# Supplementary material for: From Insect to Man: Photorhabdus Sheds Light on the Emergence of Human Pathogenicity
Source: PLOS journal article supplement (doi:10.1371/journal.pone.0144937), 2015-12-17

(A) *Pa* ATCC43949

28°C aerobic

28°C microaerobic

37°C aerobic

37°C microaerobic

LB

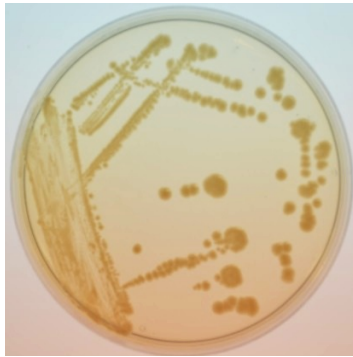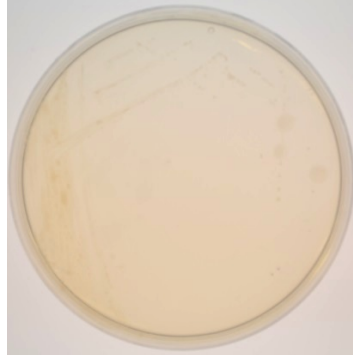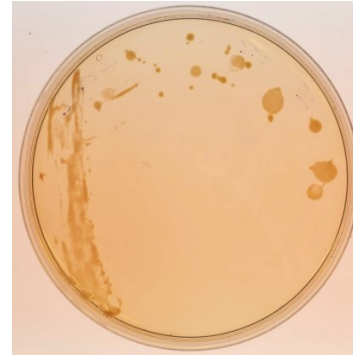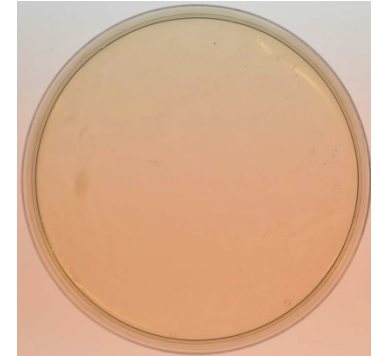

TSA+5% sRBC

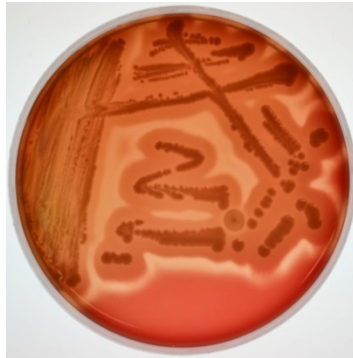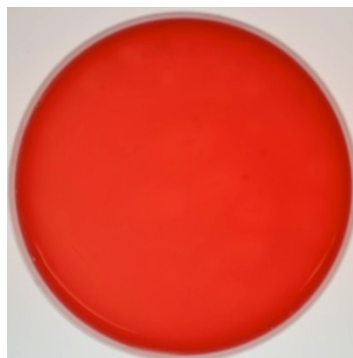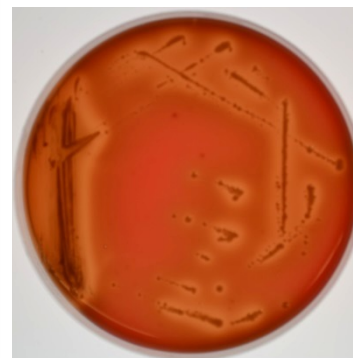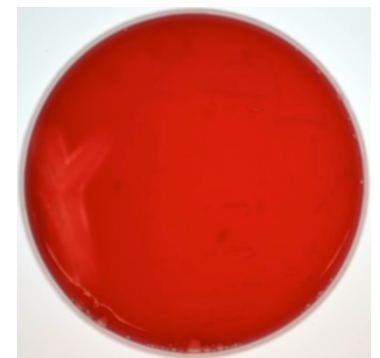

O/F+20mM glucose

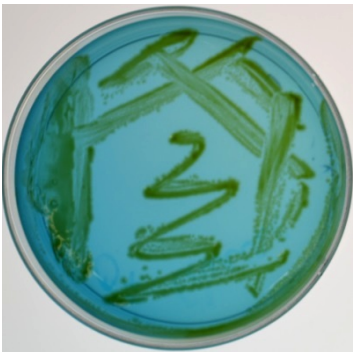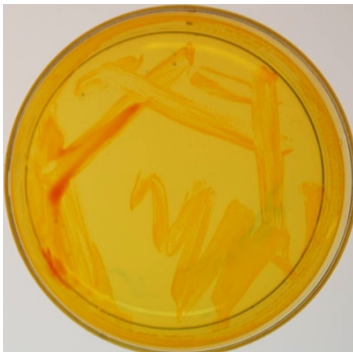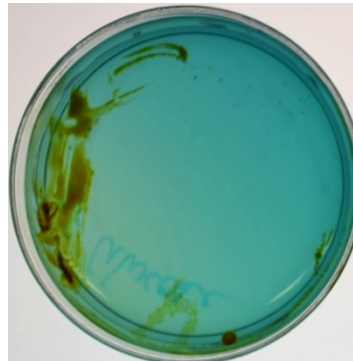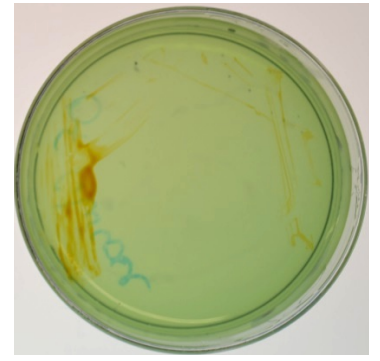

(B) *Pa* ATCC43949

28°C aerobic

28°C microaerobic

37°C aerobic

37°C microaerobic

O/F+20mM maltose

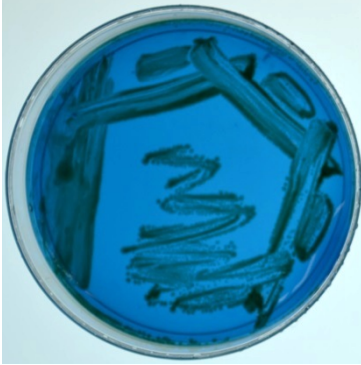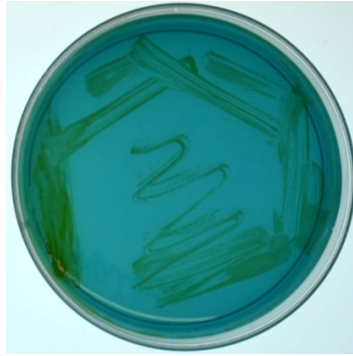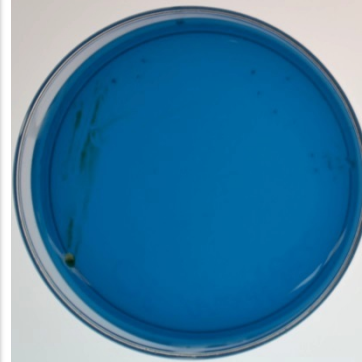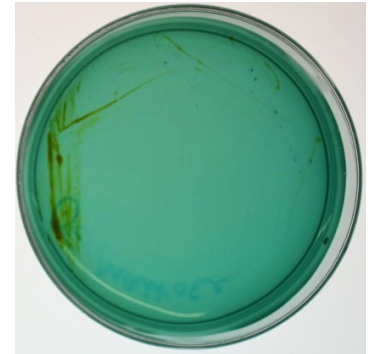

O/F+20 mM N-acetyl-D-glucosamine

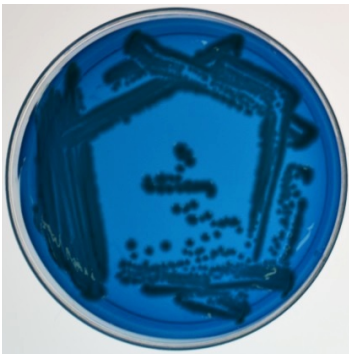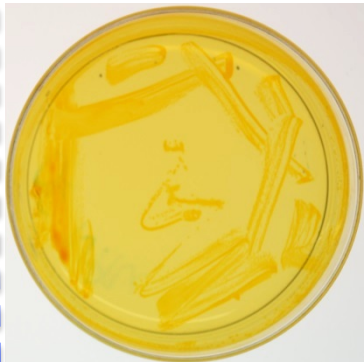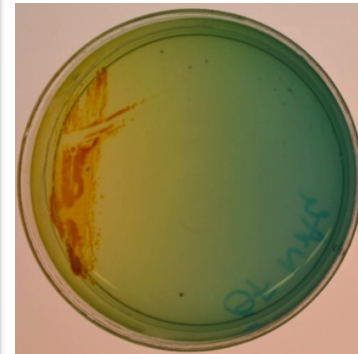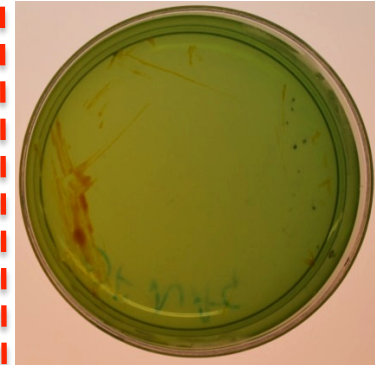

(C) *Pa* ATCC43949

28°C aerobic

28°C microaerobic

37°C aerobic

37°C microaerobic

O/F+20mM serine

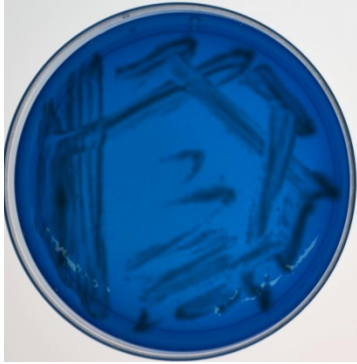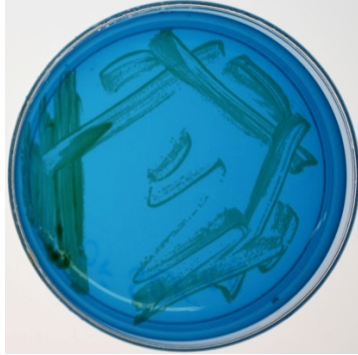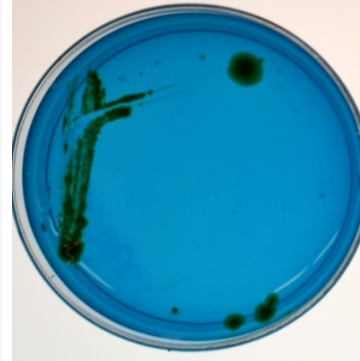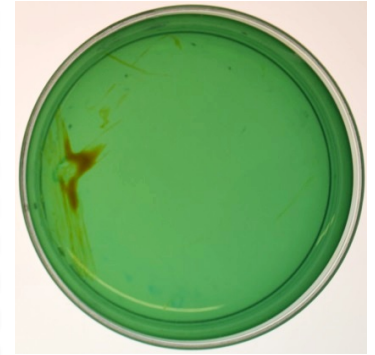

O/F+0.2% casein only

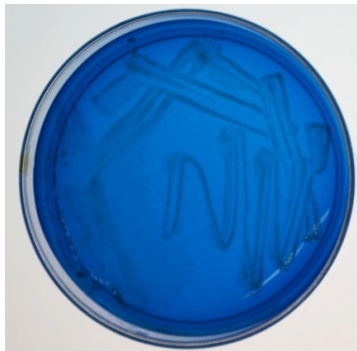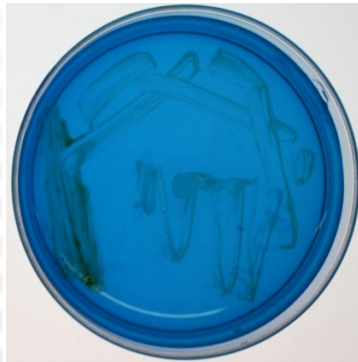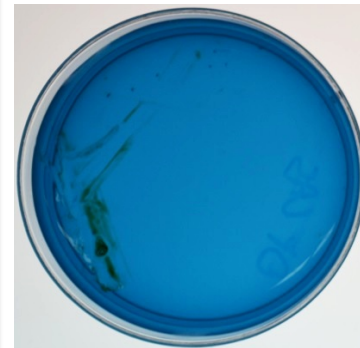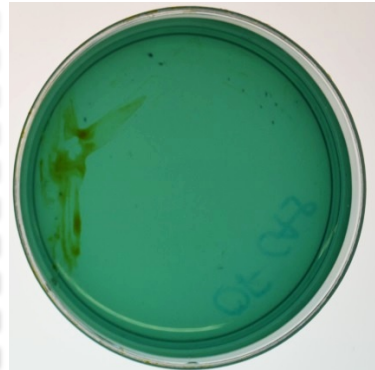



(D) *Pa* Kingscliff

28°C aerobic

28°C microaerobic

37°C aerobic

37°C microaerobic

LB

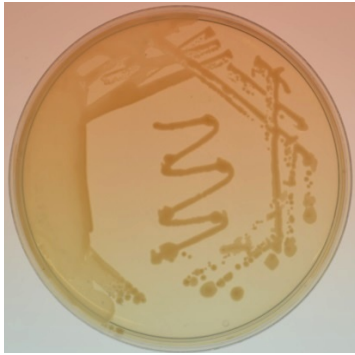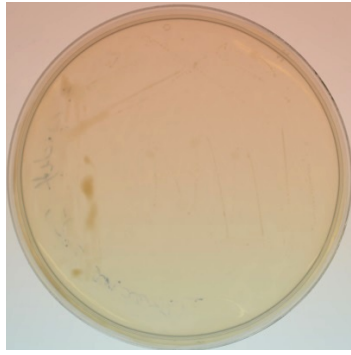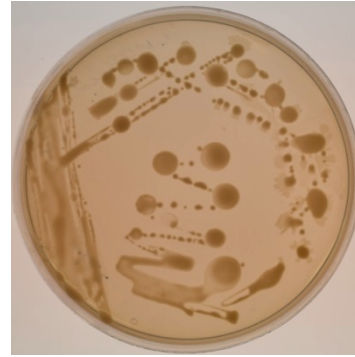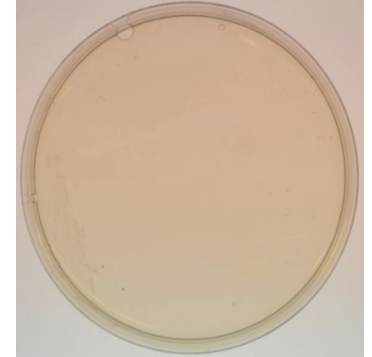

TSA+5% sRBC

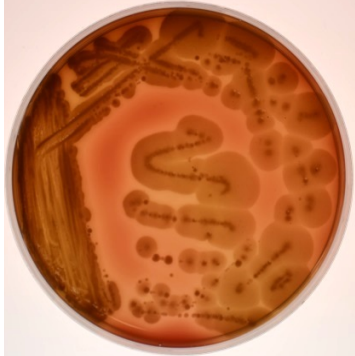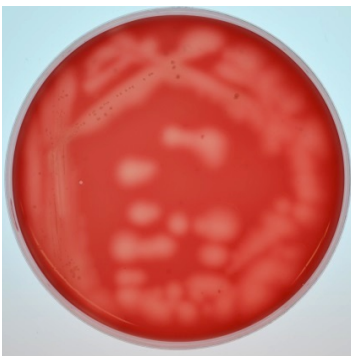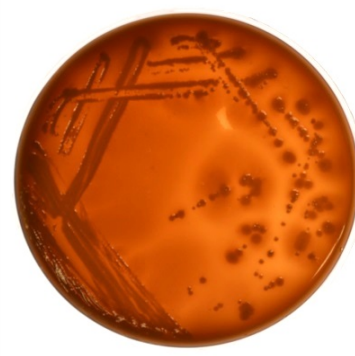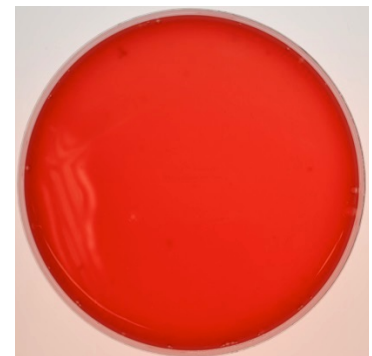

O/F+20mM glucose

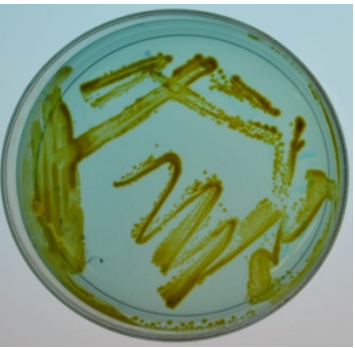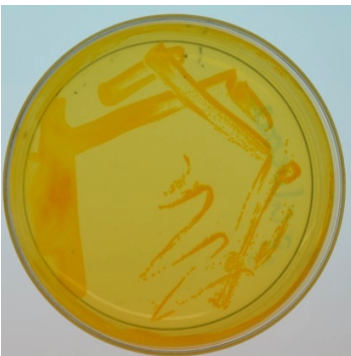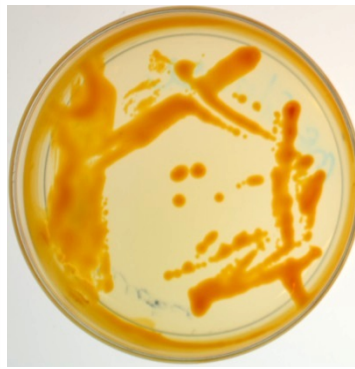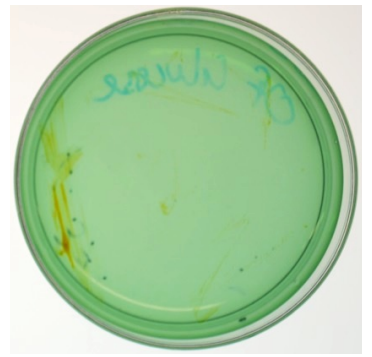

(E) *Pa* Kingscliff

28°C aerobic

28°C microaerobic

37°C aerobic

37°C microaerobic

O/F+20 mM N-acetyl-D-glucosamine    O/F+20mM maltose

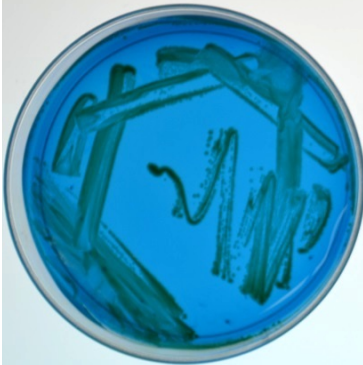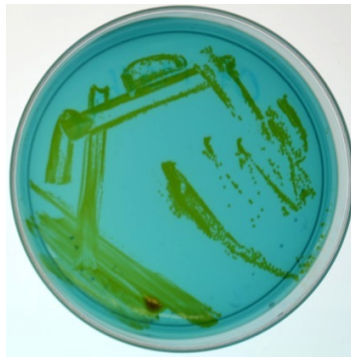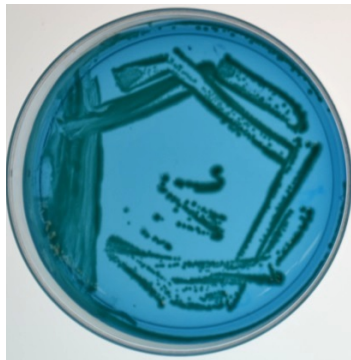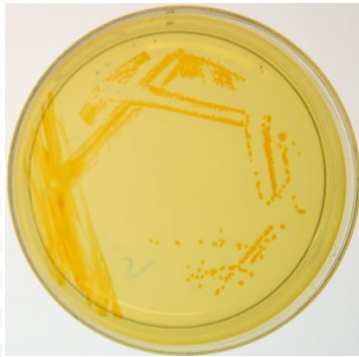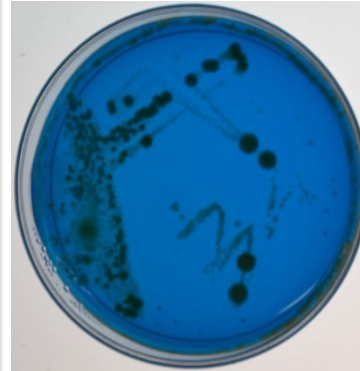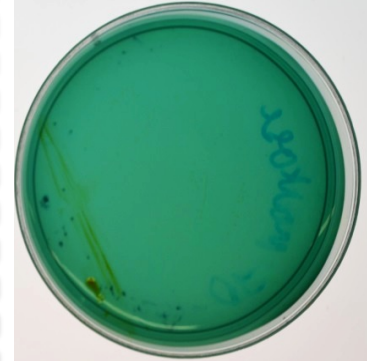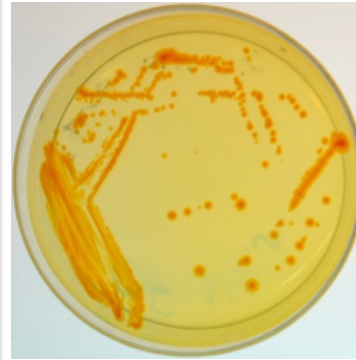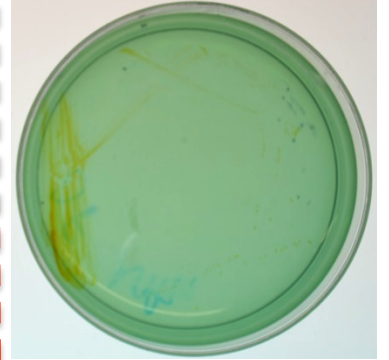

(F) *Pa* Kingscliff

28°C aerobic

28°C microaerobic

37°C aerobic

37°C microaerobic

O/F+20mM serine

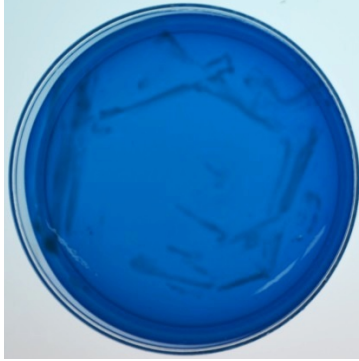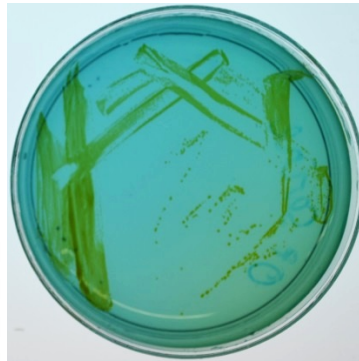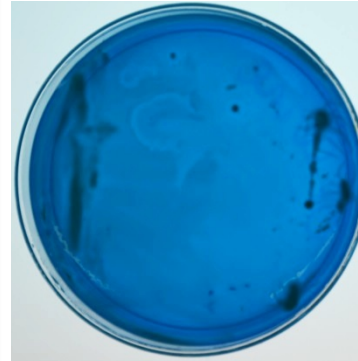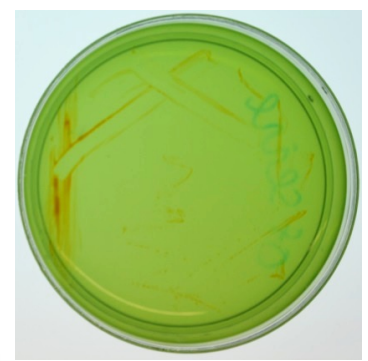

O/F+0.2% casein only

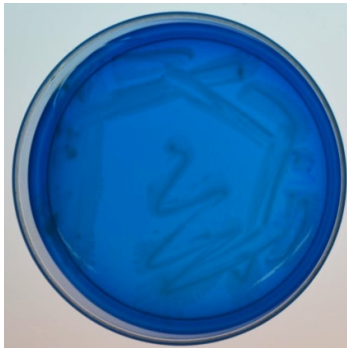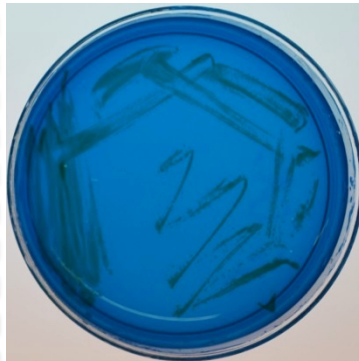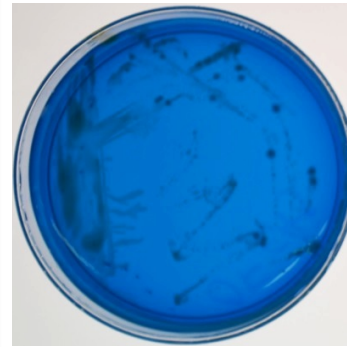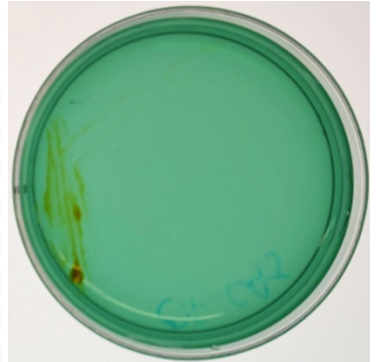



(G) *PI*<sup>TT01</sup>

28°C aerobic

28°C microaerobic

LB

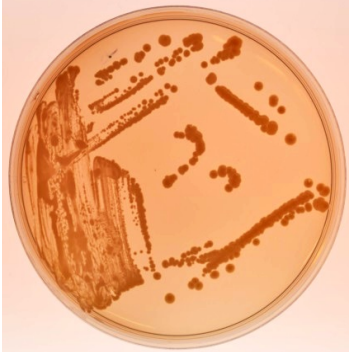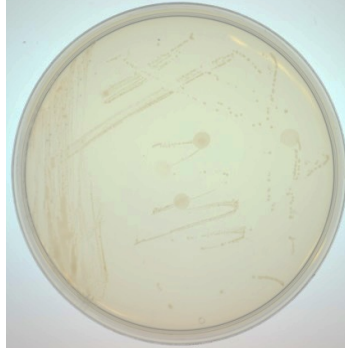

TSA+5% sRBC

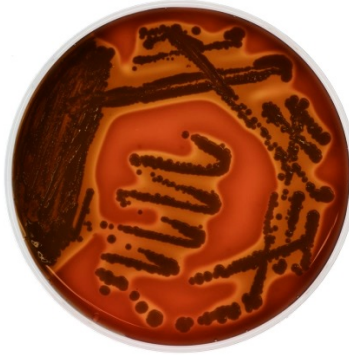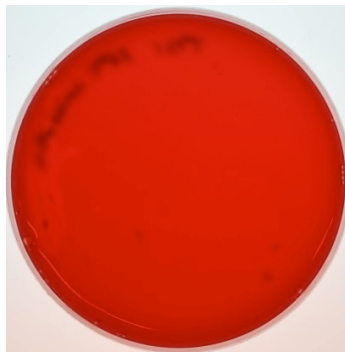

O/F+20mM glucose

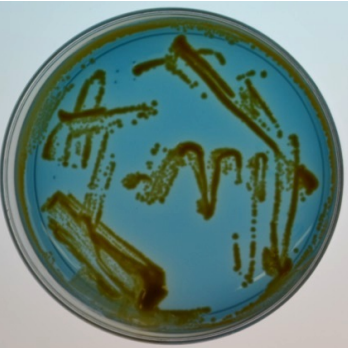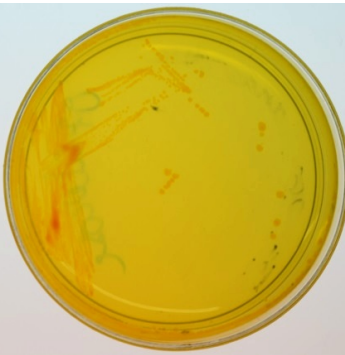

*P<sub>I</sub>* TT01

28°C aerobic

28°C microaerobic

O/F+20 mM N-acetyl-D-glucosamine    O/F+20mM maltose

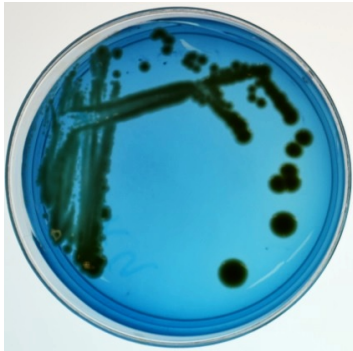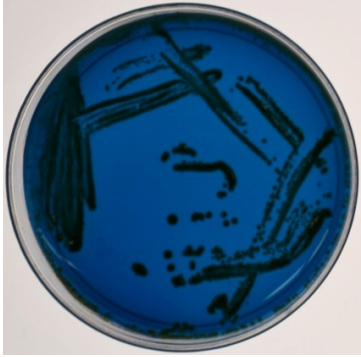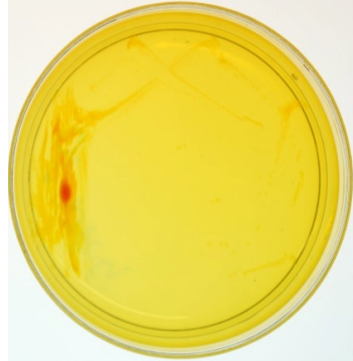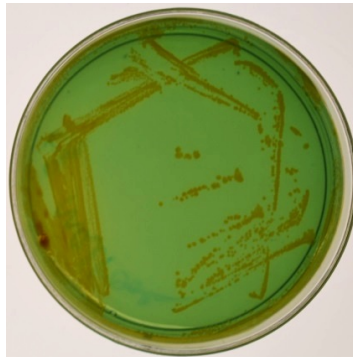

O/F+0.2% casein only

O/F+20mM serine

28°C aerobic

28°C microaerobic

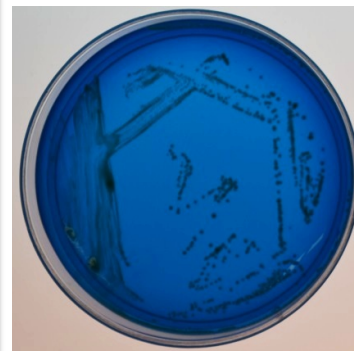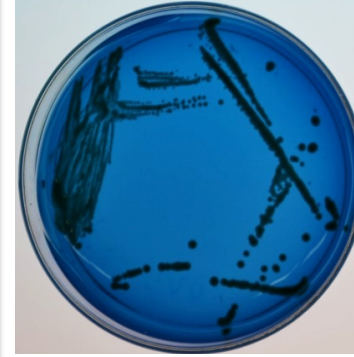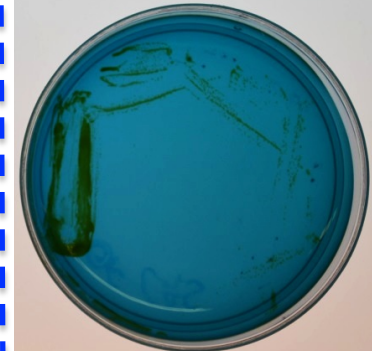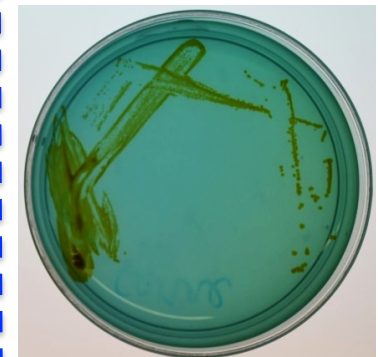

Supplement: S10 (10.1371/journal.pone.0144937.s010) [file journal.pone.0144937.s010.PDF]
