# Supplementary material for: From Insect to Man: Photorhabdus Sheds Light on the Emergence of Human Pathogenicity
Source: PLOS journal article supplement (doi:10.1371/journal.pone.0144937), 2015-12-17

Gel 1: 37°C Rep 1

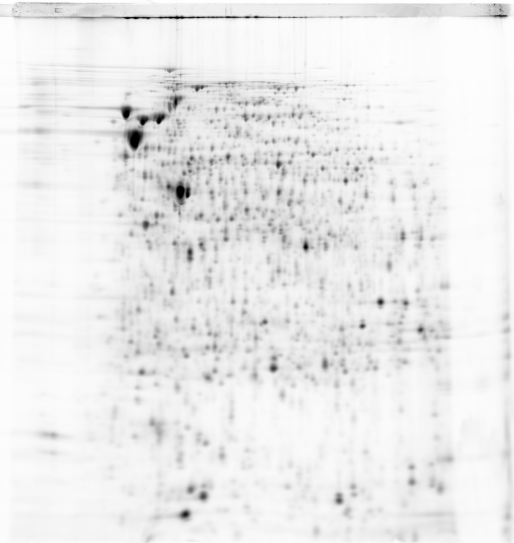

Gel 2: 37°C Rep 2

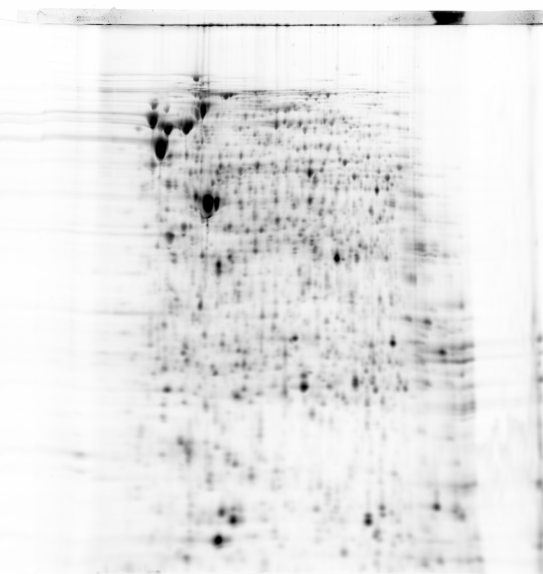

Gel 3: 37°C Rep 3

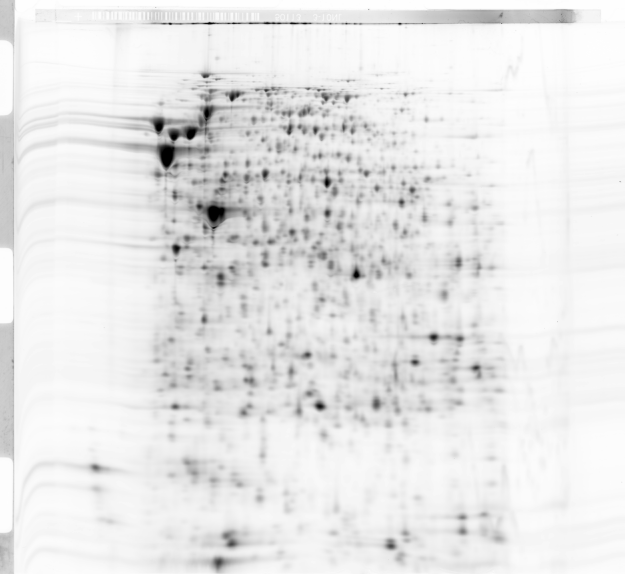

Gel 4: 28°C Rep 1

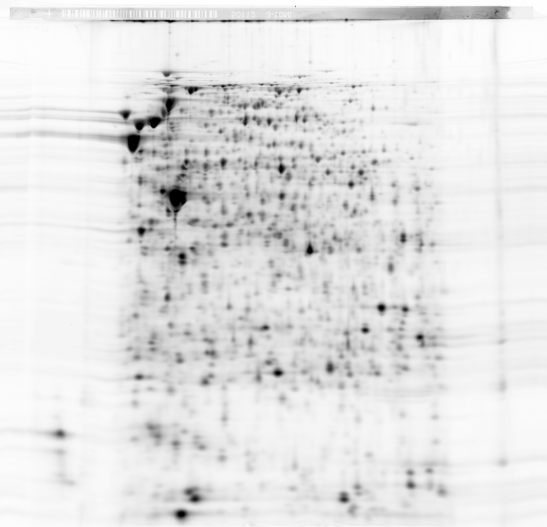

Gel 5: 28°C Rep 2

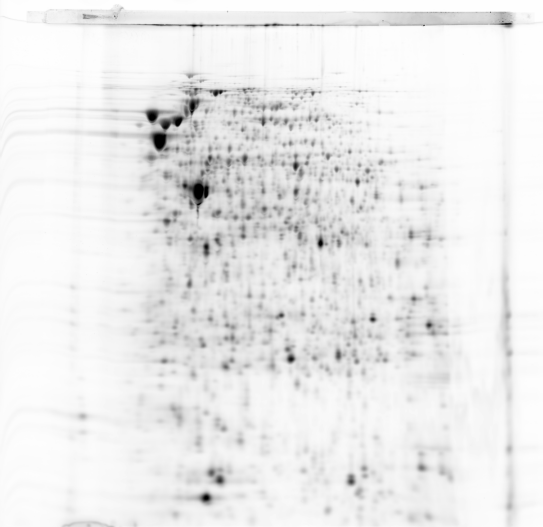

Gel 6: 28°C Rep 3

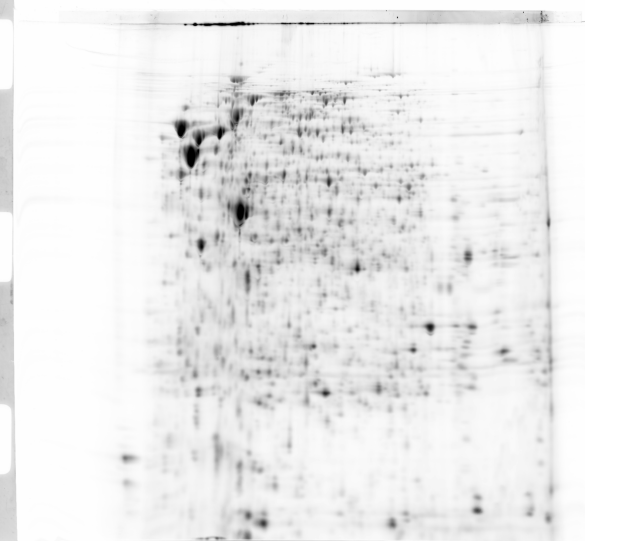

Gel 1 master image: green – cy3 labelled sample 1, red – cy5 labelled standard consisting of all the 6 samples used in experiment, yellow - where two colours overlay

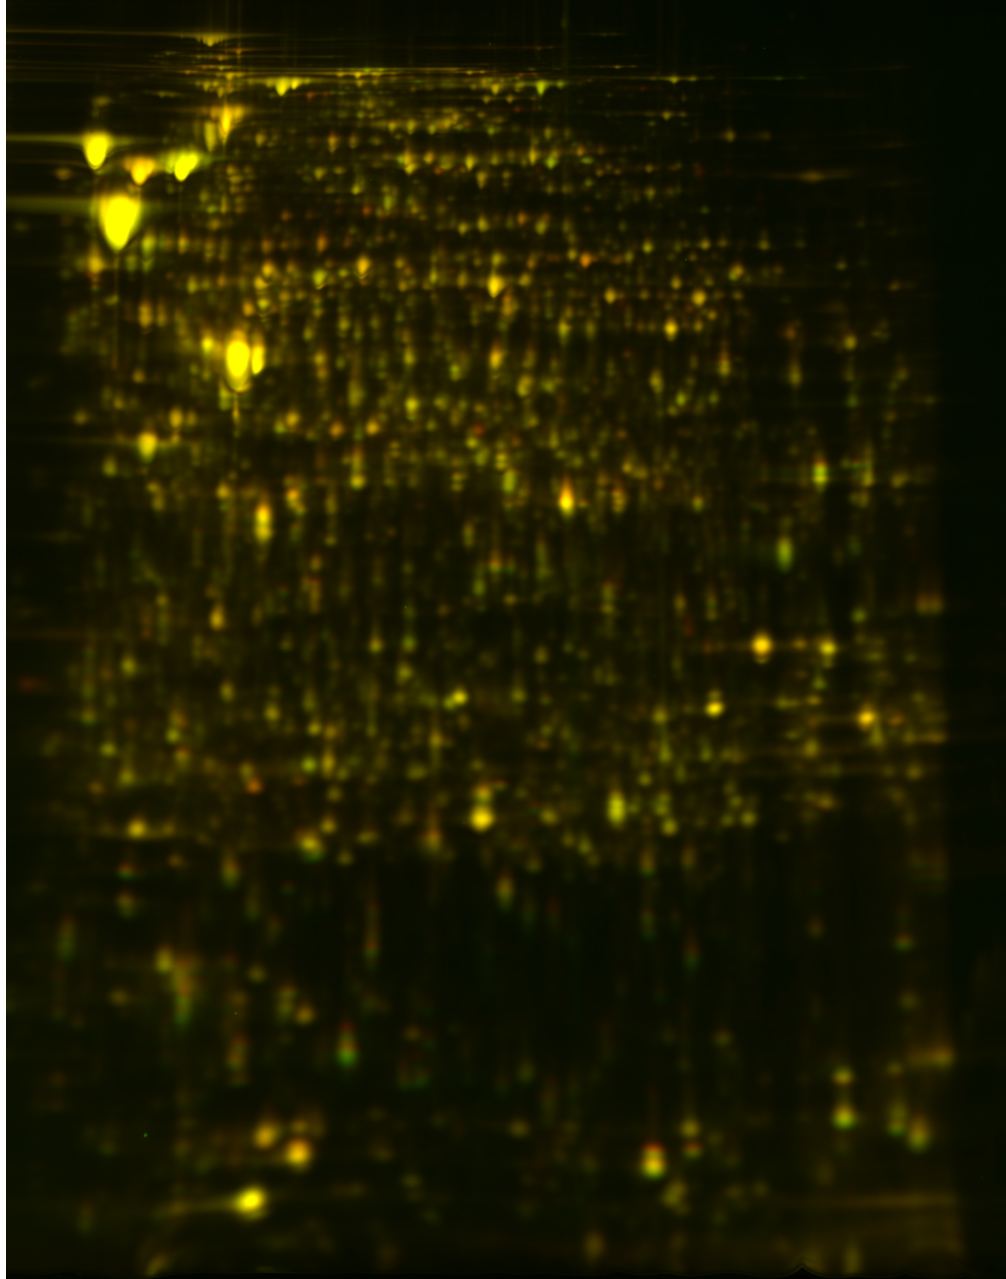

# ClpB (PAU\_03190)

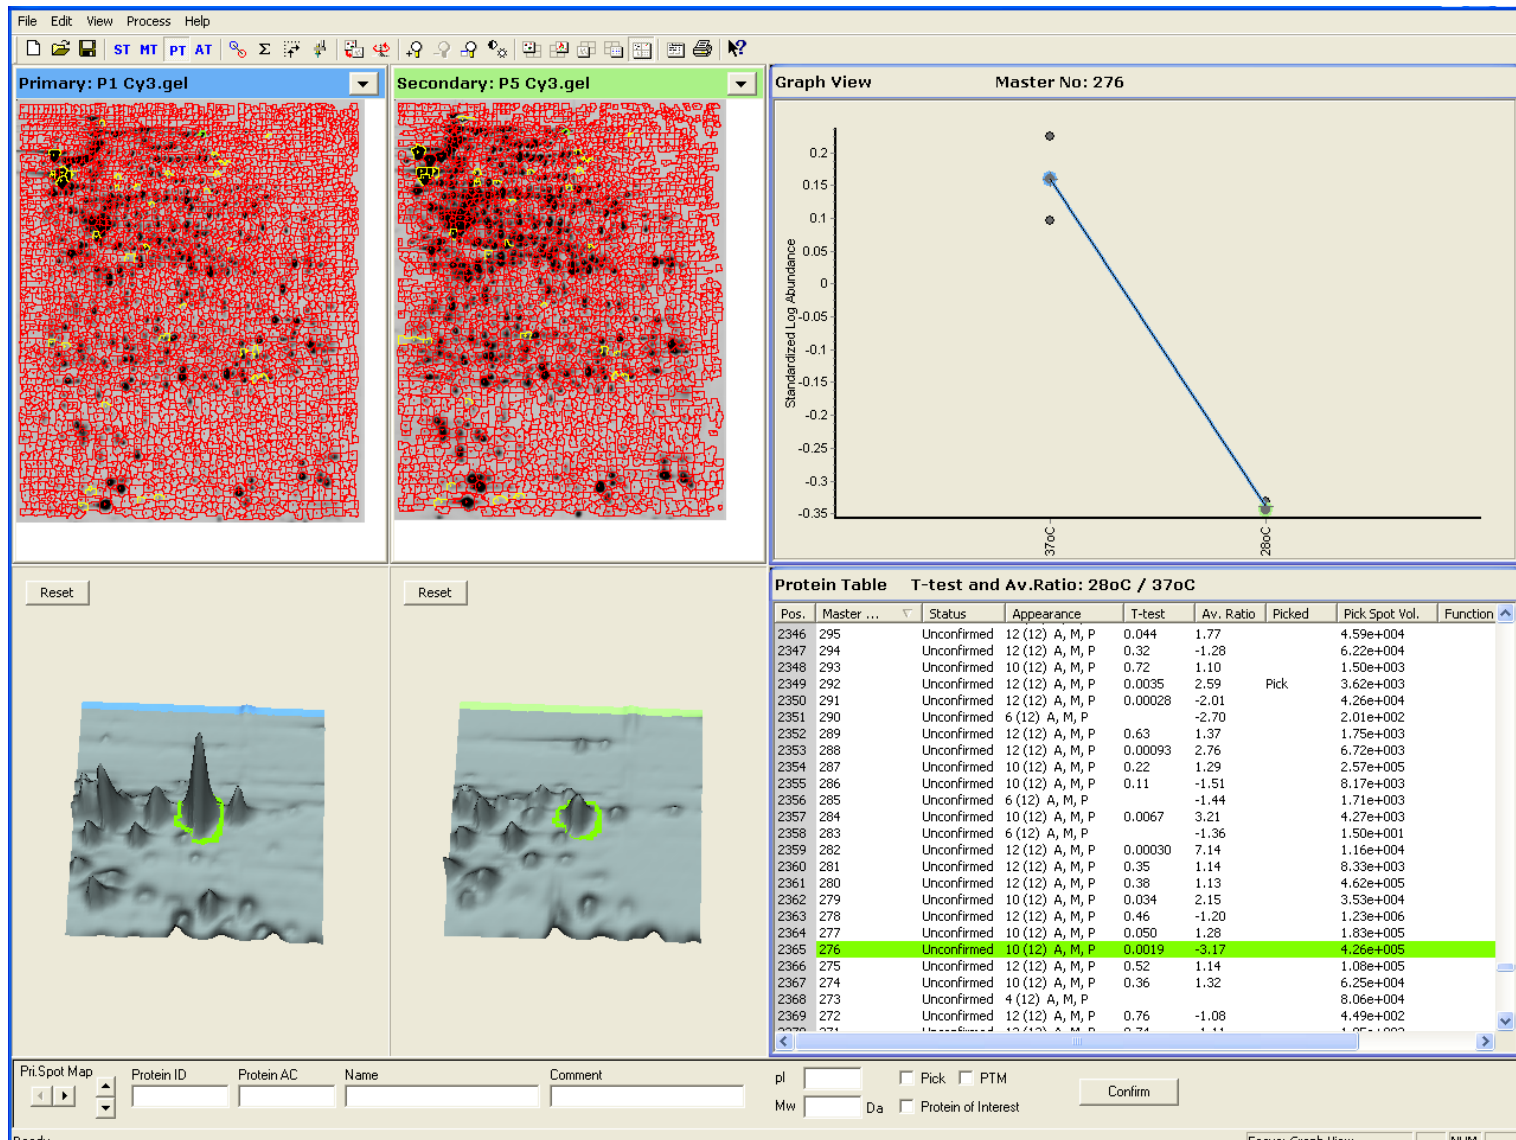

# ClpB (PAU\_03190)

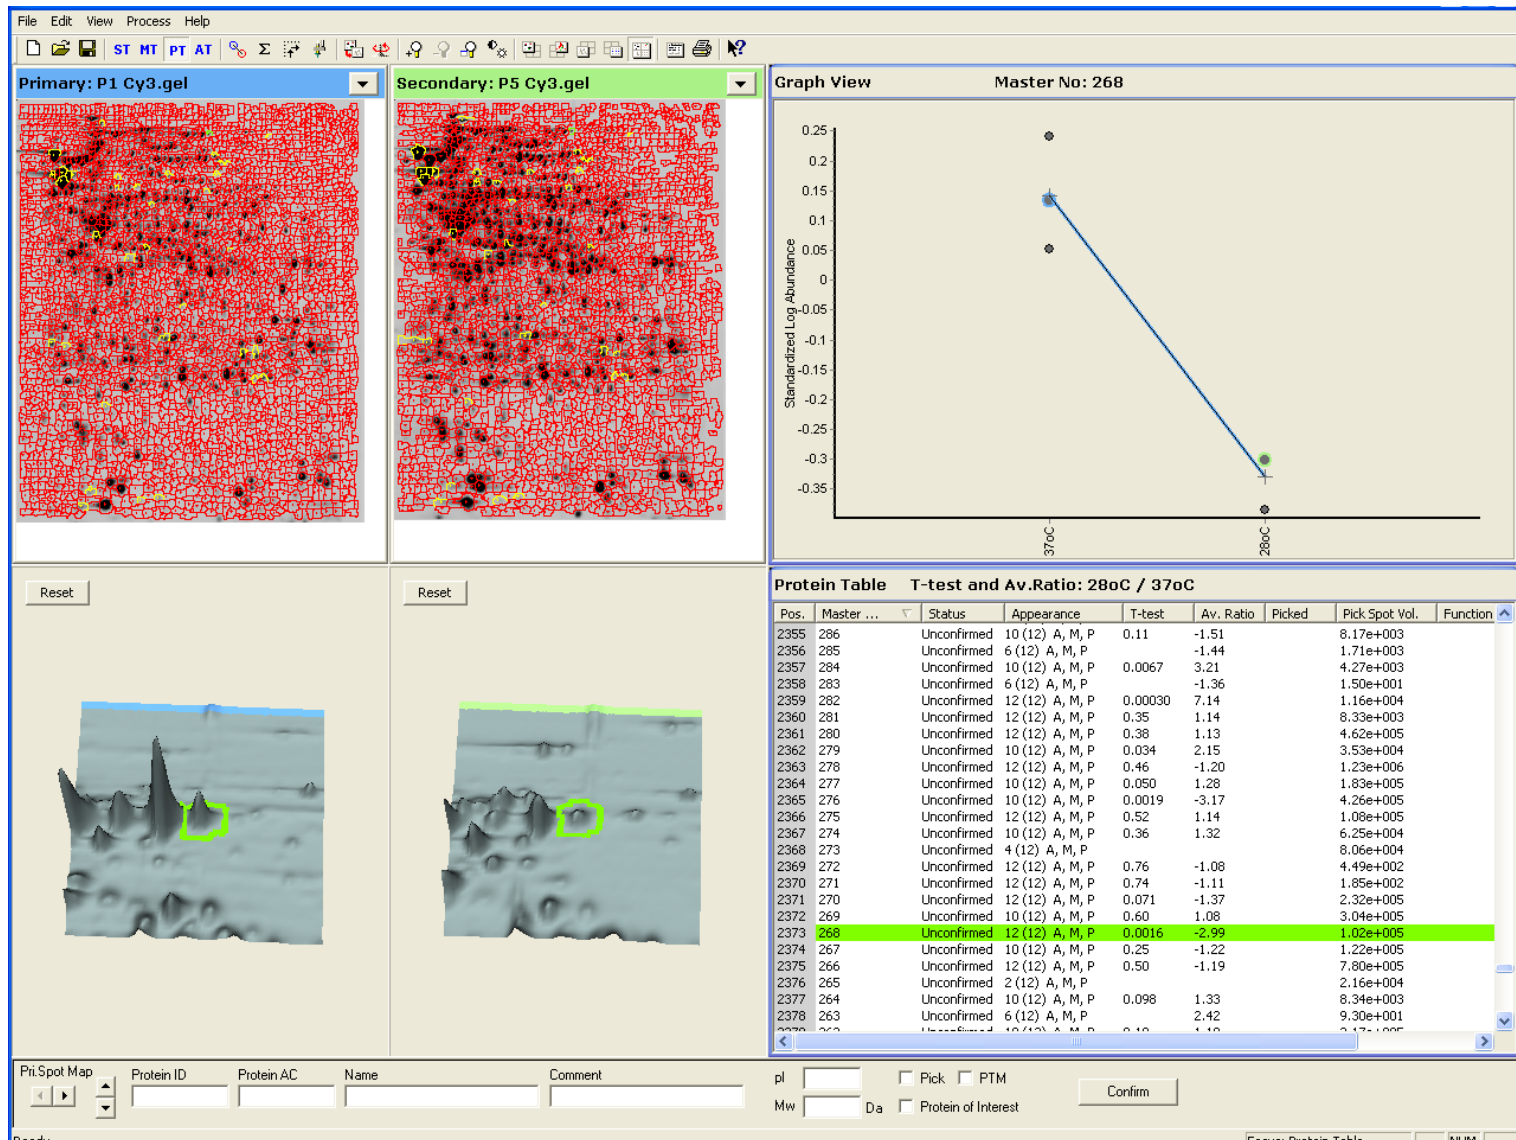



# GroEL (PAU\_03756)

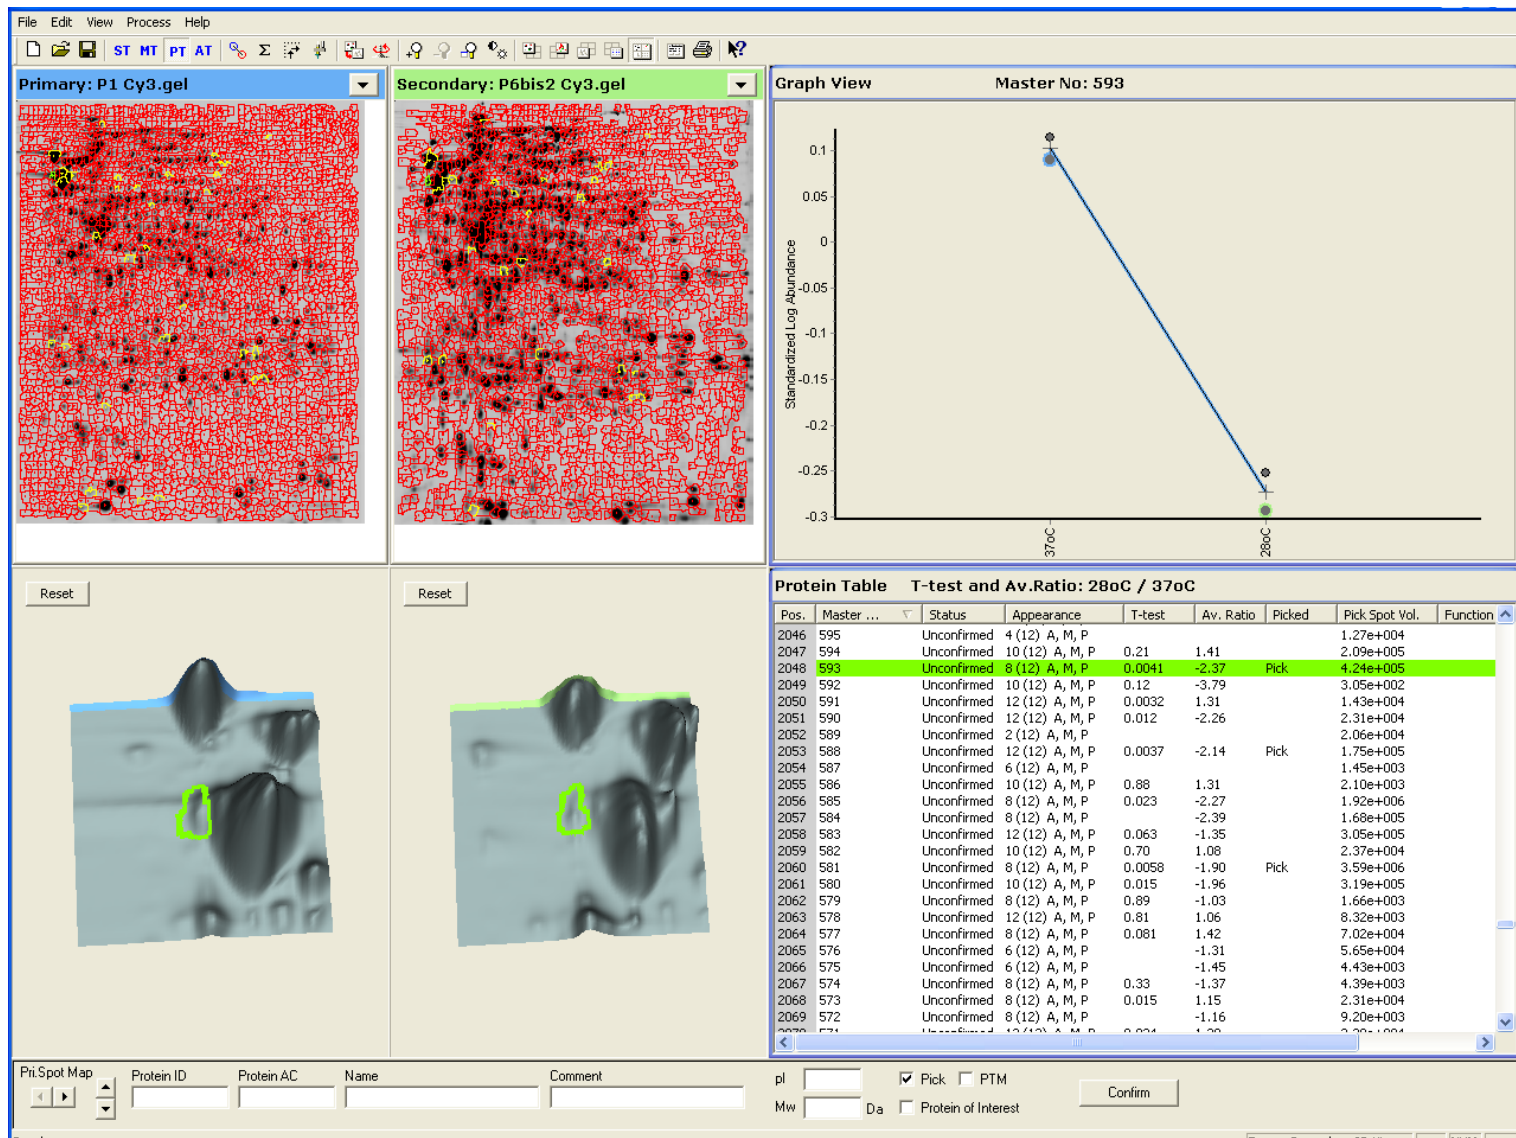

# GroES (PAU\_03757)

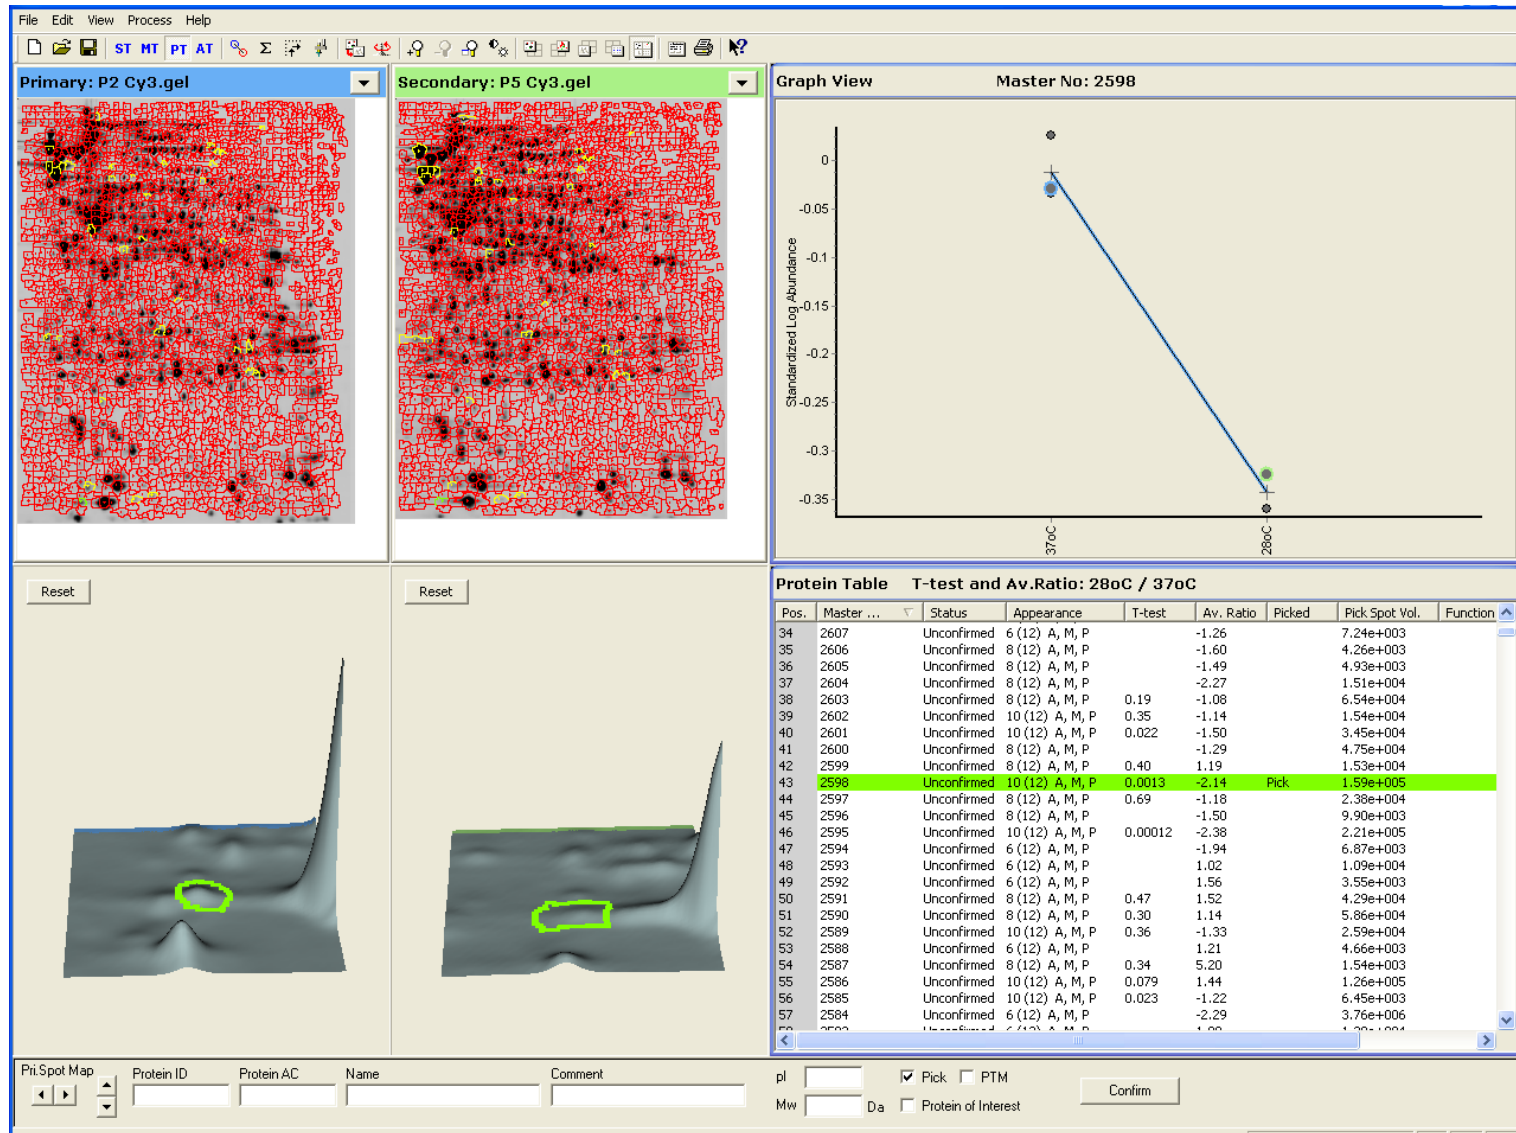

# RecA (PAU\_03212)

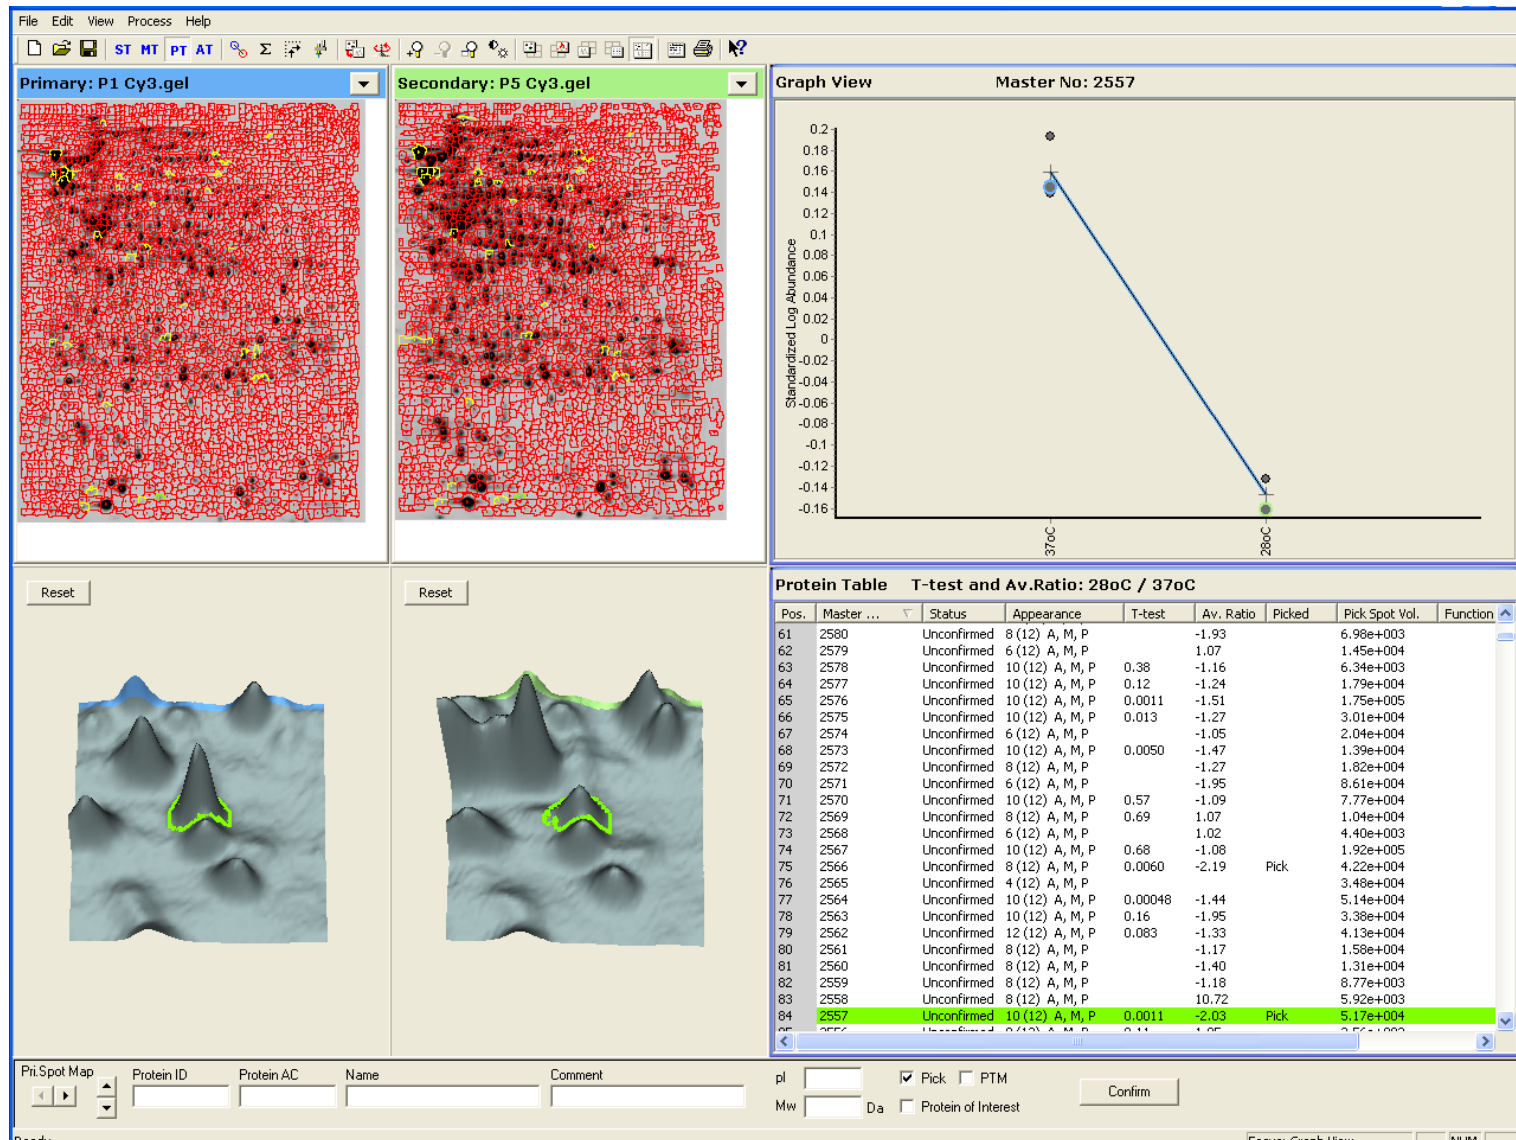

# RecA (PAU\_03212)

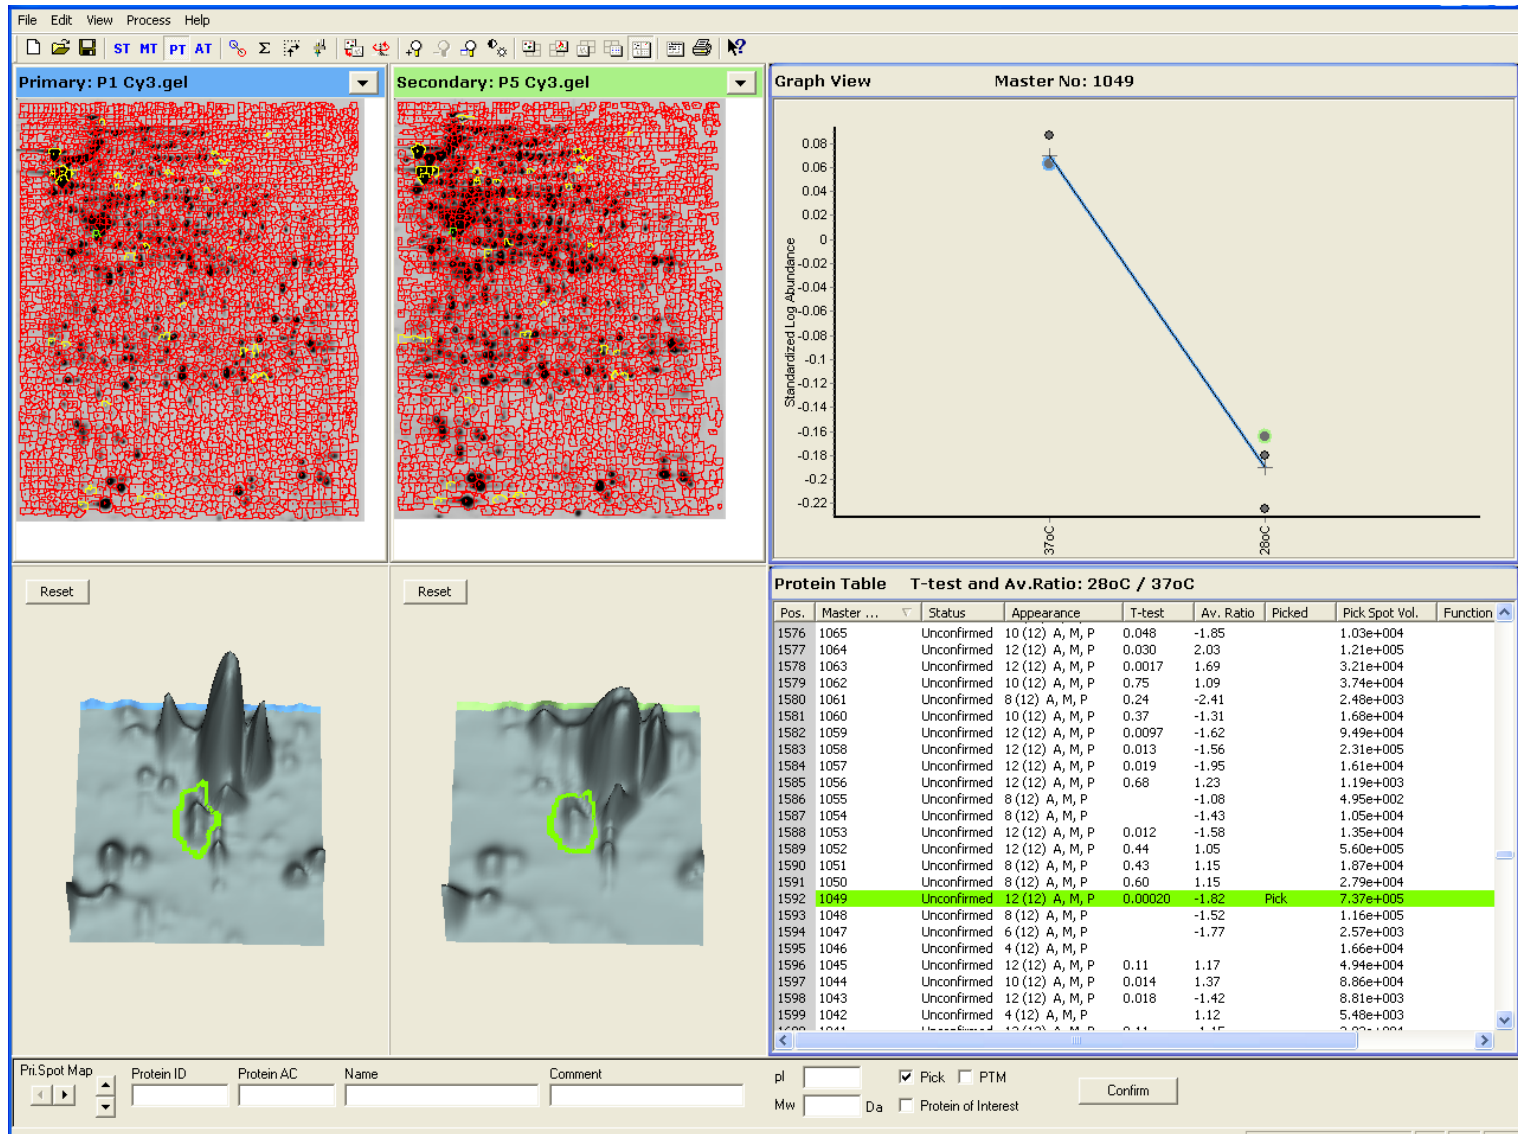



# DnaK (PAU\_00543)

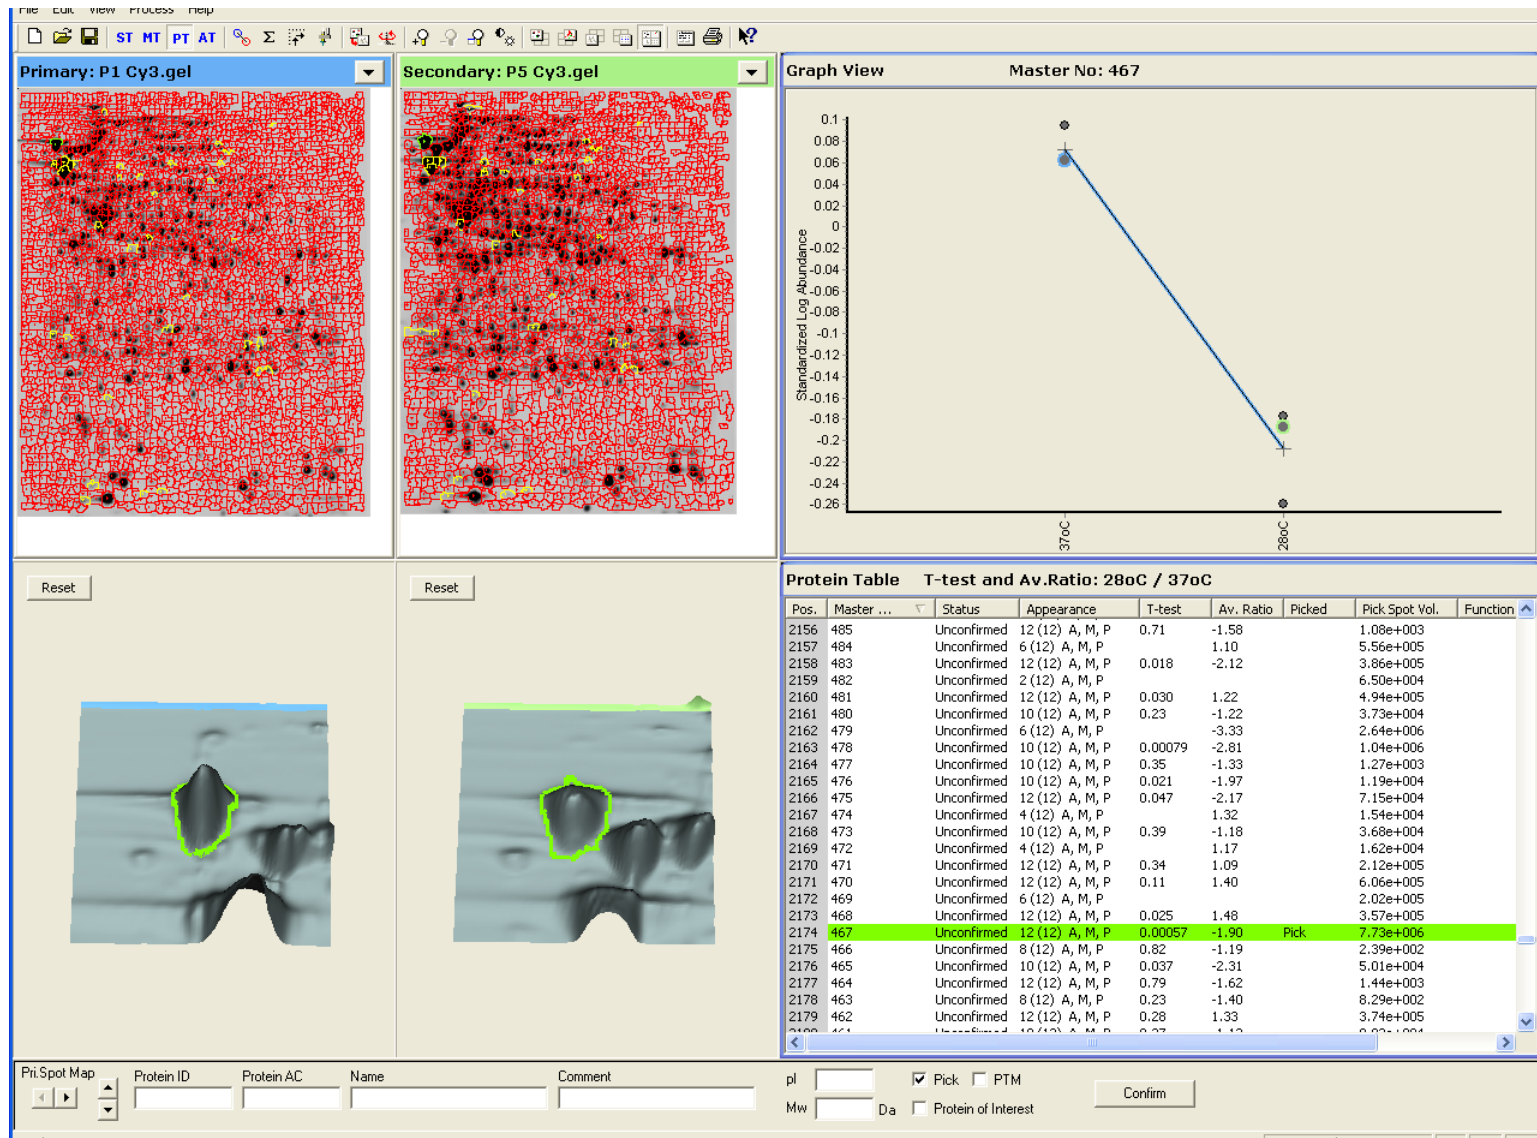

# PAU\_02173

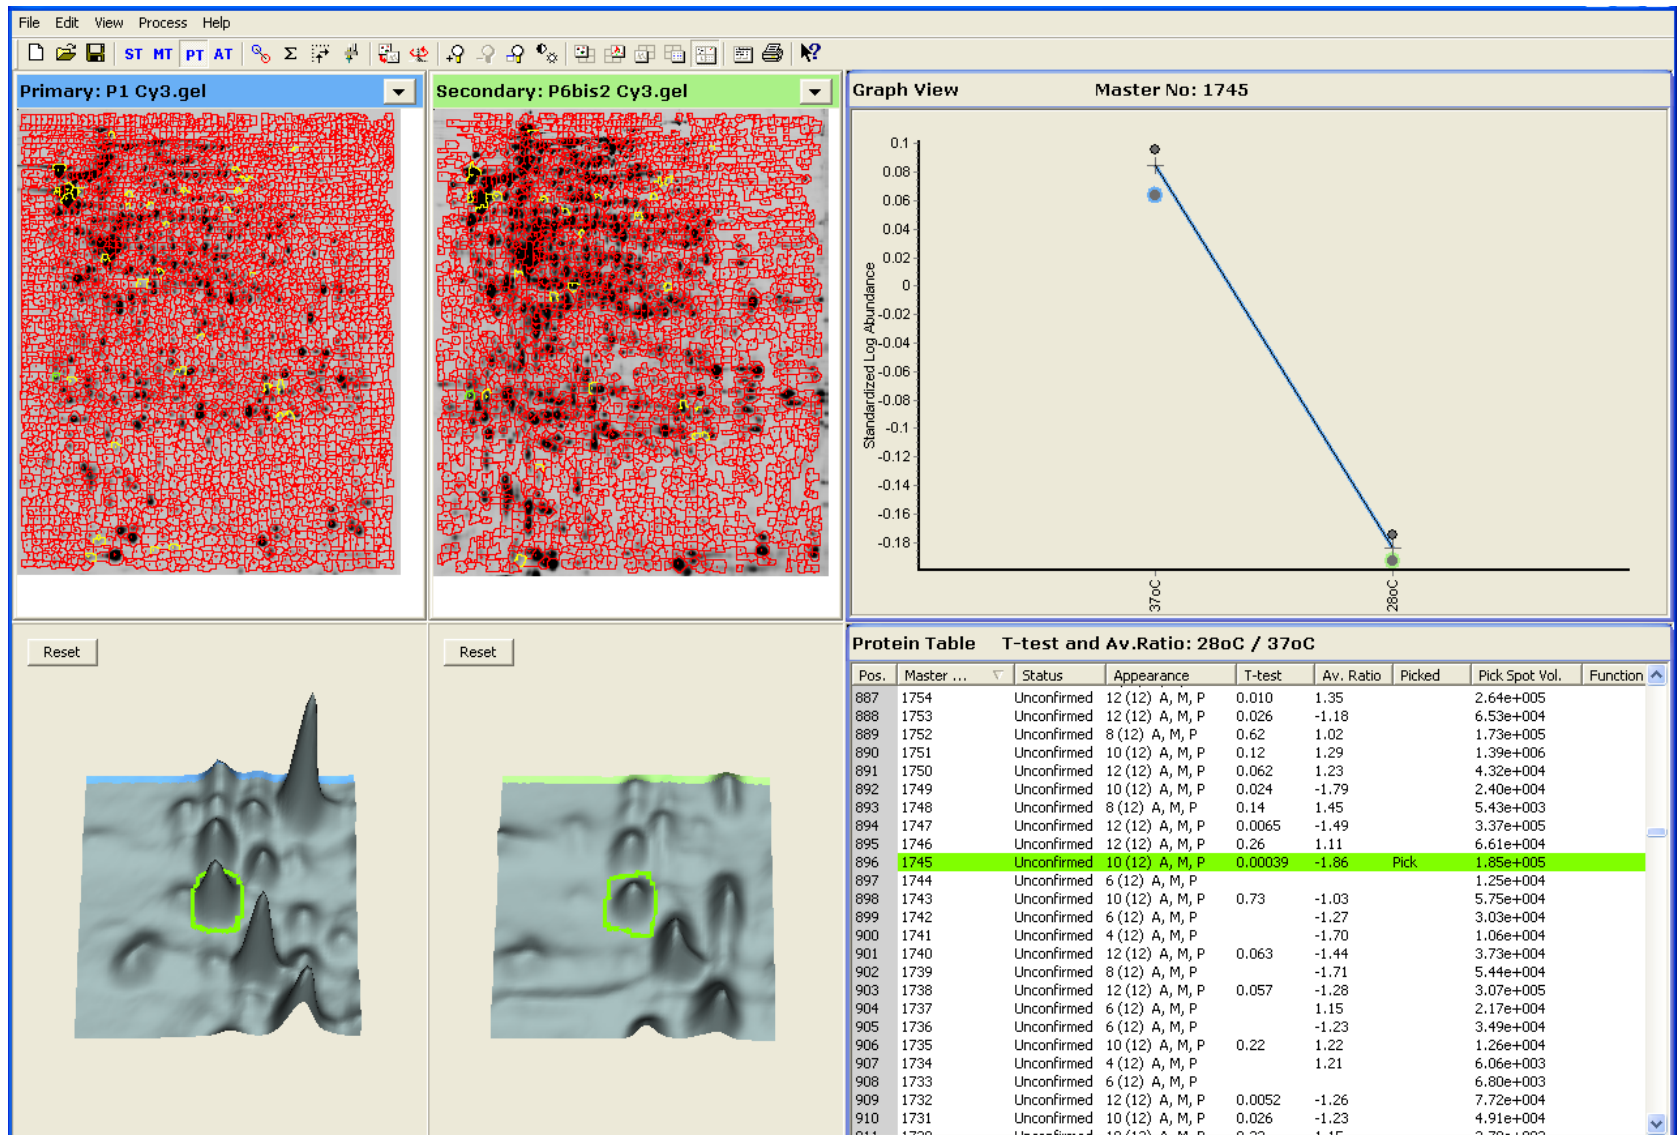

# PAU\_03263

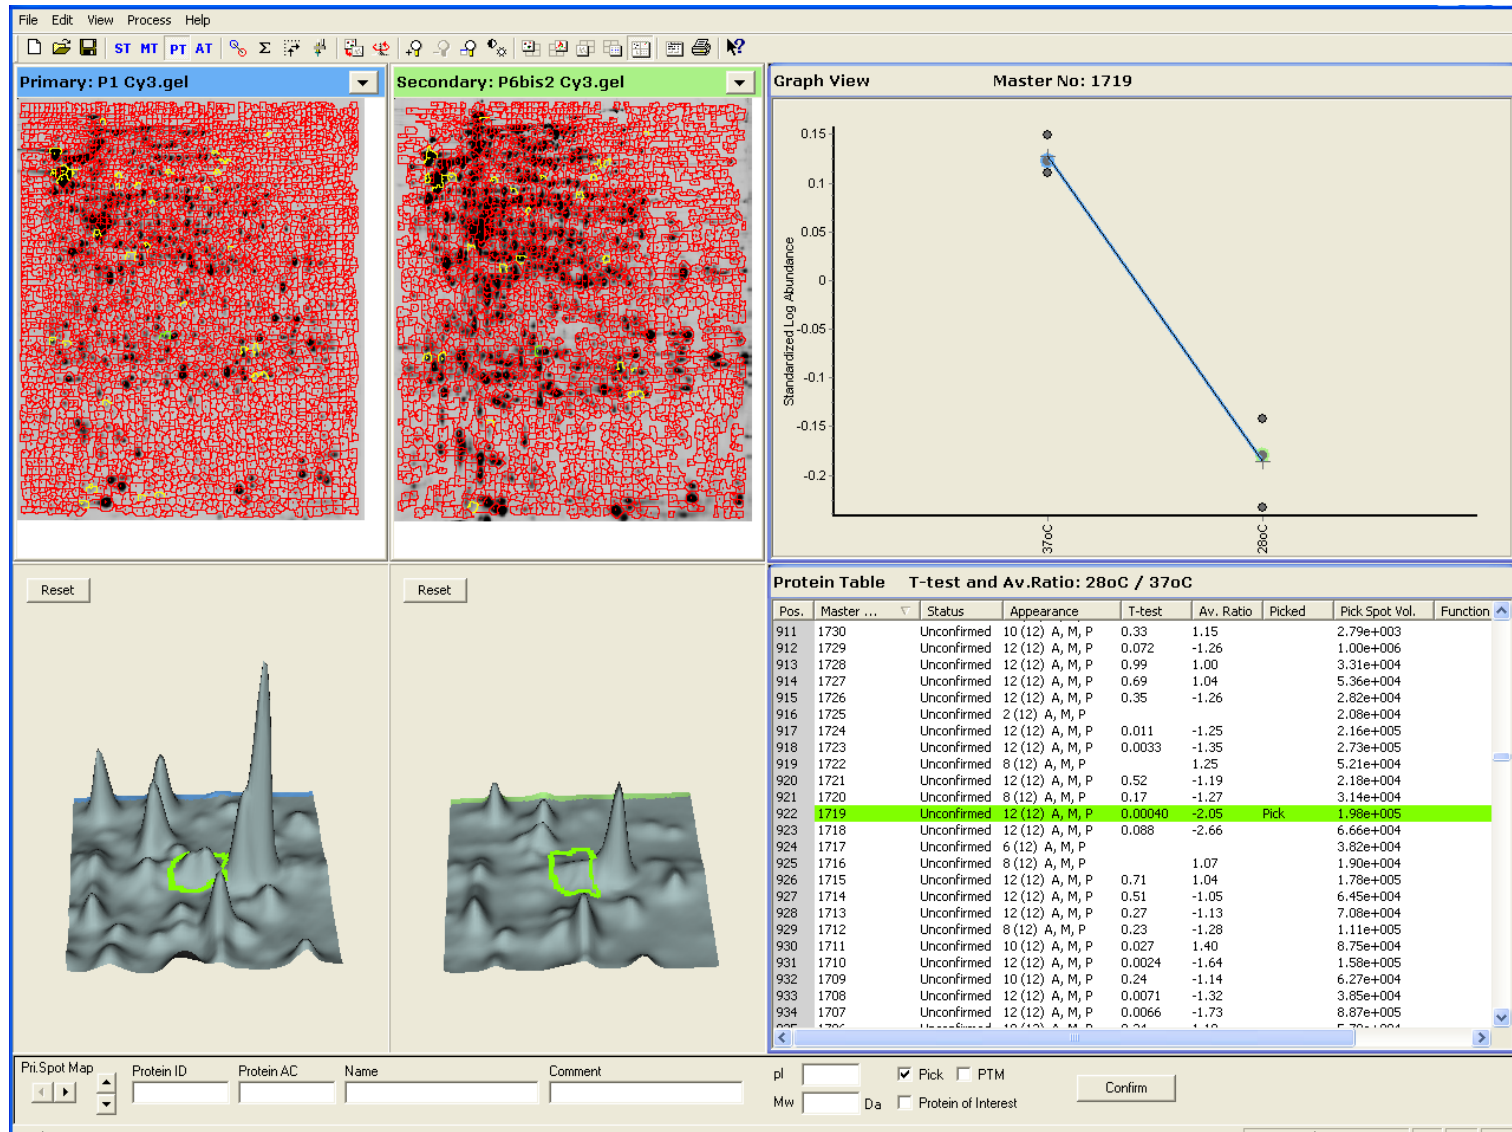

# PAU\_02575

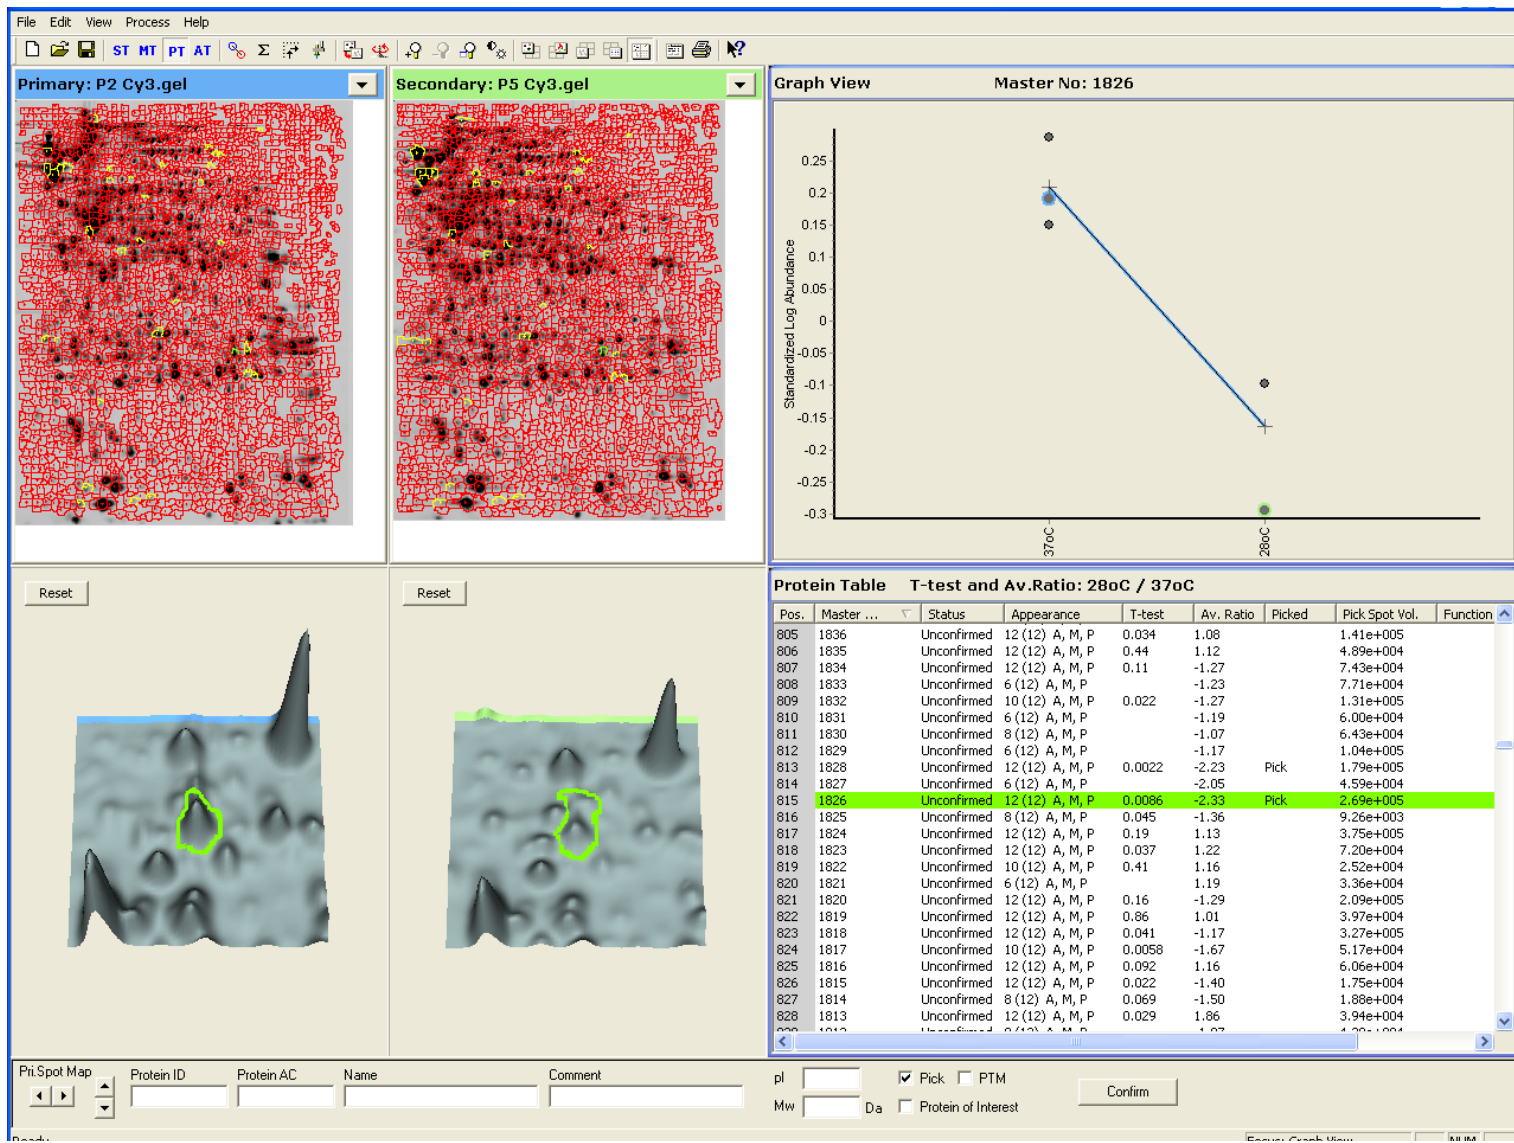



# PAU\_03286

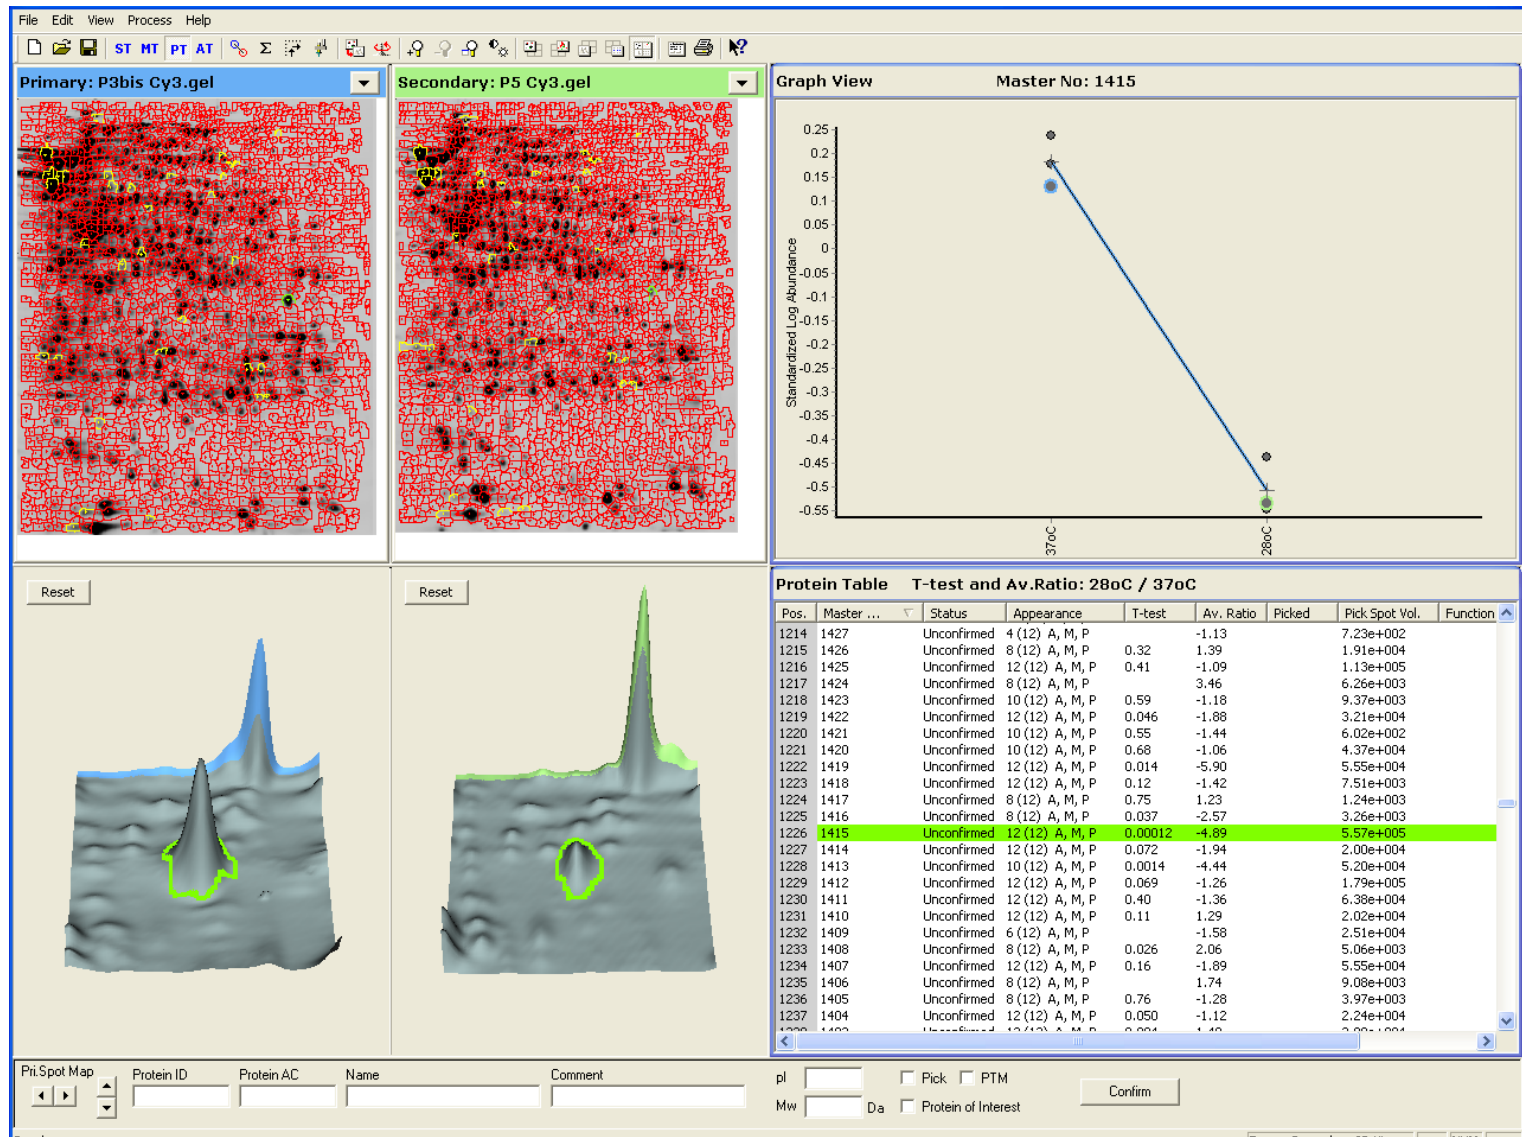

# PAU\_03286

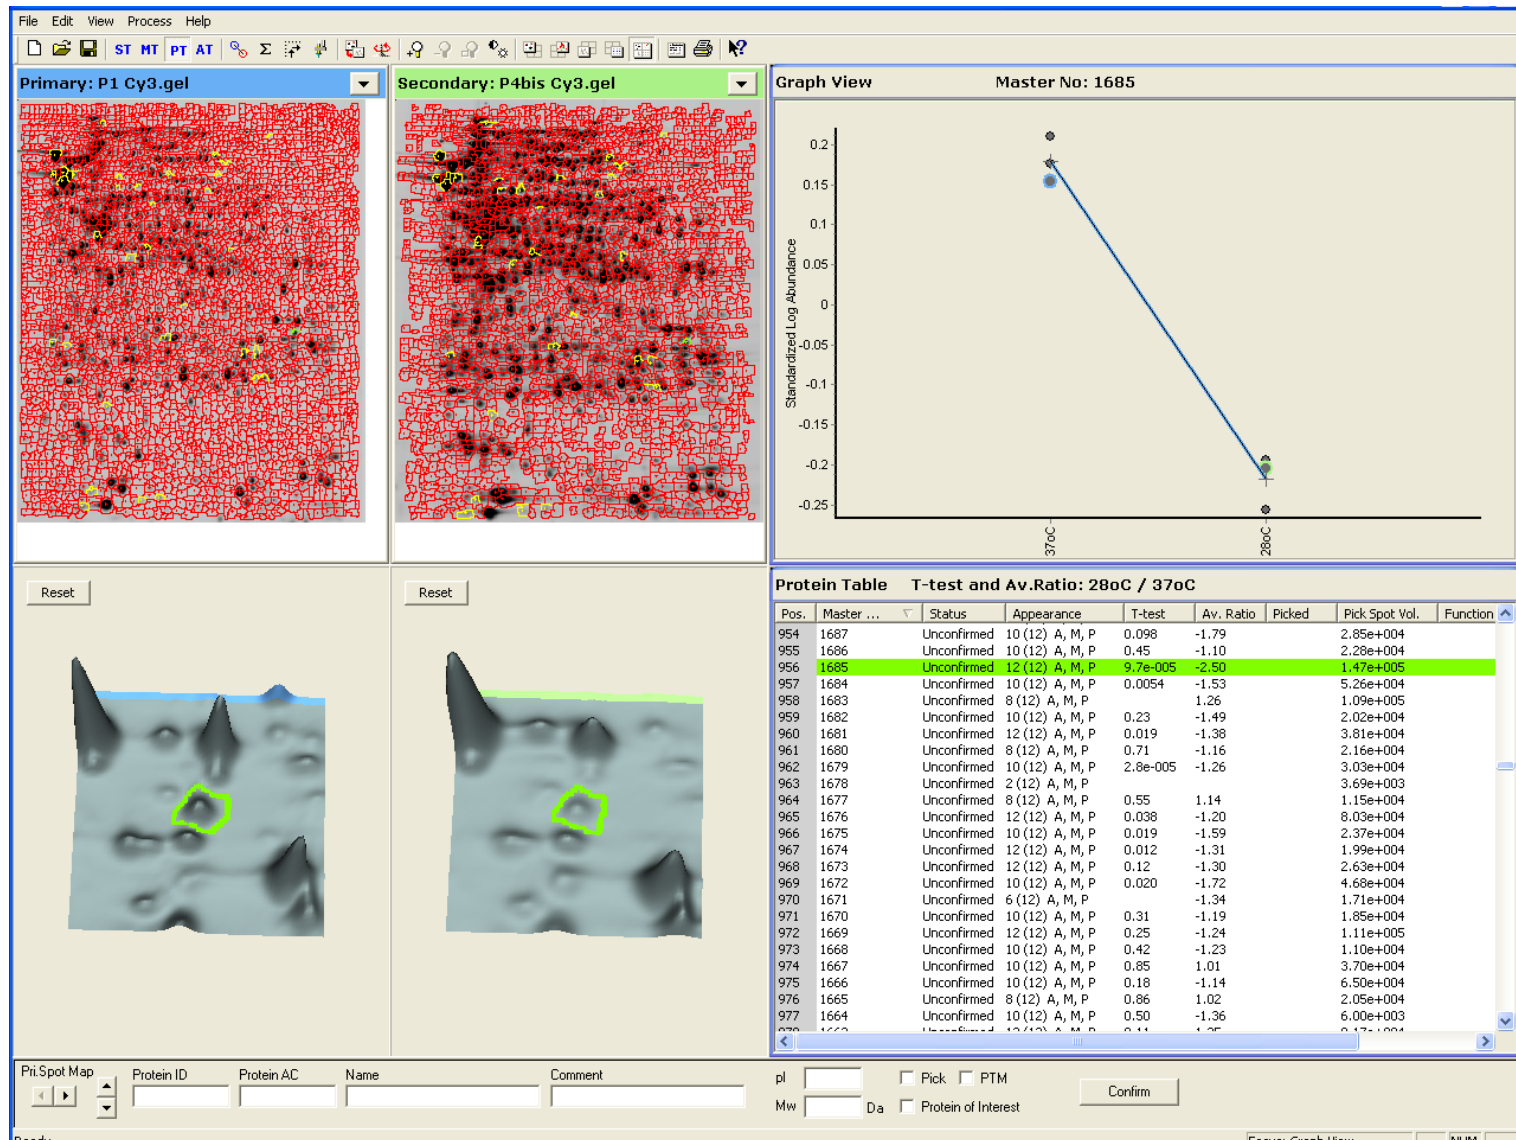

# GmhA (PAU\_03260)

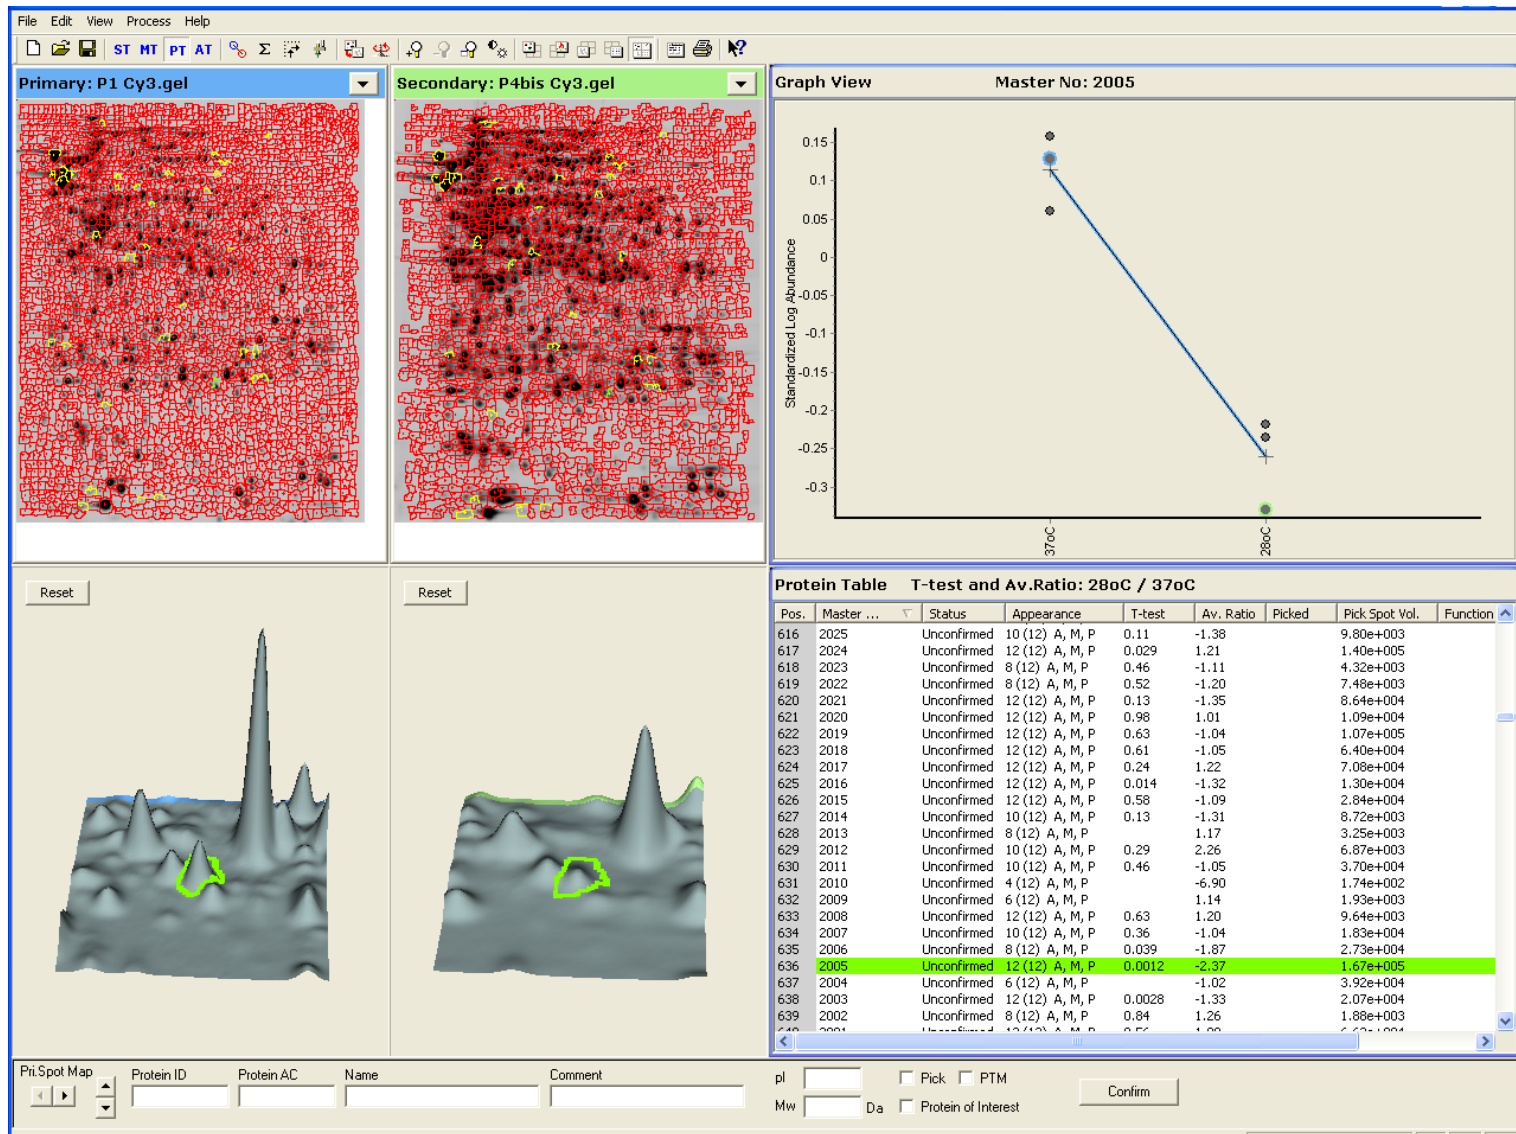

# Bcp (PAU\_01793)

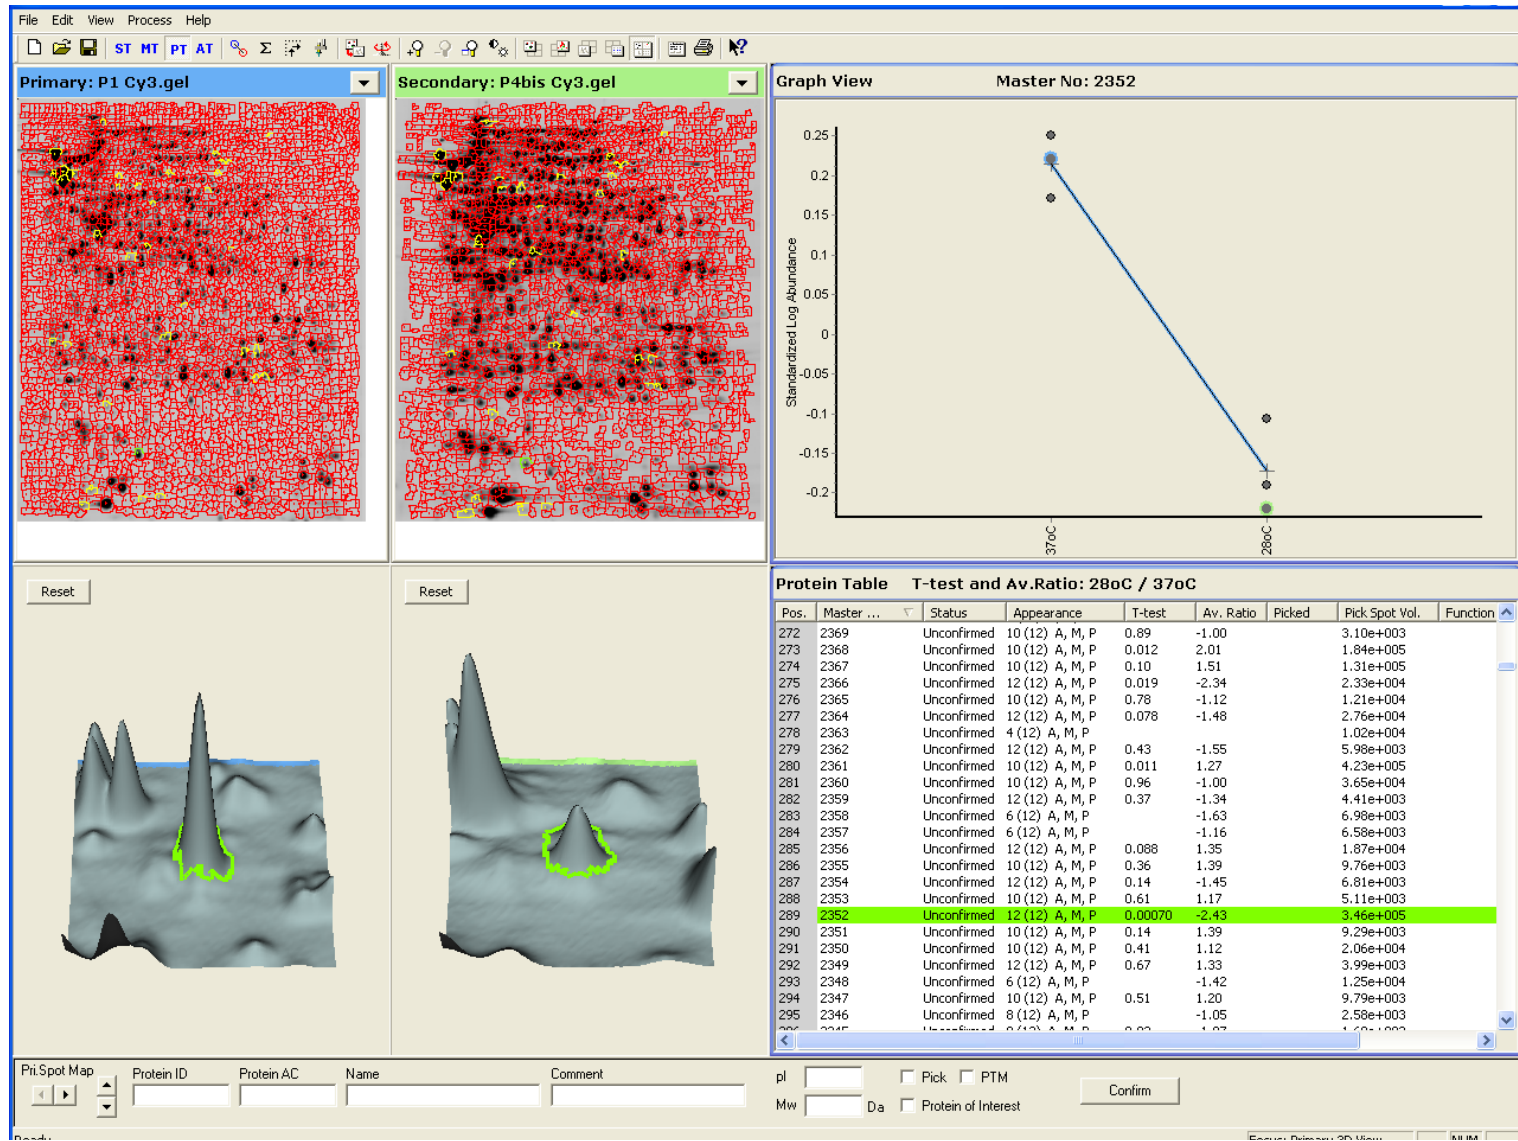



# YneB (PAU\_01469)

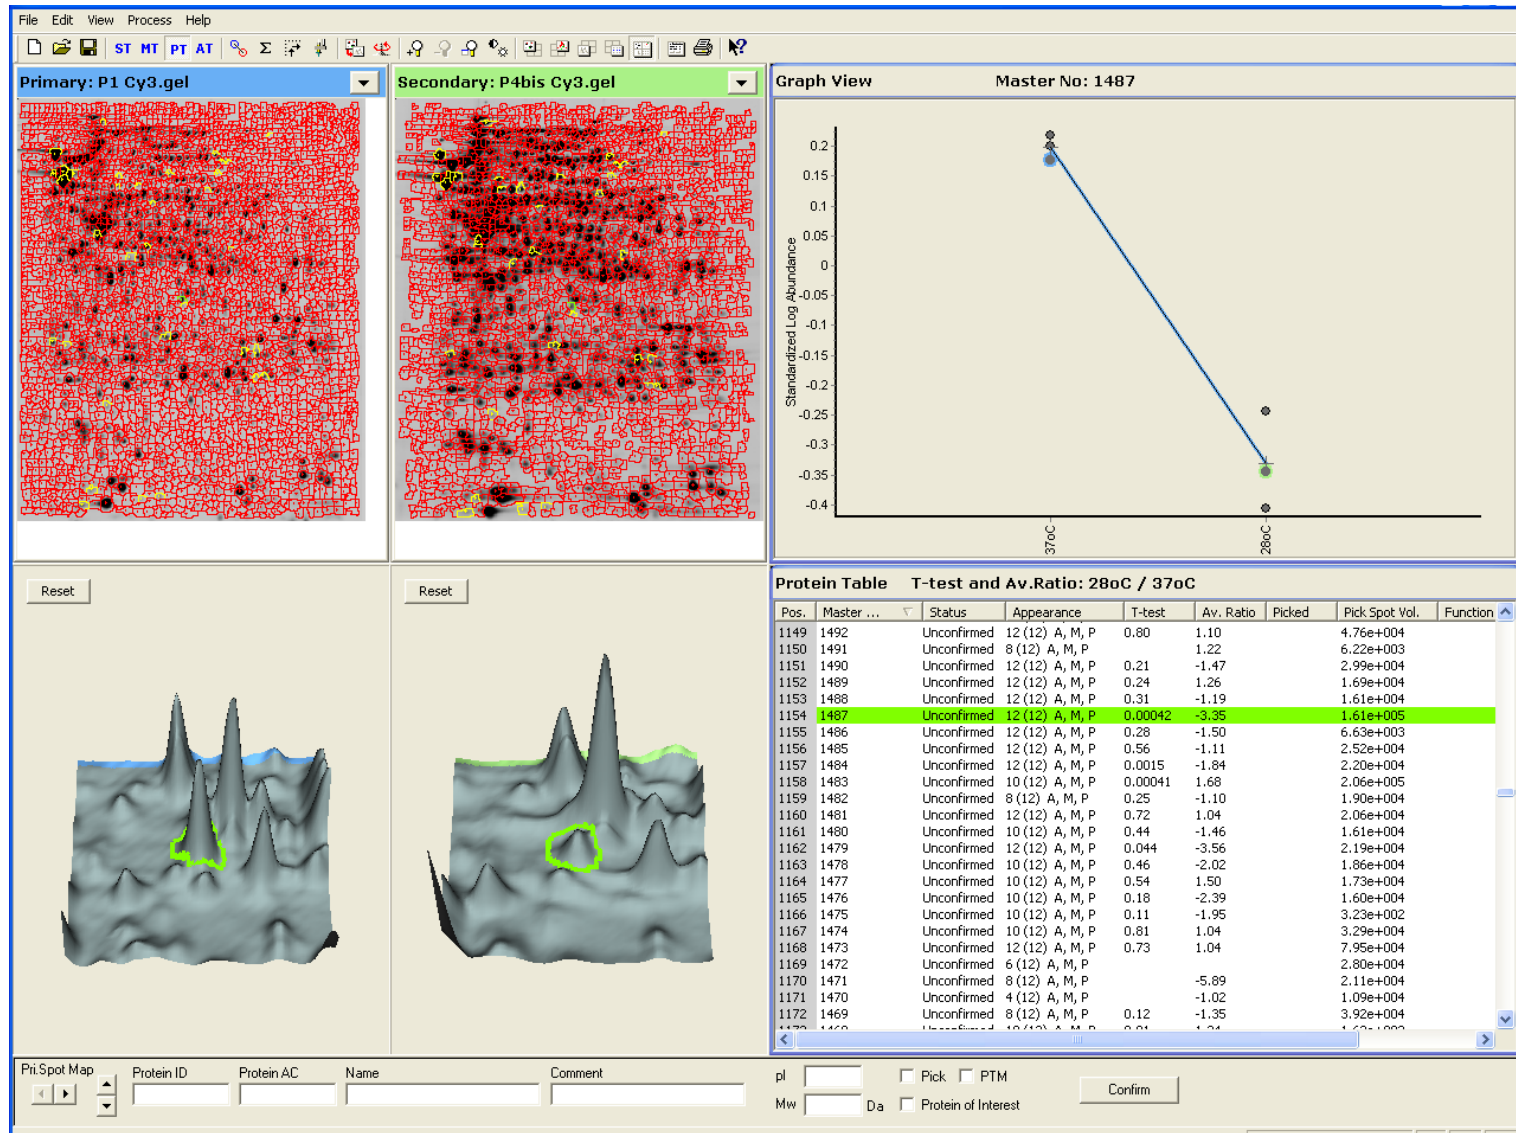

# Gst (PAU\_01940)

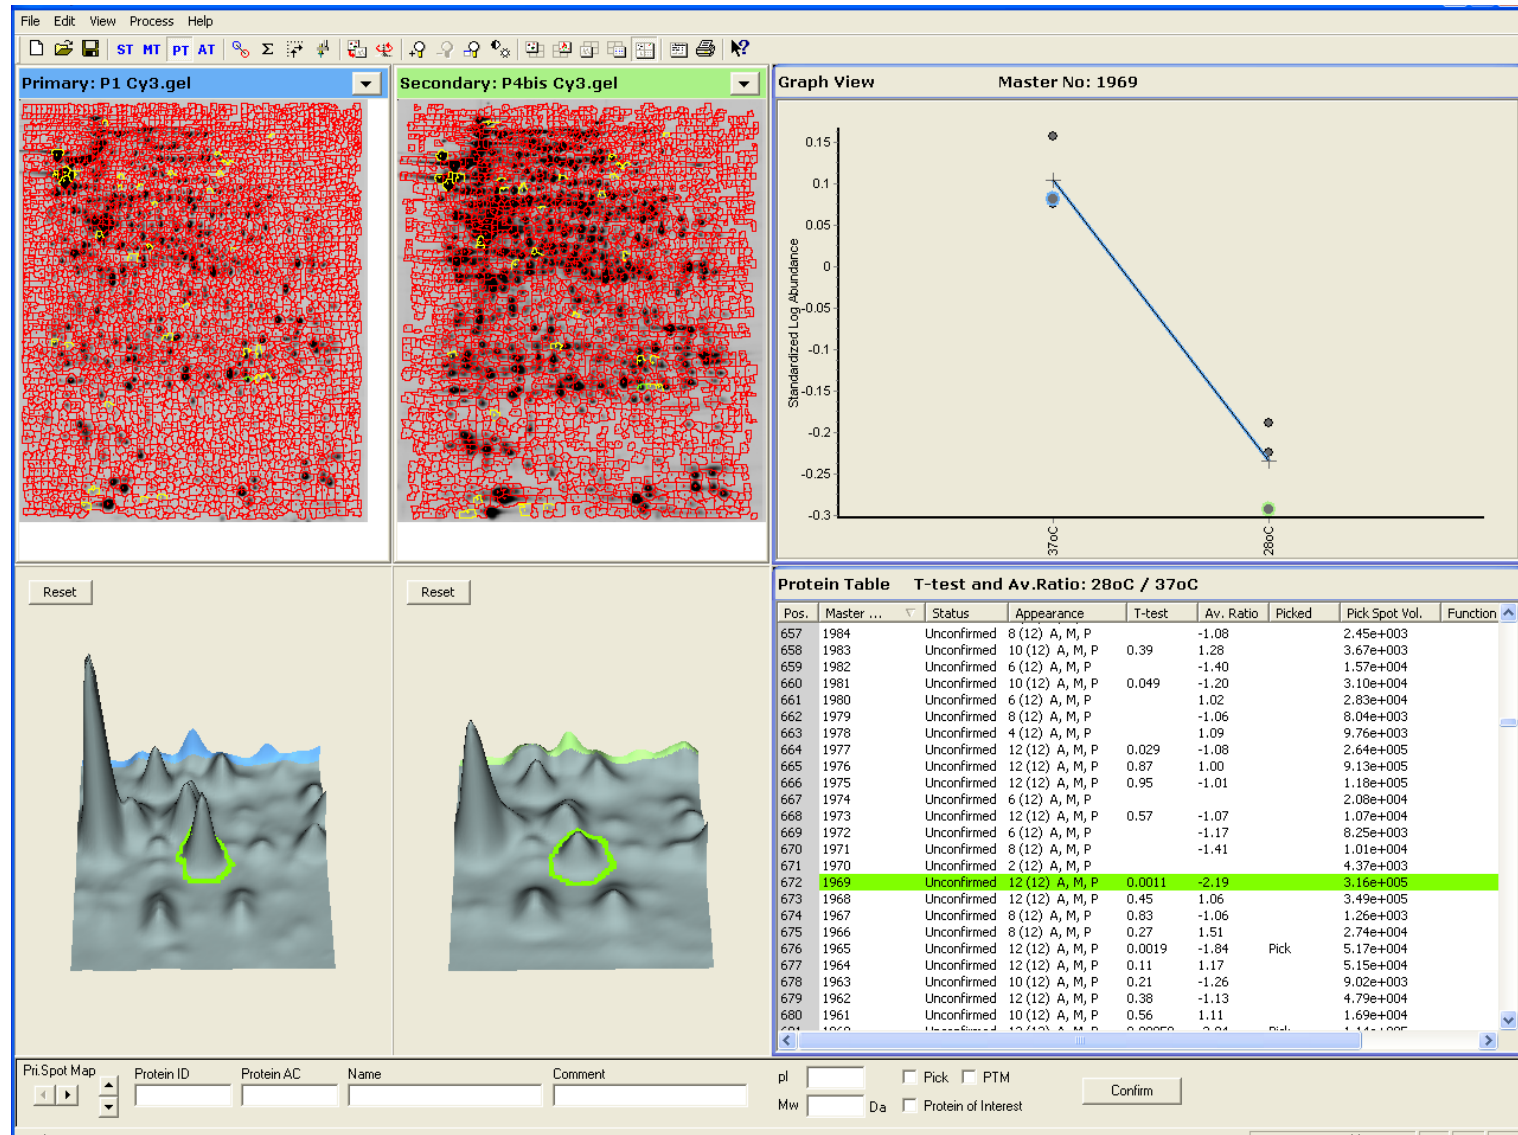

# AnsB (PAU\_02834)

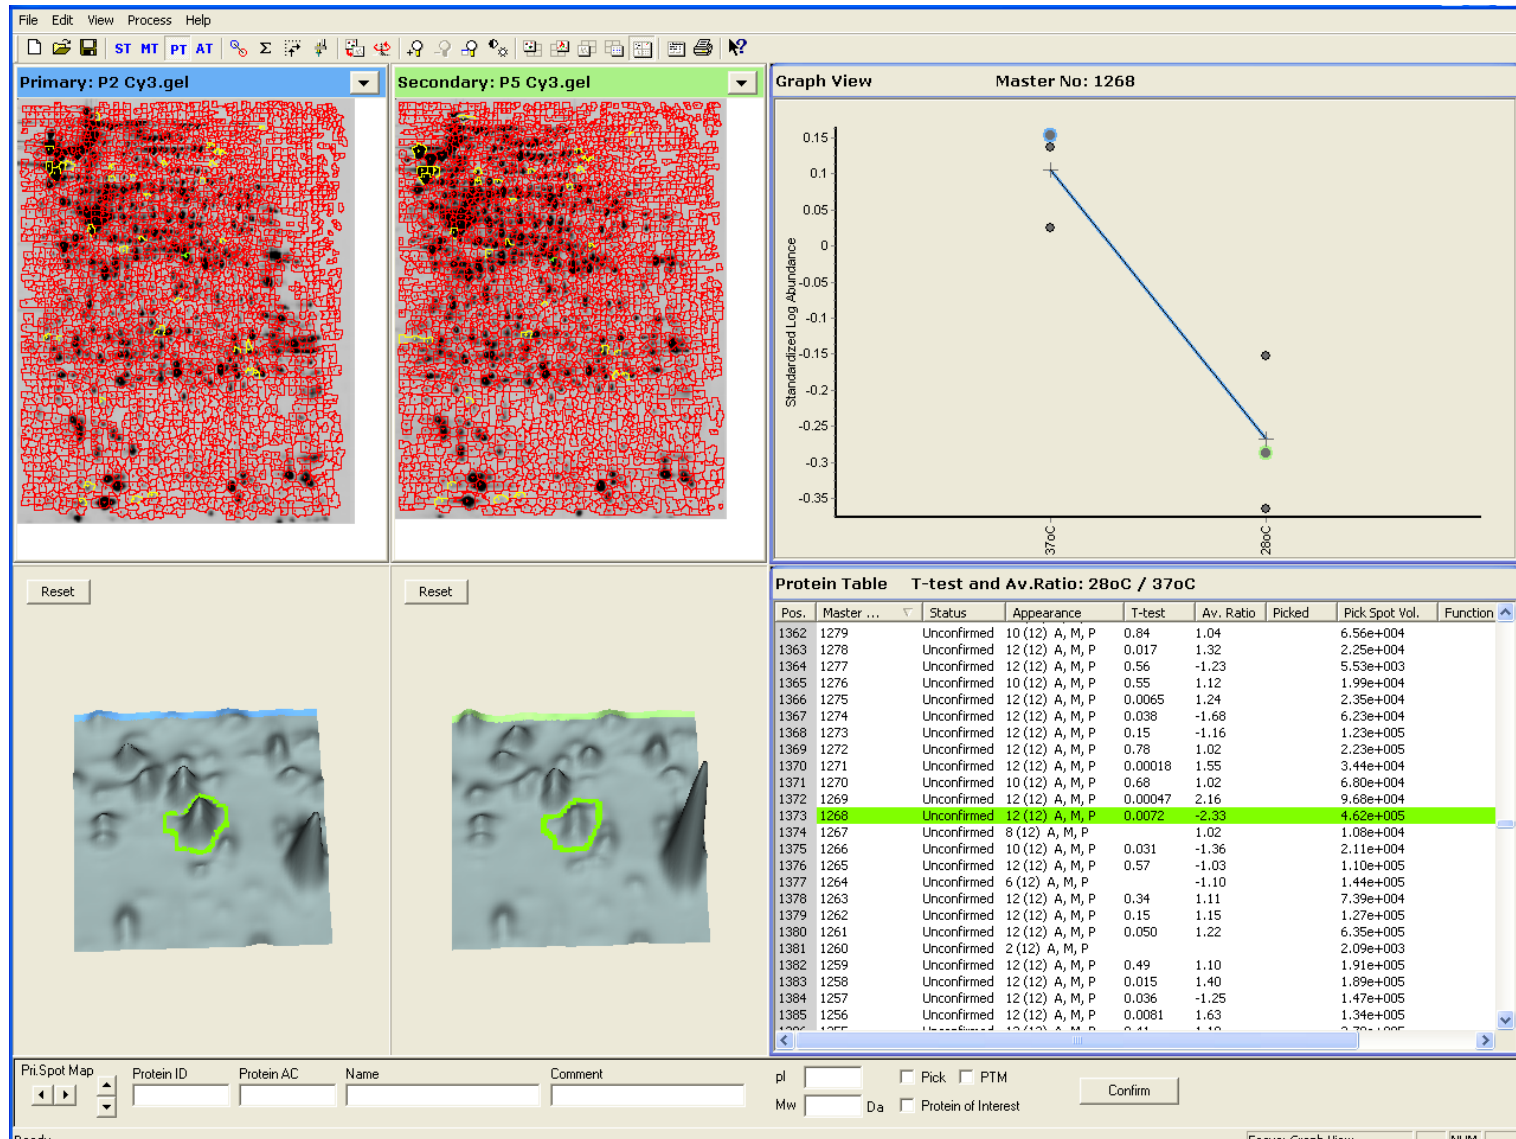

# GuaA (PAU\_01827)

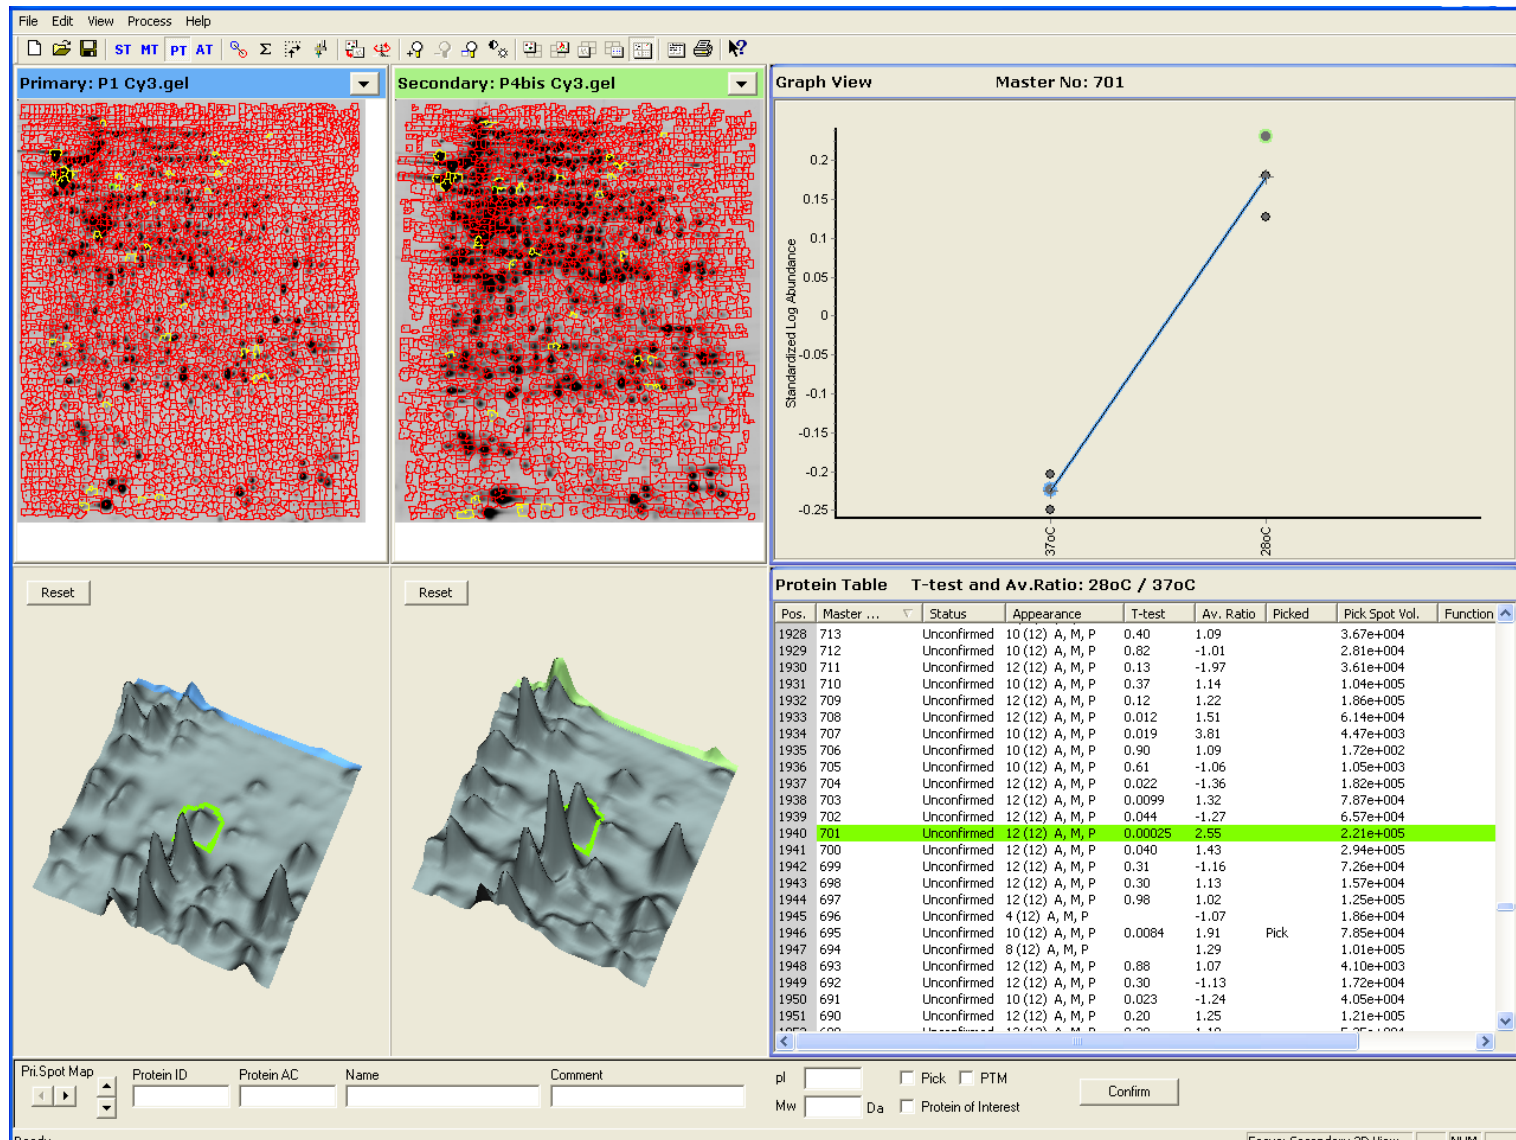



# GuaB (PAU\_01826)

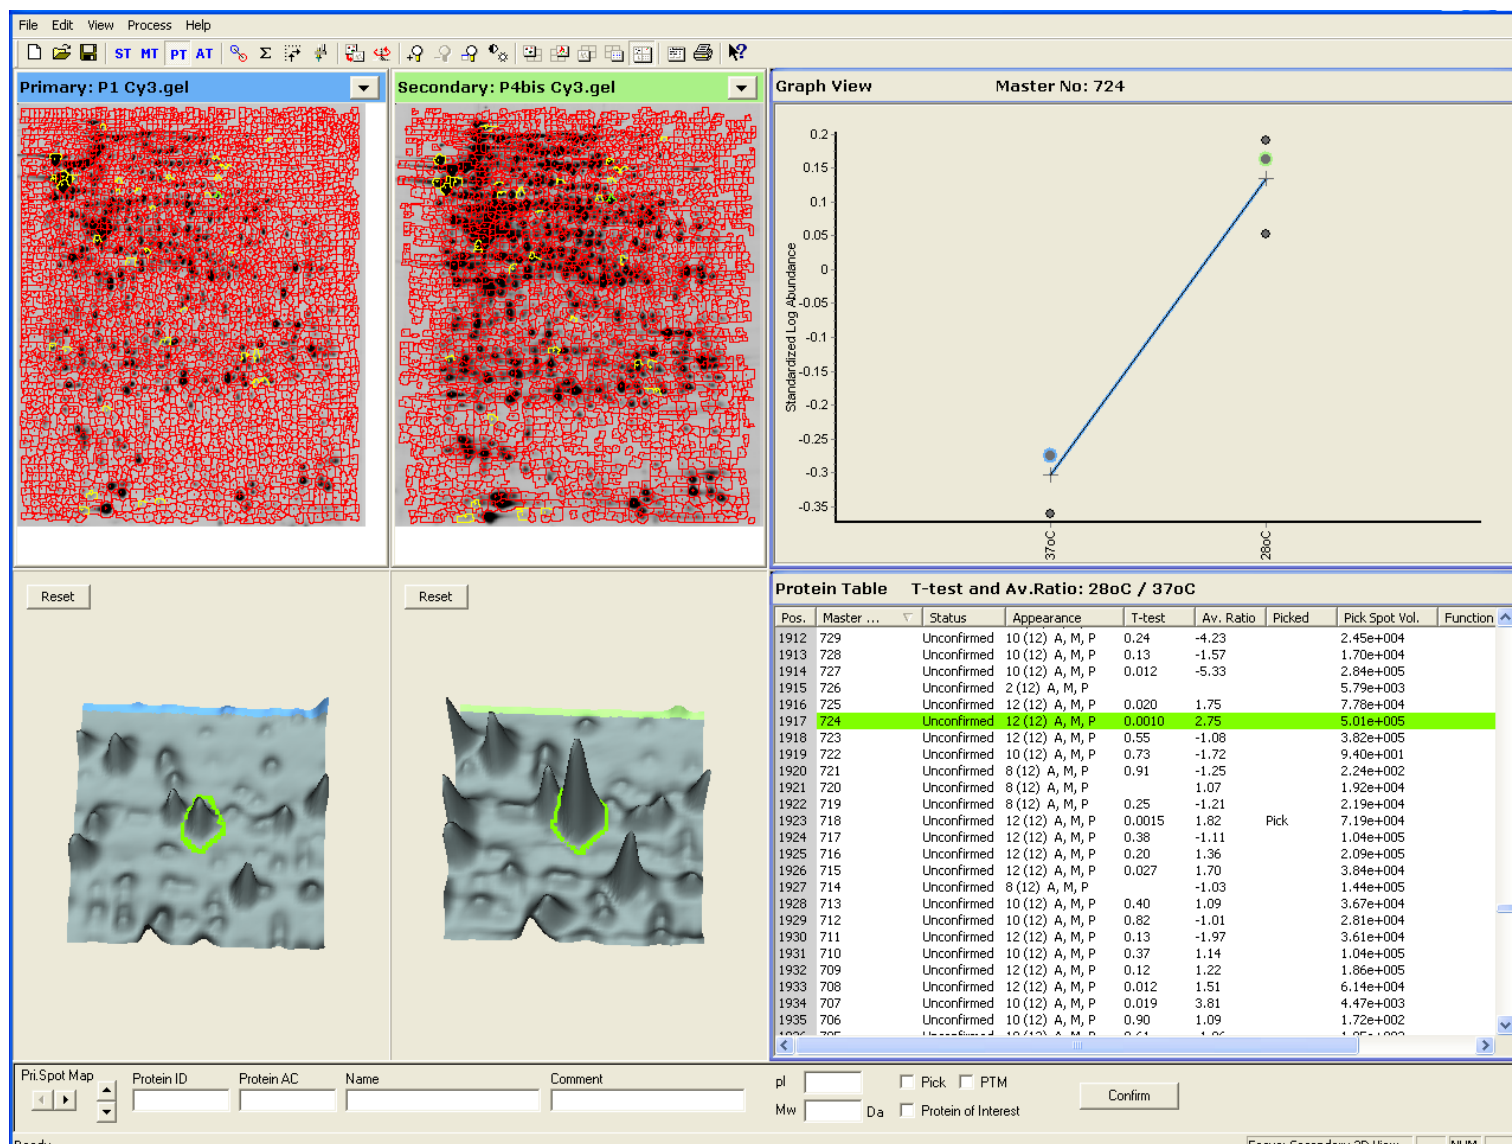

# MaIE (PAU\_00367)

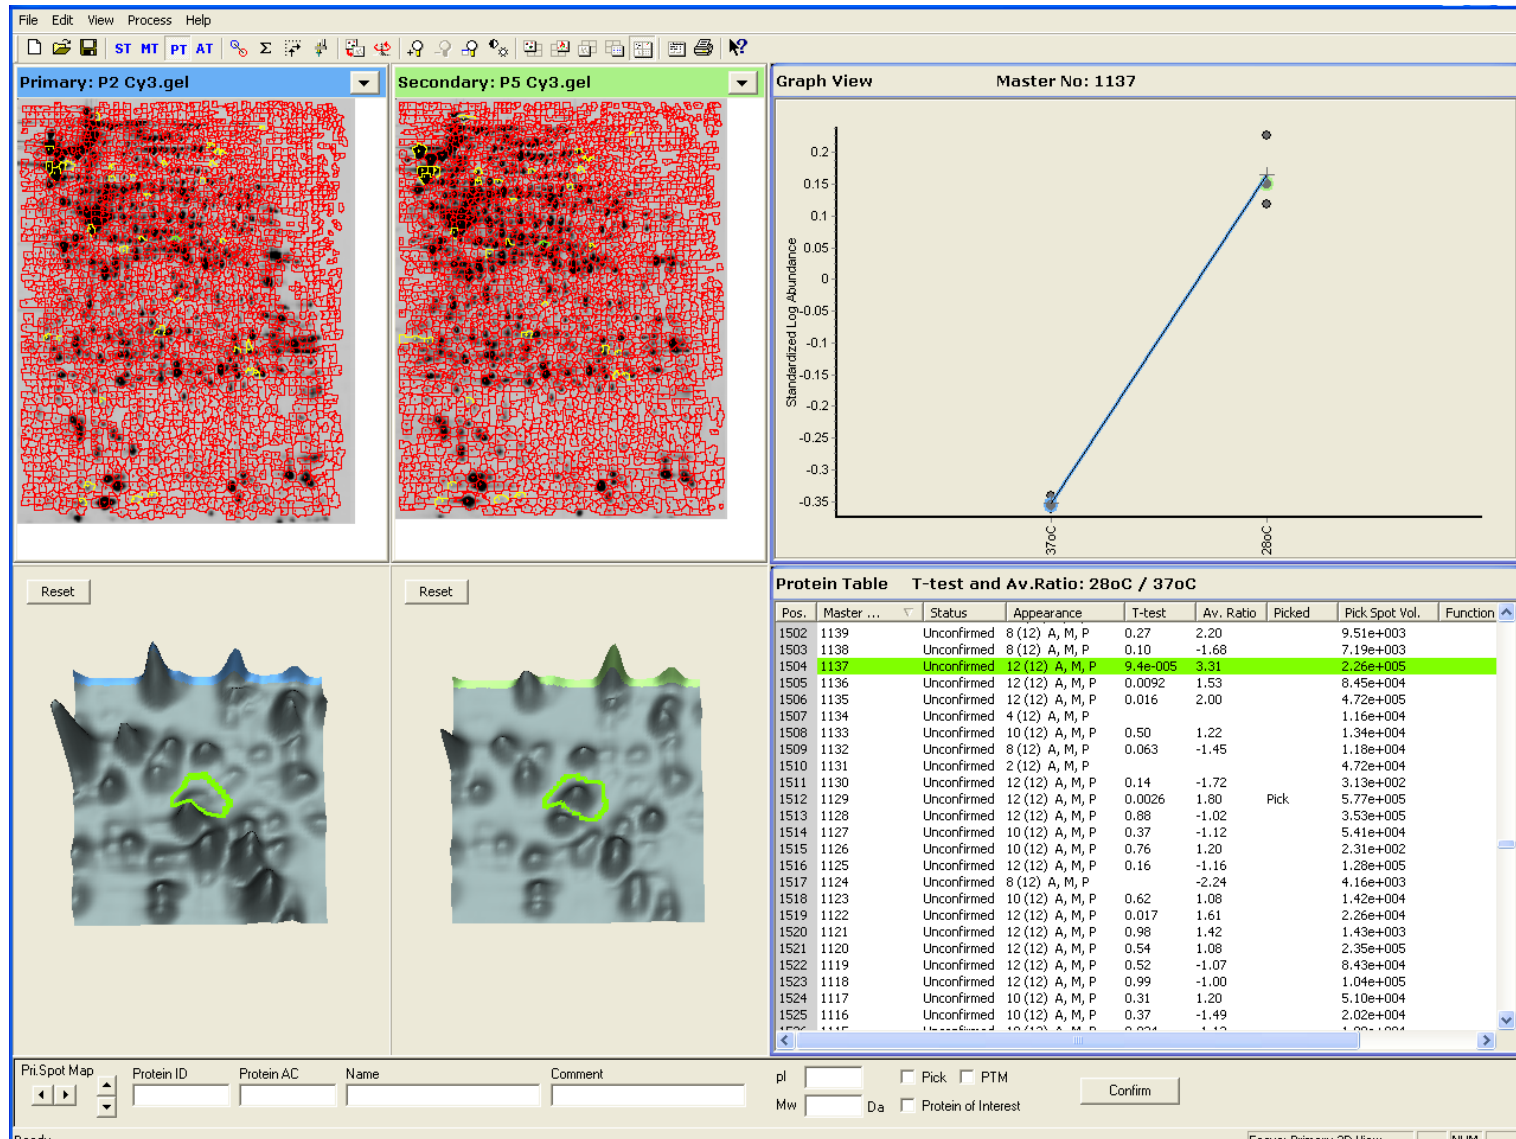

# PurH (PAU\_00406)

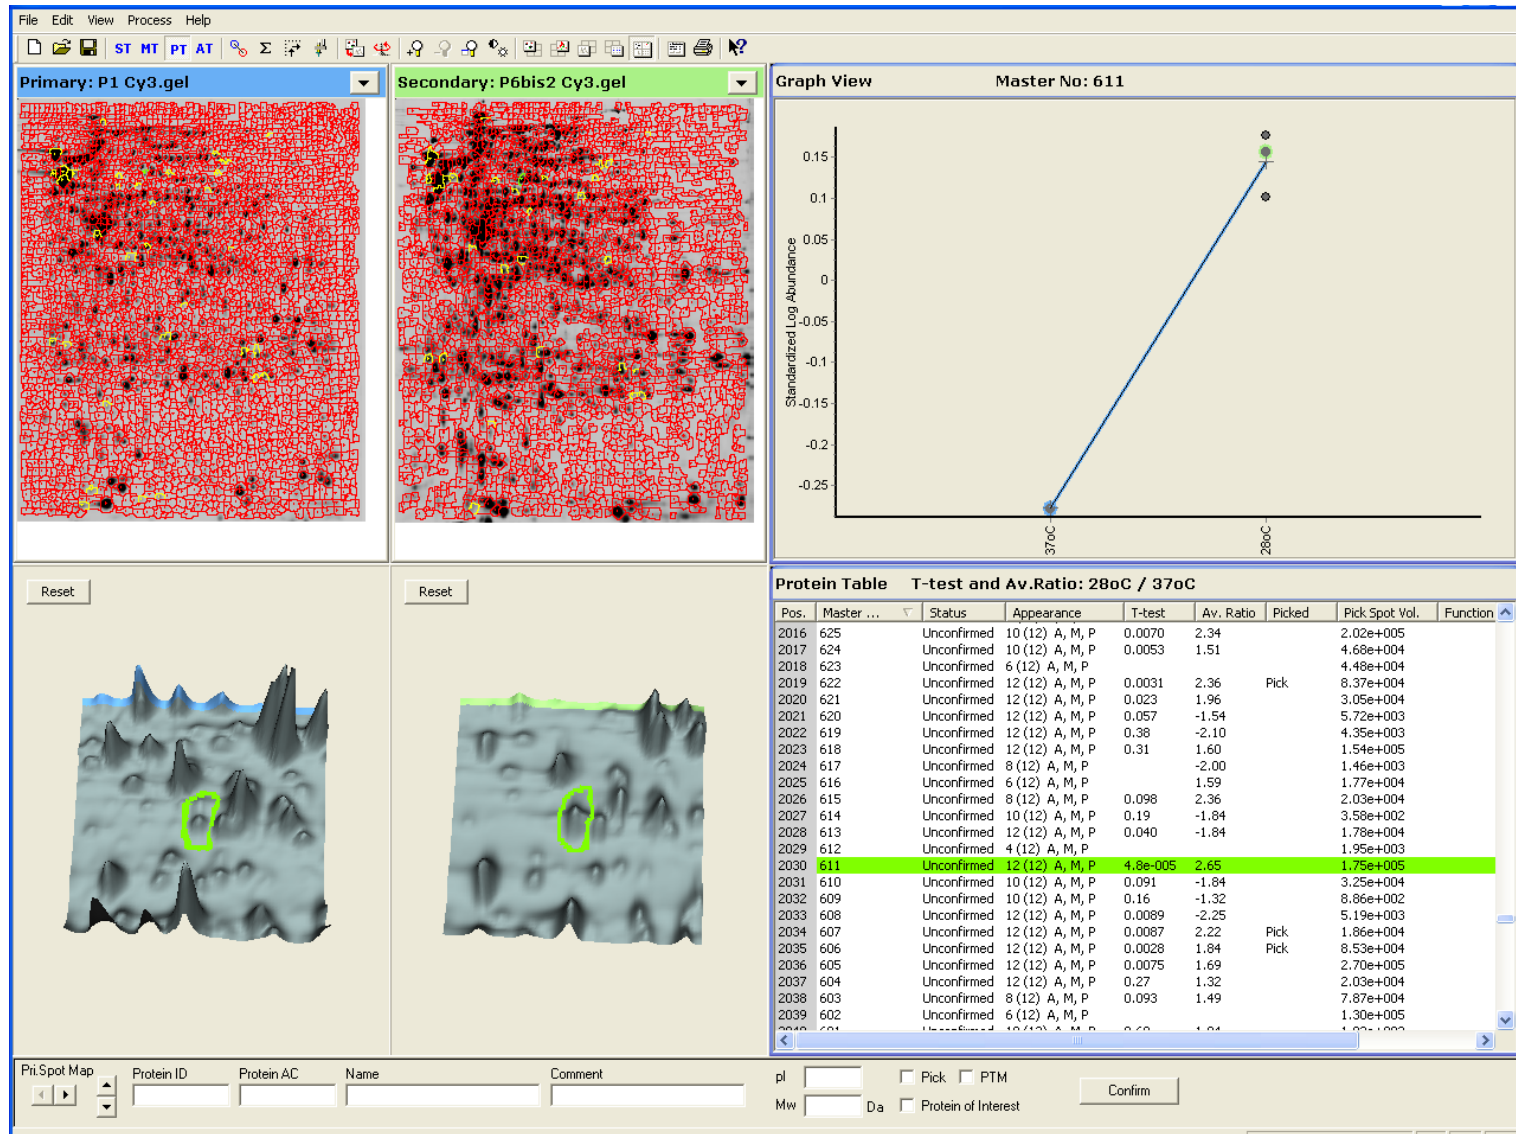



# PckA (PAU\_000083)

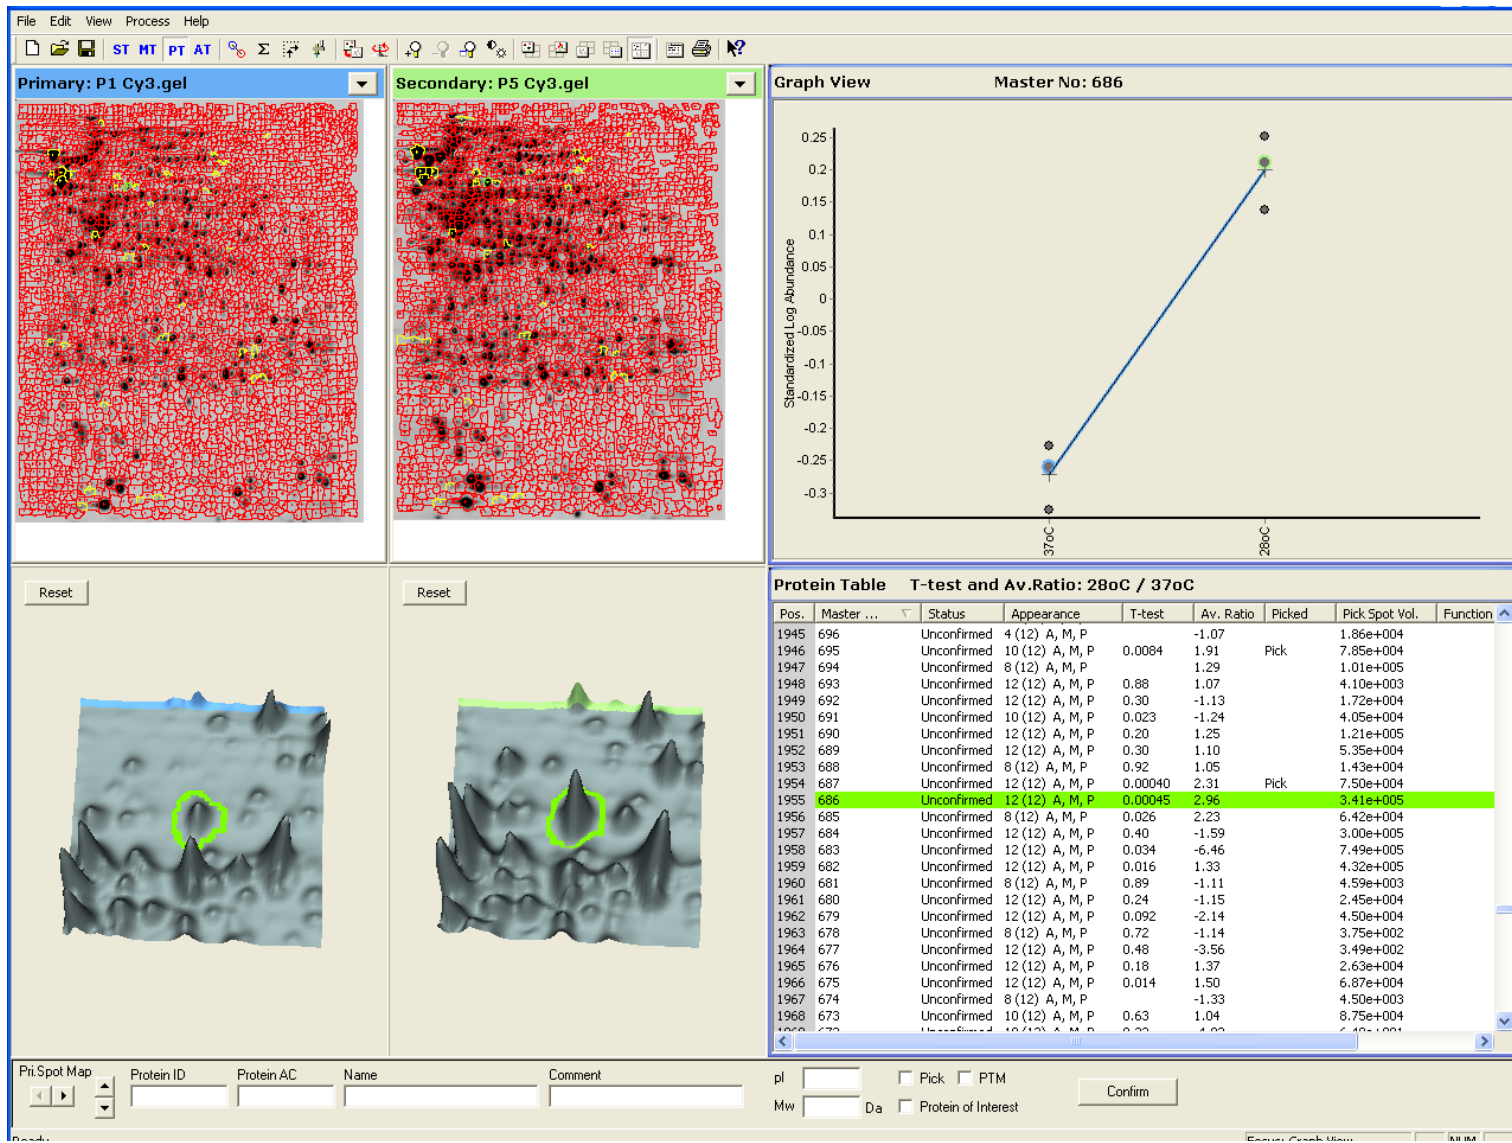



# GcvT (PAU\_01159)

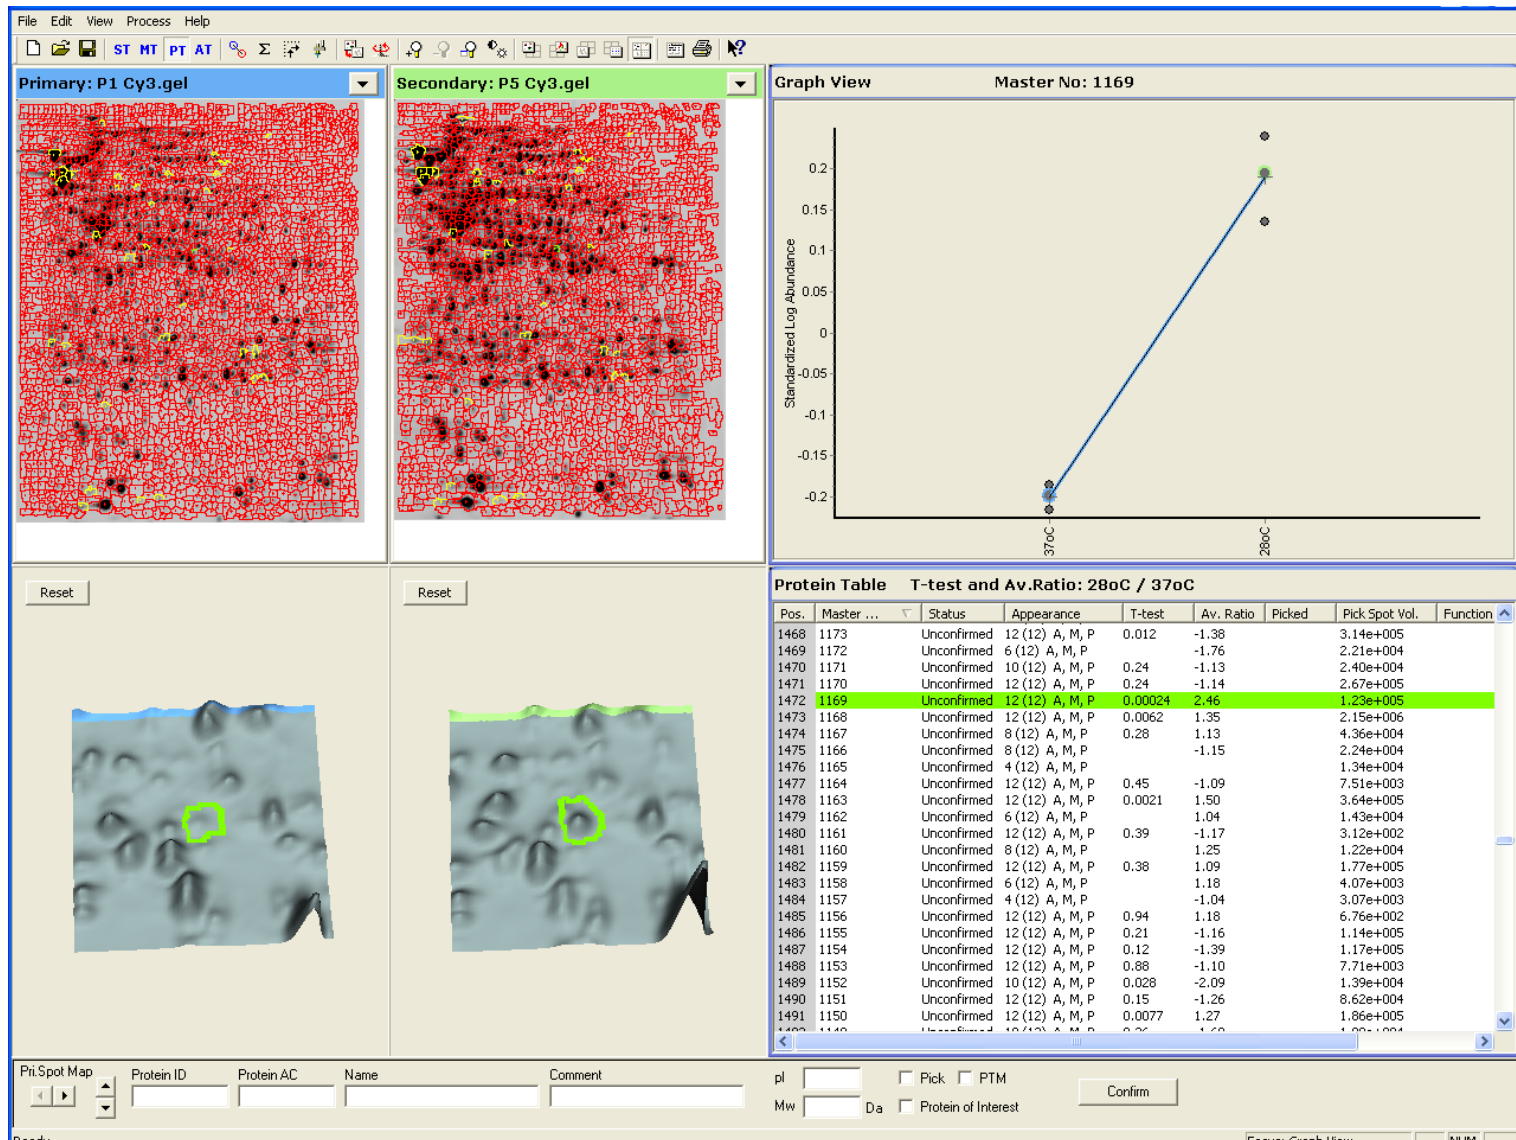

# MetY (PAU\_01242)

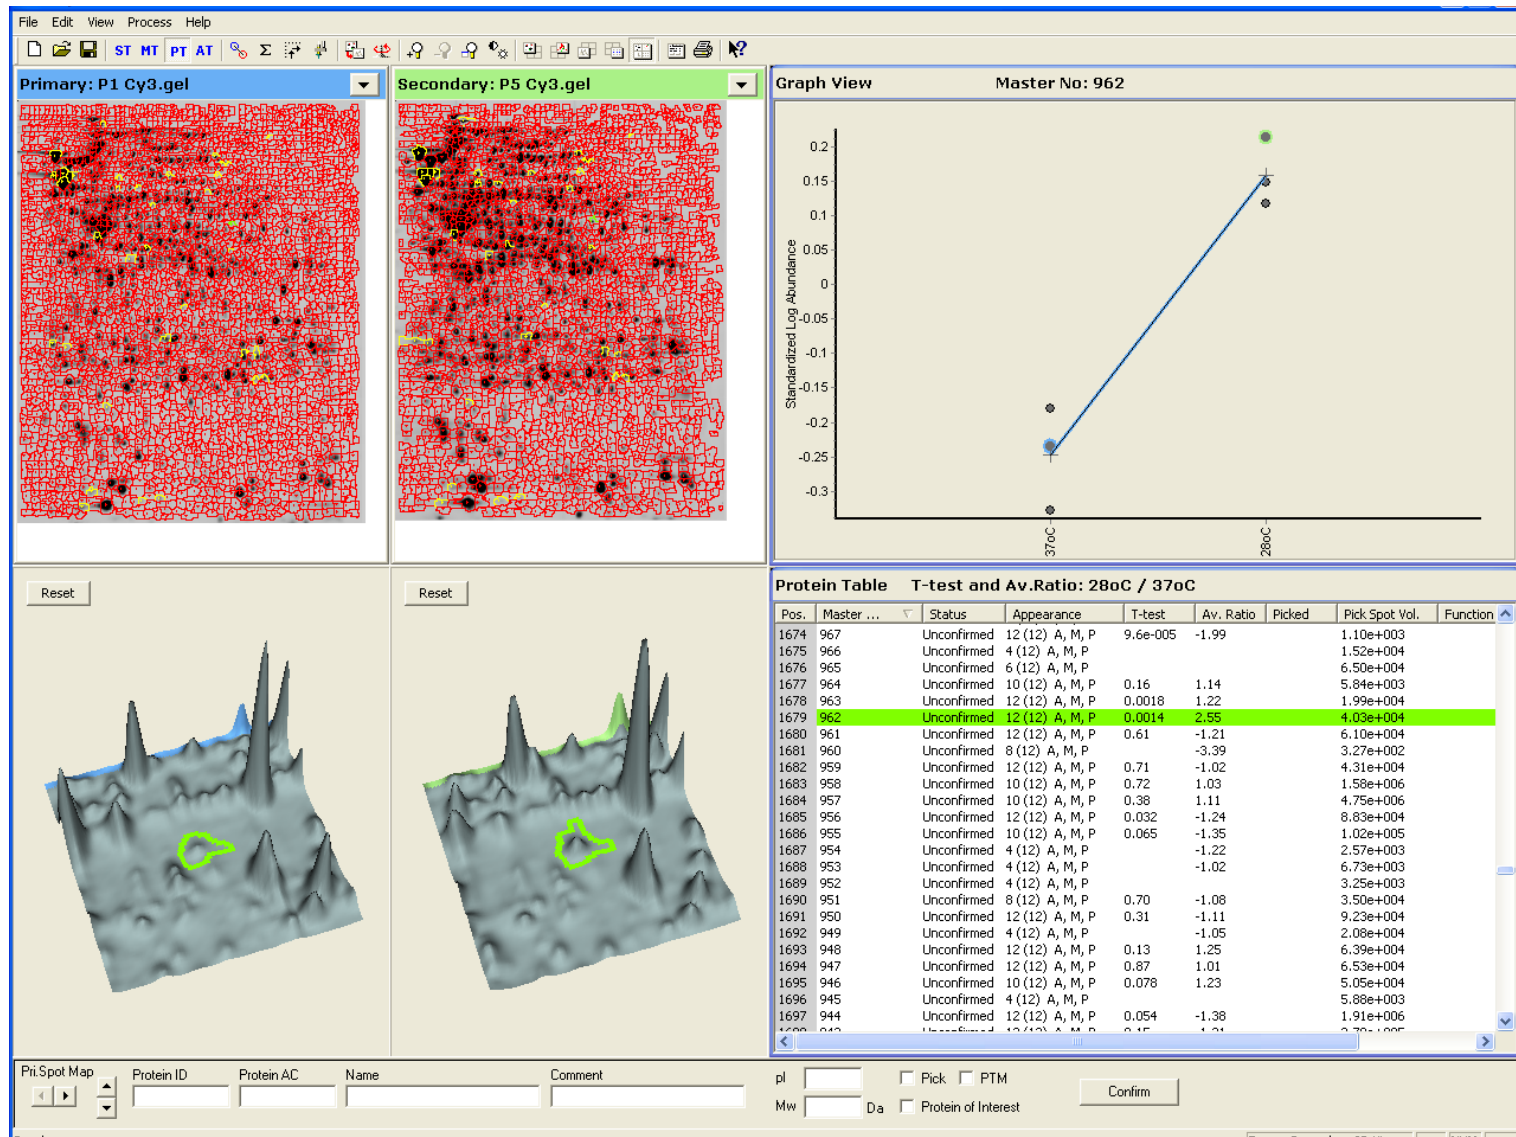

# ArnA (PAU\_01877)

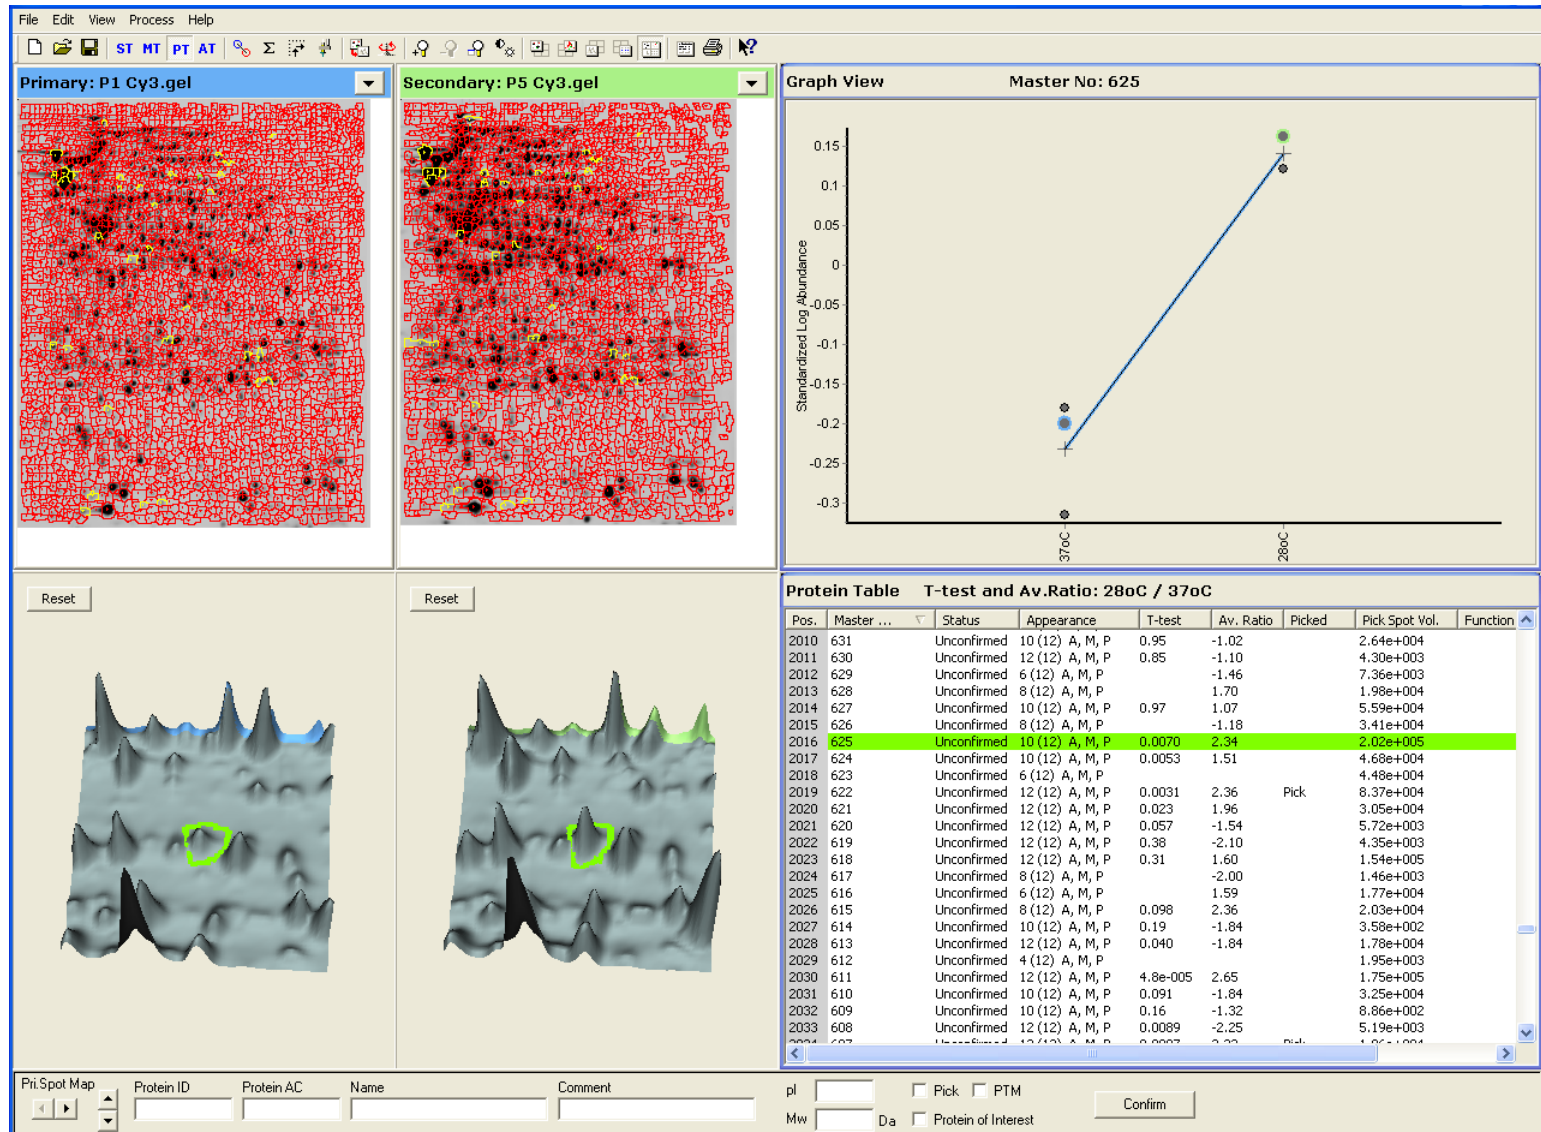

# Zwf (PAU\_02443)

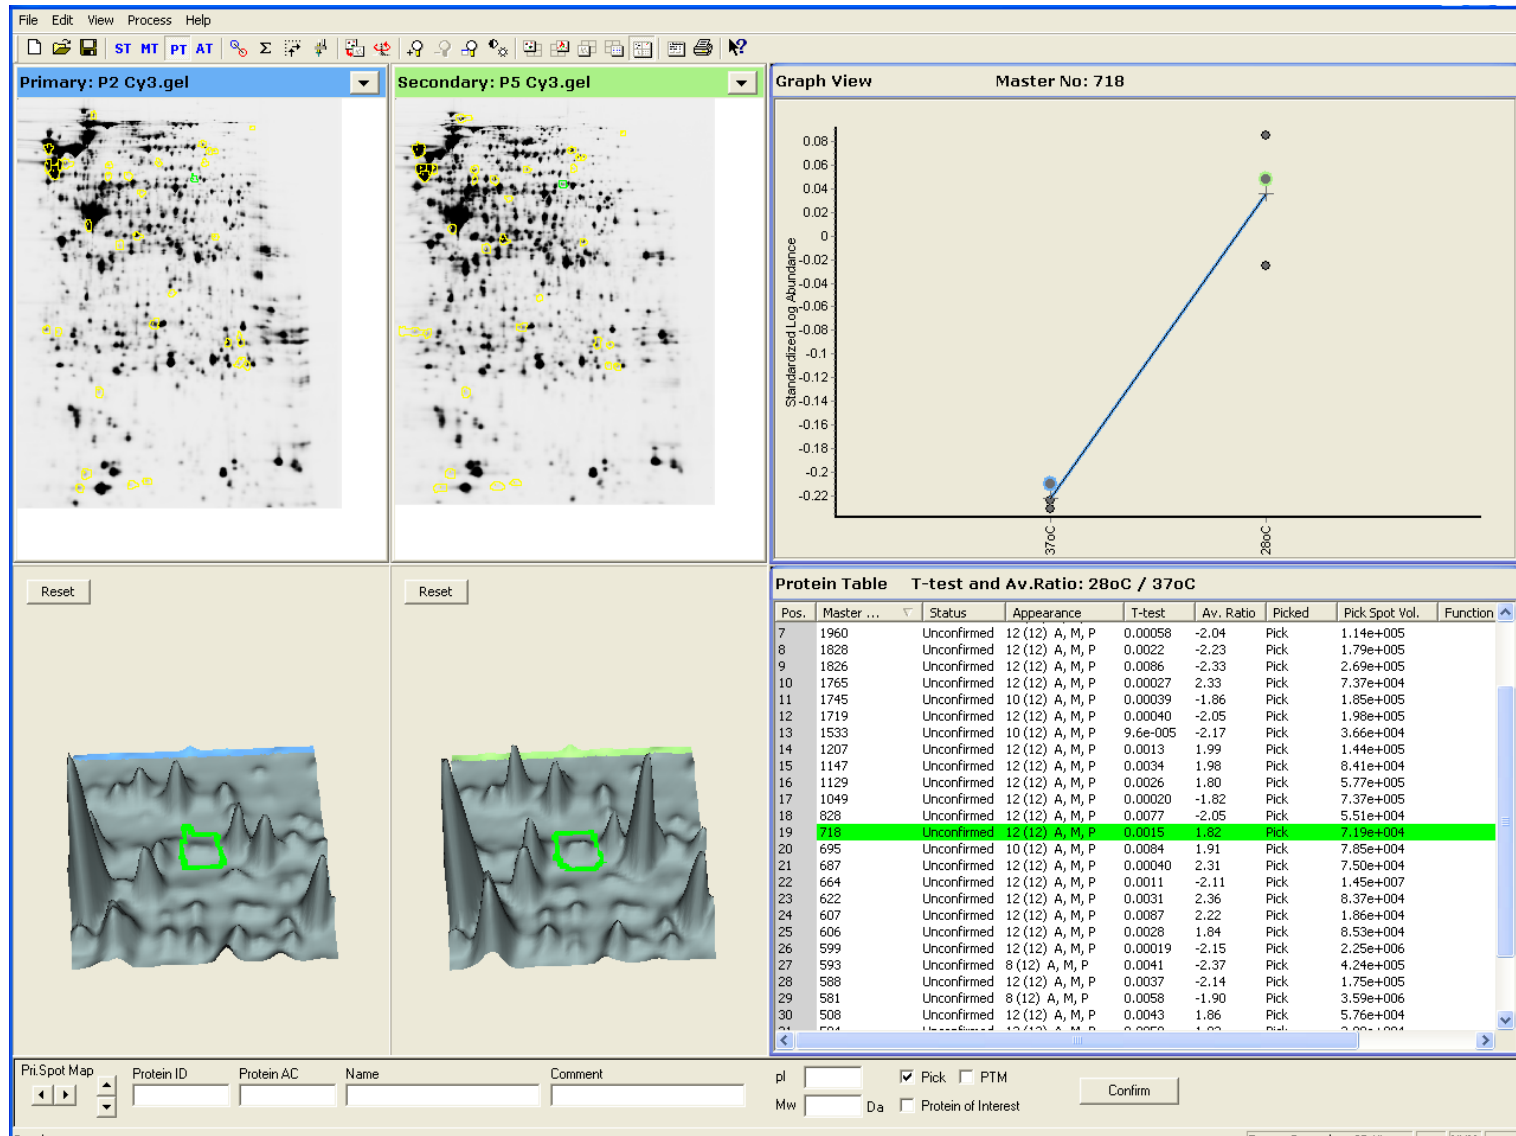



# PAU\_01687

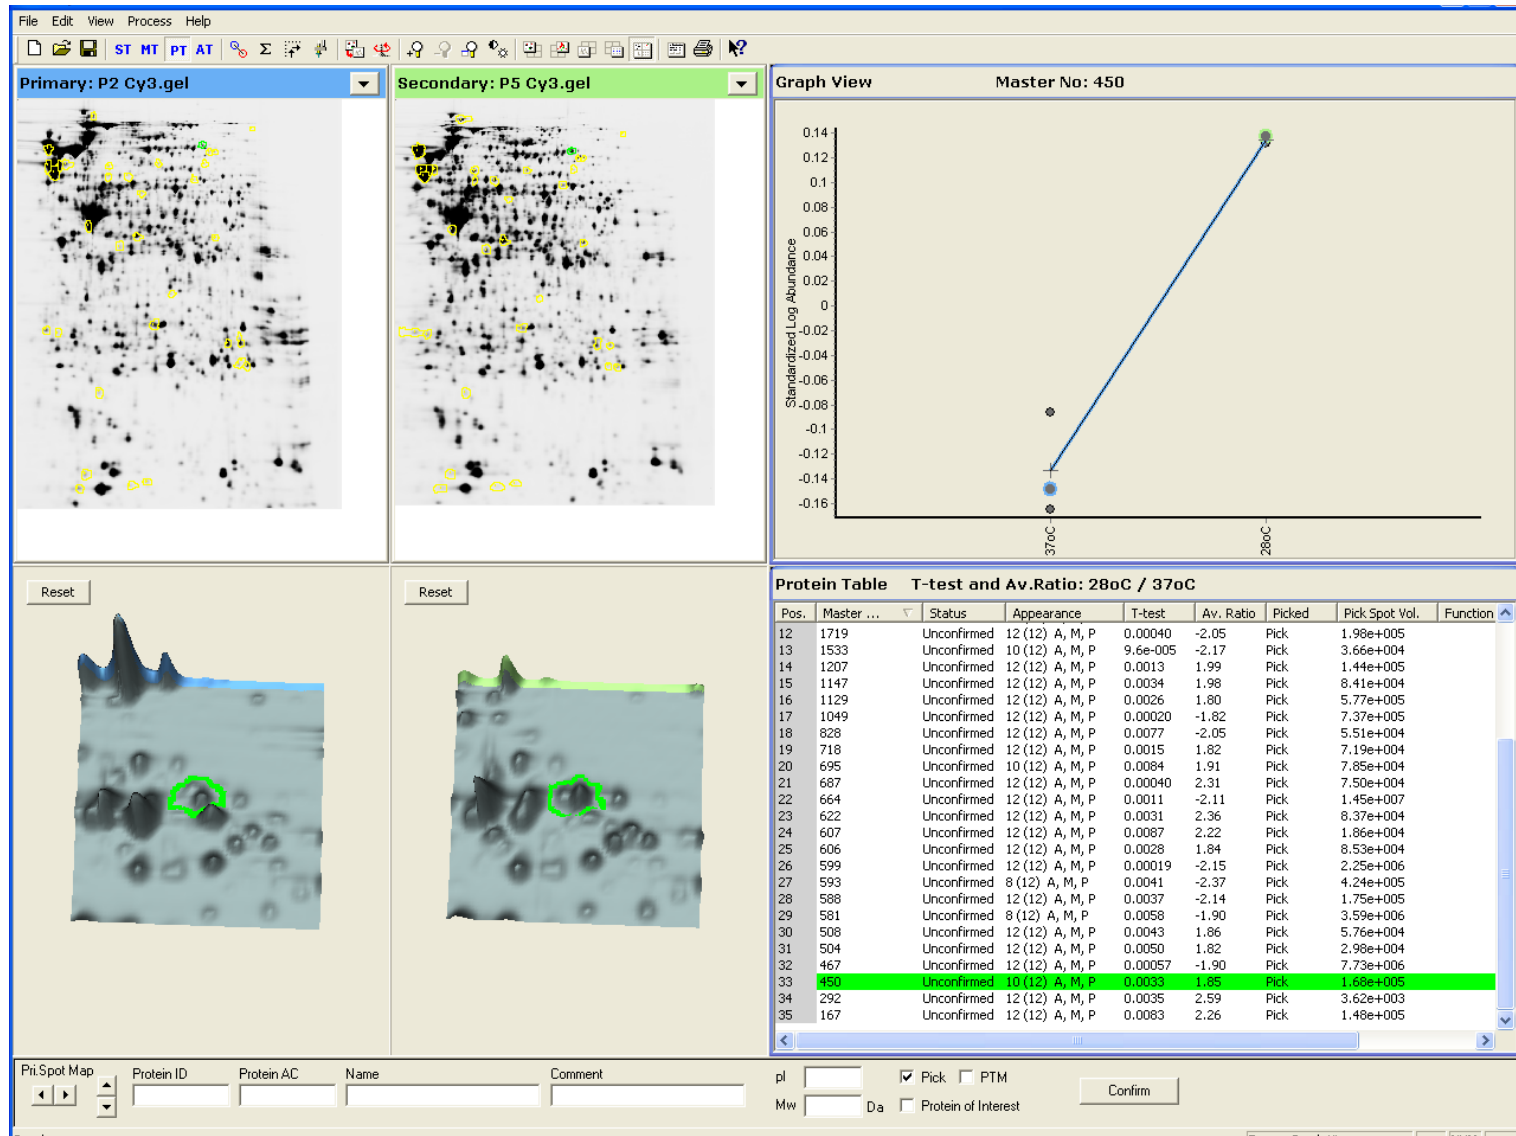

# VgrG (PAU\_00969)

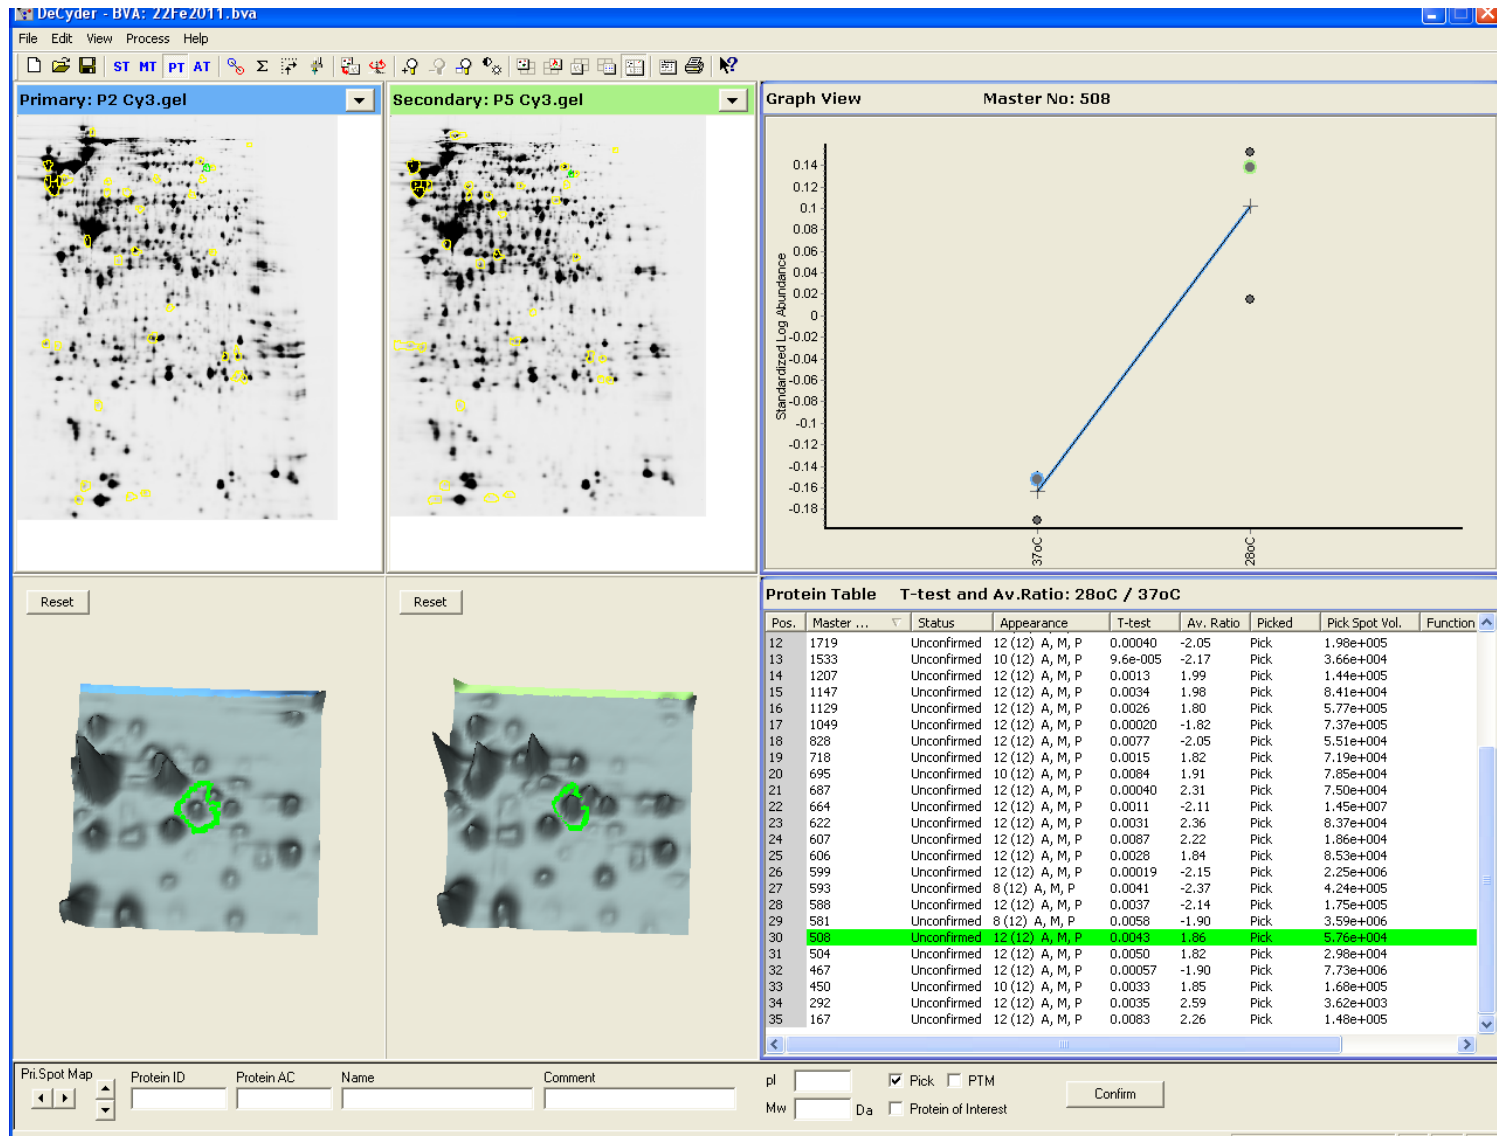

# GuaA (PAU\_01827)

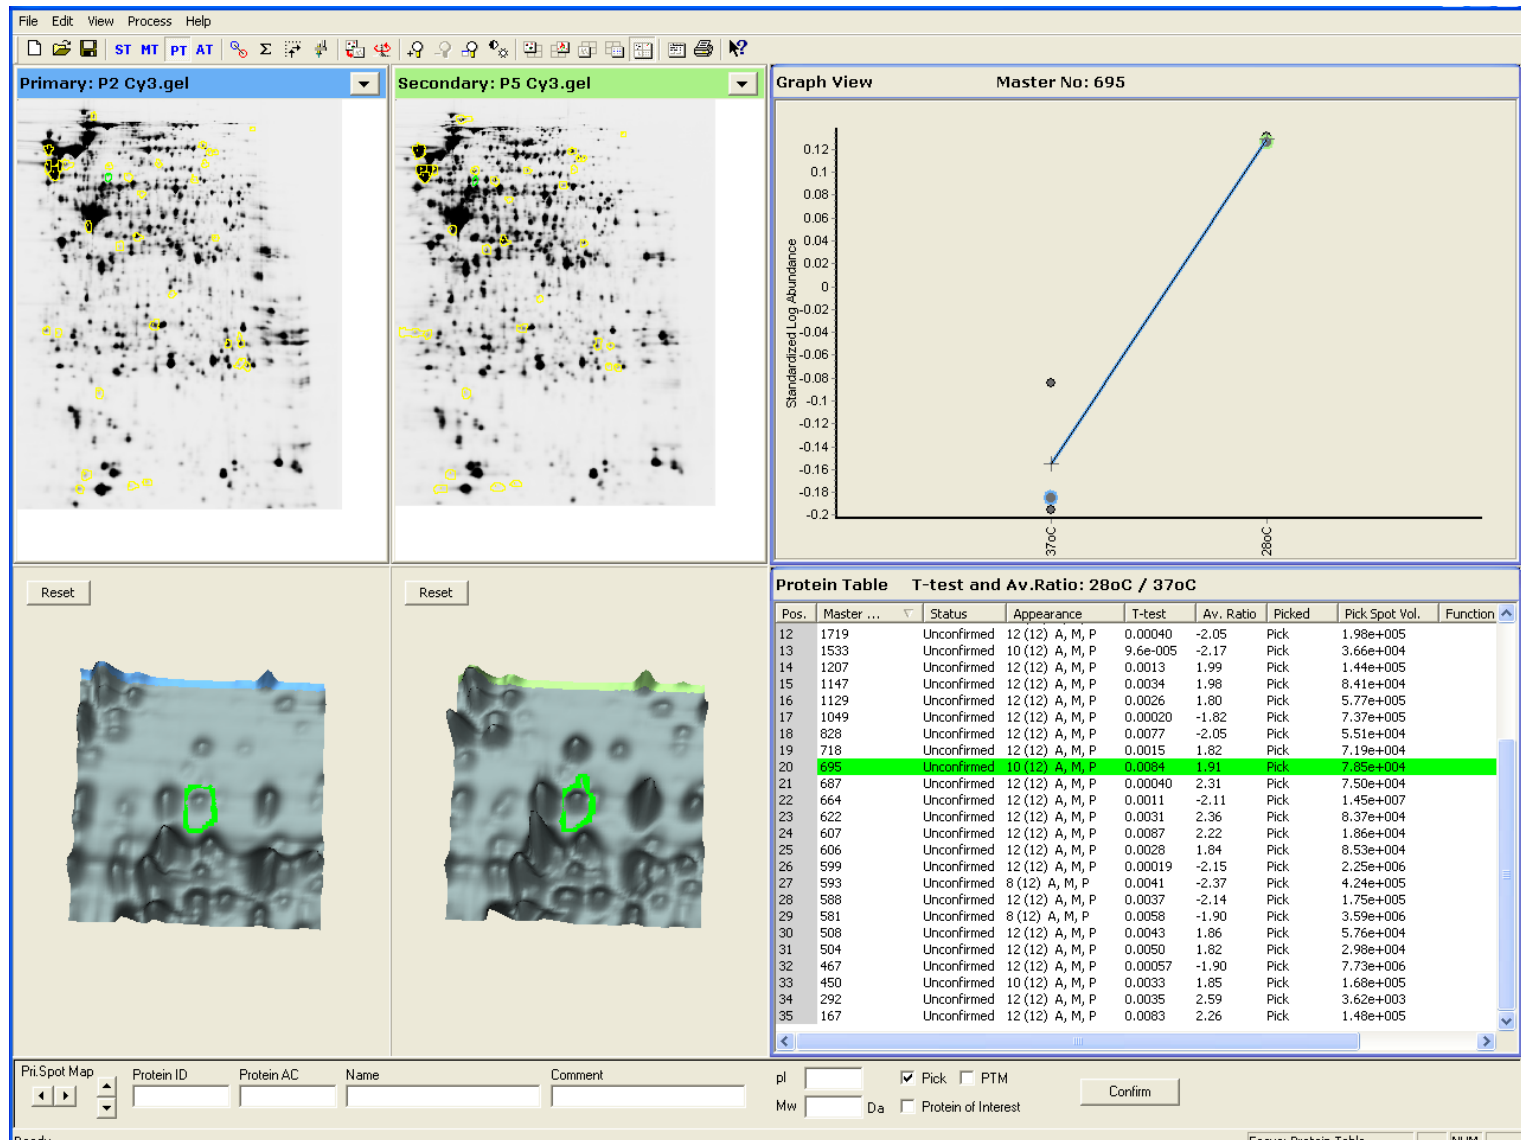

# Ggt (PAU\_03499)

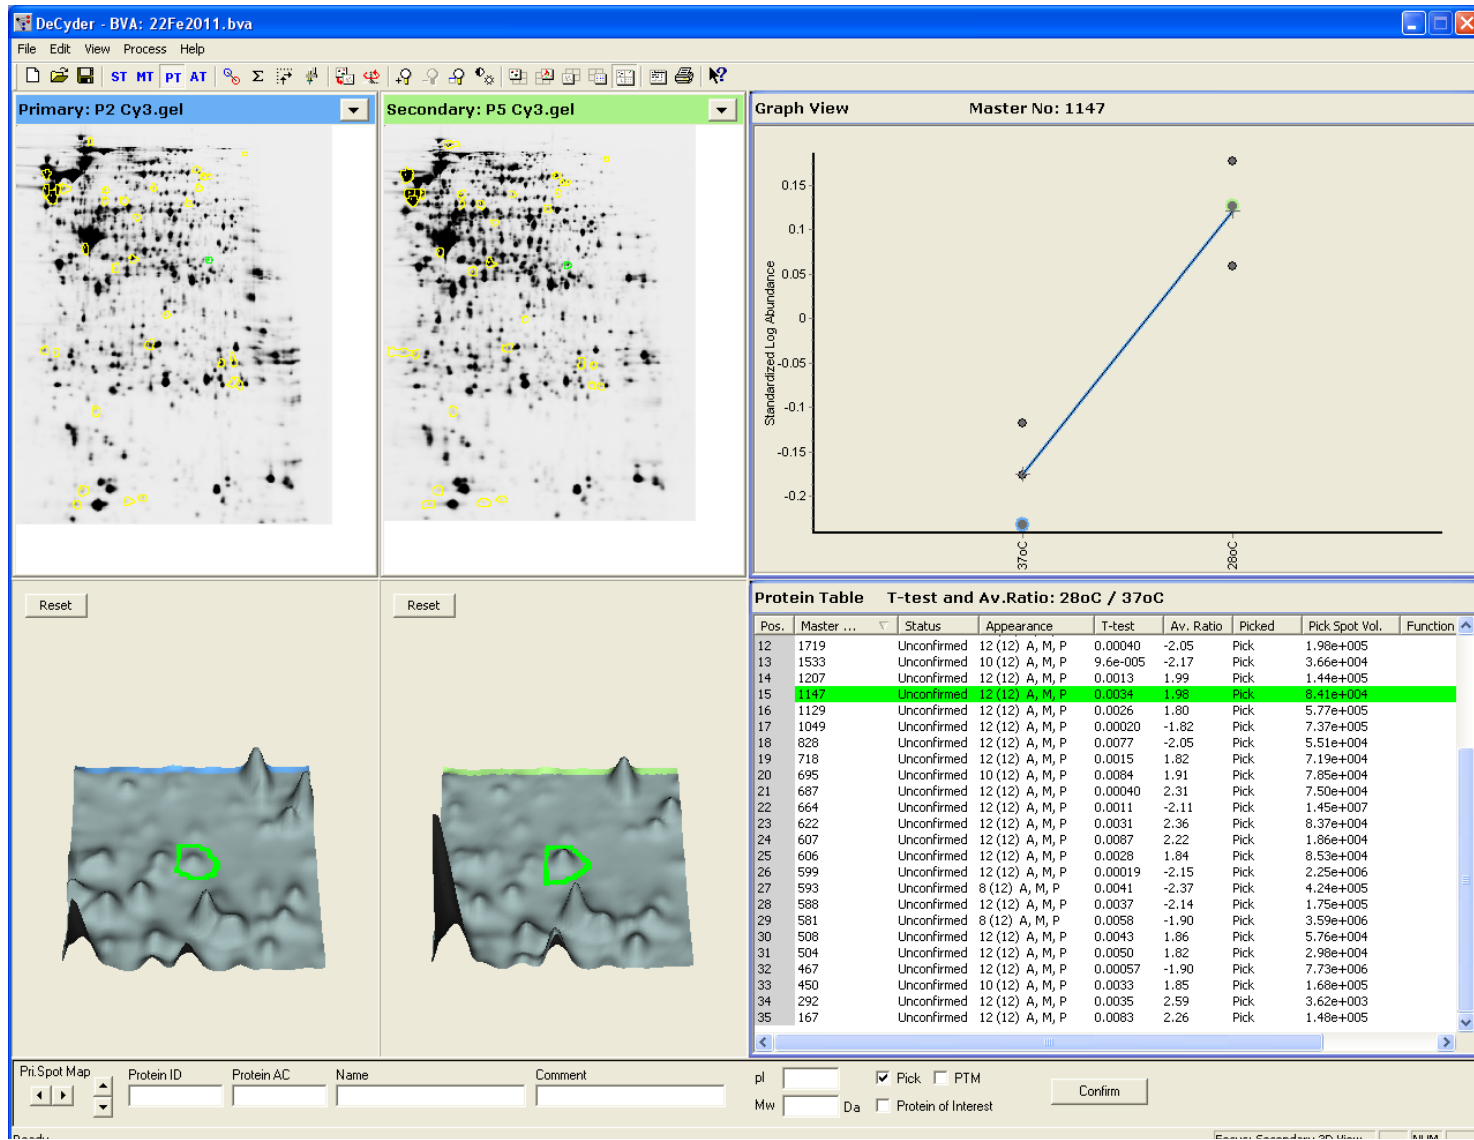



# PurL (PAU\_01324)

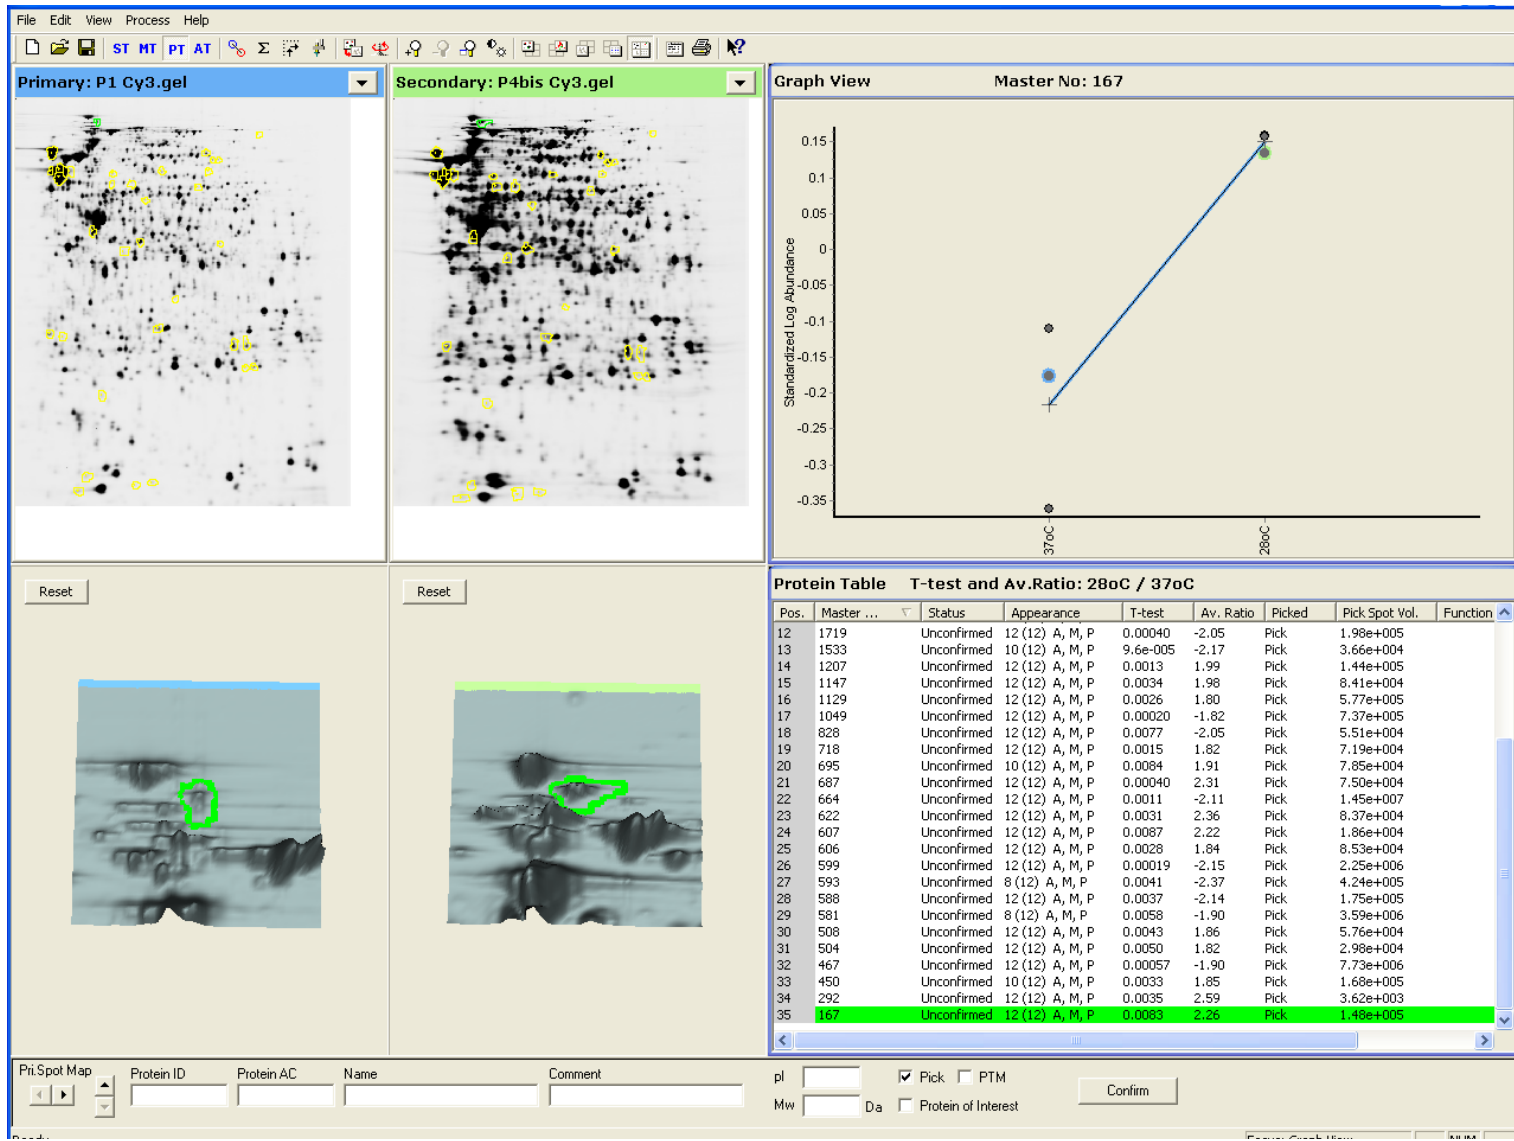

# SfcA (PAU\_02896)

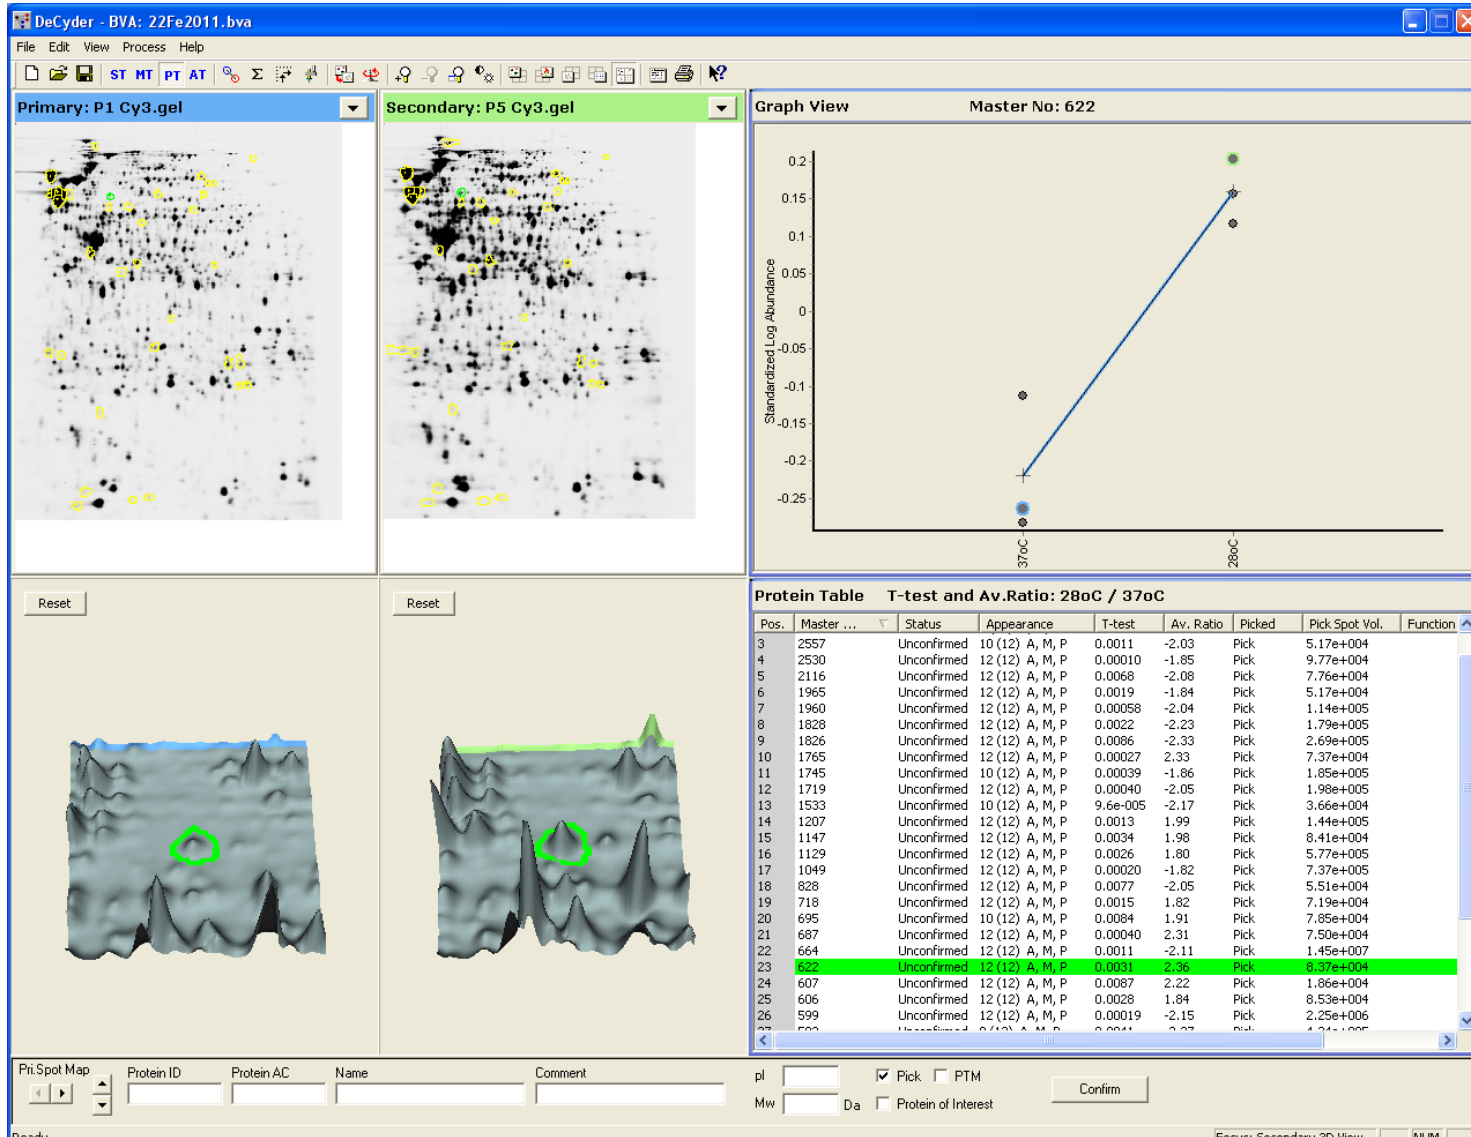

# GroEL (PAU\_03756)

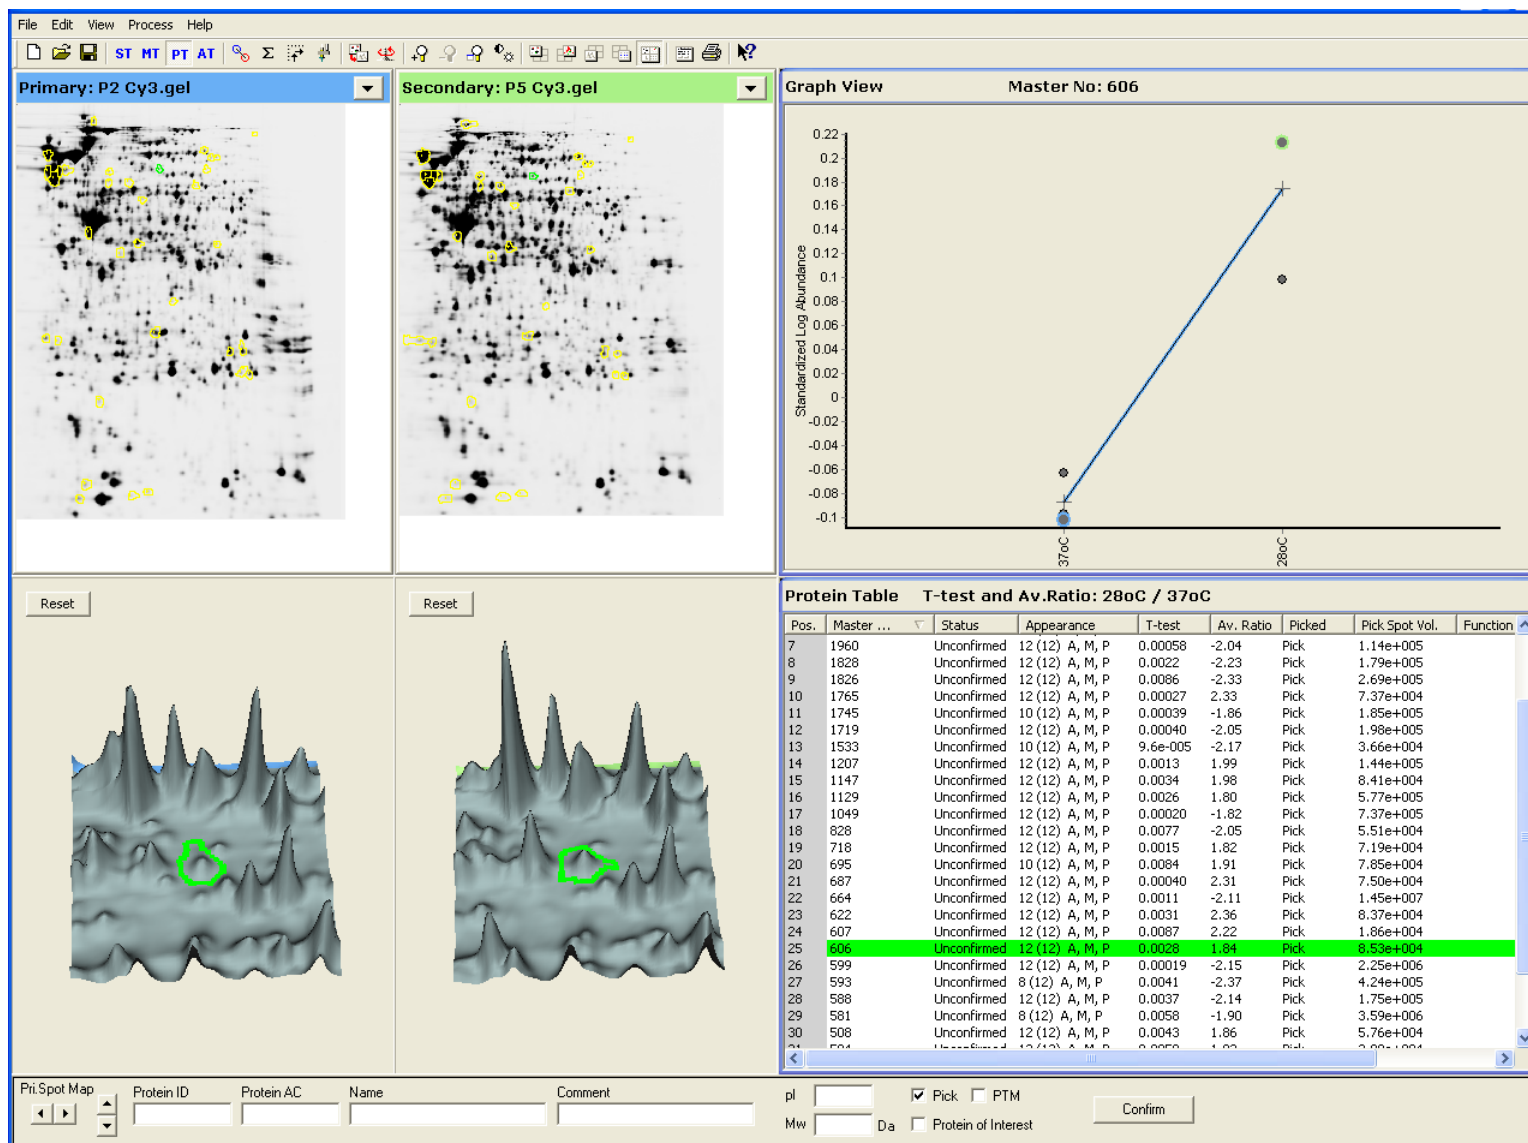

# DnaK (PAU\_00453)

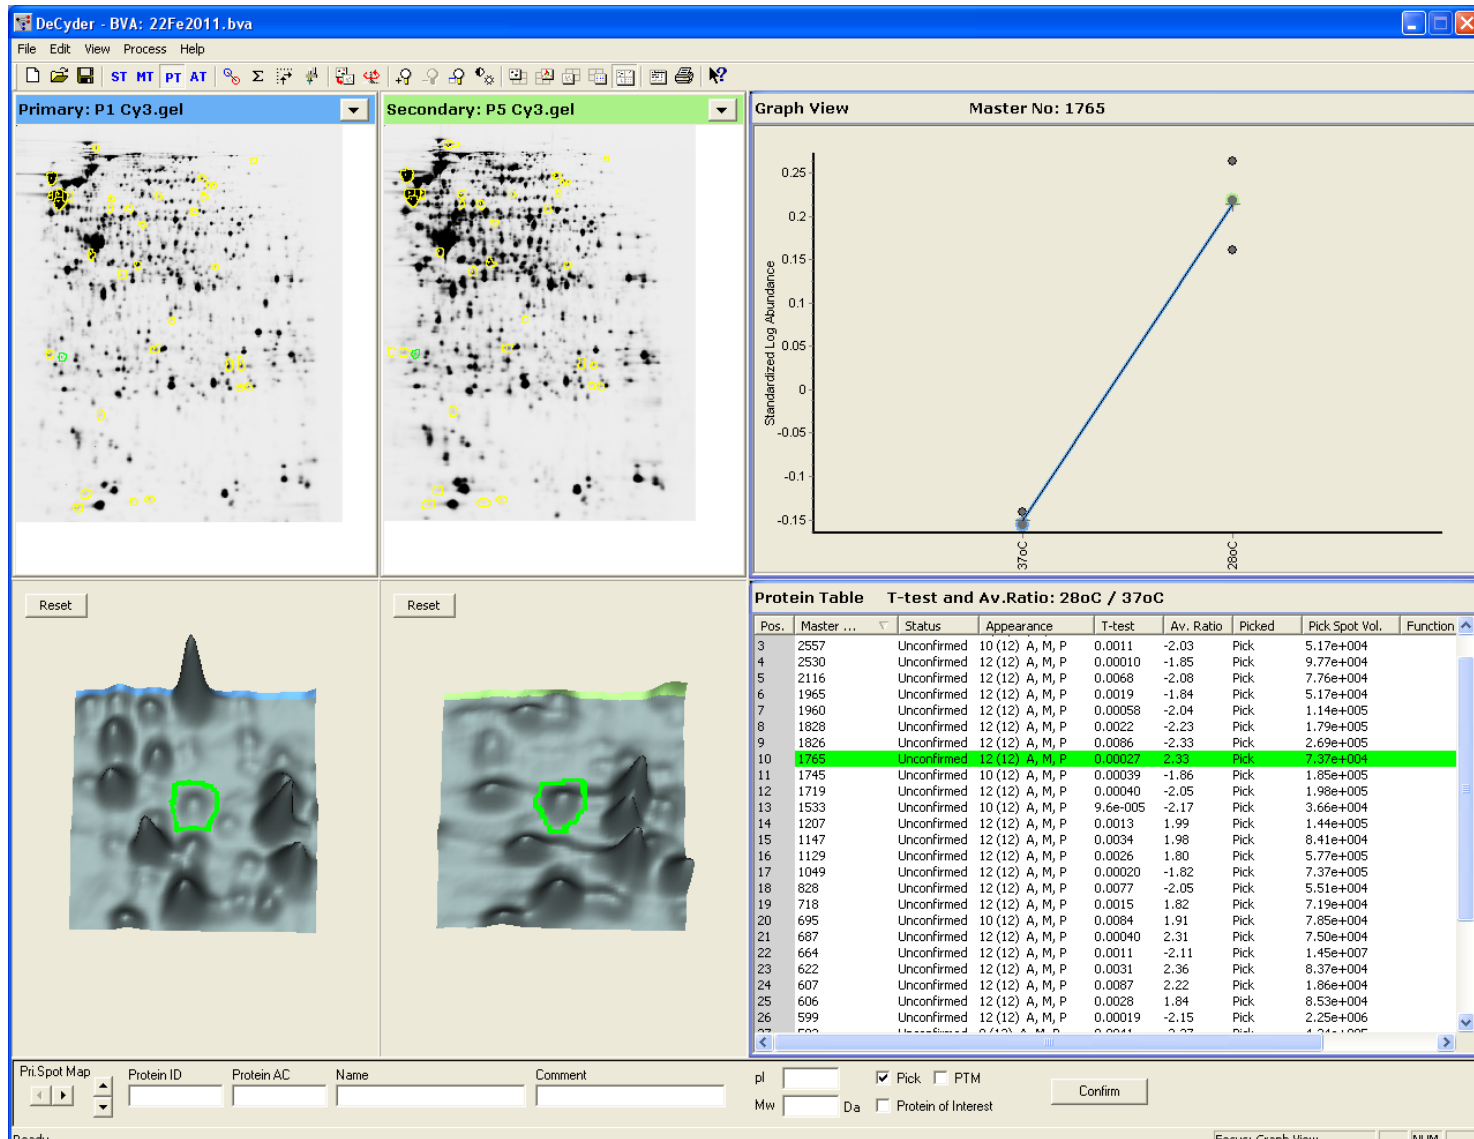



# AspC (PAU\_02766)

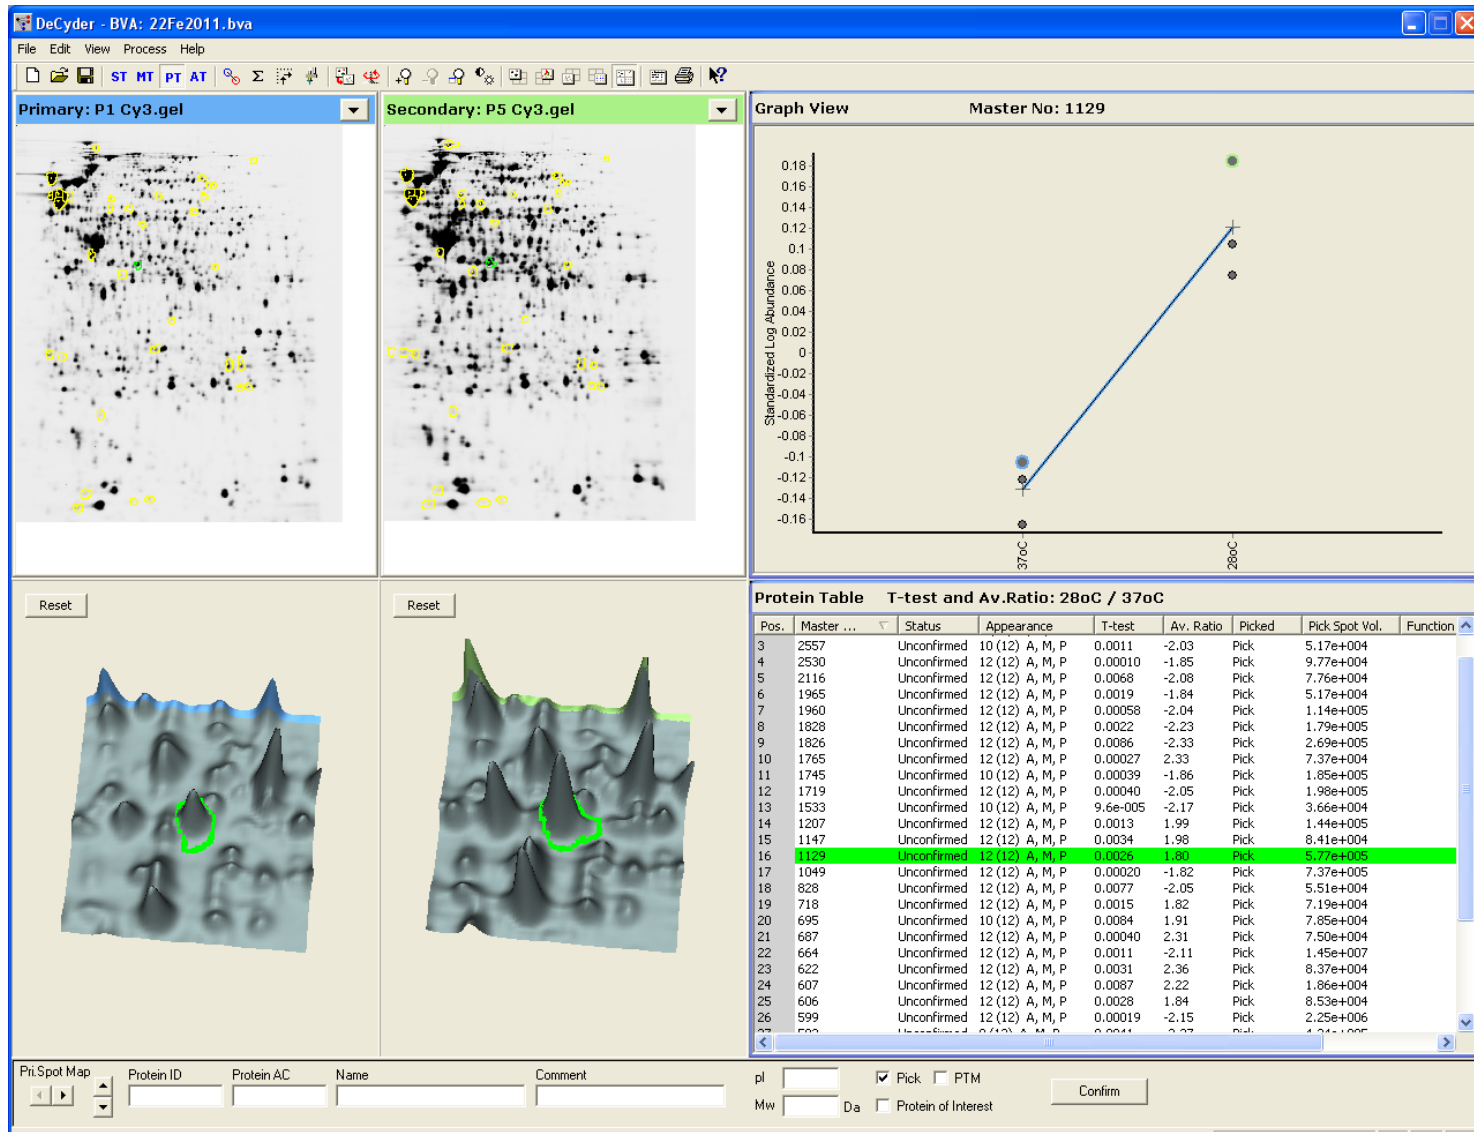

Supplement: S5 (10.1371/journal.pone.0144937.s005) [file journal.pone.0144937.s005.PDF]
