# Supplementary material for: From Insect to Man: Photorhabdus Sheds Light on the Emergence of Human Pathogenicity
Source: PubMed Central journal article supplement (PMC4683029; doi:10.1371/journal.pone.0144937), 2015-12-17

A

28°C

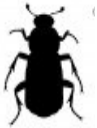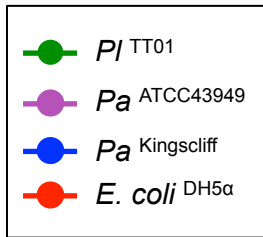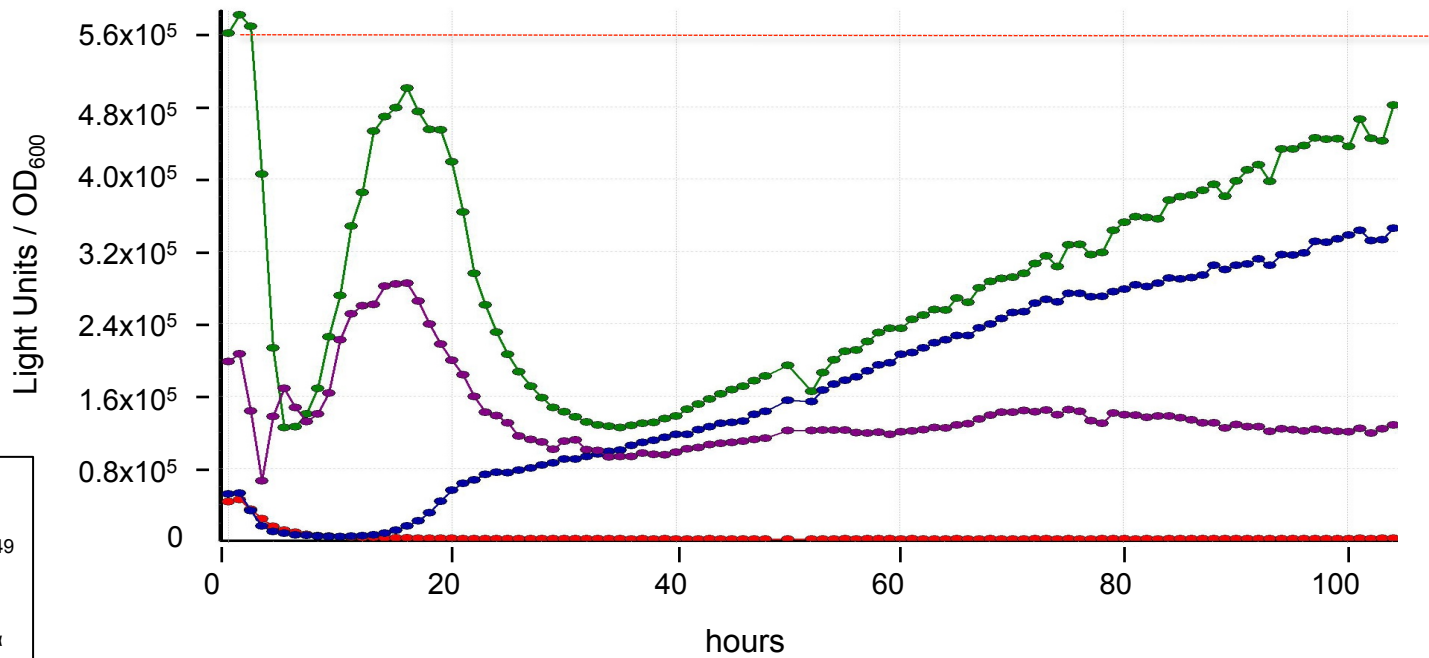

37°C

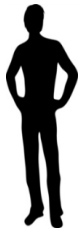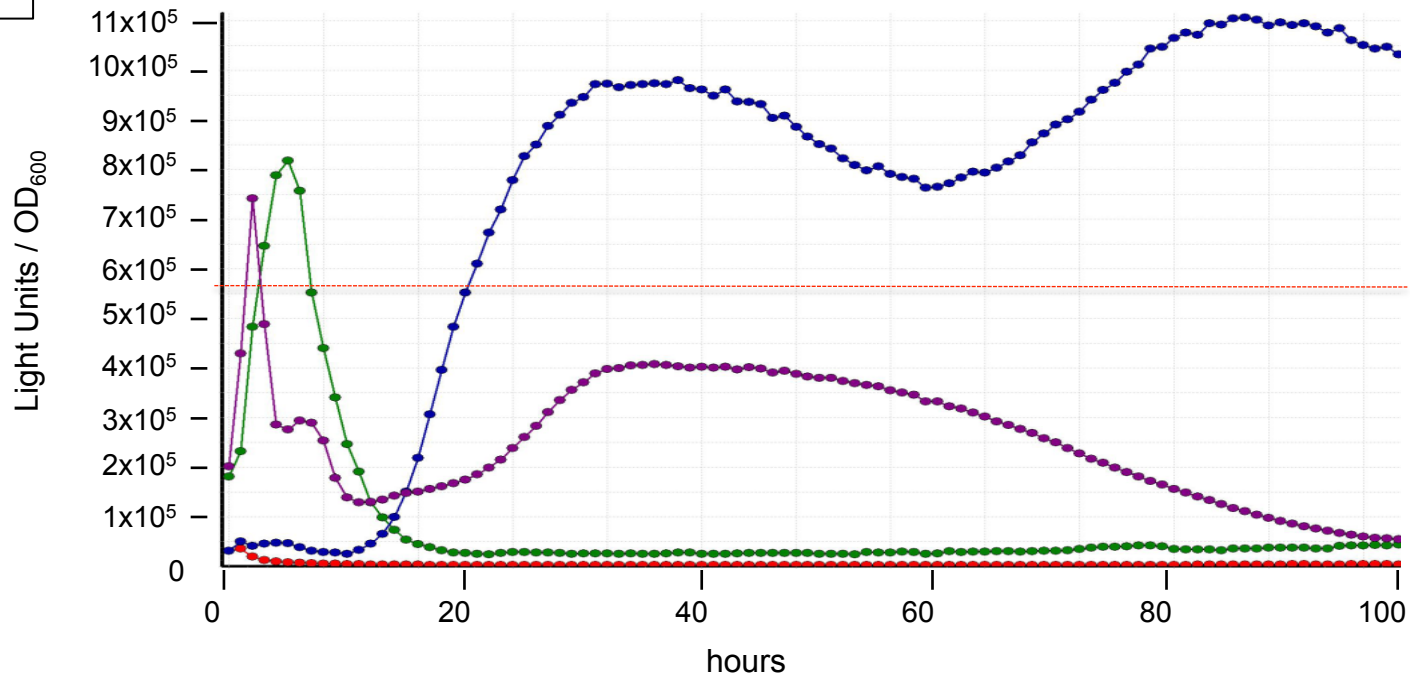

Supplement: pone.0144937.s009.pdf [file pone.0144937.s009.pdf]
