# Supplementary material for: From Insect to Man: Photorhabdus Sheds Light on the Emergence of Human Pathogenicity
Source: PLoS One. 2015 Dec 17;10(12):e0144937. doi: 10.1371/journal.pone.0144937 (PMC4683029; doi:10.1371/journal.pone.0144937)
Supplement: S1 Data — (XLSX) [file pone.0144937.s001.xlsx]

## Sheet: All CDS
Accession	Gene	Genome Position	Genome Position Start	End	strand	baseMean	baseMean at 37	baseMean at 28	foldChange	log2FoldChange (-ve represents a higher level at 37 than 28)	pval	padj	Annotation	Product
PAU_00001	dnaA	133-1452	133	1452		109.083	81.5784	136.588	1.67431	0.743567	0.313387	0.98355	chromosomal_replication_initiation_protein	chromosomal replication initiator protein dnaA
PAU_00002	dnaN	1457-2557	1457	2557		175.713	140.536	210.89	1.50061	0.585551	0.416426	0.98355	DNA_polymerase_III_subunit_beta	DNA polymerase III subunit beta
PAU_00003	recF	2579-3670	2579	3670		117.713	74.1173	161.308	2.17639	1.12194	0.12285	0.918571	recombination_protein_F	dna replication and repair protein recf
PAU_00004	gyrB	3687-6104	3687	6104		220.549	151.103	289.994	1.91918	0.940489	0.181195	0.969109	DNA_gyrase_subunit_B	DNA gyrase subunit B
PAU_00005	asd	c8268-7159	7159	8268	c	264.05	197.029	331.071	1.68032	0.748735	0.302863	0.98355	aspartate-semialdehyde_dehydrogenase	aspartate-semialdehyde dehydrogenase
PAU_00006	ogrK	c8692-8471	8471	8692	c	19.3479	17.4972	21.1986	1.21154	0.276842	0.721667	1	prophage_p2_ogr_protein	prophage p2 ogr protein
PAU_00007		c9841-8768	8768	9841	c	43.3241	39.3189	47.3294	1.20373	0.267515	0.74031	1	phage_regulator	putative phage regulator
PAU_00008		c10305-9838	9838	10305	c	30.1807	28.5209	31.8405	1.11639	0.158843	0.857454	1	tail_fiber_protein_of_prophage	putative tail fiber protein of prophage
PAU_00009		c13556-12726	12726	13556	c	252.507	361.753	143.261	0.39602	-1.33636	0.0669833	0.784273	hypothetical_protein	putative phage tail protein
PAU_00010		c13355-13038	13038	13355	c	14.4811	9.60665	19.3555	2.01481	1.01064	0.294004	0.98355	phage_tail_protein	putative phage tail protein
PAU_00011		c13897-13382	13382	13897	c	73.4629	38.8694	108.056	2.77999	1.47508	0.188783	0.979606	tail_fiber_component_of_prophage	putative tail fiber component of prophage
PAU_00012		c15080-13908	13908	15080	c	62.2337	22.1088	102.359	4.62978	2.21094	0.297328	0.98355	probable_major_tail_sheath_protein	probable major tail sheath protein
PAU_00013		15482-16042	15482	16042		87.6333	88.5553	86.7113	0.979176	-0.0303593	0.974078	1	lambda_prophage_DNA_inversion_product/tail_fiber_protein	similar to dna inversion product and tail fiber protein from lambdoi prophage
PAU_00014	tfaE	c16745-16140	16140	16745	c	76.4338	68.2663	84.6013	1.23928	0.309505	0.675675	1	lambdoid_prophage_e14_tail_fiber_assembly_protein-like_protein	lambdoid prophage e14 tail fiber assembly protein-like protein
PAU_00015	stfE	c17245-16742	16742	17245	c	58.9761	60.5044	57.4478	0.949481	-0.0747886	0.970146	1	side_tail_fiber_protein_homolog_from_lambdoid_prophage_e14_(fragment)	side tail fiber protein homolog from lambdoid prophage e14 (fragment)
PAU_00016		c18372-17245	17245	18372	c	34.7541	30.3588	39.1495	1.28956	0.366879	0.621391	1	probable_variable_tail_fibre_protein	probable variable tail fibre protein
PAU_00017		c18983-18369	18369	18983	c	45.5264	40.3817	50.6712	1.25481	0.327465	0.648335	1	phage_tail_protein	putative phage tail protein
PAU_00018		c19980-18976	18976	19980	c	20.6155	17.5198	23.7112	1.35339	0.436581	0.663807	1	phage_baseplate_assembly_protein	phage baseplate assembly protein
PAU_00019		c20362-19985	19985	20362	c	13.5886	7.02684	20.1504	2.86764	1.51986	0.104924	0.906143	phage_baseplate_assembly_protein	phage baseplate assembly protein
PAU_00020		c21135-20362	20362	21135	c	46.792	47.886	45.6981	0.95431	-0.0674695	0.936616	1	phage_baseplate_assembly_protein	putative phage baseplate assembly protein
PAU_00021		c21563-21426	21426	21563	c	14.5441	16.2959	12.7923	0.784998	-0.34924	0.683552	1	hypothetical_protein	Hypothetical protein
PAU_00022		c21953-21717	21717	21953	c	88.9098	82.7897	95.0299	1.14785	0.198929	0.758966	1	probable_phage_tail_protein	probable phage tail protein
PAU_00023	rlsC	c22416-22234	22234	22416	c	18.9347	21.8333	16.0361	0.734477	-0.445211	0.542885	1	hypothetical_protein	conserved hypothetical protein
PAU_00024		22796-23410	22796	23410		34.1162	35.3772	32.8552	0.928711	-0.106698	0.922787	1	phage_repressor_protein_ci	similar to phage repressor protein ci
PAU_00025	hin	c24067-23492	23492	24067	c	21.1423	23.0646	19.22	0.833309	-0.263076	0.782267	1	dna-invertase	putative dna-invertase
PAU_00026		24165-25136	24165	25136		9.12832	9.52647	8.73016	0.91641	-0.125934	0.984004	1	bacteriophage_tail_fiber_protein	similar to bacteriophage tail fiber protein
PAU_00027		25142-25678	25142	25678		14.4969	19.2048	9.78899	0.509715	-0.972237	0.355516	0.98355	hypothetical_protein	hypothetical phage protein
PAU_00028		c25946-25818	25818	25946	c	0.302941	0	0.605883	Inf	Inf	0.711059	1	hypothetical_protein	Hypothetical protein
PAU_00029	Sc/SvP	c26519-26022	26022	26519	c	3.69354	4.01342	3.37366	0.840595	-0.250516	0.987124	1	lambda_prophage_DNA_inversion_product/tail_fiber_protein	similar to dna inversion product and tail fiber protein from lambdoi prophage
PAU_00030	rpmJ	c27036-26896	26896	27036	c	371.459	459.198	283.721	0.617862	-0.694643	0.327039	0.98355	50S_ribosomal_protein_L36	50s ribosomal protein l36 2
PAU_00031	rpmE2	c27308-27054	27054	27308	c	93.953	102.303	85.6032	0.836763	-0.257108	0.767695	1	50s_ribosomal_protein_l31_type_b	50s ribosomal protein l31 type b
PAU_00032		27328-27603	27328	27603		72.1414	60.1884	84.0944	1.39719	0.482523	0.686039	1	hypothetical_protein	hypothetical transmembrane protein
PAU_00033	glmS	c29415-27586	27586	29415	c	504.483	387.261	621.705	1.60539	0.682925	0.328196	0.98355	glucosamine--fructose-6-phosphate_aminotransferase	glucosamine-6-phosphate synthase (previous annotation L-glutamine:D-fructose-6-phosphate aminotransferase)
PAU_00034	glmU	c30895-29525	29525	30895	c	624.14	536.824	711.457	1.32531	0.406328	0.555716	1	bifunctional_N-acetylglucosamine-1-phosphate_uridyltransferase/glucosamine-1-phosphate_acetyltransferase	bifunctional protein GlmU
PAU_00035	atpC	c31448-31026	31026	31448	c	2189.36	2527.11	1851.6	0.732695	-0.448715	0.510744	1	F0F1_ATP_synthase_subunit_epsilon	ATP synthase epsilon chain
PAU_00036	atpD	c32852-31470	31470	32852	c	1320.61	1247.49	1393.73	1.11722	0.159919	0.829644	1	F0F1_ATP_synthase_subunit_beta	membrane-bound ATP synthase F1 sector beta-subunit
PAU_00037	atpG	c33750-32887	32887	33750	c	2225.47	2341.95	2108.99	0.900527	-0.151159	0.813285	1	F0F1_ATP_synthase_subunit_gamma	ATP synthase gamma chain
PAU_00038	atpA	c35350-33809	33809	35350	c	1587.83	1780.25	1395.42	0.783833	-0.351382	0.626362	1	F0F1_ATP_synthase_subunit_alpha	ATP synthase subunit alpha
PAU_00039	atpH	c35898-35365	35365	35898	c	1691.8	1691.21	1692.4	1.0007	0.00101391	0.970031	1	F0F1_ATP_synthase_subunit_delta	membrane-bound ATP synthase F1 sector delta-subunit
PAU_00040	atpF	c36381-35911	35911	36381	c	1278.94	1300.52	1257.36	0.966809	-0.0486971	0.932955	1	F0F1_ATP_synthase_subunit_B	ATP synthase B chain
PAU_00041	atpE	c36677-36438	36438	36677	c	1315.26	1304.07	1326.46	1.01717	0.0245634	0.993954	1	F0F1_ATP_synthase_subunit_C	ATP synthase C chain
PAU_00042	atpB	c37550-36726	36726	37550	c	1733.27	1742.37	1724.18	0.989561	-0.0151395	0.997917	1	F0F1_ATP_synthase_subunit_A	membrane-bound ATP synthase F0 sector subunit A
PAU_00043	atpI	c37958-37581	37581	37958	c	2392.26	2329.02	2455.51	1.05431	0.0762993	0.925655	1	F0F1_ATP_synthase_subunit_I	atp synthase protein i
PAU_00044	gidB	c39209-38568	38568	39209	c	144.407	140.998	147.816	1.04836	0.068132	0.943082	1	16S_rRNA_methyltransferase_GidB	methyltransferase GidB
PAU_00045	gidA	c41091-39202	39202	41091	c	180.133	150.739	209.527	1.39	0.475083	0.490864	0.999716	tRNA_uridine_5-carboxymethylaminomethyl_modification_enzyme_GidA	trna uridine 5-carboxymethylaminomethyl modification enzyme gid (glucose-inhibited division protein a)
PAU_00046	mioC	c41931-41470	41470	41931	c	292.958	240.78	345.137	1.43342	0.519458	0.482724	0.99899	flavodoxin	protein mioc, involved in modulation of initiation at oric, initiation of chromosome replication
PAU_00047	asnC	c42463-42002	42002	42463	c	54.0699	68.5562	39.5836	0.577389	-0.792385	0.304575	0.98355	DNA-binding_transcriptional_regulator_AsnC	regulatory protein asnc
PAU_00048	asnA	42552-43622	42552	43622		323.848	577.689	70.0071	0.121185	-3.04472	7.39339e-05	0.0196479	asparagine_synthetase_AsnA	asparagine synthetase A
PAU_00049	viaA	c45085-43628	43628	45085	c	121.285	160.49	82.0801	0.511435	-0.967378	0.221338	0.98355	hypothetical_protein	protein viaa (vwa-domain protein interacting with aaa atpase)
PAU_00050	ravA	c46601-45090	45090	46601	c	25.136	35.3302	14.9419	0.422921	-1.24154	0.339735	0.98355	regulatory_ATPase_RavA	ATPase RavA
PAU_00051	rbsD	46871-47275	46871	47275		390.813	603.331	178.296	0.29552	-1.75867	0.0164415	0.448136	D-ribose_pyranase	high affinity ribose transport protein rbsd
PAU_00052	rbsA	47283-48788	47283	48788		361.391	558.167	164.614	0.29492	-1.76161	0.014249	0.429693	D-ribose_transporter_ATP_binding_protein	ribose transport atp-binding protein rbsa
PAU_00053	rbsC	48795-49766	48795	49766		68.7296	90.1985	47.2607	0.523963	-0.932462	0.225534	0.98355	ribose_ABC_transporter_permease_protein	ribose transport system permease protein
PAU_00054	rbsB	49791-50681	49791	50681		299.489	433.548	165.43	0.381572	-1.38997	0.0555384	0.730526	D-ribose_transporter_subunit_RbsB	d-ribose-binding periplasmic protein
PAU_00055	rbsK	50853-51782	50853	51782		326.975	448.604	205.346	0.457744	-1.12739	0.112792	0.915182	ribokinase	ribokinase
PAU_00056	rbsR	51785-52786	51785	52786		81.9794	99.8617	64.097	0.641858	-0.639673	0.404805	0.98355	transcriptional_repressor_RbsR	regulator for rbs operon
PAU_00057	yieO	c54174-52783	52783	54174	c	16.9482	18.387	15.5093	0.843494	-0.245551	0.82079	1	transport_protein	putative transport protein
PAU_00058		c54569-54345	54345	54569	c	181.104	205.481	156.727	0.762733	-0.390749	0.849435	1	hypothetical_protein	Hypothetical protein
PAU_00059	yhbX	c61622-60039	60039	61622	c	4.21811	5.36264	3.07358	0.573147	-0.803022	0.525069	1	outer-membrane_protein_yhbx	outer-membrane protein yhbx
PAU_00060	actP	c63420-61771	61771	63420	c	102.01	120.317	83.703	0.695687	-0.523489	0.479657	0.99899	acetate_permease	cation/acetate symporter actp (acetate transporter actp) (acetat permease)
PAU_00061	yjcH	c63728-63417	63417	63728	c	21.0077	21.1748	20.8405	0.984211	-0.022961	1	1	hypothetical_protein	similar to putative membrane protein yjch of escherichia coli
PAU_00062	acs	c65749-63794	63794	65749	c	228.809	213.659	243.959	1.14181	0.191326	0.781557	1	acetyl-CoA_synthetase	acetyl-coenzyme A synthetase
PAU_00063	sodA	66060-66749	66060	66749		1404.95	1273.3	1536.59	1.20677	0.271156	0.666136	1	superoxide_dismutase	superoxide dismutase [mn] (mnsod)
PAU_00064	yiiM	66867-67538	66867	67538		195.903	186.649	205.157	1.09916	0.136398	0.827383	1	hypothetical_protein	conserved hypothetical protein
PAU_00065	orf2	c68709-68401	68401	68709	c	24.2147	26.9527	21.4767	0.796829	-0.327658	0.652941	1	hypothetical_protein	conserved hypothetical protein
PAU_00066	trpS	c69888-68851	68851	69888	c	203.36	143.705	263.015	1.83024	0.872037	0.248209	0.98355	tryptophanyl-tRNA_synthetase	tryptophanyl-tRNA synthetase (tryptophan--tRNA ligase (trprs)
PAU_00067	gph	c70597-69893	69893	70597	c	147.184	116.23	178.138	1.53263	0.616006	0.384281	0.98355	phosphoglycolate_phosphatase	phosphoglycolate phosphatase
PAU_00068	rpe	c71279-70587	70587	71279	c	74.5935	58.5203	90.6667	1.54932	0.631637	0.376502	0.98355	ribulose-phosphate_3-epimerase	ribulose-phosphate 3-epimerase
PAU_00069	dam	c72142-71330	71330	72142	c	70.5313	41.8928	99.1698	2.36723	1.2432	0.104291	0.90499	DNA_adenine_methylase	DNA adenine methylase (deoxyadenosyl-methyltransferase (dna adenine methyltransferase)
PAU_00070	damX	c73180-72227	72227	73180	c	91.3499	89.153	93.5468	1.04928	0.0694042	0.897724	1	hypothetical_protein	putative membrane protein
PAU_00071	aroB	c74402-73302	73302	74402	c	86.0974	72.5908	99.604	1.37213	0.456416	0.52188	1	3-dehydroquinate_synthase	3-dehydroquinate synthase
PAU_00072	aroK	c74970-74449	74449	74970	c	1154.37	969.275	1339.46	1.38192	0.46667	0.493636	1	shikimate_kinase_I	shikimate kinase I
PAU_00073	hofQ	c76374-75340	75340	76374	c	16.6202	16.9919	16.2485	0.956253	-0.0645359	0.982452	1	hypothetical_protein	conserved hypothetical protein
PAU_00074		c76912-76367	76367	76912	c	9.06105	9.54483	8.57726	0.898628	-0.154204	0.983844	1	hypothetical_protein	similar to putative membrane protein
PAU_00075	yrfC	c77453-76899	76899	77453	c	8.80712	9.4262	8.18805	0.868648	-0.203157	0.890783	1	hypothetical_protein	conserved hypothetical protein
PAU_00076	yrfD	c78280-77450	77450	78280	c	8.15723	8.94245	7.37201	0.824384	-0.278612	0.838276	1	hypothetical_protein	conserved hypothetical protein
PAU_00077	mrcA	78400-80928	78400	80928		86.5777	76.669	96.4865	1.25848	0.331682	0.651921	1	peptidoglycan_synthetase	penicillin-binding protein 1a (pbp-1a) (pbp1a) (penicillin-bindin protein a)
PAU_00078	nudE	c81578-80979	80979	81578	c	52.1664	39.4298	64.9031	1.64604	0.719	0.382483	0.98355	ADP-ribose_diphosphatase_NudE	conserved hypothetical protein
PAU_00079	yrfF	81952-82884	81952	82884		28.563	32.8301	24.2959	0.740051	-0.434304	0.611807	1	membrane_protein_igaa_homolog	putative membrane protein igaa homolog
PAU_00080	yrfF	82884-83981	82884	83981		30.4385	32.8175	28.0596	0.855019	-0.225971	0.805995	1	hypothetical_membrane_protein_yrff	hypothetical membrane protein yrff
PAU_00081	hslR	84038-84454	84038	84454		287.004	289.21	284.797	0.984743	-0.0221802	0.949198	1	ribosome-associated_heat_shock_protein_15	ribosome-associated heat shock protein 15
PAU_00082	hslO	84481-85353	84481	85353		137.94	123.393	152.487	1.23579	0.305428	0.649989	1	Hsp33-like_chaperonin	33 kda chaperonin (heat shock protein 33 homolog) (hsp33)
PAU_00083	pckA	85569-87188	85569	87188		1293.34	1144.76	1441.92	1.25958	0.33294	0.66532	1	phosphoenolpyruvate_carboxykinase	phosphoenolpyruvate carboxykinase
PAU_00084	yhhW	c87602-87237	87237	87602	c	83.9988	83.4535	84.5442	1.01307	0.0187333	0.936635	1	hypothetical_protein	conserved hypothetical protein
PAU_00085	yhhW	c88046-87642	87642	88046	c	16.2506	12.4898	20.0114	1.60222	0.680073	0.421754	0.98355	hypothetical_protein	conserved hypothetical protein
PAU_00086		88606-89970	88606	89970		37.9547	34.7157	41.1938	1.1866	0.246836	0.779231	1	two-component_sensor_kinase-like_protein	similar to two-component sensor kinase
PAU_00087		89970-90599	89970	90599		26.5924	30.4876	22.6973	0.744476	-0.425702	0.70193	1	two_component_transcriptional_regulator	two component transcriptional regulator, luxr family
PAU_00088		90700-91188	90700	91188		17.1351	13.9131	20.3571	1.46316	0.549084	0.73717	1	hypothetical_protein	conserved hypothetical protein
PAU_00089		91961-92314	91961	92314		6.59711	8.24575	4.94848	0.600125	-0.736665	0.536529	1	hypothetical_protein	Hypothetical protein
PAU_00090		92399-92599	92399	92599		8.90875	13.5191	4.29843	0.317953	-1.65311	0.124757	0.919537	hypothetical_protein	Hypothetical protein
PAU_00091	pulA	92710-95982	92710	95982		95.3528	173.947	16.7587	0.096344	-3.37566	0.317237	0.98355	alpha-dextrin_endo-1	alpha-dextrin endo-1,6-alpha-glucosidase (pullulanase)
PAU_00092	cynS	96316-96786	96316	96786		209.394	184.283	234.504	1.27252	0.347688	0.606131	1	cyanate_hydratase	cyanate hydratase
PAU_00093		c98490-96979	96979	98490	c	20.0094	18.7638	21.255	1.13277	0.179853	0.834479	1	monooxygenase	putative monooxygenase
PAU_00094		c99392-98517	98517	99392	c	21.6545	25.3655	17.9436	0.707403	-0.499396	0.515901	1	hypothetical_protein	conserved hypothetical protein
PAU_00095		100202-100687	100202	100687		22.5079	26.7705	18.2452	0.681541	-0.553127	0.513012	1	transmembrane_protein	putative transmembrane protein
PAU_00096		100669-101160	100669	101160		63.9735	69.3778	58.5691	0.844205	-0.244334	0.705439	1	hypothetical_protein	hypothetical transmembrane protein
PAU_00097		101469-101765	101469	101765		5.49445	4.86054	6.12836	1.26084	0.334386	0.820129	1	hypothetical_protein	conserved hypothetical protein
PAU_00098	yhiN	c103046-101805	101805	103046	c	10.6717	9.75706	11.5863	1.18748	0.247898	0.853001	1	hypothetical_protein	conserved hypothetical protein
PAU_00099	pitA	103290-104780	103290	104780		580.517	427.374	733.661	1.71667	0.779615	0.26871	0.98355	low-affinity_inorganic_phosphate_transporter_1	low-affinity inorganic phosphate transporter 1
PAU_00100	uspB	c105326-104955	104955	105326	c	57.2647	95.5827	18.9468	0.198224	-2.3348	0.179058	0.96871	universal_stress_protein_UspB	conserved hypothetical protein
PAU_00101		105813-106292	105813	106292		7.79977	9.27332	6.32623	0.682197	-0.55174	0.64233	1	hypothetical_protein	conserved hypothetical protein
PAU_00102		c106819-106637	106637	106819	c	21.0044	16.5249	25.484	1.54216	0.624953	0.598404	1	hypothetical_protein	Hypothetical protein
PAU_00103		c107607-106822	106822	107607	c	161.849	139.646	184.053	1.318	0.398352	0.567278	1	hypothetical_protein	conserved hypothetical protein
PAU_00104		107627-107767	107627	107767		0.149542	0.299085	0	0	#NAME?	0.999789	1	hypothetical_protein	Hypothetical protein
PAU_00105	uspA	108580-109011	108580	109011		2201.72	3910.01	493.437	0.126198	-2.98623	0.235421	0.98355	universal_stress_protein_a	universal stress protein a
PAU_00106	gdhA	109269-110612	109269	110612		225.873	189.929	261.817	1.3785	0.4631	0.53984	1	glutamate_dehydrogenase	nadp-specific glutamate dehydrogenase (nadp-gdh)
PAU_00107	yhiQ	c111391-110648	110648	111391	c	38.7615	34.8493	42.6737	1.22452	0.29222	0.737261	1	methyltransferase	conserved hypothetical protein
PAU_00108	opdA	c113439-111397	111397	113439	c	135.467	133.898	137.036	1.02343	0.0334169	0.950251	1	oligopeptidase_A	oligopeptidase A
PAU_00109		114306-115229	114306	115229		10.4701	5.52894	15.4113	2.78739	1.47892	0.168497	0.96871	hypothetical_protein	conserved hypothetical protein
PAU_00110	cipB	116157-116477	116157	116477		24.1899	43.0544	5.32537	0.123689	-3.01521	0.25181	0.98355	hypothetical_protein	crystalline inclusion protein B
PAU_00111		117119-118255	117119	118255		51.6215	86.6967	16.5462	0.190852	-2.38947	0.31629	0.98355	l-arginine:lysine_amidinotransferase	l-arginine:lysine amidinotransferase, putative
PAU_00112		118264-119220	118264	119220		9.66399	11.6886	7.63941	0.65358	-0.613564	0.531174	1	hypothetical_protein	conserved hypothetical protein
PAU_00113		119271-120146	119271	120146		4.01121	4.62995	3.39247	0.732722	-0.448661	0.740416	1	hypothetical_protein	conserved hypothetical protein
PAU_00114		120455-121345	120455	121345		29.4266	23.1773	35.6759	1.53926	0.622238	0.503459	1	hypothetical_protein	membrane protein, putative
PAU_00115		121561-123150	121561	123150		144.274	184.978	103.571	0.559911	-0.836731	0.260479	0.98355	hypothetical_protein	conserved hypothetical protein
PAU_00116		123371-124966	123371	124966		36.491	20.0713	52.9106	2.63613	1.39842	0.0697986	0.792085	hypothetical_protein	conserved hypothetical protein
PAU_00117		125256-126848	125256	126848		37.9043	26.8333	48.9753	1.82517	0.868029	0.254596	0.98355	hypothetical_protein	conserved hypothetical protein
PAU_00118		126988-128577	126988	128577		28.4572	19.0855	37.829	1.98208	0.987017	0.209492	0.98355	hypothetical_protein	conserved hypothetical protein
PAU_00119		129096-130604	129096	130604		17.4322	20.5283	14.336	0.698356	-0.517965	0.607634	1	deoxycytidylate_deaminase-like_protein	similar to deoxycytidylate deaminase-related protein
PAU_00120	uxuA	c132145-130958	130958	132145	c	15.3029	16.3344	14.2714	0.873705	-0.194782	0.834302	1	mannonate_dehydratase	mannonate dehydratase
PAU_00121	uxuR	c133035-132235	132235	133035	c	12.464	13.9534	10.9746	0.78652	-0.346445	0.705996	1	uxu_operon_transcriptional_regulator	uxu operon transcriptional regulator
PAU_00122		c134096-133116	133116	134096	c	26.7301	34.4823	18.9779	0.550364	-0.861541	0.308486	0.98355	c4-dicarboxylate_transport_system_binding_protein	putative c4-dicarboxylate transport system binding protein
PAU_00123		134396-134902	134396	134902		15.0485	22.0112	8.08583	0.36735	-1.44477	0.113474	0.915487	trap-type_c4-dicarboxylate_transport_system	trap-type c4-dicarboxylate transport system, small permease component
PAU_00124	ygiK	134930-136231	134930	136231		7.07192	6.99506	7.14878	1.02198	0.031361	1	1	dicarboxylate_transport_protein	similar to dicarboxylate transport system
PAU_00125	uxuB	136270-137727	136270	137727		40.2434	41.2129	39.2739	0.952952	-0.0695243	0.917202	1	mannonate_oxidoreductase_(d-mannonate_oxidoreductase)	mannonate oxidoreductase (d-mannonate oxidoreductase)
PAU_00126	uxaC	137749-139173	137749	139173		34.8057	31.0064	38.6051	1.24507	0.316227	0.693302	1	glucuronate_isomerase	uronate isomerase
PAU_00127	kdgK	139170-140132	139170	140132		40.9881	30.2151	51.7612	1.71309	0.7766	0.336372	0.98355	2-dehydro-3-deoxygluconokinase_(2-keto-3-deoxygluconokinase)_(3-deoxy_2-oxo-d-gluconate_kinase)_(kdg_kinase)	2-dehydro-3-deoxygluconokinase (2-keto-3-deoxygluconokinase) (3-deoxy 2-oxo-d-gluconate kinase) (kdg kinase)
PAU_00128	eda	140132-140779	140132	140779		12.2146	11.8732	12.556	1.05751	0.0806658	0.944305	1	keto-hydroxyglutarate-aldolase/keto-deoxy-phosphogluconate_aldolase	khg/kdpg aldolase
PAU_00129		140900-141382	140900	141382		1.7715	1.34922	2.19378	1.62596	0.701291	0.741598	1	hypothetical_protein	conserved hypothetical protein
PAU_00130		c142623-141736	141736	142623	c	137.699	171.839	103.559	0.602648	-0.730612	0.416789	0.98355	hypothetical_protein	conserved hypothetical protein
PAU_00131		142746-143441	142746	143441		273.505	363.51	183.5	0.504802	-0.98621	0.225756	0.98355	hypothetical_protein	conserved hypothetical protein
PAU_00132		c144165-143686	143686	144165	c	325.931	393.187	258.674	0.657891	-0.604079	0.627298	1	hypothetical_protein	conserved hypothetical protein
PAU_00133	glpD	c145999-144497	144497	145999	c	176.575	238.155	114.994	0.482854	-1.05034	0.293959	0.98355	glycerol-3-phosphate_dehydrogenase	aerobic glycerol-3-phosphate dehydrogenase
PAU_00134	glpR	c147113-146355	146355	147113	c	53.0592	41.6148	64.5036	1.55002	0.632283	0.389687	0.98355	DNA-binding_transcriptional_repressor_GlpR	glycerol-3-phosphate regulon repressor
PAU_00135	glpG	c147894-147130	147130	147894	c	38.3452	25.4958	51.1946	2.00796	1.00573	0.198898	0.98355	intramembrane_serine_protease_GlpG	putative membrane protein glpg
PAU_00136	glpE	c148324-147989	147989	148324	c	41.3441	26.7088	55.9794	2.09592	1.06758	0.165167	0.964687	thiosulfate_sulfurtransferase_GlpE	thiosulfate sulfurtransferase GlpE
PAU_00137	gntY	c148995-148420	148420	148995	c	86.6977	57.8486	115.547	1.9974	0.998123	0.17256	0.96871	DNA_uptake_protein	conserved hypothetical protein
PAU_00138	gntX	c149519-149055	149055	149519	c	40.17	38.1039	42.2362	1.10845	0.148541	0.837294	1	hypothetical_protein	conserved hypothetical protein
PAU_00139		c149949-149494	149494	149949	c	12.0649	9.79378	14.336	1.46378	0.549702	0.535787	1	hypothetical_protein	Hypothetical protein
PAU_00140	tyrS2	150369-151568	150369	151568		224.034	233.592	214.476	0.918165	-0.123175	0.859949	1	tyrosyl-tRNA_synthetase	tyrosyl-trna synthetase 2
PAU_00141	spnH	c152376-151579	151579	152376	c	17.2669	20.9827	13.5511	0.645822	-0.630791	0.486731	0.99899	probable_o-methyltransferase	conserved hypothetical protein
PAU_00142		c154031-152379	152379	154031	c	23.706	26.5476	20.8643	0.785918	-0.347549	0.658406	1	predicted_fe-s_oxidoreductase	predicted fe-s oxidoreductase
PAU_00143		c155025-154042	154042	155025	c	7.44519	8.60912	6.28126	0.729606	-0.454811	0.674387	1	hypothetical_protein	conserved hypothetical protein
PAU_00144		c155990-155076	155076	155990	c	7.18674	6.67762	7.69587	1.15249	0.20475	1	1	hypothetical_protein	conserved hypothetical protein
PAU_00145		c156676-156089	156089	156676	c	16.9851	26.1649	7.80539	0.298315	-1.74509	0.0499365	0.703079	hypothetical_protein	Hypothetical protein
PAU_00146	ydeF	157600-158817	157600	158817		1.9864	2.06603	1.90678	0.922922	-0.115719	1	1	membrane_transport_protein	putative membrane transport protein
PAU_00147		c159164-158880	158880	159164	c	0.661344	0.716804	0.605883	0.845256	-0.24254	1	1	hypothetical_protein	Hypothetical protein
PAU_00148	bioH	159164-159940	159164	159940		56.0191	45.1169	66.9212	1.48329	0.568796	0.439718	0.990202	carboxylesterase_BioH	carboxylesterase BioH
PAU_00149		160538-160837	160538	160837		80.9467	95.4798	66.4136	0.695578	-0.523716	0.462007	0.992271	phage_n15_protein_gp48	similar to protein gp48 from prophage n15
PAU_00150	yhgG	c161201-160962	160962	161201	c	10.7739	6.72107	14.8266	2.20599	1.14143	0.238915	0.98355	DNA-binding_transcriptional_regulator_protein	similar to putative DNA-binding transcriptional regulator protein yhgg of escherichia coli
PAU_00151	feoB	c163523-161211	161211	163523	c	24.6559	11.4213	37.8905	3.31754	1.73011	0.0389294	0.641241	ferrous_iron_transport_protein_B	ferrous iron transport protein b
PAU_00152	feoA	c163810-163586	163586	163810	c	24.5125	11.4813	37.5436	3.26997	1.70928	0.0379857	0.634087	ferrous_iron_transport_protein_A	ferrous iron transport protein a
PAU_00153	yhgF	c166408-164054	164054	166408	c	69.0916	52.7235	85.4596	1.6209	0.696797	0.366529	0.98355	hypothetical_protein	conserved hypothetical protein
PAU_00154		c166794-166684	166684	166794	c	3.03679	3.45871	2.61488	0.756027	-0.40349	0.91948	1	hypothetical_protein	Hypothetical protein
PAU_00155	greB	c167352-166879	166879	167352	c	108.957	92.8247	125.089	1.34758	0.430371	0.648103	1	transcription_elongation_factor_GreB	transcription elongation factor greb (transcript cleavage facto greb)
PAU_00156		c167598-167377	167377	167598	c	41.4244	46.2079	36.641	0.792959	-0.334682	0.664936	1	hypothetical_protein	conserved hypothetical protein
PAU_00157		167939-168655	167939	168655		27.5891	38.6427	16.5356	0.427909	-1.22462	0.268779	0.98355	hypothetical_protein	conserved hypothetical protein
PAU_00158	iscS	168701-169882	168701	169882		65.4132	78.2785	52.5479	0.671295	-0.574982	0.402203	0.98355	cysteine_desulfurase	cysteine desulfurase
PAU_00159		169905-171098	169905	171098		20.5415	21.5759	19.507	0.904107	-0.145434	0.890113	1	MFS_transporter_protein	similarities with MFS transporter protein
PAU_00160	ompR	172454-173173	172454	173173		98.813	119.133	78.4929	0.658868	-0.60194	0.414307	0.98355	osmolarity_response_regulator	transcriptional regulatory protein ompr
PAU_00161	envZ	173170-174501	173170	174501		49.5068	50.5247	48.4889	0.959707	-0.0593333	0.938647	1	osmolarity_sensor_protein	osmolarity sensor protein EnvZ
PAU_00162	pstS	174514-175722	174514	175722		114.99	184.314	45.6655	0.247759	-2.01299	0.00861423	0.336034	phosphate_ABC_transporter_periplasmic_substrate-binding_protein_PstS	phosphate-binding periplasmic protein psts
PAU_00163	pstC	175931-176902	175931	176902		20.3686	23.5827	17.1545	0.727418	-0.459143	0.587983	1	phosphate_transporter_permease_subunit_PstC	phosphate transport system permease protein pstc
PAU_00164	pstA	176904-177788	176904	177788		33.8987	39.4336	28.3639	0.719282	-0.47537	0.567685	1	phosphate_transporter_permease_subunit_PtsA	phosphate transport system permease protein psta
PAU_00165	pstB	177815-178591	177815	178591		34.9378	39.4643	30.4112	0.7706	-0.375945	0.632145	1	phosphate_transporter_ATP-binding_protein	phosphate import ATP-binding protein
PAU_00166	phoU	178588-179325	178588	179325		159.417	217.748	101.086	0.464234	-1.10708	0.128718	0.919844	transcriptional_regulator_PhoU	phosphate transport system protein phou
PAU_00167	fliY	179578-180441	179578	180441		442.12	623.925	260.315	0.417221	-1.26111	0.0823993	0.843115	periplasmic_binding_transport_protein	putative periplasmic binding transport protein
PAU_00168		180510-181247	180510	181247		50.8106	58.3458	43.2753	0.741704	-0.431084	0.564687	1	amino_acid_ABC_transporter_permease	similar to amino acid permease component of abc transporter
PAU_00169		181249-181992	181249	181992		39.6116	48.3574	30.8658	0.638284	-0.64773	0.413804	0.98355	amino_acid_ABC_transporter_permease	similar to amino acid permease component of abc transporter
PAU_00170	yieG	182111-182263	182111	182263		0.299085	0.59817	0	0	#NAME?	0.708094	1	hypothetical_protein	Hypothetical protein
PAU_00171		182341-182847	182341	182847		0	0	0	NA	NA	NA	NA	transposase	transposase, orfa, is3/is911 family
PAU_00172	insK	182916-183689	182916	183689		0	0	0	NA	NA	NA	NA	transposase_InsK_for_insertion_sequence_element_IS150	putative transposase InsK for insertion sequence element IS150
PAU_00173		c185213-183750	183750	185213	c	55.1861	39.5311	70.8412	1.79204	0.841601	0.270378	0.98355	hypothetical_protein	conserved hypothetical protein
PAU_00174	yihI	185406-185918	185406	185918		987.619	869.64	1105.6	1.27133	0.346335	0.659078	1	hypothetical_protein	conserved hypothetical protein
PAU_00175	hemN	186112-187485	186112	187485		69.5434	85.0763	54.0106	0.63485	-0.655513	0.362662	0.98355	coproporphyrinogen_III_oxidase	oxygen-independent coproporphyrinogen III oxidase
PAU_00176		c188760-188416	188416	188760	c	17.5093	12.9149	22.1038	1.71149	0.77525	0.358168	0.98355	hypothetical_protein	conserved hypothetical protein
PAU_00177	glnG	c190949-189489	189489	190949	c	20.3618	13.8323	26.8912	1.94409	0.959094	0.267722	0.98355	nitrogen_regulation_protein_NR(I)	nitrogen regulation protein nr(i)
PAU_00178	glnL	c192002-190953	190953	192002	c	51.0157	43.3634	58.6679	1.35294	0.436095	0.561972	1	nitrogen_regulation_protein_NR(II)	nitrogen regulation protein nr(II)
PAU_00179	glnA	c193569-192160	192160	193569	c	62.2544	35.7115	88.7972	2.48651	1.31412	0.0854707	0.853102	glutamine_synthetase	glutamine synthetase (glutamate--ammonia ligase)
PAU_00180	typA	193977-195818	193977	195818		484.009	217.588	750.43	3.44886	1.78612	0.0138127	0.422531	gtp-binding_protein_typa/bipa_(tyrosine_phosphorylated_protein_a)	gtp-binding protein typa/bipa (tyrosine phosphorylated protein a)
PAU_00181		c196456-195887	195887	196456	c	159.357	187.869	130.845	0.696468	-0.521871	0.487739	0.99899	hypothetical_protein	putative membrane protein
PAU_00182		c198799-197345	197345	198799	c	80.3133	97.2572	63.3694	0.651566	-0.618017	0.509846	1	carbon_starvation_protein_csta	carbon starvation protein csta
PAU_00183	yihX	198951-199562	198951	199562		423.227	585.511	260.944	0.445669	-1.16596	0.250289	0.98355	phosphatase	conserved hypothetical protein
PAU_00184	dtd	199627-200064	199627	200064		827.95	864.287	791.613	0.915914	-0.126716	0.810175	1	D-tyrosyl-tRNA(Tyr)_deacylase	d-tyrosyl-tRNA(tyr) deacylase
PAU_00185	yiiD	200136-201053	200136	201053		388.713	486.449	290.977	0.598166	-0.741383	0.306596	0.98355	hypothetical_protein	conserved hypothetical protein
PAU_00186	dinJ2	201313-201549	201313	201549		143.218	172.437	113.999	0.661109	-0.59704	0.532284	1	hypothetical_protein	Hypothetical protein
PAU_00187	ef0033	201553-201825	201553	201825		449.131	531.998	366.263	0.688467	-0.53854	0.613491	1	hypothetical_protein	conserved hypothetical protein
PAU_00188	yicH	c203619-201883	201883	203619	c	63.2524	81.9817	44.5232	0.543088	-0.880742	0.236404	0.98355	hypothetical_protein	conserved hypothetical protein
PAU_00189	hpaB	204278-205831	204278	205831		6.63281	8.2599	5.00573	0.606028	-0.722543	0.49629	1	4-hydroxyphenylacetate_3-monooxygenase_oxygenase_component	4-hydroxyphenylacetate 3-monooxygenase oxygenase component
PAU_00190	yicE	c207307-205922	205922	207307	c	27.4378	6.60912	48.2665	7.30301	2.86849	0.00102288	0.0921533	xanthine/uracil_permease_family_protein	similar to xanthine/uracil permease family protein yice of escherichi coli
PAU_00191	gltS	207545-208753	207545	208753		45.4397	61.0036	29.8757	0.489737	-1.02992	0.178191	0.96871	sodium/glutamate_symport_carrier_protein_(glutamate_permease)	sodium/glutamate symport carrier protein (glutamate permease)
PAU_00192		209055-209822	209055	209822		43.0956	46.2289	39.9624	0.864448	-0.21015	0.746861	1	hypothetical_protein	conserved hypothetical protein
PAU_00193	relB	209993-210247	209993	210247		264.507	367.872	161.141	0.438036	-1.19088	0.10552	0.906143	bifunctional_antitoxin/transcriptional_repressor_RelB	negative regulator of translation relb protein
PAU_00194	relE	210237-210527	210237	210527		1529.6	1870.55	1188.65	0.635454	-0.654139	0.521751	1	RelE-like_protein	similar to rele-like protein
PAU_00195		c211301-211032	211032	211301	c	105.342	86.8708	123.812	1.42525	0.511211	0.459135	0.992271	hypothetical_protein	conserved hypothetical protein
PAU_00196	recG	c214383-212263	212263	214383	c	44.6713	30.125	59.2177	1.96573	0.975067	0.233687	0.98355	ATP-dependent_DNA_helicase_RecG	ATP-dependent DNA helicase RecG
PAU_00197	fimB	214807-215373	214807	215373		27.9457	23.7264	32.1651	1.35567	0.439008	0.58301	1	type_1_fimbriae_regulatory_protein_fimb	type 1 fimbriae regulatory protein fimb
PAU_00198		215803-216420	215803	216420		9.38143	8.72528	10.0376	1.1504	0.202137	0.840412	1	hypothetical_protein	conserved hypothetical protein
PAU_00199	aufB	216547-217293	216547	217293		8.9045	8.89406	8.91495	1.00235	0.0033847	1	1	fimbrial_chaperone	similarities with putative fimbrial chaperone
PAU_00200		217331-217897	217331	217897		3.21553	3.3125	3.11855	0.941447	-0.0870481	1	1	hypothetical_protein	conserved hypothetical protein
PAU_00201	papA	217959-218657	217959	218657		3.56175	4.11369	3.00981	0.731657	-0.45076	0.806335	1	hypothetical_protein	conserved hypothetical protein
PAU_00202		218793-219392	218793	219392		17.0866	16.7521	17.4211	1.03993	0.0564903	1	1	hypothetical_protein	conserved hypothetical protein
PAU_00203	afaB	219469-220188	219469	220188		9.45091	8.75706	10.1448	1.15847	0.212216	0.923967	1	afab	afab
PAU_00204	agg3D	220217-221011	220217	221011		7.1759	6.57908	7.77271	1.18143	0.240532	0.899175	1	fimbrial_chaperone	similar to putative fimbrial chaperone
PAU_00205	lpfC	221128-223878	221128	223878		3.55809	3.73022	3.38595	0.907706	-0.139703	0.988259	1	outer_membrane_usher_protein	similar to outer membrane usher protein
PAU_00206		224026-225366	224026	225366		12.1191	12.773	11.4653	0.89762	-0.155823	0.873887	1	hypothetical_protein	conserved hypothetical protein
PAU_00207	yheC	225496-225987	225496	225987		4.00244	4.99506	3.00981	0.602558	-0.730827	0.58626	1	hypothetical_protein	conserved hypothetical protein
PAU_00208		225984-226448	225984	226448		10.2804	9.95587	10.605	1.0652	0.0911276	0.975083	1	hypothetical_protein	conserved hypothetical protein
PAU_00209	spoT	c228588-226471	226471	228588	c	379.068	701.239	56.8961	0.0811366	-3.6235	0.306925	0.98355	bifunctional_(p)ppGpp_synthetase_II/_guanosine-3'	guanosine-3',5'-bis(diphosphate) 3'-pyrophosphohydrolase
PAU_00210	rpoZ	c228881-228606	228606	228881	c	669.55	423.161	915.94	2.16452	1.11405	0.132787	0.927111	DNA-directed_RNA_polymerase_subunit_omega	DNA-directed RNA polymerase omega chain
PAU_00211	gmk	c229559-228936	228936	229559	c	329.532	204.018	455.046	2.23042	1.15732	0.178904	0.96871	guanylate_kinase	guanylate kinase
PAU_00212		230048-230485	230048	230485		1483.67	2510.84	456.493	0.181809	-2.45951	0.000968671	0.0921533	hth-type_transcriptional_regulator	putative hth-type transcriptional regulator
PAU_00213		c231638-230778	230778	231638	c	259.311	227.06	291.563	1.28408	0.360739	0.621092	1	hypothetical_protein	conserved hypothetical protein
PAU_00214		c233405-232545	232545	233405	c	72.9409	48.3225	97.5593	2.01892	1.01359	0.177416	0.96871	hypothetical_protein	conserved hypothetical protein
PAU_00215		c235901-234276	234276	235901	c	41.4961	24.5268	58.4655	2.38374	1.25322	0.171236	0.96871	hypothetical_protein	conserved hypothetical protein
PAU_00216		c236610-236281	236281	236610	c	68.5498	41.4407	95.6588	2.30833	1.20685	0.096924	0.878723	hypothetical_protein	conserved hypothetical protein
PAU_00217		c237532-237254	237254	237532	c	43.2601	44.3913	42.1289	0.949035	-0.0754666	0.956734	1	bacteriophage_n15_gp48_protein	similar to gp48 proteins of bacteriophage n15
PAU_00218	s045	c237980-237723	237723	237980	c	240.261	266.236	214.287	0.804877	-0.31316	0.626835	1	hypothetical_protein	conserved hypothetical protein
PAU_00219		c238757-238434	238434	238757	c	22.1183	24.8941	19.3425	0.776991	-0.364031	0.692924	1	hypothetical_protein	conserved hypothetical protein
PAU_00220		c239080-238757	238757	239080	c	114.063	148.267	79.8591	0.538618	-0.892666	0.363225	0.98355	hypothetical_protein	conserved hypothetical protein
PAU_00221	yicF	239330-241066	239330	241066		54.5613	60.1062	49.0164	0.815497	-0.294249	0.670621	1	NAD-dependent_DNA_ligase_LigB	similar to putative dna ligase-like protein yicf of escherichia coli
PAU_00222	yicG	c241677-241060	241060	241677	c	31.0779	29.9587	32.197	1.07471	0.103953	0.891902	1	inner_membrane_protein	similar to putative inner membrane protein yicg of escherichia coli
PAU_00223	yidR	241812-243101	241812	243101		71.2247	66.9686	75.4808	1.12711	0.172626	0.842626	1	hypothetical_protein	conserved hypothetical protein
PAU_00224	yidQ	c243685-243365	243365	243685	c	48.0697	46.9481	49.1913	1.04778	0.0673358	0.93388	1	hypothetical_protein	conserved hypothetical protein
PAU_00225	avtA	c245634-244381	244381	245634	c	81.7315	53.2889	110.174	2.06749	1.04788	0.158224	0.963101	valine--pyruvate_transaminase	alanine-alpha-ketoisovalerate (or valine-pyruvate) transaminase transaminase c (valine-pyruvate transaminase)
PAU_00226	tag	c247001-246444	246444	247001	c	54.4289	55.2595	53.5983	0.969938	-0.0440355	0.953246	1	dna-3-methyladenine_glycosylase_i_(3-methyladenine-dna_glycosylase_i_constitutive)_(tag_i)_(dna-3-methyladenine_glycosidase_i)	dna-3-methyladenine glycosylase i (3-methyladenine-dna glycosylase i constitutive) (tag i) (dna-3-methyladenine glycosidase i)
PAU_00227	glyQ	247197-248111	247197	248111		50.761	33.7666	67.7554	2.00658	1.00474	0.17907	0.96871	glycyl-tRNA_synthetase_subunit_alpha	glycyl-tRNA synthetase alpha chain
PAU_00228	glyS	248121-250190	248121	250190		289.57	234.458	344.682	1.47012	0.555935	0.442333	0.990202	glycyl-tRNA_synthetase_subunit_beta	glycyl-trna synthetase beta chain (glycine--trna ligase beta chain (glyrs)
PAU_00229		c251237-250836	250836	251237	c	4.0745	4.92903	3.21997	0.653265	-0.61426	0.585322	1	phage_n15_protein_gp48	similar to protein gp48 from phage n15
PAU_00230	FNV1263	251920-252057	251920	252057		5.67541	6.15294	5.19787	0.844778	-0.243356	0.954339	1	hypothetical_protein	Hypothetical protein
PAU_00231	dppA	252159-253766	252159	253766		252.901	207.234	298.568	1.44073	0.526801	0.447559	0.992175	periplasmic_dipeptide_transport_protein	periplasmic dipeptide transport protein
PAU_00232	dppB	253983-255002	253983	255002		116.121	104.636	127.605	1.21951	0.286304	0.715869	1	dipeptide_transporter_permease_DppB	dipeptide transport system permease protein dppb
PAU_00233	dppC	255014-255916	255014	255916		50.5002	40.2097	60.7907	1.51184	0.596307	0.401831	0.98355	dipeptide_transporter	dipeptide transport system permease protein dppc
PAU_00234	dppD	255929-256909	255929	256909		31.1996	23.1808	39.2183	1.69184	0.758595	0.336619	0.98355	dipeptide_transporter_ATP-binding_subunit	dipeptide transport atp-binding protein dppd
PAU_00235	dppF	256906-257925	256906	257925		65.037	50.3812	79.6928	1.58179	0.661562	0.387019	0.98355	dipeptide_transporter_ATP-binding_subunit	putative atp-binding component of dipeptide transport system
PAU_00236	yhjK	258154-258894	258154	258894		72.58	60.6247	84.5353	1.3944	0.479647	0.509889	1	hypothetical_protein	conserved hypothetical protein
PAU_00237	yhjJ	259037-260521	259037	260521		55.0904	44.4785	65.7022	1.47717	0.562835	0.445688	0.991726	hypothetical_protein	conserved hypothetical protein
PAU_00238		260672-260851	260672	260851		118.939	118.992	118.885	0.999106	-0.00129091	0.997478	1	hypothetical_protein	Hypothetical protein
PAU_00239	ybjE	c261733-260843	260843	261733	c	321.139	183.691	458.587	2.49652	1.31992	0.270086	0.98355	hypothetical_protein	putative membrane protein
PAU_00240		c262491-261733	261733	262491	c	2775.55	1944.1	3607.01	1.85537	0.891704	0.210642	0.98355	hypothetical_protein	conserved hypothetical protein
PAU_00241		c263110-262904	262904	263110	c	194.685	177.36	212.01	1.19537	0.257455	0.729603	1	hypothetical_protein	conserved hypothetical protein
PAU_00242		c264206-263166	263166	264206	c	38.0083	26.5392	49.4775	1.86431	0.898645	0.2697	0.98355	hypothetical_protein	similar to putative membrane protein yhjd of escherichia coli
PAU_00243		264417-264758	264417	264758		0.914379	1.82876	0	0	#NAME?	0.226856	0.98355	hypothetical_protein	conserved hypothetical protein
PAU_00244		264816-265136	264816	265136		18.2322	17.2575	19.2069	1.11296	0.154401	0.943251	1	hypothetical_protein	conserved hypothetical protein
PAU_00245	hylA	c269643-265201	265201	269643	c	14.9784	19.6394	10.3173	0.525334	-0.928693	0.287551	0.98355	hemolysin_phla_protein	hemolysin phla protein
PAU_00246	phlB	c271372-269705	269705	271372	c	1.98065	2.94739	1.0139	0.343999	-1.53952	0.395923	0.98355	phla_hemolysin_secretion/activation_protein_phlb	phla hemolysin secretion/activation protein phlb
PAU_00247		c272667-272071	272071	272667	c	13.2784	16.9919	9.565	0.562916	-0.829007	0.347634	0.98355	hypothetical_protein	conserved hypothetical protein
PAU_00248		c273994-273422	273422	273994	c	9.87412	14.691	5.05721	0.344238	-1.53852	0.128026	0.919537	hypothetical_protein	conserved hypothetical protein
PAU_00249		c274546-274025	274025	274546	c	4.21349	6.54556	1.88142	0.287434	-1.7987	0.298993	0.98355	hypothetical_protein	conserved hypothetical protein
PAU_00250		c275765-275214	275214	275765	c	1.14499	1.33333	0.956651	0.717488	-0.478973	0.994625	1	hypothetical_protein	conserved hypothetical protein
PAU_00251		c276317-275802	275802	276317	c	1.65944	3	0.318884	0.106295	-3.23386	0.45834	0.992271	hypothetical_protein	conserved hypothetical protein
PAU_00252	sdiA1	276798-277526	276798	277526		45.6752	72.6178	18.7327	0.257963	-1.95476	0.00947516	0.363605	transcription_regulator_SdiA	similar to probable transcription regulator SdiA of Escherichia coli
PAU_00253		277591-277824	277591	277824		5.17565	7.17551	3.1758	0.442588	-1.17596	0.327432	0.98355	hypothetical_protein	hypothetical transmembrane protein
PAU_00254		c278502-277912	277912	278502	c	14.1922	23.844	4.54046	0.190424	-2.39271	0.0149828	0.437832	hypothetical_protein	conserved hypothetical protein
PAU_00255	sdiA2	279005-279733	279005	279733		1.8538	2.78283	0.924767	0.332311	-1.58939	0.475598	0.99899	transcription_regulator_SdiA	similar to probable transcription regulator SdiA of Escherichia coli
PAU_00256		c280955-279936	279936	280955	c	57.9655	77.457	38.474	0.496715	-1.00951	0.19604	0.98355	hypothetical_protein	conserved hypothetical protein
PAU_00257		c282569-281067	281067	282569	c	41.8997	46.6858	37.1136	0.794967	-0.331034	0.675416	1	hypothetical_protein	conserved hypothetical protein
PAU_00258		c283041-282670	282670	283041	c	23.7205	25.9619	21.479	0.827329	-0.273466	0.803224	1	hypothetical_protein	conserved hypothetical protein
PAU_00259		c284311-283292	283292	284311	c	194.033	245.249	142.817	0.582337	-0.780074	0.289307	0.98355	hypothetical_protein	conserved hypothetical protein
PAU_00260		c285923-284325	284325	285923	c	80.6325	82.0433	79.2217	0.965608	-0.0504901	0.920378	1	hypothetical_protein	conserved hypothetical protein
PAU_00261		c286872-285946	285946	286872	c	17.3381	18.0646	16.6116	0.919565	-0.120976	0.901742	1	hypothetical_protein	conserved hypothetical protein
PAU_00262		c288842-286872	286872	288842	c	2.88157	2.6642	3.09895	1.16318	0.218078	1	1	hypothetical_protein	conserved hypothetical protein
PAU_00263		c289284-289015	289015	289284	c	18.6783	18.8047	18.5518	0.986551	-0.0195345	0.969671	1	hypothetical_protein	conserved hypothetical protein
PAU_00264		c290272-289580	289580	290272	c	27.0062	20.2994	33.713	1.66079	0.731867	0.394169	0.98355	hypothetical_protein	putative membrane protein
PAU_00265		290892-291038	290892	291038		1.9925	2.33333	1.65167	0.707857	-0.498469	0.891863	1	hypothetical_protein	Hypothetical protein
PAU_00266		c292860-291547	291547	292860	c	10.3561	10.5724	10.1398	0.959081	-0.0602751	1	1	hypothetical_protein	Hypothetical protein
PAU_00267		c293614-293168	293168	293614	c	10.0516	7.77615	12.327	1.58523	0.664695	0.510777	1	secreted_protein	putative secreted protein
PAU_00268		c294974-293976	293976	294974	c	196.504	241.38	151.628	0.628173	-0.670766	0.363152	0.98355	hypothetical_protein	conserved hypothetical protein
PAU_00269		c295516-295328	295328	295516	c	27.6257	25.7765	29.475	1.14348	0.193436	0.777474	1	hypothetical_protein	Hypothetical protein
PAU_00270		c296453-295761	295761	296453	c	1119.38	1300.24	938.519	0.721807	-0.470316	0.460784	0.992271	hypothetical_protein	conserved hypothetical protein
PAU_00271		c297765-296455	296455	297765	c	742.298	896.17	588.426	0.656601	-0.606912	0.405522	0.98355	hypothetical_protein	Hypothetical protein
PAU_00272		c298794-297799	297799	298794	c	36.8712	30.5251	43.2174	1.4158	0.501617	0.49971	1	hypothetical_protein	conserved hypothetical protein
PAU_00273		c300761-298797	298797	300761	c	10.3503	4.44703	16.2535	3.65492	1.86984	0.0604751	0.747501	hypothetical_protein	conserved hypothetical protein
PAU_00274		c302141-300795	300795	302141	c	23.245	16.3044	30.1857	1.85139	0.888608	0.308348	0.98355	hypothetical_protein	conserved hypothetical protein
PAU_00275		c305739-302194	302194	305739	c	14.8056	10.9718	18.6394	1.69886	0.764564	0.385961	0.98355	hypothetical_protein	conserved hypothetical protein
PAU_00276		c307046-305736	305736	307046	c	64.3581	41.0084	87.7078	2.13878	1.09679	0.437095	0.989104	hypothetical_protein	conserved hypothetical protein
PAU_00277		c307816-307169	307169	307816	c	40.6748	26.5586	54.7909	2.06302	1.04476	0.331667	0.98355	hypothetical_protein	conserved hypothetical protein
PAU_00278		c308613-307813	307813	308613	c	24.9454	17.3503	32.5405	1.8755	0.907277	0.271681	0.98355	hypothetical_protein	conserved hypothetical protein
PAU_00279		c311249-308610	308610	311249	c	103.938	76.1937	131.683	1.72827	0.789328	0.386898	0.98355	ClpA/B-type_chaperone	similar to clpa/b-type chaperone
PAU_00280		c312030-311260	311260	312030	c	74.1141	49.7119	98.5163	1.98175	0.986772	0.22169	0.98355	hypothetical_protein	Putative membrane Protein
PAU_00281		c313382-312030	312030	313382	c	130.505	103.191	157.819	1.52939	0.612958	0.418751	0.98355	hypothetical_protein	conserved hypothetical protein
PAU_00282		c313939-313385	313385	313939	c	104.662	63.4364	145.888	2.29975	1.20147	0.164542	0.964687	hypothetical_protein	putative membrane protein
PAU_00283		c315225-313939	313939	315225	c	162.133	148.926	175.339	1.17735	0.235544	0.761864	1	hypothetical_protein	conserved hypothetical protein
PAU_00284		c316212-315232	315232	316212	c	182.682	170.655	194.709	1.14095	0.190234	0.791075	1	hypothetical_protein	conserved hypothetical protein
PAU_00285		c318077-316248	316248	318077	c	172.651	141.938	203.364	1.43277	0.518809	0.458811	0.992271	hypothetical_protein	conserved hypothetical protein
PAU_00286		c318520-318080	318080	318520	c	498.62	405.663	591.578	1.4583	0.544286	0.522256	1	hypothetical_protein	conserved hypothetical protein
PAU_00287		c320005-318527	318527	320005	c	930.506	985.991	875.021	0.887453	-0.172257	0.816284	1	hypothetical_protein	conserved hypothetical protein
PAU_00288		c320526-320029	320029	320526	c	1933.57	2077.51	1789.64	0.861434	-0.215188	0.774238	1	hypothetical_protein	conserved hypothetical protein
PAU_00289		321454-321972	321454	321972		14203.9	14188.8	14219	1.00213	0.00306894	0.976376	1	hypothetical_protein	conserved hypothetical protein
PAU_00290		322635-323477	322635	323477		158.774	99.5974	217.95	2.18831	1.12982	0.116008	0.915487	hypothetical_protein	conserved hypothetical protein
PAU_00291	gor	323573-324940	323573	324940		277.438	192.554	362.321	1.88166	0.912004	0.204036	0.98355	glutathione_reductase	glutathione oxidoreductase (gr) (grase)
PAU_00292		325106-326020	325106	326020		432.582	442.004	423.16	0.957368	-0.0628545	0.938872	1	hypothetical_protein	conserved hypothetical protein
PAU_00293		326139-326315	326139	326315		259.555	252.304	266.806	1.05748	0.0806254	0.958973	1	hypothetical_protein	conserved hypothetical protein
PAU_00294		326731-328149	326731	328149		55.8875	45.171	66.604	1.47449	0.560213	0.43471	0.989104	deaminase	conserved hypothetical protein
PAU_00295	mobB	c328751-328230	328230	328751	c	43.0735	40.4985	45.6485	1.12716	0.172699	0.883196	1	molybdopterin-guanine_dinucleotide_biosynthesis_protein_B	molybdopterin-guanine dinucleotide biosynthesis protein b
PAU_00296	mobA	c329560-328748	328748	329560	c	33.0444	24.2401	41.8488	1.72643	0.787792	0.341857	0.98355	molybdopterin-guanine_dinucleotide_biosynthesis_protein_MobA	molybdopterin-guanine dinucleotide biosynthesis protein a
PAU_00297	rdoA	329738-330730	329738	330730		138.747	121.611	155.883	1.28182	0.358192	0.644675	1	serine/threonine_protein_kinase	antibiotic resistance protein rdoa
PAU_00298	dsbA	330739-331374	330739	331374		332.831	400.816	264.846	0.660767	-0.597785	0.441479	0.990202	periplasmic_protein_disulfide_isomerase_I	thiol:disulfide interchange protein dsba precursor
PAU_00299	polA	331752-334541	331752	334541		162.85	114.411	211.289	1.84676	0.884999	0.217439	0.98355	DNA_polymerase_I	dna polymerase I polA
PAU_00300		c335963-334605	334605	335963	c	14.2152	12.5081	15.9224	1.27296	0.348189	0.730882	1	hypothetical_protein	conserved hypothetical protein
PAU_00301		c337422-336682	336682	337422	c	485.228	472.75	497.707	1.05279	0.0742187	0.931524	1	ribosome_biogenesis_GTP-binding_protein_YsxC	conserved hypothetical protein
PAU_00302	ppiA	337616-338185	337616	338185		388.835	484.441	293.229	0.605293	-0.724294	0.325675	0.98355	peptidyl-prolyl_cis-trans_isomerase_A_(rotamase_A)	peptidyl-prolyl cis-trans isomerase A precursor
PAU_00303	ycgJ	c338630-338280	338280	338630	c	75.3241	88.69	61.9581	0.698592	-0.517478	0.467341	0.995203	hypothetical_protein	conserved hypothetical protein
PAU_00304	pabA	338863-339447	338863	339447		55.8358	68.6145	43.0572	0.627524	-0.672258	0.381744	0.98355	para-aminobenzoate_synthase_component_II	para-aminobenzoate synthase glutamine amidotransferase, component ii
PAU_00305	argD	339569-340780	339569	340780		45.1983	56.9951	33.4014	0.586041	-0.770927	0.298371	0.98355	bifunctional_N-succinyldiaminopimelate-aminotransferase/acetylornithine_transaminase_protein	acetylornithine/succinyldiaminopimelate aminotransferase
PAU_00306	crp	c341470-340829	340829	341470	c	1322.15	1180.32	1463.99	1.24033	0.310726	0.673271	1	cAMP-regulatory_protein	catabolite gene activator (camp receptor protein) (camp-regulator protein)
PAU_00307	yhfA	341783-342190	341783	342190		100.968	85.9051	116.032	1.3507	0.433705	0.585224	1	hypothetical_protein	conserved hypothetical protein
PAU_00308	prkB	c343185-342316	342316	343185	c	330.717	337.874	323.559	0.957633	-0.0624559	1	1	phosphoribulokinase	putative phosphoribulokinase
PAU_00309	yheU	c343424-343206	343206	343424	c	92.8753	87.8341	97.9165	1.11479	0.156771	0.830665	1	hypothetical_protein	conserved hypothetical protein
PAU_00310	yheT	c344401-343421	343421	344401	c	111.009	92.7186	129.3	1.39454	0.479789	0.51061	1	hydrolase	conserved hypothetical protein
PAU_00311		344504-345112	344504	345112		39.9627	38.8567	41.0686	1.05692	0.0798715	0.922042	1	hypothetical_protein	similar to unknown protein yfik of escherichia coli-putative membrane protein
PAU_00312														putative ABC taurine transporter, atpase subunit, pseudogene
PAU_00313	tauD	346166-346705	346166	346705		41.8595	61.6617	22.0572	0.357714	-1.48312	0.420004	0.98355	taurine_dioxygenase	taurine dioxygenase, 2-oxoglutarate-dependent (taurine dioxygenase)
PAU_00314		c348180-346729	346729	348180	c	5.61527	2.99753	8.23301	2.7466	1.45765	0.186792	0.97956	PTS_system_N-acetylmuramic_acid_transporter_subunits_EIIBC	putative PTS system EIIBC component
PAU_00315	yfeU	c349164-348211	348211	349164	c	18.1051	11.0745	25.1358	2.2697	1.1825	0.196264	0.98355	N-acetylmuramic_acid-6-phosphate_etherase	similar to putative regulator yfeu protein of escherichia coli
PAU_00316		c350061-349198	349198	350061	c	14.2246	10.2048	18.2444	1.78782	0.838205	0.366094	0.98355	hypothetical_protein	conserved hypothetical protein
PAU_00317		350321-350551	350321	350551		143.5	123.07	163.929	1.332	0.413592	0.644786	1	hypothetical_protein	hypothetical transmembrane protein
PAU_00318		c351462-350983	350983	351462	c	5.27803	4.96328	5.59277	1.12683	0.172268	0.945639	1	hypothetical_protein	putative membrane protein similar to hcp protein
PAU_00319		352260-352967	352260	352967		40.5009	41.9968	39.005	0.928762	-0.106619	0.878506	1	hypothetical_protein	putative membrane protein
PAU_00320		352957-353358	352957	353358		0.961201	0.965752	0.956651	0.990577	-0.0136593	1	1	hypothetical_protein	similar to putative membrane protein
PAU_00321		353406-353807	353406	353807		1.1876	1.64831	0.726901	0.440998	-1.18116	0.648717	1	membrane_protein_precursor	putative membrane protein precursor
PAU_00322		353813-354256	353813	354256		2.04801	2.24648	1.84953	0.823304	-0.280503	0.989652	1	membrane_protein_precursor	putative membrane protein precursor
PAU_00323		354273-354674	354273	354674		0.642318	0.965752	0.318884	0.330192	-1.59862	0.769273	1	membrane_protein_precursor	putative membrane protein precursor
PAU_00324		354680-355123	354680	355123		0.826828	1.01589	0.637767	0.627792	-0.671641	0.994224	1	membrane_protein_precursor	putative membrane protein precursor
PAU_00325		355662-356585	355662	356585		14.4517	9.1914	19.7121	2.14462	1.10072	0.21342	0.98355	LysRfamily_trancsriptional_regulator	similar to putative lysr-family trancsriptional regulator
PAU_00326	yheS	c358934-356964	356964	358934	c	201.997	180.395	223.599	1.23949	0.309749	0.669961	1	ABC_transporter_ATP-binding_protein	conserved hypothetical protein
PAU_00327	kefG	359008-359562	359008	359562		79.7543	56.8672	102.641	1.80493	0.851942	0.228338	0.98355	glutathione-regulated_potassium-efflux_system_ancillary_protein_KefG	glutathione-regulated potassium-efflux system ancillary protein kefg
PAU_00328	kefB	359566-361371	359566	361371		106.114	65.1215	147.106	2.25895	1.17565	0.112999	0.915182	glutathione-regulated_potassium-efflux_system_protein_KefB	glutathione-regulated potassium-efflux system protein kefb (k(+)/h(+ antiporter) (nem-activable k(+)/h(+) antiporter)
PAU_00329	yheV	361383-361586	361383	361586		310.425	222.416	398.435	1.79139	0.841082	0.232282	0.98355	hypothetical_protein	conserved hypothetical protein
PAU_00330	slyD	361651-362259	361651	362259		1465.42	1005.34	1925.51	1.91529	0.937563	0.176211	0.96871	FKBP-type_peptidyl-prolyl_cis-trans_isomerase	fkbp-type peptidyl-prolyl cis-trans isomerase
PAU_00331		362474-363178	362474	363178		288.025	274.118	301.933	1.10147	0.139431	0.904973	1	hypothetical_protein	conserved hypothetical protein
PAU_00332		363175-363489	363175	363489		17.6856	13.1138	22.2574	1.69726	0.763205	0.389417	0.98355	hypothetical_protein	putative membrane protein
PAU_00333	fkpA	364425-365201	364425	365201		1454.06	879.438	2028.68	2.30679	1.20589	0.0857357	0.853743	FKBP-type_peptidyl-prolyl_cis-trans_isomerase	fkbp-type peptidyl-prolyl cis-trans isomerase
PAU_00334		c365456-365274	365274	365456	c	217.228	218.293	216.164	0.990249	-0.014137	0.993674	1	hypothetical_protein	Hypothetical protein
PAU_00335	yheO	365478-366212	365478	366212		415.929	466.34	365.519	0.783803	-0.351437	0.711758	1	hypothetical_protein	conserved hypothetical protein
PAU_00336	tusD	366212-366607	366212	366607		244.005	227.837	260.174	1.14193	0.191475	0.814581	1	sulfur_transfer_complex_subunit_TusD	sulfurtransferase tusd
PAU_00337	tusC	366617-366976	366617	366976		255.033	224.245	285.821	1.27459	0.350035	0.618684	1	sulfur_relay_protein_TusC	protein tusc (trna 2-thiouridine synthesizing protein c)
PAU_00338	tusB	366997-367284	366997	367284		454.602	391.29	517.914	1.3236	0.404473	0.537656	1	protein_tusb_(trna_2-thiouridine_synthesizing_protein_b)	protein tusb (trna 2-thiouridine synthesizing protein b)
PAU_00339	rpsL	367307-367795	367307	367795		928.568	662.183	1194.95	1.80457	0.851652	0.213957	0.98355	30s_ribosomal_protein_s12	30s ribosomal protein s12
PAU_00340	rpsG	367892-368362	367892	368362		1880.12	1246.54	2513.7	2.01654	1.01188	0.15421	0.962424	30S_ribosomal_protein_S7	30s ribosomal subunit protein s7
PAU_00341	fusA	368443-370551	368443	370551		3496.58	2802.02	4191.13	1.49575	0.580871	0.408353	0.98355	elongation_factor_G	elongation factor g (ef-g)
PAU_00342	tufA	370622-371806	370622	371806		93.0089	61.1676	124.85	2.04112	1.02936	0.469974	0.99857	elongation_factor_Tu	elongation factor tu-b (ef-tu-b)
PAU_00343		371889-372059	371889	372059		258.303	121.163	395.443	3.26372	1.70652	0.0485397	0.703079	hypothetical_protein	Hypothetical protein
PAU_00344	secE	372081-372464	372081	372464		548.448	395.996	700.9	1.76997	0.823725	0.232301	0.98355	preprotein_translocase_subunit_SecE	inner membrane preprotein translocase
PAU_00345	nusG	372465-373010	372465	373010		601.748	398.245	805.251	2.022	1.01578	0.15837	0.963101	transcription_antitermination_protein_NusG	transcription antitermination protein
PAU_00346	rplK	373165-373593	373165	373593		1682.75	1191.64	2173.85	1.82425	0.867304	0.220899	0.98355	50S_ribosomal_protein_L11	50s ribosomal protein l11
PAU_00347	rplA	373597-374298	373597	374298		1348.82	1066.94	1630.69	1.52838	0.612005	0.367003	0.98355	50S_ribosomal_protein_L1	50s ribosomal subunit protein l1
PAU_00348	rplJ	374608-375105	374608	375105		3110.47	2557.09	3663.85	1.43282	0.518855	0.455744	0.992271	50S_ribosomal_protein_L10	50s ribosomal subunit protein l10
PAU_00349	rplL	375169-375534	375169	375534		15891.7	13736.7	18046.7	1.31376	0.393703	0.701796	1	50S_ribosomal_protein_L7/L12	50s ribosomal subunit protein l7/l12
PAU_00350	rpoB	375873-379901	375873	379901		1072.99	897.503	1248.48	1.39106	0.476183	0.504577	1	DNA-directed_RNA_polymerase_subunit_beta	DNA-directed RNA polymerase beta chain
PAU_00351	rpoC	379957-384252	379957	384252		445.222	357.358	533.087	1.49175	0.577001	0.432835	0.988216	DNA-directed_RNA_polymerase_subunit_beta'	DNA-directed RNA polymerase beta' chain
PAU_00352		384934-385215	384934	385215		170.767	208.891	132.643	0.634987	-0.655201	0.356527	0.98355	prophage_protein_gp48	prophage protein gp48
PAU_00353		385350-385553	385350	385553		13.4991	15.2256	11.7726	0.773209	-0.371069	0.788351	1	phage_transcriptional_regulator	similar to putative phage transcriptional regulator
PAU_00354	chpR	385786-386043	385786	386043		686.268	826.444	546.092	0.660773	-0.597773	0.420403	0.98355	transcriptional_regulator_pemi-like_protein	putative transcriptional regulator pemi-like protein
PAU_00355		386043-386372	386043	386372		210.124	243.697	176.551	0.72447	-0.465003	0.530933	1	transcriptional_regulator_pemk-like_protein	putative transcriptional regulator pemk-like protein
PAU_00356		386419-386826	386419	386826		16.9495	15.9284	17.9705	1.12821	0.174036	0.859807	1	hypothetical_protein	conserved hypothetical protein
PAU_00357		387185-388063	387185	388063		11.1517	17.1572	5.14635	0.299953	-1.73719	0.241614	0.98355	hypothetical_protein	conserved hypothetical protein
PAU_00358	CWF19L1	388075-388749	388075	388749		14.3267	18.4572	10.1962	0.552425	-0.856149	0.333462	0.98355	hypothetical_protein	conserved hypothetical protein
PAU_00359	CsdB2	388731-389891	388731	389891		5.3627	7.54309	3.18232	0.421885	-1.24508	0.294739	0.98355	NifS_family_aminotransferase	similar to nifs family aminotransferase
PAU_00360		390173-390811	390173	390811		4.31378	4.13205	4.4955	1.08796	0.121623	1	1	hypothetical_protein	conserved hypothetical protein
PAU_00361		390804-391586	390804	391586		4.68814	3.46539	5.9109	1.7057	0.77036	0.565531	1	hypothetical_protein	conserved hypothetical protein
PAU_00362		391677-392456	391677	392456		1.18156	1.34922	1.0139	0.75147	-0.412213	0.992965	1	hypothetical_protein	conserved hypothetical protein
PAU_00363	rfaB	392467-393540	392467	393540		2.11882	2.33086	1.90678	0.818058	-0.289725	0.989981	1	UDP-D-galactose:(glucosyl)lipopolysaccharide-1	lipopolysaccharide 1,6-galactosyltransferase
PAU_00364	malM	c394539-393619	393619	394539	c	49.7178	13.6017	85.8338	6.31052	2.65776	0.0010403	0.0921533	maltose_regulon_periplasmic_protein	maltose operon periplasmic protein
PAU_00365	lamB	c395946-394660	394660	395946	c	56.7525	15.0487	98.4563	6.5425	2.70984	0.000808422	0.0881379	maltoporin	maltoporin precursor (maltose-inducible porin) (lambda recepto protein)
PAU_00366	malK	c397179-395983	395983	397179	c	45.4375	13.5233	77.3518	5.7199	2.51599	0.00732613	0.308573	maltose/maltodextrin_transporter_ATP-binding_protein	maltose/maltodextrin import ATP-binding protein
PAU_00367	malE	397477-398676	397477	398676		226.248	154.83	297.667	1.92254	0.943015	0.189378	0.979606	maltose_ABC_transporter_periplasmic_protein	maltose-binding periplasmic protein
PAU_00368	malF	398803-400359	398803	400359		98.9441	60.6796	137.208	2.26119	1.17709	0.107179	0.906143	maltose_transporter_membrane_protein	maltose transport system permease protein malf
PAU_00369	malG	400372-401262	400372	401262		16.3447	8.18893	24.5004	2.99189	1.58106	0.0704478	0.796262	maltose_transporter_permease	maltose transport system permease protein
PAU_00370		c403469-401454	401454	403469	c	26.7241	24.7973	28.6509	1.1554	0.208394	0.817982	1	hypothetical_protein	similarities with putative integral membrane protein
PAU_00371	rocF	403759-404637	403759	404637		89.7931	115.53	64.0559	0.55445	-0.850871	0.257583	0.98355	arginase/agmatinase/formimionoglutamate_hydrolase	arginase/agmatinase/formimionoglutamate hydrolase
PAU_00372		c405559-405149	405149	405559	c	0.1435	0	0.286999	Inf	Inf	1	1	hypothetical_protein	conserved hypothetical protein
PAU_00373		c405870-405733	405733	405870	c	0	0	0	NA	NA	NA	NA	hypothetical_protein	Hypothetical protein
PAU_00374		c406191-405883	405883	406191	c	4.17617	4.762	3.59033	0.753955	-0.40745	0.825715	1	hypothetical_protein	conserved hypothetical protein
PAU_00375		c406647-406363	406363	406647	c	59.6332	76.6694	42.5969	0.555592	-0.847903	0.265757	0.98355	hypothetical_protein	Hypothetical protein
PAU_00376	malQ	c409690-407603	407603	409690	c	32.5541	8.15889	56.9494	6.98004	2.80323	0.00101236	0.0921533	4-alpha-glucanotransferase	4-alpha-glucanotransferase
PAU_00377	malP	c412102-409700	409700	412102	c	58.6688	15.352	101.985	6.64312	2.73186	0.000764578	0.0855523	maltodextrin_phosphorylase	maltodextrin phosphorylase
PAU_00378		c412434-412216	412216	412434	c	0.76265	0.632418	0.892882	1.41185	0.49759	1	1	hypothetical_protein	conserved hypothetical protein
PAU_00379	malT	412525-415239	412525	415239		98.5166	75.3379	121.695	1.61533	0.691825	0.382678	0.98355	transcriptional_regulator_MalT	hth-type transcriptional regulator malt (atp-dependent transcriptiona activator malt)
PAU_00380	cmlA1	c416572-415376	415376	416572	c	22.3789	17.2475	27.5102	1.59502	0.673575	0.416857	0.98355	hypothetical_protein	putative membrane protein similar to multidrug resistance proteins
PAU_00381	gabT	417229-418479	417229	418479		194.751	301.974	87.5282	0.289853	-1.78661	0.109639	0.91112	4-aminobutyrate_aminotransferase_activity	4-aminobutyrate aminotransferase activity
PAU_00382		418479-419540	418479	419540		86.75	121.655	51.8446	0.426159	-1.23053	0.120057	0.916483	hypothetical_protein	conserved hypothetical protein
PAU_00383	gph	419554-420186	419554	420186		35.753	48.8733	22.6328	0.463091	-1.11063	0.387018	0.98355	phosphoglycolate_phosphatase-like_protein	similarities with phosphoglycolate phosphatases an phosphoglucomutases
PAU_00384		420247-421398	420247	421398		46.1817	46.7299	45.6336	0.976539	-0.0342506	0.96913	1	hypothetical_protein	similar to putative membrane protein
PAU_00385		421413-421994	421413	421994		66.7511	81.9605	51.5418	0.628861	-0.669188	0.494761	1	hypothetical_protein	conserved hypothetical protein
PAU_00386	hmu	c422698-422213	422213	422698	c	80.2027	139.877	20.5281	0.146758	-2.76849	0.118129	0.916483	hypothetical_protein	conserved hypothetical protein
PAU_00387		c423482-423006	423006	423482	c	1248.07	697.984	1798.16	2.57623	1.36526	0.184807	0.974939	hypothetical_protein	conserved hypothetical protein
PAU_00388		c424345-423866	423866	424345	c	27.7809	30.0085	25.5534	0.851539	-0.231855	0.87631	1	hypothetical_protein	conserved hypothetical protein
PAU_00389	thiH	c426164-425040	425040	426164	c	15.3018	16.0011	14.6026	0.912602	-0.131942	0.862751	1	thiamine_biosynthesis_protein_ThiH	thiamin biosynthesis, thiazole moiety (thiamin biosynthesis protei thih)
PAU_00390	thiG	c426946-426179	426179	426946	c	6.29411	7.24401	5.34421	0.737743	-0.438811	0.752567	1	thiazole_synthase	thiazole biosynthesis protein thig
PAU_00391	thiS	c427148-426948	426948	427148	c	4.25841	3.96328	4.55354	1.14893	0.200294	0.861538	1	sulfur_carrier_protein_ThiS	thiamin biosynthesis, probable sulfur donor
PAU_00392	thiF	c427894-427145	427145	427894	c	3.67673	3.81461	3.53885	0.927709	-0.108255	0.988685	1	4-methyl-5-(beta-hydroxyethyl)thiazole_monophosphate_synthesis_protein	4-methyl-5-(beta-hydroxyethyl)thiazole monophosphate synthesis protein
PAU_00393	thiE	c428555-427884	427884	428555	c	3.9447	4.06356	3.82585	0.941502	-0.0869635	0.988035	1	thiamine-phosphate_pyrophosphorylase	thiamine-phosphate pyrophosphorylase
PAU_00394	thiC	c430476-428539	428539	430476	c	3.25405	3.01342	3.49468	1.15971	0.213759	0.918097	1	thiamine_biosynthesis_protein_ThiC	thiamine biosynthesis protein thic
PAU_00395		430994-432235	430994	432235		8.43237	8.32592	8.53881	1.02557	0.0364254	1	1	major_facilitator_superfamily_(mfs_1)_transporter	major facilitator superfamily (mfs
PAU_00396		432232-432786	432232	432786		4.19214	3.61406	4.77021	1.3199	0.400434	0.77934	1	hypothetical_protein	conserved hypothetical protein
PAU_00397	PFI0330c	432762-434243	432762	434243		15.2914	15.5918	14.991	0.961471	-0.0566854	0.952558	1	hypothetical_protein	conserved hypothetical protein
PAU_00398		c435011-434349	434349	435011	c	26.1238	22.5625	29.6851	1.31568	0.395812	0.625944	1	hypothetical_protein	conserved hypothetical protein
PAU_00399	nudC	435111-435884	435111	435884		137.122	107.009	167.234	1.5628	0.644134	0.356665	0.98355	NADH_pyrophosphatase	NADH pyrophosphatase
PAU_00400	hemE	435982-437058	435982	437058		213.838	142.639	285.038	1.99833	0.998791	0.159863	0.963101	uroporphyrinogen_decarboxylase	uroporphyrinogen decarboxylase
PAU_00401	nfi	437064-437732	437064	437732		119.142	63.5501	174.734	2.74954	1.45919	0.0497231	0.703079	endonuclease_V	endonuclease V (deoxyinosine 3'endoduclease)
PAU_00402	yjaG	437809-438399	437809	438399		717.364	565.214	869.514	1.53838	0.621411	0.357095	0.98355	hypothetical_protein_yjag	conserved hypothetical protein
PAU_00403	dbhA	438586-438858	438586	438858		1192.6	947.043	1438.16	1.51858	0.602724	0.49983	1	dna-binding_protein_hu-alpha_(ns2)_(hu-2)	dna-binding protein hu-alpha (ns2) (hu-2)
PAU_00404	yjaH	438864-439565	438864	439565		173.907	121.669	226.144	1.85868	0.894276	0.243124	0.98355	hypothetical_protein	conserved hypothetical protein
PAU_00405	purD	c440867-439584	439584	440867	c	462.724	128.671	796.777	6.19233	2.63048	0.000500617	0.0665195	phosphoribosylamine--glycine_ligase	phosphoribosylglycinamide synthetase
PAU_00406	purH	c442514-440889	440889	442514	c	262.933	68.4336	457.432	6.68431	2.74078	0.000295211	0.0502094	bifunctional_phosphoribosylaminoimidazolecarboxamide_formyltransferase/IMP_cyclohydrolase	bifunctional purine biosynthesis protein
PAU_00407	pdxY	442513-442638	442513	442638		8.46708	3.32418	13.61	4.09423	2.03359	0.463059	0.992271	hypothetical_protein	Hypothetical protein
PAU_00408		c448589-448398	448398	448589	c	12.2539	13.839	10.6688	0.770926	-0.375336	0.736863	1	transposase	transposase, IS30 family
PAU_00409	metA	448809-449750	448809	449750		11.685	12.2867	11.0834	0.902059	-0.148706	0.909081	1	homoserine_O-succinyltransferase	homoserine O-succinyltransferase
PAU_00410		c450333-450127	450127	450333	c	4.85018	4.24822	5.45215	1.2834	0.359968	0.787462	1	phage-like_protein	phage-like protein
PAU_00411		c450900-450511	450511	450900	c	1.62682	1.31497	1.93867	1.4743	0.56003	0.86589	1	hypothetical_protein	conserved hypothetical protein
PAU_00412		c451487-450897	450897	451487	c	5.48167	5.69598	5.26736	0.924752	-0.112862	0.986027	1	hypothetical_protein	putative membrane protein
PAU_00413		c451782-451447	451447	451782	c	6.85288	8.69351	5.01225	0.576551	-0.79448	0.457808	0.992271	hypothetical_protein	conserved hypothetical protein
PAU_00414		c452299-452159	452159	452299	c	3.92195	3.96081	3.8831	0.980379	-0.0285885	0.987955	1	hypothetical_protein	Hypothetical protein
PAU_00415		c452620-452519	452519	452620	c	0.191735	0.383471	0	0	#NAME?	0.999822	1	integrase_of_prophage	putative integrase of prophage
PAU_00416	aceB	452968-454566	452968	454566		54.0978	50.0084	58.1872	1.16355	0.218531	0.797139	1	malate_synthase	malate synthase A
PAU_00417	aceA	454630-455931	454630	455931		60.1436	53.63	66.6573	1.24291	0.313724	0.689686	1	isocitrate_lyase	isocitrate lyase
PAU_00418	aceK	455996-457753	455996	457753		30.4717	30.1568	30.7866	1.02089	0.0298211	1	1	bifunctional_isocitrate_dehydrogenase_kinase/phosphatase_protein	isocitrate dehydrogenase kinase/phosphatase
PAU_00419		458077-458637	458077	458637		34.2567	54.739	13.7743	0.251636	-1.99059	0.0368326	0.628965	hypothetical_protein	conserved hypothetical protein
PAU_00420	iclR	c459856-459026	459026	459856	c	67.1944	59.1495	75.2392	1.27202	0.34712	0.614857	1	transcriptional_repressor_IclR	acebak operon repressor
PAU_00421		460388-461926	460388	461926		61.0301	91.9621	30.0981	0.327288	-1.61137	0.0343431	0.612949	hypothetical_protein	similarities with unknown protein. putative transmembrane protein
PAU_00422		462804-463640	462804	463640		17.8331	30.1691	5.49712	0.18221	-2.45633	0.00742197	0.308573	hypothetical_protein	conserved hypothetical protein
PAU_00423		463633-464016	463633	464016		4.94948	8.62995	1.26901	0.147048	-2.76564	0.197477	0.98355	integral_membrane_protein	putative integral membrane protein
PAU_00424		464064-464960	464064	464960		8.79437	12.1112	5.47752	0.452268	-1.14475	0.235466	0.98355	hypothetical_protein	conserved hypothetical protein
PAU_00425		464975-466057	464975	466057		9.11475	12.6751	5.55436	0.438209	-1.19031	0.232979	0.98355	hypothetical_protein	conserved hypothetical protein
PAU_00426		466147-468714	466147	468714		15.8525	20.1882	11.5167	0.570469	-0.809779	0.3639	0.98355	aminotransferase_class-iii	aminotransferase class-iii
PAU_00427		468698-469735	468698	469735		43.3056	40.5211	46.09	1.13743	0.185779	0.839349	1	hypothetical_protein	conserved hypothetical protein
PAU_00428	orf24	470261-470965	470261	470965		30.552	30.0346	31.0694	1.03445	0.0488661	0.956025	1	hypothetical_protein	conserved hypothetical protein
PAU_00429	orf23	470962-471564	470962	471564		18.6371	17.2317	20.0425	1.16312	0.218002	0.819721	1	hypothetical_protein	conserved hypothetical protein
PAU_00430	orf22	471573-475223	471573	475223		34.9746	34.6539	35.2952	1.0185	0.0264523	0.989795	1	DNA_repair_ATPase	putative atpase involved in dna repair
PAU_00431		475265-478891	475265	478891		30.6881	30.1751	31.2011	1.034	0.0482391	0.985661	1	hypothetical_protein	conserved hypothetical protein
PAU_00432	orf19	478891-481491	478891	481491		16.4187	14.8047	18.0327	1.21804	0.28456	0.816418	1	hypothetical_protein	Hypothetical Protein
PAU_00433		c482447-481794	481794	482447	c	5.52114	6.68009	4.3622	0.653015	-0.614811	0.668076	1	hypothetical_protein	conserved hypothetical protein
PAU_00434		482544-483209	482544	483209		11.0154	13.4029	8.62795	0.643737	-0.635456	0.504884	1	hypothetical_protein	conserved hypothetical protein
PAU_00435	hipB	483437-483748	483437	483748		10.6133	13.6952	7.53144	0.549931	-0.862678	0.394598	0.98355	transcriptional_regulator	transcriptional regulator, hipb ortholog
PAU_00436	hipA	483752-483943	483752	483943		35.5174	40.5539	30.4808	0.751611	-0.411941	0.63237	1	hipa_protein	hipa protein, dna binding regulator
PAU_00437		c484894-484085	484085	484894	c	71.3679	67.698	75.0378	1.10842	0.148504	0.890469	1	hypothetical_protein	conserved hypothetical protein
PAU_00438		c486125-484899	484899	486125	c	23.384	23.6846	23.0834	0.974616	-0.0370945	0.982159	1	hypothetical_protein	conserved hypothetical protein
PAU_00439		c486993-486784	486784	486993	c	0	0	0	NA	NA	NA	NA	had-superfamily_hydrolase_subfamily_ia	Hypothetical protein
PAU_00440		c489071-487299	487299	489071	c	13.7571	17.286	10.2281	0.5917	-0.757062	0.386363	0.98355	biotin_carboxylase/biotin_carboxyl_carrier_protein	biotin carboxylase/biotin carboxyl carrier protein
PAU_00441		c490746-489064	489064	490746	c	12.1617	13.0879	11.2355	0.858464	-0.220171	0.801971	1	hypothetical_protein	conserved hypothetical protein
PAU_00442		c491522-490752	490752	491522	c	10.5968	14.5558	6.6378	0.456025	-1.13282	0.210686	0.98355	LamB/YcsF_family_protein	lamb/ycsf
PAU_00443		c492742-491534	491534	492742	c	28.1946	46.3655	10.0237	0.21619	-2.20963	0.281896	0.98355	membrane_protein	membrane protein, putative precursor
PAU_00444		493298-493591	493298	493591		1.91718	1.01589	2.81847	2.77439	1.47217	0.485438	0.99899	hypothetical_protein	conserved hypothetical protein
PAU_00445		493612-502473	493612	502473		4.92575	4.16383	5.68767	1.36597	0.449925	0.786684	1	hemagglutinin/hemolysin-like_protein	similar to hemagglutinin/hemolysin-related proteins. putativ transmembrane protein
PAU_00446		502470-502715	502470	502715		87.9094	92.4884	83.3303	0.900981	-0.150432	0.872235	1	hypothetical_protein	Hypothetical protein
PAU_00447	hecA1	502764-503579	502764	503579		54.8237	51.8533	57.7941	1.11457	0.156488	0.904523	1	hemolysin/hemagglutinin-like_protein_HecA_precursor	hemolysin/hemagglutinin-like protein HecA precursor
PAU_00448		503576-504082	503576	504082		61.2815	85.4725	37.0905	0.433947	-1.20441	0.352863	0.98355	hypothetical_protein	conserved hypothetical protein
PAU_00449		504226-504489	504226	504489		1.51272	0.965752	2.05968	2.13273	1.0927	0.705907	1	hypothetical_protein	conserved hypothetical protein
PAU_00450		504492-505034	504492	505034		2.40055	1.68256	3.11855	1.85346	0.89022	0.577066	1	hypothetical_protein	conserved hypothetical protein
PAU_00451	hecA2	505189-505986	505189	505986		11.3799	10.727	12.0327	1.12172	0.16571	0.897532	1	hemolysin/hemagglutinin-like_protein_HecA_precursor	hemolysin/hemagglutinin-like protein HecA precursor
PAU_00452		505983-506351	505983	506351		29.8231	28.6586	30.9876	1.08127	0.112722	0.859935	1	otthump00000017444_(fragment)	Hypothetical protein
PAU_00453	bacA	507723-509459	507723	509459		7.81732	13.696	1.93867	0.14155	-2.82062	0.180491	0.969	antibiotic_synthetase	similar to antibiotic synthetases
PAU_00454		509642-515206	509642	515206		13.6393	14.1748	13.1038	0.924448	-0.113336	0.882873	1	polyketide_synthase	putative polyketide synthase
PAU_00455	tycC	515290-521499	515290	521499		24.5391	26.4339	22.6443	0.856636	-0.223246	0.803846	1	hypothetical_protein	gramicidin s synthetase 2 (gramicidin s synthetase ii) [includes: atp dependent proline adenylase (proa) (proline activase); atp-dependen valine adenylase (vala) (valine activase); atp-dependent ornithin adenylase (orna) (ornithine activase); atp-dependent leucine adenylas (leua) (leucine activase)]
PAU_00456	def1	521597-522103	521597	522103		322.984	383.617	262.35	0.683884	-0.548177	0.461757	0.992271	peptide_deformylase	peptide deformylase 2
PAU_00457	yjhP	522323-523147	522323	523147		96.5589	130.789	62.3286	0.476557	-1.06928	0.149605	0.96118	sam-dependent_methyltransferase	putative sam-dependent methyltransferase
PAU_00458		523416-523652	523416	523652		222.937	211.85	234.025	1.10467	0.14362	0.86169	1	transcription_regulator	similar to transcription regulator and to restriction enzyme control elements
PAU_00459		c523954-523745	523745	523954	c	8.92116	13.8055	4.03679	0.292404	-1.77396	0.183917	0.972655	DNA-binding_protein	putative DNA-binding protein
PAU_00460		524102-524338	524102	524338		57.6485	71.0851	44.212	0.621959	-0.685109	0.408865	0.98355	transcription_regulator	similar to transcription regulator and to restriction enzyme contro elements
PAU_00461	pks2A	524581-524736	524581	524736		1.10393	1.31497	0.892882	0.679011	-0.558493	0.992551	1	hypothetical_protein	Hypothetical protein
PAU_00462		524876-525901	524876	525901		23.0639	32.5586	13.5691	0.41676	-1.26271	0.112192	0.915182	hypothetical_protein	conserved hypothetical protein
PAU_00463		525937-526578	525937	526578		48.1305	72.6543	23.6067	0.324918	-1.62185	0.0351631	0.612949	hypothetical_protein	conserved hypothetical protein
PAU_00464		c527839-526646	526646	527839	c	142.03	126.997	157.064	1.23675	0.306558	0.652078	1	hypothetical_protein	conserved hypothetical protein
PAU_00465	yibD	528392-529381	528392	529381		30.8373	54.1815	7.49303	0.138295	-2.85418	0.174173	0.96871	glycosyl_transferase	similar to glycosyltransferase
PAU_00466	iunH	c530354-529404	529404	530354	c	164.89	145.09	184.69	1.27294	0.348162	0.598863	1	inosine-uridine_preferring_nucleoside_hydrolase_(iu-nucleosid_hydrolase)_(purine_nucleosidase)	inosine-uridine preferring nucleoside hydrolase (iu-nucleosid hydrolase) (purine nucleosidase)
PAU_00467		530618-531373	530618	531373		279.616	316.158	243.073	0.768833	-0.379258	0.621097	1	LuxR_family_transcriptional_regulator	similar to luxr family transcriptional regulators
PAU_00468	ordL	531470-532786	531470	532786		376.133	428.647	323.619	0.754979	-0.405492	0.570256	1	probable_oxidoreductase	probable oxidoreductase
PAU_00469		532976-533344	532976	533344		329.889	355.921	303.856	0.853717	-0.228171	0.762902	1	hypothetical_protein	conserved hypothetical protein
PAU_00470	feaB	533373-534866	533373	534866		54.3114	50.4478	58.175	1.15317	0.20561	0.803029	1	phenylacetaldehyde_dehydrogenase	phenylacetaldehyde dehydrogenase
PAU_00471		535373-535714	535373	535714		0	0	0	NA	NA	NA	NA	hypothetical_protein	conserved hypothetical protein
PAU_00472	api89	535807-535998	535807	535998		0	0	0	NA	NA	NA	NA	membrane-bound_sugar-binding_protein	putative membrane-bound sugar-binding protein
PAU_00473		536043-536333	536043	536333		2.05863	2.1663	1.95095	0.90059	-0.151057	0.991916	1	hypothetical_protein	conserved hypothetical protein
PAU_00474		536335-536667	536335	536667		0.818111	1.34922	0.286999	0.212714	-2.23301	0.591148	1	hypothetical_protein	conserved hypothetical protein
PAU_00475	moaR	c537762-537103	537103	537762	c	29.5525	25.4223	33.6826	1.32492	0.405909	0.642196	1	monoamine_regulon_transcriptional_regulator_MoaR	similar to monoamine regulon transcriptional regulator moar
PAU_00476		538205-539701	538205	539701		8.37068	8.29168	8.44968	1.01906	0.0272333	1	1	amino_acid_transporter_membrane_protein	putative amino acid transporter membrane protein
PAU_00477		539718-540296	539718	540296		6.40708	7.29168	5.52248	0.757368	-0.400934	0.752301	1	hypothetical_protein	conserved hypothetical protein
PAU_00478		540859-542304	540859	542304		26.7591	40.012	13.5061	0.337551	-1.56682	0.130296	0.920299	4-hydroxyphenylacetate_3-monooxygenase	similar to 4-hydroxyphenylacetate 3-monooxygenase
PAU_00479	fes	542584-544149	542584	544149		125.684	161.24	90.1287	0.558972	-0.839153	0.218031	0.98355	enterochelin_esterase-like_protein	similarities with enterochelin esterase fes
PAU_00480	phoA	544255-545697	544255	545697		270.218	387.714	152.722	0.393904	-1.34408	0.0630734	0.761217	alkaline_phosphatase	alkaline phosphatase
PAU_00481	attM/aiiB	545981-546751	545981	546751		133.6	213.298	53.9027	0.252711	-1.98444	0.00782122	0.319768	zn-dependent_hydrolase-like_protein	similar to zn-dependent hydrolases and to ahl-lactonase
PAU_00482		547488-549260	547488	549260		12.1857	15.3428	9.02865	0.588461	-0.764982	0.372153	0.98355	hypothetical_protein	conserved hypothetical protein
PAU_00483		549357-551423	549357	551423		5.90257	8.44456	3.36058	0.397958	-1.32931	0.237029	0.98355	hypothetical_protein	conserved hypothetical protein
PAU_00484		551543-551695	551543	551695		10.6775	14.6084	6.74653	0.461826	-1.11458	0.238725	0.98355	hypothetical_protein	Hypothetical protein
PAU_00485		551704-551970	551704	551970		22.2022	27.5752	16.8291	0.610299	-0.712413	0.434951	0.989104	hypothetical_protein	conserved hypothetical protein
PAU_00487	rsmC	c553587-552562	552562	553587	c	32.2474	28.6928	35.802	1.24777	0.319349	0.655832	1	16S_ribosomal_RNA_m2G1207_methyltransferase	ribosomal rna small subunit methyltransferase c (rrna (guanine-n2-) methyltransferase) (16s rrna m2g1207 methyltransferase)
PAU_00488	holD	553716-554129	553716	554129		226.86	201.105	252.615	1.25613	0.328991	0.692853	1	DNA_polymerase_III_subunit_psi	DNA polymerase III, Psi subunit
PAU_00489	rimI	554098-554565	554098	554565		97.1555	66.2351	128.076	1.93366	0.951332	0.203178	0.98355	ribosomal-protein-alanine_N-acetyltransferase	ribosomal-protein-alanine acetyltransferase
PAU_00490	prfC	554700-556289	554700	556289		994.214	815.772	1172.66	1.43748	0.523542	0.446892	0.992175	peptide_chain_release_factor_3	peptide chain release factor 3 (rf-3)
PAU_00491	osmY	556605-556982	556605	556982		1053.11	1530.64	575.57	0.376033	-1.41107	0.0498073	0.703079	osmotically_inducible_protein_y_precursor	osmotically inducible protein y precursor
PAU_00492	yjjU	557164-558231	557164	558231		38.3846	30.8552	45.914	1.48805	0.573421	0.446945	0.992175	hypothetical_protein	conserved hypothetical protein
PAU_00493	yjjV	558236-559009	558236	559009		73.1697	71.947	74.3924	1.03399	0.0482216	0.933265	1	hypothetical_protein	conserved hypothetical protein
PAU_00494	yeiM	559299-560576	559299	560576		246.214	149.076	343.352	2.3032	1.20364	0.0894747	0.873043	transport_protein	similar to hypothetical transport protein
PAU_00495		c560907-560677	560677	560907	c	14.4967	14.8365	14.157	0.954199	-0.0676375	1	1	hypothetical_protein	conserved hypothetical protein
PAU_00496		c561651-560929	560929	561651	c	4.23029	6.05014	2.41045	0.398413	-1.32766	0.572101	1	hypothetical_protein	conserved hypothetical protein
PAU_00497		c562452-561664	561664	562452	c	0.87862	1.34922	0.408017	0.302409	-1.72543	0.583839	1	hypothetical_protein	conserved hypothetical protein
PAU_00498		c562912-562646	562646	562912	c	0	0	0	NA	NA	NA	NA	hypothetical_protein	conserved hypothetical protein
PAU_00499		c563681-562959	562959	563681	c	0.978326	1	0.956651	0.956651	-0.0639352	1	1	hypothetical_protein	conserved hypothetical protein
PAU_00500		c564470-563694	563694	564470	c	0.659442	1	0.318884	0.318884	-1.6489	0.772634	1	hypothetical_protein	conserved hypothetical protein
PAU_00501		c564841-564551	564551	564841	c	0.166667	0.333333	0	0	#NAME?	0.999802	1	hypothetical_protein	conserved hypothetical protein
PAU_00502		c565585-564863	564863	565585	c	10.1799	14.1547	6.20521	0.438386	-1.18973	0.240556	0.98355	hypothetical_protein	conserved hypothetical protein
PAU_00503		c566365-565598	565598	566365	c	9.97308	13.1105	6.83566	0.521389	-0.939569	0.332406	0.98355	hypothetical_protein	conserved hypothetical protein
PAU_00504		c566736-566446	566446	566736	c	1.18256	2.36511	0	0	#NAME?	0.119837	0.916483	hypothetical_protein	conserved hypothetical protein
PAU_00505		c567480-566758	566758	567480	c	7.47667	9.60912	5.34421	0.556161	-0.846427	0.455264	0.992271	hypothetical_protein	conserved hypothetical protein
PAU_00506		c568257-567493	567493	568257	c	3.04863	4.76447	1.33278	0.279734	-1.83787	0.224278	0.98355	hypothetical_protein	conserved hypothetical protein
PAU_00507		c568604-568338	568338	568604	c	0	0	0	NA	NA	NA	NA	hypothetical_protein	conserved hypothetical protein
PAU_00508		c569373-568651	568651	569373	c	8.99678	11.31	6.68352	0.590937	-0.758924	0.484906	0.99899	hypothetical_protein	conserved hypothetical protein
PAU_00509		c570162-569386	569386	570162	c	7.6044	7.39689	7.81191	1.05611	0.0787571	0.963163	1	hypothetical_protein	conserved hypothetical protein
PAU_00510		c570505-570164	570164	570505	c	22.1717	21.7179	22.6255	1.04179	0.059065	0.954133	1	hypothetical_protein	conserved hypothetical protein
PAU_00511		c570999-570502	570502	570999	c	10.6185	10.874	10.363	0.953013	-0.0694322	1	1	hypothetical_protein	conserved hypothetical protein
PAU_00512		c573014-570996	570996	573014	c	22.1496	21.5935	22.7057	1.05151	0.0724566	1	1	hypothetical_protein	conserved hypothetical protein
PAU_00513	deoC	573699-574478	573699	574478		289.847	279.135	300.558	1.07675	0.106678	0.852558	1	deoxyribose-phosphate_aldolase	deoxyribose-phosphate aldolase
PAU_00514	deoA	574552-575877	574552	575877		219.142	191.641	246.642	1.287	0.364013	0.622247	1	thymidine_phosphorylase	thymidine phosphorylase
PAU_00515	deoB	575945-577168	575945	577168		493.873	421.848	565.898	1.34147	0.423818	0.532664	1	phosphopentomutase	phosphopentomutase
PAU_00516	deoD	577245-577961	577245	577961		2242.82	2347.82	2137.81	0.910551	-0.135189	0.863879	1	purine_nucleoside_phosphorylase	purine nucleoside phosphorylase DeoD-type
PAU_00517		c579212-578058	578058	579212	c	105.241	159.505	50.977	0.319595	-1.64568	0.0298432	0.587811	cystathionine_gamma-lyase	similar to cystathionine gamma-lyase
PAU_00518	mtcB	c580601-579234	579234	580601	c	36.5493	51.5254	21.5731	0.418689	-1.25605	0.110787	0.915182	cystathionine_beta-synthase	similar to cystathionine beta-synthase
PAU_00519	smp	c582824-582186	582186	582824	c	80.1738	79.6586	80.689	1.01294	0.0185428	0.968909	1	hypothetical_protein	small membrane protein smp
PAU_00520	serB	582941-583918	582941	583918		102.485	78.7798	126.189	1.6018	0.679694	0.346381	0.98355	phosphoserine_phosphatase	phosphoserine phosphatase
PAU_00521	radA	583943-585325	583943	585325		69.1319	58.0879	80.1758	1.38025	0.464928	0.533219	1	DNA_repair_protein_RadA	dna repair protein rada
PAU_00522	nadR	585338-586591	585338	586591		76.8418	69.458	84.2255	1.21261	0.278117	0.723314	1	nicotinamide-nucleotide_adenylyltransferase	transcriptional regulator nadr
PAU_00523		587260-588006	587260	588006		96.3571	107.064	85.6498	0.799984	-0.321956	0.668042	1	ABC_transporter_protein	similar to abc transporter
PAU_00524	yjjK	c589711-588044	588044	589711	c	145.398	145.309	145.488	1.00123	0.00177917	0.993907	1	ABC_transporter_ATP-binding_protein	abc transporter atp-binding protein yjjk
PAU_00525		590121-590267	590121	590267		20.6403	31.1294	10.1513	0.326099	-1.61662	0.257096	0.98355	hypothetical_protein	conserved hypothetical protein
PAU_00526	slt	590337-592253	590337	592253		174.458	101.357	247.56	2.44246	1.28834	0.0745246	0.810956	lytic_murein_transglycosylase	soluble lytic murein transglycosylase
PAU_00527	trpR	592311-592631	592311	592631		246.795	178.889	314.702	1.75921	0.814925	0.258136	0.98355	Trp_operon_repressor	trp operon repressor
PAU_00528	yjjX	c593197-592667	592667	593197	c	81.0056	44.3031	117.708	2.65688	1.40973	0.057594	0.73224	NTPase	conserved hypothetical protein
PAU_00529	gpmB	593252-593899	593252	593899		128.477	84.1669	172.787	2.0529	1.03767	0.164941	0.964687	phosphoglycerate_mutase	probable phosphoglycerate mutase
PAU_00530	rob	c594771-593896	593896	594771	c	421.068	439.903	402.233	0.914369	-0.129152	0.857087	1	right_origin-binding_protein	right origin-binding protein
PAU_00531	creA	595155-595640	595155	595640		350.815	354.465	347.165	0.979405	-0.0300226	0.951522	1	hypothetical_protein	conserved hypothetical protein
PAU_00532	arcA	c596538-595822	595822	596538	c	609.396	663.615	555.178	0.836597	-0.257395	0.69772	1	two-component_response_regulator	negative response regulator of genes in aerobic pathways, (sensors arcb and cpxa) (dye resistance protein)
PAU_00533	thrA	597306-599807	597306	599807		80.8178	87.5524	74.0832	0.846159	-0.241	0.771946	1	bifunctional_aspartokinase_I/homeserine_dehydrogenase_I	aspartokinase i-homoserine dehydrogenase i
PAU_00534	thrB	599810-600739	599810	600739		266.876	197.447	336.305	1.70327	0.768304	0.53021	1	homoserine_kinase	homoserine kinase
PAU_00535	thrC	600743-602035	600743	602035		124.357	106.281	142.434	1.34017	0.422414	0.556776	1	threonine_synthase	threonine synthase
PAU_00536	yaaA	c603117-602341	602341	603117	c	161.555	159.219	163.891	1.02934	0.0417199	0.982127	1	hypothetical_protein	conserved hypothetical protein
PAU_00537		603496-604707	603496	604707		2.81693	5.31497	0.318884	0.0599972	-4.05896	0.178921	0.96871	hypothetical_protein	putative membrane protein
PAU_00538	tal	604908-605861	604908	605861		1286.51	909.666	1663.35	1.82852	0.870679	0.208786	0.98355	transaldolase_B	transaldolase B
PAU_00539	mog	605949-606524	605949	606524		55.195	48.7384	61.6516	1.26495	0.33908	0.676607	1	molybdenum_cofactor_biosynthesis_protein_MogA	molybdopterin biosynthesis mog protein
PAU_00540	galT	606664-607725	606664	607725		40.072	43.0116	37.1324	0.863311	-0.212047	0.80442	1	galactose-1-phosphate_uridylyltransferase	galactose-1-phosphate uridylyltransferase (gal-1-uridylyltransferase) (udp-glucose--hexose-1-phosphat uridylyltransferase)
PAU_00541	galK	607788-608945	607788	608945		29.881	35.6581	24.1038	0.67597	-0.564968	0.47878	0.99899	galactokinase	galactokinase
PAU_00542	yaaH	c609594-609025	609025	609594	c	20.3118	13.5215	27.1021	2.00437	1.00315	0.225332	0.98355	hypothetical_protein	hypothetical membrane protein yaah
PAU_00543	dnaK	609902-611812	609902	611812		2771.74	4352.87	1190.61	0.273523	-1.87027	0.00977265	0.36608	molecular_chaperone_DnaK	chaperone hsp70, autoregulated heat shock protein
PAU_00544	dnaJ	611921-613051	611921	613051		495.812	687.715	303.909	0.441912	-1.17817	0.107594	0.906143	chaperone_protein_DnaJ	chaperone with dnak; heat shock protein
PAU_00545		c614431-613151	613151	614431	c	19.542	24.9343	14.1496	0.567476	-0.817368	0.303771	0.98355	hypothetical_protein	conserved hypothetical protein
PAU_00546	bglB	c615878-614445	614445	615878	c	10.1628	10.1931	10.1325	0.994049	-0.00861183	1	1	6-phospho-beta-glucosidase	6-phospho-beta-glucosidase
PAU_00547	bglF	c617389-615941	615941	617389	c	5.7257	5.96081	5.49059	0.921115	-0.118546	0.985513	1	beta-glucoside-specific_phosphotransferase_system-dependent_permease	beta-glucoside-specific phosphotransferase system-dependent permease
PAU_00548	bglG	617831-618685	617831	618685		10.8922	11.5039	10.2804	0.893645	-0.162226	0.944235	1	cryptic_beta-glucoside_bgl_operon_antiterminator	cryptic beta-glucoside bgl operon antiterminator
PAU_00549	bglP	618800-620647	618800	620647		6.97226	7.07698	6.86755	0.970407	-0.0433382	0.985579	1	beta-glucoside_permease_II	similar to beta-glucoside permease iiabc component
PAU_00550		620666-620782	620666	620782		2.76323	2.03178	3.49468	1.72001	0.782417	0.606842	1	hypothetical_protein	conserved hypothetical protein
PAU_00551	nhaA	621076-622242	621076	622242		24.6678	12.935	36.4005	2.8141	1.49267	0.0678694	0.784273	pH-dependent_sodium/proton_antiporter	na(+)/h(+) antiporter 1 (sodium/proton antiporter 1)
PAU_00552	nhaR	622417-623379	622417	623379		184	164.695	203.306	1.23443	0.303851	0.683496	1	transcriptional_activator_NhaR	transcriptional activator protein nhar
PAU_00553	rpsT	c623713-623450	623450	623713	c	1328.62	979.822	1677.42	1.71196	0.77565	0.31958	0.98355	30S_ribosomal_protein_S20	30s ribosomal protein s20
PAU_00554	ribF	624064-625008	624064	625008		613.243	503.081	723.404	1.43795	0.52401	0.476752	0.99899	bifunctional_riboflavin_kinase/FMN_adenylyltransferase	riboflavin biosynthesis protein
PAU_00555	ileS	625033-627846	625033	627846		512.884	399.531	626.237	1.56743	0.648399	0.371093	0.98355	isoleucyl-tRNA_synthetase	isoleucyl-tRNA synthetase
PAU_00556	lspA	627846-628349	627846	628349		728.873	722.193	735.552	1.0185	0.0264431	0.949779	1	lipoprotein_signal_peptidase	lipoprotein signal peptidase
PAU_00557		628386-628490	628386	628490		42.5778	29.4066	55.7491	1.8958	0.92281	0.517925	1	hypothetical_protein	Hypothetical protein
PAU_00558	fkpB	628492-628962	628492	628962		523.195	434.97	611.42	1.40566	0.491247	0.52335	1	peptidyl-prolyl_cis-trans_isomerase	peptidyl-prolyl cis-trans isomerase
PAU_00559	ispH	628943-629896	628943	629896		193.117	139.859	246.376	1.7616	0.816886	0.260748	0.98355	4-hydroxy-3-methylbut-2-enyl_diphosphate_reductase	4-hydroxy-3-methylbut-2-enyl diphosphate reductase
PAU_00560	dapB	630011-630832	630011	630832		576.881	461.334	692.428	1.50092	0.585851	0.421211	0.98355	dihydrodipicolinate_reductase	dihydrodipicolinate reductase
PAU_00561	carA	631268-632431	631268	632431		221.875	147.013	296.737	2.01845	1.01325	0.14963	0.96118	carbamoyl_phosphate_synthase_small_subunit	carbamoyl-phosphate synthase small chain
PAU_00562	carB	632447-635671	632447	635671		248.012	188.321	307.703	1.63392	0.708341	0.320111	0.98355	carbamoyl_phosphate_synthase_large_subunit	carbamoyl-phosphate synthase large chain
PAU_00563		c636405-635791	635791	636405	c	49.2392	49.4124	49.066	0.992989	-0.0101503	0.989498	1	hypothetical_protein	similar to unknown protein. putative transmembrane protein
PAU_00564	folA	636584-637069	636584	637069		346.978	344.296	349.659	1.01558	0.0222979	0.941646	1	dihydrofolate_reductase	dihydrofolate reductase
PAU_00565	apaH	c637943-637119	637119	637943	c	164.66	112.136	217.184	1.93679	0.95367	0.197437	0.98355	diadenosine_tetraphosphatase	bis(5'-nucleosyl)-tetraphosphatase, symmetrical
PAU_00566	apaG	c638323-637946	637946	638323	c	81.0193	67.6766	94.3619	1.39431	0.479547	0.505128	1	ApaG	conserved hypothetical protein
PAU_00567	ksgA	c639154-638336	638336	639154	c	139.161	97.9617	180.361	1.84114	0.880601	0.217722	0.98355	dimethyladenosine_transferase	dimethyladenosine transferase
PAU_00568	pdxA	c640148-639147	639147	640148	c	123.453	84.4184	162.487	1.92479	0.944698	0.192096	0.981457	4-hydroxythreonine-4-phosphate_dehydrogenase	4-hydroxythreonine-4-phosphate dehydrogenase
PAU_00569	surA	c641427-640126	640126	641427	c	361.417	263.182	459.653	1.74652	0.804486	0.258426	0.98355	peptidyl-prolyl_cis-trans_isomerase_SurA	chaperone SurA precursor (peptidyl-prolyl cis-trans isomerase)
PAU_00570	imp	c643851-641497	641497	643851	c	245.881	171.111	320.651	1.87394	0.906075	0.208469	0.98355	organic_solvent_tolerance_protein	organic solvent tolerance protein precursor
PAU_00571	djlA	644035-644853	644035	644853		119.957	88.2854	151.628	1.71748	0.780292	0.276806	0.98355	Dna-J_like_membrane_chaperone_protein	dnaj-like protein djla
PAU_00572	rluA	c645784-645092	645092	645784	c	51.6505	38.3983	64.9026	1.69025	0.757234	0.334059	0.98355	ribosomal_large_subunit_pseudouridine_synthase_A	ribosomal large subunit pseudouridine synthase A
PAU_00573	rapA	c648852-645946	645946	648852	c	55.6507	46.2899	65.0114	1.40444	0.489996	0.516999	1	ATP-dependent_helicase_HepA	probable ATP-dependent RNA helicase
PAU_00574	dinA	c649212-649048	649048	649212	c	6.40173	8.79204	4.01143	0.456257	-1.13208	0.326402	0.98355	DNA_polymerase_II	DNA polymerase II
PAU_00575	rsib	c650837-649920	649920	650837	c	14.3292	13.244	15.4144	1.16388	0.218942	0.839505	1	hypothetical_protein	conserved hypothetical protein
PAU_00576	thiQ	c652761-652045	652045	652761	c	9.34435	9.1229	9.56579	1.04855	0.0683916	0.973369	1	thiamine_transporter_ATP-binding_subunit	thiamine import ATP-binding protein
PAU_00577	yabK	c654358-652754	652754	654358	c	14.2788	12.417	16.1406	1.29987	0.37837	0.685273	1	thiamine_transporter_membrane_protein	thiamine transport system permease protein
PAU_00578	tbpA	c655347-654334	654334	655347	c	34.5437	25.5142	43.5732	1.7078	0.772141	0.338758	0.98355	thiamine_transporter_substrate_binding_subunit	thiamine-binding periplasmic protein
PAU_00579	rppH	655638-656168	655638	656168		339.344	227.98	450.708	1.97697	0.983289	0.187765	0.97956	dinucleoside_polyphosphate_hydrolase	RNA pyrophosphohydrolase
PAU_00580	ptsP	656178-658424	656178	658424		147.245	108.488	186.003	1.7145	0.777789	0.277372	0.98355	fused_phosphoenolpyruvate-protein_phosphotransferase_PtsP/GAF_domain	phosphoenolpyruvate-protein phosphotransferase pts (phosphotransferase system, enzyme i) (enzyme i-ntr)
PAU_00581	lgt	658499-659374	658499	659374		139.267	78.9453	199.588	2.52819	1.3381	0.0698404	0.792085	prolipoprotein_diacylglyceryl_transferase	prolipoprotein diacylglyceryl transferase
PAU_00582	thyA	659371-660165	659371	660165		48.5789	29.9111	67.2468	2.24822	1.16879	0.121017	0.918571	thymidylate_synthase	thymidylate synthase
PAU_00583	ygjM	c660786-660364	660364	660786	c	228.76	266.617	190.903	0.716021	-0.481926	0.473217	0.99899	hypothetical_protein	conserved hypothetical protein
PAU_00584		c661094-660783	660783	661094	c	320.777	388.142	253.412	0.652885	-0.6151	0.357387	0.98355	hypothetical_protein	conserved hypothetical protein
PAU_00585	ppdA	661731-662246	661731	662246		14.5801	15.2592	13.9011	0.910998	-0.13448	0.888472	1	hypothetical_protein	prepilin peptidase dependent protein a
PAU_00586	ppdB	662414-663001	662414	663001		8.89691	9.49049	8.30334	0.874912	-0.19279	0.938412	1	hypothetical_protein	prepilin peptidase dependent protein b
PAU_00587		663007-663474	663007	663474		50.9614	34.653	67.2699	1.94124	0.956981	0.216676	0.98355	hypothetical_protein	conserved hypothetical protein
PAU_00588	ppdC	663471-663857	663471	663857		44.9801	33.2678	56.6924	1.70412	0.769031	0.325485	0.98355	prepilin_peptidase_dependent_protein_c	prepilin peptidase dependent protein c
PAU_00589	recC	663835-667209	663835	667209		111.897	89.0131	134.781	1.51417	0.598525	0.423485	0.98355	exonuclease_V_subunit_gamma	exodeoxyribonuclease v gamma chain
PAU_00590	ptrA	667225-670113	667225	670113		151.915	127.045	176.785	1.39152	0.476663	0.492847	1	protease_iii_(pitrilysin)	protease iii (pitrilysin)
PAU_00591	recB	670110-673715	670110	673715		133.273	106.501	160.046	1.50277	0.58762	0.429785	0.986418	exonuclease_V_subunit_beta	exodeoxyribonuclease V beta chain
PAU_00592	recD	673715-675571	673715	675571		119.16	98.5279	139.793	1.41882	0.504688	0.491789	1	exonuclease_V_subunit_alpha	exodeoxyribonuclease V alpha chain
PAU_00593	argA	c677151-675817	675817	677151	c	21.9101	28.6812	15.139	0.527837	-0.921837	0.266677	0.98355	N-acetylglutamate_synthase	amino-acid acetyltransferase
PAU_00594	GE16597	c677331-677227	677227	677331	c	1.23268	1.19634	1.26901	1.06075	0.085081	1	1	hypothetical_protein	hypothetical protein
PAU_00595	amiC	677397-678644	677397	678644		140.569	144.402	136.735	0.946906	-0.0787071	0.910504	1	N-acetylmuramoyl-l-alanine_amidase	N-acetylmuramoyl-l-alanine amidase
PAU_00596		678778-678888	678778	678888		441.532	357.371	525.694	1.47101	0.556803	0.693949	1	hypothetical_protein	hypothetical protein
PAU_00597		679112-679297	679112	679297		4.56739	6.02931	3.10547	0.515062	-0.957182	0.420905	0.98355	hypothetical_protein	hypothetical protein
PAU_00598	mltA	679294-680391	679294	680391		138.255	104.803	171.706	1.63838	0.712267	0.322537	0.98355	murein_transglycosylase_A	membrane-bound lytic murein transglycosylase a (murein hydrolase a)
PAU_00599		680437-681252	680437	681252		100.328	85.4234	115.232	1.34895	0.43184	0.532094	1	hypothetical_protein	conserved hypothetical protein
PAU_00600	ygdK	c681710-681249	681249	681710	c	118.895	103.847	133.943	1.28981	0.367155	0.640958	1	hypothetical_protein	conserved hypothetical protein
PAU_00601	csdA	c682922-681714	681714	682922	c	61.3553	54.4001	68.3105	1.2557	0.328498	0.666816	1	cysteine_sulfinate_desulfinase	cysteine sulfinate desulfinase (csd)
PAU_00602	gcvA	683371-684291	683371	684291		174.351	141.258	207.445	1.46855	0.55439	0.430937	0.986418	DNA-binding_transcriptional_activator_GcvA	lysr family regulator of gcv operon
PAU_00603		684606-685001	684606	685001		99.973	83.9194	116.027	1.3826	0.467379	0.523919	1	hypothetical_protein	putative membrane protein ygdd
PAU_00604	ygdE	684994-686094	684994	686094		168.698	122.392	215.004	1.75669	0.812862	0.255537	0.98355	RNA_2'-O-ribose_methyltransferase	putative RNA 2'-O-ribose methyltransferase
PAU_00605	prtA	687386-688840	687386	688840		929.152	1804.82	53.4873	0.0296358	-5.07651	1.32767e-09	1.88175e-06	hypothetical_protein	secreted alkaline metalloproteinase
PAU_00606	inh	688894-689289	688894	689289		33.1333	59.7301	6.53638	0.109432	-3.1919	0.00471527	0.238682	hypothetical_protein	alkaline proteinase inhibitor
PAU_00607	prtB	689365-691095	689365	691095		33.6516	59.8298	7.47343	0.124912	-3.00102	0.000404433	0.0592983	transport_protein_hasd	type I protease secretion protein ATP binding (previous annotation hasD)
PAU_00608	prtC	691156-692490	691156	692490		32.6047	54.1839	11.0254	0.20348	-2.29704	0.00539944	0.25796	alkaline_protease_secretion_protein_apre	type I alkaline protease secretion protein HlyD family membrane fusion protein
PAU_00609	prtD	692493-693866	692493	693866		104.754	160.039	49.4702	0.309114	-1.69379	0.0225395	0.518368	outer_membrane_protein	type I outer membrane efflux protein
PAU_00610	xni	c694657-693863	693863	694657	c	43.0342	51.6776	34.3908	0.665487	-0.587517	0.463766	0.992271	exonuclease_IX	exodeoxyribonuclease ix-like protein
PAU_00611		c696054-694687	694687	696054	c	82.6048	71.4796	93.73	1.31128	0.390979	0.588431	1	hypothetical_protein	conserved hypothetical protein
PAU_00612	queF	c697069-696209	696209	697069	c	188.393	150.923	225.862	1.49654	0.581628	0.409558	0.98355	7-cyano-7-deazaguanine_reductase	conserved hypothetical protein
PAU_00613		c698255-697449	697449	698255	c	88.2657	147.159	29.3728	0.199599	-2.32482	0.002661	0.168702	hypothetical_protein	conserved hypothetical protein
PAU_00614		c699294-698263	698263	699294	c	212.739	368.209	57.2682	0.155532	-2.68472	0.000403134	0.0592983	hypothetical_protein	conserved hypothetical protein
PAU_00615	nikM	699729-700331	699729	700331		108.975	149.447	68.5022	0.45837	-1.12541	0.112279	0.915182	hypothetical_protein	conserved hypothetical protein
PAU_00616	hisC	700548-701603	700548	701603		66.2938	93.5958	38.9919	0.416599	-1.26327	0.0879781	0.867941	hypothetical_protein	conserved hypothetical protein
PAU_00617		701581-702072	701581	702072		71.3724	104.012	38.7326	0.372385	-1.42513	0.0564375	0.730526	hypothetical_protein	conserved hypothetical protein
PAU_00618		c702841-702251	702251	702841	c	37.9092	55.1519	20.6664	0.374719	-1.41612	0.0632024	0.761217	hypothetical_protein	hypothetical conserved protein
PAU_00619		c703827-702838	702838	703827	c	46.3051	66.2814	26.3288	0.397227	-1.33197	0.0757712	0.817714	hypothetical_protein	hypothetical protein
PAU_00620		c704618-703830	703830	704618	c	60.1001	88.0032	32.197	0.365862	-1.45063	0.158195	0.963101	hypothetical_protein	hypothetical protein
PAU_00621	sanC	c705268-704651	704651	705268	c	71.4672	100.33	42.6045	0.424644	-1.23567	0.121444	0.918571	hypothetical_protein	conserved hypothetical protein
PAU_00622		c705700-705299	705299	705700	c	26.1476	45.6501	6.64511	0.145566	-2.78025	0.223777	0.98355	hypothetical_protein	hypothetical protein
PAU_00623	yqkA	c706256-705726	705726	706256	c	86.961	123.427	50.4948	0.409106	-1.28945	0.0860461	0.854832	hypothetical_protein	conserved hypothetical protein
PAU_00624		c707462-706329	706329	707462	c	86.5213	110.191	62.8514	0.570385	-0.809993	0.240099	0.98355	hypothetical_protein	conserved hypothetical protein
PAU_00625	ISPlu8C1	707690-708742	707690	708742		0	0	0	NA	NA	NA	NA	transposase	transposase, IS630 family
PAU_00626		c708933-708739	708739	708933	c	10.1887	15.4036	4.97384	0.322901	-1.63084	0.095966	0.878723	hypothetical_protein	hypothetical protein
PAU_00627	bmyC	c710329-709091	709091	710329	c	101.099	166.387	35.8111	0.215228	-2.21606	0.142419	0.953256	hypothetical_protein	conserved hypothetical protein
PAU_00628		c712207-710366	710366	712207	c	37.6554	59.3239	15.9869	0.269486	-1.89172	0.0288905	0.585423	hypothetical_protein	putative membrane protein
PAU_00629		c713299-712277	712277	713299	c	31.7584	50.6035	12.9133	0.255186	-1.97038	0.126853	0.919537	hypothetical_protein	conserved hypothetical protein
PAU_00630	speC	c714431-713343	713343	714431	c	60.6459	89.0318	32.26	0.362343	-1.46457	0.0566965	0.730526	hypothetical_protein	conserved hypothetical protein
PAU_00631		c715741-714434	714434	715741	c	43.686	66.309	21.0629	0.317648	-1.6545	0.0352394	0.612949	hypothetical_protein	conserved hypothetical protein
PAU_00632		c716552-715914	715914	716552	c	75.303	117.612	32.9942	0.280534	-1.83375	0.0416751	0.653884	hypothetical_protein	conserved hypothetical protein
PAU_00633	murA	c718011-716626	716626	718011	c	23.2207	33.8274	12.614	0.372894	-1.42316	0.116266	0.915487	UDP-N-acetylglucosamine_1-carboxyvinyltransferase	UDP-N-acetylglucosamine 1-carboxyvinyltransferase
PAU_00634		c719460-718141	718141	719460	c	37.5327	54.8366	20.2288	0.368893	-1.43873	0.295007	0.98355	hypothetical_protein	conserved hypothetical protein
PAU_00635	syd	720892-721443	720892	721443		127.018	173.993	80.0432	0.460038	-1.12018	0.124566	0.919537	SecY_interacting_protein_Syd	putative membrane protein SecY interacting protein Syd
PAU_00636		721981-722313	721981	722313		133.931	138.771	129.091	0.930241	-0.104323	0.856654	1	hypothetical_protein	conserved hypothetical protein
PAU_00637	truC	722315-723085	722315	723085		66.6265	67.0848	66.1683	0.986338	-0.0198457	1	1	tRNA_pseudouridine_synthase_C	tRNA pseudouridine synthase C
PAU_00638		c723659-723318	723318	723659	c	0.649542	1.29908	0	0	#NAME?	0.3405	0.98355	hypothetical_protein	hypothetical protein
PAU_00639	yqcA	724320-724769	724320	724769		196.7	205.302	188.098	0.9162	-0.126266	0.882382	1	flavodoxin	conserved hypothetical protein
PAU_00640	yaeH	c725220-724834	724834	725220	c	612.412	854.473	370.35	0.433425	-1.20614	0.542721	1	hypothetical_protein	conserved hypothetical protein
PAU_00641	dapD	c726257-725433	725433	726257	c	176.217	106.701	245.733	2.30302	1.20352	0.297408	0.98355	2	2,3,4,5-tetrahydropyridine-2,6-dicarboxylate N-succinyltransferase
PAU_00642	glnD	c728959-726287	726287	728959	c	15.4288	11.4078	19.4497	1.70494	0.76972	0.378167	0.98355	PII_uridylyl-transferase	[protein-pII] uridylyltransferase
PAU_00643	map	c729894-729097	729097	729894	c	363.767	333.654	393.881	1.18051	0.239406	0.750935	1	methionine_aminopeptidase	methionine aminopeptidase
PAU_00644	rpsB	730322-731047	730322	731047		2997.23	2339.72	3654.75	1.56205	0.643437	0.357117	0.98355	30S_ribosomal_protein_S2	30s ribosomal protein s2
PAU_00645	tsf	731200-732057	731200	732057		4673.39	5271	4075.78	0.773246	-0.371001	0.590323	1	elongation_factor_Ts	elongation factor ts (ef-ts)
PAU_00646	pyrH	732204-732932	732204	732932		900.023	780.59	1019.46	1.30601	0.385163	0.580754	1	uridylate_kinase	uridylate kinase
PAU_00647	frr	733053-733610	733053	733610		1767.02	1534.2	1999.84	1.3035	0.382396	0.565208	1	ribosome_recycling_factor	ribosome recycling factor (ribosome-releasing factor) (rrf)
PAU_00648	dxr	733758-734954	733758	734954		243.85	190.678	297.022	1.55771	0.639431	0.370582	0.98355	1-deoxy-D-xylulose_5-phosphate_reductoisomerase	1-deoxy-d-xylulose 5-phosphate reductoisomerase
PAU_00649	uppS	735298-736059	735298	736059		535.437	518.895	551.98	1.06376	0.0891717	0.903734	1	undecaprenyl_pyrophosphate_synthetase	undecaprenyl pyrophosphate synthetase
PAU_00650	cdsA	736069-736917	736069	736917		417.355	330.426	504.284	1.52616	0.609911	0.360563	0.98355	CDP-diglyceride_synthase	phosphatidate cytidylyltransferase
PAU_00651	rseP	736948-738303	736948	738303		599.24	472.415	726.066	1.53692	0.620045	0.399398	0.98355	zinc_metallopeptidase_RseP	metalloendopeptidase-protease ecfe
PAU_00652	yaeT	738338-740731	738338	740731		665.245	521.453	809.037	1.55151	0.633669	0.350363	0.98355	outer_membrane_protein_assembly_factor_YaeT	outer membrane protein assembly factor yaet precursor
PAU_00653	hlpA	740728-741339	740728	741339		905.791	649.333	1162.25	1.78991	0.83989	0.230857	0.98355	periplasmic_chaperone	chaperone protein skp precursorlocated in outer membrane or nucleoid
PAU_00654	lpxD	741343-742371	741343	742371		766.557	613.736	919.377	1.498	0.583037	0.393472	0.98355	UDP-3-O-[3-hydroxymyristoyl]_glucosamine_N-acyltransferase	udp-3-o-[3-hydroxymyristoyl] glucosamine N-acyltransferase
PAU_00655	fabZ	742492-742944	742492	742944		647.727	449.354	846.099	1.88292	0.912975	0.214781	0.98355	(3r)-hydroxymyristoyl-[acyl-carrier-protein]_dehydratase	(3r)-hydroxymyristoyl-[acyl-carrier-protein] dehydratase
PAU_00656	lpxA	742948-743736	742948	743736		1791.5	1679.41	1903.58	1.13348	0.180757	0.766155	1	UDP-N-acetylglucosamine_acyltransferase	acyl-[acyl-carrier-protein]--UDP-N- acetylglucosamine O-acyltransferase
PAU_00657	lpxB	743741-744925	743741	744925		275.956	245.756	306.156	1.24577	0.317042	0.655437	1	lipid-A-disaccharide_synthase	lipid-A-disaccharide synthase)
PAU_00658	rnhB	744922-745512	744922	745512		671.639	530.406	812.872	1.53255	0.615932	0.404326	0.98355	ribonuclease_HII	ribonuclease HII
PAU_00659	dnaE	745721-749203	745721	749203		269.593	231.227	307.959	1.33185	0.413428	0.578884	1	DNA_polymerase_III_subunit_alpha	dna polymerase iii alpha subunit
PAU_00660	accA	749216-750175	749216	750175		733.894	671.944	795.843	1.18439	0.244142	0.74808	1	acetyl-CoA_carboxylase_carboxyltransferase_subunit_alpha	acetyl-coenzyme A carboxylase carboxyl transferase subunit alpha
PAU_00661	tilS	750388-751716	750388	751716		459.317	430.341	488.292	1.13466	0.182261	0.850798	1	tRNA(Ile)-lysidine_synthetase	tRNA (ile)-lysidine synthase
PAU_00662	rof	c752016-751750	751750	752016	c	147.617	152.236	142.998	0.939317	-0.0903159	0.929063	1	Rho-binding_antiterminator	rho-binding antiterminator protein
PAU_00663	cutF	752273-752950	752273	752950		367.547	295.985	439.11	1.48355	0.569058	0.420052	0.98355	lipoprotein_involved_with_copper_homeostasis_and_adhesion	copper homeostasis protein (lipoprotein)
PAU_00664	proS	c754768-753044	753044	754768	c	356.525	342.614	370.437	1.08121	0.112642	0.876504	1	prolyl-tRNA_synthetase	prolyl-tRNA synthetase
PAU_00665		c755602-754895	754895	755602	c	11.5099	10.4697	12.5502	1.19873	0.261501	0.797492	1	hypothetical_protein	conserved hypothetical protein
PAU_00666	rcsF	c755997-755599	755599	755997	c	84.0653	83.6476	84.4829	1.00999	0.0143344	0.995578	1	outer_membrane_lipoprotein	exopolysaccharide synthesis regulatory protein rcsf
PAU_00667	metQ	c756957-756142	756142	756957	c	248.38	296.723	200.038	0.674158	-0.568842	0.449225	0.992263	DL-methionine_transporter_substrate-binding_subunit	d-methionine-binding periplasmic protein metq
PAU_00668	metI	c757676-757023	757023	757676	c	100.124	102.651	97.5973	0.950765	-0.0728391	0.947708	1	DL-methionine_transporter_permease_subunit	d-methionine transport permease protein meti
PAU_00669	metN	c758700-757669	757669	758700	c	119.636	111.307	127.964	1.14965	0.201192	0.768303	1	DL-methionine_transporter_ATP-binding_subunit	methionine import ATP-binding protein
PAU_00670	gmhB	758844-759461	758844	759461		6754.81	9438.1	4071.51	0.431391	-1.21293	0.590866	1	D	d,d-heptose 1,7-bisphosphate phosphatase 1
PAU_00671	ISPlu6L	765458-765700	765458	765700		0.714628	0.383471	1.04578	2.72715	1.4474	0.77094	1	transposase	transposase, is982 family (transposase, is982 familly)
PAU_00672	ISPlu6L	765759-766217	765759	766217		1.75469	1.15041	2.35897	2.05054	1.036	0.754105	1	transposase	transposase, is982 family (transposase, is982 familly)
PAU_00673	yafD	766306-767088	766306	767088		12.524	16.107	8.94107	0.555104	-0.84917	0.531708	1	hypothetical_protein	conserved hypothetical protein
PAU_00674	proY	c768819-767434	767434	768819	c	49.1642	30.1742	68.1542	2.25869	1.17549	0.121954	0.918571	proline-specific_permease_proy	proline-specific permease proy
PAU_00675	ygcF	768990-769661	768990	769661		139.672	102.221	177.123	1.73274	0.793055	0.277274	0.98355	hypothetical_protein	conserved hypothetical protein
PAU_00676	ygcM	c770069-769707	769707	770069	c	20.829	20.7472	20.9108	1.00788	0.0113296	0.995847	1	6-pyruvoyl_tetrahydrobiopterin_synthase	putative 6-pyruvoyl tetrahydrobiopterin synthase
PAU_00677	cysJ	770337-772139	770337	772139		124.893	177.659	72.1267	0.405985	-1.3005	0.067154	0.784273	sulfite_reductase_subunit_alpha	sulfite reductase [NADPH] flavoprotein alpha-component
PAU_00678	cysI	772139-773869	772139	773869		167.323	252.192	82.4531	0.326945	-1.61288	0.0249139	0.54325	sulfite_reductase_subunit_beta	sulfite reductase [NADPH] hemoprotein beta-component
PAU_00679	cysH	773866-774600	773866	774600		72.0063	108.13	35.8822	0.331842	-1.59143	0.0333913	0.611673	phosphoadenosine_phosphosulfate_reductase	phosphoadenosine phosphosulfate reductase
PAU_00680		c775184-774933	774933	775184	c	25.5497	27.5809	23.5184	0.852705	-0.229882	0.778905	1	hypothetical_protein	conserved hypothetical protein
PAU_00681	cysG	775341-776753	775341	776753		129.673	200.928	58.4185	0.290743	-1.78218	0.0168421	0.453243	sirohaem_synthase-uroporphyrinogen_III_C-methyltransferase	sirohaem synthase-uroporphyrinogen III C-methyltransferase
PAU_00682	cysD	776764-777672	776764	777672		282.504	468.016	96.9916	0.20724	-2.27063	0.00224876	0.154221	sulfate_adenylyltransferase_subunit_2	sulfate adenylyltransferase subunit 2
PAU_00683	cysN	778068-779126	778068	779126		388.317	601.897	174.738	0.290311	-1.78433	0.0151367	0.437832	sulfate_adenylyltransferase_subunit_1	sulfate adenylyltransferase subunit 1
PAU_00684	cysC	779128-779760	779128	779760		172.858	261.676	84.0407	0.321163	-1.63862	0.0267523	0.56063	adenylylsulfate_kinase	adenylyl-sulfate kinase
PAU_00685	ftsB	779905-780225	779905	780225		127.18	93.4835	160.876	1.7209	0.783166	0.266226	0.98355	cell_division_protein_FtsB	cell division protein ftsb
PAU_00686	ispD	780231-780968	780231	780968		131.715	90.0793	173.351	1.92442	0.944426	0.196901	0.98355	2-C-methyl-D-erythritol_4-phosphate_cytidylyltransferase	2-c-methyl-d-erythritol 4-phosphate cytidylyltransferase
PAU_00687	ispF	780981-781454	780981	781454		436.783	596.157	277.408	0.465327	-1.10368	0.531048	1	2-C-methyl-D-erythritol_2	2-c-methyl-d-erythritol 2,4-cyclodiphosphate synthase
PAU_00688	truD	781455-782507	781455	782507		214.236	141.616	286.855	2.02559	1.01834	0.177738	0.96871	tRNA_pseudouridine_synthase_D	tRNA pseudouridine synthase D
PAU_00689	surE	782485-783249	782485	783249		250.498	191.807	309.189	1.61198	0.688835	0.348018	0.98355	stationary_phase_survival_protein_SurE	multifunctional protein SurE
PAU_00690	pcm	783243-783872	783243	783872		181.988	138.627	225.35	1.62559	0.700965	0.3637	0.98355	protein-L-isoaspartate_O-methyltransferase	protein-l-isoaspartate o-methyltransferase
PAU_00691	nlpD	783981-785018	783981	785018		552.445	690.488	414.402	0.600158	-0.736587	0.484372	0.99899	lipoprotein_NlpD	lipoprotein nlpd
PAU_00692	rpoS	785070-786068	785070	786068		527.676	634.973	420.379	0.662043	-0.595003	0.399785	0.98355	RNA_polymerase_sigma_factor_RpoS	rna polymerase sigma factor (sigma-38)
PAU_00693		787084-787791	787084	787791		796.178	767.209	825.148	1.07552	0.105034	0.871404	1	hypothetical_protein	conserved hypothetical protein
PAU_00694		787801-788130	787801	788130		612.194	393.314	831.074	2.113	1.0793	0.181111	0.969109	hypothetical_protein	conserved hypothetical protein
PAU_00695	miaE	c788966-788205	788205	788966	c	44.7117	21.9117	67.5117	3.08107	1.62343	0.0414913	0.653411	trna-(ms[2]io[6]a)-hydroxylase	trna-(ms[2]io[6]a)-hydroxylase
PAU_00696	mutS	c791526-788971	788971	791526	c	70.9592	33.6882	108.23	3.2127	1.68379	0.109535	0.91112	DNA_mismatch_repair_protein_MutS	dna mismatch repair protein muts
PAU_00697		c793109-791997	791997	793109	c	3.70603	3.76447	3.64758	0.968949	-0.0455071	1	1	hypothetical_protein	conserved hypothetical protein
PAU_00698		c794724-793615	793615	794724	c	5.71996	3.73022	7.7097	2.06682	1.04741	0.364194	0.98355	hypothetical_protein	conserved hypothetical protein
PAU_00699		c796450-795359	795359	796450	c	33.26	39.7718	26.7483	0.672543	-0.572302	0.414525	0.98355	hypothetical_protein	conserved hypothetical protein
PAU_00700	fucR	c797973-797272	797272	797973	c	4.03114	3.08192	4.98037	1.616	0.692424	0.607197	1	l-fucose_operon_activator	l-fucose operon activator
PAU_00701	fucK	c799476-797986	797986	799476	c	4.96573	4.69598	5.23548	1.11489	0.156897	0.942054	1	L-fuculokinase	L-fuculokinase
PAU_00702	fucI	c801255-799477	799477	801255	c	11.2662	12.0745	10.4579	0.866112	-0.207374	0.829254	1	L-fucose_isomerase	L-fucose isomerase
PAU_00703	fucP	c802579-801269	801269	802579	c	1.7616	1.64831	1.8749	1.13747	0.185826	1	1	L-fucose_transporter	l-fucose-proton symporter (l-fucose permease) (6-deoxy-l-galactos permease)
PAU_00704	fucA	802999-803646	802999	803646		3.97042	5.94492	1.99591	0.335734	-1.57461	0.223701	0.98355	L-fuculose_phosphate_aldolase	l-fuculose phosphate aldolase
PAU_00705		803760-805115	803760	805115		31.5922	30.6554	32.5289	1.06112	0.0855821	0.94068	1	hypothetical_protein	conserved hypothetical protein
PAU_00706	ygcB	805738-808455	805738	808455		57.244	29.8944	84.5935	2.82975	1.50067	0.0523219	0.714587	hypothetical_protein	conserved hypothetical protein
PAU_00707		808470-810062	808470	810062		53.3242	20.6687	85.9797	4.15989	2.05655	0.00987293	0.36608	hypothetical_protein	conserved hypothetical protein
PAU_00708		810071-810652	810071	810652		37.4264	13.6201	61.2327	4.49577	2.16857	0.00738579	0.308573	hypothetical_protein	conserved hypothetical protein
PAU_00709		810673-811707	810673	811707		26.2436	10.691	41.7962	3.90946	1.96697	0.0159776	0.448136	hypothetical_protein	conserved hypothetical protein
PAU_00710		811707-812465	811707	812465		25.1156	10.5724	39.6589	3.75117	1.90734	0.022553	0.518368	hypothetical_protein	conserved hypothetical protein
PAU_00711		812452-813126	812452	813126		67.0247	46.6907	87.3587	1.87101	0.903816	0.225137	0.98355	hypothetical_protein	conserved hypothetical protein
PAU_00712	torD3	813675-813827	813675	813827		269.733	266.933	272.534	1.02098	0.029956	0.972507	1	hypothetical_protein	Hypothetical protein
PAU_00713		c814312-813902	813902	814312	c	318.876	234.997	402.755	1.71387	0.77726	0.33652	0.98355	hypothetical_protein	conserved hypothetical protein
PAU_00714		c815267-814500	814500	815267	c	20.7455	18.3111	23.1799	1.26589	0.340154	0.704094	1	hypothetical_protein	conserved hypothetical protein
PAU_00715		c815767-815459	815459	815767	c	3.04396	3.36511	2.72282	0.809131	-0.305555	0.887789	1	hypothetical_protein	conserved hypothetical protein
PAU_00716		c816008-815736	815736	816008	c	0.326109	0.333333	0.318884	0.956651	-0.0639352	1	1	hypothetical_protein	conserved hypothetical protein
PAU_00717		c816420-816256	816256	816420	c	0.204008	0	0.408017	Inf	Inf	1	1	hypothetical_protein	conserved hypothetical protein
PAU_00718		c817250-816501	816501	817250	c	6.68944	7.00848	6.3704	0.908956	-0.137718	0.927289	1	hypothetical_protein	conserved hypothetical protein
PAU_00719		c817411-817247	817247	817411	c	0.166667	0.333333	0	0	#NAME?	0.999802	1	hypothetical_protein	conserved hypothetical protein
PAU_00720		c818239-817490	817490	818239	c	5.17982	5.87643	4.48322	0.762915	-0.390405	0.783705	1	hypothetical_protein	conserved hypothetical protein
PAU_00721		c820155-818236	818236	820155	c	4.53346	4.02931	5.03761	1.25024	0.322208	0.858953	1	hypothetical_protein	conserved hypothetical protein
PAU_00722		c821517-820909	820909	821517	c	84.1628	99.9086	68.417	0.684796	-0.546255	0.447847	0.992175	hypothetical_protein	conserved hypothetical protein
PAU_00723		c821832-821596	821596	821832	c	23.5273	32.0432	15.0115	0.468476	-1.09395	0.303743	0.98355	hypothetical_protein	conserved hypothetical protein
PAU_00724		c823546-822971	822971	823546	c	696.366	1092.48	300.252	0.274836	-1.86336	0.396819	0.98355	recombinase	recombinase, type 1 fimbriae regulatory protein
PAU_00725	smfA	824135-824770	824135	824770		1462.05	915.415	2008.68	2.19429	1.13375	0.13005	0.920299	f15_p-fimbriae_major_subunit_precursor	f15 p-fimbriae major subunit precursor
PAU_00726	mrfB	824826-825407	824826	825407		39.8991	15.5601	64.2381	4.1284	2.04558	0.0399144	0.643298	fimbrial_regulatory_protein_papH	fimbrial regulatory protein papH
PAU_00727	mrfC	825428-828034	825428	828034		64.644	32.9255	96.3626	2.92668	1.54927	0.11838	0.916483	outer_membrane_fimbrial_usher_protein_mrfc	outer membrane fimbrial usher protein mrfc
PAU_00728	mrfD	828072-828815	828072	828815		172.894	103.078	242.711	2.35464	1.23551	0.365532	0.98355	hypothetical_fimbrial_chaperone_yfcs	hypothetical fimbrial chaperone yfcs
PAU_00729	mrfX	828846-829445	828846	829445		184.692	321.435	47.9486	0.14917	-2.74497	0.406471	0.98355	type-1_fimbrial_protein	type-1 fimbrial protein, a chain
PAU_00730	mrfF	829438-830004	829438	830004		44.1369	28.5336	59.7402	2.09368	1.06604	0.246641	0.98355	yfc_fimbriae_subunit_yfcq	putative yfc fimbriae subunit yfcq
PAU_00731	mrfG	830018-830509	830018	830509		33.0091	19.6904	46.3279	2.35282	1.23439	0.122091	0.918571	hypothetical_fimbrial-like_protein_yfcq	hypothetical fimbrial-like protein yfcq
PAU_00732	mrfG	830521-831066	830521	831066		40.2145	25.1166	55.3124	2.20223	1.13897	0.14413	0.957564	minor_fimbrial_subunit	putative minor fimbrial subunit
PAU_00733		831102-831917	831102	831917		93.8433	54.4423	133.244	2.44744	1.29127	0.24929	0.98355	hypothetical_protein	conserved hypothetical protein
PAU_00734	mrfJ	831946-832251	831946	832251		27.368	17.1932	37.5429	2.18359	1.1267	0.149977	0.96118	hypothetical_protein	conserved hypothetical protein
PAU_00735		c833614-833186	833186	833614	c	201.707	260.654	142.759	0.547695	-0.868555	0.223363	0.98355	hypothetical_protein	conserved hypothetical protein
PAU_00736	purA1	c834885-833626	833626	834885	c	61.6395	86.4792	36.7997	0.425533	-1.23266	0.0975037	0.880499	adenylosuccinate_synthetase_1	adenylosuccinate synthetase 1
PAU_00737		c835754-835092	835092	835754	c	57.6816	81.8522	33.511	0.409409	-1.28839	0.0889224	0.873043	hypothetical_protein	conserved hypothetical protein
PAU_00738		c836960-835779	835779	836960	c	122.083	164.946	79.2208	0.480285	-1.05804	0.152111	0.962424	hypothetical_protein	conserved hypothetical protein
PAU_00739	hisA2	c837751-836963	836963	837751	c	169.558	241.177	97.9397	0.406091	-1.30013	0.0731064	0.806504	1-(5-phosphoribosyl)-5-[(5-phosphoribosylamino)methylideneamino]_imidazole-4-carboxamide_isomerase	1-(5-phosphoribosyl)-5-[(5-phosphoribosylamino) methylideneamino imidazole-4-carboxamide isomerase 2
PAU_00740	gene0004	c838397-838140	838140	838397	c	140.839	191.209	90.4697	0.473146	-1.07964	0.11693	0.916483	hypothetical_protein	conserved hypothetical exported protein
PAU_00741	yhaO	c839950-838628	838628	839950	c	43.6143	34.1208	53.1078	1.55647	0.638274	0.392735	0.98355	haaap_family_transport_protein	putative haaap family transport protein
PAU_00742	gene0005	c841238-840600	840600	841238	c	25.9924	12.7846	39.2002	3.0662	1.61645	0.0491042	0.703079	formate_dehydrogenase-O_subunit_gamma	putative aerobic formate dehydrogenase-o subunit
PAU_00743	fdoH2	c842158-841238	841238	842158	c	99.3694	177.569	21.1701	0.119222	-3.06828	0.357823	0.98355	formate_dehydrogenase-o	putative formate dehydrogenase-o, iron-sulfur subunit
PAU_00744	fdnG	c845224-842177	842177	845224	c	187.864	355.513	20.215	0.0568615	-4.1364	0.275383	0.98355	fdnG	fdnG, alpha subunit of formate dehydrogenase-N
PAU_00745		845552-846631	845552	846631		40.4615	35.3548	45.5682	1.28888	0.366121	0.647866	1	hypothetical_protein	conserved hypothetical protein
PAU_00746		847203-847874	847203	847874		1591.89	885.175	2298.61	2.59678	1.37673	0.0462248	0.684835	hypothetical_protein	conserved hypothetical protein
PAU_00747		847896-848255	847896	848255		4659.03	2317.65	7000.41	3.02047	1.59477	0.243576	0.98355	hypothetical_protein	conserved hypothetical protein
PAU_00748		848252-848923	848252	848923		1121.74	531.342	1712.14	3.2223	1.68809	0.0208159	0.501781	hypothetical_protein	conserved hypothetical protein
PAU_00749	yeeO	c850424-849084	849084	850424	c	30.551	17.417	43.6849	2.50817	1.32663	0.131685	0.923966	hypothetical_protein	conserved hypothetical protein
PAU_00750	paaA	851994-853130	851994	853130		350.465	580.121	120.808	0.208245	-2.26364	0.00218471	0.152285	hypothetical_protein	conserved hypothetical protein
PAU_00751	paaB	853120-853791	853120	853791		159.231	252.682	65.779	0.260323	-1.94163	0.0816949	0.843072	hypothetical_protein	conserved hypothetical protein
PAU_00752	paaC	853784-854662	853784	854662		25.9564	38.1509	13.762	0.360726	-1.47102	0.0733094	0.806504	hypothetical_protein	conserved hypothetical protein
PAU_00753		854659-856095	854659	856095		74.0728	119.194	28.9517	0.242896	-2.04159	0.105968	0.906143	hypothetical_protein	conserved hypothetical protein
PAU_00754		c857049-856570	856570	857049	c	18.2593	17.1197	19.3989	1.13314	0.180321	0.839845	1	hypothetical_protein	conserved hypothetical protein
PAU_00755		c857585-857430	857430	857585	c	120.206	142.425	97.9874	0.687991	-0.539539	0.520172	1	probable_60s_ribosomal_protein_c1687.06c	Hypothetical protein
PAU_00756		c858911-857691	857691	858911	c	579.623	668.9	490.346	0.733062	-0.447992	0.495457	1	hypothetical_protein	conserved hypothetical protein
PAU_00757		859138-859761	859138	859761		259.832	151.087	368.577	2.4395	1.28659	0.0832946	0.849326	tetr-family_regulatory_protein	putative tetr-family regulatory protein
PAU_00758		859862-860311	859862	860311		60.1875	31.4385	88.9366	2.82891	1.50024	0.147791	0.96118	hypothetical_protein	conserved hypothetical protein
PAU_00759		861160-862761	861160	862761		154.711	267.548	41.8749	0.156514	-2.67564	0.00186857	0.136986	hypothetical_protein	conserved hypothetical protein
PAU_00760		862875-864107	862875	864107		93.3719	160.878	25.8658	0.160779	-2.63685	0.157508	0.963101	hypothetical_protein	conserved hypothetical protein
PAU_00761		864113-865270	864113	865270		11.4773	15.6978	7.25676	0.462279	-1.11316	0.219697	0.98355	transport_protein	putative transport protein
PAU_00762	fbpC	c867076-866021	866021	867076	c	21.4731	22.8842	20.0621	0.876681	-0.189876	0.871343	1	ferric_transporter_ATP-binding_subunit	ferric cations import ATP-binding protein
PAU_00763	afuB	c869170-867092	867092	869170	c	27.6216	23.845	31.3982	1.31677	0.396998	0.665719	1	permease_component_of_transport_system_for_ferric_iro_(ferric_transport_system_permease)	putative permease component of transport system for ferric iro (putative ferric transport system permease)
PAU_00764	afuA	c870326-869295	869295	870326	c	102.026	122.617	81.434	0.664132	-0.590458	0.430016	0.986418	periplasmic_ferric_iron-binding_protein_(periplasmic-iron_binding_protein)	periplasmic ferric iron-binding protein (putative periplasmic-iron binding protein)
PAU_00765	uhpC	c871677-870379	870379	871677	c	12.8702	9.8556	15.8847	1.61174	0.688623	0.47373	0.99899	permease;_hexosephosphate_transport_(regulator_protein)	putative permease; hexosephosphate transport (putative regulator protein)
PAU_00766	uhpB	c873439-871895	871895	873439	c	30.8487	49.9379	11.7596	0.235484	-2.0863	0.332331	0.98355	two-component_sensor_histidine_kinase_uhpb	two-component sensor histidine kinase uhpb, phosphorylates uhpa
PAU_00767	uhpA	c874068-873436	873436	874068	c	22.3355	22.971	21.6999	0.944664	-0.0821266	0.916609	1	two-component_response_regulator._hexose_phosphate_transport_syste_regulatory_protein_uhpa	two-component response regulator. hexose phosphate transport syste regulatory protein uhpa
PAU_00768		c874493-874338	874338	874493	c	169.247	191.516	146.979	0.767449	-0.381856	0.72474	1	hypothetical_protein	conserved hypothetical protein
PAU_00769		c875145-874957	874957	875145	c	9.55139	12.362	6.7408	0.545285	-0.874916	0.499699	1	hypothetical_protein	Hypothetical protein
PAU_00770	phlA	875680-877203	875680	877203		10.1665	10.5766	9.75634	0.922445	-0.116465	0.941647	1	phospholipase	phospholipase
PAU_00771	ampC	c878455-877298	877298	878455	c	39.049	31.9237	46.1742	1.44639	0.532459	0.483428	0.99899	beta-lactamase	ampc-type class c beta-lactamase
PAU_00772	agaR	878857-879630	878857	879630		12.916	16.5858	9.24611	0.557471	-0.843031	0.320057	0.98355	aga_operon_transcriptional_repressor_of_sugar_metabolism	putative aga operon transcriptional repressor of sugar metabolism
PAU_00773	agaZ	879654-880961	879654	880961		3.45111	4.01342	2.8888	0.719784	-0.474363	0.806998	1	tagatose_6-phosphate_kinase_2	putative tagatose 6-phosphate kinase 2
PAU_00774	agaS	880958-882175	880958	882175		7.08455	7.02684	7.14226	1.01643	0.0235052	1	1	tagatose-6-phosphate_ketose/aldose_isomerase	putative tagatose-6-phosphate ketose/aldose isomerase
PAU_00775	agaV	882141-882623	882141	882623		15.1102	18.9988	11.2216	0.590649	-0.759627	0.591672	1	pts_system	pts system, n-acetylgalactosamine-specific iib component 2 (eiib-aga' (n-acetylgalactosamine-permease iib component 2) (phosphotransferas enzyme ii, b component 2)
PAU_00776	agaC	882634-883419	882634	883419		26.3449	44.4199	8.26986	0.186175	-2.42527	0.335526	0.98355	pts_system	pts system, n-acetylgalactosamine-specific iic component 1 (eiic-aga (n-acetylgalactosamine-permease iic component 1)
PAU_00777	agaD	883460-884302	883460	884302		43.2903	51.4569	35.1237	0.682586	-0.550918	0.765314	1	pts_system	pts system, n-acetylgalactosamine-specific iid component (eiid-aga (n-acetylgalactosamine-permease iid component) (phosphotransferas enzyme ii, d component)
PAU_00778	yadI	884325-884759	884325	884759		4.8489	5.01095	4.68685	0.935321	-0.0964667	0.986681	1	pts_system_iia_component	similar to putative pts system iia component yadi of escherichia coli
PAU_00779	gatY	884769-885623	884769	885623		10.7479	13.3528	8.14308	0.609843	-0.713491	0.430783	0.986418	tagatose-bisphosphate_aldolase	tagatose-bisphosphate aldolase
PAU_00780	ast	885668-887572	885668	887572		37.3139	43.4643	31.1635	0.71699	-0.479975	0.531962	1	enterotoxin	similar to enterotoxin encoded by the ast gene of aeromona hydrophila
PAU_00781		887678-887851	887678	887851		206.744	250.067	163.421	0.653509	-0.613722	0.482232	0.99899	hypothetical_protein	conserved hypothetical protein
PAU_00782		887993-888757	887993	888757		63.4273	96.4926	30.362	0.314657	-1.66815	0.257859	0.98355	hypothetical_protein	similar to putative membrane protein
PAU_00783		888750-889151	888750	889151		11.7529	16.2165	7.2894	0.449505	-1.15359	0.236578	0.98355	membrane_protein	membrane protein
PAU_00784		889432-889563	889432	889563		24.9938	33.0783	16.9093	0.51119	-0.968069	0.188035	0.97956	hypothetical_protein	Hypothetical Protein
PAU_00785		889595-889972	889595	889972		3.49	4.21223	2.76778	0.657082	-0.605855	0.728127	1	hypothetical_protein	Hypothetical Protein
PAU_00786		890274-891209	890274	891209		207.27	280.13	134.411	0.479815	-1.05945	0.249787	0.98355	hypothetical_protein	Hypothetical Protein
PAU_00787		891202-891636	891202	891636		246.139	295.83	196.448	0.664057	-0.590621	0.374905	0.98355	hypothetical_protein	Hypothetical Protein
PAU_00788		c892184-891705	891705	892184	c	1489.04	1794.84	1183.23	0.659237	-0.601131	0.368191	0.98355	hypothetical_protein	conserved hypothetical protein
PAU_00789		892740-893618	892740	893618		560.306	739.327	381.284	0.515718	-0.955346	0.170532	0.96871	hypothetical_protein	putative membrane protein
PAU_00790		894263-894961	894263	894961		92.88	141.032	44.7285	0.317152	-1.65675	0.0289154	0.585423	hypothetical_protein	putative membrane protein
PAU_00791		894954-895358	894954	895358		75.4299	109.688	41.1717	0.375352	-1.41368	0.071349	0.796262	hypothetical_protein	putative membrane protein
PAU_00792		c895743-895576	895576	895743	c	11.9327	16.9276	6.93784	0.409854	-1.28682	0.159823	0.963101	hypothetical_protein	conserved hypothetical protein
PAU_00793		896008-896547	896008	896547		26.0686	40.0473	12.0899	0.301892	-1.7279	0.0323504	0.600016	hypothetical_protein	conserved hypothetical protein
PAU_00794	speD	c897433-896639	896639	897433	c	123.504	213.376	33.632	0.157618	-2.66549	0.309903	0.98355	S-adenosylmethionine_decarboxylase	s-adenosylmethionine decarboxylase proenzyme
PAU_00795	speE	c898325-897465	897465	898325	c	11.7488	9.93998	13.5576	1.36395	0.447789	0.627571	1	spermidine_synthase	spermidine synthase
PAU_00796		c898801-898436	898436	898801	c	200.746	135.772	265.72	1.95711	0.968725	0.173098	0.96871	hypothetical_protein	conserved hypothetical protein
PAU_00797	cueO	898977-900551	898977	900551		28.0694	26.1232	30.0155	1.149	0.200375	0.826593	1	multicopper_oxidase	blue copper oxidase cueO precursor (copper efflux oxidase)
PAU_00798	hpt	900900-901451	900900	901451		649.221	565.954	732.487	1.29425	0.372118	0.580363	1	hypoxanthine_phosphoribosyltransferase	hypoxanthine phosphoribosyltransferase
PAU_00799	chpB	c901943-901602	901602	901943	c	1181.99	1512.53	851.462	0.56294	-0.828947	0.22326	0.98355	pemk-like_protein_2	pemk-like protein 2
PAU_00800		c902227-901943	901943	902227	c	798.381	1000.8	595.962	0.595486	-0.747861	0.291423	0.98355	hypothetical_protein	conserved hypothetical protein
PAU_00801	yadF	c903414-902761	902761	903414	c	333.785	376.59	290.981	0.772672	-0.372072	0.620694	1	carbonic_anhydrase	similar to putative carbonic anhydrase yadf of escherichia coli
PAU_00802	yadG	903602-904528	903602	904528		170.426	149.857	190.996	1.27452	0.349956	0.62637	1	hypothetical_abc_transporter_atp-binding_protein_yadg	hypothetical abc transporter atp-binding protein yadg
PAU_00803	yadH	904525-905295	904525	905295		120.205	181.368	59.0406	0.325529	-1.61914	0.433163	0.988216	abc_transporter	abc transporter, integral membrane protein yadh
PAU_00804	panD	c905876-905496	905496	905876	c	198.573	183.5	213.647	1.16429	0.219452	0.734693	1	aspartate_alpha-decarboxylase	aspartate 1-decarboxylase precursor
PAU_00805	panC	c906811-905957	905957	906811	c	352.34	292.072	412.607	1.41269	0.498446	0.488446	0.99899	pantoate--beta-alanine_ligase	pantoate--beta-alanine ligase
PAU_00806	panB	c907656-906865	906865	907656	c	105.851	92.1626	119.539	1.29704	0.375224	0.595318	1	3-methyl-2-oxobutanoate_hydroxymethyltransferase	3-methyl-2-oxobutanoate hydroxymethyltransferase
PAU_00807	folK	c908238-907723	907723	908238	c	254.124	360.299	147.949	0.410629	-1.28409	0.523898	1	7	7, 8-dihydro-6-hydroxymethylpterin-pyrophosphokinase
PAU_00808	pcnB	c909812-908241	908241	909812	c	80.9164	55.2214	106.611	1.93061	0.94906	0.195799	0.98355	poly(A)_polymerase_I	poly(A) polymerase
PAU_00809	yadB	c910788-909892	909892	910788	c	36.8136	18.6787	54.9485	2.94178	1.55669	0.0513164	0.713602	glutamyl-Q_tRNA(Asp)_synthetase	glutamyl-q tRNA(asp) synthetase
PAU_00810	dksA	c911303-910848	910848	911303	c	4720	4957.74	4482.27	0.904094	-0.145455	0.797156	1	RNA_polymerase-binding_transcription_factor	dnak suppressor protein
PAU_00811	dksA	c911395-911267	911267	911395	c	1444.63	1257.34	1631.91	1.29791	0.376189	0.780784	1	hypothetical_protein	Hypothetical protein
PAU_00812	sfsA	c912318-911608	911608	912318	c	176.692	108.859	244.525	2.24625	1.16752	0.118118	0.916483	sugar_fermentation_stimulation_protein_A	sugar fermentation stimulation protein homolog
PAU_00813	hrpB	912395-914848	912395	914848		46.5721	42.5964	50.5478	1.18667	0.246919	0.776147	1	ATP-dependent_RNA_helicase_HrpB	helicase, atp-dependent (atp-dependent helicase)
PAU_00814	mrcB	914892-917372	914892	917372		107.213	104.969	109.456	1.04275	0.0603882	0.949526	1	penicillin-binding_protein_1b	penicillin-binding protein 1b
PAU_00815		917917-919596	917917	919596		17.7912	9.26338	26.3191	2.84119	1.5065	0.429711	0.986418	pyocin_s2-like_protein	similar to pyocin s2 and s1
PAU_00816		919596-920063	919596	920063		8.42143	4.8789	11.964	2.45219	1.29407	0.188524	0.979606	hypothetical_protein	conserved hypothetical protein
PAU_00817		920089-920568	920089	920568		2.9382	1.64831	4.2281	2.56512	1.35902	0.370337	0.98355	immunity_protein	putative immunity protein
PAU_00818		920786-920884	920786	920884		0	0	0	NA	NA	NA	NA	hypothetical_protein	Hypothetical protein
PAU_00819		c921800-921684	921684	921800	c	18.7305	27.851	9.61	0.34505	-1.53512	0.0824873	0.843115	hypothetical_protein	Hypothetical protein
PAU_00820		c922665-922078	922078	922665	c	2461.54	4228.32	694.755	0.16431	-2.60551	0.069857	0.792085	carbonic_anhydrase	similar to carbonic anhydrase
PAU_00821		923064-923339	923064	923339		265.364	247.769	282.96	1.14203	0.191605	0.789506	1	hypothetical_protein	conserved hypothetical protein
PAU_00822	hemL	c924662-923379	923379	924662	c	80.7537	52.1755	109.332	2.09546	1.06727	0.146256	0.96118	glutamate-1-semialdehyde_aminotransferase	glutamate-1-semialdehyde 2,1-aminomutase
PAU_00823		c925497-924712	924712	925497	c	224.406	162.39	286.422	1.76379	0.818678	0.234447	0.98355	hypothetical_protein	conserved hypothetical protein
PAU_00824		925718-925828	925718	925828		4.09593	3.94492	4.24694	1.07656	0.106428	1	1	hypothetical_protein	conserved hypothetical protein
PAU_00825	yadR	925954-926301	925954	926301		709.593	882.895	536.291	0.607423	-0.719227	0.338409	0.98355	hypothetical_protein	conserved hypothetical protein
PAU_00826	btuF	c927217-926390	926390	927217	c	10.323	6.14547	14.5004	2.35953	1.2385	0.197509	0.98355	vitamin_B12-transporter_protein_BtuF	vitamin b12-binding protein precursor
PAU_00827	mtnA	c928068-927367	927367	928068	c	162.597	141.35	183.844	1.30063	0.379207	0.589909	1	5'-methylthioadenosine/S-adenosylhomocysteine_nucleosidase	methylthioadenosine nucleosidase
PAU_00828	dgt	928195-929721	928195	929721		52.0513	48.7919	55.3107	1.1336	0.180916	0.83629	1	deoxyguanosinetriphosphate_triphosphohydrolase	deoxyguanosinetriphosphate triphosphohydrolase
PAU_00829	barA	c932056-929726	929726	932056	c	13.5325	12.7045	14.3606	1.13036	0.176779	0.884468	1	signal_transduction_histidine-protein_kinase	signal transduction histidine-protein kinase
PAU_00830	rumA	932148-933479	932148	933479		64.6492	50.6508	78.6475	1.55274	0.634814	0.390646	0.98355	23S_rRNA_5-methyluridine_methyltransferase	23S rRNA (uracil-5-)-methyltransferase
PAU_00831	relA	933721-935979	933721	935979		204.02	186.473	221.568	1.18821	0.248784	0.756549	1	GDP/GTP_pyrophosphokinase	gtp pyrophosphokinase
PAU_00832	mazG	936081-936860	936081	936860		113.293	106.269	120.317	1.13219	0.179117	0.812482	1	nucleoside_triphosphate_pyrophosphohydrolase	conserved hypothetical protein
PAU_00833	nad2	937428-938573	937428	938573		1.86013	1.26484	2.45542	1.94129	0.957016	0.636545	1	hypothetical_protein	conserved hypothetical protein
PAU_00834		938566-938982	938566	938982		4.47523	4.24401	4.70645	1.10896	0.149211	0.939193	1	hypothetical_protein	conserved hypothetical protein
PAU_00835	vgaB	938979-939197	938979	939197		0.436542	0.299085	0.573998	1.91918	0.940491	1	1	hypothetical_protein	conserved hypothetical protein
PAU_00836		c939463-939365	939365	939463	c	0	0	0	NA	NA	NA	NA	hypothetical_protein	Hypothetical protein
PAU_00837		c940305-939583	939583	940305	c	100.819	89.81	111.827	1.24515	0.316322	0.653771	1	hypothetical_protein	conserved hypothetical protein
PAU_00838		c940926-940306	940306	940926	c	280.131	232.234	328.028	1.41249	0.498241	0.516285	1	hypothetical_protein	conserved hypothetical protein
PAU_00839		c941275-940928	940928	941275	c	225.507	254.936	196.078	0.769129	-0.378703	0.597241	1	hypothetical_protein	conserved hypothetical protein
PAU_00840	pyrG	941731-943368	941731	943368		264.353	181.569	347.138	1.91188	0.934994	0.180463	0.969	CTP_synthetase	CTP synthetase
PAU_00841	eno	943441-944742	943441	944742		1427.71	1180.27	1675.15	1.41929	0.505172	0.465492	0.993112	phosphopyruvate_hydratase	enolase
PAU_00842	pln	945114-945326	945114	945326		102.518	116.2	88.8354	0.764501	-0.387409	0.631824	1	sugar_fermentation_stimulation_protein_b	similar to sugar fermentation stimulation protein b
PAU_00843	orf80	c946564-945827	945827	946564	c	138.037	152.435	123.638	0.811087	-0.302071	0.688574	1	transcriptional_regulator	similar to transcriptional regulator
PAU_00844	orf78	c948132-947248	947248	948132	c	396.42	492.919	299.921	0.60846	-0.716766	0.311669	0.98355	transcriptional_regulator	similar to transcriptional regulator
PAU_00845		948543-949928	948543	949928		56.1649	40.4117	71.9182	1.77964	0.831583	0.268356	0.98355	hypothetical_protein	conserved hypothetical protein
PAU_00846		950575-951615	950575	951615		766.585	453.82	1079.35	2.37836	1.24997	0.081789	0.843072	hypothetical_protein	conserved hypothetical protein
PAU_00847		951625-952164	951625	952164		454.857	220.645	689.069	3.12297	1.64292	0.0441101	0.6739	hypothetical_protein	conserved hypothetical protein
PAU_00848		952204-952659	952204	952659		402.508	241.638	563.379	2.3315	1.22126	0.0892662	0.873043	hypothetical_protein	conserved hypothetical protein
PAU_00849		952656-953501	952656	953501		95.3824	71.4405	119.324	1.67026	0.740074	0.294191	0.98355	hypothetical_protein	conserved hypothetical protein
PAU_00850		953506-954639	953506	954639		129.253	83.8658	174.64	2.08238	1.05823	0.144689	0.959781	hypothetical_protein	conserved hypothetical protein
PAU_00851	tmk	954632-955303	954632	955303		60.4066	44.6036	76.2097	1.7086	0.772815	0.289687	0.98355	thymidylate_kinase-like_protein	similarities with thymidylate kinase
PAU_00852		955350-956534	955350	956534		18.9839	15.2458	22.7219	1.49037	0.575672	0.499731	1	membrane_protein_major_facilitator_superfamily_mfs_1	putative membrane protein major facilitator superfamily mfs
PAU_00853		c957908-956946	956946	957908	c	0.87862	1.34922	0.408017	0.302409	-1.72543	0.583839	1	hypothetical_protein	conserved hypothetical protein
PAU_00854	orf74	c960124-958931	958931	960124	c	79.6038	122.236	36.9714	0.302458	-1.72519	0.0226866	0.518368	hypothetical_protein	conserved hypothetical protein
PAU_00855		960530-960640	960530	960640		0	0	0	NA	NA	NA	NA	hypothetical_protein	Hypothetical protein
PAU_00856		961094-961411	961094	961411		2.99055	4.64831	1.33278	0.286724	-1.80226	0.347911	0.98355	hypothetical_protein	Hypothetical protein
PAU_00857	mltD	c963010-961646	961646	963010	c	217.164	218.607	215.722	0.986804	-0.0191639	0.972464	1	membrane-bound_lytic_murein_transglycosylase_D	membrane-bound lytic murein transglycosylase d (murein hydrolase d)
PAU_00858	gloB	c963834-963082	963082	963834	c	80.6037	85.4358	75.7717	0.886885	-0.173182	0.831459	1	hydroxyacylglutathione_hydrolase_(glyoxalase_ii)	hydroxyacylglutathione hydrolase (glyoxalase ii)
PAU_00859	yafS	963878-964594	963878	964594		55.4516	58.5639	52.3393	0.893714	-0.162115	0.802	1	hypothetical_protein	conserved hypothetical protein
PAU_00860	rnhA	c965106-964591	964591	965106	c	30.9748	14.768	47.1816	3.19485	1.67575	0.0383379	0.634291	DNA_replication_ribonuclease_HI	putative DNA replication ribonuclease HI
PAU_00861	dnaQ	965118-965864	965118	965864		142.145	121.173	163.118	1.34616	0.428847	0.5298	1	DNA_polymerase_III_subunit_epsilon	putative DNA polymerase III epsilon chain
PAU_00862		c966433-966182	966182	966433	c	216.621	299.347	133.895	0.447289	-1.16072	0.255391	0.98355	sugar_fermentation_stimulation_protein_b_(ner-like_protein)	sugar fermentation stimulation protein b (ner-like protein)
PAU_00863		c966996-966793	966793	966996	c	2.72575	3.31497	2.13653	0.644509	-0.633726	0.782717	1	hypothetical_protein	conserved hypothetical protein
PAU_00864	ISPlu8C2	967047-968114	967047	968114		0	0	0	NA	NA	NA	NA	transposase	transposase, IS630 family
PAU_00865	orf67	c969089-968421	968421	969089	c	267.912	92.1348	443.689	4.81565	2.26773	0.00273276	0.168702	hypothetical_protein	conserved hypothetical protein
PAU_00866	orf66	c969790-969107	969107	969790	c	238.49	84.967	392.012	4.6137	2.20592	0.00282234	0.171437	hypothetical_protein	conserved hypothetical protein
PAU_00867	orf66	c970563-969874	969874	970563	c	885.478	295.691	1475.26	4.98921	2.31881	0.00181218	0.135182	hypothetical_protein	conserved hypothetical protein
PAU_00868	tktA	971187-973181	971187	973181		462.584	315.898	609.27	1.92869	0.947624	0.182754	0.971607	transketolase	transketolase 1
PAU_00869		974017-974967	974017	974967		40.7832	47.928	33.6385	0.701855	-0.510754	0.514784	1	hypothetical_protein	conserved hypothetical protein
PAU_00870		974971-975288	974971	975288		57.0858	56.7727	57.399	1.01103	0.0158281	0.993731	1	hypothetical_protein	conserved hypothetical protein
PAU_00871		975276-976091	975276	976091		25.8421	26.3295	25.3548	0.962982	-0.0544188	0.962245	1	hypothetical_protein	conserved hypothetical protein
PAU_00872		976102-976833	976102	976833		14.2374	13.7504	14.7244	1.07084	0.0987396	0.955367	1	hypothetical_protein	conserved hypothetical protein
PAU_00873		976838-977434	976838	977434		8.91415	8.57487	9.25343	1.07913	0.109873	0.92584	1	hypothetical_protein	conserved hypothetical protein
PAU_00874	cydA1	977532-979082	977532	979082		30.9351	30.84	31.0302	1.00617	0.00886746	1	1	cytochrome_d_ubiquinol_oxidase_subunit_1	cytochrome d ubiquinol oxidase subunit 1
PAU_00875	cydB1	979112-980251	979112	980251		71.7732	56.5089	87.0376	1.54025	0.623161	0.405342	0.98355	cytochrome_d_terminal_oxidase_polypeptide_subunit_II	cytochrome d terminal oxidase polypeptide subunit II
PAU_00876		980633-980797	980633	980797		62.6739	57.3539	67.9939	1.18551	0.245513	0.750336	1	is1-family_insertion_element_protein	is1-family insertion element protein
PAU_00877	epd	981367-982386	981367	982386		233.295	184.729	281.861	1.52581	0.609578	0.376011	0.98355	erythrose_4-phosphate_dehydrogenase	d-erythrose 4-phosphate dehydrogenase
PAU_00878	pgk	982469-983632	982469	983632		379.193	307.17	451.217	1.46895	0.554784	0.417433	0.98355	phosphoglycerate_kinase	phosphoglycerate kinase
PAU_00879	fba	983686-984762	983686	984762		1454.59	861.865	2047.32	2.37545	1.2482	0.0847211	0.853102	fructose-bisphosphate_aldolase	fructose-bisphosphate aldolase class II
PAU_00880	tccC2	c987708-984925	984925	987708	c	47.1298	44.3365	49.9232	1.12601	0.171215	0.843911	1	insecticidal_toxin_complex_protein_tccc2	insecticidal toxin complex protein tccc2
PAU_00881	basA/D	988230-989879	988230	989879		49.6989	50.6423	48.7555	0.962743	-0.0547775	0.89691	1	six-domain_nonribosomal_peptide_synthetase	six-domain nonribosomal peptide synthetase
PAU_00882	phbF	989963-993094	989963	993094		88.9731	82.9078	95.0383	1.14631	0.197002	0.815343	1	six-domain_nonribosomal_peptide_synthetase	six-domain nonribosomal peptide synthetase
PAU_00883	phbG	c994502-993159	993159	994502	c	58.2528	52.2179	64.2876	1.23114	0.299997	0.670945	1	photobactin_biosynthesis_protein_phbg	putative photobactin biosynthesis protein phbg
PAU_00884		994634-994837	994634	994837		880.883	848.958	912.808	1.07521	0.104619	0.967725	1	hypothetical_protein	conserved hypothetical protein
PAU_00885		994955-995050	994955	995050		72.6777	61.445	83.9104	1.36562	0.449555	0.686577	1	hypothetical_protein	Hypothetical protein
PAU_00886	phuB	995214-996248	995214	996248		143.478	91.0635	195.893	2.15117	1.10512	0.126317	0.919537	iron-enterobactin_transporter_periplasmic_binding_protein	ferrienterobactin-binding periplasmic protein
PAU_00887	phuG	996272-997324	996272	997324		43.1562	26.8627	59.4498	2.2131	1.14607	0.15386	0.962424	cytoplasmic_membrane_permease	cytoplasmic membrane permease (ferric vibriobactin abc transporter permease protein)
PAU_00888	phuD	997321-998385	997321	998385		63.066	42.2931	83.8388	1.98233	0.987194	0.186474	0.97956	ferric_enterobactin_transport_protein_fepg	ferric enterobactin transport protein fepg
PAU_00889	phuA	999052-1001178	999052	1001178		45.2583	34.9354	55.5812	1.59097	0.669909	0.380111	0.98355	photobactin_outer_membrane_receptor_phua	putative photobactin outer membrane receptor phua
PAU_00890	phbH	1001315-1004452	1001315	1004452		79.2478	105.784	52.7113	0.49829	-1.00494	0.369145	0.98355	six-domain_nonribosomal_peptide_synthetase	six-domain nonribosomal peptide synthetase
PAU_00891	phuC	1004608-1005459	1004608	1005459		32.5098	51.1054	13.9142	0.272264	-1.87692	0.0342158	0.612949	ferric_vibriobactin_abc_transporter	ferric vibriobactin abc transporter, atp-binding protein
PAU_00892	phbC	1005737-1006918	1005737	1006918		47.9922	78.8683	17.1161	0.217021	-2.20409	0.232736	0.98355	isochorismate_synthase	isochorismate synthase
PAU_00893	phbE	1006915-1008558	1006915	1008558		45.4955	65.4456	25.5454	0.390329	-1.35724	0.345707	0.98355	enterobactin_synthase_subunit_E	enterobactin synthetase component e
PAU_00894	phbB	1008545-1009420	1008545	1009420		93.7306	136.427	51.0343	0.374077	-1.41859	0.213916	0.98355	isochorismatase	isochorismatase
PAU_00895	phbA	1009422-1010180	1009422	1010180		82.904	114.372	51.436	0.449725	-1.15288	0.180465	0.969	2	2,3-dihydro-2,3-dihydroxybenzoate
PAU_00896	tccC3	c1011415-1010573	1010573	1011415	c	5.66232	6.34428	4.98037	0.785016	-0.349205	0.791541	1	insecticidal_toxin_complex_protein_tccc3	insecticidal toxin complex protein tccc3
PAU_00897	tchA	c1011849-1011541	1011541	1011849	c	9.53958	8.25743	10.8217	1.31054	0.390167	0.716532	1	hypothetical_protein	conserved hypothetical protein
PAU_00898	tcaC	c1016308-1011902	1011902	1016308	c	9.61685	9.02437	10.2093	1.13131	0.17799	0.885647	1	insecticidal_toxin_complex_protein_tcdb2	insecticidal toxin complex protein tcdb2
PAU_00899	tcdA2	c1023559-1016366	1016366	1023559	c	17.7777	20.0346	15.5209	0.774703	-0.368285	0.671322	1	insecticidal_toxin_complex_protein_tcda2	insecticidal toxin complex protein tcda2
PAU_00900		c1025274-1023946	1023946	1025274	c	3.61047	2.08192	5.13903	2.46841	1.30358	0.43537	0.989104	transposase_insg_for_insertion_sequence_element_is4	transposase insg for insertion sequence element is4
PAU_00901	tcdA	c1031926-1025396	1025396	1031926	c	15.663	20.9318	10.3941	0.496569	-1.00993	0.245798	0.98355	insecticidal_toxin_complex_protein_tcda5	insecticidal toxin complex protein tcda5
PAU_00902		1031975-1032169	1031975	1032169		15.72	16.875	14.565	0.863112	-0.21238	0.89371	1	hypothetical_protein	conserved hypothetical protein
PAU_00903		c1032761-1032564	1032564	1032761	c	1.11275	0.682556	1.54293	2.26052	1.17666	0.811721	1	hypothetical_protein	conserved hypothetical protein
PAU_00904		1033326-1033463	1033326	1033463		0	0	0	NA	NA	NA	NA	hypothetical_protein	Hypothetical protein
PAU_00905		c1034385-1034185	1034185	1034385	c	108.351	139.545	77.1563	0.552913	-0.854876	0.249866	0.98355	hypothetical_protein	conserved hypothetical protein
PAU_00906		c1038508-1034375	1034375	1038508	c	11.7912	14.4255	9.15698	0.634779	-0.655674	0.488161	0.99899	filamentous_haemagglutinin_family_protein	filamentous haemagglutinin family protein
PAU_00907		1038804-1038968	1038804	1038968		0.293042	0.299085	0.286999	0.959591	-0.0595089	1	1	hypothetical_protein	Hypothetical protein
PAU_00908	yhiP	c1040644-1039175	1039175	1040644	c	8.16332	12.3602	3.96647	0.320907	-1.63977	0.119384	0.916483	inner_membrane_transporter_YhiP	similar to putative di-tripeptide transporter protein yhip of escherichia coli
PAU_00909	hpaC	c1041497-1040982	1040982	1041497	c	22.1681	20.6469	23.6893	1.14736	0.198312	0.845851	1	4-hydroxyphenylacetic_acid_hydroxylase_coupling_protein	4-hydroxyphenylacetic acid hydroxylase putative coupling protein
PAU_00910	hpaB	c1043080-1041518	1041518	1043080	c	71.5943	118.019	25.1693	0.213264	-2.22929	0.345828	0.98355	4-hydroxyphenylacetate_3-monooxygenase	4-hydroxyphenylacetate 3-monooxygenase, oxygenase component (4-hpa 3 monooxygenase large component) (4-hpa 3-hydroxylase)
PAU_00911		c1043952-1043680	1043680	1043952	c	136.03	129.909	142.15	1.09423	0.129912	0.94112	1	hypothetical_protein	conserved hypothetical protein
PAU_00912		1044016-1044327	1044016	1044327		14.8169	12.3853	17.2486	1.39267	0.477855	0.658603	1	hypothetical_protein	Hypothetical protein
PAU_00913	yfaA	1044636-1048796	1044636	1048796		10.5598	9.77542	11.3442	1.16049	0.214729	0.853416	1	beta-ketoacyl_synthase	beta-ketoacyl synthase
PAU_00914		1048886-1051363	1048886	1051363		23.1899	21.4657	24.9141	1.16065	0.21493	0.789552	1	omega-3_polyunsaturated_fatty_acid_synthase_pfaa	omega-3 polyunsaturated fatty acid synthase pfaa
PAU_00915	pfaC	1051422-1055693	1051422	1055693		5.97885	5.0452	6.91251	1.37012	0.454299	0.705915	1	beta-ketoacyl_synthase	beta-ketoacyl synthase
PAU_00916		1055698-1058664	1055698	1058664		26.5931	26.1935	26.9926	1.03051	0.0433582	0.980914	1	hypothetical_protein	conserved hypothetical protein
PAU_00917	orf28	c1059489-1059166	1059166	1059489	c	20.3173	26.0043	14.6303	0.562611	-0.829791	0.628529	1	hypothetical_protein	conserved hypothetical protein
PAU_00918	orf25	c1060201-1059890	1059890	1060201	c	167.308	198.172	136.445	0.688518	-0.538434	0.414926	0.98355	hypothetical_protein	conserved hypothetical protein
PAU_00919	orf24	c1061088-1060219	1060219	1061088	c	41.4734	52.7987	30.148	0.571	-0.808437	0.271577	0.98355	hypothetical_protein	conserved hypothetical protein
PAU_00920		c1061569-1061090	1061090	1061569	c	23.5965	29.1014	18.0916	0.621673	-0.685771	0.402716	0.98355	hypothetical_protein	conserved hypothetical protein
PAU_00921		c1062416-1062249	1062249	1062416	c	67.5631	90.83	44.2962	0.487682	-1.03599	0.243717	0.98355	hypothetical_protein	Hypothetical protein
PAU_00922		1063204-1063683	1063204	1063683		511.364	735.76	286.968	0.390029	-1.35835	0.089798	0.873043	hypothetical_protein	conserved hypothetical protein
PAU_00923	hpaA	c1064976-1064086	1064086	1064976	c	20.7893	22.2377	19.341	0.86974	-0.201345	0.823697	1	regulator_of_the_4hpa-hydroxylase_operon	regulator of the 4hpa-hydroxylase operon
PAU_00924	hpaX	c1066378-1065002	1065002	1066378	c	30.4884	28.577	32.3999	1.13378	0.181136	0.837714	1	hypothetical_4-hydroxyphenylacetate_permease_(hpax)	hypothetical 4-hydroxyphenylacetate permease (hpax)
PAU_00925	hpaI	c1067282-1066476	1066476	1067282	c	38.1798	40.0371	36.3224	0.907218	-0.140479	0.924427	1	2	2,4-dihydroxyhept-2-ene-1,7-dioic acid aldolase
PAU_00926	hpaH	c1068097-1067294	1067294	1068097	c	147.428	145.445	149.41	1.02726	0.0387984	0.987976	1	2-oxo-hept-3-ene-1	2-oxo-hept-3-ene-1,7-dioate hydratase (2-oxo-hept-4-ene-1,7-dioat hydratase)
PAU_00927	gabD	c1069577-1068102	1068102	1069577	c	141.691	257.481	25.9019	0.100598	-3.31333	0.312741	0.98355	succinate-semialdehyde_dehydrogenase	succinate-semialdehyde dehydrogenase, nadp-dependent activit (succinate-semialdehyde dehydrogenase)
PAU_00928	bcr	c1070797-1069574	1069574	1070797	c	9.66655	7.62501	11.7081	1.53549	0.618695	0.52763	1	bicyclomycin_resistance_protein;_transmembrane_protein	bicyclomycin resistance protein; transmembrane protein
PAU_00929	hpaF	c1071186-1070800	1070800	1071186	c	14.828	12.3486	17.3074	1.40157	0.487049	0.589125	1	5-carboxymethyl-2-hydroxymuconate_isomerase	5-carboxymethyl-2-hydroxymuconate isomerase
PAU_00930	hpaD	c1072078-1071200	1071200	1072078	c	31.7079	25.3521	38.0638	1.50141	0.586315	0.461715	0.992271	homoprotocatechuate_dyoxygenase	homoprotocatechuate dyoxygenase
PAU_00931	hpaE	c1073609-1072143	1072143	1073609	c	38.8014	31.9011	45.7016	1.4326	0.518637	0.522559	1	5-carboxy-2-hydroxymuconate_semialdehyde_dehydrogenase	5-carboxy-2-hydroxymuconate semialdehyde dehydrogenase
PAU_00932	hpaG2	c1074370-1073606	1073606	1074370	c	53.9717	40.7659	67.1775	1.64788	0.720615	0.370983	0.98355	4-hydroxyphenylacetate_degradation_bifunctional_isomerase/decarboxylase	4-hydroxyphenylacetate degradation bifunctional isomerase/decarboxylase
PAU_00933	hpaG1	c1074999-1074367	1074367	1074999	c	68.9006	64.1473	73.654	1.1482	0.199376	0.782254	1	homoprotocatechuate_catabolism_bifunctional_isomerase/decarboxylase	homoprotocatechuate catabolism bifunctional isomerase/decarboxylase
PAU_00934		1075051-1075218	1075051	1075218		41.5262	13.4496	69.6027	5.1751	2.37159	0.0658074	0.779424	hypothetical_protein	Hypothetical protein
PAU_00935		c1075389-1075234	1075234	1075389	c	156.895	98.151	215.64	2.19702	1.13555	0.230732	0.98355	hypothetical_protein	Hypothetical protein
PAU_00936	hpcR	1075513-1075950	1075513	1075950		280.268	205.218	355.317	1.73141	0.791949	0.266777	0.98355	homoprotocatechuate_degradative_operon_repressor	homoprotocatechuate degradative operon repressor
PAU_00937		c1076482-1076183	1076183	1076482	c	232.384	286.615	178.152	0.621572	-0.686007	0.352735	0.98355	hypothetical_protein	Hypothetical protein
PAU_00938		c1076729-1076490	1076490	1076729	c	232.008	275.63	188.386	0.683474	-0.549042	0.458338	0.992271	hypothetical_protein	conserved hypothetical protein
PAU_00939	gene0006	c1077863-1077516	1077516	1077863	c	0	0	0	NA	NA	NA	NA	hypothetical_protein	conserved hypothetical protein
PAU_00940	gene0007	c1078930-1077908	1077908	1078930	c	0	0	0	NA	NA	NA	NA	site-specific_tyrosine_recombinase_XerC	putative phage integrase/recombinase
PAU_00941	gene0008	c1081848-1079149	1079149	1081848	c	0	0	0	NA	NA	NA	NA	DNA_primase-like_protein	putative DNA primase-like protein
PAU_00942	gene0009	1081962-1082354	1081962	1082354		0	0	0	NA	NA	NA	NA	phage_regulatory_protein	putative phage regulatory protein
PAU_00943	gene0010	1082431-1082754	1082431	1082754		0	0	0	NA	NA	NA	NA	endoribonuclease_SymE	putative endoribonuclease SymE
PAU_00944	gene0011	1082768-1082965	1082768	1082965		51.0707	43.0243	59.1171	1.37404	0.458423	0.564799	1	hypothetical_protein	conserved hypothetical protein
PAU_00945		c1083359-1083012	1083012	1083359	c	0	0	0	NA	NA	NA	NA	hypothetical_protein	conserved hypothetical protein
PAU_00946		c1083645-1083364	1083364	1083645	c	0	0	0	NA	NA	NA	NA	hypothetical_protein	conserved hypothetical protein
PAU_00947		1083913-1084239	1083913	1084239		0	0	0	NA	NA	NA	NA	hypothetical_protein	conserved hypothetical protein
PAU_00948	gene0012	c1086133-1084715	1084715	1086133	c	0	0	0	NA	NA	NA	NA	integrase/recombinase	putative integrase/recombinase
PAU_00949	gene0013	c1089362-1086594	1086594	1089362	c	0	0	0	NA	NA	NA	NA	DNA_primase-like_protein	putative DNA primase-like protein
PAU_00950	gene0014	1089465-1089866	1089465	1089866		0	0	0	NA	NA	NA	NA	phage_regulator	putative phage regulator
PAU_00951	gene0015	1089939-1090262	1089939	1090262		0	0	0	NA	NA	NA	NA	endoribonuclease_SymE2	putative endoribonuclease SymE2
PAU_00952	gene0016	c1091066-1090524	1090524	1091066	c	0	0	0	NA	NA	NA	NA	hypothetical_protein	conserved hypothetical protein
PAU_00953		c1091352-1091080	1091080	1091352	c	0	0	0	NA	NA	NA	NA	hypothetical_protein	conserved hypothetical protein
PAU_00954	gene0017	c1093906-1092488	1092488	1093906	c	0	0	0	NA	NA	NA	NA	integrase/recombinase	putative integrase/recombinase
PAU_00955	gene0018	c1097135-1094367	1094367	1097135	c	0	0	0	NA	NA	NA	NA	DNA_primase-like_protein	putative DNA primase-like protein
PAU_00956	gene0019	1097238-1097639	1097238	1097639		0	0	0	NA	NA	NA	NA	phage_regulator	putative phage regulator
PAU_00957	gene0020	1097712-1098035	1097712	1098035		0	0	0	NA	NA	NA	NA	endoribonuclease_SymE3	putative endoribonuclease SymE3
PAU_00958	gene0021	c1098839-1098297	1098297	1098839	c	0	0	0	NA	NA	NA	NA	hypothetical_protein	conserved hypothetical protein
PAU_00959	gene0022	c1099125-1098853	1098853	1099125	c	0	0	0	NA	NA	NA	NA	phage_cell_wall_peptidase	Putative phage cell wall peptidase
PAU_00960	gene0023	c1099811-1099425	1099425	1099811	c	0	0	0	NA	NA	NA	NA	hypothetical_protein	conserved hypothetical protein
PAU_00961	gene0024	c1100152-1099805	1099805	1100152	c	0	0	0	NA	NA	NA	NA	hypothetical_protein	conserved hypothetical protein
PAU_00962	gene0025	c1101219-1100197	1100197	1101219	c	0	0	0	NA	NA	NA	NA	site-specific_tyrosine_recombinase_XerC	Phage integrase
PAU_00963	gene0026	c1104137-1101438	1101438	1104137	c	0	0	0	NA	NA	NA	NA	dnag_primase-like_protein	dnag primase-like protein
PAU_00964	gene0027	1104251-1104643	1104251	1104643		0	0	0	NA	NA	NA	NA	hypothetical_protein	conserved hypothetical protein
PAU_00965	gene0028	1104720-1105043	1104720	1105043		0	0	0	NA	NA	NA	NA	endoribonuclease_SymE4	putative endoribonuclease SymE4
PAU_00966	gene0029	c1105648-1105301	1105301	1105648	c	0	0	0	NA	NA	NA	NA	hypothetical_protein	conserved hypothetical protein
PAU_00967	rhs-core	c1110008-1105653	1105653	1110008	c	14.6741	10.9075	18.4408	1.69066	0.757583	0.409826	0.98355	hypothetical_protein	Putative membrane protein
PAU_00968		c1110445-1110026	1110026	1110445	c	14.5517	14.0035	15.0998	1.07828	0.108738	0.95469	1	hypothetical_protein	conserved hypothetical protein
PAU_00969	vgrG	c1112395-1110500	1110500	1112395	c	14.4847	12.0078	16.9616	1.41256	0.498308	0.586633	1	hypothetical_protein	conserved hypothetical protein
PAU_00970	ngrA	c1113883-1113140	1113140	1113883	c	173.911	215.598	132.224	0.613291	-0.705357	0.362814	0.98355	4'-phosphopantetheinyl_tranferase	4'-phosphopantetheinyl tranferase
PAU_00971	phfB	c1114958-1113930	1113930	1114958	c	5.43959	6.0452	4.83398	0.79964	-0.322577	0.852965	1	major_fimbrial_subunit	putative major fimbrial subunit
PAU_00972	yraJ	c1117467-1114987	1114987	1117467	c	6.05993	6.55898	5.56088	0.847827	-0.238158	0.86303	1	outer_membrane_protein	putative outer membrane protein
PAU_00973	yraI	c1118159-1117491	1117491	1118159	c	16.7439	21.0145	12.4734	0.59356	-0.752535	0.365294	0.98355	uncharacterized_fimbrial_chaperone_yrai_precursor	uncharacterized fimbrial chaperone yrai precursor
PAU_00974	phfS	c1118725-1118198	1118198	1118725	c	164.487	229.542	99.4321	0.433176	-1.20698	0.101132	0.897735	major_fimbrial_subunit_precursor	major fimbrial subunit precursor
PAU_00975	pltP	1120951-1121562	1120951	1121562		0.975785	0.682556	1.26901	1.85921	0.894689	0.819154	1	transmembrane_protein	putative transmembrane protein
PAU_00976		1121593-1121697	1121593	1121697		8.57844	8.75785	8.39903	0.959029	-0.0603541	0.992383	1	hypothetical_protein	conserved hypothetical protein
PAU_00977	ybaL	c1123471-1121768	1121768	1123471	c	21.9906	16.4848	27.4963	1.66798	0.738102	0.383471	0.98355	cation:proton_antiport_protein	similar to putative transport protein ybal of escherichia coli
PAU_00978	fsr	c1124930-1123713	1123713	1124930	c	23.2628	18.25	28.2755	1.54934	0.631654	0.448289	0.992175	fosmidomycin_resistance_protein	fosmidomycin resistance protein
PAU_00979	ushA	1125176-1126834	1125176	1126834		138.615	171.504	105.726	0.616466	-0.697906	0.344531	0.98355	bifunctional_UDP-sugar_hydrolase/5'-nucleotidase_periplasmic_precursor	protein usha
PAU_00980	ybbP	c1129404-1126972	1126972	1129404	c	25.4217	24.1558	26.6876	1.10481	0.143804	0.868623	1	probable_abc_transporter_permease_protein_ybbp	probable abc transporter permease protein ybbp
PAU_00981	ybbA	c1130087-1129401	1129401	1130087	c	98.1738	99.7605	96.5872	0.968191	-0.0466369	0.947322	1	ABC_transporter_ATP-binding_protein_YbbA	probable abc transporter atp-binding protein ybba
PAU_00982	tesA	1130055-1130690	1130055	1130690		54.0711	53.493	54.6493	1.02162	0.0308533	0.972555	1	multifunctional_acyl-CoA_thioesterase_I_and_protease_I_and_lysophospholipase_L1	acyl-coa thioesterase i (protease i) (lysophospholipase l1 (lecithinase b)
PAU_00983	ybbO	1130741-1131526	1130741	1131526		67.0171	41.7024	92.3318	2.21407	1.1467	0.129337	0.920299	short_chain_dehydrogenase	conserved hypothetical protein
PAU_00984	ybbN	1131593-1132450	1131593	1132450		571.24	743.324	399.157	0.536989	-0.897037	0.406259	0.98355	hypothetical_protein	conserved hypothetical protein
PAU_00985	ybbK	1132473-1133393	1132473	1133393		410.209	500.443	319.976	0.639387	-0.645239	0.446312	0.992012	hypothetical_protein	putative membrane protein
PAU_00986	ybbJ	1133396-1133851	1133396	1133851		228.311	289.665	166.958	0.576383	-0.7949	0.280026	0.98355	inner_membrane_protein_ybbj	inner membrane protein ybbj
PAU_00987	cueR	c1134246-1133845	1133845	1134246	c	164.829	191.183	138.475	0.724307	-0.465326	0.513411	1	transcriptional_regulator	similar to putative transcriptional regulator ybbi of escherichi coli
PAU_00988	copA	1134389-1137124	1134389	1137124		9.02581	8.30756	9.74406	1.17291	0.230097	0.835432	1	copper_exporting_ATPase	copper-transporting p-type atpase
PAU_00989		c1137500-1137312	1137312	1137500	c	34.9391	28.499	41.3793	1.45196	0.537998	0.538232	1	hypothetical_protein	conserved hypothetical protein
PAU_00990	ybaP	1137686-1138498	1137686	1138498		16.0179	18.1339	13.9019	0.766625	-0.383406	0.679474	1	hypothetical_protein	conserved hypothetical protein
PAU_00991		c1139867-1138812	1138812	1139867	c	32.3922	37.5236	27.2608	0.726498	-0.460969	0.580284	1	luciferase	Bacterial luciferase-similar to putative monooxygenase ycdm of escherichia coli
PAU_00992		c1141224-1139950	1139950	1141224	c	14.1487	11.6727	16.6247	1.42424	0.510192	0.564882	1	hypothetical_protein	conserved hypothetical protein
PAU_00993		c1142186-1141281	1141281	1142186	c	17.1257	14.5908	19.6606	1.34747	0.430251	0.627977	1	hypothetical_protein	conserved hypothetical protein
PAU_00994		1142661-1143281	1142661	1143281		308.566	307.195	309.937	1.00893	0.0128192	0.968857	1	riboflavin_synthase_subunit_alpha	Lumazine binding protein, similar to riboflavin synthase
PAU_00995		c1143889-1143731	1143731	1143889	c	30.507	11.2758	49.7382	4.41104	2.14112	0.0610441	0.748047	hypothetical_protein	hypothetical protein
PAU_00996	purK	c1145228-1144161	1144161	1145228	c	43.2692	14.4831	72.0554	4.97515	2.31474	0.00362644	0.20289	phosphoribosylaminoimidazole_carboxylase_ATPase_subunit	phosphoribosylaminoimidazole carboxylase ATPase subunit
PAU_00997	purE	c1145755-1145225	1145225	1145755	c	38.4782	12.6317	64.3246	5.0923	2.34832	0.0040245	0.21661	phosphoribosylaminoimidazole_carboxylase_catalytic_subunit_(ai_carboxylase)_(airc)	phosphoribosylaminoimidazole carboxylase catalytic subunit (ai carboxylase) (airc)
PAU_00998	lpxH	c1146612-1145890	1145890	1146612	c	307.968	489.812	126.124	0.257495	-1.95738	0.408007	0.98355	UDP-2	udp-2,3-diacylglucosamine hydrolase
PAU_00999	ppiB	c1147117-1146623	1146623	1147117	c	2160.02	2707.88	1612.15	0.595356	-0.748176	0.290746	0.98355	peptidyl-prolyl_cis-trans_isomerase_B_(rotamase_B)	peptidyl-prolyl cis-trans isomerase
PAU_01000	cysS	1147387-1148772	1147387	1148772		381.435	356.485	406.385	1.13998	0.189006	0.760963	1	cysteinyl-tRNA_synthetase	cysteinyl-tRNA synthetase
PAU_01001		c1149044-1148832	1148832	1149044	c	454.761	261.519	648.002	2.47784	1.30908	0.28317	0.98355	hypothetical_protein	conserved hypothetical protein
PAU_01002	folD	c1149919-1149044	1149044	1149919	c	275.325	225.801	324.85	1.43865	0.524721	0.7495	1	bifunctional_5	bifunctional protein fold
PAU_01003		1150358-1151572	1150358	1151572		155.607	215.482	95.7331	0.444275	-1.17048	0.111159	0.915182	phage_integrase	putative phage integrase
PAU_01004		c1151996-1151787	1151787	1151996	c	0.159442	0	0.318884	Inf	Inf	1	1	phage_transcriptional_regulator	putative phage transcriptional regulator
PAU_01005	yabA	c1154377-1152458	1152458	1154377	c	1.56018	1.69845	1.42192	0.837187	-0.256378	0.992107	1	regulatory_prophage_protein	regulatory prophage protein
PAU_01006		c1155101-1154469	1154469	1155101	c	10.86	11.6635	10.0564	0.862211	-0.213887	0.828996	1	prophage_protein	putative prophage protein
PAU_01007	alpA1	c1155298-1155098	1155098	1155298	c	0.888519	1.05014	0.726901	0.692196	-0.530749	0.994551	1	predicted_phage_transcriptional_regulator	predicted phage transcriptional regulator
PAU_01008		c1156180-1155302	1155302	1156180	c	0.804843	0.716804	0.892882	1.24564	0.31689	1	1	dna-binding_prophage_protein	dna-binding prophage protein
PAU_01009		1157717-1158940	1157717	1158940		173.992	121.985	225.998	1.85267	0.889607	0.246375	0.98355	phage_integrase	putative phage integrase
PAU_01010		c1159695-1159411	1159411	1159695	c	1.56968	2.24648	0.892882	0.397459	-1.33112	0.579766	1	hypothetical_protein	conserved hypothetical protein
PAU_01011		1160266-1160646	1160266	1160646		69.9116	72.5774	67.2459	0.926541	-0.110073	0.905591	1	hypothetical_protein	hypothetical protein
PAU_01012		1160643-1162037	1160643	1162037		37.5993	37.4015	37.7971	1.01058	0.0151785	0.979938	1	hypothetical_protein	conserved hypothetical protein
PAU_01013		1162039-1163142	1162039	1163142		42.5325	39.232	45.833	1.16826	0.224356	0.731009	1	hypothetical_protein	conserved hypothetical protein
PAU_01014		1163139-1163762	1163139	1163762		47.0099	44.2203	49.7994	1.12617	0.17142	0.785056	1	hypothetical_protein	conserved hypothetical protein
PAU_01015		1163785-1165395	1163785	1165395		35.001	33.5385	36.4635	1.08721	0.120637	0.877137	1	hypothetical_protein	conserved hypothetical protein
PAU_01016	Sc/SvQ	1166339-1167088	1166339	1167088		237.797	309.144	166.45	0.538423	-0.893188	0.200142	0.98355	lambdoid_prophage_tail_fiber_protein	similar to tail fiber protein from lambdoid prophage
PAU_01017	Sc/SvP	1167480-1168346	1167480	1168346		15.1414	23.2493	7.03353	0.302527	-1.72487	0.0529112	0.714587	pahage_sc/svp_protein	similarities with pahage sc/svp protein
PAU_01018		c1170303-1168726	1168726	1170303	c	129.268	73.1914	185.345	2.53234	1.34047	0.0711035	0.796262	phage_protein_gph	putative phage protein gph
PAU_01019	atoA	c1172245-1171595	1171595	1172245	c	3.47876	4.11369	2.84383	0.691309	-0.532598	0.708723	1	acetate_coa-transferase_beta_subunit_(acetyl-coa:acetoacetate_co_transferase_beta_subunit)	acetate coa-transferase beta subunit (acetyl-coa:acetoacetate co transferase beta subunit)
PAU_01020	atoD	c1172905-1172252	1172252	1172905	c	3.21702	3.18219	3.25185	1.02189	0.0312401	1	1	acetyl-CoA:acetoacetyl-CoA_transferase_subunit_alpha	acetate CoA-transferase subunit alpha
PAU_01021	atoC	c1174231-1173206	1173206	1174231	c	4.44093	4.97917	3.9027	0.783804	-0.351434	0.833809	1	acetoacetate_metabolism_regulatory_protein_atoc	acetoacetate metabolism regulatory protein atoc
PAU_01022		c1175481-1174453	1174453	1175481	c	5.9916	8.74364	3.23957	0.370505	-1.43243	0.214216	0.98355	hypothetical_protein	conserved hypothetical protein
PAU_01023		1176727-1177188	1176727	1177188		1.60807	2.89725	0.318884	0.110064	-3.18358	0.175966	0.96871	hypothetical_protein	conserved hypothetical protein
PAU_01024		c1178780-1177773	1177773	1178780	c	5.29565	7.69598	2.89532	0.376212	-1.41038	0.242348	0.98355	hypothetical_protein	conserved hypothetical protein
PAU_01025		c1178942-1178826	1178826	1178942	c	0	0	0	NA	NA	NA	NA	hypothetical_protein	Hypothetical protein
PAU_01026	msc	1179028-1179174	1179028	1179174		0.299085	0.59817	0	0	#NAME?	0.708094	1	hypothetical_protein
PAU_01027		1179642-1179944	1179642	1179944		4.76558	2.71433	6.81682	2.51141	1.3285	0.289785	0.98355	hypothetical_protein	conserved hypothetical protein
PAU_01028	cspI	1180375-1180590	1180375	1180590		343.073	112.462	573.685	5.10116	2.35083	0.277132	0.98355	cold_shock-like_protein_(cps-i)	cold shock-like protein (cps-i)
PAU_01029	sctL	c1181441-1180824	1180824	1181441	c	5.94378	4.36264	7.52491	1.72485	0.786473	0.484373	0.99899	type_III_secretion_system_protein	type iii secretion component protein sctl
PAU_01030	sctK	c1182046-1181420	1181420	1182046	c	7.51323	6.62748	8.39899	1.2673	0.341756	0.714407	1	type_iii_secretion_component_protein_sctk	type iii secretion component protein sctk
PAU_01031	sctJ	c1182783-1182046	1182046	1182783	c	22.4519	16.7655	28.1383	1.67834	0.747036	0.448374	0.992175	type_iii_secretion_component_protein_sctj	type iii secretion component protein sctj
PAU_01032	sctI	c1183128-1182790	1182790	1183128	c	31.7262	33.4615	29.9909	0.896281	-0.157977	0.856342	1	type_iii_secretion_component_protein_scti	type iii secretion component protein scti
PAU_01033	sctH	c1183694-1183128	1183128	1183694	c	12.5799	9.8556	15.3042	1.55284	0.634911	0.520323	1	type_iii_secretion_component_protein_scth	type iii secretion component protein scth
PAU_01034	sctG	c1184040-1183687	1183687	1184040	c	66.7426	60.7828	72.7024	1.1961	0.258338	0.728281	1	type_iii_secretion_component_protein_sctg	type iii secretion component protein sctg
PAU_01035	sctF	c1184366-1184043	1184043	1184366	c	46.0947	40.51	51.6793	1.27572	0.351311	0.669703	1	type_iii_secretion_component_protein_sctf	type iii secretion component protein sctf
PAU_01036	sctD	c1185791-1184517	1184517	1185791	c	8.2205	7.9283	8.51269	1.07371	0.102603	0.964067	1	type_iii_secretion_component_protein_sctd	type iii secretion component protein sctd
PAU_01037	sctC	c1187644-1185788	1185788	1187644	c	5.97458	5.41278	6.53638	1.20758	0.272122	0.826987	1	type_iii_secretion_outer_membrane_protein_pscc	type iii secretion outer membrane protein pscc
PAU_01038	sctB	c1188054-1187632	1187632	1188054	c	21.9597	23.5392	20.3802	0.865798	-0.207898	0.787538	1	type_iii_secretion_component_protein_sctb	type iii secretion component protein sctb
PAU_01039		c1188906-1188070	1188070	1188906	c	24.9472	29.0989	20.7955	0.714649	-0.484692	0.547147	1	hypothetical_protein	conserved hypothetical protein
PAU_01040	rhaS	c1189839-1189021	1189021	1189839	c	21.751	27.8601	15.6419	0.561443	-0.832789	0.305972	0.98355	transcriptional_activator_proteinExsA/virf	similar to the transcriptional activator protein exsa/virf
PAU_01041		c1190660-1190568	1190568	1190660	c	0	0	0	NA	NA	NA	NA	hypothetical_protein	Hypothetical protein
PAU_01042	spcU	c1191101-1190703	1190703	1191101	c	8.36519	7.27332	9.45706	1.30024	0.378778	0.731129	1	hypothetical_protein	conserved hypothetical protein
PAU_01043	exoU	c1193141-1191111	1191111	1193141	c	9.14901	9.3577	8.94031	0.955396	-0.0658294	0.984053	1	type_three_secretion_system_effector_protein	type three secretion system effector protein
PAU_01044		c1193374-1193237	1193237	1193374	c	5.11025	4.17551	6.04499	1.44773	0.533788	0.738102	1	hypothetical_protein	Hypothetical protein
PAU_01045	sctU	c1194569-1193517	1193517	1194569	c	26.4297	24.8551	28.0042	1.1267	0.172098	0.905446	1	type_iii_secretion_component_protein_sctu	type iii secretion component protein sctu
PAU_01046	sctT	c1195354-1194566	1194566	1195354	c	9.35887	8.17725	10.5405	1.289	0.366254	0.745395	1	type_iii_secretion_component_protein_sctt	type iii secretion component protein sctt
PAU_01047	sctS	c1195617-1195351	1195351	1195617	c	3.73199	2.62995	4.83402	1.83807	0.87819	0.578148	1	type_iii_secretion_component_protein_scts	type iii secretion component protein scts
PAU_01048	sctR	c1196273-1195620	1195620	1196273	c	5.3146	6.20976	4.41945	0.711694	-0.490672	0.724131	1	type_III_secretion_system_protein	type iii secretion component protein sctr
PAU_01049	sctQ	c1197199-1196270	1196270	1197199	c	10.1123	10.1748	10.0499	0.987723	-0.0178219	1	1	type_III_secretion_system_protein	type iii secretion component protein sctq
PAU_01050	sctP	c1198524-1197196	1197196	1198524	c	15.2621	11.458	19.0662	1.66401	0.734667	0.429173	0.986418	type_iii_secretion_component_protein_sctp	type iii secretion component protein sctp
PAU_01051	sctO	c1198995-1198534	1198534	1198995	c	5.69662	6.14547	5.24776	0.853924	-0.227821	0.852792	1	type_iii_secretion_component_protein_scto	type iii secretion component protein scto
PAU_01052	sctN	c1200317-1198992	1198992	1200317	c	9.87249	8.99433	10.7506	1.19527	0.257335	0.838322	1	type_III_secretion_system_ATPase	type iii secretion component protein sctn
PAU_01053	sctW	1200542-1201681	1200542	1201681		48.1864	58.6215	37.7514	0.643985	-0.634901	0.404515	0.98355	type_iii_secretion_control_protein_sctw	type iii secretion control protein sctw
PAU_01054	lssN	1201678-1202049	1201678	1202049		67.777	77.8851	57.6689	0.740436	-0.433554	0.52956	1	type_iii_secretion_protein	putative type iii secretion protein
PAU_01055	sctX	1202046-1202411	1202046	1202411		5.52328	4.61159	6.43496	1.39539	0.480667	0.643708	1	type_iii_secretion_protein_sctx	type iii secretion protein sctx
PAU_01056	sctY	1202414-1202743	1202414	1202743		47.4131	39.9272	54.8989	1.37497	0.459403	0.687193	1	type_iii_secretion_protein_scty	type iii secretion protein scty
PAU_01057	lssD	1202740-1204863	1202740	1204863		21.8229	18.3679	25.278	1.3762	0.460692	0.573207	1	type_iii_secretory_apparatus_protein_pcrd	type iii secretory apparatus protein pcrd
PAU_01058	pcrR	1204860-1205288	1204860	1205288		20.8157	19.2225	22.4088	1.16576	0.221269	0.818915	1	transcription_regulator	similar to transcription regulator proteins lcrr and pcrr
PAU_01059	lssG	1205335-1205613	1205335	1205613		29.3209	33.3246	25.3172	0.759715	-0.396469	0.632056	1	regulator_in_type_iii_secretion_lssg	regulator in type iii secretion lssg
PAU_01060	lssV	1205624-1206580	1205624	1206580		31.902	33.1491	30.6549	0.924757	-0.112853	0.903963	1	virulence-associated_v_antigen_(low_calcium_response_locus_protein_v)	virulence-associated v antigen (low calcium response locus protein v)
PAU_01061	sycD	1206590-1207099	1206590	1207099		133.915	118.904	148.925	1.25248	0.324783	0.64848	1	yopb/d_chaperone_sycd	yopb/d chaperone sycd
PAU_01062		1207080-1208258	1207080	1208258		122.401	111.9	132.901	1.18768	0.248151	0.745397	1	hypothetical_protein	conserved hypothetical protein
PAU_01063		1208271-1209164	1208271	1209164		354.638	356.566	352.711	0.989188	-0.0156834	0.984166	1	hypothetical_protein	conserved hypothetical protein
PAU_01064		c1209576-1209325	1209325	1209576	c	7.53593	6.57066	8.5012	1.29381	0.371629	0.746774	1	hypothetical_protein	hypothetical protein
PAU_01065	exsC	1209550-1209993	1209550	1209993		7.16432	8.22565	6.103	0.741947	-0.430611	0.72012	1	exoenzyme_s_synthesis_protein_C	similar to the exoenzyme s synthesis protein c exsc
PAU_01066	exsE	1209990-1210223	1209990	1210223		24.4724	28.3789	20.5658	0.724686	-0.464571	0.59041	1	hypothetical_protein	conserved hypothetical protein
PAU_01067	lscW	1210220-1210612	1210220	1210612		30.0156	29.4909	30.5404	1.03559	0.0504495	0.940152	1	lipoprotein_virg_(yscw)_(virg)	lipoprotein virg (yscw) (virg)
PAU_01068	hod	1211530-1212219	1211530	1212219		100.112	42.162	158.062	3.74893	1.90648	0.0234914	0.525053	hypothetical_protein	conserved hypothetical protein
PAU_01069	orf35	1212733-1213059	1212733	1213059		478.458	723.919	232.997	0.321855	-1.63552	0.0230267	0.520795	phage_holin	phage holin
PAU_01070	orf36	1213069-1213470	1213069	1213470		351.077	503.852	198.303	0.393573	-1.3453	0.0556979	0.730526	hypothetical_protein	conserved hypothetical protein
PAU_01071	Rz	1213480-1213929	1213480	1213929		316.757	457.259	176.254	0.385457	-1.37536	0.0476687	0.698921	lamdoid_prophage_endopeptidase_gp15	similar to probable endopeptidase gp15 protein of lamdoid prophage
PAU_01072		c1214412-1214017	1214017	1214412	c	88.6312	108.521	68.7412	0.633435	-0.658732	0.48422	0.99899	hypothetical_protein	conserved hypothetical protein
PAU_01073	wza	1215115-1216260	1215115	1216260		243.079	164.191	321.967	1.96093	0.971536	0.169553	0.96871	polysaccharide_export_protein_YccZ	similar to putative polysaccharide export protein yccz
PAU_01074	wzb	1216260-1216688	1216260	1216688		142.051	92.1907	191.911	2.08167	1.05774	0.145354	0.96118	hypothetical_protein	conserved hypothetical protein
PAU_01075	wzc	1216755-1218896	1216755	1218896		114.893	92.4633	137.323	1.48517	0.570624	0.424995	0.984783	tyrosine-protein_kinase_wzc	tyrosine-protein kinase wzc
PAU_01076	tehB	1219133-1219990	1219133	1219990		55.9493	49.262	62.6366	1.2715	0.346531	0.632185	1	tellurite_resistance_protein_TehB	putative tellurite resistance protein
PAU_01077		c1221715-1220123	1220123	1221715	c	17.8815	17.0403	18.7228	1.09874	0.135847	0.888424	1	hypothetical_protein	conserved hypothetical protein
PAU_01078		1222281-1223684	1222281	1223684		33.5235	28.5752	38.4717	1.34633	0.429035	0.588893	1	sodium:alanine_symporter-like_protein	similar to sodium:alanine symporter and other amino acid transport proteins
PAU_01079		1223750-1224256	1223750	1224256		0	0	0	NA	NA	NA	NA	is_transposase	is putative transposase
PAU_01080		1224325-1225098	1224325	1225098		0	0	0	NA	NA	NA	NA	transposase_for_insertion_sequence_element_is150	putative transposase for insertion sequence element is150
PAU_01081	aldB	c1226651-1225167	1225167	1226651	c	845.932	1249.91	441.954	0.353588	-1.49986	0.0357199	0.614904	aldehyde_dehydrogenase_b_(lactaldehyde_dehydrogenase)	aldehyde dehydrogenase b (lactaldehyde dehydrogenase)
PAU_01082		c1228105-1226969	1226969	1228105	c	37.1001	57.1126	17.0876	0.299191	-1.74086	0.311366	0.98355	abc-type_iron(iii)_transport_system	abc-type iron(iii) transport system, periplasmic binding protein precursor
PAU_01083	hcr	1228717-1228938	1228717	1228938		21.3112	25.302	17.3205	0.68455	-0.546772	0.527128	1	NADH_oxidoreductase	NADH oxidoreductase
PAU_01084		1229182-1229514	1229182	1229514		119.302	168.941	69.6633	0.412353	-1.27805	0.187618	0.97956	hypothetical_protein	conserved hypothetical protein
PAU_01085		1229915-1230988	1229915	1230988		93.4918	81.7071	105.277	1.28846	0.365652	0.593933	1	magnesium_transport_protein_MgtE	similar to magnesium transport protein mgte
PAU_01086	sprT	c1232232-1231735	1231735	1232232	c	10.3049	9.55825	11.0515	1.15622	0.209421	0.811024	1	hypothetical_protein	conserved hypothetical protein
PAU_01087	metK	c1233559-1232387	1232387	1233559	c	416.359	467.7	365.017	0.780452	-0.357619	0.63067	1	S-adenosylmethionine_synthetase	s-adenosylmethionine synthetase
PAU_01088	speA	1234190-1236094	1234190	1236094		249.225	311.5	186.949	0.600157	-0.736589	0.322922	0.98355	arginine_decarboxylase	biosynthetic arginine decarboxylase
PAU_01089	speB	1236266-1237192	1236266	1237192		356.659	401.716	311.602	0.775678	-0.36647	0.637697	1	agmatinase	agmatinase
PAU_01090	api10	c1237568-1237470	1237470	1237568	c	8.35207	6.61086	10.0933	1.52677	0.610485	0.707941	1	hypothetical_protein	conserved hypothetical protein
PAU_01091		c1238518-1237799	1237799	1238518	c	136.686	89.4707	183.901	2.05543	1.03944	0.168599	0.96871	integral_membrane_transport_protein	putative integral membrane transport protein
PAU_01092	mutH	c1239298-1238612	1238612	1239298	c	80.3883	76.6357	84.1409	1.09793	0.13479	0.915004	1	DNA_mismatch_repair_protein	dna mismatch repair protein muth (methyl-directed mismatch repai protein)
PAU_01093	sgrR	c1241543-1239882	1239882	1241543	c	75.7134	38.3499	113.077	2.94856	1.56001	0.0414375	0.653411	transcriptional_regulator_SgrR	hth-type transcriptional regulator sgrr
PAU_01094	leuD	c1242684-1242082	1242082	1242684	c	28.0651	25.4622	30.6679	1.20445	0.268369	0.731868	1	isopropylmalate_isomerase_small_subunit	3-isopropylmalate dehydratase small subunit
PAU_01095	leuC	c1244106-1242697	1242697	1244106	c	46.8371	41.613	52.0612	1.25108	0.323175	0.669042	1	isopropylmalate_isomerase_large_subunit	3-isopropylmalate dehydratase large subunit
PAU_01096	leuB	c1245199-1244108	1244108	1245199	c	16.4976	16.4213	16.574	1.0093	0.0133534	0.990262	1	3-isopropylmalate_dehydrogenase	3-isopropylmalate dehydrogenase
PAU_01097	leuA	c1246764-1245202	1245202	1246764	c	25.897	23.4481	28.3458	1.20887	0.273665	0.725109	1	2-isopropylmalate_synthase	2-isopropylmalate synthase
PAU_01098	leuO	1247721-1248665	1247721	1248665		140.31	166.963	113.656	0.680728	-0.554849	0.454152	0.992271	leucine_transcriptional_activator	probable hth-type transcriptional regulator leuo
PAU_01099	fadD	1248900-1250702	1248900	1250702		145.594	161.576	129.612	0.802173	-0.318015	0.673628	1	long-chain-fatty-acid--CoA_ligase	long-chain-fatty-acid--CoA ligase
PAU_01100		1251329-1251895	1251329	1251895		36.9146	41.7917	32.0376	0.766601	-0.383452	0.615572	1	hypothetical_protein	conserved hypothetical protein
PAU_01101	ilvI	1252250-1253977	1252250	1253977		165.125	153.855	176.396	1.14651	0.197249	0.787373	1	acetolactate_synthase_3_catalytic_subunit	acetolactate synthase isozyme III large subunit
PAU_01102	ilvH	1253980-1254471	1253980	1254471		804.299	791.718	816.881	1.03178	0.0451384	0.985891	1	acetolactate_synthase_3_regulatory_subunit	acetolactate synthase isozyme iii small subunit (ahas-iii (acetohydroxy-acid synthase iii small subunit) (als-iii)
PAU_01103	fruR	1254558-1255565	1254558	1255565		256.018	216.509	295.526	1.36496	0.44886	0.525922	1	DNA-binding_transcriptional_regulator_FruR	fructose repressor (catabolite repressor/activator)
PAU_01104	mraZ	1256150-1256608	1256150	1256608		186.503	171.088	201.919	1.18021	0.239043	0.866795	1	cell_division_protein_MraZ	conserved hypothetical protein mraz
PAU_01105	mraW	1256611-1257555	1256611	1257555		192.039	175.651	208.426	1.18659	0.246819	0.735935	1	S-adenosyl-methyltransferase_MraW	s-adenosyl-l-methionine-dependent methyltransferase
PAU_01106	ftsL	1257555-1257872	1257555	1257872		145.368	99.8057	190.93	1.91302	0.935851	0.217338	0.98355	cell_division_protein_FtsL	cell division protein ftsl
PAU_01107	ftsI	1257902-1259668	1257902	1259668		150.815	121.453	180.177	1.48352	0.56902	0.451071	0.992271	peptidoglycan_synthetase_ftsi_(penicillin-binding_protein_3)_(pbp-3)	peptidoglycan synthetase ftsi (penicillin-binding protein 3) (pbp-3)
PAU_01108	murE	1259655-1261142	1259655	1261142		1023.22	1837.88	208.568	0.113483	-3.13945	0.34167	0.98355	UDP-N-acetylmuramoylalanyl-D-glutamate--2	UDP-N-acetylmuramoyl-L-alanyl-D-glutamate--2, 6-diaminopimelate ligase
PAU_01109	murF	1261139-1262518	1261139	1262518		53.5881	37.0407	70.1355	1.89347	0.921036	0.217264	0.98355	UDP-N-acetylmuramoyl-tripeptide--D-alanyl-D-alanine_ligase	UDP-N-acetylmuramoyl-tripeptide--D-alanyl-D-ala nine ligase
PAU_01110	mraY	1262512-1263594	1262512	1263594		57.2417	45.8377	68.6457	1.49758	0.582635	0.414086	0.98355	phospho-N-acetylmuramoyl-pentapeptide-transferase	phospho-N-acetylmuramoyl-pentapeptide- transferase
PAU_01111	murD	1263636-1264907	1263636	1264907		48.8979	38.5537	59.242	1.53661	0.619751	0.402123	0.98355	UDP-N-acetylmuramoyl-L-alanyl-D-glutamate_synthetase	UDP-N-acetylmuramoylalanine--D-glutamate ligase
PAU_01112	ftsW	1264907-1266100	1264907	1266100		77.8919	62.2867	93.4971	1.50107	0.585996	0.436662	0.989104	cell_division_protein_FtsW	membrane protein ftsw, involved in peptidoglycan biosynthesis
PAU_01113	murG	1266097-1267167	1266097	1267167		188.914	163.31	214.517	1.31356	0.393479	0.606812	1	undecaprenyldiphospho-muramoylpentapeptide_beta-N-_acetylglucosaminyltransferase	UDP-N-acetylglucosamine--N-acetylmuramyl-(penta peptide pyrophosphoryl-undecaprenol n-acetylglucosamine transferase
PAU_01114	murC	1267220-1268698	1267220	1268698		70.3178	53.2783	87.3573	1.63964	0.71338	0.331422	0.98355	UDP-N-acetylmuramate--L-alanine_ligase	UDP-N-acetylmuramate--L-alanine ligase
PAU_01115	ddlB	1268691-1269611	1268691	1269611		207.354	159.473	255.235	1.60049	0.678516	0.364696	0.98355	D-alanine--D-alanine_ligase	D-alanine--D-alanine ligase
PAU_01116	ftsQ	1269613-1270416	1269613	1270416		194.053	155.708	232.397	1.49252	0.577747	0.452195	0.992271	cell_division_protein_FtsQ	cell division protein ftsQ
PAU_01117	ftsA	1270459-1271715	1270459	1271715		140.555	122.65	158.459	1.29197	0.36957	0.59336	1	cell_division_protein_FtsA	cell division protein ftsa
PAU_01118	ftsZ	1271779-1272939	1271779	1272939		388.034	319.323	456.745	1.43036	0.516374	0.46436	0.992271	cell_division_protein_FtsZ	cell division protein ftsz
PAU_01119	lpxC	1273038-1273955	1273038	1273955		1139.11	978.218	1300.01	1.32895	0.41029	0.548489	1	UDP-3-O-[3-hydroxymyristoyl]_N-acetylglucosamine_deacetylase	UDP-3-O-[3-hydroxymyristoyl] N-acetylglucosamine deacetylase
PAU_01120		c1274560-1274036	1274036	1274560	c	188.426	166.75	210.103	1.25999	0.333417	0.642274	1	hypothetical_protein	conserved hypothetical protein
PAU_01121	secM	1274593-1275123	1274593	1275123		59.6291	59.6124	59.6458	1.00056	0.000807203	0.986957	1	SecA_regulator_SecM	secretion monitor precursor
PAU_01122	secA	1275204-1277915	1275204	1277915		230.908	178.208	283.608	1.59145	0.67034	0.35694	0.98355	preprotein_translocase_subunit_SecA	preprotein translocase seca subunit
PAU_01123	mutT	1278032-1278424	1278032	1278424		258.644	187.308	329.98	1.7617	0.816964	0.279222	0.98355	nucleoside_triphosphate_pyrophosphohydrolase	mutator mutt protein (7,8-dihydro-8-oxoguanine-triphosphatase) (8-oxo dgtpase) (dgtp pyrophosphohydrolase)
PAU_01124	yacG	c1278660-1278463	1278463	1278660	c	395.272	430.672	359.872	0.835606	-0.259105	0.704468	1	zinc-binding_protein	upf0243 zinc-binding protein yacg
PAU_01125	yacF	c1279443-1278691	1278691	1279443	c	100.738	99.599	101.877	1.02287	0.0326227	0.947285	1	hypothetical_protein	conserved hypothetical protein
PAU_01126	coaE	c1280059-1279457	1279457	1280059	c	201.08	190.199	211.961	1.11442	0.156291	0.82326	1	dephospho-CoA_kinase	dephospho-CoA kinase
PAU_01127	hofC	c1281350-1280151	1280151	1281350	c	1.30366	1.68256	0.924767	0.54962	-0.863493	0.830939	1	type_IV_pilin_biogenesis_protein	protein transport protein hofc
PAU_01128	hofB	c1282795-1281347	1281347	1282795	c	4.66493	6.39689	2.93297	0.458499	-1.12501	0.310092	0.98355	hypothetical_protein	putative integral membrane protein involved in biogenesis of fimbriae protein transport, dna uptake (putative integral membrane protei hofb)
PAU_01129	ppdD	c1283387-1282962	1282962	1283387	c	9.27155	11.077	7.46611	0.674021	-0.569135	0.484487	0.99899	major_pilin_subunit	prepilin peptidase dependent protein d
PAU_01130	nadC	c1284476-1283586	1283586	1284476	c	149.673	135.954	163.393	1.20182	0.265224	0.679566	1	quinolinate_phosphoribosyltransferase	nicotinate-nucleotide pyrophosphorylase (carboxylating)
PAU_01131	ampE	1285017-1285871	1285017	1285871		26.8696	34.8048	18.9345	0.544019	-0.87827	0.332956	0.98355	regulatory_protein_AmpE	signaling protein ampe
PAU_01132		1286116-1286694	1286116	1286694		183.855	151.523	216.186	1.42675	0.512734	0.498171	1	hypothetical_protein	conserved hypothetical protein
PAU_01133		1286703-1286924	1286703	1286924		96.1571	85.284	107.03	1.25499	0.327671	0.651511	1	hypothetical_protein	conserved hypothetical protein
PAU_01134		c1287154-1286981	1286981	1287154	c	19.3381	17.2126	21.4636	1.24697	0.318432	0.747949	1	hypothetical_protein	hypothetical protein
PAU_01135		1287272-1287535	1287272	1287535		37.86	39.4389	36.281	0.919928	-0.120408	0.933004	1	hypothetical_protein	conserved hypothetical protein
PAU_01136		1287574-1287942	1287574	1287942		34.5381	29.6127	39.4634	1.33265	0.414299	0.569187	1	hypothetical_protein	conserved hypothetical protein
PAU_01137	pdhR	1288651-1289415	1288651	1289415		40.7247	59.2885	22.161	0.373782	-1.41973	0.324748	0.98355	transcriptional_regulator_PdhR	transcriptional regulator, gntr family
PAU_01138	aceE	1289604-1292267	1289604	1292267		166.144	200.338	131.951	0.658643	-0.602432	0.376751	0.98355	pyruvate_dehydrogenase_subunit_E1	pyruvate dehydrogenase E1 component
PAU_01139	aceF	1292282-1293874	1292282	1293874		88.9741	96.958	80.9902	0.835313	-0.259611	0.704905	1	dihydrolipoamide_acetyltransferase_component_of_pyruvate_dehydrogenas_complex_(e2)	dihydrolipoamide acetyltransferase component of pyruvate dehydrogenas complex (e2)
PAU_01140	lpdA	1294066-1295496	1294066	1295496		727.784	540.787	914.781	1.69157	0.758365	0.275571	0.98355	dihydrolipoamide_dehydrogenase	dihydrolipoyl dehydrogenase
PAU_01141	acnB	1295964-1298561	1295964	1298561		989.944	1050.57	929.314	0.884577	-0.17694	0.806097	1	bifunctional_aconitate_hydratase_2/2-methylisocitrate_dehydratase	aconitate hydratase 2 (citrate hydro-lyase 2) (aconitase 2)
PAU_01142		c1299734-1299438	1299438	1299734	c	12.7456	22.0219	3.46932	0.157539	-2.66622	0.0480502	0.702095	hypothetical_protein	conserved hypothetical protein
PAU_01143	yacL	1300107-1300478	1300107	1300478		168.305	217.909	118.701	0.544727	-0.876395	0.209545	0.98355	hypothetical_protein	conserved hypothetical protein
PAU_01144	yggB	1300616-1301488	1300616	1301488		549.245	533.47	565.021	1.05914	0.0828995	0.903932	1	hypothetical_protein	conserved hypothetical protein
PAU_01145		c1302256-1301726	1301726	1302256	c	1.83924	1.68256	1.99591	1.18624	0.246396	1	1	hypothetical_protein	conserved hypothetical protein
PAU_01146		c1303551-1302253	1302253	1303551	c	0.855453	1.01589	0.695016	0.684145	-0.547625	0.994379	1	hypothetical_protein	conserved hypothetical protein
PAU_01147		c1304139-1303990	1303990	1304139	c	7.63194	9.52473	5.73915	0.602552	-0.730842	0.454389	0.992271	hypothetical_protein	Hypothetical protein
PAU_01148	argO	1304736-1305365	1304736	1305365		13.3072	13.3945	13.2199	0.986966	-0.0189277	0.981769	1	arginine_exporter_protein	arginine exporter protein argo
PAU_01149	yggE	1305478-1306200	1305478	1306200		830.132	626.38	1033.88	1.65057	0.722964	0.296862	0.98355	hypothetical_protein	conserved hypothetical protein
PAU_01150	iciA	c1307099-1306197	1306197	1307099	c	17.9012	12.9333	22.8691	1.76823	0.822309	0.319989	0.98355	chromosome_replication_initiation_inhibitor_protein	chromosome initiation inhibitor (oric replication inhibitor)
PAU_01151	rpiA	1307227-1307886	1307227	1307886		919.963	797.203	1042.72	1.30797	0.387335	0.591076	1	ribose-5-phosphate_isomerase_A	ribose-5-phosphate isomerase A
PAU_01152	serA	1308159-1309400	1308159	1309400		496.209	313.204	679.214	2.1686	1.11676	0.107834	0.906143	D-3-phosphoglycerate_dehydrogenase	d-3-phosphoglycerate dehydrogenase
PAU_01153	ygfA	c1310175-1309579	1309579	1310175	c	92.6526	61.4994	123.806	2.01312	1.00943	0.175244	0.96871	hypothetical_protein	conserved hypothetical protein
PAU_01154	ygfE	c1310842-1310513	1310513	1310842	c	375.683	270.703	480.663	1.77561	0.828316	0.28284	0.98355	Z-ring-associated_protein	conserved hypothetical protein
PAU_01155	ygfB	1311029-1311604	1311029	1311604		389.287	331.8	446.774	1.34652	0.429231	0.589571	1	hypothetical_protein	conserved hypothetical protein
PAU_01156	pepP	1311653-1312969	1311653	1312969		70.1102	55.0742	85.1462	1.54603	0.628565	0.393195	0.98355	proline_aminopeptidase_P_II	xaa-pro aminopeptidase (x-pro aminopeptidase) (aminopeptidase p ii (app-ii) (aminoacylproline aminopeptidase)
PAU_01157	ubiH	1312977-1314155	1312977	1314155		323.993	273.749	374.237	1.36708	0.451098	0.621213	1	2-octaprenyl-6-methoxyphenyl_hydroxylase	2-octaprenyl-6-methoxyphenol hydroxylase
PAU_01158	visC	1314194-1315426	1314194	1315426		115.429	88.69	142.167	1.60297	0.680748	0.340709	0.98355	hypothetical_protein	conserved hypothetical protein
PAU_01159	gcvT	1315785-1316888	1315785	1316888		521.84	387.79	655.89	1.69136	0.75818	0.281426	0.98355	glycine_cleavage_system_aminomethyltransferase_T	aminomethyltransferase
PAU_01160	gcvH	1317122-1317514	1317122	1317514		969.497	722.842	1216.15	1.68246	0.750571	0.284108	0.98355	glycine_cleavage_system_protein_H	glycine cleavage system h protein
PAU_01161	gcvP	1317602-1320478	1317602	1320478		251.248	111.631	390.864	3.50139	1.80793	0.0144216	0.431837	glycine_dehydrogenase	glycine dehydrogenase [decarboxylating]
PAU_01162	cdiB	1320913-1322592	1320913	1322592		1.60898	1.59817	1.61978	1.01352	0.0193793	1	1	hemolysin_activation/secretion_protein	similar to hemolysin activation/secretion protein
PAU_01163		1322654-1331446	1322654	1331446		12.5295	11.458	13.601	1.18703	0.24736	0.871278	1	hemagglutinin/hemolysin-like_protein	similarities with hemagglutinin/hemolysin-related protein
PAU_01164		1331466-1331687	1331466	1331687		156.764	152.942	160.586	1.04999	0.070369	0.986779	1	hypothetical_protein	Hypothetical protein
PAU_01165		1331855-1332118	1331855	1332118		39.7937	46.5931	32.9943	0.708137	-0.497899	0.581953	1	hypothetical_protein	conserved hypothetical protein
PAU_01166	fhaB	1332449-1332847	1332449	1332847		606.203	739.271	473.135	0.640002	-0.643851	0.473491	0.99899	hypothetical_protein	conserved hypothetical protein
PAU_01167		1332874-1333284	1332874	1333284		433.469	522.205	344.732	0.660147	-0.599141	0.528687	1	hypothetical_protein	Hypothetical protein
PAU_01168		1333411-1334016	1333411	1334016		70.5623	66.4337	74.6908	1.12429	0.169017	0.871391	1	hypothetical_protein	conserved hypothetical protein
PAU_01169		1334024-1334341	1334024	1334341		199.232	221.061	177.402	0.802501	-0.317424	0.667932	1	hypothetical_protein	Hypothetical protein
PAU_01170		1334513-1335007	1334513	1335007		12.4095	13.9785	10.8406	0.775518	-0.366769	0.67631	1	hypothetical_protein	conserved hypothetical protein
PAU_01171		1335096-1335596	1335096	1335596		11.2626	13.3552	9.17006	0.686627	-0.542402	0.580383	1	hypothetical_protein	conserved hypothetical protein
PAU_01172		1335584-1335697	1335584	1335697		0.149542	0.299085	0	0	#NAME?	0.999789	1	hypothetical_protein	Hypothetical protein
PAU_01173	ydcW	1337240-1338670	1337240	1338670		184.846	105.366	264.327	2.50866	1.32692	0.0712016	0.796262	betaine_aldehyde_dehydrogenase	putative betaine aldehyde dehydrogenase
PAU_01174		1338686-1339459	1338686	1339459		274.277	146.429	402.124	2.74619	1.45743	0.0610471	0.748047	hypothetical_protein	conserved hypothetical protein
PAU_01175		1339515-1340267	1339515	1340267		249.141	408.488	89.7941	0.219821	-2.1856	0.435311	0.989104	regulatory_protein	regulatory protein, gntr
PAU_01176		1340303-1341043	1340303	1341043		59.0086	31.7676	86.2496	2.71502	1.44096	0.0643414	0.770647	hypothetical_protein	conserved hypothetical protein
PAU_01177	goaG	1341080-1342357	1341080	1342357		94.4011	57.4451	131.357	2.28666	1.19324	0.294737	0.98355	4-aminobutyrate_aminotransferase	4-aminobutyrate aminotransferase
PAU_01178	yhaH	1342479-1342865	1342479	1342865		17.9658	10.7705	25.1612	2.33613	1.22412	0.267775	0.98355	inner_membrane_protein_yhah	inner membrane protein yhah
PAU_01179		1342905-1344446	1342905	1344446		23.9883	15.916	32.0606	2.01437	1.01033	0.26933	0.98355	fad_dependent_oxidoreductase	fad dependent oxidoreductase
PAU_01180	forZ	1345297-1346730	1345297	1346730		57.95	96.4061	19.4939	0.202206	-2.3061	0.00354192	0.20289	fortimicin_a_n-forimidoyltransferase	fortimicin a n-forimidoyltransferase
PAU_01181		1346727-1347578	1346727	1347578		220.8	400.859	40.7401	0.101632	-3.29857	0.00131053	0.105139	modification_methylase_hemk_precursor	modification methylase hemk precursor
PAU_01182		1347603-1348877	1347603	1348877		60.2509	106.37	14.1316	0.132853	-2.9121	0.000350323	0.0562214	hypothetical_protein	aminotransferase, class II
PAU_01183	papB	1348921-1349280	1348921	1349280		182.379	320.69	44.0688	0.137419	-2.86335	0.000193047	0.0342015	chorismate_mutase/prephenat_dehydrogenase-like_protein	similar to papb protein and to chorismate mutase/prephenat dehydrogenase
PAU_01184		1349261-1351333	1349261	1351333		421.911	770.452	73.3707	0.0952306	-3.39243	0.0950422	0.878521	p-aminobenzoic_acid_synthase-like_protein	similar to p-aminobenzoic acid synthase
PAU_01185	papC	1351326-1352198	1351326	1352198		158.634	196.478	120.789	0.614774	-0.701871	0.343279	0.98355	dehydrogenase_PapC-like_protein	similar to dehydrogenase papc of streptomyces pristinaespiralis
PAU_01186		1352218-1353750	1352218	1353750		284.857	352.736	216.978	0.615129	-0.70104	0.311138	0.98355	transmembrane-transport_protein	putative transmembrane-transport protein
PAU_01187	alkB	1353740-1353853	1353740	1353853		0.149542	0.299085	0	0	#NAME?	0.999789	1	hypothetical_protein	Hypothetical protein
PAU_01188	hyp7	c1354134-1353964	1353964	1354134	c	0.459709	0.632418	0.286999	0.453812	-1.13983	0.995972	1	hypothetical_protein	Hypothetical protein
PAU_01189		1354822-1356066	1354822	1356066		11.7505	16.0529	7.44807	0.463969	-1.1079	0.232371	0.98355	hypothetical_protein	conserved hypothetical protein
PAU_01190		1356861-1358183	1356861	1358183		22.284	27.8927	16.6754	0.597841	-0.742166	0.366135	0.98355	hypothetical_protein	conserved hypothetical protein
PAU_01191		1358281-1359555	1358281	1359555		41.6303	55.0628	28.1978	0.512104	-0.965492	0.208532	0.98355	hypothetical_protein	conserved hypothetical protein
PAU_01192		1359627-1359743	1359627	1359743		3.43498	4	2.86995	0.717488	-0.478973	0.901156	1	hypothetical_protein	conserved hypothetical protein
PAU_01193		1360260-1361570	1360260	1361570		25.3166	31.267	19.3663	0.619385	-0.691091	0.380187	0.98355	hypothetical_protein	conserved hypothetical protein
PAU_01194	PE	1362358-1363614	1362358	1363614		4.602	6.36017	2.84383	0.447131	-1.16123	0.311038	0.98355	hypothetical_protein	conserved hypothetical protein
PAU_01195	wdpA	1364638-1369086	1364638	1369086		2.94921	3.29662	2.6018	0.789233	-0.341477	0.888055	1	hypothetical_protein	Hypothetical protein
PAU_01196		1369079-1370353	1369079	1370353		8.49604	10.1564	6.83566	0.673038	-0.571239	0.563874	1	hypothetical_protein	conserved hypothetical protein
PAU_01197	LOC496414	1370369-1371025	1370369	1371025		13.2811	13.8157	12.7466	0.922615	-0.116199	0.880791	1	hypothetical_protein	conserved hypothetical protein
PAU_01198		1371030-1373504	1371030	1373504		24.3285	29.0413	19.6157	0.675439	-0.566102	0.500386	1	hypothetical_protein	conserved hypothetical protein
PAU_01199		1373557-1378692	1373557	1378692		8.56115	8.09287	9.02944	1.11573	0.157986	0.9189	1	rifamycin_polyketide_synthase_(fragment)	rifamycin polyketide synthase (fragment)
PAU_01200		1378769-1379023	1378769	1379023		1.65216	2.69845	0.605883	0.22453	-2.15502	0.339971	0.98355	hypothetical_protein	Hypothetical protein
PAU_01201	ISPlu10B	1379069-1379197	1379069	1379197		0.766419	0.716804	0.816034	1.13843	0.187049	1	1	description:_is630_insertion_element;_orf5_protein	description: is630 insertion element; orf5 protein
PAU_01202	FNV1726	1380120-1380470	1380120	1380470		92.1287	111.833	72.4241	0.647608	-0.626808	0.407129	0.98355	hypothetical_protein	conserved hypothetical protein
PAU_01203		1380460-1380753	1380460	1380753		224.246	274.462	174.03	0.634076	-0.657272	0.360597	0.98355	hypothetical_protein	conserved hypothetical protein
PAU_01204	cysX	1380776-1380940	1380776	1380940		549.318	676.271	422.365	0.62455	-0.679111	0.410716	0.98355	hypothetical_protein	Hypothetical protein
PAU_01205		1380964-1381878	1380964	1381878		32.8352	32.0907	33.5797	1.0464	0.0654344	0.957467	1	integral_membrane_protein_precursor	putative integral membrane protein precursor
PAU_01206		c1382892-1382287	1382287	1382892	c	218.823	188.117	249.53	1.32646	0.407587	0.56344	1	hypothetical_protein	conserved hypothetical protein
PAU_01207	ygfZ	c1383898-1382903	1382903	1383898	c	415.918	334.987	496.849	1.48319	0.568701	0.459986	0.992271	global_regulator	conserved hypothetical protein
PAU_01208	ygfY	1384075-1384341	1384075	1384341		969.22	1485.98	452.458	0.304484	-1.71556	0.0851378	0.853102	hypothetical_protein	conserved hypothetical protein
PAU_01209	ygfX	1384322-1384738	1384322	1384738		256.862	374.657	139.068	0.371188	-1.42978	0.0863426	0.855778	hypothetical_protein	conserved hypothetical protein
PAU_01210	fldB	c1385281-1384760	1384760	1385281	c	55.6485	48.0626	63.2345	1.31567	0.395798	0.611338	1	flavodoxin_FldB	flavodoxin-2
PAU_01211	xerD	1385386-1386297	1385386	1386297		281.504	251.882	311.126	1.23521	0.304753	0.672265	1	site-specific_tyrosine_recombinase_XerD	tyrosine recombinase xerd
PAU_01212	dsbC	1386322-1387023	1386322	1387023		355.123	281.481	428.766	1.52325	0.607151	0.394841	0.98355	thiol:disulfide_interchange_protein_DsbC	thiol:disulfide interchange protein dsbc precursor
PAU_01213	recJ	1387029-1388762	1387029	1388762		36.7843	19.3838	54.1847	2.79536	1.48303	0.0564888	0.730526	ssDNA_exonuclease_RecJ	ssdna exonuclease, 5'--> 3' specific (ssdna exonuclease recj)
PAU_01214	usp	1389308-1390981	1389308	1390981		59.3001	26.2344	92.3658	3.52079	1.8159	0.0916908	0.878521	pyocin_s2-like_protein	similar to pyocin s2 and s1
PAU_01215		1390978-1391445	1390978	1391445		204.468	115.848	293.088	2.52993	1.3391	0.0710108	0.796262	hypothetical_protein	conserved hypothetical protein
PAU_01216		1392995-1393564	1392995	1393564		0	0	0	NA	NA	NA	NA	hypothetical_protein	conserved hypothetical protein
PAU_01217	col	1393561-1393758	1393561	1393758		20.7689	21.9352	19.6027	0.893664	-0.162196	0.864086	1	s-type_pyocin	s-type pyocin
PAU_01218	imm	1393742-1393996	1393742	1393996		21.142	22.0272	20.2568	0.919629	-0.120875	0.810433	1	colicin-e7_immunity_protein_(imme7)_(microcin-e7_immunity_protein)	colicin-e7 immunity protein (imme7) (microcin-e7 immunity protein)
PAU_01219	col	1394171-1394515	1394171	1394515		7.5454	8.99433	6.09648	0.677813	-0.56104	0.674111	1	pyocin_s2-like_protein	similar to pyocin s2 and s1 and colicin-e9
PAU_01220		1394499-1394756	1394499	1394756		0.619151	0.632418	0.605883	0.958041	-0.0618402	1	1	colicin/pyocin_immunity_protein	similar to colicin/pyocin immunity protein
PAU_01221		1395001-1395468	1395001	1395468		2.37967	1.94739	2.81195	1.44396	0.530026	0.891318	1	hypothetical_protein	conserved hypothetical protein
PAU_01222		1395718-1395825	1395718	1395825		1.26864	1.96328	0.573998	0.292367	-1.77415	0.528763	1	hypothetical_protein	conserved hypothetical protein
PAU_01223		c1396398-1396264	1396264	1396398	c	12.1922	17.0501	7.33433	0.430162	-1.21705	0.652065	1	membrane_protein	membrane protein
PAU_01224		1396968-1397075	1396968	1397075		4.46724	4.64337	4.29111	0.924138	-0.113819	0.908103	1	hypothetical_protein	Hypothetical protein
PAU_01225	prfB	1397333-1398265	1397333	1398265		922.678	978.085	867.271	0.886703	-0.173477	0.769231	1	peptide_chain_release_factor_2	peptide chain release factor 2 (rf-2)
PAU_01226	lysS	1398275-1399789	1398275	1399789		658.964	641.906	676.022	1.05315	0.0747094	0.930593	1	lysyl-tRNA_synthetase	lysyl-tRNA synthetase
PAU_01227		1400423-1401055	1400423	1401055		137.813	210.478	65.1471	0.309519	-1.6919	0.0233695	0.525053	antibiotic_acetyltransferase	similar to antibiotic acetyltransferase
PAU_01228	pqqE-4	1401696-1402565	1401696	1402565		536.134	1064.04	8.23297	0.0077375	-7.01392	0.107787	0.906143	coenzyme_pqq_synthesis_protein_e_(pqqe-4)	coenzyme pqq synthesis protein e (pqqe-4)
PAU_01229	DAK	1402562-1403326	1402562	1403326		520.651	984.662	56.6393	0.0575215	-4.11975	0.220744	0.98355	deoxynucleoside_kinase_family_protein	deoxynucleoside kinase family protein
PAU_01230	yfaO	1403407-1403832	1403407	1403832		940.105	1252.3	627.912	0.501407	-0.995945	0.407601	0.98355	hypothetical_protein	conserved hypothetical protein
PAU_01231		c1404854-1404009	1404009	1404854	c	6.717	5.68009	7.75391	1.3651	0.449011	0.728046	1	hypothetical_protein	conserved hypothetical protein
PAU_01232	darR	1405034-1406005	1405034	1406005		18.3682	16.5851	20.1513	1.21502	0.280982	0.718747	1	transcription_regulator	similar to probable transcription regulator
PAU_01233	prpR	c1407700-1406018	1406018	1407700	c	16.1951	13.7705	18.6198	1.35215	0.435259	0.652802	1	propionate_catabolism_operon_regulatory_protein	propionate catabolism operon regulatory protein
PAU_01234	prpB	1408005-1408895	1408005	1408895		70.3353	57.9552	82.7153	1.42723	0.513216	0.489397	0.999716	2-methylisocitrate_lyase	methylisocitrate lyase (2-methylisocitrate lyase)
PAU_01235	prpC	1408957-1410123	1408957	1410123		53.7504	42.1713	65.3295	1.54915	0.631475	0.416499	0.98355	methylcitrate_synthase	2-methylcitrate synthase (methylcitrate synthase) (citrate synthas 2)
PAU_01236	prpD	1410182-1411633	1410182	1411633		77.366	69.917	84.815	1.21308	0.278676	0.673896	1	2-methylcitrate_dehydratase	2-methylcitrate dehydratase
PAU_01237	prpE	1411704-1413590	1411704	1413590		75.3481	60.3021	90.3941	1.49902	0.58402	0.440857	0.990202	propionyl-CoA_synthetase	propionate--coa ligase (propionyl-coa synthetase)
PAU_01238		c1415347-1413803	1413803	1415347	c	82.5344	23.6621	141.407	5.9761	2.5792	0.000988722	0.0921533	hypothetical_protein	conserved hypothetical protein
PAU_01239		c1415659-1415519	1415519	1415659	c	2.58902	0.299085	4.87895	16.3129	4.02794	0.0573775	0.73224	hypothetical_protein	Hypothetical protein
PAU_01240		1416470-1416952	1416470	1416952		23.4022	15.9443	30.8601	1.9355	0.952705	0.224602	0.98355	transmembrane_protein	Putative transmembrane protein
PAU_01241	oprC	1417168-1419186	1417168	1419186		34.7789	26.3255	43.2323	1.64222	0.715648	0.386614	0.98355	outer_membrane_receptor_protein	similar to outer membrane receptor protein
PAU_01242	metY	c1420572-1419298	1419298	1420572	c	21.3132	29.834	12.7923	0.428781	-1.22169	0.147695	0.96118	O-acetylhomoserine_aminocarboxypropyltransferase	o-acetylhomoserine sulfhydrylase
PAU_01243	norM	1421200-1422558	1421200	1422558		7.48602	6.64337	8.32866	1.25368	0.32617	0.758135	1	probable_multidrug_resistance_protein_norm_(multidrug-efflu_transporter)	probable multidrug resistance protein norm (multidrug-efflu transporter)
PAU_01244		1423413-1424159	1423413	1424159		1545.91	2236.21	855.604	0.382613	-1.38604	0.0513552	0.713602	hypothetical_protein	conserved hypothetical protein
PAU_01245		1424254-1425741	1424254	1425741		12.5052	11.1339	13.8765	1.24633	0.317691	0.744808	1	hypothetical_protein	conserved hypothetical protein
PAU_01246		1425794-1428793	1425794	1428793		22.9271	24.0071	21.8471	0.910027	-0.136019	0.87697	1	heme_receptorHasR/TonB-dependent_receptor	similarities with heme receptor hasr/tonb-dependent receptor
PAU_01247	tonB	1428877-1429689	1428877	1429689		11.4062	13.0879	9.72446	0.74301	-0.428546	0.648715	1	energy_transducer_TonB	similarities with energy transducer tonb. putative secreted protein
PAU_01248		c1430232-1429771	1429771	1430232	c	22.579	21.3461	23.8119	1.11551	0.15771	0.872842	1	hypothetical_protein	conserved hypothetical protein
PAU_01249	lip-1	1430666-1432615	1430666	1432615		25.1669	31.1458	19.188	0.616071	-0.698831	0.402295	0.98355	lipase_1_precursor	lipase 1 precursor
PAU_01250		1432640-1432984	1432640	1432984		19.4761	17.8033	21.1489	1.18792	0.248442	0.921565	1	hypothetical_protein	conserved hypothetical protein
PAU_01251		c1433436-1433161	1433161	1433436	c	14.9968	15.0011	14.9926	0.999434	-0.000816671	1	1	hypothetical_protein	conserved hypothetical protein
PAU_01252		1434139-1434270	1434139	1434270		10.9083	4.47881	17.3378	3.87107	1.95273	0.0527819	0.714587	hypothetical_protein	conserved hypothetical protein
PAU_01253	prpA	1434378-1434764	1434378	1434764		4.52504	3.81461	5.23548	1.37248	0.456786	0.709317	1	hypothetical_protein	conserved hypothetical protein
PAU_01254	ybcA	1435209-1435874	1435209	1435874		415.12	600.57	229.67	0.38242	-1.38677	0.0515646	0.713714	ybca_protein_transcriptional_activator	ybca protein transcriptional activator
PAU_01255		1436358-1436891	1436358	1436891		20.5507	20.8023	20.2991	0.975812	-0.0353254	1	1	hypothetical_protein	conserved hypothetical protein
PAU_01256		1436973-1437527	1436973	1437527		134.288	117.414	151.162	1.28743	0.364491	0.629809	1	hypothetical_protein	conserved hypothetical protein
PAU_01257	fic	1437582-1438175	1437582	1438175		25.3745	25.9763	24.7727	0.953666	-0.0684433	0.923032	1	cell_filamentation_protein_fic	cell filamentation protein fic
PAU_01258	scrK	1439326-1440261	1439326	1440261		99.6988	112.657	86.7406	0.769953	-0.377158	0.655522	1	aminoimidazole_riboside_kinase	fructokinase
PAU_01259		1440452-1441870	1440452	1441870		165.501	145.482	185.52	1.27521	0.35073	0.693489	1	glycoporin	similar to putative glycoporin. putative secreted protein
PAU_01260	scrA	1441940-1443310	1441940	1443310		55.8496	98.2502	13.4489	0.136884	-2.86897	0.33406	0.98355	PTS_system	PTS system, sucrose-specific IIBC
PAU_01261	scrB	1443310-1444716	1443310	1444716		14.4258	12.935	15.9166	1.2305	0.299246	0.769993	1	sucrose-6-phosphate_hydrolase	sucrose-6-phosphate hydrolase
PAU_01262		1444845-1445078	1444845	1445078		0.642318	0.965752	0.318884	0.330192	-1.59862	0.769273	1	hypothetical_protein	Hypothetical protein
PAU_01263	ISPlu16B	1445195-1445395	1445195	1445395		1.2189	1.01589	1.42192	1.39968	0.485094	1	1	transposase	transposase, is630 family
PAU_01264	psu	1445480-1445890	1445480	1445890		2.81209	2.93324	2.69093	0.917391	-0.124392	1	1	phage_polarity_suppression_protein	phage polarity suppression protein
PAU_01265	psu	1445805-1446032	1445805	1446032		36.5524	45.8938	27.211	0.592911	-0.754112	0.375947	0.98355	phage_polarity_suppression_protein	phage polarity suppression protein
PAU_01266		c1447868-1446240	1446240	1447868	c	13.0925	13.0862	13.0989	1.00097	0.00139867	1	1	hypothetical_protein	Hypothetical protein
PAU_01267		c1448902-1447865	1447865	1448902	c	5.24234	3.5272	6.95747	1.97252	0.980039	0.406186	0.98355	prophage_cp4-57_integrase	prophage cp4-57 integrase
PAU_01268		c1449622-1449497	1449497	1449622	c	392916	265057	520774	1.96476	0.974352	0.639048	1	hypothetical_protein	conserved hypothetical protein
PAU_01269	smpB	c1450152-1449670	1449670	1450152	c	404.471	309.928	499.015	1.6101	0.68715	0.349359	0.98355	SsrA-binding_protein	small protein b-RNA Binding protein
PAU_01270	yfjG	1450310-1450744	1450310	1450744		283.623	292.684	274.562	0.938083	-0.0922127	0.960011	1	hypothetical_protein	conserved hypothetical protein
PAU_01271	yfjF	1450737-1451030	1450737	1451030		194.73	182.309	207.152	1.13627	0.184311	0.7854	1	hypothetical_protein	conserved hypothetical protein
PAU_01272	smpA	c1451433-1451086	1451086	1451433	c	182.07	147.346	216.794	1.47132	0.557114	0.502713	1	hypothetical_protein	membrane protein-small protein a
PAU_01273	recN	c1453207-1451546	1451546	1453207	c	296.451	334.237	258.665	0.773897	-0.369787	0.580905	1	recombination_and_repair_protein	dna repair protein recn (recombination protein n)
PAU_01274	ppnK	c1454173-1453295	1453295	1454173	c	55.9144	57.3556	54.4732	0.949745	-0.0743873	0.943111	1	inorganic_polyphosphate/ATP-NAD_kinase	probable inorganic polyphosphate/ATP-NAD kinase
PAU_01275		c1454727-1454188	1454188	1454727	c	1112.62	1567.85	657.387	0.419291	-1.25398	0.129927	0.920299	hypothetical_protein	conserved hypothetical protein
PAU_01276	ung	c1455612-1454932	1454932	1455612	c	178.922	187.889	169.955	0.904551	-0.144727	0.895697	1	uracil-DNA_glycosylase	uracil-DNA glycosylase
PAU_01277	yplA	1456148-1457164	1456148	1457164		7.16673	8.02684	6.30663	0.785693	-0.347963	0.767799	1	phospholipase_a	phospholipase a
PAU_01278		1457180-1457767	1457180	1457767		5.86592	7.34428	4.38756	0.597412	-0.743202	0.56738	1	phospholipase_A_accessory_protein	similarities with phospholipase a accessory protein
PAU_01279		c1457984-1457799	1457799	1457984	c	0.465752	0.931503	0	0	#NAME?	0.49277	1	hypothetical_protein	hypothetical protein
PAU_01280		1458530-1459378	1458530	1459378		3.58302	4.73022	2.43582	0.514947	-0.957503	0.473942	0.99899	hypothetical_protein	hypothetical protein
PAU_01281		1459380-1460540	1459380	1460540		3.16221	4.29662	2.0278	0.471953	-1.08329	0.445863	0.991726	hypothetical_protein	conserved hypothetical protein
PAU_01282	pcrB	1460576-1461319	1460576	1461319		2.46738	3.31497	1.61978	0.488626	-1.0332	0.556929	1	hypothetical_protein	conserved hypothetical protein
PAU_01283	idi	1461335-1461865	1461335	1461865		5.55679	6.52894	4.58463	0.702201	-0.510043	0.652633	1	isopentenyl-diphosphate_delta-isomerase_1	isopentenyl-diphosphate delta-isomerase 1
PAU_01284		1461959-1463383	1461959	1463383		3.88886	5.46292	2.3148	0.423729	-1.23878	0.367636	0.98355	hypothetical_protein	conserved hypothetical protein
PAU_01285		1463955-1464353	1463955	1464353		0.436542	0.299085	0.573998	1.91918	0.940491	1	1	hypothetical_protein	conserved hypothetical protein
PAU_01286		1464350-1465063	1464350	1465063		2.35945	2.31497	2.40393	1.03843	0.0543997	1	1	hypothetical_protein	conserved hypothetical protein
PAU_01287		1465085-1465699	1465085	1465699		54.2126	49.8918	58.5335	1.17321	0.230461	0.78556	1	hypothetical_protein	conserved hypothetical protein
PAU_01288		1465968-1467188	1465968	1467188		55.6892	56.1652	55.2131	0.983048	-0.0246667	0.998495	1	hypothetical_protein	conserved hypothetical protein
PAU_01289		1467189-1467893	1467189	1467893		47.1818	44.9894	49.3741	1.09746	0.134168	0.881858	1	hypothetical_protein	conserved hypothetical protein
PAU_01290		1467931-1468821	1467931	1468821		20.4801	18.7362	22.2239	1.18615	0.246283	0.788237	1	hypothetical_protein	conserved hypothetical protein
PAU_01291		1468847-1469656	1468847	1469656		6.47901	4.68009	8.27794	1.76876	0.822736	0.463026	0.992271	hypothetical_protein	conserved hypothetical protein
PAU_01292		1469742-1470488	1469742	1470488		5.43215	5.57734	5.28696	0.947936	-0.0771378	1	1	hypothetical_protein	conserved hypothetical protein
PAU_01293		1470617-1472281	1470617	1472281		8.94967	12.8675	5.03185	0.391051	-1.35457	0.48813	0.99899	abc-transporter	putative abc-transporter, membrane protein
PAU_01294	hlyD	1472274-1473488	1472274	1473488		3.00089	2.69845	3.30333	1.22416	0.291795	0.91023	1	hemolysin_secretion_protein	similarities with hemolysin secretion protein
PAU_01295		1474299-1474817	1474299	1474817		2.67857	3.5272	1.82993	0.518806	-0.946734	0.478357	0.99899	hypothetical_protein	putative membrane protein
PAU_01296	srmB	c1476332-1474986	1474986	1476332	c	102.159	57.5131	146.804	2.55254	1.35193	0.0667042	0.784273	ATP-dependent_RNA_helicase_SrmB	[no /product]
PAU_01297	yfiC	1476485-1477219	1476485	1477219		130.92	117.32	144.519	1.23184	0.300811	0.642336	1	hypothetical_protein	conserved hypothetical protein
PAU_01298	nadB	c1478871-1477267	1477267	1478871	c	159.957	118.867	201.046	1.69135	0.758175	0.292994	0.98355	L-aspartate_oxidase	L-aspartate oxidase
PAU_01299	rpoE	1479074-1479643	1479074	1479643		172.408	149.407	195.409	1.30789	0.387246	0.559148	1	RNA_polymerase_sigma_factor_RpoE	rna polymerase, sigma-e factor
PAU_01300	rseA	1479683-1480336	1479683	1480336		314.307	282.503	346.111	1.22516	0.29297	0.693203	1	anti-RNA_polymerase_sigma_factor_SigE	sigma-e factor negative regulatory protein
PAU_01301	rseB	1480339-1481295	1480339	1481295		94.2145	70.8741	117.555	1.65864	0.730005	0.320755	0.98355	periplasmic_negative_regulator_of_sigmaE	sigma-e factor regulatory protein rseb
PAU_01302	rseC	1481295-1481759	1481295	1481759		75.2252	59.7946	90.6557	1.51612	0.600382	0.419337	0.98355	SoxR_reducing_system_protein_RseC	sigma-e factor regulatory protein rsec
PAU_01303	lepA	1481955-1483751	1481955	1483751		645.059	549.471	740.648	1.34793	0.430745	0.53382	1	GTP-binding_protein_LepA	gtp-binding protein lepa
PAU_01304	lepB	1483772-1484752	1483772	1484752		584.346	469.992	698.7	1.48662	0.572037	0.433217	0.988216	signal_peptidase_I	signal peptidase I
PAU_01305	rnc	1484922-1485602	1484922	1485602		386.353	322.715	449.991	1.39439	0.479635	0.494579	1	ribonuclease_III	ribonuclease III
PAU_01306	era	1485599-1486507	1485599	1486507		158.806	100.521	217.091	2.15966	1.11081	0.126922	0.919537	GTP-binding_protein_Era	gtp-binding protein era
PAU_01307	recO	1486518-1487243	1486518	1487243		86.673	65.088	108.258	1.66326	0.73401	0.309301	0.98355	DNA_repair_protein_RecO	dna repair protein reco (recombination protein o)
PAU_01308	pdxJ	1487393-1488124	1487393	1488124		648.111	675.229	620.993	0.919678	-0.120799	0.884682	1	pyridoxine_5'-phosphate_synthase	pyridoxine 5'-phosphate synthase
PAU_01309	acpS	1488124-1488504	1488124	1488504		70.0258	78.844	61.2075	0.776311	-0.365293	0.640188	1	4'-phosphopantetheinyl_transferase	holo-[acyl-carrier-protein] synthase
PAU_01310	yfhL	c1488767-1488507	1488507	1488767	c	42.3645	52.4158	32.3131	0.616476	-0.697883	0.35973	0.98355	ferredoxin-like_protein	similar to putative ferredoxin-like protein yfhl of escherichia coli
PAU_01311		c1489644-1489210	1489210	1489644	c	706.824	1200.3	213.343	0.177741	-2.49215	0.286944	0.98355	tail_fiber_assembly_protein	similar to probable tail fiber assembly protein
PAU_01312		c1490464-1489646	1489646	1490464	c	441.396	658.475	224.316	0.34066	-1.55359	0.0298606	0.587811	tail_fiber_protein	putative tail fiber protein
PAU_01313		c1491169-1490735	1490735	1491169	c	73.2142	99.965	46.4634	0.464796	-1.10533	0.19023	0.979635	tail_fiber_assembly_protein	tail fiber assembly protein
PAU_01314		c1491942-1491220	1491220	1491942	c	11.2675	12.7779	9.7571	0.763592	-0.389125	0.720072	1	tail_fiber_protein	putative tail fiber protein
PAU_01315		c1492779-1492345	1492345	1492779	c	329.135	329.72	328.551	0.996453	-0.00512611	0.991639	1	tail_fiber_protein_of_prophage_cp-933x_(tail_fiber_assembl_protein)	putative tail fiber protein of prophage cp-933x (tail fiber assembl protein)
PAU_01316		c1493668-1492835	1492835	1493668	c	303.477	299.805	307.148	1.02449	0.0349103	0.963196	1	tail_fiber_protein	putative tail fiber protein
PAU_01317		c1494971-1494243	1494243	1494971	c	59.3731	53.6904	65.0559	1.21169	0.277017	0.785041	1	tail_fiber_protein	putative tail fiber protein
PAU_01318		c1495555-1495427	1495427	1495555	c	0.166667	0.333333	0	0	#NAME?	0.999802	1	tail_fiber_protein_of_prophage_cp-933x_(tail_fiber_assembl_protein)	putative tail fiber protein of prophage cp-933x (tail fiber assembl protein)
PAU_01319		1495856-1496452	1495856	1496452		19.0262	18.7737	19.2787	1.0269	0.0382952	0.97921	1	tail_fiber_protein	putative tail fiber protein
PAU_01320		1496687-1497196	1496687	1497196		130.68	138.789	122.571	0.88315	-0.179269	0.861181	1	tRNA-specific_adenosine_deaminase	similar to ecoli yfhc protein, tRNA-specific adenosine deaminase
PAU_01321	adiA	c1499514-1497208	1497208	1499514	c	43.0522	52.3065	33.798	0.646152	-0.630054	0.423185	0.98355	biodegradative_arginine_decarboxylase	biodegradative arginine decarboxylase
PAU_01322	yfhD	c1500993-1499641	1499641	1500993	c	15.7659	14.6201	16.9116	1.15674	0.210067	0.844334	1	transglycosylase	conserved hypothetical protein
PAU_01323		1501097-1501195	1501097	1501195		1.38826	1.79451	0.982015	0.547233	-0.869773	0.752054	1	hypothetical_protein	hypothetical protein
PAU_01324	purL	1501313-1505218	1501313	1505218		264.282	138.494	390.071	2.81653	1.49392	0.0398046	0.643298	phosphoribosylformylglycinamidine_synthase	phosphoribosylformylglycinamidine synthase
PAU_01325		c1505505-1505326	1505326	1505505	c	41.4312	50.3572	32.5052	0.645493	-0.631527	0.419014	0.98355	hypothetical_protein	conserved hypothetical protein
PAU_01326	yfhK	1506271-1507746	1506271	1507746		284.004	476.51	91.4977	0.192016	-2.3807	0.396381	0.98355	two-component_signal_transduction_system	two-component signal transduction system,sensor-like His kinase regulatory protein
PAU_01327		1507746-1508582	1507746	1508582		104.86	92.1985	117.521	1.27466	0.350108	0.63739	1	hypothetical_protein	conserved hypothetical protein
PAU_01328	yfhA	1508579-1509916	1508579	1509916		167.103	126.449	207.756	1.64301	0.716342	0.332266	0.98355	2-component_transcriptional_regulator	similar to putative 2-component transcriptional regulator yfha o escherichia coli
PAU_01329	nadE	1509984-1511606	1509984	1511606		198.505	154.805	242.206	1.56459	0.645786	0.352767	0.98355	NAD_synthetase	nh(3)-dependent nad+ synthetase
PAU_01330	glnB	1511622-1511960	1511622	1511960		246.334	241.469	251.2	1.0403	0.056999	0.918031	1	nitrogen_regulatory_protein_P-II_1	nitrogen regulatory protein p-ii.1
PAU_01331	ehpF	1512601-1513674	1512601	1513674		33.1654	47.6596	18.6713	0.391763	-1.35195	0.11622	0.915487	hypothetical_protein	conserved hypothetical protein
PAU_01332	ehpG	1513811-1514974	1513811	1514974		12.6541	15.3344	9.97381	0.65042	-0.620555	0.526518	1	hypothetical_protein	conserved hypothetical protein
PAU_01333	ehpG	1514992-1515285	1514992	1515285		12.1745	13.9099	10.4391	0.750476	-0.414123	0.700072	1	hypothetical_protein	conserved hypothetical protein
PAU_01334		1515539-1515793	1515539	1515793		0.826828	1.01589	0.637767	0.627792	-0.671641	0.994224	1	hypothetical_protein	conserved hypothetical protein
PAU_01335		1515951-1516085	1515951	1516085		8.33257	11.5834	5.08178	0.438714	-1.18865	0.188217	0.97956	transposase	transposase, is4 family
PAU_01336		1516072-1516329	1516072	1516329		1.41677	1.01589	1.81765	1.78922	0.83933	0.711123	1	hypothetical_protein	conserved hypothetical protein
PAU_01337		c1520857-1516676	1516676	1520857	c	152.971	143.63	162.312	1.13007	0.176408	0.79184	1	protein_involved_in_amino_acid_adenylation	putative protein involved in amino acid adenylation
PAU_01338	mxcG	c1524811-1520921	1520921	1524811	c	112.13	94.3916	129.868	1.37584	0.460315	0.519493	1	acyl_carrier_protein	similar to acyl carrier protein
PAU_01339	mchD	c1525303-1524848	1524848	1525303	c	185.56	170.155	200.964	1.18106	0.240088	0.708808	1	hypothetical_protein	conserved hypothetical protein
PAU_01340	mchC	c1526857-1525322	1525322	1526857	c	210.183	175.39	244.976	1.39675	0.482071	0.498854	1	hypothetical_protein	conserved hypothetical protein
PAU_01341		c1526989-1526870	1526870	1526989	c	326.075	338.443	313.707	0.926912	-0.109496	0.905219	1	hypothetical_protein	hypothetical protein
PAU_01342	mchB	c1527748-1527431	1527431	1527748	c	820.187	927.044	713.329	0.769466	-0.378071	0.583813	1	mchb_protein_(microcin_h47)	mchb protein (microcin h47)
PAU_01343	mclA	1528927-1530213	1528927	1530213		7.45995	5.57734	9.34256	1.67509	0.744241	0.479102	0.99899	microcin_h47_secretion_protein	microcin h47 secretion protein
PAU_01344	mchF	1530301-1530645	1530301	1530645		5.57649	3.57734	7.57564	2.11767	1.08248	0.366359	0.98355	microcin_l_transport_protein	putative microcin l transport protein
PAU_01345	mchF	1530685-1532322	1530685	1532322		11.6018	10.4898	12.7139	1.21203	0.277423	0.899015	1	probable_microcin_h47_secretion_atp-binding_protein	probable microcin h47 secretion atp-binding protein
PAU_01346		1533051-1533272	1533051	1533272		39.0808	35.2088	42.9528	1.21995	0.286816	0.82617	1	hypothetical_protein	hypothetical protein
PAU_01347		1533310-1533807	1533310	1533807		44.4271	44.4309	44.4234	0.999832	-0.000241847	0.987059	1	hypothetical_protein	conserved hypothetical protein
PAU_01348		1533804-1534145	1533804	1534145		58.7715	51.1268	66.4161	1.29905	0.377452	0.625006	1	hypothetical_protein	conserved hypothetical protein
PAU_01349		1534147-1534920	1534147	1534920		180.26	202.377	158.143	0.781428	-0.355815	0.605748	1	hypothetical_protein	conserved hypothetical protein
PAU_01350		1534933-1535655	1534933	1535655		349.354	444.279	254.428	0.572677	-0.804206	0.239105	0.98355	hypothetical_protein	conserved hypothetical protein
PAU_01351		1535701-1536057	1535701	1536057		42.4852	50.5795	34.3908	0.679934	-0.556532	0.448354	0.992175	hypothetical_protein	conserved hypothetical protein
PAU_01352	hmpA	c1537501-1536311	1536311	1537501	c	9.62833	10.3736	8.88306	0.856315	-0.223786	0.853708	1	nitric_oxide_dioxygenase	flavohemoprotein (hemoglobin-like protein)
PAU_01353	N	1537575-1537694	1537575	1537694		1.72973	1.49542	1.96403	1.31336	0.393262	1	1	hypothetical_protein	hypothetical protein
PAU_01354	glyA	1537867-1539120	1537867	1539120		1493.37	593.874	2392.87	4.02925	2.01051	0.00689775	0.302363	serine_hydroxymethyltransferase	serine hydroxymethyltransferase
PAU_01355	hcaT	1539304-1540449	1539304	1540449		101.826	59.0978	144.555	2.44602	1.29044	0.0773577	0.823909	3-phenylpropionic_acid_transporter	mfs (major facilitator superfamily) transporter (probable 3 phenylpropionic acid transporter)
PAU_01356	treR	1540524-1541471	1540524	1541471		43.3781	32.404	54.3522	1.67733	0.746167	0.325489	0.98355	trehalose_repressor	trehalose operon repressor
PAU_01357	treB	1541616-1543055	1541616	1543055		549.13	560.274	537.985	0.960216	-0.0585685	0.959403	1	PTS_system_trehalose(maltose)-specific_transporter_subunits_IIBC	pts system, trehalose-specific iibc component (eiibc-tre) (trehalose permease iibc component) (phosphotransferase enzyme ii, bc component (eii-tre)
PAU_01358	treC	1543131-1544792	1543131	1544792		1501.48	1353.06	1649.89	1.21938	0.286148	0.694653	1	trehalose-6-phosphate_hydrolase	trehalose-6-phosphate hydrolase
PAU_01359	suhB	c1545682-1544879	1544879	1545682	c	98.7064	84.0753	113.338	1.34805	0.430873	0.541406	1	inositol_monophosphatase	inositol-1-monophosphatase
PAU_01360	trmJ	1545754-1546533	1545754	1546533		55.4374	43.3648	67.5099	1.55679	0.638573	0.384086	0.98355	tRNA_(cytidine/uridine-2'-O-)-methyltransferase_TrmJ	tRNA (cytidine/uridine-2'-O-)-methyltransferase TrmJ
PAU_01361	iscR	1546621-1547115	1546621	1547115		451.693	217.294	686.092	3.15744	1.65876	0.0224239	0.518368	DNA-binding_transcriptional_regulator_IscR	hth-type transcriptional regulator iscr
PAU_01362	iscS	1547166-1548380	1547166	1548380		465.534	254.664	676.403	2.65606	1.40929	0.0529731	0.714587	cysteine_desulfurase	cysteine desulfurase
PAU_01363	nifU	1548406-1548792	1548406	1548792		415.244	265.653	564.836	2.12622	1.08829	0.121779	0.918571	scaffold_protein	nifu protein
PAU_01364	iscA	1548896-1549219	1548896	1549219		374.584	267.296	481.872	1.80277	0.850211	0.261032	0.98355	iron-sulfur_cluster_assembly_protein	iron-binding protein isca (iron-sulfur cluster assembly protein)
PAU_01365	hscB	1549259-1549780	1549259	1549780		185.985	136.591	235.378	1.72323	0.785116	0.279867	0.98355	co-chaperone_HscB	co-chaperone protein hscb (hsc20)
PAU_01366	hscA	1549792-1551642	1549792	1551642		208.828	146.497	271.159	1.85095	0.888263	0.230281	0.98355	chaperone_protein_HscA	chaperone protein hsca (hsc66)
PAU_01367	fdx	1551645-1551980	1551645	1551980		488.969	565.373	412.566	0.729723	-0.454579	0.692747	1	ferredoxin	ferredoxin, 2fe-2s
PAU_01368		1551999-1552199	1551999	1552199		239.946	195.078	284.813	1.46	0.545964	0.440224	0.990202	hypothetical_protein	conserved hypothetical protein
PAU_01369	pepB	1552383-1553678	1552383	1553678		482.141	405.77	558.512	1.37643	0.460927	0.532706	1	aminopeptidase_B	peptidase B
PAU_01370		1553713-1554135	1553713	1554135		113.269	115.478	111.061	0.96175	-0.0562668	0.903787	1	hypothetical_protein	conserved hypothetical protein
PAU_01371		1554160-1554315	1554160	1554315		27.9906	34.0874	21.8937	0.64228	-0.638726	0.675255	1	hypothetical_protein	hypothetical protein
PAU_01372	cysK	1554902-1555813	1554902	1555813		30.1536	44.8559	15.4513	0.344465	-1.53757	0.0532123	0.714587	cysteine_synthase	cysteine synthase
PAU_01373		1555831-1557111	1555831	1557111		21.178	27.8368	14.5192	0.521585	-0.939027	0.257724	0.98355	hypothetical_protein	conserved hypothetical protein
PAU_01374		1557343-1557516	1557343	1557516		26.7161	35.2384	18.1937	0.516304	-0.953706	0.237874	0.98355	hypothetical_protein	hypothetical protein
PAU_01375		1557518-1558144	1557518	1558144		11.761	15.1614	8.36055	0.551438	-0.85873	0.439585	0.990202	hypothetical_protein	conserved hypothetical protein
PAU_01376		1558536-1558640	1558536	1558640		0.448627	0.897255	0	0	#NAME?	0.538207	1	hypothetical_protein	hypothetical protein
PAU_01377		1558650-1558850	1558650	1558850		1.12828	1.68256	0.573998	0.341147	-1.55154	0.652854	1	hypothetical_protein	hypothetical protein
PAU_01378		1559007-1559807	1559007	1559807		235.739	467.512	3.96647	0.00848421	-6.881	0.0966902	0.878723	hypothetical_protein	conserved hypothetical protein
PAU_01379		c1560687-1560553	1560553	1560687	c	246.177	119.947	372.406	3.10476	1.63448	0.263735	0.98355	hypothetical_protein	conserved hypothetical protein
PAU_01380		1560858-1565894	1560858	1565894		35.2616	38.1945	32.3287	0.846424	-0.240547	0.73576	1	hypothetical_protein	conserved hypothetical protein
PAU_01381	pbpC	1565949-1568267	1565949	1568267		197.575	371.13	24.0205	0.0647226	-3.94959	0.149511	0.96118	penicillin-binding_protein_1C	penicillin-binding protein 1c
PAU_01382	ndk	1568411-1568917	1568411	1568917		2257.96	2521.88	1994.05	0.790699	-0.3388	0.772134	1	nucleoside_diphosphate_kinase	nucleoside diphosphate kinase
PAU_01383	yfgB	1569101-1570279	1569101	1570279		139.484	131.186	147.782	1.1265	0.171848	0.824619	1	ribosomal_RNA_large_subunit_methyltransferase_N	conserved hypothetical protein
PAU_01384	pilF	1570363-1570764	1570363	1570764		54.6359	48.0258	61.246	1.27527	0.350804	0.619147	1	fimbrial_biogenesis_protein	putative fimbrial biogenesis protein
PAU_01385	yfgA	1570886-1571881	1570886	1571881		304.974	294.375	315.574	1.07201	0.100322	0.879784	1	cytoskeletal_protein_RodZ	conserved hypothetical protein
PAU_01386	ispG	1571952-1573073	1571952	1573073		578.608	635.246	521.97	0.821681	-0.283349	0.676751	1	4-hydroxy-3-methylbut-2-en-1-yl_diphosphate_synthase	4-hydroxy-3-methylbut-2-en-1-yl diphosphate synthase
PAU_01387	hisS	1573194-1574471	1573194	1574471		281.07	247.827	314.312	1.26827	0.342866	0.625201	1	histidyl-tRNA_synthetase	histidyl-tRNA synthetase
PAU_01388		1574483-1575103	1574483	1575103		760.712	775.805	745.62	0.961091	-0.057255	0.942545	1	hypothetical_protein	conserved hypothetical protein
PAU_01389		1575117-1576289	1575117	1576289		504.457	465.129	543.786	1.16911	0.225406	0.751815	1	outer_membrane_protein_assembly_complex_subunit_YfgL	conserved hypothetical protein
PAU_01390	engA	1576558-1578057	1576558	1578057		247.059	183.974	310.145	1.68581	0.753441	0.297242	0.98355	GTP-binding_protein_EngA	gtp-binding protein enga (double era-like domain protein)
PAU_01391		c1578396-1578079	1578079	1578396	c	101.548	131.022	72.0742	0.550094	-0.862251	0.42416	0.98438	hypothetical_protein	conserved hypothetical protein
PAU_01392		c1579668-1578556	1578556	1579668	c	182.112	203.141	161.083	0.79296	-0.334681	0.647895	1	extracellular_metalloproteinase-like_protein	similar to extracellular metalloproteinase
PAU_01393	hemF	c1580808-1579900	1579900	1580808	c	104.538	94.7218	114.355	1.20727	0.27175	0.715851	1	coproporphyrinogen_III_oxidase	coproporphyrinogen 3 oxidase, aerobic
PAU_01394	ypeA	1580947-1581378	1580947	1581378		62.7122	76.1685	49.2559	0.64667	-0.628897	0.425975	0.985865	acetyltransferase	conserved hypothetical protein
PAU_01395	ygiW	c1581841-1581422	1581422	1581841	c	241.511	266.713	216.308	0.811016	-0.302198	0.706775	1	hypothetical_protein	conserved hypothetical protein
PAU_01396		1582022-1582630	1582022	1582630		226.441	220.908	231.973	1.05009	0.0705072	0.910379	1	hypothetical_protein	conserved hypothetical protein
PAU_01397	cysP	1582926-1583948	1582926	1583948		77.7968	105.573	50.0203	0.473797	-1.07766	0.15098	0.96118	thiosulfate_transporter_subunit	thiosulfate-binding protein cysp
PAU_01398	cysU	1583948-1584781	1583948	1584781		72.7056	102.527	42.8838	0.418267	-1.25751	0.0921715	0.878521	sulfate/thiosulfate_transporter_subunit	sulfate, thiosulfate transport system permease t protein (sulfat transport system permease t protein)
PAU_01399	cysW	1584781-1585626	1584781	1585626		27.8482	34.6328	21.0637	0.608199	-0.717384	0.362063	0.98355	sulfate/thiosulfate_transporter_permease_subunit	sulfate transport system permease protein cysw
PAU_01400	cysA	1585619-1586728	1585619	1586728		88.4247	115.687	61.1625	0.52869	-0.919505	0.223701	0.98355	sulfate/thiosulfate_transporter_subunit	sulfate/thiosulfate import ATP-binding protein
PAU_01401	cysM	1586868-1587749	1586868	1587749		269.513	327.639	211.387	0.645182	-0.632221	0.402658	0.98355	cysteine_synthase_B	cysteine synthase B
PAU_01402	crr	c1588602-1588093	1588093	1588602	c	1517.32	1627.87	1406.77	0.864181	-0.210594	0.753255	1	PTS_system_glucose-specific_transporter_subunit	glucose-specific phosphotransferase enzyme IIA component
PAU_01403	ptsI	c1590379-1588652	1588652	1590379	c	898.309	746.488	1050.13	1.40676	0.492378	0.507207	1	phosphoenolpyruvate-protein_phosphotransferase	phosphoenolpyruvate-protein phosphotransferase (phosphotransferas system, enzyme i)
PAU_01404	ptsH	c1590821-1590564	1590564	1590821	c	2844.5	1845.31	3843.7	2.08295	1.05863	0.160998	0.963101	PTS_system_phosphohistidinoprotein-hexose_phosphotransferase_subunit_Hpr	phosphocarrier protein hpr (histidine-containing protein)
PAU_01405	cysK	c1592103-1591150	1591150	1592103	c	597.267	863.555	330.979	0.383275	-1.38355	0.0563242	0.730526	cysteine_synthase	cysteine synthase
PAU_01406	cysZ	c1593001-1592225	1592225	1593001	c	61.9946	54.1537	69.8355	1.28958	0.366901	0.609806	1	sulfate_transport_protein_CysZ	sulfate transport protein cysz involved in cysteine synthesis
PAU_01407	zipA	1593222-1594133	1593222	1594133		642.443	545.849	739.037	1.35392	0.437143	0.589921	1	cell_division_protein_ZipA	cell division protein zipa homolog
PAU_01408	ligA	1594195-1596213	1594195	1596213		56.8854	38.2027	75.5681	1.97808	0.984101	0.191358	0.981457	NAD-dependent_DNA_ligase_LigA	DNA ligase
PAU_01409	nupC	1596383-1597750	1596383	1597750		107.744	87.4062	128.082	1.46537	0.551264	0.453761	0.992271	nucleoside_permease_nupc	nucleoside permease nupc
PAU_01410		1597835-1598059	1597835	1598059		110.885	102.745	119.026	1.15846	0.21221	0.780592	1	hypothetical_protein	conserved hypothetical protein
PAU_01411	gltX	c1600029-1598611	1598611	1600029	c	127.026	75.2116	178.84	2.37782	1.24964	0.0854613	0.853102	glutamyl-tRNA_synthetase	glutamyl-tRNA synthetase
PAU_01412	glk	1601964-1602929	1601964	1602929		222.391	228.49	216.293	0.946616	-0.0791482	0.87767	1	glucokinase	glucokinase
PAU_01413	vacJ	1604248-1605000	1604248	1605000		94.4713	96.7706	92.172	0.952479	-0.0702409	0.967694	1	vacj_lipoprotein	vacj lipoprotein
PAU_01414	fadL	c1606401-1605076	1605076	1606401	c	1281.67	1360.5	1202.85	0.884127	-0.177674	0.803056	1	long-chain_fatty_acid_outer_membrane_transporter	outer membrane protein
PAU_01415		1606753-1607034	1606753	1607034		33.7776	40.7684	26.7867	0.657046	-0.605935	0.366358	0.98355	hypothetical_protein	conserved hypothetical protein
PAU_01416	fadI	1607326-1608636	1607326	1608636		60.6238	70.9491	50.2985	0.708937	-0.49627	0.473792	0.99899	3-ketoacyl-CoA_thiolase	3-ketoacyl-CoA thiolase
PAU_01417	fadJ	1608636-1610819	1608636	1610819		73.0968	88.8559	57.3378	0.64529	-0.631981	0.365893	0.98355	multifunctional_fatty_acid_oxidation_complex_subunit_alpha	fatty acid oxidation complex subunit alpha
PAU_01418	sixA	1611153-1611635	1611153	1611635		50.6674	64.1043	37.2305	0.58078	-0.783937	0.327467	0.98355	phosphohistidine_phosphatase	phosphohistidine phosphatase sixa (rx6)
PAU_01419	yfcN	c1612185-1611640	1611640	1612185	c	38.613	37.4517	39.7743	1.06201	0.0868041	0.893725	1	hypothetical_protein	conserved hypothetical protein
PAU_01420	hutI	1612419-1613663	1612419	1613663		130.988	104.112	157.864	1.51629	0.600548	0.401753	0.98355	imidazolonepropionase	imidazolonepropionase
PAU_01421	hutG	1613681-1614637	1613681	1614637		168.042	140.688	195.397	1.38887	0.473912	0.525847	1	formimidoylglutamase	formimidoylglutamase
PAU_01422	hutC	1614745-1615476	1614745	1615476		135.495	136.587	134.404	0.984022	-0.0232379	0.994631	1	hutc_protein_(gntr-family_transcriptional_regulatory_protein_(repressor)	hutc protein (putative gntr-family transcriptional regulatory protein (putative repressor)
PAU_01423	hutU	1615920-1617599	1615920	1617599		225.223	187.996	262.45	1.39604	0.481336	0.613021	1	urocanate_hydratase	urocanate hydratase
PAU_01424	hutH	1617608-1619152	1617608	1619152		302.032	259.271	344.793	1.32986	0.411273	0.549445	1	histidine_ammonia-lyase	histidine ammonia-lyase
PAU_01425		1619238-1620629	1619238	1620629		103.926	117.439	90.4126	0.769866	-0.377321	0.639618	1	amino_acid_permease	amino acid permease
PAU_01426		1620865-1621797	1620865	1621797		148.714	137.039	160.389	1.17039	0.226987	0.748264	1	N5-glutamine_S-adenosyl-L-methionine-dependent_methyltransferase	conserved hypothetical protein
PAU_01427	aroC	1621878-1622963	1621878	1622963		132.563	117.539	147.587	1.25564	0.328423	0.640639	1	chorismate_synthase	chorismate synthase
PAU_01428		1623051-1623851	1623051	1623851		35.787	32.6346	38.9393	1.19319	0.254826	0.738972	1	hypothetical_protein	putative permease (putative membrane protein)
PAU_01429		1623875-1624426	1623875	1624426		81.5129	68.7616	94.2642	1.37088	0.455107	0.576057	1	hypothetical_protein	conserved hypothetical protein
PAU_01430		1624448-1624726	1624448	1624726		174.447	138.794	210.101	1.51377	0.598141	0.423281	0.98355	hypothetical_protein	conserved hypothetical protein
PAU_01431		c1625139-1624837	1624837	1625139	c	369.381	412.452	326.309	0.791146	-0.337985	0.616221	1	hypothetical_protein	conserved hypothetical protein
PAU_01432	dinJ	c1625434-1625135	1625135	1625434	c	98.7713	124.777	72.7657	0.583167	-0.77802	0.479303	0.99899	damage-inducible_protein_j_(damage-inducible_protein_dinj)	damage-inducible protein j (damage-inducible protein dinj)
PAU_01433	yfcK	c1627607-1625538	1625538	1627607	c	30.8211	27.3789	34.2632	1.25145	0.323598	0.673195	1	5-methylaminomethyl-2-thiouridine_methyltransferase	conserved hypothetical protein
PAU_01434		c1628475-1627777	1627777	1628475	c	15.0312	13.7705	16.2919	1.18311	0.242578	0.86204	1	lysine_exporter_protein_(lyse/ygga)	lysine exporter protein (lyse/ygga)
PAU_01435	lrp	1628603-1629061	1628603	1629061		26.1048	30.2988	21.9109	0.72316	-0.467613	0.556125	1	leucine-responsive_regulatory_protein	leucine-responsive regulatory protein
PAU_01436		c1630179-1629676	1629676	1630179	c	2.43004	3.64831	1.21177	0.332145	-1.59012	0.388047	0.98355	hypothetical_protein	hypothetical protein
PAU_01437	env	c1630949-1630722	1630722	1630949	c	2.78481	3.17798	2.39165	0.752568	-0.410106	0.888553	1	hypothetical_protein	hypothetical protein
PAU_01438	fabB	1630971-1632185	1630971	1632185		506.812	446.642	566.982	1.26943	0.344186	0.611178	1	3-oxoacyl-(acyl_carrier_protein)_synthase_I	3-oxoacyl-[acyl-carrier-protein] synthase i (beta-ketoacyl-ac synthase i) (kas i)
PAU_01439		1632433-1632879	1632433	1632879		90.1407	73.73	106.551	1.44516	0.531226	0.451021	0.992271	hypothetical_protein	conserved hypothetical protein
PAU_01440	tctA	c1634732-1633212	1633212	1634732	c	154.562	10.1045	299.019	29.5926	4.88716	1.34e-08	1.14e-05	hypothetical_protein	putative membrane protein
PAU_01441	tctB	c1635174-1634743	1634743	1635174	c	249.966	10.9149	489.018	44.8026	5.48551	3.32e-07	0.000156824	hypothetical_protein	conserved hypothetical protein
PAU_01442	tctC	c1636169-1635189	1635189	1636169	c	1134.51	54.442	2214.58	40.6777	5.34617	2.77e-10	5.88e-07	hypothetical_protein	conserved hypothetical protein
PAU_01443		1636544-1637185	1636544	1637185		946.092	133.329	1758.85	13.1918	3.72157	0.000185956	0.0342015	hypothetical_protein	conserved hypothetical protein
PAU_01444		1637609-1638232	1637609	1638232		427.381	83.1971	771.566	9.27395	3.21318	3.39373e-05	0.0111001	hypothetical_protein	conserved hypothetical protein
PAU_01445	tctD	1638852-1639520	1638852	1639520		94.8849	21.2475	168.522	7.93138	2.98757	0.000161687	0.0342015	two-component_response_regulator	two-component response regulator
PAU_01446	tctE	1639517-1640938	1639517	1640938		67.5196	20.0304	115.009	5.74172	2.52148	0.00129853	0.105139	sensor_protein	sensor protein
PAU_01447	rhaT12	c1641833-1640919	1640919	1641833	c	144.179	81.3389	207.02	2.54515	1.34775	0.0663564	0.783743	hypothetical_protein	putative membrane protein
PAU_01448		1642170-1642337	1642170	1642337		9.96781	5.73943	14.1962	2.47345	1.30652	0.164666	0.964687	hypothetical_protein	conserved hypothetical protein
PAU_01449	pdxB	1642427-1643554	1642427	1643554		358.841	299.777	417.905	1.39405	0.479285	0.469245	0.997616	erythronate-4-phosphate_dehydrogenase	erythronate-4-phosphate dehydrogenase
PAU_01450	usg	1643611-1644621	1643611	1644621		186.459	137.604	235.314	1.71009	0.77407	0.277312	0.98355	semialdehyde_dehydrogenase	usg-1 protein
PAU_01451	truA	1644663-1645457	1644663	1645457		180.514	135.961	225.066	1.65536	0.727149	0.286865	0.98355	tRNA_pseudouridine_synthase_A	tRNA pseudouridine synthase A
PAU_01452	dedA	1645504-1646193	1645504	1646193		207.997	175.206	240.787	1.37431	0.458706	0.519065	1	hypothetical_protein	deda protein (dsg-1 protein)
PAU_01453	accD	1646295-1647236	1646295	1647236		864.67	1031.18	698.163	0.677054	-0.562657	0.430856	0.986418	acetyl-CoA_carboxylase_subunit_beta	acetyl-coenzyme a carboxylase carboxyl transferase subunit bet (accase beta chain)
PAU_01454	folC	1647229-1648527	1647229	1648527		874.188	919.508	828.867	0.901424	-0.149722	0.815517	1	bifunctional_folylpolyglutamate_synthase/_dihydrofolate_synthase	Folylpolyglutamate synthase-folc bifunctional protein
PAU_01455	dedD	1648517-1649209	1648517	1649209		290.796	250.406	331.186	1.3226	0.403375	0.575789	1	hypothetical_protein	putative membrane protein
PAU_01456	cvpA	1649409-1649915	1649409	1649915		655.012	282.837	1027.19	3.63173	1.86066	0.0194927	0.481877	colicin_V_production_protein	colicin v production protein (dede protein) (pur regulon 18 kd protein)
PAU_01457	purF	1649930-1651447	1649930	1651447		617.782	266.344	969.221	3.63898	1.86353	0.0594454	0.743417	amidophosphoribosyltransferase	amidophosphoribosyltransferase (glutamine phosphoribosylpyrophosphat amidotransferase) (atase) (gpatase)
PAU_01458	ubiX	1651491-1652075	1651491	1652075		698.957	436.692	961.221	2.20114	1.13825	0.112473	0.915182	3-octaprenyl-4-hydroxybenzoate_carboxy-lyase	3-octaprenyl-4-hydroxybenzoate carboxy-lyase
PAU_01459		c1652970-1652056	1652056	1652970	c	33.9457	24.5685	43.323	1.76336	0.818325	0.3025	0.98355	sugar_nucleotide_epimerase	similar to putative sugar nucleotide epimerase yfch protein o escherichia coli
PAU_01460	yfcG	c1653718-1653098	1653098	1653718	c	200.214	255.339	145.09	0.568225	-0.815466	0.37713	0.98355	s-transferase	putative s-transferase
PAU_01461	pdl	1654444-1656336	1654444	1656336		8.51842	6.11369	10.9231	1.78667	0.837272	0.426998	0.986418	hypothetical_protein	conserved hypothetical protein
PAU_01462	yfcD	1656778-1657323	1656778	1657323		264.985	237.821	292.148	1.22844	0.296823	0.693644	1	hypothetical_protein	conserved hypothetical protein
PAU_01463		1657795-1658085	1657795	1658085		0.785817	0.965752	0.605883	0.627369	-0.672613	0.993991	1	hypothetical_protein	conserved hypothetical protein
PAU_01464		1658369-1658563	1658369	1658563		6.05253	7.36017	4.74489	0.644671	-0.633365	0.691808	1	hypothetical_protein	conserved hypothetical protein
PAU_01465		1658544-1658891	1658544	1658891		1.22958	1.59817	0.860997	0.53874	-0.89234	0.83303	1	hypothetical_protein	conserved hypothetical protein
PAU_01466		c1659233-1658916	1658916	1659233	c	0.166667	0.333333	0	0	#NAME?	0.999802	1	hypothetical_protein	conserved hypothetical protein
PAU_01467		c1659362-1659255	1659255	1659362	c	0.453666	0.333333	0.573998	1.72199	0.784081	1	1	hypothetical_protein	conserved hypothetical protein
PAU_01468	lsrG	c1660109-1659810	1659810	1660109	c	535.2	963.216	107.185	0.111279	-3.16775	0.0940676	0.878521	autoinducer-2_(AI-2)_modifying_protein_LsrG	conserved hypothetical protein
PAU_01469	lsrF	c1660996-1660121	1660121	1660996	c	895.197	1545.32	245.075	0.158592	-2.65661	0.000685758	0.0788066	aldolase	putative aldolase yneb
PAU_01470	lsrR	1661683-1662690	1661683	1662690		247.396	437.912	56.8791	0.129887	-2.94467	0.308592	0.98355	transcriptional_regulator	putative transcriptional regulator, sorc family (putative sorc-typ transcriptional regulator)
PAU_01471		1662777-1664369	1662777	1664369		37.8908	45.1667	30.6149	0.67782	-0.561026	0.45546	0.992271	autoinducer-2_(AI-2)_kinase	conserved hypothetical protein
PAU_01472	sypC	1666017-1675949	1666017	1675949		5.12094	4.79625	5.44563	1.13539	0.183192	0.941206	1	syringomycin_synthetase-like_protein	similar to different toxins like syringomycin synthetase and gramicidin s synthase 2
PAU_01473	cdiA	c1676888-1676439	1676439	1676888	c	0.351177	0.383471	0.318884	0.831572	-0.266087	1	1	haemagglutinin_cdia	putative haemagglutinin cdia
PAU_01474		c1677312-1677121	1677121	1677312	c	0.204008	0	0.408017	Inf	Inf	1	1	hypothetical_protein	Hypothetical protein
PAU_01475		c1677487-1677326	1677326	1677487	c	0.316209	0.632418	0	0	#NAME?	0.701968	1	hypothetical_protein	Hypothetical protein
PAU_01476		c1678544-1677807	1677807	1678544	c	12.7532	18.154	7.35241	0.405003	-1.30399	0.151286	0.96118	hypothetical_protein	conserved hypothetical protein
PAU_01477		c1678803-1678561	1678561	1678803	c	3.31711	4.56145	2.07276	0.454409	-1.13794	0.479487	0.99899	hypothetical_protein	conserved hypothetical protein
PAU_01478	cdiA	c1679423-1678800	1678800	1679423	c	23.458	29.6797	17.2363	0.580744	-0.784027	0.338521	0.98355	haemagluttinin-like_protein	similar to haemagluttinin from E.coli-cdia
PAU_01479		c1679929-1679474	1679474	1679929	c	4.6342	7.04273	2.22567	0.316023	-1.6619	0.195047	0.98355	hypothetical_protein	conserved hypothetical protein
PAU_01480		c1680652-1679933	1679933	1680652	c	5.90692	6.16383	5.65002	0.91664	-0.125572	0.986057	1	hypothetical_protein	conserved hypothetical protein
PAU_01481		c1681157-1680939	1680939	1681157	c	42.4911	44.7662	40.216	0.898356	-0.154641	0.811127	1	hypothetical_protein	conserved hypothetical protein
PAU_01482		c1681780-1681154	1681154	1681780	c	21.5694	24.1232	19.0155	0.788266	-0.343245	0.678363	1	hypothetical_protein	conserved hypothetical protein
PAU_01483	fhaB2	c1682773-1682096	1682096	1682773	c	11.5155	12.4898	10.5412	0.843992	-0.244699	0.832718	1	hypothetical_protein	conserved hypothetical protein
PAU_01484		c1683512-1682961	1682961	1683512	c	38.945	44.3521	33.5379	0.756174	-0.40321	0.636422	1	hypothetical_protein	conserved hypothetical protein
PAU_01485		c1692535-1683515	1683515	1692535	c	1.1271	1.64831	0.605883	0.367579	-1.44387	0.652939	1	adhesin/hemagglutinin/hemolysin	putative adhesin/hemagglutinin/hemolysin
PAU_01486		c1693911-1692592	1692592	1693911	c	0.149542	0.299085	0	0	#NAME?	0.999789	1	hemolysin_activator_hlyb	putative hemolysin activator hlyb
PAU_01487		1693967-1694473	1693967	1694473		0	0	0	NA	NA	NA	NA	transposase_is3/is911	transposase is3/is911
PAU_01488	yadA	1694542-1695315	1694542	1695315		0	0	0	NA	NA	NA	NA	yada_protein	yada protein
PAU_01489		c1695686-1695339	1695339	1695686	c	7.46951	7.12711	7.81191	1.09608	0.132358	0.909057	1	hemolysin_activator_hlyb	putative hemolysin activator hlyb
PAU_01490		c1696412-1696131	1696131	1696412	c	0.494677	0.383471	0.605883	1.58	0.659922	1	1	IS30_family_transposase	putative IS30 family transposase
PAU_01491	sypB	1697532-1713905	1697532	1713905		4.43938	4.44703	4.43173	0.99656	-0.00497112	1	1	syringopeptin_synthetase_b	syringopeptin synthetase b
PAU_01492		1714294-1714524	1714294	1714524		0.149542	0.299085	0	0	#NAME?	0.999789	1	hypothetical_protein	Hypothetical protein
PAU_01493		c1715839-1715459	1715459	1715839	c	22.7954	28.6864	16.9044	0.589281	-0.762973	0.343185	0.98355	hypothetical_protein	conserved hypothetical protein
PAU_01494		c1716202-1715858	1715858	1716202	c	286.726	342.308	231.144	0.675252	-0.566503	0.605472	1	hemagglutinin-like_secreted_protein	putative hemagglutinin-like secreted protein
PAU_01495	tnp	c1717425-1716451	1716451	1717425	c	165.026	159.389	170.664	1.07074	0.0986056	0.937124	1	transposase	transposase
PAU_01496		c1718174-1717785	1717785	1718174	c	0.49705	0.299085	0.695016	2.32381	1.21649	1	1	hemolysin_activator/exporter	putative hemolysin activator/exporter, tps family precursor
PAU_01497	argM	1719290-1720498	1719290	1720498		24.8643	11.3076	38.421	3.39782	1.76461	0.0335183	0.611673	bifunctional_succinylornithine_transaminase/acetylornithine_transaminase	succinylornithine transaminase
PAU_01498	astA	1720520-1721551	1720520	1721551		31.4235	17.3245	45.5225	2.62764	1.39377	0.0841187	0.851602	arginine_n-succinyltransferase	arginine n-succinyltransferase
PAU_01499	astD	1721555-1723030	1721555	1723030		12.6462	7.06109	18.2314	2.58195	1.36846	0.135134	0.931265	succinylglutamic_semialdehyde_dehydrogenase	succinylglutamic semialdehyde dehydrogenase
PAU_01500	astB	1723058-1724401	1723058	1724401		6.68069	4.99506	8.36631	1.67492	0.74409	0.519085	1	succinylarginine_dihydrolase	succinylarginine dihydrolase
PAU_01501	astE	1724414-1725397	1724414	1725397		8.87	6.34428	11.3957	1.79622	0.844964	0.388965	0.98355	succinylglutamate_desuccinylase	succinylglutamate desuccinylase
PAU_01502	cycA	1725499-1726953	1725499	1726953		4.18928	5.22812	3.15043	0.602594	-0.730742	0.607515	1	cyca_serine/alanine/glycine_apc_transporter	cyca serine/alanine/glycine apc transporter
PAU_01503		1727579-1728220	1727579	1728220		38.5519	22.2242	54.8797	2.46937	1.30414	0.0904397	0.875967	hypothetical_protein	conserved hypothetical protein
PAU_01504		1728792-1729439	1728792	1729439		0	0	0	NA	NA	NA	NA	hypothetical_protein	conserved hypothetical protein
PAU_01505		1729857-1730510	1729857	1730510		212.101	173.41	250.793	1.44624	0.532312	0.45944	0.992271	hypothetical_protein	conserved hypothetical protein
PAU_01506		c1731001-1730588	1730588	1731001	c	15.9847	20.7839	11.1856	0.538185	-0.893827	0.33398	0.98355	hypothetical_protein	conserved hypothetical protein
PAU_01507		c1731218-1731036	1731036	1731218	c	62.9434	81.1388	44.748	0.551499	-0.858569	0.259961	0.98355	hypothetical_protein	conserved hypothetical protein
PAU_01508		1731233-1731364	1731233	1731364		0	0	0	NA	NA	NA	NA	hypothetical_protein	Hypothetical protein
PAU_01509														phosphate acetyltransferase (phosphotransacetylase), pseudogene
PAU_01510		1731958-1733016	1731958	1733016		2.88334	3.33086	2.43582	0.731287	-0.451491	0.78099	1	hypothetical_protein	Hypothetical protein
PAU_01511	yfcA	1733283-1734065	1733283	1734065		35.4466	36.3683	34.5249	0.949314	-0.0750425	0.980607	1	inner_membrane_protein_yfca	inner membrane protein yfca
PAU_01512	pta	c1736437-1734311	1734311	1736437	c	35.5461	37.5508	33.5413	0.893224	-0.162907	0.816058	1	phosphate_acetyltransferase	phosphotransacetylase
PAU_01513	ackA	c1737724-1736522	1736522	1737724	c	56.2268	82.5699	29.8837	0.36192	-1.46626	0.488929	0.999483	acetate_kinase	acetate kinase
PAU_01514	yfbV	1738118-1738573	1738118	1738573		31.2378	23.1624	39.3131	1.69728	0.763225	0.341262	0.98355	hypothetical_protein	conserved hypothetical protein
PAU_01515	yfbS	1738773-1740605	1738773	1740605		34.8497	32.5466	37.1528	1.14152	0.190962	0.808272	1	membrane_protein	membrane protein
PAU_01516	yfbR	c1741195-1740602	1740602	1741195	c	39.3624	32.2811	46.4438	1.43873	0.524799	0.491089	0.999716	hypothetical_protein	5'-nucleotidase yfbr
PAU_01517	yfbQ	c1743146-1741887	1741887	1743146	c	189.138	137.399	240.876	1.75312	0.809923	0.261458	0.98355	aminotransferase_AlaT	putative aminotransferase
PAU_01518	lrhA	1743914-1744843	1743914	1744843		203.691	238.248	169.134	0.709906	-0.4943	0.514238	1	transcriptional_regulator_lrha_(hexa)	transcriptional regulator lrha (hexa)
PAU_01519		c1745153-1745046	1745046	1745153	c	0.436542	0.299085	0.573998	1.91918	0.940491	1	1	hypothetical_protein	hypothetical protein
PAU_01520	nuoA	1745550-1745999	1745550	1745999		257.014	240.859	273.17	1.13415	0.181607	0.751884	1	NADH_dehydrogenase_subunit_A	nadh-quinone oxidoreductase subunit A
PAU_01521	nuoB	1746016-1746690	1746016	1746690		141.953	106.525	177.381	1.66516	0.735659	0.361946	0.98355	NADH_dehydrogenase_subunit_B	nadh dehydrogenase i chain b (nadh-ubiquinone oxidoreductase chain 2 (nuo2)
PAU_01522	nuoC	1746812-1748611	1746812	1748611		349.023	319.816	378.23	1.18265	0.242021	0.717944	1	bifunctional_NADH:ubiquinone_oxidoreductase_subunit_C/D	nadh dehydrogenase i chain c/d (nadh-ubiquinone oxidoreductase chai 3/4) (nuo3/nuo4)
PAU_01523	nuoE	1748614-1749162	1748614	1749162		484.067	454.036	514.099	1.13229	0.17924	0.847524	1	NADH_dehydrogenase_subunit_E	nadh dehydrogenase i chain e (nadh-ubiquinone oxidoreductase chain 5 (nuo5)
PAU_01524	nuoF	1749159-1750523	1749159	1750523		176.784	159.04	194.527	1.22313	0.290582	0.692689	1	NADH_dehydrogenase_I_subunit_F	nadh dehydrogenase i chain f (nadh-ubiquinone oxidoreductase chain 6 (nuo6)
PAU_01525	nuoG	1750590-1753325	1750590	1753325		173.736	149.536	197.936	1.32366	0.404534	0.577993	1	NADH_dehydrogenase_subunit_G	nadh-quinone oxidoreductase
PAU_01526	nuoH	1753322-1754299	1753322	1754299		209.463	162.994	255.932	1.57019	0.650937	0.38704	0.98355	NADH_dehydrogenase_subunit_H	NADH-quinone oxidoreductase subunit H
PAU_01527	nuoI	1754313-1754855	1754313	1754855		98.2273	79.7205	116.734	1.46429	0.550203	0.424927	0.984783	NADH_dehydrogenase_subunit_I	NADH-quinone oxidoreductase subunit I
PAU_01528	nuoJ	1754868-1755413	1754868	1755413		106.514	90.6732	122.355	1.34941	0.432324	0.549344	1	NADH_dehydrogenase_subunit_J	nadh dehydrogenase i chain j (nadh-ubiquinone oxidoreductase chain j)
PAU_01529	nuoK	1755410-1755712	1755410	1755712		318.094	301.402	334.787	1.11077	0.151557	0.827775	1	NADH_dehydrogenase_subunit_K	NADH-quinone oxidoreductase subunit K
PAU_01530	nuoL	1755709-1757556	1755709	1757556		173.245	159.491	186.999	1.17248	0.229559	0.730821	1	NADH_dehydrogenase_subunit_L	nadh dehydrogenase i chain l (nadh-ubiquinone oxidoreductase chain l (nuo12)
PAU_01531	nuoM	1757577-1759097	1757577	1759097		149.235	131.23	167.24	1.2744	0.349823	0.599633	1	NADH_dehydrogenase_subunit_M	nadh dehydrogenase i chain m (nadh-ubiquinone oxidoreductase chain m (nuo13)
PAU_01532	nuoN	1759104-1760561	1759104	1760561		206.153	182.541	229.765	1.2587	0.33194	0.631361	1	NADH_dehydrogenase_subunit_N	NADH-quinone oxidoreductase subunit N
PAU_01533		c1761806-1760745	1760745	1761806	c	248.424	162.721	334.126	2.05336	1.03799	0.264195	0.98355	hypothetical_protein	conserved hypothetical protein
PAU_01534	xaxA	c1763077-1761851	1761851	1763077	c	178.267	64.5247	292.009	4.52554	2.17809	0.00388909	0.212005	hypothetical_protein	conserved hypothetical protein
PAU_01535		1763806-1763982	1763806	1763982		1.39815	1.64831	1.148	0.69647	-0.521867	0.991295	1	hypothetical_protein	hypothetical protein
PAU_01536	menF	1764030-1764134	1764030	1764134		2.58725	2.62995	2.54455	0.967528	-0.0476244	1	1	hypothetical_protein	conserved hypothetical protein
PAU_01537	menF	1764173-1764343	1764173	1764343		9.05263	12.7872	5.31809	0.415893	-1.26571	0.390822	0.98355	hypothetical_protein	conserved hypothetical protein
PAU_01538	menD	1764410-1766083	1764410	1766083		27.7508	39.8524	15.6492	0.392679	-1.34858	0.297947	0.98355	2-succinyl-5-enolpyruvyl-6-hydroxy-3-cyclohexene-1-carboxylate_synthase	menaquinone biosynthesis protein mend
PAU_01539		1766080-1766859	1766080	1766859		34.8749	48.8266	20.9231	0.428518	-1.22257	0.227173	0.98355	acyl-CoA_thioester_hydrolase_YfbB	conserved hypothetical protein
PAU_01540	menB	1766862-1767719	1766862	1767719		74.001	93.9556	54.0464	0.575234	-0.79778	0.375476	0.98355	naphthoate_synthase	naphthoate synthase (dihydroxynaphthoic acid synthetase) (dhn synthetase)
PAU_01541	menC	1767719-1768690	1767719	1768690		82.928	101.007	64.8493	0.642029	-0.639289	0.411156	0.98355	O-succinylbenzoate_synthase	o-succinylbenzoate-coa synthase (osb synthase) (4-(2'-carboxyphenyl) 4-oxybutyric acid synthase)
PAU_01542	menE	1768678-1770078	1768678	1770078		66.5839	78.2527	54.915	0.701765	-0.51094	0.475114	0.99899	O-succinylbenzoic_acid--CoA_ligase	o-succinylbenzoic acid--coa ligase (osb-coa synthetase) (o succinylbenzoate-coa synthase)
PAU_01543		1770048-1770473	1770048	1770473		481.462	782.509	180.415	0.230559	-2.11679	0.00359282	0.20289	hypothetical_protein	conserved hypothetical protein
PAU_01544		1770484-1770927	1770484	1770927		100.934	176.811	25.0571	0.141716	-2.81892	0.0997838	0.889477	hypothetical_protein	conserved hypothetical protein
PAU_01545	katE	c1772453-1771011	1771011	1772453	c	10.0135	13.9241	6.103	0.438305	-1.18999	0.227296	0.98355	catalase;_hydroperoxidase_hpii(iii)	catalase; hydroperoxidase hpii(iii)
PAU_01546		1772729-1773271	1772729	1773271		145.555	135.312	155.798	1.1514	0.20339	0.841029	1	hypothetical_protein	conserved hypothetical protein
PAU_01547	tyrP	c1774533-1773328	1773328	1774533	c	15.1745	9.98765	20.3614	2.03866	1.02762	0.242752	0.98355	tyrosine-specific_transport_protein	tyrosine-specific transport protein
PAU_01548		1775473-1780734	1775473	1780734		22.9184	21.2309	24.606	1.15897	0.21284	0.908061	1	hypothetical_protein	conserved hypothetical protein
PAU_01549		1780734-1781240	1780734	1781240		60.8663	63.5645	58.1682	0.915105	-0.127991	0.889133	1	hypothetical_protein	conserved hypothetical protein
PAU_01550		1781399-1781494	1781399	1781494		0.59817	1.19634	0	0	#NAME?	0.475358	0.99899	hypothetical_protein	conserved hypothetical protein
PAU_01551		c1782614-1781616	1781616	1782614	c	661.791	913.374	410.208	0.449113	-1.15485	0.56527	1	oxidoreductase	oxidoreductase, gfo/idh/moca family, putative
PAU_01552		c1782786-1782679	1782679	1782786	c	0	0	0	NA	NA	NA	NA	hypothetical_protein	hypothetical protein
PAU_01553		c1783008-1782793	1782793	1783008	c	1.22803	1.06603	1.39003	1.30394	0.382874	1	1	hypothetical_protein	conserved hypothetical protein
PAU_01554	yfaE	c1783351-1783085	1783085	1783351	c	54.9665	28.5219	81.4112	2.85434	1.51316	0.0526439	0.714587	ferredoxin-like_protein	similar to ferredoxin-like protein yfae of escherichia coli
PAU_01555	nrdB	c1784481-1783351	1783351	1784481	c	300.873	206.67	395.075	1.91162	0.934794	0.204024	0.98355	ribonucleotide-diphosphate_reductase_subunit_beta	ribonucleoside-diphosphate reductase 1 beta chain (ribonucleotid reductase 1) (b2 protein) (r2 protein)
PAU_01556	nrdA	c1786785-1784494	1784494	1786785	c	227.913	136.494	319.331	2.33952	1.22621	0.0944109	0.878521	ribonucleotide-diphosphate_reductase_subunit_alpha	ribonucleoside-diphosphate reductase 1 subunit alpha
PAU_01557	ubiG	c1787873-1787151	1787151	1787873	c	116.608	97.9851	135.232	1.38012	0.464796	0.525233	1	3-demethylubiquinone-9_3-methyltransferase	3-demethylubiquinone-9 3-methyltransferase
PAU_01558	gyrA	1788031-1790670	1788031	1790670		324.55	217.973	431.127	1.97789	0.983965	0.169493	0.96871	DNA_gyrase_subunit_A	dna gyrase subunit a
PAU_01559	rcsC	1790947-1793778	1790947	1793778		53.696	45.9506	61.4414	1.33712	0.419128	0.595613	1	hybrid_sensory_kinase_in_two-component_regulatory_system_with_RcsB_and_YojN	sensor protein
PAU_01560	rcsB	c1794581-1793928	1793928	1794581	c	327.079	277.827	376.332	1.35455	0.437818	0.568055	1	transcriptional_regulator_RcsB	capsular synthesis regulator component b
PAU_01561	yojN	c1797275-1794585	1794585	1797275	c	46.0543	42.9739	49.1348	1.14336	0.193283	0.811604	1	phosphotransfer_intermediate_protein_in_two-component_regulatory_system_with_RcsBC	putative 2-component sensor protein
PAU_01562		1797279-1797389	1797279	1797389		3.82838	6.38774	1.26901	0.198664	-2.3316	0.118111	0.916483	hypothetical_protein	hypothetical protein
PAU_01563		c1798493-1798113	1798113	1798493	c	104.853	187.794	21.9109	0.116675	-3.09943	9.45e-05	0.0236337	hypothetical_protein	conserved hypothetical protein
PAU_01564		1799830-1799955	1799830	1799955		13.2902	18.4881	8.09239	0.437709	-1.19196	0.171317	0.96871	hypothetical_protein	hypothetical protein
PAU_01565	Q	1800227-1800646	1800227	1800646		38.7854	41.3107	36.2602	0.877744	-0.188128	0.723804	1	Phage_antitermination_protein_q	Phage antitermination protein q
PAU_01566		1801033-1801593	1801033	1801593		4.00699	2.96328	5.05069	1.70443	0.769286	0.549733	1	bacteriophage_protein	putative bacteriophage protein
PAU_01567		1801597-1803063	1801597	1803063		15.67	14.8248	16.5152	1.11402	0.155775	0.896057	1	hypothetical_protein	hypothetical phage protein
PAU_01568		1803073-1803513	1803073	1803513		33.3269	41.5035	25.1504	0.605982	-0.722653	0.35382	0.98355	bacteriophage_protein	putative bacteriophage protein
PAU_01569		1803626-1804036	1803626	1804036		5.76282	7.2599	4.26575	0.587577	-0.76715	0.442275	0.990202	bacteriophage_protein	putative bacteriophage protein
PAU_01570		1804229-1806016	1804229	1806016		26.5971	29.1108	24.0834	0.827302	-0.273514	0.683768	1	bacteriophage_protein	putative bacteriophage protein
PAU_01571		1806019-1806624	1806019	1806624		5.49612	6.36264	4.6296	0.727622	-0.458739	0.72334	1	bacteriophage_protein	putative bacteriophage protein
PAU_01572		1806609-1806914	1806609	1806914		2.6639	2.8789	2.4489	0.850637	-0.233384	0.988279	1	hypothetical_protein	similar to unknown bacteriophage protein
PAU_01573		1806977-1807930	1806977	1807930		2.3266	2.41525	2.23795	0.926592	-0.109994	0.990874	1	bacteriophage_protein	putative bacteriophage protein
PAU_01574		1807930-1808685	1807930	1808685		0.855453	1.01589	0.695016	0.684145	-0.547625	0.994379	1	bacteriophage_protein	putative bacteriophage protein
PAU_01575		1808682-1809029	1808682	1809029		0.87862	1.34922	0.408017	0.302409	-1.72543	0.583839	1	bacteriophage_protein	putative bacteriophage protein
PAU_01576		1809022-1810215	1809022	1810215		2.06208	2.41525	1.70892	0.707552	-0.499091	0.860733	1	bacteriophage_protein	putative bacteriophage protein
PAU_01577		1810224-1810784	1810224	1810784		1.68228	2.03178	1.33278	0.655969	-0.608301	0.847651	1	bacteriophage_protein	putative bacteriophage protein
PAU_01578		1810787-1812109	1810787	1812109		6.42637	7.14547	5.70727	0.798725	-0.32423	0.805942	1	phage_tail_fiber_protein	putative phage tail fiber protein
PAU_01579	wabK	c1813294-1812155	1812155	1813294	c	100.104	92.1586	108.048	1.17242	0.229487	0.781596	1	glycosyltransferase	putative glycosyltransferase
PAU_01580	waaX	c1814084-1813329	1813329	1814084	c	140.798	181.521	100.075	0.551316	-0.859049	0.304019	0.98355	beta1	putative beta1,4-galactosyltransferase waax
PAU_01581		1815212-1815334	1815212	1815334		400.789	510.273	291.304	0.570879	-0.808744	0.753709	1	hypothetical_protein	hypothetical protein
PAU_01582		c1815809-1815384	1815384	1815809	c	57.2138	41.7373	72.6903	1.74161	0.800425	0.464865	0.992271	phage_tail_fiber_assembly_protein	phage tail fiber assembly protein
PAU_01583		c1815961-1815812	1815812	1815961	c	34.2158	21.2642	47.1674	2.21816	1.14936	0.14285	0.953528	tail_fiber_protein	similarities with putative tail fiber protein
PAU_01584		c1816243-1816028	1816028	1816243	c	26.5512	20.2677	32.8348	1.62005	0.696041	0.417843	0.98355	phage_tail_protein	putative phage tail protein
PAU_01585		c1817472-1816375	1816375	1817472	c	64.6921	38.9277	90.4565	2.32371	1.21643	0.148226	0.96118	LPS_biosynthesis_enzyme_(lipopolysaccharide_core_biosynthesi_protein_rfaq)	putative LPS biosynthesis enzyme (lipopolysaccharide core biosynthesi protein rfaq)
PAU_01586		1817618-1817743	1817618	1817743		0.36345	0	0.726901	Inf	Inf	0.690901	1	tail_fiber_protein_of_prophage_cp-933x_(tail_fiber_assembl_protein)	putative tail fiber protein of prophage cp-933x (tail fiber assembl protein)
PAU_01587		1818663-1820081	1818663	1820081		1.7417	1.31497	2.16842	1.64902	0.721608	0.742798	1	hypothetical_protein	similar to probable membrane protein ybip of escherichia coli
PAU_01588		1820457-1820717	1820457	1820717		10.1258	9.40363	10.8479	1.15359	0.206124	0.818399	1	hypothetical_protein	conserved hypothetical protein
PAU_01589		1820728-1821423	1820728	1821423		63.9578	80.6573	47.2583	0.585915	-0.771237	0.31585	0.98355	hypothetical_protein	conserved hypothetical protein
PAU_01590		c1822244-1821618	1821618	1822244	c	3.71338	5.60912	1.81765	0.324052	-1.6257	0.258744	0.98355	tail_fiber_protein_of_prophage_cp-933x_(tail_fiber_assembl_protein)	putative tail fiber protein of prophage cp-933x (tail fiber assembl protein)
PAU_01591		c1822981-1822244	1822244	1822981	c	4.26035	5.17972	3.34098	0.645012	-0.632602	0.58302	1	bacteriophage_tail_fiber_protein	putative bacteriophage tail fiber protein
PAU_01592		1823405-1823683	1823405	1823683		19.6903	21.3528	18.0278	0.844282	-0.244204	0.773674	1	prophage_protein_gp48	prophage protein gp48
PAU_01593	ycfB	1823732-1824160	1823732	1824160		37.328	41.3422	33.3138	0.805808	-0.311493	0.703531	1	hypothetical_protein	conserved hypothetical protein
PAU_01594		1824901-1825191	1824901	1825191		1.02816	1.64831	0.408017	0.247537	-2.01428	0.449179	0.992263	hypothetical_protein	conserved hypothetical protein
PAU_01595		1825192-1825326	1825192	1825326		0.978744	1.23059	0.726901	0.590694	-0.759518	0.806261	1	hypothetical_protein	hypothetical protein
PAU_01596		1825348-1826043	1825348	1826043		24.7717	31.536	18.0074	0.57101	-0.808411	0.304109	0.98355	hypothetical_protein	hypothetical protein
PAU_01597		c1826716-1826144	1826144	1826716	c	4.12669	3.8789	4.37448	1.12776	0.173466	1	1	hypothetical_protein	conserved hypothetical protein
PAU_01598		c1828629-1827115	1827115	1828629	c	633.312	484.427	782.197	1.61469	0.691253	0.339227	0.98355	trypsin_domain_protein	trypsin domain protein
PAU_01599	dmsD	c1829786-1829190	1829190	1829786	c	36.4079	27.8758	44.9401	1.61216	0.688992	0.376755	0.98355	twin-arginine_leader-binding_protein_dmsd	twin-arginine leader-binding protein dmsd
PAU_01600		c1830333-1830223	1830223	1830333	c	13.3198	24.4336	2.20607	0.0902882	-3.46932	0.293659	0.98355	hypothetical_protein	conserved hypothetical protein
PAU_01601	cbiA	1830659-1832041	1830659	1832041		77.644	144.526	10.7621	0.0744651	-3.74729	0.0444147	0.6739	cobyrinic_acid_a	cobyrinic acid a,c-diamide synthase
PAU_01602	cobD	1832038-1832997	1832038	1832997		29.1151	54.2066	4.02371	0.0742293	-3.75187	0.14571	0.96118	cobalamin_biosynthesis_protein	cobalamin biosynthesis protein cobd
PAU_01603	cbiC	1833012-1833644	1833012	1833644		38.3829	72.321	4.44481	0.0614595	-4.02422	0.178934	0.96871	cobalt-precorrin-8X_methylmutase	precorrin-8x methylmutase (precorrin isomerase)
PAU_01604	cbiD	1833641-1834777	1833641	1834777		35.6328	63.4357	7.82996	0.123432	-3.01822	0.0899325	0.873043	cobalt-precorrin-6A_synthase	putative cobalt-precorrin-6A synthase [deacetylating]
PAU_01605	cbiE	1834774-1835376	1834774	1835376		46.8711	87.0145	6.72772	0.0773173	-3.69307	0.166189	0.96535	cobalt-precorrin-6Y_C(5)-methyltransferase	synthesis of vitamin b12 adenosyl cobalamide
PAU_01606	cbiT	1835366-1835935	1835366	1835935		31.474	57.0812	5.86673	0.102779	-3.28239	0.163501	0.964687	cobalt-precorrin-6Y_C(15)-methyltransferase	precorrin-8w decarboxylase
PAU_01607	cbiF	1835925-1836701	1835925	1836701		17.6433	32.6275	2.65905	0.0814971	-3.61711	0.21293	0.98355	precorrin-4_c11-methyltransferase_(precorrin-3-methylase)	precorrin-4 c11-methyltransferase (precorrin-3-methylase)
PAU_01608	cbiG	1836682-1837743	1836682	1837743		39.1039	74.3051	3.9027	0.0525226	-4.25092	0.172489	0.96871	cobalamin_biosynthesis_protein_CbiG	cobalamin biosynthesis protein g (cbig)
PAU_01609	cbiH	1837737-1838462	1837737	1838462		33.5302	62.3736	4.68685	0.0751415	-3.73425	0.19522	0.98355	precorrin-3b_c17-methyltransferase_(precorrin-3_methyltransferase_(precorrin-3_methylase)	precorrin-3b c17-methyltransferase (precorrin-3 methyltransferase (precorrin-3 methylase)
PAU_01610	cbiJ	1838459-1839256	1838459	1839256		27.0549	49.3019	4.80786	0.0975188	-3.35818	0.0780892	0.823909	cobalt-precorrin-6x_reductase	cobalt-precorrin-6a reductase
PAU_01611	cbiK	1839258-1840052	1839258	1840052		41.4167	74.4548	8.3786	0.112533	-3.15158	0.178455	0.96871	sirohydrochlorin_cobaltochelatase	sirohydrochlorin cobaltochelatase
PAU_01612	cbiL	1840052-1840765	1840052	1840765		24.879	42.2592	7.49879	0.177448	-2.49453	0.235154	0.98355	cobalt-precorrin-2_C(20)-methyltransferase	precorrin-2 c20-methyltransferase (s-adenosyl-l-methionine--precorrin 2 methyltransferase) (sp2mt)
PAU_01613	cobQ	1840784-1842322	1840784	1842322		46.014	71.0296	20.9984	0.295628	-1.75814	0.254755	0.98355	cobyric_acid_synthase	cobyric acid synthase
PAU_01614	cobU	1842319-1842864	1842319	1842864		10.5323	12.6091	8.45545	0.670582	-0.576515	0.52249	1	adenosylcobinamide_kinase/adenosylcobinamide-phosphate_guanylyltransferase	bifunctional cobalamin biosynthesis protein cobu
PAU_01615	cobS	1842861-1843607	1842861	1843607		7.16479	8.57734	5.75223	0.670631	-0.576409	0.620608	1	cobalamin_synthase	cobalamin synthase
PAU_01616		c1843959-1843654	1843654	1843959	c	26.1983	27.7288	24.6679	0.889611	-0.168754	0.907629	1	hypothetical_protein	conserved hypothetical protein
PAU_01617	cobC	1844491-1845108	1844491	1845108		34.2418	34.4075	34.0761	0.99037	-0.0139607	0.966579	1	alpha-ribazole-5'-phosphate_phosphatase	alpha-ribazole-5'-phosphate phosphatase
PAU_01618	cobT	1845113-1846162	1845113	1846162		11.0756	11.5215	10.6296	0.922588	-0.116242	0.904396	1	nicotinate-nucleotide--dimethylbenzimidazole_phosphoribosyltransferase	nicotinate-nucleotide--dimethylbenzimidazole phosphoribosyltransferase
PAU_01619		c1846575-1846273	1846273	1846575	c	8.79663	10.3235	7.2698	0.704202	-0.505938	0.622973	1	hypothetical_protein	conserved hypothetical protein
PAU_01620		1846574-1846876	1846574	1846876		35.0677	42.3283	27.8071	0.656939	-0.60617	0.39613	0.98355	hypothetical_protein	hypothetical protein
PAU_01621		1847287-1847766	1847287	1847766		15.576	19.6476	11.5044	0.585537	-0.772167	0.364269	0.98355	Hcp1_family_type_VI_secretion_system_effector	similar to hcp protein
PAU_01622		1847774-1848559	1847774	1848559		47.6678	66.8623	28.4733	0.42585	-1.23158	0.105825	0.906143	hypothetical_protein	conserved hypothetical protein
PAU_01623		c1848951-1848547	1848547	1848951	c	5.90906	4.33086	7.48727	1.72882	0.789784	0.464696	0.992271	hypothetical_protein	conserved hypothetical protein
PAU_01624		c1849412-1849011	1849011	1849412	c	1.99854	2.63242	1.36467	0.518408	-0.947839	0.682647	1	hypothetical_protein	conserved hypothetical protein
PAU_01625		c1849878-1849477	1849477	1849878	c	1.44071	1	1.88142	1.88142	0.91182	0.741313	1	hypothetical_protein	conserved hypothetical protein
PAU_01626	mcoln1	c1850344-1849895	1849895	1850344	c	5.27961	3.61406	6.94515	1.9217	0.942386	0.506719	1	hypothetical_protein	conserved hypothetical protein
PAU_01627		c1850819-1850400	1850400	1850819	c	16.6567	13.9768	19.3367	1.38349	0.468314	0.637563	1	hypothetical_protein	conserved hypothetical protein
PAU_01628	LytE	1851766-1852407	1851766	1852407		18.3049	8.22565	28.3842	3.4507	1.78689	0.0399471	0.643298	hypothetical_protein	conserved hypothetical protein
PAU_01629		1852728-1853375	1852728	1853375		88.75	36.5177	140.982	3.86066	1.94885	0.0135059	0.422531	hypothetical_protein	conserved hypothetical protein
PAU_01630		c1853818-1853444	1853444	1853818	c	20.2801	28.9919	11.5682	0.399016	-1.32548	0.119894	0.916483	hypothetical_protein	conserved hypothetical protein
PAU_01631	eutC	c1854928-1854074	1854074	1854928	c	15.5466	21.834	9.25919	0.424072	-1.23762	0.160672	0.963101	ethanolamine_ammonia-lyase_small_subunit	ethanolamine ammonia-lyase light chain
PAU_01632	eutB	c1856312-1854951	1854951	1856312	c	6.86978	8.3577	5.38186	0.64394	-0.635001	0.551641	1	ethanolamine_ammonia-lyase_heavy_chain	ethanolamine ammonia-lyase heavy chain
PAU_01633	eutA	c1857736-1856324	1856324	1857736	c	15.1728	20.4364	9.90925	0.484882	-1.0443	0.227379	0.98355	reactivating_factor_for_ethanolamine_ammonia_lyase	ethanolamine utilization protein euta
PAU_01634	cysG	1858037-1858822	1858037	1858822		86.885	167.821	5.9493	0.0354504	-4.81806	0.165545	0.965111	siroheme_synthase	siroheme synthase
PAU_01635	cobD	1858856-1859929	1858856	1859929		21.8325	38.6593	5.00573	0.129483	-2.94916	0.24675	0.98355	threonine-phosphate_decarboxylase	threonine-phosphate decarboxylase
PAU_01636	pduX	1859877-1860782	1859877	1860782		12.886	22.7302	3.0417	0.133817	-2.90166	0.264807	0.98355	hypothetical_protein	conserved hypothetical protein
PAU_01637	cysG	1860800-1861501	1860800	1861501		18.2325	31.9442	4.52086	0.141524	-2.82088	0.17265	0.96871	siroheme_synthase_[includes:_uroporphyrinogen-iii_c-methyltransferase	siroheme synthase [includes: uroporphyrinogen-iii c-methyltransferase
PAU_01638	btuR	1861502-1862080	1861502	1862080		12.1622	21.5247	2.79966	0.130067	-2.94267	0.180771	0.969109	cob(i)alamin_adenolsyltransferase	cob(i)alamin adenolsyltransferase
PAU_01639		c1862468-1862142	1862142	1862468	c	200.285	277.329	123.24	0.44438	-1.17013	0.285399	0.98355	hypothetical_protein	conserved hypothetical protein
PAU_01640		c1862972-1862547	1862547	1862972	c	146.669	158.662	134.676	0.848821	-0.236468	0.704795	1	hypothetical_protein	conserved hypothetical protein
PAU_01641		1863548-1864186	1863548	1864186		40.1671	28.3093	52.025	1.83773	0.877928	0.440872	0.990202	adhesin	putative adhesin
PAU_01642		1864351-1864458	1864351	1864458		0.694829	0.981641	0.408017	0.415648	-1.26657	0.764075	1	hypothetical_protein	hypothetical protein
PAU_01643		1864596-1864715	1864596	1864715		0.539243	0.383471	0.695016	1.81243	0.857929	1	1	hypothetical_protein	hypothetical protein
PAU_01644		1864764-1865102	1864764	1865102		4.9785	6.81388	3.14312	0.461281	-1.11628	0.471865	0.99899	hypothetical_protein	conserved hypothetical protein
PAU_01645		1865507-1866721	1865507	1866721		8.15145	6.97917	9.32372	1.33594	0.41785	0.713431	1	bacteriophage_tail_fiber_protein	similar to bacteriophage tail fiber protein
PAU_01646	tfa	1866726-1867277	1866726	1867277		9.25087	11.4421	7.05965	0.61699	-0.696682	0.520157	1	tail_fiber_protein_of_prophage_cp-933x_(tail_fiber_assembl_protein)	putative tail fiber protein of prophage cp-933x (tail fiber assembl protein)
PAU_01647		1867630-1869045	1867630	1869045		131.991	24.5508	239.431	9.75245	3.28576	3.31284e-05	0.0111001	tail_fiber_protein_of_prophage_cp-933x_(tail_fiber_assembl_protein)	putative tail fiber protein of prophage cp-933x (tail fiber assembl protein)
PAU_01648		1869371-1870468	1869371	1870468		31.7302	5.74611	57.7142	10.0441	3.32827	0.0120561	0.41677	tail_fiber_protein	putative tail fiber protein
PAU_01649		1870817-1871587	1870817	1871587		25.5891	4.3125	46.8657	10.8674	3.44193	0.000140449	0.0331771	tail_fiber_protein	putative tail fiber protein
PAU_01650		1871956-1872543	1871956	1872543		16.4478	3.86054	29.035	7.52098	2.91092	0.00212198	0.150377	bacteriophage_tail_fiber_protein	similarities with bacteriophage tail fiber protein
PAU_01651		1873066-1874121	1873066	1874121		70.8719	20.7722	120.972	5.82372	2.54194	0.00341427	0.201631	tail_fiber_protein	putative tail fiber protein
PAU_01652		1874372-1875253	1874372	1875253		25.3874	9.22565	41.5491	4.50365	2.1711	0.171484	0.96871	tail_fiber_protein	putative tail fiber protein
PAU_01653	stfE	1875863-1876363	1875863	1876363		8.2108	10.976	5.44563	0.496141	-1.01118	0.320865	0.98355	side_tail_fiber_protein_homolog_from_lambdoid_prophage_e14_(fragment)	side tail fiber protein homolog from lambdoid prophage e14 (fragment)
PAU_01654		1876363-1876989	1876363	1876989		6.73206	7.55898	5.90513	0.781207	-0.356223	0.760421	1	tail_fiber_protein_of_prophage_cp-933x_(tail_fiber_assembl_protein)	putative tail fiber protein of prophage cp-933x (tail fiber assembl protein)
PAU_01655		1877328-1877447	1877328	1877447		5.14533	5.74364	4.54702	0.791662	-0.337044	0.92251	1	hypothetical_protein	hypothetical protein
PAU_01656		1877716-1878597	1877716	1878597		593.643	455.696	731.589	1.60543	0.68296	0.32977	0.98355	tail_fiber_protein	putative tail fiber protein
PAU_01657		1879065-1879946	1879065	1879946		68.9194	43.3933	94.4455	2.1765	1.12201	0.139677	0.943869	tail_fiber_protein	putative tail fiber protein
PAU_01658		1880713-1881669	1880713	1881669		21.2123	26.9544	15.4701	0.573937	-0.801036	0.339525	0.98355	tail_fiber_protein	putative tail fiber protein
PAU_01659	insI	c1881979-1881635	1881635	1881979	c	11.6718	15.6469	7.69666	0.491897	-1.02357	0.259631	0.98355	transposase_insI_for_insertion_sequence_element_IS30b/c/d	transposase insI for insertion sequence element IS30b/c/d
PAU_01660	ISPlu1B	c1882602-1882045	1882045	1882602	c	48.8013	74.6076	22.995	0.308213	-1.698	0.304463	0.98355	transposase	transposase, IS30 family
PAU_01661	waaX	c1883548-1882763	1882763	1883548	c	55.1111	64.4669	45.7554	0.70975	-0.494618	0.505414	1	hypothetical_protein	conserved hypothetical protein
PAU_01662	yejM	c1885975-1884236	1884236	1885975	c	42.5985	32.642	52.555	1.61004	0.687098	0.355169	0.98355	inner_membrane_protein_yejm	putative inner membrane protein yejm
PAU_01663	yejL	c1886235-1886008	1886008	1886235	c	224.089	176.701	271.477	1.53636	0.61952	0.397107	0.98355	hypothetical_protein	conserved hypothetical protein
PAU_01664	ndpA	1886508-1887512	1886508	1887512		750.486	867.9	633.072	0.72943	-0.455158	0.512131	1	nucleoid-associated_protein_NdpA	conserved hypothetical protein
PAU_01665	rplY	c1887868-1887584	1887584	1887868	c	1517.23	1278.11	1756.35	1.37417	0.458563	0.487325	0.99899	50S_ribosomal_protein_L25	50s ribosomal protein l25
PAU_01666	yejH	c1889782-1888025	1888025	1889782	c	27.4521	24.327	30.5772	1.25693	0.329899	0.703489	1	hypothetical_protein	conserved hypothetical protein
PAU_01667		1890037-1890165	1890037	1890165		116.881	120.377	113.385	0.941912	-0.0863354	0.925602	1	hypothetical_protein	conserved hypothetical protein
PAU_01668	rsuA	1890183-1890884	1890183	1890884		77.5592	68.6394	86.4789	1.2599	0.33331	0.628438	1	16S_rRNA_pseudouridylate_synthase_A	ribosomal small subunit pseudouridine synthase A
PAU_01669	bcr	1890928-1892115	1890928	1892115		80.5016	61.4312	99.572	1.62087	0.696769	0.336144	0.98355	bicyclomycin/multidrug_efflux_system	bicyclonycin resistance protein (sulfonamide resistance protein)
PAU_01670		1892214-1892357	1892214	1892357		16.7996	16.0294	17.5698	1.0961	0.132379	0.938027	1	hypothetical_protein	hypothetical protein
PAU_01671	yejG	1893047-1893391	1893047	1893391		206.348	219.408	193.288	0.880952	-0.182864	0.839368	1	hypothetical_protein	conserved hypothetical protein
PAU_01672	spr	c1894065-1893475	1893475	1894065	c	93.0868	58.9313	127.242	2.15916	1.11047	0.125119	0.919537	outer_membrane_lipoprotein	lipoprotein spr precursor
PAU_01673		c1895129-1894425	1894425	1895129	c	24.7112	22.1724	27.2501	1.22901	0.297498	0.70347	1	hypothetical_protein	similar to putative membrane protein yeiu of escherichia coli
PAU_01674		1895568-1895879	1895568	1895879		37.3537	44.0049	30.7024	0.697705	-0.519311	0.467409	0.995203	hypothetical_protein	conserved hypothetical protein
PAU_01675	yeiP	c1896820-1896248	1896248	1896820	c	451.742	432.149	471.336	1.09068	0.125227	0.948866	1	elongation_factor_P	elongation factor p-like protein
PAU_01676	mtr	c1898218-1896959	1896959	1898218	c	33.8362	35.0339	32.6384	0.931624	-0.10218	0.936553	1	tryptophan-specific_transport_protein	tryptophan-specific transport protein
PAU_01677		c1898755-1898336	1898336	1898755	c	44.9746	50.112	39.8372	0.794963	-0.331041	0.664982	1	hypothetical_protein	conserved hypothetical protein
PAU_01678	fruK	1898973-1899911	1898973	1899911		89.892	53.5713	126.213	2.35598	1.23632	0.103018	0.902732	1-phosphofructokinase	1-phosphofructokinase
PAU_01679	nfo	c1900773-1899931	1899931	1900773	c	92.1132	74.125	110.101	1.48535	0.570801	0.441323	0.990202	endonuclease_IV	endonuclease 4
PAU_01680	yeiH	c1901966-1900884	1900884	1901966	c	10.4053	12.6225	8.18805	0.648685	-0.624411	0.522792	1	upf0324_membrane_protein_plu2856	upf0324 membrane protein plu2856
PAU_01681	yeiE	1902160-1903023	1902160	1903023		111.117	126.57	95.6651	0.75583	-0.403867	0.609637	1	DNA-binding_transcriptional_regulator	transcriptional regulator lysr-type yeie o escherichia coli
PAU_01682	lysP	1903183-1904661	1903183	1904661		388.448	245.06	531.836	2.17023	1.11785	0.11567	0.915487	lysine_transporter	lysine-specific permease
PAU_01683		1904996-1906120	1904996	1906120		488.327	375.81	600.843	1.59879	0.676983	0.335212	0.98355	iron(III)_ABC_transporter	similarities with iron(iii) abc transporter
PAU_01684		1906243-1907229	1906243	1907229		72.0263	58.2751	85.7774	1.47194	0.557718	0.440381	0.990202	hemin/siderophore_ABC_transporter	similar to hemin/siderophore abc transporter
PAU_01685	fepC	1907226-1908014	1907226	1908014		79.7063	71.4258	87.9869	1.23186	0.300843	0.688093	1	hemin/siderophore_ABC_transporter_ATP-binding_protein	similar to hemin/siderophore transport atp-binding protein
PAU_01686		c1908108-1908007	1908007	1908108	c	1.03471	1.49542	0.573998	0.383836	-1.38144	0.730111	1	hypothetical_protein	hypothetical protein
PAU_01687		1908466-1910451	1908466	1910451		40.3379	54.5933	26.0825	0.477759	-1.06564	0.170559	0.96871	outer_membrane_receptor	putative iron-regulated outer membrane protein
PAU_01688	yeeF	1911132-1912514	1911132	1912514		207.228	289.464	124.993	0.431809	-1.21154	0.0986588	0.886053	amino_acid/amine_transport_protein	similar to putative amino acid/amine transport protein yeef o escherichia coli
PAU_01689		1912523-1912642	1912523	1912642		3.83086	4.42867	3.23304	0.730026	-0.45398	0.816843	1	hypothetical_protein	hypothetical protein
PAU_01690	dld	1912718-1914433	1912718	1914433		23.9346	27.4007	20.4685	0.747008	-0.420805	0.599904	1	D-lactate_dehydrogenase	d-lactate dehydrogenase
PAU_01691	sbcB	c1915985-1914555	1914555	1915985	c	66.3653	72.0007	60.7299	0.843462	-0.245605	0.773127	1	exonuclease_I	exodeoxyribonuclease i (exonuclease i) (dn deoxyribophosphodiesterase)
PAU_01692		1917615-1917740	1917615	1917740		1.17217	1.19634	1.148	0.959591	-0.0595089	1	1	hypothetical_protein	hypothetical protein
PAU_01693		1917747-1917854	1917747	1917854		0	0	0	NA	NA	NA	NA	hypothetical_protein	hypothetical protein
PAU_01694	yeeX	1918273-1918590	1918273	1918590		294.6	221.74	367.46	1.65717	0.728721	0.391991	0.98355	hypothetical_protein	conserved hypothetical protein
PAU_01695		c1919270-1918638	1918638	1919270	c	210.711	287.616	133.806	0.465227	-1.10399	0.137099	0.93485	hypothetical_protein	conserved hypothetical protein
PAU_01696	rne	c1922513-1919433	1919433	1922513	c	114.425	100.078	128.772	1.28671	0.363688	0.631218	1	ribonuclease_E	rnase e, membrane attachment, mrna turnover, maturation 5s rna (rnas e)
PAU_01697	rluC	1923073-1924032	1923073	1924032		240.103	211.704	268.502	1.26829	0.342884	0.632667	1	23S_rRNA_pseudouridylate_synthase_C	23S rRNA pseudouridine synthase
PAU_01698	yceF	c1924642-1924034	1924034	1924642	c	44.8983	42.41	47.3867	1.11735	0.160078	0.850225	1	Maf-like_protein	conserved hypothetical protein
PAU_01699	yceD	1924767-1925291	1924767	1925291		7341.74	8774.48	5909.01	0.673432	-0.570397	0.440378	0.990202	hypothetical_protein	conserved hypothetical protein
PAU_01700	rpmF	1925304-1925474	1925304	1925474		1082.95	1039.05	1126.85	1.0845	0.117033	0.845458	1	50S_ribosomal_protein_L32	50s ribosomal protein l32
PAU_01701	plsX	1925505-1926542	1925505	1926542		1766.91	1566.93	1966.89	1.25525	0.327977	0.650511	1	glycerol-3-phosphate_acyltransferase_PlsX	fatty acid/phospholipid synthesis protein plsx
PAU_01702	fabH	1926549-1927502	1926549	1927502		726.33	467.283	985.376	2.10873	1.07638	0.132535	0.926874	3-oxoacyl-(acyl_carrier_protein)_synthase_III	3-oxoacyl-[acyl-carrier-protein] synthase 3
PAU_01703	fabD	1927521-1928453	1927521	1928453		1207.59	896.053	1519.12	1.69535	0.761581	0.294067	0.98355	malonyl_coa-acyl_carrier_protein_transacylase	malonyl coa-acyl carrier protein transacylase
PAU_01704	fabG	1928462-1929196	1928462	1929196		1349.14	1253.2	1445.09	1.15312	0.205545	0.752463	1	3-oxoacyl-[acyl-carrier-protein]_reductase	3-oxoacyl-[acyl-carrier-protein] reductase
PAU_01705	acpP	1929351-1929587	1929351	1929587		25283.6	29184.4	21382.8	0.732678	-0.448749	0.548066	1	acyl_carrier_protein	acyl carrier protein (cytosolic activating factor) (caf)
PAU_01706	fabF	1929662-1930903	1929662	1930903		2021.73	1733.42	2310.05	1.33265	0.414302	0.575536	1	3-oxoacyl-(acyl_carrier_protein)_synthase_II	3-oxoacyl-[acyl-carrier-protein] synthase ii
PAU_01707	pabC	1931152-1931976	1931152	1931976		57.7965	51.5337	64.0594	1.24306	0.313895	0.673255	1	4-amino-4-deoxychorismate_lyase	4-amino-4-deoxychorismate lyase (adc lyase) (adcl)
PAU_01708	yceG	1932009-1933034	1932009	1933034		112.196	98.5272	125.864	1.27746	0.353274	0.647435	1	hypothetical_protein	conserved hypothetical protein
PAU_01709	tmk	1933031-1933669	1933031	1933669		110.838	96.7421	124.934	1.29141	0.368946	0.612112	1	thymidylate_kinase	thymidylate kinase
PAU_01710	holB	1933669-1934652	1933669	1934652		113.52	104.603	122.437	1.17049	0.227117	0.750998	1	DNA_polymerase_III_subunit_delta'	dna-directed dna polymerase iii delta' chain
PAU_01711	ycfH	1934683-1935468	1934683	1935468		135.494	134.598	136.391	1.01332	0.0190861	0.954033	1	metallodependent_hydrolase	conserved hypothetical protein
PAU_01712	hinT	1935665-1936015	1935665	1936015		522.99	549.021	496.959	0.905174	-0.143733	0.851753	1	purine_nucleoside_phosphoramidase	similar to histidine triad-like protein ycff of escherichia coli
PAU_01713	ycfM	1936314-1936886	1936314	1936886		323.906	300.889	346.923	1.15299	0.205383	0.879462	1	outer_membrane_lipoprotein	putative outer membrane lipoprotein
PAU_01714	thiK	1936873-1937736	1936873	1937736		78.355	75.6308	81.0791	1.07204	0.100357	0.878762	1	hypothetical_protein	conserved hypothetical protein
PAU_01715		c1937877-1937707	1937707	1937877	c	51.7282	46.8352	56.6213	1.20895	0.273753	0.730526	1	hypothetical_protein	hypothetical protein
PAU_01716	nagZ	1937913-1938935	1937913	1938935		178.053	181.921	174.186	0.957482	-0.0626833	0.897797	1	beta-hexosaminidase	beta-hexosaminidase
PAU_01717	ndh	1939422-1940726	1939422	1940726		69.3898	79.6703	59.1093	0.741924	-0.430656	0.568982	1	respiratory_nadh_dehydrogenase	respiratory nadh dehydrogenase
PAU_01718		c1942588-1940921	1940921	1942588	c	3.19718	4.04767	2.34668	0.579762	-0.786468	0.610909	1	subtilisin_family_serine_protease-like_protein	similarities with subtilisin family of serine protease
PAU_01719	yiaC	c1943346-1942870	1942870	1943346	c	33.2042	47.5124	18.896	0.397708	-1.33022	0.349833	0.98355	hypothetical_acetyltransferase	hypothetical acetyltransferase
PAU_01720	pvcB	c1944386-1943541	1943541	1944386	c	445.185	845.442	44.9269	0.0531401	-4.23405	0.000565024	0.0728024	pyoverdine_biosynthesis_protein_PvcB-like_protein	similar to pyoverdine biosynthesis protein pvcb of pseudomona aeruginosa
PAU_01721	pvcA	c1945376-1944399	1944399	1945376	c	248.113	443.963	52.2628	0.117719	-3.08658	0.0160016	0.448136	pyoverdine_biosynthesis_protein_PvcA-like_protein	similar to pyoverdine biosynthesis protein pvca of pseudomona aeruginosa
PAU_01722		c1945595-1945479	1945479	1945595	c	0	0	0	NA	NA	NA	NA	hypothetical_protein	hypothetical protein
PAU_01723	mfd	c1949604-1946158	1946158	1949604	c	61.9366	41.7066	82.1667	1.97011	0.978278	0.194478	0.98355	transcription-repair_coupling_factor	transcription-repair coupling factor (trcf)
PAU_01724		c1950322-1949993	1949993	1950322	c	17.226	19.1232	15.3288	0.80158	-0.319082	0.708295	1	hypothetical_protein	conserved hypothetical protein
PAU_01725		1950607-1950747	1950607	1950747		43.2647	63.4248	23.1046	0.364284	-1.45687	0.0766195	0.818558	hypothetical_protein	hypothetical protein
PAU_01726	lolC	1950985-1952187	1950985	1952187		160.05	147.861	172.239	1.16487	0.220168	0.723521	1	outer_membrane-specific_lipoprotein_transporter_subunit_LolC	lipoprotein releasing system transmembrane protein lolc
PAU_01727	lolD	1952180-1952884	1952180	1952884		142.197	107.528	176.865	1.64482	0.717932	0.344932	0.98355	lipoprotein_transporter_ATP-binding_subunit	lipoprotein-releasing system ATP-binding protein
PAU_01728	lolE	1952884-1954131	1952884	1954131		113.99	84.1367	143.844	1.70964	0.773693	0.302243	0.98355	outer_membrane-specific_lipoprotein_transporter_subunit_LolE	lipoprotein releasing system transmembrane protein lole
PAU_01729	cobB	1954209-1955051	1954209	1955051		352.668	318.477	386.858	1.21471	0.280614	0.683331	1	NAD-dependent_deacetylase	cobb protein
PAU_01730	pepT	1955107-1956369	1955107	1956369		110.195	210.966	9.42438	0.0446725	-4.48447	0.176444	0.96871	peptidase_T	peptidase T
PAU_01731		c1957005-1956817	1956817	1957005	c	62.5604	77.5772	47.5436	0.612856	-0.70638	0.500082	1	hypothetical_protein	conserved hypothetical protein
PAU_01732	ycfD	c1958419-1957298	1957298	1958419	c	53.8735	31.4124	76.3345	2.43008	1.281	0.0953964	0.878723	hypothetical_protein	conserved hypothetical protein
PAU_01733	phoQ	c1959966-1958503	1958503	1959966	c	82.3836	47.3919	117.375	2.4767	1.30842	0.0819872	0.843072	sensor_protein_PhoQ	sensor protein
PAU_01734	phoP	c1960654-1959986	1959986	1960654	c	103.444	87.794	119.094	1.35651	0.439903	0.539267	1	DNA-binding_transcriptional_regulator_PhoP	two-component response regulator phop
PAU_01735	purB	c1962268-1960898	1960898	1962268	c	299.883	247.283	352.484	1.42543	0.511397	0.464576	0.992271	adenylosuccinate_lyase	adenylosuccinate lyase
PAU_01736		c1962918-1962292	1962292	1962918	c	119.05	89.1154	148.984	1.67182	0.741416	0.319016	0.98355	hypothetical_protein	conserved hypothetical protein
PAU_01737	trmU	c1964024-1962921	1962921	1964024	c	139.398	108.126	170.67	1.57843	0.658487	0.364847	0.98355	tRNA-specific_2-thiouridylase_MnmA	trna (5-methylaminomethyl-2-thiouridylate)-methyltransferase
PAU_01738	ymfB	c1964561-1964109	1964109	1964561	c	19.5409	15.3344	23.7473	1.54863	0.630994	0.459601	0.992271	hypothetical_protein	conserved hypothetical protein
PAU_01739	rluE	c1965036-1964551	1964551	1965036	c	39.0249	34.9254	43.1243	1.23475	0.304224	0.729215	1	pseudouridine_synthase	pseudouridine synthase
PAU_01740	icdA	1965320-1966573	1965320	1966573		3341.41	4102.9	2579.92	0.628803	-0.669319	0.369596	0.98355	isocitrate_dehydrogenase	isocitrate dehydrogenase
PAU_01741		1966703-1967110	1966703	1967110		532.807	681.793	383.822	0.562959	-0.828899	0.252414	0.98355	hypothetical_protein	conserved hypothetical protein
PAU_01742		1968766-1968879	1968766	1968879		0.149542	0.299085	0	0	#NAME?	0.999789	1	hypothetical_protein	hypothetical protein
PAU_01743		1968907-1969041	1968907	1969041		0	0	0	NA	NA	NA	NA	hypothetical_protein	hypothetical protein
PAU_01744	yaaJ	1969488-1970951	1969488	1970951		274.341	214.121	334.561	1.56248	0.643841	0.349305	0.98355	inner_membrane_transport_protein	inner membrane transport protein
PAU_01745	ybjR	1971205-1972032	1971205	1972032		415.953	542.825	289.081	0.532549	-0.909013	0.219827	0.98355	probable_N-acetylmuramoyl-L-alanine_amidase	probable N-acetylmuramoyl-L-alanine amidase
PAU_01746		c1972834-1972406	1972406	1972834	c	10.6905	11.9559	9.42518	0.78833	-0.343128	0.748495	1	hypothetical_protein	conserved hypothetical protein
PAU_01747		1973057-1973557	1973057	1973557		82.2719	89.4092	75.1346	0.840345	-0.250946	0.75883	1	hypothetical_protein	putative membrane protein
PAU_01748	yddG	1973583-1974488	1973583	1974488		26.3974	29.2561	23.5387	0.804576	-0.313699	0.734918	1	hypothetical_protein	putative membrane protein
PAU_01749	yidA	c1975883-1975077	1975077	1975883	c	237.623	294.616	180.63	0.613102	-0.7058	0.360819	0.98355	hypothetical_protein	conserved hypothetical protein
PAU_01750		c1976358-1975969	1975969	1976358	c	189.154	194.238	184.07	0.94765	-0.0775743	0.950773	1	right_origin-binding_protein	right origin-binding protein
PAU_01751	yobG	1976765-1976935	1976765	1976935		31.3022	26.3161	36.2883	1.37894	0.46356	0.61229	1	hypothetical_protein	conserved hypothetical protein
PAU_01752		1977114-1977209	1977114	1977209		339.203	369.388	309.018	0.836567	-0.257447	0.877491	1	hypothetical_protein	hypothetical protein
PAU_01753	aroP	1977231-1978610	1977231	1978610		118.062	103.22	132.905	1.28759	0.364674	0.599541	1	aromatic_amino_acid_transport_protein_arop_(general_aromatic_amin_acid_permease)	aromatic amino acid transport protein arop (general aromatic amin acid permease)
PAU_01754	crcA	c1979299-1978676	1978676	1979299	c	66.2208	86.9421	45.4995	0.523332	-0.934203	0.224061	0.98355	palmitoyl_transferase	crca protein
PAU_01755	ERF2	c1979407-1979303	1979303	1979407	c	12.2329	14.4789	9.98693	0.689756	-0.535842	0.779886	1	hypothetical_protein	hypothetical protein
PAU_01756	cspC	1979903-1980112	1979903	1980112		23060.1	21318.3	24801.8	1.1634	0.218351	0.755816	1	cold_shock_protein	cold shock protein
PAU_01757	thiD	1980366-1981163	1980366	1981163		51.9097	45.2455	58.5739	1.29458	0.372484	0.601701	1	phosphomethylpyrimidine_kinase	phosphomethylpyrimidine kinase (hmp-phosphate kinase)
PAU_01758	fbaB	c1982357-1981308	1981308	1982357	c	79.6984	97.4125	61.9844	0.636308	-0.652202	0.392214	0.98355	fructose-bisphosphate_aldolase	fructose-biphosphate aldolase class i (fbp aldolase)
PAU_01759	Beta	1983506-1984126	1983506	1984126		0.960429	1.31497	0.605883	0.460756	-1.11792	0.807156	1	hypothetical_protein	conserved hypothetical protein
PAU_01760		c1984805-1984158	1984158	1984805	c	3.62572	4.36264	2.8888	0.662167	-0.594733	0.726804	1	hypothetical_protein	conserved hypothetical protein
PAU_01761	cII	c1985110-1984823	1984823	1985110	c	49.9094	64.6554	35.1634	0.543859	-0.878696	0.336941	0.98355	hypothetical_protein	conserved hypothetical protein
PAU_01762	yegQ	c1988039-1986663	1986663	1988039	c	46.9696	56.8771	37.0621	0.651617	-0.617903	0.414575	0.98355	protease	similar to putative protease yegq of escherichia coli
PAU_01763		c1988580-1988236	1988236	1988580	c	156.919	217.907	95.9304	0.440235	-1.18365	0.172084	0.96871	hypothetical_protein	conserved hypothetical protein
PAU_01764	baeR	c1989371-1988667	1988667	1989371	c	59.5288	65.2222	53.8354	0.825416	-0.276806	0.718516	1	DNA-binding_transcriptional_regulator_BaeR	transcriptional regulatory protein baer
PAU_01765	baeS	c1990756-1989368	1989368	1990756	c	30.4997	21.2652	39.7342	1.86851	0.901888	0.25863	0.98355	signal_transduction_histidine-protein_kinase_BaeS	sensory histidine kinase protein
PAU_01766	mdtC	c1993839-1990753	1990753	1993839	c	10.5458	7.69351	13.3982	1.74149	0.800322	0.394645	0.98355	multidrug_efflux_system_subunit_MdtC	multidrug resistance protein mdtc (multidrug transporter mdtc)
PAU_01767	mdtB	c1996982-1993836	1993836	1996982	c	15.5585	13.5741	17.5429	1.29238	0.370026	0.670912	1	multidrug_efflux_system_subunit_MdtB	multidrug resistance protein mdtb (multidrug transporter mdtb)
PAU_01768	mdtA	c1998214-1996982	1996982	1998214	c	13.9794	10.7094	17.2494	1.61068	0.687667	0.450212	0.992271	multidrug_efflux_system_subunit_MdtA	multidrug resistance protein mdta precursor (multidrug transporte mdta)
PAU_01769		1998669-1999721	1998669	1999721		0	0	0	NA	NA	NA	NA	transposase	transposase, is630 family
PAU_01770	rihB	2000034-2000963	2000034	2000963		26.0215	32.1042	19.9388	0.621065	-0.687185	0.353376	0.98355	pyrimidine-specific_ribonucleoside_hydrolase	pyrimidine-specific ribonucleoside hydrolase
PAU_01771		2001113-2001787	2001113	2001787		7.5723	9.52647	5.61813	0.589739	-0.761852	0.488453	0.99899	adenosine_deaminase_(adenosine_aminohydrolase)	adenosine deaminase (adenosine aminohydrolase)
PAU_01772		2001796-2002188	2001796	2002188		2.65983	3.381	1.93867	0.5734	-0.802386	0.67049	1	adenosine_deaminase_(adenosine_aminohydrolase)	adenosine deaminase (adenosine aminohydrolase)
PAU_01773		2002197-2002349	2002197	2002349		7.43646	6.51805	8.35486	1.2818	0.358175	0.839585	1	hypothetical_protein	conserved hypothetical protein
PAU_01774		2002535-2003182	2002535	2003182		10.4635	7.64337	13.2837	1.73793	0.797373	0.395176	0.98355	transcription_regulator	similar to transcription regulator
PAU_01775	yfgG	c2003745-2003584	2003584	2003745	c	20.0855	13.0254	27.1455	2.08405	1.05939	0.193984	0.98355	hypothetical_protein	conserved hypothetical protein
PAU_01776	ppx	c2005290-2003758	2003758	2005290	c	52.8169	29.8694	75.7643	2.53652	1.34285	0.0786078	0.827327	exopolyphosphatase	exopolyphosphatase (exopolypase) (metaphosphatase)
PAU_01777	ppk	c2007363-2005294	2005294	2007363	c	53.5858	31.4717	75.6998	2.40533	1.26623	0.0945609	0.878521	polyphosphate_kinase	polyphosphate kinase
PAU_01778	speG	c2007960-2007442	2007442	2007960	c	54.9641	29.6745	80.2536	2.70447	1.43534	0.219683	0.98355	spermidine_n1-acetyltransferase_(diamine_acetyltransferase)	spermidine n1-acetyltransferase (diamine acetyltransferase)
PAU_01779	purN	c2008723-2008085	2008085	2008723	c	685.887	219.193	1152.58	5.2583	2.3946	0.00301828	0.180757	phosphoribosylglycinamide_formyltransferase_1_(gart)_(ga_transformylase)_(5'-phosphoribosylglycinamide_transformylase)	phosphoribosylglycinamide formyltransferase 1 (gart) (ga transformylase) (5'-phosphoribosylglycinamide transformylase)
PAU_01780	purM	c2009760-2008720	2008720	2009760	c	261.569	79.3228	443.815	5.59505	2.48415	0.000916031	0.0921533	phosphoribosylaminoimidazole_synthetase	phosphoribosylformylglycinamidine cyclo-ligase
PAU_01781	upp	2009999-2010625	2009999	2010625		556.233	647.106	465.36	0.719141	-0.475654	0.527128	1	uracil_phosphoribosyltransferase	uracil phosphoribosyltransferase
PAU_01782	uraA	2010694-2011986	2010694	2011986		40.4012	23.1992	57.6033	2.48298	1.31208	0.0994252	0.888143	uracil_transporter	uracil permease (uracil transporter)
PAU_01783		2012105-2012218	2012105	2012218		2.86486	2.47707	3.25264	1.3131	0.392981	0.84476	1	hypothetical_protein	conserved hypothetical protein
PAU_01784		c2012926-2012504	2012504	2012926	c	370.184	438.05	302.318	0.690146	-0.535027	0.425449	0.985299	hypothetical_protein	hypothetical protein
PAU_01785	celF	c2014499-2013192	2013192	2014499	c	3.83287	3.92903	3.73672	0.951052	-0.0724039	0.987639	1	6-phospho-beta-glucosidase	6-phospho-beta-glucosidase
PAU_01786	celC	c2014819-2014496	2014496	2014819	c	8.18058	11.2475	5.11367	0.45465	-1.13717	0.240645	0.98355	pts_system	pts system, cellobiose-specific iia component (eiia-cel) (cellobiose permease iia component) (phosphotransferase enzyme ii, a component (eiii-cel)
PAU_01787	celB	c2016163-2014835	2014835	2016163	c	11.3103	13.0745	9.54619	0.730138	-0.453759	0.648808	1	phosphotransferase_system_cellobiose-specific_component_iic	phosphotransferase system cellobiose-specific component iic
PAU_01788	celA	c2016499-2016194	2016194	2016499	c	9.95771	12.4739	7.44155	0.596571	-0.745235	0.432363	0.988216	pts_system	pts system, cellobiose-specific iib component
PAU_01789	hda	2017085-2017819	2017085	2017819		214.04	168.518	259.562	1.54027	0.623183	0.37671	0.98355	DNA_replication_initiation_factor	dnaa-homolog protein hda
PAU_01790		c2018214-2017858	2017858	2018214	c	91.315	60.826	121.804	2.0025	1.0018	0.175352	0.96871	arsenate_reductase	arsenate reductase
PAU_01791	yfgC	c2019687-2018224	2018224	2019687	c	18.1643	13.1865	23.1422	1.755	0.81147	0.343375	0.98355	hypothetical_protein	conserved hypothetical protein
PAU_01792	perM	2019826-2020905	2019826	2020905		77.9589	93.9498	61.9681	0.659588	-0.600364	0.398564	0.98355	permease_perm	putative permease perm
PAU_01793	bcp	c2021533-2021060	2021060	2021533	c	432.686	533.158	332.214	0.623107	-0.682448	0.338417	0.98355	thioredoxin-dependent_thiol_peroxidase	bacterioferritin comigratory protein
PAU_01794	gcvR	c2022102-2021557	2021557	2022102	c	46.7334	37.2052	56.2617	1.5122	0.59665	0.456295	0.992271	glycine_cleavage_system_transcriptional_repressor	glycine cleavage system transcriptional repressor (gcv opero repressor)
PAU_01795		c2022404-2022216	2022216	2022404	c	20.9634	27.1755	14.7513	0.542817	-0.881461	0.645988	1	hypothetical_protein	hypothetical protein
PAU_01796	dapA	2022484-2023383	2022484	2023383		391.66	322.995	460.325	1.42518	0.511141	0.457308	0.992271	dihydrodipicolinate_synthase	dihydrodipicolinate synthase
PAU_01797	nlpB	2023400-2024449	2023400	2024449		775.732	619.807	931.657	1.50314	0.58798	0.393424	0.98355	lipoprotein	lipoprotein-34
PAU_01798	purC	2024542-2025255	2024542	2025255		664.879	310.39	1019.37	3.28415	1.71552	0.016811	0.453243	phosphoribosylaminoimidazole-succinocarboxamide_synthase	phosphoribosylaminoimidazole-succinocarboxamide synthase
PAU_01799		2026016-2027743	2026016	2027743		131.655	122.405	140.905	1.15114	0.20306	0.806807	1	lipid_A_export_ATP-binding/permease_protein	lipid A export ATP-binding/permease protein
PAU_01800		2027740-2029383	2027740	2029383		69.1784	65.8648	72.4921	1.10062	0.138317	0.868666	1	ABC_transporter_protein	similar to abc transporter
PAU_01801		2029657-2029857	2029657	2029857		22.8826	28.184	17.5813	0.623804	-0.680834	0.470387	0.99857	hypothetical_protein	conserved hypothetical protein
PAU_01802		2030237-2031409	2030237	2031409		19.059	21.3461	16.7718	0.78571	-0.347932	0.697515	1	hypothetical_protein	conserved hypothetical protein
PAU_01803	entB	c2031654-2031427	2031427	2031654	c	17.4054	21.9612	12.8496	0.585104	-0.773234	0.404762	0.98355	hypothetical_protein	conserved hypothetical protein
PAU_01804		c2032916-2031687	2031687	2032916	c	13.1982	12.7504	13.646	1.07024	0.0979336	1	1	ABC_transporter	putative ABC transporter
PAU_01805		c2033578-2032916	2032916	2033578	c	8.24582	9.50884	6.9828	0.734348	-0.445464	0.651893	1	abc_transporter	putative abc transporter
PAU_01806		c2034716-2033562	2033562	2034716	c	22.89	24.6787	21.1013	0.855043	-0.225931	0.794747	1	membrane_fusion_protein	membrane fusion protein
PAU_01807	pvdD/pvdJ	c2039132-2034765	2034765	2039132	c	41.0721	52.2178	29.9264	0.573106	-0.803126	0.290088	0.98355	similar_to_proteins_involved_in_antibiotics_biosynthesis	similar to proteins involved in antibiotics biosynthesis
PAU_01808		c2039644-2039150	2039150	2039644	c	32.746	41.1134	24.3786	0.592959	-0.753995	0.329166	0.98355	hypothetical_protein	conserved hypothetical protein
PAU_01809		c2040651-2039641	2039641	2040651	c	135.318	186.907	83.7294	0.447973	-1.15852	0.0968554	0.878723	hypothetical_protein	conserved hypothetical protein
PAU_01810		c2042300-2041305	2041305	2042300	c	8.32361	11.0929	5.55436	0.500715	-0.997939	0.33776	0.98355	hypothetical_protein	conserved hypothetical protein
PAU_01811		c2043372-2042311	2042311	2043372	c	28.462	48.6345	8.28946	0.170444	-2.55263	0.060124	0.747501	hypothetical_protein	conserved hypothetical protein
PAU_01812		2044077-2044169	2044077	2044169		4.85932	5.3376	4.38104	0.820788	-0.284918	0.887702	1	hypothetical_protein	hypothetical protein
PAU_01813	yeaL	2044219-2044734	2044219	2044734		20.8577	21.672	20.0433	0.924848	-0.112712	0.93635	1	hypothetical_protein	conserved hypothetical protein
PAU_01814	ypfI	2044740-2046788	2044740	2046788		27.5651	31.0582	24.072	0.775059	-0.367622	0.647472	1	acyltransferase	putative acyltransferase
PAU_01815	ypfN	c2046927-2046739	2046739	2046927	c	20.4783	20.6278	20.3288	0.985502	-0.0210691	1	1	hypothetical_protein	conserved hypothetical protein
PAU_01816	vanY	c2047604-2046915	2046915	2047604	c	12.7661	8.45377	17.0784	2.02021	1.01451	0.254503	0.98355	hypothetical_protein	conserved hypothetical protein
PAU_01817	dapE	c2048728-2047601	2047601	2048728	c	33.2891	25.0614	41.5169	1.6566	0.728228	0.39848	0.98355	succinyl-diaminopimelate_desuccinylase	n-succinyl-diaminopimelate deacylase
PAU_01818		c2049113-2048730	2048730	2049113	c	243.226	233.299	253.153	1.0851	0.117833	0.902555	1	hypothetical_protein	conserved hypothetical protein
PAU_01819	narP	c2049956-2049321	2049321	2049956	c	188.707	190.964	186.449	0.976357	-0.0345196	0.997671	1	nitrate/nitrite_response_regulator_protein_narp	nitrate/nitrite response regulator protein narp
PAU_01820	maeB	2050543-2052822	2050543	2052822		235.925	177.299	294.552	1.66133	0.732341	0.293323	0.98355	malic_enzyme	nadp-dependent malic enzyme (nadp-me)
PAU_01821	cjrA	2052911-2053822	2052911	2053822		37.041	36.101	37.9811	1.05208	0.0732448	0.909914	1	hypothetical_protein	conserved hypothetical protein
PAU_01822		2053975-2054775	2053975	2054775		7.50183	6.12711	8.87654	1.44873	0.53479	0.604422	1	hypothetical_protein	conserved hypothetical protein
PAU_01823	ptrB	2054906-2056963	2054906	2056963		508.376	566.001	450.752	0.79638	-0.328472	0.665411	1	protease_ii_(oligopeptidase_b)	protease ii (oligopeptidase b)
PAU_01824	cjrC	2057095-2059374	2057095	2059374		14.1404	17.083	11.1979	0.655498	-0.609337	0.505145	1	outer_membrane_siderophore_receptor	similar to outer membrane siderophore receptor cjrc of escherichi coli o164
PAU_01825	xseA	c2060779-2059406	2059406	2060779	c	48.8923	38.684	59.1005	1.52778	0.611435	0.422728	0.98355	exodeoxyribonuclease_VII_large_subunit	exodeoxyribonuclease 7 large subunit
PAU_01826	guaB	2060865-2062418	2060865	2062418		633.833	259.755	1007.91	3.88024	1.95614	0.00725194	0.308573	inosine_5'-monophosphate_dehydrogenase	inosine-5'-monophosphate dehydrogenase
PAU_01827	guaA	2062496-2064073	2062496	2064073		978.972	348.544	1609.4	4.6175	2.20711	0.00253382	0.165751	GMP_synthase	GMP synthase [glutamine-hydrolyzing]
PAU_01828		2064224-2064454	2064224	2064454		16.5202	16.1817	16.8586	1.04183	0.0591186	0.970534	1	hypothetical_protein	conserved hypothetical protein
PAU_01829		2064746-2065012	2064746	2065012		0.302941	0	0.605883	Inf	Inf	0.711059	1	hypothetical_protein	conserved hypothetical protein
PAU_01830		c2065513-2065121	2065121	2065513	c	58.0934	67.0683	49.1186	0.732367	-0.449361	0.566279	1	hypothetical_protein	conserved hypothetical protein
PAU_01831		c2065664-2065473	2065473	2065664	c	43.7897	53.3131	34.2664	0.642739	-0.637694	0.458884	0.992271	hypothetical_protein	conserved hypothetical protein
PAU_01832	rrmA	2065941-2066945	2065941	2066945		44.8909	39.6748	50.1071	1.26295	0.336794	0.709051	1	23S_rRNA_methyltransferase_A	ribosomal rna large subunit methyltransferase a
PAU_01833	yebN	c2067584-2067003	2067003	2067584	c	104.025	112.644	95.4062	0.846973	-0.239613	0.755659	1	upf0059_inner_membrane_protein_plu2701	upf0059 inner membrane protein plu2701
PAU_01834	yobD	c2068400-2067942	2067942	2068400	c	20.793	23.3719	18.2141	0.779316	-0.35972	0.830313	1	hypothetical_protein	upf0266 inner membrane protein plu2700
PAU_01835	manZ	c2069470-2068604	2068604	2069470	c	120.778	80.5006	161.055	2.00067	1.00048	0.161535	0.963101	PTS_system_mannose-specific_transporter_subunit_IID	pts system, mannose-specific iid component (eiid-man) (mannose permease iid component) (phosphotransferase enzyme ii, d component (eii-m-man)
PAU_01836	manY	c2070286-2069483	2069483	2070286	c	1151.11	587.466	1714.75	2.91889	1.54542	0.495003	1	pts_system	pts system, mannose-specific iic component (eiic-man) (mannose permease iic component) (phosphotransferase enzyme ii, c component (eii-p-man)
PAU_01837	manX	c2071329-2070361	2070361	2071329	c	4816.74	4326.82	5306.65	1.22645	0.294493	0.904107	1	pts_system	pts system, mannose-specific iiab component (eiiab-man) (mannose permease iiab component) (phosphotransferase enzyme ii, ab component (eiii-man)
PAU_01838		c2071788-2071657	2071657	2071788	c	1.11529	2.23059	0	0	#NAME?	0.124874	0.919537	hypothetical_protein	hypothetical protein
PAU_01839	sdaA	c2073192-2071828	2071828	2073192	c	60.1689	71.019	49.3188	0.694445	-0.526067	0.489703	0.999716	L-serine_dehydratase_1	L-serine dehydratase 1
PAU_01840	nudL	c2073926-2073363	2073363	2073926	c	31.3586	32.3697	30.3475	0.937527	-0.0930675	0.917685	1	hypothetical_protein	conserved hypothetical protein
PAU_01841	pabB	c2075371-2073923	2073923	2075371	c	40.6429	31.8633	49.4226	1.55108	0.633272	0.394307	0.98355	para-aminobenzoate_synthase_component_I	para-aminobenzoate synthase component I
PAU_01842	yoaH	2075401-2075607	2075401	2075607		146.649	125.417	167.882	1.33859	0.420715	0.621914	1	hypothetical_protein	conserved hypothetical protein
PAU_01843	yebF	2075721-2076095	2075721	2076095		86.9992	82.3607	91.6378	1.11264	0.153987	0.874519	1	hypothetical_protein	conserved hypothetical protein
PAU_01844	pip	2076168-2077121	2076168	2077121		195.379	212.139	178.619	0.841991	-0.248123	0.730494	1	proline_iminopeptidase	proline iminopeptidase
PAU_01845	holE	c2077401-2077171	2077171	2077401	c	156.715	178.469	134.96	0.756212	-0.403138	0.584773	1	DNA_polymerase_III_subunit_theta	dna polymerase iii, theta subunit
PAU_01846		c2077572-2077447	2077447	2077572	c	1.0567	1.79451	0.318884	0.1777	-2.49249	0.532548	1	hypothetical_protein	hypothetical protein
PAU_01847	ftnA	2077713-2078231	2077713	2078231		10697.9	14001.2	7394.65	0.528144	-0.920996	0.201636	0.98355	ferritin-1	ferritin-1
PAU_01848		2078426-2078812	2078426	2078812		223.948	258.446	189.45	0.733034	-0.448048	0.55781	1	hypothetical_protein	conserved hypothetical protein
PAU_01849		2078815-2079708	2078815	2079708		91.7144	94.21	89.2188	0.94702	-0.0785326	0.950483	1	copper_transporter	putative copper transporter
PAU_01850		2079760-2080215	2079760	2080215		224.008	258.984	189.031	0.729895	-0.454239	0.53059	1	hypothetical_protein	conserved hypothetical protein
PAU_01851		c2080708-2080466	2080466	2080708	c	10.4989	12.2415	8.75628	0.715293	-0.483395	0.673922	1	hypothetical_protein	conserved hypothetical protein
PAU_01852		2081332-2081829	2081332	2081829		462.472	439.164	485.779	1.10615	0.145542	0.839799	1	hypothetical_protein	conserved hypothetical protein
PAU_01853	proQ	2081925-2082629	2081925	2082629		692.514	536.48	848.547	1.58169	0.661469	0.411759	0.98355	solute/DNA_competence_effector	prop effector
PAU_01854	prc	2082649-2084700	2082649	2084700		282.169	207.103	357.236	1.72492	0.786528	0.275785	0.98355	carboxy-terminal_protease	carboxy-terminal protease for penicillin-binding protein 3
PAU_01855	htpX	2085035-2085922	2085035	2085922		786.45	1137.44	435.461	0.382844	-1.38517	0.0518668	0.713714	heat_shock_protein_HtpX	probable protease HTPX
PAU_01856	ydjN	c2087367-2085976	2085976	2087367	c	121.522	152.778	90.2658	0.590831	-0.759182	0.351105	0.98355	proton/sodium-glutamate_symport_protein	similar to proton/sodium-glutamate symport protein
PAU_01857		c2088102-2087554	2087554	2088102	c	12.3076	11.9693	12.6459	1.05653	0.0793317	0.94659	1	hypothetical_protein	similar to probable membrane protein ydjm of escherichia coli
PAU_01858		2089077-2089424	2089077	2089424		6.40889	11.077	1.7408	0.157155	-2.66974	0.0197504	0.482637	bacteriophage_tail_fiber_protein	similar to tail fiber protein from bacteriophages
PAU_01859	yniB	2089775-2090314	2089775	2090314		31.0342	40.7299	21.3384	0.523901	-0.932633	0.277139	0.98355	hypothetical_protein	similar to probable membrane protein ynib of escherichia coli
PAU_01860	yniA	c2091243-2090374	2090374	2091243	c	55.2797	70.3026	40.2567	0.572621	-0.804348	0.282053	0.98355	hypothetical_protein	conserved hypothetical protein
PAU_01861	yfeD	c2092254-2091367	2091367	2092254	c	31.8545	29.6928	34.0162	1.1456	0.196107	0.793107	1	chelated_iron_transport_system_membrane_protein_yfed_homolog	chelated iron transport system membrane protein yfed homolog
PAU_01862	yfeC	c2093126-2092251	2092251	2093126	c	75.2604	66.5059	84.0149	1.26327	0.337163	0.703948	1	chelated_iron_transport_system_membrane_protein_yfec	chelated iron transport system membrane protein yfec
PAU_01863		c2094019-2093123	2093123	2094019	c	45.7271	38.4149	53.0393	1.3807	0.465396	0.619188	1	iron_transport_system_atp-binding_protein_yfeb	iron transport system atp-binding protein yfeb
PAU_01864		c2094930-2094016	2094016	2094930	c	104.141	161.788	46.4946	0.28738	-1.79897	0.305845	0.98355	iron_(chelated)_abc_transporter	iron (chelated) abc transporter, periplasmic-binding protein yfea
PAU_01865	emtA	2095153-2095821	2095153	2095821		76.4591	87.5209	65.3972	0.747218	-0.420399	0.592595	1	hypothetical_protein	[no /product]
PAU_01866	thrS	2096236-2098164	2096236	2098164		2352.22	2145.2	2559.25	1.19301	0.254609	0.715469	1	threonyl-tRNA_synthetase	threonyl-tRNA synthetase
PAU_01867	infC	2098312-2098707	2098312	2098707		11511	15096	7925.92	0.525033	-0.929519	0.423304	0.98355	translation_initiation_factor_if-3	translation initiation factor if-3
PAU_01868	rpmI	2098806-2099003	2098806	2099003		2547.96	2569.12	2526.8	0.98353	-0.0239589	0.962885	1	50S_ribosomal_protein_L35	50s ribosomal protein l35
PAU_01869	rplT	2099046-2099402	2099046	2099402		2008.43	2146.29	1870.56	0.871528	-0.198382	0.808347	1	50s_ribosomal_protein_l20	50s ribosomal protein l20
PAU_01870	pheS	2099732-2100715	2099732	2100715		522.312	523.858	520.766	0.994099	-0.00853852	0.994877	1	phenylalanyl-tRNA_synthetase_subunit_alpha	phenylalanyl-tRNA synthetase alpha chain
PAU_01871	pheT	2100730-2103117	2100730	2103117		525.057	545.776	504.338	0.924074	-0.11392	0.871986	1	phenylalanyl-tRNA_synthetase_subunit_beta	phenylalanyl-tRNA synthetase beta chain
PAU_01872	ihfA	2103122-2103418	2103122	2103418		2910.74	3295.21	2526.27	0.766649	-0.383362	0.594978	1	integration_host_factor_subunit_alpha	integration host factor subunit alpha (ihf-alpha)
PAU_01873	btuC	2103488-2104495	2103488	2104495		66.3372	66.8544	65.8201	0.98453	-0.0224934	0.997017	1	vtamin_B12-transporter_permease	vitamin b12 import system permease protein btuc
PAU_01874	btuD	2104515-2105288	2104515	2105288		31.8829	27.5894	36.1765	1.31125	0.390942	0.629309	1	vitamin_B12-transporter_ATPase	vitamin B12 import ATP-binding protein
PAU_01875	arnB	2105426-2106583	2105426	2106583		538.435	430.154	646.716	1.50345	0.588278	0.423474	0.98355	UDP-4-amino-4-deoxy-L-arabinose--oxoglutarate_aminotransferase	UDP-4-amino-4-deoxy-l-arabinose--oxoglutarate aminotransferase
PAU_01876	arnC	2106573-2107550	2106573	2107550		390.564	252.818	528.311	2.08969	1.06329	0.154205	0.962424	undecaprenyl_phosphate_4-deoxy-4-formamido-L-arabinose_transferase	undecaprenyl-phosphate 4-deoxy-4-formamido-l-arabinose transferase
PAU_01877	arnA	2107550-2109532	2107550	2109532		703.292	355.166	1051.42	2.96035	1.56577	0.0323931	0.600016	bifunctional_UDP-glucuronic_acid_decarboxylase/UDP-4-amino-4-deoxy-L-arabinose_formyltransferase	bifunctional polymyxin resistance protein
PAU_01878		2109532-2110425	2109532	2110425		241.015	159.137	322.894	2.02904	1.02079	0.143361	0.955326	hypothetical_protein	conserved hypothetical protein
PAU_01879	arnT	2110433-2112094	2110433	2112094		154.859	101.838	207.879	2.04127	1.02947	0.167369	0.966921	4-amino-4-deoxy-L-arabinose_transferase	undecaprenyl phosphate-alpha-4-amino-4-deoxy-l-arabinose arabinosy transferase
PAU_01880		2112109-2112429	2112109	2112429		262.527	204.174	320.881	1.5716	0.652237	0.384782	0.98355	hypothetical_protein	conserved hypothetical protein
PAU_01881	yfbJ	2112429-2112821	2112429	2112821		112.794	88.6466	136.941	1.5448	0.627416	0.501296	1	hypothetical_protein	upf0188 putative innermembrane protein pbge3
PAU_01882		2112876-2113001	2112876	2113001		122.692	83.3233	162.062	1.94497	0.95975	0.2161	0.98355	hypothetical_protein	hypothetical protein
PAU_01883	nlpC	2113042-2113527	2113042	2113527		19.4318	19.6494	19.2142	0.977853	-0.0323108	1	1	probable_lipoprotein_nlpc	probable lipoprotein nlpc
PAU_01884	yrpD	c2114397-2113786	2113786	2114397	c	45.631	26.385	64.877	2.45886	1.29799	0.577965	1	hypothetical_protein	conserved hypothetical protein
PAU_01885	kpdC	2114967-2115896	2114967	2115896		20.1418	26.2543	14.0294	0.534366	-0.904099	0.275555	0.98355	hypothetical_protein	conserved hypothetical protein
PAU_01886	flhE	c2116497-2116075	2116075	2116497	c	41.396	74.0873	8.7048	0.117494	-3.08934	0.120606	0.918571	flagellar_protein	flagellar protein
PAU_01887		2116821-2117537	2116821	2117537		32.2433	47.8627	16.6239	0.347325	-1.52564	0.0497555	0.703079	ABC_transporter_ATP-binding_protein	similar to atp-binding component of abc transporter
PAU_01888		2117546-2118736	2117546	2118736		7.81686	9.95834	5.67538	0.569912	-0.811188	0.421982	0.98355	ABC_transporter_permease	similar to permease of abc transporter
PAU_01889		2118729-2120207	2118729	2120207		13.096	14.9877	11.2044	0.747574	-0.419711	0.654124	1	probable_outer_membrane_protein	probable outer membrane protein
PAU_01890		2120200-2121474	2120200	2121474		21.9054	29.048	14.7628	0.508222	-0.97647	0.250974	0.98355	hypothetical_protein	conserved hypothetical protein
PAU_01891		2122088-2122543	2122088	2122543		28.9	47.9798	9.82011	0.204672	-2.28862	0.00620355	0.277658	hypothetical_protein	conserved hypothetical protein
PAU_01892		2123020-2123430	2123020	2123430		33.9947	27.1875	40.8018	1.50075	0.585688	0.566883	1	hypothetical_protein	conserved hypothetical protein
PAU_01893		c2124509-2124147	2124147	2124509	c	74.821	36.7497	112.892	3.07193	1.61915	0.0428721	0.667737	right_origin-binding_protein-transcriptional_regulator	right origin-binding protein-transcriptional regulator
PAU_01894		2124772-2125386	2124772	2125386		704.071	524.266	883.876	1.68593	0.753545	0.278621	0.98355	hypothetical_protein	conserved hypothetical protein
PAU_01895	hmuV	c2126241-2125447	2125447	2126241	c	15.9263	15.7571	16.0956	1.02149	0.030669	0.989001	1	hemin_importer_ATP-binding_subunit	hemin import atp-binding protein
PAU_01896		c2127242-2126241	2126241	2127242	c	9.23051	9.87149	8.58954	0.870137	-0.200686	0.850152	1	hemin_permease	putative hemin permease
PAU_01897	chuT	c2128057-2127239	2127239	2128057	c	57.3054	74.1784	40.4323	0.545069	-0.87549	0.398611	0.98355	periplasmic_binding_protein_(hemin_binding_protein)	putative periplasmic binding protein (putative hemin binding protein)
PAU_01898	chuS	c2129127-2128054	2128054	2129127	c	533.994	643.009	424.979	0.660922	-0.597448	0.379938	0.98355	heme/hemoglobin_transport_protein_(uncharacterize_protein_ecs4379)	putative heme/hemoglobin transport protein (putative uncharacterize protein ecs4379)
PAU_01899		c2131247-2129160	2129160	2131247	c	20.0498	22.1741	17.9256	0.808402	-0.306856	0.729288	1	outer_membrane_heme/hemoglobin_receptor_(heme_utilization/transpor_protein)	outer membrane heme/hemoglobin receptor (heme utilization/transpor protein)
PAU_01900	aroH	c2132619-2131573	2131573	2132619	c	84.2273	120.362	48.0924	0.399564	-1.3235	0.0671374	0.784273	phospho-2-dehydro-3-deoxyheptonate_aldolase	phospho2-dehydro-3-deoxyheptonate aldolase, trp-sensitive (3-deoxy-d arabinoheptulosonate 7-phosphate synthase)
PAU_01901	ydiA	c2133749-2132886	2132886	2133749	c	46.6357	62.36	30.9115	0.495694	-1.01248	0.19953	0.98355	hypothetical_protein	conserved hypothetical protein
PAU_01902	ppsA	2133962-2136340	2133962	2136340		80.7037	83.7282	77.6792	0.927755	-0.108185	0.902177	1	phosphoenolpyruvate_synthase	phosphoenolpyruvate synthase (pep synthase)
PAU_01903		c2137896-2136787	2136787	2137896	c	31.0292	24.8934	37.1651	1.49297	0.578185	0.472439	0.99899	inner_membrane_protein	conserved hypothetical protein
PAU_01904		2138117-2141176	2138117	2141176		192.422	156.631	228.214	1.45702	0.543021	0.455065	0.992271	hypothetical_protein	conserved hypothetical protein
PAU_01905		2141173-2141589	2141173	2141589		380.341	426.816	333.866	0.782225	-0.354345	0.645162	1	hypothetical_protein	conserved hypothetical protein
PAU_01906	ISPlu8C3	c2143700-2142648	2142648	2143700	c	0	0	0	NA	NA	NA	NA	transposase	transposase, IS630 family
PAU_01907	ydiC	2144204-2144572	2144204	2144572		118.445	84.9238	151.966	1.78944	0.839508	0.238942	0.98355	iron-sulfur_cluster_assembly_scaffold_protein	Iron-sulphur cluster assembly protein
PAU_01908	sufB	2144585-2146063	2144585	2146063		387.647	332.466	442.828	1.33195	0.413539	0.569113	1	cysteine_desulfurase_activator_complex_subunit_SufB	SUF system FeS cluster assembly, SufB
PAU_01909	ynhD	2146120-2146866	2146120	2146866		213.315	168.878	257.752	1.52627	0.610006	0.406072	0.98355	cysteine_desulfurase_ATPase_component	putative atp-binding component of a transport system
PAU_01910	ynhC	2146841-2148154	2146841	2148154		94.1968	78.5209	109.873	1.39928	0.484686	0.480967	0.99899	cysteine_desulfurase_activator_complex_subunit_SufD	SUF system FeS cluster assembly
PAU_01911	sufS	2148151-2149389	2148151	2149389		144.607	125.105	164.109	1.31177	0.391518	0.593702	1	bifunctional_cysteine_desulfurase/selenocysteine_lyase	cysteine desulfurase
PAU_01912	sufE	2149427-2149843	2149427	2149843		234.604	259.805	209.404	0.806005	-0.311139	0.686568	1	cysteine_desufuration_protein_SufE	cysteine desulfuration protein sufe
PAU_01913	ycfS	2149965-2151041	2149965	2151041		162.929	169.29	156.568	0.924852	-0.112706	0.838725	1	hypothetical_protein	conserved hypothetical protein
PAU_01914	lpp	c2151384-2151148	2151148	2151384	c	2444.79	2437.96	2451.61	1.0056	0.00805801	0.966592	1	major_outer_membrane_lipoprotein_precursor_(murein-lipoprotein)	major outer membrane lipoprotein precursor (murein-lipoprotein)
PAU_01915		2151823-2152677	2151823	2152677		57.9943	80.9812	35.0074	0.43229	-1.20993	0.102568	0.90122	hypothetical_protein	conserved hypothetical protein
PAU_01916		c2153720-2153580	2153580	2153720	c	0.525069	1.05014	0	0	#NAME?	0.476038	0.99899	hypothetical_protein	hypothetical protein
PAU_01917		c2154239-2153742	2153742	2154239	c	0.512993	0.299085	0.726901	2.43041	1.2812	1	1	transposase	transposase
PAU_01918		c2154758-2154348	2154348	2154758	c	5.02716	4.4746	5.57973	1.24698	0.318437	0.875041	1	transposase_is3/is911	transposase is3/is911
PAU_01919		c2156747-2154942	2154942	2156747	c	650.802	795.956	505.648	0.635271	-0.654556	0.348085	0.98355	Type_III_secretion_system_outer_membrane	Type III secretion system outer membrane
PAU_01920	pykF	c2158447-2157038	2157038	2158447	c	36.1071	14.2182	57.996	4.07898	2.02821	0.0137775	0.422531	pyruvate_kinase	pyruvate kinase
PAU_01921	mdtK	c2160635-2159262	2159262	2160635	c	42.9928	42.8761	43.1094	1.00544	0.00783033	0.973782	1	multidrug_efflux_protein	multidrug resistance protein mdtk (multidrug-efflux transporter)
PAU_01922	ribE	2160904-2161560	2160904	2161560		95.7678	97.742	93.7936	0.959604	-0.0594891	0.930093	1	riboflavin_synthase_subunit_alpha	riboflavin synthase alpha chain
PAU_01923		2162036-2163013	2162036	2163013		141.238	211.089	71.3879	0.338188	-1.5641	0.0347595	0.612949	hypothetical_protein	conserved hypothetical protein
PAU_01924	cfa	c2164341-2163190	2163190	2164341	c	53.2518	92.1807	14.3229	0.155379	-2.68614	0.0009861	0.0921533	cyclopropane_fatty_acyl_phospholipid_synthase	cyclopropane-fatty-acyl-phospholipid synthase (cyclopropane fatty aci synthase) (cfa synthase)
PAU_01925	ydhC	c2165837-2164629	2164629	2165837	c	44.9026	64.7193	25.0859	0.387611	-1.36732	0.0745729	0.810956	inner_membrane_transport_protein_YdhC	putative transport protein
PAU_01926	ydhB	2165985-2166893	2165985	2166893		28.0441	28.744	27.3442	0.951302	-0.0720251	0.963538	1	DNA-binding_transcriptional_regulator	similar to lysr-family transcriptional regulatory ydhb of escherichi coli
PAU_01927	purR	c2167932-2166907	2166907	2167932	c	30.5834	24.0547	37.1121	1.54282	0.625567	0.457644	0.992271	DNA-binding_transcriptional_repressor_PurR	hth-type transcriptional repressor purr (purine nucleotide synthesi repressor) (pur regulon repressor)
PAU_01928	sodB	c2168994-2168416	2168416	2168994	c	1831.57	1616.86	2046.29	1.26559	0.339813	0.61359	1	superoxide_dismutase	superoxide dismutase [fe]
PAU_01929		2169157-2169354	2169157	2169354		599.446	450.912	747.98	1.65881	0.730152	0.286044	0.98355	hypothetical_protein	hypothetical protein
PAU_01930	grxD	2169516-2169863	2169516	2169863		1340.61	1544.51	1136.7	0.735957	-0.442306	0.564869	1	hypothetical_protein	glutaredoxin-4 (grx4) (monothiol glutaredoxin)
PAU_01931	rnt	c2170847-2170194	2170194	2170847	c	68.065	87.4859	48.6442	0.556023	-0.846784	0.268202	0.98355	ribonuclease_T	ribonuclease T
PAU_01932	gloA	c2171260-2170847	2170847	2171260	c	96.5571	130.631	62.4831	0.478317	-1.06396	0.160997	0.963101	lactoylglutathione_lyase_(methylglyoxalase)_(s-d-lactolyglutathion_methylglyoxal_lyase)	lactoylglutathione lyase (methylglyoxalase) (s-d-lactolyglutathion methylglyoxal lyase)
PAU_01933		2171412-2171672	2171412	2171672		402.744	625.163	180.326	0.288447	-1.79362	0.013378	0.422531	hypothetical_protein	conserved hypothetical protein
PAU_01934	slyA	2172231-2172662	2172231	2172662		1666.23	2475.15	857.314	0.346369	-1.52962	0.0308561	0.591351	transcriptional_regulator_SlyA	transcriptional regulator slya
PAU_01935	slyB	c2173220-2172750	2172750	2173220	c	770.352	595.75	944.955	1.58616	0.665539	0.379568	0.98355	outer_membrane_lipoprotein_slyb	outer membrane lipoprotein slyb
PAU_01936	anmK	2173565-2174683	2173565	2174683		173.528	149.631	197.426	1.31942	0.399899	0.566227	1	anhydro-N-acetylmuramic_acid_kinase	anhydro-N-acetylmuramic acid kinase
PAU_01937	pdxH	2174731-2175384	2174731	2175384		529.195	481.123	577.267	1.19983	0.262835	0.745141	1	pyridoxamine_5'-phosphate_oxidase	pyridoxamine 5'-phosphate oxidase
PAU_01938	tyrS	2175623-2176897	2175623	2176897		418.673	386.18	451.167	1.16828	0.224386	0.724858	1	tyrosyl-tRNA_synthetase	tyrosyl-tRNA synthetase 1
PAU_01939	pdxY	2176992-2177855	2176992	2177855		530.177	564.513	495.84	0.87835	-0.187133	0.806811	1	pyridoxamine_kinase	pyridoxamine kinase
PAU_01940	gst	c2178516-2177911	2177911	2178516	c	1528.94	2308.94	748.936	0.324364	-1.62432	0.26747	0.98355	glutathionine_S-transferase	glutathione s-transferase
PAU_01941		c2179616-2178858	2178858	2179616	c	2.10465	2.99753	1.21177	0.404255	-1.30666	0.522712	1	hypothetical_protein	conserved hypothetical protein
PAU_01942	fabI	c2180818-2180030	2180030	2180818	c	556.482	398.443	714.52	1.79328	0.8426	0.335014	0.98355	enoyl-(acyl_carrier_protein)_reductase	enoyl-[acyl-carrier-protein] reductase
PAU_01943	sapF	c2181814-2181005	2181005	2181814	c	39.4072	36.0689	42.7456	1.18511	0.245019	0.757368	1	peptide_transport_system_atp-binding_protein_sapf	peptide transport system atp-binding protein sapf
PAU_01944	sapD	c2182806-2181817	2181817	2182806	c	24.2799	23.3253	25.2346	1.08186	0.11351	0.883839	1	peptide_transport_system_atp-binding_protein_sapd	peptide transport system atp-binding protein sapd
PAU_01945	sapC	c2183697-2182807	2182807	2183697	c	40.5798	41.7567	39.403	0.943634	-0.0837005	0.942973	1	peptide_transport_system_permease_protein_sapc	peptide transport system permease protein sapc
PAU_01946	sapB	c2184649-2183684	2183684	2184649	c	15.0905	18.1222	12.0589	0.66542	-0.587663	0.528733	1	peptide_transport_system_permease_protein_sapb	peptide transport system permease protein sapb
PAU_01947	sapA	c2186310-2184646	2184646	2186310	c	22.6027	23.9135	21.2919	0.890372	-0.16752	0.832209	1	peptide_transport_periplasmic_protein_sapa	peptide transport periplasmic protein sapa
PAU_01948	pspF	c2187584-2186568	2186568	2187584	c	12.6489	13.392	11.9059	0.889035	-0.169687	0.878317	1	phage_shock_protein_operon_transcriptional_activator	psp operon transcriptional activator pspf
PAU_01949	pspA	2187749-2188420	2187749	2188420		124.473	123.69	125.257	1.01267	0.0181609	1	1	phage_shock_protein_PspA	phage shock protein a
PAU_01950	pspB	2188456-2188683	2188456	2188683		130.453	132.797	128.109	0.964693	-0.0518579	0.918006	1	phage_shock_protein_B	phage shock protein b
PAU_01951	pspC	2188670-2189023	2188670	2189023		63.1295	70.8406	55.4185	0.782299	-0.354209	0.669909	1	DNA-binding_transcriptional_activator_PspC	phage shock protein c
PAU_01952		2189033-2189152	2189033	2189152		72.0776	81.9695	62.1856	0.758644	-0.398505	0.538236	1	hypothetical_protein	hypothetical protein
PAU_01953	ycjX	2189253-2190650	2189253	2190650		94.3485	106.441	82.2558	0.772783	-0.371865	0.615405	1	hypothetical_protein	conserved hypothetical protein
PAU_01954	ycjF	2190647-2191708	2190647	2191708		202.26	200.268	204.252	1.01989	0.0284181	0.997138	1	hypothetical_protein	putative membrane protein ycjf
PAU_01955		c2191993-2191859	2191859	2191993	c	53.3426	39.3755	67.3097	1.70943	0.773517	0.333823	0.98355	hypothetical_protein	hypothetical protein
PAU_01956	tyrR	2192078-2193661	2192078	2193661		224.327	223.278	225.377	1.0094	0.0135009	0.961214	1	DNA-binding_transcriptional_regulator_TyrR	transcriptional regulatory protein tyrr
PAU_01957	tpx	c2194206-2193703	2193703	2194206	c	1164.95	994.007	1335.9	1.34395	0.426483	0.538696	1	thiol_peroxidase	thiol peroxidase (scavengase p20)
PAU_01958	mppA	2194385-2196007	2194385	2196007		205.161	199.162	211.159	1.06024	0.0843842	0.899088	1	periplasmic_murein_peptide-binding_protein	periplasmic murein peptide-binding protein
PAU_01959		2196241-2196396	2196241	2196396		60.0762	89.7255	30.427	0.339112	-1.56017	0.0945274	0.878521	integrase	putative integrase
PAU_01960		2196971-2197306	2196971	2197306		944.176	1265.38	622.976	0.492325	-1.02232	0.137573	0.935937	hypothetical_protein	conserved hypothetical protein
PAU_01961		2197303-2197656	2197303	2197656		181.757	236.473	127.041	0.537232	-0.896383	0.33531	0.98355	hypothetical_protein	conserved hypothetical protein
PAU_01962		2197838-2198173	2197838	2198173		67.4607	81.5895	53.3319	0.653662	-0.613384	0.436331	0.989104	hypothetical_protein	conserved hypothetical protein
PAU_01963	zntB	2198245-2199228	2198245	2199228		58.8824	76.6904	41.0744	0.535587	-0.900807	0.245256	0.98355	zinc_transporter	zinc transport protein zntb
PAU_01964	ydaO	2199786-2200679	2199786	2200679		649.543	769.134	529.952	0.689025	-0.537372	0.423537	0.98355	C32_tRNA_thiolase	conserved hypothetical protein
PAU_01965		2201540-2201872	2201540	2201872		291.128	355.743	226.513	0.636732	-0.651242	0.382135	0.98355	methylviologen_resistance_protein_encoded_within_prophage_cp-933_(integral_membrane_drug_resistance_protein_emre)	methylviologen resistance protein encoded within prophage cp-933 (integral membrane drug resistance protein emre)
PAU_01966	ydbJ	2201921-2202220	2201921	2202220		108.367	134.706	82.0274	0.608935	-0.71564	0.373546	0.98355	hypothetical_protein	conserved hypothetical protein
PAU_01967	dsbB	c2202881-2202372	2202372	2202881	c	106.335	118.056	94.6136	0.801427	-0.319358	0.673668	1	disulfide_bond_formation_protein_B	disulfide bond formation protein b (disulfide oxidoreductase)
PAU_01968	nhaB	c2204582-2203041	2203041	2204582	c	188.047	232.207	143.886	0.619645	-0.690486	0.346568	0.98355	sodium/proton_antiporter	na(+)/h(+) antiporter nhab (sodium/proton antiporter nhab)
PAU_01969	fadR	2204805-2205524	2204805	2205524		280.075	274.983	285.166	1.03703	0.0524555	0.966623	1	fatty_acid_metabolism_regulator	fatty acid metabolism regulator protein
PAU_01970	dadA	2206046-2207347	2206046	2207347		305.897	459.682	152.111	0.330904	-1.59551	0.0290508	0.585423	D-amino_acid_dehydrogenase_small_subunit	D-amino acid dehydrogenase small subunit
PAU_01971	dadX	2207362-2208435	2207362	2208435		498.444	767.02	229.869	0.299691	-1.73845	0.0529201	0.714587	alanine_racemase	alanine racemase, catabolic
PAU_01972	yeaF	2208827-2209579	2208827	2209579		889.913	1049.6	730.222	0.695712	-0.523437	0.47568	0.99899	uncharacterized_protein_yeaf_(scaffolding_protein_i_the_formation_of_a_murein-synthesizing_holoenzyme)	putative uncharacterized protein yeaf (putative scaffolding protein i the formation of a murein-synthesizing holoenzyme)
PAU_01973	yeaD	c2210547-2209669	2209669	2210547	c	60.3996	61.8598	58.9395	0.952792	-0.0697668	0.910686	1	hypothetical_protein	conserved hypothetical protein
PAU_01974	gapA	c2211666-2210671	2210671	2211666	c	1184.48	712.006	1656.94	2.32715	1.21856	0.109248	0.91112	glyceraldehyde-3-phosphate_dehydrogenase_a_(gapdh-a)	glyceraldehyde-3-phosphate dehydrogenase a (gapdh-a)
PAU_01975	msrB	2212003-2212413	2212003	2212413		394.558	593.943	195.173	0.328606	-1.60557	0.0307148	0.591351	methionine_sulfoxide_reductase_B	peptide methionine sulfoxide reductase
PAU_01976	yeaC	2212499-2212768	2212499	2212768		1811.8	2682.3	941.308	0.350933	-1.51073	0.0381765	0.634087	hypothetical_protein	conserved hypothetical protein
PAU_01977	ydjB	c2213471-2212833	2212833	2213471	c	168.999	155.871	182.127	1.16845	0.224597	0.758435	1	nicotinamidase/pyrazinamidase	pyrazinamidase/nicotinamidase
PAU_01978	ansA	c2214503-2213484	2213484	2214503	c	33.7568	31.4457	36.0678	1.14699	0.197851	0.831293	1	cytoplasmic_asparaginase_I	l-asparaginase i (l-asparagine amidohydrolase i) (l-asnase i)
PAU_01979	sppA	c2216512-2214656	2214656	2216512	c	194.276	174.457	214.095	1.2272	0.295374	0.661986	1	protease_4	protease iv (endopeptidase iv) (signal peptide peptidase)
PAU_01980	ydjA	2216684-2217235	2216684	2217235		248.909	246.92	250.898	1.01611	0.0230581	0.994622	1	hypothetical_protein	conserved hypothetical protein
PAU_01981	selD	2217248-2218291	2217248	2218291		120.953	124.601	117.304	0.941442	-0.0870563	0.917369	1	selenophosphate_synthetase	selenide, water dikinase
PAU_01982	topB	2218297-2220225	2218297	2220225		97.7359	82.9781	112.494	1.3557	0.439042	0.554796	1	DNA_topoisomerase_III	DNA topoisomerase
PAU_01983	xthA	c2221090-2220284	2220284	2221090	c	148.886	93.9516	203.821	2.16943	1.11732	0.134768	0.930872	exonuclease_III	exodeoxyribonuclease iii (exonuclease iii) (exo iii) (ap endonucleas vi)
PAU_01984		2221592-2222455	2221592	2222455		677.923	1056.81	299.038	0.282964	-1.82131	0.0130023	0.422531	LysR_family_transcriptional_regulator	similarities with transcription regulator lysr family
PAU_01985		c2223958-2223002	2223002	2223958	c	23.9509	27.1448	20.7571	0.76468	-0.387071	0.632842	1	hypothetical_protein	conserved hypothetical protein
PAU_01986		2225165-2225866	2225165	2225866		444.978	314.443	575.513	1.83026	0.872051	0.225048	0.98355	tail_fiber_protein	putative tail fiber protein
PAU_01987		2225869-2226492	2225869	2226492		343.84	245.016	442.665	1.80668	0.853342	0.222214	0.98355	tail_fiber_protein_of_prophage_cp-933x_(tail_fiber_assembl_protein)	putative tail fiber protein of prophage cp-933x (tail fiber assembl protein)
PAU_01988	orf47	2227211-2228797	2227211	2228797		71.7531	41.583	101.923	2.45108	1.29342	0.0946717	0.878521	hypothetical_protein	conserved hypothetical protein
PAU_01989		2228820-2229893	2228820	2229893		83.9864	79.8116	88.1612	1.10462	0.143544	0.88908	1	hypothetical_protein	conserved hypothetical protein
PAU_01990		2229945-2231087	2229945	2231087		66.4419	67.2286	65.6552	0.976596	-0.0341661	0.919344	1	hypothetical_protein	conserved hypothetical protein
PAU_01991		2231251-2232378	2231251	2232378		22.6463	24.703	20.5896	0.833484	-0.262773	0.723702	1	hypothetical_protein	conserved hypothetical protein
PAU_01992		c2233092-2232610	2232610	2233092	c	51.5871	71.8504	31.3237	0.435958	-1.19774	0.115448	0.915487	hypothetical_protein	conserved hypothetical protein
PAU_01993		2233799-2234248	2233799	2234248		0.642318	0.965752	0.318884	0.330192	-1.59862	0.769273	1	hypothetical_protein	conserved hypothetical protein
PAU_01994		2234285-2235409	2234285	2235409		4.5306	5.64337	3.41783	0.605637	-0.723475	0.546775	1	hypothetical_protein	conserved hypothetical protein
PAU_01995		2235590-2237071	2235590	2237071		12.3588	14.8206	9.89696	0.667783	-0.582548	0.542792	1	hypothetical_protein	conserved hypothetical protein
PAU_01996		2237125-2238324	2237125	2238324		5.35425	4.74611	5.96238	1.25627	0.329142	0.809664	1	hypothetical_protein	conserved hypothetical protein
PAU_01997	afp5	2238338-2238796	2238338	2238796		1.83805	1.64831	2.0278	1.23023	0.298929	1	1	hypothetical_protein	conserved hypothetical protein
PAU_01998		2238793-2238972	2238793	2238972		2.09415	1.43361	2.7547	1.92151	0.942244	0.626005	1	hypothetical_protein	conserved hypothetical protein
PAU_01999		2238959-2239642	2238959	2239642		5.59343	4.59323	6.59363	1.43551	0.521563	0.693695	1	hypothetical_protein	conserved hypothetical protein
PAU_02000		2239639-2241240	2239639	2241240		4.64438	5.46292	3.82585	0.700331	-0.513892	0.684536	1	hypothetical_protein	conserved hypothetical protein
[truncated: 2,424 more rows]

## Sheet: Up at 37 (>1.5-fold ,<0.1)
Accession	Gene	Base Mean at 28	Base Mean at 37	log2 Fold Change	P-value	Function
PAU_01378		3.96647	467.512	6.881	0.0966902	conserved hypothetical protein
PAU_03890		89.1462	4791.4	5.74813	5.85e-09	conserved hypothetical protein
PAU_00605	prtA	53.4873	1804.82	5.07651	1.32767e-09	secreted alkaline metalloproteinase
PAU_01720	pvcB	44.9269	845.442	4.23405	0.000565024	similar to pyoverdine biosynthesis protein pvcb of pseudomona aeruginosa
PAU_02535		169.166	2423.15	3.84037	0.00601031	conserved hypothetical protein
PAU_01601	cbiA	10.7621	144.526	3.74729	0.0444147	cobyrinic acid a,c-diamide synthase
PAU_02536		97.5369	1269.55	3.70223	0.0127916	conserved hypothetical protein
PAU_03067		5.82176	75.739	3.70151	2.11e-05	similar to Syringopeptin synthetase C
PAU_02342	oppA	3.96647	51.4976	3.69858	0.000627219	periplasmic oligopeptide-binding protein
PAU_02821		6.8103	86.7892	3.67173	0.0586006	conserved hypothetical protein
PAU_02393	mat	10.8479	122.638	3.49892	0.0324562	S-adenosylmethionine synthetase
PAU_02533		21.9247	236.698	3.43242	0.0591118	conserved hypothetical protein
PAU_02534		12.1733	129.829	3.41482	0.0457214	conserved hypothetical protein
PAU_01184		73.3707	770.452	3.39243	0.0950422	similar to p-aminobenzoic acid synthase
PAU_01610	cbiJ	4.80786	49.3019	3.35818	0.0780892	cobalt-precorrin-6a reductase
PAU_02033	oppA2	105.315	1040.82	3.30494	0.0227975	oligopeptide transport periplasmic binding protein
PAU_01181		40.7401	400.859	3.29857	0.00131053	modification methylase hemk precursor
PAU_02610	fliD	32.0195	308.27	3.26717	0.0147347	flagellar hook-associated protein 2
PAU_02251	ygfI	3.69255	34.8073	3.2367	0.0277624	putative lysr-family transcriptional regulatory protein
PAU_00606	inh	6.53638	59.7301	3.1919	0.00471527	alkaline proteinase inhibitor
PAU_01468	lsrG	107.185	963.216	3.16775	0.0940676	conserved hypothetical protein
PAU_01563		21.9109	187.794	3.09943	9.45e-05	conserved hypothetical protein
PAU_01721	pvcA	52.2628	443.963	3.08658	0.0160016	similar to pyoverdine biosynthesis protein pvca of pseudomona aeruginosa
PAU_02531		22.3711	185.968	3.05534	0.0941416	similar to putative invasin and adhesin
PAU_00048	asnA	70.0071	577.689	3.04472	7.39339e-05	asparagine synthetase A
PAU_01604	cbiD	7.82996	63.4357	3.01822	0.0899325	putative cobalt-precorrin-6A synthase [deacetylating]
PAU_00607	prtB	7.47343	59.8298	3.00102	0.000404433	type I protease secretion protein ATP binding (previous annotation hasD)
PAU_02200		1.26901	10.0887	2.99095	0.0162457	similar to atp-binding component of abc transporter
PAU_02670		15.3549	120.779	2.9756	0.000181673	Hypothetical Protein
PAU_03812		2.05968	16.1589	2.97183	0.00829013	conserved hypothetical Protein
PAU_02532		13.7555	106.41	2.95156	0.0118539	conserved hypothetical protein
PAU_03190	clpB	164.542	1272.35	2.95097	0.000647618	chaperone clpb
PAU_02748		4.52818	34.3094	2.9216	0.0323746	conserved hypothetical exported protein
PAU_02143		35.4504	267.817	2.91737	0.0716955	conserved hypothetical protein
PAU_01182		14.1316	106.37	2.9121	0.000350323	aminotransferase, class II
PAU_02685	cheD	11.8806	89.411	2.91185	0.0221786	methyl-accepting chemotaxis protein i (mcp-i) (serine chemoreceptor protein)
PAU_02392		19.0286	138.944	2.86826	0.0174559	conserved hypothetical protein
PAU_02394	nol	18.9837	138.366	2.86565	0.00644819	conserved hypothetical protein
PAU_01183	papB	44.0688	320.69	2.86335	0.000193047	similar to papb protein and to chorismate mutase/prephenat dehydrogenase
PAU_01544		25.0571	176.811	2.81892	0.0997838	conserved hypothetical protein
PAU_02334		39.1233	263.854	2.75364	0.0186308	conserved hypothetical protein
PAU_01924	cfa	14.3229	92.1807	2.68614	0.0009861	cyclopropane-fatty-acyl-phospholipid synthase (cyclopropane fatty aci synthase) (cfa synthase)
PAU_00614		57.2682	368.209	2.68472	0.000403134	conserved hypothetical protein
PAU_00759		41.8749	267.548	2.67564	0.00186857	conserved hypothetical protein
PAU_02389		28.4342	181.572	2.67484	0.00470998	conserved hypothetical protein
PAU_01858		1.7408	11.077	2.66974	0.0197504	similar to tail fiber protein from bacteriophages
PAU_01142		3.46932	22.0219	2.66622	0.0480502	conserved hypothetical protein
PAU_02203	dmpA	149.577	944.508	2.65867	0.000357003	L-Aminopeptidase D-amidase/D-esterase (DmpA) family; DmpA catalyzes the release of N-terminal D and L amino acids from peptide susbtrates
PAU_01469	yneB	245.075	1545.32	2.65661	0.000685758	putative aldolase yneb
PAU_02337	dppA	19.1235	117.131	2.61471	0.000829143	periplasmic oligopeptide-binding protein precursor
PAU_03384		1772.28	10814.8	2.60932	0.000421148	Chaperone protein htpG (Heat shock protein htpG)
PAU_00820		694.755	4228.32	2.60551	0.069857	similar to carbonic anhydrase
PAU_02297		92.0954	556.226	2.59447	0.0289038	transcriptional regulator, arac family
PAU_01811		8.28946	48.6345	2.55263	0.060124	conserved hypothetical protein
PAU_02390	tiorf56	17.6958	102.225	2.53027	0.00599471	conserved hypothetical protein
PAU_02369		5.32461	30.6077	2.52315	0.00490826	conserved hypothetical protein
PAU_00212		456.493	2510.84	2.45951	0.000968671	putative hth-type transcriptional regulator
PAU_00422		5.49712	30.1691	2.45633	0.00742197	conserved hypothetical protein
PAU_02391		20.8259	114.197	2.45507	0.00244419	hypothetical protein
PAU_02805	hrpN	60.2682	323.223	2.42306	0.00140098	conserved hypothetical protein
PAU_02724		161.162	855.673	2.40855	0.00107379	putative membrane protein precursor
PAU_02804		43.3065	227.713	2.39456	0.0765347	conserved hypothetical protein
PAU_02032	oppA1	37.3737	196.514	2.39454	0.0186691	oligopeptide transport periplasmic binding protein
PAU_00254		4.54046	23.844	2.39271	0.0149828	conserved hypothetical protein
PAU_02406	lpfA	39.4242	206.487	2.3889	0.0128623	similar to fimbrial subunit type 1
PAU_02806		102.164	531.554	2.37933	0.00128627	conserved hypothetical protein
PAU_02396		93.6902	481.982	2.36301	0.00144563	conserved hypothetical protein
PAU_00613		29.3728	147.159	2.32482	0.002661	conserved hypothetical protein
PAU_02801		98.2862	487.753	2.31109	0.00196724	conserved hypothetical protein
PAU_01180	forZ	19.4939	96.4061	2.3061	0.00354192	fortimicin a n-forimidoyltransferase
PAU_00608	prtC	11.0254	54.1839	2.29704	0.00539944	type I alkaline protease secretion protein HlyD family membrane fusion protein
PAU_01891		9.82011	47.9798	2.28862	0.00620355	conserved hypothetical protein
PAU_00682	cysD	96.9916	468.016	2.27063	0.00224876	sulfate adenylyltransferase subunit 2
PAU_00750	paaA	120.808	580.121	2.26364	0.00218471	conserved hypothetical protein
PAU_02908	ydhM	16.0899	76.7754	2.25449	0.00597606	Hypothetical protein
PAU_02326	aco	5.33113	24.9827	2.22842	0.0141527	conserved hypothetical protein
PAU_02882		64.586	299.884	2.21511	0.0796448	conserved hypothetical protein
PAU_02408	yraJ	2.63368	11.9901	2.18669	0.0438331	putative outer membrane protein
PAU_02537		70.802	315.946	2.15782	0.00721445	conserved hypothetical protein
PAU_03369	mcf	29.2806	128.097	2.12922	0.00497714	MCF toxin
PAU_02219		79.9021	348.854	2.12632	0.0396217	conserved hypothetical protein
PAU_01543		180.415	782.509	2.11679	0.00359282	conserved hypothetical protein
PAU_02220	cfa8A	71.902	308.767	2.10242	0.00517256	conserved hypothetical protein
PAU_02907		52.9533	225.262	2.08881	0.00555704	conserved hypothetical protein
PAU_02951	aroG	823.257	3473.7	2.07706	0.0780272	phospho-2-dehydro-3-deoxyheptonate aldolase, phe-sensitive
PAU_02803		54.0614	227.039	2.07027	0.0054655	conserved hypothetical protein
PAU_03921		9.04904	37.673	2.05769	0.0170931	similarities with the n-terminal region of unknown bacteriophage protein
PAU_02802	orf25	66.8103	277.483	2.05426	0.0160252	conserved hypothetical protein
PAU_02694		6.964	28.8224	2.0492	0.0226137	similar to mg(2+) transport atpase protein c
PAU_02072		9.21502	37.3705	2.01984	0.0189518	putative hydrolase
PAU_03622	idi2	14.5969	59.1487	2.01869	0.0123812	isopentenyl-diphosphate delta-isomerase
PAU_00162	pstS	45.6655	184.314	2.01299	0.00861423	phosphate-binding periplasmic protein psts
PAU_02514	luxC	64.8766	258.552	1.99468	0.0162465	acyl-CoA reductase
PAU_03993		199.3	793.507	1.9933	0.00747484	similar to amino acid abc transporter
PAU_02388		20.3491	80.9581	1.99221	0.0442972	conserved hypothetical protein
PAU_00419		13.7743	54.739	1.99059	0.0368326	conserved hypothetical protein
PAU_00481	attM/aiiB	53.9027	213.298	1.98444	0.00782122	similar to zn-dependent hydrolases and to ahl-lactonase
PAU_03717	pirB	12.5625	49.5477	1.97969	0.0148943	PirB similarities with putative juvenile hormone esterase
PAU_02642	flgK	45.6662	178.177	1.96411	0.00949203	flagellar hook-associated protein 1 flgK
PAU_00252	sdiA1	18.7327	72.6178	1.95476	0.00947516	similar to probable transcription regulator SdiA of Escherichia coli
PAU_00751	paaB	65.779	252.682	1.94163	0.0816949	conserved hypothetical protein
PAU_02387		39.856	151.493	1.92638	0.0308749	conserved hypothetical protein
PAU_02684	tap	34.0099	128.87	1.92188	0.0253688	methyl-accepting chemotaxis protein iv, peptide sensor receptor
PAU_04308	cpxP	77.4147	292.665	1.91857	0.0275523	conserved hypothetical protein
PAU_02790	afp1	517.628	1947.83	1.91188	0.00806688	conserved hypothetical protein
PAU_03402		794.124	2985.28	1.91043	0.00832337	conserved hypothetical protein
PAU_02513	luxD	35.2968	132.166	1.90474	0.0136352	acyl transferase
PAU_02800	afp12	71.5985	267.937	1.90389	0.00990102	conserved hypothetical protein
PAU_00628		15.9869	59.3239	1.89172	0.0288905	putative membrane protein
PAU_02270		2.95257	10.8916	1.88317	0.0896129	putative transmembrane protein
PAU_02853	cspD	58.5755	215.752	1.88101	0.0134524	cold shock-like protein cspd (csp-d)
PAU_02202		33.9762	124.86	1.87772	0.013551	conserved hypothetical protein
PAU_00891	phuC	13.9142	51.1054	1.87692	0.0342158	ferric vibriobactin abc transporter, atp-binding protein
PAU_02651	flgB	61.2206	224.147	1.87236	0.0124994	flagellar basal-body rod protein flgb (putative proximal rod protein)
PAU_02335		7.07849	25.8952	1.87117	0.0351425	hypothetical protein
PAU_00543	dnaK	1190.61	4352.87	1.87027	0.00977265	chaperone hsp70, autoregulated heat shock protein
PAU_02799	afp11	48.6623	177.346	1.86569	0.0132719	conserved hypothetical protein
PAU_02034	oppB	40.8193	147.565	1.85403	0.0151152	oligopeptide transport system permease protein oppb
PAU_02791	afp2	354.141	1262.84	1.83428	0.0121906	Phage tail sheath protein FI
PAU_00632		32.9942	117.612	1.83375	0.0416751	conserved hypothetical protein
PAU_03443		4.47669	15.9333	1.83154	0.060367	Hypothetical protein
PAU_02792	afp3	394.561	1397.24	1.82426	0.011507	conserved hypothetical protein
PAU_01984		299.038	1056.81	1.82131	0.0130023	similarities with transcription regulator lysr family
PAU_02607	fliZ	206.002	724.143	1.81362	0.0400927	fliz protein
PAU_02641	flgL	33.8371	118.727	1.81097	0.0177597	flagellar hook-associated protein 3 (hap3) (hook-filament junctio protein)
PAU_02272		6.3508	22.226	1.80724	0.0381277	conserved hypothetical protein
PAU_02650	flgC	40.6966	142.169	1.80463	0.0175463	flagellar basal-body rod protein flgc (putative proximal rod protein)
PAU_02218	syrE	42.3606	146.874	1.79378	0.016399	syringomycin synthetase
PAU_01933		180.326	625.163	1.79362	0.013378	conserved hypothetical protein
PAU_00683	cysN	174.738	601.897	1.78433	0.0151367	sulfate adenylyltransferase subunit 1
PAU_00681	cysG	58.4185	200.928	1.78218	0.0168421	sirohaem synthase-uroporphyrinogen III C-methyltransferase
PAU_02498		10.0187	34.2401	1.77299	0.0377277	similar to cytochrome b561 homolog 2
PAU_00052	rbsA	164.614	558.167	1.76161	0.014249	ribose transport atp-binding protein rbsa
PAU_00051	rbsD	178.296	603.331	1.75867	0.0164415	high affinity ribose transport protein rbsd
PAU_00145		7.80539	26.1649	1.74509	0.0499365	Hypothetical protein
PAU_01971	dadX	229.869	767.02	1.73845	0.0529201	alanine racemase, catabolic
PAU_02834	ansB	1037.5	3456.95	1.73639	0.0155482	l-asparaginase ii (l-asparagine amidohydrolase ii) (l-asnase ii (colaspase)
PAU_02378	ureE	8.94763	29.7822	1.73487	0.0486623	urease accessory protein
PAU_02793	afp4	82.3	273.885	1.73461	0.018588	conserved hypothetical protein
PAU_02037	oppF	70.6549	234.268	1.7293	0.0188878	oligopeptide transport atp-binding protein oppf
PAU_00793		12.0899	40.0473	1.7279	0.0323504	conserved hypothetical protein
PAU_00854	orf74	36.9714	122.236	1.72519	0.0226866	conserved hypothetical protein
PAU_01017	Sc/SvP	7.03353	23.2493	1.72487	0.0529112	similarities with pahage sc/svp protein
PAU_03376		160.519	530.528	1.72468	0.0130451	Hypothetical Protein
PAU_02497	yceI	23.4741	77.5442	1.72395	0.0267166	conserved hypothetical protein
PAU_02401		137.795	454.322	1.7212	0.01716	conserved hypothetical protein
PAU_02236		10.6361	34.9939	1.71813	0.0390596	Adenoviral fiber protein
PAU_02952	pnuC	93.6562	308.084	1.71788	0.02142	pnuc nmn transporter
PAU_02433	fadD	160.419	527.274	1.71671	0.0188864	long-chain-fatty-acid--CoA ligase
PAU_01208	ygfY	452.458	1485.98	1.71556	0.0851378	conserved hypothetical protein
PAU_02045		136.584	447.053	1.71065	0.0205526	conserved hypothetical protein
PAU_00609	prtD	49.4702	160.039	1.69379	0.0225395	type I outer membrane efflux protein
PAU_01227		65.1471	210.478	1.6919	0.0233695	similar to antibiotic acetyltransferase
PAU_02425		52.152	166.949	1.67862	0.0253587	conserved hypothetical protein
PAU_02271		5.00573	15.9551	1.67237	0.0846708	conserved hypothetical protein
PAU_02201		283.234	902.773	1.67237	0.0208879	conserved hypothetical protein
PAU_03615		271.719	862.668	1.66669	0.0225013	conserved hypothetical Protein
PAU_00790		44.7285	141.032	1.65675	0.0289154	putative membrane protein
PAU_00631		21.0629	66.309	1.6545	0.0352394	conserved hypothetical protein
PAU_00517		50.977	159.505	1.64568	0.0298432	similar to cystathionine gamma-lyase
PAU_00684	cysC	84.0407	261.676	1.63862	0.0267523	adenylyl-sulfate kinase
PAU_03718	pirA	10.771	33.5368	1.63859	0.0576906	conserved hypothetical protein
PAU_02619	fliJ	30.8454	95.9344	1.63699	0.0307966	flagellar flij protein
PAU_01069	orf35	232.997	723.919	1.63552	0.0230267	phage holin
PAU_00626		4.97384	15.4036	1.63084	0.095966	hypothetical protein
PAU_04151		11.9885	37.078	1.62891	0.0539769	conserved hypothetical protein
PAU_00463		23.6067	72.6543	1.62185	0.0351631	conserved hypothetical protein
PAU_02796		65.0384	199.942	1.62022	0.030319	conserved hypothetical protein
PAU_02381	ureA	50.211	154.05	1.61733	0.0311639	urease subunit gamma
PAU_00678	cysI	82.4531	252.192	1.61288	0.0249139	sulfite reductase [NADPH] hemoprotein beta-component
PAU_02035	oppC	50.6916	155.017	1.6126	0.0352388	oligopeptide transport system permease protein oppc
PAU_02380	ureB	13.7497	42.0262	1.61189	0.0976001	urease subunit beta
PAU_00421		30.0981	91.9621	1.61137	0.0343431	similarities with unknown protein. putative transmembrane protein
PAU_02906	yqhD	106.023	323.826	1.61084	0.0247588	conserved hypothetical protein
PAU_02649	flgD	329.85	1005.35	1.60782	0.0321652	basal-body rod modification protein flgd (flagellar protein for th initiation of hook assembly)
PAU_01975	msrB	195.173	593.943	1.60557	0.0307148	peptide methionine sulfoxide reductase
PAU_02198		8.28946	25.1525	1.60135	0.0649463	putative outer membrane efflux protein
PAU_02795	afp7	54.8268	165.884	1.59722	0.031036	conserved hypothetical protein
PAU_01970	dadA	152.111	459.682	1.59551	0.0290508	D-amino acid dehydrogenase small subunit
PAU_00679	cysH	35.8822	108.13	1.59143	0.0333913	phosphoadenosine phosphosulfate reductase
PAU_02798	afp10	42.2109	127.056	1.58978	0.0393972	conserved hypothetical protein
PAU_02664		205.333	615.307	1.58334	0.0947841	conserved hypothetical protein
PAU_03757	groS	89914.6	267531	1.57308	0.0261192	10 kda chaperonin (protein cpn10) (groes protein)
PAU_02733	yccV	21.5298	63.9521	1.57066	0.0475113	conserved hypothetical protein
PAU_02296		49.8285	147.411	1.5648	0.0921495	secreted hemolysin-type calcium-binding bacteriocin, putative
PAU_01923		71.3879	211.089	1.5641	0.0347595	conserved hypothetical protein
PAU_01959		30.427	89.7255	1.56017	0.0945274	putative integrase
PAU_02953	nadA	34.5544	101.534	1.55502	0.0365472	quinolinate synthetase a
PAU_01312		224.316	658.475	1.55359	0.0298606	putative tail fiber protein
PAU_02794	afp5	38.0254	110.497	1.53897	0.0452918	conserved hypothetical protein
PAU_01372	cysK	15.4513	44.8559	1.53757	0.0532123	cysteine synthase
PAU_03726	rpoH	1125.37	3262.79	1.53571	0.0302579	component of rna polymerase, sigma 32 factor
PAU_00819		9.61	27.851	1.53512	0.0824873	Hypothetical protein
PAU_01934	slyA	857.314	2475.15	1.52962	0.0308561	transcriptional regulator slya
PAU_01887		16.6239	47.8627	1.52564	0.0497555	similar to atp-binding component of abc transporter
PAU_01976	yeaC	941.308	2682.3	1.51073	0.0381765	conserved hypothetical protein
PAU_03232		203.242	576.745	1.50473	0.0406671	conserved hypothetical protein
PAU_02620	fliK	18.2836	51.8468	1.5037	0.0633751	flagellar hook-length control protein
PAU_02928		88.2451	250.181	1.50339	0.0430427	major facilitator superfamily mfs

## Sheet: Down at 37 (>1.5-fold ,<0.1)
Accession	Gene	Base Mean 28	Base Mean 37	Log2 Fold Change	P-value	Product
PAU_03767		2544.6	16.326	-7.28413	0.0293219	conserved hypothetical Protein
PAU_03768		1474.89	10.5841	-7.12256	0.0254629	conserved hypothetical Protein
PAU_03769		1823.22	21.8107	-6.3853	0.00250358	conserved hypothetical Protein
PAU_03771		1741.61	31.3881	-5.79406	0.0025835	carboxymuconolactone decarboxylase family protein
PAU_02588		179.49	3.26237	-5.78184	0.0260794	similar to probable transcriptional regulator
PAU_01441	tctB	489.018	10.9149	-5.48551	3.32e-07	conserved hypothetical protein
PAU_03770		1778.11	42.4187	-5.3895	2.21985e-10	conserved hypothetical Protein
PAU_01442	tctC	2214.58	54.442	-5.34617	2.77e-10	conserved hypothetical protein
PAU_03772	yqeF	461.187	11.4237	-5.33525	0.000150571	probable acetyl-CoA acetyltransferase
PAU_04022	cstA	199.335	6.51305	-4.93571	2.0634e-08	carbon starvation protein a
PAU_01440	tctA	299.019	10.1045	-4.88716	1.34e-08	putative membrane protein
PAU_03776		1825.42	76.0373	-4.58538	0.0243813	short-chain dehydrogenase/reductase sdr
PAU_03375		53.0152	2.28073	-4.53884	0.003797	putative peptide synthetase
PAU_02599	dsdX	439.734	19.1992	-4.51752	5.13e-08	dsdx permease
PAU_02598	dsdA	386.68	20.916	-4.20846	2.89e-07	d-serine dehydratase
PAU_02587		84.1775	5.12537	-4.0377	0.0551528	similarities with luxr family transcriptional regulator
PAU_03904	usp	10.8782	0.682556	-3.99435	0.00412084	uropathogenic specific protein
PAU_03513	FNV0471	1053.05	72.2216	-3.866	0.00492442	conserved hypothetical Protein
PAU_04005	ycfR	438.447	31.5675	-3.79589	0.0491281	conserved hypothetical protein
PAU_01443		1758.85	133.329	-3.72157	0.000185956	conserved hypothetical protein
PAU_03903	pys2	77.0442	6.64337	-3.5357	4.49e-05	colicin structural protein
PAU_01649		46.8657	4.3125	-3.44193	0.000140449	putative tail fiber protein
PAU_03941	fecA	48.3622	4.74611	-3.34906	0.000171484	iron(iii) dicitrate outer membrane transporter protein feca
PAU_03919		3182.65	313.368	-3.3443	0.0354623	sugar fermentation stimulation protein b (ner-like protein)
PAU_02764	ompN1	66.886	6.64584	-3.33118	0.000636951	outer membrane protein ompN
PAU_01648		57.7142	5.74611	-3.32827	0.0120561	putative tail fiber protein
PAU_01647		239.431	24.5508	-3.28576	3.31284e-05	putative tail fiber protein of prophage cp-933x (tail fiber assembl protein)
PAU_03778	cbeR	608.714	64.2801	-3.24332	2.99e-05	lysr-type transcriptional regulatory protein
PAU_01444		771.566	83.1971	-3.21318	3.39373e-05	conserved hypothetical protein
PAU_03945	fecE	15.5535	1.73269	-3.16615	0.00357507	iron(iii) dicitrate transport atp-binding protein fece
PAU_03087		382.956	44.6582	-3.10018	6.67e-05	conserved hypothetical protein
PAU_01445	tctD	168.522	21.2475	-2.98757	0.000161687	two-component response regulator
PAU_02320		20.9845	2.76447	-2.92425	0.0130757	conserved hypothetical protein
PAU_01650		29.035	3.86054	-2.91092	0.00212198	similarities with bacteriophage tail fiber protein
PAU_02695	cspC	2030.66	274.283	-2.88821	0.034449	cold shock-like protein cspc (csp-c)
PAU_00190	yicE	48.2665	6.60912	-2.86849	0.00102288	similar to xanthine/uracil permease family protein yice of escherichi coli
PAU_00376	malQ	56.9494	8.15889	-2.80323	0.00101236	4-alpha-glucanotransferase
PAU_00406	purH	457.432	68.4336	-2.74078	0.000295211	bifunctional purine biosynthesis protein
PAU_00377	malP	101.985	15.352	-2.73186	0.000764578	maltodextrin phosphorylase
PAU_00365	lamB	98.4563	15.0487	-2.70984	0.000808422	maltoporin precursor (maltose-inducible porin) (lambda recepto protein)
PAU_03942	fecB	24.7605	3.81461	-2.69843	0.00449189	iron(iii) dicitrate-binding periplasmic protein fecb
PAU_03897		235.659	36.5962	-2.68694	0.000478048	conserved hypothetical protein
PAU_02319		133.008	20.9395	-2.66721	0.0412527	conserved hypothetical protein
PAU_00364	malM	85.8338	13.6017	-2.65776	0.0010403	maltose operon periplasmic protein
PAU_00405	purD	796.777	128.671	-2.63048	0.000500617	phosphoribosylglycinamide synthetase
PAU_02318		88.7703	14.8382	-2.58076	0.00120984	conserved hypothetical protein
PAU_01238		141.407	23.6621	-2.5792	0.000988722	conserved hypothetical protein
PAU_01651		120.972	20.7722	-2.54194	0.00341427	putative tail fiber protein
PAU_01446	tctE	115.009	20.0304	-2.52148	0.00129853	sensor protein
PAU_00366	malK	77.3518	13.5233	-2.51599	0.00732613	maltose/maltodextrin import ATP-binding protein
PAU_01780	purM	443.815	79.3228	-2.48415	0.000916031	phosphoribosylformylglycinamidine cyclo-ligase
PAU_03086		971.722	176.227	-2.46311	0.000981774	conserved hypothetical protein
PAU_01779	purN	1152.58	219.193	-2.3946	0.00301828	phosphoribosylglycinamide formyltransferase 1 (gart) (ga transformylase) (5'-phosphoribosylglycinamide transformylase)
PAU_00934		69.6027	13.4496	-2.37159	0.0658074	Hypothetical protein
PAU_03944	fecD	10.4644	2.03178	-2.36468	0.0377954	iron(iii) dicitrate transport system permease protein fecd
PAU_00997	purE	64.3246	12.6317	-2.34832	0.0040245	phosphoribosylaminoimidazole carboxylase catalytic subunit (ai carboxylase) (airc)
PAU_03898		685.277	137.021	-2.32229	0.00158478	conserved hypothetical protein
PAU_00867	orf66	1475.26	295.691	-2.31881	0.00181218	conserved hypothetical protein
PAU_03902		55.7777	11.2066	-2.31534	0.00449328	similar to colicin/pyocin immunity protein
PAU_00996	purK	72.0554	14.4831	-2.31474	0.00362644	phosphoribosylaminoimidazole carboxylase ATPase subunit
PAU_00865	orf67	443.689	92.1348	-2.26773	0.00273276	conserved hypothetical protein
PAU_03374	mtaC	20.6491	4.36264	-2.24281	0.0175782	putative antibiotic synthesis
PAU_04004	yhbP	411.686	88.8376	-2.2123	0.00273763	conserved hypothetical protein
PAU_01827	guaA	1609.4	348.544	-2.20711	0.00253382	GMP synthase [glutamine-hydrolyzing]
PAU_00866	orf66	392.012	84.967	-2.20592	0.00282234	conserved hypothetical protein
PAU_01534	xaxA	292.009	64.5247	-2.17809	0.00388909	conserved hypothetical protein
PAU_03939	fecI	29.7481	6.57734	-2.17722	0.0155471	probable rna polymerase sigma factor feci
PAU_00708		61.2327	13.6201	-2.16857	0.00738579	conserved hypothetical protein
PAU_02316		51.7865	11.6084	-2.15741	0.007992	conserved hypothetical protein
PAU_00995		49.7382	11.2758	-2.14112	0.0610441	hypothetical protein
PAU_02313		35.0712	8.15889	-2.10384	0.0175849	conserved hypothetical protein
PAU_02321		311.307	73.6462	-2.07965	0.0297609	hypothetical protein
PAU_02314		26.6501	6.37185	-2.06435	0.09329	hypothetical protein
PAU_00707		85.9797	20.6687	-2.05655	0.00987293	conserved hypothetical protein
PAU_02317		67.2233	16.2016	-2.05282	0.0103959	conserved hypothetical protein
PAU_00726	mrfB	64.2381	15.5601	-2.04558	0.0399144	fimbrial regulatory protein papH
PAU_01920	pykF	57.996	14.2182	-2.02821	0.0137775	pyruvate kinase
PAU_02310		69.961	17.3337	-2.01297	0.0591273	conserved hypothetical protein
PAU_01354	glyA	2392.87	593.874	-2.01051	0.00689775	serine hydroxymethyltransferase
PAU_00709		41.7962	10.691	-1.96697	0.0159776	conserved hypothetical protein
PAU_01826	guaB	1007.91	259.755	-1.95614	0.00725194	inosine-5'-monophosphate dehydrogenase
PAU_01252		17.3378	4.47881	-1.95273	0.0527819	conserved hypothetical protein
PAU_01629		140.982	36.5177	-1.94885	0.0135059	conserved hypothetical protein
PAU_04135	wecE	468.642	122.478	-1.93596	0.00962777	lipopolysaccharide biosynthesis protein wece
PAU_00710		39.6589	10.5724	-1.90734	0.022553	conserved hypothetical protein
PAU_01068	hod	158.062	42.162	-1.90648	0.0234914	conserved hypothetical protein
PAU_04140	wecB	309.205	82.5353	-1.90548	0.0109887	udp-n-acetylglucosamine 2-epimerase
PAU_00273		16.2535	4.44703	-1.86984	0.0604751	conserved hypothetical protein
PAU_01457	purF	969.221	266.344	-1.86353	0.0594454	amidophosphoribosyltransferase (glutamine phosphoribosylpyrophosphat amidotransferase) (atase) (gpatase)
PAU_01456	cvpA	1027.19	282.837	-1.86066	0.0194927	colicin v production protein (dede protein) (pur regulon 18 kd protein)
PAU_03170	cspE	783.351	217.637	-1.84773	0.0100505	cold shock-like protein cspe
PAU_02520		57.3688	15.9911	-1.84299	0.0237813	similar to pyocin s2 and s1
PAU_01214	usp	92.3658	26.2344	-1.8159	0.0916908	similar to pyocin s2 and s1
PAU_01161	gcvP	390.864	111.631	-1.80793	0.0144216	glycine dehydrogenase [decarboxylating]
PAU_02601		25764.5	7409.74	-1.79789	0.0119181	similar to putative pagc-like virulence-related membrane protein
PAU_01628	LytE	28.3842	8.22565	-1.78689	0.0399471	conserved hypothetical protein
PAU_00180	typA	750.43	217.588	-1.78612	0.0138127	gtp-binding protein typa/bipa (tyrosine phosphorylated protein a)
PAU_04141	wzzE	220.436	64.8028	-1.76623	0.044446	lipopolysaccharide biosynthesis protein wzze
PAU_01497	argM	38.421	11.3076	-1.76461	0.0335183	succinylornithine transaminase
PAU_03855		47.049	13.8665	-1.76255	0.0318644	conserved hypothetical Protein
PAU_03683	ptsO	61.2951	18.3111	-1.74305	0.0276797	phosphocarrier protein npr (nitrogen related hpr)
PAU_00151	feoB	37.8905	11.4213	-1.73011	0.0389294	ferrous iron transport protein b
PAU_01798	purC	1019.37	310.39	-1.71552	0.016811	phosphoribosylaminoimidazole-succinocarboxamide synthase
PAU_00152	feoA	37.5436	11.4813	-1.70928	0.0379857	ferrous iron transport protein a
PAU_00343		395.443	121.163	-1.70652	0.0485397	Hypothetical protein
PAU_04139	wecC	578.767	179.132	-1.69196	0.0196187	udp-n-acetyl-d-mannosaminuronic acid dehydrogenase (udp-mannac dehydrogenase)
PAU_00748		1712.14	531.342	-1.68809	0.0208159	conserved hypothetical protein
PAU_00860	rnhA	47.1816	14.768	-1.67575	0.0383379	putative DNA replication ribonuclease HI
PAU_04134	wzxE	232.521	72.8758	-1.67385	0.0235854	lipopolysaccharide biosynthesis protein
PAU_02309		119.076	37.3899	-1.67116	0.0274289	conserved hypothetical protein
PAU_01361	iscR	686.092	217.294	-1.65876	0.0224239	hth-type transcriptional regulator iscr
PAU_04137	rffH	431.114	137.736	-1.64617	0.0215844	glucose-1-phosphate thymidylyltransferase
PAU_00847		689.069	220.645	-1.64292	0.0441101	conserved hypothetical protein
PAU_00695	miaE	67.5117	21.9117	-1.62343	0.0414913	trna-(ms[2]io[6]a)-hydroxylase
PAU_01893		112.892	36.7497	-1.61915	0.0428721	right origin-binding protein-transcriptional regulator
PAU_00742	gene0005	39.2002	12.7846	-1.61645	0.0491042	putative aerobic formate dehydrogenase-o subunit
PAU_04132	wzyE	264.098	87.0523	-1.60112	0.0267657	putative eca polymerase
PAU_04057	ytfL	100.177	33.1868	-1.59387	0.0351467	upf0053 inner membrane protein ytfl
PAU_02590	sgaB	129.281	43.1743	-1.58226	0.0354472	conserved hypothetical protein
PAU_00369	malG	24.5004	8.18893	-1.58106	0.0704478	maltose transport system permease protein
PAU_03159	nadD	62.9998	21.1081	-1.57755	0.0413215	nicotinate-nucleotide adenylyltransferase
PAU_01877	arnA	1051.42	355.166	-1.56577	0.0323931	bifunctional polymyxin resistance protein
PAU_01093	sgrR	113.077	38.3499	-1.56001	0.0414375	hth-type transcriptional regulator sgrr
PAU_00809	yadB	54.9485	18.6787	-1.55669	0.0513164	glutamyl-q tRNA(asp) synthetase
PAU_04136		497.523	171.314	-1.53812	0.0346877	lipopolysaccharide biosynthesis protein rffc
PAU_04142	wecA	121.128	41.8094	-1.53463	0.045434	undecaprenyl-phosphate alpha-n-acetylglucosaminyltransferase
PAU_02760		1710.97	592	-1.53115	0.0932424	Hypothetical protein
PAU_03845		1388.38	482.536	-1.52469	0.032802	similar to putative membrane protein
PAU_04390	fdoI1	40.5698	14.1197	-1.5227	0.0620073	formate dehydrogenase, cytochrome b556(fdo) subunit (format dehydrogenase-o gamma subunit) (fdh-z gamma subunit) (aerobic format dehydrogenase cytochrome b556 subunit)
PAU_01554	yfaE	81.4112	28.5219	-1.51316	0.0526439	similar to ferredoxin-like protein yfae of escherichia coli
PAU_02885	gnd	1304.83	457.229	-1.51287	0.0372221	6-phosphogluconate dehydrogenase, decarboxylating
PAU_04361	kdtX	51.2698	18.0145	-1.50895	0.0583808	lipopolysaccharide core biosynthesis glycosyl transferase kdtx
PAU_03844		275.632	96.9337	-1.50767	0.0372162	conserved hypothetical protein
PAU_02600	dsdC	107.116	37.8217	-1.50189	0.0435213	d-serine dehydratase (deaminase) transcriptional activator dsdc
PAU_00706	ygcB	84.5935	29.8944	-1.50067	0.0523219	conserved hypothetical protein

## Sheet: 100 Highest expressed CDS at 28
Accession	Gene		Base Mean 28°C	Base Mean 37°C	Log2 Fold Change	P-value	Product
PAU_01268		PAU_01268	520774	265057	0.974352	0.639048	conserved hypothetical protein
PAU_03757	groS	groS	89914.6	267531	-1.57308	0.0261192	10 kda chaperonin (protein cpn10) (groes protein)
PAU_04194	rpsM	rpsM	37378.1	20057.9	0.898019	0.565382	30s ribosomal subunit protein s13
PAU_03636		PAU_03636	32218.1	26386.4	0.288078	0.766238	conserved hypothetical Protein
PAU_02601		PAU_02601	25764.5	7409.74	1.79789	0.0119181	similar to putative pagc-like virulence-related membrane protein
PAU_03852	ydhO	ydhO	25417.6	36025.2	-0.503177	0.439956	Hypothetical protein
PAU_01756	cspC	cspC	24801.8	21318.3	0.218351	0.755816	cold shock protein
PAU_01705	acpP	acpP	21382.8	29184.4	-0.448749	0.548066	acyl carrier protein (cytosolic activating factor) (caf)
PAU_00349	rplL	rplL	18046.7	13736.7	0.393703	0.701796	50s ribosomal subunit protein l7/l12
PAU_04209	rpsC	rpsC	15545.2	10304.7	0.593174	0.483977	30S ribosomal protein S3
PAU_04191	rpoA	rpoA	15370.6	10578.6	0.53903	0.454829	DNA-directed RNA polymerase alpha chain
PAU_03756	groL	groL	14874.7	31886.9	-1.1001	0.115008	60 kda chaperonin (protein cpn60) (groel protein)
PAU_00289		PAU_00289	14219	14188.8	0.00306894	0.976376	conserved hypothetical protein
PAU_02028	hns	hns	12671.9	9130.87	0.472804	0.524417	dna-binding protein h-ns (histone-like protein hlp-ii)
PAU_04207	rpsQ	rpsQ	11834.9	9457.65	0.323493	0.653494	putative 30S ribosomal protein S17
PAU_04208	rplP	rplP	8577.21	6853.05	0.323761	0.625228	50S ribosomal protein L16
PAU_02047	ompX	ompX	8348.53	5775.57	0.531557	0.429134	outer membrane protein x precursor
PAU_01867	infC	infC	7925.92	15096	-0.929519	0.423304	translation initiation factor if-3
PAU_04214	rplD	rplD	7684.88	4656.46	0.722787	0.304115	50S ribosomal protein L4
PAU_04203	rpsN	rpsN	7613.18	5139.9	0.566758	0.441813	30S ribosomal subunit protein S14
PAU_04192	rpsD	rpsD	7468.95	5591.26	0.417732	0.551372	30s ribosomal subunit protein s4
PAU_04213	rplW	rplW	7397.15	3797.5	0.961921	0.202777	50S ribosomal protein L23
PAU_01847	ftnA	ftnA	7394.65	14001.2	-0.920996	0.201636	ferritin-1
PAU_02765	ompN2	ompN2	7381.57	5779.86	0.352894	0.60463	outer membrane protein n (porin ompn)
PAU_04215	rplC	rplC	7047.62	3706.98	0.926892	0.209291	50s ribosomal protein l3
PAU_00747		PAU_00747	7000.41	2317.65	1.59477	0.243576	conserved hypothetical protein
PAU_04202	rpsH	rpsH	6810.63	3838.67	0.827182	0.242822	30S ribosomal protein S8
PAU_04042	rpmA	rpmA	6637.03	5359.34	0.308481	0.634479	50s ribosomal protein l27
PAU_04201	rplF	rplF	6391.25	3532.08	0.855578	0.237455	50S ribosomal subunit protein L6
PAU_04071	priB	priB	6284.41	2584.35	1.28198	0.0697453	primosomal replication protein n
PAU_04205	rplX	rplX	6202.97	4567.85	0.441444	0.500853	50S ribosomal protein L24
PAU_02827	ihfB	ihfB	6193.85	6409.39	-0.0493508	0.899036	integration host factor beta-subunit (ihf-beta)
PAU_01699	yceD	yceD	5909.01	8774.48	-0.570397	0.440378	conserved hypothetical protein
PAU_04204	rplE	rplE	5572.13	3678.86	0.598969	0.383281	50S ribosomal subunit protein L5
PAU_04043	rplU	rplU	5345.6	5865.33	-0.13386	0.850132	50s ribosomal protein l21
PAU_01837	manX	manX	5306.65	4326.82	0.294493	0.904107	pts system, mannose-specific iiab component (eiiab-man) (mannose permease iiab component) (phosphotransferase enzyme ii, ab component (eiii-man)
PAU_04198	rpmD	rpmD	5302.59	2889.05	0.876099	0.225149	50S ribosomal subunit protein L30
PAU_03694		PAU_03694	4942.58	6890.12	-0.479264	0.699508	conserved hypothetical Protein
PAU_02959	tolB	tolB	4856.27	5888.72	-0.278105	0.637955	periplasmic protein involved in the tonb-independent uptake of group colicins
PAU_02910		PAU_02910	4795.27	2429.57	0.980913	0.174717	similar to 13.6 kda insecticidal crystal protein of bacillu thuringiensis
PAU_03422		PAU_03422	4735.17	4042.95	0.228009	0.764387	Trigger factor
PAU_04190	rplQ	rplQ	4696	3759.23	0.320997	0.651345	50s ribosomal subunit protein l17
PAU_04196	secY	secY	4668.76	2950.24	0.662204	0.345368	preprotein translocase secy subunit
PAU_02828	rpsA	rpsA	4593.01	4000.2	0.19937	0.789377	30s ribosomal protein s1
PAU_03202	trmD	trmD	4566.56	3038.78	0.587616	0.415134	tRNA methyltransferase; tRNA (guanine-7-)-methyltransferase
PAU_03203	rimM	rimM	4538.99	2935.62	0.628709	0.414044	16s rrna processing protein rimm
PAU_00810	dksA	dksA	4482.27	4957.74	-0.145455	0.797156	dnak suppressor protein
PAU_03414		PAU_03414	4402.59	4931.52	-0.163679	0.870041	DNA-binding protein HU-beta (NS1) (HU-1)
PAU_04197	rplO	rplO	4363.01	3171.05	0.460362	0.504855	50S ribosomal protein L15
PAU_04212	rplB	rplB	4306.64	2822.59	0.609543	0.373342	50S ribosomal protein L2
PAU_00341	fusA	fusA	4191.13	2802.02	0.580871	0.408353	elongation factor g (ef-g)
PAU_00645	tsf	tsf	4075.78	5271	-0.371001	0.590323	elongation factor ts (ef-ts)
PAU_04211	rpsS	rpsS	4072.69	2490.36	0.709631	0.329485	30S ribosomal protein S19
PAU_00670	gmhB	gmhB	4071.51	9438.1	-1.21293	0.590866	d,d-heptose 1,7-bisphosphate phosphatase 1
PAU_03387		PAU_03387	3989.46	1818.05	1.1338	0.195879	conserved hypothetical protein
PAU_03653	rplM	rplM	3847.39	2220.87	0.792754	0.258778	50s ribosomal protein l13
PAU_01404	ptsH	ptsH	3843.7	1845.31	1.05863	0.160998	phosphocarrier protein hpr (histidine-containing protein)
PAU_04070	rpsR	rpsR	3812.96	1402.74	1.44266	0.0503977	30s ribosomal subunit protein s18
PAU_00348	rplJ	rplJ	3663.85	2557.09	0.518855	0.455744	50s ribosomal subunit protein l10
PAU_00644	rpsB	rpsB	3654.75	2339.72	0.643437	0.357117	30s ribosomal protein s2
PAU_04193	rpsK	rpsK	3624.02	2486.1	0.543711	0.421046	30s ribosomal subunit protein s11
PAU_04210	rplV	rplV	3609.66	1746.18	1.04766	0.145009	50S ribosomal protein L22
PAU_00240		PAU_00240	3607.01	1944.1	0.891704	0.210642	conserved hypothetical protein
PAU_04048	mdh	mdh	3508.28	3186.51	0.138786	0.835384	malate dehydrogenase
PAU_04216	rpsJ	rpsJ	3307.69	2450.58	0.432699	0.491159	30s ribosomal subunit protein s10
PAU_03919		PAU_03919	3182.65	313.368	3.3443	0.0354623	sugar fermentation stimulation protein b (ner-like protein)
PAU_04206	rplN	rplN	2877.23	2078.07	0.469435	0.513813	50s ribosomal subunit protein l14
PAU_03996	yjgD	yjgD	2774.61	2221.07	0.321033	0.702217	conserved hypothetical protein
PAU_02973	sucB	sucB	2739.01	1459.9	0.90779	0.227016	dihydrolipoamide succinyltransferase component of 2-oxoglutarat dehydrogenase complex
PAU_03204	rpsP	rpsP	2721.31	2091.76	0.379582	0.598443	30s ribosomal protein s16
PAU_02930	ybhL	ybhL	2604.91	2151.53	0.275871	0.715032	inner membrane protein ybhl
PAU_01740	icdA	icdA	2579.92	4102.9	-0.669319	0.369596	isocitrate dehydrogenase
PAU_03201	rplS	rplS	2561.46	2100.3	0.28637	0.683822	50s ribosomal protein l19
PAU_01866	thrS	thrS	2559.25	2145.2	0.254609	0.715469	threonyl-tRNA synthetase
PAU_03767		PAU_03767	2544.6	16.326	7.28413	0.0293219	conserved hypothetical Protein
PAU_01868	rpmI	rpmI	2526.8	2569.12	-0.0239589	0.962885	50s ribosomal protein l35
PAU_01872	ihfA	ihfA	2526.27	3295.21	-0.383362	0.594978	integration host factor subunit alpha (ihf-alpha)
PAU_00340	rpsG	rpsG	2513.7	1246.54	1.01188	0.15421	30s ribosomal subunit protein s7
PAU_00043	atpI	atpI	2455.51	2329.02	0.0762993	0.925655	atp synthase protein i
PAU_01914	lpp	lpp	2451.61	2437.96	0.00805801	0.966592	major outer membrane lipoprotein precursor (murein-lipoprotein)
PAU_01354	glyA	glyA	2392.87	593.874	2.01051	0.00689775	serine hydroxymethyltransferase
PAU_03705	aroQ	aroQ	2372.45	1492.94	0.668221	0.708713	3-dehydroquinate dehydratase
PAU_04371	rpmB	rpmB	2359.19	1745.55	0.434611	0.5465	50s ribosomal protein l28
PAU_01706	fabF	fabF	2310.05	1733.42	0.414302	0.575536	3-oxoacyl-[acyl-carrier-protein] synthase ii
PAU_00746		PAU_00746	2298.61	885.175	1.37673	0.0462248	conserved hypothetical protein
PAU_02744	ompA	ompA	2265.54	1615.73	0.487666	0.516765	outer membrane protein a (outer membrane protein ii*)
PAU_04061	fklB	fklB	2262.41	1137.79	0.99162	0.167911	fkbp-type 22 kda peptidyl-prolyl cis-trans isomerase (ppiase (rotamase) (fkbp22)
PAU_03740		PAU_03740	2227.91	1935.4	0.20306	0.92284	conserved hypothetical Protein
PAU_01442	tctC	tctC	2214.58	54.442	5.34617	2.77e-10	conserved hypothetical protein
PAU_02575		PAU_02575	2197.39	4960.18	-1.1746	0.109041	similar to transcriptional regulator, luxr family
PAU_04032	secG	secG	2191.95	1294.5	0.759816	0.277997	protein-export membrane protein secg (preprotein translocase band subunit) (p12)
PAU_02351		PAU_02351	2184.34	3192.07	-0.547296	0.433681	conserved hypothetical protein
PAU_00346	rplK	rplK	2173.85	1191.64	0.867304	0.220899	50s ribosomal protein l11
PAU_00516	deoD	deoD	2137.81	2347.82	-0.135189	0.863879	purine nucleoside phosphorylase DeoD-type
PAU_00037	atpG	atpG	2108.99	2341.95	-0.151159	0.813285	ATP synthase gamma chain
PAU_04037	yhbY	yhbY	2107.8	1652.18	0.351369	0.741958	conserved hypothetical protein
PAU_00879	fba	fba	2047.32	861.865	1.2482	0.0847211	fructose-bisphosphate aldolase class II
PAU_01928	sodB	sodB	2046.29	1616.86	0.339813	0.61359	superoxide dismutase [fe]
PAU_02695	cspC	cspC	2030.66	274.283	2.88821	0.034449	cold shock-like protein cspc (csp-c)

## Sheet: 100 Highest expressed CDS at 37
Accession	Gene	Gene	Base Mean 28°C	Base Mean at 37°C	log2 Fold Change	P-value	Function
PAU_03757	groS	groS	89914.6	267531	-1.57308	0.0261192	10 kda chaperonin (protein cpn10) (groes protein)
PAU_01268		PAU_01268	520774	265057	0.974352	0.639048	conserved hypothetical protein
PAU_03852	ydhO	ydhO	25417.6	36025.2	-0.503177	0.439956	Hypothetical protein
PAU_03756	groL	groL	14874.7	31886.9	-1.1001	0.115008	60 kda chaperonin (protein cpn60) (groel protein)
PAU_01705	acpP	acpP	21382.8	29184.4	-0.448749	0.548066	acyl carrier protein (cytosolic activating factor) (caf)
PAU_03636		PAU_03636	32218.1	26386.4	0.288078	0.766238	conserved hypothetical Protein
PAU_01756	cspC	cspC	24801.8	21318.3	0.218351	0.755816	cold shock protein
PAU_04194	rpsM	rpsM	37378.1	20057.9	0.898019	0.565382	30s ribosomal subunit protein s13
PAU_01867	infC	infC	7925.92	15096	-0.929519	0.423304	translation initiation factor if-3
PAU_00289		PAU_00289	14219	14188.8	0.00306894	0.976376	conserved hypothetical protein
PAU_01847	ftnA	ftnA	7394.65	14001.2	-0.920996	0.201636	ferritin-1
PAU_00349	rplL	rplL	18046.7	13736.7	0.393703	0.701796	50s ribosomal subunit protein l7/l12
PAU_03384		PAU_03384	1772.28	10814.8	-2.60932	0.000421148	Chaperone protein htpG (Heat shock protein htpG)
PAU_04191	rpoA	rpoA	15370.6	10578.6	0.53903	0.454829	DNA-directed RNA polymerase alpha chain
PAU_04209	rpsC	rpsC	15545.2	10304.7	0.593174	0.483977	30S ribosomal protein S3
PAU_04207	rpsQ	rpsQ	11834.9	9457.65	0.323493	0.653494	putative 30S ribosomal protein S17
PAU_00670	gmhB	gmhB	4071.51	9438.1	-1.21293	0.590866	d,d-heptose 1,7-bisphosphate phosphatase 1
PAU_02028	hns	hns	12671.9	9130.87	0.472804	0.524417	dna-binding protein h-ns (histone-like protein hlp-ii)
PAU_01699	yceD	yceD	5909.01	8774.48	-0.570397	0.440378	conserved hypothetical protein
PAU_02601		PAU_02601	25764.5	7409.74	1.79789	0.0119181	similar to putative pagc-like virulence-related membrane protein
PAU_03694		PAU_03694	4942.58	6890.12	-0.479264	0.699508	conserved hypothetical Protein
PAU_04208	rplP	rplP	8577.21	6853.05	0.323761	0.625228	50S ribosomal protein L16
PAU_02827	ihfB	ihfB	6193.85	6409.39	-0.0493508	0.899036	integration host factor beta-subunit (ihf-beta)
PAU_02959	tolB	tolB	4856.27	5888.72	-0.278105	0.637955	periplasmic protein involved in the tonb-independent uptake of group colicins
PAU_04043	rplU	rplU	5345.6	5865.33	-0.13386	0.850132	50s ribosomal protein l21
PAU_02765	ompN2	ompN2	7381.57	5779.86	0.352894	0.60463	outer membrane protein n (porin ompn)
PAU_02047	ompX	ompX	8348.53	5775.57	0.531557	0.429134	outer membrane protein x precursor
PAU_04192	rpsD	rpsD	7468.95	5591.26	0.417732	0.551372	30s ribosomal subunit protein s4
PAU_04042	rpmA	rpmA	6637.03	5359.34	0.308481	0.634479	50s ribosomal protein l27
PAU_00645	tsf	tsf	4075.78	5271	-0.371001	0.590323	elongation factor ts (ef-ts)
PAU_04203	rpsN	rpsN	7613.18	5139.9	0.566758	0.441813	30S ribosomal subunit protein S14
PAU_02575		PAU_02575	2197.39	4960.18	-1.1746	0.109041	similar to transcriptional regulator, luxr family
PAU_00810	dksA	dksA	4482.27	4957.74	-0.145455	0.797156	dnak suppressor protein
PAU_03414		PAU_03414	4402.59	4931.52	-0.163679	0.870041	DNA-binding protein HU-beta (NS1) (HU-1)
PAU_03890		PAU_03890	89.1462	4791.4	-5.74813	5.85e-09	conserved hypothetical protein
PAU_04214	rplD	rplD	7684.88	4656.46	0.722787	0.304115	50S ribosomal protein L4
PAU_04205	rplX	rplX	6202.97	4567.85	0.441444	0.500853	50S ribosomal protein L24
PAU_00543	dnaK	dnaK	1190.61	4352.87	-1.87027	0.00977265	chaperone hsp70, autoregulated heat shock protein
PAU_01837	manX	manX	5306.65	4326.82	0.294493	0.904107	pts system, mannose-specific iiab component (eiiab-man) (mannose permease iiab component) (phosphotransferase enzyme ii, ab component (eiii-man)
PAU_00820		PAU_00820	694.755	4228.32	-2.60551	0.069857	similar to carbonic anhydrase
PAU_01740	icdA	icdA	2579.92	4102.9	-0.669319	0.369596	isocitrate dehydrogenase
PAU_03422		PAU_03422	4735.17	4042.95	0.228009	0.764387	Trigger factor
PAU_02828	rpsA	rpsA	4593.01	4000.2	0.19937	0.789377	30s ribosomal protein s1
PAU_00105	uspA	uspA	493.437	3910.01	-2.98623	0.235421	universal stress protein a
PAU_04202	rpsH	rpsH	6810.63	3838.67	0.827182	0.242822	30S ribosomal protein S8
PAU_04213	rplW	rplW	7397.15	3797.5	0.961921	0.202777	50S ribosomal protein L23
PAU_04190	rplQ	rplQ	4696	3759.23	0.320997	0.651345	50s ribosomal subunit protein l17
PAU_04215	rplC	rplC	7047.62	3706.98	0.926892	0.209291	50s ribosomal protein l3
PAU_04204	rplE	rplE	5572.13	3678.86	0.598969	0.383281	50S ribosomal subunit protein L5
PAU_03194		PAU_03194	189.479	3655.23	-4.26985	0.230931	conserved hypothetical protein
PAU_04201	rplF	rplF	6391.25	3532.08	0.855578	0.237455	50S ribosomal subunit protein L6
PAU_03916		PAU_03916	1405.64	3519.49	-1.32414	0.125105	conserved hypothetical protein
PAU_02951	aroG	aroG	823.257	3473.7	-2.07706	0.0780272	phospho-2-dehydro-3-deoxyheptonate aldolase, phe-sensitive
PAU_02574		PAU_02574	1823.13	3457.31	-0.923229	0.192158	similar to transcriptional regulator
PAU_02834	ansB	ansB	1037.5	3456.95	-1.73639	0.0155482	l-asparaginase ii (l-asparagine amidohydrolase ii) (l-asnase ii (colaspase)
PAU_01872	ihfA	ihfA	2526.27	3295.21	-0.383362	0.594978	integration host factor subunit alpha (ihf-alpha)
PAU_03726	rpoH	rpoH	1125.37	3262.79	-1.53571	0.0302579	component of rna polymerase, sigma 32 factor
PAU_02351		PAU_02351	2184.34	3192.07	-0.547296	0.433681	conserved hypothetical protein
PAU_04048	mdh	mdh	3508.28	3186.51	0.138786	0.835384	malate dehydrogenase
PAU_04197	rplO	rplO	4363.01	3171.05	0.460362	0.504855	50S ribosomal protein L15
PAU_03202	trmD	trmD	4566.56	3038.78	0.587616	0.415134	tRNA methyltransferase; tRNA (guanine-7-)-methyltransferase
PAU_03402		PAU_03402	794.124	2985.28	-1.91043	0.00832337	conserved hypothetical protein
PAU_04196	secY	secY	4668.76	2950.24	0.662204	0.345368	preprotein translocase secy subunit
PAU_03203	rimM	rimM	4538.99	2935.62	0.628709	0.414044	16s rrna processing protein rimm
PAU_04198	rpmD	rpmD	5302.59	2889.05	0.876099	0.225149	50S ribosomal subunit protein L30
PAU_04212	rplB	rplB	4306.64	2822.59	0.609543	0.373342	50S ribosomal protein L2
PAU_00341	fusA	fusA	4191.13	2802.02	0.580871	0.408353	elongation factor g (ef-g)
PAU_03613		PAU_03613	1300.15	2768.67	-1.09051	0.116237	Hypothetical protein
PAU_03937	hsdM	hsdM	271.266	2730.84	-3.33156	0.323299	type I restriction enzyme, modification subunit
PAU_00999	ppiB	ppiB	1612.15	2707.88	-0.748176	0.290746	peptidyl-prolyl cis-trans isomerase
PAU_02929	kbl	kbl	1012.36	2701.67	-1.41612	0.0496197	2-amino-3-ketobutyrate coenzyme A ligase
PAU_01976	yeaC	yeaC	941.308	2682.3	-1.51073	0.0381765	conserved hypothetical protein
PAU_03426		PAU_03426	1251.37	2637.5	-1.07566	0.136535	conserved hypothetical protein
PAU_04071	priB	priB	6284.41	2584.35	1.28198	0.0697453	primosomal replication protein n
PAU_01868	rpmI	rpmI	2526.8	2569.12	-0.0239589	0.962885	50s ribosomal protein l35
PAU_00348	rplJ	rplJ	3663.85	2557.09	0.518855	0.455744	50s ribosomal subunit protein l10
PAU_00035	atpC	atpC	1851.6	2527.11	-0.448715	0.510744	ATP synthase epsilon chain
PAU_01382	ndk	ndk	1994.05	2521.88	-0.3388	0.772134	nucleoside diphosphate kinase
PAU_00212		PAU_00212	456.493	2510.84	-2.45951	0.000968671	putative hth-type transcriptional regulator
PAU_04218	bfr	bfr	1794.8	2496.42	-0.476033	0.500847	bacterioferritin (bfr) (cytochrome b-1) (cytochrome b-557)
PAU_04211	rpsS	rpsS	4072.69	2490.36	0.709631	0.329485	30S ribosomal protein S19
PAU_04193	rpsK	rpsK	3624.02	2486.1	0.543711	0.421046	30s ribosomal subunit protein s11
PAU_01934	slyA	slyA	857.314	2475.15	-1.52962	0.0308561	transcriptional regulator slya
PAU_04216	rpsJ	rpsJ	3307.69	2450.58	0.432699	0.491159	30s ribosomal subunit protein s10
PAU_01914	lpp	lpp	2451.61	2437.96	0.00805801	0.966592	major outer membrane lipoprotein precursor (murein-lipoprotein)
PAU_02910		PAU_02910	4795.27	2429.57	0.980913	0.174717	similar to 13.6 kda insecticidal crystal protein of bacillu thuringiensis
PAU_02535		PAU_02535	169.166	2423.15	-3.84037	0.00601031	conserved hypothetical protein
PAU_00516	deoD	deoD	2137.81	2347.82	-0.135189	0.863879	purine nucleoside phosphorylase DeoD-type
PAU_00037	atpG	atpG	2108.99	2341.95	-0.151159	0.813285	ATP synthase gamma chain
PAU_00644	rpsB	rpsB	3654.75	2339.72	0.643437	0.357117	30s ribosomal protein s2
PAU_00043	atpI	atpI	2455.51	2329.02	0.0762993	0.925655	atp synthase protein i
PAU_00747		PAU_00747	7000.41	2317.65	1.59477	0.243576	conserved hypothetical protein
PAU_01940	gst	gst	748.936	2308.94	-1.62432	0.26747	glutathione s-transferase
PAU_01244		PAU_01244	855.604	2236.21	-1.38604	0.0513552	conserved hypothetical protein
PAU_03996	yjgD	yjgD	2774.61	2221.07	0.321033	0.702217	conserved hypothetical protein
PAU_03653	rplM	rplM	3847.39	2220.87	0.792754	0.258778	50s ribosomal protein l13
PAU_04352	kbl	kbl	1113.64	2181.88	-0.970293	0.176532	2-amino-3-ketobutyrate coenzyme A ligase
PAU_02930	ybhL	ybhL	2604.91	2151.53	0.275871	0.715032	inner membrane protein ybhl
PAU_01869	rplT	rplT	1870.56	2146.29	-0.198382	0.808347	50s ribosomal protein l20
PAU_01869	rplT	rplT	1870.56	2146.29	-0.198382	0.808347

## Sheet: pPAU1 data
ID	raw_replicate1	raw_replicate2	raw_replicate3	raw_replicate1.1	raw_replicate2.1	raw_replicate1.2	norm_replicate1	norm_replicate2	norm_replicate3	norm_replicate1.1	norm_replicate2.1	norm_replicate1.2	baseMean_28c	baseMean_37c	foldChange_37c.28c	log10FoldChange	pval	padj
PAU_pPAU1_0001	1249	2926	2184	2729	5589	7150	2549,2	3028	3144	3030,3	3328,57	3238,6	2989,9	3179,4	1063	0,02670	0,8224	0,903
PAU_pPAU1_0002	412	493	1249	1001	1014	3209	840,9	510	1798	1111,5	603,89	1453,5	1150,6	857,7	0,745	-0,12760	0,2507	0,615
PAU_pPAU1_0003	433	1307	763	538	2659	982	883,8	1352	1098	597,4	1583,59	444,8	944,8	1090,5	1154	0,06227	0,2232	0,615
PAU_pPAU1_0004	40	28	91	35	14	140	81,6	29	131	38,9	8,34	63,4	76,3	23,6	0,309	-0,50935	0,0719	0,323
PAU_pPAU1_0005	2975	4689	3387	2721	6135	5950	6072,0	4852	4876	3021,4	3653,74	2695,1	4623,7	3337,6	0,722	-0,14156	0,5199	0,766
PAU_pPAU1_0006	631	876	779	1003	1170	1657	1287,9	906	1121	1113,7	696,80	750,5	1016,6	905,3	0,891	-0,05036	0,8572	0,903
PAU_pPAU1_0007	513	1216	1687	774	1714	2842	1047,0	1258	2429	859,5	1020,78	1287,3	1505,3	940,1	0,625	-0,20444	0,3446	0,665
PAU_pPAU1_0008	159	302	876	315	340	1308	324,5	312	1261	349,8	202,49	592,5	622,6	276,1	0,443	-0,35312	0,1250	0,422
PAU_pPAU1_0010	491	1793	1127	985	3011	1924	1002,1	1855	1622	1093,8	1793,22	871,5	1337,8	1443,5	1079	0,03301	0,5391	0,766
PAU_pPAU1_0011	454	1153	259	631	1742	794	926,6	1193	373	700,7	1037,46	359,6	713,0	869,1	1219	0,08594	0,2735	0,615
PAU_pPAU1_0012	752	2010	309	1064	4706	1032	1534,8	2080	445	1181,5	2802,69	467,4	1131,7	1992,1	1760	0,24557	0,0268	0,181
PAU_pPAU1_0013	557	1103	474	1142	2532	2390	1136,8	1141	682	1268,1	1507,95	1082,6	1010,8	1388,0	1373	0,13774	0,3895	0,701
PAU_pPAU1_0014	281	528	381	573	1030	1597	573,5	546	548	636,3	613,42	723,4	597,9	624,8	1045	0,01912	0,9828	0,983
PAU_pPAU1_0016	117	127	289	153	332	950	238,8	131	416	169,9	197,72	430,3	304,1	183,8	0,604	-0,21871	0,4745	0,766
PAU_pPAU1_0017	297	1376	535	390	1468	1170	606,2	1424	770	433,1	874,28	530,0	832,5	653,7	0,785	-0,10504	0,8698	0,903
PAU_pPAU1_0018	1517	5233	1924	3741	10780	7010	3096,2	5415	2770	4154,1	6420,10	3175,2	3614,0	5287,1	1463	0,16523	0,0236	0,181
PAU_pPAU1_0019	868	1267	1244	2828	3538	5807	1771,6	1311	1791	3140,2	2107,08	2630,3	1875,9	2623,7	1399	0,14569	0,5380	0,766
PAU_pPAU1_0020	2547	5270	2463	6187	12736	12471	5198,5	5453	3546	6870,1	7585,01	5648,8	4961,5	7227,6	1457	0,16338	0,0854	0,330
PAU_pPAU1_0021	519	1177	255	987	3713	1434	1059,3	1218	367	1096,0	2211,30	649,5	823,4	1653,6	2008	0,30281	0,0211	0,181
PAU_pPAU1_0022	934	2142	866	1796	4735	4321	1906,3	2216	1247	1994,3	2819,96	1957,2	1831,6	2407,1	1314	0,11866	0,2980	0,619
PAU_pPAU1_0023	552	523	635	1011	1281	2458	1126,6	541	914	1122,6	762,91	1113,4	923,8	942,8	1021	0,00881	0,8645	0,903
PAU_pPAU1_0024	521	719	443	806	1300	2481	1063,4	744	638	895,0	774,22	1123,8	892,2	834,6	0,935	-0,02899	0,6973	0,896
PAU_pPAU1_0025	7092	17399	6362	11179	28008	20721	14474,9	18003	9159	12413,3	16680,35	9385,6	12755,6	14546,8	1140	0,05707	0,2617	0,615
PAU_pPAU1_0026	1179	1911	1319	2067	3474	6105	2406,4	1977	1899	2295,2	2068,96	2765,3	2262,0	2182,1	0,965	-0,01561	0,6722	0,896
PAU_pPAU1_0027	1623	2618	1505	2757	4051	5131	3312,6	2709	2167	3061,4	2412,60	2324,1	2628,0	2737,0	1041	0,01764	0,7908	0,903
PAU_pPAU1_0028	7031	11908	10560	8098	11432	27330	14350,4	12321	15202	8992,1	6808,40	12379,2	13563,3	7900,3	0,582	-0,23472	0,0159	0,181
PAU_pPAU1_0029	118	124	662	144	131	1068	240,8	128	953	159,9	78,02	483,8	451,5	119,0	0,263	-0,57924	0,0569	0,307
