# Supplementary material for: From Insect to Man: Photorhabdus Sheds Light on the Emergence of Human Pathogenicity
Source: PLoS One. 2015 Dec 17;10(12):e0144937. doi: 10.1371/journal.pone.0144937 (PMC4683029; doi:10.1371/journal.pone.0144937)
Supplement: S2 Data — (ZIP) [file pone.0144937.s002.zip › ATCC43949_28C_Expo_rep1.plot]

0 0
0 0
0 0
0 0
0 0
0 0
0 0
0 0
0 0
0 0
2 0
2 0
2 0
2 0
2 0
2 0
2 0
2 0
2 0
2 0
2 0
2 2
2 3
2 5
3 5
3 5
3 5
4 5
4 6
4 6
4 7
4 7
4 7
4 7
4 7
4 7
4 7
5 7
10 8
20 8
20 8
20 8
20 8
20 8
20 8
20 8
18 8
18 8
19 8
26 8
34 9
41 9
42 9
43 8
43 8
43 6
44 6
43 6
43 6
43 4
43 4
43 4
43 4
43 3
43 2
43 2
43 2
43 2
45 2
46 2
46 2
46 3
46 3
45 2
41 2
31 2
31 2
31 2
31 2
31 3
31 3
31 3
31 3
30 3
26 3
17 3
11 2
8 2
7 2
6 2
6 2
6 3
8 6
8 6
8 6
9 6
8 6
8 6
8 6
8 6
9 6
9 7
9 7
9 7
7 7
6 7
6 6
6 6
5 6
5 6
5 6
5 7
5 8
6 8
8 8
8 9
7 9
7 10
7 10
11 13
13 13
20 16
21 16
21 16
21 16
21 16
21 16
21 14
19 12
19 12
19 12
18 12
18 12
17 12
17 12
17 12
17 12
17 11
17 11
17 11
17 11
17 11
17 12
18 12
19 12
19 13
19 13
19 12
17 11
16 12
16 12
18 10
18 10
18 9
16 9
12 6
11 6
4 4
4 4
4 4
4 4
4 4
5 4
7 4
9 5
12 5
12 5
12 5
12 5
13 5
17 6
17 6
17 6
17 6
17 6
18 6
22 7
22 7
22 5
20 5
23 5
24 5
26 5
26 5
26 5
26 4
26 4
24 4
24 4
24 3
24 3
24 3
24 4
24 6
24 6
24 6
24 8
23 8
21 8
20 7
19 7
16 7
15 7
15 7
14 7
14 7
11 6
11 6
11 6
11 6
15 6
18 5
14 5
14 5
11 5
11 5
10 5
10 5
8 5
8 5
8 5
8 5
8 5
8 5
8 5
9 5
9 5
9 4
9 4
10 2
11 1
11 1
11 0
12 1
12 1
12 1
12 1
12 1
12 1
12 1
12 1
12 1
12 1
11 1
11 1
11 1
8 1
4 1
4 1
4 1
4 1
4 1
4 1
4 1
3 1
3 1
3 1
5 1
5 1
5 1
5 1
5 1
4 1
3 1
4 3
4 3
4 3
6 3
6 3
5 2
5 2
5 2
5 2
5 2
5 2
5 2
5 2
5 2
5 2
5 2
5 2
6 2
7 2
7 3
7 3
7 3
7 3
7 3
7 3
7 3
7 3
7 3
7 3
5 5
5 6
7 6
17 7
19 8
19 10
19 9
18 8
18 8
18 9
17 9
17 9
17 9
17 9
17 9
17 9
17 9
17 9
17 9
17 9
17 9
17 9
17 8
17 8
16 8
16 8
16 8
21 8
23 8
24 8
27 7
28 7
28 8
28 8
29 8
29 8
30 7
28 6
26 6
18 5
15 4
15 2
16 2
16 2
19 3
19 3
19 3
19 3
19 3
19 3
19 3
19 3
19 3
19 3
19 3
19 3
19 3
19 3
19 3
19 3
19 3
17 3
17 3
12 3
13 5
12 5
10 5
10 5
10 4
10 4
9 4
9 3
9 3
11 4
11 4
11 4
11 4
11 4
9 4
9 4
7 3
7 3
7 3
7 3
7 3
9 3
11 3
11 3
12 3
13 3
16 4
16 4
16 4
16 4
16 4
16 4
16 4
16 4
16 4
16 4
13 2
12 3
11 4
11 4
11 4
11 4
11 4
11 4
11 4
10 3
10 3
10 3
10 3
10 3
10 3
10 3
10 3
10 3
10 3
7 3
6 3
6 3
4 3
4 3
4 3
2 3
1 2
1 2
1 2
1 2
1 2
1 2
1 2
1 1
1 1
1 1
0 1
0 0
0 0
0 0
1 1
1 2
1 2
1 2
1 2
2 7
2 7
2 8
2 8
2 9
2 9
2 10
3 12
3 14
3 15
3 15
3 15
4 15
4 16
4 16
4 16
6 18
6 18
6 18
6 18
6 20
6 20
6 20
6 20
6 20
6 20
6 20
6 21
6 21
6 22
6 21
6 20
6 20
6 20
6 23
6 23
6 17
6 17
7 17
7 17
9 16
10 16
10 14
9 11
9 11
9 10
9 10
14 14
13 14
13 15
13 15
13 15
11 13
11 13
11 13
11 11
14 10
16 10
16 10
17 10
18 10
18 8
18 8
17 8
17 8
17 8
21 8
21 8
21 9
21 8
21 7
21 7
20 6
20 6
19 6
19 7
17 7
17 7
19 8
19 8
19 9
19 9
20 9
15 5
16 5
16 4
16 4
16 4
16 4
16 4
17 4
18 4
14 4
14 4
13 4
13 4
13 4
13 4
13 4
13 4
13 4
13 4
10 3
10 3
10 3
10 3
10 3
10 3
10 3
10 3
10 3
10 2
10 2
8 2
6 1
6 0
6 0
6 0
5 0
6 0
7 0
11 0
14 0
22 0
22 0
25 0
26 0
25 0
25 0
26 0
29 0
28 0
36 0
36 0
37 0
45 0
45 0
45 0
45 0
45 0
45 0
45 0
45 0
45 0
45 0
45 0
46 0
46 0
47 1
47 1
47 1
47 1
47 1
47 1
47 1
46 1
44 1
36 1
34 1
31 1
30 1
30 1
28 1
28 1
27 1
26 1
23 1
23 1
15 1
13 1
13 1
6 1
6 1
6 1
6 1
7 1
7 1
13 1
18 1
22 1
22 1
22 1
21 1
21 1
20 0
20 0
21 0
21 0
21 0
22 0
22 0
21 0
21 0
21 0
21 0
21 0
21 0
20 0
20 0
22 0
22 0
24 0
24 0
25 0
25 0
25 0
25 0
25 0
25 0
24 0
24 0
22 0
21 0
14 0
13 0
9 0
9 0
9 0
9 0
9 0
9 0
9 0
8 0
8 0
9 0
8 0
8 0
16 0
19 0
21 0
27 0
27 0
27 0
28 0
27 0
24 0
24 0
24 0
26 0
26 0
26 0
26 0
26 0
26 0
26 0
26 0
27 0
27 0
27 0
28 0
28 0
28 0
28 0
28 0
28 0
28 0
28 0
28 0
27 0
27 0
26 0
25 0
25 0
18 0
16 0
13 0
7 0
7 0
7 0
6 0
6 0
8 0
8 0
8 0
6 0
5 0
5 0
4 0
4 0
7 0
9 0
9 0
9 0
10 0
9 0
9 0
9 0
10 0
10 0
10 0
10 0
10 0
10 0
10 0
34 32
34 32
35 35
35 42
35 42
37 52
40 58
40 58
39 58
39 58
39 58
39 58
39 58
38 58
40 58
39 58
39 58
38 58
38 58
37 58
36 58
36 58
36 58
37 58
38 58
38 58
37 58
37 58
37 58
37 58
37 58
37 58
37 58
37 59
39 60
39 60
13 10
14 2
14 2
14 2
14 2
13 2
11 2
10 2
10 2
10 2
11 2
17 2
17 2
19 2
21 2
21 2
21 2
19 2
24 2
24 3
24 4
23 4
23 4
22 4
22 4
21 4
21 4
21 3
21 3
21 3
21 3
21 3
21 3
19 3
19 2
19 2
19 2
19 2
19 2
19 2
18 2
18 2
19 2
21 2
20 2
19 2
20 4
45 27
42 28
42 29
42 29
41 29
41 29
43 29
39 30
39 28
39 28
39 28
39 28
39 29
40 30
40 30
40 31
40 31
43 31
44 31
45 31
44 31
44 31
45 31
45 31
45 31
45 31
46 31
49 32
49 32
50 32
55 33
58 33
64 34
77 41
73 38
71 38
49 19
50 18
50 18
50 18
53 18
53 18
51 18
51 17
51 17
51 16
52 16
52 16
53 15
53 15
53 14
53 15
52 15
48 17
48 18
48 18
48 18
48 18
47 18
47 18
46 19
48 20
47 20
44 19
41 18
32 17
23 14
19 13
18 12
8 6
8 6
8 6
8 6
7 6
7 6
7 6
4 5
4 5
4 5
4 5
4 2
4 2
4 2
5 2
4 2
4 2
4 2
5 1
6 2
11 3
45 3
76 3
82 3
85 3
88 3
104 3
111 3
111 2
111 2
111 3
111 3
112 3
113 3
114 3
114 5
114 5
114 5
113 5
113 5
113 5
113 5
113 5
113 5
113 5
114 5
115 5
115 5
115 5
115 5
115 5
115 5
114 5
115 5
113 4
111 3
105 3
72 3
43 3
36 3
32 3
27 2
15 2
8 2
8 2
8 2
8 2
9 2
8 2
7 0
6 0
7 0
7 0
7 0
9 0
9 0
9 0
9 0
9 0
9 0
9 0
8 0
7 0
7 0
39 0
42 0
49 0
68 0
68 0
70 0
71 0
78 0
78 0
77 0
77 0
77 0
76 0
76 0
76 0
76 0
76 0
76 0
76 0
75 0
75 0
75 0
75 0
74 0
75 0
76 0
74 0
75 0
75 0
76 0
82 0
86 0
88 0
89 0
89 0
85 0
49 0
47 0
39 0
20 0
19 0
18 0
17 0
17 0
18 0
19 0
19 0
21 0
23 0
23 0
24 0
24 0
24 0
24 0
24 0
24 0
24 0
24 0
24 0
24 0
24 0
23 0
22 0
20 0
20 0
15 0
12 0
9 0
8 0
8 0
8 0
8 0
10 0
12 0
12 0
11 0
11 0
11 0
11 0
11 0
11 0
9 0
9 0
9 0
7 0
7 0
6 1
9 1
9 1
9 1
12 1
12 1
11 1
11 1
13 1
13 1
14 1
15 1
17 1
33 1
33 1
33 1
33 1
33 1
33 1
33 1
33 1
33 1
32 1
30 1
30 1
30 1
30 1
30 1
30 1
29 1
29 1
30 1
29 1
29 1
30 1
30 1
30 0
27 0
28 0
28 0
30 0
30 0
29 0
29 0
28 0
29 0
26 0
25 0
22 0
10 0
11 0
11 0
11 0
13 0
17 0
17 0
17 0
17 0
17 0
17 0
17 0
17 0
17 0
18 0
20 0
21 0
20 0
20 0
20 0
20 0
19 0
19 0
19 0
19 0
18 0
17 0
13 0
13 0
12 0
12 0
13 0
13 0
13 0
13 0
13 0
12 0
12 0
12 0
12 0
9 0
6 0
6 0
6 0
6 0
6 0
7 0
7 0
7 0
8 0
6 0
6 0
6 0
6 0
8 0
8 0
8 0
8 0
7 0
7 0
7 0
7 0
7 0
7 0
7 0
7 0
7 0
6 0
6 0
6 0
6 0
6 0
6 0
6 0
6 0
6 0
6 0
5 0
4 0
4 0
3 0
3 0
3 0
3 0
4 0
4 0
4 0
3 0
3 0
3 0
1 0
1 0
1 0
3 0
3 0
3 0
3 0
3 0
3 0
3 0
3 0
3 0
3 0
3 0
3 0
3 0
3 0
3 0
3 0
3 0
3 0
4 0
4 0
14 0
19 0
24 0
27 0
32 0
32 0
32 0
32 0
32 0
32 0
32 0
32 0
32 0
36 0
37 1
37 1
35 1
35 1
35 1
35 1
35 1
35 1
35 1
35 1
35 1
35 1
35 1
35 1
35 1
35 1
35 1
35 1
36 2
36 2
34 2
34 2
24 2
18 2
15 2
11 2
6 2
7 2
7 2
7 2
7 2
7 2
7 2
7 2
7 2
3 2
2 1
2 1
2 1
2 1
3 1
3 1
4 1
4 1
6 1
7 1
7 1
7 1
9 1
10 1
16 1
17 1
28 1
50 1
53 0
54 0
67 0
68 0
68 0
68 0
70 0
74 0
74 0
74 0
74 0
74 0
74 0
74 0
74 0
74 0
74 0
74 0
74 0
74 0
74 0
74 0
73 0
73 0
73 0
74 0
72 0
71 0
76 0
81 0
80 0
77 0
68 0
66 0
52 0
37 0
35 0
36 0
32 0
50 0
58 0
57 0
54 0
51 0
51 0
53 0
53 0
53 0
53 0
53 0
57 0
58 0
59 0
59 0
59 0
59 0
58 0
58 1
57 1
57 1
58 1
58 1
60 1
59 1
56 1
49 1
50 1
50 1
50 1
50 1
50 1
51 1
56 2
50 2
53 2
45 2
38 2
42 3
42 3
42 3
42 3
40 3
40 3
40 3
40 3
38 3
36 3
35 2
34 2
34 2
34 2
33 2
33 2
33 2
32 2
32 2
31 2
30 2
31 2
31 2
30 2
30 2
32 2
32 2
42 3
40 3
41 3
40 2
30 2
29 2
20 2
19 2
20 2
16 1
17 1
17 1
17 1
18 1
18 1
20 1
22 1
22 1
22 1
22 1
22 1
22 1
22 1
23 1
23 1
22 1
22 1
22 1
21 1
22 1
23 1
25 1
28 1
31 2
30 2
29 2
20 1
20 1
20 1
20 1
18 1
18 1
18 1
18 1
19 1
19 1
21 1
26 1
27 1
27 1
27 1
24 1
24 1
24 1
30 1
31 1
32 1
38 1
40 1
40 1
41 1
40 1
42 5
42 9
42 9
41 12
39 12
36 11
34 12
31 12
31 12
31 12
31 12
31 12
31 12
32 13
39 13
41 14
90 17
92 17
91 17
89 17
87 17
93 18
91 18
91 19
91 19
91 19
88 19
87 19
83 19
83 19
83 20
77 20
75 20
74 20
73 20
73 18
71 15
71 12
71 10
71 9
71 9
71 9
71 8
71 8
71 8
66 8
60 8
65 8
63 8
61 7
57 6
56 5
13 3
12 3
12 5
11 5
11 5
6 4
6 4
7 3
13 3
13 3
17 3
20 3
38 3
46 3
52 2
62 2
114 2
128 2
138 2
141 2
146 2
149 2
152 2
153 2
155 2
154 2
154 2
154 2
154 2
158 2
158 2
155 2
155 3
156 3
158 3
159 3
159 3
159 3
159 1
159 1
159 1
159 2
158 3
157 3
151 3
150 3
148 3
142 3
123 3
116 3
111 3
102 3
46 3
33 3
28 3
26 3
24 3
28 3
136 9
143 9
141 9
141 9
140 9
140 9
140 9
137 9
137 9
137 9
137 8
136 8
139 8
140 8
151 8
157 8
164 8
170 8
171 8
171 7
171 6
171 6
171 6
171 6
171 6
171 6
173 6
173 6
173 6
173 6
167 5
162 5
159 5
140 4
135 4
133 4
45 0
41 0
41 1
41 1
41 1
41 1
40 1
40 1
39 1
37 1
37 1
31 1
28 1
26 1
22 1
16 1
11 1
7 0
15 0
15 0
15 0
15 0
15 0
15 0
16 1
17 1
15 1
15 1
15 1
15 1
15 1
16 1
16 1
16 1
16 1
16 1
16 1
16 1
16 1
16 1
16 1
16 1
16 1
16 1
16 1
16 1
16 1
15 1
15 1
13 1
13 1
12 1
12 1
12 1
6 1
6 1
6 1
5 1
5 1
5 1
4 0
6 0
9 0
9 0
10 0
11 0
11 0
11 1
11 1
11 1
11 1
11 1
11 1
11 1
11 1
11 1
11 1
11 1
11 1
11 1
11 1
11 1
9 1
9 1
9 1
9 1
9 1
8 1
7 1
6 1
5 1
4 1
4 1
5 1
6 1
31 1
31 1
31 1
31 1
32 1
30 1
30 1
30 1
29 0
33 0
35 0
35 0
35 0
35 0
36 0
38 0
38 0
41 0
41 0
41 0
41 0
41 0
41 0
41 0
41 0
41 0
41 0
41 0
41 2
40 2
43 2
43 2
46 2
46 2
45 2
44 2
20 2
20 2
23 3
23 3
43 3
44 3
45 3
46 3
48 3
45 3
43 3
43 3
45 3
47 3
47 3
43 3
43 3
42 3
42 3
44 3
44 3
44 3
44 3
45 3
45 3
47 3
47 3
47 3
47 1
46 1
44 1
44 1
47 2
47 2
47 2
47 2
47 2
47 2
45 1
44 1
24 1
23 1
21 1
21 1
18 1
17 1
17 1
15 1
14 1
13 1
13 1
13 1
13 1
13 1
13 1
11 2
11 2
12 2
11 2
10 2
15 2
33 2
49 2
50 2
50 2
52 2
53 2
55 2
49 1
50 1
50 1
50 1
49 1
49 1
49 1
50 1
50 1
50 1
50 1
50 1
50 1
50 1
50 1
50 1
50 1
71 2
71 2
72 2
73 2
76 2
76 2
82 2
79 2
128 2
127 2
127 2
119 2
106 2
90 2
89 2
88 2
86 2
86 2
83 2
83 2
83 2
83 2
83 2
83 2
83 2
83 2
83 2
83 2
83 2
83 2
84 2
86 2
86 2
92 3
91 3
100 4
81 3
82 3
85 3
84 2
81 2
82 2
77 2
75 2
26 2
26 2
26 2
26 2
29 2
29 3
39 4
40 4
40 4
41 4
41 4
41 4
41 4
41 4
41 4
41 4
41 4
41 4
41 4
41 4
41 4
42 4
40 4
39 5
40 5
33 4
33 4
24 3
22 3
20 3
18 3
18 3
18 3
39 3
40 3
51 3
54 3
58 3
58 3
56 3
52 2
51 2
45 1
45 1
49 1
49 1
50 1
50 1
50 1
50 1
51 1
60 1
137 2
159 2
162 2
162 2
162 2
163 2
180 2
181 1
180 1
180 1
180 1
180 1
181 1
181 1
181 1
180 1
180 1
159 1
158 1
146 1
143 1
140 1
139 1
139 1
140 1
140 1
140 1
146 1
143 1
143 1
139 1
136 1
135 1
121 1
103 1
90 1
42 0
37 0
34 0
34 0
31 0
29 0
14 0
14 0
14 0
14 0
14 0
14 0
13 0
13 0
13 0
12 0
12 0
14 0
14 0
15 0
15 0
16 0
16 0
16 0
15 0
18 0
19 0
9 0
10 0
10 0
10 0
13 0
13 0
14 1
14 1
14 1
14 1
14 1
14 1
14 1
19 1
21 1
62 2
63 2
63 2
63 2
63 2
65 2
65 2
65 2
65 2
67 2
67 2
65 2
72 2
76 2
76 2
75 2
74 2
74 2
73 2
71 2
71 2
71 2
70 2
70 2
70 2
65 2
66 2
69 1
70 1
70 1
68 1
69 1
70 1
76 1
72 1
71 1
31 0
32 0
32 0
32 0
32 0
30 0
30 0
29 0
30 6
30 6
31 7
29 7
23 7
20 8
21 9
21 9
21 9
24 9
25 9
25 9
25 9
24 9
26 9
26 9
26 9
27 9
27 9
23 9
22 9
21 9
21 9
20 9
18 9
13 9
13 9
13 9
14 9
14 9
14 9
14 9
14 9
15 9
17 9
17 9
15 1
17 1
16 0
17 0
18 0
18 0
23 0
30 0
30 0
30 0
34 0
49 3
49 3
50 3
52 3
52 3
52 3
53 3
52 3
52 3
52 3
52 3
52 3
52 3
52 3
55 3
57 3
57 3
56 3
56 3
56 4
56 4
56 4
54 4
52 4
52 4
52 4
50 4
51 4
48 4
47 4
44 4
42 4
55 4
59 4
59 4
54 4
39 2
39 2
36 2
35 2
35 2
35 2
33 2
33 2
33 2
33 2
33 2
33 2
35 2
36 2
33 3
33 3
35 3
42 3
43 3
44 3
44 3
46 3
46 3
46 3
47 4
48 4
47 4
47 4
47 4
47 4
47 4
41 4
25 4
21 4
20 4
20 4
20 4
20 4
20 4
20 4
22 4
22 4
22 4
28 4
28 3
35 3
35 3
36 3
44 3
47 3
86 3
86 3
86 3
84 2
83 2
82 1
82 1
80 1
81 2
81 1
80 1
80 1
114 2
118 3
118 3
120 3
122 3
122 3
122 3
123 3
123 3
122 3
123 3
127 3
128 4
129 4
135 6
137 6
137 6
131 6
131 6
125 7
123 7
118 7
109 7
108 7
67 7
67 7
66 7
62 7
61 7
61 7
60 7
60 7
59 6
61 6
61 6
59 6
25 5
23 4
22 4
19 4
18 4
18 4
19 4
20 4
22 4
24 4
23 4
19 3
29 3
26 3
23 1
22 1
22 1
22 1
22 1
21 0
21 0
21 0
21 0
21 0
21 0
21 0
20 0
20 0
20 0
20 0
20 0
20 0
19 0
19 0
19 0
19 0
24 0
24 0
24 0
28 0
27 0
26 0
25 0
25 0
24 0
22 0
22 0
25 0
22 0
25 0
28 0
28 0
28 0
28 0
28 0
41 0
41 1
41 1
41 1
41 1
41 1
41 1
41 1
41 1
41 1
42 1
42 1
42 1
42 1
42 1
42 1
41 1
37 1
34 1
33 1
33 1
33 1
33 1
54 1
56 1
61 2
61 2
58 2
53 2
47 2
48 2
47 1
48 1
47 1
47 1
49 1
36 1
36 1
36 1
36 1
36 1
36 1
36 1
36 1
39 1
39 1
48 1
52 1
53 1
59 1
67 1
68 1
71 1
111 1
122 1
131 1
168 1
176 1
170 1
154 1
153 1
154 0
177 1
182 1
205 4
206 4
205 4
204 4
204 4
204 4
204 4
204 4
204 4
205 4
205 4
205 4
205 4
205 4
205 4
205 4
198 4
196 4
188 4
186 4
185 4
178 4
161 4
154 4
149 4
109 4
104 4
97 4
68 4
64 4
62 4
58 4
52 4
49 4
26 3
26 3
4 0
3 0
3 0
4 0
4 0
4 0
4 0
3 0
3 0
3 0
3 0
3 0
3 0
3 0
3 0
3 0
3 0
4 0
5 0
6 0
7 0
7 0
10 0
10 0
10 0
10 0
10 0
10 0
10 0
9 0
9 0
9 0
9 0
10 0
10 0
9 0
9 0
9 0
9 0
9 0
8 0
8 0
8 0
8 0
8 0
8 0
8 0
10 0
10 0
10 0
10 0
10 0
10 0
9 0
8 0
6 0
5 0
6 0
4 0
4 0
4 0
4 0
4 0
5 0
6 0
6 0
6 0
5 0
5 0
5 0
5 0
5 0
5 0
5 0
5 0
5 0
5 0
5 0
5 1
5 1
3 1
4 1
6 1
7 1
7 1
7 1
7 1
7 1
7 1
7 1
6 1
6 1
6 1
7 1
7 1
7 1
12 1
13 1
13 1
12 1
11 1
11 1
11 1
11 1
13 1
14 1
19 1
19 1
19 1
20 0
20 0
21 0
20 0
21 1
21 1
21 1
21 1
21 1
19 1
18 2
18 2
18 2
19 2
19 2
19 2
19 2
19 2
17 2
20 2
22 2
22 2
21 2
16 2
16 2
16 2
16 2
14 2
14 2
13 2
13 2
13 2
13 2
9 2
10 2
12 2
10 2
11 2
10 2
10 2
10 1
12 1
12 1
12 1
12 1
12 1
12 1
12 0
12 0
11 0
11 0
11 0
10 0
10 0
9 0
8 0
6 0
6 0
6 0
6 0
8 0
8 0
8 0
8 0
8 0
8 0
8 0
8 0
7 0
7 0
7 0
5 0
6 0
5 0
5 0
5 0
5 0
3 0
4 0
4 0
4 0
4 0
5 0
5 0
5 0
5 0
5 0
5 0
5 0
5 0
7 0
8 0
8 0
8 0
8 0
7 0
6 0
6 0
6 0
6 0
6 0
6 0
6 0
5 0
5 0
5 0
5 0
4 0
4 0
4 0
4 0
4 0
4 0
4 0
3 0
3 0
3 0
4 0
4 0
4 0
4 0
4 0
4 0
4 0
4 0
4 0
1 0
1 0
1 0
1 0
1 0
1 0
1 0
2 0
2 0
2 0
4 0
4 0
4 0
4 0
4 0
4 0
4 0
4 0
5 0
5 0
5 0
5 0
8 0
8 0
9 0
12 0
12 0
11 0
11 0
11 0
11 0
11 0
14 0
14 0
14 0
14 0
14 0
15 0
15 0
17 0
17 0
17 0
18 0
18 0
18 0
18 0
16 0
16 0
16 0
16 0
16 0
16 0
17 0
17 0
16 0
16 0
16 0
16 0
13 0
12 0
13 0
10 0
10 0
13 0
18 0
18 0
19 0
18 0
17 0
17 0
27 0
28 0
30 0
40 0
40 0
36 0
37 0
38 0
42 0
44 0
46 0
46 0
46 0
46 0
46 0
47 0
48 0
48 0
47 0
48 0
48 0
48 0
48 0
48 0
48 0
48 0
46 0
46 0
44 0
43 0
38 0
38 0
37 0
38 0
38 0
36 0
29 0
33 0
31 0
22 0
22 0
21 0
20 0
16 0
20 0
22 0
22 0
29 0
32 0
33 0
34 0
34 0
33 0
33 0
33 0
32 0
32 0
32 0
32 0
32 0
32 0
32 0
32 0
32 0
32 0
32 0
32 0
32 0
31 0
29 0
29 0
29 0
29 0
25 0
25 0
24 0
24 0
23 0
23 0
23 0
16 0
13 0
11 0
6 0
5 0
4 0
3 0
2 0
3 0
5 0
6 0
8 0
8 0
9 0
10 0
10 1
11 1
13 1
12 1
12 1
14 1
31 1
33 1
33 1
35 1
36 1
36 1
36 1
36 1
38 1
42 1
44 1
44 1
48 1
48 2
55 2
69 2
70 2
71 2
73 2
81 2
81 2
81 2
82 2
83 2
81 2
81 2
80 2
113 3
112 3
110 3
110 2
111 2
109 2
109 2
109 2
106 2
89 2
89 2
88 2
87 2
85 2
85 2
85 2
86 2
83 2
83 2
82 2
83 1
80 1
77 1
70 1
58 1
57 1
56 1
56 1
48 1
48 1
47 1
52 1
49 1
50 1
60 1
65 1
45 0
49 0
49 0
49 0
48 0
48 0
48 0
48 0
48 0
48 0
50 1
50 1
52 1
59 2
62 2
62 2
60 2
61 2
60 2
62 2
62 2
62 2
62 2
62 2
62 2
60 2
60 2
60 2
60 2
57 2
58 2
53 2
47 2
46 2
39 2
37 2
25 2
23 2
23 2
33 2
45 2
56 2
62 2
75 2
74 2
75 2
72 1
71 1
69 1
64 0
62 0
60 0
60 0
58 0
57 0
55 0
55 0
55 0
55 0
55 0
55 0
54 0
54 0
54 0
54 0
54 0
53 0
53 0
53 0
54 0
54 0
54 0
57 0
57 0
57 0
40 0
31 0
19 0
16 0
6 0
7 0
6 0
6 0
6 0
6 0
6 0
8 0
8 0
8 0
8 0
9 0
9 0
9 0
9 0
9 0
10 0
17 0
18 0
18 0
19 0
21 1
28 1
29 1
29 1
30 1
28 1
28 1
29 1
27 1
29 1
29 1
34 1
34 1
34 1
34 1
35 1
34 1
34 1
34 1
34 1
34 1
34 1
32 1
32 1
32 1
33 1
34 1
40 1
41 1
44 1
54 1
54 1
49 1
49 1
48 1
43 1
43 0
37 0
37 0
37 0
38 0
38 0
38 0
37 0
37 0
35 0
35 0
30 0
30 0
30 0
29 0
29 0
29 0
29 0
29 0
29 0
29 0
30 0
30 0
31 0
31 0
33 0
31 0
26 0
24 0
18 0
10 0
8 0
8 0
8 0
8 0
8 0
8 0
8 0
8 0
8 0
7 0
7 0
8 0
8 0
8 0
9 0
9 1
10 3
10 3
10 3
10 3
10 3
11 3
11 3
11 3
11 3
11 3
10 3
12 3
10 3
22 3
23 3
25 3
26 3
28 4
29 4
29 4
29 4
30 4
30 4
31 4
31 4
32 4
32 4
35 4
35 4
36 4
39 4
38 4
39 4
39 4
38 4
36 3
36 3
36 3
36 3
36 3
36 3
36 3
37 3
39 3
39 3
39 3
38 3
48 4
49 4
37 4
38 4
38 4
43 4
42 3
42 3
42 3
42 3
40 3
49 4
59 4
86 6
87 6
86 6
84 6
84 6
83 6
84 6
84 6
84 6
84 6
84 6
84 6
84 4
84 4
84 4
83 4
83 4
83 4
84 4
82 4
82 4
79 4
78 5
68 4
69 4
68 4
65 4
67 4
69 4
70 5
72 5
69 5
65 5
50 5
48 4
49 4
31 2
31 2
31 2
30 2
30 2
29 2
27 2
27 2
27 2
27 2
27 2
30 2
31 2
30 2
30 2
30 2
30 2
30 2
29 2
30 2
31 2
36 2
36 1
35 1
34 1
33 1
29 1
24 1
23 1
22 0
20 0
19 0
17 0
17 0
12 0
11 0
11 0
15 0
19 0
22 0
22 0
22 0
22 0
22 0
22 0
22 0
20 0
19 0
19 0
19 0
19 0
19 0
19 0
19 0
19 0
18 0
17 0
13 0
13 0
13 0
13 0
13 0
13 0
13 0
13 0
13 0
13 0
13 0
13 0
13 0
15 0
15 0
15 0
10 0
5 0
4 0
4 0
3 0
3 0
4 0
4 0
4 0
4 0
4 0
4 0
4 0
3 0
3 0
3 0
3 0
3 0
3 0
3 0
3 0
3 0
3 0
3 0
3 0
4 0
5 0
6 0
7 0
8 0
13 0
23 0
45 1
48 1
49 1
49 1
49 1
49 1
49 1
49 1
49 1
49 1
48 1
50 1
50 1
50 1
50 1
50 1
50 1
50 1
50 1
50 1
50 1
50 1
50 1
50 1
51 1
51 1
50 1
57 1
65 1
72 1
80 3
80 3
92 3
91 3
80 3
87 3
75 2
71 2
76 2
78 2
78 2
82 2
82 2
82 2
82 2
82 2
82 2
81 2
82 2
83 2
83 2
83 2
103 2
104 2
104 2
104 2
101 2
101 2
102 2
102 2
101 2
97 2
94 2
86 2
75 2
71 2
65 0
59 0
49 0
46 0
43 0
36 0
34 1
34 1
28 1
28 1
28 1
28 1
28 1
29 1
29 1
30 1
30 1
30 1
29 1
27 1
26 1
26 1
7 1
7 1
9 1
13 1
13 1
12 1
12 1
12 1
12 1
12 1
12 1
11 1
13 1
13 1
13 1
13 2
13 2
12 2
10 2
10 2
10 1
10 1
11 1
14 1
18 1
18 1
18 1
17 1
16 1
17 1
17 1
17 1
19 1
19 1
19 1
21 1
21 1
20 1
19 1
16 1
16 1
16 1
16 1
16 1
20 1
20 1
20 1
20 1
17 1
16 0
16 0
16 0
16 0
17 0
19 0
20 0
20 0
20 0
23 0
23 0
21 0
21 0
21 0
21 0
21 0
20 0
21 0
21 0
19 0
19 0
20 0
18 0
18 0
18 0
17 0
17 0
17 0
17 0
17 0
17 0
17 0
17 0
21 0
24 0
25 0
28 0
29 0
37 0
38 0
37 0
35 0
34 0
33 0
32 0
29 0
27 0
27 0
27 0
27 0
27 0
27 0
27 0
25 0
25 0
25 0
25 0
25 0
25 0
25 0
25 0
25 0
24 0
24 0
24 0
24 0
26 0
23 0
23 0
20 0
17 0
17 0
14 0
13 0
5 0
6 0
8 0
8 0
8 0
9 0
9 0
9 0
9 0
9 0
9 0
9 0
9 0
9 0
9 0
9 0
9 0
9 0
9 0
9 0
9 0
9 0
9 0
9 0
9 0
8 0
8 0
7 0
7 0
7 0
7 0
7 0
6 0
7 0
7 0
8 0
9 0
10 0
9 0
9 0
9 0
9 0
9 0
9 0
9 0
9 0
9 0
9 0
9 0
9 0
10 0
11 0
13 0
13 0
13 0
14 0
15 0
15 0
15 0
15 0
15 0
14 0
14 0
14 0
14 0
14 0
14 0
13 0
13 0
13 0
14 0
13 0
11 0
9 0
9 0
9 0
9 0
9 0
10 0
11 0
11 0
11 0
11 0
11 0
12 0
11 0
10 0
9 0
10 1
10 1
10 1
10 1
9 1
9 1
9 1
9 1
9 1
14 1
26 1
27 1
29 1
39 1
39 1
40 1
40 1
40 1
38 1
38 1
37 1
36 1
36 1
36 1
36 1
36 1
35 1
35 1
35 1
35 1
35 1
39 1
38 1
40 2
40 2
41 2
42 1
41 1
41 1
41 1
41 1
48 1
49 1
48 1
47 1
42 1
32 1
29 1
28 1
19 1
18 1
18 1
19 1
19 1
19 1
19 1
19 1
21 1
21 1
21 1
21 1
29 1
34 1
43 1
46 1
50 1
58 2
62 2
70 1
72 1
74 1
81 1
79 1
80 1
80 1
80 1
81 1
74 1
74 1
74 1
82 1
83 1
86 1
86 1
86 1
86 1
86 1
86 1
90 1
92 1
94 1
101 1
103 1
102 1
102 1
102 1
110 1
102 1
113 1
110 1
110 1
102 1
97 0
85 0
81 0
75 0
74 0
70 0
87 0
126 1
146 1
156 2
158 2
156 2
156 2
156 2
151 2
148 2
148 2
148 2
148 2
151 2
159 2
159 2
154 2
189 2
192 2
185 2
186 2
185 3
185 3
184 3
176 3
174 3
154 3
150 3
153 3
159 3
157 3
157 3
157 3
159 3
155 3
153 3
128 2
87 2
77 2
71 1
70 1
70 0
70 0
70 0
70 0
70 0
71 0
69 0
70 0
66 0
58 0
59 0
54 0
26 0
25 0
25 0
22 0
22 0
24 0
24 0
24 0
25 0
26 0
26 0
25 0
19 0
19 0
19 0
18 0
16 0
15 0
15 0
15 0
18 0
44 0
57 0
61 1
63 1
64 1
64 1
65 1
65 1
65 2
65 2
62 2
63 2
63 2
60 2
60 2
60 2
60 2
58 2
58 2
57 2
56 2
56 2
56 2
54 2
54 2
55 2
55 2
55 2
56 2
57 3
71 3
83 3
87 3
86 3
82 3
59 2
60 2
56 2
51 2
52 2
52 2
52 2
51 2
51 2
51 1
52 1
52 1
52 1
52 1
53 1
53 1
54 1
54 1
54 1
54 1
54 1
58 1
58 1
59 1
60 1
60 1
60 1
59 1
59 1
52 1
50 0
37 0
31 0
26 0
28 0
30 0
28 0
19 0
20 0
19 0
18 0
18 0
20 0
21 0
21 0
20 0
21 0
21 0
21 0
20 0
21 0
21 0
21 0
22 0
23 0
23 0
21 0
19 0
19 0
17 0
16 0
16 0
16 0
16 0
16 0
16 0
16 0
16 0
14 0
14 0
12 0
11 0
11 0
10 0
9 0
8 0
8 0
7 0
7 0
6 0
6 0
6 0
5 0
5 0
5 0
5 0
3 0
3 0
1 0
1 0
1 0
1 0
1 0
1 0
1 0
3 0
3 0
4 0
4 0
4 0
4 0
4 0
4 0
4 0
4 0
4 0
4 0
5 0
5 0
14 0
17 0
16 0
19 0
21 0
22 0
22 0
22 0
22 0
22 0
22 0
23 0
23 0
23 0
23 0
23 0
23 0
23 0
23 0
23 0
23 0
22 0
22 0
24 0
25 0
26 0
27 0
28 0
30 0
30 0
30 0
30 0
30 0
29 0
28 0
28 0
18 0
18 0
18 0
15 0
13 0
12 0
12 0
13 0
12 0
12 0
12 0
13 0
13 0
14 0
14 0
14 0
20 0
24 0
28 0
47 0
48 0
48 0
48 0
52 0
71 0
72 0
73 0
83 0
89 0
92 0
101 0
108 0
108 0
108 0
109 0
109 0
108 0
108 0
108 0
108 0
108 0
108 0
111 0
110 0
110 0
110 0
114 0
113 1
113 1
112 1
111 1
111 1
104 1
100 1
92 1
77 1
76 1
76 1
74 1
66 1
48 1
48 1
47 1
34 1
29 1
25 1
18 1
10 1
10 1
10 1
10 1
10 1
10 1
10 1
11 1
13 1
21 1
25 0
28 0
30 0
30 0
30 0
28 0
27 0
27 0
27 0
27 0
26 0
26 0
26 0
25 0
25 0
27 0
28 0
28 0
28 0
28 0
31 0
31 0
37 0
40 0
42 0
222 0
226 0
226 0
231 0
255 0
256 0
262 0
268 0
273 0
268 0
260 0
258 0
255 0
254 0
254 0
254 0
254 0
255 0
255 0
255 0
255 0
256 0
256 0
255 0
256 0
256 0
255 0
254 0
255 0
256 0
256 0
253 0
252 0
247 0
245 0
242 0
58 0
57 0
55 0
47 0
23 0
21 1
20 1
24 1
23 1
24 1
38 1
47 1
51 1
51 1
55 1
119 1
120 1
121 1
126 1
126 1
133 1
133 1
151 1
155 1
158 1
162 1
164 1
171 1
170 1
168 1
170 1
170 1
170 1
171 1
173 1
173 1
173 1
173 1
172 1
171 1
171 1
171 1
169 1
163 1
161 1
158 1
141 1
133 1
132 1
131 1
123 1
70 1
73 1
72 1
70 1
69 1
62 1
62 1
46 1
40 1
51 1
48 1
60 1
57 1
57 1
56 1
69 1
70 1
70 1
69 1
69 1
71 1
81 2
84 2
94 3
96 4
98 4
97 3
97 3
105 6
105 6
104 7
104 7
104 7
104 7
104 7
104 8
98 8
96 8
96 8
96 8
95 8
97 8
98 8
99 9
115 10
106 10
116 11
122 11
148 11
159 11
160 11
153 11
156 11
155 11
155 11
157 11
166 11
304 12
302 12
298 11
301 10
303 10
301 10
300 10
297 6
299 6
300 6
303 6
356 8
353 8
355 8
355 7
370 7
373 7
375 7
376 7
376 7
375 7
371 7
366 5
341 4
337 4
332 4
316 4
287 4
280 4
271 4
271 4
265 4
253 4
235 4
230 4
218 4
109 2
108 2
103 2
104 2
126 2
126 2
122 2
121 2
118 2
116 2
117 2
71 0
72 0
72 0
72 0
53 0
52 0
50 0
49 0
49 0
49 0
49 0
49 0
48 0
48 0
49 0
50 0
49 0
49 0
49 0
50 0
50 0
53 0
59 0
56 0
73 2
75 2
73 2
72 3
68 3
46 3
47 4
45 4
42 4
43 4
41 5
39 5
39 5
38 5
38 5
37 5
37 5
37 5
37 5
38 5
41 5
44 5
44 5
45 5
45 5
45 5
44 5
43 5
43 5
43 5
43 5
42 5
41 5
38 5
32 5
32 5
15 1
13 1
15 1
15 1
18 1
18 1
16 1
16 1
15 1
14 1
14 0
14 0
14 0
14 0
19 0
24 0
51 0
51 0
50 0
50 0
48 0
48 0
50 0
50 0
50 0
50 0
50 0
50 0
50 0
50 0
50 0
49 1
49 1
52 1
53 1
58 1
61 1
61 1
59 1
59 1
57 1
57 1
57 1
58 1
58 1
58 1
58 2
58 2
59 2
65 2
83 2
85 2
59 2
59 2
59 2
55 2
54 2
53 2
78 5
79 5
79 5
79 4
79 4
78 4
78 4
78 4
78 4
78 4
77 4
73 4
68 4
66 4
66 4
67 4
67 4
67 4
69 4
70 4
71 4
69 4
71 4
69 4
68 3
64 3
63 3
56 3
38 3
35 3
33 2
33 2
33 2
32 1
32 1
31 1
8 0
8 0
8 0
8 0
8 0
8 0
8 0
8 0
8 0
8 0
8 0
8 0
8 0
7 0
7 0
6 0
6 0
6 0
5 0
4 0
3 0
3 0
1 0
1 0
1 0
1 0
1 0
1 0
1 0
1 0
1 0
2 0
2 0
2 0
2 0
1 0
2 0
2 0
2 0
2 0
3 0
3 0
3 0
3 0
3 0
3 0
3 0
3 0
3 0
3 0
3 0
3 0
3 0
3 0
3 0
3 0
3 0
3 0
3 0
3 0
13 1
15 1
15 1
16 1
16 1
16 1
19 1
20 1
20 1
20 1
22 1
25 1
28 1
31 1
31 1
31 1
32 2
32 2
32 2
32 2
32 2
33 2
33 2
34 2
34 2
34 2
34 2
34 2
34 2
34 2
35 2
35 2
38 2
40 2
41 2
39 2
28 1
28 1
29 1
26 1
25 1
26 1
25 1
30 1
35 1
50 1
65 1
63 1
61 1
58 0
58 0
63 0
61 0
62 0
62 0
62 0
63 0
62 0
62 0
62 0
62 0
62 0
62 0
62 0
62 0
61 0
59 0
59 0
56 0
57 0
57 0
57 0
57 0
57 0
54 0
55 0
55 0
54 0
52 0
47 0
39 0
34 0
20 0
20 0
20 0
21 0
21 0
17 0
18 0
23 0
25 0
24 0
26 0
28 0
35 0
55 0
64 0
73 0
73 0
73 0
73 0
73 0
74 0
75 0
75 0
74 0
73 0
73 0
73 0
73 0
72 0
72 0
72 0
71 0
65 0
64 0
63 0
63 0
61 0
58 0
57 1
62 1
60 1
61 1
62 1
56 1
54 1
55 1
51 1
49 1
39 1
24 1
17 1
13 1
13 1
13 1
13 1
12 1
12 1
12 1
12 1
12 1
13 1
13 1
14 1
14 1
17 1
18 1
19 1
19 1
21 1
21 1
21 1
21 1
21 1
22 0
24 0
20 0
20 0
20 0
19 0
21 0
20 0
19 0
19 0
19 0
19 0
18 1
18 1
17 1
18 1
18 1
18 2
18 2
18 2
19 2
19 2
19 2
18 2
17 2
17 2
17 2
14 2
13 2
12 2
12 2
10 2
9 2
15 2
15 2
15 3
12 3
12 3
12 3
11 3
11 3
10 3
9 3
9 3
17 3
24 3
30 2
33 2
38 2
39 2
39 2
42 2
42 2
42 1
42 1
42 1
43 1
43 1
43 1
44 1
44 1
47 1
47 1
47 1
47 1
50 1
50 1
51 1
51 1
45 1
50 1
50 0
50 0
50 0
50 0
50 0
50 0
52 0
53 0
51 0
43 0
39 0
33 0
35 0
32 0
32 0
33 0
33 0
33 0
34 0
34 0
33 0
45 0
46 0
54 0
59 1
59 1
57 1
57 1
57 1
59 1
56 1
55 1
55 1
55 1
53 1
50 1
49 1
49 1
49 1
47 1
47 1
47 1
45 1
56 2
55 2
53 2
51 2
54 2
52 3
51 3
57 3
54 3
54 3
54 3
54 3
54 3
53 3
41 3
39 3
29 3
28 3
28 3
29 3
29 4
29 4
28 4
29 4
29 4
29 4
29 4
28 4
28 4
28 4
26 4
23 4
21 4
22 4
22 4
23 4
16 3
16 3
16 3
15 3
13 2
12 3
12 3
6 4
6 4
6 4
6 4
5 4
5 4
5 4
5 4
5 4
4 4
4 3
4 3
3 3
4 2
5 2
5 2
5 2
7 2
8 2
8 2
8 3
8 5
8 5
9 5
12 8
12 8
11 9
11 9
11 9
12 9
12 9
21 9
21 9
20 9
20 7
20 7
20 7
20 7
20 7
20 7
20 7
20 7
20 7
20 7
22 7
25 7
25 7
27 7
28 7
27 7
26 7
27 7
29 7
27 7
27 7
27 7
30 5
34 4
41 5
42 5
102 3
105 3
105 3
112 3
111 3
110 3
110 3
102 3
104 3
107 3
116 6
118 6
132 6
130 6
130 6
130 6
130 6
130 6
129 6
128 6
128 6
124 6
124 6
125 6
124 6
123 6
122 6
122 6
121 6
121 6
123 6
125 6
125 5
163 8
160 7
157 6
97 6
96 6
96 6
91 6
94 6
92 6
101 6
101 6
97 6
97 6
90 3
89 3
77 3
103 3
114 5
127 6
132 6
132 6
133 6
133 7
132 7
132 7
132 7
134 7
134 7
139 7
140 7
136 7
135 7
135 7
131 7
126 7
118 7
87 4
85 4
85 4
85 4
87 4
86 4
83 4
82 4
81 4
76 4
75 4
73 4
74 4
66 4
65 4
62 4
42 3
30 0
20 0
18 0
18 0
18 0
19 0
19 0
18 0
19 0
17 0
16 0
13 0
11 0
11 0
9 0
10 0
10 0
10 0
10 0
10 0
10 0
10 0
10 0
9 0
10 0
10 0
9 0
9 0
8 0
8 0
7 0
7 0
8 0
8 0
8 0
8 0
8 0
8 0
8 0
8 0
9 0
9 0
20 0
26 1
26 1
27 1
27 1
27 1
26 1
26 1
27 1
28 1
29 1
29 1
29 1
29 1
32 1
31 1
30 1
30 1
29 1
28 1
28 1
30 1
33 1
33 1
33 1
33 1
34 1
34 1
34 1
34 1
37 1
42 1
43 2
42 2
43 2
42 2
30 2
26 1
26 1
29 1
35 1
37 1
39 1
41 1
41 1
41 1
43 1
43 1
42 1
45 1
44 1
44 1
45 1
45 1
45 1
45 1
45 1
43 1
39 1
39 1
39 1
47 2
45 2
46 2
46 1
45 1
56 1
62 1
65 1
68 1
70 1
73 1
82 1
116 1
125 1
129 1
124 1
122 1
120 1
120 1
119 1
146 1
146 1
148 1
148 1
146 1
147 1
147 1
147 1
147 1
147 1
150 1
150 1
151 1
152 1
164 1
164 1
156 0
156 0
155 0
157 1
159 1
147 1
133 1
128 1
127 1
125 1
120 1
97 1
73 1
71 1
65 1
65 1
64 1
62 1
60 1
59 1
32 1
33 1
31 1
37 1
42 1
42 1
42 1
42 1
45 1
48 1
47 1
47 1
47 1
49 1
37 1
55 3
56 3
55 3
56 3
57 2
58 2
56 2
55 2
55 2
55 2
55 2
55 2
56 2
56 2
55 2
55 2
54 2
54 2
50 2
50 2
51 2
50 2
58 2
64 2
62 2
60 2
59 2
59 2
60 2
58 2
55 2
62 2
62 2
61 2
60 2
62 2
45 0
46 0
46 0
43 0
40 0
39 0
39 0
39 1
38 1
38 1
38 1
38 1
38 1
38 1
38 1
38 1
38 1
38 1
38 1
37 1
34 1
34 1
25 1
23 1
28 1
29 1
41 1
47 0
47 0
46 0
46 0
52 0
51 0
50 0
56 0
56 0
60 0
67 0
71 0
72 0
72 0
75 0
74 0
74 0
75 0
75 0
77 0
79 0
81 0
86 0
259 0
267 0
284 0
300 0
347 0
388 0
397 0
404 0
407 0
417 0
475 0
488 0
508 0
505 0
505 1
508 1
515 1
538 1
541 1
541 1
536 1
536 1
529 1
524 1
522 1
521 1
520 1
518 1
518 1
518 1
517 1
514 1
513 1
507 1
506 1
505 1
335 1
337 2
342 3
344 3
345 3
337 3
332 3
336 3
335 3
313 3
257 3
253 3
226 3
228 3
226 2
223 2
212 2
177 2
176 2
176 2
175 2
173 2
172 2
172 2
172 2
172 2
172 2
171 2
171 2
172 2
174 2
172 2
169 2
160 2
146 2
139 0
135 0
137 0
103 0
88 0
65 0
35 0
37 0
35 0
29 0
28 0
27 0
28 0
28 0
27 0
40 0
40 0
40 0
40 0
40 0
40 0
40 0
40 0
40 0
40 0
40 0
41 0
41 0
40 0
39 0
39 0
38 0
39 0
77 0
81 0
106 1
146 1
143 1
142 1
140 1
139 1
137 1
135 1
129 1
128 1
128 1
127 1
125 1
126 1
126 1
124 1
117 1
119 1
121 1
121 1
121 1
122 1
122 1
122 1
122 2
121 2
121 2
121 2
120 2
121 2
116 2
113 2
113 2
112 2
76 2
72 1
47 1
13 1
13 1
13 1
14 1
14 1
14 1
14 1
15 1
16 1
20 1
26 1
26 1
27 1
31 1
31 1
31 1
31 1
30 1
33 1
34 1
35 1
37 1
37 1
37 0
38 0
60 0
85 0
114 0
125 1
131 1
133 1
139 2
150 2
155 3
156 3
175 3
174 3
174 3
174 3
174 3
174 3
174 3
173 3
172 3
171 3
169 3
164 3
164 3
162 3
158 3
159 3
159 3
164 3
177 3
218 4
223 4
229 4
247 4
245 4
237 4
230 4
201 3
182 3
169 3
168 3
173 3
171 3
166 2
154 2
153 1
152 1
133 1
133 1
133 1
132 1
132 1
132 1
131 1
131 1
131 1
131 1
128 1
128 1
122 1
114 0
115 0
113 0
109 0
102 0
93 0
58 0
51 0
46 0
31 0
31 0
31 0
29 0
27 0
25 0
24 0
22 0
12 0
12 0
12 0
12 0
10 0
10 0
10 0
10 0
20 1
24 1
29 1
50 1
56 2
57 2
60 2
60 2
60 2
60 2
58 2
56 2
54 2
56 2
61 3
61 3
63 3
62 3
65 3
67 3
67 3
71 3
71 3
71 3
72 3
72 3
72 3
72 3
72 3
72 3
72 3
72 3
72 4
70 4
69 4
68 4
59 3
51 3
46 3
29 3
24 2
24 2
23 2
23 2
49 2
49 2
49 2
49 2
52 2
55 2
49 1
49 1
46 1
45 1
43 1
44 1
44 1
38 1
38 1
45 1
59 1
61 1
62 1
63 1
64 1
64 1
64 1
65 1
65 0
68 0
69 0
72 0
72 0
71 0
71 0
71 0
71 0
72 0
74 0
75 0
54 1
54 1
52 1
53 1
51 1
50 1
50 1
50 1
52 1
51 1
51 1
49 1
49 1
47 1
44 1
37 1
32 1
29 1
28 1
28 1
28 1
27 1
27 1
26 1
26 1
26 1
26 1
23 1
23 1
23 1
23 1
23 1
23 1
21 1
20 1
19 1
11 0
11 0
11 0
10 0
10 0
10 0
10 0
11 0
9 0
9 0
10 0
10 0
10 0
10 0
9 0
8 0
8 0
8 0
8 0
7 0
13 0
14 0
18 0
31 0
35 0
35 0
36 0
42 0
45 0
45 0
46 1
46 1
46 1
46 1
46 1
46 1
46 1
46 1
46 1
48 1
47 1
45 1
45 1
45 1
45 1
45 1
45 1
45 1
45 1
45 1
45 1
45 1
44 1
45 1
42 1
41 1
32 1
31 1
31 1
30 1
35 1
37 1
37 1
33 1
32 1
32 1
31 0
31 0
32 0
32 0
32 0
32 0
33 0
33 0
32 0
36 0
36 0
37 0
38 0
39 0
39 0
40 0
40 1
40 1
40 1
39 1
39 1
39 1
38 1
38 1
38 1
40 1
39 1
40 1
39 1
30 1
22 1
18 1
17 1
45 2
48 2
50 2
50 2
51 2
51 2
51 2
51 2
50 2
50 2
50 2
50 2
47 2
51 2
50 2
58 2
58 3
57 3
57 3
57 2
57 2
57 2
58 4
58 4
57 4
56 4
56 4
67 4
65 4
65 4
64 4
67 4
66 4
66 4
67 4
66 4
36 3
36 3
36 3
44 3
48 3
49 3
48 3
48 3
49 3
49 3
56 3
54 3
54 3
51 3
52 3
43 3
43 0
43 0
44 0
44 0
45 0
45 0
45 0
45 0
45 0
45 0
45 0
34 0
34 0
34 0
34 0
31 0
31 0
31 0
29 0
25 0
20 0
17 0
16 0
13 0
11 0
10 0
9 0
9 0
8 0
5 0
3 0
3 0
3 0
3 0
2 0
2 0
2 0
2 0
2 0
2 0
1 0
1 0
1 0
1 0
1 0
1 0
1 0
1 0
1 0
1 0
1 0
1 0
1 0
1 0
1 0
1 0
4 2
4 2
4 2
4 2
5 2
5 2
5 2
5 2
5 2
5 2
4 2
4 2
4 2
5 2
6 2
6 2
8 2
8 2
8 2
8 2
8 2
8 2
10 2
10 2
10 2
10 2
10 2
11 2
11 2
11 2
11 2
11 2
11 3
12 4
12 5
12 5
11 3
11 3
11 3
11 3
10 3
10 3
10 3
10 3
10 3
10 3
10 3
9 3
9 3
9 3
8 3
8 3
6 3
6 3
6 3
8 3
14 3
17 3
21 3
22 3
22 3
22 3
22 3
21 3
21 3
20 3
21 3
23 3
23 2
22 1
22 0
23 1
32 1
34 1
34 1
34 1
34 1
34 1
34 1
34 1
38 1
39 1
40 1
40 1
42 1
42 1
42 1
42 1
42 1
42 1
42 1
39 1
31 1
29 1
25 1
23 1
22 1
22 1
22 1
22 1
22 1
21 1
17 1
17 1
15 1
14 0
12 0
10 0
8 0
8 0
8 0
8 0
8 0
9 0
9 0
8 0
4 0
5 0
4 0
4 0
3 0
5 2
5 2
5 2
5 2
5 2
5 2
5 2
5 2
6 2
7 2
7 2
7 2
15 2
20 2
21 2
32 2
32 2
32 2
33 2
33 2
34 2
34 2
35 2
35 2
36 2
36 2
36 2
38 2
37 2
42 2
42 2
42 2
41 2
46 2
45 2
46 2
45 0
45 0
45 0
45 0
45 0
44 0
44 0
44 0
44 0
43 0
43 0
44 0
36 0
30 0
30 0
20 0
20 0
20 0
20 0
20 0
28 0
27 0
27 0
27 0
26 0
27 0
27 0
24 0
23 0
19 0
19 0
19 0
20 0
24 0
28 0
38 1
38 1
38 1
38 1
39 1
41 1
41 1
41 1
41 1
45 1
48 1
48 1
47 1
46 1
46 1
46 1
46 1
46 1
46 1
46 1
45 1
38 1
42 1
45 1
45 1
46 1
51 1
51 1
52 1
52 1
44 1
38 1
36 1
33 1
33 1
34 0
30 0
33 0
33 0
29 0
34 0
38 0
51 0
51 0
51 0
52 0
49 0
50 0
50 0
50 0
50 0
51 1
51 1
51 1
51 1
51 1
52 1
52 1
52 1
48 1
50 1
53 1
50 2
50 2
51 2
53 2
53 2
53 2
58 4
59 4
58 4
58 4
57 4
54 4
52 4
53 4
49 4
48 4
39 4
38 4
36 4
36 4
37 4
36 4
39 4
40 4
40 4
39 3
38 3
38 3
38 3
38 3
37 3
38 3
32 3
31 3
29 4
28 4
29 3
33 2
43 2
42 3
42 5
45 5
40 5
41 5
40 5
40 5
40 5
40 5
39 5
37 5
37 5
37 5
34 5
33 5
33 5
32 5
30 5
30 5
28 5
29 5
29 5
30 5
33 5
33 5
33 4
35 4
36 4
37 4
36 4
36 4
35 4
33 4
31 4
25 3
18 1
18 1
18 0
17 0
17 0
17 0
17 0
23 0
30 0
32 0
36 0
37 1
38 1
38 1
39 1
44 1
45 1
45 1
45 1
45 1
51 1
51 1
51 1
52 1
49 1
49 1
49 1
48 1
50 1
47 1
48 1
48 1
51 1
51 1
51 2
52 2
52 2
52 2
52 2
52 2
52 2
52 2
49 2
37 2
39 1
39 1
35 1
35 1
34 1
33 1
28 1
27 1
27 1
27 1
28 1
28 1
23 1
21 1
21 1
19 1
19 1
20 1
18 1
18 1
14 1
14 1
13 1
13 1
10 1
10 1
10 0
7 0
7 0
7 0
7 0
7 0
7 0
7 0
6 0
6 0
4 0
1 0
1 0
2 0
2 0
2 0
2 0
2 0
2 0
5 0
17 1
18 1
19 1
19 1
19 1
19 2
19 2
18 2
18 2
18 2
18 2
18 2
18 2
18 2
18 2
18 2
18 2
18 2
18 2
18 2
18 2
18 2
18 2
18 2
18 2
18 2
18 2
18 2
18 2
17 2
17 2
17 2
17 2
17 2
16 2
11 2
2 1
0 0
0 0
0 0
0 0
0 0
0 0
0 0
0 0
0 0
0 0
0 0
0 0
0 0
0 0
0 0
0 0
0 0
0 0
0 0
0 0
0 0
0 0
0 0
0 0
0 0
0 0
0 0
0 0
0 0
0 0
0 0
0 0
0 0
0 0
0 0
0 0
0 0
0 0
0 0
0 0
0 0
0 0
0 0
0 0
0 0
0 0
0 0
0 0
0 0
0 0
0 0
0 0
0 0
0 0
0 0
0 0
0 0
0 0
0 0
0 0
0 0
0 0
0 0
0 0
0 0
0 0
0 0
0 0
0 0
0 0
0 0
0 0
0 0
0 0
0 0
0 0
0 0
0 0
0 0
0 0
0 0
0 0
0 0
0 0
0 0
0 0
0 0
0 0
0 0
0 0
0 0
0 0
0 0
0 0
0 0
0 0
0 0
1 0
1 0
1 0
1 0
1 0
1 0
1 0
1 0
1 0
1 0
1 0
1 0
1 0
1 0
1 0
1 0
1 0
1 0
1 0
1 0
1 0
1 0
1 0
1 0
1 0
1 0
1 0
1 0
1 0
1 0
1 0
1 0
2 0
2 0
2 0
2 0
1 0
2 0
2 0
2 0
2 0
2 0
2 0
2 0
2 0
2 0
2 0
2 0
2 0
2 0
2 0
2 0
2 0
1 0
1 0
1 0
1 0
1 0
1 0
1 0
1 1
1 1
1 1
4 1
5 1
5 1
6 1
6 1
5 1
5 1
5 1
5 1
5 1
5 1
5 1
5 0
5 0
5 0
5 0
5 0
5 0
5 0
5 0
5 0
5 0
5 0
5 0
5 0
5 0
9 0
9 0
9 0
9 0
9 0
9 0
9 0
9 0
9 0
9 0
6 0
6 0
6 0
5 0
5 0
5 0
5 0
5 0
5 0
5 0
5 0
5 0
5 0
5 0
5 0
5 0
5 0
5 0
5 0
5 0
5 0
4 0
4 0
4 0
4 0
4 0
1 0
1 0
1 0
1 0
1 0
1 0
1 0
1 0
1 0
1 0
1 0
0 0
0 0
0 0
0 0
0 0
0 0
0 0
0 0
0 0
0 0
0 0
0 0
0 0
0 0
0 0
0 0
0 0
0 0
0 0
0 0
0 0
0 0
0 0
0 0
0 0
0 0
0 0
0 0
0 0
0 0
0 0
0 0
0 0
0 0
0 0
0 0
0 0
0 0
0 0
0 0
0 0
0 0
0 0
0 0
0 0
0 0
0 0
0 0
0 0
0 0
0 0
0 0
0 0
0 0
0 0
0 0
0 0
0 0
0 0
0 0
0 0
0 0
0 0
0 0
0 0
0 0
0 0
0 0
0 0
0 0
0 0
0 0
0 0
0 0
0 0
0 0
0 0
0 0
0 0
0 0
0 0
0 0
0 0
0 0
0 0
0 0
0 0
0 0
0 0
0 0
0 0
0 0
0 0
0 0
0 0
0 0
0 0
0 0
0 0
0 0
0 0
0 0
0 0
0 0
0 0
0 0
0 0
0 0
0 0
0 0
0 0
0 0
0 0
0 0
0 0
0 0
0 0
0 0
0 0
0 0
0 0
0 0
0 0
0 0
0 0
0 0
0 0
0 0
0 0
0 0
0 0
0 0
0 0
0 0
0 0
0 0
0 0
0 0
0 0
0 0
0 0
0 0
0 0
0 0
0 0
0 0
0 0
0 0
0 0
0 0
0 0
0 0
0 0
0 0
0 0
0 0
0 0
0 0
0 0
0 0
0 0
0 0
0 0
0 0
0 0
0 0
0 0
0 0
0 0
0 0
0 0
0 0
0 0
0 0
0 0
0 0
0 0
0 0
0 0
0 0
0 0
0 0
0 0
0 0
0 0
0 0
0 0
0 0
0 0
0 0
0 0
0 0
0 0
0 0
0 0
0 0
0 0
0 0
0 0
0 0
0 0
0 0
0 0
0 0
0 0
0 0
0 0
0 0
0 0
0 0
0 0
0 0
0 0
0 0
0 0
0 0
0 0
0 0
0 0
0 0
0 0
0 0
0 0
0 0
0 0
0 0
0 0
0 0
0 0
0 0
0 0
0 0
0 0
0 0
0 0
0 0
0 0
0 0
0 0
0 0
0 0
0 0
0 0
0 0
0 0
0 0
0 0
0 0
0 0
0 0
0 0
0 0
0 0
0 0
0 0
0 0
0 0
0 0
0 0
0 0
0 0
0 0
0 0
0 0
0 0
0 0
0 0
0 0
0 0
0 0
0 0
0 0
0 0
0 0
0 0
0 0
0 0
0 0
0 0
0 0
0 0
0 0
0 0
0 0
0 0
0 0
0 0
0 0
0 0
0 0
0 0
0 0
0 0
0 0
0 0
0 0
0 0
0 0
0 0
0 0
0 0
0 0
0 0
0 0
0 0
0 0
0 0
0 0
0 0
0 0
0 0
0 0
0 0
0 0
0 0
0 0
0 0
0 0
0 0
0 0
0 0
0 0
0 0
0 0
0 0
0 0
0 0
0 0
0 0
0 0
0 0
0 0
0 0
0 0
0 0
0 0
0 0
0 0
0 0
0 0
0 0
0 0
0 0
0 0
0 0
0 0
0 0
0 0
0 0
0 0
0 0
0 0
0 0
0 0
0 0
0 0
0 0
0 0
0 0
0 0
0 0
0 0
0 0
0 0
0 0
0 0
0 0
0 0
0 0
0 0
0 0
0 0
0 0
0 0
0 0
0 0
0 0
0 0
0 0
0 0
0 0
0 0
0 0
0 0
0 0
0 0
0 0
0 0
0 0
0 0
0 0
0 0
0 0
0 0
0 0
0 0
0 0
0 0
0 0
0 0
0 0
0 0
0 0
0 0
0 0
0 0
0 0
0 0
0 0
0 0
0 0
0 0
0 0
0 0
0 0
0 0
0 0
0 0
0 0
0 0
0 0
0 0
0 0
0 0
0 0
0 0
0 0
0 0
0 0
0 0
0 0
0 0
0 0
0 0
0 0
0 0
0 0
0 0
0 0
0 0
0 0
0 0
0 0
0 0
0 0
0 0
0 0
0 0
0 0
0 0
0 0
0 0
0 0
0 0
0 0
0 0
0 0
0 0
0 0
0 0
0 0
0 0
0 0
0 0
0 0
0 0
0 0
0 0
0 0
0 0
0 0
0 0
0 0
0 0
0 0
0 0
0 0
0 0
0 0
0 0
0 0
0 0
0 0
0 0
0 0
0 0
0 0
0 0
0 0
0 0
0 0
0 0
0 0
0 0
0 0
0 0
0 0
0 0
0 0
0 0
0 0
0 0
0 0
0 0
0 0
0 0
0 0
0 0
0 0
0 0
0 0
0 0
0 0
0 0
0 0
0 0
0 0
0 0
0 0
0 0
0 0
0 0
0 0
0 0
0 0
0 0
0 0
0 0
0 0
0 0
0 0
0 0
0 0
0 0
0 0
0 0
0 0
0 0
0 0
0 0
0 0
0 0
0 0
0 0
0 0
0 0
0 0
0 0
0 0
0 0
0 0
0 0
0 0
0 1
0 1
0 1
0 1
0 1
0 1
0 1
0 1
0 1
0 1
0 1
0 1
0 1
0 1
0 1
0 1
0 1
0 1
0 1
0 1
0 1
0 1
0 1
0 1
0 1
0 1
0 1
0 1
0 1
0 1
0 1
0 1
0 1
0 1
0 0
0 0
0 0
0 0
0 0
0 0
0 0
0 0
0 0
0 0
0 0
0 0
0 0
0 0
0 0
0 0
0 0
0 0
0 0
0 0
0 0
0 0
0 0
0 0
0 0
0 0
0 0
0 0
0 0
0 0
0 0
0 0
0 0
0 0
0 0
0 0
0 0
0 0
0 0
0 0
0 0
0 0
0 0
0 0
0 0
0 0
0 0
0 0
0 0
0 0
0 0
0 0
0 0
0 0
0 0
0 0
0 0
0 0
0 0
0 0
0 0
0 0
0 0
0 0
0 0
0 0
0 0
0 0
0 0
0 0
0 0
0 0
0 0
0 0
0 0
0 0
0 0
0 0
0 0
0 0
0 0
0 0
0 0
0 0
0 0
0 0
0 0
0 0
0 0
0 0
0 0
0 0
0 0
0 0
0 0
0 0
0 0
0 0
0 0
0 0
0 0
0 0
0 0
0 0
0 0
0 1
0 1
0 1
0 1
0 1
0 1
0 1
0 1
0 1
0 1
0 1
0 1
0 1
0 1
0 1
0 1
0 1
0 1
0 1
0 1
0 1
0 1
0 1
0 1
0 1
0 1
0 1
0 1
0 1
0 1
0 1
0 1
0 1
0 1
0 1
0 1
0 1
0 1
0 1
0 1
0 1
0 1
0 1
0 1
0 1
0 1
0 1
0 1
0 1
0 1
0 1
0 1
0 1
0 1
0 0
0 0
0 0
0 0
0 0
0 0
0 0
0 0
0 0
0 0
0 0
0 1
0 1
0 1
0 1
0 1
0 1
0 1
0 1
0 1
0 1
0 1
0 1
0 1
0 1
0 1
0 1
0 1
0 1
0 1
0 1
0 1
0 1
0 1
0 1
0 1
0 1
0 1
0 1
0 1
0 1
0 0
0 0
0 0
0 0
0 0
0 0
0 0
0 0
0 0
0 0
0 0
0 0
0 0
0 0
0 1
0 1
0 1
0 1
0 1
0 1
0 4
0 4
0 4
0 4
0 4
0 4
0 4
0 4
0 4
0 4
0 4
0 4
0 4
0 4
0 4
0 4
0 4
0 4
0 4
0 1
0 1
0 1
0 1
0 2
0 2
0 2
0 2
0 3
0 3
0 2
0 2
0 2
0 2
0 2
0 2
0 2
0 2
0 2
0 2
0 3
0 4
0 4
0 4
0 5
0 5
0 5
0 5
0 5
0 5
0 5
0 5
0 5
0 6
0 6
0 6
0 6
0 6
0 6
0 6
0 5
0 5
0 5
0 5
0 4
0 4
0 4
0 4
0 4
0 10
1 18
1 20
2 53
2 57
2 58
2 64
2 63
2 63
2 63
2 63
2 62
2 62
2 62
2 62
2 62
2 61
2 61
2 61
2 62
2 62
2 62
2 62
2 62
2 62
2 62
2 62
2 65
2 68
2 68
2 68
2 68
2 69
2 68
2 68
2 66
2 64
1 53
1 49
0 14
0 10
1 10
1 10
1 10
1 10
2 12
2 12
2 12
2 13
2 13
2 14
2 14
2 14
2 14
2 13
2 12
2 12
2 12
3 12
3 12
3 12
3 12
3 9
4 7
4 6
4 7
4 7
4 7
3 6
3 5
3 5
3 5
3 5
3 5
3 5
3 5
3 5
3 5
3 5
3 5
3 5
2 2
2 4
2 6
2 6
2 6
1 5
1 5
1 5
1 5
1 5
1 6
1 6
1 7
1 8
1 9
1 9
1 9
1 13
0 29
0 32
0 35
0 42
0 45
0 45
0 45
0 46
0 46
0 47
0 47
0 47
1 47
1 47
1 47
1 47
1 48
1 50
1 52
1 50
1 50
1 50
1 50
1 50
1 50
1 50
1 50
1 50
1 49
1 48
1 46
1 46
1 42
1 42
1 41
1 37
1 21
1 19
1 15
1 11
1 9
1 9
1 9
1 9
1 9
1 9
1 9
1 9
0 9
0 9
0 9
0 8
0 9
0 7
0 5
0 5
0 3
0 3
0 3
0 4
0 5
0 5
0 5
0 5
0 5
0 5
0 4
0 4
0 4
0 5
0 5
0 4
0 5
0 5
0 5
0 5
0 5
0 5
0 5
0 5
0 6
1 6
1 7
1 7
1 7
1 7
1 7
1 6
1 6
1 6
1 6
1 6
1 6
1 7
2 10
2 8
2 9
2 9
2 12
2 12
2 12
2 13
2 13
2 13
2 20
2 19
2 19
2 20
2 19
2 20
2 20
2 21
2 21
2 21
2 21
2 21
2 20
1 19
1 19
1 19
1 19
1 19
1 19
1 20
1 20
1 20
1 20
1 20
1 20
1 18
0 17
0 17
0 17
0 18
0 15
0 15
0 15
0 15
0 18
0 19
0 12
0 12
0 12
0 10
0 10
0 10
0 10
0 9
0 9
0 9
0 9
0 9
0 9
0 9
0 9
0 9
0 10
0 10
0 11
0 10
0 10
0 10
0 10
0 11
0 12
0 12
0 9
0 10
0 10
0 10
0 10
0 10
1 21
1 22
1 18
2 21
2 21
2 23
2 24
2 24
2 24
2 24
2 24
3 26
3 27
4 27
4 27
6 46
6 46
6 54
6 55
7 79
8 231
8 253
8 276
8 291
8 291
8 334
8 388
8 388
8 388
8 391
8 391
8 392
8 393
7 396
7 401
7 403
6 389
6 392
6 406
6 416
6 417
6 418
6 419
6 420
6 420
6 420
6 420
5 418
4 422
4 423
4 535
2 522
2 530
2 539
2 550
1 508
0 271
0 234
0 231
0 231
0 232
0 241
0 251
0 252
1 255
5 254
6 255
6 255
6 253
6 251
6 244
6 245
6 245
6 232
6 220
6 212
6 212
6 212
6 212
6 212
6 212
6 212
6 213
6 212
6 208
6 205
6 85
6 75
6 72
6 62
6 67
6 76
6 77
6 80
6 84
6 90
6 93
6 84
5 71
5 69
4 66
1 66
0 67
0 66
0 66
0 66
0 66
0 68
0 68
0 68
0 67
0 66
0 66
0 66
0 66
0 66
0 66
0 66
0 66
0 66
0 66
0 66
0 66
0 64
0 60
0 58
0 41
0 28
0 20
0 17
0 15
0 9
1 12
1 14
1 14
1 14
1 14
1 25
1 30
1 35
1 41
1 44
1 44
1 46
1 46
1 47
1 71
1 72
1 73
1 73
1 75
1 75
1 75
1 75
1 78
1 80
2 133
2 135
2 136
2 140
2 148
4 160
4 169
4 172
4 173
4 174
4 173
4 174
3 166
3 168
3 213
3 217
3 221
3 212
3 206
3 198
3 194
3 194
3 192
3 222
3 225
3 228
3 209
3 211
3 213
3 211
3 209
3 210
3 224
3 224
3 225
3 221
1 146
1 143
1 151
1 153
1 151
0 148
0 146
0 144
1 144
1 144
1 144
1 143
1 143
1 142
1 93
1 90
1 92
1 89
1 91
1 93
1 93
1 93
1 93
1 57
1 50
1 49
1 47
2 52
2 55
2 57
2 58
3 59
3 45
3 45
3 43
3 41
3 42
3 41
3 37
3 52
3 71
3 76
3 76
3 78
2 78
2 78
2 78
2 78
2 78
2 78
2 78
2 78
2 76
2 76
2 75
2 73
2 73
2 73
2 71
2 71
2 74
2 73
2 73
1 65
1 66
1 67
1 67
0 64
0 66
0 68
0 69
0 70
0 70
0 70
0 58
0 46
0 23
0 23
0 23
0 22
0 23
0 23
0 23
0 23
0 23
0 23
0 23
0 23
0 19
0 19
1 21
1 23
1 38
1 58
1 102
1 106
1 105
1 105
1 105
1 104
1 97
1 98
1 100
1 100
1 99
1 97
1 97
1 96
1 96
1 97
1 97
1 97
1 97
1 97
1 97
1 97
1 96
1 96
1 96
1 96
1 97
1 107
1 109
1 113
1 117
1 117
0 112
0 107
0 98
0 80
0 32
0 39
0 38
0 40
0 40
0 40
0 41
0 39
0 37
0 36
0 35
0 35
0 35
0 35
0 35
0 35
0 35
0 35
0 35
0 35
0 35
0 35
0 35
0 35
0 35
0 35
0 30
0 20
0 18
0 16
0 14
0 16
0 16
0 16
0 16
0 15
0 13
0 6
0 6
0 5
0 5
0 5
0 5
0 5
0 5
0 5
0 5
0 5
0 5
0 8
0 9
0 10
0 11
0 11
0 11
0 12
0 12
0 11
0 11
0 11
0 11
0 11
0 11
0 11
0 12
0 13
0 23
0 123
0 129
0 134
0 135
0 138
0 138
0 140
0 140
0 141
0 141
0 142
0 141
0 141
0 141
0 141
0 141
0 141
0 138
0 136
0 136
0 136
0 135
0 135
0 134
0 133
0 133
0 133
0 134
0 137
0 137
0 138
0 140
0 144
0 142
0 142
0 124
0 18
0 15
0 15
0 15
0 15
0 15
0 15
0 15
0 14
0 14
0 13
0 13
0 13
0 13
0 13
0 13
0 13
0 13
0 13
0 13
0 13
0 14
0 37
0 64
0 66
0 71
0 79
0 81
0 78
0 79
1 83
1 82
1 79
1 80
1 81
1 81
1 81
1 81
1 81
1 81
1 81
1 81
1 81
1 81
1 81
1 81
1 82
1 82
1 82
1 83
1 85
1 93
1 98
1 106
2 116
2 119
2 119
2 118
2 92
2 63
2 63
2 62
2 56
2 66
2 63
2 59
1 60
1 60
1 59
1 59
1 61
1 61
1 78
1 93
1 109
1 118
1 137
1 139
1 142
1 142
1 142
1 142
1 141
1 141
1 141
1 140
1 139
1 130
0 123
0 115
0 106
0 105
0 106
0 106
0 106
0 106
0 106
0 106
0 107
0 92
1 92
1 104
7 331
8 367
8 380
9 446
10 454
10 463
10 448
10 458
11 465
15 618
15 614
16 627
16 633
16 633
16 633
16 634
16 634
16 635
16 634
16 633
16 634
16 635
16 634
16 634
16 637
16 639
16 639
16 640
16 640
16 640
16 640
16 640
16 639
16 638
15 632
15 611
7 295
7 279
6 267
7 292
7 291
7 291
7 281
7 261
5 232
2 76
2 74
1 69
1 69
1 69
1 69
1 68
1 68
1 68
1 68
1 66
1 64
1 62
1 61
1 61
1 60
1 59
1 59
1 60
1 62
1 64
1 66
2 66
2 68
2 68
2 70
2 70
2 66
1 67
1 65
1 34
4 33
4 28
4 28
4 27
4 22
4 16
4 15
4 15
4 14
4 14
4 14
4 14
5 14
5 14
6 14
6 14
6 14
7 14
7 14
7 14
7 14
6 15
6 15
6 14
6 23
7 21
7 21
7 21
7 19
7 18
7 19
6 19
5 19
5 18
5 18
5 17
4 16
4 16
4 16
4 16
5 20
5 29
5 40
5 41
5 42
5 42
5 42
5 43
4 43
3 43
3 43
3 43
3 43
2 42
2 42
2 42
2 42
2 42
2 42
2 40
2 30
1 29
1 29
1 29
1 29
1 29
1 27
1 27
1 27
1 27
1 27
1 27
1 27
1 30
1 33
1 33
0 28
0 24
0 16
0 17
0 17
0 19
0 22
0 25
0 29
0 34
0 45
4 107
5 119
5 138
5 155
5 162
5 178
5 181
5 182
5 182
5 182
5 182
5 183
5 183
5 183
5 183
5 185
5 186
6 189
6 192
6 193
6 195
6 195
6 192
6 187
6 187
6 187
6 177
6 174
6 171
6 170
6 170
6 165
6 162
6 152
6 143
5 134
1 67
1 55
1 47
1 33
2 41
2 37
2 37
2 38
2 39
2 39
3 42
3 42
3 44
3 44
3 42
3 41
3 36
2 35
2 35
2 34
2 44
2 44
2 44
2 44
2 44
2 44
2 44
2 44
2 43
2 43
2 43
2 43
2 43
2 43
2 43
2 43
2 42
2 42
1 40
1 34
1 22
1 17
1 17
1 16
1 15
1 15
0 12
0 12
0 12
0 12
0 12
0 11
0 11
0 11
0 11
0 11
0 1
0 1
0 1
0 1
0 1
0 1
0 1
0 1
0 1
0 1
0 1
0 1
0 1
0 0
0 0
0 0
0 0
0 0
0 0
0 0
0 0
0 0
0 0
0 0
0 0
0 0
0 0
0 0
0 0
0 0
0 0
0 0
0 0
0 0
0 0
0 0
0 0
0 0
0 0
0 0
0 0
0 0
0 0
0 0
0 0
0 0
0 0
0 0
0 0
0 0
0 0
0 0
0 0
0 0
0 0
0 0
0 0
0 0
0 0
0 0
0 0
0 0
0 0
0 0
0 0
0 0
0 0
0 0
0 0
0 0
0 0
0 0
0 0
0 0
0 0
0 0
0 0
0 0
0 0
0 0
0 0
0 0
0 0
0 0
0 0
0 0
0 0
0 0
0 0
0 0
0 0
0 0
0 0
0 0
0 0
0 0
0 0
0 0
0 0
0 0
0 0
0 0
0 0
0 0
0 0
0 0
0 0
0 0
0 0
0 0
0 0
0 0
0 0
0 0
0 0
0 0
0 0
0 0
0 0
0 0
0 0
0 0
0 0
0 0
0 0
0 0
0 0
0 0
0 0
0 0
0 0
0 0
0 0
0 0
0 0
0 0
0 0
0 0
0 0
0 0
0 0
0 0
0 0
0 0
0 0
0 0
0 0
0 0
0 0
0 0
0 0
0 0
0 0
0 0
0 0
0 0
0 0
0 0
0 0
0 0
0 0
0 1
0 1
0 1
0 1
0 1
0 1
0 1
0 1
0 1
0 1
0 1
0 1
0 1
0 1
0 1
0 2
0 2
0 2
0 2
0 2
0 2
0 2
0 2
0 2
0 2
0 2
0 2
0 2
0 2
0 2
0 3
0 3
0 3
0 3
0 3
0 3
0 2
0 2
0 2
0 2
0 3
0 3
0 3
0 4
0 4
0 4
0 4
0 4
0 4
0 4
0 4
0 3
0 3
0 3
0 3
0 3
0 3
0 3
0 3
0 3
0 3
0 3
0 3
0 3
0 3
0 3
0 2
0 2
0 2
0 2
0 2
0 2
0 2
0 2
0 2
1 8
1 8
1 9
1 9
2 9
2 10
2 10
2 10
2 11
2 11
2 11
2 11
2 11
2 11
2 11
2 11
2 11
2 11
2 11
2 11
2 12
2 14
2 15
2 15
2 15
2 15
2 15
2 15
2 15
2 15
2 15
2 15
2 15
2 15
2 15
2 14
2 8
2 8
2 6
2 6
1 5
1 4
1 4
1 5
1 5
1 5
1 5
1 5
1 5
1 5
1 5
1 5
1 5
1 6
1 6
1 7
1 6
1 4
1 3
2 3
2 3
2 3
2 3
2 3
2 3
2 3
2 3
3 4
3 4
3 4
3 4
3 4
2 4
2 4
2 4
2 4
2 3
2 3
2 3
2 4
2 4
2 4
2 4
2 4
2 4
2 4
2 2
2 2
2 2
2 2
2 2
2 2
2 2
3 2
3 2
2 2
4 10
3 9
5 10
6 11
6 11
6 11
6 11
7 11
7 11
7 11
8 11
8 12
8 12
8 12
8 12
8 12
8 12
8 13
8 13
8 12
8 12
8 12
8 12
8 12
8 12
8 12
8 12
8 12
8 12
8 12
8 12
8 12
7 12
7 10
8 10
8 10
3 2
3 2
2 2
2 3
2 3
2 5
2 9
2 10
2 10
2 10
1 10
1 9
1 9
1 9
1 9
1 9
1 9
1 8
1 9
1 9
1 9
1 9
1 9
1 9
1 9
1 9
1 9
1 9
1 9
1 9
1 9
1 9
1 9
1 9
4 22
5 22
5 22
5 22
5 22
5 21
5 19
5 18
5 15
5 15
5 15
5 15
5 15
13 18
13 17
13 17
13 17
13 17
13 17
13 17
13 17
13 17
13 17
13 17
13 17
13 17
13 17
13 17
13 17
13 17
13 17
13 17
13 17
13 18
13 18
13 17
8 4
8 4
8 4
8 4
8 4
8 4
8 4
8 4
8 4
8 4
11 11
11 11
10 11
3 8
3 8
3 8
3 8
3 8
3 8
3 8
3 8
3 8
3 8
3 8
3 8
3 8
3 8
3 8
3 8
3 8
3 8
3 8
3 8
3 8
3 8
3 8
3 8
3 9
3 9
3 9
3 9
3 9
3 9
3 10
3 10
3 10
0 3
0 3
0 3
0 3
0 3
0 3
0 3
0 3
0 3
0 3
0 3
0 4
0 4
0 4
0 6
0 7
0 8
0 8
0 8
0 8
0 8
0 8
0 8
0 7
0 7
0 7
0 7
0 7
0 9
0 9
0 9
0 9
0 9
0 8
0 8
0 8
0 8
0 8
0 8
0 8
0 9
0 9
0 9
0 9
0 9
0 10
0 11
0 10
0 10
0 10
0 6
0 6
0 6
0 6
0 6
0 5
0 5
0 5
0 5
0 5
0 5
0 5
0 5
1 4
1 2
1 2
1 2
1 2
1 2
1 2
1 2
1 2
1 2
1 2
1 2
1 2
1 2
1 2
1 1
1 1
1 1
1 0
1 1
1 1
1 1
1 1
1 1
1 1
1 3
1 3
1 3
1 3
1 3
1 4
1 4
1 6
1 8
1 13
1 14
0 17
0 18
0 18
0 18
0 19
0 19
0 19
0 19
0 19
0 19
0 19
0 19
1 20
1 20
1 20
1 20
1 20
1 21
1 21
1 20
1 21
1 21
1 21
1 21
1 21
1 19
1 20
1 20
1 20
1 23
1 22
1 21
1 19
1 25
1 21
1 19
1 20
1 21
1 21
1 22
1 22
1 22
1 22
1 22
1 22
1 22
1 22
1 22
0 21
0 22
0 22
0 22
0 21
0 21
0 30
0 30
0 30
0 38
0 39
0 40
0 40
0 41
0 40
0 40
0 39
0 36
0 36
0 36
0 36
0 26
0 29
0 27
0 27
0 26
0 26
0 24
0 24
0 24
0 25
0 25
0 25
0 25
0 25
0 25
0 25
0 25
0 25
0 25
0 25
0 25
0 12
0 8
0 8
0 7
0 7
0 6
0 5
0 4
0 4
0 4
0 4
0 4
0 3
0 3
0 3
0 3
0 3
0 3
0 3
0 3
0 3
0 3
0 3
0 2
0 2
0 2
0 2
0 2
0 3
0 3
0 3
0 3
0 3
0 3
0 3
0 3
0 2
0 4
0 3
0 3
0 3
0 3
0 3
0 3
0 3
0 3
0 3
0 4
0 4
0 4
0 4
0 4
0 4
0 4
0 4
0 4
0 4
0 4
0 4
0 4
0 4
0 4
0 4
0 4
0 3
0 3
0 3
0 3
0 3
0 3
0 3
0 3
0 3
0 1
0 1
0 1
0 1
0 1
0 1
0 1
0 1
0 1
0 1
0 0
0 0
0 0
0 0
0 0
0 0
0 0
0 0
0 0
0 0
0 1
0 1
0 1
0 1
0 1
0 1
0 4
0 4
0 6
0 6
0 6
0 7
0 7
0 7
0 7
0 8
0 13
0 14
0 14
0 14
0 14
0 14
0 14
0 14
0 14
0 14
0 14
0 14
0 14
0 14
0 13
0 13
0 13
0 13
0 13
0 12
0 12
0 12
0 12
1 13
1 13
1 12
1 11
1 11
1 9
1 10
1 10
1 10
1 10
1 10
1 10
1 9
1 4
1 3
1 3
1 3
1 3
1 3
1 3
1 3
1 5
1 5
1 5
1 5
1 5
1 7
1 10
1 14
1 19
1 22
1 22
1 22
1 23
1 24
1 24
0 24
0 24
0 24
0 24
0 24
1 24
1 23
1 24
1 24
1 24
1 24
1 25
1 25
1 25
1 25
2 27
2 27
2 28
2 29
2 29
2 29
2 27
2 27
2 27
2 28
2 27
3 24
3 17
3 13
3 11
3 8
3 8
3 8
3 7
3 7
3 7
3 7
3 7
3 9
3 11
2 12
2 12
2 11
1 10
1 10
1 10
1 10
1 10
1 10
1 10
1 10
1 9
1 9
1 8
1 7
1 7
1 7
1 7
1 7
1 7
1 6
0 6
0 6
0 6
0 6
0 6
0 6
0 6
0 7
0 7
0 7
0 7
0 7
0 7
0 5
0 2
0 2
0 2
0 2
0 2
0 2
0 2
0 2
0 1
0 1
0 1
0 1
0 1
0 0
0 0
0 0
0 0
0 0
0 0
0 0
0 0
0 0
0 0
0 0
0 1
0 1
0 1
0 2
0 2
0 2
0 2
0 2
0 2
0 2
0 2
0 2
0 2
1 2
1 4
1 4
1 5
1 7
1 8
1 8
1 8
1 8
1 8
1 8
1 8
1 8
1 8
1 8
1 8
1 8
1 8
1 12
1 12
1 12
1 12
1 13
1 14
1 14
1 14
1 13
1 13
1 13
1 13
1 13
1 13
1 13
1 13
1 14
1 16
0 16
0 14
0 14
0 13
0 11
0 11
0 11
0 11
0 11
0 11
1 11
1 13
1 15
1 15
1 15
1 16
1 16
1 15
1 12
1 12
1 14
1 14
1 13
1 11
1 11
1 11
1 11
1 11
1 11
1 11
1 11
1 11
1 11
1 12
1 13
1 13
1 13
1 13
1 13
1 13
1 12
0 12
0 12
0 15
0 17
0 17
0 17
1 15
1 13
1 15
1 15
1 16
1 16
1 16
1 16
1 16
1 14
1 14
1 14
1 14
1 14
1 14
1 14
1 14
1 14
1 14
1 14
1 14
1 14
1 14
1 10
1 9
1 9
1 9
1 8
1 8
1 8
1 8
1 7
1 5
1 4
0 4
0 4
0 3
0 2
0 2
0 2
0 0
0 0
0 1
0 1
0 1
0 1
0 1
0 1
0 1
0 1
0 1
0 1
0 1
0 1
0 1
0 1
0 1
0 1
0 1
0 1
0 1
0 1
0 1
0 1
0 1
0 1
0 1
0 1
0 1
0 1
0 1
0 1
0 1
0 1
0 1
0 1
0 1
0 1
0 1
0 1
0 1
0 1
1 1
1 1
2 1
2 1
2 1
2 1
2 1
2 1
2 2
2 2
2 2
2 4
2 4
2 4
2 4
2 4
2 4
2 4
2 4
5 5
5 5
5 5
5 5
5 5
5 4
5 4
5 5
5 5
5 5
5 5
5 5
5 5
5 5
5 5
5 5
5 5
4 5
4 5
3 5
3 5
3 5
3 5
3 5
3 4
3 4
3 5
3 5
3 4
3 4
3 4
3 4
3 4
5 5
5 5
4 5
2 4
2 3
2 3
2 3
2 3
2 3
2 3
4 4
6 4
6 4
6 4
6 4
6 4
6 4
6 4
6 4
6 4
6 4
6 5
6 5
6 5
6 6
6 6
6 6
6 8
6 8
6 9
6 9
6 11
6 12
6 12
6 12
6 12
4 11
4 11
4 11
4 11
4 11
4 11
4 11
4 11
4 11
3 11
1 10
0 10
0 10
0 10
0 10
0 10
0 10
0 10
0 10
0 10
0 10
0 9
0 9
0 9
0 8
0 8
0 6
0 3
0 1
0 1
0 1
0 0
0 0
0 0
0 0
0 0
0 0
0 0
0 0
0 0
0 0
0 0
0 0
0 0
0 0
0 0
0 0
0 0
0 0
0 1
0 1
0 1
0 2
0 2
0 2
0 2
0 3
0 8
0 9
0 10
0 10
0 10
0 10
0 10
0 10
0 10
0 10
0 10
0 11
0 13
0 13
1 13
1 13
1 14
1 19
1 20
1 19
1 19
1 19
1 19
1 19
1 19
1 19
1 19
1 19
1 18
1 18
1 18
1 22
1 22
1 23
1 23
1 20
1 16
1 16
1 16
1 16
1 17
1 17
1 17
1 17
1 17
1 17
1 17
1 16
1 14
1 12
0 11
0 15
0 13
0 12
0 12
0 13
0 13
0 13
0 13
0 13
0 13
0 13
0 13
0 13
0 13
0 13
0 13
0 9
0 7
0 6
0 6
0 6
0 6
0 6
0 6
0 6
0 6
0 6
0 6
0 6
0 6
0 6
0 6
0 6
0 6
0 7
0 8
0 3
0 2
0 2
0 2
0 2
0 2
0 2
0 2
0 2
0 2
0 2
0 2
0 2
0 9
0 9
0 9
0 9
0 9
0 9
0 9
0 10
0 11
0 11
0 11
0 11
0 16
0 17
0 17
0 18
0 20
0 21
0 23
0 23
0 24
0 22
0 23
0 23
0 23
0 23
0 23
0 23
0 23
0 23
0 23
0 23
0 23
0 23
0 23
0 23
0 15
0 15
0 15
0 15
0 15
0 16
0 16
0 16
0 15
0 15
0 15
0 15
0 6
0 3
0 3
0 3
0 3
0 3
0 3
0 2
0 1
0 1
0 1
0 1
0 1
0 1
0 1
0 1
0 1
0 1
0 2
0 2
0 2
0 2
0 2
0 2
0 2
0 2
0 2
0 2
0 1
0 1
0 1
0 1
0 1
0 1
0 1
0 1
0 1
0 1
0 1
0 1
0 1
0 1
0 1
0 1
0 1
0 1
0 1
0 1
0 1
0 1
0 1
0 0
0 0
0 0
0 0
0 0
0 0
0 0
0 1
0 1
0 1
0 1
0 3
0 4
0 4
0 4
0 4
0 4
0 4
0 4
0 4
0 4
0 4
0 4
0 4
0 4
0 4
0 4
0 4
0 4
0 4
0 4
0 4
0 5
0 5
0 5
0 6
1 6
1 6
1 6
1 6
1 7
1 7
1 7
1 6
1 6
1 6
1 4
1 3
1 3
1 3
1 3
1 3
1 3
1 3
1 3
1 3
1 3
1 3
1 3
1 3
1 5
1 6
1 6
1 7
1 6
1 6
1 6
1 7
1 6
1 6
1 6
1 6
0 6
0 6
0 6
0 6
0 5
0 5
0 5
0 5
0 5
0 5
0 5
0 5
0 5
0 5
0 5
0 5
0 6
0 7
0 13
0 20
0 21
0 21
0 21
0 20
0 19
0 18
0 18
0 17
1 17
1 16
1 16
1 17
1 17
1 17
1 17
1 20
1 20
1 20
1 20
1 20
1 20
1 20
1 22
1 23
1 23
1 23
1 23
1 23
1 23
1 23
1 23
1 23
1 18
1 16
1 10
1 8
1 7
1 7
1 7
1 7
1 7
1 7
0 7
0 7
0 7
0 7
0 7
0 6
0 6
0 6
0 6
0 2
0 2
0 2
0 2
0 3
0 8
0 11
0 14
0 14
0 15
0 15
0 15
0 15
0 15
0 15
0 15
0 15
0 15
0 15
0 15
0 15
0 15
0 15
0 15
0 15
0 15
0 15
0 15
0 15
0 15
0 15
0 15
0 15
0 15
0 15
0 15
0 15
0 16
0 16
0 16
0 15
0 9
0 6
0 2
0 2
0 2
0 2
0 2
0 2
0 2
0 2
0 2
0 2
0 2
0 2
0 2
0 2
0 2
0 2
0 2
0 2
0 2
0 2
0 2
0 2
0 2
0 2
0 2
0 2
0 2
0 3
0 3
0 3
0 2
0 2
0 2
0 2
0 1
0 1
0 1
0 1
0 1
0 1
0 1
0 1
0 1
0 1
0 1
0 1
0 1
0 1
0 1
0 1
0 1
0 1
0 1
0 1
0 1
0 2
0 3
0 3
0 3
0 3
0 3
0 3
0 3
0 2
0 3
0 4
0 5
0 5
0 7
0 16
0 17
0 17
0 17
0 17
0 17
0 19
0 19
0 19
0 19
0 19
0 19
0 19
0 19
0 19
0 19
0 19
0 19
0 19
0 19
0 18
0 18
0 18
0 17
0 17
0 17
0 17
0 18
0 18
0 18
0 18
0 21
0 20
0 19
0 19
0 18
0 9
0 8
0 9
0 9
0 9
0 10
0 10
0 11
0 11
0 13
0 14
0 14
0 14
0 14
0 14
0 14
0 14
0 14
0 14
0 14
0 15
0 15
0 15
0 15
0 15
0 15
0 15
0 14
0 14
0 14
0 16
0 12
0 12
0 12
0 12
0 10
0 10
0 8
0 8
0 8
0 8
0 5
0 3
0 3
0 3
0 4
0 4
0 4
0 4
0 4
0 4
0 4
0 4
0 4
0 4
0 4
0 3
0 3
0 3
0 3
0 3
0 3
0 3
0 3
0 3
0 3
0 1
0 1
0 1
0 1
0 1
0 1
0 1
0 1
0 1
0 1
0 1
0 0
0 0
0 0
0 0
0 0
0 0
0 0
0 0
0 0
0 0
0 0
0 0
0 0
0 0
0 1
0 3
0 4
0 6
0 8
0 8
0 8
0 8
0 8
0 8
0 8
0 8
0 8
0 8
0 8
0 8
0 8
0 8
0 8
0 8
0 8
0 9
0 9
0 9
0 9
0 9
0 9
0 9
0 9
0 10
0 10
0 10
0 10
0 10
0 11
0 10
0 9
0 6
0 6
0 3
0 3
0 3
0 3
0 3
0 3
0 3
0 3
0 3
0 3
0 3
0 3
0 4
0 4
0 4
0 4
0 4
0 4
0 3
0 3
0 3
0 3
0 3
0 3
0 3
0 2
0 2
0 2
0 2
0 2
0 1
0 1
0 1
0 1
0 1
0 1
0 1
0 1
0 1
0 1
0 1
0 1
0 1
0 1
0 1
0 1
0 1
0 0
0 0
0 0
0 0
0 0
0 0
0 0
0 1
0 1
0 2
0 2
0 2
0 2
0 2
0 2
0 2
0 2
0 2
0 2
0 2
0 2
0 2
0 2
0 2
0 2
0 2
0 2
0 2
0 2
0 2
0 2
0 2
0 3
0 3
0 4
0 5
0 5
0 5
0 6
0 7
0 6
0 6
0 6
0 6
0 6
0 5
0 5
0 5
0 5
0 5
0 6
0 6
0 6
0 6
0 6
0 6
0 6
0 6
0 6
0 6
0 6
0 6
0 6
0 6
0 6
0 6
0 5
0 5
0 5
0 5
0 4
0 3
0 3
0 3
0 2
0 1
0 1
0 1
0 1
0 1
0 1
0 1
0 1
0 1
0 1
0 1
0 1
0 1
0 1
0 1
0 1
0 4
0 4
0 4
0 4
0 4
0 4
0 4
0 4
0 4
0 4
0 4
0 4
0 4
0 3
0 4
0 4
0 4
0 4
0 4
0 4
0 4
0 4
0 4
0 4
0 4
0 4
0 4
0 4
0 4
0 4
0 4
0 4
0 4
0 6
0 7
0 7
0 4
0 4
0 4
0 4
0 4
0 4
0 4
0 4
0 4
0 4
0 4
1 4
1 4
1 4
1 3
1 3
1 3
1 5
1 12
1 18
1 20
1 22
1 25
1 25
1 25
1 25
1 26
0 26
0 26
0 26
0 26
0 26
0 28
0 25
0 26
0 26
0 26
0 26
0 30
0 31
0 55
0 55
0 55
0 55
0 55
0 55
0 55
0 55
0 55
0 55
0 55
0 55
0 53
0 47
0 38
0 34
0 33
0 33
0 33
0 33
0 33
0 32
0 32
0 32
0 33
0 33
0 33
0 32
0 30
0 31
0 31
0 31
0 31
0 31
0 26
0 25
0 2
0 2
0 2
0 2
0 2
0 2
0 2
0 2
0 2
0 2
0 2
0 2
0 2
0 2
0 2
0 2
0 2
0 2
0 2
0 2
0 2
0 2
0 2
0 2
0 1
0 1
0 1
0 1
0 3
0 3
0 3
0 3
0 3
0 3
0 3
0 3
0 3
0 3
0 3
0 3
0 3
0 3
0 3
0 3
0 3
0 3
0 3
0 3
0 3
0 3
0 3
0 3
0 3
0 3
0 3
0 3
0 3
0 3
0 3
0 3
0 3
0 3
0 3
0 3
0 0
0 0
0 0
0 0
0 1
0 1
0 1
0 1
0 1
0 1
0 1
0 2
0 2
0 2
0 2
0 2
0 2
0 2
0 2
0 2
0 2
0 2
0 2
0 2
0 2
0 3
0 3
0 3
0 3
0 3
0 3
0 3
0 3
0 3
0 3
0 3
0 2
0 2
0 2
0 2
0 2
0 2
0 2
0 2
0 2
0 2
0 2
0 1
0 1
0 1
0 1
0 1
0 1
0 1
0 1
0 1
0 1
0 1
0 1
0 1
0 1
0 0
0 0
0 0
0 0
0 0
0 2
0 2
0 2
0 2
0 2
0 2
0 2
0 2
0 2
0 2
0 2
0 2
0 2
0 2
0 2
0 2
0 2
0 2
0 2
0 2
0 2
0 2
0 2
0 2
0 2
0 2
0 2
0 2
0 2
0 2
0 2
0 2
0 2
0 2
0 2
0 2
0 0
0 0
0 0
0 0
0 0
0 0
0 0
0 0
0 0
0 0
0 0
0 0
0 0
0 0
0 0
0 0
0 0
0 0
0 0
0 0
0 0
0 0
0 0
0 0
0 0
0 0
0 0
0 0
0 0
0 0
0 0
0 0
0 0
0 0
0 1
0 1
0 1
0 1
0 1
0 1
0 1
0 1
0 1
0 1
0 1
0 1
0 1
0 1
0 1
0 1
1 1
1 1
1 1
1 1
1 1
1 1
1 1
1 1
1 1
1 1
1 4
1 4
1 8
1 8
1 9
1 11
1 13
1 14
1 14
1 14
1 13
1 13
1 13
1 13
1 13
1 13
1 13
1 13
1 13
1 13
1 13
0 13
0 13
0 13
0 13
0 13
0 13
0 13
0 13
0 13
0 13
0 13
0 13
0 13
0 15
0 15
0 12
0 12
0 5
0 3
0 2
0 2
0 2
0 2
0 2
0 2
0 2
0 2
0 2
0 2
0 2
0 2
0 2
0 2
0 2
0 2
0 2
0 2
0 2
0 2
0 2
0 2
0 2
0 2
0 2
0 2
0 2
0 2
0 2
0 2
0 0
0 0
0 0
0 0
0 0
0 0
0 0
0 0
0 0
0 0
0 0
0 0
0 0
0 0
0 0
0 0
0 0
0 0
0 0
0 0
0 0
0 0
0 0
0 0
0 0
0 0
0 0
0 0
0 0
0 0
0 0
0 0
0 2
0 3
0 3
0 3
0 3
0 3
0 4
0 4
0 4
0 4
0 4
0 4
0 4
0 4
0 4
0 4
0 4
0 4
0 4
0 4
0 4
0 4
0 4
0 4
0 4
0 4
0 4
0 6
0 14
0 14
0 14
1 15
1 15
1 15
1 17
1 18
1 17
1 16
1 16
2 16
2 16
2 16
2 14
2 14
2 13
2 13
2 13
2 13
2 13
2 13
2 13
2 13
2 13
2 15
2 17
2 17
2 17
2 18
2 18
2 18
2 18
2 18
2 17
2 16
1 8
1 7
1 7
1 6
1 5
0 5
0 5
0 5
0 5
0 5
0 5
0 5
0 5
0 5
0 6
0 6
0 6
0 6
0 6
0 7
0 8
0 8
0 8
0 8
0 8
0 6
0 3
0 3
0 3
0 3
0 3
0 3
0 3
0 3
0 3
0 5
0 11
0 12
0 12
0 15
0 17
0 17
0 17
0 17
0 17
0 17
0 17
0 17
0 17
0 17
0 16
0 16
0 16
0 16
0 16
0 15
0 14
1 15
1 15
1 15
1 15
1 15
1 15
1 15
1 15
1 15
1 15
1 15
1 15
1 15
1 15
1 12
1 5
1 3
1 3
1 2
1 1
1 1
1 2
1 2
1 2
1 2
1 2
1 2
1 2
1 2
1 2
1 2
1 2
2 3
2 3
2 3
2 3
1 2
1 2
1 2
1 2
2 2
2 2
2 2
2 2
2 2
2 2
2 2
2 2
2 2
2 2
2 2
2 2
2 2
2 2
2 2
2 2
2 2
2 1
2 1
2 1
2 1
2 1
2 1
2 1
2 2
2 2
2 2
2 2
1 1
1 1
1 1
1 1
1 1
1 1
1 1
1 1
0 1
0 1
0 1
0 1
0 1
0 1
0 1
0 1
0 1
0 1
0 1
0 1
0 1
0 1
0 1
0 1
0 1
0 1
0 1
0 1
0 1
0 2
0 2
0 2
0 2
0 2
0 2
0 2
0 2
0 2
0 2
0 2
0 2
0 2
0 2
0 2
0 2
0 2
0 2
0 2
0 2
0 2
0 3
0 3
0 3
0 3
0 3
0 3
0 3
0 3
0 3
0 3
0 3
0 3
0 4
0 5
0 5
0 4
0 4
0 4
0 4
0 4
0 4
0 4
0 4
0 4
0 4
0 4
0 4
0 4
0 4
0 4
0 4
0 4
0 4
0 4
0 4
0 4
0 3
0 3
0 3
0 3
0 3
0 3
0 3
0 3
0 3
0 3
0 3
0 3
0 1
0 0
0 0
0 0
0 0
0 0
0 0
0 0
0 0
0 0
0 0
0 0
0 0
0 0
0 0
0 0
0 0
0 0
0 0
0 0
0 0
0 0
0 0
0 0
0 0
0 0
0 0
0 0
0 0
0 0
0 0
0 0
0 0
0 0
0 0
0 0
0 1
0 1
0 1
0 3
0 3
0 3
0 3
0 3
0 3
0 3
0 3
0 3
0 3
0 3
0 3
0 3
0 3
0 4
0 4
0 4
0 5
0 5
0 5
0 5
0 5
0 5
0 5
0 6
0 6
0 6
0 5
0 5
0 5
0 5
0 5
0 5
0 5
0 5
0 5
0 3
0 3
0 3
0 3
0 3
0 3
0 3
0 3
1 3
1 3
1 3
1 3
1 4
1 4
1 3
1 3
1 3
1 3
1 3
1 4
1 4
1 4
1 4
1 4
1 3
1 3
1 3
1 3
1 3
1 3
1 4
1 4
1 4
1 4
1 4
1 4
1 4
1 4
1 4
1 4
1 4
2 4
2 4
1 4
1 7
1 7
1 7
1 7
1 6
1 6
1 6
1 6
1 5
1 5
1 5
1 4
1 5
1 5
1 5
1 5
1 5
1 5
1 5
1 5
1 5
1 5
1 4
1 4
1 4
1 4
1 4
1 4
1 4
1 4
1 4
1 4
1 4
0 4
0 4
0 2
0 1
0 1
0 1
0 1
0 1
0 1
0 1
0 1
0 1
0 1
0 1
0 1
0 0
0 0
0 0
0 0
0 0
0 0
0 0
0 0
0 0
0 0
0 0
0 0
0 0
0 0
0 0
0 0
0 0
0 0
0 0
0 0
0 0
0 0
0 0
0 0
0 0
0 0
0 0
0 0
0 0
0 0
0 0
0 0
0 0
0 0
0 0
0 0
0 0
0 1
0 4
0 5
0 5
0 8
0 8
0 8
0 8
0 8
0 8
0 8
0 8
0 9
0 9
0 9
0 9
0 9
0 9
0 9
0 9
0 9
0 10
0 10
0 10
0 10
0 10
0 10
0 10
0 10
0 10
0 10
0 10
0 10
0 10
0 10
0 9
0 9
0 6
0 5
0 5
0 2
0 2
0 1
0 1
0 2
0 2
0 2
0 2
0 1
0 1
0 1
0 1
0 1
0 1
0 1
0 1
0 1
0 1
0 1
0 1
0 1
0 1
0 1
0 1
0 1
0 1
0 1
0 1
0 1
0 1
0 1
0 1
0 1
0 1
0 1
0 1
0 1
0 1
0 1
0 1
0 0
0 0
0 0
0 0
0 0
0 0
0 0
0 0
0 0
0 0
0 0
0 0
0 0
0 0
0 0
0 0
0 0
0 0
0 0
0 0
0 0
0 0
0 0
0 0
0 0
0 0
0 0
0 0
0 0
0 0
0 0
0 0
0 0
0 0
0 0
0 0
0 0
0 0
0 0
0 0
0 0
0 0
0 0
0 0
0 0
0 0
0 0
0 0
0 0
0 0
0 0
0 0
0 0
0 0
0 0
0 0
0 0
0 0
0 0
0 0
0 0
0 1
0 1
0 1
0 1
0 1
0 1
0 1
0 1
0 1
0 1
0 1
0 1
0 1
0 1
0 1
0 1
0 1
0 1
0 1
0 1
0 1
0 1
0 1
0 1
0 1
0 1
0 1
0 1
0 1
0 1
0 1
0 1
0 1
0 1
0 1
0 1
0 0
0 0
0 0
0 0
0 0
0 0
0 0
0 0
0 0
0 0
0 0
0 0
0 0
0 0
0 0
0 0
0 0
0 0
0 0
0 0
0 0
0 0
0 0
0 0
0 1
0 1
0 1
0 1
0 3
0 3
0 3
0 3
0 4
0 4
0 4
0 4
0 4
0 4
0 4
0 4
0 4
0 4
0 4
0 4
0 4
0 4
0 4
0 4
0 4
0 4
0 4
0 4
0 4
0 4
0 4
0 4
0 4
0 4
0 4
0 4
0 3
0 3
0 3
0 3
0 1
0 1
0 1
0 1
1 0
1 0
2 4
3 7
3 8
3 8
3 8
3 8
3 8
3 9
3 9
3 9
3 9
3 12
3 12
3 12
3 12
3 12
3 12
3 12
3 12
3 12
3 12
3 12
3 12
3 12
3 12
3 12
3 12
3 12
3 12
3 12
3 12
3 12
3 12
3 12
2 12
2 12
1 7
0 4
0 4
0 4
0 4
0 4
0 4
0 5
0 5
0 5
0 5
0 2
0 2
0 2
0 2
0 2
0 2
0 2
0 2
0 2
0 2
1 2
1 2
1 2
1 2
1 2
1 2
1 2
1 2
1 2
1 2
1 2
1 2
1 2
1 2
1 2
1 2
1 2
1 2
1 1
1 1
1 1
1 1
1 0
1 0
1 0
1 0
1 0
1 0
1 0
1 0
1 0
1 0
1 0
1 0
1 0
1 0
0 0
0 0
0 0
0 0
0 0
0 0
0 0
0 0
0 0
0 0
0 0
0 0
0 0
0 0
0 0
0 0
0 0
0 0
0 0
0 0
0 0
0 0
0 0
0 0
0 0
0 0
0 0
0 0
0 0
0 0
0 0
0 0
0 0
0 0
0 0
0 0
0 0
0 0
0 0
0 0
0 0
0 0
0 1
0 3
0 3
0 3
0 3
0 3
0 3
0 3
0 3
0 3
0 3
0 3
0 3
0 3
0 3
0 3
0 3
0 3
0 3
0 3
0 3
0 3
0 3
0 3
0 3
0 4
0 4
0 4
0 4
0 4
0 4
0 4
0 4
0 4
0 2
0 2
0 2
0 1
0 1
0 1
0 1
0 1
0 1
0 2
0 2
0 3
0 3
0 4
0 4
0 4
0 4
0 4
0 5
0 5
0 5
0 5
0 5
0 5
0 6
0 6
0 6
0 5
0 5
0 5
0 5
0 5
0 5
0 5
0 5
0 5
0 5
0 5
0 5
0 5
0 5
0 5
0 5
0 5
0 5
0 3
0 3
0 2
0 2
0 2
0 3
0 2
0 2
0 2
0 1
0 1
0 1
0 1
0 1
0 1
0 1
0 1
0 1
0 1
0 1
0 1
0 1
0 1
0 1
0 1
0 1
0 1
0 1
0 1
0 1
0 1
0 1
0 1
0 1
0 1
0 1
0 1
0 1
0 1
0 1
0 0
0 0
0 0
0 0
0 1
0 1
0 1
0 1
0 1
0 1
0 1
0 1
0 1
0 1
0 1
0 1
0 1
0 2
0 2
0 2
0 2
0 3
0 3
0 3
0 3
0 3
0 3
0 3
0 3
0 3
0 3
0 3
0 3
0 4
0 4
0 5
0 5
0 5
0 4
0 4
0 4
0 4
0 4
0 4
0 4
0 4
0 4
0 4
0 4
0 4
0 4
0 4
0 4
0 3
0 2
0 2
0 2
0 2
0 2
0 2
0 2
0 2
0 2
0 2
0 2
0 1
0 1
0 1
0 1
0 0
0 0
0 0
0 0
0 0
0 0
0 0
0 0
0 0
0 0
0 0
0 0
0 0
0 0
0 0
0 0
0 0
0 0
0 0
0 0
0 0
0 0
0 0
0 0
0 0
0 0
0 0
0 0
0 0
0 0
0 0
0 0
0 0
0 0
0 0
0 0
0 0
0 0
0 0
0 0
0 0
0 0
0 0
0 0
0 0
0 0
0 0
0 0
0 0
0 0
0 0
0 0
0 0
0 0
0 0
0 1
0 2
0 2
0 2
0 2
0 2
0 2
0 2
0 2
0 2
0 2
0 2
0 2
0 2
0 2
0 2
0 2
0 2
0 2
0 2
0 2
0 2
0 2
0 2
0 2
0 2
0 2
0 2
0 2
0 2
0 2
0 2
0 2
0 2
0 4
0 4
0 3
0 2
0 2
0 2
0 2
0 2
0 2
0 2
0 2
0 2
0 2
0 2
0 2
0 2
0 2
0 2
0 2
0 2
0 2
0 2
0 2
0 2
0 2
0 2
0 2
0 2
0 2
0 2
0 2
0 2
0 2
0 2
0 1
0 1
0 1
0 1
0 1
0 1
0 1
0 1
0 1
0 1
0 1
0 1
0 1
0 2
0 2
0 2
0 2
0 2
0 2
0 2
0 2
0 2
0 3
0 3
0 3
0 3
0 3
0 3
0 2
0 2
0 2
0 2
0 2
0 2
0 2
0 2
0 2
0 2
0 1
0 1
0 1
0 1
0 1
0 1
0 1
0 1
0 1
0 1
0 1
0 1
0 1
0 1
0 1
0 1
0 1
0 1
0 1
0 1
0 0
0 0
0 0
0 0
0 0
0 0
0 0
0 0
0 0
0 0
0 0
0 0
0 0
0 0
0 0
0 0
0 0
0 0
0 0
0 0
0 0
0 0
0 0
0 0
0 0
0 0
0 0
0 0
0 0
0 0
0 1
0 1
0 1
0 1
0 1
0 1
0 1
0 1
0 1
0 1
0 1
0 1
0 1
0 1
0 2
0 2
0 2
0 2
0 2
0 2
0 2
0 2
0 2
0 2
0 2
0 2
0 2
0 2
0 2
0 2
0 2
0 1
0 1
0 1
0 1
0 1
0 1
0 1
0 1
0 1
0 1
0 1
0 1
0 1
0 1
0 1
0 1
0 1
0 1
0 1
0 0
0 0
0 0
0 0
0 2
0 3
0 3
0 3
0 3
0 6
0 6
0 6
0 6
0 6
0 6
0 6
0 6
0 6
0 6
0 6
0 6
0 6
0 6
0 6
0 6
0 6
0 6
0 6
0 6
0 6
0 6
0 6
0 6
0 6
0 6
0 6
0 6
0 6
0 6
0 6
0 3
0 2
0 2
0 2
0 2
0 0
0 0
0 0
0 0
0 0
0 0
0 0
0 0
0 0
0 0
0 0
0 0
0 0
0 0
0 0
0 0
0 0
0 0
0 0
0 0
0 0
0 0
0 0
0 0
0 0
0 0
0 0
0 0
0 0
0 1
0 2
0 2
0 2
0 2
0 3
0 3
0 3
0 3
0 3
0 3
0 3
0 3
0 3
0 3
0 3
0 3
0 3
0 3
0 3
0 4
0 4
0 4
0 4
0 4
0 4
0 4
0 4
0 4
0 4
0 4
0 4
0 4
0 4
0 4
0 4
0 2
0 2
0 2
0 2
0 2
0 1
0 1
0 1
0 1
0 1
0 1
0 1
0 1
0 1
0 1
0 1
0 2
0 2
0 2
0 2
0 1
0 1
0 1
0 1
0 1
0 1
0 1
0 1
0 1
0 1
0 1
0 1
0 1
0 1
0 1
0 1
0 1
0 1
0 1
0 1
0 1
0 1
0 1
0 1
0 1
0 1
0 1
0 1
0 1
0 1
0 1
0 1
0 1
0 1
0 1
0 1
0 2
0 5
0 6
0 6
0 6
0 6
0 6
0 6
0 6
0 6
0 6
0 6
0 6
0 7
0 7
0 7
0 7
0 7
0 7
0 7
0 7
0 7
0 7
0 7
0 7
0 7
0 7
0 7
0 7
0 7
0 7
0 7
0 6
0 6
0 6
0 6
0 4
0 1
0 1
0 1
0 1
0 1
0 2
0 2
0 3
0 3
0 3
0 3
0 3
0 2
0 2
0 2
0 2
0 2
0 2
0 2
0 2
0 2
0 2
0 2
0 2
0 2
0 2
0 2
0 2
0 2
0 2
0 2
0 2
0 2
0 2
0 2
0 2
0 3
0 3
0 3
0 3
0 3
0 2
0 2
0 1
0 1
0 1
0 1
0 1
0 1
0 1
0 1
0 1
0 1
0 1
0 1
0 1
0 1
0 1
0 1
0 1
0 1
0 1
0 1
0 1
0 1
0 1
0 1
0 1
0 1
0 1
0 1
0 1
0 0
0 0
0 0
0 0
0 0
0 0
0 0
0 0
0 0
0 0
0 0
0 1
0 3
0 6
0 6
0 6
0 6
0 6
0 6
0 6
0 6
0 6
0 6
0 6
0 6
0 6
0 6
0 6
0 6
0 6
0 6
0 6
0 6
0 6
0 6
0 6
0 6
0 6
0 6
0 6
0 6
0 7
0 7
0 10
0 11
0 11
0 11
0 10
0 8
0 5
0 5
0 5
0 5
0 7
0 7
0 7
0 7
0 7
0 7
0 7
0 7
0 7
0 7
0 7
0 7
0 7
0 7
0 7
0 8
0 8
0 8
0 8
0 8
0 8
0 8
0 8
0 8
0 7
0 7
0 3
0 3
0 4
0 4
0 4
0 4
0 4
0 4
0 4
0 4
0 2
0 2
0 2
0 2
0 2
0 2
0 2
0 2
0 2
0 2
0 2
0 2
0 2
0 2
0 2
0 1
0 1
0 1
0 1
0 1
0 1
0 1
0 1
0 1
0 1
0 1
0 1
0 1
0 0
0 0
0 0
0 0
0 0
0 0
0 0
0 0
0 0
0 0
0 0
0 0
0 0
0 0
0 0
0 0
0 0
0 0
0 0
0 0
0 0
0 0
0 0
0 0
0 0
0 0
0 0
0 0
0 0
0 0
0 0
0 0
0 0
0 0
0 0
0 0
0 0
0 0
0 0
0 0
0 0
0 0
0 0
0 0
0 0
0 0
0 0
0 0
0 0
0 0
0 0
0 0
0 0
0 1
0 1
0 1
0 1
0 1
0 1
0 1
0 1
0 1
0 1
0 1
0 1
0 1
0 2
0 2
0 2
0 2
0 2
0 2
0 2
0 2
0 2
0 2
0 2
0 2
0 2
0 2
0 2
0 2
0 2
0 2
0 2
0 2
0 2
0 2
0 2
0 1
0 1
0 1
0 1
0 1
0 1
0 1
0 2
0 2
0 2
0 2
0 2
0 1
0 1
0 1
0 1
0 1
0 1
0 1
0 1
0 1
0 1
0 2
0 2
0 2
0 2
0 2
0 2
0 2
0 2
0 2
0 2
0 2
0 2
0 2
0 2
0 2
0 2
0 2
0 2
0 2
0 2
0 2
0 1
0 1
0 1
0 2
0 2
0 2
0 2
0 2
0 2
0 2
0 2
0 2
0 2
0 2
0 1
0 1
0 1
0 1
0 1
0 1
0 1
0 1
0 1
0 1
0 1
0 1
0 1
0 1
0 1
0 1
0 1
0 1
0 1
0 2
0 2
0 2
0 2
0 2
0 2
0 1
0 2
0 2
0 3
0 3
0 3
0 3
0 3
0 3
0 3
0 3
0 3
0 4
0 4
0 4
0 4
0 4
0 4
0 4
0 4
0 4
0 4
0 4
0 4
0 4
0 4
0 4
0 4
0 4
0 4
0 3
0 3
0 3
0 3
0 3
0 3
0 2
0 1
0 1
0 1
0 1
0 1
0 1
0 1
0 1
0 1
0 2
0 2
0 1
0 1
0 1
0 1
0 1
0 1
0 1
0 1
0 1
0 1
0 1
0 1
0 1
0 1
0 1
0 1
0 1
0 1
0 1
0 1
0 1
0 1
0 1
0 1
0 1
0 1
0 1
0 1
0 1
0 1
0 1
0 1
0 1
0 1
0 1
0 1
0 1
0 1
0 2
0 2
0 2
0 2
0 2
0 2
0 2
0 2
0 3
0 3
0 3
0 3
0 3
0 3
0 3
0 3
0 3
0 3
0 3
0 3
0 3
0 3
0 3
0 3
0 3
0 3
0 3
0 3
0 3
0 3
0 3
0 3
0 2
0 2
0 2
0 1
0 0
0 0
0 0
0 0
0 0
0 0
0 0
0 0
0 0
0 0
0 0
0 0
0 0
0 0
0 1
0 1
0 1
0 1
0 1
0 1
0 1
0 1
0 1
0 1
0 1
0 1
0 1
0 1
0 1
0 0
0 0
0 0
0 0
0 0
0 0
0 0
0 0
0 0
0 0
0 0
0 0
0 0
0 0
0 0
0 0
0 0
0 0
0 0
0 0
0 0
0 0
0 0
0 0
0 0
0 0
0 0
0 0
0 0
0 0
0 0
0 0
0 0
0 0
0 0
0 0
0 0
0 0
0 0
0 0
0 0
0 0
0 0
0 0
0 0
0 0
0 0
0 0
0 0
0 0
0 0
0 0
0 0
0 0
0 0
0 0
0 0
0 0
0 0
0 0
0 0
0 0
0 0
0 0
0 0
0 0
0 0
0 0
0 0
0 0
0 0
0 0
0 0
0 0
0 0
0 0
0 0
0 0
0 0
0 0
0 0
0 0
0 0
0 0
0 0
0 0
0 0
0 0
0 0
0 0
0 1
0 1
0 1
0 1
0 1
0 2
0 2
0 2
0 2
0 3
0 3
0 3
0 3
0 3
0 4
0 4
0 4
0 4
0 4
0 4
0 4
0 4
0 4
0 4
0 4
0 4
0 4
0 4
0 4
0 4
0 5
0 6
0 6
1 10
1 10
1 10
1 10
1 10
1 11
1 14
1 14
1 13
1 13
1 13
1 13
1 12
1 12
1 12
1 12
1 12
1 11
1 11
1 11
1 11
1 11
1 11
1 11
1 9
1 9
1 9
1 9
1 9
1 9
1 9
1 9
1 8
1 8
1 8
1 8
0 1
0 0
0 0
0 0
0 0
0 0
0 0
0 2
0 2
0 2
0 2
0 2
0 2
0 2
0 2
0 2
0 2
0 2
0 2
0 2
0 2
0 2
0 2
0 2
0 2
0 2
0 3
0 3
0 3
0 3
0 3
0 3
0 3
0 3
0 3
0 3
0 3
0 3
0 3
0 3
0 3
0 3
0 3
0 1
0 1
0 1
0 1
0 1
0 1
0 1
0 1
0 1
0 1
0 1
0 1
0 0
0 0
0 0
0 0
0 0
0 0
0 0
0 0
0 0
0 0
0 0
1 1
1 1
1 1
1 1
1 1
1 1
1 1
1 1
1 1
1 1
1 1
1 1
1 1
1 1
1 1
1 1
1 1
1 1
1 1
1 1
1 1
1 1
1 1
1 1
1 1
1 1
1 1
1 1
1 1
1 1
1 1
1 1
1 1
1 1
1 1
1 1
0 0
0 0
0 0
0 0
0 0
0 1
0 1
0 1
0 2
0 2
0 2
0 4
0 4
0 4
0 4
0 5
0 5
0 5
0 5
0 5
0 5
0 5
0 5
0 5
0 5
0 5
0 5
0 5
0 5
0 5
0 5
0 5
0 5
0 5
0 5
0 5
0 5
0 5
0 5
0 5
0 5
0 5
0 6
0 6
2 6
2 6
2 6
2 4
2 4
2 4
2 4
2 3
2 3
2 3
2 3
2 4
2 4
2 4
2 4
2 5
2 5
2 5
2 6
2 6
2 6
2 6
2 6
2 6
2 6
2 6
2 6
2 6
2 5
2 5
2 5
2 4
2 4
2 4
2 3
2 3
0 2
0 2
0 2
0 2
0 2
0 2
0 2
0 2
0 2
0 2
0 2
0 2
0 2
0 2
0 2
0 1
0 1
0 1
0 0
0 0
0 0
0 0
0 0
0 0
0 0
0 0
0 0
0 0
0 0
0 0
0 0
0 0
0 0
0 0
0 0
0 0
0 0
0 0
0 0
0 0
0 0
0 0
0 0
0 0
0 0
0 0
0 0
0 0
0 0
0 0
0 0
0 0
0 0
0 1
0 1
0 1
0 1
0 1
0 1
0 1
0 1
0 1
0 1
0 1
0 1
0 1
0 1
0 1
0 1
0 1
0 3
0 4
0 5
0 7
0 7
0 7
0 9
0 10
0 10
0 10
0 10
0 10
0 11
0 11
0 12
0 12
0 12
0 12
0 12
0 11
0 11
0 11
0 11
0 11
0 11
0 11
0 11
0 11
0 11
0 10
0 10
0 10
0 10
0 10
0 10
0 9
0 6
0 4
0 4
0 2
0 3
0 3
0 3
0 2
0 2
0 2
0 2
0 2
0 2
0 2
0 2
0 2
0 2
0 3
0 3
0 3
0 3
0 3
0 3
0 3
0 3
0 3
0 3
0 3
0 3
0 3
0 3
0 3
0 3
0 3
0 3
0 3
0 3
0 3
0 3
0 3
0 2
0 2
0 2
0 2
0 3
0 3
0 3
0 3
0 2
0 2
0 2
0 2
0 2
0 1
0 1
0 1
0 1
0 1
0 1
0 1
0 1
0 1
0 1
0 1
0 1
0 1
0 1
0 1
0 1
0 1
0 1
0 1
0 1
0 3
0 4
0 5
0 5
0 5
0 6
0 5
0 7
0 13
0 15
0 15
0 26
0 32
0 33
0 35
0 36
1 36
1 42
1 42
1 44
1 46
1 47
1 53
1 53
1 54
1 54
1 54
1 54
1 54
1 54
1 54
1 54
1 54
1 54
1 55
1 55
1 53
1 57
1 54
1 54
1 54
1 56
1 58
1 57
1 56
1 55
1 53
1 40
1 38
1 38
1 37
1 35
0 31
0 27
0 28
0 26
0 26
0 26
0 26
0 26
0 26
0 27
0 27
0 49
0 50
0 50
0 50
0 50
0 50
0 50
0 50
0 50
0 50
0 44
0 43
0 43
0 44
0 46
0 45
0 45
0 40
0 40
0 39
0 39
0 38
0 38
1 36
1 34
1 34
1 33
1 31
1 31
1 30
1 30
1 29
1 30
1 35
1 34
1 35
1 14
1 14
1 15
1 16
1 16
1 16
1 16
1 16
1 16
1 17
1 18
1 18
1 18
1 19
1 16
1 16
1 16
1 16
1 17
1 17
1 17
1 17
1 17
0 17
0 17
0 17
0 17
0 17
0 18
0 20
0 20
0 23
0 21
0 14
0 18
0 18
0 18
0 19
0 19
0 30
0 31
0 31
0 30
0 30
0 31
0 30
0 29
0 29
0 29
0 27
0 27
0 27
0 27
0 27
0 26
0 26
0 26
0 26
0 26
0 26
0 25
0 25
0 25
0 25
0 25
0 23
0 22
0 19
0 19
0 18
0 13
0 13
0 13
0 13
0 13
0 1
0 1
0 1
0 1
0 1
0 1
0 1
0 1
0 1
0 1
0 1
0 1
0 1
0 1
0 2
0 5
0 5
0 6
0 7
0 7
0 9
0 9
0 9
0 9
0 9
0 9
0 9
0 9
0 9
0 10
0 10
0 10
0 10
0 10
0 10
0 10
0 10
0 11
0 11
0 11
0 11
0 11
0 11
0 11
0 11
0 12
0 13
0 15
0 22
0 22
0 21
0 21
0 21
0 21
0 20
0 22
0 21
0 21
0 21
0 21
0 21
0 21
0 21
0 21
0 21
0 20
0 20
0 20
0 19
0 19
0 19
0 19
0 19
0 18
0 18
0 18
0 18
0 18
0 18
0 18
0 18
0 16
1 16
1 14
1 4
1 5
1 6
1 5
1 4
1 5
1 5
1 3
1 3
1 3
1 3
1 3
1 3
1 3
1 3
1 3
2 3
2 3
2 3
2 6
2 6
2 6
2 6
2 6
2 6
2 6
2 6
2 6
1 7
1 7
1 7
1 7
1 7
1 7
1 7
1 8
1 8
1 7
1 6
1 6
1 7
1 6
1 6
1 6
1 6
1 6
1 6
1 6
1 6
1 6
1 6
1 6
0 6
0 6
0 6
0 3
0 3
0 3
0 3
0 3
0 3
0 3
0 3
0 3
0 2
0 2
0 2
0 2
0 4
0 4
0 6
0 5
0 6
0 6
0 10
0 10
0 10
0 10
0 10
0 10
0 10
0 10
0 10
0 10
0 10
0 10
0 10
0 10
0 10
0 10
0 10
0 10
0 10
0 10
0 10
0 10
0 10
0 10
0 10
0 12
0 13
0 14
0 14
0 15
0 15
0 15
0 18
0 19
0 19
0 19
0 14
0 14
0 14
0 14
0 14
0 14
0 14
0 14
0 14
0 14
0 14
0 14
0 14
0 15
0 15
0 15
0 15
0 15
0 16
0 16
0 16
0 18
0 23
0 26
0 26
0 24
0 23
0 28
0 27
0 27
0 26
0 23
0 19
0 19
0 19
0 19
0 19
0 19
0 19
0 19
0 19
0 19
0 20
0 20
0 20
0 20
0 20
0 20
0 20
0 20
0 20
0 20
0 20
0 19
0 19
0 19
0 19
0 18
0 14
0 24
0 28
0 34
0 36
0 39
0 43
0 47
0 48
0 49
0 49
0 50
0 50
0 50
0 50
0 50
0 50
0 50
0 50
0 50
0 49
0 49
0 49
0 49
0 49
0 49
0 49
0 49
0 49
0 50
0 51
0 51
0 51
0 51
0 49
0 37
0 25
0 19
0 20
0 21
0 19
0 14
0 12
0 11
0 8
0 8
0 8
0 8
0 8
0 8
0 8
0 8
0 8
0 8
0 8
0 8
0 8
0 8
0 9
0 9
0 9
0 9
0 9
0 9
0 9
0 8
0 7
0 8
0 8
0 8
0 8
0 8
0 8
0 7
0 4
0 3
0 3
0 3
0 3
0 3
0 3
0 3
0 3
0 3
0 4
0 4
0 4
0 4
0 4
0 4
0 4
0 4
0 4
0 7
0 6
0 6
0 7
0 7
0 7
0 7
0 7
0 7
0 7
0 5
0 5
0 5
0 5
0 5
0 7
0 8
0 14
0 15
0 16
0 16
0 16
0 16
0 16
0 15
0 15
0 15
0 15
0 15
0 16
0 16
0 17
0 17
0 18
0 18
0 18
0 16
0 20
0 26
0 30
0 34
0 59
0 60
0 62
0 62
0 62
0 64
0 64
0 64
0 65
0 64
0 58
0 56
0 53
0 53
0 53
0 53
0 53
0 53
0 53
0 53
0 53
0 53
0 53
0 52
0 52
0 52
0 52
0 52
0 53
0 53
0 53
0 50
0 48
0 41
0 37
0 32
0 12
0 16
0 15
0 15
0 15
0 13
0 13
0 14
0 13
0 14
0 14
0 14
0 14
0 14
0 14
0 14
0 14
0 14
0 14
0 14
0 14
0 14
0 15
0 15
0 16
0 16
0 15
0 14
0 14
0 14
0 16
0 15
0 15
0 15
0 15
0 12
0 8
0 7
0 7
0 7
0 7
0 7
0 7
0 7
0 7
0 6
0 6
0 6
0 6
0 6
0 6
0 6
0 6
0 6
0 7
0 7
0 7
0 7
0 6
0 6
0 3
0 3
0 2
0 2
0 1
0 1
0 2
0 3
0 3
0 3
0 3
0 4
0 4
0 4
0 4
0 4
0 4
0 4
0 4
0 4
0 4
0 4
0 4
0 5
0 5
0 6
0 6
0 6
0 6
0 6
0 5
0 5
0 5
0 5
0 5
0 6
0 7
0 7
0 7
0 7
0 7
0 8
0 7
0 6
0 6
0 6
0 6
0 5
0 5
0 5
0 5
0 5
0 6
0 6
0 7
0 7
0 7
0 7
0 6
0 6
0 19
0 19
0 19
0 20
0 20
0 20
0 20
0 20
0 19
0 19
0 18
0 18
0 18
0 18
0 18
0 18
0 18
0 18
0 20
0 22
0 27
0 28
0 30
0 30
0 31
0 32
0 32
0 32
0 31
0 29
0 29
0 29
0 29
0 31
0 33
0 33
0 25
0 27
0 27
0 26
0 26
0 26
0 26
0 26
0 26
0 26
0 26
0 26
0 26
0 26
0 26
0 26
0 26
0 24
0 16
0 13
0 13
0 12
0 12
0 12
0 12
0 11
0 11
0 11
0 12
0 12
0 12
0 11
0 11
0 9
0 10
0 12
0 7
0 7
0 7
0 8
0 8
0 8
0 8
0 8
0 12
0 12
0 12
0 12
0 13
0 13
0 13
0 13
0 13
0 13
0 13
0 13
0 13
0 13
0 13
0 13
0 13
0 13
0 13
0 13
0 12
0 12
0 12
0 12
0 11
0 10
0 7
0 5
0 5
0 5
1 7
1 9
1 9
1 9
1 11
1 14
1 10
1 10
1 10
1 10
1 9
1 9
1 9
1 9
1 9
1 9
1 9
1 9
1 10
1 11
1 11
1 11
1 11
1 11
1 11
1 11
1 12
1 12
1 12
1 12
1 12
1 13
1 17
1 20
1 20
1 20
0 17
0 16
0 21
0 22
0 21
0 19
0 19
0 19
0 19
0 19
0 19
0 19
0 19
0 19
0 19
0 19
0 19
0 19
0 17
0 18
0 19
0 22
0 22
0 22
0 24
0 24
0 23
0 23
0 23
0 23
0 23
0 20
0 18
0 12
0 11
0 11
1 11
1 11
1 8
1 8
1 8
1 6
1 6
1 6
1 6
1 6
1 6
1 7
1 6
1 7
1 11
1 11
1 11
1 11
1 11
1 8
1 8
1 7
1 7
1 7
1 6
1 6
1 6
1 6
1 7
1 8
1 10
1 12
1 12
1 12
1 12
1 12
0 12
0 12
0 12
0 12
0 12
0 12
0 13
0 13
0 13
0 13
0 13
0 12
0 12
0 11
0 7
0 7
0 7
0 7
0 7
0 7
0 7
0 7
0 7
0 7
0 7
0 7
0 8
0 8
0 5
0 3
0 2
0 2
0 2
0 2
0 2
0 2
0 2
0 2
0 2
0 2
0 2
0 1
0 1
0 1
0 1
0 1
0 2
0 2
0 2
0 2
0 2
0 2
0 2
0 2
0 2
0 2
0 2
0 2
0 2
0 2
0 2
0 2
0 1
0 1
0 1
0 1
0 2
0 2
0 2
0 2
0 2
0 3
0 3
0 3
0 3
0 3
0 3
0 3
0 3
0 4
0 4
0 3
0 3
0 3
0 3
0 3
0 3
0 3
0 3
0 3
0 3
0 3
0 3
0 3
0 3
0 3
0 3
0 3
0 3
0 2
0 2
0 3
0 3
0 3
0 3
0 2
0 2
0 3
0 3
0 3
0 3
0 3
0 3
0 3
0 3
0 2
0 2
0 2
0 2
0 2
0 3
0 3
0 4
0 4
0 4
0 4
0 5
0 5
0 5
0 5
0 5
0 5
0 6
0 6
0 6
0 7
0 7
0 6
0 6
0 6
0 6
0 6
0 8
0 7
0 7
0 7
0 7
0 7
0 8
0 8
0 8
0 8
0 8
0 8
0 8
0 8
0 7
0 6
0 6
0 6
0 6
0 6
0 4
0 4
0 4
0 4
1 4
1 4
1 4
1 3
1 3
2 3
2 3
2 3
2 3
2 3
2 3
2 3
2 1
2 1
2 2
2 2
2 3
2 4
2 3
2 3
2 4
2 4
2 4
2 5
1 5
1 6
1 6
1 6
1 6
1 6
1 6
1 6
1 6
1 6
1 6
1 6
1 6
1 7
1 7
1 7
1 7
0 7
0 7
0 8
0 8
0 8
0 8
0 8
0 8
0 7
0 7
0 7
0 5
0 5
0 5
0 5
0 4
0 4
0 4
0 3
0 2
0 2
0 2
0 2
0 2
0 2
0 2
0 2
0 2
0 2
0 2
0 2
0 2
0 1
0 1
0 1
0 1
0 1
0 1
0 1
0 1
0 1
0 1
0 2
0 2
0 2
0 2
0 2
0 2
0 2
0 2
0 2
0 3
0 3
0 3
0 3
0 3
0 3
0 3
0 3
0 3
0 4
0 4
0 4
0 4
0 4
0 4
0 4
0 4
0 4
0 4
0 4
0 4
0 3
0 3
0 3
0 3
0 3
0 3
0 2
0 2
0 2
0 2
0 2
0 2
0 2
0 2
0 2
0 1
0 1
0 1
0 1
0 2
0 3
0 3
0 3
0 3
0 2
0 2
0 2
0 3
0 3
0 3
0 3
0 3
0 3
0 3
0 3
0 3
0 3
0 3
0 3
0 3
0 3
0 3
0 3
0 3
0 4
0 4
0 5
0 5
0 5
0 5
0 5
0 5
0 5
0 5
0 5
0 3
0 3
0 3
0 3
0 3
0 3
0 2
0 2
0 3
0 3
0 3
0 3
0 3
0 3
0 3
0 3
0 3
0 3
0 3
0 3
0 3
0 3
0 3
0 3
0 3
0 2
0 2
0 1
0 1
0 1
0 1
0 1
0 1
0 1
0 1
0 1
0 0
0 0
0 0
0 0
0 0
0 0
0 0
0 0
0 0
0 0
0 0
0 0
0 0
0 0
0 0
0 0
0 0
0 0
0 0
0 0
0 0
0 0
0 0
0 0
0 0
0 0
0 0
0 0
0 0
0 0
0 0
0 1
0 1
0 1
0 1
0 1
0 1
0 2
0 4
0 5
0 5
0 6
0 6
0 6
0 6
0 6
0 6
0 6
0 6
0 6
0 6
0 6
0 6
0 6
0 6
0 6
0 6
0 6
0 6
0 6
0 7
0 7
0 7
0 7
0 7
0 7
0 6
0 6
0 6
0 7
0 6
0 6
0 6
0 6
0 4
0 3
0 3
0 2
0 3
0 3
0 3
0 3
0 2
0 2
0 2
0 2
0 2
0 2
0 2
0 2
0 2
0 2
0 2
0 2
0 2
0 2
0 2
0 2
0 2
0 2
0 2
0 2
0 1
0 1
0 1
0 1
0 1
0 1
0 1
0 1
0 1
0 1
0 1
0 1
0 0
0 0
0 0
0 0
0 0
0 0
0 0
0 0
0 0
0 0
0 0
0 0
0 0
0 0
0 0
0 1
0 1
0 1
0 1
0 1
0 1
0 1
0 1
0 1
0 1
0 1
0 1
0 1
0 1
0 1
0 1
0 1
0 1
0 1
0 1
0 1
0 1
0 1
0 1
0 1
0 1
0 1
0 1
0 1
0 1
0 1
0 1
0 1
0 1
0 1
0 1
0 0
0 1
0 1
0 1
0 2
0 2
0 2
0 2
0 2
0 2
0 2
0 2
0 2
0 2
0 2
0 2
0 2
0 2
0 2
0 2
0 3
0 4
0 4
0 4
0 4
0 4
0 5
0 7
0 7
0 8
0 9
0 10
0 12
0 12
0 12
0 12
0 12
0 11
0 11
0 11
0 10
0 12
0 12
0 12
0 12
0 12
0 12
0 12
0 12
0 12
0 12
0 12
0 12
0 12
0 12
0 12
0 11
0 10
0 10
0 10
0 10
0 10
0 8
0 6
0 5
0 5
0 5
0 4
0 2
0 2
0 2
0 2
0 2
0 2
0 2
0 2
0 2
0 0
0 0
0 0
0 0
0 1
0 1
0 1
0 1
0 1
0 1
0 1
0 1
0 1
0 1
0 1
0 1
0 1
0 1
0 1
0 1
0 1
0 1
0 1
0 1
0 1
0 1
0 1
0 1
0 1
0 1
0 1
0 1
0 1
0 1
0 1
0 1
0 1
0 1
0 1
0 0
0 0
0 0
0 0
0 0
0 0
0 0
0 0
0 0
0 0
0 0
0 0
0 0
0 0
0 0
0 0
0 0
0 0
0 0
0 0
0 0
0 0
0 0
0 0
0 0
0 0
0 0
0 0
0 0
0 0
0 0
0 0
0 0
0 0
0 0
0 0
0 0
0 0
0 1
0 1
0 1
0 1
0 1
0 1
0 1
0 1
0 2
0 2
0 2
0 3
0 3
0 3
0 3
0 3
0 3
0 3
0 3
0 3
0 3
0 4
0 4
0 4
0 5
0 5
0 5
0 5
0 6
0 6
0 6
0 9
0 9
0 9
0 9
0 9
0 8
0 8
0 8
0 8
0 8
0 8
0 8
0 8
0 7
0 7
0 7
0 6
0 6
0 6
0 6
0 6
0 6
0 6
0 6
0 6
0 6
0 4
0 3
0 3
0 2
0 2
0 2
0 2
0 2
0 2
0 2
0 0
0 0
0 0
0 0
0 0
0 0
0 0
0 0
0 0
0 0
0 0
0 0
0 0
0 0
0 0
0 0
0 0
0 0
0 0
0 0
0 0
0 0
0 0
0 0
0 0
0 0
0 0
0 0
0 0
0 0
0 1
0 1
0 1
0 1
0 1
0 1
0 1
0 1
0 1
0 1
0 1
0 1
0 1
0 1
0 1
0 1
0 1
0 1
0 1
0 1
0 2
0 3
0 3
0 3
0 3
0 3
0 3
0 4
0 4
0 4
0 4
0 4
0 4
0 4
0 4
0 4
0 3
0 3
0 3
2 4
2 4
2 4
2 4
2 4
2 4
2 4
2 4
2 4
2 4
2 4
2 4
2 4
2 4
2 4
2 4
2 4
2 2
2 2
2 2
2 2
2 2
2 2
2 1
2 1
2 1
2 1
2 1
2 1
2 1
2 1
2 1
2 1
2 1
2 1
2 0
0 0
0 0
0 0
0 0
0 0
0 0
0 0
0 0
1 0
1 0
1 0
1 0
1 0
1 0
1 1
4 7
4 8
4 8
4 8
4 8
4 8
4 8
4 8
4 8
4 8
4 8
4 8
4 8
4 8
4 8
4 8
4 8
4 8
4 8
4 8
4 8
4 8
4 8
4 8
4 8
4 8
4 8
4 8
3 8
3 8
3 8
3 8
3 8
3 8
3 8
3 7
0 1
0 0
0 0
0 0
0 0
0 0
0 0
0 0
0 0
0 0
0 0
0 0
0 0
0 0
0 0
0 0
0 0
0 0
0 0
0 0
0 0
0 0
0 0
0 0
0 0
0 0
0 0
0 0
0 0
0 0
0 0
0 0
0 0
0 0
0 0
0 0
0 0
0 0
0 0
0 0
0 0
0 0
0 0
0 0
0 0
0 0
0 0
0 0
0 0
0 0
0 0
0 0
0 0
0 0
0 0
0 0
0 0
0 0
0 0
0 0
0 0
0 0
0 0
0 0
0 0
0 0
0 0
0 0
0 0
0 0
0 0
0 0
0 0
0 0
0 0
0 0
0 0
0 0
0 0
0 0
0 0
0 0
0 0
0 0
0 0
0 0
0 0
0 0
0 0
0 0
0 0
0 0
0 0
0 0
0 0
0 0
0 0
0 0
0 0
0 0
0 0
0 0
0 0
0 0
0 0
0 0
0 0
0 0
0 0
0 0
0 0
0 0
0 0
0 0
0 0
0 0
0 0
0 0
0 0
0 0
0 0
0 0
0 0
0 0
0 0
0 1
0 2
0 2
0 3
0 4
0 4
0 5
0 5
0 5
0 5
0 5
0 5
0 5
0 5
0 5
0 5
0 5
0 5
0 5
0 5
0 5
0 5
0 5
0 5
0 5
0 5
0 5
0 5
0 5
0 5
0 5
0 5
0 5
0 8
0 9
0 12
0 12
0 10
0 9
0 9
0 8
0 9
0 10
0 11
0 11
0 11
0 11
0 12
0 12
0 12
0 12
0 12
0 12
0 12
0 12
0 12
0 14
0 15
0 17
0 18
0 18
0 18
0 18
0 18
0 18
0 18
0 18
0 19
0 20
0 17
0 17
0 14
0 14
0 14
0 14
0 14
0 14
0 13
0 13
0 12
0 12
0 12
0 12
0 11
0 11
0 11
0 11
0 11
0 12
0 12
0 12
0 12
0 10
0 8
0 7
0 10
0 11
0 11
0 12
0 12
0 14
0 14
0 15
0 14
0 13
0 12
0 11
0 11
0 10
0 13
0 14
0 17
0 17
0 31
0 33
0 35
0 35
0 35
0 35
0 35
0 36
0 37
0 39
0 40
0 46
0 46
0 47
0 48
0 48
0 48
0 47
0 40
0 39
0 39
0 39
0 39
0 39
0 39
0 39
0 39
0 39
0 39
0 40
0 40
0 37
0 33
0 32
0 30
0 29
0 19
0 15
0 14
0 14
0 14
0 14
0 14
0 13
0 12
0 10
0 10
0 2
0 2
0 2
0 1
0 1
0 1
0 1
0 1
0 1
0 1
0 1
0 1
0 1
0 1
0 1
0 1
0 1
0 1
0 0
0 0
0 0
0 0
0 0
0 0
0 0
0 0
0 0
0 0
0 0
0 0
0 0
0 0
0 0
0 0
0 0
0 0
0 0
0 0
0 0
0 0
0 0
0 0
0 0
0 0
0 0
0 0
0 0
0 0
0 0
0 0
0 0
0 2
0 2
0 2
0 2
0 2
0 2
0 2
0 2
0 2
0 2
0 2
0 2
0 2
0 2
0 2
0 2
0 2
0 2
0 2
0 2
0 2
0 2
0 2
0 2
0 2
0 2
0 2
0 2
0 2
0 2
0 2
0 2
0 2
0 2
0 2
0 2
0 0
0 0
0 0
0 0
1 0
1 0
1 0
1 0
1 0
1 0
1 0
1 0
1 0
1 0
1 0
1 0
1 0
1 0
1 0
1 0
1 0
1 0
1 0
2 0
2 0
2 0
2 0
2 0
2 0
2 0
2 0
2 0
2 0
2 0
2 0
2 0
2 0
2 0
2 0
1 0
0 0
0 0
0 0
0 0
0 0
0 0
0 0
0 0
0 0
0 0
1 0
1 0
2 0
2 0
2 0
2 0
2 0
2 0
2 0
2 0
2 0
3 0
3 0
3 0
3 0
3 0
3 0
3 0
3 0
3 0
3 0
3 0
3 0
3 1
3 1
3 1
3 1
3 1
3 1
3 1
3 1
3 1
3 1
3 1
3 1
3 1
2 1
2 1
1 1
1 1
1 1
1 1
1 1
1 1
1 1
2 1
4 1
4 1
6 1
6 1
6 1
7 2
7 1
7 1
7 1
7 1
9 1
10 1
10 1
15 1
15 1
15 1
15 1
15 1
15 1
15 1
15 1
15 1
15 1
15 1
16 1
16 1
16 1
16 1
16 1
16 1
16 1
16 1
17 1
22 1
22 1
21 1
18 1
19 0
17 0
16 0
16 0
16 0
16 0
16 0
16 0
16 0
14 0
13 0
14 0
9 0
9 0
9 0
9 0
9 0
8 0
8 0
8 0
11 0
11 0
11 0
11 0
12 0
12 0
12 0
12 0
12 0
12 0
11 0
10 0
6 0
6 0
6 0
6 0
5 0
5 0
5 0
5 0
5 0
5 0
5 0
5 0
5 0
5 0
5 0
4 0
4 0
4 0
4 0
4 0
4 0
4 0
4 0
4 0
1 0
1 0
1 0
1 0
0 1
0 1
0 1
0 1
0 1
0 1
0 1
1 1
1 1
2 1
4 1
7 1
8 1
8 1
9 3
9 3
9 3
9 3
9 3
9 3
9 3
9 3
9 3
9 3
9 3
9 3
9 3
9 3
9 4
10 4
11 4
11 4
11 3
11 3
11 3
11 3
12 3
17 3
19 3
20 3
21 3
21 3
21 3
22 3
21 3
18 3
18 3
14 4
17 4
17 4
17 2
17 2
17 2
17 2
17 2
17 2
17 2
17 2
17 1
17 1
17 1
18 1
18 1
21 1
21 1
21 1
30 1
32 1
36 1
40 1
41 1
45 1
52 1
58 1
57 1
56 1
55 1
54 1
54 1
54 0
54 0
54 0
54 0
54 0
53 0
53 0
58 0
61 0
64 0
64 0
65 0
66 0
67 0
67 0
70 0
73 0
73 0
73 0
75 0
73 0
72 0
71 0
62 0
63 0
57 0
51 0
47 0
39 0
33 0
31 0
31 0
31 1
31 1
31 1
31 1
31 1
31 1
31 1
30 1
30 1
28 1
27 1
26 1
21 1
18 1
18 1
19 2
22 2
31 5
31 5
27 5
25 5
24 5
24 5
26 5
39 5
39 5
39 5
38 5
35 5
35 5
35 5
35 6
34 6
34 5
34 5
34 5
34 5
34 5
34 6
34 6
34 6
34 6
34 6
34 6
33 7
33 7
33 7
33 7
33 7
33 7
32 7
29 6
24 5
18 3
18 3
18 4
17 4
17 4
15 4
14 4
3 4
3 4
3 4
3 4
3 4
3 4
3 5
3 5
3 5
5 5
5 5
5 5
5 5
5 5
5 5
6 4
6 4
6 4
8 5
8 6
8 6
8 7
8 8
8 8
8 10
8 10
9 10
35 10
79 10
87 11
86 11
86 11
86 11
85 11
85 11
85 11
86 11
86 11
86 11
87 11
88 11
87 11
87 10
86 8
86 8
86 8
86 8
87 8
87 9
87 9
87 9
86 9
86 9
86 7
84 6
84 7
84 7
83 4
80 6
80 6
77 5
67 4
57 4
27 4
10 4
5 4
5 4
5 4
5 4
5 5
5 5
3 5
2 5
3 5
3 5
2 5
2 5
4 5
4 6
4 6
4 6
4 6
4 6
3 6
3 5
3 5
3 5
4 7
4 7
4 7
7 6
7 6
7 6
7 4
7 3
7 3
7 7
7 7
7 7
7 7
7 7
7 7
7 9
7 10
7 11
7 15
7 17
7 22
7 22
6 25
5 26
4 28
4 28
4 27
4 27
4 27
4 27
4 28
4 33
4 35
4 35
4 35
5 35
5 33
5 33
5 33
2 33
2 33
2 33
3 33
3 32
3 32
3 29
3 29
3 29
3 29
3 29
3 27
4 25
4 25
4 21
4 13
4 13
4 13
4 13
5 10
5 10
7 18
8 23
8 24
8 24
8 25
8 25
8 20
8 19
8 17
8 17
7 17
6 17
6 17
6 19
6 19
5 22
5 22
5 22
5 22
5 22
6 22
13 27
13 27
14 27
14 27
15 27
15 27
14 25
14 29
14 29
15 30
15 31
15 31
15 32
14 32
14 32
11 22
11 19
11 18
11 18
11 17
11 17
11 17
11 17
11 17
11 19
11 23
11 26
11 28
10 26
10 26
10 23
10 23
9 23
9 23
8 23
8 23
3 18
3 18
2 18
2 19
1 19
1 19
0 19
0 15
0 15
0 14
0 13
0 12
0 12
0 12
0 12
0 12
0 12
0 12
0 12
0 10
0 10
0 12
0 12
0 12
1 19
1 15
1 14
1 24
1 26
1 29
1 29
1 29
1 29
1 29
1 30
1 30
1 30
1 30
1 30
1 29
1 29
1 29
1 29
1 29
1 30
1 33
1 34
1 38
1 38
1 38
1 38
1 38
1 40
1 40
1 42
1 42
1 44
1 43
1 45
1 45
0 36
0 35
0 30
0 24
0 22
0 19
0 19
0 19
0 20
0 20
0 19
0 25
0 25
0 27
0 28
0 29
0 30
0 32
0 32
0 32
0 30
0 28
0 27
0 22
0 22
0 22
0 22
0 22
0 21
0 21
0 20
0 19
0 17
0 16
0 14
0 14
0 16
0 16
0 16
0 16
0 16
0 16
0 16
0 16
0 15
0 15
0 15
0 5
0 5
0 5
0 6
0 6
0 4
0 4
0 5
0 6
0 6
0 6
0 6
0 6
0 6
0 6
0 7
0 8
0 13
0 13
0 13
0 13
0 13
0 13
0 13
0 13
0 11
0 12
0 12
0 12
0 12
0 12
0 11
0 11
0 11
0 11
0 11
0 11
0 11
0 11
0 10
0 10
0 10
0 10
0 9
0 8
0 8
0 8
0 8
0 8
0 8
0 8
0 8
1 10
1 6
1 6
1 7
1 15
1 15
1 15
1 14
1 14
1 14
1 14
1 14
1 14
1 14
1 14
1 14
1 14
1 14
1 14
1 14
1 14
1 14
1 14
1 14
1 14
1 14
1 14
1 14
1 14
1 14
1 14
1 14
1 14
1 14
1 13
0 13
0 9
0 10
0 10
0 9
0 1
0 1
0 1
0 1
0 2
0 2
0 2
0 2
0 2
0 2
0 2
0 2
0 2
0 2
0 2
0 2
0 2
0 4
0 4
0 4
0 4
0 4
0 9
0 10
0 10
0 10
0 10
0 10
0 10
0 10
0 10
0 10
0 11
0 10
0 13
0 13
0 13
0 13
0 13
0 13
0 12
0 12
0 12
0 12
0 13
0 13
0 13
0 17
0 17
0 18
0 18
0 18
0 17
0 17
0 17
0 18
0 19
0 18
0 13
0 19
0 20
0 20
0 21
0 21
0 21
0 21
0 21
0 21
0 20
0 21
0 19
0 19
0 19
0 19
0 19
0 19
0 22
0 24
0 24
0 24
0 22
0 22
0 22
0 17
0 17
0 17
0 17
0 17
0 18
0 18
0 18
0 17
0 17
0 17
0 20
0 14
0 13
0 12
0 12
0 12
0 13
0 13
0 13
0 12
0 12
0 11
0 11
0 12
0 12
0 13
0 13
0 11
0 8
0 8
0 8
0 8
0 8
0 8
0 8
0 8
0 8
0 6
0 6
0 6
0 6
0 6
0 6
0 5
0 5
0 5
0 2
0 2
0 2
0 3
0 3
0 3
1 23
1 24
1 24
1 30
1 31
1 52
1 54
1 56
1 61
1 63
1 63
1 63
1 63
1 62
1 62
1 62
1 62
1 62
1 62
1 62
1 63
1 63
1 63
1 63
1 63
1 63
1 63
1 63
1 63
1 63
1 64
1 64
1 64
1 64
1 71
1 70
0 47
0 49
0 51
0 52
0 52
0 31
0 27
0 23
0 22
0 21
0 23
0 27
0 29
0 30
0 30
0 30
0 30
0 30
0 30
0 31
0 30
0 30
0 30
0 31
0 31
0 31
0 31
0 31
0 31
0 31
0 32
0 32
0 33
0 33
0 26
0 24
0 19
0 12
0 12
0 13
0 13
0 14
0 14
0 17
0 17
0 18
0 16
0 14
0 12
0 12
0 13
0 13
0 13
0 13
0 13
0 12
0 12
0 14
0 14
0 13
0 15
0 15
0 15
0 15
0 15
1 19
1 17
1 17
1 23
1 23
1 23
1 23
1 24
1 24
1 25
1 25
1 26
1 25
1 25
1 23
1 23
1 22
1 22
1 20
1 20
1 21
1 21
1 21
1 21
1 21
1 21
1 21
1 21
1 18
1 18
1 18
1 22
1 23
1 25
1 25
1 25
0 21
0 23
0 22
0 16
0 16
0 16
0 16
0 15
0 15
0 13
0 12
0 12
0 12
0 12
0 11
0 11
0 14
0 15
0 15
0 15
0 14
0 14
0 15
0 15
0 16
0 16
0 16
0 17
0 17
0 17
0 16
0 8
0 7
0 7
0 7
0 7
0 7
0 7
0 7
0 8
0 8
0 8
0 8
0 8
0 8
0 8
0 8
0 8
0 8
0 8
0 8
0 11
0 7
0 7
0 7
0 7
0 7
0 7
0 7
0 7
0 6
0 6
0 6
0 5
0 5
0 5
0 5
0 5
0 5
0 5
0 5
0 5
0 5
0 5
0 5
0 4
0 4
0 4
0 4
0 4
0 5
0 5
0 5
0 5
0 5
0 5
0 5
0 1
0 2
0 2
0 2
0 3
0 4
0 4
0 4
0 4
0 4
0 4
0 4
0 4
0 4
0 4
0 4
0 4
0 4
0 4
0 4
0 4
0 4
0 4
0 4
0 4
0 4
0 4
0 4
0 4
0 3
0 3
0 3
0 3
0 3
0 4
0 4
0 5
0 6
0 6
0 7
0 5
0 5
0 5
0 6
0 7
0 8
0 8
0 8
0 8
0 8
0 8
0 8
0 8
0 8
0 8
0 8
0 10
0 11
0 12
0 12
0 12
0 13
0 14
0 15
0 15
0 15
0 14
0 14
0 14
0 14
0 13
0 12
0 11
0 11
0 11
0 7
0 7
0 7
0 10
0 10
0 12
0 12
0 12
0 13
0 13
0 13
0 13
0 13
0 13
0 13
0 14
0 14
0 14
0 16
0 19
0 22
0 22
0 21
0 20
0 19
0 19
0 19
0 19
0 19
0 19
0 19
0 19
0 19
0 19
0 20
0 20
0 20
0 20
0 20
0 17
0 18
0 16
0 16
0 15
0 15
0 15
0 15
0 16
0 16
0 17
0 17
0 17
0 17
0 14
0 10
0 7
0 5
0 5
0 5
0 5
0 18
0 19
0 20
0 21
0 21
0 21
0 21
0 21
0 23
0 23
0 22
0 25
0 27
0 28
0 29
0 29
0 28
0 29
0 32
0 34
0 35
0 36
0 37
0 36
0 36
0 36
0 36
0 36
0 36
0 37
0 38
0 38
0 38
0 38
0 38
0 38
0 25
0 26
0 26
0 26
0 26
0 27
0 29
0 29
0 27
0 26
0 24
0 23
0 22
0 21
0 25
0 26
0 26
0 26
0 22
0 20
0 18
0 20
0 20
0 20
0 19
0 18
0 17
0 17
0 17
0 17
0 16
0 16
0 16
0 16
0 16
0 16
0 15
0 12
0 12
0 12
0 12
0 11
0 9
0 9
0 9
0 9
0 9
0 8
0 7
0 7
0 3
0 2
0 2
0 2
0 3
0 3
0 3
0 1
0 1
0 2
0 2
0 3
0 3
1 10
1 12
1 12
1 12
1 13
1 14
1 18
1 20
1 21
1 22
1 23
1 25
1 25
1 25
1 26
1 27
1 27
1 27
1 27
1 27
1 32
1 32
1 32
1 32
1 32
1 33
1 33
1 32
1 34
1 35
1 35
1 38
1 37
1 36
1 35
1 30
0 27
0 27
0 27
0 27
0 27
0 27
0 24
0 23
0 21
0 21
0 20
0 18
0 18
0 18
0 17
0 16
0 16
0 16
0 16
0 16
0 11
1 11
1 11
1 11
1 11
1 10
1 10
1 10
1 7
1 6
1 7
1 5
1 5
1 5
1 5
1 5
1 4
1 4
1 4
1 4
1 3
1 2
1 2
1 1
1 1
1 1
1 1
2 1
2 1
3 1
3 7
3 9
3 12
3 12
3 13
3 13
3 13
2 13
2 13
2 13
2 13
2 13
2 13
2 13
2 13
2 12
2 12
2 12
2 12
2 12
2 12
2 12
2 12
2 12
2 12
2 12
2 12
2 12
2 14
2 14
2 15
2 15
2 15
0 21
0 23
0 25
0 24
0 23
0 27
0 36
0 37
0 39
0 44
0 45
0 45
0 45
0 46
0 48
0 48
0 50
0 50
0 53
0 53
0 55
0 55
0 55
0 55
0 55
0 55
0 55
0 55
0 54
0 54
0 54
0 53
0 53
0 52
0 52
0 52
0 44
0 44
0 43
0 37
0 36
0 31
0 22
0 20
0 19
0 15
0 17
0 17
0 17
0 17
0 14
0 14
0 13
0 13
0 10
0 10
0 8
0 9
0 11
0 11
0 11
0 11
0 11
0 11
0 11
0 11
0 12
0 13
0 13
0 13
0 13
0 13
0 11
0 10
0 10
0 10
0 10
0 10
0 9
0 9
0 9
0 6
0 6
0 6
0 6
0 6
0 6
0 5
0 5
0 5
0 5
0 5
0 5
0 4
0 2
0 2
0 2
0 2
0 2
0 2
0 2
0 2
0 0
0 1
0 1
0 1
0 4
0 4
0 4
0 4
0 4
0 4
0 4
0 4
0 4
0 4
0 4
0 4
0 4
0 4
0 4
0 4
0 4
0 4
0 4
0 4
0 5
0 5
0 5
0 5
0 5
0 5
0 5
0 5
0 5
0 5
0 5
0 5
0 5
1 14
1 14
1 14
1 11
1 11
1 11
1 14
1 14
1 14
1 14
2 14
2 14
2 14
2 14
2 14
2 14
2 14
2 14
2 14
2 14
2 14
2 14
2 14
2 14
2 14
2 14
2 14
2 17
2 17
2 18
2 19
2 23
2 23
2 23
2 23
2 23
1 11
1 11
1 11
1 11
1 10
2 10
2 10
2 10
2 10
2 10
1 10
1 11
1 11
1 11
1 11
1 11
1 11
1 11
1 11
1 11
1 11
1 11
1 11
1 10
1 10
1 10
1 10
1 7
1 7
1 6
1 6
1 3
1 3
1 6
1 6
2 7
2 7
3 14
3 14
4 14
4 14
3 14
3 14
3 15
3 15
3 15
3 15
3 14
3 14
3 14
3 14
3 14
3 14
3 14
3 14
3 14
3 13
3 13
3 13
3 13
3 13
3 13
3 13
3 14
2 14
2 15
2 16
2 15
2 15
2 14
2 14
2 13
2 13
1 5
1 5
0 5
0 5
0 5
0 5
0 5
0 5
0 5
0 5
0 5
0 5
0 5
0 5
0 5
0 5
0 6
0 7
0 8
0 8
0 8
0 10
0 10
0 11
0 11
0 11
0 12
0 11
0 10
0 10
0 10
0 10
0 8
0 8
0 8
0 10
0 10
0 17
0 17
0 17
0 17
0 17
0 18
0 18
0 18
5 24
5 24
5 23
5 23
5 23
5 23
5 24
5 23
5 22
5 22
5 22
5 22
5 19
5 19
5 17
5 17
5 17
5 15
5 15
5 15
5 15
5 15
5 15
5 15
5 14
5 14
5 14
5 14
5 7
5 7
5 7
5 7
5 7
5 7
5 7
5 7
0 1
0 1
0 1
0 1
0 1
0 1
0 4
0 7
0 9
0 10
0 11
0 11
0 11
0 11
0 11
0 11
0 11
0 11
0 11
0 11
0 11
0 11
0 11
0 12
0 12
0 12
0 12
0 12
0 12
0 12
0 12
0 12
0 12
0 12
0 12
0 12
0 12
0 12
0 12
0 12
0 12
0 12
0 6
0 8
0 6
0 6
0 5
0 5
0 5
0 5
0 5
0 5
0 5
0 5
0 5
0 6
0 6
0 7
0 7
0 7
0 7
0 7
0 9
0 10
0 10
0 10
0 12
0 12
0 12
0 12
0 12
0 12
0 12
0 12
0 12
0 11
0 11
0 11
0 10
0 8
0 8
0 8
0 8
0 8
0 8
0 8
0 8
0 8
0 8
0 8
0 8
0 7
0 7
0 6
0 6
0 5
0 5
0 4
0 3
0 2
0 2
0 5
0 3
0 3
0 3
0 4
0 4
0 4
0 4
0 4
0 5
0 5
0 6
0 7
0 7
0 7
0 7
0 9
0 9
0 9
0 9
0 9
0 9
0 9
0 9
0 9
0 9
0 9
0 9
0 9
0 9
0 9
0 9
0 9
0 12
0 12
0 13
0 11
0 15
0 19
0 21
0 25
0 26
0 29
0 29
0 28
0 31
0 34
0 33
0 33
0 33
0 33
0 33
0 34
0 34
0 34
0 34
0 34
0 34
0 34
0 34
0 34
0 34
0 34
0 35
0 35
0 40
0 39
0 40
0 53
0 52
0 52
0 50
0 40
0 38
0 37
0 37
0 34
0 33
0 33
0 33
0 33
0 28
0 26
0 26
0 26
0 26
0 26
0 25
0 25
0 26
0 26
0 26
0 25
0 24
0 24
0 25
0 25
0 27
0 27
0 27
0 27
0 23
0 23
0 21
0 8
0 7
0 7
0 7
0 7
0 6
0 6
0 6
0 6
0 6
0 6
0 6
0 6
0 6
0 6
0 6
0 6
0 6
0 6
0 6
0 3
0 2
0 1
0 1
0 1
0 1
0 1
0 0
0 0
0 0
0 0
0 1
0 2
0 2
0 3
0 3
0 3
0 3
0 3
0 3
0 3
0 3
0 3
0 3
0 4
0 4
0 4
0 4
0 4
0 4
0 4
0 4
0 4
0 4
0 4
0 4
0 4
0 4
0 4
0 4
0 4
0 4
0 4
0 4
0 4
0 4
0 4
0 3
0 2
0 2
0 2
0 2
0 2
0 2
0 2
0 2
0 3
0 3
0 3
0 3
0 2
0 2
0 2
0 2
0 2
0 2
0 2
0 2
0 2
0 3
0 3
0 3
0 3
0 4
0 4
0 4
0 4
0 4
0 4
0 4
0 4
0 4
0 4
0 4
0 4
0 4
0 3
0 3
0 4
0 4
0 4
0 4
0 3
0 3
0 3
0 3
0 3
0 3
0 3
0 3
0 3
0 3
0 3
0 3
0 3
0 2
0 2
0 2
0 2
0 1
0 1
0 1
0 1
0 1
0 1
0 1
0 1
0 1
0 1
0 1
0 1
0 1
0 1
0 1
0 0
0 0
0 0
0 0
0 0
0 0
0 1
0 1
0 1
0 1
0 1
0 1
0 1
0 1
0 1
0 1
0 2
0 3
0 3
0 3
0 3
0 3
0 3
0 3
0 3
0 3
0 3
0 3
0 3
0 3
0 3
0 3
0 3
0 3
0 3
0 3
0 3
0 3
0 3
1 4
1 4
1 4
1 3
1 3
1 4
1 4
1 4
1 4
1 8
1 9
1 10
1 10
1 9
1 8
1 8
1 9
1 9
1 9
1 9
1 9
1 9
1 9
1 9
1 9
1 9
1 9
1 9
1 9
1 9
1 9
1 9
1 9
1 9
1 9
1 9
0 7
0 7
1 9
1 9
1 9
1 9
2 9
2 9
2 9
2 3
2 3
2 4
2 4
2 4
2 4
2 3
2 3
2 3
2 3
2 3
2 3
2 3
2 3
2 3
2 3
2 3
2 3
2 3
2 3
2 3
3 4
3 4
3 5
4 5
4 5
4 5
4 5
4 5
3 3
3 3
3 3
3 3
3 3
3 3
3 3
3 3
3 3
3 3
4 4
4 4
4 4
4 4
4 4
4 4
4 4
4 4
4 4
4 4
4 4
4 4
4 4
4 4
4 4
4 4
4 4
4 4
3 3
3 3
3 2
3 4
2 5
2 6
2 6
2 6
2 6
2 6
2 6
3 6
3 6
3 6
3 6
3 7
3 8
3 7
2 7
2 7
2 7
2 7
2 7
2 7
2 7
2 7
2 7
2 7
2 7
2 7
2 7
2 7
2 7
2 7
1 10
1 11
1 11
1 11
1 11
1 9
1 9
1 8
1 8
1 8
1 8
1 8
1 8
0 8
0 8
0 8
0 8
0 15
0 14
0 14
0 13
0 13
0 13
0 13
0 13
0 13
0 13
0 13
0 13
0 13
0 13
0 13
0 13
0 13
1 14
1 13
1 9
1 9
1 9
1 9
1 9
4 18
4 19
4 20
4 20
4 20
5 20
5 20
5 20
5 20
5 20
5 20
5 20
5 12
5 12
5 13
5 13
5 13
5 13
5 13
5 13
5 13
5 13
5 13
5 13
5 13
5 14
5 15
5 15
5 15
4 14
3 14
3 14
3 14
3 14
3 14
3 14
1 5
1 4
1 3
1 3
1 3
0 3
0 3
0 3
0 3
0 3
0 3
0 3
0 3
0 3
0 2
0 2
0 2
0 2
0 2
0 2
0 2
0 2
0 2
0 2
0 2
0 0
0 0
0 0
0 0
0 0
0 0
0 0
0 0
0 0
0 0
0 0
0 0
0 0
0 0
0 0
0 0
0 0
0 0
0 0
0 0
0 0
0 0
0 0
0 0
0 1
0 1
0 1
0 1
0 2
0 2
0 2
0 2
0 2
0 2
0 2
0 2
0 4
0 4
0 4
0 4
0 5
0 5
0 5
0 5
0 5
0 5
0 5
0 5
0 5
0 5
0 5
0 5
0 5
0 5
0 5
0 5
0 5
0 5
0 5
0 5
0 4
0 4
0 4
0 4
0 6
0 16
0 16
0 18
0 19
0 20
0 22
0 21
0 20
0 20
0 20
0 21
0 21
0 21
0 21
0 21
0 21
0 21
0 21
0 21
0 21
0 21
0 21
0 21
0 21
0 21
0 21
0 21
0 21
0 21
0 21
0 22
0 22
0 22
0 23
0 22
0 16
0 5
0 5
0 6
0 7
0 7
0 6
0 6
0 6
0 6
0 5
0 4
0 4
0 4
0 4
0 4
0 4
0 4
0 4
0 4
0 10
0 12
0 15
0 15
0 15
0 15
0 15
0 15
0 16
0 20
0 25
0 25
0 27
0 28
0 27
0 27
0 27
0 27
0 28
0 27
0 26
0 26
0 26
0 26
0 26
0 26
0 26
0 26
0 25
0 25
0 25
0 25
0 25
0 24
0 24
0 24
0 20
0 15
0 14
0 14
0 14
0 15
0 15
0 15
0 12
0 8
0 3
0 2
0 2
0 2
0 2
0 2
0 3
0 3
0 2
0 2
0 2
0 2
0 2
0 2
0 2
0 2
0 3
0 3
0 3
0 3
0 3
0 3
0 3
0 3
0 3
0 3
0 3
0 3
0 3
0 3
0 3
0 2
0 2
0 2
0 2
0 2
0 2
0 2
0 2
0 2
0 2
0 1
0 1
0 1
0 1
0 1
0 1
0 3
0 3
0 3
0 3
0 2
0 2
0 2
0 2
0 3
0 3
0 3
0 3
0 3
0 3
0 3
0 3
0 3
0 3
0 3
0 3
0 3
0 3
0 3
0 3
1 3
1 3
1 3
1 3
1 3
1 3
1 3
1 3
2 3
2 3
2 3
2 3
2 1
2 1
2 1
2 1
2 1
2 0
2 0
2 0
2 0
2 0
2 0
2 0
2 0
2 0
2 0
2 0
2 1
2 1
2 1
2 2
2 3
2 4
2 4
2 4
1 4
1 4
1 4
1 4
1 5
1 5
0 5
0 5
0 5
0 5
0 5
0 5
0 5
0 6
0 6
0 6
0 6
0 6
0 6
0 6
0 6
0 6
0 6
0 6
0 6
0 7
0 7
0 7
0 6
0 6
0 6
0 5
0 3
0 3
0 3
0 3
0 3
0 3
0 4
0 3
0 3
0 3
0 3
0 3
0 3
0 3
0 3
0 3
0 3
0 2
0 2
0 2
0 2
0 2
0 2
0 2
0 2
0 2
0 2
0 2
0 2
0 1
0 2
0 2
0 2
0 3
0 3
0 3
0 5
0 5
1 5
1 5
1 5
1 5
1 4
1 4
1 4
1 4
1 4
1 4
1 4
1 4
1 4
1 4
1 4
1 5
1 5
1 5
1 5
1 5
1 5
1 6
1 6
1 6
1 7
1 8
1 8
1 8
1 8
1 11
0 12
0 33
0 37
0 41
0 41
0 43
0 44
0 46
0 46
0 46
0 46
0 46
0 46
0 46
0 46
0 46
0 46
0 46
0 46
0 46
0 46
0 45
0 45
0 45
0 45
0 45
0 45
0 45
0 45
0 44
0 44
0 43
0 43
0 43
0 41
0 37
0 35
0 7
0 6
0 3
0 3
0 4
0 5
0 8
0 13
1 16
1 23
1 25
2 25
2 25
2 27
2 27
2 27
2 28
2 30
2 30
2 30
2 32
2 32
2 32
2 32
2 32
2 32
2 33
2 33
2 34
2 34
2 34
2 34
3 34
3 34
3 34
3 34
3 34
3 31
3 31
3 31
3 30
3 29
3 26
3 16
2 12
2 9
2 7
0 7
0 7
0 6
0 6
0 6
0 5
0 2
0 2
0 2
0 2
0 2
0 2
0 2
0 2
0 1
0 3
0 3
0 3
0 3
0 3
0 4
0 4
0 4
0 4
0 4
0 4
0 4
0 4
0 4
0 4
0 4
0 4
0 4
0 4
0 4
0 4
0 4
0 4
0 4
0 4
0 4
0 6
0 7
0 7
0 7
0 7
0 6
0 6
0 6
0 6
0 6
0 4
0 4
0 4
0 4
0 4
0 3
0 3
0 3
0 4
0 8
0 8
0 8
0 8
0 8
0 8
0 10
0 10
0 10
1 16
1 16
1 19
1 19
1 19
1 19
1 19
1 19
1 17
1 16
1 16
1 16
1 16
1 16
1 16
1 16
1 16
1 16
1 17
1 17
1 17
1 19
1 20
1 21
1 21
1 21
1 20
1 14
1 14
1 14
1 14
1 14
1 15
1 15
1 15
1 15
0 9
0 9
0 6
0 6
0 6
0 6
0 6
0 6
0 6
0 6
0 6
0 5
0 5
0 5
0 5
0 5
0 5
0 5
0 6
0 6
0 6
0 4
0 3
0 2
0 2
0 2
0 2
0 4
0 4
0 5
0 5
0 5
0 4
0 4
0 4
0 4
0 5
0 5
0 5
0 5
0 5
0 5
0 5
0 5
0 5
0 5
0 5
0 5
0 5
0 5
0 5
0 5
0 5
0 5
0 4
0 4
0 4
0 4
0 4
0 4
0 4
0 4
0 4
0 2
0 2
0 1
0 1
0 1
0 2
0 1
0 3
0 3
0 6
0 6
0 9
0 9
0 9
0 9
0 9
0 9
0 9
0 9
0 10
0 10
0 10
0 10
0 10
0 10
0 12
0 12
0 12
0 12
0 12
0 12
0 12
0 12
0 12
0 12
0 12
0 12
0 13
0 13
0 14
0 15
0 16
0 16
0 14
0 14
0 11
0 10
0 8
0 8
0 11
0 12
0 14
0 16
0 17
0 18
0 18
0 18
0 18
0 18
0 18
0 16
0 16
0 16
0 16
0 16
0 16
0 16
0 16
0 16
0 16
0 16
0 16
0 16
0 15
0 15
0 13
0 11
0 11
0 11
0 11
0 11
0 11
0 17
0 18
0 19
0 16
0 15
0 13
0 11
0 10
0 9
0 10
0 10
0 10
0 10
0 11
0 11
0 12
0 12
0 12
0 12
0 12
0 12
0 12
0 12
0 12
0 12
0 12
0 12
0 12
0 12
0 12
0 12
0 12
0 12
0 12
0 12
0 12
0 5
0 6
0 5
0 5
0 5
0 6
0 5
0 5
0 5
0 4
0 5
0 5
0 5
0 4
0 4
0 4
0 4
0 4
0 4
0 4
0 4
0 4
0 4
0 4
0 4
0 4
0 4
0 4
0 4
0 4
0 4
0 4
0 4
0 4
0 4
0 4
0 4
0 3
0 3
0 5
0 5
0 6
0 6
0 9
0 9
0 8
0 7
0 7
0 7
0 7
0 7
0 7
0 7
0 8
0 8
0 8
0 8
0 8
0 8
0 8
0 9
0 9
0 9
0 9
0 9
0 9
0 9
0 9
0 9
0 12
0 13
0 37
0 49
0 55
0 59
0 57
0 58
0 58
0 60
0 57
0 57
0 57
0 57
0 57
0 58
0 58
0 58
0 58
0 58
0 60
0 65
0 67
0 68
0 70
0 72
0 95
0 95
0 95
0 96
0 96
0 96
0 96
0 96
0 96
0 96
0 94
0 91
0 59
0 52
0 48
0 47
0 47
0 46
0 46
0 43
0 43
0 43
0 43
0 43
0 43
0 42
0 42
0 41
0 41
0 40
0 39
0 32
0 27
0 26
0 25
0 24
0 1
0 1
0 0
0 0
0 1
0 1
0 1
0 1
0 1
0 1
0 1
0 1
0 1
0 1
0 1
0 1
0 1
0 1
0 1
1 1
1 1
1 1
1 1
1 1
1 1
1 1
1 1
1 1
1 1
1 1
1 1
1 1
1 1
1 1
1 1
1 1
1 1
1 1
1 1
1 0
1 0
1 0
1 0
1 0
1 0
1 0
1 0
1 0
1 0
1 0
1 0
1 0
1 0
1 0
1 0
0 0
0 0
0 0
0 0
0 0
0 0
0 0
0 0
0 0
0 0
0 0
0 0
0 0
0 0
0 0
0 0
0 0
0 0
0 0
0 0
0 0
0 0
0 0
0 0
0 0
0 0
0 0
0 0
0 0
0 0
0 0
0 0
0 0
0 0
0 0
0 0
0 0
0 0
1 0
1 0
1 0
1 0
1 0
1 0
1 0
1 0
1 0
1 0
1 0
1 0
1 0
1 0
1 0
1 0
1 0
1 0
1 0
1 0
1 0
1 0
1 0
1 0
1 0
1 0
1 1
1 1
1 1
1 1
1 1
1 1
1 1
1 1
1 1
1 1
0 1
0 1
0 1
0 1
0 1
0 1
0 1
0 1
0 1
0 1
0 1
0 1
0 1
0 1
0 1
0 1
0 1
0 1
0 1
0 1
0 1
0 1
0 1
0 1
0 1
0 1
0 0
0 0
0 0
0 0
0 0
0 0
0 0
0 0
0 0
0 0
0 0
0 0
0 0
0 0
0 0
0 0
0 0
0 0
0 0
0 0
0 0
0 0
0 0
0 0
0 0
0 0
0 0
0 0
0 0
0 0
0 0
0 2
0 2
0 2
0 2
0 2
0 2
0 2
0 2
0 2
0 2
0 2
0 2
0 2
0 2
0 2
0 2
0 2
0 2
0 2
0 2
0 2
0 2
0 2
0 2
0 2
0 2
0 2
0 2
0 2
0 2
0 2
0 2
0 2
0 2
0 2
0 2
0 0
0 0
0 0
0 0
0 0
0 0
0 0
0 0
0 0
0 0
0 0
0 0
0 0
0 0
0 0
0 0
0 0
0 0
0 0
0 0
0 0
0 0
0 3
0 3
0 3
0 3
0 4
0 4
0 4
0 4
0 4
0 4
0 4
0 4
0 4
0 4
0 4
0 4
0 4
0 4
0 5
0 6
0 6
0 7
0 7
0 7
0 7
0 7
0 7
0 7
0 7
0 7
0 7
0 7
0 7
0 7
0 7
0 7
0 4
0 6
0 6
0 6
0 7
0 7
0 7
0 9
0 9
0 9
0 11
0 12
0 12
0 12
0 12
0 12
0 12
0 11
0 11
0 10
0 10
0 9
0 9
0 9
0 9
0 9
0 9
0 9
0 10
0 10
0 10
0 10
0 10
0 10
0 11
0 11
0 9
0 6
0 6
0 6
0 6
0 6
0 6
0 5
0 5
0 4
0 2
0 2
0 2
0 2
0 2
0 2
0 2
0 2
0 2
0 2
0 2
0 2
0 2
0 3
0 3
0 3
0 3
0 3
0 2
0 2
0 2
0 2
0 2
0 2
0 1
0 1
0 1
0 1
0 1
0 2
0 2
0 2
0 2
0 2
0 2
0 2
0 2
0 2
0 2
0 2
0 2
0 2
0 2
0 2
0 2
0 2
0 2
0 2
0 2
0 1
0 1
0 1
0 1
0 1
0 1
0 1
0 1
0 1
0 1
0 1
0 1
0 1
0 1
0 1
0 2
0 2
0 2
0 2
0 2
0 2
0 2
0 2
0 2
0 2
0 2
0 2
0 2
0 2
0 2
0 2
0 2
0 2
0 2
0 2
0 2
0 2
0 2
0 3
0 3
0 3
0 3
0 3
0 3
0 4
0 4
0 4
0 4
0 4
0 5
0 5
0 4
0 3
0 3
0 3
0 3
0 3
0 3
0 3
0 3
0 3
0 3
0 4
0 4
0 4
0 4
0 4
0 4
0 4
0 4
0 4
0 4
0 4
0 4
0 2
0 2
0 2
0 2
0 6
0 6
0 6
0 6
0 6
0 6
0 6
0 5
0 5
0 5
0 5
0 5
0 5
0 5
0 5
0 4
0 4
0 4
0 4
0 4
0 4
0 4
0 4
0 4
0 4
0 4
0 4
0 4
0 4
0 4
0 4
0 4
0 4
0 4
0 5
0 5
0 1
0 1
0 1
0 1
0 1
0 1
0 1
0 1
0 1
0 1
0 1
0 1
0 1
0 1
0 1
0 1
0 1
0 1
0 1
0 1
0 1
0 1
0 1
0 1
0 1
0 2
0 2
0 2
0 2
0 2
0 2
0 2
0 2
0 2
0 1
0 1
0 1
0 1
0 1
0 1
0 1
0 1
0 1
0 1
0 1
0 1
0 2
0 2
0 2
0 2
0 2
0 2
0 2
0 2
0 2
0 1
0 1
0 1
0 1
0 1
0 1
0 1
0 1
0 1
0 1
0 1
0 1
0 1
0 1
0 1
0 1
0 1
0 1
0 1
0 1
0 1
0 1
0 1
0 1
0 1
0 0
0 0
0 0
0 0
0 0
0 1
0 1
0 1
0 1
0 1
0 1
0 1
0 1
0 1
0 1
0 1
0 2
0 2
0 3
0 3
0 3
0 3
0 3
0 3
0 3
0 3
0 3
0 3
0 3
0 3
0 3
0 3
0 3
0 3
0 3
0 3
0 3
0 3
0 3
0 3
0 3
0 2
0 2
0 2
0 2
0 2
0 2
0 2
0 2
0 2
0 2
0 2
0 1
0 1
0 0
0 0
0 0
0 0
0 0
0 0
0 0
0 0
0 0
0 0
0 0
0 0
0 0
0 0
0 0
1 0
3 0
5 0
6 0
6 0
16 0
16 0
16 0
16 0
16 0
16 0
16 0
16 0
16 0
16 0
16 0
16 0
17 0
17 0
17 0
17 0
17 0
17 0
17 0
17 0
17 0
17 0
17 0
17 0
17 0
17 0
17 0
17 0
17 0
17 0
17 0
16 0
14 0
12 0
11 0
11 0
1 0
1 0
1 0
1 0
1 0
2 0
2 0
2 0
2 0
2 0
2 0
1 0
1 0
1 0
1 0
1 1
1 1
1 1
1 1
1 1
1 1
1 1
1 1
1 1
1 1
1 1
2 1
2 1
2 1
2 1
2 1
2 1
3 1
3 1
3 1
3 1
3 1
3 1
3 1
3 1
2 1
2 1
2 1
2 1
2 1
2 1
5 2
9 2
11 2
11 1
11 1
11 1
11 1
11 1
11 1
11 1
11 1
12 1
12 1
12 1
12 1
12 1
11 1
11 1
11 1
11 1
11 1
11 1
10 1
10 1
10 1
10 1
10 1
10 1
10 1
10 2
10 2
10 2
10 2
10 2
9 2
9 2
5 1
1 1
1 1
1 1
1 1
1 1
1 1
1 1
1 1
1 1
0 1
1 1
1 1
1 1
1 1
1 1
1 1
1 1
1 1
1 1
1 1
1 1
1 1
1 1
1 1
1 0
1 0
1 0
1 0
1 0
1 0
1 0
1 0
1 0
1 0
1 0
1 0
1 0
1 0
1 0
1 0
1 0
1 0
1 0
1 0
1 1
2 1
1 1
1 1
1 1
1 1
1 1
1 1
1 1
1 1
1 1
1 1
1 2
1 2
1 2
1 2
1 2
1 2
1 2
1 2
1 2
1 2
1 2
1 2
1 2
1 2
1 3
1 3
1 3
1 3
1 3
2 3
2 5
2 5
2 5
2 5
2 4
1 4
1 4
1 4
1 4
1 4
1 4
1 4
1 4
1 4
1 4
1 4
1 3
1 3
1 3
1 3
1 3
1 3
1 3
1 3
1 3
1 3
1 3
1 2
1 2
1 2
1 2
1 5
1 5
1 5
1 6
0 6
0 4
0 6
0 7
0 7
0 7
0 7
0 7
0 7
0 7
0 7
0 7
0 7
0 7
0 7
0 7
0 7
0 7
0 7
0 7
0 7
0 7
1 7
1 7
1 7
1 7
1 7
1 7
1 7
1 7
1 7
1 7
1 1
1 1
1 1
1 1
1 1
1 1
1 1
1 0
1 0
1 0
1 0
1 0
1 0
1 0
1 0
1 0
1 0
1 0
1 0
1 0
1 0
1 0
1 0
1 0
1 0
1 0
0 0
0 0
0 0
0 1
0 1
0 1
0 1
0 1
0 1
0 1
0 1
0 1
0 1
0 2
0 2
0 4
0 4
0 4
0 4
0 4
0 4
0 4
0 4
0 4
0 4
0 4
0 4
0 4
0 4
0 5
0 5
0 5
0 5
0 5
0 5
0 5
0 5
0 5
0 5
0 4
0 4
0 5
0 5
0 5
0 5
0 5
0 5
0 5
0 5
0 4
0 4
0 2
0 2
0 2
0 2
0 2
0 3
0 3
0 3
0 3
0 3
0 3
0 3
0 3
0 2
0 2
0 2
0 2
0 2
0 2
0 2
0 2
0 2
0 2
0 2
0 2
0 2
0 1
0 1
0 1
0 1
0 1
0 1
0 1
0 1
0 1
0 1
0 1
0 1
0 1
0 1
0 1
0 0
0 0
0 0
0 0
0 0
0 0
0 0
0 0
0 0
0 0
0 0
0 0
0 0
0 0
0 0
0 0
0 0
0 0
0 0
0 0
0 0
0 0
0 0
0 0
0 0
0 0
0 0
0 0
0 0
0 0
0 0
0 0
0 0
0 0
0 0
0 0
0 0
0 0
0 0
0 0
0 0
0 0
0 0
0 0
0 0
0 0
0 0
0 0
0 0
0 0
0 0
0 0
0 0
0 0
0 0
0 0
0 0
0 0
0 0
0 0
0 0
0 0
0 0
0 0
0 0
0 0
0 0
1 0
1 0
1 0
1 0
1 0
1 0
1 0
1 0
1 0
1 0
1 0
1 0
1 0
2 0
3 1
5 1
5 1
5 1
5 1
5 1
5 1
5 1
5 1
5 1
5 1
5 1
5 1
5 1
6 1
6 1
6 1
7 1
7 1
7 1
7 1
7 1
6 1
6 1
6 1
6 1
6 1
6 1
6 1
6 1
6 1
6 1
6 1
6 1
6 1
5 1
2 0
3 0
4 0
4 0
4 0
4 0
4 0
4 0
4 0
4 0
5 0
5 0
5 0
5 0
4 0
4 0
4 0
3 0
3 0
3 0
3 0
3 0
3 0
3 0
3 0
3 0
3 0
3 0
3 0
3 0
3 0
3 0
3 0
3 0
3 0
3 0
3 0
1 0
1 0
1 0
1 0
1 0
1 0
1 0
1 0
1 0
0 0
0 0
0 1
0 1
0 1
0 1
0 1
0 1
0 1
0 1
0 1
0 1
0 1
0 1
0 1
0 1
0 1
0 1
0 1
0 1
0 1
0 1
0 1
0 2
0 2
0 2
0 2
0 2
0 2
0 2
0 2
0 2
0 2
0 2
0 2
0 2
0 2
0 2
0 2
0 2
0 2
0 2
0 2
0 2
0 2
0 2
0 2
0 2
0 2
0 2
0 2
0 2
0 3
0 3
0 3
0 3
0 3
0 3
0 4
0 4
0 5
0 5
0 5
0 5
0 6
0 6
0 6
1 5
1 5
1 5
2 6
2 6
2 6
2 6
2 6
2 6
2 6
2 7
2 7
2 10
2 11
2 11
2 11
2 11
2 11
2 11
2 13
2 13
2 12
2 13
2 14
2 14
2 14
2 14
2 12
2 12
2 12
2 11
2 11
2 11
2 11
2 11
2 11
1 11
1 11
1 11
0 10
0 10
0 10
0 10
0 10
0 10
0 8
1 6
1 6
1 6
1 6
1 7
1 7
1 7
1 7
1 7
1 5
1 4
1 5
1 7
1 6
1 8
1 7
1 7
1 7
1 7
1 8
1 8
1 8
1 8
1 8
1 8
1 8
1 8
1 8
1 8
1 8
1 8
1 8
1 8
1 8
1 8
1 8
1 8
1 8
1 7
1 7
1 6
1 6
1 6
1 6
1 6
2 6
2 6
2 3
2 3
2 2
2 0
2 0
2 0
2 0
2 0
2 0
2 0
2 0
2 0
2 0
2 0
2 0
2 0
2 0
2 0
2 0
2 0
3 0
3 0
3 0
3 0
3 0
2 0
2 0
2 0
2 0
2 0
2 0
2 0
2 0
2 0
1 0
1 0
1 0
1 0
1 0
1 0
1 0
1 0
1 0
1 0
1 0
1 0
1 0
1 0
1 0
1 0
1 0
1 0
1 0
1 0
1 0
1 0
0 0
0 0
0 0
0 0
0 0
0 0
0 0
0 0
0 0
0 0
0 0
0 0
0 0
0 0
0 0
0 1
0 1
0 1
0 1
0 1
0 1
0 1
0 1
0 1
0 1
0 1
0 1
0 1
0 1
0 1
0 1
0 1
0 1
0 1
0 1
0 1
0 1
0 1
0 1
0 1
0 1
0 1
0 1
0 1
0 1
0 1
0 1
0 1
0 1
0 1
0 1
0 0
0 0
0 0
0 0
0 0
0 0
0 0
0 0
0 0
0 0
0 0
0 0
0 0
0 0
0 0
0 0
0 0
0 0
0 0
0 0
0 0
0 0
0 0
0 0
0 0
0 0
0 0
0 0
0 0
0 0
0 0
0 0
0 0
0 0
0 1
0 1
0 1
0 1
0 1
0 1
0 1
0 1
0 1
0 1
0 1
0 3
0 4
0 4
0 4
0 4
0 4
0 4
0 4
0 4
0 4
0 4
0 4
0 4
0 4
0 4
0 4
0 4
0 5
0 5
0 5
0 6
0 6
0 7
0 7
0 6
0 6
0 6
0 6
0 6
0 6
0 6
0 6
0 6
0 6
0 6
0 5
0 4
0 3
0 3
0 3
0 3
0 3
0 3
0 3
0 3
0 3
0 3
0 3
0 3
0 3
0 2
0 2
0 2
0 2
0 3
0 3
0 2
0 2
0 1
0 1
0 1
0 1
0 1
0 1
0 1
0 1
0 1
0 1
0 1
0 1
0 1
0 1
0 1
0 1
0 1
0 1
0 1
0 1
0 1
0 1
0 1
0 1
0 1
0 1
0 1
0 1
0 1
0 1
0 1
0 1
0 0
0 0
0 0
0 0
0 0
0 0
0 0
0 0
0 0
0 1
0 1
0 1
0 3
0 3
0 3
0 3
0 3
0 3
0 3
0 3
0 3
0 3
0 3
0 3
0 3
0 3
0 3
0 5
0 5
0 5
0 5
0 5
0 5
0 5
0 5
0 5
0 5
0 5
0 5
0 5
0 5
0 5
0 5
0 5
0 5
0 4
0 4
0 4
0 2
0 2
0 2
0 2
0 2
0 2
0 2
0 2
0 2
0 2
0 2
0 2
0 2
0 2
0 2
0 0
0 1
0 1
0 2
0 2
0 2
0 2
0 2
0 2
0 2
0 3
0 3
0 3
0 3
0 3
0 3
0 3
0 3
0 3
0 3
0 3
0 3
0 3
0 3
0 3
0 3
0 3
0 3
0 3
0 3
0 3
0 3
0 3
0 3
0 3
0 3
0 3
0 2
0 2
0 2
0 2
0 2
0 2
0 2
0 1
0 1
0 1
0 2
0 2
0 2
0 2
0 2
0 2
0 2
0 2
0 2
0 2
0 2
0 2
0 2
0 2
0 2
0 3
0 3
0 3
0 5
0 5
0 5
0 5
0 5
0 5
0 6
0 6
0 7
0 7
0 7
0 7
0 7
0 7
0 8
0 7
0 7
0 7
0 7
0 7
0 7
0 7
0 7
0 7
0 7
0 7
0 7
0 7
0 8
0 8
0 8
0 8
0 8
0 7
0 7
0 6
0 5
0 5
0 5
0 4
0 4
0 4
0 4
0 3
0 1
0 1
0 1
0 1
0 1
0 1
0 1
0 1
0 1
0 1
0 1
0 1
0 1
0 1
0 1
0 1
0 1
0 1
0 1
0 1
0 0
0 0
0 0
0 0
0 0
0 0
0 0
0 2
0 2
0 2
0 2
0 2
0 3
0 3
0 3
0 3
0 3
0 3
0 3
0 3
0 3
0 3
0 3
0 3
0 3
0 3
0 3
0 3
0 3
0 3
0 3
0 3
0 4
0 4
0 4
0 4
0 4
0 3
0 3
0 3
0 3
0 3
0 3
0 2
0 2
0 2
0 2
0 2
0 1
0 1
0 1
0 1
0 1
0 1
0 1
0 1
0 1
0 2
0 2
0 2
0 2
0 2
0 2
0 1
0 1
0 1
0 1
0 1
0 1
0 1
0 1
0 1
0 1
0 1
0 2
0 3
0 3
0 3
0 3
0 3
0 3
0 3
0 3
0 3
0 3
0 3
0 3
0 3
0 3
0 3
0 3
0 4
0 4
0 3
0 3
0 3
0 3
0 3
0 3
0 3
0 3
0 3
0 3
0 3
0 3
0 3
0 3
0 4
0 4
6 4
6 3
6 2
6 2
6 2
6 2
6 2
6 2
6 2
6 2
6 2
6 2
6 2
6 2
6 2
6 2
6 2
6 2
6 1
7 1
7 2
7 2
7 2
13 2
13 2
13 2
13 2
13 2
15 3
19 3
20 3
39 3
39 3
39 3
39 2
39 2
33 2
33 2
33 2
33 2
34 2
34 2
34 2
34 2
34 2
34 2
34 2
34 2
34 2
34 2
34 2
35 2
35 2
35 2
35 2
34 2
38 1
42 1
44 1
38 1
38 1
40 1
40 1
40 1
38 0
35 0
34 0
15 0
15 0
15 0
15 0
15 0
15 0
15 0
15 0
15 0
14 0
14 0
16 0
25 0
30 0
32 0
36 0
36 0
37 0
36 0
36 0
36 0
36 0
37 0
37 0
36 0
29 0
29 0
27 0
27 0
27 0
25 0
25 0
25 0
27 0
26 0
26 0
26 0
26 0
26 0
26 0
26 0
26 0
25 0
23 0
23 0
23 0
23 0
23 0
12 0
10 0
9 0
5 0
4 0
4 0
3 0
3 0
3 0
3 0
3 0
3 0
3 0
3 0
4 0
5 0
8 0
9 0
9 0
9 0
8 0
7 0
7 0
7 0
7 0
7 0
8 0
11 0
11 0
11 0
10 0
10 0
10 0
10 0
10 0
10 0
10 0
10 0
10 0
10 0
10 0
10 0
10 0
10 0
10 0
13 0
14 0
14 0
16 0
16 0
15 0
15 0
12 0
11 0
11 0
11 0
11 0
11 0
11 0
10 0
9 0
9 0
9 0
7 0
7 0
8 0
8 0
8 0
8 0
8 0
8 0
8 0
8 0
8 0
8 0
8 0
11 3
11 3
11 3
11 3
11 4
8 4
6 5
6 5
4 6
4 6
4 6
4 6
4 6
5 8
5 8
5 8
5 8
5 8
5 8
5 8
5 8
5 8
5 8
6 8
6 8
5 8
5 8
5 8
5 8
5 8
5 8
5 8
5 8
5 8
5 8
5 8
3 5
3 5
3 5
3 5
3 4
3 4
3 3
3 2
3 2
3 2
4 2
4 2
4 2
3 0
4 0
4 0
4 0
4 0
4 0
5 1
5 1
5 1
5 1
4 1
4 1
3 1
3 1
3 1
3 1
3 1
3 1
3 1
3 1
3 1
3 1
2 1
2 1
2 1
2 1
2 1
2 1
2 1
2 1
3 1
4 1
4 1
4 1
4 1
5 1
5 1
5 1
5 1
5 0
5 0
5 0
4 0
4 0
4 0
4 0
4 0
4 0
4 0
4 0
4 0
5 0
8 0
8 0
10 1
10 1
10 1
10 1
10 1
10 1
10 1
10 1
10 1
10 1
12 1
12 1
11 1
10 1
10 1
10 1
10 1
10 1
13 1
12 1
12 1
12 1
12 2
12 2
12 2
12 2
12 2
12 2
12 2
12 2
13 2
12 2
11 2
10 2
9 2
7 1
7 1
7 1
7 1
7 1
7 1
11 2
11 3
11 3
11 3
12 3
10 3
10 3
10 3
10 3
10 3
10 3
10 3
9 3
6 3
6 3
6 3
6 3
6 2
6 2
7 2
7 2
7 3
7 3
9 3
9 3
8 3
8 3
8 3
8 4
8 4
8 4
8 4
8 4
8 4
8 4
8 4
5 2
5 2
4 2
4 2
4 2
4 2
4 2
4 2
4 2
3 2
3 2
3 2
3 2
3 2
3 2
3 2
4 2
4 2
6 4
6 4
6 4
6 3
6 3
4 3
5 3
6 3
6 3
6 3
6 2
6 2
5 2
5 2
7 2
8 2
13 2
14 2
14 2
14 2
14 2
14 2
14 2
14 2
14 2
15 2
15 2
16 2
17 2
27 2
27 2
27 2
28 2
31 1
32 1
33 1
32 0
32 0
32 0
32 0
32 0
31 0
36 0
36 0
36 0
36 0
39 0
39 0
40 0
38 0
36 1
36 1
35 1
34 1
34 1
34 1
34 1
34 1
33 1
33 1
33 1
32 1
32 1
32 1
34 1
26 1
26 1
26 1
25 1
23 1
21 1
21 1
21 1
30 1
37 1
39 1
39 1
37 1
36 1
39 1
39 1
38 1
37 1
38 1
37 1
37 1
37 0
37 0
37 0
37 0
37 0
40 0
41 0
46 0
47 0
47 0
50 0
50 0
52 0
52 0
54 0
57 0
59 0
59 0
59 0
59 0
59 0
57 0
56 0
49 0
44 0
42 0
42 0
42 0
36 0
34 0
35 0
34 0
34 0
33 0
32 0
32 0
30 0
28 0
28 0
27 0
26 0
23 0
23 0
19 0
16 0
15 0
11 0
9 0
5 0
2 0
1 0
1 0
1 0
1 0
1 0
1 0
1 0
1 0
1 0
1 0
1 0
1 0
1 0
1 0
1 0
1 0
0 0
0 0
0 0
0 0
0 0
0 0
0 0
0 0
0 0
0 0
0 0
0 0
0 0
0 0
0 0
0 0
0 0
0 0
0 0
0 0
0 0
0 0
0 0
0 0
0 0
0 0
0 0
0 0
0 0
0 0
0 0
0 0
0 0
0 0
0 0
0 0
0 0
0 0
0 0
0 0
0 0
0 0
0 0
0 0
0 0
1 0
1 0
1 1
1 1
1 2
1 2
1 2
1 2
1 2
1 2
1 2
1 2
1 2
1 2
1 2
1 2
1 2
1 2
1 2
1 2
1 2
1 2
1 2
1 2
1 2
1 2
1 2
1 2
1 2
1 2
1 2
1 2
1 2
1 2
1 2
1 2
0 2
0 2
0 1
0 1
0 0
0 0
0 0
0 0
0 0
0 0
0 0
0 0
0 0
0 0
0 0
0 0
0 0
0 0
0 0
0 0
0 0
0 0
0 0
0 0
0 0
0 0
0 0
0 0
0 0
0 0
0 0
0 0
0 0
0 0
0 0
0 0
0 0
0 1
0 1
0 1
0 1
0 1
0 1
0 1
0 1
0 1
0 1
0 1
0 1
0 1
0 1
0 1
0 1
0 1
0 1
0 1
0 1
0 1
0 1
0 1
0 1
0 1
0 1
0 1
0 1
0 2
0 2
0 2
0 2
0 2
0 2
0 2
0 2
0 1
0 1
0 1
0 1
0 1
0 1
0 1
0 1
0 2
0 2
0 2
0 2
0 4
0 4
0 4
0 4
0 4
0 4
0 4
0 4
0 4
0 5
0 5
0 5
1 5
1 5
1 5
1 5
1 4
1 4
1 4
1 4
1 4
1 4
1 4
1 4
1 4
1 4
1 4
1 4
1 4
1 4
1 4
1 4
1 3
1 4
1 4
1 4
1 2
1 2
1 2
1 2
1 2
1 2
1 2
1 2
1 2
1 1
1 1
1 1
0 1
0 1
0 1
0 2
0 2
0 2
0 2
0 2
0 2
0 2
0 2
0 2
0 2
0 2
0 2
0 2
0 2
0 2
0 2
0 2
0 2
0 1
0 1
0 1
0 1
0 1
0 1
0 1
0 1
0 1
0 1
0 1
0 1
0 1
0 1
0 1
0 1
0 2
0 2
0 1
0 1
0 1
1 4
1 4
1 4
1 4
1 4
1 4
1 4
1 4
1 4
1 4
1 4
1 4
1 4
1 5
2 5
2 5
2 5
2 5
2 5
2 5
2 5
2 5
2 5
2 5
2 5
2 5
2 5
2 5
2 5
2 5
2 5
2 4
2 4
2 4
2 4
1 4
1 1
1 1
1 1
1 1
1 1
1 1
1 0
1 0
0 0
0 0
0 0
0 0
0 0
0 0
0 0
0 0
0 0
0 0
0 0
0 0
0 0
0 0
0 0
0 0
0 0
0 0
0 0
0 0
0 0
0 0
0 2
0 6
0 6
0 6
0 6
0 6
0 6
0 6
0 6
0 6
0 6
0 6
0 6
0 6
0 6
0 6
0 6
0 6
0 6
0 6
0 6
0 6
0 6
0 7
0 7
0 7
0 7
0 7
0 7
0 7
0 7
0 7
0 7
0 7
0 7
0 7
0 3
0 1
0 1
0 1
0 1
0 1
0 1
0 1
0 1
0 1
0 1
0 1
0 1
0 1
0 1
0 1
0 1
0 1
0 1
0 1
0 1
0 1
0 1
0 0
0 0
0 0
0 0
0 0
0 0
0 0
0 0
0 0
0 0
0 0
0 0
0 0
0 0
0 0
0 0
0 0
0 2
0 3
0 4
0 5
0 5
0 5
0 5
0 5
0 5
0 5
0 5
0 5
0 5
0 5
0 5
0 5
0 5
0 5
0 5
0 5
0 5
0 5
0 5
0 5
0 5
0 5
0 5
0 5
0 5
0 5
0 6
0 7
0 7
0 8
1 8
1 8
1 6
1 3
1 3
1 3
1 4
1 4
1 4
1 4
1 4
1 4
1 4
1 4
1 5
1 5
1 5
1 5
1 5
1 6
1 6
1 6
1 6
1 8
1 8
1 8
1 8
1 9
1 9
1 9
1 9
1 9
1 8
1 7
1 6
1 6
0 6
0 6
0 6
0 6
0 6
0 6
0 5
0 5
0 5
0 5
0 5
0 5
0 5
0 4
0 4
0 4
0 4
0 3
0 3
0 3
0 3
0 0
0 0
0 0
0 20
0 23
0 24
0 25
0 25
0 25
0 29
0 33
0 36
0 36
0 36
0 36
0 36
0 36
0 36
1 37
1 37
1 37
1 37
1 38
1 38
1 38
1 38
1 38
1 38
1 38
1 38
1 39
1 40
1 40
1 40
1 40
1 40
1 40
1 40
1 40
1 22
1 19
1 18
1 17
1 17
1 17
1 13
1 9
1 6
1 6
1 6
1 6
1 6
1 6
1 6
0 5
0 4
0 4
0 4
0 5
0 6
0 6
0 7
0 8
0 8
0 8
0 8
0 7
0 6
0 6
0 6
0 6
0 6
0 6
0 6
0 6
0 4
0 4
0 4
0 4
0 4
0 4
0 4
0 4
0 4
0 4
0 4
0 4
0 4
0 4
0 4
0 5
0 5
1 22
1 22
1 21
1 19
1 19
1 19
1 18
1 18
1 18
1 28
1 30
2 34
2 34
2 34
2 34
2 34
2 34
2 34
2 34
2 34
2 37
2 37
2 37
2 39
2 39
2 43
2 43
2 44
2 44
2 44
2 44
2 44
2 44
2 44
1 43
1 43
1 26
1 26
1 26
1 26
1 26
1 26
1 26
1 26
1 26
1 16
1 12
0 10
0 10
0 10
0 10
0 10
0 10
0 10
0 10
0 10
0 7
0 7
0 7
0 5
0 5
0 1
0 0
0 0
0 0
0 0
0 0
0 0
0 0
0 0
0 0
0 0
0 0
0 0
0 0
0 0
0 0
0 0
0 0
0 0
0 0
0 0
0 0
0 0
0 0
0 0
0 0
0 0
0 0
0 0
0 0
0 0
0 0
0 0
0 0
0 0
0 0
0 0
0 0
0 0
0 0
0 0
0 0
0 0
0 0
0 0
0 0
0 0
0 0
0 0
0 0
0 0
0 0
0 0
0 0
0 0
0 0
0 0
0 0
0 0
0 0
0 0
0 0
0 0
0 0
0 0
0 0
0 0
0 0
0 0
0 0
0 0
0 0
0 0
0 0
0 0
0 0
0 0
0 0
0 0
0 0
0 0
0 0
1 0
1 0
1 0
1 0
1 0
1 0
1 0
5 0
5 0
5 0
5 0
5 0
5 0
5 0
5 0
5 0
5 0
5 0
5 0
5 0
5 0
5 0
5 0
5 0
6 0
6 0
6 0
6 0
6 0
6 0
6 0
7 0
7 0
7 0
6 0
8 0
8 0
8 0
8 0
8 0
8 0
8 0
8 0
4 0
4 0
4 0
4 1
4 1
4 1
4 1
4 1
4 1
4 1
4 1
4 1
4 1
4 1
4 1
4 1
4 1
3 1
3 1
3 1
3 1
3 1
3 1
3 1
2 1
2 1
2 1
2 1
0 1
0 1
0 1
0 1
0 1
0 0
0 0
0 0
0 0
0 0
0 0
0 0
0 0
0 0
0 0
0 0
0 0
0 0
0 0
0 0
0 0
0 0
0 0
0 0
0 0
0 0
0 1
0 1
0 1
0 1
0 1
0 1
0 1
0 1
0 1
0 1
0 1
0 1
0 1
0 1
0 1
0 1
0 1
0 1
0 1
0 1
0 1
0 1
0 1
0 1
0 1
0 1
0 1
0 1
0 1
0 1
0 1
0 1
0 2
0 2
0 2
0 2
0 1
0 1
0 1
0 1
0 1
0 1
0 1
0 1
0 1
0 1
0 1
0 1
0 1
0 1
0 1
0 3
0 3
0 3
0 3
1 3
1 3
1 3
1 3
1 3
1 3
1 3
1 3
1 3
1 3
1 3
1 3
1 3
1 2
1 2
1 2
1 2
1 2
1 2
1 2
1 2
1 2
1 2
1 2
1 2
1 2
1 2
1 2
1 2
1 2
1 1
1 0
1 0
1 0
1 0
0 0
0 0
0 0
0 0
0 0
0 0
0 0
0 0
0 0
0 0
0 0
0 0
0 0
0 0
0 1
0 1
0 1
0 1
0 1
0 1
0 1
0 1
0 1
0 1
0 1
0 1
0 1
0 1
0 1
0 1
0 1
0 1
0 1
0 1
0 1
0 1
0 1
0 1
0 1
0 1
0 1
0 1
0 1
0 1
0 1
0 2
0 2
0 2
0 2
0 2
0 1
0 1
0 1
0 1
0 1
0 1
0 1
0 1
0 1
0 1
0 1
0 1
0 1
0 1
0 1
0 1
0 1
0 1
0 1
0 1
0 1
0 1
0 1
0 1
0 1
0 1
0 1
0 1
0 1
0 1
0 1
0 0
0 0
0 0
0 0
0 0
0 0
0 0
0 0
0 0
0 0
0 0
0 0
0 0
0 0
0 0
0 0
0 0
0 0
0 0
0 0
0 0
0 0
0 0
0 0
0 0
0 0
0 0
0 0
0 0
0 0
0 0
0 0
0 0
0 0
0 0
0 0
0 0
0 0
0 0
0 0
0 0
0 0
0 0
0 0
0 0
0 0
0 0
0 0
0 0
0 0
0 0
0 0
0 0
0 0
0 0
0 0
0 0
0 0
0 2
0 2
0 3
0 3
0 18
0 18
0 19
0 21
0 25
0 28
0 33
0 33
0 33
0 33
0 33
0 33
0 33
0 33
0 33
0 33
0 33
0 33
0 33
0 33
0 33
0 33
0 33
0 33
0 33
0 33
0 33
0 33
1 33
1 33
1 32
1 31
1 29
1 29
1 29
1 29
1 6
1 3
1 0
1 0
1 1
1 1
1 1
1 1
0 1
0 1
0 1
0 1
0 1
0 1
0 1
0 1
0 1
0 2
0 3
0 3
0 3
0 3
0 3
0 3
0 3
0 3
0 3
0 3
0 3
0 4
0 8
0 12
0 21
0 32
0 38
0 42
0 42
0 42
0 42
0 42
0 42
0 42
0 42
0 42
0 42
0 42
0 42
0 42
0 41
0 40
0 40
0 40
0 40
0 40
0 40
0 41
0 41
0 41
0 41
0 41
0 41
0 41
0 41
0 41
0 41
0 40
0 31
0 22
0 16
0 2
0 1
0 1
0 1
0 1
0 1
0 1
0 1
0 1
0 1
0 1
0 1
0 1
0 1
0 1
0 1
0 0
0 0
0 0
0 0
0 0
0 0
0 0
0 0
0 0
0 0
0 0
0 0
0 0
0 0
0 0
0 0
0 0
0 0
0 0
0 0
0 0
0 0
0 0
0 0
0 0
0 0
0 0
0 0
0 0
0 0
0 0
0 0
0 0
0 0
0 0
0 0
0 0
0 0
0 0
0 0
0 0
0 0
0 0
0 0
0 0
0 0
0 0
0 0
0 0
0 0
0 0
0 0
0 0
0 0
0 0
0 0
0 0
0 0
0 0
0 0
0 0
0 0
0 0
0 0
0 0
0 0
0 0
0 0
0 0
0 0
0 0
0 0
0 0
0 0
0 0
0 0
0 0
0 0
0 0
0 0
0 0
0 0
0 0
0 0
0 0
1 0
1 0
1 0
1 0
1 0
1 0
1 0
1 0
1 0
1 0
1 0
1 0
1 0
1 0
1 0
0 0
0 0
0 0
0 0
0 0
0 0
0 0
0 0
0 0
0 0
0 0
0 0
0 0
0 0
0 0
0 0
0 0
0 0
0 0
0 0
0 0
0 0
0 0
0 0
0 0
0 0
0 0
0 0
0 0
0 0
0 0
0 0
0 0
0 0
0 0
0 0
0 0
0 0
0 0
0 0
0 0
0 0
0 0
0 0
0 0
0 0
0 0
0 0
0 0
0 0
0 0
0 0
0 0
0 0
0 0
0 0
0 0
0 0
0 0
0 0
0 0
0 0
0 0
0 0
0 0
0 0
0 0
0 0
0 0
0 0
0 0
0 0
0 0
0 0
0 0
0 0
0 0
0 0
0 0
0 0
0 0
0 0
0 0
0 0
0 0
0 0
0 0
0 0
0 0
0 0
0 0
0 0
0 0
0 0
0 0
0 0
0 0
0 0
0 0
0 0
0 0
0 0
0 0
0 0
0 0
0 0
0 0
0 0
0 0
0 0
0 0
0 0
0 0
0 0
0 0
0 0
0 0
0 0
0 0
0 0
0 0
0 0
0 0
0 0
0 0
0 0
0 0
0 0
0 0
0 0
0 0
0 0
0 0
0 0
0 0
0 0
0 0
0 0
0 0
0 0
0 0
0 0
0 0
0 0
0 0
0 0
0 0
0 0
0 0
0 0
0 0
0 0
0 0
0 0
0 0
0 0
0 0
0 0
0 0
0 0
0 0
0 0
0 0
0 0
6 0
7 0
7 0
7 0
7 0
7 0
7 0
8 0
8 0
8 0
8 0
8 0
8 0
8 0
8 0
8 0
8 0
8 0
9 0
9 0
13 0
13 0
13 0
13 0
13 0
13 0
13 0
15 0
15 0
14 0
14 0
14 0
14 0
14 0
12 0
10 0
8 0
8 0
8 0
8 0
8 0
8 0
8 0
7 0
7 0
7 0
7 0
7 0
7 0
7 0
7 0
8 0
8 0
8 0
7 0
6 0
4 0
4 0
10 0
24 0
28 0
30 0
30 0
29 0
29 0
29 0
29 0
29 0
33 0
38 0
39 0
39 0
39 0
40 0
41 0
41 0
41 0
41 0
41 0
41 0
41 0
41 0
41 0
43 0
51 0
59 0
59 0
58 0
59 0
59 0
58 0
58 0
57 0
56 0
42 0
36 0
34 0
31 0
31 0
31 0
31 0
31 0
31 0
29 0
27 0
22 0
21 0
21 0
20 0
19 0
19 0
19 0
22 0
31 0
38 0
47 0
62 0
62 0
57 0
58 0
56 0
52 0
53 0
53 0
53 0
55 0
57 0
57 0
57 0
57 0
57 0
57 0
57 0
57 0
57 0
58 0
58 0
58 0
57 0
57 0
57 0
57 0
57 0
57 0
57 0
58 0
58 0
58 0
52 0
43 0
37 0
30 0
14 0
11 0
9 0
7 0
7 0
6 0
6 0
7 0
8 0
6 0
5 0
5 0
5 0
7 0
8 0
8 0
8 0
8 0
8 0
7 0
7 0
7 0
7 0
7 0
7 0
7 0
7 0
7 0
7 0
6 0
6 0
6 0
5 0
6 0
6 0
6 0
6 0
5 0
9 0
12 0
17 0
17 0
16 0
17 0
16 0
16 0
19 0
21 0
21 0
21 0
21 0
21 0
21 0
21 0
21 0
21 0
21 0
22 0
22 0
22 0
22 0
22 0
22 0
21 0
21 0
21 0
21 0
21 0
56 0
64 0
64 0
65 0
65 0
65 0
61 0
56 0
53 0
53 0
53 0
52 0
52 0
50 0
47 0
47 0
47 0
46 0
45 0
45 0
45 0
45 0
45 0
45 0
45 0
44 0
44 0
44 0
44 0
44 0
42 0
42 0
42 0
42 0
33 0
31 0
2 0
0 0
0 0
0 0
0 0
0 0
0 0
0 0
0 0
0 0
0 0
0 0
0 0
0 0
0 0
0 0
0 0
0 0
0 0
0 0
0 0
1 0
1 0
1 0
2 0
2 0
2 0
2 0
2 0
2 0
2 0
2 0
2 0
2 0
2 0
2 0
2 0
2 0
2 0
2 0
2 0
2 0
2 0
2 0
3 0
3 0
3 0
3 0
4 0
4 0
4 0
6 0
6 0
6 0
6 0
6 0
7 0
7 0
7 0
7 0
6 0
6 0
6 0
6 0
6 0
6 0
6 0
6 0
6 0
6 0
6 0
7 0
7 0
7 0
7 0
7 0
7 0
8 0
9 0
11 0
10 0
10 0
10 0
10 0
9 0
9 0
9 0
5 0
5 0
4 0
4 0
4 0
4 0
4 0
4 0
4 0
4 0
4 0
4 0
4 0
4 0
4 0
4 0
6 0
8 0
8 0
8 0
8 0
8 0
8 0
8 0
9 0
9 0
8 0
7 0
5 0
5 0
5 0
6 0
8 0
8 0
8 0
8 0
8 0
8 0
8 0
8 0
8 0
8 0
8 0
8 0
8 0
8 0
8 0
8 0
8 0
8 0
6 0
5 0
5 0
4 0
4 0
4 0
4 0
4 0
4 0
3 0
3 0
4 0
5 0
5 0
5 0
5 0
5 0
4 0
3 0
2 0
2 0
4 0
4 0
4 0
4 0
4 0
4 1
4 1
4 1
6 1
6 1
7 1
7 1
7 2
7 2
7 2
7 2
7 2
7 2
7 2
7 2
7 2
7 2
7 2
7 2
7 2
7 2
5 2
5 2
5 2
5 2
5 2
5 2
5 2
5 2
6 2
6 2
4 2
4 2
6 2
6 1
6 1
8 1
8 1
8 1
6 1
6 1
5 0
5 0
5 0
5 0
5 0
5 0
5 0
5 0
5 0
5 0
6 0
6 0
6 0
6 0
6 0
7 0
7 0
7 0
7 0
7 0
7 0
6 0
6 0
6 0
8 0
8 0
8 0
8 0
6 0
6 0
6 0
4 0
4 0
4 0
4 0
4 0
4 0
4 0
4 0
5 0
5 0
5 0
5 0
5 0
5 0
5 0
4 0
3 0
3 0
3 0
3 0
3 0
3 0
3 0
3 0
3 0
3 0
3 0
3 0
3 0
1 0
1 0
1 0
2 0
2 0
2 0
2 0
7 0
7 0
11 0
15 0
15 0
16 0
16 0
16 0
16 0
18 0
18 0
18 0
18 0
18 0
18 0
18 0
18 0
18 0
18 0
18 0
18 0
18 0
18 0
18 0
18 0
18 0
17 0
17 0
17 0
17 0
15 0
15 0
13 0
13 0
13 0
13 0
8 0
7 0
9 0
7 0
7 0
7 0
6 0
5 0
5 0
4 0
4 0
4 0
4 0
4 0
4 0
4 0
4 0
5 0
5 0
5 0
5 0
5 0
5 0
5 0
5 0
5 0
5 0
5 0
5 0
5 0
5 0
5 0
5 0
5 0
5 0
5 0
5 0
4 0
3 0
2 0
2 0
1 0
1 0
1 0
1 0
1 0
1 0
1 0
1 0
1 0
1 0
1 0
1 0
0 0
0 0
0 0
0 0
0 0
0 0
0 0
0 0
0 0
0 0
0 0
0 0
0 0
0 0
0 0
0 0
0 0
0 0
0 0
0 0
0 0
2 0
2 0
2 0
2 0
2 0
2 0
2 0
2 0
2 0
2 0
2 0
2 0
2 0
2 0
2 0
2 0
2 0
2 0
2 0
2 0
2 0
2 0
2 0
2 0
2 0
2 0
2 0
2 0
2 0
2 0
2 0
2 0
2 0
2 0
2 0
2 0
0 0
0 0
0 0
0 0
0 0
0 0
0 0
0 0
0 0
2 0
2 0
2 0
2 0
2 0
2 0
2 0
2 0
4 0
4 0
5 0
5 0
5 0
5 0
5 0
5 0
5 0
5 0
5 0
5 0
5 0
5 0
5 0
5 0
5 0
6 0
6 0
6 0
6 0
6 0
6 0
6 0
6 0
6 0
7 0
7 0
5 0
5 0
5 0
5 0
5 0
5 0
5 0
4 0
2 0
2 0
2 0
2 0
2 0
2 0
2 0
2 0
2 0
2 0
2 0
2 0
2 0
2 0
2 0
2 0
2 0
1 0
1 0
1 0
1 0
1 0
1 0
1 0
1 0
1 0
0 0
0 0
0 0
2 0
4 0
5 0
5 0
5 0
6 0
6 0
6 0
6 0
6 0
6 0
6 0
6 0
6 0
6 0
6 0
6 0
6 0
6 0
6 0
6 0
6 0
6 0
6 0
6 0
6 0
6 0
6 0
6 0
6 0
6 0
5 0
5 0
5 0
5 0
5 0
3 0
2 0
1 0
1 0
1 0
0 0
0 0
0 0
0 0
0 0
0 0
0 0
0 0
0 0
0 0
0 0
0 0
0 0
0 0
0 0
0 0
0 0
0 0
0 1
0 1
0 1
0 1
0 1
0 1
0 1
0 1
0 1
0 1
0 1
0 1
0 1
0 1
0 1
0 1
0 1
0 1
0 1
0 1
0 1
0 1
1 1
1 1
1 1
1 1
1 1
1 1
1 1
2 1
2 1
3 1
3 1
3 1
3 1
3 0
3 0
3 0
3 0
3 0
3 0
3 0
3 0
3 0
3 0
3 0
3 0
3 0
3 0
3 0
3 0
2 0
2 0
1 0
1 0
1 0
1 0
1 0
1 0
1 0
2 0
2 0
2 0
2 0
3 0
3 0
3 0
3 0
3 0
3 0
3 0
3 0
3 0
3 0
3 0
3 0
3 0
3 0
3 0
3 0
3 0
3 0
3 0
3 0
3 0
3 2
3 2
3 2
3 2
3 2
4 3
4 3
4 3
4 3
4 3
4 3
3 3
4 3
4 3
3 3
2 3
2 3
2 3
2 3
2 3
2 3
2 3
2 3
2 3
3 3
3 3
3 3
3 3
3 3
4 3
3 3
3 3
3 3
3 4
3 4
3 4
4 2
4 2
4 2
4 2
4 2
4 1
6 6
6 6
6 6
6 6
6 6
6 7
6 7
6 7
6 7
6 8
6 9
6 9
6 13
6 14
6 14
6 14
5 14
5 14
4 14
4 14
4 14
4 14
5 14
5 14
5 14
5 14
5 14
5 13
5 13
5 13
4 13
4 13
4 13
4 13
4 13
4 13
2 8
2 8
2 8
2 8
2 8
2 6
1 6
1 6
1 6
1 6
2 7
3 7
3 4
3 7
3 7
3 7
3 7
3 7
3 8
3 8
3 8
3 8
2 9
2 9
2 9
2 9
2 9
2 10
2 11
3 12
3 12
3 17
3 18
3 18
3 19
3 19
3 18
3 18
3 18
3 19
2 23
2 31
2 31
2 33
2 33
1 34
1 32
1 34
1 36
1 32
1 32
1 32
2 32
2 32
2 31
2 31
2 31
2 30
2 29
2 29
2 29
2 29
2 28
2 28
2 28
1 27
1 27
1 20
0 20
0 26
0 26
0 26
0 26
0 27
0 27
0 26
0 21
0 13
0 14
0 13
0 13
0 11
0 9
0 8
0 8
0 8
0 8
0 8
0 8
0 8
0 8
0 8
0 8
0 8
0 8
0 8
0 8
0 8
0 8
0 9
0 9
0 9
0 10
0 10
0 10
0 4
0 4
0 4
0 4
0 3
0 3
0 3
0 3
0 3
0 2
0 2
0 2
0 2
0 2
0 2
0 2
0 2
0 2
0 2
0 2
0 2
0 2
0 2
0 2
0 2
0 2
0 2
0 2
0 2
0 2
0 1
0 1
0 1
0 0
0 0
0 0
0 0
0 0
0 1
0 1
0 6
0 6
0 6
0 8
0 8
0 11
0 11
0 11
0 11
0 12
0 12
0 13
0 15
0 16
0 17
0 17
0 17
0 17
0 17
0 17
0 17
0 17
0 17
0 17
0 17
0 17
0 17
0 17
0 17
0 18
0 18
0 18
0 18
0 18
0 17
0 17
0 12
0 12
0 12
0 10
0 10
0 7
0 7
0 7
0 8
0 7
0 9
0 9
0 6
0 5
0 5
0 5
0 5
1 5
1 5
1 5
1 5
1 5
1 5
1 5
1 5
1 5
1 5
1 5
1 5
1 4
1 4
1 4
0 4
0 4
0 4
0 4
0 4
0 4
0 4
0 4
0 4
0 4
0 4
0 4
0 2
0 2
0 1
0 0
0 0
0 0
0 0
0 0
0 0
0 0
0 0
0 0
0 0
0 0
0 0
0 0
0 0
0 0
0 0
0 0
0 0
0 0
0 0
0 0
0 0
0 1
0 1
0 1
0 1
0 1
0 1
0 1
0 2
0 2
0 2
0 2
0 2
0 2
0 3
0 3
0 3
0 3
0 3
0 3
0 3
0 3
0 3
0 3
0 3
0 3
0 3
0 3
0 3
0 3
0 3
0 3
0 3
0 3
0 3
0 3
0 3
0 2
0 2
0 2
0 2
0 2
0 2
0 3
0 3
0 3
0 3
0 3
0 3
0 3
0 2
0 2
0 2
0 2
0 2
0 2
0 2
0 2
0 2
0 2
0 2
0 2
0 2
0 2
0 2
0 2
0 2
0 2
0 2
0 2
0 2
0 2
0 2
0 2
0 2
0 2
0 2
0 2
0 1
0 0
0 0
0 0
0 0
0 0
0 2
0 3
0 3
0 3
0 3
0 3
0 3
0 3
0 4
0 4
0 4
0 4
0 4
0 4
0 4
0 4
0 6
0 6
0 6
0 6
0 6
0 6
0 6
0 6
0 6
0 6
0 6
0 6
0 6
0 6
0 6
0 6
0 6
0 6
0 6
0 6
0 5
0 3
0 3
0 4
0 4
0 4
0 4
0 4
0 4
0 4
0 4
0 2
0 2
0 2
0 2
0 2
0 2
0 2
0 2
0 2
0 2
0 2
0 2
0 2
0 2
0 2
0 2
0 2
0 2
0 2
0 2
0 2
0 2
0 2
0 2
0 2
0 1
0 1
0 0
0 0
0 0
0 0
0 0
0 0
0 0
0 0
0 0
0 0
0 0
0 0
0 0
0 0
0 0
0 0
0 0
0 0
0 0
0 0
0 0
0 0
0 0
0 0
0 0
0 0
0 0
0 0
0 0
0 0
0 0
0 0
0 0
0 0
0 0
0 0
0 0
0 0
0 0
1 0
1 0
1 0
1 0
1 0
1 0
1 0
1 0
1 0
1 0
1 0
1 0
1 0
1 0
1 0
1 0
1 0
1 0
0 0
0 0
0 0
0 0
0 0
0 0
0 0
0 0
0 0
0 0
0 0
0 0
0 0
0 0
0 0
0 0
0 0
0 0
0 0
0 0
0 0
0 0
0 0
0 0
0 0
0 0
0 0
0 0
0 0
0 0
0 0
0 0
0 0
0 0
0 0
0 0
0 0
0 0
0 0
0 0
0 0
0 0
0 0
0 0
0 0
0 0
0 0
0 0
0 0
0 0
0 0
0 0
0 0
0 0
0 0
0 0
0 0
0 0
0 0
0 0
0 0
0 0
0 0
0 0
0 0
0 0
0 0
1 0
1 0
1 0
1 0
1 0
2 0
2 0
2 0
2 0
2 0
2 0
2 0
2 0
2 0
2 0
2 0
2 0
2 0
2 0
2 0
2 0
2 0
2 0
2 0
2 0
2 0
2 0
2 0
2 0
2 0
2 0
2 0
2 0
4 0
5 0
5 0
4 0
4 0
4 0
4 0
4 0
3 0
3 0
3 0
3 0
3 0
3 0
3 0
3 0
3 0
3 0
3 0
3 0
3 0
3 0
3 0
3 0
3 0
3 0
3 0
3 0
3 0
3 0
3 0
3 0
3 0
3 0
3 0
3 0
1 0
0 0
0 0
0 0
0 0
0 0
0 0
0 0
0 0
0 0
0 0
0 0
0 0
0 0
0 0
0 0
0 0
0 0
1 0
1 0
3 0
4 0
4 0
4 0
4 0
4 0
4 0
4 0
4 0
5 0
5 0
5 0
5 0
5 0
5 0
5 0
5 0
5 0
5 0
5 0
5 0
5 0
5 0
5 0
5 0
5 0
5 0
5 0
4 0
4 0
4 0
4 0
5 0
5 0
5 0
5 0
3 0
2 0
2 0
2 0
3 0
3 0
3 0
3 0
3 0
2 0
2 0
2 0
2 0
2 0
2 0
2 0
2 0
2 0
2 0
2 0
2 0
2 0
2 0
2 0
2 0
2 0
2 0
2 0
3 0
3 0
3 0
2 0
2 0
2 0
2 0
2 0
2 0
2 0
2 0
1 0
1 0
1 0
1 0
1 0
1 0
1 0
1 0
1 0
1 0
1 0
1 0
1 0
1 0
1 0
1 0
1 0
2 0
2 0
2 0
2 0
2 0
2 0
2 0
2 0
1 0
1 0
1 0
1 0
1 0
1 0
1 0
1 0
1 0
1 0
1 0
1 0
1 0
1 0
1 0
1 0
1 0
1 0
1 0
1 0
1 0
1 0
1 0
1 0
1 0
1 0
2 0
2 0
1 0
1 0
1 0
1 0
2 0
2 0
2 0
2 0
2 0
2 0
2 0
2 0
2 0
2 0
2 0
2 0
2 0
2 0
2 0
2 0
2 0
2 0
2 0
2 0
2 0
2 0
2 0
2 0
2 0
2 0
2 0
2 0
2 0
1 0
0 0
0 0
0 0
0 0
0 0
1 0
2 0
2 0
2 0
2 0
2 0
2 0
2 0
2 0
2 0
3 0
3 0
3 0
4 0
9 0
12 0
12 0
12 0
12 0
12 0
12 0
12 0
12 0
12 0
12 0
12 0
12 0
12 0
12 0
12 0
12 0
12 0
12 0
12 0
12 0
11 0
11 0
10 0
10 0
10 0
10 0
10 0
10 0
9 0
7 0
7 0
7 0
6 0
5 0
3 0
0 0
0 0
0 0
0 0
0 0
0 0
0 0
0 0
0 0
0 0
0 0
0 0
0 0
0 0
0 0
0 0
0 0
0 0
0 0
0 0
0 0
0 0
0 0
0 0
0 0
0 0
0 0
0 0
1 0
1 0
1 0
1 0
1 0
1 0
1 0
3 0
3 0
3 0
3 0
3 0
3 0
3 0
3 0
3 0
3 0
3 0
3 0
3 0
3 0
3 0
3 0
3 0
3 0
3 0
3 0
3 0
4 0
4 0
4 0
3 0
3 0
3 0
3 0
2 0
2 0
2 0
2 0
2 0
2 0
2 0
2 0
1 0
1 0
1 0
1 0
1 0
1 0
1 0
2 0
2 0
2 0
2 0
2 0
2 0
2 0
2 0
2 0
3 0
3 0
3 0
3 0
3 0
2 0
2 0
2 0
2 0
2 0
2 0
2 0
2 0
2 0
2 0
2 0
2 0
2 0
2 0
2 0
2 0
2 0
2 0
2 0
2 0
2 0
2 0
1 0
1 0
1 0
1 0
1 0
1 0
1 0
1 0
1 0
0 0
0 0
0 0
0 0
0 0
0 0
0 0
0 0
0 0
0 0
0 0
1 0
1 0
1 0
2 0
2 0
2 0
4 0
4 0
4 0
4 0
4 0
4 0
4 0
4 0
4 0
4 0
4 0
4 0
4 0
4 0
4 0
4 0
4 0
4 0
4 0
4 0
4 0
4 0
4 0
4 0
4 0
4 0
4 0
4 0
3 0
3 0
2 0
2 0
2 0
2 0
1 0
0 0
0 0
0 0
0 0
0 0
0 0
0 0
0 0
0 0
0 0
0 0
0 0
0 0
0 0
0 0
0 0
0 0
0 0
0 0
0 0
0 0
0 0
0 0
0 0
0 0
0 0
0 0
0 0
0 0
0 0
0 0
0 0
0 0
0 0
0 0
0 0
0 0
0 0
0 0
0 0
0 0
0 0
0 0
0 0
0 0
0 0
0 0
0 0
0 0
0 0
0 0
0 0
0 0
0 0
0 0
0 0
0 0
0 0
0 0
1 0
2 0
2 0
2 0
2 0
2 0
2 0
2 0
2 0
2 0
2 0
2 0
2 0
2 0
2 0
2 0
2 0
2 0
2 0
2 0
2 0
2 0
2 0
2 0
2 0
2 0
2 0
2 0
2 0
2 0
2 0
2 0
2 0
2 0
2 0
2 0
1 0
0 0
0 0
0 0
0 0
0 0
0 0
0 0
0 0
0 0
0 0
0 0
0 0
0 0
0 0
0 0
0 0
0 0
0 0
0 0
0 0
0 0
0 0
0 0
0 0
0 0
0 0
0 0
0 0
0 0
0 0
0 0
1 0
1 0
1 0
1 0
1 0
1 0
1 0
1 0
1 0
1 0
1 0
1 0
1 0
1 0
1 0
1 0
1 0
1 0
1 0
1 0
1 0
1 0
1 0
1 0
1 0
1 0
1 0
1 0
1 0
1 0
3 0
5 0
5 0
5 0
5 0
6 0
9 0
9 0
9 0
9 0
9 0
9 0
9 0
9 0
10 0
10 0
10 0
10 0
10 0
10 0
10 0
10 0
10 0
10 0
10 0
10 0
10 0
10 0
10 0
10 0
9 0
10 0
10 0
10 0
10 0
10 0
9 0
7 0
7 0
7 0
6 0
6 0
2 0
2 0
2 0
2 0
2 0
2 0
2 0
2 0
1 0
1 0
1 0
2 0
2 0
2 0
2 0
2 0
2 0
2 0
2 0
3 0
3 0
3 0
3 0
3 0
3 0
2 0
2 0
2 0
2 0
2 0
2 0
2 0
2 0
2 0
2 0
2 0
2 0
2 0
2 0
2 0
2 0
2 0
2 0
2 0
2 0
2 0
2 0
1 0
1 0
1 0
1 0
1 0
1 0
1 0
1 0
0 0
0 0
0 0
0 0
0 0
0 0
0 0
0 0
0 0
0 0
0 0
0 0
0 0
0 0
1 0
1 0
1 0
1 0
1 0
1 0
1 0
1 0
1 0
1 0
1 0
1 0
1 0
1 0
1 0
1 0
1 0
1 0
1 0
1 0
1 0
1 0
1 0
2 0
2 0
2 0
2 0
2 0
2 0
4 0
4 0
4 0
4 0
4 0
4 0
4 0
3 0
3 0
3 0
3 0
3 0
3 0
3 0
3 0
3 0
3 0
4 0
4 0
4 0
4 0
6 0
6 0
8 0
8 0
8 0
8 0
8 0
8 0
8 0
8 0
8 0
8 0
8 0
8 0
8 0
6 0
10 0
10 0
11 0
11 0
11 0
11 0
11 0
11 0
11 0
11 0
11 0
11 0
11 0
11 0
11 0
11 0
10 0
10 0
10 0
11 0
9 0
9 0
7 0
7 0
6 0
6 0
6 0
6 0
6 0
6 0
7 0
7 0
7 0
7 0
7 0
7 0
3 0
3 0
2 0
2 0
2 0
2 0
2 0
2 0
2 0
2 0
2 0
2 0
2 0
2 0
2 0
2 0
2 0
2 0
2 0
1 0
1 0
1 0
1 0
1 0
1 0
2 0
4 0
4 0
5 0
5 0
4 0
4 0
4 0
4 0
4 0
4 0
4 0
4 0
4 0
4 0
4 0
4 0
4 0
4 0
4 0
4 0
4 0
4 0
4 0
4 0
4 0
4 0
4 0
4 0
4 0
4 0
4 0
4 0
5 0
5 0
7 0
6 0
4 0
4 0
3 0
3 0
3 0
3 0
3 0
3 0
3 0
3 0
3 0
3 0
3 0
3 0
3 0
3 0
3 0
3 0
3 0
3 0
3 0
3 0
3 0
3 0
3 0
3 0
3 0
3 0
4 1
4 1
4 1
4 1
3 1
3 1
1 1
1 1
1 1
1 1
1 1
1 1
1 1
1 1
1 1
1 1
1 1
1 1
1 1
1 1
1 1
1 1
1 1
1 1
1 1
1 1
1 1
1 1
1 1
1 1
1 1
1 1
1 1
1 1
1 1
1 1
1 0
1 0
1 0
1 0
1 0
1 0
1 0
1 0
1 0
1 0
1 0
1 0
1 0
2 0
2 0
2 0
2 0
2 0
2 0
2 0
2 0
2 0
2 0
2 0
2 0
2 0
2 0
2 0
2 0
2 0
2 0
2 0
2 0
2 0
2 0
1 0
1 0
1 0
1 0
1 0
1 0
1 0
1 0
1 0
1 0
1 0
1 0
1 0
1 0
0 0
0 0
0 0
0 0
0 0
0 0
0 0
0 0
0 0
0 0
0 0
0 0
0 0
0 0
0 0
0 0
0 0
0 0
0 0
0 0
0 0
0 0
0 0
0 0
0 0
0 0
0 0
0 0
0 0
0 0
0 0
0 0
0 0
0 0
0 0
0 0
0 0
1 0
1 0
1 0
1 0
1 0
1 0
1 0
1 0
1 0
1 0
1 0
1 0
1 0
1 0
1 0
1 0
1 0
1 0
1 0
1 0
1 0
1 0
1 0
1 0
1 0
1 0
1 0
1 0
1 0
1 0
1 0
1 0
1 0
1 0
1 0
0 0
0 0
0 0
0 0
0 0
0 0
0 0
0 0
0 0
0 1
0 1
0 1
0 1
0 1
0 1
0 1
0 1
0 1
0 1
0 1
0 1
0 1
0 1
0 1
0 1
0 1
0 1
0 1
0 1
1 1
1 1
1 1
1 1
1 1
1 1
1 1
1 1
1 1
1 1
1 1
1 1
1 1
3 1
3 1
3 1
4 0
4 0
4 0
4 0
4 0
4 0
4 0
4 0
4 0
4 0
4 0
4 0
4 0
4 0
4 0
4 0
4 0
4 0
4 0
4 0
3 0
3 0
3 0
3 0
3 0
3 0
3 0
4 0
4 0
4 0
4 0
4 0
4 0
2 0
2 0
2 0
1 0
2 1
2 1
2 1
2 1
2 1
2 1
2 1
2 1
2 1
2 1
2 1
2 1
2 1
2 1
2 1
2 1
2 1
2 1
2 1
2 1
2 1
2 1
2 1
2 1
2 1
2 1
1 1
1 1
1 1
1 1
0 1
1 1
2 1
2 0
2 0
2 0
2 0
2 0
2 0
2 0
2 0
2 0
2 0
2 0
2 0
2 0
2 0
2 0
2 0
2 0
2 0
3 0
3 0
3 0
3 0
3 0
3 0
3 0
3 0
3 0
3 0
4 1
4 1
4 1
4 1
3 1
3 1
3 1
2 1
2 1
2 1
2 1
2 1
2 1
2 1
2 1
2 1
2 1
2 1
2 1
2 1
2 1
2 1
2 1
2 1
2 1
2 1
1 1
1 1
1 1
1 1
2 1
2 1
2 1
1 1
1 1
1 1
1 0
1 0
1 0
1 0
1 0
1 0
1 0
1 0
1 0
1 0
1 0
1 0
1 0
1 0
1 0
1 0
1 0
1 0
1 0
1 0
1 0
1 0
1 0
1 0
1 0
1 0
1 0
0 0
0 0
0 0
0 0
0 0
0 0
0 0
0 0
0 0
0 0
0 0
0 0
0 0
0 0
0 0
0 0
0 0
0 0
0 0
0 0
0 0
0 0
0 0
0 0
0 0
0 0
0 0
0 0
0 0
0 0
0 0
0 0
0 0
0 0
0 0
0 0
0 0
0 0
0 0
0 0
0 0
0 0
0 0
0 0
0 0
0 0
0 0
0 0
0 0
0 0
0 0
0 0
0 0
0 0
0 0
0 0
0 0
0 0
0 0
0 0
0 0
0 0
0 0
0 0
0 0
0 0
0 0
0 0
0 0
0 0
0 0
0 0
0 0
0 0
0 0
0 0
0 0
0 0
0 0
0 0
0 0
0 0
0 0
0 0
0 0
0 0
0 0
1 0
1 0
1 0
2 0
2 0
2 0
2 0
2 0
2 0
2 0
2 0
2 0
2 0
2 0
2 0
2 0
2 0
2 0
2 0
2 0
2 0
2 0
2 0
2 0
2 0
2 0
2 0
2 0
2 0
2 0
2 0
2 0
2 0
2 0
2 0
2 0
1 0
1 0
1 0
0 0
0 0
0 0
0 0
0 0
0 0
0 0
0 0
1 0
1 0
1 0
1 0
1 0
1 0
1 0
1 0
1 0
1 0
1 0
1 0
1 0
1 0
1 0
1 0
1 0
1 0
1 0
1 0
1 0
1 0
1 0
1 0
1 0
1 0
1 0
1 0
1 0
1 0
1 0
1 0
1 0
1 0
1 0
1 0
0 0
0 0
0 0
0 0
0 0
0 0
0 0
0 0
0 0
0 0
0 0
0 0
0 0
0 0
0 0
0 0
0 0
0 0
0 0
0 0
1 0
1 0
1 0
1 0
1 0
1 0
1 0
1 0
1 0
1 0
1 0
1 0
1 0
1 0
1 0
1 0
1 0
1 0
1 0
1 0
1 0
1 0
1 0
1 0
1 0
1 0
1 0
1 0
1 0
1 0
1 0
1 0
1 0
1 0
1 0
1 0
0 0
0 0
0 0
0 0
0 0
0 0
0 0
0 0
0 0
0 0
0 0
0 0
0 0
0 0
0 0
0 0
0 0
0 0
0 0
0 0
0 0
0 0
0 0
0 0
0 0
0 0
0 0
0 0
0 0
0 0
0 0
0 0
0 0
0 0
0 0
0 0
0 0
0 0
0 0
0 0
0 0
0 0
0 0
0 0
0 0
0 0
0 0
0 0
0 0
0 0
0 0
0 0
0 0
0 0
0 0
0 0
0 0
0 0
0 0
0 0
0 0
0 0
0 0
0 0
0 0
0 0
0 0
0 0
0 0
0 0
0 0
0 0
0 0
0 0
0 0
0 0
0 0
0 0
0 0
0 0
0 0
0 0
0 0
0 0
0 0
0 0
0 0
0 0
0 0
0 0
0 0
0 0
0 0
0 0
0 0
0 0
0 0
0 0
0 0
0 0
0 0
0 0
0 0
0 0
0 1
0 1
0 1
0 1
0 1
0 1
0 1
0 1
0 1
0 1
0 1
0 1
0 1
0 1
0 1
0 1
0 1
0 1
0 1
0 1
0 1
0 1
0 1
0 1
0 1
0 1
0 1
0 1
0 1
0 1
0 1
0 1
0 1
0 1
0 1
0 1
0 0
0 0
0 0
0 0
0 0
0 0
0 0
0 0
0 0
0 0
0 0
0 0
0 0
0 0
0 0
0 0
0 0
0 0
0 0
0 0
0 0
0 0
0 0
0 0
0 0
0 0
0 0
0 0
0 0
0 0
1 0
1 0
1 0
1 0
1 0
1 0
1 0
1 0
1 0
1 0
1 0
1 0
1 0
1 0
1 0
1 0
1 0
1 0
1 0
1 0
1 0
1 0
1 0
1 0
1 0
1 0
1 0
1 0
1 0
0 0
0 0
0 0
0 0
0 0
0 0
0 0
0 0
0 0
0 0
0 0
0 0
0 0
0 0
1 0
1 0
1 0
1 0
1 0
1 0
1 0
1 0
1 0
1 0
1 0
1 0
1 0
1 0
1 0
1 0
1 0
1 0
1 0
1 0
1 0
1 0
1 0
1 0
1 0
1 0
1 0
1 0
1 0
1 0
1 0
1 0
1 0
1 0
1 0
1 0
0 0
0 0
0 0
0 0
0 0
0 0
0 0
0 0
0 0
0 0
0 0
0 0
0 0
0 0
0 0
0 0
0 0
0 0
0 0
0 0
0 0
0 0
0 0
0 0
0 0
0 0
0 0
0 0
0 1
0 1
0 1
0 1
0 1
0 1
0 1
0 1
0 1
0 2
0 2
0 2
0 2
0 2
0 2
0 3
0 3
0 3
0 3
0 3
0 3
0 3
0 3
0 3
0 3
0 3
0 3
0 3
0 3
0 3
0 3
0 3
0 3
0 3
0 3
0 3
0 2
0 2
0 3
0 3
1 4
1 4
1 4
1 5
1 5
1 4
1 4
1 4
1 4
1 4
1 4
1 3
1 3
1 3
1 3
1 3
1 3
1 3
1 3
1 3
1 3
1 3
1 3
1 3
1 3
1 3
1 3
1 3
1 3
1 3
1 3
1 3
1 3
1 3
1 2
0 2
0 1
0 1
0 0
0 0
0 0
0 0
0 0
0 0
0 0
0 0
0 0
0 0
0 0
0 0
0 0
0 0
0 0
0 0
0 0
0 0
0 0
0 0
0 0
0 0
0 0
0 0
0 0
0 0
0 0
0 0
0 0
0 0
0 0
0 0
0 0
0 0
0 1
0 1
0 1
0 1
0 1
0 1
0 1
0 1
0 1
0 1
0 1
0 1
0 1
0 1
0 1
0 1
0 1
0 1
0 1
0 1
0 1
0 1
0 1
0 1
0 1
0 1
0 1
0 1
0 1
0 2
0 2
0 2
0 2
0 2
0 2
0 1
0 1
0 1
0 1
3 1
4 1
4 1
5 1
5 1
5 1
5 1
5 1
5 1
5 1
5 1
5 1
5 1
5 1
5 1
5 1
5 1
5 1
5 1
5 1
5 1
5 1
5 1
5 1
5 1
5 1
5 0
5 0
5 0
5 0
5 0
5 0
5 0
5 0
5 0
3 0
0 0
0 0
0 0
0 0
0 0
0 0
0 0
0 0
0 0
0 0
0 0
0 0
0 0
0 0
0 0
0 0
0 0
0 0
0 0
0 0
0 0
0 0
0 1
0 1
0 1
0 1
0 1
0 1
0 1
0 1
0 1
0 1
0 1
0 1
0 1
0 1
0 1
0 1
0 1
0 1
0 1
0 1
0 1
0 1
0 1
0 1
0 1
0 1
0 1
0 1
1 1
1 1
1 1
1 1
1 1
1 1
1 1
2 1
2 0
2 0
2 0
2 0
2 0
2 0
2 0
2 0
2 0
2 0
2 0
2 0
2 0
2 0
2 0
2 0
2 0
2 0
2 0
2 0
2 0
2 0
2 0
2 0
2 0
2 0
2 0
2 0
1 0
1 1
1 2
0 2
0 2
0 2
0 2
0 2
0 2
0 2
0 2
0 2
0 2
0 2
0 2
0 2
0 2
0 2
0 2
0 2
0 3
0 3
0 3
0 3
0 3
0 3
0 3
0 3
0 3
0 3
0 3
0 3
0 3
0 3
0 3
0 3
0 3
0 2
0 1
0 1
0 1
0 1
0 1
0 1
0 1
0 1
0 1
0 1
0 1
0 1
0 1
0 1
0 1
0 1
0 0
0 0
0 0
0 0
0 0
0 0
0 0
0 0
0 0
0 0
0 0
0 0
0 0
0 0
0 0
0 0
0 0
0 0
0 0
0 0
0 0
0 0
0 0
0 0
0 0
0 0
0 0
0 0
0 0
0 0
0 0
0 0
0 0
0 0
0 0
0 0
0 0
0 0
0 0
0 0
0 0
0 0
0 0
0 0
0 0
0 0
0 0
0 0
0 0
0 0
0 0
0 0
0 0
0 1
0 1
0 1
0 1
0 1
0 1
0 1
0 1
0 1
0 1
0 1
0 1
0 1
0 1
0 1
0 1
0 1
0 1
0 1
0 1
0 1
0 1
0 1
0 1
0 1
0 1
0 1
0 1
0 1
0 1
0 1
0 1
0 1
0 1
1 1
1 1
1 0
1 0
1 0
1 0
1 0
2 0
2 0
2 0
2 0
2 0
2 0
2 0
2 0
2 0
2 0
2 0
2 0
2 0
2 0
2 0
2 0
2 0
2 0
2 0
0 0
0 0
0 0
0 0
0 0
0 0
0 0
0 0
0 0
0 0
0 0
0 0
0 0
0 0
0 0
0 0
0 0
0 0
0 0
0 0
0 0
0 0
0 0
0 0
0 0
0 0
0 0
0 0
0 0
0 0
0 0
0 0
0 0
0 0
0 0
0 0
0 0
0 0
0 0
0 0
0 0
0 0
0 0
0 0
0 0
0 0
0 0
0 0
0 0
0 0
0 0
0 0
0 0
0 0
0 0
0 0
0 0
0 0
0 0
0 0
0 0
0 0
0 0
0 0
0 0
0 0
0 0
0 0
0 0
0 0
0 0
0 0
0 0
0 0
0 0
0 0
0 0
0 0
0 0
0 0
0 0
0 0
0 0
0 0
0 0
0 0
0 0
0 0
0 0
0 0
0 0
0 0
0 0
0 0
0 0
0 0
0 0
0 0
0 0
0 0
0 0
0 0
0 0
1 0
1 0
2 0
2 0
2 0
2 0
4 0
4 0
4 0
4 0
4 0
4 0
4 0
4 0
4 0
4 0
4 0
4 0
4 0
4 0
4 0
4 0
4 0
4 0
4 0
4 0
4 0
4 0
4 0
4 0
4 0
4 0
4 0
3 0
3 0
3 0
3 0
3 0
2 0
2 0
0 0
0 0
0 0
0 0
0 0
0 0
0 0
0 0
0 0
0 0
0 0
0 0
0 0
0 0
0 0
0 0
0 0
1 0
1 0
1 0
1 0
1 0
1 0
1 0
1 0
1 0
1 0
1 0
1 0
1 0
1 0
1 0
1 0
1 0
1 0
1 0
1 0
1 0
1 0
3 0
3 0
3 0
4 0
4 0
4 0
4 0
4 0
4 0
4 0
4 0
4 0
4 0
4 0
3 0
3 0
3 0
3 0
3 0
3 0
3 0
3 0
3 0
3 0
3 0
3 0
3 0
3 0
3 0
3 0
3 0
3 0
3 0
3 0
3 0
3 0
0 0
0 0
0 0
0 0
0 0
0 0
0 1
0 1
0 1
0 1
0 1
0 1
0 1
0 1
0 1
0 1
0 1
0 1
0 1
0 1
0 1
0 1
0 1
0 1
0 1
0 1
0 1
0 1
0 1
0 1
0 1
0 1
0 1
0 0
0 0
0 0
0 0
0 0
0 0
0 0
0 0
0 0
0 0
0 0
0 0
0 0
0 0
0 0
0 0
0 0
0 0
0 0
0 0
0 0
0 0
0 0
0 0
0 0
0 0
0 0
0 0
0 0
0 0
0 0
0 0
0 0
0 0
0 0
0 0
0 0
0 0
0 0
0 0
0 0
0 0
0 0
0 0
0 0
0 0
0 0
0 0
0 0
0 0
0 0
0 0
0 0
0 0
0 0
0 0
0 0
0 0
0 0
0 0
0 0
0 0
0 0
0 0
0 0
0 0
0 0
0 0
0 0
0 0
0 1
0 1
0 1
0 1
0 1
0 1
0 1
0 1
0 1
0 1
0 1
0 1
0 1
0 1
0 1
0 1
0 2
0 2
0 2
0 2
0 2
0 2
0 2
0 2
0 2
0 2
0 2
0 3
0 3
0 3
0 4
0 4
0 4
0 4
0 4
0 4
0 3
0 3
0 3
0 3
0 3
0 3
0 3
0 3
0 3
0 3
0 3
0 3
0 3
0 3
0 3
0 3
0 2
0 2
0 2
0 2
0 2
0 2
0 2
0 2
0 2
0 2
0 2
0 1
0 1
0 0
0 0
0 0
0 0
0 0
0 0
0 0
0 0
0 0
0 0
0 0
0 0
0 0
0 0
0 0
0 0
0 0
0 0
0 0
0 0
0 0
0 0
0 0
0 0
0 0
0 0
0 0
0 0
0 0
0 0
0 0
0 0
0 0
0 1
0 1
0 2
0 3
0 3
0 5
0 5
0 5
0 5
0 5
0 5
0 5
0 5
0 5
0 5
0 5
0 5
0 5
0 5
0 5
0 5
0 5
0 5
0 5
0 5
0 5
0 6
0 7
0 9
1 113
1 130
1 140
1 144
1 144
1 142
1 161
1 162
1 176
1 187
2 189
5 200
5 204
5 205
5 205
5 205
5 206
5 206
5 207
5 230
5 234
6 264
6 309
6 313
6 315
6 315
6 315
6 315
6 315
6 315
6 315
6 315
6 316
6 316
6 313
6 308
5 191
5 177
5 176
5 175
5 177
5 174
4 145
2 125
2 122
2 122
2 123
1 119
1 119
1 120
1 119
1 119
3 124
3 124
3 123
3 95
3 91
2 49
2 16
2 15
2 15
2 15
2 15
2 15
2 16
2 16
2 16
2 16
2 14
2 14
2 14
2 14
2 14
2 14
2 14
2 14
2 12
2 12
2 13
2 13
2 13
2 13
2 12
2 11
2 11
1 11
1 12
1 12
0 7
0 7
0 7
0 7
0 7
0 7
0 7
0 7
0 7
0 7
0 7
0 6
0 6
0 6
0 6
0 6
0 6
0 6
0 6
0 6
0 6
0 6
0 6
0 6
0 6
0 5
0 5
0 5
0 4
0 3
0 3
1 4
1 5
1 5
1 4
1 4
1 4
1 4
1 4
1 4
1 5
1 7
1 9
1 13
1 13
1 13
1 15
3 60
3 61
3 62
3 62
4 66
4 74
4 81
4 82
4 88
4 91
4 91
4 92
4 92
4 94
4 96
4 99
4 102
4 105
4 117
4 118
3 122
3 124
3 124
3 124
3 130
3 150
3 164
3 165
3 165
3 165
3 221
3 218
3 216
3 214
3 214
3 207
1 154
0 150
0 150
0 150
0 150
0 150
0 149
0 145
0 138
0 137
0 136
0 136
1 136
1 134
1 134
1 131
1 125
1 120
1 111
1 110
1 107
2 104
2 104
2 104
2 94
2 76
2 65
2 65
2 65
2 64
2 8
3 8
3 7
3 7
3 7
3 7
3 7
3 7
3 7
3 7
3 7
3 7
3 7
3 7
5 7
5 7
5 7
4 6
4 6
4 6
4 6
4 6
4 6
4 6
4 6
4 6
4 4
3 3
3 3
3 3
3 3
3 2
3 1
3 1
3 1
3 0
3 0
2 0
2 0
2 0
2 0
2 0
2 0
2 0
2 0
2 2
2 3
2 3
2 3
2 3
0 5
0 5
0 5
0 5
0 5
1 5
1 5
1 5
1 5
1 5
1 5
1 5
1 5
1 6
1 6
1 6
1 7
1 7
1 7
1 7
1 7
5 8
10 9
10 10
10 10
10 10
10 17
10 19
10 19
10 20
10 21
10 19
10 19
11 20
13 26
13 39
13 41
13 42
13 42
13 46
13 46
12 46
12 46
12 50
12 54
12 54
12 55
12 55
12 55
12 54
12 54
12 54
9 56
9 68
8 69
8 69
8 69
7 67
3 67
3 68
3 68
3 68
3 60
3 60
3 60
3 59
3 57
3 57
3 57
2 56
0 49
0 31
0 30
0 30
0 30
0 28
0 28
0 28
0 28
0 21
0 19
0 19
0 19
0 20
0 20
0 20
0 20
0 20
0 15
0 3
0 2
0 2
0 2
0 2
0 2
0 1
0 1
0 1
0 1
0 1
0 2
0 2
0 2
0 2
0 2
0 2
0 2
0 2
0 2
0 2
0 2
0 2
0 2
0 2
0 2
0 3
0 3
0 2
0 2
0 8
0 38
0 43
0 48
0 48
1 49
2 50
2 50
2 50
2 49
2 49
2 49
2 49
2 49
2 49
2 49
2 49
2 49
2 49
2 49
2 49
2 49
2 49
2 49
2 49
2 49
2 49
2 49
2 49
2 49
2 49
2 49
2 49
2 49
2 49
2 49
0 39
0 4
0 1
0 1
0 1
0 1
0 1
0 1
0 1
0 1
0 1
0 1
0 1
0 1
0 1
0 1
0 1
0 1
0 1
0 1
0 1
0 1
0 1
0 1
0 1
0 1
0 1
0 1
0 1
0 1
0 0
0 0
0 0
0 0
0 0
0 0
0 0
0 0
0 0
0 0
0 0
0 0
0 0
0 0
0 0
0 0
0 0
0 0
0 0
0 0
0 0
0 0
0 0
0 0
0 0
0 0
0 0
0 0
0 0
0 0
0 0
0 0
0 0
0 0
0 0
0 0
0 0
0 0
0 0
0 0
0 0
0 0
0 1
0 1
0 1
0 1
0 1
0 1
0 1
0 1
0 1
0 1
0 1
0 1
0 1
0 1
0 1
0 1
0 1
0 1
0 1
0 1
0 1
0 1
0 1
0 1
0 1
0 1
0 1
0 1
0 1
0 1
0 1
0 1
0 1
0 1
0 1
0 1
0 1
0 2
0 3
0 4
0 4
0 4
0 4
0 4
0 4
0 4
0 4
0 6
0 6
0 6
0 6
0 6
0 6
0 22
1 28
1 30
1 34
1 35
1 35
1 35
1 35
1 35
1 36
1 36
1 37
1 37
1 37
1 37
1 37
1 37
1 37
1 37
1 36
1 35
1 33
1 33
1 33
1 32
1 39
1 40
1 43
1 45
1 50
1 49
1 52
1 52
1 52
1 52
1 50
0 29
0 25
0 25
0 24
0 24
0 24
0 24
0 25
0 25
0 25
0 24
0 24
0 24
0 24
0 24
0 25
0 25
0 25
0 25
0 25
0 26
0 26
0 26
0 26
0 26
0 16
0 14
0 13
0 13
0 8
0 8
0 5
0 4
0 4
0 7
0 7
0 11
0 11
0 11
0 12
0 13
2 15
2 15
2 18
3 18
3 17
5 33
6 36
6 41
13 55
13 58
13 57
13 57
13 57
13 57
13 57
13 61
13 62
13 62
13 62
13 62
13 62
13 62
13 62
14 66
14 68
14 68
14 68
14 67
14 67
16 66
15 68
15 64
15 65
15 65
15 63
16 63
14 58
14 58
14 61
14 61
14 61
11 41
9 40
9 36
4 24
4 24
4 32
4 32
4 32
4 33
4 35
6 31
7 32
7 32
7 35
7 37
7 41
7 41
7 41
6 37
4 35
4 35
4 36
6 35
6 35
6 36
8 39
9 42
9 44
9 44
9 47
8 47
8 46
8 49
8 44
8 46
8 46
8 46
8 44
8 44
8 43
8 44
8 35
8 34
8 34
9 35
8 33
6 35
6 33
6 33
6 30
6 24
6 23
6 23
4 23
4 25
5 26
6 28
7 28
17 29
18 30
17 27
15 22
15 20
15 20
15 20
15 18
15 18
15 16
15 17
15 16
15 15
15 15
15 15
15 20
15 20
15 21
16 22
16 22
16 22
16 22
15 20
15 20
15 20
15 20
15 22
15 23
15 23
15 23
15 23
14 24
14 21
12 20
12 19
10 18
1 18
1 17
1 17
1 17
1 15
1 15
1 15
1 15
1 15
1 14
1 13
1 13
1 13
1 13
1 10
1 7
2 7
2 7
1 5
1 5
2 5
3 5
3 6
3 6
3 5
3 5
3 3
3 2
3 2
3 2
4 2
5 2
5 2
5 2
5 2
5 2
5 2
5 2
5 4
5 9
5 9
5 9
5 10
5 10
5 10
5 10
5 10
5 11
5 11
5 16
4 18
4 32
5 73
5 78
6 212
5 238
5 257
4 260
4 271
4 287
5 368
5 412
5 418
5 435
5 438
5 438
3 438
3 442
4 447
4 447
4 447
4 453
4 453
4 454
4 451
5 450
5 450
5 451
5 451
5 466
5 469
5 469
5 472
5 473
5 477
5 474
5 474
5 460
4 418
4 394
3 216
3 208
3 259
3 263
3 263
3 238
2 187
2 144
2 144
2 145
2 146
2 188
2 191
2 195
1 241
3 254
3 283
3 465
3 480
3 485
3 494
3 501
3 506
3 514
3 521
3 510
3 508
3 513
3 514
3 514
3 508
3 510
3 512
3 500
3 497
3 494
3 492
3 473
3 425
3 424
3 424
3 425
3 418
3 419
3 420
3 421
3 419
3 383
3 378
3 371
2 328
1 314
1 274
1 81
1 80
1 74
1 68
0 58
0 48
0 35
0 33
0 29
0 25
0 26
0 25
0 25
0 25
0 25
0 25
0 25
0 25
0 30
0 38
0 41
0 45
1 50
1 54
1 58
3 73
3 79
3 80
3 78
3 78
3 75
3 75
3 74
3 73
3 72
3 71
3 71
3 72
3 72
3 72
3 72
3 74
3 76
3 76
3 84
3 89
3 83
3 84
3 84
3 84
3 86
3 86
3 86
3 86
3 76
3 68
3 58
3 55
2 62
2 63
1 59
0 46
0 45
0 45
0 45
0 45
0 60
0 64
0 66
0 67
0 67
0 68
0 68
0 66
0 66
0 67
0 65
0 65
0 63
0 72
0 65
0 60
0 61
0 65
0 71
0 77
0 93
0 112
0 119
0 140
0 148
0 148
0 150
0 150
0 139
0 133
1 137
2 151
3 157
3 159
4 160
4 161
4 146
4 140
4 139
4 138
4 138
4 137
4 137
4 137
4 137
4 136
4 136
4 136
4 137
4 127
3 127
3 126
3 131
3 126
3 121
3 112
3 98
3 69
3 61
2 50
2 43
2 43
2 41
2 41
2 44
1 43
1 33
1 24
0 19
0 17
0 17
0 17
0 17
0 17
0 17
0 17
0 17
0 20
1 25
2 29
2 35
3 35
3 35
3 35
3 35
3 35
3 35
3 33
3 28
3 25
3 25
3 25
3 25
3 26
3 26
3 26
3 35
3 38
3 50
3 55
3 54
3 58
3 84
3 118
3 126
3 129
5 131
5 134
5 135
5 138
5 147
5 147
5 148
4 145
3 135
2 132
2 134
2 134
2 135
2 135
2 135
2 135
2 134
2 134
2 132
2 132
2 133
2 133
2 134
2 134
2 137
2 137
2 125
2 121
2 115
2 110
1 107
1 105
1 78
1 38
1 35
1 33
0 62
0 61
0 62
0 58
0 66
0 68
0 69
0 70
0 71
0 78
0 81
0 81
0 81
0 81
0 81
0 81
0 81
0 81
0 81
0 80
0 79
0 79
0 79
0 77
0 75
0 75
0 76
0 75
0 75
0 75
0 88
0 90
0 90
0 92
1 94
1 103
1 104
3 222
3 264
6 336
6 341
6 361
7 368
7 376
7 377
7 368
7 367
7 368
7 373
7 374
7 375
7 385
7 385
7 385
7 385
7 385
7 385
7 388
7 388
7 389
7 389
7 389
7 389
7 389
7 390
7 392
8 378
8 379
8 380
8 378
6 375
4 349
3 208
2 122
2 75
1 37
1 35
2 47
2 57
2 62
2 66
2 67
3 66
4 64
4 60
5 60
5 61
4 54
4 55
4 55
4 55
4 55
4 56
4 52
4 52
4 53
4 53
4 53
4 53
4 53
4 50
4 49
4 48
4 48
4 47
4 47
4 47
4 47
4 47
4 47
4 46
4 45
3 40
3 26
11 46
11 39
11 38
11 39
12 43
11 43
11 44
10 48
11 49
12 63
14 85
14 103
21 214
21 245
21 253
21 299
21 315
21 326
21 370
21 396
21 408
21 420
21 427
21 433
21 445
21 446
21 450
21 451
21 452
21 455
21 459
21 461
21 461
21 461
21 462
21 461
12 433
12 434
12 433
10 433
9 430
9 428
9 429
9 425
8 424
7 407
6 380
6 338
1 215
1 201
1 192
1 148
1 143
1 129
1 61
1 49
1 36
1 32
1 27
1 26
1 26
1 26
1 21
1 19
1 19
1 15
1 12
1 11
1 11
1 10
1 9
1 9
1 9
1 9
1 9
1 8
1 6
1 39
1 37
1 45
1 50
1 53
0 56
0 56
0 58
0 57
0 57
0 59
0 58
0 58
2 98
2 99
2 101
2 102
2 104
2 105
2 107
3 107
3 108
3 109
3 111
3 115
3 115
3 115
3 115
3 117
3 118
3 119
3 121
3 122
3 125
3 171
3 181
3 159
8 174
10 182
11 184
11 190
11 196
11 198
11 198
11 198
11 198
11 196
11 196
11 195
9 159
9 168
9 170
9 187
9 191
9 198
9 197
8 198
8 197
8 197
8 207
8 203
8 203
8 203
8 203
8 200
8 201
8 202
8 203
8 205
8 196
6 141
6 129
6 113
2 100
1 88
0 78
0 83
0 80
0 80
0 79
0 79
0 81
0 83
0 83
0 83
2 97
2 89
2 81
2 64
2 62
2 54
2 56
2 56
2 58
2 58
2 47
2 47
2 45
2 45
2 45
2 46
2 46
2 46
2 42
2 40
2 41
2 41
2 41
2 41
2 41
2 41
2 42
2 48
2 89
2 90
2 93
2 93
2 90
2 90
2 89
2 90
0 66
0 66
0 66
0 66
0 67
0 71
0 83
0 86
0 84
0 86
0 86
1 90
1 90
1 94
1 95
1 95
1 94
1 98
1 98
1 99
1 100
1 101
1 101
1 101
1 102
1 102
1 101
1 91
1 47
1 45
1 45
1 45
1 45
1 45
1 46
3 47
6 93
6 94
6 97
6 99
6 97
6 91
6 80
7 87
7 91
7 94
7 96
6 95
6 94
6 90
6 90
6 90
6 91
6 91
6 91
6 94
6 94
6 94
6 94
6 94
6 91
6 91
6 91
6 91
6 91
6 91
6 91
6 91
6 91
6 91
5 90
5 84
2 35
2 34
2 33
2 33
2 33
2 31
2 27
1 16
1 14
1 15
1 23
1 25
1 27
1 36
1 36
1 38
1 37
1 35
2 36
2 32
2 33
2 36
2 57
2 78
2 79
2 81
2 81
2 81
2 81
1 81
1 81
1 81
1 95
1 95
1 97
1 100
1 120
1 149
1 152
4 153
5 155
5 156
5 156
5 155
5 155
5 154
5 144
5 136
5 132
5 131
5 131
5 132
5 132
5 132
4 131
4 131
4 128
4 123
4 98
4 83
4 83
4 83
4 84
4 85
4 85
4 85
4 86
2 86
2 75
2 75
2 78
2 78
4 67
4 37
4 36
3 35
2 36
2 34
2 34
2 36
2 35
2 34
2 34
2 34
2 34
2 33
2 34
2 33
3 39
3 41
3 44
3 44
3 44
3 43
3 43
3 45
3 46
3 46
3 45
3 44
3 43
3 45
3 50
3 55
3 56
5 71
5 66
3 59
3 54
3 52
3 50
3 50
3 50
3 51
3 51
3 51
3 51
3 51
3 51
3 51
3 51
3 51
3 49
3 49
2 43
2 39
2 39
2 39
2 39
2 39
2 39
2 37
2 36
2 37
2 38
2 38
2 38
2 33
2 31
2 25
2 22
0 6
0 6
0 21
4 53
4 57
4 59
4 60
5 60
5 64
5 64
5 64
5 64
5 64
5 65
5 65
5 65
5 65
5 65
5 65
5 65
5 66
5 66
5 66
5 66
5 67
5 67
5 67
5 66
5 66
5 65
5 65
5 64
5 63
5 63
5 64
5 64
5 64
5 64
5 49
0 12
0 11
0 10
0 10
0 10
0 6
0 6
0 6
0 5
0 5
0 5
0 5
0 5
0 5
0 5
0 9
0 11
0 12
0 46
0 52
0 52
0 54
1 54
1 54
1 57
1 58
1 61
1 60
1 63
2 64
2 96
2 103
2 122
2 122
2 122
2 124
2 125
2 137
2 143
2 144
2 144
2 144
2 145
2 145
2 145
2 146
2 146
2 146
2 146
2 146
2 146
2 142
2 140
2 138
2 100
2 94
2 95
2 97
1 97
1 97
1 92
1 91
1 93
2 97
2 95
1 83
1 38
1 34
1 34
1 34
1 34
1 34
1 34
1 23
1 19
1 17
1 18
1 19
1 23
2 162
3 167
4 213
4 240
4 252
5 274
5 294
5 299
5 299
5 301
5 301
5 301
5 302
5 301
5 298
5 298
5 298
5 298
4 297
4 300
4 296
4 296
4 296
4 294
4 292
4 292
4 292
4 292
4 292
4 292
4 293
4 294
4 294
4 294
4 293
4 289
3 130
1 83
0 51
0 52
0 57
0 55
0 57
0 56
0 58
0 56
0 57
0 58
0 62
0 65
0 67
0 71
0 73
0 78
0 82
0 106
0 107
0 111
0 110
0 109
0 109
0 109
0 117
0 117
0 120
0 120
2 247
2 255
3 281
5 302
5 317
5 317
5 312
7 306
8 299
8 299
8 288
8 288
8 287
8 287
8 289
8 290
8 290
8 285
8 279
8 276
8 276
8 275
8 275
8 267
8 263
8 229
8 227
8 226
8 224
8 226
8 226
8 226
8 222
8 222
8 221
8 217
5 68
4 41
4 37
3 41
3 41
3 42
3 43
1 36
0 36
0 35
1 35
2 35
3 36
3 36
3 34
3 31
3 30
3 31
3 29
3 29
3 29
3 28
3 26
3 28
3 27
3 28
3 28
3 28
3 28
3 27
3 27
3 26
3 26
3 26
3 26
3 30
3 40
3 36
3 32
3 33
3 33
3 34
3 33
3 34
3 34
3 36
2 37
2 37
1 37
1 39
1 38
1 38
1 39
2 40
2 40
2 40
2 40
2 40
2 40
2 38
2 38
2 38
2 38
2 39
2 39
2 39
2 39
2 39
2 39
2 37
2 36
2 32
2 23
2 23
2 42
2 53
2 93
1 109
1 126
1 141
1 225
1 267
1 300
1 313
1 321
1 349
1 357
1 357
1 358
0 366
0 368
1 368
1 369
1 370
1 372
1 373
2 374
2 375
2 375
2 374
2 374
2 374
2 374
5 416
5 421
5 436
5 446
6 453
6 454
6 451
6 426
6 411
6 393
6 386
6 375
6 369
6 275
6 211
6 194
6 195
6 192
6 165
6 158
6 158
6 152
5 146
4 146
4 155
4 155
4 152
4 150
4 150
4 150
4 150
4 150
4 150
4 152
4 154
4 153
1 108
1 101
1 86
1 83
0 78
0 84
5 241
5 258
5 259
5 246
5 278
5 290
5 304
5 301
5 300
5 301
5 301
5 302
7 304
7 308
7 316
7 320
7 320
7 321
7 312
7 312
7 312
7 322
7 325
7 348
8 388
10 418
10 421
10 419
11 419
11 419
11 426
11 425
11 425
11 425
11 423
11 398
6 195
6 150
6 146
6 146
6 146
6 147
6 148
6 153
6 158
6 157
6 162
6 160
4 228
4 223
4 220
4 217
4 219
4 221
4 221
4 221
4 220
4 206
4 203
4 182
3 140
1 112
1 111
1 111
0 111
0 111
0 113
0 115
0 123
0 123
0 125
0 128
0 130
0 135
0 139
0 142
0 142
0 142
0 141
0 129
0 128
0 128
0 122
0 123
0 54
0 53
0 51
0 50
0 50
0 49
0 49
0 49
0 49
0 49
0 49
0 49
0 50
0 53
0 53
0 53
0 54
0 54
0 43
0 41
0 39
0 41
0 43
0 45
0 43
0 42
0 69
0 72
0 74
1 86
1 135
1 144
1 152
1 155
1 156
1 155
1 154
1 153
2 154
2 154
2 154
2 154
2 154
2 155
3 155
4 154
4 153
5 153
7 151
7 150
7 149
7 149
7 150
7 150
7 150
7 146
7 143
7 146
8 156
9 152
9 149
11 173
11 143
11 141
11 137
10 127
10 74
10 71
9 65
9 62
9 64
9 64
9 64
9 67
9 66
9 66
9 70
9 89
8 97
7 108
7 118
6 125
6 125
5 125
6 125
6 127
6 127
6 128
6 131
6 133
6 134
6 134
6 131
6 124
5 108
4 108
4 107
2 81
2 81
2 80
2 79
2 79
2 79
2 80
2 80
2 80
2 84
2 85
2 86
2 84
2 82
2 82
2 72
2 46
1 31
0 23
0 20
0 20
0 31
0 31
0 31
1 31
1 31
1 29
1 25
1 24
1 23
1 23
1 23
2 23
13 23
14 23
14 23
14 23
14 23
14 23
14 24
14 24
14 24
14 23
14 21
14 22
14 17
14 16
14 15
14 15
14 15
14 14
14 15
14 16
14 16
14 17
14 22
14 23
14 14
13 17
13 17
13 17
13 17
13 17
13 18
13 18
13 19
12 19
12 19
9 29
0 29
0 29
0 32
0 33
0 33
0 38
0 37
0 37
0 38
0 39
0 44
0 42
0 43
0 47
0 49
0 48
0 48
0 48
0 50
0 54
0 63
0 66
0 233
0 268
0 273
0 279
0 300
0 331
0 349
0 355
0 358
0 365
0 365
2 368
2 367
2 383
2 387
2 398
2 422
2 525
2 539
2 550
2 571
2 577
2 578
2 577
2 570
2 568
2 568
2 568
2 568
2 568
2 568
2 569
2 564
2 562
2 553
2 543
2 334
2 293
2 272
2 269
2 260
2 253
2 253
0 264
0 266
0 261
0 262
0 299
0 310
0 287
0 294
0 282
0 254
0 146
0 127
0 114
0 102
0 101
0 101
0 101
0 100
0 99
0 100
0 100
0 100
0 111
0 111
0 112
0 115
0 116
0 116
0 116
0 116
0 117
0 121
0 146
0 148
0 155
0 162
0 150
3 163
3 168
3 166
3 130
3 119
3 118
3 107
3 103
3 104
3 104
3 105
3 105
3 105
3 105
3 105
3 103
3 104
3 103
3 104
3 104
3 105
3 94
3 94
3 92
3 95
3 93
3 97
3 101
3 99
3 100
4 109
4 133
3 127
3 131
3 136
2 196
1 184
2 188
2 209
2 217
2 234
2 233
2 234
2 235
2 237
2 237
2 244
2 244
2 245
2 246
2 248
2 249
2 248
2 250
2 254
2 255
2 254
2 254
2 254
2 252
2 243
2 242
2 241
2 241
2 239
2 237
1 219
1 166
1 168
1 168
0 159
0 90
0 86
0 85
0 63
0 59
0 39
0 40
0 39
0 39
0 38
0 37
0 32
0 33
0 36
0 37
0 37
0 38
0 38
0 37
0 34
0 34
0 34
0 34
0 35
0 35
0 35
0 36
0 36
0 36
0 37
0 37
0 36
0 35
0 29
0 21
0 21
0 19
0 18
0 19
0 20
0 22
0 22
0 22
0 22
0 22
0 24
0 25
0 26
0 23
0 20
0 18
0 14
0 20
0 21
0 22
2 21
2 20
2 20
2 22
2 23
2 23
2 42
2 42
2 42
2 62
2 61
2 61
2 62
2 63
2 63
2 63
2 63
2 64
2 65
2 65
2 66
2 84
2 84
2 87
2 93
2 93
2 91
2 94
2 95
3 96
3 100
3 112
3 118
3 126
3 127
3 129
1 133
1 134
1 134
1 135
1 138
1 141
1 121
1 129
1 128
1 109
1 109
1 109
1 123
1 126
1 126
1 127
1 127
1 125
1 124
1 122
3 125
3 95
3 95
3 95
5 96
5 98
5 100
5 102
5 105
4 99
4 91
4 77
4 75
4 61
4 60
4 57
4 57
4 57
4 56
4 53
4 51
4 48
4 48
4 40
4 40
4 40
4 40
4 40
4 22
4 21
4 24
4 25
4 27
4 42
4 60
4 63
2 60
3 102
3 109
3 132
3 218
3 246
3 244
3 248
3 248
3 251
3 251
3 251
3 253
3 253
3 254
3 254
3 254
3 253
3 253
3 253
3 257
3 258
3 258
3 258
3 258
3 258
3 258
3 259
3 259
3 259
3 257
3 254
3 251
3 236
3 215
3 213
3 199
2 177
3 174
4 144
2 60
2 31
3 31
4 41
4 43
4 46
4 49
4 47
4 57
4 59
4 59
4 69
4 81
4 93
4 96
4 99
4 97
4 97
4 97
4 97
4 97
4 97
4 96
4 96
4 96
4 96
4 96
4 96
4 95
2 93
2 92
2 92
2 90
2 87
2 84
2 81
2 81
1 80
0 77
0 66
0 69
0 63
0 63
0 65
0 68
0 88
0 116
0 116
0 110
0 96
0 96
0 102
1 103
1 108
1 110
1 110
1 112
1 112
1 114
1 114
1 116
1 115
1 120
1 120
1 120
1 126
1 125
1 130
1 133
1 137
1 146
1 157
2 360
2 381
3 405
3 435
3 454
3 559
3 608
3 706
3 718
3 728
3 710
2 720
3 732
3 790
3 866
3 939
3 981
3 1003
4 1126
4 1275
4 1324
4 1332
4 1337
4 1337
4 1338
4 1339
4 1336
4 1337
4 1338
4 1332
5 1336
5 1337
5 1343
5 1353
5 1340
5 1279
3 963
3 925
3 915
3 897
3 890
4 873
4 849
3 724
3 715
3 708
3 696
3 691
4 656
4 575
4 524
4 461
4 437
4 417
3 285
5 117
5 94
5 92
5 93
5 93
5 95
5 108
5 107
4 106
4 102
4 100
4 89
4 83
4 82
4 70
4 71
4 71
3 72
3 73
3 76
3 76
3 74
3 74
3 73
3 69
3 69
3 66
3 66
3 63
1 53
1 51
1 51
1 50
1 47
1 46
1 49
1 41
1 41
1 41
1 41
2 41
2 31
2 24
2 24
2 24
2 22
2 22
2 22
2 20
2 20
2 19
2 19
2 18
2 17
2 14
2 14
2 14
2 11
2 10
2 10
2 9
2 10
2 15
2 15
2 30
2 34
2 38
2 54
2 54
2 57
2 57
1 54
1 52
1 52
1 52
1 51
0 51
0 52
0 52
0 52
0 52
0 52
0 52
0 52
0 52
0 52
0 52
0 53
0 55
0 56
0 57
0 58
0 66
0 74
0 77
0 79
0 81
0 80
0 73
0 63
0 56
0 54
0 47
0 33
0 32
0 32
0 32
0 32
0 32
0 32
0 33
0 36
0 37
0 36
0 36
0 36
0 36
0 36
0 35
0 37
0 38
0 41
0 43
0 59
0 60
0 69
1 107
1 108
1 99
1 89
1 90
1 89
1 89
1 89
1 89
1 100
1 100
1 100
1 100
1 100
1 102
1 104
1 104
2 110
2 119
2 127
2 129
2 132
2 139
2 168
2 173
2 180
2 181
2 186
2 187
2 186
2 184
2 184
2 181
2 161
2 160
2 152
1 125
1 125
1 128
1 128
1 128
1 129
1 129
1 129
1 129
1 118
1 118
1 116
1 113
1 113
1 113
1 114
1 117
0 111
0 101
0 93
0 90
0 85
0 79
0 52
0 53
0 47
0 47
0 43
0 43
0 41
0 38
0 36
0 38
0 41
0 41
0 47
0 39
0 39
0 36
0 36
0 36
0 35
0 36
0 38
0 38
0 38
1 50
1 51
1 51
1 54
1 54
2 52
2 51
2 51
2 51
2 51
2 52
2 52
2 49
2 43
2 41
2 41
2 42
2 43
2 43
2 43
2 42
2 42
2 36
2 36
2 36
2 33
2 34
2 38
2 39
2 39
2 39
2 38
2 41
2 41
2 43
2 48
1 41
1 40
1 42
1 41
1 40
0 39
0 39
0 38
0 38
0 38
0 37
0 37
0 38
0 39
0 39
0 39
1 44
1 45
1 46
1 46
1 46
1 47
1 55
1 69
1 87
1 99
1 105
1 103
1 128
1 129
1 129
1 129
1 125
1 125
1 121
1 118
1 114
1 116
1 113
1 113
1 113
1 112
1 112
1 112
1 112
1 112
1 112
1 112
0 110
0 110
0 110
0 110
0 106
0 122
0 195
0 231
0 263
0 273
0 265
0 248
0 229
0 227
0 220
0 221
0 198
0 198
0 198
0 197
0 197
0 197
0 196
0 196
0 196
0 194
0 196
0 197
0 200
0 200
0 202
0 202
0 205
0 213
0 215
0 216
0 218
0 219
0 219
0 216
0 210
0 165
0 109
0 78
0 46
0 36
0 35
0 32
0 32
0 32
0 30
0 30
0 30
0 30
0 31
0 33
0 35
0 37
0 60
0 84
0 86
0 87
0 113
0 113
0 108
0 108
0 110
0 111
0 106
0 97
0 95
0 94
0 94
0 93
0 94
0 96
0 96
0 97
0 102
0 102
0 102
0 104
0 108
0 109
0 109
0 109
0 110
0 111
1 115
2 166
2 164
3 166
3 164
3 163
3 139
3 116
3 112
3 112
3 86
3 86
3 86
3 83
3 82
3 82
3 82
3 82
3 82
3 82
3 82
3 84
4 83
4 82
4 81
4 80
4 78
4 77
4 78
4 76
4 72
4 72
4 72
4 72
3 74
3 78
3 83
2 33
2 33
1 33
1 32
1 36
1 53
1 64
1 72
1 85
1 91
1 95
1 98
1 102
1 106
1 107
1 110
1 110
1 110
1 110
1 110
1 120
0 124
0 136
0 137
0 141
0 142
0 141
0 140
0 141
0 141
0 141
0 141
1 138
1 134
1 131
1 127
1 128
1 129
4 134
6 136
6 131
6 111
6 99
6 88
6 78
6 72
6 60
6 58
6 64
6 66
6 71
6 78
6 78
6 86
6 86
6 86
7 74
7 69
7 55
7 55
7 51
7 49
7 49
7 63
7 84
7 89
7 90
7 91
6 92
6 94
6 92
6 89
6 88
5 87
2 82
1 79
2 79
2 80
2 79
2 79
2 80
2 102
3 107
3 118
3 116
3 115
3 242
2 239
2 238
2 232
2 232
1 233
1 239
1 239
1 239
1 241
1 241
1 241
1 239
1 226
1 204
1 199
1 198
1 196
1 194
1 194
1 194
1 193
1 193
1 193
1 193
1 194
1 202
1 206
1 209
1 211
1 211
0 197
4 318
4 328
8 357
8 382
8 266
10 341
11 382
11 389
11 388
11 389
11 392
11 392
11 393
11 394
11 393
11 393
11 393
11 393
11 394
11 395
11 396
11 398
11 399
11 400
11 400
11 400
11 401
11 402
11 404
11 402
11 393
11 387
11 383
11 384
11 383
11 327
5 86
3 41
0 30
0 27
0 26
0 26
0 26
0 28
0 28
0 27
0 20
0 22
0 21
0 21
0 23
0 24
0 26
0 32
0 34
0 36
0 39
0 37
0 38
0 37
0 36
0 37
0 45
0 57
0 56
0 69
0 73
0 78
1 97
1 135
1 152
1 155
1 156
1 158
1 158
1 158
1 173
1 173
1 173
1 168
2 169
3 178
3 181
3 181
3 184
3 186
3 202
3 201
3 197
3 191
3 189
3 189
3 184
3 184
3 199
3 208
4 215
4 224
4 235
4 251
4 255
4 259
4 258
3 247
4 231
4 189
4 187
4 188
4 187
4 187
4 189
4 188
4 169
6 171
7 172
8 210
7 211
6 206
6 208
6 206
6 205
6 201
6 189
6 195
6 196
6 196
6 195
6 195
6 194
6 194
6 179
6 173
5 152
5 119
5 86
5 78
5 74
5 74
5 74
5 73
4 65
4 64
4 64
4 65
4 65
4 66
4 71
4 71
4 72
1 69
1 69
0 31
0 32
0 30
0 28
0 28
0 24
0 22
0 18
0 19
0 23
0 27
0 30
0 66
0 75
0 81
0 94
0 94
0 94
0 98
0 102
0 103
0 103
0 114
0 146
0 147
0 147
0 147
0 147
0 146
0 144
0 142
0 140
0 139
0 140
0 140
0 136
0 136
0 136
0 136
0 136
0 136
0 137
0 139
0 141
0 141
0 136
0 132
0 127
0 91
0 78
0 75
0 63
0 63
0 63
0 60
0 54
0 54
0 54
0 45
0 12
0 11
0 11
0 11
0 11
0 12
0 12
0 13
0 20
0 20
0 19
0 20
0 21
0 23
0 24
0 24
0 26
0 27
0 26
0 24
0 22
0 22
0 22
0 22
0 22
0 22
0 22
0 22
0 22
0 22
0 22
0 27
0 27
0 28
0 27
0 32
0 32
0 35
0 43
0 45
0 49
0 68
0 105
0 192
1 302
1 356
1 388
1 404
1 408
1 411
1 430
1 434
1 440
1 448
1 454
1 454
1 456
1 457
1 457
1 457
1 458
1 458
1 458
1 458
1 460
1 485
1 488
1 486
1 492
1 492
1 493
1 490
1 505
2 542
2 560
2 586
2 595
2 580
2 523
2 389
1 277
1 251
1 242
1 242
1 242
1 242
1 213
1 210
1 207
1 206
1 205
1 205
1 205
1 202
1 201
1 203
1 206
0 206
0 207
0 207
0 205
0 178
0 176
0 175
0 175
0 176
0 175
0 171
0 139
0 96
0 61
0 49
0 61
0 93
0 114
0 145
0 145
0 147
0 146
0 144
0 144
0 144
0 145
0 147
0 155
1 156
1 159
1 159
1 172
1 204
1 206
2 218
2 215
2 215
2 215
2 215
2 216
2 214
2 210
2 209
2 210
2 209
2 212
2 211
2 211
2 206
2 206
2 192
2 169
2 145
2 127
2 96
2 99
2 97
2 99
1 100
1 102
1 103
1 103
1 101
1 91
1 89
1 87
1 87
1 72
1 42
1 39
0 28
0 28
0 27
0 27
0 27
0 28
0 28
0 31
0 31
0 32
0 32
0 28
0 27
0 27
0 26
0 27
0 27
0 27
0 18
0 17
0 17
0 17
0 17
0 15
0 11
0 11
0 11
0 10
0 10
0 10
0 10
0 10
0 10
0 10
0 10
0 10
0 11
1 12
1 14
1 13
1 13
1 12
1 10
1 9
1 9
1 7
1 7
1 8
1 8
1 9
1 9
1 7
1 8
1 8
1 11
1 12
1 12
1 13
1 14
1 15
1 54
1 54
1 55
1 59
1 62
1 68
1 77
1 80
1 97
1 98
1 100
1 102
1 105
0 105
0 105
0 118
0 129
0 130
0 132
0 132
0 133
0 133
0 133
0 132
1 150
1 151
1 157
1 158
1 196
1 199
1 197
2 200
2 200
2 198
2 201
2 201
2 158
2 159
2 160
2 158
2 158
2 145
2 141
2 138
2 125
2 131
2 129
2 130
2 131
2 131
2 127
2 111
2 103
2 103
2 103
2 163
2 166
2 170
2 175
2 179
1 159
1 169
1 170
1 171
1 132
1 131
0 132
0 139
0 153
0 175
0 194
0 196
0 224
0 225
0 227
0 231
0 230
0 232
0 233
0 233
0 228
0 226
0 239
0 278
0 293
0 312
0 316
0 320
0 342
0 414
0 423
0 386
0 400
0 428
0 427
0 429
0 430
0 434
0 437
0 431
1 435
1 435
1 429
1 416
1 402
1 370
1 367
1 366
1 336
1 337
1 336
1 336
1 336
1 340
1 347
1 349
1 344
2 344
2 334
2 298
2 278
2 267
2 264
2 271
2 245
2 174
2 144
2 122
2 140
2 110
2 109
2 105
2 100
2 84
2 80
2 81
1 76
1 76
1 76
1 76
1 75
1 75
1 75
1 75
1 75
1 73
1 74
2 85
2 86
2 80
2 73
2 71
2 72
1 73
1 68
1 69
1 72
1 72
1 74
1 63
2 64
2 63
2 66
2 67
2 47
2 113
2 114
2 119
2 121
2 132
2 132
2 132
2 132
2 132
2 132
2 132
2 132
2 132
2 132
2 132
2 132
2 132
2 124
1 115
1 114
1 114
5 123
6 123
6 123
6 120
6 119
6 119
6 117
6 117
6 115
6 114
5 107
5 106
6 115
6 115
6 116
6 51
6 51
6 46
6 44
6 35
6 35
6 35
6 35
6 35
6 36
6 37
6 40
6 40
6 41
6 41
5 41
4 41
6 43
6 43
6 44
5 45
3 66
3 66
3 66
3 66
3 67
3 64
3 64
3 64
3 62
3 62
3 62
3 59
2 44
2 43
2 43
2 43
2 43
2 44
2 44
2 43
2 43
2 43
2 44
2 45
2 46
2 46
2 56
2 57
2 57
2 57
1 57
1 57
0 55
0 54
0 54
0 53
0 22
0 22
0 22
0 22
0 21
0 21
0 21
0 21
0 21
0 22
0 23
0 23
0 23
0 23
0 23
0 23
0 23
0 22
0 22
0 22
0 24
0 24
0 23
0 22
0 21
0 21
0 6
0 6
0 6
0 6
0 6
0 6
0 6
0 5
0 5
0 5
0 5
0 5
0 5
0 5
0 5
0 5
0 5
0 5
0 4
0 5
0 8
0 8
0 11
0 12
0 11
0 11
0 11
0 11
0 11
0 11
0 9
0 9
0 9
0 9
0 9
0 9
0 9
0 9
0 9
0 9
0 9
0 9
0 9
0 9
0 9
0 9
0 9
0 9
0 9
0 9
0 9
0 9
0 9
0 9
0 9
0 8
0 4
0 5
0 2
0 1
0 1
0 3
0 4
0 4
0 4
0 4
0 4
0 4
0 4
0 4
0 4
0 4
0 4
0 4
0 4
0 4
0 4
0 4
0 4
0 4
0 4
0 4
0 4
0 4
0 4
0 4
0 4
0 4
0 4
0 4
0 4
0 4
0 4
0 3
0 3
0 2
0 2
0 0
0 0
0 2
0 2
0 3
0 3
0 3
0 3
0 3
0 3
0 3
0 5
0 8
0 9
1 38
1 39
1 41
1 47
1 49
1 51
1 52
1 53
1 53
1 53
1 53
1 53
1 57
1 56
1 57
1 75
2 109
3 148
50 1108
51 1169
53 1247
54 1270
54 1286
54 1290
54 1294
54 1295
54 1294
54 1294
54 1294
54 1296
54 1307
54 1312
55 1316
55 1314
55 1313
55 1311
55 1272
55 1269
55 1271
55 1271
54 1270
54 1272
54 1272
54 1272
54 1272
54 1271
54 1267
54 1266
54 1263
54 1263
54 1258
54 1224
54 1203
50 1083
5 99
4 80
4 81
4 81
4 80
4 79
5 97
5 179
5 204
5 216
5 220
5 215
5 207
4 202
3 199
3 199
3 200
3 200
3 200
3 200
3 202
3 203
3 203
3 201
3 201
3 203
4 206
4 211
7 281
7 285
7 292
7 289
7 289
7 289
7 287
6 288
5 250
5 246
5 251
5 252
5 253
5 249
4 225
4 123
4 119
4 114
4 110
4 111
4 110
4 110
4 109
4 108
4 108
4 106
4 106
4 105
4 104
4 104
4 104
4 106
4 106
10 128
10 125
10 123
7 52
7 50
7 43
7 44
8 45
8 49
8 50
8 49
8 50
8 51
8 47
8 52
8 105
8 109
8 113
8 114
8 114
8 117
8 121
8 134
8 136
9 139
9 151
9 166
9 172
9 229
9 260
9 279
9 315
10 331
10 335
10 341
10 344
4 326
4 326
26 581
40 614
42 683
42 710
41 715
42 736
42 747
42 809
42 830
43 840
43 846
43 848
44 860
44 846
44 849
44 845
43 844
43 910
43 917
43 911
43 898
43 897
43 897
43 888
42 865
42 856
41 764
41 726
41 716
41 1060
41 1106
41 1139
41 1210
41 1243
38 1272
38 1401
17 1135
6 1118
5 1050
5 1032
5 1033
4 1011
4 1008
4 955
4 944
3 944
3 1009
3 1045
2 1040
3 1007
3 1008
3 1006
3 1006
4 939
4 936
4 953
4 951
5 963
7 1006
7 1015
7 1025
7 1028
7 1037
7 1036
7 1006
6 513
6 438
6 388
5 365
4 337
4 328
4 323
4 315
4 308
4 302
4 303
4 300
4 295
4 296
4 294
4 281
4 266
4 205
3 159
3 151
3 150
3 172
3 181
3 190
3 189
2 190
1 171
1 164
1 156
0 153
0 145
0 145
0 144
0 140
0 138
0 139
0 140
0 140
0 140
0 138
0 133
0 133
0 166
0 174
0 183
0 183
0 193
1 560
1 576
1 593
1 613
2 717
2 733
2 744
2 780
2 802
2 894
3 892
3 974
3 1044
3 1074
3 1369
4 1382
5 1376
5 1383
5 1358
5 1360
5 1403
5 1403
5 1402
5 1402
5 1402
5 1403
6 1404
6 1406
6 1408
6 1410
6 1413
6 1378
6 1359
6 1363
6 1367
6 1357
5 973
5 957
5 916
5 885
4 777
4 757
4 742
4 730
4 699
4 514
2 395
2 396
2 399
1 380
1 136
1 118
1 114
1 116
1 117
1 142
1 156
1 164
1 168
1 171
1 179
1 177
0 175
0 174
0 179
0 188
0 211
0 263
0 278
0 295
0 329
0 361
0 500
0 515
0 520
0 524
0 528
0 534
0 543
0 550
1 558
1 558
1 545
1 506
1 503
1 508
1 525
2 525
2 538
2 540
3 542
3 519
3 514
3 525
3 574
3 588
3 600
3 611
3 620
3 614
4 641
4 613
3 620
3 575
3 578
3 562
3 502
3 479
3 336
3 325
3 324
3 323
3 321
3 317
3 320
3 318
2 323
2 325
2 327
2 327
2 326
2 320
2 299
3 298
3 297
3 296
2 290
2 270
2 267
2 247
2 201
2 174
2 144
2 142
2 143
2 142
1 91
1 82
1 73
1 62
1 60
1 82
1 85
1 87
1 85
1 94
1 103
1 105
1 116
1 127
2 160
2 159
2 157
2 157
2 160
2 165
2 172
2 180
1 201
1 211
1 210
2 396
2 399
2 414
2 425
2 450
2 468
2 514
2 522
2 534
2 531
2 525
2 524
2 521
2 522
2 533
2 533
2 510
3 512
3 511
3 512
3 503
3 496
3 494
3 468
3 462
2 419
2 408
2 408
2 411
2 411
3 454
3 476
3 466
3 469
3 472
3 540
2 400
6 561
6 590
6 606
6 584
6 563
6 516
6 512
6 510
6 511
6 512
6 512
6 515
6 519
6 553
6 556
6 567
5 573
14 613
15 621
16 623
16 643
16 637
16 654
18 662
18 674
19 687
20 696
22 697
22 688
21 650
21 618
22 609
22 589
22 563
22 486
21 379
18 270
20 268
20 264
20 264
20 260
20 261
20 262
20 262
20 260
20 258
20 261
20 259
20 251
20 210
20 210
20 195
20 179
10 138
9 148
9 162
9 150
9 152
9 139
7 195
7 179
7 168
6 162
5 154
6 151
5 151
5 149
5 145
5 145
5 147
13 140
13 141
13 142
12 142
13 142
14 149
14 148
23 209
23 256
24 334
24 340
26 348
26 346
26 347
26 354
26 356
26 358
26 358
27 362
26 363
26 350
26 340
26 335
26 340
26 339
26 273
26 274
25 273
25 274
25 278
24 279
24 281
24 278
24 276
24 276
24 276
16 273
17 274
20 281
20 282
19 285
19 278
19 278
11 198
11 143
10 70
8 68
9 72
10 72
10 66
9 65
9 62
9 61
9 56
10 66
10 66
10 67
10 64
10 64
12 56
12 57
12 53
12 53
12 53
12 53
12 54
12 54
12 57
12 57
12 57
13 62
13 63
12 62
11 62
5 59
4 58
6 57
49 74
50 75
51 76
51 78
51 79
51 79
50 66
50 67
50 66
50 65
50 65
50 65
50 63
49 48
50 54
52 57
52 94
52 101
52 103
52 106
52 107
52 107
52 109
52 111
52 114
52 114
52 110
52 110
52 111
52 101
51 102
51 102
50 105
50 105
45 102
44 101
5 84
6 85
6 82
6 81
6 87
6 88
6 88
6 88
6 87
6 87
6 85
6 85
6 85
5 82
4 75
3 73
3 33
3 31
3 31
3 26
4 46
4 47
4 50
4 50
4 49
4 55
5 56
5 59
6 154
6 159
6 160
6 160
6 160
5 162
5 167
5 169
5 176
5 342
6 363
6 390
7 393
7 399
7 408
7 410
7 410
7 410
7 413
7 413
7 414
7 415
7 417
7 420
8 429
9 429
10 428
13 438
11 417
11 410
11 417
11 432
11 432
10 431
10 433
10 422
9 325
8 326
8 329
9 340
9 347
9 370
10 406
12 411
12 413
11 236
11 221
10 195
10 249
10 252
10 247
11 249
11 250
11 252
11 245
11 243
11 243
11 245
11 246
11 245
10 237
10 237
10 241
16 344
16 355
16 363
16 357
17 356
17 426
17 434
17 432
17 431
17 427
17 425
17 424
16 405
15 394
15 349
15 337
14 329
14 319
14 316
14 313
14 312
14 260
14 260
14 258
13 256
13 256
12 254
12 254
12 254
12 258
12 263
12 264
12 273
12 284
12 285
10 269
2 143
2 146
2 141
4 142
5 131
5 73
7 72
7 72
8 72
8 74
8 73
8 71
8 71
8 71
7 75
7 76
7 79
7 81
7 80
7 81
7 107
8 107
8 109
8 146
8 151
8 156
8 156
8 159
8 165
8 187
12 230
12 314
12 337
13 413
13 551
13 571
12 583
12 624
12 662
9 665
8 663
8 650
6 652
6 652
6 679
9 681
9 695
11 702
13 703
25 794
26 789
30 825
30 836
30 836
30 834
29 837
30 809
30 851
30 854
31 875
31 872
31 870
31 869
31 866
31 846
28 764
27 616
27 508
27 478
27 433
27 380
27 365
27 356
27 355
27 353
28 355
28 360
30 365
33 366
35 365
37 336
34 331
33 326
32 322
29 313
14 185
14 205
14 201
15 201
14 207
14 208
14 207
14 218
14 176
14 157
13 105
14 115
14 148
14 144
14 148
14 150
14 155
15 150
15 151
15 149
15 172
15 188
16 196
18 200
18 204
17 202
16 198
16 197
14 197
12 195
10 194
8 192
8 191
10 191
32 306
33 314
33 321
34 295
33 297
33 292
34 288
34 297
34 298
39 292
40 291
40 290
40 290
37 272
38 243
43 263
43 272
47 300
48 300
48 299
46 298
46 287
46 269
46 258
45 263
46 268
46 264
46 268
47 274
47 276
47 274
48 281
48 281
43 281
45 283
44 281
24 166
24 157
25 151
27 148
35 153
37 154
37 152
35 143
35 143
31 137
32 137
35 130
41 129
39 122
38 115
35 92
35 79
33 61
32 63
32 66
32 82
32 94
32 125
31 131
31 125
32 191
33 205
37 205
36 202
43 209
42 205
42 205
42 205
42 207
40 206
41 210
42 209
41 211
39 212
35 212
32 219
30 222
30 222
30 223
30 222
30 222
29 222
24 223
20 223
20 223
18 221
18 221
18 304
18 305
18 300
20 305
19 297
20 312
20 284
20 284
20 271
19 228
16 222
12 246
10 254
6 263
8 281
9 283
9 283
9 281
8 280
8 280
7 278
7 299
8 313
8 318
8 312
8 325
8 331
8 335
8 338
8 343
8 344
9 353
9 355
8 391
8 393
8 394
8 310
7 310
5 309
5 333
4 384
4 519
4 748
4 787
4 818
3 799
4 849
4 877
4 876
3 866
3 857
3 882
3 887
3 906
3 915
3 920
3 939
3 913
2 884
2 879
2 926
2 933
2 949
2 965
3 989
2 988
2 986
1 974
1 1061
1 1022
1 1025
1 1026
1 1032
1 1035
1 1035
1 1015
1 878
1 590
1 481
1 472
1 439
3 447
3 416
3 417
3 416
4 422
4 424
4 426
4 545
5 536
6 542
6 538
6 518
6 522
6 524
6 525
6 466
6 454
6 434
6 420
6 399
6 397
6 397
6 396
6 304
6 303
6 295
6 292
6 285
6 281
6 275
6 234
6 231
6 229
6 235
5 234
5 234
4 230
4 232
3 230
6 280
6 274
6 271
6 236
6 105
6 113
5 107
5 107
5 107
5 104
5 103
5 105
5 103
5 107
5 137
5 200
5 246
6 273
6 276
6 279
6 282
6 282
6 291
6 298
6 316
6 323
6 323
6 324
6 324
6 325
6 320
6 320
5 329
5 325
5 323
5 320
2 271
2 272
2 281
2 287
3 296
3 301
3 304
3 322
3 323
4 339
4 341
4 343
3 358
3 380
3 369
4 341
4 353
4 337
4 335
4 338
4 343
4 351
4 348
4 346
4 327
4 327
4 332
7 387
7 398
7 411
8 418
10 554
10 552
10 561
10 564
10 567
10 557
9 555
9 545
9 544
8 533
8 536
8 536
8 523
8 511
7 500
7 502
8 502
8 480
8 432
8 426
7 384
7 346
7 344
7 342
7 339
7 330
7 320
8 315
9 317
9 316
9 314
9 313
5 256
5 251
5 228
5 228
3 84
3 138
4 136
4 140
4 141
4 142
4 141
5 136
6 147
7 145
7 141
7 140
8 133
8 131
7 129
7 129
7 124
7 125
7 126
7 128
7 130
7 133
7 156
9 214
16 951
16 1011
19 1286
18 1409
18 1447
19 1886
20 2025
20 2044
19 2056
19 2064
19 2064
19 2052
21 2053
21 1994
21 1994
21 1992
21 1994
21 1991
23 2060
21 2060
20 2054
21 2064
21 2081
21 2098
21 2104
22 2116
23 2177
23 2218
23 2224
23 2225
23 2236
23 2234
23 2231
23 2229
23 2175
21 1854
8 504
8 331
8 325
8 339
8 352
13 632
11 641
11 642
11 644
11 644
11 656
11 669
11 672
11 677
12 721
12 725
12 757
12 766
10 703
10 708
10 704
8 703
9 724
13 792
14 898
13 903
12 814
12 808
12 809
12 810
12 825
12 826
12 834
12 833
12 836
12 835
13 836
13 832
13 827
13 877
13 837
8 557
8 557
8 559
8 559
8 567
8 564
9 569
9 568
9 558
8 541
8 535
8 527
13 541
16 541
20 529
20 517
20 508
19 446
16 363
15 257
15 252
15 250
15 248
16 248
16 246
16 222
16 220
16 209
16 210
16 209
16 212
15 212
15 212
15 240
15 172
15 170
15 157
15 164
15 163
15 160
14 152
14 152
14 157
14 176
14 211
14 231
13 256
13 243
7 269
5 302
1 341
1 350
1 361
1 392
1 398
1 409
1 412
1 424
0 485
0 568
0 677
0 766
0 985
0 1089
0 1332
0 1546
0 1822
0 1923
0 1932
0 2029
0 2040
0 2048
0 2051
0 2065
0 2247
0 2444
0 2488
0 2514
0 2508
0 2490
0 2448
0 2362
0 2320
0 2303
0 2298
0 2292
0 2255
0 2285
0 2311
0 2306
0 2341
0 2354
1 2398
1 2399
1 2337
2 2222
2 2135
2 2066
2 1817
2 1680
2 1403
2 1212
3 995
3 911
3 904
3 785
3 778
3 758
3 749
3 740
3 552
3 335
3 304
3 285
3 285
3 286
3 286
3 293
3 293
3 296
3 296
3 294
3 273
3 204
3 179
2 166
2 152
2 140
1 108
1 87
1 86
1 84
1 98
1 98
1 96
1 99
1 99
1 97
0 97
0 97
0 99
0 90
0 96
0 96
0 94
0 94
0 94
0 90
0 88
0 92
0 91
0 90
0 88
1 79
1 77
1 75
2 75
3 92
3 112
4 150
4 148
4 153
4 150
4 139
4 133
4 143
4 150
4 149
4 153
4 155
5 183
5 182
5 178
5 180
7 188
7 192
7 195
7 197
7 196
7 200
7 200
7 200
7 201
6 199
6 199
6 196
6 195
6 195
6 195
6 195
7 209
7 210
6 211
5 187
5 143
4 140
4 140
4 139
4 137
4 140
2 145
2 135
2 126
2 151
2 131
2 130
1 139
3 234
3 241
3 265
3 261
3 258
3 257
3 256
3 258
3 259
3 272
3 287
3 306
3 326
3 332
3 332
3 335
3 336
4 336
4 338
4 325
4 325
4 322
4 310
4 311
4 312
4 311
4 313
4 332
4 332
4 330
5 488
5 516
5 517
5 522
5 527
5 484
3 392
3 395
3 384
3 398
3 421
3 439
3 441
3 442
3 437
2 416
2 393
2 385
2 372
2 369
2 368
2 414
2 418
1 432
1 436
1 441
1 476
1 477
1 478
1 479
1 478
1 483
1 480
2 466
2 463
2 467
1 289
1 249
1 247
1 251
1 256
1 261
1 261
1 258
1 249
1 225
1 204
1 196
1 197
1 198
1 199
1 205
1 217
1 224
1 229
1 237
1 275
1 273
2 295
2 275
2 276
2 274
2 236
2 240
2 240
1 239
1 240
1 235
1 231
1 229
1 227
1 216
1 213
1 213
1 201
1 197
1 193
1 189
1 189
1 189
1 190
1 190
1 192
1 200
1 203
1 210
1 215
1 220
0 206
0 198
0 196
0 191
0 145
0 76
0 71
0 122
0 121
0 121
0 123
0 123
0 123
0 123
0 124
0 123
0 124
0 134
0 138
0 139
0 140
0 139
0 139
0 138
0 138
0 139
0 139
0 141
0 143
0 145
0 135
0 130
0 127
0 116
0 108
0 100
0 99
0 99
0 99
0 99
0 100
0 103
0 118
0 85
0 120
0 146
0 180
0 257
0 286
0 301
0 312
0 313
0 319
0 307
0 303
1 304
2 308
2 311
2 333
2 336
2 337
2 337
2 337
2 335
2 333
2 340
2 339
2 340
2 341
2 341
2 339
2 342
2 342
2 345
2 345
2 344
2 342
2 329
2 310
2 280
2 253
2 229
2 179
2 108
0 74
0 66
0 63
0 63
0 57
0 56
0 55
0 53
0 47
0 44
0 24
0 22
0 22
0 25
1 40
1 42
1 43
1 34
1 39
1 41
1 47
1 54
1 56
1 55
1 60
1 60
1 60
1 60
1 56
1 56
1 56
1 56
1 96
1 108
1 116
1 118
1 119
1 120
1 120
1 119
1 122
1 123
1 123
1 124
1 124
1 124
1 124
1 122
1 121
1 116
0 99
0 99
0 99
0 99
0 97
0 94
0 83
0 79
0 79
0 78
0 74
0 74
0 75
0 77
0 80
0 113
0 124
1 153
1 130
1 137
1 144
1 146
1 149
1 152
1 157
1 159
1 156
1 155
1 155
1 153
1 168
1 174
1 176
1 195
1 200
1 201
1 205
1 205
1 204
1 204
1 205
1 205
1 205
1 206
1 205
1 205
1 207
1 206
1 208
1 205
1 196
1 178
1 173
0 154
0 136
0 124
0 121
0 123
0 119
0 117
0 113
0 113
0 116
0 124
0 131
0 132
0 99
0 96
0 92
0 88
0 90
0 89
0 90
0 90
0 90
0 91
0 205
0 216
0 219
0 223
0 226
0 236
0 240
0 255
0 285
0 291
0 299
0 287
0 284
0 273
0 265
2 273
2 275
2 278
3 285
3 305
3 332
4 396
5 571
6 655
6 666
7 738
7 779
7 792
7 803
7 810
7 816
7 874
7 882
7 886
7 888
7 885
7 752
7 749
7 747
7 751
7 749
7 745
8 766
8 751
8 724
8 724
8 725
8 723
8 721
8 720
8 717
6 694
6 683
6 717
5 716
5 705
5 674
4 592
3 375
3 266
3 258
2 189
2 185
2 185
2 189
2 188
4 230
4 233
4 292
4 324
4 332
4 362
4 364
4 366
4 368
4 366
8 431
8 439
7 408
7 406
7 408
7 404
7 407
7 415
7 420
7 454
7 454
7 455
7 454
6 413
6 415
6 417
6 417
6 563
6 564
6 576
6 601
6 607
6 613
6 608
7 624
7 620
5 549
5 491
5 406
5 397
5 396
5 371
5 372
5 372
5 372
5 368
1 288
1 285
1 286
1 289
1 297
1 305
1 304
1 304
1 300
2 266
2 278
2 278
3 277
3 278
3 279
4 298
4 302
4 161
4 167
4 162
3 137
3 140
3 145
3 143
3 129
3 129
3 127
3 128
3 132
3 156
5 209
5 241
5 293
5 338
5 386
5 399
5 417
5 420
5 424
5 421
3 418
3 411
3 421
3 431
4 456
4 487
4 487
4 500
4 504
4 508
4 503
4 481
4 477
4 472
4 471
4 462
4 493
4 488
4 482
4 481
4 489
4 498
5 540
5 568
5 568
5 524
3 471
3 435
3 380
3 353
3 325
3 325
3 322
9 436
9 458
9 468
10 506
10 511
10 500
10 492
9 465
9 457
9 451
9 442
9 442
9 438
9 446
8 450
13 638
15 725
16 738
16 766
16 727
16 746
16 753
16 753
16 748
16 737
15 689
15 649
15 646
15 642
15 632
15 630
15 628
15 631
15 637
15 643
15 641
9 513
9 474
9 463
9 444
9 437
9 434
9 431
9 436
9 414
9 419
9 429
9 455
9 456
9 449
9 437
2 150
1 106
1 110
1 110
1 168
1 170
1 174
1 176
1 176
1 182
1 184
1 184
2 185
2 186
2 186
2 190
1 187
1 185
1 178
1 170
1 170
1 167
1 166
1 166
1 164
1 163
1 164
2 164
2 150
5 203
5 217
5 217
6 222
6 229
6 230
6 226
6 226
6 222
6 223
6 221
7 159
7 157
7 153
6 152
6 156
6 157
9 206
9 210
9 209
9 210
9 210
9 227
9 232
9 234
9 242
9 241
9 242
9 242
9 242
9 244
9 247
9 250
9 261
11 395
11 421
8 381
8 376
8 619
7 602
7 615
7 621
7 637
7 643
7 654
7 685
7 690
6 691
6 721
6 724
6 729
6 734
6 725
3 739
4 742
4 749
4 759
6 1123
8 1152
9 1223
9 1265
9 1306
9 1520
11 1624
11 1666
23 2661
24 2782
26 2943
27 3008
27 3006
24 2976
25 3134
25 3129
25 3126
25 2852
26 2849
26 2835
26 2813
26 2804
26 2802
26 2796
26 2761
26 2760
26 2760
26 2729
26 2727
26 2724
26 2717
26 2700
26 2649
26 2644
26 2638
25 2547
22 1944
20 1809
20 1792
20 1776
20 1772
20 1751
19 1715
17 1486
5 305
4 244
2 303
2 314
2 330
2 270
2 272
2 266
2 268
2 268
1 269
1 270
1 269
1 268
1 267
1 290
1 291
1 293
1 291
1 296
1 300
1 301
2 300
2 304
2 325
3 348
3 382
3 389
3 392
3 392
3 404
3 412
4 419
4 408
6 419
6 417
6 357
8 352
9 299
11 338
11 362
11 367
11 372
11 373
11 374
11 374
11 378
11 386
11 388
12 391
12 393
12 386
12 392
12 395
12 412
12 450
13 457
12 510
14 709
17 753
17 851
18 862
18 838
19 852
19 872
19 875
19 864
22 950
25 1224
26 1588
27 1628
28 1672
33 1661
31 1642
28 1586
29 1565
29 1554
29 1559
29 1556
31 1560
31 1567
31 1568
31 1565
31 1559
31 1557
30 1557
31 1555
31 1540
32 1542
32 1545
36 1618
36 1598
35 1607
34 1566
32 1401
29 1402
28 1317
27 1338
27 1409
27 1507
31 1499
31 1506
32 1498
29 1344
25 926
21 691
21 685
22 692
17 693
17 691
16 692
15 688
15 677
17 671
17 666
16 658
16 654
16 652
16 651
16 651
16 652
15 668
15 716
32 991
33 1039
35 2326
32 2243
35 2276
37 2345
37 2344
37 2326
37 2273
37 2249
40 2222
40 2176
40 2065
35 2051
35 2046
34 2038
34 2037
33 2017
33 2017
33 2016
33 2010
34 2007
34 2008
34 2009
33 2008
33 2024
33 2065
33 2076
41 2170
47 2357
48 2393
49 2423
49 2433
49 2451
50 2409
49 2343
29 2042
27 1959
25 617
25 613
22 585
22 574
78 1198
81 1210
82 1221
82 1202
79 1191
79 1202
79 1199
79 1200
79 1201
79 1209
79 1220
79 1232
79 1261
78 1264
78 1273
78 1277
78 1283
78 1279
77 1281
77 1276
77 1240
77 1221
66 1114
61 954
61 925
61 921
61 919
61 898
60 931
60 935
59 933
59 939
60 955
57 967
57 978
57 979
2 367
1 359
1 321
1 316
1 313
1 307
5 306
6 307
6 308
6 295
6 293
6 284
7 263
7 260
8 256
8 257
8 255
8 247
8 239
8 236
8 230
8 228
8 228
8 187
9 188
9 187
11 189
11 192
11 171
12 189
12 182
12 176
11 159
12 146
12 131
12 125
12 104
12 102
12 103
12 102
12 101
12 99
8 99
7 95
7 112
6 110
6 162
6 171
6 221
6 325
6 328
6 325
6 328
8 483
18 524
37 559
45 656
46 707
46 720
46 722
45 721
44 720
44 715
45 711
45 686
44 681
44 680
44 679
44 680
43 676
43 676
43 676
43 712
43 710
43 714
43 715
43 716
43 721
43 718
43 717
43 707
43 740
42 687
42 690
42 622
42 530
41 533
41 531
40 529
32 371
24 328
6 269
1 168
0 151
0 150
0 149
0 150
0 150
0 150
0 151
0 151
0 146
0 145
0 145
0 144
0 144
0 144
0 144
0 104
0 102
0 98
0 96
0 92
0 94
0 95
0 95
0 83
0 25
0 21
0 16
0 16
0 15
0 13
0 12
0 12
0 12
0 11
0 11
0 12
0 13
0 14
0 12
0 16
0 16
0 16
0 18
0 20
0 22
0 76
0 77
0 81
0 100
0 104
0 105
0 105
0 105
0 106
0 108
0 109
0 113
0 119
0 119
0 117
0 119
0 119
0 119
0 119
0 119
0 119
0 119
0 119
0 119
0 123
0 123
0 120
0 117
0 117
0 115
0 113
0 113
0 113
0 112
0 111
0 108
0 38
0 32
0 31
0 26
0 25
0 24
0 24
0 24
0 23
0 21
0 21
0 20
0 14
0 16
0 19
0 22
0 28
0 32
0 35
0 40
0 41
0 44
0 44
0 45
0 42
0 42
0 42
0 42
0 42
0 42
0 44
0 46
0 45
0 45
0 45
0 45
0 45
0 45
0 45
0 44
0 44
0 43
0 43
0 43
0 43
0 43
0 42
0 39
0 35
0 34
0 25
0 21
0 16
0 15
0 19
0 14
0 13
0 13
0 13
0 13
0 16
0 22
0 39
1 69
1 74
1 75
1 85
1 87
1 90
1 92
1 95
1 98
1 98
1 98
1 98
1 98
1 98
1 98
1 98
1 98
1 98
1 98
1 98
1 98
1 99
1 99
1 99
1 99
1 99
1 99
1 92
1 92
1 92
1 95
1 94
1 94
1 95
3 367
3 374
2 355
4 440
4 530
6 656
6 709
6 716
6 724
6 726
7 725
7 727
7 730
7 731
7 731
7 731
7 732
7 734
7 734
7 734
7 734
7 735
7 735
7 734
7 734
7 734
7 734
7 734
7 732
7 732
7 732
7 742
7 748
7 757
7 762
7 1047
4 708
2 596
2 591
3 664
3 687
3 657
4 672
4 676
5 690
72 1433
91 1542
93 1580
94 1598
95 1608
97 1683
106 1789
106 1800
106 1813
106 1812
106 1816
107 1816
107 1816
113 1977
114 1983
116 1997
116 2006
116 2020
116 2027
118 2034
118 2037
121 2042
125 2100
126 2099
126 2119
126 2127
126 1812
125 1671
124 1592
124 1585
124 1585
126 1528
127 1527
125 1496
125 1486
120 1475
49 807
30 711
26 843
27 868
27 876
28 903
28 897
28 908
28 930
28 931
28 930
28 932
28 932
22 761
21 757
19 732
19 725
19 712
19 705
17 839
16 838
14 836
9 752
9 663
9 635
7 615
14 626
14 633
14 635
14 636
14 637
14 639
14 643
17 646
23 647
27 631
30 506
50 666
52 479
53 482
96 482
96 485
96 485
96 488
96 490
96 493
96 492
98 493
105 521
105 521
105 527
105 527
105 529
105 529
105 529
105 381
105 375
105 381
104 376
105 375
105 368
105 364
97 350
97 354
97 353
97 355
97 355
97 358
96 349
92 348
85 342
81 340
80 316
60 89
53 85
48 84
11 85
9 85
8 85
8 85
8 85
8 83
8 83
8 82
1 54
1 52
1 47
1 47
1 45
7 330
7 334
7 362
7 370
7 356
7 356
6 358
6 359
6 362
7 363
7 366
8 370
9 367
10 368
11 384
11 384
11 383
11 385
11 393
12 454
48 888
51 968
57 1064
61 1154
62 1232
74 1453
81 1602
81 1620
81 1620
81 1623
81 1660
82 1669
81 1672
81 1673
80 1680
80 1687
75 1401
75 1400
75 1374
75 1375
75 1371
79 1429
79 1445
78 1438
79 1432
83 1465
83 1456
83 1474
83 1480
83 1484
86 1516
86 1518
88 1526
89 1529
88 1523
83 1522
33 781
30 648
19 560
20 561
51 873
51 878
59 894
61 890
61 899
61 900
60 865
60 863
59 865
59 861
59 848
59 849
58 832
58 831
58 823
57 819
57 813
52 740
53 732
52 734
52 734
49 693
49 682
49 668
49 668
49 669
45 634
44 626
43 616
43 618
43 617
42 396
42 395
42 392
40 385
40 381
11 68
11 57
3 37
1 31
1 50
1 51
1 51
1 49
1 47
1 49
1 46
1 39
1 49
1 50
1 80
1 113
1 154
1 165
0 166
0 169
3 209
5 534
5 551
5 571
5 582
5 584
5 590
5 590
6 623
10 630
10 645
10 644
10 647
10 651
10 665
10 689
11 709
16 890
16 909
16 925
16 907
17 919
17 917
17 942
17 976
19 1276
20 1517
20 1563
21 1599
21 1680
29 1665
100 1696
103 1692
107 1714
110 1717
113 1713
110 1666
108 1331
108 1321
108 1298
108 1300
108 1299
108 1299
108 1298
107 1262
104 1259
104 1240
104 1241
104 1243
104 1242
104 1228
104 1206
103 1165
97 956
97 946
97 947
97 947
97 965
97 963
97 959
97 882
94 393
94 232
94 218
87 183
73 169
72 156
10 96
7 90
4 68
3 67
1 65
2 68
2 72
2 76
2 75
2 68
2 68
2 65
2 64
3 57
3 56
6 72
6 76
8 79
8 91
8 95
8 97
8 97
8 106
8 109
8 111
8 113
8 99
8 100
8 101
8 104
8 141
8 145
8 146
7 214
7 214
7 213
7 206
8 207
8 207
8 211
7 210
7 210
7 203
7 201
7 203
7 201
10 203
11 205
11 204
10 204
10 203
8 189
8 180
6 174
6 163
6 162
6 161
6 160
7 153
7 146
7 143
7 141
9 151
9 150
9 146
9 143
9 109
9 109
9 110
9 40
9 42
8 39
8 38
8 41
8 42
9 40
24 667
24 680
24 714
24 727
25 731
24 741
20 751
22 762
22 780
22 782
22 788
22 788
22 792
22 793
23 801
23 801
23 800
23 801
29 902
29 908
29 931
29 935
27 929
27 949
27 948
27 947
27 949
27 951
27 953
26 957
26 962
26 962
26 960
27 995
27 994
27 996
12 356
12 354
15 433
15 444
14 471
14 471
14 461
14 457
14 440
14 439
14 434
14 434
12 431
16 492
16 496
16 524
16 532
16 537
10 435
10 425
10 400
10 400
10 399
11 376
11 373
11 371
11 369
11 368
11 364
11 363
11 357
11 358
10 386
9 352
9 356
9 357
9 362
9 364
5 305
5 309
5 349
5 368
5 504
5 540
6 666
6 674
6 694
7 749
9 750
6 710
6 699
6 706
6 708
6 711
6 712
6 715
6 722
6 751
6 774
5 790
5 806
5 808
5 830
5 834
6 839
6 840
6 840
6 840
6 803
6 799
6 795
6 782
6 781
6 764
5 688
5 675
5 644
4 632
5 504
5 476
5 347
5 335
5 323
5 260
3 255
2 200
2 199
2 199
2 210
2 221
2 246
2 258
2 255
2 208
2 187
3 203
4 231
13 272
13 260
15 277
14 273
15 280
15 284
15 285
15 286
15 287
15 291
15 296
22 359
22 364
22 365
22 349
24 343
23 314
24 312
24 311
24 311
24 310
24 310
24 321
26 332
26 340
26 351
26 334
26 326
26 322
26 309
26 302
27 301
27 293
28 287
27 265
25 228
15 176
16 177
16 177
16 174
15 171
15 164
15 163
15 163
15 162
15 155
15 145
8 88
8 85
7 86
7 86
5 65
5 65
5 65
5 64
5 68
8 92
35 429
35 425
42 490
43 498
44 501
48 579
49 627
49 613
49 615
49 614
48 614
48 615
47 616
47 617
47 618
47 617
46 670
46 672
46 679
46 682
46 683
47 690
47 701
47 701
47 704
47 710
48 721
49 723
50 723
72 730
79 732
84 732
84 731
84 727
84 720
79 650
42 160
39 149
46 172
48 173
48 174
49 175
49 175
50 174
50 173
50 174
50 176
51 197
51 199
51 215
53 243
54 240
55 184
56 188
57 182
57 182
57 192
56 189
55 179
56 183
51 180
51 172
48 163
48 167
47 166
30 162
23 160
20 161
20 175
19 177
19 178
19 181
19 182
19 184
11 154
10 159
12 340
11 422
11 509
9 570
9 616
9 636
10 636
9 612
9 611
8 590
7 569
6 567
6 566
6 569
6 571
6 571
5 561
5 557
5 557
5 555
5 557
5 558
5 560
5 554
5 552
6 556
6 555
6 555
6 539
6 542
6 541
10 727
11 741
10 752
10 750
9 743
7 543
8 377
8 300
8 308
8 300
8 282
8 291
7 290
7 298
7 306
7 313
7 317
7 315
8 350
8 349
9 354
18 370
30 389
30 398
30 399
30 397
30 397
30 396
30 402
30 399
29 394
29 394
29 396
29 395
29 393
29 390
23 182
23 180
23 182
24 182
24 182
24 178
24 175
24 174
24 160
24 161
24 160
24 152
24 151
24 143
24 204
25 200
27 212
27 216
26 185
26 182
24 176
16 161
7 145
7 137
7 137
10 141
11 144
11 142
12 138
12 139
12 137
12 136
12 137
12 140
12 134
12 137
12 135
12 132
12 129
11 129
11 130
11 130
11 131
11 132
11 131
12 133
12 142
11 154
16 182
16 179
15 112
15 144
16 136
16 141
15 137
15 136
14 135
14 135
14 133
14 130
13 128
12 126
11 124
11 123
10 124
10 124
11 126
11 128
13 128
21 127
21 126
21 126
21 127
22 127
22 127
22 126
23 126
24 127
30 127
43 126
44 126
44 124
46 115
46 95
42 58
40 57
43 57
44 34
44 34
44 26
44 26
44 26
44 26
44 26
44 26
44 27
44 28
44 28
44 28
44 28
43 28
42 28
40 26
38 24
34 20
28 17
28 17
26 15
26 16
25 19
24 56
23 59
18 66
14 76
13 79
12 82
11 82
10 81
8 81
6 79
6 130
6 139
6 150
6 152
6 153
6 153
6 153
6 153
6 154
6 154
6 154
6 152
6 152
6 152
6 152
6 152
6 152
6 152
6 154
7 152
8 154
13 162
15 176
14 178
15 178
16 175
15 149
14 140
14 152
14 154
18 197
19 203
20 336
20 346
20 354
20 358
20 310
20 304
20 300
21 309
28 316
30 325
32 329
32 332
32 334
32 338
32 354
32 365
32 366
32 366
32 366
32 369
32 381
32 384
32 382
31 383
29 376
25 352
22 344
21 346
22 346
22 346
33 384
33 383
34 371
34 361
27 316
26 308
25 172
25 163
25 152
25 144
25 144
25 140
25 136
25 134
17 130
16 110
14 110
14 111
14 116
14 114
14 98
14 95
14 98
14 101
14 102
14 106
14 97
15 93
15 94
35 93
96 97
110 100
112 100
113 97
115 100
114 99
104 48
106 47
106 44
106 45
106 56
106 55
106 56
106 58
106 58
106 59
106 58
106 54
105 67
105 68
105 74
105 78
105 83
106 87
106 84
106 82
106 89
106 93
106 97
105 99
103 99
102 96
102 97
88 96
74 96
52 95
14 92
7 89
4 86
1 86
1 86
1 86
1 87
1 87
1 88
1 86
1 74
1 74
1 72
1 71
1 71
1 69
1 69
1 64
1 47
1 31
1 32
1 31
1 24
0 25
0 25
0 19
0 17
0 16
0 11
0 10
0 10
0 10
0 10
0 10
0 11
0 11
0 10
0 10
0 10
0 10
0 16
0 16
0 17
0 17
0 16
0 16
0 16
0 16
0 16
0 16
0 16
0 14
0 14
0 14
0 15
0 16
0 14
0 13
0 14
0 12
0 12
0 21
0 29
0 34
0 36
0 37
0 37
0 37
0 37
0 38
0 41
0 44
0 52
0 57
0 59
0 60
0 55
0 55
0 54
0 54
0 54
0 54
0 54
0 54
0 54
0 54
0 54
0 54
0 54
0 54
0 54
0 55
0 58
0 63
0 62
0 64
0 63
0 54
0 46
0 39
0 37
0 41
0 49
0 54
0 61
0 60
0 55
0 50
0 44
0 44
0 44
0 47
0 49
0 50
0 52
0 52
0 52
0 52
0 52
0 52
0 52
0 53
0 58
0 58
0 60
0 61
0 60
0 58
0 56
0 51
0 53
0 53
0 53
0 56
0 56
0 59
0 58
0 53
0 45
0 37
0 35
0 38
0 44
0 44
0 46
0 43
0 42
0 43
0 47
1 186
1 200
1 251
1 283
3 292
3 299
3 311
3 311
3 314
3 310
3 309
3 306
3 306
3 313
3 335
3 358
3 359
3 357
3 358
3 357
3 359
3 365
3 367
3 365
3 363
3 363
3 362
3 361
3 357
3 352
3 352
3 351
3 411
3 420
3 423
3 393
2 197
0 173
0 182
0 195
0 202
1 214
1 209
1 209
1 218
1 226
1 235
1 266
1 289
1 330
1 340
1 340
1 346
1 346
1 346
1 342
1 342
1 344
1 337
1 337
1 336
1 336
1 337
1 339
1 340
1 342
1 344
1 345
1 267
1 266
1 259
1 259
1 257
1 254
1 243
1 244
1 237
0 227
0 240
0 264
0 253
0 244
0 248
0 211
0 185
0 118
0 102
0 100
0 99
0 98
0 99
0 97
0 96
0 93
0 94
0 95
0 95
0 116
0 116
0 126
0 125
0 124
0 117
0 115
0 114
0 114
0 114
0 115
0 117
0 121
0 122
0 108
2 107
2 101
2 94
2 71
2 72
2 71
2 66
2 61
2 57
2 58
2 58
2 59
2 62
2 65
2 66
2 68
2 68
2 70
2 71
2 70
2 82
2 64
2 75
2 61
0 60
0 60
0 61
0 61
0 62
0 62
0 62
0 63
0 64
0 68
0 135
0 145
0 164
0 172
0 177
0 176
0 177
0 182
0 188
1 260
1 271
1 275
1 301
1 308
1 328
2 724
2 762
2 799
2 864
2 878
2 894
2 1006
2 997
2 997
2 1067
2 1068
2 1065
2 1067
2 1068
2 1066
2 1067
3 1072
3 1088
3 1090
3 1089
3 1075
3 1006
3 1003
3 979
3 976
3 970
3 969
3 969
3 962
3 927
2 851
2 845
2 843
2 844
2 839
2 779
1 205
1 157
1 152
1 151
1 150
1 162
1 175
1 188
2 240
2 167
2 174
1 190
1 193
1 196
1 204
3 526
3 551
3 542
3 577
3 581
3 624
3 720
3 758
3 806
3 812
3 810
3 809
3 811
3 816
3 830
3 840
3 855
3 867
3 867
3 869
3 867
3 875
3 882
3 885
3 888
4 896
4 878
4 865
4 860
3 805
3 800
3 794
3 780
3 775
3 772
3 749
1 322
1 319
1 320
1 351
1 354
1 295
1 230
1 261
1 283
1 282
1 285
1 295
1 296
1 299
1 348
1 374
1 389
1 431
1 550
1 607
1 708
2 836
3 1089
3 1109
3 1111
2 1105
2 1111
2 1114
2 1116
2 1117
2 1120
2 1126
2 1136
2 1226
2 1235
2 1244
2 1244
2 1249
2 1246
2 1217
2 1201
2 1199
2 1182
2 1139
3 1089
4 1080
4 1082
4 1081
4 1082
4 1082
4 1001
4 981
4 960
4 908
4 764
4 705
4 555
3 448
2 217
2 211
2 209
2 206
2 258
2 258
2 259
2 261
2 409
2 415
2 407
2 324
2 326
2 324
2 322
2 321
3 321
3 319
3 319
3 319
3 318
3 316
1 316
1 311
1 310
1 309
1 299
1 308
1 305
1 364
1 377
1 438
1 441
1 443
1 444
1 443
1 443
1 442
1 442
1 442
1 376
1 384
1 399
1 399
1 244
1 236
0 231
0 217
0 214
0 214
0 216
0 215
0 216
0 220
0 229
0 254
0 324
2 398
2 437
3 768
4 885
4 957
4 965
4 991
4 990
4 929
4 923
4 862
4 864
4 878
4 882
5 933
5 946
5 957
5 958
5 958
5 956
7 954
7 934
7 933
7 934
7 932
7 932
7 932
7 932
7 932
7 930
7 930
7 930
7 924
7 912
7 882
7 774
5 673
5 614
4 309
3 230
3 162
3 156
3 129
3 129
3 126
3 125
3 126
3 121
3 120
3 108
2 51
2 51
2 49
2 48
2 48
2 48
0 33
0 31
0 30
0 30
0 31
1 51
3 85
4 86
4 98
4 107
4 110
4 114
4 118
4 118
4 119
4 120
4 122
4 132
4 132
4 136
4 133
4 134
4 136
4 135
4 147
4 149
4 148
4 152
4 146
4 187
4 195
4 216
4 220
4 246
4 263
4 268
5 280
5 281
5 280
5 282
5 282
4 261
2 227
1 225
1 210
1 206
1 207
1 203
1 199
1 200
1 207
2 212
2 221
2 209
2 206
3 209
3 211
3 211
3 205
3 207
3 197
3 196
3 195
3 220
3 469
3 431
4 536
4 602
4 648
4 632
4 642
4 653
3 712
3 796
3 956
6 1166
7 1447
10 1497
10 1501
10 1501
10 1503
10 1504
10 1503
10 1503
10 1545
10 1549
9 1543
9 1536
10 1541
10 1542
10 1542
9 1536
9 1534
9 1531
9 1533
9 1527
9 1519
9 1520
9 1516
9 1438
8 1151
8 1110
8 1031
8 1209
8 1300
8 1688
9 1991
12 2569
12 2544
12 2380
13 2297
10 2182
11 2038
9 2233
9 2274
9 2326
9 2341
9 2352
9 2353
9 2353
9 2304
9 2308
9 2307
9 2310
8 2391
8 2434
8 2459
8 2474
8 2527
8 2529
8 2529
8 2531
9 2529
9 2528
9 2558
9 2597
9 2614
9 2612
9 2559
9 2273
39 2142
39 1873
38 1604
36 848
35 828
35 879
37 930
38 1076
36 1108
36 1144
36 1134
36 1122
36 1181
36 1178
36 1191
38 1288
38 1308
48 1803
48 1849
48 1924
49 2667
50 2660
50 2678
50 2792
51 2872
51 2890
52 2904
51 2919
51 2945
51 2958
51 2930
51 2887
51 2872
51 2879
51 2885
55 2901
31 2898
32 2882
33 2872
54 2950
57 2915
57 2807
55 2757
55 2599
56 2467
56 2390
57 2377
57 2360
59 2320
58 2311
57 2295
56 2217
57 2190
47 1683
49 1661
50 1588
49 755
49 713
49 679
49 561
49 434
49 425
48 409
49 386
48 364
49 350
49 349
49 347
49 348
74 399
73 404
70 374
64 304
62 287
58 273
38 172
35 172
35 173
35 174
35 174
35 174
35 175
34 177
34 172
31 143
31 150
31 153
31 147
30 154
31 211
30 202
29 214
29 216
29 217
30 219
30 219
31 245
32 247
32 254
31 253
31 253
30 253
31 287
29 283
30 285
10 247
10 263
10 261
10 264
10 266
10 273
11 280
11 285
11 286
11 286
11 288
19 291
100 626
103 654
110 740
113 931
114 967
114 983
114 976
114 958
112 894
112 896
113 898
113 1236
113 1241
113 1259
113 1263
113 1242
112 1244
112 1243
114 1263
114 1264
115 1267
114 1235
114 1234
112 1231
109 1213
109 1199
109 1195
109 1191
110 1192
110 1193
108 1185
105 1189
105 1193
106 1202
85 1199
83 1235
16 861
16 837
8 744
8 590
8 546
8 545
8 546
8 540
9 533
9 531
9 522
9 171
9 158
9 144
9 141
9 142
9 142
9 139
8 134
8 142
8 139
7 138
7 139
7 139
7 139
7 139
7 139
7 138
7 137
7 131
8 126
7 117
7 105
7 103
7 101
5 52
5 41
3 39
3 39
3 38
3 35
3 31
3 28
3 28
2 28
1 28
2 27
2 27
2 28
2 28
2 27
2 26
2 23
2 21
1 20
1 39
2 45
4 57
4 126
4 126
4 126
4 126
4 126
4 126
4 127
6 145
6 168
6 173
6 177
6 176
6 177
6 177
6 177
6 176
6 176
6 226
6 250
6 293
6 327
6 342
6 350
6 354
5 354
5 355
5 361
5 383
7 402
7 406
7 407
7 409
7 401
7 377
5 370
4 360
4 293
4 298
3 298
3 302
3 304
3 304
3 300
2 265
2 263
2 260
2 263
4 288
8 338
8 351
24 476
25 482
27 486
27 432
27 396
27 357
27 349
27 354
27 358
27 358
27 361
27 370
27 353
27 371
25 383
25 393
25 396
25 397
25 398
25 400
25 402
25 402
26 411
26 408
29 411
29 407
28 405
29 405
29 405
29 403
29 402
30 400
30 395
27 359
27 324
26 312
10 188
10 195
10 205
10 217
19 665
19 673
19 688
19 722
19 740
21 873
21 927
21 921
21 919
21 859
21 842
22 843
26 850
42 853
54 860
60 862
60 861
60 862
56 846
55 845
54 845
54 845
54 845
54 846
54 846
54 846
54 846
54 846
54 847
54 844
51 834
50 823
50 812
50 798
50 801
50 770
41 201
40 149
39 91
39 77
39 76
40 76
40 73
40 79
40 86
40 86
39 88
37 78
27 66
11 77
5 77
1 78
1 79
1 86
1 87
1 91
1 93
1 97
1 109
1 108
1 109
1 110
1 111
1 113
1 115
3 122
3 133
3 133
3 134
3 134
3 122
2 145
2 146
2 158
2 297
2 323
2 341
2 347
3 350
3 344
3 346
3 346
3 346
3 352
3 434
3 444
3 492
3 503
3 508
3 503
3 506
3 500
3 524
3 523
3 517
3 520
3 522
3 521
3 522
2 517
2 516
1 509
1 502
2 502
2 505
2 505
2 503
2 455
2 448
2 442
2 285
1 271
3 264
3 268
3 283
4 305
4 311
4 405
4 405
4 403
4 318
5 284
5 246
5 245
5 240
5 235
5 234
5 235
5 210
5 215
5 211
5 210
5 209
4 208
4 208
6 215
6 216
6 216
6 221
6 223
6 226
6 240
7 257
7 258
7 262
7 244
7 245
5 248
5 248
5 245
5 229
4 206
4 201
3 111
3 109
3 103
3 102
3 101
3 100
3 99
3 102
3 103
3 100
3 95
3 93
3 89
3 89
3 89
3 90
3 97
3 118
1 139
1 159
1 181
1 189
1 199
1 207
1 217
0 214
0 220
0 247
0 248
0 388
0 389
0 386
0 387
0 388
0 499
0 501
1 504
1 515
1 535
1 539
1 541
3 597
3 607
3 611
3 616
3 618
3 621
3 622
3 623
4 630
4 631
4 627
4 624
5 610
5 562
5 712
5 756
5 810
5 813
5 946
5 956
6 1027
6 1169
6 1198
6 1371
6 1259
6 1345
6 1352
6 1355
6 1356
6 1246
6 1250
5 1250
5 1236
5 1223
5 1224
5 1222
3 1167
3 1160
3 1164
3 1170
3 1206
3 1224
3 1227
3 1226
2 1224
2 1220
2 1223
2 1211
1 1200
1 1184
1 1007
1 944
1 906
1 881
1 711
1 553
0 367
0 173
0 148
0 144
0 147
0 147
0 175
0 180
0 198
0 296
0 376
0 500
0 561
0 615
0 636
0 663
0 658
0 655
0 641
0 644
0 622
0 612
0 622
0 625
0 640
0 641
0 640
1 642
1 649
1 650
1 644
1 680
1 699
1 712
1 741
2 761
2 815
2 823
7 892
9 901
9 907
9 906
9 874
9 882
9 854
9 725
9 663
9 565
9 498
9 444
11 468
11 526
11 550
11 570
11 585
11 585
11 579
11 646
11 667
11 698
11 689
11 693
11 696
10 697
10 689
12 695
12 696
13 618
15 613
15 608
15 587
14 581
14 552
14 546
10 485
9 477
9 473
9 472
9 469
9 464
9 498
9 500
9 487
9 506
9 577
9 591
7 545
7 429
7 423
7 425
7 418
7 425
7 389
8 330
12 303
14 301
17 298
15 306
15 298
15 296
14 295
13 296
13 300
13 299
10 290
10 288
10 283
10 276
10 257
10 251
10 252
10 253
11 268
11 270
11 270
11 292
11 266
11 268
11 262
11 240
11 150
11 143
11 140
11 143
12 138
12 138
12 134
13 123
13 120
11 119
9 120
7 120
4 120
4 109
4 107
4 113
5 142
5 175
5 180
5 189
6 191
6 190
7 194
7 194
7 194
6 193
6 193
6 197
7 180
7 182
7 181
7 147
7 154
7 158
7 158
7 158
7 156
6 154
6 153
6 148
5 139
5 138
5 137
6 138
6 138
6 138
5 137
6 137
6 134
6 134
6 134
6 129
5 85
5 61
5 52
5 42
4 42
5 43
5 41
4 41
4 41
5 47
12 170
12 182
13 183
16 184
16 184
16 182
16 175
16 178
16 180
17 181
17 182
17 183
17 184
17 184
17 184
16 184
16 186
16 198
16 198
16 198
16 199
13 200
13 197
13 197
13 197
13 192
11 229
11 229
11 229
12 229
12 239
12 240
12 241
12 245
12 247
10 228
3 109
3 129
3 137
2 144
2 145
3 147
3 147
3 143
3 143
4 143
4 141
4 145
4 146
4 149
4 154
4 152
4 146
4 153
4 153
4 203
4 217
4 227
4 231
4 236
5 256
5 295
6 381
9 522
9 535
8 536
9 551
10 582
10 599
10 603
10 618
10 611
9 616
9 613
9 631
8 638
8 638
7 638
7 638
7 683
7 685
9 692
13 786
13 782
13 780
14 777
14 772
14 771
14 769
13 753
13 751
13 692
13 685
13 685
13 736
13 743
13 738
11 710
8 553
7 423
7 417
7 413
9 411
9 391
9 385
9 385
9 369
9 369
9 341
9 318
9 305
9 301
9 302
9 302
9 300
8 250
9 250
8 240
4 151
4 152
4 151
3 152
3 151
3 151
3 151
3 155
3 156
3 167
3 181
3 184
4 123
4 116
4 114
4 103
4 94
4 92
4 91
4 94
2 88
2 89
2 86
2 92
2 99
5 155
6 206
5 212
5 239
5 243
4 243
5 244
5 244
5 244
5 243
5 243
5 244
5 243
5 254
5 255
5 257
5 257
5 256
5 251
5 247
5 235
5 210
5 200
5 189
5 186
5 186
7 186
8 205
8 215
9 216
12 241
12 241
12 243
12 241
10 236
10 229
7 155
7 92
7 87
7 88
7 88
7 89
7 92
7 128
7 132
7 139
7 150
7 154
7 167
8 163
8 171
9 186
11 199
11 209
11 213
11 215
11 215
11 215
11 217
11 217
11 218
11 218
9 222
8 205
7 193
7 189
9 174
9 174
9 173
9 173
9 173
9 173
9 173
9 173
9 178
10 177
11 179
12 193
12 194
12 206
12 224
12 231
13 237
13 232
13 233
12 228
12 218
10 192
9 183
9 182
9 178
9 178
9 177
10 177
10 177
10 176
10 174
10 175
10 167
10 165
9 165
9 162
5 155
5 155
5 155
5 155
5 156
10 176
12 180
15 186
17 183
16 185
15 182
14 161
14 160
14 103
14 54
14 57
15 92
16 146
17 159
17 163
18 200
18 203
18 213
18 216
18 216
18 216
18 217
17 218
17 218
17 218
17 217
17 217
17 218
17 217
17 217
17 217
17 216
18 216
18 215
18 215
18 215
12 188
10 184
7 182
6 181
6 180
6 177
6 177
6 177
6 176
6 175
6 157
4 95
2 74
2 67
2 61
1 23
1 22
1 18
1 33
1 34
1 39
1 42
1 44
1 44
1 57
2 96
16 184
18 214
19 224
20 279
21 301
21 307
21 310
26 314
26 316
28 315
28 314
28 314
28 314
28 314
28 315
28 316
28 316
28 316
28 316
28 314
28 315
28 315
28 317
28 317
28 317
28 334
28 332
28 329
28 317
28 327
28 327
28 352
28 357
28 379
22 376
21 323
10 234
10 214
9 205
7 149
4 132
4 132
4 131
0 128
0 126
0 126
0 126
0 126
0 124
0 124
0 122
0 122
0 122
0 122
0 117
1 116
1 116
1 115
4 123
4 120
4 129
4 129
5 184
5 177
5 182
5 184
5 186
9 191
9 182
9 171
9 173
9 177
9 181
9 181
9 181
9 181
13 183
14 186
14 191
14 192
14 192
14 200
14 200
17 207
18 222
22 228
22 229
22 233
22 235
21 241
21 249
21 252
21 259
21 258
18 248
18 249
18 240
18 203
17 160
17 154
18 156
18 155
18 149
14 85
14 84
14 83
14 84
14 87
14 89
14 108
13 109
13 108
9 108
11 113
11 110
11 111
11 111
11 105
11 109
8 101
7 88
3 86
3 93
3 88
3 95
3 97
3 94
3 112
3 109
3 118
2 118
2 115
2 122
2 122
2 127
2 139
3 159
3 179
4 225
6 330
6 366
7 399
31 741
33 762
34 779
37 984
39 1045
40 1119
41 1224
39 1304
40 1370
40 1439
40 1452
40 1498
40 1548
40 1564
40 1567
40 1570
41 1561
41 1577
41 1565
41 1561
41 1555
41 1548
41 1562
42 1555
43 1564
43 1564
43 1566
43 1585
43 1583
43 1559
42 1539
42 1526
40 1459
37 1389
36 1363
38 1312
48 1254
49 1246
47 1254
47 1003
46 967
46 893
44 792
44 756
44 732
44 669
44 636
44 604
44 571
44 561
44 561
44 564
43 567
43 553
43 563
43 564
43 553
43 529
43 512
42 503
41 502
41 502
44 568
44 558
44 556
44 556
43 560
42 558
42 560
38 659
36 660
35 671
7 349
6 353
6 345
6 339
5 333
5 331
5 302
5 299
5 297
5 307
6 326
6 362
6 356
6 365
6 367
6 365
6 367
6 363
6 360
6 363
6 364
6 368
6 379
7 409
7 407
7 419
4 357
6 576
6 588
11 840
14 936
68 2750
70 2846
71 2753
76 3017
76 3010
76 3049
78 3123
78 3309
78 3315
78 3354
78 3365
78 3364
78 3360
78 3369
78 3356
77 3334
77 3387
77 3386
77 3388
77 3388
77 3389
77 3388
77 3388
81 3573
81 3630
81 3686
81 3727
82 3809
82 3796
89 3873
89 3891
88 3873
86 3656
86 3617
78 3346
75 3191
16 1118
14 1100
13 1058
13 1024
13 1018
13 994
13 931
13 731
18 799
18 781
18 784
18 785
18 787
18 788
18 787
20 787
20 697
21 704
21 709
21 716
21 723
21 721
21 721
17 537
17 459
17 400
17 361
16 280
16 266
9 185
9 168
9 169
9 170
9 173
9 173
9 172
9 173
18 176
21 177
22 183
22 190
22 206
21 205
21 206
18 115
18 133
18 126
19 127
19 130
19 131
19 130
17 130
17 130
16 126
17 119
17 113
17 103
17 101
17 100
17 89
17 88
17 89
17 87
21 109
51 148
54 160
54 173
54 176
55 374
54 374
54 375
42 382
42 414
42 446
43 473
44 470
44 460
44 457
44 457
44 457
42 450
43 436
43 436
43 435
43 437
43 440
43 442
43 449
43 449
42 446
41 472
41 482
41 505
41 720
40 803
40 1027
40 1190
40 1219
40 1313
35 1299
6 1252
6 1548
9 1541
10 1539
9 1342
9 1342
13 1525
13 1529
13 1492
13 1501
12 1524
12 1533
12 1535
12 1531
12 1531
12 1530
12 1530
12 1532
12 1535
12 1532
14 1624
14 1622
14 1627
14 1624
14 1631
14 1633
14 1632
15 1695
15 1677
15 1448
15 1369
15 1161
15 1022
15 993
15 932
15 996
15 1121
12 852
10 920
9 920
9 969
9 976
6 795
7 789
7 774
7 737
7 698
7 694
7 701
7 702
7 703
7 704
11 711
10 703
10 702
10 702
8 604
8 603
8 634
8 631
8 630
8 623
7 551
7 497
7 492
7 531
7 556
9 620
9 630
9 632
9 604
9 535
9 385
8 362
9 303
8 300
8 259
8 254
8 248
7 248
7 247
7 245
7 244
7 243
7 232
7 226
7 225
7 229
3 221
3 226
3 328
3 375
3 375
3 377
3 348
3 353
3 392
5 460
5 575
5 622
4 1106
3 1059
3 1012
3 989
5 989
5 995
7 1003
7 1009
7 1011
7 1013
6 1013
6 1010
6 1012
6 1012
6 1013
6 1013
6 1012
6 1012
7 1012
7 1013
8 1013
9 1009
9 1006
9 1002
12 997
12 990
14 899
14 859
15 860
16 868
16 871
17 871
18 787
16 677
15 616
15 607
15 108
15 108
15 86
15 84
14 84
14 85
12 78
12 75
12 77
12 78
12 78
12 79
12 80
12 80
12 80
12 87
12 87
12 88
11 93
11 92
10 96
8 98
8 98
8 101
6 100
6 100
4 91
3 84
2 82
2 77
2 73
1 65
0 59
0 37
0 39
0 46
0 54
0 54
0 54
0 53
0 51
0 47
0 47
0 49
0 48
0 49
0 49
0 48
0 48
0 46
1 48
1 45
7 64
7 66
7 62
10 85
10 88
10 87
13 87
13 87
16 87
23 90
23 90
24 92
25 94
26 97
27 103
27 103
27 102
28 104
28 90
30 98
30 102
31 106
31 115
31 126
31 128
31 130
31 146
32 152
34 156
35 156
36 161
36 165
36 173
42 193
41 193
38 190
35 179
37 181
40 199
36 179
39 189
38 196
36 201
35 202
33 202
28 199
29 202
28 199
26 195
25 191
25 190
25 189
25 189
24 189
24 189
22 171
21 162
21 161
21 155
21 146
21 145
21 145
20 129
20 125
19 124
18 121
16 119
17 120
17 108
9 82
10 72
10 85
10 84
9 85
8 79
8 77
5 66
5 55
4 53
4 53
5 62
5 65
4 68
4 70
4 68
5 81
5 81
5 82
5 82
7 91
16 147
16 148
16 147
16 148
16 151
17 164
18 175
18 177
18 180
18 181
17 181
19 204
19 207
18 206
18 209
18 211
17 211
17 191
17 188
17 189
17 191
18 193
19 193
19 194
19 192
20 192
19 177
19 175
20 173
22 175
22 175
21 164
21 164
20 163
20 162
18 154
10 95
10 96
10 92
11 92
10 90
10 76
9 66
9 63
10 76
10 73
10 66
8 62
8 60
8 61
8 66
9 73
10 75
11 88
11 95
11 94
10 92
10 92
9 94
9 112
13 167
14 192
16 254
16 260
13 261
13 260
13 261
13 263
13 261
12 261
12 261
12 260
12 260
12 259
14 259
37 314
42 328
47 406
47 411
47 416
47 399
48 405
47 406
50 392
53 426
54 455
55 448
53 444
53 446
52 441
52 446
52 445
52 444
52 444
50 437
55 489
52 399
52 404
52 408
52 420
52 421
52 422
52 421
53 422
53 427
52 436
52 439
51 446
51 461
51 462
49 465
23 406
19 387
15 301
13 297
13 294
11 289
10 287
10 287
9 270
8 241
8 212
8 214
8 210
8 213
8 210
8 209
8 210
8 211
8 209
9 208
4 115
4 112
3 89
3 95
3 83
3 82
3 80
3 77
3 74
3 65
3 59
3 55
3 50
3 47
3 49
3 45
3 43
3 42
3 42
3 43
3 43
3 45
3 65
3 72
3 82
3 103
3 156
4 168
4 218
4 226
4 273
4 280
4 298
4 300
4 304
3 311
2 313
2 313
2 300
2 306
2 328
2 370
2 546
3 837
12 1203
13 1323
13 1425
13 1632
13 1654
13 1686
13 1719
14 1775
15 1787
15 1792
15 1796
15 1798
15 1796
15 1795
15 1807
15 2187
16 2307
16 2342
17 2345
16 2362
16 2311
15 2309
15 2285
15 2287
15 2360
15 2376
15 2445
15 2537
15 2649
15 2666
14 2665
14 2664
14 2610
14 2503
12 2109
9 1847
5 1629
5 1547
5 1485
5 1323
5 1272
5 1263
5 1245
4 1241
3 1241
3 1239
3 1239
3 1246
5 1254
4 1222
4 1141
3 707
4 635
4 581
4 543
4 492
4 490
4 486
4 479
4 477
4 399
4 398
5 275
6 199
6 129
6 122
6 123
6 110
5 102
5 94
5 88
5 89
5 88
6 87
6 88
6 86
6 103
6 113
6 111
6 108
6 110
5 110
5 109
5 104
3 93
3 91
6 190
6 190
6 197
6 198
6 199
6 199
5 198
5 197
5 198
5 199
5 200
5 174
5 180
4 177
4 178
4 179
5 185
5 186
5 187
5 192
6 202
8 218
8 244
7 248
7 249
7 246
7 224
7 213
7 214
7 217
10 399
10 405
10 418
10 429
10 430
10 437
7 335
7 335
7 325
7 324
7 330
7 330
7 330
7 330
7 333
7 335
7 335
7 335
7 330
7 492
7 505
8 585
7 581
7 581
7 582
6 568
4 638
4 623
4 609
4 607
4 605
4 604
4 603
3 603
3 601
3 597
1 416
1 413
1 393
1 387
1 387
1 382
1 383
1 383
1 384
1 384
1 376
1 377
1 376
1 375
1 390
1 389
1 387
1 389
1 385
1 221
1 226
0 157
0 157
0 158
1 162
1 167
1 81
1 79
1 77
1 76
1 72
1 72
1 70
1 69
1 70
1 75
1 72
1 72
1 72
1 72
1 72
1 69
2 68
2 68
2 68
2 69
2 72
2 71
2 72
3 71
3 54
3 53
3 52
3 50
3 50
3 50
3 33
3 26
2 31
2 32
2 31
2 239
2 240
2 240
2 241
2 237
2 243
2 243
2 244
2 244
2 245
2 241
2 242
1 242
1 242
2 245
2 247
2 249
2 259
1 262
1 261
1 260
1 328
1 328
1 331
1 333
1 338
1 348
1 370
1 373
1 381
1 389
3 408
3 413
5 432
5 442
5 452
5 261
5 280
5 284
5 286
5 287
5 293
5 309
5 316
5 337
5 342
5 436
5 453
5 460
6 545
5 547
5 552
8 594
8 584
9 599
10 625
10 629
10 555
10 556
10 552
10 553
10 548
10 538
10 523
10 521
10 526
10 563
9 546
9 538
7 490
8 557
8 562
8 1369
8 1602
11 2036
17 2144
17 2296
18 2429
18 2883
18 3060
19 3240
19 3452
18 3391
18 3409
18 3433
17 3342
17 3346
17 3341
14 3296
14 3296
14 3295
14 3285
14 3284
18 3466
18 3524
22 3809
22 3899
22 4025
22 4032
22 4035
22 4030
22 4012
22 3993
22 4024
22 4029
22 4075
21 4035
20 3885
18 2795
17 2534
17 2472
11 2372
11 2178
11 1972
11 1470
11 1308
9 1190
9 1102
8 1098
8 1103
8 1104
9 1137
9 1139
9 1144
9 1179
20 1260
20 1272
20 1279
20 1302
16 1245
16 1144
12 814
12 791
12 750
13 761
13 762
13 761
13 770
13 755
13 721
13 715
14 673
14 627
14 619
14 620
14 620
14 620
14 625
14 622
14 637
14 712
14 789
15 826
15 921
15 926
16 922
16 923
15 894
15 897
17 919
17 922
6 802
6 780
6 810
6 802
6 676
6 661
6 666
9 777
9 794
9 806
9 826
9 828
9 825
9 821
9 821
9 822
8 825
8 826
8 832
8 870
8 925
8 1035
8 1043
8 1040
8 1015
6 901
6 782
6 689
6 596
6 597
6 597
6 590
6 579
6 597
4 656
4 739
4 937
4 1023
4 1001
5 1021
6 1473
8 1761
8 1822
5 1962
5 1935
4 1927
4 1921
4 1922
4 1920
5 1924
5 1926
5 1928
5 1926
5 1925
5 1914
5 1829
5 1739
5 1716
5 1752
6 1850
6 1851
6 1854
6 1863
6 1875
6 1887
6 1893
6 1911
8 1997
8 2002
8 1989
8 1871
8 1659
8 1532
7 1501
7 1472
6 1452
6 983
4 637
4 593
4 381
4 383
4 384
4 379
4 384
4 402
3 442
3 469
3 481
3 492
3 494
2 493
2 484
2 485
2 478
2 444
2 344
2 340
2 336
2 329
2 319
2 306
1 293
1 288
0 206
0 208
0 192
0 185
0 174
0 174
0 173
0 170
0 170
0 169
0 412
2 454
2 465
2 572
2 578
2 607
2 591
2 599
2 579
2 595
2 606
2 606
2 609
2 609
2 608
2 610
2 610
2 608
2 608
2 612
2 616
2 616
2 620
2 616
2 617
2 615
2 602
2 594
2 592
2 592
2 593
2 594
2 597
2 596
2 596
3 790
3 518
1 502
1 699
3 749
4 767
4 726
4 700
4 671
4 724
4 721
4 721
4 726
4 725
4 726
4 726
4 726
4 725
4 729
4 737
4 838
4 880
4 961
4 1014
4 1022
4 1034
4 1037
4 1037
4 1036
4 1039
4 1040
4 1041
4 1042
4 1041
4 1044
4 1041
3 848
3 841
3 819
3 584
1 446
0 424
0 422
0 422
0 422
0 357
0 358
0 350
0 357
0 367
0 388
1 442
1 498
1 497
1 492
1 487
1 357
1 264
1 207
1 200
1 197
1 201
1 201
1 202
1 203
1 202
1 211
1 210
1 210
1 206
1 204
1 203
1 202
1 202
1 198
1 197
1 199
1 200
1 204
1 206
1 206
1 206
1 204
1 204
1 191
1 177
0 152
0 104
0 50
0 49
0 47
0 45
0 45
0 45
0 45
0 38
0 38
0 25
0 25
0 25
0 25
0 22
0 14
0 14
0 14
0 12
0 12
0 12
0 12
0 12
0 12
0 12
0 10
0 8
0 5
0 4
0 4
0 4
0 4
0 5
0 10
0 10
0 11
0 11
0 12
0 12
0 14
0 16
0 17
0 17
0 17
0 17
0 15
0 13
0 13
0 14
0 17
0 24
0 30
0 32
0 35
0 38
0 38
0 39
0 40
0 44
0 46
0 102
0 132
0 153
0 196
0 207
0 218
0 223
0 223
0 225
0 247
0 247
0 248
0 248
0 250
0 255
0 252
0 250
0 250
0 249
0 249
0 249
0 249
0 249
0 249
0 248
0 249
0 241
0 235
0 231
0 250
0 250
0 250
0 250
0 247
0 243
0 241
0 172
0 155
0 135
0 88
0 77
0 75
0 71
0 71
0 71
0 63
0 85
0 88
0 88
0 89
0 83
0 84
0 83
0 83
0 83
0 83
0 83
1 83
1 83
1 84
1 94
2 119
4 124
4 125
4 126
4 109
4 108
4 108
4 108
4 107
4 100
4 98
4 98
4 98
4 98
4 98
4 98
4 101
4 101
4 100
4 94
4 77
4 53
4 51
4 51
4 51
4 50
4 50
4 49
4 49
4 49
4 49
2 48
1 48
1 48
1 50
1 39
0 10
0 7
0 6
0 6
0 6
0 6
0 6
0 6
0 6
0 6
0 6
0 6
0 6
0 6
0 6
0 6
0 4
0 4
0 4
0 4
0 4
0 4
0 4
0 4
0 4
0 5
0 5
0 5
0 5
0 4
0 4
0 4
0 4
0 3
0 1
0 1
0 1
0 1
0 1
0 1
0 1
0 1
0 1
0 1
0 1
0 1
0 1
0 1
0 1
0 1
0 1
0 1
0 1
0 1
0 1
0 1
0 1
0 1
0 0
0 0
0 0
0 0
0 0
0 0
0 0
0 0
0 0
0 0
0 0
0 0
0 1
0 1
0 1
0 1
0 1
0 1
0 1
0 1
0 1
0 1
0 1
0 1
0 1
0 1
0 1
0 1
0 1
0 1
0 1
0 1
0 1
0 1
0 1
0 1
0 1
0 1
0 1
0 1
0 1
0 1
0 1
0 1
0 1
0 1
0 1
0 1
0 0
0 0
0 0
0 0
0 0
0 0
0 0
0 0
0 0
0 0
0 0
0 0
0 0
0 0
0 0
0 0
0 0
0 0
0 0
0 0
0 0
0 0
0 0
0 0
0 0
0 0
0 0
0 0
0 0
0 0
0 0
0 0
0 0
0 0
0 0
0 0
0 0
0 0
0 0
0 0
0 0
0 0
0 0
0 0
0 0
0 0
0 0
0 0
0 0
0 0
0 0
0 0
0 0
0 0
0 0
0 0
0 0
0 0
0 0
0 0
0 0
0 0
0 0
0 0
0 0
0 0
0 0
0 0
0 0
0 0
0 0
0 0
0 0
0 0
0 0
0 0
0 0
0 0
0 0
0 0
0 0
0 0
0 0
0 0
0 0
0 0
0 0
0 0
0 0
0 0
0 0
0 0
0 0
0 0
0 0
0 0
0 0
0 0
0 0
0 0
0 0
0 0
0 0
0 0
0 0
0 0
0 0
0 0
0 0
0 0
0 0
0 0
0 0
0 0
0 0
0 0
0 0
0 0
0 0
0 0
0 0
0 0
0 0
0 0
0 0
0 0
0 0
0 0
0 0
0 0
0 0
0 0
0 0
0 0
0 0
0 0
0 0
0 0
0 0
0 0
0 0
0 0
0 0
0 0
0 0
0 0
0 0
0 0
0 0
0 0
0 0
0 0
0 0
0 0
0 0
0 0
0 0
0 1
0 1
0 1
0 1
0 1
0 1
0 1
0 1
0 1
0 1
0 1
0 1
0 1
0 1
0 1
0 1
0 1
0 1
0 1
0 1
0 1
0 1
0 1
0 1
0 1
0 1
0 1
0 1
0 1
0 1
0 1
0 1
0 1
0 1
0 1
0 1
0 0
0 0
0 0
0 0
0 0
0 0
0 0
0 0
0 0
0 0
0 0
0 0
0 0
0 0
0 0
0 0
0 0
0 0
0 0
0 0
0 0
0 0
0 0
0 0
0 0
0 0
0 0
0 0
0 0
0 0
0 0
0 0
0 0
0 0
0 0
0 0
0 0
0 0
0 0
0 0
0 0
0 0
1 0
1 0
1 0
1 0
1 0
1 0
1 0
1 0
1 0
1 0
1 0
1 0
1 0
1 0
1 0
1 0
1 0
1 0
1 0
1 0
1 0
1 0
1 0
1 0
1 0
1 0
1 0
1 0
1 0
1 0
1 0
1 0
1 0
1 0
1 0
1 0
0 0
0 0
0 0
0 0
0 0
0 0
0 0
0 0
0 0
0 0
0 0
0 0
0 0
0 0
0 0
0 0
0 0
0 0
0 0
0 0
0 0
0 0
0 0
0 0
0 0
0 0
0 0
1 0
1 0
1 0
1 0
1 0
1 0
1 0
1 0
1 0
1 0
1 0
1 0
1 0
1 0
1 0
1 1
1 1
1 1
1 1
1 1
1 1
1 1
1 1
1 1
1 1
1 1
1 1
1 1
1 1
1 1
1 1
1 1
1 1
1 1
2 1
2 1
1 1
1 1
1 1
1 1
1 1
1 1
1 1
1 1
1 1
1 1
1 1
1 1
1 1
1 1
1 1
1 0
1 0
1 0
1 0
1 0
1 0
1 0
1 0
1 0
1 0
1 0
1 0
1 0
1 1
2 1
2 1
2 1
2 1
2 1
1 1
1 1
1 1
1 1
1 1
1 1
1 1
1 1
1 1
1 1
1 2
1 2
1 2
1 2
1 3
1 3
1 4
1 5
1 6
1 7
1 8
1 9
1 12
1 13
1 13
1 13
1 13
1 13
1 13
1 14
0 13
0 13
0 13
0 13
0 13
0 13
0 13
0 13
0 13
1 15
1 15
1 15
1 15
1 16
1 16
1 16
1 15
1 15
1 16
2 15
2 15
2 15
2 14
2 14
2 13
2 12
2 9
2 8
2 8
2 8
2 8
2 8
2 8
2 8
2 8
2 7
2 7
2 7
2 7
2 7
2 7
2 8
2 8
2 8
3 8
2 6
2 5
2 5
3 5
4 5
4 5
4 5
4 5
3 5
3 4
4 4
4 4
4 3
4 3
4 1
4 1
4 1
5 1
5 1
5 1
5 2
5 5
5 16
5 22
5 25
5 25
5 27
6 30
6 36
6 38
6 39
6 39
6 38
7 38
7 39
6 39
5 39
5 39
5 39
5 39
4 39
4 39
4 39
4 39
4 39
4 39
3 39
3 39
2 39
3 39
3 39
3 39
3 39
3 37
3 37
3 37
3 33
3 30
3 13
2 9
2 3
2 3
2 3
2 3
2 3
2 3
2 3
2 3
2 3
1 2
1 2
1 2
1 3
1 4
1 5
1 5
1 7
1 8
1 8
1 8
1 8
1 8
1 8
1 8
1 8
0 9
0 10
0 10
0 12
0 12
0 12
0 12
0 12
0 13
0 12
0 10
0 11
1 12
3 15
4 15
4 15
4 14
4 14
4 14
4 14
4 14
5 15
5 15
5 15
5 15
5 14
5 14
5 13
5 12
5 12
5 13
6 17
6 18
6 30
6 30
6 30
6 29
6 27
6 25
6 25
6 25
6 25
6 25
6 25
6 25
6 25
5 24
4 25
4 24
2 22
1 22
1 22
1 23
1 23
1 23
1 23
1 22
1 22
2 23
2 23
2 23
2 23
2 23
2 22
2 22
2 22
2 21
1 17
1 16
1 5
1 5
1 5
1 5
1 5
1 5
1 5
2 5
2 5
2 5
2 6
2 9
2 10
2 10
2 9
2 9
2 9
2 9
2 9
2 8
2 8
2 9
2 13
2 13
2 13
1 12
2 12
2 12
2 12
2 12
2 12
2 12
2 12
2 12
3 12
3 12
3 11
3 11
3 11
3 12
3 12
3 12
2 13
2 13
2 12
3 12
3 12
4 8
4 8
4 8
4 10
5 10
6 10
7 12
8 12
8 13
8 13
9 13
9 10
9 10
9 10
9 10
8 10
8 10
8 10
8 10
8 10
8 9
8 9
8 10
7 10
7 10
7 10
7 10
7 10
7 11
7 15
8 25
8 27
9 33
9 36
8 36
8 42
7 44
7 47
7 47
7 47
6 49
5 49
7 65
7 64
7 66
6 69
6 70
6 71
6 72
6 73
6 75
6 76
6 77
6 77
6 78
6 78
6 78
6 78
6 77
6 77
6 77
6 77
6 77
6 77
6 74
6 66
5 55
5 52
5 46
5 42
5 43
5 39
5 38
6 37
6 37
6 34
6 35
7 35
27 16
30 17
30 18
32 19
32 22
32 22
32 20
32 21
32 19
32 19
32 18
32 18
32 18
33 18
42 25
43 26
52 33
52 33
52 35
52 36
52 39
55 39
55 39
55 39
55 41
56 41
56 42
57 42
57 40
57 40
57 40
56 40
57 45
57 46
56 45
55 44
33 40
30 39
30 39
28 34
28 31
28 32
28 32
28 32
28 32
28 32
28 32
26 32
24 32
23 32
16 19
14 21
8 25
8 27
8 25
9 25
10 21
11 32
11 34
11 35
11 38
10 38
8 39
8 38
8 38
8 38
8 38
8 39
7 34
7 33
7 33
7 36
7 36
7 36
7 37
7 38
7 37
7 36
7 36
7 36
7 37
7 38
7 38
7 38
7 38
7 37
7 36
7 34
7 28
7 27
7 27
6 27
6 27
16 69
16 68
16 68
16 70
16 71
16 71
16 73
16 72
16 72
16 72
16 71
17 71
17 72
17 73
17 71
17 71
17 70
17 70
17 69
17 69
17 69
17 69
17 69
17 68
17 67
17 67
17 67
17 69
17 69
17 69
17 69
17 69
16 69
14 69
13 69
13 69
1 10
1 10
1 10
2 10
2 8
2 6
2 5
2 5
2 4
2 4
2 5
1 5
1 4
1 4
1 4
1 4
1 5
1 5
1 8
1 9
1 14
1 14
1 14
1 14
1 14
1 14
1 14
1 12
1 12
1 12
1 12
1 12
1 11
1 11
1 11
1 11
1 11
1 11
1 11
0 11
0 11
0 10
0 10
0 10
0 10
0 10
0 10
0 10
0 9
0 9
0 9
0 9
0 8
0 8
0 4
0 4
0 0
0 0
0 0
0 0
0 2
0 2
0 2
0 2
0 2
0 2
0 2
0 2
0 2
0 2
0 2
0 2
0 2
0 2
0 2
0 2
0 3
0 4
0 4
0 4
0 4
0 4
0 4
0 4
0 4
0 4
0 4
0 4
0 4
0 4
0 4
0 4
0 5
0 5
0 5
0 5
0 3
0 3
0 3
0 3
0 3
0 3
0 3
0 3
0 3
0 3
0 3
0 2
0 2
0 2
0 2
0 2
0 1
0 1
0 1
0 1
0 1
0 1
0 1
0 1
0 1
0 1
0 1
0 1
0 4
0 4
0 4
0 5
0 4
0 4
0 4
0 5
0 7
0 7
0 7
0 7
0 7
0 7
0 7
0 7
0 7
0 7
0 7
0 8
0 8
0 8
0 8
0 8
0 8
0 8
0 8
0 8
0 9
0 9
0 9
0 10
0 10
0 11
0 11
0 11
0 8
0 8
0 9
0 8
0 8
0 8
0 7
0 7
0 5
0 5
0 7
0 7
0 7
0 6
0 13
0 13
0 13
0 13
0 17
0 20
0 20
0 21
0 22
0 24
0 26
0 26
0 26
0 26
0 25
0 25
0 25
0 24
0 23
0 23
0 23
0 23
0 23
0 23
0 22
0 22
0 22
0 23
1 24
1 25
1 25
2 25
2 25
2 26
2 27
2 26
2 21
2 21
2 18
2 19
2 18
2 15
2 15
2 14
2 11
2 11
2 9
2 9
2 9
2 9
2 9
2 9
2 9
2 9
2 10
2 10
2 10
2 13
2 13
2 13
2 13
2 14
2 15
2 15
1 13
1 12
1 12
0 12
0 10
0 9
0 9
0 10
0 9
0 9
0 9
0 8
0 8
0 7
0 7
0 7
0 7
0 7
0 7
0 7
0 7
0 7
0 7
0 7
0 7
0 7
0 7
0 8
0 8
0 5
0 6
0 6
0 6
0 6
0 5
0 4
0 4
0 4
0 4
0 4
0 4
0 4
0 3
0 3
0 3
0 3
0 3
0 3
0 4
0 4
0 4
0 4
0 4
0 4
0 4
0 4
0 4
0 4
0 5
0 5
0 5
0 5
0 4
0 3
0 3
0 2
0 2
0 2
0 3
0 3
0 3
0 4
0 5
0 5
0 5
0 5
0 5
0 6
0 6
0 6
0 6
0 5
0 6
0 8
0 8
0 9
0 9
0 9
0 9
0 9
0 9
0 10
0 16
0 18
1 18
1 17
1 17
1 17
1 17
2 17
2 17
2 17
2 17
2 18
2 16
2 16
2 16
2 14
2 14
2 14
2 14
2 14
2 14
2 14
2 14
2 14
2 14
2 14
2 13
2 11
2 11
2 11
2 12
2 12
4 18
4 18
4 17
4 17
4 11
4 12
3 12
3 12
3 12
3 12
3 12
2 12
2 12
2 12
2 12
2 11
2 11
2 11
2 11
2 11
2 10
2 10
2 10
2 10
2 10
2 10
2 10
2 10
2 11
2 11
2 11
2 11
2 12
4 12
4 15
4 14
2 9
2 7
2 7
2 7
2 7
2 9
2 10
2 10
2 10
2 10
2 10
2 10
2 10
2 10
2 10
2 10
2 10
2 10
2 11
2 11
2 11
2 11
2 11
2 10
2 10
2 10
4 22
4 24
4 26
4 27
4 27
4 27
4 25
2 31
2 27
2 28
2 29
2 29
2 30
2 31
2 30
2 28
2 28
2 28
2 28
2 28
2 28
2 28
2 29
2 29
2 29
2 30
2 31
2 32
2 31
2 33
2 35
2 37
2 40
2 40
2 40
2 40
0 26
0 24
0 24
0 24
0 24
0 26
0 26
0 19
0 19
0 19
0 18
0 18
0 17
0 17
0 17
0 17
0 17
0 18
1 23
1 23
1 24
1 25
1 26
1 27
1 26
1 38
1 39
1 36
1 36
1 34
1 32
1 30
1 29
2 30
2 30
2 31
2 31
2 32
2 32
2 32
2 34
2 31
2 33
2 33
2 33
2 33
2 33
2 33
2 33
2 33
2 34
2 33
2 32
1 30
1 27
1 27
1 27
1 26
1 23
1 24
3 30
3 19
3 18
3 18
3 18
3 18
3 18
3 18
3 18
2 17
2 17
2 16
2 15
2 13
2 16
2 14
2 15
2 15
2 15
2 15
2 15
2 15
2 18
2 18
2 19
2 21
2 21
2 21
3 22
3 22
3 25
3 26
3 26
3 25
3 25
2 25
1 17
1 17
2 19
2 19
2 19
2 19
2 19
2 19
2 19
2 22
2 22
2 22
2 22
2 22
2 19
3 18
3 18
3 17
3 18
3 18
3 18
3 16
3 15
3 14
3 16
3 14
3 13
2 13
2 12
2 10
2 14
2 36
4 81
5 123
5 133
5 135
5 139
5 141
4 139
4 139
4 139
4 139
5 139
5 139
5 139
6 136
6 136
6 136
6 136
6 136
6 136
5 136
5 137
5 137
5 137
5 137
5 137
5 137
5 137
5 137
5 135
5 135
5 135
5 135
5 135
5 135
4 119
3 70
3 31
2 4
2 2
2 2
2 2
2 2
2 2
2 3
2 4
2 5
1 4
1 4
1 4
0 4
0 4
0 4
0 4
0 4
0 4
1 4
1 3
1 3
1 3
1 3
1 3
1 3
1 3
1 3
1 3
1 3
1 3
1 3
1 4
1 4
1 3
1 8
1 16
1 18
1 20
1 21
1 21
1 21
1 21
1 22
1 23
1 23
2 30
2 61
2 65
1 75
1 83
1 90
1 92
1 99
1 104
1 109
1 110
1 114
1 114
1 115
1 114
1 119
1 119
1 124
1 153
1 159
2 167
2 168
2 171
2 171
2 174
2 166
2 159
2 160
2 159
2 159
1 159
1 159
1 158
1 158
2 163
2 163
2 156
2 126
3 120
3 112
3 101
3 96
3 92
3 87
3 84
3 85
3 84
3 80
3 84
3 87
3 90
4 90
4 90
4 86
4 54
4 52
3 41
3 41
3 40
3 40
3 37
3 35
3 35
3 36
3 37
3 39
3 39
3 41
3 41
3 41
2 35
2 34
2 34
2 34
1 33
1 33
1 33
1 33
1 34
1 33
1 34
1 30
1 30
2 33
3 31
3 28
3 25
2 21
3 21
4 24
5 23
6 23
6 22
7 22
7 22
7 21
7 20
7 20
7 21
7 21
7 21
7 19
7 24
7 24
7 24
7 25
7 25
7 25
7 25
7 24
7 24
7 24
7 24
7 26
8 25
8 29
8 28
8 29
8 30
7 25
5 25
5 25
5 24
5 24
5 25
3 19
3 22
2 23
2 23
1 25
1 25
2 25
2 25
2 25
2 24
2 24
2 24
2 24
2 17
2 16
2 17
2 17
2 17
2 17
2 17
2 17
2 17
2 17
2 14
2 13
1 23
1 19
1 19
1 18
1 18
1 18
1 17
1 17
1 17
1 21
1 20
1 18
1 18
1 18
1 18
1 16
0 16
0 16
0 17
0 17
0 17
0 17
0 17
0 17
0 17
0 17
0 16
0 16
0 16
0 20
0 21
0 21
0 21
0 21
0 22
0 22
0 11
0 13
0 14
0 14
0 15
0 18
0 19
0 20
0 20
0 17
0 17
0 17
0 17
0 17
0 18
0 18
0 18
0 20
0 19
0 19
0 19
0 20
0 19
0 19
0 20
0 20
0 20
0 20
0 18
0 15
0 15
0 15
0 15
0 15
0 15
0 15
0 14
0 14
0 14
0 15
0 13
0 9
0 9
0 8
0 9
0 14
0 16
0 16
0 19
0 22
0 22
0 31
0 33
0 31
0 34
0 34
0 37
0 40
0 40
0 41
1 41
1 44
1 46
1 49
1 51
1 51
1 51
1 51
1 50
1 50
1 50
1 50
1 51
1 50
1 50
1 49
1 49
2 48
2 50
2 51
2 52
2 47
2 46
2 46
2 41
2 39
2 39
2 26
2 25
2 25
1 28
1 28
1 26
1 26
1 25
1 25
1 27
1 24
1 24
1 23
1 23
1 23
1 26
1 26
1 26
1 26
1 26
1 26
1 26
1 26
1 26
1 27
1 29
0 28
0 45
0 44
1 45
1 49
1 49
1 50
1 53
1 53
1 51
1 50
1 50
1 49
1 46
1 46
1 46
1 47
1 48
1 48
1 52
1 53
1 49
1 51
1 50
1 49
1 47
1 47
1 47
1 48
1 48
1 48
1 52
1 52
1 53
1 52
1 48
1 46
1 22
0 21
0 18
0 18
0 18
0 18
0 18
0 18
0 19
0 19
0 19
0 19
0 20
1 23
3 85
3 87
10 136
10 144
10 146
11 171
11 176
11 197
11 199
11 204
11 206
11 209
11 208
11 208
11 208
11 207
11 203
11 204
11 204
11 204
11 205
13 234
14 262
14 262
14 272
14 283
13 289
13 309
13 312
13 314
13 315
13 317
13 319
13 318
13 318
13 315
11 239
10 233
3 170
4 164
4 161
5 153
5 143
5 127
5 125
5 124
5 123
5 124
6 124
6 125
6 126
5 136
5 147
6 157
6 163
6 183
6 183
6 146
5 117
5 126
5 123
5 113
5 106
5 84
5 82
5 82
5 82
7 83
7 83
7 83
12 82
12 82
12 82
12 82
11 83
10 82
10 82
10 82
11 83
11 87
11 87
11 89
11 89
11 88
12 88
12 88
12 90
12 75
12 58
11 53
11 54
11 43
11 43
10 45
10 48
10 36
10 36
10 36
10 36
10 39
9 39
9 39
9 39
7 39
7 39
4 39
3 39
2 39
2 39
2 39
1 37
1 37
1 37
1 45
2 44
2 41
2 41
2 39
2 37
1 38
1 38
1 37
1 28
1 28
1 26
1 26
1 26
1 20
1 15
1 21
1 21
1 21
1 21
1 22
1 22
1 17
1 17
1 17
1 17
1 17
1 17
1 17
1 17
1 17
1 17
1 19
1 25
2 49
2 60
2 57
3 59
4 61
6 61
6 61
7 61
8 61
8 61
8 61
8 61
8 61
8 61
9 61
9 62
9 62
9 62
9 55
10 55
10 55
10 55
10 54
10 54
10 54
10 54
11 58
11 64
11 86
12 94
12 96
11 113
11 116
10 117
10 111
10 134
9 113
10 104
10 114
10 114
10 113
7 118
6 118
6 119
6 119
7 119
7 119
8 121
8 121
7 121
9 124
15 124
16 124
16 124
16 124
16 124
16 124
16 124
16 125
16 125
16 126
16 126
15 128
15 123
15 101
14 107
14 102
13 88
13 84
13 85
13 80
12 43
12 41
12 40
11 40
11 40
11 40
11 40
11 40
11 41
11 41
11 41
10 42
9 41
6 42
6 46
4 43
0 43
0 43
0 43
0 43
0 43
0 44
0 47
0 51
0 52
1 78
3 83
3 91
3 92
3 90
3 84
3 87
3 86
3 86
3 84
3 83
3 84
3 84
3 89
4 94
4 106
4 106
4 106
4 108
4 110
6 115
6 115
6 117
6 115
6 115
6 113
6 113
6 113
6 112
6 113
5 122
5 132
5 134
5 126
5 123
4 123
4 100
3 95
3 78
3 79
3 73
3 72
3 70
3 71
3 70
3 69
3 70
3 70
3 69
3 64
2 59
2 49
2 48
2 48
2 47
2 45
0 40
0 39
0 38
0 39
0 39
0 39
0 39
0 39
0 38
0 35
0 27
0 15
0 11
0 11
0 12
0 14
0 14
0 14
0 14
2 16
2 20
4 31
4 33
4 31
4 31
4 30
4 29
4 31
4 33
4 34
4 34
4 35
4 35
6 35
7 39
8 37
8 34
10 37
10 37
12 39
12 39
12 49
12 54
12 59
12 60
12 60
12 61
12 61
12 61
12 65
12 66
12 65
12 65
12 64
12 63
11 60
11 56
9 46
9 45
9 45
14 81
14 83
15 85
15 86
15 84
15 84
15 84
15 83
14 83
13 83
13 80
14 84
15 83
13 90
12 90
12 89
12 88
12 77
12 74
12 69
12 69
12 69
12 69
12 72
12 75
12 72
12 69
12 70
12 70
12 70
12 70
11 70
11 69
11 70
12 70
12 65
7 30
6 29
7 29
7 28
8 27
8 34
8 34
8 37
6 37
5 36
4 34
4 32
4 32
4 24
4 24
4 25
4 25
4 25
4 25
4 25
4 24
4 23
4 21
4 19
4 16
4 18
4 19
5 34
6 38
6 51
6 54
6 54
6 53
6 52
5 52
5 52
5 55
5 55
5 60
6 61
5 61
5 56
6 55
6 52
6 50
5 50
5 51
5 52
5 53
5 53
5 55
5 55
5 55
5 55
5 55
5 56
5 56
5 58
9 66
9 66
9 66
9 64
9 63
8 45
7 39
7 31
7 29
7 30
7 30
8 30
8 31
9 31
9 28
9 26
10 24
9 24
9 23
9 22
9 23
9 23
9 24
9 25
9 24
9 26
9 25
9 24
9 24
9 24
9 22
9 22
9 23
9 24
9 23
9 23
6 21
6 21
6 23
6 23
6 23
6 24
6 28
6 28
6 28
6 27
6 27
5 27
4 27
3 26
3 26
3 28
13 84
14 85
14 89
15 89
15 88
15 88
15 87
15 87
15 90
15 88
15 90
15 90
15 90
15 90
15 90
15 90
15 89
15 88
15 88
15 88
14 78
14 80
14 90
14 99
15 110
15 114
15 115
15 115
15 115
15 115
15 115
15 115
15 115
16 115
16 115
15 113
3 55
3 54
2 49
2 48
2 48
2 47
2 48
2 48
2 45
2 45
2 45
2 45
2 45
2 45
3 51
3 57
3 60
3 70
3 74
3 76
3 69
4 72
4 63
4 56
3 47
3 45
3 45
3 48
3 48
3 48
3 48
3 48
3 48
2 57
2 57
2 58
2 59
2 59
2 59
3 57
3 57
3 57
3 57
3 59
3 60
3 59
3 60
3 60
3 61
6 87
5 85
5 79
5 77
5 66
5 64
5 63
5 64
4 65
4 68
4 71
4 84
4 90
4 98
4 98
4 98
4 98
4 98
4 98
4 98
3 89
4 90
4 89
6 91
6 92
6 97
6 99
6 101
6 102
6 101
6 99
6 99
6 100
6 100
6 100
6 97
3 67
4 65
4 67
4 71
4 92
4 104
4 103
4 104
4 92
4 78
4 75
4 74
4 74
4 75
4 78
3 80
3 82
3 82
3 84
3 84
3 84
3 84
3 85
1 82
1 78
1 72
1 72
1 71
1 70
1 73
1 73
1 72
1 71
1 71
1 71
1 75
1 75
0 70
0 67
0 57
0 58
0 47
0 47
0 49
0 48
1 51
1 51
1 45
1 39
1 39
1 37
1 37
1 36
1 35
1 34
1 34
1 34
1 34
1 34
1 35
1 35
1 35
1 35
1 35
1 35
1 32
1 32
1 32
1 32
1 32
1 32
1 28
1 31
1 32
2 39
3 40
3 24
3 25
3 23
2 22
2 21
2 20
2 20
2 17
2 17
2 18
2 17
2 17
2 17
2 17
2 17
2 18
2 18
2 18
2 18
3 17
3 17
3 17
3 17
4 17
4 18
4 17
4 17
4 17
4 17
4 17
4 17
4 16
3 14
3 13
2 4
2 4
2 3
3 3
3 3
3 28
3 28
3 30
3 30
3 31
3 31
3 32
3 32
3 32
3 32
3 32
3 32
3 32
3 32
2 32
2 33
1 33
1 33
1 33
1 33
1 33
1 34
1 34
1 34
1 34
1 34
1 34
1 34
1 35
1 35
1 35
1 35
0 35
0 36
0 37
0 39
0 13
0 13
0 11
0 11
0 12
0 12
0 15
0 15
0 16
0 16
0 17
0 17
0 15
0 15
0 15
0 15
0 15
0 15
0 15
0 15
0 15
0 13
0 13
0 13
1 13
1 13
1 13
1 14
1 13
1 14
1 14
1 14
1 14
2 11
2 13
2 12
2 12
2 12
2 12
2 13
2 13
2 12
2 9
2 9
2 10
2 9
2 9
2 9
2 9
2 9
2 9
2 9
2 10
2 10
2 11
2 14
2 14
2 14
2 14
2 14
1 14
1 14
1 14
1 12
1 15
1 16
1 16
0 17
0 17
0 17
0 13
0 13
0 15
0 14
0 14
0 14
0 18
0 18
0 18
0 20
0 20
0 20
0 21
0 21
0 21
0 24
0 24
0 26
0 25
0 25
0 24
0 22
0 22
0 22
0 22
0 23
0 23
0 24
0 24
0 26
0 23
0 25
0 25
0 25
0 25
0 27
0 27
0 27
0 26
0 28
0 29
0 25
0 21
0 21
0 22
0 22
0 23
0 25
0 25
0 26
0 26
0 23
0 23
0 21
0 22
0 23
0 22
0 24
0 24
0 24
0 25
0 24
0 23
0 23
0 23
0 21
0 19
0 19
0 22
0 74
0 86
0 94
0 116
0 120
0 120
0 123
0 127
0 132
0 133
0 136
0 136
0 139
0 139
0 136
0 136
0 136
0 136
0 136
0 137
0 137
0 136
0 135
0 133
0 133
0 133
0 134
0 134
0 139
0 139
0 139
0 139
0 139
0 138
0 138
0 129
0 36
0 28
0 23
0 33
0 34
0 36
0 43
0 45
0 53
0 50
0 48
0 60
0 57
0 57
0 62
0 65
0 71
0 73
0 87
0 98
0 106
0 109
0 109
0 111
0 115
0 115
0 113
0 111
0 108
0 109
0 109
0 110
0 110
0 110
0 111
0 111
0 111
0 112
0 114
0 102
0 98
0 95
0 93
0 90
0 80
0 80
0 83
0 79
0 80
0 88
0 87
0 93
0 93
0 92
0 76
0 66
1 59
1 55
1 55
1 54
1 51
1 51
1 50
1 50
1 50
1 50
1 50
1 50
1 50
1 50
1 49
1 49
1 48
1 48
1 45
1 44
1 44
1 44
1 44
1 44
1 43
1 43
2 41
2 32
2 30
2 22
2 9
2 2
2 1
2 2
2 2
2 2
1 3
1 3
1 3
1 4
1 4
1 5
1 5
1 5
1 5
1 4
1 4
1 4
1 4
2 4
2 6
2 6
2 6
3 7
3 7
4 9
4 9
4 9
4 9
4 9
4 9
4 9
3 9
3 9
3 9
3 9
3 9
3 10
3 10
4 9
4 9
5 9
5 8
5 8
5 8
5 6
5 8
5 9
6 10
6 10
6 12
6 13
6 13
6 14
6 14
5 14
5 12
5 12
5 12
4 11
4 11
3 9
3 9
3 9
3 9
3 9
3 9
3 9
3 9
3 10
3 10
3 10
3 10
3 9
1 9
1 9
1 9
1 9
1 9
1 8
1 8
1 3
1 2
1 2
0 2
0 2
0 2
2 12
2 12
2 12
2 12
2 12
2 12
2 12
2 12
2 12
2 14
2 14
2 14
2 14
2 14
2 14
2 14
2 14
2 13
2 13
2 13
2 13
2 13
2 13
2 13
2 13
2 13
2 13
2 13
2 13
2 13
2 13
2 13
2 13
2 13
2 11
2 10
1 0
1 0
1 0
1 0
1 2
1 5
1 5
1 5
1 5
1 5
1 5
1 5
1 5
1 5
1 5
1 5
1 5
1 5
1 5
1 5
1 5
1 5
1 5
1 5
1 5
1 5
1 5
1 5
1 5
0 5
0 5
0 5
0 5
0 5
0 5
0 5
0 5
0 5
0 5
0 4
0 1
0 0
0 0
0 0
0 0
0 0
0 0
0 0
0 0
0 0
0 0
0 0
0 0
0 0
0 0
0 0
0 0
0 0
0 1
0 1
0 1
0 1
0 1
0 1
0 1
0 1
0 1
0 1
0 1
0 1
0 1
0 1
0 1
0 1
0 1
3 3
3 3
3 3
3 3
3 3
3 3
3 3
3 3
3 3
3 3
3 3
3 3
3 3
3 3
3 3
3 3
3 3
3 3
3 3
3 2
3 2
3 2
3 2
3 2
3 2
3 2
3 2
3 2
3 2
3 2
3 2
3 2
3 2
3 2
3 2
3 2
0 0
0 0
0 0
0 0
0 0
0 0
0 0
0 0
0 0
0 0
0 0
0 0
0 0
0 0
0 0
0 0
0 0
0 0
0 0
0 0
0 1
0 1
1 1
1 1
1 1
1 1
4 1
4 1
4 1
4 1
4 1
4 1
4 1
4 2
5 2
5 2
5 2
5 2
5 2
5 2
5 2
5 2
5 2
5 3
5 4
5 4
5 6
5 6
5 6
5 6
5 6
5 6
5 6
5 6
5 6
5 9
4 8
4 8
3 8
2 8
2 8
1 8
2 8
2 8
2 8
2 8
2 8
2 9
2 9
2 8
1 8
1 8
1 8
1 8
1 8
1 8
1 7
1 6
1 6
1 6
1 6
1 6
1 4
1 4
1 4
1 4
1 4
1 5
1 5
1 6
1 12
1 11
1 11
1 11
1 11
1 11
1 11
1 12
0 12
0 12
0 12
0 12
0 12
0 11
0 11
0 11
0 11
0 11
0 11
0 11
0 11
0 11
0 11
0 11
0 11
0 11
0 11
0 11
0 11
0 11
0 11
0 11
0 11
0 11
0 11
0 10
0 4
0 1
0 2
0 2
0 4
0 4
0 4
0 4
0 4
0 4
0 4
0 4
0 4
0 4
0 5
0 5
0 5
0 5
0 5
0 5
0 5
0 5
0 5
0 5
0 5
0 5
0 5
0 5
0 5
0 5
0 5
0 5
0 4
0 5
0 6
0 6
1 7
1 7
1 5
1 7
1 7
1 7
1 7
1 7
1 7
1 7
1 7
1 9
1 10
1 11
1 11
1 11
1 11
1 11
1 11
1 11
1 11
1 11
1 20
1 21
1 21
1 21
1 21
1 21
1 21
1 21
1 21
2 21
2 24
2 25
2 25
2 25
1 24
1 24
1 24
1 22
1 21
1 27
1 28
1 28
1 32
1 32
1 33
1 31
1 30
1 29
1 31
1 31
1 32
1 36
1 37
4 59
4 59
5 64
5 55
5 54
5 54
5 59
5 59
5 59
5 63
5 64
5 69
4 70
4 66
4 65
4 65
4 65
4 65
4 66
5 97
5 97
5 98
5 91
5 88
5 87
5 88
5 88
5 88
5 89
5 89
5 89
5 88
5 88
5 85
5 82
5 79
1 56
1 54
1 54
1 54
1 54
1 54
1 51
1 52
1 51
1 43
1 42
1 41
1 42
1 44
1 45
1 50
2 51
2 52
2 54
1 24
1 26
2 25
2 26
2 26
2 26
5 27
16 35
17 35
17 36
17 36
17 37
17 36
17 38
17 39
17 38
17 38
17 39
17 43
17 43
17 44
17 45
17 44
17 44
17 44
17 44
17 44
17 46
17 47
18 45
18 44
18 38
17 33
16 32
16 33
16 30
16 30
16 30
15 30
15 29
13 28
12 28
7 27
16 59
22 91
22 111
24 126
25 140
25 143
25 148
26 152
26 153
26 156
26 157
26 156
26 158
26 160
26 164
26 179
26 187
26 203
26 206
26 208
26 207
26 207
25 206
25 206
25 205
25 205
25 205
25 203
25 203
25 203
25 204
47 249
48 250
48 253
48 254
48 252
34 184
25 144
25 138
25 131
24 119
24 119
24 120
24 108
24 108
24 106
24 116
24 115
24 112
24 113
24 106
24 90
24 82
24 69
24 68
24 67
24 67
24 68
24 68
24 68
24 68
24 68
22 68
22 68
22 94
20 93
19 94
1 49
0 49
0 45
0 45
0 45
0 47
1 53
1 52
1 52
1 53
1 53
1 51
1 51
1 51
1 51
1 40
1 41
1 42
1 42
2 42
2 40
2 39
2 39
2 39
2 39
2 39
2 41
2 52
2 53
2 57
5 62
5 70
5 87
5 77
5 84
5 85
5 89
5 92
5 108
5 107
5 105
5 103
4 100
4 100
4 100
4 100
4 100
4 100
4 100
4 100
4 100
4 100
4 101
4 100
4 100
10 127
11 127
11 130
11 132
11 132
11 143
11 146
11 151
11 148
11 149
12 154
9 151
9 145
9 125
9 110
9 108
9 106
10 102
10 101
11 85
11 85
11 85
11 85
11 85
11 86
11 86
11 86
11 86
11 86
11 86
11 86
11 86
11 86
11 84
11 84
11 84
4 51
3 53
3 52
3 53
3 53
3 53
3 51
2 35
2 28
2 26
2 25
2 24
2 24
2 23
2 23
2 22
1 22
1 22
1 22
0 23
0 23
0 23
0 23
0 23
0 23
0 23
0 23
0 23
0 23
0 23
0 23
0 23
1 23
1 23
1 23
1 25
1 25
1 25
1 25
1 24
1 24
1 8
1 6
2 5
2 5
2 5
2 6
2 6
2 6
2 6
2 6
2 6
2 6
2 6
2 6
2 9
2 9
2 9
2 10
2 11
2 12
2 13
3 13
3 14
3 14
3 18
3 29
3 33
2 49
2 50
2 50
2 48
2 49
1 49
1 50
1 49
1 49
1 73
1 80
1 85
1 91
1 92
1 95
1 95
0 95
0 94
0 94
0 95
0 96
0 103
0 107
1 106
1 106
1 106
1 104
1 102
1 102
1 102
1 102
1 102
1 101
1 98
1 84
1 79
1 63
1 64
1 64
1 64
1 64
1 64
1 73
1 75
2 83
2 55
2 42
2 41
2 39
2 39
2 38
2 38
2 35
2 40
2 48
2 51
2 52
2 47
1 44
1 44
1 44
1 44
1 44
1 44
1 46
1 46
1 46
1 46
1 46
1 46
1 45
1 45
1 45
3 44
3 45
3 44
3 44
3 44
3 36
3 33
2 25
2 25
2 25
2 25
2 25
2 25
2 25
2 25
2 25
2 20
2 8
2 6
2 6
2 3
2 3
2 3
2 3
2 3
2 3
2 3
2 1
2 1
2 1
1 0
1 0
1 0
1 0
1 0
1 0
0 0
0 0
0 0
0 0
0 0
0 0
0 0
0 0
0 1
0 1
0 1
0 1
0 1
0 1
0 1
0 1
0 2
0 2
10 11
10 11
10 13
10 13
10 13
10 15
10 15
10 15
10 15
10 15
13 23
13 23
13 24
14 26
17 29
18 29
18 29
18 29
18 29
18 29
18 29
18 29
18 29
18 29
18 29
18 29
18 28
22 28
27 34
29 34
29 34
29 34
29 34
29 34
29 33
29 33
19 21
19 21
19 20
19 20
19 20
19 20
19 20
19 20
19 20
19 18
21 13
22 12
21 11
20 11
17 9
17 9
17 9
17 9
17 9
17 9
17 10
17 10
17 10
17 10
17 10
15 10
15 10
9 10
7 4
6 5
6 5
6 5
6 5
6 5
6 5
6 5
6 5
6 5
6 5
6 5
6 5
6 5
6 5
6 5
5 5
5 5
0 2
0 2
0 2
0 2
0 2
0 3
0 6
0 6
0 6
0 6
0 5
0 5
0 5
0 5
0 5
0 5
0 5
0 5
0 5
0 4
0 4
0 4
0 4
0 4
0 4
0 4
0 4
0 4
0 4
0 4
0 4
1 5
1 5
1 5
1 5
1 5
1 5
1 5
1 5
1 5
1 5
1 3
1 2
1 2
1 2
1 2
1 3
1 3
1 5
1 5
2 12
2 13
2 15
2 16
2 16
2 16
2 16
2 16
2 16
2 16
2 16
2 16
2 17
2 17
2 17
2 17
2 17
1 16
1 16
1 16
1 16
1 16
1 18
1 18
1 19
1 18
1 18
1 18
1 18
1 18
1 18
1 18
1 17
1 18
1 15
1 15
0 9
0 7
0 6
0 5
0 5
0 5
0 5
0 5
0 5
0 5
0 6
0 6
0 5
0 5
0 5
0 5
0 5
0 5
0 6
0 5
0 5
0 5
0 3
0 3
0 3
0 4
0 5
0 5
0 5
0 6
0 7
0 7
0 6
0 11
0 11
0 14
0 15
0 15
0 15
0 15
0 15
0 15
0 15
0 14
0 14
0 14
0 14
0 14
0 14
0 14
0 14
0 14
0 14
0 14
0 13
0 13
0 13
0 13
0 13
0 13
0 13
0 13
0 12
0 12
0 12
0 11
0 10
0 9
0 9
0 4
0 4
0 1
0 1
0 1
0 1
0 1
0 1
0 1
0 1
0 1
0 1
0 1
0 1
0 1
0 1
0 1
0 1
0 1
0 1
0 1
0 0
0 0
0 0
0 0
0 0
0 0
0 1
0 2
0 2
0 2
0 3
0 3
0 3
0 3
0 3
0 3
0 3
0 3
0 3
0 3
0 3
0 3
0 3
0 4
0 8
0 10
0 11
0 11
0 11
0 11
0 11
0 11
0 11
0 11
0 11
0 11
0 11
0 11
0 11
0 11
0 11
0 11
0 10
0 8
0 8
0 8
0 8
0 8
0 8
0 9
0 9
0 9
0 9
0 9
0 9
0 9
0 9
0 8
0 8
0 4
0 2
0 1
0 1
0 1
0 1
0 2
0 6
0 7
0 8
0 10
0 16
0 17
0 19
0 19
0 19
0 22
0 23
0 23
0 23
0 23
0 22
0 22
0 22
0 24
0 25
0 25
0 25
0 25
0 26
0 26
0 26
0 26
0 26
0 26
0 25
0 25
0 25
0 26
0 26
0 26
0 26
0 26
0 16
0 18
0 17
0 15
0 12
0 11
0 15
0 16
0 17
0 16
0 15
0 16
0 16
0 18
0 18
0 18
0 18
0 17
0 17
0 17
0 17
0 16
0 16
0 16
0 16
0 16
0 16
0 16
0 16
0 16
0 16
0 15
0 15
0 15
0 15
0 16
0 16
0 12
0 10
0 11
0 10
0 10
0 5
0 5
0 5
0 5
0 5
0 4
0 4
0 2
0 2
0 3
0 3
0 3
0 4
0 4
0 4
0 4
0 4
0 4
0 4
0 4
0 4
0 5
0 5
0 5
0 5
0 5
0 5
0 5
0 5
0 3
0 3
0 3
0 4
0 4
0 4
0 4
0 4
0 4
0 3
0 5
0 5
0 5
0 6
0 7
0 9
0 9
0 9
0 9
0 8
0 8
0 8
0 8
0 8
0 8
0 8
0 8
0 8
0 7
0 7
0 7
0 7
0 7
0 7
0 7
0 7
0 7
0 7
0 7
0 6
0 6
0 6
0 6
0 6
0 6
0 6
0 4
0 4
0 4
0 3
0 2
0 0
0 0
0 0
0 0
0 0
0 0
0 0
1 0
1 7
1 7
1 7
1 7
1 7
1 7
1 7
1 7
1 7
1 8
1 8
1 8
1 8
1 8
1 8
1 8
1 8
1 9
1 9
1 9
1 12
1 12
1 12
1 13
1 13
1 13
1 14
1 14
1 14
1 14
1 14
1 14
1 14
1 14
1 14
0 14
0 7
0 7
0 7
0 7
0 7
0 7
0 7
0 7
0 7
0 6
0 6
0 6
0 6
0 6
0 6
0 6
0 6
0 5
0 5
0 5
0 2
0 2
0 2
0 1
0 1
0 0
0 0
0 0
0 0
0 0
0 0
0 0
0 0
0 0
0 0
0 0
0 0
0 0
0 0
0 0
0 0
0 0
0 0
0 0
0 0
0 0
0 0
0 1
0 3
0 4
0 4
0 5
0 5
0 5
0 5
0 5
0 5
0 5
0 5
0 5
0 5
0 5
0 5
0 5
0 5
0 5
0 5
0 5
0 5
0 5
0 5
0 5
0 5
0 5
0 5
0 5
0 6
0 6
0 11
0 17
0 19
0 20
0 20
0 17
0 16
0 16
0 16
0 17
0 17
0 18
0 18
0 18
0 18
0 18
0 18
0 18
0 18
0 18
0 18
1 18
1 18
1 18
1 18
1 18
2 18
3 18
3 18
3 18
3 18
3 18
3 18
3 18
3 17
3 15
3 10
3 5
3 4
3 3
3 3
3 3
3 3
3 3
3 3
3 2
3 2
3 1
3 1
3 1
3 1
3 1
3 1
3 1
3 1
3 1
3 1
3 1
3 1
3 1
3 1
3 1
2 1
1 1
1 1
1 1
1 1
1 1
1 2
1 2
1 2
1 2
1 2
1 2
1 1
1 1
1 1
1 1
1 1
1 1
1 1
1 1
1 1
1 1
1 1
1 1
1 1
1 1
1 1
1 1
1 1
1 1
1 1
0 1
1 2
1 7
1 18
1 27
1 32
1 33
1 34
1 36
1 36
1 36
1 36
1 36
1 36
1 36
1 36
1 36
1 36
1 36
1 36
1 36
1 36
1 36
1 36
1 36
1 36
1 36
1 36
1 36
1 36
1 36
1 36
1 36
1 36
0 36
0 36
0 35
0 35
0 28
0 2
0 0
1 0
2 0
3 0
4 0
4 0
4 0
4 0
4 0
4 0
6 0
6 0
7 0
7 0
7 0
7 0
7 0
7 0
7 0
7 0
7 0
7 0
7 0
7 0
7 0
7 0
7 0
7 0
9 0
11 0
13 0
13 0
13 0
12 0
14 0
13 0
13 0
13 0
13 0
12 0
11 0
11 0
11 0
11 0
12 0
13 0
11 0
11 0
10 0
10 0
19 0
19 0
20 0
22 0
23 0
23 0
23 0
23 0
23 0
23 0
23 0
23 0
22 0
22 0
21 0
21 0
19 0
19 0
18 0
19 0
18 0
18 0
19 0
19 0
19 0
19 0
19 0
19 0
19 0
19 0
18 1
17 1
21 1
21 1
21 1
21 1
12 1
12 1
11 1
9 1
8 1
8 1
8 1
8 1
8 1
9 1
8 1
9 1
9 1
9 1
9 1
8 1
8 1
8 1
7 1
7 1
7 1
7 1
6 1
6 1
6 1
6 1
6 1
6 1
6 1
6 1
6 0
6 0
2 0
2 0
2 0
3 0
4 0
4 0
4 0
4 0
4 0
5 0
6 0
7 0
7 0
6 0
6 0
5 0
5 0
6 0
6 0
6 0
6 0
6 0
6 0
8 0
8 0
8 0
8 0
8 0
8 0
9 0
9 0
9 0
9 0
9 0
8 0
8 0
8 0
8 0
8 0
8 0
7 0
7 0
7 0
8 0
8 0
7 0
6 0
5 0
5 0
5 0
5 0
4 0
4 0
4 0
4 0
4 0
4 0
4 0
7 0
6 0
6 0
6 0
6 0
6 0
6 0
5 0
5 0
5 0
5 0
5 0
5 0
5 0
5 0
5 0
5 0
5 0
6 0
6 0
6 0
5 0
5 0
5 0
5 0
8 0
8 0
8 0
8 0
8 0
8 0
8 0
8 0
7 0
7 0
7 0
4 0
4 0
4 0
4 0
4 0
4 0
4 0
5 0
5 0
5 0
5 0
5 0
5 0
5 0
6 0
6 0
6 0
6 0
5 0
5 0
5 0
5 0
5 0
5 0
5 0
2 0
2 0
2 0
2 0
2 0
2 0
2 0
2 0
2 0
2 0
2 0
2 0
2 0
4 0
4 0
3 0
3 0
3 0
3 0
3 0
3 0
3 0
3 0
3 0
4 0
3 0
3 0
3 0
3 0
3 0
3 0
3 0
6 0
16 0
17 0
17 0
17 0
17 0
17 0
17 0
17 0
17 0
17 0
20 0
20 0
21 0
28 0
35 0
35 0
33 0
33 0
35 0
38 0
43 0
43 0
43 0
43 0
43 0
43 0
43 0
44 0
45 0
45 0
53 0
52 0
54 0
57 0
55 0
53 0
48 1
48 1
48 1
51 1
60 1
61 1
61 1
61 1
61 1
61 1
58 1
56 1
50 1
49 1
43 1
43 1
43 1
41 1
38 1
37 1
33 1
34 1
34 1
34 1
34 1
34 1
34 1
31 1
31 1
29 1
24 1
22 1
21 1
40 1
41 1
41 1
38 0
40 0
40 0
39 0
31 0
30 0
32 0
32 0
32 0
32 0
46 0
46 0
46 0
46 0
47 0
49 0
49 0
49 0
49 0
49 0
49 0
48 0
48 0
48 0
48 0
48 0
48 0
48 0
48 0
47 0
45 0
45 0
45 0
24 0
23 0
23 0
23 0
21 0
19 0
19 0
18 0
18 0
15 0
15 0
13 0
13 0
3 0
3 0
3 0
3 0
2 0
0 0
0 0
0 0
0 0
0 0
0 0
0 0
0 0
0 0
0 0
0 0
0 0
0 0
0 0
0 0
0 0
0 0
0 0
0 0
0 0
0 0
0 0
0 0
0 0
9 0
9 0
9 0
9 0
9 0
9 0
9 0
9 0
9 0
9 0
9 0
9 0
9 0
9 0
9 0
9 0
9 0
11 0
11 0
11 0
12 0
13 0
13 0
13 0
13 0
13 0
13 0
13 0
13 0
14 0
14 0
14 0
14 0
14 0
14 0
14 0
5 0
6 0
6 0
7 0
7 0
7 0
7 0
7 0
7 0
7 0
7 0
7 0
7 0
7 0
7 0
7 0
7 0
5 0
7 0
16 0
24 0
26 0
26 0
26 0
26 0
26 0
26 0
27 0
27 0
26 0
26 0
26 0
26 0
26 0
26 0
26 0
26 0
25 0
25 0
24 0
24 0
24 0
24 0
24 0
24 0
24 0
24 0
24 0
24 0
24 0
24 0
15 0
14 0
14 0
12 0
10 0
5 0
4 0
4 0
8 0
8 0
8 0
8 0
7 0
7 0
7 0
7 0
7 0
7 0
7 0
7 0
7 0
7 0
7 0
7 0
7 0
7 0
7 0
7 0
8 0
8 0
8 0
8 0
8 0
8 0
8 0
8 0
8 0
8 0
8 0
5 0
5 0
5 0
5 0
5 0
1 0
1 0
1 0
1 0
1 0
1 0
1 0
1 0
1 0
1 0
1 0
1 0
1 0
1 0
1 0
1 0
1 0
4 0
4 0
4 0
3 0
3 0
3 0
3 0
3 0
3 0
5 0
5 0
5 0
6 0
6 0
6 0
6 0
6 0
6 0
6 0
6 0
6 0
6 0
6 0
6 0
6 0
6 0
6 0
6 0
6 0
6 0
6 0
6 0
6 0
6 0
6 0
6 0
3 0
3 0
3 0
3 0
3 0
3 0
3 0
3 0
3 0
1 0
1 0
2 0
1 0
1 0
1 0
1 0
1 0
1 0
1 0
2 0
4 0
6 0
6 0
6 0
7 0
7 0
7 0
7 0
7 0
8 0
8 0
8 0
8 0
9 0
9 0
9 0
9 0
9 0
9 0
9 0
9 0
9 0
9 0
9 0
9 0
9 0
9 0
8 0
8 0
9 0
9 0
9 0
9 0
10 0
11 0
10 0
8 0
7 0
7 0
7 0
6 0
7 0
17 0
18 0
18 0
18 0
18 0
18 0
17 0
17 0
17 0
17 0
17 0
17 0
18 0
20 0
20 0
20 0
20 0
20 0
20 0
20 0
20 0
20 0
20 0
21 0
21 0
20 0
20 0
20 0
20 0
20 0
19 0
17 0
17 0
17 0
17 0
17 0
6 0
6 0
6 0
6 0
7 0
7 0
9 0
9 0
10 0
10 0
12 0
14 0
17 0
15 0
15 0
15 0
15 0
15 0
15 0
15 0
15 0
15 0
15 0
13 0
13 0
13 0
13 0
12 0
12 0
13 0
13 0
13 0
13 0
13 0
14 0
14 0
17 0
17 0
24 0
25 0
22 0
22 0
22 0
22 0
18 0
18 0
18 0
18 0
14 0
14 0
14 0
14 0
15 0
15 0
15 0
15 0
15 0
15 0
16 0
16 0
16 0
15 0
15 0
15 0
17 0
17 0
20 0
21 0
33 0
31 0
31 0
33 0
31 1
31 1
25 1
24 1
24 1
24 1
23 1
24 1
32 1
33 1
36 1
36 1
36 1
36 1
36 1
36 1
35 1
35 1
35 1
33 1
33 1
34 1
35 1
36 1
41 1
41 1
41 1
41 1
40 1
37 1
37 1
36 1
24 0
24 0
24 0
23 0
41 0
48 0
51 0
52 0
58 0
58 0
58 0
57 0
48 0
46 0
44 0
44 0
43 0
43 0
43 0
43 0
43 0
43 0
43 0
43 0
43 0
42 0
42 0
42 0
37 0
37 0
38 0
39 0
39 0
39 0
39 0
39 0
39 0
39 0
37 0
37 0
17 0
13 0
10 0
9 0
7 0
7 0
9 0
9 0
9 0
9 0
9 0
9 0
9 0
9 0
9 0
9 1
9 1
10 1
17 1
17 1
17 1
18 1
21 1
21 1
22 1
22 1
23 1
26 1
26 1
26 1
29 1
31 1
31 1
34 1
36 1
36 1
42 1
44 1
44 1
42 1
43 1
43 1
41 1
41 1
42 1
42 1
42 1
43 1
44 1
44 1
44 1
43 0
43 1
42 1
36 1
36 1
38 1
37 1
34 1
34 1
32 1
31 1
31 1
28 1
28 1
27 1
23 1
22 1
22 1
16 1
14 1
14 1
8 1
8 3
8 3
9 3
8 3
8 3
8 3
8 3
7 3
7 3
7 3
6 3
4 3
5 3
5 3
5 4
5 3
5 3
5 3
5 3
3 3
6 3
7 3
9 3
10 3
10 3
10 3
11 3
11 3
11 2
11 1
11 1
12 1
12 1
12 1
26 1
29 1
29 2
29 2
28 2
28 2
28 2
28 2
29 2
29 2
29 2
29 2
29 2
28 2
28 2
28 2
29 1
29 1
29 1
26 1
26 1
24 1
22 1
22 1
21 1
20 1
20 1
20 1
20 1
20 1
19 1
19 1
19 1
16 1
15 1
15 1
3 1
2 1
2 0
2 0
2 0
2 0
2 0
3 0
2 0
3 0
4 0
15 0
18 0
20 0
20 0
22 0
22 0
22 0
22 0
22 0
22 0
22 0
22 0
22 0
22 0
22 0
22 0
22 0
22 0
22 0
22 0
22 0
22 0
22 0
22 0
22 0
22 0
22 0
22 0
33 0
40 0
73 0
112 0
114 0
115 0
112 0
113 0
103 0
101 0
100 0
122 1
120 1
121 1
121 1
121 1
121 1
121 1
121 1
121 1
122 1
125 1
125 1
126 1
127 1
127 1
128 1
136 1
146 1
148 1
149 1
149 1
174 1
178 1
178 1
178 1
167 1
150 1
119 1
89 1
91 1
92 1
93 1
93 1
102 1
109 1
111 2
90 1
90 1
90 1
91 1
90 1
91 1
91 1
92 1
96 1
99 1
100 1
106 1
108 1
135 3
133 3
127 3
121 3
115 3
113 3
110 3
118 3
109 3
111 3
114 3
119 3
127 3
130 3
162 3
307 3
547 2
604 2
614 2
640 2
638 2
635 2
742 3
749 3
751 3
763 4
774 5
780 5
779 5
779 5
778 5
774 5
771 5
770 5
765 5
758 7
733 5
733 5
733 5
733 5
732 5
732 5
731 5
722 5
712 5
706 5
699 5
685 5
674 5
646 5
599 5
481 5
222 5
187 5
176 5
143 4
118 2
114 2
14 2
8 2
5 2
4 2
3 2
2 2
1 2
4 6
4 6
4 7
4 7
4 7
4 7
4 5
4 5
4 5
4 5
4 6
3 6
3 6
3 6
3 6
3 7
3 7
3 11
3 13
3 13
3 17
3 29
3 52
3 66
3 74
3 82
3 85
3 99
3 102
2 105
2 110
2 111
2 112
2 115
2 117
2 118
0 113
1 113
1 114
1 114
1 116
1 116
1 116
1 116
1 116
1 116
1 115
1 115
1 115
1 114
1 114
1 111
1 111
1 109
1 108
1 108
1 101
3 94
3 66
3 51
3 43
3 44
3 40
4 28
4 24
4 22
4 50
3 49
3 49
3 47
3 47
3 50
3 52
3 53
3 58
3 59
4 62
4 62
4 62
4 62
6 62
6 62
6 62
6 62
7 62
7 62
7 62
7 62
7 62
7 62
7 62
7 62
7 62
5 56
5 54
5 54
5 55
5 55
5 85
4 91
4 98
5 103
5 72
5 72
5 70
5 69
5 69
5 66
5 66
5 65
5 61
5 61
4 60
3 61
3 64
3 66
2 67
2 67
2 67
2 67
1 67
1 67
1 67
1 67
1 67
1 67
1 67
1 67
1 67
1 66
1 66
1 66
1 64
2 64
2 31
2 15
1 14
1 14
1 13
1 13
1 13
2 14
2 14
2 14
2 16
3 17
3 13
3 8
3 8
3 8
3 9
3 9
3 9
3 9
3 9
3 9
3 9
3 9
3 9
3 9
3 10
3 10
3 10
3 10
3 10
5 10
5 10
5 10
5 10
4 10
4 10
4 10
4 10
4 10
4 10
4 10
4 7
3 6
3 6
3 5
2 4
2 3
2 2
2 2
2 2
2 2
2 1
2 1
2 1
2 1
2 1
2 1
3 1
3 1
3 1
3 1
3 0
3 0
3 0
3 0
3 0
1 0
1 0
1 0
1 0
1 0
3 3
5 3
5 5
5 5
5 5
6 5
6 5
7 5
7 6
8 6
8 7
8 7
8 7
8 7
8 7
8 7
8 7
8 7
8 7
8 7
8 7
8 7
7 7
7 7
7 7
7 7
7 7
7 7
7 7
7 7
7 7
7 7
6 7
6 7
5 7
5 7
3 4
3 4
3 4
1 5
1 7
1 7
1 7
1 7
1 5
0 5
0 5
0 5
0 5
0 5
0 5
0 5
0 5
0 5
0 5
0 5
0 5
0 5
0 5
0 5
0 5
0 5
0 5
0 5
0 5
0 5
0 5
0 5
0 5
0 5
0 5
0 5
0 8
0 9
0 8
0 7
0 5
0 5
0 5
0 5
0 5
0 5
0 5
0 5
0 5
0 5
0 5
0 5
0 6
0 6
0 6
0 6
0 6
0 6
0 6
0 7
0 7
0 7
0 7
0 9
0 9
0 9
0 9
0 9
0 9
0 9
0 9
0 8
0 5
0 5
0 4
0 4
0 4
0 4
0 5
0 5
0 5
0 5
0 5
0 5
0 5
0 5
0 4
0 4
0 4
0 5
0 5
0 5
0 5
0 5
0 5
0 4
0 4
0 4
0 4
0 3
0 4
0 5
0 6
1 9
1 10
1 12
1 12
1 12
1 12
1 12
1 12
1 12
1 12
1 12
1 11
1 11
1 11
1 11
1 11
1 11
1 11
1 11
1 11
1 11
1 11
1 10
1 10
2 12
2 12
2 12
2 12
2 12
2 12
2 12
2 12
2 10
2 10
2 9
2 8
1 2
1 2
1 2
1 2
1 2
1 2
1 2
1 2
1 2
1 2
1 2
1 2
1 2
1 2
1 2
1 2
1 2
1 2
1 3
1 3
1 4
1 4
0 4
0 4
0 2
0 2
0 2
0 2
0 2
0 3
0 7
0 7
0 7
0 7
0 11
0 13
0 17
0 17
0 17
0 17
0 17
0 17
0 17
0 17
0 16
0 16
0 16
0 16
0 16
0 16
0 16
0 16
0 17
0 19
0 22
0 21
0 21
0 23
0 23
0 24
0 24
0 24
0 24
0 24
0 24
0 22
0 17
0 16
0 15
0 17
0 17
0 22
0 21
0 21
0 22
0 22
0 22
0 22
0 22
0 22
0 22
0 22
0 22
0 22
0 22
0 22
0 21
0 20
0 19
0 19
0 16
0 16
0 16
0 14
0 14
0 13
0 13
0 13
0 13
0 13
0 13
0 13
0 12
0 11
0 10
0 6
0 4
0 1
0 1
0 1
0 0
0 0
0 0
0 0
0 0
0 0
0 0
0 0
0 0
0 1
0 4
0 4
0 4
0 4
0 4
0 4
0 5
0 5
0 5
0 5
0 5
0 5
0 6
0 6
0 6
0 6
0 6
0 6
0 6
0 6
0 6
0 6
0 6
0 6
0 7
0 7
0 14
0 14
0 14
0 14
0 14
0 14
0 14
0 14
0 14
0 12
0 9
0 9
0 9
0 9
0 9
0 9
0 9
0 11
0 12
0 12
0 12
0 12
0 11
0 11
0 11
0 11
0 11
0 11
0 11
0 11
0 11
0 12
0 12
0 17
0 16
0 16
0 10
0 11
0 11
0 11
0 11
0 11
0 13
0 13
0 13
0 16
0 16
0 16
0 16
0 16
0 16
0 18
0 17
0 16
0 15
0 15
0 15
0 15
0 15
0 15
0 15
0 15
0 15
0 15
0 15
0 15
0 15
0 14
0 14
0 9
0 7
0 7
0 7
0 6
0 6
0 5
0 5
0 5
0 3
0 4
0 4
0 1
0 1
0 1
0 1
0 1
0 1
0 1
0 1
0 1
0 1
0 1
0 1
0 1
0 1
0 1
0 1
0 1
0 1
0 1
0 1
0 1
0 1
0 1
0 1
0 1
0 1
0 1
0 1
0 1
0 0
0 0
0 0
0 0
0 0
0 0
0 0
0 0
0 0
0 0
0 0
0 0
0 0
0 0
0 0
0 0
0 0
0 0
0 0
0 1
0 2
0 3
0 3
0 3
0 3
0 3
0 3
0 5
0 7
0 8
0 9
0 12
0 13
0 14
0 14
0 16
0 16
0 16
0 16
0 16
0 17
0 17
0 17
0 17
0 17
0 17
0 17
0 17
0 17
0 18
0 19
0 19
0 19
0 19
0 19
0 17
0 17
0 16
0 16
0 16
0 16
0 16
0 17
1 14
1 9
2 9
2 9
2 6
2 6
2 6
2 5
2 5
2 5
2 5
2 5
2 5
2 4
2 4
2 4
2 5
2 8
2 8
2 8
2 8
2 8
2 7
2 6
2 6
2 6
2 6
2 6
2 6
2 13
2 13
2 13
2 13
2 13
1 13
1 12
1 12
1 11
0 11
0 11
0 11
0 11
0 11
0 11
0 11
0 11
0 11
0 11
0 11
0 11
0 11
0 11
0 10
0 7
0 7
0 7
0 7
0 7
0 7
0 7
0 7
0 7
0 7
0 7
0 7
0 0
0 0
0 0
0 0
0 0
0 0
0 0
0 0
0 0
0 0
0 0
0 0
0 0
0 0
0 0
0 0
0 0
0 0
0 0
0 0
0 0
0 0
0 0
0 0
0 0
0 0
0 1
0 3
0 3
0 3
0 6
0 6
0 6
0 6
0 8
0 8
0 8
0 8
0 8
0 8
0 8
0 8
0 8
0 8
0 8
0 8
0 8
0 8
0 8
0 8
0 8
0 8
0 8
0 8
0 9
0 9
0 9
0 9
0 9
0 9
0 9
0 9
0 8
0 3
0 1
0 1
0 1
0 1
0 1
0 1
0 1
0 1
0 1
0 1
0 1
0 1
0 1
0 1
0 1
0 1
0 1
0 1
0 1
0 2
0 2
0 2
0 2
0 2
0 1
0 1
0 1
0 1
0 1
0 1
0 1
0 1
0 1
0 1
0 1
0 1
0 1
0 1
0 3
0 3
0 3
0 4
0 7
0 7
0 7
0 7
0 7
0 8
0 8
0 8
0 8
0 8
0 7
0 7
0 7
0 7
0 7
0 7
0 7
0 7
0 7
0 7
0 7
0 7
0 7
0 7
0 7
0 7
0 7
1 7
1 7
1 7
1 7
1 7
1 5
1 4
1 2
1 1
1 0
1 1
1 1
1 4
1 4
1 4
1 4
1 4
1 4
1 4
1 4
2 4
2 4
2 5
2 5
2 5
2 5
2 5
3 5
3 5
3 6
3 6
3 6
3 6
3 6
3 6
3 6
2 6
2 6
2 6
2 6
2 6
2 7
2 7
2 7
2 7
2 7
2 6
2 6
2 3
2 3
2 3
2 3
2 3
2 3
2 3
2 3
1 3
1 3
1 2
1 2
1 2
3 8
3 9
3 14
3 16
3 15
3 15
3 15
4 16
4 23
4 23
4 23
4 23
4 23
4 23
4 23
4 23
4 22
4 22
4 22
4 22
4 22
4 22
4 23
4 23
4 23
4 23
4 23
4 23
5 23
5 23
5 23
5 23
5 23
5 22
5 22
5 22
3 17
3 14
2 3
2 3
2 2
2 2
2 2
1 1
1 1
1 1
1 1
1 1
1 1
1 1
1 1
1 1
1 1
1 1
1 1
1 1
1 1
1 1
1 1
1 1
1 1
1 1
1 1
1 1
0 1
0 1
0 1
0 1
0 1
0 1
0 1
0 1
0 0
0 0
0 0
0 0
0 0
0 0
0 0
0 0
0 0
0 0
0 0
0 0
0 0
0 0
0 0
0 0
0 0
0 0
0 0
0 0
0 0
0 3
0 4
0 4
1 4
1 5
1 5
1 5
1 5
1 5
1 5
1 5
1 5
1 5
1 6
1 6
1 6
1 6
1 6
1 6
1 6
1 6
1 6
1 6
1 6
1 6
1 6
1 6
1 6
1 6
1 6
1 8
1 8
1 10
2 11
2 11
2 11
2 8
2 7
2 7
1 7
1 6
1 6
1 6
1 6
1 6
1 6
1 6
1 6
1 5
1 5
1 4
1 4
1 4
1 4
1 4
1 4
1 4
1 4
1 5
1 5
1 5
2 5
2 5
2 4
2 4
2 4
2 3
1 3
1 1
1 1
1 1
1 1
1 1
1 1
1 3
1 3
1 4
1 4
1 4
1 4
1 4
1 4
1 4
1 4
1 4
1 4
1 4
1 4
1 4
1 4
1 5
1 4
1 4
1 4
1 4
1 4
1 4
0 4
0 4
0 4
0 4
0 4
0 4
0 4
0 4
0 4
0 4
0 4
0 4
0 5
0 3
0 3
0 2
0 2
0 2
0 2
0 2
0 2
0 3
0 3
0 3
0 3
0 3
0 3
0 3
0 3
0 2
0 2
0 2
0 2
0 2
0 2
0 2
0 2
0 2
0 2
0 2
0 2
0 2
0 2
0 2
0 3
0 5
0 6
0 6
0 5
0 6
0 6
0 6
0 6
0 6
0 6
0 6
0 6
0 5
0 5
0 5
0 5
0 5
0 5
0 5
0 5
0 5
0 5
0 5
0 5
0 5
0 6
0 7
0 7
0 7
0 7
0 7
0 7
0 7
0 7
0 7
0 5
0 2
0 2
0 2
0 2
0 2
0 2
0 2
0 2
0 2
0 2
0 2
0 2
0 2
0 2
0 2
0 2
0 2
0 2
0 2
0 2
0 2
0 2
0 3
0 3
0 3
0 2
0 1
0 1
0 1
0 1
0 1
0 1
0 1
0 1
0 1
0 1
0 1
0 1
0 1
0 1
0 1
0 1
0 1
0 1
0 1
0 1
0 1
0 1
0 2
0 2
0 2
0 2
0 2
0 2
0 2
0 2
0 2
0 2
0 1
0 1
0 1
0 1
0 1
0 1
0 1
0 1
0 1
1 1
1 1
1 1
1 1
1 1
1 1
1 1
1 1
1 1
1 1
1 1
1 1
1 1
1 1
1 1
1 1
1 1
1 0
1 0
1 0
1 0
1 0
1 0
1 0
1 0
1 0
1 0
1 0
1 0
1 0
0 0
0 0
0 0
0 0
0 0
0 0
0 0
0 0
0 0
0 0
0 0
0 0
0 0
0 0
0 0
0 0
0 0
0 1
0 1
0 1
0 1
0 1
0 1
0 1
0 1
0 1
0 1
0 1
0 1
0 1
0 1
0 1
0 1
0 1
0 1
0 1
0 1
0 1
0 1
0 1
0 1
0 1
0 1
0 1
0 1
0 1
0 1
0 1
1 1
1 1
1 1
1 0
1 0
1 1
1 1
1 1
1 2
1 2
1 2
1 2
1 2
1 3
1 3
1 3
1 3
1 3
1 3
1 3
1 3
1 3
1 3
1 3
1 3
1 3
1 3
1 3
1 3
1 3
1 3
1 3
1 3
1 3
1 3
0 3
0 3
0 3
0 3
0 3
0 2
0 2
0 2
0 3
0 4
1 4
1 4
1 4
1 4
1 3
1 3
1 3
1 3
1 3
1 3
1 3
1 3
1 4
1 4
1 4
1 5
1 5
1 5
1 5
1 5
1 5
1 5
1 5
1 5
1 5
1 5
1 5
1 5
1 5
1 5
0 6
0 6
0 6
0 6
0 3
0 3
0 3
0 3
0 3
0 3
0 3
0 3
0 3
0 3
0 3
0 3
0 3
0 3
0 2
0 2
0 2
0 1
0 1
0 1
0 3
0 3
0 3
0 3
0 3
0 3
0 3
0 3
0 3
0 3
0 3
0 2
0 2
0 2
0 2
0 2
0 2
0 2
0 2
0 2
0 2
0 2
0 2
0 2
0 2
0 2
0 2
0 2
1 2
1 2
1 2
1 2
1 2
1 2
1 2
1 2
1 0
1 0
1 0
1 0
1 0
1 0
1 0
1 0
1 0
1 0
1 0
1 1
1 2
1 2
1 2
1 2
1 2
1 2
1 2
1 2
1 2
1 2
1 2
1 2
1 2
1 2
1 2
1 2
0 2
0 2
0 2
0 2
0 2
0 2
0 2
0 2
0 2
0 2
0 2
0 2
0 2
0 2
0 2
0 2
0 2
0 2
0 1
0 0
0 0
0 0
0 0
0 0
1 0
1 0
3 0
3 0
3 0
3 0
3 0
3 0
3 0
3 0
3 0
3 0
3 0
3 0
3 0
3 0
3 0
3 0
3 0
3 0
3 0
3 0
3 0
3 0
3 0
3 0
3 0
3 0
3 0
3 0
3 0
3 0
3 0
3 0
3 0
3 0
2 0
2 0
0 0
1 0
1 0
1 0
1 0
1 0
1 0
1 0
1 0
1 0
1 0
1 0
1 0
1 0
1 0
1 0
1 0
0 1
0 1
0 1
0 1
0 1
0 1
0 1
0 2
0 2
0 2
1 2
1 2
1 2
1 2
1 2
1 2
1 2
1 2
1 2
1 2
1 2
1 2
1 2
1 2
1 2
1 2
1 2
1 2
1 2
1 2
1 2
1 2
1 2
1 2
1 2
1 2
1 1
1 2
2 2
2 2
2 2
2 2
2 2
2 1
2 1
2 1
1 1
1 1
1 1
1 1
1 1
1 1
1 1
1 1
1 1
1 1
1 1
1 1
1 1
1 1
1 1
1 1
1 3
1 3
1 4
1 4
1 4
1 4
1 4
1 4
1 4
1 4
1 4
1 3
0 3
0 3
0 3
0 3
0 5
0 5
0 5
0 5
0 5
0 5
0 5
0 5
0 5
0 5
0 5
0 5
0 5
0 5
0 5
0 5
0 5
0 5
0 5
0 4
0 3
0 3
0 2
0 2
0 2
0 2
0 2
0 4
0 5
0 7
0 7
0 7
0 7
0 7
0 7
0 7
0 5
0 5
0 5
0 5
0 5
0 5
0 5
0 5
0 5
0 5
0 5
0 5
0 5
0 5
0 5
0 5
1 5
1 5
1 5
1 5
1 6
1 6
2 6
2 6
2 6
2 6
3 6
3 4
3 2
3 1
3 1
3 1
3 1
3 1
3 1
3 1
3 1
3 1
3 1
3 1
3 1
3 1
3 1
5 1
5 1
5 1
5 1
5 1
5 1
5 1
5 1
4 2
4 2
4 1
4 1
3 1
3 1
3 1
3 1
3 1
3 1
3 1
2 2
2 2
2 2
2 2
2 2
2 2
2 2
2 2
2 2
2 2
2 2
2 2
2 2
2 2
2 2
3 2
3 2
1 2
1 2
1 2
1 4
1 4
1 5
1 5
1 5
1 4
1 6
1 6
1 6
1 6
1 6
1 6
1 6
1 6
1 6
1 6
1 5
1 5
1 5
1 5
1 5
1 5
1 5
1 5
1 5
0 5
1 3
1 3
1 3
1 3
1 4
1 4
1 4
1 4
1 4
1 3
1 1
2 1
2 1
2 1
3 1
3 1
3 1
3 1
3 1
5 1
5 1
5 1
5 1
5 1
5 1
5 1
5 1
5 1
5 1
5 3
5 4
5 4
5 4
5 4
5 4
4 4
4 4
4 4
4 4
4 4
4 3
4 3
4 3
4 3
3 3
3 3
3 3
2 3
2 3
2 3
2 3
2 3
2 3
2 3
1 3
0 3
0 3
0 3
0 3
0 3
0 3
0 3
0 3
0 3
0 3
0 1
0 0
0 0
0 0
0 0
0 0
0 0
0 0
0 0
0 0
0 0
0 0
0 0
0 0
0 1
0 1
0 1
0 1
0 1
0 1
0 1
1 1
1 1
1 1
1 1
1 1
1 1
1 1
1 1
1 1
1 1
1 1
1 1
1 1
1 1
1 1
1 1
1 1
1 1
1 1
1 1
1 1
1 1
1 0
1 0
1 0
1 0
1 0
1 0
1 0
1 0
1 0
1 0
1 0
1 0
1 0
1 0
0 0
0 0
0 0
0 0
0 0
0 0
0 0
0 0
0 1
0 1
0 1
0 1
0 1
0 2
0 2
0 2
0 2
0 2
0 2
0 2
0 2
0 2
0 2
0 2
0 2
0 2
0 2
0 2
0 2
0 2
0 2
0 2
0 2
0 2
0 2
0 2
0 2
0 2
0 2
0 2
0 2
0 2
0 2
0 2
0 1
0 1
0 1
0 1
0 1
0 0
2 0
2 0
2 0
2 0
3 0
3 0
4 0
4 0
4 0
4 0
4 0
4 0
4 0
4 0
4 0
4 0
4 0
4 0
4 0
4 0
4 0
4 1
4 1
4 1
4 1
4 1
4 1
4 1
4 1
4 1
4 1
4 2
4 2
4 2
4 2
4 2
1 2
1 2
1 2
1 2
2 2
2 2
1 2
1 2
1 2
1 2
1 2
1 2
1 2
1 2
1 2
1 2
1 2
1 2
1 2
1 2
1 2
1 1
1 1
1 1
1 1
1 1
1 1
1 1
1 1
1 1
1 0
1 0
1 0
1 0
2 0
2 0
2 0
2 0
2 0
2 0
1 0
1 0
1 0
1 0
1 0
1 0
1 0
1 0
1 0
1 0
1 0
1 0
1 0
1 0
1 0
1 0
1 0
1 0
1 0
1 0
1 0
1 0
2 0
2 0
2 0
2 0
2 0
2 0
2 1
2 1
1 1
1 1
1 1
1 1
1 1
1 1
1 1
1 1
1 1
1 1
1 1
2 3
2 3
2 3
2 3
2 3
2 7
2 7
2 7
2 7
2 7
2 8
2 8
2 8
2 8
2 8
2 8
2 8
1 8
1 8
1 8
1 8
1 8
1 8
1 7
1 7
1 7
1 7
1 7
1 7
1 7
1 7
1 7
1 7
1 7
1 7
1 7
0 5
0 5
0 5
0 5
0 5
0 0
0 0
0 0
0 0
0 0
0 0
0 0
0 0
0 0
0 0
0 0
0 0
0 0
0 0
0 0
0 0
0 0
0 0
0 0
0 0
0 0
0 0
0 0
0 0
0 0
0 0
3 0
3 0
3 0
3 0
3 0
3 0
3 0
3 1
3 1
3 3
3 3
4 4
4 4
4 4
4 5
4 5
4 5
5 5
5 5
5 5
5 5
5 5
5 6
5 6
5 6
5 6
5 6
5 6
5 6
5 6
5 6
5 6
5 6
5 6
5 6
5 6
2 6
2 6
2 6
2 6
2 6
2 6
2 6
2 5
2 5
2 3
2 3
1 2
1 2
1 2
1 1
1 1
1 2
0 2
0 2
0 2
0 2
0 2
0 1
0 1
0 1
0 1
0 1
0 1
0 1
0 1
0 1
0 1
0 1
0 2
0 3
0 3
0 3
0 3
0 3
0 3
0 3
0 3
0 3
0 3
0 3
0 3
0 3
0 5
0 5
0 5
0 6
0 6
0 5
0 6
0 7
0 7
0 7
0 7
0 7
0 7
0 7
0 7
0 7
0 7
0 7
0 7
0 7
0 7
0 7
0 6
0 5
0 5
0 5
0 5
0 5
0 5
0 5
0 5
0 5
0 5
0 5
0 5
0 5
0 2
0 2
0 2
0 1
0 1
0 1
0 1
0 0
0 0
0 0
0 0
0 0
0 0
0 0
0 0
0 0
0 0
0 0
0 0
0 0
0 0
0 0
0 0
0 2
0 9
0 11
0 11
0 19
0 19
0 19
0 21
0 25
0 26
0 29
0 29
0 29
0 29
0 29
0 29
0 29
0 29
0 29
0 29
0 29
0 29
0 29
0 29
0 29
0 29
0 29
0 49
0 50
0 51
0 53
0 54
0 54
0 54
0 54
0 54
0 51
0 44
0 42
0 41
0 28
0 26
0 26
0 26
0 26
0 26
0 27
0 27
0 27
0 27
0 27
0 27
0 27
0 27
0 27
0 27
0 27
0 27
0 27
0 27
0 27
0 27
0 27
0 7
0 5
0 5
0 3
0 3
0 3
0 3
0 3
0 3
0 2
0 2
0 3
0 3
0 4
0 6
0 11
0 11
0 11
0 11
0 10
0 10
0 10
0 10
0 10
0 10
0 10
0 10
0 10
0 10
0 10
0 11
0 11
0 11
0 11
0 11
0 11
0 11
0 11
0 11
0 11
0 10
0 10
0 10
0 10
0 10
0 10
0 9
0 10
0 11
0 10
0 8
0 3
0 3
0 3
0 3
0 3
0 3
0 3
0 3
0 3
0 3
0 3
0 3
0 3
0 3
0 3
0 3
0 3
0 3
0 3
0 3
0 3
0 3
0 4
0 4
0 4
0 4
0 4
0 4
0 4
0 4
0 4
0 5
0 3
0 3
0 3
0 4
0 4
0 4
0 4
0 4
0 4
0 4
0 4
0 4
0 4
0 4
0 4
0 4
0 4
0 3
0 3
0 3
0 3
0 3
0 3
0 3
0 3
0 3
0 2
0 2
0 2
0 2
0 2
0 2
0 3
0 3
0 3
0 2
0 2
0 2
0 2
0 2
0 2
0 2
0 2
0 2
0 2
0 2
0 2
0 2
0 2
0 2
0 2
0 2
0 2
0 2
0 2
0 2
0 2
0 2
0 2
0 2
0 2
0 2
0 2
0 2
0 2
0 2
0 2
0 2
0 1
0 2
0 2
0 1
0 1
0 1
0 1
0 1
0 2
0 6
0 6
0 6
0 6
0 6
0 6
0 6
0 6
0 6
0 6
0 6
0 6
0 6
0 6
0 6
0 6
0 6
0 6
0 6
0 6
0 6
0 6
0 6
0 6
0 6
0 6
0 7
0 7
0 7
0 7
0 9
0 10
0 10
0 10
0 10
0 9
0 5
0 5
0 5
0 5
0 5
0 5
0 5
0 5
0 5
0 5
0 5
0 5
0 7
0 8
0 8
0 8
0 8
0 8
0 8
0 8
0 9
0 10
0 10
0 10
0 10
0 10
0 9
0 8
0 8
0 7
0 5
0 5
0 5
0 5
0 5
0 5
0 5
0 5
0 5
0 5
0 5
0 5
0 5
0 5
0 5
0 5
0 6
0 4
0 3
0 3
0 3
0 3
0 3
0 3
0 3
0 3
0 1
0 1
0 1
0 1
0 1
0 1
0 1
0 1
0 1
0 1
0 1
0 1
0 1
0 1
0 1
0 1
0 1
0 1
0 1
0 1
0 1
0 1
0 1
0 1
0 1
0 1
0 0
0 0
0 0
0 0
0 0
0 0
0 0
0 0
0 0
0 0
0 0
0 0
0 1
0 1
0 1
0 1
0 1
0 1
0 1
0 1
0 1
0 1
0 1
0 1
0 1
0 1
0 1
0 1
0 1
0 1
0 1
0 1
0 1
0 1
0 1
0 1
0 1
0 1
0 1
0 1
0 1
0 1
0 1
0 1
0 1
0 1
0 0
0 0
0 0
0 0
0 0
0 0
0 0
0 0
0 0
0 0
0 0
0 0
0 0
0 0
0 0
0 0
0 0
0 0
0 0
0 0
0 0
0 0
0 0
0 0
0 0
0 0
0 0
0 0
0 0
0 0
0 0
0 0
0 0
0 0
0 0
0 0
0 0
1 0
1 0
1 0
1 0
1 0
1 0
1 0
1 0
1 0
1 0
1 0
1 0
1 0
1 0
1 0
1 0
1 0
1 0
0 0
0 0
0 0
0 0
0 0
0 0
0 0
0 0
0 0
0 0
0 0
0 0
0 0
0 0
0 0
0 0
0 0
0 0
0 0
0 0
0 0
0 0
0 0
0 0
0 0
0 0
0 0
0 0
0 0
0 0
0 0
0 0
0 0
0 0
0 0
0 0
0 0
0 0
0 0
0 0
0 0
0 0
0 0
0 0
0 0
0 0
0 0
0 0
0 0
0 0
0 0
0 0
0 0
0 0
0 0
0 0
0 0
0 0
0 0
0 0
0 0
0 0
0 0
0 0
0 0
0 0
0 0
0 0
0 0
0 0
0 0
0 0
0 0
0 0
0 0
0 0
0 3
0 3
0 3
0 3
0 3
0 3
0 3
0 3
0 3
0 3
0 3
0 3
0 3
0 3
0 3
0 3
0 3
0 3
0 3
0 3
0 3
0 3
0 3
0 3
0 3
0 4
0 4
0 4
0 4
0 4
0 4
0 4
0 4
0 4
0 4
0 4
0 1
0 1
0 1
0 1
0 1
0 1
0 1
0 1
0 1
0 0
0 0
0 0
0 0
0 0
0 0
0 0
0 0
0 0
0 0
0 0
0 0
0 0
0 0
0 0
0 0
0 0
0 0
0 0
0 0
0 0
0 0
0 0
0 0
0 0
0 0
0 1
0 1
0 1
0 1
0 1
0 1
0 1
0 1
0 1
0 1
0 1
0 1
0 1
0 1
0 1
0 1
0 1
0 1
0 1
0 1
0 1
0 1
0 1
0 1
0 1
0 1
0 1
0 1
0 1
0 1
0 1
0 1
0 1
0 1
0 1
0 1
0 0
0 0
0 0
0 0
0 0
0 0
0 0
0 0
0 0
0 0
0 0
0 0
0 0
0 0
0 0
0 0
0 0
0 0
0 0
0 0
0 0
0 0
1 0
1 0
1 0
1 0
1 0
1 0
2 0
2 0
2 0
3 0
5 0
5 0
5 0
5 0
5 0
5 0
5 0
5 0
5 0
5 0
5 0
5 0
5 0
5 0
5 0
5 0
5 0
5 0
5 0
5 0
5 0
5 0
6 0
7 0
7 0
7 0
5 0
5 0
5 0
6 0
6 0
6 0
6 0
5 0
5 0
4 0
3 0
3 0
3 0
3 0
3 0
3 0
3 0
3 0
3 0
3 0
3 0
3 0
3 0
3 0
3 1
6 1
7 1
9 2
9 2
9 2
9 2
9 2
8 2
7 2
7 2
7 2
7 2
7 2
7 2
27 2
27 2
39 2
43 2
55 3
64 5
65 5
67 5
67 5
67 5
67 5
67 5
74 5
74 5
74 5
79 7
79 7
79 8
79 8
79 8
80 8
80 7
75 7
75 7
74 6
74 6
74 6
76 6
92 7
97 7
105 8
116 11
117 12
117 12
115 12
116 12
100 12
97 12
82 12
73 12
63 11
62 9
61 9
60 9
60 9
60 9
60 8
60 8
54 8
54 8
54 8
49 6
49 6
48 6
51 7
67 11
73 11
102 13
127 13
127 13
135 14
135 14
135 14
132 14
116 12
114 12
108 11
99 9
99 8
99 10
99 10
100 10
98 10
98 10
98 10
98 10
101 10
101 10
102 10
102 10
102 10
103 10
103 10
109 10
109 10
109 10
111 10
111 10
110 10
117 10
114 9
99 5
91 5
63 2
43 2
41 2
36 3
34 3
34 3
31 3
30 3
29 3
29 3
31 3
31 3
31 1
31 1
30 1
30 1
30 1
30 1
28 1
27 1
26 1
25 1
25 1
26 1
26 1
25 1
20 1
20 1
19 1
16 1
13 1
10 1
6 1
6 1
7 1
8 1
19 1
50 4
51 4
50 3
50 3
50 3
51 3
51 3
51 4
53 4
51 4
51 4
51 4
51 4
51 4
52 4
54 4
56 4
56 4
56 4
56 4
56 4
56 4
55 4
55 4
54 4
54 4
53 4
53 4
53 4
53 4
52 4
46 3
44 3
36 3
34 3
33 3
9 1
9 1
9 0
9 0
10 0
8 0
8 0
8 0
8 0
37 1
40 1
40 1
40 1
40 1
39 1
38 1
37 1
37 1
37 1
37 1
37 1
38 1
38 1
38 1
38 1
38 1
38 1
38 1
37 1
36 1
36 1
36 1
36 1
35 1
40 2
41 2
41 2
42 2
45 2
55 3
59 4
59 4
59 4
44 3
45 3
30 3
29 3
29 3
29 3
30 3
30 3
30 3
31 3
31 3
31 3
31 3
32 3
31 3
33 3
34 3
34 3
35 3
35 3
35 3
39 3
41 4
42 4
41 4
41 4
41 4
41 2
40 2
39 1
38 1
36 1
26 1
23 1
23 1
24 1
25 1
27 1
47 1
47 1
52 1
71 1
76 1
78 1
76 1
76 1
76 1
76 1
76 1
76 1
77 1
75 1
73 1
73 1
73 1
73 1
72 1
70 1
68 1
67 1
66 1
66 1
67 1
62 1
62 1
62 1
59 1
58 1
53 1
52 1
52 1
50 1
48 1
48 1
34 1
32 1
25 1
8 1
5 1
5 1
5 1
5 1
5 1
5 1
5 1
4 1
4 1
4 1
11 1
12 1
12 1
12 1
12 1
11 0
11 0
11 0
11 0
11 0
11 0
11 0
11 0
11 0
11 0
11 0
12 0
12 0
14 0
18 0
20 0
23 0
23 0
23 0
23 0
22 0
21 0
21 0
21 0
21 0
22 0
23 0
23 0
25 0
25 0
25 0
18 0
17 0
22 0
22 0
21 0
21 0
22 0
22 0
22 0
23 0
23 0
23 0
23 0
23 0
23 0
24 0
23 0
22 0
21 0
20 1
18 1
19 1
19 1
20 1
25 1
25 1
25 1
25 1
25 1
25 1
25 1
25 1
25 1
23 1
24 1
25 1
25 1
30 2
28 2
28 2
28 2
28 2
27 2
27 2
26 2
26 2
28 2
28 2
31 2
31 2
32 2
32 2
32 2
32 2
30 2
29 1
29 1
28 1
28 1
27 1
21 1
21 1
21 1
21 1
21 1
20 1
21 1
21 1
21 1
18 1
19 1
17 1
17 1
13 0
13 0
13 0
14 0
14 0
14 0
14 0
14 0
15 0
14 0
14 0
12 0
12 0
11 0
11 0
13 0
16 0
16 0
17 0
17 0
17 0
17 0
17 0
18 0
18 0
19 0
19 0
22 0
24 0
22 0
22 0
22 0
22 0
21 0
26 0
26 0
88 0
88 0
93 2
111 2
128 2
148 2
148 2
148 2
147 2
146 2
146 2
149 2
149 2
148 2
146 2
144 2
141 2
141 2
139 2
139 2
139 2
139 2
142 2
149 4
149 4
148 4
148 4
146 4
145 4
145 4
145 4
146 4
150 4
152 4
146 4
159 4
101 3
100 2
84 2
65 2
63 2
59 3
59 3
59 3
60 3
60 3
60 3
57 3
57 3
57 3
57 3
58 3
64 3
70 3
100 3
107 3
114 3
136 3
136 3
131 1
131 1
131 1
131 1
131 1
130 1
130 1
130 1
126 1
138 2
136 2
136 2
121 2
115 2
113 2
112 2
112 2
108 2
106 1
107 1
110 1
110 1
110 1
110 1
111 1
111 1
114 1
120 1
119 1
112 1
100 1
72 1
64 1
53 1
36 1
35 1
34 1
34 1
34 1
35 1
35 1
34 1
34 1
33 1
31 1
21 0
21 0
20 0
20 0
22 0
33 0
33 0
33 0
33 0
33 0
31 0
28 0
28 0
28 0
28 0
28 0
28 0
26 0
21 0
20 0
19 0
20 0
20 0
29 0
30 0
30 0
30 0
30 0
30 0
31 0
34 0
34 0
34 0
41 0
73 0
89 1
132 1
194 1
201 1
200 1
197 1
189 1
189 1
189 1
189 1
189 1
189 1
189 1
189 1
189 1
189 1
189 1
189 1
187 1
187 1
187 1
186 1
184 1
182 2
178 2
176 2
181 2
181 2
181 2
179 2
176 2
172 2
175 2
175 2
172 2
141 2
113 1
50 1
17 1
16 1
16 1
16 1
16 1
16 1
16 1
16 1
16 1
16 1
16 1
16 1
16 1
16 1
16 1
16 1
16 1
16 1
16 1
16 1
16 1
16 0
16 0
16 0
11 0
11 0
11 0
11 0
10 0
9 0
7 0
2 0
1 0
1 0
1 0
2 0
2 0
3 0
3 0
3 0
3 0
3 0
3 0
3 0
3 0
3 0
3 1
3 1
3 1
3 1
3 1
3 1
3 1
3 1
3 1
3 1
3 1
3 1
3 1
3 1
3 1
3 1
3 1
4 1
9 1
12 1
11 1
11 1
11 1
11 1
13 1
14 1
14 1
17 1
17 1
17 1
18 1
18 1
19 1
20 1
20 1
20 1
20 0
20 0
20 0
23 0
33 0
33 0
33 0
48 0
49 0
49 0
50 0
51 0
51 0
51 0
51 0
52 0
54 0
54 0
49 0
46 0
46 0
47 0
46 0
46 0
43 0
42 0
42 0
38 0
39 0
38 0
37 0
37 0
37 0
37 0
35 0
35 0
35 0
35 0
34 0
31 0
20 0
19 0
19 0
5 0
6 0
5 0
6 0
7 0
8 0
8 0
8 0
9 0
7 0
7 0
8 0
11 0
11 0
10 0
10 0
10 0
10 0
10 0
10 0
10 0
10 0
10 0
10 0
10 0
10 0
10 0
10 0
10 0
10 0
10 0
10 0
10 0
10 0
10 0
10 0
10 0
9 0
9 0
8 0
7 0
6 0
7 0
9 0
20 0
21 0
22 0
23 0
20 0
20 0
19 0
19 0
19 0
19 0
19 0
19 0
19 0
19 0
19 0
27 0
28 0
29 0
29 0
29 0
29 0
29 0
30 0
30 0
30 0
30 0
30 0
30 0
30 0
30 0
30 0
30 0
30 0
30 0
30 0
27 0
15 0
13 0
13 0
12 0
12 0
12 0
12 0
12 0
13 0
13 0
13 0
13 0
13 0
13 0
13 0
5 0
5 0
5 0
5 0
5 0
5 0
5 0
6 0
6 0
6 0
7 0
7 0
6 0
6 0
6 0
6 0
6 0
6 0
6 0
6 0
6 0
6 0
6 0
6 0
6 0
6 0
6 0
5 0
5 0
5 0
4 0
4 0
4 0
4 0
4 0
4 0
4 0
3 0
3 0
3 0
3 0
3 0
3 0
1 0
1 0
1 0
0 0
0 0
0 0
0 0
0 0
0 0
0 0
0 0
0 0
2 0
2 0
2 0
2 0
2 0
2 0
2 0
2 0
2 0
2 0
2 0
2 0
2 0
2 0
2 0
2 0
2 0
2 0
2 0
2 0
4 0
5 0
9 0
10 0
12 0
14 0
14 0
14 0
14 0
14 0
14 0
14 0
14 0
14 0
14 0
14 0
12 0
12 0
12 0
12 0
12 0
12 0
12 0
12 0
12 0
12 0
12 0
12 0
12 0
12 0
12 0
15 0
41 0
52 0
71 0
78 0
76 0
77 0
76 0
78 0
77 0
75 0
75 0
75 0
75 0
75 0
75 0
75 0
75 0
75 0
75 0
75 0
75 0
75 0
76 0
76 0
76 0
76 0
76 0
76 0
76 0
76 0
76 0
76 0
75 0
76 0
74 0
70 0
44 0
33 0
20 0
13 0
12 0
12 0
13 0
11 0
11 0
11 0
11 0
11 0
11 0
12 0
16 0
16 0
16 0
16 0
16 0
16 0
16 0
16 0
16 0
16 0
16 0
16 0
16 0
16 0
17 0
17 0
18 0
23 0
23 0
22 0
21 0
23 0
34 0
50 0
73 2
75 2
78 2
77 2
84 2
85 2
89 2
94 2
94 2
94 2
94 2
93 2
90 2
90 2
90 2
90 2
90 2
91 2
91 2
91 2
91 2
92 2
92 2
92 2
92 2
92 2
92 2
90 2
89 2
84 2
83 2
79 2
72 2
63 2
60 2
48 3
28 1
27 1
24 1
22 1
16 1
14 1
13 1
7 1
8 1
8 1
8 1
8 1
8 1
8 1
8 0
38 1
48 1
46 1
46 1
46 1
46 1
46 1
46 1
46 1
46 1
46 1
46 1
46 1
46 1
46 2
46 2
46 2
46 2
46 2
46 2
45 2
46 2
46 2
46 2
46 2
46 2
46 2
44 2
44 2
43 2
43 2
43 2
42 2
43 2
41 2
40 2
8 1
4 1
4 1
4 1
4 1
4 1
4 1
4 1
5 1
8 1
8 3
9 4
9 4
9 4
8 3
8 3
8 3
9 3
9 3
9 3
10 3
9 3
9 3
9 3
9 3
9 3
9 3
9 3
15 3
18 3
19 3
19 3
19 3
19 3
19 3
18 4
19 4
19 4
20 4
20 4
22 4
23 4
23 4
22 4
19 4
18 4
18 1
18 1
18 1
18 2
18 2
18 2
19 2
18 2
18 2
17 2
16 2
16 2
16 2
16 2
16 2
16 2
15 2
14 2
23 2
21 2
20 2
20 2
20 2
26 2
31 1
31 1
30 1
33 1
31 1
31 1
29 1
29 1
29 1
29 1
29 1
29 1
29 1
29 1
29 1
29 0
29 0
29 0
28 0
28 0
28 0
28 0
31 0
31 0
31 0
31 0
31 0
31 0
30 0
31 0
18 0
20 0
22 0
21 0
20 0
13 0
10 0
11 0
11 0
10 0
10 0
12 0
17 0
21 0
40 0
41 0
41 0
41 0
41 0
41 0
42 0
43 0
57 0
74 0
77 0
79 0
79 0
81 0
81 0
116 0
125 0
139 0
148 0
158 0
161 0
168 0
171 0
173 0
190 0
211 1
211 1
212 1
213 1
212 1
213 1
213 1
218 1
214 1
210 1
205 1
187 1
187 1
190 1
191 1
192 1
193 1
195 1
196 1
295 2
317 2
316 2
316 2
314 2
313 2
307 2
271 2
257 2
245 2
239 2
236 2
232 2
227 2
219 2
213 2
196 2
180 1
180 1
179 1
178 1
177 1
177 1
177 1
171 1
171 1
195 3
198 3
197 3
198 3
187 3
186 3
181 3
161 3
147 3
132 3
44 2
41 2
40 2
40 2
40 2
15 0
15 0
15 0
15 0
15 0
15 0
16 0
16 0
16 0
17 0
17 0
17 0
16 0
15 0
15 0
16 0
16 0
16 0
16 0
16 0
16 0
16 0
15 0
13 0
9 0
6 0
4 0
4 0
4 0
4 0
4 0
4 0
4 0
4 0
4 0
4 0
4 0
5 0
53 2
59 2
59 2
58 2
57 2
58 2
58 2
57 2
58 2
58 2
58 2
58 2
58 2
59 2
59 2
59 2
59 2
59 2
59 2
59 2
59 2
58 2
58 2
58 2
58 2
58 2
58 2
58 2
58 2
58 2
48 0
44 0
45 0
45 0
43 0
39 0
8 0
7 0
7 0
6 0
6 0
6 0
6 0
6 0
5 0
5 0
6 0
6 0
5 0
4 0
4 0
4 0
4 0
4 0
4 0
4 0
4 0
4 0
4 0
4 0
4 0
4 0
4 0
5 0
5 0
5 0
4 0
3 0
2 0
2 0
2 0
2 0
2 0
2 0
2 0
2 0
2 0
2 0
2 0
2 0
2 0
2 0
1 0
1 0
1 0
1 0
1 0
1 0
1 0
1 0
1 0
4 0
4 0
4 0
4 0
4 0
4 0
4 0
4 0
3 0
3 0
5 0
5 0
5 0
6 0
6 0
6 0
6 0
8 0
8 0
8 0
8 0
8 0
8 0
8 0
8 0
10 0
10 0
10 0
10 0
10 0
10 0
11 0
11 0
11 0
11 0
11 0
8 0
8 0
8 0
8 0
8 0
8 0
8 0
8 0
8 0
8 0
6 0
5 0
5 0
5 0
5 0
5 0
5 0
3 0
3 0
5 0
15 0
20 0
23 0
24 0
24 0
22 0
23 0
23 0
23 0
23 0
22 0
22 0
23 0
24 0
24 0
25 0
25 0
25 0
25 0
25 0
25 0
25 0
25 0
35 0
34 0
34 0
34 0
34 0
34 0
34 0
34 0
34 0
34 0
33 0
28 0
25 0
23 0
17 0
15 0
14 0
13 0
13 0
13 0
13 0
13 0
13 0
13 0
13 0
11 0
14 0
14 0
14 0
14 0
13 0
13 0
13 0
13 0
14 0
14 0
5 0
6 0
6 0
6 0
6 0
6 0
6 0
6 0
6 0
6 0
6 0
6 0
6 0
6 0
6 0
6 0
6 0
6 0
6 0
6 0
9 0
9 0
9 0
9 0
9 0
8 0
5 0
5 0
5 0
5 0
5 0
5 0
5 0
5 0
5 0
5 0
5 0
4 0
4 0
4 0
4 0
4 0
4 0
4 0
4 0
4 0
4 0
4 0
4 0
5 0
5 0
6 0
6 0
6 0
6 0
6 0
3 0
3 0
3 0
3 0
4 0
7 0
7 0
7 0
12 0
12 0
12 0
12 0
12 0
12 0
11 0
11 0
11 0
11 0
11 0
11 0
11 0
11 0
11 0
11 0
11 0
11 0
11 0
12 0
12 0
12 0
12 0
11 0
12 0
12 0
12 0
12 0
11 0
11 0
11 0
11 0
11 0
8 0
9 0
7 0
6 0
6 0
6 0
6 0
6 0
6 0
6 0
6 0
6 0
6 0
9 0
9 0
10 0
10 0
11 0
10 0
10 0
9 0
9 0
9 0
9 0
8 1
8 1
8 1
13 1
13 1
13 1
13 1
13 1
13 1
13 1
12 1
12 1
12 1
11 1
11 1
10 1
10 1
10 1
10 1
10 1
10 1
10 1
10 1
10 0
10 1
7 1
6 1
6 1
6 1
5 1
5 1
5 1
5 1
5 1
5 1
5 1
6 1
6 1
6 1
1 1
1 1
1 1
7 1
7 1
8 1
8 1
8 1
9 1
9 1
9 1
9 1
9 1
9 1
9 1
9 1
9 1
9 1
9 1
9 1
9 0
9 0
9 0
9 0
9 0
9 0
9 0
9 0
18 0
18 0
19 0
19 0
20 0
19 0
19 0
20 0
20 0
19 0
18 0
13 0
13 0
12 0
12 0
12 0
13 0
13 0
14 0
15 0
15 0
16 0
17 0
17 0
17 0
17 0
17 0
17 0
17 0
20 0
22 0
22 0
22 0
22 0
22 0
22 0
13 0
12 0
11 0
11 0
11 0
10 0
9 0
9 0
9 0
9 0
9 0
9 0
9 0
9 0
8 0
7 0
7 0
7 0
7 0
5 0
5 0
5 0
5 0
5 0
5 0
5 0
5 0
4 0
4 0
0 0
0 0
0 0
0 0
0 0
0 0
0 0
0 0
1 0
13 0
16 0
17 0
18 0
18 0
18 0
18 0
18 0
18 0
18 0
18 0
18 0
18 0
18 0
18 0
18 0
18 0
18 0
18 0
18 0
18 0
18 0
18 0
18 0
18 0
19 0
19 0
19 0
20 0
21 0
22 0
22 0
23 0
22 0
20 0
19 0
9 0
7 0
7 0
6 0
6 0
6 0
6 0
6 0
6 0
6 0
6 0
6 0
6 0
6 0
6 0
6 0
6 0
7 0
7 0
7 0
7 0
6 0
6 0
6 0
6 0
7 0
7 0
6 0
5 0
5 0
4 0
3 0
2 0
2 0
2 0
2 0
2 0
2 0
2 0
2 0
2 0
2 0
2 0
2 0
2 0
2 0
2 0
2 0
2 0
2 0
2 0
2 0
2 0
1 0
1 0
1 0
1 0
1 0
0 0
0 0
0 0
0 1
0 1
0 1
0 1
0 1
0 1
0 1
0 1
0 1
0 1
0 1
0 1
0 1
0 1
0 1
0 1
0 1
0 1
0 1
0 1
0 1
0 1
0 1
0 1
0 1
0 1
0 1
0 1
0 1
0 1
1 1
1 0
1 0
1 0
1 0
1 0
1 0
1 0
2 0
2 0
2 0
2 0
2 0
2 0
2 0
2 0
2 0
2 0
2 0
2 0
2 0
2 0
2 0
2 0
2 0
2 0
2 0
2 0
2 0
2 0
2 0
2 0
2 0
1 0
1 0
1 0
1 0
1 0
1 0
1 0
1 0
1 0
1 0
1 0
0 0
0 0
0 0
1 0
3 0
3 0
3 0
3 0
3 0
3 0
3 0
3 0
4 0
4 0
4 0
4 0
4 0
4 0
4 6
4 7
4 8
4 9
4 9
4 9
4 9
4 9
4 9
4 9
4 9
6 11
6 11
6 11
6 11
6 11
6 11
6 11
8 12
8 12
7 12
5 12
5 12
5 12
5 12
5 12
5 12
5 12
5 12
4 12
4 12
4 12
4 12
4 12
4 12
4 12
4 6
4 3
4 3
4 3
4 3
4 3
4 3
4 3
4 3
4 3
4 3
2 1
2 1
2 1
2 1
2 1
2 1
2 1
0 0
0 0
0 0
0 0
0 0
0 0
0 0
0 0
0 0
0 0
0 0
0 0
1 0
3 0
4 0
7 0
8 0
8 0
8 0
10 0
10 0
12 0
16 0
16 0
16 0
16 0
16 0
16 0
16 0
16 0
16 0
17 0
17 0
17 0
17 0
17 0
17 0
17 0
17 0
17 0
17 0
17 0
18 0
18 0
18 0
18 0
18 1
19 1
18 1
16 1
16 1
12 1
11 1
11 1
11 1
9 1
9 1
7 1
4 1
3 1
3 2
3 2
3 2
3 2
5 2
5 2
5 2
5 2
5 2
5 2
5 2
5 2
5 2
5 2
5 2
5 2
6 2
6 2
6 2
6 2
6 2
7 2
6 2
5 2
5 2
5 2
5 2
5 2
6 2
6 2
6 2
6 2
6 2
6 2
8 2
8 2
9 2
10 2
11 2
11 2
9 2
9 2
9 3
9 3
9 3
9 2
11 2
11 2
12 2
12 2
11 2
11 2
11 2
11 2
9 1
9 1
9 1
9 1
9 1
9 1
8 1
8 1
8 1
7 1
7 1
7 1
7 1
7 1
7 1
7 1
11 1
17 1
27 2
29 2
31 2
32 2
32 2
32 2
32 1
32 1
32 1
32 1
31 1
31 1
30 1
30 1
31 1
32 1
32 1
32 1
32 1
32 1
32 1
32 1
32 1
32 1
32 1
32 1
34 1
34 1
35 1
35 1
31 1
30 1
29 1
24 1
22 1
19 1
9 0
9 0
11 0
11 0
11 0
12 0
12 0
12 0
12 0
11 0
12 0
12 0
12 0
12 0
11 0
11 0
11 0
11 0
11 0
11 0
11 0
11 0
11 0
11 0
11 0
11 0
9 0
9 0
8 0
7 0
7 0
7 0
7 0
7 0
6 0
6 0
6 0
5 0
4 0
3 0
3 0
2 0
2 0
2 0
2 0
2 0
0 0
0 0
0 0
0 0
0 0
0 0
0 0
0 0
0 0
0 0
0 0
0 0
0 0
0 0
0 0
0 0
0 0
0 1
0 1
0 1
0 1
0 1
0 1
0 1
0 1
0 1
0 1
0 1
0 1
0 1
0 1
0 1
0 1
0 1
0 1
0 1
0 2
0 2
0 2
0 2
0 2
0 2
0 2
0 2
0 2
1 2
2 2
3 2
5 2
5 2
5 2
5 2
5 2
5 1
5 1
5 1
5 1
5 1
5 1
5 1
7 1
7 1
8 1
9 1
10 1
10 1
10 1
10 1
10 1
10 1
10 1
10 1
10 0
10 0
10 0
10 0
10 0
10 0
10 0
10 0
10 0
9 0
8 0
7 0
5 0
5 0
5 0
5 0
5 0
5 0
5 0
5 0
5 0
5 0
5 0
5 0
3 0
3 0
2 0
0 0
0 0
0 0
0 0
0 0
4 0
4 0
4 0
6 0
6 0
6 0
6 1
6 1
6 1
8 1
8 1
8 1
8 1
8 1
8 1
8 1
8 1
8 1
8 1
8 1
8 1
8 1
8 1
8 1
8 1
8 1
8 1
8 1
8 1
8 1
8 1
8 1
8 1
8 1
8 1
8 1
4 1
4 1
4 1
2 1
2 1
2 1
2 0
2 0
2 0
0 0
0 0
0 0
0 0
0 0
0 0
0 0
0 0
0 0
0 0
0 0
0 0
0 0
0 0
0 0
0 0
0 0
0 0
0 0
0 0
1 0
1 0
1 0
2 0
2 0
2 0
2 0
2 0
2 0
2 0
2 0
2 0
2 0
2 0
2 0
2 0
2 0
2 0
2 0
2 0
2 0
2 0
2 0
2 0
2 0
4 0
4 0
4 0
4 0
4 0
5 0
6 0
6 0
6 0
6 0
6 0
5 0
5 0
4 0
5 0
8 0
8 0
8 0
8 0
8 0
8 0
8 0
8 0
8 0
8 0
8 0
9 0
9 0
9 0
9 0
10 0
10 0
10 0
10 0
10 0
10 0
9 0
9 0
9 0
9 0
9 0
9 0
8 0
9 0
9 0
9 0
9 0
9 0
9 0
9 0
8 0
5 0
5 0
5 0
5 0
5 0
5 1
5 1
5 1
5 1
5 1
4 1
4 1
3 1
3 1
3 1
3 1
4 1
4 1
4 1
4 1
4 1
3 1
3 1
3 1
2 1
2 1
2 1
2 1
1 1
1 1
1 1
1 1
1 1
1 1
1 1
1 1
1 1
1 1
1 1
1 1
1 0
1 0
1 0
1 0
1 0
1 0
1 0
1 0
1 0
1 0
1 0
1 0
0 0
0 0
0 0
0 0
2 1
2 1
2 1
2 1
2 1
2 1
2 1
2 1
2 1
2 1
2 1
2 1
2 1
6 1
6 1
6 1
6 1
6 1
6 1
7 1
7 1
7 1
16 1
18 1
18 1
18 1
18 1
18 1
18 1
18 1
18 1
18 1
18 1
18 1
19 1
20 1
19 0
19 0
19 0
19 0
19 0
19 0
19 0
18 0
18 1
18 1
20 1
20 1
19 1
16 1
16 1
16 1
17 1
17 1
16 1
16 1
17 2
17 2
8 2
7 2
7 2
7 2
7 2
7 2
7 2
7 2
9 2
14 2
17 2
17 2
19 2
21 2
20 2
20 2
19 2
19 2
19 2
19 2
19 2
23 2
24 1
24 1
25 1
25 1
25 1
25 1
25 1
25 1
25 1
25 1
25 1
24 1
24 0
25 0
27 0
27 0
28 0
28 0
29 1
29 1
28 1
34 1
28 2
25 2
25 2
23 2
22 2
21 2
21 2
22 2
22 2
23 2
24 2
24 2
24 2
20 2
19 2
19 2
17 2
17 2
17 2
17 2
17 2
17 2
15 2
14 2
14 2
35 2
36 2
52 2
53 2
63 2
62 2
61 1
63 1
64 1
64 1
59 1
61 0
61 0
61 0
62 0
62 0
61 0
61 0
61 0
61 0
60 0
59 0
60 0
60 0
62 0
62 0
62 0
62 0
62 0
62 0
62 0
62 0
62 0
61 0
63 0
63 0
46 0
41 0
31 0
27 0
21 0
21 0
19 0
17 0
17 0
15 0
14 0
12 0
12 0
12 0
12 0
13 0
13 0
13 0
13 0
13 0
13 0
13 0
12 0
12 0
10 0
10 0
10 0
10 0
11 0
27 0
29 0
43 0
58 0
78 0
77 0
73 0
71 0
71 0
71 0
71 0
71 0
71 0
71 0
71 0
71 0
71 0
71 0
71 0
71 0
71 0
71 0
70 0
70 0
70 0
70 0
70 0
70 0
70 0
70 0
70 0
70 0
68 0
67 0
72 0
73 0
55 0
54 0
34 0
17 0
7 0
6 0
6 0
6 0
6 0
6 0
6 0
6 0
6 0
6 0
6 0
6 0
6 0
6 0
6 0
6 0
6 0
6 0
6 0
7 0
7 0
7 0
7 0
7 0
7 0
7 0
7 0
7 0
7 0
7 0
2 0
1 0
1 0
1 0
1 0
1 0
2 1
2 1
2 1
3 1
3 1
3 1
3 1
3 1
3 1
3 1
3 1
3 1
3 1
4 1
4 1
4 1
4 1
4 1
4 1
3 1
3 1
3 1
3 1
3 1
3 1
3 1
3 1
3 1
3 1
3 1
3 1
3 1
3 1
4 1
5 1
4 1
3 0
3 0
3 0
3 0
3 0
3 0
3 0
3 0
3 0
3 0
3 0
3 0
3 0
2 0
2 0
2 0
2 0
2 0
2 0
2 0
2 0
2 0
2 0
2 0
2 0
2 0
2 0
2 0
4 0
4 0
25 0
27 0
27 0
27 0
27 0
27 0
27 0
27 0
27 0
28 0
28 0
28 0
28 0
28 0
28 0
28 0
30 0
30 0
30 0
30 0
30 0
30 0
31 0
31 0
33 1
33 1
33 1
33 1
33 1
34 1
35 1
35 1
35 1
34 1
32 1
32 1
11 1
10 1
10 1
9 1
8 1
9 1
9 1
9 1
9 1
8 1
8 1
8 1
8 1
8 1
8 1
7 1
6 1
6 1
11 1
11 1
11 1
11 1
12 1
12 1
10 0
10 0
10 0
10 0
10 0
9 0
8 0
8 0
8 0
8 0
8 0
8 0
8 0
8 0
8 0
8 0
7 0
7 0
7 0
7 0
7 0
9 0
9 0
9 0
9 0
10 0
10 0
10 0
9 0
9 0
3 0
3 0
3 0
3 0
3 0
3 0
3 0
3 0
3 0
3 0
3 0
3 0
4 0
5 0
6 1
6 1
6 1
6 1
6 1
6 1
6 1
6 1
6 1
6 1
6 1
6 1
6 1
4 1
5 1
5 1
6 1
5 1
5 1
5 1
5 1
5 1
5 1
5 1
5 1
5 1
5 1
5 1
5 1
4 1
4 1
4 1
5 1
4 1
3 1
3 1
3 0
3 0
3 0
3 0
3 0
3 0
5 0
8 0
8 0
8 0
8 0
8 0
8 0
7 0
7 0
7 0
6 0
6 0
6 0
6 0
6 0
6 0
6 0
6 0
7 0
7 0
8 0
8 0
9 0
9 0
9 0
9 0
8 0
9 0
11 0
11 0
11 0
11 0
11 0
11 0
10 0
10 0
9 0
6 1
6 1
6 1
6 1
7 1
7 1
7 1
7 1
7 1
7 1
7 1
6 1
6 1
6 1
8 1
9 1
8 1
8 1
8 1
7 1
7 1
8 1
8 1
8 1
8 1
10 1
9 1
9 1
9 1
9 1
9 0
10 0
11 0
58 0
58 0
58 0
60 0
62 0
62 0
66 0
66 0
66 0
66 0
66 0
66 0
66 0
66 0
65 0
65 0
65 0
63 0
61 0
61 0
61 0
61 0
60 0
60 0
60 1
60 1
59 1
59 1
57 1
56 1
56 1
56 1
56 1
56 1
56 1
54 1
8 1
8 1
8 1
5 1
6 1
7 1
3 1
2 1
9 1
9 1
26 1
26 1
27 1
28 1
29 1
30 1
32 1
32 1
34 1
34 1
34 0
34 0
34 0
34 0
35 0
37 0
37 0
37 0
37 0
37 0
37 0
37 0
41 0
56 0
70 0
79 0
80 0
81 0
81 0
81 0
81 0
80 0
80 0
79 0
72 0
72 0
59 0
58 0
59 0
58 0
56 0
56 0
54 0
54 0
53 0
56 0
56 0
61 1
61 1
61 1
59 1
58 1
58 1
58 1
57 1
57 1
50 1
48 1
31 1
23 1
20 1
17 1
16 1
24 1
26 1
42 2
42 3
43 3
49 4
51 4
51 3
51 3
49 3
48 3
46 3
47 3
48 3
49 3
50 3
50 3
50 3
51 3
53 3
52 3
85 4
87 4
88 4
88 4
88 4
88 4
88 4
88 4
88 4
87 4
87 4
86 4
86 4
87 4
87 5
80 5
79 4
63 3
61 2
58 2
54 2
72 2
72 2
72 2
74 2
78 2
80 2
79 2
81 2
82 2
89 2
100 2
101 2
98 2
91 2
92 2
62 1
64 1
72 1
82 1
88 1
88 1
88 1
88 1
93 1
94 1
96 1
101 1
101 2
101 2
103 1
102 1
102 1
102 1
102 1
102 1
102 1
88 1
105 1
105 1
102 1
100 1
101 1
101 1
98 1
101 1
95 1
86 1
88 1
87 1
82 1
75 1
72 1
71 1
68 1
65 1
68 1
79 1
98 1
100 1
94 1
93 1
91 1
87 1
88 0
86 0
83 0
83 0
77 0
76 0
75 0
74 0
76 0
76 0
67 0
66 0
65 0
63 0
63 0
67 0
67 0
66 0
74 0
74 0
84 0
89 0
89 0
88 0
88 0
88 0
89 0
77 0
66 0
62 0
48 0
47 0
48 0
48 0
56 0
76 0
83 0
85 0
87 0
92 0
96 0
99 0
100 0
99 0
95 0
94 0
95 0
99 0
102 0
104 0
105 0
102 0
101 0
89 0
81 0
80 0
71 0
69 0
69 0
69 0
69 0
69 0
66 0
64 0
64 0
60 0
58 0
58 0
52 0
49 0
41 0
29 0
24 0
22 0
18 0
15 0
11 0
8 0
7 0
7 0
7 0
7 0
5 0
2 0
2 0
0 0
0 0
0 0
0 0
0 0
0 0
0 0
0 0
0 0
0 0
0 0
0 0
0 0
0 0
0 0
0 0
0 0
0 0
0 0
0 0
0 0
0 0
0 0
0 0
0 0
0 0
3 0
3 0
3 0
3 0
3 0
3 0
3 0
3 0
5 0
6 0
7 0
8 0
8 0
9 0
9 0
9 0
9 0
9 0
9 0
11 0
12 0
12 0
12 0
12 0
12 0
12 0
12 0
12 0
13 0
13 0
13 0
13 0
13 0
13 0
13 0
13 0
10 0
10 0
11 0
11 0
11 0
11 0
11 0
11 0
9 0
7 0
7 0
8 0
8 0
8 0
8 0
8 0
8 0
8 0
7 0
5 0
5 0
5 0
5 0
5 0
5 0
4 0
5 0
5 1
5 1
5 2
5 2
5 2
7 2
7 2
7 2
7 2
6 2
6 2
6 2
6 2
6 2
6 2
6 2
6 2
6 2
6 2
5 2
4 2
3 2
3 2
3 2
3 2
3 2
7 2
7 2
7 2
8 2
9 2
16 2
19 2
20 2
20 2
21 2
22 1
30 1
33 0
34 0
34 0
32 0
33 0
33 0
34 0
34 0
34 0
34 0
34 0
34 0
34 0
34 0
34 0
34 0
39 0
46 0
53 0
54 0
56 0
62 0
65 0
65 0
65 0
67 0
66 0
64 0
66 1
63 1
59 1
59 1
59 1
60 1
62 1
56 1
54 1
53 1
53 1
51 1
51 1
51 1
51 1
51 1
51 1
51 1
51 1
51 1
51 1
52 1
52 1
52 1
45 1
38 1
33 1
33 1
29 1
23 1
19 1
17 1
19 1
26 1
32 1
31 1
31 0
31 0
31 0
31 0
29 0
26 0
26 0
25 0
27 0
28 0
28 0
28 0
28 0
27 0
27 0
27 0
28 0
28 0
29 0
29 0
29 0
29 0
29 0
28 0
28 0
28 0
28 0
27 0
26 0
25 0
25 0
25 0
22 0
14 0
9 0
9 0
9 0
10 0
10 0
11 1
11 1
10 1
10 1
10 1
8 1
7 1
7 1
7 1
7 1
8 1
9 1
11 1
17 1
18 1
17 1
17 1
17 2
17 2
20 2
32 2
33 2
33 2
32 2
33 2
33 2
32 3
32 4
31 4
33 4
33 4
34 4
35 5
35 5
34 5
34 4
34 4
34 4
34 4
34 4
35 4
34 4
35 4
34 4
33 4
33 4
31 4
28 4
27 4
25 3
25 3
24 3
25 3
23 2
23 2
21 2
11 2
11 2
11 2
11 1
18 1
23 1
26 1
27 1
28 1
27 1
26 1
44 3
53 2
53 2
53 2
53 2
54 2
61 2
60 2
59 2
60 2
60 2
60 2
60 2
60 2
60 2
60 2
61 2
62 2
61 2
62 2
63 2
62 2
62 2
62 2
62 2
62 2
61 2
60 2
60 2
52 2
47 2
43 2
47 2
42 1
42 1
41 1
26 0
19 0
19 0
23 0
23 0
23 0
15 0
15 0
14 0
13 0
13 0
13 0
13 0
13 0
13 0
13 0
12 0
11 0
10 0
10 0
9 0
10 0
12 0
12 0
12 0
12 0
13 0
13 0
15 0
27 0
26 0
26 0
22 0
22 0
22 0
22 0
22 0
21 0
20 0
18 0
18 0
18 0
18 0
18 0
19 0
19 0
19 0
24 0
24 0
24 0
25 0
27 0
29 0
29 0
34 0
35 0
40 0
44 0
44 0
49 0
51 0
54 0
53 0
53 0
51 0
41 0
41 0
41 0
42 0
42 0
44 0
44 0
44 0
44 0
44 0
44 0
45 0
45 0
45 0
45 0
44 0
45 0
45 0
41 0
41 0
41 0
40 0
37 0
36 0
36 0
31 0
29 0
24 0
21 0
27 1
23 1
27 1
25 1
25 1
26 1
38 1
39 1
46 1
55 1
77 1
84 1
90 1
100 1
101 1
104 1
103 1
104 1
103 1
103 1
103 1
107 1
109 1
109 1
109 1
109 1
110 1
110 1
110 1
111 1
110 1
108 1
107 1
108 1
107 1
106 0
96 0
94 0
88 0
88 0
84 0
85 0
74 0
72 0
61 0
48 0
34 0
37 0
37 0
35 0
34 0
33 0
36 0
37 0
39 0
41 0
42 0
53 0
70 0
71 0
74 0
78 0
86 0
93 0
104 0
103 0
103 0
103 0
103 0
103 0
103 0
104 0
108 0
111 0
112 0
120 0
121 0
126 0
140 0
142 0
155 0
153 0
153 0
147 0
148 0
152 0
152 0
157 0
157 0
150 0
146 0
143 0
139 0
126 0
116 0
115 0
106 0
97 0
91 0
91 0
83 0
83 0
84 0
83 0
83 0
93 0
91 0
89 0
85 0
84 0
82 0
76 0
71 0
61 0
51 0
50 0
36 0
35 0
34 0
32 0
42 0
41 0
40 0
38 0
38 0
38 0
35 0
35 0
36 0
36 0
36 0
36 0
36 0
34 0
35 0
35 0
34 0
33 0
32 0
33 0
33 0
24 0
25 1
25 1
25 1
26 1
26 1
27 1
31 1
37 1
39 1
40 1
40 1
40 1
43 1
53 1
60 1
65 1
68 1
68 1
68 1
68 1
68 1
68 1
68 1
68 1
68 1
68 1
68 1
66 1
66 1
66 1
66 1
67 1
67 1
70 2
70 2
69 2
69 1
72 1
74 1
73 1
71 1
66 1
65 1
62 1
60 1
60 1
60 1
61 1
54 1
38 1
25 1
20 1
19 1
21 1
22 1
22 1
22 1
22 1
21 1
21 1
21 1
22 1
22 1
22 1
22 1
23 1
23 1
22 1
22 1
19 0
19 0
19 0
16 0
15 0
44 1
56 2
60 2
62 2
61 2
61 2
59 2
60 2
60 2
57 2
58 2
59 2
58 2
58 2
58 2
56 2
55 2
55 2
54 2
54 2
54 2
54 2
54 2
54 2
54 2
54 2
54 2
53 2
53 2
53 2
52 2
59 2
59 2
59 2
58 2
50 2
19 0
19 0
16 0
17 0
17 0
16 0
16 0
16 0
18 0
19 0
21 0
20 0
20 0
20 0
20 0
20 0
21 0
21 0
21 0
21 0
21 0
21 0
21 0
21 0
21 0
21 0
21 0
21 0
21 0
20 0
18 0
14 0
13 0
10 0
13 0
17 0
17 0
22 0
28 0
44 0
50 0
50 0
50 0
50 0
48 0
47 0
45 0
45 0
45 0
45 0
45 0
45 0
44 0
44 0
45 0
45 0
46 0
46 0
47 0
47 0
47 0
47 0
47 0
47 0
47 0
47 0
48 0
49 0
49 0
49 0
45 0
41 0
40 0
31 0
28 0
11 0
6 0
6 0
6 0
6 0
6 0
6 0
6 0
6 0
6 0
7 0
7 0
29 0
30 0
31 0
30 0
31 0
31 0
32 0
32 0
32 0
32 0
32 0
32 0
33 0
35 0
38 0
39 0
38 0
38 0
38 0
38 0
38 0
38 0
38 0
38 0
38 0
38 0
38 0
38 0
37 0
36 0
35 0
34 0
34 0
34 0
35 0
33 0
14 0
12 0
11 0
11 0
10 0
11 0
11 0
14 0
34 0
46 0
51 0
51 0
47 0
47 0
45 0
44 0
44 0
44 0
44 0
44 0
44 0
44 0
44 0
44 0
44 0
44 0
44 0
44 0
44 0
44 0
44 0
44 0
43 0
44 0
45 0
46 0
47 0
47 0
46 0
46 0
46 0
45 0
42 0
37 0
13 0
10 0
6 0
6 0
6 0
5 0
5 0
5 0
5 0
5 0
5 0
5 0
5 0
5 0
5 0
5 0
5 0
6 0
6 0
6 0
11 0
12 0
13 0
13 0
13 0
12 0
9 0
9 0
8 0
8 0
8 0
8 0
8 0
8 0
8 0
8 0
8 0
8 0
8 0
8 0
8 0
8 0
9 0
9 0
9 0
9 0
12 0
12 0
12 0
42 0
46 0
46 0
46 0
46 0
46 0
45 0
39 0
39 0
39 0
39 0
39 0
39 0
39 0
39 0
39 0
39 0
39 0
39 0
39 0
39 0
39 0
39 0
39 0
40 0
40 0
40 0
40 0
40 0
39 0
40 0
41 0
40 0
37 0
36 0
32 0
8 0
9 0
10 0
10 0
9 0
9 0
9 0
10 0
14 0
15 0
15 0
17 0
24 0
25 0
26 0
26 0
26 0
26 0
41 0
42 0
48 0
49 0
50 0
50 0
49 0
49 0
49 0
48 0
48 0
48 0
45 0
44 0
45 0
44 0
44 0
44 0
45 0
44 0
45 0
44 0
45 0
44 0
43 0
43 0
40 0
39 0
38 0
31 0
33 2
38 2
37 2
38 2
36 2
36 2
25 2
23 2
18 2
20 2
21 2
21 2
21 2
21 2
22 2
24 2
25 2
25 2
27 2
26 3
24 3
24 4
24 4
23 4
23 4
23 4
23 4
23 4
23 4
23 4
23 4
23 4
22 4
21 4
21 4
20 4
16 2
12 2
14 2
13 2
13 2
13 2
13 2
13 2
12 2
10 2
12 2
12 2
12 2
16 6
17 7
18 6
17 6
17 6
16 6
16 5
16 5
16 5
16 5
15 5
15 5
15 5
15 5
15 5
15 5
15 5
15 5
15 5
15 5
15 5
17 5
17 5
17 5
17 5
15 5
16 5
16 5
17 5
18 5
18 5
17 5
19 5
18 5
37 5
36 4
31 0
30 0
36 4
36 4
36 4
36 4
36 4
36 4
36 4
36 4
36 4
37 4
38 4
38 4
38 4
38 4
39 4
39 4
39 4
39 4
39 4
37 4
37 4
37 4
36 4
36 4
35 4
35 4
34 4
33 4
33 4
33 4
31 4
30 4
12 4
12 4
12 4
12 4
5 0
5 0
5 0
4 0
5 0
5 0
11 2
11 2
11 3
10 3
9 3
8 3
8 3
8 3
8 3
9 3
9 3
9 9
9 9
9 9
9 9
9 9
9 9
10 9
10 9
10 9
10 9
10 9
10 9
10 9
9 9
9 9
19 9
24 9
98 9
100 9
104 9
105 9
105 9
105 9
105 9
105 9
102 6
116 6
135 6
148 6
152 6
154 6
155 6
205 6
205 6
204 6
212 6
214 0
215 0
216 0
216 0
220 0
220 0
235 0
248 1
248 1
248 1
249 1
253 2
252 2
250 2
249 2
238 2
232 2
162 3
172 3
192 3
193 3
195 3
195 3
194 3
190 3
185 3
175 3
150 3
146 3
161 3
158 3
158 3
109 3
108 3
108 3
99 3
108 3
125 3
127 3
126 3
122 3
125 3
242 5
269 5
281 5
281 5
285 5
283 4
285 4
285 4
278 4
277 5
271 5
270 4
266 4
254 4
252 4
251 4
250 4
248 4
248 4
249 4
248 4
247 4
249 4
237 4
236 4
233 4
230 4
228 4
227 4
227 4
219 4
203 4
195 4
190 4
140 3
136 2
44 1
33 1
21 1
17 1
25 2
24 2
24 2
24 2
23 2
22 1
22 1
22 1
22 1
22 1
22 1
22 1
21 1
22 1
22 1
21 1
21 1
20 1
28 2
28 2
29 2
29 2
29 2
29 2
29 2
29 2
29 2
25 2
25 2
25 2
25 2
25 2
25 2
22 2
20 2
19 2
15 1
15 1
15 1
16 1
16 1
16 1
16 1
16 1
16 1
16 1
16 1
16 1
17 1
17 1
18 1
18 1
16 1
16 1
5 0
4 0
4 0
5 0
5 0
6 0
6 0
7 0
7 0
7 0
7 0
8 0
8 0
10 0
10 0
10 0
10 0
10 0
10 0
10 0
10 0
12 0
12 0
12 0
12 0
13 0
13 0
12 0
12 0
12 0
11 0
11 0
9 0
9 0
9 0
9 0
9 0
9 0
9 0
9 0
9 0
8 0
8 0
7 0
7 0
7 0
7 0
6 0
6 0
4 0
4 0
4 0
4 0
4 0
4 0
4 0
6 0
5 0
5 0
5 0
4 0
4 0
4 0
4 0
4 0
4 0
4 0
4 0
5 0
6 0
8 0
8 0
8 0
8 0
8 0
8 0
8 0
8 0
8 0
9 0
9 0
9 0
9 0
9 0
9 0
9 0
9 0
9 0
9 0
9 0
10 0
11 0
9 0
8 0
8 0
9 0
10 0
14 0
17 0
17 1
17 1
17 1
17 1
17 1
20 1
19 1
17 1
17 1
17 1
20 1
20 1
20 1
20 1
20 1
20 1
19 1
19 1
19 1
19 1
19 1
19 1
19 4
19 4
20 4
19 4
25 4
27 4
27 4
27 4
27 4
33 5
34 5
33 5
29 6
30 6
28 5
28 5
28 5
28 5
25 5
24 5
23 5
23 5
24 6
24 6
24 6
24 6
24 6
24 6
25 7
25 7
25 7
25 7
25 7
25 7
25 7
24 7
26 4
26 4
26 4
28 4
21 4
19 4
18 4
18 4
17 3
10 2
12 2
11 2
11 2
9 2
10 2
10 2
10 2
10 2
10 2
10 2
10 2
10 2
9 1
9 1
9 1
9 1
9 1
9 1
8 0
8 0
8 0
8 0
8 0
7 0
7 0
7 0
5 0
4 0
3 0
3 0
3 0
3 0
3 0
4 0
5 0
7 0
5 0
5 0
5 0
4 0
4 0
4 0
4 0
4 0
4 0
4 0
5 0
5 0
5 0
5 0
5 0
5 0
5 0
5 0
5 0
5 0
5 0
5 0
5 0
5 0
6 0
6 0
7 0
7 0
7 0
7 0
7 0
7 0
7 0
6 0
5 0
3 0
3 0
3 0
3 0
3 0
3 0
3 0
3 0
2 0
2 0
2 0
2 0
2 0
2 0
2 0
2 0
2 0
2 0
3 0
3 0
3 0
4 0
4 0
4 0
3 0
2 0
2 0
2 0
2 0
2 0
2 0
2 0
2 0
2 0
2 0
2 0
2 0
2 0
3 0
3 0
3 0
3 0
3 0
4 0
4 0
4 0
4 0
4 0
4 0
4 0
4 0
4 0
4 0
5 0
4 0
4 0
3 0
3 0
3 0
3 1
3 1
7 1
7 1
7 1
7 1
7 1
7 1
7 1
7 1
7 1
7 1
7 1
7 1
7 1
6 1
6 1
6 1
6 1
5 1
5 1
5 1
5 1
5 1
5 1
5 1
5 1
5 1
5 1
5 1
4 1
4 1
3 1
3 1
3 1
3 1
2 0
2 0
0 0
0 0
0 0
0 0
1 0
1 0
1 0
1 0
1 0
1 0
1 0
1 0
1 0
1 0
1 0
1 0
1 0
1 0
1 0
1 0
1 0
1 0
1 0
1 0
1 0
1 0
1 0
2 0
2 0
2 0
2 0
2 0
2 0
2 0
2 0
2 0
2 0
2 0
2 0
3 0
2 0
2 0
3 0
4 0
4 0
4 0
4 0
4 0
4 0
4 0
4 0
4 0
4 0
4 0
4 0
4 0
7 0
7 0
7 0
7 0
7 0
6 0
6 0
6 0
6 0
6 0
6 0
7 0
7 0
8 0
8 0
8 0
8 0
15 0
15 0
16 0
20 0
21 0
27 0
27 0
27 0
28 0
28 0
28 0
28 0
28 0
28 0
28 0
27 0
27 0
27 0
27 0
25 0
25 0
25 0
26 0
28 0
28 0
29 0
29 0
31 0
30 0
28 0
28 0
28 0
24 0
24 0
24 0
24 0
21 0
21 0
19 0
15 0
15 0
7 0
7 0
7 0
7 0
7 0
7 0
7 0
7 0
7 0
7 0
7 0
7 0
7 0
7 0
8 0
9 0
9 0
8 0
6 0
6 0
5 0
5 0
3 0
3 0
3 0
3 0
3 0
3 0
3 0
5 0
5 0
7 0
16 0
67 0
79 0
80 0
80 0
80 0
80 0
80 0
80 0
80 0
80 0
80 0
80 0
80 0
80 0
80 0
80 0
80 0
78 0
78 0
78 2
78 2
78 2
78 2
78 2
78 2
78 2
78 2
78 2
77 2
77 2
72 2
67 2
64 2
62 2
53 0
32 0
6 0
4 0
4 0
4 0
5 0
5 0
5 0
5 0
5 0
5 0
5 0
5 0
5 0
5 0
5 0
5 0
5 0
5 0
5 0
5 0
5 0
5 0
5 0
5 0
5 0
5 0
5 0
5 0
5 0
4 0
4 0
3 0
3 0
3 0
2 0
2 0
1 0
1 0
1 0
1 0
0 1
1 1
1 1
1 1
1 1
1 1
1 1
1 1
1 1
2 1
2 1
3 1
3 1
3 1
3 1
3 1
3 1
3 1
3 1
3 1
3 1
3 1
3 1
3 1
3 1
3 1
3 1
3 1
3 1
3 1
3 2
3 2
3 2
3 2
3 2
3 2
3 1
2 1
2 1
2 1
2 1
1 1
1 1
2 1
2 1
2 1
2 1
1 1
1 1
1 1
1 1
1 1
1 1
1 1
1 1
1 1
1 1
3 1
3 1
3 1
3 1
3 1
3 1
3 1
3 1
3 1
3 0
4 0
4 0
4 0
4 0
4 0
4 0
4 0
4 0
4 0
4 0
4 0
4 0
3 0
3 0
3 1
3 1
3 1
3 2
3 2
3 2
3 2
3 2
3 2
3 2
3 2
3 2
1 2
1 2
1 2
1 2
54 2
59 2
60 2
66 2
75 2
77 2
81 2
88 2
94 2
95 2
95 2
95 2
95 2
96 2
97 2
97 2
97 2
97 2
97 2
97 2
97 1
97 1
97 1
98 0
98 0
98 0
98 0
98 0
98 0
98 0
98 0
98 0
98 0
98 0
97 0
104 0
58 0
64 0
66 0
61 0
53 0
52 0
46 0
39 0
37 0
37 0
37 0
37 0
36 0
35 0
35 0
35 0
35 0
36 0
36 0
37 0
37 0
37 0
37 0
37 0
37 0
38 0
49 0
56 0
56 0
56 0
56 0
56 0
54 0
53 0
54 0
56 0
51 0
40 0
38 0
38 0
37 0
43 0
43 0
44 0
44 0
47 0
48 0
49 0
49 0
52 0
52 0
52 0
55 0
55 0
55 0
55 0
55 0
54 0
54 0
53 0
50 0
45 0
43 0
39 0
39 0
39 0
38 0
38 0
38 0
37 0
35 0
29 0
26 0
25 0
25 0
24 0
23 0
17 0
17 0
16 0
17 0
16 0
15 0
14 0
14 0
12 0
11 0
9 0
10 0
10 0
10 0
8 0
8 0
8 0
7 0
6 0
6 0
6 0
7 0
8 0
8 0
7 0
7 0
7 0
7 0
7 0
7 0
7 0
7 0
7 0
7 0
7 0
7 0
7 0
7 0
7 0
7 0
6 0
6 0
6 0
6 0
6 0
6 0
6 0
5 0
5 0
5 0
5 0
5 0
5 0
4 0
6 0
6 0
6 0
5 0
5 0
5 0
5 0
5 0
5 0
5 0
5 0
5 0
5 0
5 0
5 0
5 0
5 0
5 0
5 0
5 0
5 0
4 0
4 0
4 0
4 0
4 0
4 0
4 0
4 0
4 0
4 0
4 0
4 0
2 0
2 0
2 0
2 0
2 0
2 0
2 0
1 0
1 0
1 0
1 0
1 0
1 0
1 0
3 0
4 0
6 0
6 0
6 0
6 0
6 0
6 0
6 0
5 0
5 0
5 0
5 0
5 0
5 0
5 0
5 0
5 0
5 0
5 0
5 0
5 0
5 0
5 0
5 0
5 0
5 0
5 0
5 0
5 0
5 1
5 1
5 1
5 1
5 1
5 1
4 1
2 1
1 1
1 1
1 1
1 1
1 1
3 1
3 1
3 2
4 2
5 2
7 2
7 2
7 2
7 2
8 2
8 2
9 2
10 2
10 2
10 2
10 2
10 2
10 2
10 2
10 1
10 1
12 1
12 1
12 0
12 0
12 0
12 0
12 0
11 0
11 0
11 0
11 0
11 0
12 0
12 0
13 0
12 2
12 2
12 2
10 3
10 3
8 3
8 3
8 3
8 3
7 3
8 3
7 3
9 3
9 3
9 3
9 3
9 3
9 3
9 3
9 3
9 3
7 3
7 3
7 3
7 3
7 3
7 3
7 3
7 3
7 3
7 5
7 5
7 5
6 5
6 5
5 5
4 3
4 3
4 3
5 2
5 4
5 4
5 4
5 4
5 6
4 6
4 6
4 6
1 6
1 6
1 8
1 8
1 8
1 8
1 8
2 8
11 12
11 14
11 16
12 16
12 18
13 20
13 20
13 22
13 22
14 23
15 22
15 22
17 22
17 22
17 22
17 22
17 24
18 26
18 27
17 27
17 27
17 26
25 26
28 23
29 22
29 22
29 22
29 22
29 22
29 22
29 21
29 21
29 21
29 19
29 19
27 19
18 11
18 10
18 10
18 10
18 10
18 10
18 10
18 8
18 8
20 7
24 7
25 7
24 7
24 7
24 7
25 5
25 4
25 2
27 0
30 0
30 0
27 0
22 0
21 0
21 0
21 0
21 0
21 0
21 0
21 1
22 1
23 3
23 3
24 3
24 3
24 3
24 3
24 3
24 3
24 3
24 3
24 3
24 3
24 4
22 4
19 4
13 4
12 4
12 4
12 4
12 4
11 4
11 4
11 4
9 4
5 4
5 4
5 4
4 4
3 4
3 4
3 4
3 4
3 3
3 3
3 3
2 3
1 1
1 1
0 1
0 1
0 1
0 1
0 1
0 1
0 1
1 1
1 1
1 2
1 4
1 4
1 4
1 4
1 4
1 4
1 4
1 4
1 4
1 4
1 4
1 4
1 4
1 4
1 4
2 5
2 5
2 5
2 5
2 5
2 5
2 5
2 5
2 5
2 5
2 5
2 5
2 5
2 5
2 5
2 5
2 5
2 5
1 2
1 2
1 2
1 1
2 1
3 1
3 1
3 1
3 1
3 1
3 1
3 1
3 1
3 1
3 1
3 1
3 1
3 1
3 0
3 0
3 0
3 0
3 0
3 0
3 0
3 1
3 1
3 1
3 2
2 2
2 2
2 3
2 3
2 3
2 3
2 3
2 3
3 3
3 3
4 3
3 3
3 3
3 3
3 3
3 3
3 3
3 3
3 3
3 3
3 3
3 3
3 3
3 3
3 3
2 5
2 4
2 4
2 4
2 4
2 4
2 4
2 4
2 4
2 4
3 3
3 3
3 2
3 2
3 2
3 2
3 2
3 2
4 2
5 2
6 2
5 2
5 2
5 2
5 2
5 2
5 2
5 2
5 2
5 1
5 0
5 0
5 0
5 0
5 0
5 0
5 0
5 0
5 0
5 0
5 0
5 0
5 1
5 1
4 1
4 1
4 1
4 1
4 1
4 1
4 1
3 1
3 1
3 1
2 2
0 2
0 2
0 2
0 2
0 2
0 2
0 2
0 2
0 2
0 2
0 2
0 2
1 2
1 2
1 2
1 2
1 2
1 2
1 2
1 2
1 1
1 1
1 1
1 1
1 1
1 1
4 1
6 1
8 1
10 1
10 1
10 1
10 1
10 1
10 2
10 1
10 1
10 1
11 1
12 2
12 2
12 2
12 2
12 2
12 2
11 2
11 2
11 2
11 2
11 2
11 2
11 2
11 2
11 2
11 2
11 2
11 2
11 2
11 2
10 2
10 2
10 2
8 2
6 2
3 2
2 2
2 2
2 2
2 2
2 2
2 1
2 1
2 1
2 1
1 1
0 0
0 0
0 0
0 0
0 1
0 1
0 1
0 1
0 1
0 1
0 1
0 1
0 1
0 1
0 1
0 1
0 1
0 1
0 1
1 1
1 1
1 1
1 1
1 1
1 1
1 1
1 1
1 1
1 1
1 1
1 1
1 1
1 1
1 1
1 1
1 2
1 2
1 2
1 2
1 2
1 1
1 1
1 1
1 1
3 1
4 1
4 1
4 1
4 1
4 1
4 1
4 1
4 1
4 3
4 3
5 3
5 3
5 3
5 3
5 4
5 4
5 4
5 4
5 4
5 4
5 4
5 4
5 4
5 3
5 3
5 3
5 3
5 3
5 3
5 3
4 3
4 3
4 3
4 3
4 3
3 3
2 3
2 3
2 3
4 3
5 3
6 4
6 4
6 4
6 2
6 2
4 1
4 1
4 1
4 1
4 1
4 1
4 1
4 1
4 1
4 1
4 1
4 1
4 1
5 1
5 1
5 1
5 1
5 1
5 1
5 2
5 2
5 2
5 2
5 2
5 3
5 3
5 3
5 3
5 3
3 3
2 2
1 2
1 2
1 2
1 2
1 2
1 2
1 2
1 2
1 2
1 2
1 2
1 2
1 2
1 2
1 2
1 2
1 2
1 2
0 2
0 2
0 2
0 2
0 2
0 2
0 1
0 1
0 1
0 1
0 1
0 0
0 0
0 0
0 0
0 0
0 0
0 0
0 0
0 0
0 0
0 0
0 0
0 0
0 0
0 0
0 0
0 0
0 0
0 0
0 0
0 0
0 0
0 0
0 0
0 0
0 0
0 0
1 0
1 0
1 0
1 1
1 1
1 1
1 1
1 1
1 1
1 1
1 1
1 1
1 1
1 1
1 1
1 1
1 1
1 1
1 1
1 1
1 1
1 1
1 1
1 1
1 1
1 1
1 1
1 1
1 1
1 1
1 1
1 1
1 1
1 1
1 1
1 1
0 1
0 1
0 1
0 0
0 0
0 0
0 0
1 0
2 0
2 0
2 0
2 0
2 0
3 0
3 0
3 0
3 0
3 0
3 0
3 0
3 0
3 0
3 0
3 0
3 0
3 0
3 0
3 1
3 1
3 1
3 1
3 1
3 1
3 1
3 1
3 1
3 1
3 1
3 1
2 1
2 1
2 1
2 1
3 1
2 1
2 1
2 1
1 1
1 1
1 1
1 1
1 1
1 1
1 1
1 1
1 1
1 1
1 1
1 1
1 1
1 1
1 1
1 1
1 0
1 0
1 0
1 0
1 0
1 0
1 0
1 0
1 0
1 0
1 0
1 0
1 0
1 0
1 0
1 0
0 0
0 0
0 0
0 0
0 0
0 0
0 0
0 0
0 0
0 0
0 0
0 0
0 0
0 0
0 0
0 0
0 0
0 0
0 0
0 0
0 0
0 0
0 0
0 0
0 0
0 0
0 0
0 0
0 0
0 0
0 0
0 1
0 2
0 2
0 2
0 2
0 2
0 2
0 2
0 2
0 2
1 2
1 2
1 2
1 2
2 2
2 2
2 2
2 2
2 3
2 3
2 3
2 3
2 3
2 3
2 3
2 3
2 3
2 3
2 3
2 3
2 3
2 3
2 3
2 3
2 3
2 4
2 3
2 2
2 2
2 2
2 2
2 2
2 2
2 2
2 2
2 2
1 2
1 2
1 2
0 2
0 2
0 2
0 2
0 2
0 1
0 1
0 1
0 1
0 1
0 1
0 1
0 1
0 1
0 1
0 1
0 1
0 1
0 1
0 1
0 1
0 2
0 1
0 1
0 1
0 1
0 1
0 3
0 3
0 3
0 3
0 3
0 3
0 3
0 3
0 3
0 3
0 3
0 3
1 3
2 3
2 3
2 3
2 3
2 3
2 3
2 3
2 3
2 3
2 3
2 3
2 3
2 3
2 3
2 4
2 4
2 4
2 3
2 3
2 3
2 3
2 3
2 3
2 1
2 1
2 1
2 1
2 1
2 1
2 1
2 1
2 1
2 1
2 1
1 1
0 1
0 1
0 1
0 1
0 1
0 1
0 1
0 1
0 1
0 1
0 1
0 1
0 1
0 1
0 1
0 0
0 0
0 0
0 0
0 0
0 0
0 0
1 0
1 0
1 0
1 2
1 3
1 3
1 3
1 3
1 3
1 3
1 3
1 3
1 3
1 3
1 3
1 3
1 3
1 3
1 3
1 3
1 3
1 4
1 4
1 4
1 4
1 4
1 4
1 4
1 4
1 4
1 4
1 4
1 4
1 4
1 4
1 4
0 4
0 4
0 4
0 1
0 1
0 1
0 1
0 1
0 1
0 1
0 1
0 1
0 1
0 1
0 1
0 1
0 1
0 1
0 2
0 2
0 2
0 1
0 1
0 1
0 1
0 1
0 1
0 1
0 1
0 1
0 1
0 1
0 1
0 1
0 1
0 1
0 1
0 1
0 1
0 1
0 1
0 1
0 1
0 1
0 1
0 1
0 1
0 1
0 1
0 1
0 1
0 1
0 1
0 1
0 0
0 0
0 0
0 0
0 0
0 0
0 0
0 0
0 1
0 1
0 1
0 1
1 3
1 3
1 3
1 3
1 3
1 3
1 3
1 3
1 3
1 3
1 3
1 3
1 3
1 3
1 3
1 3
1 3
1 3
1 3
1 3
1 3
1 3
1 3
1 3
1 3
1 3
1 3
3 3
3 3
3 3
3 3
3 3
3 2
3 2
3 2
3 2
2 0
2 0
4 0
4 0
4 1
4 1
4 1
4 1
4 1
4 1
4 1
4 1
4 1
4 1
4 1
4 1
4 1
4 1
4 1
4 1
4 1
4 1
4 1
4 1
4 1
3 1
3 1
2 1
1 1
0 1
0 1
0 1
0 1
0 1
0 1
0 1
0 3
0 3
0 3
0 2
0 2
0 2
0 2
0 3
0 3
0 5
0 5
0 5
0 5
0 5
0 5
0 5
0 5
0 5
0 5
0 6
0 6
0 6
0 6
1 6
1 6
1 6
1 6
1 6
1 6
1 6
1 6
1 6
1 6
1 6
1 6
1 5
1 4
1 4
1 4
1 4
1 4
1 4
1 4
1 3
1 3
1 1
1 1
1 1
1 1
1 1
1 2
1 2
1 2
1 2
1 2
1 1
1 1
1 1
1 4
0 4
0 4
0 4
0 4
0 4
0 4
0 4
0 4
0 4
0 4
0 4
0 4
0 4
0 4
0 4
0 4
0 4
0 4
0 4
0 4
0 4
0 4
0 4
0 4
0 4
0 4
0 4
1 3
1 3
1 3
1 3
1 3
1 3
1 3
1 3
1 0
1 0
1 0
1 0
1 0
1 4
1 4
1 4
1 4
1 4
1 4
1 4
1 4
1 4
1 4
1 4
1 4
1 4
1 4
1 4
1 4
1 4
1 4
1 4
1 4
1 4
1 4
1 4
0 4
0 4
0 5
1 8
1 8
1 8
1 8
2 8
2 8
2 8
2 8
2 8
2 8
2 4
2 4
2 4
3 4
5 4
6 7
6 7
6 7
6 7
6 7
5 7
5 7
5 7
5 7
5 7
5 7
5 7
5 7
5 7
5 7
6 7
6 6
6 6
6 6
6 6
6 6
5 3
5 3
5 3
5 3
5 3
5 3
5 3
5 3
5 3
5 3
5 3
5 3
5 3
4 3
2 2
1 0
1 0
1 0
1 0
1 0
1 0
1 0
3 0
4 0
4 0
4 0
4 0
4 0
4 0
4 0
3 0
3 0
3 0
3 0
3 0
3 0
3 0
4 0
4 0
4 0
4 0
4 0
4 0
4 0
4 0
4 0
4 0
4 0
4 0
4 0
4 0
4 0
4 1
4 1
4 2
4 5
4 5
3 5
1 5
1 5
1 5
1 5
1 5
1 5
1 5
1 5
1 5
2 5
2 5
2 5
2 5
2 5
2 5
1 5
1 6
1 6
1 6
1 6
1 6
1 6
1 6
1 6
3 7
3 7
3 7
3 7
3 7
3 7
3 6
3 5
3 4
3 2
3 2
3 2
3 2
3 2
3 2
3 2
3 2
3 2
3 2
3 2
2 2
2 2
2 2
2 2
4 2
4 2
4 2
4 2
4 1
4 1
4 1
3 1
3 1
3 1
3 1
3 1
2 0
3 0
3 0
3 0
3 0
3 0
3 0
3 0
3 0
3 0
3 0
3 0
3 0
3 0
3 0
3 0
3 0
3 0
3 0
3 0
3 0
2 0
2 0
2 0
1 0
1 0
1 0
1 0
1 0
1 0
1 0
1 0
1 0
1 0
1 0
1 0
1 0
0 0
0 0
0 0
0 0
0 0
0 0
0 0
0 0
0 0
0 0
0 0
0 0
0 0
0 0
0 0
0 0
0 0
0 0
0 0
0 0
0 0
0 0
0 0
0 0
0 0
0 0
0 0
0 0
0 0
0 0
0 0
0 0
0 0
0 0
0 0
0 0
0 0
0 0
1 0
1 0
1 0
2 0
2 0
2 0
2 0
2 0
2 0
2 0
2 0
2 0
2 0
2 0
2 0
3 0
3 0
3 0
3 0
3 0
3 0
4 1
4 1
4 1
4 1
4 1
4 1
4 1
4 1
4 1
4 1
3 1
3 1
3 1
3 1
3 1
2 1
2 1
2 1
1 1
1 1
1 1
1 1
1 1
1 1
1 1
1 1
1 1
1 1
1 1
1 1
1 1
1 1
1 1
1 1
1 1
1 1
0 0
0 0
0 0
0 0
0 0
0 0
0 0
5 1
5 1
5 1
5 1
5 1
5 1
5 1
5 1
5 1
5 1
5 1
5 1
5 1
5 1
5 1
5 1
5 1
5 1
5 1
5 1
5 1
5 1
5 1
5 1
5 1
5 1
5 1
5 1
5 1
5 2
5 3
5 3
5 3
5 3
5 3
5 2
0 2
0 2
0 2
0 2
0 2
0 2
0 2
0 2
0 2
0 2
0 2
0 2
0 2
0 3
0 3
0 3
0 3
0 3
0 3
0 3
0 3
0 3
0 3
0 3
0 3
0 3
0 3
0 3
0 3
0 2
0 1
0 1
0 1
0 1
0 1
0 1
0 1
0 1
0 1
0 1
0 1
0 1
0 1
0 1
0 1
0 1
0 1
0 1
0 1
0 0
0 0
0 0
0 0
0 0
0 0
0 0
0 0
0 0
0 0
0 0
0 0
0 0
0 0
0 0
0 0
0 0
0 0
0 0
0 1
0 1
0 1
0 1
0 1
0 1
0 1
0 1
0 1
0 1
0 1
0 1
0 1
0 1
0 1
0 1
0 1
0 1
0 1
0 1
0 1
0 1
0 1
1 1
1 1
1 1
1 1
1 1
1 1
1 1
1 1
1 1
1 1
1 1
1 1
1 1
1 0
1 0
1 0
1 0
1 0
1 0
1 0
1 0
1 0
1 0
1 0
1 0
1 0
1 0
1 0
1 0
1 0
1 0
1 0
1 0
1 0
0 0
0 0
0 0
0 0
0 0
0 0
0 0
0 0
0 0
0 0
0 0
0 0
0 0
0 0
0 0
0 0
0 0
0 0
0 0
0 0
0 0
0 0
0 0
0 0
0 0
0 0
0 0
0 0
0 0
0 0
0 0
0 0
0 0
0 0
0 0
0 0
0 0
0 0
0 0
0 0
0 0
0 0
0 0
0 0
0 0
0 0
0 0
0 0
0 0
0 0
0 0
0 0
0 0
0 0
0 0
0 0
0 0
0 0
0 0
0 0
0 0
0 0
0 0
0 0
0 0
0 0
0 0
0 0
0 0
0 0
0 0
0 0
0 0
0 0
0 0
0 0
0 0
0 0
0 0
0 0
0 0
0 0
0 0
0 0
0 0
0 0
0 0
0 0
0 0
0 0
0 0
0 0
0 0
1 0
1 0
1 0
1 0
1 0
1 0
1 0
1 0
1 0
1 0
1 0
1 0
1 0
1 0
1 0
1 0
1 0
1 0
1 0
1 0
1 0
1 0
1 0
1 0
1 0
1 0
1 0
1 0
1 0
1 0
1 0
1 0
1 0
1 0
1 0
1 0
0 0
0 0
0 0
0 0
0 0
0 0
0 0
0 0
0 0
0 0
0 0
0 0
0 0
0 0
0 0
0 0
0 0
0 0
0 0
0 0
1 0
1 0
1 0
1 0
1 0
1 0
1 0
1 0
1 0
1 1
2 1
2 1
2 1
2 1
2 1
2 1
2 1
2 1
2 1
2 1
2 1
2 1
2 1
2 1
2 1
2 1
2 1
2 1
2 1
2 1
2 1
2 1
2 1
2 1
2 1
2 1
1 1
1 1
1 1
1 1
1 1
1 1
1 2
1 2
1 2
1 2
0 2
0 2
0 2
0 2
0 2
0 2
0 2
0 2
0 2
0 2
0 2
0 2
0 2
0 2
0 2
0 2
0 2
0 2
0 2
0 2
0 2
0 2
0 2
0 2
0 2
0 2
0 1
0 1
1 1
1 1
1 1
1 1
1 1
1 1
1 1
1 0
1 0
1 0
1 0
1 0
1 0
1 0
1 0
1 0
1 0
1 0
1 0
1 0
1 0
1 0
1 0
1 0
1 0
1 0
1 0
1 0
1 0
1 0
1 0
1 0
0 0
0 0
1 0
1 0
1 0
1 0
1 0
1 0
1 0
1 0
1 0
1 0
1 0
1 0
1 0
1 0
1 0
1 0
1 0
1 0
1 0
1 0
1 0
1 0
1 0
1 0
1 0
1 0
1 0
1 0
1 0
1 0
1 0
1 0
1 0
1 0
1 0
1 0
0 0
0 0
0 0
0 0
0 0
0 0
0 0
0 0
0 0
0 0
0 0
0 0
0 0
0 0
0 0
0 0
0 0
0 0
0 0
0 0
0 0
0 0
0 0
0 0
0 0
0 0
0 0
0 0
0 0
0 0
0 0
0 0
0 0
0 0
0 0
0 0
0 0
0 0
0 0
0 0
0 0
0 0
0 0
0 0
0 0
0 0
0 0
0 0
0 0
0 0
0 0
0 0
0 0
0 0
0 0
0 0
0 0
0 0
0 0
0 0
0 0
0 0
0 0
0 0
0 0
0 0
0 0
0 0
0 0
0 0
0 0
0 0
0 0
0 0
0 0
0 0
0 0
0 0
0 0
0 0
0 0
0 0
0 0
0 0
0 0
0 0
0 0
0 0
0 0
0 0
0 0
0 0
0 0
1 0
1 0
1 0
1 0
1 0
1 0
1 0
1 1
1 1
1 1
1 1
1 1
1 1
1 1
1 1
0 1
0 1
0 1
0 1
0 1
0 1
0 1
0 1
0 1
0 1
0 1
0 1
0 1
0 1
0 1
0 1
0 1
0 1
1 1
1 1
1 1
1 1
1 1
1 1
1 1
1 1
1 1
1 1
1 0
1 0
1 0
1 0
1 0
1 0
1 0
1 0
1 0
2 0
2 0
2 0
2 0
2 0
2 0
2 0
2 0
2 0
2 0
2 0
2 0
2 0
2 0
2 0
2 0
2 0
1 0
1 0
1 0
1 0
1 0
1 0
1 0
1 0
1 0
1 0
1 0
1 0
1 0
1 0
1 0
1 0
1 0
0 0
0 0
0 0
0 0
2 0
2 0
2 0
3 0
3 0
4 0
4 0
4 0
5 0
5 0
5 0
5 0
5 0
5 0
5 0
4 0
4 0
4 0
4 0
4 0
4 0
3 0
3 0
3 0
3 0
3 0
3 0
3 0
3 0
3 0
2 0
2 0
2 0
2 0
2 0
2 0
2 0
2 0
2 0
2 0
2 0
1 0
1 0
0 0
0 0
0 0
0 0
0 0
0 0
0 0
0 0
0 0
0 0
0 0
0 0
0 0
1 0
2 0
5 0
5 0
5 0
5 0
5 0
5 0
5 0
5 0
5 0
5 0
5 0
5 0
5 0
5 0
5 0
5 0
5 0
5 0
5 0
5 0
5 0
5 0
5 0
5 0
5 0
5 0
5 0
5 0
5 0
5 0
5 0
5 0
5 0
4 0
4 0
2 0
0 0
0 0
0 0
0 0
0 0
0 0
0 0
0 0
0 0
0 0
0 0
0 0
0 0
0 0
0 0
0 0
0 0
0 0
0 0
0 0
0 0
0 0
0 0
0 0
0 0
0 0
0 0
0 0
0 0
0 0
0 0
0 0
0 0
0 0
0 0
0 0
0 0
0 0
0 0
0 0
0 0
0 0
0 0
0 0
0 0
0 0
0 0
0 0
0 0
0 0
0 0
0 0
0 0
0 0
0 0
0 0
0 0
0 0
0 0
0 0
0 0
0 0
0 0
0 0
0 0
0 0
0 0
0 0
0 0
0 0
0 0
0 0
0 0
0 0
0 0
0 0
0 0
0 0
0 0
0 0
0 0
0 0
0 0
0 0
0 0
0 0
0 0
0 0
0 0
0 0
0 0
0 0
0 0
0 0
0 0
0 0
0 0
0 0
0 0
0 0
0 0
0 0
0 0
0 0
0 0
0 0
0 0
0 0
0 0
0 0
0 0
0 0
0 0
0 0
0 0
0 0
0 0
0 0
0 0
0 0
0 0
0 0
0 0
0 0
0 0
0 0
0 0
0 0
0 0
0 0
0 0
0 0
0 0
0 0
0 0
0 0
0 0
0 0
0 0
0 0
0 0
0 0
0 0
0 0
0 0
0 0
0 0
0 0
0 0
0 0
0 0
0 0
0 0
0 0
0 0
0 0
0 0
0 0
0 0
0 0
0 0
0 0
0 0
0 0
0 0
0 0
0 0
0 0
0 0
0 0
0 0
0 0
0 0
0 0
0 0
0 0
0 0
0 0
0 0
0 0
0 0
0 0
0 0
0 0
0 0
0 0
0 0
0 0
0 0
0 0
0 0
0 0
0 0
0 0
0 0
0 0
0 0
0 0
0 0
0 0
0 0
0 0
0 0
0 0
0 0
0 0
0 0
0 0
0 0
0 0
0 0
0 0
0 0
0 0
0 0
0 0
0 0
0 0
0 0
0 0
0 0
0 0
0 0
0 0
0 0
0 0
0 0
0 0
0 0
0 0
0 0
0 0
0 0
0 0
0 0
0 0
0 0
0 0
0 0
0 0
0 0
0 0
0 0
0 0
0 0
0 0
0 0
0 0
0 0
0 0
0 0
0 0
0 0
0 0
0 0
0 0
0 0
0 0
0 0
0 0
0 0
0 0
0 0
0 0
0 0
0 0
0 0
0 0
0 0
0 0
0 0
0 0
0 0
0 0
0 0
0 0
0 0
0 0
0 0
0 0
0 0
0 0
0 0
0 0
0 0
0 0
0 0
0 0
0 0
0 0
0 0
0 0
0 0
0 0
0 0
0 0
0 0
0 0
0 0
0 0
0 0
0 0
0 0
0 0
0 0
0 0
0 0
0 0
0 0
0 0
0 0
0 0
0 0
0 0
0 0
0 0
0 0
0 0
0 0
0 0
0 0
0 0
0 0
0 0
0 0
0 0
0 0
0 0
0 0
0 0
0 0
0 0
0 0
0 0
0 0
0 0
0 0
0 0
0 0
0 0
0 0
0 0
0 0
0 0
0 0
0 0
0 0
0 0
0 0
0 0
0 0
0 0
0 0
0 0
0 0
0 0
0 0
0 0
0 0
0 0
0 0
0 0
0 0
0 0
0 0
0 0
0 0
0 0
0 0
0 0
0 0
0 0
0 0
0 0
0 0
0 0
0 0
0 0
0 0
0 0
0 0
0 0
0 0
0 0
0 0
0 0
0 0
0 0
0 0
0 0
0 0
0 0
0 0
0 0
0 0
0 0
0 0
0 0
0 0
0 0
0 0
0 0
0 0
0 0
0 0
0 0
0 0
0 0
0 0
0 0
0 0
0 0
0 0
0 0
0 0
0 0
0 0
0 0
0 0
0 0
0 0
0 0
0 0
0 0
0 0
0 0
0 0
0 0
0 0
0 0
0 0
0 0
0 0
0 0
0 0
0 0
0 0
0 0
0 0
0 0
0 0
0 0
0 0
0 0
0 0
0 0
0 0
0 0
0 0
0 0
0 0
0 0
0 0
0 0
0 0
0 0
0 0
0 0
0 0
0 0
0 0
0 0
0 0
0 0
0 0
0 0
0 0
0 0
0 0
0 0
0 0
0 0
0 0
0 0
0 0
0 0
0 0
0 0
0 0
0 0
0 0
0 0
0 0
0 0
0 0
0 0
0 0
0 0
0 0
0 0
0 0
0 0
0 0
0 0
0 0
0 0
0 0
0 0
0 0
0 0
0 0
0 0
0 0
0 0
0 0
0 0
0 0
0 0
0 0
0 0
0 0
0 0
0 0
0 0
0 0
0 0
0 0
0 0
0 0
0 0
0 0
0 0
0 0
0 0
0 0
0 0
0 0
0 0
0 0
0 0
0 0
0 0
0 0
0 0
0 0
0 0
0 0
0 0
0 0
0 0
0 0
0 0
0 0
0 0
0 0
0 0
0 0
0 0
0 0
0 0
0 0
0 0
0 0
0 0
0 0
0 0
0 0
0 0
0 0
0 0
0 0
0 0
0 0
0 0
0 0
0 0
0 0
0 0
0 0
0 0
0 0
0 0
0 0
0 0
0 0
0 0
0 0
0 0
0 0
0 0
0 0
0 0
0 0
0 0
0 0
0 0
0 0
0 0
0 0
0 0
0 0
0 0
0 0
0 0
0 0
0 0
0 0
0 0
0 0
0 0
0 0
0 0
0 0
0 0
0 0
0 0
0 0
0 0
0 0
0 0
0 0
0 0
0 0
0 0
0 0
0 0
0 0
0 0
0 0
0 0
0 0
0 0
0 0
0 0
0 0
0 0
0 0
0 0
0 0
0 0
0 0
0 0
0 0
0 0
0 0
0 0
0 0
0 0
0 0
0 0
0 0
0 0
0 0
0 0
0 0
0 0
0 0
0 0
0 0
0 0
0 0
0 0
0 0
0 0
0 0
0 0
0 0
0 0
0 0
0 0
0 0
0 0
0 0
0 0
0 0
0 0
0 0
0 0
0 0
0 0
0 0
0 0
0 0
0 0
0 0
0 0
0 0
0 0
0 0
0 0
0 0
0 0
0 0
0 0
0 0
0 0
0 0
0 0
0 0
0 0
0 0
0 0
0 0
0 0
0 0
0 0
0 0
0 0
0 0
0 0
0 0
0 0
0 0
0 0
0 0
0 0
0 0
0 0
0 0
0 0
0 0
0 0
0 0
0 0
0 0
0 0
0 0
0 0
0 0
0 0
0 0
0 0
0 0
0 0
0 0
0 0
0 0
0 0
0 0
0 0
0 0
0 0
0 0
0 0
0 0
0 0
0 0
0 0
0 0
0 0
0 0
0 0
0 0
0 0
0 0
0 0
0 0
0 0
0 0
0 0
0 0
0 0
0 0
0 0
0 0
0 0
0 0
0 0
0 0
0 0
0 0
0 0
0 0
0 0
0 0
0 0
0 0
0 0
0 0
0 0
0 0
0 0
0 0
0 0
0 0
0 0
0 0
0 0
0 0
0 0
0 0
0 0
0 0
0 0
0 0
0 0
0 0
0 0
0 0
0 0
0 0
0 0
0 0
0 0
0 0
0 0
0 0
0 0
0 0
0 0
0 0
0 0
0 0
0 0
0 0
0 0
0 0
0 0
0 0
0 0
0 0
0 0
0 0
0 0
0 0
0 0
0 0
0 0
0 0
0 0
0 0
0 0
0 0
0 0
0 0
0 0
0 0
0 0
0 0
0 0
0 0
0 0
0 0
0 0
0 0
0 0
0 0
0 0
0 0
0 0
0 0
0 0
0 0
0 0
0 0
0 0
0 0
0 0
0 0
0 0
0 0
0 0
0 0
0 0
0 0
0 0
0 0
0 0
0 0
0 0
0 0
0 0
0 0
0 0
0 0
0 0
0 0
0 0
0 0
0 0
0 0
0 0
0 0
0 0
0 0
0 0
0 0
0 0
0 0
0 0
0 0
0 0
0 0
0 0
0 0
0 0
0 0
0 0
0 0
0 0
0 0
0 0
0 0
0 0
0 0
0 0
0 0
0 0
0 0
0 0
0 0
0 0
0 0
0 0
0 0
0 0
0 0
0 0
0 0
0 0
0 0
0 0
0 0
0 0
0 0
0 0
0 0
0 0
0 0
0 0
0 0
0 0
0 0
0 0
0 0
0 0
0 0
0 0
0 0
0 0
0 0
0 0
0 0
0 0
0 0
0 0
0 0
0 0
0 0
0 0
0 0
0 0
0 0
0 0
0 0
0 0
0 0
0 0
0 0
0 0
0 0
0 0
0 0
0 0
0 0
0 0
0 0
0 0
0 0
0 0
0 0
0 0
0 0
0 0
0 0
0 0
0 0
0 0
0 0
0 0
0 0
0 0
0 0
0 0
0 0
0 0
0 0
0 0
0 0
0 0
0 0
0 0
0 0
0 0
0 0
0 0
0 0
0 0
0 0
0 0
0 0
0 0
0 0
0 0
0 0
0 0
0 0
0 0
0 0
0 0
0 0
0 0
0 0
0 0
0 0
0 0
0 0
0 0
0 0
0 0
0 0
0 0
0 0
0 0
0 0
0 0
0 0
0 0
0 0
0 0
0 0
0 0
0 0
0 0
0 0
0 0
0 0
0 0
0 0
0 0
0 0
0 0
0 0
0 0
0 0
0 0
0 0
0 0
0 0
0 0
0 0
0 0
0 0
0 0
0 0
0 0
0 0
0 0
0 0
0 0
0 0
0 0
0 0
0 0
0 0
0 0
0 0
0 0
0 0
0 0
0 0
0 0
0 0
0 0
0 0
0 0
0 0
0 0
0 0
0 0
0 0
0 0
0 0
0 0
0 0
0 0
0 0
0 0
0 0
0 0
0 0
0 0
0 0
0 0
0 0
0 0
0 0
0 0
0 0
0 0
0 0
0 0
0 0
0 0
0 0
0 0
0 0
0 0
0 0
0 0
0 0
0 0
0 0
0 0
0 0
0 0
0 0
0 0
0 0
0 0
0 0
0 0
0 0
0 0
0 0
0 0
0 0
0 0
0 0
0 0
0 0
0 0
0 0
0 0
0 0
0 0
0 0
0 0
0 0
0 0
0 0
0 0
0 0
0 0
0 0
0 0
0 0
0 0
0 0
0 0
0 0
0 0
0 0
0 0
0 0
0 0
0 0
0 0
0 0
0 0
0 0
0 0
0 0
0 0
0 0
0 0
0 0
0 0
0 0
0 0
0 0
0 0
0 0
0 0
0 0
0 0
0 0
0 0
0 0
0 0
0 0
0 0
0 0
0 0
0 0
0 0
0 0
0 0
0 0
0 0
0 0
0 0
0 0
0 0
0 0
0 0
0 0
0 0
0 0
0 0
0 0
0 0
0 0
0 0
0 0
0 0
0 0
0 0
0 0
0 0
0 0
0 0
0 0
0 0
0 0
0 0
0 0
0 0
0 0
0 0
0 0
0 0
0 0
0 0
0 0
0 0
0 0
0 0
0 0
0 0
0 0
0 0
0 0
0 0
0 0
0 0
0 0
0 0
0 0
0 0
0 0
0 0
0 0
0 0
0 0
0 0
0 0
0 0
0 0
0 0
0 0
0 0
0 0
0 0
0 0
0 0
0 0
0 0
0 0
0 0
0 0
0 0
0 0
0 0
0 0
0 0
0 0
0 0
0 0
0 0
0 0
0 0
0 0
0 0
0 0
0 0
0 0
0 0
0 0
0 0
0 0
0 0
0 0
0 0
0 0
0 0
0 0
0 0
0 0
0 0
0 0
0 0
0 0
0 0
0 0
0 0
0 0
0 0
0 0
0 0
0 0
0 0
0 0
0 0
0 0
0 0
0 0
0 0
0 0
0 0
0 0
0 0
0 0
0 0
0 0
0 0
0 0
0 0
0 0
0 0
0 0
0 0
0 0
0 0
0 0
0 0
0 0
0 0
0 0
0 0
0 0
0 0
0 0
0 0
0 0
0 0
0 0
0 0
0 0
0 0
0 0
0 0
0 0
0 0
0 0
0 0
0 0
0 0
0 0
0 0
0 0
0 0
0 0
0 0
0 0
0 0
0 0
0 0
0 0
0 0
0 0
0 0
0 0
0 0
0 0
0 0
0 0
0 0
0 0
0 0
0 0
0 0
0 0
0 0
0 0
0 0
0 0
0 0
0 0
0 0
0 0
0 0
0 0
0 0
0 0
0 0
0 0
0 0
0 0
0 0
0 0
0 0
0 0
0 0
0 0
0 0
0 0
0 0
0 0
0 0
0 0
0 0
0 0
0 0
0 0
0 0
0 0
0 0
0 0
0 0
0 0
0 0
0 0
0 0
0 0
0 0
0 0
0 0
0 0
0 0
0 0
0 0
0 0
0 0
0 0
0 0
0 0
0 0
0 0
0 0
0 0
0 0
0 0
0 0
0 0
0 0
0 0
0 0
0 0
0 0
0 0
0 0
0 0
0 0
0 0
0 0
0 0
0 0
0 0
0 0
0 0
0 0
0 0
0 0
0 0
0 0
0 0
0 0
0 0
0 0
0 0
0 0
0 0
0 0
0 0
0 0
0 0
0 0
0 0
0 0
0 0
0 0
0 0
0 0
0 0
0 0
0 0
0 0
0 0
0 0
0 0
0 0
0 0
0 0
0 0
0 0
0 0
0 0
0 0
0 0
0 0
0 0
0 0
0 0
0 0
0 0
0 0
0 0
0 0
0 0
0 0
0 0
0 0
0 0
0 0
0 0
0 0
0 0
0 0
0 0
0 0
0 0
0 0
0 0
0 0
0 0
0 0
0 0
0 0
0 0
0 0
0 0
0 0
0 0
0 0
0 0
0 0
0 0
0 0
0 0
0 0
0 0
0 0
0 0
0 0
0 0
0 0
0 0
0 0
0 0
0 0
0 0
0 0
0 0
0 0
0 0
0 0
0 0
0 0
0 0
0 0
0 0
0 0
0 0
0 0
0 0
0 0
0 0
0 0
0 0
0 0
0 0
0 0
0 0
0 0
0 0
0 0
0 0
0 0
0 0
0 0
0 0
0 0
0 0
0 0
0 0
0 0
0 0
0 0
0 0
0 0
0 0
0 0
0 0
0 0
0 0
0 0
0 0
0 0
0 0
0 0
0 0
0 0
0 0
0 0
0 0
0 0
0 0
0 0
0 0
0 0
0 0
0 0
0 0
0 0
0 0
0 0
0 0
0 0
0 0
0 0
0 0
0 0
0 0
0 0
0 0
0 0
0 0
0 0
0 0
0 0
0 0
0 0
0 0
0 0
0 0
0 0
0 0
0 0
0 0
0 0
0 0
0 0
0 0
0 0
0 0
0 0
0 0
0 0
0 0
0 0
0 0
0 0
0 0
0 0
0 0
0 0
0 0
0 0
0 0
0 0
0 0
0 0
0 0
0 0
0 0
0 0
0 0
0 0
0 0
0 0
0 0
0 0
0 0
0 0
0 0
0 0
0 0
0 0
0 0
0 0
0 0
0 0
0 0
0 0
0 0
0 0
0 0
0 0
0 0
0 0
0 0
0 0
0 0
0 0
0 0
0 0
0 0
0 0
0 0
0 0
0 0
0 0
0 0
0 0
0 0
0 0
0 0
0 0
0 0
0 0
0 0
0 0
0 0
0 0
0 0
0 0
0 0
0 0
0 0
0 0
0 0
0 0
0 0
0 0
0 0
0 0
0 0
0 0
0 0
0 0
0 0
0 0
0 0
0 0
0 0
0 0
0 0
0 0
0 0
0 0
0 0
0 0
0 0
0 0
0 0
0 0
0 0
0 0
0 0
0 0
0 0
0 0
0 0
0 0
0 0
0 0
0 0
0 0
0 0
0 0
0 0
0 0
0 0
0 0
0 0
0 0
0 0
0 0
0 0
0 0
0 0
0 0
0 0
0 0
0 0
0 0
0 0
0 0
0 0
0 0
0 0
0 0
0 0
0 0
0 0
0 0
0 0
0 0
0 0
0 0
0 0
0 0
0 0
0 0
0 0
0 0
0 0
0 0
0 0
0 0
0 0
0 0
0 0
0 0
0 0
0 0
0 0
0 0
0 0
0 0
0 0
0 0
0 0
0 0
0 0
0 0
0 0
0 0
0 0
0 0
0 0
0 0
0 0
0 0
0 0
0 0
0 0
0 0
0 0
0 0
0 0
0 0
0 0
0 0
0 0
0 0
0 0
0 0
0 0
0 0
0 0
0 0
0 0
0 0
0 0
0 0
0 0
0 0
0 0
0 0
0 0
0 0
0 0
0 0
0 0
0 0
0 0
0 0
0 0
0 0
0 0
0 0
0 0
0 0
0 0
0 0
0 0
0 0
0 0
0 0
0 0
0 0
0 0
0 0
0 0
0 0
0 0
0 0
0 0
0 0
0 0
0 0
0 0
0 0
0 0
0 0
0 0
0 0
0 0
0 0
0 0
0 0
0 0
0 0
0 0
0 0
0 0
0 0
0 0
0 0
0 0
0 0
0 0
0 0
0 0
0 0
0 0
0 0
0 0
0 0
0 0
0 0
0 0
0 0
0 0
0 0
0 0
0 0
0 0
0 0
0 0
0 0
0 0
1 0
1 0
2 0
2 0
2 0
3 0
4 0
4 0
6 2
19 3
19 3
19 3
19 3
19 3
19 3
20 3
20 3
20 3
20 3
20 3
20 3
19 3
21 3
22 2
22 2
22 2
22 2
22 2
22 2
21 2
25 2
26 2
25 2
25 2
28 2
28 2
28 2
28 2
29 2
28 0
24 0
25 0
46 0
48 0
47 0
45 0
45 0
45 0
44 0
47 1
47 1
49 1
48 1
49 1
49 1
49 1
49 1
49 1
49 1
49 1
50 1
49 1
49 1
49 1
49 1
47 1
45 1
45 1
45 1
44 1
40 1
37 1
38 1
38 1
36 1
36 1
34 1
30 1
9 1
8 0
7 0
7 0
7 0
7 0
6 0
5 0
8 0
11 0
13 0
13 0
13 0
17 0
17 1
18 1
18 1
19 1
26 1
26 1
27 1
27 1
27 1
25 1
25 1
25 1
27 1
27 1
27 1
27 0
28 0
28 0
28 0
29 0
30 0
32 0
34 0
35 0
40 0
40 0
42 0
43 0
42 0
43 0
45 0
38 0
35 0
33 0
36 0
30 0
31 1
35 1
54 1
55 1
53 1
53 1
53 1
53 1
53 1
54 1
65 1
78 1
84 1
118 2
121 3
178 4
190 4
239 4
411 11
451 12
2058 17
2113 23
2328 24
2481 23
2537 23
2678 24
2696 24
2778 24
3515 26
3519 26
3537 26
3573 26
3585 26
3596 26
3614 26
3652 29
3654 29
3655 29
3668 30
3670 30
3705 32
3705 32
3710 32
3728 32
3817 34
3805 34
3762 34
3729 34
3694 27
3657 25
3629 25
3533 20
3459 20
3333 17
3176 15
3085 15
1383 12
699 11
486 8
422 8
380 8
331 8
314 8
302 8
294 9
293 9
292 8
283 8
273 7
242 7
227 7
179 5
173 5
157 5
145 4
141 4
149 2
151 2
150 2
149 1
86 1
85 1
85 1
84 1
101 1
101 1
104 1
103 1
105 1
104 1
101 1
100 1
85 1
86 1
83 1
84 1
84 1
83 1
81 1
80 1
80 1
74 1
66 1
63 1
63 1
62 1
63 1
63 1
62 1
64 1
64 0
64 0
46 0
46 0
46 0
49 0
49 0
50 0
53 0
53 0
34 0
36 0
31 0
29 0
31 0
31 0
32 0
29 0
34 0
34 0
34 0
33 0
46 0
55 1
198 3
213 3
261 6
287 6
361 7
627 11
660 11
699 12
711 12
717 13
823 13
860 14
883 14
904 14
909 14
911 14
917 14
947 17
1049 21
1049 21
1053 21
1056 21
1065 21
1061 21
1067 22
1056 22
1061 22
1065 22
1100 22
1103 22
1167 24
1231 26
1262 28
1370 24
1437 25
1504 24
1346 22
1327 22
1262 19
1202 20
1210 20
1006 16
1007 17
962 17
948 17
908 16
823 16
770 13
759 13
749 12
744 12
742 12
754 13
712 10
771 11
772 11
769 11
808 11
933 11
968 11
974 11
975 11
989 11
996 11
963 11
952 11
940 11
830 9
823 9
666 9
623 9
558 9
600 9
547 9
543 9
504 7
492 6
486 6
496 6
513 4
520 4
528 4
674 4
771 3
802 3
1070 3
2367 8
2507 9
2560 9
2564 9
2694 11
2851 13
2982 13
3179 15
3216 15
3259 16
3298 15
3475 15
3539 15
3623 16
3779 15
3939 16
3963 17
3960 17
3949 17
3839 17
3873 17
3839 17
3831 17
3781 17
3780 17
3771 17
3751 17
3737 17
3726 17
3592 17
3388 17
3311 16
3122 16
3030 16
2559 14
2394 14
1582 9
1536 9
1490 8
1463 8
1344 7
1166 6
1002 5
773 4
728 4
644 3
621 3
446 3
356 3
265 2
218 1
115 1
107 1
99 1
90 1
81 1
43 1
41 1
39 1
37 1
36 0
33 0
29 0
25 0
24 0
21 0
22 0
26 0
26 0
26 0
28 0
27 1
25 1
17 1
19 1
19 1
18 1
20 1
20 1
20 1
22 1
22 1
39 1
41 1
41 1
41 1
43 1
44 1
48 1
54 1
59 1
141 1
150 1
157 1
172 1
183 1
201 1
281 2
299 2
304 2
309 2
310 2
311 2
345 2
349 2
374 2
374 2
368 1
368 1
367 1
366 1
366 1
366 1
369 1
460 3
460 3
458 3
460 3
451 3
452 3
877 7
883 7
906 7
911 7
906 7
892 7
892 7
805 7
802 7
704 5
685 5
662 5
647 5
571 4
563 4
134 0
137 0
129 0
118 0
92 0
104 0
76 0
76 0
74 0
74 0
73 0
73 0
72 0
72 0
69 0
69 0
60 0
59 1
56 1
64 1
47 1
47 1
79 1
63 1
64 1
64 1
66 1
67 1
70 1
70 1
70 1
68 1
68 0
68 0
68 0
69 0
69 0
67 0
66 0
65 0
67 0
67 0
67 0
67 0
67 0
210 4
210 4
210 4
210 4
210 4
209 4
230 4
230 4
231 4
232 4
225 4
220 4
219 4
180 4
179 4
35 0
35 0
33 0
33 0
30 0
29 0
8 0
8 0
7 0
7 0
7 0
6 0
6 0
6 0
6 0
6 0
1 0
0 0
0 0
0 0
0 0
0 0
0 0
0 0
0 0
0 0
0 0
0 0
0 0
0 0
0 0
0 0
0 0
0 0
0 0
0 0
0 0
0 0
0 0
0 0
0 0
0 0
0 0
0 0
0 0
0 0
0 0
0 0
0 0
0 0
0 0
0 0
0 0
0 0
0 0
0 0
0 0
0 0
0 0
0 0
0 0
0 0
0 0
0 0
0 0
0 0
0 0
0 0
0 0
0 0
0 0
0 0
0 0
0 0
0 0
0 0
0 0
0 0
0 0
0 0
0 0
0 0
0 0
0 0
0 0
0 0
0 0
0 0
0 0
0 0
0 0
0 0
0 0
0 0
0 0
0 0
0 0
0 0
0 0
0 0
0 0
0 0
0 0
0 0
0 0
0 0
0 0
0 0
0 0
0 0
0 0
0 0
0 0
0 0
0 0
0 0
0 0
0 0
0 0
0 0
0 0
0 0
0 0
0 0
0 0
0 0
3 0
3 0
3 0
3 0
3 0
3 0
3 0
3 0
3 0
3 0
3 0
3 0
3 0
3 0
3 0
3 0
3 0
3 0
3 0
3 0
3 0
3 0
3 0
3 0
3 0
3 0
3 0
3 0
3 0
3 0
3 0
3 0
3 0
3 0
2 0
2 0
0 0
0 0
0 0
0 0
0 0
0 0
0 0
0 0
0 0
0 0
0 0
0 0
0 0
0 0
0 0
0 0
0 0
0 0
0 0
0 0
0 0
0 0
0 0
0 0
0 0
0 0
0 0
0 0
0 0
0 0
0 0
0 0
0 0
2 0
2 0
2 0
2 0
2 0
2 0
2 0
2 0
2 0
2 0
2 0
2 0
2 0
2 0
2 0
2 0
2 0
2 0
2 0
2 0
2 0
2 0
2 0
2 0
2 0
2 0
2 0
2 0
2 0
2 0
2 0
2 0
2 0
2 0
2 0
2 0
0 0
0 0
0 0
0 0
0 0
0 0
0 0
0 0
0 0
0 0
0 0
0 0
0 0
0 0
0 0
0 0
0 0
0 0
0 0
0 0
0 0
0 0
0 0
0 0
0 0
0 0
0 0
0 0
0 0
0 0
0 0
0 0
0 0
0 0
0 0
0 0
0 0
0 0
0 0
0 0
0 0
0 0
0 0
0 0
0 0
0 0
0 0
0 0
0 0
0 0
0 0
0 0
0 0
0 0
0 0
0 0
0 0
0 0
0 0
0 0
0 0
0 0
0 0
0 0
0 0
0 0
0 0
0 0
0 0
0 0
0 0
0 0
0 0
0 0
0 0
0 0
0 0
0 0
0 0
0 0
0 0
0 0
0 0
0 0
0 0
0 0
0 0
0 0
0 0
0 0
0 0
0 0
0 0
1 0
1 0
1 0
1 0
1 0
1 0
1 0
1 0
1 0
1 0
1 0
1 0
1 0
1 0
2 0
2 0
2 0
2 0
2 0
2 0
2 0
2 0
3 0
4 0
11 2
27 2
28 2
30 2
30 2
30 2
32 2
37 2
38 2
38 2
37 2
37 2
37 2
37 2
37 2
37 2
38 2
38 2
38 2
38 2
38 2
38 2
38 2
38 2
38 2
38 2
41 2
41 2
41 2
41 2
42 2
42 2
42 2
42 2
41 2
34 2
27 0
16 0
18 0
16 0
16 0
16 0
13 0
10 0
9 0
9 0
9 0
9 0
9 0
10 0
10 0
10 0
9 0
9 0
9 0
9 0
9 0
9 0
9 0
9 0
9 0
9 0
9 0
8 0
8 0
8 0
8 0
8 0
7 0
7 0
7 0
7 0
7 0
7 0
6 0
6 0
6 0
4 0
4 0
4 0
4 0
4 0
4 0
4 0
3 0
3 0
3 0
3 0
3 0
3 0
3 0
3 0
3 0
3 0
3 0
3 0
3 0
3 0
0 0
0 0
0 0
0 0
1 0
1 0
1 0
1 0
2 0
2 0
2 0
2 0
4 0
7 0
7 0
8 0
8 0
8 0
8 0
8 0
8 0
8 0
8 0
8 0
8 0
8 0
8 0
8 0
8 0
8 0
8 0
8 0
8 0
8 0
8 0
8 0
8 0
8 0
9 0
9 0
8 0
8 0
8 0
8 0
7 0
7 0
7 0
6 0
6 0
3 0
2 0
2 0
2 0
2 0
2 0
2 0
2 0
2 0
2 0
2 0
2 0
2 0
2 0
3 0
4 0
5 0
5 0
5 0
5 0
5 0
5 0
6 0
6 0
6 0
5 0
5 0
6 0
6 0
6 0
6 0
6 0
6 0
6 0
5 0
5 0
5 0
5 0
5 0
5 0
5 0
5 0
5 0
5 0
5 0
5 0
5 0
5 0
5 1
4 1
4 1
3 1
2 1
2 1
2 1
2 1
2 1
1 1
1 1
2 3
2 3
2 4
1 4
1 4
1 4
1 4
1 4
1 4
1 4
1 4
1 4
2 4
2 4
2 4
2 4
4 4
4 4
6 4
25 4
42 4
50 4
58 4
61 5
65 5
66 4
67 4
74 4
75 4
76 4
80 4
85 4
85 4
86 4
86 4
87 4
86 1
87 1
87 1
87 1
87 1
87 1
87 1
87 1
87 1
88 1
88 1
88 1
87 1
86 1
83 1
82 1
79 1
76 1
66 1
51 1
37 1
33 1
25 1
23 0
20 0
20 0
15 0
14 0
12 0
11 0
7 0
4 0
4 0
2 0
2 0
2 0
2 0
1 0
1 0
1 0
1 0
1 0
1 0
1 0
1 0
0 0
0 0
0 0
0 0
0 0
0 0
0 0
0 0
0 0
0 0
0 0
0 0
0 0
0 0
0 0
0 0
0 0
0 0
0 0
0 0
0 0
0 0
0 0
0 0
0 0
0 0
0 0
0 0
0 0
0 0
0 0
0 0
0 0
0 0
0 0
0 0
0 0
3 0
3 0
3 0
3 0
3 0
3 0
3 0
3 0
3 0
3 0
3 0
3 0
3 0
3 0
3 0
3 0
3 0
3 0
3 0
3 0
3 0
3 0
3 0
3 0
3 0
3 0
3 0
3 0
3 0
3 0
3 0
3 0
3 0
3 0
2 0
2 0
0 0
0 0
0 0
0 0
0 0
0 0
0 0
0 0
0 0
0 0
0 0
0 0
0 0
0 0
0 0
0 0
0 0
0 0
0 0
0 0
0 0
0 0
0 0
0 0
0 0
0 0
0 0
0 0
0 0
0 0
0 0
0 0
0 0
0 0
0 0
0 0
0 0
0 0
0 0
0 0
0 0
0 0
0 0
0 0
0 0
0 0
0 0
0 0
0 0
0 0
0 0
0 0
0 0
0 0
0 0
0 0
0 0
0 0
0 0
0 0
0 0
0 0
0 0
0 0
0 0
0 0
0 0
0 0
0 0
0 0
0 0
0 0
0 0
0 0
0 0
0 0
0 0
0 0
0 0
0 0
0 0
0 0
0 0
0 0
0 0
0 0
0 0
0 0
0 0
0 0
0 0
0 0
0 0
0 0
0 0
0 0
0 0
0 0
0 0
0 0
0 0
0 0
0 0
0 0
0 0
0 0
0 0
0 0
0 0
0 0
0 0
0 0
0 0
0 0
0 0
0 0
0 0
0 0
0 0
0 0
0 0
0 0
0 0
0 0
0 0
0 0
0 0
0 0
0 0
0 0
0 0
0 0
0 0
0 0
0 0
0 0
0 0
0 0
0 0
0 0
0 0
0 0
0 0
0 0
0 0
0 0
0 0
0 0
0 0
0 0
0 0
0 0
0 0
0 0
0 0
0 0
0 0
0 0
0 0
0 0
0 0
0 0
0 0
0 0
0 0
0 0
0 0
0 0
0 0
0 0
0 0
0 0
0 0
0 0
0 0
0 0
0 0
0 0
0 0
0 0
0 0
0 0
0 0
0 0
0 0
0 0
0 0
0 0
0 0
0 0
0 0
0 0
0 0
0 0
0 0
0 0
0 0
0 0
0 0
0 0
0 0
0 0
0 0
0 0
0 0
0 0
0 0
0 0
0 0
0 0
0 0
0 0
0 0
0 0
0 0
0 0
0 0
0 0
0 0
0 0
0 0
0 0
0 0
0 0
0 0
0 0
0 0
0 0
0 0
0 0
0 0
0 0
0 0
0 0
0 0
0 0
0 0
0 0
0 0
0 0
0 0
0 0
0 0
0 0
0 0
0 0
0 0
0 0
0 0
0 0
0 0
0 0
0 0
0 0
0 0
0 0
0 0
0 0
0 0
0 0
0 0
0 0
0 0
0 0
0 0
0 0
0 0
0 0
0 0
0 0
0 0
0 0
0 0
0 0
0 0
0 0
0 0
0 0
0 0
0 0
0 0
0 0
0 0
0 0
0 0
0 0
0 0
0 0
0 0
0 0
0 0
0 0
0 0
0 0
0 0
0 0
0 0
0 0
0 0
0 0
0 0
0 0
0 0
0 0
0 0
0 0
0 0
0 0
0 0
0 0
0 0
0 0
0 0
0 0
0 0
0 0
0 0
0 0
0 0
0 0
0 0
0 0
0 0
0 0
0 0
0 0
0 0
0 0
0 0
0 0
0 0
0 0
0 0
0 0
0 0
0 0
0 0
0 0
0 0
0 0
0 0
0 0
0 0
0 0
0 0
0 0
0 0
0 0
0 0
0 0
0 0
0 0
0 0
0 0
0 0
0 0
0 0
0 0
0 0
0 0
0 0
0 0
0 0
0 0
0 0
0 0
0 0
0 0
0 0
0 0
0 0
0 0
0 0
0 0
0 0
0 0
0 0
0 0
0 0
0 0
0 0
0 0
0 0
0 0
0 0
0 0
0 0
0 0
0 0
0 0
0 0
0 0
0 0
0 0
0 0
0 0
0 0
0 0
0 0
0 0
0 0
0 0
0 0
0 0
0 0
0 0
0 0
0 0
0 0
0 0
0 0
0 0
0 0
0 0
0 0
0 0
0 0
0 0
0 0
0 0
0 0
0 0
0 0
0 0
0 0
0 0
0 0
0 0
0 0
0 0
0 0
0 0
0 0
0 0
0 0
0 0
0 0
0 0
0 0
0 0
0 0
0 0
0 0
0 0
0 0
0 0
0 0
0 0
0 0
0 0
0 0
0 0
0 0
0 0
0 0
0 0
0 0
0 0
0 0
0 0
0 0
0 0
0 0
0 0
0 0
0 0
0 0
0 0
0 0
0 0
0 0
0 0
0 0
0 0
0 0
0 0
0 0
0 0
0 0
0 0
0 0
0 0
0 0
0 0
0 0
0 0
0 0
0 0
0 0
0 0
0 0
0 0
0 0
0 0
0 0
0 0
0 0
0 0
0 0
0 0
0 0
0 0
0 0
0 0
0 0
0 0
0 0
0 0
0 0
0 0
0 0
0 0
0 0
0 0
0 0
0 0
0 0
0 0
0 0
0 0
0 0
0 0
0 0
0 0
0 0
0 0
0 0
0 0
0 0
0 0
0 0
0 0
0 0
0 0
0 0
0 0
0 0
0 0
0 0
0 0
0 0
0 0
0 0
0 0
0 0
0 0
0 0
0 0
0 0
0 0
0 0
0 0
0 0
0 0
0 0
0 0
0 0
0 0
0 0
0 0
0 0
0 0
0 0
0 0
0 0
0 0
0 0
0 0
0 0
0 0
0 0
0 0
0 0
0 0
0 0
0 0
0 0
0 0
0 0
0 0
0 0
0 0
0 0
0 0
0 0
0 0
0 0
0 0
0 0
0 0
0 0
0 0
0 0
0 0
0 0
0 0
0 0
0 0
0 0
0 0
0 0
0 0
0 0
0 0
0 0
0 0
0 0
0 0
0 0
0 0
0 0
0 0
0 0
0 0
0 0
0 0
0 0
0 0
0 0
0 0
0 0
0 0
0 0
0 0
0 0
0 0
0 0
0 0
0 0
0 0
0 0
0 0
0 0
0 0
0 0
0 0
0 0
0 0
0 0
0 0
0 0
0 0
0 0
0 0
0 0
0 0
0 0
0 0
0 0
0 0
0 0
0 0
0 0
0 0
0 0
0 0
0 0
0 0
0 0
0 0
0 0
0 0
0 0
0 0
0 0
0 0
0 0
0 0
0 0
0 0
0 0
0 0
0 0
0 0
0 0
0 0
0 0
0 0
0 0
0 0
0 0
0 0
0 0
0 0
0 0
0 0
0 0
0 0
0 0
0 0
0 0
0 0
0 0
0 0
0 0
0 0
0 0
0 0
0 0
0 0
0 0
0 0
0 0
0 0
0 0
0 0
0 0
0 0
0 0
0 0
0 0
0 0
0 0
0 0
0 0
0 0
0 0
0 0
0 0
0 0
0 0
0 0
0 0
0 0
0 0
0 0
0 0
0 0
0 0
0 0
0 0
0 0
0 0
0 0
0 0
0 0
0 0
0 0
0 0
0 0
0 0
0 0
0 0
0 0
0 0
0 0
0 0
0 0
0 0
0 0
0 0
0 0
0 0
0 0
0 0
0 0
0 0
0 0
0 0
0 0
0 0
0 0
0 0
0 0
0 0
0 0
0 0
0 0
0 0
0 0
0 0
0 0
0 0
0 0
0 0
0 0
0 0
0 0
0 0
0 0
0 0
0 0
0 0
0 0
0 0
0 0
0 0
0 0
0 0
0 0
0 0
0 0
0 0
0 0
0 0
0 0
0 0
0 0
0 0
0 0
0 0
0 0
0 0
0 0
0 0
0 0
0 0
0 0
0 0
0 0
0 0
0 0
0 0
0 0
0 0
0 0
0 0
0 0
0 0
0 0
0 0
0 0
0 0
0 0
0 0
0 0
0 0
0 0
0 0
0 0
0 0
0 0
0 0
0 0
0 0
0 0
0 0
0 0
0 0
0 0
0 0
0 0
0 0
0 0
0 0
0 0
0 0
0 0
0 0
0 0
0 0
0 0
0 0
0 0
0 0
0 0
0 0
0 0
0 0
0 0
0 0
0 0
0 0
0 0
0 0
0 0
0 0
0 0
0 0
0 0
0 0
0 0
0 0
0 0
0 0
0 0
0 0
0 0
0 0
0 0
0 0
0 0
0 0
0 0
0 0
0 0
0 0
0 0
0 0
0 0
0 0
0 0
0 0
0 0
0 0
0 0
0 0
0 0
0 0
0 0
0 0
0 0
0 0
0 0
0 0
0 0
0 0
0 0
0 0
0 0
0 0
0 0
0 0
0 0
0 0
0 0
0 0
0 0
0 0
0 0
0 0
0 0
0 0
0 0
0 0
0 0
0 0
0 0
0 0
0 0
0 0
0 0
0 0
0 0
0 0
0 0
0 0
0 0
0 0
0 0
0 0
0 0
0 0
0 0
0 0
0 0
0 0
0 0
0 0
0 0
0 0
0 0
0 0
0 0
0 0
0 0
0 0
0 0
0 0
0 0
0 0
0 0
0 0
0 0
0 0
0 0
0 0
0 0
0 0
0 0
0 0
0 0
0 0
0 0
0 0
0 0
0 0
0 0
0 0
0 0
0 0
0 0
0 0
0 0
0 0
0 0
0 0
0 0
0 0
0 0
0 0
0 0
0 0
0 0
0 0
0 0
0 0
0 0
0 0
0 0
0 0
0 0
0 0
0 0
0 0
0 0
0 0
0 0
0 0
0 0
0 0
0 0
0 0
0 0
0 0
0 0
0 0
0 0
0 0
0 0
0 0
0 0
0 0
0 0
0 0
0 0
0 0
0 0
0 0
0 0
0 0
0 0
0 0
0 0
0 0
0 0
0 0
0 0
0 0
0 0
0 0
0 0
0 0
0 0
0 0
0 0
0 0
0 0
0 0
0 0
0 0
0 0
0 0
0 0
0 0
0 0
0 0
0 0
0 0
0 0
0 0
0 0
0 0
0 0
0 0
0 0
0 0
0 0
0 0
0 0
0 0
0 0
0 0
0 0
0 0
0 0
0 0
0 0
0 0
0 0
0 0
0 0
0 0
0 0
0 0
0 0
0 0
0 0
0 0
0 0
0 0
0 0
0 0
0 0
0 0
0 0
0 0
0 0
0 0
0 0
0 0
0 0
0 0
0 0
0 0
0 0
0 0
0 0
0 0
0 0
0 0
0 0
0 0
0 0
0 0
0 0
0 0
0 0
0 0
0 0
0 0
0 0
0 0
0 0
0 0
0 0
0 0
0 0
0 0
0 0
0 0
0 0
0 0
0 0
0 0
0 0
0 0
0 0
0 0
0 0
0 0
0 0
0 0
0 0
0 0
0 0
0 0
0 0
0 0
0 0
0 0
0 0
0 0
0 0
0 0
0 0
0 0
0 0
0 0
0 0
0 0
0 0
0 0
0 0
0 0
0 0
0 0
0 0
0 0
0 0
0 0
0 0
0 0
0 0
0 0
0 0
0 0
0 0
0 0
0 0
0 0
0 0
0 0
0 0
0 0
0 0
0 0
0 0
0 0
0 0
0 0
0 0
0 0
0 0
0 0
0 0
0 0
0 0
0 0
0 0
0 0
0 0
0 0
0 0
0 0
0 0
0 0
0 0
0 0
0 0
0 0
0 0
0 0
0 0
0 0
0 0
0 0
0 0
0 0
0 0
0 0
0 0
0 0
0 0
0 0
0 0
0 0
0 0
0 0
0 0
0 0
0 0
0 0
0 0
0 0
0 0
0 0
0 0
0 0
0 0
0 0
0 0
0 0
0 0
0 0
0 0
0 0
0 0
0 0
0 0
0 0
0 0
0 0
0 0
0 0
0 0
0 0
0 0
0 0
0 0
0 0
0 0
0 0
0 0
0 0
0 0
0 0
0 0
0 0
0 0
0 0
0 0
0 0
0 0
0 0
0 0
0 0
0 0
0 0
0 0
0 0
0 0
0 0
0 0
0 0
0 0
0 0
0 0
0 0
0 0
0 0
0 0
0 0
0 0
0 0
0 0
0 0
0 0
0 0
0 0
0 0
0 0
0 0
0 0
0 0
0 0
0 0
0 0
0 0
0 0
0 0
0 0
0 0
0 0
0 0
0 0
0 0
0 0
0 0
0 0
0 0
0 0
0 0
0 0
0 0
0 0
0 0
0 0
0 0
0 0
0 0
0 0
0 0
0 0
0 0
0 0
0 0
0 0
0 0
0 0
0 0
0 0
0 0
0 0
0 0
0 0
0 0
0 0
0 0
0 0
0 0
0 0
0 0
0 0
0 0
0 0
0 0
0 0
0 0
0 0
0 0
0 0
0 0
0 0
0 0
0 0
0 0
0 0
0 0
0 0
0 0
0 0
0 0
0 0
0 0
0 0
0 0
0 0
0 0
0 0
0 0
0 0
0 0
0 0
0 0
0 0
0 0
0 0
0 0
0 0
0 0
0 0
0 0
0 0
0 0
0 0
0 0
0 0
0 0
0 0
0 0
0 0
0 0
0 0
0 0
0 0
0 0
0 0
0 0
0 0
0 0
0 0
0 0
0 0
0 0
0 0
0 0
0 0
0 0
0 0
0 0
0 0
0 0
0 0
0 0
0 0
0 0
0 0
0 0
0 0
0 0
0 0
0 0
0 0
0 0
0 0
0 0
0 0
0 0
0 0
0 0
0 0
0 0
0 0
0 0
0 0
0 0
0 0
0 0
0 0
0 0
0 0
0 0
0 0
0 0
0 0
0 0
0 0
0 0
0 0
0 0
0 0
0 0
0 0
0 0
0 0
0 0
0 0
0 0
0 0
0 0
0 0
0 0
0 0
0 0
0 0
0 0
0 0
0 0
0 0
0 0
0 0
0 0
0 0
0 0
0 0
0 0
0 0
0 0
0 0
0 0
0 0
0 0
0 0
0 0
0 0
0 0
0 0
0 0
0 0
0 0
0 0
0 0
0 0
0 0
0 0
0 0
0 0
0 0
0 0
0 0
0 0
0 0
0 0
0 0
0 0
0 0
0 0
0 0
0 0
0 0
0 0
0 0
0 0
0 0
0 0
0 0
0 0
0 0
0 0
0 0
0 0
0 0
0 0
0 0
0 0
0 0
0 0
0 0
0 0
0 0
0 0
0 0
0 0
0 0
0 0
0 0
0 0
0 0
0 0
0 0
0 0
0 0
0 0
0 0
0 0
0 0
0 0
0 0
0 0
0 0
0 0
0 0
0 0
0 0
0 0
0 0
0 0
0 0
0 0
0 0
0 0
0 0
0 0
0 0
0 0
0 0
0 0
0 0
0 0
0 0
0 0
0 0
0 0
0 0
0 0
0 0
0 0
0 0
0 0
0 0
0 0
0 0
0 0
0 0
0 0
0 0
0 0
0 0
0 0
0 0
0 0
0 0
0 0
0 0
0 0
0 0
0 0
0 0
0 0
0 0
0 0
0 0
0 0
0 0
0 0
0 0
0 0
0 0
0 0
0 0
0 0
0 0
0 0
0 0
0 0
0 0
0 0
0 0
0 0
0 0
0 0
0 0
0 0
0 0
0 0
0 0
0 0
0 0
0 0
0 0
0 0
0 0
0 0
0 0
0 0
0 0
0 0
0 0
0 0
0 0
0 0
0 0
0 0
0 0
0 0
0 0
0 0
0 0
0 0
0 0
0 0
0 0
0 0
0 0
0 0
0 0
0 0
0 0
0 0
0 0
0 0
0 0
0 0
0 0
0 0
0 0
0 0
0 0
0 0
0 0
0 0
0 0
0 0
0 0
0 0
0 0
0 0
0 0
0 0
0 0
0 0
0 0
0 0
0 0
0 0
0 0
0 0
0 0
0 0
0 0
0 0
0 0
0 0
0 0
0 0
0 0
0 0
0 0
0 0
0 0
0 0
0 0
0 0
0 0
0 0
0 0
0 0
0 0
0 0
0 0
0 0
0 0
0 0
0 0
0 0
0 0
0 0
0 0
0 0
0 0
0 0
0 0
0 0
0 0
0 0
0 0
0 0
0 0
0 0
0 0
0 0
0 0
0 0
0 0
0 0
0 0
0 0
0 0
0 0
0 0
0 0
0 0
0 0
0 0
0 0
0 0
0 0
0 0
0 0
0 0
0 0
0 0
0 0
0 0
0 0
0 0
0 0
0 0
0 0
0 0
0 0
0 0
0 0
0 0
0 0
0 0
0 0
0 0
0 0
0 0
0 0
0 0
0 0
0 0
0 0
0 0
0 0
0 0
0 0
0 0
0 0
0 0
0 0
0 0
0 0
0 0
0 0
0 0
0 0
0 0
0 0
0 0
0 0
0 0
0 0
0 0
0 0
0 0
0 0
0 0
0 0
0 0
0 0
0 0
0 0
0 0
0 0
0 0
0 0
0 0
0 0
0 0
0 0
0 0
0 0
0 0
0 0
0 0
0 0
0 0
0 0
0 0
0 0
0 0
0 0
0 0
0 0
0 0
0 0
0 0
0 0
0 0
0 0
0 0
0 0
0 0
0 0
0 0
0 0
0 0
0 0
0 0
0 0
0 0
0 0
0 0
0 0
0 0
0 0
0 0
0 0
0 0
0 0
0 0
0 0
0 0
0 0
0 0
0 0
0 0
0 0
0 0
0 0
0 0
0 0
0 0
0 0
0 0
0 0
0 0
0 0
0 0
0 0
0 0
0 0
0 0
0 0
0 0
0 0
0 0
0 0
0 0
0 0
0 0
0 0
0 0
0 0
0 0
0 0
0 0
0 0
0 0
0 0
0 0
0 0
0 0
0 0
0 0
0 0
0 0
0 0
0 0
0 0
0 0
0 0
0 0
0 0
0 0
0 0
0 0
0 0
0 0
0 0
0 0
0 0
0 0
0 0
0 0
0 0
0 0
0 0
0 0
0 0
0 0
0 0
0 0
0 0
0 0
0 0
0 0
0 0
0 0
0 0
0 0
0 0
0 0
0 0
0 0
0 0
0 0
0 0
0 0
0 0
0 0
0 0
0 0
0 0
0 0
0 0
0 0
0 0
0 0
0 0
0 0
0 0
0 0
0 0
0 0
0 0
0 0
0 0
0 0
0 0
0 0
0 0
0 0
0 0
0 0
0 0
0 0
0 0
0 0
0 0
0 0
0 0
0 0
0 0
0 0
0 0
0 0
0 0
0 0
0 0
0 0
0 0
0 0
0 0
0 0
0 0
0 0
0 0
0 0
0 0
0 0
0 0
0 0
0 0
0 0
0 0
0 0
0 0
0 0
0 0
0 0
0 0
1 0
1 0
1 0
1 0
1 0
1 0
1 0
1 0
2 0
2 0
2 0
2 0
2 0
2 0
2 0
2 0
2 0
2 0
2 0
2 0
2 0
2 0
2 0
2 0
2 0
2 0
2 0
2 0
2 0
2 0
2 0
2 0
2 0
2 0
2 0
2 0
1 0
1 0
1 0
1 0
1 0
1 0
1 0
2 0
1 0
1 0
1 0
1 0
1 0
1 0
1 0
1 0
1 0
1 0
1 0
1 0
1 0
1 0
1 0
1 0
1 0
1 0
1 0
1 0
3 0
3 0
3 0
3 0
3 0
3 0
3 0
3 0
3 0
3 0
2 0
2 0
2 0
2 0
2 0
2 0
2 0
2 0
2 0
2 0
2 0
3 0
3 0
3 0
3 0
3 0
3 0
3 0
4 0
4 0
4 0
4 0
4 0
4 0
4 0
4 0
2 0
2 0
2 0
2 0
2 0
2 0
2 0
2 0
2 0
2 0
2 0
2 0
2 0
2 0
2 0
2 0
2 0
2 0
2 0
2 0
2 0
1 0
1 0
1 0
1 0
1 0
1 0
0 0
0 0
0 0
0 0
0 0
0 0
0 0
0 0
0 0
0 0
0 0
0 0
0 0
0 0
0 0
0 0
0 0
0 0
0 0
0 0
0 0
0 0
0 0
0 0
0 0
0 0
0 0
0 0
0 0
0 0
0 0
0 0
0 0
0 0
0 0
0 0
0 0
0 0
0 0
0 0
0 0
0 0
0 0
0 0
0 0
0 0
0 0
0 0
0 0
0 0
0 0
0 0
0 0
0 0
0 0
1 0
1 0
1 0
1 0
1 0
1 0
1 0
1 0
1 0
1 0
1 0
1 0
1 0
1 0
1 0
1 0
1 0
1 0
1 0
1 0
1 0
1 0
1 0
1 0
1 0
1 0
1 0
1 0
1 0
1 0
1 0
1 0
1 0
1 0
1 0
1 0
0 0
0 0
0 0
0 0
0 0
0 0
0 0
0 0
0 0
0 0
0 0
0 0
0 0
0 0
0 0
0 0
0 0
0 0
0 0
0 0
0 0
0 0
0 0
0 0
0 0
0 0
0 0
0 0
0 0
0 0
0 0
0 0
0 0
0 0
0 0
0 0
0 0
0 0
0 0
0 0
0 0
0 0
0 0
0 0
0 0
0 0
0 0
0 0
0 0
0 0
0 0
0 0
0 0
0 0
0 0
3 0
3 0
3 0
3 0
3 0
3 0
3 0
3 0
3 0
3 0
3 0
3 0
3 0
3 0
3 0
1 0
1 0
2 0
2 0
2 0
2 0
2 0
2 0
2 0
2 0
2 0
2 0
2 0
2 0
2 0
2 0
2 0
2 0
2 0
2 0
2 0
2 0
2 0
2 0
2 0
2 0
2 0
2 0
2 0
2 0
2 0
2 0
2 0
2 0
2 0
2 0
1 0
1 0
0 0
0 0
0 0
0 0
0 0
0 0
0 0
0 0
0 0
0 0
0 0
0 0
0 0
0 0
0 0
0 0
0 0
0 0
0 0
0 0
0 0
0 0
0 0
0 0
0 0
0 0
0 0
0 0
0 0
0 0
0 0
0 0
0 0
0 0
0 0
0 0
0 0
0 0
0 0
0 0
0 0
0 0
0 0
0 0
0 0
0 0
0 0
0 0
0 0
0 0
0 0
0 0
0 0
0 0
0 0
0 0
0 0
0 0
0 0
0 0
0 0
0 0
0 0
0 0
0 0
0 0
0 0
0 0
0 0
0 0
0 0
0 0
0 0
0 0
0 0
0 0
0 0
0 0
0 0
1 0
1 0
1 0
1 0
1 0
1 0
1 0
1 0
1 0
1 0
1 0
1 0
1 0
1 0
1 0
1 0
1 0
1 0
1 0
1 0
1 0
1 0
1 0
1 0
1 0
1 0
1 0
1 0
1 0
1 0
1 0
1 0
1 0
1 0
1 0
1 0
0 0
0 0
0 0
0 0
0 0
0 0
0 0
0 0
0 0
0 1
0 1
0 1
0 1
0 1
0 1
0 1
0 1
0 1
0 1
0 2
0 2
0 2
0 2
0 2
0 2
0 3
0 3
0 3
0 3
0 3
0 3
0 3
0 3
0 4
0 4
0 4
0 4
0 4
0 4
0 4
0 4
0 4
0 4
0 4
0 3
0 3
0 3
0 3
0 3
0 3
0 3
0 2
0 2
0 2
0 2
0 2
0 2
0 2
0 2
0 2
1 2
2 1
3 1
3 1
3 1
3 1
3 1
3 1
3 1
3 0
3 0
3 0
3 0
3 0
3 0
3 0
3 0
3 0
3 1
3 1
3 1
3 1
3 1
3 1
3 1
3 1
3 1
3 1
3 1
3 1
3 1
3 1
3 1
3 1
3 1
3 1
1 1
1 1
0 1
0 1
0 1
0 1
0 1
0 1
0 1
0 1
0 1
0 0
0 0
0 0
0 0
0 0
0 0
0 0
0 0
0 0
0 0
0 0
0 0
0 0
0 0
0 0
0 0
0 0
0 0
0 0
0 0
0 0
0 0
0 0
0 0
0 0
0 0
0 0
0 0
0 0
0 0
0 0
0 0
0 0
0 0
0 0
0 0
0 0
0 0
0 0
0 0
0 0
0 0
0 0
0 0
0 0
0 0
0 0
0 0
0 0
0 0
0 0
0 0
0 0
0 0
0 0
0 0
0 0
0 0
0 0
0 0
0 0
0 0
0 0
0 0
0 0
0 0
0 0
0 0
0 0
0 0
0 0
0 0
0 0
0 0
0 0
0 0
0 0
0 0
0 0
0 0
0 0
0 0
0 0
0 0
0 0
0 0
0 0
0 0
0 0
0 0
0 0
0 0
0 0
0 0
0 0
0 1
0 1
0 1
0 1
0 1
0 1
0 1
0 1
0 1
0 1
0 1
0 1
0 1
0 1
0 1
0 1
0 1
0 1
0 1
0 1
0 1
0 1
0 1
0 1
0 1
0 1
0 1
0 1
0 1
0 1
0 1
0 1
0 1
0 1
0 0
0 0
0 0
0 0
0 0
0 0
0 0
0 0
0 0
0 0
0 0
0 0
0 0
0 0
0 0
0 0
0 0
0 0
0 0
0 0
0 0
0 0
0 0
0 0
0 0
0 0
0 0
0 0
0 0
0 0
0 0
0 0
0 0
0 0
0 0
0 0
0 0
0 0
0 0
0 0
0 0
0 0
0 0
0 0
0 0
0 0
0 0
0 0
0 0
0 0
0 0
0 0
0 0
0 0
0 0
0 0
0 0
0 0
0 0
0 0
0 0
0 0
0 0
0 0
0 0
0 0
0 0
0 0
0 0
0 0
0 0
0 0
0 0
0 0
0 0
0 0
0 0
0 0
0 0
0 0
0 0
0 0
0 0
0 0
0 0
0 0
0 0
0 0
0 0
0 0
0 0
0 0
0 0
0 0
0 0
0 0
0 0
0 0
0 0
0 0
0 0
0 0
0 0
0 0
0 0
0 0
0 0
0 0
0 0
0 0
0 0
0 0
0 0
0 0
0 0
0 0
0 2
0 2
0 2
0 2
0 2
0 2
0 2
0 2
0 2
0 2
0 3
0 3
0 3
0 3
0 3
0 3
0 3
0 3
0 3
0 3
0 1
0 1
0 1
0 1
0 1
0 1
0 1
0 1
0 1
0 1
0 1
0 1
0 1
0 1
0 1
0 1
0 1
0 1
0 1
0 1
0 1
0 1
0 0
0 0
0 0
0 0
0 0
0 0
0 0
0 0
0 0
0 0
0 0
0 0
0 0
0 0
0 0
0 0
0 0
0 0
0 0
0 0
0 0
0 0
0 0
0 0
0 0
0 0
0 0
0 0
0 0
0 0
0 0
0 0
0 0
0 0
0 0
0 0
0 0
0 0
0 0
0 0
0 0
0 0
0 0
0 0
0 0
0 0
0 0
0 0
0 0
0 0
0 0
0 0
0 0
0 0
0 0
0 0
0 0
0 0
0 0
0 0
0 0
0 0
0 0
0 0
0 0
0 0
0 1
0 1
0 1
0 1
0 1
0 1
0 1
0 1
0 1
0 1
0 1
0 1
0 1
0 1
0 1
0 1
0 1
0 1
0 1
0 1
0 1
0 0
0 0
0 0
0 0
0 0
0 0
0 0
0 0
0 0
0 0
0 0
0 0
0 0
0 0
0 0
0 0
0 0
0 0
0 0
0 0
0 0
0 0
0 0
0 0
0 0
0 0
0 0
0 0
0 0
0 0
0 0
0 0
0 0
0 0
0 0
0 0
0 0
0 0
0 0
0 0
0 0
0 0
0 0
0 0
0 0
0 0
0 0
0 0
0 0
0 0
0 0
0 0
0 0
0 0
0 0
0 0
0 0
0 0
0 0
0 0
0 0
0 0
0 0
0 0
0 0
0 0
0 0
0 0
0 0
0 0
0 0
0 0
0 0
0 0
0 0
0 0
0 0
0 0
0 0
0 0
0 0
0 0
0 0
0 0
0 0
0 0
0 0
0 0
0 0
0 0
0 0
0 0
0 0
0 0
0 0
0 0
0 0
0 0
0 0
0 0
0 0
0 0
0 0
0 0
0 0
0 0
0 0
0 0
0 0
0 0
0 0
0 0
0 0
0 0
0 0
0 0
0 0
0 0
0 0
0 0
0 0
0 0
0 0
0 0
0 0
0 0
0 0
0 0
0 0
0 0
0 0
0 0
0 0
0 0
0 0
0 0
0 0
0 0
0 0
0 0
0 0
0 0
0 0
0 0
0 0
0 0
0 0
0 0
0 0
0 0
0 0
0 0
0 0
0 0
0 0
0 0
0 0
0 0
0 0
0 0
0 0
0 0
0 0
0 0
0 0
0 0
0 0
0 0
0 0
0 0
0 0
0 0
0 0
0 0
0 0
0 0
0 0
0 0
0 0
0 0
0 0
0 0
0 0
0 0
0 0
0 0
0 0
0 0
0 0
0 0
0 0
0 0
0 0
0 0
0 0
0 0
0 0
0 0
0 0
0 0
0 0
0 0
0 0
0 0
0 0
0 0
0 0
0 0
0 0
0 2
0 2
0 2
0 2
0 2
0 2
0 2
0 2
0 2
0 2
0 2
0 2
0 2
0 2
0 2
0 2
0 2
0 2
0 2
0 2
0 2
0 2
0 2
0 2
0 2
0 2
0 2
0 2
0 2
0 2
0 2
0 2
0 2
0 2
0 2
0 2
0 0
0 0
0 0
0 0
0 0
0 0
0 0
0 0
0 0
0 0
0 0
0 0
0 0
0 0
0 0
0 0
0 0
0 0
0 0
0 0
0 0
0 0
0 0
0 0
0 0
0 0
0 0
0 0
0 0
0 0
0 0
0 0
0 0
0 0
0 0
0 0
0 0
0 0
0 0
0 0
0 0
0 0
0 0
0 0
0 0
0 0
0 0
0 0
0 0
0 0
0 0
0 0
0 0
0 0
0 0
0 0
0 0
0 0
0 0
0 0
0 0
0 0
0 0
0 0
0 0
0 0
0 0
0 0
0 0
0 0
0 0
0 0
0 0
0 0
0 0
0 0
0 0
0 0
0 0
0 0
0 0
0 0
0 0
0 0
0 0
0 0
0 0
0 0
0 0
0 0
0 0
0 0
0 0
0 0
0 0
0 0
0 0
0 0
0 0
0 0
0 0
0 0
0 0
0 0
0 0
0 0
0 0
0 0
0 0
0 0
0 0
0 0
0 0
0 0
0 0
0 0
0 0
0 0
0 0
0 0
0 0
0 0
0 0
0 0
0 0
0 0
0 0
0 0
0 0
0 0
0 0
0 0
0 0
0 0
0 0
0 0
0 0
0 0
0 0
0 0
0 0
0 0
0 0
0 0
0 0
0 0
0 0
0 0
0 0
0 0
0 0
0 0
0 0
0 0
0 0
0 0
0 0
0 0
0 0
0 0
0 0
0 0
0 0
0 0
1 0
1 0
1 0
1 0
1 0
1 0
1 0
1 0
1 0
1 0
1 0
1 0
1 0
1 0
1 0
1 0
1 0
1 0
1 0
1 0
1 0
1 0
1 0
1 0
1 0
1 0
1 0
1 0
1 0
1 0
1 0
1 0
1 0
1 0
1 0
1 0
0 0
0 0
0 0
0 0
0 0
0 0
0 0
0 0
0 0
0 0
0 0
0 0
0 0
0 0
0 0
0 0
0 0
0 0
0 0
0 0
0 0
0 0
0 0
0 0
0 0
0 0
0 0
0 0
0 0
0 0
0 0
0 0
0 0
0 0
0 0
0 0
0 0
0 0
0 0
0 0
0 0
0 0
0 0
0 0
0 0
0 0
0 0
0 0
0 0
0 0
0 0
0 0
0 0
1 0
1 0
1 0
1 0
1 0
1 0
1 0
1 0
1 0
1 0
1 0
1 0
1 0
1 0
1 0
1 0
1 0
1 0
1 0
1 0
1 0
1 0
1 0
1 0
1 0
1 0
1 0
1 0
1 0
1 0
1 0
1 0
1 0
1 0
1 0
0 0
0 0
0 0
0 0
0 0
0 0
0 0
0 0
0 0
0 0
0 0
0 0
0 0
0 0
0 0
0 0
0 0
0 0
0 0
0 0
0 0
0 0
0 0
0 0
0 0
0 0
0 0
0 0
0 0
0 0
0 0
0 0
0 0
0 0
0 0
0 0
0 0
0 0
0 0
0 0
0 0
0 0
0 0
0 0
0 0
0 0
0 0
0 0
0 0
0 0
0 0
0 0
0 0
0 0
0 0
0 0
0 0
0 0
0 0
0 0
0 0
0 0
0 0
0 0
0 0
0 0
0 0
0 0
0 0
0 0
0 0
0 0
0 0
0 0
0 0
0 0
0 0
0 0
0 0
0 0
0 0
0 0
0 0
0 0
0 0
0 0
0 0
0 0
0 0
0 0
0 0
0 0
0 0
0 0
0 0
0 0
0 0
0 0
0 0
0 0
0 0
0 0
0 2
0 2
0 2
0 2
0 2
0 2
0 2
0 2
0 2
0 2
0 2
0 2
0 2
0 2
0 2
0 2
0 2
0 2
0 2
0 2
0 2
0 2
0 2
0 2
0 2
0 2
0 2
0 2
0 2
0 2
0 2
0 2
0 2
0 1
0 1
0 0
0 0
0 0
0 0
0 0
0 0
0 0
0 0
0 0
0 0
0 0
0 0
0 0
0 0
0 0
0 0
0 0
0 0
0 0
0 0
0 0
0 0
0 0
0 0
0 0
0 0
0 0
0 0
0 0
0 0
0 0
0 0
0 0
0 0
0 0
0 0
0 0
0 0
0 0
0 0
0 0
0 0
0 0
0 0
0 0
0 0
0 0
0 0
0 0
0 0
0 0
0 0
0 0
0 0
0 0
0 0
0 0
0 0
0 0
0 0
0 0
0 0
0 0
0 0
0 0
0 0
0 0
0 0
0 0
0 0
0 0
0 0
0 0
0 0
0 0
0 0
0 0
0 0
0 0
0 0
0 0
0 0
0 0
0 0
0 0
0 0
1 0
1 0
1 0
1 0
1 0
1 0
1 0
1 0
1 0
1 0
1 0
1 0
1 0
1 0
1 0
1 0
1 0
0 0
0 0
0 0
0 0
0 0
0 0
0 0
0 0
0 0
0 0
0 0
0 0
0 0
0 0
0 0
0 0
0 0
0 0
0 0
0 0
0 0
0 0
0 0
0 0
0 0
0 0
0 0
0 0
0 0
0 0
0 0
0 0
0 0
0 0
0 0
0 0
0 0
0 0
0 0
0 0
0 0
0 0
0 0
0 0
0 0
0 0
0 0
0 0
0 0
0 0
0 0
0 0
0 0
0 0
0 0
0 0
0 0
0 0
0 0
0 0
0 0
0 0
0 0
0 0
0 0
0 0
0 0
0 0
0 0
0 0
0 0
0 0
0 0
0 0
0 0
0 0
0 0
0 0
0 0
0 0
0 0
0 0
0 0
0 0
0 0
0 0
0 0
0 0
0 0
0 0
0 0
0 0
0 0
0 0
0 0
0 0
0 0
0 0
0 0
0 0
0 0
0 0
0 0
0 0
0 0
0 1
0 1
0 1
0 1
0 1
0 1
0 1
0 1
0 1
0 1
0 1
0 1
0 1
0 1
0 1
0 1
0 1
0 1
0 1
0 1
0 1
0 1
0 1
0 1
0 1
0 1
0 1
0 1
0 1
0 1
0 1
0 1
0 1
0 1
0 1
0 1
0 0
0 0
0 0
0 0
0 0
0 0
0 0
0 0
0 0
0 0
0 0
0 0
0 0
0 1
0 1
0 1
0 1
0 1
0 1
0 1
0 1
0 1
0 1
0 1
0 1
0 1
0 1
0 1
0 1
0 1
0 1
0 1
0 1
0 1
0 1
0 1
0 5
0 17
1 28
1 31
1 31
1 31
1 31
1 31
1 33
1 34
1 34
1 34
1 34
1 34
1 36
1 44
1 46
1 49
1 50
1 53
1 53
1 53
1 53
1 54
1 54
1 54
1 54
2 55
2 55
2 56
2 57
2 57
2 57
2 57
2 57
2 58
2 48
2 35
1 27
1 26
1 26
1 26
1 26
1 26
1 26
1 25
1 25
1 25
1 25
1 21
1 19
1 16
1 19
1 16
1 16
1 17
1 20
1 40
1 50
1 56
1 56
1 56
1 57
0 56
0 57
2 59
2 59
2 60
2 60
2 61
2 60
2 60
2 60
2 60
2 60
2 60
2 60
2 60
2 60
2 60
2 60
2 60
2 60
2 60
2 60
4 60
4 55
4 53
4 51
4 50
4 49
4 46
4 42
4 16
4 7
4 5
4 5
4 5
4 5
4 4
4 3
3 1
2 1
2 1
2 1
2 1
2 1
2 1
2 1
2 1
2 1
2 1
2 1
2 1
2 1
2 1
2 1
2 1
2 1
3 7
3 7
1 7
1 7
1 7
1 8
1 8
1 8
1 8
1 8
1 9
1 9
1 9
1 9
1 9
1 9
1 9
1 11
1 11
1 12
2 28
2 29
2 30
2 31
2 32
2 32
2 32
2 32
2 32
2 32
2 32
2 32
2 32
2 33
2 34
2 35
1 28
1 28
1 28
1 28
1 26
1 27
1 27
1 26
1 25
1 25
1 27
3 30
3 30
3 30
3 31
5 31
5 31
5 28
5 28
5 26
4 12
4 12
4 10
4 10
4 10
4 10
4 10
4 10
4 12
4 13
4 13
4 14
4 15
4 16
4 14
4 15
4 15
4 15
4 15
4 15
4 15
4 14
4 14
4 14
4 14
4 14
4 13
1 9
0 15
0 15
0 15
0 16
0 17
0 17
0 17
0 21
0 34
0 38
0 40
0 43
0 43
0 43
0 44
0 44
0 44
0 44
0 44
0 44
0 45
0 45
0 45
0 44
0 46
0 46
0 46
0 46
0 46
0 47
0 47
0 47
0 47
0 47
0 46
0 45
0 40
0 40
0 39
0 42
0 42
0 42
0 43
0 38
0 25
0 21
0 19
0 16
0 16
0 16
0 15
0 15
0 12
0 12
0 12
0 10
0 8
0 7
0 7
0 7
0 6
0 6
0 6
0 6
0 6
0 5
0 5
0 5
0 5
0 5
0 5
0 5
0 5
0 5
0 5
0 2
0 1
0 0
0 0
0 0
0 2
0 2
0 2
0 2
0 2
0 2
0 2
0 2
0 2
0 2
0 2
0 2
0 2
0 2
0 2
0 7
0 7
0 7
0 8
0 8
0 10
0 10
0 12
0 12
0 12
0 10
0 10
0 10
0 10
0 10
0 10
0 10
0 10
0 10
0 10
0 10
0 10
0 10
0 10
0 10
0 10
0 10
0 10
0 10
0 10
0 10
0 10
0 10
0 10
0 10
0 10
0 5
0 5
0 5
0 4
0 4
0 2
0 0
0 0
0 0
0 0
0 0
0 0
0 0
0 0
0 0
0 0
0 0
0 0
0 0
0 0
0 0
0 2
0 2
0 2
0 5
0 6
0 6
0 6
0 6
0 6
0 6
0 6
0 6
0 6
0 7
0 7
0 7
0 7
0 7
0 7
0 7
0 7
0 7
0 7
0 7
0 8
0 8
0 8
0 8
0 8
0 8
0 8
0 8
0 10
0 17
0 18
0 18
0 17
0 17
0 17
0 14
0 13
0 13
0 13
0 13
0 12
0 12
0 12
0 12
0 12
0 12
0 12
0 12
0 12
0 13
0 13
0 13
0 15
1 15
1 15
1 16
1 15
1 15
1 15
1 15
1 15
1 15
1 15
1 15
1 13
1 5
1 4
1 4
1 5
1 5
1 5
1 5
1 5
1 5
1 5
1 5
1 6
1 6
1 7
1 8
1 42
1 44
1 44
0 43
0 43
0 43
0 47
0 47
0 49
0 51
0 51
0 51
0 52
0 53
0 55
0 60
0 61
0 65
0 65
0 67
0 67
0 67
0 68
0 68
0 67
0 67
0 67
0 67
0 67
0 71
0 71
0 73
0 72
0 77
0 76
0 74
0 35
0 34
0 35
0 38
0 38
0 37
0 35
0 35
0 37
0 37
0 37
0 37
0 38
0 35
0 31
0 30
0 30
0 28
0 28
0 26
0 26
0 40
0 42
0 43
0 43
0 43
0 43
0 45
0 45
0 40
0 39
0 38
0 38
0 33
0 32
0 32
0 32
0 32
0 32
0 29
0 29
0 29
0 29
0 29
0 27
0 27
1 31
1 31
3 27
3 27
3 26
3 26
3 26
3 26
3 25
3 25
3 25
3 12
3 9
3 8
3 7
3 7
3 7
3 7
3 7
3 7
3 7
3 7
3 7
5 7
5 7
5 7
5 7
5 7
5 8
5 8
5 9
5 15
5 15
5 15
5 13
5 13
4 11
4 15
2 15
2 15
2 17
2 19
2 19
2 19
2 19
2 19
2 19
2 18
0 18
0 18
0 18
0 18
0 19
0 19
0 19
0 19
0 19
1 19
1 19
1 19
1 19
1 19
1 19
1 19
1 18
1 18
1 18
1 13
1 13
1 13
1 12
2 12
2 11
5 8
5 8
5 8
5 6
5 3
5 3
5 3
5 3
5 3
5 3
5 3
5 4
6 5
6 5
6 5
6 5
6 7
6 7
6 7
6 7
5 7
5 7
5 7
5 7
5 8
5 8
5 8
5 8
5 8
5 8
5 7
5 6
5 6
5 6
4 6
4 6
1 6
1 6
1 6
1 6
1 7
1 7
1 7
1 7
1 7
1 6
1 7
0 6
0 5
0 5
0 5
0 5
0 3
0 3
0 3
0 3
0 3
0 4
0 5
0 6
0 5
0 5
0 5
0 5
0 5
0 5
0 5
0 5
0 5
1 5
3 5
3 5
3 5
3 5
3 5
3 5
3 5
4 5
5 5
5 5
5 5
5 5
5 4
5 4
5 4
5 4
5 5
5 5
5 6
5 6
5 6
5 6
5 6
5 5
6 3
6 3
6 3
6 4
6 4
6 4
6 4
6 4
5 4
4 4
4 4
4 4
4 4
4 3
3 3
3 3
4 3
4 3
3 2
3 2
3 2
3 2
3 2
3 2
3 2
3 2
3 2
3 2
3 2
4 2
4 1
4 1
5 1
5 1
5 1
4 1
4 1
4 1
4 1
4 0
4 0
4 0
4 0
4 0
4 0
4 0
3 0
3 0
3 0
3 0
2 0
3 0
3 0
3 0
3 0
3 0
3 0
3 0
3 0
3 0
3 0
3 0
3 1
2 1
2 1
2 1
2 1
2 1
1 1
1 1
1 1
1 1
1 2
1 2
1 2
1 5
1 7
3 7
3 7
3 7
3 7
3 7
3 7
3 7
2 7
2 7
2 7
2 7
2 7
2 7
2 7
2 7
2 7
2 7
2 7
2 7
2 7
2 7
2 6
2 6
2 6
2 6
2 6
2 6
2 6
2 6
2 6
2 6
2 5
2 5
3 4
3 1
2 1
1 1
1 1
1 1
3 1
3 1
3 2
3 2
3 2
4 2
4 2
4 2
4 2
4 2
5 2
8 7
9 7
10 7
10 7
10 7
10 9
10 9
10 9
10 9
10 9
10 9
10 9
10 9
10 9
10 9
10 9
10 9
10 9
10 9
9 8
9 8
9 8
9 8
9 7
9 7
7 7
7 7
7 7
7 7
7 7
5 7
4 7
3 8
3 8
2 8
2 8
2 3
1 3
0 3
0 3
0 3
0 1
0 1
0 1
0 1
0 1
0 1
0 1
0 1
0 1
0 1
0 1
0 1
0 1
0 1
0 1
0 1
0 3
1 3
2 9
2 10
2 10
2 10
2 10
2 10
2 11
2 11
2 13
2 12
2 12
2 12
2 12
2 12
2 12
2 12
2 12
2 12
2 19
2 19
2 19
3 36
3 37
3 37
3 36
3 37
3 40
3 40
3 40
3 40
3 41
3 41
3 41
3 41
3 39
2 39
1 33
1 33
1 33
1 33
1 33
1 33
1 33
1 33
1 31
1 31
1 31
1 31
1 31
1 31
1 31
1 31
1 31
1 31
1 23
1 23
1 22
0 7
0 7
0 7
0 6
0 5
0 2
0 2
0 2
0 2
0 2
0 2
0 2
0 2
0 2
0 2
0 2
0 2
0 3
0 3
0 3
0 3
0 4
0 5
0 6
0 21
0 22
0 22
1 24
1 24
1 24
1 24
1 24
1 24
1 24
1 24
1 23
1 22
1 22
1 22
1 22
1 22
1 22
1 22
1 22
1 22
1 22
1 22
1 22
1 22
1 22
1 22
1 22
1 22
1 21
1 22
3 25
5 28
11 52
11 51
11 51
11 36
12 36
12 36
11 37
11 37
11 38
11 39
11 40
11 40
11 40
11 40
11 40
11 40
11 40
11 40
11 40
11 40
11 41
11 45
11 45
14 45
15 53
16 53
16 53
16 53
16 53
16 53
16 53
16 53
16 53
16 51
14 49
11 46
6 19
5 17
5 17
5 17
5 17
5 16
5 16
5 16
5 16
5 16
5 15
5 15
5 15
5 15
5 15
5 16
5 16
5 16
4 16
4 16
2 15
2 11
1 11
1 11
1 3
1 3
1 3
1 3
1 3
1 5
2 10
2 12
2 13
2 13
2 13
2 13
2 13
2 13
2 13
2 13
2 13
2 13
3 11
3 11
3 11
3 11
3 11
3 11
3 11
3 11
3 11
3 10
3 10
3 10
3 10
2 10
2 10
2 11
3 13
3 15
3 15
3 16
3 17
3 17
3 16
3 11
2 8
2 8
2 7
2 7
2 7
2 12
2 12
2 12
2 12
2 12
2 12
2 13
1 14
1 14
1 14
1 16
1 16
1 16
1 16
1 16
1 26
1 26
1 26
1 26
1 26
1 26
3 26
4 25
3 21
3 19
3 19
3 19
3 19
3 19
3 19
3 19
3 19
5 19
5 19
6 19
6 20
6 15
6 15
6 15
6 15
6 15
6 14
6 13
6 13
6 13
6 13
6 11
6 11
6 12
6 12
9 18
10 9
10 16
10 16
9 16
8 16
7 16
7 16
7 16
7 16
7 16
7 16
7 16
7 17
7 18
8 18
8 18
8 18
5 19
5 19
5 19
5 18
5 18
5 18
5 18
5 18
5 18
5 18
5 18
5 18
5 18
5 18
5 18
5 19
6 18
9 14
7 5
7 5
7 4
8 5
8 6
8 6
8 6
8 6
8 6
8 6
8 6
8 6
7 6
7 4
7 4
7 4
8 4
8 4
8 3
8 3
8 3
8 3
8 3
8 4
8 4
8 4
8 4
8 4
8 4
8 4
8 4
8 4
6 4
7 3
7 3
4 3
3 3
3 3
3 3
2 2
2 2
2 2
2 2
2 2
2 2
2 2
2 1
2 1
2 1
2 1
2 1
2 1
1 1
1 1
1 1
1 1
1 3
1 3
1 3
1 3
1 3
1 3
1 6
1 6
1 6
1 6
1 6
1 6
2 7
1 7
1 7
1 7
1 7
1 7
1 7
1 7
1 6
1 6
1 6
1 6
1 6
1 6
1 6
1 7
2 8
2 8
2 10
2 10
2 10
2 12
3 16
3 16
3 14
3 14
3 14
3 14
3 14
3 14
3 11
3 11
3 11
3 11
3 11
3 10
2 10
2 10
2 10
2 10
2 10
2 10
2 10
2 10
3 10
3 10
3 10
3 10
2 10
2 10
2 10
2 9
2 8
2 8
2 6
2 6
2 9
2 7
2 5
2 5
2 5
2 6
3 6
3 6
3 6
3 6
3 6
3 6
3 6
4 7
4 7
4 7
4 7
4 7
4 12
4 12
4 13
4 13
4 13
4 13
3 13
3 13
2 13
2 13
2 13
2 13
2 13
2 13
2 13
2 14
2 15
2 16
2 13
2 15
2 13
2 13
2 13
1 13
1 14
0 14
0 14
0 14
0 14
0 14
0 15
0 14
0 15
0 15
0 15
0 15
0 10
0 10
0 9
0 9
0 9
0 9
0 9
0 10
0 10
0 10
0 10
0 10
0 10
0 11
0 7
0 6
0 6
0 6
0 6
0 6
0 5
0 5
0 5
0 5
0 4
0 4
0 4
0 4
0 4
0 4
0 4
0 4
0 3
0 3
0 3
0 3
0 4
0 4
0 4
0 4
0 4
0 4
0 4
0 3
0 3
0 4
0 4
0 4
0 4
0 6
0 7
0 7
0 7
0 10
0 10
0 10
0 10
0 10
0 10
0 10
0 10
0 10
0 11
0 11
0 11
0 11
0 10
0 10
0 11
0 11
0 11
0 11
0 10
0 10
0 11
0 11
0 11
0 11
0 11
0 11
0 11
0 10
0 15
0 15
0 14
1 12
1 12
1 12
1 12
1 9
1 9
1 9
1 9
1 9
1 9
1 8
1 8
1 8
1 8
1 8
1 8
1 8
1 8
1 8
1 7
1 7
1 7
1 8
1 9
1 9
1 8
1 8
1 8
1 8
1 9
1 9
1 9
1 9
1 4
1 3
1 3
0 8
0 10
0 11
0 11
0 11
0 12
0 12
0 12
0 12
0 12
0 12
0 12
0 12
0 12
0 12
0 12
0 12
0 12
0 12
0 12
0 12
0 12
0 10
0 10
0 10
0 10
0 10
0 10
0 10
0 9
0 9
0 9
0 9
0 9
0 7
0 5
0 1
0 0
0 0
0 0
0 0
0 0
0 1
0 1
0 1
0 2
0 2
0 2
0 2
0 2
0 2
0 2
0 2
1 2
1 2
1 4
2 4
2 4
2 4
2 4
2 4
2 4
2 4
2 4
2 4
2 4
2 4
2 4
2 4
2 4
2 7
2 8
2 9
2 10
2 10
2 16
2 16
2 16
2 15
2 15
2 15
2 14
2 14
2 14
2 14
2 14
1 14
2 14
2 14
1 14
1 14
1 12
1 12
1 12
1 12
1 12
1 12
1 12
1 12
1 12
2 13
3 14
3 14
3 14
3 14
3 14
3 11
3 9
3 10
4 9
4 9
4 3
4 3
4 3
4 3
4 3
4 3
3 3
3 3
3 3
3 3
3 3
3 3
3 3
3 3
3 3
3 3
3 3
3 3
3 3
3 3
3 4
3 4
2 4
2 4
2 4
2 3
1 2
1 1
1 1
1 1
1 1
1 1
1 1
1 1
0 1
0 1
0 1
0 2
0 2
0 2
0 2
0 2
0 2
0 2
0 2
0 2
0 2
0 2
0 2
0 2
0 2
0 2
0 2
0 2
0 2
0 2
0 1
0 2
0 2
0 2
0 2
0 2
0 2
0 2
0 2
2 2
2 2
2 2
2 2
2 2
3 2
3 2
3 2
4 1
5 1
5 1
5 1
5 1
5 1
9 1
10 1
10 1
10 1
10 1
10 1
10 1
10 1
10 2
10 2
10 2
10 1
10 1
10 1
10 1
10 1
10 2
10 2
10 3
10 3
10 3
10 3
7 3
7 3
7 3
7 3
7 3
7 3
7 3
7 3
5 3
5 3
4 4
4 4
3 5
3 5
1 5
1 6
1 6
1 6
1 6
1 6
1 6
1 6
1 5
1 5
1 5
1 5
1 6
1 6
1 7
1 7
1 7
1 7
1 6
1 6
1 6
2 6
2 6
2 6
2 6
2 6
2 7
2 7
2 7
2 7
2 9
2 9
2 8
1 7
1 8
1 9
1 9
1 8
1 8
1 8
1 8
1 8
1 8
1 8
1 8
1 8
1 8
1 8
1 7
2 10
2 9
1 8
1 8
1 10
1 10
1 12
1 12
1 12
1 12
1 12
1 12
1 12
1 11
1 11
1 11
1 11
1 9
1 9
1 9
1 9
1 8
1 7
1 7
1 7
1 7
1 7
1 7
1 7
1 7
1 7
1 7
2 7
2 7
2 7
1 7
1 5
1 5
1 5
1 5
1 3
1 2
1 1
1 4
1 7
1 10
1 10
1 10
1 10
1 10
1 10
1 10
1 10
1 10
1 11
1 11
1 11
1 11
1 11
1 11
1 11
1 11
1 11
1 11
1 11
1 11
1 11
1 11
0 11
0 11
0 11
0 11
0 10
1 11
1 11
1 11
1 11
1 11
1 9
1 2
1 2
1 2
1 2
1 2
1 2
1 2
1 2
1 2
1 2
1 2
1 1
1 1
1 1
1 1
1 1
1 1
1 1
1 1
1 1
1 1
1 1
1 1
1 1
1 1
1 1
1 1
1 1
1 1
1 1
0 0
0 0
0 0
0 0
0 0
0 0
0 0
0 0
0 0
0 0
0 0
0 0
0 0
0 0
0 0
0 0
0 0
0 2
0 2
0 2
0 2
0 2
0 2
0 3
0 3
0 3
0 4
0 6
0 6
0 8
0 8
0 8
0 8
0 8
0 8
0 8
0 8
0 8
0 8
0 9
0 9
0 9
0 9
0 9
0 10
0 10
0 10
0 10
0 10
0 10
0 8
0 9
0 9
0 9
0 10
0 12
0 26
0 56
0 62
0 64
0 64
0 65
0 62
0 60
0 60
0 60
0 60
0 60
0 60
0 60
0 60
0 60
0 60
0 60
1 60
1 59
1 59
1 59
1 59
1 59
1 58
1 58
1 58
1 58
1 58
1 58
1 58
1 56
1 57
1 57
1 57
1 53
1 34
1 6
1 6
1 8
1 8
1 9
1 9
0 9
0 9
0 9
0 9
0 9
0 9
0 9
0 9
0 9
0 9
0 9
0 10
0 12
0 12
1 18
1 18
1 18
1 18
1 18
2 18
2 18
2 19
2 19
2 19
2 18
2 18
2 18
2 16
2 16
2 15
2 14
2 11
2 11
2 11
2 10
2 10
2 10
2 10
2 10
2 11
2 12
2 12
2 12
2 11
3 75
3 75
5 76
4 80
4 82
4 83
4 76
4 76
4 78
3 89
3 97
3 113
3 132
3 137
3 139
3 146
3 152
3 195
3 196
3 206
3 209
3 209
3 209
3 209
3 209
3 210
3 217
3 251
3 260
3 268
3 270
3 269
3 269
3 271
3 272
4 281
2 221
1 218
2 219
2 220
2 219
2 219
3 221
3 221
5 217
5 205
5 193
5 184
5 164
5 155
7 161
7 163
7 161
8 118
8 115
8 104
8 105
8 107
8 107
13 123
14 124
14 124
14 117
14 88
15 87
16 88
16 88
16 90
16 89
16 86
16 78
14 67
13 64
13 62
13 62
13 62
13 62
13 65
13 65
13 65
11 65
11 67
11 67
11 66
11 64
11 63
9 54
9 54
9 54
8 54
8 54
8 53
8 52
8 51
7 49
3 24
3 19
3 18
3 14
3 9
2 8
1 8
1 11
1 9
1 9
1 9
1 9
1 9
1 10
1 10
2 10
2 10
3 10
3 6
3 5
3 4
3 4
2 4
2 4
2 7
4 14
4 14
4 14
4 15
4 16
4 16
4 16
4 16
4 16
4 34
4 34
4 34
4 36
4 36
4 61
4 66
4 68
10 72
10 69
10 77
11 77
11 84
11 84
11 84
11 83
11 83
10 82
10 82
10 82
11 82
10 93
14 93
14 95
14 94
14 92
13 89
13 86
13 86
13 84
13 85
15 87
16 113
16 121
16 123
16 125
16 109
17 109
17 108
17 108
17 108
17 82
17 78
17 76
11 69
11 65
11 65
10 68
11 66
14 73
21 110
21 113
21 113
21 113
21 113
19 113
18 115
18 104
15 102
15 102
15 102
15 108
21 143
23 161
23 166
22 168
22 170
22 168
23 134
23 135
23 137
23 138
22 139
21 140
21 141
24 140
50 176
51 176
51 178
51 177
51 177
51 177
51 177
51 172
51 169
49 159
43 126
43 125
43 124
43 127
43 128
43 128
43 129
43 130
43 132
44 141
44 140
44 130
38 92
36 74
34 67
34 67
34 67
34 67
34 67
34 67
35 66
36 67
42 72
42 71
40 70
34 70
11 34
11 34
10 32
10 30
10 30
10 29
10 29
10 29
10 30
10 32
10 37
10 58
10 60
10 59
10 59
10 60
10 60
10 62
10 62
8 56
8 55
8 56
8 56
8 56
8 56
8 56
8 56
8 57
8 57
8 57
6 59
4 58
0 51
1 51
1 51
1 51
1 51
1 53
1 55
1 57
1 58
1 58
1 60
1 60
1 60
1 57
2 55
2 42
2 47
2 53
2 66
2 70
2 69
2 66
2 69
2 69
2 69
2 69
2 69
2 69
2 69
4 70
4 70
4 69
4 69
4 69
4 67
4 67
4 67
4 67
4 67
4 67
4 67
4 63
4 63
4 60
4 61
4 64
4 85
4 91
4 91
4 92
3 86
3 78
3 66
4 57
4 50
4 48
4 46
4 45
4 42
3 40
3 40
3 40
2 41
3 40
4 40
4 41
4 43
3 46
3 51
3 54
3 54
5 53
5 53
5 53
5 53
5 53
5 52
5 52
5 52
6 53
6 47
9 56
9 31
9 30
9 30
9 29
7 29
7 29
6 29
6 27
6 27
6 27
6 26
7 28
7 28
7 28
7 28
7 28
7 27
6 27
5 28
5 29
5 27
5 23
5 17
5 15
5 15
5 15
5 16
8 45
8 50
8 52
8 56
8 60
8 60
7 59
7 60
4 51
4 51
4 52
4 52
4 52
4 52
4 52
4 52
4 52
4 52
4 52
4 52
3 50
3 51
3 51
3 51
3 51
3 51
3 51
3 49
3 48
3 49
3 50
3 50
3 52
3 52
3 52
3 50
0 20
0 13
0 8
0 7
0 7
0 7
0 7
0 6
0 6
0 6
0 7
0 10
0 15
0 15
0 18
0 20
0 20
0 20
0 20
0 20
0 20
0 20
0 25
0 25
0 25
0 27
0 28
0 30
1 30
1 29
1 27
1 27
1 28
1 28
1 29
2 31
2 31
2 33
2 35
2 37
2 38
2 46
2 62
2 101
2 106
2 107
2 113
2 109
2 110
2 111
2 110
2 110
2 110
2 110
2 111
2 115
2 118
2 121
2 116
2 116
1 115
1 113
1 113
1 110
1 110
1 110
1 110
1 110
1 109
0 108
0 107
0 106
0 106
0 103
0 102
0 100
0 99
0 81
0 51
0 28
0 22
0 15
0 14
0 14
0 13
0 12
0 12
0 12
0 12
0 12
0 9
0 5
0 4
0 6
0 6
0 46
0 55
0 58
3 67
3 67
3 67
3 70
3 71
3 71
3 71
3 72
3 71
3 71
3 71
3 71
3 71
3 71
3 72
3 72
3 73
3 74
3 74
3 73
3 73
3 73
3 73
3 73
3 74
3 75
3 78
4 83
5 99
6 118
6 124
6 123
6 123
6 81
6 79
6 76
3 78
3 80
3 80
3 80
3 79
3 79
3 79
3 79
3 79
3 79
3 79
3 80
3 80
3 81
5 106
5 106
5 106
5 106
5 106
5 106
5 106
5 106
5 106
5 106
5 105
5 104
5 101
4 96
3 79
2 55
2 50
2 47
2 47
2 45
2 44
2 40
2 40
2 39
2 39
2 38
2 39
3 39
3 50
3 51
3 53
4 66
5 67
5 66
5 68
5 67
3 37
3 39
3 39
3 39
3 39
3 39
3 39
3 39
3 39
3 38
3 38
3 39
3 39
3 49
3 48
3 49
3 49
3 48
3 48
3 48
3 47
2 48
2 49
2 49
2 49
2 49
2 48
2 46
2 37
2 37
1 33
0 18
0 18
0 18
0 18
0 18
0 18
0 18
0 26
0 28
0 32
0 33
0 49
0 49
0 49
0 49
0 49
0 48
0 49
0 41
0 43
0 44
0 45
0 45
0 45
0 45
0 44
0 41
0 40
0 40
0 40
0 40
0 40
0 40
0 40
0 42
0 43
0 44
0 45
0 45
0 45
0 46
0 46
0 48
0 37
0 36
0 33
0 31
0 17
0 24
0 25
0 32
0 41
0 46
0 44
0 42
0 41
0 41
0 40
0 40
0 41
0 42
0 42
0 42
0 42
0 42
0 43
0 43
0 47
0 49
0 49
0 44
0 43
0 43
0 43
0 43
0 43
0 43
1 45
1 44
1 46
1 46
2 63
2 64
2 64
2 60
2 61
2 50
2 43
2 40
2 39
2 39
2 39
2 39
2 39
2 39
2 38
2 37
2 37
2 37
2 38
2 38
2 37
2 35
2 31
2 31
2 36
2 36
1 36
1 38
1 40
1 42
1 43
1 43
1 42
1 42
1 41
1 41
0 20
1 20
1 20
1 19
1 18
1 18
1 32
1 33
1 35
1 35
1 37
1 38
1 38
1 39
1 41
1 41
1 41
1 41
1 40
1 40
1 41
1 42
1 43
1 45
1 40
1 42
1 43
1 45
1 47
1 63
1 65
1 65
1 69
1 70
1 70
1 71
1 71
0 71
0 72
0 72
0 71
0 72
0 58
0 54
0 55
0 55
0 54
0 54
0 54
0 52
0 49
0 49
0 49
0 50
0 48
0 49
0 49
0 49
0 48
0 44
0 40
0 40
0 41
0 41
0 37
0 16
0 14
0 14
0 13
0 16
0 18
0 23
0 29
0 40
0 42
0 42
0 43
0 50
0 50
0 50
0 52
0 52
0 54
0 57
0 58
0 58
0 58
0 59
0 60
0 55
0 56
0 55
0 55
0 54
0 54
0 55
0 55
0 55
0 54
0 56
0 58
0 58
0 59
0 59
0 59
0 57
0 49
0 44
0 40
0 31
0 29
0 29
0 28
0 22
0 22
0 23
0 21
0 21
0 18
0 15
0 15
0 15
0 15
0 14
0 13
0 11
0 11
0 12
0 12
0 12
0 11
2 14
2 14
2 15
4 15
4 13
4 11
4 10
4 10
4 10
4 10
4 10
4 10
4 8
4 8
4 10
4 10
4 11
4 11
4 11
4 11
4 10
4 10
4 10
4 10
4 10
4 10
4 10
4 10
4 10
5 10
5 10
5 9
5 8
5 8
5 11
5 11
3 8
3 8
2 7
1 6
1 6
1 6
1 7
1 10
1 10
1 10
2 10
2 11
2 11
2 10
2 9
2 11
2 10
2 10
2 10
2 10
2 10
2 11
3 11
3 15
3 23
3 24
5 24
6 25
6 25
5 25
5 26
5 26
5 26
5 26
5 23
5 23
5 23
5 23
5 28
5 28
5 28
5 28
5 28
5 25
5 25
5 25
4 25
4 24
4 26
4 27
4 27
4 27
6 29
6 30
6 33
6 35
6 37
5 38
4 42
4 35
3 29
3 28
2 28
2 28
2 29
2 30
2 29
2 29
2 29
2 29
2 29
2 29
2 29
2 29
2 26
2 26
2 26
2 25
2 24
2 29
3 30
3 37
3 39
3 40
3 54
3 54
3 58
3 69
1 71
1 85
1 80
1 78
2 77
2 76
2 75
2 75
2 75
2 79
2 79
2 79
2 86
2 85
2 90
2 127
2 129
2 132
2 132
2 131
2 131
1 130
1 131
1 131
1 132
1 133
1 133
1 128
1 127
1 120
1 123
1 124
1 108
1 108
1 99
1 91
1 88
1 74
1 74
1 74
0 72
0 71
0 70
0 70
0 70
0 65
0 64
0 64
0 56
0 54
0 48
0 17
0 16
0 15
0 15
0 15
1 30
5 83
5 120
5 130
5 139
6 140
6 141
6 142
6 139
6 136
6 135
6 134
6 133
6 133
6 132
6 133
6 133
6 133
6 133
6 134
6 134
6 134
6 135
6 136
6 136
6 136
6 137
6 138
6 139
6 144
6 145
6 146
7 148
8 148
7 147
7 146
6 166
2 92
2 75
2 73
2 75
2 75
2 71
2 71
2 72
2 72
2 72
2 72
2 72
2 72
2 72
2 71
2 71
2 71
2 70
2 70
2 68
2 68
2 71
6 77
6 77
6 78
6 74
6 74
5 74
5 69
5 68
4 72
4 73
4 75
4 74
4 74
4 28
4 29
4 28
5 38
5 51
5 54
5 54
5 56
5 62
5 117
6 124
6 128
8 143
8 145
8 147
8 149
8 150
8 151
8 152
8 152
8 153
7 152
7 148
4 143
4 144
4 143
4 144
4 145
4 146
5 146
5 146
5 140
5 140
5 139
5 139
5 139
5 139
4 136
4 129
4 112
4 105
4 104
4 104
4 103
4 91
3 20
10 15
10 15
11 15
12 15
13 30
13 28
13 28
13 37
13 37
13 42
13 46
13 64
13 70
13 70
13 72
13 72
13 73
13 74
13 79
12 89
12 93
12 94
12 98
12 98
12 99
12 99
13 108
13 109
13 109
13 111
14 113
14 113
14 113
13 114
10 111
9 111
5 108
5 116
3 127
2 127
2 111
2 111
2 111
2 98
2 98
2 92
2 90
2 70
2 70
5 148
5 152
5 171
5 176
5 185
5 178
5 165
5 165
5 190
5 191
5 192
5 191
5 191
3 182
3 179
3 179
3 178
3 180
3 179
3 179
3 178
3 178
3 178
3 178
3 170
3 159
3 159
3 160
3 160
3 160
3 159
3 159
3 159
3 158
3 158
3 157
0 76
0 67
0 48
0 47
0 38
0 36
0 35
0 35
0 10
0 7
0 6
0 6
0 6
0 6
0 6
0 6
0 6
0 3
0 3
0 3
0 3
0 3
0 3
0 3
0 3
0 3
0 3
0 3
0 3
0 3
0 3
0 1
0 2
0 2
0 2
0 2
0 2
0 2
0 2
0 2
0 2
0 2
0 2
0 2
0 2
0 2
0 2
0 2
0 2
0 2
0 2
0 2
0 2
0 2
0 2
0 2
0 2
0 2
0 3
0 3
0 2
1 2
1 2
1 2
1 2
1 2
1 2
1 3
1 2
1 2
1 2
1 2
1 2
1 2
1 2
1 2
1 2
1 3
1 3
2 4
2 4
2 4
2 7
2 7
2 10
2 12
2 17
2 20
2 20
3 23
3 24
2 27
2 33
2 35
2 35
2 38
2 39
2 42
4 42
5 51
6 52
6 53
6 53
6 52
6 53
6 54
6 55
6 56
6 56
6 56
6 56
6 55
6 56
6 56
6 57
5 56
6 58
6 59
6 64
6 64
7 61
8 66
8 61
12 98
12 101
12 110
12 147
12 152
12 148
12 149
12 177
12 178
12 179
12 190
10 195
9 188
10 216
10 220
10 223
10 223
10 223
11 238
11 237
10 240
10 243
10 243
10 244
10 245
10 243
10 243
10 250
10 253
9 254
8 258
9 250
9 251
9 257
8 248
8 245
4 181
4 169
4 160
4 147
4 147
4 145
4 144
4 93
4 84
4 82
4 83
3 80
3 74
2 63
2 64
2 62
2 62
2 61
12 44
12 42
13 42
13 42
13 42
13 44
13 44
14 47
14 47
14 43
14 38
14 36
14 31
13 31
13 30
13 26
13 31
13 34
13 34
13 35
13 35
13 37
13 37
13 38
13 48
15 50
15 62
15 62
15 61
15 60
15 59
15 74
14 88
12 89
10 90
10 92
4 96
4 95
3 94
3 95
3 95
3 93
3 92
2 90
2 90
2 96
2 96
2 96
2 97
2 98
2 94
2 93
2 90
2 90
2 90
2 92
2 93
2 93
5 103
5 102
5 93
3 92
3 84
3 80
3 86
3 91
3 95
3 80
3 63
3 61
3 60
3 60
3 55
3 55
3 55
3 54
3 54
3 54
3 54
5 54
5 54
5 66
6 67
6 68
6 89
6 89
6 92
6 93
9 101
9 102
9 101
9 101
9 101
9 101
7 89
7 89
7 88
7 90
7 88
7 87
9 79
9 76
9 72
9 72
9 72
9 72
9 72
9 72
9 72
9 72
9 72
9 72
9 71
9 71
8 70
6 68
6 68
6 49
6 51
6 49
6 28
6 30
6 27
6 23
3 15
3 14
3 14
3 14
3 15
3 17
2 18
2 18
2 18
2 17
2 17
2 17
0 16
0 16
0 17
0 18
0 18
0 19
1 20
1 20
1 20
1 20
1 20
1 18
1 18
1 18
1 18
1 18
1 18
1 16
1 15
1 13
1 13
1 10
1 10
1 10
1 11
1 11
1 12
1 12
1 10
1 9
1 8
1 8
1 7
1 6
1 6
1 6
1 6
3 6
3 5
2 6
2 7
2 7
2 6
2 8
2 8
2 8
2 8
2 8
2 18
2 20
2 20
2 21
3 23
3 29
3 31
3 35
3 37
3 38
3 40
3 40
3 39
3 39
3 38
3 38
3 38
3 38
3 38
3 40
3 40
5 44
6 45
6 45
6 46
4 46
4 47
4 46
4 44
4 44
4 47
4 52
4 60
4 64
4 66
4 65
4 53
4 55
4 60
5 88
4 87
4 83
4 82
4 76
4 73
4 76
4 76
4 76
4 76
4 76
4 76
4 76
4 76
4 76
4 76
4 74
4 74
2 70
1 68
1 68
1 67
1 68
1 68
1 74
1 76
1 79
6 85
6 82
6 73
6 72
6 70
6 70
6 69
6 69
6 61
5 32
5 32
5 33
5 35
5 36
5 44
5 46
5 47
5 47
5 48
5 49
5 49
7 54
7 63
7 64
7 64
7 75
7 77
7 79
7 85
7 86
7 90
7 90
7 87
7 81
7 80
7 76
2 67
2 66
2 65
2 65
2 65
2 65
2 66
2 66
2 66
2 66
2 66
2 63
2 61
2 59
3 52
3 51
3 51
3 51
3 58
3 61
3 58
1 49
1 51
1 57
1 64
1 55
1 55
1 54
1 49
1 47
0 42
0 42
0 40
0 41
0 41
0 38
0 38
0 38
0 38
0 41
0 47
0 47
0 52
1 59
5 69
5 70
5 70
5 70
5 70
5 70
5 70
5 70
5 70
5 67
5 48
5 45
5 45
5 46
5 46
5 45
5 42
5 39
5 40
5 40
5 40
5 40
5 40
5 40
5 40
5 40
5 40
5 40
5 41
5 40
5 41
5 38
5 31
5 29
5 29
4 48
1 53
1 76
1 89
1 92
1 92
1 94
1 95
1 96
1 96
1 97
2 96
2 95
2 93
2 92
2 92
2 92
2 92
2 92
2 91
2 123
2 125
2 127
2 128
4 132
5 133
5 133
5 133
5 133
5 133
5 133
5 132
5 132
5 132
5 132
5 124
5 93
4 60
4 46
4 45
4 45
4 45
4 45
4 45
4 45
5 43
5 43
4 43
4 43
4 43
4 43
4 43
4 44
7 65
7 68
7 68
7 36
7 42
7 40
7 39
5 37
4 37
4 36
4 36
4 36
4 36
4 37
4 37
4 37
4 37
4 37
4 39
4 39
4 40
4 40
4 41
5 43
5 44
5 44
5 44
5 44
4 44
4 44
4 44
4 44
4 44
4 43
4 43
4 40
1 15
1 10
1 8
1 8
1 8
1 9
1 9
1 8
1 8
1 8
1 10
1 10
1 10
1 10
1 10
1 10
1 8
1 8
1 8
1 8
1 7
1 7
1 6
0 4
1 4
1 4
1 4
1 5
1 5
2 7
3 7
3 8
3 8
3 8
3 9
3 9
3 9
3 11
3 12
3 12
3 12
3 11
3 12
4 52
4 54
4 57
4 56
4 57
5 59
5 60
5 60
5 60
5 60
5 60
5 61
5 62
5 62
6 62
6 62
6 62
5 61
5 61
4 60
4 60
4 59
4 56
3 56
3 56
3 56
3 56
3 56
3 56
3 55
3 54
3 53
3 53
3 53
3 52
2 45
1 4
0 0
0 0
0 0
0 0
0 0
0 0
0 0
0 0
0 0
0 0
0 0
0 0
0 0
0 0
0 0
0 0
0 0
0 0
0 0
1 0
1 0
1 0
1 0
1 0
1 0
1 0
1 0
1 0
1 0
1 0
1 0
1 0
2 0
2 0
2 0
3 0
3 0
4 0
4 0
4 0
4 0
4 0
3 0
3 1
3 1
3 1
4 2
7 2
7 2
7 2
7 2
7 2
7 2
7 2
7 2
7 2
7 2
7 2
7 2
7 2
7 2
7 2
4 1
4 1
4 1
3 0
3 0
1 0
1 0
1 0
0 0
0 0
0 0
1 0
1 0
1 0
1 0
1 0
1 0
1 0
1 0
1 0
1 0
1 0
1 0
1 0
1 0
1 0
1 0
1 0
1 0
1 0
1 0
1 0
1 0
1 0
1 0
1 0
1 0
1 0
1 0
1 0
1 0
1 0
1 0
1 0
1 0
1 0
1 0
0 0
0 0
3 0
6 0
6 0
6 0
6 0
6 0
7 0
7 0
7 0
7 0
7 0
7 0
7 0
7 0
7 0
7 0
7 0
7 0
7 0
7 0
7 0
7 0
7 0
7 0
7 0
7 0
7 0
9 0
9 0
9 0
9 0
9 0
9 0
9 0
9 0
9 0
6 0
2 0
2 0
2 0
2 0
2 0
2 0
2 0
2 0
2 0
2 0
2 0
3 0
3 0
3 0
3 0
3 0
3 0
3 0
3 0
3 0
3 0
3 0
3 0
3 0
3 0
3 0
1 0
1 0
1 0
1 0
1 0
1 0
1 0
1 0
1 0
1 0
1 0
1 0
1 0
1 0
1 0
1 0
1 0
1 0
1 0
1 0
1 0
0 0
0 0
0 0
0 0
2 0
3 0
3 0
3 0
3 0
3 0
6 0
6 0
6 0
6 0
6 0
6 0
6 0
6 0
6 0
6 0
6 0
6 0
6 0
6 0
6 0
6 0
6 0
6 0
6 0
6 0
6 0
6 0
6 0
6 0
6 0
6 0
6 0
6 0
6 0
6 0
4 0
3 0
3 0
3 0
3 0
2 0
1 0
1 0
1 0
1 0
1 0
1 0
1 0
1 0
1 0
3 0
4 0
4 0
4 0
4 0
4 0
4 0
4 0
4 0
4 0
4 0
4 0
4 0
4 0
4 0
4 0
4 0
4 0
4 0
4 0
4 0
4 0
4 0
4 0
4 0
4 0
4 0
3 0
3 0
3 0
3 0
3 0
3 0
3 0
2 0
0 0
0 0
0 0
0 0
0 0
0 0
0 0
0 0
0 0
0 0
0 0
0 0
0 0
0 0
1 0
26 0
27 0
28 0
28 0
28 0
30 0
41 0
44 0
51 1
72 1
111 1
128 1
155 1
196 1
379 1
649 1
663 1
712 1
712 1
713 1
716 1
718 1
728 1
730 2
730 2
730 2
732 2
732 2
732 2
732 2
732 2
731 2
732 2
730 2
731 2
725 2
718 2
729 1
733 1
824 1
816 1
855 1
845 1
1059 4
1037 4
948 4
919 6
819 6
806 7
764 7
690 7
509 7
511 7
475 7
474 7
477 7
478 7
476 7
470 7
469 6
469 6
471 6
470 6
473 6
473 6
476 6
478 6
479 6
478 6
477 6
471 6
466 6
462 6
447 5
437 5
348 5
334 10
304 10
294 12
73 9
69 9
63 9
78 10
239 12
249 13
307 15
386 20
621 20
679 36
697 40
711 43
758 45
761 46
762 52
763 53
772 53
783 53
858 53
857 57
1118 110
1123 110
1132 112
1145 132
1148 138
1148 138
1146 141
1148 148
1148 158
1146 158
1143 158
1144 163
1151 163
1149 159
1147 164
1131 162
1170 163
1171 189
1155 188
1138 187
967 186
931 186
846 185
773 179
555 178
520 164
488 155
467 154
457 154
451 154
448 153
448 153
442 153
441 153
381 150
385 148
147 72
145 72
129 69
126 67
136 68
136 68
136 66
135 59
136 51
139 51
138 51
137 45
133 45
133 44
133 40
131 34
93 36
75 11
75 12
77 12
77 12
73 12
71 12
70 12
69 12
69 9
75 14
72 14
73 14
67 14
65 14
65 16
62 16
58 17
58 16
56 16
56 16
54 16
54 14
58 14
54 11
66 11
64 10
67 10
67 10
63 9
72 9
86 9
95 9
115 9
116 8
120 8
116 8
118 8
114 10
130 10
143 11
149 11
150 11
153 11
153 10
200 12
210 8
231 8
261 8
278 8
552 13
557 12
557 12
556 11
556 11
562 11
562 11
562 11
551 11
555 11
553 11
560 11
583 11
582 12
594 12
769 26
886 41
950 52
955 53
948 53
944 53
938 53
935 53
933 53
932 51
917 50
907 50
905 50
903 50
905 54
903 54
850 52
823 52
804 52
777 52
763 52
499 47
499 47
499 48
501 48
504 48
495 48
498 48
499 48
493 48
504 48
549 48
669 48
684 46
670 46
633 41
455 26
369 19
307 7
300 6
300 6
300 6
300 6
300 6
300 6
298 6
298 6
297 6
295 6
313 6
309 2
318 2
336 2
435 2
516 4
581 5
625 9
632 9
634 9
634 9
633 9
631 9
632 9
633 9
670 10
681 10
652 11
665 11
544 11
528 11
526 11
525 11
525 11
525 11
525 11
525 11
525 11
525 11
525 11
525 11
525 11
526 12
528 12
518 12
526 12
490 12
502 12
454 12
449 13
390 12
405 9
357 8
341 7
335 7
337 7
361 7
479 9
619 14
654 15
662 15
626 15
612 15
606 13
554 13
538 13
535 13
534 13
534 13
550 13
561 13
562 13
565 13
567 13
567 13
567 13
567 13
566 13
563 12
562 12
566 12
552 12
550 11
497 11
559 11
546 10
572 9
544 9
551 9
547 9
545 8
531 7
496 7
320 5
238 0
225 0
220 0
218 0
218 0
217 0
217 0
217 0
217 0
217 0
216 0
195 0
190 0
188 0
188 0
191 0
200 0
205 0
209 0
212 0
207 0
206 0
204 0
200 0
202 0
260 0
201 0
187 0
148 0
237 0
238 0
239 0
271 0
272 0
273 0
274 0
274 0
274 0
274 0
274 0
275 0
275 0
275 0
275 0
275 0
275 0
275 0
274 0
274 0
273 0
271 0
266 0
256 0
246 0
245 0
240 0
239 0
245 0
242 0
246 0
246 0
195 0
190 0
180 0
179 0
75 0
73 0
71 0
43 0
46 0
47 0
46 0
56 0
56 0
58 0
58 0
58 0
58 0
58 0
61 0
73 0
81 0
81 0
81 0
88 0
103 0
106 0
433 0
442 0
453 0
511 0
559 0
608 0
663 0
701 0
739 0
750 0
812 0
816 0
829 0
834 0
886 0
885 0
885 0
886 0
883 0
883 0
886 0
878 0
882 0
880 0
880 0
879 0
880 0
886 0
879 0
872 0
882 0
885 0
879 0
871 0
861 0
859 0
531 0
500 0
495 0
456 0
406 0
344 0
276 0
241 0
213 0
204 0
151 0
159 0
145 0
146 0
101 0
105 0
105 0
102 0
102 0
102 0
100 0
100 0
97 0
97 0
100 0
103 0
106 1
98 1
98 1
100 1
81 1
79 1
78 1
80 1
86 1
86 1
85 1
85 1
74 1
76 1
80 1
105 1
105 1
105 1
98 1
98 1
94 1
78 1
83 1
83 1
99 1
103 1
106 1
110 1
118 1
137 1
145 1
215 1
214 1
213 1
213 1
208 1
212 0
216 0
228 0
230 0
293 5
293 5
293 5
289 5
287 5
287 5
288 5
286 5
282 5
279 5
276 5
251 5
252 14
338 17
345 19
347 20
347 20
341 20
336 20
334 20
323 20
316 20
310 20
306 20
297 20
276 20
271 20
208 20
211 20
211 21
208 21
206 21
195 21
195 21
182 21
182 20
121 16
121 16
121 16
120 16
119 16
118 16
118 16
119 16
121 16
121 16
114 16
117 16
115 3
41 2
41 1
46 1
47 1
47 1
47 1
64 1
103 1
109 1
110 2
109 2
110 2
108 2
109 2
105 2
100 2
101 1
103 1
105 1
128 1
155 1
251 3
396 4
471 5
527 6
539 6
541 6
541 6
540 6
540 6
541 6
563 7
567 7
565 7
557 7
555 7
557 7
565 7
567 7
694 7
695 7
692 7
668 7
637 8
634 8
632 8
642 9
657 10
669 11
836 14
838 14
837 14
844 14
834 14
858 15
830 15
796 15
657 13
502 10
461 10
443 10
436 10
437 10
439 10
435 10
443 10
442 10
417 9
417 9
417 9
415 8
415 8
411 8
403 8
395 8
269 7
268 6
268 6
266 6
264 6
264 6
261 6
244 5
228 4
215 2
53 0
48 0
45 0
41 0
40 0
17 0
17 0
18 0
22 0
33 0
178 5
215 5
245 6
247 6
247 6
247 6
240 6
240 6
240 6
238 6
238 6
238 6
237 6
237 6
237 6
237 6
237 7
237 7
236 7
236 7
236 7
236 7
236 7
236 7
236 7
236 7
235 7
234 7
234 7
233 7
233 7
232 7
231 7
228 7
212 7
194 7
27 2
7 2
1 1
1 1
1 0
1 0
1 0
1 0
1 0
1 0
1 0
1 0
1 0
1 0
1 0
1 0
2 0
3 0
6 0
7 0
15 0
21 0
23 0
23 0
23 0
23 0
23 0
23 0
23 0
23 0
23 0
23 0
23 0
22 0
22 0
22 0
22 0
26 0
26 0
26 0
26 0
27 0
27 0
27 0
27 0
28 0
30 0
30 0
30 0
30 0
30 0
30 0
32 2
32 2
28 2
25 2
16 2
13 2
14 2
14 2
15 2
15 2
15 2
15 2
15 2
15 2
15 2
15 2
15 2
15 2
15 2
15 2
14 2
10 2
11 2
11 2
11 2
11 2
10 2
10 2
11 2
11 2
11 2
11 2
11 2
10 2
10 1
9 0
7 0
7 0
9 0
9 0
13 0
13 0
12 0
13 0
12 0
12 0
12 0
12 0
13 0
13 0
16 0
16 0
17 0
17 0
16 0
16 0
16 0
16 0
15 0
15 0
15 0
15 0
14 0
14 0
13 0
12 0
12 0
13 0
14 0
16 0
17 0
17 0
17 0
16 0
14 0
13 0
10 0
10 0
10 0
13 0
13 0
13 0
14 0
52 0
50 2
50 3
47 3
47 3
47 3
48 3
48 3
48 3
48 3
48 3
48 3
48 3
48 3
48 3
48 3
48 3
48 3
47 3
48 3
50 3
49 3
47 3
48 3
48 3
48 3
50 3
51 3
54 3
55 3
60 3
60 3
57 3
57 3
57 3
55 3
19 0
19 0
21 0
21 0
21 0
22 0
25 0
27 0
45 2
45 2
45 2
45 2
45 3
46 3
46 3
51 3
52 3
69 6
69 6
69 6
67 6
67 6
67 6
65 9
64 9
64 9
65 9
65 9
64 9
63 10
58 10
58 10
58 10
59 10
57 10
60 10
64 10
64 10
61 10
60 10
60 10
58 10
58 10
56 10
38 8
38 8
38 8
38 8
38 8
38 8
38 8
31 8
32 8
17 5
16 5
16 5
16 5
17 6
17 6
17 3
15 3
14 3
13 3
13 3
13 3
13 2
35 2
35 2
35 2
36 2
34 2
31 2
29 2
29 2
29 2
29 2
30 2
32 2
31 2
32 2
32 2
32 3
32 3
32 4
32 3
32 3
32 3
32 3
31 3
44 4
47 4
59 4
60 3
60 3
64 4
63 4
63 5
64 5
74 5
74 5
74 5
74 5
52 5
52 5
52 5
50 5
50 5
50 5
50 5
50 5
50 5
50 4
49 4
47 4
47 4
46 4
50 4
50 4
50 3
55 3
53 3
49 3
43 3
43 3
44 3
37 2
36 1
28 1
26 1
26 1
21 0
21 0
20 0
18 0
11 0
11 0
11 0
11 0
11 0
11 0
11 0
11 0
11 0
11 0
12 0
12 0
13 0
15 0
41 0
54 0
65 0
66 0
63 0
64 0
64 0
61 0
61 0
61 0
61 0
61 0
60 0
60 0
60 0
59 0
59 0
59 0
59 0
59 0
59 0
59 0
60 0
60 0
60 0
62 0
72 0
72 0
73 0
77 0
84 0
84 0
121 0
126 0
128 0
126 0
105 0
117 0
111 0
111 0
108 0
110 0
114 0
156 1
158 1
209 1
210 1
210 1
210 1
210 1
210 1
210 1
210 1
210 1
210 1
210 1
211 1
209 1
208 1
208 1
209 1
206 1
196 1
195 1
193 1
182 1
176 1
174 1
137 1
131 1
135 1
134 1
147 1
121 1
137 2
148 2
148 2
144 2
139 2
110 1
111 1
62 1
62 1
62 1
62 1
62 1
62 1
62 1
62 1
62 1
62 1
62 1
61 1
61 1
61 1
60 1
60 1
60 1
60 1
60 1
60 1
62 1
61 1
62 1
62 1
62 1
57 1
56 1
37 1
37 0
22 0
15 0
15 0
15 0
15 1
15 1
14 1
14 1
14 1
14 1
14 1
14 1
14 1
14 1
14 1
15 1
15 1
15 1
15 1
15 1
15 1
15 1
15 1
15 1
16 1
24 1
25 1
27 1
28 1
28 1
28 1
28 1
21 1
21 1
21 1
23 2
24 2
24 2
24 2
24 3
23 2
23 2
23 2
23 2
23 2
23 2
24 2
25 2
28 2
28 2
28 2
27 2
26 2
28 2
51 2
55 2
77 2
77 2
78 2
81 2
78 2
74 2
72 2
75 2
89 2
89 2
94 3
94 2
94 2
94 2
93 2
93 1
93 1
99 1
99 1
105 1
108 1
108 1
112 1
113 1
173 3
179 3
177 3
178 3
175 3
175 3
175 3
174 3
175 3
170 3
146 3
141 3
123 3
122 3
122 3
122 3
122 3
121 2
118 2
110 2
99 2
99 2
94 2
94 2
94 2
94 2
92 2
91 3
89 3
82 3
81 2
74 2
69 2
59 2
56 2
54 2
7 1
5 1
5 1
5 1
5 1
5 1
5 1
5 1
4 1
6 1
5 1
6 1
6 1
8 1
9 1
10 1
10 1
10 1
13 1
15 1
16 1
20 1
20 1
21 1
21 1
21 1
20 0
18 0
18 0
17 0
18 0
19 0
19 0
19 0
19 0
19 0
19 0
20 0
20 0
20 0
20 0
20 0
23 0
26 0
26 0
32 0
30 0
29 0
29 0
29 0
29 0
29 0
29 0
27 0
24 0
24 0
56 0
58 0
61 0
62 0
62 0
62 0
62 0
62 0
62 0
63 0
63 0
63 0
63 0
63 0
63 0
63 0
63 0
62 0
62 0
62 0
62 0
62 0
58 0
53 0
48 0
46 0
46 0
46 0
46 0
46 0
46 0
45 0
44 0
42 0
41 0
38 0
6 0
6 0
13 0
12 0
12 0
15 0
15 0
15 0
15 0
14 0
13 0
13 0
14 0
14 0
14 0
14 0
14 0
14 0
14 0
14 0
17 0
18 0
19 0
31 0
31 0
31 0
31 0
31 0
31 0
32 0
32 0
35 0
34 0
36 0
35 1
55 1
55 2
55 2
48 2
48 2
48 2
45 2
66 2
68 2
68 2
68 2
68 2
68 2
69 2
70 2
71 2
73 2
73 2
73 2
73 2
73 2
70 2
69 2
68 2
56 2
57 2
58 2
66 2
67 2
66 2
73 2
76 2
75 2
77 2
76 3
76 2
55 1
51 1
50 1
51 1
54 1
55 1
56 1
41 1
39 1
39 1
39 1
39 1
38 1
37 1
36 1
35 1
33 1
33 1
33 1
34 1
34 1
34 1
34 1
34 1
35 1
33 1
33 1
24 1
23 1
22 1
12 1
11 1
11 1
9 1
8 0
8 0
8 0
8 0
8 0
7 0
5 0
4 0
3 0
2 0
2 0
2 0
2 0
2 0
2 0
2 0
2 0
2 0
2 0
2 0
1 0
1 0
1 0
2 0
2 0
2 0
1 0
1 0
1 0
1 0
1 0
1 0
1 0
1 0
1 0
1 0
1 0
1 0
1 0
1 0
1 0
1 0
1 0
1 1
1 1
1 1
2 1
3 1
3 1
3 1
3 1
3 1
3 1
3 1
3 1
3 1
3 1
3 1
3 1
2 1
2 1
2 1
2 1
2 1
2 1
2 1
2 1
2 1
2 1
2 1
2 1
2 1
2 1
2 1
2 1
2 1
2 1
2 1
2 1
2 0
1 0
1 0
0 0
0 0
0 0
0 0
0 0
0 0
0 0
0 0
1 0
1 0
2 0
2 0
2 0
3 0
3 0
3 0
3 0
3 0
3 0
3 0
3 0
3 0
3 0
3 0
3 0
3 0
4 0
4 0
4 0
4 0
4 0
4 0
4 0
4 0
4 0
4 0
4 0
4 0
4 0
4 0
4 0
4 0
4 0
3 0
2 0
2 0
1 0
1 0
1 0
1 0
1 0
1 0
1 0
1 0
1 0
1 0
1 0
1 0
1 0
1 0
1 0
1 0
0 0
0 0
0 0
0 0
0 0
0 0
0 0
0 0
0 0
0 0
0 0
0 0
0 0
0 0
0 0
0 0
0 0
0 0
0 0
0 0
0 0
0 0
0 0
0 0
0 0
0 0
0 0
0 0
0 0
0 0
0 0
0 0
0 0
0 0
0 0
0 0
0 0
0 0
0 0
0 0
0 0
0 0
0 0
0 0
0 0
0 0
0 0
0 0
0 0
0 0
0 0
0 0
0 0
0 0
0 0
0 0
0 0
0 0
0 0
0 0
0 0
0 0
0 0
0 0
0 0
0 0
0 0
0 0
0 0
0 0
0 0
0 0
0 0
0 0
0 0
0 0
0 0
0 0
0 0
0 0
0 0
0 0
0 0
0 0
1 0
1 0
1 0
1 0
1 0
1 0
1 0
1 0
1 0
1 0
1 0
1 0
3 0
3 0
3 0
3 0
3 0
3 0
3 0
3 0
3 0
3 0
3 0
3 0
3 0
3 0
3 0
3 0
3 0
3 0
3 0
3 0
3 0
3 0
3 0
3 0
2 0
2 0
3 0
3 0
3 0
3 0
3 0
1 0
1 0
1 0
1 0
1 0
1 0
1 0
1 0
1 0
1 0
1 0
1 0
1 0
1 0
1 0
1 0
1 0
1 0
1 0
1 0
1 0
1 0
1 0
1 0
1 0
1 0
1 0
1 0
1 0
1 0
1 0
0 0
0 0
0 0
0 0
0 0
0 0
0 0
0 0
0 0
0 0
0 0
0 0
0 0
0 0
0 0
0 0
0 0
0 0
0 0
0 0
0 0
0 0
0 0
0 0
0 0
0 0
0 0
0 0
0 0
0 0
0 0
0 0
0 0
0 0
0 0
0 0
0 0
0 0
0 0
0 0
0 0
0 0
0 0
0 0
0 0
1 0
1 0
1 0
1 0
1 0
1 0
1 0
1 0
1 0
1 0
1 0
1 0
1 0
1 0
1 0
1 0
1 0
1 0
1 0
1 0
1 0
1 0
1 0
1 0
2 0
2 0
2 0
3 0
3 0
3 0
3 0
3 0
3 0
3 0
3 0
3 0
2 0
2 0
2 0
2 0
2 0
2 0
2 1
2 1
2 1
2 1
2 1
2 1
2 1
2 1
2 1
2 1
2 1
2 1
2 1
2 1
2 1
2 1
2 1
2 1
1 1
1 1
1 1
0 1
0 1
0 1
0 1
0 1
0 1
0 1
0 1
0 1
0 1
0 1
0 1
0 1
0 1
0 1
0 0
0 0
0 0
0 0
0 0
0 0
0 0
0 0
0 0
0 0
0 0
0 0
0 0
0 0
0 0
0 0
0 0
0 0
0 0
0 0
0 0
0 0
0 0
0 0
0 0
0 0
0 0
0 0
0 0
0 0
0 0
0 0
0 0
0 0
0 0
0 0
0 0
0 0
0 0
0 1
0 1
0 1
0 1
0 1
0 1
0 1
0 1
0 1
0 1
0 1
0 1
0 1
0 1
0 1
0 1
0 1
0 1
0 1
0 1
0 1
0 1
0 1
0 1
0 1
0 1
0 1
0 1
0 1
0 1
0 1
0 1
0 1
0 1
0 1
0 1
0 0
0 0
0 0
0 0
0 0
0 0
0 0
0 0
0 0
0 0
0 0
0 0
0 0
0 0
0 0
0 0
0 0
0 0
0 0
0 0
0 0
0 0
0 0
0 0
0 0
0 0
0 0
0 0
0 0
0 0
0 0
0 0
0 0
0 0
0 0
0 0
0 0
0 0
0 0
0 0
0 0
0 0
0 0
0 0
0 0
0 0
0 0
0 0
0 0
0 0
0 0
0 0
0 0
0 0
0 0
0 0
0 0
0 0
0 0
0 0
0 0
0 0
0 0
0 0
0 0
0 0
0 0
0 0
0 0
0 0
0 0
0 0
0 0
0 0
0 0
0 0
0 0
0 0
0 0
0 0
0 0
0 0
0 0
0 0
0 0
0 0
0 0
0 0
0 0
0 0
0 0
0 0
0 0
0 0
0 0
0 0
0 0
0 0
0 0
0 0
0 0
0 0
0 0
0 0
0 0
0 0
0 0
0 0
0 0
0 0
0 0
0 0
0 0
0 0
0 0
0 0
0 0
0 0
0 0
0 0
0 0
0 0
0 0
0 0
0 0
0 0
0 0
0 0
0 0
0 0
0 0
0 0
0 0
0 0
0 0
0 0
0 0
0 0
0 0
0 0
0 0
0 0
0 0
0 0
0 0
0 0
0 0
0 0
0 0
0 0
0 0
0 0
0 0
0 0
0 0
0 0
0 0
0 0
0 0
0 0
0 0
0 0
0 0
0 0
0 0
0 0
0 0
0 0
0 0
0 0
0 0
0 0
0 0
0 0
0 0
0 0
0 0
0 0
0 0
0 0
0 0
0 0
0 0
0 0
0 0
0 0
0 0
0 0
0 0
0 0
0 0
0 0
0 0
0 0
0 0
0 0
0 0
0 0
0 0
0 0
0 0
0 0
0 0
0 0
0 0
0 0
0 0
0 0
0 0
0 0
0 0
0 0
0 0
0 0
0 0
0 0
0 0
0 0
0 0
0 0
0 0
0 0
0 0
0 0
0 0
0 0
0 0
0 0
0 0
0 0
0 0
0 0
0 0
0 0
0 0
0 0
0 0
0 0
0 0
0 0
0 0
0 0
0 0
0 0
0 0
0 0
0 0
0 0
0 0
0 0
0 0
0 0
0 0
0 0
0 0
0 0
0 0
0 0
0 0
0 0
0 0
0 0
0 0
0 0
0 0
0 0
0 0
0 0
0 0
0 0
0 0
0 0
0 0
0 0
0 0
0 0
0 0
0 0
0 0
0 0
0 0
0 0
0 0
0 0
0 0
0 0
0 0
0 0
0 0
0 0
0 0
0 0
0 0
0 0
0 0
0 0
0 0
0 0
0 0
0 0
0 0
0 0
0 0
0 0
0 0
0 0
0 0
0 0
0 0
0 0
0 0
0 0
0 0
0 0
0 0
0 0
0 0
0 0
0 0
0 0
0 0
0 0
0 0
0 0
0 0
0 0
0 0
0 0
0 0
0 0
0 0
0 0
0 0
0 0
0 0
0 0
0 0
0 0
0 0
0 0
0 0
0 0
0 0
0 0
0 0
0 0
0 0
0 0
0 0
0 0
0 0
0 0
0 0
0 0
0 0
0 0
0 0
0 0
0 0
0 0
0 0
0 0
0 0
0 0
0 0
0 0
0 0
0 0
0 0
0 0
0 0
0 0
0 0
0 0
0 0
0 0
0 0
0 0
0 0
0 0
0 0
0 0
0 0
0 0
0 0
0 0
0 0
0 0
0 0
0 0
0 0
0 0
0 0
0 0
0 0
0 0
0 0
0 0
0 0
0 0
0 0
0 0
0 0
0 0
0 0
0 0
0 0
0 0
0 0
0 0
0 0
0 0
0 0
0 0
0 0
0 0
0 0
0 0
0 0
0 0
0 1
0 1
0 2
0 5
1 7
1 7
1 7
1 7
1 7
1 7
1 7
1 7
1 7
1 7
1 7
1 7
1 7
1 7
1 7
1 7
1 7
1 7
1 7
1 7
1 7
1 7
1 7
2 7
3 7
3 7
3 7
3 7
3 7
3 7
3 7
3 6
3 6
3 5
3 5
2 0
3 1
3 1
3 1
3 1
3 1
3 1
3 1
3 1
3 1
3 1
3 1
3 1
3 1
3 1
3 1
3 1
3 1
3 1
3 1
3 1
3 1
3 1
3 1
2 1
1 1
1 1
1 1
1 1
1 1
1 1
1 1
2 1
2 1
2 1
2 1
2 1
1 0
1 0
1 0
1 0
1 0
1 0
1 0
1 0
1 0
1 0
1 0
1 0
1 0
1 0
1 0
1 0
1 0
1 0
1 0
1 0
1 0
1 0
1 3
1 3
1 3
3 3
3 3
3 3
3 3
4 4
5 4
5 4
6 4
7 4
7 4
7 4
7 4
10 4
10 4
10 4
10 4
10 4
10 4
10 4
10 4
10 4
10 4
10 4
10 4
11 4
11 4
11 4
11 4
11 4
11 4
11 4
11 4
11 4
12 1
12 1
12 1
12 1
12 1
12 2
12 3
11 2
9 2
7 2
6 2
6 2
6 2
6 2
6 2
4 2
4 2
4 2
4 2
4 2
4 2
3 2
3 2
3 2
3 2
3 2
3 2
3 2
3 2
3 2
3 2
3 2
4 2
4 2
5 3
7 3
7 4
9 5
9 5
8 5
8 6
8 5
8 4
8 4
8 4
9 5
10 6
10 6
10 6
10 6
10 6
10 6
10 7
11 7
11 7
11 7
11 7
11 7
11 7
11 7
11 7
11 7
11 7
11 7
11 7
11 7
11 7
10 7
10 6
10 6
9 4
7 4
7 3
5 4
4 4
4 4
5 4
7 4
7 4
6 4
5 4
5 3
5 2
5 2
5 2
5 2
5 2
5 2
5 1
4 1
4 1
4 1
4 1
4 1
4 1
4 1
4 1
4 1
4 1
4 1
4 1
4 1
5 1
5 1
5 1
5 1
5 1
4 1
4 1
3 0
3 1
3 1
3 1
1 1
1 1
1 1
1 1
1 1
1 1
1 1
1 1
1 1
1 1
1 1
1 1
1 1
1 1
1 1
1 1
1 1
1 1
1 1
1 1
1 1
1 1
1 1
1 1
2 1
1 1
1 1
3 1
4 1
4 1
4 2
4 2
5 2
8 1
10 1
14 1
14 1
17 1
18 1
19 1
19 1
19 1
19 1
19 1
19 1
19 1
19 1
19 1
20 1
20 1
20 1
20 1
20 1
20 1
20 1
20 1
20 1
20 1
20 1
20 1
19 1
19 1
19 1
17 1
16 1
16 0
16 0
17 0
15 0
13 0
9 0
9 0
8 0
6 0
6 0
6 0
7 0
7 0
7 0
7 0
7 0
7 0
7 0
7 0
6 0
6 0
6 0
6 0
6 5
6 5
6 5
6 5
6 5
6 5
6 5
6 5
6 5
6 5
6 5
6 5
6 5
5 5
4 5
3 5
2 5
2 5
2 5
2 5
1 6
1 6
0 6
0 6
0 7
0 7
0 7
0 7
0 7
0 7
0 7
0 7
0 7
0 7
0 7
0 7
0 2
0 2
0 2
0 2
0 2
0 2
0 2
0 2
0 2
0 2
0 2
0 2
0 2
0 2
0 2
0 2
0 2
0 2
0 2
0 2
0 1
0 1
0 1
1 0
1 0
1 0
1 0
1 0
1 0
1 0
1 0
1 0
1 0
1 0
1 0
1 0
1 0
1 0
1 1
1 1
1 1
1 1
1 1
1 1
1 1
1 1
1 1
1 1
1 1
1 1
1 1
1 1
0 1
0 1
0 1
0 1
0 2
0 2
0 3
0 3
0 4
0 4
0 4
0 4
0 4
0 4
0 5
0 5
0 5
0 5
0 5
1 5
1 5
1 5
1 5
1 11
1 11
1 11
1 11
1 12
1 12
1 12
1 12
1 12
1 12
1 12
1 12
1 12
0 12
0 12
0 12
0 12
0 11
0 11
0 10
0 10
0 9
0 9
0 9
0 9
0 9
0 9
0 8
0 10
0 10
0 10
0 10
0 10
0 11
0 10
0 10
0 5
0 4
0 4
0 15
1 18
1 18
4 36
4 36
4 37
4 37
4 39
4 42
4 42
4 42
4 42
4 42
4 42
4 42
4 42
4 42
4 43
4 43
4 43
4 44
4 44
4 44
4 44
4 44
4 42
4 42
4 42
4 42
4 42
4 40
4 40
4 40
4 40
5 40
5 40
8 29
7 27
7 24
4 7
4 3
4 3
4 3
4 3
4 3
4 3
4 3
4 3
4 3
4 3
4 4
4 5
4 6
5 7
5 6
5 6
5 7
5 8
5 9
5 9
5 11
5 13
5 15
5 17
5 19
5 20
5 21
5 21
5 21
4 21
4 21
3 21
1 20
1 20
1 20
1 20
1 20
1 20
1 20
1 20
1 21
1 20
3 20
3 20
4 21
4 21
4 20
4 18
4 18
3 15
4 16
4 18
4 17
4 15
4 15
4 15
4 14
2 13
2 12
2 9
2 7
2 6
2 6
2 6
2 6
2 11
2 11
2 11
2 12
2 12
2 24
2 24
2 24
2 24
2 24
2 24
2 24
2 24
2 25
2 25
1 25
1 27
1 27
1 27
1 27
1 30
0 31
0 30
0 30
0 30
0 30
0 30
0 31
0 31
0 30
0 31
0 32
0 31
0 39
0 39
0 40
0 35
0 35
0 35
0 34
0 34
0 23
0 23
0 22
0 21
1 21
1 21
1 21
1 21
1 21
1 21
1 21
1 21
1 22
1 22
1 22
1 17
1 17
1 16
1 17
1 18
2 25
2 32
2 32
2 32
2 32
3 30
3 28
3 28
3 20
3 20
3 20
3 20
3 20
3 20
3 19
3 19
3 19
3 19
3 19
3 19
2 19
2 19
2 19
2 19
2 19
2 18
2 18
2 17
2 18
2 18
2 18
2 19
2 20
2 20
2 18
2 17
1 6
1 4
1 4
1 4
1 4
0 4
0 4
0 4
0 4
0 4
0 4
0 4
0 4
0 4
0 4
0 4
0 4
0 4
0 4
0 4
0 4
0 4
0 5
0 5
0 6
1 6
3 6
3 6
4 5
4 5
4 5
4 4
4 3
4 3
4 3
4 2
4 2
4 2
4 4
4 4
4 4
5 4
5 5
4 7
4 14
4 20
4 25
6 66
6 68
6 81
6 103
6 136
6 176
7 242
7 247
7 254
7 262
7 264
7 264
10 269
10 268
10 269
9 269
9 269
9 269
9 271
9 285
9 293
9 294
10 298
11 301
11 320
11 328
11 330
12 337
12 335
12 334
11 335
11 329
11 321
11 314
11 311
11 294
8 188
8 155
8 119
8 107
8 102
8 99
7 92
7 91
7 91
7 91
7 92
7 95
4 99
4 101
3 104
4 112
4 112
4 112
4 110
4 92
4 80
4 75
3 72
2 63
2 56
2 54
2 54
1 46
1 45
1 46
1 46
1 46
3 49
3 49
3 49
4 49
4 124
3 124
3 125
3 127
3 127
3 126
5 116
5 116
6 116
6 117
8 122
8 124
8 121
8 116
8 124
8 123
8 124
8 126
8 127
8 129
8 152
8 167
9 207
9 228
9 274
9 300
9 308
12 320
12 331
12 330
10 328
10 329
9 328
9 324
9 322
9 321
9 246
9 246
9 244
9 244
9 244
9 244
6 233
6 231
6 230
6 229
4 220
4 219
4 220
4 219
3 209
3 210
3 212
3 212
3 207
3 204
3 160
3 149
3 114
3 96
4 63
4 40
5 33
3 26
5 39
5 38
5 39
5 39
5 39
5 39
5 39
5 39
5 40
5 40
5 41
6 41
7 41
7 40
9 41
9 41
9 41
9 41
9 41
9 42
9 43
9 43
9 43
10 42
10 39
10 38
10 38
10 38
10 38
10 37
10 37
10 37
9 31
9 31
8 29
8 29
6 6
6 6
6 6
6 6
5 6
5 11
5 11
5 11
5 10
5 10
4 8
3 8
2 8
2 8
1 6
1 6
1 6
2 14
2 14
2 13
2 13
2 13
2 13
2 13
2 13
2 13
2 13
2 13
2 13
2 13
2 13
2 13
2 13
2 13
2 15
1 15
1 15
1 15
1 15
1 15
1 15
1 10
1 10
1 10
1 10
1 10
1 11
1 12
1 12
1 12
1 12
1 12
1 12
0 4
0 4
0 4
0 4
1 4
1 4
1 4
1 5
1 5
1 5
1 5
1 5
1 5
1 6
1 8
1 8
1 9
1 7
1 16
1 21
1 23
1 36
1 37
1 37
1 38
1 38
1 38
1 39
1 40
1 42
1 42
2 42
2 42
2 42
2 42
2 43
2 43
2 43
2 43
2 44
1 44
1 44
1 44
1 43
2 46
2 46
2 46
2 45
2 45
2 45
2 43
2 42
2 40
2 40
2 30
2 26
2 21
2 11
2 10
2 10
2 9
2 9
2 8
2 8
2 8
2 7
2 7
1 7
1 7
1 7
1 7
2 6
3 7
3 9
2 9
2 8
2 9
2 9
2 9
2 9
2 6
2 6
2 6
2 6
2 6
2 6
2 6
2 6
2 6
2 6
2 6
2 6
2 6
2 6
2 6
2 6
2 6
2 6
2 5
2 4
2 4
2 4
2 11
2 15
2 15
2 14
2 14
1 14
0 14
0 12
0 12
0 12
0 12
0 12
0 12
0 12
0 12
0 12
0 12
0 12
0 12
0 12
0 12
0 12
0 12
0 12
0 12
0 12
0 12
0 12
0 11
0 11
0 11
0 11
0 11
0 14
0 16
0 14
0 12
0 9
0 9
0 9
0 9
0 9
0 9
0 9
0 10
0 10
0 10
0 10
0 10
0 12
0 12
0 12
0 12
0 12
0 12
0 12
0 12
0 12
0 12
0 13
0 13
0 13
0 13
0 13
0 13
0 13
0 13
0 13
0 12
0 10
0 6
0 6
0 5
0 5
0 5
0 5
0 5
0 5
0 5
0 5
0 4
0 4
0 3
0 3
0 2
0 1
0 1
0 2
0 2
0 2
1 8
1 8
1 8
1 8
2 8
2 8
2 10
2 14
3 14
3 16
3 16
3 16
3 16
4 16
5 16
5 16
5 16
5 16
6 18
6 19
6 19
6 19
6 26
6 28
6 29
6 28
6 29
6 29
6 29
6 29
6 37
6 41
6 43
5 43
5 50
5 51
5 48
5 48
5 48
5 49
4 49
4 50
4 50
4 49
3 56
3 61
3 61
3 62
3 64
2 64
1 64
1 65
1 66
1 66
0 63
0 62
0 61
0 59
0 52
0 50
0 50
0 50
0 50
0 50
0 51
0 51
0 43
0 42
0 40
1 40
1 31
1 30
1 29
1 29
1 30
3 34
3 37
3 39
3 38
3 32
3 30
3 31
3 31
3 31
3 31
3 31
3 30
3 29
3 31
3 33
3 33
4 38
4 39
4 41
4 43
4 42
4 51
4 51
4 60
5 94
5 95
5 96
5 98
5 97
4 100
6 130
6 132
6 136
6 141
6 141
6 140
4 136
4 134
4 129
4 126
4 125
4 124
4 125
4 125
4 125
4 126
4 126
4 126
4 124
3 127
3 121
3 120
3 120
3 119
3 121
4 123
4 125
4 113
4 111
4 96
3 70
3 70
3 69
3 69
3 69
3 61
1 28
1 30
1 36
1 37
1 36
1 35
1 35
1 34
1 33
1 33
1 33
1 33
1 33
1 33
1 36
2 41
2 45
2 51
2 60
2 70
2 72
2 70
2 67
2 68
2 63
1 60
1 60
1 60
1 58
1 58
1 58
1 60
1 60
1 60
1 60
1 60
1 58
1 52
1 46
1 46
1 46
1 46
1 47
1 48
1 49
1 51
1 53
1 54
1 54
1 52
1 49
0 43
0 37
0 33
0 24
0 11
0 35
0 50
0 60
0 64
0 73
1 75
1 74
1 73
1 73
1 73
1 73
1 73
1 73
1 73
1 73
1 73
1 73
1 73
1 73
1 73
1 73
1 73
1 72
1 71
1 69
1 67
1 65
1 65
2 65
3 65
3 64
3 72
3 76
3 92
3 94
2 96
2 71
2 55
2 50
2 56
2 49
2 51
2 56
2 56
2 58
2 58
2 60
3 67
3 67
5 72
5 72
5 72
5 72
5 74
5 75
12 79
13 82
13 82
13 82
13 82
13 83
13 83
14 84
14 85
13 87
12 86
12 84
12 75
12 61
12 57
12 55
13 52
13 49
13 51
13 49
13 37
13 34
14 36
19 42
29 64
29 64
31 66
32 62
29 56
29 56
29 55
29 55
29 55
29 55
28 55
26 53
22 47
21 46
21 45
21 46
21 50
21 51
21 52
20 51
21 50
23 48
23 54
23 54
23 54
27 82
27 84
32 85
59 213
59 222
59 226
58 235
58 252
56 251
53 250
45 233
42 220
42 220
41 221
41 221
42 223
42 223
47 224
47 226
47 226
47 227
47 225
47 226
47 226
47 226
47 226
47 224
47 220
61 236
62 242
60 259
61 260
61 262
61 271
62 272
55 270
48 244
45 243
45 241
22 110
22 96
22 90
22 85
22 80
20 80
20 82
20 79
20 79
20 80
20 81
19 88
19 88
18 89
18 88
18 88
18 87
18 87
18 87
18 86
18 86
19 87
19 88
19 88
18 87
4 66
4 63
4 44
3 44
4 44
4 27
3 27
3 26
3 24
3 24
3 24
3 23
3 21
3 21
3 20
3 19
3 18
3 14
3 14
3 14
3 14
3 13
4 6
4 9
4 21
5 30
5 30
5 31
5 32
5 32
5 34
5 43
4 43
4 48
4 49
3 51
3 51
3 54
3 55
3 56
3 57
3 58
3 58
4 60
4 63
4 65
4 66
4 70
4 70
4 71
4 71
4 72
3 72
3 72
3 72
3 72
3 72
3 71
2 69
2 68
2 54
1 47
1 46
1 45
1 44
1 44
1 40
1 29
1 28
1 24
2 23
3 23
3 23
2 18
2 19
2 18
2 16
2 18
3 21
3 23
3 22
3 20
3 20
3 16
3 16
3 15
3 15
3 14
3 14
3 14
3 14
3 14
3 14
3 14
3 14
3 14
3 14
3 14
3 18
3 18
3 18
3 19
4 23
4 28
5 38
5 40
4 41
3 39
3 39
3 39
3 38
3 38
3 38
3 39
2 36
2 34
2 35
2 35
2 36
2 37
2 37
2 37
2 37
2 37
2 37
2 38
2 38
2 38
2 38
2 38
2 38
2 44
2 47
2 50
2 50
2 58
2 57
2 58
2 55
1 49
1 37
1 37
1 37
1 40
1 40
1 42
1 42
1 42
1 42
1 38
1 36
1 34
1 34
1 34
1 34
1 33
1 33
1 33
1 33
1 33
1 34
1 33
1 33
1 33
1 33
2 34
2 33
2 29
2 27
2 22
6 17
6 13
6 13
6 14
5 15
5 15
5 16
5 16
5 16
5 13
5 12
5 11
5 11
5 11
5 11
5 11
5 11
5 11
5 11
5 11
5 12
5 12
5 12
5 12
5 12
5 12
5 11
5 10
5 12
5 11
5 19
4 27
6 32
6 35
6 34
6 32
2 32
2 30
2 30
3 45
3 45
3 45
6 49
6 54
6 55
6 55
6 55
6 56
6 56
6 56
6 56
6 57
6 57
6 57
6 58
6 58
6 57
6 57
6 57
6 59
6 59
6 59
6 59
6 58
6 54
6 51
6 43
6 34
4 32
4 32
4 31
4 31
4 31
5 31
5 31
4 16
4 16
4 16
1 8
1 5
1 4
1 4
1 4
1 4
1 5
1 5
1 5
1 3
1 3
1 3
1 4
2 6
2 6
2 6
2 6
2 4
2 4
2 4
2 4
2 4
2 4
2 4
2 4
2 4
2 4
2 4
2 4
1 4
1 4
1 4
1 4
1 4
1 4
1 4
1 4
1 4
1 4
1 4
1 4
1 4
1 3
1 3
1 3
1 3
1 3
1 3
1 2
0 0
0 0
0 0
0 0
0 0
0 0
0 0
0 0
0 0
0 0
0 0
0 0
0 0
0 0
0 0
0 0
0 2
0 2
0 3
0 3
0 3
0 3
0 3
0 3
0 5
0 9
1 9
1 11
1 13
1 13
1 14
1 14
1 14
1 14
1 14
1 14
1 14
1 15
1 47
1 49
1 49
1 51
1 51
1 52
1 52
1 55
1 57
1 58
1 69
1 70
1 72
3 76
3 74
3 76
3 75
3 88
3 92
3 92
3 92
3 92
2 86
2 82
2 82
2 82
2 83
2 83
2 84
2 84
2 84
2 84
2 85
2 85
2 85
2 83
2 48
2 48
2 48
2 49
2 48
2 47
2 46
2 40
2 36
2 35
2 42
2 43
2 43
0 40
0 40
0 41
1 43
1 27
1 27
1 27
1 27
1 27
1 32
1 37
1 41
1 47
1 44
1 44
1 44
1 45
1 46
1 46
1 46
1 58
1 61
1 68
1 77
1 81
1 82
1 81
1 81
1 80
1 82
1 86
1 87
1 85
1 69
1 70
1 70
1 70
1 70
1 70
0 71
0 71
0 71
0 71
0 70
0 69
0 59
0 58
0 58
0 55
0 57
0 60
0 61
0 60
0 61
0 62
0 61
0 45
0 43
0 35
0 31
0 29
0 29
0 33
0 68
0 71
0 74
0 73
0 82
0 84
0 88
0 94
0 101
0 104
0 105
0 106
0 108
0 109
0 109
0 109
0 110
0 110
0 110
0 107
0 107
0 103
0 101
0 99
0 98
0 102
0 103
0 102
0 102
0 102
0 102
0 102
0 99
0 100
0 98
0 94
0 59
2 55
2 50
2 49
2 38
2 37
2 33
2 23
2 18
2 21
2 20
2 27
2 27
2 26
3 26
3 25
3 25
4 29
4 29
4 29
4 32
4 35
4 35
5 38
5 38
5 33
6 33
6 34
6 34
6 34
6 34
6 35
6 34
6 34
6 34
6 35
6 35
4 34
4 39
4 39
4 39
4 39
4 39
4 42
4 42
4 39
4 40
4 36
3 37
3 37
3 38
3 38
3 38
2 34
2 33
2 32
2 29
2 28
2 28
1 32
0 37
0 37
0 39
0 39
0 39
0 40
0 40
0 39
6 47
6 47
6 47
6 46
6 46
6 46
6 41
6 41
6 39
6 39
6 39
6 36
6 36
7 33
7 33
7 30
7 30
7 29
7 29
7 29
7 27
7 29
7 30
7 30
7 31
7 31
7 28
7 18
7 17
7 17
7 18
7 18
7 18
7 18
7 18
7 17
1 10
1 10
1 10
1 12
1 13
1 13
1 13
1 13
1 14
1 16
1 17
1 17
2 41
2 42
2 40
2 40
2 40
2 41
2 42
4 42
4 40
4 38
4 38
4 41
4 41
4 41
4 41
4 41
4 41
4 40
4 40
4 40
4 40
4 40
4 42
4 42
4 38
4 40
4 40
4 40
4 42
4 42
4 43
4 42
4 42
4 40
4 39
4 39
1 13
1 13
1 12
1 12
0 12
0 12
0 12
0 13
0 15
0 14
0 14
0 12
0 12
0 12
0 12
0 12
0 12
0 12
0 12
0 10
0 10
0 24
0 27
0 27
0 27
0 25
0 25
0 25
0 24
0 22
0 21
0 21
0 21
0 24
0 25
0 25
0 25
0 26
0 26
0 26
0 26
0 27
0 30
0 32
0 31
0 31
0 31
0 32
0 34
0 35
0 35
0 35
0 50
0 52
0 58
0 59
0 61
0 46
0 49
0 49
0 56
0 56
0 58
1 60
1 62
1 65
1 72
1 73
1 75
1 82
1 81
1 79
1 80
1 82
1 84
1 85
1 84
1 84
1 80
0 81
0 80
0 79
0 79
0 78
0 78
0 78
0 78
0 76
0 53
0 51
0 50
0 50
0 48
0 47
0 47
0 47
0 39
0 38
0 36
0 35
0 34
0 32
0 28
0 35
0 38
0 29
0 30
0 29
0 26
0 27
0 27
0 26
0 30
0 30
0 31
0 31
0 31
1 32
1 32
1 32
1 32
1 32
1 32
1 31
1 31
1 31
1 31
1 31
1 32
1 33
1 34
1 37
1 37
1 37
1 37
1 36
1 36
1 35
1 29
1 20
1 16
1 15
1 18
1 18
1 18
1 17
1 17
1 16
1 14
1 14
1 13
1 13
1 13
0 12
0 12
0 12
0 12
0 11
0 11
0 11
0 15
0 22
1 36
2 38
2 38
2 37
2 34
2 33
2 33
2 33
2 33
2 33
2 33
2 34
2 34
2 34
2 34
2 35
2 31
2 30
2 31
2 31
2 31
2 31
2 31
2 31
3 42
3 42
3 42
3 42
4 47
4 47
4 47
4 48
4 48
4 48
4 44
2 31
2 30
2 32
2 33
2 33
2 33
2 33
2 37
2 37
2 37
2 41
2 42
2 43
2 46
2 45
2 44
2 45
2 45
2 45
2 44
2 44
2 44
2 44
2 44
2 44
1 33
1 33
1 33
1 33
3 27
3 35
3 35
3 35
3 35
3 35
3 34
3 31
3 26
3 24
3 24
3 25
3 25
3 25
3 21
3 21
3 20
3 14
3 15
3 14
3 13
3 13
3 14
3 13
3 13
3 13
3 13
3 13
3 13
3 13
3 13
3 13
3 13
3 13
2 13
2 12
0 12
0 5
0 4
0 4
0 4
0 4
0 3
0 3
0 3
0 3
0 2
1 3
1 3
1 3
1 4
2 4
2 5
2 5
2 4
2 5
2 5
2 5
2 5
2 5
2 5
2 5
2 5
2 5
2 5
2 5
2 5
2 5
2 5
2 5
2 5
2 6
2 6
2 6
2 6
2 6
2 8
2 8
2 9
2 9
2 9
2 9
2 9
1 12
1 16
1 17
2 16
1 16
1 15
1 15
1 14
1 14
1 14
1 14
1 14
1 14
1 14
1 14
1 14
1 14
1 14
1 14
1 14
1 14
1 14
1 14
3 14
3 13
3 13
3 13
3 13
3 13
3 11
3 10
3 10
3 10
3 8
3 8
3 6
3 4
3 0
3 0
2 0
2 0
2 0
2 1
2 2
3 2
4 2
4 2
4 2
4 5
4 5
4 5
4 6
4 6
4 7
4 7
4 7
4 7
4 7
4 7
2 7
2 7
2 7
2 8
2 9
2 10
2 14
2 16
3 19
3 21
3 21
3 22
4 22
4 25
4 29
4 33
4 46
4 51
4 51
3 52
2 53
2 53
2 58
3 62
3 62
3 61
3 61
3 61
3 61
3 61
3 60
3 60
3 60
3 60
3 59
3 59
3 59
2 59
2 59
2 57
2 56
2 52
2 50
2 48
2 50
2 47
2 49
2 50
1 49
1 44
1 40
1 34
1 21
3 21
3 23
3 25
3 25
3 25
3 21
2 25
2 25
2 25
2 26
2 26
2 25
2 25
2 25
2 25
3 25
5 26
6 26
6 26
6 26
6 26
6 26
6 26
6 26
6 26
6 26
6 26
6 23
6 23
6 22
6 22
6 22
6 22
6 22
6 25
6 24
4 18
4 15
4 15
4 16
4 16
4 16
4 8
4 8
4 7
4 7
4 7
4 7
4 7
4 7
4 7
3 7
1 6
0 6
0 6
0 7
0 7
0 8
0 9
0 9
0 9
0 9
0 10
0 9
0 9
0 9
0 8
0 8
0 8
0 8
0 5
0 4
0 4
0 4
0 4
0 6
0 6
0 6
0 6
0 6
0 6
0 6
0 6
0 6
0 6
0 6
0 6
0 6
0 6
0 6
0 6
0 5
0 5
0 4
0 3
0 3
0 3
0 3
0 2
0 2
0 2
0 2
0 2
0 2
0 2
0 2
0 2
0 3
0 3
0 3
0 4
0 2
0 2
0 2
0 2
0 2
0 2
0 2
0 2
0 2
0 2
0 2
0 2
0 2
0 2
0 2
0 2
0 2
0 2
0 2
0 3
0 5
0 5
0 6
0 7
0 11
0 13
0 13
0 13
0 14
0 14
0 15
0 15
0 20
0 20
0 20
0 19
0 19
0 19
0 19
0 19
0 19
0 19
0 19
0 19
0 19
0 19
0 20
0 22
1 22
1 23
1 23
1 36
1 36
1 38
1 49
1 49
1 49
1 50
1 49
1 47
1 46
1 46
1 46
1 46
1 45
2 46
2 45
2 45
2 40
2 40
2 40
2 40
2 40
2 40
2 40
2 40
2 40
2 40
2 41
2 42
2 42
2 42
2 40
2 39
1 32
1 26
1 25
1 26
1 26
1 22
1 12
1 11
1 8
1 6
1 5
1 5
1 4
1 5
1 5
1 8
0 8
0 8
0 8
0 8
0 7
0 7
0 7
0 7
0 7
0 7
3 7
3 8
3 8
3 10
3 12
3 11
3 11
3 11
3 11
3 12
3 12
3 12
3 11
3 11
3 11
3 11
3 11
3 11
3 10
3 10
3 12
3 14
3 24
3 26
3 26
3 24
3 24
3 24
3 26
3 29
3 29
3 34
8 196
8 204
8 213
8 220
5 219
5 220
5 228
5 228
5 229
5 230
5 234
5 234
5 234
5 234
5 235
5 236
5 236
5 236
5 236
5 234
5 234
5 234
5 234
5 236
5 233
5 229
5 222
5 222
6 222
6 221
6 221
6 222
6 222
6 218
6 218
6 208
1 29
1 29
1 34
2 33
8 149
9 149
9 150
9 151
9 149
9 149
9 145
9 145
9 151
9 154
9 154
9 155
9 156
9 157
9 158
9 159
9 158
9 158
9 158
9 156
9 172
9 171
9 170
8 167
8 200
8 201
8 203
8 203
8 203
8 203
8 203
8 203
8 203
8 197
6 185
5 184
0 69
0 69
0 69
0 70
0 70
0 70
0 70
0 67
0 62
0 59
0 58
0 56
0 55
0 55
0 54
0 54
0 54
0 54
0 54
0 54
0 41
0 41
0 41
0 41
0 7
0 7
0 5
0 5
0 5
0 5
0 5
0 5
0 5
0 5
0 5
0 5
0 5
0 5
0 4
0 3
0 3
0 3
0 4
0 8
0 9
0 9
0 9
0 7
0 9
1 10
2 10
2 11
2 11
2 11
2 12
2 13
2 12
2 12
2 14
2 14
2 14
3 14
3 14
3 14
3 14
3 14
4 17
4 17
3 17
3 17
3 17
3 17
8 18
8 18
8 18
8 18
8 18
8 18
8 17
8 13
8 13
8 13
8 13
8 12
8 10
8 9
7 8
7 8
7 9
7 9
7 7
7 7
7 7
7 7
7 7
7 7
7 8
7 8
7 10
7 10
7 10
7 10
6 7
6 8
6 8
6 9
6 9
6 9
1 9
1 9
1 9
1 9
1 9
1 9
1 9
1 9
1 8
1 8
1 8
1 8
1 8
1 8
1 8
1 8
1 7
1 7
1 6
1 6
1 6
1 6
1 6
1 6
0 21
0 22
0 22
0 23
0 23
0 23
0 23
0 23
0 23
1 29
1 28
1 28
1 28
1 28
1 28
1 28
1 28
1 28
1 28
1 28
1 28
1 28
1 28
1 28
1 28
1 28
1 28
1 28
1 28
1 28
1 28
1 28
1 28
1 27
1 27
1 27
1 10
1 9
1 7
1 7
1 8
1 8
1 12
1 12
1 13
0 6
0 7
0 7
0 8
0 9
1 12
1 14
1 14
1 14
1 16
1 18
1 18
1 18
1 18
1 18
1 18
1 18
1 19
1 19
1 19
2 20
2 20
4 20
4 20
4 20
4 20
4 20
4 20
4 20
4 20
4 20
4 19
4 20
4 18
4 18
4 18
4 18
4 16
4 16
4 17
4 17
3 15
3 9
3 10
3 10
3 10
3 11
3 11
3 11
3 11
3 11
3 11
3 11
3 10
3 10
3 11
2 10
1 10
0 10
0 10
0 10
0 10
0 10
0 10
0 10
0 10
0 9
0 7
0 6
1 7
1 7
1 7
1 7
1 7
1 6
1 6
1 5
1 4
1 3
2 3
2 3
2 3
2 3
2 3
2 3
2 3
2 3
2 3
2 3
2 3
2 3
2 2
2 2
2 2
2 2
2 2
2 2
2 2
1 2
1 2
1 2
1 2
1 2
1 2
1 1
1 4
1 6
1 8
1 8
1 9
2 12
2 17
2 19
2 29
2 35
1 37
1 37
2 37
2 37
2 38
2 39
2 39
2 39
2 39
2 39
2 39
2 39
2 39
2 39
2 39
3 39
3 39
3 39
3 39
3 39
3 39
3 39
3 39
3 39
3 39
3 40
3 37
3 35
3 33
3 32
3 31
2 25
2 13
2 9
2 9
2 3
1 1
1 1
1 1
2 1
2 1
2 1
2 1
2 1
2 1
2 1
2 1
2 1
2 1
2 1
2 1
1 1
1 1
1 1
1 1
1 1
1 1
1 1
1 1
1 1
1 1
1 2
3 11
4 14
4 25
5 29
6 31
6 32
11 37
16 38
24 40
24 40
24 40
24 40
24 40
24 41
24 43
24 44
24 45
25 48
25 48
25 48
25 48
25 49
25 49
25 51
25 51
25 51
25 51
27 51
28 52
31 56
31 56
29 57
29 57
29 57
29 57
27 55
24 47
23 47
23 35
22 36
21 34
19 32
13 26
8 26
8 27
8 27
8 27
8 27
8 27
8 27
8 25
8 23
8 22
7 20
7 20
7 20
7 19
6 19
6 19
6 16
6 17
7 17
6 16
8 16
5 15
5 13
6 13
6 12
6 12
7 12
7 11
7 11
7 11
8 6
8 6
9 3
10 3
10 3
10 3
10 2
10 2
10 2
10 2
11 2
11 2
12 2
12 2
12 3
19 17
23 18
25 19
26 20
26 20
35 24
36 24
35 24
33 23
33 23
33 24
32 24
33 24
33 24
32 25
32 24
32 25
31 25
31 25
31 25
31 25
30 25
30 25
28 25
27 25
28 25
28 25
28 26
29 26
29 26
28 26
34 27
34 27
33 27
33 28
28 28
21 14
21 12
19 12
17 11
17 11
10 8
10 8
10 9
10 9
10 9
9 8
9 8
9 8
9 7
9 7
9 7
9 7
9 7
9 7
10 7
11 7
17 11
17 11
17 11
17 11
16 11
16 11
16 11
15 11
16 12
16 12
10 11
10 11
10 10
10 9
10 9
9 8
9 9
9 9
9 9
9 9
11 9
11 9
11 9
11 9
12 9
12 9
12 9
12 9
13 9
15 9
16 12
17 16
19 16
18 17
17 17
15 21
11 17
11 20
11 20
11 20
11 20
11 20
11 19
10 18
10 20
11 22
11 22
12 27
12 28
12 28
12 28
12 28
12 27
12 28
12 28
12 28
10 27
10 27
10 25
9 25
9 25
9 25
9 25
8 25
6 25
6 25
4 21
4 18
2 18
2 17
2 16
2 11
2 11
2 11
2 12
2 12
2 12
2 12
2 12
2 12
2 10
1 6
1 6
1 2
1 5
1 12
1 19
1 19
2 20
2 19
2 21
2 22
2 22
2 22
2 22
3 22
3 22
3 24
3 25
3 26
4 26
6 40
6 40
7 40
8 43
9 44
9 44
9 44
9 45
9 45
9 45
9 46
9 47
9 47
9 47
9 47
9 47
9 47
9 47
8 45
8 42
8 35
7 30
7 30
6 29
6 30
6 28
6 27
6 28
6 28
6 28
6 34
6 34
6 32
5 31
5 30
5 30
3 18
3 17
2 17
1 14
0 14
0 15
0 15
0 14
0 14
0 13
0 12
0 11
0 11
0 11
0 13
0 15
0 19
0 21
0 21
0 21
0 23
0 23
0 22
0 22
1 27
1 27
1 27
1 27
1 27
1 27
1 24
1 24
1 24
1 24
1 24
1 22
1 22
1 22
1 23
2 23
2 23
2 22
2 22
2 23
2 24
2 28
2 32
3 33
4 33
5 34
5 31
5 27
5 25
5 23
5 23
5 23
5 21
5 21
5 21
5 21
4 17
4 16
4 16
4 17
4 17
4 17
4 14
4 14
4 13
4 14
4 14
4 14
4 14
4 14
4 13
3 13
3 13
3 13
3 13
3 13
1 9
1 7
1 4
1 3
0 3
0 2
0 2
0 2
0 2
0 4
0 4
0 4
0 4
0 4
1 4
1 4
1 4
1 5
1 5
1 7
1 7
1 7
1 8
1 8
2 8
2 7
2 7
2 7
2 7
2 7
2 7
2 7
2 8
2 8
2 8
2 8
2 8
2 8
2 8
2 8
2 8
2 8
2 9
2 9
2 14
3 59
3 61
3 63
3 66
3 74
2 74
3 75
3 74
3 75
3 75
3 72
3 72
3 72
3 71
3 71
2 71
2 71
2 71
2 71
2 71
2 71
2 72
2 72
2 71
3 91
3 91
3 110
3 110
3 111
3 111
2 105
2 104
3 130
3 132
3 133
2 119
2 90
2 83
2 83
2 81
2 74
2 73
2 74
2 75
2 75
2 75
2 75
2 75
2 75
2 75
2 75
2 75
2 75
2 75
2 75
2 74
2 74
2 74
2 74
2 74
1 54
1 56
1 36
1 37
1 35
1 35
1 35
1 32
0 7
0 6
0 6
0 6
0 6
0 6
0 6
0 6
0 6
0 6
0 5
0 4
0 4
0 4
0 4
0 4
0 4
0 4
1 4
1 4
1 4
1 4
1 4
1 4
1 4
1 4
1 4
1 4
1 5
1 4
1 4
1 5
1 6
1 6
1 6
1 6
1 6
1 5
1 5
1 5
1 5
1 5
1 5
1 6
1 6
1 6
1 7
1 7
1 7
1 7
1 7
1 7
1 7
1 7
0 7
0 7
0 7
0 7
0 8
0 8
0 8
0 8
0 8
0 8
0 7
0 5
0 5
0 3
0 3
0 3
0 3
0 3
0 3
0 8
0 9
0 9
0 9
0 9
1 9
1 9
1 9
1 10
1 9
1 9
1 9
1 9
2 10
2 10
3 17
3 18
3 19
3 19
3 19
3 19
3 18
3 20
3 20
3 20
3 20
3 20
3 20
3 20
3 20
3 20
3 20
3 20
3 20
3 20
2 20
2 15
2 13
2 13
2 13
2 13
2 13
2 13
1 13
1 13
2 14
4 18
4 18
4 18
4 18
4 19
3 11
3 12
3 11
3 11
3 9
3 9
3 9
3 9
3 9
3 9
3 10
3 10
3 10
3 10
3 10
3 10
3 10
3 10
3 10
3 10
3 10
3 10
3 10
3 10
3 10
3 10
3 9
3 10
3 10
3 10
2 7
0 2
0 2
0 2
0 2
0 2
0 4
0 5
0 6
0 7
0 7
2 8
2 10
2 12
2 12
2 11
2 11
2 11
2 11
2 11
2 11
2 11
2 11
2 11
2 11
2 11
2 11
2 11
2 11
2 11
2 11
2 11
4 12
4 11
4 11
4 11
4 11
5 12
5 13
5 13
7 15
7 15
7 12
7 13
7 12
7 14
5 14
5 15
5 13
5 12
5 12
5 12
5 12
5 12
5 12
5 12
5 12
5 12
5 12
5 12
5 12
5 12
5 12
5 12
5 12
5 12
5 12
5 12
5 11
6 11
6 11
6 11
6 11
5 10
5 9
5 9
3 7
3 6
3 6
3 4
3 4
3 2
3 2
3 0
3 0
3 0
3 0
3 0
3 1
3 2
3 2
3 2
3 2
3 4
3 4
3 5
3 5
3 5
3 5
3 5
3 5
3 5
3 5
2 5
0 5
0 5
0 5
0 5
0 5
0 5
0 5
0 5
0 5
0 5
0 5
0 5
0 5
0 4
0 4
0 4
0 4
0 5
0 5
0 7
0 7
0 6
0 6
0 7
0 6
0 4
2 12
2 12
2 13
2 13
2 13
2 13
2 13
2 13
2 13
2 13
2 13
2 13
2 13
2 13
3 13
3 13
3 13
3 13
3 13
3 13
3 17
3 19
3 19
3 21
3 21
3 21
3 20
3 19
3 19
3 18
3 18
3 18
3 18
3 17
3 17
3 17
1 9
1 9
1 8
1 8
1 8
1 8
1 8
1 8
1 8
1 8
1 8
1 8
1 8
1 8
0 8
0 8
1 8
1 10
1 10
1 10
1 6
1 4
1 4
1 2
1 2
1 2
1 2
1 2
1 2
1 2
1 2
1 2
1 2
1 2
1 2
1 2
1 2
1 2
1 2
1 2
1 2
1 2
1 2
1 2
1 2
1 2
1 2
1 2
1 2
1 2
1 2
1 2
0 2
0 1
0 4
0 4
0 4
0 4
0 4
0 4
0 4
0 4
0 4
0 4
0 4
0 4
0 4
0 4
0 4
0 4
0 4
0 4
0 4
0 4
0 4
0 4
0 7
0 9
0 9
0 10
0 11
1 13
1 14
1 15
1 16
3 17
3 17
3 17
3 17
6 18
8 15
8 15
8 15
8 15
8 15
8 16
8 16
8 16
8 17
8 18
8 20
8 21
8 21
8 21
8 21
8 21
8 21
8 21
8 23
8 33
8 37
8 39
8 38
8 37
8 37
8 41
8 42
7 44
8 44
8 45
8 45
6 45
6 45
6 45
5 45
1 44
1 46
2 46
2 46
2 46
2 46
2 45
2 46
2 46
2 43
2 47
2 48
2 51
2 55
2 56
2 59
2 59
3 60
4 60
4 56
4 44
4 41
4 41
4 41
4 39
4 39
5 35
5 33
5 27
5 25
5 25
5 25
5 25
5 25
5 25
5 25
5 25
4 23
4 23
5 24
5 24
5 26
5 26
5 25
8 27
8 27
9 19
9 19
9 17
9 13
9 11
9 10
9 9
8 9
8 9
8 8
8 8
8 8
8 8
7 7
7 7
7 7
6 6
6 6
6 7
6 8
6 8
6 8
6 8
6 8
6 9
6 9
6 9
6 9
6 9
4 6
4 6
4 5
4 5
2 5
1 4
1 4
1 3
1 3
1 3
1 3
1 3
1 3
1 3
1 3
1 3
1 3
0 3
0 5
0 7
0 8
0 18
0 19
1 19
1 20
1 19
1 18
1 18
1 18
2 17
2 17
2 17
2 18
2 18
2 18
2 17
2 17
2 17
2 17
2 17
2 17
2 17
2 17
2 19
2 20
2 20
2 21
2 21
2 22
2 22
2 22
2 22
3 22
3 20
3 19
3 18
3 11
3 7
3 10
2 10
4 10
8 11
9 12
9 14
9 14
9 14
9 14
9 14
9 13
9 14
9 14
10 14
10 14
12 14
13 14
13 14
13 14
13 14
13 14
13 11
13 11
13 11
12 10
12 10
12 9
12 9
12 9
12 10
12 10
12 10
12 9
12 9
12 9
12 9
11 6
11 6
9 6
6 4
5 3
5 2
5 3
4 3
4 3
4 3
4 3
4 2
4 2
3 2
3 2
1 2
0 2
0 2
0 3
0 3
0 3
0 3
1 5
1 5
2 5
2 5
2 5
2 5
2 5
2 11
2 11
2 11
2 11
2 11
2 12
2 12
4 12
4 12
4 12
4 12
4 12
4 12
13 27
13 29
15 33
15 34
15 36
15 36
15 39
15 39
15 39
15 39
15 39
15 39
15 39
15 39
15 39
16 39
15 37
15 37
14 37
14 37
14 37
14 37
14 37
14 30
14 30
14 31
14 31
14 30
13 31
13 31
12 31
12 31
12 31
12 30
12 30
11 27
3 9
3 6
1 2
1 2
1 2
1 2
1 2
1 2
1 2
2 3
4 3
5 4
5 8
4 9
4 11
4 12
4 12
4 12
4 13
4 13
4 13
4 13
4 16
4 18
4 18
4 18
4 18
4 18
4 17
4 17
4 17
4 17
4 17
4 17
4 17
4 17
4 17
4 17
4 17
4 17
4 17
4 20
4 20
4 20
4 19
4 20
2 20
1 21
1 16
1 17
1 15
1 16
1 16
2 17
2 16
2 17
2 17
2 17
2 13
3 11
4 11
6 16
6 16
6 16
6 16
6 16
6 16
6 16
6 16
6 16
6 16
6 16
6 16
6 16
7 16
7 16
7 17
7 14
10 14
11 14
12 14
18 11
18 11
18 10
19 11
19 11
19 11
19 10
19 10
18 9
18 9
18 9
18 9
18 13
18 14
17 14
16 14
14 10
14 10
14 10
14 10
16 12
16 12
16 14
17 14
17 14
17 13
17 16
17 17
17 18
16 18
16 19
14 19
15 19
14 19
13 19
11 18
5 18
5 19
6 19
5 18
7 18
7 18
7 17
7 18
7 18
8 18
14 24
14 23
14 20
14 18
14 18
14 18
14 18
14 18
14 18
14 18
12 14
12 14
12 14
11 14
11 14
11 14
11 11
11 9
11 9
11 9
11 8
11 8
10 9
9 8
8 9
8 9
7 9
7 10
7 10
8 10
8 12
8 12
10 12
17 12
23 15
25 15
19 9
19 9
19 9
19 9
19 9
19 9
19 8
19 8
19 8
19 7
19 8
21 8
21 22
21 24
21 28
23 29
23 29
23 29
23 29
23 29
23 30
23 31
23 31
23 31
23 32
23 32
22 32
22 32
20 32
19 31
17 35
12 36
11 38
7 37
4 34
3 35
3 35
3 35
3 35
3 35
2 35
2 35
2 36
2 37
4 37
4 36
4 36
4 35
4 20
4 19
4 16
2 16
2 17
2 16
2 17
2 19
3 27
3 27
4 30
4 34
2 34
2 39
2 39
2 41
2 41
2 56
2 49
2 49
2 50
2 50
2 52
2 53
2 53
2 55
2 55
2 58
2 58
2 58
2 58
2 57
2 58
2 63
3 68
4 118
4 125
4 129
5 133
6 133
6 131
6 142
6 152
6 153
4 157
4 158
4 159
4 180
4 180
4 180
4 178
4 178
4 176
4 165
4 166
4 169
4 170
4 188
4 199
4 200
4 211
4 226
4 251
4 285
4 304
3 304
3 304
3 305
3 305
2 298
2 282
1 229
1 231
1 230
0 231
0 232
0 228
0 216
0 210
0 208
0 196
0 194
0 195
0 170
0 171
0 175
3 206
3 209
3 210
3 207
3 206
3 206
3 203
3 182
3 156
3 149
3 154
3 150
3 133
3 97
4 133
4 133
4 135
4 135
4 134
4 134
4 134
4 134
4 132
4 131
4 129
4 129
4 129
4 129
4 129
4 129
3 128
3 127
3 127
3 118
3 113
3 110
1 79
1 79
1 78
1 78
1 78
1 78
1 78
1 78
1 78
1 75
1 60
1 51
1 48
0 47
0 1
0 1
0 1
0 1
0 1
0 1
0 1
0 1
0 1
0 1
0 1
0 4
0 4
0 6
0 9
0 10
0 12
0 13
0 13
0 13
0 13
0 13
0 13
0 13
0 13
0 13
0 13
0 13
0 13
0 13
0 13
0 13
0 13
0 13
0 13
0 13
0 13
0 13
0 13
0 13
0 13
0 13
0 13
0 13
0 11
0 11
0 11
1 8
1 8
1 5
1 2
1 0
1 0
1 2
1 2
1 3
1 3
1 4
1 5
1 5
1 5
1 14
1 14
1 17
1 17
1 17
1 17
1 17
1 17
1 17
1 17
1 17
1 17
1 17
1 17
1 18
1 18
1 19
1 19
1 19
1 19
1 19
1 19
0 19
0 19
1 19
2 19
2 19
2 19
2 18
2 19
2 18
2 18
2 16
2 15
2 15
5 15
5 6
5 7
5 5
5 5
5 5
5 5
5 5
5 5
5 5
5 6
5 8
5 9
5 9
5 9
6 8
6 8
6 8
6 8
6 8
6 8
6 8
5 8
6 13
5 13
5 13
5 13
5 12
5 12
5 11
5 11
5 11
5 11
5 11
5 11
5 11
2 11
2 15
2 16
2 16
2 16
2 17
2 17
2 17
2 17
2 17
2 16
2 12
2 12
2 12
2 12
1 15
1 16
3 32
4 36
6 41
6 41
6 42
6 42
5 38
5 38
5 38
5 38
5 38
5 38
5 38
5 38
5 38
5 39
5 39
5 39
5 40
5 40
5 38
5 39
5 39
5 40
5 42
5 42
5 42
5 42
5 42
5 42
5 42
5 42
5 42
5 42
5 37
5 33
0 12
0 11
0 11
0 11
0 12
2 13
3 13
3 13
3 14
3 14
3 14
3 14
3 14
3 15
3 26
7 27
7 28
7 28
7 28
7 26
7 26
7 26
7 26
7 26
7 23
7 23
7 23
7 23
7 23
7 23
7 23
7 23
7 23
7 24
7 24
7 24
7 27
7 28
7 28
6 28
7 26
6 27
5 27
5 28
5 27
5 29
5 29
5 30
5 30
5 28
4 18
1 18
1 18
1 21
2 20
2 20
2 20
2 18
2 18
2 18
2 18
2 18
2 18
2 22
2 22
2 22
2 22
2 22
2 23
2 21
2 21
2 21
1 18
1 17
1 17
2 17
3 26
3 27
3 33
3 34
3 35
3 33
3 33
3 32
2 31
2 30
2 29
2 29
2 29
2 26
2 26
2 26
2 26
2 25
2 25
2 25
2 25
2 25
2 24
2 20
2 20
2 20
2 20
2 21
2 23
2 23
2 25
2 25
2 24
2 24
2 24
1 22
0 12
0 9
0 5
0 5
0 5
0 5
0 6
0 6
0 8
0 8
0 8
0 8
0 8
0 8
0 8
0 8
0 8
0 8
0 8
0 8
0 8
0 8
0 8
0 9
2 10
2 10
2 10
2 9
2 7
2 8
2 6
2 6
2 6
2 6
2 6
2 6
2 6
2 6
4 19
4 18
4 18
6 18
6 18
6 22
6 21
6 21
6 21
6 23
6 27
6 27
6 27
6 29
6 29
6 29
6 29
6 30
6 30
6 30
6 30
6 29
4 28
4 29
4 28
4 28
4 28
4 28
4 41
4 44
4 44
4 46
4 46
4 47
4 47
4 49
2 36
3 37
3 37
1 38
1 38
1 33
1 37
1 37
1 37
1 39
1 38
1 36
1 35
1 35
1 35
1 40
1 42
1 42
1 46
1 46
1 46
1 46
1 47
1 47
1 48
1 49
1 49
1 49
1 36
1 35
1 34
1 34
1 34
1 33
1 32
1 31
1 32
0 37
0 40
0 40
0 41
1 44
9 44
9 45
9 39
9 40
9 40
9 41
9 44
9 44
9 44
9 38
9 38
9 39
9 35
9 36
9 36
9 36
9 34
9 34
9 34
9 34
9 34
9 34
9 34
9 36
9 40
9 42
9 46
9 46
9 46
9 46
8 45
8 37
7 36
7 35
7 33
7 30
0 26
0 26
0 25
0 24
0 23
0 23
0 20
0 20
0 19
0 19
0 19
0 19
0 28
0 27
0 27
0 28
0 27
0 27
0 26
0 27
0 30
0 30
0 31
0 27
0 21
0 19
0 15
0 15
0 15
0 15
0 15
0 15
0 15
0 15
0 16
0 16
0 16
0 16
0 16
0 16
0 16
0 16
0 16
0 17
0 17
0 18
0 18
0 18
0 10
0 10
0 10
0 9
0 9
0 9
0 9
0 6
0 4
0 4
0 4
0 4
0 4
0 4
0 5
0 5
0 5
0 5
0 5
0 5
0 5
0 5
0 4
0 4
0 4
0 4
0 4
0 4
0 4
0 3
0 1
0 1
0 1
0 1
0 2
0 2
0 2
0 2
0 2
0 2
0 2
0 2
0 3
0 2
0 2
0 2
0 2
0 2
0 3
0 3
0 3
0 3
0 3
0 3
0 3
0 3
0 4
0 5
0 8
0 10
1 10
1 14
1 17
1 17
1 17
1 17
1 21
1 21
1 20
1 20
1 21
1 21
1 22
1 22
1 22
1 23
1 24
1 23
1 25
1 25
1 25
1 25
1 25
1 25
1 24
1 24
1 24
1 24
1 25
1 25
1 25
1 25
1 24
1 23
1 18
1 15
0 15
0 14
0 11
0 11
0 11
0 11
0 5
0 5
0 6
0 6
0 10
0 10
0 29
0 29
0 31
0 30
0 30
0 38
0 38
0 39
0 41
0 41
0 42
0 42
0 43
0 43
0 44
0 45
0 46
0 46
0 46
0 46
0 47
0 47
0 47
0 47
0 47
0 47
0 47
0 47
0 47
0 47
0 47
1 48
1 47
1 48
1 44
1 44
1 29
1 33
1 31
1 30
1 33
1 25
1 23
1 23
1 20
1 22
1 21
1 20
1 19
1 19
1 18
1 18
1 17
1 17
2 17
2 18
2 17
2 17
2 17
2 26
2 26
2 26
2 26
3 26
3 26
3 26
3 26
2 25
2 23
4 24
4 26
4 25
4 22
4 20
4 20
4 20
4 17
4 17
4 17
4 17
4 18
4 16
4 16
4 16
3 16
3 16
3 16
3 15
3 15
3 15
3 15
3 14
3 14
3 14
2 14
2 5
2 5
2 5
3 5
3 5
3 5
3 5
3 5
2 5
2 5
1 4
1 1
1 1
1 1
1 0
1 0
1 0
1 0
1 2
1 4
1 4
1 5
1 5
1 6
1 7
1 8
1 8
1 8
1 8
1 8
1 8
1 8
1 8
1 9
1 12
1 13
1 17
1 17
1 17
0 17
0 17
0 17
0 17
0 17
0 17
0 17
0 17
0 17
0 17
0 17
0 17
0 18
0 18
0 18
0 15
0 16
0 15
0 15
0 14
0 14
0 13
0 12
0 12
0 12
0 13
0 13
0 12
0 12
0 12
1 11
1 9
1 8
1 4
1 4
1 4
1 4
1 4
1 4
1 4
1 4
1 4
1 4
1 5
1 5
1 6
1 6
1 6
1 5
1 5
1 5
1 5
1 3
1 3
1 3
1 3
1 5
1 5
1 5
1 5
1 6
1 5
1 5
1 5
1 5
1 5
1 10
1 10
1 10
1 10
1 10
1 10
1 10
1 12
1 14
1 14
1 14
1 14
1 14
1 13
1 13
1 12
1 12
1 12
1 15
1 19
1 19
1 20
1 22
1 22
1 22
1 20
1 20
1 20
1 20
1 20
1 19
1 19
1 19
1 19
1 19
1 19
0 14
0 14
0 14
0 15
0 24
0 24
0 23
0 22
0 20
0 20
0 20
0 20
0 20
0 21
0 21
0 21
0 21
0 21
0 18
0 14
0 14
0 13
0 12
0 12
0 12
0 12
0 12
0 12
0 32
0 53
0 72
0 76
0 80
0 84
0 85
0 87
0 88
0 89
0 89
0 88
0 79
0 80
0 80
0 81
0 81
0 81
0 81
0 81
0 81
0 81
0 81
0 81
0 81
0 82
0 82
0 81
0 81
0 81
0 81
0 81
0 81
0 85
0 84
0 81
0 47
0 28
0 28
0 29
0 34
0 32
0 31
0 31
0 30
0 30
0 30
0 30
0 29
0 29
0 29
0 29
0 29
0 29
0 29
0 32
0 32
0 33
0 33
0 33
0 33
0 32
0 33
0 34
0 35
0 36
0 36
0 36
0 36
0 36
0 38
0 43
0 44
0 41
0 27
0 38
0 37
0 37
0 37
0 37
0 37
0 38
0 38
0 38
0 39
0 39
0 39
0 39
0 39
0 39
0 38
0 35
0 37
0 35
0 36
0 53
0 56
0 57
0 56
0 54
0 55
0 69
0 80
0 91
0 97
0 102
0 101
0 97
0 103
0 105
0 106
0 98
0 101
0 107
0 107
0 107
0 107
0 107
0 107
0 107
0 107
0 107
0 107
0 107
0 108
0 110
0 136
0 143
0 142
0 142
0 140
0 121
0 119
0 120
0 120
0 120
0 118
0 94
0 78
0 74
0 70
0 63
0 62
0 62
0 58
0 56
0 54
0 49
0 48
0 42
0 42
0 42
0 42
0 42
0 42
0 42
0 42
0 42
0 42
0 41
0 41
0 35
0 8
0 7
0 7
0 10
0 11
0 12
0 16
0 16
0 19
0 19
0 19
0 19
0 19
0 19
0 20
0 20
0 22
0 20
0 20
0 20
0 20
0 19
0 19
0 20
0 21
0 24
0 24
0 24
0 25
0 25
0 25
0 25
0 25
0 25
0 24
0 24
0 21
0 21
0 20
0 17
0 17
0 17
0 13
0 13
0 10
0 10
0 10
0 10
0 11
0 12
0 11
0 10
0 21
0 22
0 23
0 26
0 27
0 27
0 26
0 25
0 25
0 24
0 25
0 25
0 25
0 25
0 25
0 25
0 25
0 25
0 25
0 25
0 25
0 25
0 25
0 25
0 25
0 25
0 25
0 25
0 25
0 25
0 25
0 25
0 24
0 21
0 22
0 21
0 9
0 6
0 7
0 6
0 4
0 5
0 10
0 10
0 11
0 11
0 16
0 19
0 19
0 21
0 21
0 21
0 21
0 22
0 22
0 22
0 22
0 22
0 22
0 22
0 21
0 21
0 21
0 21
0 21
0 21
0 21
0 21
0 21
0 21
0 27
0 27
0 27
0 29
0 32
1 80
1 97
1 100
1 97
1 97
1 98
1 99
1 94
1 92
1 93
1 91
1 92
1 91
1 92
1 92
1 92
1 94
1 94
1 94
1 94
3 99
9 257
9 263
9 266
9 272
9 278
9 280
9 291
9 290
9 297
9 299
9 289
9 292
9 290
9 291
9 289
9 266
10 269
10 270
10 270
10 269
10 270
10 270
10 271
10 269
10 270
10 270
10 269
9 269
9 269
9 269
9 269
9 270
9 275
9 275
9 275
7 267
2 90
2 86
2 83
2 82
3 78
4 78
4 79
5 79
5 70
10 119
11 131
11 130
11 134
11 125
11 121
9 94
9 80
9 80
9 81
9 81
9 82
9 83
10 86
10 86
10 86
10 86
10 86
10 86
10 86
10 86
10 86
10 83
10 80
10 81
10 83
10 83
10 84
10 88
10 92
10 90
9 91
10 92
10 92
10 92
11 90
6 34
12 27
12 30
12 31
12 31
12 31
12 32
11 32
11 32
11 26
11 26
11 26
11 24
11 24
11 34
11 35
11 37
13 40
13 45
13 47
13 47
13 49
13 48
13 54
13 57
13 61
13 64
13 64
13 65
13 62
12 95
12 105
12 164
10 188
8 190
7 198
7 205
2 210
2 209
2 207
2 207
1 207
1 212
1 212
1 212
1 212
1 214
1 213
1 212
1 213
1 205
1 210
1 208
1 203
1 198
1 198
1 198
1 199
1 199
1 189
1 185
1 181
1 178
1 175
1 169
1 163
1 127
1 118
0 60
1 37
1 34
1 28
1 26
1 20
1 25
1 29
1 38
1 63
1 67
2 84
2 154
2 162
2 179
2 189
2 196
2 195
2 190
2 189
2 191
2 192
2 193
2 195
2 196
2 195
2 195
2 195
2 195
2 195
2 195
2 195
2 195
2 194
2 197
2 197
1 198
1 199
1 199
1 199
1 206
3 213
6 263
15 704
15 715
15 699
15 691
14 669
14 606
14 621
14 612
14 611
14 603
14 605
14 604
14 604
15 605
15 607
15 613
15 616
15 616
15 617
15 617
15 618
15 623
15 623
15 623
15 625
15 625
15 625
15 622
15 622
15 621
15 619
15 616
15 616
14 606
9 591
7 502
1 69
1 62
1 65
1 66
3 76
3 74
3 69
2 87
3 86
3 91
3 93
3 90
3 88
3 87
3 83
4 97
4 103
4 113
4 120
4 276
4 277
4 292
4 307
4 319
4 330
4 341
12 472
12 489
12 549
12 588
14 639
14 638
14 638
14 637
14 633
14 630
14 626
14 618
14 618
14 617
12 610
12 613
12 613
12 597
11 595
11 592
11 595
11 596
11 600
11 602
12 604
11 579
11 571
11 563
11 568
11 400
11 392
11 387
11 373
11 361
11 350
11 336
3 201
3 179
2 125
2 95
1 54
1 56
1 51
1 51
2 62
3 219
3 227
3 251
3 279
4 309
4 325
4 334
4 550
4 565
4 588
4 617
4 628
4 647
4 657
3 658
3 657
3 657
3 657
3 661
2 654
2 658
2 658
2 659
2 660
2 659
2 660
2 660
2 661
2 661
2 661
2 661
4 685
3 685
3 684
4 683
4 669
3 518
3 522
3 497
3 487
3 475
3 469
3 454
3 236
3 218
3 178
3 159
3 156
3 138
3 127
4 132
5 152
5 157
5 155
5 152
5 146
5 143
5 142
5 143
6 142
6 146
6 151
6 153
6 153
6 154
4 155
4 157
3 130
3 130
3 128
3 129
3 128
3 122
3 108
3 107
3 88
3 79
3 81
3 89
3 100
3 112
3 117
3 125
3 126
3 137
2 138
2 144
1 135
1 206
1 212
1 220
1 215
1 212
1 212
0 210
0 227
0 228
0 228
0 233
0 238
0 281
0 294
0 306
0 346
0 362
0 463
0 463
0 465
0 471
0 500
0 503
0 506
0 510
1 525
1 528
2 677
2 685
2 694
2 692
2 713
2 716
2 752
2 747
2 736
2 657
2 665
2 672
2 681
2 694
2 699
5 736
5 720
5 713
5 714
5 709
5 703
5 654
5 635
5 606
5 578
5 572
5 462
5 469
5 466
5 458
5 436
5 435
5 422
5 413
4 403
4 377
3 162
3 153
3 155
3 160
3 161
3 156
3 151
3 147
3 142
3 132
3 117
3 110
3 107
3 103
2 101
0 58
0 53
0 50
0 50
0 51
0 51
0 52
0 50
0 50
0 49
0 49
0 47
0 34
0 33
0 30
0 24
0 24
0 23
0 24
0 23
0 23
0 17
0 13
0 10
0 9
0 8
0 8
0 8
0 9
0 10
1 17
1 20
2 31
2 37
2 40
2 49
2 65
2 70
2 105
5 108
5 108
5 111
5 110
5 114
5 146
6 169
6 194
6 203
6 401
6 405
6 412
6 416
6 474
7 474
7 477
7 477
7 478
7 478
7 478
7 477
7 477
7 486
8 497
8 496
8 498
8 501
7 496
7 495
6 485
6 491
6 490
6 480
7 498
7 503
7 490
4 516
4 527
4 526
4 525
3 519
3 479
4 441
4 442
4 441
4 237
4 233
4 223
4 222
4 164
3 164
3 163
3 163
3 162
3 163
3 163
3 163
3 163
3 158
2 144
2 145
2 146
4 165
5 198
101 1130
109 1199
200 1634
200 1656
205 1703
204 1688
211 1729
212 1742
212 1738
212 1755
212 1772
212 1780
213 1797
213 1808
213 1844
213 1891
213 1967
213 2097
214 2364
214 2434
214 2439
214 2439
214 2460
214 2463
214 2465
214 2462
214 2465
215 2481
218 2504
218 2510
219 2594
219 2596
219 2603
219 2610
218 2588
215 2502
114 1493
107 1442
12 954
9 920
9 915
10 912
10 908
9 905
9 900
9 889
9 870
9 854
8 841
8 825
8 788
7 682
9 605
33 510
85 277
103 229
104 349
104 350
104 333
104 329
105 330
106 333
107 349
106 349
103 335
103 337
102 251
109 244
213 312
217 305
216 302
215 304
216 306
232 666
233 666
233 664
234 666
234 668
234 667
234 667
234 667
234 669
234 668
234 667
234 668
234 672
234 679
219 679
219 680
194 670
154 661
137 664
137 548
137 552
137 553
136 552
136 540
135 530
135 516
134 526
123 522
122 522
110 514
107 724
24 657
22 661
22 664
18 669
18 669
5 311
5 311
5 313
5 317
5 306
5 304
5 308
4 285
4 283
4 283
4 283
4 282
4 282
4 282
4 282
4 282
4 282
4 290
4 288
4 291
4 291
4 290
4 295
4 295
4 295
4 297
4 272
4 273
4 272
4 269
0 60
0 55
0 46
0 43
0 40
0 53
0 54
0 56
0 55
0 49
0 49
0 48
0 45
0 45
0 47
0 47
0 47
0 49
0 49
0 49
0 49
0 49
0 49
0 36
0 37
0 36
0 35
0 35
0 33
0 33
0 33
0 32
0 28
0 27
0 27
0 26
0 26
0 25
0 22
0 22
0 22
0 7
0 7
0 6
0 6
0 6
0 7
0 10
0 15
0 73
0 88
1 103
1 165
1 172
1 204
1 273
1 314
1 321
1 321
2 321
2 322
2 322
2 322
2 322
2 323
2 323
2 324
2 325
1 325
1 325
1 325
1 325
1 325
1 325
1 325
1 325
1 325
1 325
1 325
1 325
1 325
1 325
1 323
1 321
1 310
1 221
1 221
1 218
1 162
0 150
0 97
0 31
0 8
0 4
0 3
0 2
0 1
0 1
0 1
0 0
0 0
0 0
0 0
0 0
0 0
0 0
0 0
0 0
0 0
0 0
0 0
0 0
0 0
0 0
0 0
0 0
0 0
0 0
0 0
0 0
0 0
0 0
0 0
0 0
0 0
0 0
0 0
0 0
0 0
0 0
0 0
0 0
0 0
0 0
0 0
0 0
0 0
0 0
0 0
0 0
0 0
0 0
0 0
0 0
0 0
0 0
0 0
0 0
0 0
0 0
0 0
0 0
0 0
0 0
0 0
0 0
0 0
0 0
0 0
0 0
0 0
0 0
0 0
0 16
0 16
0 17
0 17
0 17
0 18
0 19
0 19
0 19
0 19
0 19
0 20
0 20
0 20
0 20
0 21
0 21
0 21
0 22
0 22
0 22
0 22
0 22
0 23
0 23
0 23
0 23
0 23
0 23
0 23
0 23
0 23
0 23
0 23
0 23
0 23
0 5
0 5
0 4
0 4
0 4
0 4
0 4
0 4
0 4
0 4
0 3
0 3
0 2
0 2
0 2
0 11
0 11
0 11
0 11
0 11
0 24
0 24
0 24
0 23
0 23
0 23
0 23
0 23
0 23
0 23
0 23
0 23
0 23
0 23
0 23
0 23
0 23
0 23
0 23
0 23
0 23
0 23
0 23
0 23
0 23
0 23
0 23
0 23
0 23
0 23
0 23
0 13
0 13
0 13
0 13
0 13
0 0
0 0
0 0
0 0
0 0
0 0
0 0
0 0
0 0
0 0
0 0
0 0
0 0
0 0
0 0
0 0
0 0
0 0
0 0
0 0
0 0
0 0
0 0
0 0
0 0
0 0
0 0
0 0
0 1
0 1
0 1
0 1
0 1
0 2
0 2
0 2
0 2
0 2
0 2
0 2
0 2
0 2
0 2
0 2
0 2
0 2
0 2
0 2
0 2
0 3
0 3
0 3
0 3
0 3
0 3
0 3
0 3
0 3
0 3
0 3
0 3
0 3
0 3
0 3
0 2
0 2
0 2
0 2
0 2
0 1
0 1
0 1
1 1
1 1
1 1
1 1
1 1
1 1
1 1
1 1
1 1
1 2
1 2
1 2
1 2
1 1
1 1
1 1
1 1
1 1
1 2
1 2
1 2
1 2
1 2
1 2
1 2
1 2
1 2
1 2
1 2
1 2
1 2
1 2
1 2
1 2
1 2
1 2
0 2
0 2
0 8
0 9
0 9
0 9
0 9
0 9
0 9
0 8
0 8
0 8
0 8
0 8
0 8
0 8
0 8
0 8
0 7
0 7
0 7
0 7
0 7
0 7
0 7
0 7
0 7
0 7
0 7
0 7
0 7
0 7
0 7
0 7
0 7
0 7
0 7
0 7
0 3
0 0
0 0
0 0
0 0
0 0
0 0
0 0
0 0
0 0
0 0
0 2
0 2
0 2
0 2
0 2
0 2
0 2
0 2
0 2
0 3
0 3
0 3
0 3
0 3
0 3
0 3
0 3
0 3
0 3
0 3
0 3
0 3
0 3
0 3
0 3
0 3
0 3
0 4
0 4
0 9
0 9
0 9
0 9
0 7
0 7
0 7
0 7
0 8
0 8
0 8
0 8
0 8
0 8
0 8
0 8
0 7
0 7
0 7
1 10
1 11
1 11
1 11
1 11
1 11
1 11
1 11
1 11
1 11
1 11
1 11
1 11
1 11
1 11
1 9
1 9
1 5
1 5
1 5
1 5
1 5
1 5
1 5
1 5
1 4
1 4
1 4
1 5
1 5
1 5
1 6
1 6
1 7
1 7
1 7
0 4
0 3
0 3
0 3
0 3
0 3
0 3
0 3
0 3
0 3
0 3
0 3
0 3
0 3
0 3
0 3
1 3
1 3
1 3
1 3
1 3
1 3
1 3
1 3
1 3
1 3
1 3
1 2
1 2
1 2
1 0
0 0
1 0
2 0
2 0
2 0
2 1
2 1
2 1
2 2
2 2
2 2
2 2
2 2
2 2
2 2
2 2
2 2
2 2
2 2
2 2
2 2
2 2
2 2
2 2
2 2
2 2
2 2
0 2
0 2
0 2
0 2
0 3
0 3
0 3
0 3
0 3
0 3
0 3
0 4
0 4
0 4
0 3
0 3
0 3
0 3
0 3
0 3
0 3
0 3
0 3
0 3
0 3
0 3
0 3
0 3
0 3
0 3
0 3
0 3
0 3
0 4
0 4
0 4
0 4
0 4
0 4
0 4
0 3
0 4
0 5
0 5
0 5
0 5
0 5
0 4
0 4
0 4
0 3
0 5
0 5
0 5
0 5
0 5
0 5
0 5
0 5
0 5
0 5
0 5
0 5
0 5
1 5
1 5
1 5
1 5
1 5
1 4
1 4
1 4
1 4
1 4
1 4
1 4
1 4
1 3
1 2
1 2
1 2
1 2
1 2
1 2
1 2
1 2
1 1
1 1
1 0
1 0
1 0
1 0
1 0
1 0
1 0
1 0
1 0
1 0
1 0
1 0
0 0
0 0
0 0
0 0
0 0
0 0
0 0
0 0
0 0
0 0
0 0
0 0
0 0
0 0
0 0
0 0
0 0
0 0
0 0
0 0
0 0
0 0
0 0
0 0
1 0
2 2
2 2
2 2
2 2
2 2
2 2
2 2
3 2
3 2
3 2
3 2
3 2
3 2
3 2
3 2
3 2
3 2
3 3
3 3
4 3
4 3
4 4
4 4
4 4
4 4
4 4
4 5
4 5
4 5
4 5
4 5
4 5
4 5
4 5
4 5
3 5
2 3
3 3
3 3
3 3
3 3
3 3
3 3
2 3
2 3
2 3
2 3
2 3
2 3
2 3
2 3
2 3
2 3
1 2
1 2
1 2
1 2
3 1
4 1
4 0
4 0
4 0
4 0
4 0
4 0
4 0
4 0
4 0
4 0
4 0
4 0
4 0
4 0
3 0
3 1
3 1
3 1
3 1
3 2
3 2
3 2
3 2
3 2
3 2
3 2
3 2
3 2
3 2
3 2
3 2
3 2
3 2
2 2
1 2
0 2
0 2
0 2
0 3
0 3
0 3
0 3
0 3
0 3
0 3
0 3
0 3
0 3
0 3
0 3
0 3
0 1
0 1
0 1
0 3
0 3
0 3
0 3
0 4
0 4
0 4
0 4
0 4
0 4
0 4
0 4
0 4
0 4
0 4
0 4
0 4
0 4
0 4
0 3
0 3
1 3
1 3
1 3
1 3
1 3
1 3
1 3
1 3
1 3
1 3
1 3
1 4
1 4
1 4
1 4
1 3
1 3
1 2
1 2
1 2
1 2
1 2
1 2
1 2
1 2
1 3
1 3
1 3
1 3
1 3
1 3
1 3
1 3
1 3
1 3
1 3
0 3
0 3
0 3
0 3
0 3
0 3
0 3
0 3
0 3
0 3
0 3
0 3
0 3
0 3
0 3
0 6
0 6
0 7
0 7
0 7
0 7
0 8
0 8
0 8
0 8
0 7
0 8
0 8
0 8
0 8
0 8
0 8
0 8
0 8
0 8
0 8
0 8
0 8
0 8
0 8
0 8
0 8
0 8
0 8
0 8
0 8
0 8
0 6
0 7
0 7
0 7
0 3
0 3
0 3
0 3
0 3
0 3
0 1
0 1
0 1
0 1
0 1
0 1
0 1
0 1
0 1
0 1
0 1
0 1
0 1
0 1
0 1
0 1
0 1
0 3
0 3
0 3
0 3
0 4
0 4
0 4
0 4
0 4
0 4
0 3
0 3
0 3
0 3
0 3
0 3
0 3
0 3
0 3
0 3
0 3
0 3
0 3
0 3
0 3
0 3
0 3
0 3
0 3
0 3
0 3
0 3
0 3
0 4
0 4
0 4
0 2
0 2
0 2
0 1
0 1
0 1
0 1
0 1
0 1
0 1
0 1
0 1
0 2
0 2
0 2
0 2
0 2
0 2
0 2
0 2
0 2
0 2
0 2
0 2
0 2
0 2
0 2
0 2
0 2
0 2
0 2
0 2
0 2
0 2
0 2
0 2
0 2
0 2
0 2
0 2
0 2
0 2
0 2
0 2
0 2
0 2
0 2
0 3
0 1
0 1
0 1
0 1
0 1
0 1
0 1
0 1
0 1
0 1
0 1
0 1
0 1
0 1
0 1
0 1
0 1
0 1
0 1
0 1
0 1
0 1
0 1
0 1
0 2
0 2
0 2
0 2
0 2
0 2
0 2
0 2
0 2
0 2
0 2
0 1
0 1
0 1
0 1
0 1
0 1
0 1
0 1
0 1
0 1
0 1
0 1
0 1
0 1
0 1
0 1
0 1
0 1
0 1
0 0
0 0
0 0
0 0
0 1
0 1
0 1
0 1
0 1
0 1
0 1
0 1
0 1
0 1
0 1
0 1
0 1
0 1
0 1
0 1
0 1
0 1
0 1
0 1
0 1
0 1
0 1
0 1
0 1
0 1
0 1
0 1
0 1
0 1
0 1
0 1
0 1
0 1
0 1
0 1
0 0
0 0
0 0
0 0
0 0
0 0
0 0
0 0
0 0
0 0
0 0
0 0
0 0
0 0
0 0
0 0
0 0
0 0
0 0
0 0
0 0
0 0
0 0
0 0
0 0
0 0
0 0
0 0
0 0
0 0
0 0
0 0
1 1
1 1
1 1
1 1
1 1
1 1
1 1
1 1
1 1
1 1
1 1
1 1
1 1
1 1
1 1
1 1
1 1
1 1
1 1
1 1
1 1
1 1
1 1
1 1
1 1
1 1
1 1
1 1
2 3
2 3
2 3
2 3
2 3
2 3
2 3
2 3
1 2
1 2
1 2
1 2
1 2
1 2
1 2
1 2
1 2
1 2
1 2
1 2
1 2
1 2
1 2
1 2
1 2
1 2
1 3
1 3
1 3
1 3
2 3
2 3
2 3
2 3
1 3
1 3
1 1
1 1
1 1
1 1
1 1
1 1
1 1
1 1
1 1
1 1
1 1
1 1
1 1
1 1
1 1
1 1
1 1
1 1
1 1
1 1
1 1
1 1
1 1
1 1
1 1
1 0
1 0
1 0
1 0
0 0
0 0
0 0
0 0
0 0
0 0
0 0
0 0
0 0
0 0
0 0
0 0
0 0
0 0
0 0
0 0
0 0
0 0
0 0
0 0
0 0
0 0
0 0
0 0
0 0
0 0
0 0
0 0
0 0
0 0
0 0
0 0
0 0
0 0
0 0
0 0
0 0
0 0
0 0
0 0
0 0
0 0
0 0
0 0
0 0
0 0
0 0
0 0
0 0
0 0
0 0
0 0
0 0
0 0
0 0
0 0
0 0
0 0
0 0
0 0
0 0
0 0
0 0
0 0
0 0
0 0
0 0
0 0
0 0
0 0
0 0
0 0
0 0
0 0
0 0
0 0
0 0
0 0
0 0
0 0
0 0
0 0
0 0
0 0
0 0
0 0
0 0
0 0
0 0
0 0
0 0
0 0
0 0
0 0
0 0
0 0
0 0
0 2
0 4
0 4
0 4
0 4
0 7
0 7
0 7
0 7
0 7
0 7
0 7
0 7
0 7
0 7
0 7
0 7
0 7
0 7
0 7
0 7
0 7
0 7
0 7
0 7
0 7
0 7
0 7
0 7
0 7
0 7
0 7
0 7
0 7
0 7
0 7
0 3
0 3
0 3
0 3
0 3
0 0
0 0
0 0
0 0
0 0
0 0
0 0
0 0
0 0
0 0
0 0
0 0
0 0
0 0
0 0
0 0
0 0
0 0
0 0
0 0
0 0
0 0
0 0
0 0
0 0
0 0
0 0
0 0
0 0
0 0
0 0
0 0
0 0
0 0
0 0
0 0
0 0
1 0
1 0
1 0
1 0
1 0
1 1
1 1
1 1
1 1
1 1
1 1
1 1
1 1
1 1
1 1
1 1
1 1
1 1
1 1
1 1
1 1
1 1
1 1
1 1
1 1
1 1
1 1
1 1
1 1
1 1
1 4
1 4
1 7
1 7
1 8
1 8
0 8
0 8
0 8
0 8
0 8
0 7
0 7
0 7
0 7
0 7
0 8
1 8
1 8
1 8
1 8
1 8
1 8
1 9
1 10
1 10
1 11
1 11
1 11
1 11
1 11
1 11
1 11
1 11
1 11
1 11
1 8
1 8
1 5
1 5
1 4
1 5
1 5
1 5
1 5
1 5
1 5
1 5
1 5
1 5
1 5
1 5
1 3
0 2
0 2
0 2
0 2
0 2
0 2
0 1
0 1
0 1
0 1
0 1
0 1
0 1
0 1
0 1
0 1
0 1
0 1
0 1
0 1
0 1
0 1
0 1
0 1
0 0
0 0
0 0
0 0
0 0
0 0
0 0
0 0
0 0
0 0
0 0
0 0
0 1
0 1
0 1
0 1
0 1
0 1
0 1
0 1
0 1
0 1
0 1
0 1
0 1
0 1
0 1
0 1
0 1
0 1
0 1
0 1
0 1
0 1
0 1
0 1
0 1
0 1
0 1
0 1
0 1
0 1
0 1
0 1
0 1
0 1
0 1
0 1
0 1
0 1
0 1
0 1
0 1
0 1
0 1
0 1
0 1
0 1
0 1
0 1
0 1
0 1
0 1
0 1
0 1
0 1
0 1
0 1
0 1
0 1
0 1
0 1
0 1
0 1
0 1
0 1
0 1
0 1
0 1
0 1
0 1
0 1
0 1
0 1
0 0
0 0
0 0
0 0
0 0
0 0
0 0
0 0
0 0
0 0
0 0
0 0
0 0
0 0
0 0
0 0
0 0
0 0
0 0
0 0
0 0
0 0
0 0
0 0
0 0
0 0
0 0
0 0
0 0
0 0
0 0
0 0
0 0
0 0
0 0
0 0
0 0
0 0
0 0
0 0
0 0
0 0
0 0
0 0
0 0
0 0
0 0
0 0
0 0
0 0
0 0
0 0
0 0
0 0
0 0
0 0
0 0
0 3
2 3
2 3
2 3
2 3
2 3
2 3
2 3
2 3
2 3
2 3
2 3
2 3
2 3
2 3
2 3
2 4
2 4
2 4
2 5
2 5
2 5
2 5
2 5
2 5
2 5
2 5
2 5
2 5
2 5
2 5
2 5
2 5
2 5
2 5
2 5
1 2
0 2
0 2
2 2
2 2
2 2
2 2
2 2
2 2
2 2
2 2
2 2
3 5
3 7
3 9
3 10
3 10
3 11
3 12
3 11
3 11
3 11
3 11
3 11
3 12
3 12
3 12
3 12
3 12
3 12
3 12
3 12
3 14
3 15
3 15
3 15
3 15
3 15
2 15
1 15
1 15
1 15
1 15
1 15
1 15
1 15
1 15
1 12
0 6
0 5
0 5
0 5
0 4
0 4
0 4
0 4
0 4
0 4
0 4
0 4
0 3
0 3
0 3
0 3
0 3
0 3
0 3
0 3
0 1
0 1
0 1
0 1
0 1
0 1
0 1
0 1
0 1
0 1
0 1
0 1
0 1
0 1
0 1
0 1
0 1
0 1
0 1
2 1
2 1
2 1
3 1
3 1
3 1
3 1
3 1
3 1
3 1
3 1
3 1
3 1
3 1
3 1
3 1
3 1
3 1
3 0
3 0
3 1
3 3
3 3
3 3
3 5
3 5
3 5
3 5
3 5
3 5
3 6
3 6
3 6
3 8
3 8
3 8
0 8
0 8
0 8
0 8
0 8
0 8
0 8
0 8
0 8
0 8
0 8
0 8
0 8
0 8
0 8
0 8
0 8
0 10
0 10
0 10
0 9
0 7
0 7
0 7
0 5
0 5
0 5
0 4
0 4
0 4
0 3
0 3
0 2
0 2
0 2
0 2
0 2
0 2
0 2
0 2
0 2
1 2
1 2
1 2
1 2
1 2
1 2
1 2
1 2
1 2
1 2
1 2
1 2
1 0
1 0
1 0
1 0
1 0
1 0
1 0
1 0
1 1
1 1
1 1
1 1
1 1
1 1
1 1
1 1
1 1
1 1
1 1
1 1
1 1
1 1
1 1
1 1
0 1
0 1
0 1
0 1
0 1
0 1
0 1
0 1
0 1
0 1
0 1
0 1
0 2
0 2
0 2
0 2
0 2
0 2
0 2
0 2
0 1
0 1
0 1
0 1
0 1
0 1
0 1
0 1
0 1
0 1
0 1
0 1
0 1
0 1
0 1
0 1
0 1
0 1
0 1
0 1
0 1
0 1
0 1
0 1
0 1
0 1
0 1
5 3
5 2
5 2
5 2
5 2
5 2
5 2
5 2
5 2
5 2
5 2
5 2
5 2
5 2
5 2
5 2
5 2
5 2
5 2
5 2
5 2
5 2
5 2
5 2
5 2
5 2
5 2
5 2
5 2
5 2
5 2
5 2
5 2
4 2
4 2
2 2
0 0
0 0
0 0
0 0
0 0
0 0
0 0
0 0
0 0
0 0
0 0
0 0
0 0
0 0
0 0
0 0
0 0
0 0
0 0
0 0
0 0
0 0
0 0
0 0
0 0
0 0
0 0
0 0
0 0
0 0
0 0
0 0
0 0
0 0
0 0
0 0
0 0
0 0
0 0
0 0
0 0
0 0
0 0
0 0
0 0
0 0
0 0
0 0
0 0
0 0
0 0
0 0
0 0
0 0
0 0
0 0
0 0
0 0
0 0
0 0
0 0
0 0
0 0
0 0
0 0
0 0
0 0
0 0
0 0
0 0
0 0
0 0
0 0
0 0
0 0
0 0
0 0
0 0
0 0
0 0
0 0
0 0
0 0
0 0
0 0
0 0
0 0
0 0
0 0
0 0
0 0
0 0
0 0
0 0
0 0
0 0
0 0
0 0
0 0
0 0
0 0
0 0
0 0
0 0
0 0
0 0
1 1
1 1
1 1
1 1
1 1
1 1
1 1
1 1
1 1
1 1
1 1
1 2
1 2
1 2
1 2
1 2
0 2
0 2
0 2
0 2
0 2
0 2
0 3
0 3
0 4
0 4
0 4
0 4
0 4
0 4
0 4
0 4
0 4
0 4
0 3
0 3
0 3
0 3
0 3
0 3
0 3
0 3
0 3
0 3
0 3
0 3
0 3
0 2
0 2
0 2
0 2
0 2
0 2
0 2
0 2
0 2
0 2
0 4
0 3
0 5
0 4
0 4
0 4
0 4
0 4
0 4
0 4
0 4
0 4
0 4
0 4
0 4
0 4
0 4
0 4
0 7
0 7
0 11
0 12
0 12
0 12
0 12
0 12
0 12
0 12
0 12
0 12
0 12
0 12
0 12
0 12
0 12
0 12
0 10
0 10
0 8
0 8
0 8
0 8
0 8
0 8
0 8
0 9
0 9
0 9
0 9
0 9
0 9
0 9
0 9
0 9
0 6
0 6
0 1
0 1
0 1
0 1
0 0
0 0
0 0
0 0
0 0
0 0
0 0
0 0
0 0
0 0
0 0
0 0
0 0
0 0
0 0
0 0
0 0
0 0
0 0
0 0
0 0
0 0
0 0
0 0
0 0
0 0
0 0
0 0
0 0
0 0
0 0
0 0
0 0
0 0
0 0
0 0
0 0
0 0
0 0
0 0
0 0
0 0
0 0
0 0
0 0
0 0
0 0
0 0
0 0
0 0
0 0
0 0
0 0
0 0
0 0
0 0
0 0
0 0
0 0
0 0
0 0
0 0
0 0
0 0
0 0
0 0
0 0
0 0
0 0
0 0
0 0
0 0
0 0
0 0
0 0
0 0
0 0
0 0
0 0
0 0
0 0
0 0
0 0
0 0
0 0
0 0
0 0
0 0
0 0
0 0
0 0
0 0
0 0
0 0
0 0
0 0
0 0
0 0
0 0
0 0
0 0
0 0
0 0
0 0
0 0
0 0
0 0
0 0
0 0
0 0
0 0
0 0
0 0
0 0
0 0
0 0
0 0
0 1
0 1
0 1
0 1
0 1
0 1
0 1
0 1
0 1
0 1
0 1
0 1
0 1
0 1
0 1
0 1
0 1
0 1
0 1
0 1
0 1
0 1
0 2
0 2
0 2
0 2
0 2
0 2
0 2
0 2
0 2
0 2
0 1
0 1
0 1
0 1
0 1
0 1
0 1
0 3
0 3
0 3
0 3
0 3
0 3
0 3
0 3
0 3
0 3
0 4
0 4
0 4
0 4
0 4
0 4
0 4
0 4
1 4
1 3
1 3
1 3
1 3
1 3
1 3
1 3
1 3
1 3
1 3
1 3
1 3
1 3
1 3
1 3
1 3
1 3
1 1
1 1
1 1
1 1
1 1
1 1
1 1
1 1
1 1
1 0
1 0
1 1
1 1
1 1
1 1
1 1
1 1
1 1
0 1
0 1
0 1
0 1
0 3
0 3
0 3
0 3
0 3
0 3
1 3
1 3
1 3
3 3
3 3
3 4
3 4
3 4
3 4
3 4
3 4
3 4
3 4
3 4
3 4
3 4
3 4
3 4
3 4
3 3
3 3
3 3
3 3
3 3
3 3
3 3
3 3
3 3
3 3
3 3
3 1
3 1
3 1
3 1
3 1
3 1
0 1
0 1
0 1
0 1
0 1
0 0
0 0
0 0
0 0
0 0
0 0
0 0
0 0
0 0
0 0
0 0
0 0
0 0
0 0
0 0
0 0
0 0
0 0
0 0
0 0
0 0
0 0
0 0
0 0
0 0
0 0
0 0
0 0
0 0
0 0
0 0
0 0
0 0
0 0
0 0
0 0
0 0
0 0
0 0
1 0
1 0
2 0
2 0
2 0
2 0
2 0
2 0
2 0
2 0
2 0
2 0
2 0
2 0
2 0
2 0
2 0
2 0
2 0
2 0
2 0
2 0
2 0
2 0
2 0
2 0
2 0
3 0
3 0
3 0
3 0
3 0
3 0
3 0
3 0
3 0
3 0
3 0
2 0
2 0
2 0
20 2
20 2
20 2
20 2
20 2
20 2
20 2
20 2
20 2
20 2
20 2
21 2
21 2
21 2
21 2
5 0
5 0
5 0
5 0
5 0
5 1
5 1
4 1
4 1
4 1
4 1
3 1
3 1
3 1
3 1
3 1
3 1
3 1
3 1
3 1
3 1
3 1
3 1
3 1
3 1
5 2
5 2
5 2
5 2
5 2
5 2
5 2
4 2
4 2
4 2
4 3
2 2
2 2
2 2
2 2
2 2
2 2
2 2
2 2
2 2
2 2
2 2
2 2
2 2
2 2
2 2
2 2
2 2
2 2
2 2
2 2
2 2
2 2
2 2
2 2
2 2
0 1
0 1
0 1
0 1
0 1
0 1
0 1
0 1
0 1
0 1
0 0
0 0
0 0
0 0
0 0
0 0
0 0
0 0
0 0
0 0
0 0
0 0
0 0
0 0
0 0
0 0
0 0
0 0
0 0
0 0
0 0
0 0
0 0
0 0
0 0
0 0
0 0
1 0
1 0
1 0
3 0
3 0
3 0
3 0
3 0
3 0
3 0
3 0
3 0
3 0
3 0
3 0
3 0
3 0
3 0
3 0
3 0
3 0
3 0
3 0
3 0
3 0
3 0
3 0
3 0
3 0
3 0
3 0
3 0
3 0
3 0
3 0
3 0
2 0
2 0
2 0
0 0
0 0
0 0
0 0
0 0
0 0
0 0
0 0
0 0
0 0
0 0
0 0
0 0
0 0
0 0
0 0
0 0
0 0
0 0
0 0
0 0
0 0
0 0
0 0
0 0
0 0
0 0
0 0
0 0
0 0
0 0
0 0
0 0
0 0
0 0
0 0
0 0
0 0
0 0
0 0
0 0
0 0
0 0
0 0
0 0
0 0
0 0
0 0
0 0
0 0
0 0
0 0
0 0
0 0
0 0
0 0
0 0
0 0
0 0
0 0
0 0
0 0
0 0
0 0
0 0
0 0
0 0
0 0
0 0
0 0
0 0
0 0
0 0
0 0
0 0
0 0
0 0
0 0
0 0
0 0
0 0
0 0
0 0
0 1
0 1
0 1
0 1
0 1
0 1
0 1
0 1
0 1
0 1
0 1
0 1
0 1
0 1
0 1
0 1
0 1
0 1
0 1
0 1
0 1
0 1
0 1
0 1
0 1
0 1
0 1
0 1
0 1
0 1
0 1
0 1
0 1
0 1
0 1
0 1
0 0
0 0
0 0
0 0
0 0
0 0
0 0
0 0
0 0
0 0
0 0
0 0
0 0
0 0
0 0
0 0
0 0
0 0
0 0
0 0
0 0
0 0
0 0
0 0
0 0
1 0
2 0
2 0
2 0
2 0
2 0
2 0
2 0
2 0
2 0
2 0
2 0
2 0
2 0
2 0
2 0
2 0
2 0
2 0
2 0
2 0
2 0
2 0
2 0
2 0
2 0
2 0
2 0
2 0
2 0
2 0
2 0
2 0
2 0
2 0
2 0
0 0
0 0
0 0
0 0
0 0
0 0
0 0
0 0
0 0
0 0
0 0
0 0
0 0
0 0
0 0
0 0
0 0
0 0
0 0
0 0
0 0
0 0
0 0
0 0
0 0
0 0
0 0
0 0
0 0
0 0
0 0
0 0
0 0
0 0
0 0
0 0
0 0
0 0
0 0
0 0
0 0
0 0
0 0
0 0
0 0
0 0
0 0
0 0
0 2
0 2
0 2
0 2
0 2
0 2
0 2
0 2
0 2
0 2
0 2
0 2
0 2
0 2
0 2
0 2
0 2
0 2
0 2
0 2
0 2
0 2
0 2
0 2
0 2
0 2
0 2
0 2
0 2
0 2
0 2
0 2
0 2
0 0
0 0
0 0
0 0
0 0
0 0
0 0
0 0
0 0
0 0
0 0
0 0
0 0
0 0
0 0
0 0
0 0
1 0
1 0
1 0
1 0
1 0
1 0
1 0
1 0
1 0
1 0
1 0
1 0
1 0
1 0
1 0
1 0
1 0
1 0
1 0
1 0
1 0
1 0
1 0
1 0
1 0
1 0
1 0
1 0
1 0
1 0
1 0
1 0
1 0
1 0
1 0
1 0
0 0
0 0
0 0
0 0
0 0
0 0
0 0
0 0
0 0
0 0
0 0
0 0
0 0
0 0
0 0
0 1
0 1
0 1
0 1
0 1
0 1
0 1
0 1
0 1
0 1
0 1
0 1
0 1
0 1
0 1
0 1
0 1
0 1
0 1
0 1
0 1
0 1
0 1
0 1
0 1
0 1
0 1
0 1
0 1
0 1
0 1
1 1
1 1
1 1
1 1
1 1
1 0
1 0
1 0
1 0
1 0
1 0
1 0
1 0
1 0
1 1
1 1
1 1
1 1
1 1
1 1
1 1
1 1
1 1
1 1
1 1
1 1
1 1
1 1
1 1
1 1
1 1
1 1
1 1
1 1
1 1
1 1
0 1
0 1
0 1
0 1
0 1
0 1
0 2
0 2
0 2
0 2
6 2
6 2
6 2
6 2
6 1
6 1
6 1
6 1
6 1
7 1
7 1
8 1
8 1
8 1
8 1
8 1
8 1
8 1
8 1
9 1
9 1
9 1
10 1
10 2
10 2
10 2
12 2
12 2
12 2
12 2
12 2
12 2
12 2
12 2
12 2
12 2
6 2
6 2
6 2
6 2
6 2
6 2
6 2
6 2
6 2
5 2
4 2
4 2
4 2
4 2
4 2
4 2
4 2
4 2
4 2
2 2
2 2
2 2
1 2
1 0
1 0
1 0
0 0
0 1
1 1
1 1
1 1
1 1
1 1
2 1
2 1
2 1
2 1
2 1
2 1
2 1
3 1
3 1
3 1
3 1
3 1
3 1
3 1
3 1
3 1
3 1
3 1
3 1
3 1
5 1
5 1
5 1
5 1
5 1
5 0
5 0
5 0
5 0
9 0
9 0
8 0
8 0
8 0
8 0
8 1
7 1
7 1
7 1
7 1
6 1
6 1
6 1
6 1
6 1
6 1
6 1
6 1
6 1
6 1
6 1
6 1
6 1
6 1
6 1
6 1
4 1
12 1
13 1
14 2
14 2
14 2
14 2
16 2
16 2
12 1
12 1
12 1
12 1
12 1
12 1
12 1
12 1
12 1
12 1
12 1
14 1
14 1
14 1
14 1
14 1
14 1
14 1
14 1
14 1
14 1
14 1
16 1
16 1
17 1
17 1
16 1
15 1
6 1
6 0
6 0
6 0
6 0
6 0
6 0
6 0
6 0
6 0
6 0
6 0
6 0
9 0
9 0
9 0
9 0
9 0
9 0
7 0
7 0
7 0
7 0
10 0
11 0
14 0
20 0
20 0
27 0
26 0
25 0
26 0
25 0
26 0
27 0
27 0
27 0
27 0
27 0
27 0
27 0
27 0
27 0
27 0
28 0
28 0
28 0
28 0
28 0
26 0
26 0
26 0
26 0
26 0
26 0
26 0
26 0
26 0
26 0
22 0
21 0
16 0
17 0
16 0
8 0
10 0
10 0
10 0
10 0
9 0
9 0
9 0
9 0
11 0
11 1
11 1
11 1
12 1
12 1
13 1
15 1
15 1
15 1
15 1
17 1
17 1
17 1
17 1
17 1
17 1
17 1
17 1
18 1
18 1
18 1
19 1
19 1
19 1
15 1
15 1
16 1
14 1
14 1
14 1
14 1
14 1
14 1
14 1
14 1
12 0
12 0
12 0
20 0
28 0
34 0
33 0
31 0
30 0
30 0
30 0
29 0
29 0
29 0
29 0
29 0
29 0
29 0
28 0
28 0
28 0
28 0
28 0
27 0
27 0
28 0
29 0
28 0
28 0
30 0
30 0
31 0
31 0
31 0
32 0
32 0
32 0
32 0
37 0
29 0
20 0
17 0
17 0
17 0
17 0
17 0
17 0
17 0
17 0
17 0
16 0
16 0
16 0
17 0
17 0
17 0
18 0
19 0
39 1
66 1
75 1
76 1
79 1
79 1
79 1
78 1
79 1
79 1
79 1
79 1
78 1
78 1
78 1
78 1
72 1
71 1
69 1
69 1
69 1
69 1
69 1
69 1
70 1
70 1
70 1
70 1
70 1
73 1
75 1
74 1
78 1
58 1
53 1
46 1
34 0
23 0
19 0
17 0
17 0
17 0
16 0
16 0
15 0
15 0
15 0
15 0
15 0
15 0
15 0
15 0
15 0
15 0
15 0
15 0
14 0
14 0
14 0
14 0
14 0
14 0
14 0
13 0
13 0
10 0
8 0
7 0
4 0
3 0
3 0
3 0
3 0
3 0
2 0
2 0
1 0
1 0
1 0
1 0
2 0
3 0
3 0
3 0
2 0
2 0
2 0
2 0
2 0
2 0
2 1
2 1
2 1
2 1
2 1
2 1
2 1
2 1
2 1
2 1
2 1
2 1
3 1
4 1
3 1
4 1
4 1
4 1
4 1
4 1
5 1
5 1
5 1
5 1
5 1
5 1
5 1
4 1
4 1
4 1
4 1
4 1
4 1
4 1
4 1
4 1
6 0
6 0
6 0
6 0
6 0
6 0
6 0
8 0
8 0
8 0
8 0
7 0
8 1
7 1
8 1
7 1
7 1
7 1
7 1
7 1
6 1
6 1
6 1
7 1
7 1
7 1
7 1
11 1
12 1
12 1
12 1
12 1
12 1
12 1
12 1
12 1
10 1
10 1
9 1
9 1
10 1
9 1
9 1
10 1
10 1
10 1
16 1
16 1
20 0
20 0
19 0
19 0
19 0
19 0
19 0
19 0
19 0
19 0
20 0
22 0
24 0
22 0
21 0
19 0
19 0
19 0
19 0
19 0
19 0
19 0
35 0
36 0
36 0
37 0
37 0
37 0
36 0
35 0
35 0
34 0
34 0
34 0
26 0
28 0
27 0
28 0
32 0
32 0
32 0
32 0
32 0
32 0
31 0
32 0
36 0
34 0
32 0
34 0
36 0
36 0
37 0
38 0
38 0
37 0
36 0
33 0
20 0
20 0
21 0
21 0
21 0
21 0
21 0
21 0
21 0
21 0
21 0
21 0
19 0
18 0
18 0
17 0
13 0
13 0
12 0
12 0
12 0
11 0
12 0
12 0
8 0
8 0
8 0
7 0
7 0
9 0
8 0
7 0
7 0
7 0
7 0
7 0
7 0
7 0
7 0
7 0
7 0
7 0
7 0
7 0
7 0
7 0
7 0
7 0
7 0
7 0
7 0
8 0
9 0
9 0
9 0
10 0
10 0
11 0
11 0
12 0
12 0
11 0
11 0
9 0
9 0
7 0
7 0
7 0
7 0
7 0
7 0
7 0
7 0
7 0
7 0
7 0
7 0
7 0
7 0
7 0
7 0
8 0
12 0
12 0
12 0
12 0
12 0
11 0
9 0
9 0
8 0
8 0
8 0
7 0
6 0
6 0
6 0
6 0
6 0
6 0
5 0
5 0
5 0
5 0
5 0
5 0
5 0
5 0
5 0
5 0
5 0
5 0
5 0
5 0
5 0
4 0
4 0
4 0
0 0
0 0
0 0
0 0
0 0
0 0
0 0
0 0
0 0
0 0
2 0
2 0
2 0
2 0
2 0
2 0
3 0
3 0
3 0
3 0
3 0
3 0
3 0
3 0
3 0
3 0
3 0
3 0
3 0
3 0
3 0
3 0
3 0
3 0
3 0
3 0
3 1
3 1
4 1
5 1
5 1
5 1
6 1
6 1
6 1
4 1
3 1
3 1
6 1
8 1
9 1
9 1
9 1
9 0
9 0
9 0
9 0
9 0
10 0
10 0
10 0
10 0
10 0
12 0
12 0
12 0
12 0
12 0
12 0
11 0
10 0
12 0
12 0
12 0
12 0
12 0
11 0
11 0
11 0
11 0
11 0
11 0
11 0
11 0
6 0
6 0
5 0
5 0
5 0
5 0
5 0
5 0
5 0
4 0
2 0
2 0
2 0
2 0
2 0
2 0
2 0
2 0
2 0
2 0
2 0
2 0
1 0
0 0
0 0
0 0
0 0
0 0
0 0
0 0
0 0
0 0
0 0
0 0
0 0
0 0
0 0
0 0
0 0
0 0
0 0
0 0
0 0
1 0
1 0
1 0
1 0
1 0
1 0
1 0
1 0
1 0
1 0
1 0
2 0
2 0
2 0
2 0
2 0
2 0
2 0
3 0
3 0
3 0
3 0
3 0
3 0
3 0
3 0
3 0
3 0
3 0
5 0
5 0
6 0
6 0
6 0
6 0
5 0
5 0
5 0
5 0
5 0
5 0
5 0
5 0
8 0
8 0
8 0
9 0
9 0
9 0
10 0
10 0
11 0
11 0
11 0
10 0
10 0
10 0
10 0
10 0
10 0
10 0
10 0
10 0
8 0
8 0
7 0
7 0
7 0
7 0
7 0
7 0
7 0
7 0
7 0
7 0
7 0
7 0
7 0
7 0
4 0
4 0
4 0
2 0
2 0
2 0
2 0
2 0
2 0
2 0
2 0
4 0
4 0
4 0
4 0
6 0
6 0
7 4
8 4
8 4
8 4
8 4
8 4
8 4
8 4
8 4
8 4
8 4
8 4
8 4
9 4
9 4
9 4
9 4
9 3
10 3
10 2
10 2
10 2
10 2
10 2
9 2
8 2
8 2
8 2
8 2
8 2
6 2
6 2
6 2
6 2
4 2
4 1
3 0
2 0
2 0
2 0
2 0
2 0
2 0
2 0
2 0
4 0
5 0
7 0
10 0
8 0
8 0
8 0
8 0
8 0
8 0
8 0
8 0
8 0
8 0
8 0
8 0
8 0
8 0
8 0
8 0
10 1
10 1
10 1
10 1
10 1
10 1
10 1
10 1
10 1
11 1
11 1
11 1
11 1
11 1
16 1
24 1
22 1
21 1
22 1
19 1
22 1
22 1
22 1
22 1
22 1
22 1
22 1
23 1
23 1
23 1
23 1
23 1
23 1
23 1
23 1
24 1
22 0
22 0
22 0
22 0
22 0
22 0
22 0
22 0
22 0
20 0
16 0
16 0
16 0
17 0
14 0
8 0
8 0
7 0
7 0
6 0
5 0
5 0
5 0
5 0
5 0
5 0
5 0
4 0
4 0
4 0
5 0
5 0
5 0
5 0
5 0
4 0
4 0
4 0
4 0
4 0
5 0
5 0
5 0
5 0
5 0
5 0
5 0
4 0
3 0
3 0
2 0
2 0
2 0
2 0
2 0
2 0
2 0
2 0
2 0
2 0
2 0
2 0
2 0
2 0
2 0
4 0
3 0
3 0
3 0
3 0
3 0
3 0
3 0
2 0
2 0
2 0
2 0
2 0
2 0
2 0
2 0
2 0
2 0
2 0
2 0
2 0
2 0
2 0
2 0
2 0
2 0
2 0
2 0
2 0
2 0
2 0
2 0
2 0
2 0
2 0
2 0
0 0
0 0
2 0
3 0
3 0
4 0
4 0
4 0
4 0
4 0
4 0
4 0
4 0
4 0
4 0
4 0
4 0
4 0
4 0
4 0
4 0
4 0
4 0
4 0
4 0
4 0
4 0
4 0
8 1
8 1
8 1
8 1
8 1
8 1
8 1
8 1
8 1
8 1
6 1
5 1
4 1
5 1
6 1
6 1
6 1
6 1
6 1
6 1
6 1
6 1
6 1
6 1
6 1
9 1
12 1
13 1
16 1
19 1
22 1
24 1
25 1
25 1
27 1
27 1
23 0
23 0
23 0
23 0
23 0
24 0
28 0
29 0
29 0
29 0
29 0
29 0
29 0
27 0
27 0
27 0
27 0
27 0
27 0
27 0
27 0
27 0
27 0
25 0
24 0
24 0
23 0
19 0
18 0
13 0
11 1
9 1
8 1
8 1
8 1
9 1
7 1
7 1
7 1
7 1
7 1
6 1
3 1
3 1
3 1
3 1
3 1
3 1
3 1
3 1
3 1
3 1
3 1
3 1
3 1
3 1
3 1
3 1
3 1
3 1
2 1
1 1
1 1
1 1
1 1
1 1
1 0
1 0
1 0
1 0
2 0
1 0
1 0
1 0
1 0
1 0
1 0
1 0
2 0
5 0
8 0
8 0
8 0
8 1
8 1
8 1
8 1
9 1
9 1
10 1
14 1
15 1
15 1
15 1
15 1
15 1
15 1
18 1
18 1
18 1
18 1
18 1
18 1
18 1
18 1
18 1
17 1
17 1
17 1
16 1
16 1
16 1
15 1
15 1
13 1
11 1
10 1
10 1
10 0
10 0
9 0
9 0
8 0
8 0
8 0
5 0
5 0
4 0
4 0
4 0
4 0
3 0
3 0
1 0
1 0
1 0
2 0
2 0
2 0
2 0
2 0
2 0
2 0
2 0
2 0
2 0
2 0
1 0
1 0
1 0
1 0
1 0
1 0
1 0
1 0
1 0
1 0
2 0
7 0
8 0
8 0
8 0
8 0
8 0
11 0
11 0
13 0
14 0
14 0
15 0
15 0
15 0
14 0
14 0
14 0
14 0
14 0
14 0
14 0
15 0
17 0
20 0
21 0
21 0
21 0
21 0
21 0
21 0
21 0
21 0
21 0
21 0
20 0
20 0
14 0
14 0
14 0
14 0
14 0
14 0
13 0
13 0
11 0
9 0
9 0
9 0
9 0
9 0
9 0
9 0
12 1
12 1
12 1
13 1
11 1
10 1
8 1
8 1
8 1
8 1
8 1
9 1
9 1
9 1
10 1
10 0
10 0
10 0
11 0
11 0
11 0
11 0
11 0
11 0
11 0
12 0
11 0
12 0
13 0
13 0
13 0
13 0
13 0
13 0
14 0
15 0
14 0
16 0
18 0
17 0
19 0
20 0
20 0
19 0
19 0
21 0
21 0
20 0
21 0
21 0
20 0
20 0
20 0
22 0
24 0
25 0
25 0
25 0
25 0
25 0
25 0
24 0
23 0
22 0
24 0
24 0
24 0
24 0
24 0
24 0
22 0
21 0
18 0
14 0
13 0
13 0
14 0
13 0
14 0
14 0
14 0
12 0
12 0
12 0
13 0
14 0
15 0
15 0
15 0
13 0
11 0
10 0
10 0
10 0
11 0
11 0
11 0
11 0
11 0
11 0
8 0
8 0
8 0
9 0
9 0
9 0
9 0
9 0
9 0
10 0
10 0
10 0
9 0
9 0
8 0
8 0
8 0
8 0
8 0
8 0
5 0
2 0
2 0
2 0
2 0
3 0
3 0
3 0
3 0
3 0
3 0
3 0
3 0
2 0
2 0
3 0
3 0
3 0
3 0
3 0
3 0
3 0
2 0
6 0
6 0
6 0
11 0
14 0
16 0
16 0
16 0
16 0
16 0
16 0
29 0
31 0
33 0
34 0
34 0
34 0
34 0
33 0
33 0
33 0
33 0
33 0
33 0
33 0
33 0
33 0
33 0
32 0
32 0
32 0
32 0
32 0
32 0
32 0
31 0
28 0
28 0
27 0
23 0
20 0
18 0
18 0
18 0
18 0
17 0
17 0
4 0
2 0
1 0
0 0
0 0
0 0
0 0
0 0
0 0
0 0
1 0
1 0
1 0
1 0
1 0
1 0
1 0
1 0
1 0
1 0
1 0
1 0
1 0
1 0
11 0
14 0
19 0
21 0
21 0
21 0
23 0
24 0
24 0
24 0
24 0
27 0
27 0
27 0
27 0
27 0
27 0
31 0
31 0
31 0
31 0
31 0
30 0
30 0
30 0
30 0
30 0
30 0
30 0
31 0
31 0
35 0
40 0
42 0
42 0
41 0
28 0
27 0
24 0
23 0
24 0
22 0
21 0
21 0
21 0
21 0
21 0
18 0
21 0
21 0
20 0
19 0
18 0
16 0
16 0
16 0
16 0
16 0
16 0
16 0
18 0
18 0
18 0
18 0
18 0
15 0
13 0
13 0
12 0
13 0
13 0
13 0
13 0
12 0
12 0
12 0
12 0
12 0
12 0
13 0
13 0
12 0
10 0
10 0
8 0
8 0
8 0
8 0
8 0
8 0
8 0
8 0
8 0
10 0
12 0
27 0
24 0
26 0
27 0
27 0
31 0
31 0
32 0
32 0
32 0
31 0
32 0
32 0
33 0
33 0
33 0
32 0
31 0
31 0
31 0
31 0
31 0
31 0
31 0
31 0
33 0
33 0
33 0
33 0
33 0
33 0
33 0
33 0
32 0
28 0
27 0
14 0
13 0
10 0
10 0
13 0
8 0
8 0
8 0
8 0
8 0
8 0
7 0
6 0
6 0
7 0
23 0
28 0
31 0
31 0
31 0
32 0
32 0
32 0
32 0
32 0
31 0
31 0
31 0
31 0
31 0
31 0
31 0
31 0
31 0
31 0
31 0
31 0
32 0
32 0
32 0
29 0
30 0
30 0
30 0
30 0
29 0
29 0
28 0
28 0
28 0
25 0
10 0
5 0
5 0
5 0
5 0
4 0
4 0
9 0
9 0
14 0
42 0
42 1
42 2
42 2
42 2
42 2
43 2
43 2
43 2
43 2
43 2
43 2
42 2
42 2
42 2
42 2
41 2
41 2
41 2
40 2
40 2
40 2
40 2
40 2
40 2
41 2
41 2
40 2
38 2
38 2
39 2
39 2
40 1
38 1
34 1
18 1
5 0
5 0
5 0
5 0
5 0
5 0
5 0
5 0
5 0
5 0
6 0
6 0
6 0
6 0
6 0
6 0
6 0
6 0
6 0
6 0
6 0
6 0
6 0
6 0
8 0
7 0
7 0
6 0
6 0
8 0
7 0
7 0
5 0
5 0
5 0
5 0
5 0
5 0
5 0
5 0
5 0
5 0
5 0
5 0
5 0
5 0
4 0
4 0
4 0
4 0
4 0
4 0
4 0
4 0
4 0
4 0
4 0
4 0
4 0
4 0
2 0
2 0
2 0
2 0
1 0
2 0
2 0
18 0
18 0
19 0
19 0
19 0
19 0
20 0
22 0
22 0
23 0
23 0
23 0
23 0
24 0
24 0
24 0
24 0
24 0
24 0
24 0
24 0
24 0
24 0
24 0
24 0
24 0
24 0
24 0
24 0
24 0
24 0
25 0
29 0
30 0
28 0
32 0
20 0
21 0
23 0
23 0
23 0
23 0
21 0
20 0
20 0
19 0
18 0
18 0
18 0
18 0
18 0
18 0
18 0
18 0
18 0
18 0
19 0
19 0
19 0
19 0
19 0
19 0
19 0
19 0
24 0
25 0
25 0
25 0
20 0
20 0
19 0
14 0
10 0
10 0
8 0
8 0
8 0
10 0
10 0
10 0
10 0
10 0
10 0
13 0
14 0
14 0
14 0
14 0
14 0
14 0
14 0
14 0
14 0
14 0
13 0
13 0
13 0
13 0
13 0
13 0
9 0
9 0
9 0
9 0
9 0
9 0
9 0
9 0
9 0
9 0
8 0
8 0
8 0
7 0
7 0
7 0
7 0
6 0
6 0
3 0
3 0
3 0
3 0
3 0
3 0
3 0
3 0
3 0
3 0
3 0
3 0
3 0
3 0
3 0
2 0
2 0
2 0
2 0
1 0
1 0
3 0
7 0
7 0
7 0
7 0
7 0
7 0
7 0
7 0
7 0
7 0
8 0
8 0
8 0
8 0
8 0
8 0
8 0
8 0
8 0
9 0
9 0
9 0
9 0
10 0
10 0
10 0
10 0
10 0
10 0
10 0
10 0
10 0
10 0
10 0
7 0
7 0
3 0
3 0
3 0
3 0
4 0
4 0
5 0
5 0
5 0
5 0
4 0
4 0
4 0
4 0
4 0
4 0
4 0
4 0
4 0
3 0
3 0
2 0
2 0
2 0
2 0
2 0
2 0
2 0
2 0
2 0
2 0
2 0
2 0
2 0
2 0
2 0
2 0
2 0
2 0
2 0
1 0
1 0
0 0
0 0
0 0
0 0
2 0
2 0
2 0
2 0
2 0
2 0
2 0
2 0
2 0
2 0
2 0
2 0
2 0
2 0
2 0
2 0
2 0
2 0
2 0
2 0
2 0
2 0
2 0
2 0
2 0
2 0
2 0
2 0
3 0
3 0
3 0
3 0
3 0
3 0
3 0
3 0
1 0
1 0
1 0
1 0
1 0
1 0
1 0
1 0
1 0
1 0
1 0
1 0
1 0
1 0
1 0
1 0
1 0
1 0
1 0
1 0
1 0
1 0
1 0
1 0
1 0
0 0
0 0
0 0
0 0
0 0
0 0
0 0
0 0
0 0
0 0
0 0
0 0
0 0
0 0
0 0
1 0
1 0
1 0
1 0
1 0
1 0
1 0
1 0
1 0
1 0
1 0
1 0
1 0
1 0
1 0
1 0
1 0
1 0
1 0
1 0
1 0
1 0
1 0
1 0
1 0
1 0
1 0
1 0
1 0
1 0
1 0
1 0
1 0
1 0
1 0
1 0
0 0
0 0
0 0
0 0
0 0
0 0
0 0
0 0
1 0
1 0
1 0
1 0
1 0
1 1
1 1
1 1
2 1
2 1
3 1
3 1
3 1
3 1
3 1
3 1
3 1
3 1
3 1
3 1
3 1
3 1
5 1
5 1
6 1
6 1
7 1
7 1
8 1
8 1
8 1
8 1
8 1
8 1
8 1
8 1
7 1
7 1
7 1
7 1
7 1
7 0
7 0
7 0
6 0
6 0
5 0
5 0
5 0
9 0
10 0
10 0
9 0
9 0
9 0
9 0
9 0
9 0
8 0
8 0
7 0
7 0
6 0
12 0
13 0
13 0
13 0
13 0
25 0
26 0
26 0
26 0
28 0
28 0
28 0
28 0
28 0
30 0
31 0
31 0
31 0
31 0
31 0
32 0
31 0
29 0
29 1
29 1
29 1
29 1
29 1
29 1
29 1
29 1
29 1
29 1
29 1
31 1
31 1
24 1
23 1
23 1
23 1
23 1
11 1
11 1
11 1
10 1
9 1
9 1
9 1
9 1
11 1
12 1
14 1
14 1
14 1
14 1
14 1
13 0
13 0
11 0
11 0
11 0
11 0
16 0
16 0
16 0
16 0
16 0
16 0
16 0
16 0
14 0
15 0
15 0
17 0
17 0
17 0
17 0
16 0
16 0
15 0
15 0
15 0
15 0
16 0
16 0
11 0
10 0
9 0
9 0
9 0
10 0
10 0
10 0
11 0
14 0
14 0
17 0
17 0
18 0
18 0
18 0
18 0
18 0
19 0
24 0
24 0
23 0
24 0
24 0
23 0
23 0
23 0
23 0
23 0
23 0
23 0
25 0
25 0
25 0
25 0
26 0
26 0
26 0
26 0
26 0
26 0
25 0
26 0
25 0
29 0
27 0
26 0
24 0
24 0
18 0
18 0
18 0
17 0
17 0
18 0
11 0
10 0
10 0
10 0
10 0
10 0
10 0
10 0
10 0
10 0
17 0
17 0
16 0
16 0
27 0
34 0
47 0
60 0
62 0
62 0
64 0
64 0
63 0
63 0
63 0
58 0
58 0
58 0
58 0
58 0
60 0
60 0
60 0
61 0
62 0
65 0
79 0
83 0
85 0
90 0
90 0
90 0
91 0
91 0
88 0
88 0
84 0
81 0
77 0
74 0
69 0
59 0
51 0
45 0
45 0
45 0
44 0
44 0
44 0
44 0
44 0
47 0
49 0
52 0
52 0
52 0
51 0
51 0
51 0
51 0
49 0
45 0
32 0
28 0
26 0
22 0
24 0
24 0
23 0
21 0
19 0
18 0
18 0
17 0
16 0
14 0
13 0
13 0
13 0
13 0
13 0
17 0
23 0
39 0
51 0
90 0
90 0
88 0
87 0
84 0
84 0
102 0
101 0
105 0
112 0
118 0
123 0
123 0
123 0
123 0
122 0
122 0
120 0
120 0
120 0
120 0
120 0
120 0
121 0
121 0
122 0
130 0
202 0
206 0
207 0
207 0
207 0
201 0
191 0
174 0
166 0
129 0
129 1
130 1
132 1
133 2
135 2
116 2
112 2
109 2
107 2
99 2
95 2
95 2
95 2
95 2
96 2
96 2
96 2
96 2
98 2
98 2
157 2
158 2
149 2
142 2
136 2
129 2
86 2
86 2
87 2
88 2
91 2
91 2
90 2
94 2
94 2
94 2
93 2
94 2
92 2
93 1
93 1
92 1
92 1
92 1
92 1
92 1
92 1
129 1
135 1
140 1
137 1
164 1
163 1
163 1
162 1
157 1
106 1
111 1
112 1
118 1
131 1
133 1
133 1
133 1
132 1
131 1
128 1
128 1
136 2
136 3
137 3
135 3
137 2
136 2
136 2
138 2
138 2
143 2
152 2
159 2
163 2
163 2
163 3
125 3
120 3
117 3
144 3
121 3
119 3
119 3
117 3
113 3
110 3
102 3
92 3
89 3
82 4
81 4
80 4
81 4
86 4
86 4
86 4
87 4
82 3
78 2
84 2
115 2
116 2
120 2
118 2
118 2
115 2
106 2
101 2
97 2
95 2
96 2
94 1
93 1
93 1
90 1
63 1
63 1
62 1
63 1
64 1
64 1
64 1
65 1
65 1
65 1
63 0
63 0
64 0
58 0
57 0
56 0
53 0
52 0
47 0
45 0
42 0
17 0
14 0
12 0
10 0
11 0
11 0
12 0
13 0
15 0
21 0
24 0
28 0
29 0
29 0
27 0
26 0
31 0
32 0
31 0
30 0
30 0
30 1
30 1
30 1
30 1
30 1
30 1
29 1
29 1
29 1
29 1
29 1
28 1
28 1
28 1
28 1
28 1
28 1
28 1
28 1
27 1
27 1
22 1
20 1
16 1
12 1
10 1
7 1
7 1
6 1
6 1
4 1
0 1
0 1
0 1
0 1
0 1
0 0
0 0
0 0
0 0
0 0
0 1
0 2
0 2
0 2
0 2
0 4
0 4
0 4
0 4
0 4
0 4
0 4
0 4
0 4
0 4
0 4
0 4
0 4
0 4
0 4
0 4
1 5
1 5
1 5
1 5
1 5
1 5
1 7
1 7
1 8
1 8
1 8
1 8
1 8
1 8
1 8
1 7
1 6
1 6
1 6
1 6
1 4
1 4
1 4
1 4
1 4
1 4
1 4
1 4
1 4
1 5
1 5
1 6
1 6
1 6
1 6
1 6
0 5
0 5
0 5
0 5
0 5
0 5
0 3
0 3
0 7
0 8
0 8
0 8
0 8
0 8
0 8
0 8
0 8
0 8
0 9
0 10
0 10
0 13
0 15
0 15
0 15
1 15
1 18
1 20
1 20
2 20
2 21
2 20
2 23
2 23
2 23
4 26
4 27
4 27
4 27
4 27
4 27
4 27
4 27
4 25
4 22
4 22
4 22
4 22
4 22
4 22
4 22
4 22
4 22
4 22
4 19
4 18
4 18
4 19
4 18
6 19
6 20
5 20
5 16
5 14
5 13
4 22
4 22
4 22
4 19
4 19
4 19
2 15
2 15
2 15
2 15
2 15
2 15
2 15
2 15
3 15
4 14
4 14
4 15
4 15
4 15
4 15
4 15
4 15
4 15
4 15
4 14
4 13
4 13
4 13
4 12
2 12
2 11
2 11
2 11
2 10
2 10
2 2
2 3
2 3
2 3
2 3
2 8
2 9
2 9
2 9
3 9
3 9
3 9
2 9
3 9
3 9
3 10
3 10
4 9
4 9
4 9
4 9
4 9
5 9
5 9
5 9
5 9
5 9
5 9
5 9
5 9
6 11
6 10
6 10
6 10
6 11
6 10
7 13
7 13
7 13
7 13
7 13
7 8
7 7
7 7
7 7
6 7
5 8
5 8
5 8
4 8
3 8
3 7
3 7
3 7
3 7
3 7
3 7
2 7
2 7
2 7
2 7
2 7
2 7
5 7
5 7
5 7
4 5
4 5
5 5
5 6
5 5
5 5
4 2
4 2
4 2
4 2
6 2
6 2
6 2
6 2
6 2
6 2
6 1
6 1
6 1
6 1
6 1
6 1
6 1
6 1
6 2
6 2
6 2
6 2
6 3
7 3
7 3
7 3
8 3
5 3
5 3
5 2
5 3
5 4
4 4
4 4
4 5
4 7
4 10
4 10
4 10
4 10
2 10
2 10
3 14
3 16
3 17
3 17
3 18
3 18
3 19
3 18
4 20
8 26
14 26
14 26
14 27
14 27
14 27
14 28
14 27
13 28
13 27
13 27
12 28
12 28
12 28
12 28
12 29
12 28
12 29
12 29
12 28
12 26
12 23
12 23
12 23
12 23
12 23
12 24
11 17
11 16
11 16
11 16
12 16
12 16
12 15
11 15
7 12
4 7
1 8
1 8
1 7
1 6
1 6
1 6
1 5
1 4
1 4
1 3
1 2
1 2
1 1
1 1
1 1
1 1
1 3
1 3
2 4
2 4
2 4
2 4
2 4
2 4
2 4
2 4
2 4
2 4
2 4
2 5
1 5
1 5
1 6
1 6
1 6
1 5
1 5
1 5
1 5
1 5
1 5
1 5
1 5
1 5
1 5
1 5
1 5
1 9
1 9
2 9
2 10
2 10
2 8
1 8
1 7
1 7
1 7
1 7
1 7
1 7
1 7
1 6
1 6
1 6
1 6
1 5
1 5
1 6
1 6
1 6
1 6
1 6
1 6
1 6
1 6
1 7
1 7
1 8
1 9
1 9
1 9
1 9
1 9
1 5
1 5
0 5
0 5
0 5
0 5
1 5
1 5
1 5
1 5
1 5
1 6
1 6
1 6
1 6
1 6
1 6
1 6
1 6
1 6
1 5
1 5
1 5
1 5
1 6
1 6
1 6
1 6
1 5
1 5
1 2
3 3
4 7
5 7
5 8
5 8
8 15
8 16
8 17
8 17
8 17
8 17
7 18
7 18
7 18
7 23
7 23
7 24
7 24
7 24
7 24
7 24
7 25
7 25
7 26
7 26
7 26
7 26
7 26
7 26
7 25
7 24
7 24
7 24
7 24
9 24
9 23
7 23
6 20
6 19
6 19
6 18
3 10
3 9
3 9
3 9
3 10
3 10
3 10
3 10
3 10
3 3
3 3
3 2
3 2
3 2
4 2
10 8
10 8
10 8
10 8
10 8
10 9
10 9
10 9
10 9
10 9
10 9
10 11
8 11
8 12
8 12
8 12
8 12
8 12
7 12
7 12
7 12
7 12
7 12
7 12
7 12
7 11
7 11
7 11
7 11
7 11
7 11
7 11
7 11
7 12
7 13
7 13
1 9
1 9
1 9
1 9
2 11
2 11
2 11
2 10
2 10
2 10
2 10
2 9
2 9
2 9
11 10
15 10
15 11
15 13
15 14
15 14
15 15
15 16
15 16
15 16
15 16
15 16
15 16
15 16
15 16
15 16
15 16
15 16
15 15
15 14
15 13
14 10
14 8
14 8
14 8
14 8
14 6
14 6
14 6
14 6
14 6
15 6
15 6
15 6
15 6
15 6
5 5
2 6
2 4
3 4
3 3
3 2
3 2
3 2
3 2
3 2
3 2
3 2
3 3
3 3
3 3
3 3
3 4
3 4
3 4
3 4
3 4
3 4
3 4
2 4
2 4
2 4
2 4
2 4
2 4
2 4
2 4
1 4
1 4
2 6
2 6
2 6
1 8
1 6
1 6
1 6
1 6
1 5
1 5
1 5
1 5
1 5
2 6
3 6
3 6
3 6
3 6
3 6
3 5
3 5
3 5
3 5
3 5
3 6
3 6
3 6
3 6
3 6
3 6
3 6
3 6
3 6
3 6
3 6
3 11
2 7
2 7
2 7
2 7
2 8
2 8
2 8
2 8
1 8
4 8
4 8
4 8
4 8
4 7
4 7
4 7
4 7
7 7
13 7
13 7
13 7
13 7
13 7
13 6
13 5
13 5
13 5
14 5
14 5
14 5
14 5
14 5
14 5
14 4
14 4
14 0
14 0
14 0
14 0
14 0
14 0
14 0
14 0
14 0
14 0
11 0
11 0
10 0
10 0
10 1
10 1
10 1
10 1
6 1
1 1
1 1
1 1
1 1
1 1
1 1
1 1
1 1
1 1
0 1
0 1
1 1
1 1
1 1
1 1
1 1
1 1
1 1
1 1
1 1
1 1
1 1
1 1
1 1
1 1
2 1
3 1
3 1
5 1
5 1
5 0
5 0
5 0
5 0
5 0
5 0
5 0
5 0
5 0
5 0
5 0
4 0
4 0
4 0
4 0
4 0
4 0
4 0
4 0
4 0
7 0
7 0
7 0
7 0
7 0
7 0
7 0
8 0
8 0
9 0
9 0
9 0
8 0
8 0
6 0
6 0
6 0
6 0
6 0
6 0
6 0
6 0
6 0
6 0
6 0
6 0
6 0
6 0
6 0
6 0
6 0
6 0
6 0
5 0
5 0
5 0
3 0
3 0
3 0
3 0
3 0
3 0
3 0
2 0
2 0
1 0
1 0
0 0
0 0
0 0
0 0
0 0
0 0
0 0
0 0
0 0
2 0
2 0
3 0
3 0
3 0
3 0
3 0
3 0
4 0
4 0
4 0
4 0
4 0
4 0
4 0
4 0
4 0
4 0
4 0
4 0
4 0
4 0
4 0
4 0
4 0
4 0
5 0
7 0
8 0
9 0
13 0
24 0
53 0
54 0
54 0
53 0
51 0
51 0
51 0
51 0
52 0
52 0
52 0
52 0
51 0
51 0
51 0
51 0
51 0
51 0
51 0
51 0
52 0
53 0
54 0
54 0
54 0
56 0
59 0
59 0
61 0
94 0
101 0
100 0
97 0
95 0
91 0
85 0
57 0
56 0
56 0
56 0
56 0
56 0
56 0
56 0
55 0
55 0
55 0
55 0
55 0
55 0
55 0
55 0
55 0
55 0
55 0
56 0
54 0
52 0
48 0
42 0
42 0
38 0
35 0
35 0
33 0
16 0
12 0
12 0
12 0
11 0
9 0
9 0
9 0
9 0
9 0
9 0
9 0
9 0
9 0
9 0
9 0
9 0
9 0
9 0
9 0
9 0
9 0
9 0
9 0
9 0
9 0
8 0
8 0
8 0
7 0
2 0
1 0
1 0
1 0
0 0
0 0
0 0
0 0
0 0
0 0
0 0
0 0
0 0
1 0
2 0
3 0
3 0
3 0
3 0
3 0
3 0
3 0
3 0
3 0
3 0
3 0
3 0
3 0
3 0
3 0
3 0
3 0
3 0
3 0
3 0
3 0
3 0
3 0
3 0
3 0
3 0
3 0
3 0
3 0
3 0
3 0
2 0
1 0
1 0
1 0
0 0
0 0
1 0
1 0
1 0
1 0
1 0
1 0
1 0
1 0
1 0
1 0
1 0
1 0
1 0
1 0
1 0
1 0
1 0
1 0
1 0
1 0
1 0
1 0
1 0
1 0
1 0
1 0
1 0
1 0
2 0
2 0
2 0
2 0
2 0
1 0
1 0
1 0
1 0
1 0
1 0
1 0
2 0
2 0
2 0
2 0
2 0
2 0
2 0
2 0
2 0
2 0
2 0
3 0
3 0
3 0
3 0
3 0
3 0
3 0
3 0
3 0
3 0
3 0
3 0
3 0
2 0
2 0
2 0
2 0
2 0
2 0
2 0
2 0
2 0
2 0
2 0
2 0
1 0
1 0
1 0
1 0
1 0
1 0
1 0
1 0
1 0
1 0
1 0
1 0
1 0
1 0
1 0
1 0
1 0
1 0
1 0
1 0
1 0
1 0
1 0
1 0
1 0
1 0
1 0
1 0
1 0
1 0
1 0
1 0
1 0
1 0
1 0
1 0
1 0
1 0
1 0
1 0
1 0
1 0
1 0
1 0
1 0
1 0
1 0
0 0
0 0
0 0
0 0
0 0
0 0
0 0
0 0
0 0
0 0
0 0
0 0
0 0
0 0
0 0
0 0
0 0
0 0
0 0
0 0
0 0
0 0
4 0
5 0
5 0
5 0
5 0
5 0
5 0
5 0
5 0
5 0
7 0
8 0
8 0
8 0
8 0
8 0
8 0
8 0
8 0
8 0
8 0
8 0
8 0
8 0
8 0
9 0
9 0
9 0
9 0
9 0
9 0
9 0
9 0
9 0
9 0
9 0
5 0
4 0
4 0
4 0
4 0
4 0
4 0
3 0
3 0
3 0
1 0
1 0
1 0
1 0
1 0
1 0
1 0
1 0
1 0
1 0
1 0
1 0
1 0
0 0
0 0
0 0
0 0
0 0
0 0
0 0
0 0
0 0
0 0
0 0
0 0
0 0
0 0
0 0
0 0
0 0
0 0
2 0
2 0
2 0
2 0
2 0
2 0
2 0
2 0
2 0
2 0
2 0
2 0
2 0
2 0
2 0
2 0
2 0
2 0
2 0
2 0
2 0
2 0
2 0
2 0
2 0
2 0
2 0
2 0
2 0
2 0
2 0
2 0
2 0
3 0
3 0
3 0
1 0
1 0
1 0
1 0
1 0
1 0
1 0
3 0
3 0
6 0
6 0
7 0
7 0
7 0
7 0
7 0
7 0
7 0
7 0
7 0
7 0
7 0
7 0
7 0
7 0
7 0
7 0
7 0
7 0
7 0
7 0
6 0
6 0
6 0
6 0
6 0
6 0
6 0
6 0
6 0
6 0
6 0
6 0
4 0
4 0
1 0
0 0
0 0
0 0
0 0
0 0
0 0
0 0
0 0
0 0
0 0
0 0
0 0
0 0
0 0
0 0
0 0
0 0
0 0
0 0
0 0
0 0
0 0
0 0
0 1
0 1
0 1
0 1
0 1
0 1
0 1
0 1
0 1
1 1
1 1
1 1
1 1
1 1
1 1
1 1
1 1
1 1
1 1
1 1
1 1
1 1
1 1
2 1
2 1
3 1
3 1
3 1
3 1
3 1
3 1
3 1
3 1
3 1
3 1
3 1
3 0
3 0
3 0
3 0
3 0
3 0
3 0
3 0
3 0
2 0
2 0
2 0
2 0
2 0
2 0
2 0
2 0
2 0
2 0
2 0
2 0
1 0
1 0
1 0
0 0
0 0
0 0
0 0
0 0
0 0
0 0
0 0
0 0
0 0
0 0
0 0
0 0
0 0
0 0
1 0
1 0
1 0
1 0
1 0
2 0
2 0
2 0
2 0
2 0
2 0
2 0
2 0
2 0
3 0
3 0
3 0
3 0
3 0
3 0
3 0
3 0
3 0
3 0
4 0
4 0
4 0
4 0
4 0
4 0
4 0
4 0
4 0
3 0
3 0
3 0
2 0
2 0
2 0
2 0
2 0
2 0
2 0
2 0
2 0
2 0
2 0
2 0
2 0
2 0
1 0
2 0
2 0
2 0
2 0
2 0
2 0
2 0
2 0
2 0
1 0
1 0
1 0
1 0
1 0
1 0
1 0
1 0
1 0
1 0
1 0
1 0
1 0
1 0
1 0
1 0
1 0
1 0
1 0
1 0
1 0
1 0
1 0
1 0
1 0
1 0
1 0
1 0
1 0
1 0
1 0
1 0
1 0
1 0
1 0
1 0
1 0
2 0
2 0
3 0
3 0
3 0
3 0
3 0
3 0
3 0
3 0
3 0
3 0
3 0
3 0
3 0
3 0
3 0
3 0
3 0
4 0
4 0
4 0
4 0
4 0
4 0
4 0
3 0
3 0
3 0
3 0
3 0
3 0
5 0
5 0
6 0
6 0
5 0
5 0
4 0
4 0
4 0
4 0
4 0
4 0
4 0
4 0
4 0
4 0
4 0
4 0
4 1
4 1
4 1
5 1
5 1
4 1
4 1
4 1
4 1
4 1
4 1
4 1
4 1
4 1
4 1
4 1
2 1
1 1
0 1
0 1
0 1
0 1
0 1
0 1
0 1
0 1
0 1
0 1
0 1
0 1
0 1
0 1
0 1
0 1
0 1
0 1
0 0
0 0
0 0
0 0
0 0
0 0
0 0
0 0
0 0
0 0
0 0
0 0
0 0
0 0
0 0
0 0
0 0
0 0
0 0
0 0
0 0
0 0
0 0
0 0
0 0
0 0
0 0
0 0
0 0
0 0
1 0
1 0
1 0
1 0
1 0
1 0
1 0
1 0
1 0
1 0
1 0
1 0
1 0
1 0
1 0
1 0
1 0
1 0
1 0
1 0
1 0
1 0
1 0
1 0
1 0
1 0
1 0
1 0
1 0
1 0
1 0
1 0
1 0
1 0
1 0
1 0
0 0
0 0
0 0
0 0
0 0
0 0
0 0
0 0
0 0
0 0
0 0
0 0
0 0
0 0
1 0
1 0
1 0
1 0
2 0
2 0
2 0
2 0
3 0
4 0
4 0
4 0
4 0
4 0
4 0
4 0
4 0
5 0
5 0
5 0
5 0
5 0
5 0
5 0
5 0
5 0
5 0
5 0
5 1
5 1
5 1
5 1
5 1
5 1
5 1
8 1
8 1
8 1
8 1
8 1
8 1
8 1
8 1
8 1
7 1
7 1
8 1
9 1
14 1
14 1
17 1
20 1
20 1
19 1
19 1
19 1
19 1
19 1
19 1
19 1
19 1
19 1
19 1
19 1
19 0
19 0
19 0
19 0
19 0
21 0
22 0
19 0
18 0
18 0
18 0
18 0
17 0
17 0
17 0
17 0
17 0
16 0
13 0
11 0
8 0
7 0
6 0
3 0
3 0
3 0
3 0
3 0
3 0
3 0
3 0
3 0
3 0
4 0
12 1
14 1
18 2
19 2
19 2
18 2
18 2
16 2
16 2
16 2
16 2
16 2
16 2
16 2
16 2
16 2
16 2
16 2
16 2
16 2
16 2
16 2
16 2
16 2
16 2
16 2
16 2
16 2
16 2
16 2
19 2
19 2
19 2
24 2
24 2
23 2
16 1
12 1
10 0
9 0
9 0
9 0
9 0
9 0
9 0
9 0
9 0
9 0
9 0
9 0
9 0
9 0
9 0
9 0
10 0
11 0
11 0
11 0
11 0
13 0
34 0
38 0
39 0
40 0
40 0
40 0
37 0
37 0
42 1
37 1
37 1
37 1
36 1
36 1
36 1
36 1
36 1
36 1
36 1
36 1
36 1
36 1
36 1
36 1
36 1
36 1
36 1
36 1
36 1
35 1
34 1
27 1
27 1
26 1
22 1
21 1
8 1
6 1
3 1
2 1
4 1
4 1
4 1
4 1
2 0
2 0
2 0
2 0
2 0
2 0
2 0
2 0
2 0
2 0
2 0
2 0
2 0
2 0
2 0
2 0
2 0
2 0
2 0
2 0
2 0
2 0
2 1
2 1
2 1
2 1
2 1
2 1
2 1
2 1
2 1
2 1
0 1
0 1
0 1
0 1
0 1
0 1
0 1
0 1
0 1
0 1
0 1
0 1
0 1
0 1
0 1
0 1
0 1
0 1
0 1
1 1
1 1
1 1
1 1
1 1
1 1
1 0
1 0
1 0
1 0
1 0
1 0
1 0
1 0
1 0
1 0
1 0
1 0
1 0
1 0
3 0
3 0
3 0
3 0
3 0
3 0
3 0
3 0
4 0
5 0
5 0
5 0
5 0
5 0
5 0
5 0
4 0
4 0
4 0
5 0
5 0
5 0
5 0
5 0
5 0
5 0
5 0
5 0
5 0
5 0
5 0
5 0
5 0
5 0
5 0
6 0
4 0
4 0
4 0
4 0
4 0
4 0
2 0
2 0
2 0
2 0
2 0
2 0
2 0
2 1
2 1
2 1
2 1
2 1
2 1
1 1
1 1
1 1
1 1
1 1
1 1
0 1
0 1
0 1
0 1
0 1
0 1
0 1
0 1
0 1
0 1
0 1
0 1
0 1
0 1
0 1
0 1
0 1
0 1
0 1
0 1
0 1
0 1
0 1
0 1
0 0
1 0
1 0
1 0
1 0
1 0
1 0
1 0
1 0
1 0
1 0
1 0
1 0
1 0
1 0
1 0
1 0
1 0
1 0
1 0
1 0
1 0
1 0
1 0
1 0
1 0
1 0
1 0
1 0
1 0
1 0
1 0
1 0
1 0
1 0
2 0
2 0
1 0
1 0
1 0
1 0
1 0
1 0
1 0
1 0
1 0
2 0
2 0
2 0
2 0
2 0
2 0
3 0
3 0
3 0
3 0
4 0
4 0
4 0
4 0
5 0
11 0
19 0
24 0
26 0
26 0
26 0
27 0
28 0
36 0
36 0
36 0
36 0
36 0
36 0
36 0
36 0
36 0
36 0
36 0
37 0
38 0
37 0
37 0
37 0
37 0
37 0
37 0
36 0
36 0
36 0
36 0
35 0
36 0
36 0
36 0
34 0
30 0
24 0
19 0
20 0
24 0
25 0
25 0
23 0
16 0
16 0
15 0
16 0
16 0
16 0
16 0
17 0
17 0
17 0
17 0
16 0
15 0
15 0
15 0
15 0
15 0
15 0
15 0
15 0
15 0
15 0
14 0
13 0
13 0
13 0
13 0
12 0
10 0
10 0
10 0
10 0
9 0
9 0
8 0
8 0
8 0
8 0
8 0
7 0
7 0
7 0
7 0
6 0
6 0
6 0
6 0
6 0
6 0
6 0
6 0
6 0
6 0
6 0
6 0
6 1
6 1
6 1
6 1
6 1
6 1
6 1
6 1
7 1
6 1
5 1
4 1
16 2
17 2
17 2
17 2
17 3
17 3
17 3
17 3
17 3
17 3
17 3
17 3
17 3
17 3
17 3
17 3
17 3
17 3
17 3
17 3
17 3
17 3
17 4
17 4
17 3
17 3
17 3
17 3
17 3
18 3
21 2
21 2
20 3
19 3
18 3
17 3
6 3
5 3
4 3
4 3
4 2
4 2
4 2
4 2
5 2
5 2
5 2
5 2
5 2
5 2
5 2
5 2
5 2
5 2
5 2
5 2
5 2
5 2
5 1
5 1
5 1
5 1
4 1
4 1
4 1
2 1
1 1
1 1
1 0
1 0
1 0
1 0
1 0
1 0
0 0
0 0
0 0
0 0
0 0
0 0
0 0
0 0
0 0
0 0
0 0
0 0
0 0
0 0
0 1
0 1
0 1
0 1
0 1
0 1
0 1
0 1
0 1
0 2
0 2
0 2
0 2
0 2
0 2
0 2
0 2
0 2
0 2
0 2
0 2
0 2
0 2
1 2
2 2
5 1
5 1
5 1
5 1
5 1
8 1
8 1
8 1
8 1
8 1
8 1
8 0
8 0
8 0
8 0
8 0
8 0
10 1
10 1
10 1
10 2
10 2
10 2
10 2
10 2
10 2
10 2
10 2
10 2
10 2
10 2
9 2
8 2
8 2
7 2
5 2
2 2
2 2
2 2
3 2
3 2
3 2
3 2
3 2
3 2
3 2
3 2
3 2
3 2
9 2
9 2
9 3
9 3
7 2
7 1
7 1
7 1
7 1
7 1
7 1
7 1
7 1
7 1
8 1
9 1
10 1
10 1
10 1
10 1
10 1
10 1
11 1
11 1
11 1
11 1
10 1
10 1
10 1
10 1
10 1
10 1
10 1
10 1
10 1
10 1
4 1
4 1
4 0
5 0
5 0
5 0
5 0
6 0
5 0
5 0
5 0
5 0
5 0
5 0
5 0
4 0
3 0
3 0
2 0
3 0
3 0
3 0
2 0
2 0
2 0
2 0
5 0
5 0
5 0
5 0
5 0
5 0
5 0
5 0
5 0
6 0
6 0
6 0
6 0
6 0
6 0
6 0
6 0
6 0
6 0
6 2
6 2
6 2
6 2
6 2
6 2
6 2
6 2
6 2
6 2
5 2
5 2
6 2
12 2
13 2
13 0
13 0
10 0
11 0
11 0
13 0
13 0
13 0
13 0
13 0
12 0
13 0
14 0
14 0
14 0
14 0
14 0
14 0
14 0
13 0
13 0
13 0
13 0
13 0
13 0
13 0
13 0
13 0
13 0
13 0
13 0
13 0
13 0
10 0
6 0
5 0
5 0
5 0
4 0
4 0
4 0
4 0
7 0
7 0
13 0
13 0
13 0
12 0
11 0
11 0
11 0
11 0
11 0
12 0
12 0
12 0
12 0
12 0
12 0
12 0
12 0
12 0
12 0
12 0
12 0
12 0
18 0
18 0
18 0
18 0
18 0
18 0
18 0
19 0
19 0
19 0
19 0
16 0
16 0
20 0
14 0
14 0
14 0
14 0
14 0
14 0
14 0
14 0
13 0
14 0
14 0
14 0
14 0
14 0
14 0
14 0
15 0
16 0
16 0
16 0
16 0
16 0
10 0
9 0
9 0
10 0
11 0
13 0
13 0
14 0
14 0
13 0
13 0
13 0
11 0
8 0
8 0
8 0
9 0
9 0
9 0
10 0
10 0
10 0
10 0
9 0
9 0
9 0
9 0
9 0
9 0
9 0
8 0
7 0
7 0
7 0
7 0
7 0
7 0
7 0
7 0
5 0
3 0
3 0
3 0
2 0
2 0
2 0
2 0
2 0
2 0
2 0
2 0
2 0
2 0
2 0
2 0
1 0
1 0
1 0
1 0
1 0
1 0
1 0
3 0
3 0
3 0
3 0
3 0
3 0
3 0
3 0
3 0
3 0
3 0
3 0
4 0
5 0
5 0
8 0
12 0
11 0
12 0
12 0
13 0
15 0
15 0
15 0
15 0
15 0
15 0
15 0
15 0
15 0
15 0
15 0
15 0
15 0
15 0
15 0
14 0
15 0
15 0
15 0
15 0
15 0
15 0
15 0
15 0
15 0
14 0
14 0
13 0
12 0
11 0
9 0
6 0
5 0
4 0
4 0
3 0
3 0
3 0
3 0
3 0
3 0
3 0
3 0
4 0
4 0
4 0
5 0
6 0
6 0
6 0
6 0
5 0
11 0
11 0
11 0
11 0
11 0
11 0
11 0
11 0
11 0
11 0
11 0
10 0
10 0
10 0
10 0
10 0
10 0
10 0
11 0
11 0
11 0
11 0
11 0
11 2
11 2
10 3
10 4
10 4
10 4
8 4
7 4
7 4
7 4
7 4
7 4
7 4
1 4
1 4
1 4
1 4
1 4
1 4
1 4
1 5
1 5
1 5
1 6
1 6
1 7
1 7
1 7
1 9
1 9
1 9
0 9
0 9
0 9
0 9
0 9
0 7
0 5
0 5
0 4
1 4
1 4
1 4
1 4
1 4
1 4
1 4
1 4
1 5
1 5
1 5
1 5
1 5
1 5
1 5
1 5
1 5
1 5
1 5
1 4
1 3
1 3
1 3
1 3
1 1
1 1
1 1
1 1
1 1
1 1
1 1
2 1
2 1
2 1
2 1
2 1
1 1
1 1
1 1
1 1
1 1
1 1
1 1
1 1
1 0
1 0
1 0
1 0
1 0
1 0
1 0
1 0
1 0
3 0
3 0
3 0
3 0
3 0
3 0
3 0
3 0
3 0
3 0
3 0
3 0
2 0
2 0
2 0
2 0
2 0
2 0
2 0
2 0
2 0
2 0
2 0
2 0
2 0
2 0
2 0
2 0
2 0
3 0
3 0
4 0
4 0
4 0
4 0
4 0
2 0
2 0
2 0
2 0
2 0
2 0
2 0
2 0
2 0
2 0
2 0
2 0
2 0
2 0
2 0
2 0
2 0
2 0
2 0
2 0
2 0
2 0
2 0
2 0
2 0
2 0
2 0
1 0
1 0
1 0
0 0
0 0
0 0
0 0
0 0
0 0
0 0
0 0
0 0
0 0
0 0
0 0
0 0
0 0
0 0
0 0
0 0
0 0
0 0
0 0
0 0
0 0
0 0
0 0
0 0
0 0
0 0
0 0
0 0
0 0
0 0
0 0
0 0
0 0
0 0
0 0
0 1
0 1
0 1
0 1
0 1
0 1
0 1
0 1
0 1
0 1
0 1
1 1
1 1
1 1
1 1
1 1
1 1
1 1
1 1
1 1
1 1
1 1
1 1
1 1
1 1
1 1
1 1
1 1
1 1
1 1
1 1
1 1
2 1
2 1
2 1
2 1
2 0
2 0
2 0
2 0
2 0
2 0
2 0
2 0
2 0
2 0
2 0
1 0
1 0
1 0
1 0
1 0
1 0
1 0
1 0
1 0
1 0
1 0
1 0
1 0
1 0
1 0
1 0
0 0
0 0
0 0
0 0
0 0
0 0
0 0
0 0
0 0
1 0
1 0
1 0
1 0
1 0
1 0
1 0
1 0
1 0
1 1
1 1
1 1
1 1
1 1
1 1
1 1
2 1
2 1
2 1
2 1
2 1
2 1
2 1
2 1
2 1
2 1
3 1
3 1
3 1
3 1
3 1
3 1
3 1
3 1
3 1
3 1
2 1
2 1
2 1
2 1
2 1
2 1
2 1
2 1
2 1
2 2
2 2
2 2
3 2
4 2
4 2
4 2
3 2
3 2
3 4
3 4
3 4
3 4
4 4
5 4
5 4
5 4
4 4
4 4
4 4
4 4
4 4
4 4
4 4
4 4
4 4
4 4
4 4
4 4
4 4
4 4
4 4
4 4
4 4
4 4
4 4
4 2
4 2
4 2
4 2
3 2
3 2
5 2
5 2
8 2
10 0
10 0
11 0
13 0
13 0
13 0
14 0
14 0
14 0
14 0
14 0
14 0
14 0
14 0
14 0
14 0
14 0
14 0
14 0
14 0
14 0
14 0
14 0
14 0
14 0
14 0
14 0
14 0
14 0
14 0
14 0
14 0
14 0
12 0
8 0
6 0
5 0
5 0
3 0
3 0
3 0
2 0
1 0
1 0
1 0
1 0
1 0
5 0
5 0
21 0
21 0
21 0
21 0
26 0
26 0
26 0
26 0
26 0
26 0
27 0
27 0
50 2
50 2
50 2
50 2
61 2
71 3
87 3
91 3
106 3
107 3
107 3
109 3
114 3
114 3
117 3
117 3
118 3
120 3
121 3
120 3
121 3
120 3
118 3
118 3
110 3
110 3
110 3
111 3
106 3
106 3
107 3
107 3
107 3
108 3
108 3
109 3
90 0
92 0
94 0
96 0
82 0
70 0
62 0
61 0
46 0
56 0
77 0
79 0
84 0
87 0
84 0
84 0
82 0
82 0
82 0
85 0
84 0
84 0
83 0
83 0
84 0
87 0
88 0
91 0
97 0
96 0
97 0
100 0
99 0
96 0
96 0
94 0
90 0
86 0
84 0
83 1
83 1
81 1
80 1
75 1
71 1
62 1
43 1
40 1
36 1
34 1
34 1
34 1
34 1
32 1
31 1
33 2
118 2
121 2
122 2
121 2
113 2
111 2
110 2
108 2
101 2
101 2
101 2
98 1
98 1
98 1
98 1
101 2
113 2
124 2
145 2
152 2
163 2
168 2
169 2
170 2
170 2
172 2
173 2
177 2
195 2
198 2
199 2
197 2
197 2
196 2
177 2
170 1
112 1
111 1
111 1
112 1
112 1
112 1
112 1
111 1
111 1
111 1
111 1
110 1
107 2
97 2
101 2
95 1
95 1
86 1
72 1
64 1
57 1
53 1
53 1
52 1
52 1
50 1
48 1
43 1
26 1
23 1
22 1
20 1
20 1
19 1
17 1
17 1
17 1
17 1
17 1
17 1
17 1
17 1
17 1
17 0
17 0
17 0
18 0
18 0
17 0
12 0
8 0
6 0
8 0
8 0
9 0
11 0
11 0
11 0
10 0
10 0
10 0
10 0
10 0
11 0
10 0
10 0
10 0
10 0
9 0
10 0
10 1
11 1
11 1
13 1
13 1
13 1
14 1
14 1
14 1
14 1
13 1
13 1
12 1
17 1
17 1
17 1
17 1
15 1
12 1
12 1
11 1
13 1
13 1
14 1
15 1
15 2
16 2
16 2
16 2
15 2
15 2
16 2
16 2
16 2
15 2
15 2
15 1
14 1
13 1
12 1
12 1
12 1
11 1
10 1
10 1
10 1
10 1
10 1
10 1
7 1
7 1
7 1
10 1
10 1
10 1
10 1
10 1
8 0
8 0
6 0
6 0
6 0
5 0
5 0
5 0
5 0
5 0
4 0
4 0
8 0
8 0
8 0
8 0
8 0
9 0
10 0
10 0
13 0
18 0
20 0
29 0
45 0
48 0
51 1
55 1
69 1
88 1
91 1
89 1
89 1
90 1
90 1
90 1
90 1
91 1
91 1
91 1
91 1
91 1
92 1
93 1
93 1
94 1
94 1
93 1
90 1
96 1
98 1
99 1
106 2
108 4
109 6
105 6
98 7
90 7
90 10
90 11
73 11
69 10
52 10
41 10
36 10
33 10
31 10
35 10
38 10
39 10
42 11
44 11
47 11
63 11
89 11
92 11
97 11
113 11
114 11
111 11
112 11
112 11
112 11
112 11
112 11
105 11
103 11
101 10
91 9
91 7
90 5
89 3
88 2
88 4
88 4
88 4
88 4
86 4
86 4
86 4
85 4
85 4
84 4
79 4
77 5
81 4
123 8
117 8
108 8
93 8
73 8
67 8
60 8
52 8
51 8
51 8
51 8
51 8
51 8
51 8
54 8
54 8
57 8
57 8
57 8
60 8
60 7
61 7
61 5
61 5
62 5
62 5
62 5
62 5
63 5
63 5
63 5
60 4
56 4
56 4
54 3
54 4
12 1
12 1
12 1
12 1
10 1
10 1
10 1
10 1
10 1
10 1
10 1
10 1
10 1
10 1
9 1
9 1
7 1
7 1
7 1
5 1
5 1
4 1
4 1
4 1
3 1
3 1
3 1
3 1
2 2
2 2
2 2
2 2
2 2
1 2
1 2
1 1
1 1
1 1
1 1
1 1
1 1
1 1
1 1
1 1
1 1
1 1
1 1
1 1
1 1
1 1
1 1
1 1
1 1
4 1
7 1
9 1
54 1
54 1
56 1
59 1
60 1
61 1
63 1
63 1
63 0
63 0
63 0
63 0
63 0
63 0
63 0
63 0
63 0
63 0
63 0
67 0
69 0
70 1
71 1
71 1
72 1
73 1
75 1
76 1
76 2
76 2
76 2
80 3
80 3
91 3
89 3
93 3
50 3
50 3
51 3
49 3
48 3
47 3
46 3
46 3
46 3
47 3
48 3
48 3
48 2
48 2
48 2
48 2
49 2
66 2
70 2
77 2
77 2
77 2
77 2
76 2
75 2
75 2
76 2
75 2
80 1
81 1
81 1
78 0
78 0
62 0
60 0
51 0
51 0
51 0
50 0
50 0
51 0
51 0
51 0
51 0
51 0
50 0
49 0
48 0
45 0
47 0
50 0
52 0
50 0
35 0
34 0
22 0
18 0
17 0
17 0
17 0
17 0
17 0
16 0
16 0
13 0
12 0
11 0
12 0
33 0
33 0
33 0
33 0
32 0
32 0
32 0
32 0
32 0
32 0
32 0
32 0
33 0
33 0
35 0
38 0
38 0
36 0
31 0
30 0
29 0
29 0
29 0
29 0
48 0
51 0
51 0
52 0
52 0
53 0
53 0
52 0
52 0
48 0
48 0
47 0
32 0
32 0
32 0
32 0
32 0
32 0
32 0
32 0
32 0
32 0
32 0
33 0
32 0
32 0
30 0
27 0
27 0
27 0
27 0
38 0
46 0
47 0
47 0
46 0
32 0
33 0
35 0
43 0
57 0
56 0
56 0
58 0
58 0
59 0
59 0
62 0
62 0
62 0
62 0
62 0
62 0
62 0
62 0
62 0
62 0
64 0
64 0
63 0
63 0
63 0
63 0
63 0
63 0
62 0
59 0
43 0
42 0
40 0
41 0
40 0
38 0
35 0
30 0
26 0
10 0
9 0
10 0
9 0
9 0
9 0
11 0
8 0
10 0
10 0
12 0
18 0
21 0
21 0
22 0
22 0
22 0
20 0
24 0
24 0
23 0
23 0
23 0
23 0
23 0
23 0
23 0
32 0
82 0
83 0
83 1
85 1
86 1
86 1
86 1
85 1
84 1
96 1
97 1
97 1
97 1
100 1
105 1
106 1
105 1
105 1
103 1
98 1
96 1
95 1
95 1
95 1
97 1
97 1
93 1
93 1
93 1
93 1
87 1
86 1
83 1
81 1
78 1
76 1
42 1
43 1
[truncated: 22,465,968 more chars]
