# Supplementary material for: From Insect to Man: Photorhabdus Sheds Light on the Emergence of Human Pathogenicity
Source: PLoS One. 2015 Dec 17;10(12):e0144937. doi: 10.1371/journal.pone.0144937 (PMC4683029; doi:10.1371/journal.pone.0144937)
Supplement: S2 Data — (ZIP) [file pone.0144937.s002.zip › ATCC43949_28C_Expo_rep2.plot]

2 0
2 0
2 0
2 0
2 0
2 0
2 0
2 0
2 0
2 0
2 0
2 0
2 0
2 0
2 0
2 0
3 0
3 0
3 0
3 0
3 0
3 0
3 0
3 5
6 6
6 6
6 6
6 6
6 6
6 6
6 7
6 7
6 7
6 8
6 8
6 8
6 8
7 8
18 8
30 8
29 8
29 8
29 8
29 8
29 8
29 8
29 8
29 8
29 8
30 8
33 8
34 8
35 8
35 8
35 8
32 8
33 8
31 8
31 9
33 9
35 9
35 9
35 9
37 9
37 9
37 9
38 9
38 9
38 9
38 9
38 9
38 9
38 9
38 9
38 9
39 9
39 9
40 10
44 11
45 11
45 11
45 11
49 16
49 16
55 16
55 16
55 16
55 16
55 16
56 18
56 18
56 18
60 25
63 25
63 26
63 26
63 21
61 20
62 20
62 20
62 20
62 20
63 20
63 19
63 19
63 19
63 18
63 18
61 18
61 18
61 18
51 18
41 18
41 18
41 18
42 18
42 18
44 18
44 18
44 18
44 18
44 18
42 18
39 18
39 18
40 18
40 18
40 18
41 18
40 18
40 18
39 17
41 17
43 24
42 24
42 24
41 24
41 24
41 24
41 24
41 24
42 24
42 26
49 27
49 27
50 28
50 28
47 28
44 28
42 27
43 26
42 26
42 26
42 26
42 26
38 19
37 19
29 19
29 17
27 17
27 17
27 17
27 17
27 17
27 17
24 11
24 11
24 11
24 11
24 11
24 11
23 11
27 12
34 13
39 14
38 14
48 15
48 15
48 15
48 15
48 15
48 15
48 15
48 15
48 15
48 15
48 15
48 15
48 15
49 15
48 15
48 15
49 15
49 16
49 18
49 18
50 18
50 18
48 18
48 16
45 17
45 17
42 17
42 17
42 17
41 17
38 8
38 8
38 8
37 8
40 6
44 6
44 6
44 6
42 6
42 4
31 4
31 4
27 4
22 4
22 4
19 4
19 4
18 4
18 4
18 4
18 4
20 4
20 4
20 4
21 4
21 4
21 4
21 4
21 4
21 4
21 4
21 4
21 4
21 4
21 4
21 4
21 4
20 4
21 4
21 4
21 4
19 4
19 4
16 4
16 4
18 4
19 4
19 4
19 4
19 4
20 5
20 5
20 5
22 6
22 6
23 6
25 6
24 6
24 6
24 5
24 3
24 3
23 3
21 3
21 3
21 3
17 2
17 2
15 2
16 2
16 2
16 2
16 2
16 2
18 2
18 2
18 2
23 2
22 2
22 3
22 3
22 3
22 3
22 3
22 3
22 3
22 3
22 3
22 3
24 3
26 3
26 3
27 4
27 4
25 4
24 4
24 4
23 4
22 4
21 4
21 4
21 4
21 4
21 4
21 4
22 4
22 4
22 4
22 4
22 4
22 4
21 4
21 4
21 4
23 6
24 6
24 6
24 6
28 6
29 7
29 7
28 7
28 7
29 6
29 6
29 5
29 5
29 5
28 5
27 5
27 5
27 5
27 5
27 5
27 5
27 5
27 5
27 5
27 5
27 5
27 6
27 6
28 8
28 8
29 8
29 8
29 8
26 8
26 8
26 8
20 8
18 8
18 7
18 7
18 7
18 7
18 7
18 7
16 7
16 7
17 7
17 7
15 7
13 7
13 6
11 6
10 6
9 6
7 6
7 6
7 6
7 6
7 6
7 6
7 6
7 6
7 6
7 6
7 6
7 6
7 6
7 6
7 6
7 6
7 6
7 6
7 6
7 4
6 4
6 4
8 4
8 4
8 3
8 3
8 3
6 3
6 3
6 3
6 3
6 3
6 3
6 3
6 3
6 3
6 3
6 3
6 3
6 3
6 3
6 3
6 2
9 1
9 1
9 1
10 1
7 0
7 0
7 0
7 0
7 0
7 0
7 0
7 0
7 1
8 2
8 2
8 2
8 2
8 3
8 5
8 6
10 9
10 12
9 13
9 13
9 13
9 13
9 14
9 15
9 16
9 16
9 16
12 17
12 17
12 17
12 17
12 17
12 17
12 19
12 19
12 19
12 19
12 19
12 19
12 19
12 19
12 19
12 19
12 19
12 19
12 19
11 20
11 20
10 20
10 20
10 20
10 20
10 20
10 20
10 20
10 20
10 20
10 20
10 20
10 21
10 21
10 21
10 21
10 21
10 21
10 21
10 21
10 21
10 21
7 21
7 21
7 21
6 21
7 21
7 21
7 21
7 21
7 19
7 19
7 15
7 12
7 12
6 12
10 13
10 13
10 13
10 11
10 11
10 10
8 9
9 7
9 7
9 7
10 7
10 7
10 7
10 7
10 6
11 6
11 6
8 5
8 5
8 5
8 5
8 5
8 5
8 6
8 6
8 6
8 6
8 6
8 6
8 6
8 6
8 6
8 6
8 6
8 6
8 6
8 5
8 5
8 5
8 5
8 5
8 5
8 5
8 5
8 5
8 5
8 3
8 3
8 2
8 2
8 2
8 2
8 2
9 2
17 2
25 2
38 2
49 2
52 2
52 2
52 2
52 2
53 2
55 2
60 2
60 2
78 2
78 2
79 2
79 2
80 2
80 2
80 2
76 1
76 1
76 1
76 1
76 1
76 1
75 1
75 1
75 1
75 1
74 1
74 1
74 1
74 1
73 1
73 1
73 1
75 1
75 1
75 1
75 1
75 1
75 1
75 0
75 0
75 0
75 0
75 0
72 0
72 0
70 0
68 0
55 0
55 0
39 0
37 0
37 0
38 0
41 0
44 0
51 0
51 0
51 0
51 0
51 0
45 0
43 0
43 0
42 0
43 0
43 0
50 0
51 0
50 0
50 0
48 0
48 0
45 0
44 0
44 0
44 0
45 0
46 0
45 0
44 0
44 0
30 0
30 0
30 0
30 0
30 0
30 0
30 0
30 0
30 0
30 0
30 0
30 0
30 0
30 0
30 0
30 0
30 0
30 0
30 0
30 0
30 0
30 0
29 0
29 0
28 0
31 0
31 0
31 0
32 0
34 0
34 0
34 0
34 0
34 0
37 0
37 0
37 0
37 0
37 0
37 0
37 0
37 0
37 0
37 0
36 0
32 0
30 0
23 0
23 0
23 0
23 0
23 0
23 0
23 0
23 0
20 0
19 0
19 0
14 0
13 0
13 0
13 0
13 0
12 0
12 0
12 0
12 0
12 0
11 0
9 0
9 0
9 0
9 0
10 0
10 0
10 0
10 0
11 0
11 0
11 0
12 0
12 0
15 0
16 0
17 0
17 0
17 0
17 0
17 0
166 16
167 17
172 20
174 21
175 21
175 23
175 24
174 24
174 24
171 24
174 24
178 24
183 24
183 25
183 25
183 25
184 25
185 25
183 25
188 26
188 27
188 27
188 27
188 27
188 27
188 27
188 27
188 27
188 27
188 27
188 27
188 27
188 27
188 27
192 27
192 27
192 27
192 27
192 27
192 27
192 27
192 27
192 27
193 27
194 28
194 29
266 40
267 41
267 41
267 41
265 41
268 41
268 41
268 41
272 41
272 41
272 41
272 41
272 41
272 41
272 41
271 41
271 41
277 41
277 41
276 41
274 41
274 41
274 43
274 43
273 43
273 43
273 43
122 20
122 19
121 19
133 20
142 20
155 21
223 23
230 23
230 23
230 24
227 24
221 24
218 24
216 23
216 23
216 23
216 23
216 23
216 22
211 22
211 21
211 21
211 21
211 21
211 21
211 21
211 21
211 21
211 21
211 21
211 21
211 21
211 21
211 21
207 21
207 21
208 21
210 21
212 21
212 21
217 21
217 20
217 20
214 18
199 17
199 17
138 7
139 7
139 7
140 7
141 7
141 7
136 7
136 7
135 7
135 7
135 7
135 7
135 7
135 7
134 7
134 7
135 7
128 7
127 7
127 7
127 7
130 7
129 5
129 5
131 5
132 5
132 5
127 5
120 5
109 3
94 3
87 3
77 3
18 0
17 0
17 0
15 0
15 0
15 0
15 0
11 0
11 0
11 0
11 0
12 0
12 0
12 0
12 0
12 0
12 0
12 0
12 0
14 0
18 0
98 0
164 0
210 0
251 0
262 0
361 0
361 0
361 0
361 0
361 0
361 0
360 0
360 0
356 0
356 0
356 0
356 0
356 0
357 0
359 0
358 0
358 0
358 0
359 0
360 0
362 0
492 0
505 0
530 0
628 0
629 0
631 0
634 0
630 0
633 0
631 0
630 0
631 0
629 0
630 0
627 0
626 0
623 0
616 0
613 0
613 0
615 0
615 0
603 0
603 0
603 0
603 0
603 0
603 0
603 0
603 0
604 0
604 0
605 0
605 0
605 0
605 0
605 0
604 0
603 0
603 0
603 0
603 0
603 0
603 0
603 0
604 0
602 0
529 0
475 0
429 0
391 0
382 0
296 0
295 0
297 0
297 0
297 0
297 0
297 0
297 0
297 0
297 0
297 0
297 0
297 0
295 0
294 0
294 0
294 0
294 0
291 0
286 0
273 0
138 0
131 0
108 0
14 0
14 0
11 0
11 0
11 0
10 0
10 0
10 0
10 0
10 0
10 0
10 0
14 0
14 0
14 0
14 0
14 0
14 0
15 0
15 0
16 0
18 0
21 0
40 0
41 0
41 0
41 0
42 0
42 0
41 0
42 0
43 0
43 0
43 0
45 0
45 0
45 0
45 0
46 0
47 0
47 0
48 0
46 0
47 0
46 0
43 0
45 0
45 0
47 0
47 0
48 0
46 0
46 0
46 0
47 0
47 0
47 0
47 0
47 0
47 0
47 0
47 0
49 0
49 0
49 0
50 0
50 0
50 0
50 0
50 0
51 0
51 0
51 0
51 0
51 0
51 0
51 0
51 0
51 0
51 0
51 0
52 0
52 0
51 0
49 0
48 0
48 0
48 0
48 0
48 0
47 0
46 0
46 0
42 0
40 0
31 0
15 0
15 0
12 0
9 0
8 0
8 0
7 0
7 0
7 0
7 0
7 0
6 0
6 0
6 0
6 0
5 0
5 0
5 0
5 0
5 0
4 0
4 0
4 0
4 0
3 0
2 0
2 0
2 0
2 0
2 0
2 0
2 0
2 0
2 0
2 0
2 0
2 0
2 0
2 0
2 0
2 0
2 1
1 1
1 1
2 1
2 1
2 1
2 1
2 1
2 1
2 1
3 1
3 1
3 1
3 1
3 1
3 0
2 0
2 0
2 1
2 1
2 1
2 1
3 1
3 1
3 1
3 1
3 1
3 1
3 1
3 1
3 1
3 1
3 1
3 1
3 1
3 1
3 1
3 1
3 1
3 1
3 1
3 1
3 1
3 1
3 1
3 1
3 1
3 1
3 1
3 0
3 0
3 0
4 0
4 0
4 0
4 0
4 0
4 0
4 0
4 0
4 0
4 0
4 0
4 0
4 0
4 0
4 0
4 0
4 0
4 0
5 0
8 0
16 0
20 0
24 0
24 0
30 0
32 0
32 0
32 0
32 0
32 0
32 0
31 0
31 0
33 0
33 0
33 0
33 0
33 0
33 0
33 0
33 0
33 0
34 0
33 0
33 0
35 0
35 0
35 0
36 0
47 0
68 0
68 0
73 0
75 0
75 0
75 0
75 0
78 0
79 0
79 0
79 0
79 0
79 0
79 0
79 0
79 0
82 0
89 0
89 0
89 0
89 0
89 0
89 0
88 0
88 0
88 0
88 0
90 0
92 0
92 0
92 0
92 0
97 0
101 0
105 0
107 0
114 0
120 0
123 0
123 0
126 0
126 0
123 0
112 0
109 0
107 0
107 0
100 0
98 0
98 0
98 0
98 0
98 0
98 0
98 0
97 0
96 0
96 0
96 0
96 0
97 0
101 0
101 0
101 0
101 0
100 0
117 0
118 0
117 0
118 0
117 0
117 0
105 0
76 0
73 0
80 0
89 0
96 0
97 0
87 0
80 0
77 0
71 0
71 0
71 0
71 0
71 0
71 0
72 0
74 0
70 0
70 0
71 0
71 0
71 0
71 0
71 0
71 0
71 0
71 0
71 0
71 0
71 0
71 0
70 0
68 0
68 0
66 0
69 0
67 0
80 0
81 0
82 0
82 0
84 0
93 0
93 0
93 1
93 1
93 1
94 1
94 1
94 1
94 1
94 1
94 1
94 1
94 1
94 1
94 1
94 1
94 1
93 1
93 1
89 1
89 1
91 1
91 1
92 1
76 1
77 1
75 1
83 1
83 1
82 1
82 1
81 1
80 1
65 1
59 1
54 1
52 1
54 1
54 1
55 1
56 1
56 1
56 1
54 1
53 1
53 1
53 1
53 1
53 1
50 1
49 1
49 1
49 1
49 1
49 1
49 1
49 1
49 1
49 1
49 1
49 1
49 1
49 1
49 1
49 1
49 1
49 1
50 1
80 1
79 1
80 1
80 1
78 1
73 1
73 1
74 0
74 0
74 0
73 0
73 0
73 0
73 0
74 0
75 0
75 0
78 1
78 1
81 1
81 1
86 2
86 10
86 10
85 10
90 10
88 10
87 10
85 10
85 10
84 10
84 10
76 10
76 10
76 10
76 10
76 10
76 10
76 10
76 10
75 10
74 10
73 10
73 10
73 10
73 10
72 10
72 11
72 11
71 11
71 11
71 11
70 11
70 11
70 11
70 11
70 11
70 11
70 11
70 11
70 11
71 11
71 11
71 11
71 11
72 11
72 11
71 11
84 11
84 11
82 11
81 11
80 11
34 8
34 8
30 7
30 7
30 7
27 7
27 7
26 7
33 7
33 7
35 7
36 7
40 7
48 7
56 7
59 5
175 5
186 4
209 4
219 4
238 3
392 6
399 5
401 5
400 5
398 5
399 5
403 5
403 5
407 5
412 5
445 5
451 5
456 5
500 5
518 5
533 5
538 5
549 5
552 5
556 5
557 5
557 5
558 5
558 5
557 5
558 5
560 4
560 4
560 4
560 4
560 4
560 4
560 4
560 4
560 4
562 4
562 4
564 4
564 4
564 4
563 4
561 4
561 4
561 4
560 4
559 4
558 4
544 4
544 4
543 4
540 4
541 4
538 4
538 4
540 4
540 4
540 4
542 4
542 4
542 4
536 4
536 4
534 4
533 4
527 4
517 4
517 4
491 4
386 4
371 4
312 3
298 3
277 3
134 0
129 0
129 0
129 0
91 0
90 0
88 0
88 0
84 0
82 0
78 0
68 0
65 0
57 0
42 0
26 0
20 0
13 0
14 0
16 0
17 0
19 0
19 0
19 0
18 0
18 0
17 0
20 0
20 0
22 0
22 0
22 0
22 0
22 0
22 0
22 0
22 0
22 0
22 0
22 0
22 0
22 0
23 0
23 0
23 0
23 0
23 0
23 0
23 0
21 0
21 0
17 0
17 0
17 0
15 0
15 0
15 0
13 0
13 0
13 0
12 0
12 0
12 0
12 0
12 0
12 0
12 0
12 0
12 0
12 0
12 0
12 0
12 0
12 0
12 0
12 0
12 0
12 0
12 0
12 0
12 0
12 0
12 0
12 0
12 0
12 0
12 0
12 0
12 0
12 0
12 0
12 0
11 0
12 0
13 0
40 0
43 0
44 0
44 0
45 0
42 0
40 0
40 0
40 0
41 0
44 0
44 0
44 0
44 0
45 0
47 0
47 0
55 0
55 0
55 0
54 0
54 0
54 0
54 0
54 0
54 0
54 0
54 0
56 0
56 0
56 0
54 0
55 0
55 0
55 0
55 0
55 0
55 0
55 0
55 0
69 0
69 0
69 0
69 0
72 0
72 0
72 0
73 0
74 0
75 0
75 0
75 0
75 0
75 0
75 0
75 0
75 0
75 0
75 0
82 0
96 0
108 0
109 0
109 0
109 0
110 1
112 1
115 1
124 2
124 2
123 2
121 2
120 2
94 2
91 2
90 2
90 2
90 2
90 2
90 2
90 2
89 2
89 2
86 2
86 2
86 2
86 2
87 2
85 2
85 2
77 2
77 2
77 2
77 2
77 2
77 2
77 2
77 2
78 2
80 2
80 2
87 2
87 2
88 2
87 2
86 2
86 2
86 2
86 2
86 2
86 2
86 2
86 2
72 2
72 2
72 2
72 2
70 3
70 3
78 3
78 3
189 4
190 4
190 4
191 4
199 4
200 4
203 4
203 4
238 4
238 4
238 4
228 4
216 3
204 2
208 2
206 2
209 2
210 2
207 2
207 2
201 2
202 2
202 2
202 2
202 2
202 2
202 2
202 2
202 2
202 2
202 2
207 2
207 2
239 2
239 2
239 2
239 2
240 2
246 2
244 2
245 2
246 2
246 2
246 2
246 2
245 2
244 2
244 0
248 0
248 0
247 0
246 0
246 0
237 0
237 0
237 0
237 0
238 0
249 0
374 0
403 0
404 0
410 0
410 0
413 0
450 0
456 0
456 0
458 0
458 0
458 0
446 0
445 0
336 0
389 0
389 0
421 1
472 1
470 1
507 2
535 2
526 2
528 2
528 2
528 2
524 2
523 2
520 2
524 2
522 2
522 2
524 2
524 2
527 3
530 4
531 4
537 4
537 4
537 4
537 4
536 4
536 4
536 4
537 4
537 4
537 4
510 4
510 4
511 4
511 4
510 4
508 4
510 4
508 4
508 4
509 4
509 4
509 4
509 4
509 4
509 4
505 4
506 4
505 4
505 4
505 4
503 4
500 4
498 4
479 4
415 4
374 4
216 4
203 4
128 4
127 4
120 4
116 4
64 3
58 3
58 3
37 2
37 2
37 2
37 2
37 2
37 2
37 2
37 2
40 2
35 2
35 2
29 2
31 2
29 2
29 2
29 2
28 2
28 3
16 4
15 4
15 4
15 4
14 4
17 4
17 4
17 3
17 2
18 2
18 2
18 2
37 3
47 3
47 3
129 4
129 4
130 4
129 4
129 4
129 4
129 4
129 4
130 4
133 4
135 4
135 4
135 4
141 4
141 4
143 4
143 4
144 4
144 4
142 4
140 4
139 4
139 4
139 4
139 4
139 4
142 4
144 4
144 4
145 4
146 4
148 4
148 4
167 4
167 4
168 4
166 4
166 4
166 4
166 4
171 4
171 4
171 4
171 2
171 4
173 4
178 4
187 4
180 4
173 4
173 4
176 4
174 4
174 4
202 4
203 4
207 4
207 3
207 2
207 2
209 2
209 2
207 2
193 2
193 2
182 2
182 2
182 2
178 2
177 2
174 2
167 2
167 2
105 2
105 2
105 2
105 2
105 2
105 2
105 2
105 2
104 2
101 2
101 2
101 2
102 2
100 2
103 2
103 2
103 2
109 2
109 2
109 2
109 2
109 2
109 2
109 2
109 2
109 2
105 2
103 2
103 2
103 2
103 2
102 2
106 2
94 2
105 2
110 2
110 2
108 2
108 2
108 2
104 2
104 2
104 2
102 3
100 1
99 1
94 1
84 1
85 1
84 1
92 1
90 1
88 1
88 1
61 1
60 1
55 1
54 1
55 1
55 1
54 1
54 1
54 1
54 1
56 1
57 1
68 1
70 1
71 1
73 1
73 1
73 1
76 1
76 1
76 1
77 1
78 1
81 1
82 1
128 2
128 2
129 2
130 2
130 2
130 2
129 2
127 2
122 2
121 2
121 2
116 2
119 2
119 2
120 2
126 2
127 2
128 2
131 2
133 2
135 2
135 2
137 2
157 5
159 5
235 8
235 8
222 8
215 8
215 8
216 7
216 7
215 7
215 7
215 7
215 7
215 7
215 7
215 7
215 7
218 7
218 7
217 7
216 7
208 7
208 7
208 7
208 7
210 7
214 7
245 7
251 7
252 7
253 7
253 7
253 7
253 7
253 7
251 7
251 7
239 7
237 7
237 7
236 7
236 7
236 7
232 7
232 7
231 7
228 6
228 6
226 6
224 6
167 5
166 3
165 3
165 3
154 2
154 2
154 2
156 2
159 2
161 2
162 2
165 2
167 2
163 2
162 1
153 0
153 0
150 0
148 0
150 0
149 0
148 0
146 0
138 0
138 0
73 0
72 0
72 0
68 0
68 0
67 0
67 0
67 0
67 0
67 0
69 0
72 0
76 0
76 0
84 0
81 0
81 0
82 0
81 0
81 0
81 0
83 0
90 0
88 0
84 0
57 0
63 0
69 0
72 0
75 0
120 1
120 1
120 1
119 1
119 1
119 1
118 1
124 1
145 1
158 1
168 1
168 1
174 1
183 1
184 1
189 1
260 1
273 1
287 1
359 1
363 1
363 1
373 1
383 1
389 1
420 2
429 2
465 2
466 2
460 2
458 2
460 2
463 2
466 2
466 2
466 2
466 2
463 2
463 2
464 2
464 2
464 2
464 2
464 2
464 2
464 2
464 2
464 2
464 2
464 2
464 2
464 2
464 2
461 2
455 2
449 2
447 2
447 2
447 2
447 2
446 2
446 2
446 2
446 2
441 2
437 2
439 2
439 2
435 2
424 2
420 2
415 2
415 2
370 1
371 1
372 1
372 1
372 1
372 1
372 1
351 1
336 1
327 1
316 1
314 1
305 1
291 1
282 1
270 1
191 1
183 1
167 1
96 1
92 1
86 1
82 1
75 0
66 0
44 0
40 0
5 0
5 0
5 0
5 0
3 0
3 0
3 0
2 0
2 0
2 0
2 0
2 0
2 0
2 0
2 0
2 0
2 0
2 0
2 0
5 0
8 0
12 0
12 0
12 0
12 0
12 0
12 0
12 0
12 0
12 0
12 0
12 0
12 0
12 0
12 0
12 0
12 0
12 0
12 0
12 0
11 0
11 0
10 0
10 0
10 0
10 0
10 0
10 0
10 0
10 0
10 0
10 0
10 0
9 0
9 0
8 0
8 0
8 0
8 0
8 0
9 0
9 0
9 0
10 0
10 0
10 0
10 0
10 0
10 1
10 1
10 1
10 1
10 1
10 1
10 1
10 1
10 1
10 1
10 1
10 1
9 1
7 1
10 1
13 0
13 0
11 0
11 0
11 0
11 0
11 0
11 0
11 0
11 0
11 0
11 0
11 0
11 0
11 0
11 0
11 0
11 0
11 0
11 0
11 0
13 0
13 0
16 0
16 0
16 0
16 0
16 0
16 0
16 0
16 0
16 0
16 0
16 0
16 0
16 0
17 0
17 0
17 0
17 0
17 0
17 0
17 0
17 0
15 0
15 0
15 0
10 0
10 0
8 0
8 0
8 0
8 0
3 0
3 0
3 0
3 0
3 0
3 0
3 0
3 0
4 0
4 0
4 0
4 0
4 0
4 0
4 0
4 0
4 0
4 0
4 0
3 0
3 0
3 0
3 0
3 0
3 0
3 0
3 0
3 0
3 0
3 0
3 0
3 0
3 0
3 0
3 0
3 0
3 0
3 0
3 0
3 0
3 0
3 0
3 0
2 0
2 0
2 0
2 0
2 0
2 0
2 0
2 0
2 0
2 0
2 0
2 0
4 0
3 0
3 0
3 0
3 0
3 0
3 0
3 0
5 0
6 0
6 0
6 0
6 0
6 0
6 0
6 0
6 0
6 0
6 0
6 0
6 0
6 0
6 0
6 0
6 0
6 0
5 0
5 0
5 0
5 0
5 0
5 0
5 0
5 0
5 0
5 0
5 0
5 0
5 0
5 0
5 0
5 1
5 1
5 1
5 1
5 1
6 1
6 1
6 1
6 1
6 1
6 1
6 1
7 1
7 1
7 1
7 1
7 1
7 0
7 0
7 0
7 0
7 0
7 0
7 0
7 0
8 0
8 0
8 0
8 0
8 0
8 0
8 0
6 0
6 0
6 0
8 0
8 0
8 0
9 0
15 0
13 0
13 0
54 0
58 0
69 0
73 0
74 0
74 0
74 0
75 0
75 0
75 0
75 0
75 0
75 0
75 0
75 0
75 0
75 0
75 0
75 0
75 0
76 0
76 0
76 0
78 0
83 0
93 0
95 0
95 0
95 0
95 0
95 0
102 0
102 0
112 0
129 0
132 0
138 0
145 0
148 0
148 0
146 0
168 0
168 0
167 0
167 0
167 0
167 0
167 0
167 0
166 0
166 0
161 0
158 0
157 0
157 0
157 0
156 0
156 0
156 0
156 0
157 0
157 0
156 0
156 0
156 0
155 0
154 0
154 0
154 0
154 0
154 0
154 0
156 0
122 0
111 0
110 0
110 0
103 0
104 0
105 0
106 0
111 0
112 0
114 0
114 0
115 0
116 0
117 0
119 0
119 0
122 0
129 0
129 0
129 0
132 0
144 0
144 0
145 0
141 0
142 0
142 0
141 0
141 0
141 0
130 0
129 0
122 0
115 0
118 0
126 0
120 0
116 0
116 0
115 0
95 0
95 0
95 0
96 0
98 0
102 0
106 0
106 0
108 0
108 0
108 0
108 0
108 0
108 0
110 0
111 0
112 0
117 0
117 0
116 0
116 0
116 0
116 0
116 0
116 0
116 0
116 0
118 0
123 0
123 0
122 0
127 0
127 0
143 0
130 0
130 0
132 0
133 0
135 0
132 0
127 0
125 0
131 0
132 1
139 1
147 2
145 2
143 2
143 2
141 2
135 2
133 2
133 2
128 2
114 2
113 2
111 2
106 2
107 2
107 2
108 2
110 2
110 2
109 2
108 2
107 2
97 2
87 2
74 1
72 1
72 1
72 1
72 1
75 0
75 0
75 0
79 0
79 0
78 0
78 0
79 0
79 0
79 0
79 0
79 0
76 0
76 0
73 0
73 0
73 0
70 0
70 0
69 0
68 0
68 0
68 0
68 0
71 0
72 0
72 0
72 0
69 0
69 0
69 0
69 0
66 0
58 0
58 0
56 0
56 0
53 0
52 0
51 0
43 0
43 0
38 0
35 0
26 0
18 0
19 0
24 0
29 0
35 0
41 0
57 0
57 0
58 0
61 0
60 0
60 0
59 0
58 0
58 0
59 0
59 0
59 0
59 0
59 0
61 0
61 0
61 0
62 0
62 0
59 0
63 0
67 0
67 0
67 0
68 0
67 0
67 0
71 0
70 0
71 0
71 0
73 0
73 0
73 0
73 0
73 0
73 0
73 0
73 0
73 0
74 0
74 0
74 0
75 0
75 0
78 0
75 0
75 0
74 0
73 0
75 0
75 0
75 0
75 0
75 0
75 0
77 0
76 0
76 0
76 0
77 0
75 0
74 0
74 0
74 0
74 0
74 0
70 0
70 0
65 0
59 0
54 0
49 0
32 0
32 0
32 0
32 0
32 0
31 0
31 0
30 0
30 0
30 0
31 0
36 0
36 0
36 0
34 0
34 0
34 0
35 0
34 0
32 0
29 0
23 0
24 0
23 0
23 0
23 0
23 0
21 0
20 0
20 0
20 0
18 0
18 0
18 0
18 0
18 0
18 0
18 0
18 0
18 0
18 0
18 1
20 1
32 1
35 1
45 1
51 1
51 1
52 1
50 1
49 1
49 1
50 1
51 1
51 1
54 1
54 0
54 0
54 0
54 0
53 0
53 0
53 0
53 0
55 0
59 0
59 0
61 0
61 0
61 0
61 0
61 0
62 0
63 0
63 0
63 0
63 0
70 0
71 0
71 0
77 0
78 0
78 0
77 0
72 0
72 0
72 0
73 0
82 0
90 0
113 1
114 1
114 1
114 1
121 2
122 2
123 2
123 2
123 2
123 2
125 2
125 2
125 2
125 2
125 2
125 2
125 2
125 2
125 2
125 2
125 2
125 2
125 2
125 2
123 2
121 2
111 2
104 2
91 2
100 2
100 2
100 2
100 2
100 2
99 2
99 2
97 2
97 2
95 2
95 2
95 2
95 2
95 2
95 2
95 2
95 2
95 2
94 2
91 2
91 2
89 2
89 2
87 2
87 2
87 2
87 2
86 2
86 2
84 2
86 2
80 2
79 2
79 2
73 2
76 2
81 2
81 2
82 2
82 2
79 2
62 0
58 0
59 0
40 0
40 0
40 0
40 0
36 0
32 0
32 0
32 0
32 0
32 0
32 0
32 0
32 0
32 0
32 0
30 0
30 0
30 0
30 0
32 0
32 0
35 0
35 0
35 0
35 0
35 0
36 0
36 0
36 0
29 0
28 0
28 0
28 0
28 0
28 0
28 0
29 0
32 0
33 0
38 0
38 0
38 0
38 0
38 0
38 0
38 0
38 0
38 0
38 0
38 0
38 0
38 0
38 0
38 0
38 0
38 0
38 0
38 0
38 0
36 0
36 0
37 0
37 0
38 0
33 0
32 0
32 0
40 0
59 0
60 0
60 0
55 0
54 0
54 0
54 0
54 0
54 0
54 0
55 0
55 0
56 0
56 0
56 0
56 0
56 0
56 0
56 0
56 0
56 0
56 0
56 0
54 0
54 0
54 0
52 0
52 0
52 0
52 0
52 0
51 0
51 0
51 0
51 0
51 0
51 0
51 0
52 0
52 0
52 0
51 0
46 0
44 0
42 0
42 0
42 0
43 0
44 1
44 1
44 1
44 1
49 1
50 1
50 1
51 1
52 1
52 1
52 1
53 2
53 2
53 2
53 2
59 1
61 1
72 1
75 1
85 1
97 1
102 1
107 1
100 1
107 1
91 1
89 1
89 1
89 1
88 1
88 1
88 1
88 1
88 1
88 1
87 2
87 2
86 2
86 2
86 2
87 2
88 2
91 2
99 2
99 2
99 2
100 2
100 2
100 2
99 2
96 2
95 2
95 2
95 2
95 2
95 2
95 2
95 2
95 2
94 2
94 2
94 2
92 2
90 2
90 2
89 2
89 2
89 2
89 2
89 2
90 2
90 2
86 2
84 2
84 2
85 2
84 2
67 2
65 2
64 2
50 2
50 2
50 2
50 2
50 1
50 1
50 1
50 1
50 1
49 1
42 1
38 1
34 1
26 1
24 1
22 1
35 1
31 1
39 1
43 1
50 1
61 1
61 1
61 1
62 1
62 1
82 1
82 1
82 0
82 0
82 0
82 0
82 0
82 0
80 0
72 0
73 0
73 0
73 0
73 0
74 0
94 0
103 0
103 0
104 0
103 0
98 0
94 0
94 0
94 0
94 0
93 0
93 0
93 0
93 0
95 0
97 0
97 0
97 0
97 0
96 0
97 0
91 0
90 0
88 0
85 0
83 0
76 0
72 0
72 0
73 0
66 0
66 0
66 0
67 0
61 0
61 0
61 0
61 0
61 0
63 0
63 0
66 0
67 0
71 0
73 0
73 0
70 0
68 0
66 0
66 0
64 0
63 0
62 0
59 0
59 0
59 0
59 0
59 0
52 0
52 0
52 0
52 0
52 0
52 0
52 0
52 0
53 0
53 0
52 0
53 0
54 0
53 0
50 0
33 0
25 0
29 0
29 0
29 0
30 0
30 0
30 0
30 0
30 0
30 0
30 0
30 0
30 0
28 0
25 0
25 0
25 0
25 0
25 0
24 0
24 0
23 0
23 0
23 0
23 0
23 0
23 0
23 0
23 0
22 0
22 0
22 0
22 0
22 0
22 0
22 0
22 0
22 0
20 0
20 0
18 0
17 0
12 0
12 0
12 0
12 0
12 0
12 0
12 0
12 0
12 0
12 0
12 0
12 0
12 0
12 0
13 0
16 0
35 1
36 1
36 1
36 1
37 1
37 1
35 1
34 1
34 1
34 1
34 1
33 1
34 1
35 1
35 1
35 1
28 1
29 1
29 1
29 1
29 1
29 1
29 1
29 1
31 1
31 2
31 2
31 2
34 2
35 2
38 2
40 2
40 2
40 2
41 2
41 2
41 2
41 2
41 2
41 2
41 1
42 1
41 1
42 1
68 1
127 1
134 1
139 1
184 1
185 1
186 1
187 1
187 1
187 1
187 1
187 1
187 1
187 1
187 1
187 1
187 1
187 1
187 1
187 1
187 1
188 1
188 1
188 1
188 1
193 1
193 1
192 1
187 1
169 0
169 0
172 0
191 0
190 0
190 0
190 0
190 0
190 0
190 0
191 0
191 0
190 0
189 0
200 0
203 0
207 0
208 0
210 0
211 0
211 0
216 0
216 0
220 0
220 0
237 1
242 1
246 1
246 1
245 1
243 1
245 1
248 1
270 1
334 2
358 2
362 2
364 2
366 2
366 2
370 2
371 2
372 2
371 2
351 2
289 2
287 2
286 2
248 2
248 2
381 3
385 3
390 3
394 3
395 3
395 3
395 3
395 3
395 3
412 3
435 3
457 3
460 3
459 3
461 3
461 3
461 3
461 3
464 3
462 3
462 3
463 3
466 3
468 3
466 3
466 3
450 3
450 3
450 3
450 3
450 3
452 3
453 3
454 3
458 3
458 3
458 3
447 3
441 3
438 3
437 3
438 3
436 3
436 3
431 3
430 3
427 3
422 3
412 2
418 2
414 2
412 2
409 2
408 2
399 2
390 2
357 1
311 1
297 2
291 2
288 2
273 2
273 2
273 2
273 2
272 2
270 2
268 2
268 2
267 2
260 2
259 2
248 2
116 1
114 1
106 1
91 1
91 1
91 1
91 1
92 1
94 1
97 1
87 1
86 1
86 1
86 1
86 1
86 1
86 1
86 1
86 1
86 1
85 1
85 1
83 1
83 1
84 1
85 1
86 1
88 1
88 1
90 1
91 1
91 1
91 1
91 1
89 1
89 1
89 1
88 1
88 1
91 1
91 1
89 1
88 1
86 1
84 1
84 1
83 1
81 1
80 1
72 1
72 1
74 1
76 1
80 1
79 1
77 1
57 0
28 0
25 0
24 0
24 0
19 0
19 0
19 0
19 0
20 0
20 0
20 0
20 0
20 0
20 0
20 0
20 0
20 0
21 0
21 0
23 0
30 0
31 0
31 0
31 0
31 0
29 0
29 0
29 0
29 0
29 0
29 0
29 0
29 0
29 0
29 0
29 0
30 0
30 0
30 0
29 0
29 0
29 0
30 0
30 0
30 0
29 0
28 0
28 0
27 0
26 0
26 0
26 0
28 0
30 0
31 0
31 0
31 0
31 0
31 0
31 0
31 0
31 0
31 0
31 0
31 0
31 0
30 0
28 0
26 0
23 0
23 0
23 0
23 0
23 0
22 0
22 0
22 0
22 0
22 0
22 0
22 0
21 0
21 0
21 0
22 0
22 0
22 0
22 0
22 0
22 0
21 0
20 0
15 0
12 0
11 0
11 0
11 0
11 0
11 0
11 0
11 0
11 0
11 0
11 0
11 0
11 0
12 0
11 0
33 0
38 0
44 0
47 0
50 0
50 0
50 0
48 0
48 0
48 0
48 0
48 0
48 0
48 0
47 0
50 0
53 0
54 0
53 0
53 0
53 0
53 0
54 0
69 0
69 0
71 0
88 0
88 0
90 0
95 0
95 0
96 0
96 0
96 0
96 0
99 0
99 0
99 0
99 0
99 0
99 0
99 0
99 0
99 0
99 0
99 0
99 0
99 0
99 0
99 0
103 0
103 0
111 0
121 0
121 0
142 0
143 0
145 0
145 0
145 0
145 0
145 0
145 0
147 0
151 0
153 0
157 0
170 0
172 0
172 0
172 0
172 0
172 0
151 0
152 0
157 0
163 0
163 0
165 0
165 0
166 0
166 0
173 0
179 0
183 0
184 0
185 0
184 0
180 0
175 0
171 0
170 0
169 0
169 0
165 0
161 0
136 0
136 0
136 0
104 0
104 0
108 0
98 0
98 0
97 0
97 0
97 0
97 0
97 0
99 0
101 0
104 0
106 0
109 0
109 0
110 0
111 0
111 0
111 0
111 0
111 0
111 0
111 0
111 0
111 0
111 0
106 0
106 0
94 0
94 0
93 0
93 0
93 0
94 0
96 0
100 0
108 0
104 0
288 0
290 0
280 0
287 0
315 0
317 0
323 0
322 0
322 0
309 0
288 0
280 0
281 0
279 0
277 0
277 0
277 0
272 0
270 0
272 0
271 0
271 0
271 0
274 0
274 0
278 0
280 0
280 0
281 0
281 0
281 0
281 0
281 0
281 0
281 0
281 0
280 0
279 0
279 0
279 0
279 0
282 0
285 0
292 0
299 0
305 0
305 0
302 0
300 0
303 0
306 1
412 1
412 1
414 1
416 1
418 1
422 1
421 1
439 1
443 1
458 1
470 1
468 1
468 1
469 1
467 1
469 0
467 0
465 0
464 0
461 0
458 0
456 0
280 0
279 0
277 0
274 0
251 0
250 0
248 0
247 0
247 0
245 0
243 0
242 0
241 0
243 0
243 0
261 0
262 0
262 0
262 0
262 0
269 0
299 0
302 0
316 0
332 0
351 0
355 0
358 0
359 0
364 0
364 0
364 0
367 0
386 0
560 0
593 0
597 0
655 0
658 0
658 0
657 0
650 0
645 0
640 0
637 0
716 0
713 0
713 0
714 0
729 0
720 0
618 0
615 0
613 0
614 0
613 0
610 0
610 0
592 0
584 0
570 0
557 0
557 0
557 0
556 0
555 0
555 0
555 0
555 0
555 0
554 0
554 0
554 0
554 0
568 0
568 0
566 0
570 0
574 0
574 0
577 0
577 0
577 0
577 0
577 0
573 0
569 0
569 0
552 0
551 0
550 0
549 0
535 0
528 0
470 0
458 0
445 0
431 0
405 0
396 0
394 0
389 0
382 0
372 0
351 0
347 0
336 0
192 0
182 0
181 0
144 0
144 0
144 0
142 0
141 0
135 0
130 0
128 0
45 0
45 0
43 0
42 0
26 0
26 0
26 0
26 0
26 0
26 0
27 0
27 0
27 0
27 0
28 0
28 0
28 0
28 0
28 0
28 0
28 0
35 0
55 0
57 0
232 0
238 0
239 0
239 0
239 0
224 0
223 0
222 0
221 0
220 0
221 0
219 0
218 0
218 0
218 0
219 0
219 0
219 0
220 0
223 0
227 0
227 0
227 0
227 0
227 0
227 0
226 0
226 0
226 0
226 0
226 0
225 0
225 0
225 0
230 0
233 0
234 0
234 0
241 0
241 0
243 0
243 0
243 0
242 0
242 0
243 0
245 0
258 0
313 0
461 1
513 1
521 1
651 2
655 2
655 2
656 2
656 2
747 2
748 2
751 2
756 2
756 2
758 2
755 2
757 2
761 2
759 2
759 2
759 2
758 2
743 2
731 2
729 2
552 2
552 2
552 2
554 2
554 2
556 2
556 2
557 2
559 2
560 2
560 2
560 2
560 2
562 2
564 2
564 2
564 2
564 2
563 2
561 2
557 2
557 2
557 2
557 2
557 2
557 2
557 2
557 2
557 2
557 2
557 2
557 2
548 0
541 0
530 0
521 0
520 0
520 0
513 0
513 0
511 0
510 0
510 0
507 0
497 0
494 0
463 0
429 0
325 0
226 0
163 0
146 0
102 0
102 0
97 0
92 0
90 0
10 0
9 0
7 0
7 0
7 0
6 0
6 0
6 0
6 0
6 0
6 0
6 0
6 0
5 0
5 0
5 0
6 0
7 0
8 0
8 0
8 0
7 0
7 0
14 0
12 0
12 0
12 0
12 0
12 0
12 0
12 0
12 0
12 0
13 0
15 0
15 0
23 0
24 0
24 0
25 0
25 0
25 0
25 0
25 0
25 0
25 0
25 0
25 0
25 0
25 0
25 0
25 0
25 0
25 0
25 0
25 0
25 0
25 0
24 0
24 0
24 0
24 0
24 0
24 0
24 0
24 0
24 0
25 0
25 0
25 0
25 0
27 0
27 0
27 0
27 0
27 0
27 0
27 0
27 0
27 0
27 0
27 0
27 0
27 0
27 0
27 0
27 0
27 0
27 0
26 0
24 0
24 0
28 0
29 0
28 0
28 0
22 0
22 0
22 0
22 0
22 0
22 0
24 0
24 0
26 0
28 0
35 0
31 0
31 0
24 0
22 0
23 0
23 0
23 0
23 0
24 0
25 0
26 0
34 0
38 0
41 0
41 0
41 0
41 0
41 0
41 0
42 0
42 0
42 0
42 0
42 0
42 0
42 0
42 0
42 0
42 0
42 0
42 0
45 0
47 0
49 0
50 0
52 0
52 0
52 0
52 0
54 0
55 0
55 0
55 0
55 0
55 0
55 0
55 0
55 0
55 0
55 0
55 0
55 0
55 0
55 0
55 0
55 0
55 0
55 0
51 0
50 0
50 0
50 0
50 0
50 0
50 0
50 0
50 0
50 0
48 0
47 0
44 0
43 0
38 0
38 0
39 0
40 0
40 0
40 0
39 0
39 0
39 0
35 0
33 0
31 0
22 0
15 0
12 0
12 0
12 0
12 0
12 0
12 0
11 0
11 0
11 0
12 0
12 0
12 0
12 0
13 0
14 0
14 0
14 0
16 0
15 0
15 0
15 0
15 0
14 0
14 0
14 0
13 0
13 0
14 0
14 0
14 0
15 0
15 0
15 0
16 0
18 0
18 0
18 0
19 0
19 0
19 0
19 0
19 0
20 0
20 0
20 0
20 0
22 0
22 0
22 0
22 0
23 0
24 0
24 0
25 0
25 0
31 0
31 0
31 0
29 0
28 0
28 0
27 0
26 0
26 0
25 0
25 0
29 0
37 0
41 0
41 0
40 0
40 0
40 0
40 0
40 0
40 0
40 0
40 0
40 0
45 0
46 0
46 0
44 0
43 0
44 0
44 0
43 0
43 0
43 0
43 0
41 0
41 0
44 0
44 0
42 0
42 0
40 0
42 0
44 0
53 0
52 0
52 0
52 0
51 0
52 0
53 0
53 0
50 0
52 0
52 0
51 0
52 0
52 0
52 0
54 0
53 0
53 0
53 0
53 0
50 0
50 0
49 0
49 0
49 0
49 0
49 0
49 0
49 0
46 0
46 0
47 0
47 0
47 0
47 0
47 0
47 0
47 0
47 0
47 0
44 0
41 0
37 0
37 0
37 0
37 0
37 0
37 0
37 0
37 0
37 0
37 0
37 0
31 0
28 0
28 0
28 0
28 0
26 0
26 0
26 0
25 0
25 0
25 0
25 0
26 0
22 0
22 0
16 0
17 0
18 0
18 0
26 0
23 0
23 0
23 0
22 0
22 0
23 0
22 0
20 0
20 0
19 0
19 0
19 0
18 0
17 0
17 0
16 0
16 0
16 0
16 0
16 0
16 0
16 0
16 0
17 0
18 0
18 0
18 0
18 0
18 0
16 0
17 0
35 1
36 1
36 1
36 1
36 1
37 1
39 1
45 1
46 1
50 1
51 1
51 1
51 1
53 1
53 1
53 1
53 1
53 1
53 1
53 1
53 1
54 1
54 1
54 1
54 1
54 1
54 1
54 1
56 1
55 1
57 1
57 1
75 1
77 1
86 1
88 1
105 1
106 1
106 1
107 1
107 1
103 1
103 1
103 1
103 1
107 1
112 2
113 2
141 2
151 2
151 2
154 2
154 2
155 2
155 2
154 2
153 2
153 2
154 2
155 2
156 2
156 2
156 2
156 2
156 2
155 2
158 2
159 2
159 2
157 2
159 2
157 2
157 2
139 1
139 1
138 1
140 1
138 1
135 1
135 1
130 1
130 1
127 1
127 1
126 1
126 1
124 1
124 1
124 1
124 1
124 1
124 1
124 1
124 1
123 1
123 1
123 1
123 1
125 1
123 1
126 1
124 1
123 1
119 1
108 1
94 1
94 1
90 1
87 1
76 1
75 1
73 1
73 1
72 1
72 1
71 1
71 1
71 1
67 0
65 0
60 0
39 0
24 0
21 0
18 0
17 0
16 0
17 0
17 0
17 0
17 0
16 0
15 0
14 0
13 0
13 0
13 0
14 0
15 0
15 0
16 0
15 0
15 0
13 0
12 0
12 0
12 0
12 0
12 0
12 0
12 0
12 0
12 0
13 0
13 0
13 0
13 0
14 0
18 0
18 0
20 0
21 0
22 0
24 0
31 0
34 0
34 0
35 0
34 0
36 0
36 0
38 0
38 0
35 0
35 0
35 0
41 0
41 0
41 0
41 0
41 0
41 0
41 0
41 0
43 0
52 0
60 0
58 0
58 0
58 0
59 0
59 0
60 0
61 0
61 0
61 0
61 0
61 0
61 0
63 0
63 0
64 0
64 0
66 0
69 1
79 2
79 2
86 2
89 2
92 2
92 2
91 2
91 2
90 2
90 2
90 2
92 2
101 2
105 2
106 2
106 2
106 2
106 2
106 2
106 2
146 2
146 2
147 2
149 2
148 2
152 2
146 2
146 2
142 2
142 2
141 2
148 2
156 2
163 2
166 2
164 2
164 2
162 2
162 2
157 2
172 2
174 2
188 2
191 2
190 2
190 2
185 2
185 2
189 2
191 2
190 2
192 2
192 2
189 2
191 2
191 2
191 2
192 2
195 2
198 2
204 2
209 2
209 2
207 2
205 2
201 2
198 2
170 0
168 0
168 0
166 0
165 0
165 0
158 0
158 0
155 0
162 0
163 0
163 0
163 0
163 0
164 0
164 0
164 0
161 0
166 0
160 0
158 0
156 0
156 0
157 0
217 0
219 0
190 0
190 0
189 0
189 0
189 0
187 0
186 0
186 0
186 0
186 0
185 0
173 0
165 0
160 0
157 0
155 0
154 0
153 0
153 0
150 0
140 0
144 0
135 0
135 0
133 0
133 0
133 0
132 0
145 0
143 0
143 0
143 0
143 0
145 0
144 0
144 0
145 0
140 0
136 0
133 0
129 0
128 0
129 0
129 0
130 0
130 0
130 0
131 0
136 0
154 0
156 0
161 0
162 0
163 0
163 0
163 0
154 0
158 0
158 0
158 0
164 0
163 0
163 0
163 0
162 0
156 0
156 0
155 0
156 0
159 0
156 0
98 0
98 0
98 0
98 0
98 0
98 0
100 0
101 0
102 0
103 0
110 0
135 0
136 0
395 0
427 0
452 0
519 0
617 0
686 0
705 0
715 0
749 0
747 0
850 0
852 0
862 0
860 0
861 0
864 0
891 0
912 0
918 0
919 1
920 1
921 1
915 1
914 1
910 1
910 1
910 1
909 1
907 1
906 1
905 1
905 1
904 1
904 1
905 1
905 1
900 1
894 1
868 1
866 1
857 1
847 1
842 1
846 1
846 1
845 1
843 1
844 1
845 1
841 1
840 1
840 1
840 1
840 1
842 1
843 1
843 1
841 1
839 1
839 1
839 1
838 1
838 1
838 1
838 1
836 1
834 1
865 1
867 1
870 1
875 2
861 2
847 2
614 2
546 2
514 2
433 2
302 2
260 2
256 2
252 2
251 2
236 2
165 2
163 2
154 2
158 2
160 2
158 2
156 2
140 2
138 2
136 1
135 1
133 1
133 1
134 1
134 1
134 1
134 1
134 1
134 1
134 1
134 1
134 1
134 1
134 1
134 1
134 1
134 1
134 1
134 1
134 1
135 1
135 1
133 1
132 1
132 1
133 1
132 1
131 1
131 1
132 1
132 1
133 1
133 1
134 1
136 1
135 1
135 1
135 1
160 1
204 1
233 1
246 1
259 1
260 1
266 1
272 1
272 1
242 1
258 1
242 1
206 0
199 0
198 0
198 0
196 0
194 0
194 0
196 0
186 0
194 0
206 0
212 0
215 0
237 0
238 0
240 0
253 0
354 0
364 0
366 0
393 0
401 0
402 0
403 0
404 0
404 0
404 0
406 0
416 0
427 0
427 0
438 0
439 0
443 0
449 0
462 0
471 0
485 0
485 0
487 0
487 0
487 0
487 0
486 0
487 0
487 0
487 0
487 0
486 0
486 0
486 0
485 0
484 0
484 0
484 0
483 0
488 0
485 0
479 0
469 0
450 0
416 0
378 0
362 0
364 0
348 0
348 0
338 0
331 0
330 0
327 0
301 0
304 0
299 0
300 0
313 0
313 0
312 0
312 0
312 0
309 0
306 0
303 0
296 0
270 0
263 0
251 0
248 0
232 0
215 0
113 0
108 0
85 0
49 0
45 0
44 0
44 0
43 0
43 0
43 0
42 0
32 0
32 0
32 0
32 0
33 0
33 0
33 0
34 0
33 0
34 0
34 0
34 0
36 0
36 0
36 0
36 0
35 0
35 0
35 0
35 0
36 0
36 0
36 0
36 0
38 0
38 0
39 0
36 0
35 0
35 0
35 0
35 0
35 0
35 0
35 0
35 0
35 0
35 0
35 0
36 0
36 0
36 0
36 0
36 0
32 0
32 0
30 0
13 0
13 0
13 0
13 0
13 0
39 0
40 0
41 0
41 0
48 0
50 0
50 0
52 0
52 0
52 0
52 0
52 0
53 0
51 0
51 0
57 0
64 0
64 0
64 0
64 0
64 0
64 0
64 0
65 0
70 0
74 0
74 0
75 0
75 0
75 0
75 0
75 0
75 0
74 0
74 0
76 0
93 0
97 0
97 0
98 0
98 0
97 0
97 0
97 0
97 0
95 0
95 0
94 0
94 0
94 0
94 0
94 0
96 0
96 0
97 0
104 0
105 0
112 0
124 0
128 0
131 0
133 0
138 0
139 0
139 0
141 0
141 0
141 0
140 0
140 0
139 0
138 0
136 0
114 0
115 0
112 0
110 0
106 0
106 0
106 0
104 0
104 0
104 0
104 0
101 0
100 0
102 0
102 0
96 0
93 0
93 0
94 0
94 0
94 0
99 0
99 0
98 0
95 0
92 0
92 0
92 0
92 0
92 0
92 0
92 0
92 0
92 0
90 0
89 0
72 0
71 0
71 0
70 0
70 0
70 0
70 0
70 0
70 0
70 0
71 0
71 0
71 0
71 0
70 0
70 0
67 0
67 0
65 0
55 0
52 0
49 0
37 0
39 0
36 0
42 0
35 0
35 0
34 0
32 0
32 0
34 0
34 0
34 0
34 0
33 0
33 0
32 0
37 0
37 0
37 0
38 0
38 0
38 0
38 0
38 0
38 0
38 0
38 0
38 0
38 0
38 0
38 0
35 0
35 0
33 0
34 0
34 0
30 0
29 0
28 0
27 0
26 0
27 0
29 0
33 0
33 0
33 0
34 0
35 0
35 0
35 0
35 0
36 0
37 0
40 0
40 0
47 0
47 0
48 0
48 0
49 0
57 0
57 0
68 0
70 0
72 0
80 0
80 0
88 0
87 0
86 0
87 0
89 0
89 0
89 0
86 0
84 0
77 0
77 0
77 0
75 0
75 0
75 0
73 0
73 0
75 0
79 0
86 0
88 0
88 0
84 0
84 0
84 0
83 0
83 0
83 0
83 0
83 0
83 0
83 0
83 0
83 0
83 0
83 0
83 0
83 0
83 0
83 0
82 0
82 0
83 0
83 0
83 0
71 0
70 0
66 0
55 0
42 0
32 0
29 0
29 0
29 0
19 0
19 0
19 0
17 0
17 0
17 0
17 0
13 0
13 0
12 0
13 0
12 0
12 0
12 0
9 0
9 0
9 0
9 0
9 0
9 0
9 0
9 0
9 0
9 0
10 1
10 1
10 1
17 1
17 1
17 1
17 1
17 1
17 1
17 1
17 1
17 1
17 1
16 1
15 1
15 1
15 1
15 0
15 0
15 0
15 0
15 0
15 0
17 0
19 0
19 0
19 0
20 0
20 0
20 0
20 0
20 0
20 0
20 0
21 0
21 0
23 0
22 0
27 0
28 0
30 0
28 0
25 0
25 0
25 0
25 0
25 0
25 0
25 0
25 0
25 0
25 0
25 0
25 0
24 0
24 0
24 0
25 0
25 0
25 0
27 0
27 0
27 0
27 0
27 0
27 0
27 0
27 0
27 0
27 0
27 0
27 0
27 0
27 0
27 0
27 0
21 0
21 0
21 0
21 0
21 0
21 0
21 0
21 0
21 0
21 0
21 0
21 0
22 0
23 0
24 0
24 0
24 0
24 0
22 0
22 0
20 0
18 0
18 0
18 0
17 0
17 0
17 0
17 0
17 0
17 0
17 0
16 0
13 0
8 0
8 0
6 0
6 0
6 0
7 0
7 0
7 0
7 0
7 0
6 0
6 0
6 0
6 0
6 0
6 0
6 0
6 0
7 0
7 0
7 0
6 0
6 0
6 0
6 0
6 0
6 0
9 0
11 0
11 0
11 0
11 0
11 0
11 0
11 0
11 0
11 0
11 0
12 0
17 0
21 0
26 0
27 0
31 0
31 0
34 0
36 0
38 0
43 0
48 0
49 0
46 0
46 0
43 0
42 0
42 0
42 0
43 0
47 0
47 0
47 0
50 0
50 0
50 0
50 0
50 0
50 0
50 0
56 0
56 0
56 0
68 0
71 0
72 0
74 0
79 0
79 0
79 0
78 0
74 0
74 0
74 0
74 0
74 0
74 0
74 0
74 0
72 0
72 0
72 0
71 0
71 0
71 0
72 0
72 0
78 0
92 0
96 0
98 0
102 0
103 0
103 0
103 0
103 0
104 0
105 0
105 0
105 0
107 0
107 0
107 0
108 0
104 0
99 0
94 0
94 0
88 0
85 0
82 0
79 0
80 0
78 0
71 0
70 0
68 0
70 0
74 0
76 0
83 0
81 0
82 0
71 0
72 0
74 0
63 0
63 0
64 0
65 0
65 0
65 0
66 0
66 0
70 0
70 0
68 0
66 0
64 0
63 0
60 0
68 0
67 0
67 0
67 0
68 0
69 0
69 0
69 0
69 0
69 0
69 0
69 0
69 0
69 0
69 0
69 0
69 0
76 0
75 0
74 0
66 0
66 0
66 0
63 0
62 0
62 0
62 0
63 0
61 0
62 0
62 0
62 0
61 0
61 0
59 0
56 0
55 0
54 0
54 0
55 0
56 0
56 0
58 0
61 0
62 0
62 0
62 0
60 0
58 0
55 0
54 0
49 0
44 0
42 0
41 0
41 0
41 0
38 0
38 0
39 0
39 0
38 0
39 0
40 0
39 0
40 0
43 0
44 0
41 0
41 0
47 0
47 0
36 0
33 0
33 0
33 0
33 0
33 0
33 0
33 0
33 0
33 0
33 0
33 0
33 0
33 0
33 0
33 0
33 0
33 0
31 0
30 0
30 0
37 0
39 0
48 0
52 0
52 0
52 0
56 0
57 0
60 0
62 0
63 0
63 0
63 0
63 0
63 0
63 0
63 0
63 0
63 0
62 0
61 0
61 0
59 0
52 0
50 0
50 0
50 0
50 0
50 0
50 0
48 0
47 0
47 0
62 0
66 0
66 0
65 0
65 0
65 0
65 0
65 0
64 0
61 0
59 0
58 0
57 0
56 0
56 0
55 0
49 0
44 0
44 0
43 0
43 0
45 0
45 0
45 0
45 0
45 0
45 0
40 0
36 0
35 0
35 0
35 0
35 0
35 0
35 0
35 0
35 0
35 0
35 0
35 0
28 0
28 0
28 0
27 0
27 0
27 0
26 0
24 0
22 0
21 0
21 0
21 0
21 0
21 0
21 0
21 0
21 0
21 0
21 0
21 0
21 0
21 0
21 0
21 0
21 0
21 0
21 0
21 0
21 0
21 0
21 0
20 0
19 0
6 0
0 0
0 0
0 0
0 0
0 0
0 0
0 0
0 0
0 0
0 0
0 0
0 0
0 0
0 1
0 1
0 1
0 1
0 1
0 1
0 1
0 1
0 1
0 1
0 1
0 1
0 1
0 1
0 1
0 1
0 1
0 1
0 1
0 1
0 1
0 1
0 1
0 1
0 1
0 1
0 0
0 0
0 0
0 0
0 0
0 0
0 0
0 0
0 0
0 0
0 0
0 0
0 0
0 0
0 0
0 0
0 0
0 0
0 0
0 0
0 0
0 0
0 0
0 0
0 0
0 0
0 0
0 0
0 0
0 0
0 0
0 0
0 0
0 0
0 0
0 0
0 0
0 0
0 0
0 0
0 0
0 0
0 0
0 0
0 0
0 0
0 0
0 0
0 0
0 0
0 0
0 0
0 0
3 0
7 0
8 0
8 0
8 0
18 0
18 0
18 0
18 0
18 0
18 0
18 0
18 0
18 0
18 0
18 0
18 0
19 0
21 0
21 0
21 0
21 0
21 0
21 0
21 0
21 0
21 0
21 0
21 0
21 0
21 0
21 0
21 0
21 0
21 0
21 0
21 0
21 0
21 0
21 0
21 0
21 0
21 0
21 0
22 0
22 0
22 0
22 0
22 0
22 0
22 0
22 0
22 0
22 0
22 0
22 0
22 0
22 0
22 0
22 0
21 0
21 0
21 0
21 0
21 0
21 0
21 0
21 0
22 0
22 0
22 0
22 0
20 0
20 0
15 0
8 0
6 0
6 0
4 0
4 0
4 0
4 0
4 0
4 0
4 0
4 0
4 0
4 1
4 1
4 1
4 1
3 1
3 1
3 1
3 1
3 1
3 1
3 1
3 1
3 1
3 1
3 1
3 0
3 0
3 0
3 0
3 0
3 0
3 0
3 0
3 0
3 0
3 0
3 0
3 0
3 0
3 0
3 0
3 0
3 0
3 0
3 0
3 0
3 0
3 0
2 0
2 0
2 0
2 0
2 0
1 0
1 0
1 0
1 0
1 0
1 0
1 0
1 0
1 0
1 0
1 0
0 0
0 0
0 0
0 0
0 0
0 0
0 0
0 0
0 0
0 0
0 0
0 0
0 0
0 0
0 0
0 0
0 0
0 0
0 0
0 0
0 0
0 0
0 0
0 0
0 0
0 0
0 0
0 0
0 0
0 0
0 0
0 0
0 0
0 0
0 0
0 0
0 0
0 0
0 0
0 0
0 0
0 0
0 0
0 0
0 0
0 0
0 0
0 0
0 0
0 0
0 0
0 0
0 0
0 0
0 0
0 0
0 0
0 0
0 0
0 0
0 0
0 0
0 0
0 0
0 0
0 0
0 0
0 0
0 0
0 0
0 0
0 0
0 0
0 0
0 0
0 0
0 0
0 0
0 0
0 0
0 0
0 0
0 0
0 0
0 0
0 0
0 0
0 0
0 0
0 0
0 0
0 0
0 0
0 0
0 0
0 0
0 0
0 0
0 0
0 0
0 0
0 0
0 0
0 0
0 0
0 0
0 0
0 0
0 0
0 0
0 0
0 0
0 0
0 0
0 0
0 0
0 0
0 0
0 0
0 0
0 0
0 0
0 0
0 0
0 0
0 0
0 0
0 0
0 0
0 0
0 0
0 0
0 0
0 0
0 0
0 0
0 0
0 0
0 0
0 0
0 0
0 0
0 0
0 0
0 0
0 0
0 0
0 0
0 0
0 0
0 0
0 0
0 0
0 0
0 0
0 0
0 0
0 0
0 0
0 0
0 0
0 0
0 0
0 0
0 0
0 0
0 0
0 0
0 0
0 0
0 0
0 0
0 0
0 0
0 0
0 0
0 0
0 0
0 0
0 0
0 0
0 0
0 0
0 0
0 0
0 0
0 0
0 0
0 0
0 0
0 0
0 0
0 0
0 0
0 0
0 0
0 0
0 0
0 0
0 0
0 0
0 0
0 0
0 0
0 0
0 0
0 0
0 0
0 0
0 0
0 0
0 0
0 0
0 0
0 0
0 0
0 0
0 0
0 0
0 0
0 0
0 0
0 0
0 0
0 0
0 0
0 0
0 0
0 0
0 0
0 0
0 0
0 0
0 0
0 0
0 0
0 0
0 0
0 0
0 0
0 0
0 0
0 0
0 0
0 0
0 0
0 0
0 0
0 0
0 0
0 0
0 0
0 0
0 0
0 0
0 0
0 1
0 1
0 1
0 1
0 1
0 1
0 1
0 1
0 1
0 1
0 1
0 1
0 1
0 1
0 1
0 1
0 1
0 0
0 0
0 0
0 0
0 0
0 0
0 0
0 0
0 0
0 0
0 0
0 0
0 0
0 0
0 0
0 0
0 0
0 0
0 0
0 0
0 0
0 0
0 0
0 0
0 0
0 0
0 0
0 0
0 0
0 0
0 0
0 0
0 0
0 0
0 0
0 0
0 0
0 0
0 0
0 0
0 0
0 0
0 0
0 0
0 0
0 0
0 0
0 0
0 0
0 0
0 0
0 0
0 0
0 0
0 0
0 0
0 0
0 0
0 0
0 0
0 0
0 0
0 0
0 0
0 0
0 0
0 0
0 0
0 0
0 0
0 0
0 0
0 0
0 0
0 0
0 0
0 0
0 0
0 0
0 0
0 0
0 0
0 0
0 1
0 1
0 1
0 1
0 1
0 1
0 1
0 1
0 1
0 1
0 1
0 1
0 1
0 1
0 1
0 1
0 1
0 0
0 0
0 0
0 0
0 0
0 0
0 0
0 0
0 0
0 0
0 0
0 0
0 0
0 0
0 0
0 0
0 0
0 0
0 0
0 0
0 0
0 0
0 0
0 0
0 0
0 0
0 0
0 0
0 0
0 0
0 0
0 0
0 0
0 0
0 0
0 0
0 0
0 0
0 0
0 0
0 0
0 0
0 0
0 0
0 0
0 0
0 0
0 0
0 1
0 1
0 1
0 1
0 1
0 2
0 2
0 2
0 2
0 2
0 5
0 5
0 5
0 5
0 5
0 5
0 5
0 5
0 5
0 5
0 5
0 4
0 4
0 4
0 4
0 4
0 0
0 0
0 0
0 0
0 0
0 0
0 0
0 0
0 0
0 0
0 0
0 0
0 0
0 0
0 0
0 0
0 0
0 0
0 0
0 0
0 0
0 0
0 0
0 0
0 0
0 0
0 0
0 0
0 0
0 0
0 0
0 0
0 0
0 0
0 0
0 0
0 0
0 0
0 0
0 0
0 0
0 0
0 0
0 0
0 0
0 0
0 0
0 0
0 0
0 0
0 0
0 0
0 0
0 0
0 0
0 0
0 0
0 0
0 0
0 0
0 0
0 0
0 0
0 0
0 0
0 0
0 0
0 0
0 0
0 0
0 0
0 0
0 0
0 0
0 0
0 0
0 0
0 0
0 0
0 0
0 0
0 0
0 0
0 0
0 0
0 0
0 0
0 0
0 0
0 0
0 0
0 0
0 0
0 1
0 1
0 1
0 1
0 1
0 1
0 1
0 1
0 1
0 1
0 1
0 1
0 1
0 1
0 1
0 1
0 1
0 1
0 1
0 0
0 0
0 0
0 0
0 0
0 0
0 0
0 0
0 0
0 0
0 0
0 0
0 0
0 0
0 0
0 0
0 0
0 0
0 0
0 0
0 0
0 0
0 0
0 0
0 0
0 0
0 0
0 0
0 0
0 0
0 0
0 0
0 0
0 0
0 0
0 0
0 0
0 0
0 0
0 0
0 0
0 0
0 0
0 0
0 0
0 0
0 0
0 0
0 0
0 0
0 0
0 0
0 0
0 0
0 0
0 0
0 0
0 0
0 0
0 0
0 0
0 0
0 0
0 0
0 0
0 0
0 0
0 0
0 0
0 0
0 0
0 0
0 0
0 0
0 0
0 0
0 0
0 0
0 0
0 0
0 0
0 0
0 0
0 0
0 0
0 0
0 0
0 0
0 0
0 0
0 0
0 0
0 0
0 0
0 0
0 0
0 0
0 0
0 0
0 0
0 0
0 0
0 0
0 0
0 0
0 0
0 0
0 0
0 0
0 0
0 0
0 0
0 0
0 0
0 0
0 0
0 0
0 0
0 0
0 0
0 0
0 0
0 0
0 0
0 0
0 0
0 0
0 0
0 0
0 0
0 0
0 0
0 0
0 0
0 0
0 0
0 0
0 0
0 0
0 0
0 0
0 0
0 0
0 0
0 0
0 0
0 0
0 0
0 0
0 0
0 0
0 0
0 0
0 0
0 0
0 0
0 0
0 0
0 0
0 0
0 0
0 0
0 0
0 0
0 0
0 0
0 0
0 0
0 0
0 0
0 0
0 0
0 0
0 0
0 0
0 0
0 0
0 0
0 0
0 0
0 0
0 0
0 0
0 0
0 0
0 0
0 0
0 0
0 0
0 0
0 0
0 0
0 0
0 0
0 0
0 0
0 0
0 0
0 0
0 0
0 0
0 0
0 0
0 0
0 0
0 0
0 0
0 0
0 0
0 0
0 0
0 0
0 0
0 0
0 0
0 0
0 0
0 0
0 0
0 0
0 0
0 0
0 0
0 0
0 0
0 0
0 0
0 0
0 0
0 0
0 0
0 0
0 0
0 0
0 0
0 0
0 0
0 0
0 0
0 0
0 0
0 0
0 0
0 0
0 0
0 0
0 0
0 0
0 0
0 0
0 0
0 0
0 0
0 0
0 0
0 0
0 0
0 0
0 0
0 0
0 0
0 0
0 0
0 0
0 0
0 0
0 0
0 0
0 0
0 0
0 0
0 4
0 4
0 8
0 9
0 11
0 11
0 11
0 13
0 13
0 13
0 13
0 13
0 13
0 13
0 16
0 16
0 18
0 18
0 18
0 18
0 18
0 18
0 18
0 18
0 18
0 19
0 19
0 20
0 20
0 20
0 20
0 20
0 20
0 20
0 20
0 20
0 20
0 20
0 20
0 20
0 20
0 20
0 20
0 20
0 20
0 52
0 55
0 55
0 118
0 119
0 119
0 122
0 123
0 123
0 122
0 119
0 117
0 116
0 116
0 116
0 116
0 116
0 116
0 116
0 116
0 113
0 110
0 110
0 108
0 107
0 106
0 108
0 110
0 111
0 111
0 109
0 109
0 109
0 109
0 106
0 97
0 93
0 88
0 88
0 88
0 88
0 88
0 88
0 88
0 87
0 93
0 94
0 95
0 97
0 98
0 100
0 100
0 100
0 97
0 87
0 70
0 68
0 68
0 68
0 68
0 68
0 69
0 86
1 89
1 92
1 96
1 96
1 94
1 92
1 92
1 91
1 89
1 89
1 87
2 85
2 85
2 49
2 49
2 49
2 49
2 49
2 49
2 49
2 49
2 49
2 48
2 48
2 48
2 48
2 48
2 48
2 48
2 48
2 57
2 57
2 57
2 57
2 57
2 60
2 71
2 73
2 73
2 73
2 74
2 75
2 75
2 74
2 74
2 74
2 74
2 74
2 74
2 74
2 74
2 74
2 74
2 74
2 76
2 69
2 66
2 66
2 64
2 64
2 63
2 63
2 63
2 63
2 63
2 64
2 64
2 65
2 65
2 65
2 65
2 64
2 33
1 30
1 8
1 3
1 3
1 3
1 3
1 3
1 4
1 5
1 5
1 5
0 5
0 5
0 5
0 5
0 5
0 5
0 7
0 7
0 7
0 8
0 8
0 8
0 8
0 9
0 9
0 9
0 10
0 12
0 13
0 13
0 13
0 13
0 13
0 13
0 13
0 12
0 12
0 12
0 12
0 11
0 11
0 11
0 11
0 11
0 11
0 11
0 11
0 11
0 11
0 11
0 11
0 11
0 11
0 11
0 12
0 12
0 12
0 12
0 10
0 10
0 10
0 10
0 10
0 10
0 10
0 10
0 10
0 10
0 10
0 10
0 10
0 10
0 10
0 10
0 10
0 10
0 10
0 10
0 10
0 9
0 9
0 9
0 9
0 9
0 9
0 9
0 9
1 9
1 9
1 7
1 7
1 7
1 6
1 6
1 6
1 6
1 7
1 7
1 8
1 7
1 7
1 6
1 6
1 6
0 6
0 6
0 6
0 6
0 6
0 6
0 6
0 6
0 6
0 6
0 6
0 7
0 7
0 7
0 8
0 8
0 8
0 8
0 8
0 8
0 8
0 8
0 8
0 7
0 7
0 8
0 8
1 9
1 10
1 11
3 43
3 43
3 43
3 43
3 44
3 44
3 44
3 44
3 44
3 44
3 44
3 48
3 50
3 82
3 91
3 124
3 128
6 144
6 501
6 604
10 1250
11 1326
11 1403
11 1448
11 1467
11 1619
11 1714
14 1727
17 1786
19 1793
19 1796
19 1800
19 1802
19 1802
19 1803
19 1815
19 1815
19 1842
19 1857
19 1873
19 1877
21 1879
21 1889
21 1892
21 1893
21 1893
21 1895
21 1895
21 1902
21 1905
21 1916
21 1934
21 1938
21 1969
21 1995
21 2004
21 2013
21 2020
21 2024
21 2022
21 2022
21 2021
21 2021
21 2024
21 2028
21 2033
21 2033
21 2043
21 2040
21 2028
20 2005
19 1986
19 1983
18 1954
18 1954
18 1954
18 1952
18 1950
18 1950
18 1950
18 1951
18 1951
18 1951
18 1950
18 1930
18 1896
18 1524
18 1482
15 1085
15 978
15 905
15 896
15 821
10 361
10 303
11 313
11 314
10 294
9 286
9 286
4 385
2 333
1 369
1 378
1 380
1 380
1 380
1 380
1 375
2 420
3 405
3 395
3 388
3 390
3 390
3 383
3 380
3 380
3 380
3 380
3 380
3 373
3 370
3 351
3 345
3 342
3 335
3 309
3 300
3 291
3 285
3 283
3 283
3 337
3 338
3 340
3 340
3 345
3 344
3 342
3 338
3 342
3 343
3 349
3 352
3 373
3 374
3 374
3 376
3 376
3 376
3 404
3 422
3 427
3 432
3 434
3 499
3 509
3 510
3 519
3 536
2 555
1 565
1 568
1 568
1 569
1 569
1 568
0 547
0 555
0 568
0 569
0 566
0 464
0 462
0 418
0 413
0 411
0 411
0 503
0 508
0 509
0 471
0 487
0 490
0 492
0 489
0 489
0 489
0 489
0 490
0 493
0 498
0 547
0 584
0 638
0 645
0 641
0 641
0 608
0 608
0 605
0 605
0 605
0 606
0 607
0 531
0 552
0 549
0 527
0 528
0 531
0 532
0 532
0 532
0 543
0 547
0 552
0 554
0 558
0 557
0 557
0 557
0 556
0 499
0 499
0 496
0 466
0 464
0 389
0 384
0 382
0 382
0 381
0 381
0 381
0 380
0 380
0 379
0 377
0 377
0 376
0 368
0 361
0 360
0 362
0 361
0 371
0 377
0 427
0 427
0 422
0 325
0 320
0 318
0 317
0 297
0 298
0 296
0 292
0 292
0 291
0 293
0 293
0 291
0 289
0 229
0 199
0 153
0 149
0 148
0 148
0 148
0 148
0 148
0 148
0 148
0 147
0 145
0 145
0 124
0 124
0 124
0 123
0 123
0 127
0 138
0 136
0 128
0 119
0 116
0 112
0 105
0 104
0 104
0 104
0 104
0 103
0 103
0 104
0 104
0 104
0 104
0 104
0 104
0 104
0 104
0 104
0 104
0 104
0 104
0 104
0 104
0 110
0 114
0 115
0 116
0 117
0 114
0 111
0 99
0 90
0 40
0 40
0 39
0 39
0 39
0 39
0 39
0 38
0 38
0 38
0 37
0 37
0 37
0 37
0 37
0 37
0 37
0 37
0 36
0 36
0 36
0 36
0 36
0 36
0 36
0 36
0 36
0 36
0 36
0 36
0 37
0 37
0 37
0 37
0 37
0 37
0 32
0 20
0 20
0 18
0 17
0 17
0 17
0 17
0 17
0 17
0 17
0 17
0 18
0 22
0 27
0 29
0 31
0 32
0 32
0 32
0 32
0 32
0 32
0 32
0 32
0 34
0 34
0 34
0 29
0 31
0 40
1 208
1 220
1 229
1 233
1 235
1 234
1 237
1 238
1 240
1 242
1 243
1 245
1 244
1 244
1 244
1 244
1 244
1 244
1 244
1 242
1 244
1 302
1 342
1 345
1 351
1 353
1 356
1 357
1 360
1 360
1 360
1 361
1 361
1 361
1 361
1 361
1 360
1 360
1 360
1 360
1 360
1 360
1 360
1 360
1 360
1 360
1 360
1 360
1 360
1 361
1 361
1 361
1 362
1 362
2 360
2 352
2 350
2 349
2 349
2 348
2 348
2 348
2 348
2 348
2 336
2 334
2 333
2 330
2 327
2 327
2 322
2 328
2 315
1 139
1 142
1 145
1 145
1 145
1 145
1 148
1 148
0 147
0 146
0 145
0 143
0 148
0 151
0 162
0 174
0 191
0 201
0 203
0 205
0 202
0 143
0 103
0 103
0 116
0 120
0 147
0 176
1 212
1 220
1 221
1 222
1 223
1 223
1 223
1 226
1 229
1 273
1 278
1 291
1 296
1 296
1 296
1 296
1 298
1 298
1 299
1 301
2 301
2 300
2 300
3 305
3 305
3 305
3 305
3 305
3 305
3 305
3 305
3 305
3 305
32 1765
32 1767
32 1775
32 1788
54 3190
58 3309
58 3514
62 4018
62 4095
63 4170
63 4176
64 4204
64 4167
64 4155
64 4160
64 4161
64 4167
64 4168
64 4168
64 4168
64 4169
64 4169
64 4169
64 4168
64 4167
64 4166
64 4156
64 4152
64 4140
64 4139
64 4150
64 4152
64 4155
64 4153
64 4150
64 4148
64 4142
64 4136
63 4125
63 4045
63 3911
63 3904
63 3862
64 3881
65 3882
65 3882
65 3856
63 3828
50 3583
22 2141
22 2058
22 2049
22 2047
22 2047
22 2041
22 2023
22 2020
22 2016
22 2015
5 905
5 900
5 900
5 900
5 897
5 897
5 895
5 895
5 895
5 895
5 895
5 894
5 894
5 894
5 893
6 884
6 883
7 873
6 367
7 335
6 138
7 136
7 115
7 109
7 110
6 107
6 112
6 108
6 99
6 97
6 97
6 97
6 97
8 97
8 98
8 98
8 98
8 98
10 98
10 97
11 97
19 96
19 96
19 101
19 89
19 86
19 80
19 79
19 74
19 73
19 75
19 76
17 76
17 78
17 81
17 80
17 80
15 68
13 83
13 86
13 86
14 97
14 97
14 99
14 99
14 94
14 85
14 85
14 88
14 95
14 104
22 192
22 197
22 203
23 208
23 210
23 217
23 218
23 218
23 218
23 218
23 218
23 218
23 218
23 218
23 249
23 255
23 287
23 293
23 299
23 299
23 305
23 308
23 313
23 318
23 328
23 357
23 353
23 340
23 328
23 327
23 333
23 333
23 334
23 336
23 343
21 350
21 396
21 469
21 517
20 615
19 691
19 712
18 747
10 761
10 766
10 765
10 770
10 767
10 768
10 768
10 768
10 770
10 770
10 769
10 769
10 766
10 805
10 810
10 809
10 804
10 789
10 790
10 790
9 775
9 770
9 768
9 773
9 773
6 773
6 773
5 762
5 740
5 720
2 571
2 560
2 477
1 462
1 454
1 435
1 423
1 413
1 415
1 416
1 416
1 416
1 416
1 416
1 348
1 269
1 207
1 146
1 134
1 134
1 134
1 134
3 132
7 132
7 131
7 131
7 130
7 129
7 129
7 129
7 126
7 126
8 127
8 127
8 127
8 123
8 113
8 105
8 92
8 78
8 63
8 63
8 63
8 63
8 63
8 63
8 56
8 56
8 55
8 55
8 55
8 52
8 52
8 51
8 49
8 49
10 4
10 3
10 3
10 3
10 3
10 3
10 3
10 3
10 2
10 2
10 2
10 2
10 1
10 1
9 1
9 1
9 1
9 1
9 1
9 1
9 1
9 1
9 1
9 1
9 1
9 1
9 1
9 1
9 1
9 1
9 1
9 1
9 1
9 1
9 1
9 1
8 1
8 1
7 1
7 1
3 1
3 1
3 1
3 1
3 1
3 1
3 1
2 1
2 1
1 0
0 0
0 0
0 0
0 0
0 0
0 0
0 0
0 0
0 0
0 0
0 0
0 0
0 0
0 0
0 0
0 0
0 0
0 0
0 0
0 0
0 0
0 0
0 0
0 0
0 0
0 0
0 0
0 0
0 0
0 0
0 0
0 0
0 0
0 0
0 0
0 0
0 0
0 0
0 0
0 0
0 0
0 0
0 0
0 0
0 0
0 0
0 0
0 0
0 0
0 0
0 0
0 0
0 0
0 0
0 0
0 0
0 0
0 0
0 0
0 1
0 1
0 1
0 1
0 1
0 1
0 1
0 1
0 1
0 1
0 1
0 1
0 1
0 1
0 1
0 1
0 1
0 1
0 1
0 1
0 1
0 1
0 1
0 1
0 1
0 1
0 1
0 1
0 1
0 1
0 1
0 1
0 1
0 1
0 1
0 1
0 1
0 1
0 1
0 1
0 1
0 1
0 1
0 1
0 1
0 1
0 1
0 1
0 1
0 1
0 1
0 1
0 1
0 1
0 1
0 1
0 1
0 1
0 1
0 1
0 1
0 1
0 1
0 1
0 1
2 1
2 1
2 1
2 1
2 1
2 1
2 1
2 1
2 0
2 0
2 0
2 0
2 0
2 0
3 0
3 0
3 0
3 0
3 0
3 0
3 0
3 0
3 0
3 0
3 0
3 0
3 0
3 0
4 0
4 0
4 0
4 0
4 0
4 0
4 0
4 0
4 0
4 0
4 0
4 0
4 0
4 0
4 0
4 0
4 0
4 0
4 0
4 0
4 0
4 0
4 1
4 1
5 1
5 1
5 1
5 1
5 1
5 1
5 1
5 1
5 3
5 3
5 9
5 11
5 13
5 13
5 14
4 14
4 14
4 14
4 14
4 14
4 14
2 14
2 14
2 14
2 14
2 14
2 14
2 14
2 14
2 14
2 14
2 14
2 14
2 14
2 14
1 14
1 14
1 14
1 14
1 14
1 14
1 14
1 14
1 14
1 14
1 14
1 14
1 14
1 14
0 14
0 14
0 14
0 14
0 14
0 14
0 14
0 14
0 14
0 14
0 15
0 16
0 16
0 16
0 17
0 18
0 18
0 18
0 14
0 11
0 11
0 11
0 11
0 11
0 11
0 11
0 11
0 11
0 11
0 11
0 11
0 11
0 11
0 11
0 7
0 7
0 6
0 6
0 5
0 5
0 5
0 5
0 5
0 5
0 5
0 5
0 5
0 5
0 5
0 5
0 5
0 5
0 5
0 6
0 7
0 7
0 7
0 16
0 16
0 22
0 24
0 25
0 25
0 26
0 26
0 26
0 26
0 26
0 26
0 26
0 26
0 26
0 26
0 26
0 26
0 26
0 26
0 26
0 26
0 26
0 26
0 26
0 26
0 25
0 23
0 23
0 23
0 23
0 22
0 22
0 22
0 22
0 22
0 22
0 22
0 22
0 22
0 22
0 22
0 22
0 22
0 22
0 22
0 29
0 27
0 27
0 27
0 26
0 26
0 26
0 26
0 26
0 26
0 26
0 26
0 26
0 26
0 26
0 26
0 26
0 27
0 28
0 28
0 28
0 35
0 36
0 36
0 60
0 63
1 72
1 56
1 56
1 56
1 56
1 55
1 55
2 62
2 62
2 62
2 63
2 63
2 63
2 63
2 63
2 63
2 63
2 63
2 63
2 63
2 63
2 63
2 63
2 63
2 63
2 63
2 63
2 63
2 63
2 63
2 64
2 64
2 64
2 64
2 64
2 64
2 64
2 64
2 65
2 65
2 64
2 65
2 68
2 68
2 68
2 68
2 67
2 52
2 52
2 52
2 52
2 52
2 43
2 43
2 43
2 44
2 44
2 64
2 64
2 64
2 64
2 64
2 64
2 64
2 65
2 65
2 65
2 65
2 65
2 64
2 63
1 40
1 37
1 37
1 37
1 38
1 38
1 38
1 38
1 38
0 30
0 30
0 30
0 30
0 30
0 30
0 30
0 30
0 30
0 30
0 30
0 30
0 30
0 30
0 30
0 31
0 31
0 31
0 31
0 31
0 31
0 31
0 31
0 30
0 30
0 30
0 30
0 30
0 30
0 30
0 30
0 29
0 29
0 29
0 24
0 24
0 24
0 24
0 24
0 24
0 24
0 24
0 24
0 24
0 24
0 24
0 24
0 24
0 23
0 23
0 5
0 5
0 5
0 5
0 5
0 5
0 5
0 5
0 5
0 5
0 5
0 5
0 5
0 5
0 5
0 5
0 5
0 5
0 4
0 4
0 4
0 4
0 4
0 4
0 5
0 6
0 6
0 6
0 6
0 6
0 6
0 6
0 6
0 6
0 6
0 6
0 6
0 6
0 10
0 12
0 13
0 15
0 15
0 15
0 15
0 31
0 51
0 77
1 83
1 100
1 113
1 117
1 118
1 119
1 120
1 120
1 120
1 120
1 120
1 120
1 120
1 120
1 120
0 120
0 122
0 122
0 122
0 122
0 122
0 122
0 122
0 123
0 123
0 120
0 121
0 121
0 121
0 121
0 121
0 121
0 121
0 121
0 121
0 121
0 121
0 121
0 121
0 121
0 121
0 121
0 121
0 121
0 123
0 123
0 123
0 123
0 123
0 121
0 120
0 120
0 120
0 120
0 120
0 133
0 134
0 135
0 136
0 138
0 139
0 141
0 141
0 134
0 134
0 133
0 127
0 127
0 122
0 118
0 83
0 70
0 34
0 28
0 26
0 26
0 26
0 26
0 26
0 26
0 27
0 27
0 27
0 27
0 27
0 27
0 27
0 28
0 28
0 28
0 29
0 29
0 29
0 32
0 32
0 32
0 32
0 33
0 34
0 33
0 33
0 34
0 34
0 34
0 34
0 34
0 34
0 34
0 34
0 34
0 34
0 34
0 34
0 34
0 34
0 34
0 34
0 32
0 32
0 32
0 32
0 32
0 32
0 34
0 34
0 34
0 34
0 34
0 20
0 16
0 15
0 14
0 13
0 13
0 13
0 13
0 13
0 13
0 13
0 13
0 13
0 13
0 13
0 12
0 12
0 12
0 12
0 12
0 12
0 12
0 13
0 14
0 14
0 13
0 13
0 13
0 13
0 13
0 13
0 13
0 12
0 12
0 15
0 24
0 27
0 27
0 24
0 24
0 23
0 22
0 22
0 21
0 21
0 21
0 20
0 20
0 20
0 20
0 20
0 20
0 20
0 20
0 21
0 22
0 23
0 23
0 23
0 23
0 23
0 23
0 23
0 23
0 23
0 23
0 23
0 23
0 22
0 22
0 22
0 22
0 23
0 23
0 23
0 23
0 23
0 23
0 23
0 23
0 23
0 23
0 26
0 25
0 26
0 26
0 26
0 26
0 26
0 27
0 28
0 28
0 28
0 41
0 42
0 52
0 53
0 53
0 55
0 55
0 61
0 64
0 69
0 71
0 78
0 80
0 80
0 77
0 67
0 64
0 64
0 64
0 64
0 64
0 64
0 64
0 64
0 64
0 64
0 64
0 83
0 90
0 94
0 120
0 124
0 125
0 127
0 130
0 133
0 136
0 141
0 143
0 144
0 145
0 149
0 149
0 150
0 150
0 150
0 150
0 151
0 152
0 152
0 152
0 152
0 151
0 151
0 151
0 151
0 151
0 151
0 151
0 151
0 148
0 143
0 130
0 112
0 92
0 90
0 88
0 82
0 80
0 77
0 73
0 69
0 69
0 69
0 68
0 63
0 63
0 63
0 63
0 61
0 51
0 48
0 46
0 46
0 43
0 42
0 44
0 45
0 45
0 45
0 45
0 45
0 45
0 45
0 45
0 45
0 45
0 46
0 46
0 46
0 45
0 42
0 42
0 34
0 35
0 37
0 38
0 38
0 37
0 32
0 26
0 26
0 26
0 26
0 22
0 22
0 22
0 22
0 22
0 22
0 21
0 20
0 20
0 20
0 20
0 21
0 21
0 21
0 21
0 21
0 21
0 21
0 20
0 20
0 20
0 20
0 17
0 17
0 16
0 16
0 16
0 15
0 15
0 15
0 15
0 15
0 15
0 15
0 16
0 17
0 17
0 18
0 18
0 19
0 19
0 19
0 19
0 18
0 17
0 17
0 17
0 18
0 18
0 19
0 20
0 23
0 23
0 23
0 28
0 28
0 27
0 29
0 29
0 31
0 31
0 31
0 27
0 27
0 25
0 24
0 24
0 26
0 26
0 30
0 30
0 31
0 31
0 31
0 33
0 33
0 35
0 40
0 41
0 41
0 41
0 41
0 44
0 44
0 43
0 43
0 43
0 43
0 43
0 43
0 43
0 43
0 43
0 43
0 43
0 43
0 43
0 43
0 43
0 43
0 43
0 43
0 43
0 43
0 43
0 45
0 44
0 44
0 43
0 43
0 41
0 41
0 41
0 39
0 41
0 51
0 55
0 55
0 55
0 53
0 50
0 49
0 49
0 45
0 60
0 61
0 61
0 57
0 57
0 57
0 56
0 56
0 54
0 54
0 54
0 54
0 54
0 54
0 54
0 54
0 52
0 52
0 41
0 40
0 40
0 40
0 35
0 36
0 36
0 36
0 36
0 36
0 36
0 36
0 39
0 35
0 37
0 36
0 35
0 35
0 37
0 36
0 36
0 36
0 36
0 36
0 36
0 36
0 36
0 36
0 36
0 36
0 36
0 36
0 36
0 36
0 36
0 36
0 36
0 36
0 36
0 36
0 36
0 36
0 36
0 36
0 36
0 34
0 26
0 24
0 24
0 24
0 24
0 24
0 23
0 23
0 23
0 8
0 8
0 8
0 8
1 8
1 8
5 8
5 8
5 8
5 8
5 8
5 8
5 8
5 8
5 8
5 8
5 8
5 8
5 8
7 8
14 8
14 8
15 8
27 8
27 8
27 8
27 8
27 8
27 8
29 8
36 6
36 6
36 3
36 3
36 2
33 2
33 2
33 2
33 2
34 2
34 2
34 2
34 2
35 2
35 2
36 2
36 3
36 3
36 4
36 4
36 4
36 4
36 4
36 4
36 4
36 4
36 4
36 4
36 4
36 4
36 4
36 4
36 4
36 4
36 4
36 4
36 4
36 4
36 4
36 4
36 4
36 4
36 4
36 4
36 4
36 4
36 4
35 4
35 4
31 4
31 4
31 4
31 4
31 4
31 4
31 4
30 4
29 4
29 4
29 4
29 4
29 4
27 4
23 4
23 4
20 4
12 3
12 3
12 3
12 3
11 3
11 3
10 2
3 2
3 2
3 2
3 2
3 2
3 2
3 2
3 2
3 2
2 2
2 3
1 3
1 3
1 3
1 3
0 3
0 1
0 1
0 1
0 1
0 1
0 1
0 1
0 1
0 1
0 1
0 1
0 1
0 1
0 1
0 1
0 2
0 2
0 2
0 2
0 3
0 3
0 3
0 3
0 3
0 3
0 3
0 3
0 3
0 7
0 7
0 17
0 20
0 22
0 22
0 22
0 23
0 23
0 23
0 24
0 24
0 24
0 27
0 28
0 32
0 43
0 44
0 51
0 54
0 56
0 56
0 56
0 56
0 56
0 56
0 56
0 57
0 58
0 58
0 58
0 58
0 58
0 58
0 58
0 58
0 58
0 58
0 58
0 57
0 57
0 57
0 57
0 57
0 57
0 57
0 57
0 57
0 56
0 56
0 53
0 50
0 50
0 49
0 49
0 49
0 50
0 50
0 50
0 50
0 50
0 50
0 50
0 50
0 50
0 62
0 62
0 63
0 62
0 58
0 52
0 50
0 48
0 48
0 48
0 44
0 45
0 45
0 46
0 46
0 44
0 44
0 44
0 44
0 44
0 45
0 42
0 40
0 37
0 30
0 28
0 23
0 23
0 23
0 23
0 23
0 23
0 23
0 23
0 22
0 21
0 21
0 21
0 21
0 21
0 21
0 21
0 21
0 21
0 21
0 23
0 23
0 23
0 23
0 33
0 33
0 33
0 38
0 38
0 38
0 38
0 38
0 38
0 38
0 38
0 38
0 38
0 38
0 38
0 37
0 37
0 37
0 37
0 37
0 37
0 37
0 37
0 37
0 23
0 23
0 23
0 23
0 23
0 23
0 23
0 23
0 23
0 23
0 21
0 19
0 19
0 18
0 18
0 18
0 18
0 18
0 18
0 18
0 17
0 17
0 15
0 15
0 15
0 15
0 15
0 21
0 21
0 21
0 20
0 20
0 20
0 20
0 20
0 20
0 20
0 20
0 20
0 21
0 21
0 21
0 21
0 21
0 21
0 21
0 21
0 21
0 20
0 8
0 8
0 8
0 8
0 8
0 8
0 8
0 8
0 9
0 10
0 13
0 13
0 13
0 13
0 13
0 14
0 14
0 14
0 14
0 14
0 14
0 14
0 14
0 14
0 14
0 14
0 14
0 14
0 14
0 14
0 15
0 15
0 15
0 15
0 15
0 15
0 15
0 15
0 15
0 15
0 15
0 15
0 15
0 15
0 15
0 15
0 15
0 15
0 15
0 15
0 15
0 9
0 11
0 12
0 12
0 11
0 11
0 11
0 11
0 11
0 11
0 11
0 10
0 11
0 11
0 11
0 11
0 11
0 11
0 11
0 12
0 12
0 12
0 12
0 12
0 12
0 12
0 12
0 12
0 12
0 12
0 11
0 10
0 7
0 13
0 13
0 13
0 13
0 12
0 12
0 12
0 12
0 13
0 13
0 13
0 13
0 13
0 12
0 12
0 12
0 12
0 12
0 12
0 12
0 16
0 16
0 18
0 18
0 18
0 20
0 20
0 21
0 21
0 21
0 22
0 25
0 25
0 26
0 26
0 26
0 26
0 26
0 26
0 26
0 25
0 24
0 26
0 26
0 27
0 27
0 27
0 27
0 27
0 27
0 27
0 27
0 27
0 27
0 27
0 27
0 27
0 27
0 27
0 26
0 26
0 26
0 26
0 26
0 26
0 26
0 26
0 26
0 27
0 27
0 27
0 28
0 28
0 17
0 18
0 18
0 19
0 20
0 15
0 17
0 17
0 17
0 17
0 17
0 17
0 17
0 17
0 17
0 17
0 17
0 17
0 17
0 17
0 17
0 17
0 16
0 16
0 16
0 15
0 15
0 15
0 15
0 15
0 14
0 12
0 12
0 12
0 12
0 12
0 12
0 13
0 13
0 13
0 12
0 11
0 9
0 7
0 4
0 4
0 4
0 4
0 4
0 4
0 4
0 4
0 4
0 4
0 4
0 4
0 4
0 4
0 4
0 4
0 4
0 4
0 4
0 4
0 4
1 4
1 4
1 4
1 3
1 4
1 6
1 5
1 5
1 5
1 5
1 5
1 5
1 5
1 5
1 4
1 5
1 5
1 5
1 5
1 5
1 5
1 5
1 5
1 5
1 5
1 5
1 7
1 7
1 7
1 7
1 7
1 9
1 10
1 10
1 10
1 10
1 10
1 10
1 10
1 10
1 10
1 17
1 17
1 17
1 17
1 18
2 19
2 41
2 42
2 43
2 43
2 43
2 43
2 46
2 46
2 46
2 46
2 46
2 46
2 46
2 46
2 46
2 46
2 46
2 46
2 46
2 46
2 46
2 46
2 46
2 46
2 46
2 46
1 46
1 46
1 45
1 45
1 44
2 41
3 44
3 44
5 44
5 44
5 44
5 44
5 44
5 44
5 42
5 42
5 42
5 43
5 46
5 48
5 50
5 50
5 50
5 50
5 50
5 48
5 43
5 43
5 42
5 42
5 42
5 41
5 41
5 41
5 41
5 42
5 47
5 49
5 51
5 51
5 51
5 51
5 51
5 51
5 51
5 49
4 45
3 29
3 29
3 28
3 28
3 28
3 29
3 29
3 29
3 29
3 29
3 29
3 29
1 29
1 29
1 29
1 29
1 29
1 29
2 39
2 40
2 44
2 45
2 45
2 45
2 45
2 45
2 45
2 45
2 45
2 45
2 45
2 45
1 42
1 42
1 40
1 40
1 40
1 40
1 40
1 40
1 40
1 30
1 27
1 27
1 27
1 27
1 27
1 27
1 27
1 27
1 27
1 27
1 27
1 27
1 28
1 28
1 28
1 28
1 28
1 28
1 28
1 27
1 20
1 20
1 18
1 18
1 18
1 18
1 18
1 18
1 19
1 19
1 20
1 20
1 20
1 20
1 20
1 20
1 19
1 19
1 20
1 24
1 24
1 24
1 25
1 33
1 33
1 33
1 35
1 35
1 35
0 25
0 23
0 20
0 20
0 20
0 20
0 20
0 20
0 20
0 20
0 20
0 20
0 20
0 20
0 19
0 19
0 18
0 18
0 18
0 18
0 18
0 18
0 18
0 18
0 18
0 18
0 18
0 18
0 18
0 18
0 18
0 18
0 18
0 18
0 18
0 17
0 17
0 17
0 17
0 17
0 17
0 17
0 17
0 17
0 17
0 17
0 17
0 18
0 18
0 18
0 17
0 18
0 17
0 17
0 16
0 15
0 14
0 14
0 14
0 14
0 14
0 14
0 12
0 11
0 11
0 11
0 10
0 4
0 4
0 4
0 4
0 4
0 3
0 3
0 3
0 3
0 3
0 3
0 3
0 3
0 3
0 4
0 5
0 5
0 6
0 6
0 6
0 6
0 6
0 6
0 6
0 6
0 6
0 6
0 6
0 7
0 7
0 7
0 7
0 7
0 7
0 7
0 7
0 7
0 7
0 7
0 7
0 7
0 7
0 7
0 6
0 7
0 7
0 8
0 8
0 8
0 9
0 10
0 10
0 9
0 9
0 9
0 9
0 8
0 7
0 7
0 7
0 7
0 7
0 7
0 7
0 7
0 7
0 7
0 7
0 7
0 7
0 10
0 10
0 11
0 18
0 19
0 19
0 19
0 19
0 20
0 20
0 21
0 22
0 22
0 22
0 22
0 22
0 22
0 21
0 20
0 20
0 19
0 19
0 19
0 19
0 19
0 19
0 19
0 19
0 19
0 19
0 19
0 19
0 19
0 19
0 19
0 19
0 22
0 22
0 22
0 22
0 22
0 22
0 42
0 43
0 43
0 43
0 44
0 44
0 44
0 43
0 218
0 218
0 218
0 218
0 219
0 220
0 271
0 444
0 496
0 509
0 510
0 530
0 534
0 581
0 624
0 658
0 680
0 691
0 692
0 704
0 704
0 712
0 711
0 710
0 712
0 712
0 709
0 708
0 705
0 705
0 703
0 702
0 702
0 701
0 699
0 699
0 699
0 699
0 699
0 698
0 698
0 698
0 698
0 698
0 698
0 698
0 698
0 698
0 701
0 701
0 704
0 704
0 704
0 704
0 704
0 704
0 702
0 702
0 700
0 697
0 696
0 695
0 695
0 686
0 674
0 348
0 348
0 348
0 347
0 39
0 38
0 38
0 38
0 38
0 38
0 38
0 38
0 38
0 38
0 28
0 26
0 24
0 24
0 24
0 24
0 25
0 25
0 25
0 21
0 7
0 4
0 4
0 4
0 4
0 3
0 3
0 3
0 3
0 3
0 3
0 3
0 3
0 3
0 3
0 3
0 3
0 3
0 3
0 3
0 3
0 3
0 3
0 3
0 3
0 3
0 3
0 3
0 2
0 2
0 2
0 2
0 2
0 2
0 1
0 1
0 1
0 1
0 1
0 1
0 1
0 1
0 1
0 1
0 1
0 1
0 1
0 1
0 1
0 1
0 1
0 1
0 1
0 1
0 1
0 1
0 1
0 1
0 1
0 1
0 1
0 1
0 1
0 1
0 1
0 1
0 1
0 1
0 1
0 1
0 1
0 1
0 1
0 1
0 1
0 1
0 1
0 1
0 1
0 1
0 1
0 1
0 1
0 1
0 1
0 1
0 1
0 1
0 1
0 1
0 1
0 1
0 2
0 3
0 3
0 3
0 3
0 3
0 3
0 3
0 3
0 3
0 3
0 3
0 3
0 3
0 3
0 3
0 3
0 3
0 3
0 3
0 3
0 3
0 3
0 3
0 3
0 3
0 3
0 3
0 3
0 3
0 3
0 3
0 3
0 3
0 3
0 3
0 3
0 3
0 3
0 3
0 3
0 3
0 3
0 3
0 3
0 3
0 3
0 4
0 4
0 4
0 3
0 3
0 3
0 3
0 3
0 3
0 3
0 3
0 3
0 3
0 3
0 3
0 2
0 2
0 2
0 2
0 2
0 2
0 2
0 2
0 3
0 3
0 3
0 3
0 2
0 2
0 2
0 2
0 2
0 2
0 3
0 3
0 3
0 3
0 3
0 3
0 3
0 3
0 3
0 3
0 3
0 3
0 3
0 3
0 3
0 3
0 3
0 3
0 3
0 3
0 3
0 3
0 3
0 3
0 3
0 3
0 3
0 3
0 7
0 7
0 7
0 7
0 14
0 14
0 16
0 16
0 16
0 16
0 17
0 17
0 17
0 17
0 17
0 17
0 18
0 18
0 18
0 18
0 18
0 17
0 16
0 16
0 16
0 16
0 16
0 16
0 16
0 16
0 16
0 16
0 15
0 15
0 15
0 16
0 16
0 16
0 16
0 14
0 12
0 12
0 10
0 10
0 10
0 9
0 9
0 9
0 9
0 9
0 9
0 9
0 9
0 9
0 9
0 9
0 9
0 9
0 9
0 9
0 9
0 9
0 9
0 9
0 9
0 11
0 11
0 11
0 11
0 12
0 13
0 13
0 11
0 11
0 11
0 9
0 9
0 5
0 5
0 5
0 5
0 5
0 5
0 5
0 5
0 5
0 5
0 5
0 5
0 5
0 5
0 5
0 5
0 5
0 5
0 5
0 5
0 5
0 5
0 5
0 5
0 5
0 5
0 5
0 5
0 5
0 5
0 5
0 4
0 4
0 4
0 4
0 4
0 4
0 4
0 4
0 4
0 4
0 4
0 4
0 4
0 4
0 4
0 4
0 4
0 4
0 5
0 5
0 5
0 6
2 8
2 10
3 80
3 87
3 92
3 110
3 115
3 121
3 125
3 126
3 127
3 131
3 131
3 130
3 130
3 130
3 130
4 133
4 133
4 133
4 133
4 133
4 133
4 133
4 133
4 133
4 133
5 133
5 133
5 133
5 133
5 133
5 134
5 131
5 132
5 132
5 141
5 148
5 149
5 147
5 147
5 147
4 147
4 147
4 147
4 147
4 147
4 147
4 147
4 147
4 147
4 147
4 147
4 147
4 147
4 147
4 147
4 152
7 224
7 225
7 236
7 237
7 238
7 238
7 238
7 238
8 238
8 238
8 238
8 236
8 236
8 236
8 236
6 236
6 241
5 144
6 141
6 142
6 158
6 164
6 163
6 162
6 162
6 161
6 157
6 157
6 157
6 157
6 157
6 158
5 158
5 158
5 157
5 157
5 157
5 157
5 157
5 157
8 184
8 184
8 184
8 184
8 185
8 185
8 186
8 185
8 185
8 184
8 186
8 170
8 155
8 154
8 154
8 154
8 155
8 155
8 156
8 156
8 157
8 157
8 157
8 161
8 164
8 164
8 166
8 170
8 172
8 174
8 174
7 174
7 167
5 86
5 83
5 75
5 75
5 63
5 63
5 63
5 63
4 63
4 63
4 63
4 63
4 63
4 63
4 63
4 63
4 63
4 63
3 59
3 59
3 54
3 53
3 53
3 53
3 55
3 55
3 56
3 56
3 57
3 59
3 59
3 60
3 60
3 60
3 60
3 60
3 60
3 60
3 60
2 60
0 25
0 25
0 25
0 25
0 25
0 25
0 17
0 17
0 17
0 17
0 17
0 17
0 17
0 16
0 16
0 16
0 15
0 16
1 13
1 12
1 12
2 12
2 12
2 12
2 9
2 9
2 9
2 9
2 9
2 9
2 9
2 9
2 9
2 9
2 9
2 9
2 9
2 9
2 9
2 9
2 9
2 9
2 9
2 9
2 9
2 9
2 9
2 9
2 9
2 9
2 9
2 9
3 10
3 10
4 16
4 16
6 16
6 15
6 15
6 14
6 14
6 11
6 10
6 10
6 9
6 9
6 9
6 9
6 9
6 9
6 9
6 9
6 9
6 9
6 9
6 9
6 9
6 9
6 9
6 9
6 9
6 9
6 9
6 9
6 9
6 9
6 9
6 9
6 9
6 9
3 7
3 7
3 7
3 7
0 6
0 6
0 6
0 6
0 6
0 6
0 6
0 6
0 6
0 6
0 6
0 6
0 6
0 6
0 6
0 6
0 6
0 6
0 6
0 6
0 6
0 6
0 6
0 6
0 6
0 6
0 6
0 6
0 6
0 6
0 6
0 8
0 8
0 2
0 2
0 3
0 3
0 3
0 3
0 3
0 3
0 3
0 3
0 3
0 3
0 3
0 3
0 3
0 5
0 5
0 5
0 5
0 5
0 5
0 5
0 5
0 5
0 5
0 5
0 5
0 5
0 5
0 5
0 5
0 5
0 5
0 5
0 5
0 5
0 5
0 5
0 5
0 6
0 8
0 8
0 8
0 8
0 8
0 8
0 8
0 8
0 8
0 8
0 8
0 8
0 8
0 8
0 8
0 8
0 8
0 8
0 8
0 8
0 8
0 8
0 8
0 8
0 8
0 9
0 10
0 11
0 11
0 11
0 11
0 9
0 9
0 9
0 9
0 8
0 8
0 8
0 8
0 8
0 9
0 9
0 9
0 9
0 9
0 9
0 9
0 9
0 7
0 7
0 7
0 7
0 7
0 7
0 7
0 7
0 7
0 7
0 7
0 7
0 7
0 7
0 7
0 7
0 7
0 7
0 7
0 7
0 7
0 7
0 7
0 6
0 6
0 3
0 3
0 3
0 3
0 3
0 3
0 3
0 2
0 2
0 2
0 2
0 2
0 2
0 2
0 2
0 2
0 2
0 2
0 2
0 2
0 2
0 3
0 3
0 3
0 4
0 4
0 4
0 3
0 3
0 3
0 3
0 3
0 3
0 3
0 3
0 3
0 3
0 3
0 3
0 3
0 2
0 2
0 2
0 2
0 2
0 2
0 2
0 2
0 2
0 2
1 2
1 2
1 2
1 2
1 2
1 4
1 4
1 4
1 4
1 5
1 5
2 5
2 5
2 5
2 5
2 5
2 5
2 5
2 5
2 5
2 5
2 5
2 5
2 5
2 6
2 6
2 6
2 6
2 6
2 6
2 6
2 6
2 6
2 6
2 6
2 6
2 6
2 6
2 6
2 6
2 6
2 6
2 6
2 6
2 5
2 5
2 5
2 4
2 4
2 4
2 4
2 4
2 4
2 4
2 4
2 4
2 4
2 4
2 4
2 4
2 4
2 4
2 4
2 4
2 4
2 4
2 4
2 4
2 4
1 4
1 4
1 4
1 4
1 4
1 4
1 4
1 4
1 3
1 2
1 2
1 3
1 2
1 2
1 2
0 2
0 2
0 2
0 2
0 2
0 2
0 2
0 2
0 2
0 2
0 2
0 2
0 2
0 1
0 1
0 1
0 1
0 1
0 1
0 1
0 1
0 1
0 1
0 1
0 1
0 1
0 1
0 1
0 1
0 1
0 1
0 1
0 1
0 1
0 1
0 1
0 1
0 1
0 1
0 1
0 1
0 1
0 1
0 1
0 1
0 1
0 1
0 1
0 1
0 1
0 1
0 1
0 1
0 1
0 1
0 1
0 1
0 1
0 1
0 1
0 1
0 1
0 1
0 1
0 1
0 1
0 1
0 1
0 1
0 0
0 0
0 0
0 0
0 0
0 0
0 0
0 0
0 0
0 0
0 0
0 0
0 0
0 0
0 0
0 0
0 0
0 0
0 0
0 0
0 0
0 0
0 0
0 0
0 0
0 0
0 0
0 0
0 0
0 0
0 0
0 0
0 0
0 0
0 0
0 0
0 0
0 0
0 0
0 0
0 0
0 0
0 1
0 3
0 3
0 3
0 3
0 3
0 3
0 3
0 3
0 3
0 3
0 3
0 3
0 3
0 4
0 4
0 4
0 4
0 4
0 4
0 4
0 4
0 5
0 5
0 5
0 5
0 5
0 5
0 5
0 5
0 5
0 5
0 5
0 5
0 5
0 5
0 5
0 5
0 5
0 5
0 5
0 5
0 5
0 5
0 5
0 5
0 5
0 5
0 5
0 5
0 5
0 6
0 6
0 6
0 7
0 7
0 10
0 15
0 15
0 15
2 17
2 16
2 16
2 17
2 17
2 17
2 17
2 18
2 18
2 18
2 20
2 20
2 20
2 20
2 19
2 19
2 19
2 19
2 19
2 19
2 19
2 19
2 19
2 19
2 19
2 19
2 18
2 18
2 18
2 18
2 18
2 18
2 18
1 16
1 16
1 15
1 15
1 15
0 13
0 13
0 13
0 13
0 13
0 13
0 13
0 13
0 13
0 13
0 13
0 13
0 11
0 9
0 9
0 9
0 8
0 8
0 7
0 7
0 7
0 7
0 7
0 7
0 7
0 7
0 7
0 7
0 7
0 7
0 7
0 4
0 4
0 4
0 3
0 1
0 1
0 1
0 1
0 1
0 1
0 1
0 0
0 0
0 0
0 0
0 0
0 0
0 0
0 0
0 0
0 1
0 1
0 1
0 1
0 1
0 1
0 2
0 2
0 2
0 2
0 2
0 2
0 2
0 2
0 2
0 2
0 2
0 2
0 2
0 2
0 2
0 2
0 2
0 2
0 2
0 2
0 2
0 2
0 2
0 2
0 2
0 2
0 2
0 2
0 2
0 2
0 2
0 2
0 2
0 2
0 2
0 2
0 2
0 2
0 2
0 2
0 2
0 2
0 2
0 3
0 3
0 3
0 3
0 3
0 3
0 3
0 3
0 3
0 3
0 3
0 3
0 3
0 3
0 3
0 3
0 3
0 3
0 3
0 3
0 3
0 3
0 3
0 3
0 2
0 2
0 3
0 3
0 3
0 3
0 2
0 4
0 4
0 5
0 5
0 5
0 5
0 6
0 6
0 6
0 6
0 6
0 6
0 6
0 6
0 6
0 6
0 6
0 6
0 6
0 6
0 6
0 6
0 6
0 6
0 6
0 6
0 6
0 6
0 6
0 6
0 6
0 6
0 6
0 6
0 6
0 6
0 6
0 6
0 6
0 6
0 6
0 6
0 5
0 5
0 5
0 5
0 5
0 6
0 6
0 6
0 6
0 6
0 6
0 6
0 6
0 6
0 6
0 6
0 6
0 6
0 6
0 6
0 6
0 6
0 6
0 6
0 6
0 6
0 5
0 4
0 3
0 3
0 3
0 2
0 2
0 2
0 2
0 1
0 1
0 1
0 1
0 1
0 1
0 1
0 1
0 1
0 1
0 1
0 1
0 1
0 1
0 1
0 1
0 1
0 1
0 1
0 1
0 1
0 1
0 1
0 1
0 1
0 1
0 1
0 1
0 1
0 1
0 1
0 1
0 1
0 1
0 1
0 1
0 1
0 1
0 1
0 1
0 1
0 1
0 1
0 0
0 0
0 0
0 0
0 0
0 0
0 0
0 0
0 0
0 0
0 0
0 0
0 0
0 0
0 0
0 0
0 0
0 0
0 0
0 0
0 0
0 0
0 0
0 0
0 0
0 0
0 0
0 0
0 0
0 0
0 0
0 0
0 0
0 0
0 1
0 1
0 6
0 6
0 6
0 6
0 6
0 6
0 6
0 6
0 6
0 6
0 6
0 6
0 6
0 8
0 8
0 12
0 12
0 14
0 14
0 14
0 14
0 14
0 14
0 14
0 14
0 14
0 14
0 14
0 14
0 14
0 14
0 14
0 14
0 14
0 14
0 14
0 14
0 14
0 14
0 14
0 14
0 14
0 14
0 14
0 14
0 14
0 14
0 14
0 14
0 14
0 14
0 14
0 14
0 14
0 14
0 14
0 15
0 16
0 16
0 16
0 16
0 16
0 16
0 16
0 16
0 16
0 16
0 16
0 16
0 16
0 16
0 15
0 15
0 10
0 10
0 10
0 10
0 10
0 10
0 10
0 11
0 12
0 12
0 12
0 13
0 13
0 10
0 10
0 7
0 6
0 5
0 5
0 5
0 5
0 5
0 5
0 5
0 5
0 5
0 5
0 5
0 7
0 8
0 9
0 9
0 9
0 9
0 9
0 9
0 9
0 9
0 9
0 9
0 9
0 9
0 9
0 9
0 9
1 9
1 9
1 9
2 9
2 9
2 9
2 9
2 9
2 9
2 9
2 9
2 8
2 6
2 6
2 5
2 5
2 7
2 7
2 7
2 7
2 7
2 7
2 7
2 7
2 7
2 7
2 7
2 8
2 8
2 8
2 8
2 9
2 9
2 9
2 9
2 7
2 7
2 7
2 6
2 5
2 5
2 5
2 4
2 4
2 4
1 4
1 4
0 4
0 4
0 4
0 4
0 4
0 4
0 4
0 4
0 4
0 4
0 4
0 4
0 4
0 4
0 4
0 4
0 4
0 5
0 5
0 5
0 5
0 5
0 5
0 5
0 5
0 5
0 5
0 5
0 5
0 5
0 5
0 5
0 4
0 4
0 4
0 4
0 4
0 4
0 4
0 4
0 4
0 3
0 1
0 0
0 0
0 0
0 0
0 0
0 0
0 0
0 0
0 0
0 0
0 0
0 0
0 0
0 0
0 1
0 1
0 1
0 1
0 1
0 1
0 1
0 1
0 1
0 1
0 1
0 1
0 1
0 1
0 1
0 1
0 1
0 1
0 1
0 1
0 1
0 1
0 1
0 1
0 1
0 1
0 1
0 1
0 1
0 1
0 1
0 1
0 1
0 1
0 1
0 1
0 1
0 1
0 3
0 3
0 3
0 3
0 7
0 7
0 7
0 7
0 7
0 7
0 7
0 8
0 9
0 9
0 9
0 9
0 9
0 12
0 12
0 12
0 12
0 12
0 12
0 14
0 14
0 14
0 14
0 14
0 14
0 14
0 14
0 14
0 14
0 14
0 13
0 13
0 13
0 13
0 13
0 13
0 13
0 13
0 13
0 13
0 13
0 13
0 13
0 13
0 13
0 13
0 13
0 13
0 14
0 14
0 14
0 14
0 14
0 14
0 14
0 14
0 14
0 14
0 14
0 14
0 14
0 14
0 14
0 14
0 14
0 14
0 14
0 13
0 12
0 12
0 12
0 12
0 11
0 10
0 10
0 10
0 10
0 9
0 9
0 7
0 7
0 4
0 4
0 3
0 3
0 3
0 3
0 3
0 3
0 3
0 3
0 3
0 3
0 3
0 3
0 5
0 5
0 5
0 5
0 5
0 5
0 4
0 4
0 4
0 3
0 3
0 3
0 3
0 3
0 3
0 3
0 3
0 4
0 4
0 4
0 4
0 4
0 4
0 4
0 4
0 4
0 3
0 3
0 3
0 3
0 3
0 3
0 3
0 3
0 3
0 3
0 3
0 3
0 3
0 3
0 3
0 3
0 3
0 3
0 3
0 3
0 3
0 3
0 3
0 3
0 3
0 3
0 3
0 3
0 3
0 3
0 4
0 4
0 4
0 4
0 4
0 4
0 8
0 15
0 18
0 21
0 22
0 24
0 24
0 25
0 26
0 26
0 26
0 24
0 24
0 24
0 24
0 24
0 24
0 24
0 24
0 24
0 24
0 24
0 24
0 24
0 24
0 24
0 24
0 24
0 23
0 22
0 22
0 22
0 22
0 22
0 22
0 29
0 29
0 29
0 29
0 29
0 29
0 29
0 29
0 29
0 29
0 29
0 29
0 29
0 29
0 29
0 29
0 30
0 29
0 31
0 31
0 31
0 31
0 33
0 33
0 33
0 33
0 33
0 33
0 33
0 33
0 33
0 33
0 32
0 32
0 32
0 32
0 32
0 33
0 27
0 20
0 20
0 17
0 17
0 16
0 16
0 16
0 16
0 16
0 16
0 16
0 16
0 16
0 16
0 16
0 16
0 16
0 16
0 16
0 16
0 16
0 16
0 16
0 16
0 16
0 16
0 16
0 16
0 16
0 16
0 16
0 16
0 16
0 16
0 10
0 9
0 9
0 9
0 9
0 9
0 9
0 11
0 11
0 11
0 12
0 12
0 13
0 13
0 15
0 15
0 14
0 14
0 11
0 11
0 11
0 11
0 9
0 9
0 9
0 9
0 9
0 9
0 9
0 9
0 9
0 9
0 10
0 10
0 10
0 10
0 10
0 9
0 9
0 9
0 6
0 6
0 6
0 5
0 6
0 6
0 6
0 6
0 6
0 6
0 6
0 6
0 6
1 6
1 6
1 6
1 6
1 6
1 6
1 6
1 6
1 6
1 6
1 6
1 6
1 6
1 6
1 6
1 6
1 6
1 6
2 6
2 6
2 6
2 6
2 6
2 6
2 6
2 6
2 6
2 4
2 4
2 4
2 4
2 4
2 3
1 3
1 2
1 2
1 2
1 2
1 2
1 2
1 2
1 2
1 2
1 2
1 2
1 2
1 2
1 2
1 2
1 2
1 2
1 2
1 1
1 1
1 1
1 1
1 1
1 1
1 1
1 1
1 1
1 1
1 1
1 1
1 0
1 0
1 0
1 0
1 1
1 1
1 1
0 1
0 1
0 1
0 1
0 1
0 1
0 1
0 1
0 1
0 1
0 1
0 1
0 0
0 0
0 0
0 0
0 0
1 0
1 0
1 0
1 0
1 0
2 1
2 1
2 1
2 1
2 1
2 1
2 1
2 1
2 9
2 13
2 22
2 22
2 27
2 28
2 29
2 30
2 30
2 30
2 30
2 30
2 30
2 30
1 31
1 31
1 31
1 31
1 31
1 31
1 31
1 31
1 31
1 31
1 31
1 31
1 31
1 31
1 31
1 31
1 31
1 30
1 30
1 30
1 30
1 30
1 30
1 30
1 30
1 30
1 30
1 30
1 30
1 30
1 30
1 30
1 30
1 30
1 30
1 30
2 29
2 29
2 28
2 27
2 27
2 27
2 26
2 26
2 26
2 26
2 26
2 24
2 21
2 21
2 21
1 9
1 5
1 5
1 5
1 5
1 6
1 6
1 6
1 6
1 7
1 4
1 3
1 3
1 3
1 3
1 3
1 3
1 3
1 3
1 3
1 3
1 3
1 2
1 2
1 2
1 2
1 2
2 2
2 2
2 2
2 2
2 2
2 2
2 2
2 2
2 2
2 2
2 2
2 2
2 2
2 2
2 2
2 2
2 2
2 2
2 2
2 2
2 2
2 2
2 2
2 2
2 2
2 2
2 2
2 2
2 2
2 2
2 2
1 2
1 2
1 2
1 2
1 2
1 2
1 2
1 2
1 2
1 2
1 2
1 2
1 2
1 3
1 3
1 4
1 4
1 4
1 4
1 4
1 3
1 3
1 3
1 3
1 3
1 3
1 3
1 3
1 3
1 3
1 3
1 3
1 3
1 3
1 3
1 3
1 3
1 3
1 3
1 3
1 3
1 3
0 3
0 3
0 3
0 3
0 3
0 3
0 3
0 3
0 3
0 3
0 3
0 3
0 3
0 3
0 3
0 3
0 3
0 3
0 3
0 3
0 3
0 3
0 3
0 3
0 3
0 3
0 3
0 3
0 3
0 3
0 3
0 3
0 3
0 3
0 3
0 3
0 3
0 3
0 3
0 3
0 3
0 3
0 3
0 3
0 2
0 2
0 1
0 1
0 1
0 1
0 2
0 2
0 2
0 2
0 2
0 1
0 1
0 1
0 1
0 1
0 1
0 1
0 1
0 1
0 1
0 1
0 1
0 1
0 1
0 1
0 1
0 1
0 1
0 1
0 1
0 1
0 1
0 1
0 1
0 1
0 1
0 1
0 1
0 1
0 1
0 1
0 1
0 1
0 1
0 1
0 1
0 1
0 1
0 1
0 1
0 1
0 1
0 2
0 2
0 2
0 2
0 2
0 2
0 2
0 2
0 2
0 2
0 2
0 2
0 2
0 2
0 2
0 2
0 2
0 2
0 2
0 2
0 2
0 2
0 2
0 2
0 2
0 2
0 1
0 1
0 1
0 1
0 1
0 1
0 1
0 1
0 1
0 1
0 1
0 1
0 1
0 1
0 1
0 1
0 1
0 1
0 1
0 1
0 1
0 1
0 1
0 1
0 1
0 1
0 1
0 1
0 1
0 1
0 1
0 1
0 1
0 1
0 1
0 1
0 1
0 1
0 1
0 1
0 1
0 1
0 1
0 1
0 1
0 1
0 1
0 0
0 0
0 0
0 0
0 0
0 0
0 0
0 0
0 0
0 0
0 1
0 1
0 1
0 1
0 1
0 1
0 1
0 1
0 1
0 1
0 1
0 1
0 1
0 1
0 2
0 2
0 2
0 2
0 2
0 2
0 2
0 2
0 2
0 2
0 2
0 2
0 2
0 2
0 2
0 2
0 2
0 2
0 2
0 2
0 2
0 2
0 2
0 2
0 2
0 2
0 2
0 2
0 2
0 2
0 2
0 2
0 3
0 3
0 3
0 3
0 3
0 3
0 3
0 3
0 3
0 3
0 3
0 3
0 3
0 3
0 3
0 3
0 3
0 3
0 11
0 11
0 12
0 14
0 14
0 14
0 15
0 15
0 15
0 14
0 14
0 14
0 14
0 14
0 14
0 14
0 14
0 14
0 14
0 14
0 14
0 14
0 14
0 13
0 13
0 13
0 13
0 13
0 13
0 13
0 13
0 13
0 13
0 13
0 13
0 13
0 13
0 13
0 13
0 13
0 13
0 13
0 13
0 13
0 13
0 13
0 13
0 13
0 13
0 13
0 14
0 14
0 14
0 14
0 14
0 13
0 13
0 13
0 13
0 13
0 13
0 13
0 13
0 13
0 13
0 13
0 13
0 13
0 13
0 13
0 13
0 13
0 13
0 2
0 2
0 2
0 2
0 2
0 2
0 1
0 1
0 1
0 1
0 1
0 1
0 1
0 1
0 1
0 1
0 1
0 1
0 1
0 1
0 1
0 1
0 1
0 1
0 1
0 1
0 1
0 1
0 1
0 2
0 2
0 2
0 4
0 4
0 4
0 4
0 4
0 4
0 4
0 10
0 10
0 10
0 10
0 12
0 12
0 12
0 12
0 12
0 13
0 13
0 12
0 12
0 12
0 12
0 12
0 12
0 12
0 12
0 12
0 12
0 12
0 12
0 12
0 12
0 12
0 12
0 12
0 12
0 12
0 12
0 12
0 13
0 14
0 14
0 14
0 14
0 14
0 14
0 14
0 16
0 16
0 16
0 16
0 16
0 16
0 16
0 16
0 17
0 17
0 17
0 17
0 17
0 17
0 17
0 17
0 17
0 17
0 17
0 17
0 17
0 17
0 17
0 16
0 16
0 16
0 13
0 12
0 12
0 12
0 12
0 12
0 12
0 6
0 6
0 6
0 6
0 6
0 6
0 6
0 6
0 6
0 4
0 4
0 4
0 4
0 4
0 4
0 4
0 4
0 5
0 5
0 5
0 5
0 5
0 5
0 5
0 5
0 5
0 5
0 5
0 5
0 5
0 5
0 5
0 4
0 3
0 3
0 3
0 3
0 3
0 3
0 3
0 3
0 3
0 3
0 3
0 3
0 3
0 3
0 3
0 2
0 4
0 4
0 4
0 4
0 4
0 4
0 4
0 4
0 5
0 5
0 5
0 5
0 5
0 5
0 5
0 5
0 5
2 5
2 5
2 5
2 5
2 5
2 5
2 5
2 5
2 5
2 5
2 5
2 5
2 5
2 5
2 5
2 5
2 5
2 5
2 5
2 5
2 5
2 4
2 3
2 3
2 3
2 3
2 3
2 3
2 3
2 3
2 3
2 3
2 3
2 5
2 5
2 5
2 7
2 10
2 10
2 10
2 12
2 12
2 15
2 16
2 16
2 16
2 16
2 16
2 17
2 17
0 17
0 17
0 17
0 18
0 18
0 18
0 16
0 16
0 16
0 16
0 16
0 16
0 16
0 16
0 15
0 15
0 15
0 15
0 15
0 15
0 15
0 15
0 15
0 15
0 12
0 7
0 5
0 5
0 5
0 5
0 5
0 5
0 5
0 5
0 6
0 6
0 6
0 6
0 6
0 6
0 6
0 6
0 6
0 6
0 6
0 6
0 6
0 6
0 6
0 6
0 6
0 6
0 6
0 6
0 6
0 6
0 6
0 6
0 6
0 6
0 3
0 3
0 3
0 3
0 3
0 3
0 3
0 3
0 3
0 3
0 3
0 2
0 2
0 2
0 2
0 2
0 1
0 1
0 1
0 1
0 1
0 1
0 1
0 1
0 1
0 1
0 1
0 1
0 1
0 1
0 1
0 1
0 1
0 1
0 1
0 1
0 1
0 21
0 23
0 29
0 30
0 32
0 33
0 43
0 47
0 55
0 55
0 117
0 136
0 139
0 156
0 176
0 189
0 211
0 220
0 229
0 233
0 235
0 241
0 243
0 243
0 243
0 331
0 333
0 338
0 338
0 339
0 339
0 339
0 340
0 344
0 344
0 344
0 351
0 351
0 353
0 357
0 362
0 364
0 368
0 369
0 370
0 371
0 372
0 372
0 375
0 375
0 375
0 376
0 376
0 376
0 376
0 376
0 376
0 379
0 379
0 380
0 380
0 381
0 381
0 381
0 386
0 387
0 386
0 386
0 386
0 386
0 386
0 390
0 388
0 367
0 366
0 360
0 358
0 355
0 352
0 332
0 328
0 319
0 315
0 246
0 234
0 232
0 226
0 193
0 174
0 159
0 160
0 155
0 153
0 155
0 155
0 159
0 160
0 160
0 62
0 61
0 97
0 88
0 89
0 89
0 89
0 89
0 89
0 89
0 89
0 85
0 84
0 82
0 78
0 75
0 73
0 72
0 72
0 72
0 72
0 71
0 71
0 71
0 71
0 71
0 70
0 70
0 70
0 70
0 70
0 69
0 68
0 68
0 68
0 68
0 67
0 67
0 67
0 64
0 64
0 64
0 64
0 64
0 64
0 64
0 64
0 64
0 63
0 63
0 63
0 63
0 63
0 63
0 63
0 64
0 65
0 65
0 65
0 65
0 65
0 65
0 65
0 65
0 65
0 56
0 55
0 55
0 52
0 51
0 47
0 46
0 46
0 45
0 43
0 3
0 3
0 2
0 2
0 2
0 2
0 2
0 2
0 2
0 2
0 2
0 2
0 2
0 2
0 2
0 2
0 2
0 2
0 2
0 3
0 3
0 3
0 3
0 3
0 3
0 3
0 3
0 3
0 3
0 3
0 3
0 3
0 3
0 3
0 3
0 3
0 3
0 3
0 3
0 3
0 3
0 3
0 3
0 3
0 4
0 10
0 14
0 17
0 29
0 34
0 36
0 39
0 38
0 38
0 38
0 38
0 38
0 38
0 38
0 38
0 38
0 38
0 38
0 38
0 39
0 39
0 37
0 37
0 37
0 37
0 37
0 37
0 37
0 37
0 37
0 37
0 37
0 37
0 37
0 37
0 37
0 37
0 37
0 37
0 37
0 37
0 37
0 37
0 35
0 31
0 27
0 23
0 20
0 20
0 20
0 20
0 20
0 20
0 21
0 21
0 21
0 21
0 21
0 21
0 21
0 21
0 21
0 21
0 21
0 21
0 21
0 21
0 21
0 21
0 24
0 24
0 24
0 23
0 24
0 24
0 22
0 13
0 15
0 15
0 14
0 14
0 14
0 14
0 14
0 14
0 15
0 15
0 15
0 15
0 15
0 15
0 14
0 14
0 14
0 14
0 14
0 14
0 14
0 14
0 14
0 14
0 20
0 20
0 20
0 21
0 21
0 22
0 22
0 22
0 22
0 22
0 22
0 22
0 22
0 22
0 22
0 22
0 22
0 22
0 22
0 22
0 22
0 22
0 22
0 22
0 22
0 21
0 21
0 21
0 21
0 22
0 22
0 22
0 22
0 22
0 22
0 23
0 24
0 24
0 24
0 24
0 23
0 21
0 22
0 22
0 23
0 23
0 23
0 21
0 18
0 17
0 17
0 17
0 17
0 17
0 17
0 17
0 17
0 16
0 16
0 16
0 16
0 16
0 16
0 16
0 16
0 16
0 16
0 17
0 21
0 21
0 30
0 39
0 42
0 37
0 38
0 42
0 42
0 43
0 41
0 43
0 43
0 43
0 43
0 43
0 43
0 43
0 43
0 43
0 43
0 43
0 43
0 43
0 43
0 43
0 43
0 43
0 43
0 43
0 43
0 41
0 41
0 40
0 49
0 50
0 54
0 70
0 103
0 148
0 160
0 165
0 174
0 175
0 176
0 177
0 177
0 177
0 179
0 177
0 177
0 177
0 177
0 177
0 176
0 176
0 176
0 174
0 174
0 176
0 176
0 177
0 177
0 177
0 177
0 177
0 179
0 179
0 181
0 181
0 181
0 182
0 181
0 180
0 182
0 173
0 170
0 166
0 161
0 155
0 148
0 150
0 136
0 119
0 111
0 111
0 109
0 109
0 109
0 109
0 109
0 109
0 109
0 109
0 109
0 109
0 109
0 109
0 109
0 109
0 109
0 109
0 109
0 109
0 108
0 107
0 107
0 107
0 106
0 102
0 86
0 50
0 43
0 30
0 29
0 23
0 22
0 22
0 22
0 22
0 22
0 22
0 21
0 21
0 25
0 25
0 25
0 25
0 25
0 26
0 26
0 29
0 32
0 34
0 45
0 66
0 66
0 66
0 67
0 65
0 67
0 66
0 66
0 67
0 67
0 67
0 71
0 71
0 73
0 70
0 70
0 70
0 70
0 69
0 64
0 64
0 64
0 64
0 64
0 64
0 64
0 64
0 64
0 64
0 68
0 68
0 68
0 68
0 68
0 68
0 68
0 68
0 68
0 68
0 68
0 68
0 68
0 68
0 68
0 68
0 68
0 68
0 68
0 67
0 62
0 62
0 62
0 62
0 62
0 63
0 63
0 63
0 63
0 63
0 64
0 64
0 64
0 60
0 59
0 59
0 61
0 61
0 61
0 61
0 58
0 55
0 45
0 48
0 32
0 37
0 36
0 37
0 37
0 35
0 34
0 33
0 34
0 37
0 37
0 36
0 36
0 36
0 36
0 36
0 36
0 37
0 37
0 38
0 38
0 38
0 38
0 40
0 44
0 44
0 45
0 45
0 45
0 41
0 42
0 41
0 41
0 41
0 46
0 47
0 49
0 49
0 49
0 49
0 49
0 49
0 49
0 49
0 49
0 49
0 49
0 49
0 49
0 49
0 49
0 49
0 49
0 49
0 44
0 42
0 42
0 42
0 42
0 42
0 42
0 42
0 42
0 41
0 41
0 40
0 40
0 40
0 40
0 40
0 40
0 40
0 30
0 24
0 25
0 25
0 25
0 25
0 25
0 25
0 24
0 23
0 21
0 26
0 27
0 27
0 27
0 28
0 28
0 28
0 27
0 27
0 26
0 26
0 26
0 25
0 24
0 19
0 19
0 18
0 17
0 17
0 17
0 17
0 17
0 17
0 17
0 12
0 10
0 9
0 9
0 10
0 11
0 13
0 13
0 13
0 13
0 16
0 16
0 16
0 17
0 17
0 17
0 17
0 17
0 17
0 17
0 17
0 17
0 17
0 17
0 17
0 17
0 17
0 17
0 17
0 17
0 18
0 24
0 27
0 34
0 35
0 35
0 35
0 35
0 35
0 34
0 34
0 34
0 34
0 34
0 33
0 33
0 33
0 33
0 35
0 29
0 30
0 29
0 28
0 28
0 28
0 28
0 34
0 34
0 34
0 34
0 36
0 36
0 36
0 36
0 36
0 36
0 36
0 36
0 37
0 37
0 37
0 37
0 37
0 37
0 38
0 39
0 37
0 37
0 37
0 37
0 37
0 37
0 37
0 37
0 37
0 34
0 36
0 41
0 42
0 46
0 48
0 50
0 50
0 49
0 48
0 48
0 48
0 48
0 50
0 50
0 50
0 50
0 50
0 48
0 42
0 39
0 38
0 38
0 38
0 38
0 38
0 38
0 38
0 38
0 38
0 38
0 38
0 41
0 41
0 41
0 41
0 39
0 39
0 42
0 42
0 42
0 42
0 49
0 49
0 42
0 42
0 41
0 42
0 40
0 40
0 40
0 40
0 40
0 40
0 40
0 40
0 39
0 39
0 39
0 39
0 39
0 39
0 38
0 37
0 37
0 37
0 37
0 37
0 37
0 37
0 41
0 50
0 49
0 49
0 49
0 45
0 45
0 41
0 39
0 37
0 37
0 37
0 37
0 37
0 37
0 37
0 36
0 38
0 38
0 38
0 38
0 38
0 37
0 39
0 39
0 39
0 39
0 39
0 39
0 39
0 39
0 43
0 49
0 50
0 50
0 47
0 47
0 47
0 47
0 47
0 47
0 44
0 40
0 41
0 38
0 31
0 31
0 31
0 31
0 31
0 30
0 30
0 30
0 30
0 30
0 30
0 30
0 30
0 30
0 30
0 30
0 30
0 30
0 30
0 30
0 30
0 30
0 30
0 30
0 30
0 30
0 30
0 30
0 30
0 19
0 19
0 19
0 19
0 19
0 19
0 19
0 19
0 19
0 19
0 19
0 19
0 19
0 19
0 19
0 18
0 16
0 16
0 16
0 17
0 16
0 18
0 17
0 16
0 18
0 18
0 18
0 18
0 18
0 18
0 14
0 8
0 7
0 7
0 7
0 7
0 7
0 7
0 7
0 7
0 5
0 4
0 4
0 3
0 4
0 4
0 4
0 4
0 4
0 4
0 4
0 4
0 4
0 4
0 4
0 4
0 4
0 4
0 4
1 4
1 4
1 4
1 4
1 4
1 4
1 4
1 4
1 5
1 7
1 7
1 8
1 8
1 8
1 8
0 8
0 8
0 8
0 9
0 9
0 9
0 9
0 9
0 9
0 9
0 9
0 9
0 9
0 9
0 9
0 9
0 9
0 7
0 7
0 7
0 6
0 6
0 6
0 6
0 6
0 6
0 6
0 6
0 6
0 6
0 6
0 6
0 6
0 6
0 6
0 6
0 7
0 7
0 7
0 7
0 7
0 7
0 7
0 5
0 5
0 5
0 4
0 4
0 4
0 4
0 4
0 4
0 4
0 4
0 5
0 5
0 5
0 5
0 5
0 5
0 5
0 5
0 5
0 5
0 5
0 5
0 4
0 4
0 4
0 3
0 3
0 3
0 3
0 3
0 3
0 3
0 2
0 2
0 2
0 2
0 2
0 2
0 2
0 2
0 2
0 2
0 2
0 2
0 2
0 2
0 2
0 2
0 2
0 2
0 2
0 2
0 2
0 2
0 2
0 2
0 2
0 2
0 2
0 2
0 2
0 2
0 2
0 4
0 8
0 9
0 9
0 11
0 11
0 11
0 11
0 11
0 11
0 11
0 11
0 11
0 11
0 11
0 11
0 11
0 11
0 11
0 11
0 10
0 10
0 10
0 10
0 10
0 10
0 10
0 10
0 10
0 10
0 10
0 12
0 12
0 13
0 13
0 11
0 10
0 10
0 10
0 10
0 10
0 10
0 9
0 9
0 8
0 8
0 8
0 8
0 8
0 8
0 8
0 8
0 9
0 9
0 9
0 9
0 9
0 8
0 8
0 7
0 7
0 7
0 7
0 7
0 7
0 7
0 7
0 6
0 6
0 6
0 6
0 6
0 5
0 5
0 5
0 5
0 5
0 5
0 5
0 5
0 5
0 5
0 5
0 5
0 5
0 5
0 5
0 5
0 5
0 5
0 5
0 5
0 5
0 5
0 5
0 5
0 5
0 5
0 5
0 5
0 5
0 5
0 5
0 5
0 2
0 1
0 1
0 1
0 1
0 1
0 1
0 1
0 1
0 1
0 1
0 1
0 1
0 1
0 1
0 1
0 1
0 1
0 2
0 2
0 2
0 2
0 2
0 2
0 2
0 2
0 2
0 2
0 2
0 2
0 2
0 2
0 2
0 2
0 2
0 2
0 2
0 2
0 2
0 2
0 2
0 3
0 3
0 3
0 3
0 3
0 3
0 3
0 3
0 3
0 5
0 5
0 5
0 6
0 6
0 6
0 8
0 8
0 9
0 10
0 11
0 15
0 16
0 16
0 16
0 18
0 18
0 18
0 18
0 18
0 18
0 18
0 18
0 18
0 18
0 18
0 18
0 18
0 18
0 18
0 19
0 22
0 27
0 27
0 27
0 27
0 29
0 29
0 31
0 32
0 34
0 33
0 33
0 33
0 32
0 32
0 32
0 32
0 31
0 31
0 30
0 30
0 30
0 30
0 30
0 30
0 30
0 30
0 30
0 30
0 30
0 31
0 32
0 32
0 31
0 31
0 31
0 31
0 31
0 31
0 31
0 31
0 31
0 29
0 29
0 29
0 28
0 28
0 28
0 24
0 24
0 23
0 23
0 23
0 20
0 20
0 19
0 19
0 18
0 18
0 18
0 18
0 18
0 18
0 18
0 18
0 18
0 18
0 18
0 18
1 20
1 20
1 20
1 19
1 16
1 11
1 11
1 11
1 11
1 9
1 9
1 6
1 5
1 3
1 2
0 2
0 2
0 2
0 2
0 2
0 2
0 2
0 2
0 2
0 2
0 2
0 2
0 2
0 2
0 2
0 2
0 2
0 2
0 2
0 2
0 2
0 2
0 2
0 2
0 2
0 2
0 2
0 2
0 2
0 2
0 2
0 2
0 2
0 2
0 2
0 2
0 2
0 2
0 2
0 2
0 2
0 2
0 2
0 2
0 2
0 0
0 0
0 0
0 0
0 0
0 0
0 0
0 0
0 0
0 0
0 0
0 0
0 0
0 0
0 0
0 0
0 0
0 0
0 0
0 0
0 0
0 0
0 0
0 0
0 0
0 0
0 0
0 0
0 0
0 0
0 0
0 0
0 0
0 0
0 0
0 0
0 0
0 0
0 0
0 0
0 0
0 0
0 0
0 0
0 0
0 0
0 0
0 0
0 0
0 0
0 0
0 0
0 2
0 2
0 2
0 2
0 2
0 4
0 4
0 4
0 5
0 5
0 12
0 12
0 12
0 12
0 12
0 14
0 18
0 23
0 23
0 28
0 29
0 29
1 32
1 33
1 33
1 33
1 33
1 33
1 33
1 33
1 33
1 33
1 33
1 33
1 33
1 33
1 33
1 33
1 33
1 33
1 33
1 33
1 33
1 33
1 33
1 33
1 33
1 33
1 34
1 34
1 34
1 36
1 39
1 40
1 40
1 40
1 40
1 40
1 40
1 40
1 38
1 34
1 34
1 34
1 34
1 34
1 34
1 32
1 30
1 29
1 29
1 28
1 28
1 28
2 28
2 28
2 28
2 28
2 28
2 28
2 28
2 27
2 27
2 22
2 21
2 21
2 20
2 20
2 19
2 15
2 10
2 10
2 8
2 8
2 8
1 6
1 6
1 6
1 6
1 6
1 6
1 6
1 6
1 6
1 6
1 6
1 6
1 11
1 12
1 12
1 12
1 12
1 12
1 12
1 12
1 12
1 12
1 12
1 14
1 14
1 14
1 13
1 12
1 12
1 10
1 8
1 8
1 8
1 10
1 10
1 10
1 10
1 10
1 10
1 10
1 10
1 10
1 10
1 10
1 10
1 10
1 10
1 10
1 10
1 11
1 12
1 12
0 12
0 12
0 12
0 12
0 12
0 12
0 12
0 12
0 12
0 12
0 12
0 12
0 12
0 12
0 12
0 12
0 12
0 12
0 12
0 12
0 12
0 12
0 12
0 12
0 12
0 14
0 14
0 14
0 17
0 17
0 19
0 19
0 20
0 15
0 14
0 14
0 14
0 14
0 14
0 14
0 15
0 16
0 17
0 17
0 15
0 15
0 15
0 15
0 16
0 16
0 16
0 17
0 17
0 17
0 15
0 15
0 15
0 15
0 15
0 15
0 15
0 15
0 15
0 15
0 15
0 15
0 15
0 15
0 13
0 13
0 10
0 7
0 8
0 8
0 8
0 8
0 8
0 8
0 8
0 8
0 8
0 8
0 8
0 8
0 8
0 8
0 8
0 8
0 8
0 8
0 8
0 8
0 8
0 8
0 8
0 8
0 8
0 8
0 8
0 8
0 8
0 6
0 6
0 6
0 6
0 6
0 6
0 6
0 5
0 5
0 5
0 5
0 5
0 5
0 4
0 3
0 3
0 3
0 3
0 3
0 3
0 2
0 2
0 1
0 1
0 1
0 1
0 1
0 1
0 1
0 1
0 1
1 1
3 3
3 3
3 3
3 3
3 3
3 3
3 2
3 2
3 2
3 2
3 2
3 2
3 2
3 2
6 6
6 6
6 6
8 6
8 6
8 6
10 6
10 6
10 6
10 6
10 6
10 6
10 6
10 6
10 6
10 6
10 6
10 6
10 6
10 6
10 6
10 6
10 6
10 6
10 6
10 6
10 6
10 6
10 6
10 6
10 6
10 6
10 6
10 6
10 6
11 6
11 6
11 6
11 6
12 6
12 6
12 6
12 6
12 6
12 6
12 6
12 6
12 6
12 6
12 6
12 6
12 6
12 6
12 6
12 6
12 6
12 6
12 6
11 6
9 4
9 4
9 4
9 4
9 4
9 4
9 4
9 4
8 4
9 4
9 4
9 4
7 4
7 4
4 0
4 0
5 0
5 0
2 0
2 0
2 0
2 0
2 0
2 0
2 0
2 0
2 0
2 0
2 0
2 0
2 0
2 0
2 0
2 0
2 0
2 0
2 0
2 0
2 0
2 0
2 0
2 0
2 0
3 0
3 0
3 0
3 0
3 0
3 0
3 0
3 0
3 0
3 0
3 0
3 0
3 0
3 0
3 0
3 0
2 0
2 0
2 0
2 0
2 0
2 0
2 0
2 0
2 0
2 0
2 0
2 0
2 0
2 0
2 0
2 0
2 0
2 0
2 0
2 0
2 0
2 0
2 0
1 0
1 0
1 0
1 0
1 0
1 0
1 0
0 0
0 0
0 0
0 0
0 0
0 0
0 0
0 0
0 0
0 0
0 0
0 0
0 0
0 0
0 0
0 0
0 0
0 0
0 0
0 0
0 0
0 0
0 0
0 0
0 0
0 2
0 3
0 3
0 3
0 3
0 3
0 3
0 3
0 3
0 3
0 3
0 3
0 4
0 5
0 5
0 5
0 5
0 5
0 5
0 5
0 5
0 5
0 5
0 5
0 6
0 6
0 7
0 7
0 7
0 7
0 7
0 8
0 9
0 9
0 9
0 9
0 9
0 9
0 9
0 9
0 9
0 9
0 9
0 9
0 9
0 9
0 9
0 9
0 9
0 8
0 8
0 8
0 8
0 8
0 8
0 8
0 8
0 9
0 12
0 15
0 18
0 18
0 18
0 18
0 18
0 19
0 19
0 19
0 20
0 20
0 20
0 20
0 20
0 17
0 17
0 17
0 17
0 17
0 17
0 17
0 17
0 18
0 19
0 19
0 18
0 17
0 17
0 17
0 17
0 17
0 17
0 17
0 20
0 22
0 30
0 39
0 39
0 42
0 43
0 48
0 49
0 58
0 59
0 61
0 60
0 61
0 62
0 62
0 62
0 62
0 65
0 65
0 82
0 94
0 96
0 96
0 96
0 97
0 98
0 106
0 116
0 116
0 117
0 118
0 117
0 116
0 116
0 116
0 116
0 116
0 114
0 112
0 110
0 108
0 108
0 108
0 108
0 108
0 107
0 107
0 107
0 106
0 106
0 106
0 106
0 106
0 106
0 106
0 106
0 106
0 106
0 109
0 112
0 112
0 111
0 110
0 110
0 110
0 109
0 108
0 108
0 108
0 108
0 108
0 108
0 104
0 100
0 96
0 90
0 86
0 81
0 76
0 72
0 70
0 58
0 56
0 55
0 55
0 55
0 55
0 55
0 55
0 55
0 46
0 46
0 17
0 12
0 12
0 1
0 1
0 1
0 1
0 1
0 1
0 1
0 1
0 1
0 1
0 1
0 2
0 2
0 2
0 2
0 2
0 2
0 2
0 2
0 2
0 2
0 2
0 2
0 2
0 2
0 2
0 2
0 2
0 2
0 2
0 2
0 2
0 2
0 2
0 2
0 2
0 2
0 2
0 2
0 2
0 2
0 2
0 2
0 2
0 2
0 2
0 2
0 2
0 2
0 2
0 2
0 2
0 2
0 2
0 2
0 1
0 1
0 1
0 1
0 1
0 1
0 1
0 1
0 1
0 1
0 1
0 1
0 1
0 1
0 1
0 1
0 1
0 1
0 1
0 1
0 1
0 1
0 1
0 1
0 1
0 1
0 1
0 1
0 1
0 0
0 0
0 0
0 0
1 0
1 0
1 0
1 0
1 0
1 0
1 0
1 0
1 0
1 0
3 0
3 0
3 0
3 0
3 0
3 0
3 0
3 0
3 0
3 0
3 0
3 0
3 0
3 0
3 0
3 0
3 0
3 0
3 0
3 0
3 0
3 0
3 0
3 0
3 0
3 0
3 0
3 0
3 0
3 0
3 0
3 0
3 0
3 0
3 0
4 0
5 0
5 0
6 0
6 0
6 0
6 0
6 0
6 0
6 0
6 0
6 0
6 0
6 0
6 0
6 0
6 0
6 0
6 0
6 0
6 0
6 0
6 0
6 0
6 0
6 0
6 0
6 0
5 0
5 0
5 0
5 0
5 0
5 0
5 0
5 0
5 0
5 0
3 0
3 0
3 0
3 0
5 0
5 0
5 0
6 0
17 0
24 0
25 0
25 0
25 0
25 0
25 0
25 0
25 0
25 0
25 0
32 0
34 0
35 0
37 0
37 0
37 0
37 0
37 0
37 0
37 0
37 0
37 0
37 0
37 0
37 0
37 0
36 0
36 0
36 0
35 0
35 0
35 0
40 0
59 0
61 0
61 0
61 0
64 0
65 0
65 0
65 0
65 0
65 0
65 0
65 0
65 0
65 0
65 0
65 0
65 0
65 0
65 0
65 0
65 0
65 0
65 0
65 0
70 0
69 0
69 0
68 0
68 0
67 0
67 0
68 0
70 0
70 0
70 0
68 0
71 0
72 0
85 0
91 0
88 0
89 0
89 0
90 0
90 0
90 0
90 0
90 0
90 0
90 0
83 0
80 0
80 0
78 0
78 0
78 0
78 0
79 0
79 0
79 0
80 0
80 0
81 0
86 0
92 0
97 0
104 0
103 0
103 0
103 0
103 0
102 0
95 0
80 0
78 0
78 0
78 0
74 0
74 0
74 0
74 0
74 0
74 0
74 0
74 0
74 0
74 0
76 0
76 0
76 0
76 0
76 0
76 0
76 0
76 0
76 0
76 0
70 0
70 0
70 0
70 0
70 0
70 0
69 0
67 0
67 0
67 0
66 0
64 0
57 0
54 0
38 0
34 0
33 0
31 0
31 0
30 0
30 0
31 0
31 0
32 0
33 0
36 0
37 0
37 0
38 0
40 0
41 0
42 0
62 0
93 0
108 0
115 0
125 0
135 0
146 0
161 0
166 0
162 0
159 0
159 0
159 0
159 0
157 0
157 0
157 0
157 0
157 0
157 0
159 0
167 0
191 0
205 0
207 0
208 0
209 0
209 0
209 0
209 0
210 0
211 0
213 0
214 0
217 1
217 1
217 1
217 1
217 1
217 1
217 1
217 1
218 1
224 1
227 1
228 1
228 1
228 1
228 1
228 1
228 1
228 1
228 1
228 1
228 1
228 1
227 1
227 1
225 1
223 1
223 1
233 1
237 1
247 3
231 3
208 3
197 3
162 3
156 3
145 3
159 3
159 3
158 3
154 3
136 3
129 4
125 4
121 4
112 4
107 4
104 4
99 4
98 4
98 4
98 4
100 4
100 4
100 4
99 4
99 4
99 4
99 4
99 4
99 4
97 4
78 4
119 4
191 4
213 4
215 4
217 4
217 4
218 4
219 4
230 4
232 4
232 3
229 3
230 3
230 3
233 3
231 3
235 3
236 4
239 4
238 4
235 4
233 4
232 4
232 4
232 4
232 4
232 4
232 5
232 5
232 5
232 5
231 7
231 7
231 8
231 8
233 8
233 8
226 8
216 7
210 7
201 6
201 6
201 6
201 6
201 6
198 6
198 6
182 6
182 6
182 6
182 6
182 6
182 5
181 5
181 5
181 4
181 4
181 3
181 3
181 3
181 3
181 3
180 3
180 3
180 3
180 3
180 3
179 5
179 5
179 7
176 7
163 7
153 7
98 7
37 7
12 7
12 7
11 7
11 7
11 7
11 7
11 7
8 7
7 7
6 7
5 7
5 8
6 8
6 8
5 8
4 7
4 7
4 7
2 7
3 6
3 6
3 5
3 7
3 7
3 7
4 6
4 6
4 6
4 6
4 6
4 8
4 12
4 12
5 12
5 12
5 12
6 14
6 18
6 19
6 19
6 23
6 24
6 25
6 25
6 25
6 25
6 26
6 26
6 26
6 26
6 26
6 26
6 26
6 26
6 26
6 26
6 26
10 26
10 26
11 26
15 26
15 26
15 26
15 25
15 25
17 24
25 24
25 24
25 24
25 24
25 24
25 24
26 24
28 26
28 26
29 26
30 26
30 26
30 26
33 26
36 26
38 28
41 56
42 62
42 61
43 63
43 63
43 63
43 59
43 59
43 56
43 55
42 55
42 56
42 57
42 55
42 55
42 57
41 56
41 56
41 56
41 56
41 56
41 59
41 58
41 59
40 59
40 59
40 59
39 58
39 52
39 52
39 52
39 47
39 48
39 50
39 52
39 53
39 53
39 54
39 50
39 50
39 50
39 50
39 50
39 50
39 69
39 72
39 79
39 82
35 82
34 82
34 82
29 82
28 82
28 82
26 82
25 82
23 82
13 73
13 73
13 73
13 73
12 75
12 75
11 74
9 70
3 61
1 61
1 58
0 58
0 58
0 58
0 58
0 56
0 49
0 49
0 48
0 48
0 51
0 53
0 64
0 64
0 64
0 64
0 63
0 63
0 63
0 63
0 63
0 64
0 66
0 66
0 66
0 66
0 66
0 63
0 63
0 63
0 63
0 63
0 63
0 63
0 66
0 74
0 74
0 80
0 77
0 75
0 73
0 73
0 73
1 74
2 77
2 77
2 77
2 77
2 77
2 76
2 53
2 45
2 36
2 31
2 31
2 31
2 31
2 31
2 31
2 31
2 31
2 34
2 34
2 35
2 35
2 35
2 37
2 38
2 39
2 39
2 39
2 39
2 39
2 39
2 39
2 40
2 40
2 44
2 44
2 43
2 43
2 43
2 44
2 44
2 41
2 40
2 40
2 40
2 40
2 40
2 40
2 40
2 40
2 40
2 40
2 40
2 40
2 40
2 40
2 40
2 40
2 40
2 40
2 40
2 40
2 40
2 39
2 37
2 29
2 29
2 23
2 24
2 24
0 26
0 26
0 27
0 34
0 31
0 31
0 31
0 31
0 31
0 31
0 31
0 31
0 32
0 32
0 32
0 33
0 33
0 33
0 34
0 34
0 34
0 27
0 27
0 27
0 27
0 26
0 26
0 24
0 24
0 24
0 24
0 24
0 24
0 24
0 24
0 23
0 25
0 21
0 22
0 22
0 22
0 22
0 21
0 18
0 16
0 16
0 16
0 16
0 16
0 16
0 16
0 16
0 16
0 16
0 16
0 18
0 18
0 18
0 18
0 18
0 18
0 18
0 18
0 18
0 18
0 18
0 18
0 18
0 18
0 18
0 18
0 17
0 16
0 15
0 15
0 14
0 6
0 6
0 6
0 6
0 6
0 7
0 7
0 8
0 8
0 7
0 7
0 7
0 7
0 7
0 7
0 7
0 7
0 7
0 7
0 7
0 7
0 7
0 13
0 15
0 15
0 15
0 15
0 15
0 15
0 15
0 15
0 20
0 20
0 17
0 24
0 24
0 27
0 27
0 28
0 28
0 29
0 29
0 29
0 36
0 36
0 36
0 36
0 41
0 41
0 42
0 42
0 42
0 40
0 41
0 41
0 41
0 41
0 41
0 41
0 41
0 41
0 41
0 41
0 41
0 41
0 42
0 42
0 42
0 44
0 46
0 46
0 46
0 46
0 46
0 46
0 47
0 47
0 47
0 47
0 47
0 45
0 44
0 44
0 44
0 44
0 44
0 44
0 44
0 44
0 44
0 43
0 45
0 45
0 45
0 46
0 35
0 29
0 29
0 29
0 28
0 29
0 29
0 29
0 24
0 29
0 29
0 32
0 30
0 30
0 30
0 25
0 24
0 24
0 24
0 23
0 23
0 22
0 22
0 22
0 22
0 22
0 22
0 22
0 22
0 22
0 22
0 22
0 22
0 22
0 22
0 22
0 22
1 22
1 34
1 34
1 36
1 58
1 60
1 65
1 75
1 76
1 74
1 74
1 74
1 78
1 78
1 83
1 88
0 88
0 87
0 87
0 87
0 87
0 87
0 87
0 87
0 87
0 87
0 91
0 91
0 91
0 91
0 91
0 87
0 86
0 86
0 86
0 92
0 92
0 92
0 104
0 106
0 118
0 133
0 138
0 143
0 139
0 127
0 133
0 122
0 122
0 123
0 125
0 127
0 127
0 128
0 128
0 128
0 128
0 128
0 128
0 128
0 128
0 131
0 132
0 133
0 133
0 133
0 133
0 135
0 138
0 138
0 138
0 141
0 141
0 142
0 143
0 143
0 143
0 119
0 120
0 122
0 123
0 125
0 125
0 125
0 126
0 122
0 123
0 116
0 107
0 104
0 104
0 104
0 104
0 104
0 104
0 104
0 104
0 104
0 105
0 92
0 92
0 82
0 82
0 82
0 82
0 82
0 82
0 82
0 77
0 76
0 76
0 67
0 64
0 60
0 50
0 49
0 47
0 48
0 48
0 36
0 34
0 30
0 29
0 27
0 27
0 27
0 26
0 26
0 26
0 26
0 27
0 28
0 28
0 29
0 28
0 26
0 25
0 25
0 25
0 25
0 25
0 24
0 24
0 24
0 23
0 22
0 20
0 20
0 20
0 20
0 19
0 13
0 12
0 12
0 12
0 14
0 13
0 13
0 13
0 13
0 13
0 10
0 8
0 8
0 8
0 8
0 8
0 8
0 8
0 8
0 8
0 6
0 6
0 6
0 6
0 6
0 6
0 6
0 6
0 6
0 6
0 6
0 6
0 6
0 6
0 6
0 6
0 6
0 6
0 6
0 5
0 5
0 5
0 5
0 5
0 5
0 5
0 5
0 5
0 5
0 5
0 5
0 5
0 4
0 3
0 3
0 3
0 3
0 3
0 2
0 2
0 2
0 2
0 2
0 2
0 2
0 2
0 2
0 2
0 2
0 2
0 2
0 2
0 2
0 2
0 2
0 2
0 2
0 0
0 0
0 0
0 0
0 0
0 0
0 0
0 0
0 0
0 0
0 0
0 0
0 0
0 0
0 0
0 0
0 0
0 0
0 0
0 0
0 0
0 0
0 0
0 0
0 1
0 2
0 2
0 2
0 2
0 2
0 3
0 3
0 3
0 3
0 3
0 3
0 3
0 3
0 3
0 3
0 3
0 3
0 3
0 3
0 3
0 3
0 3
0 3
0 3
0 3
0 3
0 3
0 3
0 3
0 3
0 3
0 3
0 3
0 3
0 3
0 3
0 3
0 3
0 3
0 3
0 3
0 3
0 3
0 3
0 3
0 3
0 3
0 3
0 3
0 3
0 3
0 3
0 3
0 3
0 3
0 3
0 3
0 3
0 3
0 3
0 3
0 3
0 3
0 3
0 3
0 3
0 3
0 4
0 5
0 6
0 7
0 7
0 7
0 6
0 6
0 6
0 6
0 6
0 5
0 5
0 5
0 5
0 5
0 5
0 7
0 9
0 11
0 12
0 12
0 12
0 12
0 12
0 12
0 12
0 13
0 13
0 13
0 13
0 13
0 13
0 13
0 13
0 13
0 13
0 13
0 14
0 14
0 14
0 14
0 15
1 25
1 25
1 26
1 28
1 29
1 29
1 30
1 30
1 30
1 30
1 30
1 31
1 32
1 32
1 32
1 32
1 32
1 32
1 32
1 32
1 32
1 32
1 32
1 32
1 32
1 33
1 33
1 33
1 33
1 33
1 31
1 31
1 30
1 30
1 30
1 29
1 29
1 29
1 29
1 29
1 29
1 29
1 29
1 29
1 29
1 29
1 28
1 25
1 25
1 23
1 22
1 23
1 23
1 23
1 23
1 23
1 23
1 22
1 22
1 22
1 22
1 22
1 22
1 22
1 22
1 22
1 21
1 20
1 20
1 21
1 21
1 21
1 18
0 9
0 9
0 8
0 9
1 10
1 10
1 10
1 10
1 9
1 9
1 8
1 8
1 7
1 7
1 7
1 9
1 9
1 10
1 10
1 10
1 10
1 10
1 10
1 10
1 10
1 9
2 12
2 14
2 14
2 15
2 16
2 17
2 17
2 18
2 18
2 18
2 18
3 18
3 19
3 19
3 19
3 19
3 19
3 19
3 19
3 19
3 19
3 19
3 19
3 19
3 18
3 18
3 18
3 18
3 18
3 18
3 18
3 18
4 18
4 20
4 20
4 20
4 20
4 20
4 20
4 20
4 20
4 20
4 20
4 19
4 19
5 19
5 19
8 24
8 25
9 26
9 25
8 23
9 23
9 23
10 23
10 23
10 23
12 23
12 23
12 23
12 23
12 23
12 21
12 21
12 18
12 18
12 18
12 16
12 16
12 14
12 14
12 14
12 14
11 13
11 13
11 13
11 12
11 11
11 10
11 10
11 10
11 10
11 11
11 11
10 13
10 13
10 14
10 14
10 17
10 17
10 17
10 17
10 17
10 17
10 17
10 16
10 17
10 17
10 17
10 17
10 17
10 17
10 18
10 18
10 18
9 18
9 18
9 18
9 18
9 18
9 18
9 18
9 18
9 18
10 18
10 18
10 18
8 18
8 18
4 19
3 13
3 13
3 12
3 12
3 12
3 12
3 12
2 12
2 12
0 12
0 12
0 12
0 12
0 12
0 12
0 12
0 12
0 12
0 12
0 12
0 12
0 12
0 12
0 12
0 12
0 12
0 12
0 12
0 12
0 12
0 14
0 15
0 15
0 15
0 17
0 16
0 17
0 13
0 11
0 11
0 11
0 11
0 11
0 11
0 13
0 13
0 13
0 13
0 15
0 13
0 13
0 13
0 13
0 13
0 13
0 12
0 10
0 10
0 10
0 10
0 10
0 10
0 10
0 10
0 10
0 10
0 10
0 10
0 10
0 10
0 10
0 9
0 9
0 9
0 9
0 9
0 9
0 9
0 9
0 9
0 9
0 8
0 7
0 7
0 7
0 7
0 6
0 6
0 6
0 5
0 4
0 2
0 2
0 2
0 2
0 2
0 2
0 2
0 2
0 2
0 2
0 2
0 4
0 4
0 3
0 3
0 3
0 3
0 3
0 3
0 3
0 6
0 6
0 6
0 6
0 6
0 6
0 6
0 6
0 6
0 6
0 6
0 6
0 6
0 6
0 6
0 6
0 6
0 6
0 6
0 6
0 6
0 6
0 6
0 6
0 6
0 6
0 8
0 14
0 14
0 18
0 20
0 20
0 20
0 20
0 20
0 20
0 20
0 21
0 21
0 21
0 21
0 22
0 22
0 22
0 22
0 22
0 22
0 22
0 21
0 21
0 21
0 22
0 24
0 24
0 26
0 26
0 27
0 27
0 29
0 29
0 29
0 29
0 29
0 29
0 27
0 27
0 27
0 27
0 27
0 27
0 27
0 27
0 27
0 22
0 21
0 21
0 20
0 20
0 20
0 20
0 20
0 20
0 20
0 20
0 20
0 20
0 20
0 20
0 20
0 20
0 20
0 20
0 20
0 20
0 19
0 20
0 20
0 20
0 20
0 19
0 16
0 16
0 15
0 15
0 15
0 16
0 16
0 16
0 16
0 16
0 14
0 16
0 16
0 16
0 15
0 17
0 17
0 18
0 18
0 18
0 18
0 18
0 18
0 18
0 17
1 16
1 17
1 17
1 18
1 18
1 20
1 18
1 18
1 18
1 18
1 18
1 18
1 18
1 18
1 18
1 18
1 18
1 18
1 18
2 25
2 25
2 25
2 25
2 25
2 25
2 25
2 25
2 25
2 25
2 25
2 25
2 25
2 25
2 25
2 26
2 26
2 26
2 26
2 26
2 26
2 26
2 26
2 26
2 25
2 26
2 27
2 79
2 81
2 113
2 124
2 127
2 132
2 139
2 145
2 145
2 146
2 149
2 149
2 149
2 147
2 147
2 147
2 143
2 141
2 141
2 141
2 141
2 141
2 141
2 141
2 141
2 140
2 140
1 140
1 140
1 140
1 138
1 137
1 137
1 137
1 137
1 137
1 137
1 137
1 137
1 137
1 137
1 137
1 137
1 137
1 137
1 137
0 70
0 70
0 70
0 70
0 70
0 10
1 19
1 19
1 18
1 18
1 18
1 18
1 18
1 18
1 18
1 17
1 17
1 17
1 17
1 17
1 17
1 17
1 17
1 17
1 18
1 18
1 18
1 16
1 16
1 13
1 13
1 13
1 13
1 13
1 13
1 13
1 12
1 11
1 11
1 11
1 11
1 11
2 11
2 11
2 11
2 11
2 11
2 11
2 11
2 11
2 11
2 11
2 11
2 12
2 12
2 12
2 12
2 12
2 12
2 12
2 12
2 12
2 12
2 12
2 13
2 13
2 13
2 13
2 15
2 16
2 16
2 16
2 16
2 16
2 16
2 16
2 16
2 16
2 16
1 5
1 9
1 9
1 11
1 11
1 11
1 11
1 11
1 11
1 11
1 11
1 11
1 11
1 11
1 11
1 11
1 10
1 10
1 10
1 10
1 10
1 11
1 11
1 11
1 11
1 14
1 14
1 14
1 14
1 14
1 14
1 15
1 15
1 15
1 15
1 15
0 16
0 17
0 17
0 17
0 17
0 17
0 17
0 17
0 17
0 17
0 17
0 16
0 16
0 16
0 16
0 24
0 25
0 37
0 39
0 42
0 45
0 45
0 62
0 79
0 91
0 103
0 102
0 105
0 108
0 108
0 109
0 109
0 109
0 109
0 109
0 109
0 109
0 113
0 111
0 111
0 109
0 109
0 109
0 109
0 109
0 109
0 109
0 109
0 109
0 111
0 111
0 115
0 117
0 120
0 120
0 120
0 120
0 122
0 122
0 122
0 122
0 122
0 115
0 111
0 111
0 111
0 111
0 107
0 102
0 102
0 102
0 102
0 102
0 99
0 97
0 95
0 95
0 94
0 94
0 94
0 94
0 94
0 94
0 94
0 95
0 96
0 96
0 97
0 85
0 82
0 49
0 45
0 44
0 43
0 43
0 31
0 26
0 18
0 18
0 18
0 18
0 18
0 18
0 18
0 18
0 18
0 18
0 18
0 18
0 18
0 13
0 12
0 12
0 12
0 12
0 12
0 12
0 12
0 12
0 12
0 12
0 12
0 12
0 12
0 10
0 10
0 9
0 9
0 9
0 9
0 9
0 9
0 9
0 9
0 9
0 9
0 9
0 9
0 9
0 9
0 9
0 9
0 9
0 9
0 9
0 9
0 9
0 9
0 9
0 9
0 9
0 9
0 9
0 9
0 9
0 9
0 9
0 8
0 7
0 5
0 3
0 2
0 1
0 1
0 1
0 1
0 1
0 1
0 1
0 1
0 1
0 1
0 1
0 1
0 1
0 1
0 1
0 1
0 1
0 1
0 1
0 1
0 1
0 2
0 2
0 2
0 2
0 2
0 2
0 2
0 2
0 2
0 2
0 2
0 2
0 2
0 2
0 2
0 2
0 2
0 2
0 2
0 1
0 1
0 1
0 1
0 1
0 1
0 1
0 1
0 1
0 1
0 1
0 1
0 2
0 2
0 2
0 2
0 2
0 2
0 2
0 2
0 2
0 2
0 2
0 2
0 2
0 2
0 2
0 2
0 2
0 2
0 2
0 2
0 2
0 2
0 2
0 2
0 2
0 2
0 2
0 2
0 2
0 2
0 2
0 2
0 2
0 2
0 2
0 2
0 2
0 2
0 2
0 2
0 2
0 2
0 1
0 1
0 1
0 1
0 1
0 1
0 1
0 1
0 1
0 1
0 1
0 1
0 1
0 1
0 1
0 2
0 2
0 2
0 2
0 2
0 2
0 2
0 2
0 2
0 3
0 3
0 9
0 10
0 11
0 11
0 11
0 10
0 10
0 10
0 10
0 11
0 12
0 12
0 12
0 12
0 12
0 12
0 12
0 12
0 12
0 12
0 12
0 12
0 13
0 13
0 13
0 13
0 13
0 13
0 13
0 16
0 16
0 16
0 16
0 16
0 16
0 16
0 16
0 16
0 16
0 16
0 16
0 16
0 16
0 16
0 16
0 16
0 16
0 16
0 16
0 16
0 16
0 16
0 16
0 16
0 16
0 16
0 16
0 17
0 17
0 17
0 18
0 17
0 17
0 17
0 17
0 17
0 17
0 17
0 18
0 18
0 18
0 17
0 19
0 15
0 16
0 19
0 17
0 17
0 17
0 17
0 17
0 17
0 17
0 17
0 17
0 17
0 17
0 17
0 17
0 17
0 17
0 17
0 17
0 17
0 19
0 18
0 18
0 20
0 20
0 20
0 20
0 20
0 17
0 17
0 17
0 17
0 17
0 17
0 17
0 17
0 17
0 17
0 17
0 17
0 17
0 17
0 17
0 17
0 17
0 17
0 17
0 17
0 17
0 17
0 17
0 17
0 17
0 22
0 22
0 22
0 21
0 40
0 41
0 40
0 40
0 40
0 40
0 40
0 40
0 41
0 45
0 44
0 44
0 44
0 49
0 42
0 41
0 40
0 39
0 39
0 39
0 39
0 39
0 39
0 39
0 39
0 39
0 39
0 39
0 39
0 39
0 39
0 39
0 39
0 39
0 40
0 41
0 41
0 41
0 41
0 41
0 41
0 41
0 41
0 41
0 41
0 41
0 41
0 41
0 41
0 41
0 41
0 41
0 41
0 41
0 41
0 41
0 41
0 41
0 41
0 41
0 41
0 41
0 41
0 41
0 41
0 41
0 41
0 41
0 41
0 36
0 36
0 36
0 36
0 12
0 11
0 10
0 4
0 4
0 4
0 4
0 4
0 3
0 3
0 3
0 3
0 3
0 0
0 0
0 0
0 0
0 0
0 0
0 0
0 0
0 0
0 1
0 2
0 2
0 2
0 2
0 2
0 2
0 2
0 2
0 2
0 2
0 2
0 2
0 2
0 2
0 2
0 2
0 2
0 2
0 2
0 2
0 2
0 2
0 2
0 2
0 2
0 2
0 2
0 2
0 2
0 2
0 2
0 2
0 2
0 2
0 2
0 2
0 2
0 2
0 2
0 2
0 2
0 2
0 2
0 2
0 2
0 2
0 2
0 2
0 2
0 2
0 2
0 2
0 2
0 2
0 2
0 2
0 2
0 3
0 3
0 3
0 3
0 3
0 3
0 3
0 5
0 7
0 14
0 22
0 27
0 29
0 30
0 33
0 32
0 31
0 31
0 31
0 31
0 31
0 31
0 31
0 31
0 31
0 31
0 31
0 31
0 32
0 34
0 34
0 34
0 34
0 34
0 34
0 35
0 39
0 43
0 52
0 53
0 54
0 54
0 56
0 56
0 58
0 58
0 58
0 58
0 58
0 58
0 58
0 58
0 58
0 58
0 58
0 58
0 58
0 58
0 58
0 58
0 58
0 58
0 58
0 58
0 58
0 58
0 58
0 58
0 58
0 60
0 60
0 60
0 59
0 59
0 59
0 58
0 58
0 58
0 58
0 58
0 56
0 54
0 46
0 34
0 30
0 29
0 29
0 29
0 30
0 30
0 30
0 30
0 30
0 30
0 30
0 30
0 31
0 31
0 31
0 31
0 31
0 30
0 28
0 28
0 28
0 28
0 28
0 28
0 26
0 23
0 18
0 9
0 8
0 5
0 5
0 3
0 3
0 2
0 2
0 2
0 2
0 2
0 2
0 2
0 2
0 2
0 2
0 2
0 2
0 2
0 2
0 2
0 2
0 2
0 2
0 2
0 2
0 2
0 2
0 2
0 2
0 2
0 2
0 2
0 2
0 2
0 2
0 2
0 2
0 2
0 2
0 2
0 2
0 2
0 2
0 2
0 2
0 2
0 2
0 2
0 1
0 1
0 1
0 1
0 1
0 1
0 1
0 1
0 1
0 1
0 1
0 1
0 1
0 1
0 1
0 1
0 1
0 1
0 1
0 2
0 2
0 2
0 2
0 2
0 2
0 2
0 2
0 2
0 1
0 2
0 2
0 2
0 2
0 2
0 2
0 2
0 2
0 2
0 2
0 2
0 2
0 2
0 2
0 2
0 2
0 2
0 2
0 2
0 2
0 2
0 2
0 2
0 2
0 2
0 2
0 2
0 2
0 2
0 2
0 2
0 2
0 2
0 2
0 2
0 2
0 2
0 2
0 2
0 2
0 2
0 2
0 2
0 2
0 2
0 2
0 2
0 2
0 2
0 2
0 2
0 2
0 2
0 2
0 2
0 2
0 2
0 2
0 2
0 2
0 2
0 2
0 2
0 1
0 1
0 1
0 1
0 1
0 1
0 1
0 1
0 1
0 1
0 0
0 0
0 0
0 0
0 0
0 0
0 0
0 0
0 0
0 0
0 0
0 0
0 0
0 0
0 0
0 0
0 1
0 1
0 2
0 2
0 2
0 2
0 2
0 2
0 2
0 2
0 2
0 2
0 2
0 2
0 2
0 2
0 2
0 2
0 2
0 2
0 2
0 2
0 2
0 2
0 2
0 2
0 2
0 2
0 2
0 2
0 2
0 2
0 2
0 2
0 3
0 4
0 4
0 4
0 5
0 7
0 8
0 21
0 24
0 31
0 30
0 32
0 31
0 31
0 31
0 37
0 37
0 37
0 37
0 37
0 37
0 37
0 37
0 37
0 37
0 37
0 37
0 37
0 37
0 37
0 37
0 39
0 39
0 39
0 39
0 39
0 39
0 39
0 39
0 39
0 39
0 39
0 39
0 40
0 40
0 40
0 40
0 40
0 40
0 40
0 42
0 41
0 40
0 40
0 41
0 41
0 41
0 41
0 41
0 41
0 44
0 44
0 44
0 45
0 45
0 45
0 45
0 45
0 45
0 45
0 46
0 46
0 46
0 46
0 45
0 45
0 45
0 44
0 43
0 40
0 23
0 21
0 18
0 18
0 18
0 18
0 18
0 14
0 12
0 12
0 12
0 12
0 13
0 13
0 14
0 14
0 14
0 14
0 14
0 14
0 15
0 15
0 15
0 15
0 13
0 13
0 13
0 13
0 13
0 13
0 13
0 13
0 13
0 13
0 13
0 13
0 12
0 12
0 12
0 12
0 12
0 12
0 29
0 27
0 27
0 26
0 26
0 26
0 26
0 26
0 26
0 26
0 26
0 22
0 22
0 22
0 22
0 22
0 22
0 22
0 22
0 22
0 22
0 21
0 21
0 21
0 23
0 23
0 23
0 23
0 28
0 28
0 28
0 28
0 28
0 29
0 30
0 31
0 31
0 32
0 32
0 35
0 35
0 35
0 36
0 35
0 35
0 34
0 34
0 34
0 34
0 34
0 34
0 33
0 33
0 33
0 33
0 33
0 33
0 33
0 33
0 37
0 38
0 39
0 39
0 41
0 41
0 41
0 41
0 41
0 41
0 41
0 41
0 41
0 42
0 22
0 22
0 22
0 22
0 19
0 19
0 19
0 19
0 19
0 19
0 19
0 19
0 19
0 19
0 19
0 19
0 19
0 19
0 19
0 19
0 19
0 17
0 17
0 17
0 17
0 15
0 15
0 15
0 13
0 13
0 13
0 13
0 13
0 13
0 14
0 15
0 16
0 18
0 17
0 15
0 15
0 15
0 15
0 15
0 15
0 15
0 15
0 15
0 15
0 15
0 15
0 15
0 15
0 15
0 15
0 15
0 15
0 16
0 16
0 12
0 11
0 11
0 11
0 9
0 9
0 9
0 9
0 9
0 9
0 9
0 10
0 10
0 9
0 9
0 9
0 10
0 10
0 11
0 14
0 14
0 14
0 15
0 15
0 15
0 15
0 15
0 15
0 15
0 15
0 16
0 16
0 16
0 16
0 16
0 16
0 16
0 16
0 16
0 17
0 17
0 19
0 20
0 23
0 28
0 30
0 30
0 30
0 30
0 28
0 27
0 26
0 26
0 26
0 26
0 26
0 26
0 26
0 26
0 26
0 26
0 26
0 26
0 26
0 26
0 26
0 26
0 26
0 26
0 26
0 26
0 25
0 25
2 25
2 24
2 24
2 25
2 25
2 24
2 24
2 24
2 24
2 24
2 26
2 26
2 27
2 52
2 53
2 56
0 52
0 50
0 46
0 45
0 46
0 46
0 48
0 50
0 51
0 51
0 51
0 51
0 51
0 51
0 50
0 50
0 50
0 50
0 50
0 50
0 50
0 50
0 50
0 50
0 50
0 49
0 48
0 46
0 46
0 45
0 45
0 43
0 43
1 43
1 43
1 43
1 43
1 44
1 45
1 47
1 47
1 47
1 47
1 48
1 48
1 48
1 48
1 48
1 48
0 49
0 49
0 49
0 49
0 49
0 49
0 50
0 50
0 50
0 50
0 48
0 47
0 47
0 50
0 50
0 50
0 56
0 56
0 56
0 58
0 63
0 37
0 35
0 36
0 40
0 39
0 39
0 46
0 44
0 46
0 44
0 43
0 42
0 42
0 42
0 42
0 42
0 47
0 47
0 47
0 47
0 47
0 77
0 77
0 77
0 77
0 78
0 78
0 78
0 90
0 90
0 90
0 91
4 498
4 517
7 919
7 994
7 1037
8 1054
8 1056
8 1067
8 1068
8 1084
8 1089
8 1094
8 1094
8 1094
9 1116
8 1117
8 1119
8 1119
8 1127
8 1127
8 1126
8 1128
8 1130
8 1132
8 1152
8 1167
8 1170
8 1179
8 1180
8 1184
8 1187
8 1191
8 1195
8 1193
8 1192
8 1193
8 1171
8 1170
8 1145
8 1128
8 1117
8 1112
8 1111
8 1102
8 1101
8 1101
8 1101
8 1097
8 1098
8 1098
8 1098
8 1095
8 1093
8 1087
8 1083
8 1081
8 1081
8 1066
8 1054
8 1051
8 1041
8 1029
5 552
5 548
5 532
5 526
2 77
2 77
2 74
2 74
2 74
2 74
2 74
2 73
2 71
1 41
1 41
1 41
1 40
1 40
1 40
1 41
1 39
1 37
1 37
1 37
1 37
0 14
0 14
0 7
0 7
0 7
0 7
0 7
0 5
0 5
0 5
0 5
0 5
0 5
0 5
0 5
0 3
0 3
0 2
0 2
0 2
0 2
0 2
0 2
0 2
0 3
0 3
0 3
0 3
0 3
0 3
0 3
0 3
0 3
0 2
0 2
0 2
0 2
0 2
0 2
0 2
0 2
0 2
0 2
0 2
0 2
0 2
0 2
0 2
0 2
0 2
0 2
0 2
0 2
0 2
0 2
0 2
0 2
0 2
0 2
0 3
0 3
0 3
0 4
0 4
0 4
0 4
0 4
0 3
0 3
0 3
0 3
0 3
0 3
0 3
0 3
0 3
0 3
0 3
0 3
0 3
0 3
0 3
0 3
0 3
0 3
0 3
0 3
0 3
0 3
0 3
0 3
0 3
0 3
0 3
0 3
0 3
0 2
0 2
0 2
0 3
0 3
0 3
0 3
0 3
0 3
0 3
0 3
0 3
0 3
0 3
0 3
0 3
0 3
0 3
0 3
0 3
0 3
0 3
0 3
0 3
0 3
0 3
0 3
0 3
0 3
0 3
0 6
0 6
0 6
0 6
0 5
1 5
2 5
2 5
2 5
2 4
2 4
2 4
2 4
2 4
2 4
2 4
2 4
2 4
2 4
2 4
2 4
2 4
2 4
2 4
2 4
2 4
2 5
2 5
2 5
2 5
2 5
2 5
2 5
2 5
2 5
2 5
2 5
2 5
2 5
2 5
2 5
2 5
2 5
2 5
2 5
2 4
2 4
2 4
2 4
2 4
2 4
2 4
2 4
2 4
2 4
2 4
2 4
2 4
2 4
2 4
2 4
2 4
2 4
2 4
2 6
2 6
2 6
2 6
2 6
2 6
2 6
1 6
1 7
1 4
0 4
0 4
0 5
0 6
0 6
0 6
0 6
0 6
0 6
0 6
0 6
0 6
0 6
0 6
0 12
0 12
0 12
0 12
0 12
0 19
0 19
0 19
0 21
0 21
0 22
0 21
0 21
0 21
0 21
0 21
0 21
0 21
0 21
0 21
0 21
0 21
0 21
0 21
0 21
0 21
0 21
0 21
0 21
0 21
0 21
0 21
0 21
0 21
0 21
0 21
0 21
0 21
0 21
0 21
0 21
0 21
0 22
0 22
0 24
0 24
0 25
0 25
0 26
0 24
0 24
0 24
0 24
0 24
0 24
0 24
0 24
0 23
0 21
0 19
0 15
0 12
0 9
0 7
0 7
0 7
0 7
0 7
0 7
0 7
0 7
0 7
0 7
0 7
0 7
0 7
0 7
0 7
0 5
0 5
0 5
0 5
0 5
0 5
0 5
0 5
0 5
0 5
0 5
0 5
0 5
0 5
0 5
0 5
0 5
0 5
0 6
0 7
0 7
0 8
0 9
0 13
0 13
0 13
0 15
0 15
0 16
0 16
0 15
0 19
0 19
0 19
0 19
0 19
0 19
0 18
0 18
0 18
0 18
0 18
0 18
0 17
0 17
0 17
0 17
0 17
0 17
0 17
0 17
0 17
0 17
0 18
0 18
0 18
0 18
0 18
0 18
0 18
0 18
0 18
0 18
0 18
0 18
0 18
0 18
0 18
0 17
0 17
0 16
0 16
0 15
0 15
0 15
0 14
0 13
0 13
0 13
0 13
0 13
0 13
0 13
0 13
0 13
0 13
0 13
0 13
0 13
0 13
0 13
0 12
0 12
0 11
0 11
0 11
0 9
0 9
0 9
0 7
0 7
0 6
0 5
0 5
0 1
0 1
0 1
0 1
0 1
0 1
0 0
0 0
0 0
0 0
0 0
0 0
0 0
0 0
0 0
0 0
0 0
0 0
0 0
0 0
0 0
0 0
0 0
0 0
0 0
0 0
0 0
0 0
0 0
0 0
0 0
0 0
0 0
0 0
0 0
0 0
0 0
0 0
0 0
0 0
0 0
0 0
0 0
1 0
1 0
1 0
1 0
1 0
2 0
2 0
2 0
2 0
2 0
2 0
2 0
2 0
2 0
2 0
2 0
2 0
2 0
2 0
2 0
2 0
2 0
2 0
2 0
2 0
2 0
2 0
2 0
2 0
2 0
2 0
2 0
3 0
3 0
3 0
3 0
3 0
3 0
3 0
3 0
3 0
3 0
3 0
3 0
3 1
3 1
3 1
3 1
3 1
3 1
3 1
3 1
3 1
3 1
3 1
3 1
3 1
3 1
3 1
3 1
3 1
3 1
3 1
3 1
3 1
3 2
3 2
3 2
4 2
4 2
4 2
4 2
4 2
3 2
3 2
3 2
2 2
2 2
2 2
2 2
2 2
2 2
2 2
2 2
2 2
2 2
2 2
2 2
2 2
2 2
2 2
2 2
2 3
2 3
2 3
2 3
2 3
2 3
2 3
2 3
2 3
2 3
2 3
2 3
2 3
1 3
1 3
1 3
1 3
1 4
1 4
1 4
1 4
1 5
1 5
1 5
1 5
1 4
1 4
1 4
1 4
1 4
1 4
1 4
1 4
1 4
1 4
1 4
1 4
1 4
1 4
1 4
1 4
1 4
1 6
1 6
1 6
1 6
1 5
1 5
0 5
0 5
0 5
0 5
0 5
0 5
0 5
0 5
0 5
0 5
0 5
0 5
0 5
0 4
0 4
0 4
0 4
0 3
0 3
0 3
0 3
0 3
0 3
0 3
0 3
0 2
1 2
1 2
1 2
1 2
1 2
1 2
1 1
1 0
1 0
1 0
1 0
1 0
1 0
2 0
2 0
2 0
2 0
2 0
2 0
2 0
2 0
2 0
2 0
2 0
2 0
2 0
2 0
2 0
2 0
2 0
2 0
2 0
2 0
2 0
2 0
2 0
2 0
2 0
2 0
2 0
2 0
2 0
2 0
2 0
2 0
2 0
2 0
2 0
2 0
2 0
2 0
2 0
2 0
2 0
2 0
2 0
2 0
2 0
2 0
2 0
2 0
3 2
3 3
3 3
3 4
3 4
3 4
3 4
3 4
4 4
4 4
4 5
4 5
3 6
3 6
3 6
3 6
3 7
3 7
3 7
3 7
3 7
3 7
3 6
3 6
3 6
2 6
2 6
2 6
2 6
2 6
2 6
2 6
2 6
2 6
2 6
2 6
2 6
2 6
2 6
2 6
2 6
2 6
2 6
2 6
2 6
3 6
3 6
3 6
3 7
3 7
3 7
3 7
3 7
3 7
3 7
3 7
3 7
3 7
3 7
3 7
3 7
3 7
3 7
3 7
3 7
3 7
3 7
3 7
3 7
3 7
3 7
3 7
3 7
2 5
2 4
2 4
2 5
2 5
2 6
3 9
3 9
4 9
4 9
4 8
4 8
4 7
4 7
4 7
4 7
4 6
4 6
4 6
4 6
4 6
4 6
4 6
4 6
4 6
4 6
4 6
4 6
4 6
4 6
4 6
4 6
4 6
4 6
4 6
4 6
4 6
4 9
4 9
4 9
4 9
4 9
4 9
4 9
4 9
3 9
3 9
3 8
3 8
3 8
3 8
3 8
3 8
3 8
3 8
3 8
3 8
3 8
3 8
3 8
3 8
3 8
3 8
3 8
3 8
3 8
3 8
3 8
3 8
3 8
3 8
3 8
3 8
3 8
3 8
3 8
3 7
3 6
3 5
1 3
1 3
0 3
0 3
0 3
0 3
0 3
0 3
0 3
0 3
0 3
0 3
0 3
0 3
0 3
0 3
0 3
0 3
0 3
0 3
0 3
0 3
0 3
0 3
0 5
0 5
0 12
0 12
0 12
0 12
0 12
0 9
0 9
0 9
0 9
0 9
0 9
0 9
0 9
0 9
0 9
0 9
0 9
0 9
0 9
0 9
0 9
0 9
0 9
0 9
0 9
0 9
0 9
0 9
0 9
0 9
0 9
0 9
0 9
0 9
0 9
0 9
0 9
0 9
0 9
0 9
0 10
0 10
0 10
0 10
0 8
0 8
0 8
0 9
0 9
0 9
0 9
0 9
0 9
0 9
0 9
0 9
0 11
0 11
0 11
0 11
0 11
0 12
0 11
0 12
0 10
0 10
0 11
0 11
0 11
0 11
0 11
0 11
0 11
0 8
0 8
0 8
0 9
0 9
0 9
0 9
0 9
0 9
0 9
0 9
0 9
0 9
0 9
0 9
0 9
0 9
0 9
0 9
0 9
0 9
0 9
0 9
0 9
0 9
0 9
0 9
0 9
0 9
0 9
0 9
0 9
0 9
0 9
0 9
0 9
0 9
0 9
0 9
0 9
0 6
0 6
0 6
0 6
0 6
0 6
0 6
0 5
0 3
0 3
0 3
0 3
0 3
0 3
0 3
0 3
0 3
0 3
0 2
0 2
0 2
0 2
0 1
0 1
0 1
0 1
0 0
0 0
0 0
0 0
0 0
0 0
0 0
0 0
0 0
0 0
0 0
0 0
0 0
0 0
0 0
0 0
0 0
0 0
0 0
0 0
0 0
0 0
0 0
0 0
0 0
0 0
0 0
0 0
0 0
0 0
0 0
0 0
0 0
0 1
0 1
0 1
0 1
0 1
0 1
0 1
0 1
0 1
0 1
0 1
0 1
0 4
0 4
0 4
0 4
0 4
0 4
0 4
0 4
0 4
0 4
0 4
0 4
0 4
0 4
0 4
0 4
0 4
0 4
0 4
0 4
0 4
0 4
0 4
0 4
0 4
0 4
0 4
0 4
0 4
0 4
0 4
0 4
0 4
0 4
0 4
0 4
0 4
0 4
0 4
0 4
0 4
0 4
0 4
0 4
0 4
0 5
0 5
0 5
0 5
0 5
0 5
0 5
0 5
1 6
3 6
3 6
3 6
3 6
3 6
3 6
3 6
3 5
3 5
3 7
3 8
3 9
3 10
3 10
3 10
3 10
3 10
3 11
3 12
3 9
3 9
3 9
3 9
3 9
3 9
3 9
3 9
3 9
3 9
3 9
3 9
3 9
3 8
3 8
3 8
3 8
3 8
3 8
3 8
3 8
3 8
3 8
3 8
3 8
3 7
3 7
3 7
3 7
3 7
3 7
3 7
3 7
3 7
3 7
3 6
3 5
3 5
3 5
3 5
4 5
4 5
5 5
5 5
5 5
5 5
5 5
5 5
5 5
5 5
5 5
4 5
4 5
2 4
2 4
2 4
2 4
0 4
0 4
0 4
0 4
0 4
0 4
0 3
0 3
0 1
0 1
0 1
0 1
0 1
0 1
0 1
0 0
0 0
0 0
0 0
0 0
0 0
0 0
0 0
0 0
0 0
0 1
0 1
0 1
0 1
0 1
0 1
0 1
0 2
0 3
0 3
0 3
0 3
0 3
0 3
0 3
0 3
0 3
0 3
0 3
0 3
0 3
0 3
0 3
0 3
0 3
0 3
0 6
0 7
0 8
0 8
0 13
0 13
0 15
0 18
0 18
0 19
0 22
0 22
0 23
0 24
0 24
0 24
0 26
0 26
0 27
0 27
0 27
0 27
0 32
0 33
0 33
0 39
0 39
0 40
1 58
1 61
2 75
2 88
2 89
2 94
2 97
2 97
2 97
2 97
2 97
2 99
2 99
2 100
2 100
2 102
2 104
2 106
2 106
3 106
4 105
4 105
4 105
4 105
4 105
4 105
4 105
4 98
4 98
4 98
4 98
4 93
4 93
4 93
4 93
4 93
4 93
4 93
4 93
4 93
4 93
4 91
4 91
4 91
4 91
4 91
4 88
4 83
4 82
4 80
4 78
4 78
4 77
5 75
5 70
5 63
6 61
6 61
6 60
6 60
6 60
6 60
6 60
6 60
6 60
6 60
6 60
6 54
6 54
6 54
6 52
4 50
4 49
3 31
3 27
2 17
2 11
2 12
2 10
2 10
2 10
2 10
2 10
2 10
2 8
2 8
2 7
2 7
2 5
2 3
2 2
2 2
2 2
2 2
2 2
2 2
2 2
2 2
2 2
2 2
2 2
2 2
2 2
2 2
2 2
2 2
2 2
2 2
2 2
2 2
2 2
2 2
2 2
2 2
2 2
2 2
2 2
2 2
2 3
2 3
2 3
2 3
2 3
2 3
2 3
2 3
1 3
1 3
1 3
0 3
0 4
0 4
0 4
0 4
0 4
0 4
0 4
0 4
0 4
0 4
0 4
0 4
0 4
0 4
0 4
0 4
0 4
0 4
0 4
0 3
0 2
0 2
0 2
0 2
0 2
0 2
0 2
0 2
0 2
0 2
0 2
0 2
0 2
0 2
0 2
1 2
1 2
1 2
1 2
1 2
1 2
1 2
1 2
1 2
1 2
1 2
1 3
1 3
1 3
1 3
1 3
1 3
1 3
1 3
1 3
1 3
1 3
1 3
1 3
1 3
1 3
1 2
1 2
1 2
1 2
1 2
1 2
1 2
2 3
3 4
3 4
3 4
3 4
3 3
3 3
3 3
3 3
3 3
3 3
3 3
3 3
3 3
3 3
3 4
3 5
3 5
3 5
3 5
3 5
3 6
3 6
3 6
3 6
3 6
3 6
3 6
3 6
3 6
5 6
5 6
5 6
5 6
5 8
5 9
5 9
7 12
7 12
7 12
6 13
6 13
6 13
6 13
6 13
6 13
6 13
6 13
6 13
6 13
6 13
6 12
6 12
6 12
6 12
6 12
6 12
6 12
6 12
6 12
6 12
6 12
6 12
6 12
6 12
6 12
6 12
6 12
6 12
6 12
6 12
6 12
6 12
4 11
4 10
4 10
4 10
4 10
4 10
4 10
4 10
4 10
4 10
4 10
4 11
4 11
4 11
4 11
4 9
4 9
4 9
4 9
4 12
4 12
4 11
4 11
2 11
2 11
2 11
2 11
2 11
2 11
2 11
1 10
1 10
1 8
0 7
0 5
0 5
0 5
0 4
0 4
0 4
0 4
0 4
0 4
0 4
0 4
0 4
0 4
0 4
0 4
0 4
0 4
0 4
0 4
0 4
0 4
0 4
0 4
0 4
0 4
0 4
0 4
0 4
0 4
0 4
0 4
0 4
0 4
0 4
0 4
0 4
0 4
0 4
0 4
0 4
0 4
0 4
0 4
0 4
0 4
0 4
0 6
0 10
0 18
0 17
0 17
0 17
0 17
0 19
0 19
0 19
0 19
0 19
0 16
0 16
0 16
0 16
0 16
0 16
0 16
0 16
0 16
0 16
0 16
0 16
0 16
0 16
0 16
0 16
0 16
0 16
0 16
0 16
0 16
0 16
0 16
0 16
0 16
0 16
0 16
0 16
0 19
0 19
0 19
0 20
0 19
0 20
0 20
0 20
0 20
0 20
0 21
0 21
0 21
0 21
0 22
0 22
0 22
0 22
0 22
0 22
0 22
0 22
0 22
0 23
0 25
0 26
0 29
0 29
0 29
0 29
0 30
0 30
0 30
0 30
0 25
0 16
0 16
0 16
0 16
0 16
0 16
0 16
0 16
0 16
0 16
0 16
0 16
0 16
0 16
0 16
0 16
0 16
0 16
0 16
0 16
0 16
0 16
0 16
0 16
0 16
0 16
0 16
0 16
0 16
0 16
0 16
0 16
0 16
0 16
0 16
0 15
0 15
0 15
0 13
0 15
0 14
0 14
0 14
0 13
0 13
0 12
0 12
0 10
0 10
0 10
0 10
0 10
0 13
0 13
0 13
0 13
0 20
0 20
0 22
0 22
0 23
0 22
0 21
0 19
0 17
0 17
0 17
0 17
0 16
0 16
0 16
0 17
0 17
0 17
0 17
0 17
0 17
0 17
0 17
0 17
0 17
0 17
0 17
0 18
0 18
0 18
0 18
0 18
0 18
0 18
0 18
0 18
0 18
0 18
0 18
0 18
0 18
0 18
0 18
0 18
0 19
0 19
0 19
0 19
0 28
0 28
0 28
0 28
0 27
0 24
0 24
0 24
0 24
0 23
0 21
0 21
0 21
0 21
0 18
0 18
0 18
0 18
0 18
0 18
0 19
0 19
0 19
0 19
0 20
0 19
0 21
0 21
0 21
0 20
0 20
0 19
0 19
0 19
0 19
0 19
0 19
0 19
0 19
0 19
0 18
0 18
0 18
0 18
0 18
0 18
0 18
0 18
0 18
0 18
0 18
0 18
0 17
0 16
0 16
0 16
1 16
1 16
1 18
1 18
1 18
1 18
1 18
1 18
1 18
1 18
1 18
1 18
1 18
1 18
1 18
1 18
1 18
1 10
1 10
1 10
1 10
1 11
1 11
1 14
1 14
1 16
1 16
1 16
1 16
1 16
1 16
1 16
1 16
1 21
1 21
1 21
1 21
1 20
1 20
3 20
3 19
11 18
11 17
11 15
11 15
11 15
11 15
11 15
11 15
11 15
11 15
11 15
11 15
11 15
11 15
11 15
11 15
11 15
11 15
11 15
11 15
11 15
15 15
15 15
27 15
27 15
27 15
27 15
29 15
29 14
38 14
42 14
56 14
55 14
55 14
54 11
54 11
53 10
53 10
53 10
53 10
53 10
53 10
68 10
71 10
72 10
77 10
78 10
78 10
78 10
78 10
78 10
78 10
78 10
78 9
96 9
98 8
127 6
127 6
128 6
128 6
128 6
128 6
128 6
128 6
127 6
126 1
126 1
126 1
126 1
128 1
130 1
130 1
130 1
124 2
124 1
124 1
124 1
124 1
124 1
124 1
124 1
124 1
124 1
124 1
124 1
124 1
124 1
126 1
126 1
125 1
123 1
114 1
112 1
112 1
110 1
107 1
97 1
96 1
96 1
95 1
96 1
95 1
93 1
90 1
79 1
87 1
87 1
87 1
87 1
86 1
79 1
79 1
79 1
78 1
75 1
57 1
57 1
54 1
46 1
44 1
44 1
40 1
40 1
40 1
39 1
39 1
39 1
28 1
28 1
16 1
16 1
17 1
17 1
17 1
17 1
17 1
17 1
19 1
19 1
19 1
19 1
19 1
19 1
19 1
19 1
19 1
19 0
19 0
19 0
19 0
19 0
19 0
19 0
19 0
19 0
19 0
19 0
19 0
19 0
20 0
22 0
22 0
22 0
22 0
21 0
21 0
21 0
21 0
21 0
21 0
21 0
21 0
21 0
20 0
20 0
17 0
16 0
15 0
8 0
8 0
7 0
7 0
7 0
7 0
7 0
7 0
7 0
7 0
7 0
8 0
8 0
11 0
11 0
11 0
11 0
11 1
10 4
9 9
9 12
9 13
9 13
9 13
8 13
8 13
6 13
6 13
6 13
6 15
6 16
10 16
10 16
10 16
10 16
10 15
10 16
10 16
10 17
10 17
10 19
10 19
10 20
10 20
10 20
10 20
10 20
10 20
10 20
10 20
10 20
10 20
10 22
10 22
10 22
9 22
9 22
9 22
9 22
9 21
9 21
9 17
9 17
9 17
9 17
9 17
9 18
9 18
9 18
9 18
9 18
9 18
8 18
8 18
8 19
8 19
8 19
9 19
10 19
10 19
12 19
12 19
17 19
18 19
18 19
18 19
15 19
15 18
15 17
15 17
15 16
15 15
15 13
15 12
15 12
15 12
16 12
16 12
16 12
16 12
16 12
14 11
14 11
14 8
12 8
12 7
12 6
12 6
12 6
12 6
12 4
12 4
12 4
12 4
12 4
12 3
12 3
12 3
12 3
12 3
12 3
12 3
12 3
12 3
12 3
12 3
12 3
12 3
12 3
12 3
12 3
12 3
18 3
21 3
40 3
40 3
40 3
40 3
40 3
40 2
40 2
40 2
40 2
40 2
40 2
43 2
43 2
43 1
43 1
43 1
39 1
37 1
37 3
37 3
37 3
33 3
33 3
42 5
43 6
43 6
43 6
43 6
43 6
43 6
43 6
43 6
43 6
43 6
43 6
42 6
42 6
42 6
43 6
43 6
43 5
43 5
43 5
43 5
43 5
43 5
73 5
73 5
73 5
73 5
73 5
74 5
74 5
74 5
75 5
86 5
92 5
92 5
92 5
92 5
92 5
92 5
92 5
92 5
92 5
92 5
94 5
94 5
94 5
94 5
93 5
87 4
85 4
66 3
66 3
66 3
66 3
67 3
68 3
68 3
68 2
69 2
87 1
87 1
86 2
88 2
88 2
89 2
90 2
90 2
93 2
93 2
93 2
93 2
93 2
93 2
82 1
82 1
82 1
82 1
82 1
82 1
82 1
86 1
89 1
98 1
106 1
106 1
106 1
106 1
110 1
115 1
117 1
138 1
140 1
140 1
141 1
141 1
146 1
117 1
119 1
120 1
129 1
135 1
135 1
134 1
127 1
123 1
117 1
117 1
117 1
118 1
118 1
125 1
127 1
127 1
129 1
131 1
131 1
132 1
133 1
133 1
134 1
135 1
135 1
135 1
135 1
135 1
135 1
135 1
134 1
135 1
133 1
133 1
131 1
127 1
131 1
132 1
132 0
134 0
131 0
130 0
130 0
127 0
127 0
127 0
127 0
127 0
127 0
127 0
127 0
127 0
127 0
127 0
125 0
125 0
119 0
112 0
109 0
105 0
104 0
104 0
104 0
103 0
101 0
101 0
75 0
71 0
66 0
63 0
64 0
58 0
58 0
58 0
51 0
51 0
50 0
50 0
50 0
50 0
49 0
49 0
49 0
47 0
43 0
43 0
33 0
26 0
22 0
15 0
13 0
7 0
4 0
2 0
2 0
2 0
2 0
2 0
2 0
2 0
2 0
2 0
2 0
2 0
2 0
2 0
2 0
0 0
0 0
0 0
0 0
0 0
0 0
0 0
0 0
0 0
0 0
0 0
0 0
0 0
0 0
0 0
0 0
0 0
0 0
0 0
0 0
0 0
0 0
1 0
1 0
1 0
1 0
1 0
1 0
1 0
1 0
1 0
1 0
1 0
1 0
2 0
2 0
2 0
2 0
1 0
1 0
1 0
1 0
1 0
1 0
1 0
1 0
1 0
1 1
1 1
1 1
0 1
0 1
0 1
0 1
0 1
0 1
0 1
0 1
0 1
0 1
0 1
0 1
0 1
0 1
0 1
0 1
0 1
0 1
0 1
0 1
0 1
0 1
0 1
0 1
0 1
0 1
0 1
0 1
0 1
0 1
0 1
0 1
0 1
0 1
0 1
0 1
0 1
0 1
0 1
0 1
0 1
0 1
0 1
0 1
0 1
0 1
0 1
0 1
0 1
0 1
0 1
0 1
0 1
0 1
0 1
0 1
0 1
0 1
0 1
0 1
0 1
0 1
0 1
0 1
0 1
0 1
0 1
0 1
0 1
0 1
0 0
0 0
0 0
0 0
0 0
0 0
0 0
0 0
0 0
0 0
0 0
0 0
0 0
0 0
0 0
0 0
0 0
0 0
0 0
0 0
0 0
0 0
0 0
0 0
0 0
0 0
0 0
0 0
0 0
0 0
0 0
0 0
0 0
0 0
0 0
0 0
0 0
0 0
0 0
0 0
0 0
0 0
0 0
0 0
0 0
0 0
0 1
0 1
0 1
0 1
0 1
0 1
0 1
0 1
0 1
0 1
0 1
0 1
0 1
0 1
0 1
0 1
0 1
0 1
0 1
0 1
0 1
0 1
0 1
0 1
0 1
0 1
0 1
0 1
0 1
0 1
0 1
0 1
0 1
0 1
0 1
0 1
0 1
0 1
0 1
0 1
0 1
0 1
0 1
0 1
0 1
0 1
0 1
0 1
0 1
0 2
0 4
0 6
0 6
0 6
0 6
0 13
0 13
0 13
0 13
0 13
0 13
0 13
0 13
0 13
0 13
0 13
0 13
0 13
0 13
0 13
0 13
0 12
0 12
0 11
0 11
0 11
0 11
0 11
0 11
0 11
0 11
0 11
0 11
0 11
0 11
0 11
0 11
0 11
0 11
0 11
0 11
0 11
0 11
0 12
0 12
0 12
0 12
0 12
0 12
0 12
0 12
0 12
0 12
0 12
0 12
0 12
0 12
0 12
0 12
0 12
0 12
0 12
0 12
0 12
0 12
0 12
0 12
0 12
0 12
0 12
0 12
0 12
0 9
0 7
0 8
0 8
0 8
0 8
0 2
0 2
0 2
0 2
0 2
0 2
0 2
0 2
0 2
0 2
0 2
0 2
0 1
0 1
0 1
0 1
0 1
0 1
0 1
0 1
0 1
0 1
0 1
0 1
0 1
0 1
0 1
0 1
0 1
0 1
0 1
0 3
0 4
0 4
0 6
0 6
0 5
0 5
0 5
0 5
0 5
0 5
0 5
0 5
0 5
0 5
0 5
0 5
0 5
0 5
0 5
0 5
0 5
0 5
0 5
0 5
0 5
0 5
0 5
0 5
0 5
0 5
0 5
0 5
0 6
0 6
0 6
0 6
0 6
0 6
0 6
0 6
0 7
0 7
0 7
0 7
0 7
0 7
0 7
0 7
0 7
0 7
0 7
0 7
0 7
0 6
0 6
0 6
0 6
0 6
0 6
0 6
0 6
0 6
0 6
0 6
0 6
0 6
0 6
0 6
0 6
0 7
0 7
0 6
0 4
0 3
0 3
0 3
0 3
0 3
0 3
0 3
0 3
0 3
0 3
0 3
0 3
0 3
0 3
0 3
0 3
0 3
0 3
0 3
0 3
0 3
0 3
0 3
0 3
0 3
0 2
0 2
0 2
0 2
0 2
0 2
0 2
0 2
0 3
0 3
0 3
0 3
0 3
0 1
0 1
0 1
0 2
0 2
0 2
0 2
0 2
0 2
0 2
0 2
0 2
0 2
0 2
0 2
0 2
0 2
0 4
0 4
0 4
0 5
0 5
0 5
0 5
0 5
0 5
0 5
0 5
0 5
0 5
0 5
0 5
0 5
0 5
0 5
0 5
0 5
0 5
0 5
0 5
0 5
0 5
0 5
0 5
0 5
0 5
0 5
0 5
0 5
0 5
0 5
0 5
0 5
0 5
0 5
0 5
0 6
0 57
1 60
1 63
2 67
2 68
2 68
2 70
2 71
2 73
2 74
2 76
2 77
2 79
2 79
2 79
2 79
2 79
2 79
2 80
2 83
2 83
2 83
2 83
2 82
2 81
2 81
2 81
2 81
2 81
2 81
2 81
2 80
2 80
2 80
2 80
2 80
2 80
2 81
2 81
2 81
2 81
2 81
2 81
2 81
2 81
2 81
2 81
2 81
2 81
2 81
2 81
2 81
4 120
4 120
4 120
4 120
4 120
4 120
4 120
4 120
4 120
4 131
4 132
4 139
4 139
4 139
4 139
4 139
4 138
4 138
4 136
4 136
4 138
4 86
3 84
2 95
2 93
2 94
2 96
2 93
2 91
2 87
2 84
2 84
2 84
2 84
2 84
2 84
2 84
2 84
2 84
2 81
2 79
2 79
2 79
2 79
2 79
2 79
2 79
3 79
3 79
3 79
3 79
3 79
3 79
3 79
3 79
3 79
3 78
3 78
3 78
3 78
3 78
3 78
3 78
3 78
3 78
3 78
3 78
3 78
3 78
3 78
3 78
3 78
3 78
1 39
1 39
1 39
1 39
1 39
1 39
1 39
1 39
1 39
1 28
1 26
1 20
1 20
1 20
1 20
1 20
1 20
1 20
1 20
1 20
1 16
1 16
1 16
1 3
1 2
1 1
1 0
1 0
1 0
1 0
1 0
1 0
1 0
1 0
1 0
1 0
1 0
1 0
1 0
1 0
1 0
1 0
1 0
1 0
1 0
1 0
2 0
1 0
1 0
1 0
1 0
1 0
1 0
1 0
1 0
1 0
1 0
1 0
1 0
1 0
1 0
1 0
1 0
1 0
1 0
1 0
1 0
1 0
1 0
1 0
1 0
1 0
1 0
1 0
1 0
1 0
1 0
1 0
1 0
1 0
1 0
1 0
1 0
1 0
1 0
1 0
1 0
1 0
1 0
1 0
1 0
1 0
1 0
1 0
1 0
1 0
1 0
1 0
1 0
1 0
1 0
1 0
1 0
1 0
1 0
2 0
3 0
3 0
3 0
6 0
6 0
6 0
12 0
15 0
16 0
16 0
18 0
18 0
18 0
17 0
17 0
17 0
17 0
17 0
17 0
17 0
17 0
16 0
16 0
16 0
15 0
15 0
15 0
15 0
15 0
15 0
15 0
15 0
15 0
15 0
15 0
15 0
15 0
15 0
15 0
15 0
15 0
15 0
15 0
15 0
15 0
15 0
15 0
15 0
15 0
15 0
15 0
15 0
15 0
15 0
15 0
15 0
15 0
15 0
15 0
15 0
15 0
15 0
15 0
15 0
15 0
14 0
12 0
11 0
9 0
9 0
7 0
7 0
5 0
5 0
4 0
1 0
0 0
0 0
0 0
0 0
0 0
0 0
0 0
0 0
0 0
0 0
0 0
0 0
0 0
0 0
0 0
0 0
0 0
0 0
0 0
0 0
0 0
0 0
0 0
0 0
0 0
0 0
0 0
0 0
0 0
0 0
0 0
0 0
0 0
0 0
0 0
0 0
0 0
0 0
0 0
0 0
0 0
0 0
1 0
1 0
1 0
1 0
1 0
1 0
1 0
1 0
1 0
1 0
1 0
1 0
1 0
1 0
1 0
1 0
1 0
1 0
1 0
1 0
1 0
1 0
1 0
1 0
1 0
1 0
1 0
1 0
1 0
1 0
1 0
1 0
1 0
1 0
1 0
1 0
1 0
1 0
1 0
1 0
1 0
1 0
1 0
1 0
1 0
1 0
1 0
1 0
1 0
1 0
1 0
1 0
1 0
1 0
1 0
1 0
1 0
1 0
1 0
1 0
1 0
1 0
1 0
1 0
1 0
1 0
1 0
1 0
1 0
1 0
1 0
1 0
1 0
0 0
0 0
0 0
0 0
0 0
0 0
0 0
0 0
0 0
0 0
0 0
0 0
0 0
0 0
0 0
0 0
0 0
0 0
0 0
0 0
0 0
0 0
0 0
0 0
0 0
0 0
0 0
0 0
0 0
0 0
0 0
0 0
0 0
0 0
0 0
0 0
0 0
0 0
0 0
0 0
0 0
0 0
0 0
0 0
0 0
0 0
0 0
0 0
0 0
0 0
0 0
0 0
0 0
0 0
0 0
0 0
0 0
0 0
0 0
0 0
0 0
0 0
0 0
0 0
0 0
0 0
0 0
0 0
0 0
0 0
0 0
0 0
0 0
0 0
0 0
0 0
0 0
0 0
0 0
0 0
0 0
0 0
0 0
0 0
0 0
0 0
0 0
0 0
0 0
0 0
0 0
0 0
1 0
1 0
1 0
1 0
1 0
1 0
1 0
1 0
1 0
1 0
1 0
1 0
1 0
1 0
1 0
1 0
1 0
1 0
1 0
1 0
1 0
1 0
1 0
1 0
1 0
1 0
1 0
1 0
1 0
1 0
1 0
1 0
1 0
1 0
1 1
1 1
1 1
1 1
1 1
1 1
1 1
1 1
1 2
1 2
1 2
1 2
1 2
1 3
1 29
1 29
1 30
1 40
1 43
1 44
1 51
1 51
1 51
1 51
1 51
1 52
1 52
1 53
1 54
1 57
1 57
1 57
1 57
1 57
1 57
1 57
1 57
1 57
1 57
0 57
0 57
0 58
0 59
0 64
1 71
1 75
1 97
1 99
1 99
1 99
1 99
1 99
1 99
1 99
1 99
1 99
1 99
1 99
1 99
1 99
1 99
1 100
1 100
1 100
1 100
1 100
1 100
1 100
1 102
1 104
1 104
1 104
1 104
1 102
1 102
1 102
1 102
1 102
1 103
1 103
1 103
1 102
1 103
1 104
1 104
1 104
1 101
1 63
1 58
1 57
1 57
1 57
1 57
1 57
1 57
1 57
1 57
1 57
1 56
1 56
1 54
1 54
1 51
1 51
1 51
1 51
1 51
1 51
1 51
1 51
1 51
1 51
1 51
1 51
1 50
1 48
1 38
0 28
0 24
0 3
0 1
0 1
0 1
0 1
0 1
0 1
0 1
0 1
0 1
0 1
0 1
0 1
0 1
0 1
0 0
0 0
0 0
0 0
0 0
0 0
0 0
0 0
0 0
0 0
0 0
0 0
0 0
0 0
0 0
0 0
0 0
0 0
0 0
0 0
0 0
0 0
0 0
0 0
0 0
0 0
0 1
0 2
0 2
0 2
0 2
0 2
0 2
0 2
0 2
0 2
0 2
0 2
0 2
0 2
0 2
0 2
0 2
0 2
0 2
0 0
0 0
0 0
0 0
0 0
0 0
0 0
0 0
0 0
0 0
0 0
0 0
0 0
0 0
0 0
0 0
0 0
0 0
0 0
0 0
0 0
0 0
0 0
0 0
0 0
0 0
0 0
0 0
0 0
0 0
0 0
0 0
0 0
0 0
0 0
0 0
0 0
0 0
0 0
0 0
0 0
0 0
0 0
0 0
0 0
0 0
0 0
0 0
0 0
0 0
0 0
0 0
0 0
0 0
0 0
0 0
0 0
0 0
0 0
0 0
0 0
0 0
0 0
0 0
0 0
0 0
0 0
0 0
0 0
0 0
0 0
0 0
0 0
0 0
0 0
0 0
0 0
0 0
0 0
0 0
0 0
0 0
0 0
0 0
0 0
0 0
0 0
0 0
0 0
0 0
0 0
0 0
0 0
0 0
0 0
0 0
0 0
0 0
0 0
0 0
0 0
0 0
0 0
0 0
0 0
0 0
0 0
0 0
0 0
0 0
0 0
0 0
0 0
0 0
0 0
0 0
0 0
0 0
0 0
0 0
0 0
0 0
0 0
0 0
0 0
0 0
0 0
0 0
0 0
0 0
0 0
0 0
0 0
0 0
0 0
0 0
0 0
0 0
0 0
0 0
0 0
0 0
0 0
0 0
0 0
0 0
0 0
0 0
0 0
0 0
0 0
0 0
0 0
0 0
0 0
0 0
0 0
0 0
0 0
0 0
0 0
0 0
0 0
0 0
0 0
0 0
0 0
0 0
0 0
0 0
0 0
0 0
0 0
0 0
0 0
0 0
0 0
0 0
0 0
0 0
0 0
0 0
0 0
0 0
0 0
0 0
0 0
0 0
0 0
0 0
0 0
0 0
0 0
0 0
0 0
0 0
0 0
0 0
0 0
0 0
0 0
0 0
0 0
0 0
0 0
0 0
0 0
0 0
0 0
0 0
0 0
0 0
0 0
0 0
0 0
0 0
0 0
0 0
0 0
4 0
85 0
177 0
186 0
186 0
188 0
188 0
188 0
211 0
211 0
211 0
211 0
211 0
211 0
211 0
211 0
211 0
211 0
211 0
212 0
214 0
214 0
214 0
214 0
214 0
214 0
214 0
214 0
215 0
215 0
217 0
217 0
218 0
225 0
227 0
227 0
227 0
227 0
227 0
227 0
227 0
227 0
227 0
227 0
227 0
227 0
227 0
230 0
241 0
293 0
296 0
296 0
293 0
294 0
293 0
291 0
289 0
279 0
285 0
291 0
264 0
272 0
271 0
271 0
257 0
256 0
256 0
248 0
248 0
254 0
254 0
252 0
245 0
238 0
228 0
188 0
188 0
188 0
188 0
188 0
188 0
173 0
173 0
173 0
173 0
173 0
173 0
173 0
174 0
174 0
174 0
174 0
174 0
173 0
173 0
173 0
173 0
173 0
173 0
173 0
173 0
172 0
172 0
169 0
168 0
168 0
161 0
160 0
160 0
160 0
160 0
160 0
161 0
162 0
163 0
175 0
183 0
185 0
180 0
145 0
136 0
127 0
82 0
81 0
81 0
80 0
44 0
44 0
45 0
45 0
45 0
45 0
45 0
45 0
44 0
43 0
43 0
43 0
43 0
42 0
42 0
42 0
42 0
42 0
42 0
42 0
43 0
43 0
43 0
43 0
43 1
43 1
43 1
43 1
44 1
49 1
51 1
51 1
51 1
51 1
51 1
51 1
51 1
51 1
51 2
52 2
54 2
54 2
54 2
54 2
54 2
54 2
54 2
55 2
55 2
55 2
55 2
55 2
54 2
54 2
54 2
52 2
53 2
54 2
86 2
89 2
88 2
84 2
75 2
65 2
59 2
61 2
61 2
60 2
60 2
60 2
60 2
60 2
60 2
59 2
59 2
60 2
69 2
76 2
76 2
76 2
76 2
76 2
76 2
76 2
76 2
76 2
76 2
76 2
76 2
76 2
76 2
76 2
77 2
77 2
77 2
77 2
77 2
78 1
79 1
79 1
79 1
77 1
71 1
68 1
69 1
69 1
69 1
69 1
69 1
69 1
69 0
69 0
69 0
68 0
68 0
68 0
68 0
68 0
68 0
68 0
67 0
67 0
66 0
66 0
67 0
67 0
70 0
70 0
70 0
66 0
62 0
22 0
18 0
18 0
18 0
5 0
6 0
6 0
6 0
6 0
6 0
6 0
6 0
6 0
6 0
6 0
6 0
6 0
6 0
6 0
6 0
6 0
6 0
6 0
6 0
6 0
6 0
6 0
6 0
6 0
6 0
6 0
6 0
6 0
6 0
6 0
6 0
6 0
6 0
6 0
6 0
6 0
6 0
6 0
6 0
6 0
6 0
6 0
6 0
6 0
6 0
6 0
6 0
6 0
6 0
6 0
6 0
6 0
6 0
6 0
6 0
6 0
6 0
5 0
5 0
5 0
5 0
4 0
4 0
1 0
1 0
1 0
1 0
1 0
0 0
0 0
0 0
0 0
1 0
1 0
2 0
3 0
3 0
4 0
4 1
4 1
4 1
4 1
4 1
4 1
4 1
4 1
4 1
4 1
4 1
4 1
4 1
4 1
4 1
4 1
4 1
4 1
4 1
4 1
4 1
4 1
4 0
4 0
4 0
4 0
4 0
4 0
4 0
4 0
4 0
4 0
4 0
4 0
4 0
4 0
4 0
4 0
5 0
5 0
5 0
5 0
5 0
5 0
5 0
5 0
5 0
5 0
7 0
7 0
7 0
7 0
7 0
7 0
7 0
7 0
7 0
7 0
7 0
7 0
7 0
7 0
7 0
7 0
7 0
7 0
7 0
6 0
6 0
4 0
4 0
4 0
3 0
3 0
3 0
3 0
4 0
4 0
4 0
4 0
4 0
4 0
4 0
4 0
4 0
4 0
4 0
4 0
4 0
4 0
4 0
4 0
5 0
5 0
5 0
5 0
5 0
5 0
5 0
5 0
5 0
5 0
5 0
5 0
5 0
5 0
5 0
5 0
5 0
5 0
5 0
4 0
4 0
4 0
4 0
4 0
5 0
5 0
5 0
5 0
5 0
3 0
3 0
3 0
5 0
5 0
5 0
5 0
5 0
5 0
5 0
5 0
4 0
4 0
4 0
4 0
4 0
4 0
4 0
4 0
4 0
4 0
4 0
4 0
4 0
4 0
4 0
4 0
4 0
3 0
3 0
3 0
3 0
3 0
3 0
3 0
3 0
3 0
3 0
3 0
3 0
3 0
3 0
3 0
3 0
2 0
2 0
2 0
2 0
2 0
3 0
3 0
3 0
3 0
3 0
4 0
5 0
5 0
5 0
5 0
5 0
5 0
5 0
5 0
5 0
5 0
10 0
10 0
17 0
18 0
20 0
23 0
23 0
23 0
23 0
24 0
24 0
22 0
22 0
22 0
22 0
22 0
22 0
22 0
22 0
22 0
22 0
22 0
22 0
22 0
22 0
22 0
22 0
22 0
22 0
22 0
20 0
16 0
16 0
14 0
14 0
14 0
14 0
14 0
14 0
14 0
14 0
13 0
12 0
12 0
12 0
12 0
12 0
10 0
10 0
8 0
8 0
8 0
8 0
8 0
8 0
8 0
8 0
5 0
5 0
5 0
5 0
5 0
3 0
3 0
3 0
3 0
3 0
3 0
3 0
3 0
3 0
3 0
3 0
3 0
3 0
2 0
1 0
1 0
1 0
1 0
1 0
1 0
1 0
1 0
1 0
1 0
1 0
1 0
1 0
1 0
1 0
1 0
1 0
1 0
1 0
1 0
1 0
1 0
1 0
1 0
1 0
1 0
1 0
1 0
1 0
1 0
1 0
1 0
1 0
1 0
1 0
1 0
1 0
1 0
1 0
1 0
1 0
1 1
1 1
1 1
1 1
1 1
1 1
1 1
1 1
1 1
1 1
1 1
1 1
1 1
1 1
1 1
1 1
1 1
1 1
1 1
1 1
1 1
1 1
1 1
1 1
1 1
1 1
1 1
1 1
1 2
1 2
1 2
0 2
0 2
0 2
0 2
0 2
0 2
0 2
0 2
0 2
0 2
0 2
0 2
0 2
0 2
0 2
0 2
0 2
0 2
0 2
0 2
0 2
0 2
0 2
0 2
0 2
0 2
0 2
0 2
0 2
0 2
0 2
0 2
0 2
0 2
0 2
0 2
0 2
0 2
0 2
0 2
0 2
0 2
0 1
0 1
0 1
0 1
0 1
0 1
0 1
0 1
0 1
0 1
0 1
0 1
0 1
0 1
0 1
0 1
0 1
0 1
0 1
0 1
0 1
0 1
0 1
0 1
0 1
0 1
0 1
0 1
0 0
0 0
0 0
0 0
0 0
0 0
0 0
0 0
0 0
0 0
0 0
0 0
0 0
0 0
0 0
0 0
0 0
0 0
0 0
0 0
0 0
0 0
0 1
0 1
0 1
0 1
0 1
0 1
0 1
0 1
0 1
0 1
0 1
0 1
0 1
0 1
0 1
0 1
0 1
0 1
0 1
0 1
0 1
0 1
0 1
0 1
0 1
0 1
0 1
0 1
0 1
0 1
0 1
0 1
0 1
0 1
0 1
0 1
0 1
0 1
0 1
0 1
0 1
0 1
0 1
0 1
0 1
0 1
0 1
0 1
0 1
0 1
0 1
0 1
0 1
0 1
0 1
0 1
0 1
0 1
0 1
0 1
0 1
0 1
0 1
0 1
0 1
0 1
0 1
0 1
0 1
0 1
0 1
0 1
0 1
0 0
0 0
0 0
0 0
0 0
0 0
0 0
0 0
0 0
0 0
0 0
0 0
0 0
0 0
0 0
0 0
0 0
0 0
0 0
0 0
0 0
0 0
0 0
0 0
0 0
0 0
0 0
0 0
0 0
0 0
0 0
0 0
0 0
0 0
0 0
0 1
0 1
0 1
0 1
0 1
0 1
0 1
0 1
0 1
0 1
0 1
0 1
0 1
0 1
0 1
0 1
0 1
0 1
0 1
0 1
0 1
0 1
0 4
0 4
0 4
0 4
0 9
0 9
0 9
0 9
0 9
0 10
0 10
0 12
0 12
0 12
0 12
0 12
0 12
0 12
0 12
0 12
0 12
0 12
0 12
0 12
0 12
0 12
0 12
0 12
0 12
0 12
0 12
0 12
0 12
0 12
0 12
0 12
0 12
0 12
0 12
0 12
0 12
0 12
0 12
0 12
0 12
0 12
1 23
1 23
1 23
1 24
1 26
1 23
1 23
1 23
1 23
2 29
2 29
2 29
2 36
2 36
2 37
2 37
2 37
2 38
2 38
2 38
2 39
2 39
2 39
2 39
2 36
2 36
2 33
2 33
2 33
2 32
2 32
2 31
2 31
2 31
2 31
2 30
2 30
2 30
2 31
2 31
2 31
2 31
2 32
2 33
2 37
2 37
2 37
2 37
2 37
2 37
2 37
2 37
2 37
2 36
2 36
2 36
2 36
2 36
2 36
2 36
2 36
2 36
2 36
2 36
2 36
2 36
2 36
2 39
2 43
2 45
2 46
2 46
2 47
1 34
1 34
1 37
1 41
2 45
2 47
2 50
2 50
2 50
1 47
1 49
1 45
1 45
1 45
1 44
1 44
1 44
1 43
1 43
1 43
1 42
1 42
1 42
1 42
1 42
1 42
1 42
1 42
1 42
1 42
1 42
1 42
1 42
1 42
1 42
1 42
1 44
1 47
1 47
1 47
1 47
1 48
1 45
1 42
1 31
1 31
1 31
1 28
1 28
1 28
1 28
1 28
1 28
1 28
1 28
1 28
1 27
1 27
1 27
1 27
1 27
1 27
1 27
1 27
1 27
1 27
1 27
1 25
1 18
1 18
1 18
2 28
2 26
2 27
2 25
2 26
2 23
1 21
1 21
1 20
1 22
1 22
1 22
1 19
1 20
1 20
1 20
1 20
1 20
1 20
1 20
1 20
1 20
1 20
1 20
1 20
1 20
1 20
1 20
1 20
1 20
1 20
1 20
1 20
1 20
1 20
1 21
1 21
1 20
1 19
1 18
1 18
1 18
1 18
1 18
1 18
1 18
1 18
1 18
1 18
1 18
1 18
1 18
1 18
1 18
1 18
1 18
1 18
1 18
1 18
1 18
1 18
1 18
1 18
1 18
1 18
1 18
1 18
1 18
1 18
1 18
1 18
1 18
1 17
0 7
0 7
0 6
0 5
0 4
0 4
0 5
0 6
0 6
0 5
0 6
0 6
0 6
0 5
0 5
0 5
0 5
0 5
0 5
0 5
0 5
0 5
0 5
0 5
0 5
0 5
0 5
0 5
0 5
0 5
0 6
0 7
0 7
0 7
0 7
0 7
0 5
0 5
0 5
0 5
0 5
0 5
0 5
0 5
0 5
0 5
0 5
0 5
0 5
0 5
0 5
0 5
0 5
0 5
0 5
0 5
0 5
0 5
0 5
0 5
0 5
0 5
0 5
0 5
0 5
0 5
0 5
0 5
0 5
0 5
0 5
0 3
0 3
0 3
0 6
0 6
0 6
0 7
0 7
0 7
0 7
0 7
0 5
0 5
0 5
0 5
0 5
0 5
0 5
0 5
0 5
0 5
0 5
0 5
0 5
0 5
0 5
0 5
0 5
0 5
0 5
0 5
0 5
0 5
0 5
0 5
0 4
0 4
0 4
0 4
0 4
0 4
0 5
0 5
0 5
0 5
0 6
0 7
0 7
0 7
0 7
0 7
0 7
0 7
0 7
0 9
0 9
0 9
0 9
0 10
0 10
0 10
0 10
0 10
0 10
0 10
0 10
0 10
0 10
0 10
0 10
0 10
0 10
0 10
0 10
0 10
0 10
0 7
0 6
0 6
0 6
0 9
0 9
0 9
0 9
0 9
0 9
0 9
0 9
0 9
0 9
0 9
0 9
0 9
0 9
0 9
0 9
0 9
0 9
0 9
0 9
0 9
0 9
0 9
0 9
0 9
0 9
0 9
0 9
0 9
0 9
0 9
0 9
0 9
0 9
0 8
0 8
0 8
0 8
0 7
0 6
0 6
0 6
0 6
0 6
0 6
0 6
0 6
0 4
0 4
0 4
0 3
0 3
0 3
0 3
0 3
0 3
0 3
0 3
0 3
0 3
0 3
0 3
0 3
0 3
0 3
0 3
0 3
0 3
0 3
0 3
0 3
0 3
0 3
0 0
0 0
0 0
0 0
0 0
0 0
0 0
0 0
0 0
0 0
0 0
0 0
0 0
0 0
0 0
0 0
0 0
0 0
0 0
0 0
0 0
0 0
0 0
0 0
0 0
0 0
0 0
0 0
0 0
0 0
0 0
0 0
0 0
0 0
0 0
0 0
0 0
0 0
0 0
0 0
0 0
0 0
0 0
0 0
0 0
0 0
0 0
0 0
0 0
0 0
0 0
0 0
0 0
0 0
0 0
0 0
0 0
0 0
0 0
0 0
0 0
0 0
0 0
0 0
0 0
0 0
0 0
0 0
0 0
0 0
0 0
0 0
0 0
0 0
0 0
0 0
0 0
0 0
0 0
0 0
0 0
0 0
0 0
0 0
0 0
0 0
0 0
0 0
0 0
0 0
0 0
0 0
0 0
0 0
0 0
0 0
0 0
0 0
0 0
0 0
0 0
0 0
0 0
0 0
0 0
0 0
0 0
0 0
0 0
0 0
0 0
0 0
0 0
0 0
0 0
0 0
0 0
0 0
0 0
0 0
0 0
0 0
0 0
0 0
0 0
0 0
1 0
1 0
1 0
1 0
1 0
1 0
1 0
1 0
1 0
1 0
1 0
1 0
1 0
1 0
1 0
1 0
1 0
1 0
1 0
1 0
1 0
1 0
1 0
1 0
1 0
1 0
1 0
1 0
1 0
1 0
1 0
1 0
2 0
2 0
3 0
3 0
3 0
3 0
3 0
3 0
3 0
3 0
3 0
3 0
3 0
3 0
3 0
3 0
3 0
3 0
3 0
3 0
3 0
3 0
3 0
3 0
3 0
3 0
3 0
3 0
3 0
3 0
3 0
3 0
3 0
3 0
3 0
3 0
3 0
3 0
3 0
3 0
3 0
2 0
2 0
2 0
2 0
2 0
2 0
2 0
2 0
2 0
2 0
2 0
2 0
2 0
2 0
2 0
2 0
2 0
2 0
2 0
2 0
2 0
2 0
2 0
2 0
2 0
2 0
2 0
2 0
2 0
2 0
2 0
2 0
1 0
1 0
0 0
0 0
0 0
0 0
0 0
0 0
0 0
0 0
0 0
0 0
0 0
0 0
1 0
1 0
1 0
1 0
1 0
1 0
1 0
1 0
1 0
1 0
1 0
1 0
1 0
1 0
1 0
1 0
1 0
1 0
1 0
1 0
1 0
1 0
1 0
1 0
1 0
1 0
1 0
1 0
1 0
1 0
1 0
1 0
1 0
1 0
2 0
4 0
4 0
4 0
8 0
8 0
8 0
8 0
9 0
9 0
9 0
9 0
9 0
9 0
9 0
9 0
9 0
9 0
9 0
9 0
9 0
9 0
9 0
9 0
9 0
9 0
10 0
10 0
10 0
10 0
11 0
11 0
11 0
11 0
11 0
11 0
11 0
11 0
11 0
10 0
10 0
10 0
10 0
10 0
10 0
10 0
10 0
10 0
10 0
10 0
10 0
10 0
10 0
10 0
10 0
10 0
10 0
10 0
10 0
10 0
11 0
11 0
11 0
11 0
11 0
11 0
11 0
11 0
11 0
11 0
11 0
11 0
11 0
10 0
8 0
8 0
8 0
4 0
4 0
5 0
18 0
18 0
18 0
18 0
18 0
18 0
18 0
18 0
18 0
18 0
18 0
18 0
18 0
18 0
18 0
18 0
18 0
18 0
18 0
17 0
17 0
16 0
16 0
20 0
24 0
24 0
24 0
24 0
30 0
30 0
30 0
30 0
36 0
37 0
37 0
37 0
38 0
38 0
39 0
39 0
39 0
39 0
39 0
39 0
39 0
39 0
39 0
39 0
39 0
39 0
39 0
39 0
39 0
38 0
38 0
38 0
38 0
38 0
38 0
38 0
38 0
38 0
38 0
38 0
39 0
39 0
39 0
39 0
36 0
36 0
35 0
35 0
33 0
15 0
15 0
15 0
15 0
4 0
4 0
4 0
4 0
4 0
4 0
4 0
4 0
4 0
4 0
4 0
4 0
4 0
4 0
4 0
4 0
4 0
4 0
4 0
4 0
4 0
4 0
4 0
4 0
4 0
4 0
4 0
5 0
4 0
4 0
4 0
4 0
4 0
4 0
5 0
5 0
5 0
5 0
5 0
5 0
5 0
5 0
5 0
5 0
5 0
5 0
6 0
5 0
5 0
5 0
5 0
5 0
5 0
5 0
5 0
4 0
4 0
4 0
4 0
3 0
2 0
2 0
2 0
2 0
3 0
3 0
3 0
3 0
3 0
3 0
3 0
3 0
3 0
3 0
3 0
3 0
3 0
3 0
3 0
3 0
3 0
3 0
3 0
3 0
3 0
3 0
3 0
3 0
3 0
3 0
3 0
3 0
3 0
3 0
3 0
4 0
4 0
5 0
6 0
6 0
6 0
6 0
6 0
6 0
6 0
6 0
5 0
5 0
5 0
5 0
5 0
5 0
5 0
5 0
5 0
5 0
5 0
5 0
5 0
4 0
4 0
4 0
4 0
4 0
4 0
4 0
4 0
4 0
4 0
4 0
4 0
4 0
4 0
4 0
4 0
4 0
4 0
3 0
3 0
3 0
3 0
3 0
3 0
3 0
3 0
3 0
3 0
3 0
3 0
3 0
3 0
3 0
3 0
3 0
3 0
3 0
3 0
3 0
3 0
3 0
3 0
3 0
3 0
3 0
3 0
3 0
3 0
3 0
2 0
2 0
1 0
0 0
0 0
0 0
0 0
0 0
0 0
0 0
0 0
0 0
0 0
0 0
0 0
0 0
0 0
0 0
0 0
0 0
0 0
0 0
0 0
0 0
0 0
0 0
0 0
0 0
0 0
0 0
0 0
0 0
0 0
0 0
0 0
0 0
0 0
0 0
0 0
0 0
0 0
0 0
0 0
0 0
0 0
0 0
0 0
0 0
0 0
0 0
0 0
0 0
0 0
0 0
0 0
0 0
0 0
0 0
0 0
0 0
0 0
0 0
0 0
0 0
2 0
2 0
5 0
5 0
5 0
5 0
5 0
5 0
5 0
5 0
5 0
5 0
5 0
5 0
5 0
5 0
5 0
5 0
5 0
5 0
5 0
5 0
5 0
5 0
5 0
5 0
5 0
5 0
5 0
5 0
5 0
5 0
5 0
5 0
5 0
5 0
5 0
5 0
6 0
6 0
6 0
6 0
6 0
6 0
6 0
6 0
6 0
6 0
6 0
6 0
6 0
6 0
6 0
6 0
6 0
6 0
6 0
6 0
6 0
6 0
6 0
6 0
4 0
4 0
2 0
2 0
2 0
2 0
2 0
2 0
2 0
2 0
2 0
2 0
2 0
1 0
1 0
1 0
1 0
1 0
2 0
2 0
2 0
2 0
2 0
2 0
2 0
2 0
2 0
2 0
2 0
2 0
2 0
2 0
2 0
2 0
3 0
4 0
4 0
4 0
4 0
4 0
3 0
3 0
3 0
3 0
3 0
3 0
3 0
3 0
3 0
3 0
3 0
3 0
3 0
3 0
3 0
3 0
3 0
3 0
3 0
3 0
3 0
3 0
3 0
3 0
3 0
3 0
3 0
3 0
3 0
3 0
3 0
3 0
3 0
3 0
3 0
3 0
3 0
3 0
3 0
3 0
3 0
3 0
3 0
3 0
3 0
3 0
3 0
3 0
2 0
2 0
2 0
2 0
2 0
2 0
2 0
2 0
2 0
2 0
2 0
2 0
2 0
2 0
2 0
2 0
2 0
2 0
2 0
1 0
0 0
0 0
0 0
0 0
0 0
0 0
0 0
0 0
0 0
0 0
0 0
0 0
0 0
0 0
0 0
0 0
0 0
0 0
0 0
0 0
0 0
0 0
0 0
0 0
0 0
0 0
0 0
0 0
0 0
0 0
0 0
0 0
0 0
0 0
0 0
0 0
0 0
0 0
0 0
0 0
0 0
2 0
2 0
2 0
2 0
3 0
3 0
3 1
3 1
3 1
3 1
4 1
5 1
5 1
5 1
5 1
5 1
5 1
6 1
7 1
7 1
7 1
7 1
7 1
7 1
7 1
15 2
15 2
15 2
15 2
15 2
15 2
15 2
15 2
15 2
15 2
15 2
15 2
15 2
15 2
15 2
15 2
15 2
15 2
15 2
15 2
16 2
18 2
18 2
18 2
18 2
18 2
18 2
18 2
18 2
18 2
18 2
18 2
18 2
18 2
18 2
18 2
18 2
18 2
18 2
18 2
18 2
18 2
18 2
18 2
19 2
20 2
20 2
20 2
18 1
18 1
18 1
18 1
17 1
17 1
17 1
17 1
17 1
15 1
15 1
12 1
12 1
12 1
13 1
12 1
12 1
13 1
13 1
13 1
13 1
13 1
13 1
13 1
13 1
5 0
5 0
5 0
5 0
5 0
5 0
5 0
5 0
5 0
5 0
5 0
5 0
5 0
5 0
5 0
5 0
5 0
5 0
5 0
5 0
5 0
4 0
4 0
6 0
6 0
6 0
6 0
6 0
6 0
6 0
6 0
6 0
6 0
6 0
6 0
6 0
6 0
6 0
6 0
6 0
6 0
6 0
6 0
5 0
5 0
4 0
4 0
4 0
4 0
4 0
4 0
4 0
4 0
4 0
4 0
4 0
4 0
4 0
4 0
4 0
4 0
4 0
3 0
3 0
2 0
2 0
2 0
2 0
2 0
2 0
2 0
2 0
2 0
2 0
2 0
2 0
2 0
2 0
2 0
2 0
2 0
2 0
2 0
2 0
2 0
2 0
3 0
3 0
3 0
3 0
9 0
10 0
10 0
10 0
10 0
10 0
8 0
8 0
8 0
8 0
8 0
8 0
8 0
8 0
8 0
8 0
8 0
8 0
8 0
8 0
8 0
8 0
8 0
8 0
8 0
8 0
8 0
8 0
7 0
7 0
6 0
6 0
6 0
6 0
6 0
6 0
6 0
6 0
6 0
6 0
6 0
6 0
6 0
6 0
6 0
6 0
6 0
6 0
6 0
6 0
6 0
6 0
6 0
6 0
6 0
6 0
6 0
6 0
6 0
6 0
6 0
6 0
6 0
6 0
6 0
6 0
6 0
6 0
6 0
6 0
6 0
6 0
6 0
1 0
0 0
0 0
0 0
0 0
0 0
0 0
0 0
0 0
0 0
0 0
0 0
0 0
0 0
0 0
0 0
0 0
0 0
0 0
0 0
0 0
0 0
0 0
0 0
0 0
0 0
0 0
0 0
0 0
0 0
0 0
0 0
0 0
0 0
0 0
0 0
0 0
0 0
0 0
0 0
0 0
0 0
0 0
0 0
0 0
0 0
0 0
0 0
0 0
0 0
0 0
0 0
0 0
0 0
0 0
0 0
0 0
0 0
0 0
0 0
1 0
1 0
1 0
1 0
1 0
1 0
1 0
1 0
1 0
1 0
1 0
1 0
1 0
1 0
1 0
1 0
1 0
1 0
1 0
1 0
1 0
1 0
1 0
1 0
1 0
1 0
1 0
1 0
1 0
1 0
1 0
1 0
1 0
2 0
2 0
2 0
2 0
2 0
2 0
2 0
2 0
2 0
3 0
3 0
3 0
3 0
3 0
3 0
3 0
3 0
3 0
3 0
3 0
3 0
3 0
3 0
3 0
3 0
3 0
3 0
3 0
3 0
3 0
3 0
3 0
3 0
8 0
8 0
8 0
11 0
11 0
11 0
10 0
10 0
10 0
10 0
10 0
10 0
10 0
10 0
10 0
10 0
10 0
10 0
10 0
10 0
10 0
10 0
10 0
10 0
10 0
10 0
10 0
10 0
10 0
11 0
11 0
11 0
11 0
11 0
12 0
12 0
12 0
12 0
12 0
12 0
11 0
12 0
12 0
12 0
12 0
12 0
12 0
12 0
12 0
11 0
11 0
12 0
15 0
15 0
17 0
17 0
18 0
18 0
18 0
18 0
18 0
18 0
18 0
18 0
21 0
21 0
21 0
21 0
21 0
21 0
21 0
22 0
23 0
18 0
18 0
18 0
15 0
15 0
15 0
15 0
15 0
15 0
15 0
15 0
15 0
15 0
15 0
15 0
15 0
15 0
15 0
15 0
15 0
15 0
16 0
17 0
17 0
17 0
17 0
17 0
17 0
16 0
16 0
16 0
16 0
16 0
16 0
15 0
15 0
15 0
15 0
15 0
14 0
14 0
14 0
14 0
14 0
14 0
14 0
14 0
14 0
13 0
13 0
13 0
13 0
10 0
10 0
7 0
4 0
4 0
4 0
4 0
4 0
4 0
4 0
4 0
4 0
1 0
1 0
0 0
0 0
0 0
0 0
0 0
0 0
0 0
0 0
0 0
0 0
0 0
0 0
0 0
0 0
0 0
0 0
0 0
0 0
0 0
0 0
0 0
0 0
0 0
0 0
0 0
0 0
0 0
0 0
0 0
0 0
0 0
0 0
0 0
0 0
0 0
0 0
0 0
0 0
0 0
0 0
0 0
0 0
0 0
0 0
0 0
0 0
0 0
0 0
0 0
0 0
0 0
0 0
0 0
0 0
0 0
0 0
0 0
0 0
0 0
0 0
0 0
0 0
0 0
0 0
0 0
0 0
0 0
0 0
0 0
0 0
0 0
0 0
0 0
0 0
0 0
0 0
0 0
0 0
0 0
0 0
0 0
0 0
0 0
0 0
0 0
0 0
0 0
0 0
0 0
0 0
0 0
0 0
0 0
0 0
0 0
0 0
0 0
0 0
0 0
0 0
0 0
0 0
0 0
0 0
0 0
0 0
0 0
0 0
0 0
0 0
0 0
0 0
0 0
0 0
0 0
0 0
0 0
0 0
0 0
0 0
0 0
0 0
0 0
0 0
0 0
0 0
0 0
0 0
0 0
0 0
0 0
0 0
0 0
0 0
0 0
0 0
0 0
0 0
0 0
0 0
0 0
0 0
0 0
0 0
0 0
0 0
0 0
0 0
0 0
0 0
0 0
0 0
0 0
0 0
0 0
0 0
2 0
2 0
2 0
4 0
4 0
4 0
4 0
4 0
4 0
4 0
4 0
4 0
4 0
4 0
4 0
4 0
4 0
4 0
4 0
4 0
4 0
5 0
6 0
6 0
6 0
6 0
6 0
6 0
6 0
7 0
7 0
7 0
7 0
7 0
7 0
7 0
7 0
7 0
7 0
7 0
7 0
7 0
5 0
5 0
5 0
4 0
4 0
3 0
3 0
2 0
2 0
2 0
2 0
2 0
2 0
2 0
2 0
2 0
2 0
2 0
3 0
3 0
4 0
4 0
4 0
4 0
4 0
4 0
4 0
4 0
4 0
4 0
4 0
4 0
4 0
4 0
4 0
3 0
3 0
3 0
3 0
3 0
3 0
2 0
2 0
2 0
2 0
2 0
2 0
2 0
2 0
2 0
2 0
2 0
1 0
0 0
0 0
0 0
0 0
0 0
0 0
0 0
0 0
0 0
0 0
0 0
0 0
0 0
0 0
0 0
0 0
0 0
0 0
0 0
0 0
0 0
0 0
0 0
0 0
0 0
0 0
0 0
0 0
0 0
0 0
0 0
0 0
0 0
0 0
0 0
0 0
0 0
0 0
0 0
0 0
0 0
0 0
0 0
0 0
0 0
0 0
0 0
0 0
0 0
0 0
0 0
0 0
0 0
0 0
0 0
0 0
0 0
0 0
0 0
0 0
0 0
0 0
0 0
0 0
0 0
0 0
0 0
0 0
0 0
0 0
0 0
0 0
0 0
0 0
0 0
0 0
0 0
0 0
0 0
0 0
0 0
0 0
0 0
0 0
0 0
0 0
0 0
0 0
0 0
0 0
0 0
0 0
0 0
0 0
0 0
0 0
0 0
0 0
0 0
0 0
0 0
0 0
0 0
0 0
0 0
0 0
0 0
0 0
0 0
0 0
0 0
0 1
0 1
0 1
0 1
0 1
0 1
0 1
0 1
0 1
0 1
0 1
0 1
0 1
0 1
0 1
0 1
0 0
0 0
0 0
0 0
0 0
0 0
0 0
0 0
0 0
0 0
0 0
0 0
0 0
0 0
0 0
0 0
0 0
0 0
0 0
0 0
0 0
0 0
0 0
0 0
0 0
0 0
0 0
0 0
0 0
0 0
0 0
0 0
0 0
0 0
0 0
0 0
0 0
0 0
0 0
0 0
0 0
0 0
0 0
0 0
0 0
0 0
0 0
0 0
0 0
0 0
0 0
0 0
0 0
0 0
0 0
0 0
0 0
0 0
0 0
0 0
0 0
0 0
0 0
0 0
0 0
0 0
0 0
0 0
0 0
0 0
0 0
0 0
0 0
0 0
0 0
0 0
0 0
0 0
0 0
0 0
0 0
0 0
0 0
0 0
0 0
0 0
0 0
0 0
0 0
0 0
0 0
0 0
0 0
0 0
0 0
0 0
0 0
0 0
0 0
0 0
0 0
0 0
0 0
0 0
0 0
0 0
0 0
0 0
0 0
0 0
0 0
0 0
0 0
0 0
0 0
0 0
0 0
0 0
0 0
0 0
0 0
0 0
0 0
0 0
0 0
0 0
0 0
0 0
0 0
0 0
0 0
0 0
0 0
0 0
0 0
0 0
0 0
0 0
0 0
0 0
0 0
0 0
0 0
0 0
0 0
0 0
0 0
0 0
0 0
0 0
0 0
0 0
0 0
0 0
0 1
0 1
0 1
0 1
0 1
0 1
0 1
0 1
0 1
0 1
0 1
0 1
0 1
0 1
0 1
0 1
0 1
0 1
0 1
0 1
0 1
0 1
0 1
0 1
0 1
0 1
0 1
0 1
0 1
0 1
0 1
0 1
0 1
0 1
0 1
0 1
0 1
0 1
0 1
0 1
0 1
0 1
0 1
0 1
0 1
0 1
0 1
0 1
0 1
0 1
0 1
0 1
0 1
0 1
0 1
0 1
0 1
0 1
0 1
0 1
0 1
0 1
0 1
0 1
0 1
0 1
0 1
0 1
0 1
0 1
0 1
0 2
0 2
0 1
0 1
0 1
0 1
0 1
0 1
0 1
0 1
0 1
0 1
0 1
0 1
0 1
0 1
0 1
0 1
0 1
0 1
0 1
0 1
0 1
0 1
0 1
0 1
0 1
0 1
0 1
0 1
0 1
0 1
0 1
0 1
0 1
0 1
0 1
0 1
0 1
0 1
0 1
0 1
0 1
0 1
0 1
0 1
0 1
0 1
0 1
0 1
0 1
0 1
0 1
0 1
0 1
0 1
0 1
0 1
0 1
0 1
0 1
1 1
2 1
2 1
2 1
2 1
2 2
2 2
2 2
2 2
2 2
2 2
2 2
2 1
2 1
2 1
5 1
5 1
5 1
8 1
8 1
8 1
8 1
8 1
8 1
8 1
8 1
8 1
8 1
8 1
8 1
8 1
8 1
8 1
8 1
8 1
7 1
6 1
6 1
6 1
6 1
6 1
6 1
6 1
6 1
6 1
6 1
6 1
6 1
6 1
6 1
4 1
4 1
2 1
2 1
0 1
0 1
0 1
0 1
0 1
0 1
0 1
0 1
0 1
0 1
0 1
0 1
0 1
0 1
0 1
0 1
0 1
0 1
0 1
0 1
0 1
0 1
0 1
0 1
0 0
0 0
0 0
0 0
0 0
0 0
0 0
0 0
0 0
0 0
0 0
0 0
0 0
0 0
0 0
0 0
0 0
0 0
0 1
0 1
0 1
0 1
0 1
0 1
0 1
0 1
0 1
0 1
0 1
0 1
0 1
0 1
0 1
0 1
0 1
0 1
0 1
0 1
0 1
0 1
0 1
0 1
0 1
0 1
0 1
0 1
0 1
0 1
0 1
0 1
0 1
0 1
0 1
0 1
0 1
0 1
0 1
0 1
0 1
0 1
0 1
0 1
0 2
0 2
0 2
0 2
0 2
0 2
0 2
0 2
0 2
0 2
0 2
0 2
0 2
0 2
0 2
0 1
0 1
0 1
0 1
0 1
0 1
0 1
0 1
0 1
0 1
0 1
0 1
0 1
0 1
0 0
0 0
0 0
0 0
0 0
0 0
0 0
0 0
0 0
0 0
0 0
0 0
0 0
0 0
0 0
0 0
0 0
0 0
0 0
0 0
0 0
0 0
0 0
0 0
0 0
0 0
0 0
0 0
0 0
0 0
0 0
0 0
0 0
0 0
0 0
0 0
0 0
0 0
0 0
0 0
0 0
0 0
0 0
0 0
0 0
0 0
0 0
0 0
0 0
0 0
0 0
0 0
0 0
0 0
0 0
0 0
0 0
0 0
0 0
0 0
0 0
0 0
0 0
0 0
0 0
0 0
0 0
0 0
0 0
0 0
0 0
0 0
0 0
0 0
0 0
0 0
0 0
0 0
0 0
0 0
0 0
0 0
0 0
0 0
0 0
0 0
0 0
0 0
0 0
0 0
0 0
0 0
0 0
0 0
0 0
0 0
0 0
0 0
0 0
0 0
0 0
0 0
0 0
0 0
0 0
0 0
0 0
0 0
0 0
0 0
0 0
0 0
0 0
0 0
0 0
0 0
0 0
0 0
0 0
0 0
0 0
0 0
0 0
0 0
0 0
0 0
0 0
0 0
0 0
0 0
0 0
0 0
0 0
0 0
0 0
0 0
0 0
0 0
0 0
0 0
0 0
0 0
0 0
0 0
0 0
0 0
0 0
0 0
0 0
0 0
0 0
0 0
0 0
0 0
0 0
0 0
0 0
0 0
0 0
0 0
0 0
0 0
0 0
0 0
0 0
0 0
0 0
0 0
0 0
0 0
0 0
0 0
0 0
0 0
0 0
0 0
0 0
0 0
0 0
0 0
0 0
0 0
0 0
0 0
0 0
0 0
0 0
0 0
0 0
0 0
0 0
0 0
0 0
0 0
0 0
0 0
0 0
0 0
0 0
0 0
0 0
0 0
0 0
0 0
0 0
0 0
0 0
0 0
0 0
0 0
0 0
0 0
0 0
0 0
0 0
0 0
0 0
0 0
0 0
0 0
0 0
0 0
0 0
0 0
1 0
1 0
1 0
2 0
2 0
2 0
2 0
2 1
2 2
2 2
2 2
2 2
2 2
2 2
2 2
2 2
2 2
2 2
2 2
2 2
2 3
2 3
2 3
2 3
2 3
2 3
2 3
2 2
2 2
2 2
2 2
2 2
2 2
2 2
2 2
2 2
2 1
2 1
2 1
2 1
2 1
2 1
2 1
2 1
2 1
2 1
2 1
2 1
2 1
2 1
2 1
2 1
2 1
2 1
2 1
2 1
2 1
2 1
2 1
2 1
2 1
2 1
2 1
2 1
2 1
2 1
2 1
2 1
2 1
2 1
0 1
0 1
0 1
0 1
0 1
0 1
0 1
0 1
0 1
0 2
0 2
0 2
0 2
0 2
0 2
0 2
0 2
0 2
0 2
0 2
0 2
0 2
0 2
0 1
0 1
0 1
0 1
0 1
0 1
0 1
0 1
0 1
0 1
0 1
0 1
0 1
0 1
0 1
0 1
0 1
0 1
0 1
0 1
0 1
0 1
0 1
0 1
0 1
0 1
0 1
0 1
0 1
0 1
0 1
0 1
0 1
0 1
0 1
0 1
0 1
0 1
0 1
0 1
0 1
0 1
0 1
0 1
0 1
0 1
0 1
0 1
0 1
0 1
0 1
0 1
0 1
0 1
0 1
0 1
0 1
0 1
0 1
0 0
0 0
0 0
0 0
0 0
0 0
0 0
0 0
0 0
0 0
0 0
0 0
0 0
0 0
0 0
0 0
0 0
0 0
0 0
0 0
0 0
0 0
0 0
0 0
0 0
0 0
0 0
0 0
0 0
0 0
0 0
0 0
0 0
0 0
0 0
0 0
0 0
0 0
0 0
0 0
0 0
0 0
0 0
0 0
0 0
0 0
0 0
0 0
0 0
0 0
0 0
0 0
0 0
0 0
0 0
0 0
0 0
0 0
0 0
0 0
0 0
0 0
0 0
0 0
0 0
0 0
0 0
0 0
0 0
0 0
0 0
0 0
0 0
0 0
0 0
0 0
0 3
0 3
0 3
0 3
0 9
0 10
0 10
0 10
0 10
0 10
0 10
0 10
0 10
0 10
0 10
0 10
0 11
0 11
0 11
0 11
0 12
0 12
0 12
0 12
0 12
0 12
0 12
0 12
0 12
0 12
0 12
0 12
0 12
0 12
0 12
0 12
0 12
0 12
0 12
0 12
0 12
0 12
0 12
0 12
0 12
0 12
0 12
0 12
0 12
0 12
0 12
0 12
0 12
0 12
0 12
0 12
0 12
0 12
0 12
0 9
0 6
0 6
0 6
0 6
0 6
0 7
0 7
0 6
0 6
0 6
0 5
0 5
0 5
0 5
0 5
0 5
0 5
0 2
0 1
0 1
0 1
0 1
0 1
0 1
1 1
1 1
1 1
1 1
1 1
1 1
1 1
1 1
1 1
1 1
1 1
1 1
1 1
1 1
1 1
1 1
1 1
0 1
0 1
0 1
0 1
0 1
0 1
0 1
0 1
0 1
0 1
0 1
0 1
0 1
0 1
0 1
0 1
0 1
0 1
0 5
0 5
0 5
0 5
0 5
0 5
0 5
0 5
0 5
1 267
1 268
1 279
2 692
2 763
2 801
2 812
2 903
2 903
2 1027
2 1052
2 1119
2 1206
3 1252
3 1304
3 1307
3 1307
3 1308
4 1373
4 1373
4 1378
4 1378
4 1379
4 1379
4 1381
4 1381
4 1381
4 1381
4 1381
4 1382
4 1383
4 1383
4 1383
4 1383
4 1383
4 1383
4 1383
4 1383
4 1383
4 1384
4 1384
4 1384
4 1384
4 1384
4 1384
4 1384
4 1384
4 1384
4 1384
4 1384
4 1384
4 1384
4 1393
4 1395
4 1397
4 1397
4 1386
4 1367
4 1223
4 999
2 725
2 599
2 473
2 473
2 472
2 472
2 472
2 472
2 470
2 469
2 469
2 468
2 468
2 463
2 463
2 451
2 284
2 258
2 257
2 253
2 252
2 250
2 174
3 126
2 125
2 124
2 124
2 109
2 109
2 109
2 107
1 37
1 37
1 35
1 35
1 43
1 51
1 61
1 63
1 64
1 64
1 64
1 63
1 62
1 62
1 62
1 62
1 65
1 66
1 67
1 67
1 67
1 66
1 66
1 66
1 67
1 68
1 72
1 84
1 109
1 112
1 114
1 115
1 121
1 123
1 116
1 120
1 127
1 129
1 129
1 130
2 306
2 308
2 415
2 415
2 415
2 417
2 420
2 509
2 513
2 516
2 516
2 540
2 557
2 564
2 564
2 585
2 591
2 592
2 592
2 592
2 597
2 598
2 600
2 600
2 600
1 594
1 591
1 591
1 589
1 588
1 588
1 590
1 592
1 592
1 591
1 591
1 590
1 583
1 565
1 556
1 556
1 556
1 556
1 556
1 557
1 557
1 557
1 557
1 557
1 551
1 550
1 550
1 550
1 551
1 551
1 552
1 549
1 548
1 545
1 534
1 503
1 473
1 463
1 454
1 454
1 447
1 447
1 440
1 424
1 403
1 403
1 402
1 397
0 130
0 129
0 127
0 127
0 38
0 39
0 38
0 22
0 22
0 22
0 22
0 23
0 23
0 23
0 21
0 17
0 16
0 16
0 16
0 16
0 16
0 16
0 16
0 16
0 16
0 16
0 11
0 11
0 11
0 11
0 11
0 11
0 11
0 11
0 11
0 11
0 11
0 11
0 10
0 10
0 10
0 10
0 10
0 15
0 14
0 14
0 16
0 37
0 44
0 44
0 44
0 44
0 47
0 46
0 46
0 45
0 45
0 45
0 45
0 45
0 45
0 45
0 45
0 45
0 45
0 45
0 45
0 45
0 44
0 44
0 44
0 44
0 45
0 46
0 45
0 45
0 50
0 49
0 48
0 49
0 49
0 49
0 51
0 51
0 50
0 50
0 50
0 51
0 51
0 51
0 51
0 51
0 51
0 52
0 55
0 57
0 57
0 57
0 54
0 54
0 55
0 55
0 55
0 69
0 69
0 69
0 69
0 69
0 69
0 69
0 69
0 69
0 69
0 68
0 68
0 68
0 63
0 63
0 62
0 59
0 38
0 31
0 31
0 31
0 31
0 27
0 27
0 27
0 27
0 27
0 27
0 27
0 27
0 46
0 54
0 55
0 55
0 55
0 55
0 55
0 55
0 55
0 55
0 55
0 55
0 54
0 52
0 52
0 52
0 47
0 47
0 47
0 46
0 46
0 46
0 46
0 45
0 45
0 45
0 45
0 45
0 46
0 46
0 47
0 47
0 47
0 44
0 43
0 43
0 43
0 42
0 42
0 41
0 41
0 41
0 41
0 30
0 30
0 30
0 30
0 30
0 30
0 30
0 30
0 30
0 30
0 30
0 30
0 30
0 30
0 30
0 30
0 30
0 30
0 30
0 30
0 30
0 30
0 30
0 35
0 36
0 36
0 36
0 36
0 36
0 36
0 13
0 7
0 6
0 6
0 6
0 6
0 7
0 7
0 7
0 7
0 7
0 7
0 7
0 7
0 7
0 7
0 7
0 8
0 8
0 8
0 9
0 9
0 9
0 9
0 9
0 9
0 9
0 9
0 9
0 9
0 9
0 9
0 9
0 9
0 9
0 9
0 9
0 9
0 9
0 9
0 9
0 9
0 9
0 9
0 9
0 9
0 9
0 9
0 9
1 9
1 9
1 9
1 9
1 9
1 9
1 9
1 9
1 9
1 9
1 9
1 9
1 9
1 9
1 9
1 9
0 9
0 3
0 3
0 3
0 3
0 3
0 3
0 3
0 3
0 3
0 3
0 3
0 3
0 3
0 2
0 2
0 2
0 2
0 2
0 2
0 2
0 2
0 2
0 2
0 2
0 2
0 1
0 0
0 0
0 0
0 0
0 0
0 0
0 0
0 0
0 0
0 0
0 0
0 0
0 0
0 0
0 0
0 0
0 1
0 1
0 1
0 1
0 3
0 4
0 5
0 5
0 9
0 9
0 9
0 9
0 9
0 9
0 40
0 40
0 83
0 87
0 87
0 91
0 91
0 92
0 93
0 93
0 93
0 94
0 94
0 94
0 94
0 94
0 96
0 97
0 96
0 96
0 96
0 96
0 96
0 96
0 96
0 96
0 96
0 96
0 96
0 95
0 95
0 94
0 94
0 94
0 94
0 95
0 96
0 97
0 95
0 96
0 97
0 97
0 98
0 98
0 98
0 98
0 98
0 98
0 98
0 98
0 98
0 98
0 98
0 98
0 98
0 98
0 98
0 98
0 96
0 95
0 96
0 96
0 96
0 77
0 74
0 57
0 55
0 37
0 37
0 36
0 35
0 35
0 35
0 19
0 19
0 11
0 11
0 11
0 10
0 13
0 13
0 13
0 13
0 13
0 23
0 25
0 29
1 43
1 43
1 41
1 41
1 41
1 41
1 43
1 49
1 49
1 50
1 61
1 62
1 62
1 69
1 69
1 72
1 72
1 72
1 74
1 80
1 80
1 82
1 87
1 93
1 93
1 92
1 91
1 91
1 90
1 90
1 90
1 90
1 92
1 92
1 92
1 92
1 92
1 92
1 92
1 92
1 92
1 92
1 92
1 91
1 91
1 91
1 91
1 90
1 90
1 90
1 90
1 90
1 90
1 91
2 96
2 96
2 96
2 96
2 97
2 97
2 97
2 97
2 97
2 97
2 97
2 94
2 93
2 94
2 93
2 93
2 82
2 79
2 74
1 61
1 60
1 59
1 57
1 57
1 57
1 56
1 48
1 48
1 46
1 24
1 22
1 16
1 16
1 16
1 16
1 17
1 17
1 18
1 18
1 18
1 15
1 13
1 12
1 12
1 12
1 14
1 14
1 14
1 14
1 14
1 14
1 12
1 12
1 12
1 13
1 13
1 13
1 13
1 13
1 13
1 13
1 13
1 13
1 14
1 14
1 14
1 15
1 16
1 16
1 16
0 16
0 16
0 13
0 10
0 10
0 10
0 10
0 9
0 9
0 9
0 9
0 9
0 9
0 9
0 9
0 9
0 8
0 8
0 8
3 8
6 8
6 8
6 8
6 8
6 11
6 11
6 11
6 11
6 11
6 11
6 11
6 11
6 11
6 11
6 11
6 11
6 12
6 15
6 14
6 13
6 13
6 14
6 20
6 20
6 20
6 20
6 20
6 20
6 18
6 18
6 18
6 19
6 28
6 34
6 98
6 153
6 163
6 387
6 423
6 462
6 476
6 501
7 523
7 623
7 669
7 671
7 687
7 705
7 706
7 716
9 742
8 749
8 777
8 1037
8 1041
8 1043
8 1051
8 1072
8 1077
8 1089
8 1100
8 1104
8 1125
8 1127
8 1129
8 1134
8 1149
8 1162
8 1171
8 1186
8 1194
8 1194
7 1200
4 1225
4 1230
4 1269
4 1289
4 1294
4 1299
4 1306
4 1306
4 1306
4 1305
4 1304
4 1307
4 1307
4 1308
4 1286
4 1286
4 1254
4 1217
4 1184
4 1184
4 1184
4 1184
4 1182
4 1180
4 1178
4 1178
4 1168
4 1169
4 1163
4 1161
4 1160
4 1153
4 1144
4 1141
4 1116
4 1062
4 1037
4 777
4 780
4 778
4 813
4 831
3 823
3 757
3 726
3 726
3 727
3 713
3 714
3 699
0 673
0 665
0 629
0 319
0 321
0 257
0 248
0 246
0 237
0 212
0 199
0 198
0 189
0 199
0 200
0 200
0 198
0 193
0 192
0 188
0 182
0 186
0 189
0 198
0 208
0 189
0 188
0 191
0 193
0 194
0 194
0 194
0 206
0 205
0 206
0 207
0 207
0 206
0 206
0 206
0 206
0 206
0 206
0 206
0 204
0 204
0 204
0 206
0 207
0 209
0 213
0 219
0 223
0 238
0 245
0 256
0 256
0 254
0 255
0 254
0 253
0 229
0 226
0 180
0 153
0 150
0 150
0 150
0 149
0 149
0 144
0 143
0 142
0 142
0 142
0 142
0 137
0 135
0 134
0 135
0 134
0 133
0 138
0 138
0 138
0 139
0 132
0 131
0 131
0 131
0 131
0 134
0 140
0 142
0 138
0 130
0 122
0 105
0 94
0 95
0 104
0 108
0 107
0 107
0 107
0 96
0 96
0 93
0 93
0 96
0 101
0 103
0 103
0 103
0 103
0 103
0 103
0 102
0 104
0 104
0 104
0 118
0 117
0 117
0 111
0 107
0 88
0 83
0 74
0 73
0 74
0 75
0 78
0 85
0 106
0 155
0 160
0 160
0 161
0 162
0 162
0 162
0 162
0 162
0 162
0 162
0 163
0 163
0 163
0 163
0 163
0 163
0 161
0 161
0 161
0 155
0 155
0 156
0 158
0 158
0 158
0 158
0 157
0 158
0 157
0 158
0 160
0 160
0 162
0 162
0 164
0 160
0 156
0 149
0 164
0 168
0 172
0 173
0 181
0 185
0 187
0 188
0 186
0 190
0 193
0 194
0 194
0 195
0 195
0 195
0 194
0 192
0 191
0 188
0 171
0 171
0 171
0 171
0 173
0 177
0 178
0 177
0 176
0 172
0 168
0 164
0 158
0 132
0 78
0 74
0 71
0 71
0 71
0 72
0 72
0 72
0 72
0 72
0 72
0 71
0 71
0 71
0 71
0 71
0 71
0 72
0 72
0 72
0 72
0 72
0 71
0 69
0 69
0 69
0 69
0 69
0 69
0 74
0 74
0 74
0 75
0 103
0 104
0 105
0 108
0 110
0 132
0 396
1 1078
1 1256
1 1538
1 1580
1 1618
1 1630
1 1642
1 1641
1 1630
1 1627
1 1627
1 1627
1 1627
1 1628
1 1629
1 1629
1 1630
1 1630
1 1631
1 1631
1 1632
1 1634
1 1634
1 1633
1 1631
1 1631
1 1631
1 1636
1 1637
1 1638
1 1638
1 1639
1 1639
1 1633
1 1621
1 1608
1 1594
1 1592
1 1585
1 1613
3 1976
3 1987
3 1999
3 2003
3 2001
3 1963
3 1896
3 1882
3 1876
3 1882
3 1803
3 1830
3 2097
3 2196
3 2215
3 2250
3 2245
3 2246
3 2345
3 2348
3 2352
3 2355
3 2356
3 2356
3 2358
3 2355
3 2342
3 2339
3 2337
3 2325
3 2315
3 2271
2 1724
2 1361
2 1230
2 1138
2 1130
2 1133
2 1138
2 1135
2 1139
2 1146
2 1155
2 1161
2 1171
2 1187
2 1201
2 1233
2 1238
2 1267
2 1270
2 1274
2 1279
2 1281
2 1291
2 1318
2 1382
3 1404
3 1433
3 1438
3 1434
3 1443
3 1442
3 1443
3 1443
3 1443
3 1443
3 1446
3 1447
3 1447
3 1447
3 1446
3 1403
1 1016
1 1011
1 1004
1 1004
1 1010
1 1010
1 1012
1 1016
1 1019
1 1008
1 1006
1 943
1 569
1 476
1 439
1 394
1 387
1 544
1 428
1 436
1 409
1 403
1 400
1 399
1 397
1 394
1 378
1 378
1 382
1 381
1 378
1 377
1 377
1 377
1 377
1 377
1 377
1 376
1 373
1 373
1 372
2 379
2 387
2 388
2 382
2 379
2 377
2 358
2 357
2 333
2 331
2 331
2 333
2 333
2 322
1 274
1 262
1 256
1 255
1 255
1 255
1 256
1 256
1 261
1 261
1 261
1 261
1 259
1 259
1 261
1 262
1 265
1 271
1 278
1 279
1 329
1 340
1 338
1 348
1 345
1 375
1 376
1 376
1 372
1 373
1 373
1 373
1 372
1 370
1 425
1 265
1 265
1 255
1 253
1 253
1 252
1 252
1 252
1 252
1 252
1 253
1 246
1 246
1 246
1 246
1 246
1 247
1 247
1 247
1 247
1 247
1 247
1 247
1 247
0 238
0 229
0 249
0 282
0 283
0 285
0 285
0 285
0 292
0 294
0 298
0 302
0 305
0 304
0 296
0 284
0 283
0 281
0 279
0 280
0 279
0 279
0 273
0 273
0 279
0 281
0 282
0 283
0 283
0 283
0 280
0 273
0 272
0 269
0 216
0 208
0 198
0 197
0 197
0 167
0 165
0 164
0 164
0 164
0 164
0 164
0 164
0 162
0 107
0 108
0 108
0 109
0 109
0 112
0 113
0 117
0 117
0 118
0 118
0 120
0 120
0 120
0 120
0 120
0 122
0 121
0 121
0 121
0 121
0 121
0 122
0 122
0 123
0 120
0 118
0 92
0 49
0 41
0 41
0 41
0 43
0 42
0 42
0 39
0 64
0 66
0 70
0 73
0 70
0 68
0 68
0 70
0 72
0 72
0 71
0 71
0 72
0 66
0 66
0 65
0 64
0 64
0 64
0 64
0 64
0 66
0 68
0 68
0 68
0 69
0 68
0 68
0 68
0 68
0 68
0 73
0 73
0 74
0 74
0 79
0 100
0 100
0 100
0 100
0 110
0 109
0 103
0 96
0 95
0 104
0 126
0 140
0 146
0 155
0 157
0 159
0 161
0 159
0 161
0 160
0 164
0 177
0 203
0 222
0 224
0 227
0 227
1 227
1 227
1 226
1 225
1 225
1 225
1 225
1 227
1 228
1 225
1 200
1 200
1 201
1 201
1 201
1 200
0 200
0 197
0 196
0 196
0 196
0 196
0 197
0 196
0 201
0 206
0 207
0 207
0 207
0 207
0 207
0 205
0 201
0 201
0 200
0 199
0 199
0 199
0 199
0 199
0 199
0 191
0 191
0 182
0 182
0 154
0 98
0 83
0 81
0 81
0 81
0 81
0 81
0 79
0 78
0 77
0 72
0 68
0 65
0 64
0 64
0 63
0 63
0 62
0 62
0 62
0 62
0 54
0 37
0 21
0 21
0 21
0 22
0 22
0 24
1 28
1 31
1 33
1 46
1 66
2 115
2 117
2 117
2 116
2 116
2 117
2 117
2 118
2 118
2 118
2 118
2 118
2 118
2 119
2 119
2 116
2 116
2 110
2 104
2 104
2 104
2 104
2 104
2 104
2 104
2 104
2 104
2 104
2 104
2 104
2 104
2 104
2 104
2 104
2 104
2 104
2 104
2 104
2 104
2 104
2 104
2 105
2 105
2 106
2 106
2 106
2 106
2 106
2 106
2 106
2 106
2 106
2 106
2 106
2 106
2 106
2 106
2 106
2 106
2 106
2 107
2 107
2 109
2 109
2 108
2 108
2 107
2 106
1 101
1 99
1 97
1 80
1 59
0 11
0 10
0 9
0 9
0 9
0 8
0 8
0 8
0 8
0 8
0 8
0 8
0 8
0 8
0 8
0 8
0 12
0 12
0 41
0 44
0 45
0 46
0 46
0 46
0 46
0 47
0 47
0 48
0 51
0 51
0 72
0 74
0 78
0 78
0 79
0 79
0 80
0 80
0 80
0 83
0 83
0 83
0 83
0 89
0 89
0 89
0 93
0 94
0 94
0 96
0 96
0 96
0 96
0 96
0 96
0 97
0 99
0 101
0 101
0 101
0 98
0 99
0 100
0 103
0 103
0 100
0 97
0 97
0 97
0 97
0 98
0 98
0 98
0 91
0 155
0 155
0 155
0 155
0 167
1 303
1 307
1 340
1 370
1 377
1 384
1 387
1 387
1 387
1 387
1 387
1 388
1 360
1 359
1 360
1 361
1 364
1 364
1 381
1 381
1 382
1 382
1 382
1 380
1 360
1 358
1 359
1 359
1 358
1 360
1 361
1 361
1 361
1 359
1 357
1 358
1 364
1 311
1 311
1 262
1 241
1 220
1 219
1 215
1 211
1 209
1 207
1 207
1 209
1 205
1 205
1 204
1 204
1 204
1 204
1 198
1 198
1 196
1 197
1 195
1 196
1 196
1 271
1 272
1 272
1 274
2 634
2 647
2 716
2 746
2 758
2 763
2 758
1 652
1 636
1 626
1 625
1 627
1 631
1 631
1 633
1 633
1 633
1 634
1 635
1 635
1 634
1 633
1 630
1 627
2 632
2 600
2 600
2 598
2 584
2 584
2 586
2 586
2 586
2 586
2 596
2 645
2 645
2 653
2 657
2 659
2 658
2 658
2 657
2 631
2 630
2 578
2 569
2 557
2 557
2 554
2 551
2 551
2 551
2 551
2 551
2 547
2 547
2 547
2 547
2 548
2 548
2 546
2 546
2 544
2 538
2 528
2 528
2 526
2 525
2 525
2 518
2 518
2 511
1 189
1 137
1 177
1 183
1 191
1 196
1 333
1 403
1 432
1 435
1 435
1 439
1 438
1 438
1 436
1 436
1 436
1 436
1 436
1 437
1 437
1 437
1 437
1 438
0 433
0 433
0 433
0 433
0 433
1 522
1 519
1 521
1 520
1 520
1 507
1 460
1 458
1 449
1 459
1 459
1 461
1 460
1 461
1 461
1 453
1 449
1 448
1 448
1 448
1 448
2 448
2 449
2 449
2 450
2 450
2 450
2 450
2 451
2 451
2 450
2 451
2 451
2 451
2 451
3 451
3 451
3 456
3 472
3 486
3 492
3 502
3 505
3 506
3 516
3 513
3 468
3 467
3 461
3 455
3 311
4 235
3 219
3 221
3 226
3 218
3 225
3 225
3 224
3 223
3 223
3 222
3 221
3 231
3 236
3 252
3 259
3 261
3 265
3 265
3 269
3 269
3 270
2 163
2 364
2 368
2 370
2 371
2 361
2 639
2 654
2 666
2 669
2 687
2 696
3 703
3 701
3 700
3 703
3 704
3 739
3 739
3 741
3 744
2 744
2 746
2 746
2 745
2 744
2 745
2 745
2 743
2 743
2 745
2 746
2 750
2 752
2 752
2 777
2 781
2 790
2 787
2 783
2 778
2 775
2 775
2 778
2 769
2 767
2 767
2 767
2 767
2 766
2 764
1 762
1 761
1 747
1 688
1 609
1 573
1 544
1 544
1 542
1 540
1 539
1 539
1 501
1 460
1 386
1 340
1 292
1 293
1 282
1 280
1 280
1 275
1 273
1 269
1 266
1 261
1 260
1 258
0 123
0 112
0 111
0 111
0 126
0 127
0 127
0 127
0 128
0 124
0 122
0 90
0 90
0 90
0 89
0 89
0 86
0 86
0 86
0 86
0 86
0 86
0 86
0 86
0 87
0 87
0 87
0 87
0 87
0 60
0 55
0 48
0 47
0 47
0 48
0 48
0 47
0 54
0 58
0 64
0 74
0 75
0 76
0 80
0 80
0 79
0 76
0 74
0 74
0 75
0 85
0 96
0 97
0 97
1 98
1 99
1 99
1 99
1 99
1 99
1 99
1 99
1 98
1 98
1 98
1 98
1 98
1 99
1 99
1 103
1 103
1 103
3 113
3 114
3 115
3 114
3 114
3 98
3 98
3 97
3 100
3 105
3 105
3 105
3 108
3 108
3 107
3 109
3 116
3 121
3 134
3 150
3 155
3 155
3 155
3 155
3 154
3 154
3 154
3 154
3 153
4 153
4 155
4 150
9 148
9 145
9 143
9 142
9 142
9 141
9 127
9 122
9 120
9 113
9 110
9 112
9 111
9 112
9 115
9 116
9 116
9 116
9 112
9 91
9 71
9 64
9 66
8 66
8 65
8 71
8 71
8 71
8 71
8 71
8 71
8 69
8 69
8 69
8 69
8 73
8 73
8 74
8 72
8 73
8 73
6 63
6 63
6 62
6 62
6 62
6 66
6 67
6 66
6 64
6 64
6 64
6 64
6 62
6 61
6 61
6 59
6 54
6 46
6 39
6 37
6 37
6 37
6 37
6 37
6 37
6 37
5 37
5 36
5 36
5 35
4 39
3 39
0 46
0 51
0 88
0 91
0 91
0 95
0 95
0 95
0 94
0 94
0 94
0 91
0 91
0 90
0 87
0 86
0 88
0 91
0 99
1 231
1 241
1 248
2 681
2 747
2 759
2 782
2 797
2 828
2 860
2 865
2 867
2 870
2 956
2 960
2 963
2 997
2 1002
2 1003
2 1003
2 1004
2 1005
2 1005
2 1005
2 1005
2 1006
2 1007
2 1001
2 995
2 993
2 994
2 998
2 998
2 999
2 1000
2 1000
2 1000
2 1000
2 1000
2 1001
2 1003
2 1002
2 1002
2 1002
2 1002
2 1002
2 1009
2 1020
2 1023
2 1026
2 1027
2 1030
2 1016
2 1006
2 965
2 932
2 794
2 782
2 670
2 659
2 654
0 654
0 656
0 654
0 654
0 654
0 654
0 654
0 654
0 654
0 653
0 652
0 650
0 639
0 632
0 630
0 284
0 360
0 395
3 402
3 409
3 485
3 467
6 490
6 539
6 546
6 470
6 468
8 467
8 428
8 426
8 426
8 427
8 429
8 429
8 429
8 429
8 431
8 431
8 431
8 431
8 439
8 442
8 440
8 441
8 454
8 456
8 468
8 472
8 473
8 479
8 479
8 478
4 475
4 481
0 485
0 486
0 486
0 487
0 479
0 467
0 465
0 463
0 463
0 459
0 459
0 460
0 460
0 460
0 461
0 461
1 461
1 461
1 461
1 461
1 459
1 459
1 459
1 461
1 461
1 461
1 461
1 461
1 461
0 461
0 461
0 461
0 457
0 455
0 423
0 289
0 225
0 207
0 203
0 115
0 115
0 93
0 39
0 31
0 28
0 29
0 29
0 29
0 30
0 30
0 29
0 27
0 28
0 29
0 29
0 29
0 29
0 27
0 25
0 24
0 27
0 27
0 27
0 33
0 33
0 32
0 34
0 34
0 35
0 35
0 35
0 35
0 29
0 28
0 26
0 25
0 25
0 25
0 24
0 24
0 24
0 24
0 24
0 24
0 25
0 25
0 29
0 49
0 69
0 74
0 78
0 88
0 90
0 90
0 92
0 92
0 90
0 91
0 92
0 96
0 96
0 96
0 96
0 108
0 109
0 109
0 109
0 109
0 109
0 108
0 108
0 108
0 108
0 130
0 131
0 156
0 156
0 160
0 173
0 182
0 183
0 186
0 186
0 186
0 190
0 198
0 202
0 209
0 209
0 211
0 213
0 213
0 220
0 224
0 228
0 231
0 227
0 237
0 235
0 244
0 244
0 246
0 278
0 281
0 284
0 284
0 286
0 286
0 286
0 286
0 288
0 290
0 307
0 422
0 427
0 434
0 434
0 433
0 431
0 428
0 400
0 360
0 346
0 345
0 339
0 338
0 340
0 342
0 342
0 342
0 342
0 342
0 342
0 342
0 342
0 342
0 332
0 332
0 332
0 336
0 342
0 344
0 346
0 346
0 374
0 386
0 363
0 394
0 352
0 363
0 361
0 379
0 363
0 362
0 362
0 363
0 364
0 360
0 359
0 358
0 353
0 352
0 354
0 353
0 357
0 351
0 347
0 346
0 344
0 341
0 335
0 334
0 334
0 334
0 330
0 302
0 304
0 305
0 305
0 307
0 308
0 308
0 309
0 308
0 305
0 271
0 123
0 120
0 116
0 75
0 75
0 76
0 77
0 77
0 77
0 84
0 85
0 86
0 86
0 86
0 86
0 86
0 86
0 86
0 86
0 86
0 86
0 86
0 86
0 86
0 86
0 86
0 86
0 83
0 83
0 83
0 82
0 72
0 68
0 62
0 56
0 54
0 51
0 48
0 37
0 36
0 34
0 33
0 35
0 38
2 55
2 84
2 97
2 118
2 132
2 136
2 153
2 151
2 157
2 188
2 206
2 209
2 209
2 209
2 209
2 211
2 211
2 215
2 220
2 224
2 224
2 234
2 236
2 255
2 275
2 1338
2 1401
2 1466
2 2284
2 2463
2 2618
2 2712
2 2800
2 3327
2 3395
2 3587
2 3683
2 3705
1 3736
1 3852
0 3854
0 3866
0 3872
0 3889
0 3892
0 3906
0 3944
0 3968
0 3968
0 3972
0 3973
0 3974
0 3976
0 3976
0 3976
0 3972
0 3970
0 3966
0 3964
0 3964
0 3964
0 3964
0 3964
0 3970
0 3973
0 3975
0 3976
0 3976
0 3979
0 3967
0 3965
0 3963
0 3962
0 3932
0 3913
0 3891
0 3731
0 3359
0 3210
0 2911
0 2603
0 2529
0 2152
0 1428
0 1093
0 1091
0 1091
0 1091
0 1090
0 1095
0 1095
0 1093
0 1074
0 1043
0 975
0 794
0 700
0 640
0 637
0 574
0 559
0 370
0 354
0 353
0 351
0 346
0 338
0 329
0 266
0 275
0 293
0 280
0 207
0 228
0 225
0 217
0 214
0 212
0 198
0 159
0 144
0 144
0 144
0 144
0 144
0 144
0 144
0 144
0 144
0 144
0 142
0 142
0 142
0 142
0 143
0 143
0 138
0 135
0 148
0 151
0 151
0 142
0 142
0 142
0 142
0 141
0 138
0 138
0 137
0 136
0 135
0 134
0 134
0 135
0 125
0 116
0 114
0 113
0 113
0 113
0 112
0 111
0 110
0 110
0 110
0 114
0 114
0 115
0 115
0 115
0 116
0 127
0 185
0 185
0 187
0 189
0 190
0 190
0 190
0 190
0 190
0 166
0 150
0 134
0 133
0 131
0 111
0 111
0 111
0 111
0 111
0 113
0 114
0 118
0 120
0 129
0 129
0 129
0 129
0 129
0 129
0 129
0 129
0 130
0 134
0 140
0 147
0 147
0 182
0 184
0 185
0 171
0 167
0 167
0 167
0 167
0 167
0 168
0 168
0 168
0 168
0 168
0 168
0 168
0 168
0 168
0 171
0 171
0 172
0 172
0 172
0 172
0 172
0 177
0 182
0 180
0 182
0 183
0 179
0 179
0 178
0 178
0 178
0 176
0 159
0 103
0 103
0 102
0 100
0 99
0 101
0 101
0 101
0 101
0 94
0 100
0 100
0 101
0 102
0 103
0 115
0 119
0 129
0 129
0 128
0 127
0 122
0 124
0 112
0 112
0 112
0 109
0 110
0 112
0 112
0 113
0 112
0 114
0 114
0 108
0 108
0 61
0 61
0 57
0 55
0 46
0 47
0 47
0 47
0 47
0 47
0 49
0 50
0 50
0 50
0 50
0 49
0 50
0 50
0 45
0 45
0 45
0 46
0 46
0 46
0 46
0 46
0 44
0 44
0 44
0 46
0 46
0 46
0 54
0 61
0 66
0 68
0 68
0 73
0 73
0 73
0 73
0 69
0 65
0 64
0 69
0 71
0 71
0 71
0 73
0 73
0 71
0 67
0 63
0 60
0 58
0 58
0 56
0 56
0 56
0 54
0 54
0 54
0 54
0 54
0 53
0 52
0 52
0 52
0 52
0 51
0 51
0 51
0 51
0 51
0 51
0 51
0 51
0 51
0 50
0 50
0 50
0 51
0 51
0 48
0 47
0 47
0 47
0 47
0 47
0 47
0 47
0 47
0 47
0 47
0 46
0 46
0 46
0 48
0 54
0 112
0 200
0 298
0 375
0 400
0 401
0 394
0 390
0 383
0 381
0 380
0 376
0 377
0 377
0 378
0 381
0 424
0 456
0 464
0 464
0 518
0 518
0 518
0 522
0 522
0 524
0 525
0 527
0 529
0 529
0 529
0 531
0 531
0 531
0 531
0 531
0 531
0 531
0 531
0 531
0 531
0 532
0 533
0 534
0 534
0 534
0 534
0 535
0 535
0 535
0 536
0 542
0 546
0 550
0 551
0 550
0 548
0 543
0 541
0 541
0 542
0 544
0 546
0 545
0 543
0 544
0 542
0 543
0 544
0 544
0 550
0 547
0 529
0 451
0 367
0 295
0 213
0 207
0 207
0 205
0 205
0 204
0 205
0 207
0 259
0 259
0 261
0 263
0 285
0 248
0 230
0 228
0 227
0 176
0 177
0 177
0 174
0 174
0 173
0 172
0 171
0 169
0 170
0 171
0 170
0 178
0 178
0 185
0 184
0 184
0 184
0 192
0 192
0 192
0 191
0 191
0 194
0 201
0 204
0 215
0 216
0 219
0 222
0 219
0 213
0 211
0 207
0 207
0 207
0 225
0 235
0 247
0 253
0 256
0 256
0 256
0 260
0 260
0 259
0 259
0 259
0 258
0 258
0 251
0 252
0 255
0 265
0 292
0 293
0 294
0 285
0 285
0 286
0 288
0 291
0 296
0 296
0 249
0 248
0 250
0 249
0 225
0 213
0 199
0 194
0 193
0 195
0 197
0 199
0 478
0 488
0 497
0 503
1 512
1 513
1 513
1 513
1 510
1 501
1 498
1 493
1 493
1 494
1 494
1 488
1 488
1 489
1 489
1 492
1 486
1 487
1 486
1 476
1 475
1 471
1 468
1 558
1 558
1 559
1 559
1 560
1 646
1 627
2 618
2 608
2 607
2 605
2 604
2 603
2 600
2 599
2 598
2 598
2 602
2 602
2 604
2 604
2 601
2 599
2 587
2 555
2 552
2 549
2 548
2 548
2 548
2 547
2 543
2 535
3 527
3 528
3 540
3 555
3 564
3 587
3 586
3 612
3 624
3 1239
3 1264
4 1334
4 1411
4 1071
4 1152
4 1220
3 1231
2 1132
2 1132
2 1131
2 1134
2 1134
2 1136
2 1136
2 1141
2 1145
2 1151
2 1155
2 1156
2 1156
2 1156
2 1155
2 1152
2 1152
2 1151
2 1150
2 1150
2 1149
2 1150
2 1160
3 1186
3 1283
3 1302
3 1306
3 1306
3 1301
3 1301
2 1301
2 1302
2 1302
2 1300
2 1300
2 1327
2 1408
2 1409
2 1409
2 1409
2 1438
2 1442
2 1443
2 1443
2 1446
2 1446
2 1450
2 1450
2 1442
2 1525
2 1521
2 1520
2 1522
2 1527
2 1543
2 1553
2 1554
2 1548
2 1537
2 1521
2 1503
2 1481
2 1469
2 1467
2 1412
1 671
1 594
1 589
1 608
1 578
1 667
1 646
1 650
1 650
1 647
1 650
1 653
1 670
1 692
1 691
1 684
1 681
1 677
1 673
1 673
1 673
1 677
1 691
1 707
1 729
1 762
1 833
1 853
1 856
1 858
1 848
0 817
0 707
0 705
0 706
0 707
0 707
0 708
0 709
0 708
0 709
0 709
0 708
0 675
0 592
0 587
0 582
0 577
0 548
0 542
0 561
0 570
0 587
0 659
0 663
0 673
0 679
0 587
0 587
0 578
0 577
0 578
0 567
0 592
0 666
0 667
0 667
0 664
0 664
0 664
0 666
0 667
0 668
0 671
0 676
0 675
0 653
0 641
0 495
0 486
0 451
0 451
0 450
0 407
0 405
0 397
0 386
0 384
0 382
0 382
0 382
0 382
0 382
0 382
0 382
0 376
0 366
0 341
0 312
0 306
0 305
0 303
0 305
0 302
0 302
0 301
0 301
0 300
0 300
0 299
0 298
0 298
0 298
0 299
0 305
0 307
0 307
0 308
0 309
0 309
0 309
0 310
0 309
0 289
0 279
0 258
0 186
0 170
0 164
0 153
0 153
0 156
0 155
0 152
0 153
0 156
0 119
0 44
0 44
0 45
0 46
0 47
0 51
0 92
0 112
0 127
0 133
0 133
0 132
0 131
0 131
0 131
0 131
0 130
0 130
0 130
0 130
0 130
0 130
0 130
0 130
0 130
0 130
0 130
0 130
0 130
0 130
0 131
0 132
0 133
0 134
0 134
0 130
0 128
0 132
0 133
0 132
0 134
0 178
0 215
0 395
0 755
0 818
0 897
0 934
0 939
0 952
0 1069
0 1084
0 1101
0 1116
0 1127
0 1128
0 1130
0 1133
0 1146
0 1154
0 1155
0 1157
0 1157
0 1160
0 1177
0 1244
0 1253
0 1256
0 1273
0 1273
0 1276
0 1281
0 1396
1 1525
1 1566
1 1651
1 1733
1 1779
1 1790
1 1678
1 1520
1 1481
1 1478
1 1478
1 1478
1 1479
1 1480
1 1502
1 1502
1 1502
1 1503
1 1623
1 1979
1 1985
2 2306
2 2313
2 2317
2 2320
2 2320
2 2320
2 2313
2 2303
2 2296
2 2288
2 2281
2 2287
2 2286
2 2290
2 2285
2 2282
2 2266
2 2264
2 2260
2 2247
2 2197
2 2181
2 2039
2 1774
2 1727
2 1697
2 1693
2 1692
2 1676
2 1572
2 1557
2 1554
2 1548
2 1547
2 1547
2 1546
2 1541
2 1516
2 1490
2 1482
2 1482
2 1499
2 1499
2 1496
2 1426
2 1420
2 1414
2 1411
2 1406
2 1403
2 1389
1 1284
1 1159
1 1116
1 1062
1 1001
1 961
1 934
1 933
1 931
1 929
1 926
1 926
1 926
1 925
1 926
1 905
1 905
1 908
1 905
1 761
1 412
1 405
0 81
0 78
0 74
0 72
0 72
0 72
0 72
0 72
0 73
0 71
0 71
0 71
0 71
0 70
0 70
0 69
0 72
0 77
0 80
0 80
0 82
0 82
0 83
0 76
0 74
0 74
0 74
0 71
0 72
0 72
0 72
0 86
0 86
0 86
0 86
0 85
0 86
0 89
0 95
0 101
0 100
0 83
0 80
0 76
0 75
0 75
0 75
0 75
0 74
0 74
0 75
0 61
0 61
0 59
0 59
0 57
0 62
0 62
0 62
0 62
0 93
0 96
0 96
0 98
0 100
0 105
0 114
0 116
0 114
0 115
0 115
0 115
0 115
0 115
0 115
0 115
0 116
0 116
0 116
0 116
0 117
0 117
0 117
0 117
0 138
0 139
0 150
0 152
1 245
1 242
1 244
1 245
1 246
1 243
1 252
1 298
1 299
1 299
1 297
1 296
1 296
1 295
1 295
1 296
1 295
1 307
1 323
1 327
1 329
1 329
1 323
1 318
1 350
1 378
1 410
1 491
1 528
1 537
1 550
1 561
1 578
1 582
1 582
1 592
1 593
1 593
1 596
1 603
1 634
1 656
1 699
1 701
1 708
1 675
1 669
1 666
1 667
1 667
1 660
1 655
1 663
1 673
1 676
1 678
1 678
1 680
1 700
1 702
1 703
1 701
1 704
1 725
1 722
1 722
1 722
1 722
1 721
1 702
1 701
1 701
1 709
0 612
0 611
0 612
0 607
0 605
0 604
0 605
0 542
0 549
0 549
0 549
0 549
0 537
0 553
0 561
0 558
0 547
0 539
0 519
0 506
0 505
0 505
0 496
0 489
0 433
0 384
0 339
0 341
0 293
0 276
0 273
0 294
0 279
0 268
0 266
0 264
0 263
0 263
0 263
0 260
0 253
0 241
0 234
0 234
0 232
0 232
0 238
0 238
1 272
1 272
1 273
1 272
1 258
1 246
1 241
1 239
1 238
1 243
1 227
2 232
3 237
3 241
4 243
4 221
4 221
4 221
4 220
4 220
4 219
4 219
4 219
5 219
5 210
5 210
5 210
5 210
5 210
5 210
5 210
5 208
5 209
5 206
5 206
5 206
5 212
5 208
5 202
5 200
5 200
5 199
5 199
5 198
5 198
5 196
5 197
5 199
5 199
5 206
5 206
5 207
5 130
5 129
5 113
5 107
5 67
5 67
5 61
5 62
5 62
5 62
5 65
5 65
5 65
5 65
5 65
5 65
5 65
5 66
5 66
5 63
5 62
2 33
2 33
2 33
2 33
2 33
1 32
1 34
1 35
1 35
0 33
0 31
0 30
0 29
0 28
0 28
0 28
0 28
0 28
0 28
0 29
0 29
0 29
0 29
0 29
0 30
0 31
0 31
0 31
0 32
0 34
0 34
0 33
0 32
0 32
0 32
0 32
0 24
0 24
0 22
0 22
0 22
0 22
0 22
0 21
0 21
0 24
0 24
0 24
0 24
0 17
0 17
0 17
0 17
0 17
0 17
0 17
0 17
0 17
0 17
0 16
0 16
0 16
0 12
0 12
0 12
0 11
0 11
0 11
0 11
0 10
0 10
0 10
0 10
0 10
0 10
0 10
0 10
0 10
0 9
0 8
0 7
0 7
0 10
0 10
0 11
0 11
0 12
0 12
0 12
0 12
0 12
0 12
0 10
0 10
0 10
0 10
0 9
0 9
0 9
0 9
0 9
0 8
0 8
0 8
0 8
0 8
0 8
0 8
0 8
0 8
0 8
0 8
0 8
0 8
0 8
0 8
0 8
0 8
0 5
0 5
0 5
0 5
0 5
0 5
0 5
0 5
0 5
0 5
0 5
0 5
0 5
0 5
0 5
0 5
0 5
0 5
0 5
0 5
0 5
0 5
0 5
0 5
0 5
0 5
0 5
0 5
0 5
0 5
0 5
0 5
0 5
0 5
0 5
0 5
0 5
0 2
0 2
0 1
0 1
0 0
0 0
0 0
0 0
0 0
0 0
0 0
0 0
0 0
0 0
0 0
0 1
0 5
0 7
0 71
0 71
0 72
0 76
0 77
0 77
0 77
0 79
0 79
0 79
0 79
0 79
0 81
0 82
0 82
0 96
1 151
1 232
8 1613
8 1669
8 1761
8 1788
8 1798
8 1813
8 2170
8 2217
9 2232
9 2236
9 2237
9 2245
9 2256
9 2262
9 2266
9 2267
9 2269
9 2269
9 2270
9 2271
9 2269
9 2269
9 2269
9 2274
9 2276
9 2278
9 2283
9 2442
10 2445
10 2448
10 2448
10 2448
10 2448
10 2448
10 2446
10 2446
10 2446
10 2451
10 2452
10 2453
10 2452
10 2448
10 2448
10 2446
10 2446
10 2447
10 2447
10 2447
10 2444
10 2444
10 2443
10 2443
10 2439
10 2434
10 2431
10 2365
10 2364
10 2361
10 2348
10 2348
8 2384
8 2375
8 2373
8 2373
8 2373
8 2373
8 2371
8 2361
8 2361
8 2352
8 2303
8 2287
8 2152
1 715
1 704
1 746
1 746
1 742
1 729
1 337
1 327
1 317
1 314
1 315
1 307
1 303
1 298
1 293
1 294
1 294
1 294
1 295
1 297
1 298
1 298
1 308
1 303
1 303
3 819
5 821
5 724
4 732
4 731
4 732
4 732
4 750
4 753
4 753
4 755
4 755
4 756
4 807
4 808
4 808
4 808
4 835
4 839
4 840
4 842
4 855
4 856
4 855
4 859
4 977
4 998
4 1352
4 1501
4 1565
4 1712
4 1769
4 1776
4 1802
4 1814
4 1782
4 1784
4 1784
4 1784
4 1805
4 1837
4 1847
4 1891
4 1925
4 1943
4 1972
4 2011
4 2052
4 2063
4 2100
4 2055
4 2061
4 2055
4 2052
4 2100
4 2125
4 2129
4 2147
4 2268
4 2276
4 2288
4 2288
4 2677
4 2678
4 2681
4 2762
4 3879
4 4043
4 4124
4 4371
4 4438
4 4496
4 4785
2 4098
0 4084
0 4003
0 3984
0 3983
0 3989
0 3818
0 3789
0 3782
0 3770
0 3770
0 3766
0 3764
0 3756
0 3759
0 3735
0 3736
0 3681
0 3681
0 3658
0 3666
0 3719
0 3737
0 3732
0 3730
0 3728
0 3723
0 3383
0 3255
0 3209
0 3194
0 3191
0 3188
0 3147
0 3156
0 3154
0 3157
0 3156
0 3168
0 4962
0 4976
0 5005
0 5009
0 5038
0 5033
0 5011
0 4899
0 4759
0 4744
0 4668
0 4666
0 4669
0 4662
0 4660
0 4608
0 4555
0 4518
0 4464
0 4058
0 4014
0 3978
0 3683
0 3679
0 3671
0 3666
0 3505
0 2407
0 2249
0 2175
0 2170
0 2174
0 2179
0 2182
0 2189
0 2197
0 2207
0 2210
0 2320
0 2315
0 2320
0 2491
0 2517
0 2541
0 2632
0 2699
1 2989
1 3036
1 3255
3 3426
3 3513
3 3839
3 3869
3 3877
4 3882
4 3846
4 3844
4 3868
4 3870
4 3874
5 3880
5 3877
5 3879
5 3883
5 3888
5 3903
5 3921
5 3987
5 3955
5 3946
6 3964
6 4005
6 4250
6 2231
6 2207
6 1915
6 1845
6 1834
6 1834
6 1834
6 1834
6 1835
6 1837
6 1837
6 1837
6 1835
6 1835
6 1832
6 1831
6 1830
6 1831
6 1832
6 1843
6 1904
7 1979
7 1999
7 2001
7 2002
7 2002
7 2002
7 2000
7 1995
7 1994
7 1984
7 1979
7 1977
7 1970
7 1969
7 1951
7 1928
7 1907
7 1897
7 1896
7 1898
7 1811
7 1833
7 1834
7 1813
6 1749
5 1392
4 1142
4 1103
4 1100
4 1079
5 935
5 931
5 928
5 925
5 913
5 903
5 891
5 916
4 911
4 938
4 970
4 1066
4 1074
4 1167
4 1141
4 1141
4 1097
4 1124
4 1124
3 1086
3 1041
3 763
3 755
3 756
3 759
3 765
3 773
3 774
3 774
3 774
3 774
3 772
3 777
3 778
3 778
3 778
3 781
3 909
3 911
3 911
3 909
3 899
3 803
2 703
2 647
2 659
2 661
2 668
2 675
2 668
3 671
3 669
3 666
3 662
3 672
3 678
3 678
3 679
3 682
3 680
3 677
3 677
3 665
3 644
3 536
3 461
3 456
3 455
3 465
3 465
3 465
3 463
3 456
1 403
1 403
1 403
1 405
1 392
1 392
1 392
1 391
1 391
1 381
1 381
1 381
1 381
1 352
1 362
1 371
1 374
1 374
2 377
2 376
2 373
2 369
2 359
2 359
2 352
2 348
2 340
2 339
2 342
2 373
2 393
2 551
2 559
2 580
2 579
2 594
2 775
2 878
4 1831
4 1963
4 2035
4 2068
4 2066
4 2038
4 2032
4 2028
4 2030
4 2028
4 2024
4 2024
3 2020
3 2020
3 2028
3 2047
3 2047
4 2246
4 2263
4 2274
4 2282
4 2294
4 2441
4 2498
4 2541
4 2586
5 2605
5 2612
5 2622
5 2642
5 2618
5 2641
5 2626
5 2606
5 2615
5 2613
5 2613
6 2614
7 2661
7 2667
7 3216
7 3453
7 4296
7 4318
7 4339
7 4343
7 4343
7 4339
7 4335
7 4313
7 4297
7 4291
7 4276
6 4260
6 4278
6 4276
6 4254
6 4254
6 4254
6 4230
6 4229
6 4228
6 4228
6 4225
6 4220
6 4209
6 4059
6 4051
6 4027
6 4007
6 3995
6 3721
5 3134
4 2469
4 2449
4 2450
4 2453
4 2454
4 2454
4 2454
4 2474
4 2475
4 2476
4 2480
4 2482
4 2483
4 2483
4 2479
4 2459
5 2445
4 2238
4 2204
4 2185
4 2181
4 2169
4 2014
4 1977
4 1946
4 1927
3 1905
3 1910
3 1901
3 1901
3 1891
3 1882
3 1878
3 1878
3 1858
7 1861
7 1861
14 2046
13 1990
13 1970
14 1400
14 1150
14 343
14 327
14 309
14 308
14 307
14 311
14 311
14 311
14 312
14 323
14 324
14 326
14 308
14 308
14 298
14 298
14 298
14 298
14 298
14 312
14 312
14 312
14 310
14 310
14 310
14 331
14 339
14 342
15 339
15 340
16 341
16 340
16 338
16 337
16 332
16 341
16 341
16 341
16 320
16 318
16 317
16 313
15 312
15 312
15 312
15 311
15 315
15 315
15 345
15 344
15 343
15 347
15 344
15 335
15 334
15 333
15 328
15 327
14 315
14 315
14 315
13 316
12 316
12 316
12 316
12 316
11 311
10 311
1 192
1 194
1 207
1 213
1 213
1 213
1 213
1 213
1 213
1 213
0 194
0 193
0 192
0 194
0 188
0 194
0 192
1 263
1 264
1 264
1 276
1 280
1 290
1 289
1 289
1 296
1 298
1 302
2 434
2 449
2 442
2 447
2 447
2 445
2 454
2 474
2 475
2 504
2 509
2 582
2 574
2 574
2 574
2 576
2 576
2 577
2 577
2 577
2 577
2 590
2 590
2 590
3 615
3 592
3 592
3 600
3 597
3 601
3 610
3 684
2 686
2 688
2 692
2 708
2 711
2 711
2 711
2 727
2 759
2 795
2 847
2 858
2 857
2 677
2 668
2 643
2 544
2 542
2 541
2 543
2 542
2 542
2 540
2 544
2 543
2 541
2 549
2 615
2 616
2 620
2 632
5 757
5 756
5 754
5 755
6 768
6 768
6 769
6 767
6 768
6 767
6 673
6 672
6 672
6 673
6 673
6 673
6 671
6 670
6 669
7 679
7 676
7 568
7 594
7 594
7 554
7 555
7 555
7 555
7 555
7 555
7 555
7 555
7 558
7 558
6 545
6 543
6 543
6 536
6 532
6 524
5 498
5 347
5 343
5 273
5 267
5 265
5 266
5 266
5 265
5 252
5 251
5 235
5 226
5 220
5 219
5 219
5 233
5 241
5 251
5 253
5 258
6 265
6 265
6 279
8 290
9 418
11 771
17 1097
17 1205
18 1537
20 1925
20 1970
20 1998
16 2016
17 2051
17 2048
17 2044
17 2041
17 2049
17 2049
17 2050
17 2050
17 2057
17 2094
17 2097
23 2265
23 2261
24 2288
24 2294
24 2295
24 2295
23 2304
23 2274
23 2275
23 2268
24 2253
24 2344
24 2346
24 2332
25 2333
25 2336
25 2336
26 2341
26 2345
26 2423
26 2433
26 2437
26 2437
26 2435
26 2435
26 2423
26 2413
26 2411
26 2412
27 2414
27 2410
27 2277
27 2261
46 2342
46 2338
46 2339
45 2339
45 2338
45 2337
45 2337
45 2337
45 2336
46 2374
46 2359
46 2187
46 1892
44 1575
44 1574
44 1572
41 1317
41 1313
41 1302
41 1291
37 1185
32 967
31 865
31 828
31 795
31 761
31 746
31 735
31 733
31 732
31 732
31 734
31 731
31 724
31 726
31 725
31 725
31 720
31 723
30 724
24 567
25 569
25 568
25 566
25 571
25 571
25 555
25 555
25 554
25 551
24 523
25 436
27 453
27 454
28 467
28 463
28 466
27 461
27 450
27 379
27 365
27 361
27 364
28 364
29 365
29 365
30 366
31 368
31 368
32 366
31 361
31 360
29 355
13 131
13 132
13 129
15 130
15 132
15 134
15 134
15 132
15 130
14 92
14 91
14 89
14 89
14 88
14 86
14 148
14 147
14 147
16 151
16 160
16 166
16 178
18 228
18 229
20 229
20 333
20 337
20 343
20 345
20 348
20 348
20 346
20 347
20 351
20 351
20 353
20 378
20 444
20 444
19 455
19 464
19 466
20 466
20 464
20 461
20 461
20 462
17 459
11 459
11 459
7 455
7 452
7 439
7 432
6 423
6 429
6 437
5 467
5 468
5 479
5 479
5 501
2 496
2 497
1 497
1 507
1 515
1 514
1 522
1 524
1 525
1 527
1 526
1 526
1 525
0 543
0 543
0 545
0 553
0 554
0 554
0 555
0 563
0 634
0 635
0 657
0 655
0 652
0 567
0 571
0 571
0 597
0 797
0 1379
1 1985
1 2003
1 2039
1 2045
1 2061
1 2097
1 2109
1 2115
1 2196
1 2405
1 2418
1 2422
1 2423
1 2424
1 2423
1 2386
1 2297
1 2274
1 2265
1 2257
1 2256
1 2257
1 2256
1 2256
1 2256
1 2255
1 2255
1 2255
1 2255
1 2255
1 2255
1 2263
1 2266
1 2277
1 2276
1 2271
1 2255
1 2258
1 2238
1 2243
1 2206
1 2185
1 2175
1 2172
1 2159
1 2147
1 2131
1 2110
1 2084
1 2079
1 2049
1 2021
1 2021
1 2024
1 1895
1 1882
1 1750
1 1716
1 1651
1 1632
1 1629
1 1627
1 1333
1 1334
1 1320
1 1093
1 1089
1 1084
1 1081
1 1079
1 1033
0 905
0 586
0 483
0 472
0 471
0 475
0 495
1 526
1 528
1 527
1 441
1 222
1 218
1 214
1 214
1 214
1 214
1 215
1 221
1 250
1 309
1 361
1 369
1 368
1 369
1 369
1 371
1 370
1 371
1 375
1 379
1 381
1 382
1 419
1 415
1 409
1 409
1 409
1 409
1 410
1 410
1 405
1 405
1 404
1 404
1 404
1 403
1 403
1 409
1 412
1 415
1 428
1 469
3 496
3 496
3 489
3 488
3 473
3 457
3 423
3 427
3 434
3 436
3 434
3 442
3 465
3 464
3 459
3 465
3 473
3 473
4 492
4 514
4 514
5 767
5 766
5 777
5 774
5 773
5 753
4 720
4 717
4 714
4 711
4 710
4 709
4 707
4 707
4 706
4 706
4 705
4 697
4 618
4 584
4 543
4 543
4 542
4 540
4 540
4 539
4 539
4 538
4 535
4 528
4 526
4 525
2 469
2 471
2 466
0 447
0 447
0 447
0 444
0 444
0 444
0 453
1 470
1 474
2 518
2 522
2 521
2 525
2 524
2 518
2 494
2 470
2 451
2 449
2 447
2 452
5 858
5 866
5 901
5 999
6 3929
7 4066
9 5059
9 5368
9 5440
10 6095
10 6201
10 6210
10 6214
10 6219
10 6218
10 6195
10 6198
10 6032
10 6037
10 6116
10 6133
10 6136
10 6147
10 6160
10 6209
11 6514
11 6746
11 6894
11 6900
11 6903
14 6960
14 6992
14 6992
14 7041
14 7049
14 7051
14 7047
14 7047
14 7007
14 7006
14 7006
14 7018
15 7134
15 7143
15 7159
15 7487
15 7489
15 7500
15 7554
15 7568
15 7574
15 7584
15 7587
15 7588
15 7585
15 7602
15 7614
16 7604
15 7210
15 7208
15 7187
11 6752
11 6753
8 6753
8 6751
8 6754
8 6743
8 6741
8 6738
8 6735
8 6736
8 6728
8 6729
8 6715
8 6658
8 6601
8 6160
6 2134
6 1952
6 1940
6 1926
6 1922
6 1915
6 1908
6 1905
6 1901
6 1901
6 1903
6 1900
6 1895
6 1822
6 1813
6 1743
6 1745
6 1733
6 1724
6 1696
6 1645
5 1300
5 1038
4 910
3 906
3 944
2 1025
2 1215
2 1434
2 1896
2 2008
2 2570
2 2972
2 3380
2 3430
2 3448
2 3510
2 3544
1 3428
1 3433
1 3409
1 3574
2 4128
2 4179
2 4190
2 4183
2 4219
2 4277
2 4316
3 4493
3 4545
3 4568
3 4635
2 4784
2 4902
2 4936
2 4959
2 4971
2 4997
2 5012
2 5014
2 5013
2 5012
2 5014
2 5020
2 5046
2 5120
2 5127
2 5200
2 5209
2 5236
2 5246
2 5254
2 5252
2 5298
2 5320
2 5333
2 5354
2 5384
2 5394
2 5399
2 5410
2 5410
2 5408
2 5408
2 5409
2 5378
2 5375
2 5363
2 5370
2 5369
3 5383
3 5390
3 5401
3 5424
3 5435
5 5514
5 5542
5 5494
5 5314
5 5098
5 4878
5 4351
5 4119
5 3434
5 3035
5 2590
5 2498
5 2488
5 2414
5 2391
5 2373
5 2370
5 2341
5 1745
4 851
4 639
4 577
4 567
4 567
4 564
4 559
3 532
3 523
3 522
3 507
3 454
3 366
3 339
3 329
3 323
3 306
3 298
3 296
3 294
3 294
3 295
4 320
3 317
3 317
3 315
4 300
3 303
3 311
3 312
3 294
3 290
3 286
3 284
3 282
3 280
3 259
3 254
3 252
3 252
3 252
3 253
3 332
3 332
3 339
3 367
5 389
5 410
7 436
6 431
6 430
6 418
6 405
6 392
6 333
6 296
6 295
6 300
6 316
6 423
6 425
6 428
6 427
6 427
6 428
6 428
6 427
6 431
6 426
6 427
6 430
6 442
6 443
6 443
6 437
6 441
6 442
6 443
6 441
6 441
6 446
6 442
6 444
6 444
6 444
6 444
6 444
6 446
6 448
6 465
6 469
6 470
5 482
5 483
5 482
5 455
5 455
5 452
5 455
0 451
0 445
0 432
0 430
0 428
0 426
0 426
0 426
0 426
0 426
0 426
0 453
0 455
0 462
0 467
0 465
0 376
0 376
0 348
0 318
0 296
0 291
0 286
0 286
0 383
0 391
0 395
0 593
0 626
0 648
0 653
0 644
0 629
0 517
0 519
0 521
0 571
0 611
0 649
0 645
0 646
0 646
0 648
0 645
0 641
0 628
0 623
0 623
0 623
0 618
0 617
0 614
0 614
0 613
0 617
0 617
0 617
0 618
0 618
0 620
0 620
0 620
0 620
0 603
0 587
0 583
0 578
0 580
0 585
0 585
0 585
0 585
0 587
0 590
0 598
0 614
0 616
0 624
0 640
0 647
0 649
0 661
0 673
0 721
0 689
0 880
0 748
0 760
0 754
0 741
0 755
0 747
0 747
0 748
0 747
0 783
0 794
0 779
0 770
0 762
0 661
0 631
0 629
0 620
0 619
0 620
0 621
0 618
0 611
0 583
0 565
0 561
0 561
0 561
0 565
0 568
0 568
0 568
0 568
0 569
0 576
0 594
0 627
0 635
0 655
0 712
0 725
0 725
0 726
0 727
0 726
0 726
0 724
0 724
0 725
0 725
0 735
0 738
0 738
0 737
0 733
0 728
0 727
0 727
0 727
0 723
0 718
0 703
0 680
0 685
0 675
0 660
0 651
0 643
0 637
0 622
0 562
0 460
0 286
0 272
0 266
0 264
0 267
0 274
0 282
0 282
0 282
0 284
0 243
0 236
0 236
0 235
0 235
0 225
0 225
0 231
0 238
0 239
0 239
0 239
0 239
0 239
0 239
0 240
0 240
0 240
0 238
0 234
0 234
0 234
0 234
0 235
0 232
0 220
0 203
0 167
0 157
0 127
0 75
0 59
0 58
0 57
0 57
0 57
0 57
0 57
0 57
0 56
0 55
0 44
0 38
0 38
0 38
0 41
0 41
0 41
0 40
0 41
0 41
0 51
0 57
0 58
0 50
0 55
0 58
0 57
0 58
0 61
0 63
0 75
0 86
0 127
0 139
0 143
0 142
0 143
0 144
0 142
0 142
0 143
0 143
0 142
0 142
0 143
0 145
0 148
0 151
0 151
0 144
0 133
0 133
0 132
0 132
0 132
0 132
0 132
0 131
0 131
0 132
0 132
0 132
0 132
0 134
0 141
0 146
0 147
0 151
0 153
0 153
0 153
0 153
1 153
1 153
1 153
1 153
1 151
1 148
1 148
1 144
1 164
1 162
1 162
1 170
1 170
1 170
1 170
1 167
0 167
0 167
0 167
0 165
0 165
0 156
0 149
0 152
0 152
0 152
0 150
0 151
0 150
0 147
0 149
0 149
0 143
0 107
0 99
0 99
0 99
0 98
0 96
0 99
0 102
0 116
0 120
0 121
0 121
0 120
0 118
0 113
0 147
0 148
0 192
0 192
0 192
0 193
0 364
0 371
0 377
0 385
0 385
0 397
0 398
0 409
0 474
0 475
0 477
0 477
0 473
0 471
0 469
0 489
0 505
0 507
0 580
0 626
1 668
1 762
1 1137
1 1261
1 1283
1 1393
1 1424
1 1415
2 1441
2 1515
2 1582
2 1824
2 1930
2 1937
2 1969
2 1969
2 1970
2 1971
2 1971
2 1973
2 2004
2 2009
2 2045
2 2056
2 2053
2 2050
2 2051
2 2051
2 2048
2 2042
2 2028
2 2027
2 2027
2 2027
2 2027
2 2027
2 2109
2 2104
2 2086
2 2075
2 2062
2 2060
2 2059
2 2060
2 2060
2 2062
2 2056
2 1882
2 1879
2 1877
2 1740
2 1736
2 1745
2 1610
2 1609
2 1609
2 1690
2 1700
2 1695
2 1700
2 1686
2 1653
2 1655
2 1668
2 1668
2 1710
2 1710
2 1708
2 1684
2 1623
2 1624
2 1576
2 1559
1 1529
1 1450
1 1124
1 1022
1 1020
1 927
1 923
1 912
0 888
0 807
0 734
0 435
0 412
0 427
0 440
0 469
0 472
0 473
0 474
0 474
0 474
0 470
0 455
0 455
0 456
0 465
0 495
0 523
0 527
0 529
0 532
0 530
0 548
0 547
0 586
0 585
0 490
0 492
0 631
0 619
0 623
0 630
0 632
0 630
0 688
0 686
0 689
0 692
0 718
0 817
0 867
0 894
0 916
0 945
0 949
0 947
0 871
0 871
0 878
0 879
0 880
0 880
0 876
0 876
0 876
0 842
0 845
0 848
0 852
0 858
0 860
0 857
0 848
0 839
0 826
0 810
0 807
0 804
0 803
0 806
0 813
0 829
0 838
0 840
0 824
0 826
0 794
0 732
0 674
0 683
0 680
0 680
0 739
0 762
0 766
0 792
0 794
0 794
0 777
0 720
0 692
0 675
0 654
0 647
0 646
0 667
0 666
0 794
0 863
0 872
0 942
0 761
0 770
0 737
0 730
0 734
0 734
0 734
0 734
0 734
0 731
0 713
0 673
0 669
0 679
0 688
0 684
0 686
0 686
0 682
0 681
0 662
0 650
0 648
0 647
0 704
0 724
0 744
0 784
0 790
0 788
0 780
0 773
0 768
0 768
0 772
0 771
0 774
0 772
0 772
0 772
0 772
0 770
0 765
0 751
0 737
0 736
0 740
0 737
0 735
0 736
0 730
0 694
0 688
0 663
0 598
0 576
0 575
0 570
1 648
1 656
1 658
1 656
1 760
1 752
1 740
1 738
1 737
1 732
1 735
1 528
1 505
1 490
1 438
1 452
1 451
1 451
1 451
1 451
1 506
1 511
1 514
1 515
1 517
1 517
1 518
1 516
1 514
1 514
1 512
1 511
1 512
1 513
1 530
2 553
2 598
2 606
2 639
2 578
2 551
2 543
2 503
2 500
2 514
2 545
2 554
2 554
2 591
2 587
2 587
2 633
2 635
2 643
2 663
2 724
2 978
2 1043
2 1075
2 1132
4 2029
4 2108
4 2380
5 2475
6 2598
6 2987
6 3083
6 3175
11 4443
11 4636
14 4750
15 4799
15 4810
14 4718
14 4774
14 4740
14 4732
14 4500
14 4495
14 4486
14 4376
14 4371
14 4386
14 4381
14 4376
14 4374
13 4371
13 4372
12 4374
12 4375
12 4375
12 4378
12 4391
12 4387
12 4385
12 4384
12 4381
12 4375
12 4379
12 4379
12 4377
12 4378
12 4379
12 4381
12 4382
12 4435
12 4511
12 4555
12 4560
12 4440
12 4440
12 4433
12 4357
12 4355
12 4354
12 4354
12 4354
12 4354
12 4352
12 4350
12 4350
12 4340
12 4340
12 4341
12 4310
12 4795
16 4817
16 4858
16 4826
16 4611
18 4615
18 4591
18 4388
15 3017
15 2821
14 2780
14 2781
14 2770
14 2737
14 2719
12 2536
7 1151
6 1019
6 1001
6 982
6 979
6 978
6 978
6 978
6 980
6 985
6 1004
6 1010
6 1014
8 1018
8 1032
8 1052
8 1062
9 1119
9 1169
10 1214
11 1285
11 1300
11 1327
11 1383
11 1492
11 1526
11 1535
11 1537
12 1554
12 1572
12 1789
13 2556
13 3432
13 3521
14 3620
14 3630
14 3628
14 3547
14 3498
15 3491
15 3509
15 3530
15 3571
15 3596
15 3597
15 3617
15 3618
15 3642
15 3697
15 3818
15 3874
15 5570
15 5610
16 5769
16 5787
16 5788
16 5801
15 5261
9 5234
9 5169
9 5154
9 5146
6 5056
8 5073
8 5085
9 5087
9 5081
9 5081
9 5078
9 5069
9 5057
9 5056
9 5056
9 5065
9 5087
9 5118
9 5120
9 5150
9 5149
9 5149
9 5150
9 5153
10 6026
11 6040
12 6066
12 6084
23 7908
23 7970
25 8088
25 8101
26 8282
44 11917
47 12034
49 12063
49 12040
49 12017
49 11843
49 11725
49 11630
49 11615
49 11604
48 11580
48 11566
47 11268
46 10419
48 9762
48 9727
48 9722
53 9787
53 9784
53 9779
53 9771
52 9738
52 9735
61 10033
66 10391
67 10438
69 10487
74 10505
74 10574
74 10529
74 10427
74 10243
74 10200
74 7698
74 7701
73 7625
73 7629
73 6785
73 6784
74 6775
74 6766
74 6755
74 6760
74 6762
75 6755
73 6750
73 6750
72 6747
72 6750
72 6753
72 6754
71 6756
71 6756
70 6756
69 6752
69 6729
69 6691
69 6627
69 6624
69 6579
69 6552
69 6537
69 6534
69 6532
69 6501
68 6480
67 6466
65 6427
51 5295
51 5202
50 5101
50 5078
49 4982
20 1075
20 1051
20 980
20 957
20 925
10 614
11 612
11 637
11 645
11 739
12 752
12 760
12 784
12 781
12 776
13 777
16 835
19 1037
25 1078
27 1195
27 1216
27 1215
26 1207
23 1133
19 935
18 923
28 931
28 932
28 909
30 976
32 978
32 947
32 886
32 870
32 849
32 900
31 892
31 892
31 893
31 901
31 902
31 901
31 903
31 904
31 914
31 921
31 927
31 931
31 928
33 933
33 931
33 930
33 931
33 931
33 931
33 931
33 931
33 931
33 930
33 930
33 932
33 932
33 932
33 932
33 932
33 932
33 932
33 932
32 930
32 930
32 930
32 930
32 930
32 930
32 930
32 932
32 935
32 937
32 937
31 937
31 908
31 893
31 789
28 766
28 748
27 712
27 712
27 706
26 705
20 640
15 423
6 354
5 185
5 125
5 125
5 125
5 124
3 118
3 118
3 118
3 118
2 100
2 100
2 100
2 100
2 98
2 93
2 93
1 41
1 41
1 40
1 39
0 40
0 42
0 42
0 43
0 42
0 23
0 13
0 13
0 14
0 15
1 15
1 15
1 14
1 16
1 16
1 16
1 16
1 16
1 16
1 16
1 16
1 17
1 17
1 23
1 28
0 30
1 110
1 110
1 117
2 129
2 138
2 141
2 142
2 144
2 146
2 150
2 154
2 160
2 163
2 169
2 172
2 173
2 173
2 179
2 179
2 179
2 180
2 181
2 181
2 181
2 179
2 179
2 179
2 179
2 179
2 182
2 183
2 183
2 183
2 182
2 181
2 182
2 182
2 182
2 182
2 182
2 182
2 182
2 182
2 182
2 182
2 182
2 182
2 178
2 172
2 171
2 170
2 170
2 180
2 187
2 188
2 187
2 190
2 191
2 191
2 191
2 188
2 188
2 188
2 188
2 188
2 191
2 191
2 192
2 194
2 195
0 196
0 189
0 183
0 98
0 90
0 89
0 88
0 85
0 84
0 84
0 84
0 82
0 76
0 74
0 64
0 60
0 53
0 52
0 51
0 51
0 46
0 46
0 46
0 45
0 43
0 43
0 44
0 49
0 81
0 139
0 148
0 149
0 151
0 150
0 151
0 151
0 151
0 151
0 151
0 151
0 151
0 151
0 151
0 151
0 151
0 151
0 152
0 152
0 152
0 152
0 152
0 152
0 152
0 152
0 152
0 140
0 134
0 138
0 139
0 180
0 318
0 969
0 1099
1 2369
1 2509
1 2581
1 2938
1 3265
1 3512
1 3603
1 3607
2 3623
2 3629
2 3634
2 3636
2 3636
2 3636
2 3643
2 3647
2 3648
2 3650
2 3650
2 3650
2 3655
2 3817
2 3817
2 3822
2 3825
2 3825
2 3825
2 3824
2 3826
2 3829
2 4343
2 4467
2 4603
2 4680
2 4694
2 4708
2 4707
2 4707
2 4675
6 9899
6 9903
6 9915
6 9931
6 9941
6 10007
14 15759
15 16343
16 16555
16 16608
16 16650
16 16838
20 17074
20 17086
20 17104
20 17109
20 17109
20 17115
20 17116
20 17118
20 17128
20 17131
20 17155
20 17197
20 17667
20 17703
20 17728
20 17747
20 17750
20 17681
20 17612
20 17546
20 16483
20 15204
19 14336
19 14097
19 14066
19 14056
19 14059
19 14025
18 14061
18 14972
18 15857
18 16021
22 16841
23 16935
23 16969
24 17045
25 17030
25 17029
25 17073
25 17068
25 17064
25 17363
25 17352
23 16573
23 16571
23 16489
20 15791
20 15785
20 15775
20 15744
20 15705
20 15518
18 11962
17 6144
17 5009
17 4340
17 4318
17 4316
17 4320
17 4318
17 4318
17 4318
17 4312
16 4312
16 4292
23 4284
24 4262
29 3153
28 3022
27 2977
27 2979
27 2978
27 2979
25 2978
25 2978
25 2977
25 2976
25 2976
25 2976
25 2977
25 2977
25 2976
30 3935
30 3943
30 3971
30 3242
30 3225
30 2935
30 2895
30 2882
30 2881
30 2895
30 2831
30 2830
30 2820
30 2818
30 2816
30 2816
30 2811
30 2809
30 2801
31 2801
31 2758
28 2348
28 2300
24 1870
19 1866
14 1866
14 1866
14 1883
14 1883
14 1855
14 1885
14 1886
13 1588
13 1588
13 1545
13 1542
13 1548
13 1543
13 1544
13 1545
13 1545
13 1546
13 1561
13 1566
13 1569
13 1590
13 1594
13 1601
13 1600
13 1598
13 1600
15 1907
15 1913
16 1917
16 1925
17 2069
17 2192
47 3862
43 3837
47 4015
55 4772
58 4987
60 5654
62 5981
62 5993
62 5996
62 6002
62 6017
62 6036
62 6040
62 6038
62 6038
62 6021
58 5021
59 5005
59 4942
61 4892
61 4891
63 4914
63 4910
63 4905
63 4901
63 4834
63 4774
63 4764
63 4768
63 4766
65 4779
65 4779
65 4780
65 4782
65 4782
64 4769
64 4769
64 4767
63 4649
63 4648
64 4648
64 4648
65 4647
66 4630
68 4638
68 4633
68 4586
68 4565
68 4563
68 4558
68 4556
68 4565
68 4552
68 4568
68 4602
68 4637
68 4647
66 4605
67 4554
67 4536
67 5285
64 5215
61 5186
62 5185
62 5165
62 5163
62 5159
61 5160
61 5147
61 5168
61 5126
61 4936
57 4592
25 2533
23 2314
22 2232
13 1244
13 1242
13 1202
12 1189
12 1185
12 1188
12 1185
12 1162
12 1155
12 1153
12 1153
12 1205
13 1220
14 1221
48 1357
49 1355
51 1575
51 1575
51 1554
52 1554
54 1575
54 1572
54 1576
56 1602
56 1605
56 1600
58 1606
57 1608
58 1635
60 1648
60 1649
60 1650
60 1652
64 1753
65 1810
65 1861
64 1896
71 2143
71 2158
70 2178
68 2135
68 2136
68 2141
69 2169
70 2187
75 2506
76 2709
77 2748
77 2773
77 2836
77 2843
77 2808
77 2786
79 2781
80 2782
79 2772
79 2760
79 1986
79 1976
79 1930
78 1903
78 1903
78 1904
78 1903
78 1893
78 1927
78 1907
78 1905
78 1908
78 1900
78 1884
78 1883
78 1887
78 1889
78 1881
78 1877
78 1875
78 1879
78 1878
78 1882
79 1901
79 1899
79 1901
79 1951
75 1890
66 1854
65 1842
26 1584
26 1578
22 1321
9 1193
8 1193
8 1194
8 1178
8 1178
8 1175
8 1150
7 1101
7 1094
7 1090
7 1085
7 1066
7 1062
7 1062
7 1063
7 1062
7 1063
7 1051
7 1027
7 1004
6 825
6 824
6 824
6 825
6 824
6 812
5 807
5 755
4 352
3 263
3 258
3 239
3 226
3 189
3 187
3 184
13 555
12 562
12 567
12 568
12 568
12 569
12 570
12 572
12 580
12 578
12 579
12 579
12 545
12 533
12 537
12 533
12 532
12 533
14 754
14 753
14 796
14 802
14 805
14 839
14 833
14 830
14 830
13 813
13 813
13 811
13 758
13 764
13 762
13 763
13 763
13 764
13 765
13 769
13 1181
13 1198
12 1234
12 1237
12 1238
12 1247
14 1277
14 1277
15 1278
15 1280
15 1280
16 1282
16 1278
16 1276
16 1275
16 1275
16 1275
16 1277
16 1277
16 1277
16 1277
16 1276
16 1275
16 1276
16 1276
16 1276
16 1276
16 1278
16 1278
16 1278
16 1328
15 1329
14 1344
14 1350
13 1345
4 947
4 1007
4 1005
4 1055
4 1064
4 1121
3 1094
3 1119
3 1112
3 1114
5 1159
6 1181
6 1187
7 1208
7 1216
6 1225
6 1228
6 1226
5 1003
5 996
5 951
4 949
4 945
4 913
4 913
4 917
4 915
4 916
4 917
4 916
4 916
4 915
4 916
4 916
4 917
4 914
4 912
4 901
4 489
4 472
4 459
4 450
4 448
4 448
4 444
4 444
4 521
4 521
4 523
4 545
4 545
4 546
4 562
4 567
4 569
4 578
4 597
4 641
5 684
5 710
5 764
5 768
5 779
5 786
5 794
5 791
5 800
5 799
5 755
5 755
5 742
5 731
5 729
5 725
5 658
5 649
5 601
5 587
5 524
5 509
5 466
5 448
5 445
1 334
1 331
1 323
1 310
1 306
1 309
1 309
1 309
1 308
1 308
1 253
1 255
1 267
1 278
2 303
2 300
2 305
2 303
2 302
2 300
2 300
2 300
2 301
2 307
2 307
2 328
2 329
2 329
2 298
2 288
2 237
2 218
2 218
2 218
2 219
2 219
2 227
2 237
2 241
3 230
4 229
4 222
4 203
4 190
4 186
4 186
4 180
5 168
5 158
5 152
5 178
5 179
5 179
3 177
3 168
3 168
3 161
3 161
3 159
3 158
3 158
3 158
3 159
3 159
3 159
3 149
15 243
15 243
15 244
15 247
15 260
29 690
31 742
34 886
34 915
34 916
35 950
35 965
35 955
35 956
35 951
37 1034
37 1034
37 1076
37 1075
37 1066
37 1056
37 1037
37 1037
37 1039
37 1039
38 1042
38 1044
38 1044
38 1044
38 1043
38 1043
38 1045
38 1031
38 1031
38 1031
38 1031
38 1034
38 1034
38 1034
38 1034
38 1034
38 1031
38 1031
38 1023
38 1121
38 1136
37 1156
36 1174
36 1182
36 1185
36 1189
36 1191
36 1189
35 1190
35 1195
35 1207
35 1203
35 1108
35 1099
35 1032
35 1030
35 1031
35 1027
35 1022
35 1023
33 1019
33 1019
28 1018
28 1022
26 1022
23 1020
17 1018
13 1017
13 1017
13 1017
10 1017
10 1016
10 983
5 481
2 421
2 415
2 398
2 393
2 396
2 393
2 396
2 399
2 398
0 317
0 318
0 274
0 274
0 274
0 285
0 285
0 291
1 294
2 299
2 297
2 295
2 296
2 297
2 297
2 304
2 306
2 306
2 315
4 316
4 316
4 313
7 360
7 360
9 670
9 695
10 723
10 724
10 722
10 607
10 576
10 551
10 541
10 535
10 531
10 530
10 536
10 766
10 768
10 779
10 790
10 805
10 812
10 812
10 812
10 813
10 811
10 812
10 813
10 816
10 816
10 816
10 816
10 814
10 814
10 814
10 816
10 815
10 815
10 815
10 813
10 811
10 812
10 812
10 813
10 813
10 813
10 812
10 801
10 801
10 792
10 780
10 773
10 769
10 774
10 773
10 787
10 787
10 760
9 760
9 740
4 726
0 709
0 702
0 699
0 698
0 694
0 692
0 680
0 679
0 674
0 667
0 665
0 661
0 655
0 653
0 649
0 357
0 343
0 345
0 344
0 344
0 344
0 343
0 343
0 341
1 347
2 351
6 380
7 372
9 146
9 144
9 130
9 118
9 104
9 100
9 100
9 100
9 99
9 100
9 100
9 99
9 96
9 96
9 96
9 96
9 97
9 98
10 99
11 104
11 102
11 102
11 102
11 111
11 113
11 115
11 118
11 117
11 117
11 117
11 117
11 116
11 118
11 135
11 138
11 148
11 149
11 142
11 140
11 126
11 126
11 126
11 126
11 126
11 126
11 124
11 124
11 124
11 124
11 124
11 124
11 124
11 124
11 124
11 128
11 129
11 130
11 130
11 131
11 133
11 125
11 132
11 135
11 135
11 143
12 278
12 277
12 277
12 278
11 271
9 263
4 235
4 235
3 235
3 235
3 236
3 236
3 236
3 240
3 247
3 250
3 250
3 249
3 249
3 249
3 249
3 249
3 249
3 254
3 254
3 258
3 262
6 283
6 286
6 287
7 337
7 412
7 411
7 412
7 415
9 509
9 517
9 523
9 541
9 542
9 548
9 532
11 536
11 526
11 536
12 541
15 546
19 546
19 550
19 550
19 550
19 552
19 554
19 554
19 554
19 558
19 566
20 575
21 576
23 578
47 579
48 578
48 573
49 571
49 566
49 566
49 566
49 563
49 563
49 554
49 557
49 556
49 547
48 356
48 353
48 354
48 296
48 296
48 301
50 302
52 305
52 306
52 306
52 306
52 306
52 306
52 296
52 276
52 265
52 261
52 261
52 261
52 261
52 261
52 261
52 261
52 261
53 261
54 256
51 246
49 230
49 230
49 223
47 122
47 122
47 116
47 116
46 69
44 50
44 48
44 48
44 48
44 48
44 47
44 46
44 42
44 42
44 41
42 39
40 38
36 38
36 35
36 35
36 35
36 35
36 34
36 34
35 34
35 35
35 34
32 31
27 31
24 32
4 33
3 33
3 34
3 34
3 34
3 34
3 34
3 34
3 34
3 32
3 24
3 25
3 24
3 24
3 24
3 22
3 22
0 21
0 16
0 15
0 13
0 12
0 12
0 12
0 17
0 23
0 26
0 26
0 25
0 24
0 24
0 24
0 24
0 25
0 26
0 26
0 26
0 26
0 24
0 23
0 23
0 23
0 23
0 23
0 23
0 23
0 23
0 23
0 23
0 23
0 23
0 23
0 23
0 23
0 23
0 23
0 23
0 23
0 23
0 23
0 23
0 23
0 23
0 23
0 23
0 23
0 23
0 23
0 22
0 21
0 21
0 21
0 19
0 19
0 19
0 18
0 18
0 19
0 19
0 19
0 19
0 19
0 19
0 19
0 19
0 20
0 20
0 22
0 22
0 22
0 22
0 23
0 24
0 28
0 28
0 28
0 28
0 23
0 17
0 15
0 18
0 20
0 26
0 33
0 35
0 35
0 34
0 35
0 35
0 35
0 35
0 35
0 35
0 36
0 36
0 36
0 36
0 36
0 37
0 37
0 37
0 37
0 37
0 37
0 37
0 37
0 37
0 37
0 37
0 37
0 37
0 39
0 41
0 41
0 44
0 44
0 44
0 44
0 44
0 45
0 53
0 58
0 73
0 72
0 75
0 82
0 224
0 225
0 232
0 690
0 718
0 845
0 894
0 913
0 924
0 928
0 932
0 936
0 942
0 974
0 1027
0 1099
0 1113
0 1155
0 1186
0 1186
0 1182
0 1185
0 1183
0 1181
0 1181
0 1179
0 1179
0 1178
0 1176
0 1170
0 1162
0 1161
0 1161
0 1175
0 1176
0 1246
0 1260
0 1254
0 1257
0 1258
0 1258
0 1270
0 1274
1 1286
1 1304
1 1347
1 1350
1 1352
1 1367
1 1369
1 1357
1 1369
1 1387
1 1410
1 1407
1 1406
1 1407
1 1403
1 1363
1 1347
1 1342
1 1213
1 1212
1 1323
1 1322
1 1241
1 1243
1 1242
1 1240
1 1241
1 1244
1 1244
1 1237
1 1218
1 1218
1 1181
1 750
1 719
1 718
1 717
1 706
1 709
1 711
1 713
1 712
1 706
1 644
1 604
1 529
1 513
1 492
1 479
1 478
1 478
1 477
1 477
1 477
1 477
1 480
1 480
1 482
1 483
1 484
1 484
1 485
1 484
1 484
1 482
1 407
1 405
1 405
1 410
1 426
1 425
1 423
0 419
0 408
0 386
0 327
0 327
0 325
0 312
0 310
0 304
0 296
0 267
0 264
0 264
0 263
0 263
0 263
0 263
0 263
0 262
0 262
0 263
0 178
0 177
0 126
0 110
0 104
0 92
0 92
0 93
0 95
0 101
0 107
0 114
0 122
0 140
0 145
0 139
0 139
0 141
0 141
0 141
0 142
0 147
0 232
0 244
0 250
0 292
0 486
0 520
0 1086
0 1175
0 1232
0 1371
0 1403
0 1433
0 1638
1 1939
1 1963
1 2000
1 2018
1 2022
1 2024
1 2024
1 2024
1 2025
1 2029
1 2031
1 2032
1 2034
1 2032
1 2017
1 2014
1 2002
1 1993
1 1989
1 1989
1 1989
1 1990
1 1992
1 1997
1 2002
1 2003
1 2007
1 2007
1 2010
1 2013
1 2012
1 2012
1 2012
1 2015
1 2010
1 2012
1 2040
1 2032
1 1774
1 1779
1 1775
1 1564
2 1596
2 1597
3 1880
3 1898
3 1835
3 1806
3 1810
3 1850
3 1907
3 1930
3 1969
3 1973
3 1974
3 1972
3 1970
3 2016
3 2019
3 2043
3 2031
3 2133
3 2167
3 2266
3 2354
3 2433
3 1815
3 1759
3 1756
3 1781
3 1782
3 1785
3 1785
1 1436
1 1412
0 1321
0 1310
0 1308
0 1307
0 1307
0 1308
0 1312
1 1313
1 1309
1 1309
1 1344
1 1345
1 1393
1 1403
1 1404
1 1417
1 1425
1 1425
1 1435
1 1432
1 1450
1 1442
1 1443
0 1448
0 1452
0 1447
0 1468
0 1469
0 1498
0 1497
0 1539
0 1537
0 1531
0 1528
0 1768
0 1766
0 1768
0 1806
0 1895
0 1892
0 1896
0 1881
0 1562
0 1556
0 1526
0 1504
0 1495
0 1441
0 1374
0 1358
0 1345
0 1345
0 1347
0 1349
0 1353
0 1393
0 1401
0 1380
0 1345
0 1210
0 1152
0 1008
0 924
0 767
0 765
0 729
0 727
0 719
0 724
0 720
0 724
0 722
0 728
0 728
0 725
0 726
0 723
0 721
0 721
0 718
0 716
0 718
0 718
0 718
0 718
0 693
0 678
0 667
0 662
0 662
0 662
0 660
0 658
0 642
0 642
0 642
0 639
0 639
0 638
0 614
0 600
0 589
0 587
0 544
0 544
0 538
0 535
0 265
0 262
0 228
0 211
0 161
0 159
0 157
0 157
0 157
0 161
0 167
0 193
0 248
0 297
0 323
1 564
1 619
1 657
1 665
1 665
1 661
1 578
1 566
1 545
1 545
1 546
1 547
1 580
1 585
1 592
1 591
1 590
1 588
1 593
1 589
1 592
1 594
1 594
1 591
1 591
1 593
1 590
1 591
1 595
1 600
1 600
1 599
1 599
1 600
1 600
1 600
1 600
1 600
1 601
1 604
1 605
1 605
1 605
1 605
1 603
1 601
1 597
1 597
1 598
1 598
1 598
1 599
1 599
1 599
1 598
1 598
1 597
1 596
1 593
1 600
1 621
1 622
1 626
1 631
1 630
1 630
1 630
1 620
1 611
1 581
1 500
1 447
1 413
0 214
0 171
0 144
0 143
0 139
0 145
0 145
0 143
0 142
0 140
0 164
0 166
0 145
0 148
0 166
0 178
0 194
0 228
0 266
1 341
1 417
1 417
1 417
1 417
1 417
1 415
1 414
1 413
1 429
1 425
1 427
1 429
1 434
1 445
1 448
1 449
1 461
1 461
1 460
1 458
1 630
1 630
1 631
1 632
1 719
1 1316
1 1412
1 1574
1 1733
1 1811
1 1824
1 1843
1 1848
1 1847
1 1848
1 1849
1 2143
1 2290
1 2423
1 2493
1 2485
1 2483
1 2478
1 2479
1 2479
1 2481
1 2480
1 2483
1 2554
1 2582
1 2611
1 2628
1 2640
1 2639
1 2641
1 2643
1 2642
1 2646
1 2662
1 2685
1 2692
1 2699
1 2697
1 2741
1 3148
1 3588
2 4168
2 4658
3 5611
3 5746
3 5739
3 5802
2 5736
2 5706
2 5870
2 5882
2 5855
2 5858
2 5866
2 5883
2 5879
2 5927
2 5937
2 5959
2 6505
2 6513
2 6541
2 6642
2 6668
2 6669
2 6670
2 6668
2 6668
2 6671
2 6674
3 6689
3 6683
3 6549
3 6076
3 6027
3 5977
9 5961
10 5969
10 5980
10 5985
10 5995
11 5996
11 5996
11 5973
11 5212
11 4152
11 3904
11 3810
11 3766
11 3777
12 3810
12 3872
12 3879
13 4011
13 4021
13 4024
13 3900
13 3787
13 3722
13 3698
13 3699
13 3694
14 3697
14 3760
14 3825
14 3833
14 3796
14 3760
15 3799
15 3810
15 3813
16 3781
18 3630
18 3552
18 3320
27 3260
26 2678
28 2530
28 2471
28 2243
28 2163
28 1980
28 1927
26 1914
26 1891
26 1890
26 1889
26 1884
26 1966
26 1859
26 1858
26 1832
26 1169
26 1152
26 1032
26 895
26 827
26 815
26 808
26 804
26 805
26 830
26 831
26 833
26 855
26 899
26 904
26 905
26 905
20 904
19 901
19 896
19 896
19 895
19 898
21 902
44 1295
45 1296
45 1295
45 1295
45 1295
45 1299
45 1300
44 1278
44 1281
44 1277
43 1179
43 1549
42 1550
42 1564
42 1611
42 1614
42 1663
42 1651
42 1653
42 1648
42 1622
42 1599
42 1593
42 1585
44 1583
43 1513
44 1516
44 1512
43 1432
41 1344
41 1336
41 1321
30 1206
30 1204
30 1206
30 1209
30 1209
32 1326
33 1480
36 1594
39 1796
40 1860
40 1874
40 1874
40 1855
40 1774
42 1770
42 1754
42 1750
42 1749
42 1750
42 1751
42 1751
42 1753
42 1769
42 1775
42 1775
42 1773
42 1740
42 1739
42 1731
42 1693
42 1660
42 1657
42 1657
42 1655
42 1654
42 1654
42 1657
42 1655
42 1655
32 1641
32 1672
9 1172
8 1194
8 1192
8 1193
8 1196
8 1197
8 1195
0 1066
0 1057
0 1053
0 1046
0 484
0 483
0 465
0 270
0 270
0 268
0 270
0 279
0 281
0 295
0 306
0 306
0 306
0 306
0 306
0 305
0 306
0 331
0 357
0 358
0 360
0 355
0 355
0 351
0 351
0 351
0 339
0 356
0 336
0 284
0 296
0 299
0 300
0 300
0 300
0 300
0 300
0 300
0 300
0 299
0 299
0 299
0 296
0 280
0 275
0 274
0 274
0 280
0 281
0 281
0 283
0 282
0 283
0 283
0 283
0 283
0 284
0 281
0 280
0 279
0 279
0 231
0 217
0 209
0 210
0 216
0 213
0 230
0 232
0 232
0 232
0 232
0 235
1 268
1 295
1 302
2 302
2 305
2 307
2 305
2 295
2 292
2 280
2 269
2 270
2 269
2 269
2 269
2 269
2 267
2 221
2 206
2 202
2 210
2 247
2 285
2 292
5 376
5 378
5 379
5 349
5 332
5 310
5 287
5 285
5 285
5 285
5 285
5 285
5 283
5 283
5 285
5 288
6 288
8 292
8 293
8 293
8 293
8 293
10 298
10 289
10 290
10 284
10 282
10 279
10 279
10 277
10 277
10 279
10 278
10 283
14 309
14 319
14 321
14 332
14 346
14 365
17 759
17 779
17 801
17 805
19 816
20 872
20 882
21 881
21 878
20 828
19 805
19 802
19 813
19 813
19 813
19 813
19 824
19 828
19 827
19 828
19 829
19 836
19 836
19 837
19 837
19 840
19 841
19 847
19 859
19 866
19 844
19 819
19 805
16 725
16 793
16 793
16 815
16 940
16 955
16 962
16 963
16 964
16 964
18 967
18 976
18 976
18 982
18 1012
16 994
13 998
9 997
7 1001
5 1001
5 1000
5 1000
3 1005
3 1003
3 997
3 988
3 988
3 988
3 989
3 991
3 991
3 990
3 990
3 984
3 980
3 969
3 962
3 945
3 928
3 934
3 538
3 547
3 554
3 554
2 553
2 549
2 547
2 549
2 549
2 549
2 549
2 551
2 542
2 544
2 542
2 545
2 536
2 534
2 535
2 538
2 535
2 528
2 529
2 528
2 527
3 530
3 527
3 524
3 506
3 501
1 501
1 501
1 525
1 525
1 455
1 454
1 417
1 294
1 283
1 275
1 274
1 290
1 296
1 298
1 338
1 337
1 335
1 292
1 278
1 264
1 263
1 260
1 260
1 265
1 267
1 252
1 254
1 252
1 257
1 255
1 256
1 258
1 259
1 261
1 264
1 265
1 269
1 282
1 287
1 290
1 304
1 305
1 319
1 314
1 272
1 253
1 253
1 285
1 287
1 287
1 289
1 299
1 299
1 299
1 379
1 386
1 388
1 390
1 388
1 388
1 388
1 386
1 378
1 378
1 378
1 376
0 376
0 375
0 371
0 371
0 371
0 371
0 371
0 371
0 368
0 333
0 332
0 324
0 324
0 324
0 324
0 320
0 322
0 319
0 316
0 312
0 311
0 270
0 270
0 270
0 269
0 269
0 271
0 273
0 280
0 281
0 275
0 275
0 287
0 307
0 308
0 311
0 355
1 469
1 477
2 1010
4 1106
4 1288
4 1335
5 1780
5 1931
6 2146
7 2544
7 2619
7 2928
7 2907
7 3025
7 3030
7 3039
7 3099
7 3111
7 3236
7 3319
7 3400
7 3396
7 3417
7 3417
6 3302
6 3296
5 3258
5 3270
5 3271
5 3284
5 3289
5 3302
5 3303
5 3303
5 3306
5 3322
5 3320
5 3319
5 3348
5 3377
5 3400
5 3491
5 3540
6 3688
6 3691
7 3692
8 3694
8 3699
8 3700
8 3699
8 3699
8 3702
8 3700
8 3693
8 3650
8 3635
8 3635
8 3640
8 3906
8 3917
8 3925
8 3946
8 3891
8 3891
8 3927
8 3880
9 3896
10 3911
10 3905
10 3893
10 3890
10 3887
10 3844
10 3809
10 3795
9 3264
9 3215
9 3128
9 3099
8 2768
8 2587
6 2235
6 1927
6 1897
6 1896
6 1893
6 1861
6 1877
6 1871
4 1812
4 1781
4 1992
4 1925
4 1867
4 1869
4 1847
4 1863
4 1862
4 1872
4 1870
4 1855
4 1859
4 1870
4 1871
4 1873
4 1874
4 1905
4 1903
4 1886
4 1885
4 1887
4 1846
4 1858
4 1825
4 1720
4 1678
3 1531
3 1524
3 1524
3 1573
3 1567
3 1572
3 1613
3 1623
3 1679
3 1690
3 1694
3 1695
3 1693
3 1690
3 1681
2 1385
2 1400
2 1389
1 1371
1 1379
1 1330
1 1203
1 1165
1 1149
0 1130
0 1116
0 1127
0 1125
0 1127
0 1135
0 1152
0 1164
0 1159
0 1133
0 1120
0 1100
0 1008
0 949
0 939
0 893
0 893
0 894
0 902
0 922
0 915
0 913
0 899
0 865
0 458
0 456
0 390
0 387
0 399
0 395
0 393
0 364
0 359
0 357
0 351
0 321
0 320
0 302
0 297
0 299
0 336
0 385
0 399
0 403
0 404
0 393
0 396
0 396
0 396
0 396
0 402
0 405
0 350
0 351
0 341
0 335
0 343
0 327
0 325
0 324
0 316
0 312
0 312
0 298
0 297
0 289
0 289
0 289
0 289
0 286
0 286
0 286
0 279
0 279
0 277
0 298
0 296
0 295
0 287
0 273
0 261
1 298
1 305
1 306
1 318
1 337
2 591
2 601
2 605
2 605
2 606
2 594
2 568
2 569
2 570
2 571
2 576
2 576
2 577
2 577
2 576
2 565
2 569
4 575
4 575
4 589
4 589
4 592
4 585
4 581
4 575
4 573
4 564
4 520
4 487
4 480
4 480
4 481
4 481
4 484
4 486
4 493
4 528
4 517
4 527
4 521
4 520
4 524
4 593
4 582
4 585
4 748
4 749
4 754
4 755
4 760
4 768
4 776
4 796
4 811
4 815
4 892
4 897
2 990
2 1005
2 1013
2 1061
2 1175
2 1415
2 1681
2 1698
2 1718
2 1732
2 1805
2 1817
2 1784
2 1775
2 1767
2 1746
2 1527
2 1519
2 1517
2 1516
2 1516
2 1518
2 1518
2 1519
2 1518
2 1517
2 1510
2 1510
2 1509
2 1511
2 1510
2 1518
2 1543
2 1575
2 1709
2 1801
2 1941
2 1943
2 1947
2 1944
2 1945
2 1945
2 1960
2 1959
2 1957
2 1981
2 1984
2 1984
2 1983
2 1968
2 1956
2 1933
2 1872
2 1850
2 1844
2 1844
2 1843
2 1840
2 1704
2 1706
2 1688
1 1374
1 1391
1 1387
1 1386
0 1312
0 1307
0 1306
0 1305
0 1297
0 1294
0 1222
0 1208
0 1059
0 1033
0 961
0 938
0 906
0 726
0 568
0 562
0 568
0 565
0 551
0 549
0 550
0 578
0 616
0 616
0 626
0 626
0 626
0 626
0 626
0 631
0 638
0 641
0 644
0 652
0 652
0 680
0 687
0 685
0 682
0 672
0 626
0 573
0 391
0 268
0 200
0 186
0 184
0 185
0 189
0 190
0 197
0 205
0 205
0 197
0 197
0 196
0 196
0 198
0 203
0 203
0 205
0 215
0 220
0 318
0 355
0 358
0 362
0 371
0 374
0 376
0 359
0 360
0 361
0 361
0 361
0 362
0 363
0 363
0 363
0 363
0 363
0 363
0 362
0 362
0 359
0 357
0 357
0 357
0 356
0 350
0 350
0 350
0 348
0 348
0 312
0 276
0 276
0 279
0 280
2 280
2 280
2 280
2 272
2 264
2 261
2 259
2 247
2 244
2 217
2 208
2 206
2 205
2 205
2 204
2 205
2 205
2 205
2 205
2 205
2 204
2 201
2 197
2 196
1 187
1 179
1 179
1 179
0 179
0 183
0 183
0 186
0 182
0 183
0 181
0 170
0 169
0 69
0 23
0 29
0 71
0 116
0 120
0 125
0 158
0 169
0 208
0 209
0 210
0 211
0 213
0 216
0 235
0 242
0 362
0 378
0 384
0 396
0 398
0 398
0 398
0 398
0 398
0 398
0 399
0 400
0 400
0 400
0 400
0 400
0 400
0 400
0 400
0 400
0 400
0 401
0 408
0 408
0 408
0 415
0 415
0 415
0 417
0 419
0 419
0 432
0 434
0 437
0 448
0 448
0 466
0 469
0 472
0 473
0 473
0 473
0 473
0 473
0 473
0 472
0 472
0 472
0 466
0 466
0 465
0 464
0 464
0 464
0 464
0 464
0 463
0 459
0 453
0 395
0 369
0 367
0 361
0 327
0 313
0 274
0 273
0 275
0 273
0 272
0 270
0 249
0 241
0 111
0 101
0 93
0 80
0 80
0 81
0 81
0 81
0 85
0 85
0 84
0 85
0 85
0 85
0 84
0 84
0 86
0 86
0 85
0 87
0 87
0 85
0 79
0 79
0 80
0 96
1 141
1 144
1 153
1 153
1 157
7 211
7 221
7 216
7 225
7 228
7 225
7 223
7 223
7 222
7 222
7 222
7 222
7 222
7 224
7 227
7 227
7 239
7 239
7 246
7 246
7 246
7 246
7 246
7 246
7 245
7 246
7 246
7 238
7 239
7 238
7 238
7 238
7 239
7 239
7 238
7 238
7 238
7 238
7 239
7 241
7 247
7 372
7 402
7 414
7 424
3 424
3 431
3 440
3 441
3 443
3 452
3 455
3 454
2 449
2 457
1 454
1 452
1 471
1 489
1 489
1 519
1 511
1 511
1 511
1 510
1 510
1 509
1 484
0 503
2 564
2 658
3 765
4 1062
8 1472
15 2470
21 3549
23 3640
23 3700
23 3730
25 3840
25 4150
25 4937
25 6078
25 6447
25 6493
25 6525
25 6539
25 6538
25 6553
25 6546
25 6569
25 6565
25 6567
25 6567
25 6571
25 6575
25 6590
25 6597
26 6601
26 6610
26 6633
26 6628
26 6640
26 6639
26 6636
26 6634
26 6632
26 6651
26 6661
26 6664
26 6665
26 6658
26 6647
26 6619
23 5793
23 5605
23 5529
20 4843
20 4833
20 4820
20 4770
20 4690
20 4587
20 4512
20 4440
20 4440
20 4439
20 4439
20 4439
20 4439
20 4435
20 4430
20 4420
20 4399
20 4395
20 4396
20 4391
20 4388
20 4383
20 4371
20 4368
20 4346
18 4313
18 4282
17 4202
16 4103
15 4043
5 1924
1 1264
1 1226
1 1211
1 1196
0 152
0 128
0 104
0 90
0 84
0 100
0 110
0 111
0 119
0 119
0 118
0 119
0 136
0 145
0 156
0 162
0 202
0 204
0 209
0 210
0 216
0 192
0 363
0 667
1 790
1 832
3 1827
4 1870
4 1885
4 1998
4 1997
4 2027
4 2091
4 2351
4 2363
4 2400
4 2405
4 2406
4 2404
4 2411
4 2412
4 2414
4 2420
4 2430
4 2430
4 2432
4 2432
4 2432
4 2432
4 2430
4 2428
4 2427
4 2427
4 2428
4 2435
4 2443
4 2445
4 2448
4 2451
4 2451
4 2452
4 2450
4 2448
5 2447
5 2447
5 2448
5 2448
5 2448
5 2447
5 2447
5 2447
5 2447
5 2446
5 2446
5 2445
5 2443
5 2440
5 2437
5 2360
5 2349
5 2348
5 2349
5 2295
5 2295
5 2290
5 2167
5 2001
5 1925
5 1873
5 1793
5 1699
5 1673
5 1677
6 1740
6 1733
6 1592
6 1567
6 1478
5 1461
3 641
3 631
3 620
3 607
3 613
3 588
3 552
3 313
3 302
3 294
3 288
3 290
3 296
3 294
3 294
3 291
3 291
3 284
3 287
3 424
3 451
3 524
3 552
3 567
3 589
3 592
3 593
3 750
3 749
3 749
3 748
3 749
3 999
3 1002
2 1013
2 1055
2 1171
2 1181
2 1183
2 1198
2 1198
2 1198
2 1198
2 1198
2 1198
2 1198
2 1199
2 1199
2 1199
2 1199
2 1199
2 1199
2 1197
2 1197
2 1197
2 1196
2 1194
2 1194
2 1194
2 1193
2 1193
2 1199
2 1204
2 1150
2 1159
4 1145
4 1142
3 1072
3 1072
3 1072
3 1073
2 1058
2 1042
2 1040
2 1040
2 1040
2 1035
2 1032
2 1035
2 1037
2 1030
2 1035
2 1037
2 1055
2 1071
2 1066
2 1065
2 1064
2 1064
2 1065
2 1104
2 1104
2 964
2 931
2 864
2 839
2 822
2 806
2 802
2 801
2 642
2 646
2 642
2 645
2 642
2 390
2 387
2 373
2 312
2 215
2 207
2 207
2 193
2 194
1 194
1 202
1 229
1 234
1 234
1 233
1 233
1 233
1 235
1 241
0 270
0 271
0 352
0 368
0 387
0 424
0 478
0 483
0 487
0 484
0 476
0 434
0 426
0 414
0 405
0 404
0 405
0 406
0 405
0 405
0 404
0 403
0 403
0 400
0 392
0 390
0 390
0 385
0 385
1 386
1 387
1 397
1 385
1 362
1 364
1 364
1 356
1 355
1 340
1 319
1 319
1 318
1 318
1 318
1 318
1 318
1 319
1 319
1 319
1 319
1 316
1 315
1 313
1 312
1 311
1 309
1 309
1 309
1 309
1 309
1 307
1 307
1 306
1 307
1 285
1 257
1 248
1 250
1 250
1 250
1 253
1 252
1 222
1 185
1 187
1 96
1 95
1 82
1 68
1 69
1 69
1 69
1 70
1 70
1 70
1 70
1 69
1 69
1 69
1 69
1 69
1 69
1 69
1 69
1 69
1 69
1 69
1 69
1 69
1 71
1 71
1 71
0 67
0 64
0 52
0 49
0 46
0 45
0 45
0 45
0 45
0 45
0 45
0 45
0 45
0 45
0 45
0 44
0 44
0 44
0 44
0 44
0 45
0 46
0 46
0 48
0 50
2 78
2 85
3 86
3 106
3 112
3 116
3 117
3 117
3 118
3 118
3 118
3 115
3 114
3 114
3 115
3 115
3 114
3 113
3 97
3 93
3 91
3 100
3 104
3 109
3 112
3 114
3 124
3 125
3 128
3 133
3 142
3 144
3 144
3 157
3 159
3 164
3 165
3 165
3 171
3 171
3 177
3 177
2 178
2 180
1 180
1 179
1 179
1 179
1 180
1 180
2 180
2 180
2 186
2 241
3 241
3 241
3 242
3 242
3 245
3 245
3 245
3 247
3 247
3 247
3 247
3 247
3 247
3 247
3 244
4 247
5 248
5 261
5 254
4 237
4 227
4 220
4 197
4 195
4 192
4 191
4 191
4 192
4 209
4 209
4 210
4 210
5 209
5 207
5 207
5 207
5 207
5 207
5 194
5 187
5 187
5 184
5 181
5 203
5 206
5 202
5 211
5 222
5 210
5 210
5 209
5 208
5 196
5 190
5 190
5 189
5 191
5 191
5 191
5 184
5 184
5 183
5 182
5 182
5 180
5 180
5 180
5 178
4 179
4 178
4 177
3 166
2 103
2 104
1 104
1 105
1 108
1 105
1 105
1 105
1 106
1 106
1 107
1 107
1 110
1 111
1 118
1 120
1 120
1 127
1 123
1 123
1 122
1 122
1 161
1 201
1 254
1 307
1 364
1 363
1 365
1 364
1 366
1 366
1 367
0 367
0 368
0 368
0 368
0 368
0 370
1 370
2 386
2 420
2 422
2 421
2 394
2 395
2 392
2 384
2 394
2 396
2 397
2 403
2 403
2 397
2 396
2 398
2 398
2 398
2 398
2 400
2 400
2 400
2 400
2 400
2 400
2 400
2 399
2 399
2 399
2 401
2 403
2 403
2 405
2 404
2 406
2 383
2 383
2 377
2 366
2 366
2 365
2 364
2 364
2 363
2 363
2 360
2 361
2 349
2 361
2 360
2 358
2 357
2 356
2 355
2 349
1 243
1 203
1 118
0 92
0 79
0 79
0 79
0 79
0 75
0 75
0 78
0 78
0 78
0 79
0 79
0 84
0 85
0 87
0 82
0 61
0 64
0 64
0 131
0 143
0 153
0 180
0 243
0 279
0 366
0 374
0 407
0 424
0 441
0 448
0 475
0 496
0 500
0 500
0 501
0 505
0 566
0 640
0 1612
0 3019
1 4352
1 4631
1 4758
1 5019
1 5028
1 5058
1 5081
1 5101
1 5113
1 5115
1 5118
1 5118
1 5119
1 5128
1 5155
1 5251
1 5397
1 5455
1 5467
1 5452
1 5441
1 5439
1 5419
1 5412
1 5492
1 5488
1 5495
1 5503
1 5504
1 5504
1 5505
1 5511
1 5513
1 5514
1 5525
1 5525
1 5515
1 5519
1 5520
1 5538
1 5536
1 5531
1 5514
1 5487
1 5482
1 5458
1 5457
1 5481
1 5523
1 5598
1 5587
1 4670
1 4641
1 3734
1 3621
1 3475
1 3342
1 3283
1 3273
1 3264
1 3210
1 3167
1 2950
1 2625
4 2348
4 2366
4 2366
4 2360
4 2349
4 2303
4 2225
4 1674
3 1217
3 852
3 800
3 767
3 660
3 648
3 640
3 850
3 854
3 859
3 861
3 863
3 862
3 861
3 848
3 775
3 709
3 673
3 653
3 645
3 645
3 642
3 641
3 642
3 641
3 571
3 1160
3 1187
3 1449
3 1452
3 1452
3 1453
3 1448
3 1810
3 1813
3 1834
3 1842
3 1841
3 1845
3 1844
3 1825
3 1809
3 1804
3 1809
3 1809
3 1809
3 1809
3 1809
3 1778
2 1736
2 1653
2 1653
2 1650
1 1648
1 1648
0 1648
0 1649
0 1675
0 1675
0 1677
0 1677
0 1678
0 1662
0 1679
0 1682
0 1681
0 1651
0 1649
0 1653
0 1654
0 1654
0 1654
0 1654
0 1653
0 1653
0 1653
0 1654
0 1646
0 1645
0 1641
0 1420
0 1415
0 1402
0 1399
0 1397
0 1398
0 1398
0 1399
0 1399
0 1399
0 1393
0 1393
0 1393
0 1392
0 1393
0 1393
0 1388
0 1385
0 1375
0 768
0 736
0 477
0 472
0 471
0 641
0 638
0 266
0 262
0 259
0 260
0 261
0 259
0 257
0 257
0 257
0 256
0 252
0 253
0 253
0 253
0 253
0 253
0 253
0 253
0 253
0 330
0 331
0 334
0 335
0 335
0 309
0 309
0 309
0 308
0 308
0 308
0 291
0 287
0 289
0 292
0 292
0 291
0 290
0 290
0 290
0 291
0 293
0 296
0 298
0 297
0 297
0 297
0 297
0 295
0 297
1 298
1 301
1 301
1 302
1 301
1 301
1 301
1 301
1 300
1 300
1 301
1 302
1 302
1 319
1 321
1 325
1 330
1 344
1 345
1 349
1 348
1 345
1 171
1 171
1 172
1 172
1 176
1 175
1 175
1 175
1 186
1 189
3 266
3 279
3 280
4 336
4 348
4 351
4 383
4 384
4 389
4 397
4 435
4 362
4 364
4 360
4 353
4 352
4 352
4 357
4 356
5 367
5 431
5 437
5 487
5 935
5 1043
5 1079
5 2363
5 2587
7 3144
7 3263
7 3775
7 4001
7 4970
7 5373
6 5684
6 5966
6 6031
6 6072
6 6130
6 6135
6 6141
5 6179
5 6183
5 6187
5 6213
5 6218
5 6354
5 6417
5 6447
5 6665
5 6718
5 6762
5 6766
5 6762
5 6756
5 6763
5 6762
5 6759
5 6749
5 6751
5 6747
5 6748
5 6723
5 6722
5 6697
4 6657
4 6647
4 6716
4 7145
3 7541
3 7710
3 7715
3 7711
1 7640
1 7660
1 7662
0 7622
0 7632
1 7629
3 7656
3 7692
3 7677
3 7659
3 7225
3 6750
3 7033
3 7043
3 7041
3 7067
3 7053
3 7047
3 7041
3 7015
3 6695
3 6350
3 6111
3 5990
3 5804
3 5684
3 4605
3 4410
3 4374
3 4314
3 4132
3 3945
3 3282
3 2976
3 2763
3 2658
3 2646
3 2643
3 2594
3 2620
3 2668
3 2691
3 2698
3 2685
3 2671
3 2926
4 2883
5 2864
5 2938
5 2746
5 2736
5 2736
5 2736
5 2734
5 2728
5 2721
5 2720
5 2719
5 2718
5 2721
5 2722
5 2750
5 2792
5 2917
5 2989
5 2983
5 2963
5 2638
5 2012
5 1621
5 1521
5 1524
5 1684
5 1686
5 1700
5 1697
5 1685
4 1670
4 1667
2 1638
2 1595
2 1595
2 1596
2 1579
2 1572
2 1248
2 1233
2 1208
2 1189
2 1179
2 1182
2 1185
2 1185
2 1184
2 1182
2 1181
2 1181
2 1181
2 1181
2 1181
2 1181
2 1181
2 1182
2 1182
2 1183
2 1194
2 1196
2 1198
2 1250
2 1275
2 1279
2 1279
2 1231
2 1159
2 1100
2 1092
2 1088
2 1067
2 781
0 641
0 628
0 538
0 535
0 528
0 528
0 528
0 531
0 531
0 531
0 530
0 524
0 524
0 523
0 522
0 506
0 482
0 402
0 334
0 332
0 326
0 328
0 328
0 327
0 312
0 305
0 147
0 144
0 131
0 129
0 129
0 129
0 129
0 305
0 551
0 560
0 1672
0 2301
0 2573
0 2975
0 3060
0 3612
0 3787
0 4239
0 4362
0 4455
0 4524
0 4557
0 4591
0 4606
0 4607
0 4608
0 4613
0 4614
0 4667
0 4673
0 4693
0 4698
0 4698
0 4679
0 4669
0 4659
0 4512
0 4359
0 4313
0 4309
0 4307
0 4305
0 4305
0 4303
0 4303
0 4304
0 4304
0 4294
0 4294
0 4294
0 4294
0 4286
0 4286
0 4286
0 4267
0 4247
0 4267
0 4266
0 4273
0 4274
0 4300
0 4300
0 4297
0 4296
0 4295
0 4283
0 4265
0 4261
0 4252
0 4247
0 4247
0 4246
0 4246
0 4243
0 4240
0 4237
0 4237
0 4236
0 4230
0 4232
0 4211
0 3695
0 3631
0 2448
0 1339
0 522
0 344
0 334
0 330
0 326
0 213
0 211
0 196
0 192
0 198
0 212
0 252
0 254
0 254
0 249
0 249
0 195
0 177
0 170
0 167
0 167
0 175
0 175
0 176
0 177
0 177
0 181
0 181
0 181
0 181
0 182
0 182
0 184
0 184
0 183
0 182
0 182
0 182
0 182
0 182
0 182
0 183
0 183
0 183
0 144
0 126
0 109
0 110
0 80
0 80
0 80
0 77
0 77
0 77
0 77
0 77
0 77
0 77
0 77
0 77
0 77
0 77
0 77
0 77
0 77
0 77
0 74
0 74
0 74
0 74
0 92
0 93
0 95
0 101
0 100
0 102
0 102
0 104
0 105
0 116
0 116
0 114
0 108
0 97
0 82
0 81
0 82
0 81
0 81
0 80
0 80
0 80
0 78
0 78
0 69
0 80
0 86
0 91
0 92
0 94
0 93
0 93
0 93
0 93
0 92
0 91
0 90
0 90
0 90
0 90
0 90
0 90
0 90
0 90
0 89
0 92
0 90
0 90
0 89
0 88
0 88
0 88
0 89
0 89
0 92
0 91
0 94
0 94
0 94
0 94
0 96
0 103
0 104
0 134
0 134
0 134
0 167
0 167
0 168
0 188
0 185
0 205
0 205
0 180
0 180
0 176
0 170
0 167
0 166
0 165
0 164
0 164
0 151
0 151
0 151
0 151
0 149
0 140
0 139
0 135
0 135
0 135
0 135
0 135
0 146
0 150
0 150
0 150
0 140
0 137
0 136
0 136
0 136
0 136
0 136
0 136
0 136
0 136
0 136
0 136
0 136
0 136
0 137
0 137
0 138
0 138
0 136
0 134
0 119
0 107
0 106
0 103
0 103
0 103
0 103
0 101
0 101
0 101
0 100
0 100
0 99
0 97
0 97
0 84
0 50
0 50
0 30
0 30
0 30
0 23
0 23
0 23
0 23
0 23
0 15
0 15
0 15
0 15
0 15
0 15
0 15
0 15
0 15
0 15
0 15
0 15
0 15
0 15
0 15
0 16
0 16
0 16
0 16
0 16
0 16
0 16
0 16
0 5
0 1
0 1
0 1
0 1
0 1
0 1
0 1
0 1
0 1
0 1
0 1
0 1
0 1
0 1
0 1
0 1
0 1
0 1
0 1
0 1
0 1
0 1
0 1
0 1
0 1
0 1
0 1
0 1
0 1
0 1
0 1
0 1
0 1
0 1
0 1
0 1
0 1
0 1
0 1
0 1
0 1
0 1
0 1
0 1
0 1
0 1
0 1
0 1
0 1
0 1
0 1
0 1
0 1
0 1
0 1
0 1
0 1
0 1
0 1
0 1
0 1
0 1
0 1
0 1
0 0
0 0
0 0
0 0
0 0
0 0
0 0
0 0
0 0
0 0
0 0
0 0
0 0
0 0
0 0
0 0
0 0
0 0
0 0
0 0
0 0
0 0
0 0
0 2
0 2
0 2
0 2
0 2
0 2
0 2
0 2
0 2
0 2
0 2
0 2
0 2
0 2
0 2
0 2
0 1
0 0
0 0
0 0
0 0
0 0
0 0
0 0
0 0
0 0
0 0
0 0
0 0
0 0
0 0
0 0
0 0
0 0
0 0
0 0
0 0
0 0
0 0
0 0
0 0
0 0
0 0
0 0
0 0
0 0
0 0
0 0
0 0
0 0
0 0
0 0
0 0
0 0
0 0
0 0
0 0
0 0
0 0
0 0
0 0
0 0
0 0
0 0
0 0
0 0
0 0
0 0
0 0
0 0
0 0
0 0
0 0
0 0
0 0
0 0
0 0
0 0
0 0
0 0
0 0
0 0
0 0
0 0
0 0
0 0
0 0
0 0
0 0
0 0
0 0
0 0
0 0
0 0
0 0
0 0
0 0
0 0
0 0
0 0
0 0
0 0
0 0
0 0
0 0
0 0
0 0
0 0
0 0
0 0
0 0
0 0
0 0
0 0
0 0
0 0
0 0
0 0
0 0
0 0
0 0
0 0
0 0
0 0
0 0
0 0
0 0
0 0
0 0
0 0
0 0
0 0
0 0
0 0
0 0
0 0
0 0
0 0
0 0
0 0
0 0
0 0
0 0
0 0
0 0
0 0
0 0
0 0
0 0
0 0
0 0
0 0
0 0
0 0
0 0
0 0
0 0
0 0
0 0
0 0
0 0
0 0
0 0
0 0
0 0
0 0
0 0
0 0
0 0
0 0
0 0
0 0
0 0
0 0
0 0
0 0
0 0
0 0
0 0
0 0
0 0
0 0
0 0
0 0
0 0
0 0
0 0
0 0
0 0
0 0
0 0
0 0
0 0
0 0
0 0
0 0
0 0
0 0
0 0
0 0
0 0
0 0
0 0
0 0
0 0
0 0
0 0
0 0
0 0
0 0
0 0
0 0
0 0
0 0
0 0
0 0
0 0
0 0
0 0
0 0
0 0
0 0
0 0
0 0
0 0
0 0
0 0
0 0
0 0
0 0
0 0
0 0
0 0
0 0
0 0
0 0
0 1
0 1
0 1
0 1
0 1
0 2
0 2
0 2
0 2
0 2
0 2
0 2
0 2
0 2
0 2
0 2
0 2
0 2
0 2
0 2
0 2
0 2
0 2
0 2
0 2
0 2
0 2
0 2
0 2
0 2
0 2
1 2
1 2
1 2
1 2
1 1
1 1
1 1
1 1
1 0
1 0
1 0
1 0
1 0
1 0
1 0
1 0
0 0
0 0
0 0
0 0
0 0
0 0
0 0
0 0
0 0
0 0
0 0
0 0
0 0
0 0
0 0
0 1
0 2
0 2
0 2
0 2
0 2
0 2
0 2
0 2
0 2
0 2
0 2
0 2
0 2
0 2
0 2
0 2
0 2
0 2
0 2
0 2
0 2
0 2
0 2
0 2
0 2
0 2
0 2
0 2
0 2
0 2
0 2
0 2
0 2
0 2
0 2
0 2
0 2
0 2
0 2
0 2
0 2
0 2
0 2
0 2
0 2
0 2
0 2
0 2
0 2
0 2
0 2
0 2
0 2
0 2
0 2
0 2
0 2
0 2
0 2
0 2
0 2
0 2
0 2
0 2
0 2
0 2
0 2
0 2
0 3
0 5
0 6
0 11
0 14
0 14
0 21
0 22
0 29
0 30
0 30
0 33
0 33
0 33
0 33
0 34
0 34
0 34
0 34
0 34
0 34
0 34
0 34
0 34
0 34
0 34
0 34
0 34
0 34
0 34
0 34
0 34
0 34
0 34
0 34
0 34
0 34
0 34
0 34
0 34
0 34
0 34
0 34
0 34
0 34
0 34
0 34
0 34
0 34
0 34
0 34
0 34
0 34
0 34
0 34
0 34
0 34
0 34
0 34
0 34
0 34
0 30
0 30
0 30
3 30
4 26
4 26
4 26
5 26
5 26
5 31
15 27
15 25
15 23
18 23
18 21
18 20
18 18
18 18
18 7
18 6
18 6
18 12
19 35
30 55
34 56
34 56
34 56
34 59
34 67
34 67
34 67
34 67
34 67
34 67
34 67
34 67
34 67
34 67
34 68
35 82
35 83
35 83
35 83
35 83
35 83
36 83
36 83
35 83
35 83
35 84
34 84
34 84
34 85
32 80
32 80
32 80
30 78
26 72
26 72
27 72
27 72
45 85
46 85
46 85
46 85
46 85
46 85
46 85
46 85
46 85
46 85
46 85
46 85
46 85
46 85
46 85
46 85
46 85
47 86
50 102
49 103
49 108
49 108
39 108
41 108
41 108
41 109
43 109
43 109
43 109
43 109
43 109
43 109
43 108
43 101
42 80
34 57
30 58
30 58
30 58
30 59
30 59
30 59
30 59
30 59
30 59
30 59
30 59
30 59
30 59
30 59
30 58
29 43
29 43
29 43
29 43
29 43
29 43
28 43
28 43
28 43
28 43
28 42
28 42
28 42
28 41
28 41
28 41
28 43
27 44
26 44
26 44
20 44
20 43
7 31
7 31
7 31
7 31
6 31
6 35
6 35
6 36
6 37
6 38
6 38
6 38
7 39
7 39
7 39
7 40
7 40
6 39
3 22
3 21
2 16
2 15
2 15
1 15
1 15
1 14
1 14
1 15
1 16
1 16
1 17
1 18
1 18
1 18
1 18
1 18
1 18
1 18
1 20
1 21
1 23
1 23
1 24
1 24
1 24
1 24
1 24
1 24
1 24
1 24
1 24
1 24
1 24
1 24
1 24
1 24
1 24
1 24
1 24
1 24
1 24
1 24
1 24
1 24
1 24
1 23
1 22
1 20
1 20
1 20
1 20
1 20
1 20
2 20
2 20
2 20
2 20
2 20
2 15
2 14
2 14
2 12
1 11
1 11
1 11
1 10
1 10
1 9
1 9
1 10
1 10
1 11
1 11
1 11
1 12
1 24
1 39
1 65
1 81
1 96
1 103
1 103
1 133
1 135
1 140
1 140
1 141
2 143
2 151
3 227
3 228
3 229
4 229
4 229
4 229
4 228
4 228
4 233
4 241
4 247
4 248
4 248
4 248
4 248
4 248
4 248
4 248
4 248
4 248
4 248
4 248
4 248
4 248
4 248
4 248
4 248
5 248
6 248
8 248
8 248
10 248
10 246
10 242
12 238
12 239
17 252
18 255
18 255
18 255
18 255
18 255
18 254
18 253
18 253
18 253
18 253
18 253
18 253
18 256
20 327
20 329
20 369
21 374
21 380
21 381
21 387
21 387
21 386
21 376
21 362
21 339
21 325
21 313
21 310
21 310
21 285
21 283
21 289
21 289
20 287
20 286
20 280
19 212
19 211
19 207
18 203
18 203
18 203
18 203
18 203
18 197
18 190
16 185
16 184
16 184
16 184
14 184
10 184
6 187
6 188
6 188
13 572
15 620
15 620
17 620
18 632
16 632
16 632
16 635
16 636
16 636
16 636
16 637
16 638
16 638
16 638
16 638
16 637
15 624
15 621
15 621
15 621
15 621
15 621
15 621
15 627
15 633
15 633
15 633
15 631
15 630
15 621
12 512
12 506
12 507
12 508
12 503
12 504
12 494
12 491
12 489
12 488
12 488
12 489
12 486
12 484
12 484
12 484
12 484
12 484
12 471
12 470
12 469
12 470
12 471
12 472
12 472
12 473
12 473
12 472
12 471
12 471
12 471
12 471
12 471
12 471
12 472
12 472
12 472
12 472
11 472
10 470
8 467
8 464
4 73
1 21
0 21
0 21
0 14
0 14
0 14
0 14
0 14
0 14
0 13
0 13
0 12
0 12
0 12
0 12
0 12
0 12
0 12
0 12
0 12
0 12
0 12
0 12
0 12
0 12
0 12
0 12
0 11
0 12
0 12
0 12
0 12
0 12
0 13
0 13
0 12
0 12
0 11
0 11
0 11
0 11
0 9
0 9
0 10
0 10
0 10
0 10
0 10
0 10
0 10
0 9
0 9
0 8
0 6
0 8
0 7
0 7
0 7
0 6
0 6
0 6
0 6
0 6
0 6
0 5
0 5
0 5
0 5
0 5
0 5
0 5
0 5
0 5
0 5
0 5
0 5
0 5
0 5
0 5
0 5
0 5
0 5
0 5
0 5
0 5
0 5
0 5
0 5
0 5
0 5
0 5
0 5
0 5
0 5
0 4
0 3
0 3
0 3
0 3
0 3
0 3
0 3
0 3
0 3
0 3
0 3
0 3
0 3
0 3
0 3
0 3
0 3
0 3
0 3
0 3
0 3
0 2
0 2
0 3
0 3
0 3
0 3
0 4
0 7
0 7
0 8
0 8
0 6
0 6
0 7
0 8
0 8
0 10
0 10
0 10
0 10
0 10
0 10
0 10
0 10
0 10
0 11
0 11
0 11
0 11
0 11
0 11
0 11
0 11
0 11
0 11
0 12
0 12
0 12
0 12
0 12
0 12
0 12
0 12
0 12
0 12
0 12
0 12
0 12
0 12
0 12
0 12
0 12
0 12
0 12
0 16
0 17
0 18
0 18
0 18
0 18
0 18
0 18
0 18
0 18
0 18
0 18
0 18
0 18
0 18
0 18
0 18
0 18
0 18
0 18
0 19
0 18
0 18
0 21
0 21
0 20
0 18
0 18
0 18
0 18
0 20
0 23
0 23
0 22
0 23
0 22
0 24
0 24
0 24
0 24
0 24
0 24
0 25
0 25
0 24
0 24
0 24
0 24
0 25
0 25
0 25
0 24
0 24
0 25
0 24
0 24
0 27
0 28
0 28
0 28
0 28
0 28
0 28
0 28
0 28
0 27
0 27
0 27
0 27
0 27
0 27
0 27
0 27
0 22
0 20
0 20
0 20
0 20
0 20
0 20
0 20
0 20
0 20
0 20
0 20
0 20
0 20
0 20
0 20
0 20
0 20
0 20
0 20
0 18
0 18
0 17
0 9
0 9
0 4
0 4
0 4
0 4
0 4
0 4
0 4
0 4
0 4
0 4
0 4
0 4
0 4
0 4
0 4
0 6
1 7
1 8
1 8
1 8
1 8
1 8
1 8
1 8
1 9
1 9
1 9
1 9
1 9
1 9
1 8
1 6
0 6
0 6
0 6
0 6
0 6
0 6
0 6
0 6
0 6
0 6
0 6
0 6
0 6
0 6
0 6
0 6
0 6
0 6
0 6
0 6
0 6
0 6
0 6
0 6
0 6
0 6
0 6
0 6
0 6
0 6
0 6
0 6
0 6
0 6
0 6
0 6
0 6
0 6
0 6
0 6
0 5
0 5
0 4
0 4
0 4
0 4
0 4
0 4
0 4
0 4
0 4
0 4
0 4
0 4
0 4
0 3
0 1
0 1
0 4
0 5
0 5
0 12
0 12
0 12
0 13
0 13
0 14
0 15
0 15
0 15
0 15
0 15
0 15
0 15
0 15
0 15
0 15
0 15
0 15
0 15
0 15
0 15
0 15
0 15
0 15
0 15
0 15
0 15
0 15
0 15
0 15
0 15
0 15
0 15
0 15
0 15
0 15
0 15
0 15
0 15
0 15
0 15
0 15
0 15
0 15
0 15
0 15
0 16
0 16
0 17
0 17
0 18
0 18
0 18
0 18
0 18
0 18
0 18
0 18
0 18
0 22
0 23
0 23
0 50
0 50
0 51
0 52
0 55
0 55
0 57
0 60
0 57
0 57
0 57
0 51
0 51
0 51
0 49
0 48
0 47
0 46
0 46
0 47
0 48
0 50
0 50
0 50
0 50
0 50
0 50
0 50
0 50
0 51
0 53
0 53
0 53
0 53
0 54
0 54
0 54
0 54
0 54
0 54
0 55
0 55
0 55
0 55
0 55
0 55
0 55
0 55
0 55
0 55
0 55
0 55
0 55
0 55
0 60
0 59
0 59
0 58
0 56
0 76
0 78
0 87
0 86
0 87
0 88
0 88
0 88
0 88
0 88
0 88
0 88
0 87
0 86
0 73
0 74
0 74
0 76
0 71
0 71
0 69
0 63
0 64
0 65
0 65
0 65
0 65
0 65
0 65
0 65
0 65
0 65
0 65
0 64
0 63
0 61
0 61
0 61
0 61
0 61
0 61
0 61
0 61
0 61
0 60
0 59
0 59
0 59
0 59
0 59
0 59
0 59
0 59
0 58
0 58
0 58
0 58
0 58
0 58
0 58
0 58
0 58
0 59
0 60
0 60
0 58
0 57
0 56
0 52
0 52
0 52
0 51
0 50
0 25
0 21
0 9
0 9
0 9
0 9
0 9
0 9
0 9
0 16
0 16
0 16
0 16
0 15
0 13
0 13
0 13
0 14
0 14
0 14
0 14
0 15
0 14
0 13
0 16
0 16
0 16
0 16
0 16
0 16
0 27
0 86
0 163
1 216
1 226
1 230
2 239
2 241
2 242
2 242
2 242
2 242
2 242
2 242
2 242
2 242
2 242
2 242
2 242
2 242
2 242
2 242
2 242
2 242
2 242
2 242
2 242
2 242
2 242
2 243
2 243
2 243
2 242
2 241
2 241
2 241
2 246
2 249
2 251
2 252
2 252
2 252
2 252
2 252
2 252
2 252
2 252
2 252
2 277
2 277
2 278
2 279
2 272
2 274
2 289
2 294
2 295
2 295
2 294
2 293
2 291
2 291
2 291
2 291
2 293
2 381
2 386
2 390
2 392
2 395
2 398
2 408
2 404
2 376
2 290
1 241
0 202
0 201
0 201
0 201
0 202
0 204
0 206
0 207
0 211
0 211
0 211
0 211
0 211
0 211
0 213
0 213
0 215
0 215
0 221
0 224
0 224
0 230
0 238
1 238
1 239
1 240
1 242
1 243
1 243
1 247
1 248
1 248
1 248
1 243
1 237
1 237
1 236
1 236
1 236
1 236
1 236
1 236
1 237
1 237
1 237
1 212
1 212
1 209
1 203
1 203
1 200
1 183
1 179
1 178
1 178
1 178
1 178
1 179
1 179
1 182
2 194
2 193
2 96
2 93
2 81
2 83
2 77
2 76
2 61
2 61
2 61
2 61
2 61
2 62
2 62
2 62
2 62
2 61
2 60
2 59
2 58
2 57
2 55
3 55
3 55
3 55
4 56
4 56
5 56
6 54
6 54
6 52
6 52
6 52
6 46
5 37
5 37
5 37
5 36
5 36
5 35
5 35
5 35
6 34
6 34
6 34
6 34
6 34
6 34
6 35
6 47
6 47
6 47
6 49
6 49
6 48
6 46
6 47
6 47
6 47
4 49
4 58
4 58
5 60
4 60
4 60
4 60
4 56
4 54
4 55
4 54
4 56
4 54
3 45
3 43
3 43
3 41
3 40
3 40
3 40
3 40
3 38
2 36
2 36
1 36
1 36
1 35
1 35
1 35
1 36
2 38
2 38
2 40
2 40
2 40
2 40
2 40
2 40
2 40
2 39
2 39
2 39
2 39
2 39
2 39
2 39
2 39
2 39
2 39
2 39
2 39
2 39
2 39
2 39
2 40
2 40
2 40
2 40
2 41
2 41
2 41
2 41
2 39
2 26
2 26
2 26
2 26
2 26
2 26
2 26
2 25
2 24
2 24
2 22
2 13
1 12
1 11
1 11
1 11
1 11
1 11
1 13
1 15
1 23
1 21
1 21
1 21
1 21
1 21
1 21
1 20
1 20
1 20
1 22
1 22
1 22
1 22
2 22
2 22
2 25
2 25
2 28
2 27
1 25
1 25
1 23
1 23
1 23
1 23
1 23
1 25
1 25
0 25
0 25
0 26
0 28
0 38
0 38
0 38
0 65
0 67
0 68
0 110
0 117
0 123
0 149
0 157
0 156
0 167
0 168
0 168
0 171
0 171
0 171
0 171
0 180
0 180
0 180
0 184
0 184
0 184
0 184
0 184
0 184
0 184
0 184
0 184
0 184
0 184
0 184
0 185
0 186
0 188
0 189
0 188
0 182
0 167
0 163
0 163
0 163
0 163
0 163
0 163
0 163
0 162
0 162
0 158
0 159
0 158
0 157
0 158
0 158
0 120
0 111
0 70
0 69
0 69
0 67
0 67
0 67
0 67
0 68
0 68
0 68
0 68
0 69
0 72
0 73
0 88
0 88
0 94
0 94
0 89
0 86
0 81
0 71
0 64
0 62
0 51
0 51
0 51
0 51
0 51
0 51
0 52
0 52
0 52
0 52
0 43
0 43
0 43
0 39
0 39
0 39
0 39
0 39
0 39
0 39
0 39
0 39
0 40
0 40
0 50
0 50
0 49
0 48
0 48
0 54
0 68
0 69
0 69
0 69
0 69
0 69
0 69
0 69
0 126
2 170
3 271
4 281
15 356
16 369
16 381
16 410
16 432
16 461
16 467
16 471
16 474
16 475
16 477
16 477
16 484
16 491
16 502
16 522
16 528
16 529
16 530
16 528
16 559
16 545
16 546
16 544
16 543
16 543
16 543
16 544
16 544
16 544
16 544
16 544
16 544
16 544
16 544
16 544
16 544
16 543
16 543
16 542
17 546
17 546
17 547
17 547
17 547
17 547
17 548
17 548
17 548
17 548
17 548
17 546
17 552
18 560
20 561
20 507
20 511
20 464
21 464
21 432
19 384
16 322
16 282
16 278
16 278
16 276
16 274
16 274
18 274
18 274
18 275
17 223
17 217
7 169
7 163
7 154
7 150
7 144
7 137
7 136
7 136
7 135
7 135
7 135
7 136
7 125
7 113
7 105
7 95
7 90
7 94
7 92
7 88
7 66
7 66
7 66
7 65
7 65
7 65
7 65
7 64
7 64
7 64
7 64
7 64
7 65
7 65
7 69
8 74
8 75
6 75
7 77
7 77
11 71
12 73
12 72
12 72
12 72
12 72
12 70
12 70
13 70
14 70
14 70
14 70
14 60
12 52
12 49
12 49
12 49
12 49
12 49
12 49
12 30
12 29
12 29
12 28
12 28
12 28
12 28
11 29
10 29
10 29
10 28
10 28
10 28
10 28
10 28
10 28
10 28
10 28
10 28
10 28
10 27
10 27
11 27
13 26
13 22
16 21
19 21
19 22
19 22
19 22
19 19
19 19
19 19
19 18
19 18
19 18
19 18
20 25
25 37
25 50
25 101
27 111
27 113
31 129
31 130
32 141
30 140
31 185
31 184
31 190
31 201
29 198
29 198
24 200
23 199
23 199
23 200
23 201
23 201
25 202
25 202
25 202
25 202
25 202
25 202
25 202
25 202
24 202
24 203
24 207
24 222
24 273
24 277
24 302
24 302
24 305
24 310
24 310
24 310
24 310
24 309
24 315
24 316
24 317
24 320
24 330
24 344
24 344
24 345
24 345
24 346
24 348
24 348
24 348
21 349
21 349
17 349
16 349
14 347
8 347
8 346
8 346
8 346
8 346
3 344
3 348
3 349
3 352
3 353
3 352
2 331
2 322
2 295
2 247
2 242
2 237
2 223
2 223
2 221
2 218
2 168
2 167
2 167
2 166
2 166
2 166
2 166
2 169
2 173
2 170
2 170
2 170
0 170
0 170
0 169
1 171
1 171
1 173
1 176
1 179
2 184
2 180
2 173
2 160
2 109
2 101
2 77
2 83
2 82
2 80
2 80
2 80
2 80
2 80
2 80
2 79
2 78
2 74
2 59
2 46
2 45
2 44
2 44
2 43
2 41
2 41
2 41
2 41
2 42
2 42
2 42
2 42
2 42
2 42
2 42
2 42
2 45
2 47
2 46
2 47
2 44
2 44
2 44
2 42
2 42
3 42
3 40
3 40
3 40
3 40
3 38
3 39
3 39
3 39
3 39
3 39
3 41
3 41
3 43
3 43
3 43
3 39
3 39
3 41
3 41
3 40
3 40
3 40
2 38
2 38
2 37
2 38
2 35
1 30
1 30
1 30
1 30
1 31
1 31
1 31
3 28
3 28
3 27
3 27
5 42
5 42
6 43
6 43
6 43
6 43
6 44
6 44
6 44
6 44
6 44
6 44
6 45
6 45
6 45
6 45
6 45
6 44
6 44
6 44
6 44
6 44
6 44
6 44
6 45
6 42
6 38
6 39
6 38
6 38
6 38
6 38
6 38
5 37
5 37
5 36
5 35
4 35
4 35
3 36
3 36
4 39
5 39
5 39
5 39
5 37
5 38
3 36
3 36
3 29
3 29
3 25
3 25
3 25
3 25
3 25
3 25
3 25
3 25
3 25
3 23
4 23
4 24
4 37
4 39
4 42
4 41
4 42
4 42
4 42
4 42
4 42
4 41
3 34
3 33
3 33
3 33
3 33
3 33
3 33
3 33
3 33
3 33
3 33
3 33
3 32
3 32
3 32
3 32
3 32
3 32
5 34
6 39
6 39
17 46
17 46
17 47
17 46
17 46
17 46
17 45
17 45
17 45
17 45
17 45
17 45
17 45
17 45
19 45
30 78
33 79
33 79
33 77
33 79
31 77
31 76
31 76
31 77
31 77
31 76
31 76
31 76
31 76
31 76
31 76
31 75
33 82
33 84
33 84
33 85
35 101
35 111
35 117
35 119
35 119
35 119
35 105
35 104
35 103
35 103
35 102
35 102
35 102
35 104
35 104
35 103
34 98
34 100
34 102
34 102
35 104
35 104
34 102
34 102
34 102
34 102
34 102
34 102
34 102
34 102
34 102
34 102
34 102
34 102
33 102
32 100
32 100
22 93
22 93
22 93
22 93
22 93
22 93
22 93
22 93
22 93
22 93
22 93
22 93
20 93
19 93
18 93
5 52
3 51
3 52
3 52
3 52
3 51
1 45
1 45
1 44
1 44
1 44
1 44
1 44
1 44
1 51
1 56
1 64
1 68
1 77
1 79
1 77
1 73
1 66
1 67
1 67
1 68
1 68
1 68
1 68
1 68
1 68
1 68
1 68
1 71
1 71
1 73
1 73
1 86
1 88
1 85
0 85
0 85
0 85
0 85
0 142
0 143
0 143
0 143
0 144
0 221
0 226
1 241
1 260
2 272
2 286
2 288
2 289
2 304
2 310
2 323
2 327
2 339
2 341
2 344
2 345
2 345
2 345
2 345
2 345
2 345
2 345
2 345
2 345
2 345
2 345
2 345
2 345
2 350
2 350
2 350
2 350
2 350
2 350
2 350
2 350
2 350
2 350
2 343
2 343
2 340
2 331
2 323
2 321
2 311
2 301
2 293
2 250
2 222
2 213
2 213
2 213
2 213
2 213
2 215
2 215
2 215
2 212
3 212
3 208
3 194
3 162
3 148
3 146
3 146
3 147
3 147
3 147
3 147
3 148
3 147
3 152
3 151
2 112
2 106
2 103
2 79
1 59
1 57
1 57
1 57
1 48
1 45
1 33
1 31
1 29
1 29
1 29
1 29
1 29
1 29
1 29
1 29
1 29
1 29
1 29
1 30
1 30
1 30
1 30
1 30
1 23
1 23
1 23
1 23
1 22
1 21
1 23
1 23
1 23
1 26
1 25
1 21
1 22
1 32
1 32
1 33
1 33
1 33
1 33
1 34
1 34
1 34
1 34
1 34
1 35
1 35
1 35
1 37
1 38
1 38
0 37
0 38
0 38
0 39
0 42
0 43
0 43
0 42
0 42
0 42
0 42
0 41
0 41
0 36
0 36
0 36
0 36
0 36
0 36
0 37
0 37
0 35
0 36
0 36
0 38
0 39
0 39
0 40
0 40
0 40
0 40
0 40
0 40
0 40
0 40
0 40
0 40
0 40
0 39
0 39
0 39
0 39
0 39
0 39
0 39
0 39
0 39
0 39
0 39
0 37
0 37
0 38
0 35
0 39
0 36
0 35
0 25
0 25
0 23
0 23
0 23
0 23
0 22
0 22
0 22
0 22
0 22
0 22
0 22
0 22
0 20
0 20
0 20
0 20
0 20
1 20
1 19
1 16
1 15
1 15
1 15
2 15
2 16
2 16
2 17
2 16
2 16
2 16
2 16
2 16
2 15
2 16
2 16
2 16
2 16
2 18
2 18
2 17
2 16
2 15
2 14
2 14
2 14
2 13
2 19
2 18
2 18
2 18
2 18
2 18
2 18
2 18
2 18
2 18
2 18
2 18
2 18
2 18
2 18
2 18
2 19
2 19
2 19
2 19
2 19
0 18
0 16
0 17
0 22
0 22
0 22
0 23
0 30
0 30
0 30
0 30
0 34
0 37
0 37
0 37
0 37
0 37
0 37
0 37
0 37
0 37
0 36
0 36
0 36
0 36
0 36
0 36
0 36
0 36
0 35
0 34
0 36
1 36
1 36
1 36
1 36
1 36
1 36
1 36
1 35
1 35
1 35
1 35
1 32
1 32
1 34
1 34
1 34
1 34
1 34
1 35
1 34
1 29
1 29
1 29
1 29
1 29
1 29
1 30
1 30
1 30
1 30
1 30
1 30
1 34
1 34
1 34
1 33
1 33
1 37
1 191
2 208
2 238
2 286
2 306
2 318
2 311
2 323
2 329
2 333
3 343
3 348
3 353
3 354
3 355
3 355
3 359
3 408
3 438
3 447
3 449
3 449
3 454
3 454
3 454
3 455
3 455
3 455
3 455
3 455
3 455
3 455
3 455
3 452
2 446
2 447
2 446
2 447
2 450
2 451
2 453
2 453
2 453
2 454
2 454
2 454
2 464
2 465
2 473
2 476
2 486
2 489
2 489
2 489
2 489
2 489
2 489
2 489
2 489
2 489
2 489
2 488
2 488
2 488
2 488
2 488
2 488
2 488
2 488
2 488
2 484
2 484
2 480
1 271
1 262
1 229
1 216
1 195
1 189
1 189
1 182
1 180
1 175
0 161
0 161
0 160
0 158
0 153
0 152
0 148
0 91
0 67
0 60
0 59
0 59
0 54
0 54
0 54
0 53
0 54
0 54
0 54
0 54
0 54
0 54
0 54
0 54
0 54
0 52
0 51
0 46
0 46
0 45
0 43
0 43
0 43
0 42
0 42
0 42
0 32
0 31
0 23
0 18
0 6
0 6
0 6
0 6
2 6
2 6
2 6
2 6
2 6
2 6
2 7
2 7
2 7
2 7
2 7
2 7
2 7
2 7
2 8
2 8
2 8
2 8
2 8
2 8
2 7
2 7
2 5
2 5
2 5
2 5
2 5
2 5
2 5
2 5
3 5
5 5
5 5
5 4
5 4
5 3
5 3
5 4
5 4
5 4
5 4
6 4
6 5
6 9
6 9
8 17
9 18
9 18
9 18
9 18
9 18
9 18
9 18
9 18
9 18
9 19
9 19
9 19
9 19
9 19
9 19
9 19
9 19
10 19
11 19
11 19
11 19
11 19
11 21
11 21
11 21
11 21
10 21
9 21
9 21
9 21
9 21
9 21
9 21
8 20
8 20
8 20
7 20
7 18
7 18
7 18
7 18
7 17
7 17
7 17
7 17
7 17
7 17
7 17
7 17
7 17
7 17
7 17
7 17
7 17
7 17
7 17
7 17
7 17
6 17
6 17
6 17
6 17
7 17
7 17
7 16
7 16
6 16
6 16
5 16
5 15
4 11
3 11
2 1
2 1
2 1
2 2
2 2
2 4
0 4
0 4
0 4
0 3
0 3
0 3
0 3
0 3
0 3
0 3
0 3
0 3
0 3
0 3
0 3
0 3
0 3
0 3
0 3
0 3
0 3
0 3
0 3
0 3
0 3
0 3
0 3
0 3
0 3
0 3
0 3
0 3
0 3
0 3
0 3
0 3
0 3
0 3
0 3
0 3
0 3
0 3
0 3
0 3
0 3
0 3
0 3
0 3
0 3
0 3
0 3
0 3
0 3
0 3
0 3
0 3
0 3
0 3
0 3
0 3
0 3
0 3
0 3
0 3
0 3
0 3
0 3
0 3
0 3
1 3
1 2
1 2
2 1
2 1
2 1
2 1
2 1
2 1
2 1
2 1
2 1
2 1
2 1
2 1
2 1
2 1
2 1
2 1
2 1
2 1
2 1
2 1
2 1
3 1
4 4
4 4
4 4
4 4
4 4
4 4
4 4
4 4
4 4
4 4
4 4
4 4
4 4
4 4
4 4
4 4
4 4
4 4
4 4
4 4
4 4
4 4
4 4
4 4
4 4
4 4
4 4
4 4
4 4
4 4
4 4
4 4
4 4
4 4
4 4
4 4
4 4
4 4
4 4
4 4
4 4
4 4
4 4
6 4
6 6
6 6
6 6
6 6
5 6
4 6
4 6
4 5
4 5
4 5
4 5
4 5
4 5
4 5
4 5
4 5
4 5
4 5
4 5
4 6
4 6
4 6
4 9
4 9
4 9
4 10
3 10
3 10
3 10
2 9
3 9
3 9
3 9
3 9
3 13
3 13
3 13
3 13
3 13
3 13
3 13
3 13
3 13
3 13
3 13
3 13
3 13
3 13
3 13
3 13
3 13
3 15
1 15
1 15
1 15
1 16
1 20
1 25
1 30
1 31
1 32
1 32
1 32
1 33
1 33
1 33
1 33
1 33
1 33
1 33
1 33
1 33
1 32
1 31
1 31
1 31
1 31
1 31
1 31
1 31
1 31
1 31
1 31
1 31
1 31
1 31
1 31
1 31
1 31
1 31
1 31
1 32
1 31
1 31
1 31
1 32
1 34
1 35
1 33
1 34
1 32
1 30
0 29
0 31
0 31
0 31
0 34
0 31
0 31
0 31
0 31
0 31
0 31
0 31
0 38
0 40
1 42
1 42
1 42
1 43
1 43
1 43
1 43
1 43
1 44
1 44
1 45
1 45
1 44
1 40
1 39
1 34
2 38
2 39
2 39
2 39
2 39
2 39
2 39
2 39
2 39
2 39
2 39
2 39
2 39
2 39
2 39
2 38
2 38
2 38
2 38
2 38
2 38
2 38
2 38
2 39
2 39
2 39
2 39
2 40
2 41
2 41
2 41
2 41
2 40
2 40
2 41
2 41
2 37
2 35
2 44
2 44
2 47
2 55
2 55
2 55
2 54
2 52
2 49
2 51
2 51
2 51
2 60
1 60
1 102
1 103
1 112
1 103
1 104
1 102
1 102
1 102
1 100
2 118
2 118
2 120
2 120
2 118
2 118
2 117
2 118
2 118
2 117
2 164
2 170
1 171
1 173
1 173
1 174
1 174
1 174
1 174
1 174
1 175
1 175
1 175
1 175
1 175
1 175
1 175
1 183
1 183
1 185
1 185
1 185
1 185
1 185
1 185
1 184
1 184
1 184
1 184
1 184
1 184
1 188
1 196
1 198
1 199
1 198
1 199
1 199
1 199
1 200
1 183
1 180
2 178
3 270
3 275
3 277
3 275
3 274
3 274
3 273
3 273
3 273
3 263
3 264
3 221
3 219
3 220
3 240
3 250
3 258
3 259
3 259
3 259
2 242
2 242
2 242
2 242
2 242
2 242
2 241
2 235
2 234
2 230
16 360
16 357
16 357
16 357
16 357
16 356
27 504
28 513
28 554
28 583
29 603
29 615
29 615
29 625
29 627
29 627
29 628
29 620
29 620
29 618
29 619
29 623
29 631
29 633
29 633
29 641
29 641
29 641
29 641
29 641
29 640
29 632
29 630
29 664
29 664
29 664
29 664
29 666
29 665
29 664
28 664
28 663
28 663
27 526
27 525
27 524
27 484
27 483
27 483
27 482
27 482
27 481
27 483
27 482
27 480
27 480
27 475
27 443
27 392
27 375
27 374
27 374
27 373
27 372
27 372
27 372
27 374
27 377
26 385
26 390
26 394
23 397
23 396
13 263
13 273
13 272
13 273
14 274
2 188
1 119
1 112
1 110
1 106
1 104
1 104
1 104
1 99
1 99
1 99
1 100
1 100
2 122
2 122
2 120
2 119
2 116
2 115
2 131
2 132
2 133
3 170
3 174
3 183
3 195
3 218
3 220
3 215
3 236
3 238
3 239
3 238
3 238
3 238
3 238
3 238
3 238
3 238
3 238
3 238
3 238
3 239
3 239
3 239
3 239
3 238
3 235
3 235
3 235
3 237
3 237
3 247
3 249
3 316
3 375
3 377
3 388
3 396
5 400
5 399
5 389
5 382
5 365
5 348
5 327
5 315
5 312
5 312
5 280
5 279
5 278
4 276
4 254
4 253
4 253
4 251
4 249
4 249
4 249
4 251
4 251
4 251
4 251
4 250
4 250
3 212
3 211
3 210
3 209
3 209
3 193
3 195
3 194
2 189
2 181
2 183
2 181
2 181
2 180
2 178
2 167
2 167
1 167
1 168
0 168
0 168
0 168
0 169
0 169
0 169
0 169
0 168
0 168
0 168
0 168
0 168
0 168
0 168
0 168
0 168
0 168
0 168
0 164
0 159
0 159
0 161
0 88
0 33
0 26
0 19
0 19
0 19
0 16
0 16
0 16
0 16
0 16
0 17
0 17
0 17
0 17
0 17
0 17
0 17
0 17
0 17
0 17
0 17
0 17
0 25
0 48
0 92
0 100
0 172
0 175
0 179
0 180
0 180
0 258
0 293
0 328
0 353
0 373
0 384
0 385
0 388
0 388
0 388
0 385
0 420
0 422
0 426
0 432
0 432
0 432
0 432
0 431
0 431
0 431
0 431
0 437
0 437
0 437
0 437
0 437
0 438
0 439
0 439
0 439
0 439
0 439
0 439
0 442
0 442
0 443
0 443
0 440
0 436
0 426
0 413
0 411
0 409
0 409
0 407
0 410
0 409
0 414
0 414
0 414
0 408
0 403
0 401
0 401
0 401
0 401
0 399
0 399
0 399
0 399
0 399
0 397
0 397
0 397
0 383
0 340
0 334
0 265
0 264
0 263
0 262
0 258
0 153
0 110
0 86
0 82
0 76
0 73
0 73
0 73
0 72
0 72
0 72
0 33
0 21
0 20
0 14
0 14
0 14
0 14
0 14
0 14
0 14
0 14
0 5
0 5
0 4
0 1
0 1
0 1
0 1
0 1
0 1
0 1
0 1
0 1
0 1
0 1
0 1
0 1
0 1
2 4
2 5
2 5
2 5
2 5
2 5
7 29
8 30
8 31
8 30
24 62
24 63
24 65
24 66
24 66
35 69
35 69
35 69
35 69
45 73
51 79
56 82
59 82
62 82
64 83
64 83
64 83
64 83
64 83
64 83
64 83
64 84
68 84
68 84
68 84
68 86
68 86
68 86
68 86
68 86
68 86
68 86
68 86
68 86
68 86
68 86
68 85
68 85
68 85
68 85
68 85
68 85
68 85
68 85
68 85
68 85
68 85
68 85
68 85
68 85
68 85
68 85
68 85
68 85
68 84
68 83
68 83
68 84
68 84
68 84
67 84
66 85
66 85
57 80
47 53
44 51
44 51
44 51
44 51
44 51
44 51
44 50
22 22
12 15
12 15
12 15
12 16
12 16
12 16
11 16
11 16
11 16
1 12
0 7
0 6
0 6
0 6
0 5
0 6
0 6
0 6
0 6
0 6
0 7
0 7
0 13
0 13
0 13
0 11
0 11
0 11
0 11
0 11
0 11
0 11
0 11
0 11
0 11
0 11
0 11
0 11
0 11
0 11
0 11
0 11
0 11
0 11
0 12
0 12
0 12
0 12
0 12
0 12
0 12
0 12
0 12
0 12
0 12
0 12
0 12
0 11
0 11
0 11
0 11
0 10
0 10
0 10
0 10
0 10
0 10
0 10
0 10
0 10
0 10
0 10
0 10
0 10
0 10
0 10
0 9
0 9
0 9
0 9
0 9
0 9
0 9
0 9
0 9
0 9
0 9
0 9
0 8
0 8
0 8
0 8
0 8
0 6
0 6
0 2
0 2
0 2
0 2
0 2
0 2
0 2
0 2
0 2
0 2
0 2
0 2
0 2
0 2
0 2
0 2
0 2
0 2
0 2
0 2
0 2
0 2
0 1
0 1
0 1
0 2
0 2
0 2
0 4
0 4
0 9
0 9
0 9
0 9
0 9
0 9
0 9
0 9
0 9
0 9
0 9
0 9
0 9
0 9
0 9
0 9
0 15
0 15
0 15
0 15
0 15
0 15
0 15
0 15
0 15
0 15
0 15
0 15
0 15
0 15
0 15
0 15
0 15
0 15
0 15
0 15
0 15
0 15
0 15
0 13
0 13
0 11
0 11
0 10
0 10
0 10
0 10
0 10
0 10
0 10
0 10
0 10
0 10
0 10
0 10
0 10
0 10
0 10
0 10
0 10
0 10
0 10
0 10
0 10
0 10
0 10
0 11
0 11
0 10
0 11
0 11
0 11
0 11
0 8
0 8
0 8
0 8
0 8
0 8
0 8
0 8
0 8
0 8
0 8
0 12
0 14
0 15
0 15
0 15
0 11
0 11
0 13
0 16
0 18
0 19
0 19
0 19
0 20
0 20
0 20
0 20
0 20
0 20
0 20
0 20
0 20
0 20
0 20
0 20
0 20
0 20
0 20
0 20
0 20
0 20
0 23
0 23
0 23
0 23
0 23
0 23
0 23
0 23
0 23
0 23
0 23
0 23
0 23
0 23
0 24
0 25
0 30
0 30
0 30
0 30
0 35
0 35
0 35
0 35
0 34
0 34
0 34
0 33
0 33
0 33
0 33
0 33
0 33
0 33
0 34
0 34
0 34
0 34
0 35
0 35
0 35
0 36
0 37
0 35
0 39
0 39
0 51
0 49
0 68
0 67
0 61
0 60
0 59
0 60
0 60
0 60
0 60
0 61
0 63
0 63
0 63
0 63
0 63
0 63
0 66
0 66
0 66
0 65
0 64
0 64
0 64
0 64
0 64
0 63
0 62
0 63
0 69
0 69
0 69
0 69
0 69
0 69
0 69
0 69
0 69
0 69
0 69
0 66
0 65
0 58
0 51
0 51
0 51
0 51
0 51
0 49
0 47
0 45
0 45
0 45
0 45
0 45
0 45
0 45
0 45
0 45
0 45
0 42
0 42
0 40
0 40
0 41
0 41
0 41
0 40
0 33
0 31
0 29
0 29
0 29
0 29
0 16
0 16
0 16
0 16
0 16
0 16
0 16
0 16
0 15
0 16
0 16
0 20
0 24
0 24
0 24
0 24
0 21
0 21
0 21
0 21
0 21
0 21
0 21
0 21
0 21
0 21
0 21
0 19
0 14
0 14
0 14
0 14
0 14
0 16
0 16
0 16
0 16
0 16
0 16
0 16
0 16
0 16
0 16
0 15
0 14
0 14
0 14
0 14
0 14
0 14
0 15
0 15
0 15
0 15
0 15
0 15
0 16
0 16
0 16
0 16
0 16
0 16
0 16
0 15
0 15
0 15
0 15
0 16
0 15
0 15
0 14
0 14
0 14
0 14
0 14
0 14
0 16
0 16
0 16
0 14
0 14
0 15
0 15
0 13
0 11
0 8
0 8
0 8
0 8
0 8
0 8
0 8
0 8
0 8
0 8
0 8
0 8
0 8
0 8
0 8
0 8
0 9
0 10
0 10
0 11
0 11
0 9
0 9
0 9
0 9
0 9
0 9
0 9
0 9
0 9
0 9
0 9
0 9
0 9
0 9
0 9
0 9
0 9
0 8
0 8
0 8
0 8
0 8
0 8
0 7
0 7
0 7
0 7
0 7
0 9
0 9
0 9
0 9
0 9
0 9
0 8
0 8
0 8
0 8
0 8
0 8
0 8
0 8
0 8
0 6
0 6
0 6
0 6
0 6
0 5
0 5
0 5
0 5
0 5
0 5
0 5
0 5
0 5
0 5
0 5
0 5
0 5
0 5
0 10
0 14
0 31
0 70
0 74
0 80
0 80
0 79
0 78
0 78
0 78
0 78
0 78
0 78
0 78
0 78
0 79
0 79
0 79
0 79
0 79
0 79
0 79
0 79
0 79
0 80
0 80
0 80
4 80
6 80
6 80
6 80
6 80
6 80
6 80
6 80
6 80
9 81
9 82
9 79
9 82
9 82
9 82
9 82
9 82
9 82
9 82
9 82
9 82
9 82
9 82
9 82
9 82
9 82
9 82
9 82
9 82
9 82
9 82
9 82
9 100
9 151
9 181
9 184
9 184
9 184
9 184
9 184
9 184
9 184
9 184
9 184
9 183
9 177
9 173
9 147
7 116
7 115
7 113
7 113
7 113
7 113
7 113
5 113
5 113
5 113
5 113
5 113
6 113
6 112
6 111
6 111
6 111
6 111
6 111
6 111
4 111
4 111
4 110
4 110
4 110
5 110
5 110
6 110
6 110
6 110
5 110
5 110
4 110
4 109
3 109
3 108
3 108
3 105
3 104
3 104
3 104
3 104
3 104
3 104
3 104
3 104
3 104
3 104
3 104
3 104
3 104
3 104
3 104
3 104
3 103
3 102
3 102
3 81
3 15
3 0
3 0
3 0
3 0
3 0
3 0
3 0
3 0
3 0
3 0
3 0
3 0
3 0
3 0
3 0
4 0
4 0
4 0
4 0
4 0
4 0
4 0
4 0
4 0
4 0
4 0
3 0
3 0
3 0
3 0
4 0
4 0
4 0
4 0
4 0
5 0
5 0
5 0
5 0
4 0
4 0
3 0
3 0
3 0
3 0
3 0
3 0
3 0
4 0
4 0
11 0
11 0
11 0
12 0
12 0
12 0
12 0
12 0
12 0
12 0
12 0
12 0
13 0
13 0
13 0
13 0
13 0
13 0
13 0
13 0
13 0
13 0
13 0
13 0
13 0
13 0
13 0
13 0
13 0
14 0
15 0
17 0
32 0
32 0
33 0
33 0
33 0
33 0
32 0
32 0
32 0
35 0
35 0
35 0
35 0
35 0
35 0
37 0
37 0
37 0
37 0
37 0
37 0
36 0
36 0
35 0
33 0
33 0
31 0
31 0
30 0
31 0
31 0
31 0
31 0
31 0
31 0
31 0
31 0
31 0
31 0
31 0
31 0
25 0
25 0
26 0
25 0
25 0
25 0
25 0
25 0
25 0
25 0
25 0
24 0
24 0
24 0
24 0
24 0
24 0
25 0
27 0
29 0
29 0
29 0
29 0
29 0
29 0
29 0
29 0
29 0
29 0
29 0
28 0
28 0
13 0
13 0
13 0
13 0
13 0
13 0
13 0
13 0
13 0
14 0
14 0
14 0
14 0
13 0
13 0
12 0
12 0
11 0
10 0
10 0
11 0
14 0
21 0
20 0
20 0
20 0
20 0
20 0
19 0
19 0
19 0
19 0
19 0
19 0
19 0
19 0
19 0
19 0
19 0
19 0
19 0
19 0
19 0
18 0
18 0
18 0
18 0
18 0
18 0
18 0
18 0
18 0
18 0
18 0
18 0
18 0
18 0
18 0
18 0
17 0
15 0
15 0
16 0
16 0
16 0
16 0
16 0
16 0
16 0
16 0
16 0
16 0
16 0
16 0
16 0
16 0
16 0
15 0
30 0
31 0
32 0
32 0
28 0
28 0
28 0
28 0
28 0
28 0
28 0
28 0
28 0
28 0
28 0
28 0
27 0
20 0
20 0
22 0
22 0
22 0
22 0
22 0
22 0
22 0
22 0
22 0
22 0
22 0
22 0
22 0
23 0
23 0
23 0
24 0
25 0
25 0
26 0
30 0
30 0
30 0
30 0
30 0
30 0
30 0
30 0
30 0
33 0
34 0
37 0
46 0
46 0
46 0
46 0
48 0
51 0
55 0
55 0
55 0
55 0
55 0
55 0
55 0
55 0
55 0
56 0
65 0
66 0
75 0
74 0
74 0
73 0
51 0
48 0
49 0
63 0
61 0
61 0
61 0
61 0
61 0
65 0
65 0
65 0
65 0
66 0
68 0
68 0
68 0
68 0
68 0
68 0
68 0
68 0
68 0
69 0
69 0
69 0
69 0
71 1
71 1
71 1
71 1
71 1
71 1
71 1
71 1
71 1
67 1
67 1
67 1
65 1
65 1
65 1
65 1
65 1
65 1
65 1
65 1
65 1
63 1
62 1
63 1
56 1
56 1
56 1
55 1
55 1
54 1
48 1
48 1
48 1
48 1
48 1
47 2
46 2
46 2
46 2
45 2
37 2
37 2
22 2
22 2
22 2
16 2
16 2
16 2
15 2
14 2
14 2
14 2
14 1
12 1
12 1
9 1
9 1
8 1
8 1
7 1
5 1
5 1
4 1
4 1
5 1
5 1
5 1
5 1
5 1
5 1
5 1
5 1
5 1
4 0
4 0
4 0
4 0
5 0
5 0
5 0
5 0
6 0
10 0
10 0
22 0
23 0
23 0
23 0
23 0
23 0
23 0
23 0
23 0
22 0
22 0
22 0
20 0
20 0
20 0
20 0
20 0
26 0
31 0
44 0
47 0
48 0
49 0
49 0
49 0
49 0
49 0
49 0
49 0
49 0
49 0
49 0
49 0
49 0
49 0
49 0
49 0
49 0
49 0
49 0
51 0
51 0
51 0
51 0
52 0
52 1
52 2
52 3
52 3
52 3
52 3
52 4
52 4
51 4
53 4
53 4
53 4
53 4
53 4
53 4
53 4
54 4
54 4
54 4
54 4
52 4
50 4
50 4
49 4
49 4
47 4
49 4
49 4
39 4
39 4
39 4
38 4
38 4
38 4
38 4
38 4
38 4
38 4
38 4
38 4
38 4
36 4
31 4
31 4
27 4
17 4
17 4
7 5
5 5
4 5
4 5
4 5
4 5
4 5
4 4
4 4
4 3
4 3
4 3
4 3
4 3
4 3
4 3
4 3
4 3
4 3
4 3
4 3
4 3
4 3
4 3
4 3
3 3
3 2
3 2
3 2
3 2
3 2
3 2
3 1
3 1
3 1
3 1
3 1
3 1
3 1
3 1
4 1
4 1
4 1
4 1
5 1
5 1
5 1
5 1
5 1
5 1
5 1
4 1
3 1
3 1
3 1
3 1
3 1
3 1
3 1
3 1
3 1
3 1
3 1
3 1
3 1
6 1
6 1
6 1
7 1
7 1
7 1
7 1
7 1
6 0
6 0
6 0
6 0
6 0
6 0
6 0
6 0
6 0
5 0
5 0
5 0
5 0
5 0
5 0
5 0
5 0
4 0
4 0
4 0
4 0
4 0
4 0
4 0
4 0
4 0
4 0
4 0
4 0
4 0
4 0
5 0
5 0
5 0
5 0
5 0
5 0
5 0
8 0
10 0
10 0
10 0
10 0
10 0
10 0
10 0
10 0
10 0
10 0
10 0
10 0
10 0
10 0
10 0
10 0
10 0
10 0
11 0
11 0
11 0
11 0
11 0
11 0
11 0
11 0
8 0
8 0
8 0
7 0
7 0
7 0
7 0
7 0
7 0
7 0
7 0
7 0
7 0
7 0
7 0
7 0
7 0
7 0
8 0
7 0
5 0
5 0
5 0
4 0
4 0
4 0
4 0
6 0
6 0
6 0
6 0
6 0
6 0
6 0
6 0
6 0
6 0
6 0
10 0
10 0
10 0
10 0
9 0
10 0
10 0
10 0
9 0
10 0
10 0
10 0
11 0
11 0
11 0
13 0
13 0
13 0
13 0
13 0
13 0
17 0
17 0
17 0
17 0
17 0
17 0
17 0
17 0
17 0
17 0
17 0
17 0
17 0
17 0
17 0
17 0
17 0
17 0
17 0
17 0
17 0
17 0
17 0
17 0
17 0
17 0
17 0
17 0
17 0
17 0
17 0
17 0
17 0
18 0
18 0
18 0
20 0
20 0
19 0
20 0
20 0
17 0
17 0
17 0
17 0
17 0
17 0
13 0
13 0
13 0
13 0
13 0
10 0
10 0
10 0
10 0
11 0
11 0
13 0
25 0
26 0
41 0
41 0
41 0
54 0
57 0
57 0
55 0
55 0
55 0
55 0
55 0
55 0
55 0
55 0
55 0
55 0
56 0
56 0
56 0
56 0
56 0
56 0
56 0
56 0
56 0
57 0
58 0
59 0
85 0
85 0
91 0
91 0
91 0
91 0
91 0
91 0
91 0
91 0
91 0
91 0
102 0
118 0
122 0
122 0
124 0
123 0
118 0
116 0
104 0
96 0
95 0
94 0
85 0
85 0
85 0
85 0
87 0
94 0
94 0
94 0
94 0
94 0
94 1
94 1
95 1
97 1
102 1
113 1
115 1
124 1
129 1
129 1
132 1
128 1
128 1
134 1
126 1
128 1
128 1
133 1
133 1
133 1
133 1
133 1
133 1
133 1
133 1
133 1
133 1
132 1
132 1
132 1
132 1
132 1
134 1
140 1
143 1
152 1
156 1
157 1
157 1
132 1
130 1
122 1
122 1
119 1
119 1
119 1
119 1
119 1
119 1
119 1
118 1
113 1
99 1
96 1
96 1
94 1
96 1
96 1
97 1
97 1
97 1
100 1
102 1
101 1
101 1
100 1
100 1
99 1
91 1
91 1
90 1
91 1
98 1
100 0
90 0
89 0
88 0
79 0
68 0
65 0
51 0
50 0
48 0
43 0
58 0
57 0
50 0
50 0
50 0
48 0
47 0
47 0
47 0
47 0
47 0
47 0
47 0
47 0
47 0
47 0
47 0
47 0
47 0
47 0
47 0
47 0
43 0
43 0
39 0
37 0
36 0
36 0
36 0
36 0
36 0
36 0
36 0
36 0
36 0
36 0
36 0
36 0
36 0
36 0
35 0
35 0
35 0
35 0
35 0
33 0
33 0
36 0
36 0
35 0
32 0
32 1
32 1
32 1
32 1
32 1
30 1
30 1
31 1
31 1
30 1
22 1
21 1
21 1
21 1
21 1
21 1
21 1
21 1
20 1
18 1
18 1
18 1
6 1
6 1
6 1
6 1
6 1
6 1
6 1
6 1
6 1
6 1
6 1
6 1
6 1
6 1
6 1
8 1
14 1
14 1
14 1
14 1
14 1
14 1
14 1
14 1
14 1
14 1
14 1
15 1
15 1
15 1
15 1
15 1
15 1
15 1
16 1
16 1
16 1
16 1
23 1
37 1
79 1
188 1
229 1
249 1
255 1
265 1
298 1
307 1
307 1
307 1
308 1
308 0
308 0
308 0
308 0
308 0
308 0
308 0
307 0
304 0
302 0
302 0
302 0
301 0
306 0
307 0
307 0
307 0
306 0
306 0
306 0
306 0
305 0
306 0
306 0
307 0
307 0
307 0
311 0
315 1
315 1
321 2
322 2
338 2
351 2
351 2
333 2
333 2
330 2
330 2
308 2
308 2
308 2
309 2
311 2
776 2
803 2
833 2
843 3
1308 4
1321 4
1325 4
1320 4
1310 4
1309 4
1308 4
1326 4
1340 4
1354 4
1362 4
1382 4
1435 4
1455 4
1608 4
1807 4
1851 4
1877 4
1871 4
1863 2
1823 2
1805 2
1801 2
1801 2
1801 2
1804 2
1811 2
1817 2
1819 2
1819 2
1819 2
1819 2
1818 2
1818 2
1817 2
1816 2
1814 2
1814 2
1813 2
1813 2
1813 2
1813 2
1813 2
1813 2
1812 2
1810 2
1810 2
1810 2
1810 2
1803 2
1791 2
1770 2
1251 2
1189 2
666 2
589 2
444 2
413 2
234 2
220 2
23 2
14 2
10 2
8 2
2 2
3 4
3 4
3 4
3 4
3 3
3 3
4 3
4 3
3 2
4 3
4 3
4 3
4 3
4 3
4 3
4 3
4 4
4 6
4 7
4 12
4 14
4 34
4 61
4 72
4 81
4 93
4 96
3 112
3 117
3 125
3 128
3 129
4 129
4 129
4 131
4 131
4 131
4 138
4 139
4 143
4 143
4 143
4 143
5 144
5 144
5 144
5 144
5 144
5 144
5 144
5 144
5 144
5 144
5 145
5 145
5 145
5 145
5 150
5 150
5 153
5 157
5 205
5 219
5 225
5 225
5 229
6 231
6 229
6 229
6 227
6 228
6 228
6 227
5 232
5 236
5 236
5 237
5 233
5 232
4 232
4 232
3 231
3 231
3 231
3 230
3 229
3 229
3 229
3 228
3 226
3 225
3 220
3 220
3 219
3 196
3 159
3 145
3 143
3 143
3 142
3 125
3 123
3 115
3 114
3 114
2 114
2 114
2 113
2 113
2 113
2 107
3 106
3 102
3 102
3 102
3 102
2 101
2 101
2 101
2 101
2 101
2 101
2 101
2 101
2 101
2 101
2 101
2 101
3 103
3 103
5 99
5 99
5 95
5 89
5 36
5 20
5 19
5 19
5 24
4 24
4 24
6 32
6 32
6 33
6 36
6 36
6 28
6 25
6 25
6 25
6 25
6 25
6 25
6 25
6 25
6 25
6 25
6 25
6 25
6 25
6 25
6 25
6 25
6 25
6 25
6 25
6 25
6 25
8 25
13 48
16 49
16 51
16 51
16 51
19 51
20 51
20 51
20 55
20 55
20 55
20 53
20 53
20 52
20 52
19 52
19 52
19 52
19 52
19 52
19 52
19 52
19 52
19 52
19 52
19 52
19 52
19 52
19 52
19 52
19 52
19 52
18 50
18 50
16 50
16 50
16 50
16 50
16 50
16 50
16 51
16 52
17 48
17 48
18 47
16 37
16 37
16 36
16 36
16 36
16 36
16 36
16 36
16 36
16 36
16 36
16 36
16 36
16 36
16 36
16 36
16 36
16 36
16 36
16 36
16 36
16 36
16 36
16 36
16 36
16 36
14 36
7 35
0 11
0 11
0 9
0 9
0 9
0 9
0 9
0 9
0 5
0 5
0 5
0 4
0 3
0 3
0 3
0 3
0 3
0 3
0 3
0 3
0 3
0 3
0 3
0 3
0 3
0 3
0 3
0 3
0 3
0 3
0 3
0 3
0 3
0 4
0 7
0 10
0 13
0 15
0 16
0 15
0 15
0 14
0 13
0 13
0 13
0 13
0 13
0 13
0 13
0 13
0 13
0 13
0 14
0 12
0 12
0 12
0 12
0 12
0 12
0 12
0 12
0 12
0 12
0 12
0 12
0 12
0 12
0 12
0 12
0 12
0 12
0 12
0 12
0 12
0 12
0 12
0 12
1 12
1 12
1 12
1 12
1 12
1 12
1 12
1 12
1 12
1 12
1 12
1 12
1 12
1 16
1 16
1 16
0 16
0 16
0 16
0 16
0 16
0 16
0 18
0 17
0 18
0 18
0 18
0 19
0 19
0 19
0 17
0 15
0 12
0 12
0 12
0 12
0 12
0 13
0 13
0 13
0 13
0 13
0 13
0 13
0 13
0 14
0 14
0 14
0 13
0 13
0 13
0 13
0 13
0 13
0 13
0 13
0 13
0 13
0 13
0 13
0 12
0 12
0 12
0 12
0 12
0 12
0 12
0 12
0 12
0 12
0 12
0 12
0 12
0 12
0 12
0 12
0 12
0 12
0 12
0 12
0 12
0 12
0 12
0 12
0 12
0 12
0 7
0 8
0 8
0 8
0 8
0 7
0 17
0 17
0 20
0 32
0 56
0 77
0 87
0 89
0 89
0 89
0 89
0 89
0 89
0 89
0 89
0 89
0 89
0 89
0 88
0 89
0 89
0 89
0 89
0 89
0 89
0 89
0 89
0 89
0 89
0 89
0 89
0 89
0 89
0 89
0 89
0 89
0 89
0 89
0 89
0 89
0 89
0 89
0 89
0 89
0 89
0 89
0 89
0 89
0 89
0 89
0 90
0 90
0 90
0 90
0 90
0 90
0 90
0 90
0 90
0 90
0 90
0 88
0 88
0 88
0 88
0 88
0 88
0 88
0 88
0 88
0 88
0 88
0 87
0 68
0 60
0 24
0 6
0 3
0 4
0 7
0 6
0 6
0 6
0 6
0 6
0 6
0 6
0 6
0 6
0 6
0 7
0 6
0 6
0 6
0 6
0 6
0 6
0 6
0 6
0 6
0 6
0 6
0 7
0 7
0 7
0 7
0 7
0 8
0 8
0 8
0 8
0 8
0 8
0 8
0 8
0 8
0 8
0 8
0 8
0 8
0 8
0 9
0 9
0 8
0 8
0 8
0 8
0 8
0 8
0 8
0 8
0 8
0 9
0 10
0 11
0 11
0 11
0 11
0 11
0 11
0 11
0 11
0 11
0 11
1 11
1 11
1 11
1 11
1 11
2 15
2 15
2 15
2 11
2 11
2 11
2 11
2 11
2 11
2 11
2 11
2 11
2 14
2 14
2 14
2 14
2 14
2 14
2 14
2 14
2 14
2 14
2 14
2 14
2 14
2 14
2 13
2 13
2 13
2 13
2 13
2 12
2 12
2 12
2 12
2 12
2 13
2 13
2 13
2 13
2 13
2 14
2 14
2 15
2 15
2 14
2 14
2 14
0 14
0 14
0 14
0 14
0 14
0 14
0 14
0 13
0 13
0 12
0 11
0 11
0 11
0 11
0 11
0 11
0 11
0 11
0 11
0 12
0 13
0 14
0 17
0 20
0 21
0 17
0 17
0 17
0 17
0 17
0 17
0 17
0 18
0 18
0 18
0 18
0 19
0 15
0 16
0 16
0 16
0 16
0 16
0 16
0 16
0 16
0 16
0 16
0 16
0 16
0 16
0 16
0 16
0 16
0 18
0 18
0 18
0 18
0 18
0 18
0 18
0 18
0 18
0 18
0 18
0 18
0 17
0 17
0 16
0 16
0 16
0 16
0 16
0 16
0 16
0 16
0 16
0 16
0 16
0 16
0 16
0 16
0 16
0 16
0 16
0 16
0 16
0 16
0 16
0 16
0 16
0 16
0 16
0 14
0 13
0 12
0 12
0 13
0 13
0 14
0 14
0 14
0 14
0 14
0 13
0 11
0 11
0 11
0 11
0 11
0 11
0 11
0 11
0 11
0 11
0 11
0 11
0 11
0 11
0 11
0 11
0 11
0 11
0 11
0 11
0 11
0 11
0 7
0 7
0 7
0 7
0 6
0 6
0 6
0 6
0 6
0 6
0 6
0 6
0 6
0 6
0 6
0 6
0 6
0 6
0 6
0 6
0 6
0 6
0 6
0 6
0 6
0 7
0 7
0 7
0 7
0 7
0 6
0 6
0 5
0 7
0 8
0 8
0 8
0 8
0 8
0 7
0 7
0 7
0 7
0 6
0 7
0 7
0 7
0 7
0 7
0 7
0 7
0 7
0 7
0 7
0 9
0 10
0 11
0 30
0 37
0 39
0 41
0 41
0 44
0 44
0 45
0 45
0 45
0 45
0 46
0 46
0 46
0 46
0 46
0 46
0 46
0 46
0 46
0 46
0 44
0 44
0 44
0 44
0 44
0 44
0 44
0 44
0 44
0 44
0 45
0 45
0 45
0 45
0 45
0 45
0 45
0 61
0 61
0 61
0 60
0 60
0 60
0 60
0 60
0 60
0 59
0 59
0 59
0 59
0 59
0 59
0 59
0 59
0 59
0 59
0 58
0 58
0 56
0 56
0 56
0 56
0 56
0 56
0 56
0 55
0 55
0 55
0 55
0 54
0 53
0 50
0 30
0 23
0 23
0 23
0 23
0 20
0 22
0 23
0 23
0 23
0 23
0 22
0 22
0 22
0 22
0 23
0 27
0 27
0 27
0 27
0 27
0 27
0 27
0 27
0 27
0 27
0 27
0 28
0 28
0 28
0 28
0 27
0 27
0 27
0 27
0 27
0 27
0 27
0 12
0 12
0 11
0 10
0 10
0 10
0 10
0 12
0 12
0 12
0 12
0 12
0 12
0 12
0 12
0 12
0 12
0 12
0 12
0 19
0 20
0 20
0 20
0 20
0 20
0 20
0 20
0 20
0 20
0 20
0 20
0 20
0 20
0 20
0 20
0 20
0 20
0 20
0 20
0 20
0 20
0 18
0 17
0 17
0 17
0 17
0 17
0 17
0 17
0 17
0 17
0 12
0 12
0 12
0 21
0 21
0 21
0 21
0 33
0 33
0 33
0 33
0 32
0 32
0 36
0 36
0 36
0 36
0 36
0 36
0 36
0 36
0 35
0 35
0 35
0 35
0 35
0 35
0 35
0 35
0 33
0 33
0 33
0 33
3 33
4 33
4 33
4 33
4 33
4 33
4 33
4 33
4 17
4 16
4 7
4 7
4 7
4 7
4 7
4 7
4 7
4 7
4 7
4 7
4 7
4 7
4 7
4 7
4 7
4 7
4 7
4 7
4 7
4 7
4 7
7 8
7 10
7 10
7 10
7 10
7 10
7 10
7 10
8 10
8 10
8 10
9 10
9 10
9 10
9 9
9 9
11 3
11 3
11 6
11 6
11 6
11 6
11 6
11 6
11 6
11 6
11 6
11 6
11 6
11 6
11 6
11 6
12 6
12 6
12 6
12 6
12 6
12 6
12 6
12 6
12 6
12 6
9 6
8 6
8 6
8 6
8 6
8 8
8 8
8 8
8 8
8 8
8 8
8 8
8 8
8 8
8 8
8 8
8 8
8 8
8 8
8 8
8 8
8 8
8 8
8 8
8 8
8 8
8 8
8 8
8 8
8 9
8 9
3 9
1 7
1 7
1 7
1 7
1 7
1 7
1 7
1 7
1 7
1 7
1 7
1 7
1 7
1 7
1 7
1 7
1 7
1 4
1 4
1 4
1 4
1 4
1 4
1 4
1 4
1 4
1 4
1 4
1 4
1 4
1 4
0 4
0 4
0 4
0 4
0 4
0 4
0 4
0 4
0 4
0 4
0 4
0 3
0 3
0 3
0 3
0 2
0 2
0 2
0 2
0 2
0 2
0 2
0 2
0 2
0 2
2 2
2 2
3 2
3 2
3 2
3 2
3 2
3 2
3 2
3 2
3 2
3 2
3 2
3 2
3 1
2 1
2 0
2 0
2 0
2 0
2 0
2 0
2 0
2 0
2 0
2 0
2 0
2 0
2 0
2 0
2 0
2 0
2 0
2 0
2 0
2 0
2 0
2 0
2 0
2 0
2 0
2 0
2 2
2 2
2 7
2 7
2 7
2 7
2 7
2 7
2 7
2 7
2 7
2 8
2 8
2 8
2 8
2 8
2 8
2 8
2 8
2 7
2 7
1 7
1 7
1 7
1 7
1 7
1 7
1 7
1 7
1 7
0 7
0 7
0 7
0 7
0 7
0 7
1 7
1 7
4 7
4 7
4 7
4 7
4 7
4 7
4 7
4 7
4 7
4 7
4 7
4 7
4 7
4 7
4 7
4 7
0 7
0 7
0 7
0 7
0 7
0 7
0 7
0 7
0 7
0 8
0 8
0 6
0 4
0 4
0 4
0 4
0 4
0 4
0 4
0 4
0 4
0 2
0 2
0 2
0 2
0 2
0 2
0 2
0 2
0 2
0 1
0 1
0 1
0 1
0 1
0 1
0 1
0 1
0 1
0 1
0 1
0 1
0 1
0 1
0 1
0 1
0 1
0 1
0 1
0 1
0 1
0 1
0 1
0 1
0 1
0 1
0 1
0 1
0 1
0 1
0 1
0 1
0 1
0 1
0 1
0 1
0 1
0 1
0 1
0 1
0 1
0 1
0 1
0 1
0 1
0 1
0 1
0 1
0 1
0 1
0 1
0 1
0 0
0 0
0 0
0 0
0 0
0 0
0 0
0 0
0 0
0 0
0 0
0 0
0 0
0 0
0 0
0 0
0 1
0 1
0 1
0 2
0 2
0 2
0 2
0 2
0 2
0 2
0 2
0 2
0 2
0 2
0 2
0 2
0 2
0 2
0 2
0 2
0 2
0 2
0 2
0 2
0 2
0 2
0 2
0 2
0 2
0 2
0 2
0 4
0 4
0 4
0 4
0 4
0 4
0 4
0 4
0 4
0 4
0 4
0 4
0 4
0 4
0 4
0 4
0 4
0 4
0 4
0 4
0 4
0 4
0 4
0 4
0 4
0 4
0 4
0 4
0 4
0 4
0 4
0 4
0 4
0 4
0 4
1 4
1 4
1 4
2 4
2 4
2 4
2 4
2 2
2 1
2 1
2 1
2 1
2 1
2 1
2 1
2 1
2 1
2 1
2 1
2 1
2 1
2 1
2 1
2 1
2 1
2 1
2 1
2 1
2 1
2 1
2 1
2 1
2 1
2 1
2 1
2 1
2 1
2 1
2 1
2 1
2 1
2 2
2 2
2 2
2 2
2 2
2 2
2 2
2 2
2 2
2 2
2 2
2 2
2 2
2 2
2 2
1 2
1 2
0 2
0 2
0 2
0 2
0 2
0 2
0 2
0 2
0 2
0 2
0 2
0 2
0 2
0 2
0 2
0 2
0 2
0 2
0 2
0 2
0 2
0 2
0 2
0 2
0 2
0 1
0 1
0 1
0 2
0 3
0 3
0 3
0 3
0 3
0 3
0 3
0 4
0 4
0 4
0 4
0 4
0 4
0 4
0 4
0 4
0 4
0 4
0 4
0 4
0 4
0 4
0 4
0 4
0 7
0 8
0 9
0 9
0 9
0 9
0 10
0 10
0 10
0 10
0 10
0 10
0 10
0 10
0 10
0 10
0 10
0 10
0 10
0 10
0 10
0 10
0 10
0 10
0 10
0 10
0 10
0 10
0 10
0 10
0 10
0 10
0 10
0 10
0 10
0 10
0 10
0 10
0 10
1 10
1 10
1 10
1 10
1 10
1 10
2 10
2 10
2 10
2 9
2 7
2 6
2 6
2 6
2 6
2 6
2 6
2 5
2 5
2 5
2 5
2 5
2 5
2 5
2 6
2 6
2 6
2 6
2 6
2 6
2 6
2 6
2 7
1 7
0 5
0 4
0 3
0 3
0 3
0 3
0 2
0 2
0 2
0 2
0 2
0 2
0 2
0 2
0 2
0 2
0 2
0 2
0 2
0 2
0 2
0 2
0 2
0 2
0 2
0 2
0 2
0 2
0 2
0 2
0 2
0 2
0 2
0 2
0 2
0 2
0 2
0 2
0 2
0 2
0 2
0 2
0 2
0 2
0 2
0 2
0 2
0 2
0 2
0 2
0 2
0 2
0 2
0 2
0 2
0 2
0 2
2 5
2 7
2 7
2 7
2 6
2 6
2 6
2 6
2 6
2 6
2 6
2 6
2 6
2 6
2 5
2 5
2 5
2 5
2 5
2 5
2 5
2 5
2 5
2 5
2 5
2 5
2 5
2 5
2 5
2 5
2 5
2 5
2 5
2 5
2 5
2 5
2 5
2 7
2 7
0 7
0 7
0 7
0 8
0 8
0 8
0 8
0 10
0 10
0 10
0 10
0 10
0 10
0 10
0 10
0 10
0 10
0 10
0 10
0 10
0 10
0 10
0 10
0 10
0 10
0 10
0 10
0 10
1 10
1 10
1 10
1 10
1 10
1 10
1 7
1 5
1 5
1 5
1 5
1 5
1 5
1 5
1 5
1 5
1 5
1 5
1 5
1 5
1 5
1 5
1 5
1 5
1 5
1 5
1 5
1 5
1 5
1 5
1 6
1 6
1 6
1 6
1 6
1 7
2 8
2 10
2 10
2 10
2 10
2 10
2 10
2 7
2 7
2 7
2 7
2 5
2 5
2 5
2 5
2 5
2 5
2 5
3 5
3 5
3 5
3 5
3 5
3 5
3 5
3 5
3 5
3 5
3 5
3 5
3 5
3 5
3 5
3 5
3 5
3 5
3 5
2 5
2 5
2 5
2 5
2 5
2 5
2 5
2 5
2 5
2 5
2 5
2 5
2 5
2 5
2 5
2 5
2 5
2 5
2 5
2 5
2 5
2 5
2 5
2 5
5 5
11 5
11 5
11 5
11 5
11 3
11 3
12 3
15 3
15 1
15 1
15 1
15 1
15 0
15 0
15 0
15 0
15 0
15 0
15 0
16 0
16 0
18 0
18 0
19 0
20 0
20 0
20 0
20 0
21 0
20 0
20 0
20 0
20 0
20 0
20 0
20 0
20 0
20 0
20 0
20 0
20 0
20 0
20 0
20 0
20 0
20 0
20 0
20 0
20 0
20 0
20 0
20 0
20 0
20 0
20 0
20 0
20 0
19 0
19 0
19 0
19 0
19 0
19 0
19 0
19 0
19 0
19 0
19 0
19 0
19 0
19 0
19 0
16 0
11 0
11 0
10 0
10 0
8 0
8 0
8 0
4 0
4 0
4 0
4 0
4 0
3 0
3 0
3 0
3 1
3 1
3 1
3 1
3 1
3 1
2 1
2 1
2 1
2 1
2 1
2 1
2 1
2 2
2 2
2 2
2 1
2 1
2 1
2 1
2 1
2 1
2 1
2 1
2 1
2 1
2 1
2 1
2 1
2 1
2 1
2 1
2 2
2 3
2 3
2 3
2 3
2 3
2 3
2 3
2 3
2 3
2 3
2 3
2 3
2 3
2 3
2 3
2 3
2 3
2 3
2 3
2 3
2 3
2 3
2 3
1 3
1 3
1 3
1 3
1 3
1 3
1 3
1 3
1 3
1 3
1 3
1 3
1 3
1 3
0 3
0 3
0 3
0 3
0 3
0 3
0 3
0 3
0 3
0 3
0 3
0 3
0 3
0 3
0 3
0 3
0 2
0 2
0 2
0 2
0 2
0 2
0 2
0 2
0 2
0 2
0 2
0 2
0 2
0 2
0 3
0 3
0 5
0 5
0 5
0 3
0 3
0 3
0 3
5 3
5 3
6 4
10 5
10 6
10 6
10 6
10 6
10 6
10 6
10 6
10 6
10 6
10 6
10 6
10 6
10 6
10 6
10 6
10 6
10 6
10 6
10 6
10 6
10 6
10 6
10 6
10 6
10 6
10 5
10 4
10 4
10 4
11 4
11 4
11 4
11 4
11 4
11 4
11 4
11 4
11 4
11 4
11 4
11 4
11 4
11 4
11 4
11 4
11 3
11 3
11 3
11 3
11 2
11 2
11 2
11 2
11 2
11 2
11 2
11 2
11 2
11 2
11 1
11 1
11 1
11 1
11 2
11 2
11 2
11 2
11 2
14 2
10 2
10 1
9 1
6 1
6 1
6 1
6 1
6 1
6 1
6 1
6 1
6 1
6 1
6 1
6 1
6 1
6 1
6 1
6 1
6 1
6 1
6 1
6 1
6 1
6 1
6 1
6 1
6 1
6 1
6 1
6 1
6 1
6 1
5 1
5 1
5 1
5 1
5 1
5 1
5 1
5 1
5 1
5 1
5 1
5 1
5 1
5 1
5 1
5 1
6 2
6 2
6 2
6 2
6 2
6 2
6 2
6 2
6 2
6 2
6 2
6 2
6 2
6 2
6 2
6 2
6 2
6 2
6 1
6 1
6 1
5 1
5 1
3 1
1 1
1 1
1 1
2 1
2 1
2 1
2 1
2 1
2 1
2 1
2 1
2 1
2 1
2 1
2 1
2 1
2 1
3 1
3 1
4 1
4 1
4 1
4 1
4 2
4 2
4 2
4 2
4 2
4 2
4 2
4 2
4 2
4 2
3 2
3 2
3 2
3 2
3 2
3 2
3 2
3 2
3 2
3 2
3 2
3 2
3 2
3 2
3 2
3 2
2 1
2 1
2 1
2 1
2 2
2 2
2 2
2 2
2 2
2 2
2 2
2 2
2 2
2 2
2 2
2 2
2 2
2 2
2 2
2 1
2 1
2 1
1 1
1 1
1 1
1 1
1 1
1 1
1 1
1 1
1 1
1 1
1 1
1 1
1 1
1 1
1 1
1 1
1 1
1 1
1 1
1 1
1 1
0 1
0 1
0 0
0 0
0 0
0 0
0 0
0 0
0 0
0 0
0 0
0 0
0 0
0 0
0 0
0 0
0 0
0 0
0 0
0 0
0 0
0 0
0 0
0 0
0 0
0 0
0 0
0 0
0 0
0 3
0 3
0 3
0 3
0 3
0 3
0 3
0 3
0 3
0 3
0 3
0 3
0 3
0 3
0 3
0 3
0 3
0 3
0 3
0 3
0 3
0 3
0 3
0 3
0 3
0 3
0 3
0 5
0 5
0 5
0 5
0 5
0 5
0 5
0 5
0 5
0 5
0 5
0 5
0 5
0 5
0 5
0 6
0 6
0 6
0 6
0 6
0 6
0 6
0 6
0 6
0 23
0 23
0 23
0 23
0 27
0 27
0 26
0 28
0 47
0 74
0 96
0 104
0 117
0 118
0 121
0 127
0 133
0 134
0 138
0 138
0 138
0 138
0 135
0 135
0 135
0 135
0 135
0 135
0 135
0 135
0 135
0 135
0 135
0 134
0 134
0 134
0 134
0 134
0 134
0 134
0 134
0 134
0 134
0 134
0 134
0 133
0 133
0 132
0 133
0 135
0 135
0 136
0 137
0 137
0 137
0 137
0 137
0 137
0 137
0 137
0 137
0 137
0 137
0 137
0 137
0 137
0 139
0 139
0 138
0 137
0 136
0 95
0 89
0 42
0 32
0 26
0 26
0 26
0 26
0 26
0 26
0 25
0 22
0 16
0 16
0 12
0 12
0 12
0 12
0 12
0 11
0 12
0 12
0 12
0 12
0 12
0 12
0 12
0 12
0 12
0 12
0 12
0 12
0 12
0 12
0 12
0 12
0 12
0 12
0 12
0 12
0 12
0 12
0 12
0 12
0 12
0 12
0 12
0 12
0 12
0 12
0 12
0 7
0 7
0 5
0 4
0 4
0 4
0 4
0 4
0 4
0 4
0 4
0 4
0 4
0 4
0 4
0 4
0 4
0 2
0 3
0 3
0 3
0 3
0 3
0 3
0 3
0 3
0 3
0 3
0 3
0 3
0 3
0 3
0 3
0 3
0 3
0 3
0 2
0 2
0 2
0 2
0 2
0 2
0 2
0 2
0 2
0 2
0 2
0 2
0 2
0 2
0 2
0 2
0 2
0 2
0 2
0 2
0 2
0 2
0 2
0 2
0 2
0 2
0 2
0 2
0 2
0 2
0 2
0 2
0 2
0 3
0 3
0 3
0 4
0 4
0 4
0 4
0 4
0 4
0 4
0 4
0 4
0 4
0 4
0 4
0 4
0 4
0 4
0 4
0 4
0 4
0 4
0 3
0 3
0 3
0 3
0 3
0 3
0 3
0 3
0 3
0 3
0 3
0 5
0 5
0 5
0 5
0 5
0 5
0 5
0 5
0 5
0 5
0 5
0 5
0 5
0 5
0 5
0 5
0 5
0 5
0 5
0 5
0 5
0 5
0 5
0 5
0 5
0 5
0 6
0 6
0 6
0 6
0 6
0 7
0 7
0 9
0 9
0 9
0 9
0 9
0 9
0 8
0 8
0 8
0 8
0 6
0 6
0 6
0 7
0 7
0 8
0 8
0 8
0 8
0 8
0 8
0 8
0 8
0 8
0 8
0 8
0 8
0 8
0 8
0 10
0 10
0 10
0 10
0 11
0 11
0 11
0 11
0 11
0 11
0 11
0 9
0 9
0 9
0 9
0 9
0 9
0 9
0 9
0 9
0 9
0 9
0 9
0 9
0 9
0 9
0 9
0 9
0 9
0 9
0 9
0 9
0 9
0 9
0 9
0 9
0 9
0 7
0 7
0 6
0 6
0 6
0 5
0 5
0 3
0 3
0 3
0 3
0 3
0 3
0 3
0 3
0 3
0 3
0 3
0 3
0 3
0 3
0 3
0 3
0 3
0 3
0 3
0 3
0 3
0 3
0 3
0 3
0 3
0 3
0 3
0 3
0 3
0 1
0 1
0 1
0 1
0 0
0 0
0 0
0 0
0 0
0 0
0 0
0 0
0 0
0 0
0 0
0 0
0 0
0 0
0 0
0 0
0 0
0 0
0 0
0 0
0 0
0 0
0 0
0 0
0 0
0 0
0 0
0 0
0 0
0 0
0 0
0 0
0 0
0 0
0 0
0 0
0 0
0 0
0 0
0 0
0 0
0 0
0 1
0 1
0 1
0 1
0 1
0 1
0 1
0 1
0 1
0 1
0 1
0 1
0 1
0 1
0 1
0 1
0 1
0 1
0 1
0 1
0 2
0 2
0 2
0 2
0 2
0 2
0 2
0 2
0 2
0 2
0 2
0 2
0 3
0 3
0 3
0 3
0 3
0 3
0 3
0 3
0 3
0 3
0 3
0 3
0 3
0 3
0 3
0 3
0 3
0 3
0 3
0 3
0 3
0 3
0 3
0 4
0 4
0 4
0 4
0 4
0 4
0 4
0 4
0 4
0 4
0 4
0 4
0 4
0 4
0 4
0 4
0 4
0 4
0 3
0 3
0 3
0 3
0 3
0 3
0 3
0 3
0 3
0 3
0 3
0 3
0 3
0 3
0 3
0 3
0 3
0 3
0 3
0 3
0 2
0 2
0 2
0 2
0 2
0 2
0 2
0 2
0 2
0 2
0 2
0 1
0 1
0 1
0 1
0 1
0 1
0 1
0 1
0 1
0 1
0 1
0 1
0 1
0 1
0 1
0 1
0 1
0 1
0 1
0 1
0 1
0 1
0 1
0 1
0 0
0 0
0 0
0 0
0 0
0 0
0 0
0 0
0 0
0 0
0 0
0 0
0 0
0 0
0 0
0 0
0 0
0 0
0 0
0 0
0 0
0 0
0 0
0 0
0 0
0 0
0 0
0 0
0 0
0 0
0 0
0 0
0 0
0 0
0 0
0 0
0 0
0 0
0 0
0 0
0 0
0 0
0 0
0 0
0 0
0 0
0 0
0 0
0 0
0 0
0 0
0 0
0 0
0 0
0 0
0 0
0 0
0 0
0 0
0 0
0 0
0 0
0 0
0 0
1 0
1 0
1 0
1 0
1 0
1 0
1 0
1 0
1 0
1 0
1 0
1 0
1 0
1 0
1 0
1 0
1 0
1 0
0 0
0 0
0 0
0 0
0 0
0 0
0 0
0 0
0 0
0 0
0 0
0 0
0 0
0 0
0 0
0 0
0 0
0 0
0 0
0 0
0 0
0 0
0 0
0 0
0 0
0 0
0 0
0 0
0 0
0 0
0 0
0 0
0 0
0 0
0 0
0 0
0 0
0 0
0 0
0 0
0 0
0 0
0 0
0 0
0 0
0 0
0 0
0 0
0 0
0 0
2 0
2 0
2 0
2 0
2 0
2 0
2 0
2 1
2 1
2 1
2 1
2 1
2 2
2 2
2 2
2 2
3 2
3 2
3 2
3 2
3 2
3 2
3 2
3 2
7 1
7 1
8 1
8 1
8 0
8 0
8 0
8 0
8 0
8 0
8 0
8 0
8 0
8 0
8 0
8 0
8 0
8 0
8 0
8 0
8 0
8 0
8 0
8 0
8 0
8 0
14 1
33 1
34 1
36 1
36 1
37 1
50 1
51 1
53 1
55 1
56 1
56 1
84 1
85 1
85 1
129 1
131 1
145 1
152 1
181 1
196 2
196 2
198 2
196 2
196 2
196 2
197 2
199 2
201 2
203 2
216 3
216 3
218 4
244 5
249 5
253 5
253 5
253 5
249 5
248 5
248 6
248 6
248 6
248 6
252 6
258 6
259 6
258 7
258 7
257 7
257 7
259 8
260 8
260 8
260 8
260 8
260 8
260 8
260 8
260 8
260 8
262 8
262 8
262 8
262 8
262 8
262 8
262 8
262 8
267 9
268 9
268 9
299 10
307 9
291 10
295 10
292 10
293 10
288 10
250 10
249 10
222 10
210 10
209 10
207 10
202 10
191 10
191 10
174 10
174 10
158 10
150 10
141 10
133 9
133 9
132 9
132 9
132 9
132 9
132 9
129 9
129 9
129 9
123 7
125 7
123 7
99 6
91 4
139 6
140 6
137 6
144 6
146 6
147 5
147 5
148 5
147 5
146 5
142 5
141 5
141 4
141 4
141 4
141 4
138 3
139 3
139 3
139 3
139 3
139 3
139 3
141 3
141 3
141 3
138 3
138 3
137 3
137 3
137 3
137 3
137 3
137 3
137 3
136 3
135 3
108 2
100 2
98 2
94 2
92 2
92 2
92 2
101 2
119 2
117 2
117 2
116 2
116 2
115 2
116 2
121 2
122 2
122 2
122 2
122 2
122 2
122 2
122 2
122 2
121 2
121 2
121 2
121 2
122 2
121 2
117 2
110 2
108 2
107 2
105 2
104 2
57 0
57 0
56 0
51 0
51 0
48 0
48 0
48 0
48 0
48 0
48 0
48 0
48 0
48 0
48 0
48 0
47 0
48 0
48 0
48 0
48 0
48 0
48 0
46 0
46 0
46 0
46 0
46 0
46 0
46 0
46 0
46 0
46 0
46 0
46 0
46 0
50 0
52 0
64 0
102 0
127 0
127 0
126 0
116 0
130 0
122 0
126 0
149 1
158 1
158 2
158 2
158 2
157 2
158 2
158 2
158 2
161 2
161 2
163 2
163 2
163 2
163 2
163 2
165 2
165 2
165 2
165 2
168 2
167 3
164 3
156 3
155 3
143 3
141 3
138 3
134 3
130 3
130 3
132 3
132 3
132 3
133 3
133 3
133 3
135 3
135 3
135 3
135 3
135 3
135 2
135 2
135 2
135 2
135 2
135 2
135 2
135 2
135 2
135 2
135 2
135 2
135 2
135 2
135 2
135 2
135 2
135 2
135 2
135 2
130 2
127 2
121 2
98 2
79 2
78 2
78 2
78 2
55 2
52 2
46 2
23 2
13 2
12 1
12 1
11 1
11 1
9 1
9 1
9 1
8 1
8 1
10 1
13 1
13 1
12 1
12 1
11 1
11 1
11 1
11 1
11 1
11 0
11 0
11 0
11 0
11 0
11 0
11 0
12 0
14 0
14 0
12 0
13 0
13 0
12 0
12 0
12 0
10 0
10 0
10 0
10 0
10 0
10 0
10 0
10 0
10 0
10 0
10 0
12 0
12 0
12 0
12 0
12 0
12 0
12 0
12 0
12 0
12 0
12 0
12 0
12 0
12 0
12 0
11 0
12 0
15 0
26 0
28 0
52 0
55 0
56 0
68 0
68 0
68 0
68 0
68 0
68 0
68 0
68 0
68 0
68 0
66 0
67 0
67 0
72 0
70 0
70 0
70 0
70 0
68 0
68 0
67 0
71 0
72 0
72 0
72 0
72 0
72 0
72 0
72 0
72 0
72 0
73 0
73 0
73 0
73 0
73 0
73 0
73 0
74 0
78 0
78 0
78 0
78 0
78 0
78 0
78 0
78 0
78 0
78 0
78 0
78 0
82 0
93 0
104 0
105 0
105 0
105 0
105 0
105 0
108 0
108 0
108 0
110 0
124 0
141 0
168 0
172 0
194 0
184 0
179 0
157 0
163 0
162 0
150 0
150 0
151 0
151 0
151 0
151 0
151 0
151 0
318 0
325 0
338 0
340 0
717 0
716 0
757 0
800 0
807 0
807 0
806 0
806 0
806 0
803 0
804 0
804 0
804 0
804 0
804 0
804 0
804 0
804 0
807 0
808 0
811 0
812 0
822 0
824 0
824 0
824 0
821 0
814 0
812 0
808 0
810 0
821 0
831 0
848 0
852 0
885 0
875 0
866 0
819 0
677 0
613 0
565 0
567 0
566 0
567 0
567 0
566 0
546 0
500 0
498 0
478 0
478 0
475 0
480 0
513 0
514 0
513 0
521 0
519 0
487 0
476 0
452 0
446 0
442 0
441 0
441 0
441 0
443 0
442 0
446 0
446 0
441 0
437 0
226 0
218 0
211 0
192 0
191 0
191 0
191 0
191 0
192 0
192 0
193 0
194 0
195 0
208 0
211 0
212 0
212 0
216 0
215 0
214 0
207 0
206 0
200 0
199 0
204 0
204 0
206 0
222 0
272 0
314 0
450 0
589 0
591 0
577 0
598 0
595 0
675 0
695 0
703 0
702 0
700 0
694 0
690 0
690 0
690 0
690 0
690 0
690 0
690 0
690 0
691 0
690 0
719 0
712 0
719 0
721 0
718 0
705 0
703 0
703 0
703 0
702 0
702 0
702 0
704 0
706 0
706 0
701 0
701 0
696 0
696 0
695 0
695 0
695 0
697 0
697 0
698 0
698 0
698 0
697 0
697 0
697 0
696 0
695 0
695 0
695 0
682 0
678 0
678 0
677 0
672 0
671 0
676 0
676 0
675 0
674 0
672 0
669 0
667 0
661 0
624 0
549 0
463 0
206 0
80 0
45 0
45 0
45 0
44 0
44 0
40 0
22 0
22 0
22 0
22 0
22 0
22 0
22 0
22 0
22 0
22 0
22 0
22 0
22 0
22 0
22 0
22 0
20 0
20 0
20 0
20 0
20 0
20 0
20 0
20 0
20 0
20 0
22 0
22 0
22 0
25 0
25 0
25 0
25 0
26 0
26 0
26 0
25 0
25 0
24 0
24 0
24 0
24 0
28 0
29 0
30 0
44 0
44 0
44 0
44 0
45 0
45 0
45 0
45 0
45 0
102 0
104 0
104 0
191 0
214 0
209 0
214 0
215 0
216 0
215 0
214 0
214 0
214 0
213 0
213 0
213 0
213 0
213 0
213 0
213 0
213 0
213 0
213 0
214 0
214 0
214 0
215 0
220 0
229 0
233 0
234 0
235 0
236 0
236 0
237 0
237 0
237 0
238 0
241 0
244 0
245 0
245 0
245 0
245 0
245 0
242 0
240 0
239 0
231 0
231 0
229 0
226 0
223 0
224 0
224 0
224 0
224 0
223 0
223 0
218 0
211 0
168 0
162 0
126 0
71 0
69 0
69 0
69 0
69 0
68 0
26 0
26 0
26 0
26 0
26 0
26 0
18 0
17 0
16 0
16 0
16 0
16 0
16 0
16 0
16 0
16 0
21 0
22 0
22 0
22 0
22 0
23 0
23 0
23 0
23 0
23 0
23 0
23 0
23 0
23 0
22 0
18 0
18 0
17 0
16 0
15 0
15 0
16 0
24 0
29 0
29 0
28 0
25 0
24 0
24 0
24 0
24 0
24 0
24 0
24 0
24 0
24 0
24 0
24 0
24 0
24 0
24 0
24 0
24 0
25 0
25 0
26 0
25 0
25 0
25 0
25 0
25 0
25 0
25 0
25 0
25 0
25 0
25 0
25 0
25 0
25 0
25 0
25 0
25 0
25 0
25 0
25 0
25 0
23 0
23 0
23 0
23 0
22 0
22 0
17 0
17 0
14 0
14 0
14 0
14 0
14 0
14 0
14 0
14 0
14 0
14 0
14 0
14 0
14 0
14 0
14 0
14 0
14 0
14 0
14 0
11 0
4 0
2 0
2 0
2 0
2 0
2 0
2 0
2 0
2 0
2 0
2 0
2 0
2 0
2 0
2 0
2 0
4 0
5 0
5 0
7 0
7 0
6 0
6 0
6 0
6 0
7 0
7 0
7 0
8 0
8 0
8 0
9 0
9 0
9 0
9 0
9 0
10 0
10 0
10 0
10 0
10 0
10 0
10 0
10 0
10 0
10 0
10 0
10 0
10 0
10 0
10 0
10 0
13 0
15 0
16 0
16 0
16 0
16 0
16 0
16 0
16 0
16 0
16 0
16 0
16 0
16 0
16 0
16 0
16 0
16 0
16 0
16 0
16 0
16 0
16 0
16 0
16 0
16 0
16 0
16 0
16 0
16 0
16 0
16 0
20 0
56 0
65 0
86 0
89 0
92 0
91 0
90 0
89 0
89 0
90 0
89 0
89 0
89 0
91 0
92 0
92 0
91 0
91 0
91 0
91 0
91 0
91 0
91 0
91 0
91 0
91 0
91 0
91 0
91 0
91 0
97 0
97 0
99 0
100 0
107 0
118 0
121 0
140 0
142 0
143 0
143 0
143 0
145 0
146 0
147 0
148 0
148 0
149 0
150 0
151 0
151 0
151 0
151 0
151 0
151 0
152 0
152 0
152 0
152 0
152 0
152 0
152 0
152 0
152 0
152 0
152 0
154 0
155 0
155 0
155 0
155 0
154 0
145 0
137 0
140 0
130 0
128 0
124 0
124 0
124 0
128 0
130 0
130 0
129 0
129 0
128 0
126 0
126 0
168 0
169 0
169 0
169 0
169 0
169 0
169 0
169 0
169 0
169 0
170 0
168 0
168 0
168 0
167 0
161 0
161 0
158 0
145 0
138 0
128 0
123 0
98 0
97 0
93 0
84 0
83 0
80 0
80 0
80 0
80 0
79 0
78 0
78 0
77 0
77 0
77 0
77 0
77 0
77 0
76 0
76 0
76 0
76 0
76 0
76 0
76 0
76 0
76 0
76 0
76 0
75 0
76 0
76 0
76 0
78 0
79 0
77 0
67 0
58 0
58 0
57 0
56 0
52 0
52 0
49 0
48 0
48 0
48 0
47 0
47 0
44 0
43 0
6 0
5 0
5 0
5 0
5 0
5 0
5 0
5 0
7 0
8 0
8 0
8 0
13 0
14 0
14 0
14 0
14 0
14 0
14 0
14 0
14 0
14 0
14 0
14 0
14 0
14 0
14 0
15 0
51 0
53 0
53 0
53 0
53 0
53 0
53 0
53 0
53 0
53 0
58 0
62 0
63 0
63 0
63 0
63 0
63 0
65 0
65 0
65 0
65 0
65 0
65 0
67 0
66 0
66 0
66 0
64 0
63 0
63 0
63 0
63 0
63 0
70 1
80 1
89 1
173 2
178 2
179 2
181 2
185 2
187 2
190 2
192 2
193 2
194 2
195 2
196 2
206 2
206 2
207 2
208 2
208 2
206 2
205 2
205 2
205 2
200 2
199 2
200 2
200 2
200 2
200 2
200 2
200 2
200 2
200 2
200 2
200 2
200 2
202 2
201 2
203 2
167 2
168 2
170 2
170 2
168 2
168 2
168 2
165 2
170 2
169 2
174 2
198 2
206 2
320 2
327 2
328 2
331 2
330 1
332 1
345 1
723 1
1150 2
1339 2
1359 2
1371 1
1380 1
1601 1
1603 1
1869 1
1915 1
2117 1
2212 2
2275 2
2282 2
2336 2
2388 2
2397 2
2431 2
2530 2
2535 2
2532 2
2525 2
2523 2
2521 2
2520 2
2518 2
2516 2
2514 2
2502 2
2502 2
2497 2
2496 2
2497 2
2497 2
2497 2
2497 2
2497 2
2497 2
2497 2
2496 2
2492 2
2492 2
2493 2
2493 2
2493 2
2497 2
2504 2
2510 2
2512 2
2512 2
2507 2
2506 2
2502 2
2498 2
2492 2
2488 2
2490 2
2488 2
2487 2
2485 2
2484 2
2460 2
2460 2
2455 2
2413 2
2408 2
2312 2
2272 2
2265 2
2237 2
2126 2
1982 2
1899 2
933 1
742 1
697 1
685 1
679 1
183 1
404 2
417 2
368 2
363 2
356 2
348 1
345 1
347 1
341 1
333 1
332 1
329 1
279 1
280 1
280 1
280 1
280 1
280 1
280 1
280 1
280 1
280 1
280 1
280 1
280 1
280 1
280 1
280 1
280 1
280 1
280 1
281 1
282 1
290 1
289 1
300 1
301 1
304 1
304 1
303 1
300 1
299 1
298 1
298 1
298 1
297 1
297 1
297 1
297 1
297 1
296 1
296 1
296 1
296 1
296 1
296 1
296 1
296 1
296 1
294 1
287 1
284 1
283 1
283 1
283 1
283 1
283 1
272 1
270 1
270 1
262 1
258 1
249 0
29 0
25 0
24 0
23 0
22 0
20 0
9 0
9 0
9 0
9 0
9 0
9 1
9 1
9 1
10 1
10 1
10 1
10 1
15 1
15 1
15 1
16 1
16 1
16 1
16 1
16 1
16 0
21 0
22 0
23 0
25 0
25 0
24 0
25 0
25 0
25 0
23 0
23 0
23 0
23 0
23 0
23 0
23 0
24 0
24 0
24 0
24 0
24 0
24 0
24 0
23 0
23 0
23 0
23 0
30 0
31 0
31 0
40 0
40 0
40 0
40 0
40 0
40 0
40 0
40 0
40 0
40 0
40 0
40 0
40 0
40 0
40 0
40 0
40 0
40 0
40 0
40 0
40 0
40 0
40 0
40 0
40 0
40 0
40 0
40 0
41 0
41 0
40 0
40 0
40 0
40 0
35 0
35 0
34 0
34 0
33 0
33 0
40 0
40 0
40 0
35 0
32 0
30 0
28 0
27 0
24 0
23 0
23 0
18 0
19 0
20 0
21 0
23 0
23 0
25 0
25 0
23 0
23 0
22 0
22 0
22 0
22 0
22 0
24 0
24 0
24 0
24 0
24 0
23 0
23 0
22 0
22 0
22 0
22 0
22 0
22 0
22 0
22 0
22 0
22 0
22 0
22 0
22 0
22 0
22 0
22 0
22 0
22 0
22 0
22 0
22 0
22 0
22 0
22 0
22 0
22 0
22 0
22 0
22 0
20 0
20 0
20 0
22 0
23 0
22 0
22 0
22 0
22 0
22 0
23 0
16 0
16 0
16 0
15 0
15 0
15 0
15 0
15 0
15 0
16 0
16 0
16 0
14 0
14 0
13 0
12 0
12 0
12 0
10 0
11 0
19 0
19 0
19 0
19 0
19 0
19 0
17 0
17 0
17 0
17 0
17 0
17 0
17 0
17 0
17 0
17 0
17 0
17 0
17 0
17 0
17 0
18 0
18 0
18 0
18 0
18 0
18 0
18 0
18 0
18 0
21 0
21 0
21 0
20 0
20 0
20 0
20 0
19 0
19 0
19 0
19 0
21 0
24 0
27 0
30 0
30 0
29 0
29 0
29 0
29 0
29 0
29 0
28 0
28 0
28 0
28 0
28 0
28 0
28 0
28 0
28 0
28 0
28 0
29 0
29 0
29 0
29 0
39 0
40 0
41 0
40 0
40 0
39 0
32 0
32 0
32 0
35 0
35 0
54 0
55 0
56 0
57 0
57 0
57 0
57 0
57 0
56 0
58 0
58 0
58 0
61 0
62 0
70 0
75 0
75 0
75 0
77 0
77 0
77 0
77 0
77 0
77 0
77 0
74 0
74 0
76 0
106 0
107 0
110 0
110 0
110 0
112 0
112 0
112 0
111 0
107 0
103 0
102 0
100 0
100 0
100 0
100 0
100 0
100 0
100 0
100 0
100 0
100 0
100 0
100 0
100 0
100 0
100 0
100 0
100 0
100 0
101 0
101 0
100 0
99 0
86 0
84 0
79 0
78 0
78 0
79 0
79 0
78 0
78 0
77 0
77 0
59 0
59 0
59 0
59 0
63 0
63 0
63 0
65 0
65 0
67 0
67 0
68 0
65 0
62 0
60 0
55 0
55 0
63 0
61 0
62 0
62 0
62 0
63 0
63 0
63 0
62 0
58 0
56 0
27 0
26 0
23 0
24 0
24 0
24 0
24 0
24 0
23 0
23 0
23 0
23 0
23 0
23 0
23 0
23 0
23 0
23 0
23 0
23 0
23 0
23 0
23 0
24 0
24 0
25 0
54 0
63 0
64 0
66 0
66 0
66 0
66 0
66 0
66 0
66 0
66 0
66 0
66 0
64 0
64 0
63 0
63 0
63 0
63 0
61 0
60 0
60 0
60 0
56 0
56 0
56 0
54 0
54 0
52 0
52 0
52 0
52 0
52 0
52 0
53 0
53 0
46 0
46 0
45 0
45 0
45 0
45 0
45 0
45 0
45 0
45 0
45 0
45 0
45 0
45 0
44 0
44 0
44 0
44 0
45 0
45 0
45 0
45 0
45 0
45 0
45 0
45 0
45 0
45 0
45 0
45 0
45 0
46 0
44 0
42 0
41 0
37 0
36 0
12 0
6 0
6 0
4 0
4 0
4 0
4 0
4 0
4 0
4 0
4 0
4 0
4 0
4 0
4 0
4 0
4 0
4 0
4 0
4 0
4 0
4 0
4 0
4 0
4 0
4 0
4 0
4 0
4 0
4 0
4 0
4 0
4 0
4 0
3 0
3 0
3 0
3 0
3 0
3 0
3 0
3 0
3 0
3 0
3 0
3 0
3 0
3 0
3 0
3 0
3 0
3 0
3 0
3 0
2 0
2 0
2 0
2 0
2 0
2 0
2 0
2 0
2 0
2 0
2 0
2 0
1 0
1 0
1 0
1 0
1 0
1 0
1 0
1 0
0 0
0 0
0 0
0 0
0 0
0 0
0 0
0 0
0 0
0 0
0 0
0 0
0 0
0 0
0 0
0 0
0 0
0 0
0 0
0 0
0 0
0 0
0 0
0 0
0 0
0 0
0 0
0 0
0 0
0 0
0 0
0 0
0 0
0 0
0 0
0 0
0 0
0 0
0 0
0 0
0 0
0 0
0 0
0 0
0 0
0 0
0 0
0 0
0 0
0 0
0 0
0 0
0 0
0 0
0 0
0 0
0 0
1 0
1 0
1 0
1 0
1 0
1 0
1 0
1 0
1 0
1 0
1 0
1 0
1 0
1 0
1 0
1 0
1 0
1 0
1 0
1 1
1 1
1 1
1 2
1 2
1 2
1 2
1 2
1 2
1 2
1 2
1 2
1 2
1 2
1 2
1 2
1 2
1 2
1 2
1 2
1 2
1 2
1 2
1 2
1 2
1 2
1 2
1 2
1 2
1 2
1 2
1 2
1 2
1 2
1 2
1 2
1 2
1 2
1 2
1 2
1 2
1 2
1 2
1 2
1 1
1 1
1 1
1 1
1 1
1 1
1 1
1 1
1 1
1 0
0 0
0 0
0 0
0 0
0 0
0 0
0 0
0 0
0 0
0 0
0 0
0 0
0 0
0 0
0 0
1 0
2 0
3 0
14 0
14 0
14 0
14 0
14 0
14 0
15 0
16 0
16 0
16 0
16 0
16 0
16 0
16 0
16 0
16 0
16 0
16 0
16 0
16 0
16 0
16 0
17 0
17 0
17 0
17 0
17 0
20 0
20 0
20 0
20 0
20 0
21 0
21 0
21 0
21 0
21 0
21 0
21 0
21 0
21 0
21 0
21 0
21 0
21 0
23 0
23 0
23 0
23 0
27 0
27 0
27 0
27 0
27 0
27 0
27 0
27 0
27 0
27 0
27 0
27 0
27 0
27 0
29 0
29 0
29 0
29 0
29 0
29 0
30 0
29 0
28 0
26 0
16 0
16 0
16 0
16 0
16 0
19 0
27 0
37 0
42 0
42 0
44 0
44 0
46 0
46 0
46 0
46 0
46 0
58 0
58 0
57 0
70 0
70 0
70 0
72 0
72 0
72 0
72 0
69 0
70 0
71 0
71 0
71 0
70 0
70 0
70 0
70 0
70 0
70 0
70 0
70 0
70 0
70 0
80 0
92 0
102 0
111 0
113 0
114 0
114 0
111 0
111 0
111 0
111 0
111 0
111 0
111 0
111 0
111 0
111 0
112 0
113 0
113 0
113 0
111 0
111 0
111 0
111 0
111 0
111 0
110 0
110 0
110 0
110 0
110 0
104 0
103 0
97 0
85 0
76 0
65 0
42 0
38 0
37 0
37 0
37 0
38 0
38 0
9 0
9 0
7 0
5 0
5 0
5 0
4 0
4 0
4 0
4 0
4 0
4 0
4 0
2 0
2 0
2 0
2 0
2 0
2 0
2 0
2 0
2 0
2 0
2 0
2 0
2 0
2 0
2 0
2 0
1 0
1 0
1 0
1 0
1 0
1 0
1 0
1 0
1 0
1 0
1 0
1 0
1 0
1 0
1 0
1 0
1 0
1 0
1 0
1 0
1 0
1 0
1 0
1 0
1 0
1 0
1 0
1 0
1 0
1 0
1 0
1 0
1 0
1 0
1 0
1 0
2 0
2 0
2 0
2 0
2 0
2 0
1 0
1 0
1 0
1 0
1 0
1 0
1 0
1 0
1 0
1 0
1 0
1 0
1 0
1 0
1 0
1 0
1 0
1 0
1 0
1 0
1 0
1 0
1 0
1 0
1 0
1 0
1 0
1 0
1 0
1 0
1 0
2 0
2 0
2 0
2 0
2 0
2 0
2 0
2 0
2 0
2 0
2 0
2 0
2 0
3 0
3 0
3 0
4 0
4 0
4 0
4 0
4 0
4 0
4 0
4 0
4 0
4 0
4 0
4 0
4 0
4 0
4 0
5 0
5 0
5 0
5 0
5 0
4 0
4 0
4 0
4 0
4 0
8 0
8 0
9 0
10 0
10 0
10 0
10 0
10 0
10 0
10 0
10 0
10 0
10 0
10 0
10 0
10 0
10 0
10 0
11 0
11 0
11 0
11 0
11 0
11 0
11 0
11 0
11 0
11 0
11 0
11 0
11 0
11 0
10 0
10 0
10 0
10 0
10 0
11 0
11 0
12 0
12 0
12 0
12 0
12 0
12 0
10 0
10 0
9 0
8 1
8 1
8 1
8 1
8 1
9 1
9 1
9 1
9 1
9 1
9 1
9 1
9 1
9 1
8 1
8 0
8 0
8 0
8 0
8 0
8 0
8 0
8 0
8 0
8 0
4 0
4 0
4 0
4 0
4 0
4 0
4 0
4 0
4 0
4 0
4 0
4 0
4 0
4 0
4 0
4 0
4 0
4 0
3 0
3 0
3 0
3 0
3 0
3 0
3 0
3 0
3 0
3 0
3 0
3 0
3 0
8 0
9 0
9 0
9 0
9 0
9 0
8 0
7 0
7 0
7 0
7 0
7 0
7 0
7 0
7 0
7 0
7 0
7 0
7 0
7 0
8 0
9 0
11 0
11 0
11 0
11 0
11 0
11 0
11 0
11 0
11 0
11 0
11 0
11 0
11 0
11 0
11 0
11 0
11 0
11 0
11 0
11 0
11 0
11 0
11 0
11 0
11 0
11 0
11 0
12 0
12 0
12 0
12 0
14 0
14 0
14 0
16 0
16 0
16 0
15 0
15 0
14 0
14 0
14 0
14 0
14 0
13 0
12 0
12 0
12 0
12 0
12 0
12 0
8 0
8 0
8 0
8 0
8 0
8 0
8 0
8 0
8 0
8 0
8 0
8 0
8 0
8 0
8 0
8 0
8 0
8 0
8 0
8 0
7 0
7 0
5 0
5 0
5 0
5 0
5 0
5 0
5 0
5 0
5 0
5 0
5 0
8 0
8 0
8 0
8 0
8 0
8 0
8 0
8 0
8 0
11 0
11 0
11 0
11 0
11 0
11 0
11 0
10 0
8 0
8 0
8 0
11 0
11 0
11 0
9 0
9 0
9 0
10 0
11 0
11 0
12 0
12 0
12 0
13 1
13 2
13 2
13 2
13 2
13 2
13 2
13 2
13 2
13 2
13 2
13 2
15 3
15 3
15 3
15 3
15 3
15 3
15 3
15 3
17 3
20 3
24 3
27 3
27 3
27 3
27 3
27 3
27 3
27 3
27 3
27 3
27 3
27 3
27 3
27 3
27 3
27 3
27 3
27 3
27 3
24 3
24 3
26 3
26 3
26 3
26 3
26 3
26 3
26 3
23 3
23 3
24 3
35 3
36 2
36 2
45 2
45 2
43 2
44 2
44 2
40 2
40 2
38 2
38 2
37 2
37 2
37 2
37 2
37 2
37 2
37 2
37 1
34 1
32 1
32 1
32 1
32 1
32 1
32 1
32 1
32 1
54 2
56 3
72 3
75 2
75 2
75 2
75 2
78 2
78 2
78 2
79 2
78 2
80 2
77 2
76 2
76 2
76 2
76 2
76 2
76 2
76 2
76 2
76 2
76 2
81 2
84 2
85 2
85 2
105 4
108 4
121 4
149 5
166 5
167 5
166 5
166 6
168 12
168 18
168 18
168 20
168 20
168 20
168 20
168 20
158 20
157 20
157 20
148 20
149 22
149 23
148 23
149 25
149 28
149 28
149 28
149 28
149 28
149 28
149 29
149 29
148 29
148 29
150 36
150 36
150 36
150 36
150 37
150 39
150 39
150 39
148 39
147 39
147 39
124 37
122 37
109 37
105 37
105 37
105 37
105 37
102 37
102 37
102 37
99 37
98 37
98 37
98 37
98 37
98 37
98 37
98 37
98 37
98 37
98 37
98 36
98 36
97 36
92 36
89 36
88 36
87 36
64 29
59 29
38 29
14 23
4 19
3 19
4 19
4 19
4 17
3 10
3 10
3 10
3 10
3 10
4 10
4 10
4 10
4 10
4 10
5 10
5 10
5 10
5 10
5 8
5 8
5 8
5 8
5 8
5 8
7 8
10 8
10 8
10 8
10 8
8 1
8 1
8 1
11 1
11 1
13 0
18 0
18 0
18 0
18 0
18 0
18 0
18 0
18 0
18 0
18 0
18 0
18 0
18 0
18 0
18 0
18 0
18 0
18 0
18 0
18 0
18 0
18 0
18 0
18 0
18 0
18 0
19 0
19 0
19 0
19 0
19 0
19 0
19 0
19 0
19 0
19 0
19 0
19 0
19 0
18 0
18 0
18 0
18 0
18 0
18 0
18 0
18 0
17 0
15 0
15 0
13 0
13 0
12 0
12 0
12 0
12 0
12 0
12 0
12 0
12 0
12 0
12 0
10 0
7 0
7 0
7 0
11 0
11 0
11 0
10 0
10 0
10 0
7 0
5 0
5 0
5 0
5 0
5 0
5 0
5 0
5 0
5 0
8 0
8 0
8 0
8 0
8 0
8 0
8 0
8 0
8 0
8 0
8 0
8 0
8 0
8 0
8 0
8 0
8 0
7 0
7 0
7 0
7 0
7 0
7 0
7 0
7 0
7 0
7 0
7 0
8 0
8 0
8 0
8 0
8 0
8 0
8 0
8 0
8 0
8 0
17 0
18 0
18 0
18 0
18 0
18 0
18 0
18 0
18 0
18 0
18 0
18 0
18 0
18 0
18 0
20 0
20 0
20 0
20 0
16 0
16 0
16 0
16 0
16 0
16 0
17 0
17 0
17 0
17 0
17 0
17 0
17 0
17 0
17 0
17 0
14 0
14 0
14 0
14 0
14 0
14 0
14 0
14 0
14 0
14 0
14 0
14 0
14 0
14 0
14 0
15 0
15 0
15 0
15 0
15 0
15 0
15 0
15 0
15 0
15 0
15 0
16 0
16 0
15 0
15 0
16 0
16 0
17 0
17 0
17 0
17 0
17 0
16 0
7 0
7 0
7 0
6 0
6 0
6 0
6 0
6 0
6 0
6 0
7 0
7 0
8 0
8 0
8 0
6 0
6 0
6 0
8 0
13 0
16 0
16 0
16 0
16 0
16 0
15 0
15 0
15 0
15 0
15 0
15 0
16 0
16 0
16 0
16 0
16 0
16 0
16 0
16 0
16 0
17 0
17 0
17 0
17 0
17 0
17 0
19 0
19 0
19 0
19 0
18 0
18 0
18 0
18 0
18 0
19 0
19 0
22 0
22 0
22 0
25 0
25 0
25 0
25 0
25 0
24 0
24 0
23 0
25 0
25 0
32 0
34 0
34 0
34 0
34 0
35 0
35 0
35 0
35 0
35 0
36 0
38 0
38 0
36 0
37 0
36 0
36 0
37 0
36 0
172 1
172 1
174 1
170 1
167 1
167 1
172 1
174 1
175 1
175 1
175 1
175 1
175 1
175 1
176 1
176 1
176 1
176 1
176 1
176 1
176 1
176 1
176 1
176 1
175 1
175 1
175 1
175 1
175 1
175 1
174 1
185 1
209 2
238 2
245 2
245 2
245 2
245 2
246 2
244 2
244 2
242 2
255 2
264 2
304 2
307 2
377 2
379 2
383 2
385 2
385 2
386 2
388 2
388 2
385 2
383 2
387 2
387 2
387 2
387 2
387 2
387 2
387 2
387 2
386 2
384 2
384 2
385 2
389 2
393 2
394 2
399 2
405 2
268 1
268 1
267 1
268 1
268 1
268 1
263 1
262 1
262 1
264 1
264 1
264 1
265 1
265 1
264 1
266 1
266 1
275 1
278 1
282 1
365 1
367 1
367 1
369 1
369 1
369 1
364 1
363 1
363 1
338 1
332 1
302 1
369 4
342 4
342 4
342 4
348 4
351 5
509 9
512 11
497 12
513 12
512 12
513 12
484 12
480 12
423 12
421 12
422 12
428 12
431 12
432 12
429 12
427 12
426 12
432 12
432 12
438 12
465 12
497 12
501 12
503 12
506 12
510 12
510 12
510 12
513 12
534 14
540 14
545 14
554 14
555 14
555 14
557 14
558 14
588 14
587 14
590 14
655 14
657 14
659 14
660 14
659 14
667 15
674 15
705 15
717 15
757 16
770 14
765 13
746 13
730 13
706 12
562 9
559 9
497 7
497 7
497 7
497 7
497 7
507 7
534 7
555 7
560 7
560 7
553 7
553 7
547 7
548 7
544 7
538 6
450 5
456 6
456 6
448 6
448 6
448 6
452 6
452 6
455 6
456 6
455 6
456 6
459 6
465 6
467 6
464 6
449 6
437 6
424 6
400 6
355 6
335 7
338 7
345 7
367 7
371 7
373 7
379 7
406 7
361 5
337 5
331 5
324 5
325 5
326 5
323 5
321 5
313 5
308 5
302 5
268 4
268 4
254 4
254 2
254 2
253 2
250 2
230 2
228 2
217 2
216 2
216 1
216 1
216 1
216 1
219 1
225 1
228 1
228 1
228 1
228 1
228 1
237 1
237 1
240 1
257 1
269 1
284 1
287 1
301 1
301 1
301 1
302 1
299 1
294 0
294 0
293 0
290 0
290 0
289 0
286 0
278 0
277 0
247 0
241 0
231 0
220 0
215 0
213 0
214 0
213 0
210 0
209 0
207 0
202 0
188 0
184 0
168 0
145 0
138 0
123 0
82 0
81 0
55 0
44 0
43 0
39 0
21 0
21 0
21 0
13 0
13 0
13 0
8 0
8 0
8 0
8 0
8 0
8 0
8 0
8 0
8 0
8 0
8 0
8 0
8 0
8 0
8 0
8 0
8 0
8 0
8 0
8 0
8 0
8 0
8 0
8 0
7 0
6 0
5 0
5 0
8 0
6 0
5 0
5 0
5 0
5 0
5 0
5 0
7 0
9 0
10 0
9 0
9 0
9 0
9 0
9 0
9 0
10 0
11 0
12 0
12 0
11 0
11 0
11 0
11 0
11 0
11 0
11 0
11 0
11 0
11 0
11 0
11 0
11 0
11 0
11 0
11 0
11 0
11 0
11 0
11 0
11 0
11 0
11 0
11 0
11 0
11 0
12 0
12 0
12 0
12 0
12 0
13 0
13 0
13 0
21 0
22 0
22 0
22 0
22 0
22 0
22 0
22 0
22 0
22 0
24 0
24 0
24 0
24 0
26 0
26 0
26 0
26 0
23 0
23 0
23 0
24 0
25 0
25 0
25 0
25 0
23 0
21 0
20 0
20 0
20 0
20 0
20 0
20 0
20 0
19 0
19 0
19 0
19 0
20 0
25 0
25 0
26 0
26 0
28 0
33 0
39 0
40 0
40 0
40 0
40 0
40 0
40 0
40 0
40 0
41 0
41 0
41 0
41 0
41 0
41 0
41 0
46 0
51 0
60 0
80 0
86 0
89 0
90 0
93 0
104 0
122 0
126 0
119 0
119 0
118 0
118 0
118 0
119 0
119 0
119 0
120 0
120 0
118 0
118 0
118 0
117 0
114 0
114 0
114 0
115 0
115 0
115 0
115 0
115 0
116 0
116 0
116 0
116 0
116 0
116 0
116 0
116 0
118 0
125 0
125 0
125 0
125 0
125 0
124 0
123 0
123 0
123 0
119 0
119 0
115 0
116 0
114 0
111 0
102 0
101 0
101 0
101 0
102 0
104 0
107 0
107 0
107 0
107 0
107 0
108 0
108 0
131 0
132 0
132 0
128 0
122 0
114 0
95 0
84 0
84 0
84 0
78 0
59 0
44 0
43 0
43 0
43 0
43 0
43 0
43 0
41 0
43 0
43 0
43 0
43 0
43 0
43 0
43 0
43 0
43 0
43 0
44 0
43 0
44 0
44 0
44 0
44 0
43 0
44 0
46 0
46 0
46 0
47 0
47 0
47 0
47 0
43 0
43 0
49 0
49 2
49 2
51 2
52 2
52 2
56 2
56 2
56 2
59 2
59 2
63 2
64 2
64 2
64 2
62 2
62 2
62 2
63 2
61 2
61 2
61 2
63 2
63 2
62 2
61 2
37 2
37 2
37 2
39 2
49 2
54 2
56 2
56 2
56 2
56 2
56 2
56 2
59 2
60 2
60 2
60 2
60 2
60 2
60 2
59 2
58 2
58 2
58 2
58 2
58 2
58 2
58 2
59 2
59 2
59 2
60 2
62 2
64 2
64 2
64 2
68 2
68 2
68 2
68 2
74 2
74 2
74 2
72 2
75 2
74 2
73 2
73 2
63 0
63 0
58 0
55 0
55 0
55 0
50 0
51 0
48 0
47 0
50 0
50 0
50 0
50 0
51 0
51 0
51 0
51 0
50 0
50 0
50 0
50 0
48 0
48 0
48 0
48 0
48 0
48 0
48 0
48 0
36 0
34 0
33 0
33 0
33 0
33 0
33 0
33 0
29 0
28 0
28 0
28 0
28 0
28 0
28 0
28 0
28 0
28 0
28 0
29 0
29 0
31 0
31 0
31 0
32 0
48 0
53 0
77 0
95 0
107 0
111 0
111 0
111 0
111 0
110 0
103 0
103 0
103 0
104 0
104 0
104 0
104 0
104 0
104 0
103 0
103 0
103 0
103 0
104 0
106 0
105 0
105 0
105 0
102 0
102 0
102 0
102 0
101 0
101 0
101 0
101 0
101 0
101 0
101 0
115 0
115 0
144 0
156 0
162 0
165 0
176 0
180 0
207 0
226 0
293 0
309 0
323 0
323 0
325 0
325 0
325 0
325 0
327 0
330 0
364 0
391 0
399 0
401 0
409 0
413 0
423 0
441 0
440 0
439 0
435 0
419 0
412 0
399 0
374 0
365 0
322 0
312 0
314 0
310 0
288 0
290 0
290 0
292 0
292 0
292 0
291 0
291 0
291 0
291 0
295 0
298 0
299 0
302 0
302 0
312 0
314 0
326 0
326 0
326 0
326 0
326 0
326 0
327 0
327 0
327 0
327 0
327 0
327 0
327 0
327 0
327 0
327 0
329 0
329 0
314 0
320 0
326 0
335 0
327 0
342 0
322 0
307 0
250 0
244 0
234 0
234 0
234 0
233 0
229 0
222 0
210 0
200 0
173 0
157 0
150 0
145 0
127 0
114 0
108 0
94 0
94 0
94 0
91 0
91 0
90 0
88 0
87 0
85 0
85 0
85 0
77 0
78 0
78 0
78 0
78 0
78 0
78 0
89 0
107 0
124 0
135 0
135 0
129 0
128 0
124 0
123 0
123 0
123 0
123 0
118 0
118 0
118 0
118 0
118 0
118 0
117 0
117 0
117 0
117 0
117 0
117 0
118 0
119 0
119 0
121 0
121 0
119 0
119 0
114 0
104 0
97 0
94 0
75 0
74 0
73 0
72 0
72 0
72 0
72 0
72 0
72 0
72 0
72 0
72 0
72 0
72 0
72 0
72 0
72 0
73 0
73 0
73 0
74 0
74 0
76 1
77 1
78 1
84 1
113 2
125 2
125 2
125 2
126 2
128 2
128 2
128 2
128 2
128 2
126 2
121 2
90 2
72 2
62 2
61 2
61 2
61 2
61 2
60 2
60 2
60 2
60 2
60 2
60 2
60 2
60 2
60 2
60 2
60 2
60 2
60 2
60 2
60 2
60 2
60 2
59 2
59 2
61 2
72 2
86 2
93 2
94 2
95 2
95 2
95 2
95 2
95 2
95 2
95 2
95 2
95 2
95 2
95 2
95 2
95 2
95 2
95 2
95 2
95 2
95 2
95 2
95 2
95 2
94 2
94 2
94 2
91 2
93 2
91 1
96 1
94 1
81 1
43 0
38 0
37 0
37 0
37 0
37 0
26 0
25 0
26 0
27 0
33 0
33 0
33 0
35 0
35 0
35 0
35 0
35 0
35 0
35 0
35 0
35 0
35 0
35 0
35 0
35 0
35 0
35 0
35 0
35 0
35 0
36 0
36 0
36 0
40 0
41 0
42 0
52 0
56 0
64 0
65 0
61 0
61 0
60 0
60 0
58 0
58 0
58 0
58 0
58 0
74 0
74 0
74 0
74 0
78 0
80 0
80 0
80 0
80 0
81 0
82 0
82 0
83 0
83 0
84 0
84 0
85 0
84 0
85 0
83 0
76 0
75 0
75 0
75 0
75 0
75 0
75 0
75 0
74 0
75 0
74 0
72 0
72 0
66 0
66 0
66 0
64 0
64 0
64 0
64 0
64 0
64 0
64 0
64 0
64 0
64 0
64 0
64 0
64 0
64 0
64 0
65 0
65 0
66 0
65 0
65 0
65 0
61 0
62 0
64 0
55 0
51 0
40 0
39 0
38 0
38 0
38 0
38 0
38 0
40 0
41 0
40 0
41 0
26 0
26 0
25 0
24 0
21 0
19 0
20 0
22 0
26 0
25 0
24 0
24 0
22 0
23 0
23 0
22 0
22 0
22 0
22 0
21 0
21 0
21 0
21 0
21 0
21 0
21 0
21 0
21 0
21 0
20 0
20 0
20 0
20 0
21 0
21 0
21 0
21 0
21 0
22 0
22 0
22 0
22 0
22 0
22 0
22 0
22 0
22 0
22 0
22 0
23 0
23 0
22 0
22 0
21 0
21 0
22 0
48 0
48 0
46 0
45 0
45 0
45 0
45 0
50 0
59 0
64 0
66 0
65 0
63 0
63 0
62 0
62 0
61 0
61 0
61 0
61 0
61 0
63 0
62 0
62 0
58 0
55 0
55 0
55 0
55 0
55 0
55 0
55 0
55 0
55 0
54 0
54 0
54 0
54 0
54 0
54 0
54 0
54 0
54 0
54 0
55 0
55 0
55 0
59 0
63 0
63 0
63 0
63 0
63 0
63 0
82 0
83 0
103 0
106 0
106 0
106 0
106 0
106 0
106 0
105 0
105 0
105 0
105 0
105 0
105 0
105 0
104 0
104 0
108 0
82 0
82 0
82 0
80 0
75 0
75 0
75 0
75 0
66 0
64 0
63 0
63 0
63 0
63 0
63 0
63 0
63 0
63 0
63 0
63 0
63 0
63 0
63 0
63 0
63 0
63 0
63 0
63 0
63 0
63 0
62 0
62 0
62 0
62 0
62 0
62 0
62 0
62 0
62 0
62 0
62 0
62 0
62 0
62 0
61 0
61 0
60 0
55 0
61 0
70 0
70 0
68 0
68 0
67 0
43 0
41 0
24 0
23 0
23 0
22 0
22 0
22 0
22 0
22 0
22 0
22 0
22 0
22 0
22 0
22 0
21 0
19 0
19 0
19 0
19 0
19 0
19 0
19 0
19 0
19 0
19 0
19 0
19 0
19 0
19 0
19 0
19 0
19 0
19 0
19 0
19 0
19 0
19 0
19 0
19 0
20 0
20 0
22 0
26 0
31 0
33 0
35 0
35 0
35 0
35 0
35 0
35 0
36 0
36 0
36 0
37 0
37 0
37 0
37 0
37 0
37 0
37 0
37 0
42 0
42 0
40 0
35 0
27 0
27 0
26 0
26 0
26 0
27 0
26 0
29 0
28 0
49 0
49 0
52 0
54 0
78 0
78 0
78 0
80 0
80 0
80 0
80 0
82 0
82 0
82 0
82 0
82 0
82 0
82 0
82 0
83 0
85 0
85 0
85 0
85 0
85 0
85 0
85 0
85 0
85 0
85 0
85 0
85 0
85 0
86 0
86 0
86 0
88 0
88 0
88 0
86 0
81 0
76 0
79 0
78 0
78 0
78 0
144 1
145 1
148 1
146 1
146 1
146 1
146 1
146 1
146 1
146 1
146 1
146 1
146 1
146 1
141 1
141 1
141 1
141 1
140 1
140 1
140 1
139 1
141 1
141 1
142 1
148 1
166 1
148 1
499 1
539 1
543 1
528 1
528 1
528 1
526 1
526 1
527 1
541 1
572 1
643 2
652 2
670 2
670 2
753 2
760 2
761 2
799 2
865 2
866 2
866 2
870 2
879 2
1225 2
1322 2
1372 3
1383 3
1384 3
1386 3
1386 4
1387 4
1386 4
1386 4
1387 4
1379 4
1377 4
1370 4
1369 4
1369 4
1367 4
1367 4
1366 4
1364 4
1364 4
1299 3
1301 3
1300 3
1302 3
1301 3
1301 3
1300 3
1299 3
1299 3
1299 3
1299 3
1299 3
1299 3
1300 3
1300 3
1301 3
1327 3
1356 3
1358 3
1373 3
1378 3
1379 3
1379 3
1379 3
1361 3
1359 3
1335 3
1329 3
995 3
950 3
935 3
929 3
929 3
923 3
924 3
924 3
915 3
905 5
868 5
809 4
806 4
787 4
780 4
715 4
712 4
709 4
680 4
593 4
578 4
550 4
398 4
389 4
132 4
109 4
75 3
50 3
47 3
46 3
46 2
46 2
46 2
46 2
46 2
46 2
47 2
47 2
47 2
47 5
47 6
48 6
48 6
48 6
48 6
48 6
42 6
41 6
41 6
41 6
41 6
41 6
41 6
41 6
42 6
42 6
42 6
42 6
41 6
41 6
41 6
40 6
36 6
35 6
19 6
19 6
19 6
19 6
18 6
18 6
17 6
18 6
18 6
18 6
18 6
18 6
17 6
18 6
18 6
17 6
17 6
17 6
5 2
5 2
5 2
5 2
5 0
5 0
5 0
5 0
5 0
5 0
5 0
5 0
5 0
6 0
6 0
6 0
6 0
6 0
6 0
6 0
6 0
6 0
6 0
6 0
6 0
6 0
6 0
5 0
5 0
5 0
5 0
8 0
7 0
7 0
7 0
7 0
7 0
7 0
7 0
7 0
7 0
7 0
7 0
7 0
6 0
6 0
6 0
6 0
6 0
6 0
6 0
6 0
6 0
6 0
6 0
7 0
13 0
13 0
13 0
13 0
12 0
12 0
12 0
12 0
12 0
12 0
12 0
11 0
11 0
12 0
13 0
13 0
13 0
13 0
13 0
13 0
13 0
13 0
13 0
22 0
22 0
22 0
22 1
22 1
22 1
22 1
21 1
21 1
30 1
36 1
38 1
38 1
38 1
44 1
48 1
48 1
49 1
49 1
49 1
49 1
49 1
47 1
48 1
51 2
50 2
50 2
51 2
51 2
50 2
50 2
49 2
49 2
49 2
49 2
49 2
49 2
49 2
49 2
49 2
49 2
49 2
49 2
49 2
49 2
50 2
50 2
50 2
51 2
52 2
47 2
47 2
47 2
47 2
47 2
47 2
47 2
47 2
47 2
47 2
47 2
46 2
46 2
45 2
45 2
45 2
45 2
45 2
45 2
45 2
45 2
45 2
45 2
36 2
36 2
36 2
36 1
36 1
37 1
37 1
37 1
37 1
23 1
18 1
17 1
17 1
17 1
10 1
7 1
7 1
7 1
7 1
8 1
8 1
8 1
8 1
7 1
4 0
4 0
4 0
3 0
3 0
3 0
3 0
3 0
3 0
3 0
3 0
3 1
3 1
4 1
4 1
6 1
6 1
6 1
6 1
6 1
6 1
5 1
5 1
5 1
6 1
12 1
12 0
12 0
12 0
12 0
12 0
12 0
12 0
12 0
12 0
12 0
12 0
12 0
12 0
12 0
12 0
12 0
12 0
12 0
12 0
13 0
13 0
13 0
13 0
13 0
13 0
13 0
13 0
13 0
12 0
12 0
12 0
12 0
12 0
12 0
12 0
12 0
12 0
12 0
12 0
12 0
12 0
12 0
11 0
11 0
11 0
11 0
11 0
11 0
11 0
11 0
11 0
11 0
13 0
12 0
12 0
12 0
13 0
14 0
14 0
14 0
13 0
13 0
12 0
12 0
12 0
12 1
12 1
12 1
12 1
12 1
11 1
11 1
5 1
5 1
5 1
4 1
4 1
4 1
4 1
4 1
5 0
5 0
5 0
5 0
5 0
5 0
5 0
5 0
5 0
5 0
5 0
4 0
4 0
4 0
4 0
4 0
4 0
4 0
4 0
4 0
4 0
4 0
4 0
4 0
5 0
5 0
5 0
5 0
5 0
5 0
5 0
7 0
7 0
7 0
7 0
7 0
7 0
7 0
9 0
9 0
9 0
9 0
8 0
8 0
8 0
7 0
7 0
7 0
7 0
6 0
8 0
8 0
8 0
8 0
8 0
13 0
13 0
14 0
17 0
17 0
17 0
17 0
17 0
17 0
17 0
17 0
17 0
17 0
17 0
17 0
17 0
17 0
17 0
16 0
16 0
16 0
16 0
16 0
16 0
16 0
16 0
16 0
17 0
17 0
17 0
17 0
17 0
17 0
18 0
18 0
18 0
18 0
18 0
18 0
18 0
18 0
18 0
17 0
17 0
17 0
17 0
17 0
17 0
17 0
15 0
15 0
15 0
15 0
16 0
20 0
20 0
22 0
22 0
22 0
26 0
26 0
26 0
26 0
26 0
28 0
28 0
28 0
34 0
34 0
34 0
35 0
37 0
37 0
33 0
38 0
39 0
39 0
39 0
39 0
39 0
39 0
39 0
41 0
41 0
41 0
41 0
41 0
41 0
41 0
42 0
43 0
43 0
43 0
44 0
46 0
53 0
54 0
56 0
62 0
62 0
61 0
62 0
63 0
63 0
63 0
63 0
62 0
64 0
129 0
138 0
138 0
139 0
153 0
153 0
153 0
167 0
167 0
167 0
167 0
167 0
167 0
168 0
171 0
171 0
171 0
173 0
174 0
172 0
178 0
176 0
176 0
176 0
172 0
172 0
172 0
172 0
171 0
170 0
169 0
169 0
162 0
163 0
164 0
162 0
196 0
225 0
227 0
222 0
222 0
220 0
222 0
226 0
226 0
226 0
227 0
226 0
226 0
226 0
226 0
226 0
226 0
226 0
225 0
224 0
224 0
224 0
223 0
219 0
212 0
212 0
211 0
205 0
205 0
205 0
204 0
201 0
196 0
193 0
186 0
173 0
144 0
57 0
55 0
55 0
55 0
1 0
1 0
1 0
0 0
0 0
0 0
0 0
0 0
0 0
0 0
0 0
0 0
0 0
1 0
1 0
1 0
2 0
2 0
2 0
2 0
2 0
2 0
2 0
2 0
2 0
2 0
2 0
2 0
2 0
2 0
2 0
2 0
2 0
2 0
2 0
2 0
2 1
3 1
3 1
3 1
3 1
3 1
3 1
3 1
3 1
3 1
3 1
3 1
3 1
3 1
3 1
3 1
3 1
3 1
3 1
3 1
3 1
3 1
3 1
3 1
3 1
3 1
3 1
3 1
3 1
3 1
3 2
3 2
3 2
3 3
4 3
4 3
4 3
4 3
4 3
4 3
4 3
4 3
4 3
4 3
4 3
4 3
4 3
4 3
4 3
4 3
3 3
3 3
3 3
2 3
2 3
2 3
2 3
3 3
3 3
3 3
3 3
3 3
3 3
3 3
3 3
4 3
4 3
4 3
4 3
4 3
4 3
4 3
4 3
3 2
3 2
3 2
3 2
3 2
3 2
3 2
3 2
2 2
2 2
3 2
3 2
3 2
3 2
3 2
3 2
3 2
3 2
3 2
3 2
3 2
3 2
6 2
10 2
26 2
26 2
26 3
28 4
29 4
29 4
33 3
37 2
37 2
37 2
36 2
36 2
36 2
36 2
37 2
38 2
38 2
38 2
38 2
38 2
38 2
38 2
38 2
39 2
39 2
40 3
42 3
42 3
42 3
42 3
42 3
42 3
42 3
41 3
45 3
46 3
46 3
50 3
50 3
54 3
55 3
55 3
55 3
55 3
58 3
58 3
58 3
58 3
58 3
58 3
58 3
58 3
58 3
58 3
58 3
58 3
58 3
59 3
59 3
58 3
58 3
58 3
58 3
58 3
61 3
63 3
66 3
67 3
67 3
65 3
62 3
56 3
49 3
37 3
36 3
37 2
35 1
34 1
34 1
33 1
33 1
33 1
33 1
33 1
33 1
33 1
32 1
32 1
31 1
31 1
31 1
31 1
31 1
31 1
31 1
31 1
27 1
24 1
23 0
21 0
21 0
19 0
19 0
19 0
19 0
17 0
17 0
15 0
14 0
14 0
14 0
13 0
13 0
11 0
11 0
11 0
10 0
7 0
7 0
7 0
7 0
7 0
7 0
7 0
7 0
7 0
7 0
7 0
7 0
7 0
4 0
4 0
4 0
4 0
4 0
4 0
4 0
4 0
4 0
3 0
2 0
2 0
2 0
2 0
2 0
2 0
2 0
2 0
1 0
2 1
2 1
2 1
1 1
1 1
1 1
1 1
1 1
1 1
1 1
1 1
1 1
1 1
1 1
1 1
1 1
1 1
1 1
1 1
1 1
1 1
1 1
1 1
1 1
1 1
1 1
1 1
1 1
1 1
1 1
1 1
1 1
1 2
1 3
1 3
1 3
1 3
1 3
1 3
1 3
1 3
1 3
1 3
1 3
1 3
1 3
1 3
1 3
1 3
1 3
1 3
1 3
1 3
1 3
1 3
1 3
1 3
1 3
1 3
1 3
1 3
1 3
1 3
1 3
1 3
2 3
2 3
2 3
2 3
2 3
2 3
2 3
2 2
1 2
1 2
1 0
1 0
1 0
1 0
1 0
1 0
1 0
1 0
1 0
1 0
1 0
1 0
1 0
1 0
1 0
1 0
1 0
1 0
1 0
1 1
1 3
2 4
2 4
2 4
2 4
2 4
2 4
2 4
2 4
2 4
2 4
2 4
2 4
2 4
2 4
2 4
2 4
3 4
3 4
3 4
3 4
3 4
4 4
4 4
4 4
5 4
5 4
5 4
5 4
5 4
5 4
5 4
5 5
5 5
6 5
6 5
6 6
6 6
6 6
6 6
6 6
6 6
5 6
5 6
5 5
5 4
5 4
5 4
5 4
5 5
5 5
5 5
5 6
5 6
5 6
5 6
5 6
5 7
5 7
5 7
5 7
5 8
5 8
5 8
5 8
5 8
5 7
5 5
5 4
5 4
5 4
5 4
5 4
5 4
4 4
4 6
4 6
4 7
4 7
4 7
4 7
4 7
4 7
4 7
5 7
5 7
5 7
5 7
5 7
5 7
9 7
11 7
11 7
11 7
11 7
10 7
10 7
10 7
9 7
23 73
23 73
23 73
23 73
23 73
23 74
59 136
58 146
58 148
58 154
58 156
58 156
58 157
58 157
59 160
60 160
61 160
61 160
61 160
61 160
62 160
63 161
63 161
68 164
72 168
73 166
74 169
76 171
77 171
77 171
77 171
77 170
78 171
78 171
78 173
79 174
80 174
80 174
80 174
80 174
80 174
80 174
79 174
79 174
79 172
79 173
78 171
79 172
79 160
79 131
79 98
77 68
77 68
77 71
77 71
75 46
75 46
75 46
75 46
75 46
76 46
74 46
74 46
72 46
59 45
48 44
47 44
47 45
47 45
47 45
47 45
47 45
47 45
47 45
47 45
47 45
47 46
47 46
47 45
25 29
25 29
26 30
26 30
26 31
26 33
26 33
26 33
22 30
21 30
20 30
20 30
20 30
20 30
20 30
19 27
19 27
14 21
11 20
10 20
8 20
7 19
6 19
6 19
6 19
6 19
6 18
6 18
6 14
4 14
4 14
4 14
4 14
4 14
4 14
4 14
4 14
4 14
4 14
4 13
4 12
3 12
3 12
3 12
3 12
3 12
3 12
3 8
3 8
3 7
3 7
3 7
3 7
3 7
3 7
4 7
4 7
5 7
5 7
5 7
5 6
5 6
5 6
5 6
5 6
4 6
3 6
3 6
3 6
3 6
3 5
3 5
3 5
3 5
3 4
2 0
2 0
2 0
2 0
2 1
2 1
2 1
2 1
2 1
2 1
2 1
2 1
2 1
2 1
2 1
2 1
2 1
2 1
3 1
3 1
3 1
3 3
3 3
3 3
3 3
3 3
3 3
3 3
3 5
3 5
3 5
3 5
3 5
3 5
3 5
3 5
3 5
3 6
3 6
3 6
3 6
3 6
3 6
3 6
3 6
3 6
3 6
3 6
3 6
4 6
4 6
4 4
4 4
3 4
3 4
2 4
2 4
2 4
2 4
2 4
2 4
2 4
2 4
2 4
2 4
2 4
2 4
2 4
3 4
3 4
3 4
3 4
3 4
6 4
7 5
8 5
8 5
8 4
8 4
8 4
8 4
8 4
8 4
8 4
8 4
8 4
8 4
8 4
8 4
9 4
9 4
8 4
9 4
10 4
10 4
10 4
10 4
10 4
10 4
14 4
14 4
17 2
19 4
19 4
19 4
19 4
19 4
19 4
19 3
19 3
19 3
19 3
19 3
19 3
19 3
19 3
19 3
19 3
19 3
19 3
19 3
19 3
18 3
18 3
18 3
18 3
18 3
18 3
18 3
18 3
18 3
18 3
18 3
19 3
19 3
19 3
19 3
19 3
19 3
18 3
18 3
18 3
18 3
18 3
18 3
17 3
14 2
13 2
15 2
15 2
15 2
15 2
15 2
15 2
15 2
15 2
14 2
14 2
14 2
14 2
14 2
14 2
14 2
14 2
14 2
13 2
12 2
12 2
12 2
12 2
12 2
12 2
4 2
4 2
3 2
3 1
3 1
3 1
3 2
3 2
3 2
3 2
3 2
3 2
3 2
3 2
3 2
3 2
3 2
3 2
3 2
5 9
5 9
5 9
5 9
5 9
5 9
5 9
5 9
5 9
5 12
5 12
5 12
5 12
5 12
5 12
4 12
4 12
4 12
4 12
4 12
4 12
4 12
4 12
4 12
4 12
4 12
4 12
4 12
4 12
4 12
2 12
2 12
2 12
2 12
2 12
2 12
2 12
2 12
2 12
2 12
2 12
2 12
2 12
2 12
2 12
2 12
2 12
2 12
2 12
2 12
2 12
2 12
2 12
2 12
2 12
2 12
2 12
3 11
3 11
3 11
3 10
3 10
3 10
3 10
3 10
3 10
3 10
3 10
4 10
4 10
4 10
4 10
5 11
3 4
7 4
7 4
7 4
7 4
7 4
11 5
11 5
11 5
11 2
11 2
11 2
11 2
11 2
11 2
11 1
11 1
11 1
11 1
11 1
12 1
12 1
12 1
12 1
12 1
12 1
12 1
12 1
12 1
12 1
12 1
12 1
12 1
12 1
12 1
12 1
12 1
12 1
12 1
12 1
12 1
10 1
10 1
10 1
10 1
8 1
8 1
8 1
8 1
8 1
8 1
8 1
8 1
8 1
8 1
8 1
8 1
7 1
7 1
7 1
6 1
5 1
5 1
5 1
5 1
5 1
4 1
4 1
2 1
2 1
2 1
2 1
1 1
1 1
1 1
1 1
1 1
1 1
1 1
1 0
1 0
1 0
1 0
1 0
1 0
1 0
1 0
1 0
2 0
2 0
2 0
2 0
1 0
1 0
1 0
1 0
1 0
2 0
2 0
2 0
2 0
2 0
2 0
2 0
3 0
3 0
3 0
3 0
3 0
4 0
6 1
6 1
6 1
6 1
6 1
6 1
6 1
6 1
6 1
6 1
6 1
6 1
6 1
6 1
6 1
6 1
6 1
6 1
6 1
6 1
6 2
6 2
6 2
6 2
6 2
6 2
6 2
6 2
6 2
6 2
6 2
6 2
6 2
6 2
6 2
6 2
6 2
6 2
6 2
6 2
6 2
6 2
6 2
6 2
6 2
6 2
6 2
6 2
6 2
6 2
6 2
5 2
5 2
5 2
5 2
5 2
5 2
5 2
5 2
5 2
4 2
4 2
4 2
4 2
4 2
5 2
5 2
5 2
5 2
5 2
5 2
5 2
4 2
2 1
2 1
2 1
2 1
2 1
2 1
2 1
2 1
2 1
2 1
2 1
2 1
2 1
2 1
2 1
2 1
2 1
2 1
2 1
2 1
2 0
2 0
3 0
3 0
3 0
3 0
3 0
3 0
3 0
3 0
3 0
3 0
3 0
3 0
2 0
1 0
1 0
1 0
1 0
1 0
1 0
2 1
2 1
2 1
2 1
2 1
2 1
3 1
4 1
4 1
4 1
4 1
4 1
4 1
4 1
4 1
4 1
4 2
4 2
4 2
4 2
4 3
4 3
4 4
4 4
4 4
4 4
4 4
4 4
4 4
4 4
4 4
4 4
4 4
4 4
4 4
4 4
4 4
4 4
4 4
4 4
4 4
4 4
4 4
4 4
4 4
4 4
4 4
4 4
4 4
4 4
4 4
4 4
4 4
4 4
3 4
3 4
3 4
3 4
3 4
3 4
3 4
3 4
3 4
3 4
3 4
1 4
1 4
1 4
1 4
1 4
1 4
1 4
1 4
0 2
0 2
0 1
0 1
0 1
0 1
0 1
0 1
0 1
0 1
0 1
0 1
0 1
0 1
0 1
0 1
0 1
0 1
0 1
0 1
0 1
0 0
0 0
0 2
0 2
0 2
0 2
0 2
0 2
0 2
0 2
0 2
0 2
0 2
0 2
0 2
0 2
0 2
0 2
0 2
0 2
0 2
0 2
0 2
0 2
0 2
0 2
0 2
0 2
0 2
0 2
0 2
0 2
0 2
0 1
0 0
0 0
0 0
0 0
0 1
0 1
0 1
0 1
0 1
0 1
0 1
0 1
0 1
0 1
0 1
0 1
0 1
0 1
0 1
0 1
0 1
0 1
0 1
0 1
0 1
0 1
0 1
0 1
0 1
0 1
0 1
0 1
0 1
0 1
0 1
0 1
0 1
5 1
6 1
7 1
7 1
7 1
7 1
7 1
7 1
7 1
7 1
7 2
7 2
7 2
7 2
7 2
7 2
7 2
7 2
7 2
7 2
7 2
7 2
7 2
7 2
8 2
8 2
8 2
8 2
8 2
8 2
8 2
8 2
8 2
8 2
8 2
8 2
8 2
8 2
8 2
8 2
8 1
8 1
8 1
8 1
8 1
8 1
8 1
8 1
8 1
8 1
8 1
8 1
8 1
8 1
8 1
8 1
8 1
8 1
8 1
8 1
7 1
6 1
6 1
6 1
6 1
6 1
6 1
6 1
6 1
7 1
7 1
7 1
7 1
3 1
3 1
2 1
2 1
2 1
2 1
2 1
2 1
2 0
2 0
2 0
2 0
2 0
3 0
3 0
3 0
4 0
4 0
4 0
4 0
7 0
7 0
7 0
7 0
6 0
6 0
6 1
7 2
7 3
7 3
8 4
8 5
8 5
8 5
8 5
8 5
8 5
8 5
8 5
8 5
8 5
8 5
8 5
8 5
8 5
8 5
8 5
8 5
8 5
8 5
8 5
8 5
8 5
8 5
8 5
8 5
8 5
8 5
8 5
8 5
8 5
8 5
8 5
8 5
8 5
8 5
8 5
8 5
8 6
7 6
7 6
7 6
7 6
7 7
7 7
7 7
7 7
7 7
7 7
7 7
7 7
7 7
7 7
7 7
7 7
7 7
6 6
6 5
6 4
5 4
5 5
5 5
4 5
0 5
0 5
0 5
0 5
0 5
0 5
0 4
0 4
0 3
0 3
0 2
0 2
0 2
0 2
0 2
0 2
0 3
0 3
2 3
2 3
2 3
2 3
2 3
2 3
2 3
2 3
2 3
2 3
2 3
2 3
2 7
2 7
2 7
2 7
2 7
2 7
2 7
2 7
2 7
2 7
2 7
2 7
2 7
2 7
2 7
2 7
2 7
2 7
2 6
2 6
2 6
2 6
2 6
2 6
2 6
2 6
2 6
2 6
2 7
2 8
2 8
2 8
2 8
2 8
2 8
2 8
2 8
2 8
2 8
2 8
2 7
2 8
2 8
2 8
3 8
3 8
4 8
4 8
4 8
4 8
4 8
4 8
4 8
4 8
4 8
4 8
4 8
4 8
4 8
4 7
4 7
2 7
2 7
2 7
2 7
2 7
2 7
2 7
2 7
2 7
2 7
2 7
2 7
2 2
2 2
2 1
2 1
3 1
3 1
3 1
3 1
3 1
3 1
3 1
3 1
3 1
3 1
3 1
3 1
3 1
4 1
4 1
4 1
4 1
4 1
4 1
4 1
4 1
4 1
4 1
4 1
4 1
4 1
4 1
4 1
4 1
4 1
4 1
4 1
4 1
4 1
4 1
4 1
3 1
3 0
3 0
3 0
4 0
4 2
3 6
3 6
3 7
3 7
3 7
3 7
4 7
5 7
6 7
6 7
6 7
6 7
6 7
6 7
6 7
6 8
6 8
7 8
7 8
7 8
7 8
7 8
7 8
7 8
7 8
7 8
7 8
7 8
7 8
7 8
7 8
6 8
6 8
7 8
11 8
11 9
11 9
11 9
11 9
11 9
11 9
11 9
11 9
11 8
10 7
10 7
10 7
10 7
10 7
10 7
10 7
10 7
10 7
10 7
10 7
10 7
12 7
12 7
12 7
12 8
12 8
12 8
12 8
12 8
12 8
12 8
12 8
12 8
12 8
12 8
11 8
11 8
11 7
11 4
11 3
11 3
10 3
10 3
10 3
6 3
6 3
4 3
0 3
0 3
0 3
0 3
0 3
0 3
0 2
0 2
0 2
0 2
0 2
0 2
0 3
0 3
0 3
0 3
0 3
0 3
0 3
0 3
0 3
0 3
0 3
0 3
0 3
0 3
0 2
0 2
0 2
0 2
0 2
0 2
0 2
0 2
0 2
0 2
0 2
0 2
0 2
0 2
0 2
0 2
0 2
0 2
0 2
0 2
0 2
0 2
0 2
0 1
0 1
0 1
0 1
0 1
0 1
0 1
0 1
4 1
4 1
4 1
4 1
4 1
4 1
4 1
4 1
4 1
4 1
4 2
4 2
4 2
4 2
4 2
0 2
0 2
0 2
0 2
0 2
0 2
0 2
0 2
0 2
0 2
0 2
0 3
0 3
0 2
0 2
0 2
0 2
0 2
0 2
0 2
0 2
0 3
0 3
0 3
0 3
0 3
0 3
0 3
0 3
0 3
0 3
0 4
0 4
0 4
0 4
0 4
0 4
0 4
0 4
0 4
0 4
0 4
0 4
0 4
0 4
0 4
0 4
0 4
0 4
0 4
0 4
0 4
0 4
0 3
0 3
0 3
0 3
0 3
0 3
0 3
1 3
1 3
1 3
1 3
1 3
1 3
1 3
1 3
1 2
1 2
1 2
1 2
1 2
1 2
1 2
1 2
1 2
1 2
1 2
1 2
1 2
3 2
3 2
3 2
3 1
3 1
3 1
7 1
7 1
7 1
7 1
7 1
7 1
7 1
7 0
7 0
7 0
7 0
7 0
7 0
7 0
7 0
7 0
7 0
7 0
7 0
7 0
7 0
7 0
7 0
9 0
9 0
9 0
9 0
9 0
9 0
9 0
9 0
9 0
9 0
9 0
9 0
9 0
9 0
9 0
9 0
9 0
9 0
9 0
9 0
9 0
9 0
9 0
8 0
8 0
8 0
8 0
8 0
8 0
8 0
8 0
8 0
8 0
8 0
8 0
8 0
8 0
8 0
8 0
8 0
8 0
8 0
8 0
8 0
6 1
6 1
6 1
6 1
6 1
6 1
1 1
1 1
0 1
0 1
0 1
0 1
0 1
0 1
0 1
0 1
0 1
0 1
0 1
0 1
0 1
0 1
0 1
0 1
0 1
0 1
0 1
0 1
0 1
0 1
0 1
0 1
0 1
0 1
0 1
0 1
0 1
0 1
0 1
0 1
0 1
0 1
0 1
0 1
0 1
0 1
0 1
0 1
0 1
0 1
0 1
0 1
0 1
0 1
0 1
0 1
0 1
0 1
0 1
0 1
0 1
0 1
0 1
0 1
0 1
0 1
0 1
0 1
0 1
0 1
0 1
0 1
0 1
0 0
0 0
0 1
0 1
0 1
0 1
0 1
0 1
0 1
0 1
0 1
0 1
0 1
0 1
0 1
0 1
0 1
0 1
0 1
0 1
0 1
0 1
0 1
0 1
0 1
0 1
0 1
0 1
0 1
0 1
0 1
0 1
0 1
0 1
0 1
0 1
0 1
0 1
0 1
0 1
0 1
0 1
0 1
0 1
0 1
0 1
0 1
0 1
0 1
0 1
0 1
0 1
0 1
0 1
0 1
0 1
0 1
0 1
0 1
0 1
0 1
0 1
0 1
0 1
0 1
0 1
0 1
0 1
0 1
0 1
0 1
0 1
0 1
0 1
0 1
0 0
0 0
0 0
0 0
0 0
0 0
0 0
0 0
0 0
0 0
0 0
0 0
0 0
0 0
0 0
0 0
0 0
0 0
0 0
0 0
0 0
0 0
0 0
0 0
0 0
0 0
0 0
0 0
0 0
0 0
0 0
0 0
0 0
0 0
0 0
0 0
0 0
0 0
0 0
0 0
0 0
0 0
0 0
0 0
0 0
0 0
0 0
0 0
0 0
0 0
0 0
0 0
0 0
0 0
0 0
0 0
0 0
0 0
0 0
0 0
0 0
0 0
0 0
0 0
0 0
0 0
0 0
0 0
0 0
0 0
0 0
0 0
0 0
0 0
0 0
0 0
0 0
0 0
0 0
0 0
0 0
0 0
1 0
1 0
1 0
1 0
1 0
1 0
1 0
1 0
1 0
1 0
1 0
1 0
1 0
1 0
1 0
1 0
1 0
1 0
1 0
1 0
1 0
1 0
1 0
1 0
1 0
3 1
3 1
3 1
3 1
3 1
3 1
3 1
4 1
4 1
4 1
4 1
4 1
4 1
4 1
4 1
4 1
4 1
4 1
4 1
4 1
4 1
4 1
4 1
3 1
3 1
3 1
3 1
3 1
3 1
3 1
3 1
4 2
4 2
4 2
4 2
4 2
4 2
4 2
4 2
4 2
4 2
4 2
3 2
3 2
3 2
3 2
3 2
3 2
3 2
3 2
3 2
3 2
3 2
3 2
3 2
3 2
3 2
3 2
3 2
3 2
3 2
3 2
3 2
3 2
3 2
3 2
3 2
3 2
3 2
3 2
3 2
3 2
3 2
1 1
1 1
1 1
1 1
1 1
1 1
1 1
1 1
1 1
1 1
1 1
1 1
1 1
1 1
1 1
1 1
1 2
1 2
1 2
1 2
3 2
3 2
3 2
3 2
3 2
3 2
3 2
3 2
3 2
3 2
3 2
2 2
2 1
2 1
2 1
2 1
2 1
2 1
2 1
2 1
2 1
2 1
2 1
2 1
2 1
2 1
2 1
11 1
11 1
12 1
12 1
12 1
12 1
12 1
12 1
12 1
12 1
12 0
12 0
12 0
12 0
12 0
7 0
3 0
2 0
2 0
2 0
2 0
2 0
2 0
2 0
3 0
3 0
3 0
3 0
3 0
3 0
3 0
3 0
3 0
3 0
3 0
3 0
3 0
3 0
3 0
2 0
2 0
1 0
1 0
0 0
0 0
0 0
0 0
0 0
0 0
0 0
0 0
0 0
0 0
0 0
0 0
0 0
0 0
0 0
0 0
0 0
0 0
0 0
0 0
0 0
0 0
0 0
0 0
0 0
0 0
0 0
0 0
0 0
0 0
0 0
0 0
0 0
0 0
0 0
0 0
0 0
0 0
0 0
0 0
0 0
0 0
0 0
0 0
0 0
0 0
0 0
0 0
0 0
0 0
0 0
0 0
0 0
0 0
0 0
0 0
0 0
0 0
0 0
0 0
0 0
1 0
2 0
2 0
2 0
2 0
2 0
2 0
2 0
2 0
3 0
3 0
3 0
3 0
3 0
3 0
2 0
2 0
2 0
1 0
1 0
1 0
1 0
1 0
1 0
2 0
2 0
2 0
2 0
2 0
2 0
2 0
2 0
2 0
2 0
2 0
2 0
2 0
2 0
2 0
2 0
2 0
2 0
2 0
2 0
2 0
2 0
2 0
2 0
2 0
2 0
3 0
4 0
4 0
5 0
5 0
6 0
6 0
6 0
6 0
6 0
6 0
6 0
7 0
7 0
7 0
7 0
8 0
16 0
42 0
44 0
45 0
46 0
46 0
48 0
54 0
55 0
56 0
57 0
58 0
58 0
58 0
59 0
58 0
58 0
57 0
58 0
58 0
58 0
61 0
61 0
61 0
61 0
61 0
61 0
61 0
61 0
61 0
61 0
63 0
64 0
64 0
63 0
63 0
63 0
63 0
63 0
63 0
63 0
63 0
63 0
63 0
54 0
54 0
54 0
54 0
53 0
53 0
52 0
52 0
49 0
49 0
50 0
45 0
44 0
41 0
36 0
26 0
14 0
12 0
10 0
10 0
16 0
31 0
42 0
44 0
44 0
44 0
44 0
44 0
40 0
42 0
41 0
41 0
42 0
44 0
44 0
45 0
45 0
54 0
53 0
56 0
58 0
55 0
55 0
52 0
54 0
54 0
55 0
55 0
56 0
56 0
56 0
55 0
54 0
53 0
53 0
55 0
55 0
55 0
55 0
55 0
53 0
52 0
51 0
51 0
51 0
51 0
51 0
51 0
52 0
67 0
68 0
68 0
68 0
68 0
68 0
68 0
68 0
68 0
68 0
68 0
68 0
68 0
68 0
67 0
67 0
67 0
67 0
67 0
66 0
66 0
66 0
66 0
61 0
56 0
55 0
45 0
45 0
45 0
45 0
44 0
44 0
44 0
44 0
43 0
42 0
40 0
37 0
36 0
34 0
30 0
2 0
1 0
0 0
0 0
0 0
0 0
0 0
0 0
0 0
0 0
0 0
0 0
0 0
0 0
0 0
0 0
0 0
0 0
0 0
0 0
0 0
0 0
0 0
0 0
0 0
0 0
0 0
0 0
0 0
0 0
0 0
0 0
0 0
0 0
0 0
0 0
0 0
0 0
0 0
0 0
0 0
0 0
0 0
0 0
0 0
0 0
0 0
0 0
0 0
0 0
0 0
0 0
0 0
0 0
0 0
0 0
0 0
0 0
0 0
0 0
0 0
0 0
0 0
0 0
0 0
0 0
0 0
0 0
0 0
0 0
0 0
0 0
0 0
0 0
0 0
0 0
0 0
0 0
0 0
0 0
0 0
0 0
0 0
0 0
0 0
0 0
0 0
0 0
0 0
0 0
0 0
0 0
0 0
0 0
0 0
0 0
0 0
0 0
0 0
0 0
0 0
0 0
0 0
0 0
0 0
0 0
0 0
0 0
0 0
0 0
0 0
0 0
0 0
0 0
0 0
0 0
0 0
0 0
0 0
0 0
0 0
0 0
0 0
0 0
0 0
0 0
0 0
0 0
0 0
0 0
0 0
0 0
0 0
0 0
0 0
0 0
0 0
0 0
0 0
0 0
0 0
0 0
0 0
0 0
0 0
0 0
0 0
0 0
0 0
0 0
0 0
0 0
0 0
0 0
0 0
1 0
1 0
1 0
1 0
1 0
1 0
1 0
1 0
1 0
1 0
1 0
1 0
1 0
1 0
1 0
1 0
1 0
1 0
1 0
1 0
1 0
1 0
1 0
1 0
1 0
1 0
1 0
1 0
1 0
1 0
2 0
2 0
2 0
2 0
2 0
2 0
2 0
2 0
2 0
2 0
2 0
2 0
2 0
2 0
2 0
2 0
2 0
2 0
2 0
2 0
2 0
2 0
2 0
2 0
2 0
2 0
2 0
2 0
2 0
2 0
2 0
2 0
2 0
2 0
2 0
2 0
2 0
2 0
2 0
2 0
2 0
1 0
1 0
0 0
0 0
0 0
0 0
0 0
0 0
0 0
0 0
0 0
0 0
0 0
0 0
0 0
0 0
0 0
0 0
0 0
0 0
0 0
0 0
0 0
0 0
0 0
0 0
0 0
0 0
0 0
0 0
0 0
0 0
0 0
0 0
0 0
0 0
0 0
0 0
0 0
0 0
0 0
0 0
0 0
0 0
0 0
0 0
0 0
0 0
0 0
0 0
0 0
0 0
0 0
0 0
0 0
0 0
0 0
0 0
0 0
0 0
0 0
0 0
0 0
0 0
0 0
0 0
0 0
0 0
0 0
0 0
0 0
0 0
0 0
0 0
0 0
0 0
0 0
0 0
0 0
0 0
0 0
0 0
0 0
0 0
0 0
0 0
0 0
0 0
0 0
0 0
0 0
0 0
0 0
0 0
0 0
0 0
0 0
0 0
0 0
0 0
0 0
0 0
0 0
0 0
0 0
0 0
0 0
0 0
0 0
0 0
0 0
0 0
0 0
0 0
0 0
0 0
0 0
0 0
0 0
0 0
0 0
0 0
0 0
0 0
0 0
0 0
0 0
0 0
0 0
0 0
0 0
0 0
0 0
0 0
0 0
0 0
0 0
0 0
0 0
0 0
0 0
0 0
0 0
0 0
0 0
0 0
0 0
0 0
0 0
0 0
0 0
0 0
0 0
0 0
0 0
0 0
0 0
0 0
0 0
0 0
0 0
0 0
0 0
0 0
0 0
0 0
0 0
0 0
0 0
0 0
0 0
0 0
0 0
0 0
0 0
0 0
0 0
0 0
0 0
0 0
0 0
0 0
0 0
0 0
0 0
0 0
0 0
0 0
0 0
0 0
0 0
0 0
0 0
0 0
0 0
0 0
0 0
0 0
0 0
0 0
0 0
0 0
0 0
0 0
0 0
0 0
0 0
0 0
0 0
0 0
0 0
0 0
0 0
0 0
0 0
0 0
0 0
0 0
0 0
0 0
0 0
0 0
0 0
0 0
0 0
0 0
0 0
0 0
0 0
0 0
0 0
0 0
0 0
0 0
0 0
0 0
0 0
0 0
0 0
0 0
0 0
0 0
0 0
0 0
0 0
0 0
0 0
0 0
0 0
0 0
0 0
0 0
0 0
0 0
0 0
0 0
0 0
0 0
0 0
0 0
0 0
0 0
0 0
0 0
0 0
0 0
0 0
0 0
0 0
0 0
0 0
0 0
0 0
0 0
0 0
0 0
0 0
0 0
0 0
0 0
0 0
0 0
0 0
0 0
0 0
0 0
0 0
0 0
0 0
0 0
0 0
0 0
0 0
0 0
0 0
0 0
0 0
0 0
0 0
0 0
0 0
0 0
0 0
0 0
0 0
0 0
0 0
0 0
0 0
0 0
0 0
0 0
0 0
0 0
0 0
0 0
0 0
0 0
0 0
0 0
0 0
0 0
0 0
0 0
0 0
0 0
0 0
0 0
0 0
0 0
0 0
0 0
0 0
0 0
0 0
0 0
0 0
0 0
0 0
0 0
0 0
0 0
0 0
0 0
0 0
0 0
0 0
0 0
0 0
0 0
0 0
0 0
0 0
0 0
0 0
0 0
0 0
0 0
0 0
0 0
0 0
0 0
0 0
0 0
0 0
0 0
0 0
0 0
0 0
0 0
0 0
0 0
0 0
0 0
0 0
0 0
0 0
0 0
0 0
0 0
0 0
0 0
0 0
0 0
0 0
0 0
0 0
0 0
0 0
0 0
0 0
0 0
0 0
0 0
0 0
0 0
0 0
0 0
0 0
0 0
0 0
0 0
0 0
0 0
0 0
0 0
0 0
0 0
0 0
0 0
0 0
0 0
0 0
0 0
0 0
0 0
0 0
0 0
0 0
0 0
0 0
0 0
0 0
0 0
0 0
0 0
0 0
0 0
0 0
0 0
0 0
0 0
0 0
0 0
0 0
0 0
0 0
0 0
0 0
0 0
0 0
0 0
0 0
0 0
0 0
0 0
0 0
0 0
0 0
0 0
0 0
0 0
0 0
0 0
0 0
0 0
0 0
0 0
0 0
0 0
0 0
0 0
0 0
0 0
0 0
0 0
0 0
0 0
0 0
0 0
0 0
0 0
0 0
0 0
0 0
0 0
0 0
0 0
0 0
0 0
0 0
0 0
0 0
0 0
0 0
0 0
0 0
0 0
0 0
0 0
0 0
0 0
0 0
0 0
0 0
0 0
0 0
0 0
0 0
0 0
0 0
0 0
0 0
0 0
0 0
0 0
0 0
0 0
0 0
0 0
0 0
0 0
0 0
0 0
0 0
0 0
0 0
0 0
0 0
0 0
0 0
0 0
0 0
0 0
0 0
0 0
0 0
0 0
0 0
0 0
0 0
0 0
0 0
0 0
0 0
0 0
0 0
0 0
0 0
0 0
0 0
0 0
0 0
0 0
0 0
0 0
0 0
0 0
0 0
0 0
0 0
0 0
0 0
0 0
0 0
0 0
0 0
0 0
0 0
0 0
0 0
0 0
0 0
0 0
0 0
0 0
0 0
0 0
0 0
0 0
0 0
0 0
0 0
0 0
0 0
0 0
0 0
0 0
0 0
0 0
0 0
0 0
0 0
0 0
0 0
0 0
0 0
0 0
0 0
0 0
0 0
0 0
0 0
0 0
0 0
0 0
0 0
0 0
0 0
0 0
0 0
0 0
0 0
0 0
0 0
0 0
0 0
0 0
0 0
0 0
0 0
0 0
0 0
0 0
0 0
0 0
0 0
0 0
0 0
0 0
0 0
0 0
0 0
0 0
0 0
0 0
0 0
0 0
0 0
0 0
0 0
0 0
0 0
0 0
0 0
0 0
0 0
0 0
0 0
0 0
0 0
0 0
0 0
0 0
0 0
0 0
0 0
0 0
0 0
0 0
0 0
0 0
0 0
0 0
0 0
0 0
0 0
0 0
0 0
0 0
0 0
0 0
0 0
0 0
0 0
0 0
0 0
0 0
0 0
0 0
0 0
0 0
0 0
0 0
0 0
0 0
0 0
0 0
0 0
0 0
0 0
0 0
0 0
0 0
0 0
0 0
0 0
0 0
0 0
0 0
0 1
0 1
0 1
0 1
0 1
0 1
0 1
0 1
0 1
0 1
0 1
0 1
0 1
0 1
0 1
0 1
0 1
0 1
0 1
0 1
0 1
0 1
0 1
0 1
0 1
0 1
0 1
0 1
0 1
0 1
0 1
0 1
0 1
0 1
0 1
0 1
0 1
0 1
0 1
0 1
0 1
0 1
0 1
0 1
0 1
0 1
0 1
0 1
0 1
0 1
0 1
0 1
0 1
0 1
0 1
0 1
0 1
0 1
0 1
0 2
0 2
0 2
0 2
0 2
0 2
0 2
0 2
0 2
0 2
0 1
0 1
0 1
0 1
0 1
0 1
0 1
0 1
0 1
0 1
0 1
0 1
0 1
0 1
0 1
0 1
0 1
0 1
0 1
0 1
0 1
0 1
0 1
0 1
0 1
0 1
0 1
0 1
0 1
0 1
0 1
0 1
0 1
0 1
0 1
0 1
0 1
0 1
0 1
0 1
0 1
0 1
0 1
0 1
0 1
0 1
0 1
0 1
0 1
0 1
0 1
0 1
0 1
0 1
0 1
0 1
0 1
0 1
0 1
0 0
0 0
0 0
0 0
0 0
0 0
0 0
0 0
0 0
0 0
0 0
0 0
0 0
0 0
0 0
0 0
0 0
0 0
0 0
0 0
0 0
0 0
0 0
0 0
0 0
0 0
0 0
0 0
0 0
0 0
0 0
0 0
0 0
0 0
0 0
0 0
0 0
0 0
0 0
0 0
0 0
0 0
0 0
0 0
0 0
0 0
0 0
0 0
0 0
0 0
0 0
0 0
0 0
0 0
0 0
0 0
0 0
0 0
0 0
0 0
0 0
0 0
0 0
0 0
0 0
0 0
0 0
0 0
0 0
0 0
0 0
0 0
0 0
0 0
0 0
0 0
0 0
0 0
0 0
0 0
0 0
0 0
0 0
0 0
0 0
0 0
0 0
0 0
0 0
0 0
0 0
0 0
0 0
0 0
0 0
0 0
0 0
0 0
0 0
0 0
0 0
0 0
0 0
0 0
0 0
0 0
0 0
0 0
0 0
0 0
0 0
0 0
0 0
0 0
0 0
0 0
0 0
0 0
0 0
0 0
0 0
0 0
0 0
0 0
0 0
0 0
0 0
0 0
0 0
0 0
0 0
0 0
0 0
0 0
0 0
0 0
0 0
0 0
0 0
0 0
0 0
0 0
0 0
0 0
0 0
0 0
0 0
0 0
0 0
0 0
0 0
0 0
0 0
0 0
0 0
0 0
0 0
0 0
0 0
0 0
0 0
0 0
0 0
0 0
0 0
0 0
0 0
0 0
0 0
0 0
0 0
0 0
0 0
0 0
0 0
0 0
0 0
0 0
0 0
0 0
0 0
0 0
0 0
0 0
0 0
0 0
0 0
0 0
0 0
0 0
0 0
0 0
0 0
0 0
0 0
0 0
0 0
0 0
0 0
0 0
0 0
0 0
0 0
0 0
0 0
0 0
0 0
0 0
0 0
0 0
0 0
0 0
0 0
0 0
0 0
0 0
0 0
0 0
0 0
0 0
0 0
0 0
0 0
0 0
0 0
0 0
0 0
0 0
0 0
0 0
0 0
0 0
0 0
0 0
0 0
0 0
0 0
0 0
0 0
0 0
0 0
0 0
0 0
0 0
0 0
0 0
0 0
0 0
0 0
0 0
0 0
0 0
0 0
0 0
0 0
0 0
0 0
0 0
0 0
0 0
0 0
0 0
0 0
0 0
0 0
0 0
0 0
0 0
0 0
0 0
0 0
0 0
0 0
0 0
0 0
0 0
0 0
0 0
0 0
0 0
0 0
0 0
0 0
0 0
0 0
0 0
0 0
0 0
0 0
0 0
0 0
0 0
0 0
0 0
0 0
0 0
0 0
0 0
0 0
0 0
0 0
0 0
0 0
0 0
0 0
0 0
0 0
0 0
0 0
0 0
0 0
0 0
0 0
0 0
0 0
0 0
0 0
0 0
0 0
0 0
0 0
0 0
0 0
0 0
0 0
0 0
0 0
0 0
0 0
0 0
0 0
0 0
0 0
0 0
0 0
0 0
0 0
0 0
0 0
0 0
0 0
0 0
0 0
0 0
0 0
0 0
0 0
0 0
0 0
0 0
0 0
0 0
0 0
0 0
0 0
0 0
0 0
0 0
0 0
0 0
0 0
0 0
0 0
0 0
0 0
0 0
0 0
0 0
0 0
0 0
0 0
0 0
0 0
0 0
0 0
0 0
0 0
0 0
0 0
0 0
0 0
0 0
0 0
0 0
0 0
0 0
0 0
0 0
0 0
0 0
0 0
0 0
0 0
0 0
0 0
0 0
0 0
0 0
0 0
0 0
0 0
0 0
0 0
0 0
0 0
0 0
0 0
0 0
0 0
0 0
0 0
0 0
0 0
0 0
0 0
0 0
0 0
0 0
0 0
0 0
0 0
0 0
0 0
0 0
0 0
0 0
0 0
0 0
0 0
0 0
0 0
0 0
0 0
0 0
0 0
0 0
0 0
0 0
0 0
0 0
0 0
0 0
0 0
0 0
0 0
0 0
0 0
0 0
0 0
0 0
0 0
0 0
0 0
0 0
0 0
0 0
0 0
0 0
0 0
0 0
0 0
0 0
0 0
0 0
0 0
0 0
0 0
0 0
0 0
0 0
0 0
0 0
0 0
0 0
0 0
0 0
0 0
0 0
0 0
0 0
0 0
0 0
0 0
0 0
0 0
0 0
0 0
0 0
0 0
0 0
0 0
0 0
0 0
0 0
0 0
0 0
0 0
0 0
0 0
0 0
0 0
0 0
0 0
0 0
0 0
0 0
0 0
0 0
0 0
0 0
0 0
0 0
0 0
0 0
0 0
0 0
0 0
0 0
0 0
0 0
0 0
0 0
0 0
0 0
0 0
0 0
0 0
0 0
0 0
0 0
0 0
0 0
0 0
0 0
0 0
0 0
0 0
0 0
0 0
0 0
0 0
0 0
0 0
0 0
0 0
0 0
0 0
0 0
0 0
0 0
0 0
0 0
0 0
0 0
0 0
0 0
0 0
0 0
0 0
0 0
0 0
0 0
0 0
0 0
0 0
0 0
0 0
0 0
0 0
0 0
0 0
0 0
0 0
0 0
0 0
0 0
0 0
0 0
0 0
0 0
0 0
0 0
0 0
0 0
0 0
0 0
0 0
0 0
0 0
0 0
0 0
0 0
0 0
0 0
0 0
0 0
0 0
0 0
0 0
0 0
0 0
0 0
0 0
0 0
0 0
0 0
0 0
0 0
0 0
0 0
0 0
0 0
0 0
0 0
0 0
0 0
0 0
0 0
0 0
0 0
0 0
0 0
0 0
0 0
0 0
0 0
0 0
0 0
0 0
0 0
0 0
0 0
0 0
0 0
0 0
0 0
0 0
0 0
0 0
0 0
0 0
0 0
0 0
1 0
1 0
1 0
1 0
1 0
1 0
1 0
1 0
1 0
1 0
1 0
1 0
1 0
1 0
1 0
1 0
1 0
1 0
1 0
1 0
1 0
1 0
1 0
1 0
1 0
1 0
1 0
1 0
1 0
1 0
1 0
1 0
1 0
1 0
0 0
0 0
0 0
0 0
0 0
0 0
0 0
0 0
0 0
0 0
0 0
0 0
0 0
0 0
0 0
0 0
0 0
0 0
0 0
0 0
0 0
0 0
0 0
0 0
0 0
0 0
0 0
0 0
1 0
1 0
1 0
1 0
1 0
1 0
1 0
1 0
1 0
1 0
1 0
1 0
1 0
1 0
1 0
1 0
1 0
1 0
1 0
1 0
1 0
1 0
1 0
1 0
1 0
1 0
1 0
1 0
1 0
1 0
1 0
1 0
1 0
1 0
1 0
1 0
1 0
1 0
1 0
1 0
1 0
1 0
1 0
1 0
1 0
1 0
1 0
1 0
1 0
1 0
1 0
1 0
1 0
1 0
1 0
1 0
1 0
1 0
1 0
1 0
1 0
1 0
1 0
1 0
1 0
1 0
1 0
1 0
1 0
1 0
1 0
1 0
0 0
0 0
0 0
0 0
0 0
0 0
0 0
0 0
0 0
0 0
0 0
0 0
0 0
0 0
0 0
0 0
0 0
0 0
0 0
0 0
0 0
0 0
0 0
0 0
0 0
0 0
0 0
0 0
0 0
0 0
0 0
0 0
0 0
0 0
0 0
0 0
0 0
0 0
0 0
0 0
0 0
0 0
0 0
0 0
0 0
0 0
0 0
0 0
0 0
0 0
0 0
0 0
0 0
0 0
0 0
0 0
0 0
0 0
0 0
0 0
0 0
0 0
0 0
0 0
0 0
0 0
0 0
1 0
1 0
1 0
1 0
1 0
1 0
1 0
1 0
1 0
1 0
1 0
1 0
1 0
1 0
1 0
1 0
1 0
1 0
1 0
1 0
1 0
2 0
5 0
5 0
8 0
8 0
10 0
10 0
10 0
10 0
10 0
10 0
10 0
10 0
10 0
10 0
10 0
10 0
10 0
11 0
11 0
11 0
11 0
11 0
11 0
11 1
11 1
13 1
13 1
13 1
13 1
15 1
15 1
15 1
15 1
19 2
19 2
21 2
23 2
50 2
55 2
55 2
56 2
56 2
56 2
56 2
63 2
64 2
68 2
68 2
68 2
68 2
74 2
74 2
74 2
74 2
74 2
74 2
74 2
74 2
74 2
74 2
76 2
76 2
76 2
76 2
76 2
76 2
76 2
76 2
76 2
76 2
77 2
86 2
85 2
82 2
80 2
78 2
77 2
77 2
77 2
77 1
78 1
78 1
84 1
84 1
85 1
84 1
88 1
88 1
88 0
88 0
87 0
87 0
87 0
87 0
88 0
114 0
242 0
255 0
281 0
301 0
312 0
327 0
327 0
350 0
355 0
370 0
1197 0
2097 0
3429 1
3796 2
4176 4
5035 4
5274 4
5326 4
5367 5
5373 5
5387 5
5452 5
5462 5
5762 5
5776 5
5985 5
6091 5
6403 6
6964 7
8366 12
8814 12
8834 12
8841 12
8841 12
8847 12
8853 12
8885 12
8891 12
8899 12
8906 12
8925 12
8927 12
8958 12
8962 12
8977 12
9030 12
9057 12
10992 12
11040 12
11336 12
11424 12
11431 12
11464 12
11464 12
11466 12
11489 12
11490 12
11493 12
11493 12
11491 12
11490 12
11490 12
11494 12
11501 12
11503 12
11521 12
11624 12
11688 13
11716 13
11728 13
11736 13
11810 13
11818 13
11688 13
11676 13
11653 13
11635 14
11621 14
11614 14
11616 14
11587 14
11577 14
11568 14
10696 14
9287 14
8464 12
8097 11
7715 9
6886 9
6678 9
6628 9
6597 9
6589 9
6580 11
6503 11
6489 10
6178 10
6156 10
5881 9
5609 8
5077 8
4844 8
3529 4
3101 4
3090 4
3094 4
3086 4
3085 4
3090 4
3089 4
3083 4
3176 4
3175 4
3177 4
3172 4
3139 4
3136 4
3111 4
3088 4
3060 4
1087 4
1026 4
780 4
736 4
1192 4
1192 4
1278 6
1306 6
1381 6
1831 7
1873 7
1949 7
1970 7
2021 7
2154 8
2221 8
2270 8
2286 8
2251 8
2132 8
2088 7
2123 7
2234 7
2248 10
2199 10
2202 11
2207 11
2209 11
2212 11
2209 11
2209 11
2207 11
2248 14
2356 14
2381 14
2448 15
2431 15
2596 15
2607 14
2794 14
2849 14
2867 13
2891 13
2962 13
3046 13
3258 13
3319 13
3427 13
3429 13
3429 13
3433 13
3450 14
3453 14
3490 14
3510 14
3512 14
3512 14
3505 14
3493 14
3492 14
3484 14
3488 14
3491 14
3486 14
3432 14
3428 14
3429 14
3434 14
3454 14
3838 14
3938 14
4278 14
4339 14
4398 14
4436 14
5226 15
5284 15
4871 16
4839 15
4720 13
4597 12
4619 12
4266 10
4279 10
4218 10
4185 9
4514 9
4414 8
4429 8
5245 8
11083 12
11680 12
11779 12
12273 13
12281 13
13607 14
14130 13
15435 15
15862 15
16384 16
16770 16
16838 16
16924 15
16961 15
16934 15
16895 13
16842 13
16812 13
16730 12
16692 12
16536 12
16546 12
16356 12
16370 13
16347 15
16335 15
16170 15
16047 15
15961 15
15955 15
15873 15
15893 15
15889 15
15888 15
15950 15
15992 15
15996 15
16086 15
16088 15
16294 15
16300 15
16664 15
16677 15
16717 15
16783 15
16830 15
16149 15
16118 16
16603 16
16894 17
17256 17
17466 17
17539 17
17511 17
17282 17
17234 17
16798 16
16796 16
16383 16
16383 16
16285 15
16287 15
16208 15
16165 15
16094 15
16073 15
15934 16
15348 16
15041 16
14355 16
13976 16
11875 16
11257 15
6455 10
6243 10
5842 8
5772 8
5503 7
4584 7
3999 6
2791 4
2614 3
2353 3
2298 3
2289 3
2258 3
2258 3
2252 3
2263 3
2283 3
2292 3
2372 3
2382 3
2412 4
2426 4
2455 4
2549 4
2911 4
3007 4
3060 4
3086 4
3099 4
3140 4
3169 4
3235 4
3271 4
3261 4
3252 4
3220 4
3174 4
3010 4
2985 3
2971 2
2945 2
2859 2
2855 2
2809 2
2766 2
2758 2
2732 2
2501 2
2205 2
2173 3
1912 3
1824 3
1710 3
1707 3
1707 3
1707 3
1701 3
1687 3
1690 3
1688 3
1691 3
1692 3
1692 3
1742 3
1736 3
1735 3
1712 2
1710 2
1710 2
1717 2
1715 2
1693 2
1692 2
1694 2
1691 2
1692 2
1684 2
1686 2
1686 2
1680 2
1682 2
1706 2
1664 2
1667 2
1706 2
1741 2
1753 2
1760 2
1724 2
1659 2
1660 2
1527 2
1498 2
1447 1
1377 1
1256 1
1145 1
689 1
648 1
639 1
638 1
623 1
592 1
547 1
525 1
465 1
462 1
460 1
460 1
460 1
460 1
459 1
459 1
446 1
444 1
426 1
417 1
403 1
401 1
385 1
361 1
319 1
211 0
204 0
202 0
203 0
203 0
203 0
203 0
203 0
202 0
202 0
202 0
202 0
203 0
203 0
201 0
201 0
200 0
200 0
200 0
200 0
199 0
199 0
196 0
196 0
193 0
191 0
191 0
190 0
186 0
183 0
178 0
173 0
140 0
116 0
104 0
24 0
22 0
17 0
14 0
12 0
11 0
4 0
3 0
3 0
2 0
2 0
2 0
0 0
0 0
0 0
0 0
0 0
0 0
0 0
0 0
0 0
0 0
0 0
0 0
0 0
0 0
0 0
0 0
0 0
0 0
0 0
0 0
0 0
0 0
0 0
0 0
0 0
0 0
0 0
0 0
0 0
0 0
0 0
0 0
0 0
0 0
0 0
0 0
0 0
0 0
0 0
0 0
0 0
0 0
0 0
0 0
0 0
0 0
0 0
0 0
0 0
0 0
0 0
0 0
0 0
0 0
0 0
0 0
0 0
0 0
0 0
0 0
0 0
0 0
0 0
0 0
0 0
0 0
0 0
0 0
0 0
0 0
0 0
0 0
0 0
0 0
0 0
0 0
0 0
0 0
0 0
0 0
0 0
0 0
0 0
0 0
0 0
0 0
0 0
0 0
0 0
0 0
0 0
0 0
0 0
0 0
0 0
0 0
0 0
0 0
0 0
0 0
0 0
0 0
0 0
0 0
0 0
0 0
0 0
0 0
0 0
0 0
0 0
0 0
0 0
0 0
0 0
0 0
0 0
0 0
0 0
0 0
0 0
0 0
0 0
0 0
0 0
0 0
0 0
0 0
0 0
0 0
0 0
0 0
0 0
0 0
0 0
0 0
0 0
0 0
0 0
0 0
0 0
0 0
0 0
0 0
0 0
0 0
0 0
0 0
0 0
0 0
0 0
0 0
0 0
0 0
0 0
0 0
0 0
0 0
0 0
0 0
0 0
0 0
0 0
0 0
0 0
0 0
0 0
0 0
0 0
0 0
0 0
0 0
0 0
0 0
0 0
0 0
0 0
0 0
0 0
0 0
0 0
0 0
0 0
0 0
0 0
0 0
0 0
0 0
0 0
0 0
0 0
0 0
0 0
0 0
0 0
0 0
0 0
0 0
0 0
0 0
0 0
0 0
0 0
0 0
0 0
0 0
0 0
0 0
0 0
0 0
0 0
0 0
0 0
0 0
0 0
0 0
0 0
0 0
0 0
0 0
0 0
0 0
0 0
0 0
0 0
0 0
0 0
0 0
0 0
0 0
0 0
0 0
0 0
0 0
0 0
0 0
0 0
0 0
0 0
0 0
0 0
0 0
0 0
0 0
0 0
0 0
0 0
0 0
0 0
0 0
0 0
0 0
0 0
0 0
0 0
0 0
0 0
0 0
0 0
0 0
0 0
0 0
0 0
0 0
0 0
0 0
0 0
0 0
0 0
0 0
0 0
0 0
0 0
0 0
0 0
0 0
0 0
0 0
0 0
0 0
0 0
0 0
0 0
0 0
0 0
0 0
0 0
0 0
0 0
0 0
0 0
0 0
0 0
0 0
0 0
0 0
0 0
0 0
1 0
1 0
1 0
1 0
1 0
1 0
1 0
1 0
1 0
1 0
1 0
1 0
1 0
1 0
1 0
1 0
1 0
1 0
1 0
1 0
1 0
1 0
1 0
1 0
1 0
1 0
1 0
1 0
1 0
1 0
1 0
1 0
1 0
2 0
2 0
2 0
2 0
2 0
2 0
2 0
11 0
40 0
40 0
45 0
46 0
47 0
49 0
50 0
51 0
51 0
51 0
51 0
51 0
52 0
52 0
54 0
54 0
54 0
54 0
54 0
54 0
54 0
54 0
54 0
54 0
54 0
56 0
56 0
56 0
56 0
56 0
56 0
56 0
55 0
55 0
55 0
55 0
55 0
55 0
55 0
55 0
57 0
57 0
57 0
57 0
57 0
57 0
57 0
57 0
57 0
57 0
57 0
57 0
57 0
57 0
57 0
57 0
57 0
57 0
57 0
57 0
57 0
57 0
57 0
57 0
57 0
57 0
57 0
57 0
57 0
57 0
57 0
51 0
43 0
19 0
19 0
10 0
10 0
9 0
8 0
7 0
7 0
7 0
7 0
7 0
7 0
8 0
8 0
7 0
9 0
9 0
9 0
9 0
9 0
9 0
9 0
9 0
9 0
9 0
8 0
8 0
8 0
9 0
9 0
9 0
9 0
9 0
9 0
9 0
10 0
10 0
14 0
15 0
15 0
13 0
13 0
13 0
13 0
13 0
13 0
13 0
13 0
14 0
14 0
14 0
14 0
14 0
14 0
15 0
15 0
15 0
15 0
15 0
15 0
15 0
15 0
15 0
15 0
15 0
15 0
16 0
16 0
16 0
16 0
16 0
16 0
16 0
16 0
16 0
16 0
16 0
16 0
16 0
16 0
16 0
16 0
16 0
16 0
16 0
14 0
14 0
13 0
11 0
13 0
14 0
14 0
15 0
15 0
15 0
17 0
17 0
17 0
17 0
17 0
17 0
16 0
16 0
16 0
16 0
16 0
18 0
22 0
24 0
24 0
20 0
21 0
21 0
27 0
37 0
56 0
65 0
72 0
79 0
81 0
83 1
86 1
88 1
89 1
90 1
90 1
92 1
91 1
91 1
91 1
91 1
91 3
96 3
96 4
97 4
97 4
97 4
97 4
97 4
96 4
97 4
97 4
97 4
97 4
97 4
97 4
97 4
100 4
102 4
102 4
103 4
105 4
111 4
113 4
113 4
113 4
113 4
114 4
114 4
115 4
117 4
117 4
115 4
114 4
114 4
113 4
112 3
112 3
111 3
111 2
111 2
111 2
111 2
111 2
111 2
111 2
111 2
110 2
106 2
104 2
103 2
102 2
101 2
99 2
98 2
95 2
82 2
62 2
39 2
34 2
26 2
24 2
17 2
17 1
15 1
11 1
10 1
10 1
10 1
7 1
6 1
5 1
5 1
5 1
5 1
2 1
2 0
2 0
1 0
1 0
1 0
1 0
1 0
1 0
1 0
1 0
1 0
1 0
1 0
1 0
1 0
1 0
1 0
1 0
1 0
1 0
1 0
1 0
1 0
1 0
1 0
1 0
1 0
1 0
1 0
1 0
1 0
1 0
1 0
1 0
1 0
1 0
1 0
1 0
1 0
1 0
1 0
1 0
1 0
1 0
1 0
1 0
1 0
1 0
1 0
1 0
1 0
1 0
1 0
1 0
1 0
1 0
1 0
1 0
1 0
1 0
1 0
1 0
1 0
1 0
1 0
1 0
1 0
1 0
1 0
1 0
1 0
1 0
1 0
1 0
1 0
1 0
1 0
1 0
1 0
1 0
0 0
0 0
0 0
0 0
0 0
0 0
0 0
0 0
0 0
0 0
0 0
0 0
0 0
0 0
0 0
0 0
0 0
0 0
0 0
0 0
0 0
0 0
0 0
0 0
0 0
0 0
0 0
0 0
0 0
0 0
0 0
0 0
0 0
0 0
0 0
0 0
0 0
0 0
0 0
0 0
0 0
0 0
0 0
0 0
0 0
0 0
0 0
0 0
0 0
0 0
0 0
0 0
0 0
0 0
0 0
0 0
0 0
0 0
0 0
0 0
0 0
0 0
0 0
0 0
0 0
0 0
0 0
0 0
0 0
0 0
0 0
0 0
0 0
0 0
0 0
0 0
0 0
0 0
0 0
0 0
0 0
0 0
0 0
0 0
0 0
0 0
0 0
0 0
0 0
0 0
0 0
0 0
0 0
0 0
0 0
0 0
0 0
0 0
0 0
0 0
0 0
0 0
0 0
0 0
0 0
0 0
0 0
0 0
0 0
0 0
0 0
0 0
0 0
0 0
0 0
0 0
0 0
0 0
0 0
0 0
0 0
0 0
0 0
0 0
0 0
0 0
0 0
0 0
0 0
0 0
0 0
0 0
0 0
0 0
0 0
0 0
0 0
0 0
0 0
0 0
0 0
0 0
0 0
0 0
0 0
0 0
0 0
0 0
0 0
0 0
0 0
0 0
0 0
0 0
0 0
0 0
0 0
0 0
0 0
0 0
0 0
0 0
0 0
0 0
0 0
0 0
0 0
0 0
0 0
0 0
0 0
0 0
0 0
0 0
0 0
0 0
0 0
0 0
0 0
0 0
0 0
0 0
0 0
0 0
0 0
0 0
0 0
0 0
0 0
0 0
0 0
0 0
0 0
0 0
0 0
0 0
0 0
0 0
0 0
0 0
0 0
0 0
0 0
0 0
0 0
0 0
0 0
0 0
0 0
0 0
0 0
0 0
0 0
0 0
0 0
0 0
0 0
0 0
0 0
0 0
0 0
0 0
0 0
0 0
0 0
0 0
0 0
0 0
0 0
0 0
0 0
0 0
0 0
0 0
0 0
0 0
0 0
0 0
0 0
0 0
0 0
0 0
0 0
0 0
0 0
0 0
0 0
0 0
0 0
0 0
0 0
0 0
0 0
0 0
0 0
0 0
0 0
0 0
0 0
0 0
0 0
0 0
0 0
0 0
0 0
0 0
0 0
0 0
0 0
0 0
0 0
0 0
0 0
0 0
0 0
0 0
0 0
0 0
0 0
0 0
0 0
0 0
0 0
0 0
0 0
0 0
0 0
0 0
0 0
0 0
0 0
0 0
0 0
0 0
0 0
0 0
0 0
0 0
0 0
0 0
0 0
0 0
0 0
0 0
0 0
0 0
0 0
0 0
0 0
0 0
0 0
0 0
0 0
0 0
0 0
0 0
0 0
0 0
0 0
0 0
0 0
0 0
0 0
0 0
0 0
0 0
0 0
0 0
0 0
0 0
0 0
0 0
0 0
0 0
0 0
0 0
0 0
0 0
0 0
0 0
0 0
0 0
0 0
0 0
0 0
0 0
0 0
0 0
0 0
0 0
0 0
0 0
0 0
0 0
0 0
0 0
0 0
0 0
0 0
0 0
0 0
0 0
0 0
0 0
0 0
0 0
0 0
0 0
0 0
0 0
0 0
0 0
0 0
0 0
0 0
0 0
0 0
0 0
0 0
0 0
0 0
0 0
0 0
0 0
0 0
0 0
0 0
0 0
0 0
0 0
0 0
0 0
0 0
0 0
0 0
0 0
0 0
0 0
0 0
0 0
0 0
0 0
0 0
0 0
0 0
0 0
0 0
0 0
0 0
0 0
0 0
0 0
0 0
0 0
0 0
0 0
0 0
0 0
0 0
0 0
0 0
0 0
0 0
0 0
0 0
0 0
0 0
0 0
0 0
0 0
0 0
0 0
0 0
0 0
0 0
0 0
0 0
0 0
0 0
0 0
0 0
0 0
0 0
0 0
0 0
0 0
0 0
0 0
0 0
0 0
0 0
0 0
0 0
0 0
0 0
0 0
0 0
0 0
0 0
0 0
0 0
0 0
0 0
0 0
0 0
0 0
0 0
0 0
0 0
0 0
0 0
0 0
0 0
0 0
0 0
0 0
0 0
0 0
0 0
0 0
0 0
0 0
0 0
0 0
0 0
0 0
0 0
0 0
0 0
0 0
0 0
0 0
0 0
0 0
0 0
0 0
0 0
0 0
0 0
0 0
0 0
0 0
0 0
0 0
0 0
0 0
0 0
0 0
0 0
0 0
0 0
0 0
0 0
0 0
0 0
0 0
0 0
0 0
0 0
0 0
0 0
0 0
0 0
0 0
0 0
0 0
0 0
0 0
0 0
0 0
0 0
0 0
0 0
0 0
0 0
0 0
0 0
0 0
0 0
0 0
0 0
0 0
0 0
0 0
0 0
0 0
0 0
0 0
0 0
0 0
0 0
0 0
0 0
0 0
0 0
0 0
0 0
0 0
0 0
0 0
0 0
0 0
0 0
0 0
0 0
0 0
0 0
0 0
0 0
0 0
0 0
0 0
0 0
0 0
0 0
0 0
0 0
0 0
0 0
0 0
0 0
0 0
0 0
0 0
0 0
0 0
0 0
0 0
0 0
0 0
0 0
0 0
0 0
0 0
0 0
0 0
0 0
0 0
0 0
0 0
0 0
0 0
0 0
0 0
0 0
0 0
0 0
0 0
0 0
0 0
0 0
0 0
0 0
0 0
0 0
0 0
0 0
0 0
0 0
0 0
0 0
0 0
0 0
0 0
0 0
0 0
0 0
0 0
0 0
0 0
0 0
0 0
0 0
0 0
0 0
0 0
0 0
0 0
0 0
0 0
0 0
0 0
0 0
0 0
0 0
0 0
0 0
0 0
0 0
0 0
0 0
0 0
0 0
0 0
0 0
0 0
0 0
0 0
0 0
0 0
0 0
0 0
0 0
0 0
0 0
0 0
0 0
0 0
0 0
0 0
0 0
0 0
0 0
0 0
0 0
0 0
0 0
0 0
0 0
0 0
0 0
0 0
0 0
0 0
0 0
0 0
0 0
0 0
0 0
0 0
0 0
0 0
0 0
0 0
0 0
0 0
0 0
0 0
0 0
0 0
0 0
0 0
0 0
0 0
0 0
0 0
0 0
0 0
0 0
0 0
0 0
0 0
0 0
0 0
0 0
0 0
0 0
0 0
0 0
0 0
0 0
0 0
0 0
0 0
0 0
0 0
0 0
0 0
0 0
0 0
0 0
0 0
0 0
0 0
0 0
0 0
0 0
0 0
0 0
0 0
0 0
0 0
0 0
0 0
0 0
0 0
0 0
0 0
0 0
0 0
0 0
0 0
0 0
0 0
0 0
0 0
0 0
0 0
0 0
0 0
0 0
0 0
0 0
0 0
0 0
0 0
0 0
0 0
0 0
0 0
0 0
0 0
0 0
0 0
0 0
0 0
0 0
0 0
0 0
0 0
0 0
0 0
0 0
0 0
0 0
0 0
0 0
0 0
0 0
0 0
0 0
0 0
0 0
0 0
0 0
0 0
0 0
0 0
0 0
0 0
0 0
0 0
0 0
0 0
0 0
0 0
0 0
0 0
0 0
0 0
0 0
0 0
0 0
0 0
0 0
0 0
0 0
0 0
0 0
0 0
0 0
0 0
0 0
0 0
0 0
0 0
0 0
0 0
0 0
0 0
0 0
0 0
0 0
0 0
0 0
0 0
0 0
0 0
0 0
0 0
0 0
0 0
0 0
0 0
0 0
0 0
0 0
0 0
0 0
0 0
0 0
0 0
0 0
0 0
0 0
0 0
0 0
0 0
0 0
0 0
0 0
0 0
0 0
0 0
0 0
0 0
0 0
0 0
0 0
0 0
0 0
0 0
0 0
0 0
0 0
0 0
0 0
0 0
0 0
0 0
0 0
0 0
0 0
0 0
0 0
0 0
0 0
0 0
0 0
0 0
0 0
0 0
0 0
0 0
0 0
0 0
0 0
0 0
0 0
0 0
0 0
0 0
0 0
0 0
0 0
0 0
0 0
0 0
0 0
0 0
0 0
0 0
0 0
0 0
0 0
0 0
0 0
0 0
0 0
0 0
0 0
0 0
0 0
0 0
0 0
0 0
0 0
0 0
0 0
0 0
0 0
0 0
0 0
0 0
0 0
0 0
0 0
0 0
0 0
0 0
0 0
0 0
0 0
0 0
0 0
0 0
0 0
0 0
0 0
0 0
0 0
0 0
0 0
0 0
0 0
0 0
0 0
0 0
0 0
0 0
0 0
0 0
0 0
0 0
0 0
0 0
0 0
0 0
0 0
0 0
0 0
0 0
0 0
0 0
0 0
0 0
0 0
0 0
0 0
0 0
0 0
0 0
0 0
0 0
0 0
0 0
0 0
0 0
0 0
0 0
0 0
0 0
0 0
0 0
0 0
0 0
0 0
0 0
0 0
0 0
0 0
0 0
0 0
0 0
0 0
0 0
0 0
0 0
0 0
0 0
0 0
0 0
0 0
0 0
0 0
0 0
0 0
0 0
0 0
0 0
0 0
0 0
0 0
0 0
0 0
0 0
0 0
0 0
0 0
0 0
0 0
0 0
0 0
0 0
0 0
0 0
0 0
0 0
0 0
0 0
0 0
0 0
0 0
0 0
0 0
0 0
0 0
0 0
0 0
0 0
0 0
0 0
0 0
0 0
0 0
0 0
0 0
0 0
0 0
0 0
0 0
0 0
0 0
0 0
0 0
0 0
0 0
0 0
0 0
0 0
0 0
0 0
0 0
0 0
0 0
0 0
0 0
0 0
0 0
0 0
0 0
0 0
0 0
0 0
0 0
0 0
0 0
0 0
0 0
0 0
0 0
0 0
0 0
0 0
0 0
0 0
0 0
0 0
0 0
0 0
0 0
0 0
0 0
0 0
0 0
0 0
0 0
0 0
0 0
0 0
0 0
0 0
0 0
0 0
0 0
0 0
0 0
0 0
0 0
0 0
0 0
0 0
0 0
0 0
0 0
0 0
0 0
0 0
0 0
0 0
0 0
0 0
0 0
0 0
0 0
0 0
0 0
0 0
0 0
0 0
0 0
0 0
0 0
0 0
0 0
0 0
0 0
0 0
0 0
0 0
0 0
0 0
0 0
0 0
0 0
0 0
0 0
0 0
0 0
0 0
0 0
0 0
0 0
0 0
0 0
0 0
0 0
0 0
0 0
0 0
0 0
0 0
0 0
0 0
0 0
0 0
0 0
0 0
0 0
0 0
0 0
0 0
0 0
0 0
0 0
0 0
0 0
0 0
0 0
0 0
0 0
0 0
0 0
0 0
0 0
0 0
0 0
0 0
0 0
0 0
0 0
0 0
0 0
0 0
0 0
0 0
0 0
0 0
0 0
0 0
0 0
0 0
0 0
0 0
0 0
0 0
0 0
0 0
0 0
0 0
0 0
0 0
0 0
0 0
0 0
0 0
0 0
0 0
0 0
0 0
0 0
0 0
0 0
0 0
0 0
0 0
0 0
0 0
0 0
0 0
0 0
0 0
0 0
0 0
0 0
0 0
0 0
0 0
0 0
0 0
0 0
0 0
0 0
0 0
0 0
0 0
0 0
0 0
0 0
0 0
0 0
0 0
0 0
0 0
0 0
0 0
0 0
0 0
0 0
0 0
0 0
0 0
0 0
0 0
0 0
0 0
0 0
0 0
0 0
0 0
0 0
0 0
0 0
0 0
0 0
0 0
0 0
0 0
0 0
0 0
0 0
0 0
0 0
0 0
0 0
0 0
0 0
0 0
0 0
0 0
0 0
0 0
0 0
0 0
0 0
0 0
0 0
0 0
0 0
0 0
0 0
0 0
0 0
0 0
0 0
0 0
0 0
0 0
0 0
0 0
0 0
0 0
0 0
0 0
0 0
0 0
0 0
0 0
0 0
0 0
0 0
0 0
0 0
0 0
0 0
0 0
0 0
0 0
0 0
0 0
0 0
0 0
0 0
0 0
0 0
0 0
0 0
0 0
0 0
0 0
0 0
0 0
0 0
0 0
0 0
0 0
0 0
0 0
0 0
0 0
0 0
0 0
0 0
0 0
0 0
0 0
0 0
0 0
0 0
0 0
0 0
0 0
0 0
0 0
0 0
0 0
0 0
0 0
0 0
0 0
0 0
0 0
0 0
0 0
0 0
0 0
0 0
0 0
0 0
0 0
0 0
0 0
0 0
0 0
0 0
0 0
0 0
0 0
0 0
0 0
0 0
0 0
0 0
0 0
0 0
0 0
0 0
0 0
0 0
0 0
0 0
0 0
0 0
0 0
0 0
0 0
0 0
0 0
0 0
0 0
0 0
0 0
0 0
0 0
0 0
0 0
0 0
0 0
0 0
0 0
0 0
0 0
0 0
0 0
0 0
0 0
0 0
0 0
0 0
0 0
0 0
0 0
0 0
0 0
0 0
0 0
0 0
0 0
0 0
0 0
0 0
0 0
0 0
0 0
0 0
0 0
0 0
0 0
0 0
0 0
0 0
0 0
0 0
0 0
0 0
0 0
0 0
0 0
0 0
0 0
0 0
0 0
0 0
0 0
0 0
0 0
0 0
0 0
0 0
0 0
0 0
0 0
0 0
0 0
0 0
0 0
0 0
0 0
0 0
0 0
0 0
0 0
0 0
0 0
0 0
0 0
0 0
0 0
0 0
0 0
0 0
0 0
0 0
0 0
0 0
0 0
0 0
0 0
0 0
0 0
0 0
0 0
0 0
0 0
0 0
0 0
0 0
0 0
0 0
0 0
0 0
0 0
0 0
0 0
0 0
0 0
0 0
0 0
0 0
0 0
0 0
0 0
0 0
0 0
0 0
0 0
0 0
0 0
0 0
0 0
0 0
0 0
0 0
0 0
0 0
0 0
0 0
0 0
0 0
0 0
0 0
0 0
0 0
0 0
0 0
0 0
0 0
0 0
0 0
0 0
0 0
0 0
0 0
0 0
0 0
0 0
0 0
0 0
0 0
0 0
0 0
0 0
0 0
0 0
0 0
0 0
0 0
0 0
0 0
0 0
0 0
0 0
0 0
0 0
0 0
0 0
0 0
0 0
0 0
0 0
0 0
0 0
0 0
0 0
0 0
0 0
0 0
0 0
0 0
0 0
0 0
0 0
0 0
0 0
0 0
0 0
0 0
0 0
0 0
0 0
0 0
0 0
0 0
0 0
0 0
0 0
0 0
0 0
0 0
0 0
0 0
0 0
0 0
0 0
0 0
0 0
0 0
0 0
0 0
0 0
0 0
0 0
0 0
0 0
0 0
0 0
0 0
0 0
0 0
0 0
0 0
0 0
0 0
0 0
0 0
0 0
0 0
0 0
0 0
0 0
0 0
0 0
0 0
0 0
0 0
0 0
0 0
0 0
0 0
0 0
0 0
0 0
0 0
0 0
0 0
0 0
0 0
0 0
0 0
0 0
0 0
0 0
0 0
0 0
0 0
0 0
0 0
0 0
0 0
0 0
0 0
0 0
0 0
0 0
0 0
0 0
0 0
0 0
0 0
0 0
0 0
0 0
0 0
0 0
0 0
0 0
0 0
0 0
0 0
0 0
0 0
0 0
0 0
0 0
0 0
0 0
0 0
0 0
0 0
0 0
0 0
0 0
0 0
0 0
0 0
0 0
0 0
0 0
0 0
0 0
0 0
0 0
0 0
0 0
0 0
0 0
0 0
0 0
0 0
0 0
0 0
0 0
0 0
0 0
0 0
0 0
0 0
0 0
0 0
0 0
0 0
0 0
0 0
0 0
0 0
0 0
0 0
0 0
0 0
0 0
0 0
0 0
0 0
0 0
0 0
0 0
0 0
0 0
0 0
0 0
0 0
0 0
0 0
0 0
0 0
0 0
0 0
0 0
0 0
0 0
0 0
0 0
0 0
0 0
0 0
0 0
0 0
0 0
0 0
0 0
0 0
0 0
0 0
0 0
0 0
0 0
0 0
0 0
1 0
1 0
1 0
1 0
1 0
1 0
1 0
1 0
1 0
1 0
2 0
3 0
3 0
3 0
4 0
4 0
4 0
4 0
4 0
4 0
4 0
4 0
4 0
4 0
4 0
4 0
4 0
4 0
4 0
4 0
4 0
4 0
4 0
4 0
4 0
4 0
4 0
4 0
4 0
4 0
4 0
4 0
4 0
4 0
4 0
4 0
4 0
4 0
4 0
4 0
4 0
4 0
4 0
4 0
4 0
4 0
4 0
4 0
4 0
4 0
4 0
4 0
4 0
4 0
4 0
4 0
4 0
4 0
4 0
4 0
4 0
3 0
3 0
2 0
2 0
2 0
2 0
2 0
2 0
2 0
2 0
2 0
1 0
1 0
0 0
0 0
0 0
0 0
0 0
0 0
0 0
0 0
0 0
0 0
0 0
0 0
0 0
0 0
0 0
0 0
0 0
0 0
0 0
0 0
0 0
0 0
0 0
0 0
0 0
0 0
0 0
0 0
0 0
0 0
0 0
0 0
0 0
0 0
0 0
0 0
0 0
0 0
0 0
0 0
0 0
0 0
0 0
0 0
0 0
0 0
0 0
0 0
0 0
0 0
0 0
0 0
0 0
0 0
0 0
0 0
0 0
0 0
0 0
0 0
0 0
0 0
0 0
0 0
0 0
0 0
0 0
0 0
0 0
0 0
0 0
0 0
0 0
0 0
0 0
0 0
0 0
0 0
0 0
0 0
0 0
0 0
0 0
0 0
0 0
0 0
0 0
0 0
0 0
0 0
0 0
0 0
0 0
0 0
0 0
0 0
0 0
0 0
0 0
0 0
0 0
0 0
0 0
0 0
0 0
0 0
0 0
0 0
0 0
0 0
0 0
0 0
0 0
0 0
0 0
0 0
0 0
0 0
0 0
0 0
0 0
0 0
0 0
0 0
0 0
0 0
0 0
0 0
0 0
0 0
0 0
0 0
0 0
0 0
0 0
0 0
0 0
0 0
0 0
0 0
0 0
0 0
0 0
0 0
0 0
0 0
0 0
0 0
0 0
0 0
0 0
0 0
1 0
1 0
1 0
1 0
1 0
1 0
1 0
1 0
1 0
1 0
1 0
1 0
1 0
1 0
1 0
1 0
1 0
1 0
1 0
1 0
1 0
1 0
1 0
1 0
1 0
1 0
1 0
1 0
1 0
1 0
1 0
1 0
1 0
1 0
1 0
1 0
1 0
1 0
1 0
1 0
1 0
1 0
1 0
1 0
1 0
1 0
1 0
1 0
1 0
1 0
1 0
1 0
1 0
1 0
1 0
1 0
1 0
1 0
1 0
1 0
1 0
1 0
1 0
1 0
1 0
1 0
1 0
1 0
1 0
1 0
1 0
1 0
1 0
0 0
0 0
0 0
0 0
0 0
0 0
0 0
0 0
0 0
0 0
0 0
0 0
0 0
0 0
0 0
0 0
0 0
0 0
0 0
0 0
0 0
0 0
0 0
0 0
0 0
0 0
0 0
0 0
0 0
0 0
0 0
0 0
0 0
0 0
0 0
0 0
0 0
0 0
0 0
0 0
0 0
0 0
0 0
1 0
1 0
1 0
1 0
1 0
1 0
1 0
1 0
1 0
1 0
1 0
1 0
1 0
1 0
1 0
1 0
1 0
1 0
1 0
1 0
1 0
1 0
1 0
1 0
1 0
1 0
1 0
1 0
1 0
1 0
1 0
1 0
1 0
1 0
1 0
1 0
1 0
1 0
1 0
1 0
1 0
1 0
1 0
1 0
1 0
1 0
1 0
1 0
1 0
1 0
1 0
1 0
1 0
1 0
1 0
1 0
1 1
1 1
1 1
1 1
1 1
1 1
1 1
1 2
1 2
1 2
1 2
1 2
1 2
1 2
1 2
1 2
1 2
0 2
0 2
0 2
0 2
0 2
0 2
0 2
0 2
0 2
0 2
0 2
0 2
0 2
0 2
0 2
0 2
0 2
0 2
0 2
0 2
0 2
0 2
0 2
0 2
0 2
0 2
0 2
0 2
0 2
0 2
0 2
0 2
0 2
0 2
0 2
0 2
0 2
0 2
0 2
0 2
0 2
0 2
0 2
0 2
0 2
0 2
0 2
0 2
0 2
0 2
0 2
0 2
0 2
0 2
0 2
0 2
0 1
0 1
0 1
0 1
0 1
0 1
0 1
0 0
0 0
0 0
0 0
0 0
0 0
0 0
0 0
0 0
0 0
0 0
0 0
0 0
2 0
2 0
2 0
2 0
2 0
2 0
2 0
2 0
2 0
2 0
2 0
2 0
2 0
2 0
2 0
0 0
0 0
0 0
0 0
0 0
0 0
0 0
0 0
0 0
0 0
0 0
0 0
0 0
0 0
0 0
0 0
0 0
0 0
0 0
0 0
0 0
1 0
1 0
1 0
1 0
1 0
1 0
1 0
1 0
1 0
1 0
1 0
1 0
1 0
1 0
1 0
1 0
1 0
1 0
1 0
1 0
1 0
1 0
1 0
1 0
1 0
1 0
1 0
1 0
1 0
1 0
2 0
2 0
2 0
2 0
2 0
2 0
2 0
2 0
2 0
2 0
2 0
2 0
2 0
2 0
2 0
2 0
2 0
2 0
2 0
2 0
2 0
2 0
2 0
2 0
2 0
2 0
2 0
2 0
2 0
3 0
3 0
3 0
3 0
3 0
3 0
3 0
3 0
3 0
3 0
3 0
3 0
3 0
3 0
2 0
2 0
2 0
2 0
2 0
2 0
2 0
2 0
2 0
2 0
2 0
2 0
2 0
2 0
2 0
2 0
2 0
3 0
3 0
3 0
3 0
3 0
3 0
3 0
3 0
3 0
3 0
3 0
3 0
3 0
2 0
2 0
2 0
2 0
2 0
2 0
2 0
2 0
2 0
2 0
2 0
2 0
2 0
2 0
2 0
2 0
2 0
2 0
2 0
2 0
2 0
2 0
2 0
2 0
2 0
2 0
2 0
2 0
1 0
1 0
1 0
1 0
1 0
1 0
1 0
1 0
1 0
1 0
1 1
1 1
1 1
1 1
1 1
1 1
1 2
1 2
1 2
1 2
1 2
1 2
1 2
1 2
1 4
1 4
1 4
1 4
1 4
1 4
1 4
1 4
0 4
0 4
0 4
0 4
0 4
0 4
0 4
0 4
0 4
0 5
0 5
0 5
0 5
0 5
0 5
0 5
0 5
0 5
0 5
0 5
0 5
0 5
0 5
0 5
0 5
0 5
0 5
0 5
0 5
0 5
0 6
0 6
0 6
0 6
0 6
0 6
0 6
0 6
0 6
0 6
0 6
0 6
0 6
0 6
0 6
0 6
0 6
0 6
0 6
0 6
0 6
0 5
0 5
0 5
0 5
0 5
0 5
0 4
0 4
0 4
0 4
0 4
0 4
0 4
0 4
0 2
0 2
0 2
0 2
0 2
0 3
0 3
0 3
0 3
0 3
0 3
0 3
0 3
0 2
0 2
0 2
0 2
0 2
0 2
0 2
0 2
0 2
0 2
0 2
0 2
0 2
0 2
0 2
0 2
0 2
0 2
0 2
0 2
0 2
0 2
0 2
0 3
0 3
0 2
0 2
0 2
0 2
0 2
0 2
0 2
0 2
0 2
0 2
0 2
0 2
0 2
0 2
0 2
0 2
0 2
0 2
0 2
0 2
0 2
0 2
0 2
0 2
0 2
0 2
0 2
0 2
0 2
0 2
0 2
0 2
0 2
0 2
0 2
0 2
0 2
0 2
0 2
0 2
0 1
0 1
0 1
0 1
0 1
0 1
0 1
0 1
0 1
0 1
0 1
0 1
0 1
0 1
0 1
0 1
0 1
0 1
0 1
0 1
0 1
0 1
0 1
0 1
0 1
0 1
0 1
0 1
0 1
0 1
0 1
0 0
0 0
0 0
0 0
0 0
0 0
0 0
0 0
0 0
0 0
0 0
0 0
0 0
0 0
0 0
0 0
0 0
0 0
0 0
0 0
0 0
0 0
0 0
0 0
0 0
0 0
0 0
0 0
0 0
0 0
0 0
0 0
0 0
0 0
0 0
0 1
0 1
0 1
0 1
0 1
0 1
0 1
0 1
0 1
0 1
0 1
0 1
0 1
0 1
0 1
0 1
0 1
0 1
0 1
0 1
0 1
0 1
0 1
0 1
0 1
0 1
0 1
0 1
0 1
0 1
0 1
0 1
0 1
0 1
0 1
0 1
0 1
0 1
0 1
0 3
0 5
0 5
0 7
0 8
0 8
0 8
0 8
0 8
0 8
0 8
0 8
0 8
0 8
0 8
0 8
0 8
0 8
0 8
0 8
0 8
0 8
0 8
0 8
0 9
0 9
0 9
0 9
0 9
0 9
0 9
0 9
0 8
0 8
0 8
0 8
0 8
0 8
0 8
0 8
0 8
0 8
0 8
0 9
0 9
0 10
0 10
0 10
0 10
0 10
0 10
0 10
0 10
0 10
0 10
0 10
0 10
0 10
0 10
0 10
0 10
0 10
0 10
0 10
0 10
0 10
0 10
0 10
0 10
0 10
0 10
0 10
0 9
0 12
0 11
0 10
0 9
0 9
0 9
0 9
1 12
1 12
1 14
1 14
1 16
1 17
1 17
1 17
1 13
1 13
1 13
1 13
1 13
1 13
1 13
1 13
1 13
1 12
1 12
1 12
1 12
1 12
1 12
1 12
1 12
1 12
1 12
1 12
1 12
1 12
1 12
1 12
1 12
1 12
2 12
2 12
2 11
2 11
2 10
2 10
4 11
4 11
4 11
4 11
4 12
4 12
4 12
4 12
4 12
4 12
4 12
4 12
4 12
4 12
4 12
4 12
4 12
4 12
4 12
4 12
4 12
4 12
4 12
4 11
4 11
4 10
4 9
4 8
4 8
4 8
4 8
4 8
4 8
3 5
3 3
3 5
3 5
3 5
3 5
3 5
3 5
3 5
3 5
3 5
3 5
3 5
3 5
3 5
3 5
3 5
3 5
3 5
3 5
3 5
3 5
3 5
3 5
3 5
3 5
3 5
3 5
3 5
3 5
3 5
3 5
3 5
3 5
2 5
2 5
2 5
2 5
2 5
2 5
0 4
0 4
0 4
0 4
0 3
0 3
0 3
0 3
0 3
0 3
0 3
0 3
0 3
0 3
0 3
0 3
0 3
0 3
0 3
0 3
0 3
0 3
0 3
0 3
0 3
0 3
0 3
0 3
0 3
0 3
0 3
0 3
0 3
0 3
0 0
0 0
0 0
0 0
0 0
0 0
0 2
0 2
0 2
0 2
0 2
0 2
0 2
0 2
0 2
0 2
0 2
0 2
0 2
0 2
0 2
0 2
0 2
0 2
0 2
0 2
0 2
0 2
0 2
0 2
0 2
0 2
0 2
0 2
0 2
0 2
0 2
0 2
0 2
0 2
0 2
0 2
0 2
0 2
0 2
0 2
0 2
0 2
0 2
0 2
0 2
0 2
0 2
0 2
0 2
0 2
0 2
0 2
0 2
0 2
0 2
0 2
0 2
0 2
0 2
0 2
0 2
0 2
0 2
0 2
0 2
0 2
0 2
0 2
0 2
0 2
0 2
0 2
0 2
0 0
0 0
0 0
0 0
0 0
0 0
0 0
0 0
0 0
0 0
0 0
0 0
0 0
0 0
0 0
0 0
0 0
0 0
0 0
0 0
0 0
0 0
0 0
0 0
0 0
0 0
0 0
0 0
0 1
0 1
0 1
0 1
0 1
0 1
0 1
0 1
0 1
0 1
0 1
0 1
0 1
0 1
0 1
0 1
0 1
0 1
0 1
0 1
0 1
0 1
0 1
0 1
0 1
0 1
0 1
0 1
0 1
0 1
0 1
0 1
0 1
0 1
0 1
0 1
0 1
0 1
0 1
0 1
0 1
0 1
0 1
0 1
0 1
0 1
0 1
0 1
0 1
0 1
0 1
0 1
0 1
0 1
0 1
0 1
0 1
0 1
0 1
0 1
0 1
0 1
0 1
0 1
0 1
0 1
0 1
0 1
0 1
0 1
0 1
0 1
0 1
0 0
0 0
0 0
0 0
0 0
0 0
0 0
0 0
0 0
0 0
0 0
0 0
0 0
0 0
0 0
0 0
0 0
0 0
0 0
0 0
0 0
0 0
0 0
0 0
0 0
0 0
0 0
0 0
0 0
0 0
0 0
0 0
0 0
0 0
0 0
0 0
0 0
0 0
0 0
0 0
0 0
0 1
0 1
0 2
0 2
0 2
0 2
0 2
0 2
0 2
0 2
0 2
0 2
0 2
0 2
0 2
0 2
0 2
0 2
0 2
0 2
0 2
0 2
0 2
0 2
0 2
0 2
0 2
0 2
0 2
0 2
0 2
0 2
0 2
0 2
0 2
0 2
0 2
0 2
0 2
0 2
0 2
0 2
0 2
0 2
0 2
0 2
0 2
0 2
0 2
0 2
0 2
0 2
0 2
0 2
0 2
0 2
0 2
0 2
0 2
0 2
0 2
0 2
0 2
0 2
0 2
0 2
0 2
0 2
0 2
0 2
0 2
0 2
0 1
0 1
0 1
0 0
0 0
0 0
0 0
0 0
0 0
0 0
0 0
0 0
0 0
0 0
0 0
0 0
0 0
0 0
0 0
0 0
0 0
0 0
0 0
0 0
0 0
0 0
0 2
0 2
0 2
0 3
0 3
0 3
0 3
0 3
0 3
0 3
0 3
0 3
0 3
0 3
0 3
0 3
0 3
0 3
0 3
0 3
0 3
0 3
0 3
0 3
0 3
0 3
0 3
0 3
0 3
0 3
0 3
0 3
0 3
0 3
0 3
0 3
0 3
0 3
0 3
0 3
0 3
0 3
0 3
0 3
0 3
0 3
0 3
0 3
0 3
0 3
0 3
0 3
0 3
0 3
0 3
0 3
0 3
0 3
0 3
0 3
0 3
0 3
0 3
0 3
0 3
0 3
0 3
0 3
0 3
0 3
0 3
0 3
0 3
0 1
0 1
0 1
0 0
0 0
0 0
0 0
0 0
0 0
0 0
0 0
0 0
0 0
0 0
0 0
0 0
0 0
0 0
0 0
0 0
0 0
0 0
0 0
0 0
0 0
0 0
0 0
0 0
0 1
0 1
0 1
0 1
0 1
0 1
0 1
0 1
0 1
0 1
0 1
0 1
0 1
0 1
0 1
0 0
0 0
0 0
0 0
0 0
0 0
0 0
0 0
0 0
0 0
0 0
0 0
0 0
0 0
0 0
0 0
0 0
0 0
0 0
0 0
0 0
0 0
0 0
0 0
0 0
0 0
0 0
0 0
0 0
0 0
0 0
0 0
0 0
0 0
0 0
0 0
0 0
0 0
0 0
0 0
0 0
0 0
0 0
0 0
0 0
0 0
0 0
0 0
0 0
0 0
0 0
0 0
0 0
0 0
0 0
0 0
0 0
0 0
0 0
0 0
0 0
0 0
0 0
0 0
0 0
0 0
0 0
0 0
0 0
0 0
0 0
0 0
0 0
0 0
0 0
0 0
0 0
0 0
0 0
0 0
0 0
0 0
0 0
0 0
0 0
0 0
0 0
0 0
0 0
0 0
0 1
0 1
0 1
0 1
0 1
0 1
0 1
0 1
0 1
0 1
0 2
0 2
0 2
0 2
0 2
0 3
0 3
0 2
0 2
0 2
0 2
0 2
0 2
0 2
0 2
0 2
0 2
0 1
0 1
0 1
0 1
0 1
0 1
0 0
0 0
0 0
0 0
0 0
0 0
0 0
0 0
0 0
0 0
0 0
0 0
0 0
0 0
0 0
0 0
0 0
0 0
0 0
0 0
0 0
0 0
0 0
0 0
0 0
0 0
0 0
0 0
0 0
0 0
0 0
0 0
0 0
0 0
0 0
0 0
0 0
0 0
0 0
0 0
0 0
0 0
0 0
0 0
0 0
0 0
0 0
0 0
0 0
0 0
0 0
0 0
0 0
0 0
0 0
0 0
0 0
0 0
0 0
0 0
0 0
0 0
0 0
0 0
0 0
0 0
0 0
0 0
0 0
0 0
0 0
0 0
0 0
0 0
0 0
0 0
0 0
0 0
0 0
0 0
0 0
0 0
0 0
0 0
0 0
0 0
0 0
0 0
0 0
0 0
0 0
0 0
0 0
0 0
0 0
0 0
0 0
0 0
0 0
0 0
0 0
0 0
0 0
0 0
0 0
0 0
0 0
0 0
0 0
0 0
0 0
0 0
0 0
0 0
0 0
0 0
0 0
0 0
0 0
0 0
0 0
0 0
0 0
0 0
0 0
0 0
0 0
0 0
0 0
0 0
0 0
0 0
0 0
0 0
0 0
0 0
0 0
0 0
0 0
0 0
0 0
0 0
0 0
0 0
0 0
0 0
0 0
0 0
0 0
0 0
0 0
0 0
0 0
0 0
0 0
0 0
0 0
0 0
0 0
0 0
0 0
0 0
0 0
0 0
0 0
0 0
0 0
0 0
0 0
0 0
0 0
0 0
0 0
0 1
0 1
0 1
0 1
0 1
0 1
0 1
0 1
0 1
0 1
0 1
0 1
0 1
0 1
0 1
0 1
0 1
0 0
0 0
0 0
0 0
0 0
0 0
0 0
0 0
0 0
0 0
0 0
0 0
0 0
0 0
0 0
0 0
0 0
0 0
0 0
0 0
0 0
0 0
0 0
0 0
0 0
0 0
0 0
0 0
0 0
0 0
0 0
0 0
0 0
0 0
0 0
0 0
0 0
0 0
0 0
0 0
0 0
0 0
0 0
0 0
0 0
0 0
0 0
0 0
0 0
0 0
0 0
0 0
0 0
0 0
0 0
0 0
0 0
0 0
0 0
0 0
0 0
0 0
0 0
0 0
0 0
0 0
0 0
0 0
0 0
0 0
0 0
0 0
0 0
0 0
0 0
0 0
0 0
0 0
0 0
0 0
0 0
0 0
0 0
0 0
0 0
0 0
0 0
0 0
0 0
0 0
0 0
0 0
0 0
0 0
0 0
0 0
0 0
0 0
0 0
0 0
0 0
0 0
0 0
0 0
0 0
0 0
0 0
0 0
0 0
0 0
0 0
0 0
0 0
0 0
0 0
0 0
0 0
0 0
0 0
0 0
0 0
0 0
0 0
0 0
0 0
0 0
0 0
0 0
0 0
0 0
0 0
0 0
0 0
0 0
0 0
0 0
0 0
0 0
0 0
0 0
0 0
0 0
0 0
0 0
0 0
0 0
0 0
0 0
0 0
0 0
0 0
0 0
0 0
0 0
0 0
0 0
0 0
0 0
0 0
0 0
0 0
0 0
0 0
0 0
0 0
0 0
0 0
0 0
0 0
0 0
0 0
0 0
0 0
0 0
0 0
0 1
0 7
0 16
0 57
0 106
0 113
0 114
0 116
0 121
0 121
0 122
0 122
0 122
0 122
0 122
0 123
0 137
1 175
1 193
1 202
1 208
1 214
1 213
1 216
1 217
1 217
1 216
1 216
1 216
1 216
1 216
1 216
1 215
1 216
1 216
1 216
1 216
1 216
1 216
1 216
1 216
1 214
1 215
1 213
1 213
1 213
1 213
1 213
1 213
1 213
1 213
1 213
1 213
1 217
1 224
1 224
1 227
1 240
1 243
2 335
2 350
2 358
2 361
2 361
2 362
2 362
2 358
2 356
2 355
2 355
2 360
2 362
2 361
2 355
2 352
2 342
2 302
2 275
2 272
2 271
2 270
2 269
2 269
2 269
3 300
3 300
3 300
3 302
3 290
2 262
2 236
2 230
2 221
2 217
2 214
2 213
2 211
2 210
2 210
2 210
2 210
2 210
2 210
2 211
2 268
2 272
2 270
2 269
2 269
2 269
2 269
2 268
2 267
2 267
2 266
2 265
2 265
2 270
2 270
2 271
2 271
2 271
2 270
2 269
2 269
2 268
2 264
2 258
2 258
2 257
2 244
3 268
2 167
2 159
2 155
2 155
2 155
2 154
2 156
2 153
2 151
2 146
2 144
2 140
2 138
2 136
2 136
2 135
2 135
2 135
2 135
2 135
2 135
2 141
2 141
2 141
2 141
1 110
1 110
1 110
1 108
1 108
1 108
1 108
1 115
1 116
1 120
1 121
1 125
1 128
1 129
1 132
1 134
1 134
1 134
1 165
1 212
1 164
1 170
1 171
1 172
1 172
1 172
1 172
1 172
1 172
1 173
1 175
1 181
1 190
1 188
1 189
1 190
1 190
1 190
1 190
1 190
1 191
1 192
1 192
1 192
1 192
1 192
1 192
0 162
0 162
0 159
0 159
0 159
0 159
0 158
0 157
0 157
0 157
0 157
0 157
0 157
0 159
0 159
0 161
0 161
0 161
0 161
0 162
0 162
0 164
0 158
0 158
0 158
0 158
0 158
0 158
0 158
0 158
0 158
0 158
0 157
0 150
0 147
0 146
0 145
0 141
0 137
0 136
0 136
0 134
0 134
0 132
0 94
0 39
0 34
0 33
0 32
0 32
0 32
0 32
0 32
0 33
0 33
0 32
0 30
0 21
0 10
0 7
0 7
0 5
0 5
0 5
0 10
0 11
0 11
0 14
0 14
0 14
0 14
0 14
0 15
0 17
0 17
0 17
0 16
0 16
0 16
0 16
0 16
0 16
0 16
0 16
0 16
0 16
0 16
0 16
0 16
0 16
0 16
0 16
0 16
0 16
0 15
0 15
0 15
0 15
0 15
0 15
0 15
0 15
0 15
0 15
0 15
0 15
0 15
0 15
0 15
0 15
0 15
0 15
0 15
0 16
0 16
0 16
0 16
0 16
0 16
0 15
0 14
0 14
0 14
0 14
0 15
0 17
0 16
0 16
0 16
0 16
0 16
0 16
0 16
0 16
0 16
0 16
0 15
0 11
0 8
0 8
0 7
0 7
0 7
0 7
0 7
0 5
0 4
0 4
0 4
0 4
0 4
0 5
0 6
0 6
0 6
0 6
0 6
0 6
0 6
0 6
0 6
0 6
0 6
0 6
0 6
0 6
0 6
0 6
0 6
0 6
0 6
0 6
0 6
0 6
0 6
0 6
0 6
0 7
0 7
0 7
0 7
0 7
0 8
0 8
0 8
0 9
0 13
0 13
0 13
0 15
0 16
0 16
0 16
0 16
0 16
0 16
0 16
0 15
0 12
0 12
0 11
0 11
0 11
0 11
0 11
0 11
0 11
0 11
0 11
0 11
0 11
0 11
0 11
0 11
0 11
0 11
0 11
0 11
0 11
0 11
0 11
0 11
0 11
0 11
0 11
0 11
0 11
0 11
0 11
0 13
0 14
0 14
0 14
0 21
0 26
0 26
0 26
0 84
0 87
0 88
0 90
0 91
0 92
0 97
0 104
0 106
0 106
0 110
0 113
0 124
0 126
0 131
0 134
0 136
0 138
0 137
0 139
0 179
0 185
0 185
0 187
0 187
0 189
0 189
0 189
0 189
0 189
0 189
0 190
0 191
0 192
0 192
0 192
0 192
0 192
0 192
0 192
0 192
0 193
0 193
0 193
0 193
0 200
0 200
0 200
0 200
0 200
0 200
0 200
0 201
0 201
0 202
2 202
2 202
2 202
2 203
2 203
2 203
2 203
2 203
2 203
2 203
2 196
2 193
2 186
2 186
2 182
2 177
2 177
2 177
2 116
2 116
2 116
3 117
3 116
3 113
3 110
3 102
3 101
3 105
3 102
3 101
3 94
3 95
3 90
3 88
3 87
3 87
3 87
3 85
2 41
2 36
2 28
1 24
2 24
3 24
4 24
4 24
4 27
4 27
4 27
4 26
4 26
4 26
4 26
4 26
4 26
4 26
4 26
5 26
5 25
5 25
5 25
5 25
5 25
5 17
5 17
5 17
5 17
5 16
5 16
5 16
5 16
5 16
5 16
5 16
5 17
5 19
5 18
5 18
5 18
5 18
5 18
5 18
5 18
5 18
5 18
5 18
5 18
5 18
5 19
5 19
5 19
5 19
5 19
5 19
4 18
4 19
4 19
4 19
6 19
4 19
17 14
17 13
17 12
17 12
17 10
17 10
17 10
17 10
17 10
17 10
17 9
17 9
17 9
17 9
17 9
17 9
21 9
20 9
20 9
20 6
21 8
21 8
21 9
21 9
21 9
21 9
21 9
22 9
22 11
22 11
21 11
21 11
21 11
19 11
19 11
19 11
19 11
19 11
19 11
23 12
23 12
24 12
24 12
24 12
24 12
24 11
24 11
24 10
24 8
24 8
24 8
24 8
25 8
25 8
25 8
25 8
26 8
26 8
26 8
26 8
26 8
26 8
26 8
26 8
26 8
31 9
31 9
31 9
31 9
32 9
33 9
32 9
32 9
20 8
20 8
20 8
20 6
20 5
20 5
20 5
20 5
20 5
20 5
20 5
20 5
20 5
20 5
20 5
20 5
16 5
16 5
16 5
16 5
15 3
15 3
15 2
15 2
15 2
15 2
15 2
14 2
14 2
14 2
14 2
14 2
14 2
14 2
14 2
13 2
14 2
16 2
16 2
13 1
13 1
12 1
13 1
13 1
13 1
13 1
13 1
13 1
13 1
13 1
14 1
14 1
15 1
17 1
17 1
17 1
16 1
16 1
16 1
16 1
16 1
16 1
16 1
16 1
16 1
11 0
11 0
11 0
9 0
9 0
8 0
8 0
8 0
8 0
8 0
8 0
8 0
8 0
8 0
8 0
8 0
8 0
8 0
8 0
8 0
9 0
9 0
9 0
9 0
9 0
9 0
9 0
9 0
10 2
10 2
10 3
14 13
18 15
19 18
19 18
20 18
20 18
20 21
20 21
20 21
20 21
20 21
18 21
18 21
18 22
20 22
28 33
28 33
28 33
28 33
27 33
28 38
30 38
30 38
34 38
34 38
34 38
33 38
33 38
33 38
31 38
30 38
30 38
30 39
30 39
31 39
32 39
32 39
32 39
32 39
32 39
32 39
33 39
33 39
32 39
34 39
36 39
36 39
36 40
36 40
34 40
34 40
34 37
34 37
34 37
34 37
34 37
34 37
34 37
34 37
34 37
34 37
34 37
33 37
33 37
33 38
33 38
33 38
33 38
33 38
35 38
34 36
34 35
34 34
31 25
29 23
29 20
29 20
28 20
28 20
28 19
28 19
28 19
28 19
25 19
24 19
24 19
23 17
21 16
10 7
10 7
10 7
8 7
8 7
8 2
7 2
7 2
2 2
2 2
2 2
2 2
2 2
2 2
0 2
0 2
0 2
0 2
0 2
0 2
0 3
0 6
0 9
0 13
0 13
0 14
0 14
0 14
0 14
0 14
0 14
0 14
0 13
0 13
0 13
0 13
0 13
0 13
0 14
0 15
0 17
0 23
0 27
0 29
0 42
0 42
0 42
0 43
0 43
0 42
0 42
0 42
0 42
0 42
0 42
0 42
0 42
0 42
0 42
0 42
0 42
0 42
0 42
0 42
0 42
0 43
0 43
0 59
0 59
0 59
0 60
0 61
0 61
0 61
0 61
0 61
0 61
0 61
0 61
0 61
0 61
0 61
0 62
0 62
0 62
0 62
0 62
0 62
0 62
0 62
0 62
0 62
0 62
0 61
0 57
0 54
0 52
0 52
0 51
0 51
0 49
0 49
0 47
0 47
0 47
0 47
0 47
0 47
0 47
0 47
0 47
0 46
0 46
0 44
0 39
0 35
0 34
0 22
0 21
0 21
0 24
0 25
0 25
0 25
0 33
0 33
0 33
0 33
0 33
0 33
0 33
0 33
0 33
0 33
0 34
0 43
0 43
0 61
0 59
0 62
0 50
0 51
0 51
0 50
0 49
0 49
0 49
0 49
0 49
0 49
0 50
0 50
0 50
0 50
0 51
0 50
0 50
0 50
0 50
0 50
0 50
0 50
0 50
0 50
0 50
0 52
0 52
0 53
0 53
0 52
0 52
0 52
0 52
0 52
0 52
0 52
0 52
0 52
0 52
0 52
0 52
0 52
0 52
0 52
0 52
0 52
0 52
0 52
0 52
0 52
0 52
0 52
0 52
0 47
0 43
0 41
0 41
0 28
0 28
0 28
0 22
0 22
0 22
0 22
0 22
0 22
0 22
0 21
0 21
0 21
0 10
0 10
0 7
0 5
0 6
0 6
1 6
2 6
2 6
2 6
2 6
2 6
2 6
2 5
2 5
2 5
2 5
2 4
2 4
5 5
6 5
8 5
10 5
10 5
10 5
10 5
10 5
10 5
10 3
10 2
10 2
10 2
10 2
10 2
10 2
10 2
10 2
10 2
10 2
10 3
10 3
11 3
11 4
11 4
11 4
11 4
11 4
11 4
11 4
11 4
11 4
11 4
11 4
11 4
11 6
11 6
11 6
11 6
11 6
11 6
11 6
11 6
11 6
11 6
11 6
11 6
11 6
11 6
12 6
12 6
12 6
12 6
12 6
12 6
12 6
12 7
12 7
12 6
11 6
11 6
10 7
10 9
10 9
10 9
10 15
10 15
10 18
10 18
10 18
10 18
10 18
10 18
5 17
4 17
3 17
2 17
2 17
2 17
2 17
2 17
2 17
2 17
2 17
2 17
2 17
2 17
2 17
2 17
2 17
2 17
2 17
2 17
2 16
2 16
1 15
1 15
1 15
1 15
1 15
1 15
1 15
1 15
1 14
1 14
1 16
1 16
1 16
1 14
1 14
1 14
1 14
1 14
1 14
1 14
1 14
1 14
1 14
1 14
1 13
1 13
1 13
0 14
0 14
0 14
0 14
0 18
0 17
0 17
0 16
0 16
0 16
0 16
0 16
0 16
0 16
0 16
0 15
0 8
0 8
0 8
0 8
0 8
0 8
0 8
0 8
0 8
0 8
0 9
1 9
1 11
1 11
1 11
1 12
1 12
2 12
2 12
5 13
5 13
5 13
5 13
5 13
6 13
6 13
6 15
6 15
6 15
6 15
7 15
7 15
7 15
7 15
7 15
7 15
7 15
7 15
7 15
7 14
7 12
7 12
7 12
7 12
7 12
7 12
7 12
7 12
7 12
7 12
9 12
9 12
9 12
9 12
9 12
9 12
9 12
9 11
10 10
10 9
10 9
10 5
10 5
12 5
12 5
12 5
12 5
12 5
12 5
12 5
12 5
12 5
12 5
12 5
13 5
14 5
14 5
14 5
16 5
16 5
16 5
16 5
16 5
16 4
15 4
16 2
16 2
16 2
16 2
17 2
16 2
16 2
13 2
13 2
13 2
13 2
13 2
12 2
12 2
12 0
12 0
12 0
11 0
11 0
11 0
11 0
11 0
11 0
11 0
11 0
11 0
11 0
11 0
11 2
11 2
11 2
11 2
11 2
11 2
11 2
11 3
11 3
11 3
9 3
7 3
7 3
7 3
7 3
7 3
7 3
4 3
4 3
4 3
4 3
2 3
1 3
0 3
0 3
0 3
0 3
0 3
0 2
0 2
0 2
0 1
0 1
0 1
0 1
0 1
0 1
0 1
0 1
0 2
0 2
0 2
0 2
0 2
0 2
0 2
0 2
0 2
0 2
0 2
0 2
0 2
0 2
0 2
0 2
0 2
0 2
0 2
0 2
0 2
0 2
0 2
0 2
0 2
0 4
0 5
0 6
0 6
0 6
0 6
0 6
0 6
0 6
0 6
0 6
0 6
0 6
0 6
0 6
0 5
0 6
0 6
0 6
0 6
0 6
0 6
0 6
0 6
0 6
0 6
0 6
0 6
0 6
0 6
0 6
0 6
0 6
0 7
0 7
0 7
0 7
0 7
0 7
0 7
0 7
0 7
0 7
0 7
0 10
0 10
0 23
0 23
0 22
0 23
0 23
0 23
0 23
0 23
0 23
0 23
0 23
0 23
0 23
0 23
0 23
0 23
0 23
0 23
0 23
0 23
0 23
0 23
0 22
0 22
0 21
0 24
0 24
0 23
0 22
0 22
0 22
0 22
0 22
0 22
0 22
0 22
0 22
0 22
0 24
0 33
0 33
0 33
0 33
0 31
0 31
0 30
0 28
0 27
0 27
0 27
0 27
0 27
0 28
0 28
0 28
0 28
0 29
0 32
0 32
0 32
0 32
0 32
0 32
0 32
0 32
0 32
0 32
0 32
0 30
0 30
0 31
0 29
0 29
0 22
0 22
0 23
0 23
0 27
0 27
0 27
0 27
0 27
0 27
0 27
0 27
0 27
0 27
0 27
0 27
1 27
1 27
1 28
2 29
2 29
2 29
2 29
2 29
2 29
2 26
2 26
2 26
2 26
2 26
2 26
2 26
2 26
2 26
2 26
2 26
2 25
2 25
2 22
2 15
2 15
2 15
2 15
2 15
2 15
2 15
2 15
2 14
2 14
2 14
2 14
2 13
2 18
2 19
2 19
2 19
2 18
2 14
2 14
2 14
2 15
2 14
2 14
2 14
2 14
2 14
3 15
3 15
3 14
3 14
3 14
3 14
3 14
3 13
3 13
3 12
3 12
3 8
3 8
3 8
3 8
3 8
3 8
3 8
3 8
3 8
3 8
3 8
3 8
2 8
2 8
2 8
1 8
1 8
1 8
1 8
1 8
1 8
1 8
1 8
1 8
1 8
1 8
1 8
1 8
1 8
1 8
1 8
1 8
1 8
1 8
1 8
1 8
1 8
1 8
1 8
1 8
1 9
1 9
4 9
4 9
4 9
4 9
4 7
4 7
4 4
4 3
4 3
4 3
4 3
4 2
4 2
4 1
4 1
4 1
4 1
4 1
4 1
4 1
3 0
4 0
7 0
10 0
11 0
11 0
11 0
11 0
11 0
11 0
12 0
13 0
13 0
13 0
13 0
13 0
13 0
13 0
13 0
13 0
13 0
13 0
13 0
13 0
13 0
13 0
13 0
13 0
13 2
13 2
13 2
13 2
13 2
13 2
13 2
13 2
13 2
13 2
13 2
13 2
13 2
13 2
13 2
13 2
13 2
13 2
13 7
13 7
13 7
13 10
13 11
13 11
10 11
3 11
3 11
0 11
0 11
0 11
0 11
0 11
0 11
0 11
0 11
0 11
0 11
0 12
0 12
0 12
0 12
0 12
0 12
0 14
0 14
0 14
0 14
0 14
0 14
0 14
0 14
0 14
0 14
0 14
0 14
0 14
0 14
0 14
0 14
0 14
0 14
0 14
0 14
0 14
0 14
0 14
0 14
0 14
1 15
1 15
1 15
1 15
2 15
2 14
2 14
2 14
2 14
2 14
2 14
2 14
2 14
2 14
2 14
2 14
2 14
2 14
2 14
2 14
2 14
2 14
2 14
2 8
2 8
2 7
2 6
0 5
0 5
0 5
0 5
0 5
0 5
0 5
0 5
0 5
0 5
0 5
0 5
0 5
3 5
3 5
6 4
6 5
6 5
6 5
6 5
6 6
6 5
6 11
6 15
6 15
6 15
6 15
6 15
6 15
6 15
6 15
6 15
6 18
6 18
6 18
6 18
6 18
6 18
6 18
6 18
6 18
6 18
6 18
6 18
6 18
6 18
6 18
6 18
6 18
6 18
6 18
6 18
6 18
6 18
6 18
6 18
5 18
4 18
4 18
4 18
4 18
4 18
4 18
4 18
4 18
4 18
4 18
4 18
4 18
4 18
2 18
2 18
2 18
0 18
0 19
0 19
0 20
0 21
0 21
0 21
0 21
0 21
0 21
0 21
0 21
0 21
0 21
0 21
0 18
0 17
0 17
0 16
0 17
0 15
0 15
0 9
0 13
0 13
0 13
0 14
0 14
0 20
0 46
0 50
0 50
0 48
0 48
0 48
0 48
0 48
0 48
0 48
0 48
0 48
0 48
0 48
0 48
0 48
0 48
0 48
0 48
0 48
0 48
0 48
0 48
0 48
0 48
0 48
0 48
0 48
0 48
0 48
0 48
0 48
0 48
0 48
0 49
0 49
0 49
0 54
0 56
0 60
0 61
0 68
0 150
1 399
1 416
1 439
1 451
1 450
1 448
2 450
2 450
2 450
2 450
2 451
2 451
2 451
2 451
2 451
2 452
2 463
2 463
2 465
2 647
2 647
2 650
2 651
2 646
2 646
2 646
2 640
2 640
2 640
2 630
2 610
2 611
2 612
2 613
2 614
2 615
2 615
2 618
2 618
2 618
2 618
2 619
2 619
2 619
2 620
2 620
2 620
2 620
2 620
2 620
2 620
2 620
2 620
2 620
2 620
2 620
2 620
2 620
2 620
2 620
2 620
2 620
2 619
2 618
2 616
2 615
2 658
2 653
2 662
2 641
2 610
2 599
2 500
1 277
1 272
1 293
0 361
0 366
0 367
0 370
0 371
0 372
0 373
0 416
0 416
0 416
1 488
1 486
1 486
1 477
1 478
1 475
1 289
1 298
1 298
1 309
1 314
1 331
1 354
1 360
2 363
2 370
2 370
2 370
2 371
2 371
2 370
2 370
2 370
2 371
2 371
2 374
2 379
2 387
2 386
2 390
1 390
1 390
1 390
1 392
1 397
1 425
1 500
1 504
1 517
1 519
1 525
1 526
1 526
1 527
1 528
1 529
1 529
1 533
1 545
1 548
1 580
1 585
1 587
1 532
2 570
2 556
2 551
2 551
2 539
3 676
3 682
3 682
3 647
4 542
4 517
4 523
4 520
4 521
4 521
4 514
4 514
4 513
4 515
3 495
4 495
4 495
4 495
4 497
4 495
4 495
4 497
4 496
4 490
4 489
4 485
4 477
4 473
4 473
4 474
4 475
4 475
4 477
4 501
4 502
4 503
4 503
4 503
4 526
4 507
2 461
2 429
2 429
2 419
2 416
2 416
2 415
2 412
2 400
2 351
2 319
2 310
2 311
2 311
2 365
2 365
2 362
2 353
2 346
2 344
2 343
2 340
2 339
2 340
2 323
2 356
2 360
2 360
2 361
2 361
2 360
2 361
2 356
1 235
1 235
1 236
1 238
1 238
3 246
5 240
7 247
7 273
7 295
7 292
6 290
6 285
6 279
6 279
6 279
6 279
6 279
7 277
7 278
7 277
7 275
7 275
7 275
7 270
7 270
7 276
7 276
7 276
7 294
7 293
7 293
7 293
7 268
7 268
7 266
7 338
7 337
7 307
7 305
7 305
7 297
7 297
9 314
9 317
9 319
11 320
14 355
14 355
14 355
16 357
15 357
14 358
14 360
25 400
25 401
25 401
25 401
25 406
33 517
39 552
37 557
37 567
37 567
37 560
37 521
37 520
37 519
37 521
37 521
37 521
37 523
37 524
37 523
37 523
37 521
37 521
37 521
37 514
37 512
37 506
37 474
37 449
37 446
37 445
37 445
37 445
37 445
37 445
37 445
37 445
36 446
36 449
38 449
38 450
38 450
38 450
38 449
38 447
38 447
38 447
38 447
38 433
38 435
38 435
38 440
37 438
35 432
33 428
19 227
19 227
19 224
19 220
2 91
2 92
2 91
2 92
2 91
2 95
2 109
3 137
3 152
3 158
3 156
3 153
3 152
3 153
3 151
3 148
3 147
3 146
3 142
3 112
4 114
4 114
4 114
4 114
4 113
4 113
4 113
4 113
4 112
4 112
4 112
4 112
4 111
4 113
4 112
4 112
4 112
4 136
4 137
4 137
4 138
4 138
4 151
4 157
4 157
4 157
4 157
4 158
4 158
2 158
2 156
2 153
2 144
2 144
2 144
2 146
2 146
2 148
2 150
2 153
2 153
2 153
2 152
2 151
2 151
2 148
2 148
2 148
2 148
2 149
2 154
2 154
2 178
2 179
2 178
2 182
2 182
2 182
2 180
2 166
1 120
1 112
1 105
1 105
1 105
1 105
1 103
1 103
1 103
1 103
1 103
1 104
1 104
0 97
0 97
0 97
0 97
0 97
0 97
0 99
0 138
0 138
0 139
0 142
0 143
0 143
0 141
0 141
0 141
0 141
0 116
0 116
0 116
0 116
0 116
0 104
0 98
0 98
0 98
0 98
0 97
0 97
0 98
0 98
0 98
0 98
0 98
0 98
0 96
0 96
0 94
0 92
0 89
0 89
0 89
0 89
0 89
0 89
0 89
0 89
0 89
0 89
0 89
0 83
0 82
0 56
0 56
0 55
0 54
0 54
0 54
0 54
0 54
0 54
0 53
0 53
0 53
0 53
0 53
0 53
0 53
0 54
0 55
0 55
0 54
0 54
0 54
0 54
0 54
0 54
0 54
0 57
0 55
0 16
0 15
0 13
0 12
0 12
0 12
0 12
0 12
0 12
0 12
0 12
0 12
0 12
0 12
0 14
0 17
0 17
0 17
0 17
0 17
0 17
0 16
0 24
0 24
0 25
0 25
0 25
0 28
0 29
0 29
0 29
0 29
0 29
0 30
0 35
0 36
0 36
0 36
0 36
0 36
0 36
0 44
0 48
0 76
0 80
0 83
0 88
0 87
0 88
0 88
0 88
0 89
0 89
0 89
0 89
0 90
0 92
0 95
0 132
0 135
0 135
0 135
0 134
0 135
0 135
0 135
0 135
0 135
0 135
0 135
0 135
0 131
0 131
0 131
0 131
0 132
0 132
0 132
0 132
0 132
0 132
0 132
0 133
0 133
0 133
0 133
0 132
0 129
0 128
0 128
0 128
0 128
0 128
0 128
0 128
0 121
0 124
0 125
0 127
0 127
0 126
0 126
0 126
0 125
0 125
0 125
0 124
0 118
0 118
0 118
0 122
0 151
0 150
0 148
0 139
0 123
0 104
0 102
0 100
0 100
0 100
0 99
0 98
0 98
0 99
0 130
0 139
0 182
0 188
0 189
0 194
0 160
0 165
0 167
0 166
0 168
0 168
0 169
0 169
0 169
0 169
0 169
0 169
0 169
0 169
0 169
0 169
0 169
0 168
0 168
0 168
0 168
0 168
0 168
0 169
0 168
0 168
0 168
0 170
0 170
0 180
0 182
0 180
0 180
0 178
0 178
0 179
0 181
0 180
0 174
0 166
0 163
0 164
0 164
0 164
0 164
0 168
0 168
0 168
1 173
1 174
1 173
1 171
1 167
1 104
1 110
1 109
1 110
1 82
1 86
1 86
1 86
1 86
1 87
1 88
1 89
1 90
1 89
1 90
1 81
1 52
1 50
1 50
1 50
1 50
1 49
1 49
1 49
1 49
1 49
1 49
1 49
1 49
1 50
1 51
1 51
1 51
1 51
1 51
1 51
1 51
1 51
1 51
1 51
1 51
1 51
1 54
1 53
1 58
1 66
1 67
1 67
1 67
1 59
1 59
1 59
1 59
1 59
1 68
1 67
1 64
1 62
1 61
1 61
1 61
1 60
1 60
0 60
0 60
0 56
0 56
0 56
0 51
0 55
0 55
0 56
0 56
0 56
0 50
0 50
0 48
0 48
0 44
0 44
0 44
0 43
0 43
0 42
0 41
0 40
0 40
0 38
0 38
0 38
0 38
0 38
0 38
0 38
0 38
0 38
0 38
0 38
0 38
0 38
0 38
0 38
0 37
0 38
0 38
0 39
0 39
0 39
0 43
0 47
0 49
0 49
0 67
0 68
0 68
0 66
0 67
0 61
0 53
0 50
0 48
0 48
0 48
0 48
0 50
0 51
0 51
0 42
0 42
0 42
0 42
0 42
0 42
0 42
0 44
0 43
0 46
0 51
0 51
0 51
0 51
0 51
0 47
0 47
0 47
0 47
0 48
0 48
0 48
0 48
0 50
0 50
0 50
0 51
0 60
0 60
0 62
0 64
0 64
0 64
0 64
0 64
0 64
0 64
0 64
0 64
0 64
0 64
0 64
0 64
0 65
0 68
0 66
0 62
0 62
0 64
0 62
0 81
1 83
1 86
1 88
1 89
1 93
1 92
2 93
2 78
2 80
2 80
2 81
2 82
2 82
2 88
2 88
2 88
2 88
2 88
2 88
2 85
2 85
2 90
2 90
2 95
2 94
2 95
2 96
2 97
2 99
2 96
2 91
2 87
2 82
2 79
2 78
2 78
2 78
2 78
2 78
2 78
2 78
2 77
2 77
2 77
2 78
2 78
2 78
2 78
2 76
2 66
2 66
2 66
2 67
2 67
2 67
2 67
2 67
2 68
2 68
2 68
2 68
2 68
2 68
2 67
2 67
2 67
2 66
2 66
2 66
2 66
2 68
2 68
2 51
1 50
1 51
1 47
1 38
1 37
1 35
0 35
0 35
0 35
0 36
0 37
0 35
0 35
0 28
0 28
0 28
0 27
0 28
0 28
0 29
0 29
0 26
0 27
0 25
0 26
0 29
0 29
0 28
0 29
0 28
0 28
0 28
0 28
0 28
0 28
0 28
0 28
0 28
0 28
0 29
0 29
0 30
0 30
0 30
0 30
0 30
0 30
0 30
0 30
0 30
0 30
0 30
0 29
0 29
0 29
0 29
0 30
0 29
0 29
0 29
0 29
0 29
0 28
0 28
0 30
0 30
0 30
0 30
0 30
0 29
0 28
0 29
0 30
0 31
0 32
0 32
0 32
0 28
0 28
0 27
0 27
0 29
0 28
0 27
0 27
0 27
0 27
0 28
0 28
0 28
0 27
0 27
0 26
0 23
0 23
0 21
0 21
0 19
0 16
0 17
0 17
0 16
0 16
0 16
0 16
0 16
0 19
0 19
0 19
0 19
0 19
0 23
0 22
0 24
0 25
0 27
0 33
0 33
0 33
0 38
0 39
0 39
0 39
0 39
0 41
0 41
0 41
0 47
0 47
0 46
0 52
0 52
0 52
0 52
0 52
0 52
0 52
0 50
0 49
0 49
0 49
0 50
0 50
0 57
0 58
0 62
0 63
0 63
0 64
0 64
0 64
0 64
0 63
0 63
0 61
0 63
0 63
0 63
0 63
0 63
0 62
0 62
0 62
0 64
0 64
0 66
0 73
0 81
0 81
0 81
0 81
0 81
0 80
0 81
0 81
0 82
0 82
0 82
0 82
0 79
0 79
0 80
0 82
1 79
1 75
1 74
1 72
1 66
1 64
1 53
1 53
1 49
1 47
1 47
1 47
1 47
1 47
1 45
1 45
1 45
1 35
1 34
1 29
1 19
1 22
1 22
1 22
1 26
1 77
2 155
3 210
3 214
3 223
3 224
3 227
3 227
3 225
3 224
3 221
3 221
3 221
3 221
3 221
3 221
3 221
3 221
3 221
3 221
3 221
3 221
4 222
4 222
4 222
4 222
4 222
4 222
4 222
4 222
4 224
4 223
4 223
4 223
4 223
5 224
5 223
5 224
5 220
5 220
5 219
5 219
5 216
5 216
5 216
5 216
5 215
5 215
4 215
4 215
4 215
4 215
4 217
4 217
4 217
4 217
4 219
4 221
4 225
4 227
4 228
4 228
4 229
4 229
4 229
4 227
4 228
4 226
4 227
4 227
4 227
4 222
4 171
4 157
2 62
2 48
2 73
2 84
2 85
2 99
2 113
6 220
6 243
8 259
10 314
10 348
10 351
10 357
10 368
10 369
10 372
10 377
10 378
10 378
10 378
9 377
9 377
9 377
9 379
9 385
9 399
9 412
9 415
9 413
9 413
9 413
10 413
10 413
9 412
9 411
9 411
9 410
9 410
9 410
9 413
9 414
9 415
9 426
9 439
9 453
9 455
9 456
9 456
9 459
9 457
9 453
9 472
9 473
9 467
9 509
9 666
9 669
9 697
9 703
9 708
9 711
9 713
9 712
9 769
9 771
9 775
9 784
9 787
9 787
9 795
9 794
9 791
9 786
9 759
9 745
9 742
9 739
9 732
9 689
1 534
0 509
0 504
0 504
0 479
0 480
0 479
0 469
0 468
0 465
0 460
0 459
0 459
0 466
0 466
0 474
0 475
0 484
0 470
0 445
0 417
0 414
0 414
0 414
0 414
0 414
0 414
0 414
0 414
0 414
0 414
0 414
0 414
0 409
0 406
0 401
0 386
0 372
0 352
0 352
0 347
0 347
0 346
0 347
0 349
0 350
0 348
0 348
0 326
0 148
0 138
0 98
0 83
0 79
0 78
0 77
0 76
0 19
0 18
0 14
0 14
0 13
0 13
0 13
0 13
0 13
0 13
0 13
0 12
0 12
0 12
0 12
0 12
0 12
0 12
0 12
0 12
0 12
0 11
0 10
0 10
0 10
0 10
0 10
0 10
0 10
0 7
0 7
0 7
0 7
0 4
0 4
0 4
0 4
0 4
0 4
0 4
0 4
0 4
0 4
0 4
0 5
0 5
0 5
0 5
0 5
0 5
0 7
0 7
0 7
0 8
0 9
0 9
0 11
0 11
0 12
0 11
0 8
0 9
0 9
0 9
0 9
0 9
0 9
0 9
0 9
0 9
0 9
0 9
0 9
0 9
0 9
0 9
0 9
0 10
0 11
0 12
0 12
1 12
1 14
1 19
1 24
1 26
1 27
1 27
2 27
2 28
2 29
2 31
2 31
2 31
2 31
2 31
2 32
2 32
2 33
2 33
2 33
2 33
2 33
2 33
2 33
2 38
2 38
2 40
2 43
2 47
2 63
3 66
4 86
4 89
4 92
5 145
5 150
7 170
11 205
11 209
11 232
11 233
11 283
11 288
12 310
12 325
12 333
12 344
16 368
16 368
16 369
16 368
25 368
27 368
27 366
27 365
27 365
27 365
27 365
27 365
27 365
28 364
28 363
28 364
28 366
28 366
28 366
28 372
28 383
28 384
28 383
28 382
28 382
27 382
27 381
27 383
27 398
27 398
27 406
27 407
27 407
26 407
26 406
26 413
26 425
26 431
26 431
26 432
26 433
24 408
24 408
24 402
24 402
22 377
22 378
22 378
22 380
22 382
22 375
22 376
22 376
22 357
22 353
21 323
21 310
21 311
21 304
21 292
19 241
16 237
15 240
15 233
15 228
15 228
15 228
15 177
15 181
15 162
15 156
15 153
14 145
12 135
11 135
11 135
10 135
2 135
1 135
1 135
1 135
1 135
1 135
1 140
1 142
1 152
0 149
0 150
0 157
0 156
0 156
0 157
0 153
0 144
0 144
0 144
0 144
0 144
0 144
0 144
0 139
0 116
0 109
0 101
0 115
0 115
0 115
0 115
0 106
0 94
0 93
0 91
0 91
0 90
0 90
0 90
0 90
0 89
0 88
0 88
0 88
0 86
0 82
0 82
0 82
0 82
0 85
0 85
0 85
0 86
0 86
0 85
0 88
0 87
0 91
0 81
0 81
0 81
0 80
0 80
0 80
0 70
0 72
0 68
0 67
0 67
0 67
0 67
0 67
0 67
0 67
0 67
0 67
0 67
0 67
0 67
0 62
0 60
0 50
0 50
0 49
0 41
0 41
0 41
0 39
0 37
0 34
0 34
0 34
0 34
0 34
0 34
0 34
0 34
0 34
0 33
0 33
0 18
0 18
0 17
0 16
0 15
0 15
0 15
0 15
0 15
0 15
0 15
0 15
0 15
0 15
0 15
0 15
0 15
0 14
0 15
0 15
0 14
0 14
0 13
1 15
1 15
1 14
1 14
1 14
1 12
1 10
1 8
1 8
1 8
1 8
1 8
1 7
1 6
1 6
1 4
1 4
1 5
1 5
1 5
1 6
1 8
1 9
1 10
1 10
1 16
1 16
1 16
1 16
1 18
1 41
1 42
1 44
1 45
1 45
1 46
1 46
1 46
1 46
1 48
1 48
1 48
1 48
1 48
1 48
1 48
1 48
1 48
1 48
1 49
1 49
1 49
1 49
1 49
2 66
2 66
2 66
2 67
2 69
2 69
2 69
2 71
2 81
2 84
2 112
2 112
2 112
2 112
2 111
2 111
2 111
2 112
1 112
1 113
1 113
1 112
1 112
1 112
1 112
1 118
1 118
1 118
1 122
1 124
1 127
1 127
1 127
1 129
1 137
1 137
1 135
1 139
1 137
1 127
1 123
1 121
1 121
1 121
1 116
1 116
1 116
1 112
1 110
1 98
1 99
1 99
1 101
1 101
1 101
1 101
1 101
1 101
1 103
1 104
1 104
1 105
1 105
1 105
1 105
1 105
1 105
1 105
1 104
1 104
1 103
0 102
0 103
0 80
0 80
0 80
0 80
0 70
0 70
0 70
0 69
0 68
0 67
0 48
0 48
0 48
0 48
0 48
0 48
0 48
0 47
1 86
1 93
1 100
1 104
1 118
1 151
1 156
1 161
1 167
1 167
1 160
1 159
1 155
1 156
1 153
1 152
1 143
1 143
1 141
1 140
1 140
1 141
1 146
1 146
1 218
1 267
1 309
1 313
1 315
1 315
1 315
1 314
1 314
1 314
1 314
1 316
1 316
1 316
1 316
1 316
1 312
1 312
1 312
1 313
1 334
1 334
1 334
1 334
1 335
1 335
1 337
1 337
1 337
1 337
1 336
1 336
1 336
1 336
1 336
1 336
1 336
1 336
1 336
1 336
1 336
1 336
1 338
1 338
1 338
1 338
1 335
1 335
1 333
0 255
0 240
0 228
0 227
0 227
0 226
0 219
0 205
0 202
0 202
0 202
0 202
0 202
0 202
0 203
0 203
0 203
0 203
0 203
0 203
0 203
0 202
0 197
0 192
0 117
0 49
0 28
0 28
0 28
0 28
0 28
0 28
0 28
0 28
0 28
0 26
0 28
0 28
0 28
1 28
1 29
3 99
3 104
3 107
3 91
3 95
3 98
3 102
3 100
3 100
3 99
3 99
3 99
3 99
3 99
3 99
3 99
3 99
3 99
3 99
3 99
3 99
3 99
3 99
3 99
3 99
3 99
3 99
3 99
3 100
3 100
3 100
3 100
3 100
3 100
3 100
3 100
3 100
3 100
3 101
3 101
3 101
3 102
3 196
3 196
3 197
3 199
3 199
3 199
3 198
4 198
4 199
4 198
4 198
4 198
4 198
4 198
4 198
4 199
4 199
4 199
4 199
4 201
4 203
4 203
4 205
4 205
4 205
4 205
4 209
4 209
4 208
3 208
2 204
1 125
1 120
1 120
1 120
1 120
1 120
1 119
1 119
1 119
1 119
1 119
1 119
1 119
1 119
1 119
1 119
1 120
2 121
2 121
2 121
2 121
2 121
2 121
2 121
2 121
2 121
3 121
3 121
3 120
3 120
3 120
3 120
3 120
3 120
3 120
3 120
3 120
3 120
4 119
4 119
4 119
3 116
3 12
2 0
2 0
2 0
2 0
2 0
2 0
2 0
2 0
2 0
2 0
2 0
2 0
2 0
2 0
2 0
2 0
2 0
2 0
4 0
6 0
6 0
6 0
6 0
6 0
6 0
6 0
6 0
6 0
6 0
6 0
6 0
6 0
6 0
6 0
6 0
6 0
6 0
6 0
6 0
6 0
6 0
6 0
6 0
6 0
6 0
6 0
7 0
6 0
6 0
7 0
7 0
7 0
7 0
7 0
7 0
7 0
7 0
7 0
7 0
7 0
7 0
6 0
6 0
6 0
6 0
5 0
3 0
3 0
2 0
1 0
1 0
1 0
1 0
1 0
0 0
0 0
0 0
0 0
0 0
0 0
0 0
0 0
0 0
0 0
0 0
0 0
0 0
0 0
0 0
0 0
0 0
0 0
0 0
0 0
0 0
0 0
0 0
0 0
0 0
0 0
0 0
0 0
0 0
0 0
0 0
0 0
0 0
0 0
0 0
0 0
0 0
1 0
3 0
3 0
4 0
4 0
4 0
4 0
4 0
6 0
6 0
6 0
6 0
6 0
6 0
6 0
6 0
6 0
6 0
6 0
6 0
6 0
6 0
6 0
6 0
6 0
6 0
6 0
6 0
6 0
6 0
6 0
6 0
6 0
6 0
6 0
6 0
6 0
6 0
6 0
6 0
6 0
6 0
6 0
6 0
6 0
6 0
6 0
6 0
6 0
6 0
6 0
6 0
6 0
6 0
6 0
6 0
6 0
6 0
6 0
6 0
6 0
6 0
6 0
6 0
6 0
6 0
6 0
6 0
6 0
6 0
6 0
6 0
6 0
5 0
3 0
3 0
2 0
2 0
2 0
2 0
2 0
0 0
0 0
0 0
0 0
0 0
0 0
2 0
3 0
4 0
5 0
5 0
5 0
5 0
5 0
5 0
5 0
5 0
5 0
5 0
5 0
5 0
5 0
5 0
5 0
5 0
5 0
5 0
5 0
5 0
5 0
5 0
5 0
5 0
5 0
5 0
5 0
5 0
5 0
5 0
5 0
5 0
5 0
5 0
5 0
5 0
5 0
6 0
6 0
6 0
6 1
6 1
6 1
6 1
6 1
6 1
6 1
6 1
6 1
6 1
6 1
6 1
6 1
6 1
6 1
6 1
6 1
6 0
6 0
6 0
6 0
6 0
6 0
6 0
6 0
6 0
6 0
6 0
5 0
4 0
4 0
7 0
6 0
6 0
7 0
7 0
7 0
7 0
7 0
7 0
7 0
7 0
7 0
7 0
7 0
7 0
7 0
7 0
7 0
7 0
7 0
7 0
7 0
7 0
7 0
8 0
8 0
8 0
20 0
34 0
35 0
36 0
36 0
38 0
39 0
41 0
43 0
46 0
49 0
51 0
53 0
62 0
71 0
138 0
281 0
289 0
306 0
309 0
309 0
309 0
309 0
313 0
315 0
315 0
316 0
316 0
316 0
316 0
316 0
316 0
317 0
317 0
317 0
323 0
323 0
323 0
328 0
328 0
362 0
363 0
373 0
369 0
447 1
443 1
403 1
442 1
391 1
412 1
434 1
587 1
595 1
597 1
598 1
598 1
600 1
601 1
601 1
604 1
604 1
604 1
604 1
605 1
605 1
613 1
616 1
616 1
616 1
616 1
617 1
617 1
615 1
609 1
609 1
610 1
610 1
614 2
614 2
618 3
618 3
615 3
614 3
614 4
612 4
610 7
617 9
607 10
587 10
503 17
507 19
508 19
534 21
534 21
534 29
534 30
533 30
540 32
560 32
562 33
624 47
624 47
624 47
625 53
625 55
625 55
623 55
624 55
620 55
620 55
620 55
615 55
614 55
580 58
571 58
566 58
578 58
505 57
506 57
506 57
455 57
433 58
394 57
362 57
203 57
197 57
190 57
182 57
182 57
179 57
179 57
179 57
178 57
180 57
181 57
181 57
180 57
180 57
171 57
165 57
164 57
163 57
162 57
160 57
158 56
158 56
157 55
154 54
154 53
154 53
150 52
146 52
148 51
145 45
146 45
147 45
145 40
145 38
145 37
145 37
145 37
147 37
137 32
131 28
125 28
119 28
119 28
119 28
119 27
119 27
120 28
102 28
101 26
52 7
57 7
61 7
90 7
105 7
105 7
105 7
171 23
201 28
235 29
253 30
263 31
279 31
277 30
278 30
277 30
259 30
251 29
254 29
258 29
259 29
261 28
272 28
273 28
310 28
414 28
450 28
551 28
561 28
790 28
795 28
794 28
792 28
792 28
792 28
792 28
794 28
794 28
794 28
794 28
794 28
795 28
795 28
795 28
796 28
796 28
796 28
794 28
793 28
793 28
793 28
792 28
790 28
795 28
795 28
795 28
816 28
819 28
842 28
848 28
901 28
949 27
1000 28
1034 29
1037 29
1037 29
1038 29
1039 29
1039 29
1040 29
1035 28
1041 28
1040 28
1047 28
1075 28
1116 28
1148 28
1147 28
1143 26
1131 24
988 8
911 6
866 4
825 2
764 2
762 2
762 2
762 2
763 2
764 2
764 2
769 2
771 2
785 2
788 2
792 2
795 2
800 2
738 2
729 2
715 2
714 2
568 2
649 2
695 2
700 2
702 2
739 2
783 2
849 2
884 2
1008 2
1012 2
1020 2
1022 2
1022 2
1025 2
1024 2
1024 2
1024 2
1026 2
1026 2
1026 2
1029 2
1028 2
1027 2
1025 2
1025 2
1017 2
986 2
971 2
902 2
891 2
783 1
746 1
672 0
654 0
652 0
651 0
654 0
654 0
661 0
668 0
670 0
654 0
650 0
648 0
613 0
579 0
551 0
542 0
542 0
542 0
542 0
542 0
547 0
550 0
554 0
554 0
554 0
554 0
553 0
551 0
547 0
531 0
550 0
532 0
570 0
569 0
676 0
675 0
692 0
716 0
718 0
711 0
694 0
555 0
457 0
443 0
443 0
440 0
432 0
427 0
422 0
360 0
358 0
358 0
357 0
357 0
356 0
356 0
356 0
356 0
356 0
358 0
358 0
360 0
360 0
364 0
363 0
362 0
362 0
361 0
369 0
369 0
369 0
369 0
367 0
366 0
366 0
365 0
362 0
360 0
360 0
352 0
348 0
348 0
348 0
348 0
348 0
348 0
350 0
350 0
351 1
351 1
350 1
350 1
349 1
343 1
335 1
326 1
324 1
336 1
349 1
347 1
349 1
366 1
366 1
339 1
337 1
279 1
268 1
154 0
139 0
130 0
92 0
91 0
96 0
97 0
99 0
99 0
99 0
99 0
100 0
100 0
100 0
101 0
108 0
112 0
113 0
113 0
152 0
154 0
153 0
268 0
270 0
273 0
284 0
295 0
296 0
297 0
311 0
315 0
321 0
341 0
345 0
348 0
352 0
367 0
367 0
367 0
367 0
367 0
367 0
367 0
367 0
366 0
365 0
365 0
366 0
365 0
365 0
365 0
361 0
359 0
359 0
360 0
360 0
357 0
355 0
359 0
358 0
365 0
356 0
351 0
306 0
267 0
235 0
229 0
224 0
222 0
222 0
221 0
241 0
240 0
241 0
241 0
242 0
243 0
243 0
242 0
241 0
236 0
235 0
235 0
236 0
238 0
244 0
242 0
240 0
226 0
226 0
218 0
218 0
217 0
214 0
214 0
141 0
136 0
134 0
134 0
129 0
157 0
150 0
138 0
135 0
132 0
113 0
112 0
105 0
105 0
93 0
93 0
93 0
127 1
140 1
142 1
235 2
235 2
235 2
235 2
235 2
247 2
248 2
249 2
251 2
310 2
311 2
311 2
309 2
308 2
307 2
308 2
304 2
303 2
298 2
298 2
298 2
298 3
300 4
301 4
301 4
301 4
300 4
307 4
320 4
309 4
310 4
305 4
304 4
302 4
301 4
302 4
304 4
306 4
304 4
303 4
315 4
321 4
342 4
376 5
388 5
394 5
398 5
396 5
395 5
395 5
395 5
395 5
408 6
409 6
410 6
404 6
404 6
399 6
342 5
336 5
293 4
292 4
291 4
292 4
292 4
292 4
292 4
295 4
301 4
304 4
334 4
327 4
325 4
269 4
269 4
269 4
276 4
276 4
283 4
282 4
283 4
282 4
236 4
236 4
236 4
236 4
235 4
235 4
234 4
234 4
234 4
235 4
235 4
234 4
414 2
427 2
434 2
717 2
719 2
718 2
708 2
697 2
694 2
694 2
695 2
695 2
695 2
697 2
698 2
700 2
704 2
705 2
717 2
699 2
690 2
651 2
701 1
708 1
707 1
699 1
703 1
704 1
701 1
703 1
701 1
678 0
678 0
678 0
663 0
659 0
659 0
659 0
659 0
659 0
659 0
659 0
657 0
657 0
656 0
656 0
638 0
617 0
604 0
429 0
429 0
280 0
281 0
281 0
282 0
281 0
281 0
280 0
280 0
280 0
280 0
280 0
280 0
280 0
280 0
280 0
281 0
281 0
281 0
281 0
281 0
281 0
281 0
279 0
273 0
270 0
167 0
168 0
175 0
179 0
180 0
179 0
180 0
180 0
180 0
180 0
180 0
180 0
179 0
178 0
177 0
170 0
169 0
167 0
157 0
36 0
26 0
20 0
20 0
19 0
18 0
18 0
16 0
16 0
16 0
16 0
16 0
18 0
18 0
18 0
18 0
18 0
18 0
18 0
18 0
18 0
18 0
18 0
18 0
18 0
19 0
21 0
21 0
21 0
22 0
22 0
22 0
21 0
21 0
21 0
22 0
22 0
22 0
22 0
22 0
22 0
22 0
22 0
22 0
22 0
22 0
22 0
22 0
22 0
22 0
22 0
26 0
63 0
64 0
64 0
59 0
50 0
48 0
47 0
47 0
47 0
47 0
48 0
48 0
48 0
50 0
51 0
51 0
51 0
51 0
51 0
51 0
50 0
49 0
49 0
49 0
49 0
49 0
49 0
49 0
49 0
49 0
49 0
49 0
50 0
50 0
52 0
52 0
54 0
54 0
55 0
58 0
64 0
65 0
65 0
63 0
63 0
63 0
62 0
62 0
62 0
62 0
61 0
64 0
64 0
64 0
64 0
64 0
62 0
59 0
56 0
55 0
55 0
55 0
55 0
55 0
55 0
55 0
55 0
55 0
55 0
57 0
56 0
55 0
41 0
25 0
25 0
25 0
25 0
25 0
25 0
27 0
33 0
36 0
37 0
79 0
79 0
79 0
79 0
78 0
78 0
79 0
79 0
79 0
79 0
79 0
79 0
79 0
79 0
79 0
79 0
78 0
77 0
78 0
78 0
79 0
78 0
73 0
69 0
68 0
69 0
71 0
72 0
73 0
75 0
80 0
80 0
81 0
81 0
81 0
81 0
81 0
81 0
82 0
82 0
82 0
81 0
81 0
82 0
177 0
177 0
179 0
180 0
181 0
181 0
181 0
210 0
212 0
244 0
251 0
252 0
252 0
252 0
251 0
249 0
249 0
249 0
249 0
251 0
255 0
255 0
254 0
254 0
252 0
252 0
253 0
257 0
266 0
227 0
228 0
227 0
227 0
227 0
227 0
225 0
225 0
225 0
225 0
225 0
225 0
225 0
226 0
226 0
241 0
241 0
265 0
264 0
265 0
267 0
267 0
265 0
267 0
308 0
308 0
306 0
313 0
309 0
321 0
316 0
317 0
317 0
319 0
319 0
319 0
319 0
319 0
319 0
319 0
320 0
320 0
324 0
323 0
229 0
232 0
233 0
234 0
234 0
233 0
232 0
204 0
201 0
177 0
171 0
171 0
171 0
171 0
170 0
169 0
169 0
168 0
167 0
166 0
162 0
162 0
161 0
161 0
161 0
159 0
152 0
146 0
141 0
148 0
201 0
231 0
238 0
239 0
239 0
239 0
239 0
240 0
239 0
235 0
230 0
231 0
231 0
231 0
222 0
222 0
197 0
201 0
199 0
197 0
197 0
195 0
193 0
146 0
146 0
146 0
146 0
143 0
135 0
135 0
135 0
133 0
134 0
135 0
138 0
150 0
156 0
162 0
181 0
185 0
186 0
183 0
183 0
211 0
207 0
272 0
274 0
276 0
277 0
277 0
277 0
277 0
274 0
274 0
274 0
274 0
274 0
274 0
274 0
274 0
279 0
279 0
279 0
287 0
287 0
289 0
291 0
338 0
338 0
369 0
380 0
369 0
358 0
294 0
287 0
285 0
285 0
283 0
283 0
283 0
282 0
282 0
282 0
282 0
281 0
281 0
281 0
281 0
280 0
279 0
277 0
277 0
277 0
277 0
277 0
277 0
277 0
277 0
276 0
276 0
273 0
272 0
272 0
268 0
264 0
263 0
261 0
263 0
255 0
252 0
243 0
239 0
241 0
240 0
240 0
238 0
193 0
191 0
88 0
74 0
73 0
35 0
35 0
35 0
35 0
35 0
35 0
35 0
35 0
35 0
35 0
35 0
35 0
35 0
35 0
39 0
38 0
43 0
50 0
49 0
50 0
50 0
43 0
42 0
44 0
44 0
44 0
42 0
42 0
42 0
42 0
42 0
42 0
42 0
42 0
42 0
42 0
42 0
42 0
42 0
42 0
42 0
42 0
42 0
42 0
42 0
42 0
42 0
43 0
43 0
43 0
45 0
45 0
45 0
45 0
48 0
48 0
48 0
48 0
48 0
47 0
47 0
50 0
43 0
35 1
32 1
32 1
32 1
32 1
32 1
62 2
64 2
71 2
72 2
73 2
83 2
83 2
83 2
83 2
83 2
92 2
106 2
114 2
127 2
128 2
127 2
126 2
125 2
122 2
121 3
124 3
128 3
128 3
129 3
129 3
129 3
129 3
127 3
127 3
127 3
131 3
133 3
139 3
140 3
140 3
140 2
140 2
140 2
140 2
140 2
140 2
140 2
140 2
142 2
145 2
145 2
145 2
145 2
145 2
145 2
145 2
144 2
144 2
144 2
145 2
145 2
145 2
145 2
142 2
142 2
142 2
142 2
141 2
140 2
139 2
135 1
134 1
134 1
132 1
129 1
108 1
107 1
106 1
73 0
72 0
71 0
70 0
44 0
39 0
39 0
43 0
47 0
48 0
48 0
43 0
43 0
40 0
43 0
43 0
43 0
43 0
45 0
58 0
58 0
57 0
57 0
55 0
55 0
55 0
55 0
54 0
55 0
55 0
53 0
53 0
48 0
47 0
47 1
47 1
47 1
47 1
47 1
47 1
47 1
47 1
45 1
45 1
42 1
42 1
42 1
42 1
42 1
42 1
41 1
41 0
41 0
41 0
39 0
39 0
39 0
43 0
43 0
43 0
43 0
43 0
43 0
43 0
43 0
43 0
43 0
43 0
43 0
43 0
43 0
43 0
43 0
43 0
43 0
43 0
43 0
43 0
42 0
39 0
37 0
33 0
33 0
33 0
33 0
31 0
32 0
29 0
29 0
28 0
25 0
23 0
12 0
12 0
9 0
10 0
10 0
23 0
23 0
23 0
23 0
22 0
22 0
20 0
20 0
20 0
20 0
20 0
20 0
20 0
20 0
20 0
20 0
26 0
26 0
35 0
37 0
37 0
38 0
38 0
39 0
41 0
42 0
65 0
67 0
68 0
67 0
92 0
92 0
92 0
90 0
90 0
89 0
89 0
89 0
89 0
89 0
89 0
89 0
89 0
89 0
89 0
89 0
89 0
89 0
89 0
89 0
89 0
89 0
89 0
89 0
89 0
89 0
89 0
89 0
89 0
89 0
89 0
85 0
83 0
82 0
82 0
82 0
82 0
78 0
75 0
75 0
75 0
74 0
74 0
52 0
50 0
49 0
48 0
31 0
31 0
31 0
31 0
29 0
29 0
29 0
29 0
29 0
29 0
29 0
29 0
29 0
29 0
26 0
24 0
23 0
22 0
19 0
11 0
6 0
5 0
5 0
4 0
4 0
4 0
3 0
3 0
3 0
4 0
4 0
4 0
4 0
4 0
4 0
4 0
3 0
3 0
3 0
3 0
3 0
3 0
3 0
3 0
3 0
3 0
3 0
3 0
3 0
3 0
3 0
3 0
3 0
3 0
3 0
3 0
3 0
3 0
3 0
3 0
3 0
3 0
3 0
3 0
3 0
3 0
3 0
3 0
3 0
3 0
3 0
3 0
3 0
3 0
3 1
3 1
3 2
3 2
3 3
3 4
3 5
3 5
3 5
3 5
3 5
3 5
3 5
3 5
3 5
3 5
3 5
3 5
3 5
3 5
3 5
3 5
3 5
3 5
3 5
3 5
3 5
3 5
0 4
0 4
0 1
0 1
0 1
0 1
0 1
0 1
0 1
0 1
0 1
0 1
0 1
0 1
0 1
0 1
0 1
0 1
0 1
0 1
0 1
0 1
0 1
0 1
0 1
0 1
0 1
0 1
0 1
1 1
1 1
1 1
1 1
1 1
1 1
2 1
2 1
2 1
2 1
2 1
2 1
2 1
2 1
2 1
2 1
2 0
2 0
2 0
2 0
2 0
2 0
2 0
2 0
2 0
2 0
2 0
2 0
2 0
2 0
2 0
2 1
2 1
2 1
2 1
2 1
2 1
2 1
2 1
2 1
2 1
2 1
2 1
2 1
2 1
2 1
2 1
2 1
2 1
2 1
2 1
2 1
2 1
2 2
2 2
2 2
2 3
2 3
2 3
2 3
2 3
2 3
2 3
2 3
2 3
2 3
2 3
2 3
2 3
2 3
2 3
2 3
2 3
1 3
1 3
1 3
0 3
0 3
0 3
0 3
0 3
0 3
0 3
0 3
0 3
0 3
0 3
0 3
0 3
0 3
0 3
0 3
0 3
0 3
0 3
0 3
0 3
0 3
0 3
1 3
2 3
2 3
2 3
2 3
2 2
2 2
2 2
2 2
2 2
2 2
2 2
2 2
2 2
2 2
2 2
2 2
2 2
2 2
2 2
2 2
2 2
2 2
2 2
2 2
2 2
2 2
2 1
2 1
2 1
2 0
2 0
2 0
2 0
2 0
2 0
2 0
2 0
2 0
2 0
2 0
2 0
2 0
2 0
2 0
2 0
2 0
2 0
2 0
2 0
2 0
2 0
2 0
2 0
2 0
2 0
2 0
2 0
2 0
2 0
2 0
2 0
2 0
2 0
2 0
2 0
2 0
2 0
2 0
2 0
2 0
2 0
0 0
0 0
0 0
0 0
0 0
0 0
0 0
0 0
0 0
0 0
0 0
0 0
0 0
0 0
0 0
0 0
0 0
0 0
0 0
0 0
0 0
0 0
0 0
0 0
0 0
0 0
0 0
0 0
0 0
0 0
0 0
0 0
0 0
0 0
0 0
0 0
0 0
0 0
0 0
0 0
0 0
0 0
0 0
0 0
0 0
0 0
0 0
0 0
0 0
0 0
0 0
0 0
0 0
0 0
0 0
0 0
0 0
0 0
0 0
0 0
0 0
0 0
0 0
0 0
0 0
0 0
0 0
0 0
0 0
0 0
0 0
0 0
0 0
0 0
0 0
0 0
0 0
1 0
1 0
1 0
1 0
1 0
1 0
1 0
1 0
1 0
1 0
1 0
1 0
1 0
1 0
1 0
1 0
1 0
1 0
1 0
1 0
1 0
1 0
1 0
1 0
1 0
1 0
1 0
1 0
1 0
1 0
1 0
1 0
1 0
1 0
1 0
1 0
1 0
1 0
1 0
1 0
1 0
1 0
1 0
1 0
1 0
1 0
1 0
1 0
1 0
1 0
2 0
2 0
2 0
2 0
2 0
2 0
2 0
2 0
2 0
2 0
2 0
2 0
2 0
2 0
2 0
2 0
2 0
2 0
2 0
2 0
2 0
3 0
3 0
2 0
2 0
2 0
2 0
2 0
2 0
2 0
3 0
3 0
3 0
3 0
3 0
3 0
3 0
3 0
3 0
3 0
3 0
3 0
3 0
3 0
3 0
3 0
3 0
2 0
2 0
2 0
2 0
4 0
4 0
4 0
4 0
4 0
4 0
4 0
4 0
4 0
5 0
6 0
6 0
6 0
6 0
6 0
6 0
6 0
6 0
6 0
6 0
6 0
5 0
5 0
5 0
5 0
5 0
5 0
5 0
5 0
5 0
5 0
5 0
5 0
5 0
5 0
5 0
5 0
5 0
5 0
5 0
5 0
4 0
4 0
2 0
2 0
2 0
2 0
0 0
0 0
0 0
0 0
0 0
0 1
0 1
0 1
0 1
0 1
0 1
0 1
0 1
0 1
0 1
0 1
0 1
0 1
0 1
0 1
0 1
0 0
0 0
0 0
0 0
1 0
1 0
1 0
1 0
1 0
1 0
1 0
1 0
1 0
1 0
1 0
1 0
1 0
1 0
1 0
1 0
1 0
1 0
1 0
1 0
1 0
1 0
1 0
1 0
1 0
1 0
1 0
1 0
1 0
1 0
1 0
1 0
1 0
1 0
1 0
1 0
1 0
1 0
1 0
1 0
1 0
1 0
1 0
1 0
1 0
1 0
1 0
1 0
1 0
1 0
1 0
1 0
1 0
1 0
1 0
1 0
1 0
1 0
1 0
1 0
1 0
1 0
1 0
1 0
1 0
1 0
1 0
1 0
1 0
1 0
1 0
1 0
1 0
0 0
0 0
0 0
0 0
0 0
0 0
0 0
0 0
0 0
0 0
0 0
0 0
0 0
0 0
0 0
0 0
0 0
0 0
0 0
0 0
0 0
0 0
0 0
0 0
0 0
0 0
0 0
0 0
0 0
0 0
0 0
0 0
0 0
0 0
0 0
0 0
0 0
0 0
0 0
0 0
0 0
1 0
1 0
1 0
1 0
1 0
1 0
1 0
1 0
1 0
1 1
1 1
1 1
1 1
1 1
1 1
1 1
1 1
0 1
0 1
0 1
0 1
0 1
0 1
0 1
0 1
0 1
0 0
0 0
0 0
0 0
0 0
0 0
0 0
0 0
0 0
0 0
0 0
0 0
0 0
0 0
0 0
0 0
0 0
0 0
0 0
0 0
0 0
0 0
0 0
0 0
0 0
0 0
0 0
0 0
0 0
1 0
1 0
1 0
1 0
1 0
1 0
1 0
1 0
2 0
2 0
2 0
2 0
2 0
2 0
2 0
2 0
2 0
2 0
2 0
2 0
2 0
2 0
2 0
2 0
2 0
3 0
3 0
3 0
3 0
3 0
3 0
2 0
2 0
2 0
2 0
2 0
2 0
2 0
2 0
2 0
2 0
2 0
2 0
2 0
2 0
2 0
2 0
2 0
2 0
2 0
2 0
2 0
2 0
2 0
2 0
2 0
2 0
2 0
2 0
2 0
2 0
2 0
2 0
2 0
2 0
2 0
2 0
2 0
2 0
2 0
2 0
2 0
2 0
1 0
1 0
1 0
1 0
1 0
1 0
1 0
1 0
1 0
1 0
1 0
1 0
1 0
1 0
1 0
1 0
1 0
1 0
1 0
1 0
1 0
1 0
1 0
1 0
1 0
0 0
0 0
0 0
0 0
0 0
0 0
0 0
0 0
0 0
0 0
0 0
0 0
0 0
0 0
0 0
0 0
0 0
0 0
0 0
0 0
0 0
0 0
0 0
0 0
0 0
0 0
0 0
0 0
0 0
0 0
0 0
0 0
0 0
0 0
0 0
0 0
0 0
0 0
0 0
0 0
0 0
0 0
0 0
0 0
0 0
0 0
0 0
0 0
0 0
0 0
0 0
0 0
0 0
0 0
0 0
0 0
0 0
0 0
0 0
0 0
0 0
0 0
0 0
0 0
0 0
0 0
0 0
0 0
0 0
0 0
0 0
0 0
0 0
0 0
0 0
0 0
0 0
0 0
0 0
0 0
0 0
0 0
0 0
0 0
0 0
0 4
0 4
0 9
0 9
0 9
0 9
0 9
0 9
0 9
0 9
0 9
0 9
0 9
0 9
0 9
0 9
0 9
0 9
0 9
0 9
0 9
0 9
0 9
0 9
0 9
0 9
0 9
0 9
0 9
0 9
0 9
0 9
0 9
0 9
0 9
0 9
0 9
0 9
0 10
0 13
0 13
0 16
0 25
0 29
0 29
0 29
0 29
0 29
0 29
0 29
0 29
0 28
0 28
0 28
0 28
0 26
0 25
0 25
0 25
0 23
0 21
0 21
0 21
0 21
0 21
0 21
0 21
0 21
0 21
0 21
0 21
0 21
0 21
0 21
0 20
0 22
0 22
0 22
0 22
0 23
0 23
0 23
0 23
0 23
0 23
0 23
0 23
0 23
0 23
0 23
0 23
0 23
0 23
0 23
0 23
0 23
0 23
0 23
0 23
0 23
0 36
0 36
0 36
0 36
0 36
0 36
0 36
0 37
1 37
1 37
3 39
3 35
3 35
3 35
3 31
3 20
3 19
3 21
3 21
3 21
3 21
3 22
3 22
3 23
3 23
3 23
3 23
3 23
3 23
3 23
3 23
3 23
3 23
3 23
3 23
3 23
3 23
3 23
3 23
3 23
3 23
3 23
5 24
5 24
5 24
5 24
5 24
5 24
5 22
5 22
5 23
5 23
8 22
9 22
9 22
9 22
9 22
9 22
9 23
9 23
9 23
9 23
9 23
9 23
9 23
9 24
9 24
9 24
9 24
9 24
9 24
9 24
9 24
9 9
10 9
10 9
10 9
10 9
11 9
10 9
9 7
8 7
8 7
7 6
7 6
7 6
7 6
7 6
7 6
7 6
6 6
6 6
6 6
6 6
6 5
6 5
6 4
6 4
6 4
6 4
6 4
6 4
7 4
7 4
8 4
8 4
16 5
24 8
30 8
30 8
31 8
31 8
31 8
31 8
30 8
29 7
29 7
29 7
29 7
29 7
29 7
29 7
29 7
29 6
29 6
27 6
27 6
27 5
27 6
30 7
30 7
30 7
30 7
30 7
30 7
30 7
30 6
30 5
30 4
30 4
30 4
30 4
30 4
30 4
30 4
32 4
32 6
32 6
32 6
34 6
34 6
31 6
31 6
28 6
25 8
21 8
20 8
20 8
20 8
20 8
20 8
20 8
20 8
20 8
20 8
20 8
20 8
20 8
20 7
20 7
20 6
20 6
20 6
20 6
20 6
21 6
21 6
20 6
20 6
19 6
12 4
10 4
13 4
19 4
23 4
25 4
25 4
25 4
25 4
25 4
25 4
25 4
25 4
25 4
25 4
25 4
25 4
25 4
25 4
25 4
25 4
23 4
22 4
22 4
22 4
22 4
22 4
22 4
22 4
22 4
22 4
22 4
26 4
30 4
30 4
31 4
33 4
36 4
34 2
34 2
34 2
34 2
32 2
32 2
35 2
36 2
37 2
37 0
37 0
37 0
37 0
37 0
37 0
37 0
37 0
37 0
37 0
37 0
37 0
37 0
37 0
37 0
37 0
37 0
37 0
37 0
37 0
37 0
36 0
36 0
36 0
35 0
33 0
32 0
31 0
23 0
18 0
18 0
17 0
17 0
17 0
17 0
17 0
17 0
17 0
17 0
17 0
17 0
15 0
15 0
15 0
15 0
15 0
15 0
15 2
15 2
15 2
15 2
15 2
15 2
15 2
15 2
15 2
14 2
14 2
12 2
11 2
11 2
9 2
6 2
5 2
5 2
5 2
5 2
4 2
2 2
2 2
1 2
1 2
0 2
0 2
0 2
0 2
0 2
0 2
0 2
0 2
0 2
0 2
0 2
0 2
0 2
0 2
0 2
0 2
0 2
0 2
0 2
0 2
0 2
0 2
0 2
0 2
0 2
0 2
0 2
0 2
0 2
0 2
0 2
0 2
0 2
0 2
0 2
0 2
0 2
0 2
0 2
0 2
0 2
0 2
0 2
0 2
0 2
0 2
0 2
0 2
0 0
0 0
0 0
0 0
0 0
0 0
0 0
0 0
0 0
0 0
0 1
0 1
0 1
0 1
0 1
0 1
0 1
0 1
0 1
0 1
0 2
0 2
0 2
0 2
0 2
0 2
0 2
0 2
0 2
0 2
0 2
0 2
0 2
0 2
0 4
0 4
0 4
0 4
0 7
0 7
0 7
0 9
0 9
0 9
0 9
0 9
0 9
0 9
0 9
0 9
0 9
0 9
0 9
0 9
0 9
0 9
0 9
0 9
0 9
0 9
0 9
0 9
0 9
0 9
0 9
0 9
0 11
0 11
0 11
0 11
0 11
0 11
0 11
0 12
0 12
0 12
0 13
0 18
0 18
0 18
1 46
1 49
1 51
1 52
1 51
1 51
1 52
1 53
1 53
1 53
1 53
1 53
1 52
1 67
1 67
1 68
1 68
1 68
1 68
1 68
1 68
1 69
1 69
1 69
1 69
1 69
1 69
1 69
1 69
1 69
1 69
1 66
1 66
1 66
1 66
1 66
1 66
1 67
1 67
1 68
1 70
1 70
1 71
1 71
1 71
1 72
1 72
1 72
1 72
1 72
1 72
1 73
1 74
1 74
1 74
1 74
1 74
1 74
1 74
1 73
1 74
1 76
1 76
1 75
1 73
1 75
1 75
1 75
1 75
1 73
1 69
1 69
1 69
0 36
0 32
0 31
0 30
0 30
0 30
0 30
0 30
0 30
0 30
0 30
0 30
0 32
0 16
0 17
0 17
0 17
0 17
0 17
0 17
0 16
0 16
0 16
0 18
0 19
0 21
0 21
0 21
0 21
0 21
0 21
0 21
0 21
0 21
0 21
0 21
0 21
0 20
0 20
0 19
0 17
0 17
1 17
1 17
4 17
4 17
4 17
4 17
4 17
4 17
4 17
4 16
4 15
4 15
5 16
5 16
5 16
5 18
5 18
5 18
5 17
5 15
5 16
5 16
5 17
5 15
5 15
5 15
5 15
5 15
5 14
5 14
5 14
5 14
5 14
5 14
5 14
5 14
5 14
5 14
5 14
5 15
5 15
5 15
6 16
6 14
6 14
6 13
6 14
6 15
6 16
6 16
6 16
6 16
6 16
6 15
6 14
6 13
6 11
6 11
6 11
6 11
6 11
6 11
6 11
6 11
6 11
6 11
6 11
6 11
5 11
5 14
4 15
4 15
4 15
4 15
4 15
2 15
2 15
2 15
2 16
2 17
2 18
2 18
2 18
2 18
2 17
1 17
1 17
1 17
1 16
1 21
1 20
1 20
1 20
1 19
1 20
1 19
1 19
1 19
1 19
1 19
1 19
1 19
1 19
1 19
1 19
1 19
1 19
1 19
1 19
1 21
1 21
1 21
3 20
3 20
3 20
2 19
2 19
2 18
2 17
2 98
2 100
2 99
2 99
2 99
2 100
2 100
2 100
2 107
2 118
2 154
2 179
3 597
3 619
3 679
3 865
3 1129
3 1271
4 1457
4 1465
4 1478
4 1493
4 1495
4 1492
5 1495
5 1495
5 1503
5 1504
5 1504
5 1504
5 1506
6 1528
6 1540
6 1538
6 1540
6 1547
6 1554
6 1555
6 1559
7 1567
7 1567
7 1567
7 1560
7 1523
7 1492
7 1493
7 1499
7 1927
7 1924
7 1950
7 1951
7 1952
7 1953
7 1954
7 1982
7 1985
7 1988
7 1988
7 1987
7 1988
6 1953
6 1977
6 1963
5 1929
5 1917
5 1922
5 1926
5 2049
5 2091
5 2198
5 2254
5 2392
5 2453
5 2457
5 2457
5 2490
5 2490
5 2492
5 2491
5 2494
5 2493
6 2487
6 2466
6 2422
6 2358
4 1628
4 1476
4 1350
4 1323
4 1315
4 1309
4 1241
5 1259
5 1260
6 1287
6 1288
5 1290
5 1289
5 1289
5 1290
5 1288
5 1288
5 1288
5 1287
4 1262
4 1244
4 1243
4 1243
4 1243
4 1251
4 1252
7 1444
6 1436
6 1436
6 1434
6 1434
6 1431
6 1424
6 1422
6 1413
6 976
6 980
6 963
6 951
6 949
6 949
6 944
6 921
6 919
6 917
6 917
6 917
6 915
6 912
6 889
6 888
6 887
6 886
6 872
6 856
6 711
6 650
6 564
6 497
6 368
6 300
8 309
8 307
8 271
8 271
7 269
7 269
7 294
7 293
7 293
7 293
8 293
8 293
8 292
8 292
8 291
8 291
8 290
7 282
6 291
6 290
6 289
6 281
6 281
6 281
6 281
6 280
6 274
6 274
6 274
6 274
6 277
6 278
6 278
6 278
6 278
6 276
6 266
3 254
3 73
3 73
3 73
3 73
3 71
3 71
3 71
3 71
3 71
3 71
3 66
3 66
3 66
3 66
3 66
3 66
3 66
3 66
3 66
3 66
3 66
3 66
3 66
3 65
3 65
3 65
3 65
3 65
3 65
3 65
3 69
3 70
3 71
2 67
2 75
1 70
1 75
1 104
1 108
1 108
1 108
1 79
1 79
1 79
2 81
1 82
1 82
1 82
1 82
1 82
1 82
1 82
1 82
1 70
1 70
1 71
1 72
1 72
1 72
1 72
1 75
1 77
1 77
1 78
1 78
1 74
1 75
1 75
1 79
1 79
1 78
1 78
1 78
1 78
1 78
1 78
1 78
1 78
1 78
1 78
1 78
1 78
1 78
1 78
1 78
1 78
1 78
1 81
1 84
1 88
1 88
1 88
1 88
1 88
1 88
1 88
1 88
1 88
1 88
1 88
1 88
1 88
1 87
1 82
1 82
1 82
1 79
1 69
1 63
1 59
1 24
1 23
1 22
1 22
2 22
2 22
3 23
2 22
2 23
2 23
2 23
2 23
2 23
2 23
2 23
2 23
2 23
2 23
3 23
3 23
3 24
3 24
3 23
3 20
3 19
3 19
3 18
3 18
3 18
3 18
3 19
3 16
3 16
3 16
3 16
3 16
3 16
3 16
3 16
3 16
3 16
3 16
3 19
3 19
3 20
3 22
4 23
4 24
4 24
4 24
4 21
2 18
2 14
2 14
2 14
2 15
2 15
2 15
2 15
2 15
2 15
2 15
2 15
2 15
2 15
2 15
2 15
3 18
3 18
3 18
3 18
3 18
3 18
3 18
3 18
3 18
3 18
3 18
3 18
3 17
3 17
3 16
3 17
3 17
3 17
3 17
3 17
3 17
3 17
3 17
2 17
2 16
2 16
2 15
2 15
2 15
2 15
2 15
2 16
2 16
2 16
2 16
2 16
2 15
2 15
2 15
2 15
2 15
2 15
2 15
2 15
2 15
4 15
4 15
4 15
4 12
4 19
4 19
4 16
3 16
3 24
3 24
3 24
3 24
3 24
3 24
3 24
3 24
3 28
3 28
3 28
3 28
3 28
3 28
3 28
3 29
3 29
3 29
3 29
3 29
2 27
2 28
2 29
2 29
2 29
2 29
2 29
2 29
2 29
2 29
2 29
2 29
2 29
2 28
2 28
2 28
2 30
2 32
2 38
2 38
2 38
2 38
2 38
2 38
2 38
2 37
2 47
2 49
2 50
2 65
2 67
2 69
2 69
2 70
2 70
2 73
2 79
2 82
2 87
2 89
2 95
2 96
2 98
2 98
2 98
0 99
0 99
0 99
0 99
0 91
0 92
0 89
0 94
0 84
0 85
0 85
0 82
0 82
0 83
0 83
0 83
0 70
0 71
0 59
0 59
0 59
0 61
0 61
0 60
0 60
0 64
0 70
0 70
0 78
0 80
0 82
0 84
0 84
0 84
0 84
0 84
0 84
0 84
0 85
0 88
0 88
0 99
0 103
0 108
0 111
0 108
0 131
0 132
0 143
0 175
0 175
0 176
0 182
0 183
0 200
1 293
1 328
1 321
1 324
1 327
1 327
1 328
1 327
1 324
1 316
1 310
1 306
1 306
1 307
1 310
1 316
1 326
1 327
1 331
1 331
1 329
1 327
1 323
1 323
1 318
1 311
1 310
1 308
1 306
1 307
1 306
1 304
1 303
1 303
1 303
1 303
1 303
1 301
1 301
1 301
1 302
1 303
1 303
1 295
1 288
1 284
1 283
1 283
1 282
1 282
1 283
1 283
1 283
1 283
1 291
1 298
1 307
2 305
2 307
2 301
2 288
2 276
2 274
2 274
2 250
2 250
2 241
2 217
2 217
2 216
2 216
2 213
2 181
1 97
1 63
1 62
1 62
1 62
1 62
1 62
1 64
1 69
1 72
1 72
1 73
1 73
1 72
1 65
1 55
1 49
1 46
1 44
1 44
1 44
1 43
1 43
1 43
1 43
1 43
1 42
1 42
1 42
1 42
1 42
1 42
1 42
1 42
1 42
1 42
1 42
1 42
1 42
1 42
1 41
1 40
1 40
1 40
1 40
1 40
1 40
1 40
2 41
3 42
3 47
3 56
3 68
3 70
3 68
3 62
3 46
2 42
2 51
2 50
2 51
2 54
2 55
2 56
2 57
2 62
2 66
2 68
3 70
3 70
3 70
3 72
3 74
3 77
3 82
3 89
3 90
3 90
3 90
3 90
3 90
3 88
3 88
3 88
3 87
3 87
3 89
3 89
3 89
5 200
5 201
5 200
5 200
5 200
5 200
5 200
5 217
7 263
14 341
14 351
14 358
14 358
15 358
15 358
15 358
15 358
15 358
15 358
15 360
15 360
15 360
15 360
15 360
15 364
17 367
17 367
17 367
17 368
18 367
18 373
18 376
20 389
19 391
23 413
24 405
24 399
24 398
24 402
24 402
24 407
24 432
24 420
24 421
24 420
24 420
24 421
24 420
24 418
24 411
23 410
23 407
23 407
23 407
23 409
22 407
24 403
23 399
23 396
23 391
23 390
23 390
23 390
23 392
23 405
26 404
29 406
28 407
26 408
21 406
21 403
21 402
21 401
19 199
19 200
19 199
19 199
19 199
15 107
15 111
14 110
14 105
14 98
14 105
14 116
14 132
14 136
14 138
14 139
14 139
14 139
14 152
14 157
14 157
14 158
14 158
13 158
13 154
6 150
6 153
0 153
0 155
0 153
0 143
0 138
0 136
0 134
0 119
0 120
0 120
0 120
0 112
0 113
0 112
0 99
0 97
0 97
0 98
0 98
0 97
0 97
0 97
0 97
0 98
0 99
0 107
0 107
0 108
0 108
0 110
0 109
0 107
0 107
0 107
0 107
0 107
0 107
0 96
0 96
0 95
0 95
0 94
0 94
0 94
0 94
0 94
0 94
0 93
0 93
0 93
0 93
0 93
0 89
0 89
0 89
0 88
0 75
0 62
0 47
0 42
0 41
0 41
0 41
0 48
0 36
0 35
0 37
0 37
0 37
0 38
0 38
0 37
0 35
0 35
0 33
2 34
2 35
2 35
2 32
3 32
3 32
3 30
3 30
3 30
3 28
3 27
3 27
3 27
3 27
3 27
3 27
3 27
3 27
3 27
3 27
3 27
3 27
3 27
3 19
3 19
3 19
3 19
3 20
3 20
3 20
3 20
3 20
3 20
3 20
3 20
3 20
3 20
3 20
3 20
3 20
3 20
3 20
3 20
3 20
3 20
3 20
3 20
3 20
3 21
3 21
3 21
3 21
3 21
5 21
6 22
9 30
9 41
9 47
9 72
9 75
9 75
9 65
9 66
9 60
9 61
9 61
9 68
9 68
9 70
9 71
9 71
9 71
8 70
7 68
7 64
7 64
7 64
6 64
6 64
6 64
6 64
6 64
6 64
6 64
6 64
6 64
6 69
6 73
6 75
6 76
6 76
6 76
6 76
8 76
8 72
10 80
10 76
10 77
16 93
17 93
17 94
17 94
17 94
17 95
17 95
17 95
18 96
18 96
18 98
18 98
18 98
18 101
18 101
18 101
18 101
18 102
18 106
18 106
18 106
19 113
19 116
19 116
19 126
19 137
19 137
19 135
17 135
15 134
13 127
13 116
13 107
13 100
13 100
13 100
13 100
13 99
13 98
13 98
13 98
13 91
13 91
13 91
13 90
13 90
13 90
13 90
13 90
13 90
13 90
13 90
13 90
13 90
13 90
13 90
13 90
13 91
13 91
13 91
13 91
13 85
13 78
13 77
13 77
13 77
13 77
13 76
11 76
11 76
9 57
8 57
8 49
2 21
2 21
2 18
2 8
2 8
2 6
2 6
2 5
1 5
1 5
1 5
1 4
1 2
1 2
1 2
1 2
1 2
1 2
1 2
0 2
0 2
0 1
0 1
0 1
0 1
0 1
0 1
0 1
0 1
0 1
0 1
0 2
0 2
0 2
0 2
0 2
0 2
0 2
0 2
0 2
0 2
0 2
0 2
0 2
0 2
0 2
0 2
0 2
0 2
0 2
0 2
0 2
0 2
0 2
0 2
0 2
0 2
0 1
0 1
0 1
0 1
0 1
0 1
0 1
0 1
0 1
0 1
0 1
0 1
0 2
0 2
0 3
0 3
0 4
0 6
0 8
0 8
0 8
0 8
0 8
0 8
0 8
0 8
0 8
0 8
0 9
0 9
0 47
0 47
0 48
0 49
0 49
0 49
0 50
0 56
0 63
0 69
0 79
0 80
0 83
0 84
0 84
0 85
0 85
0 97
0 98
0 98
0 98
0 99
0 99
0 99
0 99
0 99
0 99
0 99
0 99
0 99
0 99
0 99
0 101
0 105
0 105
0 110
0 110
0 110
0 110
0 110
0 110
0 110
0 110
0 112
1 113
1 117
2 131
2 131
2 131
2 131
2 130
2 131
2 131
2 131
2 131
2 131
2 134
2 133
2 155
2 162
2 172
2 172
2 172
2 172
2 173
2 173
2 174
2 175
2 175
2 187
2 188
2 188
2 190
2 151
2 151
2 207
2 209
2 211
3 216
4 216
4 210
4 205
4 211
4 212
4 212
4 212
4 212
4 212
3 212
3 212
2 199
2 198
2 198
2 198
2 202
2 202
2 211
2 212
2 212
2 218
2 227
2 229
2 229
2 230
2 230
2 228
2 220
2 218
2 211
2 211
2 212
2 221
2 222
2 222
2 222
2 221
2 219
2 216
2 214
2 204
2 211
2 212
2 218
2 218
2 218
2 218
2 218
2 218
2 218
2 217
2 217
2 192
2 183
2 182
2 183
2 183
2 183
2 182
2 180
2 180
2 179
2 178
2 168
2 168
2 167
2 165
2 164
3 162
2 101
2 99
1 91
1 89
1 82
1 82
1 80
1 61
1 59
1 65
1 64
1 75
1 75
1 76
1 78
1 78
1 78
1 97
1 97
1 100
1 100
1 97
1 99
1 101
1 97
1 89
1 88
1 88
1 86
1 86
1 85
2 110
2 110
2 110
2 107
2 105
2 106
2 106
3 119
4 121
4 122
4 122
4 122
4 123
4 119
4 112
4 111
4 102
4 102
4 99
4 99
4 99
4 99
4 99
4 103
4 103
4 103
4 103
4 103
4 178
4 199
4 202
4 203
4 201
4 203
4 208
4 208
4 206
4 206
4 207
4 207
4 207
3 207
3 207
3 207
3 207
3 208
3 210
3 207
3 344
3 341
3 340
3 336
3 336
3 328
3 330
3 330
3 329
3 327
3 327
3 312
3 312
3 310
3 310
3 310
3 308
3 306
3 306
3 306
3 306
3 307
3 306
3 306
3 306
1 272
1 271
1 271
1 271
1 271
0 260
0 260
0 254
0 254
0 253
0 253
0 253
0 251
0 249
0 249
0 250
0 250
0 250
0 251
0 251
0 251
0 251
0 251
0 251
0 251
0 251
0 251
0 240
0 156
0 154
0 154
0 154
0 154
0 154
0 154
0 154
0 154
0 154
0 153
0 153
0 155
0 155
0 155
0 155
0 157
0 156
0 156
0 154
0 11
0 12
0 12
0 12
0 10
0 12
0 12
0 12
0 12
0 12
0 12
0 12
0 12
0 12
0 12
0 12
0 12
0 12
0 12
0 14
0 14
0 24
0 27
0 33
0 33
0 32
0 33
0 35
0 36
0 39
0 40
0 41
0 46
0 46
0 46
0 47
0 50
0 50
0 53
0 53
0 57
0 57
0 57
0 56
0 56
0 56
0 56
0 56
0 69
0 69
0 70
0 70
0 90
0 90
0 95
0 95
0 96
0 96
0 96
0 96
0 96
0 96
0 96
0 96
0 96
0 95
0 97
0 97
0 97
0 95
0 95
0 95
0 95
0 95
0 94
0 95
0 95
0 95
0 92
0 92
0 92
0 92
0 92
0 91
0 90
0 90
0 90
0 90
0 90
0 90
0 90
0 89
0 89
0 88
0 79
0 76
0 63
0 63
0 57
0 53
0 49
0 47
0 35
0 35
0 27
0 21
0 21
0 20
0 20
0 20
0 20
0 20
0 20
0 19
0 19
0 18
0 18
0 18
0 18
0 18
0 18
0 18
0 18
0 18
0 19
0 11
0 11
0 11
0 11
0 11
0 11
0 11
0 11
0 11
0 11
0 11
0 11
0 11
0 8
0 7
0 7
0 7
0 7
0 7
0 7
0 7
0 7
0 7
0 6
0 6
0 6
0 6
0 6
0 6
0 6
0 6
0 6
0 6
0 7
0 7
0 9
0 12
0 26
0 26
0 27
0 27
0 27
0 24
0 23
0 23
0 23
0 23
0 23
0 23
0 23
0 23
0 23
0 23
0 23
0 23
0 23
0 23
0 23
0 23
0 26
0 26
0 27
0 27
0 27
0 26
0 30
0 30
0 30
0 30
0 30
0 30
0 30
0 29
0 29
0 30
0 30
0 29
0 28
0 28
0 28
0 28
0 28
0 28
0 28
0 28
0 28
0 28
0 28
1 28
1 26
1 24
1 24
1 24
1 24
1 24
1 24
1 24
1 24
1 24
1 24
1 24
1 24
1 24
1 24
1 24
1 24
1 22
1 21
1 20
1 12
1 7
1 7
1 7
1 7
1 7
2 10
2 10
2 9
2 8
2 7
2 7
2 7
2 7
2 7
2 7
2 7
2 7
2 7
2 7
2 7
2 7
2 7
2 7
2 7
2 6
2 6
2 6
2 6
2 5
2 5
2 5
2 5
2 5
2 5
2 5
2 5
2 5
2 4
2 4
2 4
2 4
2 4
2 4
2 4
2 4
2 6
2 6
2 6
2 6
2 6
2 6
1 6
1 6
1 6
1 6
1 6
1 6
1 6
1 6
1 6
1 6
1 6
1 6
1 6
1 6
1 6
1 6
1 6
2 6
3 7
3 7
3 7
3 8
4 8
6 10
8 10
8 10
8 10
7 6
7 6
7 6
7 6
8 6
8 7
8 7
8 7
8 7
8 7
8 7
8 7
8 7
8 7
8 7
8 7
8 7
8 7
8 7
8 7
8 7
8 7
8 8
8 8
8 8
8 8
8 8
8 8
8 8
8 8
8 8
8 8
8 9
8 11
8 12
8 13
8 13
8 13
8 13
8 13
8 11
8 11
8 11
8 11
8 11
8 11
8 11
8 11
8 11
8 11
8 11
8 12
8 12
6 12
4 15
4 15
4 15
4 15
4 16
4 23
2 25
2 25
2 27
2 30
2 33
2 34
2 34
2 33
2 35
2 42
1 42
1 61
1 62
1 63
1 64
1 67
1 67
0 92
0 92
0 92
0 92
0 94
0 94
0 94
0 94
0 94
0 94
0 96
0 96
0 96
0 96
0 96
0 96
0 96
0 96
0 95
0 95
0 97
0 98
0 100
0 108
0 113
0 114
0 117
0 113
0 110
0 109
0 103
0 102
0 100
0 101
0 101
0 101
0 101
0 101
0 101
0 102
0 102
0 103
0 103
0 103
0 103
0 103
0 100
0 98
0 98
0 98
0 98
0 98
0 98
0 99
0 98
0 94
0 96
0 95
0 92
0 89
0 87
0 86
0 86
0 86
0 84
0 84
0 84
0 69
0 70
0 70
0 70
0 68
1 68
1 36
1 33
1 33
1 33
1 26
1 26
1 26
1 27
1 27
1 27
1 27
1 27
1 27
1 27
1 27
1 28
1 30
1 30
1 30
1 29
1 28
1 28
1 25
1 23
1 22
1 20
1 20
1 20
1 19
1 19
1 19
1 16
1 15
1 15
1 15
1 15
1 15
1 15
1 14
1 13
1 13
1 12
1 12
1 12
1 12
1 12
1 12
1 12
1 12
1 12
1 13
1 15
1 16
1 16
1 17
1 17
1 15
1 15
1 14
1 14
1 14
1 14
1 14
1 14
1 18
1 16
1 16
1 17
1 17
1 16
1 16
1 15
0 15
0 15
0 15
0 15
0 16
0 16
0 16
0 17
1 16
1 19
1 19
1 19
1 19
1 19
1 19
1 19
1 21
1 21
1 21
1 21
1 21
1 21
1 21
1 21
1 21
1 23
1 23
1 23
1 23
1 23
1 23
1 23
1 23
1 23
1 23
1 23
1 23
1 23
1 23
1 23
1 23
1 23
1 23
1 23
1 23
1 23
1 23
1 23
1 26
1 28
1 30
1 38
1 34
1 33
1 33
1 34
1 33
1 32
1 32
1 32
1 33
1 33
1 35
1 35
1 36
1 32
1 32
1 32
1 32
1 32
1 32
1 32
1 32
1 32
1 32
1 32
1 32
1 31
1 32
1 32
1 31
0 31
0 28
0 28
0 28
0 28
0 28
0 28
0 28
0 26
0 25
0 25
0 29
0 30
0 30
0 30
0 32
0 32
0 29
0 33
0 33
0 33
0 32
0 33
0 33
0 33
0 34
0 35
0 35
0 35
1 36
1 38
1 38
1 38
1 38
1 38
1 38
1 37
1 37
1 37
1 32
1 31
1 31
1 27
1 19
1 19
1 20
1 20
1 20
1 20
1 19
1 19
1 19
1 19
1 19
1 66
1 68
1 68
1 75
1 384
1 401
1 416
2 484
2 497
2 503
2 592
2 597
3 603
3 607
3 612
3 614
3 618
3 618
3 618
3 618
3 618
3 618
3 618
3 618
3 619
3 619
3 620
2 669
2 664
2 653
2 651
2 702
2 703
2 702
2 702
2 702
2 699
2 685
2 683
2 669
2 664
2 659
2 650
2 646
2 646
2 646
2 646
1 646
1 646
1 645
1 645
1 645
1 645
1 645
1 648
1 648
1 648
1 648
1 648
1 648
1 648
1 647
1 647
1 644
1 641
1 635
1 628
1 623
1 618
1 617
1 616
1 616
1 616
1 617
1 616
1 613
1 590
1 318
1 307
1 303
0 138
0 137
0 136
0 136
0 137
0 139
0 140
0 137
0 137
0 133
0 132
0 132
0 132
0 132
0 132
0 132
0 132
0 131
0 131
0 129
0 77
0 79
0 76
0 74
0 17
0 17
0 17
0 17
0 17
0 17
0 17
0 17
0 17
0 17
0 17
0 18
0 18
0 18
0 17
0 17
0 17
0 17
0 17
0 17
0 17
0 17
0 17
0 13
0 12
0 14
0 14
0 14
0 14
0 14
0 14
0 14
0 13
0 13
0 13
0 13
0 13
0 13
0 13
0 13
0 13
0 13
0 13
0 13
0 13
0 13
0 12
0 10
0 12
0 12
0 12
0 12
0 12
0 9
0 10
0 6
0 7
0 6
0 6
0 6
0 6
0 6
0 6
0 6
0 7
0 7
0 7
0 7
0 7
0 7
0 7
0 13
0 13
1 14
1 16
3 16
3 16
3 16
3 16
3 16
6 22
6 22
6 22
6 22
6 21
6 21
6 21
6 21
6 21
6 21
6 21
6 21
6 21
6 21
6 21
6 21
6 21
6 21
6 21
6 21
6 21
6 21
6 21
6 21
6 21
6 21
6 22
7 23
7 23
7 23
7 23
7 24
7 24
7 24
7 24
7 24
7 24
7 24
7 24
7 24
7 24
7 22
7 22
7 22
7 22
7 21
7 21
7 21
7 20
7 20
7 20
7 20
7 20
7 20
7 20
7 20
7 20
7 19
7 19
7 19
7 19
7 19
7 19
7 19
7 13
7 13
5 12
5 10
4 10
4 12
3 16
3 17
4 20
2 13
2 13
2 13
2 14
2 15
2 31
2 34
2 34
2 39
2 43
2 53
2 54
2 54
2 54
2 54
2 54
2 54
2 54
3 54
3 54
5 55
5 55
5 55
5 56
5 58
7 58
11 58
10 58
10 58
10 58
10 57
10 56
10 56
10 56
10 56
10 56
10 57
10 57
10 57
10 57
10 57
10 57
10 57
10 57
10 57
10 57
10 58
10 58
10 58
10 58
10 58
10 58
10 58
10 57
10 57
10 56
10 55
10 54
10 54
10 54
10 54
10 54
10 53
10 53
10 52
10 52
10 52
10 51
9 51
9 48
8 46
8 46
7 37
5 38
5 38
5 39
5 38
3 36
3 22
3 14
3 13
3 13
3 8
3 8
3 8
3 8
3 8
3 8
4 8
4 9
5 11
5 11
5 16
4 15
4 16
4 16
4 17
4 15
4 15
2 15
2 15
2 15
2 15
2 15
2 15
2 16
2 17
2 19
2 20
2 25
2 31
2 61
2 78
2 94
2 107
0 109
0 118
0 121
0 120
0 123
0 124
0 124
0 124
0 124
0 124
0 125
0 125
0 125
0 125
0 125
0 125
0 125
0 125
0 125
0 125
0 125
0 125
0 125
0 126
1 152
1 210
1 218
1 225
1 225
1 226
1 226
1 225
1 225
1 224
1 224
1 224
1 224
1 224
1 224
1 224
1 224
1 224
1 224
1 224
1 224
1 226
1 226
1 225
1 220
1 220
1 218
1 218
1 218
1 218
1 215
1 212
1 210
1 210
1 210
1 210
1 210
1 210
2 224
2 223
2 225
4 228
4 228
4 224
6 223
14 179
17 173
18 165
18 154
18 147
18 139
18 139
19 139
21 139
22 139
22 139
22 138
22 138
22 138
22 138
23 138
23 137
24 137
24 137
27 138
31 138
36 138
46 139
54 139
55 139
54 139
54 139
54 138
53 109
52 49
52 38
53 32
53 32
53 32
53 32
53 32
53 32
53 32
53 32
53 32
53 33
53 33
53 34
53 34
60 34
61 34
61 34
62 34
62 34
68 38
69 38
69 38
69 35
69 35
69 34
69 32
69 32
69 33
69 33
69 33
69 33
69 33
69 33
69 33
69 33
69 33
69 18
75 18
83 15
82 10
83 10
82 10
78 9
70 9
70 9
70 9
70 9
70 9
70 10
69 10
67 10
67 10
72 10
75 10
76 10
76 10
73 10
73 10
71 10
69 10
69 10
69 10
65 9
62 9
57 9
49 8
43 8
40 8
40 8
40 9
40 9
43 10
43 10
43 10
42 10
42 10
44 10
44 10
44 10
44 10
45 10
45 10
48 10
48 9
48 9
48 8
46 8
40 8
37 8
37 8
36 8
36 8
25 4
19 5
21 6
21 6
21 6
22 6
22 6
16 6
17 5
17 5
17 6
17 6
17 6
17 6
17 6
17 6
17 6
17 6
17 6
17 6
17 6
17 6
17 7
17 7
17 8
17 8
17 8
17 8
17 8
17 7
17 7
17 7
16 7
14 7
14 7
14 7
14 7
14 7
14 7
14 7
14 7
14 7
14 7
14 7
15 7
15 8
16 12
17 12
17 12
17 14
16 13
16 22
12 21
12 25
10 25
10 26
10 26
10 26
10 26
10 26
10 26
10 27
10 27
11 32
11 32
11 32
11 32
11 32
11 32
11 32
11 32
11 32
10 32
10 32
9 31
8 30
8 30
8 30
7 30
5 30
5 30
4 30
4 30
6 29
6 27
6 27
7 27
8 27
8 27
8 27
8 27
8 27
8 27
8 27
8 27
8 26
8 26
8 25
8 25
8 26
8 27
8 32
8 35
8 35
8 35
8 36
8 36
8 37
8 37
8 37
8 38
8 38
8 38
8 39
8 39
8 41
8 42
8 60
8 59
9 56
8 56
8 55
8 55
8 55
8 46
8 46
7 45
7 46
6 46
6 46
6 48
6 61
6 63
6 67
6 66
6 65
5 61
5 61
5 61
5 61
5 61
5 61
5 61
5 61
5 61
5 61
5 62
5 62
5 62
5 62
5 63
5 63
5 63
6 63
7 63
7 62
5 60
5 60
5 59
4 59
3 59
3 60
3 61
3 61
3 63
3 63
3 64
3 63
3 64
3 64
3 64
3 63
3 61
3 60
3 57
3 54
3 54
3 57
3 56
3 56
3 54
3 54
3 54
3 53
3 53
3 53
3 53
3 53
3 53
3 52
3 36
3 35
2 35
2 35
2 35
2 35
2 35
2 35
2 35
2 35
2 34
2 33
2 33
2 30
2 16
2 15
2 12
2 12
2 12
2 12
2 15
2 15
2 15
2 15
2 15
2 15
2 15
2 15
2 15
2 14
2 15
2 15
2 15
2 14
2 14
2 14
1 16
0 17
0 18
0 18
1 18
1 17
2 17
2 17
3 17
3 16
3 16
3 13
3 12
3 11
3 11
3 11
3 11
3 11
3 12
3 12
3 13
3 13
3 13
3 13
3 10
3 10
3 10
3 10
3 10
3 10
3 10
3 10
3 11
3 11
3 11
3 11
3 11
3 11
3 12
3 18
3 19
3 21
3 21
3 21
3 21
3 21
3 21
4 31
4 34
5 44
5 50
5 65
7 267
7 291
7 305
7 320
7 324
6 341
5 346
5 346
5 346
5 346
5 346
5 346
5 346
5 346
5 346
5 345
5 350
5 351
5 351
6 352
6 352
6 347
6 347
6 346
6 348
5 348
5 348
5 348
5 348
5 348
5 348
5 349
5 353
5 354
5 355
5 355
5 356
5 356
5 357
5 354
5 351
5 349
5 349
5 349
5 349
5 349
5 349
5 349
5 349
5 349
5 349
5 349
5 349
5 348
5 348
5 348
5 348
5 348
5 348
5 346
5 289
5 289
5 260
5 213
5 176
5 175
5 178
5 172
3 105
3 103
2 97
2 89
1 33
1 20
1 18
1 18
1 18
1 18
1 17
1 17
1 17
1 17
1 17
1 17
1 17
1 17
1 17
1 17
1 18
1 21
1 21
1 21
0 20
0 20
0 20
0 20
0 20
0 18
0 18
0 18
0 18
0 18
0 18
0 18
0 18
0 18
0 18
0 18
0 18
0 18
0 18
0 18
0 18
0 18
0 18
0 18
0 18
0 21
0 21
1 21
1 21
1 21
1 21
1 21
1 21
1 21
1 21
1 21
1 21
1 21
1 21
1 21
1 21
1 21
1 20
1 20
1 19
1 19
1 19
1 16
1 16
1 16
2 16
2 16
2 16
2 16
2 17
2 17
2 16
3 17
3 17
3 16
3 16
3 21
3 21
3 22
3 28
3 28
3 29
3 31
3 31
3 30
3 26
3 26
3 26
3 26
3 26
3 26
3 26
3 26
3 26
3 26
3 26
3 26
3 26
3 26
3 26
3 22
3 20
3 20
3 20
3 20
3 20
3 20
3 21
3 21
3 21
3 29
3 29
3 29
3 24
3 25
2 22
2 22
2 22
2 22
2 21
2 21
2 21
2 21
2 22
2 23
2 25
2 27
2 27
2 27
2 27
2 25
2 25
2 25
2 25
2 25
2 25
2 25
2 25
1 25
1 25
1 25
1 24
1 22
1 22
1 22
0 20
0 20
0 20
0 24
0 24
0 24
0 23
0 21
0 20
0 20
0 20
0 20
0 20
0 20
0 20
0 20
0 20
0 20
0 20
0 20
0 20
0 20
0 20
0 20
0 20
0 20
0 20
0 20
0 20
0 20
0 20
0 20
0 20
0 20
0 20
0 20
0 20
0 20
0 11
0 12
0 13
0 13
0 13
0 13
0 13
0 13
0 13
0 11
0 11
0 10
0 10
1 10
1 9
1 8
1 8
1 8
1 8
1 8
1 8
1 8
1 8
1 8
1 9
1 9
1 10
1 10
1 10
1 10
1 9
1 9
1 9
1 11
1 11
1 11
1 11
1 11
1 7
1 7
1 7
1 7
1 7
1 7
1 7
1 7
1 7
1 7
1 7
1 7
1 7
1 7
1 7
1 7
1 7
1 13
1 13
1 13
1 13
1 13
1 13
2 13
2 13
2 13
2 13
2 13
2 13
2 13
2 13
2 13
3 14
3 13
3 12
3 11
4 12
4 12
4 13
4 14
4 18
4 18
4 20
4 20
4 22
5 22
5 22
5 22
4 22
4 22
4 22
4 22
4 20
4 20
4 20
4 20
4 20
4 20
4 20
4 20
4 20
4 20
4 20
4 20
4 20
4 20
4 20
4 20
4 19
4 19
4 21
4 21
4 21
4 21
4 21
5 28
6 29
6 29
6 29
6 29
6 29
6 29
6 29
6 29
5 29
5 29
7 29
7 29
7 29
7 29
7 22
7 22
7 22
7 22
7 21
7 21
7 21
7 21
7 21
7 21
7 21
6 21
6 21
5 21
5 21
5 21
5 21
6 21
6 21
6 21
6 21
6 19
6 15
6 10
6 9
7 8
7 8
6 7
6 7
6 7
6 7
6 7
6 7
6 7
6 7
6 7
6 7
6 7
6 7
6 7
6 7
6 7
6 7
6 7
6 8
6 8
6 8
6 7
6 7
6 8
6 9
6 9
9 10
9 10
9 10
9 10
9 10
9 11
8 6
7 5
7 5
6 5
6 5
6 5
6 5
6 5
6 5
6 5
6 5
5 5
5 5
5 5
5 5
5 5
5 5
5 5
6 9
6 11
6 12
6 17
6 17
6 20
6 20
6 20
6 20
6 20
6 20
6 20
6 20
7 20
7 20
7 20
7 20
7 21
7 21
7 21
7 21
7 21
6 21
6 21
6 22
7 35
7 36
7 38
7 38
7 38
7 38
7 38
7 41
7 51
8 62
8 64
8 67
8 69
9 69
10 70
10 72
10 71
10 72
10 72
10 72
10 72
10 71
10 70
8 69
5 68
5 69
4 71
4 71
4 71
3 71
3 71
3 71
3 69
3 68
3 66
3 64
3 64
3 64
3 64
3 64
3 65
3 65
3 65
3 65
3 65
3 65
3 65
6 65
5 63
5 59
6 62
6 59
7 53
8 51
9 51
9 51
9 51
9 51
9 51
9 51
9 50
9 50
9 50
9 50
9 50
9 49
9 49
9 49
9 52
9 52
9 49
9 46
9 43
9 32
9 31
9 27
9 25
10 25
10 25
10 25
10 24
10 22
9 18
9 18
9 18
9 18
9 18
8 17
8 17
8 17
9 17
9 18
9 19
9 19
9 19
9 19
9 19
9 19
9 17
9 14
9 14
9 14
9 14
9 14
9 15
9 16
9 16
9 16
9 16
9 16
9 18
9 18
9 17
9 17
9 17
9 17
9 17
9 17
9 18
9 23
8 25
8 25
8 26
7 24
7 24
5 22
4 22
4 22
4 23
4 23
4 23
4 23
4 23
4 23
4 23
4 23
4 23
4 23
4 23
4 23
4 23
4 20
4 20
4 20
4 20
4 20
4 20
4 20
4 20
4 20
3 20
3 20
3 19
3 18
3 17
3 17
3 17
3 17
3 17
3 17
5 21
6 22
6 23
6 24
6 24
6 24
6 24
6 24
4 24
4 24
8 24
8 24
9 25
9 25
9 25
9 24
9 25
9 23
9 23
9 23
10 23
12 23
12 20
12 19
12 19
12 24
12 24
12 24
12 24
12 24
12 24
12 23
12 20
12 18
12 18
12 17
12 17
12 17
12 17
12 17
12 17
12 16
12 16
12 16
12 16
12 16
12 16
12 16
12 16
12 16
12 16
12 16
13 16
13 16
13 16
15 17
15 17
15 17
15 18
15 19
16 19
16 19
16 23
16 23
16 23
16 24
16 24
16 28
16 29
16 31
16 31
16 32
18 34
16 31
14 30
24 72
25 72
28 76
28 80
28 80
29 81
29 81
29 81
25 81
25 81
24 79
24 79
23 79
23 79
23 80
23 80
23 80
22 80
22 80
20 80
20 80
20 82
20 82
20 78
20 78
20 78
20 78
20 78
20 78
21 78
21 78
21 78
21 78
21 78
21 78
21 78
21 78
21 78
21 78
21 78
21 78
21 78
19 78
19 78
19 79
19 79
23 81
24 82
24 84
24 84
24 83
25 83
25 80
23 78
23 76
23 74
23 74
23 72
22 72
22 72
22 69
22 69
22 68
22 67
22 67
22 65
22 64
22 62
22 60
22 60
22 59
22 59
22 56
10 15
10 12
8 10
8 10
14 12
14 12
14 12
32 13
36 15
36 15
37 15
37 15
37 15
37 14
37 14
37 14
37 15
37 16
37 16
37 23
37 26
37 25
38 24
39 25
40 31
40 31
40 31
40 31
40 31
39 31
39 33
39 34
39 34
39 36
39 39
40 39
40 39
40 40
40 41
40 41
40 41
40 41
41 41
43 41
43 40
43 39
39 38
37 37
37 36
37 36
37 36
36 36
36 36
38 65
38 65
38 65
38 65
38 65
38 65
38 65
38 65
38 65
41 66
41 66
46 66
46 66
47 66
47 67
47 67
47 67
47 67
47 67
47 67
47 67
47 67
46 67
45 67
40 65
40 65
34 65
20 64
17 62
16 62
16 62
16 63
16 63
21 64
29 86
33 86
33 85
33 84
33 84
33 77
33 74
33 75
33 75
33 74
32 68
32 68
32 68
32 68
32 68
32 68
32 67
32 66
32 65
32 63
32 60
32 60
32 60
32 59
32 59
32 59
32 59
32 59
31 59
32 59
33 59
33 59
36 60
41 62
41 63
41 63
41 63
40 63
40 61
35 33
35 33
35 33
35 33
31 32
31 32
31 32
31 32
31 32
31 31
32 31
30 31
30 32
30 33
30 34
30 34
30 34
30 34
30 34
30 34
30 34
30 34
30 34
30 34
30 34
30 34
30 34
29 34
29 34
28 34
28 35
22 33
20 34
14 33
9 11
4 11
4 11
4 11
4 11
4 11
0 11
0 11
0 11
0 11
0 11
0 11
0 11
0 11
0 11
0 11
1 12
2 12
2 13
2 14
2 15
2 16
4 35
4 36
4 54
4 55
4 58
4 63
4 65
4 65
4 64
3 72
3 71
2 69
2 70
2 70
2 71
2 72
2 73
2 78
2 96
2 99
2 99
2 99
2 100
2 205
2 208
2 217
2 225
2 394
2 420
2 430
2 439
2 440
2 450
2 464
2 481
2 481
2 485
2 486
3 487
3 489
3 492
3 588
3 596
3 598
3 598
3 598
3 598
4 604
4 616
4 665
5 702
5 717
5 762
5 848
5 911
5 1140
5 1186
5 1190
5 1199
5 1199
5 1199
5 1199
5 1198
5 1202
5 1206
5 1206
5 1207
5 1207
5 1207
5 1201
5 1190
5 1187
5 1176
3 1147
3 1142
3 1121
3 1121
3 1117
3 1100
3 1097
3 1096
3 1094
3 1086
3 1086
3 1086
3 1087
3 1087
3 1083
3 1083
3 1071
3 1000
3 789
3 653
3 647
3 647
3 647
3 647
3 646
3 643
3 627
3 540
3 538
3 541
3 541
3 541
3 541
3 537
3 532
3 529
3 529
3 522
2 512
2 509
2 493
2 432
2 429
2 392
2 392
2 393
2 394
1 392
1 387
1 353
0 321
0 281
0 249
0 235
0 208
0 24
0 21
0 21
0 18
0 18
0 18
0 18
0 18
0 18
0 16
0 16
0 16
0 16
0 16
0 16
0 16
0 16
0 16
0 16
0 17
0 16
0 16
0 16
0 16
0 19
0 19
0 19
0 18
0 18
0 18
0 18
0 18
0 18
0 18
0 18
0 18
0 18
0 18
0 18
0 18
0 18
0 18
0 18
0 18
0 18
0 21
0 21
1 17
1 18
1 17
1 13
1 12
1 16
1 16
1 16
1 16
1 16
1 16
1 16
1 16
1 16
1 16
1 16
1 16
1 16
1 16
1 16
1 16
1 16
1 16
1 16
1 16
1 16
1 16
1 16
1 16
1 16
1 16
1 16
1 16
1 16
1 17
3 20
3 20
3 20
3 20
3 20
3 20
3 20
3 20
3 20
3 19
3 19
4 19
4 19
4 19
7 19
7 15
7 15
7 15
7 15
7 15
7 15
7 15
7 15
7 15
7 15
7 15
7 15
7 15
7 15
7 15
7 15
7 15
7 15
8 15
8 15
8 15
8 12
8 12
7 11
7 11
7 11
7 11
7 11
6 4
6 4
6 4
5 4
5 4
5 4
5 4
5 5
5 7
5 7
5 7
5 7
5 9
5 9
5 9
5 9
5 9
5 9
5 9
5 9
5 14
6 14
6 15
6 15
8 43
8 43
8 45
8 46
8 46
8 45
6 42
6 42
6 42
6 42
6 42
6 42
6 42
6 42
8 44
8 44
8 44
8 45
8 45
8 45
6 45
6 45
6 45
6 45
6 45
6 44
6 44
6 44
6 44
6 44
6 44
6 44
6 44
5 44
5 44
4 44
4 43
4 43
4 43
3 43
3 43
3 43
3 43
3 43
3 43
3 43
3 44
3 45
3 48
3 53
3 73
3 79
7 85
7 84
10 90
10 90
10 94
10 92
10 88
10 89
10 88
10 87
10 87
10 87
10 87
10 87
10 87
10 87
10 87
10 87
10 87
10 87
10 92
9 74
9 74
9 74
9 74
9 74
9 74
9 74
9 74
9 74
9 74
9 74
9 74
9 74
9 74
4 72
4 71
4 71
4 71
1 71
1 71
1 71
1 71
1 71
2 73
2 73
2 73
3 80
3 80
3 80
4 80
4 81
4 81
4 83
4 83
4 83
4 83
4 89
4 91
4 93
4 139
4 142
4 155
4 157
4 158
4 158
4 158
4 172
4 167
4 167
4 164
4 145
4 139
4 133
4 134
3 131
3 131
2 127
2 125
2 125
2 125
1 125
1 125
1 125
1 125
1 125
1 125
1 125
1 126
1 126
1 126
1 126
1 126
1 122
1 115
1 115
1 115
1 115
1 115
1 115
1 115
1 115
1 121
1 121
1 121
1 123
1 127
1 128
1 128
1 128
1 128
1 128
1 126
1 126
1 124
1 124
1 124
1 123
1 123
1 123
1 118
1 122
1 122
0 120
0 118
0 160
0 156
0 155
0 156
0 155
0 175
0 173
0 172
0 134
1 158
1 151
1 150
1 150
1 157
1 162
1 141
1 143
1 144
1 144
3 149
3 149
3 149
3 149
3 148
3 149
3 146
3 146
3 146
3 146
3 148
3 148
3 148
3 148
3 149
3 149
3 149
3 148
3 155
3 155
3 155
3 155
3 155
3 156
3 156
3 156
3 156
3 156
3 157
3 157
4 157
8 151
8 151
8 148
8 142
8 138
8 136
8 136
8 138
8 138
8 144
10 154
10 155
10 156
12 161
12 161
12 161
12 162
12 163
12 161
12 159
12 160
12 160
12 159
12 96
12 95
12 95
12 75
12 75
12 75
12 75
12 72
12 70
11 71
11 81
11 84
11 85
11 89
11 86
11 89
11 92
11 104
11 108
9 107
9 113
9 113
9 113
9 113
9 118
9 121
9 123
9 123
9 124
9 127
9 127
9 128
9 128
9 128
9 128
9 128
9 128
9 120
9 118
9 118
9 118
9 118
9 117
9 117
9 117
9 117
9 117
9 116
9 118
8 118
2 112
2 112
2 112
2 112
0 109
0 109
0 109
0 109
0 109
0 98
0 89
0 88
0 88
0 84
0 84
0 84
0 84
0 84
0 83
0 81
0 83
0 82
0 82
0 80
0 74
0 61
0 61
0 60
0 58
0 58
0 58
0 57
0 50
0 48
0 47
0 47
0 43
0 43
0 43
0 41
0 33
0 35
0 45
0 42
0 43
0 43
0 43
0 36
0 31
0 31
0 30
0 30
0 28
0 28
0 28
0 29
0 29
0 29
0 29
0 28
0 28
0 28
0 28
0 28
0 28
0 28
0 29
0 29
0 29
0 35
0 36
0 35
0 36
0 36
0 36
0 36
0 36
0 36
0 36
0 36
0 36
0 36
0 35
0 35
0 35
0 30
0 30
0 30
0 30
0 30
0 30
0 31
0 31
0 29
0 29
0 29
0 29
0 29
0 29
0 29
0 29
0 29
0 29
0 29
0 29
0 30
0 29
0 29
0 29
0 31
0 31
0 31
0 31
0 31
0 33
0 23
0 23
0 22
0 22
0 27
0 27
0 28
0 29
0 30
0 58
0 58
0 59
0 60
0 59
0 59
0 59
0 62
0 63
0 63
0 63
0 63
0 63
0 63
0 63
0 65
0 65
0 65
0 59
0 59
0 58
0 57
0 55
0 55
0 55
0 55
0 55
0 55
0 58
0 58
0 62
0 62
0 64
0 64
0 67
0 67
0 71
0 71
0 71
0 71
0 75
0 75
0 74
0 74
0 74
0 74
0 74
0 74
0 74
0 74
0 74
0 74
0 74
0 75
0 75
0 74
0 74
0 73
0 73
0 73
0 73
0 73
0 73
0 67
2 67
2 66
2 66
2 67
2 61
2 61
2 60
2 59
2 58
2 27
2 26
2 26
2 20
2 20
2 20
2 19
2 15
2 15
2 15
2 15
2 15
2 15
3 15
3 15
3 15
3 15
3 15
3 15
3 14
3 14
3 14
3 14
3 14
3 14
3 14
3 14
3 14
3 15
3 16
3 15
3 15
3 15
2 15
2 14
2 14
2 10
1 10
1 10
1 10
1 6
1 6
1 6
1 6
1 6
1 6
1 6
1 6
1 6
1 6
1 6
1 6
1 6
1 6
1 5
1 5
1 5
1 5
1 5
1 5
1 5
1 5
1 5
1 4
1 4
1 4
1 4
1 5
1 5
1 5
1 5
1 5
1 8
1 10
1 10
1 12
1 12
1 14
1 14
1 16
1 16
1 16
1 16
1 17
1 17
1 17
0 18
0 19
0 24
1 24
1 24
1 24
1 24
1 24
1 24
1 24
1 24
1 25
1 25
1 25
1 25
1 24
1 23
1 23
1 23
1 23
1 23
1 23
1 23
1 23
1 23
1 23
1 23
1 23
1 23
1 23
1 23
1 23
1 23
1 23
1 23
1 23
1 23
1 22
1 22
1 23
1 17
1 17
1 17
1 11
1 11
1 11
1 11
1 11
1 10
1 10
1 10
1 10
1 10
1 10
1 10
1 9
1 9
1 9
1 9
1 7
1 6
1 5
1 4
1 4
1 4
1 4
1 4
1 4
1 3
1 3
1 3
1 3
1 3
0 3
0 3
0 2
0 3
0 3
0 3
0 3
0 3
0 3
0 3
0 3
0 2
0 2
0 2
0 2
0 2
0 2
0 2
0 2
0 7
0 7
0 8
0 8
0 8
0 8
0 8
0 8
0 8
0 8
0 8
0 8
0 8
0 8
0 8
0 9
0 9
0 9
0 9
0 9
0 10
0 10
0 10
0 9
0 8
0 8
0 8
0 8
0 8
0 8
0 8
0 8
0 8
0 8
0 8
0 8
0 8
0 8
0 10
0 11
0 11
0 13
0 13
0 13
0 13
0 38
0 47
0 62
0 63
0 64
0 65
0 65
0 65
0 65
0 65
0 65
0 65
0 60
0 61
0 61
0 57
0 57
0 57
0 57
0 57
0 57
0 57
0 57
0 57
0 57
0 57
0 57
0 57
0 56
0 57
0 56
0 57
0 57
0 58
0 60
0 60
0 62
0 62
0 92
0 95
0 96
0 96
0 95
0 95
0 95
0 95
0 95
0 95
0 95
0 95
0 95
0 95
0 95
0 95
0 94
0 94
0 93
0 93
0 94
0 96
0 96
0 90
0 90
0 90
0 90
0 97
0 104
0 110
0 112
0 113
0 114
0 114
0 114
0 83
0 82
0 80
0 83
0 86
0 85
0 85
0 85
0 85
0 85
0 85
0 85
0 85
0 84
0 86
0 86
0 86
0 87
0 88
0 91
0 91
0 91
0 91
0 91
0 93
0 94
0 95
0 95
0 95
0 95
0 95
0 95
0 95
0 95
0 92
0 93
0 92
0 93
0 65
0 64
0 63
0 63
0 63
0 63
0 63
0 63
0 63
0 63
0 63
0 73
0 73
0 73
0 74
0 94
0 100
0 100
0 101
0 100
0 100
0 107
0 110
0 112
0 112
0 110
0 104
0 93
0 90
0 79
0 75
0 75
0 75
0 75
0 75
0 74
0 69
0 62
0 55
0 56
0 52
0 52
0 52
0 52
0 52
0 52
0 52
0 52
0 52
0 53
0 53
0 53
0 53
0 53
0 52
0 52
0 52
0 52
0 51
0 46
0 46
0 46
0 46
0 46
0 46
0 47
0 45
0 45
0 40
0 42
0 39
0 39
0 34
0 34
0 32
0 32
0 32
0 32
0 32
0 32
0 32
0 32
0 32
0 32
0 32
0 32
0 31
0 29
0 14
0 14
0 14
0 14
0 14
0 9
0 7
0 7
0 7
0 7
0 7
0 7
0 8
0 8
0 8
1 20
1 22
1 23
1 25
1 25
1 26
1 26
1 25
1 24
1 23
1 24
1 24
1 24
1 24
1 24
1 24
1 24
1 24
1 24
1 23
1 23
1 23
1 23
1 23
1 23
1 23
1 23
1 23
1 23
1 23
1 23
1 23
1 22
1 25
1 25
1 25
1 25
1 26
1 31
1 35
1 35
1 36
1 38
1 42
1 42
1 45
1 51
1 52
1 53
1 54
1 55
1 55
1 55
1 55
1 55
1 55
1 55
1 55
1 55
1 55
1 55
2 55
2 55
2 57
2 57
2 57
2 57
2 57
2 57
2 57
2 56
2 57
2 62
1 89
1 114
3 192
3 202
3 205
3 206
3 206
3 206
3 208
3 208
3 207
3 207
3 207
3 207
3 207
3 207
3 207
3 207
3 272
3 274
3 274
3 274
3 276
3 430
4 435
4 437
4 441
4 441
4 441
4 444
4 444
4 445
4 443
4 436
4 438
4 434
4 436
4 417
4 403
4 387
4 386
4 372
4 371
4 371
4 371
4 367
4 364
4 363
4 363
4 363
4 363
4 363
4 363
4 363
4 365
4 365
4 365
4 365
3 365
3 365
3 361
3 359
3 357
3 345
4 345
4 345
4 338
4 339
4 390
4 399
5 400
5 385
5 375
5 339
5 250
5 187
5 187
5 186
5 187
5 187
5 187
5 209
5 209
5 210
5 220
5 220
5 220
5 220
5 220
5 219
5 218
5 216
4 216
4 218
4 219
4 217
3 122
3 142
3 141
3 143
3 143
3 143
3 143
3 143
3 140
3 140
3 140
3 140
3 140
3 135
3 135
3 129
3 127
3 128
3 128
3 128
3 126
3 125
3 129
3 128
3 128
3 128
3 129
3 129
3 129
3 129
3 129
3 134
3 135
3 138
3 138
3 138
3 144
3 146
3 148
3 152
1 202
1 221
1 221
1 224
1 225
1 186
1 190
1 195
1 216
1 219
1 224
1 242
1 243
1 245
1 247
1 246
1 245
1 245
1 224
1 224
1 222
1 213
1 213
1 213
1 213
1 213
1 213
1 213
1 213
1 213
1 211
1 211
1 211
1 210
1 189
1 189
1 187
1 187
1 187
1 187
1 187
1 187
1 187
1 188
1 189
1 189
2 195
2 206
2 258
2 263
2 271
2 271
2 273
2 273
2 273
2 263
2 255
2 256
2 257
2 258
2 258
2 258
2 258
2 258
2 251
2 250
2 247
2 247
2 247
2 240
2 242
2 242
2 236
1 193
1 181
1 181
1 186
1 198
2 243
3 893
3 915
3 906
3 903
3 900
3 880
3 900
3 897
3 895
3 896
3 896
3 897
3 897
3 897
3 898
3 898
3 899
3 899
3 899
3 899
3 899
3 902
3 913
3 917
3 921
3 1187
3 1192
3 1203
4 1207
4 1249
4 1249
4 1251
4 1253
4 1255
4 1260
4 1264
4 1269
4 1280
4 1279
4 1279
3 1286
3 1274
3 1225
3 1226
3 1230
3 1240
3 1240
3 1238
3 1238
3 1241
3 1238
3 1260
3 1266
3 1281
3 1287
3 1473
3 1474
3 1486
3 1498
3 1503
3 1509
3 1515
3 1520
4 1535
4 1561
4 1620
4 1626
4 1624
4 1621
4 1629
3 1740
3 1736
3 1650
2 1026
2 1028
2 1028
2 1033
2 1320
2 1355
2 1389
2 1442
2 1447
2 1462
2 1463
2 1465
2 1469
2 1470
2 1470
2 1473
2 1477
2 1508
2 1513
2 1519
2 1523
2 1520
1 1505
1 1496
1 1494
1 1207
1 1199
1 1192
1 1272
1 1228
1 1228
1 1226
1 1224
1 1221
1 1216
1 1214
1 1208
1 1206
2 1208
2 1210
2 1202
2 1202
2 1202
2 1201
2 1191
2 1190
2 1189
2 1201
2 1199
2 1199
2 1200
2 1171
3 1159
3 1153
3 1145
3 965
3 956
3 950
3 945
3 939
3 936
3 932
3 924
2 904
2 882
2 867
2 869
2 871
2 874
2 863
2 736
2 782
2 771
2 788
2 807
2 807
2 799
2 511
2 483
2 436
2 388
2 394
2 387
2 386
2 395
3 423
3 424
3 424
3 422
3 422
3 410
3 400
3 429
3 434
3 442
3 462
3 480
3 558
4 571
5 595
5 672
5 576
5 637
5 638
5 640
5 642
5 644
5 639
5 638
5 640
5 636
4 636
5 638
5 638
5 639
5 639
5 639
5 638
5 639
5 667
5 657
5 664
5 758
5 763
5 768
4 768
5 768
4 806
4 807
4 808
4 806
4 806
4 806
4 806
4 804
4 805
4 806
4 806
4 767
4 766
4 772
4 769
4 769
4 806
4 759
4 759
4 733
4 791
4 798
4 1223
4 1247
4 1276
4 1268
4 1297
4 1307
4 1375
4 1377
4 1371
4 1342
3 1346
3 1354
4 1364
4 1402
4 1414
4 1444
4 1412
4 1426
4 1416
4 1393
4 1369
4 1278
3 1243
2 1175
2 1096
2 1082
2 1001
2 1016
3 999
3 994
3 1002
3 1003
3 1002
3 1000
3 994
3 991
3 991
3 992
3 994
3 995
3 996
3 996
3 988
3 986
3 986
3 982
2 933
2 937
2 937
2 941
2 958
2 891
2 904
2 906
2 907
2 906
2 906
2 908
2 965
2 962
2 985
2 1003
2 1430
2 1431
2 1433
2 1436
2 1463
2 1416
2 1413
2 1413
2 1405
2 1400
2 1372
2 912
2 893
2 892
2 889
2 889
2 889
2 885
2 882
2 879
2 875
2 860
2 844
1 834
1 816
1 807
1 775
1 768
1 767
1 764
1 765
1 765
1 765
1 765
1 766
1 766
1 765
1 761
1 749
0 746
0 744
0 739
0 740
0 739
0 739
0 739
0 739
0 736
0 735
0 739
0 743
0 774
0 777
0 778
0 778
0 782
0 782
0 769
0 787
0 785
0 780
0 756
0 744
0 743
0 761
0 761
0 762
0 764
0 763
0 710
0 653
0 655
0 670
0 272
0 274
0 268
0 263
0 233
0 234
0 234
0 238
0 239
0 241
0 242
0 244
0 257
0 258
0 262
0 272
0 1405
0 1472
0 2085
30 6641
31 6891
48 9151
49 9219
49 9379
50 9432
50 9562
51 9591
51 9612
51 9684
51 9747
51 9793
51 9818
51 9825
52 9825
52 9827
55 9861
66 9986
71 10003
72 10438
72 10443
72 10445
72 10444
72 10445
72 10470
72 10530
72 10611
72 10664
73 10698
73 10702
75 10695
103 11316
103 11291
104 11295
104 11297
104 11299
106 15569
106 15563
106 15575
106 15584
106 15585
106 15607
106 15606
106 15606
106 15593
106 15580
106 15584
106 15583
106 15549
106 15466
106 15402
106 15109
106 14666
106 13686
106 13077
106 12466
106 12420
106 12418
106 12397
106 12390
106 12392
106 12391
106 12417
106 12397
106 12400
106 12383
106 12534
106 12527
106 12377
106 12350
106 12287
106 12216
106 12017
77 8422
73 8348
55 6485
55 6448
55 6440
55 6430
55 6422
55 6406
55 6397
54 6361
54 6319
54 6294
54 6280
54 6279
54 6278
54 6279
50 6243
39 6112
34 6097
34 5666
34 5667
34 5666
34 5665
34 5548
34 5518
34 5463
34 5447
31 5444
29 5419
21 5414
19 5407
2 4787
2 4785
2 4777
2 4730
2 4700
0 441
0 441
0 441
0 441
0 436
0 429
0 429
0 427
0 429
0 436
0 436
0 436
0 436
0 436
0 437
0 437
0 437
0 437
0 434
0 434
0 434
0 440
0 440
0 440
0 440
0 439
0 410
0 408
0 407
0 397
0 79
0 68
0 44
0 36
0 32
0 32
0 32
0 32
0 31
0 30
0 30
0 29
0 39
0 40
0 41
0 44
0 44
0 48
0 54
0 62
0 64
0 64
0 64
0 65
0 65
0 65
0 65
0 65
0 63
0 63
0 63
0 63
0 63
0 63
0 63
0 63
0 63
0 63
0 61
0 61
0 61
0 57
0 57
0 56
0 56
0 56
0 56
0 56
0 56
0 56
0 56
0 53
0 45
0 45
0 45
0 45
0 45
0 45
0 45
0 45
0 45
0 45
0 45
0 44
0 38
0 38
0 38
0 38
0 38
0 38
0 38
0 38
0 38
0 38
0 38
0 38
0 38
0 38
0 38
0 38
0 38
0 38
0 38
0 38
0 38
0 25
0 24
0 24
0 23
0 23
0 16
0 12
0 5
0 3
0 3
0 3
0 2
0 2
0 2
0 2
0 2
0 2
0 2
0 2
0 2
0 2
0 2
0 2
0 2
0 2
0 2
0 2
0 2
0 2
0 2
0 2
0 2
0 2
0 2
0 2
0 2
0 2
0 2
0 2
0 2
0 2
0 2
0 2
0 2
0 2
0 2
0 2
0 2
0 2
0 2
0 2
0 2
0 2
0 2
0 2
0 2
0 2
0 2
0 2
0 2
0 2
0 2
0 2
0 2
0 1
0 1
0 0
0 0
0 0
0 0
0 0
0 0
0 0
0 0
0 0
0 0
0 0
1 1
1 7
1 7
1 7
1 7
1 7
1 7
1 7
1 7
1 7
1 7
1 7
1 7
1 7
1 7
2 8
2 8
2 8
2 8
2 8
2 13
2 13
2 13
2 13
2 16
2 16
2 16
2 16
2 16
2 16
2 16
2 16
2 16
2 16
2 16
2 16
2 16
2 16
2 16
2 13
2 13
2 13
2 13
2 13
2 13
2 13
2 13
2 13
2 13
2 13
2 13
2 13
2 13
2 13
2 13
2 14
2 14
2 14
2 14
2 14
2 14
2 14
2 14
2 14
2 14
2 14
2 14
2 14
2 14
2 14
2 14
2 14
2 14
1 13
1 7
1 7
1 7
1 7
1 7
1 7
1 7
1 7
1 7
1 7
1 7
1 7
1 7
1 7
0 6
0 6
0 6
0 6
0 6
0 1
0 1
0 1
0 1
0 1
0 1
0 1
0 1
0 1
0 1
0 1
0 1
0 1
0 1
0 1
0 1
0 1
0 1
0 1
0 1
2 1
2 1
2 1
2 1
2 1
2 1
2 1
2 1
2 1
2 1
2 1
2 1
2 1
2 1
2 0
2 0
2 0
2 0
2 0
2 0
2 0
2 0
2 0
2 0
2 0
2 0
2 0
2 0
2 0
2 0
2 0
2 0
2 0
2 0
2 0
2 0
2 0
2 0
2 0
2 0
2 0
2 0
2 0
2 0
2 0
2 0
2 0
2 0
2 0
2 0
2 0
2 0
2 1
2 1
2 1
2 1
2 1
0 1
0 1
0 1
0 1
0 1
0 1
0 1
0 1
0 2
0 2
0 2
0 2
0 2
0 2
0 2
0 2
0 2
0 2
0 2
0 2
0 2
0 2
0 2
0 2
0 2
0 2
0 2
0 2
0 2
0 3
0 3
0 3
0 6
0 11
0 12
0 15
0 15
0 15
0 16
0 16
0 17
0 17
0 17
0 17
0 17
0 16
0 16
0 13
0 13
0 13
0 13
0 13
0 15
0 15
0 15
0 15
0 15
0 15
0 15
0 15
0 15
0 15
0 15
0 15
0 15
0 15
0 16
0 15
0 15
0 15
0 15
0 15
0 16
0 16
0 16
0 16
0 17
0 17
0 17
0 17
0 18
0 18
0 18
0 18
0 18
0 18
0 18
0 18
0 18
0 19
0 19
0 20
0 20
0 21
0 21
0 21
0 21
0 21
0 21
1 21
1 21
1 21
1 21
1 21
1 21
1 21
1 13
1 11
1 10
1 10
1 10
1 10
1 10
1 10
1 10
0 10
0 10
0 10
0 10
0 10
0 10
0 11
0 11
0 11
0 11
0 9
0 9
0 9
0 9
0 9
0 9
0 9
0 9
0 9
0 9
0 10
0 10
0 12
0 12
0 11
0 11
0 11
0 12
0 13
0 14
0 13
0 13
0 13
0 13
0 13
0 13
0 13
0 13
0 11
0 12
0 12
0 12
0 12
0 19
0 21
0 21
0 21
0 20
0 20
0 18
0 17
0 17
0 17
0 17
0 17
0 17
0 17
0 17
0 17
0 18
0 18
0 18
0 18
0 18
0 18
0 18
0 18
0 18
0 18
0 18
0 18
0 18
0 18
0 18
0 18
0 18
0 18
0 16
0 16
0 12
0 9
0 7
0 7
0 7
0 7
0 7
0 7
0 7
0 7
0 7
0 7
0 7
0 7
0 7
0 7
0 6
0 6
0 6
2 6
2 6
2 6
2 6
2 6
2 6
2 6
2 6
2 6
2 6
2 6
2 5
2 4
2 4
2 4
2 4
0 4
0 4
0 3
0 5
0 10
0 14
0 14
0 14
0 16
0 16
0 16
0 16
0 18
0 18
0 18
0 18
0 19
0 19
0 19
0 19
0 19
0 19
0 19
0 19
0 19
0 19
0 19
0 19
0 19
0 19
0 19
0 19
0 19
0 19
0 19
0 19
0 19
0 19
0 19
0 19
0 19
0 19
0 19
0 19
0 19
0 19
0 19
0 19
0 19
0 19
0 20
0 21
0 22
0 23
0 24
0 24
0 24
0 24
0 24
0 24
0 24
0 24
0 24
0 24
0 24
0 24
0 24
0 24
0 24
0 24
0 24
0 21
0 21
0 17
0 17
0 17
0 16
0 14
0 10
0 7
0 7
0 8
0 8
0 8
0 8
1 8
1 8
5 9
5 11
5 10
5 10
5 9
5 9
5 9
5 9
5 9
5 9
5 9
5 9
5 9
5 9
5 9
5 9
5 9
5 9
5 9
5 9
5 9
5 9
5 9
5 9
5 9
5 9
6 10
6 10
6 10
6 11
16 14
17 15
17 15
17 15
17 15
17 15
17 13
17 13
18 12
20 11
21 11
21 11
21 11
21 11
21 11
21 11
21 11
21 11
21 11
21 11
21 11
27 13
27 13
27 13
26 13
26 13
26 13
26 13
26 13
26 13
26 13
26 13
26 13
26 13
26 13
26 13
26 13
26 14
26 17
26 17
26 17
26 17
26 17
23 14
21 12
21 12
21 12
21 12
21 14
21 14
21 14
21 14
21 14
21 14
21 14
21 14
21 14
21 14
21 14
21 14
21 14
21 14
21 14
21 14
21 14
22 14
23 14
23 14
23 14
23 14
23 14
23 14
23 12
13 10
13 10
13 10
13 10
13 10
13 10
13 9
13 9
11 9
10 9
9 9
9 9
9 9
9 9
9 9
9 9
8 9
7 9
7 8
7 8
7 6
2 6
2 6
2 6
2 6
2 6
2 6
2 5
2 5
2 5
2 4
2 3
2 3
2 3
2 3
2 3
2 3
2 2
2 3
2 5
2 8
2 11
2 11
2 11
2 12
2 12
2 12
2 12
2 10
2 10
2 12
2 12
2 12
2 12
2 12
2 12
2 12
2 12
2 12
2 12
2 12
2 12
2 12
2 12
2 12
1 12
0 12
0 12
0 12
0 12
0 12
0 12
0 12
0 12
0 13
0 13
0 14
0 14
0 14
0 14
0 14
0 14
0 14
0 14
0 14
0 14
0 14
0 14
0 14
0 14
0 14
0 14
0 14
0 14
0 14
0 14
0 15
0 15
0 15
0 15
0 15
0 16
0 16
0 16
0 16
0 16
0 16
0 16
0 16
0 16
0 16
0 14
0 12
0 9
0 6
0 6
0 6
0 6
0 6
0 6
0 6
0 6
0 6
0 4
0 4
0 4
0 4
1 4
1 4
1 4
1 4
1 4
1 4
1 4
1 4
1 6
1 6
1 6
1 8
1 9
1 9
1 11
0 11
0 12
0 12
0 12
0 12
0 11
0 11
0 10
0 10
0 10
0 10
0 10
0 10
0 10
0 10
0 10
0 11
0 11
0 11
0 11
0 11
0 11
0 11
0 11
0 11
0 11
0 11
0 11
0 11
0 11
0 11
0 11
0 10
0 10
0 10
0 10
1 10
1 10
1 10
1 10
1 10
1 10
1 9
1 9
1 9
1 10
1 10
1 10
1 10
1 10
1 10
1 10
1 10
1 10
1 10
1 10
1 10
1 10
1 11
1 11
1 11
1 11
1 11
1 11
1 11
1 11
1 8
1 8
1 7
1 6
1 4
1 4
1 4
1 4
1 2
1 2
1 2
1 2
2 3
2 3
2 3
2 3
2 3
2 3
3 3
3 3
3 3
3 3
3 3
3 2
3 2
3 2
3 2
3 2
3 2
3 2
3 2
3 2
3 2
3 2
3 2
3 2
3 2
3 2
3 2
3 2
4 3
4 3
4 3
3 3
3 3
3 3
3 3
3 3
3 3
3 3
3 3
3 2
4 2
4 2
4 2
4 2
4 2
4 2
4 2
4 2
4 2
4 2
4 2
4 2
4 2
4 2
4 2
4 2
4 2
4 2
4 2
4 2
4 2
4 2
4 2
4 2
4 2
4 2
4 2
4 2
4 2
4 2
4 2
4 2
4 2
2 1
2 1
2 1
2 1
2 1
2 1
2 1
2 1
2 1
2 1
2 1
2 1
2 2
2 2
2 2
2 2
2 2
2 2
2 2
2 2
2 2
2 2
2 2
2 2
2 2
2 2
2 2
2 1
1 0
1 0
1 0
1 0
1 0
1 0
1 0
1 0
1 0
1 0
1 0
1 0
0 0
0 0
0 0
0 0
0 0
0 0
0 0
0 0
0 0
0 0
0 0
0 0
0 0
0 0
0 0
1 0
1 0
1 0
1 0
1 0
1 0
1 0
1 0
1 0
1 0
1 0
1 0
1 0
1 0
1 0
1 0
1 0
1 0
1 0
1 0
1 0
1 0
1 0
1 0
1 0
3 0
3 0
3 0
3 0
3 0
4 0
4 0
4 0
4 0
5 1
5 1
5 1
5 1
5 1
5 1
5 1
5 1
5 1
5 1
5 1
5 1
5 1
5 1
5 1
5 1
5 1
5 1
5 1
5 1
5 1
5 1
5 1
5 1
5 1
5 1
5 1
5 1
5 1
5 1
5 1
5 2
5 2
5 2
6 2
7 3
7 3
7 3
7 3
6 3
6 3
7 6
7 6
7 6
10 10
10 10
10 10
12 10
12 10
12 10
12 10
12 10
12 10
12 10
12 10
12 10
12 10
12 10
12 10
12 12
12 12
12 12
12 12
12 12
6 12
6 12
3 12
3 12
3 12
3 12
3 12
3 12
3 12
3 11
3 11
3 11
3 11
3 11
3 11
3 11
3 11
3 11
3 11
3 11
3 11
3 11
3 11
3 11
3 11
3 11
3 11
3 11
3 11
4 11
4 11
4 11
4 11
4 11
4 11
4 11
4 11
4 11
4 11
4 11
3 7
3 7
3 7
2 4
2 3
2 3
2 3
2 3
2 3
2 3
2 3
2 3
2 3
2 2
2 2
2 2
1 2
1 2
1 2
1 3
1 3
1 3
1 3
1 3
1 3
1 3
1 3
1 3
1 1
1 1
1 1
1 1
1 1
1 1
1 1
1 1
1 1
1 1
1 1
1 1
1 1
1 1
1 1
1 1
1 1
1 1
1 1
1 1
1 1
1 1
1 1
1 1
1 2
1 2
1 2
1 2
1 2
1 2
1 2
1 2
1 2
1 2
0 2
0 2
0 2
0 2
0 2
0 2
0 2
0 2
0 2
0 2
0 2
0 2
0 2
0 2
0 2
0 2
0 3
0 3
0 3
0 3
0 3
0 3
0 3
0 3
0 3
0 3
0 3
0 3
0 3
0 3
0 2
0 2
0 2
0 2
0 2
0 2
0 2
0 2
0 2
0 2
0 2
0 2
0 2
0 2
0 2
0 2
0 2
0 2
0 2
0 2
0 2
0 2
0 2
0 2
0 2
0 2
0 2
0 2
0 2
0 2
0 2
0 2
0 2
0 1
0 1
0 1
0 1
0 1
0 1
0 1
0 1
0 1
0 1
0 1
0 1
0 1
0 1
0 1
0 1
0 1
0 1
0 1
0 1
0 1
0 1
0 1
0 1
0 1
0 1
0 0
0 0
0 0
0 0
0 0
0 0
0 1
0 1
0 1
0 1
0 1
0 1
0 1
0 1
0 1
0 1
0 1
0 1
0 1
0 1
0 1
0 1
0 1
0 1
0 1
0 1
0 1
0 1
0 1
0 1
0 1
0 1
0 1
0 1
0 1
0 1
0 1
0 1
0 1
0 1
0 1
0 1
0 1
0 1
0 1
0 1
0 1
0 1
0 1
0 1
0 1
0 1
0 1
0 1
0 1
0 1
0 1
0 1
0 1
0 1
0 1
0 1
0 1
0 1
0 1
0 1
0 1
0 1
0 1
0 1
0 1
0 1
0 1
0 1
0 1
0 1
0 1
0 1
0 1
0 0
0 0
0 0
0 0
0 0
0 0
0 0
0 0
0 0
0 0
0 0
0 0
0 0
0 0
0 0
0 0
0 0
0 0
0 0
0 0
0 0
0 0
0 0
0 0
0 0
0 0
0 0
0 0
0 0
0 0
0 0
0 0
0 0
0 0
0 0
0 0
0 0
0 0
0 0
0 0
0 0
0 0
0 0
0 0
0 0
0 0
0 0
0 0
0 0
0 0
0 0
0 0
0 0
0 0
0 0
0 0
0 0
0 0
0 0
0 0
0 0
0 0
0 0
0 0
0 0
0 0
0 0
0 0
0 0
0 0
0 0
0 0
0 0
0 0
0 0
0 0
0 0
0 0
0 0
0 0
0 0
0 0
0 0
0 0
0 0
0 0
0 0
0 0
0 1
0 1
0 2
0 2
0 2
0 2
0 2
0 2
0 2
0 2
0 2
0 2
0 2
0 2
0 2
0 2
0 2
0 2
0 2
0 2
0 2
0 2
0 2
0 2
0 2
0 2
0 2
0 2
0 3
0 3
0 3
0 3
0 3
0 3
0 3
0 3
0 3
0 3
0 3
0 3
0 3
0 3
0 3
0 3
0 3
0 3
0 3
0 3
0 3
0 3
0 3
0 3
0 3
0 3
0 3
0 3
0 3
0 3
0 3
0 3
0 3
0 3
0 3
0 3
0 3
0 3
0 3
0 3
0 3
0 3
0 3
0 3
0 3
0 3
0 2
0 2
0 3
0 3
0 3
0 3
0 3
0 3
0 3
0 3
0 3
0 3
0 3
0 3
0 3
0 3
0 3
0 9
0 9
0 11
0 17
0 19
0 19
0 20
0 20
0 20
0 20
0 19
0 19
0 19
0 19
0 19
0 19
0 19
0 19
0 19
0 19
0 19
0 19
0 19
0 19
0 19
0 19
0 19
0 19
0 19
0 19
0 19
0 19
0 19
0 19
0 19
0 19
0 19
0 19
0 19
0 19
0 19
0 17
0 17
0 15
0 15
0 15
0 16
0 16
0 19
0 20
0 20
0 32
0 39
0 39
0 40
0 35
0 36
0 34
0 28
0 28
0 28
0 27
0 27
0 27
0 27
0 27
0 27
0 27
0 27
0 28
0 28
0 28
0 28
0 28
0 28
0 28
0 27
0 27
0 27
0 27
0 27
0 27
0 27
0 27
0 27
0 27
0 27
0 27
0 25
0 25
0 25
0 25
0 25
0 25
0 25
0 25
0 25
0 25
0 25
0 25
0 25
1 25
1 25
2 25
2 25
2 23
2 23
2 22
2 19
2 19
2 20
2 20
2 20
2 22
2 22
2 22
2 22
2 22
2 22
2 22
2 25
2 29
2 29
2 27
2 16
2 15
2 15
2 14
2 14
2 14
2 14
2 14
2 15
2 16
2 16
2 19
2 19
2 19
2 19
2 19
2 19
2 19
2 18
2 18
2 18
2 18
2 18
2 17
2 17
2 17
2 17
2 17
2 17
2 17
2 17
2 17
2 17
2 17
2 17
2 17
2 17
2 17
2 17
2 17
2 17
2 17
2 17
2 17
0 17
0 17
0 17
0 17
0 17
0 17
0 17
0 17
0 22
0 22
0 22
0 28
0 28
0 29
0 27
0 27
0 29
0 30
0 28
0 28
0 28
0 28
0 28
0 28
0 28
0 21
0 20
0 20
0 20
0 20
0 20
0 20
0 20
0 20
0 20
0 20
0 20
0 20
0 19
0 19
0 17
0 17
0 15
0 15
0 15
0 16
0 17
0 17
0 17
0 18
0 18
0 18
0 18
0 18
0 19
0 19
0 17
0 17
0 18
0 18
0 18
0 16
0 14
0 14
0 14
0 14
0 14
0 14
0 14
0 14
0 14
0 14
0 14
0 14
0 14
0 14
0 14
0 14
0 14
0 14
0 14
0 14
0 15
0 14
0 8
0 8
0 8
0 8
0 9
0 9
0 9
0 9
0 9
0 9
0 9
0 10
0 10
0 10
0 10
0 10
0 10
0 10
0 10
0 10
0 10
0 9
0 9
0 9
0 9
0 9
0 9
0 9
0 8
0 8
0 8
0 7
0 7
0 7
0 7
0 7
0 7
0 8
0 8
0 8
0 8
0 8
0 8
0 7
0 7
0 7
0 7
0 6
0 6
0 6
0 6
0 6
0 6
0 6
0 6
0 6
0 6
0 6
0 6
0 6
0 6
0 6
0 6
0 6
0 6
0 6
0 6
0 6
0 6
0 6
0 5
0 4
0 4
0 4
0 4
0 4
0 4
0 4
0 4
0 4
0 4
0 4
0 4
0 4
0 3
0 3
0 3
0 3
0 3
0 3
0 3
0 3
0 5
0 5
0 5
0 5
0 5
0 5
0 5
0 5
0 5
0 5
0 5
0 5
0 5
0 5
0 4
0 4
0 4
0 5
0 4
0 3
0 3
0 3
0 3
0 3
0 3
0 3
0 3
0 3
0 3
0 3
0 3
0 3
0 3
0 3
0 3
0 3
0 3
0 3
0 3
0 3
0 3
0 3
0 3
0 3
0 4
0 4
0 4
0 4
0 4
0 4
0 4
0 4
0 4
0 4
0 4
0 4
0 4
0 4
0 4
0 3
0 3
0 3
0 3
0 3
0 3
0 3
0 3
0 3
0 3
0 3
0 3
0 3
0 3
0 1
0 1
0 1
0 1
0 1
0 1
0 1
0 1
0 1
0 1
0 1
0 1
0 1
0 1
0 1
0 1
0 1
0 0
0 0
0 0
0 0
0 0
0 0
0 1
0 1
0 1
0 1
0 1
0 1
1 1
1 1
1 1
1 1
1 1
1 1
1 1
1 1
1 1
1 1
1 2
1 3
1 3
1 3
1 3
0 3
0 3
0 3
0 3
0 3
0 3
0 3
0 4
0 4
0 4
0 4
0 4
0 4
0 4
0 4
0 4
0 4
0 4
0 4
0 4
0 6
0 6
0 6
0 6
0 7
0 7
0 7
0 7
0 7
1 7
1 7
1 7
1 8
1 8
1 8
1 8
1 8
1 8
1 8
1 8
1 8
1 8
1 8
1 8
1 8
1 8
1 8
1 8
1 8
1 8
2 8
2 7
2 7
2 7
2 7
2 7
2 7
2 7
2 7
2 7
2 7
2 7
2 7
2 9
2 9
2 9
2 9
2 9
2 7
2 7
2 7
2 7
2 7
2 7
2 7
2 7
2 8
2 8
2 8
2 8
2 6
2 7
2 6
2 6
2 6
2 6
2 6
2 6
2 6
2 6
2 6
2 7
2 7
2 7
2 7
2 7
2 7
2 6
2 6
2 6
2 6
2 6
1 6
1 6
1 6
1 5
1 5
1 5
1 5
1 5
1 6
1 6
1 6
1 6
1 6
1 6
1 6
1 6
1 6
1 6
1 6
1 6
1 6
0 6
0 6
0 6
0 6
0 6
0 6
0 6
0 6
0 6
0 7
0 7
0 7
0 7
0 5
0 5
0 5
0 5
0 5
0 5
0 5
0 5
0 6
0 6
0 6
0 6
0 6
0 5
0 5
0 5
0 5
0 5
0 4
0 4
0 4
0 4
0 4
0 4
0 4
0 4
0 4
0 4
0 3
0 3
0 3
0 3
0 3
0 3
0 3
0 3
0 3
0 3
0 3
0 3
0 3
0 3
0 3
0 3
0 3
0 3
0 3
0 2
0 2
0 2
0 2
0 2
0 2
0 2
0 2
0 2
0 2
0 2
0 2
0 2
0 2
0 2
0 2
0 2
0 2
0 2
0 3
0 3
0 3
0 2
0 2
0 2
0 2
0 2
0 2
0 2
0 2
0 2
0 2
0 2
0 2
1 1
1 1
1 1
1 1
1 1
1 1
1 1
1 1
1 1
1 1
1 1
1 1
1 1
1 1
1 1
1 1
1 1
1 1
1 1
1 1
1 1
1 1
2 1
2 1
2 1
2 1
2 1
2 1
2 1
2 1
2 1
2 1
2 1
2 3
2 3
2 3
2 3
2 3
2 3
2 3
2 3
3 5
3 5
3 6
3 6
3 6
3 6
3 6
3 6
3 6
3 6
3 6
3 6
3 6
3 6
3 7
3 7
3 6
3 6
3 6
3 6
3 7
5 7
5 7
5 7
5 7
5 7
5 7
5 7
5 7
5 7
5 7
4 7
4 7
4 7
4 7
4 7
4 7
4 7
4 6
4 6
4 6
4 7
4 7
4 7
4 7
4 7
4 7
4 7
4 6
4 6
5 6
5 6
4 5
3 5
3 5
3 5
2 4
2 4
2 4
2 4
2 4
2 4
2 4
2 4
2 4
2 4
2 4
2 4
2 4
2 4
2 4
3 4
3 4
3 3
3 3
3 3
3 3
3 3
3 3
3 3
3 3
3 3
3 3
3 3
3 3
3 3
3 3
3 2
3 2
3 2
3 1
3 1
4 1
4 1
4 1
4 1
4 1
4 1
4 1
4 1
4 1
4 1
4 1
4 1
4 1
4 1
4 1
4 1
4 1
4 1
4 1
4 1
4 1
4 1
4 0
4 0
4 0
4 0
4 0
4 0
4 0
4 0
4 0
3 0
3 0
3 0
3 0
3 0
3 0
3 0
3 0
3 0
3 0
3 0
3 0
3 0
3 0
3 0
3 0
3 0
3 0
3 0
3 0
3 0
2 0
2 0
1 0
1 0
1 0
1 0
1 0
1 0
1 0
1 0
1 0
1 0
2 0
3 0
4 0
4 0
4 0
4 0
4 0
4 0
4 0
3 0
3 0
50 0
50 0
50 0
53 0
53 0
53 0
53 0
53 0
53 0
53 0
53 0
60 0
60 0
60 0
60 0
21 0
21 0
21 0
21 0
21 0
21 0
21 0
21 0
21 0
21 0
21 0
21 0
21 0
21 0
21 0
21 0
21 0
21 0
21 0
21 0
21 0
21 0
21 0
21 0
21 0
21 0
21 0
21 0
19 0
19 0
19 0
19 0
18 0
18 0
18 0
18 0
18 0
17 0
17 0
17 0
17 0
17 0
17 0
17 0
17 0
17 0
16 0
16 0
15 0
14 0
14 0
14 0
14 0
14 0
14 0
14 0
14 0
14 0
12 0
12 0
11 0
5 0
5 0
5 0
6 0
2 0
2 0
2 0
2 0
2 0
2 0
2 0
2 0
1 0
1 0
1 0
1 0
1 0
1 0
1 0
1 0
1 0
1 0
1 0
1 0
1 0
2 0
2 0
2 0
2 0
2 0
2 0
2 0
2 0
2 0
2 0
2 0
2 0
2 0
2 0
2 0
2 0
2 0
1 0
1 0
1 0
1 0
1 0
1 0
1 0
1 0
1 0
1 0
1 0
1 0
1 0
1 0
1 0
1 0
1 0
1 0
1 0
1 0
1 0
1 0
1 0
1 0
1 0
1 0
1 0
1 0
1 0
1 0
1 0
1 0
1 0
0 0
1 0
1 0
1 0
1 0
1 0
1 0
1 0
1 0
1 0
1 0
1 0
1 0
1 0
1 0
1 0
1 0
1 0
1 0
1 0
1 0
1 0
1 0
1 0
1 0
1 0
1 0
1 0
1 0
1 0
1 0
1 0
1 0
1 0
1 0
1 0
1 0
1 0
1 0
1 0
1 0
1 0
1 0
1 0
1 0
1 0
1 0
1 0
1 0
2 0
2 0
2 0
2 0
2 0
2 0
2 0
2 0
2 0
2 0
2 0
2 0
2 0
2 0
2 0
2 0
2 0
2 0
2 0
2 0
2 0
2 0
2 0
2 0
1 0
1 0
1 0
1 0
1 0
1 0
1 0
1 0
1 0
1 0
1 0
1 0
2 0
2 0
3 0
3 0
3 0
3 0
3 0
4 0
4 0
4 0
4 0
4 0
4 0
4 0
4 0
4 0
4 0
4 0
4 0
4 0
4 0
4 0
4 0
4 0
4 0
4 0
4 0
4 0
4 0
4 0
4 0
4 0
4 0
4 0
4 0
4 0
4 0
3 0
3 0
3 0
3 0
3 0
3 0
3 0
3 0
3 0
3 0
3 0
3 0
3 0
3 0
3 0
3 0
3 0
3 0
3 0
3 0
3 0
3 0
3 0
3 0
3 0
3 0
3 0
3 0
3 0
3 0
3 0
3 0
3 0
3 0
3 0
3 0
2 0
2 0
1 0
1 0
1 0
1 0
1 0
0 0
0 0
0 0
0 0
0 0
0 0
0 0
0 0
0 0
0 0
0 0
0 0
0 0
0 0
0 0
0 0
0 0
0 0
1 0
1 0
1 0
1 0
1 0
1 0
1 0
1 0
1 0
1 0
1 0
1 0
1 0
1 0
1 0
0 0
0 0
0 0
0 0
0 0
0 0
0 0
0 0
0 0
0 0
0 0
0 0
0 0
0 0
0 0
0 0
0 0
0 0
0 0
0 0
0 0
0 0
0 0
0 0
0 0
0 0
0 0
0 0
0 0
0 0
0 0
0 0
0 0
0 0
0 0
0 0
0 0
0 0
0 0
0 0
0 0
0 0
0 0
0 0
0 0
0 0
0 0
0 0
0 0
0 0
0 0
0 0
0 0
0 0
0 0
0 0
0 0
0 0
0 0
0 0
0 0
0 0
0 0
0 0
0 0
0 0
0 0
0 0
0 0
0 0
0 0
0 0
0 0
0 0
0 0
0 0
0 0
0 0
0 0
0 0
0 0
0 0
0 0
0 0
0 0
0 0
0 0
0 0
0 0
0 0
0 0
0 0
0 0
0 0
0 0
0 0
0 0
0 0
0 0
0 0
0 0
0 0
0 0
0 0
0 3
0 3
0 3
0 7
0 7
0 7
0 7
0 7
0 7
0 7
0 7
0 7
0 7
0 7
0 7
0 7
0 7
0 7
0 7
0 7
0 7
0 7
0 7
0 7
0 7
0 7
0 7
0 7
0 7
0 7
0 7
0 7
0 7
0 7
0 7
0 7
0 7
0 7
0 7
0 7
0 7
0 7
0 7
0 7
0 7
0 7
0 7
0 7
0 7
0 7
0 7
0 7
0 7
0 7
0 7
0 7
2 7
2 7
2 7
3 7
4 7
4 7
4 7
4 7
4 6
4 5
4 5
4 5
4 5
5 6
5 6
5 6
5 6
5 4
5 4
5 2
5 1
5 1
5 1
5 1
5 1
5 1
5 1
5 1
5 1
5 1
5 1
5 1
5 1
5 1
5 1
5 1
5 1
5 1
5 1
5 1
5 1
5 1
5 1
5 1
5 1
5 1
5 1
5 1
5 1
8 1
8 1
10 1
10 1
10 1
10 1
10 1
10 1
10 1
10 1
10 1
11 1
11 1
11 1
11 1
11 1
11 1
11 1
11 1
11 1
11 1
11 1
12 1
12 1
11 1
10 1
11 1
10 1
10 1
10 1
10 1
10 1
10 1
10 1
10 1
10 1
10 1
9 0
9 0
9 0
9 0
9 0
9 0
9 0
9 0
9 0
9 0
9 1
9 1
9 1
9 1
9 1
9 1
9 1
9 1
9 1
9 1
9 1
9 1
9 1
9 1
9 2
9 2
9 2
11 2
11 2
11 2
11 2
11 2
13 2
13 2
13 2
13 2
9 2
8 3
8 3
9 3
9 3
9 3
9 3
9 3
9 3
9 3
9 3
8 3
8 3
8 3
8 3
8 3
15 3
15 3
15 3
23 3
23 3
23 3
21 3
21 3
21 3
38 4
37 4
37 4
37 4
37 4
37 4
37 4
37 4
37 4
37 4
38 4
38 5
38 5
38 5
38 5
38 5
38 5
38 5
38 5
38 5
38 5
38 5
38 3
39 3
39 3
39 2
39 2
39 2
39 2
39 2
39 2
39 2
39 2
39 2
39 2
39 2
39 2
39 2
39 2
37 2
45 2
45 2
45 2
45 2
43 2
43 2
43 2
43 2
43 2
43 2
43 2
42 2
42 2
42 2
42 2
42 2
42 2
44 2
46 3
46 3
46 3
46 3
46 3
46 3
31 3
23 3
23 3
23 3
23 3
23 3
23 3
23 3
23 3
14 2
14 2
14 2
14 2
14 2
14 2
14 2
14 2
14 2
14 2
13 1
13 1
13 1
13 1
22 1
28 1
35 2
52 2
56 2
92 2
95 2
95 2
95 2
94 2
94 2
96 2
96 2
96 2
96 2
96 2
96 2
96 2
96 2
101 2
101 2
101 2
101 2
100 2
100 2
99 2
92 2
92 2
92 2
92 2
92 2
92 2
91 2
91 2
91 2
90 2
90 2
89 2
89 2
89 2
89 2
89 2
89 2
86 2
85 1
85 1
85 1
85 1
85 1
85 1
86 1
85 1
86 1
86 1
94 1
94 1
94 1
98 1
98 1
100 1
100 1
100 1
102 1
102 1
102 1
102 1
102 1
102 1
102 1
102 1
102 1
102 1
107 1
98 1
92 1
76 0
65 0
65 0
32 0
31 0
31 0
31 0
31 0
33 0
32 0
32 0
32 0
32 0
32 0
51 0
94 0
128 0
129 0
130 0
131 0
131 0
131 0
131 0
131 0
131 0
131 0
132 0
132 0
132 0
132 0
132 0
141 0
248 0
286 0
313 0
317 0
321 0
322 0
323 0
323 0
325 0
326 0
326 0
326 0
326 0
326 0
328 0
344 0
343 0
363 0
368 0
377 0
372 0
372 0
375 0
371 0
371 0
367 0
367 0
367 0
365 0
365 0
365 0
365 0
365 0
365 0
365 0
365 0
365 0
367 0
362 0
359 0
359 0
359 0
359 0
357 0
357 0
357 0
357 0
357 0
357 0
357 0
357 0
357 0
357 0
357 0
357 0
340 0
296 0
266 0
266 0
267 0
267 0
267 0
267 0
266 0
266 0
266 0
266 0
266 0
264 0
265 0
225 0
204 0
194 0
110 0
72 0
46 0
40 0
23 0
23 0
22 0
22 0
19 0
19 0
17 0
16 0
16 0
16 0
16 0
16 0
16 0
15 0
13 0
13 0
13 0
13 0
13 0
14 0
14 0
14 0
14 0
13 0
13 0
13 0
13 0
13 0
13 0
13 0
13 0
13 0
12 0
12 0
12 0
12 0
12 0
12 0
12 0
12 0
12 0
12 0
12 0
12 0
12 0
12 0
12 0
12 0
12 1
12 1
12 2
12 2
12 2
12 2
9 2
7 2
6 2
6 2
6 2
7 2
7 2
7 2
7 2
7 2
6 2
5 2
5 2
5 2
5 2
5 2
6 2
6 2
5 2
5 2
6 2
6 2
9 2
8 2
8 2
8 2
8 2
8 2
8 2
8 2
8 2
8 2
8 2
8 2
8 2
8 2
8 2
8 2
8 2
8 2
8 1
9 1
8 0
8 0
8 0
8 0
8 0
8 0
8 0
8 0
8 0
8 0
8 0
8 0
8 0
8 0
8 0
8 0
8 0
8 0
8 0
8 0
8 0
8 0
8 0
13 0
13 0
13 0
13 0
13 0
13 0
14 0
15 0
15 0
15 0
15 0
26 0
25 0
40 0
45 0
50 0
52 0
52 0
52 0
52 0
52 0
52 0
56 0
57 0
60 0
65 0
71 0
82 0
82 0
82 0
78 0
78 0
78 0
90 0
90 0
92 0
94 0
126 0
128 0
128 0
128 0
128 0
130 0
130 0
130 0
130 0
129 0
129 0
128 0
128 0
128 0
128 0
128 0
128 0
128 0
128 0
129 0
129 0
129 0
129 0
129 0
129 0
129 0
129 0
134 0
142 0
143 0
145 0
145 0
145 0
144 0
144 0
141 0
99 0
99 0
64 0
64 0
64 0
64 0
64 0
64 0
64 0
64 0
64 0
64 0
64 0
63 0
63 0
60 0
58 0
59 0
59 0
59 0
60 0
60 0
60 0
60 0
55 0
54 0
52 0
49 0
49 0
49 0
49 0
49 0
49 0
49 0
49 0
50 0
50 0
30 0
30 0
30 0
30 0
30 0
30 0
30 0
30 0
34 0
34 0
34 0
35 0
35 0
34 0
34 0
34 0
34 0
34 0
34 0
33 0
33 0
33 0
33 0
33 0
32 0
31 0
31 0
28 0
19 0
19 0
17 0
17 0
17 0
17 0
17 0
17 0
16 0
14 0
14 0
14 0
14 0
14 0
14 0
13 0
13 0
13 0
13 0
13 0
13 0
12 0
12 0
10 0
10 0
9 0
10 0
11 0
10 0
10 0
10 0
10 0
10 0
11 0
11 0
9 0
9 0
9 0
9 0
9 0
9 0
9 0
9 0
9 0
9 0
9 0
9 0
9 0
9 0
9 0
10 0
9 0
9 0
5 0
5 0
4 0
4 0
4 0
4 0
4 0
5 0
5 0
5 0
5 0
5 1
5 1
5 1
5 1
5 1
5 1
5 1
5 1
5 1
5 1
5 1
5 1
5 1
5 1
5 1
5 0
5 0
5 0
5 0
5 0
5 0
5 0
5 0
6 0
6 0
6 0
6 0
6 0
6 0
6 0
6 0
7 0
7 0
7 0
7 0
6 0
5 0
5 0
5 0
5 0
5 0
5 0
4 0
4 0
4 0
4 0
4 0
4 0
4 0
4 0
5 0
6 0
6 0
6 0
6 0
6 0
6 0
6 0
6 0
5 0
5 0
5 0
5 0
5 0
5 0
5 0
5 0
5 0
5 0
4 0
4 0
4 0
4 0
4 0
4 0
4 0
4 0
4 0
4 0
4 0
4 0
4 0
4 0
4 0
4 0
4 0
4 0
5 0
7 0
7 0
7 0
7 0
7 0
7 0
6 0
6 0
6 0
6 0
6 0
6 0
6 0
6 0
7 0
6 0
6 0
6 0
6 0
6 0
6 0
6 0
6 0
6 0
6 0
7 0
8 0
8 2
8 2
8 2
8 2
8 2
8 2
7 2
7 2
7 2
6 2
6 2
6 2
6 2
6 2
6 2
6 2
4 2
4 2
4 2
4 2
4 2
4 2
4 2
4 2
4 2
4 2
4 2
4 2
4 2
4 2
4 2
4 2
4 2
4 2
4 1
4 0
4 0
4 0
4 0
4 0
4 0
4 0
4 0
4 0
4 0
4 0
3 0
3 0
3 0
3 0
5 0
6 0
6 0
6 0
6 0
6 0
6 0
6 0
10 0
10 0
10 0
10 0
10 0
10 0
10 0
11 0
11 0
11 0
11 0
12 0
11 0
13 0
12 0
12 0
12 0
12 0
12 0
12 0
12 0
12 0
12 0
12 0
12 0
13 0
13 0
13 0
13 0
13 0
14 0
14 0
14 0
14 0
14 0
14 0
14 0
15 0
15 0
25 5
25 5
26 5
26 5
26 5
26 5
26 5
26 5
26 5
26 5
26 5
26 5
26 5
27 5
27 5
27 5
27 5
27 5
27 5
27 5
27 5
27 5
27 5
27 5
27 5
27 5
24 5
24 5
24 5
24 5
24 5
24 5
24 5
24 5
20 4
20 4
19 4
19 3
19 3
19 3
19 3
19 3
20 3
39 5
39 5
40 5
46 5
51 5
57 5
59 5
59 5
59 5
59 5
59 5
59 5
59 5
59 5
59 5
59 5
58 5
58 5
58 5
58 5
60 5
59 6
59 6
59 6
59 6
59 6
59 6
58 6
57 6
57 5
47 3
47 3
47 3
47 3
47 3
47 3
47 3
47 3
47 3
53 3
53 3
53 3
59 3
58 3
58 3
58 3
58 3
58 3
58 3
58 3
58 3
58 3
58 3
59 3
59 3
59 3
59 3
62 4
63 4
63 4
63 4
63 4
64 4
64 4
64 4
64 4
64 4
63 4
58 4
58 4
52 3
50 3
47 3
24 2
24 2
23 2
23 2
5 2
5 2
5 2
5 2
5 2
5 2
5 2
5 2
5 2
7 2
7 3
8 3
8 3
8 3
8 3
9 3
10 3
10 2
10 2
10 2
10 2
10 2
10 2
10 2
10 2
10 2
10 2
10 2
10 2
10 2
10 2
10 2
10 2
10 2
10 2
10 2
10 2
10 2
10 2
10 2
10 2
10 2
10 2
10 2
10 2
10 2
10 2
10 2
10 2
10 2
10 2
10 2
10 2
8 1
7 1
7 1
7 1
7 1
7 1
7 1
7 1
7 1
7 1
7 1
7 1
6 1
6 1
6 1
6 1
6 1
7 1
7 1
7 1
12 1
12 1
12 1
12 1
12 1
12 1
12 1
12 1
12 1
10 0
10 0
8 0
8 0
10 0
9 0
9 0
9 0
9 0
9 0
9 0
9 0
9 0
9 0
9 0
9 0
9 0
9 0
9 0
9 0
10 0
10 0
10 0
10 0
10 0
10 0
10 0
10 0
10 0
10 0
10 0
10 0
10 0
11 0
11 0
12 0
12 0
12 0
12 0
13 0
13 0
13 0
14 0
14 0
14 0
14 0
14 0
14 0
14 0
13 0
13 0
13 0
13 0
15 0
20 0
24 0
24 0
28 0
33 0
38 0
40 0
39 0
39 0
39 0
34 0
34 0
34 0
35 0
35 0
35 0
37 0
37 0
37 0
37 0
37 0
37 0
37 0
34 0
34 0
33 0
35 0
35 0
35 0
35 0
35 0
35 0
35 0
35 0
35 0
35 0
43 0
43 0
43 0
38 0
36 0
38 0
38 0
38 0
38 0
38 0
38 0
39 0
39 0
39 0
39 0
37 0
33 0
38 0
39 0
39 0
39 0
33 0
33 0
33 0
33 0
32 0
32 0
32 0
32 0
32 0
32 0
32 0
32 0
32 0
32 0
31 0
[truncated: 23,949,008 more chars]
