# Supplementary material for: From Insect to Man: Photorhabdus Sheds Light on the Emergence of Human Pathogenicity
Source: PLoS One. 2015 Dec 17;10(12):e0144937. doi: 10.1371/journal.pone.0144937 (PMC4683029; doi:10.1371/journal.pone.0144937)
Supplement: S2 Data — (ZIP) [file pone.0144937.s002.zip › ATCC43949_28C_Expo_rep3.plot]

65 0
65 0
66 0
66 0
66 0
67 0
68 0
68 0
70 0
71 0
85 0
86 0
86 0
86 0
86 2
86 2
86 2
86 3
86 3
86 3
86 3
86 3
86 3
86 5
98 6
98 6
98 6
98 7
98 7
98 7
98 7
98 7
98 7
98 7
99 7
99 7
99 7
104 7
115 8
126 8
126 9
128 9
130 9
131 9
134 9
135 9
136 9
136 9
139 9
140 9
141 9
141 9
141 9
136 9
131 9
92 9
89 9
88 9
87 9
88 9
87 9
87 9
86 9
86 9
85 9
86 9
86 9
86 9
86 9
86 9
86 9
86 10
86 10
86 10
86 10
86 10
86 10
87 11
88 11
88 11
88 11
88 11
89 11
89 12
89 12
87 12
87 12
87 12
87 12
87 12
87 12
88 12
101 18
103 18
103 18
103 18
105 18
105 18
105 18
112 18
120 18
121 18
121 18
120 18
120 18
124 17
130 28
129 28
128 28
128 29
114 29
114 29
115 29
116 29
116 29
117 29
129 28
131 28
132 29
132 29
132 29
132 29
132 29
132 27
121 25
121 25
121 25
121 25
122 25
122 25
122 25
122 25
122 25
122 25
121 25
122 25
122 25
116 25
107 24
97 24
100 23
99 23
98 23
101 24
100 25
100 26
100 26
101 26
96 26
96 26
95 26
95 26
95 26
95 26
94 26
93 26
93 26
90 26
89 26
89 26
90 26
91 26
91 26
91 26
91 26
91 26
92 27
92 27
95 27
98 27
99 26
99 26
99 26
99 26
100 27
100 27
101 27
100 26
99 26
99 26
99 25
99 25
98 25
98 25
100 25
100 25
100 26
100 26
100 26
102 26
102 26
100 26
88 22
87 23
87 24
87 24
85 25
85 25
81 25
73 25
71 25
71 26
67 26
65 25
65 25
64 25
61 13
61 13
61 13
61 13
66 13
79 12
79 12
79 12
79 12
78 12
67 12
65 12
64 11
64 11
64 11
64 11
64 11
64 11
67 11
67 11
67 11
67 11
66 11
70 11
70 11
71 11
72 11
72 11
72 11
69 11
67 11
66 11
66 11
66 11
64 11
64 10
63 10
60 8
58 8
57 8
57 8
56 8
56 8
54 8
54 8
54 8
54 8
56 8
57 8
60 8
70 8
74 8
74 8
77 8
77 8
76 8
76 8
76 8
76 8
75 8
75 7
75 7
72 7
69 7
68 7
68 8
68 8
69 8
68 7
68 7
67 7
67 7
67 7
67 7
67 7
67 7
67 7
69 7
67 7
67 7
67 6
67 6
66 6
65 6
65 6
65 6
64 3
66 6
66 6
71 6
81 5
87 6
87 6
87 6
83 6
83 5
83 5
83 5
83 5
83 5
81 5
80 5
78 5
76 5
73 5
61 5
62 5
62 5
62 5
66 5
67 5
67 5
67 5
68 5
69 5
72 5
76 5
81 5
88 5
88 8
89 8
90 8
91 8
89 8
90 9
90 9
89 9
89 9
89 9
89 10
89 10
89 10
89 10
89 10
89 10
89 10
89 10
89 10
89 10
89 10
89 10
89 10
93 10
93 10
94 10
94 10
94 10
91 10
91 10
87 10
76 10
74 10
73 10
74 10
73 10
73 10
73 10
73 10
73 10
73 10
72 11
72 11
73 11
74 11
75 11
75 10
75 10
76 10
76 10
76 10
76 10
76 10
76 10
76 10
75 10
75 10
77 10
75 10
75 10
74 10
74 10
74 10
74 10
75 10
85 12
85 12
85 12
85 9
88 8
85 8
79 8
74 8
74 8
75 8
75 8
82 8
83 9
83 9
83 9
83 9
83 9
83 9
83 9
83 9
84 9
83 9
82 9
83 9
89 9
84 9
82 9
83 8
84 8
79 8
82 8
100 9
96 9
93 9
88 8
87 6
87 6
86 6
85 6
81 6
81 5
83 5
85 4
86 4
87 4
87 4
88 4
88 4
88 7
88 8
88 8
88 8
88 8
88 8
88 8
89 8
89 10
89 10
85 10
85 10
84 10
86 10
86 10
86 10
86 10
86 10
86 10
86 10
86 10
83 10
83 10
84 10
84 10
84 10
84 10
84 10
84 10
84 10
83 10
82 10
81 10
81 10
80 10
79 10
79 10
79 10
79 10
79 10
79 10
79 10
79 10
79 10
77 10
77 10
77 10
77 10
77 10
77 10
78 10
77 10
68 8
66 8
66 8
60 8
67 8
69 9
70 9
70 9
70 9
68 9
68 9
62 9
62 9
62 9
64 9
65 9
66 9
67 9
67 9
69 9
69 9
71 9
73 9
72 9
66 9
66 9
66 8
60 8
60 8
59 7
63 8
46 7
47 7
51 7
54 7
66 7
68 7
70 7
73 7
79 7
80 7
78 7
76 7
75 7
75 7
75 7
75 7
75 6
77 3
77 3
77 3
77 3
77 3
77 3
77 3
77 3
77 3
77 3
77 3
77 3
76 3
75 3
75 3
75 3
75 3
75 3
75 3
79 3
81 3
82 3
82 3
81 3
83 3
87 3
93 3
93 3
94 2
95 2
99 2
99 2
106 2
106 2
106 2
106 2
106 2
106 2
106 2
106 2
106 2
106 2
106 2
107 2
107 2
107 2
107 2
106 2
106 2
106 2
106 2
104 2
104 2
104 2
106 2
108 2
106 2
107 1
108 1
109 1
109 1
115 1
120 1
133 1
145 1
147 1
158 1
158 1
160 1
163 1
163 1
161 1
159 1
158 1
155 1
156 1
156 1
157 1
159 1
161 1
160 1
160 1
159 0
158 0
155 0
153 0
149 0
135 0
136 0
134 0
132 0
131 0
140 0
155 0
158 0
170 0
170 0
170 0
170 0
170 0
168 0
168 0
168 0
168 0
168 0
169 0
170 0
178 0
182 0
182 0
182 0
182 0
183 0
183 0
183 0
183 0
183 0
184 0
184 0
180 0
178 0
177 0
178 0
178 0
173 0
171 0
167 0
170 0
171 0
169 0
172 2
173 2
167 2
168 2
168 2
168 2
168 2
169 2
169 2
170 2
170 2
170 2
170 2
169 2
169 2
169 2
169 2
169 2
169 2
169 2
171 2
171 2
171 2
173 2
171 2
173 2
166 2
164 2
166 2
165 2
165 2
169 2
169 2
157 2
148 2
144 2
133 2
132 2
130 2
128 2
129 2
128 2
128 2
128 2
130 2
131 2
130 2
133 2
139 2
150 2
157 2
157 2
157 2
158 3
158 3
159 3
164 3
165 5
164 5
164 5
162 5
156 5
147 6
133 9
143 54
134 55
137 65
138 73
138 73
139 81
139 84
139 84
138 84
138 84
141 84
143 84
143 84
133 84
135 84
135 84
135 84
137 85
142 86
192 106
196 106
197 106
198 106
198 106
199 106
201 106
206 106
209 106
208 106
208 106
208 106
208 106
209 107
208 107
223 111
233 111
255 113
256 113
254 113
254 113
254 113
254 113
256 113
256 113
256 113
256 113
258 114
258 114
260 114
272 123
279 126
287 128
317 152
323 156
326 156
326 156
324 156
324 156
324 156
322 156
321 156
316 156
316 156
315 156
310 156
307 156
306 156
291 156
291 156
291 156
291 156
291 156
290 156
290 156
290 156
289 156
289 156
293 157
294 157
293 157
295 157
292 158
292 158
283 158
275 158
264 158
261 158
261 158
261 158
260 157
260 157
260 156
254 154
254 154
253 153
253 153
253 153
253 153
254 152
257 148
244 84
242 76
239 76
238 76
238 76
238 76
247 78
246 78
247 79
248 79
247 79
245 79
247 80
256 80
250 79
250 78
247 78
226 71
224 70
187 56
187 56
187 56
189 56
189 56
188 56
181 54
178 54
183 54
183 54
184 54
184 54
183 54
180 53
179 53
163 51
155 51
129 49
129 49
129 49
130 49
134 49
134 49
134 49
132 49
133 49
133 49
132 45
127 44
112 40
100 33
93 31
90 31
71 6
70 6
69 6
69 6
69 6
69 6
69 6
69 6
69 6
69 6
69 6
73 6
77 6
77 6
77 6
77 6
79 6
79 6
81 6
84 6
114 6
143 6
159 7
174 7
174 7
175 6
175 6
175 6
172 5
173 5
174 5
173 5
176 5
176 5
176 5
176 5
176 5
176 5
175 5
175 5
175 5
175 5
175 5
175 5
175 5
175 5
175 5
172 5
172 5
173 5
174 7
175 7
176 7
176 7
165 5
163 5
162 4
161 4
161 4
161 4
163 3
156 3
156 3
151 3
148 3
149 3
151 3
151 3
151 3
150 3
150 3
150 3
150 3
150 3
153 3
149 3
149 3
149 3
149 3
149 3
149 3
149 3
149 3
149 3
147 3
147 3
147 3
147 3
143 3
143 3
143 3
143 3
145 3
145 3
143 3
142 3
142 3
142 3
142 3
142 3
142 3
142 3
142 3
142 3
142 3
143 3
144 3
145 3
148 3
152 3
152 3
148 3
147 3
148 3
160 3
161 3
160 3
158 3
165 6
179 6
147 6
121 6
108 5
94 5
94 5
92 5
91 5
90 5
90 5
88 5
88 5
88 5
87 5
87 5
87 5
87 5
87 5
89 5
89 5
89 5
90 5
90 5
90 5
90 5
89 5
89 5
91 5
91 5
91 5
90 4
89 3
90 3
89 3
89 3
89 3
89 3
89 3
95 3
95 3
97 3
94 3
93 3
93 3
93 3
93 3
90 3
91 3
91 3
91 3
91 3
91 3
92 4
93 4
95 4
92 4
92 4
93 4
96 4
96 4
96 4
96 4
96 4
96 4
97 4
99 4
99 4
99 4
100 4
100 4
99 4
98 4
97 4
93 4
93 4
93 4
93 4
93 4
93 4
93 4
91 4
91 4
91 4
91 4
91 4
91 4
90 4
85 4
85 4
83 4
78 4
79 4
79 4
79 4
75 4
67 4
66 4
57 3
55 3
49 1
35 1
35 1
35 1
34 1
33 1
33 1
33 1
33 1
33 1
33 1
33 1
33 1
33 1
33 1
33 1
33 1
31 1
32 1
32 1
35 2
35 3
35 3
35 3
35 3
35 3
37 3
38 3
36 3
36 3
36 3
36 3
35 3
34 3
34 3
34 3
34 3
34 3
35 3
30 3
30 3
28 3
29 3
30 3
31 3
38 3
47 3
48 3
47 3
49 3
50 3
50 3
56 3
55 2
54 2
52 2
52 2
52 2
50 2
48 2
48 2
48 2
49 2
49 2
51 2
50 2
49 2
50 2
50 2
50 2
50 2
50 2
50 2
50 2
50 2
50 2
50 2
50 2
50 2
50 2
50 2
50 2
51 2
53 2
53 2
53 2
53 2
53 2
55 2
55 2
55 2
54 2
53 2
53 2
55 2
55 2
55 2
55 2
59 2
58 2
58 2
57 2
57 2
57 2
57 2
57 2
58 2
59 2
59 2
59 2
59 2
59 2
61 2
62 2
62 2
63 1
78 1
103 2
102 2
101 2
102 2
102 1
101 1
102 1
103 1
109 1
108 1
118 1
119 1
119 1
121 1
122 1
125 1
125 1
125 1
125 1
125 1
125 1
123 1
123 1
123 1
123 1
122 1
120 1
117 1
112 1
107 2
106 2
105 2
102 2
102 2
102 2
96 2
96 2
96 2
96 2
95 2
95 2
96 2
96 3
96 3
95 3
95 3
96 3
94 3
94 3
95 3
94 3
94 3
95 3
95 3
95 3
95 3
95 3
95 3
95 3
95 3
97 3
99 3
99 3
99 3
101 3
101 3
101 3
114 3
114 3
114 3
114 3
113 3
113 3
117 3
119 3
123 3
123 3
121 3
121 3
121 3
121 3
117 3
117 3
117 3
117 3
117 3
119 3
121 3
121 3
121 3
123 3
124 3
129 3
151 3
156 3
157 3
157 3
153 2
159 2
147 2
126 2
126 2
127 2
129 2
129 2
131 2
127 2
129 2
122 2
122 2
116 2
116 2
116 2
114 2
114 2
115 2
115 2
115 2
115 2
115 2
115 2
115 2
115 2
116 2
117 2
121 3
122 3
123 3
122 3
119 2
122 2
122 2
124 2
123 2
123 2
124 3
125 3
129 3
135 3
135 4
135 4
134 4
138 3
138 3
138 3
138 3
137 3
137 3
136 3
136 3
136 3
138 3
141 3
145 3
146 3
146 3
146 3
148 3
148 3
152 3
155 3
156 3
160 3
158 3
157 3
155 3
155 3
142 4
142 4
142 6
142 6
141 6
141 6
137 6
134 6
130 6
130 6
133 6
132 6
134 6
136 6
141 6
147 6
223 9
227 9
229 9
228 9
228 9
235 9
236 9
236 9
233 9
227 9
209 9
202 9
201 9
200 9
196 9
185 9
186 9
186 9
187 9
185 9
185 9
185 9
182 9
182 9
179 9
178 9
178 9
178 9
178 9
178 9
179 9
179 9
176 9
176 9
176 9
176 9
176 9
176 9
176 9
176 9
175 9
174 9
171 8
170 8
170 8
173 8
173 8
171 9
175 10
174 10
174 10
173 9
173 10
170 10
165 10
162 10
162 9
162 9
163 9
159 9
159 9
159 9
160 9
161 9
161 9
161 9
161 9
161 9
162 9
162 9
160 9
159 9
158 9
158 9
157 7
157 7
152 7
149 7
145 7
142 7
142 7
142 7
142 7
142 7
142 7
142 7
143 6
143 6
143 6
143 6
143 6
144 6
146 6
148 6
162 8
172 8
172 9
169 9
163 9
159 9
91 6
89 6
87 6
85 6
85 6
80 6
81 6
85 6
88 6
92 6
101 6
103 6
105 6
107 6
110 6
110 6
112 6
112 6
111 6
111 6
111 6
111 6
111 6
111 6
111 6
111 6
111 6
111 6
111 6
110 6
110 6
110 6
110 7
110 7
110 7
111 7
111 7
111 7
111 7
111 7
111 7
111 8
110 8
111 8
111 8
111 8
110 8
110 7
112 6
112 5
112 5
112 5
113 5
114 5
120 5
121 5
121 5
120 5
122 5
122 5
125 5
125 5
125 5
124 5
127 5
127 5
127 5
125 5
120 5
118 5
118 6
118 6
118 6
118 6
118 6
117 6
117 6
117 6
117 6
117 6
117 6
116 6
116 6
116 6
116 6
116 6
115 6
115 6
114 5
112 5
112 5
101 5
98 5
98 5
80 4
71 3
69 3
69 3
64 3
64 3
64 3
62 3
62 3
62 3
61 3
61 2
60 2
56 2
52 2
50 2
46 2
43 2
41 2
40 2
40 2
39 2
36 2
36 2
36 2
36 2
36 2
36 2
37 2
37 2
37 2
38 2
38 2
38 2
38 2
38 2
38 2
38 2
38 1
38 1
37 1
44 1
52 1
54 1
56 1
57 1
59 1
59 1
60 1
58 1
58 1
55 1
55 1
56 1
49 1
50 1
50 1
50 1
56 1
56 1
52 1
52 1
53 1
52 1
53 1
53 1
51 1
54 1
54 1
56 1
54 1
54 1
55 1
55 1
55 0
55 0
55 0
55 0
55 0
56 0
56 0
56 0
56 0
56 0
56 0
56 0
57 0
67 0
69 0
70 0
70 0
72 0
75 0
78 0
78 0
94 0
94 0
94 0
93 0
92 0
89 0
90 0
92 0
102 0
103 0
104 0
104 0
104 0
104 0
104 0
104 0
104 0
104 0
104 0
104 0
104 0
103 0
103 0
103 0
102 0
103 0
103 0
103 0
103 0
103 0
102 0
102 0
110 0
128 0
141 0
141 0
141 0
141 0
141 0
143 0
146 0
146 0
147 0
147 0
148 0
149 0
140 0
134 0
136 0
135 0
137 1
136 1
136 1
136 1
136 1
137 1
136 1
138 1
139 1
140 1
142 1
144 1
144 1
136 1
136 1
136 1
137 1
136 1
147 1
146 1
146 1
145 1
141 1
141 1
140 1
140 1
140 1
139 1
139 1
139 1
139 1
139 1
139 1
139 1
138 1
138 1
138 1
139 1
141 1
143 2
150 2
149 2
163 2
162 2
161 2
160 2
161 2
158 2
158 2
158 2
142 2
143 3
143 3
143 3
143 3
143 3
147 3
157 4
151 4
152 4
153 4
153 4
154 4
155 4
155 4
155 4
155 4
156 4
156 4
156 4
156 4
173 4
173 4
175 4
175 5
174 5
174 5
179 5
180 5
202 5
204 5
204 5
193 5
178 5
168 5
169 5
168 5
168 5
168 5
166 5
163 5
161 5
161 5
161 5
160 6
159 6
159 6
158 6
158 6
155 5
153 5
153 5
161 6
206 6
232 7
232 7
236 7
233 7
232 7
254 7
259 7
262 7
273 7
277 7
277 7
278 7
277 7
277 7
266 7
267 7
267 7
267 7
266 7
266 7
266 7
266 7
266 7
266 7
266 7
266 7
271 7
271 7
271 7
271 7
271 7
271 7
272 7
271 7
269 6
268 6
261 6
260 6
235 6
235 6
235 6
236 6
233 6
231 6
237 6
238 6
239 6
239 5
246 6
246 6
244 6
244 6
240 5
226 5
223 5
223 5
222 5
222 5
222 5
221 5
229 5
229 5
233 5
234 5
234 5
234 5
233 5
216 5
217 4
216 4
216 4
216 4
213 4
210 4
208 4
187 4
186 4
186 4
186 4
185 4
185 4
184 4
184 4
183 4
183 4
183 4
184 5
184 5
184 5
188 5
190 4
191 4
191 4
190 4
188 4
188 4
178 3
150 3
133 3
99 3
94 2
84 2
84 2
82 2
77 2
61 2
59 2
58 2
58 2
58 2
59 2
59 2
60 2
61 2
61 2
61 2
62 2
62 2
62 2
67 2
75 2
76 2
76 2
79 4
78 4
78 4
76 4
77 4
77 4
77 4
81 4
81 4
80 4
82 4
81 4
82 4
82 4
82 4
83 4
95 4
96 4
124 4
124 4
124 4
119 4
118 4
115 4
116 4
109 3
110 3
109 3
110 3
111 3
111 3
118 3
118 3
118 3
118 3
116 3
117 3
112 3
113 3
112 3
111 3
111 3
111 3
111 3
111 3
150 3
151 3
154 3
155 3
156 3
156 3
160 3
160 3
162 3
163 3
167 3
172 3
172 2
172 2
172 2
172 2
173 2
173 4
172 5
172 5
171 5
167 5
166 5
165 5
166 5
167 5
169 5
170 5
169 5
168 5
168 5
168 5
167 5
167 5
168 5
169 5
166 5
166 5
165 5
164 5
164 5
164 5
162 5
162 5
161 5
160 5
160 5
159 5
158 5
158 5
157 5
156 5
148 5
154 5
157 5
158 3
158 3
160 3
159 4
167 4
171 4
180 4
177 4
183 4
183 4
180 4
180 4
180 4
180 4
179 4
176 4
168 4
166 4
137 4
137 4
137 4
136 4
136 4
141 4
144 4
144 4
144 4
144 5
144 5
143 5
143 5
137 5
137 5
136 5
137 5
140 5
143 5
142 5
140 5
138 5
138 5
156 5
158 5
192 7
193 7
152 7
155 7
152 7
153 7
153 7
153 7
149 7
149 7
148 7
147 7
144 7
148 7
151 7
153 7
154 7
155 8
156 8
159 8
163 7
163 7
164 7
164 9
164 9
164 10
163 13
162 13
160 13
159 13
158 13
158 13
158 13
158 13
158 13
157 13
156 13
157 13
159 13
160 13
161 13
161 13
165 13
166 13
166 13
218 13
222 13
316 13
323 13
328 13
338 13
341 13
352 14
350 14
348 14
343 14
341 14
336 14
335 15
332 16
332 15
325 15
319 15
313 15
313 15
308 15
308 15
311 15
311 15
311 15
312 15
312 15
312 15
312 15
311 15
315 15
317 15
323 16
323 16
324 16
319 15
317 15
318 15
317 15
331 20
331 20
331 20
334 20
338 20
339 20
339 20
337 20
333 20
329 20
329 20
331 20
331 20
328 21
310 21
310 21
273 19
271 19
271 19
270 19
279 19
284 19
291 19
295 19
297 19
300 19
301 19
298 19
298 19
297 19
297 19
292 19
292 18
291 18
291 18
289 16
286 16
286 16
285 16
285 14
285 14
285 13
287 11
287 10
288 10
288 10
288 10
288 10
288 10
288 10
288 10
293 10
299 10
321 10
338 10
339 10
343 10
357 12
355 12
359 12
400 13
371 13
387 13
343 14
349 14
349 14
349 14
355 14
347 13
391 13
402 13
462 14
468 14
469 14
469 14
469 13
472 13
473 13
481 13
483 13
484 13
487 15
487 15
486 15
488 15
489 15
490 15
494 15
494 15
494 15
494 15
488 15
484 15
480 14
480 14
479 14
478 14
478 14
479 14
478 14
465 9
465 9
465 9
464 9
460 9
459 9
459 9
459 9
459 9
459 9
459 8
457 8
457 8
457 8
457 8
457 8
457 8
457 8
457 8
456 8
441 8
438 8
433 8
429 8
426 8
425 8
424 8
423 8
421 8
419 8
419 8
418 8
418 8
418 8
418 8
417 8
417 8
417 8
417 8
417 8
417 8
417 8
415 8
415 8
414 8
414 8
414 8
414 8
414 8
414 8
412 8
391 8
384 8
363 8
349 7
346 7
337 7
313 5
302 5
293 5
254 5
247 4
230 4
182 4
177 4
162 4
148 3
127 3
117 3
86 3
86 3
43 2
39 0
36 0
35 0
32 0
32 0
31 0
26 0
26 0
26 0
22 0
22 0
21 0
21 0
21 0
21 0
21 0
21 0
21 0
21 0
21 0
21 0
22 0
22 0
22 0
22 0
21 0
20 0
20 0
20 0
20 0
20 0
22 0
22 0
22 0
22 0
22 0
22 0
23 0
23 0
23 0
23 0
23 0
23 0
23 0
24 0
24 0
24 0
24 0
24 0
24 0
24 0
24 0
23 0
23 0
23 0
23 0
23 0
23 0
24 0
25 0
26 0
26 0
28 0
29 0
29 0
29 0
29 0
29 0
29 0
29 0
30 0
30 0
31 0
31 0
32 0
32 0
32 0
33 0
33 0
31 0
29 0
29 0
26 0
26 0
25 0
27 0
27 0
26 0
26 0
25 0
24 0
24 0
24 0
24 0
24 0
24 0
24 0
25 0
25 0
24 0
24 0
25 0
27 0
29 0
29 0
30 0
30 0
29 0
31 0
31 0
30 0
30 0
30 0
30 0
30 0
30 0
30 0
30 0
32 0
33 0
33 0
33 0
34 0
34 0
34 0
34 0
34 0
35 1
35 1
35 1
36 1
35 1
35 1
35 1
35 1
35 1
35 1
34 1
34 1
34 1
34 1
34 1
34 1
35 1
34 1
35 1
35 1
35 1
37 1
37 1
37 1
37 2
38 2
38 2
37 2
36 2
36 2
37 2
36 2
36 2
36 2
43 2
39 2
39 2
39 2
39 2
39 2
39 2
39 2
40 2
41 3
46 3
48 3
53 3
59 3
59 3
62 3
61 3
61 3
62 3
62 3
61 3
61 3
61 3
61 3
59 3
65 3
65 3
64 3
64 3
64 3
64 3
64 3
64 3
64 3
64 3
64 3
64 3
69 3
69 3
68 3
66 3
65 3
64 3
71 3
72 3
71 3
71 3
69 3
69 3
69 3
68 3
68 3
68 3
68 3
69 3
69 3
69 3
68 3
69 3
69 3
69 3
68 3
68 3
68 3
68 3
67 3
67 2
67 2
67 2
66 2
66 2
66 2
66 2
66 2
66 2
66 2
66 2
66 2
66 2
66 2
66 2
66 2
68 2
68 2
67 1
67 1
67 1
66 1
67 1
67 1
67 1
66 1
66 1
66 1
68 1
71 1
70 1
69 1
70 1
70 1
63 1
63 1
63 1
63 1
63 1
63 1
62 1
63 1
62 1
59 0
62 0
59 0
81 0
76 0
76 0
74 0
80 0
80 0
80 0
79 0
80 0
80 0
81 0
81 0
81 0
75 0
90 0
92 0
92 0
92 0
92 0
92 0
92 0
92 0
92 0
92 0
94 0
90 0
91 0
91 0
92 0
92 0
92 0
92 0
96 0
98 0
102 0
102 0
103 0
104 0
104 0
106 0
106 0
108 0
108 0
110 0
112 0
114 0
112 0
113 0
115 0
116 0
116 0
116 0
117 0
117 0
117 0
119 0
120 0
120 0
122 0
122 0
123 0
123 0
124 0
127 0
129 0
130 0
130 0
135 0
163 0
163 0
170 0
173 0
176 0
184 0
184 0
204 0
206 0
206 0
210 0
214 0
221 0
233 1
253 1
251 1
252 1
255 1
254 1
254 1
255 1
255 1
255 1
255 1
255 1
255 1
255 1
254 1
254 1
253 1
245 1
250 1
226 1
223 1
224 1
224 1
219 1
219 1
219 1
219 1
218 1
218 1
217 1
217 1
217 1
216 1
200 1
199 1
198 1
198 1
198 1
199 1
207 2
207 2
207 2
207 2
207 2
207 2
206 2
208 2
209 2
217 2
217 2
228 2
226 2
226 2
222 2
222 2
220 2
219 2
218 2
217 2
217 2
223 2
224 2
226 2
234 2
239 2
239 2
252 2
251 2
252 2
253 2
253 2
252 2
255 2
255 2
252 2
251 2
254 2
252 2
264 3
262 3
265 3
266 3
265 3
263 3
261 3
261 3
255 3
228 3
226 3
217 3
212 3
217 3
212 3
213 3
199 3
200 3
195 3
194 3
190 3
181 2
169 2
151 2
149 2
150 2
150 2
150 2
150 2
150 2
150 2
159 2
159 2
161 2
161 3
161 3
161 3
161 3
161 3
162 3
157 3
158 3
159 3
158 3
158 3
162 3
162 3
163 3
163 3
163 3
163 3
165 3
167 3
169 3
169 3
172 3
172 3
173 3
171 3
171 3
172 3
171 2
171 2
172 2
171 2
171 2
169 2
166 2
165 2
170 2
164 2
163 2
149 2
148 2
148 2
170 2
173 2
189 2
195 2
203 2
204 2
205 5
197 5
200 5
198 5
187 5
185 5
184 5
173 5
172 5
170 5
170 5
170 5
168 5
167 5
167 5
167 5
167 5
165 5
168 5
158 4
160 4
165 4
166 4
166 4
166 4
168 4
170 4
183 4
184 4
186 4
186 4
185 4
178 4
176 4
171 4
168 4
170 4
169 4
169 4
174 4
174 4
177 4
178 4
192 4
195 4
204 4
205 4
206 4
206 4
206 4
198 3
239 3
253 3
255 3
285 3
294 3
300 4
303 4
302 5
302 5
300 6
300 6
300 6
300 6
296 6
296 6
295 6
295 6
295 6
295 6
292 6
290 6
290 6
291 6
288 6
289 4
286 4
286 4
285 5
284 5
279 5
279 5
280 5
280 5
280 5
276 5
283 5
334 5
346 5
357 5
369 5
370 5
374 5
370 5
351 5
360 5
355 5
352 5
351 6
353 6
351 3
351 3
346 3
345 3
354 3
355 3
355 3
355 3
356 3
356 3
356 3
358 3
359 3
361 3
362 3
363 3
363 3
364 4
361 4
360 4
354 4
377 6
377 6
378 6
379 6
379 6
378 6
367 6
365 6
364 6
366 6
373 6
391 6
417 7
451 7
456 7
455 7
455 7
458 7
453 7
454 7
450 7
448 7
432 7
430 7
421 7
421 7
420 7
420 7
418 8
417 8
378 8
362 8
357 8
328 8
323 8
319 7
317 7
317 7
317 7
317 7
317 7
317 7
317 7
317 7
317 7
317 7
317 7
317 7
316 7
316 7
316 7
317 7
316 7
317 7
316 7
315 7
315 7
318 6
317 6
319 6
321 6
322 6
322 6
321 6
312 6
309 6
253 6
241 6
222 6
216 6
215 6
212 5
212 5
212 5
200 5
193 5
186 5
185 5
184 5
184 5
184 5
184 5
184 5
175 5
175 5
174 5
176 5
175 5
175 5
175 5
175 6
174 6
170 6
171 6
171 6
172 6
170 5
169 5
166 4
179 4
150 3
152 3
155 3
157 3
161 3
162 3
165 3
163 3
162 3
152 3
118 3
102 3
96 3
75 3
71 3
70 3
68 3
70 3
69 3
69 3
69 3
69 3
71 3
71 3
71 3
71 3
71 3
71 3
70 2
70 2
70 2
70 2
70 2
70 2
71 2
71 2
71 2
71 2
72 2
72 2
72 2
72 2
73 2
73 2
73 2
74 2
78 2
82 2
85 2
86 2
90 2
93 2
96 2
120 3
152 4
154 4
155 4
153 4
152 4
149 4
148 4
147 4
146 4
147 4
148 4
147 4
146 4
146 4
146 4
146 4
147 4
144 4
143 4
143 4
143 4
143 4
143 3
142 3
142 3
143 3
143 3
143 3
143 3
143 3
142 3
141 3
141 3
141 3
141 3
139 3
139 3
139 3
142 3
140 3
139 3
139 3
138 3
138 3
138 3
125 3
124 3
124 3
120 3
115 3
109 3
109 3
112 3
113 3
113 3
113 3
113 3
112 2
111 2
111 2
111 2
111 2
112 2
110 2
110 2
110 2
109 2
109 2
108 2
108 2
108 2
108 2
108 2
108 2
108 2
108 2
108 2
108 2
108 2
108 2
107 2
107 2
108 2
109 2
109 2
109 2
113 2
114 2
116 2
116 4
119 4
118 4
113 4
109 4
108 4
105 4
102 4
99 4
78 4
67 3
50 2
50 2
49 2
49 2
48 2
48 2
48 2
48 2
48 2
48 2
48 2
49 2
49 2
48 2
48 2
48 2
48 2
49 2
49 2
48 2
48 2
48 2
50 2
50 2
50 2
49 2
49 2
49 2
49 2
49 2
49 2
49 2
48 2
48 2
50 2
50 2
50 2
50 2
47 2
47 2
47 2
48 2
52 2
54 2
56 2
58 2
60 2
59 2
58 2
58 2
58 2
59 2
52 2
51 2
51 2
49 2
48 2
48 2
49 2
49 2
49 2
50 2
50 2
50 2
50 2
50 2
51 2
51 2
51 2
52 2
53 2
53 2
53 2
55 2
55 3
56 3
58 3
58 3
61 3
61 3
60 3
61 3
60 3
61 3
61 3
61 3
59 2
58 1
55 1
54 1
51 1
50 1
49 1
49 1
49 1
49 1
53 3
51 3
48 3
44 3
44 3
43 3
43 3
47 3
47 3
47 3
47 3
47 3
45 3
45 3
48 3
51 3
53 3
55 3
55 3
56 3
56 3
55 3
61 3
61 3
61 3
62 3
60 3
60 3
60 3
61 3
61 3
61 3
61 3
61 3
62 3
62 3
64 3
62 3
65 3
122 3
123 3
125 3
125 3
130 3
128 3
125 3
121 3
119 3
117 3
117 3
117 4
121 4
121 4
121 4
121 4
120 4
120 4
120 4
120 4
120 4
120 4
119 4
119 4
119 4
119 4
119 4
119 4
121 4
123 4
123 4
122 4
122 4
124 4
124 4
123 4
126 4
126 4
124 3
124 3
124 3
147 3
156 3
156 3
156 3
156 3
155 3
155 3
154 3
154 3
154 3
154 3
154 3
154 3
154 3
154 3
154 3
154 3
155 3
157 3
161 3
159 1
162 1
166 1
169 1
172 1
173 1
174 1
172 1
172 1
175 1
177 1
177 1
177 1
177 1
173 1
170 1
167 1
167 1
167 1
166 1
165 1
165 1
158 1
158 1
158 1
157 1
158 1
158 1
158 1
159 1
159 1
159 1
160 1
160 1
165 1
171 1
173 1
174 1
172 1
118 1
116 1
117 1
117 1
112 1
115 1
116 2
119 2
119 2
120 2
125 2
123 1
122 1
123 1
123 1
124 1
126 2
130 2
132 2
134 2
134 2
134 3
135 3
135 3
135 3
135 3
135 3
135 3
132 3
131 3
133 3
133 3
134 3
138 3
137 3
139 3
137 3
139 3
140 3
143 4
142 4
123 5
114 5
113 5
113 5
113 5
113 5
113 5
114 5
114 5
114 5
114 5
114 5
115 6
115 7
122 7
122 7
122 7
120 7
117 9
115 9
112 9
113 9
110 9
106 9
102 9
100 9
99 9
98 9
112 9
110 9
109 9
130 10
175 11
199 12
205 12
206 12
211 12
211 12
212 12
212 12
213 12
213 12
214 12
216 12
217 12
218 12
225 12
260 12
362 13
394 13
404 13
407 13
412 13
421 13
424 13
418 13
419 13
418 13
422 13
419 13
422 13
423 13
424 13
429 13
426 13
427 12
424 12
426 12
425 12
420 12
420 12
419 12
418 12
419 12
419 12
421 10
416 10
415 10
414 10
414 10
413 10
413 10
415 10
428 10
429 10
433 10
435 10
435 10
435 10
437 10
436 10
434 10
429 9
433 9
436 9
437 9
435 9
431 9
430 9
430 9
426 8
427 8
428 9
427 9
436 9
476 9
491 9
503 9
510 9
512 9
512 9
516 9
513 8
512 7
506 7
506 7
506 7
506 6
506 5
502 5
501 5
501 5
502 5
506 5
516 5
515 5
517 5
517 5
506 5
500 5
503 5
469 4
415 3
374 2
366 3
358 3
343 3
343 3
343 3
343 3
342 3
342 3
329 3
327 3
328 3
323 3
317 3
306 3
221 2
211 2
203 2
190 2
186 2
182 2
180 2
180 2
178 2
178 2
177 2
175 2
175 2
174 2
174 2
169 2
169 2
167 2
167 2
165 2
164 2
163 2
163 2
165 2
164 2
165 2
165 2
160 2
159 2
173 2
173 2
171 2
174 2
173 2
172 2
163 2
163 2
162 2
161 2
165 2
165 2
162 2
161 2
160 2
158 2
158 2
155 2
157 2
159 2
160 2
161 2
161 2
161 2
159 2
153 1
147 1
108 1
86 1
77 1
74 1
73 1
71 1
71 1
67 1
67 1
67 1
67 1
67 1
67 1
67 1
67 1
67 1
67 1
65 1
64 1
63 1
54 1
52 1
50 1
50 1
49 1
48 1
48 1
46 1
46 1
46 1
46 0
46 0
46 0
46 0
46 0
46 0
46 0
45 0
44 0
43 0
42 0
42 0
43 0
41 0
41 0
41 0
41 0
41 0
41 0
41 0
41 0
41 0
41 0
41 0
41 0
41 0
41 0
41 0
41 0
41 0
41 0
41 0
41 0
41 0
41 0
41 0
41 0
39 0
39 0
38 0
38 0
38 0
38 0
23 0
23 0
23 0
21 0
21 0
21 0
21 0
21 0
18 0
22 0
19 0
19 0
18 0
18 0
17 0
17 0
18 0
17 0
14 0
12 0
13 0
11 0
14 0
15 0
23 0
26 0
30 0
30 0
31 0
33 0
36 0
38 0
65 0
67 0
71 0
90 0
92 0
92 0
95 0
99 0
99 0
100 0
100 0
101 0
101 0
101 0
101 0
101 0
101 0
101 0
104 0
105 0
106 0
106 0
107 0
111 0
111 0
111 0
111 0
111 0
111 0
111 0
112 0
112 0
112 0
112 0
112 0
114 0
114 0
113 0
113 0
113 1
113 1
113 1
113 1
114 1
114 1
114 1
114 1
114 1
114 1
115 1
115 1
118 1
129 1
135 1
139 1
142 1
144 1
175 1
178 1
215 1
217 1
221 1
222 1
223 1
223 1
224 1
224 1
226 1
228 1
235 1
238 1
243 1
243 1
243 1
244 1
244 1
244 1
238 1
238 1
238 1
238 1
238 1
237 1
235 1
235 1
235 1
237 1
237 1
240 1
243 1
241 1
242 1
233 1
232 1
235 1
240 1
238 1
236 1
227 1
221 1
200 1
200 1
200 1
180 1
178 1
179 1
172 1
172 1
174 1
174 1
173 1
174 1
174 1
174 1
174 1
175 1
176 1
176 1
172 1
171 1
173 1
172 1
170 1
168 1
171 1
177 1
180 1
180 1
180 1
180 1
183 1
184 1
184 1
186 1
187 1
188 1
191 1
193 1
199 1
213 0
271 0
295 0
846 0
859 0
862 0
866 0
873 0
873 0
874 0
875 0
876 0
872 0
857 0
850 0
838 0
839 0
839 0
816 0
815 0
780 0
780 0
777 0
776 0
775 0
775 0
782 0
782 0
781 0
775 0
771 0
771 0
765 0
765 0
767 0
767 0
771 0
785 1
787 1
787 1
787 1
788 1
789 1
790 1
790 1
789 1
790 1
788 2
787 2
790 2
788 2
791 2
796 2
797 2
833 2
828 2
827 2
828 2
830 2
831 2
831 2
831 2
831 2
832 2
833 2
834 2
833 2
833 2
833 2
837 2
858 2
864 2
890 2
919 2
967 2
985 2
987 2
988 2
994 2
997 2
999 2
1002 2
1014 2
1346 3
1350 4
1356 4
1374 5
1376 5
1377 5
1378 5
1378 5
1381 5
1382 5
1389 5
1511 5
1512 5
1513 5
1514 5
1538 5
1547 5
1531 5
1475 5
1439 5
911 5
897 5
896 5
896 5
892 5
895 5
895 5
897 5
896 5
896 5
896 5
898 5
898 5
897 5
896 5
893 5
891 5
890 5
890 5
893 5
926 5
927 5
926 5
920 5
919 5
920 5
920 5
920 5
919 5
918 5
918 5
915 5
911 5
910 5
899 4
898 4
898 4
898 4
897 4
902 4
903 4
907 4
915 4
914 4
914 3
913 3
910 3
909 3
908 3
905 3
901 3
863 3
865 3
867 3
868 3
867 3
867 3
868 3
869 3
874 3
875 3
874 3
873 3
873 3
872 3
863 3
854 3
816 3
804 3
785 3
764 3
728 3
715 3
712 3
706 3
694 3
675 3
643 3
634 3
614 3
350 1
350 1
336 1
320 0
320 0
320 0
308 0
313 0
304 0
300 0
306 0
191 0
188 0
187 0
182 2
145 2
137 2
136 2
135 2
135 2
135 2
136 2
135 2
135 2
135 2
134 2
134 2
133 2
134 2
134 2
134 2
134 2
136 2
139 2
140 2
144 8
147 8
149 8
150 8
148 8
117 8
117 8
123 8
127 8
126 8
125 8
126 8
126 8
126 8
126 8
126 8
126 8
127 8
128 8
133 8
139 8
146 8
154 8
156 8
151 8
148 8
149 8
140 8
140 8
140 8
154 11
152 11
152 11
144 11
144 11
144 11
143 11
145 11
147 11
149 10
150 10
151 9
150 9
147 9
148 9
145 9
145 9
146 9
149 9
152 9
155 9
155 9
177 9
179 9
184 9
188 10
189 10
200 10
209 10
217 10
218 10
219 10
219 10
215 10
214 10
214 10
213 10
214 10
211 10
209 10
210 10
209 10
204 10
203 10
200 10
195 10
194 10
194 10
196 10
197 10
197 10
197 10
206 10
206 10
205 10
204 10
204 10
204 10
204 10
204 10
204 10
204 11
204 11
203 11
201 11
199 11
204 11
206 11
203 11
201 11
198 5
195 5
194 5
193 5
190 5
185 5
181 5
178 5
177 5
182 5
182 5
182 5
184 5
187 5
191 5
190 5
196 5
193 5
193 5
189 5
183 5
170 5
166 5
165 5
163 4
164 4
207 4
210 4
213 4
213 4
198 3
199 3
204 5
204 7
205 7
202 7
202 7
203 7
206 7
222 7
226 7
226 7
227 7
226 7
222 7
220 7
220 7
220 7
216 7
216 7
210 7
208 7
188 7
186 7
179 7
176 6
165 6
156 6
149 6
142 6
141 6
141 6
141 6
141 6
141 6
141 6
141 6
140 6
140 6
140 6
140 6
140 6
140 6
137 6
137 6
136 6
136 6
136 6
134 6
133 6
133 6
133 6
124 5
124 5
124 5
124 5
124 5
124 5
124 5
124 4
124 4
124 4
124 4
124 4
124 4
124 4
118 4
115 4
115 4
115 4
115 4
115 4
115 4
115 4
115 4
115 4
114 4
114 5
114 5
110 5
109 5
108 5
106 5
103 5
98 5
95 5
93 5
93 5
93 5
93 5
92 5
91 5
91 4
90 4
83 4
81 4
45 3
45 3
42 2
38 2
38 2
38 2
33 0
33 0
32 0
31 0
29 0
28 0
24 0
4 0
3 0
3 0
1 0
1 0
1 0
1 0
1 0
1 0
1 0
1 0
1 0
1 0
1 0
4 0
5 0
8 0
7 0
7 0
7 0
10 0
10 0
10 0
10 0
10 0
10 0
11 0
12 0
12 0
15 0
16 0
21 0
23 0
23 0
23 0
23 0
23 0
27 0
27 0
27 1
28 1
31 1
33 1
36 1
36 1
37 1
37 1
37 1
37 1
40 1
42 1
43 1
43 1
43 1
43 1
44 1
44 1
44 1
44 1
44 1
45 1
45 1
45 1
45 1
45 1
45 1
47 1
47 1
47 1
47 1
47 1
55 1
61 1
61 1
64 1
64 1
65 1
65 1
68 1
68 1
68 1
69 1
71 1
71 1
71 1
71 1
71 1
71 1
71 1
72 1
78 1
80 1
80 1
91 1
91 1
91 1
91 1
103 1
103 1
104 1
116 1
126 1
129 1
133 1
134 1
134 1
134 1
134 1
134 1
134 1
134 1
136 1
136 2
136 2
135 2
135 2
134 2
134 2
134 2
134 2
131 2
131 2
131 2
131 2
131 2
131 2
130 2
129 2
129 2
123 2
121 2
130 2
130 2
133 2
135 2
139 2
174 2
192 2
192 2
216 1
216 1
213 1
213 1
212 1
212 1
211 1
210 1
210 1
210 1
208 1
206 1
205 1
207 1
208 1
210 1
214 1
244 1
245 1
245 1
245 1
245 1
246 1
246 1
250 2
249 2
249 2
248 2
254 2
254 2
256 2
255 2
269 2
263 2
262 2
260 2
261 2
266 2
265 2
263 2
263 2
267 2
267 2
265 2
270 2
271 2
271 2
271 2
272 2
272 2
270 2
264 2
264 2
265 2
255 2
256 2
256 2
255 2
243 2
244 2
238 2
232 2
227 2
224 2
222 2
221 2
221 2
221 2
221 2
221 2
221 2
221 2
219 2
219 1
218 1
217 1
215 1
216 1
216 1
216 1
217 1
217 1
218 1
218 1
219 1
220 1
220 1
221 1
221 1
223 1
223 1
224 1
214 1
211 1
207 1
203 1
199 1
155 1
150 1
150 1
131 1
131 1
131 1
132 2
131 2
131 2
131 2
131 2
129 2
130 2
130 2
132 2
123 2
122 2
122 2
120 2
133 2
113 2
115 1
117 1
115 1
114 1
114 1
126 1
119 0
119 0
122 0
120 0
120 0
119 0
137 0
137 0
123 0
122 0
121 0
119 0
119 0
116 0
116 0
116 0
115 0
113 0
112 0
111 0
106 0
106 0
105 0
105 0
106 0
106 0
106 0
107 0
108 0
129 0
128 0
130 0
130 0
130 0
131 0
129 0
134 0
141 0
151 0
158 0
160 0
164 0
165 0
167 0
171 0
191 0
204 0
210 0
212 0
214 0
215 0
215 0
215 0
214 0
214 0
214 0
214 0
216 0
220 0
221 0
224 0
224 0
223 0
224 0
224 0
223 0
224 0
226 0
230 0
233 0
233 0
234 0
236 0
237 0
229 0
227 0
227 0
227 0
226 0
225 0
225 0
225 0
225 0
225 0
225 0
225 0
225 0
223 0
224 0
223 0
221 0
222 0
212 0
211 0
209 0
207 0
207 0
205 0
204 0
192 0
192 0
190 0
188 0
187 0
181 0
181 0
167 0
167 0
167 0
167 0
167 0
166 0
166 0
166 0
166 0
166 0
166 0
166 0
166 0
166 0
167 0
167 0
167 0
164 0
163 0
163 0
163 0
163 0
158 0
138 0
138 0
131 0
132 0
130 0
130 0
127 0
123 0
121 0
119 0
113 0
112 0
110 0
102 0
98 0
95 0
83 0
68 0
64 0
60 0
58 0
57 0
57 0
57 0
58 0
61 0
66 0
66 0
62 0
62 0
61 0
59 0
61 0
65 0
68 0
68 0
67 0
69 0
66 0
63 0
61 0
63 0
64 0
62 0
61 0
60 0
60 0
60 0
59 0
60 0
60 0
60 0
61 0
61 0
63 0
62 0
62 0
64 0
67 0
71 0
71 2
71 2
66 2
66 2
67 2
67 2
68 2
72 2
75 2
76 3
76 3
77 3
77 3
77 3
77 3
77 3
77 3
78 3
78 3
83 3
88 3
89 3
89 3
89 3
89 3
90 3
90 3
90 3
91 3
91 3
92 3
96 3
96 3
96 3
95 3
94 3
95 3
95 3
96 3
97 3
100 3
100 3
100 3
99 3
101 3
102 3
103 3
102 3
97 3
97 3
97 3
96 3
97 3
96 3
100 3
102 3
102 3
109 3
110 3
116 3
229 3
235 3
332 3
335 3
336 3
361 3
370 3
371 3
370 3
371 3
373 3
379 3
376 3
372 3
373 3
374 3
376 3
374 3
374 3
373 3
376 3
373 4
372 4
372 4
372 4
373 4
373 4
379 4
380 4
395 4
404 4
412 4
418 4
420 4
480 4
484 4
487 4
493 4
506 4
508 6
510 4
510 4
510 4
509 4
507 4
507 4
506 4
499 4
495 3
495 3
495 3
494 3
496 3
496 3
496 3
496 3
496 3
493 3
493 3
493 3
489 3
488 3
489 3
489 3
489 3
489 3
509 3
527 3
528 3
534 3
546 4
619 9
624 10
625 10
656 12
658 12
657 13
658 14
659 14
665 14
676 14
684 16
686 16
686 16
684 16
684 16
682 16
682 16
682 16
680 16
683 16
680 16
681 16
682 16
682 16
723 17
725 17
731 17
735 17
744 17
635 17
627 17
530 17
529 17
527 17
502 17
492 17
494 17
495 17
493 17
491 17
485 17
483 17
483 17
481 17
479 17
478 17
478 17
478 17
477 17
476 16
476 16
476 16
476 16
476 16
474 16
475 16
461 16
460 16
441 16
447 17
468 17
472 17
487 21
437 19
437 20
433 20
432 20
413 20
414 20
421 20
456 20
465 20
468 20
470 20
470 20
470 20
471 20
475 20
475 20
488 20
492 20
498 20
527 20
546 20
578 20
580 20
780 20
783 20
789 20
798 20
829 20
859 20
865 20
867 20
882 20
857 20
878 20
878 19
881 19
870 16
807 13
808 13
804 13
785 9
786 9
784 7
783 7
783 7
778 7
761 7
756 5
756 5
756 5
753 5
752 5
752 5
752 5
758 5
760 5
757 5
758 5
759 6
757 6
751 6
701 6
695 6
758 7
751 7
781 7
819 7
820 7
820 7
819 7
819 7
819 8
819 8
816 8
818 8
825 8
826 8
830 8
833 8
834 8
834 8
837 8
840 8
851 8
852 8
852 8
851 8
851 8
852 8
859 8
854 8
862 8
858 8
857 7
857 7
853 7
842 7
820 7
813 6
795 5
789 5
790 4
790 4
784 4
783 4
780 4
776 4
743 4
734 4
734 4
733 4
734 4
734 4
732 4
738 4
739 4
724 4
717 4
712 4
691 4
670 4
652 4
650 4
458 4
449 4
429 4
422 4
458 4
500 4
566 4
581 4
599 4
596 4
558 4
570 4
567 4
570 4
598 4
593 4
592 4
587 4
586 4
587 4
585 4
587 4
588 4
591 4
595 4
597 4
598 4
601 4
602 4
601 4
603 4
603 3
624 2
681 3
701 3
722 3
753 3
775 3
778 3
782 4
710 3
702 3
668 2
630 2
645 2
646 2
646 2
646 2
646 2
648 2
651 2
653 2
649 2
649 2
645 2
646 2
649 2
649 2
642 2
640 2
630 2
630 2
630 2
630 2
630 2
626 2
622 2
624 2
618 2
621 2
622 2
619 2
619 2
619 2
641 2
638 2
638 2
639 2
638 2
637 2
636 2
636 2
635 2
635 2
636 2
637 2
635 2
634 2
647 2
649 2
660 3
686 4
694 4
694 4
694 4
693 4
681 4
680 4
679 4
680 4
686 4
676 4
677 4
654 4
575 4
524 4
495 4
491 4
461 4
466 4
466 4
447 4
444 4
442 4
415 4
414 4
413 4
413 4
414 4
413 4
409 4
409 4
410 4
408 4
408 4
407 4
404 4
387 3
380 3
372 3
364 3
346 3
324 3
283 2
268 2
259 2
229 2
215 2
212 2
209 2
209 2
207 2
206 2
206 2
199 2
200 2
199 2
205 2
205 2
205 2
204 2
202 2
202 2
201 2
202 3
202 3
219 3
218 3
241 3
241 3
243 3
244 3
244 3
244 3
244 3
244 3
241 3
237 3
237 3
235 3
235 3
235 3
235 3
234 3
214 3
214 3
216 3
218 3
219 3
222 3
224 3
225 3
226 3
227 3
227 3
226 3
230 3
229 3
210 2
201 2
189 1
160 1
156 1
162 1
162 1
162 1
187 1
187 1
187 1
179 1
178 1
180 1
179 1
180 1
179 1
177 1
174 1
172 1
172 1
169 1
169 1
171 1
171 1
172 1
168 1
171 1
171 1
171 1
170 1
170 1
170 1
174 1
174 1
180 1
187 1
188 1
198 1
214 1
225 1
239 1
246 1
263 1
276 2
279 3
289 3
294 3
297 3
298 3
298 3
298 3
300 3
299 3
302 3
307 3
305 3
304 3
303 3
299 3
300 2
299 2
300 2
300 2
303 2
303 2
302 1
305 1
283 1
284 1
268 1
268 1
266 1
268 1
274 1
284 2
292 2
304 2
308 2
310 2
312 2
313 2
314 2
314 2
314 2
312 2
310 2
310 2
308 2
307 2
306 2
303 2
301 2
300 2
300 2
300 2
298 2
297 2
295 2
294 3
293 3
293 3
292 3
292 3
291 3
286 3
286 3
285 3
263 3
265 3
265 3
265 3
258 3
254 3
250 3
304 4
304 4
306 4
307 4
309 4
312 4
314 4
315 4
312 4
310 4
309 4
310 4
307 4
314 4
316 4
319 4
324 4
337 4
333 4
331 4
322 4
306 4
301 4
314 4
289 4
315 4
304 4
299 4
286 4
275 3
273 3
268 3
261 3
258 3
257 3
257 3
257 3
257 3
263 3
268 4
283 4
283 4
283 4
284 4
284 4
282 4
284 4
283 4
282 4
282 4
281 4
281 4
280 4
283 4
285 4
279 4
278 4
274 4
274 4
268 4
257 3
248 3
238 3
233 3
229 3
228 3
229 3
231 3
232 3
232 3
233 3
233 3
233 3
234 3
234 3
234 3
235 3
235 3
234 3
240 3
239 3
239 3
239 3
239 3
239 2
239 2
240 2
240 2
240 2
241 2
241 2
243 2
243 2
243 2
244 2
244 2
244 2
244 2
243 2
238 1
188 1
189 1
187 1
183 1
181 1
176 1
175 1
175 1
180 1
181 1
182 1
182 1
182 1
175 1
174 1
172 1
164 1
153 1
154 1
150 1
153 1
151 1
147 1
138 1
135 1
104 1
105 1
105 1
105 1
104 1
106 1
106 1
107 1
108 1
108 1
110 1
104 1
99 1
92 1
81 0
67 0
65 0
65 0
67 0
68 0
68 0
67 0
65 0
65 0
66 0
66 0
67 0
66 0
62 0
60 0
60 0
60 0
60 0
60 0
60 0
62 0
65 0
71 0
75 0
88 0
100 0
107 0
107 0
106 0
106 0
107 0
107 0
108 1
108 1
109 1
110 1
111 1
112 1
115 1
117 1
132 1
136 1
148 1
150 1
150 1
151 1
151 1
152 1
160 1
159 1
159 1
156 1
156 1
157 1
155 1
155 1
156 1
157 1
157 1
159 1
158 1
159 1
160 1
183 1
188 4
192 8
193 8
192 8
188 8
187 8
187 8
187 8
186 8
184 8
183 8
184 8
184 8
189 8
188 8
188 8
184 8
184 8
189 8
190 8
192 8
192 8
192 8
192 8
192 8
202 8
201 8
201 8
201 8
201 8
200 8
197 8
197 8
197 8
199 8
199 8
200 8
202 8
201 8
209 9
213 9
213 9
211 9
211 9
212 9
215 9
216 10
215 10
215 10
216 10
216 10
217 10
218 10
219 10
220 10
221 10
221 10
217 10
213 10
206 10
194 10
177 10
177 10
177 10
177 10
177 10
175 10
176 10
176 9
174 9
172 9
171 9
166 9
159 9
157 9
147 9
140 9
138 9
129 9
128 9
127 9
127 9
125 9
124 9
115 9
115 9
115 9
114 9
115 9
113 9
114 9
115 9
131 9
137 9
145 9
147 9
165 9
163 9
163 10
141 10
135 3
144 3
150 3
155 3
158 4
175 5
176 5
182 5
184 5
184 5
185 5
181 5
180 5
181 5
183 5
186 5
190 5
194 5
197 5
200 5
202 5
204 5
218 7
217 7
218 8
209 8
208 8
204 8
204 8
202 8
202 8
202 9
203 9
202 9
201 9
203 9
201 9
199 9
199 9
193 8
193 8
194 9
192 10
198 11
198 10
212 10
211 10
212 10
213 10
214 10
216 10
215 10
213 10
213 10
214 10
213 10
213 10
216 10
220 10
222 10
220 10
220 10
219 10
220 10
220 10
221 10
222 10
221 10
220 10
220 10
222 10
222 10
222 10
223 10
227 10
228 10
229 10
229 10
232 10
237 10
243 10
243 10
297 10
297 10
299 10
301 10
301 10
303 10
303 10
302 10
291 10
287 10
270 10
263 10
268 10
281 10
284 9
284 9
283 9
283 8
282 8
275 8
276 8
275 8
271 8
255 7
252 7
242 7
244 7
246 7
249 7
258 7
260 7
259 7
259 7
259 7
256 7
250 7
244 7
239 7
239 6
239 6
232 4
234 4
242 2
242 2
242 2
242 2
242 2
243 2
243 2
244 1
247 1
250 1
252 1
251 1
252 1
252 1
260 1
269 1
283 1
303 3
311 2
309 2
311 2
294 2
310 2
328 2
334 2
333 2
330 2
330 2
329 2
333 2
331 2
334 2
335 2
335 2
339 2
346 2
351 2
356 2
357 2
357 2
360 2
359 2
368 2
370 2
372 2
374 2
371 3
371 3
371 3
370 3
360 3
360 3
360 3
368 3
365 3
364 3
356 3
356 3
306 3
306 3
303 3
303 3
303 3
299 3
298 3
301 3
301 3
299 3
297 3
295 3
289 3
268 3
254 3
254 3
252 3
251 3
246 3
245 3
242 3
241 3
241 3
241 3
243 3
243 3
241 3
241 3
238 4
231 4
231 4
230 4
237 4
235 4
235 4
233 4
231 4
232 4
233 4
234 4
250 4
251 4
247 4
246 4
246 4
246 4
246 4
245 4
245 4
245 4
243 4
242 4
240 4
239 4
237 4
235 4
224 4
204 4
195 4
178 2
170 2
168 2
166 2
165 2
139 2
129 2
123 2
123 2
123 2
122 2
121 2
120 2
120 2
117 2
114 2
111 2
104 2
96 2
92 2
86 2
86 2
86 2
80 2
79 2
71 2
71 2
69 2
67 2
66 1
66 1
66 1
66 1
66 1
66 1
56 1
50 1
50 1
50 1
50 1
49 1
49 1
49 1
48 1
48 1
48 1
48 1
48 1
45 1
45 1
45 1
45 1
45 1
44 1
44 1
44 1
44 1
44 1
44 1
44 1
44 1
44 1
44 1
44 1
44 1
42 1
41 1
41 1
41 1
41 0
41 0
41 0
41 0
35 0
35 0
32 0
32 0
31 0
31 0
29 0
27 0
4 0
0 0
0 0
0 0
0 0
0 0
0 0
0 0
0 0
0 0
0 0
0 0
0 0
1 0
1 0
1 0
1 0
1 0
1 0
1 0
1 0
1 0
1 0
1 0
1 0
1 0
1 0
1 0
1 0
1 0
1 0
1 0
1 0
1 0
1 0
1 0
1 0
1 0
1 0
1 0
1 0
1 0
1 0
1 0
1 0
1 0
1 0
1 0
1 0
1 0
1 0
1 0
2 1
2 1
2 1
2 1
2 1
2 1
2 1
2 1
2 1
2 1
2 1
2 1
2 1
2 1
2 1
2 1
2 0
2 0
2 0
2 0
2 0
2 0
2 0
2 0
2 0
2 0
2 0
2 0
2 0
2 0
2 0
2 0
2 0
2 0
2 0
2 0
2 0
2 0
2 0
2 0
2 0
2 0
2 0
2 0
2 0
2 0
3 0
3 0
3 0
3 0
3 0
3 0
3 0
3 0
3 0
4 0
4 0
4 0
4 0
4 0
4 0
3 0
3 0
3 0
3 0
3 0
3 0
3 0
3 0
3 0
5 0
5 0
5 0
5 0
5 0
5 0
5 0
6 0
7 0
7 0
7 0
7 0
8 0
8 0
8 0
8 0
8 0
8 0
8 0
8 0
8 0
8 0
8 0
7 0
7 0
7 0
7 0
7 0
7 0
7 0
6 0
6 0
6 0
6 0
6 0
6 0
6 0
6 0
6 0
6 0
6 0
6 0
6 0
6 0
6 0
6 0
6 0
6 0
6 0
6 0
6 0
6 0
6 0
6 0
6 0
6 0
6 0
6 0
6 0
6 0
6 0
6 0
6 0
6 0
6 0
6 0
6 0
6 0
6 0
6 0
6 0
6 0
6 0
6 0
6 0
6 0
5 0
5 0
5 0
5 0
5 0
5 0
5 0
5 0
5 0
4 0
4 0
4 0
4 0
4 0
4 0
4 0
4 0
4 0
4 0
4 0
4 0
4 0
2 0
2 0
2 0
2 0
2 0
2 0
2 0
2 0
2 0
1 0
1 0
1 0
1 0
1 0
0 0
0 0
0 0
0 0
0 0
0 0
0 0
0 0
0 0
0 0
0 0
0 0
0 0
0 0
0 0
0 0
0 0
0 0
0 0
0 0
0 0
0 0
0 0
0 0
0 0
0 0
0 0
0 0
0 0
0 0
0 0
0 0
0 0
0 0
0 0
0 0
0 0
0 0
0 0
0 0
0 0
0 0
0 0
0 0
0 0
0 0
0 0
0 0
0 0
0 0
0 0
0 0
0 0
0 0
0 0
0 0
0 0
0 0
0 0
0 0
0 0
0 0
0 0
0 0
0 0
0 0
0 0
0 0
0 0
0 0
0 0
0 0
0 0
0 0
0 0
0 0
0 0
0 0
0 0
0 0
0 0
0 0
0 0
0 0
0 0
0 0
0 0
0 0
0 0
0 0
0 0
0 0
0 0
0 0
0 0
0 0
0 0
0 0
0 0
0 0
0 0
0 0
0 0
0 0
0 0
0 0
0 0
0 0
0 0
0 0
0 0
0 0
0 0
0 0
0 0
0 0
0 0
0 0
0 0
0 0
0 0
0 0
0 0
0 0
0 0
0 0
0 0
0 0
0 0
0 0
0 0
0 0
0 0
0 0
0 0
0 0
0 0
0 0
0 0
0 0
0 0
0 0
0 0
0 0
0 0
0 0
0 0
0 0
0 0
0 0
0 0
0 0
0 0
0 0
0 0
0 0
0 0
0 0
0 0
0 0
0 0
0 0
0 0
0 0
0 0
0 0
0 0
0 0
0 0
0 0
0 0
0 0
0 0
0 0
0 0
0 0
0 0
0 0
0 0
0 0
0 0
0 0
0 0
0 0
0 0
0 0
0 0
0 0
0 0
0 0
0 0
0 0
0 0
0 0
1 0
1 0
3 0
3 0
3 0
3 0
3 0
3 0
3 0
3 0
3 0
3 0
3 0
3 0
3 0
2 0
2 0
0 0
0 0
0 0
0 0
0 0
0 0
0 0
0 0
0 0
0 0
0 0
0 0
0 0
0 0
0 0
0 0
0 0
0 0
0 0
0 0
0 0
0 0
0 0
0 0
0 0
0 0
0 0
0 0
0 0
0 0
0 0
0 0
0 0
0 0
0 0
0 0
0 0
0 0
0 0
0 0
0 0
0 0
0 0
0 0
0 0
0 0
0 0
0 0
0 0
0 0
0 0
0 0
0 0
0 0
0 0
0 0
0 0
0 0
0 0
0 0
0 0
0 0
0 0
0 0
0 0
0 0
0 0
0 0
0 0
0 0
0 0
0 0
0 0
0 0
0 0
0 0
0 0
0 0
0 0
0 0
0 0
0 0
0 0
0 0
0 0
0 0
0 0
0 0
0 0
0 0
0 0
0 0
0 0
0 0
0 0
0 0
0 0
0 0
0 0
0 0
0 0
0 0
0 0
0 0
0 0
0 0
0 0
0 0
0 0
0 0
0 0
0 0
0 0
0 0
0 0
0 0
0 0
0 0
0 0
0 0
0 0
0 0
0 0
0 0
0 0
0 0
0 0
0 0
0 0
0 0
0 0
0 0
0 0
0 1
1 1
1 1
1 1
1 1
1 1
1 1
1 1
1 1
1 1
1 1
1 1
1 1
2 1
2 1
2 0
2 0
2 0
2 0
1 0
1 0
1 0
1 0
1 0
1 0
1 0
2 0
2 0
2 0
1 0
1 0
1 0
1 0
1 0
1 0
1 0
1 0
1 0
1 0
1 0
1 0
0 0
0 0
0 0
0 0
0 0
0 0
0 0
0 0
0 0
0 0
0 0
0 0
0 0
0 0
0 0
0 0
0 0
0 0
0 0
0 0
0 0
0 0
0 0
1 2
1 2
2 2
2 2
2 2
2 2
2 2
2 2
2 2
2 2
2 2
2 2
2 2
2 2
2 2
2 1
2 1
0 0
0 0
0 0
0 0
0 0
0 0
0 0
0 0
0 0
0 0
0 0
0 0
0 0
0 0
0 0
0 0
0 0
0 0
0 0
0 0
0 0
0 0
0 0
0 0
0 0
0 0
0 0
0 0
0 0
0 0
0 0
0 0
0 0
0 0
0 0
0 0
0 0
0 0
0 0
0 0
0 0
0 0
0 0
0 0
0 0
0 0
0 0
0 0
0 0
0 0
0 0
0 0
0 0
0 0
0 0
0 0
0 0
0 0
0 0
0 0
0 0
0 0
0 0
0 0
0 0
0 0
0 0
0 0
0 0
0 0
0 0
0 0
0 0
0 0
0 0
0 0
0 0
0 0
0 0
0 0
0 0
0 0
0 0
0 0
0 0
0 0
0 0
0 0
0 0
0 0
0 0
0 0
0 0
0 0
0 0
0 0
0 0
1 0
1 0
1 0
1 0
1 0
1 0
1 0
1 0
1 0
1 0
1 0
1 0
1 0
1 0
1 0
0 0
0 1
0 1
0 1
0 1
0 1
0 1
0 2
0 2
0 2
0 2
0 2
0 2
0 2
0 2
0 2
0 1
0 1
0 1
0 1
0 1
0 1
0 1
0 0
0 0
0 0
0 0
0 0
0 0
0 0
0 0
0 0
0 0
0 0
0 0
0 0
0 0
0 0
0 1
0 1
0 1
0 1
0 1
0 1
0 1
0 1
0 1
0 1
0 1
0 1
0 1
0 1
0 1
0 1
0 1
0 1
0 1
0 1
0 1
0 1
0 1
0 1
0 1
0 1
0 1
0 1
0 1
0 1
0 1
0 1
0 1
0 1
0 1
0 1
0 1
0 1
0 1
0 1
0 1
0 1
0 1
0 1
0 1
0 1
0 1
0 1
0 1
0 1
0 1
0 1
0 1
0 1
0 1
0 2
0 2
0 2
0 2
0 2
0 2
0 2
0 2
0 2
0 2
0 2
0 2
0 2
0 2
0 2
0 2
0 2
0 2
0 2
0 2
0 2
0 2
0 2
0 2
0 2
0 2
0 2
0 2
0 2
0 2
0 2
0 2
0 2
0 2
0 2
0 2
0 2
0 2
0 2
0 2
0 2
0 2
0 2
0 2
0 2
0 1
0 1
0 1
0 1
0 1
0 1
0 1
0 1
0 1
0 1
0 1
0 1
0 1
0 1
0 1
0 1
0 1
0 1
0 1
0 1
0 1
0 1
0 1
0 1
0 1
0 2
0 2
0 2
0 2
0 2
0 2
0 2
0 2
0 2
0 2
0 2
0 2
0 2
0 2
0 2
0 2
0 2
0 1
0 1
0 1
0 1
0 1
0 1
0 1
0 1
0 1
0 2
0 2
0 2
0 2
0 1
0 1
0 1
0 1
0 1
0 1
0 1
0 1
0 1
0 1
0 1
0 1
0 1
0 1
0 1
0 1
0 1
0 1
0 1
0 1
0 1
0 1
0 1
0 1
0 2
0 2
0 2
0 2
0 2
0 2
0 2
0 2
0 2
0 2
0 2
0 2
0 2
0 2
0 2
0 2
0 2
0 2
0 2
0 2
0 2
0 2
0 2
0 2
0 2
0 2
0 2
0 2
0 2
0 2
0 2
0 2
0 3
0 3
0 3
0 3
0 4
0 4
0 4
0 4
0 4
0 4
0 4
0 4
0 4
0 4
0 4
0 4
0 4
0 4
0 4
0 4
0 4
0 4
0 4
0 4
0 4
0 4
0 4
0 4
0 4
0 4
0 4
0 4
0 4
0 4
0 4
0 4
0 4
0 4
0 4
0 3
0 3
0 3
0 3
0 3
0 4
0 4
0 4
0 4
0 4
0 4
0 4
0 4
0 4
0 4
0 4
0 4
0 4
0 4
0 4
0 4
0 5
0 6
0 6
0 7
0 7
0 7
0 7
0 7
0 6
0 6
0 6
0 6
0 6
0 6
0 6
0 6
0 6
0 6
0 6
0 6
0 6
0 6
0 6
0 6
0 6
0 6
0 6
0 6
0 6
0 7
0 15
0 17
1 84
1 89
1 90
1 111
1 111
1 114
1 115
1 115
1 114
1 114
1 114
1 114
1 114
1 114
1 114
1 114
1 116
1 117
1 118
1 118
1 119
1 119
1 121
1 122
1 125
1 127
1 128
1 129
1 134
1 135
1 137
1 137
1 147
1 147
1 151
1 158
1 169
1 169
1 169
1 169
1 169
1 169
1 171
1 172
1 172
1 173
1 174
1 178
1 178
1 185
1 185
1 186
1 185
1 185
1 185
1 185
1 185
1 185
1 185
1 185
1 185
1 185
1 188
1 188
1 188
1 188
1 188
1 188
1 186
1 185
1 185
1 185
1 185
1 185
1 185
0 185
0 185
0 186
0 186
0 186
0 186
0 186
0 186
0 186
0 186
0 186
0 186
0 186
0 188
0 188
0 187
0 187
0 189
0 189
0 189
0 189
0 191
0 194
0 187
0 182
0 97
0 91
0 90
0 90
0 90
0 89
0 89
0 89
0 89
0 92
0 92
0 94
0 96
0 97
0 99
0 100
0 98
0 96
0 96
0 96
0 96
0 96
0 94
0 91
0 89
0 88
0 88
0 84
0 82
0 83
0 84
0 83
0 75
0 76
0 69
0 58
0 60
0 61
0 64
0 69
0 72
0 73
0 70
0 71
0 71
0 69
0 68
0 68
0 68
0 61
0 61
0 60
0 60
0 60
0 62
0 62
0 62
0 62
0 62
0 62
0 62
0 70
0 73
0 73
0 74
0 74
0 74
0 74
0 74
0 74
0 74
0 74
0 74
0 74
0 75
0 75
0 75
0 74
0 74
0 75
0 75
0 75
0 75
0 75
0 75
0 75
0 76
0 76
0 74
0 74
0 75
0 73
0 73
0 73
0 73
0 70
0 69
0 67
0 67
0 67
0 67
0 66
0 66
0 66
0 66
0 67
0 70
1 71
1 71
1 69
1 68
1 66
1 63
1 62
1 60
1 59
1 59
1 59
1 59
1 59
1 59
1 59
1 59
1 59
1 59
1 59
1 59
1 59
1 59
1 58
1 56
1 57
1 55
1 55
1 55
1 53
1 48
2 46
2 41
2 35
2 32
2 32
2 32
2 31
2 31
2 31
2 30
2 30
2 31
2 31
2 35
2 35
2 35
2 35
3 36
3 36
3 39
3 40
3 42
3 42
3 43
3 35
3 29
3 32
3 31
3 31
3 32
3 32
7 47
11 49
11 49
11 51
12 51
12 51
12 50
12 50
12 51
12 51
12 51
12 53
12 53
12 56
12 57
14 74
14 74
14 81
14 93
14 106
14 197
14 210
15 226
15 238
15 246
15 283
16 312
16 318
16 326
16 333
16 359
16 384
16 410
16 411
16 411
16 411
16 411
16 413
16 415
15 416
15 417
15 418
15 418
15 418
15 420
15 420
15 420
15 420
15 420
15 420
15 422
15 421
15 422
15 422
15 422
15 422
15 422
15 422
15 421
15 421
15 421
15 421
15 420
15 423
15 424
15 424
15 425
15 426
14 441
14 442
14 445
14 446
14 445
15 453
15 455
15 458
15 462
15 464
15 464
15 465
15 464
15 464
15 483
15 485
15 486
15 487
14 478
14 476
14 465
14 464
14 464
14 463
14 461
14 461
14 462
14 462
14 462
14 462
13 461
11 464
8 451
4 450
4 451
4 452
4 450
4 451
4 484
4 485
3 487
3 487
3 488
3 486
3 486
3 483
3 482
3 458
3 457
3 454
3 451
3 420
3 272
2 254
1 253
1 252
1 256
1 253
1 248
1 242
1 232
1 223
1 201
1 173
1 149
1 151
1 151
1 151
1 151
1 148
1 143
1 142
1 142
1 142
1 142
1 143
1 143
1 144
1 145
1 145
1 146
1 144
1 143
1 143
1 143
1 143
1 143
1 146
3 169
3 170
3 170
3 173
3 177
3 178
3 178
3 175
3 173
3 174
3 171
3 173
3 163
3 162
3 163
3 164
3 164
2 155
2 154
2 148
2 147
2 147
2 148
2 152
2 153
2 153
2 131
2 128
2 128
2 127
2 126
2 126
2 126
2 126
2 126
2 126
2 127
2 127
2 130
2 130
2 131
2 131
2 132
2 128
2 128
2 128
2 126
2 126
2 126
2 125
2 88
2 88
2 86
2 86
2 86
2 89
2 90
2 90
2 90
2 90
2 90
2 90
2 91
2 93
2 91
3 92
3 97
3 97
3 93
3 93
3 94
3 94
3 95
3 100
3 112
3 113
3 112
3 112
3 112
3 113
3 113
3 113
2 113
2 113
2 115
2 115
2 115
2 114
2 111
2 111
2 109
2 109
2 111
2 113
2 114
2 114
2 114
3 115
3 115
3 113
1 84
1 80
1 80
1 82
1 82
1 82
1 84
1 84
1 83
1 83
1 83
1 80
1 73
1 72
1 70
1 70
1 70
1 70
1 70
1 70
1 70
1 68
1 67
1 61
1 61
1 61
1 62
1 64
1 64
1 64
1 65
1 65
1 65
1 65
1 65
1 66
1 65
1 65
1 62
1 63
1 62
1 61
1 60
1 60
1 65
1 65
1 65
1 67
1 67
1 67
1 67
1 67
1 66
1 65
1 65
2 63
2 62
6 90
6 101
6 112
6 120
6 121
6 121
6 118
6 118
6 118
6 114
6 116
6 115
6 117
6 115
6 115
6 114
6 109
6 99
6 97
6 97
6 97
6 97
6 96
6 96
6 96
6 96
6 96
6 94
6 94
6 94
6 94
6 94
6 94
6 94
6 94
6 91
6 88
6 88
6 88
6 89
5 90
5 89
5 89
5 88
5 89
5 89
5 89
5 89
5 89
5 87
5 87
5 87
5 87
5 87
5 87
5 87
5 87
5 91
5 91
5 98
5 98
5 98
5 98
5 98
5 98
5 98
5 98
5 98
5 99
5 98
5 97
5 107
5 109
5 111
5 123
6 134
7 193
7 202
7 211
7 212
7 216
7 219
7 222
7 222
7 223
7 223
8 223
8 218
8 216
8 216
8 214
8 214
8 215
8 215
8 215
8 215
8 213
8 211
7 210
7 206
3 185
3 173
3 163
3 159
3 158
3 157
3 157
3 158
3 158
3 160
3 161
3 162
3 162
3 163
3 162
3 161
3 162
3 162
3 162
3 162
3 162
3 162
3 173
3 177
3 184
3 187
3 188
3 188
3 189
3 192
3 192
3 192
3 192
3 192
3 192
3 192
3 191
3 191
3 191
3 190
3 189
3 189
3 189
3 189
3 188
3 188
3 187
3 187
3 187
3 187
3 187
3 187
3 187
3 187
3 187
3 187
3 187
3 181
4 179
6 212
7 212
8 216
9 219
9 220
10 230
11 234
11 234
12 234
12 233
12 233
12 229
12 204
12 184
12 184
12 185
11 179
10 135
10 128
10 124
10 123
9 118
9 114
9 114
9 116
9 115
9 116
9 117
9 117
9 123
9 125
9 125
9 130
9 130
9 134
9 135
9 135
9 136
9 136
9 138
9 138
9 141
9 141
9 142
9 143
9 143
9 143
9 144
9 143
9 143
9 142
10 143
10 143
10 147
10 152
17 233
19 238
19 245
22 302
23 311
22 317
22 319
24 326
24 310
24 314
24 315
24 319
33 325
34 326
36 326
36 323
36 323
36 324
36 324
36 325
36 328
36 332
36 332
36 332
36 333
36 333
36 333
36 333
36 333
36 332
36 332
36 332
36 332
36 333
36 333
36 333
36 333
36 337
36 338
36 343
36 345
36 346
36 346
36 346
34 343
29 299
29 297
29 295
29 295
29 295
28 291
28 286
27 285
27 286
27 290
27 288
27 289
27 289
27 289
27 289
27 290
27 283
27 286
27 286
27 287
27 288
27 289
27 289
27 289
27 290
27 291
27 297
27 299
27 306
27 305
27 303
27 303
27 297
27 296
27 296
27 296
27 304
27 305
27 306
27 301
27 300
27 299
27 301
27 302
27 299
27 299
27 300
27 300
27 304
27 310
27 309
27 313
27 319
27 316
30 313
18 200
17 188
17 180
17 179
17 181
17 179
17 177
15 169
15 169
15 165
15 163
15 155
7 152
7 153
5 152
5 153
5 154
5 153
5 154
5 153
5 150
5 147
5 149
5 149
5 148
5 148
5 148
5 149
5 149
5 149
5 148
5 148
5 148
5 148
5 148
5 148
5 149
5 146
5 145
5 144
5 145
5 155
5 159
5 165
5 166
5 180
5 183
5 185
7 204
7 207
7 209
7 212
7 212
7 210
7 208
7 212
7 211
7 213
7 213
7 212
7 210
7 211
7 220
7 232
7 235
7 248
7 262
7 267
8 270
8 276
8 278
8 275
8 273
8 267
8 262
8 261
8 258
8 258
8 258
8 259
8 261
8 253
8 253
8 251
8 251
8 249
9 244
9 242
9 242
9 242
9 242
9 239
10 235
10 230
10 226
10 226
10 221
10 216
10 216
7 212
7 201
7 199
7 195
7 194
7 191
7 191
7 189
5 188
5 188
5 188
5 188
5 188
5 188
5 187
5 185
5 185
5 185
5 185
5 184
5 184
5 183
5 182
5 181
5 181
5 180
5 180
5 180
5 180
5 180
5 180
5 180
5 180
5 180
5 181
5 181
5 181
5 180
5 177
4 174
4 171
4 166
2 141
2 134
2 122
2 118
2 66
2 61
2 41
2 34
2 32
2 29
2 25
2 22
2 20
2 20
2 12
2 12
2 12
2 10
2 10
2 10
2 7
2 7
2 5
2 5
2 4
2 4
2 4
2 4
2 4
2 4
2 4
2 4
2 4
2 4
2 4
2 4
2 4
2 4
2 4
2 4
2 4
2 4
2 4
2 4
0 4
0 4
0 4
0 5
0 5
0 5
0 5
0 5
0 5
0 5
0 5
0 5
0 5
0 5
0 5
0 5
0 5
0 5
0 5
0 3
0 3
0 3
0 2
0 2
0 2
0 3
0 3
0 3
0 3
0 3
0 3
0 3
0 3
0 3
0 3
0 3
0 3
0 3
0 4
0 4
0 4
0 4
0 4
0 4
0 4
0 4
0 4
0 4
0 3
0 3
0 3
0 3
0 3
0 3
0 3
0 3
0 3
0 3
0 3
0 3
0 3
0 3
0 3
0 3
0 3
0 3
0 3
0 3
0 3
0 3
0 3
0 3
0 3
0 3
0 3
0 3
0 3
0 3
0 3
0 3
0 3
0 3
0 3
0 3
0 3
0 4
0 4
0 5
0 5
0 5
0 5
0 5
0 5
0 5
0 5
0 5
0 5
0 5
0 5
0 5
0 4
0 4
0 4
0 4
0 4
0 4
0 4
0 4
0 4
0 4
0 4
0 4
0 4
0 4
0 4
0 4
0 4
0 4
0 5
0 4
0 4
0 4
0 4
0 4
0 4
0 4
0 4
0 4
0 4
0 4
0 4
0 4
0 4
0 4
0 4
0 4
0 4
0 3
0 3
0 3
0 3
0 3
0 3
0 3
1 3
2 3
2 4
2 4
2 5
2 6
2 6
2 6
2 6
2 6
2 7
2 7
2 7
2 7
2 7
2 7
2 7
2 8
2 8
2 10
2 10
2 10
2 10
2 10
2 10
2 10
2 10
2 11
2 11
2 12
2 12
2 12
2 12
2 12
2 12
2 12
2 12
2 12
2 12
2 12
2 11
2 11
2 11
2 13
2 13
2 13
2 13
2 13
2 14
2 14
2 14
2 14
2 16
2 16
2 18
2 18
2 18
2 18
2 18
2 18
2 19
2 21
2 24
2 25
2 31
2 32
2 33
2 35
2 36
2 35
2 35
2 35
2 35
2 34
2 34
2 34
2 34
2 34
2 34
2 34
2 34
2 34
2 34
2 34
2 35
2 36
2 38
2 39
2 40
2 40
2 41
2 41
2 41
2 42
2 43
2 43
2 43
2 43
2 43
0 43
0 43
0 44
0 43
0 43
0 42
0 43
0 43
0 44
0 44
0 43
1 43
3 43
3 44
3 44
3 43
3 43
3 43
3 42
3 42
3 41
3 41
3 41
3 41
3 41
3 40
3 40
3 40
3 40
3 40
3 39
3 39
3 39
3 39
3 39
3 39
3 41
3 41
4 43
4 43
4 44
4 44
4 44
4 44
4 41
4 43
4 43
4 43
4 43
4 43
4 41
4 41
5 44
5 43
5 43
5 42
5 43
5 43
5 43
8 62
8 63
8 68
8 68
9 58
9 56
9 56
9 56
9 56
9 56
9 56
9 56
9 58
9 58
9 58
9 59
9 59
9 59
9 59
15 69
15 69
15 69
15 69
15 69
15 69
15 69
15 68
15 67
15 63
15 61
15 61
15 60
15 60
15 60
15 60
15 60
15 60
15 60
15 60
15 60
15 60
15 61
15 61
15 60
15 60
14 60
13 60
13 58
13 59
13 58
13 58
13 58
13 65
13 65
13 66
13 67
13 67
13 69
13 69
13 69
13 69
13 69
13 69
13 69
13 69
13 69
13 69
14 69
14 69
14 70
15 100
15 101
15 108
15 109
15 109
15 109
15 109
15 107
15 108
14 108
14 110
14 112
14 111
14 111
14 109
14 109
14 109
14 111
14 111
14 111
14 114
14 118
14 118
13 115
13 115
13 120
13 121
13 121
13 121
13 120
9 91
9 91
9 108
9 108
9 109
9 109
9 110
9 110
9 110
9 110
9 110
9 110
9 108
9 108
9 108
9 107
9 107
9 107
8 107
3 97
3 99
3 99
3 99
3 101
3 101
3 101
3 101
3 101
3 101
3 101
3 101
3 101
3 101
3 103
3 103
3 103
3 103
3 103
3 103
3 103
3 102
3 102
3 102
3 102
3 102
3 102
3 102
3 101
3 103
3 105
3 108
3 110
1 104
1 104
1 103
1 103
1 103
0 102
0 105
0 106
0 106
0 106
0 106
0 106
0 106
0 106
0 106
0 105
0 105
0 103
0 68
0 67
0 66
0 66
0 65
0 65
0 65
0 64
0 64
0 61
0 60
0 55
0 55
0 55
0 54
0 54
0 51
0 50
0 50
0 50
0 48
0 48
0 48
0 48
0 48
0 48
0 48
2 49
2 49
2 54
2 57
2 57
2 45
2 47
2 47
2 47
2 46
2 46
2 47
2 47
2 47
2 47
2 47
2 47
2 47
2 47
2 49
2 49
2 49
2 49
2 53
2 53
2 54
2 53
2 53
2 53
2 53
2 54
2 54
2 54
2 54
2 54
2 54
2 52
2 52
2 52
2 52
2 52
2 52
2 52
2 53
2 53
2 55
2 56
2 57
2 58
2 60
2 60
2 64
2 68
2 66
2 67
2 64
2 64
2 64
2 67
2 68
2 68
2 66
2 65
2 66
2 66
2 66
2 66
2 66
2 66
2 66
2 66
2 67
2 67
2 68
2 68
2 68
2 68
2 68
2 68
2 68
2 68
2 68
2 68
2 66
2 66
2 66
2 66
2 66
2 66
2 66
2 66
2 66
2 66
2 66
2 65
2 65
0 65
0 65
0 62
0 59
0 59
0 59
0 52
0 52
0 52
0 48
0 46
0 45
0 54
0 55
0 57
1 65
1 68
1 67
1 70
1 70
1 70
1 73
1 73
1 74
1 74
1 75
1 76
1 70
1 70
1 69
1 66
1 66
1 66
1 66
1 66
1 66
1 66
1 67
1 67
1 67
1 67
1 67
1 68
1 68
1 68
1 70
1 70
1 69
1 69
1 68
1 65
1 67
1 68
2 68
2 68
2 62
2 55
2 54
2 52
2 52
2 53
2 53
2 53
2 53
2 53
2 53
2 53
2 53
2 53
2 53
2 53
2 53
2 53
2 53
2 52
2 52
2 53
2 52
2 53
2 54
2 55
2 57
2 58
2 59
2 59
2 61
2 66
2 66
2 68
2 68
2 69
2 69
2 71
2 81
2 88
2 90
2 91
2 91
2 91
2 91
2 91
2 91
2 91
2 91
2 91
2 91
2 91
2 91
2 89
2 89
2 89
2 86
1 72
1 67
1 66
1 65
1 65
1 65
1 65
1 65
1 65
1 62
1 62
1 59
1 57
1 57
1 58
1 58
1 58
1 58
1 58
1 58
1 58
1 58
1 58
1 58
1 58
1 56
1 58
1 59
1 59
1 59
1 58
1 59
1 59
1 59
1 59
1 59
1 59
1 59
1 59
1 60
1 59
0 56
0 56
0 56
0 60
0 59
0 59
0 59
0 57
0 57
0 57
0 58
0 58
0 58
0 58
0 58
0 58
0 59
0 59
1 59
1 59
1 62
1 63
1 63
1 62
1 62
1 62
1 60
1 62
1 62
1 60
1 60
1 60
1 60
1 56
1 55
1 55
1 57
2 57
2 57
2 54
2 45
2 38
2 36
2 37
2 39
2 39
2 39
2 39
2 39
2 39
2 39
2 39
2 39
2 43
2 45
2 52
2 53
2 56
2 58
2 59
2 59
2 62
2 64
2 66
2 67
2 68
2 68
2 68
2 68
2 68
2 68
2 68
2 70
2 69
2 69
2 69
2 69
2 69
2 70
2 70
2 70
2 70
2 70
2 72
2 71
2 73
2 73
2 74
2 76
2 76
2 75
2 75
2 75
2 74
2 74
2 74
2 74
2 71
2 70
2 69
2 69
2 68
2 68
2 67
2 66
2 66
2 66
2 66
2 66
2 66
2 65
2 65
2 64
2 63
2 63
2 63
2 62
2 62
1 62
1 62
1 59
1 58
1 58
1 58
1 58
1 58
1 58
1 54
1 54
1 54
1 54
1 53
1 50
1 49
1 49
1 49
1 47
0 47
0 47
0 47
0 47
0 47
0 47
0 45
0 45
0 45
0 45
0 45
0 45
0 45
0 45
0 44
0 43
0 38
0 33
0 25
0 24
0 24
0 25
0 35
0 34
0 31
0 29
0 26
0 25
0 25
0 25
0 26
0 26
0 26
0 26
0 27
0 25
0 25
0 25
0 25
0 25
0 24
0 26
0 28
0 28
0 35
0 34
0 34
0 35
0 30
0 30
0 29
0 29
0 29
0 32
0 32
0 34
0 40
0 40
0 42
0 42
0 42
0 44
0 45
0 45
0 45
0 45
0 44
0 44
0 44
0 44
0 44
0 44
0 44
0 44
0 44
0 44
0 44
0 44
0 45
0 45
0 46
0 47
0 47
0 47
0 47
0 47
0 47
0 47
0 47
0 47
0 47
0 48
0 48
0 48
0 48
0 48
0 48
0 48
0 48
1 54
1 56
1 56
1 56
1 56
1 56
1 55
1 55
1 55
1 55
1 55
1 57
1 60
1 61
1 61
1 61
2 61
2 61
2 65
3 67
3 68
3 68
4 67
4 56
4 56
4 57
4 57
4 58
4 58
4 58
4 59
4 57
5 57
5 57
5 57
5 56
5 56
4 56
4 56
4 56
4 55
4 55
5 54
5 50
5 50
5 42
5 42
5 39
5 38
5 37
5 37
5 38
5 38
5 38
5 38
5 38
5 43
5 42
5 41
5 39
5 41
5 40
5 40
5 40
5 40
5 40
5 40
5 40
5 40
5 40
5 40
5 40
5 40
5 40
5 40
5 40
5 40
5 40
5 40
5 39
5 38
5 37
5 37
5 39
5 39
5 40
5 40
5 40
5 41
5 41
5 41
5 42
5 43
5 43
4 43
4 45
4 46
5 46
6 45
6 45
6 39
6 38
6 38
6 38
6 38
6 38
8 38
8 38
8 38
8 38
8 38
8 36
8 32
8 32
8 32
7 32
7 32
7 32
8 27
8 24
8 23
8 23
8 23
8 23
8 23
8 23
8 24
8 23
8 24
8 24
8 24
8 24
7 24
7 24
7 24
7 24
7 24
7 24
7 24
7 24
7 24
7 24
6 24
6 24
6 24
6 24
6 24
6 25
6 25
6 25
6 25
6 26
6 26
6 26
6 26
6 26
6 20
6 20
6 20
6 19
6 18
6 18
6 16
6 16
6 16
6 16
6 17
6 17
6 17
6 17
6 17
6 18
6 18
6 18
6 18
6 18
6 18
6 18
6 18
6 18
6 18
6 18
6 18
6 16
6 17
6 17
6 17
5 17
5 16
5 17
5 16
5 16
5 14
5 13
5 12
5 11
4 12
4 13
4 13
4 14
4 14
4 14
3 14
2 14
1 14
1 14
1 14
1 14
1 14
0 14
0 14
0 14
0 14
0 14
0 14
0 14
0 14
0 19
0 19
0 19
0 19
0 19
0 19
0 18
0 18
0 18
0 18
0 17
0 17
0 16
0 16
0 16
0 16
0 16
0 16
0 16
0 16
0 16
0 16
0 16
0 17
0 18
0 18
0 18
0 18
0 18
0 17
0 17
0 17
0 18
0 21
0 22
0 23
0 23
0 23
0 23
0 23
0 23
0 23
0 23
0 23
0 23
0 28
0 30
0 33
0 38
0 39
0 39
0 40
0 42
1 46
1 45
1 46
1 47
1 48
1 49
1 49
1 49
1 49
1 49
1 50
1 50
1 50
1 48
1 48
2 52
2 52
2 52
2 52
2 51
2 51
2 51
2 51
2 51
2 50
2 49
2 50
2 49
2 50
2 50
2 50
2 50
2 51
2 51
2 51
2 51
2 51
2 51
2 51
2 52
2 54
2 54
2 55
2 55
2 55
2 55
2 55
2 50
2 50
2 50
2 50
2 50
2 50
2 50
2 50
2 52
2 52
2 52
2 52
2 52
2 52
2 52
2 52
2 52
2 52
2 52
2 51
2 51
2 51
2 50
2 50
2 50
2 50
2 50
2 50
2 50
2 50
2 50
2 50
2 49
2 44
2 42
2 42
2 42
2 42
2 42
2 42
2 42
2 42
2 41
2 40
2 52
2 47
2 47
2 45
2 44
2 42
2 44
2 43
2 43
1 39
1 39
1 36
1 36
1 36
1 35
1 35
1 35
1 35
1 36
1 35
1 35
1 35
1 35
1 35
0 31
0 31
0 31
0 31
0 31
0 32
0 32
0 32
0 32
0 32
0 32
0 31
0 31
0 30
0 31
0 32
0 33
0 33
0 33
0 33
0 34
0 34
0 34
0 34
0 33
0 31
0 30
0 34
0 34
0 34
0 34
0 36
0 40
0 46
0 47
0 49
0 50
0 50
0 50
0 49
0 48
0 48
0 48
0 48
0 48
0 49
0 51
0 51
0 51
0 51
0 52
0 53
0 54
0 54
0 54
0 54
0 54
0 54
0 54
0 54
0 54
0 55
1 55
1 55
1 55
1 55
1 55
1 55
1 55
1 56
1 56
1 56
1 56
1 56
1 58
1 58
1 38
1 38
1 38
1 38
1 38
1 38
1 38
1 38
1 38
1 38
1 38
1 38
1 38
1 37
1 39
1 39
1 43
1 43
1 43
1 43
1 43
1 43
1 43
1 43
1 43
1 43
1 45
1 45
1 46
1 45
2 51
2 51
2 51
2 51
2 51
2 51
2 51
2 50
2 50
2 48
2 48
2 47
3 47
3 47
3 47
3 47
3 47
3 48
3 48
3 48
3 50
3 46
3 45
3 45
3 44
3 43
3 39
3 33
3 32
3 30
3 30
3 30
3 30
3 31
3 31
3 31
3 31
3 30
3 30
3 30
3 28
3 29
3 29
3 28
3 27
3 27
3 32
3 43
3 49
3 51
3 51
3 54
3 55
2 55
2 57
2 56
2 58
2 58
2 58
2 59
2 59
2 59
2 60
2 63
2 64
2 64
2 64
2 64
2 61
2 61
2 61
2 61
2 61
2 61
2 61
2 61
2 62
2 62
2 63
2 64
2 64
2 65
2 66
2 66
2 65
2 65
2 61
2 61
2 61
2 61
2 62
2 62
2 63
2 63
2 63
2 63
2 61
2 61
2 60
2 60
1 54
1 54
1 55
1 55
1 55
1 55
1 56
1 56
1 56
1 56
1 56
1 56
0 56
0 57
0 56
0 56
0 56
0 55
0 55
0 55
0 53
0 53
0 53
0 53
0 53
0 53
0 53
0 53
0 53
0 53
0 53
0 53
0 53
0 52
0 53
0 53
0 53
0 53
0 53
0 53
0 53
0 48
0 48
0 47
0 38
0 39
0 34
0 28
0 27
0 27
0 27
0 29
0 28
0 29
0 28
0 29
0 29
0 29
0 26
0 26
0 26
0 26
0 25
0 24
0 24
0 24
0 24
0 24
0 24
0 24
1 24
1 24
1 24
1 24
1 24
1 24
1 23
1 23
1 22
1 22
1 22
1 22
1 21
1 20
1 20
1 20
1 20
1 20
1 19
1 18
1 18
1 18
1 18
1 18
1 18
1 18
1 18
1 18
1 18
1 18
1 19
1 19
1 18
1 18
1 18
1 18
1 17
1 17
1 17
1 17
1 17
1 17
1 17
1 16
1 16
1 16
1 16
1 16
1 16
1 16
1 16
1 16
1 16
1 16
1 16
1 16
1 16
1 16
1 16
1 16
1 16
1 16
1 16
1 15
1 15
1 15
1 15
1 15
1 15
1 15
1 15
1 15
1 15
1 14
1 12
1 11
1 12
1 12
1 12
1 11
1 11
1 9
1 9
1 11
1 12
1 11
1 13
1 15
1 17
1 16
1 16
1 16
1 16
1 16
1 16
1 16
1 16
1 16
1 16
0 17
0 17
0 17
0 17
0 17
0 17
0 17
0 20
0 20
0 21
0 19
0 21
0 21
0 21
0 21
0 21
0 21
0 21
0 21
0 21
0 21
0 22
0 22
0 22
0 22
0 22
0 22
0 22
0 22
0 22
0 22
0 22
0 22
0 22
0 22
0 23
0 23
0 23
0 23
0 23
0 23
0 23
0 23
0 23
0 23
0 23
0 24
0 24
0 24
0 24
0 24
0 24
0 24
1 24
1 24
1 24
1 25
1 25
1 25
1 25
1 26
1 26
1 27
1 27
1 27
1 27
1 27
1 27
1 27
1 27
1 27
1 27
1 26
1 26
1 25
1 24
1 24
1 24
1 23
1 23
1 23
1 23
1 23
1 23
1 17
1 15
1 15
1 15
1 15
1 16
1 16
1 16
1 16
1 16
1 18
1 18
1 18
1 18
1 18
1 18
1 17
1 19
1 20
1 21
1 23
1 23
1 23
1 20
1 20
1 19
1 18
1 17
1 17
1 17
1 17
1 17
1 17
1 17
1 17
1 17
1 17
1 16
1 16
1 16
1 16
1 16
1 20
1 20
1 21
1 23
1 24
1 27
1 29
1 29
1 29
1 29
2 29
2 29
2 29
2 29
2 29
2 29
2 29
2 29
2 29
2 29
2 28
1 28
1 28
1 28
1 28
1 28
1 28
1 29
1 29
1 28
1 28
1 28
1 28
1 27
1 27
1 28
1 27
1 27
1 27
1 27
1 27
1 27
1 27
1 27
1 27
1 29
1 29
1 29
1 29
1 29
1 29
1 28
1 28
1 28
1 28
1 28
1 28
1 28
1 28
1 28
1 28
1 28
1 29
1 29
1 29
1 31
1 31
1 31
1 29
1 29
1 29
1 29
1 29
1 29
1 28
1 25
1 23
1 23
1 25
1 25
1 25
1 26
1 26
1 26
1 26
1 26
1 27
1 27
1 27
1 27
1 27
1 28
1 28
1 28
1 31
1 32
1 32
1 32
1 34
1 34
1 29
1 27
2 26
2 25
2 27
2 24
2 22
2 22
2 21
2 21
1 23
1 23
1 23
1 24
1 24
1 24
1 24
1 24
1 24
1 24
1 24
1 26
1 26
1 26
1 26
1 26
1 28
1 27
1 27
1 26
1 26
1 26
1 26
1 32
1 32
1 32
1 32
1 33
1 33
1 32
1 32
1 32
1 32
1 31
1 31
1 31
1 31
1 31
1 32
1 32
1 32
1 32
1 32
1 32
1 32
1 32
1 32
1 32
1 32
1 32
1 32
1 32
1 30
1 30
1 28
1 28
1 29
1 30
1 30
1 30
1 30
1 30
1 30
1 30
1 39
1 42
1 46
1 48
1 47
1 49
1 48
1 47
1 47
1 47
1 48
1 48
1 49
1 49
1 48
1 48
1 47
1 47
1 47
1 45
1 44
1 44
1 44
1 44
1 42
1 42
1 42
1 42
0 42
0 41
0 41
0 42
0 42
0 42
0 42
0 42
0 41
0 41
0 41
0 40
0 41
0 41
0 41
0 41
0 42
0 42
0 42
0 40
0 40
0 41
0 41
0 41
0 39
0 39
0 39
0 42
0 43
0 43
0 43
0 37
0 37
0 37
0 37
0 36
0 36
0 36
0 36
0 36
0 36
0 36
0 37
0 37
0 38
0 38
0 37
0 37
0 37
0 37
0 37
0 38
0 38
0 38
0 38
0 38
0 38
0 38
0 38
0 38
0 38
0 38
0 38
0 37
0 36
0 36
0 36
0 36
0 36
0 36
0 36
0 35
0 20
0 18
0 15
0 15
0 15
0 15
0 15
0 15
0 15
0 15
0 13
0 13
0 13
0 13
0 13
0 13
0 13
0 13
0 13
0 13
0 13
0 13
0 14
0 14
0 16
0 21
0 22
0 24
0 25
0 24
0 23
0 23
0 24
0 24
0 26
0 26
0 25
0 25
0 25
0 25
0 24
0 24
0 24
0 24
0 23
0 23
0 24
0 23
0 24
0 25
0 25
0 25
0 25
0 25
0 25
0 22
0 21
0 22
0 22
0 22
0 22
0 22
0 22
0 22
0 22
0 22
0 22
0 22
0 22
0 21
0 21
0 20
0 20
0 20
0 20
0 20
0 23
0 26
0 27
0 25
0 26
0 26
0 26
0 27
0 27
0 27
0 27
0 27
0 27
0 28
0 28
0 28
0 28
0 28
0 29
0 29
0 30
0 30
0 30
0 30
0 30
0 30
0 30
0 30
0 30
0 30
0 30
0 30
0 30
0 30
0 30
0 30
0 31
0 31
0 31
0 31
0 31
0 31
0 31
0 31
0 31
0 31
0 28
0 27
0 26
0 22
1 22
1 24
1 27
1 28
1 28
1 28
1 27
1 27
1 25
1 25
1 25
1 25
1 25
1 25
1 24
0 24
0 25
0 25
0 25
0 25
0 24
0 24
0 24
0 23
0 24
0 24
0 24
0 24
0 25
0 27
0 27
0 26
0 26
0 26
0 26
0 26
0 26
0 26
0 26
0 26
0 26
0 26
0 26
0 26
0 26
0 26
0 26
0 26
0 26
0 26
0 22
0 20
0 18
0 18
0 17
0 17
0 17
0 16
0 16
0 17
0 17
1 26
1 27
1 29
1 31
1 31
1 31
1 32
1 34
1 34
1 33
1 33
1 33
1 33
1 33
1 33
1 33
1 33
1 33
1 33
1 33
1 33
1 34
1 34
1 34
1 34
1 33
1 33
1 33
1 33
1 33
1 35
1 37
1 37
1 38
1 38
1 38
1 37
1 37
1 37
1 37
1 35
1 31
1 32
1 32
1 34
1 34
1 34
1 34
1 34
1 35
1 36
1 36
1 36
1 36
1 36
1 35
1 35
1 35
1 35
1 35
1 35
1 35
1 35
1 35
1 35
1 34
1 35
1 35
1 33
1 33
1 33
1 33
1 33
1 33
1 33
1 33
1 33
1 33
1 33
1 33
1 33
1 33
1 33
1 33
1 33
1 33
1 33
1 33
1 33
1 33
1 33
1 33
1 33
1 33
1 34
1 34
1 34
1 34
1 33
1 32
0 21
0 20
0 18
0 18
0 18
0 18
0 16
0 14
0 14
0 14
0 14
0 14
0 14
0 14
0 16
0 16
0 16
0 16
0 16
0 15
0 15
0 15
1 17
1 17
1 18
1 20
1 24
1 28
2 40
2 42
2 43
3 45
3 46
4 49
4 51
4 54
4 63
4 66
4 67
4 67
4 68
4 68
4 67
4 67
4 65
4 65
4 65
4 65
4 64
4 64
4 63
4 63
4 63
4 63
4 63
4 63
4 64
6 78
6 79
6 80
6 80
6 80
6 79
6 79
6 79
6 79
6 78
6 78
6 78
6 78
6 78
6 78
6 78
6 78
6 78
6 78
6 78
6 78
6 78
6 78
6 78
6 78
6 78
6 78
6 78
6 79
6 82
6 82
6 82
6 82
6 82
6 82
7 82
7 82
7 81
7 81
7 81
9 91
9 91
9 91
10 91
10 92
11 93
11 95
13 98
13 100
13 101
13 103
13 104
13 105
13 104
13 104
13 104
13 106
13 104
13 104
13 103
13 102
13 101
13 101
13 101
13 103
12 98
12 99
12 99
12 98
12 96
12 89
10 76
9 72
10 71
10 71
10 71
10 71
10 70
10 69
10 61
10 56
10 56
10 57
10 59
10 59
10 60
10 60
10 61
10 62
10 62
10 64
10 65
10 65
10 65
10 65
10 65
10 68
10 68
10 68
10 67
8 53
8 53
8 52
8 55
8 60
8 63
8 63
8 63
8 63
8 63
8 64
8 64
8 64
8 64
8 64
8 64
8 64
8 64
8 64
8 64
8 64
8 64
8 64
8 64
8 64
8 64
8 64
8 63
8 62
7 60
12 61
12 61
12 61
12 61
12 61
12 61
11 61
11 61
11 64
11 70
9 60
9 61
9 61
9 61
9 61
8 60
7 57
6 52
6 52
6 51
6 46
6 46
6 46
6 46
6 46
6 46
6 45
6 45
6 46
6 46
6 45
6 46
6 46
6 47
6 44
6 44
6 44
6 44
6 44
6 45
6 44
6 42
5 42
5 42
5 43
5 43
5 43
5 44
5 42
5 42
5 42
5 42
5 43
5 41
5 40
5 38
5 37
5 36
5 36
5 36
5 36
5 36
5 37
5 38
6 42
6 44
6 45
6 46
6 47
6 48
6 47
6 47
6 47
6 44
6 37
6 36
6 36
6 36
6 36
6 36
6 35
6 35
6 35
6 35
6 35
6 35
6 35
6 35
6 35
6 35
6 35
6 35
6 35
6 35
6 35
6 36
6 36
6 37
6 37
6 39
1 38
1 38
1 38
1 38
1 38
1 38
1 37
1 37
1 36
1 32
1 33
1 32
1 32
1 32
1 32
1 31
1 31
1 31
1 31
1 31
1 31
1 31
1 31
1 30
1 29
1 29
1 29
1 29
1 29
1 32
1 34
1 34
1 34
1 33
1 33
1 33
1 33
1 33
1 33
1 33
1 33
1 33
1 33
1 33
1 33
2 34
2 34
2 33
2 33
2 34
2 43
2 43
2 42
2 43
2 43
2 43
2 43
2 43
2 43
2 43
2 43
2 43
2 42
2 40
1 35
1 31
1 30
1 30
1 29
1 29
1 31
1 31
1 31
1 31
2 31
2 31
2 31
2 31
2 31
2 31
2 31
2 31
2 32
2 35
2 37
2 37
2 37
2 37
2 37
1 37
1 37
1 37
1 37
1 38
1 38
1 39
1 37
1 36
1 36
1 34
1 34
1 34
1 34
1 35
1 36
1 37
1 37
1 37
1 36
1 34
1 35
1 35
1 35
1 35
1 36
1 36
1 36
1 36
1 36
2 40
2 40
2 40
2 40
2 40
2 40
2 41
2 41
2 40
2 40
2 40
2 40
2 40
2 40
2 40
2 40
2 40
2 39
2 40
2 40
2 40
2 40
2 40
2 40
2 39
2 42
1 43
1 45
1 46
1 46
1 45
1 36
1 36
1 37
1 36
1 37
1 37
2 37
2 38
2 38
2 38
2 38
2 38
2 38
2 38
2 38
2 38
2 37
2 37
2 37
2 37
2 34
2 34
2 34
2 33
2 33
2 33
2 33
2 33
2 34
2 34
2 34
2 34
2 34
2 33
2 31
2 31
2 31
2 33
2 33
2 33
2 34
2 34
2 34
2 33
2 32
2 31
2 33
2 33
2 33
2 33
2 33
2 33
2 32
2 31
2 30
2 32
2 34
2 34
2 34
2 33
2 34
2 34
2 34
2 34
2 33
2 33
2 33
2 33
2 32
1 29
1 29
1 29
1 29
1 29
1 30
1 29
1 29
1 29
1 29
1 28
1 27
1 27
1 27
1 27
1 27
1 25
1 27
1 27
1 27
1 27
1 27
1 27
1 27
1 27
1 24
1 24
1 22
1 21
1 21
1 21
1 23
1 23
1 22
1 23
1 22
0 22
0 22
0 22
0 23
0 24
0 24
0 25
0 25
0 25
0 25
0 25
0 25
0 25
0 25
0 25
0 25
0 25
0 25
0 25
0 25
0 25
0 25
0 25
0 25
0 25
0 25
0 25
0 24
0 24
0 25
0 25
0 25
0 23
0 23
0 23
0 22
0 22
0 22
0 22
0 22
0 22
0 20
0 20
0 20
0 20
0 20
0 19
0 19
0 18
0 18
0 14
0 14
0 14
0 14
0 14
0 14
0 16
0 17
0 17
0 17
0 17
0 17
0 17
0 17
0 19
0 19
0 19
0 19
0 19
0 18
0 18
0 18
0 18
0 18
0 18
0 18
0 18
0 18
0 19
0 19
0 18
0 18
0 18
0 18
0 24
0 24
0 26
0 26
0 27
0 27
0 25
0 24
0 24
0 24
0 24
0 24
0 24
0 24
0 23
0 27
0 27
0 27
0 26
0 25
0 24
0 24
0 23
0 23
0 23
0 23
0 23
0 23
0 23
0 23
0 24
0 24
0 25
0 25
0 25
0 25
0 25
0 25
0 25
0 24
0 24
0 24
0 24
0 24
0 24
0 23
0 23
0 23
0 23
0 23
0 23
0 23
0 23
0 23
0 23
0 23
0 23
0 23
0 23
0 23
0 23
0 23
0 23
0 23
0 23
2 23
2 23
2 22
2 26
2 27
2 30
2 30
2 28
2 28
2 28
2 28
2 28
2 28
2 28
2 28
2 26
2 26
2 26
2 26
2 26
2 26
2 26
2 26
2 26
2 26
2 26
2 27
2 27
2 27
2 26
2 26
2 27
2 26
2 25
2 25
2 20
2 20
2 18
2 18
2 17
2 17
2 17
2 19
2 19
2 21
2 22
2 22
2 26
2 28
2 30
2 27
2 32
2 32
2 33
2 35
2 35
2 35
2 36
2 38
2 38
2 39
2 39
2 39
2 39
2 39
2 38
2 38
2 37
2 37
2 37
2 37
2 37
2 37
2 37
2 37
2 37
2 37
2 37
2 37
2 37
2 37
2 37
2 37
2 37
1 37
1 37
1 36
1 35
1 35
0 35
0 35
0 35
0 35
0 35
0 35
0 35
0 35
0 35
0 35
0 35
0 35
0 34
0 34
0 33
0 31
0 28
0 28
0 28
0 28
0 28
0 28
0 28
0 28
0 28
0 28
0 28
0 28
0 28
0 28
0 28
0 28
0 28
0 28
0 28
0 28
0 28
0 26
0 26
0 25
0 24
0 24
0 23
0 22
0 22
0 22
0 22
0 22
0 22
0 21
0 18
0 18
0 18
0 18
0 18
0 16
0 16
0 16
0 13
0 10
0 9
0 8
0 5
0 5
0 4
0 4
0 4
0 4
0 3
0 1
0 1
0 0
0 0
0 0
0 0
0 0
0 0
0 0
0 0
0 0
0 0
0 0
0 0
0 0
0 0
0 0
0 0
0 0
0 0
0 0
0 0
0 0
0 0
0 0
0 0
0 0
0 1
0 1
0 1
0 1
0 1
0 1
0 1
0 1
0 1
0 1
0 1
0 1
0 2
0 2
0 2
0 2
0 2
0 2
0 2
0 2
0 2
0 2
0 2
0 2
0 2
0 2
0 2
0 2
0 2
0 2
0 2
0 2
0 3
0 3
0 3
0 3
0 3
0 3
0 3
0 3
0 3
0 3
0 4
0 4
0 4
0 4
1 4
1 4
1 4
1 4
1 4
1 4
1 4
1 4
1 5
1 5
1 5
1 5
1 5
1 5
1 5
1 5
1 5
1 5
1 5
1 5
1 5
1 5
1 5
1 5
1 5
1 7
1 9
1 10
1 10
1 10
1 10
1 10
1 10
1 10
1 10
1 11
1 12
1 12
1 12
2 13
2 13
2 13
2 13
2 13
2 13
2 13
2 13
2 13
2 13
2 13
2 13
2 14
2 14
2 14
2 13
2 13
2 13
2 13
2 13
2 13
2 13
2 13
2 13
2 13
2 13
2 12
2 12
2 12
2 12
2 12
2 12
2 12
2 12
2 12
2 13
2 13
2 14
2 14
2 14
2 14
2 14
2 14
2 14
2 14
2 15
2 15
2 14
2 14
2 14
2 14
2 14
2 14
2 13
2 13
2 13
2 13
2 13
2 13
2 13
2 13
1 13
1 13
1 13
1 13
1 13
1 13
1 13
1 12
1 12
1 13
1 13
1 14
1 14
1 14
1 14
1 14
1 14
1 14
1 14
1 14
1 14
1 14
1 14
1 14
1 13
1 12
1 10
1 10
1 10
1 10
1 10
1 10
1 10
1 10
1 9
1 8
1 8
1 8
1 8
0 7
0 7
0 7
0 8
0 8
0 8
0 10
0 11
0 11
0 12
0 12
0 12
0 12
0 12
0 12
0 12
0 12
0 12
0 12
0 12
0 12
0 12
0 12
0 12
0 12
0 12
0 12
0 12
0 12
0 12
0 13
0 13
0 13
0 13
0 13
0 13
0 13
0 12
0 12
0 13
0 13
0 13
0 13
0 13
0 12
0 12
0 12
0 12
0 12
0 12
0 12
0 12
0 12
0 12
0 12
0 12
0 12
0 12
0 12
0 12
0 12
0 12
0 12
0 12
0 12
0 12
0 13
0 13
0 13
0 13
0 12
0 11
0 11
0 11
0 11
0 11
0 11
0 11
0 11
0 11
0 11
0 11
0 11
0 11
0 14
0 14
0 16
0 16
0 15
0 15
0 15
0 15
0 15
0 16
0 16
0 17
0 17
0 18
0 18
0 18
0 18
0 18
0 18
0 17
0 17
0 17
0 12
0 12
0 12
0 12
0 12
0 12
0 12
0 12
0 12
0 12
0 12
0 12
0 12
0 12
0 12
0 12
0 14
0 14
0 14
0 14
0 14
0 15
0 15
0 15
0 13
0 14
0 14
0 14
0 14
0 14
0 14
0 14
0 14
0 13
0 13
0 13
0 13
0 13
0 13
0 13
0 13
0 13
0 13
0 13
0 13
0 13
0 13
0 13
0 13
0 13
0 13
0 13
0 13
0 13
0 13
0 13
0 13
0 13
0 13
0 13
0 13
0 13
0 13
0 13
0 13
0 13
0 13
0 13
0 13
0 13
0 13
0 13
0 13
0 13
0 13
0 14
0 14
0 14
0 11
0 11
0 9
0 9
0 9
0 9
0 9
0 9
0 9
0 8
0 8
0 7
0 7
0 6
0 6
0 6
0 6
0 7
0 7
0 7
0 14
0 17
0 19
0 19
0 20
0 22
0 23
0 23
0 23
0 23
0 26
0 26
0 26
0 26
0 26
0 26
0 26
0 26
0 24
0 24
0 24
0 24
0 24
0 23
0 23
0 23
0 23
0 22
0 22
0 22
0 22
0 22
0 22
0 22
0 22
0 22
0 22
0 22
0 22
0 22
0 22
0 22
0 22
0 23
0 23
0 23
0 23
0 23
0 23
0 23
0 23
0 23
0 23
0 23
0 23
0 23
0 23
0 23
0 23
0 23
0 23
0 22
0 22
0 22
0 23
0 24
0 29
0 30
0 31
0 33
0 34
0 34
0 35
0 35
0 35
0 37
0 37
0 36
0 36
0 36
0 36
0 36
0 36
0 36
0 36
0 36
0 36
0 37
0 37
0 37
0 37
0 37
0 37
0 37
0 37
0 37
0 35
0 33
0 32
0 32
0 23
0 21
0 20
0 19
0 18
0 18
0 19
0 19
0 19
0 19
0 19
0 19
0 20
0 20
0 20
0 20
0 20
0 20
0 20
0 20
0 20
0 20
0 20
0 20
0 20
0 20
0 20
0 20
0 20
0 20
0 20
0 20
0 20
0 20
0 20
0 20
0 20
0 21
0 21
0 21
0 21
0 21
0 21
0 20
0 21
0 21
0 21
0 21
0 21
0 21
0 21
0 21
0 21
0 21
0 21
0 21
0 21
0 21
0 21
0 21
0 21
0 21
0 21
0 19
0 19
0 18
0 13
0 11
0 10
0 9
0 8
0 8
0 7
0 6
0 6
0 6
0 8
0 8
0 8
0 9
0 9
0 9
0 9
0 13
0 13
0 14
0 14
0 13
0 13
0 13
0 13
0 13
0 13
0 13
0 13
0 13
0 15
0 15
0 15
0 15
0 15
0 15
0 15
0 15
0 14
0 14
0 14
0 14
0 13
0 13
0 13
0 12
0 12
0 12
0 12
0 12
0 12
0 12
0 12
0 13
0 13
0 13
0 13
0 17
1 26
1 27
1 27
1 31
1 33
1 33
1 37
1 40
1 40
1 42
1 43
1 43
1 43
1 44
1 44
1 44
1 44
1 44
1 44
1 44
1 43
1 43
1 44
1 44
1 45
1 45
1 45
1 45
1 46
2 53
2 53
2 53
2 53
2 51
2 51
2 51
2 51
2 51
2 51
2 51
2 51
2 53
2 53
2 54
2 56
2 56
2 56
2 61
2 62
2 63
2 62
2 62
2 61
2 61
2 61
2 59
2 59
2 59
2 59
2 55
2 55
2 55
2 55
2 55
2 55
2 55
2 55
2 56
2 56
2 56
2 56
2 56
2 56
2 56
2 56
2 56
2 56
2 56
2 56
2 56
2 56
2 56
2 56
2 56
2 56
2 58
2 58
2 58
2 58
2 58
2 58
2 58
2 58
2 58
2 58
2 57
2 57
2 56
2 56
2 53
1 43
1 38
1 37
1 35
1 34
1 34
1 32
1 29
1 28
1 28
1 28
1 28
1 29
1 28
1 28
1 28
1 28
1 29
1 32
1 34
1 32
1 35
1 38
1 38
1 37
1 37
1 37
1 37
0 36
0 28
0 28
0 28
0 28
0 28
0 27
0 27
0 26
0 26
0 27
0 27
0 27
0 27
0 27
0 26
0 25
0 25
0 25
0 20
0 20
0 19
0 19
0 19
0 19
0 19
0 19
0 19
0 19
0 19
0 19
0 19
0 19
0 19
0 19
0 19
0 19
0 19
0 19
0 18
0 18
0 18
0 18
0 18
0 18
0 18
0 18
0 18
0 18
0 18
0 18
0 18
0 18
0 19
0 19
0 19
0 19
0 17
0 17
0 17
0 17
0 17
0 17
1 17
1 17
1 17
1 17
1 18
1 18
1 18
1 18
1 18
1 18
1 18
1 18
1 18
1 18
1 18
1 18
1 17
1 17
1 15
1 14
1 15
2 13
2 11
2 11
2 11
2 11
2 11
2 11
2 10
2 9
2 5
2 6
2 6
2 6
2 6
2 7
2 7
2 8
2 8
2 8
2 10
2 10
2 10
2 10
2 10
2 10
2 9
2 9
2 9
2 9
2 9
2 9
2 10
2 10
2 10
2 10
2 10
2 10
2 10
2 10
3 10
3 11
3 11
3 11
3 11
3 11
3 11
3 11
3 11
3 11
3 12
3 14
3 23
3 24
3 27
3 28
3 31
3 32
3 32
3 34
3 34
3 34
3 36
3 37
3 38
3 38
3 38
3 38
3 38
3 38
3 37
3 37
3 37
3 37
3 37
3 37
3 37
3 37
3 37
3 36
2 36
2 36
2 36
2 36
2 36
2 36
2 36
2 36
2 36
2 36
2 36
2 36
2 36
3 42
3 42
3 42
3 42
3 42
3 42
3 43
3 42
2 42
2 42
2 41
2 41
2 41
2 41
2 41
2 41
2 41
2 42
2 41
2 41
2 40
2 40
2 40
2 39
2 39
2 39
2 39
2 38
2 38
2 39
2 39
2 42
2 44
2 44
2 43
2 43
2 43
2 44
4 44
4 43
4 47
4 47
4 47
4 47
4 47
4 47
4 47
3 47
3 47
3 47
3 46
3 46
3 45
3 44
3 43
3 44
3 43
3 43
3 42
3 33
3 31
3 28
3 28
3 27
3 27
3 27
3 25
3 25
3 24
3 24
3 24
3 23
3 23
3 23
3 23
3 25
3 25
3 26
3 27
3 28
3 28
3 28
3 28
3 28
3 28
3 28
3 28
3 28
3 28
3 28
3 28
3 28
3 29
3 31
3 31
3 33
3 33
3 33
3 33
3 32
2 28
2 28
2 28
2 28
2 28
2 28
2 27
2 27
3 27
3 27
3 27
3 27
3 27
3 27
3 27
3 27
3 27
3 26
3 26
3 26
3 27
3 27
3 26
2 26
2 27
2 27
2 27
2 26
2 26
2 26
2 25
2 22
2 22
2 22
2 22
2 22
2 22
1 21
0 21
0 21
0 17
0 17
0 17
0 17
0 17
0 17
0 17
0 17
0 17
0 17
0 17
0 17
0 17
0 17
0 17
0 16
0 17
0 17
0 17
0 17
0 17
0 17
0 17
0 17
0 17
0 17
0 17
0 17
0 17
0 15
0 15
0 15
0 15
0 15
0 15
0 10
0 10
0 10
0 10
0 10
0 10
0 10
0 10
0 10
0 10
0 10
0 10
0 10
0 10
0 11
0 11
0 13
0 11
0 10
0 9
0 8
0 8
0 8
0 8
0 7
0 7
0 7
0 7
0 7
0 7
0 7
0 7
0 8
0 12
0 12
0 12
0 12
0 12
0 13
0 13
0 15
0 16
0 16
0 16
0 16
0 15
0 15
0 14
0 14
0 13
0 13
0 13
0 13
0 13
0 13
0 13
0 13
0 13
0 13
0 13
0 13
0 15
0 15
0 15
0 15
0 15
0 16
0 16
0 16
0 16
0 16
0 16
0 16
0 16
0 16
0 16
0 16
0 14
0 14
0 14
0 14
0 13
0 13
0 13
0 13
0 13
0 13
0 13
0 13
0 13
0 13
0 13
0 14
0 14
0 15
0 15
0 16
0 16
0 16
0 17
0 18
0 19
0 19
0 19
0 20
0 21
0 22
0 24
0 24
0 24
1 26
2 26
2 26
2 26
2 25
2 25
2 23
2 23
2 23
2 23
2 23
2 23
2 24
2 24
2 24
2 24
2 24
2 24
2 24
2 25
2 25
2 25
2 23
2 20
2 20
2 20
2 20
2 20
2 18
2 18
2 17
2 16
2 16
2 16
2 16
2 16
2 16
2 16
2 16
2 16
2 16
2 16
2 16
2 16
2 16
2 16
2 16
2 16
2 16
2 16
2 16
2 16
2 16
2 16
2 16
2 16
2 15
2 15
2 15
2 15
2 15
2 15
2 15
2 15
2 15
2 15
2 15
2 15
2 15
2 15
2 15
2 15
2 15
2 15
2 15
2 16
2 16
2 16
2 16
2 16
2 16
2 16
2 15
2 15
2 13
2 13
2 13
2 13
2 13
2 11
2 9
2 9
2 9
2 9
2 8
2 7
2 4
2 4
2 4
2 4
1 2
0 2
0 2
0 2
0 2
0 2
0 2
0 2
0 2
0 2
0 2
0 2
0 1
0 1
0 1
0 1
0 1
0 1
0 1
0 0
0 0
0 0
0 0
0 0
0 0
0 0
0 0
0 0
0 0
0 0
0 0
0 0
0 0
0 0
0 0
0 0
0 0
0 0
0 0
0 0
0 0
0 0
0 0
0 0
0 0
0 0
0 0
0 0
0 0
0 0
0 0
0 0
0 0
0 0
0 1
0 1
0 1
0 1
0 1
0 2
0 2
0 2
0 2
0 2
0 2
0 2
0 7
0 8
0 8
0 8
0 8
0 8
0 9
0 9
0 10
0 18
0 18
0 18
0 18
0 18
0 18
0 18
0 18
0 19
0 19
0 19
0 19
0 19
0 19
0 19
0 19
0 19
0 19
0 20
0 20
0 21
0 22
0 24
0 34
0 45
0 45
0 46
0 46
0 46
0 46
0 46
0 46
0 46
0 46
0 46
0 46
0 46
0 46
0 46
0 50
0 50
0 52
0 52
0 52
0 52
0 52
0 52
0 52
0 53
0 53
0 54
0 54
0 54
0 54
0 54
0 54
0 54
0 56
0 56
0 64
0 64
0 65
0 66
0 67
0 67
0 67
0 67
0 67
0 67
0 67
0 67
0 67
0 67
0 67
0 67
0 67
0 67
0 67
0 67
0 69
0 69
0 69
0 69
0 70
0 70
0 70
0 70
0 70
0 70
0 70
0 70
0 65
0 64
0 64
0 64
0 64
0 64
0 63
0 62
0 62
0 55
0 55
0 55
0 55
0 55
0 55
0 55
0 55
0 54
0 54
0 54
0 54
0 54
0 54
0 54
0 54
0 54
0 54
0 53
0 53
0 52
0 51
0 48
0 40
0 27
0 27
0 27
0 27
0 27
0 27
0 27
0 28
0 28
0 28
0 29
0 29
0 31
0 38
0 38
0 33
0 33
0 31
0 31
0 31
0 32
0 32
0 32
0 32
0 32
0 32
0 32
0 32
0 32
0 31
0 29
0 28
0 28
0 28
0 30
0 23
0 24
0 23
0 23
0 22
0 22
0 22
0 22
0 22
0 22
0 22
0 23
0 23
0 23
0 23
0 23
0 23
0 23
0 23
0 24
0 22
0 22
0 22
0 22
0 26
0 25
0 25
0 25
0 25
0 25
0 26
0 28
0 28
0 28
0 28
0 42
0 42
0 42
0 44
0 45
0 45
0 46
0 46
0 47
0 47
0 47
0 47
0 50
0 51
0 53
0 54
0 54
0 54
0 54
0 54
0 54
0 54
0 54
0 54
0 54
0 54
0 54
0 55
0 56
0 56
0 60
0 60
0 61
0 61
0 62
0 63
0 63
0 62
0 62
0 62
0 64
0 63
0 62
0 55
0 55
0 55
0 55
0 55
0 55
0 54
0 54
0 55
0 54
0 55
0 55
0 55
0 57
0 57
0 57
0 57
0 57
0 57
0 57
0 57
0 54
0 54
0 54
0 54
0 54
0 54
0 54
0 54
0 54
0 54
0 56
0 55
0 56
0 56
0 56
1 57
1 57
1 57
1 57
1 57
1 56
1 55
1 55
1 55
1 53
1 47
1 48
1 47
1 47
1 47
1 47
1 47
1 47
1 48
1 50
1 50
1 33
1 34
1 34
1 36
1 38
1 38
1 38
1 38
2 40
2 45
2 49
2 53
2 55
2 57
2 62
2 62
2 63
2 67
2 78
2 84
2 120
2 136
2 138
2 149
2 172
2 182
2 198
3 216
3 229
3 244
3 240
3 249
3 249
3 249
3 251
3 255
3 257
3 257
3 257
3 256
3 254
3 254
3 254
3 254
3 255
3 255
3 269
3 269
3 271
3 271
3 280
3 295
3 294
3 295
3 296
3 296
3 296
3 298
3 301
3 302
3 303
3 307
3 311
3 311
3 312
3 313
3 318
3 321
3 321
3 321
3 322
3 322
3 323
3 331
3 336
3 342
3 341
3 344
3 346
2 347
2 349
2 353
2 358
2 423
2 430
2 437
2 442
2 445
2 446
2 447
2 448
2 450
2 451
2 451
3 451
3 450
3 447
3 444
3 444
3 443
3 445
3 441
3 442
3 441
3 437
4 462
4 461
4 464
3 450
3 447
3 430
3 412
3 410
3 407
3 407
3 407
3 407
4 407
4 406
4 399
4 373
5 358
5 355
5 350
5 337
5 319
5 300
5 292
5 281
5 278
5 278
5 278
5 279
5 279
5 281
5 279
5 279
5 280
5 287
5 325
5 331
5 333
5 352
6 351
6 350
6 350
6 336
6 335
6 341
6 345
6 341
6 324
6 324
6 323
6 324
6 331
6 331
6 330
6 329
6 328
6 328
6 325
6 320
6 320
7 320
7 318
7 312
7 310
7 310
7 310
7 308
7 308
7 308
7 301
7 288
7 280
7 280
7 280
7 278
7 280
7 279
7 277
7 271
7 204
7 200
7 188
7 185
7 184
7 183
7 182
7 182
7 180
7 179
6 179
6 181
6 182
6 183
6 183
6 183
6 183
6 182
6 182
6 182
6 181
6 181
5 152
4 152
4 152
4 153
4 155
4 157
4 160
4 161
4 170
4 177
4 178
4 176
3 167
4 167
4 165
4 168
3 167
3 169
3 166
3 167
3 167
3 167
3 169
3 173
3 176
3 181
3 212
4 213
4 215
4 233
4 235
4 232
3 233
3 226
3 188
3 181
3 179
3 162
3 162
3 163
3 163
3 163
3 162
3 154
3 149
4 148
4 148
4 148
4 151
4 150
4 144
4 142
4 142
4 142
4 144
4 145
4 145
4 145
4 147
3 148
3 148
3 148
3 148
3 148
3 148
3 148
3 148
3 147
3 148
3 148
3 153
3 154
3 172
3 177
3 179
3 181
3 180
3 179
3 180
3 180
3 181
3 187
3 187
3 188
3 188
3 187
3 187
3 187
3 188
3 185
3 185
3 184
3 184
3 184
3 184
3 184
3 185
3 185
3 185
3 184
3 183
3 181
3 184
3 182
3 182
3 184
3 181
3 178
3 171
3 163
3 163
3 163
3 163
2 160
2 159
2 154
2 153
2 151
2 151
2 149
2 148
2 148
2 145
2 140
2 134
2 129
1 99
1 96
1 93
1 79
1 86
1 87
1 87
1 87
1 87
1 89
1 90
1 91
1 93
1 92
1 92
1 92
1 93
1 93
1 93
0 93
0 93
0 89
0 89
0 89
0 88
0 89
0 90
0 89
0 87
0 87
0 86
1 86
2 86
2 87
2 87
2 88
2 89
2 89
2 91
2 91
2 92
2 96
2 103
2 105
2 103
2 100
2 81
2 78
2 81
2 79
2 89
2 90
2 90
2 91
2 90
2 84
2 84
2 83
2 83
2 82
2 82
2 84
2 84
2 84
2 84
2 84
2 89
2 92
2 102
2 108
2 112
2 115
2 123
2 127
2 130
2 130
2 127
2 125
2 122
2 127
2 127
2 128
2 126
2 126
2 125
2 127
2 127
2 127
2 127
2 127
2 127
2 127
2 127
2 127
2 128
2 128
2 128
2 128
2 128
2 126
2 132
2 136
2 142
2 147
3 162
3 205
3 213
3 252
3 261
3 267
3 267
3 266
3 267
3 267
3 269
3 270
3 270
3 271
1 273
1 274
1 277
1 277
1 278
1 279
1 279
1 280
1 280
1 281
1 283
1 283
1 282
1 282
1 282
1 284
1 284
1 283
1 285
1 289
1 288
1 290
1 290
1 282
1 284
1 283
1 282
1 282
1 281
1 280
1 276
1 277
1 276
1 275
1 273
1 271
1 273
1 275
1 273
1 271
1 271
1 270
1 267
1 269
2 270
3 271
3 272
3 272
4 270
4 264
4 245
4 248
4 249
4 250
4 249
4 250
4 263
4 263
4 265
4 268
4 271
4 270
4 273
4 273
4 283
4 283
4 284
4 282
4 282
4 282
4 283
4 289
4 291
4 295
4 295
4 295
4 294
4 296
4 296
4 309
5 309
5 309
5 304
5 300
5 296
5 273
5 217
5 192
5 191
5 173
5 173
5 172
5 171
5 173
5 184
5 205
6 257
6 261
6 264
6 264
6 262
6 258
6 257
6 257
6 256
6 255
6 254
6 252
6 252
6 250
6 249
6 250
6 250
6 250
6 251
6 248
6 248
6 247
6 242
6 243
6 244
6 242
6 242
6 242
6 234
6 234
6 234
6 237
6 237
6 239
6 240
6 241
6 233
6 232
6 233
6 240
6 244
6 243
4 249
4 250
4 250
4 250
4 254
4 253
4 251
4 251
4 270
4 278
3 294
3 302
4 305
4 299
4 301
4 306
4 307
4 324
6 333
6 395
6 413
6 424
6 426
6 423
6 425
6 439
6 444
6 445
6 451
6 451
6 451
6 451
6 450
6 445
6 447
6 444
5 444
5 444
5 444
5 445
5 472
5 467
5 492
5 501
5 517
5 526
5 531
4 539
4 562
4 566
4 565
4 565
4 565
4 565
4 562
4 558
4 518
3 503
3 487
4 488
4 490
4 490
4 490
4 491
4 493
4 497
5 504
5 509
5 509
5 512
5 514
5 523
5 526
5 531
5 719
5 724
5 738
5 745
5 747
5 747
5 745
5 745
5 743
5 745
5 746
5 746
5 749
5 754
5 756
5 756
5 755
5 755
5 757
5 756
5 755
5 753
5 749
5 739
5 731
5 723
5 717
3 719
3 719
3 718
3 725
3 723
3 724
3 718
3 697
2 694
2 662
2 659
2 659
2 660
2 662
2 659
2 652
2 607
2 569
2 559
2 557
2 555
2 554
2 553
2 546
2 527
2 508
2 507
2 507
2 506
2 512
2 523
2 525
2 527
2 526
2 526
2 526
2 527
2 526
2 523
2 492
2 489
2 441
2 426
2 406
2 405
2 400
2 391
2 382
2 381
2 381
2 382
2 380
2 382
2 415
2 428
2 447
2 463
2 520
1 532
1 545
1 545
2 551
2 549
2 549
2 549
1 543
1 540
1 540
1 541
1 540
1 531
1 532
1 535
1 352
1 355
1 338
1 334
1 330
1 330
2 331
2 332
2 332
2 332
2 332
2 334
2 334
2 334
2 332
2 331
2 331
2 329
2 328
2 328
2 331
2 331
2 333
2 333
2 335
2 336
2 339
2 337
2 339
2 339
2 335
2 335
2 337
2 337
2 342
2 339
3 355
3 363
3 374
3 379
3 380
3 381
3 381
3 380
3 376
3 371
3 371
3 371
3 374
3 374
3 374
4 375
4 375
4 375
4 375
4 375
4 366
4 359
4 358
4 357
4 357
5 357
5 358
5 358
5 359
5 359
5 359
5 358
5 355
5 355
5 360
5 362
5 362
5 362
9 383
9 386
9 388
9 388
10 386
10 387
10 337
10 313
10 258
10 232
10 221
10 218
10 217
10 218
9 215
9 216
9 216
9 214
9 213
9 216
9 215
9 213
10 213
10 206
10 202
10 202
10 193
10 193
10 195
10 199
10 201
10 203
10 211
11 271
11 282
11 294
12 299
13 303
19 318
19 320
19 320
19 318
19 318
19 318
19 320
19 320
19 314
19 314
19 316
19 326
19 326
19 326
19 324
19 323
19 326
19 330
19 336
19 352
19 349
19 355
19 340
19 340
18 330
18 327
18 326
18 326
18 324
18 327
18 329
18 327
18 330
18 330
18 330
18 329
18 327
18 328
18 328
17 326
17 326
17 326
17 326
17 324
17 324
17 324
17 324
16 328
16 365
16 365
16 365
16 363
16 362
16 362
16 363
16 363
16 365
16 365
16 360
16 359
16 360
16 362
12 350
11 349
11 353
11 354
11 355
11 355
11 350
11 351
11 349
11 349
11 347
11 347
11 346
11 343
11 343
11 342
12 353
12 353
12 352
12 349
12 349
12 348
10 342
10 341
9 337
9 335
9 336
9 336
9 334
9 332
9 329
9 320
9 303
8 223
8 213
8 213
6 212
3 209
1 209
1 209
1 209
1 209
1 208
1 208
1 205
1 213
1 211
1 213
1 213
1 208
1 206
1 222
1 227
1 229
1 226
1 216
1 215
1 212
1 222
1 209
1 206
1 204
1 193
1 193
1 194
1 194
1 196
1 193
1 188
1 187
1 186
1 187
1 194
1 204
1 227
1 228
1 232
1 237
1 248
1 249
1 249
1 251
1 252
1 250
1 250
1 246
1 214
1 222
1 223
1 223
1 223
1 223
1 223
1 223
1 223
1 223
1 224
1 224
1 223
1 220
1 207
1 207
1 202
1 203
1 203
1 203
1 202
1 197
1 197
1 197
1 197
1 197
1 197
1 196
1 196
1 197
0 184
0 184
0 184
0 184
0 184
0 187
0 189
0 189
0 190
0 190
0 196
0 199
0 204
0 214
0 215
1 217
2 221
2 221
2 224
2 229
2 229
2 229
2 229
2 229
2 231
2 232
2 232
2 235
2 236
2 228
2 229
2 225
2 223
2 219
2 220
2 203
2 193
2 187
2 181
2 176
2 168
2 167
2 157
2 168
2 168
2 170
2 170
2 171
2 170
2 170
2 168
2 168
2 168
2 168
2 170
2 168
2 153
2 131
2 130
2 130
2 127
2 122
2 111
2 111
2 111
2 110
2 114
2 116
2 116
2 116
2 135
2 124
2 125
2 125
2 125
2 134
2 142
2 144
2 147
2 147
2 150
2 152
2 153
2 153
2 155
2 155
2 161
2 159
2 159
2 159
2 159
2 159
2 160
2 160
2 160
2 161
2 161
1 162
1 162
1 161
1 162
0 164
0 164
0 164
0 164
0 161
0 160
0 159
0 159
0 160
0 153
0 149
0 142
0 134
0 132
0 130
0 125
0 125
0 120
0 116
0 116
0 116
0 116
0 116
0 114
0 113
0 113
0 111
0 110
0 109
0 108
0 108
0 107
0 108
0 107
0 111
0 109
0 109
0 109
0 109
0 109
0 107
0 108
0 96
0 96
0 95
0 95
0 95
0 96
0 96
0 96
0 97
0 97
0 98
0 97
0 100
0 100
0 100
0 97
0 96
0 97
0 98
0 97
0 97
0 97
0 94
0 91
0 89
0 89
0 89
0 69
0 69
0 68
0 69
0 68
0 60
0 48
0 43
0 43
0 44
0 40
0 36
0 36
0 36
0 36
0 32
0 29
0 29
0 29
0 30
0 37
0 37
0 36
0 35
0 36
0 36
0 40
0 39
0 39
0 39
0 38
0 36
0 36
0 37
0 37
0 37
0 36
0 36
0 35
0 34
0 35
0 35
0 35
0 35
0 35
0 36
0 42
0 46
0 49
0 49
0 50
0 50
0 51
1 51
1 51
1 53
1 54
1 54
1 57
1 61
1 62
1 66
1 68
1 67
1 69
1 67
2 71
2 72
2 77
2 78
2 79
2 80
2 79
2 79
2 80
2 82
2 84
2 83
2 85
2 86
2 86
2 86
2 85
2 82
2 82
2 81
2 81
2 81
2 82
2 82
2 80
2 79
2 79
2 80
2 80
2 81
2 85
2 88
2 90
2 90
2 90
2 92
2 93
2 92
2 92
2 92
2 92
2 92
2 92
2 91
2 91
2 90
2 90
2 90
2 89
2 88
2 88
2 88
2 89
2 88
2 83
2 83
2 83
2 83
2 83
2 83
2 80
2 80
2 80
2 81
2 81
1 81
1 81
1 80
1 80
1 80
1 80
1 80
1 78
1 78
1 80
1 80
1 80
1 80
1 80
1 76
1 75
1 74
1 72
1 71
1 71
1 75
1 81
1 81
1 81
1 78
1 78
1 78
1 74
1 70
1 70
1 67
1 66
1 67
1 68
1 64
0 63
0 63
0 60
0 59
0 58
0 58
0 60
0 61
0 59
0 58
0 55
0 54
0 52
0 51
0 51
0 50
0 50
0 50
0 50
0 51
0 51
0 54
0 53
0 53
0 55
0 58
0 58
0 58
0 65
0 66
0 61
0 59
0 58
0 58
0 56
0 56
0 57
0 57
0 57
0 57
0 57
0 57
0 58
0 61
0 61
1 63
1 64
1 65
1 65
1 65
1 65
1 65
1 63
1 63
1 68
1 70
1 70
1 70
1 70
1 70
1 71
1 72
1 72
1 72
1 72
1 73
1 74
1 74
1 74
1 75
1 76
1 76
1 76
1 76
1 73
1 73
1 72
1 72
1 72
1 72
1 67
1 66
1 65
1 65
1 65
1 59
1 57
1 56
1 56
1 56
1 56
1 56
1 56
1 56
1 57
1 55
1 52
1 50
1 48
1 48
1 48
1 48
1 48
1 48
1 47
1 47
1 46
1 45
1 45
1 45
1 47
1 60
1 67
1 70
1 74
1 74
1 82
1 90
1 101
1 113
1 125
1 133
1 144
1 162
1 170
1 169
1 173
1 173
1 167
1 164
1 164
1 164
1 164
1 169
1 170
1 172
1 170
1 172
1 173
1 173
1 173
1 173
1 171
1 168
1 167
0 165
0 163
0 163
0 164
0 164
0 165
0 166
0 164
0 163
0 162
1 163
1 163
1 163
1 163
1 161
1 162
1 164
1 163
1 163
1 162
1 163
1 163
1 164
1 164
1 164
1 164
1 164
1 164
1 164
1 164
1 164
1 166
1 166
1 167
1 168
1 170
1 173
1 175
1 175
1 175
1 175
1 175
1 175
1 175
1 176
1 177
1 177
1 190
1 190
1 194
1 195
1 195
1 209
1 209
1 210
1 211
1 211
1 213
1 218
1 218
1 218
1 218
1 219
1 220
1 218
1 210
1 194
1 181
1 184
1 183
1 185
1 174
1 159
1 136
1 124
1 115
1 110
1 101
1 93
1 90
1 88
1 87
1 87
1 88
1 88
1 87
1 87
1 87
1 83
1 82
1 80
1 80
1 78
1 78
1 78
1 78
1 78
1 78
1 78
1 80
1 80
1 82
1 82
1 81
1 81
1 80
1 79
1 79
1 79
1 79
0 76
0 76
0 78
0 78
0 78
0 76
0 75
0 75
0 76
0 75
0 74
0 74
0 73
0 73
0 74
0 73
0 75
0 76
0 77
0 79
0 77
0 85
0 87
0 89
0 90
0 91
0 92
0 94
0 94
0 94
0 94
0 94
0 95
0 96
0 96
0 95
0 95
0 95
0 95
0 90
0 91
0 91
0 95
0 95
0 97
0 101
0 103
0 102
0 97
0 97
0 98
0 99
0 99
0 105
0 105
0 105
0 103
0 102
0 95
0 105
0 105
0 104
0 105
0 103
0 102
0 101
0 101
0 101
0 101
0 101
0 101
0 101
0 101
0 100
0 100
0 101
0 101
0 101
0 101
0 101
0 101
0 101
0 101
0 100
0 100
0 100
0 100
0 100
0 99
0 98
0 98
0 96
0 96
0 96
0 96
0 96
0 98
0 98
0 98
0 98
0 97
0 97
0 96
0 96
0 95
0 94
0 94
0 94
0 93
0 93
0 93
0 93
0 93
0 93
0 92
0 92
0 89
0 88
0 88
0 86
0 84
0 71
1 66
1 65
1 65
1 64
2 68
2 68
2 68
2 68
2 68
2 68
2 67
2 66
2 65
2 66
2 66
2 52
2 52
2 52
2 51
2 50
2 46
2 43
2 40
2 37
2 35
2 35
2 35
2 35
2 33
2 33
2 33
2 26
2 26
2 26
2 26
2 26
2 26
2 12
2 12
2 12
2 12
2 12
2 12
2 12
2 12
2 12
2 12
2 12
2 12
2 12
2 12
2 12
2 12
2 11
2 12
2 12
2 13
2 14
2 14
2 14
2 14
2 14
2 14
2 14
2 14
2 14
2 14
2 14
2 14
2 14
2 14
2 14
2 14
2 14
2 12
2 12
2 12
2 12
2 12
2 12
2 12
2 12
2 12
2 12
2 12
2 12
2 12
2 12
2 12
2 12
2 12
1 10
1 10
1 9
1 9
0 7
0 7
0 7
0 7
0 7
0 7
0 7
0 7
0 7
0 5
0 5
0 5
0 5
0 5
0 5
0 5
0 5
0 5
0 4
0 4
0 4
0 4
0 4
0 4
0 4
0 4
1 4
1 4
1 4
1 4
1 4
1 4
1 4
1 4
1 4
1 4
1 4
1 4
1 4
1 4
1 3
1 3
0 3
0 3
0 3
0 3
0 3
0 3
0 5
0 5
0 5
0 5
0 5
0 5
0 5
0 5
0 5
0 5
0 4
0 4
0 5
0 4
0 3
0 3
0 3
0 3
0 3
0 4
0 4
0 4
0 4
0 4
0 4
0 4
0 4
0 4
0 4
0 4
0 4
0 4
0 4
0 4
0 4
0 4
0 4
0 4
0 4
0 4
0 4
0 4
0 4
0 4
0 4
0 4
0 4
0 4
0 6
0 6
0 6
0 6
0 6
0 6
0 6
0 6
0 6
0 6
0 6
0 6
0 6
0 6
0 6
0 6
0 6
0 6
0 6
0 6
0 6
0 6
0 6
0 6
0 7
0 7
0 9
0 14
0 16
0 16
0 16
0 18
0 19
0 20
0 23
0 25
0 25
0 25
0 25
0 25
0 26
0 26
0 27
0 27
0 28
0 28
0 28
0 28
0 28
0 29
0 29
0 29
0 27
0 28
0 28
0 28
0 27
0 32
0 35
0 37
0 40
0 40
0 40
0 40
0 41
0 41
0 41
0 41
0 41
0 41
0 41
0 40
0 41
0 41
0 48
0 54
0 54
0 54
0 54
0 54
0 54
0 55
0 55
0 57
0 57
0 65
0 65
0 65
0 65
0 65
0 65
0 65
0 66
0 68
0 69
0 70
0 75
0 80
0 80
0 80
0 78
0 78
0 78
0 78
0 78
0 78
0 78
0 78
0 78
0 78
0 78
0 78
0 78
0 79
0 79
0 80
0 80
0 80
0 80
0 81
0 83
0 83
0 82
0 82
0 79
0 75
0 74
0 71
0 69
0 69
0 69
0 67
0 66
0 64
0 64
0 64
0 64
0 64
0 64
0 64
0 64
0 64
0 63
0 63
0 62
0 63
0 63
0 63
0 63
0 62
0 62
0 62
0 62
0 62
0 62
0 62
0 62
0 57
0 55
0 52
0 50
0 50
0 50
0 51
0 49
0 49
0 49
0 51
0 52
0 52
0 52
0 52
0 56
0 56
0 49
0 43
0 43
0 42
0 40
0 40
0 40
0 39
0 40
0 38
0 38
0 25
0 25
0 24
0 18
0 18
0 18
0 18
0 17
0 17
0 17
0 17
0 17
0 17
0 17
0 17
0 17
0 17
0 17
0 17
0 17
0 17
0 17
0 16
0 15
0 15
0 15
0 15
0 15
0 15
0 15
0 14
0 14
0 14
0 14
0 13
0 10
0 10
0 10
0 10
0 10
0 10
0 10
1 10
1 10
1 10
1 10
1 10
1 10
2 10
2 10
2 10
2 10
2 10
2 10
2 10
2 10
2 10
2 10
2 10
2 10
2 9
2 9
2 9
2 9
2 9
2 9
2 9
2 9
2 9
2 9
2 9
2 9
2 9
2 9
3 9
3 9
3 9
3 9
3 9
3 9
3 9
3 9
3 7
3 6
3 6
3 6
3 6
4 2
4 2
4 2
4 2
7 2
7 2
7 2
7 2
7 2
7 1
7 1
7 1
7 1
7 1
7 1
7 1
7 1
7 1
7 1
7 1
7 1
7 1
8 1
8 1
8 1
8 1
8 1
8 1
8 1
8 1
8 1
8 1
8 1
9 1
9 1
9 1
10 1
10 1
10 1
10 1
10 1
10 1
10 1
10 1
10 1
10 1
10 1
10 1
9 1
11 1
14 1
14 1
23 1
24 1
24 1
25 1
31 1
31 1
50 1
50 1
50 1
49 1
49 1
49 1
49 1
49 1
50 1
50 1
50 1
50 1
50 1
51 1
52 1
52 1
52 1
52 1
52 1
52 1
53 1
53 1
53 1
53 1
55 1
55 1
55 1
55 1
55 1
54 1
54 1
54 1
54 1
54 1
54 1
55 1
56 1
67 1
69 1
69 1
69 1
69 1
68 0
68 0
67 0
68 0
68 0
68 0
73 0
73 0
74 0
74 0
74 0
74 0
74 0
75 0
75 0
77 0
77 0
77 0
77 0
77 0
77 0
77 0
77 0
78 0
78 0
80 0
80 0
80 0
80 0
80 0
80 0
81 0
83 0
84 0
85 0
85 0
84 0
84 0
87 0
88 0
95 0
102 0
102 0
106 0
109 0
111 0
114 0
113 0
113 0
112 0
111 0
112 0
104 0
106 0
106 0
102 0
99 0
99 0
80 0
88 0
88 0
89 0
91 0
92 0
92 0
97 0
102 0
105 0
111 0
113 0
115 0
118 0
120 0
120 0
120 0
120 0
123 0
122 0
122 0
121 0
121 0
123 0
123 0
123 0
123 0
123 0
123 0
123 0
123 0
124 0
124 0
124 0
123 0
122 0
122 0
113 0
114 0
114 0
115 0
115 0
114 0
114 0
114 0
113 0
112 1
112 1
106 1
106 1
106 1
106 1
106 1
106 1
105 1
105 1
104 1
102 1
102 1
102 1
102 1
102 1
103 1
104 1
104 2
105 2
105 2
106 2
106 2
108 2
109 2
108 2
108 2
108 2
107 2
107 2
110 2
112 2
112 2
112 2
106 2
104 2
92 2
91 2
91 2
87 2
83 2
81 2
79 2
79 2
79 2
79 2
78 2
78 2
78 2
76 2
76 2
80 2
90 2
91 2
88 2
84 2
85 2
87 2
85 2
84 2
81 2
69 2
67 2
65 2
61 2
61 2
58 2
58 2
58 2
59 2
59 2
59 2
57 2
58 2
58 2
58 2
59 2
60 2
60 2
61 2
61 2
61 2
61 2
61 2
61 2
60 2
60 2
60 2
60 2
60 2
60 2
58 2
56 2
56 2
55 1
55 1
55 1
55 1
55 1
55 1
55 2
55 2
55 2
56 2
57 2
57 2
62 2
63 2
63 2
64 2
64 2
64 2
64 2
62 2
62 2
62 4
61 4
61 9
59 9
58 9
58 9
56 9
54 9
62 10
84 10
94 10
96 10
98 10
98 11
96 11
96 11
95 11
96 11
97 11
98 11
98 11
98 11
98 11
98 11
100 11
100 11
99 11
99 11
102 11
102 14
102 14
102 15
101 15
101 15
101 15
100 15
96 15
83 15
82 15
82 15
82 15
82 15
80 15
80 15
79 15
79 15
79 15
79 15
79 15
79 15
78 15
77 15
74 15
73 16
73 16
72 16
72 16
70 16
70 16
70 16
70 16
68 16
68 16
68 20
67 21
67 22
67 24
67 26
67 26
67 31
67 33
68 34
68 34
68 34
68 34
68 34
68 34
68 34
68 34
68 34
68 34
68 34
68 34
68 34
68 34
68 33
68 33
68 33
67 34
67 34
67 34
61 34
61 34
61 34
60 34
60 34
60 34
60 34
60 34
60 33
60 32
60 31
60 28
61 30
60 31
57 31
52 31
47 31
29 30
19 30
14 30
13 30
14 30
14 29
14 29
14 29
13 29
12 29
12 29
14 29
14 29
14 29
14 31
14 33
13 33
13 33
13 34
12 35
10 35
10 33
10 34
11 36
11 36
11 36
11 37
11 37
11 37
11 37
11 38
10 38
10 38
10 45
10 46
10 46
10 46
10 48
10 50
10 54
10 58
14 68
14 78
14 86
14 90
14 92
14 93
14 94
14 94
14 94
14 95
14 95
14 95
14 97
15 94
15 91
15 90
15 89
15 86
15 86
14 85
14 82
14 82
14 81
14 81
14 81
14 83
14 83
14 83
14 83
14 83
14 83
14 83
14 83
14 83
14 83
14 83
14 83
14 83
14 83
14 82
13 82
13 82
13 85
13 102
13 107
13 107
13 108
13 108
13 109
13 112
13 116
13 118
13 119
13 119
12 117
12 117
12 117
11 117
11 128
11 140
11 153
11 162
10 169
10 175
10 176
10 176
10 176
10 176
10 177
10 177
6 177
6 178
6 180
6 180
6 183
6 184
6 183
6 183
6 183
6 184
6 182
6 183
5 180
5 180
5 180
5 180
5 180
6 180
6 180
6 179
6 179
6 179
6 169
6 167
6 168
6 168
6 168
6 166
5 157
4 155
3 141
3 126
2 126
2 126
2 126
2 124
2 124
1 124
1 124
1 122
1 122
1 121
1 119
1 119
0 119
0 119
0 119
0 119
0 118
0 118
0 119
0 120
0 120
0 120
0 120
0 118
0 118
0 118
0 118
0 119
0 120
0 120
0 121
0 121
0 125
0 125
0 125
0 127
0 127
0 128
0 128
0 128
0 125
0 113
0 118
0 126
0 127
0 146
0 147
0 143
0 140
0 141
0 140
0 141
0 143
0 144
0 148
0 149
0 138
0 124
0 109
0 97
0 88
0 85
0 85
0 85
0 85
0 87
0 87
0 90
0 90
0 105
0 102
0 109
0 116
0 118
0 118
0 119
0 119
0 118
0 118
0 117
0 117
0 117
0 117
0 117
0 117
0 117
0 117
0 117
0 117
0 117
0 117
0 117
0 116
0 116
0 115
0 115
0 116
0 122
0 122
0 122
0 122
0 122
0 123
0 123
0 123
0 126
0 126
0 127
0 129
0 130
0 131
0 131
0 131
0 132
0 133
0 134
0 136
0 136
0 135
0 133
0 133
0 133
0 133
0 133
0 133
0 133
0 133
0 131
0 129
0 128
0 127
0 127
0 124
0 124
0 124
0 122
0 122
0 121
0 121
0 121
0 118
0 115
0 107
0 101
0 99
0 77
0 77
0 77
0 80
0 105
0 106
0 104
0 102
0 101
0 94
0 93
0 93
0 102
0 104
0 107
0 108
0 108
0 110
0 112
0 112
0 110
0 109
0 106
0 106
0 84
0 79
0 78
0 78
0 76
0 76
0 76
0 76
0 77
0 77
0 78
0 79
0 79
0 79
0 79
0 79
0 79
0 79
0 82
0 84
0 84
0 86
0 86
0 88
0 88
0 88
0 90
0 94
0 88
0 93
0 93
0 105
0 105
0 105
0 105
0 108
0 110
0 110
0 107
0 106
0 105
0 105
0 106
0 105
0 105
0 104
0 102
0 101
0 102
0 102
0 110
0 110
0 110
0 110
0 110
0 112
0 112
0 111
0 111
0 111
0 112
0 113
0 115
0 116
0 116
0 116
0 116
0 116
0 116
0 117
0 117
0 119
0 119
0 119
0 120
0 125
0 126
0 125
0 125
0 121
0 97
0 96
0 98
0 98
0 98
0 99
0 98
0 97
0 88
0 86
0 85
0 83
0 80
0 77
0 77
1 77
1 78
1 81
1 81
1 82
1 82
1 81
1 81
1 81
1 84
1 89
1 90
1 91
1 91
1 91
1 91
1 90
1 92
1 95
1 97
1 97
1 99
1 105
1 107
2 117
2 127
2 126
2 126
2 125
2 124
2 124
2 121
2 119
2 117
2 114
2 114
2 101
2 100
2 100
2 99
2 98
2 93
2 93
2 93
2 93
2 93
2 93
2 93
2 93
2 93
2 94
2 94
2 94
2 94
2 92
2 86
2 86
2 86
2 86
2 86
2 86
2 86
2 86
2 85
2 86
2 86
2 87
2 87
2 89
2 116
2 122
2 122
2 131
2 132
2 131
2 131
2 130
2 132
2 132
2 130
2 124
2 124
2 124
2 123
2 125
2 125
2 124
2 124
2 124
2 124
2 123
2 123
2 123
2 123
2 123
2 123
2 123
2 123
2 124
2 125
1 126
1 125
1 121
2 134
2 135
2 140
3 172
3 186
3 199
3 208
3 204
3 203
3 199
3 200
3 202
3 207
3 211
3 213
3 207
3 205
2 205
2 202
2 196
2 190
2 186
2 183
2 187
2 199
2 202
2 208
2 209
2 209
2 213
2 215
2 218
2 222
2 223
2 223
2 225
2 225
2 225
2 226
2 226
2 226
2 227
2 227
2 227
2 234
2 234
2 235
2 236
2 237
2 237
2 237
2 237
2 237
2 237
2 237
2 238
2 239
2 239
2 241
2 242
2 242
2 240
2 240
2 238
2 236
2 231
2 199
2 198
2 196
2 196
2 194
2 194
2 195
2 195
2 196
2 196
2 196
2 196
2 196
2 196
2 196
2 194
2 194
2 193
2 193
2 194
2 194
2 194
2 194
2 195
3 210
3 216
3 217
3 219
3 219
3 219
3 218
3 218
3 223
3 224
2 207
2 208
1 203
1 173
1 161
1 150
1 143
1 143
1 143
1 143
1 144
1 142
1 133
1 129
1 128
1 128
1 125
1 122
1 122
1 135
1 136
1 138
1 134
2 130
2 112
2 114
2 112
2 111
2 111
2 109
2 106
2 103
2 101
2 100
2 100
2 99
2 99
2 98
2 98
2 98
2 98
2 97
2 97
2 98
2 87
2 88
2 87
2 87
2 87
2 86
2 86
2 89
2 89
2 90
2 89
2 88
2 90
2 94
2 94
2 93
2 93
2 93
2 93
2 93
2 93
2 93
2 91
2 90
2 90
2 90
2 90
2 90
2 90
2 88
2 87
2 87
2 89
2 89
2 89
2 89
2 89
2 89
2 89
2 90
2 91
2 90
2 90
2 90
2 91
2 90
1 75
1 65
1 62
1 64
1 66
1 66
1 66
1 64
1 58
1 57
1 57
1 53
1 51
1 51
1 52
1 55
1 59
1 60
1 61
1 60
1 61
1 63
1 63
1 64
1 64
1 67
1 67
1 66
1 64
0 48
0 46
0 45
0 45
0 45
0 46
0 46
0 45
0 45
0 45
0 52
0 52
0 54
0 54
0 60
0 60
0 62
0 66
0 66
0 66
0 66
0 68
0 69
0 68
0 67
0 67
0 67
0 68
0 67
0 67
0 67
0 67
0 66
0 66
0 65
0 65
0 65
0 63
0 58
0 58
0 58
0 58
0 58
0 58
0 58
0 59
0 59
0 59
0 59
0 59
0 59
0 60
0 60
0 59
0 59
0 59
0 60
0 59
0 59
0 59
0 60
0 64
0 65
0 69
0 73
0 80
1 83
1 83
1 89
1 88
1 93
1 96
1 101
1 101
1 98
1 97
1 97
1 97
1 97
1 99
1 99
1 99
1 100
1 100
1 100
1 98
1 92
1 90
1 89
1 89
1 93
1 96
1 97
1 97
1 96
1 96
1 92
1 93
1 93
1 93
1 93
1 93
1 93
1 96
1 96
2 96
2 126
2 127
2 133
2 135
2 124
2 122
2 125
2 125
2 123
3 124
3 122
3 123
3 123
3 125
3 125
3 123
3 123
3 123
3 122
3 122
3 122
3 122
3 122
3 122
2 123
2 122
2 124
2 132
2 132
2 132
2 132
2 133
2 134
2 134
2 134
2 134
2 134
2 134
2 134
2 134
2 134
3 135
3 135
3 135
3 133
3 129
3 129
3 129
3 129
3 131
3 131
3 132
3 133
4 132
4 130
4 133
4 134
4 137
4 133
4 127
3 127
3 127
3 119
3 115
3 112
3 111
3 120
3 120
3 120
3 120
3 120
3 119
3 120
3 119
3 119
3 119
3 118
3 118
3 118
3 118
3 118
3 118
3 118
3 117
3 112
3 101
3 101
3 101
3 102
3 102
3 102
3 103
3 103
3 103
3 103
3 104
3 104
4 105
4 108
6 112
6 85
6 81
6 79
6 81
6 81
6 82
6 80
6 80
6 80
6 79
6 80
6 76
6 76
6 74
6 74
6 74
6 74
7 75
10 75
13 76
13 76
13 77
13 77
13 77
13 76
13 76
13 74
13 66
13 66
13 65
13 65
13 65
13 64
13 66
13 66
13 66
13 66
13 66
13 65
13 65
13 65
12 64
12 63
12 65
13 65
13 66
13 66
13 66
13 66
13 70
13 70
13 68
13 68
12 68
12 67
12 59
12 57
12 54
12 54
12 52
12 52
12 53
12 53
12 58
12 57
12 57
12 47
12 47
12 48
12 49
12 49
12 49
12 48
12 48
12 48
12 49
12 49
12 49
12 49
12 49
12 50
12 50
12 50
12 51
12 51
12 52
12 53
12 55
12 54
12 54
12 53
12 53
12 53
12 53
12 53
12 52
12 55
11 53
10 46
8 46
8 47
8 50
8 51
8 47
8 47
8 47
8 47
8 47
8 47
8 48
8 47
8 50
8 50
7 50
7 54
6 54
6 56
3 55
0 54
0 53
0 53
0 52
0 52
0 52
0 52
0 52
0 52
0 52
0 54
0 54
0 54
0 54
0 54
0 52
0 52
0 53
0 53
0 53
1 53
1 53
1 53
1 53
1 53
1 52
1 52
1 51
1 51
1 51
1 51
1 44
1 43
1 45
1 45
1 45
1 45
1 46
1 47
1 46
1 47
1 47
1 46
1 44
1 42
1 42
1 42
1 42
1 44
1 46
1 45
1 44
1 44
1 45
1 46
1 46
1 46
1 46
1 44
1 45
1 45
1 45
1 44
1 44
1 45
1 50
1 55
1 55
1 54
1 54
1 55
1 55
1 54
1 54
1 54
1 54
1 54
1 55
1 51
1 51
1 49
1 49
1 48
1 45
1 44
2 44
2 45
2 48
2 49
2 48
2 48
2 48
2 49
2 47
2 47
2 47
2 43
2 43
2 41
2 41
2 41
2 41
2 42
3 51
3 51
3 51
3 55
3 55
3 55
3 54
3 52
3 52
3 52
3 52
3 52
3 52
3 52
3 52
3 52
3 52
2 52
2 52
2 55
2 55
2 55
2 55
2 56
2 56
2 56
2 56
2 56
2 55
2 55
2 54
2 54
2 53
2 53
2 51
2 52
2 86
2 85
2 87
2 89
2 91
2 92
2 94
2 94
2 94
2 93
2 91
2 91
2 91
2 92
2 105
2 103
2 106
2 108
2 110
2 111
2 109
2 109
2 109
2 110
2 111
2 111
2 105
2 104
2 103
2 103
2 102
2 102
2 102
2 102
2 102
2 102
2 102
2 102
2 101
3 102
3 104
3 105
3 105
3 105
3 105
3 105
2 104
2 102
2 100
2 101
2 101
2 101
2 101
2 99
2 99
2 100
2 100
2 101
2 101
2 101
2 101
2 101
2 101
2 100
1 91
1 91
1 95
1 91
1 91
1 92
1 92
1 95
1 98
3 107
3 107
3 107
3 108
3 108
3 107
3 107
3 108
3 108
3 108
3 106
3 106
3 105
3 105
3 105
3 105
3 105
5 114
5 114
5 114
5 114
5 114
5 114
5 117
5 117
5 119
5 119
5 85
5 90
5 91
5 90
5 90
5 89
5 87
5 88
5 89
5 90
5 90
5 95
5 96
5 96
5 82
5 81
5 78
5 76
5 76
5 74
5 75
5 75
5 75
5 73
5 76
5 80
5 88
5 85
5 86
5 87
5 87
5 87
5 88
5 88
5 89
5 90
5 90
5 91
5 91
4 91
4 90
4 89
4 89
4 90
4 94
4 97
4 114
4 117
4 118
4 121
4 128
4 129
4 130
4 130
4 130
4 131
4 131
4 130
4 130
4 130
4 130
4 130
4 130
4 130
4 130
4 130
4 128
4 128
4 128
4 127
4 126
4 124
4 120
2 112
2 112
2 112
2 111
2 112
2 112
2 112
2 114
2 113
2 113
2 116
2 117
2 118
2 118
2 118
2 120
2 120
0 112
1 113
1 118
1 117
1 117
1 117
3 123
3 125
3 124
3 124
3 122
3 118
3 117
3 117
3 117
3 117
3 117
3 117
3 116
3 114
3 113
3 106
3 106
3 108
3 108
3 108
3 108
3 108
3 107
3 107
3 107
3 107
3 107
3 106
3 102
3 100
3 90
3 90
3 88
3 92
3 91
3 92
3 91
3 92
3 91
3 91
3 91
3 91
3 91
3 89
3 90
3 91
3 91
3 91
3 90
3 82
3 60
3 57
3 56
3 56
3 56
3 56
3 56
3 57
3 57
3 57
3 57
3 57
3 57
3 57
3 57
3 57
3 57
3 56
3 57
3 57
3 57
3 58
3 59
3 59
3 60
3 60
3 61
3 62
3 62
3 62
3 62
3 61
3 63
3 63
3 60
3 60
3 62
3 58
3 57
3 54
3 54
1 53
1 52
1 51
1 51
1 51
1 46
1 46
1 46
1 63
0 54
1 54
1 51
2 53
2 54
2 54
2 54
2 54
2 54
2 56
2 58
2 58
2 58
2 58
2 58
2 58
2 58
2 56
2 56
2 56
2 57
2 57
2 57
2 57
2 59
2 61
2 61
2 61
2 61
2 61
2 61
2 65
2 63
2 60
2 62
2 63
2 63
2 62
2 62
2 62
2 62
2 62
2 62
2 61
2 60
2 60
2 60
2 59
2 58
2 58
2 58
2 56
2 56
2 56
2 56
2 56
2 56
2 55
2 55
2 55
2 58
2 58
2 58
2 59
2 59
2 59
2 59
2 60
2 59
2 60
2 60
2 59
2 58
2 57
2 57
2 57
2 56
2 55
2 55
2 56
2 56
2 56
1 54
1 55
1 57
1 58
1 56
1 56
1 56
1 56
1 57
1 57
1 57
1 57
1 57
1 57
1 55
1 55
1 57
1 35
1 34
1 34
1 34
0 33
0 33
0 33
0 31
0 31
0 31
0 28
0 26
0 27
0 27
0 28
0 28
0 28
0 28
0 28
0 28
0 28
0 26
0 26
0 26
0 26
0 25
0 24
1 24
1 23
1 23
1 23
1 23
1 20
1 18
1 18
1 18
1 18
1 18
1 18
1 18
1 18
1 18
1 18
1 18
1 18
1 18
1 18
1 18
1 18
1 18
1 18
1 18
1 18
1 18
1 18
1 18
1 18
1 18
1 18
1 18
1 18
1 15
1 14
1 14
1 14
1 14
1 14
1 14
1 13
1 13
1 12
1 12
1 12
1 13
1 13
1 13
1 13
1 13
1 13
1 13
1 12
1 12
1 12
1 12
1 11
1 9
1 8
1 8
1 8
1 8
1 8
1 7
1 7
1 10
1 10
1 10
1 11
1 10
1 9
1 9
1 9
1 9
1 9
1 9
1 9
1 9
1 9
1 11
1 12
1 12
1 13
1 13
1 12
1 12
1 11
1 11
1 11
1 11
1 11
1 11
1 11
1 11
1 11
1 11
1 11
1 10
1 10
0 9
0 10
0 10
0 10
0 10
0 10
0 10
0 10
0 10
0 10
0 10
0 10
0 10
0 10
0 10
0 10
0 10
0 10
0 10
0 10
0 10
0 10
0 10
0 10
0 10
0 11
0 11
0 11
0 11
0 11
0 11
0 11
0 11
0 11
0 12
0 13
0 13
0 13
0 13
0 13
0 13
0 12
0 12
0 12
0 12
0 12
0 12
0 12
0 12
0 12
0 12
0 12
0 12
0 12
0 12
0 12
0 14
0 14
0 14
0 14
0 16
0 19
0 20
0 21
0 22
1 31
1 29
1 35
1 36
1 39
1 40
1 42
1 43
1 44
1 45
1 45
1 45
1 45
1 45
1 44
1 43
1 42
1 42
1 42
1 42
1 42
1 42
1 42
1 42
1 42
1 42
1 42
1 42
1 42
1 43
1 44
1 45
1 46
1 49
1 51
1 50
1 50
1 51
1 51
1 51
1 52
1 53
1 56
1 57
1 58
1 61
1 62
2 63
2 65
2 69
2 69
3 70
5 71
6 71
7 71
7 71
7 71
8 72
8 72
8 72
8 71
8 72
8 72
8 75
8 75
8 75
8 76
8 75
8 77
8 78
8 79
8 80
8 85
8 85
8 85
8 87
8 89
8 89
8 89
8 89
8 89
8 89
8 89
8 89
8 89
8 89
8 92
8 93
8 93
8 94
8 94
8 92
9 92
9 92
9 93
9 87
9 90
9 87
10 86
10 86
9 78
9 78
9 73
9 74
11 80
11 80
11 78
11 78
11 77
11 77
11 77
11 77
11 78
11 78
11 78
11 78
11 78
11 77
12 77
12 77
12 77
12 77
13 77
13 77
13 78
13 78
13 78
13 82
13 82
13 85
13 85
13 85
13 84
13 81
13 80
13 80
13 80
13 79
13 79
13 79
13 77
13 76
13 74
13 75
14 85
14 83
14 82
12 81
12 79
12 75
12 75
11 74
10 74
9 74
9 74
9 74
9 74
8 73
8 73
8 73
8 73
8 71
8 71
8 69
8 69
8 69
8 68
8 68
8 65
8 64
8 64
8 62
8 57
8 57
8 57
8 55
8 53
8 53
8 53
8 53
8 53
8 53
8 53
8 53
8 54
8 54
8 56
8 56
7 55
7 55
7 54
7 53
7 52
7 52
7 52
7 51
7 50
7 50
6 50
6 48
6 48
6 49
6 47
6 45
5 38
6 37
6 36
6 35
6 36
6 37
6 38
6 38
6 36
6 37
6 37
6 36
6 36
6 36
5 36
4 36
4 36
4 36
4 36
4 38
4 38
5 38
5 39
5 36
5 37
5 34
5 34
5 34
5 35
5 37
5 38
5 38
5 39
5 39
5 38
5 37
5 38
5 38
5 38
5 37
4 28
4 28
4 28
4 29
4 29
4 29
4 29
4 29
3 28
3 28
3 28
3 28
3 28
3 28
3 28
3 28
3 33
3 34
3 34
3 35
3 35
3 35
3 35
3 35
3 35
3 36
3 36
3 37
3 37
3 37
3 37
3 37
3 37
3 37
3 37
3 37
3 37
3 37
3 37
3 37
3 36
3 36
4 31
4 31
4 31
4 32
4 32
4 32
4 34
4 34
4 35
4 35
4 36
4 36
3 36
2 36
2 35
2 35
2 36
2 37
2 39
2 40
2 40
2 39
2 39
2 38
2 37
2 37
2 37
2 36
2 36
2 36
2 36
2 36
2 36
2 36
2 36
2 36
2 36
1 34
1 34
1 34
1 32
1 32
1 31
1 31
1 31
1 32
1 30
1 28
1 27
1 27
1 26
1 26
1 26
1 26
1 25
1 27
1 27
1 27
1 27
1 27
1 27
1 26
1 28
1 28
1 29
1 30
1 30
1 30
1 30
1 30
1 30
1 30
1 30
1 30
1 25
1 24
1 24
1 23
1 25
1 25
1 25
1 25
1 25
1 24
1 24
1 23
1 23
1 23
1 23
1 23
1 23
1 23
1 23
1 23
1 23
1 23
1 22
1 22
1 22
1 22
0 22
0 22
0 22
0 21
0 21
0 21
0 19
0 18
0 17
0 17
0 17
0 17
0 17
0 19
0 19
0 19
0 20
0 17
0 16
0 15
0 15
0 15
0 15
0 15
0 16
0 16
0 16
0 16
0 16
0 16
0 16
0 16
0 16
0 16
0 16
0 16
0 16
0 16
0 16
0 16
0 16
0 16
0 16
0 16
0 16
0 15
0 15
0 15
0 15
0 15
0 15
0 15
0 15
0 15
0 18
0 16
0 16
0 16
0 16
0 16
0 16
0 14
0 14
0 14
0 14
0 15
0 15
0 15
0 15
0 17
0 17
0 17
0 17
0 17
0 17
0 17
0 17
0 16
0 15
0 15
0 15
0 15
0 15
0 15
0 15
0 15
0 15
0 15
0 15
0 16
0 16
0 16
0 16
0 16
0 16
0 16
0 16
0 16
0 16
0 16
0 16
0 16
0 16
0 16
0 16
0 17
0 17
0 17
0 17
0 17
0 17
0 17
0 17
0 14
0 12
0 12
0 12
0 12
0 12
0 12
0 12
0 12
0 12
0 12
0 11
0 11
0 11
0 12
0 12
0 13
0 13
0 13
0 13
0 13
0 13
0 13
0 13
0 13
0 13
0 13
0 13
0 14
0 14
0 15
0 16
0 16
0 16
0 16
0 16
0 16
0 16
0 16
0 16
0 17
0 14
0 14
0 14
0 14
0 13
0 13
0 13
0 13
0 13
0 13
0 13
0 11
0 11
0 11
0 11
0 9
0 10
0 10
0 10
0 10
0 10
0 10
0 10
0 10
0 10
0 10
0 10
0 10
0 11
0 11
0 11
0 11
0 11
0 11
0 10
0 10
0 10
0 10
0 10
0 10
0 10
0 10
0 10
0 9
0 9
0 9
0 9
0 9
0 9
0 9
0 9
0 8
0 8
0 8
0 8
0 8
0 8
0 8
0 8
0 8
0 12
0 16
0 21
0 47
0 55
1 59
1 61
1 70
1 71
1 73
1 73
1 73
1 73
1 72
1 72
1 71
1 71
1 71
1 71
2 72
2 72
2 72
2 72
2 72
2 72
2 72
2 72
2 71
2 71
2 70
2 70
2 71
2 71
2 71
2 71
2 71
2 71
2 74
2 74
2 73
2 74
2 74
2 77
2 78
2 79
2 79
2 80
2 80
2 80
2 80
2 80
2 80
2 81
2 81
2 81
2 81
3 88
3 90
3 90
3 92
3 93
3 94
3 94
3 101
3 101
3 103
3 105
3 105
3 106
3 106
3 106
3 106
3 107
3 108
3 108
3 108
3 108
3 108
3 108
3 108
3 108
3 108
3 108
3 108
3 108
3 110
3 110
3 110
3 109
3 109
3 106
3 109
3 106
3 107
3 105
3 105
3 105
3 107
3 105
3 104
3 101
3 99
3 92
2 68
2 59
2 56
2 55
2 54
2 54
2 53
2 53
2 53
2 53
2 53
2 54
2 54
2 54
2 55
2 55
1 54
1 54
1 54
1 55
1 55
1 55
1 55
1 55
1 55
1 55
1 55
1 54
1 53
1 53
1 54
1 55
1 55
1 55
1 52
1 52
1 52
1 51
1 50
2 48
2 44
2 44
2 45
3 50
3 50
3 51
3 51
3 51
3 51
3 53
3 53
3 56
3 56
2 46
2 44
2 44
2 44
2 43
2 43
2 43
2 36
2 36
2 32
2 31
2 31
2 30
2 30
2 30
2 30
2 29
2 28
2 28
2 28
2 31
2 34
2 39
2 39
2 39
2 39
2 39
2 39
2 39
2 37
2 37
2 40
2 43
2 44
2 44
2 44
2 43
2 42
2 43
2 43
2 44
2 45
2 47
2 48
2 49
2 49
2 49
2 48
2 48
2 48
2 51
2 51
2 51
2 53
2 53
2 54
1 55
1 55
1 54
1 54
0 55
0 55
0 55
0 55
0 54
0 55
0 55
0 55
0 56
0 56
0 56
0 56
0 56
0 56
0 56
0 56
0 56
0 54
0 54
0 55
0 55
0 55
0 55
0 57
0 59
0 59
0 60
0 60
0 61
0 61
0 53
0 53
0 53
0 54
0 54
0 55
0 55
0 57
0 54
0 54
0 54
0 54
0 54
0 54
0 54
0 54
0 54
0 54
0 54
0 54
0 54
0 54
0 55
0 55
0 56
0 56
0 57
0 57
0 57
0 57
0 54
0 48
0 46
0 46
0 44
0 44
0 44
0 44
0 45
0 47
0 47
0 44
0 42
0 42
0 42
0 41
0 41
0 40
0 42
0 44
0 42
0 40
0 38
0 37
0 39
0 39
0 39
0 39
0 39
0 39
0 37
0 38
0 38
0 36
0 36
0 34
0 34
0 34
0 34
0 33
0 33
0 32
0 32
0 35
0 36
0 36
0 36
0 36
0 35
0 35
0 35
0 35
0 35
0 35
0 35
0 35
0 35
0 34
0 34
0 34
0 38
0 38
0 40
0 38
0 35
0 35
0 36
0 36
0 35
0 35
0 35
0 35
0 35
0 34
0 34
0 37
0 37
0 36
0 39
0 39
0 39
0 39
0 39
0 39
0 39
0 39
0 39
0 39
0 39
0 39
0 39
0 39
0 38
0 38
0 38
0 38
0 37
0 37
0 37
0 37
0 37
0 37
0 37
0 37
0 37
0 37
0 38
0 38
0 40
0 39
0 39
0 38
0 38
0 38
0 39
0 38
0 37
0 37
0 34
0 34
0 34
0 33
0 33
0 32
0 30
0 32
0 32
0 42
0 42
0 42
0 43
0 44
0 44
0 44
0 44
0 45
0 46
0 47
0 48
0 53
0 53
0 53
0 53
0 50
0 49
0 49
0 49
0 49
0 49
0 49
0 49
0 49
0 50
0 51
0 55
0 56
0 56
0 56
0 56
0 57
0 51
0 51
0 51
0 51
0 51
0 52
0 52
1 60
1 66
1 65
1 67
1 66
1 67
1 68
1 69
1 67
1 67
1 67
1 64
1 65
1 65
1 65
1 65
1 65
1 65
1 65
1 65
1 65
1 65
1 65
1 65
1 65
1 65
1 64
1 64
1 64
1 64
1 65
1 65
1 66
2 66
2 66
2 66
2 65
2 65
2 64
2 64
2 63
2 61
2 61
2 61
2 61
2 61
2 60
2 60
2 60
2 60
2 62
2 62
2 64
2 64
2 64
2 66
2 65
2 64
2 63
2 62
2 52
2 52
2 50
2 50
2 49
2 49
2 49
2 48
2 48
2 47
2 46
2 46
2 41
2 41
2 41
2 41
2 41
2 41
2 41
2 41
2 41
2 41
2 41
2 41
2 41
2 37
2 36
2 29
2 29
2 29
2 29
2 29
2 27
2 27
2 26
2 26
2 25
2 25
2 25
2 24
1 14
1 13
1 13
1 11
1 11
1 11
1 9
1 9
1 8
1 8
1 8
1 8
1 8
1 8
1 8
1 8
1 8
1 8
1 8
1 8
1 8
1 8
1 8
1 8
1 8
1 8
1 8
1 8
1 8
1 7
1 7
1 7
1 6
0 6
0 6
0 6
0 6
0 6
0 6
0 6
0 6
0 6
0 6
0 6
0 6
0 6
0 6
0 6
0 6
0 6
0 4
0 4
0 2
0 2
0 0
0 0
0 0
0 0
0 0
0 1
0 1
0 1
0 1
0 1
0 1
0 1
0 1
0 1
0 1
0 1
0 1
0 1
0 1
0 1
0 1
0 1
0 1
0 1
0 1
0 1
0 1
0 1
0 1
0 1
0 1
0 1
0 1
0 1
0 1
0 1
0 1
0 1
0 1
0 1
0 1
0 1
0 1
0 1
0 1
0 1
0 1
0 1
0 1
0 1
0 1
0 1
0 1
0 1
0 1
0 1
0 1
0 4
0 6
0 6
0 6
0 6
0 6
0 6
0 6
0 6
0 6
0 6
0 6
0 6
0 6
0 6
0 6
0 6
0 6
0 6
0 8
0 8
0 8
0 8
0 8
0 8
0 8
0 8
0 8
0 8
0 8
0 8
0 8
0 8
0 8
0 8
0 8
0 8
0 8
0 8
0 8
0 8
0 8
0 8
0 8
0 8
0 8
0 8
0 8
0 7
0 7
0 9
0 10
0 10
0 10
0 10
0 10
0 10
0 10
0 10
0 10
0 10
0 10
0 10
0 10
0 10
0 10
0 12
0 12
0 12
0 12
0 12
0 12
0 12
0 12
0 12
0 12
0 12
0 12
0 12
0 12
0 12
0 12
0 12
0 12
0 12
0 12
0 12
0 12
0 12
0 11
0 10
0 10
0 10
1 16
1 17
1 17
2 20
2 20
3 21
3 21
3 19
3 19
3 19
3 19
3 19
3 19
3 19
3 19
3 19
3 19
3 19
3 19
3 20
3 20
3 20
3 20
3 20
3 20
3 20
3 18
3 19
3 19
3 19
3 19
3 19
3 19
3 19
3 19
3 20
3 21
3 23
3 24
3 24
3 30
3 30
3 30
3 36
3 38
3 38
3 39
3 40
3 40
3 43
3 43
3 43
3 43
3 43
3 43
3 43
3 43
3 41
3 40
3 40
3 40
3 40
3 40
3 40
3 41
3 41
3 41
4 41
4 41
4 41
4 41
4 41
4 41
4 39
4 39
4 41
4 41
5 45
5 45
6 45
6 45
6 45
6 46
7 52
7 52
7 52
7 52
7 52
7 53
7 54
7 54
7 54
7 56
7 57
7 57
7 58
7 61
7 63
7 63
8 63
6 54
5 52
5 53
5 53
5 53
5 53
5 52
5 52
5 52
5 52
5 52
5 52
5 52
5 52
5 52
5 52
5 52
5 52
5 52
5 51
5 51
5 51
5 51
5 53
5 53
6 54
6 55
6 55
6 56
6 57
6 57
6 58
6 58
6 58
6 59
6 58
6 55
6 53
6 49
6 47
6 47
6 47
6 46
6 39
6 38
6 38
6 38
6 38
6 38
6 37
6 39
6 39
6 40
6 40
6 40
6 40
6 40
6 40
6 40
6 40
6 40
6 40
6 40
6 40
6 39
6 42
6 42
5 42
5 42
5 42
6 45
6 45
6 45
6 49
6 48
6 47
6 47
5 43
5 43
4 43
4 45
4 45
4 44
3 37
3 37
3 37
3 37
3 36
3 35
3 34
3 34
3 34
3 34
3 33
3 33
3 31
3 29
2 29
4 29
4 29
4 29
4 29
4 28
4 28
4 28
4 28
4 28
4 28
4 28
4 28
4 29
4 29
4 29
4 29
4 30
4 30
4 30
4 30
4 30
4 30
4 30
4 30
4 30
4 28
4 28
3 25
3 25
3 24
3 23
3 23
3 23
3 22
3 22
3 22
3 22
3 22
3 22
3 22
3 22
3 22
3 22
3 22
3 22
3 22
3 22
3 23
3 23
3 23
3 22
3 21
3 20
3 20
3 19
3 19
3 19
3 19
3 19
3 19
3 19
3 19
3 20
3 20
3 20
3 20
3 20
3 18
3 18
3 18
3 15
3 15
2 15
2 15
2 16
2 12
2 12
2 12
2 12
2 12
2 12
2 9
2 8
2 8
2 8
2 8
2 8
2 8
2 8
2 8
2 9
2 9
2 10
2 12
2 14
2 14
2 14
2 14
2 14
2 14
0 14
0 14
0 14
0 14
0 14
0 17
0 17
0 17
0 17
0 17
0 17
0 17
0 16
0 16
0 16
0 16
0 15
0 15
0 15
0 15
0 15
0 15
0 15
0 15
0 15
0 15
0 15
0 15
0 15
0 15
0 15
0 15
0 14
0 14
0 14
0 27
1 27
1 28
1 28
1 31
1 31
1 32
1 34
2 43
2 45
2 48
2 48
2 47
2 47
2 47
3 49
3 49
3 49
3 49
3 50
3 51
3 52
3 53
3 54
3 55
3 54
3 55
3 55
3 55
3 55
3 54
3 54
3 54
3 54
3 54
3 54
3 54
3 54
3 54
3 53
3 53
3 53
3 53
3 53
3 53
3 53
3 53
3 53
3 53
3 53
3 53
3 53
3 53
3 54
4 54
4 51
4 50
4 49
4 48
6 48
7 48
9 48
9 48
9 48
9 49
10 49
10 49
10 49
10 49
10 49
10 46
10 46
10 46
10 46
10 46
10 46
10 46
10 46
10 46
10 46
10 46
10 46
10 46
10 46
11 60
13 60
14 60
14 60
14 60
14 60
14 60
14 60
14 60
14 60
15 60
15 60
15 60
15 61
15 63
15 63
14 51
14 49
14 50
14 50
14 49
14 48
13 47
13 43
13 35
13 34
13 35
12 35
12 34
12 36
12 44
12 44
12 45
12 48
12 50
12 49
12 51
12 51
12 52
12 51
12 51
12 51
12 52
12 52
12 52
12 53
12 53
13 53
14 53
14 53
14 53
14 53
14 53
14 53
14 53
14 53
14 53
14 53
14 53
14 53
13 53
12 53
12 53
12 53
12 55
12 55
12 55
12 55
12 55
12 54
11 55
11 55
11 55
11 55
11 55
11 55
10 55
8 55
8 55
8 55
8 54
7 54
8 55
8 55
8 55
8 55
8 55
8 55
8 55
8 55
8 55
8 56
8 57
8 60
9 60
9 60
9 60
9 60
9 60
9 60
8 46
6 46
5 46
5 46
5 46
5 48
5 48
5 48
5 48
5 48
4 48
5 48
5 49
5 79
5 79
5 81
5 80
5 80
5 80
5 80
5 80
5 80
5 80
5 79
5 78
5 76
5 75
5 75
5 75
5 71
5 62
5 62
5 60
5 59
5 58
5 56
5 54
5 54
5 53
5 53
5 52
5 52
5 50
5 50
5 50
5 49
5 49
3 49
3 49
3 49
3 49
3 49
3 49
3 50
3 50
3 50
3 50
3 50
3 50
3 50
3 50
3 50
3 50
3 50
3 48
3 48
3 48
3 48
3 48
3 48
3 47
3 47
3 47
3 47
3 47
3 47
3 47
3 48
3 48
3 49
3 49
3 49
2 48
2 48
2 48
2 48
2 48
2 48
2 48
2 48
2 47
2 46
2 46
2 43
1 43
1 43
1 43
1 44
1 44
1 44
1 44
1 46
1 46
1 46
1 46
1 45
1 47
1 47
1 56
1 59
1 62
0 62
0 62
0 30
0 27
0 26
0 27
0 27
0 28
0 29
0 29
2 31
2 31
2 31
2 31
2 31
2 31
2 31
2 31
2 31
2 31
2 31
2 31
2 31
2 31
2 31
2 32
2 32
2 32
2 32
2 32
2 32
2 32
2 32
2 32
2 32
2 32
2 32
2 32
2 32
2 32
2 32
2 32
2 34
2 34
2 34
2 34
2 34
2 34
2 35
2 35
2 35
2 35
2 35
2 35
2 35
2 35
2 35
2 36
2 39
2 39
2 40
2 40
2 41
2 42
2 42
2 42
2 40
2 40
2 40
2 41
2 41
2 41
2 41
2 41
2 42
2 44
2 44
2 44
2 44
2 44
2 44
2 44
2 44
2 44
2 44
2 44
2 43
2 43
2 43
2 43
2 41
2 41
2 41
2 41
2 40
2 38
2 34
2 24
2 22
2 22
2 22
2 22
2 22
2 20
2 20
2 19
2 19
2 18
1 17
1 17
0 15
0 15
0 16
0 16
0 16
0 16
0 16
0 16
0 16
0 16
0 16
0 16
0 16
0 15
0 15
0 15
0 17
0 17
0 17
0 17
0 17
0 19
0 19
0 19
0 19
0 19
0 19
0 19
0 19
0 19
0 19
0 19
0 17
0 18
0 18
0 17
0 15
0 15
0 15
0 16
0 16
0 23
0 23
0 23
0 23
0 23
0 23
0 22
0 21
0 21
0 20
0 20
0 20
0 19
0 19
0 19
0 19
0 19
0 19
0 18
0 18
0 18
0 18
0 18
0 17
0 15
0 15
0 15
0 15
0 15
0 17
1 23
1 23
2 23
2 24
2 24
2 24
2 24
2 24
2 25
2 25
2 27
2 27
2 28
2 28
2 28
2 28
2 28
2 28
2 28
2 28
2 28
2 28
2 28
2 28
2 28
2 28
2 28
2 28
2 27
2 28
2 29
2 31
2 32
2 33
2 34
2 34
2 34
2 36
2 37
3 39
3 39
4 39
4 39
4 39
4 40
4 38
4 40
4 39
4 39
4 39
4 40
4 41
4 45
4 45
4 45
4 48
4 48
4 48
4 48
4 48
4 48
4 47
4 47
4 48
4 48
4 48
4 48
4 48
4 47
4 48
4 41
4 42
4 42
4 42
4 42
4 43
4 43
4 42
4 42
4 42
4 42
4 43
4 44
4 44
4 45
4 45
4 45
4 45
4 45
4 45
4 45
4 45
4 45
4 45
4 46
4 46
4 48
5 49
5 49
5 49
4 42
4 42
3 42
3 42
3 42
3 42
3 42
3 42
3 41
3 41
3 39
5 40
5 39
5 39
5 39
5 40
5 41
5 41
5 42
5 42
5 42
5 42
5 42
5 42
5 42
5 42
3 42
3 42
2 42
2 40
2 39
2 37
2 36
1 35
1 35
1 35
2 32
2 31
2 31
2 28
2 27
2 27
2 27
2 27
2 27
2 27
2 24
2 24
2 24
2 23
2 23
2 22
2 21
2 22
2 22
2 19
2 19
2 19
2 20
2 20
2 20
2 20
2 20
2 20
2 22
2 24
3 25
3 25
3 25
3 24
3 24
3 23
3 23
3 23
3 23
3 22
3 22
3 22
3 22
3 22
3 22
3 21
3 20
3 19
3 19
3 21
3 22
3 23
3 24
3 24
3 24
3 25
3 25
4 25
4 26
4 26
4 23
3 23
3 23
3 21
3 21
3 22
3 23
3 24
3 24
3 25
3 26
3 26
3 26
3 28
3 30
3 32
3 35
3 38
3 39
3 39
3 38
3 38
3 37
3 37
3 39
3 39
3 39
3 39
3 39
3 39
3 39
3 39
3 39
3 39
3 39
3 39
3 39
3 39
3 39
3 39
2 39
2 39
2 39
2 39
2 39
2 39
2 39
2 39
2 40
2 41
2 41
2 41
2 41
2 41
2 41
2 41
2 39
2 38
2 38
2 38
2 38
2 39
2 40
2 40
2 41
2 41
2 41
2 39
2 38
2 37
1 37
1 38
1 38
1 39
1 41
1 41
1 41
1 41
1 39
1 39
1 39
1 39
1 39
1 39
1 39
1 39
1 40
1 40
1 39
1 35
1 35
1 38
1 38
1 38
1 38
0 37
0 36
0 35
0 35
0 34
0 34
0 34
0 33
0 33
0 32
0 32
0 32
0 31
0 31
0 30
0 30
0 30
0 29
0 25
0 22
0 18
0 19
0 19
0 19
0 19
0 19
0 19
0 19
0 19
0 19
0 19
0 19
0 19
0 19
0 19
0 19
0 19
0 19
0 19
0 19
0 19
0 19
0 19
0 19
0 19
0 19
0 19
0 18
0 18
0 18
0 18
0 18
0 18
0 17
0 16
0 16
0 16
0 16
0 16
0 16
0 16
0 16
0 16
0 16
0 16
0 16
0 15
0 13
0 12
0 12
0 12
0 12
0 13
0 13
0 12
0 12
0 12
0 11
0 11
1 10
1 10
1 10
1 10
1 12
1 12
1 14
1 15
1 15
1 15
1 18
1 21
1 20
1 20
1 20
1 20
1 19
1 18
1 18
1 18
1 18
1 19
1 19
1 20
1 20
1 20
1 20
1 20
1 20
1 20
1 21
1 21
1 21
1 22
1 22
1 23
1 23
1 23
1 23
1 23
2 23
2 23
2 22
2 22
2 22
2 22
2 22
2 22
2 22
2 22
2 22
2 22
2 22
2 22
2 22
2 23
2 23
2 24
2 24
2 24
2 24
2 24
2 24
2 24
2 24
2 24
2 24
2 24
2 24
2 24
2 24
2 24
2 24
2 24
2 28
2 29
2 30
2 30
2 30
2 30
2 30
2 30
2 30
2 30
2 30
2 30
2 30
2 30
2 30
2 30
2 30
2 31
2 31
2 30
2 31
2 33
2 33
2 34
2 34
2 34
1 33
1 33
1 33
1 33
1 31
1 31
1 29
1 28
1 28
1 28
1 25
1 23
1 23
1 23
1 23
1 23
1 23
1 22
1 23
1 23
1 23
1 23
1 23
1 22
1 22
1 23
1 23
1 23
1 23
1 24
1 26
1 27
1 26
1 26
1 31
1 30
1 30
1 30
1 30
1 30
0 28
0 28
0 27
0 27
0 27
0 27
0 27
0 27
0 27
0 27
0 27
0 27
0 27
0 27
0 28
0 27
0 27
0 26
0 26
0 27
0 27
0 28
0 28
0 28
0 30
0 30
0 30
0 30
0 30
0 30
0 30
0 30
0 29
0 30
0 26
0 25
0 26
0 26
0 26
0 26
0 26
0 26
0 26
0 26
0 26
0 27
0 28
0 28
0 30
0 30
0 34
0 33
0 47
0 52
0 53
0 52
0 53
0 52
0 52
0 52
0 52
0 52
0 52
0 53
0 53
0 53
0 54
0 56
0 57
0 65
0 66
0 66
0 66
0 67
0 67
0 67
0 67
0 67
0 65
0 64
0 64
0 64
0 64
0 64
0 64
0 63
0 63
0 65
0 64
0 59
0 59
0 58
0 60
0 62
0 62
0 62
0 62
0 62
0 62
0 62
0 62
0 62
0 62
0 62
0 62
0 62
0 62
0 62
0 62
0 62
0 62
0 62
0 62
0 62
0 61
0 61
0 61
0 61
0 61
0 60
0 60
0 59
0 59
0 59
0 57
0 57
0 57
0 57
0 57
0 57
0 57
0 57
0 57
0 56
0 56
0 56
0 55
0 55
0 55
0 53
0 53
0 51
0 51
0 51
0 49
0 43
0 39
0 39
0 37
0 37
0 37
0 34
0 25
0 25
0 24
0 24
0 24
0 24
0 24
0 24
0 24
0 23
0 23
0 23
0 23
0 22
0 21
0 20
0 17
0 9
0 9
0 7
0 7
0 6
0 6
0 6
0 6
0 6
0 6
0 6
0 6
0 6
0 6
0 6
0 6
0 6
0 6
0 6
0 6
0 6
0 5
0 5
0 3
0 1
0 0
0 0
0 0
0 0
0 0
0 0
0 0
0 0
0 0
0 0
0 0
0 0
0 0
0 0
0 0
0 0
0 0
0 0
0 0
0 0
0 0
0 0
0 0
0 0
0 0
0 0
0 0
0 0
0 0
0 0
0 0
0 0
0 1
0 1
0 1
0 1
0 1
0 1
0 1
0 1
0 1
0 1
0 1
0 1
0 1
0 1
0 1
0 1
0 1
0 1
0 1
0 2
0 2
0 2
0 2
0 2
0 2
0 2
0 2
0 4
0 5
0 6
0 6
0 6
0 6
0 6
0 8
0 8
0 9
0 12
0 12
0 14
0 17
0 17
0 18
0 18
0 19
0 19
0 19
1 19
1 19
1 19
1 19
1 19
1 19
1 19
1 19
1 19
1 20
1 20
1 20
4 21
4 21
4 21
3 21
3 21
3 21
3 21
3 21
3 21
3 21
3 21
3 21
3 21
3 21
3 21
3 21
3 21
3 21
3 21
3 21
3 21
3 21
3 22
3 25
3 25
3 27
3 27
3 27
3 27
3 27
3 27
3 27
3 27
3 27
4 27
4 27
5 27
5 27
6 27
6 27
6 27
9 27
9 28
9 28
10 28
11 28
14 28
14 28
14 28
14 28
14 28
14 28
14 28
14 28
14 28
14 28
20 29
20 29
20 29
21 29
22 28
22 28
44 28
45 28
80 28
84 28
84 28
86 28
89 26
92 25
97 24
97 24
107 24
107 24
107 24
107 22
107 22
107 21
107 16
107 16
107 16
109 13
110 13
110 12
110 12
110 12
110 12
111 12
113 12
113 12
114 12
114 12
114 12
114 12
114 12
115 11
115 11
126 11
128 11
129 11
126 10
126 10
126 10
126 10
126 10
126 10
126 10
126 10
126 10
126 10
127 10
127 10
127 10
128 10
129 10
129 10
140 10
140 10
140 10
155 10
155 10
156 8
158 9
158 7
158 7
158 6
158 7
158 7
158 7
158 7
158 7
157 7
157 7
157 7
157 7
157 7
157 7
161 7
159 7
159 7
160 8
159 6
160 7
159 7
164 7
164 7
161 7
161 7
161 7
161 7
161 7
157 7
157 7
157 7
153 8
151 8
129 7
129 7
114 7
107 7
104 7
104 7
104 7
105 7
90 7
88 7
88 7
87 7
81 7
83 6
82 6
82 6
74 6
74 6
74 6
74 6
74 6
74 5
75 6
77 6
77 6
76 6
76 6
76 6
76 6
76 6
76 6
75 6
73 6
73 6
72 6
72 6
72 6
72 6
72 6
71 6
70 6
61 6
59 6
59 6
59 6
60 6
60 6
60 6
60 6
60 6
60 6
58 6
58 6
59 6
58 6
58 6
58 6
56 6
56 6
54 6
41 6
41 6
41 6
31 6
31 4
31 4
30 5
31 5
32 5
33 5
33 4
33 4
34 4
36 4
38 7
38 7
52 8
52 8
54 12
54 12
53 12
50 13
50 16
49 18
47 20
46 20
45 19
45 20
41 20
41 20
41 20
42 20
42 20
42 20
42 20
42 20
42 20
42 20
42 20
42 20
43 20
43 20
43 20
43 20
44 20
44 20
44 20
46 20
51 20
52 20
52 20
52 20
53 20
55 21
58 21
58 21
58 23
58 23
58 23
58 23
59 23
60 23
59 22
58 22
62 22
61 22
61 22
61 22
61 23
61 24
61 24
61 24
61 26
61 26
60 26
60 26
60 26
60 27
60 27
60 27
60 27
60 27
61 27
60 27
60 27
60 27
60 27
60 27
62 27
62 27
62 27
62 27
62 27
62 27
63 27
63 27
63 27
64 27
64 27
64 27
64 27
64 27
65 27
65 27
65 27
69 28
69 27
68 27
67 27
66 27
66 27
66 27
66 27
63 25
64 22
64 22
52 21
52 22
50 18
50 18
50 18
49 16
49 12
49 11
49 11
49 13
49 13
49 13
47 13
49 13
49 13
48 13
48 13
48 13
48 13
48 13
49 15
81 17
81 17
81 17
81 17
81 17
81 17
82 17
81 17
81 17
82 18
79 18
75 18
75 18
75 17
74 17
73 17
70 16
68 16
67 16
68 14
68 14
67 14
67 14
75 14
74 15
74 15
74 15
71 15
77 15
83 15
86 14
87 14
87 13
87 13
87 13
87 11
88 11
88 11
89 11
89 11
89 10
89 10
89 10
89 10
89 10
90 10
95 11
95 11
94 11
94 11
94 11
95 12
95 12
95 12
95 12
107 12
112 13
113 13
115 13
115 13
115 13
119 14
121 14
122 14
121 14
122 14
122 14
122 14
117 14
117 14
115 14
115 14
115 14
115 14
114 14
117 14
122 15
125 16
133 17
135 17
135 16
136 16
136 16
137 16
138 16
138 16
148 16
149 16
149 13
148 13
148 13
155 13
156 13
156 13
156 13
156 13
156 13
156 13
156 13
154 11
121 9
121 9
123 9
126 9
139 9
144 9
159 9
161 9
163 9
170 9
174 9
179 9
183 10
188 10
188 10
190 10
191 10
191 10
191 10
190 10
190 10
190 10
189 10
180 9
180 9
179 9
176 9
168 9
164 9
163 9
163 9
163 9
163 9
163 9
162 9
162 9
162 9
162 9
161 9
161 9
161 9
161 9
161 9
161 9
161 9
159 9
154 8
154 8
154 8
153 8
153 8
150 7
150 7
149 7
148 7
135 6
133 6
130 6
129 6
127 6
124 5
120 5
120 5
119 5
119 5
118 5
118 5
117 5
117 5
117 5
117 5
117 5
116 5
116 4
115 3
109 3
105 3
100 2
97 2
96 2
95 2
95 2
95 2
94 2
91 2
91 2
82 2
82 2
81 2
80 2
80 2
71 2
69 2
69 2
66 2
66 2
66 2
66 2
66 2
66 2
64 2
64 2
62 2
60 2
47 2
47 2
34 2
33 2
30 2
21 1
13 1
7 1
3 0
0 0
0 0
0 0
0 0
0 0
0 0
0 0
0 0
0 0
0 0
0 0
0 0
0 0
0 0
0 0
0 0
0 0
0 0
0 0
0 0
0 0
0 0
0 0
0 0
0 0
0 0
0 0
0 0
0 0
0 0
0 0
0 0
0 0
0 0
0 0
0 0
0 0
0 0
0 0
0 0
0 0
0 0
0 0
0 0
0 0
0 0
0 0
0 0
0 0
0 0
0 0
0 0
0 0
0 0
0 0
0 0
1 0
1 0
1 0
1 0
1 1
4 3
4 3
4 8
4 8
4 8
4 8
4 8
4 8
4 8
4 8
3 8
3 8
3 8
3 8
3 8
3 8
3 8
3 8
3 8
3 8
3 8
3 8
3 9
3 11
3 11
3 11
3 11
3 11
3 11
3 11
3 11
3 11
3 11
3 11
3 12
3 13
3 13
3 15
3 15
3 15
3 15
3 15
3 15
3 15
3 15
3 15
3 15
3 15
3 15
3 15
3 15
3 15
3 15
3 15
3 15
3 15
3 15
3 15
3 15
3 15
3 15
3 15
3 15
3 15
3 15
3 15
3 15
3 15
3 15
3 15
3 15
3 16
3 16
3 17
3 17
3 17
4 18
4 18
4 18
4 18
4 18
4 18
4 18
4 18
4 18
4 18
5 18
5 19
5 19
5 19
5 19
5 19
5 19
5 19
5 19
5 19
5 19
5 19
5 19
5 16
2 12
2 12
2 11
2 11
2 11
2 11
2 11
2 11
2 11
2 11
2 11
2 11
2 11
2 11
2 12
2 12
2 12
2 12
2 12
2 13
2 13
3 21
3 20
3 18
3 18
3 18
3 18
3 18
3 20
3 20
3 21
3 21
3 21
3 21
3 20
3 19
3 19
3 17
3 17
3 17
3 17
3 17
3 17
3 17
3 17
3 17
3 17
4 18
4 18
3 18
3 18
3 18
3 18
3 18
3 18
3 18
3 18
3 18
3 18
3 18
3 18
3 18
3 20
3 21
3 21
3 21
3 21
3 21
3 21
3 21
3 22
3 22
3 22
3 21
3 21
3 21
3 20
3 20
3 20
3 20
2 20
2 20
2 20
2 20
2 20
4 29
4 29
4 28
4 28
4 28
4 28
4 29
4 29
4 29
4 29
4 29
4 29
4 29
4 29
4 29
4 29
4 29
4 29
4 29
4 29
4 29
4 29
4 31
4 32
4 32
4 32
4 33
4 34
4 34
4 33
4 33
4 35
4 35
4 35
4 33
4 33
3 26
3 26
3 25
3 25
3 25
3 25
3 24
3 24
3 23
3 23
3 23
3 23
3 23
3 23
3 23
3 23
3 23
3 24
3 24
3 24
3 25
3 25
3 26
3 26
3 26
3 26
2 25
2 25
2 25
2 25
2 25
2 25
2 25
2 25
2 24
2 23
2 23
2 23
2 23
2 23
2 23
2 20
2 20
2 20
2 20
2 20
2 20
2 20
2 20
2 20
2 20
2 20
2 20
2 20
2 20
2 20
2 27
2 30
2 31
2 32
2 34
2 34
2 34
2 34
0 25
0 25
0 25
0 25
0 25
0 25
0 25
0 25
0 25
0 25
0 25
0 25
0 26
0 28
0 28
0 29
0 29
0 29
1 29
1 29
1 29
1 28
1 25
1 25
1 27
1 26
2 26
2 26
2 26
2 26
2 26
2 24
2 24
2 24
2 24
2 24
2 24
2 24
2 24
2 24
2 24
2 24
2 24
2 24
2 24
2 24
2 24
2 24
2 24
2 26
2 26
2 26
2 27
2 26
2 26
2 26
2 25
2 25
2 25
2 25
2 25
2 25
2 25
2 25
2 25
2 25
2 25
2 25
2 25
2 25
2 25
2 25
2 25
2 25
2 25
2 25
2 25
2 25
2 25
2 25
2 25
2 25
2 25
2 25
2 25
2 26
2 26
2 26
2 26
2 26
2 26
2 23
2 19
2 12
2 12
2 12
2 12
2 12
2 12
2 12
2 12
2 12
2 12
2 12
2 12
2 11
2 11
2 11
2 11
2 12
2 11
2 11
2 9
2 9
2 9
2 8
2 8
2 8
1 8
1 8
1 8
1 8
1 8
1 8
1 6
1 6
0 6
0 6
0 6
0 6
0 6
0 6
0 6
0 6
0 6
0 6
0 6
0 6
0 6
0 6
0 6
0 6
0 6
0 6
0 6
0 6
0 6
0 6
0 6
0 4
0 4
0 4
0 3
0 3
0 3
0 3
0 3
0 3
0 2
0 2
0 2
0 3
0 3
0 3
0 3
0 3
0 3
0 3
0 3
0 3
0 3
0 3
0 3
0 3
0 3
0 3
0 3
0 3
0 3
0 3
0 3
0 3
0 5
0 5
0 5
0 4
0 5
0 95
0 101
0 103
0 103
0 103
0 104
0 104
0 104
0 106
0 108
1 109
4 117
4 122
4 124
4 124
4 125
4 125
4 125
4 125
4 125
4 126
4 127
4 127
4 127
4 127
4 129
4 130
4 130
4 130
4 130
4 130
5 130
5 132
5 132
5 132
5 133
5 133
5 133
5 133
5 133
5 133
5 133
5 133
5 133
5 133
5 133
4 133
4 133
4 133
4 133
4 134
4 134
4 134
4 134
4 134
4 134
4 134
4 134
4 134
4 134
4 134
4 134
4 134
4 134
4 134
4 134
4 134
4 135
4 135
4 135
4 135
4 136
4 136
4 136
4 138
4 138
4 138
4 138
4 138
4 138
4 138
4 138
4 138
4 139
4 139
4 140
4 141
4 141
4 141
4 141
4 141
4 141
4 141
4 141
4 141
4 139
4 139
4 139
4 139
4 138
3 40
3 39
3 36
3 36
3 36
3 36
3 35
2 31
2 31
2 30
1 29
0 20
0 18
0 17
0 17
0 16
0 16
0 16
0 16
0 16
0 15
0 15
0 15
0 15
0 14
0 13
0 12
0 12
0 12
0 11
0 11
0 11
0 8
0 8
0 8
0 8
0 8
0 8
0 8
0 8
0 8
0 8
0 8
0 8
0 8
0 8
0 8
0 8
0 8
0 8
0 8
0 8
0 8
0 8
0 8
0 8
0 8
0 8
0 8
0 8
0 8
0 8
0 8
0 8
0 8
0 8
0 8
0 7
0 7
0 7
0 7
0 6
0 6
0 4
0 3
0 3
0 3
0 3
0 3
0 3
0 3
0 3
0 3
0 2
0 2
0 1
0 0
0 0
0 0
0 0
0 0
0 0
0 0
0 0
0 0
0 0
0 0
0 0
0 0
0 0
0 0
0 0
0 0
0 0
0 0
0 0
0 0
0 0
0 0
0 0
0 0
0 0
0 0
0 0
0 1
0 1
0 1
0 1
0 1
0 1
0 1
0 1
0 1
0 1
0 1
0 1
0 1
0 1
0 1
0 1
0 1
0 1
0 1
0 1
0 1
0 1
0 1
0 1
0 1
0 1
0 1
0 2
0 2
0 2
0 2
0 2
0 2
0 2
0 2
0 2
0 2
0 2
0 2
0 2
0 2
0 2
0 2
0 2
0 2
0 2
0 2
0 2
0 2
0 2
0 2
0 2
0 2
0 2
0 2
0 2
0 2
0 2
0 2
0 2
0 2
0 2
0 2
0 2
0 2
0 2
0 2
0 2
0 2
0 2
0 2
0 2
0 2
0 2
0 2
0 2
0 2
0 2
0 2
0 2
0 2
0 2
0 2
0 2
0 2
0 2
0 2
0 2
0 2
0 2
0 2
0 2
0 2
0 2
0 2
0 2
0 2
0 2
0 2
0 2
0 1
0 1
0 1
0 1
0 1
0 1
0 1
0 1
0 1
0 1
0 1
0 1
0 1
0 1
0 1
0 1
0 1
0 1
0 1
0 1
0 3
0 5
0 5
0 5
0 5
0 5
0 4
0 4
0 4
0 4
0 4
0 4
0 4
0 4
0 4
0 4
0 4
0 4
0 4
0 4
0 4
0 4
0 4
0 4
0 4
0 4
0 4
0 4
0 4
0 4
0 4
0 4
0 4
0 4
0 4
0 4
0 4
0 4
0 4
0 4
0 4
0 4
0 4
0 4
0 4
0 4
0 4
0 4
0 4
0 4
0 4
0 4
0 4
0 4
0 4
0 4
0 4
0 4
0 4
0 4
0 4
0 4
0 4
0 4
0 4
0 4
0 4
0 4
0 4
0 4
0 4
0 4
0 4
0 4
0 4
0 4
0 4
0 4
0 4
0 4
0 4
0 4
0 4
0 4
0 4
0 6
0 6
0 6
0 6
0 6
0 6
0 6
0 6
0 6
0 6
0 6
0 6
0 6
0 6
0 6
0 4
0 2
0 2
0 2
0 2
0 2
0 2
0 2
0 2
0 3
0 3
0 3
0 3
0 3
0 3
0 3
0 3
0 3
0 3
0 3
0 3
0 3
0 3
0 3
0 4
0 5
0 5
0 5
0 5
0 5
0 5
0 5
0 5
0 5
0 5
0 5
0 5
0 5
0 5
0 5
0 5
0 5
0 5
0 5
0 5
0 5
0 5
0 5
0 5
0 5
0 5
0 5
0 5
0 5
0 5
0 5
0 6
0 6
0 7
0 7
0 7
0 7
0 7
0 7
0 7
0 7
0 7
0 7
0 7
0 7
0 7
0 7
0 7
0 7
0 7
0 7
0 7
0 7
0 7
0 7
0 7
0 7
0 7
0 7
0 7
0 5
0 5
0 5
0 5
0 5
0 5
0 5
0 5
0 5
0 5
0 5
0 5
0 5
0 5
0 6
0 6
0 6
0 7
0 14
0 15
0 15
0 17
0 21
0 22
0 28
0 31
0 37
0 39
0 40
0 40
0 42
0 42
0 42
0 42
0 42
0 42
0 42
0 41
0 43
0 42
0 42
0 42
0 42
0 42
0 42
0 42
0 42
0 42
0 42
0 42
0 40
0 40
0 40
0 40
0 40
0 40
0 40
0 40
0 40
0 41
0 41
0 41
0 41
0 41
0 41
0 41
0 41
0 41
0 41
0 41
0 41
0 40
0 40
0 39
0 39
0 39
0 39
0 39
0 39
0 39
0 39
0 39
0 39
0 39
0 39
0 39
0 39
0 39
0 39
0 39
0 39
0 39
0 39
0 39
0 39
0 39
0 39
0 39
0 38
0 38
0 38
0 38
0 38
0 38
0 38
0 38
0 38
0 38
0 39
0 39
0 39
0 39
0 39
0 39
0 39
0 39
0 39
0 38
0 24
0 22
0 22
0 21
0 21
0 16
0 15
0 11
0 7
0 6
0 5
0 4
0 2
0 2
0 2
0 2
0 2
0 2
0 1
0 1
0 0
0 0
0 0
0 0
0 0
0 0
0 0
0 0
0 0
0 0
0 0
0 0
0 0
0 0
0 0
0 0
0 0
0 0
0 0
0 0
1 0
1 0
1 0
1 0
2 1
2 1
2 1
2 1
2 1
2 2
2 3
2 3
3 3
3 3
3 3
2 3
2 3
2 3
2 3
1 2
1 2
1 2
1 2
1 2
1 2
1 0
1 0
0 0
0 0
0 0
0 0
0 0
0 0
0 0
0 0
0 0
0 0
0 0
0 0
0 0
0 0
0 0
0 0
0 0
0 0
0 0
0 0
0 0
0 0
0 0
0 0
0 0
0 0
0 0
0 0
0 0
0 0
0 0
0 0
0 0
0 0
0 0
0 0
0 0
0 0
0 0
0 0
0 0
0 0
0 0
0 0
0 0
0 0
0 0
0 0
0 0
0 0
0 0
0 0
0 0
0 0
0 0
0 1
0 1
0 1
0 1
0 1
0 1
0 1
0 1
0 1
0 1
0 1
0 1
0 1
0 1
0 1
0 0
0 0
0 0
0 0
0 0
0 0
0 0
0 0
0 0
0 0
0 0
0 0
0 0
0 0
0 0
0 0
0 0
0 0
0 0
0 0
0 0
0 0
0 0
0 0
0 0
0 0
0 0
0 0
0 0
0 0
0 0
0 0
0 0
0 0
0 0
0 0
0 0
0 0
0 0
0 0
0 0
0 1
0 1
0 1
0 1
0 1
0 1
0 1
0 1
0 1
0 1
0 1
0 1
0 1
0 1
0 1
0 1
0 1
0 1
0 1
0 1
0 1
0 1
0 1
0 1
0 1
0 1
0 1
0 1
0 1
0 1
0 1
0 1
0 1
0 1
0 1
0 1
0 1
0 1
0 1
0 1
0 1
0 1
0 1
0 1
0 0
0 0
0 0
0 0
0 0
0 0
0 0
0 0
0 0
0 0
0 0
0 0
0 0
0 0
0 0
0 0
0 0
0 0
0 0
0 0
0 0
0 0
0 0
0 0
0 0
0 0
0 0
0 0
0 0
0 0
0 0
0 0
0 0
0 0
0 0
0 0
0 0
0 0
0 0
0 0
0 0
0 0
0 0
0 0
0 0
0 0
0 0
0 0
0 0
0 0
0 0
0 0
0 0
0 0
0 0
0 0
0 0
0 0
0 0
0 0
0 0
0 0
0 0
0 0
0 0
0 0
0 0
0 1
1 2
1 2
3 2
3 2
3 2
3 2
3 2
3 2
3 2
3 2
3 2
3 2
3 2
3 2
3 2
3 2
3 2
3 2
3 2
3 2
3 2
3 2
3 2
3 2
3 2
3 2
3 2
3 2
3 2
3 2
3 2
3 2
3 2
3 2
3 2
3 2
3 2
3 2
3 2
3 2
3 2
3 2
3 2
3 2
3 2
3 2
4 2
4 2
5 2
5 2
5 2
6 2
6 2
10 2
10 2
10 2
10 2
10 2
10 2
10 2
10 2
10 2
10 2
11 2
11 2
11 2
11 2
11 2
11 2
11 2
11 2
12 2
12 2
12 2
12 2
12 2
12 2
12 2
12 2
12 2
12 2
12 2
12 2
12 2
12 2
12 2
12 2
12 2
12 2
12 2
12 2
12 2
12 2
12 2
12 2
12 0
12 0
12 0
11 0
11 0
11 0
11 0
9 0
9 0
11 0
11 0
12 0
13 0
13 0
13 0
15 0
17 0
19 0
20 0
28 0
31 0
31 0
31 0
31 0
31 0
31 0
36 0
38 0
40 0
40 0
40 0
41 0
41 0
41 0
41 0
42 0
42 0
42 0
42 0
42 0
42 0
42 0
42 0
43 0
43 0
45 0
45 0
45 0
45 0
44 0
44 0
44 0
44 0
43 0
43 0
43 0
51 0
53 0
52 0
52 0
52 0
52 0
52 0
52 0
52 0
52 0
52 0
52 0
51 0
51 0
51 0
51 0
51 0
51 0
51 0
50 0
50 0
50 0
50 0
50 0
50 0
50 0
51 0
51 0
51 0
51 0
51 0
51 0
53 0
53 0
53 0
53 0
53 0
54 0
54 0
54 0
54 0
54 0
54 0
54 0
54 0
54 0
54 0
54 0
54 0
54 0
55 0
55 0
56 0
53 0
53 0
53 0
54 0
55 0
55 0
53 0
50 0
48 0
47 0
40 0
37 0
38 0
40 0
40 0
40 0
38 0
34 0
32 0
30 0
30 0
30 0
29 0
29 0
28 0
28 0
28 0
28 0
28 0
29 0
29 0
32 0
32 0
32 0
31 0
31 0
29 0
29 0
29 0
29 0
29 0
29 0
29 0
29 0
29 0
27 0
25 0
17 0
17 0
17 0
17 0
17 0
17 0
17 0
17 0
17 0
17 0
17 0
17 0
17 0
17 0
17 0
17 0
17 0
17 0
17 0
17 0
17 0
17 0
17 0
17 0
17 0
17 0
16 0
16 0
16 0
16 0
16 0
16 0
14 0
14 0
14 0
13 0
13 0
14 0
14 0
16 0
16 0
16 0
16 0
16 0
16 0
16 0
16 0
16 0
17 0
17 0
21 0
23 0
23 0
23 0
23 0
26 0
25 0
27 0
27 0
28 0
28 0
28 0
27 0
27 0
26 0
25 0
24 0
24 0
24 0
24 0
25 0
25 0
25 0
25 0
25 0
25 0
25 0
25 0
25 0
26 0
26 0
26 0
26 0
27 0
24 0
24 0
24 0
24 0
24 0
24 0
24 0
24 0
24 0
24 0
24 0
24 0
24 0
24 0
24 0
24 0
23 0
23 0
23 0
24 0
29 0
29 0
29 0
30 0
30 0
30 0
30 0
30 0
30 0
30 0
30 0
30 0
30 0
31 0
31 0
31 0
31 0
32 0
32 0
32 0
32 0
32 0
32 0
32 0
33 0
34 0
34 0
34 0
34 0
34 0
34 0
34 0
34 0
31 0
31 0
31 0
31 0
31 0
32 0
32 0
32 0
32 0
32 0
32 0
30 0
31 0
30 0
28 0
28 0
28 0
27 0
26 0
25 0
23 0
23 0
23 0
23 0
23 0
23 0
23 0
27 0
27 0
30 0
30 0
31 0
32 0
31 0
31 0
31 0
31 0
31 0
31 0
31 0
31 0
31 0
33 0
34 0
34 0
34 0
33 0
33 0
33 0
33 0
33 0
33 0
33 0
33 0
33 0
33 0
34 0
34 0
36 0
36 0
36 0
38 0
39 0
39 0
39 0
40 0
39 0
35 0
35 0
35 0
34 0
34 0
34 0
34 0
34 0
35 0
35 0
35 0
35 0
37 0
36 0
37 0
37 0
37 1
36 1
36 1
36 1
36 1
36 1
38 1
38 1
38 1
37 1
37 1
37 1
37 1
37 1
37 1
36 1
36 1
36 1
35 1
35 1
35 1
34 1
35 1
34 1
34 1
34 1
34 1
33 1
32 1
32 1
32 2
32 2
32 2
32 2
32 2
31 2
31 2
31 2
31 2
30 2
30 2
30 2
30 2
30 2
28 2
28 2
24 2
24 2
23 2
23 2
23 2
23 2
23 2
24 2
26 2
26 2
26 2
26 2
26 2
21 2
20 2
20 2
20 2
20 2
20 2
20 2
20 2
20 2
20 2
20 2
20 2
20 2
20 2
20 2
20 2
19 2
19 2
19 2
17 2
16 2
14 2
14 2
14 2
14 2
14 2
14 2
14 2
14 2
14 2
14 2
14 2
14 2
15 2
15 2
15 2
15 2
13 2
17 2
16 2
16 2
16 1
16 1
16 1
16 1
16 1
16 1
14 1
14 1
13 1
13 1
13 1
13 1
13 1
13 1
13 1
14 1
15 1
15 1
15 1
15 1
15 3
15 3
14 3
12 3
12 3
12 3
12 3
12 3
12 3
12 3
12 2
12 2
12 2
12 2
12 2
11 2
11 2
11 2
11 2
11 2
12 2
12 2
12 2
12 2
12 2
12 2
12 2
12 2
12 2
12 2
12 2
12 2
14 2
13 2
11 2
11 2
11 2
11 2
13 2
13 2
13 2
13 2
13 2
13 2
13 2
13 2
13 2
13 2
13 2
13 2
13 2
13 2
13 2
13 2
13 2
13 2
13 2
13 2
13 2
13 2
13 2
13 2
13 2
13 2
13 2
13 2
13 2
13 2
13 2
11 2
11 2
11 2
11 2
11 2
11 2
11 2
11 2
7 2
7 2
7 2
7 2
7 2
7 2
7 2
7 2
7 2
7 2
7 2
7 2
7 2
7 1
7 0
6 0
6 0
6 0
6 0
5 0
5 0
5 0
5 0
5 0
5 0
5 0
5 0
5 0
5 0
5 0
5 1
5 1
5 1
5 1
5 1
5 1
5 1
5 1
5 1
5 1
5 1
5 1
5 1
4 1
4 1
4 1
4 0
4 0
4 0
4 0
4 0
4 0
4 0
4 0
3 0
2 0
2 0
2 0
2 0
2 0
2 0
0 0
0 0
0 0
0 0
0 0
0 0
0 0
0 0
0 0
0 0
0 0
0 0
0 0
0 0
0 0
0 0
0 0
0 0
0 0
0 0
0 0
0 0
0 0
0 0
0 0
0 0
0 0
0 0
0 0
0 0
0 0
0 0
0 0
0 0
0 0
0 0
0 0
0 0
0 0
0 0
0 0
0 0
0 0
0 0
0 0
0 0
0 0
0 0
0 0
0 0
0 0
0 0
0 0
0 0
0 0
0 0
0 0
0 0
0 0
0 0
0 0
0 0
0 0
0 0
0 0
0 0
0 0
0 0
0 0
0 0
0 0
0 0
0 0
0 0
0 0
0 0
0 0
0 0
0 0
0 2
0 2
0 2
0 3
0 3
0 3
0 3
0 3
0 3
0 3
0 3
0 3
0 3
0 3
0 3
0 3
0 3
0 3
0 3
0 3
0 3
0 3
0 3
0 3
0 3
0 3
0 3
0 3
0 3
0 3
0 3
0 3
0 3
0 3
0 4
0 4
0 4
0 4
0 4
0 4
0 4
0 4
0 4
0 4
0 4
0 4
0 4
0 4
0 4
0 4
0 4
0 4
0 4
0 4
0 4
0 4
0 4
0 4
0 4
0 4
0 4
0 4
0 4
0 4
0 4
0 4
0 4
0 4
0 4
0 4
0 4
0 4
0 4
0 4
0 4
0 4
0 4
0 4
0 4
0 4
0 4
0 4
0 4
0 4
0 4
0 4
0 4
0 4
0 4
0 5
0 5
0 5
0 5
0 5
0 5
0 5
0 5
0 5
0 5
0 5
0 3
0 3
0 3
0 2
0 2
0 2
0 2
0 2
0 2
0 2
0 2
0 2
0 3
0 3
0 3
0 3
0 3
0 3
0 3
0 3
0 3
0 3
0 3
0 3
0 3
0 3
0 3
0 3
0 5
0 5
0 5
0 5
0 5
0 4
0 4
0 4
0 4
0 4
0 4
0 4
0 4
0 4
0 4
0 4
0 4
0 4
0 4
0 4
0 4
0 4
0 4
0 4
0 4
0 4
0 5
0 5
0 5
0 5
0 5
0 5
0 5
0 5
0 5
0 5
0 5
0 5
0 5
0 5
0 5
0 6
0 6
0 6
0 6
0 7
0 7
0 7
0 7
0 7
0 7
0 7
0 7
0 7
0 7
0 7
0 8
0 8
0 9
0 9
0 8
0 8
0 8
0 8
0 9
0 9
0 9
0 10
0 10
0 10
0 10
0 11
0 11
0 11
0 11
0 11
0 11
0 13
0 13
0 13
0 13
0 13
0 13
0 13
0 12
0 12
0 12
0 12
0 13
0 13
0 13
0 13
0 13
0 13
0 13
0 13
0 13
0 13
0 13
0 13
0 11
0 11
0 11
0 11
0 11
0 11
0 11
0 11
0 11
0 11
0 13
0 13
0 13
0 13
0 13
0 13
0 13
0 14
0 16
0 17
0 17
0 17
0 18
0 17
0 17
0 17
0 17
0 17
0 17
0 17
0 17
0 17
0 17
0 17
0 17
0 17
0 17
0 17
0 17
0 17
0 17
0 16
0 16
0 16
0 16
0 14
0 14
0 12
0 12
0 12
0 12
0 12
0 12
0 12
0 12
0 12
0 12
0 12
0 12
0 13
0 13
0 13
0 13
0 13
0 13
0 13
0 13
0 12
0 12
0 12
0 12
0 11
0 11
0 11
0 11
0 11
0 10
0 9
0 9
0 9
0 9
0 9
0 9
0 8
0 8
0 8
0 8
0 8
0 8
0 8
0 8
0 9
0 9
0 9
0 9
0 9
0 9
0 9
0 9
0 9
0 9
0 9
0 9
0 9
0 9
0 9
0 9
0 9
0 9
0 7
0 8
0 8
0 8
0 8
0 9
0 9
0 10
0 9
0 6
0 6
0 6
0 6
0 5
0 5
0 6
0 6
0 12
0 12
0 13
0 13
0 13
0 13
0 13
0 13
0 17
0 17
0 17
0 17
0 17
0 17
0 17
0 17
0 17
0 17
0 17
0 17
0 17
0 18
0 19
0 15
0 15
0 15
0 15
0 15
0 15
0 15
0 15
0 15
0 15
0 14
0 14
0 14
0 14
0 14
0 14
0 14
0 14
0 14
0 14
0 14
0 14
0 14
0 14
0 14
0 14
0 14
0 14
0 14
0 14
0 14
0 14
0 15
0 16
0 16
0 16
0 16
0 16
0 16
0 16
0 16
0 16
0 15
0 15
0 15
0 15
0 15
0 15
0 15
0 15
0 16
0 17
0 19
0 19
0 19
0 19
0 19
0 19
0 19
0 19
0 19
0 18
0 18
0 18
0 18
0 17
0 17
0 16
0 16
0 18
0 18
0 18
0 19
0 19
0 19
0 18
0 18
0 12
0 12
0 12
0 12
0 12
0 12
0 12
0 12
0 12
0 12
0 12
0 12
0 13
0 14
0 14
0 19
0 19
0 20
0 20
0 20
0 20
0 19
0 18
0 18
0 18
0 18
0 18
0 18
0 18
0 18
0 18
0 18
0 18
0 18
0 18
0 18
0 18
0 18
0 18
0 18
0 18
0 18
0 18
0 18
0 18
0 18
0 18
0 18
0 18
0 18
0 18
0 18
0 18
0 18
0 16
0 16
0 16
0 16
0 16
0 16
0 16
0 16
0 16
0 16
0 16
0 16
0 16
0 16
0 16
0 16
0 16
0 16
0 16
0 15
0 14
0 12
0 12
0 12
0 12
0 12
0 12
0 12
0 12
0 12
0 12
0 12
0 12
0 12
0 12
0 12
0 11
0 11
0 10
0 10
0 10
0 9
0 9
0 9
0 9
0 8
0 8
0 8
0 8
0 8
0 8
0 8
0 8
0 8
0 8
0 8
0 8
0 8
0 7
0 6
0 6
0 1
0 1
0 0
0 0
0 0
0 0
0 0
0 0
0 0
0 0
0 0
0 0
0 0
0 0
0 0
0 0
0 0
0 0
0 0
0 0
0 0
0 0
0 0
0 0
0 0
0 0
0 0
0 0
0 0
0 0
0 0
0 0
0 0
0 0
0 0
0 0
0 0
0 0
1 0
1 0
1 0
2 0
2 0
2 0
2 0
2 0
2 0
2 0
2 0
2 0
2 0
2 0
2 0
2 0
2 0
2 0
2 0
2 0
2 0
2 0
2 0
2 0
2 0
2 0
2 0
2 0
2 0
3 0
3 0
3 0
3 0
3 0
3 0
3 0
3 0
3 0
3 0
3 0
3 0
3 0
3 0
3 0
3 0
3 0
3 0
3 0
3 0
3 0
3 0
3 0
3 0
3 0
3 0
3 0
3 0
4 0
4 0
4 0
4 0
4 0
4 0
4 0
4 0
4 0
3 0
3 0
3 0
3 0
2 0
2 0
2 0
2 0
2 0
3 0
3 0
3 0
4 0
4 0
4 0
4 0
4 0
5 0
5 0
5 0
5 0
5 0
5 0
5 0
5 0
5 0
5 0
5 0
5 0
5 0
5 0
5 0
5 0
5 0
5 0
5 0
5 0
5 0
5 0
5 0
5 0
5 0
5 0
5 0
5 0
6 0
6 0
6 0
6 0
6 0
6 0
6 0
6 0
6 0
6 0
8 0
8 0
8 0
8 0
8 0
8 0
8 0
8 0
7 0
7 0
7 0
7 0
7 0
7 0
7 0
7 0
7 0
7 0
7 0
7 0
7 0
7 0
7 0
7 0
7 0
7 0
7 0
7 0
7 0
7 0
7 0
7 0
7 0
7 0
7 0
7 0
6 0
6 0
6 0
6 0
6 0
6 0
6 0
6 0
6 0
6 0
6 0
8 0
8 0
8 0
8 0
8 0
8 0
9 0
8 0
8 0
8 0
7 0
7 0
7 0
7 0
6 0
6 0
6 0
6 0
6 0
6 0
6 0
6 0
6 0
6 0
6 0
6 0
6 0
6 0
6 0
6 0
6 0
6 0
6 0
6 0
6 0
6 0
6 0
6 0
7 0
7 0
7 0
7 0
9 0
9 0
9 0
9 0
9 0
9 0
9 0
9 0
9 0
9 0
9 0
7 0
7 0
7 0
7 0
7 0
7 0
7 0
7 0
7 0
7 0
7 0
7 0
7 0
7 0
7 0
7 0
7 0
7 0
7 0
7 0
8 0
8 0
8 0
8 0
8 0
8 0
8 0
8 0
8 0
8 0
8 0
8 0
9 0
9 0
9 0
9 0
9 0
9 0
9 0
9 0
9 0
9 0
9 0
9 0
9 0
9 0
9 0
7 0
7 0
7 0
7 0
7 0
7 0
6 0
6 0
6 0
6 0
6 0
6 0
6 0
6 0
6 0
6 0
6 0
6 0
6 0
6 0
6 0
6 0
6 0
6 0
6 0
6 0
10 0
12 0
12 0
12 0
12 0
12 0
12 0
12 0
12 0
12 0
12 0
11 0
11 0
11 0
11 0
10 0
9 0
8 0
8 0
8 0
8 0
8 0
8 0
8 0
8 0
8 0
8 0
8 0
8 0
8 0
8 0
8 0
8 0
8 0
8 0
8 0
8 0
8 0
8 0
8 0
8 0
8 0
8 0
8 0
8 0
8 0
8 0
7 0
7 0
7 0
7 0
7 0
7 0
7 0
7 0
7 0
8 0
8 0
8 0
7 0
7 0
7 0
7 0
7 0
7 0
7 0
7 0
7 0
7 0
7 0
7 0
7 0
8 0
8 0
8 0
8 0
8 0
8 0
8 0
8 0
8 0
8 0
8 0
8 0
8 0
8 0
8 0
8 0
8 0
9 0
9 0
9 0
9 0
9 0
9 0
9 0
8 0
8 0
7 0
5 0
3 0
3 0
3 0
3 0
3 0
3 0
3 0
3 0
3 0
3 0
3 0
3 0
3 0
3 0
3 0
3 0
3 0
3 0
3 0
3 0
3 0
3 0
3 0
3 0
3 0
3 0
3 0
3 0
3 0
3 0
3 0
3 0
3 0
3 0
3 0
3 0
3 0
3 0
3 0
3 0
4 0
4 0
4 0
4 0
4 0
4 0
4 0
4 0
4 0
4 0
4 0
4 0
4 0
4 0
4 0
4 0
3 0
3 0
3 0
3 0
3 0
3 0
3 0
3 0
3 0
3 0
3 0
3 0
3 0
3 0
3 0
4 0
3 0
3 0
3 0
3 0
4 0
4 0
5 0
5 0
5 0
5 0
5 0
5 0
5 0
5 0
5 0
5 0
5 0
4 0
4 0
4 0
4 0
4 0
4 0
4 0
4 0
4 0
4 0
4 0
4 0
4 0
4 0
4 0
4 0
4 0
4 0
4 0
5 0
5 0
5 0
5 0
5 0
5 0
5 0
5 0
5 0
5 0
5 0
5 0
5 0
5 0
5 0
5 0
5 0
5 0
5 0
5 0
5 0
5 0
5 0
5 0
5 0
5 0
5 0
5 0
5 0
5 0
5 0
5 0
4 0
4 0
4 0
4 0
4 0
4 0
4 0
4 0
4 0
4 0
4 0
4 0
4 0
4 0
4 0
4 0
4 0
4 0
4 0
4 0
4 0
4 0
4 0
4 0
4 0
4 0
4 0
4 0
4 0
4 0
4 0
3 0
3 0
3 0
3 0
3 0
2 0
2 0
1 0
1 0
1 0
1 0
1 0
1 0
1 0
1 0
1 0
1 0
1 0
1 0
1 0
1 0
1 0
1 0
1 0
1 0
1 0
1 0
2 0
2 0
2 0
2 0
2 0
2 0
2 0
2 0
2 0
2 0
1 0
1 0
1 0
1 0
1 0
1 0
1 0
1 0
1 0
1 0
1 0
1 0
1 0
1 0
1 0
1 0
1 0
1 0
1 0
1 0
1 0
1 0
1 0
1 0
1 0
1 0
2 0
2 0
2 0
2 0
3 0
3 0
3 0
3 0
3 0
3 0
3 0
3 0
3 0
3 0
3 0
3 0
3 0
3 0
3 0
3 0
3 0
3 0
3 0
3 0
3 0
3 0
3 0
3 0
3 0
3 0
3 0
3 0
3 0
3 0
3 0
3 0
3 0
3 0
3 0
3 0
3 0
3 0
3 0
3 0
3 0
3 0
3 0
4 0
4 0
4 0
4 0
4 0
4 0
4 0
4 0
4 0
4 0
4 0
4 0
5 0
5 0
5 0
5 0
5 0
4 0
4 0
5 0
5 0
5 0
5 0
5 0
6 0
6 0
6 0
6 0
6 0
6 0
6 0
6 0
6 0
6 0
6 0
6 0
6 0
6 0
6 0
6 0
6 0
6 0
6 0
6 0
6 0
6 0
6 0
6 0
6 0
6 0
6 0
6 0
6 0
5 0
5 0
5 0
5 0
4 0
4 0
4 0
4 0
4 0
4 0
4 0
4 0
4 0
4 0
4 0
4 0
4 0
4 0
4 0
4 0
4 0
4 0
4 0
4 0
4 0
4 0
4 0
4 0
4 0
4 0
4 0
4 0
4 0
4 0
4 0
4 0
4 0
4 0
4 0
4 0
4 0
4 0
4 0
4 0
4 0
4 0
4 0
3 0
3 0
3 0
3 0
3 0
3 0
3 0
3 0
3 0
3 0
3 0
3 0
2 0
2 0
2 0
2 0
2 0
2 0
2 0
1 0
1 0
1 0
1 0
0 0
0 0
0 0
0 0
0 0
0 0
0 0
0 0
0 0
1 0
1 0
1 0
1 0
1 0
1 0
1 0
1 0
1 0
1 0
1 0
1 0
2 0
2 0
2 0
2 0
2 0
2 0
2 0
2 0
2 0
2 0
2 0
2 0
2 0
2 0
2 0
2 0
4 0
4 0
4 0
4 0
4 0
4 0
5 0
5 0
5 0
5 0
5 0
5 0
5 0
5 0
5 0
5 0
5 0
5 0
5 0
5 0
5 0
5 0
5 0
5 0
5 0
5 0
5 0
5 0
5 0
6 0
6 0
7 0
7 0
7 0
7 0
7 0
7 0
7 0
7 0
7 0
7 0
7 0
7 0
7 0
7 0
7 0
7 0
7 0
7 0
7 0
7 0
7 0
7 0
7 0
7 0
7 0
7 0
7 0
7 0
7 0
7 0
7 0
7 0
7 0
7 0
10 0
10 0
10 0
11 0
12 0
12 0
12 0
11 0
11 0
11 0
11 0
11 0
11 0
11 0
11 0
11 0
11 0
11 0
11 0
10 0
10 0
10 0
10 0
11 0
11 0
11 0
11 0
11 0
11 0
11 0
11 0
11 0
11 0
11 0
11 0
10 0
10 0
10 0
10 0
10 0
10 0
9 0
9 0
9 0
9 0
9 0
9 0
9 0
9 0
9 0
9 0
9 0
9 0
9 0
9 0
9 0
9 0
10 0
10 0
10 0
10 0
10 0
10 0
9 0
9 0
9 0
8 0
8 0
8 0
8 0
8 0
8 0
8 0
8 0
8 0
8 0
9 0
9 0
9 0
9 0
9 0
9 0
9 0
9 0
9 0
9 0
9 0
9 0
10 0
10 0
10 0
10 0
11 0
11 0
10 0
10 0
10 0
10 0
10 0
10 0
8 0
8 0
8 0
7 0
6 0
6 0
6 0
6 0
6 0
6 0
6 0
6 0
6 0
6 0
6 0
6 0
6 0
6 0
6 0
6 0
6 0
6 0
5 0
5 0
5 0
5 0
5 0
5 0
5 0
8 0
9 0
9 0
9 0
9 0
9 0
8 0
8 0
8 0
8 0
8 0
8 0
8 0
8 0
8 0
8 0
8 0
8 0
8 0
8 0
8 0
8 0
8 0
8 0
8 0
9 0
9 0
9 0
8 0
8 0
8 0
8 0
8 0
8 0
8 0
8 0
8 0
8 0
8 0
8 0
8 0
8 0
8 0
9 0
9 0
9 0
9 0
8 0
9 0
9 0
9 0
9 0
9 0
9 0
9 0
9 0
9 0
9 1
8 1
8 1
9 2
9 2
9 2
8 2
8 2
8 2
8 2
9 2
9 2
10 2
10 2
10 2
10 2
10 2
10 2
10 2
10 2
10 2
10 2
10 2
10 2
10 2
10 2
10 2
10 2
10 2
10 2
10 2
10 2
10 2
10 2
10 2
10 2
10 2
10 2
10 2
10 2
10 2
10 2
10 2
7 2
6 2
6 2
6 2
6 2
6 2
6 2
7 2
7 2
7 2
7 2
7 2
7 2
7 2
7 2
7 2
7 2
7 2
7 2
7 2
7 2
7 2
7 2
7 2
7 2
6 2
6 2
7 2
7 2
7 2
7 2
7 2
7 2
7 2
7 2
7 2
7 2
7 2
7 2
7 2
6 2
6 2
6 2
6 2
6 2
6 2
6 2
6 2
5 2
5 2
5 2
5 2
5 2
5 2
7 2
7 2
7 2
7 1
8 0
8 0
7 0
7 0
7 0
8 0
8 0
8 0
8 1
7 1
7 1
6 1
6 1
6 2
6 2
6 2
6 2
10 2
11 2
11 2
11 2
11 2
12 2
12 2
12 2
12 2
12 2
12 2
12 2
12 2
12 2
13 2
13 2
13 2
13 2
13 2
13 2
13 2
13 2
15 2
15 2
16 2
16 2
16 2
16 2
16 2
16 2
16 2
19 2
18 2
18 2
18 2
19 2
19 2
19 2
20 2
20 2
20 2
20 2
20 2
20 2
20 2
20 2
20 2
25 2
26 2
29 2
30 2
31 2
33 2
34 2
34 2
34 2
34 2
34 2
34 2
34 2
34 2
38 2
38 2
38 2
38 2
38 2
38 2
38 2
38 2
39 2
39 2
39 2
39 2
39 2
39 2
39 2
37 2
37 2
37 2
37 2
37 2
37 2
37 2
36 2
35 2
35 2
35 2
35 2
34 2
34 2
34 2
34 1
34 1
34 1
34 1
34 1
34 0
34 0
34 0
33 0
29 0
29 0
29 0
29 0
29 0
28 0
28 0
28 0
28 0
28 0
28 0
28 0
28 0
28 0
27 0
28 0
28 0
28 0
28 0
28 0
28 0
28 0
26 0
26 0
25 0
23 0
23 0
23 0
23 0
23 0
23 0
20 0
20 0
21 0
20 0
19 0
20 0
20 0
19 0
21 0
21 0
21 0
21 0
20 0
20 0
20 0
20 0
18 0
18 0
16 0
14 0
12 0
10 0
10 0
10 0
10 0
10 0
10 0
10 0
10 0
10 0
6 0
6 0
6 0
6 0
6 0
6 0
6 0
6 0
6 0
6 0
6 0
6 0
6 0
6 0
6 0
6 0
6 0
6 0
6 0
6 0
6 0
6 0
7 0
7 0
7 0
7 0
7 0
7 0
7 0
7 0
7 0
7 0
7 0
7 0
7 0
7 0
7 0
7 0
7 0
7 0
7 0
7 0
7 0
7 0
7 0
7 0
7 0
7 0
7 0
7 0
8 0
8 0
8 0
8 0
7 0
7 0
7 0
7 0
7 0
7 0
7 0
7 0
7 0
7 0
7 0
9 0
11 0
11 0
12 0
11 0
10 0
10 0
10 0
10 0
10 1
10 1
11 1
11 1
9 1
9 1
9 1
9 1
9 1
9 1
10 1
10 1
10 1
10 1
10 1
10 1
10 0
10 0
10 0
10 0
10 0
10 0
10 0
10 0
10 0
10 0
10 0
10 0
10 0
10 0
10 0
10 0
10 0
10 0
10 0
10 0
10 0
10 0
10 0
10 0
10 0
10 0
10 0
10 0
10 0
10 0
10 0
10 0
9 0
9 0
9 0
9 0
9 0
9 0
9 0
9 0
9 0
9 0
9 0
9 0
9 0
9 0
9 0
9 0
9 0
9 0
9 0
9 0
9 0
9 0
9 0
9 0
9 0
9 0
9 0
9 0
8 0
9 0
11 0
11 0
11 0
11 0
11 0
11 0
11 0
11 0
11 0
11 0
11 0
11 0
11 0
8 0
7 0
7 0
6 0
6 0
6 0
6 0
6 0
6 0
6 0
5 0
4 0
4 0
4 0
4 0
4 0
4 0
4 0
4 0
3 0
3 0
3 0
3 0
3 0
3 0
3 0
3 0
3 0
3 0
3 0
3 0
3 0
3 0
3 0
3 0
3 0
3 0
3 0
3 0
3 0
3 0
3 0
3 0
3 0
3 0
3 0
3 0
3 0
3 0
3 0
3 0
3 0
3 0
3 0
3 0
3 0
3 0
3 0
3 0
3 0
3 0
3 0
3 0
3 0
3 0
3 0
3 0
3 0
3 0
3 0
3 0
3 0
3 0
3 0
3 0
3 0
3 0
3 0
3 0
3 0
3 0
3 0
3 0
3 0
3 0
3 0
2 0
0 0
0 0
0 0
0 0
0 0
0 0
0 0
0 0
0 0
0 0
0 0
0 0
0 0
0 0
0 0
0 0
0 0
0 0
0 0
0 0
0 0
0 0
0 0
0 0
0 0
0 0
0 0
0 0
0 0
0 0
0 0
0 0
0 0
0 0
0 0
0 0
0 0
0 0
0 1
0 1
0 1
0 1
0 1
0 1
0 1
0 1
0 1
0 1
0 1
0 1
0 1
0 1
0 1
0 1
0 1
0 1
0 1
0 1
0 1
0 1
0 0
0 0
0 0
0 0
0 0
0 0
0 0
0 0
0 0
0 0
0 0
0 0
0 0
0 0
0 0
0 0
0 0
0 0
0 0
0 0
0 0
0 0
0 0
0 0
0 0
0 0
0 0
0 0
0 0
1 0
1 0
1 0
1 0
1 0
1 0
1 0
1 0
1 0
1 0
1 0
1 0
1 0
1 0
1 0
1 0
1 0
1 0
1 0
1 0
1 0
1 0
1 0
1 0
1 0
1 0
1 0
1 0
1 0
1 0
1 0
1 0
1 0
1 0
1 0
1 0
1 0
1 0
1 0
1 0
1 0
1 0
1 0
1 0
1 0
1 0
1 0
1 0
1 0
1 0
1 0
1 0
1 0
1 0
1 0
1 0
1 0
1 0
1 0
1 0
1 0
1 0
1 0
1 0
1 0
1 0
1 0
1 0
1 0
1 0
1 0
1 0
1 0
1 0
1 0
1 0
1 0
1 0
1 0
1 0
1 0
1 0
1 0
1 0
1 0
1 0
1 0
1 0
1 0
1 0
1 0
1 0
1 0
1 0
1 0
1 0
1 0
1 0
1 0
1 0
0 0
0 0
0 0
0 0
0 0
0 0
0 0
0 0
0 0
0 0
0 0
0 0
0 0
0 0
0 0
0 0
0 0
0 0
0 0
0 0
0 0
0 0
0 0
2 0
2 0
3 0
3 0
3 0
3 0
3 0
3 0
3 0
3 0
3 0
3 0
3 0
3 0
3 0
3 0
3 0
3 0
3 0
3 0
3 0
3 0
3 0
3 0
3 0
3 0
3 0
3 0
3 0
3 0
3 0
3 0
3 0
3 0
3 0
3 0
3 0
3 0
3 0
3 0
3 0
3 0
3 0
3 0
3 0
4 0
4 0
4 0
4 0
4 0
4 0
4 0
4 0
4 0
4 0
4 0
4 0
4 0
4 0
4 0
4 0
4 0
4 0
4 0
4 0
4 0
4 0
4 0
4 0
4 0
4 0
4 0
4 0
4 0
4 0
5 0
5 0
6 0
6 0
6 0
6 0
6 0
6 0
6 0
6 0
6 0
6 0
6 0
6 0
6 0
6 0
6 0
6 0
6 0
6 0
6 0
6 0
4 0
4 0
4 0
4 0
4 0
3 0
3 0
3 0
3 0
3 0
3 0
3 0
3 0
3 0
3 0
3 0
3 0
3 0
3 0
3 0
3 0
3 0
4 0
4 0
4 0
4 0
4 0
4 0
4 0
4 0
4 0
5 0
5 0
5 0
5 0
5 0
5 0
5 0
5 0
4 0
4 0
4 0
4 0
4 0
4 0
4 0
4 0
4 0
3 0
3 0
3 0
3 0
3 0
3 0
3 0
3 0
3 0
3 0
3 0
3 0
3 0
3 0
3 0
3 0
3 0
3 0
3 0
3 0
3 0
3 0
3 0
3 0
3 0
3 0
3 0
2 0
2 0
2 0
2 0
2 0
1 0
1 0
1 0
1 0
1 0
1 0
1 0
1 0
1 0
1 0
1 0
1 0
1 0
1 0
1 0
1 0
1 0
1 0
1 0
1 0
1 0
1 0
1 0
1 0
2 0
2 0
2 0
3 0
3 1
3 1
3 1
3 1
3 1
3 2
3 2
3 2
3 2
3 2
3 2
3 2
3 2
3 2
3 2
3 2
3 2
3 2
3 2
3 2
3 2
3 2
3 2
2 2
2 2
2 2
2 2
2 2
2 2
2 2
2 2
2 2
2 2
2 2
2 2
2 2
2 2
2 2
2 2
2 2
2 2
2 2
2 2
2 2
2 2
2 2
2 2
2 2
2 2
2 2
2 2
2 2
2 2
2 2
2 2
2 2
2 2
2 2
2 2
2 2
2 2
2 2
2 2
2 2
2 2
2 2
2 2
2 2
2 2
2 2
2 2
2 2
2 2
2 2
2 2
2 2
2 2
2 2
2 2
3 2
3 2
3 2
3 2
3 2
3 2
3 2
3 2
3 2
3 2
3 2
3 2
3 2
3 2
3 2
2 2
2 2
1 2
1 2
0 2
0 2
0 1
0 1
0 0
0 0
0 0
0 0
0 0
0 0
0 0
0 0
0 0
0 0
0 0
0 0
0 0
0 0
0 0
0 0
0 0
0 0
0 0
0 0
0 0
0 0
0 0
0 0
0 0
0 0
0 0
0 0
0 0
0 0
0 0
0 0
0 0
0 0
0 0
0 0
0 0
0 0
0 0
0 0
0 0
0 0
0 0
0 0
0 0
0 0
0 0
0 0
0 0
0 0
0 0
0 1
0 1
0 1
0 1
0 1
0 1
0 1
0 1
0 1
0 1
0 1
0 1
0 2
0 2
0 2
0 2
0 2
0 2
0 2
0 2
0 2
0 2
0 2
0 2
0 2
0 2
0 2
0 2
0 2
0 2
0 2
0 2
0 2
0 2
0 2
0 2
0 2
0 2
0 2
0 2
0 2
0 2
0 2
0 2
0 2
0 2
0 2
0 2
0 2
0 2
0 2
0 2
0 2
0 2
0 2
0 2
0 2
0 2
0 2
0 2
0 2
0 2
0 2
0 2
0 2
0 2
0 2
0 2
0 2
0 2
0 2
0 2
0 2
0 2
0 2
0 2
0 2
0 2
0 2
0 2
0 2
0 2
0 2
0 2
0 2
0 2
0 2
0 2
0 2
0 2
0 2
0 2
0 2
0 2
0 2
0 2
0 2
0 2
0 2
0 1
0 1
0 1
0 1
0 1
0 1
0 1
0 1
0 1
0 1
0 1
0 1
0 1
0 0
0 0
0 0
0 0
0 0
0 0
0 0
0 0
0 0
0 0
0 0
0 0
0 0
0 0
0 0
0 0
0 0
0 0
0 0
0 0
0 0
0 0
0 0
0 0
0 0
0 0
0 0
0 0
0 0
0 0
0 0
0 0
0 0
0 0
0 0
0 0
0 0
0 0
0 0
0 0
0 0
0 0
0 0
0 0
0 0
0 0
0 0
0 0
0 0
0 0
0 0
0 0
0 0
0 0
0 0
0 0
0 0
0 0
0 0
0 0
0 0
0 0
0 0
0 0
0 1
0 1
0 1
0 1
1 1
1 1
1 1
1 1
1 1
1 1
1 1
1 1
1 1
1 1
1 1
1 0
1 0
1 0
1 0
1 0
1 0
1 0
1 0
1 0
1 0
1 0
1 0
1 0
1 0
1 0
1 0
1 0
1 0
1 0
1 0
1 0
1 0
1 0
1 0
1 0
1 1
1 1
1 1
1 1
1 1
1 1
1 1
1 1
1 1
1 1
1 1
1 1
1 1
1 1
1 1
1 1
1 1
1 1
1 1
1 1
1 1
1 1
1 1
1 1
1 1
1 1
1 1
1 1
1 1
1 1
1 1
1 1
1 1
1 1
1 1
1 1
1 1
1 1
1 1
1 1
1 1
1 1
1 1
2 1
2 1
2 1
2 1
2 1
2 1
2 1
2 1
2 1
2 1
2 1
2 1
2 1
2 1
2 1
2 1
2 1
2 1
2 1
2 1
2 1
1 1
1 1
1 1
1 1
1 1
1 1
1 1
1 1
1 1
1 1
1 3
1 3
1 3
1 3
1 3
1 3
1 3
1 3
1 3
1 3
1 3
1 3
1 3
1 3
1 3
1 3
1 3
1 3
1 3
1 3
1 3
1 3
1 3
1 3
1 3
1 3
1 2
1 2
1 2
1 2
1 2
1 2
1 2
1 2
1 2
1 2
1 2
1 2
1 2
1 2
1 2
1 2
1 2
1 2
1 2
1 2
1 2
1 2
1 2
1 2
1 2
1 2
1 2
1 2
1 2
1 2
1 2
1 2
1 2
1 2
1 2
1 2
1 2
1 2
1 2
1 2
1 2
1 2
0 2
0 2
0 2
0 2
0 2
0 2
0 2
0 2
0 2
0 2
0 2
0 2
0 2
0 2
0 2
0 2
0 2
0 2
0 2
0 3
0 3
0 3
0 3
0 3
0 3
0 3
0 3
0 3
0 3
0 3
0 3
0 3
0 1
0 1
0 1
0 1
0 1
0 1
0 1
0 1
0 1
0 1
0 1
0 1
0 1
0 1
0 1
0 1
0 1
0 1
0 1
0 1
0 1
0 1
0 1
0 1
0 1
0 1
0 1
0 1
0 1
0 1
0 1
0 1
0 1
0 1
0 1
0 1
0 1
0 1
0 1
0 1
0 1
0 1
0 1
0 1
0 1
0 1
0 1
0 1
0 1
0 1
0 1
0 1
0 1
0 1
0 1
0 1
0 1
0 1
0 1
0 1
0 1
0 1
0 1
0 1
0 1
0 1
0 1
0 1
0 1
0 1
0 1
0 1
0 1
0 1
0 1
0 1
0 1
0 1
0 1
0 1
0 1
0 1
0 1
0 1
0 0
0 0
0 0
0 0
0 0
0 0
0 0
0 0
0 0
0 0
0 0
0 1
0 1
0 1
0 1
0 1
0 1
0 1
0 1
0 1
0 1
0 1
0 1
0 1
0 1
0 1
0 1
0 1
0 1
0 1
0 1
0 1
0 1
0 1
0 1
0 1
0 1
0 1
0 1
0 1
0 1
0 1
0 1
0 1
0 2
0 3
0 3
0 3
0 3
0 3
0 3
0 3
0 3
0 3
0 3
0 3
0 3
0 3
0 3
0 2
0 2
0 2
0 2
0 2
0 2
0 2
0 2
0 2
0 2
0 2
0 2
0 2
0 2
0 2
0 2
0 2
0 2
0 3
0 3
0 3
0 3
0 3
0 3
0 3
0 3
0 3
0 3
0 3
0 3
0 3
0 3
0 3
0 3
0 3
0 3
0 3
0 3
0 3
0 3
0 3
0 3
0 3
0 3
0 3
0 3
0 3
0 3
0 3
0 3
0 3
0 4
0 3
0 3
0 3
0 3
0 3
0 3
0 3
0 3
0 6
0 7
1 8
1 72
4 85
4 91
4 94
4 94
4 94
4 101
4 104
4 110
4 114
4 119
4 127
4 128
4 130
4 130
4 130
4 130
4 130
4 130
4 130
4 130
4 135
4 135
4 134
4 135
4 140
4 140
4 141
4 142
4 142
4 142
4 143
4 143
4 143
4 143
4 143
4 143
4 143
4 143
4 143
4 143
4 143
4 143
4 144
4 144
4 144
4 146
4 148
4 148
4 148
4 148
4 148
4 148
4 151
4 151
4 150
4 150
4 150
4 150
4 150
4 150
4 150
4 150
4 150
4 150
5 152
6 152
6 153
6 153
6 153
6 153
6 153
6 153
6 153
6 153
6 153
6 153
6 154
7 158
7 161
7 167
7 168
7 171
7 172
7 174
7 174
7 170
7 171
7 170
7 171
7 170
7 170
7 170
7 172
7 177
7 178
7 183
7 184
7 183
6 181
4 113
3 142
3 140
3 141
3 141
3 141
3 132
3 124
3 117
3 117
3 115
3 107
3 107
3 107
3 107
3 108
3 110
3 110
3 110
3 111
4 112
4 108
4 109
4 109
4 108
4 101
4 102
4 113
4 112
4 112
4 119
4 119
4 119
4 120
4 122
6 145
6 145
7 146
7 147
8 150
8 160
10 162
10 162
10 166
10 170
11 170
11 169
11 167
11 169
11 169
11 170
11 170
11 170
11 167
11 167
11 167
11 167
11 167
11 168
11 168
11 168
11 168
11 168
11 168
11 168
10 166
9 166
9 165
9 165
9 165
9 166
9 166
9 166
9 167
9 167
9 167
9 166
9 164
8 160
8 158
8 153
8 153
8 152
8 152
8 150
8 150
8 150
8 151
10 151
11 150
11 150
11 150
12 155
12 153
12 148
12 147
13 142
13 139
13 139
13 139
13 140
13 97
13 97
14 96
14 97
14 94
14 97
14 97
15 102
17 102
17 103
17 103
17 103
17 103
17 103
17 103
17 102
17 120
17 120
17 118
16 119
17 122
17 128
17 128
17 128
17 127
17 127
17 114
17 114
17 114
17 112
17 112
17 112
17 111
16 106
13 85
12 83
12 81
12 82
12 80
12 81
11 81
11 77
11 72
10 70
11 70
11 77
12 77
12 77
12 77
12 77
12 79
12 79
12 79
12 79
12 79
12 79
12 79
12 78
12 78
12 78
12 78
12 79
12 79
12 81
12 81
12 81
12 81
12 81
12 81
12 80
12 80
12 80
12 79
12 80
12 80
12 80
12 85
12 87
12 94
12 95
12 98
11 99
10 104
10 106
10 106
10 105
10 105
9 108
9 108
9 108
9 108
8 103
8 103
8 103
8 106
7 104
7 104
7 104
7 105
7 105
6 104
6 104
6 104
6 109
6 105
6 104
6 108
5 111
3 111
4 114
4 114
4 114
4 114
4 116
4 117
4 117
4 99
4 98
4 98
4 96
3 93
3 89
3 90
3 90
3 90
3 90
3 90
3 90
3 90
3 90
3 90
3 90
3 90
3 90
3 90
3 88
3 86
3 86
3 86
3 85
3 85
3 85
3 85
3 85
2 85
2 76
1 76
1 75
1 74
1 73
1 70
1 70
1 70
1 70
1 70
1 70
1 70
1 70
1 70
1 70
1 70
1 69
1 69
1 67
1 67
1 67
1 67
1 67
1 67
1 67
1 67
1 67
1 66
1 66
1 66
1 66
1 61
1 56
1 49
1 47
1 42
1 36
1 35
1 34
1 34
1 33
1 33
1 33
1 33
1 33
1 33
1 32
1 32
1 32
1 31
1 31
1 31
1 31
1 29
1 31
1 32
1 32
1 31
0 23
0 23
0 23
0 15
0 12
0 12
0 11
0 11
0 11
0 11
0 9
0 8
0 8
0 8
0 8
0 8
0 8
0 8
0 5
0 5
0 5
0 5
0 5
0 5
0 5
0 5
0 5
0 5
0 5
0 5
0 5
0 5
0 5
0 5
0 5
0 5
0 5
0 5
0 5
0 5
0 5
0 5
0 5
0 5
0 5
0 5
0 5
0 5
0 5
0 5
0 5
0 5
0 5
0 6
0 6
0 7
0 7
0 7
0 7
0 7
0 7
0 7
0 7
0 7
0 7
0 7
0 7
0 7
0 7
0 7
0 7
0 7
0 7
0 7
2 7
2 7
2 7
2 7
2 7
2 7
2 7
2 7
2 7
2 7
2 7
2 7
2 7
2 7
2 7
0 7
0 7
0 7
0 7
0 7
0 7
0 7
0 5
0 4
0 4
0 4
0 4
0 3
0 2
0 2
0 2
0 2
0 2
0 2
0 2
0 2
0 3
0 3
0 6
0 9
0 9
0 9
0 9
0 9
0 9
0 9
0 9
0 10
0 10
0 10
0 10
0 10
0 10
0 10
0 10
0 10
0 10
0 10
0 10
0 10
0 10
0 10
0 10
0 10
0 10
0 10
0 10
0 10
0 10
0 10
0 10
0 10
0 10
0 9
0 9
0 9
0 9
0 8
0 8
0 8
0 8
0 8
0 8
0 8
0 8
0 8
0 8
0 8
0 8
0 8
0 8
0 8
0 8
0 8
0 8
0 8
0 8
0 8
0 8
0 8
0 8
0 8
0 8
0 8
0 8
0 8
0 8
0 8
0 9
0 10
0 10
0 10
0 10
0 10
0 10
0 10
0 10
0 10
0 10
0 10
0 10
0 10
0 10
0 10
0 10
0 10
0 11
0 11
0 12
0 12
1 15
1 16
1 16
2 17
2 17
3 42
4 51
4 66
5 84
5 82
5 82
5 83
5 83
5 84
5 85
5 93
5 98
5 97
5 97
5 97
5 97
5 97
5 98
6 98
6 99
6 99
6 101
6 104
6 104
6 105
6 105
6 109
6 111
6 111
6 111
11 113
12 113
12 114
12 114
12 119
12 119
12 123
12 123
12 123
12 123
12 123
12 123
12 124
12 125
12 127
12 128
12 131
12 137
12 142
12 142
12 143
12 143
12 143
13 143
13 152
13 153
13 158
13 159
13 159
13 160
13 160
13 160
13 167
13 172
13 174
13 179
13 179
13 179
13 184
13 185
13 191
13 194
13 198
13 198
13 205
13 208
13 213
13 214
13 215
13 215
13 215
13 216
13 216
13 216
13 216
13 216
13 215
13 213
13 213
14 211
14 210
14 213
14 213
14 218
14 219
13 218
13 226
11 230
11 233
11 230
10 198
10 192
10 182
9 170
9 170
9 170
9 169
9 170
9 170
9 172
9 164
9 162
9 163
9 163
9 163
9 163
9 163
9 162
8 162
8 161
8 161
8 158
8 156
8 156
8 155
8 155
8 150
8 150
8 150
5 150
2 148
2 148
2 147
2 147
2 143
2 143
2 140
2 139
2 138
2 138
2 138
2 139
2 142
2 143
2 138
2 137
2 140
2 137
2 132
2 134
3 133
3 137
3 138
2 138
2 129
2 125
2 123
2 122
2 121
2 121
2 122
2 120
3 113
3 109
3 108
3 101
3 101
3 109
3 109
3 112
3 109
3 106
3 101
3 106
3 99
3 94
3 93
3 92
3 93
3 97
3 108
4 180
4 237
4 251
4 464
4 488
4 515
4 528
5 556
4 585
5 696
5 769
5 774
5 800
5 802
5 801
5 800
5 799
5 798
5 801
5 801
5 813
5 813
5 814
5 815
5 815
5 815
5 815
5 813
5 830
5 836
5 838
5 840
5 846
5 854
5 855
5 857
5 873
5 873
5 876
5 885
5 894
5 983
5 998
5 1005
5 1012
5 1016
5 1122
5 1123
5 1128
5 1133
5 1212
5 1228
5 1260
5 1268
5 1275
5 1277
5 1279
5 1279
5 1279
5 1277
5 1286
5 1290
5 1289
5 1296
5 1299
5 1307
5 1329
5 1343
4 1355
4 1363
4 1359
4 1358
4 1361
4 1365
4 1367
4 1369
5 1371
5 1371
5 1372
5 1371
5 1371
4 1371
4 1375
4 1376
4 1379
4 1380
4 1388
4 1381
4 1363
3 1363
2 1360
2 1359
3 1315
3 1317
3 1306
3 1309
3 1315
3 1317
3 1314
3 1314
4 1300
4 1251
5 1230
5 987
5 966
5 962
5 963
5 954
5 920
4 818
4 768
4 785
4 808
4 819
4 823
4 841
4 852
4 871
4 912
4 915
4 905
4 906
4 910
4 911
4 916
4 916
4 916
4 914
4 894
4 885
4 882
4 882
4 881
4 876
4 876
4 872
4 858
4 857
4 851
4 846
4 812
4 730
4 728
4 728
4 725
4 722
4 610
4 611
4 602
4 596
4 521
4 494
3 471
3 463
3 458
3 457
3 457
3 457
3 457
3 457
3 442
3 438
3 438
3 437
3 431
3 413
3 392
3 371
3 364
3 363
3 364
4 363
4 359
4 356
4 353
4 350
3 350
3 348
3 347
3 346
3 346
3 346
3 342
3 340
3 336
3 335
3 313
3 301
3 298
3 299
3 298
3 297
3 294
3 291
3 270
3 250
3 239
2 236
2 231
2 230
2 230
2 230
1 218
1 218
1 218
1 215
1 214
1 214
1 214
1 213
1 198
1 173
1 138
1 129
1 125
1 98
1 93
1 79
1 37
1 37
1 33
1 32
1 27
1 27
1 23
1 22
1 22
1 21
1 20
1 20
1 20
1 20
1 19
1 18
1 18
1 17
2 29
2 29
2 31
2 37
2 44
2 44
2 44
2 44
2 40
2 43
2 43
2 45
2 46
2 46
2 46
2 47
2 48
2 48
2 53
2 54
2 57
2 60
2 61
2 61
2 61
2 61
2 61
2 61
2 63
2 63
2 65
2 65
2 66
2 66
2 67
1 67
1 67
1 67
1 70
1 73
1 74
1 74
1 74
1 74
1 74
1 75
1 76
1 76
1 77
1 77
1 77
1 79
1 78
1 80
1 81
2 81
2 83
2 82
2 82
2 82
2 80
2 79
2 78
2 78
2 77
2 77
2 77
2 78
2 79
2 81
2 84
1 84
1 84
1 87
1 90
1 90
1 90
1 90
1 90
1 90
1 93
1 94
1 94
1 94
1 93
1 93
1 93
1 93
1 93
1 93
1 93
1 93
1 94
1 94
1 130
1 136
1 139
1 149
1 152
1 168
1 206
3 408
3 482
3 642
3 687
3 726
3 752
3 778
3 781
3 780
3 779
3 777
3 777
3 781
6 824
6 828
6 832
6 833
6 831
6 832
6 829
7 841
7 841
7 859
7 861
7 868
8 882
8 888
8 895
8 910
9 917
9 921
9 1001
9 1007
9 1023
9 1027
9 1029
9 1028
9 1029
9 1030
9 1074
9 1112
9 1122
9 1152
9 1159
9 1180
9 1188
9 1192
9 1196
9 1197
9 1197
9 1198
9 1205
9 1215
9 1219
9 1223
9 1222
9 1223
9 1224
9 1225
9 1225
9 1225
9 1224
9 1223
9 1223
9 1223
9 1222
9 1221
9 1220
9 1221
9 1221
9 1221
9 1221
9 1217
9 1217
9 1218
9 1218
9 1218
9 1225
9 1225
9 1222
9 1222
10 1229
10 1229
10 1229
10 1246
10 1246
10 1251
10 1270
10 1270
15 1316
15 1324
15 1320
15 1324
15 1291
15 1303
15 1353
15 1398
16 1424
15 1411
14 1215
13 1054
13 968
13 902
14 941
14 943
14 952
14 951
14 951
14 960
14 961
14 962
14 963
14 960
11 916
11 932
11 928
11 929
11 929
11 927
11 937
10 927
10 928
10 916
10 911
10 906
9 895
9 898
10 901
10 929
9 953
9 937
9 878
9 874
9 859
9 856
9 854
9 854
9 852
9 848
10 787
10 758
10 752
10 736
10 733
10 720
10 716
10 720
10 751
10 751
10 885
10 881
10 882
10 877
10 871
10 872
10 874
10 874
10 880
10 926
10 934
10 937
10 942
10 943
10 942
10 942
10 943
11 997
11 997
11 997
11 994
11 994
11 993
11 993
11 991
12 991
15 1048
15 1048
15 1043
15 1042
15 1042
14 1040
14 1042
14 1048
14 1055
14 1041
14 1047
15 1061
15 1054
19 1142
14 1117
14 1139
14 1193
14 1194
14 1189
14 1169
13 1076
14 1023
14 1001
14 1001
14 997
14 991
13 991
13 982
13 959
13 958
13 951
13 951
13 948
13 942
13 941
13 934
13 933
13 931
13 931
13 913
13 917
13 920
13 921
13 925
13 925
13 922
13 922
14 921
14 919
14 915
14 912
14 908
13 894
13 924
13 899
13 901
13 891
13 891
13 890
12 887
12 892
12 904
12 911
12 915
12 918
12 915
12 912
12 908
12 908
12 898
12 897
12 891
12 859
12 857
12 722
12 721
12 710
12 711
12 711
12 719
12 716
12 716
12 709
12 661
12 653
12 653
12 650
12 652
12 654
12 659
12 665
11 626
11 630
11 629
10 630
10 630
10 631
10 630
10 631
9 634
6 554
4 558
4 558
4 558
4 560
3 539
5 552
5 554
5 547
5 550
5 552
5 559
5 530
4 416
4 390
4 362
4 352
4 363
4 366
4 363
4 368
5 370
6 371
6 372
7 382
7 377
7 373
7 369
8 337
8 338
8 340
8 347
8 350
8 354
8 365
8 374
13 541
13 557
13 575
13 577
13 622
13 618
13 625
15 632
15 635
15 664
15 666
14 667
15 689
15 690
15 691
15 693
15 702
15 619
15 622
15 624
15 624
15 624
18 629
18 628
18 620
18 613
18 612
18 605
18 602
18 605
18 610
18 612
18 615
18 615
18 615
18 615
18 615
18 614
18 614
18 615
18 616
18 616
18 626
18 630
19 641
19 650
19 685
19 714
19 752
19 786
19 788
22 793
22 789
22 786
22 783
22 774
23 773
23 793
23 856
23 924
23 937
24 965
24 971
24 971
24 970
25 972
25 972
25 970
25 975
25 957
23 932
23 932
23 931
23 932
23 928
23 933
24 936
24 936
24 935
24 934
24 928
24 915
24 913
24 918
23 914
22 913
21 910
23 916
22 906
22 906
22 908
23 908
22 915
22 917
22 910
22 900
22 899
22 893
22 882
22 844
17 678
17 675
17 674
17 672
17 620
17 620
16 611
15 597
15 587
15 595
15 590
15 585
14 568
14 568
14 572
15 617
23 751
23 784
23 788
23 789
23 790
23 831
20 828
20 839
20 841
20 840
20 840
21 841
21 841
21 840
19 836
19 833
19 830
19 829
19 829
19 829
19 831
19 840
19 860
20 871
20 882
22 934
22 904
22 898
21 885
21 866
21 816
21 777
21 735
21 729
22 725
20 722
20 722
20 724
20 727
20 723
20 717
20 691
20 613
18 561
18 552
18 545
19 545
19 545
19 545
19 540
19 540
19 540
19 534
19 533
19 532
19 532
19 533
19 531
19 529
18 525
18 522
18 523
18 525
18 526
18 527
18 529
18 529
18 524
18 523
18 525
17 526
16 524
17 520
18 649
18 648
17 650
17 644
17 642
17 642
17 643
18 642
18 642
18 642
18 643
19 644
19 646
19 647
19 651
19 655
19 671
19 674
19 689
19 690
19 652
19 653
19 656
19 652
18 649
18 645
17 588
10 422
10 413
10 408
10 406
10 406
10 365
10 363
10 351
10 350
10 350
10 349
9 347
9 347
9 347
9 347
9 349
10 355
10 357
10 399
10 408
10 407
10 393
10 375
9 370
10 367
8 312
8 312
8 312
8 322
7 327
7 390
7 403
7 432
7 435
6 459
6 460
6 470
6 469
6 475
7 475
7 476
7 475
7 475
7 474
7 474
7 474
7 474
7 474
7 475
7 475
7 475
7 478
7 484
7 484
7 487
7 488
7 493
8 499
8 500
9 500
9 500
9 499
9 500
10 520
10 527
10 525
10 528
10 531
10 530
9 528
10 562
10 558
10 559
9 436
10 492
9 492
9 496
9 497
10 510
18 731
19 735
22 830
22 868
23 892
25 915
25 936
25 936
25 931
36 928
38 910
38 910
38 898
38 899
38 900
38 900
38 898
38 898
38 899
38 898
38 898
38 902
39 907
39 910
39 912
39 911
39 912
39 913
39 914
39 914
39 916
39 920
39 919
39 919
39 917
39 917
39 921
38 917
38 919
37 874
37 870
37 879
37 881
37 876
37 872
37 859
37 859
37 860
37 865
37 857
37 838
36 752
36 736
36 736
35 736
35 719
35 719
35 717
35 717
35 709
34 707
34 707
37 709
39 712
40 712
40 712
46 907
46 909
47 939
48 969
48 984
48 987
49 988
49 988
48 1004
48 1003
48 1003
48 997
47 991
47 991
47 993
47 994
46 997
46 991
47 951
47 938
47 927
47 927
47 924
46 923
46 923
46 862
46 862
46 853
46 818
46 808
46 806
46 804
46 803
46 794
33 566
30 491
29 439
28 432
28 433
29 433
29 433
26 433
26 433
19 431
18 429
18 428
18 425
18 427
18 434
18 438
18 441
18 444
18 452
18 467
18 475
18 480
17 478
17 566
17 631
17 643
17 652
17 668
17 671
17 672
17 683
17 694
17 704
17 705
17 705
17 711
17 704
17 703
17 702
17 701
17 693
24 845
25 847
27 859
27 862
25 869
25 864
23 864
23 855
23 855
24 896
24 897
24 901
25 904
25 906
25 906
25 906
25 907
25 907
25 908
25 907
25 907
25 906
23 905
22 907
22 906
16 682
15 653
15 648
15 645
15 645
16 649
17 648
17 645
17 633
17 625
17 624
17 624
17 624
17 626
17 627
17 626
17 622
16 619
16 618
16 618
16 618
16 616
16 615
16 616
16 614
16 615
17 614
17 613
17 613
17 616
17 623
17 626
17 631
17 631
17 630
17 633
17 633
17 636
17 641
17 645
17 651
18 674
21 693
23 706
23 711
24 709
30 712
30 711
30 715
31 720
31 723
31 727
31 720
31 696
31 681
30 680
30 677
30 602
30 534
30 522
30 515
30 498
30 495
31 494
31 478
31 497
31 489
31 494
31 496
31 490
30 489
30 489
31 489
30 487
30 487
22 327
22 381
21 367
20 361
20 360
20 371
26 560
29 578
29 592
30 568
30 604
30 607
29 636
29 638
29 638
29 639
29 638
29 639
28 651
28 655
28 659
28 660
28 659
28 662
28 655
27 652
27 651
27 650
27 651
27 652
27 646
26 655
27 659
29 657
29 657
29 657
30 656
30 655
30 655
30 655
30 656
30 661
30 662
30 663
31 663
31 663
31 664
31 664
31 663
30 663
30 664
30 666
30 667
30 669
30 667
30 666
30 780
30 787
30 798
30 803
30 798
30 800
30 793
30 792
28 788
28 778
27 756
21 740
19 729
17 728
18 727
18 716
18 706
18 703
18 697
18 691
18 684
18 682
18 681
18 681
18 686
18 687
18 688
18 693
18 696
18 696
18 696
18 697
18 697
18 691
18 628
18 628
18 552
18 551
18 552
18 548
18 548
17 546
17 546
17 545
17 545
17 544
17 543
17 543
17 539
17 521
9 327
7 297
7 284
7 277
7 270
7 270
7 270
7 270
7 270
7 269
7 270
7 267
7 253
7 249
7 246
7 246
7 245
7 242
7 242
7 242
7 241
7 241
6 240
6 239
6 236
6 227
5 227
3 227
3 227
3 227
2 226
2 226
2 223
1 222
1 220
1 216
1 214
1 213
1 212
1 212
1 211
1 211
1 211
1 206
1 206
1 207
1 207
1 205
1 205
1 202
1 84
1 68
2 57
2 50
2 47
2 45
2 45
2 41
1 40
1 40
1 40
1 40
1 39
1 38
1 37
1 37
1 37
1 36
1 35
1 36
1 35
1 33
1 33
1 33
1 28
1 26
1 22
1 17
1 16
1 24
1 43
1 45
1 61
1 68
1 71
1 73
1 73
1 74
1 77
1 77
1 80
1 94
1 98
1 102
1 105
1 105
1 106
1 106
2 106
2 107
2 108
2 108
2 129
2 130
2 131
2 133
2 137
2 137
2 137
2 139
2 143
2 146
2 149
2 148
2 149
2 149
2 149
2 150
2 150
2 151
2 151
2 160
2 162
2 169
2 168
2 175
2 177
2 179
2 192
2 193
2 194
3 195
3 198
3 199
3 199
3 199
3 199
3 200
3 200
3 200
3 200
3 200
3 201
3 206
3 206
3 206
3 206
3 206
3 206
3 206
2 206
2 212
2 212
2 213
2 215
2 270
2 271
2 274
2 283
2 294
2 298
2 301
2 302
2 302
2 303
2 303
2 303
2 307
2 313
2 337
2 339
2 342
4 467
4 522
4 536
4 550
4 570
5 608
5 626
5 626
5 611
5 607
9 599
9 597
9 598
9 593
9 593
9 592
9 594
10 596
10 594
10 588
10 586
10 596
10 602
10 604
10 605
10 606
10 606
9 609
9 608
9 608
9 584
9 584
9 584
9 585
9 581
9 582
9 582
9 582
9 576
9 575
9 575
9 574
9 575
9 576
9 588
9 587
9 591
9 606
9 621
9 621
9 626
9 646
9 649
9 648
9 660
9 661
9 664
9 666
8 671
8 673
8 673
8 674
8 683
8 699
8 703
8 702
8 705
8 708
8 710
8 714
8 714
8 714
8 716
8 723
8 728
9 808
10 820
10 840
10 853
10 855
10 909
10 912
10 911
11 866
11 874
11 865
11 858
11 846
11 841
11 837
11 834
11 834
11 830
11 829
11 827
11 820
11 809
11 804
11 798
11 793
9 642
8 587
8 573
8 569
8 556
8 540
8 537
8 535
8 533
8 534
5 534
6 552
6 554
6 556
6 559
6 559
5 552
5 557
5 557
5 550
5 546
5 534
5 526
5 529
5 538
5 544
6 549
6 548
6 548
6 549
6 549
6 549
6 548
6 545
6 546
6 546
6 546
6 542
6 541
6 541
6 539
5 539
5 539
5 538
5 530
5 534
5 530
5 515
5 548
5 550
5 554
5 534
5 538
5 528
5 527
5 527
5 516
5 519
5 516
5 512
5 516
5 515
5 504
5 492
5 505
5 510
5 517
5 521
5 517
5 518
5 518
5 518
5 539
5 543
5 549
4 460
3 440
4 436
4 432
4 419
4 379
4 376
4 370
3 356
3 353
3 350
3 350
3 350
3 351
3 348
3 348
3 347
3 347
3 347
3 347
3 351
3 354
3 354
3 372
3 373
3 372
3 373
3 375
3 398
3 405
3 406
3 418
3 420
2 417
2 412
1 405
1 389
1 387
1 386
1 381
1 402
1 404
1 401
1 404
1 404
1 404
1 404
1 404
1 396
1 390
1 386
1 383
4 449
4 450
4 457
4 477
4 479
4 482
4 485
4 488
5 489
5 497
5 533
7 830
8 887
9 928
9 932
9 938
9 941
9 961
10 979
10 988
10 990
10 940
10 949
10 945
10 966
10 961
10 960
11 1001
11 1005
11 1003
11 1003
11 1003
11 1001
11 996
11 996
11 995
11 988
11 977
11 969
11 956
11 952
11 952
11 950
11 947
12 937
12 904
12 886
12 886
12 888
12 893
11 900
11 900
11 906
11 907
11 907
11 910
11 911
11 912
11 911
11 911
11 912
11 912
11 912
11 916
11 916
11 922
11 923
11 923
11 921
13 953
14 962
14 973
18 1103
18 1114
18 1129
18 1139
18 1156
19 1200
19 1216
19 1208
19 1211
20 1212
20 1213
20 1214
21 1211
22 1211
23 1213
23 1213
23 1187
23 1190
23 1191
23 1195
23 1196
23 1219
23 1220
23 1227
23 1231
23 1231
23 1234
23 1236
20 1144
20 1143
20 1141
20 1138
19 1137
19 1135
19 1135
19 1135
19 1134
19 1123
18 1058
16 717
16 675
15 630
15 598
14 588
14 595
14 589
13 581
13 579
13 574
13 572
14 570
14 574
14 574
14 575
14 576
15 547
15 553
15 553
15 556
15 561
15 564
15 570
15 572
15 574
15 577
15 592
15 605
15 609
15 611
15 612
15 612
15 633
13 633
13 636
13 638
13 640
13 636
13 629
13 628
13 626
13 626
14 626
14 632
14 639
14 662
14 672
14 678
14 682
14 681
14 679
14 678
14 670
14 670
14 663
14 661
13 669
13 661
9 622
9 591
9 557
7 476
7 475
7 471
6 453
6 410
5 345
4 349
3 346
2 375
2 389
2 392
3 592
3 621
3 662
4 693
5 705
5 812
5 845
7 951
7 1024
7 1050
7 1050
7 1083
7 1083
7 1098
7 1102
7 1097
7 1100
7 1101
7 1105
8 1175
8 1181
8 1182
8 1192
8 1200
8 1198
8 1200
8 1203
8 1209
8 1208
8 1208
8 1205
8 1193
8 1195
8 1188
8 1188
8 1188
8 1189
8 1190
8 1190
7 1190
7 1198
7 1198
7 1201
7 1205
7 1204
7 1204
7 1208
11 1221
11 1215
12 1216
12 1217
12 1217
12 1216
15 1221
15 1210
15 1204
15 1205
15 1207
15 1312
15 1317
17 1300
18 1340
18 1372
18 1371
19 1415
19 1415
19 1417
19 1415
19 1418
19 1411
18 1412
18 1400
18 1386
18 1380
18 1374
18 1369
18 1367
18 1371
18 1374
18 1374
18 1374
18 1374
18 1377
18 1379
18 1362
18 1364
18 1353
18 1351
18 1333
18 1319
18 1323
18 1310
18 1315
18 1304
18 1304
18 1302
18 1302
18 1298
18 1282
17 1237
16 989
16 934
18 907
17 899
17 895
17 869
17 848
15 744
15 723
15 709
15 708
15 707
15 713
15 714
15 718
15 724
15 738
18 770
18 770
17 690
17 692
17 694
17 697
17 691
18 699
18 700
21 727
21 720
21 723
21 724
21 724
21 724
21 721
21 721
21 723
21 723
21 727
21 729
21 729
21 727
21 739
21 742
21 762
21 759
21 760
21 753
21 752
17 739
17 746
16 738
16 734
16 737
16 736
18 742
18 740
18 731
18 729
18 726
18 628
17 622
15 596
15 568
15 531
15 528
14 485
14 480
14 479
14 475
14 472
14 458
14 454
14 448
14 448
14 448
14 447
14 447
14 441
14 439
14 451
14 451
14 454
14 456
14 453
14 451
14 448
14 446
14 444
14 442
14 441
14 439
14 429
14 423
14 419
14 417
14 418
14 432
14 451
14 455
14 489
14 496
14 498
14 498
12 489
12 489
12 498
12 514
12 521
12 462
12 484
12 492
12 469
12 469
12 472
12 471
12 471
12 468
12 450
9 414
9 413
9 411
9 406
9 401
8 391
8 391
8 389
8 389
5 358
5 357
5 354
5 353
5 356
5 381
5 399
5 402
5 405
5 405
5 399
5 399
5 398
5 397
5 368
5 368
5 344
5 342
5 343
5 342
5 341
5 355
5 360
5 361
5 369
5 374
5 379
0 366
0 366
0 362
0 362
0 364
0 366
0 374
0 382
0 400
0 414
0 510
0 517
0 520
0 523
0 523
0 524
0 528
0 528
0 531
0 531
0 531
0 530
0 530
0 530
0 529
0 508
0 507
0 508
0 507
0 509
0 510
0 510
0 510
0 511
0 511
0 512
0 519
0 537
0 534
0 528
0 528
0 525
0 502
0 488
0 485
0 456
0 462
0 464
0 468
0 468
0 468
0 460
0 441
0 433
0 431
0 416
0 395
0 392
0 389
1 386
1 383
1 374
1 377
1 391
2 392
2 395
2 398
2 398
2 398
2 397
2 397
2 397
2 395
2 395
2 395
2 393
2 391
2 386
2 360
2 344
2 342
2 337
2 337
2 337
2 337
2 338
2 340
2 337
2 353
2 369
2 373
2 377
2 378
2 379
2 358
2 345
2 342
2 341
2 349
2 441
6 634
7 759
8 862
8 917
8 920
8 910
8 921
8 930
8 915
8 921
8 820
8 812
8 810
8 810
8 814
8 823
8 823
8 841
8 842
8 843
8 849
8 861
8 891
8 907
9 914
9 918
9 921
9 923
9 923
9 921
9 920
9 922
9 923
9 922
9 921
9 916
9 908
9 896
9 896
9 895
9 895
9 895
9 895
9 896
9 886
9 875
9 871
9 870
9 868
9 871
9 877
9 883
9 884
9 886
9 887
9 885
9 889
8 891
8 891
8 894
8 932
9 956
9 982
9 980
8 987
8 983
8 982
8 984
8 985
8 994
8 996
8 997
8 1001
9 1002
10 1004
10 1009
12 1026
12 1031
12 1033
12 1037
12 1043
12 1045
12 1054
13 1185
13 1190
13 1187
13 1187
13 1187
13 1148
13 1057
13 982
13 972
13 968
15 1004
19 1053
19 1055
19 1058
19 1055
19 1033
16 909
14 813
14 737
13 666
13 630
13 626
14 625
14 631
14 631
14 643
14 641
14 646
14 646
14 644
15 638
15 634
16 629
16 641
17 626
17 678
17 753
17 777
16 773
16 760
16 742
16 743
16 743
16 740
16 739
16 753
16 774
16 775
16 790
16 807
16 807
16 807
16 807
16 806
16 807
16 816
16 834
16 851
16 1173
16 1177
16 1182
16 1185
16 1188
16 1189
16 1189
16 1189
16 1186
16 1180
16 1175
16 1174
16 1176
16 1178
16 1180
16 1182
16 1179
16 1175
16 1171
16 1135
15 1093
15 1068
14 1056
13 1052
13 1056
13 1055
13 1055
13 1054
13 1046
13 1049
13 1045
13 1042
12 1044
11 1041
13 1040
13 1026
13 1018
13 1015
13 1013
13 1011
13 1007
13 995
12 866
12 864
12 863
12 863
12 864
12 864
12 869
12 869
10 867
8 867
7 826
6 769
7 768
7 766
7 766
7 766
7 762
8 767
8 770
8 768
8 765
9 766
8 763
8 758
8 758
8 743
8 743
8 740
7 743
7 744
7 746
6 751
5 746
5 746
5 740
5 687
5 596
5 553
5 547
5 540
5 540
5 540
5 537
5 537
5 535
5 519
5 502
5 504
5 516
5 522
5 539
5 541
5 560
4 575
5 766
5 775
7 845
7 904
7 626
7 782
8 849
8 870
8 862
8 867
8 868
8 869
8 917
8 918
8 919
8 918
10 918
11 917
11 915
11 915
11 915
11 918
11 925
11 927
11 931
11 931
11 931
11 938
11 935
11 938
11 946
11 946
11 945
11 943
11 942
11 940
11 940
10 940
9 939
9 940
8 940
8 943
8 943
8 943
8 943
8 944
8 946
8 946
8 945
8 944
9 944
9 954
9 951
9 954
9 956
9 956
9 963
9 985
9 1005
9 1026
9 1039
9 1044
9 1058
9 1067
9 1074
9 1084
9 1087
9 1100
9 1101
9 1101
10 1107
10 1109
10 1120
10 1121
10 1138
10 1141
10 1180
10 1176
10 1178
10 1168
10 1172
10 1174
10 1175
10 1179
10 1177
10 1177
10 1192
10 1193
10 1193
10 1185
10 1176
10 1173
10 1169
10 1158
11 1144
11 1139
11 1139
11 1149
11 1164
11 1122
8 801
7 687
7 770
7 769
7 771
7 745
7 786
7 793
7 801
6 803
6 836
6 844
6 797
6 799
6 798
6 799
4 798
3 798
3 799
3 804
3 804
3 804
3 799
3 799
3 801
3 802
3 803
3 797
3 795
3 793
3 785
3 785
2 786
2 784
2 784
2 784
2 785
2 785
2 783
2 781
2 781
2 781
2 781
2 783
2 785
2 784
2 786
2 786
2 788
1 790
1 791
1 776
1 777
1 776
1 774
1 772
1 758
1 734
1 710
1 696
1 686
1 685
1 662
1 637
1 630
1 628
1 627
0 611
0 615
0 613
0 614
0 613
0 601
0 601
0 579
0 573
0 531
0 533
0 535
0 535
0 534
0 539
0 539
0 539
0 545
0 557
0 534
0 534
0 539
0 553
0 559
0 566
0 576
0 581
0 590
0 584
0 556
0 523
0 489
0 469
0 453
0 448
0 354
0 352
0 342
0 297
0 251
0 239
0 235
0 231
0 199
0 190
0 191
0 195
1 196
1 197
2 198
2 199
2 209
2 211
2 227
2 225
2 228
2 227
2 221
2 220
2 220
2 221
2 221
2 222
2 223
2 223
2 226
2 226
2 226
2 226
2 225
2 226
2 226
2 226
2 227
2 231
2 240
2 238
2 236
2 234
2 234
2 234
4 234
4 232
4 231
4 238
4 240
4 262
4 302
4 313
4 326
4 338
4 345
4 354
4 386
4 395
4 406
4 411
4 423
4 426
4 427
4 423
4 421
6 420
6 440
6 442
6 441
6 446
7 458
7 485
7 489
7 486
7 491
7 496
8 496
8 496
8 524
9 582
9 602
9 641
11 661
13 670
13 662
13 649
13 641
13 650
13 651
13 655
13 652
13 649
13 649
13 649
13 647
13 647
13 657
13 680
13 686
13 688
13 713
13 713
13 719
13 716
13 718
13 719
13 728
13 731
13 738
13 740
12 745
12 742
11 738
11 740
11 727
11 722
11 707
11 707
11 714
11 718
11 716
11 717
11 717
11 717
11 726
11 725
11 725
11 725
11 722
11 723
11 725
11 730
11 730
11 729
11 730
11 732
12 727
12 722
12 708
12 701
12 703
12 706
12 705
12 708
10 709
10 712
10 709
10 698
10 691
10 682
10 654
9 640
9 633
9 617
9 615
10 621
10 578
10 569
10 564
10 558
8 545
8 545
8 550
8 551
9 554
9 556
9 532
9 532
10 529
10 529
10 522
10 504
10 502
9 500
8 500
8 496
8 496
8 489
8 453
4 379
4 345
4 325
4 319
4 310
4 315
4 318
4 318
4 301
4 296
4 289
4 288
4 295
4 296
4 299
4 299
4 298
4 288
4 263
4 257
4 256
4 233
4 233
4 229
4 228
4 228
4 227
4 216
4 208
4 204
4 204
5 212
6 219
6 220
6 216
6 216
6 214
6 211
6 208
6 197
6 192
6 192
6 191
6 192
6 192
6 183
6 184
6 188
6 188
6 188
6 187
6 185
6 181
6 182
7 235
7 233
7 233
7 238
7 237
7 243
7 258
7 257
10 273
11 274
11 271
11 269
11 269
11 269
10 269
10 263
10 259
10 259
10 260
11 261
11 259
11 262
10 255
10 259
11 289
11 306
11 313
11 324
14 391
14 406
13 408
15 419
15 426
15 427
15 429
14 426
14 424
14 424
14 418
14 418
14 414
14 413
14 413
14 413
14 420
14 434
14 435
14 429
14 429
14 428
14 427
14 421
14 419
14 422
14 423
16 502
16 505
16 508
16 520
16 546
16 556
16 576
16 583
17 604
17 626
17 627
17 630
17 642
18 667
20 715
21 776
22 789
22 789
22 789
22 791
22 790
21 791
20 780
20 773
20 774
20 774
20 776
20 787
20 788
20 792
21 808
21 810
21 811
22 811
22 811
22 814
22 815
22 813
22 812
22 813
22 813
22 814
22 815
22 814
22 813
21 758
21 838
21 839
21 858
21 866
21 869
19 863
19 865
17 844
17 843
17 844
17 844
17 845
17 849
18 862
18 862
18 861
18 860
18 858
17 859
17 862
19 866
35 914
36 910
35 876
35 858
35 845
35 838
31 771
31 747
31 743
30 731
30 724
30 718
30 712
30 711
30 711
30 711
30 711
30 712
30 710
30 711
30 712
30 713
30 702
30 699
30 700
30 726
30 732
30 741
30 741
30 740
30 738
30 738
30 734
28 654
28 662
28 657
28 716
28 730
28 741
28 762
28 778
27 793
27 779
27 789
26 782
26 770
25 743
22 687
22 674
22 664
22 662
22 660
22 659
22 659
22 657
22 657
22 671
22 672
22 677
22 683
22 676
22 679
22 846
21 835
21 838
21 835
20 832
20 832
20 829
20 836
20 836
20 835
20 836
20 837
20 853
20 853
20 874
20 873
20 869
20 791
20 790
20 769
20 766
20 753
20 752
20 749
20 749
20 749
20 748
20 748
20 745
19 739
19 761
19 761
18 761
18 761
18 761
18 759
18 755
11 747
0 694
0 693
0 692
0 692
0 692
0 691
0 691
0 691
0 691
0 689
0 689
0 689
0 690
0 690
0 690
0 690
0 690
0 688
0 690
0 688
0 688
0 685
0 679
0 679
0 671
0 646
0 638
0 633
0 634
0 635
0 635
0 635
0 627
0 624
0 613
0 605
0 527
0 479
0 434
0 395
0 380
0 351
0 334
0 332
0 329
0 326
0 326
0 325
0 325
0 325
0 325
0 325
0 325
0 325
0 326
0 326
0 311
0 306
0 300
0 296
0 293
0 288
0 104
0 102
0 97
0 84
0 84
0 83
0 82
0 74
0 74
0 74
0 72
0 71
0 70
0 69
0 62
0 62
0 62
0 62
0 62
0 58
0 58
0 58
0 57
0 57
0 57
0 57
0 56
0 56
0 56
0 56
0 24
1 24
1 24
1 24
1 23
1 23
1 23
1 23
1 23
1 23
1 23
1 23
1 23
1 23
1 23
1 23
0 23
0 23
0 23
0 23
0 22
0 22
0 22
0 22
0 22
0 22
0 19
0 19
0 19
0 19
0 19
0 19
0 19
0 19
0 19
0 19
0 18
0 17
0 17
0 16
0 14
0 13
0 12
0 11
0 11
0 11
0 11
0 10
0 10
0 10
0 10
0 10
0 10
0 10
0 10
0 10
0 10
0 10
0 10
0 10
0 10
0 10
0 9
0 9
0 8
0 8
0 8
0 6
0 6
0 6
0 6
0 7
0 7
0 7
0 7
0 7
0 7
0 8
0 8
0 18
0 21
0 109
0 111
0 115
0 123
0 124
0 126
0 126
0 130
0 127
0 127
0 127
0 127
1 136
1 136
1 145
6 190
15 266
15 359
66 3040
67 3139
70 3301
70 3358
72 3387
72 3392
72 3400
72 3400
72 3401
72 3402
72 3409
72 3416
72 3437
74 3441
75 3454
75 3457
76 3459
76 3459
76 3459
76 3459
76 3460
76 3461
76 3461
76 3462
76 3462
76 3462
76 3462
76 3464
76 3466
76 3466
76 3470
76 3470
76 3471
84 3563
84 3563
84 3565
84 3565
84 3565
84 3567
84 3569
84 3573
84 3583
84 3582
84 3584
84 3584
84 3585
84 3585
84 3591
85 3802
85 3814
85 3891
85 3898
85 3903
85 3910
86 3914
86 3918
86 3924
86 3926
87 3934
87 3947
87 3951
87 3958
87 3961
87 3961
88 3962
88 3964
88 3968
88 3970
88 3969
88 4003
89 4007
123 5219
134 5249
137 5287
137 5296
137 5305
137 5317
137 5320
137 5342
137 5331
137 5338
137 5327
137 5258
137 5258
136 5429
136 5444
136 5486
136 5496
138 5548
136 5533
136 5537
136 5556
137 5560
137 5566
136 5553
136 5551
136 5547
129 5483
125 5432
122 5207
70 2446
70 2396
70 2377
70 2367
68 2360
68 2360
69 2359
69 2359
69 2355
69 2357
68 2360
68 2365
68 2433
66 2449
65 2463
65 2492
65 2508
65 2525
65 2537
65 2552
65 2554
65 2565
65 2566
65 2596
65 2608
65 2689
66 2756
66 2789
66 2860
73 2888
73 2889
71 2898
71 2902
65 2817
65 2819
65 2819
65 2819
67 2822
68 2843
68 2848
68 2872
70 2884
70 2908
70 2928
70 2936
70 2946
71 2948
71 2964
70 2757
70 2746
70 2675
70 2672
70 2689
70 2685
69 2681
68 2678
68 2680
68 2685
68 2680
68 2662
68 2662
68 2662
68 2666
68 2680
69 2920
68 3027
68 3092
68 3150
69 3161
59 3134
59 3162
31 1937
23 1919
21 1889
21 1882
21 1872
21 1869
20 1864
20 1841
20 1836
20 1835
20 1831
20 1823
22 2056
22 1886
22 1898
22 1901
22 1941
20 1906
20 1913
20 1915
20 1902
19 1896
19 1891
19 1880
18 1879
18 1875
18 1871
18 1871
18 1878
18 1878
18 1878
18 1876
18 1870
18 1869
18 1869
18 1869
18 1869
18 1861
18 1853
18 1846
18 1818
18 1722
18 1712
18 1701
18 1675
18 1651
18 1643
18 1628
18 1618
18 1618
18 1607
18 1602
18 1576
18 1549
18 1435
16 1347
16 1305
16 1294
8 1290
8 1292
8 1291
6 1289
6 1282
6 1283
6 1284
6 1286
6 1292
6 1270
6 1266
5 1227
5 1215
5 1212
5 1222
5 1216
5 1210
5 1206
5 1179
6 1189
6 1208
6 1237
7 1290
7 1310
7 1326
7 1360
7 1396
7 1492
8 1506
8 1570
8 1642
8 1674
10 1870
10 1873
10 1853
9 1559
8 1444
8 1387
8 1379
8 1388
8 1456
8 1457
8 1457
9 1460
10 1464
10 1464
10 1472
10 1482
10 1506
10 1516
11 1517
11 1511
11 1509
11 1508
9 1265
9 1263
9 1207
9 1167
9 1139
9 1125
9 1120
9 1111
9 1112
9 1113
10 1112
10 1110
10 1109
10 1110
10 1121
10 1127
10 1128
10 1130
10 1133
10 1132
10 1133
10 1133
10 1135
10 1137
14 1140
14 1140
14 1137
14 1136
14 1136
14 1131
14 1128
14 1127
14 1123
14 1119
14 1118
14 1115
14 1114
14 1114
14 1113
14 1114
14 1113
14 1143
14 1168
14 1172
14 1181
14 1187
14 1189
14 1190
14 1191
14 1209
14 1252
14 1293
14 1308
14 1308
14 1308
15 1310
15 1292
15 1292
15 1295
14 1295
14 1277
15 1484
16 1498
17 1529
18 1565
18 1553
18 1541
18 1540
16 1496
16 1459
16 1455
16 1436
16 1374
16 1188
16 1089
16 1071
16 1065
16 1053
13 933
13 927
13 931
13 929
13 926
13 925
12 924
12 913
12 843
11 841
11 841
11 840
11 842
11 836
11 843
11 837
11 825
11 812
10 817
10 825
10 829
10 842
10 850
10 861
10 863
10 864
10 865
11 869
11 870
11 884
12 890
12 900
11 911
11 945
11 955
11 954
11 952
11 944
11 944
11 944
11 965
11 966
11 966
11 965
10 964
10 962
7 961
8 967
8 967
8 968
8 968
8 968
8 968
8 968
8 966
8 969
8 970
8 975
8 975
8 976
8 981
11 1002
12 1001
14 966
17 951
17 950
17 941
17 941
17 938
17 930
17 923
17 912
17 866
17 825
17 826
17 836
17 848
16 878
16 882
15 938
14 933
14 942
14 968
17 819
20 999
20 997
21 973
22 971
22 962
22 925
22 915
24 913
24 901
24 896
24 894
24 905
24 905
25 910
25 924
26 939
27 940
30 1021
30 1024
33 1030
33 1046
33 1048
33 1054
33 1064
33 1069
34 1083
36 1092
36 1107
36 1106
37 1122
37 1102
37 1098
37 1096
37 1096
38 1095
38 1085
37 1085
37 1073
37 1067
37 1059
37 1057
37 1056
37 1055
36 1050
36 1044
36 1033
36 1030
36 1028
36 1034
37 1014
37 1027
37 1030
37 1018
38 1037
38 1037
38 1040
38 1015
38 1017
37 1022
37 1019
37 1019
37 1015
37 1011
37 1009
37 1009
37 1010
37 1010
37 1010
37 1014
37 1017
38 1022
38 1020
38 1027
38 1055
38 1055
38 1055
38 1045
34 1029
33 1027
31 1026
29 1019
29 1018
30 1016
52 1025
54 1032
54 1028
54 1028
54 1023
54 1023
54 1001
54 983
54 975
54 953
54 921
54 916
54 815
54 814
55 813
54 738
50 621
46 538
46 536
46 533
45 532
45 529
45 528
45 529
44 547
46 560
46 563
46 563
46 553
46 550
43 539
43 528
41 511
41 504
38 414
38 412
38 406
38 395
38 393
38 388
38 385
37 388
36 380
35 374
35 360
35 366
35 352
35 350
35 349
35 346
35 346
34 336
34 337
34 338
34 336
34 335
34 341
34 354
34 357
34 364
34 365
34 364
34 368
34 363
34 352
34 341
33 326
33 313
33 311
33 311
32 290
32 289
32 285
32 354
32 359
32 370
32 380
32 384
32 419
32 420
32 451
34 455
34 463
35 476
35 479
35 476
35 471
34 467
34 465
34 458
33 425
33 424
33 424
33 427
33 434
33 438
32 438
32 438
25 434
25 433
7 412
7 407
7 409
7 409
7 405
7 405
7 404
7 401
7 398
7 400
6 398
6 398
4 403
4 402
5 394
5 392
5 386
5 403
5 403
5 404
7 417
7 419
7 426
8 424
7 404
7 400
7 398
7 401
9 493
9 507
9 509
9 522
9 524
9 526
9 531
10 537
10 547
10 568
10 573
10 574
10 563
10 553
10 551
10 553
10 551
10 540
10 541
10 541
10 542
10 543
10 543
10 542
11 554
12 554
12 555
13 569
13 567
14 555
14 557
15 576
15 577
15 579
15 582
15 588
15 592
15 590
17 604
20 631
20 661
21 725
23 803
23 823
23 843
25 771
25 755
26 743
27 736
27 749
27 721
27 721
26 694
25 691
25 682
25 699
25 699
25 706
25 938
26 1005
26 1011
26 1017
26 1035
37 1222
38 1233
38 1244
38 1245
38 1260
38 1261
40 1263
40 1266
40 1266
41 1267
41 1266
41 1263
41 1263
41 1263
41 1259
41 1259
41 1261
41 1262
41 1263
40 1264
40 1269
41 1269
41 1283
41 1283
41 1278
41 1277
41 1268
41 1270
41 1269
39 1246
39 1243
39 1247
39 1247
39 1249
39 1254
39 1257
39 1247
37 1144
37 1143
37 1142
37 1144
38 1142
38 1141
38 1137
38 1134
38 1121
38 1095
38 1093
38 1093
39 1093
39 1093
39 1093
39 1089
39 1090
39 1088
39 1088
39 1088
39 1088
39 1103
39 1103
40 1120
39 1114
38 1113
38 1123
35 1132
37 1179
39 1273
39 1388
39 1437
41 1579
41 1770
41 1784
42 1799
41 1863
41 1909
40 1910
37 1870
35 1885
34 1800
34 1782
33 1765
33 1747
33 1749
34 1755
31 1754
35 1829
35 1821
36 1846
37 1867
37 1868
37 1868
56 2120
55 2083
55 2092
55 2065
55 1779
55 1769
55 1762
56 1701
56 1683
52 1572
51 1570
53 1575
52 1570
52 1565
52 1567
52 1566
52 1565
52 1567
52 1568
52 1573
52 1578
52 1593
52 1595
55 1603
55 1617
55 1613
55 1615
55 1617
55 1628
55 1631
54 1622
54 1610
55 1615
56 1622
56 1629
56 1629
56 1638
55 1634
56 1626
56 1625
59 1625
62 1629
63 1627
63 1625
63 1623
63 1622
64 1620
65 1618
65 1618
65 1617
64 1618
63 1625
62 1624
62 1626
62 1641
62 1643
62 1648
62 1648
62 1658
62 1659
63 1661
63 1662
63 1663
64 1665
66 1666
74 1670
74 1669
74 1626
74 1624
73 1577
73 1575
73 1628
73 1632
73 1554
70 1358
68 1149
68 1023
69 991
68 957
68 954
68 931
67 940
67 937
67 930
67 909
67 893
67 866
67 859
66 918
66 920
66 920
66 918
65 921
65 924
60 826
61 825
61 823
61 818
61 818
60 818
42 570
42 570
42 555
42 557
41 556
41 561
41 560
40 553
40 554
33 543
33 544
32 539
32 540
32 544
32 541
32 542
32 541
33 541
33 539
33 529
33 516
33 515
31 513
30 505
30 491
30 490
30 489
30 484
30 468
30 464
30 464
30 459
29 451
28 441
28 436
28 436
28 426
28 425
27 420
24 417
23 413
20 413
20 410
20 407
20 405
20 405
19 403
18 401
18 401
18 400
18 397
18 390
18 390
18 390
18 374
18 373
18 369
18 369
18 358
18 356
17 356
16 354
15 353
12 350
9 349
5 339
5 336
5 333
5 325
5 315
5 302
5 242
4 222
4 218
4 212
4 212
4 210
4 201
4 196
4 168
4 158
4 144
4 143
4 143
4 143
4 141
4 141
4 140
3 70
3 67
3 60
3 58
3 53
3 51
2 51
2 47
2 47
0 44
0 42
0 42
0 37
0 36
0 36
0 33
0 30
0 25
0 25
0 24
0 22
0 19
0 13
0 10
0 10
0 4
0 2
0 2
0 2
0 2
0 3
0 4
0 5
0 6
0 10
0 37
0 70
0 92
0 100
1 127
1 133
1 138
1 142
1 147
1 150
1 152
1 155
1 157
1 160
1 160
1 161
1 161
1 180
1 183
1 185
1 186
1 190
1 196
1 214
1 233
1 250
1 259
1 278
1 325
1 335
1 340
1 342
1 342
1 349
1 358
1 369
1 388
1 435
1 436
1 439
1 441
1 442
1 443
1 444
1 446
1 449
1 451
3 459
5 471
6 505
7 509
7 511
7 515
7 517
7 522
7 523
7 523
7 523
7 523
7 523
7 523
7 524
7 529
7 536
7 540
7 549
7 558
7 560
7 568
7 568
7 568
7 568
7 568
7 568
7 570
7 572
7 573
7 581
7 582
7 582
8 587
8 590
8 596
8 597
8 600
8 600
8 600
8 608
8 608
12 660
12 661
12 665
12 668
12 674
13 677
13 682
13 680
13 679
13 678
13 673
13 622
13 591
13 591
13 586
12 559
12 558
13 559
13 559
13 558
13 555
13 573
13 573
13 573
13 574
13 576
13 577
21 636
22 621
22 629
22 624
22 626
22 621
22 619
22 587
22 574
22 565
22 557
22 537
22 488
22 484
27 492
27 491
27 489
30 477
30 459
30 450
30 435
30 386
30 381
30 379
30 379
30 379
30 378
30 374
30 370
30 369
28 369
28 364
26 356
25 319
24 313
24 311
24 313
24 316
24 318
24 319
24 319
24 320
24 323
24 323
24 328
24 327
24 320
24 315
24 307
24 300
24 295
24 295
24 290
24 290
25 296
25 301
26 357
26 376
26 383
26 414
31 757
31 788
33 947
33 1023
34 1045
34 1249
34 1281
34 1289
34 1289
34 1291
34 1289
34 1301
34 1304
30 1259
30 1260
30 1264
30 1266
29 1273
29 1278
29 1282
31 1287
31 1287
31 1296
31 1305
31 1318
32 1329
39 1368
43 1384
45 1387
45 1386
45 1402
45 1405
45 1408
45 1410
45 1385
45 1385
45 1384
49 1382
49 1384
49 1384
41 1322
45 1436
45 1438
46 1441
46 1439
46 1442
46 1448
46 1456
46 1461
46 1464
46 1465
46 1470
46 1493
46 1497
41 1487
41 1489
41 1489
38 1490
38 1492
38 1493
38 1495
38 1496
38 1498
38 1497
38 1500
38 1500
38 1501
38 1502
38 1505
38 1507
38 1507
38 1510
38 1514
38 1521
38 1528
38 1570
38 1580
38 1633
38 1672
38 1718
38 1750
38 1752
38 1766
38 1767
38 1763
38 1766
38 1774
38 1811
38 1868
38 1901
38 1915
38 1915
39 1916
39 1911
40 1902
40 1880
39 1830
39 1772
39 1756
39 1607
32 1065
32 993
32 955
32 959
32 967
32 973
32 1015
32 1030
32 1036
32 1042
32 1047
32 1030
32 1030
32 1027
32 1032
32 1026
32 1020
32 1004
33 1037
33 1035
31 1041
31 1062
31 1094
31 1107
32 1113
25 1121
16 1084
14 1103
11 1104
11 1109
11 1096
11 1097
11 1098
11 1102
11 1102
10 1106
10 1103
9 1104
9 1123
9 1123
9 1122
8 1028
8 1035
7 1037
7 1045
7 1072
7 1074
7 1076
7 1084
7 1097
7 1101
7 1105
7 1088
7 1083
7 1083
7 1082
7 1102
7 1100
7 1101
7 1100
7 1097
7 1097
7 1114
5 1114
7 1127
8 1129
8 1132
8 1137
9 1137
9 1168
10 1206
11 1201
11 1203
11 1198
11 1194
11 1152
11 1106
11 1030
11 1016
11 985
11 965
11 964
11 948
12 993
12 993
12 991
11 969
14 913
12 842
12 818
12 813
12 813
12 813
12 812
12 813
12 814
12 814
12 811
12 814
12 812
12 808
13 807
13 805
13 800
13 786
13 774
13 726
13 700
13 694
13 698
13 691
13 691
13 690
13 689
13 682
13 680
13 680
13 679
12 640
13 652
14 784
14 758
13 707
13 691
13 679
13 664
13 655
13 628
13 629
13 626
13 626
13 629
13 626
13 627
15 644
16 663
16 706
16 717
16 703
17 709
17 697
17 672
17 674
18 681
18 680
19 669
19 671
19 666
19 654
19 638
19 631
19 629
19 624
19 624
19 624
19 624
19 602
19 602
19 599
19 600
19 601
19 603
19 578
19 577
16 560
16 556
16 544
16 539
15 534
15 498
14 480
15 496
15 490
15 496
15 499
15 501
15 542
15 553
15 557
15 576
14 589
14 596
14 597
14 555
14 560
14 569
14 580
11 579
11 577
10 577
10 577
10 579
10 581
10 585
10 584
9 584
9 583
9 583
9 575
9 574
9 575
9 576
9 576
9 575
9 576
9 575
9 575
9 575
9 576
9 571
9 569
11 576
11 577
11 578
13 658
13 671
13 685
13 683
13 682
12 669
11 531
11 533
11 528
11 530
11 547
11 561
11 561
11 560
11 555
11 553
11 551
11 545
11 546
10 545
8 516
8 482
8 467
8 466
9 464
9 464
9 465
9 469
9 467
8 453
8 450
7 444
7 438
7 448
7 446
7 446
7 449
7 451
7 450
7 451
7 458
8 461
8 463
8 466
8 465
8 461
8 464
8 477
8 482
8 489
8 489
8 505
8 522
8 527
9 532
9 540
9 562
7 581
7 611
7 602
7 601
7 599
7 556
7 552
7 547
7 530
7 519
7 516
7 514
7 511
7 513
7 510
7 500
7 504
7 508
7 509
7 508
7 505
7 507
7 518
7 530
7 529
8 588
6 594
6 597
6 599
6 602
6 602
7 602
7 605
7 602
7 605
7 606
7 606
7 606
7 607
7 606
6 594
6 590
6 589
5 499
5 487
5 485
5 485
4 485
4 481
4 479
4 478
4 470
4 460
4 444
4 437
4 436
4 435
4 435
4 435
4 432
4 431
4 431
4 428
4 426
3 423
4 424
4 417
4 410
4 410
4 410
4 421
4 420
4 424
4 428
4 418
4 427
4 420
4 421
4 424
4 421
4 423
4 433
4 429
4 427
3 424
3 420
3 420
3 421
3 424
3 416
3 401
3 393
3 385
3 382
3 362
3 343
2 335
2 331
2 327
2 303
2 254
2 252
2 245
2 244
2 244
2 243
2 243
2 241
2 242
2 240
2 238
2 235
2 235
3 233
3 220
3 218
3 218
3 215
3 217
3 219
3 219
3 213
3 208
3 199
3 194
2 134
2 123
2 120
2 121
2 123
2 123
2 124
2 125
2 128
2 140
2 143
2 177
2 188
2 188
2 190
2 190
2 190
2 190
2 190
2 188
2 188
2 188
2 216
2 228
3 236
3 236
3 236
3 245
3 253
3 262
3 268
3 277
3 278
3 280
3 280
3 281
3 283
3 283
3 283
3 282
2 280
2 282
2 282
2 281
2 281
2 265
2 264
2 257
2 257
2 258
2 247
2 247
2 245
2 240
2 235
2 234
2 233
2 233
2 234
2 234
2 232
2 233
2 234
2 233
2 237
2 238
2 260
3 262
2 261
2 261
2 279
2 283
2 283
2 294
2 294
2 295
2 295
2 295
2 295
2 295
2 295
2 297
2 295
2 299
2 299
2 300
2 300
2 301
2 304
2 304
2 303
2 304
2 304
2 308
2 311
2 303
2 306
2 306
2 305
2 305
2 305
2 305
2 304
2 310
2 308
2 317
2 316
2 313
2 303
2 299
2 295
2 261
3 253
3 253
3 253
3 256
4 338
4 343
4 355
4 367
4 379
4 401
3 373
4 371
5 425
5 426
5 428
5 425
5 414
5 398
5 399
5 431
5 438
5 435
5 452
5 470
5 496
5 534
5 623
5 685
5 690
5 748
5 771
5 772
5 777
5 819
5 816
5 826
5 840
5 844
5 851
5 852
5 854
5 854
5 859
5 853
5 857
5 865
5 871
5 875
5 872
5 871
5 870
5 866
5 862
5 862
5 840
4 838
4 840
4 843
4 818
4 821
4 823
4 823
5 832
5 833
5 834
5 834
5 839
5 841
5 847
5 854
5 865
5 866
5 872
5 886
5 901
5 904
5 899
5 900
5 900
5 897
6 937
6 942
6 939
6 939
6 941
6 942
6 946
6 952
6 961
6 989
6 991
6 986
5 989
5 978
5 998
5 1015
5 1032
5 1047
5 1068
5 1083
5 1089
5 1092
5 1092
5 1085
4 1014
4 1006
4 1000
4 981
4 967
4 941
4 938
3 913
2 887
2 880
2 880
2 878
2 876
2 876
2 875
2 844
2 832
2 828
2 819
2 806
2 786
2 751
3 648
3 591
3 592
3 536
3 536
3 546
3 545
3 495
3 494
3 475
3 462
3 456
3 456
3 455
3 452
3 451
3 446
3 445
3 447
3 444
3 455
3 464
3 469
3 479
3 508
3 511
3 520
3 520
3 519
3 517
3 516
3 515
3 513
3 512
3 513
3 513
2 506
2 506
2 509
2 509
2 509
2 511
2 509
2 496
2 486
2 484
2 484
2 469
2 457
2 459
2 460
2 466
3 487
4 526
4 497
4 507
4 528
4 529
4 530
4 554
5 554
6 548
6 548
6 581
6 609
6 626
6 648
6 653
6 626
6 609
6 598
6 607
6 590
6 578
6 574
6 571
9 587
9 588
16 762
19 864
19 890
19 935
20 929
21 944
21 951
21 953
21 957
21 959
21 965
21 967
21 969
21 970
21 970
21 970
21 972
21 977
21 979
21 980
21 980
21 980
20 981
20 983
20 979
20 980
20 984
20 973
20 981
20 983
20 985
20 990
20 1001
20 1002
20 1003
20 1077
20 1082
20 1108
20 1142
21 1313
21 1322
21 1326
21 1305
21 1289
21 1284
21 1295
21 1296
21 1321
21 1330
21 1338
20 1345
20 1347
20 1348
21 1352
21 1351
21 1347
21 1346
20 1350
20 1347
23 1346
23 1343
23 1340
23 1335
23 1336
23 1330
23 1333
25 1334
25 1335
27 1328
28 1328
28 1327
29 1367
29 1373
29 1370
29 1345
28 1288
27 1270
27 1267
25 1252
24 1246
24 1250
24 1232
24 1240
24 1236
24 1234
24 1164
24 1137
24 1119
24 1104
24 1090
24 1085
24 1084
24 1079
24 1048
24 1045
23 1042
23 1042
23 1036
23 1036
25 1034
17 775
15 706
13 690
13 682
13 674
13 678
13 679
13 680
13 682
13 683
13 686
13 687
13 687
14 716
14 718
14 719
14 718
17 722
17 740
17 743
17 743
17 744
17 826
18 826
19 848
19 863
21 865
21 922
21 941
21 954
24 1310
24 1350
24 1408
25 1440
26 1450
26 1398
27 1468
27 1437
27 1409
26 1242
26 1233
26 1209
26 1215
26 1215
26 1220
25 1205
25 1180
25 1153
25 1149
25 1160
25 1158
25 1156
25 1158
24 1157
24 1158
24 1158
22 1160
22 1156
22 1156
19 1156
20 1178
20 1176
20 1185
20 1189
20 1188
19 1187
19 1188
19 1184
19 1182
19 1184
19 1182
19 1133
19 1136
19 1130
22 1122
22 1122
22 1122
21 1122
21 1122
21 1123
21 1118
21 1116
22 1113
22 1111
22 1110
22 1109
22 1108
22 1107
22 1107
22 1107
22 1107
22 1109
22 1110
22 1111
22 1111
22 1115
22 1145
22 1154
24 1173
23 1180
23 1198
23 1235
24 1230
24 1228
26 1228
26 1226
26 1227
26 1229
26 1224
26 1224
26 1220
26 1219
26 1223
27 1203
25 1205
26 1208
26 1211
25 1231
25 1217
24 1224
24 1250
22 1277
22 1156
22 1164
22 1167
22 1174
22 1173
23 1337
24 1322
24 1283
21 841
21 807
21 808
21 959
21 1294
22 1760
23 1807
24 1849
24 1864
24 1876
24 1878
24 1883
24 1889
24 1893
24 1899
24 1908
25 1912
25 1907
25 1916
25 1904
25 1907
27 1928
27 1923
26 1939
26 1942
26 1945
28 1953
28 1957
28 1965
27 1967
27 1943
27 1959
27 1953
27 1946
27 1947
27 1946
27 1945
39 2246
39 2250
39 2260
39 2266
39 2270
38 2278
38 2278
37 2280
37 2281
36 2282
36 2283
36 2286
36 2301
36 2305
36 2317
36 2323
36 2337
36 2338
36 2344
37 2353
37 2359
38 2364
42 2412
42 2640
43 2647
43 2654
43 2664
43 2683
43 2696
42 2673
42 2671
41 2655
40 2629
40 2610
40 2585
39 2590
39 2614
37 2614
37 2614
37 2603
37 2608
37 2612
37 2640
37 2654
38 2659
38 2660
37 2649
37 2649
36 2647
36 2644
40 2646
43 2789
43 2797
43 2776
43 2752
42 2742
40 2702
40 2697
39 2689
39 2679
39 2424
39 2425
39 2398
39 2372
39 2292
39 2264
38 2014
37 1641
36 1328
36 1321
36 1317
36 1310
36 1299
36 1299
36 1293
36 1283
36 1281
36 1271
35 1267
34 1267
34 1266
35 1267
35 1276
35 1281
33 1266
33 1317
33 1302
32 1305
35 1301
37 1369
39 1448
45 1482
48 1514
48 1546
47 1530
47 1531
47 1531
46 1531
45 1531
45 1530
34 1220
34 1218
33 1203
33 1201
33 1197
32 1186
32 1186
32 1181
33 1181
33 1179
33 1192
33 1190
33 1174
32 1169
32 1170
31 1155
31 1149
31 1171
31 1175
31 1162
31 1153
31 1152
27 1107
27 873
26 870
26 882
26 895
26 889
26 884
26 890
26 879
25 874
25 870
25 869
25 846
25 815
25 809
25 804
25 803
25 799
25 797
25 790
25 763
25 738
25 737
25 739
25 743
25 750
25 747
25 764
21 720
19 589
19 583
19 580
18 578
18 577
18 577
18 576
18 576
18 575
18 573
18 571
19 574
19 574
19 575
19 575
19 575
19 575
19 575
19 575
19 575
19 578
19 581
19 581
19 583
19 585
19 584
19 588
19 589
19 589
19 591
18 593
18 587
18 578
16 572
16 524
15 530
15 527
14 526
12 452
9 342
2 308
2 267
2 262
2 262
2 265
2 266
2 267
2 270
2 272
2 272
2 274
2 275
2 275
2 276
2 277
2 278
2 278
1 274
1 273
1 258
1 258
1 257
1 255
1 247
1 247
1 247
1 221
1 219
1 219
1 220
1 219
1 218
1 210
1 201
1 180
1 168
1 162
1 155
2 153
2 156
2 159
2 163
2 157
2 155
2 159
2 159
2 159
5 205
5 206
5 210
5 219
6 216
6 214
6 213
6 213
6 208
6 207
6 194
6 180
6 181
6 181
6 181
6 181
6 181
6 181
6 181
6 182
6 182
6 181
6 181
6 181
5 178
5 178
5 178
5 179
5 179
5 181
5 181
5 182
5 182
5 177
5 174
5 174
5 173
5 174
5 177
5 175
5 178
5 179
5 181
5 183
5 180
5 182
5 184
5 182
5 173
5 174
5 175
5 176
6 178
6 179
7 179
7 179
7 180
7 176
7 175
7 173
7 168
7 165
7 163
7 163
7 161
7 163
7 165
7 166
7 168
8 168
8 168
8 167
8 168
8 170
8 184
8 185
8 186
8 185
8 185
8 185
8 185
8 185
8 186
8 186
8 183
8 182
8 182
8 181
8 180
8 179
8 176
7 175
7 170
7 168
7 167
7 167
7 167
7 169
7 178
8 181
5 133
5 127
5 130
5 131
6 156
6 162
6 168
6 174
6 175
6 172
6 172
6 173
6 176
6 177
6 179
6 179
6 181
6 181
6 181
6 181
6 181
6 181
6 181
6 181
6 181
6 181
6 180
9 192
9 192
19 214
21 216
23 216
23 218
39 283
40 289
40 293
43 322
48 362
51 405
51 424
51 426
53 433
53 437
53 441
53 441
53 437
53 437
54 432
54 431
55 431
55 430
55 429
54 426
53 425
53 426
53 426
53 423
53 422
53 422
54 422
54 424
54 424
54 424
54 424
54 424
54 422
54 418
54 416
54 415
53 415
53 415
53 415
53 428
53 425
53 411
53 408
53 410
53 413
53 441
53 447
53 449
53 450
53 450
53 453
53 452
53 452
53 450
53 450
53 450
54 451
54 451
54 451
54 451
54 451
54 451
54 449
54 449
54 443
54 434
52 425
52 421
52 421
52 417
52 416
51 385
51 367
51 361
51 356
51 355
51 355
51 354
51 352
51 350
51 350
51 349
51 349
51 348
51 348
51 348
51 347
51 346
51 346
50 346
50 345
48 342
48 339
48 337
35 299
35 297
35 286
18 262
16 262
16 253
7 155
4 111
4 93
1 92
1 86
1 80
7 87
7 87
7 82
7 70
7 65
7 65
7 65
7 65
7 65
8 73
8 84
10 91
16 289
18 296
18 301
18 305
18 308
18 310
18 312
18 349
18 349
21 353
31 396
31 397
31 397
31 397
31 395
31 399
31 399
31 399
32 398
32 398
32 396
32 400
32 404
32 422
32 460
32 458
32 462
32 468
32 466
32 465
33 468
34 474
35 489
41 511
42 516
42 560
41 569
41 575
41 580
41 580
41 590
41 592
41 593
41 748
41 753
41 762
41 772
41 777
45 909
45 914
45 923
45 932
45 933
45 937
45 937
45 942
45 944
45 949
45 952
45 953
45 957
45 965
45 967
45 969
45 970
45 969
45 979
45 979
45 980
45 988
45 991
45 1029
60 1253
61 1329
66 1402
70 1458
70 1512
71 1646
72 1726
72 1734
72 1736
73 1739
73 1744
73 1745
73 1747
73 1747
73 1753
73 1753
66 1754
66 1755
66 1750
65 1752
65 1755
67 1869
67 1873
67 1871
67 1891
66 1887
66 1884
65 1886
58 1689
58 1695
61 1726
61 1727
61 1727
61 1995
60 2001
58 2000
58 2013
58 2022
49 2002
49 2000
49 2036
49 2036
50 2092
50 2094
50 2107
50 2112
50 2126
50 2127
50 2134
50 2131
50 2142
50 2137
50 2102
50 2094
50 2093
48 2080
49 2081
48 2081
45 2076
45 2072
45 2065
42 2050
43 2046
45 1999
45 1989
45 1987
45 1979
45 1979
45 1968
45 1968
45 1966
45 1812
45 1810
45 1797
45 1787
45 1778
41 1648
41 1643
41 1629
41 1624
41 1624
41 1620
41 1619
41 1605
41 1603
41 1601
41 1600
41 1599
41 1594
41 1582
41 1578
41 1576
41 1573
41 1571
41 1570
41 1568
41 1568
41 1556
41 1549
39 1386
19 978
14 881
14 842
14 841
14 839
14 838
14 838
14 832
14 831
13 830
13 828
13 827
13 825
13 826
13 822
13 822
13 809
13 805
13 805
13 803
13 796
11 690
11 698
11 700
11 682
11 676
11 667
11 656
11 650
11 642
8 608
8 605
7 600
7 329
7 327
7 287
7 274
7 266
7 250
7 247
7 212
7 212
6 154
5 149
5 133
5 130
5 115
5 113
5 105
5 97
5 81
5 77
5 76
5 78
5 72
3 69
3 67
3 66
3 62
3 61
1 52
0 43
0 43
0 42
0 42
0 42
0 42
0 42
0 42
0 48
0 53
0 54
0 55
0 59
1 59
10 668
11 674
12 683
12 690
12 695
14 703
14 710
14 719
14 756
14 757
14 769
14 774
14 777
14 779
14 792
14 794
14 795
14 796
17 845
17 847
17 876
17 875
17 881
18 922
18 925
18 931
18 953
18 957
18 971
18 978
18 983
18 983
18 983
18 983
18 983
18 988
18 988
18 992
18 1074
18 1077
18 1097
18 1105
18 1108
18 1121
18 1123
18 1120
19 1110
19 1110
19 1112
19 1112
20 1119
20 1118
21 1118
22 1118
22 1119
22 1122
22 1122
22 1123
22 1124
23 1131
23 1135
23 1142
23 1142
23 1142
23 1142
23 1144
23 1146
24 1151
26 1159
26 1160
26 1162
27 1177
27 1179
27 1181
27 1190
27 1194
28 1214
28 1214
28 1231
28 1239
28 1294
28 1322
30 1336
32 1409
32 1416
34 1463
34 1473
34 1548
34 1568
34 1582
34 1582
34 1590
34 1592
34 1595
34 1591
34 1590
34 1592
34 1617
34 1617
33 1615
25 1010
24 1009
24 993
24 991
24 993
22 987
22 975
22 969
22 938
22 937
22 927
22 930
22 933
24 967
24 970
24 992
24 995
24 996
22 950
22 949
22 917
22 917
22 912
21 871
21 874
21 864
21 847
21 844
22 836
22 845
23 851
23 855
23 871
23 879
26 884
26 886
27 892
33 887
33 816
33 816
33 790
33 786
33 785
33 773
33 773
32 775
32 774
32 773
32 795
33 859
31 853
31 853
30 860
30 859
30 855
30 858
30 860
30 876
30 892
29 901
29 924
30 926
30 937
30 937
30 938
30 937
29 936
28 930
27 921
27 919
26 914
26 906
26 904
26 905
26 896
26 883
25 873
26 873
26 849
26 826
24 777
24 747
23 739
21 666
20 657
20 605
20 594
20 518
20 497
20 487
20 486
20 473
20 472
20 473
20 481
21 507
21 517
23 536
24 537
25 556
25 554
25 553
25 552
25 550
26 545
26 544
26 556
27 558
31 637
31 639
31 642
31 641
30 639
28 566
28 563
28 563
28 561
28 561
30 565
34 578
35 595
35 602
35 611
34 608
33 614
33 610
33 609
33 610
37 623
37 602
39 605
39 606
40 589
42 585
40 582
39 569
38 566
37 589
37 585
38 611
38 614
39 620
39 620
39 620
40 621
40 618
40 618
40 617
40 591
39 544
39 543
39 543
39 545
39 555
47 820
48 828
54 933
54 926
54 909
56 940
60 951
60 963
60 971
60 972
60 974
61 980
62 1052
62 1077
62 1117
62 1172
62 1216
62 1224
62 1227
62 1241
63 1249
63 1250
63 1251
62 1252
60 1250
60 1258
60 1272
60 1272
60 1274
60 1284
60 1286
60 1286
60 1281
60 1276
61 1275
61 1276
61 1290
61 1290
61 1292
61 1293
61 1288
60 1264
59 1244
56 1206
55 1205
55 1206
55 1208
55 1208
56 1212
56 1223
57 1250
57 1253
56 1245
56 1240
53 1163
53 1164
53 1165
53 1172
53 1172
53 1181
53 1182
54 1200
54 1202
55 1215
62 1215
61 1206
60 1219
60 1218
60 1215
60 1217
60 1208
60 1236
60 1237
60 1242
53 1238
54 1241
53 1241
52 1249
52 1256
50 1254
50 1281
50 1279
50 1278
47 1250
47 1247
46 1208
46 1207
46 1194
46 1180
47 1177
47 1177
47 1177
47 1181
47 1196
47 1196
47 1196
47 1201
47 1214
46 1218
44 1174
29 788
30 782
30 771
29 769
29 763
29 772
29 773
43 1068
44 1099
45 1120
45 1109
45 1107
44 1050
43 1006
43 953
43 921
43 920
43 915
43 915
43 896
43 896
42 897
42 898
42 898
42 913
42 904
42 899
42 900
48 903
48 897
48 917
48 917
49 955
49 953
49 958
49 959
49 947
49 948
49 946
49 944
49 943
49 942
50 940
50 937
51 935
51 935
51 936
51 940
50 936
50 922
49 902
49 899
49 895
49 895
49 891
49 890
49 883
49 869
49 861
49 862
49 864
48 848
45 853
43 831
38 828
34 819
34 796
35 787
36 790
36 790
36 785
36 753
36 751
36 748
36 737
35 736
35 731
35 721
35 715
35 715
35 684
35 683
35 682
35 682
35 698
35 700
35 700
36 708
36 714
41 772
50 822
73 922
73 939
73 931
75 939
75 928
76 920
76 903
76 902
77 985
76 985
76 972
76 970
76 968
76 964
76 962
75 945
58 615
58 589
58 587
58 587
59 584
59 568
59 559
59 553
59 550
59 550
59 544
59 540
58 540
58 539
58 539
59 539
59 539
59 522
59 521
59 518
59 521
53 517
53 516
53 493
53 495
52 456
52 455
52 449
52 447
52 444
51 442
51 442
51 442
51 442
51 442
50 440
49 440
49 440
49 437
49 436
49 432
49 432
49 432
49 431
49 429
49 429
49 424
49 424
49 422
49 423
49 423
49 423
48 421
48 418
47 416
47 408
47 408
47 408
47 408
47 407
45 406
45 404
45 403
45 403
45 403
45 403
45 402
45 402
45 402
45 402
45 402
45 401
45 401
45 401
45 401
45 401
45 401
45 382
45 378
45 376
44 369
43 361
35 290
22 201
6 126
6 123
10 116
10 115
10 114
10 112
10 115
11 118
11 36
10 45
10 71
10 90
10 112
10 127
9 127
9 134
11 133
11 133
11 137
11 140
11 140
11 140
11 143
11 152
11 159
11 166
11 176
11 180
11 188
11 190
11 193
11 193
11 193
11 198
11 198
11 198
11 198
11 200
11 201
11 201
11 200
11 201
11 202
11 204
11 205
11 209
11 209
11 221
11 224
11 224
11 225
11 225
11 225
11 226
11 226
11 226
11 228
11 230
11 231
11 232
11 232
11 232
11 232
11 232
11 237
11 240
11 244
11 245
11 247
11 251
11 253
11 253
11 255
11 256
11 256
11 256
11 263
11 264
11 267
11 269
11 274
11 277
11 281
11 283
11 283
11 284
11 284
11 284
11 284
11 285
11 286
11 286
11 286
11 286
11 286
11 288
13 289
11 333
11 340
11 341
9 347
9 349
5 344
5 345
5 346
5 344
5 337
5 331
5 328
5 316
5 277
5 273
6 254
6 239
6 236
6 236
6 236
6 231
6 231
6 230
6 236
6 237
6 233
6 222
6 213
6 209
6 205
6 203
6 197
6 194
6 194
6 194
6 194
6 189
6 189
6 189
6 181
6 182
6 182
6 182
6 186
6 186
6 187
6 184
6 183
6 181
7 180
7 168
7 166
7 166
7 170
7 170
7 170
8 170
9 171
9 172
9 172
9 170
9 168
9 172
9 173
9 174
9 174
9 172
9 168
9 168
9 176
9 175
9 180
9 180
9 181
9 184
9 187
9 187
9 187
9 187
9 181
9 179
9 178
9 177
9 173
10 169
10 166
10 166
10 166
10 165
10 165
10 165
10 165
11 164
11 165
11 197
11 200
11 208
11 214
9 214
9 217
9 175
6 168
6 163
6 167
6 172
6 188
6 195
6 201
6 206
6 210
6 211
6 209
6 203
6 203
5 201
4 201
4 202
4 202
4 202
4 202
4 202
4 203
4 207
4 201
4 199
4 198
4 198
4 199
4 203
5 205
5 206
5 206
5 213
5 215
5 219
5 221
5 222
5 228
5 230
5 234
5 232
5 232
5 232
5 229
5 229
5 234
5 234
5 239
3 241
3 256
3 256
3 259
4 370
4 382
4 424
4 453
5 458
5 461
5 464
5 463
5 463
5 462
5 461
5 460
5 461
5 474
5 520
5 556
5 561
5 551
5 560
6 576
6 578
6 587
6 584
6 583
6 584
6 583
6 581
6 580
7 579
7 580
7 582
7 584
6 633
8 652
7 653
7 669
7 669
7 672
7 681
8 688
8 690
9 704
9 668
9 665
9 656
9 651
9 651
9 656
9 666
9 695
11 729
11 726
12 718
12 705
12 699
12 690
12 690
12 695
12 692
12 693
12 696
12 702
12 705
12 711
12 715
12 718
12 726
12 734
12 741
12 745
12 753
12 754
12 756
12 757
12 756
10 765
10 762
9 759
9 757
9 755
9 745
9 743
10 745
10 735
10 738
10 722
10 712
10 710
10 707
10 707
10 707
10 709
10 712
10 712
10 716
10 715
10 711
10 708
10 705
10 684
10 542
10 523
10 520
10 520
10 519
10 518
10 539
10 539
10 542
10 541
10 539
10 540
10 537
10 503
9 450
9 441
8 442
8 438
8 434
6 408
6 401
6 391
6 389
6 390
6 390
6 394
6 396
6 401
5 406
5 405
5 415
5 412
5 350
5 341
5 339
5 329
5 329
5 327
5 319
5 314
5 312
8 338
8 341
8 362
8 377
8 385
8 399
7 382
7 366
5 327
6 316
6 318
6 322
6 323
6 334
7 425
7 428
7 425
7 453
7 454
7 462
8 811
9 842
9 874
10 950
10 980
10 985
10 1079
10 1070
10 1077
10 1085
10 1088
10 1089
10 1095
10 1101
10 1092
10 1094
10 1097
10 1099
10 1103
10 1105
10 1107
9 1104
9 1104
9 1095
9 1096
9 1099
9 1101
9 1102
9 1099
9 1100
9 1098
9 1101
9 1101
9 1101
9 1100
9 1099
9 1100
9 1108
9 1111
9 1113
9 1115
9 1132
9 1142
9 1156
9 1171
9 1206
9 1215
9 1214
9 1228
10 1272
10 1284
10 1549
10 1577
10 1583
10 1611
11 1613
11 1643
11 1707
11 1746
10 1790
10 1797
10 1802
10 1822
10 1827
10 1827
10 1827
10 1819
10 1818
10 1820
10 1808
10 1810
10 1809
10 1809
10 1816
11 1821
10 1839
10 1854
10 1861
10 1862
10 1861
7 1822
7 1814
6 1803
6 1794
6 1788
6 1887
6 1884
6 1891
6 1896
6 2022
7 2025
7 2037
7 2059
8 2051
7 1966
7 1965
7 1966
7 1972
7 1973
7 1928
6 1432
5 1386
5 1375
5 1340
5 1341
5 1356
5 1355
5 1353
5 1373
5 1367
5 1405
5 1412
5 1640
5 1758
5 1782
5 1789
5 1787
5 1787
5 1789
5 1822
5 1934
5 1957
5 1987
5 2066
5 2112
5 2120
5 2120
4 2117
4 2117
4 2118
4 2115
4 2111
4 2109
4 2116
4 2116
4 2122
4 2122
4 2116
4 2116
4 2113
4 2105
4 2085
4 2071
4 2059
4 2047
4 1976
4 1969
4 1957
4 1940
4 1908
4 1880
4 1577
3 1572
3 1569
3 1576
3 1568
3 1517
3 1454
3 1437
3 1423
3 1418
3 1417
3 1394
3 1390
3 1389
3 1389
3 1387
3 1386
3 1382
3 1381
3 1381
3 1382
3 1382
3 1375
2 1366
2 1348
2 1332
2 1328
2 1361
2 1361
2 1360
2 1363
2 1351
2 1348
2 1343
2 1232
2 1230
2 1216
2 1206
1 1082
1 1072
1 1051
1 1021
0 1012
0 1001
0 994
0 991
0 988
0 990
0 1001
0 1016
0 1070
1 1127
2 1164
8 1327
9 1371
11 1417
12 1422
12 1403
12 1387
12 1343
12 1319
12 1071
12 917
12 894
12 891
14 931
15 930
15 945
15 934
15 848
17 843
17 822
17 737
17 693
17 697
17 697
17 697
18 698
18 697
19 698
19 696
19 696
19 690
19 690
19 682
19 680
19 679
19 683
19 685
20 705
20 714
20 725
20 729
20 730
20 730
20 731
20 731
20 731
20 730
20 730
20 730
20 728
20 738
20 732
20 732
20 731
20 731
20 732
20 730
20 734
20 731
20 733
22 754
22 785
22 790
22 802
22 811
22 827
22 836
23 883
24 884
24 890
24 890
24 889
24 896
24 896
24 897
24 881
24 882
24 881
24 881
24 883
24 883
24 884
24 886
24 886
24 916
24 927
24 949
24 968
24 981
24 993
24 996
24 1001
24 1001
24 999
24 994
24 991
24 979
24 963
23 890
20 804
19 751
16 622
15 581
14 551
13 559
13 575
13 586
13 597
12 599
12 604
12 613
12 614
12 612
10 561
10 561
10 563
10 566
10 574
8 594
8 735
8 757
8 817
9 868
9 899
9 899
8 902
8 909
7 912
7 911
7 911
7 926
10 948
10 976
11 982
11 981
11 979
11 978
10 965
13 962
14 974
14 1035
15 1059
15 1074
15 1117
15 1121
15 1133
15 1144
15 1149
15 1202
15 1227
16 1225
17 1268
19 1272
19 1291
20 1306
20 1332
21 1347
22 1506
22 1726
22 1892
23 2266
24 2510
24 3069
24 3127
24 3137
24 3215
24 3219
23 3229
24 3337
24 3334
24 3344
24 3343
24 3338
24 3338
24 3337
24 3323
24 3322
24 3327
24 3337
24 3340
24 3338
24 3338
24 3343
24 3345
24 3298
24 3283
24 3273
24 3273
24 3262
24 3267
24 3266
24 3265
24 3265
24 3265
24 3267
44 3280
44 3288
44 3296
44 3304
44 3319
64 3374
64 3374
64 3378
63 3358
63 3328
63 3309
65 3298
65 3290
66 3289
66 3303
66 3318
67 3322
72 3498
72 3500
73 3511
73 3506
73 3499
73 3481
73 3433
73 3275
73 3372
73 3363
73 3413
73 3452
73 3461
73 3464
73 3458
73 3455
73 3461
73 3466
73 3465
71 3519
71 3518
72 3618
72 3731
72 3750
71 3766
71 3761
70 3749
68 3739
68 3667
65 3640
65 3639
70 3653
71 3655
71 3644
71 3650
73 3647
95 4319
99 4182
98 4182
97 4041
95 3996
95 3762
95 3728
94 3650
94 3709
93 3474
93 3235
94 3338
92 3165
91 3070
90 2732
90 2702
90 2697
90 2691
90 2688
90 2686
90 2684
90 2681
90 2676
90 2679
90 2676
90 2677
90 2676
90 2677
90 2676
90 2672
90 2665
90 2666
90 2673
90 2674
90 2667
90 2664
90 2663
90 2661
90 2659
90 2640
90 2631
90 2629
90 2633
90 2655
90 2657
90 2661
90 2662
71 2642
71 2635
72 2632
71 2619
71 2611
51 2563
51 2571
50 2571
49 2574
49 2574
49 2575
49 2575
49 2577
49 2576
49 2546
49 2532
48 2516
42 2348
42 2383
42 2450
42 2639
43 2679
43 2689
44 2686
43 2666
43 2531
43 2516
43 2433
43 2392
43 2386
43 2385
43 2384
44 2381
44 2382
44 2372
46 2358
44 2291
44 2283
42 2179
42 2065
42 2041
42 2032
42 2027
42 2030
42 2011
42 2001
42 2001
37 2100
33 2047
31 2039
31 2038
22 2012
21 2019
7 1183
7 1172
7 1165
7 1155
7 1158
7 1156
7 1152
7 1138
7 1023
7 1023
6 1021
6 843
6 843
6 846
6 861
6 874
6 887
6 876
6 875
6 880
6 881
6 882
6 882
6 882
6 887
6 886
6 887
6 887
6 889
6 886
6 881
6 894
6 891
6 892
7 892
7 890
7 891
7 893
7 896
7 904
7 913
7 914
7 909
7 890
7 895
7 892
7 889
7 888
7 888
5 892
5 907
5 927
5 942
5 937
5 941
5 949
5 949
6 953
6 960
6 961
6 960
6 962
6 961
6 962
6 932
6 888
6 812
6 640
5 595
5 593
6 592
6 592
6 592
6 592
6 591
6 591
6 595
6 599
5 618
5 619
5 623
4 626
3 606
3 608
3 623
3 648
3 667
3 677
3 678
3 679
3 674
3 657
3 650
3 635
3 525
3 534
3 538
5 550
7 558
8 533
9 528
9 518
9 518
9 517
10 519
18 556
20 633
20 650
33 858
33 861
35 871
36 851
36 845
36 817
36 810
36 807
36 795
36 795
36 800
36 807
36 811
36 810
36 810
36 810
36 813
36 816
36 819
36 824
36 824
36 824
36 837
36 821
36 835
36 846
36 847
36 849
36 850
36 854
36 851
36 848
36 843
36 855
37 887
39 911
39 906
40 926
40 934
42 958
43 1603
43 1644
44 1702
44 1720
44 1753
45 1923
45 1948
47 1953
48 1951
47 1953
47 1960
47 1963
47 2003
47 2011
47 2016
47 2021
47 2013
47 2018
47 2021
47 2027
47 2069
47 2080
46 2127
46 2153
46 2197
46 2199
46 2205
46 2204
46 2296
46 2295
46 2285
47 2286
47 2283
47 2274
47 2275
47 2275
47 2252
48 2211
48 2196
47 2189
47 2189
47 2191
48 2191
48 2198
48 2206
48 2226
48 2225
48 2214
40 2206
32 2217
31 2253
30 2260
29 2261
29 2264
29 2269
29 2275
29 2269
27 2224
25 2149
25 2115
17 1901
17 1896
17 1896
17 1896
17 1896
17 1898
17 1896
17 1898
17 1901
18 1901
18 1898
23 1897
23 1895
23 1901
25 2000
25 2012
25 2011
25 2020
32 2052
32 2068
32 2074
33 2076
32 2048
34 2048
34 2050
34 2037
34 2041
34 2041
34 2042
34 2033
34 2026
34 2027
35 2032
35 2019
33 1995
31 1960
31 1948
31 1943
31 1934
29 1854
28 1077
27 964
26 870
26 863
26 868
27 871
27 873
25 867
24 865
24 853
24 840
24 838
24 803
24 797
24 793
25 813
25 843
26 962
26 1201
26 1212
26 1196
26 1184
26 1147
25 1436
25 1437
26 1481
26 1512
26 1539
26 1453
26 1453
26 1485
25 1493
25 1500
25 1514
25 1524
25 1545
25 1550
25 1554
25 1576
25 1593
25 1599
24 1604
24 1605
24 1601
24 1595
24 1577
24 1575
24 1569
24 1566
24 1547
23 1505
23 1501
23 1498
23 1496
23 1490
23 1483
23 1501
23 1497
23 1500
23 1502
25 1509
25 1514
25 1516
25 1516
25 1515
25 1510
25 1506
25 1507
24 1512
23 1516
23 1523
18 1514
18 1514
18 1510
17 1392
16 1388
16 1382
16 1364
8 1324
8 1322
7 1318
7 1315
7 1314
7 1313
7 1312
7 1311
7 1307
7 1303
7 1299
7 1294
7 1293
7 1289
7 1279
7 1281
7 1286
7 1303
7 1322
8 1343
8 1344
7 1353
7 1354
7 1391
8 1400
8 1401
8 1396
8 1409
9 1436
9 1441
8 1517
11 1552
11 1597
12 1605
12 1675
13 1709
13 1762
13 1841
14 1835
14 1839
14 1624
14 1672
14 1678
14 1682
14 1710
14 1410
14 1376
14 1320
14 1314
14 1295
14 1298
14 1301
14 1271
14 1272
14 1253
14 1243
14 1239
14 1220
14 1217
14 1225
15 1205
16 1188
16 1193
16 1198
16 1202
16 1218
16 1223
16 1223
16 1229
16 1228
16 1229
16 1230
16 1231
16 1237
16 1237
16 1240
16 1243
15 1249
15 1229
15 1239
15 1241
15 1246
17 1249
17 1252
17 1254
17 1257
17 1265
17 1267
17 1273
17 1276
17 1271
17 1271
17 1291
17 1310
17 1320
17 1318
17 1318
18 1319
18 1323
19 1326
19 1323
19 1323
21 1325
21 1327
22 1329
22 1335
22 1338
25 1347
26 1353
26 1352
33 1420
34 1426
35 1428
35 1433
34 1434
35 1448
35 1445
35 1415
37 1405
37 1385
37 1376
37 1367
38 1365
41 1304
42 1309
42 1281
42 1280
42 1258
41 1230
42 1215
41 1149
39 1124
39 1081
39 1060
38 978
37 889
36 777
35 659
35 645
35 637
35 641
35 619
35 606
35 601
35 562
35 562
35 556
36 564
36 568
36 560
36 560
36 555
37 589
37 595
37 602
37 607
36 610
36 613
35 616
35 609
35 665
35 696
35 699
35 706
35 706
35 691
35 688
35 694
35 691
35 692
35 731
34 730
34 727
34 723
34 723
34 720
31 713
31 709
31 706
31 692
31 683
31 671
31 664
31 662
31 661
31 659
31 652
31 649
31 643
31 638
31 631
31 622
31 583
31 572
30 566
30 566
30 563
30 560
30 556
30 550
30 545
28 545
26 544
25 539
20 538
20 531
20 523
19 519
18 515
17 515
14 445
8 437
8 435
8 427
8 421
8 404
7 401
7 401
7 389
7 388
7 381
7 381
7 374
5 373
3 368
3 367
3 367
3 367
2 367
2 367
2 366
2 362
2 359
2 357
2 356
2 353
2 349
2 342
2 341
2 338
2 327
2 324
2 319
2 314
1 310
1 305
1 303
1 289
1 270
1 270
1 268
1 268
0 228
0 220
0 305
0 294
0 288
0 291
0 292
0 276
0 230
0 210
0 218
0 236
0 246
0 253
0 253
0 248
0 245
1 269
1 235
2 248
2 307
2 310
2 314
2 315
2 317
2 321
2 322
2 323
2 323
2 322
2 323
2 324
3 327
3 327
4 328
4 334
4 341
4 343
4 347
4 350
4 358
4 358
4 359
5 367
5 371
5 373
5 373
5 378
5 378
5 380
5 382
5 388
5 397
5 398
5 400
6 419
6 423
8 497
8 497
9 522
9 529
9 537
9 561
10 600
10 792
10 1059
10 1079
10 1091
10 1124
10 1167
10 1201
10 1212
10 1217
10 1217
10 1220
10 1226
10 1237
11 1242
11 1242
11 1243
11 1243
12 1243
13 1244
14 1244
14 1244
14 1244
14 1245
14 1246
15 1247
14 1247
14 1248
14 1249
15 1257
15 1257
17 1429
17 1435
17 1453
17 1472
17 1475
17 1481
17 1482
17 1478
17 1387
17 1386
18 1388
18 1390
18 1392
18 1389
18 1376
18 1366
18 1344
18 1342
18 1333
19 1342
19 1348
18 1351
18 1353
18 1330
18 1320
18 1312
18 1256
18 1257
18 1256
18 1259
18 1259
18 1262
18 1267
18 1276
18 1279
18 1284
18 1290
21 1290
20 1304
20 1342
20 1345
21 1367
21 1360
22 1377
22 1389
22 1396
22 1405
22 1411
22 1417
21 1456
22 1479
24 1580
29 1720
33 1850
33 1903
33 1901
33 1901
33 1903
33 1893
33 1893
33 1892
32 1886
31 1875
30 1795
29 1798
28 1776
28 1769
28 1764
28 1749
28 1706
28 1456
28 1191
28 1175
28 1171
28 1165
28 1140
28 1124
29 1125
29 1150
30 1162
30 1162
31 1183
31 1178
30 1176
30 1177
30 1176
30 1176
29 1178
28 1178
27 1178
28 1181
28 1184
29 1186
29 1187
27 1226
27 1230
27 1242
27 1254
27 1250
27 1272
26 1095
26 1099
26 1069
26 1068
26 1068
26 1063
26 1062
28 1055
28 1049
28 1048
27 1047
27 1044
27 1044
27 1044
27 1044
27 1044
27 1043
27 1022
27 1022
27 1015
29 1006
29 1000
29 1000
29 1000
29 1001
29 998
30 999
30 1004
30 1007
30 1006
30 1003
30 1006
30 1002
30 1001
30 996
29 992
28 987
25 985
24 965
23 928
23 926
23 895
23 892
25 892
25 873
25 864
25 858
26 873
27 887
27 837
27 818
24 697
22 550
18 415
18 417
18 416
19 426
21 430
25 461
30 476
41 505
48 491
54 501
57 512
57 516
58 516
58 517
58 515
58 530
59 593
61 665
66 672
67 677
67 708
67 709
69 716
69 717
68 717
68 697
67 687
67 675
67 682
67 682
67 693
67 712
67 731
66 739
66 748
66 763
65 781
65 794
65 796
65 796
65 796
65 745
65 724
65 710
65 710
65 707
65 701
64 698
64 691
64 689
64 688
64 688
64 688
63 688
62 691
62 692
63 695
63 694
63 693
63 692
63 691
76 697
76 693
76 704
76 704
76 704
80 740
78 755
78 761
78 763
78 766
78 764
77 764
77 759
77 756
77 753
77 748
77 744
77 735
80 736
81 734
81 739
81 739
81 742
81 741
81 741
81 741
83 751
84 750
84 752
81 738
81 732
81 734
81 736
80 720
79 697
79 696
79 690
79 682
78 687
78 688
78 690
78 688
75 678
72 675
67 635
62 617
49 589
39 587
36 574
35 568
35 559
35 558
35 556
35 550
35 538
33 451
29 426
29 425
29 422
29 392
29 393
27 384
28 380
28 377
28 394
28 393
28 396
29 415
31 492
31 459
32 483
32 488
33 497
36 532
36 528
36 525
38 530
38 533
38 533
38 534
38 534
38 534
38 534
38 536
38 540
38 548
38 554
42 625
42 628
42 660
41 673
42 688
42 691
42 700
42 709
42 720
44 737
44 739
44 743
44 746
31 735
31 772
31 764
31 766
31 767
26 723
26 717
26 717
26 715
26 714
26 713
26 715
26 716
27 722
27 730
30 779
29 783
29 848
27 854
29 875
51 1011
53 1010
52 1025
53 1026
53 1035
55 1035
54 1023
53 1025
53 1021
53 1018
53 1017
54 1023
54 1032
55 1047
55 1044
55 1048
55 1051
55 1050
55 1050
55 1050
55 1058
55 1081
55 1101
54 1135
55 1206
58 1349
59 1478
60 1521
62 1889
62 1912
62 1934
62 1940
63 1984
64 2099
67 2180
67 2300
67 2414
67 2433
67 2444
68 2455
68 2466
68 2483
67 2489
67 2561
67 2544
67 2549
67 2549
66 2471
63 2399
63 2408
63 2417
63 2410
61 2401
57 2313
57 2306
57 2311
57 2311
57 2311
57 2316
57 2316
57 2317
57 2319
57 2321
57 2321
57 2316
57 2305
57 2311
52 2251
52 2269
52 2239
52 2236
51 2234
51 2237
51 2233
51 2224
51 2205
51 2203
51 2200
51 2202
51 2201
51 2203
51 2169
51 2180
51 2227
51 2228
51 2235
50 2235
50 2234
50 2236
50 2243
51 2339
51 2382
50 2456
50 2465
48 2481
45 2435
46 2457
45 2390
44 2385
43 2359
17 2204
16 2207
16 2187
16 2188
16 2190
12 2171
13 2176
12 2177
12 2180
13 2190
13 2208
14 2296
14 2258
14 2255
14 2220
14 2217
14 2205
14 2202
15 2178
15 2166
15 2163
16 2135
17 2129
20 2153
17 2055
16 1986
15 1876
14 2214
15 1883
25 2322
27 2465
95 5035
97 5144
98 5134
102 5373
101 5347
101 5353
101 5456
101 5825
101 5836
102 5916
103 5938
104 5945
104 5880
104 5901
104 5896
104 5893
106 5903
106 5897
106 5876
107 5880
107 5879
109 5885
109 5891
109 5913
109 5921
109 5952
109 5965
109 5971
111 5984
111 6023
115 6061
116 6059
117 6058
117 6058
117 6057
126 6049
159 6045
161 6015
162 6014
162 6011
165 6365
165 6360
165 6411
165 6538
166 6721
166 6956
168 7296
168 7323
168 7353
169 7415
169 7418
169 7417
169 7378
169 7380
169 7381
169 7382
169 7392
169 7393
169 7382
168 7287
168 7210
168 7123
168 7136
169 7128
170 7132
169 7161
169 7182
169 7212
169 7277
169 7331
169 7490
169 7737
169 7785
169 8233
168 8244
168 8272
168 8293
168 8317
172 8390
172 8381
171 8317
173 8368
173 8416
175 8426
175 8470
176 8986
177 8996
176 9000
176 8999
176 9001
175 8995
174 8969
172 8988
172 8976
172 8965
172 8938
171 8539
169 8467
158 8023
143 7777
84 4944
84 4916
84 4816
83 4756
83 4728
83 4690
83 4588
83 4178
83 4159
83 4137
83 4215
82 4245
82 4432
82 4493
82 4514
81 4531
80 4529
80 4629
80 4643
78 4654
78 4684
77 4722
77 4719
77 4696
88 4696
86 4655
86 4646
86 4638
84 4612
84 4572
82 4786
81 4788
80 4798
80 4801
80 4803
73 4802
41 4795
39 4792
38 4793
38 4789
35 4438
35 4421
35 4338
35 4191
34 4024
35 3830
34 3487
34 3456
34 3436
33 3377
33 3373
33 3353
33 3344
34 3352
35 3361
35 3359
35 3376
35 3410
33 3412
35 3413
35 3416
35 3429
36 3516
36 3636
37 3631
37 3594
37 3573
37 3549
37 3489
37 3394
38 3268
38 3032
38 3160
37 2728
40 2786
41 2763
43 2767
43 2758
38 2702
37 2742
37 2697
34 2655
33 2610
32 2606
32 2556
32 2047
32 2044
32 2033
32 2026
31 2031
31 2027
31 2019
31 1942
31 1944
32 1945
32 1945
36 1944
36 1943
36 1938
36 1944
36 1956
43 1986
46 2004
47 2074
46 2078
47 2071
48 2071
48 2051
48 2017
48 2006
48 1912
48 1873
49 1682
49 1630
49 1608
49 1590
49 1585
49 1486
48 1463
48 1445
48 1415
50 1371
49 1368
49 1409
40 1404
40 1409
40 1414
40 1414
40 1413
40 1414
39 1171
39 1171
39 1161
39 1160
39 1163
38 1168
36 1167
36 1167
36 1164
36 1164
36 1151
37 1154
38 1164
38 1180
38 1172
37 1171
38 1171
38 1164
38 1161
38 1160
38 1157
38 1156
38 1155
37 1146
37 1137
39 1142
39 1116
39 1084
39 1087
37 1081
38 1080
38 1065
40 958
40 837
39 834
40 831
50 842
55 861
57 859
69 923
70 916
69 919
69 750
69 744
65 673
64 643
64 639
66 645
66 626
67 585
67 594
67 591
67 587
67 583
67 579
67 578
67 576
67 577
67 577
67 571
67 569
68 569
68 571
68 567
65 568
65 569
61 567
61 568
60 647
60 653
59 665
53 634
51 608
52 565
52 557
50 558
49 554
49 555
49 555
49 562
49 571
49 574
49 575
49 577
49 577
50 578
50 582
50 582
50 584
50 583
50 582
49 582
49 584
49 551
51 612
51 608
51 609
51 639
51 641
51 643
52 647
53 647
53 648
53 664
54 669
55 668
55 667
55 676
55 687
56 687
56 698
57 691
57 681
59 719
60 728
61 769
60 778
63 789
63 807
65 820
65 997
66 1010
65 1031
68 1046
67 1048
66 1049
66 1057
80 1077
80 1070
81 1075
80 1083
80 1089
77 1073
77 1063
78 1077
72 1076
63 1082
62 1065
58 1061
48 983
47 979
47 978
47 974
47 975
47 970
47 977
47 974
44 962
44 950
45 1013
46 1007
45 1013
48 1031
48 1034
48 1035
49 1037
50 1037
50 1037
50 1037
50 1037
50 1038
49 1038
49 1036
49 1039
50 1046
51 1064
51 1068
52 1086
52 1005
52 981
52 945
52 941
52 937
54 938
54 939
54 938
54 940
54 939
54 939
54 931
54 918
54 917
54 916
54 916
54 916
54 916
54 912
54 913
54 913
54 916
53 916
53 915
53 916
53 892
52 842
71 866
72 864
72 838
71 834
71 833
71 835
69 834
69 834
69 816
70 804
69 813
69 802
69 796
69 797
68 801
67 800
67 800
66 786
64 742
62 734
62 739
61 739
58 739
58 723
52 715
50 541
50 531
49 511
49 519
49 533
48 532
48 523
39 496
39 485
39 477
39 474
39 473
39 474
39 472
38 463
38 483
38 468
38 481
38 506
40 503
40 502
40 503
40 511
39 541
41 624
41 666
41 737
41 741
41 752
40 685
40 690
40 688
37 673
37 674
37 675
36 673
36 673
36 674
36 675
36 683
37 738
45 971
45 977
45 978
44 971
44 983
44 986
43 978
45 1060
45 1078
44 1076
44 1077
44 1077
43 1076
43 1075
43 1073
43 1072
43 1072
44 1072
51 1073
52 1075
52 1082
52 1085
52 1086
52 1094
51 1100
51 1100
51 1100
51 1097
51 1098
50 1102
50 1110
50 1143
50 1145
51 1148
44 1167
45 1170
45 1172
47 1174
47 1175
47 1181
47 1202
47 1217
46 1218
46 1218
46 1208
46 1208
46 1202
46 1199
46 1196
46 1284
46 1280
46 1296
46 1298
47 1310
47 1263
47 1258
46 1239
47 1245
46 1249
45 1244
44 1243
44 1247
44 1234
45 1213
45 1220
45 1217
45 1223
45 1229
45 1231
45 1237
45 1240
45 1240
45 1239
44 1229
44 1210
44 1206
44 1231
45 1240
45 1251
45 1266
45 1312
45 1316
45 1322
43 1202
42 1208
42 1204
42 1220
42 1197
42 1202
42 1211
42 1215
42 1219
42 1200
42 1203
42 1230
42 1291
42 1523
42 1862
44 2296
43 2397
35 2308
35 2496
35 2513
36 2543
35 2560
36 2592
36 2590
36 2527
36 2515
36 2518
36 2522
36 2539
36 2585
36 2676
37 2867
38 2952
38 3004
37 3024
30 3043
29 3055
29 3173
29 3183
30 3224
30 3240
30 3266
30 3278
30 3288
30 3291
29 3286
30 3299
26 3295
24 3282
24 3318
24 3315
14 3272
14 3290
14 3292
14 3300
14 3296
15 3294
15 3272
15 3255
15 3255
15 3270
17 3301
19 3327
22 3365
24 3367
24 3369
24 3264
26 3576
26 3565
26 3593
25 3606
25 3612
24 3607
24 3600
23 3596
23 3590
24 3589
24 3617
25 3609
25 3600
24 3598
24 3585
24 3583
24 3570
24 3564
24 3571
32 3619
32 3617
35 3659
35 3660
35 3661
34 3678
33 3687
35 4279
35 4286
35 4308
35 4306
35 4286
35 4270
35 4188
35 4169
35 4160
36 4156
36 4152
36 4148
36 4144
36 4122
35 4109
35 4106
35 4101
35 4087
35 4013
35 3825
35 3388
33 3066
33 2847
33 2773
33 2801
32 2620
32 2590
31 2587
31 2605
31 2651
31 2738
31 2795
32 2822
32 2826
33 2828
33 2777
33 2657
34 2553
33 2468
32 2422
32 2370
32 2360
32 2358
32 2357
31 2225
32 2231
32 2189
31 2159
31 2112
31 2109
31 2104
31 2101
31 2108
31 2075
31 2063
31 2054
29 2029
29 2030
29 2020
29 2007
30 1999
29 1989
28 1989
27 1979
27 1979
27 1979
27 1979
27 1969
26 1932
25 1907
20 1872
20 2018
21 2021
21 2031
20 1770
20 1781
20 1802
20 1788
20 1798
20 1804
20 1805
20 1805
21 1808
21 1809
21 1777
21 1778
21 1776
21 1778
21 1782
21 1783
21 1779
21 1770
21 1984
14 1945
13 1991
12 1957
12 1959
12 1951
12 1935
12 1933
11 1307
11 1291
11 1236
10 1224
10 1224
10 1226
10 1233
10 1240
10 1241
10 1236
10 1227
10 1224
10 1234
10 1251
10 1261
10 1278
10 1287
10 1296
10 1308
10 1311
10 1307
10 1314
10 1310
10 1324
10 1222
10 1224
10 1219
10 1182
10 1139
10 1112
9 1033
8 969
8 950
8 950
8 948
8 938
8 921
7 908
7 902
7 897
7 895
7 903
7 902
7 903
7 902
6 893
7 895
7 898
7 904
8 911
8 912
8 915
8 909
8 912
8 909
9 911
10 906
10 905
12 907
12 907
12 907
12 913
13 935
13 936
13 939
13 948
13 974
13 977
13 992
13 996
13 991
13 847
12 846
12 818
11 775
11 766
11 722
11 718
11 710
11 711
11 713
13 863
12 882
12 886
13 1035
13 1041
13 1054
12 1131
12 1135
13 1155
14 1184
14 1185
14 975
14 989
14 943
14 938
14 936
14 941
15 960
15 963
15 1039
16 1122
16 1121
16 1139
17 1302
19 1390
21 1433
27 2808
30 3134
35 3871
35 4010
37 4325
38 4498
40 5072
41 5329
42 5587
42 5879
42 5911
42 5958
42 5992
42 5996
43 5998
45 6010
45 6029
45 6098
45 6107
45 6114
45 6186
46 6334
48 6429
65 7066
67 7325
68 7497
68 7511
67 7687
68 7699
68 7715
68 7746
69 7752
76 7843
76 7862
81 7879
83 7892
83 7905
83 7912
83 7922
82 7930
82 7939
81 7979
79 7987
79 7986
79 7993
79 7998
78 7994
76 7992
75 7993
74 7994
73 7993
74 7996
74 7999
96 8102
96 8090
94 8097
95 8142
96 8144
95 8155
96 8136
97 8154
97 8183
97 8215
98 8239
98 8254
101 8497
110 8945
111 9037
116 10021
117 10103
117 10116
117 10129
118 10144
117 10146
117 10006
117 9991
118 9992
117 9835
117 9832
117 9825
117 9723
117 9725
117 9736
116 9814
116 9987
115 9977
115 9990
115 9951
115 9923
115 9925
115 9894
115 9802
124 9827
124 9556
124 9207
124 9112
124 9112
123 9117
121 9005
117 8763
111 7198
110 6850
110 6792
110 6729
108 6475
109 6297
108 5750
109 5512
108 5321
109 5288
110 5466
110 5478
111 5496
110 5509
110 5532
108 5559
106 5558
106 5485
105 5485
105 5506
105 5433
105 5261
102 5087
86 4372
85 4187
85 4174
85 4171
85 4001
85 4000
85 3977
84 3959
84 3951
73 3866
73 3845
71 3812
70 3811
70 3792
70 3784
71 3762
74 3798
74 3787
74 3736
74 3720
74 3720
74 3710
74 3705
74 3711
74 3712
74 3717
74 3720
74 3721
73 3736
74 3730
55 3593
55 3619
55 3628
55 3623
55 3628
55 3631
53 3620
50 3587
50 3533
50 3518
48 3489
46 3477
45 3231
37 2712
34 2551
32 1640
32 1612
32 1596
32 1571
31 1552
30 1577
29 1565
30 1572
29 1622
36 1694
39 1802
40 1825
40 1818
40 1817
40 2050
41 1973
41 1829
41 1809
41 1806
41 1805
41 1807
41 1793
41 1793
41 1793
30 1688
31 1687
30 1647
29 1625
29 1619
29 1622
30 1679
30 1684
31 1708
34 1713
34 1729
34 1755
34 1768
33 1797
33 1806
33 1792
30 1669
29 1557
29 1507
29 1557
29 1546
27 1535
26 1495
26 1440
22 1401
22 1397
22 1394
22 1366
22 1364
22 1366
22 1368
22 1375
22 1379
22 1490
22 1492
22 1507
22 1506
22 1503
22 1508
22 1517
22 1517
22 1520
22 1522
21 1523
21 1525
21 1525
20 1524
17 1482
17 1481
17 1481
17 1483
17 1485
17 1488
17 1488
17 1477
17 1472
17 1466
17 1471
17 1475
16 1477
16 1478
14 1454
14 1414
14 1412
14 1411
14 1401
14 1406
14 1408
14 1393
14 1392
14 1392
14 1392
14 1392
14 1391
14 1391
14 1391
14 1391
14 1399
14 1416
14 1429
14 1435
14 1408
14 1404
13 1383
12 1336
6 1251
3 1152
2 1115
2 1110
2 1107
2 853
1 837
1 793
1 772
1 765
1 764
1 761
1 761
1 759
1 758
1 756
0 745
0 742
0 722
0 704
0 699
0 642
0 633
0 601
0 595
0 569
0 534
0 523
0 486
0 475
0 466
0 458
0 434
0 423
0 364
0 347
0 345
0 345
0 345
0 345
0 345
0 345
0 340
0 336
0 328
0 326
0 322
0 321
0 184
0 177
0 159
0 152
0 151
0 144
0 142
0 141
0 137
0 135
0 134
0 131
0 131
0 131
0 131
0 131
0 131
0 129
0 126
0 123
0 123
0 123
0 123
0 121
0 113
0 101
0 81
0 78
0 78
0 78
0 76
0 76
0 76
0 60
0 59
0 60
0 58
0 58
0 59
0 63
0 72
0 109
0 147
0 156
0 149
0 123
0 123
0 148
0 152
0 188
0 189
0 202
0 204
0 206
0 212
0 247
0 337
0 342
0 344
0 345
0 356
0 360
0 365
0 370
0 371
0 370
0 370
0 370
0 371
0 372
0 372
0 372
0 371
0 371
0 372
0 372
0 373
0 374
0 375
0 375
0 375
0 375
0 375
0 375
0 375
0 377
0 377
0 377
0 379
0 378
0 380
0 380
0 379
0 377
0 379
0 381
0 381
0 381
0 381
0 381
0 381
0 381
0 381
0 381
0 381
0 381
0 375
0 375
0 375
0 375
0 375
0 378
0 380
0 380
0 380
0 380
0 380
0 380
0 380
0 380
0 380
0 380
0 380
0 379
0 379
0 379
0 379
0 379
0 379
0 379
0 379
0 379
0 379
0 379
0 378
0 378
0 379
0 379
0 377
0 372
0 356
0 307
0 277
0 270
0 269
0 264
0 258
0 226
0 225
0 188
0 187
0 185
0 179
0 171
0 169
0 133
0 44
0 41
0 38
0 38
0 23
0 17
0 16
0 12
0 11
0 11
0 11
0 12
0 10
0 10
0 10
0 10
0 10
0 10
0 10
0 10
0 10
0 10
0 10
0 10
0 10
0 10
0 10
0 10
0 10
0 9
0 9
0 9
0 8
0 8
0 8
0 7
0 7
0 6
0 6
0 6
0 6
0 6
0 6
0 6
0 6
0 6
0 6
0 6
1 6
1 6
1 6
1 6
1 6
1 6
1 6
1 3
1 3
1 3
1 3
1 3
1 3
1 3
1 3
0 3
0 3
0 3
0 3
0 3
0 3
0 3
0 3
0 3
0 3
0 3
0 3
0 3
0 3
0 3
0 3
0 3
0 2
0 2
0 2
0 2
0 2
0 2
0 2
0 2
0 2
0 2
0 2
0 2
0 2
0 2
0 2
0 2
0 2
0 2
0 2
0 2
0 2
0 2
0 2
0 2
0 2
0 2
0 1
0 1
0 1
0 1
0 1
0 0
0 0
0 0
0 0
0 0
0 0
0 0
0 0
0 0
0 0
0 0
1 0
1 0
1 0
1 0
1 0
1 0
1 0
1 0
1 0
1 0
1 0
1 0
1 0
1 0
1 0
0 0
0 0
0 0
0 0
0 0
0 0
0 0
0 0
0 0
0 0
0 0
0 0
0 0
0 0
0 0
0 0
0 0
0 0
0 0
0 0
0 0
0 0
0 0
0 0
0 0
0 0
0 0
0 0
0 0
0 0
0 0
0 0
0 0
0 0
0 0
0 0
0 0
0 0
0 0
0 0
0 0
0 0
0 0
0 0
0 0
0 0
0 0
0 0
0 0
0 0
0 0
0 0
0 0
0 0
0 0
0 0
0 0
0 0
0 0
0 0
0 1
1 1
1 1
1 1
1 1
1 1
1 1
1 1
1 1
1 2
1 2
1 2
1 2
1 2
1 2
1 2
0 1
1 2
1 2
1 2
1 2
1 2
1 2
1 2
1 2
1 2
1 2
1 2
1 2
1 2
1 2
1 2
1 2
1 2
0 1
0 1
0 1
0 1
0 1
0 1
0 1
0 1
0 1
0 1
0 1
0 1
0 1
0 1
0 1
0 1
0 1
0 1
0 1
0 1
0 1
0 1
0 1
0 1
0 1
0 1
0 1
0 1
0 1
0 1
0 1
0 1
0 1
0 1
0 1
0 1
0 1
0 1
0 1
0 1
0 1
0 1
0 1
0 1
0 1
0 1
0 1
0 1
0 1
0 1
0 1
0 1
0 1
0 1
0 1
0 1
0 1
0 1
0 1
0 1
0 1
1 1
1 1
1 1
1 1
1 1
1 1
1 1
1 1
1 1
1 1
2 1
3 1
3 1
3 1
3 0
3 0
3 0
3 0
3 0
3 0
3 0
3 0
3 0
3 0
3 0
3 0
3 0
3 0
3 0
3 0
3 0
3 0
3 0
3 0
3 0
3 0
3 0
3 0
3 0
3 0
3 0
3 0
3 0
3 0
4 0
4 0
4 0
4 0
5 0
5 0
5 0
5 0
5 0
5 0
5 0
5 0
5 0
5 0
5 0
5 0
5 0
5 0
5 0
5 0
5 0
5 0
5 0
5 0
5 0
5 0
5 0
5 0
5 0
5 0
5 0
5 0
5 0
5 0
5 0
5 0
5 0
5 0
5 0
5 0
5 0
5 0
5 0
5 0
5 0
5 0
5 0
5 0
5 0
5 0
5 0
5 0
5 0
5 0
5 0
5 0
4 0
4 0
4 0
4 0
4 0
4 0
4 0
4 0
4 0
4 0
3 0
2 0
2 0
2 0
2 0
2 0
2 0
2 0
2 0
2 0
2 0
2 0
2 0
2 0
2 0
2 0
2 0
2 0
2 0
2 0
2 0
2 0
2 0
2 0
2 0
2 0
2 0
2 0
2 0
2 0
2 0
2 0
2 0
2 0
1 0
1 0
1 0
1 0
0 0
0 0
0 0
0 0
0 0
0 0
0 0
0 0
0 0
0 0
0 0
0 0
0 0
0 0
0 0
0 0
0 0
0 0
0 0
0 0
0 0
0 0
0 0
0 0
0 0
0 0
0 0
0 0
0 0
0 0
0 0
0 0
0 0
0 0
0 0
0 0
0 0
0 0
0 0
0 0
0 0
0 1
0 1
0 1
1 2
1 2
1 2
1 2
1 3
1 4
1 4
1 8
1 13
1 15
1 22
1 27
1 31
1 35
1 35
1 39
1 39
1 39
1 40
1 40
1 40
1 40
1 40
1 40
1 40
1 40
1 40
1 40
2 41
2 41
2 41
2 41
2 41
2 41
2 41
2 41
2 41
2 41
2 41
2 41
2 41
2 41
2 41
2 43
2 43
2 43
2 43
2 43
2 43
2 43
2 43
2 43
2 43
2 43
2 43
2 43
2 43
2 43
2 43
2 43
4 43
9 44
17 44
25 44
27 44
30 44
30 44
30 44
32 44
32 46
32 46
32 46
32 46
32 46
32 46
33 47
33 47
33 49
33 51
33 52
33 52
34 52
34 52
34 52
34 52
34 52
34 52
34 59
37 75
37 79
37 83
38 85
38 91
38 98
38 101
38 102
38 100
38 99
43 100
64 106
68 106
68 108
68 108
68 108
68 107
68 107
68 102
68 96
70 93
70 89
70 75
70 75
70 75
70 77
70 78
70 78
71 78
73 82
73 81
73 99
73 99
73 99
73 99
73 99
73 99
73 99
73 100
73 100
72 99
72 99
72 100
72 100
74 100
74 104
74 104
74 104
74 104
74 104
74 104
74 104
74 104
74 104
74 104
74 104
74 104
74 104
74 104
74 105
74 105
74 105
74 105
74 105
74 106
74 107
74 107
74 107
74 107
74 107
74 107
73 107
72 107
63 109
56 111
49 111
49 111
46 111
46 111
45 112
45 112
45 110
45 110
45 111
45 111
45 112
45 112
44 111
44 111
44 109
44 109
44 108
44 106
44 112
44 113
44 115
43 113
43 111
43 107
42 89
41 76
41 74
41 72
40 72
40 74
36 71
33 75
32 75
32 75
28 75
26 71
9 67
8 68
8 68
8 70
7 68
7 68
7 72
7 73
7 76
7 78
7 78
7 82
7 81
8 83
8 81
8 80
8 80
7 81
4 77
4 77
4 60
3 60
3 60
3 61
3 62
3 62
3 62
3 61
3 61
3 61
3 61
3 61
3 61
3 61
3 57
3 57
3 57
3 57
3 57
3 57
3 58
3 60
3 61
3 61
3 61
3 62
3 63
3 63
3 62
3 65
3 65
3 65
3 65
3 64
3 63
3 63
3 63
3 63
3 63
3 63
3 63
3 62
3 60
3 58
2 58
2 58
2 58
2 58
2 57
2 58
2 57
2 57
2 56
3 59
3 61
3 60
3 61
3 61
3 59
3 59
3 58
3 59
2 52
2 52
2 50
2 50
2 50
2 50
2 50
2 51
2 51
2 53
2 53
2 54
3 58
3 61
3 71
3 85
3 92
4 100
4 112
4 112
4 132
4 132
4 135
4 135
4 130
4 134
4 130
5 141
5 141
5 138
5 140
4 139
4 139
4 141
4 141
4 143
4 146
4 149
4 149
4 150
5 149
5 149
5 148
5 148
5 148
5 148
5 149
5 149
5 149
5 148
5 149
5 150
5 151
5 153
5 153
5 153
6 153
7 154
9 153
9 151
9 150
10 149
10 149
11 153
11 152
11 152
11 152
11 149
11 150
11 149
11 150
11 150
11 150
11 150
11 151
11 152
11 152
12 184
12 187
12 197
12 197
12 200
12 201
12 203
12 203
12 203
12 204
12 204
12 204
12 204
11 204
11 201
19 259
19 263
19 265
19 270
19 271
20 272
22 274
22 270
22 270
22 268
24 267
24 266
24 263
24 263
24 264
24 265
23 260
23 251
23 248
23 244
23 240
23 232
23 226
23 214
23 209
22 213
22 211
23 214
23 216
23 218
23 218
23 218
21 219
21 218
21 218
20 204
20 205
20 205
20 204
20 204
20 204
20 203
20 203
20 200
20 197
20 194
20 193
19 193
19 193
19 195
19 196
19 198
19 199
19 201
19 207
19 207
19 209
19 209
19 208
19 208
19 207
19 205
19 205
19 206
19 207
18 206
17 206
17 207
16 207
16 208
16 208
15 204
15 205
15 207
15 207
15 207
15 206
15 206
15 205
15 206
15 206
15 206
15 205
15 205
15 202
14 161
14 158
14 158
14 158
14 157
14 155
14 153
14 153
14 153
14 153
14 153
14 155
13 157
13 155
13 161
5 97
5 97
5 96
5 88
3 87
3 87
3 87
3 88
3 89
3 89
1 89
1 86
1 86
1 86
1 85
1 84
1 84
1 84
1 85
1 87
1 87
1 87
1 87
1 86
1 83
1 70
1 70
0 68
0 51
0 55
0 55
0 56
0 55
0 57
0 59
0 56
0 57
0 57
0 57
0 57
0 58
0 58
0 58
0 58
0 58
0 58
0 57
0 57
0 57
0 55
0 53
0 52
0 51
0 50
0 44
0 44
0 42
0 42
0 42
0 41
0 40
0 42
0 42
1 41
1 40
1 42
1 43
1 43
1 43
1 42
1 42
1 42
1 41
1 39
1 39
1 39
1 39
1 39
1 38
1 38
1 39
1 39
1 39
1 39
1 39
1 39
1 39
1 40
1 41
1 42
1 42
1 43
1 43
1 43
1 44
1 44
1 48
1 45
1 45
1 38
1 38
1 37
1 37
1 36
1 36
1 36
1 37
1 36
1 35
1 35
1 35
1 35
1 35
1 36
1 37
1 37
1 37
1 38
1 39
1 38
2 41
2 42
2 43
2 42
2 45
2 45
2 46
2 46
2 47
2 41
2 41
2 43
2 43
2 42
3 39
3 39
4 42
4 42
4 43
4 43
4 43
4 43
4 44
4 45
4 50
4 50
4 57
4 62
4 62
4 63
4 63
4 63
4 63
4 63
4 64
4 66
4 66
4 66
4 66
4 66
4 66
4 64
4 64
3 64
3 66
3 65
3 64
3 64
3 64
3 64
3 64
3 64
3 66
3 69
3 74
4 77
4 78
4 78
4 79
4 79
4 79
4 79
4 79
4 79
4 79
4 79
4 79
4 78
4 77
4 76
4 76
4 75
4 75
4 75
4 74
4 74
4 68
4 68
4 69
4 70
4 70
5 72
5 82
5 85
5 85
5 89
5 88
5 90
5 90
5 90
5 90
5 90
5 88
5 90
5 90
5 90
6 91
6 87
6 86
6 85
5 83
4 80
4 80
4 80
4 78
4 82
4 83
4 86
4 87
4 87
4 87
4 84
4 84
4 83
4 83
4 83
3 80
3 82
3 82
3 84
3 84
3 85
3 84
3 82
3 77
3 81
3 75
3 70
3 70
3 69
3 69
3 69
3 69
3 69
3 70
3 68
3 68
4 68
4 68
4 68
4 68
4 68
4 68
4 68
6 66
6 68
6 72
6 75
6 77
6 78
6 77
6 77
6 76
6 74
6 69
5 65
5 64
5 64
5 64
5 64
5 64
5 64
5 64
5 64
5 65
5 69
5 70
5 70
5 70
5 70
5 70
5 70
5 70
5 70
5 70
5 70
5 71
5 70
5 70
5 69
5 69
4 64
4 58
4 55
4 55
4 50
4 52
4 51
4 51
4 52
4 52
4 52
4 52
4 50
4 49
4 50
3 50
3 51
3 51
3 51
3 51
3 52
3 52
3 57
3 56
3 52
3 49
3 46
3 46
3 46
3 47
3 48
3 51
3 52
3 54
3 57
3 56
3 54
3 53
3 60
3 60
3 61
3 61
3 61
3 61
3 57
3 58
3 58
3 60
3 60
3 60
3 60
3 62
3 62
3 61
3 61
2 61
1 63
1 63
1 63
1 63
0 65
0 95
0 95
0 94
0 91
0 86
0 85
0 82
0 81
0 81
0 81
0 81
0 81
0 81
0 80
0 80
0 84
0 84
0 84
0 84
0 84
0 84
0 85
0 83
0 81
0 82
0 83
0 85
0 87
0 90
0 97
0 100
0 102
0 102
0 102
0 103
0 103
0 103
0 104
0 104
1 107
1 107
1 109
1 111
1 111
1 111
1 112
1 117
1 116
1 117
1 117
1 117
1 117
1 116
1 117
1 117
1 117
1 117
1 118
1 118
2 118
2 118
2 115
3 163
3 167
3 168
3 169
3 171
3 170
3 169
3 182
3 179
3 186
3 186
3 186
3 190
3 190
3 189
3 181
3 179
3 179
3 179
3 180
3 180
3 180
3 181
3 182
3 184
3 184
3 184
3 184
3 181
3 181
3 183
3 187
3 192
3 191
3 196
3 199
3 200
3 201
3 171
3 169
3 169
3 169
3 169
3 169
3 169
3 169
3 171
3 171
3 171
3 174
3 176
3 177
3 183
3 190
3 233
3 241
3 245
3 247
3 252
3 251
3 251
3 255
3 255
3 254
3 252
3 250
3 240
3 232
3 232
4 231
4 233
4 234
4 235
4 240
4 249
4 250
4 254
2 254
2 255
1 253
1 253
1 253
1 251
1 249
1 248
1 248
1 249
1 249
1 250
1 250
1 251
1 250
1 251
1 250
1 250
1 249
1 249
1 249
1 248
1 246
1 198
1 196
1 196
1 196
1 194
1 193
1 193
1 168
1 167
1 167
1 166
1 165
1 163
1 163
1 163
1 163
1 163
1 163
1 163
1 162
1 162
1 162
1 159
1 159
1 157
1 157
1 157
1 157
1 157
1 156
1 152
1 146
1 139
1 138
1 138
1 134
1 133
1 132
1 132
1 132
1 132
1 132
1 132
1 132
1 132
1 132
1 130
1 130
1 129
1 125
1 123
1 123
1 115
1 91
1 51
0 46
0 45
0 44
0 42
0 42
0 40
0 38
0 38
0 37
0 37
0 37
0 37
0 37
0 36
0 35
0 34
0 29
0 28
0 19
0 9
0 9
0 9
0 7
0 7
0 7
0 7
0 7
0 7
0 12
0 12
0 15
0 15
0 16
0 19
0 26
0 30
0 34
0 36
0 38
0 38
0 39
0 40
0 40
0 40
0 40
0 44
0 44
2 46
2 47
2 48
2 48
2 48
2 48
2 50
2 50
2 50
2 50
2 50
2 50
2 50
2 52
2 54
2 55
2 55
2 56
2 56
2 56
2 56
2 56
2 57
2 58
2 60
2 134
2 136
2 139
2 143
2 145
2 151
2 160
2 161
2 162
2 163
2 164
2 165
2 166
2 169
2 171
2 171
2 175
2 187
2 188
2 194
2 194
2 194
2 194
2 195
2 195
2 195
2 197
2 197
2 197
2 198
2 199
2 201
2 204
2 195
2 195
2 195
2 195
2 199
2 201
2 201
2 207
2 208
2 209
2 208
2 245
2 247
2 247
2 247
2 247
2 247
2 247
2 247
2 249
3 255
3 256
3 257
3 250
3 256
3 252
3 252
3 249
3 247
2 238
1 235
1 232
2 230
2 228
2 228
2 231
2 237
2 245
2 251
2 255
2 259
2 269
2 269
2 268
2 271
2 271
2 271
2 271
2 270
2 270
2 271
2 278
2 277
2 280
2 279
2 278
2 276
2 276
2 276
2 274
2 274
2 274
2 274
2 273
2 270
2 268
2 263
2 194
2 194
2 192
2 187
2 186
2 183
2 175
2 176
2 174
2 174
2 174
2 174
3 174
4 171
4 170
4 170
4 167
4 164
4 163
4 159
4 160
4 176
4 177
4 178
4 181
4 181
4 181
4 181
4 181
4 179
4 178
4 177
4 179
5 183
5 190
5 190
5 191
5 185
5 183
5 181
5 178
5 177
5 176
5 177
5 142
5 143
5 143
5 145
5 145
5 145
5 145
5 145
5 143
5 135
5 134
5 132
5 131
5 129
5 154
5 156
5 156
5 166
5 166
5 172
5 175
4 175
4 174
4 174
4 170
4 163
4 151
4 149
4 142
4 134
4 129
4 129
4 129
4 126
4 126
4 127
4 127
4 127
4 127
4 126
4 118
4 118
4 116
4 119
4 119
5 123
5 123
5 123
5 123
5 123
5 123
5 123
5 124
5 126
5 125
5 125
5 125
5 126
5 126
5 126
5 126
5 121
5 121
5 119
5 117
5 117
5 117
5 118
4 118
3 118
3 123
3 124
3 124
3 124
3 124
3 124
3 121
3 103
4 103
4 103
4 112
4 114
4 114
4 118
4 121
4 123
4 127
4 124
4 121
3 117
3 110
3 110
3 109
3 110
3 115
3 127
3 128
3 130
3 133
3 132
3 131
3 129
3 127
3 127
3 127
3 127
3 130
3 131
3 132
2 143
2 143
2 145
2 157
2 156
2 133
2 133
2 133
2 125
2 127
2 120
2 118
2 118
2 119
2 118
2 118
2 118
2 118
2 118
2 118
2 119
2 119
2 119
2 119
2 120
2 123
2 126
2 131
2 136
2 137
2 141
3 142
3 160
3 159
3 157
3 157
2 153
2 155
2 155
2 155
2 157
2 158
2 161
2 161
2 160
2 162
1 162
1 162
1 160
1 160
1 160
1 161
1 160
1 160
1 159
1 159
1 159
1 159
1 159
1 157
1 157
1 152
1 152
1 152
1 169
1 171
1 204
1 205
1 209
0 211
0 214
0 205
0 212
0 224
0 220
0 221
0 219
0 221
0 223
0 229
0 230
0 232
0 232
0 232
0 229
0 222
0 210
0 207
0 197
0 196
0 196
0 196
0 196
0 196
0 196
0 196
0 198
1 198
1 198
1 197
1 193
1 192
1 187
1 175
1 174
1 175
1 176
1 177
1 177
1 177
1 177
1 187
1 187
1 186
1 202
1 215
8 271
10 281
18 324
18 331
18 344
19 364
19 371
19 402
19 401
19 407
19 402
19 402
19 398
19 396
19 393
20 409
20 375
20 389
20 393
20 395
20 396
20 383
20 393
20 393
20 397
20 399
20 399
20 401
21 408
21 408
21 409
21 409
21 408
21 408
21 408
21 422
21 422
21 424
21 424
21 424
21 424
21 424
21 424
22 424
22 424
22 424
26 424
26 422
26 421
26 415
26 389
26 386
26 386
27 379
27 377
27 377
27 377
27 366
27 369
27 366
27 364
27 360
27 359
27 353
27 351
28 355
28 355
28 355
28 355
28 357
28 358
29 358
29 358
29 358
29 358
29 358
29 360
29 362
29 362
28 362
28 361
28 363
28 366
28 378
28 387
28 394
28 401
28 406
34 405
36 401
36 399
36 398
37 395
37 391
37 384
37 358
37 358
37 335
37 334
37 329
28 274
28 273
20 235
19 233
20 216
21 213
21 208
22 188
22 185
22 177
21 176
21 174
22 172
26 182
26 183
26 165
26 166
26 156
26 146
26 143
26 143
26 140
26 131
26 130
26 130
26 130
26 132
25 130
25 123
25 122
25 122
26 122
29 121
34 121
42 121
43 107
43 107
43 105
42 105
42 107
42 107
42 107
42 107
42 107
42 107
42 107
38 106
38 106
38 105
38 104
38 104
38 104
38 103
37 103
37 103
37 103
37 103
37 103
37 100
37 100
37 100
37 100
37 100
37 100
37 100
36 95
36 95
36 95
36 95
36 93
36 92
35 92
35 92
35 92
35 92
35 91
35 88
35 88
35 88
35 88
35 83
35 78
35 69
35 59
35 45
35 43
34 35
34 30
28 26
27 27
27 27
26 27
26 27
26 27
26 27
26 25
26 25
26 25
26 23
26 23
26 23
26 23
26 23
26 23
24 23
24 22
24 22
23 22
23 22
23 22
23 22
23 22
22 22
18 11
18 10
18 9
18 9
18 9
18 9
18 9
18 8
18 8
18 8
18 7
18 7
18 5
18 4
17 4
17 4
14 5
14 5
12 5
8 5
4 5
0 5
0 5
0 6
0 7
0 11
0 13
0 15
0 26
0 29
0 31
0 33
0 35
0 36
0 36
0 37
0 37
0 37
0 37
0 37
0 37
0 37
0 37
0 39
0 39
0 39
0 39
0 39
0 41
0 45
0 56
0 58
0 58
0 71
0 74
0 77
0 78
0 79
0 83
0 88
3 97
3 114
5 141
5 142
5 143
5 143
5 143
5 145
5 145
5 145
5 146
5 146
6 147
6 147
6 148
6 148
6 148
6 150
6 150
6 151
6 151
6 151
6 151
6 151
6 151
6 151
7 153
7 153
7 153
8 154
9 156
10 157
11 163
11 180
12 180
12 216
12 220
12 220
12 229
12 230
12 231
12 235
12 237
12 238
12 242
13 248
13 267
14 275
14 275
14 278
14 278
14 279
14 277
14 278
14 283
14 287
14 289
14 293
14 301
14 303
14 311
14 311
14 312
14 318
14 316
14 320
14 328
14 323
14 316
14 315
14 311
14 310
14 309
14 308
14 308
14 307
14 308
14 311
15 314
15 315
15 315
15 317
15 322
15 329
15 330
16 337
22 410
23 420
23 423
23 423
23 413
23 412
23 412
23 397
24 393
24 393
25 392
25 392
26 390
26 384
23 379
24 366
22 343
22 340
22 340
22 341
22 342
22 345
22 348
22 347
23 348
23 350
22 349
22 349
22 348
22 348
22 348
22 346
22 347
22 346
22 347
22 347
22 347
22 347
22 347
23 347
21 348
21 367
21 367
21 366
20 363
19 363
17 366
17 350
17 350
16 313
16 307
16 304
16 298
16 298
16 297
16 295
16 295
16 293
16 288
15 278
15 270
14 262
14 262
16 285
16 290
16 294
16 306
16 303
16 297
16 293
16 292
16 288
17 284
17 284
17 279
17 279
17 278
17 272
17 270
17 261
17 251
17 251
23 368
25 368
25 376
25 380
25 381
25 382
25 381
24 387
24 385
27 402
27 403
27 402
30 417
30 414
30 409
31 402
31 404
30 390
24 320
23 308
23 303
23 303
23 303
22 305
22 307
22 316
22 323
22 328
21 329
21 330
20 328
20 327
20 325
19 322
19 322
19 324
19 324
19 323
19 321
19 318
19 317
19 318
19 317
19 317
19 318
19 321
19 321
19 322
20 334
20 334
20 336
20 338
20 337
20 341
20 341
20 342
19 342
19 347
19 346
19 329
19 329
19 329
19 328
19 326
19 319
19 321
19 321
19 321
19 321
19 323
19 320
19 318
19 318
19 317
19 318
19 318
19 318
19 317
19 317
19 317
19 317
17 288
17 283
17 278
17 269
17 269
17 268
17 268
17 268
17 268
16 266
16 264
16 264
16 264
16 264
16 265
16 265
15 265
14 265
14 263
6 129
5 129
5 115
5 108
5 106
5 106
2 92
2 92
2 92
2 91
2 90
2 90
1 85
1 85
1 89
2 93
2 99
2 105
2 106
2 110
2 112
3 120
3 125
4 125
4 127
4 122
4 117
4 111
4 110
4 111
4 112
4 111
4 115
4 119
4 123
4 124
4 124
4 124
4 124
4 123
4 124
4 123
4 123
4 122
4 121
4 120
4 120
4 119
3 105
4 123
6 145
6 154
6 154
6 154
6 155
6 155
6 156
6 158
6 163
6 166
6 166
6 177
6 180
6 181
6 184
7 184
7 189
7 191
7 192
7 192
7 192
7 194
7 196
7 195
7 194
7 194
7 194
7 193
7 193
7 193
8 194
8 194
8 194
8 195
8 195
9 198
9 198
9 203
9 210
10 219
10 225
10 228
10 229
10 229
10 229
10 229
10 229
10 229
10 228
10 228
10 228
10 228
10 226
10 229
10 229
10 229
10 229
10 229
9 229
8 230
8 232
8 233
8 235
8 235
8 231
7 225
7 217
7 209
7 204
7 202
7 202
7 198
7 193
7 194
7 193
7 190
7 188
7 188
7 189
7 186
7 189
7 189
7 187
7 183
7 182
7 182
7 187
7 188
7 191
7 191
7 190
7 191
7 192
7 190
7 189
7 189
7 189
7 189
7 184
6 157
4 133
4 134
4 134
4 134
4 141
4 142
4 151
4 144
4 140
5 154
5 155
5 148
5 149
5 145
5 143
4 140
4 135
4 134
4 132
4 131
4 133
4 131
4 129
4 129
4 131
4 131
4 131
4 139
4 145
4 152
3 160
3 167
3 170
3 183
3 183
2 180
2 181
2 176
2 169
1 161
1 160
1 156
1 156
1 156
1 156
1 156
1 156
1 156
1 156
1 155
1 155
1 155
1 155
1 152
1 154
1 154
3 154
3 154
3 154
3 152
3 150
3 157
3 156
3 156
3 156
3 155
3 155
3 156
3 158
3 162
3 157
3 159
3 159
3 160
3 160
3 161
3 161
3 164
3 163
3 161
3 160
3 160
3 156
3 158
3 156
3 156
3 150
3 150
3 147
3 147
3 147
3 153
3 157
3 162
3 164
3 164
3 163
3 163
3 162
3 162
3 160
3 160
3 160
3 159
3 150
3 144
3 137
3 132
3 131
2 117
2 117
2 118
2 118
2 120
2 131
2 131
2 132
2 132
2 133
2 134
2 133
2 133
2 134
2 134
2 132
2 142
2 142
2 132
2 124
2 118
2 110
2 103
2 100
2 87
2 87
2 87
2 87
2 92
2 95
2 99
2 99
2 100
2 101
2 101
2 104
2 104
2 104
2 105
2 105
2 113
2 115
2 116
2 120
2 122
2 120
1 120
0 121
0 122
0 122
0 123
0 124
0 120
0 130
0 132
0 132
0 132
0 132
0 130
0 127
0 125
0 125
0 123
0 123
0 123
0 123
0 123
0 121
0 119
0 119
0 120
0 120
0 120
0 120
0 116
0 116
0 118
0 119
1 123
1 122
1 126
1 126
1 121
1 117
1 110
1 110
1 110
1 110
1 110
1 110
1 110
1 111
1 111
1 112
1 114
1 114
1 117
1 117
1 114
1 116
1 116
1 117
1 119
1 119
1 116
1 110
1 111
1 112
1 114
1 114
1 118
1 118
1 118
1 116
1 116
1 119
1 132
1 146
1 156
1 174
1 176
1 181
1 184
1 187
1 199
1 205
1 207
1 205
1 212
1 210
1 208
1 207
1 206
1 206
1 206
1 203
1 203
1 203
1 202
1 202
1 194
1 194
1 195
1 198
1 222
1 225
1 226
1 226
1 232
1 232
1 230
1 230
1 222
1 216
1 214
1 214
1 214
1 214
1 214
1 213
1 213
1 214
1 215
1 216
1 217
1 233
1 238
1 257
1 262
1 265
1 264
1 264
1 264
1 264
1 263
1 264
1 261
0 268
0 269
0 271
0 266
0 270
0 270
0 271
0 271
0 272
0 275
0 275
0 276
0 278
0 278
0 277
0 275
0 274
0 274
0 309
0 307
0 307
0 307
0 303
0 303
0 297
0 294
0 293
0 292
0 291
0 288
0 285
0 283
1 284
1 284
1 294
1 297
1 298
1 299
1 293
1 250
1 239
1 233
1 230
1 232
1 230
1 231
1 230
1 221
1 215
1 212
1 211
2 203
2 199
2 198
2 198
2 198
2 198
2 198
2 198
2 198
2 198
2 198
2 196
2 196
2 196
2 194
2 184
2 160
2 157
2 157
2 157
2 151
2 151
2 151
2 151
2 151
2 151
2 151
2 151
2 152
2 152
2 158
2 158
2 158
5 216
5 216
5 217
5 214
5 195
5 189
5 173
5 169
5 166
5 166
5 166
5 168
5 170
5 174
5 172
5 169
5 163
5 160
5 160
5 160
5 156
5 156
5 155
5 157
5 156
5 154
5 153
5 152
5 152
5 152
5 152
5 152
5 151
5 150
5 115
5 114
5 114
5 114
5 114
5 113
5 113
5 113
5 112
5 109
5 108
5 109
5 109
5 109
4 107
4 107
4 96
4 91
4 90
4 90
4 90
4 90
4 90
4 89
4 86
4 86
4 86
4 86
4 86
4 86
4 86
4 86
4 86
3 86
3 86
3 89
3 89
3 89
3 89
3 89
3 89
3 90
3 90
3 90
3 90
3 90
3 90
3 90
3 90
3 90
3 89
3 89
3 88
3 88
3 88
3 88
3 88
3 88
3 88
3 88
3 88
3 87
3 87
3 80
3 80
3 80
0 16
0 16
0 14
1 14
1 14
3 22
3 19
3 19
3 19
3 19
3 19
3 19
3 19
3 17
3 17
3 17
3 17
3 17
3 17
3 17
3 17
3 16
3 16
3 16
3 15
3 14
3 14
3 14
3 14
3 14
3 14
3 14
3 14
3 14
3 14
3 14
3 14
3 14
3 14
3 14
3 14
3 14
3 14
3 15
3 16
3 15
3 15
3 15
3 15
3 15
3 15
3 15
3 15
3 15
3 15
3 16
3 17
3 17
3 17
3 17
3 17
3 17
3 19
3 19
3 19
3 19
3 19
3 22
3 24
4 24
4 24
4 24
4 23
6 28
6 28
6 29
6 30
6 31
6 32
6 32
6 31
6 31
6 32
6 32
6 32
6 32
6 32
6 32
6 32
6 32
6 32
6 32
6 32
6 32
6 32
6 32
6 32
6 32
6 32
6 32
6 32
6 32
6 32
5 32
4 32
3 25
3 24
3 24
3 24
3 24
3 24
3 26
3 26
3 26
3 27
3 27
3 27
3 27
3 27
3 27
3 27
3 27
3 27
3 27
3 27
3 27
3 27
3 27
3 27
3 27
3 27
3 27
3 27
3 27
3 27
3 27
3 27
3 27
3 27
3 28
3 28
3 28
3 27
3 27
3 28
3 28
3 29
3 29
3 31
3 31
3 33
3 34
3 34
3 35
3 35
3 34
3 33
3 33
3 33
3 33
3 33
3 33
3 35
3 45
3 46
3 47
3 50
3 47
3 45
2 42
0 42
0 42
0 42
1 43
2 44
2 43
3 44
3 46
3 50
3 53
3 54
3 53
3 54
3 54
3 54
3 54
3 55
3 55
3 57
3 57
3 57
3 57
3 58
3 58
3 58
3 59
3 59
3 59
3 61
3 62
3 75
3 93
3 124
3 126
3 126
3 126
3 126
3 126
3 126
3 126
3 126
3 126
3 126
3 126
3 125
3 125
3 125
3 125
3 125
3 125
3 125
3 125
3 125
3 127
3 127
3 127
3 127
3 127
3 127
3 128
3 129
3 149
3 150
3 161
3 161
3 162
3 162
3 164
3 171
4 174
4 183
4 196
5 199
5 200
5 199
5 201
5 201
5 202
5 202
5 202
5 199
5 198
5 197
5 197
5 197
5 197
5 197
5 197
5 200
5 200
5 203
5 204
5 201
5 192
5 193
5 192
5 189
5 189
5 189
5 191
5 193
5 197
5 198
2 198
2 195
2 196
2 205
2 203
2 200
2 197
2 197
3 197
3 197
3 197
3 200
3 200
3 199
3 199
3 197
3 196
3 195
3 195
3 194
3 195
3 195
3 195
3 197
3 197
3 194
3 192
3 173
3 154
3 130
3 130
3 132
3 133
3 133
3 133
3 133
3 134
3 134
3 134
3 134
3 135
7 145
7 150
7 155
7 173
7 193
7 194
7 198
7 196
7 195
7 200
7 201
7 209
7 217
7 218
9 252
9 250
9 252
9 231
9 230
9 219
9 221
9 221
9 218
10 230
10 233
9 230
9 229
8 215
8 216
8 214
8 214
8 212
9 211
9 250
10 254
10 255
10 256
10 257
10 257
10 264
10 264
10 265
10 265
10 265
10 261
10 260
10 257
10 257
10 257
13 293
13 292
13 292
13 292
13 292
13 292
13 287
13 283
13 283
13 281
13 274
13 274
13 275
13 269
12 274
12 280
12 295
12 296
13 301
13 302
13 301
13 301
13 304
13 305
13 305
13 307
16 312
25 326
25 326
25 327
47 363
49 369
51 370
52 369
52 368
52 368
52 369
52 371
52 371
52 371
52 373
52 374
52 373
52 373
52 374
52 375
52 374
52 377
52 377
52 378
52 377
48 359
48 356
48 355
48 337
48 311
48 312
52 309
52 309
52 306
52 301
52 300
52 300
56 464
57 473
57 495
58 523
58 569
58 596
58 609
58 629
58 635
58 640
58 638
57 626
57 624
57 624
57 624
57 623
57 626
57 626
57 626
57 632
56 627
55 589
55 594
55 595
55 596
56 596
56 596
56 590
56 590
56 589
56 589
56 589
56 589
56 594
56 594
56 598
56 602
53 571
53 577
53 586
54 585
54 662
54 667
55 670
55 672
55 674
55 677
55 677
55 678
55 681
55 680
55 674
55 663
55 652
55 651
54 646
54 646
54 646
56 662
57 661
57 662
56 665
54 663
53 661
43 646
41 647
40 648
15 602
15 599
15 598
15 599
15 613
11 607
11 613
11 620
11 623
11 623
11 620
11 619
11 619
11 619
11 618
11 618
11 618
11 617
11 617
11 616
11 614
11 614
11 614
11 614
11 613
11 612
11 611
11 613
12 613
12 613
14 614
14 614
14 615
10 384
10 353
10 324
11 306
11 283
11 281
11 276
12 256
12 254
12 249
12 249
12 245
12 243
12 243
12 243
12 242
12 238
12 237
12 235
12 234
12 235
12 233
12 227
12 224
12 224
11 224
11 225
12 257
12 260
12 269
12 285
12 286
12 295
12 293
12 293
12 288
11 280
11 281
11 273
11 268
11 267
11 190
10 185
10 184
10 183
10 183
10 180
10 180
10 176
10 194
11 196
11 199
11 199
11 201
11 201
11 199
11 198
9 199
7 179
7 179
7 178
6 177
6 177
6 180
6 180
6 180
6 176
6 175
6 175
6 175
6 174
6 163
6 160
6 158
6 151
6 149
6 156
6 159
6 163
6 174
6 178
6 178
6 178
6 181
6 182
6 183
6 183
6 183
6 183
6 183
6 185
6 184
6 184
6 184
6 182
5 183
4 183
4 184
4 184
4 179
4 174
4 174
4 172
4 172
4 181
4 185
5 194
4 192
4 192
4 193
4 197
4 199
4 201
4 202
4 203
4 214
4 216
4 219
4 219
4 221
4 223
4 223
4 227
4 233
4 247
4 249
4 319
3 280
3 277
3 263
3 257
3 257
3 252
3 254
3 255
3 257
3 258
3 253
3 255
3 255
3 255
3 255
3 253
3 250
3 250
3 249
3 248
3 248
3 248
3 230
2 227
2 224
1 224
1 222
1 222
1 221
1 221
1 221
1 221
1 221
1 221
1 220
1 220
1 217
1 217
1 216
1 215
1 215
1 215
1 214
1 214
1 210
1 209
1 209
1 207
1 206
1 200
1 197
1 192
1 182
1 179
1 179
1 179
1 174
1 173
1 173
1 172
1 172
1 172
1 171
1 170
1 170
1 170
1 170
1 170
1 169
1 169
1 167
1 167
1 166
1 165
1 165
1 164
1 164
1 154
1 149
0 140
0 140
0 140
0 139
0 135
0 132
0 129
0 129
0 129
0 117
0 107
0 103
0 102
0 101
0 96
0 94
0 92
0 91
0 80
0 77
0 6
0 6
0 3
0 0
0 0
0 1
0 2
0 2
0 2
0 2
0 2
0 2
0 2
0 2
0 2
0 2
0 2
0 2
0 2
0 2
0 2
0 2
0 2
0 2
0 2
0 2
0 3
0 10
0 10
0 13
0 13
0 13
1 13
1 13
1 13
1 14
1 14
2 18
3 22
3 24
3 24
3 28
3 29
3 29
3 29
3 29
3 30
3 30
3 30
3 30
3 30
3 30
3 30
3 31
3 31
3 31
3 31
3 31
3 31
3 31
3 31
3 31
3 31
3 31
3 31
3 31
3 31
3 31
3 31
3 31
3 31
3 31
3 31
3 31
3 34
3 34
3 34
3 34
3 34
3 34
3 34
3 34
3 35
3 36
3 38
3 38
3 39
3 39
3 42
3 42
3 42
3 43
3 44
3 44
3 44
4 46
4 46
4 46
4 46
4 46
4 46
4 46
4 46
4 47
4 47
4 46
4 45
4 45
4 45
4 45
4 45
4 45
4 45
4 47
4 47
5 53
5 54
5 56
5 56
5 57
5 59
5 60
5 61
5 61
3 63
3 63
3 60
3 53
3 52
3 51
3 51
3 51
3 51
3 51
3 51
3 49
3 49
2 40
2 39
2 37
2 37
2 35
2 35
2 35
2 35
2 35
2 35
2 35
2 35
2 35
2 35
2 35
2 34
2 34
2 34
2 34
2 34
2 34
2 34
2 34
2 34
2 34
2 34
2 34
2 34
2 34
2 34
2 34
2 34
2 34
2 34
2 34
2 34
2 32
2 31
2 31
2 31
2 31
2 31
2 31
2 31
2 31
2 30
2 29
2 27
2 27
2 26
2 26
2 23
2 23
2 23
2 22
2 21
2 21
2 21
1 19
1 19
1 19
1 19
1 19
1 19
1 19
1 18
1 18
1 18
1 18
1 18
1 18
1 17
1 17
1 17
1 17
1 16
1 14
0 11
0 9
0 8
0 6
0 6
0 5
0 3
0 1
0 0
0 0
0 0
0 2
0 2
0 3
0 4
0 4
0 4
0 4
0 4
0 4
0 4
0 4
0 5
0 5
0 5
0 6
0 6
0 9
0 10
0 12
0 14
0 14
0 14
0 17
0 17
0 17
0 17
0 17
0 17
0 17
1 17
1 17
1 17
1 17
1 17
1 17
1 17
1 18
1 18
1 18
1 18
1 18
1 19
1 19
1 19
1 19
1 20
1 20
1 20
1 21
1 21
1 26
1 26
1 27
1 29
1 29
1 29
1 29
1 29
1 29
1 29
1 29
1 29
1 29
1 29
1 29
1 29
1 33
1 34
1 35
1 39
1 40
1 40
1 40
1 40
1 40
1 40
1 40
1 40
1 40
1 40
1 40
1 40
1 42
1 44
1 52
1 59
1 63
1 63
1 63
1 63
1 63
1 63
1 63
1 63
1 63
1 63
1 63
1 64
1 64
1 65
1 61
1 61
1 62
1 68
1 79
1 81
1 83
1 83
1 83
1 84
1 85
1 86
1 86
1 86
1 86
1 86
1 81
1 80
1 78
1 78
1 78
1 77
1 77
1 79
1 79
1 78
1 78
1 78
1 78
0 78
0 78
0 79
0 79
0 79
0 79
0 79
0 79
0 79
0 79
0 81
0 83
0 82
0 82
0 84
0 85
0 84
0 84
0 84
0 87
0 87
0 83
0 83
0 82
0 81
0 81
0 83
0 83
0 86
0 87
0 87
0 87
1 90
1 90
1 95
1 97
1 99
1 96
1 94
1 92
1 92
2 91
2 91
2 99
2 99
2 100
2 101
2 101
2 101
2 101
2 101
2 102
2 102
2 98
2 89
2 82
2 81
2 80
2 80
2 80
2 80
2 80
2 80
2 81
2 81
2 82
2 82
2 82
2 81
2 81
2 80
2 80
2 80
2 79
2 73
2 62
2 58
2 58
2 58
2 58
2 57
2 56
2 54
2 53
2 52
2 52
2 52
2 52
2 53
2 53
2 53
2 52
2 52
2 50
2 49
2 49
2 49
2 50
2 50
2 50
2 50
2 50
2 50
2 52
2 52
2 53
2 53
2 53
2 53
2 53
2 50
2 49
2 49
2 49
2 48
2 47
2 46
2 46
2 46
2 45
2 44
2 44
2 44
2 44
2 40
0 37
0 35
0 35
0 33
0 32
0 32
0 32
0 31
0 31
0 24
0 23
0 23
0 23
0 23
0 23
0 22
0 22
0 22
0 14
0 14
0 13
0 13
0 13
0 13
0 13
0 13
0 12
0 12
0 12
0 12
0 11
0 11
0 11
0 11
0 11
0 11
0 11
0 11
0 17
0 16
0 17
0 17
0 18
0 18
0 20
0 20
0 20
0 20
0 20
0 22
0 22
0 24
0 24
0 24
0 24
0 24
0 24
0 25
0 29
0 29
0 32
0 32
0 32
0 33
0 33
0 33
0 33
0 33
0 33
0 37
0 38
0 38
0 37
0 37
0 37
0 37
0 37
0 37
0 35
0 34
0 33
0 33
0 33
0 33
0 33
0 33
0 34
0 34
0 34
0 36
0 37
0 38
0 39
0 41
0 39
0 44
0 49
0 50
0 50
0 52
0 51
0 51
0 51
0 51
0 51
0 51
0 51
0 51
0 51
0 51
0 51
0 51
0 51
0 51
0 51
0 51
0 51
0 51
0 51
0 51
0 51
0 51
0 51
0 51
0 51
0 51
0 51
1 51
1 51
1 51
1 51
1 51
1 51
1 51
1 51
1 51
1 51
1 50
1 40
1 40
1 40
1 40
1 40
0 40
0 40
0 40
0 40
0 40
0 40
0 37
0 36
0 36
0 38
0 41
0 41
0 41
0 42
0 40
0 37
0 36
0 34
0 34
0 34
0 33
0 33
0 33
0 33
0 33
0 32
0 28
0 28
0 28
0 28
0 28
0 28
0 28
0 28
2 28
6 28
6 28
6 28
9 28
10 28
11 28
13 29
13 29
13 28
13 27
13 27
13 25
13 23
13 22
13 21
13 20
13 20
13 14
13 11
13 10
13 10
13 8
13 8
13 8
13 8
13 8
13 8
13 8
13 8
13 8
13 9
13 9
13 9
13 9
14 9
14 9
14 9
14 9
14 9
14 9
14 9
14 9
14 9
14 9
14 9
14 9
17 9
21 9
21 9
21 9
21 8
21 8
21 8
21 8
21 8
21 8
21 8
21 8
21 8
21 8
21 8
21 8
21 8
21 8
21 8
21 8
21 8
21 8
21 8
21 8
21 8
21 8
21 7
21 6
21 4
21 4
21 4
21 4
21 3
21 3
21 3
21 3
21 3
21 3
21 3
21 3
21 3
21 3
21 3
21 3
21 3
21 3
21 3
21 3
21 3
21 3
21 3
21 3
20 3
19 3
15 3
14 3
13 3
11 3
10 3
9 3
8 2
9 2
9 3
9 3
9 3
9 3
10 2
10 2
10 2
11 2
11 2
12 2
12 2
14 2
15 2
15 2
15 2
15 2
15 2
15 2
15 2
15 2
15 2
15 2
15 2
15 2
15 2
15 2
14 2
14 2
15 2
18 2
19 2
19 2
19 2
19 2
20 2
20 2
20 2
20 1
15 1
13 1
13 1
13 1
13 1
14 1
14 1
21 1
22 1
23 1
24 1
41 1
41 1
41 1
41 1
43 1
43 1
45 1
46 1
46 1
46 1
46 1
46 1
46 1
46 1
46 1
46 1
46 1
46 1
46 1
46 1
47 1
47 1
48 1
48 1
48 1
48 1
48 1
48 1
48 1
49 1
49 1
53 1
62 2
63 3
63 3
64 3
64 3
64 3
64 3
64 3
64 3
64 3
64 3
64 3
65 3
65 3
65 3
66 3
67 3
67 4
67 4
67 3
65 3
66 3
66 3
65 3
65 3
65 3
64 3
64 3
65 3
65 3
65 3
64 3
64 3
64 3
64 3
64 3
64 3
64 3
64 3
64 3
64 3
64 3
64 3
64 3
64 3
64 3
63 4
63 4
59 4
59 5
59 5
59 5
59 5
60 5
60 5
61 5
61 5
61 5
61 5
61 5
62 5
65 6
67 6
64 6
60 6
59 6
59 6
58 6
41 6
41 6
40 6
40 8
38 8
39 8
38 8
39 8
39 8
39 8
39 8
39 8
39 8
39 8
40 8
41 8
41 8
41 8
43 8
52 8
55 8
57 8
57 8
57 8
57 8
57 8
60 8
65 8
64 8
63 8
62 8
60 8
50 7
50 6
50 6
51 6
51 6
52 6
52 6
52 6
53 6
53 6
53 6
55 5
54 5
54 5
55 5
54 5
54 5
55 5
55 5
56 6
56 6
55 6
55 6
57 6
82 9
84 9
84 9
83 9
84 9
84 9
84 9
84 9
85 9
87 9
87 9
92 9
92 8
92 8
92 8
92 8
92 8
94 8
94 8
95 8
95 8
95 8
95 6
95 6
95 6
95 6
95 6
95 6
94 6
94 6
94 6
93 6
93 6
92 6
91 6
91 6
94 7
94 6
91 6
92 6
93 6
93 6
92 6
94 6
94 6
94 6
94 6
94 4
94 4
93 4
93 5
91 5
91 5
92 5
92 5
92 5
93 5
95 6
96 6
95 6
94 6
92 6
91 6
81 6
79 6
79 6
79 6
80 6
81 6
106 7
110 7
108 7
110 7
110 7
112 7
115 7
119 7
132 7
136 7
138 7
138 7
137 7
152 7
156 7
158 7
159 7
159 7
157 7
158 7
163 7
163 7
164 7
163 7
163 7
161 7
161 7
161 7
160 7
159 7
158 7
137 4
137 4
137 4
138 4
139 4
139 4
139 4
140 4
138 4
137 4
137 4
132 4
132 4
132 4
132 4
132 4
132 4
130 4
131 4
131 4
132 4
132 4
132 4
132 4
132 4
132 4
132 4
141 4
142 4
142 4
145 4
150 4
151 4
153 4
154 4
154 4
149 3
149 3
149 3
149 3
148 3
148 3
147 3
146 3
146 3
146 3
146 3
146 3
147 3
148 3
162 2
162 2
161 2
161 2
161 2
162 2
164 2
163 1
162 1
161 1
161 1
161 1
161 1
160 1
160 1
160 1
159 1
158 1
156 1
117 0
116 0
114 0
99 0
99 0
98 0
97 0
96 0
96 0
87 0
89 0
86 0
87 0
76 0
74 0
73 0
72 0
72 0
71 0
71 0
68 0
67 0
66 0
65 0
64 0
63 0
62 0
62 0
62 0
62 0
63 1
63 1
72 1
83 1
108 1
108 1
107 1
108 1
109 1
112 1
112 1
116 1
119 1
119 1
120 1
120 1
120 1
120 1
120 1
119 1
118 1
118 1
118 1
118 1
118 1
117 1
117 1
117 1
108 1
106 1
108 1
106 1
102 1
101 1
99 1
98 1
98 1
98 1
99 1
99 1
98 1
98 1
98 1
100 1
100 1
100 1
100 1
100 1
100 1
98 1
98 1
84 1
84 1
84 1
84 1
87 1
85 1
82 1
81 1
81 1
81 1
81 1
81 1
81 1
81 1
81 1
80 1
79 1
78 1
77 1
77 1
77 1
77 1
76 1
76 1
75 1
75 1
75 1
74 1
73 1
72 1
72 1
71 1
71 1
70 1
69 1
69 1
69 1
69 1
69 1
69 1
69 1
69 1
69 1
69 1
69 1
70 1
70 1
69 1
57 1
52 0
51 0
37 0
36 0
20 0
19 0
18 0
17 0
17 0
16 0
16 0
13 0
10 0
10 0
9 0
9 0
9 0
9 0
9 0
9 0
9 0
10 0
10 0
11 0
11 0
10 0
11 0
11 0
11 0
10 0
10 0
10 0
10 0
10 0
10 0
10 0
9 0
9 0
9 0
9 0
9 0
8 0
8 0
7 0
7 0
7 0
7 0
7 0
7 0
7 0
7 0
7 0
7 0
7 0
8 0
5 0
5 0
5 0
5 0
5 0
6 0
6 0
6 0
7 0
7 0
7 1
7 1
7 1
7 1
7 1
7 1
7 1
8 1
8 1
8 1
8 1
8 1
8 1
8 1
8 1
8 1
8 1
8 1
8 1
8 1
8 1
8 1
8 1
8 1
8 1
8 1
9 1
9 1
9 1
9 1
9 1
8 1
8 1
8 1
8 1
8 1
8 1
8 1
8 1
9 1
9 1
10 1
10 1
10 1
10 1
10 1
10 1
10 1
10 1
11 1
14 1
15 1
15 1
15 1
15 1
16 1
16 1
16 1
15 1
16 1
16 1
16 1
16 1
16 1
16 1
17 1
17 1
17 1
17 1
17 1
17 1
19 1
19 1
20 1
20 1
20 1
20 1
23 1
23 1
23 1
23 1
24 1
25 1
25 1
26 1
27 1
27 1
27 1
32 1
31 1
32 1
32 1
32 1
34 1
34 1
32 1
32 1
32 1
32 1
32 1
32 0
33 0
33 0
37 0
37 0
37 0
37 0
36 0
36 0
36 0
36 0
37 0
38 0
39 0
39 0
41 0
41 0
41 0
42 0
43 0
44 0
45 0
45 0
45 0
45 0
45 0
44 0
44 0
45 0
45 0
45 0
45 0
45 0
45 0
45 0
45 0
45 0
45 0
46 0
48 0
46 0
46 0
46 0
46 0
47 0
52 0
54 0
56 0
57 0
56 0
53 0
52 0
52 0
52 0
52 0
51 0
50 0
50 0
49 0
49 0
48 0
48 0
48 0
48 0
49 0
50 0
50 0
50 0
50 0
51 0
51 0
49 0
49 0
48 0
47 0
47 0
47 0
45 0
44 0
44 0
44 0
44 0
44 0
45 0
44 0
46 0
47 0
47 0
42 0
41 0
41 0
41 0
42 0
41 0
43 0
55 0
56 0
88 1
92 1
94 1
114 1
118 1
120 1
116 1
116 1
116 1
116 1
116 1
116 1
116 1
116 1
115 1
115 1
116 1
116 1
114 1
114 1
114 1
112 1
112 1
111 1
110 1
111 1
111 1
111 1
114 2
114 2
118 3
120 3
122 3
122 3
123 3
123 3
126 3
131 3
133 3
139 3
145 3
145 3
147 3
147 3
147 3
158 3
158 3
159 3
163 5
161 5
159 5
159 5
159 5
159 5
159 5
159 5
159 5
161 5
163 5
163 5
163 5
163 5
163 5
163 5
163 5
163 5
164 5
164 5
164 5
165 5
165 5
165 5
164 5
164 5
164 5
164 5
165 5
165 5
165 5
167 6
169 6
169 6
169 6
168 6
168 6
168 6
167 6
167 6
164 6
163 6
163 6
163 6
163 6
163 6
162 6
165 6
165 6
165 6
158 6
154 6
124 5
122 5
117 5
99 5
97 5
97 5
97 5
100 6
102 6
102 6
102 6
102 6
102 6
103 6
103 6
103 6
102 6
102 6
102 6
108 6
108 6
108 6
108 6
111 6
111 5
113 5
113 5
112 5
109 4
109 4
104 4
103 4
100 4
99 4
98 4
97 4
90 4
88 4
86 4
81 4
80 4
80 4
76 4
77 4
76 4
67 4
66 4
65 4
53 2
53 2
53 2
52 2
52 2
52 2
52 2
52 2
52 2
51 2
50 2
50 2
50 2
50 2
50 2
50 2
56 2
57 2
75 2
77 2
77 2
77 2
86 2
87 2
88 2
88 2
90 2
90 2
89 2
89 2
89 2
85 1
85 1
85 1
85 1
85 1
85 1
85 1
85 1
85 1
86 1
86 1
86 1
87 1
87 1
87 1
87 1
83 1
81 1
76 1
74 1
74 1
74 1
73 1
73 0
73 0
73 0
72 0
72 0
68 0
67 0
67 0
67 0
67 0
67 0
66 0
66 0
66 0
66 0
65 0
65 0
61 0
61 0
66 0
66 0
64 0
62 0
61 0
63 0
63 0
62 0
62 0
63 0
63 0
63 0
63 0
63 0
63 0
63 0
62 0
62 0
63 0
62 0
62 0
62 0
61 0
61 0
61 0
61 0
61 0
61 0
60 0
60 0
60 0
60 0
60 0
60 0
60 0
60 0
60 0
60 0
60 0
61 0
62 0
61 0
61 0
55 0
55 0
35 0
33 0
31 0
30 0
23 0
22 0
21 0
20 0
19 0
19 0
19 0
19 0
19 0
19 0
19 0
19 0
19 0
19 0
19 0
19 0
19 0
18 0
17 0
17 0
17 0
17 0
17 0
17 0
17 0
17 0
17 0
17 0
17 0
17 0
17 0
17 0
17 0
17 0
17 0
16 0
16 0
16 0
16 0
16 0
16 0
16 0
16 0
16 0
16 0
15 0
15 0
15 0
14 3
14 3
13 3
9 3
9 3
9 3
8 3
8 3
6 3
6 3
6 3
6 3
5 3
5 3
3 3
4 3
5 3
5 3
5 3
5 3
3 3
3 3
3 4
3 4
3 4
3 4
3 4
3 4
3 4
3 4
3 4
3 4
3 4
3 4
3 4
3 4
3 4
3 4
3 4
3 4
3 4
3 4
3 5
3 5
3 5
3 5
3 5
3 5
3 5
3 5
5 5
5 5
5 5
5 5
5 5
5 5
5 5
5 5
5 5
5 5
4 5
4 5
4 5
5 5
5 5
7 5
7 5
8 5
8 7
8 7
8 7
8 7
8 8
8 8
8 10
9 10
9 10
9 11
9 11
9 11
9 15
11 16
11 16
11 18
12 19
12 20
12 25
12 39
12 44
12 53
12 58
12 61
12 72
12 78
12 79
12 81
12 82
12 84
12 86
12 89
12 89
12 89
12 89
12 89
13 90
13 90
13 90
13 90
13 115
12 119
12 121
12 122
12 128
12 131
12 132
12 132
11 133
11 133
11 136
11 136
11 136
11 136
11 140
11 140
11 141
11 143
11 143
11 143
11 143
11 143
11 143
11 143
11 143
11 143
11 143
11 143
11 143
11 143
11 143
11 144
11 144
15 144
15 143
15 143
15 143
15 143
15 144
15 144
16 145
16 145
14 145
14 145
14 145
14 145
14 145
14 145
14 145
14 145
14 145
14 145
14 145
14 145
14 145
13 145
14 145
13 143
14 143
13 143
14 143
13 143
13 143
13 143
13 141
13 138
13 134
13 132
13 132
13 131
14 128
13 128
13 122
11 117
11 117
11 116
11 116
11 116
12 108
12 90
12 84
12 76
12 75
12 74
12 72
12 72
12 69
12 68
12 67
12 64
12 63
12 59
12 58
12 58
12 59
12 59
12 58
12 59
12 61
17 62
17 36
18 34
18 31
18 22
18 14
18 13
18 13
18 13
18 13
18 13
18 13
18 13
18 13
18 13
18 11
18 11
18 11
18 10
18 10
18 10
18 10
18 10
18 10
18 10
18 10
18 10
18 10
18 10
18 10
18 10
18 9
18 9
18 9
14 9
14 10
14 11
14 11
14 12
14 12
14 11
13 11
13 11
13 11
13 11
13 11
13 11
13 11
13 11
13 11
13 11
13 11
13 11
13 11
13 11
12 11
12 11
11 11
11 11
10 11
10 11
9 11
9 11
9 12
9 12
9 12
9 12
9 12
9 12
9 12
8 12
8 12
8 12
8 12
8 12
8 12
8 12
8 12
7 12
7 12
7 12
7 12
7 12
7 12
7 12
7 12
7 12
7 12
7 12
7 12
7 12
7 12
7 12
7 12
5 12
5 10
5 10
4 10
4 9
3 8
1 6
0 6
0 5
0 5
0 5
0 5
0 5
0 5
0 5
0 6
0 6
0 6
0 6
0 6
0 6
0 6
0 6
0 6
0 6
0 6
0 6
0 6
0 6
0 6
0 6
0 6
0 6
0 6
0 6
0 6
0 6
0 6
0 6
0 5
0 5
0 4
0 6
0 7
0 6
0 6
0 6
0 6
0 6
0 6
0 6
0 6
0 7
0 7
0 7
0 8
0 8
0 8
0 9
0 9
0 9
0 9
0 9
0 9
0 9
0 9
0 9
0 9
0 9
0 8
0 8
0 8
0 8
0 8
0 8
0 8
0 11
0 11
0 11
0 11
0 11
0 11
0 11
0 11
0 12
0 13
0 13
0 13
0 13
0 13
0 13
0 13
0 13
0 14
0 14
0 14
0 14
0 14
0 15
0 15
0 16
2 16
2 16
2 16
2 16
2 18
2 20
2 21
2 21
2 26
2 26
2 27
2 28
2 28
2 28
2 27
2 28
2 28
2 28
2 28
2 28
2 28
2 28
2 28
2 28
2 28
2 28
2 28
2 28
2 28
2 28
2 28
2 29
2 29
2 29
2 29
2 29
2 29
2 29
2 29
2 27
2 27
2 26
2 26
2 26
2 26
2 26
2 26
2 26
2 26
2 26
2 27
2 28
2 28
2 28
2 27
2 27
2 27
2 26
2 26
2 26
2 26
2 26
2 26
2 26
2 26
2 26
2 26
2 26
2 26
2 26
2 26
2 26
2 26
2 26
2 29
2 27
2 27
2 27
2 29
2 34
2 36
2 40
2 40
2 39
2 39
3 39
3 41
3 41
3 41
3 41
3 41
3 41
3 40
3 40
3 40
3 40
3 41
4 40
4 39
4 39
2 39
3 41
3 41
3 40
3 37
3 36
3 36
3 35
3 30
3 30
3 30
3 29
3 31
3 31
3 31
3 31
3 31
3 32
3 32
3 32
3 32
3 32
3 32
3 32
3 32
3 32
3 35
3 37
3 38
3 38
3 38
3 37
3 37
3 37
3 37
3 37
3 37
3 37
3 37
3 37
3 37
3 36
3 36
3 36
3 36
3 36
3 36
3 36
3 36
3 36
3 35
3 33
3 34
3 34
3 34
3 34
3 34
3 34
3 34
3 34
3 35
3 35
3 35
3 35
3 36
3 36
3 36
3 36
3 40
3 40
3 41
3 41
3 41
3 41
3 36
3 34
3 33
3 32
3 30
3 32
3 31
3 27
3 27
3 27
2 26
2 26
2 24
2 24
2 24
2 24
2 24
2 24
2 24
2 24
2 24
2 23
2 23
1 23
1 23
1 23
0 22
0 21
0 21
0 21
0 21
0 21
0 21
0 21
0 21
0 21
0 21
0 21
0 18
0 18
0 18
0 18
0 18
0 17
0 17
0 17
0 17
0 17
0 17
0 17
0 17
0 17
0 13
0 12
0 11
0 11
0 11
0 11
0 11
0 11
0 11
0 11
0 11
0 11
0 11
0 11
0 11
0 11
0 11
0 11
0 11
0 11
0 11
0 11
0 11
0 11
0 11
0 11
0 10
0 10
0 10
0 10
0 8
0 8
0 8
0 8
0 8
0 8
0 8
0 8
0 8
0 8
0 8
0 8
0 4
0 4
0 3
0 3
0 3
0 3
0 2
0 2
0 2
0 2
0 0
0 0
0 0
0 0
0 0
0 0
0 0
0 0
0 0
0 0
0 0
0 0
0 0
0 0
0 0
0 0
0 0
0 0
0 0
0 0
0 1
0 1
0 1
0 1
0 1
0 1
0 1
0 2
0 2
0 2
0 2
0 3
0 3
0 3
0 3
0 3
0 3
0 3
0 7
0 7
0 8
0 9
0 9
0 9
0 9
0 9
0 9
0 9
0 9
0 9
0 17
0 17
0 18
0 18
0 18
0 18
0 18
0 18
0 18
0 18
0 18
0 18
0 18
0 18
0 18
0 18
0 18
0 18
0 18
0 18
0 18
0 18
0 18
0 18
0 18
0 18
0 18
0 18
0 18
0 18
0 18
0 18
0 18
0 18
0 18
0 18
0 18
0 18
0 18
0 18
0 18
0 18
0 18
0 18
0 18
0 19
0 19
0 19
0 19
0 19
0 19
0 19
0 20
0 20
0 20
0 20
0 20
0 20
0 20
0 20
0 20
0 20
0 20
0 20
0 20
0 20
0 20
0 20
0 20
0 20
0 19
0 19
0 19
0 19
0 19
0 19
0 19
0 18
0 18
0 18
0 18
0 17
0 17
0 17
0 17
0 17
0 17
0 17
0 13
0 13
0 11
0 11
0 12
0 12
0 12
0 14
0 14
0 14
0 14
0 14
0 6
0 7
0 6
0 6
0 6
0 6
0 6
0 6
0 6
0 6
0 6
0 6
0 7
0 7
0 9
0 9
0 9
0 9
0 9
0 9
0 9
0 9
0 9
0 9
0 10
0 10
0 10
0 18
0 19
0 19
0 23
0 23
0 24
0 24
0 24
0 24
0 24
0 24
0 29
0 29
0 31
0 32
0 32
0 32
0 33
0 32
0 32
0 32
0 32
0 32
0 33
0 33
0 32
0 32
0 32
0 34
0 34
0 35
0 35
0 35
0 35
0 35
0 35
0 35
0 35
0 35
0 35
0 35
0 35
0 35
0 35
0 35
0 35
0 35
0 35
0 35
0 35
0 35
0 35
0 35
0 35
0 35
0 35
0 35
0 35
0 35
0 35
0 33
0 33
0 34
0 34
0 34
0 34
0 34
0 34
0 33
0 33
0 33
0 33
0 33
0 34
0 33
0 33
0 33
0 33
0 33
0 33
0 33
0 31
0 31
0 31
0 31
0 30
0 30
0 30
0 30
0 30
0 30
0 30
0 30
0 30
0 30
0 30
0 30
0 29
0 29
0 29
0 18
0 16
0 16
0 16
0 16
0 17
0 17
0 18
0 18
0 18
0 18
0 13
0 13
0 10
0 10
0 11
0 11
0 10
0 12
0 12
0 12
0 12
0 12
0 11
0 11
0 11
0 11
0 10
0 9
0 9
0 8
0 8
0 8
0 8
0 8
0 8
0 8
0 8
0 8
0 8
0 8
0 8
0 8
0 8
0 8
0 8
0 8
0 8
0 9
0 10
0 10
0 10
0 10
0 10
0 10
0 10
0 10
0 10
0 10
0 10
0 10
0 10
0 9
0 9
0 9
0 9
0 9
0 9
0 9
0 10
0 13
0 13
0 13
0 12
0 12
0 14
0 14
0 14
0 14
0 14
0 14
0 14
0 14
0 14
0 14
0 14
0 14
0 14
0 14
0 14
0 14
0 14
0 14
0 14
0 14
0 14
0 14
0 14
0 14
0 14
0 14
0 14
0 14
0 13
0 13
0 12
0 13
0 12
0 12
0 12
0 11
0 11
0 10
0 10
0 10
0 10
0 10
0 11
0 10
0 10
0 10
0 10
0 10
0 10
0 10
0 11
0 11
0 11
0 11
0 11
0 11
0 11
0 11
0 11
0 12
0 12
0 12
0 12
0 12
0 12
0 12
0 12
0 12
0 12
0 12
0 12
0 12
0 12
0 11
0 10
0 10
0 10
0 10
0 10
0 10
0 10
0 10
0 10
0 10
0 10
0 10
0 10
0 10
0 10
0 11
0 11
0 11
0 11
0 10
0 5
0 5
0 5
0 6
0 6
0 6
0 6
0 6
0 6
0 6
0 6
0 6
0 6
0 6
0 6
0 6
0 6
0 6
0 6
0 6
0 6
1 6
1 6
1 7
2 8
2 8
2 8
2 8
2 8
2 8
2 8
2 8
2 8
2 8
2 8
2 9
2 9
2 8
2 8
2 8
2 8
2 8
3 8
3 8
4 8
4 8
4 8
4 7
4 8
4 8
4 7
4 7
4 7
4 7
4 7
4 7
4 6
4 6
4 6
4 6
4 6
4 6
4 6
4 6
4 6
4 5
4 5
4 6
4 6
4 7
4 7
4 7
4 7
4 7
4 7
4 7
4 7
4 7
4 7
4 7
4 7
4 7
4 7
4 7
4 7
4 7
4 7
4 7
5 7
5 7
5 7
5 7
5 7
5 7
5 7
5 6
5 6
6 6
6 6
6 6
6 6
6 6
6 6
6 5
6 5
7 5
8 5
8 5
8 5
8 5
8 5
8 5
8 5
8 5
8 5
8 5
8 5
8 5
8 5
8 5
8 5
7 5
7 5
6 4
6 3
6 3
6 3
8 4
8 5
8 5
8 5
8 7
8 7
8 7
8 7
8 8
7 9
7 9
7 9
7 9
7 9
7 10
7 10
7 10
6 10
6 10
6 10
6 9
6 9
6 9
6 9
6 9
6 9
6 9
6 9
6 9
6 9
6 10
6 10
6 10
6 11
6 11
6 11
6 11
6 11
6 10
6 9
6 9
6 9
6 9
6 9
6 9
6 9
6 9
6 9
6 9
6 9
6 9
6 9
6 9
6 9
6 9
6 9
6 9
6 9
6 9
6 9
6 9
5 9
5 10
5 10
5 10
5 10
5 10
5 10
5 11
5 11
5 11
5 11
5 11
5 11
5 11
5 11
5 11
4 12
4 12
3 14
3 14
3 14
3 14
2 13
2 13
2 13
2 13
2 13
2 13
2 14
2 14
2 14
2 15
2 17
2 17
2 17
2 17
2 18
2 18
2 18
0 17
0 16
0 15
0 15
0 14
0 14
0 14
0 14
0 13
0 13
0 13
0 13
0 14
0 13
0 15
0 15
0 15
0 15
0 15
0 15
0 15
0 15
0 16
0 16
0 16
0 16
0 16
0 16
0 16
0 16
0 15
0 15
0 15
0 14
0 14
0 14
0 14
0 14
0 14
0 14
0 14
0 14
0 14
0 14
0 14
0 14
0 14
0 14
0 14
0 14
0 14
0 14
0 14
0 14
0 14
0 14
0 14
0 14
0 14
0 14
0 14
0 14
0 14
0 14
0 14
0 14
0 14
0 14
0 14
0 15
0 15
0 15
0 15
0 15
0 15
0 15
0 15
0 14
0 15
0 13
0 13
0 13
0 13
0 13
0 13
0 13
0 13
0 13
0 13
0 12
0 12
0 12
0 11
0 9
0 8
0 11
0 11
0 10
0 10
0 13
0 13
0 13
0 15
0 15
0 15
0 15
0 15
0 15
0 15
0 15
0 15
0 15
0 14
0 14
0 12
0 13
0 14
0 14
0 14
0 14
0 14
0 13
0 13
0 15
0 17
0 17
0 17
0 17
0 17
0 17
0 17
1 17
1 17
1 17
1 17
1 17
1 17
1 17
1 17
1 17
1 17
1 17
1 17
1 17
1 17
1 17
1 17
1 17
1 17
1 17
1 17
1 17
1 19
1 19
1 19
1 19
1 19
1 19
1 19
1 19
1 19
1 22
1 23
1 23
1 23
1 25
1 25
1 26
1 26
1 26
1 26
1 26
1 26
1 26
1 26
1 26
1 26
1 26
1 25
1 25
1 26
1 26
1 26
1 26
1 26
1 26
1 26
1 26
1 26
1 26
1 26
1 26
1 26
1 26
1 26
1 23
1 22
1 22
1 22
1 18
1 18
1 18
1 18
1 18
1 18
1 18
1 18
1 18
1 18
1 18
3 18
3 18
3 18
3 18
3 18
3 17
3 16
3 16
3 16
3 16
3 16
3 15
4 15
4 12
4 12
4 12
4 12
4 12
4 12
4 12
3 12
3 13
3 15
3 15
3 15
3 16
3 16
3 17
3 17
3 17
3 17
3 17
3 17
3 17
3 17
3 17
3 17
3 18
3 18
3 18
3 18
3 18
3 14
3 12
3 12
3 12
4 12
4 12
4 12
4 12
4 12
4 10
4 9
4 9
4 9
4 9
4 8
4 7
4 7
4 7
4 7
4 7
4 8
4 8
4 8
4 8
4 8
4 8
4 7
4 7
4 7
4 7
4 7
4 7
4 8
4 8
4 8
4 8
4 8
4 8
4 8
4 8
4 8
4 8
4 8
4 8
4 8
4 8
4 8
4 8
4 8
5 8
6 8
6 8
6 8
6 8
6 8
6 8
6 8
6 8
4 8
5 9
5 9
5 9
5 10
5 10
5 10
5 10
5 10
5 10
5 10
5 11
4 11
4 11
4 11
4 11
4 11
4 11
4 11
4 11
4 11
4 10
4 8
4 7
4 7
4 8
4 8
4 7
4 7
4 7
4 7
4 7
4 7
4 7
4 7
4 7
4 7
4 6
4 6
4 6
4 6
4 6
4 6
4 6
4 6
3 6
3 6
3 6
3 6
3 6
3 6
3 7
3 7
3 7
3 8
3 8
3 8
3 8
3 8
3 8
3 8
3 9
3 8
3 8
3 8
3 8
3 8
3 8
3 8
3 9
3 9
3 9
3 9
3 9
3 8
3 8
3 8
3 8
3 8
3 8
3 8
3 8
3 8
3 8
3 8
3 8
3 8
3 8
3 8
3 8
3 8
1 8
1 8
1 8
1 8
1 9
1 9
1 11
1 11
1 11
1 12
0 11
0 11
0 12
0 11
0 12
0 12
0 12
0 12
0 12
0 13
0 12
0 12
0 12
0 12
0 12
0 12
0 13
0 13
0 12
0 13
0 13
0 13
0 13
0 13
0 13
0 13
0 13
0 13
0 13
0 13
0 13
0 13
0 13
0 13
0 13
0 13
0 13
0 17
0 17
0 17
0 18
0 18
0 18
0 18
0 18
0 18
0 18
0 18
0 19
0 19
0 18
0 18
1 19
1 20
1 20
1 21
1 22
1 22
1 22
2 22
2 21
2 21
2 21
2 21
2 21
2 21
2 21
2 21
2 20
2 20
2 20
2 20
2 20
3 20
3 20
3 20
2 20
3 20
3 20
3 20
3 20
3 20
3 20
3 20
3 20
3 20
3 20
3 20
3 20
3 20
3 20
3 20
3 20
3 20
3 19
4 20
4 17
4 17
4 15
4 15
4 15
4 15
4 15
4 15
4 15
4 16
4 16
4 16
4 16
4 15
4 15
4 15
4 15
4 15
4 16
4 17
4 16
4 16
4 16
4 15
4 15
4 15
4 15
4 15
4 15
4 15
4 15
4 15
4 15
4 15
4 15
4 15
4 15
4 15
4 15
4 15
4 15
4 10
4 10
4 10
4 10
4 10
4 10
4 10
4 10
4 10
4 10
4 10
4 9
4 9
3 9
3 9
3 9
3 7
3 7
3 6
3 5
3 5
3 5
3 5
3 5
3 5
3 5
3 5
3 5
3 5
3 5
3 5
3 5
3 6
3 6
3 6
3 6
2 6
2 6
1 6
1 6
1 6
1 6
1 6
1 7
1 7
1 7
1 7
1 7
1 7
1 7
1 7
1 7
1 7
1 7
1 7
1 7
1 7
1 7
0 6
0 6
0 6
0 6
0 6
0 7
0 9
0 10
0 10
0 10
0 9
0 9
0 9
0 11
0 11
0 14
0 14
0 14
0 15
0 14
0 14
0 14
0 14
0 14
0 14
0 14
0 14
0 14
0 14
0 14
0 14
0 14
0 14
0 14
0 14
0 13
0 13
0 13
0 13
0 13
0 13
0 13
0 13
0 13
0 13
0 13
0 13
0 13
0 13
0 13
0 13
0 13
0 13
0 13
0 13
0 13
0 13
0 13
0 13
0 13
0 13
0 13
0 13
0 13
0 13
0 13
0 13
0 13
0 13
0 13
0 13
0 13
0 13
0 13
0 12
0 12
0 12
0 12
0 12
0 12
0 12
0 12
0 12
0 12
0 12
0 11
0 11
0 11
0 11
0 11
0 11
0 11
0 11
0 11
0 11
0 11
0 11
0 11
0 11
0 11
0 11
0 11
0 11
0 11
0 10
0 10
0 7
0 8
0 9
0 9
0 9
0 9
0 10
0 7
0 5
0 5
0 5
2 6
2 5
2 5
2 6
2 7
3 8
4 8
4 9
4 9
4 9
4 9
4 9
4 10
4 10
4 10
4 10
4 10
4 10
4 10
4 10
4 10
4 10
4 10
4 10
4 10
4 10
4 9
4 9
4 9
4 9
4 9
4 9
4 9
4 9
4 9
4 9
4 9
4 9
4 9
4 9
4 9
4 9
5 9
5 9
5 9
5 9
5 9
5 10
5 10
5 10
5 10
5 10
5 10
5 10
5 11
5 11
5 12
5 12
5 12
5 12
5 12
5 12
5 12
5 12
5 12
5 12
5 12
5 12
5 12
5 12
5 12
5 12
5 12
6 12
6 12
6 12
6 12
6 12
6 12
6 12
6 12
6 12
6 12
6 12
6 12
6 12
6 12
6 12
6 12
6 12
6 10
6 10
6 10
6 10
6 10
6 9
6 9
6 9
6 9
6 9
3 8
3 8
3 8
3 7
3 7
3 6
2 6
2 5
2 5
2 5
2 5
2 5
2 4
2 4
2 4
2 4
2 4
2 5
2 5
2 5
2 5
2 5
2 10
2 12
2 12
2 13
2 13
2 14
2 15
2 15
2 15
2 15
2 15
2 15
2 15
2 15
2 15
2 16
2 16
2 16
2 16
2 16
1 16
1 16
1 16
1 15
1 16
1 16
1 16
1 16
1 16
1 16
1 16
1 16
1 15
1 15
1 14
1 14
1 14
1 14
1 14
1 14
1 14
1 14
1 14
1 14
1 14
1 14
1 14
1 14
1 14
1 14
1 14
0 14
0 15
0 15
0 15
0 15
0 15
0 15
0 15
0 15
0 15
0 15
0 15
0 16
0 16
0 16
0 16
0 16
0 16
0 16
0 16
0 16
0 16
0 16
0 16
0 18
0 18
0 18
0 18
0 18
0 18
0 18
0 18
0 18
0 18
0 18
0 18
0 18
0 18
0 18
0 18
0 18
0 18
0 18
0 18
0 17
0 17
0 17
0 17
0 16
0 9
0 7
0 7
0 7
0 7
0 7
0 7
0 7
0 7
1 7
1 7
1 7
1 7
1 7
1 7
1 6
1 6
1 6
1 6
1 6
1 6
1 6
1 6
1 6
0 5
0 5
0 5
0 5
0 5
0 5
0 5
0 5
0 5
0 5
0 5
0 5
0 5
0 5
0 5
0 5
0 5
0 5
0 5
0 5
0 5
1 6
1 6
1 6
1 6
1 6
1 6
1 5
1 5
1 5
1 5
1 5
1 5
1 5
1 5
1 5
0 5
0 5
0 5
0 4
0 4
0 4
0 4
0 4
0 4
0 4
0 4
0 4
0 4
0 4
0 4
0 2
0 1
0 1
0 1
0 1
0 1
0 1
0 1
0 1
0 1
0 1
0 2
0 2
0 2
0 2
0 2
0 2
0 2
0 2
0 2
0 2
0 2
0 2
0 2
0 2
0 2
0 2
0 2
0 2
0 2
0 2
0 5
0 6
0 7
0 8
0 8
0 9
0 10
0 10
0 10
0 10
0 10
0 10
0 11
0 12
0 12
0 13
0 14
0 14
0 14
0 14
0 14
0 14
0 14
0 14
0 14
0 14
0 14
0 14
0 14
0 14
0 14
0 14
0 14
0 14
0 14
0 14
0 14
0 14
0 14
0 14
0 14
0 14
0 14
0 14
0 14
0 14
0 14
0 14
0 14
0 14
0 14
0 14
0 14
0 14
0 14
0 14
0 14
0 14
0 14
0 14
0 14
0 14
0 15
0 15
0 15
0 15
0 15
0 15
0 16
0 16
0 16
0 16
0 16
0 16
0 17
0 18
0 18
0 17
0 17
0 17
0 17
1 17
1 17
1 17
2 17
2 17
2 17
2 17
2 17
2 17
2 17
2 17
2 17
2 17
2 17
2 17
2 17
2 17
2 16
2 15
2 13
2 13
2 9
2 9
2 9
2 9
2 9
2 9
2 10
2 12
2 12
2 12
2 10
2 10
2 10
2 9
2 8
2 8
2 8
2 8
2 9
2 9
2 9
2 9
2 9
2 9
2 9
2 9
2 9
2 9
2 9
2 9
2 9
2 9
2 9
2 9
2 9
2 9
2 8
2 8
2 8
2 8
2 8
2 9
2 9
2 9
2 9
2 11
2 13
2 13
2 13
2 13
2 13
2 13
2 13
2 13
2 12
2 12
2 12
2 12
2 12
2 12
2 12
2 12
2 12
2 12
2 12
2 11
2 11
2 11
2 11
2 11
2 11
2 11
2 10
2 9
2 9
2 9
1 9
1 10
1 10
1 10
1 11
1 12
0 13
0 13
0 13
0 19
0 19
0 19
0 19
0 19
0 19
0 19
0 19
0 19
0 19
0 19
0 19
0 19
0 19
0 19
0 19
0 19
0 19
0 19
0 19
0 19
0 17
0 16
0 16
0 16
0 16
0 16
0 16
0 16
0 16
0 16
0 17
0 17
0 16
0 16
0 16
0 16
0 16
0 16
0 16
0 16
0 16
0 16
0 16
0 16
0 16
0 16
0 16
0 16
0 16
0 16
0 16
0 16
0 16
0 17
0 17
0 15
0 14
0 14
0 13
0 12
0 13
0 13
0 13
0 13
0 13
0 13
0 13
0 13
0 13
0 13
0 13
0 13
0 13
0 13
0 13
0 13
0 13
0 13
0 13
0 14
0 14
0 14
0 14
0 14
0 14
0 14
0 14
0 14
0 14
0 14
0 14
0 13
0 13
0 13
0 12
0 11
0 10
0 10
0 10
0 4
0 4
0 5
0 5
0 5
0 5
0 5
0 5
1 5
1 5
1 5
1 5
1 5
1 5
1 5
1 5
1 5
1 5
1 5
1 4
1 4
1 4
1 4
0 4
0 4
0 4
0 4
0 4
0 4
0 6
0 7
0 6
0 6
0 6
0 6
0 6
0 6
0 6
0 6
0 6
0 6
0 6
0 6
0 6
0 6
0 6
0 6
0 6
0 6
0 6
0 6
0 6
0 6
0 6
0 5
0 5
0 5
0 5
0 5
0 5
0 5
0 4
0 4
0 4
0 4
0 4
0 4
0 4
0 4
0 4
0 4
0 4
0 4
0 4
0 4
0 4
0 4
0 4
0 4
0 4
0 3
0 3
0 3
0 3
0 3
0 3
0 3
0 3
0 3
0 3
0 3
0 3
0 3
0 3
0 3
0 3
0 3
0 3
0 3
0 3
0 3
0 3
0 3
0 3
0 3
0 3
0 3
0 3
0 3
0 3
0 3
0 3
0 3
0 3
0 3
0 3
0 3
0 3
0 3
0 3
0 3
0 3
0 3
0 3
0 3
0 3
0 3
0 3
0 3
0 1
0 0
0 0
0 0
0 0
0 0
0 0
0 0
0 0
0 0
0 0
0 0
0 0
0 0
0 0
0 0
0 0
0 0
0 0
0 0
0 0
0 0
0 0
0 0
0 0
0 0
0 0
0 0
0 0
0 0
0 0
0 0
0 0
0 0
0 0
0 0
0 0
0 0
0 0
0 0
0 0
0 0
0 0
0 0
0 0
0 0
0 0
0 0
0 0
0 0
0 0
0 0
0 0
0 0
0 0
0 0
0 0
0 0
0 0
0 0
0 0
0 0
0 0
0 0
0 0
0 0
0 0
0 0
0 0
0 0
0 0
0 0
0 0
0 0
0 0
0 0
0 0
0 0
0 0
0 0
0 0
0 0
0 0
0 0
0 0
0 0
0 0
0 0
0 0
0 0
0 0
0 0
0 0
0 0
0 0
0 0
0 0
0 0
0 0
0 0
0 0
0 0
0 0
0 0
0 0
0 0
0 0
0 0
0 0
0 0
0 0
0 0
0 0
0 0
0 0
0 0
0 0
0 0
0 0
0 0
0 0
0 0
0 0
0 0
0 0
0 0
0 0
1 0
1 0
1 0
1 0
1 0
1 0
1 0
1 0
2 0
2 0
2 0
2 0
2 0
2 0
2 0
2 0
2 0
2 0
1 0
1 0
1 0
1 0
1 0
0 0
0 0
0 0
0 0
0 0
0 0
0 0
0 0
0 0
0 0
0 0
0 0
0 0
0 0
0 0
0 0
0 0
0 0
0 0
0 0
0 0
0 0
0 0
0 0
0 0
0 0
0 0
0 0
0 0
0 0
0 0
0 0
0 0
0 0
0 0
0 0
0 0
0 0
0 0
0 0
0 0
0 0
0 0
0 0
0 0
0 0
0 0
0 0
0 0
0 0
0 0
0 0
0 0
0 0
0 0
0 0
0 0
0 0
0 0
0 0
0 0
0 0
0 0
0 0
0 0
0 0
0 0
0 0
0 0
0 0
0 0
0 0
0 0
0 0
0 0
0 0
0 0
0 0
0 0
0 0
0 0
0 0
0 0
0 0
0 0
0 0
0 0
0 0
0 0
0 0
0 0
0 0
0 0
1 0
1 0
1 0
1 0
1 0
1 0
1 0
1 0
1 0
1 0
1 0
1 0
1 0
1 0
1 0
1 0
1 0
1 0
1 0
1 0
1 0
1 0
1 0
1 0
1 0
2 0
2 0
2 0
2 0
2 0
2 0
2 0
2 0
2 0
2 0
2 0
2 0
2 0
2 0
2 0
2 0
2 0
2 0
2 0
2 0
3 1
4 1
8 1
8 3
10 3
11 3
11 3
23 4
23 4
27 4
27 4
27 4
30 4
32 4
33 4
33 4
36 4
36 4
36 4
36 4
37 6
39 6
39 6
39 6
39 6
39 6
39 6
40 6
42 6
42 6
43 6
47 6
47 6
49 6
49 6
52 6
54 6
55 6
55 6
56 6
56 6
56 6
56 6
56 6
56 6
57 6
59 6
59 6
60 6
62 7
62 7
63 7
63 7
63 7
63 7
64 7
66 7
66 7
67 7
69 7
69 7
69 7
69 7
69 7
69 7
69 7
69 7
69 7
69 7
70 7
71 8
73 8
76 8
121 10
176 11
191 11
205 11
206 11
209 11
209 11
208 11
216 11
247 12
252 14
254 14
255 14
256 14
256 14
257 14
257 14
258 14
260 14
260 14
262 14
262 14
263 14
267 14
273 14
277 14
331 14
330 13
330 13
331 13
331 11
329 11
327 11
326 11
313 9
311 9
309 9
309 9
307 8
308 10
308 10
309 10
309 10
306 10
306 10
306 10
306 10
305 9
303 8
303 8
303 8
303 8
303 8
305 8
348 13
348 13
348 13
347 13
342 13
349 13
348 13
348 13
346 13
344 13
343 13
343 13
342 13
342 13
347 13
349 13
349 13
349 13
346 13
346 13
344 13
344 13
342 12
342 12
342 12
348 12
348 12
350 12
347 12
347 12
346 12
345 12
341 12
341 12
341 12
342 12
342 12
346 12
347 12
351 12
351 12
351 12
350 12
351 12
348 12
342 12
295 10
244 10
233 10
221 10
217 8
215 8
205 8
203 8
200 8
172 7
171 7
173 7
172 7
176 7
175 7
175 7
176 7
177 7
177 7
177 7
178 7
178 7
176 7
172 7
179 7
173 7
175 7
181 7
191 7
210 7
229 7
234 7
234 7
235 7
235 7
235 7
235 7
237 7
240 7
239 5
239 5
239 5
239 5
239 5
239 5
243 5
243 5
245 5
245 5
244 5
244 5
241 5
223 5
223 5
203 1
203 1
203 1
203 1
201 1
196 1
198 1
198 1
198 1
198 1
199 1
203 1
204 1
205 1
203 1
202 1
202 1
205 1
206 1
218 1
221 1
222 1
224 1
224 1
223 1
220 1
220 1
219 1
219 1
218 1
218 1
218 1
218 1
218 1
218 1
217 1
216 1
213 1
212 1
208 1
206 1
206 1
206 1
206 1
206 1
206 1
203 1
203 1
203 1
203 1
203 1
203 1
203 1
202 1
202 1
201 1
201 1
200 1
199 1
195 1
201 1
201 1
200 1
199 1
201 1
200 1
195 1
196 1
195 2
192 2
182 2
176 2
121 2
118 2
105 2
89 2
75 2
73 3
73 3
72 3
72 3
71 3
71 3
71 3
73 3
73 3
76 3
77 3
76 3
76 3
75 3
72 3
71 3
70 3
69 3
67 2
67 2
68 2
68 2
67 2
67 2
74 2
74 2
75 2
76 2
76 2
74 2
74 2
74 2
73 2
73 2
66 2
61 2
55 2
51 2
51 2
51 2
50 2
47 2
46 2
45 3
44 3
43 3
43 3
43 3
42 3
42 3
42 3
42 3
42 3
42 3
42 3
42 3
43 3
43 3
43 3
44 3
44 3
45 3
50 3
54 3
57 3
58 3
59 3
61 3
61 3
70 3
70 3
70 3
71 3
71 3
73 3
73 3
73 3
74 3
73 3
74 3
79 3
86 3
92 3
91 3
91 3
91 3
91 3
87 3
86 3
85 3
89 3
107 2
110 2
119 2
126 1
128 1
128 1
129 1
131 1
132 1
145 1
145 1
146 1
147 1
147 1
156 1
155 1
151 1
150 1
145 2
144 2
150 2
150 2
161 3
162 3
162 3
162 3
165 3
166 3
165 3
165 3
165 3
165 3
163 3
158 3
160 3
161 3
161 3
161 3
161 3
161 3
161 3
161 3
161 3
162 3
162 3
164 3
164 3
164 3
163 3
163 3
163 3
162 3
162 2
162 2
163 2
163 2
164 2
164 2
165 2
166 2
167 2
170 2
170 2
202 2
201 2
201 2
203 2
212 2
214 2
214 2
213 2
207 2
204 2
202 2
201 2
200 2
198 2
201 2
193 2
193 2
194 2
193 2
193 2
192 2
192 2
192 2
192 2
192 2
187 2
182 2
175 2
165 2
166 2
166 2
168 2
175 2
186 2
195 2
199 2
195 2
181 2
176 2
165 2
165 2
163 2
163 2
162 2
162 2
161 2
152 2
152 2
151 2
150 1
150 1
141 1
139 1
140 1
141 1
142 1
142 1
136 1
136 1
128 0
128 0
128 0
128 0
126 0
125 0
127 0
126 0
129 0
129 0
129 0
130 0
128 0
130 0
136 0
162 0
175 0
199 0
251 0
260 0
260 0
261 0
261 0
260 0
261 0
267 0
270 0
271 0
271 0
271 0
271 0
271 0
269 0
268 0
267 0
268 0
267 0
266 0
267 0
264 0
264 0
232 0
232 0
232 0
230 0
222 0
221 0
221 0
221 0
221 0
222 0
222 0
222 0
222 0
222 0
219 0
217 0
217 0
216 0
216 0
216 0
216 0
216 0
215 0
213 0
213 0
213 0
213 0
212 0
216 0
217 0
216 0
208 0
200 0
193 0
188 0
182 0
182 0
181 0
177 0
177 0
175 0
175 0
175 0
175 0
176 0
176 0
176 0
176 0
177 1
180 1
181 3
180 3
180 3
178 3
177 3
176 3
176 3
176 3
176 3
176 3
176 3
176 3
182 5
184 5
184 5
200 5
199 5
197 5
197 5
192 5
188 5
185 5
184 5
172 5
145 5
124 5
81 5
60 5
54 5
54 5
54 5
54 5
54 5
58 5
57 5
57 5
62 5
62 5
63 5
64 5
64 5
65 5
65 5
65 5
65 5
65 6
65 6
64 6
66 6
74 7
75 7
78 7
87 8
87 8
87 8
87 8
88 8
88 8
88 8
87 8
86 8
86 8
86 8
87 8
87 8
87 8
87 8
87 8
88 8
88 8
88 8
89 8
90 8
90 8
91 8
91 8
90 8
89 8
87 8
87 8
87 8
87 8
86 8
86 8
86 8
86 8
86 8
86 8
86 8
86 8
86 8
88 8
88 8
89 8
88 8
88 8
90 8
89 8
89 6
86 6
86 5
86 5
88 5
89 5
89 5
89 5
88 5
89 5
89 5
89 5
89 5
90 5
84 3
81 3
81 3
64 3
65 3
65 3
65 3
65 3
65 3
65 3
61 3
58 3
58 3
62 3
62 3
62 3
63 3
63 3
63 3
63 3
63 3
59 3
59 3
58 3
53 3
54 3
54 3
52 3
53 3
52 3
54 3
54 3
56 3
56 2
56 2
58 2
58 2
51 1
50 1
48 1
40 0
40 0
39 0
39 0
39 0
39 0
39 0
39 0
39 0
39 0
39 0
38 0
38 0
38 0
38 0
38 0
37 0
37 0
37 0
36 0
35 0
34 0
34 0
34 0
34 0
34 0
34 0
33 0
33 0
33 0
33 0
33 0
33 0
33 0
33 0
32 0
33 0
33 0
32 0
31 0
31 0
33 0
34 0
34 0
33 0
34 0
34 0
35 0
35 0
35 0
32 0
33 0
33 0
33 0
32 0
32 0
32 0
32 0
33 0
32 0
32 0
32 0
32 0
32 0
32 0
32 0
32 0
32 0
32 0
32 0
32 0
33 0
35 0
33 0
33 0
33 0
32 0
32 0
32 0
32 0
32 0
32 0
32 0
32 0
32 0
31 0
32 0
33 0
33 0
34 0
36 0
36 0
35 0
36 0
38 0
36 0
34 0
33 0
33 0
33 0
33 0
33 0
33 0
32 0
32 0
32 0
32 0
33 0
37 0
37 0
40 0
42 0
42 0
42 0
42 0
42 0
42 0
42 0
42 0
42 0
42 0
42 0
42 0
42 0
42 0
42 0
41 0
41 0
41 0
41 0
41 0
42 0
42 0
44 0
45 0
46 0
46 0
46 0
46 0
46 0
46 0
44 0
43 0
43 0
43 0
42 0
42 0
41 0
40 0
40 0
41 0
40 0
40 0
40 0
41 0
42 0
42 0
42 0
41 0
42 0
42 0
43 0
43 0
43 0
42 0
42 0
42 0
42 0
43 0
44 1
45 1
44 1
42 1
40 1
42 1
43 1
44 1
44 1
45 1
47 1
47 1
50 1
52 1
52 1
52 1
52 1
52 1
52 1
52 1
49 1
46 2
46 2
45 2
45 2
42 2
41 2
41 2
41 2
41 2
41 2
42 2
44 2
46 2
47 2
48 2
51 2
51 2
50 2
47 2
48 2
51 2
53 4
58 4
58 4
58 4
59 4
59 4
59 4
59 4
59 4
59 4
59 4
59 4
59 4
59 4
59 4
59 4
59 4
59 4
60 4
59 4
59 4
59 4
57 8
54 9
54 9
54 9
54 9
54 9
54 9
55 9
55 9
54 9
54 9
54 9
54 9
54 9
55 9
56 9
56 9
55 9
55 9
55 9
55 9
55 9
54 9
55 9
56 9
55 9
55 9
55 9
55 9
56 9
66 11
72 12
72 13
72 12
71 12
70 12
69 12
69 12
69 12
70 12
70 12
74 12
81 12
84 14
84 14
86 14
88 14
88 15
85 16
84 17
84 19
85 19
85 19
85 19
83 19
82 19
82 18
82 18
82 18
82 18
82 18
81 18
81 18
81 18
81 18
81 18
80 18
78 18
77 18
74 18
75 18
75 18
73 17
74 17
75 17
70 16
69 16
68 15
67 14
63 14
63 14
63 14
62 14
62 15
62 16
62 16
62 16
63 16
63 16
63 16
63 16
63 16
63 16
63 16
63 16
63 16
62 16
62 16
62 16
62 16
62 12
62 11
62 11
62 11
62 11
62 11
63 11
62 11
62 11
62 11
62 11
62 11
62 11
63 11
62 11
62 11
62 11
62 11
62 11
62 11
62 11
60 11
60 11
60 11
59 11
60 11
58 11
58 11
57 11
55 10
39 8
35 8
35 8
35 8
35 8
28 8
30 8
30 8
30 8
30 8
30 8
29 8
29 7
28 5
28 5
26 5
24 5
24 4
24 4
24 4
23 3
23 3
23 3
23 3
23 3
24 3
25 3
25 3
28 3
29 3
31 3
33 3
33 3
33 3
33 3
33 3
34 3
35 3
39 3
39 4
38 4
38 4
38 4
38 4
36 4
36 4
35 4
35 4
34 4
34 4
34 4
35 4
36 4
36 3
36 2
36 2
35 2
35 2
35 2
35 2
35 2
35 2
35 2
35 2
36 2
37 2
39 2
39 2
41 2
41 2
41 2
41 2
41 2
42 2
42 3
43 3
43 3
43 3
43 3
43 3
44 3
45 3
49 3
47 3
47 3
47 3
47 3
47 3
48 3
48 3
49 3
49 3
50 3
51 3
75 3
79 3
81 3
81 3
81 3
82 3
82 2
82 2
82 2
82 2
82 2
82 2
80 2
79 2
79 2
79 2
79 2
79 2
76 2
76 2
77 2
77 2
77 2
76 2
76 2
76 2
76 2
76 2
77 2
77 2
77 2
76 2
75 2
74 2
72 2
71 2
70 2
68 2
68 2
68 2
68 2
68 2
67 2
69 2
69 1
75 6
74 6
74 6
74 6
73 6
73 7
71 7
71 7
71 7
71 7
71 7
71 7
70 7
69 7
69 7
69 7
69 7
69 7
69 7
69 7
69 7
69 7
69 7
69 7
69 7
66 7
65 7
65 7
64 7
62 7
62 7
63 7
63 7
65 7
81 12
83 12
81 12
83 12
84 12
84 12
84 12
85 12
89 12
89 12
91 12
92 12
98 12
98 12
98 12
93 12
92 12
89 12
84 12
78 12
78 12
67 12
64 12
62 12
62 12
62 12
60 12
60 12
60 12
60 12
60 12
60 12
60 12
60 12
60 12
60 12
61 12
61 12
61 12
61 12
61 12
60 12
60 12
60 12
60 12
60 12
60 12
60 12
60 12
59 12
59 12
59 12
59 12
59 12
59 12
59 12
58 12
58 12
58 12
59 12
59 12
59 12
60 12
57 12
54 12
53 12
47 7
47 6
47 6
47 6
47 6
47 6
47 6
49 6
49 6
49 6
49 6
49 6
49 6
49 6
49 6
49 6
49 6
49 6
49 6
49 6
49 6
49 6
49 6
49 6
49 6
53 7
53 7
53 7
52 7
51 7
51 7
49 7
48 7
46 5
27 1
23 1
23 1
23 1
23 1
24 1
17 1
17 1
16 1
17 1
17 1
17 1
17 1
17 1
17 1
17 1
19 1
19 1
19 1
19 1
21 1
21 1
21 1
21 1
21 1
21 1
22 1
24 1
24 1
24 1
25 1
25 1
25 1
25 1
25 1
26 1
25 1
25 1
25 1
25 1
25 1
25 1
25 1
25 1
25 1
25 1
25 1
25 1
25 1
25 1
25 1
25 1
25 1
25 1
25 1
25 1
26 1
26 1
26 1
26 1
26 1
26 1
25 1
25 1
25 1
25 1
25 1
25 1
25 1
25 1
29 1
29 1
29 1
27 1
28 1
29 1
29 1
29 1
29 1
29 1
29 1
29 1
29 1
29 1
29 1
29 1
29 1
29 1
28 1
28 1
28 1
25 0
25 0
25 0
25 0
25 0
25 0
26 0
27 0
27 0
26 0
26 0
23 0
23 0
24 0
23 0
22 0
21 0
21 0
21 0
21 0
23 0
23 0
23 0
23 0
24 0
23 0
24 0
24 0
23 0
21 0
21 0
21 0
21 0
21 0
20 0
20 0
18 0
18 0
18 0
17 0
17 0
17 0
17 0
17 0
17 0
17 0
17 0
17 0
17 0
17 0
17 0
17 0
17 0
17 0
17 0
17 0
17 0
17 0
17 0
17 0
17 0
17 0
19 0
19 0
19 0
19 0
17 0
17 0
17 0
17 0
17 0
17 0
17 0
17 0
17 0
17 0
17 0
17 0
17 0
14 0
14 0
14 0
13 0
13 0
13 0
14 0
14 0
14 0
14 0
14 0
14 0
14 0
15 0
15 0
15 0
16 0
16 0
16 0
16 0
16 0
16 0
16 0
16 0
16 0
15 0
15 0
16 0
15 0
16 0
16 0
16 0
16 0
16 0
15 0
15 0
16 0
15 0
15 0
15 0
15 0
14 0
14 0
14 0
13 0
12 0
12 0
12 0
12 0
12 0
12 0
12 0
12 0
12 0
12 0
12 0
12 0
12 0
12 0
12 0
12 0
12 0
12 0
12 0
12 0
11 0
11 0
11 0
11 0
11 0
10 0
9 0
9 0
9 0
9 0
9 0
9 0
9 0
9 0
9 0
9 0
9 0
9 0
9 0
9 0
9 0
9 0
9 0
9 0
9 0
9 0
9 0
9 0
9 0
9 0
9 0
9 0
9 0
9 0
9 0
7 0
7 0
6 0
6 0
6 0
6 0
6 0
6 0
6 0
6 0
6 0
6 0
6 0
5 0
5 0
5 0
4 0
4 0
4 0
4 0
4 0
4 0
4 0
4 0
4 0
4 0
4 0
3 0
2 0
2 0
2 0
2 0
2 0
2 0
2 0
1 0
0 0
0 0
1 0
1 0
1 0
1 0
1 0
1 0
1 0
1 0
1 0
1 0
1 0
1 1
1 1
2 1
2 1
4 1
5 1
5 1
5 1
5 1
5 1
5 1
5 1
5 1
5 1
5 1
6 0
6 0
6 0
6 0
6 0
6 0
6 0
6 0
6 0
6 0
6 0
6 0
6 0
6 0
6 0
6 0
6 0
6 0
6 0
6 0
6 0
8 0
8 0
8 0
19 0
20 0
26 0
29 0
30 0
30 0
30 0
30 0
31 0
35 0
65 0
68 0
70 0
72 0
72 0
74 0
74 0
76 0
76 0
76 0
76 0
76 0
76 0
76 0
76 0
76 0
76 0
76 0
76 0
76 0
76 0
76 0
76 0
77 0
77 0
78 0
78 0
78 0
78 0
78 0
79 0
79 0
79 0
79 0
79 0
79 0
79 0
79 0
79 0
79 0
78 0
78 0
78 0
78 0
78 0
78 0
78 0
78 0
78 0
77 0
77 0
77 0
77 0
77 0
77 0
75 0
74 0
74 0
74 0
74 0
74 0
74 0
74 0
74 0
74 0
74 0
73 0
73 0
73 0
73 0
73 0
73 0
73 0
73 0
73 0
73 0
73 0
73 0
73 0
73 0
73 0
73 0
73 0
73 0
73 0
73 0
73 0
71 0
71 0
73 0
63 0
62 0
56 0
54 0
51 0
51 0
52 0
39 0
33 0
29 0
13 0
13 0
14 0
12 0
12 0
12 0
13 0
13 0
13 0
13 0
13 0
13 0
13 0
13 0
13 0
13 0
13 0
14 0
14 0
14 0
14 0
15 0
16 0
16 0
16 0
15 0
15 0
15 0
15 0
15 0
14 0
14 0
14 0
14 0
14 0
14 0
14 0
14 0
14 0
14 0
14 0
14 0
14 0
16 0
16 0
16 0
16 0
16 0
16 0
16 0
16 0
16 0
16 0
16 0
16 0
16 0
16 0
16 0
16 0
17 0
17 0
17 0
18 0
19 0
19 0
19 0
19 0
19 0
19 0
19 0
20 0
20 0
20 0
20 0
20 0
20 0
20 0
20 0
20 0
20 0
20 0
20 0
20 0
20 0
20 0
20 0
20 0
20 0
21 0
19 0
18 0
18 0
17 0
17 0
15 0
15 0
15 0
15 0
14 0
14 0
15 0
15 0
14 0
14 0
17 0
18 0
18 0
19 0
19 0
19 0
19 0
19 0
19 0
19 0
19 0
19 0
19 0
18 0
18 0
18 0
17 0
17 0
15 0
15 0
15 0
15 0
15 0
15 0
15 0
15 0
15 0
15 0
15 0
15 0
15 0
15 0
15 0
15 0
15 0
15 0
15 0
15 0
15 0
13 0
13 0
13 0
13 0
13 0
13 0
13 0
13 0
13 0
13 0
13 2
13 2
13 4
12 4
12 4
12 4
12 4
12 4
12 4
12 4
12 4
12 4
12 4
12 4
12 4
12 4
12 4
11 4
11 4
12 4
12 4
12 4
12 4
12 4
12 4
12 4
12 4
12 4
12 4
12 4
12 4
12 4
12 4
12 4
12 4
11 4
11 4
11 5
11 5
11 5
11 5
11 5
10 5
10 5
10 5
10 5
10 5
9 5
9 5
8 5
8 5
5 5
4 5
4 5
3 5
3 5
3 5
4 5
4 5
4 5
4 5
5 5
5 5
6 5
6 5
9 6
16 6
19 6
23 6
26 6
27 6
29 6
29 6
29 6
29 6
29 6
29 6
29 6
29 6
29 6
29 6
29 6
29 6
29 6
29 6
29 6
29 6
30 6
30 6
30 6
30 6
30 6
31 6
31 6
31 6
32 6
40 6
40 6
40 6
40 6
40 2
40 2
40 2
40 2
40 2
40 2
39 2
39 3
38 3
38 3
38 3
38 3
39 3
39 3
49 3
49 3
50 3
50 3
50 3
51 3
54 3
61 3
71 4
75 4
76 4
76 4
76 4
78 4
78 4
78 4
78 4
78 4
79 4
79 4
79 4
80 4
81 4
83 3
84 3
84 3
84 3
85 3
85 3
85 3
85 3
85 3
85 3
85 3
85 3
85 3
85 3
85 3
85 3
85 3
85 3
85 3
85 3
84 3
84 3
83 3
83 3
83 3
84 3
85 3
83 2
81 2
73 2
70 2
69 2
66 2
64 2
63 2
63 2
63 2
63 2
63 2
63 2
63 2
63 2
63 2
63 2
63 2
63 2
63 2
63 2
63 2
63 2
62 2
62 2
63 2
63 2
63 2
62 2
62 2
62 2
60 2
52 2
52 2
52 2
52 2
52 2
52 2
52 2
52 2
52 2
52 2
52 2
52 1
52 1
52 1
53 1
53 1
52 1
52 1
42 1
42 1
39 1
37 1
36 1
33 1
30 1
25 1
13 0
11 0
11 0
11 0
11 0
13 0
13 0
12 0
11 0
11 0
14 0
14 1
14 1
13 1
13 1
12 1
11 1
11 1
11 1
10 1
10 1
10 1
10 1
10 1
10 1
10 1
10 1
10 1
10 1
11 1
11 1
11 1
11 1
11 1
11 1
11 1
11 1
11 1
11 1
11 1
9 1
9 1
9 1
8 1
8 1
8 1
10 1
10 1
10 1
10 1
10 1
10 1
10 1
11 1
11 1
11 1
11 1
11 1
12 1
12 1
12 1
12 1
12 1
12 1
12 1
12 1
12 1
11 1
11 1
11 1
11 1
11 1
11 1
11 1
11 1
11 1
11 1
11 1
11 1
11 1
11 1
12 1
12 1
12 1
12 1
12 1
11 1
11 1
11 1
11 1
12 1
12 1
12 1
12 1
12 1
13 1
13 0
13 0
13 0
14 0
14 0
14 0
14 0
14 0
14 0
12 0
12 0
13 0
13 0
14 0
11 0
11 0
11 0
11 0
11 0
11 0
11 0
11 0
11 0
11 0
11 0
11 0
11 0
11 0
11 0
11 0
11 0
11 0
11 0
10 0
10 0
10 0
10 0
10 0
10 0
10 0
10 0
10 0
10 0
10 0
10 0
10 0
10 0
9 0
9 0
9 0
8 0
8 0
8 0
8 0
24 0
25 0
25 0
26 0
30 0
30 0
32 0
32 0
33 0
33 0
33 0
35 0
41 0
42 0
42 0
42 0
42 0
42 0
44 0
44 0
44 0
44 0
44 0
44 0
44 0
45 0
45 0
45 0
45 0
45 0
45 0
44 0
44 0
46 0
46 0
46 0
46 0
46 0
47 0
47 0
49 0
50 0
50 0
50 0
50 0
49 0
49 0
49 0
49 0
48 0
48 0
48 0
49 0
49 0
49 0
49 0
49 0
48 0
48 1
49 1
50 1
50 1
50 1
52 1
53 1
53 1
53 1
53 1
54 1
54 1
54 1
54 1
54 1
54 0
54 0
54 0
54 0
54 0
54 0
56 0
56 0
56 0
56 0
56 0
56 0
57 0
57 0
57 0
57 0
57 0
58 0
58 0
58 0
58 0
58 0
61 0
63 0
63 0
64 0
64 0
48 0
47 0
46 0
44 0
44 0
43 0
43 1
43 1
41 1
41 1
40 1
37 1
32 1
32 1
32 1
32 1
32 1
35 1
36 1
36 1
36 1
37 1
38 1
38 1
37 1
39 1
43 1
43 1
44 1
44 1
45 1
45 1
45 1
44 1
44 1
44 1
44 1
44 2
46 2
46 2
46 2
46 2
46 2
47 2
47 2
48 2
48 2
48 2
48 2
48 2
48 2
48 2
47 2
48 2
48 2
48 2
49 2
56 2
57 2
53 2
53 2
52 2
52 2
52 2
51 2
51 2
51 2
51 2
50 2
50 2
50 2
50 2
50 2
50 2
50 2
50 2
50 2
50 2
50 2
48 2
48 2
48 2
48 2
48 2
49 2
48 2
48 2
48 2
48 2
49 2
48 2
49 2
49 2
49 2
49 2
45 2
44 2
43 2
43 2
43 2
43 2
44 2
45 2
55 2
52 2
52 1
52 1
52 1
52 1
52 1
53 1
53 1
53 1
55 1
57 1
58 1
57 1
57 1
57 1
67 1
67 1
66 1
65 1
65 1
65 1
63 1
59 1
63 1
65 1
65 1
64 1
63 1
63 1
62 1
62 1
62 1
62 0
62 0
59 0
59 0
57 0
56 1
59 1
58 1
58 1
57 1
57 1
57 1
58 1
58 1
58 1
59 1
59 1
59 3
59 3
58 3
58 3
51 3
51 3
51 3
52 3
53 3
56 3
56 3
57 3
58 3
60 3
60 3
60 3
60 3
60 3
60 3
60 3
60 3
60 3
60 3
60 3
61 3
62 3
62 3
62 3
62 3
62 3
62 3
61 3
61 4
61 4
61 4
61 4
60 4
60 4
61 4
61 4
62 5
66 5
69 5
70 5
70 6
72 6
73 6
75 6
77 6
73 6
67 6
67 6
65 6
65 6
65 6
65 6
65 6
65 7
65 7
64 7
62 7
58 7
59 7
59 7
59 7
60 7
54 7
54 7
55 7
55 7
55 7
59 7
63 7
69 8
73 8
85 9
93 9
93 9
93 9
93 9
93 9
93 9
93 9
93 9
93 9
92 9
92 9
90 9
89 8
87 8
87 8
87 8
87 8
87 8
87 8
86 8
86 8
86 8
86 8
86 7
86 6
86 6
86 6
86 6
86 6
86 6
96 6
94 8
94 9
90 9
90 9
89 9
88 9
87 7
87 7
87 7
87 7
87 7
87 7
87 10
87 12
87 12
87 12
87 12
86 12
89 13
90 13
90 13
90 13
90 13
90 13
91 13
91 13
91 13
91 13
91 13
91 13
91 13
89 13
89 13
86 13
82 13
80 13
79 13
79 13
77 13
74 13
74 13
74 13
76 13
73 13
73 13
73 13
73 13
73 13
72 13
72 12
72 12
72 12
72 12
71 12
68 12
68 12
69 12
69 12
71 12
71 12
70 12
69 12
71 12
71 11
66 10
60 10
55 10
42 10
33 10
29 10
29 10
29 10
29 10
29 10
29 10
29 10
30 10
30 10
31 10
31 10
31 10
31 10
31 10
31 10
31 10
31 10
31 10
31 10
31 10
31 10
31 10
31 10
31 10
31 10
29 10
29 10
29 10
28 10
28 10
21 7
21 6
21 3
21 3
21 3
21 3
22 3
22 3
22 2
23 2
24 3
24 3
25 3
25 2
25 2
25 2
25 2
25 2
25 3
22 3
21 3
21 3
21 3
21 3
21 3
20 3
21 2
21 2
21 2
22 2
23 2
24 2
28 2
28 2
28 2
28 2
28 2
28 2
28 2
26 2
27 2
28 2
25 2
25 2
25 2
25 2
25 2
25 2
25 2
28 2
28 2
28 2
28 2
28 2
28 2
27 2
27 2
25 2
25 2
24 2
24 2
24 2
24 2
21 2
21 2
20 2
20 2
21 2
25 2
25 2
31 2
31 2
38 2
38 2
40 2
41 2
40 2
40 2
40 2
39 2
39 2
39 2
39 2
39 2
39 2
39 2
39 2
39 2
40 2
42 2
42 2
42 2
42 2
45 2
46 2
46 2
46 2
46 2
46 2
47 2
47 2
48 2
49 2
51 2
52 2
52 2
52 2
52 2
52 2
51 2
51 1
52 1
51 1
51 1
51 1
51 1
51 1
52 1
53 0
53 0
54 0
57 0
57 0
59 0
61 0
61 0
72 0
72 0
72 0
70 0
69 0
69 0
65 0
65 0
65 0
65 0
65 0
65 0
65 0
64 0
62 0
62 0
62 0
62 0
62 0
62 0
62 0
62 0
62 0
59 0
59 0
59 0
59 0
59 0
59 0
59 0
59 0
59 0
59 0
59 0
59 0
59 0
59 0
59 0
62 0
62 0
61 0
61 0
56 0
55 0
51 0
51 0
44 0
42 0
43 0
42 0
43 0
43 0
43 0
44 0
45 0
45 0
53 0
55 0
57 0
57 0
57 0
57 0
56 0
54 0
55 0
58 0
59 0
56 0
55 0
55 0
56 0
56 0
56 0
57 0
56 0
56 0
56 0
54 0
54 0
54 0
55 0
56 0
56 0
57 0
56 0
54 0
53 0
53 0
54 0
54 0
55 0
54 0
55 0
57 0
57 0
55 0
55 0
54 0
56 0
57 0
46 0
48 0
49 0
49 0
50 0
50 0
50 0
50 0
50 0
50 0
50 0
50 0
50 0
50 0
51 0
51 0
51 0
51 0
51 0
52 0
52 0
52 0
52 0
52 0
52 0
52 0
52 0
54 0
54 0
55 0
59 0
60 0
59 0
62 0
62 0
62 0
62 0
62 0
60 0
60 0
60 0
62 0
64 0
70 0
73 0
74 0
74 0
73 0
77 0
79 0
80 0
80 0
78 0
78 0
78 0
77 0
70 0
67 0
67 0
69 0
83 0
83 0
161 5
160 5
160 7
158 7
165 7
181 7
200 7
206 7
206 7
206 7
206 7
204 7
204 7
203 7
202 7
202 7
202 7
202 7
200 7
202 7
206 7
206 7
206 7
206 7
206 7
206 7
205 7
209 9
207 9
213 10
211 10
209 10
209 10
209 10
210 10
208 10
205 13
205 13
207 13
210 13
211 14
212 14
212 14
215 14
234 14
235 14
267 14
269 14
270 14
273 14
275 14
275 14
278 14
279 14
279 14
279 14
279 14
278 14
280 14
280 14
286 14
289 14
289 14
292 15
293 15
294 16
334 16
341 16
339 16
338 16
338 16
335 16
336 16
336 16
342 16
346 16
366 16
368 16
367 16
366 16
369 16
365 16
365 16
364 16
364 16
363 16
359 16
357 16
356 16
356 16
356 16
357 16
356 16
356 16
356 16
358 16
357 16
356 16
342 16
338 16
269 9
269 9
255 9
251 9
254 9
276 10
275 10
276 10
276 10
279 10
280 12
323 17
324 18
341 23
351 27
355 27
358 27
357 27
356 27
355 27
352 27
352 27
351 27
358 30
382 32
384 33
382 32
378 30
376 30
373 30
377 30
389 30
392 30
394 30
393 31
392 31
393 28
393 28
388 28
385 28
384 27
383 27
382 27
381 27
364 27
366 27
334 27
332 27
332 27
333 27
331 27
371 27
367 27
372 27
384 27
392 27
393 27
394 27
399 27
394 27
394 27
390 27
389 27
384 26
376 26
369 25
334 25
345 25
350 25
353 25
363 25
370 25
372 25
373 25
372 25
366 25
356 25
353 25
353 25
353 25
349 25
349 25
352 25
355 25
364 25
396 26
399 26
403 26
406 26
408 26
410 26
418 26
418 26
418 26
418 26
418 26
417 26
412 26
411 26
413 26
405 26
403 26
394 21
385 21
369 21
348 21
341 20
340 20
340 20
338 19
337 19
308 13
302 9
282 8
282 8
281 8
280 8
279 8
273 4
270 3
268 3
262 3
257 3
256 3
248 2
246 2
242 2
240 2
239 2
239 2
237 2
229 2
228 2
226 1
226 1
226 1
225 1
225 1
225 1
225 1
224 1
224 1
224 1
222 1
218 1
218 1
215 1
213 1
213 1
212 1
212 1
171 1
168 1
166 1
154 1
149 1
148 1
148 1
141 1
139 1
139 1
138 1
138 1
136 1
136 1
130 1
125 1
105 1
104 1
103 1
96 1
88 1
87 1
86 1
84 1
81 1
80 1
80 1
79 1
77 0
73 0
70 0
57 0
52 0
46 0
24 0
22 0
17 0
15 0
13 0
10 0
2 0
2 0
2 0
2 0
2 0
2 0
2 0
2 0
2 0
2 0
2 0
2 0
2 0
2 0
2 0
2 0
2 0
2 0
2 0
2 0
2 0
2 0
1 0
1 0
1 0
1 0
2 0
1 0
5 0
5 0
5 0
5 0
5 0
7 0
8 0
8 0
8 0
10 0
10 0
10 0
11 0
15 0
28 0
32 0
34 0
35 0
36 0
37 0
37 0
43 0
43 0
45 0
45 0
45 0
45 0
45 0
45 0
45 0
46 0
48 0
49 0
51 0
58 0
58 0
58 0
58 0
60 0
61 0
61 0
62 0
63 0
64 0
64 0
66 0
66 0
67 0
67 0
67 0
67 0
67 0
67 0
67 0
67 0
68 0
68 0
68 0
68 0
68 0
69 0
69 0
69 0
74 0
75 0
77 0
77 0
77 0
80 0
83 0
83 0
86 0
90 1
91 1
91 1
91 1
96 1
97 1
97 1
97 1
97 1
97 1
98 1
98 1
98 1
98 1
98 1
99 1
99 1
99 1
99 1
99 1
99 1
99 1
101 1
102 1
107 1
112 1
125 1
135 1
137 1
145 1
145 1
150 1
165 1
176 1
173 1
174 1
174 1
172 1
172 1
172 2
173 2
170 2
158 2
153 2
151 2
150 2
149 2
148 2
147 2
142 2
142 2
147 2
151 3
152 3
162 4
164 5
166 5
169 5
171 5
166 5
165 5
165 5
160 5
159 5
160 5
160 5
161 5
159 5
159 5
157 5
157 5
157 5
156 5
155 5
155 5
154 5
154 5
154 5
154 5
154 5
154 5
154 5
153 5
153 5
153 5
153 5
157 5
164 5
163 5
162 5
160 5
158 5
159 5
162 5
195 7
203 7
208 7
205 7
202 6
203 6
203 6
202 6
202 6
202 6
199 6
199 6
203 7
205 7
207 7
208 7
207 7
210 7
210 7
210 7
210 7
209 7
211 7
211 7
212 7
212 7
213 7
213 7
210 7
212 7
206 7
190 7
174 7
171 7
167 7
158 7
158 7
148 7
137 7
131 7
131 7
130 7
132 7
132 7
132 7
134 6
137 6
161 6
164 6
164 6
164 6
165 6
165 6
178 6
179 6
179 6
179 6
175 6
171 4
170 3
160 3
156 3
155 3
150 3
149 3
150 3
150 3
150 3
155 4
155 4
155 4
155 4
153 4
153 4
154 4
154 4
157 4
158 4
158 4
159 4
159 4
159 4
160 4
161 4
162 4
163 4
168 4
167 4
166 4
166 4
165 4
161 4
161 4
156 4
156 4
155 4
150 4
148 4
143 4
142 4
111 3
108 3
104 3
107 3
108 3
111 3
113 3
114 3
112 3
117 3
116 3
120 2
139 2
138 2
137 2
136 2
136 2
134 2
134 2
134 2
133 2
132 2
131 2
131 2
131 2
131 2
130 2
132 2
131 2
130 2
132 2
134 2
134 2
134 2
134 2
135 2
136 2
137 2
137 2
138 2
144 2
151 2
148 2
160 2
153 2
147 2
144 2
127 2
126 2
126 2
127 2
126 2
125 2
112 2
112 2
111 2
111 2
110 2
110 2
110 2
110 2
110 2
110 2
110 2
110 2
108 2
108 2
108 2
103 1
105 1
105 1
107 1
107 1
107 1
106 1
104 1
104 1
110 1
110 1
110 1
110 1
110 1
110 1
109 1
107 1
107 1
102 1
102 1
102 1
102 1
102 1
102 1
101 1
101 1
101 1
101 1
109 1
110 1
111 1
110 1
109 0
109 0
111 0
105 0
100 0
98 0
100 0
98 0
97 0
91 0
91 0
85 0
66 0
66 0
65 0
67 0
72 0
75 0
75 0
75 0
75 0
75 0
75 0
75 0
77 0
79 0
79 0
77 0
77 0
78 0
75 0
75 0
75 0
76 0
88 0
96 0
95 0
96 0
96 0
100 0
102 0
121 0
123 0
133 0
160 0
183 0
188 0
194 0
194 0
196 0
197 0
201 2
216 9
216 9
216 9
216 9
216 9
217 9
217 9
217 9
217 9
217 9
217 9
218 9
220 9
223 9
223 9
223 9
224 9
222 9
222 9
220 9
219 9
219 9
221 9
222 9
222 9
214 9
214 9
213 9
213 9
213 9
213 9
213 9
213 9
213 9
213 9
213 9
213 9
213 9
214 9
214 9
216 9
217 9
220 9
219 9
211 10
210 10
209 13
209 13
209 13
208 13
207 13
207 13
207 13
206 14
205 14
205 14
205 14
205 14
205 14
206 14
208 14
209 14
209 14
204 14
201 14
201 14
205 14
215 14
223 14
233 14
233 14
233 14
233 14
233 14
235 14
236 14
236 14
236 14
236 14
229 14
224 14
222 14
213 14
203 14
197 14
186 14
178 14
164 14
163 14
147 13
147 13
137 13
125 12
120 12
124 12
122 10
121 10
116 10
113 10
113 7
104 6
104 6
104 6
104 6
104 6
103 6
103 6
103 6
102 6
133 6
134 6
133 6
132 5
133 5
135 4
136 4
136 4
137 4
137 4
137 4
137 4
137 4
135 4
134 4
133 4
133 4
133 4
134 4
134 4
135 4
136 4
136 4
136 4
136 4
141 4
143 4
144 4
144 4
143 4
143 4
141 4
186 5
192 5
193 5
193 5
192 5
192 3
192 3
193 3
193 3
193 3
193 3
193 3
192 2
192 2
192 2
192 2
192 2
193 2
191 2
189 2
189 2
190 2
191 2
191 2
189 2
175 2
169 2
165 2
157 2
157 2
157 2
155 2
153 2
152 2
151 2
150 2
150 2
150 2
149 2
134 2
130 2
126 2
126 2
126 2
128 2
131 2
133 2
132 2
133 2
134 2
134 2
133 2
133 2
131 2
131 2
131 2
130 2
128 1
127 1
127 1
127 1
127 1
128 1
128 1
128 1
128 1
129 1
127 1
97 1
96 1
98 1
99 1
99 1
96 1
95 1
95 1
94 1
94 1
94 1
94 1
94 1
96 1
96 1
102 1
103 1
106 1
105 1
105 1
104 1
103 1
103 1
103 1
103 1
96 1
95 1
96 1
97 1
96 1
92 1
87 1
48 0
48 0
47 0
47 0
49 0
49 0
48 0
47 0
47 0
47 0
47 0
47 0
47 0
47 0
47 0
47 0
49 0
48 0
49 0
49 0
49 0
49 0
48 0
64 0
64 0
67 0
72 0
73 0
73 0
76 0
78 0
79 0
77 0
77 0
82 0
87 0
95 0
104 0
152 0
215 0
216 0
217 0
218 2
220 2
217 2
214 2
212 2
210 2
210 2
210 2
210 2
210 2
210 2
210 2
210 2
210 2
210 2
210 2
210 2
210 2
210 2
210 2
209 2
209 2
209 2
209 2
208 2
212 2
213 2
211 2
210 2
210 2
210 2
210 2
210 2
210 2
211 2
213 2
213 2
213 2
213 2
211 2
210 2
203 2
203 2
201 2
201 2
201 2
201 2
201 2
201 2
201 2
203 2
203 2
204 2
201 2
199 2
200 2
199 2
199 2
198 2
197 2
197 2
199 2
197 2
197 2
197 2
198 2
198 2
200 2
200 2
201 2
202 2
202 2
202 2
203 2
200 2
198 2
199 2
200 2
200 2
200 2
199 2
172 2
172 2
167 2
151 2
150 2
147 2
148 2
147 2
147 2
147 2
144 2
136 2
131 2
133 2
119 1
105 0
56 0
57 0
56 0
56 0
55 0
55 0
55 0
56 0
57 0
59 0
59 0
60 0
64 0
122 0
132 0
133 0
133 0
135 0
136 0
136 0
136 0
137 0
141 0
141 0
141 0
141 0
141 0
141 0
136 0
135 0
135 0
135 0
135 0
135 0
137 0
137 0
137 0
136 0
133 0
135 0
138 0
138 0
139 0
146 0
148 0
151 0
152 0
154 0
156 1
156 1
156 2
157 2
157 2
154 2
153 2
154 2
154 2
162 2
166 2
167 2
168 2
170 2
170 2
171 2
169 2
172 2
173 2
191 3
196 3
213 4
215 4
214 4
213 4
213 4
213 4
213 4
213 4
214 4
215 4
215 4
216 4
219 4
219 4
217 4
216 4
217 4
219 4
220 4
219 4
217 4
215 4
215 4
215 4
215 4
215 4
215 4
215 4
209 4
209 4
208 4
208 4
208 4
208 4
207 4
208 4
210 4
210 4
207 4
204 4
201 4
195 4
185 4
178 4
135 4
130 4
131 4
131 4
130 4
129 4
131 4
130 4
130 4
130 4
130 4
130 4
130 4
130 4
130 4
131 4
131 4
131 4
131 4
131 4
131 4
129 4
129 4
129 4
129 4
129 4
127 4
124 4
124 4
122 3
113 3
110 2
109 2
108 2
106 2
105 2
105 2
105 2
104 2
104 2
110 2
108 2
109 2
109 2
100 2
98 2
97 2
95 2
95 2
97 2
97 2
95 2
94 2
93 2
76 1
74 1
62 0
59 0
62 0
63 0
64 0
64 0
63 0
58 0
62 0
64 0
64 0
65 0
62 0
62 0
61 0
59 0
53 0
51 0
48 0
48 0
48 0
48 0
48 0
48 0
49 0
48 0
49 0
56 0
59 0
59 0
59 0
62 0
63 0
63 0
68 0
67 0
68 0
69 0
72 0
74 0
74 0
74 5
74 5
72 5
72 5
71 5
71 5
71 5
71 5
69 5
72 5
72 5
72 5
72 5
72 5
72 5
72 4
72 4
72 4
72 4
72 4
72 4
72 5
74 5
74 5
75 5
79 5
81 5
83 6
87 6
96 6
101 6
106 6
157 6
157 6
291 7
293 7
294 7
294 7
297 9
298 9
304 10
319 11
318 11
316 11
315 11
313 11
313 11
313 11
315 11
315 11
319 11
319 11
316 11
315 11
315 11
318 12
318 11
318 11
318 11
316 11
317 11
315 11
314 11
313 11
313 11
312 11
312 11
308 11
307 11
307 11
308 11
310 12
312 12
312 12
315 12
315 12
316 12
318 12
319 12
320 12
333 15
343 15
358 15
358 15
359 15
354 15
351 16
348 16
348 16
350 16
348 16
348 16
371 18
367 19
367 19
364 19
363 19
361 19
359 19
363 19
379 15
379 15
377 15
377 15
378 15
484 15
544 16
552 16
578 16
577 16
577 16
577 16
577 16
577 16
579 16
585 16
587 16
597 16
602 16
607 16
608 16
609 15
613 15
619 15
618 15
615 15
614 15
611 14
610 14
600 14
595 14
593 14
551 14
555 14
431 13
431 13
431 13
430 13
429 11
426 11
424 10
409 10
409 10
405 10
405 10
436 12
439 12
439 12
438 12
438 12
433 12
430 12
430 12
430 12
430 12
427 11
426 11
426 11
425 11
425 11
426 11
427 11
428 11
444 11
446 11
446 11
446 11
446 11
448 11
452 11
456 11
454 10
455 10
458 10
459 10
459 10
455 10
446 10
445 10
441 10
430 7
428 7
418 6
415 6
416 6
418 6
416 6
416 6
415 6
410 5
406 5
406 5
390 3
392 3
387 3
388 3
384 3
383 3
383 3
379 3
361 3
347 3
336 3
285 3
277 3
187 2
174 2
170 2
142 2
142 2
142 2
142 2
142 2
142 2
142 2
141 2
142 2
142 2
140 2
141 2
141 2
140 2
142 2
135 2
132 2
130 2
129 2
125 2
120 2
120 2
120 2
120 2
119 2
115 2
111 2
110 2
109 2
109 2
108 2
107 2
107 2
107 2
100 2
98 2
96 2
73 0
72 0
71 0
71 0
70 0
70 0
70 0
70 0
70 0
70 0
70 0
70 0
70 0
69 0
69 0
68 0
66 0
63 0
45 0
44 0
44 0
43 0
38 0
37 0
35 0
33 0
32 0
28 0
28 0
27 0
27 0
27 0
27 0
25 0
25 0
25 0
25 0
26 0
27 0
26 0
24 0
24 0
25 0
25 0
26 0
27 0
28 0
28 0
27 0
26 0
26 0
31 0
31 0
30 0
29 0
28 0
28 0
28 0
28 0
25 0
24 0
23 0
23 0
22 0
22 0
22 0
22 0
22 0
22 0
22 0
20 0
20 0
20 0
20 0
21 0
20 0
21 0
19 0
20 0
49 0
51 0
53 0
53 0
54 0
59 0
67 0
73 0
75 1
78 1
79 1
80 1
80 1
80 1
80 1
83 1
85 1
85 1
104 1
104 1
104 1
104 2
105 2
106 2
108 3
108 3
108 3
110 3
112 3
115 3
115 4
115 4
115 4
117 4
118 4
119 4
119 4
119 4
119 4
119 4
119 4
119 4
119 4
119 4
119 4
120 4
120 4
120 4
120 4
120 4
120 4
120 4
120 4
120 4
120 4
120 4
119 4
119 4
119 4
118 4
119 4
119 4
119 4
118 4
117 4
117 4
115 4
114 4
114 4
114 4
114 4
113 4
108 4
108 4
108 4
108 4
108 4
108 4
108 4
108 4
107 4
107 4
107 4
107 4
106 4
106 4
106 4
106 4
106 5
106 5
106 5
106 5
108 5
108 5
108 5
106 5
117 5
115 5
116 5
121 5
88 5
83 5
77 5
77 5
78 5
71 5
75 5
71 5
71 4
68 4
69 4
69 4
69 4
69 4
68 4
66 3
65 3
64 3
45 3
43 3
43 3
43 2
42 2
42 2
41 1
41 1
41 1
41 1
41 1
40 1
40 1
40 1
40 1
37 1
38 1
37 1
37 1
37 1
38 2
38 2
38 2
38 2
38 2
38 2
38 2
37 2
37 2
37 2
37 2
37 2
37 2
37 2
39 2
39 2
39 2
39 2
39 2
39 2
39 2
41 2
41 2
41 2
41 2
43 2
43 2
42 2
49 2
50 2
50 2
50 2
50 2
50 2
50 2
50 2
54 2
55 2
55 2
55 2
55 2
57 2
57 2
57 2
57 2
57 2
57 2
58 2
58 2
58 2
56 1
58 1
59 1
59 1
57 1
58 2
62 2
63 2
52 2
51 2
49 2
50 2
52 2
52 2
52 2
52 2
50 2
50 2
41 2
41 2
41 2
41 2
40 2
40 2
40 2
40 2
43 2
43 2
43 2
43 2
43 2
43 2
43 2
43 2
43 2
43 2
43 2
43 2
43 2
43 2
43 2
43 2
43 2
43 2
43 2
43 2
42 2
42 2
42 2
45 2
45 1
45 1
45 1
45 1
45 1
45 1
46 1
46 1
47 1
49 1
50 1
53 1
55 1
57 1
58 1
59 1
59 1
59 1
59 1
59 1
56 1
57 1
57 1
57 1
56 1
56 1
56 1
55 1
49 1
49 1
49 1
50 1
50 1
55 1
55 1
55 1
51 1
50 1
49 1
49 1
50 1
49 1
49 1
49 1
49 1
49 1
49 1
48 1
48 1
48 1
49 1
47 1
47 1
48 1
48 1
47 0
43 0
42 0
41 0
41 0
40 0
39 0
37 0
37 0
37 0
37 0
37 0
37 0
37 0
37 0
38 0
39 0
42 0
42 0
44 0
44 0
41 0
41 0
41 0
42 0
43 0
43 0
43 0
47 0
47 0
47 0
47 0
47 0
47 0
47 0
47 1
50 1
50 1
51 1
53 1
56 1
57 1
60 1
60 1
57 1
56 1
57 1
63 1
65 1
65 1
66 1
64 1
64 1
63 1
62 1
61 1
57 1
58 1
58 1
59 1
59 1
60 1
60 1
66 1
101 1
116 1
116 1
117 1
117 1
117 1
116 1
116 1
118 1
119 1
121 1
121 1
122 1
122 1
122 1
122 1
126 1
127 1
127 1
127 1
127 1
126 1
126 1
126 1
126 1
126 1
126 1
126 1
126 1
126 1
125 1
125 1
125 1
124 1
124 1
124 1
124 1
125 1
126 1
126 1
126 1
126 1
126 1
126 1
126 1
126 1
125 1
125 1
124 1
123 1
123 1
123 1
121 1
118 1
118 1
118 1
118 1
118 1
118 1
117 1
116 1
115 2
115 2
115 2
113 2
113 2
114 2
114 2
114 2
114 2
114 2
114 1
112 1
112 1
112 1
110 1
106 1
106 0
103 0
103 0
103 0
102 0
102 0
97 0
96 0
97 0
96 0
95 0
95 0
95 0
95 0
94 0
93 0
91 0
86 0
81 0
77 0
69 0
62 0
40 0
26 0
22 0
23 0
23 0
17 0
17 0
17 0
17 0
18 0
18 0
18 0
18 0
18 0
19 0
18 0
18 0
18 0
17 0
17 0
18 0
18 0
18 0
18 0
18 0
18 0
19 0
19 0
19 0
19 0
19 0
19 0
19 0
19 0
19 0
18 0
19 0
19 0
18 0
18 0
18 0
20 0
20 0
20 0
21 0
22 2
23 3
25 3
26 3
26 3
26 3
26 3
26 3
26 4
26 4
26 6
25 6
25 6
25 8
25 8
25 8
25 8
25 8
25 8
25 8
24 8
24 8
23 8
24 8
24 8
23 8
23 10
27 10
28 10
28 10
28 10
28 10
28 10
28 10
30 10
30 10
30 10
30 10
30 10
29 10
28 10
27 10
27 10
26 10
26 10
26 10
26 10
25 10
25 10
24 10
24 10
25 10
25 10
27 10
27 10
27 10
27 10
27 10
26 10
26 10
25 10
25 10
25 10
25 10
26 10
30 11
39 11
41 11
43 12
45 13
45 13
45 13
45 13
45 13
44 13
44 13
44 13
45 13
45 13
45 13
45 13
44 13
44 13
44 13
44 13
44 13
44 13
45 13
46 13
48 13
49 13
52 13
55 13
66 13
67 13
67 13
67 13
67 13
68 11
67 11
67 9
69 9
70 9
69 9
69 9
69 9
71 9
71 9
71 9
71 9
72 7
73 7
73 7
73 5
74 5
75 6
75 6
78 6
79 6
79 6
79 6
79 6
80 6
79 6
79 6
79 6
80 4
77 4
76 4
76 4
76 4
78 5
78 5
78 5
76 5
76 5
76 5
76 6
76 6
76 6
76 6
76 6
76 6
75 6
75 6
77 6
79 6
78 6
79 6
79 6
79 6
78 6
78 5
76 5
76 5
76 5
76 5
76 5
76 5
76 5
76 5
80 5
80 5
82 5
80 5
77 4
67 4
67 3
66 3
62 2
62 2
62 2
62 2
62 2
62 2
62 2
62 2
61 2
60 2
60 2
60 2
62 2
62 2
62 2
62 2
62 2
61 2
57 2
56 2
54 2
52 2
51 2
48 2
37 2
36 2
35 2
34 2
35 2
34 2
33 2
33 2
33 2
30 2
30 2
30 2
30 2
29 2
29 2
29 2
29 2
28 2
28 2
28 2
28 2
27 2
25 1
24 1
25 1
24 1
24 1
24 1
24 1
23 1
23 1
23 1
23 1
25 1
25 1
25 1
25 1
25 1
26 0
26 0
26 0
26 0
26 0
26 0
26 0
26 0
26 0
26 0
26 0
26 0
26 0
27 0
23 1
23 2
24 2
22 2
20 2
20 2
20 2
20 2
20 2
21 2
21 2
21 2
21 2
21 2
21 2
21 2
20 2
19 2
18 2
18 2
17 2
17 2
16 2
17 2
17 3
17 3
17 4
17 4
17 4
17 4
17 4
17 4
17 4
17 4
17 4
16 4
15 4
15 4
15 4
15 4
15 4
15 4
15 4
15 4
15 4
15 4
15 4
18 4
20 4
21 4
22 4
22 4
20 4
20 4
20 4
19 4
19 4
19 4
19 4
19 4
19 4
18 4
18 4
18 4
18 4
18 4
19 4
19 4
19 4
19 4
19 4
21 4
19 4
19 4
20 4
20 4
20 4
21 4
21 4
21 4
21 4
18 4
19 4
20 4
22 4
22 4
21 4
23 4
24 4
24 4
24 4
25 4
26 4
26 4
26 4
26 4
26 4
26 4
25 4
25 4
25 3
25 2
24 2
24 2
24 2
25 2
27 2
29 2
30 2
32 2
35 3
35 3
35 3
35 3
35 2
35 2
36 2
36 2
38 2
39 2
39 2
39 2
38 2
38 2
38 2
38 2
41 1
41 1
41 2
41 2
41 2
41 3
41 3
41 3
42 3
42 5
43 5
43 6
44 7
44 7
44 9
44 9
46 12
46 12
47 15
47 15
46 15
43 15
41 15
41 16
40 16
40 16
40 16
44 17
46 17
58 17
65 17
66 17
66 17
66 17
66 17
66 17
66 17
66 17
66 18
65 18
65 18
65 18
65 19
65 19
65 19
63 19
63 19
63 19
62 19
62 19
64 20
68 20
73 20
75 20
77 20
77 20
75 20
73 20
73 20
74 20
74 20
72 20
73 20
74 20
74 20
75 20
77 20
79 20
79 20
79 20
79 23
80 51
80 68
81 73
83 81
85 83
85 87
85 92
86 92
85 92
82 94
79 94
77 94
77 98
74 97
74 97
74 101
74 107
76 119
76 123
74 125
75 133
73 133
72 134
72 134
72 132
72 132
72 132
72 133
72 134
69 134
69 133
69 134
69 134
69 134
69 134
69 134
70 134
73 134
73 132
72 134
72 133
72 133
72 133
71 142
71 142
70 140
73 139
72 137
73 140
76 143
77 144
77 146
77 148
76 148
76 158
76 158
73 157
70 158
57 159
51 161
50 162
50 162
50 162
50 162
50 162
50 163
50 165
50 164
50 165
50 165
50 165
50 164
50 164
50 164
50 163
50 163
49 163
48 163
46 163
46 162
40 162
37 163
36 163
35 163
35 163
35 163
35 163
36 167
36 167
36 168
37 168
36 168
35 168
35 168
31 168
27 168
27 168
27 168
27 169
27 160
27 116
27 105
26 104
24 98
24 96
24 95
24 94
23 94
23 91
23 90
23 91
24 107
25 104
25 102
25 105
25 101
25 95
24 88
24 87
24 87
23 83
23 83
23 82
23 83
23 83
23 83
23 83
23 82
23 82
23 82
24 83
24 82
24 82
24 84
24 84
23 84
22 84
19 83
19 81
19 79
18 79
18 78
18 78
18 68
18 70
18 69
15 69
15 69
14 65
10 61
10 62
10 60
10 63
10 63
10 53
10 56
10 56
10 56
10 58
10 60
10 59
10 60
10 60
10 60
10 58
11 58
12 59
12 59
12 58
13 59
13 61
13 61
13 62
13 62
13 62
13 63
12 69
14 71
14 71
14 71
15 70
15 70
15 70
15 72
15 73
15 73
14 74
13 71
13 71
12 71
11 71
11 72
11 71
11 71
11 71
10 71
10 71
10 71
10 70
10 70
10 70
10 70
10 70
10 72
10 72
10 72
10 72
10 71
10 70
11 71
12 70
14 53
14 53
14 52
15 48
17 47
17 45
17 43
17 43
18 44
24 44
25 44
27 44
27 44
27 44
27 44
27 44
27 48
27 48
27 48
26 47
26 48
26 48
26 46
26 46
26 46
26 46
26 46
26 45
26 46
26 48
26 48
26 48
26 47
26 47
26 47
27 47
27 47
27 47
27 47
27 46
27 48
27 48
27 47
27 54
27 53
27 54
27 53
28 52
28 49
28 49
28 49
28 49
28 49
27 49
27 49
26 48
26 48
26 49
25 48
25 47
25 47
25 48
25 48
25 48
24 46
24 40
22 39
22 40
22 40
22 40
22 41
22 41
22 38
22 38
22 38
22 37
22 36
22 36
22 36
22 36
22 35
22 35
22 35
22 35
22 35
22 39
22 39
22 42
22 42
22 42
22 42
22 43
22 42
22 42
22 42
22 42
22 42
22 42
21 41
20 41
17 41
19 44
19 44
17 44
17 44
17 44
14 44
14 44
12 43
8 43
8 44
6 44
6 44
6 43
6 43
6 43
6 40
6 41
6 41
6 40
7 41
7 41
7 41
8 41
8 41
9 41
11 42
11 42
11 41
11 39
11 39
11 39
11 39
11 39
11 39
10 39
10 39
10 39
10 39
10 39
10 36
10 33
13 33
13 27
13 26
13 24
13 24
12 23
12 23
12 23
12 23
12 23
12 23
12 23
12 23
12 21
12 20
12 20
12 21
12 20
12 20
12 18
12 18
12 18
12 18
12 18
12 18
12 18
12 18
12 18
12 17
12 17
13 17
13 17
13 17
13 17
13 17
13 17
13 17
13 16
13 16
13 16
13 16
13 16
13 16
13 13
13 13
13 10
13 10
13 10
13 9
13 8
13 8
13 8
13 8
13 8
12 8
12 8
12 8
12 8
11 8
9 5
9 5
9 5
11 5
18 5
20 6
20 10
20 10
20 11
20 10
20 11
19 11
19 11
18 11
18 11
18 11
18 10
18 10
18 10
18 9
18 9
18 9
17 8
17 8
17 8
15 8
15 8
15 8
15 8
15 8
15 8
15 8
15 8
15 8
15 8
16 8
16 8
16 8
16 8
16 8
15 8
13 8
13 8
13 8
13 8
13 8
13 8
14 9
14 9
14 9
14 9
14 9
14 9
14 9
14 9
14 9
14 9
14 8
14 8
14 8
14 8
14 8
14 8
14 8
14 8
14 8
14 8
14 8
14 8
14 8
14 8
13 8
11 8
11 8
11 8
11 8
11 8
11 8
12 8
12 8
12 8
12 8
12 8
16 12
16 12
16 14
16 14
16 14
16 15
16 15
16 15
14 15
14 15
13 15
12 15
12 15
12 15
12 15
12 15
13 16
13 16
13 16
12 16
11 16
8 16
8 14
8 10
8 9
8 9
8 9
8 9
8 9
8 9
8 9
8 9
8 9
8 9
8 9
8 9
8 9
8 9
8 9
8 9
8 9
8 9
8 9
8 9
8 9
8 9
8 9
8 10
8 10
8 10
8 10
8 10
7 10
7 10
8 10
8 11
8 11
8 11
8 11
8 11
8 11
8 11
8 11
7 11
7 10
7 10
7 10
7 10
7 10
7 10
7 10
7 10
7 10
7 10
7 10
7 10
7 10
7 10
7 10
7 10
7 10
7 10
7 10
7 10
8 10
8 10
8 10
8 10
9 10
9 10
9 10
9 10
9 10
9 11
10 11
9 11
9 11
9 11
9 11
9 11
6 6
6 7
6 6
6 6
6 6
6 5
6 5
6 5
6 5
6 5
6 5
6 5
6 5
6 5
7 5
6 5
6 4
6 4
6 4
6 4
6 4
6 4
6 4
7 4
7 4
7 4
7 4
7 4
7 4
7 4
7 4
7 4
7 4
7 4
7 4
7 4
7 4
7 4
7 4
7 4
7 4
7 4
7 4
7 4
7 4
7 4
7 4
7 3
7 3
7 3
7 3
7 3
7 3
7 2
6 2
6 2
6 2
6 2
6 2
6 2
6 2
6 3
7 4
7 5
8 5
8 6
8 6
8 6
8 6
8 6
8 6
8 6
8 6
8 6
8 6
8 6
8 6
8 6
8 6
8 6
8 6
8 6
10 6
12 6
11 6
12 6
12 6
12 6
11 6
11 6
11 6
11 6
11 6
11 6
10 6
9 6
9 6
9 6
9 6
9 6
9 6
9 5
9 5
9 5
9 5
9 5
9 5
9 5
9 5
9 5
9 5
8 5
8 6
8 6
8 6
8 6
8 6
8 6
8 6
8 6
8 6
9 6
9 6
8 6
8 6
8 6
8 6
8 8
8 8
8 8
8 8
8 8
8 9
8 9
8 9
8 9
8 9
8 9
8 10
8 10
8 11
8 11
8 11
8 11
8 11
8 11
8 12
8 11
8 10
8 10
8 10
8 10
8 10
8 10
8 10
8 10
8 10
8 10
8 10
8 10
8 10
7 10
7 10
6 9
6 9
6 8
6 8
6 8
6 8
6 8
6 8
6 8
6 8
6 8
6 8
6 8
6 8
6 8
6 8
6 8
5 8
5 8
4 8
2 8
1 8
1 8
1 8
1 8
1 8
1 8
1 8
1 8
1 8
1 7
1 7
1 7
1 7
1 7
1 7
1 7
1 7
1 7
1 7
1 7
1 7
1 7
1 7
1 8
1 9
1 9
1 9
1 9
1 8
1 8
1 9
1 7
1 8
1 8
0 8
0 8
0 8
0 8
0 8
0 8
0 8
0 8
0 8
0 9
0 9
0 15
0 15
0 14
0 14
0 14
0 14
0 14
0 14
0 14
0 12
0 13
0 13
0 13
0 15
0 15
0 15
0 15
0 14
0 14
0 15
0 15
0 15
0 15
0 15
0 16
0 16
0 16
0 16
0 16
0 16
0 16
0 16
0 16
0 16
0 16
0 16
0 16
0 16
0 16
0 16
0 16
0 16
0 16
0 16
1 16
1 16
1 16
1 16
1 16
1 17
1 17
1 17
1 17
1 17
1 17
1 17
1 17
1 17
1 17
1 17
1 17
1 17
1 17
1 17
1 18
1 18
1 19
1 20
1 20
1 20
1 20
1 20
1 20
1 20
1 21
1 21
1 23
1 25
1 24
1 24
1 25
1 25
1 25
1 25
1 25
1 24
1 24
1 23
1 23
1 23
1 23
1 23
1 23
1 23
1 23
1 23
1 23
1 23
1 22
1 22
1 14
1 14
1 14
1 13
1 13
1 13
1 13
1 13
1 13
1 13
1 13
1 13
1 13
1 13
1 13
1 13
1 13
1 13
1 13
1 12
1 12
1 12
1 12
1 12
1 11
1 11
1 11
1 11
1 11
1 11
1 11
1 11
1 11
1 11
1 11
1 11
1 11
1 11
1 11
1 11
1 11
1 11
1 11
1 11
0 11
0 11
0 12
0 12
0 12
0 11
0 11
0 11
0 12
0 12
0 12
0 12
0 12
0 12
0 12
0 13
0 13
0 13
0 13
0 13
0 12
0 10
0 6
0 6
0 6
0 6
0 5
0 4
0 4
0 4
0 4
0 4
0 4
0 4
0 4
0 4
0 4
0 4
0 4
0 4
0 4
0 4
0 4
0 4
0 4
0 4
0 4
0 4
0 4
0 4
0 4
0 4
0 4
0 4
0 5
0 5
0 5
0 5
0 6
0 6
0 6
0 6
0 6
0 6
0 6
0 6
0 6
0 6
0 6
0 9
0 9
0 9
0 9
0 10
0 10
0 10
0 9
0 9
0 10
0 10
0 10
0 10
0 10
0 10
0 10
0 10
0 10
0 10
0 10
0 10
0 10
0 10
0 10
1 10
2 10
2 10
2 10
2 10
2 10
2 10
2 10
2 10
2 9
2 9
2 9
2 9
2 9
2 9
2 8
2 8
2 8
2 8
2 8
2 8
2 8
2 7
2 7
2 7
2 7
2 7
2 7
2 7
2 7
2 7
2 7
3 7
3 7
4 7
4 7
4 7
4 6
4 6
4 6
4 6
4 6
4 6
4 6
4 6
4 6
4 6
4 6
4 6
4 6
4 6
4 6
4 6
4 6
4 6
4 9
4 9
4 9
4 9
4 9
4 8
4 8
4 8
4 8
4 8
4 8
4 8
4 8
4 8
4 8
4 8
4 8
4 8
4 8
4 8
4 8
4 5
4 5
4 5
4 5
4 4
4 4
4 4
4 3
4 3
4 3
4 3
4 3
4 3
4 3
4 3
4 3
4 3
4 3
4 4
4 4
4 4
4 4
4 4
3 4
2 4
2 4
2 4
2 4
2 5
2 5
2 5
2 5
2 5
2 5
3 5
3 5
3 5
3 6
3 6
3 6
3 6
3 6
3 6
3 6
3 6
3 6
3 6
3 6
3 6
3 6
3 6
3 6
3 6
3 6
3 6
3 6
2 6
2 6
1 6
1 6
1 7
1 7
1 7
1 7
2 7
2 7
2 7
2 7
2 7
2 7
2 7
2 7
2 7
2 7
2 7
2 7
3 7
3 7
3 6
3 4
3 4
3 4
3 4
3 4
3 4
3 4
3 4
3 4
3 4
3 4
3 4
3 4
3 4
3 4
3 4
3 4
3 4
3 4
3 4
3 4
3 4
3 4
3 4
3 4
3 4
3 4
3 4
4 4
4 4
4 4
4 4
4 4
4 4
4 4
4 4
4 4
4 3
4 3
4 3
4 3
4 3
4 3
4 3
4 3
4 3
4 3
5 3
5 3
6 2
6 2
6 2
6 2
6 2
6 2
5 2
5 2
6 2
6 1
6 2
6 2
6 2
6 2
6 2
6 2
6 2
6 2
6 2
6 2
6 2
7 2
7 2
7 2
7 2
7 2
7 2
7 2
7 2
7 2
7 2
7 2
7 1
7 1
7 1
7 1
6 1
6 1
6 1
6 1
6 1
6 1
6 1
6 1
6 1
6 1
6 1
6 1
5 1
5 1
5 1
5 1
5 1
5 1
5 1
5 1
5 1
5 1
5 1
5 1
5 1
4 1
4 1
4 1
5 1
6 1
6 1
6 1
6 1
6 1
6 1
6 1
6 1
6 1
6 1
6 1
6 1
6 1
6 1
6 1
7 1
7 1
7 1
7 1
7 1
7 2
8 2
8 2
8 2
8 2
8 2
8 2
8 2
8 2
8 4
8 4
8 4
8 4
7 4
6 4
6 4
6 4
6 4
6 4
6 4
6 4
6 4
6 4
5 4
5 4
5 3
5 3
5 3
5 3
5 3
5 3
5 3
5 3
4 3
4 3
4 3
4 3
4 3
4 3
4 3
4 3
4 3
4 3
4 3
4 3
4 3
4 3
4 3
4 3
4 3
4 3
4 3
4 3
4 3
4 3
4 3
4 3
4 3
4 3
4 3
4 3
4 3
4 3
4 3
4 3
4 3
4 3
4 3
4 3
4 3
4 3
4 3
4 3
4 3
4 4
4 4
4 4
4 4
4 5
3 5
1 5
1 5
0 5
0 5
0 5
0 5
0 5
0 5
0 5
0 5
0 5
0 5
0 5
0 5
0 5
0 5
0 5
0 5
0 5
0 5
0 4
0 4
0 4
0 4
0 4
0 4
0 4
0 4
0 2
0 2
0 2
0 2
0 2
0 2
0 2
0 2
0 2
0 2
0 2
0 2
0 2
0 2
0 2
0 2
0 2
0 2
0 2
0 2
0 2
0 2
0 3
0 3
0 3
0 3
0 3
0 3
0 3
0 3
0 3
0 3
0 3
0 3
0 3
0 3
0 3
0 3
0 3
0 3
0 3
0 3
0 3
0 4
0 4
0 4
0 4
0 4
0 4
0 4
0 4
0 4
0 4
0 4
0 4
0 4
0 4
0 4
0 4
0 4
0 4
0 4
0 4
0 4
0 4
0 4
0 3
0 3
0 3
0 3
0 2
0 2
0 2
0 2
0 2
0 2
0 2
0 2
0 2
0 2
0 2
0 2
0 2
0 2
0 2
0 2
0 2
0 2
0 2
0 2
0 2
0 2
0 2
0 2
0 2
0 2
0 2
0 2
0 2
0 2
0 2
0 2
0 2
0 2
0 2
0 2
0 2
0 2
0 2
0 2
0 2
0 2
0 2
0 2
0 2
0 2
0 2
0 2
0 2
0 2
0 2
0 2
0 0
0 0
0 0
0 0
0 0
0 0
0 0
0 0
0 0
0 0
0 0
0 0
0 0
0 0
0 0
0 0
0 0
0 0
0 0
0 0
0 0
0 0
0 0
0 0
0 0
0 0
0 0
0 0
0 0
0 0
0 0
0 0
0 0
0 0
0 0
0 0
0 0
0 0
0 0
0 0
0 0
0 0
0 0
0 0
0 0
0 0
0 0
0 0
0 0
0 0
0 0
0 0
0 0
0 0
0 0
0 0
0 0
0 0
0 0
0 0
0 0
0 0
0 0
0 0
0 0
0 0
0 0
0 0
0 0
1 0
15 0
16 0
18 0
19 0
19 0
19 0
19 0
19 0
19 0
19 0
19 0
19 0
19 0
19 0
19 0
19 0
19 0
19 0
19 0
19 0
19 0
19 0
19 0
19 0
19 0
19 0
19 0
19 0
19 0
19 0
19 0
19 0
20 0
23 0
27 0
27 0
27 0
27 0
27 0
27 0
27 0
27 0
27 0
27 0
27 0
27 0
27 0
27 0
27 0
27 0
27 0
27 0
27 0
29 0
29 0
29 0
29 0
29 0
29 0
29 0
29 0
29 0
33 0
35 0
36 0
36 0
36 0
36 0
36 0
36 0
36 0
36 0
36 0
36 0
36 0
36 0
36 0
36 0
36 0
37 0
37 0
37 0
37 0
37 0
37 0
37 0
37 0
37 0
37 0
36 0
36 0
36 0
35 0
36 0
37 0
39 0
41 0
42 0
41 0
39 0
29 0
30 0
29 0
28 0
28 0
28 0
28 0
28 0
28 0
28 0
28 0
28 0
29 0
29 0
29 0
29 0
29 0
29 0
29 0
29 0
29 0
29 0
29 0
29 1
29 1
29 1
30 1
30 1
31 1
31 1
31 1
31 1
29 1
24 1
23 1
23 1
23 1
23 1
23 1
23 0
23 0
23 0
22 0
22 0
22 0
22 0
21 0
21 0
21 0
24 0
24 0
25 0
25 0
25 0
25 0
25 0
25 0
25 0
25 0
24 0
24 0
22 0
18 0
18 0
16 0
15 0
14 0
14 0
14 0
14 0
14 0
14 0
14 0
14 0
14 0
14 0
14 0
14 0
14 0
13 0
13 0
13 0
13 0
13 0
13 0
13 0
13 0
13 0
13 0
12 0
11 0
10 0
10 0
10 0
10 0
8 0
7 0
7 0
5 0
5 0
3 0
3 0
3 0
3 0
3 0
3 0
3 0
3 0
3 0
3 0
3 0
3 0
2 0
2 0
2 0
2 0
2 0
2 0
2 0
2 0
2 0
2 0
2 0
2 0
2 0
2 0
1 0
1 0
0 0
0 0
0 0
0 0
0 0
0 0
0 0
0 0
0 0
0 0
0 0
0 0
0 0
0 0
0 0
0 0
0 0
0 0
0 0
0 0
0 0
0 0
0 0
0 0
0 0
0 0
0 0
0 0
0 0
0 0
0 0
0 0
0 0
0 0
0 0
0 0
0 0
0 0
0 0
0 0
0 0
0 0
0 0
0 0
0 0
0 0
0 0
0 0
0 0
0 0
0 0
0 0
0 0
0 0
0 0
0 0
0 0
0 0
0 0
0 0
0 0
0 0
0 0
0 0
0 0
0 0
0 0
0 0
0 0
0 0
0 0
0 0
0 0
0 0
0 0
0 0
0 0
0 0
0 0
0 0
0 0
0 0
0 0
0 0
0 0
0 0
0 0
0 0
0 0
0 0
0 0
0 1
0 1
0 1
0 1
0 1
0 1
0 1
0 1
0 1
0 1
0 1
0 1
0 1
0 1
0 1
0 0
0 0
0 0
0 0
0 0
0 0
0 0
0 0
0 0
0 0
0 0
0 0
0 0
0 0
0 0
0 0
0 0
0 0
0 0
0 0
0 0
0 0
0 0
0 0
0 0
0 0
0 0
0 0
0 0
0 0
0 0
0 0
0 0
0 0
0 0
0 0
0 0
0 0
0 0
0 0
0 0
0 0
0 0
0 0
0 0
0 0
0 0
0 0
0 0
0 0
0 0
0 0
0 0
0 0
0 0
0 0
0 0
0 0
0 0
0 0
0 0
0 0
0 0
0 0
0 0
0 0
0 0
0 0
0 0
0 0
0 0
0 0
0 0
0 0
0 0
0 0
0 0
0 0
0 0
0 0
0 0
0 0
0 0
0 0
0 0
0 0
0 0
0 0
0 0
0 0
0 0
0 0
0 0
0 0
0 0
0 0
0 0
0 0
0 0
0 0
0 0
0 0
0 0
0 0
0 0
0 0
0 0
0 0
0 0
0 0
0 0
0 0
1 0
1 0
1 0
1 0
1 0
1 0
1 0
1 0
1 0
1 0
1 0
1 0
1 0
1 0
1 0
1 0
1 0
1 0
1 0
1 0
1 0
1 0
1 0
1 0
1 0
1 0
1 0
1 0
1 0
1 0
1 0
1 0
1 0
1 0
1 0
1 0
1 0
1 0
1 0
1 0
1 0
1 0
1 0
1 0
1 0
1 0
1 0
1 0
1 0
1 0
1 0
1 0
1 0
1 0
1 0
1 0
1 0
1 0
1 0
1 0
1 0
1 0
1 0
1 0
1 0
1 0
1 0
1 0
1 0
1 0
1 0
1 0
1 0
1 0
1 0
1 0
1 0
1 0
1 0
1 0
1 0
1 0
1 0
1 0
1 0
0 0
0 0
0 0
0 0
0 0
0 0
0 0
0 0
0 0
0 0
0 0
0 0
0 0
0 0
0 0
0 0
0 0
0 0
0 0
0 0
0 0
0 0
0 0
0 0
0 0
0 0
0 0
0 0
0 0
0 0
0 0
0 0
0 0
0 0
0 0
0 0
0 0
0 0
0 0
0 0
0 0
0 0
0 0
0 0
0 0
0 0
0 0
0 0
0 0
0 0
0 0
0 0
0 0
0 0
0 0
0 0
0 0
0 0
0 0
0 0
0 0
0 0
0 0
0 0
0 0
0 0
0 0
0 0
0 0
0 0
0 0
0 0
0 0
0 0
0 0
0 0
0 0
0 0
0 0
0 0
0 0
0 0
0 0
0 0
0 0
0 0
0 0
0 0
0 0
0 0
0 0
0 0
0 0
0 0
0 0
0 0
0 0
0 0
0 0
0 0
0 0
0 0
0 0
0 0
0 0
0 0
0 0
0 0
0 0
0 0
0 0
0 0
0 0
0 0
0 0
0 0
0 0
0 0
0 0
0 0
0 0
0 0
0 0
0 0
0 0
0 0
0 0
0 0
0 0
0 0
0 0
0 0
0 0
0 0
0 0
0 0
0 0
0 0
0 0
0 0
0 0
0 0
0 0
0 0
0 0
0 0
0 0
0 0
0 0
0 0
0 0
0 0
0 0
0 0
0 0
0 0
0 0
0 0
0 0
0 0
0 0
0 0
0 0
0 0
0 0
0 0
0 0
0 0
0 0
0 0
0 0
0 0
0 0
0 0
0 0
0 0
0 0
0 0
0 0
0 0
0 0
0 0
0 0
0 0
0 0
0 0
0 0
0 0
0 0
0 0
0 0
0 0
0 0
0 0
0 0
0 0
0 0
0 0
0 0
0 0
0 0
0 0
0 0
0 0
0 0
0 0
0 0
0 0
0 0
0 0
0 0
0 0
0 0
0 0
0 0
0 0
0 0
0 0
0 0
0 0
0 0
0 0
0 0
0 0
0 0
0 0
0 0
0 0
0 0
0 0
0 0
0 0
0 0
0 0
0 0
0 0
0 0
0 0
0 0
0 0
0 0
0 0
0 0
0 0
0 0
0 0
0 0
0 0
0 0
0 0
0 0
0 0
0 0
0 0
0 0
0 0
0 0
0 0
0 0
0 0
0 0
0 0
0 0
0 0
0 0
0 0
0 0
0 0
0 0
0 0
0 0
0 0
0 0
0 0
0 0
0 0
0 0
0 0
0 0
0 0
0 0
0 0
0 0
0 0
0 0
0 0
0 0
0 0
0 0
0 0
0 0
0 0
0 0
0 0
0 0
0 0
0 0
0 0
0 0
0 0
0 0
0 0
0 0
0 0
0 0
0 0
0 0
0 0
0 0
0 0
0 0
0 0
0 0
0 0
0 0
0 0
0 0
0 0
0 0
0 0
0 0
0 0
0 0
0 0
0 0
0 0
0 0
0 0
0 0
0 0
0 0
0 0
0 0
0 0
0 0
0 0
0 0
0 0
0 0
0 0
0 0
0 0
0 0
0 0
0 0
0 0
0 0
0 0
0 0
0 0
0 0
0 0
0 0
0 0
0 0
0 0
0 0
0 0
0 0
0 0
0 0
0 0
0 0
0 0
0 0
0 0
0 0
0 0
0 0
0 0
0 0
0 0
0 0
0 0
0 0
0 0
0 0
0 0
0 0
0 0
0 0
0 0
0 0
0 0
0 0
0 0
0 0
0 0
0 0
0 0
0 0
0 0
0 0
0 0
0 0
0 0
0 0
0 0
0 0
0 0
0 0
0 0
0 0
0 0
0 0
0 0
0 0
0 0
0 0
0 0
0 0
0 0
0 0
0 0
0 0
0 0
0 0
0 0
0 0
0 0
0 0
0 0
0 0
0 0
0 0
0 0
0 0
0 0
0 0
0 0
0 0
0 0
0 0
0 0
0 0
0 0
0 0
0 0
0 0
0 0
0 0
0 0
0 0
0 0
0 0
0 0
0 0
0 0
0 0
0 0
0 0
0 0
0 0
0 0
0 0
0 0
0 0
0 0
0 0
0 0
0 0
0 0
0 0
0 0
0 0
0 0
0 0
0 0
0 0
0 0
0 0
0 0
0 0
0 0
0 0
0 0
0 0
0 0
0 0
0 0
0 0
0 0
0 0
0 0
0 0
0 0
0 0
0 0
0 0
0 0
0 0
0 0
0 0
0 0
0 0
0 0
0 0
0 0
0 0
0 0
0 0
0 0
0 0
0 0
0 0
0 0
0 0
0 0
0 0
0 0
0 0
0 0
0 0
0 0
0 0
0 0
0 0
0 0
0 0
0 0
0 0
0 0
0 0
0 0
0 0
0 0
0 0
0 0
0 0
0 0
0 0
0 0
0 0
0 0
0 0
0 0
0 0
0 0
0 0
0 0
0 0
0 0
0 0
0 0
0 0
0 0
0 0
0 0
0 0
0 0
0 0
0 0
0 0
0 0
0 0
0 0
0 0
0 0
0 0
0 0
0 0
0 0
0 0
0 0
0 0
0 0
0 0
0 0
0 0
0 0
0 0
0 0
0 0
0 0
0 0
0 0
0 0
0 0
0 0
0 0
0 0
0 0
0 0
0 0
0 0
0 0
0 0
0 0
0 0
0 0
0 0
0 0
0 0
0 0
0 0
0 0
0 0
0 0
0 0
0 0
0 0
0 0
0 0
0 0
0 0
0 0
0 0
0 0
0 0
0 0
0 0
0 0
0 0
0 0
0 0
0 0
0 0
0 0
0 0
0 0
0 0
0 0
0 0
0 0
0 0
0 0
0 0
0 0
0 0
0 0
0 0
0 0
0 0
0 0
0 0
0 0
0 0
0 0
0 0
0 0
0 0
0 0
0 0
0 0
0 0
0 0
0 0
0 0
0 0
0 0
0 0
0 0
0 0
0 0
0 0
0 0
0 0
0 0
0 0
0 0
0 0
0 0
0 0
0 0
0 0
0 0
0 0
0 0
0 0
0 0
0 0
0 0
0 0
0 0
0 0
0 0
0 0
0 0
0 0
0 0
0 0
0 0
0 0
0 0
0 0
0 0
0 0
0 0
0 0
0 0
0 0
0 0
0 0
0 0
0 0
0 0
0 0
0 0
0 0
0 0
0 0
0 0
0 0
0 0
0 0
0 0
0 0
0 0
0 0
0 0
0 0
0 0
0 0
0 0
0 0
0 0
0 0
0 0
0 0
0 0
0 0
0 0
0 0
0 0
0 0
0 0
0 0
0 0
0 0
0 0
0 0
0 0
0 0
0 0
0 0
0 0
0 0
0 0
0 0
0 0
0 0
0 0
0 0
0 0
0 0
0 0
0 0
0 0
0 0
0 0
0 0
0 0
0 0
0 0
0 0
0 0
0 0
0 0
0 0
0 0
0 0
0 0
0 0
0 0
0 0
0 0
0 0
0 0
0 0
0 0
0 0
0 0
0 0
0 0
0 0
0 0
0 0
0 0
0 0
0 0
0 0
0 0
0 0
0 0
0 0
0 0
0 0
0 0
0 0
0 0
0 0
0 0
0 0
0 0
0 0
0 0
0 0
0 0
0 0
0 0
0 0
0 0
0 0
0 0
0 0
0 0
0 0
0 0
0 0
0 0
0 0
0 0
0 0
0 0
0 0
0 0
0 0
0 0
0 0
0 0
0 0
0 0
0 0
0 0
0 0
0 0
0 0
0 0
0 0
0 0
0 0
0 0
0 0
0 0
0 0
0 0
0 0
0 0
0 0
0 0
0 0
0 0
0 0
0 0
0 0
0 0
0 0
0 0
0 0
0 0
0 0
0 0
0 0
0 0
0 0
0 0
0 0
0 0
0 0
0 0
0 0
0 0
0 0
0 0
0 0
0 0
0 0
0 0
0 0
0 0
0 0
0 0
0 0
0 0
0 0
0 0
0 0
0 0
0 0
0 0
0 0
0 0
0 0
0 0
0 0
0 0
0 0
0 0
0 0
0 0
0 0
0 0
0 0
0 0
0 0
0 0
0 0
0 0
0 0
0 0
0 0
0 0
0 0
0 0
0 0
0 0
0 0
0 0
0 0
0 0
0 0
0 0
0 0
0 0
0 0
0 0
0 0
0 0
0 0
0 0
0 0
0 0
0 0
0 0
0 0
0 0
0 0
0 0
0 0
0 0
0 0
0 0
0 0
0 0
0 0
0 0
0 0
0 0
0 0
0 0
0 0
0 0
0 0
0 0
0 0
0 0
0 0
0 0
0 0
0 0
0 0
0 0
0 0
0 0
0 0
0 0
0 0
0 0
0 0
0 0
0 0
0 0
0 0
0 0
0 0
0 0
0 0
0 0
0 0
0 0
0 0
0 0
0 0
0 0
0 0
0 0
0 0
0 0
0 0
0 0
0 0
0 0
0 0
0 0
0 0
0 0
0 0
0 0
0 0
0 0
0 0
0 0
0 0
0 0
0 0
0 0
0 0
0 0
0 0
0 0
0 0
0 0
0 0
0 0
0 0
0 0
0 0
0 0
0 0
0 0
0 0
0 0
0 0
0 0
0 0
0 0
0 0
0 0
0 0
0 0
0 0
0 0
0 0
0 0
0 0
0 0
0 0
0 0
0 0
0 0
0 0
0 0
0 0
0 0
0 0
0 0
0 0
0 0
0 0
0 0
0 0
0 0
0 0
0 0
0 0
0 0
0 0
0 0
0 0
0 0
0 0
0 0
0 0
0 0
0 0
0 0
0 0
0 0
0 0
0 0
0 0
0 0
0 0
0 0
0 0
0 0
0 0
0 0
0 0
0 0
0 0
0 0
0 0
0 0
0 0
0 0
0 0
0 0
0 0
0 0
0 0
0 0
0 0
0 0
0 0
0 0
0 0
0 0
0 0
0 0
0 0
0 0
0 0
0 0
0 0
0 0
0 0
0 0
0 0
0 0
0 0
0 0
0 0
0 0
0 0
0 0
0 0
0 0
0 0
0 0
0 0
0 0
0 0
0 0
0 0
0 0
0 0
0 0
0 0
0 0
0 0
0 0
0 0
0 0
0 0
0 0
0 0
0 0
0 0
0 0
0 0
0 0
0 0
0 0
0 0
0 0
0 0
0 0
0 0
0 0
0 0
0 0
0 0
0 0
0 0
0 0
0 0
0 0
0 0
0 0
0 0
0 0
0 0
0 0
0 0
0 0
0 0
0 0
0 0
0 0
0 0
0 0
0 0
0 0
0 0
0 0
0 0
0 0
0 0
0 0
0 0
0 0
0 0
0 0
0 0
0 0
0 0
0 0
0 0
0 0
0 0
0 0
0 0
0 0
0 0
0 0
0 0
0 0
0 0
0 0
0 0
0 0
0 0
0 0
0 0
0 0
0 0
0 0
0 0
0 0
0 0
0 0
0 0
0 0
0 0
0 0
0 0
0 0
0 0
0 0
0 0
0 0
0 0
0 0
0 0
0 0
0 0
0 0
0 0
0 0
0 0
0 0
0 0
0 0
0 0
0 0
0 0
0 0
0 0
0 0
0 0
0 0
0 0
0 0
0 0
0 0
0 0
0 0
0 0
0 0
0 0
0 0
0 0
0 0
0 0
0 0
0 0
0 0
0 0
0 0
0 0
0 0
0 0
0 0
0 0
0 0
0 0
0 0
0 0
0 0
0 0
0 0
0 0
0 0
0 0
0 0
0 0
0 0
0 0
0 0
0 0
0 0
0 0
0 0
0 0
0 0
0 0
0 0
0 0
0 0
0 0
0 0
0 0
0 0
0 0
0 0
0 0
0 0
0 0
0 0
0 0
0 0
0 0
0 0
0 0
0 0
0 0
0 0
0 0
0 0
0 0
0 0
0 0
0 0
0 0
0 0
0 0
0 0
0 0
0 0
0 0
0 0
0 0
0 0
0 0
0 0
0 0
0 0
0 0
0 0
0 0
0 0
0 0
0 0
0 0
0 0
0 0
0 0
0 0
0 0
0 0
0 0
0 0
0 0
0 0
0 0
0 0
0 0
0 0
0 0
0 0
0 0
0 0
0 0
0 0
0 0
0 0
0 0
0 0
0 0
0 0
0 0
0 0
0 0
0 0
0 0
0 0
0 0
0 0
0 0
0 0
0 0
0 0
0 0
0 0
0 0
0 0
0 0
0 0
0 0
0 0
0 0
0 0
0 0
0 0
0 0
0 0
0 0
0 0
0 0
0 0
0 0
0 0
0 0
0 0
0 0
0 0
0 0
0 0
0 0
0 0
0 0
0 0
0 0
0 0
0 0
0 0
0 0
0 0
0 0
0 0
0 0
0 0
0 0
0 0
0 0
0 0
0 0
0 0
0 0
0 0
0 0
0 0
0 0
0 0
0 0
0 0
0 0
0 0
0 0
0 0
0 0
0 0
0 0
0 0
0 0
0 0
0 0
0 0
0 0
0 0
0 0
0 0
0 0
0 0
0 0
0 0
0 0
0 0
0 0
0 0
0 0
0 0
0 0
0 0
0 0
0 0
0 0
0 0
0 0
0 0
0 0
0 0
0 0
0 0
0 0
0 0
0 0
0 0
0 0
0 0
0 0
0 0
0 0
0 0
0 0
0 0
0 0
0 0
0 0
0 0
0 0
0 0
0 0
0 0
0 0
0 0
0 0
0 0
0 0
0 0
0 0
0 0
0 0
0 0
0 0
0 0
0 0
0 0
0 0
0 0
0 0
0 0
0 0
0 0
0 0
0 0
0 0
0 0
0 0
0 0
0 0
0 0
0 0
0 0
0 0
0 0
0 0
0 0
0 0
0 0
0 0
0 0
0 0
0 0
0 0
0 0
0 0
0 0
0 0
0 0
0 0
0 0
0 0
0 0
0 0
0 0
0 0
0 0
0 0
0 0
0 0
0 0
0 0
0 0
0 0
0 0
0 0
0 0
0 0
0 0
0 0
0 0
0 0
0 0
0 0
0 0
0 0
0 0
0 0
0 0
0 0
0 0
0 0
0 0
0 0
0 0
0 0
0 0
0 0
0 0
0 0
0 0
0 0
0 0
0 0
0 0
0 0
0 0
0 0
0 0
0 0
0 0
0 0
0 0
0 0
0 0
0 0
0 0
0 0
0 0
0 0
0 0
0 0
0 0
0 0
0 0
0 0
0 0
0 0
0 0
0 0
0 0
0 0
0 0
0 0
0 0
0 0
0 0
0 0
0 0
0 0
0 0
0 0
0 0
0 0
0 0
0 0
0 0
0 0
0 0
0 0
0 0
0 0
0 0
0 0
0 0
0 0
0 0
0 0
0 0
0 0
0 0
0 0
0 0
0 0
0 0
0 0
0 0
0 0
0 0
0 0
0 0
0 0
0 0
0 0
0 0
0 0
0 0
0 0
0 0
0 0
0 0
0 0
0 0
0 0
0 0
0 0
0 0
0 0
0 0
0 0
0 0
0 0
0 0
0 0
0 0
0 0
0 0
0 0
0 0
0 0
0 0
0 0
0 0
0 0
0 0
0 0
0 0
0 0
0 0
0 0
0 0
0 0
0 0
0 0
0 0
0 0
0 0
0 0
0 0
0 0
0 0
0 0
0 0
0 0
0 0
0 0
0 0
0 0
0 0
0 0
0 0
0 0
0 0
0 0
0 0
0 0
0 0
0 0
0 0
0 0
0 0
0 0
0 0
0 0
0 0
0 0
0 0
0 0
0 0
0 0
0 0
0 0
0 0
0 0
0 0
0 0
0 0
0 0
0 0
0 0
0 0
0 0
0 0
0 0
0 0
0 0
0 0
0 0
0 0
0 0
0 0
0 0
0 0
0 0
0 0
0 0
0 0
0 0
0 0
0 0
0 0
0 0
0 0
0 0
0 0
0 0
0 0
0 0
0 0
0 0
0 0
0 0
0 0
0 0
0 0
0 0
0 0
0 0
0 0
0 0
0 0
0 0
0 0
0 0
0 0
0 0
0 0
0 0
0 0
0 0
0 0
0 0
0 0
0 0
0 0
0 0
0 0
0 0
0 0
0 0
0 0
0 0
0 0
0 0
0 0
0 0
0 0
0 0
0 0
0 0
0 0
0 0
0 0
0 0
0 0
0 0
0 0
0 0
0 0
0 0
0 0
0 0
0 0
0 0
0 0
0 0
0 0
0 0
0 0
0 0
0 0
0 0
0 0
0 0
0 0
0 0
0 0
0 0
0 0
0 0
0 0
0 0
0 0
0 0
0 0
0 0
0 0
0 0
0 0
0 0
0 0
0 0
0 0
0 0
0 0
0 0
0 0
0 0
0 0
0 0
0 0
0 0
0 0
0 0
0 0
0 0
0 0
0 0
0 0
0 0
0 0
0 0
0 0
0 0
0 0
0 0
0 0
0 0
0 0
0 0
0 0
0 0
0 0
0 0
0 0
0 0
0 0
0 0
0 0
0 0
0 0
0 0
0 0
0 0
0 0
0 0
0 0
0 0
0 0
0 0
0 0
0 0
0 0
0 0
0 0
0 0
0 0
0 0
0 0
0 0
0 0
0 0
0 0
0 0
0 0
0 0
0 0
0 0
0 0
0 0
0 0
0 0
0 0
0 0
0 0
0 0
0 0
0 0
0 0
0 0
0 0
0 0
0 0
0 0
0 0
0 0
0 0
0 0
0 0
0 0
0 0
0 0
0 0
0 0
0 0
0 0
0 0
0 0
0 0
0 0
0 0
0 0
0 0
0 0
0 0
0 0
0 0
0 0
0 0
0 0
0 0
0 0
0 0
0 0
0 0
0 0
0 0
0 0
0 0
0 0
0 0
0 0
0 0
0 0
0 0
0 0
0 0
0 0
0 0
0 0
0 0
0 0
0 0
0 0
0 0
0 0
0 0
0 0
0 0
0 0
0 0
0 0
0 0
0 0
0 0
0 0
0 0
0 0
0 0
0 0
0 0
0 0
0 0
0 0
0 0
0 0
1 0
1 0
1 0
1 0
1 0
1 0
2 0
2 0
2 0
2 0
2 0
2 0
2 0
2 0
2 0
2 0
3 0
3 0
3 0
3 0
3 0
3 0
3 0
3 0
3 0
3 0
3 0
3 0
3 0
3 0
3 0
3 0
3 0
3 0
3 0
3 0
3 0
3 0
3 0
2 0
2 0
2 0
2 0
2 0
2 0
2 0
2 0
2 0
2 0
2 0
2 0
2 0
2 0
2 0
2 0
2 0
2 0
2 0
2 0
2 0
2 0
2 0
2 0
2 0
2 0
2 0
2 0
2 0
2 0
2 0
2 0
2 0
2 0
2 0
2 0
2 0
2 0
2 0
2 0
2 0
2 0
2 0
2 0
2 0
2 0
2 0
2 0
2 0
2 0
2 0
2 0
2 0
2 0
2 0
2 0
2 0
2 0
2 0
2 0
1 0
0 0
0 0
0 0
0 0
0 0
0 0
0 0
0 0
0 0
0 0
0 0
0 0
0 0
0 0
0 0
0 0
0 0
0 0
0 0
0 0
0 0
0 0
0 0
0 0
1 0
1 0
1 0
1 0
1 0
1 0
1 0
1 0
1 0
1 0
1 0
1 0
1 0
1 0
1 0
1 0
1 0
1 0
2 0
3 0
4 0
4 0
4 0
4 0
4 0
4 0
4 0
4 0
4 0
4 0
4 0
4 0
5 0
5 0
5 0
5 0
5 0
5 0
5 0
7 0
7 0
7 0
8 0
8 0
8 0
8 1
9 1
10 1
10 1
10 1
11 1
11 1
14 1
14 1
14 1
14 1
15 1
14 1
14 1
14 1
14 1
14 1
14 1
14 1
13 1
13 1
13 1
13 1
13 1
13 1
13 1
13 1
13 1
12 1
12 1
11 1
11 1
10 1
10 1
10 1
11 1
11 1
12 1
12 1
12 1
12 1
12 1
12 1
12 1
12 1
13 1
13 1
13 1
13 1
12 1
12 1
12 1
12 1
12 1
13 1
13 1
13 1
13 1
12 1
14 1
11 1
11 1
10 1
10 1
10 1
10 1
10 1
10 1
10 1
9 1
9 1
8 1
7 1
6 1
5 1
2 1
2 1
2 1
2 1
2 1
2 1
2 1
1 0
1 0
1 0
1 0
1 0
1 0
1 0
1 0
1 0
1 0
1 0
1 0
1 0
1 0
1 0
1 0
1 0
1 0
1 0
1 0
1 0
1 0
1 0
1 0
1 0
1 0
1 0
1 0
1 0
1 0
1 0
1 0
1 0
1 0
1 0
1 0
1 0
1 0
1 0
1 0
1 0
1 0
1 0
1 0
1 0
1 0
1 0
1 0
1 0
1 0
1 0
1 0
1 0
1 0
1 0
1 0
1 0
1 0
1 0
1 0
1 0
1 0
1 0
1 0
1 0
1 0
1 0
1 0
1 0
1 0
0 0
0 0
0 0
0 0
0 0
0 0
0 0
0 0
0 0
0 0
0 0
0 0
0 0
0 0
0 0
0 0
0 0
0 0
0 0
0 0
0 0
0 0
0 0
0 0
0 0
0 0
0 0
0 0
0 0
0 0
0 0
0 0
0 0
0 0
0 0
0 0
0 0
0 0
0 0
0 0
0 0
0 0
0 0
0 0
0 0
0 0
0 0
0 0
0 0
0 0
0 0
0 0
0 0
0 0
0 0
0 0
0 0
0 0
0 0
0 0
0 0
0 0
0 0
0 0
0 0
0 0
0 0
0 0
0 0
0 0
0 0
0 0
0 0
0 0
0 0
0 0
0 0
0 0
0 0
0 0
0 0
0 0
0 0
0 0
0 0
0 0
0 0
0 0
0 0
0 0
0 0
0 0
0 0
0 0
0 0
0 0
0 0
0 0
0 0
0 0
0 0
0 0
0 0
0 0
0 0
0 0
0 0
0 0
0 0
0 0
0 0
0 0
0 0
0 0
0 0
0 0
0 0
0 0
0 0
0 0
0 0
0 0
0 0
0 0
0 0
0 0
0 0
0 0
0 0
0 0
0 0
0 0
0 0
0 0
0 0
0 0
0 0
0 0
0 0
0 0
0 0
0 0
0 0
0 0
0 0
0 0
0 0
0 0
0 0
0 0
0 0
0 0
0 0
0 0
0 0
0 0
0 0
0 0
0 0
0 0
0 0
0 0
0 0
0 0
0 0
0 0
0 0
0 0
0 0
0 0
0 0
0 0
0 0
0 0
0 0
0 0
0 0
0 0
0 0
0 0
0 0
0 0
0 0
0 0
0 0
0 0
0 0
0 0
0 0
0 0
0 0
0 0
0 0
0 0
0 0
0 0
0 0
0 0
0 0
0 0
0 0
0 0
0 0
0 0
0 0
0 0
0 0
0 0
0 0
0 0
0 0
0 0
0 0
0 0
0 0
0 0
0 0
0 0
0 0
0 0
0 0
0 0
0 0
0 0
0 0
0 0
0 0
0 0
0 0
0 0
0 0
0 0
0 0
0 0
0 0
0 0
0 0
0 0
0 0
0 0
0 0
0 0
0 0
0 0
0 0
0 0
0 0
0 0
0 0
0 0
0 0
0 0
0 0
0 0
0 0
0 0
0 0
0 0
0 0
0 0
0 0
0 0
0 0
0 0
0 0
0 0
0 0
0 0
0 0
0 0
0 0
0 0
0 0
0 0
0 0
0 0
0 0
0 0
0 0
0 0
0 0
0 0
0 0
0 0
0 0
0 0
0 0
0 0
0 0
0 0
0 0
0 0
0 0
0 0
0 0
0 0
0 0
0 0
0 0
0 0
0 0
0 0
0 0
0 0
0 0
0 0
0 0
0 0
0 0
0 0
0 0
0 0
0 0
0 0
0 0
0 0
0 0
0 0
0 0
0 0
0 0
0 0
0 0
0 0
0 0
0 0
0 0
0 0
0 0
0 0
0 0
0 0
0 0
0 0
0 0
0 0
0 0
0 0
0 0
0 0
0 0
0 0
0 0
0 0
0 0
0 0
0 0
0 0
0 0
0 0
0 0
0 0
0 0
0 0
0 0
0 0
0 0
0 0
0 0
0 0
0 0
0 0
0 0
0 0
0 0
0 0
0 0
0 0
0 0
0 0
0 0
0 0
0 0
0 0
0 0
0 0
0 0
0 0
0 0
0 0
0 0
0 0
0 0
0 0
0 0
0 0
0 0
0 0
0 0
0 0
0 0
0 0
0 0
0 0
0 0
0 0
0 0
0 0
0 0
0 0
0 0
0 0
0 0
0 0
0 0
0 0
0 0
0 0
0 0
0 0
0 0
0 0
0 0
0 0
0 0
0 0
0 0
0 0
0 0
0 0
0 0
0 0
0 0
0 0
0 0
0 0
0 0
0 0
0 0
0 0
0 0
0 0
0 0
0 0
0 0
0 0
0 0
0 0
0 0
0 0
0 0
0 0
0 0
0 0
0 0
0 0
0 0
0 0
0 0
0 0
0 0
0 0
0 0
0 0
0 0
0 0
0 0
0 0
0 0
0 0
0 0
0 0
0 0
0 0
0 0
0 0
0 0
0 0
0 0
0 0
0 0
0 0
0 0
0 0
0 0
0 0
0 0
0 0
0 0
0 0
0 0
0 0
0 0
0 0
0 0
0 0
0 0
0 0
0 0
0 0
0 0
0 0
0 0
0 0
0 0
0 0
0 0
0 0
0 0
0 0
0 0
0 0
0 0
0 0
0 0
0 0
0 0
0 0
0 0
0 0
0 0
0 0
0 0
0 0
0 0
0 0
0 0
0 0
0 0
0 0
0 0
0 0
0 0
0 0
0 0
0 0
0 0
0 0
0 0
0 0
0 0
0 0
0 0
0 0
0 0
0 0
0 0
0 0
0 0
0 0
0 0
0 0
0 0
0 0
0 0
0 0
0 0
0 0
0 0
0 0
0 0
0 0
0 0
0 0
0 0
0 0
0 0
0 0
0 0
0 0
0 0
0 0
0 0
0 0
0 0
0 0
0 0
0 0
0 0
0 0
0 0
0 0
0 0
0 0
0 0
0 0
0 0
0 0
0 0
0 0
0 0
0 0
7 0
178 10
432 33
463 35
469 36
518 38
583 45
703 52
2369 99
5709 183
8734 257
10757 295
11773 311
12915 322
13567 329
14064 334
14407 341
14922 350
15131 372
15248 378
15674 394
16923 478
17055 482
17353 484
17495 485
17705 488
17774 489
18297 501
18345 503
18403 509
18423 513
18444 515
18455 517
18469 518
18480 520
18748 548
18878 560
19029 569
19162 576
19191 581
19347 582
19370 584
19376 584
19391 587
19408 587
19435 591
19442 592
19446 606
19484 612
19590 623
19597 633
19603 639
19608 644
19616 644
19635 652
19645 663
19662 664
19692 677
19754 678
19783 678
19797 678
19845 678
19876 678
19911 679
19936 680
19977 683
20011 686
20053 687
20088 689
20144 693
20183 702
20348 705
20461 707
20542 707
20693 734
20901 738
20965 742
21019 746
21099 750
21112 753
21112 753
21113 753
21113 753
21113 753
21113 753
21113 753
21113 753
21113 753
21113 753
21113 753
21113 753
21113 753
21113 753
21113 753
21113 753
21113 753
21113 753
21113 753
21113 753
21113 753
21023 753
20913 743
20569 715
20465 713
19893 700
19798 696
19460 680
18991 668
15336 575
12574 508
9703 442
8782 428
7661 402
7011 393
6137 382
5970 378
5543 370
5330 369
5197 356
5089 348
4582 323
3464 250
3383 248
3248 243
3193 241
3159 240
3082 239
2619 228
2592 226
2576 224
2549 221
2532 218
2510 216
2499 216
2475 212
2223 178
2074 162
1928 144
1795 134
1780 130
1633 127
1626 126
1602 126
1591 123
1577 123
1563 123
1547 119
1539 112
1493 107
1432 105
1426 94
1419 87
1416 79
1405 76
1381 69
1376 69
1354 67
1339 67
1264 66
1236 66
1214 64
1177 63
1133 61
1105 61
1059 57
1046 57
1008 56
978 56
945 55
895 51
800 46
685 42
570 40
479 40
289 11
187 11
125 8
82 6
2 2
0 0
0 0
0 0
0 0
0 0
0 0
0 0
0 0
0 0
0 0
0 0
0 0
0 0
0 0
0 0
0 0
0 0
0 0
0 0
0 0
0 0
0 0
0 0
0 0
0 0
0 0
0 0
0 0
0 0
0 0
0 0
0 0
0 0
0 0
0 0
0 0
0 0
0 0
0 0
0 0
0 0
0 0
0 0
0 0
0 0
0 0
0 0
0 0
0 0
0 0
0 0
0 0
0 0
0 0
0 0
0 0
0 0
0 0
0 0
0 0
0 0
0 0
0 0
0 0
0 0
0 0
0 0
0 0
0 0
0 0
0 0
0 0
0 0
0 0
0 0
0 0
0 0
0 0
0 0
0 0
0 0
0 0
0 0
0 0
0 0
0 0
0 0
0 0
0 0
0 0
0 0
0 0
0 0
0 0
0 0
0 0
0 0
0 0
0 0
0 0
0 0
0 0
0 0
0 0
0 0
0 0
0 0
0 0
0 0
0 0
0 0
0 0
0 0
0 0
0 0
0 0
0 0
0 0
0 0
0 0
0 0
0 0
0 0
0 0
0 0
0 0
0 0
0 0
0 0
0 0
0 0
0 0
0 0
0 0
0 0
0 0
0 0
0 0
0 0
0 0
0 0
0 0
0 0
0 0
0 0
0 0
0 0
0 0
0 0
0 0
0 0
0 0
0 0
0 0
0 0
0 0
0 0
0 0
0 0
0 0
0 0
0 0
0 0
0 0
0 0
0 0
0 0
0 0
0 0
0 0
0 0
0 0
0 0
0 0
0 0
0 0
0 0
0 0
0 0
0 0
0 0
0 0
0 0
0 0
0 0
0 0
0 0
0 0
0 0
0 0
0 0
0 0
0 0
0 0
0 0
0 0
0 0
0 0
0 0
0 0
0 0
0 0
0 0
0 0
0 0
0 0
0 0
0 0
0 0
0 0
0 0
0 0
0 0
0 0
0 0
0 0
0 0
0 0
0 0
0 0
0 0
0 0
0 0
0 0
0 0
0 0
0 0
0 0
0 0
0 0
0 0
0 0
0 0
0 0
0 0
0 0
0 0
0 0
0 0
0 0
0 0
0 0
0 0
0 0
0 0
0 0
0 0
0 0
0 0
0 0
0 0
0 0
0 0
0 0
0 0
0 0
0 0
0 0
0 0
0 0
0 0
0 0
0 0
0 0
0 0
0 0
0 0
0 0
0 0
0 0
0 0
0 0
0 0
0 0
0 0
0 0
0 0
0 0
0 0
0 0
0 0
0 0
0 0
0 0
0 0
0 0
0 0
0 0
0 0
0 0
0 0
0 0
0 0
0 0
0 0
0 0
0 0
0 0
0 0
0 0
0 0
0 0
0 0
0 0
0 0
0 0
0 0
0 0
0 0
0 0
0 0
0 0
0 0
0 0
0 0
0 0
0 0
0 0
0 0
0 0
0 0
0 0
0 0
0 0
0 0
0 0
0 0
0 0
0 0
0 0
0 0
0 0
0 0
0 0
0 0
0 0
0 0
0 0
0 0
0 0
0 0
0 0
0 0
0 0
0 0
0 0
0 0
0 0
0 0
0 0
0 0
0 0
0 0
0 0
0 0
0 0
0 0
0 0
0 0
0 0
0 0
0 0
0 0
0 0
0 0
0 0
0 0
0 0
0 0
0 0
0 0
0 0
0 0
0 0
0 0
0 0
0 0
0 0
0 0
0 0
0 0
0 0
0 0
0 0
0 0
0 0
0 0
0 0
0 0
0 0
0 0
0 0
0 0
0 0
0 0
0 0
0 0
0 0
0 0
0 0
0 0
0 0
0 0
0 0
0 0
0 0
0 0
0 0
0 0
0 0
0 0
0 0
0 0
0 0
0 0
0 0
0 0
0 0
0 0
0 0
0 0
0 0
0 0
0 0
0 0
0 0
0 0
0 0
0 0
0 0
0 0
0 0
0 0
0 0
0 0
0 0
0 0
0 0
0 0
0 0
0 0
0 0
0 0
0 0
0 0
0 0
0 0
0 0
0 0
0 0
0 0
0 0
0 0
0 0
0 0
0 0
0 0
0 0
0 0
0 0
0 0
0 0
0 0
0 0
0 0
0 0
0 0
0 0
0 0
0 0
0 0
0 0
0 0
0 0
0 0
0 0
0 0
0 0
0 0
0 0
0 0
0 0
0 0
0 0
0 0
0 0
0 0
0 0
0 0
0 0
0 0
0 0
0 0
0 0
0 0
0 0
0 0
0 0
0 0
0 0
0 0
0 0
0 0
0 0
0 0
0 0
0 0
0 0
0 0
0 0
0 0
0 0
0 0
0 0
0 0
0 0
0 0
0 0
0 0
0 0
0 0
0 0
0 0
0 0
0 0
0 0
0 0
0 0
0 0
0 0
0 0
0 0
0 0
0 0
0 0
0 0
0 0
0 0
0 0
0 0
0 0
0 0
0 0
0 0
0 0
0 0
0 0
0 0
0 0
0 0
0 0
0 0
0 0
0 0
0 0
0 0
0 0
0 0
0 0
0 0
0 0
0 0
0 0
0 0
0 0
0 0
0 0
0 0
0 0
0 0
0 0
0 0
0 0
0 0
0 0
0 0
0 0
0 0
0 0
0 0
0 0
0 0
0 0
0 0
0 0
0 0
0 0
0 0
0 0
0 0
0 0
0 0
0 0
0 0
0 0
0 0
0 0
0 0
0 0
0 0
0 0
0 0
0 0
0 0
0 0
0 0
0 0
0 0
0 0
0 0
0 0
0 0
0 0
0 0
0 0
0 0
0 0
0 0
0 0
0 0
0 0
0 0
0 0
0 0
0 0
0 0
0 0
0 0
0 0
0 0
0 0
0 0
0 0
0 0
0 0
0 0
0 0
0 0
0 0
0 0
0 0
0 0
0 0
0 0
0 0
0 0
0 0
0 0
0 0
0 0
0 0
0 0
0 0
0 0
0 0
0 0
0 0
0 0
0 0
0 0
0 0
0 0
0 0
0 0
0 0
0 0
0 0
0 0
0 0
0 0
0 0
0 0
0 0
0 0
0 0
0 0
0 0
0 0
0 0
0 0
0 0
0 0
0 0
0 0
0 0
0 0
0 0
0 0
0 0
0 0
0 0
0 0
0 0
0 0
0 0
0 0
0 0
0 0
0 0
0 0
0 0
0 0
0 0
0 0
0 0
0 0
0 0
0 0
0 0
0 0
0 0
0 0
0 0
0 0
0 0
0 0
0 0
0 0
0 0
0 0
0 0
0 0
0 0
0 0
0 0
0 0
0 0
0 0
0 0
0 0
0 0
0 0
0 0
0 0
0 0
0 0
0 0
0 0
0 0
0 0
0 0
0 0
0 0
0 0
0 0
0 0
0 0
0 0
0 0
0 0
0 0
0 0
0 0
0 0
0 0
0 0
0 0
0 0
0 0
0 0
0 0
0 0
0 0
0 0
0 0
0 0
0 0
0 0
0 0
0 0
0 0
0 0
0 0
0 0
0 0
0 0
0 0
0 0
0 0
0 0
0 0
0 0
0 0
0 0
0 0
0 0
0 0
0 0
0 0
0 0
0 0
0 0
0 0
0 0
0 0
0 0
0 0
0 0
0 0
0 0
0 0
0 0
0 0
0 0
0 0
0 0
0 0
0 0
0 0
0 0
0 0
0 0
0 0
0 0
0 0
0 0
0 0
0 0
0 0
0 0
0 0
0 0
0 0
0 0
0 0
0 0
0 0
0 0
0 0
0 0
0 0
0 0
0 0
0 0
0 0
0 0
0 0
0 0
0 0
0 0
0 0
0 0
0 0
0 0
0 0
0 0
0 0
0 0
0 0
0 0
0 0
0 0
0 0
0 0
0 0
0 0
0 0
0 0
0 0
0 0
0 0
0 0
0 0
0 0
0 0
0 0
0 0
0 0
0 0
0 0
0 0
0 0
0 0
0 0
0 0
0 0
0 0
0 0
0 0
0 0
0 0
0 0
0 0
0 0
0 0
0 0
0 0
0 0
0 0
0 0
0 0
0 0
0 0
0 0
0 0
0 0
0 0
0 0
0 0
0 0
0 0
0 0
0 0
0 0
0 0
0 0
0 0
0 0
0 0
0 0
0 0
0 0
0 0
0 0
0 0
0 0
0 0
0 0
0 0
0 0
0 0
0 0
0 0
0 0
0 0
0 0
0 0
0 0
0 0
0 0
0 0
0 0
0 0
0 0
0 0
0 0
0 0
0 0
0 0
0 0
0 0
0 0
0 0
0 0
0 0
0 0
0 0
0 0
0 0
0 0
0 0
0 0
0 0
0 0
0 0
0 0
0 0
0 0
0 0
0 0
0 0
0 0
0 0
0 0
0 0
0 0
0 0
0 0
0 0
0 0
0 0
0 0
0 0
0 0
0 0
0 0
0 0
0 0
0 0
0 0
0 0
0 0
0 0
0 0
0 0
0 0
0 0
0 0
0 0
0 0
0 0
0 0
0 0
0 0
0 0
0 0
0 0
0 0
0 0
0 0
0 0
0 0
0 0
0 0
0 0
0 0
0 0
0 0
0 0
0 0
0 0
0 0
0 0
0 0
0 0
0 0
0 0
0 0
0 0
0 0
0 0
0 0
0 0
0 0
0 0
0 0
0 0
0 0
0 0
0 0
0 0
0 0
0 0
0 0
0 0
0 0
0 0
0 0
0 0
0 0
0 0
0 0
0 0
0 0
0 0
0 0
0 0
0 0
0 0
0 0
0 0
0 0
0 0
0 0
0 0
0 0
0 0
0 0
0 0
0 0
0 0
0 0
0 0
0 0
0 0
0 0
0 0
0 0
0 0
0 0
0 0
0 0
0 0
0 0
0 0
0 0
0 0
0 0
0 0
0 0
0 0
0 0
0 0
0 0
0 0
0 0
0 0
0 0
0 0
0 0
0 0
0 0
0 0
0 0
0 0
0 0
0 0
0 0
0 0
0 0
0 0
0 0
0 0
0 0
0 0
0 0
0 0
0 0
0 0
0 0
0 0
0 0
0 0
0 0
0 0
0 0
0 0
0 0
0 0
0 0
0 0
0 0
0 0
0 0
0 0
0 0
0 0
0 0
0 0
0 0
0 0
0 0
0 0
0 0
0 0
0 0
0 0
0 0
0 0
0 0
0 0
0 0
0 0
0 0
0 0
0 0
0 0
0 0
0 0
0 0
0 0
0 0
0 0
0 0
0 0
0 0
0 0
0 0
0 0
0 0
0 0
0 0
0 0
0 0
0 0
0 0
0 0
0 0
0 0
0 0
0 0
0 0
0 0
0 0
0 0
0 0
0 0
0 0
0 0
0 0
0 0
0 0
0 0
0 0
0 0
0 0
0 0
0 0
0 0
0 0
0 0
0 0
0 0
0 0
0 0
0 0
0 0
0 0
0 0
0 0
0 0
0 0
0 0
0 0
0 0
0 0
0 0
0 0
0 0
0 0
0 0
0 0
0 0
0 0
0 0
0 0
0 0
0 0
0 0
0 0
0 0
0 0
0 0
0 0
0 0
0 0
0 0
0 0
0 0
0 0
0 0
0 0
0 0
0 0
0 0
0 0
0 0
0 0
0 0
0 0
0 0
0 0
0 0
0 0
0 0
0 0
0 0
0 0
0 0
0 0
0 0
0 0
0 0
0 0
0 0
0 0
0 0
0 0
0 0
0 0
0 0
0 0
0 0
0 0
0 0
0 0
0 0
0 0
0 0
0 0
0 0
0 0
0 0
0 0
0 0
0 0
0 0
0 0
0 0
0 0
0 0
0 0
0 0
0 0
0 0
0 0
0 0
0 0
0 0
0 0
0 0
0 0
0 0
0 0
0 0
0 0
0 0
0 0
0 0
0 0
0 0
0 0
0 0
0 0
0 0
0 0
0 0
0 0
0 0
0 0
0 0
0 0
0 0
0 0
0 0
0 0
0 0
0 0
0 0
0 0
0 0
0 0
0 0
0 0
0 0
0 0
0 0
0 0
0 0
0 0
0 0
0 0
0 0
0 0
0 0
0 0
0 0
0 0
0 0
0 0
0 0
0 0
0 0
0 0
0 0
0 0
0 0
0 0
0 0
0 0
0 0
0 0
0 0
0 0
0 0
0 0
0 0
0 0
0 0
0 0
0 0
0 0
0 0
0 0
0 0
0 0
0 0
0 0
0 0
0 0
0 0
0 0
0 0
0 0
0 0
0 0
0 0
0 0
0 0
0 0
0 0
0 0
0 0
0 0
0 0
0 0
0 0
0 0
0 0
0 0
0 0
0 0
0 0
0 0
0 0
0 0
0 0
0 0
0 0
0 0
0 0
0 0
0 0
0 0
0 0
0 0
0 0
0 0
0 0
0 0
0 0
0 0
0 0
0 0
0 0
0 0
0 0
0 0
0 0
0 0
0 0
0 0
0 0
0 0
0 0
0 0
0 0
0 0
0 0
0 0
0 0
0 0
0 0
0 0
0 0
0 0
0 0
0 0
0 0
0 0
0 0
0 0
0 0
0 0
0 0
0 0
0 0
0 0
0 0
0 0
0 0
0 0
0 0
0 0
0 0
0 0
0 0
0 0
0 0
0 0
0 0
0 0
0 0
0 0
0 0
0 0
0 0
0 0
0 0
0 0
0 0
0 0
0 0
0 0
0 0
0 0
0 0
0 0
0 0
0 0
0 0
0 0
0 0
0 0
0 0
0 0
0 0
0 0
0 0
0 0
0 0
0 0
0 0
0 0
0 0
0 0
0 0
0 0
0 0
0 0
0 0
0 0
0 0
0 0
0 0
0 0
0 0
0 0
0 0
0 0
0 0
0 0
0 0
0 0
0 0
0 0
0 0
0 0
0 0
0 0
0 0
0 0
0 0
0 0
0 0
0 0
0 0
0 0
0 0
0 0
0 0
0 0
0 0
0 0
0 0
0 0
0 0
0 0
0 0
0 0
0 0
0 0
0 0
0 0
0 0
0 0
0 0
0 0
0 0
0 0
0 0
0 0
0 0
0 0
0 0
0 0
0 0
0 0
0 0
0 0
0 0
0 0
0 0
0 0
0 0
0 0
0 0
0 0
0 0
0 0
0 0
0 0
0 0
0 0
0 0
0 0
0 0
0 0
0 0
0 0
0 0
0 0
0 0
0 0
0 0
0 0
0 0
0 0
0 0
0 0
0 0
0 0
0 0
0 0
0 0
0 0
0 0
0 0
0 0
0 0
0 0
0 0
0 0
0 0
0 0
0 0
0 0
0 0
0 0
0 0
0 0
0 0
0 0
0 0
0 0
0 0
0 0
0 0
0 0
0 0
0 0
0 0
0 0
0 0
0 0
0 0
0 0
0 0
0 0
0 0
0 0
0 0
0 0
0 0
0 0
0 0
0 0
0 0
0 0
0 0
0 0
0 0
0 0
0 0
0 0
0 0
0 0
0 0
0 0
0 0
0 0
0 0
0 0
0 0
0 0
0 0
0 0
0 0
0 0
0 0
0 0
0 0
0 0
0 0
0 0
0 0
0 0
0 0
0 0
0 0
0 0
0 0
0 0
0 0
0 0
0 0
0 0
0 0
0 0
0 0
0 0
0 0
0 0
0 0
0 0
0 0
0 0
0 0
0 0
0 0
0 0
0 0
0 0
0 0
0 0
0 0
0 0
0 0
0 0
0 0
0 0
0 0
0 0
0 0
0 0
0 0
0 0
0 0
0 0
0 0
0 0
0 0
0 0
0 0
0 0
0 0
0 0
0 0
0 0
0 0
0 0
0 0
0 0
0 0
0 0
0 0
0 0
0 0
0 0
0 0
0 0
0 0
0 0
0 0
0 0
0 0
0 0
0 0
0 0
0 0
0 0
0 0
0 0
0 0
0 0
0 0
0 0
0 0
0 0
0 0
0 0
0 0
0 0
0 0
0 0
0 0
0 0
0 0
0 0
0 0
0 0
0 0
0 0
0 0
0 0
0 0
0 0
0 0
0 0
0 0
0 0
0 0
0 0
0 0
0 0
0 0
0 0
0 0
0 0
0 0
0 0
0 0
0 0
0 0
0 0
0 0
0 0
0 0
0 0
0 0
0 0
0 0
0 0
0 0
0 0
0 0
0 0
0 0
0 0
0 0
0 0
0 0
0 0
0 0
0 0
0 0
0 0
0 0
0 0
0 0
0 0
0 0
0 0
0 0
0 0
0 0
0 0
0 0
0 0
0 0
0 0
0 0
0 0
0 0
0 0
0 0
0 0
0 0
0 0
0 0
0 0
0 0
0 0
0 0
0 0
0 0
0 0
0 0
0 0
0 0
0 0
0 0
0 0
0 0
0 0
0 0
0 0
0 0
0 0
0 0
0 0
0 0
0 0
0 0
0 0
0 0
0 0
0 0
0 0
0 0
0 0
0 0
0 0
0 0
0 0
0 0
0 0
0 0
0 0
0 0
0 0
0 0
0 0
0 0
0 0
0 0
0 0
0 0
0 0
0 0
0 0
0 0
0 0
0 0
0 0
0 0
0 0
0 0
0 0
0 0
0 0
0 0
0 0
0 0
0 0
0 0
0 0
0 0
0 0
0 0
0 0
0 0
0 0
0 0
0 0
0 0
0 0
0 0
0 0
0 0
0 0
0 0
0 0
0 0
0 0
0 0
0 0
0 0
0 0
0 0
0 0
0 0
0 0
0 0
0 0
0 0
0 0
0 0
0 0
0 0
0 0
0 0
0 0
0 0
0 0
0 0
0 0
0 0
0 0
0 0
0 0
0 0
0 0
0 0
0 0
0 0
0 0
0 0
0 0
0 0
0 0
0 0
0 0
0 0
0 0
0 0
0 0
0 0
0 0
0 0
0 0
0 0
0 0
0 0
0 0
0 0
0 0
0 0
0 0
0 0
0 0
0 0
0 0
0 0
0 0
0 0
0 0
0 0
0 0
0 0
0 0
0 0
0 0
0 0
0 0
0 0
0 0
0 0
0 0
0 0
0 0
0 0
0 0
0 0
0 0
0 0
0 0
0 0
0 0
0 0
0 0
0 0
0 0
0 0
0 0
0 0
0 0
0 0
0 0
0 0
0 0
0 0
0 0
0 0
0 0
0 0
0 0
0 0
0 0
0 0
0 0
0 0
0 0
0 0
0 0
0 0
0 0
0 0
0 0
0 0
0 0
0 0
0 0
0 0
0 0
0 0
0 0
0 0
0 0
0 0
0 0
0 0
0 0
0 0
0 0
0 0
0 0
0 0
0 0
0 0
0 0
0 0
0 0
0 0
0 0
0 0
0 0
0 0
0 0
0 0
0 0
0 0
0 0
0 0
0 0
0 0
0 0
0 0
0 0
0 0
0 0
0 0
0 0
0 0
0 0
0 0
0 0
0 0
0 0
0 0
0 0
0 0
0 0
0 0
0 0
0 0
0 0
0 0
0 0
0 0
0 0
0 0
0 0
0 0
0 0
0 0
0 0
0 0
0 0
0 0
0 0
0 0
0 0
0 0
0 0
0 0
0 0
0 0
0 0
0 0
0 0
0 0
0 0
0 0
0 0
0 0
0 0
0 0
0 0
0 0
0 0
0 0
0 0
0 0
0 1
0 1
0 1
0 1
0 1
0 1
0 1
0 1
0 1
0 1
0 1
0 1
0 2
0 2
0 2
0 2
0 3
0 3
0 3
0 3
0 3
0 3
0 3
0 3
0 3
0 3
0 3
0 3
0 3
0 3
0 3
0 3
0 3
0 3
0 3
0 3
0 3
0 3
0 3
0 3
0 3
0 3
0 3
0 3
0 3
0 3
0 3
0 3
0 3
0 3
0 3
0 3
0 3
0 3
0 3
0 3
0 3
0 3
0 3
0 3
0 3
0 3
0 3
0 3
0 3
0 3
0 3
0 3
0 3
0 3
0 3
0 3
0 3
0 3
0 3
0 3
0 3
0 3
0 3
0 3
0 3
0 3
0 3
0 3
0 3
0 3
0 3
0 3
0 3
0 3
0 3
0 3
0 3
0 3
0 3
0 3
0 3
0 3
0 3
0 3
0 2
0 2
0 2
0 2
0 2
0 2
0 2
0 2
0 2
0 2
0 2
0 2
0 1
0 1
0 1
0 1
0 0
0 0
0 0
0 0
0 0
0 0
0 0
0 0
0 0
0 0
0 0
0 0
0 0
0 0
0 0
0 0
0 0
0 0
0 0
0 0
0 0
0 0
0 0
0 0
0 0
0 0
0 0
0 0
0 0
0 0
0 0
0 0
0 0
0 0
0 0
0 0
0 0
0 0
0 0
0 0
0 0
0 0
0 0
0 0
0 0
0 0
0 0
0 0
0 0
0 0
0 0
0 0
0 0
0 0
0 0
0 0
0 0
0 0
0 0
0 0
0 0
0 0
0 0
0 0
0 0
0 0
0 0
0 0
0 0
0 0
0 0
0 0
0 0
0 0
0 0
0 0
0 0
0 0
0 0
0 0
0 0
0 0
0 1
0 1
1 2
1 2
1 2
1 2
1 2
1 2
1 2
1 2
1 2
2 2
2 2
3 2
3 2
3 2
3 2
3 2
3 2
3 2
3 2
3 2
3 2
3 2
3 2
3 2
3 2
3 2
3 2
3 2
3 2
3 2
3 2
3 2
3 2
3 2
3 2
4 2
4 2
4 2
4 2
4 2
4 2
4 2
4 2
4 2
4 2
4 2
5 2
5 2
5 2
5 2
5 2
4 2
4 2
4 2
4 2
4 2
4 2
4 2
4 2
4 2
4 2
4 2
4 2
4 2
4 2
4 2
4 2
4 2
4 3
4 3
4 3
4 3
5 3
5 3
5 2
5 2
5 2
5 1
5 1
5 1
5 1
5 1
5 1
5 1
5 1
5 1
5 1
5 1
5 1
5 1
5 1
5 1
6 1
6 1
6 1
6 1
6 1
6 1
6 1
7 1
6 1
6 1
6 1
6 1
6 1
5 1
5 1
5 1
4 1
4 1
4 1
4 1
4 1
4 1
4 1
4 1
4 1
4 1
4 1
4 1
4 1
4 1
4 1
4 1
4 1
4 1
7 1
7 1
7 2
7 2
7 2
7 2
7 2
7 2
7 2
7 2
7 2
7 2
7 2
7 2
7 2
7 2
7 2
7 2
7 2
7 2
6 2
6 2
6 2
6 2
6 2
6 2
6 2
6 2
6 2
6 2
6 2
8 2
10 2
10 2
10 2
10 2
10 2
10 2
10 2
10 2
10 2
10 2
10 1
10 1
10 1
10 1
9 1
9 1
9 1
9 1
9 1
9 3
9 3
9 3
9 3
9 3
9 3
9 3
9 3
9 3
9 3
9 3
9 4
9 4
9 4
9 4
8 4
8 4
8 4
8 4
8 4
8 4
8 4
7 4
7 4
7 4
7 4
7 4
7 4
7 4
7 4
7 4
7 4
7 4
7 4
7 4
7 4
7 4
8 4
8 4
8 4
8 4
8 4
8 4
8 4
8 4
8 4
8 4
8 4
8 4
5 4
5 4
5 3
5 4
5 4
5 4
5 4
5 4
5 4
6 6
6 6
6 6
6 6
6 6
6 6
6 6
6 6
6 6
6 6
6 6
6 6
6 6
6 6
6 6
6 6
6 6
6 6
6 6
4 6
3 6
3 6
3 6
2 6
2 6
2 6
2 6
2 6
2 6
2 6
2 6
2 6
2 9
2 9
2 9
2 9
2 9
2 9
2 9
2 9
2 9
2 9
2 7
2 7
2 7
2 7
2 7
2 7
2 7
2 7
2 7
2 7
2 6
2 6
2 6
2 6
2 6
2 6
2 6
2 6
2 6
2 6
2 6
2 6
2 6
2 6
2 6
2 6
2 6
2 6
2 6
2 6
2 6
2 6
2 6
2 6
2 6
2 6
2 6
1 6
1 6
1 6
1 6
1 6
1 6
1 6
1 6
1 6
1 6
1 6
1 6
1 6
1 6
1 6
1 5
1 5
1 5
1 5
1 5
1 5
0 3
0 3
0 3
0 3
0 3
0 3
0 3
0 3
0 3
0 3
0 3
0 3
0 3
0 3
0 3
0 3
0 3
0 3
0 3
0 3
0 3
0 3
0 3
0 3
0 3
0 3
0 3
0 3
0 3
0 3
0 3
0 3
0 0
0 0
0 0
0 0
0 0
0 0
0 0
0 0
0 0
0 0
0 0
0 0
0 0
0 0
0 0
0 0
0 0
0 0
0 0
0 0
0 0
0 0
0 0
0 0
0 0
0 0
0 0
0 0
0 0
0 0
0 0
0 0
0 0
0 0
0 0
0 0
0 0
0 0
0 0
0 0
0 0
0 0
0 0
0 0
0 0
0 0
0 0
0 0
0 0
0 0
0 0
0 0
0 0
0 0
0 0
0 0
0 0
0 0
0 0
0 0
0 0
0 0
0 0
0 0
0 0
0 0
0 0
0 0
0 0
0 0
0 0
0 0
0 0
0 0
0 0
0 0
0 0
0 0
0 0
0 0
0 0
0 0
0 0
0 0
0 0
0 0
0 0
0 0
0 0
0 0
0 0
0 0
0 0
0 0
0 0
0 0
0 0
0 0
0 0
0 0
0 0
0 0
0 0
1 0
1 0
1 0
1 0
2 0
2 0
2 0
2 0
2 0
2 0
2 0
2 0
2 0
2 0
2 0
2 0
2 0
2 0
2 0
2 0
2 0
2 0
2 0
2 0
2 0
2 0
2 0
2 0
2 0
2 0
2 0
2 0
2 0
2 0
2 0
2 0
2 0
2 0
2 0
2 0
2 0
2 0
2 0
2 0
2 0
2 0
2 0
2 0
2 0
2 0
2 0
3 0
3 0
3 0
3 0
3 0
3 0
3 0
3 0
3 0
3 0
3 0
3 0
3 0
6 0
6 0
6 0
6 0
6 0
6 0
6 0
6 0
6 0
6 0
6 0
6 0
6 0
6 0
6 0
6 0
6 0
6 0
6 0
6 0
6 0
6 0
6 0
6 0
6 0
6 0
6 0
6 0
6 0
6 0
6 0
6 0
6 0
6 0
6 0
6 0
5 0
5 0
5 0
4 0
4 0
4 0
4 0
4 0
4 0
4 0
4 0
4 1
4 1
4 1
4 1
4 1
4 1
4 1
4 1
4 1
4 1
4 1
4 1
4 1
4 1
4 1
4 1
4 1
4 1
4 1
4 1
4 1
4 1
4 1
4 1
4 1
4 1
4 1
4 1
4 1
4 1
4 1
4 1
4 1
4 1
4 1
4 1
4 1
4 1
4 1
4 1
3 1
3 1
3 1
3 1
3 1
3 1
3 1
3 1
3 1
3 1
3 1
3 1
3 1
0 1
0 1
0 1
0 1
0 1
0 1
0 1
0 1
0 1
0 1
0 1
0 1
0 1
0 1
0 1
0 2
0 2
0 2
0 2
0 2
0 2
0 2
0 2
0 2
0 2
0 2
0 2
0 2
0 2
0 2
0 2
0 2
0 2
0 2
0 2
0 2
0 2
0 2
0 2
0 2
0 2
0 2
0 2
0 2
0 2
0 2
0 2
0 1
0 1
0 1
0 1
0 1
0 1
0 1
0 1
0 1
0 1
0 1
0 1
0 1
0 1
0 1
0 1
0 1
0 1
0 1
0 1
0 1
0 1
0 1
0 1
0 1
0 1
0 1
0 1
0 1
0 1
0 1
0 1
0 1
0 1
0 1
0 1
0 1
0 1
0 1
0 1
0 1
0 1
0 1
0 1
0 1
0 1
0 1
0 1
0 1
0 1
0 1
0 1
0 1
0 1
0 1
0 1
0 1
0 1
0 1
0 1
0 1
0 1
0 1
0 1
0 1
0 1
0 1
0 1
0 0
0 0
0 0
0 0
0 0
0 0
0 0
0 0
0 0
0 0
0 0
0 0
0 0
0 0
0 0
0 0
0 0
0 0
0 0
0 0
0 0
0 0
0 0
0 0
0 0
0 0
0 0
0 0
0 0
0 0
0 0
0 0
0 0
0 0
0 0
0 0
0 0
0 0
0 0
0 0
0 0
0 0
0 0
0 0
0 0
0 0
0 0
0 0
0 0
0 0
0 0
0 0
0 0
0 0
0 0
0 0
0 0
0 0
0 0
0 0
0 0
0 0
0 0
0 0
0 0
0 0
0 0
0 0
0 0
0 0
0 0
0 0
0 0
0 0
0 0
0 0
0 0
0 0
0 0
0 0
0 0
0 0
0 0
0 0
1 0
1 0
1 0
1 0
1 0
1 0
1 0
1 0
1 0
1 0
1 0
1 0
1 0
1 0
1 0
1 0
1 0
1 0
1 0
1 0
1 0
1 0
1 0
1 0
1 0
1 0
1 0
1 0
1 0
1 0
1 0
1 0
1 0
1 0
1 0
1 0
1 0
1 0
1 0
1 0
1 0
1 0
1 0
1 0
1 0
1 0
1 0
2 0
2 0
2 0
2 0
2 0
2 0
2 0
2 0
2 0
2 0
2 0
2 0
2 0
2 0
2 0
2 0
2 0
2 0
2 0
2 0
2 0
2 0
2 0
2 0
2 0
2 0
2 0
2 0
2 0
2 0
2 0
2 0
2 0
2 0
2 0
2 0
2 0
2 0
2 0
2 0
2 0
2 0
2 0
2 0
2 0
2 0
2 0
2 0
2 0
2 0
2 0
2 0
2 0
1 0
1 0
1 0
1 0
1 0
1 0
1 0
1 0
1 0
1 0
1 0
1 0
1 0
1 0
1 0
1 0
1 0
1 0
1 0
2 0
2 0
2 0
2 0
2 0
2 0
2 0
2 0
2 0
2 0
2 0
2 0
2 0
2 0
2 0
2 0
2 0
2 0
2 0
1 0
1 0
1 0
1 0
1 0
1 0
1 0
1 0
1 0
0 0
0 0
0 0
0 0
0 0
0 0
0 0
0 0
0 0
0 0
0 0
0 0
0 0
0 0
0 0
0 0
0 0
0 0
0 0
0 0
0 0
0 0
0 0
0 0
0 0
0 0
0 0
0 0
1 0
1 0
1 0
1 0
1 0
1 0
1 0
1 0
1 0
1 0
1 0
1 0
1 0
1 0
1 0
1 0
1 0
1 0
1 0
1 0
1 0
1 0
1 0
1 0
1 0
1 0
1 0
1 0
1 0
1 0
1 0
1 0
1 0
1 0
1 0
1 0
1 0
1 0
1 0
1 0
1 0
1 0
1 0
1 0
1 0
1 0
1 0
1 0
1 0
2 0
2 0
2 0
2 0
2 0
2 0
2 0
2 0
2 0
2 0
2 0
2 0
2 0
2 0
2 0
2 0
2 0
2 0
2 0
4 0
4 0
4 0
4 0
4 0
4 0
4 0
4 0
4 0
4 0
4 0
4 0
4 0
4 0
4 0
4 0
4 0
4 0
5 0
5 0
5 0
5 0
5 0
5 0
5 0
5 0
5 0
5 0
5 0
5 0
5 0
5 0
4 0
4 0
4 0
4 0
4 0
4 0
4 0
4 0
4 0
4 0
4 0
4 0
4 0
4 0
4 0
4 0
4 0
4 0
4 0
4 0
4 0
4 0
4 0
4 0
4 0
4 0
4 0
4 0
4 0
4 0
4 0
4 0
4 0
4 0
4 0
4 0
4 0
4 0
4 0
4 0
4 0
4 0
4 0
4 0
4 0
4 0
4 0
4 0
4 0
3 0
3 0
3 0
3 0
3 0
3 0
3 0
3 0
3 0
3 0
3 0
3 0
3 0
3 0
4 0
4 0
4 0
4 0
4 0
2 0
1 0
1 0
1 0
1 0
1 0
1 0
1 0
1 0
1 0
1 0
1 0
1 0
1 0
1 0
1 0
1 0
1 0
1 0
1 0
1 0
1 0
1 0
1 0
1 0
1 0
1 0
1 0
1 0
1 0
1 0
1 0
1 0
1 0
1 0
1 0
1 0
1 0
1 0
1 0
1 0
1 0
1 0
1 0
1 0
1 0
1 0
1 0
1 0
1 0
1 0
1 0
1 0
1 0
1 0
1 0
1 0
1 0
1 0
1 0
1 0
1 0
1 0
1 0
1 0
1 0
2 0
2 0
2 0
2 0
2 0
2 0
2 0
2 0
2 0
2 0
2 0
2 0
1 0
1 0
1 0
1 0
0 0
1 0
1 0
1 0
1 0
1 0
1 0
1 0
1 0
1 0
1 0
1 0
1 0
1 0
1 0
1 0
1 0
1 0
1 0
1 0
0 0
0 0
0 0
0 0
0 0
0 0
0 0
0 0
0 0
0 0
0 0
0 0
0 0
0 0
0 0
0 0
0 0
0 0
0 0
0 0
0 0
0 0
0 0
0 0
0 0
0 0
0 0
0 0
0 0
0 0
0 0
0 0
0 0
0 0
0 0
0 0
0 0
0 0
0 0
0 0
0 0
0 0
0 0
0 0
0 0
0 0
0 0
0 0
0 0
0 0
0 0
0 0
0 0
0 0
0 0
0 0
0 0
0 0
0 0
0 0
0 0
0 0
0 0
0 0
0 0
0 0
0 0
0 0
0 0
0 0
0 0
0 0
0 0
0 0
0 0
0 0
0 0
0 0
0 0
0 0
0 0
0 0
0 0
0 0
0 0
0 0
0 0
0 0
0 0
0 0
0 0
0 0
0 0
0 0
0 0
0 0
0 0
0 0
0 0
0 0
0 0
0 0
0 0
0 0
0 0
0 0
0 0
0 0
0 0
0 0
0 0
0 0
0 0
0 0
0 0
0 0
0 0
0 0
0 0
0 0
0 0
0 0
0 0
0 0
0 0
0 0
0 0
0 0
0 0
0 0
0 0
0 0
0 0
0 0
0 0
0 0
0 0
0 0
0 0
0 0
0 0
0 0
0 0
0 0
0 0
0 0
0 0
0 0
0 0
0 0
0 0
0 0
0 0
0 0
0 0
0 0
0 0
0 0
0 0
0 0
0 0
0 0
0 0
0 0
0 0
0 0
0 0
0 0
0 0
0 0
0 0
0 0
0 0
0 0
0 0
0 0
0 0
0 0
0 0
0 0
0 0
0 0
0 0
0 0
0 0
0 0
0 0
0 0
0 0
0 0
0 0
0 0
0 0
0 0
0 0
0 0
0 0
0 0
0 0
0 0
0 0
0 0
0 0
0 0
0 0
0 0
0 0
0 0
0 0
0 0
0 0
0 0
0 0
0 0
0 0
0 0
0 0
0 0
0 0
0 0
0 0
0 0
0 0
0 0
0 0
0 0
0 0
0 0
0 0
0 0
0 0
0 0
0 0
0 0
0 0
0 0
0 0
0 0
0 0
0 0
0 0
0 0
0 0
0 0
0 0
0 0
0 0
0 0
0 0
0 0
0 0
0 0
0 0
0 0
0 0
0 0
0 0
0 0
0 0
0 0
0 0
0 0
0 0
0 0
0 0
0 0
0 1
0 1
0 1
0 1
0 1
0 1
0 1
0 1
1 1
1 1
1 1
1 1
1 1
1 1
1 1
1 0
1 1
1 2
1 2
1 2
1 2
1 2
1 2
0 3
0 3
0 3
0 3
0 3
0 3
0 3
0 3
0 3
0 3
0 3
0 3
0 3
0 3
1 3
1 3
1 3
1 3
1 3
1 3
1 3
1 3
1 3
1 3
1 3
1 3
1 8
1 14
1 32
1 38
1 39
1 40
1 41
1 41
1 42
1 42
1 42
1 42
1 42
1 43
1 55
1 70
1 80
1 85
1 91
1 97
1 97
1 98
1 100
1 100
1 100
1 100
1 101
1 101
1 103
1 103
1 103
1 103
1 103
1 104
1 104
1 104
1 104
1 104
1 104
1 105
1 108
1 110
1 113
2 115
2 115
2 115
2 115
2 115
2 115
2 115
2 116
2 118
2 118
2 118
2 119
3 137
3 140
4 165
5 172
6 182
6 183
6 185
6 187
6 189
6 191
6 194
6 196
6 198
6 199
6 199
6 202
6 202
6 202
6 202
6 201
7 209
7 211
7 211
8 211
8 212
8 213
8 213
8 213
8 214
8 216
9 223
9 223
9 223
8 225
8 227
8 230
8 230
8 230
8 229
8 229
8 229
8 229
8 231
8 245
8 245
8 234
8 221
10 214
10 213
11 213
11 212
11 211
11 211
11 211
11 212
11 213
11 213
11 212
11 205
11 180
11 170
11 167
11 165
11 163
11 156
10 156
10 156
10 158
10 158
10 159
10 160
10 162
10 164
10 162
10 164
10 165
10 165
10 165
10 164
10 164
10 164
10 168
10 169
10 169
10 171
10 169
10 166
10 165
9 163
9 163
9 163
9 166
9 170
9 171
9 174
9 179
9 178
9 178
9 177
9 178
7 163
7 159
7 133
6 126
5 122
5 121
5 119
5 116
5 116
5 114
5 113
5 110
5 108
5 113
5 114
5 111
5 111
5 111
5 112
4 111
5 103
5 103
4 103
4 105
4 106
4 105
4 108
4 109
4 112
4 110
3 116
3 116
3 117
3 115
3 112
3 110
3 110
3 110
3 110
3 110
3 110
3 112
3 109
3 96
3 96
3 96
2 96
1 95
1 94
1 94
1 93
1 93
1 93
1 92
1 92
1 91
1 91
1 91
1 91
1 91
1 91
1 91
1 91
1 92
1 92
1 92
1 91
1 90
1 89
1 88
1 88
1 84
1 83
1 83
1 81
1 81
1 81
1 81
1 81
1 90
1 88
1 86
1 88
1 86
1 84
1 87
1 87
1 89
1 89
1 89
1 89
1 86
1 89
1 84
1 83
1 79
1 78
1 78
1 78
1 77
1 71
1 73
1 72
1 72
1 71
1 71
1 70
1 70
1 70
1 69
1 69
1 69
1 69
1 63
1 62
1 62
1 62
1 62
1 62
1 62
0 62
0 62
0 62
0 60
1 58
1 56
1 55
1 55
1 50
1 49
1 40
1 40
1 38
1 38
1 38
1 39
1 45
1 47
1 48
1 52
1 51
1 49
1 49
1 49
1 49
1 49
1 49
1 49
1 49
1 49
1 49
1 49
1 49
1 49
1 49
1 49
1 49
1 49
1 49
1 49
1 49
1 49
1 48
1 48
1 48
1 48
1 48
1 48
1 48
1 47
1 47
1 46
1 45
1 45
1 45
1 45
1 45
1 45
1 45
1 36
1 36
1 33
1 31
1 31
1 32
1 31
1 30
1 29
1 29
1 29
1 28
1 27
1 21
1 22
1 22
1 22
1 22
1 22
1 22
1 22
1 21
1 21
1 21
1 22
1 24
1 24
1 25
1 25
3 27
3 27
3 28
3 28
3 28
3 28
3 28
3 28
3 28
3 28
3 27
3 26
3 26
3 26
3 27
1 27
1 28
1 27
1 28
1 28
1 28
1 29
1 28
1 28
1 29
2 46
2 47
2 48
2 43
2 44
2 44
2 41
2 41
2 41
2 42
2 42
2 42
2 42
2 42
2 42
2 42
2 42
2 42
2 42
2 42
2 42
2 43
2 43
2 43
2 44
2 44
2 46
2 46
2 46
2 46
2 46
2 46
2 46
2 46
2 46
2 46
2 46
2 46
2 46
2 47
2 47
2 47
2 47
2 47
2 50
2 52
2 55
3 61
3 62
3 65
3 65
5 96
5 100
5 101
5 102
5 104
5 106
6 114
6 114
6 114
6 113
6 113
6 113
6 115
6 115
6 118
6 119
6 119
6 121
6 128
6 128
6 128
6 128
6 127
6 127
5 125
5 125
5 124
5 124
5 124
5 124
5 124
5 124
5 124
5 124
5 124
5 124
5 124
5 123
5 121
5 121
5 120
5 120
5 120
5 120
5 120
5 119
5 119
5 119
5 118
4 98
4 97
4 96
4 98
4 98
4 97
4 99
4 101
4 101
4 101
5 106
5 106
5 107
5 108
5 110
5 111
5 111
5 111
5 111
5 111
5 111
5 110
5 110
5 110
5 109
5 110
5 108
5 109
5 110
5 111
5 116
5 116
5 116
5 117
5 117
10 117
11 118
12 118
12 119
13 119
13 119
13 119
14 119
14 119
13 111
13 107
13 104
12 99
12 99
12 95
12 94
11 59
11 58
11 58
11 59
11 57
11 53
10 53
10 53
10 53
10 53
10 53
10 53
10 51
10 50
10 47
10 47
10 47
10 47
10 39
10 38
10 37
10 37
10 37
11 37
11 37
11 37
11 37
11 37
11 37
11 37
11 37
11 37
11 37
11 37
11 37
11 37
11 37
11 37
11 37
11 37
11 37
11 37
11 38
11 38
15 38
15 38
15 38
15 38
15 38
15 37
15 38
15 38
15 35
15 35
15 35
24 34
24 32
24 32
25 31
24 25
24 25
24 25
25 24
25 22
25 21
25 21
25 21
33 22
33 22
33 22
34 22
35 23
35 23
35 22
35 22
35 22
35 20
35 20
35 19
35 14
35 14
35 14
35 13
37 13
35 13
34 12
33 12
33 11
32 10
32 10
32 10
31 10
31 10
32 10
32 9
32 9
35 9
35 9
35 9
35 9
35 8
36 13
37 13
37 13
37 16
37 16
37 15
37 15
37 16
37 16
37 16
37 16
37 16
37 16
37 16
37 16
37 15
37 14
37 15
37 15
37 15
37 15
37 15
36 15
36 15
36 15
36 15
36 15
36 15
36 16
36 16
36 16
36 16
36 16
36 16
36 16
36 16
37 16
38 16
38 16
38 16
38 16
38 16
39 16
35 17
35 17
35 17
35 17
35 17
35 17
36 16
37 17
37 17
38 17
38 17
29 17
29 17
30 17
29 17
29 17
29 17
28 17
28 17
26 17
25 17
25 17
25 17
22 16
22 16
21 16
20 16
20 16
20 16
20 16
20 16
20 16
20 16
20 16
20 16
20 16
19 16
19 16
19 16
18 16
15 16
15 16
15 16
15 16
15 16
15 16
15 17
15 17
15 17
14 17
14 17
12 17
11 17
11 17
11 17
13 17
14 17
13 11
12 11
12 10
12 8
12 8
12 8
12 8
12 7
12 7
12 7
12 7
16 14
16 14
16 15
16 15
16 14
16 19
17 19
17 19
17 19
17 21
17 21
17 21
17 25
17 27
17 27
17 27
17 27
17 26
17 27
17 27
17 27
16 27
16 27
16 27
16 27
16 27
15 27
15 27
15 26
15 26
15 28
14 28
14 28
14 28
14 28
14 29
14 29
14 34
13 34
11 33
11 33
11 33
11 33
11 33
11 33
10 33
10 33
10 33
10 33
10 33
10 33
9 33
9 33
8 33
8 33
8 33
8 34
9 34
9 34
9 33
9 33
9 33
9 33
9 33
9 33
9 33
9 33
9 33
9 33
9 33
9 33
9 33
9 33
9 33
9 33
10 33
10 33
10 33
10 32
10 32
10 32
11 32
11 32
11 32
11 32
11 32
11 32
8 32
8 32
8 32
8 33
8 33
8 33
8 33
8 33
6 33
6 33
6 33
4 33
4 32
4 25
4 25
4 24
3 24
3 24
3 17
3 17
3 17
3 17
3 16
3 16
3 16
3 11
3 11
4 11
4 11
4 11
4 11
4 11
4 11
4 12
4 14
4 18
5 22
5 25
5 25
5 26
5 26
5 23
5 23
5 24
5 27
5 27
5 27
5 27
5 26
5 26
5 21
5 21
5 22
7 24
7 34
7 38
8 41
9 56
9 57
9 62
9 62
9 63
9 64
9 65
9 65
9 65
9 65
9 65
9 65
8 64
8 65
8 65
8 65
8 65
8 65
8 65
8 65
8 65
8 65
8 65
8 65
8 65
8 65
8 65
8 68
10 68
10 68
10 68
9 68
9 68
9 68
9 70
9 72
9 72
8 73
8 73
8 76
8 76
8 77
8 77
8 77
8 77
8 77
8 77
8 77
8 77
8 77
8 81
8 81
8 82
8 92
8 92
8 92
8 92
8 92
8 92
8 92
8 93
8 93
8 93
8 92
8 92
8 92
8 92
8 92
8 92
8 92
7 92
7 92
7 91
7 91
7 91
7 91
7 90
7 86
7 83
6 79
6 78
6 77
6 77
6 77
6 77
6 77
6 76
6 73
6 70
7 71
7 71
7 74
7 76
9 110
9 111
9 113
7 106
7 107
7 96
6 97
5 88
5 88
5 88
5 90
5 90
5 90
5 89
5 89
5 92
5 93
5 93
5 93
5 93
5 92
5 92
5 93
5 93
5 93
5 93
5 93
5 93
5 93
5 93
5 92
5 92
5 92
5 92
5 89
3 89
3 89
3 89
3 89
3 90
3 88
3 86
3 86
3 89
3 89
3 89
3 86
3 85
3 85
3 85
3 85
4 86
4 86
4 87
4 87
4 89
4 92
4 90
4 96
4 96
4 86
4 86
5 86
5 86
7 86
7 88
7 88
7 87
7 87
7 87
7 87
7 87
7 87
7 87
7 87
7 87
8 87
8 88
8 88
8 88
8 89
8 89
8 89
8 89
11 89
11 87
11 87
11 87
11 87
11 87
11 88
11 88
11 88
11 87
11 89
10 94
10 91
11 90
11 90
11 87
9 52
9 50
9 49
9 49
9 46
9 46
9 45
9 45
9 43
9 42
9 42
9 42
9 43
9 46
10 48
10 49
10 48
10 48
10 48
10 48
10 48
10 48
10 48
10 48
10 48
10 48
10 48
10 48
12 49
12 51
12 51
12 52
12 52
12 52
12 52
12 52
12 52
12 52
12 51
12 51
12 51
13 51
13 51
13 47
13 47
13 47
14 47
14 47
14 47
14 47
14 47
13 46
13 45
13 45
13 45
13 40
12 38
13 43
13 39
13 45
13 45
13 46
12 47
11 52
11 52
11 50
11 50
11 50
11 50
9 51
9 54
9 54
9 56
8 57
8 58
8 58
8 58
8 57
8 57
8 57
8 56
8 56
8 56
8 57
7 57
7 57
7 57
7 57
7 58
7 58
7 58
8 63
8 63
8 62
8 61
8 56
8 56
7 59
7 59
8 59
8 54
8 54
8 54
8 54
8 52
8 52
9 52
9 52
9 52
9 52
10 57
10 55
10 58
10 56
9 55
9 57
9 58
9 59
9 59
9 63
9 63
9 63
9 64
9 64
9 64
8 64
8 64
8 64
7 63
7 61
7 61
7 61
7 61
7 61
7 61
7 61
7 61
7 61
7 61
7 61
7 62
6 62
6 62
6 62
6 62
5 62
5 63
5 63
5 63
5 64
5 65
5 65
5 65
5 68
5 68
4 69
4 63
4 48
4 48
4 48
4 48
5 54
6 56
6 56
6 56
6 56
7 56
7 56
7 59
7 58
7 54
7 54
7 54
7 53
7 52
7 53
7 53
7 53
7 53
7 54
7 54
7 54
7 53
7 54
7 54
7 54
7 54
7 55
7 54
7 53
7 53
7 48
7 48
7 47
7 47
7 47
7 47
7 43
6 43
6 43
6 43
6 43
6 43
6 43
6 43
5 43
5 43
5 43
5 43
5 43
4 38
4 38
4 34
4 33
4 33
4 32
4 31
4 30
4 30
4 26
4 26
4 26
4 25
4 25
4 26
4 26
4 25
4 25
4 25
4 25
4 25
4 25
4 25
4 25
4 25
4 25
4 25
4 25
4 25
4 25
4 24
4 24
4 24
4 24
4 24
4 24
4 23
4 23
4 24
4 24
4 28
4 31
4 31
4 28
4 30
3 29
3 29
3 30
3 33
3 33
2 34
1 28
1 27
1 27
1 27
1 27
0 27
0 27
0 24
0 24
0 24
0 23
0 23
0 23
0 23
0 22
0 22
0 22
0 22
0 21
0 21
0 22
0 22
0 21
0 21
0 21
0 21
0 20
0 20
0 21
0 21
0 22
0 22
0 22
0 22
0 22
0 22
0 22
0 22
0 22
0 22
0 22
0 22
0 22
0 22
0 22
0 22
0 22
0 27
0 27
0 30
0 30
0 30
0 30
0 30
0 30
0 30
0 30
0 30
0 30
0 30
0 31
0 31
0 31
0 30
1 30
1 30
1 30
1 30
3 31
3 32
3 32
3 33
3 34
3 34
3 34
3 34
3 34
3 34
3 34
2 34
2 34
2 34
2 34
2 34
2 34
2 34
2 35
2 31
2 27
2 25
2 25
2 25
3 39
3 38
3 39
3 44
3 44
3 42
3 42
3 40
3 40
3 40
3 40
3 40
3 40
3 40
3 43
3 45
3 46
3 46
3 46
3 46
3 46
3 46
3 46
3 46
3 46
3 46
3 46
3 46
3 45
3 45
3 49
3 49
3 49
3 49
3 49
3 49
3 50
4 51
4 64
5 94
6 100
6 105
6 107
6 107
6 107
6 109
8 109
8 109
8 112
8 113
9 154
8 154
8 156
8 156
8 155
8 161
8 161
8 158
7 159
7 159
7 159
7 159
7 159
7 159
7 159
7 159
7 159
7 159
7 158
7 158
7 158
7 158
7 158
7 158
7 158
7 158
7 156
7 155
7 155
7 155
7 156
7 156
7 157
7 157
7 158
7 158
7 158
7 158
7 158
8 158
8 158
8 158
8 158
8 158
8 157
8 157
8 156
8 156
8 156
8 156
8 138
7 138
7 138
8 134
8 134
8 134
8 134
8 134
8 134
8 138
8 139
8 139
8 140
8 140
8 137
8 135
8 134
8 134
8 132
8 135
8 135
8 135
8 135
8 134
8 137
9 139
9 141
9 141
9 141
9 141
9 136
9 136
9 137
9 137
9 136
8 137
8 134
7 131
7 113
8 85
9 86
10 86
10 85
10 84
10 84
10 84
8 83
8 82
8 80
8 80
7 38
7 38
7 36
7 36
7 36
7 27
7 28
7 28
7 29
7 29
7 30
7 30
7 30
7 30
8 30
14 31
14 31
14 31
14 31
14 39
14 41
14 41
14 42
14 43
14 43
14 43
14 43
14 43
14 43
14 43
14 42
14 42
14 41
14 41
14 40
14 40
14 40
14 41
14 41
13 41
13 41
13 41
13 41
13 41
13 41
13 41
13 41
13 41
13 41
13 42
13 43
13 43
13 44
12 44
13 44
13 44
13 44
13 44
13 44
13 39
13 39
13 39
13 37
13 38
13 38
13 38
13 38
14 39
15 40
15 37
15 38
15 37
15 37
15 38
15 37
14 36
14 33
14 33
14 33
14 33
14 33
14 34
14 34
14 34
14 34
14 33
14 35
14 35
14 36
12 34
11 33
10 32
10 32
10 32
10 31
10 31
10 31
10 31
10 31
10 31
10 32
10 32
10 33
10 33
10 34
10 34
10 33
10 33
10 32
9 32
8 31
8 38
8 38
8 38
8 41
3 42
3 47
3 47
3 47
3 37
3 37
3 37
3 36
3 35
3 35
3 35
3 35
3 35
3 35
3 35
3 35
3 35
3 35
3 35
3 35
3 35
3 35
3 34
3 34
3 34
4 34
4 34
4 34
4 34
4 34
4 34
4 34
4 34
4 33
4 33
4 32
4 32
4 31
4 31
3 31
3 31
3 31
3 30
3 30
3 30
3 30
3 30
3 30
3 28
3 28
4 28
2 28
2 28
2 27
2 26
2 24
2 24
2 24
2 24
2 24
2 24
2 24
2 24
2 25
2 24
2 24
2 23
2 23
2 23
2 23
2 23
2 23
2 23
2 22
2 22
2 22
2 22
2 22
2 22
2 22
2 22
2 22
2 22
2 22
2 22
3 21
3 22
3 20
3 20
3 19
3 19
3 19
3 21
3 21
3 21
3 21
3 16
3 18
3 18
3 15
3 13
3 10
3 10
3 10
3 10
3 11
3 11
3 11
3 11
3 11
3 11
3 11
3 11
3 11
3 11
3 11
3 11
3 11
3 11
3 11
3 11
3 11
3 14
3 14
3 14
2 14
2 14
2 14
2 14
2 14
2 14
2 14
2 14
2 14
2 14
2 14
2 14
2 14
2 14
2 14
2 14
2 14
2 14
2 14
2 14
2 14
2 14
2 14
2 14
2 14
1 14
1 15
1 15
1 15
1 15
1 15
1 15
1 15
1 15
1 15
1 15
1 15
1 14
1 13
1 13
1 13
1 13
1 13
1 13
1 13
1 13
1 13
1 13
1 13
1 13
1 13
1 13
1 13
1 13
1 13
1 13
1 13
1 13
1 13
1 13
0 12
0 11
0 11
0 11
0 11
0 11
0 9
0 7
0 7
0 7
0 7
0 7
0 7
0 7
0 7
0 6
0 5
0 5
0 5
0 5
0 4
0 4
0 4
0 4
0 4
0 4
0 4
0 4
0 4
0 4
0 4
0 5
0 5
0 5
0 5
0 4
0 4
0 2
0 2
0 2
0 2
0 2
0 2
0 2
0 2
0 2
0 2
0 2
0 2
0 2
0 2
0 2
0 2
0 2
0 2
0 2
0 2
0 2
0 2
0 2
0 5
0 6
0 7
0 7
0 7
0 8
0 8
0 9
0 9
0 17
0 18
0 18
0 19
0 19
0 20
0 20
0 20
0 20
0 22
0 27
0 27
0 29
0 30
0 30
0 30
0 31
0 32
0 32
0 32
0 32
0 33
0 33
0 33
0 33
0 33
0 33
0 33
0 33
0 33
0 33
0 33
0 33
0 33
0 34
0 35
0 36
0 36
0 36
0 36
0 36
0 36
0 37
0 38
0 40
1 41
1 41
10 89
10 89
12 89
12 92
12 95
13 95
13 95
13 97
13 98
13 104
13 113
13 125
13 142
13 146
13 147
13 152
13 152
13 152
13 152
13 152
13 153
13 153
13 153
13 154
13 154
15 155
15 155
15 160
15 161
15 169
15 169
15 170
15 170
15 174
15 176
15 190
15 210
15 213
15 218
15 219
15 220
16 223
16 221
16 223
17 222
17 222
18 222
18 226
18 227
18 226
18 235
18 234
18 235
18 231
18 234
18 234
18 236
19 236
19 236
20 256
20 258
20 258
20 257
20 253
20 262
21 264
21 264
21 266
21 268
21 266
21 289
21 293
21 297
21 311
21 311
21 315
21 315
21 317
21 317
21 317
21 317
21 317
21 318
21 318
21 324
21 324
23 332
27 331
27 331
27 328
27 328
27 328
27 328
27 328
27 328
27 325
27 327
27 333
26 336
24 337
15 288
15 288
14 289
14 289
14 288
14 290
14 290
14 288
14 286
14 279
14 264
14 264
14 242
14 254
14 264
14 265
14 266
14 266
15 266
16 268
17 270
17 274
17 275
17 275
17 275
15 274
15 274
15 269
15 269
15 260
15 260
15 263
15 263
15 258
15 250
15 236
15 221
16 219
17 219
17 228
17 228
22 264
22 265
22 265
21 262
20 262
20 260
20 257
20 256
20 256
20 247
20 248
20 245
20 240
20 239
20 239
19 236
19 236
19 234
18 211
18 214
18 224
18 224
18 225
18 226
17 226
17 224
17 224
17 222
17 221
17 199
17 192
17 188
17 177
17 178
17 175
17 175
17 175
17 175
18 201
18 202
18 202
17 202
17 203
17 197
17 199
15 191
12 191
12 191
12 194
12 194
12 209
12 217
12 218
12 221
12 221
12 220
12 210
12 212
12 212
12 216
12 219
12 218
12 219
12 217
12 217
12 217
12 225
12 225
12 224
12 225
12 224
12 223
12 206
12 196
12 193
12 193
12 193
11 194
10 191
9 189
9 185
9 185
9 185
9 190
9 194
9 199
9 204
9 205
9 204
9 204
9 204
8 206
8 208
8 208
8 209
8 211
7 216
8 214
7 206
7 204
2 171
2 171
2 171
2 171
2 171
2 171
2 168
2 168
2 169
2 168
2 170
3 185
3 187
3 186
3 202
3 202
3 202
3 202
3 200
3 194
3 184
3 183
3 183
3 183
3 183
3 183
3 185
3 185
3 185
3 185
3 183
3 184
3 185
3 186
3 187
3 189
3 192
3 192
2 164
2 165
2 166
2 167
2 167
2 167
2 168
2 168
2 174
2 174
2 172
4 178
4 160
4 151
4 151
4 154
4 154
4 152
4 152
4 153
4 153
4 148
4 147
4 146
4 146
4 147
4 147
4 147
4 139
4 138
4 137
4 138
4 138
4 138
4 138
6 138
6 138
6 138
6 138
7 159
7 161
7 171
7 172
7 175
7 175
7 168
7 165
7 161
7 158
7 158
7 160
7 159
7 154
7 152
7 151
7 150
7 149
7 146
7 143
6 140
6 140
6 140
6 141
6 141
6 141
6 141
6 140
6 141
6 141
6 141
6 140
6 141
6 138
5 120
5 119
5 119
5 104
5 104
5 103
5 103
5 103
5 103
5 103
5 105
5 105
5 104
5 104
5 105
5 102
5 102
5 102
5 103
5 105
5 102
5 101
5 101
5 102
5 101
5 96
5 94
5 94
5 94
5 94
5 93
5 94
5 94
5 94
5 94
5 89
5 87
6 88
4 80
4 80
4 79
4 79
4 76
4 76
4 76
4 76
4 76
4 76
4 76
4 75
4 75
4 75
4 74
4 74
4 73
4 73
4 73
4 72
4 70
4 70
4 70
3 70
2 70
2 71
2 71
2 70
1 49
1 40
1 33
1 33
1 31
1 31
1 31
1 31
1 29
1 28
1 28
1 26
1 26
1 26
1 26
1 26
1 26
1 26
1 25
1 23
1 23
1 23
1 23
1 22
1 22
1 21
1 21
1 21
1 21
1 20
1 20
1 20
1 20
1 20
1 20
1 20
1 20
1 20
1 20
1 20
1 20
1 20
1 20
1 19
1 18
1 17
1 17
1 17
1 16
1 16
1 16
1 16
1 15
1 13
1 13
1 11
1 10
1 10
1 9
1 9
1 9
1 6
1 6
1 6
1 6
1 4
1 4
1 4
1 4
1 3
1 3
0 1
0 1
0 1
0 1
0 1
0 1
0 1
0 1
0 1
0 1
0 1
0 1
0 1
0 1
0 1
0 1
0 1
0 1
0 1
0 1
0 1
0 1
0 1
0 1
0 1
0 1
0 0
0 0
0 0
0 0
0 0
0 1
0 1
0 1
0 1
0 1
0 1
0 1
0 1
0 1
0 1
0 1
0 1
0 1
0 1
0 1
0 1
0 1
0 1
0 1
0 1
0 1
0 1
0 3
0 5
0 13
0 33
0 36
0 36
0 39
0 39
0 39
0 50
0 53
0 55
0 56
0 56
0 56
0 56
0 56
0 56
0 56
0 57
0 57
0 57
0 57
0 57
0 57
0 57
0 57
0 57
0 57
0 57
0 58
0 58
0 58
0 58
0 58
0 58
0 58
0 59
0 73
0 74
0 74
0 75
0 76
0 76
0 78
0 78
0 78
0 80
0 80
0 80
0 80
0 80
0 84
0 85
0 86
0 102
0 104
0 105
0 106
0 106
0 106
0 106
0 106
0 106
0 106
0 107
0 107
0 107
0 107
0 107
0 107
0 107
0 108
0 109
0 109
0 111
0 112
0 113
0 120
0 120
1 122
1 122
1 125
1 125
1 127
1 128
1 134
1 137
1 138
1 139
1 139
1 139
1 139
1 139
1 139
1 139
0 139
0 139
0 139
0 139
0 138
0 136
0 125
0 102
0 102
0 102
0 102
0 101
0 101
0 91
0 89
0 92
0 92
0 92
0 93
0 93
0 93
0 94
0 94
0 95
0 95
0 95
0 95
0 95
0 95
0 95
0 95
0 95
0 95
0 96
0 95
0 95
0 98
0 98
0 99
0 99
0 100
0 99
0 85
0 84
0 84
0 82
0 82
0 82
0 80
0 80
0 84
0 82
0 85
0 85
0 85
0 85
0 81
0 80
0 79
0 62
0 60
0 61
0 62
0 63
0 63
0 64
0 64
0 64
0 63
0 63
0 63
0 63
0 63
0 67
0 67
0 66
0 74
0 73
0 73
0 71
0 70
0 67
0 62
0 63
0 61
0 61
0 58
0 58
0 55
0 55
0 48
0 45
0 45
0 44
0 44
0 44
0 45
0 45
0 45
0 45
0 45
0 45
0 44
0 44
0 44
0 44
0 44
0 43
0 43
0 42
0 42
0 42
0 42
0 42
0 40
0 38
0 38
0 38
0 40
0 39
0 42
0 43
0 43
0 41
0 41
0 42
0 42
0 42
0 42
0 42
0 43
0 43
0 44
0 50
0 52
0 52
0 51
0 50
0 50
0 52
0 52
0 71
0 79
0 79
0 87
0 88
0 88
0 88
0 90
0 93
0 91
0 92
0 89
0 92
0 94
0 92
0 96
0 96
0 97
0 99
0 99
0 97
0 96
0 97
0 97
0 98
0 98
0 98
0 96
0 96
0 96
0 95
0 94
0 94
0 94
0 94
0 88
0 88
0 88
0 88
0 86
0 88
0 90
0 90
0 90
0 90
0 98
0 99
0 99
0 99
0 99
0 99
0 99
0 100
0 113
0 115
0 114
0 114
0 117
0 117
0 117
0 117
0 119
0 119
0 119
0 124
0 126
0 127
0 127
0 128
0 128
0 128
0 135
0 135
0 138
0 138
0 138
0 137
0 133
0 133
0 133
0 135
0 135
0 137
0 137
0 136
0 134
0 135
0 135
0 135
0 134
0 136
0 135
0 128
0 126
0 122
0 122
0 122
0 122
0 124
0 121
0 98
0 92
0 92
0 91
0 92
0 93
0 93
0 91
0 85
0 84
0 82
0 81
0 81
0 80
0 80
0 76
0 76
0 73
0 72
0 72
0 72
0 72
0 71
0 71
0 69
0 69
0 70
0 70
0 71
0 71
0 71
0 73
0 73
0 73
0 73
0 73
0 73
0 73
0 73
0 73
0 71
0 69
0 69
0 69
0 67
0 63
0 62
0 63
0 64
0 64
0 66
0 65
0 65
0 52
0 50
0 50
0 50
0 48
0 50
0 50
0 50
1 57
1 59
1 68
1 65
1 69
1 71
1 72
1 71
1 71
1 70
1 72
1 70
1 69
1 71
1 71
1 71
1 87
1 87
1 87
1 85
1 84
1 84
1 84
1 84
1 82
1 81
1 81
1 81
1 81
1 81
1 82
1 83
1 87
1 89
1 90
1 94
1 95
1 93
1 93
1 93
1 93
1 93
1 91
1 90
1 90
1 90
1 90
1 90
1 90
1 90
1 90
1 90
1 90
1 90
1 90
1 90
1 91
3 92
3 97
3 100
3 100
3 100
3 100
3 100
3 101
3 100
3 102
3 101
3 101
3 101
3 99
3 97
3 97
3 97
3 97
3 97
3 98
3 98
3 101
3 103
3 107
3 107
3 107
3 106
3 105
3 105
3 105
3 103
3 102
3 102
3 102
3 104
3 105
3 117
3 122
3 124
3 130
3 129
3 131
4 134
3 127
3 123
3 111
3 109
3 105
3 104
4 105
4 105
4 105
4 104
4 97
4 98
4 98
4 96
4 96
5 96
5 80
5 81
5 81
5 80
6 81
7 99
9 198
13 287
13 299
13 308
14 309
14 316
14 319
14 320
14 359
14 355
14 402
14 402
14 400
14 398
14 398
14 398
14 398
14 398
14 398
14 399
14 400
14 400
14 401
14 402
15 403
15 403
15 403
15 403
15 404
15 405
15 405
15 411
15 411
15 412
15 411
13 410
13 406
13 405
13 405
13 406
13 406
13 405
13 404
13 404
13 404
14 404
14 404
14 404
14 404
14 404
14 404
14 404
14 403
17 410
18 409
18 408
19 408
19 432
20 438
20 440
20 443
20 444
20 444
20 444
20 445
20 447
20 448
20 449
20 448
20 447
20 445
20 431
20 434
20 445
20 455
20 470
20 481
19 481
19 482
19 484
19 524
19 528
19 534
19 560
18 560
18 561
19 562
19 562
19 564
19 564
19 564
19 572
19 572
17 572
16 570
16 570
15 575
13 576
12 578
12 556
10 436
10 364
10 405
10 404
9 436
9 433
9 436
9 434
9 397
9 400
9 367
9 368
9 370
9 372
9 376
9 376
9 378
9 378
9 380
9 380
9 378
9 378
9 378
9 378
8 378
8 380
8 381
8 381
8 388
8 388
8 388
9 388
9 390
9 394
9 431
9 439
9 441
9 441
9 441
9 441
9 441
9 441
9 442
9 448
9 448
8 449
8 449
8 450
8 455
8 456
6 456
6 456
6 457
4 448
4 448
3 447
2 443
2 416
2 409
2 406
2 404
2 403
2 403
3 407
3 408
3 407
3 410
3 410
3 413
3 413
3 421
3 410
3 406
3 392
3 375
3 365
3 356
3 355
3 353
3 342
3 284
4 280
4 280
5 281
5 280
5 281
4 282
4 283
4 281
4 281
4 281
4 273
4 273
4 273
4 273
4 273
4 268
4 266
4 264
4 262
4 259
4 258
4 213
4 209
4 175
4 171
4 168
4 171
4 171
4 169
4 153
4 150
4 142
4 141
4 140
4 140
4 138
4 138
4 136
4 136
4 136
4 142
4 143
4 143
4 143
4 143
4 143
4 143
4 136
4 136
4 136
3 132
3 128
3 125
3 82
3 80
3 76
3 87
3 88
3 87
3 88
3 88
3 89
3 85
3 92
3 91
3 91
3 90
3 85
3 85
3 85
3 85
3 84
3 84
3 84
3 84
3 84
3 84
3 84
4 84
4 84
4 83
4 83
3 77
3 76
3 77
3 74
3 74
3 71
3 70
3 60
3 59
3 59
3 59
3 59
3 59
3 59
3 60
3 61
3 66
3 67
2 67
2 67
1 64
1 65
1 64
1 64
1 69
1 70
1 72
1 74
1 79
1 81
1 85
1 93
1 95
1 96
1 96
1 95
2 95
4 96
4 96
4 95
4 98
4 98
4 98
4 97
4 92
4 93
4 95
4 95
4 95
4 95
4 95
4 96
8 95
8 95
9 96
9 97
9 100
9 114
9 107
13 110
13 112
13 114
16 171
16 173
20 204
23 242
23 249
23 258
23 263
23 344
23 347
23 357
24 369
24 381
24 383
24 435
24 451
24 465
24 478
24 477
24 474
24 471
24 472
24 486
24 492
24 495
24 497
24 503
24 510
24 511
24 513
24 518
24 524
24 526
24 528
24 529
23 530
23 530
23 530
23 531
23 532
23 532
23 531
23 531
23 531
23 533
23 538
23 547
24 553
24 564
24 592
24 605
24 619
24 620
24 622
24 621
24 619
24 621
24 652
24 656
24 659
24 668
23 670
23 671
23 670
23 670
23 668
23 667
23 662
23 660
22 653
22 644
22 644
22 644
22 642
22 645
22 648
21 649
21 650
21 653
21 659
21 660
21 662
21 664
21 664
21 663
21 663
21 663
20 663
21 663
19 662
19 662
11 666
11 666
10 665
3 663
3 658
3 646
3 646
3 643
3 639
3 624
3 543
3 515
3 498
3 486
3 485
3 485
3 479
3 383
3 375
3 369
2 367
2 358
2 339
2 318
2 302
2 292
2 283
2 279
2 280
2 281
2 311
2 299
2 292
2 290
2 290
2 290
2 283
2 285
2 289
2 288
2 281
2 280
2 284
2 286
2 286
2 286
2 286
2 286
2 286
2 288
2 288
2 288
2 293
2 291
1 285
1 275
1 268
1 258
1 226
2 215
2 205
2 207
2 206
2 206
2 200
2 201
2 169
2 164
2 160
2 154
2 151
2 150
2 148
2 148
2 148
2 152
2 150
2 150
2 150
2 149
2 150
2 151
2 151
2 149
2 146
2 148
2 141
2 138
2 134
2 133
2 132
2 131
2 131
2 133
2 134
2 134
2 135
1 135
1 135
1 135
1 130
1 130
1 132
1 133
1 133
1 141
1 145
1 148
1 148
1 148
1 149
1 149
1 148
1 150
1 147
1 147
1 148
1 137
1 137
1 137
1 134
1 132
1 129
1 129
1 129
1 131
1 130
1 129
1 127
1 124
1 93
1 88
1 86
1 83
1 81
1 80
1 81
1 81
1 76
1 76
1 76
1 76
1 73
1 73
1 71
1 72
1 72
1 72
1 84
2 86
2 95
4 97
4 95
4 107
4 110
4 109
5 111
6 109
6 111
5 107
5 106
5 105
5 105
5 105
5 105
5 104
5 104
5 102
5 102
5 102
5 102
5 103
5 102
5 102
5 102
5 101
5 101
5 102
5 103
5 102
5 105
5 106
5 109
5 107
6 109
6 118
6 120
7 143
7 145
7 147
7 149
7 149
7 149
7 148
7 147
9 147
9 147
9 147
9 146
9 146
9 146
10 149
10 148
10 147
10 147
10 138
10 134
10 131
10 132
10 132
10 132
11 144
11 144
12 147
12 157
12 157
12 157
12 157
12 156
12 156
12 157
12 158
12 158
12 157
12 157
12 156
12 161
12 167
12 166
12 169
12 169
12 169
12 169
12 170
12 174
12 190
12 200
12 198
12 207
12 207
12 206
12 207
12 207
12 207
13 208
13 209
13 209
13 210
12 194
12 194
10 184
9 183
9 176
9 167
8 164
8 165
8 165
8 165
8 165
8 165
8 169
8 169
8 169
8 169
8 172
8 176
8 184
8 186
8 190
8 191
8 191
8 191
8 194
8 196
8 196
8 187
8 194
8 184
8 185
8 187
8 185
8 183
9 179
9 177
8 176
8 210
8 206
7 192
7 196
8 205
9 217
8 220
8 224
8 224
9 242
8 242
8 242
8 242
8 243
8 243
8 242
7 239
7 239
7 239
7 239
7 239
7 239
7 240
7 238
7 237
7 235
6 225
6 224
5 217
5 212
5 211
5 211
5 211
5 211
5 214
5 215
5 214
5 214
5 214
5 216
5 213
5 211
5 204
5 205
5 202
5 202
5 202
5 202
5 201
5 198
5 174
5 176
5 187
5 188
5 191
5 193
5 197
5 202
5 203
5 202
5 202
5 201
5 201
5 201
5 199
5 199
5 199
5 201
6 201
6 201
6 200
6 200
6 202
6 202
6 206
6 202
6 208
6 207
6 206
6 205
6 201
6 188
6 184
6 183
6 182
6 182
6 182
6 181
6 180
6 181
6 178
6 170
7 169
8 175
8 176
8 177
9 177
11 192
12 193
12 193
12 163
12 170
12 164
13 163
12 154
11 152
11 148
11 143
10 144
10 129
10 130
10 130
10 141
10 140
10 141
10 142
11 144
13 144
13 144
13 147
13 147
13 147
13 147
13 147
13 147
13 147
13 147
13 148
13 148
13 147
13 147
13 147
13 147
13 147
13 143
13 142
13 142
13 142
13 142
13 140
13 140
13 140
13 140
13 139
13 139
13 139
13 139
13 138
13 137
13 133
13 128
13 126
13 112
13 111
14 109
14 107
14 100
14 96
14 95
13 95
13 95
14 95
16 95
16 95
16 95
16 95
16 94
16 93
15 93
15 93
15 93
15 93
15 89
15 89
15 88
15 88
15 82
14 81
14 81
14 81
14 81
15 81
15 82
16 82
16 82
16 82
16 82
16 82
16 82
16 80
16 80
16 77
17 75
15 65
13 60
13 55
12 49
10 40
10 39
10 39
10 34
10 34
10 33
10 29
10 29
10 24
10 23
10 23
10 23
10 22
10 21
8 19
7 8
7 4
7 2
7 2
7 2
7 2
7 2
7 1
7 1
7 1
7 1
7 1
7 1
7 1
7 1
7 1
7 1
7 1
7 1
7 1
7 1
7 1
7 1
7 1
7 1
7 1
7 1
7 1
7 1
7 1
7 1
7 1
7 1
7 1
7 1
7 1
7 1
8 1
8 1
8 1
9 1
9 1
8 1
8 1
8 1
8 1
8 1
8 2
8 3
7 3
6 3
6 3
5 3
5 3
5 3
5 3
5 3
5 3
5 3
5 3
5 3
5 3
5 3
4 2
4 2
4 2
4 2
4 2
1 2
1 0
1 0
1 0
2 0
2 0
3 0
3 0
3 0
3 0
3 0
3 0
3 0
3 0
3 0
3 0
3 0
3 0
3 0
3 0
3 0
3 0
3 0
3 0
3 0
3 0
4 0
4 0
4 0
4 0
5 0
5 0
5 0
5 0
5 0
5 0
5 0
6 0
6 0
6 0
7 0
7 0
7 0
8 0
10 0
10 0
11 0
12 0
12 0
12 0
12 0
14 0
16 0
19 0
19 0
20 0
20 0
20 0
20 0
20 0
20 0
20 0
20 0
20 0
20 0
20 0
20 0
21 0
21 0
20 0
20 0
20 0
21 0
24 0
25 0
27 1
28 1
28 1
28 1
28 1
28 1
28 1
28 1
28 1
28 2
29 2
29 2
29 2
29 2
29 2
29 2
29 2
29 1
29 1
29 1
29 1
29 1
29 0
30 0
30 0
30 0
32 0
32 0
32 0
33 0
34 0
33 0
33 0
33 0
33 0
33 0
33 0
33 0
33 0
33 0
33 0
33 0
33 0
33 0
33 0
33 0
33 0
33 0
34 0
34 0
34 0
33 0
33 0
33 0
32 0
32 0
33 0
36 0
37 0
37 0
37 0
35 0
34 0
34 0
34 0
33 0
32 0
32 0
31 0
31 0
31 0
31 0
31 0
35 0
34 0
35 0
36 0
35 0
32 0
33 0
32 0
32 0
32 0
32 0
32 0
32 0
32 0
32 0
32 0
32 0
32 0
32 0
31 0
31 0
31 0
31 0
32 0
32 0
30 0
29 0
27 0
27 0
30 0
45 0
45 0
46 0
48 0
49 0
53 0
60 0
71 0
71 0
71 0
71 0
71 0
71 0
71 0
71 0
71 0
71 0
71 0
71 0
71 0
70 0
70 0
70 0
68 0
69 0
69 0
67 0
66 0
66 0
66 0
66 0
66 0
66 0
66 0
66 0
66 0
66 0
66 0
66 0
67 0
67 0
67 0
67 0
67 0
67 0
67 0
67 0
67 0
68 0
68 0
69 0
70 0
70 0
72 0
71 0
78 0
79 0
89 0
99 0
127 0
184 0
281 1
298 1
334 1
354 2
371 2
393 2
397 2
416 2
470 2
529 2
608 2
705 2
716 2
859 4
880 5
938 6
1029 6
1215 8
1231 8
1231 8
1233 8
1237 8
1241 8
1248 8
1259 8
1333 8
1334 8
1340 8
1481 8
1521 8
1591 8
1701 8
1729 8
1769 8
1777 8
1807 12
1816 12
1858 14
1856 14
1868 15
1878 16
1896 16
1955 16
1975 17
1986 17
1987 18
2010 19
2015 19
2017 19
2026 19
2026 19
2038 19
2038 19
2040 19
2042 19
2046 19
2056 19
2055 19
2058 19
2059 19
2059 19
2060 19
2061 19
2063 19
2063 19
2063 19
2064 19
2065 21
2066 21
2079 23
2080 25
2083 25
2085 28
2092 28
2092 27
2093 27
2100 27
2104 27
2105 27
2109 27
2111 27
2111 27
2161 29
2166 29
2173 31
2188 32
2191 32
2192 32
2191 33
2196 33
2198 33
2257 35
2255 35
2491 60
2491 59
2496 59
2494 65
2481 67
2458 69
2402 71
2342 71
2328 71
2300 71
2285 71
2265 71
2295 71
2297 71
2260 72
2218 69
2371 69
2326 69
2245 69
2246 69
2094 66
2060 68
1914 67
1823 67
1517 67
1508 67
1497 68
1489 68
1488 68
1483 68
1485 68
1500 68
1512 68
1594 69
1628 70
1630 70
1602 70
1584 68
1544 68
1526 67
1487 70
1478 70
1470 69
1472 71
1435 68
1433 68
1422 68
1421 69
1435 70
1398 69
1424 70
1425 70
1451 70
1620 76
1737 86
1818 94
1839 94
1848 94
1859 94
1862 94
1861 94
1858 94
1858 94
1850 94
1851 94
1849 94
1855 94
1863 94
1881 94
1897 94
1934 94
1942 96
1944 96
1947 96
1954 91
1964 90
1980 89
2004 87
2013 87
2031 85
2026 85
2026 85
2030 85
2038 85
2036 85
2046 86
2047 86
2044 86
2045 87
2019 85
2018 84
2202 84
2275 84
2289 82
2292 82
2296 82
2292 82
2314 81
2260 79
2273 79
2246 49
2279 49
3282 50
3281 50
3299 50
3355 49
3617 48
3849 50
4107 50
4276 50
4293 50
4318 50
4277 50
4266 50
4249 49
4213 49
3990 49
4008 49
3999 49
3990 49
3986 49
4011 48
4026 48
4021 48
4023 48
4025 48
4035 47
4035 47
4032 47
4032 48
4017 48
4031 54
4020 56
3936 55
3910 54
3878 55
3876 55
3922 55
3956 55
4064 56
4129 52
4214 53
4299 53
4469 56
4491 56
4502 56
4513 56
4545 55
4593 55
5153 61
5475 63
5528 63
5483 60
5249 48
5174 45
5102 39
5076 38
5064 38
5059 38
5056 38
5057 38
5073 38
5090 38
5096 38
5102 38
5103 38
5101 38
5094 38
5089 39
5064 39
5053 39
5072 39
5084 40
5090 40
5085 40
5076 40
5047 40
5035 40
5059 40
5049 40
5054 40
5059 40
5052 40
5046 40
5053 40
5042 39
5043 38
5038 38
5031 38
5001 38
4982 38
4805 37
4731 37
4717 36
4715 36
4713 36
4717 36
4689 36
4647 37
4585 37
4395 38
4367 40
3387 38
3341 38
3174 36
3112 35
2809 35
2698 35
2538 35
2460 35
2456 35
2539 38
2549 38
2552 38
2570 38
2703 38
2715 38
2681 38
2724 40
2722 40
2717 40
2692 40
2680 40
2679 40
2677 40
2675 40
2670 40
2669 40
2669 40
2666 38
2660 38
2629 30
2625 30
2625 30
2610 30
2593 30
2589 30
2507 30
2458 30
2284 29
2262 29
2188 28
2140 28
1998 23
1982 23
1961 23
1938 22
1894 22
1796 19
1110 14
899 12
865 11
865 11
866 11
867 11
863 11
863 11
865 11
860 11
861 11
860 11
833 11
842 10
837 10
838 10
836 10
839 10
843 10
842 11
843 11
836 13
825 13
814 12
807 12
800 12
800 12
792 13
790 13
870 14
952 19
963 19
963 19
960 19
960 19
948 19
947 19
945 19
943 19
943 19
942 19
942 19
942 19
942 18
941 18
946 18
944 18
939 18
936 18
933 18
930 18
924 17
914 15
886 15
882 15
878 15
859 15
855 15
813 15
810 15
808 15
811 15
719 12
709 12
693 12
670 12
571 12
573 12
569 11
527 10
529 10
532 10
530 10
533 10
533 10
533 10
533 10
533 10
533 10
533 10
534 10
536 10
538 10
535 10
534 10
533 10
532 10
531 10
529 10
528 10
525 10
497 10
489 10
464 10
440 10
428 10
427 10
422 10
420 10
419 10
418 10
418 10
417 10
417 10
414 10
413 10
411 10
409 10
403 10
402 10
402 10
402 10
402 10
382 10
379 10
376 10
375 9
370 9
365 9
362 9
353 9
344 7
340 7
338 7
338 7
337 7
337 7
327 6
319 6
181 4
121 0
108 0
103 0
103 0
103 0
103 0
101 0
99 0
99 0
102 0
102 0
101 0
102 0
102 0
100 0
97 0
98 0
97 0
97 0
97 0
97 0
95 0
92 0
90 0
74 0
73 0
71 0
68 0
66 0
61 0
60 0
63 0
74 0
75 0
74 0
75 0
70 0
67 0
68 0
71 1
76 1
81 1
82 1
83 1
84 1
96 1
98 1
109 1
112 1
116 1
117 1
154 3
189 4
200 4
211 4
212 4
212 4
213 4
215 4
215 4
232 11
233 11
234 11
236 11
278 11
302 13
429 15
618 18
734 19
785 20
798 21
800 29
800 46
805 49
812 55
814 58
858 65
861 65
863 66
863 66
863 66
863 66
864 66
864 66
864 66
865 66
865 66
868 66
870 66
870 66
870 66
912 66
959 67
972 67
1174 72
1180 72
1180 72
1183 72
1185 72
1186 72
1192 72
1192 72
1196 72
1198 72
1198 72
1203 72
1202 72
1203 72
1203 72
1199 72
1200 72
1199 72
1199 72
1200 72
1202 72
1202 72
1203 72
1203 72
1203 72
1203 72
1203 72
1203 72
1203 72
1204 72
1204 72
1205 72
1205 72
1207 72
1206 72
1211 72
1210 72
1198 72
1190 72
1191 72
1189 72
1182 72
1179 72
1178 71
1178 71
1183 71
1264 72
1286 75
1290 75
1287 75
1284 75
1299 75
1303 75
1294 75
1317 76
1310 76
1308 76
1262 74
1228 73
1221 73
1214 73
1213 73
1213 73
1212 73
1211 73
1211 73
1192 66
1193 66
1186 66
1186 66
1139 66
1085 62
887 41
708 30
642 28
618 28
614 27
614 26
614 18
610 18
606 16
603 15
566 12
566 12
566 11
566 11
566 11
566 11
565 11
565 11
565 11
564 11
564 11
562 11
559 11
558 11
558 11
502 10
463 10
452 10
249 5
251 5
256 5
266 5
268 5
266 5
262 5
262 5
261 5
260 5
260 5
260 5
260 5
260 5
260 5
260 5
260 5
260 5
260 5
259 5
259 5
259 5
259 6
259 6
259 6
259 6
259 6
259 6
259 6
259 6
259 6
260 6
261 6
259 6
258 6
252 6
248 6
248 6
246 5
242 5
243 6
244 6
242 6
238 6
234 6
221 6
100 2
91 2
86 2
84 2
62 2
62 2
62 2
62 2
59 1
61 1
62 1
62 1
62 1
62 1
62 1
62 1
62 1
62 1
59 1
58 1
58 1
58 1
58 1
55 1
55 1
55 1
55 1
55 1
55 1
56 1
55 1
54 1
53 1
53 1
49 1
50 1
50 1
49 1
49 1
49 1
49 1
49 1
49 1
49 1
49 1
49 1
52 1
52 1
52 1
52 1
52 1
51 2
50 2
50 2
51 2
49 2
32 2
30 2
28 2
28 2
28 2
28 2
28 2
28 2
28 2
28 2
28 2
28 2
28 2
28 2
28 2
29 2
29 2
26 2
26 2
25 2
25 2
25 2
25 2
25 2
24 2
27 2
27 2
29 2
29 2
28 2
29 2
31 2
34 2
35 2
47 2
48 2
52 2
57 2
59 1
59 1
59 1
59 1
58 1
59 1
60 1
60 1
62 1
62 1
62 1
62 1
61 1
61 1
63 1
61 1
61 1
61 1
62 1
62 1
62 1
62 1
62 1
62 1
62 1
62 1
62 1
62 1
62 1
63 1
63 1
63 1
63 1
64 1
64 1
64 1
65 1
69 1
70 1
78 1
79 1
131 1
131 1
131 1
132 1
132 1
133 1
133 1
133 1
133 1
133 1
134 1
137 1
145 1
145 2
145 2
145 2
145 1
144 1
144 1
142 1
141 1
144 1
143 1
143 1
143 1
144 1
145 1
145 1
146 1
148 1
149 1
150 1
150 1
150 1
151 1
152 1
152 1
152 1
155 1
155 1
155 1
155 1
155 1
155 1
164 2
164 2
161 3
161 3
160 3
161 3
160 3
165 3
163 3
177 3
180 3
167 3
165 3
159 3
157 3
156 3
157 3
162 3
162 3
166 3
166 3
167 3
170 3
169 3
169 3
170 4
178 4
178 4
180 4
180 4
180 4
179 4
178 4
178 4
178 4
179 4
181 4
183 4
183 4
183 4
183 4
183 4
184 4
193 4
198 4
200 4
200 4
205 4
205 4
205 4
206 4
205 4
201 4
199 4
186 4
185 4
141 4
141 5
142 5
142 5
143 5
142 5
142 5
142 5
142 5
142 5
141 5
135 5
128 5
128 4
131 4
131 4
131 4
133 4
135 4
140 4
174 4
207 5
211 6
212 7
213 7
212 7
213 7
215 7
218 7
225 7
223 7
226 7
227 7
227 7
226 7
225 7
223 7
223 7
220 7
220 7
220 7
220 7
221 7
221 7
211 5
211 5
211 5
212 5
213 5
215 6
215 6
205 6
202 6
191 6
189 6
197 6
198 6
197 6
200 6
205 6
207 6
203 6
205 6
238 9
244 9
270 9
266 9
265 9
263 9
262 8
255 8
255 8
254 8
254 8
253 8
253 8
254 8
257 8
257 8
257 8
255 8
255 8
255 8
255 8
255 8
255 8
255 8
249 8
249 8
247 8
247 8
240 8
240 8
240 8
239 8
238 8
238 8
238 8
238 8
238 8
236 7
236 7
234 7
234 7
234 7
234 7
235 7
236 7
236 7
236 7
264 7
263 7
264 7
263 7
260 7
255 7
255 7
248 7
241 7
231 7
190 4
184 4
181 4
180 4
180 4
180 4
178 4
178 4
179 4
171 4
170 4
170 4
170 4
170 4
170 4
170 4
172 4
173 4
173 4
173 5
175 5
176 5
177 5
177 5
177 5
177 5
176 5
175 5
176 5
174 4
169 4
170 4
170 4
170 4
176 4
179 4
180 4
180 4
183 5
181 5
181 5
180 5
175 5
131 2
129 2
106 2
106 2
106 2
104 2
104 2
104 2
104 2
104 2
104 2
104 2
106 2
106 2
104 2
105 2
105 2
105 2
106 2
107 2
109 2
109 2
116 2
113 2
112 2
112 2
112 2
112 2
114 2
114 2
114 2
114 2
114 2
114 2
114 4
115 4
115 4
116 4
116 4
116 4
116 4
117 4
118 4
116 4
116 4
116 4
116 4
129 4
135 4
134 4
133 4
133 4
140 4
140 4
140 4
156 4
155 4
155 4
150 4
151 4
151 4
153 4
153 4
150 4
152 4
151 4
167 6
166 6
166 6
165 6
165 6
165 5
165 5
164 5
164 5
165 6
165 6
164 6
169 6
177 6
178 6
179 6
181 6
184 6
213 6
267 6
273 6
282 6
287 6
285 6
279 6
273 6
267 6
264 6
261 5
259 5
262 5
264 5
268 5
269 5
269 5
272 5
272 5
279 5
284 5
285 5
287 5
287 5
288 5
290 5
292 5
291 5
290 5
290 5
293 5
294 5
294 5
295 5
294 5
293 5
290 5
290 5
284 5
285 5
286 5
290 5
294 5
306 5
319 5
321 5
322 5
322 3
322 3
322 3
324 3
323 3
323 3
323 3
329 3
371 3
380 3
390 3
390 3
390 3
376 3
380 3
379 3
343 3
345 3
346 3
355 3
344 3
344 3
342 3
342 3
331 3
332 3
332 3
330 3
330 3
329 3
328 3
328 3
329 3
328 3
331 3
314 1
315 1
315 1
319 1
325 2
327 2
328 2
328 2
328 1
327 1
327 1
353 2
353 2
345 2
345 2
345 2
341 2
337 3
315 3
260 3
255 3
246 3
245 3
245 4
246 4
245 4
245 4
245 4
242 4
237 4
236 5
234 5
231 5
231 5
230 5
225 5
222 5
214 5
213 5
214 5
216 5
217 5
217 5
215 5
213 5
213 5
213 5
213 5
210 5
208 5
209 5
248 6
251 6
251 6
251 6
252 6
254 6
253 6
253 6
246 6
237 6
226 6
219 6
220 6
221 6
221 6
221 6
223 6
219 6
217 6
216 6
223 6
222 6
179 6
183 6
187 6
185 6
188 6
190 6
185 6
186 6
186 6
181 6
178 6
179 6
184 6
186 6
186 6
186 6
186 6
185 6
185 6
186 6
189 6
188 6
188 6
190 6
190 6
190 6
188 6
188 6
187 6
187 6
183 6
177 5
171 5
170 5
169 5
168 4
167 4
167 4
148 4
146 4
144 4
143 4
143 4
143 4
141 3
141 3
141 3
139 3
139 2
138 2
138 2
137 2
137 2
137 2
137 2
137 2
137 2
137 1
137 1
137 1
136 1
136 1
136 1
136 1
136 1
134 1
132 1
130 1
129 1
128 1
128 1
128 1
127 1
127 1
127 1
126 0
126 0
125 0
81 0
79 0
78 0
78 0
73 0
72 0
72 0
72 0
72 0
69 0
68 0
68 0
68 0
68 0
68 0
68 0
67 0
67 0
66 0
65 0
54 0
53 0
49 0
30 0
25 0
24 0
19 0
19 0
19 0
19 0
19 0
19 0
17 0
11 0
8 0
6 0
6 0
6 0
5 0
5 0
5 0
5 0
3 0
3 0
3 0
1 0
1 0
1 0
1 0
1 0
1 0
1 0
1 0
1 0
1 0
1 0
1 0
0 0
0 0
0 0
0 0
0 0
0 0
0 0
0 0
0 0
0 0
0 0
0 0
0 0
0 0
0 0
0 0
0 0
0 0
0 1
0 1
0 1
1 2
1 2
1 2
1 2
1 4
1 4
1 5
1 5
1 5
1 5
1 6
1 6
1 6
1 6
1 6
1 6
1 6
1 6
1 6
1 6
1 6
1 6
1 6
1 6
1 6
1 6
1 6
1 6
1 6
1 6
1 6
1 6
1 6
1 6
1 6
1 6
2 6
2 6
2 6
2 6
2 6
2 6
2 6
2 6
2 6
2 6
2 6
2 6
2 6
2 6
2 6
2 6
2 6
2 6
2 6
3 6
3 6
5 11
5 11
5 11
5 11
5 11
5 11
5 11
5 11
5 11
6 11
6 11
6 11
6 11
6 11
6 11
6 11
6 11
6 11
6 11
6 11
6 11
6 12
6 12
6 12
6 12
6 12
7 22
8 22
8 22
8 22
8 22
8 22
8 22
8 22
8 22
8 22
8 22
8 22
8 22
9 22
9 21
9 21
9 21
8 20
8 20
8 20
8 20
8 18
9 18
9 17
9 17
9 17
9 17
9 16
9 16
9 16
9 16
9 16
9 16
9 16
9 16
9 16
9 16
9 16
9 16
9 16
9 16
9 16
9 16
9 16
9 16
10 16
10 16
10 16
10 16
10 16
10 16
10 16
9 16
9 16
9 16
9 16
9 16
9 16
10 16
10 16
10 16
10 16
10 16
10 16
10 16
10 16
10 16
10 16
10 16
10 16
10 16
10 16
9 16
9 16
7 11
7 11
7 11
7 11
7 11
7 11
7 11
7 11
6 11
6 11
6 11
6 11
6 11
6 11
6 11
6 11
7 11
7 11
7 11
7 11
7 11
7 10
7 10
7 10
7 10
6 10
4 0
4 0
4 0
4 0
4 0
4 0
4 0
4 0
4 0
4 0
4 0
4 0
4 0
4 0
4 0
4 0
4 0
4 0
4 0
4 0
4 0
4 0
3 0
4 0
4 0
4 0
4 0
4 0
4 0
4 0
4 0
4 0
4 0
4 0
4 0
4 0
4 0
4 0
4 0
4 0
4 0
4 0
4 0
4 0
4 0
3 0
4 0
6 0
6 0
7 0
7 0
7 0
7 0
7 0
7 0
7 0
7 0
7 0
7 0
7 0
7 0
7 0
7 0
7 0
7 0
7 0
7 0
7 0
7 0
7 0
7 0
7 0
7 0
7 0
7 0
7 0
7 0
7 0
7 0
7 0
7 0
7 0
7 0
7 0
7 0
7 0
7 0
7 0
7 0
7 0
6 0
6 0
6 0
6 0
6 0
6 0
6 0
6 0
6 0
6 0
6 0
6 0
6 0
6 0
6 0
6 0
6 0
6 0
6 0
6 0
6 0
6 0
6 0
6 0
6 0
6 0
6 0
6 0
7 0
7 0
8 0
8 0
8 0
7 0
7 0
7 0
7 0
7 0
7 0
7 0
7 0
7 0
7 0
7 0
7 0
7 0
8 0
8 0
8 0
8 0
8 0
8 0
8 0
8 0
7 0
7 0
6 0
5 0
5 0
4 0
4 0
4 0
3 0
3 0
5 0
6 0
6 0
6 0
5 0
5 0
5 0
5 0
5 0
5 0
5 0
5 0
7 0
7 0
7 0
7 0
7 0
7 0
7 0
7 0
7 0
7 0
7 0
7 0
7 0
7 0
7 0
7 0
7 0
7 0
7 0
7 0
7 0
7 0
7 0
7 0
7 0
7 0
7 0
7 0
7 0
7 0
7 0
7 0
7 0
7 0
7 0
7 0
7 0
8 0
8 0
8 0
8 0
8 0
8 0
8 0
8 0
8 1
8 1
8 1
8 1
8 1
8 1
8 1
7 1
7 1
6 1
6 1
6 1
6 1
6 1
6 1
6 0
6 0
6 0
6 0
6 0
6 0
6 0
6 0
6 0
6 0
6 0
6 0
6 0
6 1
6 1
6 1
6 1
6 1
6 1
6 1
6 1
6 1
6 1
6 1
6 1
6 1
6 1
6 1
4 0
3 0
3 0
3 0
4 0
4 0
4 0
4 0
4 0
4 0
4 0
4 0
2 0
2 0
2 0
2 0
2 0
2 0
2 0
2 0
2 0
2 0
2 0
2 0
2 0
2 0
2 0
2 0
2 0
2 0
2 0
3 0
3 0
3 0
3 0
3 0
3 0
3 0
3 0
3 0
3 0
3 0
3 0
3 0
3 0
3 0
3 0
3 0
3 0
2 0
2 0
2 0
2 0
2 0
2 0
2 0
2 0
2 0
2 0
2 0
2 0
2 0
2 0
2 0
2 0
2 0
2 0
2 0
2 0
2 0
2 0
2 0
2 0
2 0
2 0
2 0
2 0
2 0
2 0
2 0
2 0
2 0
2 0
2 0
2 0
2 0
2 0
2 0
2 0
2 0
2 0
2 0
2 0
2 0
2 0
2 0
2 0
2 0
2 0
2 0
2 0
3 0
3 0
3 0
2 0
2 0
2 0
2 0
2 0
2 0
2 0
2 0
2 0
2 0
2 0
2 0
2 0
2 0
2 0
2 0
2 0
2 0
2 0
2 0
2 0
2 0
2 0
2 0
2 0
2 0
2 0
1 0
1 0
1 0
1 0
1 0
1 0
1 0
2 0
2 0
2 0
2 0
2 0
2 0
2 0
2 0
2 0
2 0
2 0
2 0
2 0
2 0
2 0
2 0
2 0
2 0
2 0
3 0
3 0
3 0
3 0
3 0
3 0
3 0
3 0
3 0
3 0
3 0
3 0
3 0
3 0
3 0
3 0
3 0
3 0
3 0
3 0
3 0
3 0
3 0
3 0
3 0
3 0
3 0
3 0
3 0
3 0
3 0
3 0
3 0
3 0
3 0
3 0
3 0
3 0
3 0
3 0
3 0
2 0
2 0
2 0
2 0
2 0
2 0
2 0
2 0
2 0
2 0
2 0
2 0
2 0
2 0
2 0
2 0
2 0
2 0
2 0
2 0
2 0
2 0
2 0
2 0
2 0
2 0
2 0
8 0
8 0
8 0
8 0
8 0
8 0
8 0
8 0
8 0
8 0
8 0
8 0
8 0
7 0
7 0
1 0
1 0
1 0
1 0
1 0
1 0
1 0
1 0
1 0
1 0
1 0
1 0
1 0
1 0
1 0
1 0
1 0
0 0
0 0
0 0
0 0
0 0
0 0
0 0
0 0
0 0
0 0
0 0
0 0
0 0
0 0
0 0
0 0
0 0
0 0
0 0
0 0
0 0
0 0
0 0
0 0
0 0
0 0
0 0
0 0
0 0
0 0
0 0
0 0
0 0
0 0
0 0
0 0
0 0
0 0
0 0
0 0
0 0
0 0
0 0
0 0
0 0
0 0
0 0
1 0
1 0
1 0
1 0
1 0
1 0
1 0
1 0
1 0
1 0
1 0
1 0
1 0
1 0
1 0
1 0
1 0
1 0
1 0
1 0
1 0
1 0
1 0
1 0
1 0
1 0
1 0
1 0
1 0
1 0
1 0
1 0
1 0
1 0
1 0
1 0
1 0
1 0
2 0
2 0
2 0
2 0
2 0
2 0
2 0
2 0
2 0
2 0
2 0
2 0
2 0
2 0
2 0
2 0
2 0
2 0
2 0
2 0
2 0
2 0
2 0
2 0
2 0
2 0
2 0
2 0
2 0
2 0
2 0
2 0
2 0
2 0
2 0
2 0
2 0
2 0
2 0
2 0
2 0
2 0
2 0
2 0
2 0
2 0
2 0
2 0
2 0
2 0
2 0
2 0
2 1
2 1
2 1
2 1
2 2
2 2
3 2
3 2
3 2
3 2
2 2
2 2
2 2
2 2
2 2
2 2
2 2
2 2
2 2
2 2
2 2
2 2
2 2
2 2
2 2
2 2
2 2
2 2
2 2
2 2
2 2
2 2
2 2
2 2
2 2
3 2
3 2
3 2
3 2
3 2
3 2
3 2
3 2
3 2
3 2
3 2
2 2
2 2
2 2
2 2
2 2
2 2
2 2
2 2
2 2
2 2
2 2
2 2
2 2
2 2
2 2
2 2
2 2
2 2
2 4
2 4
2 4
2 4
2 4
2 4
2 4
2 4
2 5
2 5
2 5
2 5
2 5
2 5
2 5
2 5
2 5
4 5
4 5
4 5
4 5
4 5
4 5
4 5
4 5
4 5
4 5
4 5
4 5
4 5
4 5
4 5
4 5
4 5
4 5
4 5
4 4
4 3
4 3
4 3
4 3
4 3
3 3
3 3
3 3
3 3
3 3
3 3
3 3
3 3
3 3
3 4
3 5
3 5
3 5
3 5
3 5
3 5
3 5
3 5
3 5
3 5
3 5
3 5
3 5
3 5
3 5
3 5
3 5
3 5
3 5
2 5
2 5
2 5
2 5
2 5
2 5
2 5
2 5
2 5
2 5
3 5
3 5
3 5
3 5
3 5
3 5
14 5
14 5
14 5
14 6
14 6
14 6
15 6
15 6
15 6
16 6
16 6
16 6
16 6
16 4
16 4
16 4
16 4
16 5
16 5
16 5
17 5
18 4
18 4
18 4
18 4
18 4
18 4
18 4
18 4
17 4
16 4
17 4
17 4
17 4
17 4
17 4
17 4
17 4
17 4
17 4
17 4
17 4
17 4
17 4
17 4
17 4
17 4
17 4
17 4
17 4
17 4
17 4
17 4
17 4
18 4
18 4
20 4
23 6
23 6
23 6
23 6
23 6
23 6
23 6
23 5
23 4
23 4
23 4
23 4
23 4
23 4
23 4
23 4
23 4
25 4
25 4
27 4
28 4
29 4
29 4
29 4
30 4
30 4
30 4
30 4
30 4
30 4
30 4
30 4
30 4
30 4
30 4
30 4
32 4
31 4
31 4
31 4
34 4
34 4
34 4
24 4
26 4
25 4
26 3
34 3
39 3
42 3
42 3
43 3
42 3
42 3
42 3
44 3
44 3
45 3
45 3
45 3
45 2
45 2
45 2
44 2
43 2
43 2
44 2
44 2
44 2
44 2
44 2
44 2
44 2
44 2
43 2
43 2
43 2
43 2
43 2
43 2
45 2
50 2
51 2
51 2
52 2
52 2
52 2
52 2
53 2
55 2
55 2
55 4
55 4
55 4
55 4
55 4
55 4
54 4
53 4
51 4
49 2
49 2
49 2
49 2
49 2
49 2
49 2
49 2
49 2
49 2
49 2
49 2
49 2
49 2
49 2
48 2
48 2
46 2
45 2
44 2
44 2
43 2
43 2
42 2
42 2
42 2
42 2
42 2
42 2
42 2
42 2
42 2
42 2
42 2
42 2
42 2
40 2
40 2
40 2
38 2
37 2
37 2
37 2
32 2
32 2
30 2
26 2
20 2
17 2
16 2
16 2
15 2
15 2
15 2
15 2
15 2
15 2
14 2
14 2
14 2
14 2
14 2
13 2
13 2
13 2
13 2
12 2
14 2
14 2
14 2
14 2
14 2
14 2
14 2
14 2
14 2
14 2
13 2
12 2
6 2
4 2
3 2
1 2
1 2
1 2
1 2
1 2
1 2
0 2
0 2
0 2
0 0
0 0
0 0
0 0
0 0
0 0
0 0
0 0
0 0
0 0
0 0
0 0
0 0
0 0
0 0
0 0
0 0
0 0
0 0
0 0
0 0
0 0
0 0
0 0
0 0
0 0
0 0
0 0
0 0
0 0
0 0
0 0
0 0
0 0
0 0
0 0
0 0
0 0
0 0
0 0
0 0
0 0
0 0
0 0
0 0
0 0
0 0
0 0
0 0
0 0
0 0
0 0
0 0
0 0
0 0
0 0
0 0
0 0
0 0
0 0
0 0
0 0
0 0
0 0
0 0
0 1
0 1
0 2
0 2
0 2
0 2
0 2
0 2
0 2
0 2
0 2
0 2
0 2
0 2
0 2
0 2
0 2
0 2
0 2
0 4
0 23
0 27
0 28
0 30
0 31
0 31
0 31
0 31
0 31
0 31
0 31
1 32
1 32
1 32
1 32
1 32
1 34
1 34
1 35
1 35
1 36
1 36
1 36
1 36
1 36
1 38
1 38
1 38
1 42
1 43
1 43
1 44
1 44
1 46
1 47
1 47
1 47
1 47
1 48
1 59
1 61
1 61
2 107
2 108
2 116
2 119
2 122
2 127
2 128
2 129
2 129
2 129
2 130
2 130
2 130
2 130
2 130
2 130
2 130
2 130
2 130
2 130
2 130
2 130
2 133
2 136
2 141
2 143
2 144
2 144
2 144
2 144
2 144
2 146
2 146
2 146
2 146
2 146
2 147
2 146
2 149
2 149
2 149
2 149
2 150
2 170
2 173
2 174
2 183
2 183
2 183
2 185
2 185
2 185
2 186
2 186
2 187
2 188
2 188
2 183
2 162
2 162
2 164
2 169
2 171
2 172
2 173
2 174
1 174
1 174
1 173
1 173
1 173
1 175
1 175
1 175
1 175
1 175
1 176
1 176
1 176
2 176
2 176
4 176
4 176
5 174
6 174
6 167
6 165
6 163
6 173
6 173
6 174
6 175
8 174
8 174
8 174
8 174
8 174
8 164
8 163
8 160
7 108
7 103
7 99
7 99
7 101
7 103
7 103
7 103
7 103
7 103
7 105
7 105
7 106
7 106
7 106
7 106
7 106
7 107
7 107
7 107
8 106
8 106
8 104
8 101
8 94
8 94
8 93
10 94
10 94
10 95
11 99
11 102
11 104
11 105
11 106
11 106
11 106
11 106
11 102
11 102
11 101
12 102
13 101
13 81
13 80
13 76
14 69
14 68
14 68
14 70
14 70
14 69
14 68
14 69
14 71
14 73
16 73
17 73
17 72
18 70
19 67
20 64
20 61
20 61
20 61
20 61
20 61
20 60
20 59
20 61
20 61
20 59
20 59
20 59
20 58
20 58
21 59
21 63
21 62
20 62
20 62
18 62
16 63
15 63
15 63
14 63
14 63
14 63
14 52
14 52
14 49
14 49
14 49
14 49
16 49
16 49
16 49
16 49
16 49
16 49
17 47
17 47
17 47
17 47
17 44
17 43
17 43
17 43
17 43
17 43
17 40
17 39
17 39
17 39
17 39
17 39
17 39
17 38
17 38
17 38
16 38
17 38
18 38
18 38
18 38
18 39
18 39
15 38
15 37
14 36
13 31
13 27
13 26
13 25
13 24
13 24
13 24
13 24
13 24
13 24
13 23
13 23
13 23
13 24
13 29
13 33
14 76
14 82
14 95
14 123
14 167
14 223
16 293
16 301
16 341
17 354
13 357
12 357
12 357
11 357
11 362
11 361
11 364
11 364
12 365
12 382
12 389
12 390
12 394
12 395
12 411
13 416
13 417
13 435
13 437
14 438
13 438
16 436
17 438
17 440
17 448
17 464
17 500
17 516
17 517
17 518
17 525
17 528
17 533
17 534
17 536
17 536
17 536
17 540
15 540
15 543
15 543
15 548
15 548
15 548
14 548
14 549
14 549
14 549
14 549
14 550
15 551
15 552
15 555
15 556
15 556
15 556
15 556
15 556
15 556
15 556
15 556
16 556
20 580
20 580
23 584
22 584
21 585
21 586
22 600
22 599
23 601
23 601
24 628
24 634
24 638
24 636
24 636
24 638
24 638
24 638
24 638
24 640
24 640
24 641
24 641
24 640
24 641
24 639
24 632
24 617
22 501
22 456
22 417
22 397
22 391
22 372
20 360
21 358
21 312
21 309
21 308
21 305
21 305
21 320
21 320
21 320
21 321
20 321
20 319
20 300
20 291
20 287
20 284
20 281
20 281
19 279
21 279
21 262
20 258
20 261
20 258
17 258
16 265
16 255
17 248
17 230
17 197
17 191
17 188
17 186
17 179
17 176
17 169
17 168
18 169
18 169
18 170
18 169
18 169
18 168
18 171
18 173
18 173
18 174
18 173
18 172
18 172
18 172
18 172
18 171
16 169
16 169
16 166
16 166
15 166
15 166
15 166
15 166
15 166
15 166
15 166
13 166
9 138
9 137
9 137
9 137
8 132
8 131
7 118
7 117
7 117
7 116
6 88
6 83
6 81
6 82
6 82
6 82
6 82
6 82
6 82
6 80
6 80
6 79
6 79
6 78
6 78
6 78
6 73
6 59
6 59
6 59
6 59
6 59
6 59
5 59
5 59
4 54
4 54
4 54
4 54
4 54
4 54
4 38
4 38
4 37
4 37
4 37
4 37
4 37
4 37
4 37
4 37
4 34
4 33
4 32
2 31
2 31
2 30
2 29
2 29
2 28
2 17
1 16
1 17
1 17
1 16
1 15
1 15
1 15
1 15
1 15
1 15
1 14
0 13
0 13
0 13
0 13
0 12
0 8
0 6
0 5
0 5
0 4
0 4
0 3
0 3
0 3
0 3
0 3
0 3
0 3
0 3
0 7
0 7
0 7
0 7
0 7
0 7
0 7
0 7
0 7
0 7
0 7
0 7
0 7
0 7
0 7
0 7
0 7
0 7
0 7
0 7
0 7
0 8
0 9
0 9
0 9
0 10
0 10
0 13
0 13
0 13
0 13
0 12
0 12
0 12
0 12
0 12
0 12
0 12
1 20
1 27
1 30
1 30
1 30
1 31
1 31
1 31
1 31
1 31
1 31
1 31
1 31
1 31
1 31
1 31
1 31
1 33
1 33
2 35
2 35
2 36
2 36
2 37
2 38
2 38
2 39
2 46
2 49
2 50
2 51
2 51
2 51
2 50
2 50
2 50
2 50
2 50
2 50
2 50
2 50
2 50
2 51
2 51
2 51
2 51
2 51
2 51
2 52
2 52
2 52
2 52
2 63
2 63
2 63
2 63
2 63
2 63
2 63
2 64
2 64
4 66
4 62
4 64
4 64
4 64
4 64
4 64
4 66
4 66
4 68
4 68
4 68
4 69
6 82
7 85
7 85
7 85
7 85
7 86
7 86
7 86
7 88
7 87
7 85
8 85
8 85
8 84
9 84
9 81
9 81
9 85
9 85
9 88
9 88
9 88
9 88
9 88
9 88
8 88
9 83
9 78
9 75
9 75
9 75
9 74
9 74
9 76
9 76
9 76
9 76
9 76
9 76
9 77
9 77
9 79
9 79
9 77
9 77
8 74
8 73
8 74
9 78
9 91
9 94
9 94
9 93
9 88
9 85
9 85
9 84
9 84
9 84
9 84
9 84
9 84
9 84
9 84
10 86
10 88
10 88
10 89
10 88
10 89
10 89
10 91
10 93
10 96
10 95
10 96
10 100
11 102
11 92
11 93
12 92
12 94
12 94
12 101
12 104
12 107
12 108
10 108
10 109
9 109
9 111
9 111
9 111
9 117
9 116
9 116
9 114
9 114
9 114
9 113
8 100
8 97
8 97
8 98
8 100
8 104
8 104
8 104
7 102
7 102
7 105
6 106
6 107
7 107
7 107
7 108
7 108
7 125
7 132
8 133
8 151
8 151
8 154
8 154
8 154
8 153
7 151
7 149
7 151
7 151
7 152
7 156
7 161
7 171
7 172
7 174
7 176
7 180
8 241
8 243
9 272
9 325
9 329
9 331
9 346
10 350
10 358
11 456
10 456
10 449
11 455
11 460
11 470
11 474
11 474
11 473
11 473
11 474
11 474
11 474
11 474
11 474
11 475
11 476
10 474
10 474
10 475
12 474
12 474
12 475
12 475
12 470
11 470
11 470
12 472
11 473
11 467
11 463
11 463
12 470
12 471
12 479
12 489
12 483
12 483
12 485
12 485
12 489
12 489
11 489
11 488
11 488
11 490
11 489
11 489
11 489
11 489
11 489
13 503
13 503
14 505
14 513
14 518
15 518
15 517
15 516
15 516
14 516
14 516
14 517
14 514
14 517
14 516
14 517
14 517
14 516
14 514
14 489
14 484
13 474
13 467
13 467
13 465
13 465
13 465
13 464
13 463
13 464
13 464
12 465
12 467
12 463
12 457
12 448
11 443
11 439
11 435
11 428
11 350
11 342
11 301
11 260
11 257
10 255
10 255
11 254
11 234
9 130
9 131
9 131
9 131
9 130
9 126
9 126
9 127
10 128
10 129
10 150
10 150
10 151
10 151
10 151
10 151
10 150
10 153
9 152
8 151
8 152
8 154
12 155
13 167
14 176
22 205
24 213
23 225
23 231
23 229
23 233
24 268
23 351
24 364
25 370
34 590
34 616
34 630
36 655
36 688
37 699
37 737
37 738
37 737
37 740
37 749
38 758
40 768
43 779
43 781
43 781
41 767
41 767
40 762
40 752
40 751
39 748
39 747
39 748
39 748
46 750
46 751
46 751
46 751
46 747
47 755
47 755
48 755
49 756
49 768
49 769
51 808
55 815
55 820
55 821
55 821
55 819
55 819
55 819
55 820
55 818
55 816
55 819
55 817
55 817
55 817
55 817
55 817
55 817
55 817
55 817
55 817
54 816
54 829
54 830
54 830
52 847
52 851
52 851
52 855
52 863
52 859
52 875
52 896
52 897
52 903
52 904
52 904
51 902
51 902
48 879
48 881
48 879
48 879
48 882
48 882
48 883
48 878
45 874
45 872
45 870
45 869
44 867
39 854
38 836
37 824
36 839
36 851
37 853
37 854
37 850
35 802
33 692
32 676
32 665
22 355
22 350
21 332
21 318
21 310
18 292
18 300
18 301
17 303
17 302
17 302
17 302
17 301
17 304
17 307
17 307
17 307
17 307
17 307
17 308
17 307
17 310
15 310
15 310
15 310
6 313
6 312
2 312
2 310
2 310
1 301
1 301
1 300
1 299
1 297
1 282
1 256
1 256
1 255
1 254
1 254
1 255
1 255
1 255
1 254
1 254
1 254
1 248
1 248
1 248
1 248
1 246
1 247
1 247
1 248
1 248
1 248
1 247
2 234
2 241
2 241
2 227
2 224
2 222
2 214
2 206
2 201
2 189
2 180
2 179
2 173
2 174
2 174
2 176
2 182
2 180
2 178
2 177
2 177
2 174
2 210
2 210
2 211
2 211
2 212
2 212
2 212
2 211
2 209
3 209
4 207
4 181
4 153
3 141
3 140
3 140
3 140
3 142
3 139
5 139
5 137
5 133
5 130
5 131
5 124
5 116
5 109
5 108
5 107
5 107
5 106
5 101
5 100
5 97
5 96
5 96
5 96
5 96
5 94
5 93
5 93
5 92
5 92
5 92
5 92
5 88
5 88
5 86
5 86
5 87
5 90
5 90
5 91
6 90
6 90
6 89
6 89
6 91
6 92
6 93
6 92
6 92
6 92
6 92
6 92
6 92
6 92
6 92
6 92
6 92
6 92
6 92
6 91
6 91
6 90
7 90
7 90
7 94
6 95
7 88
7 92
7 91
8 88
8 87
8 87
8 82
8 81
8 81
8 85
8 85
9 90
9 91
9 91
11 92
11 87
11 91
12 92
12 92
14 99
14 100
14 65
14 64
14 67
14 67
14 67
14 67
14 67
14 67
14 67
13 67
12 67
12 67
12 67
12 67
12 68
12 67
12 68
12 67
12 67
10 68
10 68
10 68
10 65
10 62
10 62
10 61
10 61
10 61
10 61
10 61
10 61
10 61
10 61
10 61
10 61
10 62
10 62
10 62
10 62
10 62
10 62
10 66
11 72
11 74
11 75
11 82
11 82
11 82
11 84
11 83
11 80
11 80
10 81
10 81
10 81
10 81
10 81
10 79
10 77
10 77
10 77
10 77
10 77
10 77
10 77
10 77
10 77
10 77
10 77
10 77
10 77
10 77
10 78
10 78
10 78
9 80
9 78
10 74
10 73
9 70
9 69
9 68
8 68
8 68
8 68
9 68
9 68
9 67
9 65
10 64
8 58
8 59
8 58
7 55
7 56
7 51
7 51
7 51
5 43
5 42
5 42
5 42
5 39
5 38
5 39
5 40
5 40
5 42
5 42
5 43
5 44
5 48
5 48
5 48
5 46
5 46
5 45
5 45
5 45
5 44
5 44
5 44
5 44
5 44
5 44
5 44
5 44
5 44
5 44
6 44
6 46
6 49
6 49
6 49
6 48
6 48
6 48
6 48
6 48
6 48
6 48
6 43
5 37
5 32
5 29
5 26
5 27
5 27
5 27
5 29
5 29
5 29
5 28
5 28
5 29
5 29
5 29
5 29
5 29
5 29
5 29
5 29
5 29
5 30
5 30
5 30
5 31
5 34
6 39
6 39
6 39
6 39
6 39
6 39
6 39
6 37
7 37
6 37
6 37
6 38
9 81
9 85
9 86
9 91
9 92
8 93
8 93
8 97
7 109
7 111
7 124
7 125
7 126
8 128
8 128
8 130
7 132
7 140
7 148
7 150
7 151
7 151
7 152
7 152
7 153
7 152
7 153
7 150
8 150
8 150
8 149
8 151
8 151
8 153
8 154
8 154
8 154
9 154
9 155
9 155
9 156
9 158
9 158
9 159
9 165
9 166
9 205
9 206
8 214
8 214
8 212
8 210
8 213
8 213
8 218
8 228
8 243
8 244
9 262
9 267
9 272
10 280
10 281
10 282
10 282
10 282
10 283
10 284
10 285
11 294
11 294
11 294
12 297
12 304
12 304
12 304
12 308
12 307
12 310
12 319
12 320
12 321
12 321
12 321
12 321
12 321
12 320
11 319
9 315
9 316
9 316
9 316
9 318
9 322
9 323
9 324
9 330
9 330
9 332
9 338
8 292
8 295
8 300
8 304
8 304
8 304
8 302
9 293
9 283
9 276
9 272
9 280
10 281
9 277
9 274
9 275
9 270
9 259
9 259
9 258
9 258
9 257
9 257
9 256
8 255
8 256
8 255
8 255
8 255
8 255
8 255
8 248
8 248
8 246
8 245
8 245
8 245
7 245
7 245
7 245
7 244
7 242
7 242
7 241
7 237
7 236
7 199
7 199
7 192
7 191
7 193
8 193
10 206
10 205
10 196
10 185
11 175
11 175
10 159
9 170
9 165
9 163
9 163
9 161
9 162
11 172
12 170
13 173
13 173
14 163
14 163
14 162
14 162
14 156
14 156
14 153
14 152
14 152
14 150
14 141
14 139
14 138
14 139
14 139
14 139
14 139
14 147
14 148
16 149
17 148
17 148
17 148
17 146
17 142
17 141
17 140
16 132
16 131
16 129
16 124
24 249
23 244
23 263
23 262
23 261
23 261
23 263
23 279
23 292
23 291
23 289
23 281
23 281
23 287
23 287
23 286
23 286
23 286
23 286
23 285
23 285
23 287
23 288
23 288
23 290
24 290
24 290
24 291
25 291
25 291
25 293
25 292
25 292
25 293
25 293
25 294
25 294
25 294
25 294
25 294
25 294
25 294
25 294
25 295
25 294
25 291
25 291
25 292
25 293
25 292
25 290
24 290
22 275
22 275
21 274
21 275
21 275
21 273
21 272
21 255
21 256
21 256
21 256
20 256
19 255
18 244
16 244
16 243
15 242
15 244
15 242
14 241
14 241
14 242
14 242
14 248
14 247
14 247
14 246
14 245
14 245
14 245
14 245
14 245
14 245
14 245
14 238
14 238
12 237
11 237
11 237
11 237
12 239
12 241
12 251
12 251
12 253
13 251
13 249
13 246
5 101
5 100
5 98
5 98
5 78
5 82
5 79
4 70
4 70
4 75
4 78
4 78
4 79
4 79
4 80
4 80
4 80
4 80
4 81
4 80
4 81
4 105
2 109
2 113
2 111
2 111
2 112
2 111
2 111
2 111
2 108
2 108
2 108
2 107
2 107
2 108
2 114
2 119
2 120
2 120
2 129
2 131
2 134
2 135
2 136
2 138
2 138
2 139
3 158
3 158
3 160
3 162
10 219
10 219
13 235
13 236
13 239
13 239
13 241
13 241
13 240
13 243
13 244
13 245
13 245
13 248
13 260
13 263
13 268
13 266
13 269
13 271
13 271
13 267
13 264
13 265
13 265
14 265
14 265
14 266
14 265
14 265
13 264
13 264
13 264
13 263
13 263
13 263
13 263
13 261
13 261
12 261
12 259
12 257
12 249
12 249
12 248
12 249
12 246
12 245
12 246
12 250
12 251
12 253
12 250
12 252
12 253
12 252
12 247
12 246
12 245
12 246
13 246
13 250
13 249
13 251
13 251
13 251
13 251
13 252
13 251
13 222
14 242
14 237
14 237
14 237
14 237
14 237
14 237
14 237
14 237
14 237
14 237
14 237
14 237
15 233
15 228
15 222
15 221
15 221
15 216
15 214
15 218
15 220
15 215
15 208
15 208
15 206
14 195
14 196
14 193
14 182
4 123
4 122
4 122
4 122
4 119
4 119
4 120
4 120
4 123
5 129
9 149
9 149
9 149
9 144
8 130
8 126
8 125
8 124
8 122
8 119
8 118
8 118
8 118
8 116
8 116
8 116
8 116
8 116
8 117
8 117
8 117
8 117
8 119
8 119
8 118
9 118
9 118
9 118
10 125
10 127
10 129
10 129
10 129
10 129
10 127
10 124
10 124
10 123
10 123
10 118
10 117
10 116
10 116
10 110
10 109
10 108
10 108
10 108
10 107
10 106
9 106
11 104
11 104
11 104
11 105
11 105
11 105
11 104
11 103
11 103
10 82
10 82
10 82
12 83
14 87
14 95
14 96
15 98
15 100
15 100
15 101
15 101
15 101
14 101
14 102
14 103
14 103
14 104
14 101
14 101
14 95
14 88
14 88
14 87
14 84
14 83
14 83
14 83
14 83
14 82
14 82
15 82
15 82
15 82
15 81
15 79
14 76
14 75
11 75
10 58
10 49
10 49
10 49
10 49
10 49
15 53
23 53
23 53
23 53
23 53
23 52
23 52
23 52
23 52
23 52
24 53
24 53
25 54
25 56
26 58
26 59
26 59
26 60
26 60
26 60
25 60
25 61
26 65
26 60
27 60
27 58
27 60
27 60
29 62
29 63
29 64
29 64
29 64
30 64
30 65
30 66
30 68
30 69
30 69
30 68
30 67
30 70
30 73
32 77
32 77
32 76
30 73
30 73
30 71
28 70
28 69
28 69
28 69
28 70
28 70
28 71
28 71
28 71
28 71
26 81
26 83
26 89
25 88
25 86
25 86
25 86
25 86
25 86
25 86
25 85
26 84
26 84
26 83
26 83
26 83
26 82
26 82
26 80
26 80
26 80
26 81
26 83
26 82
26 82
26 82
26 82
25 82
25 82
25 83
25 84
25 86
25 86
25 86
25 86
25 86
25 87
27 92
27 93
26 94
24 94
21 90
13 90
13 92
13 92
13 92
13 95
12 96
13 100
13 102
13 105
13 107
13 107
13 107
14 105
14 104
14 113
14 118
14 137
13 139
13 138
12 142
12 145
12 141
12 140
9 140
9 140
10 138
10 138
10 137
10 136
10 135
10 134
10 134
9 133
9 132
9 130
9 131
9 130
9 130
9 130
9 129
9 126
9 122
7 119
8 119
8 120
8 120
8 121
8 124
8 125
8 125
8 126
8 130
8 130
8 132
8 132
8 133
8 133
8 131
8 118
8 109
8 104
8 104
8 105
8 105
8 108
8 109
8 109
8 109
7 108
7 108
7 108
7 108
7 108
7 110
7 110
7 110
7 110
8 110
8 109
8 109
9 108
9 109
9 109
9 109
9 109
9 109
9 109
9 110
9 109
9 107
9 108
9 108
9 108
8 108
8 106
7 100
7 97
7 97
7 97
7 96
7 96
7 94
7 94
7 92
5 90
5 87
4 86
4 85
4 83
4 78
4 78
4 77
4 71
4 70
4 67
4 63
4 43
4 41
4 42
4 40
4 37
4 37
4 36
3 35
3 39
3 40
3 40
3 40
3 40
3 40
3 40
3 42
3 42
3 42
3 41
3 40
3 40
3 39
3 39
3 39
3 39
3 39
3 38
2 38
2 37
2 36
2 37
2 36
2 37
2 39
2 38
2 35
2 33
2 31
2 29
2 31
2 34
2 41
2 45
2 46
2 47
2 47
2 47
2 47
2 44
2 45
2 46
2 46
2 46
2 46
2 47
2 47
2 46
2 44
2 43
2 43
2 44
1 44
1 44
1 44
0 44
0 44
0 44
0 44
1 45
2 45
2 44
2 46
2 46
2 46
2 47
2 47
2 47
2 47
2 47
2 47
2 47
2 47
2 47
2 47
2 47
2 47
2 47
2 47
2 46
2 46
2 46
2 46
2 46
2 46
2 46
2 46
2 46
2 46
2 44
2 45
2 46
2 47
3 53
3 56
3 56
3 59
4 60
4 60
4 55
4 60
4 60
4 60
4 60
4 59
4 59
4 59
4 60
4 60
4 60
4 60
4 60
4 60
4 61
4 65
5 66
5 69
5 71
5 72
5 74
5 74
5 73
5 71
5 71
5 70
5 70
5 69
5 70
6 70
6 69
7 67
7 64
7 58
7 54
7 53
7 52
7 54
7 54
7 54
7 54
7 53
7 52
7 52
7 53
7 53
7 52
7 52
7 52
7 52
7 52
9 53
9 53
8 52
8 55
8 58
8 57
8 57
8 76
7 76
7 75
7 75
7 75
7 71
7 71
7 73
7 73
7 75
7 77
7 78
7 78
7 78
7 82
7 82
7 82
7 82
7 82
7 82
7 115
7 116
7 117
7 120
10 256
10 273
10 280
10 283
10 283
10 283
10 288
10 289
12 294
12 293
12 294
12 292
11 285
11 285
11 284
11 284
10 283
10 283
10 283
10 280
10 281
10 281
10 283
10 288
10 288
11 289
11 288
11 288
11 289
11 289
11 289
12 289
12 289
12 284
11 283
11 280
11 277
11 276
11 276
11 275
11 275
11 277
11 277
11 278
11 278
11 279
11 278
8 278
7 278
7 278
7 278
7 278
7 278
7 277
7 278
7 283
7 284
7 284
7 284
7 285
7 285
7 287
7 288
7 289
7 290
7 290
7 290
7 290
7 291
7 290
7 290
7 289
7 293
7 299
7 299
7 300
7 280
7 281
7 286
7 288
7 295
7 296
6 294
6 293
8 286
10 281
9 277
9 272
9 274
10 272
10 269
11 266
11 266
13 267
13 261
13 261
13 241
13 241
13 222
13 211
11 99
11 91
11 87
11 84
11 83
11 82
11 80
11 79
11 81
11 80
11 80
11 80
11 79
11 79
11 79
11 77
11 76
11 75
11 76
11 76
11 77
11 81
11 82
11 75
11 80
10 81
10 81
11 81
11 81
11 81
11 86
11 86
11 86
11 86
11 88
11 88
11 88
11 88
11 88
11 88
11 88
11 86
11 86
11 85
12 122
12 125
12 128
11 129
11 136
11 136
11 136
11 136
11 136
13 148
13 148
13 142
13 143
13 145
13 146
13 145
13 147
13 145
13 144
13 142
13 143
13 145
13 146
13 147
13 146
13 146
12 145
12 144
12 137
12 129
12 127
12 130
12 130
12 129
12 124
12 122
12 116
12 115
12 115
13 115
9 115
8 116
8 117
8 116
8 115
7 115
7 115
7 115
6 115
5 114
5 114
5 114
5 114
6 114
6 114
6 115
6 115
6 115
6 115
6 115
6 116
6 116
6 117
6 117
6 116
6 116
6 116
6 116
6 116
6 116
6 117
6 117
6 117
6 119
6 118
6 118
7 116
7 112
7 111
7 111
7 105
7 110
7 110
6 110
6 110
6 111
6 105
6 104
6 103
6 103
6 103
7 108
7 108
7 109
7 109
7 109
7 109
7 109
7 109
7 109
5 69
5 67
5 63
5 61
5 56
5 59
5 61
5 61
5 62
3 46
3 48
3 47
3 49
3 50
3 62
3 67
3 67
3 69
3 71
3 75
3 76
3 75
3 74
4 74
4 73
4 72
4 72
4 73
4 73
4 77
4 77
4 76
4 77
4 83
5 83
8 83
8 85
9 86
9 88
9 89
11 88
11 87
11 91
11 91
11 92
11 92
11 92
11 92
11 92
11 93
11 93
11 93
11 93
10 93
10 93
10 93
10 93
10 94
10 94
10 93
10 93
10 93
10 92
12 91
12 90
12 89
12 89
12 89
12 89
12 89
12 89
12 89
12 90
12 89
12 89
12 89
11 89
11 90
11 90
11 91
11 91
11 85
11 83
11 83
11 81
11 81
11 81
11 81
11 81
11 81
10 81
10 72
10 72
10 71
10 71
10 69
10 69
10 69
10 69
15 72
15 70
15 72
15 69
15 69
15 67
15 64
15 64
15 64
15 64
15 64
15 63
15 62
15 62
15 61
15 42
15 41
15 45
15 44
17 46
18 47
18 55
20 73
22 86
21 99
21 108
21 113
21 113
21 113
21 115
21 112
21 112
21 111
21 110
21 103
20 104
16 100
16 99
16 98
16 98
16 96
14 93
14 93
14 92
14 92
14 91
15 95
15 95
15 98
15 98
15 97
15 99
15 99
15 99
15 99
15 99
15 99
15 98
15 98
15 98
16 99
16 99
18 99
18 100
16 100
16 100
16 100
16 100
16 100
16 101
16 101
16 101
16 101
16 100
16 100
16 100
16 100
16 99
16 99
16 99
16 98
17 98
18 98
18 98
18 99
18 99
19 100
19 102
19 102
19 102
20 109
20 110
20 110
20 122
21 123
28 125
28 125
28 125
28 125
27 124
23 121
23 122
23 125
24 126
24 129
24 129
24 129
24 129
25 130
25 130
25 131
25 143
25 145
26 149
26 152
26 153
28 173
33 173
32 174
31 170
29 164
29 141
27 127
26 123
28 117
28 106
28 105
28 107
28 109
28 110
28 110
28 112
28 114
28 118
28 118
28 118
28 118
28 118
28 118
28 118
28 118
28 118
28 118
28 118
28 118
28 117
27 113
27 113
27 111
27 111
27 111
27 109
27 109
27 109
27 109
27 109
27 109
27 109
27 109
27 109
26 108
26 108
24 107
24 107
24 107
24 107
24 107
24 107
25 110
25 109
25 109
25 110
25 110
25 110
25 110
25 110
25 111
25 111
27 112
27 112
25 112
24 112
23 112
24 112
25 113
25 113
25 110
25 110
25 108
23 108
21 103
20 102
20 101
19 87
19 87
20 87
20 87
20 87
20 87
22 87
25 86
25 84
25 82
24 80
24 80
23 80
23 81
23 81
23 80
23 80
23 78
22 64
22 62
21 59
21 55
19 54
16 31
12 30
12 30
12 30
12 29
12 29
12 29
12 29
12 27
12 27
12 25
12 24
12 22
12 21
12 21
12 18
12 17
12 13
12 12
12 12
12 12
12 12
12 15
12 16
12 20
12 25
12 26
13 26
14 26
14 26
15 26
15 27
15 29
15 29
15 29
15 30
15 30
15 30
15 30
15 30
15 30
15 30
15 31
15 31
15 33
15 33
17 37
17 47
17 51
17 52
16 52
17 55
17 53
17 59
16 60
16 59
20 61
21 61
21 61
21 62
21 62
21 63
19 63
19 69
19 69
19 69
19 69
19 69
18 67
18 67
18 67
18 67
19 67
19 67
19 67
17 67
17 67
17 67
17 67
16 67
16 67
16 67
15 67
13 72
13 72
13 73
13 72
14 71
14 71
14 70
14 70
14 70
14 70
14 70
14 70
14 70
14 70
14 71
14 71
14 72
14 72
14 81
14 86
14 91
14 91
14 92
14 93
14 93
14 93
14 93
14 93
14 93
14 93
14 94
14 95
14 96
14 99
14 126
14 128
14 131
14 131
14 131
15 128
15 125
15 122
15 119
15 119
14 119
13 119
13 119
12 119
12 117
12 118
12 118
12 119
12 118
12 122
12 123
12 128
12 132
12 132
12 132
12 131
12 128
12 127
12 127
10 121
10 117
10 115
10 115
10 116
9 108
8 108
8 112
8 112
7 112
3 110
3 110
3 109
3 108
3 108
3 106
3 108
4 103
4 103
4 103
4 103
4 103
4 104
4 104
4 105
4 105
3 108
3 111
3 111
3 111
3 111
3 114
3 114
3 115
3 115
3 115
4 114
5 110
5 110
5 109
5 109
4 109
4 114
4 123
4 123
4 124
4 124
4 124
4 124
6 124
6 124
6 125
6 127
6 127
6 126
6 114
6 112
6 109
6 108
6 107
6 106
6 106
6 106
6 106
6 106
6 106
6 106
6 105
6 105
6 108
7 106
7 81
7 88
7 87
7 89
7 89
6 89
6 88
6 88
6 88
6 87
6 87
6 87
6 87
6 87
6 87
6 86
6 85
6 84
6 83
6 81
6 78
6 84
6 81
6 85
6 85
6 87
6 87
6 88
6 89
7 101
8 106
8 108
8 108
8 107
8 107
8 105
8 102
8 106
8 106
8 107
8 107
8 110
8 111
8 112
8 111
10 109
9 109
9 110
9 110
9 111
9 111
9 110
9 110
9 108
9 107
9 104
9 105
9 105
9 108
9 109
9 113
10 149
10 154
10 153
11 161
9 161
9 161
7 162
7 162
7 162
7 162
7 157
7 148
7 148
7 147
7 147
8 148
8 149
8 150
8 149
8 148
8 145
8 145
8 145
8 144
8 144
8 144
8 144
8 146
8 146
8 146
7 145
7 145
7 144
7 144
7 146
7 146
7 143
6 138
6 136
6 137
6 130
6 130
6 130
6 130
6 130
6 130
6 130
6 130
6 130
6 129
6 129
6 129
6 129
6 129
6 129
6 129
6 129
6 128
6 129
6 128
6 112
6 112
6 110
6 109
6 105
6 105
6 105
6 102
3 80
3 80
3 79
3 79
2 71
2 71
2 71
2 70
2 70
2 70
2 71
2 73
2 72
2 72
2 72
2 72
2 72
2 72
2 72
2 70
2 68
2 68
2 74
2 74
2 78
2 79
2 81
2 80
2 80
2 78
2 78
2 73
2 53
2 45
1 45
1 45
0 45
0 45
0 45
0 45
0 45
0 45
0 45
0 45
0 46
0 46
0 46
0 46
1 45
1 45
1 45
1 45
1 45
2 45
2 45
2 45
2 45
2 45
2 45
2 43
2 44
2 44
2 44
2 44
1 44
1 44
1 43
1 43
1 43
1 43
1 43
1 41
1 39
1 39
1 39
1 39
1 39
1 39
1 40
1 40
1 40
1 40
1 40
1 40
1 40
1 40
1 41
1 41
1 49
1 45
1 47
1 50
1 50
1 50
1 53
1 54
1 54
1 54
1 54
1 54
1 53
1 53
1 53
1 58
1 65
1 68
1 69
1 69
1 69
1 69
1 65
1 65
1 65
1 65
1 65
1 65
1 65
1 65
1 66
2 82
2 81
2 81
2 82
2 83
2 78
2 78
2 77
2 77
2 77
2 74
2 94
2 96
2 96
2 99
2 103
2 105
2 105
2 105
2 105
2 106
2 106
2 106
2 106
2 106
2 107
2 107
2 108
3 108
3 108
3 108
3 108
3 108
2 108
2 108
2 108
2 109
2 109
2 109
2 109
2 109
2 108
2 108
2 108
2 108
2 109
2 111
2 111
2 111
2 111
2 111
2 111
2 110
2 110
2 110
2 110
2 110
2 110
2 110
2 109
2 109
2 111
2 111
2 111
2 111
2 111
2 112
2 111
2 111
2 96
2 96
2 96
2 95
2 96
2 97
2 98
2 98
2 99
2 99
2 100
3 104
3 104
3 104
3 102
3 99
3 91
3 88
3 88
3 88
3 88
3 89
4 89
4 91
4 93
4 94
4 95
4 95
5 95
5 100
6 99
5 81
5 81
5 81
5 76
5 76
5 76
5 77
5 77
5 77
5 75
5 72
5 45
5 45
5 44
5 42
5 40
5 39
5 39
5 39
5 39
5 38
5 38
5 42
5 42
5 44
5 43
5 43
5 42
4 42
4 42
4 42
4 42
4 42
4 42
4 42
4 42
4 41
4 41
4 41
4 41
4 41
4 41
4 41
4 41
4 41
4 38
4 37
4 37
4 37
4 37
4 37
4 37
4 37
4 37
4 37
4 38
4 38
4 38
4 38
4 39
4 40
4 38
4 38
4 38
4 38
4 37
4 37
4 37
4 37
4 38
4 38
4 39
4 38
4 36
4 36
4 36
4 36
3 35
3 35
3 34
3 30
3 29
3 29
3 29
3 29
3 31
4 36
4 39
4 39
4 39
4 38
4 38
2 35
2 34
2 33
2 33
2 33
2 33
2 28
2 28
2 28
2 25
2 25
2 25
2 25
2 25
2 24
2 24
2 24
2 24
2 24
2 24
2 24
2 24
2 24
2 24
2 24
3 24
3 24
3 24
3 24
3 25
3 21
3 21
3 18
3 18
3 19
3 19
3 19
3 19
3 19
3 19
3 19
3 20
3 21
3 21
3 22
3 22
3 22
3 22
3 22
3 22
3 22
3 23
3 23
3 23
3 23
3 23
3 23
3 23
3 23
3 24
3 28
3 28
3 31
3 30
3 30
3 32
3 32
3 32
3 31
3 31
3 31
3 31
3 31
3 31
3 31
3 31
3 32
3 31
3 31
3 30
3 30
3 29
3 29
3 29
3 29
3 31
3 31
3 31
3 31
3 31
5 31
5 31
5 32
5 30
4 23
5 22
5 22
5 22
5 22
4 22
4 22
4 22
4 21
4 21
4 21
4 21
4 21
4 21
4 21
4 22
4 24
4 25
4 25
4 25
4 25
4 25
4 25
4 25
4 28
8 33
9 34
9 35
9 38
9 39
10 40
9 40
9 40
9 41
9 41
9 40
9 40
9 40
9 40
11 41
11 40
14 40
15 41
15 41
15 42
15 42
15 42
15 40
15 40
15 40
15 39
15 39
15 39
15 39
15 39
15 39
16 39
16 39
17 39
18 39
18 39
18 39
18 39
18 42
18 40
18 39
19 42
19 42
19 39
19 39
19 40
19 39
19 39
19 39
19 39
19 39
19 39
19 39
19 39
19 39
19 40
19 40
20 39
21 39
22 39
22 39
23 38
23 37
23 37
23 38
23 36
23 38
24 39
24 41
26 41
26 42
24 43
24 44
24 43
24 44
24 44
23 44
23 47
23 47
23 47
23 47
23 47
23 48
24 49
24 49
25 50
25 50
25 50
25 48
25 49
25 47
25 47
25 47
25 47
25 47
25 47
25 46
25 46
25 46
25 43
21 39
20 37
20 37
20 37
20 37
19 35
19 35
19 35
19 35
19 35
19 38
19 43
19 43
19 44
17 43
17 43
13 43
13 42
13 42
13 41
13 41
13 41
13 41
13 41
13 41
13 41
13 42
13 42
13 42
13 42
12 43
11 43
11 42
11 42
10 42
10 43
10 43
10 44
10 41
10 41
10 39
9 34
9 34
9 34
10 34
10 33
10 33
10 33
11 33
12 36
12 36
13 46
14 48
14 48
14 47
14 47
13 47
12 47
12 48
11 48
11 48
10 52
9 52
9 55
9 54
9 54
9 51
8 51
8 49
7 48
7 48
7 49
7 49
7 49
7 48
7 48
7 48
7 45
7 45
7 47
7 47
8 47
8 46
10 46
10 46
9 45
9 45
10 45
10 44
10 43
10 43
10 43
10 42
10 42
10 42
10 42
10 42
10 42
10 42
10 42
10 42
10 43
10 43
11 43
11 43
11 44
11 44
11 44
11 45
11 46
11 44
11 39
11 39
11 38
11 38
12 38
12 38
12 40
12 43
13 43
14 49
14 50
14 51
14 53
14 54
14 56
20 91
20 93
20 100
21 101
21 100
21 106
21 111
21 111
21 111
21 110
21 110
21 109
21 109
22 112
22 112
22 112
22 112
22 112
21 112
21 113
23 114
22 114
22 115
21 111
21 111
20 102
19 101
19 101
19 106
19 106
21 107
21 107
21 106
22 106
22 104
22 102
22 102
23 99
23 99
23 99
23 99
23 99
23 99
24 101
24 102
24 104
28 107
34 113
35 114
37 114
43 116
45 117
46 116
51 115
52 115
49 115
50 116
48 115
48 115
49 124
49 124
49 124
50 124
50 124
50 124
50 124
50 124
50 124
50 124
50 124
50 124
50 124
50 124
50 124
50 124
50 125
50 125
49 126
49 126
49 126
49 126
49 127
49 128
49 127
49 126
49 126
49 127
49 127
49 127
48 127
48 127
48 122
48 122
47 120
46 110
46 109
46 109
47 118
47 119
52 188
46 147
46 145
46 145
45 145
45 145
45 144
45 144
45 144
45 144
45 144
45 144
45 144
45 144
44 141
44 141
45 141
45 142
45 142
45 142
45 141
43 141
43 140
43 140
43 140
43 140
43 140
43 138
42 138
41 133
41 133
41 133
42 134
42 134
43 136
49 136
49 136
49 136
48 137
48 137
48 137
48 137
48 137
48 137
47 135
47 134
45 130
41 125
35 118
32 117
31 118
26 118
26 118
25 118
22 119
22 119
22 119
21 123
21 123
21 123
20 114
20 115
20 115
19 116
19 117
19 118
19 119
19 119
19 119
19 119
19 121
19 122
19 122
19 122
19 122
19 121
19 121
19 121
19 119
19 119
19 118
19 116
19 116
19 115
19 115
19 115
19 114
19 114
19 114
19 114
19 114
19 115
20 116
20 117
20 119
20 119
20 119
18 117
17 109
17 107
14 31
14 31
14 28
14 28
14 29
14 30
14 30
14 30
14 30
14 30
14 34
14 34
14 42
14 42
14 42
14 42
13 42
13 41
13 40
13 40
13 40
13 41
13 41
14 41
15 41
15 42
15 42
16 42
16 43
16 44
16 50
14 52
14 53
9 53
8 51
6 51
6 51
6 51
6 50
6 50
6 50
6 50
6 50
6 51
6 52
6 52
6 53
6 57
6 57
6 58
6 57
5 58
5 58
5 58
5 57
5 57
6 70
6 70
6 72
6 73
6 75
6 79
6 82
6 82
6 81
6 86
7 85
8 88
8 88
8 88
8 104
8 106
8 109
8 111
8 111
8 114
8 118
8 120
8 120
9 126
9 131
10 135
10 141
12 162
12 188
12 196
13 199
13 203
13 206
13 219
13 224
12 224
12 225
12 223
12 223
12 225
12 226
12 234
12 234
12 234
12 234
12 234
12 234
12 234
12 235
12 243
12 247
12 247
12 251
12 260
12 265
13 281
13 283
13 283
13 284
13 284
13 284
14 284
14 284
14 285
14 291
14 294
13 294
13 294
12 294
12 291
12 290
11 290
11 289
11 289
10 284
10 280
10 281
10 281
10 280
10 279
10 279
10 278
10 278
10 278
10 278
10 278
10 277
10 276
10 277
10 280
10 279
10 275
10 271
10 271
10 271
10 271
10 270
10 268
10 267
10 262
9 250
9 248
9 246
9 246
9 245
9 242
9 242
8 242
6 240
7 235
7 235
6 236
6 236
6 235
6 208
6 203
6 193
6 195
6 193
6 197
6 189
6 185
6 185
6 185
6 181
6 168
6 150
4 133
4 103
4 104
4 99
4 92
4 95
4 95
4 93
4 87
4 80
4 76
4 74
4 72
4 72
4 71
4 71
4 71
4 71
5 71
5 71
5 71
5 68
5 62
5 57
5 54
5 52
6 58
6 53
4 44
4 43
4 43
4 43
4 43
4 43
4 43
4 42
4 40
4 35
4 34
4 34
4 34
4 34
4 34
4 35
5 37
5 37
5 36
5 37
8 37
8 36
8 36
8 36
8 37
8 37
8 37
8 37
8 50
9 50
9 51
9 51
9 50
9 49
9 46
9 48
9 48
9 48
9 48
9 48
9 48
9 48
9 50
9 54
9 54
9 54
9 54
9 54
9 54
9 54
9 54
8 53
8 53
8 53
8 53
8 53
8 52
8 52
8 52
8 52
8 52
8 51
8 49
8 48
8 46
8 46
8 46
7 46
7 46
7 46
7 46
7 45
7 44
7 44
7 43
7 43
7 40
7 37
7 36
7 36
7 36
7 36
7 36
7 36
7 36
7 35
7 35
7 35
7 35
7 35
6 35
6 35
6 35
6 35
6 35
6 35
6 35
6 34
5 28
5 28
5 28
5 28
5 28
5 28
5 28
5 28
5 28
5 28
5 28
5 28
5 28
5 28
5 28
5 28
5 28
4 27
4 24
4 24
4 24
4 24
1 24
1 24
1 24
1 23
1 23
1 23
1 23
1 22
1 9
1 9
0 9
0 9
0 9
0 8
0 8
0 6
0 6
0 6
0 6
0 6
0 6
0 6
0 4
0 1
0 1
0 2
0 2
0 6
0 6
0 6
0 6
0 10
3 11
3 11
3 11
3 11
3 11
3 11
3 11
3 11
3 11
3 11
3 11
3 11
3 11
3 12
4 12
4 12
4 13
4 13
4 14
4 15
5 24
5 25
5 26
5 26
5 29
5 29
5 29
5 29
5 31
5 31
5 31
5 32
5 32
5 32
5 33
5 33
5 33
5 33
5 33
5 33
5 33
5 33
5 36
5 37
5 37
5 37
5 37
5 37
5 38
5 38
5 39
5 39
5 39
5 39
5 40
5 40
5 40
5 40
5 40
5 40
5 40
6 40
6 40
6 40
6 40
6 40
6 40
6 40
6 40
6 44
6 44
6 45
7 45
7 45
7 47
7 47
7 47
7 47
7 47
7 50
7 50
7 50
7 58
7 58
7 62
7 67
7 67
7 68
7 68
7 68
7 68
7 67
7 67
7 66
7 66
7 62
7 62
9 63
6 63
6 59
6 60
6 61
6 61
6 61
6 61
6 62
6 62
6 62
6 62
6 62
6 62
6 62
6 61
6 61
5 61
5 60
5 63
5 63
5 62
5 61
4 65
4 64
4 65
4 65
4 63
4 63
4 63
4 61
4 60
4 60
4 60
4 60
4 60
4 60
4 61
4 62
4 62
4 62
4 62
4 63
4 65
4 64
4 61
4 61
4 61
4 61
4 61
4 61
4 59
4 59
4 58
4 57
4 58
4 57
4 61
4 61
4 63
4 63
4 63
4 63
4 63
3 63
3 63
3 63
3 63
3 63
3 63
3 63
3 63
3 59
4 60
4 59
3 58
3 58
3 53
3 53
3 54
3 54
3 54
3 55
3 55
3 52
3 46
3 44
3 41
3 40
3 40
3 40
3 40
3 41
3 41
3 41
3 41
3 41
3 41
3 41
3 42
1 41
1 41
1 40
1 39
1 38
1 38
1 38
1 38
1 37
1 37
1 41
1 44
1 44
1 58
1 58
1 59
1 60
1 60
1 60
1 64
1 69
1 70
1 72
1 59
1 59
1 57
1 60
1 61
1 61
1 61
1 61
1 62
1 67
1 71
1 76
1 78
1 79
1 78
1 77
1 78
1 84
1 86
1 85
1 86
1 86
1 86
1 86
1 86
1 86
1 86
1 86
1 86
1 86
1 86
1 86
1 86
1 85
1 81
1 82
1 82
1 82
1 82
1 82
1 82
1 82
1 82
1 83
1 83
1 83
1 83
1 83
1 83
1 83
0 83
0 83
0 84
0 84
0 84
0 84
0 83
0 83
0 83
0 82
0 82
0 82
0 82
0 82
0 82
0 82
0 82
0 84
0 86
2 101
2 105
2 105
2 106
2 106
2 105
2 105
2 105
2 105
2 105
2 105
2 105
2 105
2 106
2 106
2 106
2 106
2 106
2 101
2 98
2 98
2 85
2 85
2 91
2 90
2 93
2 96
2 90
2 89
2 88
2 88
2 88
2 87
2 87
2 86
2 86
2 86
2 86
2 86
2 82
2 76
2 73
2 71
2 74
2 74
2 73
2 72
2 71
2 66
2 66
2 66
2 61
2 61
2 61
2 61
2 61
2 61
2 61
2 61
2 61
2 61
2 61
2 61
2 61
2 61
2 61
2 60
2 60
2 60
2 60
2 60
2 60
2 60
2 69
2 68
2 70
2 78
2 82
2 96
2 97
2 100
2 100
2 101
2 100
2 100
2 100
2 101
2 102
2 106
2 107
2 109
2 109
2 109
2 109
0 109
0 110
0 111
0 111
0 109
0 108
0 91
0 87
0 87
0 87
0 87
0 87
0 87
0 87
0 86
0 95
0 95
0 95
0 95
0 96
0 99
0 99
0 100
0 101
0 110
0 110
0 110
0 110
0 109
0 102
0 102
0 94
0 92
0 91
0 88
0 88
0 88
0 89
0 90
0 90
0 89
1 93
1 93
1 93
1 93
[truncated: 24,792,713 more chars]
