# Supplementary material for: From Insect to Man: Photorhabdus Sheds Light on the Emergence of Human Pathogenicity
Source: PLoS One. 2015 Dec 17;10(12):e0144937. doi: 10.1371/journal.pone.0144937 (PMC4683029; doi:10.1371/journal.pone.0144937)
Supplement: S2 Data — (ZIP) [file pone.0144937.s002.zip › ATCC43949_37C_Expo_rep1.plot]

0 0
0 0
0 0
0 0
0 0
0 0
0 0
0 0
0 0
0 0
1 0
1 0
1 0
2 0
2 0
2 0
2 0
2 0
2 0
5 0
5 0
5 0
5 1
5 1
5 1
5 1
5 2
5 2
5 2
5 2
5 2
5 2
5 2
5 2
5 2
5 2
5 2
7 2
9 2
17 2
17 2
17 2
17 2
16 2
16 2
16 2
15 2
15 2
15 2
24 2
32 2
37 2
38 2
38 2
38 2
35 2
35 2
36 2
38 1
38 1
39 1
39 0
39 1
39 1
39 1
39 1
39 1
39 1
39 1
39 1
39 1
39 1
39 1
37 1
35 1
27 1
27 1
29 1
33 1
33 1
33 1
33 1
33 1
32 1
31 1
21 1
12 1
10 1
10 1
10 2
10 2
10 2
14 6
12 6
11 6
11 6
10 6
11 6
11 5
11 6
12 6
12 6
14 6
14 6
14 6
14 6
14 6
14 6
14 6
14 6
14 6
15 6
16 6
14 6
11 6
11 6
11 6
11 6
11 6
17 8
17 8
26 8
28 7
28 7
28 7
28 6
29 6
29 6
25 3
25 3
25 3
25 3
26 3
26 3
26 3
26 2
25 2
25 2
23 2
23 2
23 2
23 2
23 3
23 3
23 3
23 3
24 3
24 3
22 3
21 3
21 3
21 3
21 3
20 3
20 3
16 1
14 1
5 1
5 1
5 1
5 1
5 1
4 1
5 1
5 1
5 1
5 1
4 1
3 1
3 1
6 1
6 1
7 1
7 1
8 1
9 1
15 3
14 3
15 2
16 2
24 2
23 2
23 2
23 2
23 2
23 2
23 2
23 2
23 2
23 2
23 2
23 2
23 5
23 5
23 5
23 6
23 7
23 7
23 7
22 7
22 7
23 7
22 7
21 7
21 7
21 7
20 7
22 7
23 7
23 7
30 7
39 7
33 5
33 5
32 5
31 5
23 5
23 5
23 5
23 5
23 5
23 5
23 5
23 5
23 5
23 5
23 4
23 4
23 2
23 1
24 1
24 1
24 0
28 2
28 2
28 2
27 2
26 2
26 2
26 2
26 2
26 2
26 2
23 2
22 2
21 2
15 2
5 2
5 2
5 2
5 2
5 2
5 2
5 2
5 2
5 2
5 2
5 2
5 2
5 2
5 2
5 2
5 2
5 2
8 2
8 2
7 2
7 2
7 2
3 0
3 0
3 0
3 0
3 0
3 0
3 0
3 0
3 0
3 0
3 0
3 0
3 0
3 0
3 0
3 0
3 0
3 0
3 0
3 0
3 0
3 0
3 0
3 0
3 0
3 0
5 0
15 3
17 3
17 3
17 3
15 4
16 4
16 4
16 4
16 4
16 4
16 4
16 4
16 4
16 4
16 4
16 4
16 4
16 4
16 4
16 4
16 4
18 4
18 4
19 4
23 4
24 5
25 5
25 5
28 5
30 5
30 5
30 5
31 5
30 5
29 4
28 3
19 2
18 3
18 3
19 2
19 2
19 2
19 2
19 2
19 2
19 2
19 2
19 2
19 2
19 2
19 2
19 2
19 3
19 3
19 3
19 3
19 3
17 3
17 3
16 3
11 3
13 3
11 3
10 3
6 3
6 3
6 3
5 3
4 3
4 3
5 3
5 3
5 3
5 2
5 2
4 2
5 2
4 2
4 2
4 2
4 2
4 2
4 2
7 3
7 3
7 3
7 3
8 3
8 2
14 2
14 2
13 2
13 2
13 2
13 2
13 2
13 2
12 1
12 2
13 2
13 2
13 2
13 2
13 2
13 2
13 2
12 2
12 2
12 2
12 2
12 2
11 2
12 3
12 3
13 3
13 3
11 3
11 3
11 3
10 2
10 2
10 2
10 2
9 2
9 2
3 2
3 2
2 2
2 2
2 2
2 2
2 2
2 2
2 2
2 1
2 1
2 1
2 1
2 1
2 1
2 2
2 2
2 5
2 5
2 5
2 5
2 5
2 5
1 7
0 7
0 7
0 7
0 7
0 7
0 7
0 7
0 7
0 7
1 7
1 7
1 7
2 7
2 8
2 8
2 8
2 8
2 9
2 9
2 10
2 11
2 12
2 12
2 12
2 12
2 12
2 12
2 12
2 12
3 9
3 9
3 9
3 9
8 9
8 9
9 6
10 6
12 6
12 6
12 6
20 7
20 7
20 7
20 7
20 7
19 7
19 7
19 7
18 5
21 5
21 5
21 5
23 4
25 4
25 4
25 3
25 2
25 3
26 3
27 3
27 3
27 3
27 3
27 2
27 2
28 2
30 2
30 3
30 3
25 3
25 3
23 3
23 3
22 3
22 3
22 3
14 2
14 2
14 2
14 2
14 2
14 2
14 2
15 2
17 2
17 2
18 2
17 2
17 2
16 2
16 2
16 2
16 1
15 1
15 1
14 1
14 1
14 1
14 2
14 2
14 2
12 2
10 2
10 1
10 1
10 1
10 1
10 2
10 2
9 2
9 2
9 2
9 2
10 2
14 2
15 2
17 2
18 2
20 2
24 2
20 2
19 2
19 2
21 2
21 2
34 2
34 2
34 2
37 2
37 2
37 2
37 2
37 2
37 2
37 1
37 1
37 1
37 1
37 1
38 1
38 1
39 1
40 1
40 0
40 0
40 0
40 0
41 0
41 0
40 0
37 0
37 0
34 0
34 0
32 0
27 0
27 0
29 0
26 0
25 0
27 0
14 0
14 0
14 0
11 0
11 0
11 0
11 0
11 0
13 0
15 0
16 0
19 0
19 0
19 0
17 0
16 0
15 0
14 0
14 0
14 0
14 0
14 0
14 0
14 0
14 0
14 0
14 0
16 0
16 0
16 0
16 0
16 0
13 0
13 0
13 0
11 0
11 0
11 0
11 0
11 0
11 0
11 0
11 0
11 0
9 0
6 0
6 0
3 0
3 0
3 0
3 0
4 0
4 0
4 0
6 0
6 0
6 0
7 0
10 0
12 0
14 0
15 0
19 0
18 0
18 0
20 0
20 0
20 0
20 0
20 0
20 0
20 0
20 0
20 0
20 0
20 0
20 0
20 0
20 0
20 0
20 0
20 0
20 0
20 0
20 0
20 0
20 0
19 0
20 0
20 0
17 0
16 0
14 0
14 0
13 0
12 0
10 0
8 0
3 0
2 0
2 0
1 0
2 0
3 0
4 0
4 0
4 0
4 0
4 0
4 0
5 0
9 0
16 0
16 0
16 0
16 0
16 0
16 0
16 0
17 0
17 0
17 0
17 0
17 0
16 0
16 0
37 43
37 45
37 52
39 58
39 59
39 68
42 70
42 70
42 70
42 70
45 70
46 70
45 70
43 70
44 70
44 70
43 70
38 70
33 70
33 70
33 70
33 70
33 70
34 70
34 70
35 70
34 70
35 70
35 70
35 70
35 70
35 70
35 70
35 70
38 70
39 67
20 6
20 2
20 0
18 0
18 0
18 0
15 1
15 1
15 1
15 1
12 1
14 1
17 2
19 2
19 2
19 2
18 2
17 2
19 2
19 2
20 3
20 3
19 3
20 3
20 3
20 3
20 3
19 3
19 3
19 3
19 3
19 3
19 3
18 3
15 3
14 3
13 3
13 3
13 3
13 3
13 3
14 3
14 2
14 2
14 2
13 2
18 2
40 26
39 26
37 27
37 27
37 27
37 27
40 27
38 27
38 27
37 26
37 26
36 27
36 27
36 27
36 27
37 27
40 27
47 28
47 28
47 28
47 28
47 28
47 28
47 28
47 28
47 28
48 28
49 29
49 29
51 29
59 33
59 35
64 37
84 48
85 45
85 45
63 28
63 28
63 27
63 27
64 27
64 26
61 26
61 26
61 26
61 26
61 26
61 26
60 26
60 26
58 26
56 26
56 26
50 25
50 27
50 27
50 27
50 27
50 27
50 27
51 27
55 29
54 29
49 27
47 27
40 24
32 19
29 19
27 18
8 5
7 4
7 4
6 4
6 4
6 4
6 4
6 4
6 4
6 4
6 4
6 2
7 2
7 2
7 2
7 2
7 2
7 2
10 3
11 3
15 7
49 9
74 9
84 9
86 9
85 9
101 9
104 9
103 8
103 8
103 8
104 8
104 8
104 8
104 8
103 8
103 8
103 8
103 8
103 8
103 8
103 8
103 8
103 8
103 8
103 8
103 8
103 8
102 8
102 8
102 8
102 8
102 8
101 8
99 7
103 7
99 2
63 1
40 1
31 1
27 1
23 1
10 0
8 0
6 0
6 0
6 0
7 0
8 0
8 0
8 0
8 0
8 0
8 0
8 0
8 0
8 0
8 0
8 0
8 0
8 0
8 0
8 0
8 0
49 0
53 0
56 0
78 0
78 0
78 0
79 0
77 0
80 0
80 0
79 0
79 0
79 0
79 0
79 0
79 0
79 0
79 0
79 0
78 0
77 0
77 0
77 0
78 0
78 0
78 0
78 0
78 0
78 0
78 0
80 0
81 0
81 0
82 0
82 0
82 0
37 0
35 0
32 0
8 0
9 0
8 0
7 0
7 0
6 0
6 0
8 0
10 0
12 0
13 0
14 0
14 0
14 0
14 0
16 0
16 0
16 0
16 0
16 0
15 0
15 0
15 0
15 0
15 0
15 0
13 0
12 0
12 0
12 0
10 0
10 0
11 0
12 0
12 0
13 0
13 0
14 0
14 0
14 0
13 0
12 0
11 0
11 0
10 0
7 0
7 0
7 0
10 0
12 0
12 0
12 0
12 0
13 0
13 0
16 0
16 0
16 0
17 0
22 0
46 1
47 1
47 1
48 1
53 1
53 1
53 1
53 1
51 1
51 1
50 1
50 1
50 1
49 1
49 1
49 1
48 1
48 1
49 1
49 1
48 1
48 1
47 1
47 1
44 1
43 1
43 1
46 1
47 1
46 1
46 1
43 1
41 1
38 1
37 1
32 1
13 0
12 0
11 0
10 0
9 0
10 0
10 0
10 0
10 0
10 0
10 0
10 0
10 0
9 0
9 0
9 0
9 0
9 0
9 0
9 0
9 0
10 0
11 0
10 0
10 0
10 0
10 0
6 0
5 0
5 0
5 0
5 0
5 0
5 0
4 0
4 0
4 0
4 0
3 0
3 0
2 0
2 0
2 0
2 0
3 0
3 0
3 0
4 0
4 0
5 0
5 0
6 0
6 0
6 0
8 0
8 0
7 0
6 0
6 0
6 1
7 1
7 1
7 1
8 1
8 1
8 1
8 1
8 1
8 1
8 1
8 1
8 1
8 1
8 1
8 0
8 0
8 0
8 0
8 0
7 0
6 0
6 0
6 0
5 0
6 0
6 0
6 0
6 0
6 0
6 0
4 0
5 0
5 0
6 0
6 0
5 0
5 0
5 0
5 0
4 0
4 0
4 0
4 0
4 0
4 0
4 0
4 0
4 0
4 0
4 0
4 0
5 0
5 0
16 0
17 0
19 0
21 0
27 0
27 0
27 0
25 0
25 0
25 0
24 0
24 0
24 0
27 1
28 1
28 1
27 1
27 1
27 1
27 1
27 1
27 1
27 1
28 1
28 1
28 1
28 1
28 1
28 1
28 1
28 1
28 1
30 1
30 1
29 1
27 1
17 1
16 1
14 1
13 1
7 1
7 1
7 1
7 1
7 1
7 1
7 1
11 1
11 1
8 0
7 0
7 0
7 0
7 0
7 0
8 0
8 0
9 0
8 0
8 0
9 0
9 0
9 0
10 0
13 0
16 0
25 0
45 1
46 1
49 1
54 1
54 1
55 1
55 1
55 1
56 1
57 1
57 1
57 1
57 1
57 1
57 1
57 1
53 1
53 1
53 1
53 1
53 1
53 1
53 1
53 2
51 2
51 2
51 2
51 2
51 2
61 2
65 2
64 2
64 2
61 2
60 2
50 2
34 1
31 1
29 2
36 2
54 2
58 2
58 2
58 2
56 2
56 2
56 2
56 2
56 2
56 2
56 2
59 2
60 2
60 2
60 2
60 2
60 2
60 2
60 2
60 0
61 0
64 0
63 0
63 0
63 0
53 0
46 0
46 0
47 0
47 0
44 0
44 0
42 0
45 0
35 0
39 0
35 0
31 0
41 0
41 0
41 0
41 0
41 0
41 0
41 0
41 0
42 0
39 0
38 0
38 0
40 0
40 0
40 0
40 0
40 0
39 0
39 0
36 0
36 0
36 0
36 0
36 0
37 0
39 0
38 0
39 0
38 0
38 0
38 0
28 0
27 0
19 0
18 0
18 0
9 0
9 0
9 0
8 0
8 0
8 0
8 1
8 1
8 1
8 1
8 1
6 1
6 1
6 1
6 1
6 1
6 1
6 1
6 1
6 1
6 1
6 1
8 1
8 1
6 1
3 1
4 1
3 1
3 1
3 1
3 1
3 1
3 1
3 1
3 1
3 1
3 1
4 1
5 1
8 1
11 1
11 1
12 0
12 0
12 0
17 0
19 0
19 0
20 0
20 0
20 0
20 1
20 2
20 2
20 4
20 4
20 4
20 4
18 4
18 4
18 4
18 4
17 4
17 4
18 4
18 4
19 4
20 4
22 4
85 4
91 4
91 4
89 4
87 4
91 4
90 4
88 4
88 4
87 4
87 4
87 4
81 4
80 4
80 4
79 4
79 4
79 3
79 3
79 2
79 2
79 0
79 0
79 0
79 0
79 0
79 0
79 0
80 0
80 0
74 0
80 0
80 0
78 0
76 0
75 0
16 0
15 0
14 0
13 0
13 0
10 0
10 0
11 0
14 0
15 0
15 1
15 1
22 1
29 1
32 1
37 1
81 1
90 1
100 1
104 1
108 1
108 1
108 1
110 1
112 1
112 1
114 1
114 1
115 1
114 1
114 1
108 1
107 1
107 1
108 1
108 1
108 1
108 1
108 1
109 1
110 1
110 1
110 1
108 1
106 1
105 1
105 0
104 0
96 0
90 0
87 0
81 0
33 0
23 0
16 0
14 0
11 0
17 0
90 4
96 4
95 4
98 4
96 4
96 4
95 4
94 4
94 4
96 4
96 4
96 4
96 4
97 4
106 4
112 4
117 4
121 4
120 4
120 4
120 4
120 4
120 4
120 4
120 4
120 4
121 4
122 4
122 4
122 4
116 4
116 4
113 4
104 4
101 4
98 4
34 0
32 0
31 0
31 0
31 0
31 0
31 0
31 0
31 0
29 0
28 0
24 0
25 0
25 0
18 0
11 0
6 0
5 0
9 0
12 0
13 0
15 0
15 0
15 0
15 0
15 0
14 0
13 0
13 0
13 0
13 0
13 0
13 0
13 0
13 0
13 0
13 0
13 0
13 0
13 0
13 0
13 0
13 0
13 0
13 0
13 0
13 0
13 0
12 0
12 0
11 0
10 0
10 0
13 0
11 0
9 0
9 0
7 0
7 0
7 0
7 0
7 0
7 0
8 0
8 0
8 0
8 0
9 0
9 0
9 0
9 0
9 0
9 0
9 0
10 0
10 0
10 0
10 0
10 0
10 0
10 0
10 0
10 0
10 0
10 0
10 0
10 0
10 0
9 0
5 0
5 0
3 0
3 0
7 0
8 0
37 0
37 0
37 0
37 0
37 0
37 0
37 0
37 0
36 0
38 0
39 0
41 0
41 0
41 0
42 0
42 0
44 0
48 0
48 0
48 0
48 0
48 0
48 0
48 0
48 0
48 0
48 0
48 0
48 0
49 0
49 0
49 0
49 0
50 0
47 0
46 0
16 0
16 0
19 0
19 0
53 0
53 0
55 0
57 0
59 0
58 0
57 0
57 0
58 0
58 0
57 0
57 0
56 0
53 0
53 0
53 0
53 0
53 0
53 0
53 0
53 0
53 0
53 0
53 0
53 0
52 0
52 0
53 0
59 3
58 3
57 3
55 3
55 3
53 3
52 3
52 3
17 3
16 3
15 3
14 3
12 3
11 3
11 3
9 3
9 3
9 3
9 3
8 3
8 3
8 3
8 3
9 3
9 3
9 3
9 3
10 3
20 3
30 3
45 3
45 3
45 3
45 3
44 3
46 3
40 0
40 0
40 0
40 0
40 0
40 0
40 0
40 0
40 0
40 0
40 0
40 0
40 0
40 0
40 0
40 0
40 0
55 1
56 1
58 2
61 3
62 3
62 3
66 3
65 3
104 3
104 3
104 3
93 3
83 3
71 3
71 3
71 3
71 3
71 3
69 3
69 3
68 3
69 3
69 3
69 3
69 3
69 3
69 3
69 3
69 3
69 3
71 3
71 3
71 3
78 4
78 4
90 3
74 2
75 2
76 1
74 1
72 1
68 1
67 1
67 1
28 1
27 1
27 1
27 1
30 1
30 1
37 1
41 1
44 1
46 2
47 2
47 2
46 2
46 2
46 2
46 2
46 2
46 2
46 2
46 2
45 2
45 2
44 2
45 2
45 2
38 1
38 1
26 1
24 1
21 1
21 1
21 1
21 1
42 1
43 1
52 1
55 1
61 1
60 1
60 1
57 1
57 1
49 1
45 1
44 1
43 0
43 0
43 0
43 0
43 0
43 0
52 0
129 1
147 2
149 2
151 2
151 2
153 2
171 2
173 2
174 2
174 2
174 2
174 2
174 2
174 2
174 2
174 2
174 2
153 2
151 2
142 2
141 2
134 2
134 2
134 2
134 2
134 2
135 2
140 2
140 2
139 2
138 2
136 2
136 2
130 2
111 2
94 2
36 0
34 0
34 0
33 0
31 0
29 0
12 0
11 0
10 0
10 0
10 0
10 0
10 0
11 0
11 0
11 0
11 0
12 0
12 0
13 0
15 0
16 0
16 0
15 0
17 0
24 0
25 1
22 1
22 1
22 1
25 1
28 1
28 1
29 2
30 2
30 2
28 2
28 2
28 2
29 2
34 2
34 2
81 4
82 4
82 4
82 5
82 6
82 6
82 6
81 6
81 6
81 6
81 6
80 6
84 7
86 7
85 7
86 7
86 7
86 7
83 7
75 7
73 6
72 7
70 7
70 7
70 7
67 7
67 7
73 6
72 6
72 6
72 6
72 6
72 6
73 7
70 7
70 7
23 4
23 3
23 3
23 3
23 3
23 3
23 3
24 3
26 8
26 10
26 10
25 10
21 9
15 10
14 10
17 10
19 10
20 10
21 10
22 10
22 10
22 9
22 9
22 9
22 9
21 9
22 9
17 9
17 9
17 9
18 9
17 9
17 9
15 8
15 8
15 8
15 8
15 8
15 8
15 8
15 8
17 8
16 8
16 8
15 0
16 0
17 0
17 0
23 0
24 0
30 0
31 0
32 0
31 0
34 1
48 2
48 3
48 3
50 3
50 3
50 3
50 3
48 3
48 3
47 3
47 3
47 3
47 4
47 4
48 4
53 6
53 6
54 7
54 7
54 7
57 7
57 7
54 7
54 7
53 7
51 7
50 7
49 7
49 7
44 7
43 7
40 7
53 7
51 7
53 7
52 6
38 5
39 4
39 4
37 4
37 4
38 4
38 4
38 4
38 4
38 4
38 4
38 3
39 3
41 3
40 3
37 1
37 1
40 0
43 0
45 1
42 1
42 2
42 2
45 2
46 2
46 2
46 2
46 2
46 2
46 2
43 2
40 2
24 2
24 2
21 2
18 2
18 2
19 2
20 2
20 2
22 2
22 2
22 2
25 2
25 2
35 2
36 2
38 3
45 3
52 3
116 3
115 3
114 3
118 3
116 3
114 1
115 1
115 2
115 2
112 2
111 2
112 2
147 5
149 5
149 5
150 5
150 5
151 5
151 5
151 5
150 5
150 5
150 5
147 5
150 6
151 6
157 8
160 13
160 13
158 13
158 13
149 13
146 13
141 12
132 12
126 12
65 12
65 12
65 12
59 12
59 12
59 12
58 12
57 11
56 11
56 11
58 11
59 11
23 8
23 8
24 8
23 8
22 8
22 8
23 8
23 8
25 8
25 8
27 8
26 8
31 7
28 6
26 5
23 0
22 0
22 0
22 0
25 0
25 0
25 0
23 0
24 0
23 0
23 0
23 0
23 0
23 0
23 0
23 0
22 0
22 0
21 0
21 0
21 0
21 0
21 0
21 0
23 0
23 0
22 0
21 0
21 0
19 0
19 0
18 0
19 0
19 2
21 2
24 2
25 2
26 2
27 2
27 2
37 3
38 3
38 3
38 3
37 3
37 3
37 3
37 3
37 3
37 3
37 3
37 3
39 3
39 3
39 3
39 3
38 3
38 3
36 3
35 3
35 3
35 3
37 3
47 3
47 3
49 3
49 3
47 3
42 3
36 1
36 1
34 1
33 1
32 1
33 1
33 0
20 0
20 0
20 0
20 0
20 0
20 0
20 0
20 0
27 0
27 0
39 0
47 0
48 0
52 0
65 0
65 0
69 0
112 1
119 1
131 1
180 1
184 1
182 1
174 1
179 1
180 1
204 3
213 3
241 3
243 3
243 3
243 3
243 3
243 3
240 3
241 3
241 3
241 3
241 3
241 3
241 3
241 3
241 3
241 3
230 3
228 3
214 3
206 3
203 3
199 3
181 3
175 3
169 3
131 2
126 2
116 2
78 2
77 2
75 2
62 2
51 2
48 2
26 0
23 0
5 0
7 0
7 0
7 0
7 0
7 0
6 0
6 0
6 0
6 0
6 0
6 0
6 0
6 0
6 0
6 0
6 0
5 0
5 0
5 0
8 0
8 0
11 0
11 0
11 0
11 0
11 0
10 0
9 0
8 0
8 0
8 0
8 0
9 0
9 0
9 0
9 0
7 0
7 0
7 0
7 0
7 0
7 0
7 0
7 0
7 0
7 0
9 0
9 0
8 0
8 0
8 0
8 0
8 0
8 0
6 0
5 0
5 0
4 0
4 0
4 0
4 0
4 0
3 0
3 0
3 0
3 0
4 0
4 0
4 0
4 0
4 0
4 0
4 0
4 0
4 0
4 0
4 0
4 0
3 0
3 0
3 0
5 0
5 0
5 0
5 0
5 0
6 0
5 0
5 0
5 0
5 0
5 0
5 0
5 0
6 0
10 0
10 0
10 0
10 0
10 0
9 0
9 0
9 0
9 0
9 0
14 0
14 0
15 0
15 0
15 0
17 0
17 0
17 0
18 0
18 0
18 0
18 1
16 1
15 4
15 4
15 4
15 4
14 4
14 4
14 4
14 4
13 4
13 4
13 4
11 4
11 4
9 4
9 4
9 4
9 4
9 4
9 4
9 4
9 4
9 4
9 4
3 4
3 4
5 5
5 5
5 5
3 5
3 5
2 4
2 4
2 3
2 3
2 3
2 3
2 1
2 1
2 1
2 1
2 1
2 1
2 1
2 1
2 1
2 1
2 1
2 1
2 1
2 1
2 1
2 1
2 1
2 1
2 1
3 1
3 1
3 1
3 1
3 1
3 1
1 0
2 0
2 0
3 0
3 0
3 0
3 0
3 0
3 0
3 0
3 0
3 0
3 0
3 0
3 0
3 0
3 0
3 0
3 0
3 0
3 0
3 0
3 0
3 0
4 0
4 0
4 0
5 0
5 0
4 0
4 0
4 0
4 0
4 0
4 0
4 0
4 0
3 0
2 0
2 0
3 0
3 0
3 0
3 0
3 0
3 0
6 2
6 2
6 2
6 2
6 2
6 2
6 2
6 2
6 2
6 2
6 2
6 2
7 2
7 2
6 2
6 2
5 2
5 2
6 2
8 3
8 3
8 3
8 3
8 3
8 3
8 3
8 3
8 3
8 3
8 3
8 3
9 3
9 3
9 3
9 3
9 3
6 1
6 1
6 1
6 1
6 1
6 1
6 1
6 1
6 1
6 1
6 1
5 1
13 1
13 1
13 1
13 1
14 1
14 1
13 1
11 0
11 0
11 0
11 0
11 0
11 0
11 0
11 0
11 0
11 0
12 0
12 0
11 0
11 0
11 0
11 0
11 0
18 0
22 1
22 1
22 1
22 1
22 1
22 1
25 1
25 1
30 1
48 1
50 1
43 1
44 1
47 1
52 2
53 2
53 2
53 2
53 2
53 2
53 2
53 2
55 2
55 2
55 2
55 2
54 2
54 2
54 2
53 2
53 2
53 2
53 2
53 2
46 2
45 2
42 1
42 1
42 1
42 1
42 1
42 1
39 1
42 1
37 1
25 1
22 1
23 1
23 1
21 1
21 0
20 0
20 0
32 0
35 0
36 0
38 0
40 0
39 0
39 0
39 0
39 0
39 0
39 0
39 0
39 0
39 0
39 0
39 0
39 0
39 1
39 1
39 1
38 1
38 1
38 1
37 1
35 1
34 1
31 1
31 1
30 1
30 1
26 1
25 1
25 1
18 1
16 1
16 1
5 1
4 1
2 1
2 1
2 1
3 1
3 1
3 1
5 1
5 1
5 1
6 1
6 1
6 1
7 1
7 1
7 1
8 0
19 0
19 0
19 0
20 0
22 0
22 0
22 0
22 0
22 0
23 0
27 0
28 0
37 0
40 0
47 0
60 0
61 0
61 0
65 0
73 0
73 0
72 0
72 0
71 0
71 0
73 0
71 0
87 3
87 3
86 3
86 3
88 4
87 4
87 4
87 4
85 4
75 4
75 4
75 4
74 4
72 4
73 4
74 4
81 4
81 4
81 4
79 4
76 4
64 4
61 4
55 4
42 4
46 4
45 4
45 4
36 4
36 4
36 4
40 4
40 4
40 4
49 4
56 4
58 2
60 2
60 2
59 2
58 1
58 1
58 1
58 1
58 1
58 1
59 1
59 1
60 1
63 1
62 1
61 1
55 1
54 1
55 1
55 1
55 1
56 1
56 1
56 1
56 1
52 1
52 1
52 1
52 1
50 1
47 1
42 1
37 1
37 1
30 1
27 1
11 0
11 0
11 0
20 0
23 0
33 0
43 0
63 0
64 0
64 0
63 0
63 0
61 0
58 0
58 0
58 0
56 0
56 0
56 0
56 0
56 0
56 0
55 0
55 0
55 0
55 0
55 0
55 0
55 0
55 0
55 0
56 0
56 0
55 0
55 0
55 0
57 0
57 0
56 0
44 0
44 0
29 0
21 0
5 0
4 0
4 0
3 0
3 0
3 0
4 0
3 0
3 0
6 0
7 0
9 0
9 0
9 0
9 0
10 0
10 0
15 0
16 0
19 0
19 0
21 0
26 0
26 0
26 0
27 0
27 0
27 0
28 0
26 0
32 0
32 0
37 0
37 0
37 0
37 0
37 0
36 0
36 0
36 0
36 0
36 0
35 0
35 0
34 0
32 0
33 0
31 0
38 0
40 0
42 0
44 0
44 0
39 0
38 0
36 0
35 0
33 0
29 0
29 0
29 0
28 0
29 0
29 0
28 0
27 0
20 0
20 0
17 0
17 0
17 0
17 0
17 0
17 0
17 0
17 0
17 0
17 0
17 0
17 0
16 0
14 0
16 0
14 0
10 0
8 0
7 0
4 0
4 0
4 0
4 0
4 0
4 0
4 0
4 0
4 0
4 0
4 0
4 0
4 0
4 0
4 0
6 0
6 0
6 0
6 0
6 0
6 0
6 0
6 0
6 0
6 0
6 0
6 0
6 0
8 0
9 1
18 1
19 1
20 1
22 1
22 1
22 1
22 1
22 1
23 1
23 1
23 1
24 1
24 1
24 1
25 1
25 1
26 1
28 1
28 1
28 0
28 0
26 0
28 0
28 0
28 0
28 0
28 0
28 0
28 0
29 1
29 1
27 1
27 1
27 1
37 1
36 1
28 1
23 1
22 1
23 1
24 1
24 1
25 1
25 1
28 1
40 2
52 2
80 2
81 2
81 2
81 2
80 2
79 2
77 2
77 2
77 1
77 1
76 1
77 1
77 1
77 1
77 1
77 1
77 1
76 1
77 1
77 1
77 1
74 1
74 1
65 1
66 1
66 1
66 1
70 1
73 1
72 1
71 1
70 1
66 0
46 0
38 0
38 0
21 0
20 0
20 0
20 0
20 0
20 0
20 0
20 0
20 0
20 0
20 0
21 0
21 0
21 0
21 0
21 0
21 0
21 0
20 0
21 0
21 0
30 0
30 0
30 0
27 0
27 0
26 0
22 0
19 0
19 0
17 0
17 0
15 0
14 0
12 0
11 0
11 0
13 0
13 0
15 0
16 0
18 0
18 0
18 0
18 0
18 0
18 0
17 0
17 0
17 0
17 0
17 0
17 0
17 0
16 0
16 0
16 0
7 0
7 0
7 0
7 0
7 0
7 0
7 0
7 0
7 0
7 0
7 0
7 0
9 0
9 0
9 0
9 0
7 0
6 0
5 0
4 0
2 0
3 0
3 0
3 0
3 0
3 0
3 0
3 0
3 0
3 0
3 0
3 0
3 0
3 0
3 0
3 0
3 0
3 0
3 0
3 0
3 0
3 0
3 0
5 0
5 0
6 0
8 0
16 0
36 0
37 0
37 0
37 0
37 0
37 0
37 0
37 0
38 0
37 0
37 0
37 0
37 0
37 0
37 0
37 0
37 0
37 0
37 0
37 0
37 0
37 0
38 0
38 0
39 0
39 1
41 1
44 1
47 1
59 1
67 1
70 1
77 1
77 1
72 1
79 1
68 1
67 1
72 1
72 1
72 1
73 1
73 1
73 1
71 1
71 1
71 1
72 1
73 1
73 1
73 1
73 1
94 1
96 1
97 1
96 1
95 1
95 1
95 1
94 1
93 1
91 0
86 0
79 0
74 0
68 0
62 0
57 0
50 0
47 1
46 1
34 1
33 1
34 1
30 1
30 1
30 1
29 1
29 1
29 1
29 1
29 1
28 1
27 1
27 1
27 1
27 1
26 1
8 1
6 1
8 1
9 1
9 1
9 1
9 1
9 1
9 1
9 1
9 1
9 1
10 1
11 1
11 1
10 1
10 1
9 0
9 0
8 0
9 0
10 0
11 0
13 0
15 0
15 0
16 0
16 0
16 0
15 0
15 0
14 0
15 0
15 0
15 0
17 0
18 1
19 1
17 1
17 1
17 1
17 1
17 1
17 1
23 2
23 2
23 2
23 2
22 2
21 2
21 2
21 2
19 2
19 2
21 2
21 2
21 2
20 2
23 2
26 2
24 2
24 2
25 2
25 2
26 2
26 2
29 2
29 2
28 2
26 2
26 2
23 1
23 1
23 1
24 1
23 1
23 1
23 1
23 1
23 1
18 0
21 0
26 0
31 0
32 0
34 0
34 0
41 0
42 0
42 0
41 0
40 0
40 0
39 0
34 0
31 0
31 0
30 0
30 0
30 0
30 0
30 0
27 0
27 0
27 0
27 0
28 0
28 0
28 0
28 0
27 0
27 0
28 0
29 0
29 0
29 0
27 0
24 0
20 0
18 0
18 0
16 0
18 0
10 0
13 0
16 0
18 0
18 0
18 0
18 0
18 0
18 0
18 0
18 0
18 0
18 0
18 0
18 0
18 0
18 0
18 0
18 0
18 0
18 0
18 0
20 0
21 0
19 0
19 0
18 0
18 0
18 0
18 0
17 0
17 0
15 0
15 0
14 0
13 0
13 0
10 0
6 0
7 0
7 0
7 0
7 0
7 0
7 0
7 0
7 0
9 0
9 0
9 0
10 0
12 0
13 0
14 1
14 1
13 1
13 1
13 1
10 1
10 1
10 1
10 1
10 1
10 1
11 1
11 1
11 1
11 1
11 1
10 1
10 1
10 1
10 1
8 1
8 1
9 1
11 1
11 1
12 1
12 1
12 1
12 1
12 1
11 1
11 1
11 1
10 1
7 1
7 1
8 0
8 0
8 0
8 0
9 0
10 0
10 0
11 0
19 0
22 0
21 0
22 0
31 0
32 0
32 0
32 0
33 0
33 0
33 0
33 0
33 0
33 0
32 0
30 0
30 0
30 0
30 0
30 0
30 0
30 0
33 0
33 0
35 0
35 0
35 0
39 0
37 0
38 0
38 0
38 0
43 0
43 0
43 0
42 0
34 0
31 0
30 0
28 0
19 0
18 0
18 0
19 0
20 0
20 0
20 0
22 0
22 0
22 0
22 0
24 0
28 0
31 0
35 0
37 0
38 0
44 0
45 0
47 0
47 0
48 0
49 0
46 0
50 0
49 0
49 0
49 0
43 0
43 0
43 0
46 0
46 0
47 0
47 0
47 0
48 0
49 0
47 0
54 0
55 0
58 0
61 0
61 0
61 0
61 0
60 0
63 0
58 0
66 0
68 0
63 0
63 0
58 0
54 0
53 0
51 0
50 0
50 0
62 1
87 1
102 1
109 1
109 1
110 1
111 1
110 1
108 1
107 1
106 1
106 1
106 1
105 1
111 1
111 1
105 1
144 1
143 1
145 1
146 1
146 1
146 1
146 1
142 1
141 1
128 1
124 1
127 1
131 1
131 1
132 1
129 1
129 1
126 1
126 1
109 0
87 0
77 0
68 0
68 0
68 0
67 0
67 0
67 0
67 0
66 0
65 0
63 0
63 0
59 0
62 0
59 0
20 0
20 0
17 0
16 0
16 0
17 0
17 0
16 0
16 0
17 0
17 0
13 0
11 0
11 0
11 0
11 0
10 0
9 0
10 0
10 0
17 0
40 0
52 0
54 0
55 0
55 0
55 0
54 0
53 0
53 0
53 0
53 0
54 0
53 0
50 0
50 1
50 1
50 1
50 1
50 1
50 1
50 1
50 1
51 1
51 1
50 1
50 1
49 1
49 1
50 1
53 1
70 1
77 1
76 1
71 1
67 1
48 1
46 1
44 1
44 1
43 1
45 1
45 1
47 1
47 1
47 0
47 0
47 0
46 0
46 0
46 0
46 0
46 0
46 0
45 0
45 0
48 0
56 0
61 0
61 0
62 0
62 0
61 0
60 0
58 0
51 0
49 0
38 0
33 0
32 0
32 0
31 0
30 0
21 0
20 0
19 0
19 0
18 0
18 0
18 0
19 0
20 0
21 0
21 0
21 0
22 0
23 0
23 0
23 0
24 0
24 0
23 0
15 0
11 0
8 0
6 0
6 0
6 0
6 0
6 0
6 0
6 0
6 0
6 0
6 0
6 0
6 0
6 0
6 0
6 0
6 0
6 0
6 0
6 0
6 0
6 0
5 0
4 0
2 0
2 0
2 0
1 0
0 0
0 0
0 0
0 0
1 0
1 0
1 0
1 0
1 0
2 0
2 0
3 0
3 0
3 0
3 0
3 0
3 0
3 0
3 0
3 1
3 1
3 1
3 1
12 1
14 1
14 1
14 1
16 1
16 1
16 1
16 1
16 1
16 1
15 1
15 0
15 0
15 0
15 0
15 0
15 0
15 0
15 0
15 0
15 0
14 0
14 0
14 0
14 0
14 0
15 0
16 0
16 0
16 0
18 0
18 0
18 0
18 0
18 0
18 0
9 0
8 0
9 0
8 0
7 0
7 0
7 0
7 0
7 0
8 0
8 0
8 0
8 0
8 0
8 0
8 0
10 0
16 0
18 0
24 0
24 0
24 0
24 0
29 0
42 0
43 0
44 0
59 0
63 0
66 0
73 0
83 0
83 0
83 0
82 0
82 0
82 0
81 0
81 0
80 0
80 0
80 0
83 0
83 0
83 0
83 0
87 2
87 2
87 2
87 2
87 2
87 2
85 2
77 2
76 2
71 2
71 2
70 2
68 2
62 2
48 2
48 2
48 2
30 2
26 2
22 2
17 2
7 2
7 2
7 2
7 2
7 2
7 2
7 2
8 2
10 2
19 2
23 2
23 2
26 2
28 2
28 2
24 0
24 0
24 0
24 0
24 0
24 0
24 0
24 0
24 0
24 0
24 0
25 0
25 0
25 0
28 0
30 0
30 0
33 0
33 0
33 0
211 0
210 0
211 0
213 0
228 0
232 0
234 0
237 0
240 0
241 0
231 0
229 0
226 0
224 0
222 0
223 0
223 0
223 0
223 0
223 0
223 0
223 0
223 0
223 0
223 0
223 0
223 0
222 0
222 0
222 0
220 0
219 0
219 0
216 0
215 0
213 0
38 0
37 0
36 0
31 0
17 0
14 0
12 0
18 0
20 0
20 0
27 1
28 1
31 1
32 1
33 1
107 1
107 1
109 1
112 1
114 1
120 1
121 1
126 1
129 1
136 1
141 1
148 1
151 1
151 1
150 1
149 1
149 1
149 1
149 1
150 1
150 1
150 1
150 1
149 1
149 1
148 1
147 1
146 1
141 1
136 1
135 1
128 0
125 0
124 0
123 0
121 0
61 0
60 0
57 0
56 0
55 0
49 0
49 0
44 0
39 0
48 0
46 0
46 0
45 0
46 0
46 0
55 0
55 0
55 0
57 0
57 0
58 0
61 0
64 0
80 1
80 1
80 1
80 1
78 1
81 2
82 2
80 3
81 3
81 3
81 3
81 3
84 3
78 4
76 4
77 4
77 4
76 4
75 4
77 4
76 4
88 4
77 5
88 5
94 5
117 5
122 5
124 5
116 5
121 5
123 5
121 5
124 5
126 5
243 6
243 6
236 5
239 5
241 5
241 5
242 4
239 3
238 3
238 3
239 3
318 4
315 4
316 4
311 4
323 3
332 3
333 3
334 3
336 3
337 3
328 3
325 3
305 3
299 2
294 2
284 2
263 2
260 2
257 2
255 2
251 2
243 2
230 2
225 2
217 2
123 1
122 1
115 1
115 1
132 2
131 2
129 2
131 2
127 2
124 2
124 2
52 1
51 1
49 1
45 1
34 1
31 1
31 1
27 1
27 1
27 1
27 1
27 1
27 1
27 1
27 1
27 1
27 1
28 1
28 1
28 1
28 1
31 1
34 1
34 1
48 1
48 1
48 1
48 1
43 1
24 0
25 0
25 0
23 0
23 0
24 0
24 0
24 0
24 0
24 0
24 0
24 0
24 0
24 0
24 0
28 0
28 0
28 0
28 0
28 0
28 0
28 0
28 0
28 0
27 0
27 0
27 0
25 0
22 0
20 0
20 0
6 0
6 0
6 0
6 0
6 0
6 0
5 0
5 0
5 0
5 0
4 0
4 0
4 0
4 0
7 0
7 0
30 1
30 1
30 1
31 1
27 1
29 1
30 1
30 1
30 1
30 1
30 1
30 1
31 1
31 1
31 1
31 1
31 1
31 1
33 1
35 1
36 1
36 1
36 1
36 1
36 1
36 1
37 1
37 1
37 1
37 1
38 1
38 1
39 1
45 1
58 1
64 2
41 1
42 1
42 1
41 1
40 1
40 1
55 2
55 2
55 2
55 2
55 2
55 2
54 2
54 2
53 2
53 2
53 2
51 2
49 2
48 2
48 2
48 2
48 2
48 2
49 2
50 2
50 2
52 2
52 2
50 2
51 2
49 2
49 2
44 2
31 2
24 1
21 1
21 1
20 1
19 1
19 1
19 1
7 0
7 0
7 0
7 0
7 0
7 0
7 0
7 0
7 0
7 0
7 0
7 0
7 0
7 0
7 0
7 0
7 0
7 0
5 0
5 0
5 0
3 0
3 0
3 0
1 0
1 0
1 0
1 0
1 0
1 0
1 0
1 0
1 0
1 0
1 0
1 0
1 0
1 0
1 0
1 0
1 0
1 0
1 0
1 0
1 0
1 0
1 0
1 0
1 0
1 0
1 0
1 0
1 0
1 0
0 0
0 0
0 0
0 0
0 0
1 0
6 0
6 0
7 0
7 0
7 0
7 0
9 0
11 0
11 0
11 0
11 0
11 0
12 0
16 1
16 1
16 1
16 1
16 1
16 1
16 1
16 1
16 1
16 1
16 1
16 1
16 1
16 1
16 1
16 1
16 1
17 1
17 1
25 1
26 1
25 1
28 1
22 1
22 1
21 1
21 1
21 1
21 1
21 1
23 1
24 1
29 1
41 1
40 1
39 1
37 0
37 0
37 0
37 0
37 0
37 0
37 0
37 0
37 0
37 0
37 0
37 0
37 0
37 0
37 0
37 0
36 0
34 0
32 0
23 0
23 0
21 0
21 0
21 0
21 0
22 0
22 0
22 0
23 0
26 0
28 0
26 0
26 0
15 0
15 0
15 0
14 0
15 0
18 0
18 0
24 0
25 0
25 0
25 0
28 0
30 0
45 0
55 0
58 0
58 0
58 0
58 0
58 0
58 0
58 0
58 0
58 0
58 0
58 0
57 0
57 0
57 0
57 0
56 0
55 0
48 0
46 0
45 0
44 0
44 0
43 0
44 0
45 0
44 0
41 0
42 0
35 0
36 0
37 0
34 0
32 0
25 0
13 0
7 0
6 0
6 0
6 0
7 0
7 0
7 0
7 0
8 0
8 0
8 0
8 0
8 0
8 0
8 0
8 0
8 0
8 0
9 0
9 0
9 0
9 0
10 0
11 0
11 0
10 0
10 0
10 0
9 0
9 0
8 0
6 0
6 0
6 0
5 0
5 0
5 0
5 0
4 0
4 0
4 0
4 0
4 0
5 0
5 0
5 0
5 0
5 0
5 0
5 0
5 0
5 0
6 0
6 0
5 0
4 0
10 0
10 0
9 0
10 0
9 0
9 0
9 0
9 0
9 0
11 0
12 0
17 0
22 0
29 0
31 0
32 0
31 0
31 0
32 0
33 0
33 0
33 0
34 0
34 0
34 0
35 0
35 0
36 0
42 0
43 0
43 0
43 0
44 0
44 0
44 0
44 0
38 0
38 0
38 0
38 0
39 0
39 0
39 0
40 0
41 0
39 0
33 0
28 0
28 0
24 0
23 0
22 0
21 0
21 0
21 0
20 0
20 0
21 0
20 0
24 0
24 0
25 0
28 0
27 0
21 0
20 0
19 0
19 0
17 0
17 0
17 0
17 0
17 0
18 0
18 0
18 0
18 0
17 0
16 0
16 0
17 0
32 0
31 0
31 0
30 0
30 0
30 0
31 0
35 0
34 0
34 0
34 0
34 0
34 0
36 0
32 1
32 1
27 1
28 1
28 1
28 1
28 1
28 1
28 1
28 1
28 1
28 1
28 1
28 1
27 1
26 1
26 1
25 1
23 1
23 1
21 0
22 0
10 0
10 0
10 0
10 0
10 0
10 0
8 0
5 0
5 0
5 0
4 0
4 0
4 0
2 0
2 0
3 0
3 0
3 0
3 0
3 0
3 0
3 0
3 0
3 0
3 0
3 0
3 0
3 0
3 0
3 0
3 0
3 1
3 2
3 2
3 2
2 3
2 3
2 3
9 3
9 3
8 3
8 3
8 4
8 4
8 4
8 4
8 4
8 4
8 4
9 4
10 4
9 4
11 4
11 4
11 4
11 4
11 4
12 4
12 4
14 4
14 4
14 4
14 4
15 4
16 4
16 4
18 4
43 2
43 2
44 2
47 2
47 2
47 1
47 1
40 1
40 1
42 1
45 1
45 1
49 1
49 1
49 1
49 1
49 1
49 1
48 1
47 1
47 1
45 1
45 1
45 1
45 1
45 1
44 1
44 1
42 1
42 1
42 1
42 1
41 1
50 2
51 1
51 1
25 1
26 1
27 1
25 1
25 1
25 1
27 1
27 1
27 1
25 1
23 1
23 1
20 2
25 2
32 2
38 2
45 2
47 2
47 2
47 2
47 2
47 2
47 2
48 2
49 2
50 2
50 2
50 2
53 2
53 2
53 2
52 2
51 2
43 1
44 1
44 1
44 1
44 1
43 1
43 1
43 1
43 1
41 1
40 1
39 1
39 1
37 0
37 0
38 0
34 0
25 0
18 0
16 0
14 0
15 0
15 0
15 0
15 0
15 0
14 0
13 0
14 0
15 0
13 0
10 0
10 0
10 0
10 0
10 0
9 0
7 0
7 0
7 0
7 0
7 0
7 0
7 0
7 0
7 0
7 0
7 0
6 0
6 0
6 0
6 0
6 0
6 0
6 0
6 0
6 0
5 0
5 0
17 0
23 0
24 0
24 0
24 0
24 0
23 0
23 0
23 0
23 0
24 0
26 0
27 0
29 0
30 0
29 0
29 0
29 0
29 0
29 0
30 0
35 0
40 0
40 0
40 0
40 0
40 0
39 0
39 0
39 0
40 0
41 0
46 0
46 0
46 0
46 0
32 0
28 0
25 0
26 0
26 0
27 0
29 0
29 0
28 0
28 0
25 0
24 0
24 0
23 0
24 0
24 0
26 0
26 0
26 0
25 0
24 0
20 0
15 0
15 1
15 1
27 1
27 1
29 1
28 1
26 1
32 1
37 1
34 1
37 1
42 1
49 1
59 1
71 1
84 1
84 1
84 1
83 1
81 1
81 1
82 1
93 1
98 1
102 1
101 1
100 1
100 0
100 0
98 0
98 0
98 0
98 0
98 0
99 0
99 0
104 0
104 0
92 0
92 0
89 0
89 0
90 0
87 0
85 0
85 0
83 0
76 0
66 0
51 0
44 0
37 0
37 0
38 0
37 0
37 0
36 0
34 0
23 0
21 0
20 0
20 0
20 0
21 0
22 0
22 0
22 0
25 0
27 0
27 0
27 0
27 0
22 0
31 1
31 1
31 1
32 1
34 1
33 1
31 1
28 1
28 1
28 1
28 1
28 1
28 1
27 1
26 1
26 1
26 1
26 1
25 1
26 1
26 1
25 1
27 1
31 1
31 1
31 1
30 1
30 1
30 1
30 1
26 1
31 1
31 1
31 1
31 1
31 1
22 0
22 0
22 0
20 0
18 0
16 0
16 0
16 0
16 0
16 0
16 0
16 0
16 0
16 0
16 0
16 0
16 0
16 0
16 0
15 0
14 0
14 0
9 0
10 0
15 0
16 0
24 0
29 0
29 0
30 0
30 0
33 0
33 0
33 0
38 0
44 0
45 0
45 0
45 0
49 0
49 0
51 0
51 0
51 0
51 0
51 0
54 0
54 0
60 0
61 0
224 0
225 0
239 0
250 0
291 0
345 0
350 0
356 0
359 0
371 0
419 0
423 0
449 0
445 0
447 0
447 0
455 0
484 0
487 0
488 0
483 0
478 0
479 0
478 0
478 0
476 0
475 0
475 0
475 0
475 0
475 0
475 0
474 0
475 0
474 0
475 1
315 1
313 1
302 1
306 1
316 1
299 1
301 1
294 1
291 1
273 1
227 1
228 1
196 1
196 1
195 1
193 1
177 1
146 1
146 1
145 1
145 1
144 1
142 1
142 1
141 1
141 1
141 1
141 1
140 1
136 1
136 1
134 1
133 1
128 1
124 0
122 0
120 0
120 0
97 0
84 0
51 0
24 0
39 0
41 0
38 0
39 0
39 0
38 0
37 0
38 0
39 0
39 0
39 0
39 0
39 0
39 0
39 0
39 0
39 0
39 0
40 0
40 0
40 0
40 0
40 0
40 0
40 0
40 0
79 1
86 2
99 2
125 3
125 3
124 3
124 3
121 3
119 3
114 3
99 3
97 3
97 3
97 3
97 3
96 3
96 3
95 3
94 3
97 3
99 3
99 3
99 3
99 3
99 4
99 4
99 4
99 4
98 4
98 4
98 4
98 4
98 4
98 4
98 4
98 4
55 2
50 2
33 2
7 1
7 1
7 1
7 1
8 1
8 1
8 1
8 1
8 1
8 1
11 1
13 1
15 1
20 1
20 1
19 1
17 1
15 1
15 1
18 1
18 0
20 0
20 0
20 0
20 0
44 0
69 0
103 0
116 0
128 0
127 0
131 0
149 0
151 0
151 0
170 0
173 0
176 0
176 0
176 0
175 0
175 0
175 0
175 0
175 0
179 0
176 0
176 0
175 0
170 0
170 0
170 0
172 0
180 0
237 0
240 0
253 0
265 0
268 0
266 0
257 0
218 0
200 0
185 0
184 0
185 0
187 1
183 1
166 1
164 1
165 1
144 1
142 1
140 1
140 1
140 1
140 1
140 1
137 1
137 1
137 1
133 1
131 1
130 1
123 1
120 1
119 1
119 1
113 1
101 1
57 1
50 1
45 1
31 1
27 1
26 1
25 0
25 0
25 0
24 0
22 0
9 0
8 0
8 0
8 0
8 0
7 0
7 0
8 0
20 1
22 1
32 1
56 1
66 1
66 1
67 2
67 2
67 2
66 2
65 2
65 2
63 2
63 2
64 3
65 3
67 3
67 3
68 3
70 3
71 3
75 3
75 3
75 3
75 3
75 3
75 3
75 3
74 3
74 3
74 3
74 3
74 3
74 3
74 4
72 4
56 3
53 3
44 3
18 3
15 3
15 3
15 2
15 2
21 2
21 2
21 2
21 2
21 2
22 2
21 1
20 1
18 1
18 1
14 1
15 1
16 1
12 1
13 1
24 1
36 1
38 1
38 1
38 1
38 1
38 1
38 1
40 1
40 1
41 1
41 0
43 0
43 0
43 0
43 0
43 0
43 0
43 0
43 0
45 0
55 0
56 0
55 0
56 0
55 0
54 0
53 0
53 0
56 0
56 0
55 0
53 0
51 0
49 0
45 0
34 0
29 0
28 0
28 0
28 0
27 0
26 0
26 0
26 0
26 1
27 1
27 1
25 1
25 1
26 1
26 1
26 1
27 1
27 1
26 1
25 1
9 1
8 1
8 1
7 1
7 1
7 1
7 1
7 1
4 1
4 1
4 1
4 1
4 1
4 1
4 1
4 1
3 1
3 1
4 1
5 1
7 1
10 1
15 1
23 1
27 0
26 0
26 0
30 1
31 1
31 1
33 1
33 1
32 1
32 1
32 1
32 1
32 1
32 1
32 1
33 1
33 1
34 1
34 0
34 0
34 0
34 0
34 0
34 0
34 0
34 0
34 0
32 0
32 0
32 0
31 0
28 0
24 0
24 0
23 0
23 0
30 0
28 0
29 0
24 0
24 0
24 0
22 0
22 0
22 0
22 0
22 0
22 0
22 0
22 0
22 0
22 0
21 0
21 0
22 0
22 0
22 0
23 0
23 0
23 0
23 0
23 0
23 0
23 0
23 0
23 1
21 2
21 2
19 2
18 2
18 2
13 2
5 2
5 2
4 2
18 2
19 2
19 2
20 2
22 2
22 2
22 2
22 2
22 2
22 2
22 2
22 2
21 2
24 2
24 2
27 2
29 2
28 2
28 2
28 2
28 2
28 2
31 2
31 2
31 2
31 2
31 0
33 0
33 0
33 0
33 0
34 0
34 0
34 0
34 1
32 1
19 1
19 1
19 2
21 2
28 2
29 2
29 2
29 2
30 2
31 2
34 2
37 2
39 2
37 2
38 2
34 2
33 2
33 2
34 2
34 2
34 2
34 2
31 2
31 2
31 2
31 2
31 2
29 2
29 2
28 2
28 2
27 1
27 1
29 1
29 1
27 1
25 1
23 1
22 0
17 0
11 0
10 0
10 0
10 0
9 0
7 0
6 0
5 0
5 0
4 0
3 0
3 0
3 0
3 0
2 0
2 0
2 0
2 0
2 0
2 0
2 0
3 0
3 0
3 0
3 0
3 0
3 0
3 0
3 0
1 0
1 0
1 0
3 0
3 0
3 0
4 0
4 0
4 0
5 0
5 0
5 0
5 0
5 0
5 0
5 0
6 0
6 0
6 0
9 0
9 0
9 0
9 0
9 0
9 0
9 0
9 0
10 0
12 0
12 0
13 0
13 0
13 0
13 0
13 0
13 1
13 2
13 2
13 2
11 2
11 2
10 2
10 2
10 2
10 2
9 2
9 2
9 2
9 2
9 2
9 2
9 2
8 2
8 2
8 2
5 2
5 2
6 2
8 2
10 2
11 2
13 2
12 2
11 2
9 2
9 2
8 2
8 2
8 2
8 2
8 2
8 0
8 0
9 0
13 0
17 0
17 0
17 0
17 0
17 0
17 0
17 1
17 1
18 1
18 1
18 1
18 1
18 1
17 1
17 1
18 1
18 1
18 1
17 1
16 1
14 1
13 1
12 1
12 1
12 1
12 1
12 1
12 1
11 1
11 1
10 1
10 1
9 1
7 1
5 1
4 1
3 1
3 1
3 1
3 1
3 1
3 2
3 1
3 1
2 1
2 1
2 1
2 1
3 1
4 1
3 1
2 1
2 1
2 1
2 1
2 1
2 1
2 1
2 1
3 1
3 1
5 1
10 1
11 1
17 1
17 1
17 1
17 1
17 1
18 1
18 1
18 1
19 1
20 1
21 1
26 1
27 1
28 0
30 0
29 0
30 1
30 1
31 1
31 1
31 1
30 1
31 1
30 1
30 1
30 1
30 1
30 1
30 1
30 1
30 1
30 1
31 1
28 1
24 1
22 1
16 1
15 1
15 1
15 1
15 1
19 1
19 1
18 1
17 1
15 1
13 1
12 1
11 1
10 1
8 1
9 1
12 0
14 0
17 0
20 0
21 0
24 0
23 0
23 0
23 0
23 0
23 0
24 0
25 0
30 0
33 0
38 0
38 0
39 0
39 0
39 0
40 0
40 0
40 1
41 1
41 1
36 1
43 1
44 1
44 1
44 1
47 1
47 1
47 1
47 1
43 1
37 1
34 1
33 1
32 1
32 1
31 1
31 1
30 1
28 1
37 1
38 1
59 1
58 1
58 1
53 1
50 1
47 1
45 1
45 1
44 1
45 1
45 1
46 1
46 0
47 0
47 0
46 0
43 0
43 0
42 0
42 0
42 0
42 0
42 0
42 0
44 0
46 0
51 0
51 0
51 0
50 0
50 0
50 0
51 0
47 0
42 0
44 0
28 0
28 0
28 0
30 0
30 0
31 0
32 0
32 0
32 0
31 0
31 0
29 0
29 0
31 0
31 0
31 0
29 0
30 0
31 0
31 0
29 0
33 0
43 1
43 1
43 1
41 1
37 1
37 1
37 1
37 1
37 1
37 1
36 1
34 1
34 1
34 1
29 1
29 1
29 1
28 1
28 1
27 1
26 1
26 1
26 1
26 1
26 1
26 1
26 1
26 1
28 1
28 1
30 1
30 1
29 1
30 1
29 1
22 0
14 2
14 2
13 2
13 2
12 2
13 2
13 2
17 2
19 3
20 3
23 3
24 3
24 3
24 3
27 3
31 3
32 3
31 3
31 3
31 3
41 3
42 3
42 5
42 5
42 5
42 5
46 5
47 5
46 5
48 5
47 5
47 5
48 5
48 5
52 5
54 5
59 3
59 3
60 3
60 3
60 3
59 3
59 3
53 2
54 2
56 2
55 2
54 2
54 2
53 2
49 2
47 2
47 2
47 2
47 2
47 2
37 2
36 2
36 0
36 0
36 0
36 0
32 0
29 0
27 0
25 0
23 0
23 0
23 0
22 1
16 1
15 1
11 1
11 1
10 1
10 1
10 1
10 1
9 1
9 1
4 1
1 1
1 1
1 1
1 1
1 1
1 1
1 1
1 1
5 1
21 2
24 4
27 4
27 4
27 4
27 4
27 4
27 4
27 4
27 3
27 3
27 3
26 3
26 3
26 3
26 3
26 3
26 3
26 3
26 3
26 3
26 3
26 3
26 3
26 3
26 3
26 3
26 3
26 3
26 3
26 3
26 3
26 3
26 3
26 3
21 3
4 2
2 0
0 0
0 0
0 0
0 0
0 0
0 0
0 0
0 0
0 0
0 0
0 0
0 0
0 0
1 0
1 0
1 0
1 0
1 0
1 0
1 0
1 0
1 0
1 0
1 0
1 0
1 0
1 0
1 0
1 0
1 0
1 0
1 0
1 0
1 0
1 0
1 0
1 0
1 0
1 0
1 0
1 0
1 0
1 0
1 0
1 0
1 0
1 0
1 0
1 0
0 0
0 0
0 0
0 0
0 0
0 0
0 0
0 0
0 0
0 0
0 0
0 0
0 0
0 0
0 0
0 0
0 0
0 0
0 0
0 0
0 0
0 0
0 0
0 0
0 0
0 0
0 0
0 0
0 0
0 0
0 0
0 0
0 0
0 0
0 0
0 0
0 0
0 0
0 0
0 0
0 0
0 0
0 0
0 0
0 0
0 0
0 0
0 0
0 0
0 0
0 0
0 0
0 0
0 0
0 0
0 0
0 0
0 0
0 0
0 0
0 0
0 0
0 0
0 0
0 0
0 0
0 0
0 0
0 0
0 0
0 0
0 0
0 0
0 0
0 0
0 0
0 0
0 0
0 0
0 2
0 2
1 2
1 2
1 2
1 2
1 2
2 2
4 2
4 2
4 2
4 2
4 2
4 2
4 2
4 2
4 2
4 2
4 2
4 2
4 2
4 2
4 2
4 2
4 2
4 2
4 2
4 2
4 2
4 2
5 2
5 2
5 2
5 2
5 2
5 2
5 0
5 0
4 0
4 0
4 0
3 0
3 0
2 0
1 0
1 0
1 0
1 0
1 0
1 0
2 0
2 0
2 0
2 0
2 0
2 0
2 0
5 0
5 0
5 0
5 0
5 0
5 0
5 0
5 0
5 0
4 0
4 0
4 0
4 0
4 0
4 0
4 0
4 0
4 0
4 0
4 0
4 0
4 0
4 0
4 0
4 0
4 0
4 0
4 0
4 0
3 0
3 0
1 0
1 0
1 0
1 0
1 0
0 0
0 0
0 0
0 0
0 0
0 0
0 0
0 0
0 0
0 0
0 0
0 0
0 0
0 0
0 0
0 0
0 0
0 0
0 0
0 0
0 0
0 0
0 0
0 0
0 0
0 0
0 0
0 0
0 0
0 0
0 0
0 0
0 0
0 0
0 0
0 0
0 0
0 0
0 0
0 0
0 0
0 0
0 0
0 0
0 0
0 0
0 0
0 0
0 0
0 0
0 0
0 0
0 0
0 0
0 0
0 0
0 0
0 0
0 0
0 0
0 0
0 0
0 0
0 0
0 0
0 0
0 0
0 0
0 0
0 0
0 0
0 0
0 0
0 0
0 0
0 0
0 0
0 0
0 0
0 0
0 0
0 0
0 0
0 0
0 0
0 0
0 0
0 0
0 0
0 0
0 0
0 0
0 0
0 0
0 0
0 0
0 0
0 0
0 0
0 0
0 0
1 0
1 0
1 0
1 0
1 0
1 0
1 0
1 0
1 0
1 0
1 0
1 0
1 0
1 0
1 0
1 0
1 0
3 0
3 0
3 0
3 0
3 0
3 0
3 0
3 0
3 0
3 0
3 0
3 0
3 0
3 0
3 0
3 0
3 0
3 0
3 0
2 0
2 0
2 0
2 0
2 0
2 0
2 0
2 0
2 0
2 0
1 0
0 0
0 0
0 0
0 0
0 0
0 0
0 0
0 0
0 0
0 0
0 0
0 0
0 0
0 0
0 0
0 0
0 0
0 0
0 0
0 0
0 0
0 0
0 0
0 0
0 0
0 0
0 0
0 0
0 0
0 0
0 0
0 0
0 0
0 0
0 0
0 0
0 0
0 0
0 0
0 0
0 0
0 0
0 0
0 0
0 0
0 0
0 0
0 0
0 0
0 0
0 0
0 0
0 0
0 0
0 0
0 0
0 0
0 0
0 0
0 0
0 0
0 0
0 0
0 0
0 0
0 0
0 0
0 0
0 0
0 0
0 0
0 0
0 0
0 0
0 0
0 0
0 0
0 0
0 0
0 0
0 0
0 0
0 0
0 0
0 0
0 0
0 0
0 0
0 0
0 0
0 0
0 0
0 0
0 0
0 0
0 0
0 0
0 0
0 0
0 0
0 0
0 0
0 0
0 0
0 0
0 0
0 0
0 0
0 0
0 0
0 0
0 0
0 0
0 0
0 0
0 0
0 0
0 0
0 0
0 0
0 0
0 0
0 0
0 0
0 0
0 0
0 0
0 0
0 0
0 0
0 0
0 0
0 0
0 0
0 0
0 0
0 0
0 0
0 0
0 0
0 0
0 0
0 0
1 0
1 0
1 0
1 0
1 0
1 0
1 0
1 0
1 0
1 0
1 0
1 0
1 0
1 0
1 0
1 0
0 0
0 0
0 0
0 0
0 0
0 0
0 0
0 0
0 0
0 0
0 0
0 0
0 0
0 0
0 0
0 0
0 0
0 0
0 0
0 0
0 0
0 0
0 0
0 0
0 0
0 0
0 0
0 0
0 0
0 0
0 0
0 0
0 0
0 0
0 0
0 0
0 0
0 0
0 0
0 0
0 0
0 0
0 0
0 0
0 0
0 0
0 0
0 0
0 0
0 0
0 0
0 0
0 0
0 0
0 0
0 0
0 0
0 0
0 0
0 0
0 0
0 0
0 0
0 0
0 0
0 1
0 1
0 1
0 1
0 1
0 1
0 1
0 1
0 1
0 1
0 1
0 1
0 1
0 1
0 1
0 1
0 1
0 1
0 1
0 1
0 0
0 0
0 0
0 0
0 0
0 0
0 0
0 0
0 0
0 0
0 0
0 0
0 0
0 0
0 0
0 0
0 0
0 0
0 0
0 0
0 0
0 0
0 0
0 0
0 0
0 0
0 0
0 0
0 0
0 0
0 0
0 0
0 0
0 0
0 0
0 0
0 0
0 0
0 0
0 0
0 0
0 0
0 0
0 0
0 0
0 0
0 0
0 0
0 0
0 0
0 0
0 0
0 0
0 0
0 0
0 0
0 0
0 0
0 0
0 0
0 0
0 0
0 0
0 0
0 0
0 0
0 0
0 0
0 0
0 0
0 0
0 0
0 0
0 0
0 0
0 0
0 0
0 0
0 0
0 0
0 0
0 0
0 0
0 0
0 0
0 0
0 0
0 0
0 0
0 0
0 0
0 0
0 0
0 0
0 0
0 0
0 0
0 0
0 0
0 0
0 0
0 0
0 0
0 0
0 0
0 0
0 0
0 0
0 0
0 0
0 0
0 0
0 0
0 0
0 0
0 0
0 0
0 0
0 0
0 0
0 0
0 0
0 0
0 0
0 0
0 0
0 0
0 0
0 0
0 0
0 0
0 0
0 0
0 0
0 0
0 0
0 0
0 0
0 0
0 0
0 0
0 0
0 0
0 0
0 0
0 0
0 0
0 0
0 0
0 0
0 0
0 0
0 0
0 0
0 0
0 0
0 0
0 0
0 0
0 0
0 0
0 0
0 0
0 0
0 0
0 0
0 0
0 0
0 0
0 0
0 0
0 0
0 0
0 0
0 0
0 0
0 0
0 0
0 0
0 0
0 0
0 0
0 0
0 0
0 0
0 0
0 0
0 0
0 0
0 0
0 0
0 0
0 0
0 0
0 0
0 0
0 0
0 0
0 0
0 0
0 0
0 0
0 0
0 0
0 0
0 0
0 0
0 0
0 0
0 0
0 1
0 1
0 1
0 1
0 1
0 1
0 1
0 1
0 1
0 1
0 1
0 1
0 1
0 1
0 1
0 1
0 1
0 1
0 1
0 1
0 1
0 1
0 1
0 1
0 1
0 1
0 1
0 1
0 1
0 1
0 1
0 0
0 0
0 0
0 0
0 0
0 0
0 0
0 0
0 1
0 1
0 1
0 1
0 1
0 1
0 1
0 1
0 1
0 1
0 1
0 1
0 1
0 1
0 1
0 1
0 1
0 1
0 1
0 1
0 1
0 1
0 1
0 1
0 1
0 1
0 1
0 1
0 1
0 1
0 1
0 1
0 1
0 1
0 1
0 1
0 0
0 0
0 0
0 0
0 0
0 0
0 0
0 0
0 0
0 0
0 0
0 0
0 0
0 0
0 0
0 0
0 0
0 0
0 0
0 0
0 0
0 0
0 0
0 0
0 0
0 0
0 0
0 0
1 0
1 0
1 0
1 0
1 0
1 0
1 0
1 0
1 0
1 0
1 0
1 0
1 0
1 0
1 0
0 0
0 0
0 0
0 0
0 0
0 0
0 0
0 0
0 0
0 0
0 0
0 0
0 0
0 0
0 0
0 0
0 0
0 0
0 0
0 0
0 0
0 0
0 0
0 0
0 0
0 0
0 0
0 0
0 0
0 0
0 0
0 0
0 0
0 0
0 0
0 0
0 0
0 0
0 0
0 0
0 0
0 0
0 0
0 0
0 0
0 0
0 0
0 1
0 1
0 1
0 1
0 1
0 1
0 1
0 1
0 1
0 1
0 1
0 1
0 1
0 1
0 1
0 1
0 1
0 1
0 1
0 1
0 1
0 1
0 1
0 1
0 1
0 1
0 1
0 1
0 1
0 1
0 1
0 1
0 1
0 1
0 1
0 1
0 0
0 0
0 0
0 0
0 0
0 0
0 0
0 1
0 1
0 1
0 1
0 2
0 2
0 2
0 3
0 3
0 3
0 3
0 3
0 3
0 3
0 3
0 3
0 3
0 3
0 3
0 3
0 3
0 3
0 3
0 3
0 3
0 3
0 3
0 3
0 3
0 3
0 3
0 3
0 4
0 5
0 5
0 6
0 5
0 5
0 5
0 5
0 4
0 4
0 4
0 3
0 3
0 3
0 3
0 6
0 8
0 9
0 10
0 10
0 10
0 10
0 11
0 11
0 11
0 11
0 11
0 11
0 11
0 11
0 12
0 12
0 12
0 12
0 12
0 12
0 11
0 10
0 10
0 9
0 9
0 9
0 9
0 11
0 12
1 24
1 24
2 59
2 61
2 62
2 65
2 61
2 63
2 61
2 60
2 60
2 60
2 60
2 60
2 60
2 61
2 61
2 61
2 61
2 62
2 63
2 63
2 63
2 63
2 63
2 65
2 67
2 68
2 68
2 68
2 68
2 68
2 68
2 69
2 66
2 66
1 53
1 53
0 16
0 14
0 13
0 13
0 13
0 13
0 14
0 14
0 14
0 14
0 14
0 13
0 13
0 13
0 13
0 12
0 12
0 10
0 10
0 10
0 10
0 10
0 10
1 8
1 6
1 6
1 5
1 5
1 5
1 5
1 4
1 2
1 2
1 2
1 2
1 2
1 2
1 2
1 2
1 2
1 2
1 3
1 2
1 3
1 4
1 4
1 4
1 7
1 7
1 7
1 7
1 7
1 7
1 7
1 7
1 7
1 7
1 7
1 9
0 9
0 29
0 32
0 33
0 34
0 38
0 38
0 39
0 39
0 39
0 39
0 39
0 40
0 40
0 40
0 40
0 41
0 41
0 40
0 41
0 40
0 40
0 41
0 41
0 39
0 39
0 39
0 39
0 39
0 39
0 39
0 39
0 39
0 39
0 39
0 38
0 36
0 15
0 11
0 10
0 9
0 7
0 7
0 7
0 7
0 7
0 6
0 6
0 5
0 5
0 5
0 5
0 4
0 4
0 4
0 3
0 2
0 2
0 2
0 3
0 4
0 5
0 5
0 5
0 5
0 5
0 6
0 6
0 5
0 6
0 6
0 6
0 6
0 6
0 6
0 6
0 6
0 6
0 6
0 6
0 6
0 6
0 8
0 8
0 8
0 8
0 8
0 8
0 8
0 7
0 7
0 7
0 8
0 8
0 8
0 7
0 5
0 5
0 5
0 7
0 8
0 8
0 7
0 12
0 12
0 15
0 16
0 16
0 16
0 16
0 16
0 16
1 16
1 16
1 16
1 16
1 16
1 16
1 14
1 14
1 14
1 14
1 14
1 14
1 14
1 14
1 14
1 14
1 13
1 13
1 14
1 14
1 14
1 14
1 14
1 12
1 13
1 13
1 13
1 10
1 11
1 7
1 6
1 6
1 6
1 6
1 6
1 6
0 6
0 6
0 6
0 6
0 6
0 6
0 6
0 6
0 6
0 6
0 6
0 7
0 7
0 8
0 8
0 8
0 9
0 10
0 9
0 9
0 9
0 9
0 10
0 9
0 8
0 14
0 15
0 15
0 15
0 15
0 16
0 17
0 17
0 17
0 17
0 17
0 20
0 21
0 23
1 26
2 33
2 33
2 37
2 38
2 58
3 186
3 206
3 229
3 231
3 234
3 271
3 314
3 316
3 317
3 319
3 319
3 319
3 319
3 320
3 326
3 327
3 321
3 320
3 322
3 325
3 328
3 328
3 328
3 329
3 329
3 329
3 329
3 325
3 325
3 323
2 405
1 407
1 409
1 411
1 414
1 374
0 177
0 144
0 149
0 149
0 149
0 158
0 162
0 162
1 163
3 158
3 159
3 159
3 160
3 160
3 154
3 154
3 152
3 146
3 142
3 142
3 142
3 143
3 143
3 143
3 144
3 144
3 144
3 144
3 144
3 145
3 54
3 51
3 50
3 45
3 46
3 50
3 51
3 50
3 44
3 45
3 47
3 38
3 33
3 33
2 32
0 31
0 28
0 28
0 28
0 28
2 28
2 28
2 28
2 28
2 28
2 26
2 26
2 26
2 26
2 26
2 25
2 25
2 25
2 25
2 25
2 23
2 22
2 19
2 20
2 20
2 16
2 8
2 5
2 4
2 4
2 4
2 13
2 13
2 13
2 13
2 13
2 50
2 55
2 64
2 65
2 68
0 69
0 73
0 73
0 73
0 97
0 97
0 99
0 100
0 104
0 104
0 106
0 106
0 106
0 109
0 133
0 136
0 136
0 138
0 146
0 156
0 160
0 165
0 165
0 166
0 166
0 166
0 155
0 155
0 187
0 189
0 191
0 153
0 146
0 137
0 136
0 136
0 135
1 141
1 141
1 144
1 120
1 121
1 119
1 115
1 114
1 114
1 133
1 133
1 135
1 131
1 90
1 86
1 90
1 91
1 90
1 89
1 89
1 84
1 85
1 84
1 84
1 84
1 84
1 84
1 51
1 51
1 50
1 50
1 50
1 51
1 51
1 52
1 51
0 40
0 37
0 37
0 37
0 38
0 41
0 43
0 45
0 44
0 25
0 25
0 22
0 20
0 20
0 20
0 22
0 28
0 39
0 43
0 44
0 44
0 44
0 44
0 44
0 44
0 44
0 44
0 44
0 44
0 45
0 45
0 45
0 44
0 44
0 43
0 43
0 43
0 44
0 44
0 44
0 40
0 37
0 37
0 37
0 37
0 38
0 41
0 41
0 41
0 42
0 42
0 30
0 26
0 13
0 12
0 11
0 11
0 11
0 11
0 11
0 11
0 11
0 11
0 11
0 11
0 8
0 8
0 11
0 14
0 19
0 26
0 60
0 61
0 60
0 59
0 60
0 60
0 59
0 59
0 61
0 62
0 62
0 59
0 58
0 58
0 59
0 59
0 59
0 59
0 59
0 59
0 59
0 59
0 59
0 59
0 59
0 59
0 61
0 71
0 71
0 74
0 75
0 76
0 69
0 65
0 62
0 56
0 22
0 26
0 26
0 26
0 26
0 26
0 27
0 27
0 25
0 24
0 23
0 22
0 22
0 22
0 22
0 22
0 22
0 22
0 22
0 22
0 22
0 22
0 22
0 22
0 22
0 22
0 18
0 10
0 9
0 6
0 6
0 6
0 6
0 6
0 6
0 6
0 6
0 2
0 2
0 2
0 2
0 2
0 1
0 1
0 1
0 1
0 1
0 1
0 1
1 3
1 4
1 5
1 5
1 5
1 5
2 5
2 5
2 5
2 5
2 5
2 5
2 5
2 5
2 5
2 5
2 6
2 16
4 108
4 113
4 120
4 120
4 122
4 122
4 125
4 125
4 125
4 125
4 125
4 125
4 125
4 125
4 125
4 125
4 125
4 124
3 121
3 121
3 121
3 120
3 119
3 119
2 119
2 119
2 120
2 120
2 120
2 121
2 121
2 123
2 124
2 123
2 123
2 108
0 9
0 6
0 5
0 5
0 5
0 5
0 5
0 5
0 5
0 5
0 5
0 5
0 5
0 6
0 6
0 6
0 6
0 6
0 7
0 7
0 7
0 7
0 22
0 57
0 59
0 62
0 65
0 69
0 76
0 78
0 80
0 78
0 77
0 77
0 77
0 77
0 77
0 77
0 77
0 77
1 77
1 77
1 77
1 77
1 77
1 77
1 77
1 77
1 77
1 76
1 77
1 81
1 85
1 94
1 95
1 97
1 97
1 98
1 80
1 41
1 40
1 39
1 38
1 41
1 32
1 32
2 32
2 32
2 32
2 32
1 34
1 34
1 46
1 51
1 60
1 73
1 82
1 86
1 86
1 87
1 87
1 86
1 86
1 86
1 86
1 86
1 85
1 79
1 80
1 71
1 69
1 68
1 68
1 69
1 68
1 68
1 68
1 68
1 69
1 63
1 63
1 71
8 269
9 294
9 303
11 361
11 366
11 375
11 371
11 380
14 388
20 491
20 497
20 504
20 510
20 510
20 510
20 510
20 511
20 511
20 511
20 511
20 511
20 511
20 506
20 506
20 507
20 508
20 508
20 506
20 506
20 506
20 505
20 505
20 505
20 505
19 504
19 488
9 211
9 196
9 195
9 205
9 205
9 206
9 195
9 179
6 151
0 38
0 32
0 28
0 30
0 33
0 32
0 32
0 32
0 32
0 32
0 32
0 31
0 31
0 31
0 31
0 30
0 30
0 30
0 30
0 32
0 32
0 32
0 32
0 33
0 34
0 34
0 34
1 34
1 32
1 29
1 19
4 21
4 16
5 16
5 16
5 15
5 13
5 13
5 12
6 11
6 9
7 9
7 9
7 9
7 8
8 8
8 8
8 8
8 8
8 8
8 8
8 8
8 7
8 7
8 7
8 8
8 9
8 10
8 10
8 10
8 10
8 13
8 13
7 13
7 14
7 14
7 13
4 11
3 11
2 11
1 12
1 14
1 22
1 32
1 33
1 33
1 33
1 33
1 33
1 33
1 33
1 33
1 33
1 33
1 33
1 33
1 33
1 33
1 32
1 32
1 33
1 29
1 29
1 29
1 29
1 29
1 28
1 25
1 25
0 24
1 26
1 26
1 26
1 26
1 29
1 33
1 33
1 29
1 27
1 21
1 21
1 22
1 23
1 24
1 26
1 28
1 31
1 49
3 112
3 121
3 134
3 150
3 155
3 165
3 165
3 165
3 165
3 165
3 165
3 165
3 165
3 165
3 169
3 170
3 172
3 172
2 173
2 175
2 177
2 177
2 174
2 166
2 166
2 166
2 157
2 155
2 154
2 154
2 153
2 152
2 150
1 145
1 137
1 117
0 56
0 45
0 35
0 30
0 32
0 27
0 27
0 27
0 28
0 28
0 30
0 30
0 30
0 30
0 26
0 25
0 23
0 19
0 20
0 20
0 27
0 27
0 27
0 27
0 28
0 28
0 28
0 28
0 26
0 26
0 26
0 26
0 26
0 26
0 26
0 26
0 26
0 26
0 27
0 22
0 20
0 17
0 17
0 17
0 15
0 15
0 12
0 12
0 11
0 11
0 11
0 10
0 10
0 10
0 10
0 10
0 2
0 2
0 2
0 1
0 1
0 1
0 1
0 1
0 1
0 1
0 1
0 1
0 1
0 1
0 1
0 1
0 1
0 1
0 1
0 1
0 1
0 1
0 1
0 1
0 1
0 1
0 2
0 2
0 2
0 2
0 2
0 2
0 2
0 2
0 2
0 2
0 2
0 2
0 2
0 2
0 1
0 1
0 1
0 1
0 1
0 1
0 1
0 1
0 1
0 1
0 1
0 1
0 1
0 1
0 1
0 1
0 1
0 1
0 1
0 1
0 1
0 1
0 0
0 0
0 0
0 0
0 0
0 0
0 0
0 0
0 0
0 0
0 0
0 0
0 0
0 0
0 0
0 0
0 0
0 0
0 0
0 0
0 0
0 0
0 0
0 0
0 0
0 0
0 0
0 0
0 0
0 0
0 0
0 0
0 0
0 0
0 0
0 0
0 0
0 0
0 0
0 0
0 0
0 0
0 0
0 0
0 0
0 0
0 0
0 0
0 0
0 0
0 0
0 0
0 0
0 0
0 0
1 0
1 0
1 0
1 0
1 0
1 0
1 0
1 0
1 0
1 0
1 0
1 0
1 0
1 0
1 0
1 0
1 0
1 0
1 0
1 0
1 0
1 0
1 0
1 0
2 0
2 0
2 0
2 0
2 0
2 0
2 0
2 0
2 0
2 0
2 0
2 0
1 0
1 0
1 0
1 0
1 0
1 0
1 0
1 0
1 0
1 0
1 0
1 0
1 0
1 0
1 0
1 0
1 0
1 0
1 0
1 0
1 0
1 0
1 0
1 0
0 0
0 0
0 0
0 0
0 0
0 0
0 0
0 0
0 0
0 0
0 0
0 0
0 0
0 0
0 0
0 0
0 1
0 1
0 1
0 1
0 1
0 1
0 1
0 1
0 1
0 1
0 1
0 1
0 1
0 1
0 1
0 1
0 1
0 0
0 0
0 0
0 0
0 0
0 0
0 0
0 0
0 0
0 0
0 0
0 0
0 0
0 0
0 0
1 0
1 0
1 0
1 0
1 0
1 0
1 0
1 0
1 0
1 0
1 0
1 4
1 5
2 6
2 6
2 6
2 6
3 7
3 8
3 8
3 8
3 8
3 8
3 8
3 8
3 8
3 8
3 8
3 8
3 8
3 9
3 9
3 10
3 11
3 11
3 11
2 11
2 11
2 11
2 11
2 11
2 11
2 11
2 11
2 11
2 11
2 11
2 4
1 4
0 4
1 4
1 4
1 3
1 3
1 3
1 3
1 3
1 3
1 3
1 3
1 3
1 3
1 3
1 3
1 3
1 3
1 2
1 2
1 0
1 0
1 0
1 0
1 0
1 0
1 0
1 0
1 0
1 0
1 0
1 0
1 0
1 0
1 0
1 0
1 0
1 0
0 0
2 0
2 0
2 0
2 0
2 0
2 0
2 0
2 0
2 0
2 0
3 0
3 0
3 0
3 2
3 2
3 4
3 4
3 5
3 5
3 5
9 16
9 16
10 18
11 18
12 19
12 19
12 19
12 19
12 19
11 19
11 20
11 23
11 23
11 23
9 23
9 23
9 23
9 23
9 23
9 23
9 23
9 23
9 23
9 23
9 23
9 23
9 22
9 20
9 20
9 19
9 19
9 17
9 17
9 17
9 17
8 18
1 6
1 5
1 5
1 5
0 6
0 7
0 7
0 7
0 7
0 6
0 6
0 3
0 3
0 3
0 3
0 3
0 3
0 3
0 3
0 3
0 3
0 3
0 3
0 3
0 3
0 3
0 3
0 3
0 3
0 3
0 4
0 4
0 4
0 4
1 29
1 28
1 29
1 29
1 29
1 29
1 28
1 27
1 27
1 27
1 27
1 27
1 27
8 32
8 32
8 32
8 32
8 32
8 32
8 32
8 32
8 32
8 32
8 32
8 33
8 35
8 35
8 35
8 35
8 35
8 35
8 35
8 34
8 34
8 34
7 34
7 9
7 8
7 8
7 8
7 8
7 8
7 8
7 8
7 8
7 8
14 11
14 11
14 10
7 6
7 6
7 6
7 6
7 6
7 6
7 6
7 6
7 6
7 6
7 5
7 5
7 3
7 3
7 3
7 3
7 3
7 3
7 4
7 4
7 4
7 4
7 4
7 4
7 4
7 4
7 4
7 4
7 4
6 4
4 6
4 7
3 8
0 5
0 5
0 5
0 5
0 5
0 6
0 7
0 7
0 7
0 7
0 7
0 7
0 7
0 8
1 21
1 21
1 21
1 21
1 21
1 21
1 22
1 21
1 21
1 21
1 21
1 21
1 21
1 21
1 25
1 25
1 25
1 25
1 26
1 24
1 22
1 22
1 22
1 22
1 22
1 22
1 22
1 21
1 20
1 20
1 20
1 20
1 20
1 20
1 20
1 19
0 6
0 7
0 11
0 13
0 13
0 13
0 12
0 12
0 12
0 12
0 12
0 12
0 12
0 12
0 8
0 8
0 8
0 8
0 7
0 7
0 7
0 7
0 7
0 7
0 7
0 8
0 8
0 8
0 8
0 8
0 8
0 8
0 10
0 10
0 10
0 10
0 9
0 7
0 4
0 4
0 4
0 4
0 4
0 4
0 4
0 4
0 9
0 14
0 15
0 20
0 23
0 24
0 28
0 30
0 30
0 30
0 30
0 30
0 30
0 30
0 30
0 30
0 30
0 30
0 30
0 31
0 32
0 32
0 30
0 30
0 30
0 30
0 32
0 32
0 31
0 32
0 33
0 33
0 34
0 34
0 34
0 34
0 30
0 17
0 21
0 22
0 24
0 24
0 21
0 21
0 21
0 21
0 21
0 21
0 21
0 21
0 21
0 20
0 20
0 20
0 20
0 19
0 18
0 29
0 29
0 30
0 37
0 41
0 42
0 42
0 44
0 43
0 44
0 44
0 43
0 43
0 43
0 43
0 37
0 35
0 32
0 31
0 30
0 30
0 30
0 30
0 30
0 30
0 30
0 30
0 30
0 30
0 30
0 31
0 31
0 33
0 33
0 33
0 33
0 21
0 18
0 15
0 16
0 13
0 13
0 13
0 11
0 12
0 10
0 11
0 11
0 11
0 11
0 11
0 11
0 11
0 11
0 11
0 11
0 11
0 11
0 11
0 11
0 11
0 11
0 11
0 11
0 11
0 11
0 10
0 10
0 8
0 8
0 8
0 8
0 7
0 7
0 7
0 6
0 6
0 3
0 3
0 3
0 2
0 2
0 1
0 1
0 2
0 2
0 2
0 2
0 2
0 2
0 2
0 2
0 2
0 2
0 2
0 2
0 2
0 2
0 2
0 2
0 2
0 2
0 2
0 2
0 2
0 5
0 5
0 5
0 5
0 4
0 4
0 4
0 4
0 4
0 4
0 4
0 4
0 4
0 3
0 3
0 3
0 3
0 3
0 3
0 3
0 3
0 3
0 3
0 3
0 3
0 3
0 3
0 4
0 4
0 6
0 7
0 11
0 18
0 19
0 19
0 19
0 16
0 16
0 16
0 19
0 29
0 36
0 37
0 38
0 38
0 38
0 38
0 38
0 38
0 38
0 38
0 38
0 40
0 40
0 40
0 40
0 40
0 40
0 40
0 40
0 40
0 40
0 40
0 43
0 44
0 42
0 42
0 38
0 34
0 35
0 36
0 36
0 37
0 35
0 34
0 32
0 19
0 15
0 15
0 15
0 15
0 15
0 15
0 15
0 18
0 18
0 19
0 20
0 24
0 26
0 34
0 38
0 37
0 38
0 39
0 39
0 39
0 40
0 40
0 35
0 35
0 35
0 36
0 36
0 32
0 33
0 34
0 35
0 34
0 35
0 37
0 37
0 36
0 36
0 36
0 36
0 36
0 36
0 36
0 36
0 31
0 31
0 29
0 28
0 27
0 24
0 17
0 11
0 11
0 10
0 10
0 9
0 9
0 9
0 7
0 7
0 7
0 8
0 7
0 11
0 8
0 9
0 9
0 9
0 9
0 9
0 7
0 8
0 10
0 10
0 10
0 10
0 10
0 10
0 10
0 10
0 10
0 10
0 10
0 10
0 10
0 10
0 10
0 10
0 10
0 10
0 9
0 10
0 10
0 10
0 10
0 10
0 10
0 6
0 6
0 2
0 2
0 2
0 2
0 2
0 2
0 2
0 2
0 1
0 1
0 1
0 1
0 1
0 1
0 1
0 1
0 1
0 1
0 1
0 1
0 1
0 1
0 1
0 2
0 2
0 2
0 2
0 2
0 1
0 1
0 1
0 1
0 1
0 1
0 1
0 1
0 1
0 1
0 1
0 1
0 2
0 2
0 2
0 2
0 2
0 2
0 2
0 2
0 2
0 2
0 2
0 2
0 2
0 2
0 9
0 9
0 9
0 9
0 9
0 10
0 10
0 10
0 10
0 10
0 10
0 10
0 10
0 10
0 10
0 10
0 10
0 10
0 14
0 14
0 15
0 15
0 14
0 14
0 14
0 14
0 14
0 14
0 14
0 18
0 23
0 23
0 23
0 23
0 23
0 23
0 16
0 17
0 17
0 17
0 17
0 15
0 15
0 15
0 15
0 15
0 15
0 15
0 16
0 17
0 19
0 19
0 17
0 17
0 16
0 16
0 16
0 16
0 16
0 16
0 16
0 17
0 17
0 17
0 17
0 13
0 8
0 11
0 11
0 11
0 11
0 11
0 11
0 10
0 10
0 10
0 10
0 10
0 10
0 10
0 10
0 10
0 10
0 10
0 9
0 7
0 6
0 6
0 4
0 4
0 4
0 4
0 4
0 4
0 4
0 4
0 3
0 1
0 1
0 1
0 1
0 1
0 1
0 1
0 1
0 1
0 1
0 3
0 4
0 5
0 5
0 5
0 5
0 5
0 5
0 5
0 5
0 5
0 5
0 5
0 5
0 5
0 5
0 5
0 5
0 6
0 7
0 7
0 7
0 7
0 7
0 7
0 7
0 7
0 7
0 8
0 8
0 8
0 7
0 8
0 8
0 8
0 8
0 5
0 5
0 4
0 4
2 4
2 4
5 4
5 5
5 5
5 5
5 5
5 5
5 5
5 5
5 6
5 9
5 9
5 9
5 8
5 7
5 7
5 7
5 7
9 7
9 7
9 7
9 7
9 7
9 6
9 6
9 6
9 6
9 5
9 5
9 5
9 5
9 5
9 5
9 5
7 5
7 5
7 5
4 5
4 5
4 5
4 5
4 6
4 6
4 6
4 6
4 5
4 2
4 2
4 2
4 2
4 2
6 2
6 2
4 2
2 2
2 2
2 2
2 2
2 2
2 2
2 2
3 3
4 3
4 3
4 3
4 3
4 3
4 3
4 3
4 3
4 3
4 3
5 2
5 2
5 2
5 2
5 3
5 2
5 2
7 2
8 3
9 3
9 3
9 3
9 3
8 3
8 3
7 3
7 3
7 3
7 3
7 3
7 3
7 3
7 3
7 3
6 3
5 2
5 2
5 2
5 2
5 2
5 2
5 2
5 2
5 2
5 2
4 2
4 2
4 2
4 2
4 2
4 1
4 1
3 0
2 0
1 0
0 0
0 0
0 0
0 0
0 0
0 0
0 0
0 0
0 0
0 0
0 0
0 0
0 0
0 0
0 0
0 0
0 0
0 0
0 0
0 1
0 1
0 1
0 2
0 2
0 2
0 2
0 2
0 8
0 8
0 9
0 9
0 10
0 10
0 10
0 10
0 10
0 10
0 10
0 10
0 10
0 14
0 16
0 17
0 22
0 22
0 24
0 24
0 24
0 23
0 23
0 23
0 23
0 23
0 23
0 23
0 23
0 23
0 23
0 26
0 28
0 28
0 27
0 27
0 21
0 21
0 21
0 21
0 20
0 20
0 20
0 20
0 20
0 20
0 20
0 20
0 20
0 15
0 14
0 17
0 11
0 11
0 11
0 11
0 11
0 11
0 11
0 11
0 11
0 11
0 11
0 11
0 11
0 11
0 11
0 6
0 5
0 5
0 5
0 5
0 5
0 5
0 5
0 5
0 5
0 5
0 5
0 5
0 5
0 5
0 5
0 5
0 5
0 6
0 6
0 1
0 1
0 1
0 1
0 1
0 1
0 1
0 1
0 1
0 1
0 1
0 1
0 1
0 3
0 3
0 3
0 3
0 3
0 3
0 3
0 3
0 5
0 5
0 5
0 8
0 19
0 19
0 23
0 23
0 24
0 24
0 24
0 24
0 25
0 24
0 24
0 24
0 24
0 24
0 24
0 23
0 23
0 23
0 24
0 24
0 24
0 24
0 25
0 25
0 23
0 23
0 23
0 23
0 23
0 25
0 26
0 26
0 26
0 25
0 25
0 21
0 8
0 7
0 7
0 7
0 7
0 7
0 7
0 7
0 6
0 6
0 6
0 6
0 6
0 6
0 6
0 8
0 8
0 8
0 7
0 8
0 9
0 9
0 8
0 8
0 8
0 8
0 7
0 7
0 7
0 5
0 4
0 4
0 4
0 4
0 4
0 4
0 4
0 4
0 4
0 4
0 4
0 4
0 4
0 4
0 4
0 4
0 4
0 4
0 4
0 4
0 4
0 1
0 1
0 0
0 0
0 0
0 0
0 0
0 0
0 0
0 0
0 0
0 0
0 0
0 0
0 0
0 0
0 0
0 0
0 0
0 0
0 0
0 0
0 0
0 0
0 0
0 0
0 0
0 0
0 0
0 0
0 0
0 0
0 3
0 7
0 8
0 9
0 10
0 10
0 12
0 12
0 12
0 12
0 12
0 12
0 12
0 12
0 12
0 12
0 12
0 12
0 12
0 12
0 12
0 12
0 12
0 12
0 12
1 13
1 14
1 15
1 18
1 18
1 18
1 18
1 18
1 18
1 18
1 18
1 14
1 9
1 8
1 8
1 8
1 8
1 6
1 7
1 7
1 7
1 7
1 7
1 7
1 7
1 7
1 7
1 7
1 7
1 7
1 7
1 7
2 10
2 13
2 19
2 22
1 23
1 22
1 20
1 18
1 19
1 19
1 20
1 21
1 23
1 23
1 25
1 25
1 25
1 26
2 32
2 32
2 32
2 32
2 31
2 31
2 31
2 31
2 31
2 31
2 31
2 31
2 31
2 31
2 31
2 31
2 31
2 28
1 26
1 23
1 20
1 18
1 16
1 16
1 16
1 16
1 14
1 14
1 14
1 13
1 11
1 11
1 8
1 9
1 9
1 8
0 3
0 3
0 3
0 3
0 4
0 6
0 11
0 13
0 16
0 16
0 15
0 15
0 15
0 15
0 15
0 15
1 15
1 15
1 15
1 15
1 15
1 14
1 14
1 14
1 14
1 14
1 14
1 14
1 14
1 14
1 14
1 14
1 14
1 13
1 13
1 13
1 18
1 19
1 19
1 20
1 19
1 17
1 11
1 10
1 9
1 9
1 9
1 9
1 9
1 9
1 9
0 9
0 9
0 9
0 9
0 9
0 9
0 9
0 9
0 9
0 9
0 9
0 9
0 9
0 9
0 9
0 9
0 9
0 9
0 9
0 9
0 7
0 3
0 2
0 2
0 2
0 2
0 2
0 0
0 0
0 0
0 0
0 0
0 0
0 0
0 0
0 0
0 0
0 0
0 0
0 0
0 1
0 1
0 1
0 1
0 1
0 1
0 2
0 2
0 3
0 3
0 3
0 3
0 3
0 3
0 3
0 3
0 3
0 6
0 7
0 7
0 9
0 18
0 23
0 24
0 24
0 27
0 32
0 39
0 39
0 39
0 39
0 39
0 39
0 39
0 39
0 39
0 39
0 40
0 40
0 41
0 41
0 41
0 40
0 40
0 39
0 39
0 40
0 40
0 40
0 40
0 40
0 40
0 40
0 39
0 37
0 37
0 33
0 17
1 12
1 12
1 10
1 10
1 9
1 9
1 9
1 9
1 9
1 12
1 12
1 12
1 12
1 12
1 11
1 9
1 9
1 9
1 9
1 9
1 9
1 8
1 8
1 8
1 8
1 8
1 8
1 8
1 8
1 8
1 6
1 6
1 6
1 7
1 7
1 6
0 5
0 4
0 4
0 4
0 3
0 3
0 2
0 2
0 2
0 2
0 2
0 2
0 2
0 2
0 2
0 2
0 2
0 2
0 2
0 2
0 2
0 2
0 2
0 2
0 2
0 2
0 3
0 3
0 3
0 3
0 3
0 4
1 4
1 3
1 3
1 3
1 3
1 3
1 3
1 3
1 3
1 2
1 2
1 2
1 2
1 2
1 2
1 2
1 2
1 2
1 2
1 2
1 2
1 2
1 2
2 7
2 9
2 10
2 10
2 10
2 10
2 10
2 9
2 9
2 9
2 9
2 8
2 8
1 8
1 8
1 8
1 8
1 8
1 9
1 9
1 9
1 9
1 9
1 9
1 9
1 9
1 9
1 9
1 9
1 12
1 12
1 12
1 12
1 14
1 14
1 15
0 11
0 10
0 9
0 9
0 9
0 9
0 9
0 9
0 9
0 9
0 9
0 9
0 9
0 10
0 9
0 9
0 8
0 9
0 8
0 9
0 9
0 9
0 9
0 9
0 9
0 9
0 9
0 9
0 9
0 8
0 7
0 7
0 7
0 6
0 6
0 4
0 3
0 3
0 3
0 3
0 3
0 3
0 3
0 3
0 3
0 3
0 5
0 5
0 5
0 4
0 4
0 4
0 4
0 3
0 3
0 2
0 2
0 2
0 2
0 2
0 2
0 3
0 3
0 3
0 3
0 3
0 3
0 3
0 3
0 3
0 3
0 3
0 3
0 3
0 3
0 3
0 2
0 2
0 2
0 2
0 2
0 4
0 2
0 4
0 4
0 4
0 5
0 6
0 7
0 7
0 7
0 8
0 8
0 9
0 9
0 9
0 9
0 9
0 9
0 9
0 9
0 9
0 9
0 9
0 9
0 9
0 9
0 9
0 9
0 9
0 9
0 8
0 9
0 9
0 9
0 8
0 8
0 7
0 7
0 6
0 6
0 6
0 5
0 4
0 3
0 3
0 3
0 2
0 2
0 2
0 2
0 2
0 2
0 2
0 2
0 2
0 2
0 2
0 2
0 2
0 3
0 3
0 3
0 3
0 3
0 3
0 3
0 3
0 2
0 2
0 2
0 2
0 2
0 2
0 2
0 1
0 1
0 1
0 1
0 1
0 1
0 1
0 1
0 1
0 1
0 1
0 1
0 1
0 1
0 1
0 1
0 1
0 1
0 7
0 7
0 7
0 6
0 6
0 6
0 6
0 6
0 7
0 7
0 7
0 7
0 8
0 8
0 8
0 8
0 8
0 8
0 8
0 8
0 20
0 31
0 35
0 36
0 37
0 39
0 39
0 41
0 44
0 44
0 44
0 44
0 44
0 45
0 46
0 47
0 41
0 41
0 41
0 42
0 42
0 46
0 49
0 78
0 77
0 79
0 79
0 79
0 78
0 78
0 78
0 78
0 78
0 78
0 78
0 76
0 63
0 53
0 47
0 46
0 46
0 46
0 46
0 45
0 42
0 42
0 42
0 42
0 42
0 40
0 40
0 39
0 39
0 39
0 39
0 38
0 37
0 32
0 30
0 2
0 2
0 0
0 0
0 0
0 0
0 0
0 0
0 0
0 0
0 0
0 0
0 0
0 0
0 0
0 0
0 0
0 0
0 0
0 0
0 0
0 0
0 0
0 0
0 0
0 0
0 0
0 0
0 0
0 0
0 0
0 1
0 1
0 1
0 1
0 2
0 2
0 2
0 2
0 2
0 2
0 2
0 2
0 2
0 2
0 2
0 2
0 2
0 2
0 2
0 2
0 2
0 2
0 2
0 2
0 2
0 2
0 2
0 2
0 2
0 2
0 2
0 2
0 5
0 5
0 6
0 6
0 5
0 5
0 5
0 5
0 4
0 5
0 5
0 5
0 6
0 6
0 6
0 6
0 6
0 6
0 6
0 6
0 7
0 7
0 7
0 7
0 7
0 7
0 7
0 7
0 7
0 7
0 7
0 7
0 7
0 7
0 7
0 6
0 3
0 3
0 3
0 2
0 2
0 2
0 2
0 2
0 3
0 3
0 3
0 3
0 2
0 2
0 2
0 2
0 2
0 2
0 2
0 1
0 1
0 1
0 1
0 1
0 1
0 3
0 3
0 3
0 3
0 5
0 5
0 6
0 6
0 6
0 6
0 6
0 6
0 6
0 6
0 6
0 6
0 6
0 6
0 6
0 5
0 5
0 5
0 5
0 5
0 5
0 5
0 5
0 5
0 5
0 5
0 5
0 5
0 5
0 5
0 5
0 5
0 3
0 2
0 2
0 2
0 1
0 1
0 0
0 0
0 0
0 0
0 0
0 0
0 0
0 0
0 0
0 0
0 0
0 0
0 0
0 0
0 0
0 0
0 0
0 0
0 0
0 0
0 0
0 0
0 0
0 0
0 0
0 0
0 0
0 0
0 0
0 0
0 0
0 0
0 0
0 1
0 1
0 1
0 1
0 1
0 1
0 2
0 2
0 2
0 2
0 2
0 2
0 2
0 2
0 2
0 2
0 2
0 2
0 2
0 2
0 2
0 2
0 2
0 2
0 2
0 2
0 2
0 5
0 5
0 16
0 17
0 18
0 19
0 20
0 20
0 21
0 20
0 21
0 21
0 21
0 21
0 21
0 20
0 20
0 20
0 20
0 20
0 20
0 20
0 20
0 20
0 20
0 20
0 20
0 20
0 20
0 20
0 20
0 20
0 20
0 20
0 20
0 20
0 17
0 17
0 3
0 2
0 1
0 0
0 0
0 0
0 0
0 0
0 0
0 0
0 0
0 0
0 0
0 0
0 0
0 0
0 0
0 0
0 0
0 0
0 0
0 0
0 0
0 1
0 1
0 1
0 1
0 1
0 1
0 1
0 1
0 1
0 1
0 1
0 1
0 1
0 1
0 1
0 1
0 1
0 1
0 1
0 1
0 1
0 1
0 1
0 1
0 1
0 1
0 1
0 1
0 1
0 1
0 1
0 1
0 1
0 1
0 1
0 1
0 0
0 1
0 4
0 11
0 13
0 14
0 14
0 14
0 14
0 14
0 15
0 16
0 16
0 16
0 16
0 16
0 16
0 16
0 16
0 16
0 16
0 16
0 16
0 16
0 16
0 16
0 16
0 17
0 17
0 17
0 17
0 18
1 20
3 29
3 30
3 30
3 33
3 32
3 28
3 23
3 21
3 21
3 21
3 21
3 21
3 20
3 20
3 19
3 19
3 19
3 19
3 19
3 19
3 19
3 19
3 19
3 19
3 19
3 19
3 20
3 21
3 21
3 21
3 20
3 19
3 19
2 19
2 18
2 16
0 3
0 2
0 2
0 2
0 2
0 2
0 2
0 2
0 2
0 4
0 7
0 7
0 7
0 8
0 8
0 8
0 8
0 8
0 8
0 8
0 11
0 12
0 12
0 12
0 12
0 12
0 10
0 10
0 10
0 10
0 10
0 11
0 11
0 11
0 11
0 13
0 16
0 16
0 17
0 19
0 23
0 24
0 23
0 24
0 24
0 23
0 21
0 21
0 21
0 19
0 19
0 19
0 19
0 19
0 19
0 19
0 18
1 22
1 23
1 23
1 23
1 23
1 23
1 23
1 23
1 23
1 23
1 23
1 23
1 23
1 23
1 21
1 17
1 16
1 15
1 13
1 10
1 10
1 10
1 9
1 9
1 9
1 10
1 11
1 10
1 10
1 10
1 10
1 10
1 11
1 11
1 11
1 11
0 6
0 5
0 5
0 5
2 8
2 8
2 8
2 8
2 8
2 7
2 7
2 7
2 7
2 7
2 7
2 7
2 7
2 7
2 7
2 6
2 6
2 5
2 4
2 4
2 4
2 4
2 4
2 4
2 4
2 4
2 4
2 5
2 4
2 4
2 4
1 4
1 4
1 4
1 4
1 4
0 1
0 1
0 1
0 1
0 1
0 1
0 1
0 1
0 1
0 1
0 1
0 1
0 1
0 1
0 1
0 1
0 1
0 1
0 1
0 1
0 1
0 7
0 7
0 10
0 10
0 13
0 12
0 13
0 14
0 15
0 16
0 16
0 16
0 16
0 16
0 16
0 16
0 16
0 16
0 16
0 16
0 16
0 16
0 16
0 16
0 16
0 16
0 16
0 16
0 16
0 16
0 16
0 18
0 18
0 22
0 22
0 21
0 15
0 15
0 13
0 12
0 9
0 9
0 8
0 7
0 6
0 6
0 4
0 4
0 4
0 4
0 4
0 4
0 4
0 4
0 4
0 4
0 4
0 4
0 4
0 4
0 4
0 4
0 4
0 4
0 4
0 4
0 4
0 4
0 4
0 0
0 0
0 0
0 0
0 0
0 0
0 0
0 0
0 0
0 0
0 0
0 0
0 0
0 0
0 0
0 1
0 1
0 1
0 1
0 1
0 1
0 1
0 1
0 1
0 1
0 1
0 1
0 1
0 1
0 1
0 3
0 3
0 3
0 3
0 3
0 3
0 3
0 3
0 3
0 3
0 3
0 3
0 3
0 3
0 3
0 2
0 2
0 2
0 2
0 2
0 2
0 2
0 2
0 3
0 4
0 4
0 4
0 4
0 4
0 4
0 4
0 4
0 4
0 5
0 5
0 5
0 3
0 3
0 3
0 3
0 3
0 3
0 3
0 3
0 3
0 3
0 3
0 3
0 3
0 3
0 3
0 3
0 3
0 4
0 4
0 4
0 4
0 4
0 4
0 3
0 2
0 2
0 2
0 2
0 2
0 2
0 2
0 2
0 2
0 1
0 1
0 1
0 1
0 2
0 2
0 2
0 2
0 2
0 2
0 2
0 2
0 2
0 2
0 2
0 3
0 3
0 3
0 3
0 3
0 2
0 2
0 2
0 2
0 2
0 2
0 2
0 2
0 2
0 3
0 3
0 3
0 3
0 3
0 3
0 3
0 3
0 3
0 3
0 3
0 2
0 2
0 2
0 2
0 2
0 2
0 2
0 2
0 2
0 2
0 2
0 1
0 1
0 1
0 1
0 1
0 1
0 1
0 1
0 1
0 1
0 1
0 1
0 1
0 1
0 0
0 0
0 0
0 0
0 0
0 0
0 0
0 0
0 0
0 0
0 0
0 0
0 0
0 0
0 0
0 0
0 0
0 0
0 0
0 0
0 0
0 0
0 0
0 0
0 0
0 0
0 0
0 0
0 0
0 0
0 0
0 0
0 1
0 1
0 1
0 1
0 1
0 1
0 1
0 1
0 2
0 2
0 2
0 2
0 5
0 5
0 5
0 5
0 5
0 5
0 5
0 5
0 5
0 5
0 5
0 5
0 5
0 5
0 5
0 5
0 5
0 5
0 5
0 5
0 5
0 5
0 5
0 5
0 4
0 4
0 4
0 4
0 4
0 4
0 4
0 4
0 3
0 3
0 3
0 3
0 1
0 1
0 1
0 1
0 1
0 1
0 1
0 1
0 1
0 1
0 1
0 1
0 1
0 1
0 1
0 1
0 1
0 1
0 1
0 1
0 1
0 1
0 1
0 1
0 1
0 1
0 1
0 1
0 1
0 1
0 1
0 1
0 1
0 1
0 1
0 1
0 0
0 0
0 0
0 0
0 0
0 0
0 0
0 0
0 0
0 0
0 0
0 0
1 0
1 0
1 0
1 0
1 0
1 0
1 0
1 0
1 0
1 0
1 0
1 0
1 0
1 0
1 0
1 0
0 0
0 1
0 1
0 1
0 1
0 1
0 1
0 1
0 1
0 1
0 1
0 1
0 1
0 1
0 1
0 1
0 1
0 1
0 1
0 1
0 1
0 1
0 1
0 1
0 1
0 1
0 1
0 1
0 1
0 1
0 1
0 1
0 1
0 1
0 1
0 1
0 1
0 0
0 0
0 0
0 0
0 0
0 0
0 0
0 0
0 0
0 0
0 0
0 0
0 0
0 0
0 0
0 0
0 0
0 0
0 0
0 0
0 0
0 0
0 0
0 0
0 0
0 0
0 0
0 0
0 0
0 0
0 0
0 0
0 0
0 0
0 0
0 0
0 0
0 0
0 0
0 0
0 0
0 0
0 0
0 0
0 0
0 0
0 0
0 0
0 0
0 0
0 0
0 1
0 1
0 1
0 1
0 1
0 1
0 1
0 1
0 1
0 1
0 2
0 2
0 2
0 2
0 2
0 3
0 3
0 3
0 3
0 3
0 3
0 3
0 3
0 3
0 3
0 3
0 3
0 3
0 3
0 3
0 3
0 3
0 3
0 3
0 3
0 3
0 2
0 2
0 2
0 2
0 2
0 2
0 2
0 2
0 2
0 2
0 1
0 1
0 1
0 0
0 0
0 0
0 1
0 1
0 1
0 3
0 4
0 4
0 5
0 7
0 7
0 7
0 8
0 8
0 8
0 9
0 9
0 9
0 9
0 9
0 9
0 9
0 9
0 11
0 11
0 12
0 11
0 11
0 11
0 11
0 11
0 11
0 11
0 11
0 11
0 11
0 11
0 11
0 11
0 11
0 11
0 9
0 7
0 7
0 6
0 5
0 5
0 5
0 5
0 5
0 5
0 4
0 4
0 4
0 4
0 4
0 4
0 4
0 4
0 1
0 0
0 0
0 0
0 0
0 0
0 0
0 0
0 0
0 0
0 0
0 0
0 0
0 0
0 0
0 0
0 0
0 0
0 0
0 0
0 0
0 0
0 0
0 0
0 0
0 0
0 0
0 0
0 0
0 0
0 0
0 0
0 0
0 0
0 0
0 0
0 0
0 0
0 0
0 0
0 0
0 0
0 0
0 0
0 0
0 0
0 0
0 0
0 0
0 0
0 0
0 0
0 0
0 0
0 0
0 0
0 0
0 0
0 0
0 0
0 0
0 0
0 0
0 0
0 0
0 0
0 0
0 0
0 0
0 0
0 0
0 0
0 0
0 0
0 0
0 0
0 0
0 0
0 0
0 2
0 2
0 2
0 2
0 2
0 2
0 2
0 2
0 2
0 2
0 2
0 2
0 2
0 2
0 2
0 2
0 2
0 2
0 2
0 2
0 2
0 2
0 3
0 3
0 3
0 3
0 3
0 3
0 3
0 3
0 3
0 3
0 3
0 3
0 3
0 3
0 2
0 3
0 3
0 3
0 3
0 3
0 3
0 3
0 4
0 4
0 5
0 6
0 6
0 6
0 6
0 6
0 6
0 6
0 6
0 6
0 6
0 6
0 5
0 5
0 5
0 5
0 5
0 5
0 5
0 5
0 5
0 5
0 5
0 5
0 4
0 4
0 3
0 3
0 3
0 3
0 4
0 4
0 4
0 4
0 3
0 2
0 2
0 1
0 1
0 1
0 1
0 1
0 1
0 1
0 1
0 1
0 1
0 1
0 1
0 1
0 1
0 1
0 1
0 1
0 1
0 1
0 1
0 1
0 1
0 1
0 1
0 1
0 1
0 1
0 1
0 0
0 0
0 0
0 0
0 0
0 0
0 0
0 0
0 0
0 0
0 0
0 0
0 0
0 0
0 1
0 1
0 1
0 1
0 1
0 1
0 1
0 1
0 1
0 1
0 1
0 1
0 1
0 1
0 1
0 1
0 2
0 2
0 2
0 2
0 2
0 2
0 2
0 2
0 2
0 2
0 2
0 2
0 2
0 2
0 2
0 2
0 2
0 2
0 2
0 1
0 1
0 1
0 1
0 1
0 1
0 1
0 1
0 1
0 1
0 1
0 1
0 1
0 1
0 1
0 1
0 1
0 0
0 0
0 0
0 0
0 0
0 0
0 0
0 0
0 0
0 0
0 0
0 0
0 0
0 0
0 0
0 0
0 0
0 0
0 0
0 0
0 0
0 0
0 0
0 0
0 0
0 0
0 0
0 0
0 1
0 1
0 1
0 1
0 1
0 1
0 1
0 1
0 1
0 1
0 1
0 1
0 1
0 1
0 1
0 1
0 1
0 1
0 1
0 2
0 2
0 2
0 2
0 2
0 2
0 2
0 2
0 2
0 2
0 2
0 2
0 2
0 2
0 2
0 1
0 1
0 1
0 1
0 1
0 1
0 1
0 2
0 2
0 4
0 4
0 4
0 4
0 4
0 4
0 4
0 4
0 4
0 4
0 4
0 4
0 3
0 3
0 3
0 3
0 3
0 3
0 3
0 3
0 3
0 3
0 3
0 3
0 3
0 3
0 3
0 3
0 3
0 3
0 3
0 3
0 3
0 3
0 2
0 3
0 1
0 1
0 1
0 1
0 1
0 1
0 1
0 1
0 1
0 1
0 1
0 1
0 1
0 1
0 1
0 1
0 1
0 1
0 1
0 1
0 1
0 1
0 1
0 1
0 1
0 1
0 1
0 1
0 1
0 1
0 1
0 1
0 1
0 1
0 1
0 0
0 0
0 0
0 0
0 0
0 0
0 0
0 0
0 0
0 0
0 0
0 0
0 0
0 0
0 0
0 0
0 0
0 0
0 0
0 0
0 0
0 0
0 0
0 0
0 0
0 0
0 0
0 0
0 0
0 0
0 0
0 0
0 0
0 0
0 0
0 0
0 0
0 0
0 0
0 0
0 0
0 0
0 0
0 0
0 0
0 0
0 0
0 0
0 2
0 2
0 2
0 2
0 2
0 2
0 2
0 2
0 2
0 2
0 2
0 2
0 2
0 2
0 2
0 2
0 2
0 2
0 2
0 2
0 2
0 2
0 2
0 2
0 2
0 2
0 2
0 2
0 2
0 2
0 2
0 2
0 2
0 2
0 2
0 1
0 0
0 0
0 0
0 0
0 0
0 0
0 0
0 0
0 0
0 0
0 0
0 0
0 0
0 0
0 0
0 0
0 0
0 0
0 0
0 0
0 0
0 0
0 0
0 0
0 0
0 0
0 0
0 0
0 0
0 0
0 0
0 0
0 0
0 0
0 0
0 0
0 0
0 0
0 0
0 0
0 1
0 1
0 1
0 1
0 1
0 1
0 1
0 1
0 1
0 1
0 2
0 2
0 2
0 2
0 2
0 2
0 2
0 3
0 4
0 4
0 5
0 5
0 5
0 5
0 5
0 5
0 5
0 5
0 5
0 5
0 5
0 5
0 5
0 5
0 5
0 5
0 4
0 4
0 4
0 4
0 6
0 6
0 6
0 6
0 6
0 6
0 5
0 5
0 5
0 5
0 5
0 6
0 6
0 4
0 4
0 3
0 3
0 3
0 3
0 3
0 3
0 3
0 3
0 3
0 3
0 3
0 3
0 3
0 3
0 3
0 3
0 3
0 3
0 3
0 3
0 2
0 1
0 1
0 1
0 1
0 1
0 1
0 2
0 2
0 3
0 4
0 4
0 3
0 3
0 3
0 3
0 3
0 3
0 3
0 3
0 3
0 3
0 3
0 3
0 3
0 3
0 3
0 3
0 3
0 3
0 3
0 3
0 3
0 3
0 3
0 3
0 3
0 3
0 3
0 3
0 3
0 3
0 3
0 0
0 0
0 0
0 0
0 0
0 0
0 0
0 0
0 0
0 0
0 0
0 0
0 0
0 0
0 0
0 0
0 1
0 1
0 1
0 1
0 1
0 1
0 1
0 1
0 1
0 1
0 1
0 1
0 1
0 1
0 1
0 1
0 1
0 1
0 1
0 1
0 1
0 1
0 1
0 1
0 1
0 1
0 1
0 1
0 1
0 1
0 1
0 1
0 1
0 1
0 3
0 3
0 4
0 4
0 6
0 6
0 7
0 9
0 12
0 12
0 12
0 12
0 12
0 12
0 12
0 12
0 12
0 12
0 12
0 12
0 12
0 12
0 12
0 13
0 13
0 13
0 13
0 13
0 13
0 13
0 13
0 13
0 13
0 13
0 13
0 12
0 11
0 11
0 9
0 9
0 7
0 7
0 6
0 2
0 1
0 3
0 3
0 3
0 3
0 3
0 3
0 3
0 3
0 3
0 3
0 3
0 3
0 3
0 3
0 2
0 2
0 2
0 2
0 2
0 2
0 2
0 2
0 2
0 2
0 2
0 2
0 2
0 2
0 2
0 2
0 2
0 2
0 3
0 3
0 3
0 3
0 1
0 1
0 1
0 1
0 1
0 1
0 1
0 1
0 1
0 1
0 1
0 1
0 1
0 1
0 1
0 1
0 1
0 1
0 1
0 1
0 1
0 1
0 1
0 1
0 1
0 1
0 1
0 2
0 2
0 2
0 2
0 2
0 1
0 1
0 1
0 1
0 1
0 1
0 3
0 3
0 3
0 3
0 3
0 3
0 3
0 3
0 3
0 4
0 4
0 5
0 5
0 5
0 6
0 6
0 6
0 6
0 6
0 6
0 6
0 6
0 6
0 6
0 5
0 5
0 5
0 5
0 5
0 5
0 5
0 5
0 5
0 5
0 5
0 3
0 3
0 5
0 6
0 11
0 11
0 11
0 11
0 11
0 11
0 8
0 8
0 8
0 8
0 8
0 8
0 8
0 8
0 8
0 8
0 8
0 8
0 8
0 8
0 9
0 9
0 9
0 9
0 9
0 10
0 10
0 10
0 10
0 10
0 10
0 10
0 10
0 10
0 9
0 8
0 3
0 3
0 3
0 3
0 3
0 3
0 3
0 3
0 3
0 3
0 3
0 3
0 3
0 3
0 3
0 3
0 3
0 2
0 2
0 2
0 2
0 2
0 2
0 2
0 2
0 1
0 1
0 1
0 1
0 2
0 2
0 2
0 1
0 1
0 1
0 1
0 1
0 1
0 1
0 1
0 1
0 1
0 1
0 1
0 1
0 1
0 1
0 1
0 1
0 1
0 1
0 1
0 1
0 1
0 1
0 1
0 1
0 1
0 1
0 1
0 1
0 1
0 1
0 1
0 1
0 0
0 0
0 0
0 0
0 0
0 0
0 0
0 0
0 0
0 0
0 0
0 1
0 2
0 3
0 4
0 4
0 4
0 4
0 4
0 4
0 4
0 4
0 4
0 4
0 4
0 4
0 4
0 4
0 4
0 4
0 4
0 4
0 4
0 4
0 4
0 4
0 4
0 4
0 7
0 7
0 7
0 7
0 7
0 7
0 7
0 7
0 7
0 6
0 5
0 4
0 3
0 3
0 3
0 3
0 3
0 3
0 3
0 3
0 3
0 3
0 3
0 3
0 3
0 3
0 3
0 3
0 3
0 4
0 4
0 4
0 4
0 4
0 4
0 4
0 1
0 1
0 1
0 1
0 1
0 1
0 1
0 1
0 1
0 3
0 3
0 3
0 3
0 3
0 3
0 3
0 3
0 5
0 5
0 5
0 5
0 5
0 5
0 5
0 5
0 5
0 5
0 5
0 5
0 4
0 4
0 4
0 4
0 4
0 4
0 4
0 4
0 4
0 4
0 4
0 4
0 4
0 5
0 5
0 5
0 3
0 3
0 3
0 3
0 3
0 3
0 3
0 1
0 1
0 1
0 1
0 1
0 1
0 1
0 1
0 1
0 1
0 1
0 1
0 2
0 2
0 2
0 2
0 2
0 2
0 2
0 2
0 2
0 2
0 2
0 2
0 2
0 2
0 1
0 1
0 1
0 1
0 1
0 1
0 2
0 2
0 2
0 2
0 2
0 2
0 2
0 2
0 2
0 2
0 2
0 2
0 2
0 2
0 2
0 2
0 1
0 1
0 1
0 1
0 1
0 1
0 1
0 1
0 1
0 1
0 2
0 2
0 2
0 2
0 2
0 3
0 2
0 2
0 2
0 2
0 2
0 2
0 2
0 2
0 2
0 2
0 2
0 2
0 2
0 2
0 2
0 2
0 2
0 2
0 2
0 2
0 2
0 2
0 2
0 2
0 2
0 2
0 2
0 2
0 1
0 1
0 1
0 1
0 1
0 1
0 1
0 0
0 0
0 0
0 0
0 1
0 1
0 1
0 1
0 1
0 1
0 1
0 1
0 1
0 1
0 1
0 1
0 1
0 1
0 1
0 1
0 1
0 1
0 1
0 1
0 1
0 1
0 1
0 1
0 1
0 1
0 1
0 1
0 1
0 1
0 1
0 1
0 1
0 1
0 1
0 1
0 0
0 0
0 0
0 0
0 0
0 0
0 0
0 0
0 0
0 0
0 0
0 0
0 0
0 0
0 0
0 0
0 0
0 0
0 1
0 1
0 1
0 1
0 1
0 1
0 1
0 1
0 1
0 1
0 1
0 1
0 1
0 1
0 1
0 1
0 1
0 1
0 1
0 1
0 1
0 1
0 1
0 1
0 1
0 1
0 1
0 1
0 1
0 1
0 1
0 1
0 1
0 1
0 1
0 1
0 0
0 1
0 1
0 1
0 1
0 1
0 1
0 1
0 1
0 1
0 1
0 1
0 1
0 1
0 1
0 1
0 1
0 1
0 1
0 1
0 1
0 1
0 1
0 1
0 1
0 1
0 1
0 1
0 1
0 1
0 1
0 1
0 1
0 1
0 1
0 1
0 0
0 0
0 0
0 0
0 0
0 0
0 0
0 0
0 0
0 0
0 0
0 0
0 0
0 0
0 0
0 0
0 0
0 0
0 0
0 0
0 0
0 0
0 0
0 0
0 0
0 0
0 0
0 0
0 0
0 0
0 0
0 0
0 0
0 0
0 0
0 0
0 0
0 0
0 0
0 0
0 0
0 0
0 0
0 0
0 0
0 0
0 0
0 0
0 0
0 0
0 0
0 0
0 0
0 0
0 0
0 0
0 0
0 0
0 2
0 2
0 2
0 2
0 2
1 7
1 7
1 7
1 7
1 7
1 7
1 11
1 11
1 11
1 11
1 11
1 11
1 11
1 11
1 11
1 11
1 11
1 11
1 11
1 11
1 11
1 11
1 11
1 11
1 11
1 11
1 11
1 11
1 11
1 11
1 11
1 9
1 9
1 9
1 9
0 9
0 2
0 1
0 1
0 1
0 1
0 0
0 0
0 0
0 0
0 0
0 0
0 0
0 0
0 0
0 0
0 0
0 0
0 0
0 0
0 0
0 0
0 0
0 0
0 0
0 0
0 0
0 0
0 0
0 0
0 0
0 0
0 0
0 0
0 0
0 0
0 0
0 0
0 0
0 0
0 0
0 0
0 0
0 0
0 0
0 0
0 0
0 0
0 0
0 0
0 0
0 0
0 0
0 0
0 0
0 0
0 0
0 0
0 0
0 0
0 0
0 0
0 0
0 0
0 0
0 0
0 0
0 2
0 2
0 2
0 2
0 2
0 2
0 2
0 2
0 2
0 2
0 2
0 2
0 2
0 2
0 2
0 4
0 4
0 4
0 4
0 4
0 4
0 4
0 4
0 4
0 4
0 4
0 4
0 4
0 4
0 4
0 4
0 4
0 4
0 4
0 4
0 4
0 2
0 2
0 2
0 2
0 4
0 4
0 5
0 5
0 5
0 5
0 5
1 5
1 6
1 6
1 6
1 6
1 6
1 6
1 6
1 6
1 7
1 7
1 7
1 7
1 7
1 7
1 7
1 7
1 8
1 8
1 8
1 8
1 8
1 8
1 8
1 8
1 8
1 8
1 8
1 8
1 6
1 6
1 5
1 5
1 8
1 7
1 7
0 7
0 7
0 7
0 6
0 5
0 5
0 5
0 5
0 5
0 4
0 4
0 4
0 4
0 4
0 4
0 4
0 4
0 3
0 3
0 3
0 3
0 3
0 3
0 3
0 3
0 3
0 3
0 3
0 3
0 3
0 3
0 3
0 3
0 0
0 0
0 0
0 0
0 0
0 0
0 0
0 0
0 0
0 0
0 0
0 0
0 0
0 0
0 0
0 0
0 0
0 0
0 0
0 0
0 0
0 0
0 0
0 0
0 1
0 1
0 1
0 1
0 1
0 1
0 1
0 1
0 1
0 1
0 1
0 1
0 1
0 1
0 1
0 1
0 1
0 1
0 1
0 1
0 1
0 1
0 1
0 1
0 1
0 1
0 1
0 1
0 1
0 1
0 1
0 1
0 1
0 1
0 1
0 1
0 0
0 0
0 0
0 1
0 1
0 1
0 1
0 2
0 2
0 2
0 5
0 9
0 11
0 12
0 12
0 12
0 13
0 14
0 14
0 14
0 14
0 14
0 14
0 14
0 14
0 14
0 14
0 14
0 14
0 14
0 14
0 14
0 14
0 14
0 14
0 14
0 14
0 14
0 14
0 13
0 13
0 13
0 12
0 12
0 12
0 13
0 8
0 5
0 3
0 2
0 3
0 3
0 2
0 2
0 2
0 2
0 2
0 2
0 2
0 2
0 2
0 2
0 2
0 2
0 2
0 2
0 2
0 2
0 2
0 2
0 2
0 2
0 2
0 2
0 2
0 2
0 2
0 2
0 2
0 2
0 2
0 1
0 1
0 1
0 1
0 1
0 0
0 0
0 0
0 0
0 0
0 1
0 1
0 1
0 1
0 1
0 1
0 1
0 1
0 1
0 1
0 1
0 1
0 1
0 1
0 1
0 1
0 1
0 1
0 1
0 1
0 2
0 2
0 2
0 2
0 2
0 2
0 2
0 2
0 2
0 5
0 5
0 5
0 5
0 5
0 4
0 4
0 7
0 8
0 10
1 31
1 37
1 38
1 39
1 47
1 47
1 50
1 55
1 57
1 62
1 62
1 64
1 64
1 64
1 64
1 64
1 64
1 63
1 63
1 63
1 63
1 63
1 63
1 63
1 63
1 63
1 62
1 62
2 62
2 65
2 65
2 65
2 65
2 64
2 62
2 59
1 36
1 30
1 31
1 31
1 25
1 26
1 20
1 18
1 19
1 20
1 21
1 21
1 21
1 21
1 21
1 21
2 41
2 42
2 46
2 48
2 48
2 50
2 50
2 50
2 50
2 50
2 47
2 46
1 45
1 45
1 49
1 50
1 51
1 49
1 49
1 49
1 49
1 49
1 48
1 46
1 46
1 41
1 39
1 39
1 38
1 36
1 35
1 35
1 35
1 39
1 39
1 39
0 18
0 18
0 11
0 10
0 10
0 11
0 11
0 11
0 11
0 11
0 11
0 12
0 12
0 11
0 7
0 7
0 6
0 6
0 6
0 6
0 6
0 5
0 5
0 5
0 5
0 5
0 5
0 5
0 5
0 16
0 20
0 22
0 22
0 19
0 21
0 21
0 21
0 21
0 21
0 23
0 23
0 23
0 23
0 23
0 23
0 23
0 23
0 22
0 22
0 22
0 22
0 22
0 22
0 22
0 24
0 24
0 24
0 25
0 25
0 25
0 25
0 25
0 25
0 25
0 25
0 14
0 7
0 7
0 7
0 7
0 5
0 5
0 5
0 5
0 5
0 2
0 2
0 2
0 2
0 2
0 2
0 2
0 2
0 2
0 2
0 2
0 2
0 2
0 2
0 3
0 3
0 5
0 5
0 5
0 5
0 5
0 5
0 5
0 5
0 5
0 5
0 5
0 5
0 5
1 5
1 7
1 7
1 8
1 8
1 8
1 8
1 8
1 11
1 11
1 11
1 11
1 11
1 11
1 11
1 11
1 13
1 14
1 17
1 25
1 25
1 23
1 28
1 26
1 28
1 29
1 30
1 30
1 30
1 30
1 30
1 30
1 30
1 30
1 30
1 30
0 30
0 28
0 28
0 27
0 27
0 27
0 27
0 27
0 24
0 23
0 23
0 23
0 23
0 23
0 23
0 22
0 21
0 20
0 17
0 9
0 8
0 7
0 3
0 3
0 2
0 2
0 1
0 1
0 1
0 1
0 1
0 1
0 1
0 1
0 1
0 1
0 1
0 1
0 3
0 3
0 3
0 3
0 3
0 3
0 3
0 3
0 3
0 4
0 4
0 4
0 4
0 4
0 4
0 4
0 3
0 3
0 3
0 3
0 3
0 3
0 3
0 3
0 3
0 3
0 3
0 3
0 3
0 3
0 3
0 4
0 5
0 6
0 6
0 6
0 4
0 4
0 4
0 4
0 4
0 4
0 4
0 4
0 4
0 3
0 3
0 3
0 4
0 5
0 6
0 8
0 8
0 9
0 11
0 15
0 16
0 16
0 16
0 16
0 16
0 16
0 16
0 16
0 17
0 14
0 14
0 14
0 14
0 14
0 14
0 14
0 14
0 14
0 14
0 14
0 14
0 14
0 15
0 15
0 17
0 18
0 19
0 20
0 20
0 19
0 17
0 17
0 21
0 20
0 18
0 13
0 13
0 13
0 13
0 13
0 13
0 13
0 13
0 14
0 13
0 13
0 13
0 13
0 13
0 13
0 14
0 14
0 15
0 16
0 16
0 17
0 17
0 21
0 20
0 20
0 17
0 19
0 19
0 21
0 21
0 21
0 17
0 16
0 16
0 16
0 16
0 16
0 16
0 16
0 16
0 16
0 16
0 18
0 18
0 17
0 18
0 19
0 19
0 19
0 20
0 20
0 19
0 18
0 18
0 17
0 18
0 17
0 17
0 15
0 26
0 28
0 30
0 33
0 33
0 39
0 41
0 44
0 46
0 48
0 48
0 48
0 48
0 48
0 48
0 48
0 48
0 48
0 48
0 46
0 46
0 46
0 45
0 44
0 44
0 43
0 43
0 43
0 43
0 42
0 42
0 42
0 42
0 42
0 39
0 26
0 21
0 21
0 22
0 21
0 20
0 14
0 12
0 8
0 8
0 6
0 6
0 6
0 6
0 6
0 6
0 6
0 6
0 6
0 7
0 7
0 7
0 7
0 7
0 7
0 7
0 7
0 8
0 8
0 9
0 9
0 10
0 10
0 9
0 9
0 9
0 9
0 7
0 6
0 5
0 5
0 4
0 4
0 4
0 4
0 4
0 4
0 4
0 4
0 4
0 3
0 3
0 3
0 3
0 3
0 3
0 3
0 3
0 3
0 3
0 4
0 4
0 4
0 3
0 3
0 2
0 2
0 1
0 1
0 1
0 1
0 1
0 1
0 2
0 8
0 8
0 8
0 8
0 8
0 8
0 8
0 8
0 8
0 8
0 9
0 9
0 9
0 10
0 10
0 10
0 10
0 10
0 10
0 10
0 12
0 13
0 13
0 14
0 25
0 25
0 25
0 25
0 26
0 26
0 26
0 26
0 28
0 28
0 24
0 23
0 21
0 22
0 22
0 22
0 22
0 22
0 22
0 22
0 22
0 22
0 21
0 21
0 20
0 20
0 20
0 20
0 20
0 20
0 21
0 21
0 20
0 18
0 18
0 18
1 7
1 10
1 11
1 11
1 10
1 10
1 10
1 10
1 8
1 8
1 10
1 10
1 10
1 9
1 9
1 9
1 9
1 9
1 9
1 9
1 9
1 9
2 10
2 12
2 13
2 13
2 13
2 13
2 14
2 14
2 14
2 13
2 13
2 13
2 13
2 12
1 8
1 8
1 8
1 8
1 9
1 9
1 9
1 9
1 9
1 9
1 7
1 7
1 7
1 7
1 7
1 7
1 7
1 7
2 7
2 7
2 7
1 6
1 5
1 3
1 2
1 2
1 1
1 1
1 1
1 1
1 1
1 1
1 1
1 1
1 1
1 1
1 2
1 2
1 2
1 2
1 1
1 1
1 1
1 1
1 1
1 1
1 1
1 1
1 1
1 1
1 2
1 2
0 2
0 2
0 2
0 2
0 2
0 2
0 2
0 2
0 2
0 2
1 2
1 2
1 2
1 2
1 2
1 2
1 2
1 2
1 2
1 2
1 1
1 2
1 2
1 2
1 2
1 2
1 2
1 2
1 2
1 2
1 2
1 2
1 13
1 13
1 12
1 13
1 13
1 13
1 13
1 13
0 13
0 13
0 13
0 13
0 13
0 13
0 13
0 13
0 13
0 15
0 16
0 19
0 20
0 20
0 20
0 20
0 20
0 19
0 20
0 20
0 20
0 20
0 20
0 20
0 20
0 21
0 21
0 23
0 11
0 11
0 11
0 10
0 9
0 9
0 9
0 9
0 9
0 9
0 9
0 9
0 9
0 9
0 9
0 9
0 9
0 8
0 6
0 4
0 4
0 4
0 4
0 4
0 4
0 4
0 3
0 3
0 3
0 3
0 3
0 4
0 4
0 3
0 3
0 2
0 3
0 3
0 3
0 3
0 3
0 3
0 3
0 3
0 4
0 5
0 5
0 5
0 6
0 6
0 6
0 6
0 6
0 6
0 6
0 6
0 6
0 6
0 6
0 6
0 6
0 6
0 6
0 6
0 6
0 6
0 5
0 5
0 5
0 4
0 4
0 3
0 3
0 3
0 5
0 6
0 6
0 7
0 8
0 9
0 9
0 8
0 8
0 8
0 7
0 7
0 7
0 8
0 8
0 8
0 8
0 8
0 8
0 8
0 8
0 9
0 9
0 9
0 9
0 9
0 9
0 9
0 9
0 9
0 9
0 9
0 9
0 11
0 11
0 11
0 9
0 8
0 7
0 6
0 6
0 5
0 4
0 4
0 4
0 4
0 4
0 3
0 3
0 4
0 4
0 4
0 4
0 4
0 4
0 4
0 3
0 4
0 4
0 4
0 5
0 5
0 5
0 6
0 6
0 6
0 6
0 6
0 6
0 4
0 4
0 4
0 4
0 4
0 4
0 4
0 4
0 4
0 4
0 4
0 4
0 4
0 4
0 4
0 4
0 6
0 6
0 6
0 6
0 6
0 6
0 6
0 6
0 5
0 4
0 4
0 4
0 4
0 4
0 4
0 4
0 4
0 4
0 4
0 4
0 5
0 5
0 5
0 5
0 5
0 5
0 5
0 5
0 5
0 5
0 5
0 5
0 5
0 5
0 5
0 5
0 2
0 2
0 2
0 2
0 3
0 3
0 3
0 3
0 3
0 3
0 3
0 3
0 2
0 2
0 2
0 1
0 1
0 1
0 1
0 0
0 0
0 0
0 0
0 0
0 1
0 1
0 1
0 1
0 1
0 1
0 1
0 1
0 1
0 2
0 2
0 2
0 2
0 2
0 2
0 2
0 2
0 2
0 2
0 3
0 3
0 3
0 3
0 3
0 3
0 3
0 3
0 3
0 3
0 5
0 5
0 5
0 5
0 4
0 4
0 5
0 5
0 5
0 5
0 5
0 5
0 5
0 6
0 6
0 6
0 5
0 5
0 5
0 5
0 5
0 5
0 5
0 5
0 5
0 5
0 4
0 4
0 4
0 4
0 4
0 4
0 4
0 4
0 3
0 2
0 2
0 2
0 2
0 3
0 3
0 3
0 2
0 2
0 3
0 3
0 3
0 3
0 3
0 2
0 2
0 2
0 2
0 2
0 2
0 2
0 2
0 2
0 2
0 2
0 4
0 4
0 4
0 4
0 4
0 4
0 4
0 4
0 4
0 3
0 3
0 3
0 3
0 3
0 3
0 3
0 3
0 3
0 3
0 3
0 2
0 2
0 4
0 4
0 4
0 4
0 4
0 4
0 4
0 4
0 4
0 4
0 4
0 4
0 4
0 5
0 3
0 3
0 3
0 3
0 3
0 3
0 3
0 3
0 3
0 3
0 3
0 3
0 3
0 3
0 3
0 3
0 3
0 3
0 4
0 4
0 5
0 5
0 3
0 3
0 3
0 3
0 4
0 5
0 5
0 5
0 5
0 5
0 5
0 5
0 5
0 4
0 4
0 4
0 4
0 4
0 4
0 4
0 4
0 4
0 4
0 4
0 4
0 5
0 5
0 5
0 5
0 5
0 5
0 5
0 5
0 5
0 4
0 4
0 4
0 4
0 4
0 4
0 3
0 2
0 2
0 2
0 2
0 2
0 2
0 2
0 2
0 2
0 3
0 3
0 3
0 3
0 3
0 3
0 3
0 3
0 3
0 3
0 3
0 2
0 2
0 2
0 2
0 2
0 2
0 2
0 2
0 2
0 2
0 2
0 2
0 2
0 3
0 3
0 3
0 3
0 3
0 3
0 3
0 3
0 4
0 4
0 5
0 5
0 4
0 4
0 5
0 5
0 5
0 5
0 5
0 5
0 5
0 5
0 5
0 5
0 5
0 4
0 4
0 4
0 4
0 4
0 4
0 4
0 4
0 4
0 4
0 4
0 3
0 3
0 3
0 3
0 4
0 5
0 5
0 4
0 3
0 4
0 4
0 3
0 3
0 3
0 3
0 3
0 3
0 3
0 3
0 3
0 3
0 3
0 3
0 3
0 3
0 3
0 3
0 3
0 3
0 3
0 3
0 3
0 3
0 4
0 4
0 4
0 4
0 4
0 4
0 5
0 4
0 3
0 4
0 4
0 4
0 4
0 4
0 5
0 5
0 5
0 5
0 5
0 5
0 5
0 5
0 5
0 5
0 5
0 5
0 5
0 5
0 5
0 5
0 5
0 5
0 5
0 5
0 5
0 5
0 4
0 4
0 4
0 4
0 4
0 4
0 3
0 3
0 3
0 2
0 2
0 2
0 1
0 1
0 0
0 0
0 0
0 0
0 0
0 0
0 0
0 0
0 0
0 0
0 0
0 0
0 0
0 0
0 0
0 0
0 0
0 0
0 0
0 0
0 0
0 1
0 2
0 2
0 2
0 2
0 2
0 2
0 2
0 2
0 3
0 6
0 7
0 9
0 9
0 9
0 9
0 9
0 9
0 9
0 9
0 9
0 9
0 9
0 9
0 9
0 9
0 9
0 9
0 9
0 9
0 9
0 9
0 9
0 9
0 9
0 9
0 7
0 7
0 7
0 7
0 7
0 8
0 8
0 8
0 8
0 7
0 4
0 3
0 1
0 1
0 1
0 1
0 1
0 1
0 1
0 1
0 1
0 1
0 1
0 1
0 1
0 1
0 1
0 1
0 1
0 1
0 1
0 1
0 1
0 1
0 1
0 1
0 2
0 2
0 2
0 2
0 2
0 1
0 1
0 1
0 1
0 1
0 1
0 1
0 1
0 1
0 1
0 1
0 1
0 1
0 1
0 1
0 1
0 1
0 1
0 1
0 1
0 1
0 1
0 1
0 1
0 1
0 1
0 1
0 1
0 0
0 0
0 0
0 0
0 0
0 0
0 0
0 0
0 0
0 0
0 0
0 0
0 0
0 0
0 0
0 0
0 0
0 0
0 0
0 0
0 0
0 0
0 0
0 0
0 0
0 0
0 0
0 0
0 0
0 0
0 0
0 0
0 0
0 0
0 0
0 0
0 1
0 1
0 1
0 1
0 1
0 1
0 1
0 1
0 1
0 1
0 1
0 1
0 1
0 1
0 1
0 1
0 1
0 1
0 1
0 1
0 1
0 1
0 1
0 1
0 1
0 2
0 2
0 2
0 2
0 2
0 2
0 2
0 2
0 2
0 2
0 2
0 1
0 1
0 1
0 1
0 1
0 1
0 1
0 1
0 1
0 1
0 1
0 1
0 1
0 1
0 1
0 1
0 1
0 1
0 1
0 1
0 1
0 1
0 1
0 1
0 1
0 0
0 0
0 0
0 0
0 0
0 0
0 0
0 0
0 0
0 0
0 0
0 0
0 0
0 0
0 0
0 0
0 0
0 0
0 0
0 0
0 0
0 0
0 0
0 0
0 0
0 0
0 0
0 0
0 0
0 0
0 0
0 0
0 0
0 0
0 2
0 2
0 2
0 2
0 2
0 2
0 2
0 2
0 2
0 2
0 2
0 2
0 2
0 2
0 2
0 2
0 2
0 2
0 2
0 2
0 2
0 2
0 2
0 2
0 2
0 2
0 2
0 2
0 2
0 2
0 2
0 2
0 2
0 2
0 2
0 2
0 0
0 0
0 0
0 0
0 0
0 0
0 0
0 0
0 0
0 0
0 0
0 0
0 0
0 0
0 0
0 0
0 0
0 0
0 1
0 1
0 1
0 1
0 1
0 1
0 1
0 1
0 1
0 1
0 1
0 1
0 1
0 1
0 1
0 1
0 1
0 1
0 1
0 1
0 1
0 1
0 1
0 1
0 1
0 1
0 1
0 1
0 1
0 1
0 1
0 1
0 1
0 1
0 1
0 1
0 0
0 0
0 0
0 0
0 0
0 0
0 0
0 0
0 0
0 0
0 0
0 0
0 0
0 0
0 0
0 0
0 0
0 0
0 0
0 0
0 0
0 0
0 0
0 0
0 0
0 0
0 0
0 0
0 0
0 0
0 0
0 0
0 0
0 0
0 0
0 0
0 0
0 0
0 0
0 0
0 0
0 0
0 0
0 0
0 0
0 0
0 0
0 0
0 0
0 0
0 0
0 0
0 0
0 0
0 0
0 0
0 0
0 0
0 0
0 0
0 0
0 0
0 0
0 0
0 0
0 0
0 0
0 0
0 0
0 0
0 0
0 0
0 0
0 0
0 0
0 0
0 0
0 0
0 0
0 0
0 0
0 0
0 0
0 0
0 0
0 0
0 0
0 0
0 0
0 0
0 0
0 0
0 0
0 0
0 0
0 0
0 0
0 0
0 0
0 0
0 0
0 2
0 2
0 2
0 2
0 2
0 2
0 2
0 2
0 2
0 2
0 2
0 2
0 2
0 2
0 2
0 2
0 2
0 2
0 2
0 2
0 2
0 2
0 2
0 2
0 2
0 2
0 2
0 2
0 2
0 2
0 2
0 2
0 2
0 2
0 2
0 2
0 0
0 0
0 0
0 0
0 0
0 0
0 0
0 0
1 0
1 0
1 0
1 0
1 0
1 0
1 0
2 2
2 2
4 2
4 2
4 2
4 2
4 2
4 2
4 2
4 2
4 2
4 2
4 2
4 2
4 2
4 2
4 2
4 2
4 2
4 2
4 2
4 2
4 2
4 2
4 2
4 2
4 2
4 2
4 2
3 2
3 2
3 2
3 2
3 2
3 2
3 2
1 0
1 0
0 0
0 0
0 0
0 0
0 0
0 0
0 0
0 0
0 0
0 0
0 0
0 0
0 0
0 0
0 0
0 0
0 0
0 0
0 0
0 0
0 0
0 0
0 0
0 0
0 0
0 0
0 0
0 0
0 0
0 0
0 0
0 0
0 0
0 0
0 0
0 0
0 0
0 0
0 0
0 0
0 0
0 0
0 0
0 0
0 0
0 0
0 0
0 0
0 0
0 0
0 0
0 0
0 0
0 0
0 0
0 0
0 0
0 0
0 0
0 0
0 0
0 0
0 0
0 0
0 0
0 0
0 0
0 0
0 0
0 0
0 0
0 0
0 0
0 0
0 0
0 0
0 0
0 0
0 0
0 0
0 0
0 0
0 0
0 0
0 0
0 0
0 0
0 0
0 0
0 0
0 0
0 0
0 0
0 0
0 0
0 0
0 0
0 0
0 1
0 1
0 1
0 1
0 1
0 1
0 1
0 1
0 1
0 1
0 1
0 1
0 1
0 1
0 1
0 1
0 1
0 1
0 1
0 1
0 1
0 1
0 1
0 1
0 1
0 1
0 6
0 6
0 6
0 6
0 6
0 7
0 8
0 8
0 8
0 8
0 7
0 7
0 8
0 8
0 8
0 8
0 9
0 9
0 9
0 9
0 9
0 9
0 9
0 9
0 9
0 9
0 9
0 9
0 9
0 9
0 9
0 10
0 13
0 18
0 29
0 29
0 24
0 24
0 25
0 25
0 25
0 25
0 25
0 25
0 25
0 25
0 25
0 25
0 25
0 25
0 25
0 25
0 24
0 24
0 24
0 24
0 25
0 26
0 26
0 26
0 26
0 26
0 27
0 27
0 27
0 27
0 29
0 34
0 34
0 34
0 26
0 28
0 28
0 28
0 28
0 28
0 28
0 27
0 27
0 27
0 27
0 27
0 27
0 26
0 26
0 26
0 26
0 27
0 27
0 28
0 28
0 28
0 27
0 27
0 33
0 33
0 38
0 39
0 38
0 40
0 42
0 42
0 36
0 27
0 24
0 22
0 21
0 20
0 20
0 22
0 25
0 27
0 42
0 46
0 49
0 50
0 50
0 50
0 50
0 50
0 53
0 58
0 58
0 78
0 78
0 77
0 77
0 77
0 77
0 75
0 66
0 66
0 61
0 61
0 60
0 60
0 60
0 60
0 60
0 60
0 60
0 60
0 60
0 58
0 58
0 55
0 54
0 51
0 36
0 31
0 29
0 29
0 29
0 29
0 29
0 29
0 28
0 23
0 23
0 2
0 2
0 2
0 2
0 2
0 2
0 2
0 2
0 2
0 2
0 2
0 2
0 2
0 2
0 2
0 2
0 2
0 2
0 2
0 2
0 2
0 2
0 2
0 2
0 1
0 1
0 1
0 0
0 0
0 0
0 0
0 0
0 0
0 0
0 0
0 0
0 0
0 0
0 0
0 0
0 0
0 0
0 1
0 1
0 1
0 1
0 1
0 1
0 1
0 1
0 1
0 1
0 2
0 2
0 2
0 2
0 2
0 2
0 2
0 2
0 2
0 2
0 2
0 2
0 2
0 2
0 2
0 2
0 2
0 2
0 2
0 2
0 2
0 2
0 2
0 2
0 2
0 2
0 1
0 1
0 1
0 1
0 1
0 1
0 1
0 1
0 1
0 0
0 0
0 0
0 0
0 0
0 0
0 0
0 0
0 0
0 0
0 0
0 0
0 0
0 0
0 0
0 0
0 0
0 0
0 0
0 0
0 0
0 0
0 0
0 0
0 0
0 0
0 0
0 0
0 0
0 0
0 0
0 0
0 0
0 0
0 0
0 0
0 0
0 0
0 0
0 0
0 0
0 0
0 0
0 0
0 0
0 0
0 0
0 0
0 0
0 0
0 0
0 0
2 0
2 0
2 0
2 0
2 0
2 0
5 0
5 0
5 0
5 0
5 0
5 0
5 0
5 0
5 0
5 0
5 0
5 0
5 0
5 0
5 0
5 0
5 0
5 0
5 0
5 0
5 1
5 1
5 1
5 1
5 1
5 1
5 1
5 1
5 1
5 1
3 1
3 1
3 1
3 1
3 1
3 1
1 1
4 1
10 1
10 1
10 1
10 1
10 1
10 1
10 1
11 1
12 1
12 1
13 1
14 1
20 1
22 2
23 2
23 2
23 2
23 2
23 1
23 1
23 1
23 1
23 1
23 1
27 1
27 1
27 1
27 1
27 1
27 1
27 1
27 1
36 1
38 1
38 1
36 1
30 1
29 1
29 1
29 1
29 1
29 1
29 1
28 1
28 1
28 1
28 1
25 1
20 1
19 0
18 0
18 0
18 0
18 0
18 0
18 0
18 0
18 0
18 0
18 0
13 0
13 0
11 0
11 0
11 0
11 0
11 0
10 0
5 0
3 0
2 0
3 0
3 0
2 0
2 0
2 0
2 0
2 0
2 0
2 0
2 0
2 0
2 0
2 0
2 0
2 0
2 0
2 0
2 0
2 0
2 0
2 0
2 0
1 0
1 0
1 0
1 0
1 0
1 0
1 0
1 0
2 0
2 0
2 0
2 0
3 0
3 0
3 0
4 0
9 0
10 0
12 1
12 1
12 1
12 1
12 1
12 1
12 1
12 1
12 1
12 1
12 1
12 1
12 1
12 1
13 1
13 1
14 1
14 1
14 1
14 1
16 1
16 1
17 1
21 1
23 1
23 1
23 1
25 1
26 1
24 1
24 1
23 1
23 1
22 1
19 1
18 1
17 0
17 0
17 0
17 0
17 0
17 0
17 0
17 0
18 0
18 0
18 0
18 0
19 0
22 0
21 0
22 0
38 0
45 0
54 0
67 0
71 0
76 0
78 0
80 0
78 0
77 0
77 0
76 0
77 0
77 0
77 0
77 0
78 0
78 0
77 0
79 0
80 0
87 0
91 0
93 0
95 0
95 0
95 0
97 0
108 0
114 0
118 0
121 0
124 0
124 0
124 0
121 0
104 0
97 0
87 0
76 0
69 0
62 0
60 0
55 0
54 0
54 0
55 0
55 0
54 0
54 0
54 0
54 0
53 0
53 0
53 0
51 0
50 0
41 0
37 0
33 1
39 2
43 3
48 8
50 9
41 9
30 10
27 10
31 10
27 10
39 11
39 11
39 11
39 11
38 11
38 12
38 12
38 12
38 12
38 12
38 12
38 12
38 12
38 13
38 13
38 13
38 13
38 13
38 13
38 13
38 13
38 13
38 13
38 13
38 13
38 12
35 12
29 11
23 6
18 4
19 4
19 4
18 3
17 3
13 3
14 3
3 2
3 2
3 2
3 2
3 2
3 1
3 1
3 1
3 1
3 3
3 3
3 3
3 3
3 2
3 2
3 2
3 2
3 2
4 2
4 3
4 3
5 3
5 3
5 3
5 3
5 3
7 3
43 3
88 3
99 3
99 3
100 3
101 4
101 4
100 4
99 4
104 4
105 4
105 4
106 4
106 4
106 4
106 4
108 4
108 5
108 3
108 3
110 3
110 4
110 4
110 4
110 4
110 4
110 4
109 3
109 4
109 4
107 5
105 5
105 5
104 5
94 5
88 5
48 5
18 5
12 5
13 5
13 5
13 4
13 4
13 4
13 4
8 4
8 4
9 4
8 4
9 4
9 4
9 4
7 4
7 3
7 3
7 3
5 3
5 2
5 2
5 2
5 3
5 3
5 3
5 3
5 2
5 2
5 1
4 1
4 1
4 4
4 5
4 5
4 5
4 5
3 5
3 6
3 9
3 9
4 14
3 15
3 21
3 22
3 23
2 23
2 24
1 24
1 25
1 25
1 25
1 26
1 29
1 31
1 31
1 33
1 32
2 33
2 33
2 33
2 33
2 33
2 33
2 33
2 33
3 33
3 33
3 27
3 27
3 27
3 27
3 27
3 27
4 21
4 20
4 20
3 11
3 11
3 11
3 11
4 10
4 10
7 20
8 26
8 27
8 28
8 28
8 27
8 24
8 21
8 20
8 19
8 19
7 19
7 19
7 20
7 20
7 24
7 24
7 24
7 24
6 24
6 24
16 28
17 29
17 29
17 29
17 30
18 30
18 30
20 31
20 31
20 32
20 32
20 33
20 33
19 32
19 31
16 20
15 15
15 17
15 17
15 17
15 18
15 18
15 18
15 18
15 18
15 23
15 24
15 25
15 24
15 24
14 20
14 20
14 20
14 20
12 20
10 20
4 16
4 15
3 15
3 17
3 16
2 17
2 17
0 16
0 16
0 15
0 14
0 14
0 14
0 14
0 13
0 12
0 10
0 10
0 10
0 10
0 11
0 11
0 11
0 11
0 14
0 14
0 17
0 21
0 27
0 27
0 27
0 27
0 27
0 27
0 28
0 28
0 28
0 28
0 28
0 26
0 26
1 26
1 26
1 28
1 30
1 31
1 32
1 44
1 44
1 44
1 44
1 44
1 44
1 45
1 49
1 49
1 49
1 49
1 51
1 53
1 45
1 43
1 36
1 33
1 31
1 31
1 31
1 32
1 32
1 32
1 32
1 41
1 43
1 48
1 51
1 51
1 52
0 52
0 53
0 51
0 48
0 47
0 47
0 34
0 34
0 34
0 34
0 34
0 34
0 34
0 31
0 30
0 28
0 28
0 25
0 26
0 26
0 28
0 28
0 27
0 27
0 27
0 27
0 26
0 26
0 26
0 26
0 9
0 4
0 4
0 4
0 4
0 5
0 6
0 6
0 6
0 7
0 7
0 8
0 9
0 9
0 9
0 9
0 10
0 15
0 15
0 14
0 14
0 14
0 14
0 15
0 14
0 14
0 12
0 12
0 12
0 12
0 12
0 12
0 12
0 12
0 13
0 13
0 13
0 13
0 12
0 12
0 12
0 10
0 10
0 10
0 10
0 8
0 8
0 8
0 8
0 8
0 8
0 8
0 13
0 10
0 12
0 13
0 20
0 20
0 20
0 19
0 19
0 19
0 19
0 19
0 19
0 19
0 19
0 19
0 19
0 19
0 18
0 18
0 18
0 18
0 18
0 18
0 18
0 18
0 18
0 18
0 18
0 18
0 18
0 19
0 19
0 19
0 19
0 19
0 12
0 11
0 9
0 9
0 2
0 2
0 2
0 2
0 2
0 2
0 2
0 2
0 3
0 3
0 3
0 3
0 3
0 3
0 3
0 3
0 5
0 5
0 5
0 5
0 5
0 5
0 9
0 9
0 9
0 9
0 9
0 9
0 9
0 10
0 10
0 11
0 10
0 10
0 12
0 13
0 13
0 13
0 14
0 14
0 14
0 14
0 14
0 14
0 14
0 14
0 14
0 15
0 15
0 15
0 14
0 14
0 13
0 13
0 13
0 13
0 13
0 13
0 9
0 24
0 26
0 26
0 27
0 26
0 26
0 25
0 25
0 27
0 27
0 26
0 24
0 24
0 24
0 24
0 23
0 23
0 28
0 28
0 29
0 29
0 28
0 28
0 28
0 27
0 27
0 27
0 27
0 27
0 27
0 27
0 28
0 29
0 30
0 31
0 33
0 18
0 15
0 16
0 16
0 16
0 16
0 16
0 17
0 14
0 14
0 15
0 15
0 15
0 15
0 15
0 16
0 17
0 12
0 12
0 11
0 11
0 11
0 11
0 11
0 11
0 11
0 11
0 11
0 11
0 11
0 11
0 10
0 8
0 7
0 7
0 5
0 4
0 4
0 4
0 4
0 4
0 24
0 26
0 26
0 32
0 32
0 48
0 53
0 55
0 57
0 59
0 60
0 60
0 60
0 60
0 60
0 60
0 60
0 60
0 61
0 62
0 62
0 62
0 62
0 62
0 62
0 62
0 62
0 62
0 62
0 62
1 63
1 64
1 64
1 64
1 69
1 69
1 43
1 46
1 47
1 49
1 49
1 29
1 26
1 23
1 22
1 21
1 20
1 25
1 25
1 25
1 25
1 27
1 27
1 27
1 26
1 26
1 26
1 28
1 28
1 29
1 29
1 29
1 29
1 29
1 29
1 30
0 30
0 30
0 31
0 31
0 26
0 25
0 23
0 21
0 17
0 17
0 17
1 18
1 21
1 24
1 24
1 26
1 27
1 21
1 21
1 21
1 21
1 20
1 20
1 19
1 19
1 19
1 18
1 18
1 19
1 18
1 18
1 18
1 18
1 18
1 18
1 18
1 17
1 17
1 23
1 23
1 23
0 23
0 23
0 23
0 24
0 21
0 24
0 23
0 20
0 17
0 18
0 18
0 18
0 18
0 18
0 18
0 19
0 20
0 20
0 20
0 20
0 20
0 20
0 20
0 19
0 21
0 27
0 27
0 28
0 28
0 28
0 25
0 26
0 26
0 20
1 20
1 20
1 20
1 21
1 21
1 20
1 18
1 17
1 17
1 17
1 17
1 13
2 20
2 20
2 20
2 20
2 20
2 19
2 20
2 20
2 20
2 20
2 20
2 23
2 23
2 23
2 21
2 14
2 14
2 13
2 13
2 13
2 12
2 12
1 12
1 12
1 12
1 12
1 12
1 12
1 12
1 12
1 13
1 13
1 13
1 14
1 14
1 19
0 11
0 12
0 12
1 12
1 12
1 13
1 13
1 13
1 13
1 13
1 13
1 10
1 10
1 10
1 10
1 10
1 10
1 10
1 10
1 10
1 10
1 10
1 10
1 10
1 10
1 10
1 10
1 10
1 11
1 12
1 11
1 11
1 12
1 10
1 9
1 5
1 4
1 4
1 4
0 4
0 4
0 4
0 4
0 5
0 5
0 5
0 5
0 5
0 5
0 5
0 5
0 5
0 5
0 5
0 5
0 5
0 5
0 5
0 5
0 5
0 5
0 5
0 5
0 5
0 4
0 6
0 6
0 6
0 5
0 7
0 7
0 7
0 7
0 7
2 11
2 10
2 10
2 9
2 9
2 10
2 10
2 10
2 10
2 10
2 10
2 10
2 10
2 10
2 10
2 11
2 11
2 11
2 11
2 11
2 11
2 11
2 11
2 13
2 14
2 14
2 14
2 12
2 13
2 13
2 13
2 11
2 11
2 11
2 12
2 12
0 8
0 8
0 7
0 7
0 11
0 12
0 13
0 13
0 13
0 13
0 13
0 13
0 14
0 16
0 16
0 15
0 16
0 20
0 23
1 27
1 27
1 27
1 27
1 25
1 24
1 24
1 24
1 24
1 23
1 23
1 23
1 22
1 22
1 22
1 22
1 23
1 25
1 25
1 25
1 25
1 21
1 20
1 19
1 19
1 19
1 20
1 20
1 19
1 18
1 17
1 18
1 18
1 15
1 11
1 10
0 6
0 5
0 5
0 5
0 6
3 29
3 31
3 34
3 36
3 37
3 38
3 41
3 41
3 41
3 42
3 42
3 41
3 42
3 42
3 42
3 42
3 42
3 42
3 44
3 45
3 48
3 48
3 48
3 48
3 48
3 48
3 50
3 50
3 50
3 50
3 52
3 52
3 52
3 52
3 52
3 51
0 29
0 26
0 25
0 24
0 24
1 23
1 22
1 22
1 23
1 22
1 22
1 22
1 22
1 23
1 25
1 28
1 28
1 28
1 24
1 23
1 21
1 22
1 22
1 22
1 22
1 22
1 19
1 19
1 19
1 19
1 18
1 18
1 18
1 18
1 18
1 17
1 16
1 15
0 15
0 15
0 14
0 13
0 13
0 12
0 12
0 12
0 12
0 11
0 9
0 8
0 6
0 4
0 4
0 5
0 5
0 7
0 7
0 6
0 6
0 7
0 7
0 7
0 11
1 20
1 21
1 21
1 20
1 20
1 20
1 23
1 24
1 28
2 31
2 31
2 36
2 36
2 37
2 38
2 38
2 37
2 41
2 41
2 41
2 42
2 42
2 42
2 42
2 43
2 43
2 43
2 45
2 43
2 43
2 43
2 46
2 45
1 43
1 42
1 37
1 32
1 31
1 31
1 31
1 31
1 29
1 27
1 25
1 23
0 21
0 21
0 16
0 16
0 17
0 15
0 15
0 15
0 11
0 12
0 11
0 10
0 10
0 11
0 12
0 10
0 10
0 9
0 9
0 9
0 9
0 9
0 6
0 6
0 6
0 6
0 6
0 6
0 6
0 6
0 6
0 6
0 6
0 4
0 4
0 6
0 6
0 5
1 5
9 4
10 4
10 6
10 7
10 9
10 9
10 10
10 9
10 9
10 9
10 8
10 8
10 10
10 10
10 10
10 10
10 10
10 10
10 10
10 10
10 10
10 10
10 10
10 11
10 11
10 11
10 11
10 11
10 11
10 11
10 12
10 12
10 13
9 13
4 13
2 15
0 17
0 23
0 26
0 25
0 30
0 44
0 48
0 50
0 57
0 59
0 59
0 59
0 57
0 63
0 64
0 66
0 69
0 71
0 74
0 76
0 77
0 78
0 78
0 77
0 77
0 77
0 77
0 76
0 76
0 76
0 76
0 74
0 73
0 74
0 76
0 75
0 72
0 66
0 61
0 61
0 55
0 39
0 34
0 33
0 27
0 28
0 31
0 31
0 31
0 22
0 22
0 22
0 20
0 20
0 20
0 17
0 18
0 18
0 18
0 18
0 18
0 18
0 18
0 18
0 18
0 18
0 21
0 21
0 21
0 20
0 17
0 16
0 16
0 16
0 16
0 16
0 16
0 16
0 16
0 16
0 16
0 14
0 11
0 10
0 10
0 10
0 9
0 9
0 8
0 6
0 7
0 6
0 5
0 5
0 5
0 5
0 5
0 5
0 5
0 5
0 5
0 3
0 6
0 6
0 6
0 7
0 7
0 8
0 8
0 8
0 8
0 8
0 8
0 8
0 8
0 8
0 8
0 8
0 8
0 8
0 8
0 9
0 8
0 8
0 8
0 8
0 7
0 7
0 7
0 7
0 7
0 7
0 7
0 7
0 7
0 7
0 7
0 5
2 24
2 24
2 24
2 24
2 24
2 24
2 24
2 24
2 25
2 25
2 25
2 25
2 25
2 25
2 27
2 27
2 27
2 29
2 31
2 30
2 31
2 31
2 31
2 31
2 31
2 31
2 32
2 33
2 33
2 33
2 34
2 41
2 42
2 42
2 42
2 39
0 21
0 21
0 21
0 21
0 21
0 21
0 21
0 21
0 20
0 20
0 20
0 22
0 22
0 22
0 19
0 19
0 19
0 17
0 15
0 15
0 15
0 15
0 15
0 15
0 15
0 14
1 14
1 12
1 12
1 12
1 9
1 6
1 7
1 7
1 11
1 12
1 12
1 14
1 15
1 14
1 14
1 14
1 14
1 15
1 15
1 15
1 16
1 14
1 14
1 14
1 14
1 14
1 14
1 14
1 14
1 14
1 14
1 14
1 14
1 14
1 14
1 15
1 17
1 17
1 16
1 19
1 18
1 16
1 18
1 19
1 16
1 15
1 14
1 11
1 11
1 11
1 11
1 11
1 11
1 11
1 11
1 11
1 10
1 10
1 10
1 11
1 11
1 11
1 11
1 12
1 12
1 12
1 12
1 12
1 13
1 13
1 13
0 12
0 10
0 12
0 11
0 9
0 9
0 8
0 6
0 5
0 5
0 6
0 7
0 7
0 20
0 20
0 21
0 22
0 23
0 24
0 24
0 24
3 36
3 36
3 36
3 35
3 35
3 35
3 36
3 35
3 35
3 35
3 35
3 35
3 34
3 34
3 34
3 34
3 34
3 32
3 32
3 32
3 32
3 32
3 32
3 32
3 32
3 30
3 30
3 26
3 15
3 14
3 13
3 13
3 13
3 13
3 13
3 13
0 5
0 5
0 5
0 5
0 4
0 4
0 13
0 14
0 17
0 17
0 17
0 17
0 17
0 17
0 17
0 17
0 17
0 17
0 17
0 17
0 17
0 17
0 17
0 18
0 18
0 18
0 18
0 18
0 18
0 18
0 18
0 18
0 18
0 18
0 18
0 18
0 14
0 14
0 14
0 14
0 14
0 14
0 5
0 6
0 3
0 3
0 3
0 4
0 4
0 4
0 4
0 4
0 4
0 5
0 5
0 5
0 5
0 5
0 4
0 4
0 4
0 4
0 4
0 4
0 4
0 4
0 11
0 11
0 11
1 11
1 11
1 11
1 11
1 11
1 11
1 12
1 12
1 12
1 11
1 10
1 10
1 10
1 10
1 9
1 9
1 9
1 9
1 9
1 9
1 8
1 8
1 8
1 8
1 8
1 8
1 8
1 8
1 8
1 8
1 8
1 8
1 11
1 4
1 6
1 5
0 5
0 6
0 6
0 6
0 9
0 9
0 9
0 9
0 9
0 9
0 9
0 9
0 11
0 11
0 11
0 11
0 11
0 11
0 11
0 11
0 11
0 11
0 11
0 11
0 11
0 11
0 12
0 12
0 14
0 18
0 18
0 18
0 15
0 22
0 20
0 25
0 28
0 27
0 30
0 30
0 28
0 33
0 34
0 34
0 34
0 34
0 34
0 35
0 35
0 36
0 36
0 36
0 36
0 36
0 36
0 36
0 36
0 36
0 36
0 36
0 38
0 39
0 37
0 38
0 42
0 43
0 43
0 41
0 40
0 31
0 29
0 28
0 25
0 26
0 28
0 29
0 29
0 24
0 23
0 23
0 23
0 23
0 23
0 21
0 23
0 23
0 23
0 24
0 24
0 24
0 24
0 24
0 25
0 25
0 25
0 25
0 23
0 21
0 22
0 21
0 13
0 12
0 12
0 12
0 12
0 11
0 11
0 11
0 11
0 11
0 8
0 7
0 7
0 7
0 8
0 8
0 8
0 8
0 8
0 8
0 4
0 4
0 4
0 2
0 2
0 2
0 2
0 2
0 2
0 2
0 1
0 2
0 2
0 2
0 2
0 3
0 3
0 3
0 3
0 3
0 3
0 3
0 3
0 3
0 2
0 2
0 2
0 2
0 2
0 2
0 2
0 2
0 2
0 2
0 2
0 2
0 2
0 2
0 2
0 2
0 2
0 2
0 2
0 2
0 2
0 2
0 2
0 1
0 1
0 1
0 1
0 0
0 0
0 0
0 0
0 0
0 1
0 1
0 2
0 2
0 2
0 2
0 2
0 2
0 2
0 2
0 2
0 2
0 2
0 2
0 2
0 3
0 3
0 3
0 3
0 3
0 3
0 3
0 3
0 3
0 3
0 3
0 3
0 3
0 3
0 3
0 3
0 3
0 3
0 3
0 3
0 3
0 2
0 2
0 1
0 1
0 1
0 1
0 1
0 1
0 1
0 1
0 1
0 1
0 1
0 1
0 0
0 0
0 0
0 0
0 0
0 0
0 0
0 0
0 0
0 1
0 1
0 1
0 1
0 1
0 1
0 1
0 1
0 1
0 1
0 1
0 1
0 1
0 1
0 1
0 1
0 1
0 1
0 1
0 1
0 1
0 1
0 1
0 1
0 2
0 2
0 2
0 2
0 5
0 5
0 5
0 5
0 5
0 4
0 4
0 4
0 4
0 4
0 4
0 4
0 4
0 4
0 4
0 4
0 4
0 5
0 6
0 6
0 6
0 6
0 6
0 6
0 6
0 6
0 6
0 6
0 6
0 10
1 10
1 11
1 10
1 10
1 10
1 9
1 7
1 8
1 8
1 8
1 8
1 8
1 8
1 8
1 8
1 8
1 8
1 8
1 8
1 8
1 8
1 8
1 7
1 7
1 6
1 6
1 6
1 6
1 7
1 7
1 7
1 7
1 7
1 7
1 7
0 3
0 3
0 2
0 2
0 2
0 1
0 1
0 1
0 1
0 1
0 1
0 1
0 1
0 1
0 1
0 1
0 1
0 1
0 1
0 1
0 1
0 1
0 1
0 2
0 2
0 2
1 2
1 2
1 2
1 1
1 1
1 1
1 1
2 2
2 2
2 2
2 3
2 3
2 5
2 7
2 7
2 7
2 7
2 7
2 7
2 7
2 7
2 7
2 7
2 7
2 7
2 7
2 7
2 7
2 7
2 7
2 8
2 8
2 8
2 7
2 8
2 8
1 9
1 9
1 9
1 9
1 9
1 9
1 8
0 6
0 6
0 5
0 5
0 5
0 5
0 3
0 3
0 4
0 4
0 4
0 4
0 4
0 4
0 4
0 4
0 4
0 4
0 4
0 4
0 5
0 5
0 13
0 12
0 13
0 13
0 14
0 13
0 13
0 13
0 13
0 13
0 13
0 13
0 13
0 13
0 13
0 13
0 13
0 17
0 17
0 17
0 17
0 17
0 16
0 16
0 16
0 17
0 17
0 17
0 17
0 17
0 17
0 17
0 17
0 16
0 15
0 14
0 8
0 8
0 6
0 6
0 6
2 11
2 10
2 10
2 11
2 12
2 12
2 12
2 12
2 12
2 12
2 12
2 12
2 8
2 8
2 8
2 8
2 8
2 8
2 8
2 8
2 7
2 7
2 7
2 7
2 7
2 7
2 7
2 7
2 7
2 7
2 7
2 7
2 7
2 7
2 7
2 7
0 2
0 2
0 1
0 0
0 0
0 0
0 0
0 0
0 0
0 0
0 0
0 0
0 0
0 0
0 0
0 0
0 0
0 0
0 0
0 0
0 0
0 0
0 0
0 0
0 0
0 0
0 0
0 0
0 0
0 0
0 0
0 0
0 0
0 0
0 0
0 0
0 0
0 0
0 0
0 0
0 0
0 0
0 0
0 0
0 0
0 0
0 0
0 0
0 0
0 1
0 1
0 1
0 1
0 1
0 1
0 1
0 1
0 1
0 1
0 1
0 2
0 3
0 4
0 4
0 4
0 6
0 6
0 6
0 6
0 6
0 6
0 6
0 6
0 6
0 6
0 6
0 6
0 6
0 6
0 6
0 6
0 6
0 6
0 6
0 6
0 5
0 6
0 6
0 8
0 14
0 25
0 25
0 27
0 28
0 30
0 30
0 29
0 28
0 28
0 28
0 29
0 27
0 27
0 27
0 27
0 27
0 27
0 27
0 27
0 27
0 27
0 27
0 27
0 27
0 27
0 27
0 27
0 27
0 27
0 28
0 28
0 27
0 27
0 27
0 24
0 15
0 5
0 4
0 6
1 8
1 8
1 8
1 8
1 7
1 7
1 7
1 6
1 6
1 6
1 6
1 6
1 6
1 6
1 6
1 6
1 7
1 8
1 9
1 9
1 10
1 10
1 10
1 11
1 14
1 19
1 26
1 28
1 32
1 34
1 35
1 35
1 36
1 37
1 38
1 35
0 33
0 33
0 33
0 33
0 33
0 33
0 33
0 33
0 33
0 33
0 33
0 33
0 33
0 33
0 33
0 33
0 32
0 31
0 30
0 30
0 29
0 29
0 27
0 26
0 22
0 18
0 10
0 7
0 5
0 2
0 2
0 2
0 1
0 1
0 0
0 0
0 0
0 0
0 0
0 0
0 0
0 0
0 1
0 1
0 1
0 1
0 1
0 1
0 1
0 2
0 2
0 2
0 2
0 2
0 2
0 2
0 2
0 2
0 2
0 2
0 2
0 2
0 2
0 2
0 2
0 2
0 2
0 2
0 2
0 2
0 2
0 2
0 3
0 3
0 3
0 3
0 3
0 3
0 2
0 2
0 2
0 2
0 2
0 2
0 2
0 1
0 1
0 1
0 1
0 1
0 1
0 1
0 1
0 1
0 1
0 1
0 1
0 1
0 1
0 1
0 1
0 1
0 1
0 1
0 1
0 1
0 1
0 1
0 0
0 0
0 1
0 1
0 1
0 1
0 1
0 1
0 1
0 1
0 1
0 1
0 2
0 2
0 2
0 2
0 3
0 3
0 3
0 3
0 4
0 4
0 4
0 4
0 4
0 4
0 4
0 4
0 4
0 8
0 9
0 9
0 9
0 10
0 10
0 10
0 10
0 10
0 9
0 9
0 9
0 9
0 9
0 9
0 9
0 9
0 9
0 9
0 8
0 8
0 8
0 8
0 7
0 7
0 7
0 7
0 6
0 5
0 5
0 5
0 5
0 5
0 5
0 5
0 5
0 3
0 2
0 2
0 2
0 1
0 1
0 1
0 1
0 1
0 1
0 1
0 1
0 1
0 1
0 1
0 1
0 1
0 1
0 1
0 1
0 1
0 1
0 1
0 1
0 1
0 0
0 0
0 0
0 1
0 1
0 1
0 1
0 1
0 1
0 1
0 1
0 1
0 1
0 1
0 1
0 1
0 1
0 1
0 1
0 1
0 1
0 1
0 1
0 1
0 1
0 1
0 2
0 2
0 2
0 3
0 3
0 3
0 3
0 7
0 8
0 8
0 34
0 35
0 39
0 39
0 46
0 46
0 47
1 47
1 47
1 47
1 47
1 47
1 47
1 47
1 47
1 47
1 47
1 47
1 47
1 47
1 47
1 47
1 47
1 47
1 47
1 47
1 47
1 47
1 47
1 46
1 46
1 46
1 46
1 39
1 35
1 30
1 4
1 3
1 0
1 0
1 0
1 2
1 3
0 12
0 15
0 19
0 25
0 25
0 25
0 25
0 25
0 25
1 25
1 27
1 27
1 27
1 27
1 27
1 27
1 27
1 27
1 27
1 27
1 27
1 27
1 27
1 27
1 27
1 27
1 27
1 26
1 26
1 26
1 26
1 26
1 26
1 25
1 24
1 23
1 12
1 9
1 7
1 3
1 3
1 3
1 3
1 3
1 3
0 3
0 1
0 1
0 1
0 1
0 1
0 1
0 1
0 1
0 1
0 2
0 2
0 2
0 2
0 2
0 3
0 3
0 3
0 3
0 3
0 3
0 3
0 3
0 3
0 3
0 3
0 3
0 3
0 2
0 2
0 2
0 2
0 2
0 2
0 2
0 2
0 4
0 4
0 5
0 5
0 5
0 5
0 5
0 5
0 5
0 5
0 4
0 4
0 4
0 4
0 4
0 3
0 3
0 3
0 3
0 6
0 6
0 6
0 9
0 9
0 9
0 9
0 9
0 9
0 13
0 13
0 18
0 19
0 20
0 20
0 20
0 20
0 17
0 17
0 17
0 18
0 18
0 18
0 20
0 20
0 20
0 20
0 20
0 20
0 20
0 23
0 26
0 29
0 29
0 29
0 29
0 23
0 23
0 23
0 23
0 23
0 23
0 23
0 26
0 27
0 23
0 22
0 16
0 16
0 16
0 16
0 16
0 14
0 14
0 14
0 14
0 14
0 14
0 14
0 14
0 14
0 14
0 14
0 16
0 16
0 16
0 11
0 9
0 7
0 7
0 7
0 7
0 9
0 9
0 9
0 10
0 10
0 10
0 10
0 7
0 6
0 6
0 6
0 6
0 6
0 6
0 6
0 5
0 5
0 5
0 5
0 5
0 5
0 5
0 5
0 5
0 5
0 5
0 5
0 3
0 3
0 3
0 3
0 3
0 3
0 2
0 2
0 3
0 1
0 1
0 1
0 1
0 2
0 2
0 2
0 2
0 5
0 9
0 11
0 12
0 12
0 12
0 12
0 12
0 12
0 12
0 12
0 13
0 13
0 13
0 13
0 14
0 15
0 16
0 17
0 17
0 17
0 17
0 20
0 23
0 23
0 24
0 24
0 23
0 23
0 23
0 23
0 25
0 24
0 24
0 24
0 24
0 19
0 14
0 14
0 14
0 14
0 17
0 18
0 19
0 20
0 20
0 20
0 19
0 19
0 19
0 19
0 18
0 17
0 16
0 15
0 16
0 16
0 16
0 12
0 9
0 9
0 9
0 9
0 9
0 9
0 9
0 9
0 7
0 7
0 7
0 7
0 7
0 7
0 7
0 14
0 14
0 14
0 11
0 10
0 8
0 9
0 9
0 9
0 11
0 11
0 12
0 13
0 14
0 14
0 14
0 14
0 13
0 13
0 13
0 13
0 13
0 13
0 13
0 13
0 13
0 13
0 14
0 15
0 15
0 15
0 15
0 15
0 15
0 15
0 15
0 8
0 8
0 8
0 8
0 8
0 8
0 7
0 7
0 7
0 5
0 5
0 5
0 4
0 3
0 3
0 3
0 4
0 4
0 4
0 4
0 4
0 4
0 4
0 4
0 4
0 4
0 3
0 3
0 2
0 3
0 3
0 3
0 3
0 3
0 3
0 3
0 4
0 4
0 4
0 4
0 5
0 5
0 5
1 7
1 7
1 7
1 6
1 6
1 5
1 5
1 5
1 5
1 5
1 5
1 5
1 5
1 5
1 5
1 5
1 5
1 5
1 5
1 5
1 5
1 5
1 4
1 4
1 4
1 4
1 10
1 11
2 39
2 45
2 50
2 51
2 50
2 50
2 51
2 53
1 53
1 53
1 54
1 54
1 54
1 54
1 55
1 55
1 55
1 56
1 57
1 60
1 60
1 60
1 62
2 65
3 103
3 105
3 108
3 109
3 109
3 109
3 107
3 107
3 111
3 110
3 105
3 101
2 70
2 67
2 64
2 64
2 64
2 64
2 64
2 61
2 61
2 61
2 60
2 60
2 60
2 63
2 62
2 63
2 62
2 62
2 61
2 58
1 59
1 59
1 57
1 53
0 9
0 9
0 8
0 8
0 7
0 7
0 7
0 7
0 7
0 7
0 7
0 7
0 7
0 7
0 7
0 7
0 7
0 7
0 7
1 7
1 6
1 6
1 6
1 6
1 6
1 2
1 2
1 1
1 1
1 1
1 1
1 1
1 1
1 1
1 1
1 1
1 1
1 1
1 1
1 1
1 0
1 0
1 0
1 0
1 0
1 0
1 0
1 0
1 0
1 0
1 0
1 0
1 0
1 0
1 0
0 0
0 0
0 0
0 0
0 1
0 1
0 1
0 1
0 1
0 1
0 1
0 1
0 1
0 1
0 1
0 1
0 1
0 1
0 1
0 1
0 1
0 1
0 2
0 2
0 2
0 2
0 2
0 2
0 2
0 2
0 2
0 2
0 2
0 2
0 2
0 2
0 2
0 2
1 2
1 2
1 1
1 1
1 1
1 1
1 1
1 1
1 1
1 1
1 1
1 1
1 1
1 1
1 1
1 1
1 1
1 1
1 1
1 1
1 0
1 0
1 0
1 0
1 0
1 0
1 0
1 0
1 0
1 0
1 0
1 1
1 1
1 1
1 1
1 1
0 1
0 1
0 1
0 1
0 1
0 1
0 1
0 1
0 1
0 1
0 1
0 1
0 1
0 1
0 1
0 1
0 1
0 1
0 1
0 1
0 1
0 1
0 1
0 1
0 1
0 1
0 1
0 1
1 1
1 1
1 1
1 0
1 0
1 0
1 0
1 0
1 0
1 0
1 0
1 0
1 0
1 0
1 0
1 0
1 1
1 1
1 1
1 1
1 1
1 1
1 1
1 1
1 1
1 1
1 1
1 1
1 1
1 1
1 1
1 1
1 0
1 0
0 0
0 0
0 0
0 0
0 0
0 0
0 0
0 0
0 0
0 0
0 0
0 0
0 0
0 0
0 0
0 0
0 0
0 0
0 0
0 0
0 0
0 0
0 0
0 0
0 0
0 0
0 0
0 0
0 0
0 0
0 0
0 0
0 0
0 0
0 0
0 0
0 0
0 0
0 0
0 0
0 0
0 0
0 0
0 0
0 0
0 0
0 0
0 0
0 0
0 0
0 0
0 0
0 0
0 2
0 2
0 2
0 2
0 2
0 2
0 2
0 2
0 2
0 2
0 2
0 2
0 2
0 2
0 2
0 2
0 2
0 2
0 2
0 2
0 2
0 3
0 3
0 3
0 3
0 3
0 3
0 3
0 3
0 3
0 3
0 3
0 3
0 3
0 3
0 3
0 3
0 3
0 3
0 3
0 4
0 4
0 4
0 4
0 4
0 4
0 4
0 4
1 4
1 5
1 5
1 5
1 5
1 5
1 5
1 5
1 5
1 4
1 4
1 4
1 4
1 4
1 4
1 4
1 4
1 4
1 4
1 5
1 5
1 5
1 5
1 5
1 3
1 3
1 2
1 2
1 2
1 2
1 2
1 2
1 1
1 1
1 1
1 1
0 1
0 1
0 1
0 1
0 1
0 1
0 1
0 1
0 1
0 1
0 1
0 1
0 1
0 1
0 1
0 1
0 1
0 1
0 1
0 0
0 0
0 0
0 0
0 0
0 0
0 0
0 0
0 0
0 0
0 0
0 0
0 0
0 0
0 0
0 0
0 0
0 0
0 0
0 0
0 0
0 0
0 0
0 0
0 0
0 0
0 0
0 0
0 0
0 0
0 0
0 0
0 0
0 0
0 0
0 0
0 0
0 0
0 1
0 1
0 2
0 2
0 2
0 2
0 3
0 3
0 3
0 3
0 3
0 3
0 3
0 3
0 3
0 3
0 3
0 3
0 3
0 3
0 3
0 3
0 3
0 3
0 3
0 3
0 3
0 3
0 3
0 3
0 3
0 3
0 3
0 3
0 3
0 3
0 2
0 2
0 1
0 1
0 1
0 1
0 0
0 0
0 0
0 0
0 0
0 0
0 0
0 0
0 0
0 0
0 0
0 0
0 0
0 0
0 0
0 0
0 0
0 0
0 0
0 0
0 0
0 0
0 0
0 0
0 0
0 0
0 1
0 1
0 1
0 1
0 1
0 1
0 1
0 2
0 2
0 2
0 2
0 3
0 3
0 3
0 3
0 3
0 3
0 3
0 3
0 3
0 3
0 3
0 3
0 3
0 3
0 3
0 3
0 3
0 3
0 3
0 3
0 3
0 3
0 3
0 3
0 3
0 2
0 2
0 2
0 2
0 2
0 2
0 2
1 1
1 1
1 1
1 0
1 0
1 0
1 0
1 0
1 0
1 0
1 0
2 0
2 0
2 0
2 0
2 0
2 0
2 0
2 0
2 0
2 0
2 0
2 0
2 0
2 0
2 0
2 0
2 0
2 0
2 0
2 0
2 0
2 0
2 0
2 0
2 0
1 0
1 1
1 1
1 1
1 2
1 2
1 2
1 2
0 2
0 2
0 2
0 2
0 2
0 2
0 2
0 2
0 2
0 2
0 2
0 2
0 2
0 2
0 2
0 2
0 2
0 2
0 2
0 2
0 2
0 2
0 2
0 2
0 2
0 2
0 2
0 2
0 2
0 1
0 0
0 0
0 0
0 0
1 0
1 0
1 0
2 4
2 7
2 7
2 7
2 8
2 8
2 8
2 10
2 11
2 11
2 11
2 11
2 11
2 11
2 11
2 11
2 11
2 11
2 11
2 12
2 12
2 13
2 13
2 13
2 13
2 13
2 13
2 13
2 13
1 13
1 13
1 13
2 14
2 14
2 14
2 14
1 7
1 7
1 7
1 7
1 6
1 6
1 7
1 5
1 4
1 4
1 4
1 4
1 4
1 4
1 4
1 4
1 4
2 4
2 4
2 3
2 3
2 2
2 2
2 2
2 2
3 2
5 2
6 2
8 2
8 2
23 2
23 2
22 1
22 1
22 1
22 1
22 1
22 1
22 1
22 1
22 1
22 1
22 0
22 0
22 0
22 0
22 0
22 0
22 0
22 0
22 0
22 0
22 0
21 0
21 0
21 0
21 1
21 1
21 1
21 1
21 1
20 1
17 1
17 1
15 1
15 1
0 1
0 1
0 1
0 1
0 1
0 1
0 1
0 1
0 1
0 2
0 2
0 2
0 6
0 6
0 6
0 6
1 6
1 6
1 6
1 6
1 6
1 6
1 6
1 6
1 6
1 6
1 5
1 5
1 5
1 5
1 6
1 6
1 6
1 6
1 6
1 6
1 6
1 6
1 6
1 6
1 6
1 6
1 6
1 6
1 6
1 5
1 8
4 8
9 4
9 4
9 4
8 4
8 4
8 4
8 4
9 4
13 5
14 5
14 5
14 6
14 8
14 8
14 9
14 9
14 9
14 9
14 8
14 8
14 8
14 8
14 8
15 8
15 9
15 9
15 9
15 9
15 9
15 9
15 9
15 9
15 9
14 9
13 6
9 6
7 6
7 7
9 7
9 8
10 8
9 8
9 9
9 9
4 8
7 8
11 8
13 7
13 5
13 5
13 4
13 4
13 4
13 4
13 4
13 4
13 4
13 4
13 4
12 4
12 3
12 3
12 3
12 3
12 3
12 3
12 3
12 3
12 3
12 3
12 3
12 3
11 3
11 2
10 2
10 0
9 0
9 0
9 1
7 1
7 4
3 4
2 4
1 4
1 4
1 4
1 4
1 4
1 4
1 4
1 4
1 4
1 4
1 4
1 4
1 4
1 4
1 4
1 4
1 4
1 4
1 4
1 4
1 5
1 5
1 6
1 6
1 6
1 6
1 6
2 6
2 13
2 13
2 13
2 13
2 11
1 9
1 9
1 9
1 9
1 9
1 9
1 9
1 9
1 9
1 9
1 9
1 9
1 9
1 9
1 10
1 10
1 10
1 10
1 10
1 10
1 10
1 10
1 10
1 9
1 9
1 8
1 14
1 14
1 13
1 14
0 14
0 8
0 8
0 9
0 9
0 9
0 9
0 9
0 9
0 9
0 9
0 9
0 9
0 9
0 9
0 9
0 9
0 9
0 9
0 9
0 8
0 8
0 8
0 9
0 9
0 9
0 9
0 9
0 9
0 9
0 9
0 9
0 2
0 2
0 2
0 2
0 2
0 2
0 2
0 1
0 1
0 1
0 1
0 1
0 1
1 1
1 1
1 1
1 1
1 1
1 1
1 1
1 1
1 2
1 2
1 2
1 2
1 2
1 2
1 1
1 1
1 1
1 1
1 1
1 1
1 1
1 1
1 1
1 1
1 1
1 1
1 1
1 1
1 3
1 5
1 5
1 5
1 5
1 5
0 5
0 5
0 5
0 5
0 5
0 5
0 5
0 5
0 5
0 4
0 4
0 4
0 4
0 4
0 4
0 4
0 4
0 4
0 4
0 4
0 4
0 4
0 4
0 4
0 4
0 4
0 4
0 3
0 3
0 3
0 1
0 0
0 0
0 0
0 0
0 1
0 2
0 2
0 2
0 2
0 2
0 2
0 2
0 2
0 2
0 2
0 2
0 2
0 2
0 3
0 3
0 3
0 3
0 3
0 3
0 3
0 3
0 3
0 3
0 3
0 3
0 3
0 3
0 3
0 3
0 3
0 3
0 3
0 3
0 3
0 3
0 1
0 1
0 1
0 1
0 1
0 1
0 1
0 1
0 1
0 1
0 1
0 0
0 1
0 1
0 1
0 1
0 1
0 1
0 1
0 1
0 1
0 1
0 1
0 1
0 1
0 1
0 1
0 1
0 1
0 1
0 2
0 2
0 2
0 2
0 2
0 2
0 2
0 2
0 2
0 2
0 2
0 2
0 2
0 2
0 2
0 2
0 2
0 1
0 1
0 1
0 1
0 1
0 1
0 1
0 1
0 1
0 1
0 1
0 1
0 1
0 1
0 1
0 1
0 1
0 1
0 1
0 0
0 0
2 0
2 0
2 0
2 0
2 0
2 0
2 0
2 0
2 0
2 0
2 0
2 0
3 0
5 0
5 0
5 0
5 0
5 0
6 0
6 0
6 0
6 0
6 0
6 0
6 0
6 0
6 2
6 2
6 2
6 2
6 2
6 2
6 2
6 2
6 2
6 2
4 2
4 2
4 2
4 2
4 2
4 2
4 2
4 2
4 2
4 2
4 2
4 2
3 2
1 2
1 2
1 2
1 3
1 3
0 4
0 4
0 4
2 4
2 4
4 4
4 4
4 4
4 2
4 2
4 2
4 2
4 2
4 2
4 2
4 2
4 2
4 2
4 2
4 2
4 2
4 2
4 2
4 2
4 2
4 2
4 2
4 2
4 2
4 2
4 2
4 2
4 2
4 2
4 1
4 1
4 0
4 0
4 0
2 0
2 0
0 0
0 0
0 0
0 0
0 0
0 0
0 0
0 0
0 0
0 0
0 0
0 0
0 0
0 0
0 0
0 0
0 0
0 0
0 0
0 0
0 0
0 0
0 0
0 0
0 0
0 0
0 0
0 0
0 0
0 0
0 0
0 0
0 0
0 0
0 0
0 0
0 0
0 0
0 0
0 0
0 0
0 0
0 0
0 0
0 0
0 0
0 0
0 0
0 0
0 0
0 0
0 0
0 0
0 0
0 0
0 0
0 0
0 0
0 1
0 1
0 1
0 1
0 1
0 1
0 1
0 1
1 1
4 1
4 1
4 1
5 1
5 1
5 1
5 1
5 1
5 1
5 1
5 3
6 3
6 3
6 3
6 3
6 3
6 3
7 3
7 3
7 3
7 3
7 3
7 3
7 3
7 3
7 4
7 4
7 3
7 4
8 4
8 4
8 4
8 4
8 4
7 4
7 4
4 4
4 4
4 4
3 4
3 4
3 4
3 4
3 4
3 4
2 4
2 2
3 2
3 3
3 3
2 3
2 3
2 3
2 3
2 3
2 3
2 3
4 3
4 4
4 4
4 5
4 4
4 4
4 4
3 3
3 3
3 3
3 3
3 3
3 3
3 3
3 3
3 3
3 3
3 3
3 3
3 3
3 3
3 3
3 3
3 3
3 3
3 3
2 3
2 2
2 2
2 2
2 2
2 2
2 2
3 2
4 2
4 2
2 2
2 0
2 0
2 0
2 0
2 0
2 0
2 0
2 0
3 0
3 0
3 0
3 0
3 0
3 0
3 0
3 0
3 0
3 0
3 0
3 0
3 1
3 1
3 1
3 1
2 2
2 2
1 2
1 2
1 2
1 2
1 2
1 2
1 2
1 2
1 2
1 2
1 2
1 2
1 2
1 2
1 2
1 2
1 2
1 2
0 2
0 2
0 2
0 2
0 2
0 2
0 2
0 2
0 2
0 2
0 2
0 2
0 1
0 1
0 1
0 1
0 0
0 0
0 0
0 0
0 0
0 0
0 0
0 0
0 0
0 0
0 0
0 0
0 0
0 0
0 0
0 0
0 0
0 0
0 0
0 0
0 0
0 0
0 0
0 0
0 0
0 0
0 0
0 0
0 0
0 0
0 0
0 0
0 0
0 0
0 0
0 0
0 0
0 0
0 0
0 0
0 0
0 0
0 0
0 0
0 0
0 0
0 0
0 0
0 0
0 0
0 0
0 0
0 0
0 0
0 0
0 0
0 0
0 0
0 0
0 0
0 0
0 0
0 0
0 0
0 0
0 0
0 0
0 0
0 0
0 0
0 0
0 1
0 1
0 1
0 1
0 1
0 1
0 1
0 1
0 1
0 1
0 1
0 1
0 1
0 1
0 1
0 2
0 2
0 2
0 2
0 3
0 3
0 4
0 4
0 5
0 5
0 5
0 5
0 5
0 5
0 5
0 5
0 6
0 6
0 6
0 7
0 8
0 8
0 7
0 7
0 7
0 7
0 7
0 7
0 7
0 7
0 7
0 7
0 7
0 7
0 7
0 7
0 6
0 6
0 6
0 6
0 5
0 4
0 4
0 4
0 3
0 3
0 3
0 3
0 3
0 3
0 3
0 3
0 2
0 2
0 2
0 0
0 0
0 0
0 0
0 2
0 2
0 2
0 2
0 2
0 2
0 2
0 2
0 2
0 2
0 2
0 2
0 2
0 2
0 2
0 2
0 2
0 2
0 2
0 2
0 2
0 2
0 2
0 2
0 2
0 2
0 2
0 2
0 2
0 2
0 2
0 2
0 2
0 2
0 2
0 2
0 0
0 0
0 0
0 0
0 0
0 0
0 0
0 0
0 0
0 0
0 0
0 0
0 0
0 2
0 2
0 2
0 2
0 2
0 2
0 2
0 2
0 2
0 2
0 2
0 2
0 2
0 2
0 2
0 2
0 2
0 2
0 2
0 2
0 2
0 2
0 2
0 2
0 2
0 2
0 2
0 2
0 2
0 2
0 2
0 2
0 2
0 2
0 2
0 2
0 0
0 0
0 0
0 0
0 0
0 0
0 0
0 0
0 0
0 0
0 0
0 0
0 0
0 0
0 0
0 0
0 0
0 0
0 0
0 0
0 0
0 0
0 0
0 0
0 0
0 1
0 1
0 1
0 1
0 1
0 2
0 2
0 2
0 2
0 2
0 2
0 2
0 2
0 2
0 2
0 2
0 2
0 2
0 2
0 2
0 2
0 2
0 2
0 2
0 2
0 2
0 2
0 2
0 2
0 2
0 2
0 2
0 2
0 2
0 2
0 2
0 1
0 0
0 0
0 0
0 0
0 0
0 0
0 0
0 0
0 0
0 0
0 0
0 0
0 0
0 1
0 2
0 2
0 2
0 2
0 2
0 2
0 2
0 2
0 2
0 2
0 2
0 4
0 4
0 4
0 4
0 4
0 4
0 4
0 4
0 5
0 5
0 5
0 5
0 5
0 5
0 5
0 5
0 5
0 5
0 5
0 5
0 5
0 5
0 6
0 7
0 6
0 5
0 5
0 5
0 5
0 5
0 5
0 5
0 5
0 5
0 5
0 5
0 3
0 3
0 3
0 3
0 3
0 3
0 3
0 2
0 2
0 2
0 2
0 2
0 2
0 2
0 2
0 2
0 2
0 2
0 2
0 2
0 0
0 0
0 0
0 0
0 0
0 0
0 0
0 0
0 0
0 0
0 0
0 0
0 0
0 0
0 0
0 0
0 0
0 0
0 0
0 0
0 0
0 0
0 0
0 0
0 0
0 0
0 0
0 0
0 0
0 0
0 0
0 0
0 0
0 0
0 0
0 0
0 0
0 0
0 0
0 0
0 0
0 0
0 0
0 0
0 0
0 0
0 0
0 0
0 0
0 0
0 0
0 0
0 0
0 0
0 0
0 0
0 0
0 0
0 0
0 0
0 0
0 0
0 0
0 0
0 0
0 0
0 0
0 0
3 0
3 0
3 0
3 1
3 1
3 1
3 1
3 1
3 1
3 1
3 1
3 1
3 1
3 1
3 1
3 1
3 1
3 1
3 1
3 1
3 1
3 1
3 1
3 1
3 1
3 1
3 1
3 1
3 1
3 1
3 1
3 1
3 1
3 1
3 1
3 1
0 0
0 0
1 0
1 1
1 1
5 1
5 1
5 1
5 1
5 1
5 1
5 1
5 1
5 1
6 1
6 1
6 1
6 1
6 1
6 1
6 1
6 1
6 1
6 1
7 2
7 2
7 2
7 2
20 2
20 2
20 2
20 2
22 2
23 3
28 3
29 4
61 4
61 3
61 3
61 3
61 3
57 3
57 3
57 3
57 3
57 3
57 3
57 3
57 3
57 3
57 3
57 3
57 3
57 3
57 3
57 3
57 3
57 3
57 3
58 3
57 2
60 2
62 2
67 2
54 2
54 2
57 2
57 2
55 2
54 1
51 1
51 0
24 0
24 0
24 0
24 0
24 0
24 0
24 0
24 0
25 0
25 0
25 0
27 0
44 0
48 0
49 0
52 0
57 0
59 0
59 0
59 0
61 0
62 0
61 0
57 0
53 0
52 0
50 0
50 0
50 0
50 0
48 0
48 0
47 0
46 0
46 0
46 0
43 0
43 0
43 0
43 0
43 0
43 0
42 0
38 0
38 0
38 0
38 0
38 0
21 0
19 0
17 0
13 0
7 0
9 0
9 0
9 0
8 0
7 0
6 0
6 0
6 0
7 0
7 0
8 0
20 0
18 0
20 0
21 0
21 0
21 0
22 0
24 0
24 0
24 0
25 0
29 1
29 1
30 1
30 1
30 1
30 1
29 1
29 1
29 1
29 1
27 1
27 1
27 1
27 1
27 1
27 1
27 1
27 1
29 1
31 1
31 1
31 1
31 1
31 1
30 1
18 1
18 1
15 1
15 1
15 1
13 1
13 1
11 1
11 1
11 1
12 1
8 0
8 0
7 0
8 0
8 0
8 0
8 0
8 0
8 0
8 0
8 0
8 0
8 0
13 0
13 0
13 0
13 0
11 0
10 0
8 0
8 2
7 2
7 2
7 2
7 2
7 2
7 4
7 4
7 4
7 4
7 4
7 4
7 4
7 4
7 4
5 4
5 4
5 4
5 4
5 4
5 4
5 4
5 4
5 4
5 4
5 4
5 4
5 4
5 4
0 4
0 4
1 4
1 4
1 3
1 3
1 2
1 2
1 2
3 2
3 2
3 2
3 2
3 0
3 0
3 0
3 0
3 0
5 0
11 0
11 0
11 0
11 0
11 0
11 0
11 0
11 0
11 0
11 0
11 0
11 1
11 1
11 1
14 1
14 1
14 1
14 1
14 1
13 1
12 1
12 1
12 1
12 1
13 1
13 1
13 1
14 1
15 1
16 1
16 1
16 1
16 1
14 1
14 1
15 1
10 1
10 1
10 1
10 1
10 1
10 1
10 1
10 1
11 1
11 1
12 1
14 0
14 0
14 0
11 0
11 0
11 0
11 0
11 0
10 0
10 0
10 0
11 0
11 0
10 0
10 0
10 0
9 0
8 0
8 0
19 1
19 1
19 1
19 1
23 2
21 3
21 3
21 3
20 3
21 3
21 3
22 3
22 3
22 3
22 3
22 3
21 3
19 3
19 3
19 3
19 3
19 3
19 3
21 4
21 4
21 4
21 4
21 4
20 4
20 4
20 4
20 4
21 4
21 4
21 4
20 4
9 2
10 2
10 2
10 2
6 1
7 1
7 1
7 1
7 1
6 1
14 1
13 1
13 1
13 1
13 1
14 1
14 1
14 1
14 1
14 1
14 1
14 1
14 1
12 0
13 0
13 0
13 0
13 0
13 0
13 0
13 0
13 0
12 0
12 0
11 0
11 0
11 0
10 0
10 0
10 0
10 0
12 1
12 1
12 1
12 1
12 1
4 1
4 1
4 1
4 1
4 1
3 1
3 1
2 1
2 1
3 1
5 1
12 1
13 1
13 1
14 1
14 1
14 1
14 1
14 1
14 1
14 1
14 1
14 1
14 1
24 1
24 1
24 1
24 1
27 1
33 1
33 1
31 0
31 0
33 0
33 0
33 0
34 0
39 0
40 0
44 0
47 0
47 0
47 0
49 0
46 0
44 0
42 0
41 0
40 0
40 0
40 0
40 0
40 0
40 0
40 0
40 0
40 0
40 0
43 0
46 0
42 0
42 0
42 0
41 0
39 0
34 0
35 0
36 0
52 1
53 1
56 1
53 1
51 1
52 1
54 1
52 1
54 1
56 1
59 1
58 1
57 1
58 1
58 1
58 1
58 1
58 1
60 1
60 1
75 2
76 2
76 2
83 2
82 2
84 2
81 2
78 2
78 2
79 2
79 2
79 2
79 2
78 2
77 2
75 2
59 1
55 1
53 1
53 1
52 1
45 1
43 1
42 1
41 1
39 1
37 1
36 1
36 1
36 1
33 1
33 1
29 1
29 1
27 1
27 1
17 0
15 0
15 0
8 0
8 0
4 0
2 0
1 0
0 0
0 0
0 0
0 0
0 0
0 0
0 0
0 0
0 0
0 0
0 0
0 0
0 0
0 0
0 0
0 0
0 0
0 0
0 0
0 0
0 0
0 0
0 0
0 0
0 0
0 0
0 0
0 0
0 0
0 0
0 0
1 0
1 0
1 0
1 0
1 0
1 0
1 0
1 0
1 0
1 0
1 0
1 0
1 0
1 0
1 0
1 0
1 0
1 0
1 0
1 0
1 0
1 0
1 0
1 0
1 0
1 0
1 0
1 0
1 0
4 3
4 3
3 4
3 4
3 4
3 5
3 5
3 5
3 5
3 5
3 5
3 5
3 5
3 5
3 5
3 5
3 5
3 5
3 5
3 5
3 5
3 5
3 6
3 6
3 6
3 6
3 6
3 6
3 6
3 6
3 6
3 6
3 6
3 6
3 5
3 5
0 2
0 2
0 2
0 1
0 1
0 1
0 1
0 1
0 1
0 1
0 1
0 1
0 1
0 1
0 1
0 1
0 1
0 2
0 2
0 2
0 2
0 2
0 1
0 1
0 1
0 1
0 1
0 1
0 1
0 1
0 1
0 1
0 1
0 1
0 1
0 1
0 1
0 1
0 1
0 1
0 2
0 2
0 2
0 2
0 2
0 2
0 2
0 2
0 2
0 2
0 2
0 3
0 3
0 2
0 2
0 2
0 2
0 2
0 2
0 2
0 2
0 2
0 2
0 2
0 2
0 2
0 2
0 2
0 2
0 2
0 2
0 2
0 2
0 1
0 1
0 1
0 1
0 1
0 1
0 1
0 1
0 1
0 1
0 3
0 3
3 9
4 9
4 8
4 8
4 8
4 8
4 8
4 8
4 8
4 8
4 8
4 8
4 8
4 8
4 8
4 8
4 8
4 8
4 8
4 8
4 8
4 8
4 8
4 8
4 8
4 8
4 8
4 8
4 8
4 8
4 8
4 8
4 7
4 9
4 8
4 8
1 2
0 2
0 2
0 2
0 2
0 4
0 4
0 4
0 4
0 4
0 4
0 4
0 4
0 4
0 4
0 4
0 5
0 5
0 5
0 5
0 6
0 7
0 7
0 8
0 8
0 8
0 8
0 8
0 8
0 8
0 8
0 8
0 8
0 6
0 6
0 6
0 6
0 6
0 6
0 6
0 6
0 4
0 4
0 4
0 4
0 4
0 4
0 4
0 4
0 3
0 3
0 3
0 3
0 3
6 6
6 5
6 3
6 3
6 3
6 3
6 3
6 3
6 3
6 3
6 3
6 3
6 3
6 3
6 3
6 3
6 3
6 4
6 4
6 4
6 4
6 4
6 4
6 4
6 4
6 4
6 4
6 4
6 4
6 4
6 4
6 4
6 4
5 4
5 4
5 3
0 1
0 1
1 6
1 6
1 6
1 6
1 6
1 6
1 6
1 6
1 6
1 6
1 5
1 5
1 5
1 5
1 5
1 5
1 5
1 5
1 6
1 6
1 6
1 6
1 6
1 6
2 6
2 6
2 6
2 6
2 7
2 10
2 10
2 10
2 10
2 10
2 10
2 10
1 5
1 5
1 5
1 5
1 5
1 5
1 5
1 5
1 5
1 5
1 5
1 5
1 5
1 5
1 5
1 6
1 6
1 6
1 5
1 5
2 5
2 5
2 5
2 5
1 5
1 5
1 5
1 5
1 3
1 1
1 1
1 1
1 1
1 1
1 1
0 1
0 1
0 1
0 1
0 1
0 1
0 1
0 3
0 3
0 3
0 3
0 3
0 3
0 3
0 3
0 3
0 2
0 2
0 2
0 2
0 2
0 2
0 2
0 2
0 2
0 2
0 2
0 2
0 2
0 2
0 2
0 2
0 2
0 5
0 5
0 5
0 5
0 5
0 5
0 5
0 5
0 5
0 5
0 3
0 3
0 3
0 3
0 3
0 3
0 3
0 3
0 3
0 3
0 3
0 3
0 3
0 3
0 3
0 3
0 3
0 3
0 3
0 4
0 4
0 4
0 4
0 4
0 4
0 4
0 1
0 1
0 1
0 1
0 1
0 1
0 1
0 1
0 1
0 1
0 1
0 1
0 1
0 1
0 1
0 1
0 1
0 1
0 1
0 2
0 2
0 2
0 2
0 2
0 2
0 2
0 2
0 2
0 2
0 1
0 1
0 1
0 1
0 1
0 1
0 1
0 1
0 1
0 1
0 1
0 1
0 1
0 1
0 1
0 1
0 1
0 1
0 1
0 1
0 1
0 1
0 1
0 1
0 1
0 1
0 0
0 1
0 1
0 20
0 24
0 24
0 26
0 26
0 26
0 27
0 32
0 32
0 33
0 33
0 34
0 34
0 35
0 35
0 35
0 35
0 36
0 36
0 36
0 36
0 36
0 36
0 36
0 36
0 36
0 36
0 36
0 37
0 37
0 37
0 36
0 36
0 35
0 35
0 35
0 15
0 12
0 12
0 11
0 11
0 11
0 10
0 5
0 2
0 2
0 2
0 2
0 2
0 2
0 2
0 2
0 2
0 1
0 2
0 2
0 2
0 2
0 2
0 2
0 2
0 2
0 2
0 1
0 1
0 1
0 1
0 1
0 1
0 1
0 1
0 1
0 1
0 1
0 1
0 1
0 1
0 1
0 1
0 1
0 1
0 1
0 1
0 1
0 1
0 1
0 1
0 2
0 2
0 15
0 14
0 14
0 14
0 14
0 14
0 14
0 14
0 14
0 20
0 22
0 28
0 28
0 28
0 28
0 28
0 28
1 28
1 28
1 28
1 31
1 32
1 33
1 33
1 33
1 42
1 43
1 43
1 43
1 43
1 43
1 43
1 43
1 43
1 42
1 42
1 29
1 29
1 29
1 29
1 29
1 29
1 29
1 29
1 29
1 23
1 21
1 15
1 15
1 15
1 15
1 15
1 15
0 15
0 15
0 15
0 12
0 11
0 10
0 10
0 10
0 1
0 0
0 0
0 0
0 0
0 0
0 0
0 0
0 0
0 0
0 0
0 0
0 0
0 0
0 0
0 0
0 0
0 0
0 0
0 0
0 0
0 0
0 0
0 0
0 0
0 0
0 0
0 0
0 0
0 0
0 0
0 0
0 0
0 0
0 0
0 0
0 0
0 0
0 0
0 0
0 0
0 0
0 0
0 0
0 0
0 0
0 0
0 0
0 0
0 0
0 0
0 0
0 0
0 0
0 0
0 0
0 0
0 0
0 0
0 0
0 0
0 0
0 0
0 0
0 0
0 0
0 0
0 0
0 0
0 0
0 0
0 0
0 0
0 0
0 0
0 0
0 0
0 0
0 0
0 0
0 0
1 0
1 0
3 0
3 0
3 0
3 0
3 0
3 0
5 0
5 0
7 0
7 0
7 0
7 0
7 0
7 0
7 0
7 0
7 0
7 1
7 1
7 1
7 1
7 1
7 1
7 1
7 1
7 1
7 1
7 1
7 1
7 1
7 1
7 1
7 1
7 1
9 1
9 1
7 1
9 1
9 1
9 1
9 1
9 2
7 2
6 2
5 2
5 2
5 2
5 2
5 2
5 2
5 2
5 2
5 2
5 1
5 1
5 1
5 1
5 1
5 1
5 1
5 1
5 1
5 1
5 1
5 1
5 1
5 1
5 1
5 1
5 1
2 1
2 1
2 1
0 1
0 1
0 1
0 1
0 0
0 0
0 0
0 0
0 0
0 0
0 0
0 0
0 0
0 0
0 0
0 0
0 0
0 0
0 0
0 0
0 0
0 0
0 0
1 0
1 0
1 0
1 0
1 0
1 0
1 0
1 0
1 0
1 0
1 0
1 0
1 0
1 0
1 0
1 0
1 0
1 0
1 0
1 0
1 0
1 0
1 0
1 0
1 0
1 0
1 0
1 0
1 0
1 0
1 0
1 0
1 0
1 0
1 0
1 0
0 0
0 0
0 0
0 0
0 0
0 0
0 0
0 0
0 0
0 0
0 0
0 0
0 0
0 0
0 0
0 0
0 0
0 0
0 0
1 0
1 0
1 0
1 0
1 0
1 0
1 0
1 0
1 0
1 0
1 0
1 0
1 0
1 0
1 0
1 0
1 0
1 0
1 0
1 0
1 0
1 0
1 0
1 0
1 0
1 0
1 0
1 0
1 0
1 0
1 0
1 0
1 0
1 0
1 0
1 0
0 0
0 0
0 0
0 0
0 0
0 0
0 0
0 0
0 0
0 0
0 0
0 0
0 0
0 0
0 0
0 0
0 0
0 0
0 0
0 0
0 0
0 0
0 0
0 0
0 0
0 0
0 0
0 0
0 0
0 0
0 0
0 0
0 0
0 0
0 0
0 0
0 0
0 0
0 0
0 0
0 0
0 0
0 0
0 1
0 1
0 1
0 1
0 1
0 1
0 1
0 1
0 1
0 1
0 1
0 2
0 2
0 2
0 2
0 2
0 2
0 2
0 2
0 2
0 2
0 2
0 2
0 2
0 2
0 2
0 2
0 2
0 2
0 2
0 2
0 2
0 2
0 2
0 2
0 2
0 1
0 1
0 1
0 1
0 1
0 1
0 1
0 1
0 0
0 0
0 0
0 0
0 0
0 0
0 0
0 0
0 0
0 0
0 0
0 0
0 0
0 0
0 0
0 0
0 0
0 0
0 0
0 0
0 0
0 0
0 0
0 0
0 0
0 0
0 0
0 0
0 0
0 0
0 0
0 0
0 0
0 0
0 0
0 0
0 0
0 0
0 0
0 0
0 0
0 0
0 0
0 0
0 0
0 0
0 0
0 0
0 0
0 0
0 0
0 2
0 3
0 3
0 3
0 24
0 25
1 27
1 32
1 36
1 38
1 51
1 51
1 51
1 51
1 51
1 51
1 51
1 51
1 51
1 51
1 51
1 51
1 51
1 51
1 51
1 51
1 51
1 52
1 52
1 52
1 52
1 52
1 52
1 52
1 50
1 48
1 46
1 46
1 46
0 45
0 9
0 5
0 4
0 4
0 4
0 4
0 4
0 4
0 4
0 4
0 4
0 4
0 4
0 4
0 4
0 7
0 9
0 9
0 9
0 10
0 10
0 11
0 11
0 10
0 10
0 10
0 10
0 10
0 10
0 12
0 16
0 22
1 31
1 58
1 64
1 61
1 61
1 61
1 62
1 62
1 63
1 63
1 63
1 63
1 63
1 63
1 63
1 63
1 63
1 63
1 61
1 60
1 58
1 58
1 57
1 56
1 56
1 56
1 56
1 56
1 56
1 56
1 56
1 56
1 54
1 50
1 40
1 31
0 21
0 2
0 0
0 0
0 0
0 0
0 0
0 0
0 0
0 0
0 0
0 0
0 0
0 0
0 0
0 0
0 0
0 0
0 0
0 0
0 0
0 0
0 0
0 0
0 0
0 0
0 0
0 0
0 0
0 0
0 0
0 0
0 0
0 2
0 2
0 2
0 2
0 2
0 2
0 2
0 2
0 2
0 2
0 2
0 2
0 2
0 2
0 2
0 2
0 0
0 0
0 0
0 0
0 0
0 0
0 0
0 0
0 0
0 0
0 0
0 0
0 0
0 0
0 0
0 0
0 0
0 0
0 0
0 0
0 0
0 0
0 0
0 0
0 0
0 0
0 0
0 0
0 0
0 0
0 0
0 0
0 0
0 0
0 0
0 0
0 0
0 0
0 0
0 0
0 0
0 0
0 0
0 0
0 0
0 0
0 0
0 0
0 0
0 0
0 0
0 0
0 0
0 0
0 0
0 0
0 0
0 0
0 0
0 0
0 0
0 0
0 0
0 0
0 0
0 0
0 0
0 0
0 0
0 0
0 0
0 0
0 0
0 0
0 0
0 0
0 0
0 0
0 0
0 0
0 0
0 0
0 0
0 0
0 0
0 0
0 0
0 0
0 0
0 0
0 0
0 0
0 0
0 0
0 0
0 0
0 0
0 0
0 0
0 0
0 0
0 0
0 0
0 0
0 0
0 0
0 0
0 0
0 0
0 1
0 1
0 1
0 1
0 1
0 1
0 1
0 1
0 1
0 1
0 1
0 1
0 1
0 1
0 1
0 1
0 1
0 1
0 1
0 1
0 1
0 1
0 1
0 1
0 1
0 1
0 1
0 1
0 1
0 1
0 1
0 1
0 1
0 1
0 1
0 1
0 0
0 0
0 0
0 0
0 0
0 0
0 0
0 0
0 0
0 0
0 0
0 0
0 0
0 0
0 0
0 0
0 0
0 0
0 0
0 0
0 0
0 0
0 0
0 0
0 0
0 0
0 0
0 0
0 0
0 0
0 0
0 0
0 0
0 0
0 0
0 0
0 0
0 0
0 0
0 0
0 0
0 0
0 0
0 0
0 0
0 0
0 0
0 0
0 0
0 0
0 0
0 0
0 0
0 0
0 0
0 0
0 0
0 0
0 0
0 0
0 0
0 0
0 0
0 0
0 0
0 0
0 0
0 0
0 0
0 0
0 0
0 0
0 0
0 0
0 0
0 0
0 0
0 1
0 1
0 1
0 1
0 1
0 1
0 1
0 1
0 1
0 1
5 1
10 1
10 1
10 1
10 1
10 1
10 1
10 1
10 1
10 1
10 1
10 1
10 1
10 1
10 1
10 1
10 1
10 1
10 1
11 1
14 1
14 1
14 1
14 1
14 1
14 1
14 0
15 0
15 0
15 0
15 0
15 0
15 0
14 0
12 0
10 0
10 0
5 0
5 0
5 0
5 0
5 0
5 0
5 0
5 0
5 0
5 0
5 0
5 0
5 0
5 0
6 0
6 0
5 0
5 0
4 0
6 0
10 0
11 0
20 0
21 0
22 0
22 0
21 0
21 0
21 0
21 0
21 0
22 0
25 0
26 0
26 0
26 0
26 0
26 0
26 0
26 0
26 0
26 0
26 0
26 0
26 0
26 0
26 0
29 0
39 0
40 0
39 0
39 0
40 0
40 0
38 0
33 0
31 0
28 0
22 0
21 0
20 0
21 0
21 0
21 0
21 0
22 0
22 0
20 0
17 0
17 0
17 0
17 0
17 0
17 0
17 0
17 0
20 0
33 0
53 0
69 0
69 0
66 0
65 0
65 0
64 0
64 0
64 0
64 0
68 0
71 0
71 0
71 0
71 0
71 0
71 0
71 0
71 0
70 0
70 0
70 0
70 0
70 0
70 0
70 0
70 0
71 0
71 0
71 0
71 0
71 0
70 0
66 0
60 0
50 0
31 0
14 0
13 0
11 0
8 0
8 0
8 0
8 0
8 0
8 0
3 0
2 0
2 0
2 0
2 0
2 0
2 0
2 0
2 0
2 0
2 0
2 0
2 0
1 0
1 0
1 0
1 0
0 0
1 0
2 0
2 0
2 0
2 0
2 0
2 0
2 0
2 0
2 0
2 0
6 0
11 0
13 0
13 0
13 0
13 0
13 0
13 0
14 1
14 1
14 1
14 2
16 2
16 2
16 2
16 2
16 2
16 2
16 2
16 2
16 2
15 2
15 2
15 2
15 2
15 2
15 2
15 2
15 2
15 2
57 2
61 2
64 2
67 2
67 2
67 2
63 2
60 2
59 2
59 2
59 2
59 2
59 2
59 0
58 0
58 0
58 0
58 0
56 0
56 0
56 0
56 0
56 0
56 0
56 0
55 0
55 0
55 0
55 0
55 0
56 0
56 0
56 0
55 0
49 0
48 0
10 0
7 0
6 0
4 0
4 0
4 0
4 0
3 0
3 0
3 0
3 0
3 0
3 0
3 0
3 0
3 0
3 0
3 0
3 0
3 0
3 0
6 0
7 0
7 0
8 2
8 2
9 2
9 2
9 2
9 2
10 2
10 2
10 2
9 2
9 2
9 2
9 2
9 2
9 2
8 2
8 2
8 2
8 2
8 2
8 2
8 3
8 3
9 3
12 3
12 3
12 3
12 3
13 3
14 3
14 3
14 3
15 3
12 3
11 3
11 3
10 1
10 1
9 1
9 1
9 1
9 1
7 1
7 1
7 1
7 1
7 1
7 1
7 1
7 1
7 1
8 1
8 1
8 1
9 1
9 2
8 1
8 2
9 2
9 2
7 2
7 2
7 2
7 2
5 2
5 2
5 2
5 2
4 2
4 2
4 2
4 2
4 1
4 1
4 1
4 1
5 1
5 1
7 1
7 1
7 1
7 1
7 1
7 1
7 1
7 1
7 1
6 1
7 1
6 1
6 1
4 0
4 0
4 0
4 0
4 0
4 0
4 0
4 0
4 0
4 0
4 0
4 0
4 0
4 0
4 0
4 1
4 1
4 1
4 1
4 1
4 1
3 1
2 1
1 1
1 1
1 1
1 1
1 1
1 1
2 1
2 1
2 1
2 1
3 1
4 1
4 1
4 1
4 1
4 1
4 1
4 1
4 1
4 1
5 1
5 1
5 1
5 1
5 1
5 1
5 1
5 0
11 0
11 0
16 2
17 2
17 2
17 2
17 2
17 2
17 3
17 3
17 3
17 3
17 3
17 3
16 3
16 3
16 3
15 3
14 3
13 3
13 3
13 3
13 3
13 3
13 3
13 3
14 3
14 3
13 3
13 3
13 3
15 3
16 3
17 3
17 3
17 3
11 3
11 3
6 1
5 1
5 1
5 1
5 1
5 1
5 0
5 0
5 0
5 0
5 0
5 0
5 0
5 0
5 0
5 0
6 0
6 0
6 0
6 0
6 0
6 0
6 0
6 0
5 0
5 0
5 0
4 0
4 0
2 0
2 0
1 0
1 0
1 0
1 0
1 0
1 0
1 0
1 0
1 0
1 0
1 0
1 0
1 0
1 0
1 0
1 0
1 0
1 0
1 0
1 0
1 0
1 0
1 0
1 0
1 0
1 0
1 0
2 0
2 0
2 0
2 0
3 0
3 0
3 0
3 0
3 0
13 0
13 0
16 0
22 0
22 0
24 0
24 0
24 0
24 0
28 0
30 0
30 0
30 0
30 0
30 0
30 0
30 0
30 0
30 0
33 0
33 0
32 0
32 0
32 0
32 0
32 0
32 0
31 0
31 0
31 0
31 0
30 0
30 0
30 0
30 0
30 0
20 0
20 0
18 0
12 0
11 0
11 0
11 0
11 0
10 0
6 0
6 0
6 0
6 0
6 0
6 0
6 0
6 0
6 0
6 0
3 0
3 0
3 0
3 0
3 0
3 0
3 0
3 0
3 0
3 0
3 0
3 0
4 0
4 0
4 0
5 0
4 0
4 0
3 0
3 0
2 0
2 0
2 0
2 0
2 0
2 0
2 0
2 0
5 0
5 0
5 0
5 0
5 0
5 0
5 0
5 0
5 0
5 0
5 0
5 0
5 0
5 0
5 0
5 0
5 0
5 0
5 0
5 0
4 0
6 0
6 0
5 0
5 0
5 0
5 0
9 0
9 0
9 0
9 0
9 0
9 0
9 0
9 0
9 0
6 0
6 0
6 0
6 0
6 0
6 0
6 0
6 0
6 0
6 0
6 0
6 0
6 0
6 0
7 0
7 0
7 0
7 0
7 0
7 0
5 0
5 0
5 0
5 0
4 0
4 0
4 0
1 0
1 0
1 0
1 0
1 0
1 0
1 0
1 0
1 0
2 0
2 0
2 0
2 0
2 0
2 0
2 0
3 0
3 0
3 0
3 0
3 0
3 0
2 0
2 0
2 0
2 0
3 0
3 0
3 0
3 0
3 0
3 0
3 0
3 0
4 0
4 0
4 0
4 0
4 0
4 0
4 0
4 0
4 0
4 0
4 0
3 0
3 0
3 0
3 0
3 0
3 0
3 0
2 0
2 0
2 0
2 0
2 0
2 0
2 0
2 0
2 0
2 0
1 0
1 0
1 0
1 0
1 0
1 0
1 0
1 0
0 0
0 0
0 0
0 0
0 0
0 0
0 0
0 0
0 0
0 0
0 0
1 0
10 0
13 0
14 0
14 0
14 0
14 0
14 0
14 0
14 0
14 0
14 0
14 0
14 0
14 0
14 0
14 0
14 0
14 0
14 0
14 0
14 0
14 0
14 0
14 0
14 0
14 0
14 0
14 0
14 0
15 0
15 0
14 0
13 0
13 0
13 0
13 0
4 0
1 0
1 0
1 0
1 0
1 0
1 0
1 0
1 0
1 0
1 0
1 0
1 0
1 0
1 0
1 0
1 0
1 0
1 0
1 0
1 0
1 0
1 0
1 0
1 0
1 0
1 0
1 0
1 0
0 0
0 0
0 0
0 0
0 0
0 0
0 0
0 0
0 0
0 0
0 0
0 0
0 0
0 0
0 0
0 0
0 0
0 0
0 0
0 0
0 0
0 0
0 0
0 0
0 0
0 0
0 0
0 0
0 0
0 0
0 0
0 0
0 0
1 0
1 0
1 0
1 0
1 0
1 0
1 0
1 0
1 0
1 0
1 0
1 0
1 0
1 0
1 0
0 0
0 0
0 0
0 0
0 0
0 0
0 0
0 0
0 0
0 0
0 0
0 0
0 0
0 0
0 0
0 0
0 0
0 0
0 0
0 0
0 0
0 0
0 0
0 0
0 0
0 0
0 0
0 0
0 0
0 0
0 0
0 2
0 2
0 2
0 3
0 3
0 3
0 3
0 3
0 3
0 3
0 3
0 3
0 3
0 3
0 3
0 3
0 3
0 3
0 3
0 3
0 3
0 3
0 3
0 3
0 3
0 3
0 3
0 3
0 3
0 3
0 3
0 3
0 3
0 3
0 3
0 3
0 0
0 0
0 0
0 0
0 0
0 0
0 8
0 8
0 9
0 10
0 12
0 13
0 13
0 13
0 13
0 13
0 13
0 14
0 19
0 19
0 19
0 19
0 19
0 19
0 19
0 19
0 19
0 19
0 19
0 19
0 19
0 19
0 19
0 19
0 19
0 19
0 19
0 19
0 19
0 19
0 19
0 19
0 8
0 6
0 6
0 7
0 7
0 7
0 7
0 7
0 7
0 7
0 11
0 11
0 8
0 8
0 11
0 13
0 13
0 13
0 13
0 14
0 14
0 14
0 14
0 14
0 14
0 14
0 14
0 18
0 18
0 18
0 18
0 19
0 19
0 19
0 19
0 19
0 19
0 19
0 18
0 18
0 21
1 34
1 34
1 36
1 36
1 41
1 37
1 42
1 39
1 38
1 37
1 35
1 35
1 35
1 35
1 34
1 34
1 34
1 31
1 31
1 31
1 31
1 30
1 30
1 30
1 30
1 30
1 30
1 29
1 32
1 32
1 32
1 32
1 38
1 39
1 40
1 37
0 25
0 25
0 22
0 22
0 16
0 15
0 12
0 12
0 12
0 12
0 12
0 12
0 12
0 12
0 12
0 12
0 12
0 12
0 12
0 12
0 12
0 12
0 12
0 13
0 13
0 12
0 12
0 12
0 9
0 9
0 9
0 9
0 4
0 3
0 1
0 1
0 1
0 1
0 1
0 1
0 1
0 1
0 1
0 1
0 1
0 1
0 1
0 1
0 1
0 1
0 1
0 1
0 1
0 1
0 1
0 1
0 1
0 1
0 1
0 0
0 0
0 0
0 0
0 0
0 0
0 0
0 0
0 0
1 8
1 10
1 12
1 12
1 12
1 12
1 12
1 12
1 12
1 14
1 14
1 14
1 15
1 16
1 17
1 17
1 17
1 17
1 17
1 17
1 17
1 17
1 17
1 17
1 17
1 17
1 17
1 17
1 17
1 18
1 18
1 18
1 18
1 18
1 18
1 18
0 10
0 9
0 8
0 8
0 8
0 8
0 8
0 8
0 9
0 8
0 7
0 6
0 6
0 5
0 5
0 5
0 5
1 5
1 5
1 5
1 5
1 5
1 5
1 5
1 5
1 5
1 5
1 5
1 5
1 4
1 5
1 5
0 5
0 5
0 5
0 5
0 3
0 3
0 4
0 4
0 4
0 4
0 4
0 4
0 3
0 2
0 2
0 2
0 2
0 2
0 2
0 2
0 2
0 2
0 2
0 2
0 2
0 2
0 2
0 2
0 2
0 2
0 2
0 2
0 1
0 1
0 1
0 1
0 1
0 1
0 1
0 1
0 1
0 1
0 0
0 0
0 0
0 0
0 0
0 0
0 0
0 0
0 0
0 0
0 0
0 0
0 0
0 0
0 0
0 0
0 0
0 0
0 0
0 0
0 0
0 0
0 0
0 0
0 0
0 0
0 0
0 0
0 0
0 0
0 0
0 0
0 0
0 0
0 0
0 0
0 0
0 0
0 1
0 1
0 1
0 2
0 2
0 2
0 2
0 2
0 2
0 2
0 2
0 2
0 2
0 2
0 2
0 2
0 2
0 2
0 2
0 2
0 2
0 2
0 2
0 2
0 2
0 2
0 2
0 2
0 2
0 2
0 2
0 2
0 2
0 3
0 3
0 3
0 2
0 2
0 2
0 1
0 2
0 4
0 4
0 5
0 5
0 5
0 5
0 5
0 5
0 5
0 6
0 7
0 7
0 7
0 8
0 9
0 9
0 9
0 9
0 10
0 10
0 10
0 10
0 10
0 10
0 10
0 10
0 10
0 9
0 9
0 9
0 9
0 9
0 9
0 9
0 9
0 8
0 8
0 8
0 7
0 7
0 8
0 8
0 8
0 8
0 8
0 8
0 6
0 6
0 5
0 4
0 4
0 4
0 4
0 4
0 4
0 4
0 4
0 4
0 4
0 4
0 4
0 4
0 4
0 4
0 4
0 4
0 4
0 4
0 4
0 4
0 4
0 2
0 2
0 2
0 2
0 0
0 0
0 0
0 0
0 0
0 0
0 0
0 0
0 0
0 0
0 0
0 0
0 0
0 0
0 0
0 0
0 0
0 0
0 0
0 0
0 0
0 0
0 0
0 0
0 0
0 0
0 0
0 0
0 0
0 0
0 0
0 0
0 0
0 0
0 0
0 0
0 0
0 0
0 0
0 0
0 0
0 0
0 0
0 0
0 0
0 0
0 0
0 0
0 0
0 0
0 0
0 0
0 0
0 0
0 0
0 0
0 0
0 0
0 0
0 0
0 0
0 0
0 0
0 0
0 0
0 0
0 0
0 0
0 0
0 0
0 0
1 0
1 0
1 0
1 0
1 0
1 0
1 0
1 0
1 0
1 0
1 0
1 0
1 0
1 0
1 0
1 0
1 0
1 0
1 0
1 0
1 0
1 0
1 0
1 0
1 0
1 0
1 0
1 0
1 0
1 0
1 0
1 0
1 0
1 0
1 0
1 0
0 0
0 0
0 0
0 0
0 0
0 0
0 0
0 0
0 0
0 0
0 0
0 0
0 0
0 0
0 0
0 0
0 0
0 0
0 0
0 0
0 0
0 0
0 0
0 0
0 0
0 0
0 0
0 0
0 0
0 0
0 0
0 0
0 0
0 0
0 0
0 0
0 0
0 0
0 0
0 0
0 0
0 0
0 0
0 0
0 0
0 0
0 0
0 0
0 0
0 0
0 0
0 0
0 0
0 0
0 0
0 0
0 0
0 0
0 0
0 0
0 0
0 0
0 0
0 0
0 0
0 0
0 0
0 0
0 0
0 0
0 0
0 0
0 0
0 0
0 0
0 0
0 0
0 0
0 0
0 0
0 0
0 0
0 0
0 0
0 0
0 0
0 0
0 0
0 0
0 0
0 0
0 0
0 0
0 0
0 0
0 0
0 0
0 0
0 0
0 0
0 0
0 0
1 0
1 0
1 0
1 0
1 0
1 0
1 0
1 0
1 0
1 0
1 0
1 0
1 0
1 0
1 0
1 0
1 0
1 0
1 0
1 0
1 0
1 0
1 0
1 0
1 0
1 0
1 0
1 0
1 0
1 0
1 0
2 0
2 0
2 0
2 0
2 0
1 0
1 0
1 0
1 0
1 0
2 0
4 0
4 0
4 0
4 0
4 0
4 0
4 0
4 0
4 0
4 0
4 0
4 0
4 0
4 0
4 0
4 0
4 0
4 0
4 0
4 0
4 0
4 0
4 0
4 0
6 0
5 0
5 0
5 0
5 0
5 0
5 0
5 0
5 0
5 0
4 0
2 0
2 0
2 0
2 0
2 0
2 0
2 0
2 0
2 0
2 0
2 0
2 0
2 0
2 0
2 0
2 0
3 0
6 0
6 0
7 0
8 0
8 0
8 0
8 0
8 0
6 0
6 0
6 0
6 0
6 0
6 0
6 0
6 0
6 0
6 0
6 0
6 0
6 0
6 0
6 0
6 0
6 0
6 0
6 0
6 0
6 0
6 0
5 0
5 0
5 0
6 0
5 0
5 0
2 0
2 0
2 0
1 0
1 0
1 0
1 0
1 0
1 0
1 0
1 0
1 0
1 0
1 0
1 0
1 0
1 0
1 0
1 0
1 0
1 0
1 0
1 0
1 0
1 0
1 0
1 0
1 0
1 0
1 0
1 0
1 0
1 0
0 0
0 0
0 0
0 0
0 0
0 0
0 0
1 0
1 0
1 0
1 0
1 0
1 0
2 0
2 0
3 0
3 0
3 0
3 0
4 0
11 0
14 0
15 0
15 0
15 0
15 0
15 0
15 0
15 0
15 0
15 0
15 0
15 0
15 0
15 0
15 0
15 0
15 0
15 0
15 0
15 0
15 0
15 0
14 0
14 0
14 0
14 0
14 0
14 0
12 0
11 0
11 1
11 1
10 1
7 1
4 1
1 1
1 1
0 1
0 1
0 1
0 1
0 1
0 1
0 1
0 1
0 1
0 1
0 1
0 1
0 1
0 1
1 1
1 1
1 1
1 1
1 1
1 1
1 1
1 1
1 1
1 1
1 1
1 1
1 1
1 1
1 1
1 0
1 0
1 0
1 0
1 0
1 0
1 0
1 0
1 0
1 0
1 0
1 0
1 0
1 0
1 0
1 0
2 0
2 0
2 0
3 0
4 0
3 0
3 0
3 0
3 0
3 0
3 0
3 0
3 0
3 0
3 0
3 0
3 0
3 0
3 0
3 0
3 0
3 0
3 0
3 0
3 0
3 0
3 0
3 0
3 0
3 0
3 0
3 0
3 0
3 0
3 0
2 0
2 0
2 0
2 0
1 0
0 0
0 0
0 0
0 0
0 0
0 0
0 0
0 0
0 0
0 0
0 0
0 0
0 0
0 0
0 0
0 0
0 0
0 1
0 1
0 1
0 1
0 1
0 1
0 1
0 1
0 1
0 1
0 1
0 1
0 1
0 1
0 1
0 1
0 1
0 1
0 1
0 1
0 1
0 1
0 1
0 1
0 1
0 1
0 1
0 1
0 1
0 1
0 1
0 1
1 1
1 1
4 0
4 0
4 0
4 0
4 0
4 0
4 0
4 0
4 0
4 0
4 0
4 0
4 0
4 0
4 0
4 0
4 0
4 0
4 0
4 0
4 0
4 0
4 0
4 0
4 0
4 0
4 0
4 0
4 0
4 0
4 0
4 0
4 0
4 0
3 0
3 0
0 0
0 0
0 0
0 0
0 0
0 0
0 0
0 0
0 0
0 0
0 0
0 0
0 0
0 0
0 0
0 0
0 0
0 0
0 0
0 0
0 0
0 0
0 0
0 0
0 0
0 0
0 0
0 0
0 0
0 0
0 0
0 0
0 0
0 0
0 0
0 0
0 0
0 0
0 0
0 0
0 0
0 0
0 0
0 0
0 0
0 0
0 0
0 0
0 0
0 0
0 0
0 0
0 0
0 0
0 0
0 0
0 0
0 0
0 0
0 0
0 0
0 0
0 0
0 0
1 0
1 0
1 0
1 0
1 0
1 0
1 0
1 0
1 0
1 0
1 0
1 0
1 0
1 0
1 0
1 0
1 0
1 0
1 0
1 0
1 0
1 0
1 0
1 0
1 0
1 0
1 0
1 0
1 0
1 0
1 0
1 0
1 0
1 0
1 0
1 0
0 0
0 0
0 0
0 0
0 0
0 0
0 0
0 0
0 0
0 0
0 0
0 0
0 0
0 0
0 0
0 0
0 0
0 0
0 0
0 0
0 0
0 0
0 0
0 0
0 0
0 0
0 0
0 0
0 0
0 0
0 0
0 0
0 0
0 0
0 0
0 0
0 0
0 0
0 0
0 0
0 0
0 0
0 0
0 0
0 0
0 0
0 0
0 0
0 0
0 0
0 0
0 0
0 0
0 0
0 0
0 0
0 0
0 0
2 0
4 0
4 0
4 0
4 0
4 0
5 0
5 0
5 0
5 0
5 0
5 0
5 0
5 0
8 0
8 0
8 0
8 0
8 0
8 0
8 0
8 0
8 0
8 0
8 0
8 0
8 0
8 0
9 0
9 0
9 0
9 0
9 0
9 0
9 0
9 0
7 0
5 0
5 0
5 0
5 0
5 0
4 0
4 0
4 0
4 0
4 0
4 0
4 0
4 0
1 0
1 0
1 0
1 0
1 0
1 0
1 0
1 0
1 0
1 0
1 0
1 0
2 0
2 0
2 0
2 0
2 0
2 0
2 0
2 0
2 0
2 0
2 0
2 0
2 0
2 0
2 0
2 0
2 0
2 0
2 0
2 0
2 0
2 0
2 0
2 0
2 0
2 0
2 0
2 0
2 0
2 0
2 0
2 0
2 0
2 0
2 0
1 0
0 0
0 0
0 0
0 0
0 0
0 0
0 0
0 0
0 0
0 0
0 0
0 0
0 0
0 0
0 0
0 0
1 0
2 0
2 0
2 0
2 0
2 0
2 0
2 0
3 0
3 0
3 0
3 0
3 0
3 0
3 0
3 0
3 0
4 0
4 0
4 0
4 0
4 0
4 0
4 0
5 0
5 0
8 0
8 0
8 0
8 0
8 0
8 0
8 0
8 0
8 0
8 0
7 0
6 0
6 0
6 0
6 0
6 0
6 0
7 0
6 0
6 0
6 0
9 0
9 0
10 0
11 0
11 0
11 0
10 0
10 0
10 0
10 0
10 0
10 0
10 0
9 0
9 0
6 0
10 0
10 0
10 0
10 0
10 0
10 0
10 0
10 0
10 0
10 0
10 0
10 0
10 0
10 0
10 0
10 0
9 0
9 0
9 0
9 0
8 0
8 0
7 0
6 0
6 0
6 0
6 0
6 0
6 0
6 0
6 0
6 0
6 0
6 0
6 0
5 0
2 0
2 0
2 0
2 0
2 0
2 0
2 0
3 0
3 0
3 0
3 0
3 0
3 0
3 0
3 0
3 0
3 0
3 0
3 0
2 0
1 0
1 0
1 0
1 0
1 0
1 0
2 0
2 0
3 0
3 0
5 0
5 0
5 0
5 0
5 0
5 0
5 0
5 0
6 0
6 0
6 0
6 0
6 0
5 0
5 0
5 0
5 0
5 0
5 0
5 0
5 0
5 0
5 0
5 0
5 0
5 0
5 0
5 0
6 0
6 0
6 0
7 0
6 0
7 0
6 0
6 0
4 0
4 0
4 0
4 0
4 0
4 0
4 0
4 0
3 0
3 0
3 0
3 0
3 0
3 0
3 0
3 0
4 0
4 0
4 0
4 0
4 0
4 0
4 0
4 0
11 0
13 0
13 0
13 0
12 0
12 0
12 0
10 0
10 0
10 0
10 0
10 0
10 0
10 0
10 0
10 0
10 0
10 0
10 0
10 0
10 0
10 0
10 0
10 0
10 0
10 0
10 0
11 0
10 0
10 0
10 0
10 0
10 0
10 0
10 0
10 0
3 0
1 0
1 0
1 0
1 0
1 0
1 0
1 0
1 0
1 0
1 0
1 0
4 0
4 0
4 0
4 0
4 0
4 0
4 0
4 0
4 0
4 0
4 0
4 0
7 0
7 0
7 0
7 0
7 0
7 0
7 0
8 0
8 0
8 0
8 0
8 0
8 0
8 0
9 0
9 0
9 0
9 0
9 0
11 0
10 0
8 0
8 0
8 0
8 0
8 0
8 0
8 0
8 0
8 0
8 0
8 0
8 0
8 0
9 0
9 0
5 0
5 0
5 0
5 0
5 0
5 0
6 0
5 0
5 0
5 0
4 0
4 0
4 1
4 1
4 1
4 1
4 1
4 1
4 1
2 1
2 1
2 1
2 1
2 1
2 1
2 1
2 1
2 0
2 0
2 0
2 0
2 0
2 0
2 0
1 0
1 0
1 0
1 0
1 0
1 0
1 0
1 0
0 0
1 0
1 0
1 0
1 0
1 0
1 0
1 0
1 0
1 0
1 0
1 0
1 0
1 0
1 0
1 0
1 0
1 0
1 0
1 0
1 0
1 0
1 0
1 0
1 0
1 0
1 0
1 0
3 0
3 0
3 0
3 0
3 0
3 0
3 0
3 0
3 0
2 0
2 0
2 0
2 0
2 0
2 0
2 0
2 0
2 0
2 0
2 0
2 0
2 0
2 0
3 0
3 0
3 0
3 0
3 0
3 0
3 0
3 0
3 0
3 0
5 0
5 0
6 0
4 0
4 0
4 0
4 0
4 1
4 1
4 1
4 1
4 1
4 1
4 1
4 1
4 1
4 1
4 1
4 1
4 1
4 1
4 1
4 1
3 1
3 0
3 0
3 0
4 0
4 0
4 0
4 0
4 0
4 0
4 0
4 0
4 0
1 0
1 0
1 0
1 0
11 0
11 0
11 0
11 0
11 0
11 0
12 0
12 0
12 0
12 0
12 0
12 0
12 0
12 0
12 0
12 0
12 0
12 0
12 0
12 0
12 0
12 0
13 0
12 0
12 0
12 0
12 0
12 0
12 0
12 0
12 0
13 0
13 0
13 0
14 0
14 0
5 0
6 0
6 0
6 0
6 0
6 0
6 0
6 0
6 0
6 0
6 0
6 0
6 0
8 0
8 0
10 0
11 0
11 1
11 1
12 1
12 1
12 1
11 1
15 1
15 1
17 1
17 1
17 1
17 1
17 1
17 1
16 1
15 1
15 1
15 1
15 1
13 1
13 1
13 1
12 1
12 1
12 1
12 1
12 1
12 1
12 1
12 1
12 1
12 1
10 1
10 1
7 1
7 1
7 0
7 0
6 0
6 0
6 0
6 0
2 0
2 0
0 0
0 0
0 0
0 0
0 0
0 0
0 0
0 0
0 0
0 0
0 0
0 0
0 0
0 0
0 0
0 0
0 0
0 0
0 0
0 0
0 0
0 0
0 0
0 0
0 0
0 0
0 0
0 0
0 0
0 0
0 0
0 0
0 0
0 0
0 0
0 0
0 0
0 0
0 0
0 0
0 0
0 0
0 0
0 0
0 0
0 0
0 0
0 0
0 0
0 0
0 0
0 0
0 0
0 0
0 0
0 0
0 0
0 0
0 0
0 0
0 0
0 0
0 0
0 0
0 0
1 0
1 0
1 0
1 0
1 0
1 0
1 0
1 0
1 0
1 0
1 0
1 0
1 0
1 0
1 0
1 0
1 0
1 0
1 0
1 0
1 0
1 0
1 0
1 0
1 0
1 0
1 0
1 0
1 0
1 0
1 0
1 0
1 0
1 0
1 0
1 0
0 0
0 0
0 0
0 0
0 0
0 0
0 0
0 0
0 0
0 0
0 0
0 0
0 0
1 0
1 0
1 0
1 0
1 0
1 0
1 0
1 0
1 0
1 0
1 0
1 0
1 0
1 0
1 0
1 0
1 0
1 0
1 0
1 0
1 0
1 0
1 0
1 0
1 0
1 0
1 0
1 0
1 0
1 0
1 0
1 0
1 0
1 0
1 0
1 0
0 0
0 0
0 0
0 0
0 0
0 0
0 0
0 0
0 0
0 0
0 0
2 0
2 0
2 0
2 1
2 1
2 1
2 1
3 1
3 1
3 1
3 1
3 1
3 1
3 1
3 1
3 1
3 1
3 1
3 1
3 1
3 1
3 1
3 1
3 1
3 1
3 1
3 1
3 1
3 1
3 1
3 1
3 1
3 1
3 1
3 1
3 0
1 0
1 0
1 0
1 0
1 0
1 0
0 0
0 0
0 0
0 0
0 0
0 0
0 0
0 0
0 0
0 0
0 0
0 0
0 0
0 0
1 0
1 0
1 0
1 0
1 0
1 0
1 0
1 0
1 0
1 0
1 0
1 0
1 0
1 0
1 0
1 0
1 0
1 0
1 0
1 0
1 0
1 0
1 0
1 0
1 0
1 0
1 0
1 0
1 0
1 0
1 0
1 0
1 0
0 0
0 0
0 0
0 0
0 0
0 0
0 0
0 0
0 0
0 0
0 0
0 0
0 0
0 0
0 0
0 0
0 0
0 0
0 0
0 0
0 0
0 0
0 0
0 0
0 0
0 0
0 0
0 0
0 0
0 0
0 0
0 0
0 0
0 0
0 0
0 0
0 0
0 0
0 0
0 0
0 0
0 0
0 0
0 0
0 0
0 0
0 0
0 0
0 0
0 0
0 0
0 0
0 0
0 0
0 0
0 0
0 0
0 0
0 0
0 0
0 0
0 0
0 0
0 0
0 0
0 0
0 0
0 0
0 0
0 0
0 0
0 0
0 0
0 0
0 0
0 0
0 0
0 0
0 0
0 0
0 0
0 0
0 0
0 0
0 0
0 0
0 0
0 0
0 0
0 0
0 0
0 0
0 0
0 0
0 0
0 0
0 0
0 0
0 0
0 0
0 0
0 0
0 0
0 0
0 0
0 0
0 0
0 0
0 0
0 0
0 0
0 0
0 0
0 0
0 0
0 0
0 0
0 0
0 0
0 0
0 0
0 0
0 0
0 0
0 0
0 0
0 0
0 0
0 0
0 0
0 0
0 0
0 0
0 0
0 0
0 0
0 0
0 0
0 0
0 0
0 0
0 0
0 0
0 0
0 0
0 0
0 0
0 0
0 0
0 0
0 0
0 0
0 0
0 0
0 0
0 0
0 0
0 0
0 0
0 0
0 0
0 0
0 0
0 0
0 0
0 0
0 0
0 0
0 0
0 0
0 0
0 0
0 0
0 0
0 0
0 0
0 0
0 0
0 0
0 0
0 0
0 0
0 0
0 0
0 0
0 0
0 0
0 0
0 0
0 0
0 0
0 0
0 0
0 0
0 0
0 0
0 0
0 0
0 0
0 0
0 0
0 0
0 0
0 0
0 0
0 0
0 0
0 0
0 0
0 0
0 0
0 0
0 0
0 0
0 0
0 0
0 0
0 0
0 0
0 0
0 0
0 0
0 0
0 0
0 0
0 0
0 0
0 0
0 0
0 0
0 0
0 0
0 0
0 0
0 0
0 0
0 0
0 0
0 0
0 0
0 0
0 0
0 0
0 0
0 0
0 0
0 0
0 0
0 0
0 0
0 0
0 0
0 0
0 0
0 0
0 0
0 0
0 0
0 0
0 0
0 0
0 0
0 0
0 0
0 0
0 0
0 0
0 0
0 0
0 0
0 0
0 0
0 0
0 0
0 0
0 0
0 0
0 0
0 0
0 0
0 0
0 0
0 0
0 0
0 1
0 1
0 1
0 1
0 1
0 1
0 1
0 1
0 1
0 1
0 1
0 1
0 1
0 1
0 1
0 1
0 1
0 1
0 1
0 1
0 1
0 1
0 1
0 1
0 1
0 1
0 1
0 1
0 1
0 1
0 1
0 1
0 1
0 1
0 1
0 1
0 0
0 0
0 0
0 0
0 0
0 0
0 0
0 0
0 0
0 0
0 0
0 0
0 0
0 0
0 0
0 0
0 0
0 0
0 0
0 0
0 0
0 0
0 0
0 0
0 0
0 0
0 0
0 0
0 0
0 0
0 0
0 0
0 0
0 0
0 0
0 0
0 0
0 0
0 0
0 0
0 0
0 0
0 0
0 0
0 0
0 0
0 0
0 0
0 0
0 0
0 0
0 0
0 0
0 0
0 0
0 0
0 0
0 0
0 0
0 0
0 0
0 0
0 0
0 0
0 0
0 0
0 0
0 0
0 0
0 0
0 0
0 0
0 0
0 0
0 0
0 0
0 0
0 0
0 0
0 0
0 0
0 0
0 0
0 0
0 0
0 0
0 0
0 0
0 0
0 0
0 0
0 0
0 0
0 0
0 0
0 0
0 0
0 0
0 0
0 1
0 1
0 2
0 2
0 2
0 2
0 2
0 2
0 2
0 2
0 2
0 2
0 2
0 2
0 2
1 2
1 2
1 2
1 2
1 2
1 2
1 3
1 3
1 3
1 3
1 3
1 3
1 3
1 3
1 3
1 3
1 3
1 3
1 3
1 3
1 3
1 1
1 1
1 0
1 0
1 0
1 0
1 0
1 0
1 0
1 0
1 0
1 0
1 0
1 0
1 0
0 0
0 0
0 0
0 0
0 0
0 0
0 0
0 0
0 0
0 0
0 0
0 0
1 0
1 0
1 0
1 0
1 0
1 0
1 0
1 0
1 0
1 0
1 0
1 0
1 0
1 0
1 0
1 0
1 0
1 0
1 0
1 0
1 0
1 0
1 0
1 0
1 0
1 0
1 0
1 0
1 0
1 0
1 0
1 0
1 0
1 0
1 0
1 0
0 0
0 0
0 0
0 0
0 0
0 0
0 0
0 0
0 0
0 0
0 0
0 0
0 0
0 0
0 0
0 0
0 0
0 0
0 0
0 0
0 0
0 0
0 0
0 0
0 0
0 0
0 0
0 0
0 0
0 0
0 0
0 1
0 1
0 3
0 3
0 4
0 4
0 4
0 5
0 5
0 5
0 5
0 5
0 5
0 5
0 5
0 5
0 5
0 5
0 5
0 5
0 6
0 7
0 7
0 7
0 7
0 7
0 7
0 7
0 7
0 7
0 7
0 7
0 7
0 7
0 7
0 7
0 5
0 4
0 4
0 4
0 3
0 3
0 3
0 4
0 4
0 4
0 4
0 4
0 4
0 4
0 4
0 4
0 4
0 4
0 4
0 4
0 3
0 2
0 2
0 2
0 2
0 2
0 2
0 2
0 2
0 2
0 2
0 2
0 2
0 2
0 2
0 2
0 2
0 2
0 2
0 2
0 2
0 2
0 2
0 0
0 0
0 0
0 0
0 0
0 0
0 0
0 0
0 0
0 0
0 0
0 0
0 0
0 0
0 0
0 0
0 0
0 0
0 0
0 0
0 0
0 0
0 0
0 0
0 0
0 0
0 0
0 0
0 0
0 0
0 0
0 0
0 0
0 0
0 0
0 0
0 0
0 0
0 0
0 0
0 0
0 0
0 0
0 0
0 0
0 0
0 0
0 0
0 0
0 0
0 0
0 0
0 0
0 0
0 0
0 0
0 0
0 0
0 0
0 0
0 0
0 0
0 0
0 0
0 0
0 0
0 0
0 0
0 0
0 0
0 0
0 0
0 0
0 0
0 0
0 0
0 0
0 0
0 0
0 0
0 0
0 0
0 0
0 0
0 0
0 0
0 0
0 0
0 0
0 0
0 0
0 0
0 0
0 0
0 0
0 0
0 0
0 0
0 0
0 0
0 0
0 0
0 0
0 0
0 0
0 0
0 0
0 0
0 0
0 0
0 0
0 0
0 0
0 0
0 0
0 0
0 0
0 0
0 0
0 0
0 0
0 0
0 0
0 0
0 0
0 0
0 0
0 0
0 0
0 0
0 0
0 0
0 0
0 0
0 0
0 0
0 0
0 0
0 0
0 0
0 0
0 0
0 0
0 0
0 0
0 0
0 0
0 0
0 0
0 0
0 0
0 0
0 0
0 0
0 0
0 0
0 0
0 0
0 0
0 0
0 0
0 0
0 0
0 0
0 0
0 0
0 0
0 0
0 0
0 0
0 0
0 0
0 0
0 0
0 0
0 0
0 0
0 0
0 0
0 0
0 0
0 0
0 0
0 0
0 0
0 0
0 1
0 1
0 1
0 1
0 1
0 1
0 1
0 1
0 1
0 1
0 1
0 1
0 1
0 2
1 2
1 2
1 2
1 2
1 2
1 2
1 2
1 2
1 2
1 2
1 2
1 2
1 2
1 2
1 2
1 2
1 2
1 2
1 2
1 2
1 2
1 2
1 1
1 1
1 1
1 1
1 1
1 1
1 1
1 1
1 1
1 1
1 1
1 1
1 1
1 0
0 0
0 0
0 0
0 0
0 0
0 0
0 0
0 0
0 0
0 0
0 0
0 0
0 0
0 0
0 0
0 0
0 0
0 0
0 0
0 0
0 0
0 0
0 0
0 0
0 0
0 0
0 0
0 0
0 0
0 0
0 0
0 0
0 0
0 0
0 0
0 0
0 0
0 0
1 0
1 0
1 0
1 0
1 0
1 0
1 0
1 0
1 0
1 0
1 0
1 0
1 0
1 0
1 0
1 0
1 0
1 0
1 0
1 0
1 0
1 0
1 0
1 0
1 0
1 0
1 0
1 0
1 0
1 0
1 0
1 0
1 0
1 0
1 0
1 0
0 0
0 0
0 0
0 0
0 0
0 0
0 0
0 0
0 0
0 0
0 0
0 0
0 0
0 0
0 0
0 0
0 0
0 0
0 0
0 0
0 0
0 0
0 0
0 0
0 0
0 0
0 0
0 0
0 0
0 0
0 0
0 0
0 0
0 0
0 0
0 0
0 0
0 0
0 0
0 0
0 0
0 0
0 0
0 0
0 0
0 0
0 0
0 0
0 0
0 0
0 0
0 0
0 0
0 0
0 0
0 0
0 0
0 0
0 0
0 0
0 0
0 0
0 0
0 0
0 0
0 0
0 0
0 0
0 0
0 0
0 0
0 0
0 0
0 0
0 0
0 0
0 0
0 0
0 0
0 0
0 0
0 0
0 0
0 0
0 0
0 0
0 0
0 0
0 0
0 0
0 0
0 0
0 0
0 0
0 0
0 0
0 0
0 0
0 0
0 0
0 0
0 0
0 0
0 2
0 2
0 2
0 2
0 2
0 2
0 2
0 2
0 2
0 2
0 2
0 2
0 2
0 2
0 2
0 2
0 4
0 4
0 4
0 5
0 5
0 5
0 5
0 5
0 5
0 5
0 5
0 6
0 6
0 6
0 6
0 6
0 6
0 6
0 6
0 6
0 4
0 4
0 4
0 4
0 4
0 4
0 4
0 4
0 4
0 4
0 4
0 4
0 4
0 4
0 4
0 4
0 2
0 2
0 2
0 1
0 1
0 1
0 1
0 1
0 1
0 1
0 1
0 0
0 0
0 0
0 0
0 0
0 0
0 0
0 0
0 0
0 0
0 0
0 0
0 0
0 0
0 0
0 0
0 0
0 0
0 0
0 0
0 0
0 0
0 0
0 0
0 0
0 0
0 0
0 0
0 0
0 0
0 0
0 1
0 1
0 1
0 1
0 2
0 3
0 3
0 3
0 3
0 3
0 3
0 3
0 3
0 3
0 3
0 3
0 3
0 3
0 3
1 3
1 3
1 3
1 3
1 3
1 3
1 3
1 3
1 3
1 3
1 3
1 3
1 6
1 11
1 252
1 298
1 320
2 326
1 328
1 331
1 390
1 399
1 431
2 457
3 466
3 501
3 509
3 510
3 511
3 511
3 511
3 511
3 513
3 555
3 565
3 617
3 702
3 716
3 722
3 722
3 722
3 722
3 722
3 722
3 723
3 723
3 723
3 723
3 718
3 696
2 445
2 399
2 396
2 393
2 394
2 391
2 300
2 244
0 235
0 232
0 229
1 216
1 219
1 221
1 223
1 223
2 235
2 235
2 233
2 190
2 171
2 83
2 29
2 26
2 26
2 26
2 26
2 25
2 25
2 24
2 24
2 25
2 25
2 25
2 25
2 26
2 26
2 26
2 25
2 25
2 24
2 23
2 24
2 24
2 24
2 23
2 22
1 23
1 24
1 23
1 25
1 25
0 14
0 14
0 12
0 12
0 12
0 12
0 14
0 13
0 13
0 13
0 13
0 13
0 13
0 13
0 14
0 15
0 15
0 15
0 15
0 14
0 14
0 14
0 14
0 14
0 14
0 14
0 13
0 13
0 16
0 18
0 17
0 18
0 19
0 19
0 17
0 17
0 17
0 17
0 17
0 17
0 17
0 21
0 28
0 35
0 40
0 42
1 47
1 119
1 124
1 128
1 128
1 129
2 143
2 151
2 152
2 159
2 160
2 161
2 163
2 164
2 166
2 170
2 171
2 176
2 193
2 215
2 215
2 216
2 214
2 214
2 218
2 225
2 260
2 288
2 291
2 294
2 297
2 454
2 444
2 438
2 441
2 438
1 430
0 341
0 338
0 334
0 333
0 333
0 332
0 332
0 330
0 318
0 316
0 316
0 316
1 314
1 313
1 312
1 311
1 303
1 274
1 261
1 259
1 258
2 259
2 258
2 254
2 241
2 207
2 184
2 184
2 179
2 176
2 12
2 13
2 13
2 13
2 13
2 13
2 13
2 16
2 16
2 16
2 16
2 16
2 16
2 16
2 16
2 16
2 16
2 16
1 16
1 16
1 16
1 16
1 16
1 15
1 15
1 15
1 13
0 11
0 11
0 11
0 11
0 7
0 7
0 5
0 5
0 4
0 4
0 4
0 3
0 2
0 1
0 1
0 1
0 1
0 1
0 2
0 2
0 2
0 3
0 4
0 5
0 5
0 5
0 5
0 5
3 5
3 5
3 5
3 5
3 5
3 5
3 5
3 5
3 5
3 6
3 6
3 7
3 7
3 7
3 9
3 8
4 9
11 10
11 10
11 11
11 11
11 16
11 18
11 18
11 19
11 20
11 19
11 17
11 19
11 31
11 55
11 57
11 62
11 63
11 64
11 65
8 65
8 65
8 68
8 72
8 72
8 72
8 72
8 73
8 72
8 72
8 75
8 74
8 90
8 90
8 89
8 90
6 89
0 88
0 91
0 90
1 91
1 85
1 83
1 83
1 82
1 81
1 81
1 79
1 74
1 60
1 35
1 34
1 34
1 34
1 33
1 33
1 33
1 33
1 30
1 23
1 23
1 23
1 23
1 22
1 22
1 22
1 22
1 21
1 1
1 1
1 1
1 2
1 2
1 4
1 4
1 4
0 3
0 3
0 3
0 3
0 3
0 3
0 3
0 3
0 3
0 3
0 3
0 3
0 3
0 3
0 3
0 3
0 3
0 3
0 3
0 3
0 3
0 4
0 10
0 53
0 61
0 65
0 70
0 70
0 71
0 71
0 70
0 70
0 70
0 68
0 68
0 68
0 68
0 68
0 68
0 68
0 68
0 70
0 70
0 70
0 70
0 70
0 70
0 70
0 70
0 70
0 70
0 70
0 70
0 70
0 70
0 70
0 70
0 69
0 61
0 8
0 4
0 3
0 3
0 3
0 3
0 3
0 3
0 3
0 1
0 1
0 1
0 1
0 1
0 1
0 1
0 1
0 1
0 1
0 1
0 1
0 1
0 1
0 1
0 1
0 1
0 1
0 1
0 1
0 1
0 1
0 1
0 1
0 1
0 1
0 1
0 0
0 0
0 0
0 0
0 0
0 0
0 0
0 0
0 0
0 0
0 0
0 0
0 0
0 0
0 0
0 0
0 0
0 0
0 0
0 0
0 0
0 0
0 0
0 0
0 0
0 0
0 0
0 0
0 0
0 0
0 0
0 0
0 0
0 0
0 0
0 0
0 0
0 0
0 0
0 0
0 0
0 0
0 0
0 0
0 0
0 0
0 0
0 0
0 0
0 0
0 0
0 0
0 0
0 0
0 0
0 0
0 0
0 0
0 0
0 0
0 0
0 0
1 0
1 0
1 0
1 0
1 0
1 0
1 0
1 1
1 1
1 1
1 1
1 1
1 4
1 5
1 5
1 5
1 5
1 5
1 5
1 5
1 5
1 5
1 5
1 6
1 7
1 8
1 41
1 48
1 48
1 53
0 54
0 54
0 54
0 54
0 54
0 54
0 54
0 54
0 54
0 55
0 55
0 55
0 55
0 54
0 54
0 54
0 54
0 53
0 50
0 50
0 51
0 62
0 62
0 67
0 69
0 74
0 74
0 76
0 76
0 74
0 75
0 75
0 36
0 32
0 31
0 29
0 29
0 29
0 32
0 32
0 32
0 32
0 32
0 32
0 32
0 31
0 31
0 34
0 34
0 34
0 34
0 34
0 33
0 34
0 34
0 33
0 31
0 21
0 20
0 18
0 17
0 12
0 12
0 10
0 11
0 12
0 15
0 17
0 19
0 22
0 25
0 25
0 25
0 27
0 25
0 28
0 28
0 28
3 44
3 48
3 52
7 68
7 69
7 66
7 66
7 66
7 66
7 66
7 70
7 69
7 69
7 69
7 69
7 68
7 69
7 69
7 72
7 73
7 73
7 74
7 72
7 69
7 67
7 65
7 63
7 62
7 59
7 59
8 59
8 57
8 56
8 54
8 55
8 56
5 42
4 41
4 39
1 25
1 25
1 26
1 26
1 26
1 27
1 27
1 24
1 25
1 25
1 32
1 40
1 41
1 40
1 40
1 37
1 36
1 36
1 35
1 35
1 35
1 35
4 35
4 37
4 36
4 36
4 40
3 40
3 40
4 40
4 37
4 40
4 39
4 40
4 36
4 34
4 34
4 34
4 33
4 33
4 33
4 32
4 32
4 32
4 31
4 32
4 25
4 17
4 18
4 18
4 18
4 18
4 23
4 29
5 30
9 30
8 31
8 31
6 31
6 29
5 28
5 28
5 24
5 24
5 24
5 24
5 23
5 20
5 20
5 17
5 18
5 21
5 21
6 23
6 23
6 23
6 23
6 23
6 21
6 23
6 24
6 26
6 27
6 27
6 25
6 26
6 26
6 25
6 20
6 15
5 14
1 14
1 14
1 14
1 14
1 14
1 14
1 14
0 14
0 13
0 15
0 16
0 14
0 15
0 15
0 14
0 14
1 14
1 14
1 12
1 12
1 12
1 12
1 12
1 12
1 10
1 10
1 7
1 8
1 11
1 10
1 10
1 11
1 11
1 11
1 11
1 11
1 11
1 11
1 12
1 14
1 14
1 14
1 15
1 15
1 15
1 11
1 11
1 11
1 12
1 12
1 14
1 25
0 59
0 70
0 207
0 218
0 233
0 240
0 265
0 280
0 359
0 401
0 404
0 416
0 415
0 415
0 415
0 416
0 425
0 425
0 426
0 429
0 428
0 428
0 426
0 426
0 426
0 426
0 426
0 442
0 450
0 452
0 455
0 457
0 464
0 464
0 463
0 464
0 429
0 405
0 234
0 227
0 291
0 297
0 293
0 278
1 215
1 178
1 177
1 176
1 176
1 194
1 197
1 199
1 213
1 226
1 242
1 421
1 437
1 443
1 450
1 453
1 455
1 466
1 473
2 454
2 446
2 454
2 454
2 454
2 446
2 444
2 442
2 426
2 423
2 421
2 417
2 398
2 334
2 334
2 333
2 334
1 330
1 329
1 328
1 329
1 332
1 315
1 311
1 307
1 287
1 273
1 247
1 62
1 61
1 56
1 51
1 44
1 42
1 31
1 28
0 26
0 26
0 28
0 29
0 29
0 29
0 29
0 30
0 29
0 30
0 32
0 38
0 49
0 49
0 54
0 55
0 69
0 72
0 78
0 80
0 78
0 76
0 73
0 73
0 76
0 72
0 72
0 72
0 71
0 72
0 72
0 70
0 70
0 70
0 70
0 68
0 69
0 75
0 68
0 69
0 70
0 70
0 70
0 70
0 71
0 70
0 65
0 58
0 41
0 38
0 39
0 42
0 34
0 32
0 32
0 32
0 32
0 33
0 47
0 51
0 50
0 51
0 53
0 53
0 53
0 51
0 50
0 50
0 50
0 49
0 49
0 55
0 52
0 47
0 47
0 54
0 59
0 71
0 92
0 114
0 127
0 148
0 155
0 156
0 157
0 157
0 150
0 145
0 155
0 167
0 169
0 171
0 172
0 172
0 157
0 153
0 152
0 151
0 151
0 151
0 151
0 151
0 151
0 151
0 151
0 151
0 151
0 145
0 145
0 146
0 161
0 154
0 144
0 131
0 115
0 79
0 71
0 56
0 52
0 51
0 52
0 52
0 54
0 53
0 39
0 31
0 27
0 26
0 24
0 24
0 26
0 27
0 27
0 27
0 27
0 29
1 33
1 37
1 40
1 40
1 39
1 39
1 39
1 39
1 39
1 34
1 22
1 22
1 22
1 22
1 22
1 23
1 23
2 24
2 31
2 32
2 41
2 45
2 46
2 46
2 74
2 115
2 121
2 122
2 123
2 127
2 125
2 127
2 132
2 135
2 137
2 135
1 130
1 127
1 128
1 130
1 132
1 132
1 132
1 132
1 132
1 132
1 131
1 131
1 131
1 131
1 131
1 130
1 133
0 132
0 122
1 120
1 112
1 109
1 105
1 103
1 75
1 32
1 29
1 28
1 65
1 66
1 75
1 84
1 85
1 84
1 84
1 90
1 95
1 103
1 102
1 103
1 102
1 102
1 102
1 102
1 103
1 103
1 103
1 103
1 103
1 103
1 103
1 103
0 100
0 100
0 100
0 100
0 100
0 101
0 116
0 120
0 121
0 123
0 125
0 136
0 146
2 275
2 322
2 401
3 425
3 442
3 439
3 442
3 440
3 433
3 433
3 432
3 436
3 436
3 437
3 445
3 445
3 445
3 446
3 446
3 446
4 450
4 450
4 450
4 450
4 449
4 449
4 449
4 449
4 447
4 430
4 428
4 429
4 427
4 422
4 399
4 244
3 124
3 68
2 28
2 25
2 40
2 41
2 43
2 45
2 45
2 42
2 42
2 40
2 40
2 41
2 34
2 35
2 35
2 35
2 35
2 36
1 32
1 32
1 32
1 33
1 33
1 33
1 33
1 33
1 34
1 33
1 33
1 33
1 33
1 33
1 33
1 33
0 33
0 33
0 33
0 25
0 13
3 40
3 38
3 38
3 39
3 40
3 41
3 43
3 50
3 50
3 64
5 85
5 105
8 217
8 244
8 250
8 282
8 289
8 301
8 354
9 384
9 396
9 420
9 431
9 434
9 440
9 441
9 453
9 453
9 455
9 455
9 457
10 464
10 464
10 463
11 462
11 461
8 431
8 431
8 429
8 428
8 426
9 425
9 425
9 418
9 417
9 403
6 377
6 338
4 222
4 207
4 196
4 168
4 159
4 148
3 59
3 46
3 38
3 28
3 24
3 24
3 24
3 24
2 15
2 15
2 13
2 13
2 11
2 4
2 6
2 6
1 6
1 6
1 6
1 5
1 5
1 5
1 4
0 42
0 42
0 46
0 53
0 61
0 67
0 68
0 69
0 69
0 69
0 70
0 70
0 70
0 148
0 148
0 151
0 151
0 151
0 151
0 151
0 151
0 151
0 151
0 152
0 153
0 153
0 152
0 152
0 153
0 156
0 157
0 158
0 158
0 157
0 190
0 201
0 178
1 200
3 212
3 212
3 208
3 213
3 212
3 212
3 212
3 213
3 211
3 211
3 211
3 135
3 140
3 141
3 155
3 156
3 166
3 166
3 167
3 169
3 169
3 181
3 179
3 179
3 180
3 180
3 179
3 177
3 177
4 178
4 194
4 189
4 134
4 124
4 107
3 106
1 90
1 83
1 98
1 91
1 91
1 89
1 89
1 92
1 95
1 99
1 104
1 137
1 130
1 127
1 114
1 114
1 103
1 104
1 103
1 104
1 104
1 92
1 93
1 91
1 91
1 92
1 94
1 93
1 94
0 92
0 77
0 76
0 76
0 76
1 76
1 76
1 76
1 77
1 72
1 101
1 106
1 107
1 107
1 103
1 98
2 96
2 93
2 58
2 59
2 59
2 58
2 59
2 60
2 67
2 67
2 67
2 69
2 68
2 70
2 70
2 75
2 75
2 72
2 72
2 74
2 75
2 75
2 76
2 77
1 77
1 77
1 79
1 79
1 79
1 67
1 37
1 33
1 33
1 33
1 33
0 33
0 34
0 35
1 82
1 87
1 91
1 91
1 91
1 90
1 83
1 103
1 109
1 115
1 116
1 112
1 113
1 108
1 108
1 109
1 111
1 109
1 110
1 113
1 112
1 112
1 115
1 115
1 113
1 113
1 112
1 113
1 114
1 115
1 115
1 115
1 114
1 114
1 110
1 101
0 50
0 50
0 53
0 53
0 53
0 52
0 48
0 21
0 20
0 23
1 39
2 48
2 48
2 60
2 60
2 61
2 58
2 56
2 56
2 51
2 51
2 55
2 88
2 114
2 115
2 119
2 121
2 120
2 118
2 118
2 118
2 118
2 130
2 130
2 130
2 130
2 155
2 190
2 193
5 196
5 197
5 198
5 198
5 197
4 197
4 191
4 173
3 162
3 161
3 158
3 158
3 157
3 157
3 157
3 157
3 157
3 155
3 145
3 109
3 89
3 89
3 89
3 89
3 90
3 90
3 90
3 91
3 93
3 82
3 83
3 83
3 89
1 72
1 37
1 33
1 31
1 31
1 31
1 31
1 31
1 30
1 30
1 29
1 30
1 31
1 29
1 29
1 29
1 34
1 40
1 40
1 40
1 41
1 41
1 40
1 40
1 40
1 40
1 40
1 39
1 37
1 37
1 41
1 41
1 41
2 54
2 54
2 48
2 41
1 40
1 38
1 38
1 37
1 37
1 38
1 38
1 37
2 37
2 37
2 37
2 36
2 36
2 36
2 36
2 31
2 25
2 25
2 25
2 24
2 24
2 24
2 24
2 24
2 24
2 24
2 24
2 26
2 27
2 25
2 26
2 22
1 10
1 10
2 38
8 81
8 93
8 93
8 93
8 93
8 97
8 97
8 97
8 97
7 98
7 98
7 98
7 98
7 98
7 98
7 98
7 98
7 98
7 98
7 98
7 98
7 98
7 99
7 99
7 99
7 99
7 99
7 99
7 94
7 92
7 92
7 92
7 93
7 93
6 93
6 64
0 12
0 9
0 9
0 9
0 9
0 5
0 5
0 5
0 5
0 4
0 4
0 4
0 4
0 4
0 4
0 7
0 7
0 9
0 47
0 50
0 51
0 54
0 53
0 54
0 58
0 59
0 59
0 59
0 60
0 61
0 99
0 112
0 125
0 128
0 133
0 134
0 138
0 150
0 154
0 159
0 160
0 160
0 160
0 160
0 160
0 162
0 162
0 162
0 162
0 162
0 162
0 159
0 159
0 156
0 116
0 114
0 112
0 115
0 116
0 115
0 110
0 108
0 109
0 112
0 112
0 98
0 44
0 34
0 32
0 32
0 32
0 32
0 32
0 21
0 19
0 14
0 12
0 14
0 16
1 226
1 247
1 299
1 324
1 338
1 353
1 376
1 378
1 379
1 381
1 381
1 381
1 381
1 380
1 378
1 378
1 378
1 379
1 379
1 379
1 376
1 376
1 376
1 376
1 376
1 376
1 376
1 376
1 376
1 377
1 377
1 377
1 377
1 377
1 377
1 377
0 134
0 80
0 42
0 41
0 41
0 39
0 40
0 38
0 38
0 38
0 39
0 39
0 44
0 48
0 48
0 51
0 52
0 55
0 58
0 84
0 84
0 85
0 86
0 86
0 86
0 86
0 91
0 91
0 91
0 91
0 324
0 331
0 363
1 396
1 414
1 414
1 410
2 406
2 404
2 406
2 402
2 400
2 401
2 402
2 402
2 400
2 400
2 397
2 393
2 390
2 390
2 389
2 388
2 386
2 381
2 352
2 352
2 351
2 346
2 348
2 348
2 348
2 348
2 348
2 348
2 345
1 88
1 34
1 32
1 33
1 33
0 34
0 34
0 29
0 31
0 28
0 27
0 27
0 27
0 26
0 27
0 27
0 26
0 26
0 23
0 23
0 22
0 22
0 21
0 23
0 23
0 23
0 23
0 23
0 23
0 21
0 21
0 21
0 21
0 21
0 21
0 29
0 33
0 31
0 29
0 29
0 27
0 27
0 27
0 27
0 29
0 33
0 35
0 38
0 38
0 38
0 38
0 38
0 38
0 38
0 38
0 38
0 38
0 38
0 37
0 35
0 35
0 35
0 37
0 38
0 38
0 38
0 38
0 38
0 38
0 38
0 37
0 29
0 26
0 38
0 65
0 70
0 133
0 155
0 176
0 195
0 336
0 406
0 457
0 473
0 479
0 537
0 542
0 543
0 544
0 551
0 552
0 553
0 564
0 568
0 569
0 568
0 570
0 570
0 570
0 569
0 570
0 570
0 570
0 624
0 626
1 638
1 643
1 650
1 650
1 635
2 604
2 574
2 544
2 534
2 515
2 502
2 342
2 247
2 217
2 216
2 214
2 158
2 153
2 150
2 150
2 143
2 142
2 148
2 138
2 134
2 133
2 133
2 133
2 133
2 133
2 133
2 136
2 136
2 137
2 82
2 80
1 68
1 66
1 60
1 61
2 213
2 223
2 228
3 223
3 242
3 254
3 254
3 251
3 251
3 251
3 251
3 250
3 254
3 256
3 265
3 270
3 271
3 271
3 265
3 265
3 263
3 270
3 270
3 303
3 337
4 359
4 358
4 357
4 357
4 360
4 364
4 364
4 364
4 367
4 367
4 358
2 166
1 140
1 139
1 140
1 140
1 141
1 142
1 142
1 142
1 141
1 142
1 141
1 201
1 199
1 193
1 189
1 189
1 189
1 189
1 189
1 189
1 177
1 174
0 141
0 108
0 85
0 82
0 82
0 82
0 82
0 86
0 88
0 89
0 89
0 90
0 91
0 92
0 92
0 99
0 101
0 102
0 103
0 102
0 102
0 102
0 102
0 101
0 103
0 39
0 42
0 41
0 40
0 40
0 40
0 40
0 40
0 40
0 40
0 40
0 40
0 41
0 43
0 43
0 43
0 45
0 45
0 36
0 34
0 39
0 38
0 42
0 51
0 52
0 52
0 78
0 82
0 90
0 110
0 139
0 147
0 151
0 151
0 151
0 149
0 146
0 146
0 145
0 145
0 145
0 145
0 145
0 145
0 146
1 148
1 150
1 153
1 150
1 150
1 150
1 150
1 147
1 146
1 145
1 142
1 136
1 135
3 138
3 135
3 136
4 150
4 123
5 111
5 99
5 81
5 56
6 55
6 54
6 55
6 55
6 55
6 55
6 57
6 57
6 57
6 69
6 77
7 87
6 93
6 104
6 107
6 109
6 110
6 111
6 113
6 114
6 114
6 118
6 119
6 119
6 119
6 116
6 114
4 102
4 100
4 97
2 75
2 75
1 75
1 75
1 75
1 75
1 76
1 75
1 76
1 76
1 78
2 79
2 79
2 78
2 78
2 65
2 49
1 36
1 22
1 16
1 15
1 24
1 25
1 25
1 25
1 24
1 24
1 20
1 19
1 19
1 18
2 18
2 18
14 18
14 18
15 18
15 18
15 18
15 18
15 18
15 18
15 18
15 16
15 15
15 16
15 16
15 15
14 14
14 13
14 14
14 14
14 14
14 14
14 14
14 14
14 20
14 19
14 10
14 10
14 10
14 10
14 10
14 10
14 10
14 10
14 10
11 10
9 10
9 23
1 26
1 26
0 28
0 29
0 29
0 31
0 31
0 31
0 31
0 31
1 34
1 33
1 35
1 37
1 37
1 37
1 38
1 46
1 48
1 49
1 58
1 61
1 245
1 277
2 282
2 296
2 321
2 355
2 369
2 372
2 373
2 374
2 376
2 380
2 381
2 404
2 404
2 423
2 451
2 596
2 616
2 625
2 642
2 645
2 647
2 646
1 643
1 637
1 636
1 638
1 638
1 638
1 636
1 629
1 626
1 626
1 617
1 614
1 370
0 341
0 323
0 319
0 309
0 302
0 299
0 311
0 321
0 316
0 317
0 351
0 358
0 321
0 332
0 318
0 287
0 140
0 126
0 115
0 105
0 105
0 105
0 109
0 110
0 110
0 111
0 109
0 109
0 112
0 112
0 112
0 115
0 116
0 117
0 118
0 119
0 119
0 121
1 136
1 141
1 144
2 151
2 139
2 149
3 152
3 143
3 114
3 110
3 108
3 91
3 87
3 86
3 86
3 86
3 86
3 86
3 86
3 86
3 82
3 80
3 79
3 79
3 79
3 79
3 76
3 76
3 75
3 75
3 75
3 74
3 75
3 77
3 80
3 96
2 130
2 136
2 144
1 154
1 198
1 184
1 183
1 214
1 220
2 227
2 226
2 226
2 226
2 227
2 227
2 228
2 229
2 229
2 231
2 233
2 234
2 234
2 236
2 237
2 240
2 240
2 239
2 239
2 235
2 232
2 231
2 231
2 231
2 230
2 225
2 207
1 149
1 137
1 135
1 127
1 77
1 76
1 75
1 45
1 41
0 34
0 35
0 35
0 35
0 35
0 34
1 34
2 34
2 35
2 38
2 37
2 39
2 39
2 38
2 37
2 34
2 35
2 36
2 36
2 36
2 36
2 35
2 35
2 35
2 37
2 38
2 38
2 36
2 34
2 27
2 25
2 20
2 22
2 23
2 22
2 21
2 20
2 19
2 19
2 19
2 21
2 21
1 21
0 20
0 15
0 14
0 13
0 23
0 23
0 24
0 26
0 27
0 26
0 29
0 29
0 29
1 52
1 52
1 53
1 62
1 60
1 59
1 59
1 59
1 59
1 58
1 58
1 58
1 57
1 57
1 58
1 75
1 77
1 84
1 89
1 89
1 88
1 90
1 91
1 93
1 99
1 107
1 111
1 108
1 108
1 108
1 109
1 108
1 112
1 108
1 109
1 109
0 88
0 89
0 89
0 80
0 80
0 80
0 118
0 121
0 123
0 123
0 123
0 123
0 121
0 121
0 130
0 102
0 100
0 99
0 100
0 100
0 102
0 103
0 106
0 104
0 98
0 88
0 88
0 77
0 77
0 77
0 79
0 80
0 78
0 77
0 76
0 76
0 74
0 73
0 73
0 73
0 74
0 73
0 32
0 32
0 36
0 37
0 41
1 49
1 73
1 79
1 76
1 113
1 115
1 139
2 219
2 259
2 258
3 262
3 264
3 266
3 266
3 266
3 266
3 266
3 267
3 267
3 265
3 265
3 264
3 263
3 269
3 270
3 272
3 272
3 272
3 272
3 272
3 272
3 275
3 276
3 273
3 271
3 265
2 261
3 234
3 227
3 205
2 190
2 186
2 158
1 75
1 37
1 33
1 38
1 41
1 41
1 43
1 44
1 50
1 50
1 53
1 54
1 62
1 69
1 72
1 77
2 73
2 73
2 71
2 71
2 71
2 71
2 71
2 69
2 68
2 67
2 65
2 63
2 62
2 61
1 59
1 58
1 58
0 57
0 53
0 53
0 53
0 53
0 49
0 47
0 42
0 40
0 44
0 48
0 56
0 83
0 116
0 126
0 126
0 118
0 118
0 122
0 120
0 120
0 121
0 122
0 122
0 122
0 122
0 122
0 122
0 123
0 123
0 123
0 124
0 127
0 127
0 135
0 135
0 149
0 169
0 184
2 448
2 481
2 518
2 540
2 570
2 683
2 723
3 825
3 838
3 842
3 820
3 840
3 864
3 931
3 1010
3 1075
3 1114
3 1139
3 1289
4 1458
4 1509
5 1512
5 1520
5 1520
5 1520
5 1520
5 1520
5 1521
5 1521
5 1518
5 1523
5 1529
5 1541
5 1539
5 1526
5 1452
3 1073
3 1010
3 1003
3 988
3 982
3 971
3 950
2 805
2 787
2 781
2 759
2 759
2 722
2 624
1 572
1 518
1 494
1 475
1 324
1 138
1 111
1 110
1 111
1 110
1 109
1 122
1 124
1 125
1 123
1 121
1 97
1 88
1 85
1 76
1 77
1 77
1 77
1 80
1 85
1 86
1 82
1 82
1 80
1 79
1 79
1 76
1 78
1 73
1 62
1 56
1 54
1 55
1 54
1 54
1 51
0 41
0 41
0 41
0 41
0 39
0 35
0 28
0 25
0 25
0 25
0 25
0 25
0 23
0 24
0 23
0 23
0 23
0 20
0 12
0 12
0 12
0 11
0 11
0 12
0 12
0 13
0 26
0 21
0 36
0 41
0 44
0 70
0 70
0 71
0 71
0 71
0 69
0 72
0 72
0 72
0 71
0 71
0 72
0 71
0 71
0 71
0 71
0 71
0 71
0 71
0 71
0 71
0 71
0 73
0 76
0 76
0 89
0 98
0 100
0 103
0 104
0 103
0 88
0 86
0 73
0 68
0 64
0 38
0 38
0 38
0 38
0 38
0 38
0 34
0 36
0 38
0 38
0 38
0 38
0 38
0 44
0 44
0 44
0 45
0 47
0 49
0 54
1 67
1 76
1 96
1 131
1 134
1 120
1 108
1 108
1 108
1 108
1 109
1 109
1 123
1 123
1 124
1 124
1 124
1 126
1 129
1 129
1 133
1 140
1 145
1 152
1 156
1 163
1 205
1 213
1 219
1 215
1 220
1 220
1 216
1 213
1 216
1 214
0 193
0 188
0 167
0 148
0 148
0 148
0 148
0 148
0 149
0 149
0 150
0 150
0 136
0 136
0 134
0 134
0 137
0 136
0 141
0 142
0 136
0 131
0 125
0 117
0 109
0 98
0 59
0 52
0 49
0 48
0 45
0 45
0 45
0 45
0 43
0 40
0 41
0 41
0 45
0 28
0 27
0 26
0 26
0 26
0 26
0 30
0 31
0 31
0 32
0 46
0 47
0 48
0 45
0 45
1 38
1 38
1 38
1 37
1 37
1 37
1 37
1 35
1 35
1 35
1 35
1 37
1 38
1 38
1 40
1 39
1 39
1 37
1 36
1 35
1 34
1 36
1 39
1 39
1 39
1 39
1 36
1 34
1 34
1 37
1 37
1 27
1 28
1 29
1 29
1 27
0 25
0 26
0 26
0 26
0 26
0 26
0 26
0 26
0 29
0 29
0 29
0 32
0 32
0 33
0 32
0 32
0 33
0 49
0 59
0 73
0 83
0 92
0 92
0 108
0 108
0 108
0 108
0 106
0 106
0 102
0 101
0 97
0 98
0 97
0 97
0 97
0 97
0 97
0 97
0 97
0 97
0 97
0 97
0 97
0 94
0 94
0 94
0 96
0 114
0 186
0 238
0 292
0 313
0 299
0 288
0 274
0 273
0 269
0 269
0 252
0 252
0 252
0 252
0 252
0 252
0 252
1 255
1 255
1 255
1 259
1 259
1 261
1 261
1 261
1 261
1 261
1 264
1 265
1 265
1 267
1 271
1 271
1 271
1 252
1 211
1 155
1 109
1 50
1 27
1 27
1 24
1 24
1 25
1 24
1 24
1 24
1 24
1 24
1 26
1 36
1 38
1 66
0 90
0 95
0 95
0 127
0 127
0 126
0 127
0 127
0 130
0 130
0 128
0 129
0 126
0 125
0 124
0 124
0 127
0 128
0 126
0 127
0 127
0 127
0 128
0 130
0 130
0 131
0 132
0 134
0 136
0 138
0 171
0 170
1 170
1 161
1 157
1 133
1 104
1 100
1 100
1 64
1 64
1 64
1 62
1 62
1 59
1 57
1 56
1 56
1 56
1 57
1 57
1 59
1 56
1 55
1 55
1 54
1 54
1 54
1 53
1 51
1 50
1 52
1 52
1 58
1 61
1 63
1 32
1 33
0 33
0 35
0 36
0 46
0 55
0 66
0 70
0 79
0 93
0 101
0 109
0 120
0 123
0 123
0 123
0 124
0 123
0 123
0 143
0 146
0 157
0 160
0 164
0 163
0 163
0 161
0 161
1 161
1 160
1 159
1 155
1 149
1 148
1 145
1 149
1 149
3 154
3 156
4 155
4 144
4 125
4 118
4 110
4 90
4 78
4 72
4 83
4 84
4 87
4 92
4 93
4 104
4 107
4 107
4 86
4 80
5 69
5 67
5 64
5 65
5 69
5 83
4 116
4 121
4 125
4 126
4 126
3 128
3 128
3 124
2 121
0 120
0 115
0 110
1 110
1 110
1 110
1 110
1 110
1 142
1 147
1 152
1 145
1 148
1 344
1 339
1 337
1 324
1 324
0 326
0 330
0 331
0 331
1 333
1 332
1 331
1 327
1 313
1 280
1 273
1 269
1 266
1 266
2 267
2 265
2 265
2 265
2 265
2 265
2 271
2 277
2 282
2 296
2 297
2 299
2 269
2 530
2 547
3 603
3 657
3 479
3 578
3 620
3 631
3 629
3 631
3 635
3 634
3 634
2 635
2 636
2 636
2 636
2 636
2 636
2 636
2 637
2 637
2 639
1 637
1 637
1 638
1 638
1 638
1 639
1 632
1 626
1 621
1 610
1 610
1 606
1 540
1 140
0 43
0 24
1 26
1 27
2 30
2 31
2 40
2 37
2 34
2 29
2 30
2 30
2 31
2 34
2 35
2 36
2 39
2 40
2 42
2 43
2 42
2 43
2 43
2 42
2 42
2 52
2 73
2 77
2 91
2 94
2 104
2 125
2 170
2 186
2 192
2 193
2 192
2 190
1 191
0 207
0 204
0 206
0 199
0 209
0 226
0 229
0 234
0 238
0 236
0 262
0 264
0 263
0 259
0 259
0 259
0 256
0 257
0 291
0 298
0 302
0 316
0 335
0 348
0 352
0 352
0 351
0 340
0 314
0 264
0 263
0 263
0 262
0 263
0 263
0 262
0 243
1 238
1 238
1 279
1 284
1 271
1 272
1 267
1 269
1 270
1 248
1 250
1 251
1 251
1 250
1 248
1 248
1 247
1 212
1 208
1 189
1 146
1 111
1 99
1 94
1 93
1 93
1 92
1 87
1 86
1 86
1 88
1 92
1 95
1 98
1 97
1 101
0 95
0 93
0 44
0 45
0 43
0 42
0 39
0 32
0 30
0 27
0 27
0 34
0 36
0 44
0 75
0 87
0 97
0 113
0 111
0 111
0 116
0 116
0 116
0 115
0 135
0 213
0 214
0 216
0 216
0 217
0 215
0 210
0 206
0 205
0 205
0 203
0 204
0 201
0 201
0 201
0 201
0 201
0 201
0 201
0 204
0 211
0 212
0 201
0 198
0 191
0 159
0 145
0 139
0 124
0 124
0 124
0 118
0 116
0 116
0 116
0 93
0 17
0 19
0 19
0 19
0 22
0 23
0 24
0 24
0 28
0 28
0 26
0 26
0 26
0 27
0 28
0 30
0 30
0 31
0 34
0 31
0 23
0 23
0 24
0 24
0 24
0 24
0 24
0 24
0 24
0 24
0 24
0 28
0 28
0 29
0 31
0 42
0 38
0 40
0 46
0 53
0 57
0 74
0 137
0 278
0 438
0 522
0 571
0 588
0 595
0 597
0 640
0 648
0 658
0 669
0 675
0 678
0 679
0 680
0 680
0 683
0 683
0 684
0 684
0 685
0 687
0 712
0 718
0 720
0 730
0 730
0 733
0 723
0 769
0 825
0 836
0 882
0 893
0 874
0 774
0 559
0 420
0 372
0 364
0 362
0 362
0 361
0 316
0 305
0 297
0 291
0 288
0 285
0 285
0 282
0 281
0 288
0 291
0 291
0 291
0 291
0 287
0 247
0 244
0 240
0 240
0 240
0 237
0 231
0 171
0 109
0 83
0 60
0 66
0 105
0 131
0 187
0 187
0 190
0 190
0 189
0 189
0 189
0 189
0 189
0 211
0 219
0 220
0 220
0 227
0 284
0 285
0 307
0 307
0 309
0 309
0 309
0 309
0 309
0 306
0 303
0 303
0 304
0 305
0 307
0 307
0 303
0 303
0 293
0 264
0 227
0 207
0 151
0 150
0 148
0 153
0 157
0 159
0 159
0 163
0 162
0 142
0 135
0 134
0 134
0 125
0 70
0 67
0 40
0 37
0 35
0 35
0 35
0 45
0 46
0 52
0 52
0 52
0 52
0 49
0 48
0 47
0 45
0 53
0 53
0 52
0 42
0 42
0 42
0 43
0 43
0 39
0 35
0 35
0 35
0 31
0 31
0 30
0 30
0 30
0 34
0 34
0 34
0 35
0 35
0 35
0 38
0 37
0 37
0 28
0 27
0 20
0 20
0 20
0 20
0 20
0 21
0 21
0 22
0 15
0 23
0 22
0 25
0 26
0 27
0 28
0 28
0 28
2 60
2 60
2 61
2 62
2 68
2 73
2 85
2 91
2 96
2 97
2 97
2 96
2 95
2 95
2 102
2 121
2 131
2 133
2 135
2 136
2 136
2 137
2 138
2 138
2 160
2 161
2 164
2 165
6 228
6 232
6 231
6 236
6 238
6 237
6 237
6 242
4 207
4 210
4 212
4 214
4 208
4 201
4 191
4 185
4 178
4 185
4 187
4 189
4 189
4 189
4 176
4 155
4 146
4 146
4 146
5 221
5 224
5 228
5 238
5 240
5 219
5 221
5 222
5 230
1 163
1 162
1 161
1 161
1 167
1 197
1 214
1 214
2 234
2 231
2 231
2 235
2 236
2 236
2 236
2 235
2 230
2 227
2 231
2 263
2 277
2 295
2 298
2 303
2 318
2 414
2 427
1 384
1 395
1 428
1 422
1 424
1 425
1 433
2 446
2 427
3 444
3 447
3 446
3 441
3 431
3 396
2 385
2 385
2 366
2 363
2 363
2 363
2 363
2 366
2 372
2 375
3 374
4 384
4 389
4 356
4 343
4 327
4 324
4 332
4 318
4 217
4 185
4 166
4 184
4 149
4 148
4 145
4 138
4 120
3 107
3 105
2 87
2 86
2 87
2 87
2 88
2 88
2 88
2 88
2 88
2 89
2 93
3 98
3 98
3 94
3 86
3 85
2 84
1 74
1 65
1 64
1 65
1 66
1 66
1 61
1 62
2 56
3 60
3 59
3 41
3 133
3 137
3 146
3 155
3 181
3 181
3 181
3 181
3 181
3 181
3 181
3 180
3 180
3 181
3 181
3 180
3 179
2 175
2 170
2 169
2 169
13 176
13 176
13 175
13 175
13 173
13 175
13 173
13 172
13 172
13 166
13 164
12 162
11 166
11 165
11 164
11 69
11 67
11 56
11 51
11 26
11 26
11 25
11 25
11 26
11 26
11 26
11 27
11 28
11 28
11 28
10 28
9 29
9 30
8 30
8 30
7 30
0 44
0 44
0 44
0 44
0 44
0 43
0 43
0 43
0 42
0 41
0 41
0 39
0 29
0 29
0 29
0 29
0 29
0 29
0 29
0 28
0 27
0 27
0 28
0 27
0 29
0 30
0 46
0 46
0 46
0 46
0 45
0 45
0 44
0 44
0 44
0 43
0 22
0 22
0 22
0 22
0 22
0 21
0 22
0 23
0 23
0 23
0 23
0 23
0 23
0 23
0 23
0 23
0 23
0 23
0 23
0 23
0 24
0 24
0 23
0 23
0 20
0 20
0 3
0 3
0 3
0 3
0 3
0 3
0 3
0 3
0 3
0 3
0 3
0 3
0 3
0 3
0 3
0 3
0 1
0 1
0 2
0 2
0 11
0 12
0 13
0 13
0 13
0 13
0 13
0 13
0 13
0 13
0 12
0 12
0 12
0 12
0 12
0 12
0 12
0 12
0 12
0 12
0 12
0 12
0 12
0 12
0 12
0 12
0 12
0 12
0 12
0 12
0 12
0 13
0 13
0 13
0 12
0 11
0 3
0 3
0 2
0 2
0 2
0 2
0 2
0 2
0 2
0 2
0 2
0 2
0 2
0 2
0 2
0 2
0 3
0 3
0 3
0 3
0 3
0 3
0 3
0 3
0 3
0 3
0 3
0 3
0 3
0 3
0 3
0 2
0 2
0 2
0 2
0 2
0 2
0 1
0 1
0 1
0 1
0 1
0 2
0 2
0 2
0 2
0 2
0 2
0 2
0 2
0 2
1 3
1 7
2 9
3 12
7 106
7 110
7 112
7 120
7 122
7 125
7 128
7 129
7 129
7 129
7 130
7 130
8 135
10 136
10 139
11 169
14 222
16 280
95 2464
102 2585
108 2708
109 2754
111 2799
111 2804
111 2808
111 2808
111 2808
111 2809
111 2809
111 2813
111 2827
111 2833
110 2839
110 2834
109 2833
109 2825
103 2723
103 2719
103 2721
103 2720
103 2722
103 2722
103 2721
102 2720
102 2720
102 2717
102 2717
102 2716
101 2711
99 2708
98 2695
98 2642
96 2610
86 2406
2 143
0 103
0 103
0 102
0 88
0 91
0 115
2 271
2 296
2 314
2 315
2 312
3 303
3 295
3 291
3 291
3 291
3 292
3 292
3 293
3 297
3 302
3 299
3 298
3 299
3 305
3 312
3 322
13 457
13 460
13 471
13 473
13 475
13 476
13 474
13 478
13 438
13 438
13 445
13 445
14 449
13 435
13 396
11 235
11 232
11 227
11 226
11 225
11 223
11 223
11 218
11 218
11 217
11 216
11 217
11 216
11 216
11 214
11 216
11 219
11 217
16 245
15 234
15 228
7 88
7 87
7 79
7 78
7 80
7 79
8 81
8 76
8 73
8 68
8 62
7 80
9 226
9 233
9 250
9 251
9 252
9 252
9 253
9 269
9 279
9 285
9 305
9 336
9 346
9 497
9 564
9 610
10 712
10 745
10 757
10 769
10 771
5 749
5 754
66 1321
81 1378
85 1565
88 1638
88 1649
88 1689
87 1730
87 1827
87 1868
87 1884
87 1902
87 1909
88 1940
86 1885
86 1903
86 1904
86 1907
87 2018
87 2029
87 2024
87 2010
87 2010
87 2005
88 1970
88 1921
88 1909
87 1669
87 1579
87 1592
89 2230
91 2317
91 2372
91 2532
92 2594
82 2647
83 2860
24 2270
13 2216
11 2039
10 1979
10 1970
10 1922
9 1904
9 1826
9 1799
9 1792
9 1900
9 2006
9 1981
9 1890
9 1893
9 1881
9 1876
8 1757
8 1747
8 1786
8 1792
8 1818
16 1944
15 1965
15 1981
15 1982
16 1982
16 1983
16 1874
14 964
11 817
11 741
11 698
9 657
10 641
10 629
10 618
10 609
10 605
10 605
10 609
10 590
10 591
10 589
10 570
11 558
11 431
11 310
11 294
11 300
11 341
11 355
11 361
11 370
11 371
10 316
8 314
8 299
2 262
2 263
2 253
2 253
2 252
2 244
2 243
2 244
2 248
2 248
2 246
2 242
1 243
1 293
1 303
1 309
1 311
1 330
1 1186
1 1235
1 1265
1 1313
0 1558
0 1582
0 1600
0 1668
0 1724
0 1986
0 1973
0 2112
1 2270
2 2351
8 2816
9 2844
9 2834
10 2840
10 2778
10 2782
10 2801
10 2799
10 2796
10 2796
10 2797
10 2798
10 2797
10 2798
11 2801
11 2803
11 2806
11 2756
11 2748
11 2758
11 2763
11 2739
11 1832
11 1782
11 1682
11 1637
11 1389
11 1366
11 1352
11 1327
12 1240
10 836
9 602
8 626
8 612
7 577
2 203
2 177
2 175
2 175
2 179
3 217
3 246
3 268
3 277
3 283
5 300
5 301
5 303
5 305
4 315
4 335
4 365
4 451
4 462
4 490
6 534
6 595
6 871
6 885
6 887
6 887
6 898
6 921
6 947
6 955
5 963
5 953
5 927
5 881
5 873
5 881
5 900
5 901
5 913
5 916
5 907
4 887
4 872
4 890
5 961
5 986
3 1005
3 1019
3 1032
3 1026
3 1069
3 1008
3 1026
3 964
3 970
3 935
1 856
1 795
1 516
1 503
1 502
1 502
1 496
1 483
1 478
1 494
1 508
1 510
1 513
1 514
1 514
2 505
2 482
3 478
11 475
11 474
11 473
11 442
11 428
11 387
10 308
10 259
10 225
10 221
10 225
10 222
10 160
10 156
10 125
10 118
10 118
10 152
10 154
10 157
10 160
10 197
10 212
10 218
10 231
10 214
10 253
10 234
10 232
10 234
10 232
10 233
10 244
8 269
6 306
7 329
1 332
2 761
2 776
2 790
2 807
2 853
2 921
2 991
2 1013
2 1032
2 1022
2 1012
2 1011
2 1004
2 1005
4 1020
4 1021
4 985
6 987
6 987
6 985
6 948
6 933
6 929
6 918
6 915
6 858
7 852
7 854
7 856
7 859
8 946
8 986
8 955
8 952
7 956
7 1049
6 713
9 988
10 1020
10 1025
11 975
11 912
11 830
11 827
11 826
11 830
11 834
11 836
11 842
11 852
8 918
9 931
10 940
10 969
17 1061
16 1072
16 1079
17 1119
17 1120
17 1143
17 1169
19 1190
21 1209
23 1221
24 1226
24 1221
23 1143
23 1077
23 1069
23 1048
23 1008
22 877
20 679
17 513
18 508
18 506
18 505
18 496
18 494
19 495
20 495
19 490
19 487
19 486
19 484
19 473
20 388
20 377
20 368
17 328
11 236
11 240
11 261
11 230
11 234
10 214
10 260
6 236
6 210
4 194
4 184
4 175
4 175
4 171
4 168
4 168
4 170
11 163
11 164
11 164
10 163
10 163
13 174
13 178
18 283
17 375
17 538
17 549
17 553
17 552
17 548
17 555
17 555
17 556
17 555
17 557
17 558
17 544
17 535
18 525
18 532
18 533
18 457
18 458
18 458
18 458
18 461
18 461
18 462
18 457
18 454
18 454
19 453
12 451
12 452
17 463
18 464
18 465
15 455
15 452
10 316
10 229
8 83
8 80
8 96
8 97
8 95
8 92
8 91
8 93
8 88
10 102
10 103
10 102
9 93
9 93
9 86
9 85
9 85
9 85
9 91
9 91
9 94
9 99
9 113
9 113
9 113
9 121
8 121
8 124
6 123
3 113
2 114
2 113
55 143
57 140
57 141
57 141
57 141
57 141
57 120
57 121
57 121
57 119
57 119
57 118
57 117
55 100
55 102
57 107
58 145
58 147
58 148
60 155
60 154
60 152
60 143
60 144
60 151
60 147
60 134
60 134
60 133
60 124
59 123
58 123
57 124
57 126
48 125
49 124
8 91
7 89
7 85
7 85
7 93
7 94
7 100
7 98
7 98
7 99
7 97
7 97
7 97
7 94
6 90
5 84
4 49
4 48
4 47
3 39
6 66
6 66
6 73
6 73
6 61
7 65
7 67
7 69
13 142
13 155
13 158
13 166
13 167
13 164
13 169
11 169
11 176
11 455
13 485
13 513
13 511
13 514
13 521
13 522
13 522
13 521
13 522
13 523
13 525
13 528
13 529
13 529
13 543
13 547
13 547
13 553
10 521
10 519
10 528
9 539
9 539
8 541
8 544
8 539
3 450
3 444
4 446
6 459
6 471
6 508
6 547
6 550
6 545
5 258
5 235
5 206
7 241
8 243
8 238
8 244
8 244
8 245
8 241
8 240
8 239
8 240
8 240
8 238
8 226
8 228
9 236
20 361
20 368
20 378
22 371
22 386
21 454
21 469
21 464
21 470
21 479
21 480
21 477
19 453
19 436
18 389
18 367
18 367
18 360
18 356
18 355
18 352
15 313
15 311
15 307
15 305
15 306
15 304
15 304
15 304
15 310
15 311
15 311
15 320
15 331
15 328
14 313
0 169
0 175
0 168
2 176
3 149
3 92
5 89
5 88
5 84
5 75
5 74
5 73
5 73
5 73
7 79
7 79
7 80
7 81
7 81
7 83
8 117
8 117
8 120
8 167
8 176
8 179
8 179
9 181
9 182
10 223
13 340
14 482
16 530
17 633
19 809
19 828
19 850
21 895
21 929
19 921
18 922
17 908
16 910
16 912
16 949
17 958
17 973
17 982
18 986
21 1109
19 1104
26 1148
29 1157
30 1155
30 1153
30 1149
32 1114
33 1188
33 1199
40 1217
40 1220
40 1221
40 1211
40 1210
40 1199
37 1072
33 842
31 682
31 640
30 576
30 516
30 495
29 481
29 478
29 476
28 473
28 477
28 477
31 475
31 474
31 428
30 420
30 413
30 400
27 391
18 235
18 251
18 251
16 240
16 244
16 244
16 243
13 252
12 173
12 123
5 72
4 82
4 112
4 113
4 118
4 121
4 125
3 122
3 122
3 123
3 160
5 176
6 192
6 191
6 192
6 190
6 185
6 184
5 191
3 190
3 189
3 192
3 192
3 196
31 314
31 319
31 320
31 303
31 307
31 304
31 302
31 303
31 303
33 293
33 296
33 295
33 294
33 270
34 248
37 285
37 286
39 313
39 314
39 314
39 316
39 311
39 277
37 263
36 268
36 272
36 271
37 277
37 280
37 279
40 272
41 277
41 278
35 280
38 282
35 277
16 162
16 153
16 153
18 151
25 154
30 154
30 155
30 150
30 151
28 144
28 146
28 144
33 145
32 142
30 126
29 93
29 88
28 65
28 69
28 74
29 82
29 89
29 125
29 128
29 113
31 195
32 203
36 205
40 206
44 210
42 207
42 201
43 201
43 202
40 203
40 204
40 212
40 213
40 215
35 214
27 217
26 223
26 222
26 221
26 221
26 221
26 220
25 219
20 217
20 218
20 218
20 219
20 303
20 303
20 300
20 303
19 301
19 321
19 283
19 280
19 274
16 234
10 237
9 260
5 277
2 294
1 307
1 310
1 310
1 308
1 305
1 304
1 297
1 323
1 366
1 371
1 376
1 395
1 402
1 403
1 408
1 410
1 413
1 421
1 425
3 474
3 476
3 476
3 391
3 395
3 392
3 397
3 477
5 694
5 960
5 1003
6 1041
6 995
6 1039
6 1064
6 1062
6 1051
6 1044
6 1072
6 1075
6 1100
6 1107
6 1113
6 1139
6 1108
6 1048
7 1029
8 1095
8 1108
8 1125
8 1144
8 1163
8 1162
8 1162
8 1153
8 1268
6 1224
6 1228
6 1232
6 1235
6 1232
6 1232
6 1192
5 1009
3 647
3 530
3 513
2 476
2 477
2 446
2 443
2 444
2 445
3 449
3 461
3 606
3 587
3 583
3 579
3 556
3 558
3 558
2 560
1 476
1 464
1 453
1 434
1 415
1 414
1 413
1 412
1 291
1 291
1 282
1 282
1 278
1 276
1 271
1 247
1 246
1 246
1 248
1 248
1 249
1 249
1 252
0 254
0 286
0 281
0 281
0 232
0 78
0 77
0 76
0 73
0 74
0 74
0 75
0 74
0 72
0 75
0 93
1 199
1 278
1 313
1 314
1 316
1 331
1 332
1 336
1 339
1 359
1 364
1 365
1 364
1 365
1 366
1 364
1 363
1 374
1 369
1 366
1 363
1 340
1 346
1 357
1 361
1 365
1 368
1 377
1 403
1 406
5 416
5 416
5 414
5 423
5 434
5 439
4 349
4 329
4 299
4 299
5 302
5 291
5 301
5 300
5 307
5 293
5 296
5 299
8 365
9 370
9 375
9 379
10 495
10 489
10 512
10 514
10 513
10 496
10 491
10 478
10 474
10 473
10 476
10 472
10 446
9 438
6 431
6 437
6 433
6 419
6 384
6 376
6 344
6 312
6 310
5 309
5 307
5 300
5 290
5 281
6 284
6 284
6 285
6 284
2 216
2 214
2 205
1 206
1 71
1 142
1 140
1 142
1 141
1 142
1 143
1 142
1 161
2 159
4 153
4 149
4 143
4 144
4 142
4 141
4 138
4 136
4 135
4 140
4 143
4 144
4 180
5 261
7 1298
7 1368
8 1748
8 1895
7 1939
7 2353
7 2450
7 2454
7 2460
7 2463
7 2465
7 2461
7 2461
6 2388
6 2386
6 2385
6 2384
5 2384
7 2431
7 2430
7 2426
6 2431
6 2451
6 2466
6 2474
6 2480
7 2589
7 2651
7 2654
7 2658
7 2666
7 2662
7 2658
7 2656
7 2598
6 2242
3 488
3 341
3 338
3 353
3 364
4 665
4 669
4 671
4 676
4 676
4 680
4 692
4 705
4 714
4 753
4 758
4 786
4 790
2 742
2 754
2 743
2 745
3 777
4 839
6 922
6 922
5 769
5 750
5 747
5 747
5 773
5 775
5 782
5 783
5 783
5 786
5 787
5 788
5 787
5 816
5 783
4 477
4 477
4 478
4 477
4 485
4 491
5 492
5 481
6 474
6 457
6 452
6 443
6 450
7 456
8 446
9 443
9 435
8 369
7 287
5 206
5 200
5 199
5 200
5 201
5 201
5 171
5 171
5 162
5 161
5 161
5 166
5 163
5 163
5 181
5 128
5 132
4 125
4 124
5 124
5 121
5 115
5 109
4 109
4 124
4 155
4 189
4 210
4 212
4 228
3 251
2 286
1 291
1 303
1 311
1 314
1 321
1 325
1 333
1 405
1 494
1 622
1 750
1 1046
1 1171
1 1516
1 1789
1 2153
1 2270
0 2284
0 2386
0 2404
0 2418
0 2423
0 2438
0 2700
0 2919
0 2979
0 3019
0 3019
0 3009
0 2969
0 2882
0 2837
0 2831
0 2829
0 2828
0 2811
1 2843
1 2875
1 2896
2 2929
2 2950
2 2984
2 2993
2 2924
2 2811
2 2689
2 2582
2 2250
2 2120
2 1714
2 1445
2 1164
2 1067
2 1059
2 940
2 928
2 917
2 907
2 895
2 637
2 389
2 340
2 320
2 316
2 316
2 316
2 320
2 320
2 319
2 317
2 305
2 267
1 201
1 179
1 166
0 147
0 141
0 106
0 81
0 75
0 72
0 86
0 85
0 82
0 82
0 83
0 83
0 84
0 85
0 87
0 75
0 78
0 79
0 79
0 79
0 79
0 75
0 75
0 80
0 80
0 80
0 80
0 75
0 74
0 73
0 74
0 87
1 115
1 154
1 161
1 169
1 161
1 148
1 143
1 157
2 169
2 170
2 168
2 170
2 204
2 205
2 201
2 203
2 207
2 209
2 211
2 215
2 217
2 215
2 218
2 217
2 217
2 215
2 213
2 209
2 209
2 209
2 209
2 209
5 234
5 234
5 235
5 205
4 160
4 153
4 148
4 140
4 139
4 142
4 146
4 132
3 122
3 140
3 131
3 131
3 121
3 221
3 227
3 240
3 239
3 234
3 230
3 230
3 231
3 234
3 247
3 261
3 273
3 297
3 297
3 297
3 297
3 302
3 304
3 309
0 287
0 287
0 283
0 279
0 279
0 278
0 278
0 277
0 295
0 294
0 292
0 471
0 497
0 507
0 509
0 507
0 477
0 373
0 374
0 370
0 389
0 410
0 418
0 420
0 422
0 416
0 397
0 375
0 370
0 355
0 349
0 349
1 399
1 397
1 409
1 414
1 422
1 448
1 448
1 450
1 450
1 450
1 457
1 460
1 449
1 446
1 446
1 258
1 227
1 230
1 239
1 253
1 257
1 258
1 261
1 256
1 230
1 212
1 208
1 206
1 207
1 208
1 224
1 236
1 244
1 260
1 270
1 324
1 318
1 323
1 313
1 314
1 314
1 289
1 294
1 291
1 289
1 285
1 282
1 274
1 272
1 274
1 266
1 254
1 253
1 242
1 235
1 223
1 216
1 216
1 215
1 215
1 215
1 215
1 218
1 221
1 227
1 234
1 236
1 225
1 215
1 205
1 189
1 137
0 77
0 72
0 131
0 132
0 135
0 135
0 135
0 135
0 137
0 140
0 139
0 140
0 153
0 152
0 150
0 150
0 150
0 153
0 153
0 153
0 153
0 154
0 158
0 160
0 160
0 156
0 154
0 148
0 139
0 130
0 113
0 111
0 111
0 111
0 113
0 111
0 116
0 135
0 95
0 144
0 171
0 212
0 332
0 370
0 379
0 387
0 390
0 396
0 384
0 383
0 382
0 388
0 388
0 408
0 407
0 407
0 406
0 406
0 404
0 402
0 407
0 408
0 409
0 409
0 410
0 411
0 412
0 411
0 411
0 412
0 412
0 406
0 393
0 370
0 337
0 291
0 262
0 209
0 95
0 58
0 56
0 52
0 54
0 52
0 50
0 50
0 50
0 43
0 43
0 19
0 19
0 17
0 16
0 26
0 28
0 30
0 26
0 26
0 30
0 38
0 53
0 55
0 56
0 60
0 59
0 59
0 59
0 59
0 59
0 60
0 60
0 122
0 134
0 149
0 149
0 149
0 148
0 148
0 148
0 149
0 149
0 150
0 150
0 150
0 150
0 150
0 149
0 149
0 144
0 134
0 134
0 133
0 132
0 132
0 126
0 104
0 99
0 95
0 95
0 95
0 95
0 97
0 98
0 104
0 131
0 137
0 168
0 117
0 113
0 112
0 113
0 114
0 116
0 118
0 118
0 120
0 120
0 119
0 120
0 150
0 154
0 155
0 172
0 174
0 177
0 178
0 178
0 178
0 178
0 178
0 178
0 178
0 178
0 178
0 178
0 177
0 177
0 174
0 174
0 165
0 139
0 139
0 117
0 105
0 99
0 97
0 96
0 96
0 94
0 90
0 89
0 90
0 101
0 112
0 113
0 79
0 75
0 73
0 65
0 64
0 60
0 60
0 60
0 60
0 62
0 185
0 189
0 199
0 205
0 209
0 226
0 231
1 244
1 304
1 309
1 322
1 322
1 320
1 312
1 305
1 325
1 331
1 333
1 348
1 378
1 436
2 498
2 757
2 837
2 856
2 962
2 1007
2 1017
2 1031
2 1035
2 1042
2 1101
2 1106
2 1110
2 1110
2 1104
2 967
2 964
2 959
2 959
2 957
2 944
2 967
1 940
1 892
1 891
1 890
1 888
1 888
1 888
1 887
1 856
1 844
1 891
1 884
1 866
1 811
0 732
0 428
0 314
0 307
0 200
0 198
0 201
0 204
0 207
0 242
0 240
0 332
0 386
0 391
0 432
0 432
0 432
0 434
0 433
1 532
1 544
1 511
1 512
1 511
1 506
1 511
1 517
1 520
1 571
1 576
1 573
1 572
1 516
1 517
1 518
1 518
1 680
1 679
1 690
1 718
1 724
1 727
2 728
2 733
2 726
2 684
2 620
2 490
2 478
2 474
2 436
2 434
2 433
2 432
2 422
1 313
1 314
1 313
1 318
1 333
1 341
1 337
1 333
1 329
1 276
1 292
1 292
1 290
1 290
1 280
1 310
1 316
1 167
2 180
3 183
3 164
3 181
3 180
2 182
2 179
2 179
2 179
2 179
2 184
2 214
2 288
2 326
2 404
2 464
2 517
2 540
2 565
2 574
2 577
2 571
2 553
2 550
2 554
1 570
1 597
1 641
1 640
1 654
1 653
1 659
1 664
1 630
1 627
1 614
1 609
0 591
0 654
0 647
0 649
0 648
0 655
0 669
0 714
0 738
0 729
0 682
1 623
1 566
1 483
1 461
1 422
1 427
1 427
4 621
4 674
4 682
4 741
4 746
4 743
4 735
4 694
5 712
5 705
6 692
6 692
6 684
6 691
6 693
11 1028
14 1149
14 1171
15 1210
15 1135
15 1147
15 1150
15 1146
15 1139
15 1120
14 1067
14 1027
14 1012
14 1002
14 989
14 989
14 985
14 987
14 993
14 1005
14 1001
11 771
11 712
11 702
11 677
10 673
10 670
10 668
10 684
10 634
10 637
10 653
10 696
9 697
10 693
10 680
4 237
2 161
2 166
2 186
4 244
4 252
4 257
5 256
5 257
5 264
5 265
5 266
5 267
6 270
6 272
6 277
6 276
6 275
6 266
6 242
6 239
6 237
6 236
6 236
6 235
6 237
6 238
6 238
6 218
5 270
7 292
7 304
7 290
7 296
7 296
7 298
7 300
7 295
6 284
6 263
4 205
4 199
4 192
4 192
4 191
4 191
5 228
5 233
4 234
4 234
4 233
4 252
4 252
4 252
4 257
4 259
4 261
4 264
4 264
4 264
5 268
5 269
5 280
7 472
6 501
6 456
4 445
4 824
4 802
4 819
4 830
4 845
5 855
5 867
6 899
6 904
6 906
6 952
6 955
6 956
6 968
5 971
7 1014
7 1027
8 1035
8 1059
12 1653
14 1702
14 1840
15 1899
15 1957
15 2218
16 2344
15 2455
31 4672
32 4857
34 5156
34 5269
34 5275
33 5245
33 5505
33 5483
33 5478
34 5075
34 5069
35 5050
35 5036
35 5030
35 5028
35 5015
34 4977
34 4973
34 4971
34 4924
34 4919
34 4912
34 4902
34 4880
32 4798
32 4783
31 4775
31 4625
27 3710
24 3560
24 3530
23 3525
23 3512
22 3479
22 3424
21 2995
4 399
2 291
2 326
3 327
3 348
3 245
3 245
3 239
3 243
2 243
2 243
1 242
1 242
1 242
1 240
1 259
1 259
1 262
1 265
1 266
1 272
1 272
1 268
1 270
1 286
2 322
2 349
2 352
2 353
2 354
2 386
2 389
4 402
5 397
6 409
6 409
6 366
7 375
7 322
6 355
6 361
7 365
7 368
7 371
7 372
7 373
7 375
7 383
7 388
7 392
7 403
7 400
8 408
8 407
9 449
10 520
10 553
13 640
14 870
18 939
19 1066
18 1068
18 1059
18 1072
19 1094
20 1106
20 1084
22 1233
18 1685
22 2302
22 2357
22 2417
26 2422
25 2395
25 2343
25 2314
25 2316
25 2329
25 2333
25 2350
25 2361
24 2363
24 2374
24 2364
24 2363
24 2358
24 2345
24 2322
24 2325
25 2311
26 2428
25 2392
25 2385
22 2308
21 2110
17 2111
15 2034
15 2065
16 2148
16 2316
15 2298
15 2292
14 2284
14 2030
14 1379
10 958
9 947
9 962
5 961
5 956
5 955
5 957
5 942
6 932
6 915
7 892
7 886
7 885
7 884
7 886
7 889
7 920
7 1009
23 1539
22 1617
24 4575
23 4423
26 4476
29 4569
29 4580
30 4557
30 4509
30 4457
29 4435
29 4368
29 4199
29 4186
29 4183
29 4175
28 4175
28 4149
28 4150
29 4149
29 4139
29 4131
29 4131
29 4132
29 4141
29 4159
27 4230
27 4241
36 4369
43 4674
43 4728
43 4764
44 4780
44 4808
45 4730
45 4624
28 4048
24 3951
20 940
20 940
20 896
20 878
70 2162
72 2174
72 2170
72 2143
72 2117
72 2131
72 2131
72 2137
72 2136
72 2140
72 2156
73 2164
74 2193
73 2194
73 2200
73 2201
73 2204
73 2208
73 2199
73 2193
73 2132
72 2120
64 1979
57 1717
57 1683
57 1675
56 1668
56 1631
57 1681
57 1679
57 1676
56 1694
55 1724
55 1751
55 1777
54 1779
6 520
5 514
5 471
5 465
5 461
5 452
6 447
6 443
6 442
6 436
8 439
7 432
6 419
6 423
6 412
6 414
6 412
6 405
6 390
6 384
6 376
6 376
7 376
7 300
7 303
7 300
8 302
8 304
6 263
6 274
5 270
5 253
5 217
5 186
6 147
7 140
7 115
7 117
7 118
7 117
7 117
7 115
6 116
6 110
6 117
7 128
5 202
5 213
5 269
5 412
5 413
5 415
5 424
9 692
18 749
36 866
48 1037
48 1136
48 1143
48 1145
48 1142
47 1142
47 1139
47 1132
47 1115
47 1111
47 1110
47 1110
47 1109
47 1102
46 1102
45 1101
45 1159
45 1157
45 1159
45 1160
45 1161
45 1162
45 1152
45 1153
45 1155
44 1204
43 1128
43 1131
43 1052
43 918
43 928
43 930
41 928
31 660
23 586
6 408
0 242
0 210
0 210
0 213
0 209
0 209
0 210
0 209
0 209
0 206
0 206
0 206
0 206
0 203
0 203
0 203
0 143
0 142
0 140
0 140
0 140
0 140
0 140
0 139
0 126
0 40
0 38
0 25
0 26
0 17
0 14
0 13
0 12
0 11
0 13
0 13
0 15
0 15
0 16
0 13
0 18
0 18
0 17
0 19
0 23
0 26
1 127
1 131
2 142
2 160
2 174
2 178
2 184
2 186
2 190
2 194
2 195
2 201
2 209
2 211
2 211
2 213
2 214
2 214
2 214
2 213
2 213
2 212
2 213
2 215
2 215
2 216
2 214
2 213
2 212
2 211
2 207
2 207
2 207
2 209
2 205
2 200
0 72
0 63
0 57
0 53
0 49
0 47
0 45
0 44
0 41
0 37
0 38
0 34
0 29
0 31
0 34
0 36
0 43
0 52
0 59
0 60
0 62
0 63
0 66
0 63
0 62
0 64
0 65
0 65
0 65
0 64
0 65
0 66
0 66
0 64
0 64
0 64
0 62
0 61
0 61
0 61
0 61
0 61
0 61
0 61
0 61
0 60
0 57
1 56
1 50
1 48
1 44
1 40
1 32
1 28
1 29
1 28
1 29
1 31
1 27
1 26
1 30
1 40
1 68
1 116
1 121
1 124
1 134
1 140
1 143
1 152
1 156
1 158
1 158
1 159
1 159
1 159
1 160
1 160
1 161
1 161
1 163
1 163
1 163
0 164
0 164
0 164
0 162
0 162
0 162
0 159
0 152
0 151
0 149
0 149
0 149
0 149
0 151
2 493
2 491
2 460
2 575
4 686
6 809
6 850
6 856
6 863
6 864
6 864
6 870
6 870
6 870
6 868
6 868
6 870
6 869
6 870
6 869
6 869
7 874
7 873
7 873
7 873
7 873
7 871
7 871
7 871
8 870
8 871
8 891
8 905
9 916
9 932
10 1198
8 753
5 643
5 629
6 694
6 704
6 682
6 685
6 694
6 705
93 2043
116 2196
125 2254
125 2265
126 2284
132 2372
139 2451
139 2460
140 2472
140 2475
140 2478
140 2479
141 2474
147 2647
149 2655
149 2674
149 2683
150 2704
149 2708
154 2715
156 2722
158 2729
162 2833
163 2815
164 2864
164 2893
163 2606
162 2468
161 2378
161 2359
161 2358
161 2318
163 2314
163 2294
163 2285
163 2289
69 1127
41 996
44 1294
45 1318
45 1334
45 1369
43 1369
42 1387
43 1409
43 1409
43 1410
43 1408
43 1408
37 1234
35 1224
35 1191
35 1188
33 1174
31 1171
25 1358
23 1351
22 1342
16 1189
16 1068
16 1027
16 1007
18 1017
18 1019
18 1020
19 1023
19 1023
19 1022
19 1026
21 1029
22 1029
33 998
35 765
91 1135
89 819
94 822
163 827
166 827
166 829
164 831
166 830
166 834
166 835
168 836
173 875
173 875
173 881
173 881
173 881
174 881
175 882
175 690
175 688
175 681
175 663
175 661
175 660
175 657
172 642
173 646
173 649
171 650
171 652
171 654
169 645
164 645
162 646
151 641
147 608
86 111
81 99
79 99
14 101
10 100
8 100
8 100
8 100
8 97
8 97
8 96
4 55
4 54
4 45
4 45
3 49
9 604
8 620
8 670
8 676
8 670
8 672
8 671
8 668
7 674
7 683
7 683
7 687
7 683
8 682
9 716
9 714
9 708
9 707
9 720
9 855
76 1922
80 2146
87 2366
104 2562
108 2702
115 3150
123 3457
124 3490
124 3493
124 3498
126 3531
127 3543
127 3548
127 3545
127 3546
128 3545
121 2998
121 2984
121 2941
122 2940
122 2941
133 3035
135 3066
135 3074
135 3079
138 3102
141 3091
141 3105
141 3105
141 3108
146 3162
146 3174
147 3184
147 3185
146 3172
139 3193
54 1441
44 1166
34 997
37 1008
79 1716
79 1726
82 1746
82 1744
86 1750
84 1745
83 1714
83 1713
84 1721
84 1714
85 1710
86 1713
86 1688
86 1686
85 1673
85 1665
83 1653
71 1541
72 1525
71 1519
71 1507
68 1466
68 1459
68 1441
68 1438
68 1439
63 1386
62 1372
63 1365
63 1362
64 1360
63 846
63 845
62 834
58 818
56 805
18 110
17 101
13 68
12 54
8 103
8 102
8 103
8 90
7 90
7 90
6 82
5 79
5 93
5 93
5 152
3 220
3 293
3 314
2 319
2 329
14 388
16 1195
16 1241
16 1289
16 1319
17 1328
17 1345
17 1350
18 1410
22 1423
22 1451
22 1451
22 1458
22 1463
23 1522
25 1586
25 1623
32 2106
35 2147
35 2165
36 2116
36 2128
36 2134
39 2178
39 2249
45 2988
46 3488
47 3590
50 3690
51 3872
65 3838
238 3931
242 3923
246 3985
246 3985
253 3975
239 3915
237 3059
237 3037
237 2979
237 2985
237 2979
237 2979
236 2983
234 2923
230 2918
230 2883
230 2884
230 2877
230 2869
230 2814
228 2742
227 2661
215 2133
215 2121
215 2124
214 2124
216 2153
216 2149
218 2136
218 1975
212 860
211 561
210 529
194 441
162 393
161 363
16 213
16 201
13 128
13 125
6 126
6 126
6 133
8 139
8 138
8 121
9 117
9 115
9 110
9 101
9 98
13 126
13 132
13 150
13 167
13 172
13 174
13 174
13 188
13 192
13 193
13 196
11 174
10 179
8 179
7 189
7 269
7 272
7 277
7 410
7 410
7 411
7 392
7 392
7 392
5 398
5 394
4 395
4 387
4 383
5 381
5 380
12 380
12 381
12 378
13 376
13 373
10 347
10 332
10 318
10 299
10 296
10 295
10 295
10 286
10 281
10 280
10 281
12 306
12 304
12 297
12 289
12 219
10 217
10 212
10 78
10 83
10 83
10 85
10 89
10 89
10 84
66 1356
66 1376
66 1437
66 1483
66 1488
66 1518
58 1538
59 1574
59 1613
59 1617
59 1625
59 1627
60 1640
60 1641
60 1648
60 1651
60 1652
60 1651
62 1960
62 1970
62 2029
62 2040
60 2024
62 2091
62 2093
62 2090
62 2091
62 2091
62 2097
62 2098
62 2103
62 2103
61 2105
63 2147
63 2143
63 2146
8 833
8 815
10 1099
10 1110
10 1152
10 1146
9 1129
9 1128
9 1098
9 1089
9 1081
9 1082
9 1068
11 1128
11 1128
11 1168
11 1167
11 1168
9 846
10 838
10 767
10 766
10 764
10 692
10 688
10 685
10 685
10 685
10 678
10 677
10 665
10 665
10 703
8 668
8 675
7 683
7 689
7 702
6 438
6 434
6 505
6 552
6 842
6 890
6 1187
6 1209
6 1232
8 1333
7 1337
11 1334
11 1335
10 1343
10 1355
10 1358
10 1354
10 1361
10 1369
11 1417
12 1435
11 1455
11 1505
11 1513
11 1525
11 1533
11 1538
11 1543
11 1544
11 1543
11 1492
11 1483
11 1477
11 1464
11 1458
11 1436
11 1310
11 1300
11 1245
10 1233
10 952
10 906
10 610
10 595
11 574
9 460
9 445
4 345
4 337
4 336
4 345
4 365
5 393
5 396
5 393
4 323
3 301
4 318
5 361
10 456
10 455
11 477
11 477
11 489
11 493
11 501
11 503
12 504
12 511
13 518
16 594
16 599
16 592
16 570
20 530
19 469
19 464
19 463
19 462
19 462
19 463
20 483
20 504
21 513
21 527
21 511
21 510
20 499
20 481
20 473
21 471
21 463
21 457
19 416
17 359
13 248
13 239
13 238
14 229
14 223
14 218
14 209
14 209
13 207
13 201
13 185
10 110
10 110
9 110
9 110
6 99
6 99
6 100
6 100
6 107
7 134
37 918
36 908
46 1096
47 1126
48 1130
53 1220
56 1262
58 1248
58 1256
58 1257
57 1257
57 1258
57 1258
57 1259
57 1258
55 1261
56 1347
56 1358
55 1370
55 1374
55 1381
55 1382
55 1394
55 1395
55 1396
55 1399
55 1417
55 1419
58 1423
78 1435
87 1435
88 1435
89 1435
88 1433
88 1421
82 1327
40 240
39 225
50 251
50 249
49 247
51 249
51 246
52 245
52 243
52 242
52 241
52 290
52 295
53 324
54 349
54 348
53 265
54 265
54 256
55 257
55 262
55 262
55 250
55 252
53 251
53 245
47 228
48 233
43 229
30 218
22 218
22 219
21 229
21 231
21 234
20 242
20 244
20 247
8 212
8 219
11 641
10 781
11 923
10 1028
10 1115
10 1140
10 1145
10 1101
11 1101
10 1062
9 1035
8 1034
8 1034
7 1036
7 1037
7 1035
8 1031
8 1027
8 1031
8 1032
8 1035
8 1034
8 1036
7 1032
7 1033
9 1039
9 1038
9 1040
9 1029
9 1033
10 1032
23 1359
22 1385
23 1399
23 1395
23 1385
20 914
20 660
19 519
19 521
19 506
19 488
18 495
18 484
18 494
18 508
18 513
18 521
18 521
18 599
18 600
18 604
26 623
35 651
36 669
36 668
36 665
36 670
36 671
36 681
36 679
34 669
34 669
34 669
34 668
34 664
32 655
20 305
20 299
20 297
21 302
21 301
21 297
22 294
22 290
22 267
23 266
23 260
23 250
23 249
23 236
23 398
23 395
24 409
25 417
27 349
25 351
26 345
16 321
10 291
10 278
11 279
12 287
15 291
15 290
15 280
15 282
14 282
14 282
14 284
14 286
14 280
14 281
14 284
14 275
14 273
13 271
13 271
12 270
12 271
12 275
11 275
11 281
14 287
17 305
33 358
37 364
38 188
42 225
41 208
39 212
37 201
37 198
36 199
36 199
36 198
34 190
33 190
32 186
31 181
32 181
32 179
32 179
33 181
33 182
35 190
46 190
46 188
47 185
48 184
48 184
49 189
49 191
50 192
52 193
57 193
77 194
77 194
75 188
78 179
72 158
55 107
54 104
55 104
55 63
55 63
56 46
56 46
56 45
56 44
56 44
56 44
56 46
55 47
55 47
55 47
55 47
54 45
54 45
53 40
53 39
51 30
39 27
39 28
36 29
30 33
30 34
26 78
26 82
24 88
18 94
16 96
15 94
15 94
14 94
8 96
8 95
8 143
10 161
11 166
11 170
11 174
11 176
11 177
11 177
11 178
11 178
11 178
10 176
10 175
9 174
9 174
9 175
9 175
9 175
9 176
8 177
12 187
16 205
24 225
24 237
24 239
24 237
24 207
22 201
22 216
22 221
24 278
24 297
24 592
24 625
24 637
24 649
24 606
23 589
22 592
22 594
23 605
29 623
32 628
32 628
32 630
32 644
32 671
32 680
32 680
32 679
32 679
32 681
33 691
33 696
33 696
33 696
28 680
22 649
17 634
17 641
17 638
17 638
24 696
25 696
25 680
25 661
21 593
20 571
20 265
20 252
20 232
20 214
20 211
19 204
20 201
20 201
19 192
13 167
10 166
10 169
10 176
11 165
11 141
11 138
11 139
11 141
11 142
11 141
10 130
10 127
10 125
31 125
147 126
163 126
167 126
168 120
167 120
167 121
161 42
161 41
162 36
162 36
162 46
162 47
162 49
162 49
162 49
162 50
162 52
161 52
161 57
161 55
161 68
161 71
161 68
161 66
161 64
160 68
160 80
160 87
160 93
160 94
159 94
156 95
156 95
141 95
120 95
93 95
9 93
5 93
0 92
0 92
0 93
0 92
0 93
0 94
0 96
0 97
0 87
1 87
1 84
1 84
1 84
2 83
2 82
2 63
2 54
2 43
2 43
2 40
2 39
2 40
2 41
2 32
2 26
2 20
2 16
2 15
2 15
2 15
2 16
2 17
2 17
2 17
3 17
3 17
3 17
3 16
3 21
3 19
3 19
3 19
3 19
3 20
2 20
1 20
1 20
1 20
1 20
1 21
1 21
1 21
1 21
1 20
1 15
1 15
1 15
1 12
1 13
1 28
2 32
2 40
2 42
2 42
1 42
1 42
1 42
1 44
1 49
1 55
1 60
1 62
1 62
1 62
1 57
1 57
1 53
1 53
1 53
1 52
1 52
1 52
1 52
1 52
1 52
1 51
1 51
1 52
1 55
1 55
1 61
1 68
1 68
1 68
1 67
1 53
0 47
0 39
0 42
0 49
0 62
0 76
0 84
0 79
0 75
0 69
0 64
0 64
0 66
0 66
0 68
0 70
0 72
0 72
0 72
0 73
0 73
0 73
0 72
0 72
0 75
0 75
0 82
0 82
0 80
0 79
0 72
0 67
0 72
0 72
0 73
0 73
0 73
0 78
0 75
0 69
0 56
0 39
0 37
0 40
0 49
0 49
0 48
0 48
0 49
0 55
0 61
0 326
0 343
0 422
0 465
0 474
0 479
0 493
0 494
0 494
0 492
0 491
0 486
0 485
0 502
0 551
0 583
0 586
0 580
0 584
0 583
0 587
0 595
0 605
0 606
0 604
0 605
0 607
0 603
0 597
0 592
0 592
0 595
1 670
1 677
1 674
1 661
1 288
1 271
1 283
1 295
1 304
1 316
1 308
1 308
1 316
1 330
1 338
2 374
4 406
4 431
4 439
4 434
4 438
4 440
4 441
5 433
5 428
5 429
5 413
5 413
5 413
5 413
5 412
5 419
5 421
5 420
5 427
5 432
4 333
4 333
4 324
4 325
4 318
4 313
4 296
4 320
4 312
4 312
4 331
4 364
4 348
4 340
4 340
3 290
1 263
1 178
1 164
1 166
1 164
1 164
1 164
0 163
0 162
0 162
0 163
0 163
0 165
0 203
0 204
0 219
0 215
0 212
0 201
0 199
0 198
0 198
0 198
0 198
0 199
0 205
0 207
0 173
0 173
0 160
0 132
0 105
0 100
0 100
0 103
0 96
0 92
0 93
0 93
0 95
0 99
0 100
0 100
0 102
0 103
0 104
0 108
0 107
0 109
0 75
0 85
0 67
0 67
0 67
0 66
0 68
0 68
0 70
0 71
0 73
0 79
0 81
0 187
0 204
0 221
0 233
0 243
0 244
0 244
0 250
0 256
0 358
0 366
0 365
0 407
0 414
0 449
0 1062
0 1112
0 1159
0 1259
0 1302
0 1331
1 1509
1 1510
1 1506
1 1619
1 1619
1 1619
1 1621
1 1621
1 1631
1 1633
1 1641
1 1657
1 1652
1 1644
2 1639
2 1541
2 1529
2 1505
2 1507
2 1493
2 1493
2 1491
2 1485
2 1437
2 1318
2 1314
2 1312
2 1322
2 1319
2 1225
1 322
1 242
1 230
1 229
1 229
1 235
1 242
1 254
2 334
2 223
2 236
2 247
2 253
3 262
3 264
5 726
6 756
6 744
6 811
6 817
5 854
6 989
6 1024
6 1092
6 1103
6 1106
6 1109
6 1109
6 1110
6 1118
6 1128
6 1146
6 1156
6 1149
6 1157
6 1160
6 1173
6 1188
6 1199
6 1210
6 1237
6 1230
6 1213
6 1208
4 1131
4 1117
2 1106
2 1094
2 1088
2 1078
2 1049
0 452
0 442
0 446
0 467
0 472
0 393
0 292
0 318
0 337
0 341
0 348
0 354
0 358
0 370
0 440
0 488
0 530
0 604
0 766
0 871
0 1058
0 1277
1 1657
1 1667
1 1664
1 1644
1 1652
1 1658
1 1667
1 1667
1 1670
1 1683
1 1698
3 1830
3 1841
3 1846
3 1851
3 1851
3 1844
3 1830
3 1819
3 1816
3 1796
3 1758
3 1699
3 1705
3 1709
3 1713
3 1713
3 1708
3 1599
4 1540
4 1501
4 1415
4 1199
4 1100
4 822
4 666
3 311
3 301
3 292
3 292
3 398
3 399
3 389
3 391
3 642
3 660
3 647
1 522
1 531
1 530
1 524
1 523
1 523
1 517
1 516
1 516
2 516
2 513
2 508
2 488
2 483
2 481
3 474
2 475
2 481
2 573
2 597
2 675
2 681
2 682
2 684
2 682
2 682
2 683
2 683
2 682
2 564
2 574
2 587
2 587
2 324
2 307
2 304
2 294
2 290
3 291
3 292
3 292
3 292
3 293
4 304
6 354
5 454
5 587
6 664
7 1208
7 1371
8 1460
8 1476
9 1494
9 1489
9 1389
9 1375
9 1300
9 1305
9 1308
9 1312
10 1436
11 1447
11 1461
11 1463
11 1463
11 1457
11 1461
11 1448
11 1455
11 1460
11 1460
11 1460
11 1459
11 1459
10 1455
10 1455
10 1455
10 1456
10 1452
9 1441
7 1382
6 1214
6 1041
6 928
4 455
4 339
3 265
3 259
2 235
2 233
2 232
2 232
2 234
2 234
2 235
2 217
1 90
0 86
0 83
0 84
0 84
0 83
0 50
0 43
0 40
0 40
0 40
1 59
3 115
3 121
3 131
3 156
3 156
3 160
3 171
3 171
3 171
3 172
3 174
3 185
3 187
3 189
3 185
3 185
3 184
3 183
3 185
3 186
3 183
3 186
3 183
3 237
1 246
1 267
1 275
1 307
2 326
2 329
3 344
3 346
3 346
3 346
3 343
2 320
2 253
2 243
2 231
2 224
2 226
2 221
2 215
2 217
2 224
2 226
2 235
2 221
2 218
4 231
4 231
4 227
4 223
4 229
4 225
4 225
4 224
5 266
6 618
6 583
7 738
7 820
7 871
7 850
6 864
6 871
5 978
5 1103
5 1342
7 1559
11 1963
13 2013
13 2019
13 2020
14 2020
14 2021
14 2017
14 2022
14 2082
14 2083
15 2080
15 2081
15 2088
15 2088
15 2089
13 2075
13 2077
13 2076
13 2075
13 2069
13 2072
13 2080
13 2073
12 1955
10 1525
10 1469
11 1369
11 1620
11 1723
15 2247
17 2604
18 3365
18 3289
18 3016
18 2916
16 2785
12 2584
10 2762
10 2853
10 2919
10 2948
10 2961
10 2963
10 2956
10 2899
11 2903
10 2901
10 2901
10 2996
10 3015
10 3064
10 3087
12 3145
12 3148
12 3149
12 3149
12 3148
12 3146
13 3169
13 3222
13 3235
13 3231
12 3163
9 2792
33 2644
31 2203
31 1886
30 1016
33 987
34 1060
34 1104
36 1296
36 1324
36 1332
36 1284
37 1273
36 1345
36 1335
39 1361
41 1501
42 1531
53 2147
53 2189
55 2234
56 3171
56 3157
57 3152
57 3271
54 3368
54 3396
54 3418
55 3448
55 3487
55 3492
55 3461
55 3403
55 3398
55 3404
56 3411
58 3442
36 3480
37 3479
37 3465
59 3562
60 3524
63 3416
64 3349
62 3138
61 2961
61 2835
61 2817
60 2793
61 2744
62 2744
58 2710
57 2595
59 2559
46 1934
47 1920
48 1880
48 848
50 818
50 792
50 655
50 498
50 475
50 451
49 421
49 393
49 384
48 382
48 387
48 390
59 448
59 456
57 401
54 334
51 323
49 308
26 200
24 197
21 195
21 195
21 195
21 195
21 195
21 194
21 190
20 164
16 161
16 163
16 159
15 176
18 282
19 276
18 287
18 287
17 288
17 291
17 293
20 335
20 339
20 340
20 340
22 339
22 340
22 374
21 367
20 370
11 317
11 333
11 331
11 335
11 337
11 336
10 341
11 346
11 356
10 358
13 361
21 374
124 808
134 880
138 982
142 1221
145 1279
145 1299
145 1294
144 1263
141 1164
141 1169
141 1158
141 1790
141 1793
141 1817
141 1817
138 1784
138 1791
138 1801
137 1826
136 1830
136 1832
136 1800
136 1799
136 1792
136 1786
136 1771
135 1767
136 1762
135 1764
135 1766
134 1759
132 1764
129 1757
126 1758
104 1754
104 1793
11 1316
10 1258
1 1140
1 940
1 893
1 891
1 890
1 883
1 868
1 866
1 853
1 210
1 191
1 168
1 164
1 164
1 164
1 159
1 144
1 150
1 149
1 151
1 152
1 154
1 151
1 150
1 150
0 149
0 146
0 144
0 143
0 136
0 124
0 126
0 124
0 61
0 49
0 44
0 45
0 46
0 41
0 35
0 36
0 37
0 38
0 38
0 38
0 38
0 38
0 38
0 38
0 39
0 33
0 31
0 33
0 54
0 68
0 86
0 171
0 171
0 172
0 172
0 173
0 173
0 175
0 206
1 245
1 249
1 250
1 251
1 252
1 251
1 251
1 249
1 252
1 353
1 383
1 445
2 496
2 513
2 519
2 520
2 521
2 521
2 548
2 586
2 611
2 617
2 618
2 619
2 605
2 570
2 557
2 544
2 462
2 469
2 466
2 472
3 478
3 476
3 473
3 413
2 401
2 397
2 403
2 441
7 532
8 558
23 805
23 816
25 829
25 725
25 662
26 616
25 594
25 596
25 604
25 605
26 605
26 609
26 582
26 615
26 634
26 647
26 656
26 657
26 657
26 657
26 658
26 658
27 666
28 660
28 662
27 656
27 651
27 653
27 653
27 650
27 650
27 650
27 641
25 593
22 514
21 496
4 240
5 259
5 266
5 285
14 1132
14 1130
14 1196
15 1236
15 1257
15 1417
16 1453
16 1439
16 1432
16 1339
16 1319
17 1327
28 1332
45 1332
53 1335
58 1338
59 1339
59 1338
58 1326
57 1325
57 1325
57 1328
57 1330
57 1330
57 1330
57 1330
57 1330
57 1329
57 1328
57 1325
56 1312
56 1285
55 1270
55 1256
55 1258
55 1217
43 261
43 164
43 90
43 78
43 77
42 82
42 84
42 91
42 101
42 105
42 107
39 92
24 85
10 102
4 103
1 103
0 103
0 109
0 109
0 114
0 116
0 118
0 132
0 133
0 135
0 136
0 137
0 137
0 141
0 149
0 158
0 158
0 161
0 161
0 153
0 193
0 194
0 216
1 412
2 437
2 455
2 456
2 456
2 450
2 449
2 447
2 448
2 451
2 580
2 598
2 651
2 662
2 673
2 671
2 670
2 665
2 696
2 692
2 681
2 679
2 686
2 684
2 688
2 689
2 685
2 676
2 670
2 670
2 669
2 669
2 668
2 600
2 588
2 577
1 363
0 349
0 354
0 362
2 382
3 406
3 413
5 560
5 562
5 563
5 432
5 390
5 351
5 353
5 346
5 348
5 351
5 353
5 326
5 333
5 334
5 336
5 328
5 326
5 323
7 340
8 342
8 344
8 346
8 351
8 358
8 368
9 385
9 393
9 395
9 376
9 379
9 376
9 361
9 348
7 331
6 303
6 288
4 135
4 130
4 124
4 124
4 123
4 123
4 119
4 118
4 114
5 109
5 104
5 97
5 96
5 95
5 89
5 92
5 114
5 169
3 226
2 246
2 284
2 304
1 323
1 335
1 374
1 402
1 444
1 511
1 518
1 825
1 831
1 833
1 834
1 835
1 1016
1 1021
1 1027
1 1037
1 1078
1 1080
1 1081
3 1174
3 1193
3 1202
3 1211
2 1215
2 1219
2 1219
2 1222
2 1231
2 1233
2 1231
2 1231
3 1183
3 1080
5 1345
5 1381
5 1471
6 1463
7 1689
7 1683
8 1778
8 2019
9 2030
9 2313
9 2045
9 2132
9 2142
9 2150
9 2150
9 1975
9 1973
9 1970
9 1956
9 1917
10 1921
10 1920
8 1818
8 1811
8 1821
8 1830
8 1879
8 1891
7 1889
8 1885
8 1879
8 1877
8 1872
8 1848
8 1831
8 1816
5 1498
5 1435
5 1367
5 1325
4 1026
3 780
2 506
2 190
2 160
2 158
2 156
2 153
2 186
2 194
2 216
2 316
2 415
2 547
1 643
1 729
1 746
1 767
1 768
1 767
1 751
1 756
1 726
1 721
1 736
0 741
0 752
1 752
1 752
1 753
1 756
1 757
1 758
1 807
1 832
1 851
1 895
1 932
1 1025
1 1030
8 1110
8 1118
8 1123
8 1125
8 1089
8 1096
8 1075
8 928
8 828
8 728
8 606
8 558
8 636
9 765
9 824
9 847
9 883
9 883
9 875
9 977
9 1006
10 1059
10 1060
9 1065
9 1066
9 1068
9 1063
9 1068
9 1069
9 970
9 958
9 944
9 913
9 900
8 850
9 851
3 771
3 762
3 758
3 759
3 756
3 752
3 803
3 809
3 808
3 830
3 940
3 946
2 822
2 633
2 631
2 633
1 617
1 639
1 578
1 496
5 459
6 457
8 446
8 458
8 457
8 453
8 455
8 454
8 453
8 453
7 448
7 438
7 433
7 418
7 380
7 372
7 372
7 372
7 385
7 389
7 390
9 436
9 390
10 392
10 380
10 350
10 209
10 202
10 197
11 196
11 188
12 184
12 173
12 151
12 148
11 142
8 143
7 143
5 143
5 127
5 129
5 137
6 193
6 256
6 271
6 274
6 284
6 287
6 295
6 292
6 292
6 293
6 293
6 295
6 286
6 282
7 281
5 239
5 249
4 252
4 254
4 254
4 253
4 253
4 254
3 250
3 235
2 234
2 232
2 230
2 230
2 229
2 228
3 228
3 225
3 228
3 230
3 212
2 143
2 92
2 81
2 73
2 66
2 63
2 62
3 61
5 64
5 80
9 293
11 318
11 318
11 322
10 324
10 318
10 309
11 319
11 319
11 321
11 320
11 320
11 320
11 319
11 319
11 320
11 328
11 329
9 329
9 329
9 329
8 330
8 326
8 324
8 323
8 319
10 345
8 347
8 349
8 350
9 361
10 363
10 368
10 372
9 374
9 340
5 136
5 160
5 169
5 176
5 177
5 194
5 197
5 185
5 185
5 185
5 186
5 195
5 196
5 198
5 207
6 207
6 198
6 210
6 212
8 292
8 315
8 332
8 334
8 341
9 366
9 422
8 641
8 922
8 950
8 962
7 979
6 1027
6 1039
6 1033
6 1048
6 1046
6 1062
6 1069
6 1102
6 1116
6 1114
5 1098
5 1100
5 1199
6 1203
6 1216
6 1383
6 1374
6 1373
6 1369
6 1362
5 1359
5 1360
5 1347
4 1336
3 1247
3 1240
3 1228
6 1303
6 1305
5 1292
5 1253
4 956
4 703
4 684
4 681
4 682
4 645
4 637
4 636
4 621
4 615
4 558
4 505
4 487
5 479
5 478
6 475
5 473
5 372
5 370
5 357
5 188
5 188
5 188
5 188
5 187
5 188
5 186
5 198
5 208
5 217
5 222
5 225
2 160
2 156
2 155
2 130
2 117
2 118
2 115
2 115
2 114
2 115
2 114
3 123
5 131
10 225
11 312
11 316
13 350
12 355
12 355
11 357
11 357
11 357
11 357
11 358
11 358
11 358
11 387
11 390
11 391
11 390
11 390
11 374
11 365
11 353
11 329
11 318
11 300
11 292
11 292
12 292
14 334
15 354
18 365
19 394
19 394
19 398
19 402
18 393
16 385
10 256
8 166
9 167
9 168
9 169
12 172
12 175
13 225
15 231
15 237
15 263
15 278
15 312
15 295
17 309
17 350
17 360
17 363
17 365
17 368
17 370
17 370
17 370
17 368
17 368
17 369
16 380
14 343
13 324
10 306
15 295
15 293
15 289
16 285
14 285
14 283
12 282
12 282
12 286
12 281
12 281
12 307
12 304
11 396
10 429
10 449
12 451
12 443
12 438
12 425
10 407
10 367
11 357
11 354
11 353
11 353
11 353
11 362
11 363
11 362
11 363
11 364
12 343
11 340
11 339
11 339
6 329
6 329
5 329
5 330
6 332
10 352
14 354
17 360
18 355
19 359
19 359
19 333
19 329
18 179
18 69
18 71
19 129
19 214
19 231
19 245
22 316
22 320
22 344
22 346
22 345
22 345
21 345
21 340
21 342
21 342
21 342
21 342
21 342
21 342
21 342
21 342
21 341
21 341
21 341
21 338
20 337
15 313
10 311
8 310
8 311
7 307
7 306
7 306
7 306
7 302
6 296
6 277
3 189
3 142
3 129
3 117
0 45
0 42
0 29
0 54
0 56
0 58
0 59
0 63
0 66
2 81
7 146
17 297
17 341
18 351
19 431
23 449
28 454
29 455
39 462
39 472
39 471
39 468
39 468
39 470
39 469
39 470
39 472
39 473
39 473
39 473
39 473
39 473
39 474
39 475
39 473
39 474
39 506
39 506
39 496
39 473
39 482
39 483
39 537
39 547
39 587
34 582
29 513
21 352
21 320
21 311
18 231
14 209
6 208
5 207
0 201
0 201
0 201
0 200
0 198
0 195
0 196
0 191
0 192
0 192
0 191
0 191
0 192
1 191
1 188
2 212
2 210
2 220
6 203
10 268
10 266
10 292
10 296
13 305
15 306
16 289
16 273
16 285
16 299
16 299
16 301
16 300
16 300
25 300
30 304
32 315
32 316
32 316
32 329
32 331
33 353
33 365
33 368
33 369
33 374
33 375
33 381
33 389
33 394
32 408
32 408
31 384
31 386
31 374
26 330
23 270
23 265
23 261
23 257
20 232
17 130
17 122
17 120
17 120
18 121
18 123
18 155
16 157
16 157
5 158
7 162
5 151
5 155
5 155
5 142
5 147
4 127
4 116
4 114
5 122
5 114
5 122
5 127
6 127
8 149
9 143
9 151
9 151
9 151
9 155
9 155
9 159
9 180
10 207
10 236
10 301
10 484
10 535
12 582
39 1221
38 1252
38 1271
41 1562
42 1663
44 1770
47 1910
45 2069
45 2167
45 2267
45 2298
46 2363
46 2494
46 2522
46 2524
46 2531
45 2520
44 2536
44 2528
44 2522
43 2518
42 2517
42 2533
43 2527
44 2531
44 2533
44 2536
44 2561
44 2555
44 2533
43 2501
43 2474
43 2375
43 2253
42 2217
43 2158
57 1977
58 1965
58 1958
56 1579
55 1515
52 1388
49 1239
49 1165
49 1143
49 1044
49 986
49 935
50 822
50 808
50 814
50 816
50 817
50 800
50 805
50 804
49 796
48 760
48 749
47 744
47 748
47 746
47 819
47 800
47 797
48 797
46 796
46 798
47 799
47 960
47 974
47 992
4 506
4 516
4 502
5 495
5 481
5 479
5 439
4 432
4 425
4 426
4 452
4 498
4 501
4 522
4 516
4 513
4 513
4 513
4 511
5 512
5 513
5 519
6 526
7 556
7 554
7 566
7 506
11 883
11 914
15 1389
15 1518
65 4778
65 4929
64 4799
72 5352
72 5357
73 5419
73 5543
75 5891
75 5903
75 5952
75 5967
75 5964
75 5961
75 5981
75 5967
75 5929
76 5952
76 5944
76 5944
76 5945
76 5949
76 5949
76 5950
76 6186
76 6263
76 6327
76 6380
75 6486
74 6472
83 6553
83 6578
83 6532
79 6156
79 6068
71 5589
67 5351
14 1548
14 1518
14 1458
14 1403
14 1389
14 1349
14 1251
12 865
13 946
13 925
13 923
13 927
13 928
13 929
14 937
15 937
15 866
15 876
15 883
15 880
15 883
15 880
15 874
14 628
13 535
13 476
13 425
14 313
10 297
5 203
5 183
5 179
5 182
5 184
5 185
5 185
5 189
12 191
15 196
17 200
17 213
18 232
18 232
18 233
18 119
19 144
19 136
19 141
19 149
19 149
17 142
16 141
16 139
16 140
17 132
17 131
17 127
17 128
18 128
18 128
18 128
18 131
18 130
20 179
55 257
56 263
56 292
57 297
61 646
60 648
60 649
49 660
49 725
49 772
49 803
49 798
49 790
49 792
49 792
49 793
48 786
47 768
47 772
47 765
47 767
47 768
47 767
47 767
47 768
46 760
46 822
46 836
46 875
45 1347
45 1536
45 1919
45 2226
45 2303
45 2470
43 2457
7 2374
7 3017
8 3003
9 3009
4 2663
4 2665
6 3162
6 3176
6 3101
8 3131
8 3236
8 3259
8 3263
8 3270
8 3277
8 3280
8 3278
8 3273
8 3272
8 3270
13 3345
14 3348
14 3347
14 3349
14 3355
15 3356
14 3340
16 3409
16 3362
16 2803
17 2649
17 2262
17 2006
18 1918
18 1832
18 1899
19 2103
18 1521
16 1637
17 1644
16 1705
16 1716
14 1206
14 1190
14 1156
12 1081
12 973
12 957
12 957
12 960
12 961
12 961
17 972
17 963
17 963
16 962
13 876
12 873
11 943
11 941
11 941
11 938
9 863
7 794
7 802
8 844
8 875
13 952
13 962
13 963
13 910
13 810
12 550
12 507
12 413
11 394
11 346
11 345
11 340
11 336
11 336
11 330
11 328
11 328
11 319
11 297
11 296
11 301
6 297
6 309
6 418
6 478
6 481
6 484
6 415
6 420
6 485
6 574
6 707
6 748
5 1504
4 1454
0 1430
0 1397
0 1397
0 1403
1 1414
2 1422
2 1423
2 1421
2 1419
3 1417
3 1414
3 1414
3 1414
3 1416
3 1416
3 1417
4 1419
6 1421
6 1421
6 1414
6 1410
6 1398
8 1395
8 1370
8 1277
9 1220
9 1228
11 1236
13 1241
13 1240
13 1108
13 991
13 923
13 914
13 144
12 133
12 97
13 93
12 92
12 91
12 89
12 86
12 91
12 89
12 88
11 90
11 90
11 90
11 90
11 96
11 94
11 93
9 95
8 93
8 93
8 94
8 97
8 97
6 96
6 93
6 84
5 81
4 76
1 67
1 64
1 55
1 55
0 32
0 32
0 49
0 58
0 61
0 62
0 62
0 61
0 59
0 53
0 52
0 52
0 53
0 52
0 51
0 53
0 53
2 58
3 59
6 105
6 108
6 113
8 143
8 146
8 146
19 149
22 149
25 149
30 152
30 151
30 153
30 154
30 156
30 161
30 163
30 161
30 162
30 152
31 156
31 154
31 160
31 169
33 185
33 189
33 195
38 213
38 219
39 233
39 240
39 258
39 259
39 268
39 302
37 300
35 285
34 258
34 257
35 277
29 253
31 267
28 271
22 280
22 282
18 282
14 281
14 281
14 277
14 275
14 272
14 270
14 269
15 268
16 268
17 268
16 249
16 239
16 235
16 230
14 212
14 206
14 203
9 186
9 181
8 169
8 165
8 153
8 151
8 136
7 95
7 82
8 100
8 98
8 101
8 88
8 89
6 73
6 71
5 61
5 61
8 78
8 82
8 90
8 92
8 92
8 99
7 99
7 100
5 102
7 120
9 234
10 239
10 239
10 249
10 253
10 269
10 281
10 283
10 292
10 293
10 291
12 337
12 337
13 339
13 342
13 342
12 342
11 320
11 318
11 317
11 317
11 320
11 321
11 319
11 318
11 318
8 297
8 291
8 285
8 288
7 287
7 281
8 285
8 284
8 281
7 257
4 145
4 142
4 139
4 131
4 125
4 108
4 97
4 95
5 104
5 102
5 97
7 78
7 78
6 78
6 89
6 97
6 97
6 109
6 114
6 113
6 108
6 108
6 112
6 145
9 202
10 247
12 318
12 324
12 325
11 321
12 323
12 324
12 320
12 320
12 320
12 320
12 319
12 319
12 322
41 401
48 430
54 510
55 521
56 524
55 511
55 520
54 517
51 492
52 534
52 564
52 551
52 548
52 555
52 555
52 554
52 554
52 556
52 554
51 535
50 585
48 496
47 520
47 521
47 532
47 536
47 536
47 539
48 542
48 545
48 549
48 553
48 562
47 571
47 576
47 574
14 485
8 453
6 368
5 364
5 359
5 353
5 348
5 346
5 326
4 291
4 256
4 257
4 253
4 261
4 259
4 263
4 263
4 263
4 264
4 264
5 148
4 141
5 92
5 98
5 85
5 83
5 78
4 76
4 73
4 69
4 66
4 63
4 52
4 54
3 53
3 51
4 52
4 52
4 52
4 51
4 55
4 55
4 91
4 101
4 123
4 156
5 207
6 210
7 278
7 288
7 326
7 330
7 346
7 352
7 360
7 372
5 378
4 381
4 378
4 388
5 430
5 498
6 888
11 1515
24 2229
25 2436
26 2600
28 2943
30 2974
30 3019
30 3062
30 3133
30 3153
30 3157
30 3155
30 3158
30 3156
30 3170
30 3165
32 3715
32 3911
31 3980
31 3996
30 4017
30 3944
30 3950
30 3940
30 3931
30 4032
30 4053
29 4163
29 4296
29 4441
29 4454
29 4457
27 4460
25 4374
23 4154
21 3388
17 2799
6 2391
6 2251
3 2145
3 1844
3 1790
3 1772
3 1763
3 1752
3 1763
3 1758
4 1757
4 1767
4 1790
4 1733
4 1614
2 1004
2 890
2 816
2 764
2 710
2 704
2 692
2 689
2 690
2 587
2 586
2 395
2 295
2 205
2 195
4 187
3 165
3 157
3 146
3 143
3 140
3 139
3 138
3 137
3 135
3 161
3 180
3 166
3 158
3 155
3 156
2 158
2 146
2 122
2 121
4 334
4 335
4 338
4 345
4 344
4 344
4 346
4 346
4 348
4 349
4 351
4 319
4 332
4 326
4 327
4 328
2 341
2 344
2 347
2 358
2 386
2 406
2 444
2 460
2 461
2 452
2 423
2 405
2 406
2 412
5 752
5 770
5 795
5 802
5 801
5 808
3 595
3 591
3 580
3 574
3 597
3 596
3 598
3 598
3 600
3 603
3 607
3 608
3 594
5 970
5 996
5 1195
5 1189
5 1189
5 1189
5 1165
6 1344
6 1317
6 1300
6 1289
6 1290
6 1292
6 1289
6 1286
6 1285
6 1290
3 958
3 946
3 921
3 921
3 921
3 918
3 918
3 918
3 918
3 918
3 891
3 891
3 890
3 893
3 909
3 910
3 908
3 910
3 904
1 524
1 521
1 343
1 343
1 340
0 340
0 343
0 137
0 137
0 131
0 131
0 127
0 126
0 123
0 124
0 122
0 116
0 96
0 95
0 96
0 96
0 96
0 93
0 92
0 92
0 91
0 91
0 94
0 95
0 95
0 89
0 67
0 65
0 63
0 58
0 59
0 59
0 36
0 21
0 28
0 34
0 40
0 524
0 526
0 530
0 530
0 531
0 541
0 541
0 541
0 539
0 539
0 539
0 543
0 545
0 545
0 548
0 549
0 549
2 564
2 569
2 571
2 570
2 707
2 707
2 720
2 723
2 726
2 738
2 767
2 767
2 781
2 796
3 829
3 828
3 851
3 869
3 882
3 414
3 443
3 438
3 436
4 440
4 446
4 493
4 511
4 544
4 558
4 762
4 791
4 799
5 995
5 1000
5 1005
5 1074
3 1058
3 1077
4 1106
4 1111
4 974
4 985
4 971
4 973
4 970
4 948
4 942
4 938
4 947
4 1002
3 968
3 964
3 920
3 1045
3 1050
6 3078
7 3486
9 4460
12 4679
13 5041
13 5324
13 6307
13 6652
14 7104
14 7494
17 7377
20 7420
20 7466
19 7261
19 7261
19 7252
19 7171
19 7170
19 7168
18 7168
18 7166
18 7508
18 7598
19 8153
19 8302
19 8495
19 8513
19 8504
19 8509
19 8481
19 8432
19 8500
19 8503
19 8555
19 8473
17 8163
12 5545
12 5014
12 4850
9 4691
8 4270
8 3832
7 2754
7 2428
7 2060
7 1899
3 1902
1 1914
1 1920
1 1970
1 1975
1 1981
1 2040
8 2192
8 2201
8 2229
8 2273
8 2139
8 1968
8 1316
8 1280
8 1236
8 1252
8 1254
8 1257
8 1268
8 1263
8 1191
8 1179
8 1123
8 1052
8 1036
8 1036
8 1036
8 1037
8 1037
8 1037
8 1065
8 1217
8 1368
8 1434
9 1588
9 1596
9 1595
9 1610
10 1562
10 1561
11 1598
11 1594
3 1384
3 1352
3 1419
3 1417
3 1211
3 1191
3 1195
5 1453
5 1474
5 1499
5 1527
5 1535
5 1530
5 1523
5 1522
5 1522
5 1523
5 1523
5 1533
5 1606
6 1682
7 1860
7 1878
7 1870
7 1824
6 1590
5 1366
5 1220
5 1071
5 1074
5 1072
5 1051
5 1043
5 1078
4 1194
4 1416
4 1775
4 1958
4 1905
4 1965
5 3251
5 3999
9 4214
7 4594
7 4586
7 4575
7 4563
7 4560
7 4561
8 4568
8 4570
7 4568
7 4565
7 4563
7 4554
6 4407
6 4297
6 4249
6 4352
6 4565
6 4563
6 4572
7 4579
7 4586
7 4606
7 4614
7 4636
8 4862
8 4865
8 4851
8 4577
9 4160
9 3927
9 3856
9 3784
8 3717
7 2382
6 1454
4 1342
4 801
4 799
4 801
4 795
4 810
4 857
4 928
4 987
4 1010
4 1018
5 1023
5 1015
5 1001
5 1000
5 998
5 886
5 673
5 673
5 667
4 662
4 658
4 642
4 612
4 609
3 394
3 409
3 381
3 373
2 346
2 345
2 344
2 346
3 345
7 333
7 722
8 779
8 796
8 947
8 953
8 991
6 953
6 946
6 916
6 946
6 949
6 957
6 959
6 959
1 956
1 957
1 956
1 956
1 955
1 957
1 962
1 962
1 975
1 963
1 963
1 960
2 932
2 906
2 904
2 904
2 904
2 904
2 905
2 905
2 905
2 1221
2 803
1 775
1 1094
2 1215
2 1255
2 1210
2 1167
2 1088
2 1182
2 1165
2 1168
2 1169
2 1166
2 1167
2 1168
2 1168
2 1170
2 1178
2 1194
2 1392
1 1463
1 1634
1 1689
1 1698
1 1708
1 1709
1 1709
1 1710
1 1713
1 1715
1 1717
1 1718
1 1730
1 1732
1 1727
1 1408
1 1387
1 1373
1 980
0 763
0 738
0 739
0 738
0 738
0 627
0 627
0 614
0 621
0 650
0 698
0 798
0 916
0 921
0 913
0 894
0 645
0 500
0 395
0 379
0 376
0 388
0 389
0 389
0 398
0 398
0 409
0 410
0 409
0 391
0 392
0 391
0 389
0 389
0 374
0 371
0 375
0 381
0 384
0 384
0 384
0 383
0 382
0 382
0 361
0 327
0 271
0 185
0 70
0 69
0 65
0 64
0 64
0 64
0 64
0 60
0 63
0 40
0 41
0 40
0 40
0 38
0 28
0 25
0 25
0 26
0 26
0 26
0 26
0 26
0 28
0 27
0 22
0 18
0 15
0 15
0 15
0 15
0 15
0 15
0 25
0 22
0 22
0 22
0 23
0 23
0 23
0 23
0 23
0 23
0 23
0 23
0 19
0 15
0 15
0 15
0 17
0 27
0 33
0 40
0 43
0 45
0 45
0 45
0 46
0 50
0 55
0 204
0 252
0 292
0 367
0 386
0 424
0 429
0 433
0 435
0 460
0 462
0 463
0 464
0 463
0 477
0 479
0 478
0 480
0 483
0 485
0 486
0 486
0 486
0 486
0 486
0 488
0 475
0 470
0 467
0 489
0 489
0 490
0 490
0 486
0 489
0 482
0 322
0 294
0 247
0 171
0 127
0 118
0 117
0 116
0 125
0 111
0 144
0 147
0 149
0 151
0 138
0 135
0 133
0 130
0 132
0 132
0 132
0 132
0 133
0 133
0 154
0 196
0 207
0 205
0 205
0 181
0 179
0 180
0 180
0 179
0 163
0 162
0 162
0 162
0 162
0 163
0 163
0 164
0 166
0 166
0 151
0 129
0 97
0 94
0 92
0 90
0 90
0 90
0 90
0 90
0 88
0 88
0 86
0 86
0 85
0 85
0 56
0 10
0 5
0 4
0 4
0 3
0 3
0 3
0 3
0 3
0 3
0 3
0 3
0 2
0 2
0 2
0 2
0 2
0 1
0 1
0 1
0 1
0 1
0 1
0 1
0 1
0 1
0 1
0 1
0 1
0 1
0 1
0 1
0 1
0 0
0 0
0 0
0 0
0 0
0 0
0 0
0 0
0 0
0 0
0 0
0 0
0 0
0 0
0 0
0 0
0 0
0 0
0 0
0 0
0 0
0 0
0 0
0 0
0 0
0 0
0 0
0 0
0 0
0 0
0 0
0 0
0 0
0 0
0 0
0 0
0 0
0 0
0 0
0 0
0 0
0 0
0 0
0 0
0 0
0 0
0 0
0 0
0 0
0 0
0 0
0 0
0 0
0 0
0 0
0 0
0 0
0 0
0 0
0 0
0 0
0 0
0 0
0 0
0 0
0 0
0 0
0 0
0 0
0 0
0 0
0 0
0 0
0 0
0 0
0 0
0 0
0 0
0 0
0 0
0 0
0 0
0 0
0 0
0 0
0 0
0 0
0 0
0 0
0 0
0 0
0 0
0 0
0 0
0 0
0 0
0 0
0 0
0 0
0 0
0 0
0 0
0 0
0 0
0 0
0 0
0 0
0 0
0 0
0 0
0 0
0 0
0 0
0 0
0 0
0 0
0 0
0 0
0 0
0 0
0 0
0 0
0 0
0 0
0 0
0 0
0 0
0 0
0 0
0 0
0 0
0 0
0 0
0 0
0 0
0 0
0 0
0 0
0 0
0 0
0 0
0 0
0 0
0 0
0 0
0 0
0 0
0 0
0 0
0 0
0 0
0 0
0 0
0 0
0 0
0 0
0 0
0 0
0 0
0 0
0 0
0 0
0 0
0 0
0 0
0 0
0 0
0 0
0 0
0 0
0 0
0 0
0 0
0 0
0 0
0 0
0 0
0 0
0 0
0 0
0 0
0 0
0 0
0 0
0 0
0 0
0 0
0 0
0 0
0 0
0 0
0 0
0 0
0 0
0 0
0 0
0 0
0 0
0 0
0 0
0 0
0 0
0 0
0 0
0 0
0 0
0 0
0 0
0 0
0 0
0 0
0 0
0 0
0 0
0 0
0 0
0 0
0 0
0 0
0 0
0 0
0 0
0 0
0 0
0 0
0 0
0 0
0 0
0 0
0 0
0 0
0 0
0 0
0 0
0 0
0 0
0 0
0 0
0 0
0 0
0 0
0 0
0 0
0 0
0 0
0 0
0 0
0 0
0 0
0 0
0 0
0 0
0 0
0 0
0 0
0 0
0 0
0 0
0 0
0 0
0 0
0 0
0 0
0 0
0 0
0 0
0 0
0 0
0 0
1 0
1 0
1 0
1 0
1 0
1 0
1 0
1 0
1 0
1 0
1 0
1 0
1 0
1 0
1 0
1 0
1 0
1 0
1 0
1 0
1 0
1 0
1 0
1 0
1 0
1 0
1 0
1 0
1 0
1 0
1 0
1 0
1 0
1 0
1 0
1 0
0 0
0 0
0 0
1 0
1 0
1 0
1 0
1 0
1 0
1 0
1 0
1 0
1 0
1 0
1 0
1 0
1 0
1 0
1 0
1 0
1 0
1 0
1 0
1 0
1 0
1 0
1 0
1 0
1 0
1 0
1 0
1 0
1 0
1 0
1 0
1 0
1 0
1 0
1 0
0 0
0 0
0 0
0 0
0 0
0 0
0 0
0 0
0 0
0 0
1 0
1 0
1 0
1 0
1 0
1 0
1 0
1 0
1 0
1 0
1 0
1 0
1 0
2 0
2 0
2 0
2 0
2 0
2 0
2 0
2 0
2 0
2 0
2 0
2 0
2 0
2 0
2 0
2 0
2 0
2 1
2 1
2 1
2 1
2 1
1 1
1 1
1 1
1 1
1 1
1 1
1 1
1 1
1 1
1 1
1 1
1 1
2 2
2 2
1 2
1 2
1 2
1 2
1 2
1 2
1 2
1 2
1 2
1 2
1 2
1 2
1 2
1 2
1 2
1 2
1 1
1 1
1 1
1 1
1 1
1 1
1 1
1 1
1 1
1 1
1 1
1 1
1 1
1 1
1 1
1 1
1 2
1 2
0 1
0 1
0 1
0 1
0 2
0 2
0 2
0 2
0 2
0 3
0 3
0 3
0 3
0 3
0 3
0 3
0 3
0 4
0 4
0 5
0 7
0 13
0 16
0 16
0 18
0 21
0 28
0 28
0 28
0 32
0 32
0 32
0 32
0 32
0 30
0 30
0 30
0 30
0 30
0 30
0 30
0 30
0 29
0 35
0 35
0 35
0 35
0 34
0 34
0 34
0 34
0 34
0 34
0 38
0 38
0 39
0 36
0 29
0 28
0 25
0 19
0 17
0 16
0 16
0 16
0 16
0 16
0 16
0 16
0 16
0 16
0 16
0 16
0 16
0 16
0 17
0 17
0 17
0 17
0 11
0 11
3 11
8 11
11 11
11 11
11 11
12 10
12 10
13 9
14 5
14 5
14 4
14 4
14 2
14 1
14 2
19 2
19 2
19 2
19 4
20 8
20 23
22 35
23 38
23 38
23 38
24 49
24 56
24 58
24 59
24 59
24 58
25 58
25 58
25 58
25 58
25 58
20 58
17 58
14 58
13 58
13 58
12 58
12 58
12 58
11 58
11 58
10 58
10 58
10 58
10 54
10 54
7 51
7 51
7 48
7 42
5 35
4 25
3 5
2 1
2 0
2 0
2 0
2 0
2 0
2 0
2 0
2 0
1 0
1 0
1 0
1 0
1 0
1 0
2 2
3 4
4 4
4 4
4 4
4 4
4 4
4 4
4 4
4 4
4 4
4 5
4 5
4 6
4 6
4 6
4 6
4 6
4 6
4 6
4 6
5 7
5 7
12 16
15 17
16 17
16 17
16 17
16 17
16 17
17 17
17 17
17 17
17 17
17 17
16 17
16 14
15 13
14 13
14 14
15 15
15 23
15 24
15 31
15 31
15 31
15 32
15 31
14 33
14 33
14 33
14 33
14 33
14 33
14 33
13 33
12 33
7 33
6 33
2 26
2 26
2 26
2 26
2 26
2 26
2 26
1 26
1 26
1 27
1 27
1 27
1 27
1 27
1 27
1 27
1 26
0 25
0 16
0 16
0 8
0 8
0 8
0 8
0 8
0 5
0 5
0 5
0 5
0 6
0 6
0 9
0 9
0 9
0 6
0 6
0 5
0 5
0 5
0 5
0 5
0 4
0 10
0 10
0 10
0 12
0 13
0 14
0 14
0 15
0 16
0 16
0 16
0 16
0 16
0 16
0 16
0 17
0 17
0 17
0 18
0 18
0 18
0 21
0 21
0 20
0 20
0 18
0 18
0 18
0 21
0 21
1 22
3 27
3 28
3 28
3 30
3 30
3 23
3 23
3 22
4 21
4 20
4 20
4 20
4 20
4 19
4 18
4 18
4 19
4 19
4 21
4 21
4 21
4 23
4 24
4 32
4 40
4 43
5 46
5 50
5 51
5 71
5 73
5 77
5 77
5 78
5 81
4 81
8 109
8 108
7 108
7 111
7 111
7 111
7 113
7 114
7 115
7 117
7 120
7 121
7 121
7 121
7 121
7 121
7 120
7 120
7 116
7 115
7 114
7 113
7 110
7 102
7 92
7 87
5 77
5 72
6 73
7 60
7 59
8 58
8 58
9 49
12 47
16 45
42 17
47 19
47 18
48 22
48 27
48 27
48 28
48 26
48 26
48 23
48 24
48 23
48 25
49 25
59 54
59 55
75 63
78 66
78 66
78 66
78 68
78 69
78 70
78 70
78 70
80 70
83 70
83 72
83 71
82 72
82 74
81 74
81 77
80 77
76 77
71 77
40 69
37 67
37 67
36 64
36 58
36 55
36 55
36 56
36 54
36 54
36 54
33 54
32 55
29 53
20 18
18 25
7 30
6 31
6 33
6 33
6 32
8 44
8 44
8 44
8 48
6 48
3 50
2 48
2 47
2 47
2 47
2 47
2 44
2 43
2 43
2 43
2 44
2 45
2 45
2 49
2 49
2 49
2 48
2 48
2 48
2 48
2 48
2 48
2 47
2 47
2 45
2 39
2 33
2 32
2 33
2 33
4 32
23 102
23 101
23 102
23 102
23 102
23 101
23 101
23 101
23 101
23 104
23 105
24 105
24 104
24 104
24 104
24 103
24 102
24 101
24 99
24 100
24 99
24 99
24 99
24 99
24 100
24 99
24 99
25 101
25 100
25 100
24 101
23 101
20 100
16 102
16 102
15 102
2 14
2 13
2 13
2 13
3 12
3 12
3 11
3 13
3 13
3 10
3 9
2 9
2 8
2 8
2 8
2 8
2 9
2 11
2 13
2 13
2 14
2 14
2 13
3 13
3 11
3 11
3 13
2 12
2 12
2 12
2 12
2 12
2 12
2 11
2 11
2 11
3 11
3 11
3 11
3 11
2 11
2 11
2 11
2 9
2 9
2 9
2 9
2 9
2 9
2 10
2 10
2 10
2 9
2 7
2 6
2 6
2 5
2 5
2 5
1 6
1 7
1 7
1 5
1 6
1 6
1 6
2 6
2 6
2 5
3 5
3 6
3 6
2 6
2 6
2 6
2 6
2 7
2 7
2 7
2 7
2 7
2 7
2 7
2 7
2 5
2 5
2 5
2 5
2 5
2 5
2 5
2 5
2 9
2 9
2 10
2 9
2 8
2 7
2 7
2 7
2 7
2 7
1 7
1 7
1 7
0 7
0 6
0 6
0 6
0 6
0 6
0 6
0 5
0 5
0 5
0 5
0 5
0 5
0 5
0 5
0 5
0 5
0 5
0 5
0 8
0 7
0 5
0 5
0 3
0 5
0 5
0 5
0 6
0 7
0 7
0 7
0 7
0 8
0 8
0 8
0 8
1 8
1 8
1 8
1 8
1 8
1 8
1 8
1 8
1 8
1 8
1 8
1 8
1 9
1 9
1 9
1 9
1 9
1 9
1 8
1 8
1 8
1 9
1 9
1 9
1 7
1 7
1 6
1 4
1 4
1 10
1 10
1 10
1 12
1 15
1 19
1 21
0 25
0 29
0 30
0 31
0 31
0 32
0 35
1 39
1 39
1 39
1 39
1 39
1 38
1 38
1 38
1 38
1 38
1 38
1 38
1 36
1 36
1 35
1 35
1 35
1 35
2 40
3 40
3 40
3 43
3 40
3 41
3 40
3 39
3 36
3 34
3 30
3 27
3 26
3 24
3 24
3 23
3 20
3 20
2 17
2 17
2 17
2 17
2 17
2 18
2 18
2 20
2 23
2 23
2 23
2 24
3 24
3 24
3 24
3 24
3 24
3 24
2 19
1 19
1 19
1 15
1 12
1 10
1 10
1 10
1 8
1 8
1 8
1 8
1 7
1 7
1 7
1 7
1 7
1 7
1 7
1 7
1 7
1 7
1 7
1 6
1 6
1 4
1 2
3 2
3 2
3 1
2 1
2 1
2 1
2 1
2 1
2 1
2 1
2 1
2 1
2 1
2 1
2 1
2 1
2 2
2 2
2 2
2 2
2 2
2 2
2 2
2 2
2 2
2 2
2 2
2 2
2 2
2 2
2 2
2 2
2 2
2 2
2 2
2 1
0 1
0 1
0 1
0 1
0 1
0 1
0 1
0 1
0 3
0 4
0 3
0 4
0 4
0 4
0 4
0 4
0 4
0 4
0 4
1 5
1 7
1 9
1 9
1 9
1 9
1 10
1 10
1 10
1 12
1 13
1 15
1 15
1 16
1 16
1 16
1 16
2 16
2 17
2 17
2 17
2 17
3 17
3 17
3 17
3 15
3 14
3 14
3 13
3 13
3 13
3 13
3 13
3 13
3 13
3 13
2 11
2 9
2 7
2 7
2 8
2 8
4 19
4 19
4 19
4 17
4 13
4 13
4 13
4 13
4 13
4 13
4 13
3 12
3 12
3 12
3 12
3 12
2 12
2 12
2 12
2 12
2 12
2 12
2 12
2 12
2 12
2 12
2 12
2 12
2 13
2 13
2 13
2 13
2 17
2 17
2 20
2 20
0 9
0 9
0 9
0 9
0 11
0 15
0 15
0 16
0 16
0 16
0 16
0 16
0 16
0 16
0 17
0 17
0 17
0 17
0 18
0 18
0 18
0 18
0 18
0 18
0 18
0 18
0 33
0 33
0 35
0 35
0 35
0 35
0 31
0 33
0 29
1 30
1 31
1 33
1 33
1 33
1 30
1 27
1 27
1 27
1 27
1 27
1 27
1 28
1 28
1 28
1 30
1 31
1 33
1 34
1 33
1 33
1 35
1 36
1 39
1 39
2 40
2 41
2 23
2 24
2 24
2 24
2 24
2 25
2 25
1 23
1 20
1 20
1 20
1 20
1 20
1 20
1 20
1 20
1 20
1 23
1 27
1 27
1 26
1 25
1 25
1 25
1 23
3 30
3 28
3 28
3 28
3 28
3 26
2 21
2 20
4 20
4 20
4 20
4 21
4 25
4 27
4 27
4 27
4 27
4 29
4 28
4 28
4 28
4 28
4 28
4 28
4 28
5 29
5 29
5 28
5 25
5 21
5 21
5 21
5 21
5 21
6 21
10 29
9 22
9 21
9 22
9 23
9 23
9 23
9 22
9 22
7 22
7 22
7 22
7 20
7 17
7 16
7 16
7 17
7 15
7 15
7 15
7 16
7 17
7 19
7 20
7 20
7 23
6 22
6 22
6 22
6 26
6 26
6 26
6 27
6 27
6 26
5 26
0 17
0 17
0 19
0 18
0 19
0 20
0 20
0 20
0 20
0 23
0 23
0 23
0 25
0 25
0 26
0 25
1 24
1 26
1 24
1 24
1 23
1 22
1 20
1 20
1 19
1 19
1 20
1 20
1 20
1 16
1 20
2 52
3 94
4 144
4 154
4 156
4 162
4 168
4 165
4 167
4 167
4 167
4 167
4 167
4 167
4 162
4 162
4 163
4 164
4 164
4 162
4 164
3 169
3 167
3 167
3 167
3 167
3 167
3 167
3 166
3 166
3 166
3 166
3 166
3 166
3 166
3 150
2 93
1 39
0 11
0 10
0 10
0 10
0 10
0 10
0 10
1 10
1 10
1 10
1 10
1 9
1 2
1 2
1 2
1 1
1 1
2 1
2 1
2 1
2 1
2 1
2 1
2 1
2 1
2 1
2 1
2 1
2 2
2 2
2 2
2 2
2 2
2 2
2 5
2 10
2 12
2 13
2 13
2 13
2 13
2 13
2 13
1 15
1 15
1 24
1 59
0 63
0 69
0 70
0 77
0 79
0 86
0 90
0 93
0 93
0 97
0 100
0 100
0 98
0 101
0 100
0 101
0 146
0 149
0 152
1 156
1 160
1 163
1 172
1 168
1 164
1 164
1 163
1 163
1 163
1 163
1 163
1 163
2 164
2 164
3 155
3 119
3 116
3 111
3 109
3 103
3 103
3 94
3 90
3 89
3 89
3 85
3 83
3 82
3 84
4 91
3 93
3 92
3 45
3 45
3 41
3 38
3 35
3 34
3 24
3 24
3 24
3 24
3 25
3 28
3 28
3 28
3 28
3 29
2 28
2 28
1 26
1 26
1 27
1 27
1 27
1 27
4 29
4 29
4 30
4 30
4 30
4 32
4 33
4 33
5 30
4 20
4 19
8 22
8 22
8 21
8 21
8 22
8 20
8 18
8 19
9 20
12 20
12 20
12 19
12 18
12 29
12 30
12 31
12 35
12 35
12 34
12 35
12 35
12 35
12 35
12 36
12 39
9 39
9 41
9 40
9 40
9 40
9 37
9 37
8 37
7 37
7 37
8 38
5 34
5 35
5 36
4 35
4 34
4 35
4 35
4 33
4 33
1 33
1 33
1 33
1 31
1 13
1 13
1 13
1 13
1 13
1 13
1 13
1 13
1 13
1 13
1 10
1 7
1 12
1 11
1 11
1 11
1 11
1 11
1 11
1 11
1 11
1 12
0 11
0 11
0 11
0 10
0 10
0 9
0 9
0 9
0 9
0 9
0 10
0 10
0 10
0 10
0 10
0 10
0 10
0 10
1 10
1 12
1 12
1 13
1 13
1 13
1 15
1 15
1 8
1 11
1 11
1 13
1 13
1 20
1 22
1 22
1 22
1 22
1 22
1 22
1 22
1 23
1 24
1 24
1 24
1 27
1 27
1 27
1 27
1 27
1 30
1 31
1 32
1 35
1 36
1 36
0 35
0 33
0 32
0 32
0 32
0 30
0 30
0 30
0 30
0 27
0 27
0 25
0 24
0 16
0 13
0 13
0 13
0 19
0 27
1 28
1 32
1 34
1 35
1 41
1 41
1 38
1 40
1 40
1 38
1 36
1 34
1 33
1 35
1 36
1 37
1 38
1 40
1 40
1 40
1 40
1 40
1 40
1 40
1 40
1 40
1 40
1 41
1 41
1 41
1 41
1 41
1 41
1 40
1 36
1 27
0 26
0 22
0 20
0 18
0 14
0 15
0 16
0 17
0 17
0 16
0 18
0 17
0 17
0 15
0 14
0 13
0 12
0 12
0 14
0 14
0 14
0 14
0 14
0 14
0 14
0 13
0 15
0 17
0 17
0 20
0 22
0 39
0 39
0 39
0 40
0 40
0 42
0 42
0 42
0 40
0 39
0 38
0 37
0 35
0 35
0 35
0 36
0 36
0 36
0 43
0 44
0 42
0 40
0 38
0 38
0 38
0 38
0 38
0 38
0 38
0 38
0 38
0 36
0 36
0 36
0 34
0 31
0 14
0 14
0 13
0 14
0 15
0 15
0 15
0 15
0 15
0 15
0 15
0 15
0 16
0 17
2 84
2 85
3 135
3 139
3 132
3 151
3 154
3 173
3 177
3 177
3 179
3 179
3 179
3 179
3 179
3 178
3 177
3 177
3 176
3 176
3 176
3 198
3 214
3 215
3 216
3 216
3 225
3 233
3 238
3 239
3 240
3 240
3 240
3 240
3 238
3 237
1 164
1 161
0 105
0 102
0 100
0 96
0 92
0 72
0 71
0 71
0 72
0 72
0 72
0 73
0 73
0 93
0 109
0 113
0 116
0 121
0 122
1 98
1 80
1 87
1 87
1 84
1 76
1 69
1 65
1 65
1 64
1 64
1 64
1 64
2 65
3 65
3 64
3 63
3 63
3 62
3 62
3 63
3 63
3 63
3 64
4 64
4 61
4 63
4 63
4 63
4 67
3 45
3 32
3 26
3 27
3 27
3 30
3 30
3 30
3 23
3 23
3 23
3 23
3 31
3 31
3 32
3 32
3 32
3 32
3 32
2 31
1 32
1 32
1 32
1 32
1 32
1 33
4 35
4 35
4 35
4 34
3 34
3 31
3 31
4 31
4 30
4 23
4 19
4 19
4 19
4 19
4 17
4 15
4 16
4 16
4 17
4 17
4 17
4 17
4 8
4 7
4 7
4 7
4 7
4 7
4 7
4 7
4 5
4 5
4 8
5 15
5 44
5 65
2 66
1 66
1 67
1 67
1 67
2 67
2 67
2 67
2 67
2 67
2 67
2 67
3 67
3 70
3 70
3 70
3 69
3 69
3 68
3 68
3 69
3 69
3 69
3 69
3 69
3 76
3 100
3 110
3 112
3 121
3 123
3 123
2 117
3 138
3 108
4 96
4 100
4 102
4 102
4 107
4 107
3 107
3 107
3 107
3 107
4 111
4 109
4 112
4 114
7 113
8 114
8 114
8 115
8 114
8 114
8 115
8 115
8 118
8 120
8 121
8 129
8 122
8 95
8 99
8 96
8 88
8 86
8 87
8 79
6 47
6 49
6 47
6 47
6 47
6 46
6 46
6 46
6 46
6 46
6 46
5 44
4 39
4 39
3 38
2 36
1 37
0 37
0 37
0 37
0 37
0 37
0 40
0 42
0 41
0 58
0 62
0 83
0 83
0 82
0 76
0 78
0 78
0 78
0 77
0 77
0 78
0 74
0 75
0 78
1 87
1 89
1 89
1 90
1 90
1 99
1 101
1 101
1 100
1 100
1 100
1 100
1 99
1 100
1 99
1 101
1 103
3 108
3 104
3 101
3 98
3 82
3 78
3 50
3 52
3 50
3 50
3 48
3 48
3 48
3 48
3 48
3 46
3 46
3 44
3 37
2 32
2 30
2 30
2 30
4 30
4 20
4 23
4 23
4 22
4 22
4 22
4 21
4 21
4 20
4 20
4 20
3 16
2 11
2 10
2 10
2 10
2 10
2 10
3 11
3 9
3 20
4 24
4 27
4 27
4 27
4 27
4 27
4 27
4 27
4 27
3 27
3 29
3 29
4 31
4 33
3 30
3 30
4 31
4 30
4 31
4 31
4 36
4 43
4 51
4 55
4 55
4 56
4 56
5 56
5 57
5 60
5 61
5 60
5 60
4 57
4 56
4 47
5 42
5 42
5 43
11 67
11 68
11 69
11 69
11 70
12 71
12 70
12 69
12 68
11 66
11 66
12 70
12 69
11 73
11 75
11 75
11 75
11 67
11 58
11 50
10 48
10 48
10 48
10 50
10 50
10 51
10 47
10 47
10 47
10 47
10 47
10 47
10 47
8 47
8 44
8 43
2 22
2 19
2 18
3 18
3 19
3 24
3 24
3 25
3 26
3 25
3 25
2 21
2 21
2 15
2 13
2 13
2 13
2 13
2 14
2 14
2 14
2 14
2 12
2 10
2 11
2 15
3 15
4 31
4 33
6 37
7 38
7 38
7 38
7 39
7 39
7 39
7 39
7 40
7 45
6 46
6 50
5 45
5 46
5 45
5 45
5 45
5 44
5 45
5 46
5 46
5 46
5 46
5 46
5 46
5 44
6 44
6 44
6 47
9 49
9 49
9 49
9 45
8 45
7 27
6 24
5 21
4 21
4 21
4 21
4 21
4 21
4 21
4 20
4 16
5 14
5 12
5 9
5 9
5 8
5 11
5 11
5 12
5 12
5 14
5 12
5 13
5 13
5 13
5 13
5 15
5 15
4 15
4 14
4 14
1 22
1 22
2 25
2 25
2 25
2 26
2 27
2 27
2 27
2 27
2 27
2 27
2 27
2 27
2 27
3 28
15 53
18 53
19 54
19 55
19 54
19 52
19 52
19 51
19 54
19 51
19 50
20 52
20 53
20 53
20 53
20 52
20 52
20 52
20 52
20 52
21 42
20 43
20 48
20 61
20 67
20 76
20 76
20 77
20 77
20 77
20 77
20 77
18 77
17 77
17 77
15 76
5 49
2 49
2 49
2 49
3 50
3 52
4 52
4 52
4 48
3 47
3 47
3 46
3 46
3 46
3 57
3 60
3 63
3 72
3 75
3 76
2 75
2 79
2 76
2 65
2 61
2 54
2 53
2 53
2 53
2 53
2 53
2 53
2 53
2 61
2 59
2 61
2 61
2 61
2 60
2 57
1 57
1 57
0 57
0 57
0 57
0 57
0 56
0 58
0 60
1 91
1 82
1 85
1 83
1 78
1 75
1 74
1 67
1 68
2 72
2 76
2 92
2 102
2 113
2 116
2 116
2 116
2 117
2 117
2 117
2 108
2 108
3 107
4 111
4 114
4 120
4 121
4 124
4 124
4 124
4 125
4 125
4 125
4 125
4 123
4 117
3 81
3 81
3 84
3 91
4 115
4 129
4 133
4 132
4 111
3 102
3 98
3 86
3 84
3 85
3 85
3 88
3 88
3 88
3 88
3 88
3 88
3 88
2 88
1 81
1 79
1 74
1 74
1 71
1 71
2 74
2 72
2 72
2 72
2 72
2 72
2 73
2 73
2 67
1 64
1 55
1 38
1 25
1 23
1 24
1 24
1 24
1 24
1 20
1 16
1 19
1 19
1 19
1 19
1 19
1 19
1 19
1 19
1 19
1 19
1 20
1 20
1 20
1 20
0 20
0 20
0 17
1 17
1 17
1 17
2 17
2 20
2 25
3 25
3 25
3 33
3 36
3 27
3 29
3 29
3 27
3 27
3 27
3 27
3 26
3 25
3 24
3 24
3 24
3 24
3 24
3 24
3 24
3 24
3 27
3 27
3 25
3 25
3 24
2 24
2 24
2 24
2 24
2 24
2 24
2 24
1 24
1 23
1 16
0 16
0 16
0 4
0 3
0 3
0 3
0 3
0 26
0 26
0 27
0 28
0 28
0 29
0 29
0 29
0 29
0 29
0 29
0 30
0 30
0 30
0 27
0 27
0 27
0 27
0 27
0 27
0 27
0 27
0 28
0 28
0 28
0 28
0 28
0 28
0 28
0 28
0 28
0 28
0 28
0 29
0 31
0 32
0 9
0 10
0 9
0 9
0 10
0 10
0 16
0 16
0 18
0 18
0 18
0 17
0 17
0 17
0 17
0 17
0 17
0 17
0 17
0 17
0 17
0 16
0 16
0 16
0 16
2 16
2 16
2 16
2 21
2 21
2 21
2 21
2 20
2 19
6 16
7 16
7 16
7 16
7 16
7 20
7 20
7 20
7 14
7 14
7 12
7 12
7 12
7 12
7 13
7 13
7 14
7 14
7 18
7 20
7 20
7 21
7 21
7 21
7 21
7 22
7 23
5 22
5 22
5 21
5 24
5 24
5 23
5 23
5 23
4 29
0 29
0 30
0 31
0 32
0 30
0 29
0 41
0 40
0 41
0 41
0 41
0 40
0 41
0 41
0 41
1 44
1 44
1 44
1 40
1 38
1 38
1 37
1 37
1 37
1 37
1 37
1 36
1 37
1 37
1 38
1 34
1 35
1 35
1 36
1 36
1 31
1 29
1 28
1 28
1 36
1 38
1 31
1 24
1 24
1 24
1 28
1 29
1 30
1 29
1 30
1 29
0 26
0 26
0 26
0 27
0 28
0 28
0 28
0 28
0 28
0 28
0 28
0 27
0 27
0 26
0 25
0 24
0 26
0 34
0 116
0 126
0 134
0 169
0 172
0 175
0 165
0 167
0 176
0 179
0 179
0 177
0 176
0 176
0 175
0 175
0 174
0 174
0 177
0 177
0 177
0 175
0 175
0 175
0 175
0 175
0 176
2 178
2 183
2 183
2 183
2 184
2 184
2 183
2 179
2 169
2 37
2 29
2 26
2 30
2 31
2 39
2 42
2 45
2 50
2 48
2 48
2 56
2 55
2 55
2 60
2 63
2 70
2 72
2 94
2 113
2 125
3 128
3 129
3 138
3 138
3 138
3 137
1 134
1 131
1 131
1 132
1 131
1 131
1 131
1 132
1 132
1 132
1 133
1 135
1 128
1 126
1 120
1 119
1 116
1 104
1 104
1 105
1 111
1 115
1 129
1 134
1 145
1 145
1 144
1 117
1 99
1 84
0 83
0 83
0 74
0 75
0 75
0 75
0 75
0 75
0 75
0 75
0 75
0 75
0 75
0 74
2 73
5 73
5 72
5 71
5 70
5 69
5 69
5 69
5 69
5 68
5 67
5 67
5 50
5 46
5 34
5 21
5 2
4 2
4 3
4 3
4 3
4 3
4 3
4 3
4 3
4 3
4 3
4 3
4 4
4 4
4 4
4 4
4 4
4 4
4 4
4 4
2 4
0 4
0 5
0 5
0 6
0 6
0 6
0 6
0 6
0 6
0 6
0 6
0 7
0 7
0 7
0 7
0 7
0 7
2 6
2 5
2 6
2 6
2 6
2 5
2 5
2 5
2 7
3 13
3 17
3 17
3 17
3 17
3 18
3 18
3 18
3 18
3 18
3 17
3 16
3 16
3 16
3 16
3 16
3 16
3 16
3 15
3 15
3 15
4 15
4 15
4 15
4 15
4 16
4 16
2 16
2 16
2 15
2 16
2 16
2 16
2 13
2 13
2 11
1 5
1 3
1 3
4 22
4 22
4 22
5 22
5 22
5 22
5 22
5 22
5 22
5 22
5 21
5 21
5 21
5 21
5 21
5 21
5 21
5 20
4 20
4 20
4 20
4 20
4 20
4 20
4 19
4 19
4 19
4 19
4 19
4 19
4 19
4 19
3 19
3 19
3 19
3 19
0 0
0 0
0 0
0 0
0 1
0 1
0 1
0 1
0 1
0 1
0 1
0 1
0 1
0 1
0 1
0 1
0 1
0 1
0 1
0 1
0 1
0 1
0 1
0 1
0 1
0 1
0 1
0 1
0 1
0 1
0 1
0 1
0 1
0 1
0 1
0 1
0 1
0 1
0 1
0 1
0 0
0 0
0 0
0 0
0 0
0 0
0 0
0 0
0 0
0 0
0 0
0 1
0 1
0 1
0 1
0 1
0 1
0 1
0 1
0 1
0 2
0 2
0 2
0 2
0 2
0 2
0 2
0 2
0 2
0 2
0 2
0 2
0 2
0 2
0 2
0 4
0 4
0 4
0 4
0 4
0 4
0 4
0 4
0 4
0 4
0 4
0 4
0 3
0 3
0 3
0 3
0 3
0 3
0 2
0 2
0 2
0 2
0 2
0 2
0 2
0 2
0 2
0 2
0 2
0 2
0 2
0 2
0 2
0 2
0 2
0 4
1 2
1 2
1 2
1 2
1 2
1 2
1 2
1 2
1 2
1 2
1 2
1 2
1 2
1 2
1 2
1 2
1 2
1 2
1 2
1 2
1 2
1 2
1 3
1 3
1 3
1 3
3 4
3 4
3 4
3 4
3 5
3 5
2 5
2 6
3 4
3 4
3 4
3 4
3 4
3 4
3 4
3 5
3 5
3 5
3 5
3 5
3 5
3 5
3 5
3 5
3 5
3 5
3 9
3 9
3 9
3 13
3 13
3 12
3 12
3 12
3 13
2 13
1 14
1 14
1 14
1 15
1 14
2 14
2 14
2 13
1 13
1 13
1 13
1 13
1 13
1 13
1 13
1 12
1 12
1 12
1 12
1 12
1 12
1 12
1 12
1 12
1 12
1 12
1 8
1 9
1 15
1 13
1 13
1 13
1 13
1 13
1 13
1 13
1 10
1 10
1 10
1 10
1 10
0 10
0 10
0 10
0 10
0 10
0 10
0 10
0 10
0 10
0 10
0 10
0 10
0 10
0 10
0 10
0 10
0 10
0 10
0 10
0 10
0 10
0 10
0 8
0 2
0 5
0 11
0 14
0 14
0 15
0 15
0 15
0 15
0 15
0 15
0 15
0 15
0 15
0 15
0 15
0 15
0 15
0 15
0 15
0 15
0 15
0 15
0 15
0 15
0 15
0 15
0 15
0 15
0 15
0 15
0 15
0 15
0 15
0 17
0 17
0 20
0 17
0 11
0 12
0 12
0 11
0 11
0 11
0 11
0 11
0 12
0 12
0 13
0 13
0 16
0 17
0 17
0 17
0 17
0 17
0 19
0 20
0 25
0 25
0 25
0 26
0 26
0 26
0 26
0 26
0 26
0 28
0 29
0 28
0 29
0 29
0 24
0 23
0 23
0 19
0 19
0 33
0 35
0 37
2 39
2 39
2 40
2 38
2 37
2 36
2 37
2 37
2 38
2 42
2 42
9 65
9 65
10 67
10 62
10 63
10 63
10 63
10 63
10 63
13 77
14 80
14 85
14 84
14 83
14 83
14 81
14 81
14 81
15 87
16 125
16 128
16 128
15 114
14 110
14 112
14 113
14 112
14 111
14 111
14 111
14 111
14 110
14 112
14 110
14 106
14 105
6 79
6 78
6 78
6 78
6 79
6 79
6 79
6 78
6 76
2 57
2 56
2 56
2 56
2 56
2 59
3 71
3 71
3 74
2 69
1 30
1 29
2 29
2 29
2 29
2 30
3 34
9 42
10 42
10 43
10 44
11 45
11 44
11 42
11 42
11 42
11 44
11 44
11 55
11 55
11 57
12 56
12 56
12 56
12 56
12 56
12 56
12 56
12 56
12 55
12 55
12 48
10 41
10 40
10 39
10 35
10 35
10 35
10 33
9 33
8 32
7 30
6 27
13 93
17 137
17 154
18 173
20 191
20 198
20 201
20 216
20 217
20 219
20 224
20 215
20 218
20 216
19 220
19 248
19 262
19 278
19 280
19 281
19 281
19 281
19 283
19 282
19 283
19 283
19 283
19 282
19 282
19 282
21 283
46 311
46 311
46 314
46 314
46 311
35 216
29 155
28 154
27 143
27 129
27 130
27 132
27 112
27 112
27 111
27 116
27 114
27 113
27 113
27 106
27 78
27 63
27 50
27 48
27 48
27 48
27 48
27 48
27 48
27 47
28 47
27 47
27 48
27 80
24 80
25 81
2 53
2 53
2 50
2 49
2 49
2 49
2 51
2 51
2 50
2 50
2 49
2 47
2 47
2 47
2 46
2 40
2 40
2 40
2 41
2 41
2 40
2 40
2 40
2 40
2 40
2 40
2 41
2 50
3 52
3 55
3 64
3 69
3 88
3 79
3 97
2 100
2 108
2 109
2 130
3 132
3 132
3 129
3 128
3 128
3 128
3 128
3 128
3 128
3 128
3 128
3 128
3 129
3 130
3 130
3 129
11 175
11 175
11 180
11 180
11 181
13 207
13 208
13 213
12 217
12 222
12 224
12 213
12 213
12 191
11 169
11 155
11 151
11 145
11 144
11 124
11 124
10 125
10 125
10 125
10 125
10 125
10 125
10 125
10 125
10 125
10 125
10 124
10 124
10 123
10 123
10 123
3 74
4 75
4 74
4 74
4 73
2 72
2 72
2 56
2 48
2 43
2 41
1 41
2 41
2 37
2 37
2 36
2 35
2 35
2 35
2 35
2 35
2 35
2 35
2 35
2 35
2 35
2 35
2 35
2 35
2 35
2 35
2 35
2 36
2 37
2 38
2 42
2 42
1 41
1 38
1 38
1 38
1 10
1 10
1 9
1 9
1 9
1 9
1 11
0 11
0 13
0 13
0 13
0 13
0 13
0 13
0 15
0 15
0 15
0 15
0 17
0 17
0 17
0 18
0 18
0 19
0 26
0 44
0 44
1 70
1 70
1 69
1 64
1 64
1 64
1 64
1 65
1 66
1 107
1 112
1 117
1 127
1 128
1 129
1 126
2 125
2 123
2 123
2 123
2 124
2 127
3 132
3 132
3 132
3 132
3 133
3 130
3 130
3 128
3 128
3 128
3 128
3 124
3 105
3 104
2 79
2 79
2 78
2 78
2 78
2 77
2 100
2 105
4 107
4 62
3 53
3 52
3 48
3 48
3 47
3 47
3 47
5 64
5 68
5 72
5 74
5 69
4 65
4 65
4 65
4 65
4 65
4 65
5 71
5 71
5 72
5 72
5 72
5 72
5 72
5 71
5 71
5 71
5 71
5 71
5 71
5 71
5 47
5 43
3 37
3 37
3 37
3 37
3 37
3 37
3 37
3 37
3 36
1 18
1 12
1 12
1 7
1 7
1 7
1 7
1 7
1 7
1 7
1 7
0 1
0 1
0 0
0 0
0 0
1 0
1 0
1 0
1 0
1 0
1 0
1 0
1 0
1 0
1 0
1 0
1 0
1 0
1 0
1 0
1 0
1 0
1 0
1 0
1 0
1 0
1 0
11 11
11 12
11 15
12 16
12 16
12 17
12 17
12 17
12 17
12 17
23 36
26 41
28 45
28 47
40 51
41 52
41 52
41 53
41 53
41 53
41 53
41 53
41 53
41 53
41 53
41 53
41 53
51 55
57 59
66 59
66 59
66 59
66 59
66 59
66 59
65 56
55 43
55 42
54 42
54 42
54 42
54 42
54 42
54 42
54 41
55 43
52 25
52 25
50 23
50 21
37 17
37 20
37 20
37 19
37 19
37 19
37 19
37 19
37 19
37 20
37 21
37 21
38 21
28 18
19 15
13 15
13 15
13 16
13 16
13 16
13 16
13 16
13 16
13 16
13 17
13 17
13 17
12 17
12 17
12 17
12 17
12 15
1 7
1 7
1 7
1 6
1 6
1 5
2 7
2 7
2 7
2 7
2 7
2 7
2 7
1 6
1 7
1 6
1 6
1 6
1 6
1 6
1 6
1 6
1 6
1 6
1 6
1 6
1 6
1 6
1 5
1 6
1 6
4 6
4 6
4 6
4 6
4 6
4 6
4 6
4 6
4 8
5 7
5 4
4 4
4 4
4 4
5 7
5 7
5 8
5 10
5 12
5 17
5 19
5 20
5 20
5 20
5 20
5 20
5 20
6 20
6 20
6 20
6 20
6 20
6 20
6 20
6 19
6 19
3 19
3 19
3 19
3 19
3 19
3 20
3 20
3 21
3 19
2 19
2 19
2 19
2 19
2 19
1 15
1 15
1 14
2 12
2 12
2 7
2 4
2 4
2 4
2 4
2 4
2 4
1 4
1 4
1 4
1 4
1 5
1 5
1 5
1 5
1 7
1 7
1 8
1 10
0 10
0 11
0 11
0 10
0 10
0 9
0 9
0 9
0 10
0 10
0 10
0 22
0 21
0 23
0 31
0 31
0 33
0 36
0 37
0 37
0 37
0 37
0 37
0 38
0 38
0 38
0 39
0 42
0 41
0 42
0 43
0 43
0 41
0 42
0 42
0 42
0 42
0 41
0 42
0 42
0 42
0 42
0 41
0 41
0 40
0 40
0 40
0 26
0 25
0 25
0 18
0 17
0 14
0 13
0 12
0 12
0 12
0 12
0 12
0 11
0 11
0 11
0 10
0 5
0 5
0 5
0 4
0 3
0 3
0 2
0 1
0 0
0 0
0 0
0 1
0 1
0 1
0 1
0 1
0 3
1 6
1 6
1 6
1 6
1 7
1 7
1 7
1 7
1 7
1 7
1 7
1 7
1 7
1 8
1 12
1 22
1 26
1 29
1 29
1 29
1 29
1 29
1 29
1 29
2 29
2 29
2 29
2 29
2 29
2 29
2 29
2 29
2 29
2 30
2 30
2 28
1 25
1 25
1 25
1 26
1 26
1 28
1 29
1 30
1 30
1 31
1 32
1 32
1 32
1 31
1 23
1 14
1 12
1 11
1 11
1 11
1 13
1 15
1 18
1 25
0 31
0 46
0 50
0 52
0 52
0 52
0 55
0 56
0 56
0 58
0 57
0 59
0 59
0 59
0 58
0 59
0 58
0 57
0 56
0 55
0 54
0 53
0 53
0 53
0 53
0 53
0 55
0 55
0 55
0 55
0 54
0 54
0 53
0 53
0 61
0 55
0 48
0 31
0 33
0 39
0 46
0 47
0 45
0 45
0 45
0 47
0 51
0 50
0 49
0 49
0 49
0 49
0 49
0 49
0 49
0 49
0 49
0 51
0 51
0 51
0 51
0 51
0 49
0 49
0 49
0 48
0 47
0 47
0 47
0 46
0 29
0 27
0 27
0 25
0 24
0 14
0 13
0 13
0 13
0 13
0 13
0 9
0 6
0 6
0 6
0 6
0 6
0 8
0 8
0 8
0 9
0 9
0 9
0 7
0 7
0 7
0 7
0 7
0 7
0 8
0 8
0 8
0 9
0 8
0 9
0 11
0 11
0 15
0 16
0 18
0 17
0 21
0 21
0 21
0 21
0 22
0 24
0 24
0 29
0 32
0 32
0 32
0 32
0 30
0 30
0 31
0 31
0 31
0 30
0 30
0 30
0 30
0 30
0 30
0 30
0 29
0 29
0 29
0 29
0 28
0 26
0 25
0 25
0 21
0 21
0 18
0 18
0 16
0 16
0 16
0 16
0 15
0 12
0 12
0 8
0 5
0 5
0 5
0 5
0 5
0 5
0 4
0 2
0 7
0 7
0 8
0 8
0 8
0 8
0 8
0 8
0 8
0 8
0 8
0 12
0 12
0 12
0 12
0 12
0 12
0 11
0 11
0 11
0 16
0 16
0 20
0 20
0 20
0 22
0 22
0 21
0 21
0 21
0 21
0 21
0 21
0 21
0 21
0 21
0 15
0 15
0 15
0 15
0 15
0 15
0 15
0 15
0 15
0 15
0 15
0 11
0 11
0 11
0 11
0 11
0 11
0 11
0 11
0 11
0 5
0 3
0 2
0 2
0 2
0 0
0 0
0 0
0 0
0 0
0 0
0 0
0 0
0 0
0 0
0 0
0 0
0 0
0 0
0 0
0 0
0 0
0 0
0 0
0 0
0 0
0 0
0 11
0 15
0 16
0 17
0 18
0 19
0 19
0 19
0 19
0 19
0 19
0 19
0 19
0 19
0 19
0 19
0 19
0 19
0 19
0 19
0 19
0 19
0 19
0 19
0 19
0 19
0 19
0 19
0 19
0 20
0 23
0 34
0 48
0 52
0 55
0 54
0 41
0 38
0 39
0 39
0 40
0 40
0 40
0 40
0 40
0 40
0 40
0 40
0 40
0 40
0 40
0 40
0 40
0 40
0 40
1 40
2 40
132 40
146 40
170 40
179 40
184 40
187 40
187 40
189 40
192 36
194 35
229 19
236 6
242 6
259 5
259 5
259 5
259 5
271 4
277 4
287 3
292 3
293 3
293 3
292 3
292 3
292 3
290 3
285 3
284 3
284 3
284 3
287 3
286 3
284 3
293 3
294 4
199 4
178 4
168 4
161 4
158 4
155 4
156 4
154 4
151 4
145 3
118 3
112 3
107 1
90 1
90 1
85 1
85 1
75 1
66 1
57 1
56 1
56 1
56 1
56 1
56 1
55 1
56 1
55 1
56 1
60 1
60 1
48 1
47 1
46 9
27 21
22 45
21 53
18 57
11 57
11 57
9 57
9 57
14 57
14 57
14 57
14 57
14 57
14 57
14 57
14 57
14 57
14 57
14 57
14 57
14 57
14 57
15 57
15 57
15 57
15 57
15 57
16 57
16 57
13 57
12 57
12 57
11 57
12 56
17 56
17 45
18 8
25 2
27 2
32 2
63 2
84 2
84 2
84 2
81 2
81 2
83 2
100 2
107 2
111 2
112 2
116 2
127 2
127 2
127 2
127 2
125 2
124 2
124 2
124 2
124 2
127 2
128 2
131 2
133 2
141 2
141 2
177 2
178 2
179 2
183 2
194 0
191 0
181 0
179 0
172 0
138 0
124 0
124 0
127 0
125 0
129 0
133 0
120 0
127 0
121 0
122 0
287 0
278 0
279 0
319 0
335 0
338 0
338 0
338 0
339 0
338 0
335 0
342 0
340 0
337 0
336 0
343 0
304 0
303 0
303 0
317 0
325 0
329 0
346 0
346 0
346 0
346 0
346 0
356 0
354 0
353 0
359 0
364 0
417 1
412 1
412 1
410 1
243 1
238 1
232 1
197 1
183 1
181 1
181 1
180 1
179 1
179 1
176 1
175 1
173 1
175 1
178 1
170 1
169 1
163 1
148 1
138 1
127 1
123 1
108 1
108 1
110 1
111 1
111 1
98 1
95 1
90 1
80 1
75 1
20 0
20 1
22 1
30 2
34 2
35 2
36 2
36 2
37 2
41 2
54 2
56 2
56 2
57 3
57 4
51 4
71 5
74 5
73 5
74 5
75 5
77 5
79 5
93 5
108 5
108 5
108 5
108 5
107 5
107 5
108 5
109 5
109 5
109 4
109 4
109 8
108 8
106 7
100 8
97 8
94 8
92 8
93 9
93 9
104 10
103 10
92 8
88 8
88 8
88 7
85 7
84 7
65 7
64 7
64 7
65 7
72 7
79 7
112 8
143 8
132 8
132 8
132 8
131 8
130 8
129 8
130 8
129 8
129 8
129 8
128 8
128 3
128 3
128 3
127 2
130 2
131 2
135 2
141 2
144 2
131 1
130 1
130 1
135 1
137 1
135 1
135 1
134 1
138 1
136 4
134 4
124 4
120 4
113 4
74 3
40 3
42 3
42 3
41 3
49 3
49 3
49 3
49 3
49 3
49 3
49 3
49 4
49 4
48 4
48 4
46 4
39 4
36 4
38 4
38 4
38 4
37 4
39 4
40 4
38 4
36 4
36 4
37 4
37 4
32 4
33 1
33 1
34 1
36 1
42 1
43 1
58 2
63 2
65 2
65 2
56 2
56 2
57 2
59 3
59 3
59 3
59 3
61 2
61 2
61 2
65 6
67 7
66 8
67 9
62 9
77 9
102 9
298 11
314 11
320 11
323 11
322 11
319 11
320 11
325 11
327 12
324 12
340 12
343 12
374 12
474 12
677 13
667 12
664 12
663 11
668 11
757 11
849 12
850 12
850 12
850 12
850 12
851 12
850 12
861 12
884 12
884 6
1007 6
1007 6
1045 5
1155 5
1146 5
1137 5
1032 4
1035 4
1046 4
1160 4
1397 4
1405 4
1403 4
1400 4
1405 3
1405 2
1391 2
1364 2
1291 2
1269 2
1076 2
1077 1
1068 1
1054 1
1024 1
977 1
898 1
921 1
924 1
925 1
936 1
938 1
937 1
939 1
917 1
898 1
744 1
696 1
679 1
917 4
926 4
925 4
851 3
832 3
799 3
753 3
504 3
500 3
509 3
510 3
504 3
510 3
627 7
629 7
629 7
632 7
661 7
679 7
680 7
705 7
700 7
698 7
695 7
673 7
669 7
663 7
654 7
652 7
652 7
635 7
633 7
624 7
616 7
603 6
595 6
266 4
261 4
251 4
246 4
236 4
230 4
222 4
221 4
220 4
204 4
196 4
175 4
169 4
81 0
81 0
81 0
76 0
47 0
29 0
28 0
4 0
2 0
2 0
2 0
2 0
2 0
2 0
2 0
2 0
4 0
7 0
7 0
7 0
7 0
6 0
6 0
6 0
6 0
7 0
10 0
13 0
22 0
169 0
171 0
171 0
171 0
171 0
171 0
171 0
171 0
173 0
178 0
183 0
192 0
193 0
194 0
194 0
194 0
194 0
212 0
216 0
219 0
228 0
235 0
235 0
235 0
233 0
234 0
234 0
236 0
239 0
242 0
257 0
276 0
276 0
275 0
276 0
272 0
134 0
141 0
145 0
154 0
156 0
157 0
157 0
158 0
156 0
148 0
146 0
148 0
146 0
151 0
155 0
167 0
167 0
156 0
267 0
423 0
788 1
865 1
866 1
866 1
871 1
875 1
877 1
908 1
904 1
901 1
898 1
890 1
889 1
885 1
886 1
879 1
869 1
864 1
861 1
851 1
850 1
851 1
850 1
852 1
852 1
848 1
849 1
845 1
835 1
824 1
811 1
649 0
617 0
559 0
447 0
400 0
127 0
110 0
112 0
157 0
171 0
168 0
166 0
134 0
137 0
135 0
122 0
122 0
124 0
124 0
124 0
149 0
172 0
181 0
181 0
179 0
178 0
176 0
174 0
175 0
174 0
169 0
167 0
168 0
168 0
166 0
167 0
163 0
156 0
154 0
141 0
138 0
135 0
135 0
129 0
86 0
74 0
74 0
73 0
71 0
81 0
84 0
88 0
89 0
87 0
83 0
80 0
46 0
31 0
30 0
30 0
32 0
57 0
57 0
58 0
57 0
57 0
57 0
57 0
57 0
59 0
72 0
76 0
77 0
91 0
91 0
92 0
93 0
93 0
89 0
89 0
89 0
89 0
85 0
85 0
85 0
73 0
70 0
67 0
73 0
78 0
80 0
85 0
88 0
88 0
90 0
91 0
91 0
67 0
68 0
67 0
67 0
68 0
68 0
67 0
67 0
63 0
51 0
49 0
48 0
38 0
38 0
36 0
37 0
37 0
37 0
37 0
50 0
83 0
113 0
113 0
117 0
130 0
129 0
127 0
122 0
118 0
130 0
132 0
136 0
145 0
150 0
155 0
156 0
158 0
157 0
157 0
157 0
156 0
156 0
156 0
156 0
156 0
155 0
155 0
154 0
151 0
152 0
152 0
151 0
152 0
155 0
157 0
141 0
103 0
107 0
102 0
102 0
98 0
99 0
234 0
236 0
239 0
229 0
225 0
216 0
208 0
201 0
196 0
194 0
192 0
193 0
198 0
204 0
205 0
206 0
208 0
208 0
208 0
208 0
208 0
207 0
219 0
226 0
230 0
232 0
242 0
256 0
255 0
255 1
255 1
229 1
228 1
229 2
220 2
219 2
82 2
80 2
77 2
76 2
84 2
89 2
94 2
109 2
113 2
113 2
112 2
115 2
157 3
155 3
154 3
153 3
151 3
153 3
154 3
153 3
153 3
154 3
142 3
135 3
128 3
122 3
118 3
104 3
104 3
104 2
104 2
104 2
103 2
102 1
102 1
112 1
121 1
123 1
191 1
191 1
200 1
196 1
183 1
172 1
167 1
165 1
164 1
161 1
129 0
127 0
126 0
126 0
133 0
131 0
130 0
131 0
137 0
142 0
147 0
147 0
146 0
146 0
148 0
147 0
173 0
184 0
211 0
222 0
410 0
418 0
414 0
404 0
408 0
408 0
341 0
340 1
327 1
327 1
328 1
339 1
432 1
461 1
490 1
491 1
492 1
492 1
491 1
491 1
486 1
486 2
486 2
485 2
478 2
474 2
472 2
482 2
541 5
543 5
542 5
541 5
521 5
503 5
478 6
466 6
287 6
279 6
280 6
277 6
510 5
699 5
742 5
752 5
794 5
794 5
793 5
774 5
691 5
663 5
641 5
641 5
645 5
649 5
649 5
650 5
651 5
649 4
649 3
646 4
642 4
637 4
632 4
629 4
575 1
574 2
579 2
697 4
703 4
704 4
704 4
703 4
701 4
697 4
690 4
654 4
413 4
224 4
188 4
193 5
170 5
168 5
182 5
186 5
184 5
182 5
182 5
180 5
181 5
178 5
182 5
183 5
183 5
195 5
274 6
278 5
281 5
292 6
304 6
303 5
313 5
323 5
329 5
260 3
313 3
330 3
385 3
421 3
425 3
471 3
494 3
509 3
593 3
597 3
596 3
590 2
589 2
589 2
579 2
582 2
584 2
588 2
590 2
603 2
604 2
603 2
599 2
583 2
582 2
572 2
509 1
507 1
507 1
491 0
480 1
477 2
440 2
421 2
406 2
368 2
326 2
317 2
245 2
238 3
220 3
178 4
166 4
158 4
85 4
79 4
80 4
81 4
82 4
81 4
75 4
71 4
64 4
61 4
60 4
54 4
60 4
64 4
63 5
63 5
57 5
57 5
55 3
58 3
56 3
73 3
80 3
102 3
117 3
121 3
126 3
126 3
126 3
122 3
123 3
114 2
113 1
112 1
112 1
272 2
298 2
301 2
301 2
299 2
300 2
300 2
302 2
303 2
304 2
303 2
302 2
289 2
288 2
286 1
286 1
286 1
284 1
281 1
267 1
265 1
261 1
250 1
242 1
222 1
211 1
206 1
205 1
205 1
206 1
206 1
204 1
204 1
188 1
186 1
179 1
28 0
17 0
15 0
13 0
13 0
11 0
12 0
12 0
15 0
31 0
32 0
135 0
170 0
176 0
178 0
218 0
222 0
222 0
225 0
226 0
227 0
229 0
232 0
233 0
233 0
232 0
231 0
233 0
233 0
232 0
232 0
232 0
232 0
232 0
232 0
232 0
232 0
232 0
232 0
247 0
263 0
352 0
407 0
407 0
402 0
382 0
377 0
270 0
248 0
247 0
286 0
252 0
250 0
249 0
247 0
243 0
238 0
237 0
234 0
234 0
238 0
237 0
239 0
240 0
242 0
240 0
266 0
277 0
280 0
281 0
283 0
317 0
321 0
320 0
317 0
304 0
276 0
199 0
158 0
154 0
153 0
152 1
158 1
177 2
181 3
180 5
149 5
151 6
150 6
150 6
152 6
153 6
155 6
154 6
157 6
164 6
162 6
172 6
171 7
261 10
262 10
253 11
231 14
228 14
224 14
222 14
231 14
227 14
230 14
235 14
254 15
268 14
288 14
368 13
724 12
1328 13
1450 13
1467 12
1537 12
1532 12
1538 13
1754 15
1764 15
1763 13
1774 14
1802 15
1809 16
1810 16
1809 16
1808 15
1804 15
1799 15
1797 16
1787 15
1782 15
1692 11
1693 11
1691 11
1690 11
1687 11
1688 10
1687 10
1675 10
1646 10
1643 10
1630 10
1600 10
1586 10
1502 10
1372 10
1095 9
467 7
392 7
371 7
289 7
242 6
236 5
25 3
21 3
10 2
6 2
3 2
2 1
2 1
6 4
8 4
8 4
8 4
8 3
8 3
9 3
9 3
9 3
10 3
12 3
13 3
13 3
13 6
13 6
13 7
13 13
13 18
13 21
13 25
13 36
13 75
13 127
13 149
13 168
13 184
13 194
14 212
14 222
14 227
14 230
14 231
14 234
14 238
13 239
15 246
10 243
8 243
8 245
13 245
13 246
14 246
13 246
12 245
14 244
15 244
13 244
12 244
12 244
12 241
12 239
12 237
12 229
12 226
12 222
12 221
13 207
15 173
15 106
15 82
16 82
16 78
16 76
16 63
17 59
17 57
17 106
17 103
17 105
17 100
19 100
18 123
18 124
18 123
21 127
16 128
20 132
19 132
19 132
18 132
30 136
29 136
29 136
29 136
32 136
32 136
32 136
32 136
32 136
32 136
32 136
32 135
31 134
29 112
29 111
29 108
28 109
28 109
27 167
26 177
27 191
27 195
27 143
27 144
27 141
27 141
25 141
24 117
22 116
22 116
20 114
22 128
17 129
15 141
16 144
16 152
7 151
7 151
7 151
7 151
4 151
4 151
4 151
4 151
4 151
4 151
4 151
5 151
6 151
6 151
7 151
7 151
7 147
8 147
8 86
8 55
7 54
7 52
8 54
9 54
9 54
12 63
12 64
12 61
12 64
12 68
12 33
10 19
10 20
9 20
9 20
10 20
10 20
10 20
10 20
10 20
10 20
11 20
11 20
11 21
12 21
12 21
13 21
12 21
13 21
22 22
21 22
21 22
21 22
20 22
20 22
20 22
21 22
21 22
20 22
20 22
20 21
17 10
17 10
17 9
17 9
17 6
17 6
19 5
19 5
19 5
19 5
18 5
18 5
18 5
18 5
18 5
18 5
18 5
18 6
17 5
16 5
16 5
15 5
15 5
14 5
6 4
6 5
6 5
6 11
8 12
23 26
29 26
34 28
34 29
34 27
33 27
34 27
35 27
35 27
37 28
38 28
38 27
38 27
36 27
36 27
36 27
36 27
36 27
36 27
36 27
36 27
36 27
35 27
34 26
34 26
34 26
34 26
34 26
34 26
34 26
31 26
31 26
31 25
30 25
26 17
18 17
8 2
8 3
6 5
6 6
6 10
6 12
4 14
2 14
1 14
1 13
1 13
1 13
1 13
1 13
1 13
1 13
1 13
1 13
1 13
1 13
1 13
1 13
1 13
1 13
0 13
0 13
0 13
0 13
0 13
0 13
0 13
0 13
0 13
0 12
0 14
0 15
0 16
0 17
0 14
0 14
0 9
0 7
0 6
0 6
0 6
0 6
0 6
0 6
0 6
0 7
1 7
1 7
3 12
3 12
3 12
3 12
3 12
3 12
3 12
3 14
3 14
3 14
3 14
3 15
3 15
3 15
3 16
3 16
3 16
3 16
3 15
3 14
3 13
3 11
3 11
3 11
3 11
3 11
3 11
3 12
3 12
3 12
3 12
3 12
3 12
3 11
2 11
2 11
0 6
0 6
0 6
0 6
0 6
0 6
0 6
0 4
0 4
0 4
0 4
0 4
0 5
0 5
0 5
0 11
0 12
0 12
0 11
0 12
0 12
0 12
0 12
0 12
0 12
0 12
0 12
0 11
0 11
0 11
0 11
0 11
0 11
0 11
0 11
0 11
0 11
0 11
1 11
3 13
3 13
3 14
3 14
3 14
3 14
3 14
3 14
3 12
3 11
3 11
3 11
3 3
3 3
3 3
4 3
4 4
4 6
4 6
4 6
4 6
4 6
4 6
4 6
4 7
4 7
4 7
4 7
4 7
4 7
4 7
4 7
3 7
2 7
2 7
2 7
1 5
1 5
1 4
1 4
1 4
1 5
1 10
1 12
1 12
1 12
1 16
1 22
1 28
1 29
1 29
0 29
0 27
0 26
0 26
0 26
0 26
0 26
0 26
0 26
0 26
0 27
0 27
0 28
0 28
0 28
0 28
0 28
0 28
0 31
0 31
0 33
0 33
0 34
0 34
0 37
0 38
0 37
0 27
0 24
0 23
0 25
0 29
0 36
0 35
0 35
0 35
0 35
0 35
0 35
0 35
0 35
0 35
0 35
0 35
0 35
0 34
0 33
0 33
0 32
0 32
0 32
0 32
0 32
0 32
0 27
0 27
0 25
0 25
0 25
0 25
0 22
0 22
0 22
0 22
0 21
0 19
0 13
0 5
0 0
0 0
0 0
0 0
0 0
0 0
0 0
0 0
0 0
0 0
2 0
2 0
2 0
4 2
4 2
4 2
4 2
4 2
4 2
4 2
4 3
4 3
4 3
4 4
4 4
4 5
5 5
5 5
5 6
5 6
5 6
5 6
5 6
5 6
5 6
5 6
5 6
5 7
5 7
5 12
5 12
5 12
5 12
5 12
5 12
4 12
3 12
3 13
3 14
1 11
1 12
1 12
1 12
1 12
1 12
1 12
1 13
1 14
1 14
1 16
1 16
1 14
0 14
0 14
0 14
0 14
0 14
0 14
0 14
0 15
0 15
0 16
0 21
0 20
0 20
0 15
0 17
0 17
0 18
0 18
0 18
0 18
0 17
0 16
0 22
0 22
0 21
0 21
0 21
0 21
0 21
0 21
0 21
0 20
0 21
0 18
0 18
0 18
0 18
0 18
0 21
0 21
0 21
0 21
0 21
0 20
0 20
0 19
0 12
0 11
0 11
0 11
0 11
0 11
0 11
0 11
0 11
0 11
0 11
0 11
0 5
0 5
0 5
0 5
0 5
0 5
0 5
0 5
0 4
1 4
1 3
1 3
1 3
1 3
1 3
1 2
1 0
1 0
1 0
1 0
1 0
1 0
1 0
1 0
1 0
0 0
0 0
0 0
0 0
0 0
0 0
0 0
0 0
0 0
0 0
0 0
0 0
0 0
0 1
0 1
0 1
0 1
0 1
0 1
0 1
0 1
0 1
0 1
0 1
0 4
0 4
0 4
0 4
0 4
0 4
0 4
0 4
0 5
0 11
0 14
0 21
0 24
0 25
0 28
0 28
0 28
0 28
0 28
0 28
0 29
0 29
0 29
0 29
0 29
0 28
0 28
0 28
0 28
0 28
0 28
0 28
0 28
0 28
0 28
0 27
0 25
0 25
0 25
0 25
0 25
0 25
3 27
3 28
3 25
3 21
3 19
3 10
3 7
3 7
3 6
3 8
3 8
3 10
3 11
3 11
3 10
3 10
3 10
3 11
3 14
3 15
3 17
3 17
3 17
3 18
3 20
3 21
3 21
3 22
3 22
3 22
3 29
3 29
3 30
3 30
3 31
3 31
0 28
0 28
0 28
0 27
0 27
0 27
0 27
0 27
0 27
0 25
0 25
0 23
0 22
0 22
0 22
0 22
0 22
0 21
0 15
0 15
0 15
0 15
0 15
0 14
0 11
0 11
0 12
0 11
0 11
0 11
0 4
0 4
0 3
0 3
0 2
0 2
0 2
0 2
0 1
0 1
0 1
0 1
0 1
0 1
0 1
0 1
0 1
0 1
0 1
0 1
0 1
0 1
0 1
0 1
0 2
0 4
0 4
0 22
0 27
0 28
0 29
0 31
0 33
0 34
0 36
0 36
0 36
0 36
0 36
0 36
0 36
0 36
0 36
1 37
1 37
1 37
1 37
1 37
1 37
1 37
1 38
1 39
1 39
1 39
1 39
1 39
1 39
1 39
1 39
1 39
1 36
1 35
1 35
1 11
1 4
1 4
1 4
1 4
1 4
1 5
1 5
1 5
1 5
1 5
1 5
1 5
1 5
1 5
1 5
0 4
0 5
0 5
0 5
0 5
0 5
0 5
0 3
0 2
0 2
0 2
0 2
0 2
0 2
0 2
0 2
0 2
0 2
0 2
0 2
0 2
0 2
0 3
0 10
0 10
0 11
0 11
0 12
0 12
0 12
0 12
0 12
0 12
0 12
0 13
0 13
0 13
0 12
0 13
0 13
0 13
0 13
0 13
0 13
0 13
0 13
0 13
0 13
0 13
0 13
0 13
0 13
0 13
0 13
0 13
0 13
0 14
0 14
0 13
0 6
0 6
0 4
0 4
0 3
0 4
2 4
2 9
2 10
2 10
2 10
2 9
2 9
2 9
2 9
3 15
3 15
3 15
3 15
3 16
3 16
3 16
3 16
4 16
4 16
4 16
4 17
4 17
4 17
4 17
4 17
4 17
4 17
4 17
4 17
4 17
4 17
4 17
4 17
4 17
4 17
4 16
2 16
2 11
2 10
2 11
2 11
2 11
2 11
2 11
2 11
1 4
1 4
1 3
1 4
1 5
3 20
3 21
4 30
5 38
6 39
6 39
6 38
6 45
7 58
7 58
7 58
7 58
7 58
7 57
7 57
7 57
7 57
7 57
6 57
6 57
6 57
6 57
6 56
6 56
6 56
6 56
6 56
6 56
11 56
11 56
11 56
11 56
11 54
10 53
10 53
10 52
9 34
9 32
7 3
5 2
5 1
5 0
5 0
5 0
5 0
5 0
5 0
5 0
5 0
5 0
5 0
5 0
5 0
5 0
5 0
5 0
5 0
5 0
5 0
5 0
5 0
5 0
5 0
5 0
0 0
0 0
0 0
0 0
0 0
0 0
0 0
0 0
0 0
0 0
0 0
0 0
0 0
0 0
2 0
2 0
2 0
2 0
2 0
2 0
2 0
2 0
2 0
2 0
2 0
2 2
2 2
2 3
2 3
2 7
3 9
3 12
8 14
9 15
11 15
11 16
11 16
11 16
11 17
11 17
11 19
11 20
11 20
11 20
11 20
11 20
11 21
11 21
11 21
11 21
9 23
9 24
9 25
9 25
9 26
9 27
9 27
9 27
9 28
9 28
9 29
9 27
9 27
9 26
9 26
10 22
9 19
9 17
3 15
2 15
1 15
1 15
1 15
1 15
1 14
1 13
1 12
1 10
1 10
1 10
1 10
1 10
1 10
1 10
1 10
1 10
1 8
1 7
1 6
1 6
1 5
1 4
1 4
1 4
1 3
1 3
1 2
1 2
1 2
1 2
1 2
0 0
0 0
0 0
0 0
0 1
0 1
0 1
0 1
0 1
0 1
0 1
0 1
0 1
0 2
0 2
0 2
0 2
0 2
0 2
0 2
0 2
0 2
0 2
0 2
0 2
0 2
0 2
0 2
0 2
0 2
0 2
0 2
0 2
0 2
0 2
0 2
0 2
0 7
0 8
0 8
0 7
0 7
0 7
0 7
0 7
0 7
0 7
0 7
0 7
0 6
0 6
0 6
0 6
0 6
0 6
0 6
0 6
0 6
0 6
0 6
0 6
0 6
0 6
0 6
0 6
0 6
0 6
0 6
0 9
0 9
0 12
0 11
0 11
0 9
0 8
0 8
0 8
0 8
0 8
0 8
0 8
0 8
0 9
0 9
0 9
0 9
0 9
0 9
0 9
0 9
0 9
0 9
0 9
0 9
0 9
0 11
0 13
1 15
1 15
1 15
1 15
1 15
1 15
1 14
1 11
1 11
1 7
2 8
2 8
2 8
2 8
2 8
2 8
2 8
2 8
2 8
2 8
2 8
2 7
2 7
2 7
2 7
2 7
2 8
2 9
2 11
2 11
2 12
2 13
2 13
2 13
2 10
2 8
1 7
1 7
1 7
1 7
1 7
1 7
1 7
1 7
1 7
1 7
0 7
0 7
0 7
0 7
0 7
0 7
0 7
0 7
0 7
0 7
0 7
0 7
0 5
0 5
0 5
0 5
0 5
0 5
1 4
1 4
1 4
1 3
1 3
1 4
1 5
1 5
1 5
1 5
1 5
1 5
1 5
1 5
1 5
1 4
1 4
1 4
1 4
1 4
1 4
1 4
1 4
1 4
1 4
1 4
1 4
1 5
1 5
1 5
1 5
1 5
1 5
1 5
1 4
1 4
0 3
0 3
0 2
0 2
0 2
0 1
0 1
0 1
0 1
0 1
0 1
0 1
0 1
0 1
0 1
0 1
0 1
0 1
0 1
0 1
0 1
0 1
0 1
0 0
0 0
0 0
0 0
0 0
0 0
0 0
0 0
0 1
0 1
0 1
0 1
0 1
0 1
0 1
0 1
0 1
0 1
0 1
0 1
0 1
0 1
0 1
1 1
1 1
1 1
1 1
1 1
1 1
1 2
1 2
1 5
1 5
1 5
1 5
1 6
1 7
1 8
1 10
1 12
1 12
1 12
1 12
1 13
2 13
2 13
2 13
2 13
2 13
2 13
2 13
2 13
2 13
2 13
2 13
2 13
2 13
2 13
2 13
1 13
1 13
1 13
1 13
1 13
1 13
1 12
1 12
1 10
1 10
1 10
1 10
1 9
1 7
1 6
1 5
1 3
1 3
1 4
1 4
1 4
0 3
0 3
0 3
0 3
1 3
1 3
1 3
1 3
1 3
1 3
1 3
1 3
1 4
1 4
1 4
1 4
1 4
1 4
1 4
1 4
1 4
1 4
1 4
1 3
1 3
1 3
1 3
1 3
1 3
1 4
1 3
1 3
1 3
1 3
1 2
1 2
1 2
1 2
1 2
1 2
0 2
0 2
0 2
0 2
0 2
0 2
0 2
0 3
0 2
0 2
0 2
0 2
0 2
0 3
0 3
0 3
0 3
0 3
0 3
0 3
0 3
0 3
0 3
0 3
0 3
0 2
0 2
0 2
0 2
0 2
0 2
0 2
0 2
0 2
0 2
0 2
0 2
2 2
4 2
4 2
4 2
4 2
4 1
4 1
4 1
4 1
4 1
4 0
4 0
4 0
4 0
4 0
4 0
4 0
4 0
4 0
4 4
5 4
5 4
5 4
5 4
5 4
5 4
5 4
5 5
5 5
5 5
5 5
5 7
3 7
3 7
3 7
3 7
3 7
1 7
1 7
1 7
1 7
1 7
1 7
1 7
1 7
1 7
1 7
1 7
1 7
1 7
1 7
1 7
1 7
1 7
1 7
1 3
0 3
0 3
0 3
0 3
0 3
0 3
0 2
2 2
2 2
2 2
2 2
2 0
2 0
2 0
2 0
2 0
2 0
2 0
2 0
2 0
2 0
2 0
2 0
2 0
2 0
2 0
2 0
2 0
2 0
2 0
2 0
2 0
2 0
2 0
2 0
2 0
2 0
2 0
2 0
2 0
2 0
2 0
2 0
0 0
0 0
0 0
0 0
0 0
0 0
0 0
0 0
0 0
0 0
0 0
0 0
0 0
0 0
0 0
0 0
0 0
0 0
0 0
0 0
0 0
0 0
0 0
0 0
0 0
0 0
0 0
0 0
0 0
0 0
0 0
0 0
0 0
0 0
0 0
0 0
0 0
0 0
0 0
0 0
0 0
0 0
0 0
0 0
0 0
0 0
0 0
0 0
0 0
0 0
0 0
0 0
0 0
4 0
5 0
6 0
6 0
6 0
6 0
6 0
6 0
6 0
6 0
7 3
7 3
7 3
7 3
7 3
7 3
7 3
7 3
7 3
7 3
7 3
7 3
7 3
7 4
7 4
7 4
7 4
7 4
7 4
7 4
7 4
7 4
7 4
6 4
6 5
6 5
2 5
1 5
1 5
1 5
1 5
1 5
2 6
2 8
2 8
2 7
1 4
1 4
1 4
1 4
1 4
1 4
1 4
1 4
1 4
1 4
1 4
1 4
1 4
1 4
1 4
1 4
2 4
2 5
2 5
2 5
2 5
2 5
2 5
2 6
3 6
3 7
3 7
3 7
3 7
3 7
3 7
3 7
2 6
2 4
2 4
2 4
2 4
2 4
2 4
2 4
2 4
2 4
2 4
2 4
2 5
2 5
2 5
2 5
2 5
2 5
2 5
2 5
1 5
1 5
2 5
2 5
2 5
2 5
2 5
2 4
1 2
1 2
1 2
1 2
1 2
1 2
1 2
1 2
1 2
1 2
1 2
1 2
1 2
1 2
1 2
2 2
2 2
2 2
2 2
2 2
2 1
2 1
2 1
2 3
2 3
2 3
2 3
2 3
2 3
1 2
1 2
1 2
1 2
1 2
1 2
1 2
1 2
1 2
1 2
1 2
1 2
1 2
1 2
1 2
1 2
1 2
1 2
1 2
1 2
1 2
2 2
1 2
1 2
1 3
1 6
2 6
2 6
2 6
2 6
2 4
2 4
2 4
2 4
2 4
2 4
2 4
2 4
2 4
2 4
2 4
2 4
2 4
2 4
2 4
2 4
2 4
2 4
2 4
2 4
2 4
2 4
1 5
1 5
1 5
1 5
1 5
1 5
1 5
1 5
1 4
1 1
0 1
0 1
0 1
0 1
0 1
0 1
0 1
1 1
3 1
3 1
3 1
3 1
3 1
3 1
3 1
3 1
3 1
3 1
3 5
3 5
3 5
3 5
3 5
3 5
3 5
3 5
3 4
3 4
3 4
3 4
3 4
3 4
3 4
3 4
3 4
3 4
3 4
3 4
3 4
3 4
3 4
3 4
3 4
2 4
0 4
0 4
0 4
0 4
0 4
0 4
0 5
0 5
0 5
0 5
0 1
0 1
0 1
0 1
0 1
0 1
0 1
0 1
0 1
0 1
0 1
0 2
0 2
0 2
0 2
0 2
0 2
0 2
0 2
0 2
0 2
0 2
0 2
0 2
0 2
0 2
0 2
0 2
0 2
0 2
0 2
0 1
0 1
0 1
0 1
0 1
0 1
0 1
0 1
0 1
0 1
0 1
0 1
0 1
0 1
0 1
0 1
0 0
0 0
0 0
0 0
0 0
0 0
0 0
0 0
0 0
0 0
0 0
0 0
0 0
0 0
0 0
0 0
0 0
0 0
0 0
0 0
1 4
1 5
1 5
1 5
1 5
1 5
1 5
1 5
1 5
1 5
1 5
1 5
1 5
1 5
1 5
1 5
1 5
1 5
1 5
1 5
1 5
1 5
1 5
1 5
1 5
1 5
1 5
1 5
1 5
1 5
1 5
1 6
1 6
1 7
1 7
1 7
0 2
0 2
0 2
0 2
5 3
5 3
5 4
6 4
7 4
8 4
8 4
8 4
8 4
8 4
8 4
8 4
8 4
8 4
8 4
8 4
8 4
8 4
8 4
8 4
8 4
8 4
8 4
8 4
8 4
8 4
8 4
8 3
8 3
8 2
8 2
8 2
8 2
8 2
8 2
8 2
1 0
0 0
0 0
0 0
0 0
0 0
0 0
0 0
0 0
0 0
0 0
0 0
0 0
0 0
0 0
0 0
0 0
0 0
0 0
0 0
0 0
0 0
0 0
0 0
0 0
0 0
0 0
0 0
0 0
0 0
0 0
0 0
1 0
2 0
3 0
3 2
9 2
9 2
9 2
9 2
9 2
10 2
10 2
10 2
10 2
10 2
10 2
10 2
10 2
10 2
10 2
10 2
10 2
10 2
10 2
10 2
10 2
10 2
10 2
10 2
10 2
10 2
10 2
10 2
10 2
10 2
10 2
10 2
9 3
7 3
7 3
7 1
1 1
1 1
2 1
3 1
3 1
3 1
4 1
6 1
7 1
7 1
7 1
7 1
7 1
7 1
7 6
7 7
7 8
7 8
7 8
7 8
7 8
8 8
8 8
8 8
8 8
8 8
8 8
8 8
8 8
9 8
9 8
9 8
9 7
9 7
9 7
9 7
9 7
9 7
7 7
7 7
7 7
7 7
5 7
4 7
3 7
3 8
3 8
3 8
3 8
3 6
3 1
3 1
3 1
3 1
3 1
4 1
4 1
3 1
3 1
3 1
3 1
3 1
3 1
3 1
2 1
2 1
2 1
2 1
2 1
2 1
1 1
1 1
1 1
0 1
0 1
0 1
3 1
4 1
6 2
6 2
7 1
7 1
7 1
7 1
7 1
7 1
7 1
7 1
7 3
7 3
7 3
7 3
7 4
7 4
7 5
7 6
7 6
7 6
7 6
9 6
9 6
9 6
9 6
9 6
9 6
9 6
9 6
9 6
9 6
9 6
9 6
9 8
5 8
4 8
3 7
2 7
2 7
2 8
2 8
2 8
2 8
2 8
2 8
2 8
2 6
2 6
2 6
2 5
2 5
2 5
2 4
2 4
2 4
2 4
1 4
0 4
0 4
0 4
0 4
0 4
0 4
0 4
0 4
0 4
0 4
0 4
0 4
0 2
0 2
0 2
0 2
0 1
0 1
0 1
0 1
0 1
0 1
0 1
1 2
1 5
1 5
1 5
1 7
1 7
1 6
1 6
1 6
1 6
1 6
1 6
1 6
1 6
1 6
1 6
2 6
2 6
2 6
2 6
2 6
2 6
2 6
2 6
2 6
2 6
2 6
2 6
2 6
2 6
2 6
2 6
2 6
2 6
2 6
2 6
1 5
1 2
1 2
1 3
1 1
1 1
1 1
1 1
1 1
1 1
1 1
0 1
0 1
0 1
0 1
0 1
0 1
0 1
0 1
0 1
0 1
0 1
0 1
0 1
0 1
0 5
0 10
0 15
0 31
0 33
0 33
0 40
0 42
0 43
0 46
0 46
0 46
0 46
0 46
0 45
0 45
0 45
0 45
0 45
0 45
0 45
0 45
0 45
0 45
0 45
0 46
0 84
0 86
0 88
0 89
0 91
0 91
0 91
0 91
0 91
0 89
0 83
0 77
0 70
0 48
0 47
0 47
0 46
0 46
0 46
0 46
0 46
0 46
0 46
0 46
0 46
0 46
0 46
0 46
0 46
0 46
0 46
0 46
0 46
0 46
0 46
0 45
0 7
0 6
0 4
0 2
0 1
0 1
0 1
0 1
0 1
0 1
0 1
0 2
0 3
0 5
0 5
0 9
0 10
0 10
0 13
0 13
0 13
0 13
0 13
0 13
0 13
0 13
0 13
0 13
0 13
0 13
0 15
0 15
0 14
0 14
0 14
0 14
0 14
0 14
0 14
0 14
0 15
0 15
0 15
0 15
0 15
0 15
0 16
0 16
0 16
0 14
0 14
0 9
0 9
0 9
0 6
0 6
0 6
0 6
0 6
0 6
0 6
0 6
0 6
0 6
0 6
0 4
0 4
0 4
0 4
0 4
0 4
0 4
0 4
0 4
0 3
0 3
0 4
0 4
0 4
0 4
0 5
0 5
0 4
0 2
0 2
0 2
0 2
0 3
0 3
0 3
0 3
0 3
0 4
0 4
0 4
0 4
0 4
0 4
0 4
0 5
0 5
0 5
0 5
0 5
0 5
0 5
0 6
0 6
0 6
0 6
0 6
0 6
0 5
0 5
0 5
0 5
0 4
0 4
0 6
0 6
0 6
0 6
0 6
0 5
0 4
0 4
0 4
0 4
0 4
0 4
0 4
0 4
0 4
0 4
0 4
0 3
0 3
0 3
0 3
0 3
0 3
0 3
0 2
0 2
0 2
0 3
0 3
0 3
0 3
0 3
0 3
0 3
0 3
0 4
0 2
0 2
0 2
0 2
0 2
0 2
0 6
0 6
0 6
0 6
0 6
0 6
0 6
0 6
0 6
0 6
0 6
0 6
0 6
0 6
0 6
0 6
0 6
0 6
0 6
0 6
0 7
0 6
0 6
0 6
0 6
0 6
0 11
0 11
0 11
0 11
0 12
0 12
0 12
0 12
0 12
0 12
0 8
0 8
0 8
0 8
0 8
0 8
0 8
0 8
0 8
0 8
0 8
0 10
0 10
0 10
0 10
0 10
0 10
0 10
0 10
0 10
0 10
0 10
0 10
0 10
0 12
0 13
0 7
0 7
0 7
0 7
0 6
0 6
0 6
0 6
0 6
0 6
0 6
0 6
0 6
0 6
0 6
0 6
0 6
0 6
0 6
0 6
0 6
0 5
0 6
0 6
0 6
0 6
0 6
0 6
0 6
0 6
0 5
0 5
0 5
0 5
0 3
0 2
0 2
0 2
0 2
0 2
0 2
0 2
0 2
0 2
0 2
0 2
0 2
0 2
0 2
0 2
0 2
0 2
0 2
0 2
0 2
0 2
0 2
0 1
0 0
0 0
0 0
0 0
0 0
0 0
0 0
0 0
0 0
0 0
0 0
0 0
0 0
0 0
0 0
0 0
0 0
0 0
0 0
0 0
0 0
0 0
0 0
0 0
0 0
0 0
0 0
0 0
0 0
0 0
0 0
0 0
0 0
0 0
0 0
0 0
0 0
0 0
0 0
0 1
0 1
0 1
0 1
0 1
0 1
0 1
0 1
0 1
0 1
0 1
0 1
0 1
0 1
0 1
0 1
0 1
0 1
0 1
0 1
0 1
0 1
0 1
0 1
0 1
0 1
0 1
0 1
0 1
0 1
0 1
0 1
0 1
0 1
0 1
0 1
0 0
0 0
0 0
0 0
0 0
0 0
0 0
0 0
0 0
0 0
0 3
0 3
0 3
0 3
0 3
0 3
0 3
0 3
0 3
0 3
0 3
0 3
0 3
0 3
0 3
0 3
0 3
0 3
0 3
0 4
0 4
0 4
0 4
0 4
0 4
0 4
0 5
0 5
0 6
0 6
0 6
0 6
0 6
0 6
0 6
0 6
0 3
0 3
0 3
0 3
0 3
0 3
0 3
0 3
0 3
0 3
0 3
0 3
0 2
0 2
0 2
0 2
0 2
0 2
0 2
0 2
0 2
0 2
0 2
0 2
0 2
0 1
0 0
0 0
0 0
0 0
0 0
0 0
0 0
0 0
0 0
0 0
0 0
0 0
0 0
0 0
0 0
0 0
0 0
0 0
0 0
0 0
0 0
0 0
0 0
0 0
0 0
0 0
0 0
0 0
0 0
1 0
1 0
1 0
1 0
1 0
1 0
1 0
1 0
1 0
1 0
1 0
1 0
1 0
1 0
1 0
1 0
1 0
1 0
1 0
1 0
1 0
1 0
1 0
1 0
1 0
1 0
1 0
1 0
1 0
1 0
1 0
1 0
1 0
1 0
1 0
1 0
0 0
0 0
0 0
0 0
0 0
0 0
0 0
0 0
0 0
0 0
0 0
0 0
0 0
0 0
0 0
0 0
0 0
0 0
0 0
0 0
0 0
0 0
0 0
0 0
0 0
0 0
0 0
0 0
0 0
0 0
0 0
0 0
0 0
0 0
0 0
0 0
0 0
0 0
0 0
0 0
0 0
0 0
0 0
0 0
0 0
0 0
0 0
0 0
0 0
0 0
0 0
0 0
0 0
0 0
0 0
0 0
0 0
0 0
0 0
0 0
0 0
0 0
0 0
0 0
0 0
0 0
0 0
0 0
0 0
0 0
0 0
0 0
0 0
0 0
0 0
0 0
0 0
0 0
0 0
0 0
0 0
0 0
0 0
0 0
0 0
0 0
0 0
0 0
0 0
1 0
2 0
2 0
2 0
2 0
2 0
2 0
2 0
2 0
2 0
2 0
3 0
9 0
17 0
17 0
17 0
17 0
19 0
19 0
19 0
19 1
19 1
19 1
19 1
19 1
19 1
19 1
19 1
19 1
19 1
19 1
18 1
17 1
17 1
17 1
17 1
17 1
18 1
21 1
22 1
22 1
22 1
24 1
24 1
24 1
24 1
24 1
23 1
17 1
9 1
9 1
9 0
9 0
7 0
7 0
7 0
7 0
7 0
7 0
7 0
7 0
10 1
10 2
17 3
52 5
54 5
58 5
59 5
59 5
59 5
59 5
59 5
59 5
56 5
56 5
55 6
55 6
55 6
195 6
202 6
226 6
245 6
325 7
380 12
386 13
391 13
392 13
392 13
392 13
395 13
399 14
399 14
401 14
427 22
427 22
430 22
430 21
426 19
426 19
419 19
382 17
382 17
378 17
378 17
378 17
380 17
447 17
466 17
495 17
529 20
540 20
547 19
554 19
558 19
444 18
443 18
412 17
377 17
293 15
272 13
266 12
261 12
262 12
263 12
262 12
263 12
260 11
259 11
259 11
235 3
250 3
251 3
256 4
369 9
408 11
522 20
583 22
588 22
604 25
601 25
608 25
594 26
525 27
516 27
484 27
456 24
451 24
441 28
436 28
431 28
415 28
415 28
415 28
409 28
408 28
408 28
410 28
413 28
415 28
415 28
412 28
431 29
430 29
430 29
432 29
435 29
435 29
454 29
447 28
335 23
299 20
196 9
138 7
134 7
122 6
125 6
115 6
110 6
106 5
106 5
106 5
112 7
116 8
116 4
119 4
122 4
123 4
124 4
124 4
124 4
123 4
120 4
119 4
116 4
123 5
122 5
122 5
105 4
105 4
103 4
99 4
82 4
58 4
46 4
44 4
43 4
46 4
75 6
196 11
201 11
197 11
194 11
192 11
191 11
187 11
191 11
195 11
190 9
188 8
188 8
184 8
186 8
187 8
187 8
188 8
188 8
188 8
188 8
189 8
189 8
181 7
181 7
181 7
181 7
181 7
181 7
182 7
182 7
179 8
168 8
158 8
131 5
128 5
119 5
24 1
23 1
22 1
21 1
21 1
20 1
22 1
18 1
17 3
131 7
143 7
144 7
145 7
142 7
141 7
141 7
140 7
140 7
141 7
141 7
140 8
140 8
140 8
140 8
140 8
139 8
139 8
139 8
138 7
138 7
137 7
136 7
136 7
138 7
147 9
144 9
148 9
152 9
160 9
187 10
215 10
211 10
210 9
161 7
160 7
97 3
95 3
94 3
94 3
97 3
105 3
106 3
109 3
109 3
108 3
109 3
109 3
109 3
113 3
120 3
120 3
120 3
120 3
120 3
121 3
126 3
131 3
146 3
147 3
148 4
143 2
145 2
133 2
131 2
124 2
103 1
76 1
75 1
79 1
88 1
92 1
179 1
182 1
199 1
236 1
276 1
273 1
271 1
271 1
272 1
272 1
272 1
272 1
275 1
271 1
265 1
265 1
264 1
262 1
263 1
267 2
263 2
256 2
241 2
242 2
240 1
232 1
230 1
231 1
229 1
224 1
220 1
217 1
213 1
207 1
202 1
198 1
118 1
118 1
100 1
66 1
36 1
34 1
35 1
34 1
33 1
32 1
31 1
31 1
29 1
31 0
50 0
56 0
56 0
55 0
54 0
51 0
52 0
52 0
53 0
51 0
51 0
51 0
51 0
51 0
50 0
54 0
56 0
56 0
71 0
86 0
98 0
110 0
110 0
105 0
103 0
102 0
99 0
99 0
100 0
100 0
101 0
102 0
102 0
109 0
105 0
105 0
85 0
82 0
112 0
112 0
111 0
111 0
115 0
116 0
118 0
122 0
122 0
124 0
124 0
125 0
126 0
122 0
121 0
127 0
117 0
158 0
146 0
162 0
168 0
169 0
216 0
216 0
214 0
215 0
215 0
216 0
218 0
218 0
218 0
210 0
212 0
220 0
216 0
247 0
222 0
225 0
225 0
225 0
217 0
217 0
215 0
212 0
220 0
219 0
226 0
226 0
225 0
224 0
222 0
211 0
202 0
161 0
155 0
135 0
129 0
128 0
84 0
84 0
84 0
84 0
84 0
82 0
81 0
80 0
80 0
80 0
77 0
70 0
70 0
38 0
36 0
36 0
36 0
36 0
36 0
36 0
35 0
36 0
29 0
29 0
24 0
24 0
24 0
28 0
35 0
42 0
47 0
51 0
50 0
50 0
50 0
50 0
49 0
49 0
50 0
52 0
64 0
71 0
78 0
77 0
78 0
81 0
82 0
95 0
98 0
601 0
604 0
630 0
700 0
772 0
824 0
828 0
828 0
826 0
825 0
831 0
856 0
857 0
858 0
852 0
843 0
838 0
834 0
819 0
821 0
823 1
823 1
849 1
903 1
910 1
905 1
907 1
902 1
896 1
886 1
886 1
886 1
893 1
926 1
923 1
999 1
511 1
494 1
446 1
369 1
367 1
362 2
360 2
361 2
365 2
366 2
362 2
342 2
342 2
343 2
342 2
342 1
364 1
397 1
572 1
625 1
630 1
721 1
709 1
674 1
666 1
663 1
660 1
656 1
655 1
655 1
655 1
655 1
690 1
654 1
645 1
561 1
550 1
547 1
542 1
538 1
506 1
495 0
499 0
508 0
508 0
511 0
512 0
511 0
511 0
523 0
538 0
534 0
504 0
472 0
310 0
253 0
227 0
138 0
135 0
136 0
141 1
147 1
158 1
160 1
164 1
161 1
155 1
150 1
115 1
110 1
112 1
112 1
130 1
147 1
153 1
155 1
153 1
153 1
145 1
136 1
134 1
133 1
131 1
132 1
133 1
119 1
103 1
103 1
102 1
102 1
94 1
116 1
136 1
136 1
135 1
130 1
125 1
129 1
136 1
134 1
140 1
187 1
367 1
492 3
782 4
1255 5
1288 5
1290 5
1276 5
1265 5
1256 5
1256 5
1256 5
1256 5
1258 5
1258 5
1257 5
1257 5
1257 5
1256 5
1255 5
1252 5
1253 5
1252 5
1251 5
1246 5
1247 6
1228 5
1208 5
1235 5
1235 5
1238 5
1236 5
1216 5
1203 5
1230 5
1250 5
1164 5
981 5
792 3
375 1
143 1
135 1
135 1
135 1
135 1
135 1
135 1
134 1
134 1
134 1
134 1
134 1
134 1
134 1
134 1
134 1
134 1
135 1
135 1
134 1
134 1
129 0
126 0
125 0
98 0
98 0
98 0
97 0
83 0
52 0
29 0
7 0
7 0
7 0
15 0
21 0
24 0
25 0
27 0
27 0
27 0
27 0
27 0
27 0
26 0
26 0
26 0
26 0
26 0
27 0
27 0
27 0
27 0
26 0
26 0
26 0
26 0
26 0
26 0
27 0
31 0
31 0
33 0
35 0
60 0
86 0
83 0
83 0
83 0
84 0
93 0
89 0
95 0
110 0
108 0
108 0
109 0
113 0
115 0
116 0
116 0
116 0
118 0
119 0
119 0
130 0
196 0
202 0
212 0
304 0
320 0
324 0
325 0
324 0
324 0
324 0
319 0
319 0
319 0
317 0
296 0
271 0
270 0
269 0
266 0
263 0
244 0
245 0
242 0
228 0
227 0
227 0
224 0
224 0
222 0
222 0
221 0
224 0
223 0
222 0
218 0
200 0
133 0
123 0
113 0
33 0
25 0
22 0
22 0
23 0
26 1
26 1
27 1
29 1
27 1
24 1
30 1
38 1
43 1
43 1
43 1
43 1
43 1
43 1
43 1
41 1
41 1
42 1
42 1
40 1
39 1
39 1
38 1
36 1
36 1
36 1
35 1
35 1
35 1
35 1
35 1
35 1
31 1
31 1
31 1
33 1
30 0
45 0
66 0
83 0
101 0
104 0
99 0
94 0
92 0
91 0
92 0
92 0
93 0
93 0
93 0
95 0
95 0
95 0
136 0
145 0
147 0
148 0
149 0
150 0
151 0
152 0
153 0
154 0
154 0
154 0
154 0
154 0
155 0
155 0
154 0
151 0
145 0
127 0
101 0
82 0
75 0
71 0
66 0
66 0
66 0
66 0
65 0
65 0
66 0
73 0
74 0
74 0
74 0
68 0
26 0
23 0
21 0
20 0
20 0
20 0
20 0
34 0
37 0
37 0
38 0
38 0
37 0
37 0
37 0
36 0
35 0
35 0
35 0
35 0
34 0
34 0
33 0
33 0
33 0
33 0
33 0
33 0
32 0
32 0
32 0
25 0
24 0
24 0
25 0
24 0
24 0
25 0
25 0
22 0
21 0
21 0
21 0
5 0
3 0
2 0
3 0
4 0
4 0
6 0
15 0
16 0
16 0
16 0
16 0
22 0
22 0
22 0
22 0
22 0
23 0
23 0
23 0
23 0
23 0
23 0
23 0
22 0
22 0
21 0
20 0
20 0
20 0
20 0
20 0
28 0
32 0
51 0
57 0
63 0
66 0
65 0
64 0
63 0
64 0
63 0
55 0
55 0
55 0
55 0
55 0
49 0
49 0
49 0
49 0
50 0
49 0
49 0
49 0
49 0
49 0
49 0
49 0
49 0
49 0
49 0
61 0
185 0
259 0
332 0
359 0
374 0
377 0
357 0
369 0
367 0
365 0
365 0
365 0
365 0
364 0
364 0
364 0
364 0
364 0
364 0
364 0
364 0
366 0
366 0
366 0
366 0
370 0
370 0
370 0
369 0
369 0
369 0
369 1
369 1
368 1
365 1
331 1
205 1
143 1
93 1
70 1
50 1
46 1
54 1
42 1
41 1
41 1
42 1
42 1
42 1
56 1
69 2
72 2
72 2
72 2
73 2
74 2
74 2
72 2
72 2
72 2
71 2
67 2
72 2
72 2
75 2
75 2
78 2
97 1
107 1
108 1
111 1
127 2
164 2
190 2
309 7
311 9
322 9
315 9
321 9
323 9
344 9
367 9
366 9
368 9
368 9
348 9
341 8
340 8
339 8
339 8
338 8
336 8
333 8
333 8
334 8
334 8
334 8
334 8
334 8
332 8
330 8
331 8
332 8
315 8
304 8
295 8
257 8
235 7
211 7
180 7
85 1
87 0
75 0
73 0
58 0
51 0
48 0
40 0
40 0
39 0
39 0
39 0
35 0
35 0
42 0
183 2
206 3
206 3
206 3
205 3
205 3
205 3
204 3
204 3
204 3
204 3
204 3
203 3
203 3
205 4
203 4
205 4
205 4
208 4
208 5
206 5
206 5
205 5
205 5
204 5
204 5
202 5
198 5
189 5
187 5
186 5
186 5
182 5
179 5
166 5
160 5
27 3
19 2
19 2
19 2
20 2
20 2
20 2
20 2
21 2
28 2
30 5
32 5
38 5
37 5
33 4
33 4
30 4
30 4
27 4
26 3
26 3
25 3
23 3
23 3
23 3
24 3
25 3
25 3
81 3
94 3
94 3
99 3
99 3
99 3
102 3
101 3
101 3
103 3
105 3
106 3
120 3
122 3
122 3
122 3
113 3
113 3
113 0
111 0
107 0
107 0
107 0
110 0
111 0
111 0
111 0
111 0
111 0
110 0
110 0
110 0
110 0
110 0
122 0
122 0
113 1
107 1
107 1
105 1
113 1
123 1
127 1
135 1
138 1
137 1
132 1
127 1
123 1
121 1
121 1
121 1
121 1
119 1
121 1
121 1
121 1
121 1
120 1
118 1
117 1
117 1
117 1
117 1
120 1
121 1
121 1
120 1
118 1
108 1
100 1
94 1
55 0
55 0
60 0
57 1
49 1
42 1
38 1
30 1
26 1
22 1
23 1
25 2
40 2
53 3
97 3
98 3
98 3
97 3
97 3
97 3
99 3
101 3
149 3
245 3
270 3
276 3
278 3
278 3
278 3
429 3
442 3
495 3
536 3
593 3
604 3
629 3
643 3
658 2
692 2
780 1
781 1
781 1
780 1
780 1
780 1
782 1
800 1
794 0
789 0
774 0
733 0
732 0
741 0
742 0
748 0
750 0
750 0
763 0
1173 2
1219 3
1208 3
1205 3
1204 3
1202 3
1200 3
1035 3
993 3
942 3
905 3
881 3
866 3
840 3
819 3
795 3
767 3
688 3
687 3
687 3
687 3
687 3
684 3
679 3
662 3
663 3
669 3
673 3
675 3
681 4
639 4
644 4
629 4
563 3
487 2
445 2
72 1
50 1
50 1
52 1
53 1
46 1
46 1
47 1
48 1
49 1
53 1
52 1
54 1
55 1
56 1
55 1
56 1
56 1
55 1
55 1
55 1
55 1
54 1
53 1
51 1
50 1
48 1
45 0
40 0
37 0
32 0
21 0
21 0
21 0
21 0
21 0
21 0
20 0
19 0
19 0
19 0
33 0
54 0
327 0
358 0
358 0
353 0
352 0
351 0
351 0
350 0
350 0
349 0
350 0
350 0
352 0
352 0
352 0
353 0
358 0
357 0
357 0
357 0
357 0
357 0
357 0
356 0
356 0
356 0
356 0
356 0
355 0
354 0
316 0
301 0
300 0
292 0
273 0
248 0
31 0
19 0
19 0
19 0
18 0
18 0
18 0
18 0
17 0
17 0
20 0
24 0
23 0
24 0
24 0
24 0
21 0
21 0
20 0
20 0
20 0
19 0
19 0
19 0
19 0
19 0
19 0
24 0
24 0
24 0
23 0
20 0
18 0
18 0
19 0
19 0
16 0
16 0
16 0
16 0
16 0
16 0
15 0
15 0
15 0
15 0
12 0
8 0
7 0
6 0
6 0
6 0
6 0
7 0
7 0
28 1
28 1
34 1
34 1
36 1
36 1
36 1
36 1
31 1
31 1
37 1
37 1
39 1
41 1
43 1
44 1
46 1
51 1
53 1
55 1
55 1
55 1
55 1
55 1
56 1
63 1
65 1
65 1
65 1
65 1
66 1
70 1
70 1
70 1
68 1
65 1
47 0
47 0
41 0
40 0
40 0
40 0
40 0
40 0
40 0
39 0
34 0
31 0
28 0
26 0
23 0
21 0
20 0
18 0
19 0
25 0
70 0
86 0
88 0
91 0
93 0
90 0
90 0
90 0
90 0
90 0
90 0
87 0
89 0
92 0
94 0
97 0
97 0
97 0
97 0
97 0
97 0
97 0
98 0
131 0
131 0
131 0
131 0
131 0
131 0
131 0
130 0
130 0
130 0
125 0
118 0
101 0
74 0
59 0
54 0
51 0
48 0
46 0
44 0
44 0
44 0
44 0
44 0
43 0
38 0
39 0
40 0
39 0
40 0
39 0
39 0
39 0
39 0
38 0
38 0
6 0
6 0
6 0
6 0
6 0
6 0
6 0
6 0
7 0
7 0
7 0
7 0
7 0
10 0
10 0
10 0
13 0
18 0
19 0
21 0
31 1
31 1
32 1
32 1
32 1
32 1
27 1
26 1
26 1
29 1
29 1
29 1
29 1
30 1
32 1
32 1
32 1
34 1
34 1
34 1
34 1
35 1
35 1
35 1
34 1
34 1
35 1
36 1
36 1
36 1
37 2
36 2
32 2
30 2
29 2
27 2
17 1
17 1
16 1
16 1
16 1
21 1
21 1
24 1
37 1
39 1
39 1
39 1
40 1
39 1
40 1
40 1
40 1
38 1
38 1
38 1
38 1
37 1
37 1
37 1
37 1
37 1
36 1
35 1
35 1
32 1
31 0
31 0
31 1
31 1
31 1
31 1
31 1
31 1
31 1
32 1
33 1
29 1
48 2
48 2
38 2
35 2
34 2
33 2
33 2
33 2
32 2
32 2
32 2
32 2
35 2
37 2
47 2
50 2
50 2
50 2
50 2
50 2
50 2
50 2
50 2
49 2
50 2
51 2
77 3
82 4
82 4
82 4
82 4
83 4
83 4
82 4
80 4
79 4
59 3
56 3
56 3
56 3
56 3
56 3
56 3
56 3
55 3
55 3
55 3
55 3
52 3
49 3
40 3
37 3
37 3
37 3
37 3
37 3
35 3
36 3
36 3
35 3
35 3
36 3
12 1
9 0
11 0
43 0
47 0
53 0
60 0
60 0
62 0
62 0
61 0
61 0
61 0
61 0
61 0
61 0
64 0
64 0
64 0
64 0
64 0
64 0
67 0
67 0
67 0
67 0
67 0
67 0
91 0
91 0
92 0
92 0
92 0
95 0
94 0
95 0
91 0
88 0
85 0
54 0
52 1
44 1
44 1
44 1
42 1
42 1
42 1
46 1
49 1
50 1
51 1
50 1
48 1
48 1
48 1
49 1
50 1
61 1
61 1
61 1
61 1
61 1
61 1
61 1
36 1
36 1
34 1
34 1
33 1
32 1
32 1
31 1
31 1
32 1
31 1
31 0
30 0
29 0
26 0
26 0
26 0
26 0
26 0
22 0
19 0
18 0
18 0
18 0
17 0
17 0
17 0
15 0
15 0
4 0
4 0
3 0
3 0
3 0
3 0
3 0
5 0
7 0
59 0
75 0
76 0
79 0
79 0
79 0
79 0
79 0
79 0
79 0
79 0
79 0
78 0
78 0
78 0
78 0
78 0
78 0
78 0
78 0
78 0
78 0
78 0
78 0
79 0
78 0
78 0
78 0
78 0
80 0
92 0
94 0
98 0
94 0
82 0
78 0
37 0
32 0
31 0
28 0
28 0
28 0
28 0
28 0
28 0
28 0
28 0
28 0
28 0
28 0
28 0
28 0
28 0
28 0
28 0
28 0
28 0
28 0
28 0
28 0
28 0
28 0
27 0
26 0
25 0
23 0
13 0
8 0
3 0
1 0
2 0
3 1
3 1
3 1
3 1
3 1
3 1
3 1
4 1
4 1
4 1
4 1
4 1
4 1
4 1
4 1
4 0
4 0
4 0
5 0
5 0
5 0
5 0
5 0
4 0
4 0
4 0
5 0
5 0
5 0
5 0
5 0
5 0
5 0
5 0
5 0
4 0
4 0
4 0
4 0
4 0
5 0
7 0
7 0
6 0
6 0
6 0
6 0
6 0
6 0
6 0
6 0
6 0
6 0
6 0
5 0
5 0
5 0
5 0
5 0
5 0
5 0
6 0
5 0
3 0
5 0
5 0
5 0
5 0
5 0
5 0
5 0
5 0
4 0
4 0
4 0
4 0
4 0
3 0
3 0
3 0
3 0
4 0
4 0
4 0
4 0
4 0
4 0
4 0
4 0
4 0
4 0
4 0
4 0
4 0
4 0
4 0
4 0
3 0
3 0
3 0
1 0
1 0
1 0
3 0
7 0
7 0
7 0
7 0
8 0
8 0
8 0
9 0
9 0
9 0
9 0
9 0
11 0
10 0
10 7
10 8
10 14
10 14
10 14
10 14
10 14
10 14
10 14
10 14
10 14
19 15
19 15
19 15
19 15
22 17
24 17
25 17
29 20
29 20
27 20
25 20
23 20
23 20
23 20
23 20
23 20
23 20
23 20
22 21
22 21
22 21
22 21
22 21
20 21
20 21
20 12
20 7
20 7
20 7
20 7
20 7
19 7
19 7
19 7
19 7
19 7
11 6
11 6
11 6
11 5
6 4
5 3
5 3
0 1
0 1
0 1
0 1
0 1
0 1
0 1
0 1
0 1
0 1
0 0
0 0
2 0
10 0
15 0
23 0
24 0
25 0
25 0
26 0
26 0
29 0
33 0
33 0
33 0
33 0
33 0
33 0
33 0
33 0
33 0
33 0
33 0
33 0
33 0
33 0
33 0
33 0
33 0
33 0
35 0
35 0
39 0
39 0
39 0
39 0
39 0
43 0
41 0
33 0
26 0
17 0
17 0
17 0
18 0
16 0
16 0
13 0
11 0
11 0
11 0
11 0
12 0
12 0
18 0
18 0
18 0
18 0
18 0
18 0
18 0
18 1
18 1
17 1
17 1
17 1
21 1
21 1
20 1
20 1
20 1
22 1
22 1
21 1
24 1
24 1
25 1
25 1
25 1
25 1
24 1
24 1
25 1
25 1
25 1
25 1
26 1
27 1
27 1
27 1
22 1
22 1
24 1
24 3
26 3
28 4
32 4
32 3
38 3
38 4
38 4
37 4
37 4
37 4
34 4
33 4
33 4
32 4
32 4
29 4
26 4
26 4
26 4
27 4
27 4
26 4
25 4
25 4
26 4
27 4
31 4
51 4
92 5
104 5
104 5
103 5
102 5
102 5
100 5
100 3
99 3
98 2
94 2
94 2
88 2
89 1
89 2
89 2
87 2
87 2
88 2
87 2
87 2
87 2
87 2
87 2
87 2
87 2
88 2
87 2
89 2
88 2
80 2
78 2
77 2
70 2
65 2
49 2
18 1
11 1
11 1
11 1
11 1
12 1
12 1
15 1
15 1
15 1
17 1
17 1
17 0
16 0
16 0
16 0
14 0
12 0
11 0
11 0
11 0
11 0
11 0
11 0
11 0
11 0
10 0
10 0
8 0
8 0
8 0
8 0
8 0
5 0
5 0
4 0
4 0
4 0
4 0
4 0
4 0
2 0
2 0
2 0
2 0
2 0
0 0
0 0
0 0
0 0
0 0
0 0
0 0
0 0
0 0
0 0
0 0
0 0
0 0
0 0
0 0
0 0
0 0
2 1
2 1
2 1
2 1
2 1
2 1
2 1
2 1
2 1
2 1
2 1
2 1
2 1
2 1
2 1
2 1
2 1
2 1
2 1
2 2
2 2
2 2
2 2
2 2
2 2
2 2
2 2
2 2
2 2
2 2
2 2
2 2
2 2
3 2
3 2
3 2
1 1
1 1
1 1
1 1
1 1
1 1
1 1
8 1
8 1
11 1
12 1
13 1
13 1
14 1
14 1
14 1
14 1
14 1
14 1
14 0
14 0
14 0
14 0
14 0
14 0
14 0
15 0
15 0
15 0
15 0
15 0
15 0
15 0
16 0
16 0
16 0
16 0
16 0
16 0
16 0
16 0
16 0
16 0
9 0
9 0
6 0
5 0
4 0
4 0
3 0
3 0
8 2
8 2
8 2
9 2
11 2
11 2
11 2
11 2
12 2
15 2
15 2
15 2
15 2
15 2
15 2
15 2
15 2
13 2
14 2
16 2
16 2
16 2
16 2
16 2
16 2
16 2
16 2
17 2
18 2
19 2
19 2
19 2
19 2
19 2
19 2
19 2
14 0
14 0
14 0
13 0
11 0
11 0
11 0
11 0
10 0
7 0
7 0
6 0
6 0
6 0
6 0
6 0
6 0
6 0
5 0
3 0
3 0
3 0
3 0
3 0
3 0
3 0
3 0
2 0
1 0
0 0
0 0
0 0
1 0
1 0
1 0
1 0
1 0
1 0
3 0
3 1
7 1
8 1
8 1
8 1
8 1
8 1
8 1
8 1
8 1
8 1
8 1
8 1
8 1
8 1
11 1
11 1
11 1
11 1
11 1
11 1
11 1
12 1
12 1
12 1
12 1
12 1
12 1
12 1
12 1
18 1
19 1
19 1
19 1
19 1
17 1
17 0
13 0
12 0
12 0
12 0
12 0
13 0
13 0
13 0
13 0
13 0
13 0
13 0
13 0
15 0
14 0
15 0
15 0
14 0
14 0
14 0
14 0
14 0
14 0
14 0
14 0
14 0
14 0
13 0
13 0
7 0
7 0
7 0
7 0
7 0
7 0
7 0
7 0
7 0
7 0
7 0
6 0
6 0
6 0
6 0
6 0
8 0
8 0
9 0
9 0
7 0
4 0
5 0
5 0
5 0
5 0
5 0
6 0
6 0
6 0
6 0
6 0
6 0
6 0
6 0
6 0
6 0
5 0
5 0
5 0
5 0
5 0
5 0
5 0
5 0
5 0
5 0
5 0
4 0
8 0
8 0
8 0
6 0
6 0
6 0
5 0
9 1
9 1
9 1
9 1
9 1
11 1
10 1
11 1
11 1
11 1
11 1
11 1
11 1
15 1
15 1
15 1
15 1
15 1
15 1
15 1
15 1
15 1
28 1
28 1
30 1
30 1
30 1
31 1
31 1
27 1
27 1
27 1
27 1
27 1
27 1
27 1
23 0
23 0
24 0
24 0
25 0
23 0
23 0
22 0
22 0
22 0
22 0
22 0
22 0
18 2
18 2
18 2
18 2
20 3
21 3
22 3
22 3
22 3
9 3
9 3
7 3
8 3
8 3
8 3
8 3
11 3
17 3
25 3
29 3
34 3
47 3
47 3
47 3
46 3
46 3
46 3
45 3
47 3
47 3
49 3
49 3
49 3
54 3
55 3
55 2
56 1
56 1
56 1
57 2
55 1
55 1
54 1
54 1
54 1
59 3
58 3
59 3
63 3
77 3
76 3
75 3
98 3
94 3
83 3
87 3
83 3
72 3
73 3
73 3
74 3
75 3
77 3
78 3
76 3
77 3
76 3
76 3
75 3
71 3
70 3
69 3
69 3
69 3
69 3
68 2
69 2
68 2
111 3
110 3
141 4
146 2
167 2
168 2
165 2
167 2
168 2
170 2
146 3
152 3
158 3
153 3
153 3
151 3
151 3
151 3
150 3
149 3
148 3
151 3
150 3
149 3
155 3
158 3
158 3
158 3
158 3
159 3
159 3
159 3
159 3
159 3
158 3
159 3
119 1
118 1
85 1
69 1
56 2
53 2
51 2
39 2
39 1
32 1
22 1
21 1
20 1
20 1
21 1
21 1
20 2
20 2
19 2
19 2
18 2
17 2
17 2
16 2
10 2
7 2
7 2
7 2
7 2
34 5
42 5
82 5
139 7
181 7
182 7
180 7
179 7
178 7
178 6
178 6
178 6
178 6
178 6
177 6
178 6
178 6
178 6
178 6
178 6
178 6
178 5
178 5
178 5
178 5
178 5
178 5
178 5
178 5
178 5
178 5
178 5
176 5
178 5
197 5
195 5
164 2
153 2
106 2
49 0
25 0
24 0
24 0
23 0
23 0
23 0
23 0
23 0
23 0
23 0
23 0
23 0
24 0
25 0
25 0
25 0
25 0
25 0
25 0
26 0
28 0
28 0
28 0
28 0
29 0
27 0
32 0
34 0
34 0
33 0
15 0
15 0
13 0
13 0
13 0
13 0
18 0
18 0
20 0
20 0
23 0
25 0
26 0
26 0
26 0
26 0
26 0
26 0
25 0
24 0
28 0
29 0
32 0
34 0
33 0
31 0
31 0
31 0
31 0
31 0
30 0
29 0
25 0
24 0
24 0
24 0
24 0
23 0
23 0
23 0
26 0
26 0
24 0
27 0
27 0
26 0
22 0
22 0
21 0
21 0
21 0
21 0
21 0
21 0
21 0
18 0
13 0
13 0
12 0
11 0
11 0
11 0
11 0
11 0
11 0
11 0
11 0
11 0
10 0
11 0
14 0
14 0
48 3
50 3
53 3
53 3
51 3
51 3
45 3
44 3
44 3
44 3
44 3
44 3
44 3
44 3
46 3
46 3
48 3
49 3
49 3
49 3
49 3
50 3
52 3
52 3
56 3
56 3
57 3
57 3
57 3
57 3
57 3
57 3
57 3
56 3
53 3
53 3
19 0
21 0
19 0
19 0
20 0
19 0
19 0
20 0
19 0
19 0
19 0
19 0
19 0
19 0
18 0
21 0
21 0
21 0
32 0
32 0
32 0
30 0
28 0
28 0
25 0
25 0
24 0
24 0
24 0
24 0
24 0
24 0
24 0
24 0
24 0
24 0
23 0
18 0
18 0
19 0
18 1
18 1
18 1
18 1
18 1
20 1
20 1
20 1
20 1
20 1
19 1
16 1
15 1
15 1
4 1
5 1
5 1
8 1
8 1
8 1
8 1
8 1
8 1
8 1
8 1
8 1
8 1
12 1
15 1
15 1
15 1
15 1
15 1
15 1
15 1
14 1
14 0
15 0
17 0
17 0
17 0
19 0
19 0
19 0
21 0
23 0
22 0
21 0
21 0
21 0
21 0
21 0
21 0
21 0
21 0
21 0
21 0
21 0
21 0
21 0
19 0
19 0
19 0
17 0
13 0
13 0
13 0
12 0
12 0
12 0
17 0
24 0
24 0
23 0
22 0
21 0
21 0
18 0
18 0
18 1
16 1
13 1
14 1
14 1
14 1
14 1
14 1
13 1
13 1
13 1
13 1
19 1
19 1
19 1
19 1
19 1
19 1
20 1
22 1
25 1
25 1
25 1
24 1
24 1
24 1
23 1
20 1
14 1
17 1
21 1
25 1
34 3
35 3
35 3
35 3
35 2
36 2
37 2
36 2
36 2
36 2
49 2
60 2
61 2
61 2
61 2
61 2
55 2
57 2
57 2
56 2
58 2
59 2
60 2
58 2
56 2
56 2
56 2
62 2
61 2
211 10
211 8
214 8
213 9
212 10
210 10
220 10
218 10
221 10
221 10
221 10
221 10
221 10
220 10
220 10
220 10
218 10
207 10
193 10
192 10
193 10
197 10
197 10
197 10
197 10
197 10
197 10
195 10
195 10
194 10
194 10
193 10
193 10
190 10
185 10
185 10
33 1
33 1
33 1
28 0
27 0
26 0
16 0
14 0
50 0
52 0
140 0
141 0
143 0
152 0
154 0
157 0
181 0
181 0
181 0
181 0
180 0
176 0
175 0
175 0
176 0
182 0
182 0
182 0
183 0
183 0
187 0
188 0
205 0
255 1
309 1
332 1
336 1
337 1
336 1
336 1
336 1
336 1
337 1
333 1
295 1
294 1
212 1
212 1
212 1
205 1
203 1
199 1
176 1
176 1
176 1
184 1
184 1
199 2
201 2
200 2
197 2
194 2
195 2
185 1
181 1
176 1
152 1
139 2
93 2
94 2
73 2
64 2
61 2
81 2
86 4
150 6
151 7
161 8
181 11
184 12
182 12
181 12
175 12
175 12
174 12
174 12
178 12
179 13
180 13
186 13
181 15
186 15
196 15
196 15
307 18
312 18
312 18
312 18
311 18
311 18
311 18
312 18
312 18
312 17
312 17
291 19
292 19
292 19
297 19
280 20
274 18
207 15
204 11
198 11
180 11
239 11
239 11
240 11
244 11
245 11
245 11
252 11
259 12
271 11
301 11
336 11
337 9
324 10
311 9
311 9
219 6
224 6
261 6
308 7
316 7
320 7
320 7
320 7
323 7
327 7
335 7
360 7
377 7
379 8
379 8
376 8
376 7
374 7
374 7
375 7
384 7
335 7
368 7
372 7
368 7
368 7
370 6
361 6
347 6
346 8
329 8
299 8
294 7
291 7
279 7
269 7
262 7
253 7
225 7
191 6
196 6
208 7
245 7
253 7
259 7
252 8
241 8
207 5
204 5
202 5
196 4
197 4
190 4
177 4
174 4
163 4
167 5
168 5
155 5
147 5
135 3
133 3
134 3
145 3
156 3
153 3
168 4
179 3
190 3
198 3
198 3
195 3
193 3
193 3
195 3
188 3
172 3
161 3
132 3
125 3
127 2
137 2
162 2
216 2
227 2
235 2
244 2
263 2
269 2
290 1
294 1
293 1
288 1
285 1
287 1
288 1
295 1
297 1
293 1
276 0
270 0
237 0
229 0
225 0
216 0
211 0
211 0
210 0
209 0
206 0
204 0
203 0
202 0
187 0
182 0
176 0
150 0
143 0
122 0
94 0
88 0
81 0
70 0
53 0
47 0
29 0
25 0
22 0
22 0
22 0
18 0
16 0
10 0
8 0
7 0
6 0
6 0
6 0
6 0
6 0
6 0
6 0
9 0
9 0
10 0
11 0
11 0
12 0
12 0
13 0
13 0
13 0
13 0
13 0
13 0
13 0
13 0
11 0
11 0
14 0
14 0
13 0
13 0
13 0
13 0
13 0
14 0
21 0
32 0
32 0
33 0
33 0
34 0
34 0
37 0
37 0
38 0
39 0
40 0
39 0
38 0
37 0
36 0
36 0
36 0
37 0
39 0
38 0
38 0
38 0
38 0
38 0
37 0
37 0
39 0
36 0
36 0
36 0
36 0
36 0
36 0
40 0
39 0
31 0
21 0
20 0
21 1
22 1
23 1
25 1
23 1
23 1
20 1
18 1
17 1
18 1
18 1
18 1
19 1
19 1
20 1
19 1
17 1
18 1
19 1
19 1
19 1
19 2
19 3
21 3
19 3
19 3
19 3
19 3
19 3
19 3
15 3
15 3
15 3
15 3
15 3
14 3
11 2
8 2
8 2
8 2
8 2
8 2
16 2
18 2
20 2
28 2
37 2
51 2
68 2
68 2
68 2
70 2
69 1
90 0
109 0
110 0
112 0
111 0
111 0
110 0
112 0
112 0
112 0
113 0
113 0
113 0
113 0
113 0
114 0
113 0
119 0
128 0
146 0
170 0
189 0
213 0
222 0
224 0
226 0
233 0
234 0
221 0
217 0
213 0
195 0
195 0
194 0
197 1
197 1
177 1
162 1
163 1
162 1
161 1
162 1
162 1
161 1
161 1
162 1
163 1
163 1
163 1
166 1
166 1
165 1
166 1
160 1
148 1
128 1
107 1
82 1
66 1
62 1
58 1
60 1
75 1
92 1
94 1
91 1
91 1
90 1
93 1
93 1
91 0
90 0
86 0
88 0
89 0
89 0
89 0
89 0
89 0
89 0
89 0
88 0
86 0
86 0
85 1
83 1
84 1
84 1
83 1
83 1
83 1
84 1
84 1
84 1
76 1
73 1
76 2
58 2
40 2
24 2
19 2
19 2
19 2
20 2
17 2
17 2
14 2
14 2
14 2
12 2
11 2
11 2
11 2
12 2
12 1
15 1
25 1
53 1
54 1
55 1
55 1
55 1
55 1
59 1
125 1
127 1
131 1
130 1
132 1
132 1
132 1
131 1
125 0
125 0
125 0
128 0
132 0
133 0
134 0
139 0
139 0
139 0
139 0
140 0
144 0
150 0
155 0
153 0
154 0
149 0
144 0
135 0
137 0
115 0
116 0
114 0
116 0
110 0
106 0
101 0
50 0
49 0
48 0
48 0
60 0
74 0
85 0
90 0
88 0
91 0
92 0
137 1
158 1
158 1
159 1
154 1
154 1
169 1
169 1
164 1
160 1
158 1
155 1
155 1
153 1
152 1
152 1
152 1
156 1
156 1
154 1
151 1
148 1
147 1
146 1
146 1
146 1
145 1
145 1
145 1
120 1
114 1
105 1
113 1
107 1
103 1
98 1
60 0
43 0
44 1
59 2
59 2
58 2
47 2
47 2
47 2
46 2
45 2
45 2
45 2
45 2
45 2
45 2
45 2
41 2
41 2
41 2
44 2
49 2
55 2
55 2
59 2
61 2
62 2
62 2
71 2
105 2
104 2
105 2
94 1
94 1
94 1
94 1
93 1
91 1
89 1
74 0
73 0
73 0
74 0
74 0
77 0
77 0
79 0
83 0
83 0
87 0
87 0
99 0
102 0
101 0
106 0
112 0
120 0
141 0
146 0
155 0
167 0
168 0
168 0
168 0
157 0
122 0
121 0
121 0
123 0
123 0
123 0
123 0
125 0
126 0
125 0
125 0
125 0
125 0
126 0
127 0
124 0
124 0
124 0
120 0
120 0
116 0
115 0
106 0
102 0
100 0
92 0
83 0
70 0
50 0
68 0
65 0
76 0
79 0
100 0
105 0
126 0
132 0
152 0
174 0
234 0
246 0
269 0
284 0
286 0
287 0
287 0
288 0
288 0
287 0
286 0
286 0
286 0
288 0
289 0
289 0
292 0
292 0
292 0
291 0
290 0
284 0
286 0
283 0
279 0
272 0
240 0
238 0
217 0
215 0
190 0
189 0
172 0
154 0
133 0
118 0
70 0
70 0
70 0
65 0
65 0
64 0
64 0
68 0
69 0
75 0
86 0
161 6
195 6
200 7
207 7
216 7
225 7
250 7
270 7
271 7
271 7
271 7
270 7
270 7
270 7
269 7
268 7
275 7
286 7
311 7
314 7
323 7
342 7
350 7
420 7
416 7
414 7
406 7
404 7
409 7
411 7
429 7
432 7
419 7
404 7
393 7
378 7
320 0
294 0
285 0
271 0
251 0
239 0
230 0
221 0
222 0
221 0
221 0
223 0
235 0
234 0
233 0
216 1
210 1
197 1
180 1
173 1
156 1
145 1
133 1
64 1
64 1
61 1
50 1
61 1
63 1
64 1
54 1
53 1
51 1
49 1
49 1
49 1
49 1
49 1
49 1
49 1
48 1
48 1
48 1
48 1
47 1
47 1
46 1
45 1
32 1
32 2
32 2
31 1
33 1
33 1
33 2
36 3
41 3
44 3
44 3
44 3
47 3
53 3
90 3
130 3
160 3
164 3
164 3
164 3
164 3
165 3
165 3
165 3
165 3
165 3
165 3
165 3
165 3
165 3
165 3
165 3
167 3
167 3
181 3
182 3
184 1
194 1
210 1
221 1
223 1
224 1
222 1
225 0
220 0
217 0
211 0
211 0
208 0
201 0
133 0
101 0
86 0
82 0
87 0
87 0
87 0
86 0
85 0
85 0
85 0
86 0
86 0
88 0
88 0
88 0
88 0
88 0
87 0
88 0
74 0
72 0
67 0
57 0
46 0
143 3
167 4
174 4
179 4
181 4
181 4
179 4
178 4
176 4
172 4
169 4
169 4
171 4
171 4
171 4
166 4
166 4
166 4
165 4
165 4
165 4
165 4
164 4
165 4
164 4
164 4
164 4
167 4
167 4
168 4
168 4
172 4
188 4
193 3
192 3
185 3
84 0
79 0
71 0
68 0
64 0
64 0
63 0
64 0
72 0
77 0
83 0
87 0
88 0
89 0
89 0
89 0
89 0
89 0
89 0
89 0
89 0
88 0
88 0
87 0
86 0
86 0
85 0
83 0
82 0
78 0
73 0
66 0
50 0
41 0
48 0
72 0
75 0
96 0
110 0
199 0
213 0
213 0
215 0
214 0
207 0
205 0
201 0
195 0
203 0
203 0
204 0
204 0
204 0
204 0
204 0
204 0
204 0
204 0
204 0
204 0
204 0
204 0
204 0
204 0
204 0
204 0
204 0
208 0
215 1
215 1
202 2
179 2
173 2
144 2
130 2
41 2
30 2
30 2
28 2
33 2
35 2
36 2
37 2
35 2
29 2
29 2
29 2
94 2
97 2
101 2
108 2
114 2
114 2
120 2
120 2
121 2
121 2
126 2
129 2
130 2
131 2
135 2
139 2
136 2
132 0
132 0
132 0
132 0
133 0
133 0
133 0
133 0
133 0
131 0
126 0
122 0
121 0
115 0
114 0
114 0
114 0
119 0
118 0
61 0
59 0
51 0
46 0
43 0
44 0
42 0
45 0
104 0
141 0
136 0
135 0
128 0
130 0
129 0
127 0
122 0
122 0
122 0
122 0
122 0
122 0
122 0
122 0
122 0
122 0
122 0
122 0
121 0
120 0
118 0
116 0
115 0
114 0
117 0
120 0
122 0
121 0
119 0
118 0
117 0
113 0
105 0
86 0
31 0
12 0
12 0
11 0
10 0
9 0
9 0
9 0
9 0
9 0
11 0
12 0
12 0
12 0
12 0
12 0
12 0
13 0
13 0
16 0
27 0
31 0
34 0
37 0
37 0
38 0
33 0
31 0
29 0
29 0
29 0
29 0
30 0
30 0
30 0
30 0
30 0
31 0
31 0
31 0
31 0
31 0
31 0
36 0
36 0
37 0
38 0
38 0
43 0
171 0
187 0
188 0
190 0
190 0
190 0
182 0
174 0
170 0
167 0
165 0
166 1
166 1
166 1
167 1
167 1
167 1
167 1
167 1
166 1
166 1
166 1
166 1
168 1
165 1
165 1
165 1
166 1
166 1
166 1
168 2
168 2
166 2
158 2
146 2
137 2
24 2
26 2
23 2
24 2
23 2
23 2
24 2
25 2
28 2
33 2
35 2
41 1
48 1
54 1
54 1
55 1
55 1
55 1
101 1
109 2
159 2
161 2
161 2
159 2
160 2
160 2
160 3
159 3
160 3
160 3
150 2
149 2
146 2
146 2
146 2
147 2
148 2
155 2
159 2
160 2
159 2
158 2
157 2
157 2
153 2
153 2
150 2
142 2
152 3
167 4
168 4
169 4
166 4
163 4
124 4
118 3
75 3
80 3
80 3
81 3
80 3
80 3
80 2
80 3
80 3
80 3
83 3
83 4
81 5
80 5
78 5
79 5
75 5
70 5
67 5
67 5
66 5
66 5
65 5
64 5
63 5
61 5
61 5
58 5
39 4
26 3
24 3
23 3
22 3
21 3
21 3
19 3
18 3
12 3
15 3
17 3
20 4
39 5
39 4
42 6
43 6
51 6
49 5
49 5
51 4
51 4
51 4
49 4
49 4
49 4
49 4
49 4
49 4
49 4
49 4
49 4
49 4
48 4
52 4
52 4
52 4
54 4
52 4
53 4
53 4
53 4
54 4
54 4
54 4
63 4
60 4
143 4
140 2
126 1
121 1
141 3
143 3
141 3
143 4
144 4
144 4
144 4
144 4
144 4
152 4
154 4
155 4
156 4
158 4
159 4
159 4
162 4
162 4
162 4
158 4
158 4
156 4
156 4
155 4
154 4
154 4
154 4
153 4
154 4
154 4
145 4
143 4
58 4
59 4
57 4
57 4
35 1
31 1
30 1
24 0
27 0
28 0
56 4
55 4
57 4
48 4
48 4
47 4
46 4
43 4
42 4
43 4
42 4
44 7
44 7
44 7
45 7
45 7
46 7
46 7
46 7
46 7
46 7
44 7
43 7
43 7
46 7
48 7
82 7
95 7
401 8
402 8
412 8
424 8
425 8
425 8
424 8
423 8
397 4
423 4
478 4
513 4
520 4
522 4
521 4
679 5
679 5
678 5
699 7
702 4
704 4
704 4
704 4
711 4
710 4
737 4
754 4
753 3
753 3
753 3
757 3
757 3
753 3
756 3
719 3
708 3
404 3
413 3
472 4
473 4
475 4
477 4
476 4
471 4
467 4
438 4
374 4
352 4
402 5
404 5
403 5
246 5
246 5
245 5
222 3
235 3
312 3
314 3
312 3
304 3
312 3
713 6
821 8
848 8
852 8
862 8
863 8
865 8
863 8
846 8
849 8
832 8
828 8
826 8
781 8
774 8
772 8
772 9
766 9
767 9
768 9
767 9
757 9
760 9
728 8
727 8
715 8
713 7
709 7
707 7
706 7
686 7
610 7
585 5
560 5
386 5
369 4
84 2
52 1
34 1
25 1
71 6
71 6
70 6
68 6
67 6
66 6
65 6
65 6
65 6
65 6
65 6
65 6
64 5
63 5
62 5
59 5
59 5
59 5
94 8
94 8
94 8
94 8
94 8
94 8
94 8
94 8
94 8
94 8
93 8
93 8
93 8
93 8
93 8
90 7
88 7
81 6
43 3
42 3
42 3
43 3
43 3
43 3
43 3
43 3
43 3
48 3
48 3
48 3
51 3
57 3
58 3
57 2
57 2
56 2
19 0
18 0
18 0
19 0
19 0
19 0
20 0
20 0
20 0
23 0
24 0
25 0
27 0
35 0
35 0
36 0
37 0
37 0
37 0
37 0
37 0
36 0
40 0
40 0
43 0
43 0
46 0
44 0
48 0
48 0
44 0
37 0
37 0
37 0
37 0
37 0
37 0
37 0
37 0
37 0
37 0
37 0
36 0
36 0
35 0
33 0
33 0
30 0
29 0
22 0
22 0
21 0
20 0
20 0
20 0
20 0
21 0
20 0
18 0
18 0
14 0
15 0
12 0
10 0
5 0
5 0
5 0
6 0
7 0
8 0
10 0
11 0
11 0
11 0
10 0
10 0
10 0
11 0
11 0
19 1
19 1
18 1
20 1
20 1
21 1
21 1
21 1
21 1
22 1
25 1
26 1
26 1
24 1
24 1
24 1
24 1
26 1
29 1
30 2
30 2
30 2
32 2
36 2
42 2
44 2
46 2
44 2
44 2
44 2
48 2
49 2
49 2
49 2
48 2
48 2
40 1
40 1
39 1
37 1
37 1
37 1
37 2
37 2
37 3
38 4
61 4
63 4
64 4
66 4
66 4
79 4
90 4
90 4
86 4
85 3
85 3
85 3
83 3
82 3
75 3
70 3
72 4
72 4
78 5
79 5
78 5
78 5
78 5
78 5
78 6
78 6
78 6
78 6
78 6
79 6
79 6
78 6
82 4
82 3
82 3
81 3
57 4
54 4
53 4
51 4
51 4
33 4
29 4
27 4
27 4
26 4
28 4
28 4
28 4
28 4
28 4
24 2
21 2
20 2
15 2
15 2
15 2
15 2
15 2
15 2
15 1
15 1
15 1
15 1
15 1
14 1
14 0
16 0
12 0
12 0
10 0
10 0
10 0
10 0
11 0
14 0
16 0
19 0
18 0
18 0
18 0
16 0
16 0
16 0
15 0
15 0
16 0
16 0
16 0
18 0
18 0
18 0
18 0
18 0
18 0
18 0
18 0
18 0
18 0
18 0
18 0
18 0
17 0
16 0
16 0
16 0
16 0
16 0
16 0
16 0
14 0
12 0
8 0
4 0
4 0
4 0
4 0
4 0
4 0
4 0
4 0
4 0
3 0
2 0
2 0
2 0
3 0
3 0
3 0
3 0
4 0
5 0
5 0
7 0
9 0
11 0
16 0
16 0
15 0
15 0
15 0
15 0
15 0
15 0
15 0
15 0
15 0
15 0
15 0
15 0
16 0
15 0
15 0
15 0
15 0
15 0
15 0
16 0
15 0
16 0
17 0
17 0
18 0
18 0
18 0
18 0
26 0
24 0
22 0
21 0
18 0
18 0
14 0
14 0
18 0
19 0
19 0
19 0
19 0
19 0
19 0
19 0
19 0
19 0
19 0
19 0
18 0
18 0
20 0
20 0
20 0
20 0
20 0
19 0
18 0
18 0
18 0
18 0
17 0
20 0
20 0
20 0
11 0
11 0
11 0
10 0
10 0
14 0
14 0
14 0
11 0
11 0
11 0
11 0
11 0
12 0
12 0
12 0
12 0
12 0
12 0
12 0
12 0
11 0
10 0
10 0
10 0
10 0
10 0
10 0
10 0
10 0
9 0
9 0
9 0
6 0
6 0
6 0
6 0
9 0
9 0
9 0
9 0
4 0
5 0
5 0
7 0
8 0
8 0
22 0
23 0
23 0
29 0
30 0
32 0
32 0
32 0
32 0
33 0
34 0
34 0
34 0
34 0
34 0
34 0
35 0
37 0
38 0
39 0
40 0
40 0
40 0
40 0
40 0
39 0
37 0
37 0
37 0
36 0
38 0
43 0
47 0
50 0
66 0
68 0
62 0
72 0
71 0
87 0
87 0
86 0
86 0
86 0
87 0
86 0
85 0
85 0
85 0
85 0
85 0
85 0
83 0
82 0
81 0
80 0
80 0
80 0
81 0
80 0
81 0
81 0
81 0
81 0
81 0
80 0
73 0
66 0
58 0
55 0
44 0
38 0
34 0
30 0
30 0
12 0
12 0
12 0
15 0
15 0
14 0
14 0
14 0
14 0
14 0
15 0
15 0
15 0
15 0
15 0
19 0
19 0
18 0
18 0
17 0
15 0
15 0
15 0
15 0
15 0
15 0
15 0
16 0
16 0
16 0
18 0
21 0
36 0
161 0
200 0
201 0
203 0
205 0
205 0
202 0
202 0
202 0
202 0
202 0
202 0
202 0
201 0
201 0
201 0
201 0
199 0
197 0
197 0
197 0
197 0
197 0
196 0
196 0
196 0
196 0
196 0
196 0
193 0
184 0
173 0
168 0
155 0
140 0
81 0
9 0
7 0
7 0
7 0
6 0
6 0
6 0
6 0
7 0
7 0
7 0
7 0
8 0
8 0
8 0
8 0
8 0
10 0
12 0
12 0
12 0
12 0
13 0
13 0
13 0
13 0
13 0
13 0
13 0
11 0
12 0
10 0
10 0
9 0
9 0
9 0
8 0
8 0
8 0
8 0
8 0
8 0
8 0
8 0
8 1
8 1
8 1
10 1
10 1
9 1
9 1
9 1
9 1
5 1
5 2
5 3
5 3
5 3
4 3
4 3
4 3
4 3
4 3
4 3
4 3
4 3
4 3
4 3
4 3
4 3
4 3
4 3
4 3
4 3
4 3
4 3
4 3
4 3
6 3
6 3
5 2
5 2
4 2
2 2
2 2
2 2
2 2
2 2
2 2
2 2
2 0
3 0
3 0
4 0
4 0
4 0
4 0
5 0
5 0
5 0
5 0
5 0
5 0
5 0
5 0
5 0
5 0
5 0
6 0
7 0
8 0
8 0
8 0
8 0
8 0
8 0
8 0
8 0
8 0
8 0
8 0
8 1
8 1
8 2
8 2
8 2
8 2
7 2
6 2
6 2
6 2
6 2
6 2
5 2
6 2
6 2
6 2
91 2
100 2
100 2
117 2
133 2
133 2
140 2
147 2
154 2
153 2
152 2
152 2
151 2
151 2
152 2
152 2
154 2
154 2
154 2
154 2
155 1
155 0
156 0
157 0
157 0
157 0
157 0
157 0
157 0
157 0
157 0
157 0
156 0
156 0
157 0
169 0
99 0
102 0
100 0
86 0
73 1
71 1
62 1
57 1
52 1
52 1
52 1
52 1
52 1
51 1
50 1
50 1
48 1
48 1
48 1
48 1
48 1
48 1
48 1
50 1
52 1
53 1
67 1
81 1
82 1
84 1
87 1
91 1
93 1
91 1
90 1
88 1
74 1
67 1
68 1
68 1
67 0
75 0
75 0
75 0
75 0
82 0
84 0
84 0
84 0
88 0
90 0
90 0
92 0
92 0
92 0
92 0
93 0
91 0
92 0
92 0
88 0
84 0
79 0
65 0
64 0
60 0
53 0
52 0
50 0
50 0
48 0
44 0
40 0
35 0
33 0
32 0
32 0
27 0
27 0
27 0
28 0
21 0
22 0
22 0
23 0
21 0
20 0
18 0
19 0
19 0
19 0
19 0
18 0
18 0
11 0
11 0
11 0
11 0
12 0
12 0
12 0
12 0
12 0
12 0
12 0
12 0
12 0
12 0
12 0
12 0
11 0
11 0
10 0
9 0
9 0
9 0
11 0
11 0
10 0
10 0
8 0
7 0
6 0
6 0
4 0
4 0
4 0
4 0
4 0
4 0
5 0
5 0
10 0
12 0
14 0
15 0
15 0
15 0
15 0
15 0
15 0
15 0
15 0
15 0
15 0
15 0
15 0
15 0
15 0
15 0
15 0
17 0
16 0
16 0
16 0
16 0
16 0
17 0
17 0
17 0
17 0
17 0
17 0
17 0
17 0
15 0
15 0
15 0
10 0
9 0
6 0
5 0
5 0
5 0
5 0
5 0
5 0
5 0
6 0
14 0
20 0
21 0
21 0
21 0
21 0
22 0
22 0
19 0
20 0
20 0
20 0
20 0
20 0
19 0
19 0
20 0
20 0
20 0
20 0
20 0
20 0
20 0
20 0
20 0
20 0
20 0
20 0
20 0
21 0
22 1
22 2
22 2
22 2
21 2
18 2
10 2
8 2
7 2
7 2
7 2
7 2
9 2
9 2
8 2
9 2
9 2
11 2
11 2
11 2
10 3
17 3
17 3
20 3
21 3
21 3
21 3
21 3
21 3
21 3
22 3
22 2
22 2
22 2
22 2
19 2
19 1
19 1
19 1
19 1
19 1
19 1
19 1
19 1
19 1
18 1
18 1
19 1
16 2
17 2
16 2
17 6
16 6
14 6
14 7
14 7
14 6
6 6
5 6
5 6
9 7
9 7
9 9
9 9
9 9
8 9
8 9
8 9
8 9
8 9
8 9
8 9
8 9
8 9
8 9
8 9
8 9
8 9
8 9
8 9
8 9
8 9
8 8
8 10
8 10
7 10
7 10
6 6
6 7
6 7
6 8
6 8
6 9
6 9
5 9
5 9
1 6
1 6
1 6
1 6
1 6
1 6
1 7
1 7
10 20
11 22
13 24
14 24
15 24
16 26
16 27
16 30
16 30
19 35
19 35
19 35
19 36
19 36
19 36
18 34
18 34
19 37
19 37
19 37
19 37
21 37
33 35
40 35
40 35
40 35
40 35
40 35
40 35
40 35
40 35
40 35
40 35
39 33
39 33
39 32
28 18
28 14
26 14
27 14
26 14
26 14
25 14
25 9
28 9
27 4
30 3
31 4
31 4
33 4
33 4
34 4
35 4
38 2
48 1
53 2
53 2
49 2
40 3
39 3
39 3
39 3
39 3
40 3
40 3
43 3
45 3
49 3
50 3
50 3
50 3
50 3
50 3
50 3
50 3
49 3
48 3
48 3
48 3
48 3
45 3
45 3
42 3
41 2
42 3
40 3
38 4
37 4
36 4
31 4
21 4
20 3
19 3
18 3
18 2
17 2
17 2
17 2
17 3
17 3
17 3
12 3
11 3
8 3
8 3
8 3
8 3
8 3
8 3
8 3
8 3
8 3
8 4
8 6
8 6
8 7
8 7
8 7
8 8
8 8
7 7
6 7
6 6
6 6
6 6
6 6
6 6
5 6
4 6
4 6
3 6
3 6
3 6
3 6
2 5
1 5
1 6
1 6
1 6
1 6
1 6
1 6
1 6
1 6
1 6
1 6
1 6
1 5
1 3
1 1
1 1
1 1
1 2
1 2
1 2
1 2
1 2
1 2
1 2
1 2
1 2
1 2
1 2
1 2
1 2
1 2
0 1
0 2
0 3
0 4
0 4
0 4
0 4
0 4
0 4
0 5
0 7
0 7
0 7
0 7
0 7
0 7
0 7
0 7
0 7
2 7
2 8
2 8
2 7
2 7
3 7
3 7
3 7
3 7
3 7
3 7
3 4
3 4
3 4
3 4
3 4
3 5
3 5
3 6
3 6
3 6
3 6
3 6
3 6
3 6
3 6
3 5
3 4
3 4
3 4
3 4
4 4
4 4
3 4
3 4
5 4
12 4
17 3
20 3
20 3
20 3
20 3
20 2
20 2
20 2
20 2
20 1
20 1
22 1
22 1
22 1
22 1
22 0
22 0
22 0
22 0
22 0
22 0
22 0
22 0
22 0
23 0
23 0
23 0
23 0
22 0
21 0
21 0
21 0
20 0
20 2
14 2
8 2
5 2
3 2
3 2
3 2
3 2
3 2
3 2
3 2
2 2
2 2
2 2
1 2
1 2
1 2
1 2
1 2
1 2
0 2
0 2
0 2
0 2
0 2
0 2
4 2
6 2
11 2
16 3
18 3
20 4
20 4
20 4
20 4
20 4
20 4
20 4
20 4
20 4
21 4
22 4
22 4
22 5
24 5
24 5
24 5
24 5
24 5
24 5
24 5
24 5
24 5
25 5
25 5
25 5
25 5
25 5
25 5
25 5
24 5
22 5
19 5
19 5
14 4
8 4
8 4
5 3
4 3
4 3
4 3
4 3
4 1
4 1
4 1
2 1
2 1
2 0
2 0
2 0
2 0
2 0
3 0
3 0
3 0
3 0
3 0
3 0
3 0
2 0
2 0
2 0
2 0
2 0
2 0
2 0
2 0
2 0
2 0
1 0
1 0
1 0
1 0
1 0
1 0
1 0
1 0
1 0
1 1
1 1
2 1
2 1
2 1
2 1
2 1
2 1
2 1
1 1
1 1
1 1
1 1
15 1
15 1
15 1
15 1
15 1
15 1
15 1
15 1
15 1
15 7
15 7
15 7
15 7
15 7
15 7
15 7
15 7
15 7
15 7
15 8
15 8
15 8
15 8
15 7
15 7
14 7
14 7
14 7
14 7
14 7
12 7
10 7
10 7
10 7
7 7
7 7
0 7
0 7
0 7
0 7
0 7
0 8
4 9
4 9
4 10
4 4
4 4
4 5
4 6
4 5
5 5
5 5
5 5
6 5
6 5
7 5
7 5
7 5
7 5
8 5
8 5
8 5
8 5
8 5
8 5
8 5
8 5
8 5
8 5
8 5
8 5
7 6
9 6
10 6
10 6
10 7
10 7
10 5
6 3
6 3
6 3
6 3
7 3
7 2
7 2
7 2
6 2
6 2
5 2
4 2
5 2
5 2
5 2
5 2
5 2
5 2
5 2
5 2
5 2
5 2
5 2
6 2
6 2
6 2
6 2
6 2
6 2
5 1
4 0
3 0
3 0
3 0
3 0
3 0
3 0
3 0
3 0
3 0
2 0
2 0
2 0
2 0
2 0
2 0
3 0
3 0
2 0
2 0
2 0
2 0
2 0
2 0
2 0
3 0
3 0
4 0
4 0
3 0
3 0
3 0
3 0
3 0
3 0
3 0
3 0
3 0
3 0
3 0
3 0
3 0
3 0
3 0
3 0
3 0
3 0
3 0
3 0
3 0
3 0
3 0
2 0
2 0
2 0
2 0
2 0
2 0
3 1
3 1
3 1
2 1
3 1
2 1
2 1
2 1
2 1
3 1
3 1
3 1
3 1
3 1
3 1
3 1
3 1
5 1
5 1
5 1
5 1
5 1
5 1
5 1
5 1
5 1
5 1
5 1
5 1
5 1
5 1
5 1
5 1
5 1
5 1
5 0
5 0
5 0
5 0
5 0
4 0
4 0
4 0
4 0
4 0
4 0
5 0
5 0
5 0
5 0
4 0
4 0
4 0
3 0
3 0
3 0
3 0
3 0
3 0
3 0
3 0
3 0
3 0
3 0
3 0
3 0
2 0
2 0
2 0
2 0
2 0
2 1
2 1
2 1
2 1
3 2
4 2
4 2
4 2
4 2
4 2
2 2
2 2
2 2
2 2
2 2
2 2
2 2
2 2
2 2
2 2
2 2
2 2
2 2
2 2
2 2
2 2
2 2
2 2
2 2
2 2
2 2
2 2
2 2
2 2
2 2
2 2
2 1
2 0
2 0
2 0
1 0
0 0
0 0
0 2
0 3
0 4
0 4
0 4
0 4
0 4
0 4
0 4
0 4
0 4
0 4
0 4
0 4
1 4
1 4
2 4
3 4
3 4
3 4
4 4
4 4
4 4
4 4
4 4
4 4
4 4
4 4
4 4
4 4
4 4
4 4
4 4
4 4
4 6
4 6
4 3
4 2
4 2
4 2
4 2
4 2
4 2
4 2
4 2
4 2
4 2
4 2
4 2
3 2
1 2
1 2
1 2
1 2
1 2
1 2
0 2
0 2
0 2
0 2
0 2
0 2
0 2
0 2
0 2
0 2
0 2
0 2
0 2
0 2
0 2
0 2
0 2
0 2
0 2
0 2
0 2
0 2
0 2
0 2
0 2
0 2
0 2
0 2
1 2
2 2
3 2
5 2
5 2
5 2
5 2
5 2
5 3
5 3
5 3
5 3
5 3
6 3
6 3
6 3
6 3
6 3
6 3
6 3
6 3
6 3
6 1
6 1
6 1
6 1
6 1
6 1
6 1
6 1
6 1
7 1
7 1
7 1
7 1
7 1
6 1
5 1
3 1
1 1
1 1
1 1
1 1
1 1
1 1
1 1
1 1
1 1
1 1
1 1
1 1
1 1
1 1
1 1
1 1
1 1
1 1
1 1
1 1
1 1
0 1
5 1
5 1
7 1
7 1
8 3
8 4
8 4
8 4
9 4
10 4
10 5
10 4
10 4
10 4
10 4
10 4
10 4
10 4
10 4
10 4
10 4
10 4
10 4
10 4
10 4
10 4
10 4
10 4
10 4
10 4
10 4
10 4
10 4
10 4
10 4
10 4
4 4
3 4
3 4
3 4
2 1
2 1
2 1
2 1
1 1
0 1
0 0
0 0
0 0
0 0
0 0
0 0
0 0
0 0
0 0
0 0
0 0
0 0
0 0
0 0
0 0
0 0
0 0
0 0
0 0
0 0
0 0
0 0
0 0
0 0
0 0
0 0
0 0
0 0
0 0
0 0
0 0
0 0
0 0
0 0
0 0
0 0
0 0
0 0
0 0
0 0
0 0
1 1
1 1
1 1
1 1
1 1
1 1
1 1
1 1
1 1
1 1
1 1
1 1
1 1
1 1
1 1
1 1
1 3
1 4
1 4
1 5
1 5
1 5
1 5
1 5
1 5
1 5
1 5
1 5
1 5
1 5
1 5
1 5
1 5
2 5
5 5
6 5
5 4
5 4
5 4
5 4
5 4
6 4
7 4
7 4
10 4
10 4
10 4
10 4
10 4
10 4
10 4
10 3
10 1
10 1
10 3
10 2
10 3
10 3
10 3
10 3
10 3
10 3
10 3
10 3
10 3
10 3
7 3
7 3
5 3
5 3
5 3
5 3
5 3
5 3
5 3
4 3
4 3
3 3
3 3
2 3
0 3
0 3
0 3
1 3
1 3
1 3
1 3
1 3
1 5
1 5
1 2
1 2
1 2
1 2
1 2
1 2
1 3
1 4
1 4
1 4
1 4
1 4
1 4
1 4
1 4
1 4
1 5
1 5
1 6
1 6
2 6
3 6
3 6
3 6
3 6
3 6
3 6
3 6
3 6
2 6
2 6
2 6
2 6
2 6
2 4
2 4
2 4
2 4
2 4
2 4
2 4
2 4
2 2
2 2
2 2
2 2
2 2
2 2
2 3
2 3
2 3
2 3
2 2
2 1
2 1
2 1
1 3
0 3
0 3
0 3
0 3
0 3
0 3
0 3
0 4
0 4
0 4
0 4
0 4
0 4
0 4
0 4
0 4
0 4
0 4
0 4
0 4
0 4
0 4
0 4
0 4
0 4
0 4
0 4
0 3
0 3
0 3
0 3
0 3
0 3
0 3
0 3
1 1
1 1
2 1
2 1
2 1
2 1
2 1
2 1
2 0
2 0
2 0
2 0
2 0
2 0
2 0
2 0
2 0
2 0
2 0
2 0
2 0
2 0
2 0
2 0
2 0
2 0
2 0
2 0
2 0
2 1
2 1
3 3
3 3
3 3
3 3
3 4
2 4
1 4
1 4
1 4
1 4
1 4
1 4
1 4
1 4
1 4
1 4
1 4
1 3
1 5
1 5
1 5
1 5
2 6
2 6
2 6
2 6
2 6
2 6
2 6
2 6
2 6
2 6
2 6
2 6
2 6
2 6
1 4
1 4
1 4
1 4
1 3
1 3
1 3
1 3
1 3
1 3
1 3
1 3
1 3
1 3
1 3
1 3
1 3
0 3
0 1
0 1
0 1
0 1
3 0
3 0
3 0
3 0
3 0
3 0
3 0
3 0
3 0
3 0
3 1
3 1
3 1
3 1
3 1
3 1
3 1
3 1
3 1
3 1
3 1
3 1
3 1
3 1
3 1
3 1
3 1
3 1
3 1
3 1
3 1
3 2
3 2
2 2
2 2
2 2
0 2
0 2
0 2
0 2
0 2
0 2
0 2
0 2
0 2
0 1
0 1
0 1
0 1
0 1
0 1
0 1
0 1
0 1
0 1
0 1
0 1
0 1
0 1
0 1
0 1
0 1
0 1
0 1
0 1
0 1
0 1
0 0
0 0
0 0
0 0
0 0
0 0
0 0
0 0
0 0
0 0
0 0
0 0
0 0
0 0
0 0
0 0
0 0
0 0
0 0
0 0
0 0
0 0
0 0
0 0
2 0
2 0
2 0
2 0
2 0
2 0
3 0
3 0
3 0
3 0
3 0
3 0
3 0
3 0
3 0
3 0
3 0
3 0
3 0
3 0
3 0
3 0
3 0
3 0
3 0
3 0
3 0
3 0
3 0
3 0
3 0
3 0
3 0
3 0
3 0
3 0
1 0
1 0
1 0
2 0
2 0
2 0
1 0
1 0
1 0
1 0
1 0
1 0
1 0
1 0
1 0
1 0
1 0
1 0
1 0
1 0
1 0
1 0
1 0
1 0
1 0
1 0
1 0
1 0
1 0
1 0
1 0
1 0
1 0
1 0
1 0
1 0
1 0
1 0
1 0
0 0
0 0
0 0
0 0
0 0
0 0
0 0
0 0
0 1
0 1
0 1
0 1
0 1
0 1
0 1
0 1
0 1
0 1
0 1
0 1
0 1
0 1
0 1
0 1
0 1
1 1
1 1
1 1
1 1
1 1
1 1
1 1
1 1
1 1
1 1
1 1
1 1
1 1
1 1
1 1
1 1
1 1
1 1
1 1
1 0
1 0
1 0
1 0
1 0
1 0
1 0
1 0
1 0
1 0
2 0
2 0
2 0
2 0
2 0
2 0
2 0
1 0
2 0
2 0
2 0
2 0
2 0
2 0
2 0
5 0
5 0
5 0
5 0
5 0
5 0
5 0
5 0
5 0
5 0
5 0
5 0
5 0
5 0
5 0
5 0
5 0
5 0
5 0
5 0
4 0
4 0
4 0
4 0
4 0
4 0
4 0
4 0
4 0
3 0
3 0
3 0
3 0
3 0
3 1
3 1
0 1
0 1
0 1
0 1
0 1
0 1
0 1
0 1
0 1
0 1
0 1
0 1
0 1
0 1
0 1
0 1
0 1
0 1
0 1
0 1
0 1
0 1
0 1
0 1
0 1
0 1
0 1
0 1
0 1
0 1
0 1
0 1
0 1
0 1
0 0
0 0
0 0
0 0
0 0
0 0
0 0
0 0
0 0
0 0
0 0
0 0
0 0
0 0
0 0
0 0
0 0
0 0
0 0
0 0
0 0
0 0
0 0
0 0
0 0
0 0
0 0
0 0
0 0
0 0
0 0
0 0
0 1
0 1
0 1
0 1
0 1
0 1
0 1
0 1
0 1
0 1
0 1
0 1
0 1
0 1
0 1
0 1
0 1
0 1
0 1
0 1
0 1
0 1
0 1
0 1
0 1
0 1
0 1
0 1
0 1
0 1
0 1
0 1
0 1
0 1
0 1
0 0
0 0
0 0
0 0
0 0
0 0
0 0
0 0
0 0
0 0
0 0
0 0
0 0
0 0
0 0
0 0
0 0
0 0
0 0
0 0
0 0
0 0
0 0
0 0
0 0
0 0
0 0
0 0
0 0
0 0
0 0
0 0
0 0
0 1
0 1
0 1
0 1
0 1
0 1
0 1
0 1
0 1
0 1
0 1
0 1
0 1
0 1
0 1
0 1
0 1
0 1
0 1
0 1
0 1
0 1
0 1
0 1
0 1
0 1
0 1
0 1
0 1
0 1
0 1
0 1
0 1
0 1
0 1
0 1
0 0
0 0
0 0
0 0
0 0
0 0
0 0
1 0
1 0
1 0
1 0
1 0
1 0
1 0
1 0
1 0
1 0
1 0
1 0
1 0
1 0
1 0
1 0
1 0
1 0
1 0
1 0
1 0
1 0
1 0
1 0
1 0
1 0
1 0
1 0
1 0
1 0
1 0
1 0
1 0
1 0
1 0
1 0
0 0
0 0
0 0
0 0
0 0
0 0
1 0
1 0
1 0
2 0
2 0
2 0
2 0
2 0
2 0
2 0
2 0
2 0
2 0
2 0
2 0
2 0
2 0
2 0
2 0
2 0
2 0
2 0
2 0
2 0
2 0
2 0
2 0
2 0
2 0
3 0
5 1
5 1
5 1
5 1
5 1
5 1
3 1
3 1
3 1
3 2
3 2
3 2
3 2
3 2
3 2
3 2
3 2
3 2
3 2
3 2
3 2
3 2
3 2
3 2
3 2
5 2
5 2
5 2
5 2
5 2
5 2
5 2
5 2
5 2
4 2
4 2
3 1
2 1
2 1
2 1
2 1
2 1
2 1
2 1
2 1
2 0
2 0
2 0
2 0
2 0
2 0
2 0
2 0
2 0
2 0
2 0
2 0
2 0
2 0
2 0
2 0
0 0
0 0
0 0
0 0
0 0
0 0
0 0
0 0
1 0
1 0
1 0
1 0
1 0
1 0
1 0
1 0
1 0
1 0
1 0
1 0
1 0
1 0
1 0
1 0
1 0
1 0
1 0
1 0
1 0
1 0
1 0
1 0
1 0
1 0
1 0
1 0
1 0
2 0
2 0
2 0
2 0
2 0
2 0
2 0
2 0
2 0
2 0
2 0
2 0
2 0
2 0
2 0
2 0
2 0
2 0
2 0
2 0
2 0
2 0
2 0
2 0
2 0
2 0
2 0
2 0
2 0
2 0
2 0
2 0
4 0
5 0
5 0
5 0
4 0
4 0
4 0
5 0
5 1
5 1
5 1
4 1
4 1
4 1
4 1
4 1
4 1
4 1
4 1
4 1
4 1
4 1
4 1
4 1
4 1
4 1
4 1
4 1
4 1
4 1
4 1
4 1
4 1
4 1
3 1
3 1
1 1
1 1
1 1
1 1
1 1
1 1
1 1
0 1
0 0
0 0
0 0
0 0
0 0
0 0
0 0
0 0
0 0
0 0
0 0
0 0
0 0
0 0
0 0
0 0
0 0
0 0
0 0
0 0
0 0
0 0
0 0
0 0
0 0
0 0
0 0
0 0
0 0
0 0
0 0
0 0
0 0
0 0
0 0
0 0
0 0
0 0
0 0
0 0
0 0
0 0
0 0
0 0
0 0
0 0
0 0
0 0
0 0
0 0
0 0
0 0
0 0
0 0
0 0
0 0
0 0
0 0
0 0
0 0
0 0
0 0
0 0
0 0
0 0
0 0
0 0
0 0
0 0
0 0
0 0
0 0
0 0
0 0
0 0
0 0
0 0
0 0
1 0
1 0
1 0
1 0
1 0
1 0
1 0
1 0
1 0
1 0
1 0
1 0
1 0
1 0
1 0
1 0
1 0
1 0
1 0
1 0
1 0
1 0
1 0
1 0
1 0
1 0
1 0
1 0
1 0
1 0
1 0
1 0
1 0
1 0
0 0
0 0
0 0
0 0
0 0
0 0
1 0
2 0
2 0
2 0
2 0
2 0
2 0
2 0
2 0
2 0
2 0
2 0
2 0
2 0
2 0
2 0
2 0
2 0
2 0
2 0
2 0
2 0
5 0
5 0
5 0
5 0
5 0
5 0
5 0
5 0
5 0
5 0
5 0
5 0
5 0
5 0
4 0
3 0
3 0
3 0
3 0
3 0
3 0
3 0
3 0
3 0
3 0
3 0
3 0
2 0
2 0
2 0
2 0
2 0
1 0
1 0
0 0
0 0
0 0
0 0
0 0
0 0
0 0
1 0
3 0
3 0
7 0
7 0
7 0
7 0
7 0
7 0
7 0
7 0
7 0
7 0
7 0
7 0
7 0
7 0
7 0
3 0
3 0
3 0
1 0
1 0
1 0
1 0
1 0
1 0
1 0
1 0
1 0
1 0
1 0
1 0
1 0
1 0
1 0
0 0
0 0
0 0
0 0
0 0
0 0
0 0
0 0
0 0
0 0
0 0
0 0
0 0
0 0
0 0
0 0
0 0
0 0
0 0
0 0
0 0
0 0
0 0
0 0
0 0
0 0
0 0
0 0
0 0
0 0
0 0
0 0
0 0
0 0
0 0
0 0
0 0
0 0
0 0
0 0
0 0
0 1
0 1
0 1
0 1
0 1
0 1
0 1
0 1
0 1
0 1
0 1
0 1
1 1
1 1
1 1
1 0
1 0
1 0
1 0
1 0
1 0
1 0
1 0
1 0
1 0
1 0
1 0
1 0
1 0
1 0
1 0
1 0
1 0
1 0
1 0
1 0
1 0
1 0
1 0
1 0
0 0
0 0
0 0
0 0
0 0
0 0
0 0
0 0
0 0
0 0
0 0
0 0
0 0
0 0
0 0
0 0
0 0
0 0
0 0
0 0
0 0
0 0
0 0
0 0
0 0
0 0
0 0
0 0
0 0
0 0
0 0
0 0
0 0
0 0
0 0
0 0
0 0
0 0
0 0
0 0
0 0
0 0
0 0
0 0
0 0
0 0
0 0
0 0
0 0
0 0
0 0
0 0
0 0
0 0
0 0
0 0
0 0
0 0
0 0
0 0
0 0
0 0
0 0
0 0
0 0
0 0
2 0
2 0
2 0
2 0
2 0
2 0
2 0
2 0
2 0
2 0
2 0
2 0
2 0
2 0
2 0
2 0
2 0
2 0
2 0
2 0
2 0
2 0
2 0
2 0
2 0
2 0
2 0
2 0
2 0
2 0
2 0
2 0
2 0
2 0
1 0
1 0
0 0
0 0
0 0
0 0
0 0
0 0
0 0
0 0
0 0
0 0
0 0
0 0
0 0
0 0
0 0
0 0
0 0
0 0
0 0
0 0
0 0
0 0
0 0
0 0
0 0
0 0
0 0
0 0
0 0
0 0
0 0
0 0
0 0
0 0
0 0
0 0
0 0
0 0
0 0
0 0
0 0
0 0
0 0
0 0
0 0
0 0
0 0
0 0
0 0
0 0
0 0
0 0
0 0
0 0
0 0
0 0
0 0
0 0
0 0
0 0
0 0
0 0
0 0
0 0
0 0
0 0
0 0
0 0
0 0
0 0
0 0
0 0
0 0
0 0
0 0
0 0
0 0
0 0
0 0
0 0
0 0
0 0
0 0
0 0
0 0
0 0
0 0
0 0
0 0
0 0
0 0
0 0
0 0
0 0
0 0
0 0
0 0
0 0
0 0
0 0
0 0
0 0
0 0
0 0
0 0
0 0
0 0
0 0
0 0
0 0
0 0
0 0
0 0
0 0
0 0
0 0
0 0
0 0
0 0
0 0
0 0
0 0
0 0
0 0
0 0
0 0
0 0
0 0
0 0
0 0
0 0
0 0
0 0
0 0
0 0
0 0
0 0
0 0
0 0
0 0
0 0
0 0
0 0
0 0
0 0
0 0
0 0
0 0
0 0
0 0
0 0
0 0
0 0
0 0
0 0
0 0
0 0
0 0
0 0
0 0
0 0
0 0
0 0
0 0
0 0
0 0
0 0
0 0
0 0
0 0
0 0
0 0
0 0
0 0
0 0
0 0
0 0
0 0
0 0
0 0
0 0
0 0
0 0
0 0
0 0
0 0
0 0
0 0
0 0
0 0
0 0
0 0
0 0
0 0
0 0
0 0
0 0
0 0
0 0
0 0
0 0
0 0
0 0
0 0
0 0
0 0
0 0
0 0
0 0
0 0
0 0
0 0
0 0
0 0
0 0
0 0
0 0
0 0
0 0
0 0
0 0
0 0
0 0
0 0
0 0
0 0
0 0
0 0
0 0
0 0
0 0
0 0
0 0
0 0
0 0
0 0
0 0
0 0
0 0
0 0
0 0
0 0
0 0
0 0
0 0
0 0
0 0
0 0
0 0
0 0
0 0
0 0
0 0
0 0
0 0
0 0
0 0
0 0
0 0
0 0
0 0
0 0
0 0
0 0
0 0
0 0
0 0
0 0
0 0
0 0
0 0
0 0
0 0
0 0
0 0
0 0
0 0
0 0
0 0
0 0
0 0
0 0
0 0
0 0
0 0
0 0
0 0
0 0
0 0
0 0
0 0
0 0
0 0
0 0
0 0
0 0
0 0
0 0
0 0
0 0
0 0
0 0
0 0
0 0
0 0
0 0
0 0
0 0
0 0
0 0
0 0
0 0
0 0
0 0
0 0
0 0
0 0
0 0
0 0
0 0
0 0
0 0
0 0
0 0
0 0
0 0
0 0
0 0
0 0
0 0
0 0
0 0
0 0
0 0
0 0
0 0
0 0
0 0
0 0
0 0
0 0
0 0
0 0
0 0
0 0
0 0
0 0
0 0
0 0
0 0
0 0
0 0
0 0
0 0
0 0
0 0
0 0
0 0
0 0
0 0
0 0
0 0
0 0
0 0
0 0
0 0
0 0
0 0
0 0
0 0
0 0
0 0
0 0
0 0
0 0
0 0
0 0
0 0
0 0
0 0
0 0
0 0
0 0
0 0
0 0
0 0
0 0
0 0
0 0
0 0
0 0
0 0
0 0
0 0
0 0
0 0
0 0
0 0
0 0
0 0
0 0
0 0
0 0
0 0
0 0
0 0
0 0
0 0
0 0
0 0
0 0
0 0
0 0
0 0
0 0
0 0
0 0
0 0
0 0
0 0
0 0
0 0
0 0
0 0
0 0
0 0
0 0
0 0
0 0
0 0
0 0
0 0
0 0
0 0
0 0
0 0
0 0
0 0
0 0
0 0
0 0
0 0
0 0
0 0
0 0
0 0
0 0
0 0
0 0
0 0
0 0
0 0
0 0
0 0
0 0
0 0
0 0
0 0
0 0
0 0
0 0
0 0
0 0
0 0
0 0
0 0
0 0
0 0
0 0
0 0
0 0
0 0
0 0
0 0
0 0
0 0
0 0
0 0
0 0
0 0
0 0
0 0
0 0
0 0
0 0
0 0
0 0
0 0
0 0
0 0
0 0
0 0
0 0
0 0
0 0
0 0
0 0
0 0
0 0
0 0
0 0
0 0
0 0
0 0
0 0
0 0
0 0
0 0
0 0
0 0
0 0
0 0
0 0
0 0
0 0
0 0
0 0
0 0
0 0
0 0
0 0
0 0
0 0
0 0
0 0
0 0
0 0
0 0
0 0
0 0
0 0
0 0
0 0
0 0
0 0
0 0
0 0
0 0
0 0
0 0
0 0
0 0
0 0
0 0
0 0
0 0
0 0
0 0
0 0
0 0
0 0
0 0
0 0
0 0
0 0
0 0
0 0
0 0
0 0
0 0
0 0
0 0
0 0
0 0
0 0
0 0
0 0
0 0
0 0
0 0
0 0
0 0
0 0
0 0
0 0
0 0
0 0
0 0
0 0
0 0
0 0
0 0
0 0
0 0
0 0
0 0
0 0
0 0
0 0
0 0
0 0
0 0
0 0
0 0
0 0
0 0
0 0
0 0
0 0
0 0
0 0
0 0
0 0
0 0
0 0
0 0
0 0
0 0
0 0
0 0
0 0
0 0
0 0
0 0
0 0
0 0
0 0
0 0
0 0
0 0
0 0
0 0
0 0
0 0
0 0
0 0
0 0
0 0
0 0
0 0
0 0
0 0
0 0
0 0
0 0
0 0
0 0
0 0
0 0
0 0
0 0
0 0
0 0
0 0
0 0
0 0
0 0
0 0
0 0
0 0
0 0
0 0
0 0
0 0
0 0
0 0
0 0
0 0
0 0
0 0
0 0
0 0
0 0
0 0
0 0
0 0
0 0
0 0
0 0
0 0
0 0
0 0
0 0
0 0
0 0
0 0
0 0
0 0
0 0
0 0
0 0
0 0
0 0
0 0
0 0
0 0
0 0
0 0
0 0
0 0
0 0
0 0
0 0
0 0
0 0
0 0
0 0
0 0
0 0
0 0
0 0
0 0
0 0
0 0
0 0
0 0
0 0
0 0
0 0
0 0
0 0
0 0
0 0
0 0
0 0
0 0
0 0
0 0
0 0
0 0
0 0
0 0
0 0
0 0
0 0
0 0
0 0
0 0
0 0
0 0
0 0
0 0
0 0
0 0
0 0
0 0
0 0
0 0
0 0
0 0
0 0
0 0
0 0
0 0
0 0
0 0
0 0
0 0
0 0
0 0
0 0
0 0
0 0
0 0
0 0
0 0
0 0
0 0
0 0
0 0
0 0
0 0
0 0
0 0
0 0
0 0
0 0
0 0
0 0
0 0
0 0
0 0
0 0
0 0
0 0
0 0
0 0
0 0
0 0
0 0
0 0
0 0
0 0
0 0
0 0
0 0
0 0
0 0
0 0
0 0
0 0
0 0
0 0
0 0
0 0
0 0
0 0
0 0
0 0
0 0
0 0
0 0
0 0
0 0
0 0
0 0
0 0
0 0
0 0
0 0
0 0
0 0
0 0
0 0
0 0
0 0
0 0
0 0
0 0
0 0
0 0
0 0
0 0
0 0
0 0
0 0
0 0
0 0
0 0
0 0
0 0
0 0
0 0
0 0
0 0
0 0
0 0
0 0
0 0
0 0
0 0
0 0
0 0
0 0
0 0
0 0
0 0
0 0
0 0
0 0
0 0
0 0
0 0
0 0
0 0
0 0
0 0
0 0
0 0
0 0
0 0
0 0
0 0
0 0
0 0
0 0
0 0
0 0
0 0
0 0
0 0
0 0
0 0
0 0
0 0
0 0
0 0
0 0
0 0
0 0
0 0
0 0
0 0
0 0
0 0
0 0
0 0
0 0
0 0
0 0
0 0
0 0
0 0
0 0
0 0
0 0
0 0
0 0
0 0
0 0
0 0
0 0
0 0
0 0
0 0
0 0
0 0
0 0
0 0
0 0
0 0
0 0
0 0
0 0
0 0
0 0
0 0
0 0
0 0
0 0
0 0
0 0
0 0
0 0
0 0
0 0
0 0
0 0
0 0
0 0
0 0
0 0
0 0
0 0
0 0
0 0
0 0
0 0
0 0
0 0
0 0
0 0
0 0
0 0
0 0
0 0
0 0
0 0
0 0
0 0
0 0
0 0
0 0
0 0
0 0
0 0
0 0
0 0
0 0
0 0
0 0
0 0
0 0
0 0
0 0
0 0
0 0
0 0
0 0
0 0
0 0
0 0
0 0
0 0
0 0
0 0
0 0
0 0
0 0
0 0
0 0
0 0
0 0
0 0
0 0
0 0
0 0
0 0
0 0
0 0
0 0
0 0
0 0
0 0
0 0
0 0
0 0
0 0
0 0
0 0
0 0
0 0
0 0
0 0
0 0
0 0
0 0
0 0
0 0
0 0
0 0
0 0
0 0
0 0
0 0
0 0
0 0
0 0
0 0
0 0
0 0
0 0
0 0
0 0
0 0
0 0
0 0
0 0
0 0
0 0
0 0
0 0
0 0
0 0
0 0
0 0
0 0
0 0
0 0
0 0
0 0
0 0
0 0
0 0
0 0
0 0
0 0
0 0
0 0
0 0
0 0
0 0
0 0
0 0
0 0
0 0
0 0
0 0
0 0
0 0
0 0
0 0
0 0
0 0
0 0
0 0
0 0
0 0
0 0
0 0
0 0
0 0
0 0
0 0
0 0
0 0
0 0
0 0
0 0
0 0
0 0
0 0
0 0
0 0
0 0
0 0
0 0
0 0
0 0
0 0
0 0
0 0
0 0
0 0
0 0
0 0
0 0
0 0
0 0
0 0
0 0
0 0
0 0
0 0
0 0
0 0
0 0
0 0
0 0
0 0
0 0
0 0
0 0
0 0
0 0
0 0
0 0
0 0
0 0
0 0
0 0
0 0
0 0
0 0
0 0
0 0
0 0
0 0
0 0
0 0
0 0
0 0
0 0
0 0
0 0
0 0
0 0
0 0
0 0
0 0
0 0
0 0
0 0
0 0
0 0
0 0
0 0
0 0
0 0
0 0
0 0
0 0
0 0
0 0
0 0
0 0
0 0
0 0
0 0
0 0
0 0
0 0
0 0
0 0
0 0
0 0
0 0
0 0
0 0
0 0
0 0
0 0
0 0
0 0
0 0
0 0
0 0
0 0
0 0
0 0
0 0
0 0
0 0
0 0
0 0
0 0
0 0
0 0
0 0
0 0
0 0
0 0
0 0
0 0
0 0
0 0
0 0
0 0
0 0
0 0
0 0
0 0
0 0
0 0
0 0
0 0
0 0
0 0
0 0
0 0
0 0
0 0
0 0
0 0
0 0
0 0
0 0
0 0
0 0
0 0
0 0
0 0
0 0
0 0
0 0
0 0
0 0
0 0
0 0
0 0
0 0
0 0
0 0
0 0
0 0
0 0
0 0
0 0
0 0
0 0
0 0
0 0
0 0
0 0
0 0
0 0
0 0
0 0
0 0
0 0
0 0
0 0
0 0
0 0
0 0
0 0
0 0
0 0
0 0
0 0
0 0
0 0
0 0
0 0
0 0
0 0
0 0
0 0
0 0
0 0
0 0
0 0
0 0
0 0
0 0
0 0
0 0
0 0
0 0
0 0
0 0
0 0
0 0
0 0
0 0
0 0
0 0
0 0
0 0
0 0
0 0
0 0
0 0
0 0
0 0
0 0
0 0
0 0
0 0
0 0
0 0
0 0
0 0
0 0
0 0
0 0
0 0
0 0
0 0
0 0
0 0
0 0
0 0
0 0
0 0
0 0
0 0
0 0
0 0
0 0
0 0
0 0
0 0
0 0
0 0
0 0
0 0
0 0
0 0
0 0
0 0
0 0
0 0
0 0
0 0
0 0
0 0
0 0
0 0
0 0
0 0
0 0
0 0
0 0
0 0
0 0
0 0
0 0
0 0
0 0
0 0
1 0
2 0
2 0
2 0
2 0
2 0
2 0
2 0
2 0
2 0
2 0
2 0
2 0
2 0
2 0
2 0
2 0
2 0
2 0
2 0
2 0
2 0
2 0
2 0
2 0
2 0
2 0
2 0
2 0
2 0
2 0
2 0
2 0
2 0
1 0
1 0
1 0
0 0
0 0
0 0
0 0
0 0
0 0
0 0
0 0
0 0
0 0
0 0
0 0
0 0
0 0
0 0
0 0
0 0
0 0
0 0
0 0
0 0
0 0
0 0
0 0
0 0
0 0
0 0
0 0
0 0
0 0
0 0
0 0
0 0
0 0
0 0
0 0
0 0
0 0
0 0
0 0
0 0
0 0
0 0
0 0
0 0
0 0
0 0
0 0
0 0
0 0
0 0
0 0
0 0
0 0
0 0
0 0
0 0
0 0
0 0
0 0
0 0
0 0
0 0
0 0
0 0
0 0
0 0
0 0
0 0
0 0
0 0
0 0
0 0
0 0
0 0
0 0
0 0
0 0
0 0
0 0
0 0
0 0
0 0
0 0
0 0
0 0
0 0
0 0
0 0
0 0
0 0
0 0
0 0
0 0
0 0
0 0
0 0
0 0
0 0
0 0
0 0
0 0
0 0
0 0
0 0
0 0
0 0
0 0
0 0
0 0
0 0
0 0
0 0
0 0
0 0
0 0
0 0
0 0
0 0
0 0
0 0
0 0
0 0
0 0
0 0
0 0
0 0
0 0
0 0
0 0
0 0
0 0
0 0
0 0
0 0
0 0
0 0
0 0
0 0
0 0
0 0
0 0
0 0
0 0
0 0
0 0
0 0
0 0
0 0
0 0
0 0
0 0
0 0
0 0
0 0
0 0
0 0
0 0
0 0
0 0
0 0
0 0
0 0
0 0
0 0
0 0
0 0
0 0
0 0
0 0
0 0
0 0
0 0
0 0
0 0
0 0
0 0
0 0
0 0
0 0
0 0
0 0
0 0
0 0
0 0
0 0
0 0
0 0
0 0
0 0
0 0
0 0
0 0
0 0
0 0
0 0
0 0
0 0
0 0
0 0
0 0
0 0
0 0
0 0
0 0
0 0
0 0
0 0
0 0
0 0
0 0
0 0
0 0
0 0
0 0
0 0
0 0
0 0
0 0
0 0
0 0
0 0
0 0
0 0
0 0
0 0
0 0
0 0
0 0
0 0
0 0
0 0
0 0
0 0
0 0
0 0
0 0
0 0
0 0
0 0
0 0
0 0
0 0
0 0
0 0
0 0
0 0
0 0
0 0
0 0
0 0
0 0
0 0
0 0
0 0
0 0
0 0
0 0
0 0
0 0
0 0
0 0
0 0
0 0
0 0
0 0
0 0
0 0
0 0
0 0
0 0
0 0
0 0
0 0
0 0
0 0
0 0
0 0
0 0
0 0
0 0
0 0
0 0
0 0
0 0
0 0
0 0
0 0
0 0
1 0
1 0
1 0
1 0
1 0
1 0
1 0
1 0
1 0
1 0
1 0
1 0
1 0
1 0
1 0
1 0
1 0
1 0
1 0
1 0
1 0
1 0
1 0
1 0
1 0
1 0
1 0
1 0
1 0
1 0
0 0
0 0
0 0
0 0
0 0
0 0
0 0
0 0
0 0
0 0
0 0
0 0
0 0
0 0
0 0
0 0
0 0
0 0
0 0
0 0
0 0
0 0
0 0
0 0
0 0
0 0
0 0
0 0
0 0
0 0
0 0
0 0
0 0
0 0
0 0
0 0
0 0
0 0
0 0
0 0
0 0
0 0
0 0
0 0
0 0
0 0
0 0
0 0
0 0
0 0
0 0
0 0
0 0
0 0
0 0
0 0
0 0
0 0
0 0
0 0
0 0
0 0
0 0
0 0
0 0
0 0
0 0
0 0
0 0
0 0
0 0
0 0
0 0
0 0
0 0
0 0
0 0
0 0
4 0
4 0
4 0
4 0
4 0
4 0
4 0
4 0
4 0
4 0
4 0
4 0
4 0
4 0
4 0
5 0
5 0
5 0
6 0
6 0
6 0
6 0
7 0
7 0
7 0
7 0
7 0
7 0
7 0
7 0
6 0
4 0
4 0
6 0
7 0
8 0
7 0
7 0
7 0
7 0
7 0
7 0
8 0
8 0
8 0
8 0
8 0
8 0
8 0
8 0
8 0
8 0
8 0
8 0
7 0
7 0
6 0
6 0
6 0
6 0
6 0
6 0
6 0
6 0
6 0
6 0
6 0
6 0
5 0
2 0
2 0
1 0
1 0
2 0
2 0
2 0
1 0
1 0
1 0
1 0
1 0
2 0
3 0
3 0
3 0
3 0
3 0
3 0
3 0
3 0
3 0
3 0
3 0
3 0
3 0
3 0
3 0
3 0
3 0
3 0
3 0
3 0
3 0
3 0
3 0
3 0
3 0
4 0
5 0
5 0
4 0
5 0
5 0
5 1
5 1
5 1
5 1
5 1
4 1
5 1
5 1
5 1
5 1
5 1
5 1
5 1
5 1
5 1
8 1
17 1
28 1
31 1
45 1
50 1
99 1
110 1
145 1
238 2
273 3
1855 5
1890 8
2016 9
2123 9
2153 9
2247 9
2261 9
2292 9
2658 11
2664 11
2668 10
2682 10
2690 11
2691 11
2693 12
2695 13
2700 13
2703 13
2706 14
2712 14
2732 14
2732 14
2733 14
2734 14
2821 14
2812 14
2786 14
2768 14
2753 13
2736 13
2716 12
2643 10
2592 10
2520 10
2437 10
2382 9
752 8
433 7
296 4
240 4
216 4
152 4
143 3
143 3
143 3
143 2
146 2
141 2
137 2
131 1
126 0
123 0
116 0
108 0
103 0
99 0
87 0
87 0
87 0
85 0
18 0
17 0
17 0
17 0
26 0
24 0
24 0
23 0
23 0
23 0
19 0
19 0
18 0
19 0
19 0
19 0
19 0
19 0
19 0
20 0
20 0
19 0
18 0
19 0
19 0
19 0
19 0
19 0
19 0
18 0
19 0
19 0
18 0
18 0
18 0
19 0
19 0
20 0
20 0
20 0
12 0
9 0
9 0
8 0
8 0
8 0
8 0
8 0
8 0
7 0
7 0
6 0
15 0
18 0
106 2
114 2
142 2
153 2
190 2
355 5
381 5
416 6
423 6
441 6
508 6
532 6
544 6
555 6
559 6
558 6
561 6
573 6
635 7
637 7
642 8
642 8
648 9
648 9
649 9
647 9
647 9
646 9
650 9
651 9
659 10
703 10
709 10
774 10
775 10
839 11
757 9
745 9
709 9
664 8
660 8
541 5
535 5
501 4
492 4
469 3
412 3
386 3
383 3
375 3
371 3
372 3
372 3
344 3
328 2
328 1
327 1
334 1
369 2
379 2
379 2
380 2
386 3
387 3
382 3
381 3
376 3
332 3
329 4
250 4
244 4
173 3
181 3
170 2
171 2
145 2
138 2
139 2
141 2
139 2
142 2
143 2
228 2
282 2
311 2
435 2
1508 7
1623 7
1668 7
1677 7
1791 7
1905 7
1988 7
2153 7
2173 7
2220 6
2233 6
2285 5
2307 6
2333 6
2390 6
2453 6
2465 6
2463 6
2461 6
2367 6
2368 6
2356 6
2358 6
2334 6
2331 6
2326 6
2318 6
2306 6
2307 6
2252 6
2124 6
2077 6
1956 6
1897 6
1562 5
1454 4
743 1
706 1
661 1
652 1
593 1
480 1
405 1
252 1
231 1
176 1
168 1
118 1
107 0
78 0
62 0
21 0
18 0
18 0
15 0
14 0
10 0
10 0
10 0
10 0
9 0
9 0
9 0
8 0
8 0
8 0
8 0
9 0
12 0
10 0
10 0
10 0
9 0
6 0
6 0
6 0
6 0
6 0
6 0
6 0
7 0
7 0
11 0
13 0
13 0
13 0
13 0
14 0
15 0
17 0
18 0
32 0
33 0
36 0
40 0
42 0
54 0
96 0
97 0
96 0
96 0
99 0
100 0
100 0
100 0
103 0
102 0
100 0
101 0
101 0
101 0
101 0
103 0
103 0
121 0
121 0
122 0
121 0
119 0
120 0
210 1
209 1
213 1
213 1
215 1
210 1
209 1
188 1
188 1
165 1
164 1
160 1
148 1
116 1
116 1
27 0
25 0
25 0
24 0
22 0
22 0
16 0
16 0
16 0
16 0
16 0
16 0
16 0
15 0
15 0
15 0
13 0
14 0
14 0
15 0
14 0
13 0
28 0
23 0
22 0
22 0
23 0
23 0
24 0
24 0
24 0
23 0
23 0
23 0
23 1
23 1
23 1
23 1
23 1
23 1
23 1
23 1
23 1
23 1
23 1
42 1
42 1
42 1
42 1
43 1
43 1
45 1
45 1
44 1
42 1
36 1
36 1
36 1
24 1
24 1
5 1
5 1
4 1
4 1
3 1
3 1
1 1
1 1
1 1
1 1
1 0
1 0
1 0
1 0
1 0
1 0
0 0
0 0
0 0
0 0
0 0
0 0
0 0
0 0
0 0
0 0
0 0
0 0
0 0
0 0
0 0
0 0
0 0
0 0
0 0
0 0
0 0
0 0
0 0
0 0
0 0
0 0
0 0
0 0
0 0
0 0
0 0
0 0
0 0
0 0
0 0
0 0
0 0
0 0
0 0
0 0
0 0
0 0
0 0
0 0
0 0
0 0
0 0
0 0
0 0
0 0
0 0
0 0
0 0
0 0
0 0
0 0
0 0
0 0
0 0
0 0
0 0
0 0
0 0
0 0
0 0
0 0
0 0
0 0
0 0
0 0
0 0
0 0
0 0
0 0
0 0
0 0
0 0
0 0
0 0
0 0
0 0
0 0
0 0
0 0
0 0
0 0
0 0
0 0
0 0
0 0
0 0
0 0
0 0
0 0
0 0
0 0
0 0
0 0
0 0
0 0
0 0
0 0
0 0
0 0
0 0
0 0
1 0
12 0
37 0
267 0
732 0
745 0
753 0
770 0
770 0
771 0
771 0
772 0
781 0
782 0
783 0
784 0
794 1
794 1
797 1
797 1
797 1
797 1
796 1
796 1
796 1
796 1
796 1
796 1
796 1
796 1
796 1
803 1
804 1
810 1
853 1
836 1
817 1
773 1
700 1
462 1
136 1
122 1
118 1
102 1
102 1
102 1
100 1
98 1
89 1
88 1
87 1
88 1
85 0
86 0
101 1
101 1
119 1
123 1
123 1
124 1
127 1
130 1
130 1
130 1
132 1
135 1
135 1
124 1
124 1
122 1
82 1
82 1
129 1
250 1
275 1
291 1
296 1
299 1
323 1
371 1
378 1
398 1
466 2
471 2
479 2
480 2
480 2
477 2
469 2
468 2
452 1
452 1
430 1
431 1
428 1
427 1
427 1
426 1
425 1
438 1
444 1
448 1
472 1
496 1
572 1
576 1
568 1
532 1
493 1
383 1
363 1
346 1
340 1
322 1
297 1
271 1
261 1
275 1
258 0
258 0
257 0
264 0
264 0
264 0
264 0
264 0
263 0
269 0
273 0
273 0
272 0
272 0
272 0
273 0
272 0
258 0
245 0
229 0
214 0
212 0
147 0
149 0
149 0
153 0
155 0
165 0
165 0
166 0
182 0
185 0
200 0
224 0
245 0
362 0
731 0
799 0
849 0
861 0
865 0
869 0
870 0
870 0
886 0
882 0
882 0
889 0
894 0
895 0
895 0
929 0
979 0
978 0
977 0
971 0
963 0
953 0
948 0
947 0
946 0
942 0
1005 0
1000 0
1032 0
1044 0
1177 1
1195 1
1181 1
1121 1
1062 1
963 1
580 1
509 1
478 1
469 1
468 1
464 1
460 1
481 1
465 1
462 1
461 1
465 1
462 1
456 1
423 1
408 1
383 1
384 1
385 1
385 1
385 1
382 1
382 1
382 1
411 1
478 1
588 2
583 2
604 2
603 2
462 1
454 1
499 1
490 1
520 1
655 1
2905 1
8040 2
8272 2
10470 2
11040 2
11429 3
12142 3
13897 7
14386 7
14567 7
14636 7
14635 7
14639 7
14752 7
14799 7
15016 7
15330 8
15542 8
15596 8
15606 8
15602 8
15592 7
15585 7
15559 7
15505 7
15391 7
15728 7
15721 8
15725 9
15730 10
15732 10
15729 11
15670 11
15634 11
15405 11
14210 11
12060 11
8214 11
8053 11
5898 11
5151 11
5042 12
4381 12
2923 8
2629 8
2490 8
2432 7
2459 11
2456 11
2341 11
2231 11
1965 11
1663 11
1537 10
1508 10
1507 11
1508 11
1508 11
1505 11
1501 11
1493 11
1526 11
1281 11
1326 9
1321 9
1321 9
1327 8
1344 8
1338 8
1329 8
1323 8
1322 8
1314 7
1170 12
1115 12
1082 12
1094 12
504 9
515 9
515 9
513 9
511 9
511 9
489 7
490 7
478 7
759 14
802 17
1065 18
1261 18
1282 18
1285 17
1288 17
1289 17
1301 17
1327 18
1339 18
1336 18
1120 18
1098 18
1100 19
1084 19
1166 18
1156 18
1155 18
1145 18
1179 18
1211 18
1292 18
1450 13
1550 13
2904 13
3180 13
3340 13
3390 14
3424 14
3439 14
3442 14
3447 14
3450 15
3489 15
3460 17
3082 6
2960 6
2897 6
2763 6
2746 6
2736 6
2752 7
2751 7
2738 7
2732 7
2713 8
2707 8
2717 8
2730 7
2759 10
2836 22
2748 23
2763 23
2790 23
2780 24
2748 25
2708 26
2586 27
2285 28
1996 28
796 29
680 29
550 28
503 27
479 27
465 27
469 27
487 27
489 27
484 26
471 24
492 24
522 24
527 24
580 24
663 24
880 24
862 23
839 23
855 23
855 23
902 24
928 24
1088 25
1161 25
1146 20
1089 9
1091 8
1090 8
1063 8
1074 7
1061 7
1059 6
1070 6
1173 5
1254 5
1259 4
1296 4
1395 5
1436 6
1454 6
1450 6
1460 6
1448 6
1443 6
1452 6
1449 8
1425 8
1372 8
1318 8
1282 9
1249 8
1027 7
1020 6
1066 7
1035 8
948 8
865 8
758 8
864 9
1046 12
1148 12
1250 12
1246 12
1245 12
1248 13
1264 13
1258 15
1253 15
1242 15
1334 16
2511 28
2490 28
2440 28
2514 29
2711 30
2935 31
5815 49
10965 60
17327 76
19943 86
21526 88
22850 87
23951 89
24662 90
25210 91
26421 93
26834 96
27179 98
27925 100
30028 108
30293 115
30450 119
30503 120
30554 120
30312 119
30262 115
30189 114
30159 112
30117 112
30097 112
29929 108
29888 107
29851 104
29747 112
29546 115
29479 116
28603 110
28355 109
27535 107
27113 103
26509 99
25405 98
20601 79
15829 69
10876 55
9774 48
8325 46
7192 45
5888 43
5510 42
4844 37
4044 33
3716 29
3319 27
2484 26
549 17
450 16
355 16
307 15
306 15
301 15
181 15
179 15
179 15
179 15
175 15
169 15
171 15
172 15
130 6
95 2
80 2
59 1
57 1
63 1
65 1
69 1
71 1
71 1
71 1
71 1
71 1
72 1
72 1
74 1
75 0
75 0
74 0
71 0
74 0
151 1
147 1
134 1
131 1
129 1
125 1
124 1
146 1
234 1
319 2
369 2
384 2
390 2
390 2
391 2
429 2
992 6
1038 6
1041 6
1044 6
1041 6
1040 6
1037 6
1036 6
1035 6
1037 6
1042 6
1050 6
1064 6
1103 7
1239 10
1277 12
1278 12
1269 12
1268 12
1262 12
1211 11
1210 11
1192 11
1188 11
1184 11
1164 11
1142 11
1120 11
1004 11
973 10
945 10
915 10
903 10
879 10
843 9
797 9
304 6
291 6
294 7
291 7
291 7
289 7
289 7
289 7
287 7
281 7
276 7
259 7
218 6
174 6
39 3
31 1
30 1
30 1
30 1
30 1
30 1
30 1
30 1
30 1
30 1
30 1
30 1
31 1
31 1
32 1
35 1
107 2
111 2
129 2
142 2
136 2
133 2
131 2
124 1
123 1
122 1
124 1
130 1
133 1
136 1
144 1
160 1
168 1
204 1
251 1
263 1
315 1
317 1
317 1
317 1
317 1
317 1
317 1
318 1
318 1
318 1
317 1
317 1
315 1
314 1
309 1
304 1
231 0
226 0
214 0
201 0
199 0
202 0
202 0
203 0
241 0
263 0
282 0
321 0
336 0
334 0
318 0
295 0
265 0
237 0
225 0
220 0
177 0
179 0
179 0
179 0
181 0
185 1
185 1
184 1
184 1
186 1
186 1
186 1
188 1
216 1
236 1
253 2
293 2
294 2
294 2
296 2
298 2
287 2
319 2
349 3
322 3
319 3
309 3
275 3
262 3
260 3
260 3
256 3
256 3
261 3
261 3
264 3
264 3
262 3
262 3
262 2
259 2
256 2
256 2
255 2
255 2
246 2
243 2
241 2
239 2
204 1
179 1
174 0
159 1
294 2
293 2
290 2
280 2
271 2
225 2
211 2
195 2
193 2
195 2
192 2
193 2
193 2
193 2
193 2
190 2
183 2
181 2
182 2
182 2
182 2
182 2
182 2
182 2
182 2
182 2
182 2
182 2
182 2
182 2
181 2
181 2
181 2
174 1
172 1
157 1
29 0
25 0
25 0
25 0
26 0
26 0
19 0
15 0
10 0
10 0
10 0
9 0
9 0
9 0
9 0
9 0
9 0
9 0
7 0
7 0
7 0
12 0
12 0
12 0
12 0
12 0
12 0
12 0
12 0
12 0
12 0
12 0
12 0
12 0
7 0
7 0
6 0
6 0
7 0
8 0
7 0
7 0
7 0
7 0
7 0
7 0
7 0
7 0
7 0
7 0
7 0
7 0
7 0
7 0
4 0
2 0
2 0
2 0
2 0
2 0
2 0
2 0
2 0
2 0
2 0
2 0
2 0
2 0
2 0
2 0
2 0
2 0
2 0
2 0
1 0
0 0
0 0
0 0
0 0
0 0
2 0
2 0
4 1
6 1
8 2
16 2
21 2
47 2
59 2
70 2
70 2
71 2
71 2
73 2
73 2
73 2
73 2
73 2
73 2
73 2
73 2
73 2
73 2
73 2
73 2
73 2
73 2
73 2
73 2
73 2
73 2
73 2
72 2
72 2
72 2
72 2
70 2
65 2
58 1
58 1
55 0
42 0
37 0
18 0
10 0
5 0
5 0
3 0
4 0
3 0
3 0
3 0
3 0
3 0
3 0
3 0
3 0
3 0
8 1
31 2
43 2
44 2
44 2
44 2
44 2
44 2
44 2
44 2
44 2
44 2
42 2
42 2
42 2
42 2
42 2
42 2
42 2
42 2
41 2
41 2
41 2
41 2
41 2
41 2
41 2
41 2
41 2
41 2
41 2
42 2
39 1
35 0
33 0
25 0
12 0
2 0
1 0
1 0
1 0
1 0
3 0
3 0
3 0
3 0
3 0
3 0
3 0
3 0
4 0
4 0
4 0
4 0
4 0
4 0
4 0
4 0
4 0
4 0
4 0
4 0
4 0
4 0
4 0
4 0
4 0
3 0
3 0
3 0
3 0
3 0
3 0
3 0
3 0
2 0
2 0
1 0
1 0
1 0
1 0
1 0
2 0
2 0
2 0
2 0
1 0
1 0
1 0
1 0
1 0
1 0
1 0
1 0
1 0
1 0
1 0
1 0
1 0
1 0
1 0
1 0
1 0
1 0
1 0
1 0
1 0
1 0
1 0
1 0
1 0
1 0
1 0
2 0
2 0
2 0
1 0
1 0
1 0
1 0
1 0
1 0
1 0
1 0
1 0
1 0
1 0
1 0
1 0
1 0
1 0
1 0
1 0
1 0
1 0
1 0
1 0
1 0
1 0
1 0
1 0
1 0
1 0
1 0
1 0
1 0
1 0
1 0
1 0
0 0
1 0
1 0
1 0
1 0
1 0
1 0
1 0
2 0
2 0
2 0
2 0
2 0
2 0
2 0
2 0
2 0
2 0
2 0
2 0
2 0
2 0
2 0
2 0
2 0
2 0
2 0
2 0
2 0
2 0
2 0
2 0
1 0
1 0
1 0
1 0
1 0
1 0
1 0
2 0
2 0
2 0
2 0
2 0
1 0
1 0
1 0
1 0
1 0
1 0
1 0
1 0
1 0
1 0
1 0
1 0
1 0
1 0
1 0
1 0
1 0
1 0
1 0
1 0
1 0
1 0
1 0
1 0
1 0
1 0
1 0
1 0
1 0
1 0
1 0
0 0
0 0
0 0
0 0
0 0
0 0
0 0
0 0
0 0
0 0
0 0
0 0
0 0
0 0
0 0
0 0
0 0
0 0
0 0
0 0
0 0
0 0
0 0
0 0
0 0
0 0
0 0
0 0
0 0
0 0
0 0
0 0
0 0
0 0
0 0
0 0
0 0
0 0
0 0
0 0
0 0
0 0
0 0
0 0
0 0
0 0
0 0
0 0
0 0
0 0
0 0
0 0
0 0
0 0
0 0
0 0
0 0
0 0
0 0
0 0
0 0
0 0
0 0
0 0
0 0
0 0
0 0
0 0
0 0
0 0
0 0
0 0
0 0
0 0
0 0
0 0
0 0
0 0
0 0
0 0
0 0
0 0
0 0
0 0
0 0
0 0
0 0
0 0
0 0
0 0
0 0
0 0
0 0
0 0
0 0
0 0
0 0
0 0
0 0
0 0
0 0
0 0
0 0
0 0
0 0
0 0
0 0
0 0
0 0
0 0
0 0
0 0
0 0
0 0
0 0
0 0
0 0
0 0
0 0
0 0
0 0
0 0
0 0
0 0
0 0
0 0
0 0
0 0
0 0
0 0
0 0
0 0
0 0
0 0
0 0
0 0
0 0
0 0
0 0
0 0
0 0
0 0
0 0
0 0
0 0
0 0
0 0
0 0
0 0
0 0
0 0
0 0
0 0
0 0
0 0
0 0
0 0
0 0
0 0
0 0
0 0
0 0
0 0
0 0
0 0
0 0
0 0
0 0
0 0
0 0
0 0
0 0
0 0
0 0
0 0
0 0
0 0
0 0
0 0
0 0
0 0
0 0
0 0
0 0
0 0
0 0
0 0
0 0
0 0
0 0
0 0
0 0
0 0
0 0
0 0
0 0
0 0
0 0
0 0
0 0
0 0
0 0
0 0
0 0
0 0
0 0
0 0
0 0
0 0
0 0
0 0
0 0
0 0
0 0
0 0
0 0
0 0
0 0
0 0
0 0
0 0
0 0
0 0
0 0
0 0
0 0
0 0
0 0
0 0
0 0
0 0
0 0
0 0
0 0
0 0
0 0
0 0
0 0
0 0
0 0
0 0
0 0
0 0
0 0
0 0
0 0
0 0
0 0
0 0
0 0
0 0
0 0
0 0
0 0
0 0
0 0
0 0
0 0
0 0
0 0
0 0
0 0
0 0
0 0
0 0
0 0
0 0
0 0
0 0
0 0
0 0
0 0
0 0
0 0
0 0
0 0
0 0
0 0
0 0
0 0
0 0
0 0
0 0
0 0
0 0
0 0
0 0
0 0
0 0
0 0
0 0
0 0
0 0
0 0
0 0
0 0
0 0
0 0
0 0
0 0
0 0
0 0
0 0
0 0
0 0
0 0
0 0
0 0
0 0
0 0
0 0
0 0
0 0
0 0
0 0
0 0
0 0
0 0
0 0
0 0
0 0
0 0
0 0
0 0
0 0
0 0
0 0
0 0
0 0
0 0
0 0
0 0
0 0
0 0
0 0
0 0
0 0
0 0
0 0
0 0
0 0
0 0
0 0
0 0
0 0
0 0
0 0
0 0
0 0
0 0
0 0
0 0
0 0
0 0
0 0
0 0
0 0
0 0
0 0
0 0
0 0
0 0
0 0
0 0
0 0
0 0
0 0
0 0
0 0
0 0
0 0
0 0
0 0
0 0
0 0
0 0
0 0
0 0
0 0
0 0
0 0
0 0
0 0
0 0
0 0
0 0
0 0
0 0
0 0
0 0
0 0
0 0
0 0
0 0
0 0
0 0
0 0
0 0
0 0
0 0
0 0
0 0
0 0
0 0
0 0
0 0
0 0
0 0
0 0
0 0
0 0
0 0
0 0
0 0
0 0
0 0
0 0
0 0
0 0
0 0
0 0
0 0
0 0
0 0
0 0
0 0
0 0
0 0
0 0
0 0
0 0
0 0
0 0
0 0
0 0
0 0
0 0
0 0
0 0
0 0
0 0
0 0
0 0
0 0
0 0
0 0
0 0
0 0
0 0
0 0
0 0
0 0
0 0
0 0
0 0
0 0
0 0
0 0
0 0
0 0
0 0
0 0
0 0
0 0
0 0
0 0
0 0
0 0
0 0
0 0
0 0
0 0
0 0
0 0
0 0
0 0
0 0
0 0
0 0
0 0
0 0
0 0
0 0
0 0
0 0
0 0
0 0
0 0
0 0
0 0
0 0
0 0
0 0
0 0
0 0
0 0
0 0
0 0
0 0
0 0
0 0
0 0
0 0
0 0
0 0
0 0
0 0
0 0
0 0
0 0
0 0
0 0
0 0
0 0
0 0
0 0
0 0
0 0
0 0
0 0
0 0
0 0
0 0
0 0
0 0
0 0
0 0
0 0
0 0
0 0
0 0
0 0
0 0
0 0
0 0
0 0
0 0
0 0
0 0
0 0
0 0
0 0
0 0
0 0
0 0
0 0
0 0
0 0
0 0
0 0
0 0
0 0
0 0
0 0
0 0
0 0
0 0
0 0
0 0
0 0
0 0
0 0
0 0
0 0
0 0
0 0
0 0
0 0
0 0
0 0
0 0
0 0
0 0
0 0
0 0
0 0
0 0
0 0
0 0
0 0
0 0
0 0
0 0
0 0
0 0
0 0
0 0
0 0
0 0
0 0
0 0
0 0
0 0
0 0
0 0
0 0
0 0
0 0
0 0
0 0
0 0
0 0
0 0
0 0
0 0
0 0
0 0
0 0
0 0
0 0
0 0
0 0
0 0
0 0
0 0
0 0
0 0
0 0
0 0
0 0
0 0
0 0
0 0
0 0
0 0
0 0
0 0
0 0
0 0
0 0
0 0
0 0
0 0
0 0
0 0
0 0
0 0
0 0
0 0
0 0
0 0
0 0
0 0
0 0
0 0
0 0
0 0
0 0
0 0
0 0
0 0
0 0
0 0
0 0
0 0
0 0
0 0
0 0
0 0
0 0
0 0
0 0
0 0
0 0
0 0
0 0
0 0
0 0
0 0
0 0
0 0
0 0
0 0
0 0
0 0
0 0
0 0
0 0
0 0
0 0
0 0
0 0
0 0
0 0
0 0
0 0
0 0
0 0
0 0
0 0
0 0
0 0
0 0
0 0
0 0
0 0
0 0
0 0
0 0
0 0
0 0
0 0
0 0
0 0
0 0
0 0
0 0
0 0
0 0
0 0
0 0
0 0
0 0
0 0
0 0
0 0
0 0
0 0
0 0
0 0
0 0
0 0
0 0
0 0
0 0
0 0
0 0
0 0
0 0
0 0
0 0
0 0
0 0
0 0
0 0
0 0
0 0
0 0
0 0
0 0
0 0
0 0
0 0
0 0
0 0
0 0
0 0
0 0
0 0
0 0
0 0
0 0
0 0
0 0
0 0
0 0
0 0
0 0
0 0
0 0
0 0
0 0
0 0
0 0
0 0
0 0
0 0
0 0
0 0
0 0
0 0
0 0
0 0
0 0
0 0
0 0
0 0
0 0
0 0
0 0
0 0
0 0
0 0
0 0
0 0
0 0
0 0
0 0
0 0
0 0
0 0
0 0
0 0
0 0
0 0
0 0
0 0
0 0
0 0
0 0
0 0
0 0
0 0
0 0
0 0
0 0
0 0
0 0
0 0
0 0
0 0
0 0
0 0
0 0
0 0
0 0
0 0
0 0
0 0
0 0
0 0
0 0
0 0
0 0
0 0
0 0
0 0
0 0
0 0
0 0
0 0
0 0
0 0
0 0
0 0
0 0
0 0
0 0
0 0
0 0
0 0
0 0
0 0
0 0
0 0
0 0
0 0
0 0
0 0
0 0
0 0
0 0
0 0
0 0
0 0
0 0
0 0
0 0
0 0
0 0
0 0
0 0
0 0
0 0
0 0
0 0
0 0
0 0
0 0
0 0
0 0
0 0
0 0
0 0
0 0
0 0
0 0
0 0
0 0
0 0
0 0
0 0
0 0
0 0
0 0
0 0
0 0
0 0
0 0
0 0
0 0
0 0
0 0
0 0
0 0
0 0
0 0
0 0
0 0
0 0
0 0
0 0
0 0
0 0
0 0
0 0
0 0
0 0
0 0
0 0
0 0
0 0
0 0
0 0
0 0
0 0
0 0
0 0
0 0
0 0
0 0
0 0
0 0
0 0
0 0
0 0
0 0
0 0
0 0
0 0
0 0
0 0
0 0
0 0
0 0
0 0
0 0
0 0
0 0
0 0
0 0
0 0
0 0
0 0
0 0
0 0
0 0
0 0
0 0
0 0
0 0
0 0
0 0
0 0
0 0
0 0
0 0
0 0
0 0
0 0
0 0
0 0
0 0
0 0
0 0
0 0
0 0
0 0
0 0
0 0
0 0
0 0
0 0
0 0
0 0
0 0
0 0
0 0
0 0
0 0
0 0
0 0
0 0
0 0
0 0
0 0
0 0
0 0
0 0
0 0
0 0
0 0
0 0
0 0
0 0
0 0
0 0
0 0
0 0
0 0
0 0
0 0
0 0
0 0
0 0
0 0
0 0
0 0
0 0
0 0
0 0
0 0
0 0
0 0
0 0
0 0
0 0
0 0
0 0
0 0
0 0
0 0
0 0
0 0
0 0
0 0
0 0
0 0
0 0
0 0
0 0
0 0
0 0
0 0
0 0
0 0
0 0
0 0
0 0
0 0
0 0
0 0
0 0
0 0
0 0
0 0
0 0
0 0
0 0
0 0
0 0
0 0
0 0
0 0
0 0
0 0
0 0
0 0
0 0
0 0
0 0
0 0
0 0
0 0
0 0
0 0
0 0
0 0
0 0
0 0
0 0
0 0
0 0
0 0
0 0
0 0
0 0
0 0
0 0
0 0
0 0
0 0
0 0
0 0
0 0
0 0
0 0
0 0
0 0
0 0
0 0
0 0
0 0
0 0
0 0
0 0
0 0
0 0
0 0
0 0
0 0
0 0
0 0
0 0
0 0
0 0
0 0
0 0
0 0
0 0
0 0
0 0
0 0
0 0
0 0
0 0
0 0
0 0
0 0
0 0
0 0
0 0
0 0
0 0
0 0
0 0
0 0
0 0
0 0
0 0
0 0
0 0
0 0
0 0
0 0
0 0
0 0
0 0
0 0
0 0
0 0
0 0
0 0
0 0
0 0
0 0
0 0
0 0
0 0
0 0
0 0
0 0
0 0
0 0
0 0
0 0
0 0
0 0
0 0
0 0
0 0
0 0
0 0
0 0
0 0
0 0
0 0
0 0
0 0
0 0
0 0
0 0
0 0
0 0
0 0
0 0
0 0
0 0
0 0
0 0
0 0
0 0
0 0
0 0
0 0
0 0
0 0
0 0
0 0
0 0
0 0
0 0
0 0
0 0
0 0
0 0
0 0
0 0
0 0
0 0
0 0
0 0
0 0
0 0
0 0
0 0
0 0
0 0
0 0
0 0
0 0
0 0
0 0
0 0
0 0
0 0
0 0
0 0
0 0
0 0
0 0
0 0
0 0
0 0
0 0
0 0
0 0
0 0
0 0
0 0
0 0
0 0
0 0
0 0
0 0
0 0
0 0
0 0
0 0
0 0
0 0
0 0
0 0
0 0
0 0
0 0
0 0
0 0
0 0
0 0
0 0
0 0
0 0
0 0
0 0
0 0
0 0
0 0
0 0
0 0
0 0
0 0
0 0
0 0
0 0
0 0
0 0
0 0
0 0
0 0
0 0
0 0
0 0
0 0
0 0
0 0
0 0
0 0
0 0
0 0
0 0
0 0
0 0
0 0
0 0
0 0
0 0
0 0
0 0
0 0
0 0
0 0
0 0
0 0
0 0
0 0
0 0
0 0
0 0
0 0
0 0
0 0
0 0
0 0
0 0
0 0
0 0
0 0
0 0
0 0
0 0
0 0
0 0
0 0
0 0
0 0
0 0
0 0
0 0
0 0
0 0
0 0
0 0
0 0
0 0
0 0
0 0
0 0
0 0
0 0
0 0
0 0
0 0
0 0
0 0
0 0
0 0
0 0
0 0
0 0
0 0
0 0
0 0
0 0
0 0
0 0
0 0
0 0
0 0
0 0
0 0
0 0
0 0
0 0
0 0
0 0
0 0
0 0
0 0
0 0
0 0
0 0
0 0
0 0
0 0
0 0
0 0
0 0
0 0
0 0
0 0
0 0
0 0
0 0
0 0
0 0
0 0
0 0
0 0
0 0
0 0
0 0
0 0
0 0
0 0
0 0
0 0
0 0
0 0
0 0
0 0
0 0
0 0
0 0
0 0
0 0
0 0
0 0
0 0
0 0
0 0
0 0
0 0
0 0
0 0
0 0
0 0
0 0
0 0
0 0
0 0
0 0
0 0
0 0
0 0
0 0
0 0
0 0
0 0
0 0
0 0
0 0
0 0
0 0
0 0
0 0
0 0
0 0
0 0
0 0
0 0
0 0
0 0
0 0
0 0
0 0
0 0
0 0
0 0
0 0
0 0
0 0
0 0
0 0
0 0
0 0
0 0
0 0
0 0
0 0
0 0
0 0
0 0
0 0
0 0
0 0
0 0
0 0
0 0
0 0
0 0
0 0
0 0
0 0
0 0
0 0
0 0
0 0
0 0
0 0
0 0
0 0
0 0
0 0
0 0
0 0
0 0
0 0
0 0
0 0
0 0
0 0
0 0
0 0
0 0
0 0
0 0
0 0
0 0
0 0
0 0
0 0
0 0
0 0
0 0
0 0
0 0
0 0
0 0
0 0
0 0
0 0
0 0
0 0
0 0
0 0
0 0
0 0
0 0
0 0
0 0
0 0
0 0
0 0
0 0
0 0
0 0
0 0
0 0
0 0
0 0
0 0
1 0
1 0
1 0
1 0
1 0
1 0
1 0
1 0
1 0
1 0
1 0
1 0
1 0
1 0
1 0
1 0
1 0
1 0
1 0
1 0
1 0
1 0
1 0
1 0
1 0
1 0
1 0
1 0
1 0
1 0
1 0
1 0
1 0
1 0
1 0
1 0
0 0
0 0
0 0
0 0
0 0
0 0
0 0
0 0
0 0
0 0
0 0
0 0
0 0
0 0
0 0
1 0
1 0
1 0
1 0
2 0
2 0
2 0
2 0
2 0
2 0
2 0
2 0
2 0
2 0
2 0
2 0
2 0
2 0
2 0
2 0
2 0
2 0
2 0
2 0
2 0
2 0
2 0
2 0
2 0
2 0
2 0
2 0
2 0
2 0
2 0
2 0
1 0
1 0
1 0
1 0
0 0
0 0
0 0
0 0
0 0
0 0
0 0
0 0
0 0
1 0
1 0
1 0
1 0
1 0
1 0
1 0
1 0
1 0
1 0
1 0
1 0
1 0
1 0
2 0
2 0
2 0
2 0
2 0
2 0
2 0
2 0
2 0
2 0
2 0
2 0
2 0
2 0
2 0
2 0
2 0
2 0
2 0
2 0
1 0
1 0
1 0
1 0
1 0
1 0
1 0
1 0
1 0
1 0
1 0
1 0
1 0
1 0
1 0
1 0
0 0
0 0
0 0
0 0
0 0
0 0
0 0
0 0
0 0
0 0
0 0
0 0
0 0
0 0
0 0
0 0
0 0
0 0
0 0
0 0
0 0
0 0
0 0
0 0
0 0
0 0
0 0
0 0
0 0
0 0
0 0
0 0
0 0
0 0
0 0
0 0
0 0
0 0
0 0
0 0
0 0
0 0
0 0
0 0
0 0
0 0
0 0
0 0
0 0
0 0
0 0
0 0
0 0
0 0
0 0
0 0
0 0
0 0
0 0
0 0
0 0
0 0
0 0
0 0
0 0
0 0
0 0
0 0
0 0
0 0
0 0
0 0
0 0
0 0
0 0
0 0
0 0
0 0
0 0
1 0
1 0
1 0
1 0
1 0
1 0
1 1
1 1
1 1
1 1
1 1
1 1
1 1
1 1
1 1
0 1
0 1
0 1
0 1
0 1
0 1
0 1
0 1
0 1
0 1
0 1
0 1
0 1
0 1
0 1
0 1
0 1
0 1
0 1
0 1
0 1
1 1
1 1
1 1
1 1
1 1
1 1
2 0
2 0
2 0
2 0
2 0
2 0
2 0
2 0
2 0
2 0
2 0
2 0
2 0
2 0
2 0
2 0
2 0
2 0
2 0
2 0
2 0
2 0
2 0
2 0
2 0
2 0
2 0
2 0
2 0
2 0
1 0
1 0
1 0
2 0
2 0
2 0
1 0
1 0
1 0
1 0
1 0
1 0
1 0
1 0
1 0
1 0
1 0
1 0
1 0
1 0
1 0
1 0
1 0
1 0
1 0
1 0
1 0
1 0
1 0
1 0
1 0
1 0
1 0
1 0
1 0
1 0
1 0
1 0
1 0
0 0
0 0
0 0
0 0
0 0
0 0
0 0
0 0
0 0
0 0
0 0
0 0
0 0
0 0
0 0
0 0
0 0
0 0
0 0
0 0
0 0
0 3
0 3
0 3
0 3
0 3
0 4
0 4
0 4
0 4
0 4
0 4
0 4
0 4
0 4
0 4
0 4
0 4
0 4
0 4
0 4
0 4
0 4
0 4
0 4
0 4
0 4
0 4
0 4
0 4
0 4
0 4
0 4
0 4
0 4
0 4
0 4
0 1
0 1
0 1
0 1
0 1
0 0
0 0
0 0
0 0
0 0
0 0
0 0
0 0
0 0
0 0
0 0
0 0
0 0
0 0
0 0
0 0
0 0
0 0
0 0
0 0
1 0
1 0
1 0
1 0
1 0
1 0
1 0
1 0
1 1
1 1
1 1
1 1
1 1
1 1
1 1
1 1
1 1
1 1
1 1
1 1
1 1
1 1
1 1
1 1
1 1
1 1
1 1
1 1
1 1
1 1
1 1
1 1
1 1
1 1
1 1
3 1
2 1
2 1
2 1
2 1
2 1
2 1
2 1
2 1
2 0
2 0
2 0
2 0
2 0
2 0
2 0
2 0
2 0
2 0
2 1
2 1
2 1
2 1
2 1
2 1
2 1
2 1
2 1
2 1
2 1
2 1
2 1
2 1
2 1
1 1
1 1
0 1
0 1
0 1
0 1
0 1
0 1
0 1
0 1
0 1
0 1
0 1
0 1
0 1
0 1
0 0
0 0
0 0
0 0
0 0
0 0
0 0
0 0
0 0
0 0
0 0
0 0
0 0
0 0
0 0
0 0
0 0
0 0
0 0
0 0
0 0
0 0
0 0
0 0
0 0
0 0
0 0
1 0
1 0
1 0
1 0
1 0
1 0
1 0
1 0
1 0
1 0
1 0
1 0
1 0
1 0
1 0
1 0
1 0
1 0
1 0
1 1
1 1
1 1
1 1
1 1
1 1
1 1
1 1
1 1
1 1
1 1
1 1
1 1
1 1
0 1
0 1
0 1
0 1
0 1
0 1
0 1
0 1
0 1
0 1
0 1
0 1
0 1
0 1
0 1
0 1
0 0
0 0
0 0
0 0
0 0
0 0
0 0
0 0
0 0
0 0
0 0
0 0
0 0
0 0
0 0
0 0
0 0
0 0
0 0
0 0
0 0
0 0
0 0
0 0
0 0
0 0
0 0
0 0
0 0
0 0
0 0
0 0
0 0
0 0
0 0
0 0
0 0
0 0
0 0
0 0
0 0
0 0
0 0
0 0
0 0
0 0
0 0
0 0
0 0
0 0
0 0
0 0
0 0
0 0
0 0
0 0
0 0
0 0
0 0
0 0
0 0
0 0
0 0
0 0
0 0
0 0
0 0
0 0
0 0
0 0
0 0
0 0
0 0
0 0
0 0
0 0
0 0
0 0
0 0
0 0
0 0
0 0
0 0
0 0
0 0
0 0
0 0
0 0
0 0
0 0
0 0
0 0
0 0
0 1
0 1
0 1
0 1
0 1
0 1
0 1
0 1
0 1
0 1
0 1
0 1
0 1
0 1
0 1
0 1
0 1
0 1
0 1
0 1
0 1
0 1
0 1
0 1
0 1
0 1
0 1
0 1
0 1
0 1
0 1
0 1
0 1
0 1
0 1
0 1
0 0
0 0
0 0
0 0
0 0
0 0
0 0
0 0
0 0
0 0
0 0
0 0
0 0
0 0
0 0
0 0
0 0
0 0
0 0
0 0
0 0
0 0
0 0
0 0
0 0
0 0
0 0
0 0
0 0
0 0
0 0
0 0
0 0
0 0
0 0
0 0
0 0
0 2
0 2
0 2
0 2
0 2
0 2
0 2
1 3
1 3
1 7
1 7
1 9
1 9
1 9
1 9
1 7
1 7
1 7
1 7
1 7
1 7
1 7
1 7
1 7
1 7
1 7
1 7
1 7
1 7
1 7
1 7
1 7
1 7
1 7
1 7
1 7
1 7
1 7
1 7
1 7
1 7
1 6
1 6
0 2
0 0
0 0
0 0
0 0
0 0
0 0
1 0
1 0
1 0
1 0
1 0
1 0
1 0
1 0
1 0
1 0
1 0
1 0
1 0
1 0
1 0
1 0
1 0
1 0
1 0
1 0
1 0
1 0
1 0
1 0
1 0
1 0
1 0
1 0
1 0
1 0
1 0
1 0
1 0
0 0
2 1
2 1
2 1
2 1
2 1
2 1
2 1
2 1
2 1
2 1
2 1
2 1
2 1
2 1
2 1
2 1
2 1
2 1
2 1
2 1
2 1
2 1
2 1
2 1
2 1
2 1
2 1
2 1
2 1
2 1
2 1
2 1
2 1
2 1
2 3
2 3
0 2
0 2
0 2
0 2
0 2
0 2
0 2
0 2
0 2
0 2
0 2
0 2
0 2
0 2
0 2
0 2
0 2
0 2
0 2
0 2
0 2
0 2
0 2
0 2
0 2
0 2
0 2
0 2
0 2
0 2
0 2
0 2
0 2
0 2
0 0
0 0
0 0
0 0
0 0
0 0
0 0
0 0
0 0
0 0
0 0
0 0
0 0
0 0
0 0
0 0
0 0
0 0
0 0
0 0
0 0
0 0
0 0
0 0
0 0
0 0
0 0
0 0
0 0
0 0
0 0
0 0
0 0
0 0
0 0
0 0
0 0
0 0
0 0
0 0
0 0
0 0
0 0
0 0
0 0
0 0
0 0
0 0
0 0
0 0
0 0
0 0
0 0
0 0
0 0
0 0
0 0
0 0
0 0
0 0
0 0
0 0
0 0
0 0
0 0
0 0
0 0
0 0
0 0
0 0
0 1
0 1
0 1
0 1
0 1
0 1
0 1
0 1
0 1
0 1
0 1
0 1
0 1
0 1
0 1
0 1
0 1
0 1
0 1
0 1
0 1
0 1
0 1
0 1
0 1
0 1
0 1
0 1
0 1
0 1
0 1
0 1
0 1
0 1
0 1
0 0
0 0
0 0
0 0
0 0
0 0
0 0
0 0
0 0
0 0
0 0
0 1
0 1
0 1
0 1
0 1
0 1
0 1
0 1
0 1
0 1
0 1
0 1
0 1
0 1
0 1
0 1
0 1
0 1
0 1
0 1
0 1
0 1
0 1
0 1
0 1
0 1
0 1
0 1
0 1
0 1
0 0
0 0
0 0
0 0
0 0
0 0
0 0
0 0
0 0
0 0
0 0
0 0
0 0
0 0
0 0
0 0
0 0
0 0
0 0
0 0
0 0
0 0
0 0
0 0
0 0
0 0
0 0
0 0
0 0
0 0
0 0
0 0
0 0
0 0
0 0
0 0
0 0
0 0
0 0
0 0
0 0
0 0
0 0
0 0
0 0
0 0
0 0
0 1
0 1
0 1
0 1
0 1
0 1
0 1
0 1
0 1
0 1
0 1
0 1
0 1
0 1
0 1
0 1
0 1
0 1
0 1
0 1
0 1
0 1
0 1
0 2
0 2
0 2
0 2
0 3
0 3
0 4
0 6
0 6
0 6
1 6
1 6
1 6
1 5
1 5
1 5
1 6
1 6
1 6
1 6
1 6
1 6
1 6
1 6
1 6
1 6
1 6
1 6
1 6
1 6
1 6
1 6
1 6
1 6
1 6
1 6
1 5
1 5
1 5
1 5
1 4
1 4
1 3
1 1
1 1
1 1
0 1
0 1
0 1
0 1
0 1
0 1
0 0
0 0
0 0
0 0
0 0
0 0
0 0
0 0
1 0
1 0
1 0
1 0
1 0
1 1
1 1
2 1
2 1
2 1
2 1
2 1
2 1
2 1
2 1
2 1
2 1
2 1
2 1
2 1
2 1
2 1
2 1
2 1
2 1
2 1
2 1
2 1
2 1
2 1
2 1
2 1
2 1
2 1
2 1
3 2
2 2
2 2
2 2
2 2
2 2
2 1
2 1
1 1
1 1
1 1
1 1
1 1
1 1
2 1
2 1
2 1
2 1
2 1
2 1
2 1
2 1
2 1
2 1
2 1
2 1
2 1
2 1
2 1
2 1
2 1
3 1
3 1
3 1
3 1
3 1
2 0
2 0
2 0
2 0
2 0
2 0
2 0
2 0
2 0
3 1
4 2
4 4
5 5
5 5
4 6
4 6
4 6
4 6
4 6
4 6
4 6
4 6
4 6
4 6
4 6
4 6
4 6
4 6
4 6
4 6
4 6
3 6
3 6
3 6
3 6
3 6
3 6
6 6
7 6
7 6
7 6
7 6
7 6
7 6
7 6
5 5
4 4
4 2
4 1
4 1
4 0
4 0
4 0
4 0
4 0
4 0
4 0
4 0
4 0
4 0
4 0
4 0
4 0
4 0
4 0
4 0
4 0
4 0
4 0
4 0
4 0
4 0
4 0
1 0
0 1
0 1
0 1
0 1
0 1
0 1
0 1
0 1
0 1
0 1
0 1
0 1
0 1
0 1
0 1
0 1
0 1
0 0
0 0
0 0
0 0
0 0
0 0
0 0
0 0
0 0
0 0
0 0
0 0
0 0
0 0
0 0
0 0
0 0
0 0
0 0
0 0
0 0
0 0
0 0
0 0
0 0
0 0
0 0
0 0
0 0
0 0
0 0
0 0
0 0
0 0
2 0
2 0
3 0
3 0
3 0
3 0
3 0
3 0
3 0
3 0
3 0
3 0
3 0
3 0
3 0
3 0
3 0
3 0
3 0
3 0
3 0
3 0
3 0
3 0
3 0
3 0
3 0
3 0
3 0
3 0
3 0
4 0
4 0
4 0
4 0
4 0
2 1
1 1
1 1
1 1
1 1
1 1
1 1
1 1
1 1
1 1
1 1
1 1
1 1
1 1
1 1
1 1
1 1
1 1
1 1
1 1
1 1
1 1
1 1
1 1
1 1
1 1
1 1
1 1
1 1
1 1
1 1
0 1
0 1
0 1
0 1
0 0
0 0
0 0
0 0
0 0
0 0
0 0
0 0
0 0
0 0
0 0
0 0
0 0
0 0
0 0
0 0
0 0
0 0
0 0
0 0
0 0
0 0
0 0
0 0
0 0
0 0
0 0
0 0
0 0
0 0
0 0
0 0
0 0
0 0
0 0
0 0
0 0
0 0
0 0
1 0
1 0
1 0
1 0
1 0
1 0
1 0
2 0
2 0
2 0
2 0
2 0
2 0
2 0
2 0
2 0
2 0
2 0
2 0
2 0
2 0
2 0
2 0
2 0
2 0
2 0
2 0
2 0
2 0
2 0
2 0
2 0
2 0
2 0
2 0
2 0
1 0
1 0
1 0
1 0
0 0
0 0
0 0
0 0
0 0
0 0
0 0
0 0
0 0
0 0
0 0
0 0
0 0
0 0
0 0
0 1
0 1
0 1
0 1
0 1
0 1
0 2
0 2
0 2
0 2
0 3
0 3
0 3
0 3
0 3
0 3
0 3
0 3
0 3
0 3
0 3
0 3
0 3
0 3
0 3
0 3
0 3
0 3
0 3
0 3
0 3
0 3
0 3
0 3
0 3
0 3
0 2
0 2
0 2
0 3
0 3
0 3
0 1
0 1
0 1
0 1
0 1
0 1
0 1
0 1
0 1
0 1
0 1
0 1
0 1
0 1
0 1
0 1
0 1
0 1
0 1
0 1
0 1
0 1
0 1
0 1
0 1
0 1
0 1
0 0
0 0
0 0
0 0
0 0
0 0
0 0
0 0
0 0
0 0
0 0
0 0
0 0
0 0
0 0
0 0
0 0
0 0
0 0
0 0
0 0
0 0
0 0
0 0
0 0
0 0
0 0
0 0
0 0
0 0
0 0
0 0
0 0
0 0
0 0
0 0
0 0
0 0
0 0
0 0
0 0
0 0
0 0
0 0
0 0
0 0
0 0
0 0
0 0
0 0
0 0
0 0
0 0
0 0
0 0
0 0
0 0
0 0
0 0
0 0
0 0
0 0
0 0
0 0
0 0
0 0
0 0
0 0
0 0
0 0
0 0
0 0
0 0
0 0
0 0
0 0
0 0
0 0
0 0
0 0
0 0
0 0
0 0
0 0
0 0
0 0
0 0
0 0
0 0
0 0
0 0
0 0
0 0
0 0
0 0
0 0
0 0
0 0
0 0
0 0
0 0
0 0
0 0
0 0
0 0
0 0
0 0
0 0
0 0
0 0
0 0
0 0
0 1
0 1
0 1
0 1
0 1
0 1
0 1
0 1
0 1
0 1
0 1
0 1
0 1
0 1
0 1
0 1
0 1
0 1
0 1
0 1
0 1
0 1
0 1
0 1
0 1
0 1
0 1
0 1
0 1
0 1
0 1
0 1
0 1
0 1
0 1
0 3
0 2
0 2
0 2
0 2
0 2
0 4
0 4
0 4
0 4
0 4
0 4
0 4
0 4
0 4
0 4
0 4
0 4
0 4
0 4
0 4
0 4
0 4
0 4
0 4
0 4
0 4
0 4
0 4
0 4
0 5
0 5
0 5
0 5
0 5
0 5
0 3
0 3
0 3
0 3
0 3
1 3
1 1
1 2
1 2
1 2
1 2
1 2
1 2
1 3
1 3
1 3
1 3
1 3
1 3
1 3
1 3
1 3
1 3
1 3
2 4
2 4
2 4
2 4
2 4
2 3
2 3
2 5
2 5
2 5
2 5
2 5
2 10
3 23
3 49
3 64
2 71
2 72
2 73
2 72
2 74
2 74
2 74
2 74
2 74
2 73
2 84
3 115
3 133
3 146
3 150
3 160
3 160
3 159
4 160
4 161
3 162
3 162
3 163
3 163
3 164
3 165
3 167
3 165
3 165
3 165
3 165
3 165
3 153
2 124
3 108
3 100
3 103
3 102
3 100
3 100
3 100
4 100
4 100
4 100
4 100
4 94
4 67
5 48
5 47
5 38
5 38
5 39
5 46
7 114
6 134
6 154
6 166
6 170
6 173
6 174
6 177
6 179
6 179
6 183
6 185
6 186
6 191
6 191
6 191
6 191
5 189
5 190
5 189
5 189
5 189
5 189
5 188
4 188
4 188
4 188
3 188
7 190
6 188
6 181
6 173
6 173
6 172
6 161
6 151
4 61
4 41
4 32
4 31
4 29
4 26
4 24
4 19
4 17
4 13
4 10
4 8
4 11
4 8
4 10
4 10
4 10
4 10
4 10
4 10
4 10
4 11
4 11
4 11
4 11
4 11
5 29
5 29
1 26
1 27
1 27
1 27
1 28
1 28
1 28
1 28
1 29
1 29
1 29
1 29
1 29
1 29
1 33
1 36
1 37
1 41
5 74
5 76
5 74
5 73
5 72
5 72
5 72
5 72
5 72
5 72
5 72
5 72
5 72
5 80
5 87
5 88
4 69
4 69
4 69
4 69
4 69
4 69
4 69
4 68
4 68
4 67
4 68
9 82
10 85
10 86
10 88
10 89
10 85
10 83
10 83
10 79
6 44
6 44
6 43
6 43
6 43
6 43
6 43
6 43
6 43
6 43
6 45
6 45
6 45
6 36
6 32
6 34
6 34
7 35
7 35
7 35
7 35
7 35
7 35
7 34
7 39
7 40
7 37
3 22
2 28
2 30
2 29
2 32
2 35
2 35
2 40
2 65
2 129
2 138
2 144
2 160
2 161
2 162
2 163
2 164
2 165
2 165
2 167
1 178
1 188
1 193
1 199
1 201
1 203
1 202
1 202
1 202
1 202
1 202
1 202
1 202
0 196
0 195
0 195
0 195
0 187
0 184
0 182
1 188
1 185
1 186
1 182
1 147
1 84
1 76
1 70
1 60
1 60
1 60
1 60
1 59
1 54
1 55
1 53
1 39
1 30
1 20
1 20
1 18
1 16
1 16
1 16
1 16
1 16
1 16
1 16
1 16
1 16
1 16
1 16
1 16
1 16
1 16
1 16
0 7
0 7
0 6
0 5
0 5
0 5
0 6
0 5
0 5
0 5
0 5
0 5
0 4
0 3
0 3
0 2
0 1
0 1
0 1
0 1
0 5
0 5
0 5
0 5
0 6
0 14
0 20
0 20
0 25
0 27
0 27
0 27
0 27
0 30
0 30
0 30
0 30
0 33
0 33
0 33
0 33
0 34
0 34
0 34
0 34
0 34
0 34
0 35
0 35
0 35
0 35
0 35
0 35
0 35
0 35
0 35
0 33
0 33
0 33
0 33
0 32
0 24
0 15
0 14
0 13
0 10
0 10
0 10
0 9
0 7
0 7
0 7
0 7
0 3
0 3
0 3
0 3
0 2
0 3
0 3
0 7
0 8
0 8
0 9
0 9
0 15
0 16
0 16
0 16
0 17
0 17
0 19
0 17
0 18
0 18
0 18
0 18
0 20
0 20
0 20
0 20
0 20
0 21
0 22
0 22
0 22
0 23
0 23
0 23
0 23
0 34
0 35
0 35
0 36
0 37
0 37
0 33
0 31
0 31
0 31
0 31
0 23
0 22
0 22
0 21
0 20
0 20
0 20
0 20
0 20
0 20
0 20
0 20
0 18
0 18
0 18
0 18
0 16
0 16
0 16
0 16
0 16
0 15
0 15
0 15
0 14
0 1
0 0
0 0
0 0
0 0
0 0
0 0
0 0
0 0
0 1
0 4
0 5
0 6
0 7
0 7
0 76
0 81
0 83
0 86
0 86
0 90
0 97
0 98
1 99
1 99
1 99
1 99
1 104
1 108
1 116
1 130
1 130
1 134
1 134
1 134
1 135
1 136
1 141
1 141
1 141
1 141
1 141
1 141
1 141
1 156
1 156
1 154
1 154
1 159
1 159
1 154
1 76
1 73
1 73
1 74
0 74
0 73
0 73
0 73
0 77
0 77
0 78
0 81
0 82
0 77
0 69
0 63
0 63
0 59
0 59
0 58
0 58
0 75
0 72
1 76
3 77
3 78
3 78
3 79
3 79
3 63
3 62
3 61
3 61
3 55
3 54
3 54
3 54
3 54
3 54
3 52
3 52
3 51
3 51
3 50
3 45
3 43
4 50
4 48
4 41
4 39
5 37
5 36
5 36
5 36
5 36
5 36
5 35
4 18
4 15
4 14
3 15
3 15
3 15
5 15
5 15
5 15
5 15
5 15
5 15
5 14
5 14
5 14
5 14
5 15
5 16
5 18
5 18
5 29
5 29
6 29
6 32
6 33
5 29
5 40
5 40
5 41
4 46
4 54
4 54
4 54
4 54
4 54
4 54
4 50
4 49
3 49
3 48
3 48
3 48
1 48
1 48
1 49
1 50
1 50
1 51
1 51
1 51
1 52
1 52
1 51
1 50
1 48
1 48
2 39
2 39
1 40
1 36
1 35
1 31
9 22
9 22
9 21
9 16
9 8
9 8
9 8
9 8
9 8
10 9
10 10
10 15
11 26
11 26
11 28
11 28
11 30
11 30
11 29
11 29
11 29
11 28
11 28
11 28
11 27
11 27
11 27
11 27
11 27
11 27
10 25
10 23
10 23
10 23
10 23
10 23
2 23
2 23
2 23
2 23
2 24
2 24
2 24
2 23
1 23
1 17
3 16
3 12
2 3
2 2
2 2
2 2
2 2
2 2
2 2
2 2
2 2
2 2
2 5
2 7
2 7
2 7
2 8
2 8
2 8
2 8
2 8
2 8
2 8
3 8
5 8
5 8
5 8
5 8
5 8
5 8
6 7
6 7
6 7
6 7
6 7
6 7
4 7
4 7
4 6
4 6
4 6
4 6
4 6
4 6
4 6
4 6
4 6
4 7
4 3
4 2
4 2
4 1
4 1
4 1
4 1
4 1
5 1
4 1
4 1
6 1
4 1
4 1
3 1
3 1
4 1
4 1
4 1
4 1
4 1
4 1
4 1
4 1
4 1
4 1
4 1
4 1
4 1
4 1
4 1
4 1
4 1
4 1
4 1
4 0
4 0
4 0
4 0
4 0
4 0
4 0
4 0
4 0
3 0
3 0
3 0
1 0
1 0
1 0
1 0
0 0
1 0
1 0
2 0
2 0
2 0
2 0
3 0
3 0
3 0
3 0
4 0
4 0
4 0
4 0
4 0
4 0
4 0
4 1
4 1
4 1
4 4
4 4
4 4
5 13
8 14
8 16
8 16
8 16
9 16
9 16
9 16
9 17
9 17
9 17
7 17
7 17
7 17
9 17
9 17
9 17
9 17
9 17
8 17
8 17
8 17
8 17
7 17
7 17
7 17
7 17
7 17
7 17
7 17
7 16
7 16
7 16
8 12
8 12
7 12
7 4
4 3
3 1
3 1
3 1
4 1
6 1
6 3
6 3
6 4
6 4
6 5
6 5
7 5
5 8
6 8
13 14
14 14
14 14
14 14
14 14
16 17
16 17
16 17
16 17
16 17
16 17
16 17
16 17
16 17
16 17
16 17
16 17
15 17
15 17
15 17
15 17
15 17
15 17
15 17
15 17
14 16
12 17
12 15
12 16
12 17
12 17
11 16
9 16
8 17
8 14
8 14
3 8
2 8
2 8
1 8
1 8
0 5
0 5
0 5
0 5
0 5
0 5
0 5
0 5
0 5
0 5
0 5
0 5
0 5
0 5
0 5
0 5
0 8
0 23
0 37
0 38
0 38
0 37
0 36
0 35
0 35
0 35
0 36
0 36
0 35
0 35
0 35
0 35
0 35
0 35
0 35
0 35
0 49
0 58
1 59
3 96
3 97
3 98
3 99
3 101
3 101
3 101
3 101
3 101
3 101
3 101
3 101
3 100
3 96
3 82
3 67
3 67
3 68
3 68
3 68
3 68
3 68
3 68
3 67
3 67
3 67
3 67
3 67
3 67
3 67
3 67
3 67
3 67
3 51
3 44
2 43
0 6
0 5
0 4
0 4
0 2
0 2
0 2
0 2
0 2
0 2
0 2
0 3
0 3
0 3
0 3
0 3
0 3
0 2
0 2
0 2
0 5
0 7
0 8
0 9
0 56
0 56
0 58
0 62
0 62
0 62
0 62
0 62
0 62
0 62
0 62
0 61
0 61
0 61
0 61
0 61
0 61
0 61
0 61
0 61
0 61
0 61
0 61
0 60
1 60
1 60
1 60
1 60
1 60
1 60
2 63
3 65
7 68
7 112
7 115
7 114
8 69
9 69
9 68
9 64
9 64
9 64
9 64
9 65
9 66
9 66
9 66
9 66
9 66
9 66
9 66
9 66
9 66
9 74
9 79
9 80
9 80
10 95
10 95
10 95
9 95
9 95
9 95
9 97
9 97
9 97
8 92
6 91
3 82
1 35
1 33
1 33
1 33
1 34
1 35
1 36
1 37
1 37
1 37
1 35
1 35
1 35
1 35
1 35
1 38
1 38
1 38
1 39
1 39
1 31
1 28
1 29
1 29
0 13
0 13
0 13
0 12
0 12
1 17
1 19
1 22
1 22
1 22
1 23
1 23
1 22
1 22
1 22
1 22
1 20
1 20
1 20
1 20
1 20
2 20
2 20
2 20
2 20
2 20
2 20
2 16
2 16
2 16
2 15
2 15
2 15
2 13
2 17
3 23
3 25
4 28
4 29
3 29
3 29
3 22
3 18
3 18
3 18
3 18
3 18
3 26
3 26
3 26
3 28
3 28
3 30
3 31
4 32
3 32
3 32
3 36
3 36
3 36
4 37
4 38
4 46
4 46
4 46
4 46
4 47
4 46
4 47
5 49
5 44
4 39
4 36
4 36
4 35
4 35
4 35
4 35
4 36
4 36
4 36
4 37
4 37
4 29
4 30
4 29
4 28
4 30
4 28
4 27
3 22
3 23
3 23
3 21
3 22
3 24
3 24
4 38
4 31
4 39
4 41
4 42
4 40
4 43
3 47
2 43
2 43
2 43
2 43
2 43
2 43
4 43
4 43
4 43
4 43
5 45
5 45
5 43
5 43
5 43
5 43
5 43
5 43
4 41
4 41
4 41
4 41
4 41
4 41
4 40
4 41
5 40
11 36
11 12
12 13
12 11
12 11
12 11
12 11
12 11
12 6
12 6
12 6
12 6
12 6
11 6
11 7
10 7
10 7
10 7
10 7
9 5
9 5
9 5
9 5
9 4
9 4
9 4
9 4
9 4
9 4
9 4
9 4
9 4
9 4
8 4
8 3
7 2
2 2
1 2
0 1
0 3
0 3
0 3
0 4
0 4
0 4
0 4
0 4
0 4
0 4
0 4
0 3
0 3
0 3
0 3
0 3
0 3
0 3
0 3
0 3
0 3
0 3
0 3
0 4
0 10
0 11
0 11
0 11
0 12
0 13
0 13
0 13
0 13
0 13
0 13
0 13
0 11
0 11
0 11
0 10
0 10
0 10
0 10
4 11
4 11
4 12
4 13
5 15
5 20
5 20
5 20
5 20
5 25
5 25
5 25
5 25
5 25
5 25
5 25
5 25
5 20
5 19
6 20
6 20
6 21
6 20
6 20
6 20
6 20
6 20
6 20
6 20
6 20
5 20
6 20
6 20
6 20
8 20
8 20
5 19
5 19
5 18
5 17
4 15
4 10
4 10
6 15
6 15
6 10
6 11
7 11
7 11
7 11
7 11
7 11
7 10
7 9
7 9
6 7
6 10
6 9
6 9
6 9
6 9
6 19
6 19
6 19
6 19
6 19
6 20
5 20
5 20
4 20
3 20
3 21
3 21
3 21
2 22
2 23
2 23
2 24
2 24
1 19
1 21
1 22
1 22
0 22
0 22
0 22
0 22
0 22
0 22
0 22
0 22
0 22
0 19
0 19
0 19
0 18
0 18
0 8
0 7
0 7
0 7
0 7
0 7
0 9
0 11
0 11
0 10
0 10
0 10
0 10
0 10
0 6
0 5
0 6
0 6
0 6
0 6
0 7
0 7
0 7
0 7
0 7
0 7
0 7
0 7
0 7
0 7
0 11
0 11
0 11
0 11
0 12
0 12
0 12
0 14
0 14
0 14
0 14
0 14
0 12
0 13
0 15
0 15
0 16
0 16
0 17
0 16
0 15
0 16
0 16
0 17
0 17
0 17
0 16
0 17
0 18
0 18
0 18
0 18
0 18
0 18
0 18
0 18
0 14
0 14
0 14
0 14
0 14
0 13
0 12
0 12
0 12
0 12
0 12
0 12
1 11
1 8
1 8
1 7
1 30
1 32
1 31
1 33
1 33
1 32
1 32
1 32
1 33
1 34
1 35
1 35
1 34
1 34
1 35
1 35
1 35
1 35
1 35
1 35
1 35
1 35
1 34
1 34
1 34
1 34
1 34
1 37
1 37
1 37
1 37
1 36
0 36
0 37
0 37
0 36
0 13
0 12
0 13
1 21
1 21
1 24
1 24
1 24
1 23
1 21
1 20
1 20
1 20
1 20
1 19
1 19
1 19
1 19
1 19
1 19
1 19
1 19
1 19
1 19
1 19
1 19
1 17
1 16
2 16
2 16
2 16
2 16
2 16
2 15
2 15
2 15
2 15
2 13
2 10
1 1
1 1
1 0
1 0
1 0
1 0
1 1
1 2
1 2
1 2
1 2
1 2
1 2
1 2
1 2
1 2
2 2
4 2
4 2
3 12
3 12
3 12
3 12
3 12
3 12
3 12
3 12
3 12
3 12
3 13
3 13
3 13
3 13
3 13
3 17
4 20
4 23
4 24
4 24
5 32
5 32
5 32
5 31
5 32
5 33
5 36
5 37
5 38
5 38
5 39
4 41
4 42
4 42
2 42
2 42
2 32
2 32
2 32
2 32
2 32
2 32
2 32
2 32
2 32
2 32
3 32
3 32
3 32
3 32
3 33
3 28
3 25
3 25
3 24
3 24
2 15
2 15
2 15
2 15
2 12
2 12
2 9
2 9
2 8
2 8
2 7
2 5
2 4
2 4
2 4
2 4
2 4
2 4
2 4
2 4
2 5
2 8
2 8
2 8
2 8
2 8
1 7
1 7
1 7
1 6
1 5
1 5
0 4
0 5
0 5
0 5
0 5
0 5
0 5
0 5
0 5
0 5
0 5
0 5
0 5
0 5
0 5
0 5
0 5
0 5
0 5
0 5
0 5
0 5
1 5
1 5
1 1
1 1
1 1
1 1
1 1
1 1
1 1
1 1
1 1
1 1
1 1
1 1
1 1
1 0
1 0
1 0
1 0
1 0
1 0
1 0
1 0
1 0
1 0
2 0
3 0
3 0
3 0
3 0
3 0
3 0
3 0
3 0
3 0
3 0
2 0
2 1
2 1
2 1
2 2
2 2
2 2
2 2
2 2
2 2
2 2
2 3
2 3
2 3
2 3
2 3
2 3
2 4
2 4
2 5
2 5
2 7
2 8
2 8
2 8
1 8
0 8
0 10
0 10
1 10
1 10
1 10
1 10
1 10
1 10
1 10
1 10
1 11
1 11
1 11
1 12
1 15
1 15
1 15
2 15
2 15
2 15
2 15
2 15
2 15
2 14
2 15
2 15
2 15
2 15
2 17
2 17
2 14
2 15
2 15
2 15
2 15
3 15
3 14
3 14
2 14
2 14
2 14
2 14
2 14
2 14
2 14
2 15
2 12
2 18
2 17
2 16
2 13
2 20
2 20
1 20
1 21
1 21
1 21
1 21
1 21
1 21
1 20
1 20
2 20
2 20
2 17
2 17
2 17
2 15
2 15
1 15
1 15
1 15
1 15
1 15
1 15
1 15
1 15
1 15
1 15
2 15
2 15
2 14
2 14
2 8
2 8
2 8
2 8
2 0
2 0
2 0
2 7
2 10
2 10
2 10
2 10
2 10
2 10
2 10
1 10
1 10
1 10
1 11
1 11
1 11
2 11
2 11
2 11
2 11
2 11
2 11
2 11
2 11
2 11
2 11
2 11
1 11
1 11
1 11
1 11
1 11
1 12
1 12
1 12
1 13
1 12
1 11
1 3
1 3
1 3
1 3
1 3
1 3
1 3
1 3
1 3
1 3
1 3
1 4
1 4
1 5
0 5
0 5
0 5
0 5
0 5
0 5
0 5
0 5
0 5
0 5
0 5
0 5
0 5
0 5
0 5
0 5
0 4
0 3
0 3
0 3
0 3
0 3
0 3
0 3
0 3
0 3
0 3
0 3
0 3
0 4
0 11
0 15
0 16
0 16
0 16
0 16
0 16
0 16
0 16
0 16
0 19
0 19
0 19
0 22
0 23
0 23
0 23
0 24
0 24
0 24
0 24
0 24
0 24
0 24
0 24
0 24
0 24
0 24
0 24
0 24
0 24
0 24
0 24
0 24
0 24
0 21
0 9
0 10
0 11
0 11
0 12
0 23
0 61
0 136
0 150
0 157
0 161
0 163
0 162
0 161
0 161
0 161
0 161
0 161
0 161
0 161
0 161
0 161
0 161
0 161
0 161
0 161
0 161
0 161
0 161
0 161
0 160
0 160
0 160
0 160
0 160
0 160
0 160
0 160
0 159
0 157
0 157
0 145
0 85
0 5
0 5
0 5
0 5
0 5
0 6
0 6
0 6
0 6
0 8
0 8
0 8
0 9
0 9
0 9
0 9
0 9
0 14
0 15
0 16
1 40
1 41
1 41
1 41
1 41
1 41
1 41
1 41
1 41
1 40
1 40
1 40
1 39
1 38
1 37
1 37
1 37
2 37
2 37
2 36
2 36
2 36
2 36
2 35
2 35
2 33
2 34
2 33
2 34
2 35
7 113
7 112
8 113
8 111
12 114
12 113
11 92
12 92
12 93
12 110
12 124
12 146
12 173
12 181
12 183
12 188
12 195
13 262
13 265
13 279
13 280
12 280
13 279
13 279
13 279
13 279
14 303
14 376
14 390
14 400
14 401
14 401
14 404
14 408
14 409
14 418
8 358
4 356
4 359
4 359
4 360
4 359
4 359
4 358
4 356
4 339
4 321
4 305
4 273
4 267
5 273
5 273
3 271
4 202
4 201
4 189
3 189
3 189
3 189
6 231
6 231
6 232
6 212
6 139
7 145
7 142
7 142
7 143
7 141
7 136
7 134
6 113
6 104
6 102
6 102
6 102
6 102
6 107
6 106
6 104
6 105
6 106
6 105
6 103
6 102
6 101
5 91
5 91
5 91
4 93
4 93
4 93
4 92
4 94
4 94
0 34
0 32
0 30
0 25
0 20
1 18
1 17
1 19
1 17
1 15
1 16
1 17
1 18
1 18
2 20
2 20
2 21
2 21
2 15
2 14
2 14
2 13
2 13
2 14
2 18
2 23
2 23
2 23
2 23
2 23
2 22
2 22
2 24
2 24
2 35
2 37
2 39
2 41
2 43
2 80
1 80
1 81
4 87
5 86
7 99
6 100
6 104
6 102
6 101
6 100
6 100
7 99
7 99
8 99
8 99
9 104
11 104
11 105
11 105
11 105
11 101
11 96
11 96
11 97
11 99
12 102
13 152
13 160
13 160
13 160
13 147
13 146
13 144
13 144
13 142
13 105
13 104
13 103
9 92
8 91
7 84
7 88
7 100
7 116
15 151
15 151
15 151
14 152
14 152
13 153
13 157
12 152
10 152
10 149
10 149
10 155
13 184
17 194
17 198
17 199
17 198
16 192
15 137
15 137
15 136
15 136
15 136
15 135
15 136
15 134
42 165
43 165
43 167
43 167
43 167
43 168
43 167
43 163
43 151
43 135
35 100
35 100
35 100
35 103
35 106
35 107
35 111
35 113
35 114
35 117
35 118
35 112
32 79
29 69
29 68
29 68
29 68
30 68
30 68
30 68
30 70
31 71
34 81
34 82
34 80
29 76
7 50
6 49
6 47
6 43
6 42
6 42
6 41
6 40
6 42
6 43
7 49
7 69
7 68
7 67
7 66
6 66
6 64
6 66
6 66
6 60
6 60
6 60
6 60
6 60
7 60
8 60
8 60
7 59
7 59
6 59
5 58
4 56
3 48
3 48
3 48
3 48
3 46
3 46
3 47
3 48
3 49
3 49
3 53
3 53
3 51
3 50
2 47
2 31
2 37
2 45
2 57
2 57
2 57
2 54
2 57
1 57
1 59
1 61
1 61
1 61
1 62
1 62
2 62
2 61
2 61
2 61
2 61
2 61
2 60
2 60
2 60
2 60
2 60
2 61
2 60
2 59
2 58
2 58
3 72
3 78
3 78
3 78
3 70
3 67
3 55
3 46
3 42
3 41
3 42
3 40
3 37
3 35
3 35
3 33
2 34
2 35
3 35
2 35
2 36
2 37
2 45
2 51
2 51
2 51
2 51
2 52
2 50
2 50
2 50
2 49
2 49
2 52
2 53
4 69
3 50
3 45
3 45
3 45
3 45
3 45
3 44
3 43
3 42
3 42
3 43
3 43
3 43
3 43
3 43
3 44
3 43
3 40
2 41
2 43
2 43
2 42
2 34
2 29
2 30
2 31
2 32
5 68
5 74
5 81
5 86
5 90
5 90
5 87
5 86
3 71
3 71
3 71
3 71
3 71
3 73
3 73
3 73
3 73
3 73
3 73
3 72
3 72
3 72
3 73
3 74
3 73
3 72
3 72
3 70
3 68
3 69
3 71
3 73
3 74
3 72
3 71
3 70
0 34
0 24
0 18
0 15
0 13
0 13
0 13
0 13
0 9
0 11
0 12
0 16
0 19
0 19
0 22
0 23
0 23
0 23
0 23
0 22
0 22
0 20
0 29
0 29
0 30
0 30
0 31
0 34
0 35
0 34
0 33
0 32
0 32
0 32
0 35
0 37
0 37
0 39
0 39
0 43
0 44
0 49
0 67
1 97
1 100
1 106
1 120
1 119
1 117
1 118
1 116
1 118
1 118
1 119
1 119
1 122
1 123
1 127
1 116
1 116
1 115
1 116
1 116
1 110
1 109
1 108
1 110
1 110
1 110
1 110
1 107
1 103
1 103
1 102
1 102
1 98
1 97
1 87
1 55
0 31
0 25
0 14
0 13
0 13
0 13
0 13
0 13
0 13
0 13
0 12
0 11
0 5
0 4
0 4
0 4
2 58
2 61
2 60
2 69
2 70
2 70
2 71
2 70
2 70
2 70
2 70
2 70
2 70
2 70
2 70
2 70
2 70
2 71
2 71
2 71
2 71
2 71
2 71
2 71
2 71
2 70
2 72
2 75
2 75
2 75
2 76
2 89
2 111
2 114
2 116
2 120
0 67
0 71
0 71
0 69
0 70
0 71
0 72
0 71
0 72
0 72
0 72
0 72
0 72
0 72
0 72
0 72
0 77
0 120
0 121
0 123
0 123
0 124
0 125
0 125
0 125
0 125
0 122
0 120
0 120
0 120
0 117
0 99
0 72
0 73
0 72
0 73
0 72
0 66
0 63
0 61
0 59
0 60
0 60
0 60
0 60
0 62
0 63
0 65
0 85
0 85
0 85
0 85
0 79
0 34
0 34
0 33
0 33
0 32
0 31
0 31
0 31
0 31
0 31
0 31
0 32
0 32
0 36
0 36
0 35
0 35
0 35
0 35
0 35
0 35
0 36
0 38
0 38
0 38
0 38
0 38
0 36
0 34
0 34
0 32
0 12
0 12
0 12
0 12
0 12
0 12
0 12
0 19
0 20
0 21
0 21
0 44
0 44
0 44
0 44
0 46
0 45
0 47
0 42
0 41
0 45
0 45
0 46
0 46
0 46
0 45
0 44
0 43
0 43
0 42
0 42
0 42
0 42
0 42
0 42
0 42
0 42
0 43
0 46
0 46
0 47
0 47
0 47
0 40
0 40
0 39
0 38
0 18
0 23
0 26
0 29
0 34
0 39
0 42
0 42
0 43
0 39
0 39
0 38
0 37
0 37
0 37
0 37
0 37
0 37
0 37
0 37
0 37
0 38
0 38
0 38
0 38
0 38
0 36
0 32
0 32
0 32
0 37
0 36
0 36
0 36
0 48
0 47
0 50
0 45
0 43
0 38
0 32
0 29
0 25
0 25
0 24
0 24
0 24
0 24
0 24
0 24
0 24
0 24
0 24
0 24
0 24
0 23
0 22
0 22
0 22
0 22
0 24
0 27
0 28
0 30
0 30
0 31
0 26
0 26
0 27
0 26
0 12
0 11
0 11
0 11
0 11
0 11
0 17
0 18
0 19
0 19
0 19
0 19
0 19
0 22
0 23
0 23
0 23
0 23
0 23
0 23
0 23
0 25
0 26
0 26
0 26
0 24
0 27
0 26
0 23
0 39
0 48
0 48
0 50
0 51
0 51
0 51
0 51
0 51
0 51
0 54
0 54
0 54
0 47
0 47
0 47
0 47
0 47
0 47
0 47
0 44
0 43
0 43
0 43
0 46
0 46
0 47
0 47
0 45
0 44
0 42
0 42
0 42
0 37
0 36
0 33
0 14
0 11
0 11
0 11
0 11
0 13
0 17
0 31
0 35
0 44
0 45
0 46
0 49
0 49
0 50
0 53
0 54
0 57
0 61
0 61
0 62
0 62
0 62
0 63
0 60
0 60
0 61
0 61
0 61
0 64
0 64
0 63
0 63
0 64
0 65
0 68
0 68
0 70
0 69
0 70
0 69
0 63
0 62
0 54
0 46
0 41
0 40
0 39
0 36
0 35
0 35
0 33
0 34
0 30
0 26
0 26
0 26
0 26
0 26
0 25
0 24
0 27
0 28
0 27
0 27
0 27
0 29
0 29
0 31
0 30
0 29
0 26
0 25
0 25
0 25
0 23
0 23
0 22
0 17
0 19
0 20
0 21
0 21
0 20
0 19
0 19
0 19
0 18
0 16
0 16
0 16
0 16
0 17
0 17
0 17
0 21
0 21
0 17
0 16
0 16
0 16
0 15
0 13
0 13
0 11
0 11
0 10
0 10
0 10
0 11
0 11
0 11
0 13
0 14
0 14
0 12
0 11
0 9
0 9
0 9
0 9
0 9
0 9
0 9
0 9
0 14
0 18
0 18
0 17
0 19
0 19
0 15
0 15
0 15
0 15
0 15
0 15
0 15
0 16
0 17
0 17
0 17
0 17
0 17
0 19
0 19
0 19
0 18
0 16
0 16
0 17
0 17
0 17
0 17
0 17
0 19
0 20
0 23
0 25
0 26
0 26
0 17
0 17
0 19
0 19
0 19
0 19
0 19
0 20
0 20
0 19
0 19
0 19
0 20
0 21
0 22
0 22
0 22
0 22
0 22
0 20
0 22
0 26
0 34
0 39
0 39
0 60
0 61
0 68
0 81
0 82
0 106
0 106
0 103
0 99
0 98
0 97
0 97
0 99
0 102
0 102
0 102
0 109
0 111
0 115
0 138
0 139
0 139
0 139
0 139
0 136
0 136
0 136
0 136
0 136
0 136
0 136
0 133
0 132
0 128
0 125
0 126
0 104
0 101
0 89
0 81
0 80
0 57
0 58
0 58
0 55
0 55
0 55
0 55
0 55
0 54
0 54
0 54
0 47
0 40
0 38
0 16
0 16
0 16
0 16
0 20
0 43
3 144
6 195
7 207
8 217
8 217
8 220
8 218
8 213
8 212
8 212
8 210
8 210
8 210
8 210
8 210
8 210
8 209
8 208
8 209
8 209
8 209
8 209
8 209
8 208
8 208
8 208
9 209
9 209
9 212
9 212
9 214
10 215
10 215
10 214
10 209
10 228
7 108
3 69
3 65
3 65
3 65
3 63
3 63
3 63
3 63
3 64
3 64
3 64
3 64
3 64
3 64
3 64
3 63
3 63
3 63
3 62
3 63
3 66
5 74
5 75
5 75
5 75
4 75
4 75
4 71
4 71
3 73
2 73
2 74
3 74
3 73
3 27
3 26
3 27
4 39
4 63
5 71
5 72
5 72
5 81
6 150
6 158
6 165
7 193
7 194
7 194
7 196
7 197
7 200
7 201
7 200
7 201
7 202
7 199
5 191
5 190
5 188
5 188
5 188
5 188
5 188
5 187
5 185
5 185
5 185
4 184
4 184
5 183
5 182
5 169
3 153
3 140
3 135
3 134
3 134
3 120
1 23
10 20
10 20
10 20
12 21
12 49
12 50
12 50
12 55
12 56
12 58
12 65
12 92
12 93
12 94
13 98
12 98
12 100
12 106
12 115
12 125
12 137
12 137
12 138
12 139
12 139
12 139
12 148
12 149
12 149
12 151
12 152
12 154
12 154
9 158
9 153
9 154
1 153
1 165
1 173
1 173
1 145
1 144
1 142
1 133
1 132
1 132
1 123
1 97
1 99
2 238
1 241
2 264
2 271
3 276
3 264
3 255
3 248
3 278
3 278
3 280
3 281
3 284
3 273
3 273
3 272
3 272
3 272
3 271
3 271
3 267
3 266
3 262
3 259
3 249
3 238
3 238
3 237
3 238
3 238
3 239
3 241
3 240
2 243
2 242
2 239
1 101
1 87
1 61
1 58
0 50
0 50
0 50
0 50
0 18
0 17
0 14
0 14
0 12
0 12
0 11
0 11
0 11
0 10
0 10
0 10
0 10
0 10
0 10
0 11
0 12
0 13
0 10
0 10
0 10
0 10
0 9
0 6
0 7
0 8
0 7
0 6
0 6
0 6
0 6
0 6
0 6
0 6
0 6
0 6
0 6
0 6
0 6
0 6
0 6
0 6
0 6
0 6
0 6
0 6
0 6
0 6
0 6
1 6
1 5
1 5
1 4
1 4
1 6
1 6
1 8
1 8
1 8
1 7
1 5
1 6
1 6
1 6
1 6
1 6
1 6
1 7
1 7
1 7
1 8
1 8
1 8
1 9
1 10
1 15
1 21
1 23
1 26
2 27
2 28
2 33
2 36
2 42
2 44
1 46
2 53
2 57
2 61
2 60
3 62
5 78
5 78
8 79
8 79
8 79
8 81
8 80
8 80
9 80
9 80
9 79
9 79
9 78
9 78
9 79
9 80
10 84
10 84
10 94
10 107
10 103
10 100
10 100
10 98
10 163
10 173
10 191
10 247
10 246
9 251
10 255
9 295
9 298
9 305
9 318
8 329
6 319
6 348
5 349
6 352
6 353
5 351
9 367
9 369
9 370
9 371
9 371
9 371
9 371
9 372
9 370
9 374
8 374
8 379
8 377
8 363
8 363
8 367
8 362
8 356
6 252
6 229
6 210
6 195
6 189
6 185
6 181
6 107
6 91
6 86
6 89
6 84
5 72
4 67
4 67
4 66
4 67
4 67
8 50
9 48
11 48
11 47
11 49
11 51
11 50
11 54
11 54
11 48
11 44
11 41
11 33
11 32
11 30
11 33
11 39
11 41
11 42
11 42
11 43
11 42
11 42
11 43
11 47
11 51
11 65
11 69
11 67
11 67
11 66
10 92
10 101
9 102
8 102
7 103
2 106
2 106
0 105
0 104
0 105
0 103
0 103
0 99
0 101
0 103
0 101
0 101
0 103
0 104
0 104
0 96
0 90
0 89
0 89
0 93
0 95
0 96
0 112
0 112
0 109
0 107
0 93
0 93
0 107
0 108
0 117
0 88
0 78
0 77
0 76
0 76
0 73
0 73
0 73
0 74
0 72
0 73
0 73
0 80
0 85
0 107
0 112
0 119
0 160
0 161
0 164
0 168
1 177
1 184
1 183
1 178
1 177
1 177
1 160
1 161
1 160
1 159
1 155
1 149
1 143
1 141
1 133
1 134
1 134
1 134
1 134
1 134
1 134
1 134
1 134
1 133
1 132
1 131
1 131
1 123
1 114
1 84
1 79
1 80
1 40
1 41
1 39
1 31
0 21
0 19
0 19
0 19
0 24
0 26
0 31
0 30
0 29
0 32
0 32
0 32
0 25
0 25
0 26
0 26
0 26
0 26
0 28
0 28
0 28
0 28
0 28
0 28
0 28
0 28
0 28
0 28
1 28
1 28
1 26
1 22
1 19
1 19
1 20
1 20
1 21
1 23
1 23
1 23
1 18
1 15
1 11
1 11
1 9
1 8
1 9
1 9
1 9
1 10
2 8
2 11
2 11
2 12
2 10
2 12
2 15
2 15
2 15
2 15
3 26
3 29
3 30
3 31
2 37
2 70
2 71
2 73
2 77
2 82
2 86
2 90
2 89
2 87
2 87
2 87
2 87
2 89
2 90
2 90
2 90
2 94
2 95
2 95
2 97
2 95
1 95
1 93
1 93
1 99
1 101
1 105
1 115
1 123
1 126
1 127
0 116
0 117
0 119
0 162
0 155
0 128
0 123
0 117
0 114
0 111
1 111
1 110
1 110
1 110
3 110
3 114
3 113
3 113
3 112
3 112
3 111
3 106
3 105
3 105
3 103
3 103
3 102
3 125
3 127
3 122
5 149
5 147
5 130
5 127
5 127
5 126
5 125
5 124
5 118
5 71
5 71
5 73
5 75
4 80
4 86
4 88
4 90
4 90
4 90
4 88
2 93
2 108
2 126
2 126
2 127
4 141
4 141
4 141
4 158
4 162
5 172
5 172
5 170
4 148
3 146
3 137
3 113
3 110
3 110
3 110
3 110
3 111
3 111
3 111
3 111
4 112
6 112
6 107
6 103
6 99
6 94
6 93
6 91
6 91
7 107
7 109
7 102
7 78
7 82
7 95
7 100
5 89
5 94
5 93
5 76
5 74
4 65
4 65
4 64
4 62
4 61
4 60
4 60
4 60
4 60
4 61
4 72
4 73
5 81
5 82
7 105
6 105
4 106
4 104
4 104
4 104
4 104
4 104
4 107
4 107
4 76
4 73
4 68
4 70
4 70
4 66
4 63
4 56
4 56
4 56
4 57
4 57
4 57
4 57
4 57
4 58
4 58
4 58
4 59
4 60
4 61
4 59
4 48
4 46
3 47
2 116
2 150
2 187
2 206
2 210
2 212
2 215
2 217
2 217
1 216
1 216
1 217
1 217
1 215
1 212
1 212
1 213
1 215
1 215
1 215
1 265
1 264
1 264
1 269
2 275
3 276
4 276
4 276
4 276
4 276
4 275
4 273
4 273
4 272
4 269
4 258
4 172
3 98
3 69
3 68
3 68
3 68
3 68
3 68
4 68
4 68
4 68
4 67
4 66
4 66
4 66
4 66
5 66
8 98
9 101
10 102
10 57
9 61
9 61
9 60
8 53
8 53
7 51
7 53
7 53
7 53
7 53
7 54
7 54
7 54
7 54
7 54
7 54
7 54
7 54
7 55
8 56
8 58
8 58
8 58
7 58
7 59
7 59
7 59
7 59
7 59
7 59
7 59
7 59
2 16
2 10
2 10
2 11
2 11
2 12
2 12
2 13
2 14
2 15
2 14
2 15
2 15
2 15
2 15
2 15
2 15
2 14
2 14
2 14
2 14
2 14
2 12
1 11
1 13
1 13
1 14
1 14
1 14
2 14
3 17
3 19
3 21
3 21
3 21
2 21
2 21
3 20
4 20
4 19
4 23
4 22
4 25
4 77
4 79
5 80
5 79
7 79
8 84
8 84
8 85
8 85
8 86
8 86
8 87
8 87
8 87
9 87
9 87
9 87
9 83
9 83
10 82
10 82
10 82
9 80
8 76
8 74
8 74
8 74
8 74
7 74
7 74
7 74
6 74
6 74
6 70
5 70
2 59
2 5
1 1
1 1
1 1
1 1
1 1
1 1
1 1
1 1
1 1
1 1
1 0
0 0
0 0
0 0
0 0
0 0
0 0
0 0
1 0
3 0
3 0
3 0
3 0
3 0
3 0
3 0
3 0
3 0
3 0
3 0
3 0
5 0
5 0
7 0
10 1
10 1
11 1
12 1
14 1
14 1
14 1
14 1
14 1
14 1
13 1
13 1
13 1
13 1
13 1
13 1
13 1
13 1
13 1
13 1
13 1
11 1
11 1
11 1
11 1
11 1
11 1
11 1
4 0
4 0
4 0
4 0
4 0
2 0
2 0
0 0
0 0
0 0
0 0
3 0
4 0
4 0
4 0
4 0
4 0
4 0
4 0
4 0
4 1
4 1
4 1
4 1
4 1
4 1
4 1
4 1
4 1
4 1
4 1
4 1
4 1
4 1
4 1
4 1
4 0
4 0
4 0
5 0
5 0
5 0
5 0
5 0
5 0
5 0
3 0
1 0
1 0
7 0
14 0
17 0
23 0
24 0
24 0
24 0
24 0
25 0
28 0
28 0
28 0
28 0
28 0
28 0
28 0
28 0
28 0
28 0
27 0
27 0
27 0
27 0
27 0
27 0
27 0
27 0
31 0
31 0
31 0
31 0
31 0
31 0
31 0
29 0
29 0
23 0
17 0
15 0
9 0
8 0
7 0
7 0
7 0
7 0
4 0
4 0
5 0
5 0
5 0
5 0
5 0
5 0
6 0
6 0
6 0
6 0
6 0
6 0
6 0
6 0
6 0
6 0
2 0
2 0
2 0
2 0
2 0
2 0
2 0
2 0
2 0
2 0
2 0
2 0
2 0
3 0
3 0
3 0
4 0
3 0
3 0
3 0
2 0
2 0
2 0
2 0
2 0
10 0
13 0
13 0
13 0
13 0
13 0
14 0
14 0
14 0
14 0
14 0
14 0
14 0
14 0
14 0
14 0
14 0
14 0
14 0
14 0
14 0
14 0
14 0
14 0
13 0
13 0
13 0
12 0
12 0
12 0
12 0
12 0
12 0
12 0
11 0
10 0
4 0
1 0
1 0
1 0
1 0
1 0
2 0
3 0
4 0
6 0
6 0
6 0
6 0
7 0
10 0
11 0
15 0
24 0
24 0
24 0
24 0
24 0
24 0
24 0
24 0
24 0
24 0
24 0
24 0
24 0
24 0
24 0
25 0
25 0
25 0
26 0
25 0
25 0
25 0
25 0
26 0
25 0
24 0
22 0
22 0
21 0
20 0
20 0
19 0
19 0
17 0
15 0
13 0
4 0
4 0
4 0
4 0
4 0
4 0
5 0
5 0
5 0
4 0
4 0
5 0
33 0
34 0
35 0
34 0
34 0
41 0
56 0
62 0
72 0
120 0
158 0
177 0
208 0
264 0
562 0
1000 1
1024 1
1117 1
1122 1
1122 1
1126 1
1126 1
1141 1
1146 1
1146 1
1146 1
1147 1
1147 1
1147 1
1147 1
1144 1
1142 1
1142 1
1140 1
1139 1
1131 1
1125 1
1139 1
1145 1
1221 1
1215 1
1256 1
1223 1
1500 3
1475 3
1295 3
1271 4
1101 5
1064 5
996 5
876 4
601 4
597 4
516 4
519 4
518 4
518 4
522 4
514 4
514 4
518 4
521 4
524 4
528 4
529 4
530 4
528 4
528 4
528 4
528 4
518 5
510 6
507 6
492 7
480 7
395 8
380 9
348 9
340 11
66 8
65 8
67 8
83 8
260 8
285 8
382 9
482 11
843 12
942 25
958 26
976 32
1055 34
1058 35
1060 35
1058 35
1067 35
1078 36
1158 36
1158 36
1470 98
1471 98
1482 101
1499 130
1504 134
1504 135
1503 133
1508 137
1508 137
1507 137
1503 136
1502 138
1507 137
1503 136
1499 139
1485 139
1538 140
1535 152
1514 152
1482 152
1305 152
1262 149
1120 147
1026 145
711 144
661 129
620 126
582 124
554 124
553 123
550 123
550 123
541 123
547 123
471 123
471 123
184 34
183 28
172 26
160 25
166 28
166 28
166 28
161 24
162 23
163 23
164 23
164 21
161 21
159 21
150 19
147 17
88 17
60 5
61 5
61 6
61 6
59 6
58 6
54 7
55 7
55 7
59 11
59 11
58 11
53 11
50 11
50 11
50 11
48 11
49 11
48 11
49 12
45 12
48 12
53 11
59 9
81 10
80 10
81 11
80 11
78 10
92 10
109 10
118 11
143 11
144 10
151 10
148 10
149 10
139 8
156 8
175 8
177 9
184 9
188 9
192 10
256 10
268 6
289 7
341 7
352 7
698 8
700 8
701 8
699 8
699 8
708 8
708 7
709 7
699 7
691 7
684 6
691 5
723 6
729 6
736 6
980 40
1136 74
1223 83
1229 82
1217 82
1214 84
1208 84
1207 84
1205 83
1201 83
1191 83
1176 83
1180 83
1176 83
1189 83
1181 82
1119 82
1089 82
1063 81
1022 81
1015 81
681 80
680 80
680 81
677 81
678 81
670 81
670 81
669 81
662 81
701 81
761 81
899 81
910 79
886 79
841 67
580 33
467 13
386 5
370 5
366 5
366 3
366 3
366 3
366 3
362 4
361 4
362 4
357 4
379 5
374 5
386 5
407 7
494 6
626 6
717 7
776 8
778 10
783 10
785 10
785 10
787 10
791 10
805 10
864 10
869 12
819 12
854 12
722 13
691 12
695 12
694 12
693 10
693 10
693 10
693 10
693 10
692 10
692 10
690 10
688 10
690 10
698 11
701 11
716 11
693 10
724 10
653 7
664 8
532 9
554 10
490 10
461 9
461 8
470 8
488 8
681 8
847 12
893 13
904 13
850 13
837 11
823 11
742 10
727 9
725 9
719 9
719 9
727 9
728 9
728 9
729 9
729 8
729 8
729 8
728 8
727 8
727 8
726 8
735 8
710 8
698 8
640 8
716 7
690 7
715 6
659 5
664 6
661 6
651 6
632 6
600 6
366 6
252 1
223 1
212 1
212 1
212 1
210 1
210 1
211 1
211 1
211 1
208 1
202 1
201 1
201 1
205 1
217 1
238 1
249 1
251 1
250 1
244 1
239 1
232 1
229 1
230 1
316 2
237 3
232 3
203 3
349 3
351 3
354 3
394 4
399 4
399 4
400 4
403 4
403 4
403 4
403 4
403 4
403 4
403 4
403 4
403 4
403 4
403 4
403 4
403 4
399 4
395 4
385 4
364 4
350 4
347 4
342 4
341 4
350 4
349 4
350 4
350 4
273 3
262 2
245 2
238 2
89 1
87 1
87 1
48 0
47 0
47 0
44 0
55 0
55 0
60 0
60 0
61 0
62 0
62 0
67 0
87 0
111 0
111 0
113 0
119 0
140 0
147 0
601 0
620 0
632 0
697 0
789 0
866 0
940 0
976 0
1059 0
1079 0
1159 0
1162 0
1170 0
1178 0
1244 0
1243 0
1243 0
1242 0
1242 0
1241 0
1243 0
1236 0
1236 0
1233 0
1232 0
1230 0
1225 0
1227 0
1218 0
1205 0
1210 0
1212 0
1205 0
1197 0
1181 0
1181 0
725 0
690 0
693 0
634 0
555 0
463 0
369 0
328 0
268 1
261 1
182 1
202 1
190 1
192 1
133 1
142 1
141 1
140 1
142 1
142 1
140 1
135 1
134 1
134 1
138 1
143 1
149 1
145 1
142 1
143 1
120 1
114 1
114 2
119 2
125 2
122 2
121 2
121 2
93 2
96 1
101 1
134 1
136 1
135 1
131 1
130 1
126 1
104 1
105 1
101 1
119 1
111 1
114 1
119 1
122 1
140 1
151 1
252 2
252 2
256 2
254 2
252 2
250 1
255 1
278 1
279 1
384 1
384 1
385 1
379 1
375 1
375 1
375 1
372 1
367 1
363 1
360 1
332 2
330 10
445 13
456 17
461 17
461 17
462 17
459 17
455 17
446 17
443 17
439 17
433 17
426 17
407 17
397 17
307 16
308 16
307 16
305 16
301 16
296 16
290 16
268 16
268 16
165 16
165 16
165 16
163 16
163 16
163 16
162 16
163 16
163 16
162 16
151 16
152 15
149 7
47 2
43 0
49 0
49 0
48 0
49 0
67 0
112 0
119 0
119 0
119 0
120 0
118 0
115 0
112 1
109 1
108 1
113 1
114 1
161 1
196 1
339 1
528 1
652 1
714 1
727 1
730 1
731 1
733 1
733 1
733 1
768 2
773 2
775 2
769 2
770 2
778 2
793 2
787 2
965 2
963 2
964 2
941 2
896 2
894 2
896 2
923 3
969 3
995 3
1232 3
1235 2
1233 2
1241 2
1228 2
1244 2
1199 2
1144 2
937 2
741 2
673 2
638 2
631 2
631 2
631 2
629 2
633 2
630 2
593 1
592 1
591 1
589 1
591 1
591 1
581 1
573 1
410 1
410 1
410 1
406 1
406 1
404 1
403 1
354 0
309 0
291 0
57 0
54 0
49 0
43 0
37 0
18 0
17 0
19 0
21 0
32 1
288 12
334 13
358 13
360 13
360 13
360 13
354 13
354 13
354 13
352 13
353 13
353 13
353 13
351 13
351 13
351 13
351 13
351 13
350 13
350 13
350 13
350 13
350 13
350 13
350 13
351 13
351 13
351 13
349 13
349 13
349 13
348 13
349 13
338 13
328 13
313 12
51 0
19 0
6 0
5 0
5 0
5 0
5 0
5 0
5 0
5 0
5 0
5 0
6 0
6 0
6 0
6 0
6 0
6 0
6 0
9 0
22 0
24 0
26 0
26 0
26 0
25 0
25 0
25 0
25 0
25 0
25 0
25 0
23 0
22 0
22 0
21 0
21 0
24 0
24 0
24 0
24 0
24 0
24 0
25 0
25 0
26 0
27 0
27 0
27 0
27 0
27 0
29 0
37 0
37 1
31 1
30 1
19 1
18 1
18 1
18 1
19 1
19 1
19 1
19 1
19 1
19 1
19 1
20 1
20 1
20 1
20 1
20 1
20 1
17 1
18 1
17 1
17 1
16 1
15 1
15 1
15 1
15 1
15 1
15 1
15 1
14 1
12 1
8 1
6 1
6 0
7 0
8 0
14 1
14 1
12 1
12 1
12 1
12 1
12 1
12 1
12 1
12 1
13 1
12 1
12 1
12 1
12 1
12 1
11 1
10 1
9 1
9 1
9 1
9 1
9 1
9 1
9 1
10 1
12 1
14 1
14 1
14 1
14 1
15 1
15 1
15 1
14 1
12 1
7 0
7 0
7 0
11 0
11 0
15 0
19 0
71 0
71 0
71 0
70 0
71 0
71 0
71 0
71 0
71 0
71 0
71 0
71 0
71 0
71 0
71 0
71 0
71 0
71 0
71 0
70 0
71 0
73 0
73 0
75 0
74 0
74 0
77 0
79 0
84 0
90 0
94 0
96 0
92 0
92 0
86 0
84 0
33 0
33 0
38 0
38 0
38 0
38 0
39 0
40 0
78 1
78 1
78 2
79 2
79 2
79 2
79 2
94 2
94 2
112 4
121 4
118 4
116 4
114 4
115 4
116 5
116 5
117 5
112 5
109 5
104 5
103 6
100 6
100 6
100 6
103 6
103 6
104 6
107 6
109 6
103 6
103 6
103 6
103 6
103 6
102 6
64 4
63 4
62 4
62 4
62 3
62 3
61 3
44 3
42 3
30 2
20 2
20 2
20 2
20 2
19 3
16 2
16 2
15 2
16 2
17 2
18 2
17 1
55 1
55 1
56 1
55 1
52 1
52 1
51 1
49 1
49 1
50 1
50 1
52 1
52 1
53 1
53 1
53 1
53 1
52 1
52 1
52 1
52 1
56 1
56 1
66 1
67 1
76 1
76 1
75 1
76 0
78 0
78 0
78 0
91 1
89 1
88 1
87 1
49 1
49 1
49 1
47 1
47 1
47 1
47 1
47 1
47 1
47 1
46 1
45 1
45 1
44 1
45 1
44 1
44 1
47 1
45 1
44 1
41 1
40 1
40 1
35 1
33 1
26 1
27 1
27 1
26 1
24 1
24 1
24 1
10 0
10 0
10 0
10 0
10 0
10 0
10 0
10 0
10 0
11 0
11 0
11 0
15 0
22 0
72 0
107 0
117 0
121 0
120 0
120 0
118 0
115 0
115 0
114 0
114 0
114 0
114 0
113 0
113 0
113 0
112 0
112 0
112 0
112 0
112 0
112 0
112 0
112 0
112 0
112 0
128 0
132 0
132 0
137 0
145 0
147 0
181 0
180 0
175 0
170 0
115 0
111 0
107 0
108 0
107 0
108 0
108 0
160 0
170 0
257 1
260 1
260 1
260 1
260 1
260 1
260 1
260 1
260 1
260 1
260 1
260 1
260 1
260 1
260 1
260 1
256 1
243 1
241 1
237 1
225 1
219 1
210 1
179 1
178 1
178 1
174 1
182 1
167 1
196 1
210 1
210 1
210 1
200 1
151 1
145 1
66 0
66 0
66 0
66 0
66 0
66 0
66 0
66 0
66 0
66 0
66 0
67 0
67 0
67 0
67 0
67 0
67 0
66 0
66 0
65 0
66 0
67 0
68 1
68 1
68 1
65 1
68 1
56 1
45 1
23 1
11 1
10 1
10 1
10 1
10 1
10 1
10 1
10 1
10 1
10 1
10 1
10 1
10 1
10 1
10 1
10 1
10 1
10 1
10 1
10 1
10 1
10 1
10 1
11 1
19 1
18 1
19 1
19 1
19 0
19 0
20 0
20 0
16 0
16 0
18 2
17 2
17 2
17 2
17 2
17 2
17 2
17 2
17 2
17 2
17 2
17 2
17 2
23 2
23 2
23 2
23 2
23 2
23 2
58 2
63 2
93 2
95 3
97 3
100 3
99 3
90 3
94 3
109 3
140 3
145 3
151 3
151 3
151 3
152 3
151 3
149 1
154 1
158 1
160 1
167 1
168 1
168 1
170 1
177 1
255 2
265 2
265 2
265 2
259 2
261 2
262 3
262 3
264 3
264 3
229 3
216 3
191 3
187 3
187 3
187 3
187 3
187 3
179 3
157 3
134 3
131 3
127 3
126 3
126 3
125 3
125 3
122 3
119 3
117 3
115 3
103 3
101 3
72 3
69 3
66 3
15 2
13 2
14 1
14 1
13 1
10 1
12 1
11 1
12 1
11 1
11 1
11 1
14 1
15 0
15 0
18 0
18 0
18 0
22 0
23 0
23 0
25 0
25 0
25 0
25 0
25 0
25 0
25 0
25 0
24 0
24 0
25 0
25 0
25 0
23 0
23 0
23 0
21 0
20 0
20 0
20 0
20 0
19 0
22 0
28 0
49 0
50 0
50 0
45 0
45 0
45 0
44 0
44 0
44 0
41 0
43 0
79 0
81 0
84 0
85 0
86 0
87 0
87 0
87 0
87 0
88 0
88 0
89 0
90 0
90 0
90 0
90 0
90 0
90 0
89 0
89 0
89 0
87 0
86 0
72 0
64 0
57 0
56 0
56 0
56 0
56 0
56 0
53 0
51 0
50 0
47 0
45 0
9 0
8 0
20 0
23 0
24 0
25 0
25 0
25 0
26 0
25 0
24 0
23 0
22 0
23 0
23 0
23 0
24 0
24 0
25 0
25 0
27 0
29 0
30 0
41 1
42 1
42 1
42 1
42 1
43 1
43 1
43 1
46 1
46 1
47 1
49 1
72 1
72 1
72 1
57 1
55 1
55 1
54 1
91 1
94 1
93 1
93 1
93 1
93 1
93 1
96 1
96 1
96 1
96 1
97 1
98 1
98 1
96 1
94 1
92 1
82 0
82 0
83 0
88 0
88 0
89 0
91 0
95 0
96 0
95 0
94 0
91 0
70 0
65 0
63 0
65 0
66 0
66 0
64 0
35 0
32 0
32 0
32 0
31 0
31 0
30 0
28 0
28 0
28 0
26 0
25 0
24 0
24 0
24 0
24 0
24 0
24 0
22 0
21 0
18 0
18 0
16 0
9 0
5 0
5 0
5 0
5 0
5 0
5 0
5 0
4 0
2 0
1 0
1 0
1 0
1 0
1 0
1 0
1 0
1 0
1 0
1 0
1 0
1 0
1 0
1 0
1 0
1 0
1 0
1 0
1 0
0 0
0 0
0 0
0 0
0 0
0 0
0 0
0 0
0 0
0 0
0 0
0 0
0 0
0 0
0 0
0 0
0 0
0 0
8 0
10 0
10 1
10 1
11 1
11 1
11 1
11 1
11 1
11 1
11 1
11 1
11 1
11 1
11 1
11 1
11 1
11 1
11 1
11 1
11 1
11 1
11 1
11 1
11 1
11 1
11 1
11 1
11 1
11 1
11 1
11 1
11 1
11 1
11 1
11 1
3 1
1 1
0 0
0 0
0 0
0 0
0 0
0 0
0 0
0 0
0 0
0 0
0 0
0 0
0 0
0 0
0 0
0 0
0 0
0 0
0 0
0 0
0 0
0 0
0 0
0 0
0 0
0 0
0 0
2 1
2 1
2 1
2 1
2 1
2 1
2 1
2 1
2 1
2 1
2 1
2 1
2 1
2 1
2 1
2 1
2 1
2 1
2 1
2 1
2 1
2 1
2 1
2 1
2 1
2 1
2 1
2 1
2 1
2 1
2 1
2 1
2 1
2 1
2 1
2 1
0 0
0 0
0 0
0 0
0 0
0 0
2 0
2 0
3 0
3 0
3 0
3 0
3 0
3 0
3 0
3 0
3 0
3 0
3 0
3 1
3 1
3 1
3 1
3 1
3 1
3 1
3 1
3 1
3 1
3 1
3 1
3 1
3 1
3 1
3 0
3 0
3 0
3 0
3 0
3 0
3 0
3 0
1 0
0 0
0 0
0 0
0 0
1 0
1 1
1 1
1 1
1 1
1 1
1 1
1 1
1 1
1 1
1 1
1 1
1 1
1 1
1 1
1 1
2 1
2 1
2 1
2 1
2 1
2 1
2 1
2 1
2 1
2 1
2 1
2 1
2 1
2 1
2 1
2 0
2 0
2 0
2 0
2 0
1 0
1 0
1 0
1 0
1 0
1 0
1 0
1 0
1 0
1 0
1 0
1 0
1 0
1 0
1 0
1 0
0 0
0 0
1 0
1 0
1 0
1 0
1 0
1 0
1 0
1 0
1 0
1 0
1 0
1 0
1 0
1 0
1 0
1 0
1 0
1 0
1 0
1 0
1 0
3 0
3 0
3 0
3 0
3 0
3 0
3 0
3 0
3 0
3 0
3 0
3 0
3 0
2 0
2 0
2 0
2 0
2 0
2 0
2 0
2 0
2 0
2 0
2 0
2 0
2 0
2 0
2 0
3 0
3 0
3 0
3 0
3 0
3 0
3 0
3 0
1 0
1 0
1 0
1 0
1 0
1 0
1 0
1 0
1 0
1 0
1 0
1 0
1 0
1 0
1 0
1 0
1 0
1 0
1 0
1 0
1 0
1 0
1 0
4 0
4 0
4 0
4 0
4 0
3 0
3 0
3 0
3 0
3 0
3 0
3 0
3 0
3 0
3 0
3 0
3 1
3 1
3 1
3 1
3 1
3 1
3 1
3 1
3 1
4 1
4 1
4 1
4 1
4 1
4 1
4 1
4 1
4 1
4 1
4 1
1 1
1 1
1 1
1 1
1 1
1 1
1 1
1 1
1 1
1 1
1 1
1 1
1 1
1 1
1 1
1 0
1 0
1 0
1 0
1 0
1 0
1 0
1 0
2 0
2 0
1 0
1 0
1 0
1 0
1 0
1 0
1 0
1 0
1 0
1 0
1 0
1 0
1 0
1 0
1 0
1 0
1 0
1 0
1 0
3 0
5 0
5 0
5 0
5 0
5 0
5 0
5 0
5 0
5 0
5 0
5 0
5 0
5 0
5 0
5 0
5 0
5 0
5 0
5 0
5 0
6 0
6 0
6 0
6 0
6 0
6 0
6 0
6 0
6 0
6 0
6 0
6 0
7 0
7 0
6 0
5 0
3 0
3 0
3 0
3 0
3 0
3 0
3 0
3 0
4 0
4 0
4 0
4 0
4 0
4 0
3 0
3 0
3 0
3 0
3 0
3 0
2 0
3 0
3 1
3 1
3 1
4 1
4 1
4 1
4 1
4 1
4 1
4 1
3 1
3 1
3 1
3 1
3 1
3 1
3 1
3 1
3 1
3 1
3 1
3 1
2 1
3 1
3 1
3 1
3 1
3 1
4 1
4 1
5 1
5 1
5 1
5 1
4 1
5 1
5 0
5 0
5 0
4 0
4 0
4 0
4 0
4 0
4 0
4 0
4 0
4 0
4 0
4 0
4 0
4 0
4 0
4 0
4 0
4 0
4 0
4 0
4 0
3 0
3 0
3 0
3 0
3 0
2 0
2 0
1 0
1 0
1 0
1 0
1 0
0 0
0 0
0 0
0 0
0 0
0 0
0 0
0 0
0 0
0 0
0 0
0 0
0 0
0 0
0 0
0 0
0 0
0 0
0 0
0 0
0 0
0 0
0 0
0 0
0 0
0 0
0 0
0 0
0 0
0 0
0 0
2 0
2 0
2 0
2 0
2 0
2 0
2 0
2 0
2 0
2 0
3 0
3 0
3 0
4 0
4 0
4 0
4 0
4 0
4 0
4 0
5 0
5 0
5 0
5 0
5 0
6 0
6 0
6 0
6 0
6 0
6 0
6 0
7 0
7 0
7 0
7 0
5 0
5 0
5 0
5 0
5 0
5 0
5 0
5 0
5 0
3 0
3 0
3 0
3 0
3 0
3 0
3 0
3 0
3 0
2 0
2 0
2 0
2 0
2 0
2 0
2 0
1 0
1 0
1 0
1 0
0 0
0 0
0 0
0 0
0 0
0 0
0 0
0 0
0 0
0 0
0 1
0 1
0 1
0 1
0 1
0 1
0 1
0 1
0 1
0 1
0 1
0 1
0 1
0 1
0 1
0 1
0 1
0 1
0 1
0 1
0 1
0 1
0 1
0 1
0 1
0 1
0 1
0 1
0 1
0 1
0 1
0 1
0 1
0 1
0 1
0 0
0 0
0 0
0 0
0 0
0 0
0 0
0 0
0 0
0 0
0 0
0 0
0 0
0 0
0 0
0 0
0 0
0 0
0 0
0 0
0 0
0 0
0 0
0 0
0 0
0 0
0 0
0 0
0 0
0 0
0 0
0 0
0 0
0 1
0 1
2 1
2 1
5 1
5 1
5 1
5 1
5 1
5 1
5 1
5 1
5 1
5 1
5 1
5 1
5 1
5 1
5 1
0 1
0 1
0 1
0 1
0 1
0 1
0 1
0 1
0 1
0 1
0 1
0 1
0 1
0 1
0 1
0 1
0 1
0 0
0 0
0 0
0 0
0 0
0 0
0 0
0 0
0 0
0 0
0 0
0 0
0 0
0 0
0 0
0 0
0 0
0 0
0 0
0 0
0 0
0 0
0 0
0 0
0 0
0 0
0 0
0 0
0 0
0 0
0 0
0 0
0 0
0 0
0 0
0 0
0 0
0 0
0 0
0 0
0 0
0 0
0 0
0 0
0 0
0 0
0 0
0 0
0 0
0 0
1 0
1 0
1 0
1 0
1 0
1 0
1 0
1 0
1 0
1 0
1 0
1 0
1 0
1 0
1 0
1 0
0 0
0 0
0 0
0 0
0 0
0 0
0 0
0 0
0 0
0 0
0 0
0 0
0 0
0 0
0 0
0 0
0 0
0 0
0 0
0 0
0 0
0 0
0 0
0 0
0 0
0 0
0 0
0 0
0 0
0 0
0 0
0 0
0 0
0 0
0 0
0 0
0 0
0 0
0 0
0 0
0 0
0 0
0 0
0 0
0 0
0 0
0 0
0 0
0 0
0 0
0 0
0 0
0 0
0 0
0 0
0 0
0 0
0 0
0 0
0 0
0 0
0 0
0 0
0 0
0 0
0 0
0 0
0 0
0 0
0 0
0 0
0 0
0 1
0 1
0 1
0 1
0 1
0 1
0 1
0 1
0 1
0 1
0 1
0 1
0 1
0 1
0 1
0 1
0 1
0 1
0 1
0 1
0 1
0 1
0 1
0 1
0 1
0 1
0 1
0 1
0 1
0 1
0 1
0 1
0 1
0 1
0 1
0 1
0 2
0 4
0 4
1 5
2 9
2 13
2 13
2 13
2 13
2 13
2 13
2 13
2 13
2 13
2 13
2 13
2 13
2 13
2 13
2 13
2 13
2 13
2 13
2 13
2 13
2 13
2 13
4 13
5 13
5 13
5 13
6 13
6 13
6 13
6 13
6 13
6 10
6 9
6 9
5 7
4 0
4 1
4 2
4 2
4 2
4 2
4 2
4 2
4 2
4 2
4 2
4 2
4 3
4 3
4 3
4 3
4 3
4 3
4 3
4 3
4 3
4 3
4 3
2 3
1 3
1 3
1 3
0 3
0 3
0 3
0 3
0 3
1 3
1 3
1 3
1 3
1 3
2 1
2 1
2 1
2 1
2 1
2 1
2 1
2 1
2 1
2 1
2 1
2 0
2 0
2 0
2 0
2 0
2 0
2 0
2 0
2 0
2 0
2 0
2 3
2 3
2 3
3 3
3 3
3 4
3 4
3 4
3 4
3 4
4 4
4 4
4 4
4 4
3 4
8 5
8 5
8 5
8 5
8 5
8 5
8 5
8 5
8 5
8 5
8 5
8 5
8 5
8 5
8 5
8 5
8 5
8 5
8 5
8 5
8 5
8 2
8 2
8 2
9 2
13 3
15 2
15 2
15 3
14 6
13 6
13 6
13 6
14 6
15 6
19 6
14 5
14 5
15 5
15 5
15 5
15 5
18 5
19 5
19 5
19 5
19 5
19 5
19 5
19 5
19 5
19 5
19 5
18 5
20 5
23 7
27 8
34 8
35 7
36 7
34 7
30 7
30 7
30 6
30 3
31 3
32 4
33 4
33 4
32 4
30 4
27 4
25 4
25 4
25 4
25 4
25 4
26 4
24 4
24 4
24 4
24 4
24 4
24 4
24 4
25 4
25 4
25 4
25 4
25 4
22 3
19 2
17 1
12 1
11 1
10 1
10 1
13 1
12 1
13 1
13 1
12 1
10 0
10 0
10 0
10 0
10 0
10 0
10 1
10 1
10 1
10 1
9 1
8 1
8 1
8 1
9 2
9 2
9 2
8 2
7 2
7 2
7 2
7 2
7 2
7 2
8 2
8 2
7 2
6 3
6 3
6 4
6 5
3 5
3 5
2 5
2 5
2 5
2 5
2 5
2 5
3 5
3 5
3 5
3 4
3 4
3 4
2 4
2 4
2 4
2 4
2 4
2 3
2 3
2 3
2 3
2 3
2 3
3 3
3 4
4 4
7 4
6 4
6 4
6 4
7 3
8 3
11 2
20 1
26 1
29 2
30 2
31 2
31 2
30 2
30 2
31 2
31 2
31 2
32 2
32 2
32 2
32 2
32 2
33 2
33 2
33 2
33 2
33 2
33 2
33 2
33 2
33 2
33 2
32 1
32 1
30 1
26 1
25 1
24 1
26 1
33 1
46 1
39 1
35 1
32 1
31 0
31 0
30 0
35 0
36 0
38 0
39 0
39 0
38 0
38 0
38 0
38 0
38 0
38 0
37 0
37 0
37 2
37 2
37 2
37 2
37 2
37 2
37 2
37 2
37 2
37 2
37 2
37 2
35 2
35 2
27 2
16 2
11 2
10 2
10 2
10 2
10 2
10 2
9 2
3 2
3 2
2 2
0 2
0 2
0 2
0 2
0 2
0 2
0 2
0 2
0 2
0 2
0 0
0 0
0 0
0 0
0 0
1 0
1 0
1 0
1 0
1 1
1 1
1 1
1 1
1 1
1 1
1 1
1 1
1 1
1 1
1 1
1 2
1 2
1 2
1 2
1 2
1 2
1 2
1 2
1 2
1 2
1 2
1 2
1 2
1 2
1 2
1 2
1 2
1 2
1 2
1 3
1 3
0 3
0 3
0 3
0 3
0 2
0 2
0 2
0 2
0 2
0 2
0 2
0 2
0 2
0 2
0 2
0 1
0 3
0 3
0 3
0 3
0 3
0 4
0 4
0 4
0 4
0 4
0 4
0 4
0 4
0 4
0 4
0 4
0 4
0 4
1 6
1 7
1 7
1 7
1 8
1 8
1 8
1 8
1 8
1 8
1 9
1 9
1 9
1 9
1 9
1 9
1 9
1 9
1 7
1 7
1 7
1 7
1 7
1 6
1 6
1 6
1 6
1 6
1 6
1 7
1 7
1 7
1 7
1 9
1 9
1 9
0 5
0 5
0 5
0 16
1 16
1 16
1 37
1 37
1 39
1 39
1 42
1 44
1 44
1 44
1 45
1 45
1 45
1 45
1 45
1 45
1 45
1 45
1 45
1 45
1 45
1 46
1 46
1 46
1 46
1 45
1 45
1 45
1 45
1 43
1 43
1 43
1 43
1 43
1 42
2 31
1 31
1 30
1 7
1 4
1 3
1 3
1 3
1 3
1 2
1 2
1 2
1 2
1 2
1 2
1 2
2 3
2 8
2 9
2 10
2 10
2 10
2 9
2 9
2 9
2 10
2 10
2 10
2 13
2 13
2 14
2 14
2 14
2 14
2 14
2 14
1 13
1 13
1 13
1 13
1 13
1 14
1 14
1 14
1 14
1 14
1 14
1 14
1 14
1 14
1 14
1 13
1 13
1 7
1 10
1 11
2 12
2 12
2 12
2 12
2 12
2 11
2 11
2 10
2 7
2 7
2 7
2 7
2 7
4 13
4 13
4 13
4 13
4 14
4 17
4 18
4 18
4 18
4 18
4 18
4 18
4 18
4 18
4 18
4 18
4 21
4 21
4 21
3 21
3 25
3 21
3 20
2 20
2 20
2 20
2 20
2 20
2 20
2 20
2 21
2 21
0 21
0 23
0 23
0 23
0 16
0 16
0 16
0 16
0 16
0 13
0 13
0 13
0 12
0 12
0 12
0 12
0 12
0 12
0 12
0 11
0 10
0 11
0 11
0 11
0 7
0 6
0 6
1 6
1 8
1 14
1 18
1 22
1 22
1 22
1 21
1 21
1 21
1 20
1 20
1 20
1 20
1 21
1 21
1 21
1 20
1 20
1 20
1 20
1 20
1 20
1 20
1 20
1 20
1 20
1 20
1 20
1 18
1 20
1 20
1 20
1 24
3 24
3 24
2 24
2 20
2 12
2 9
2 8
2 8
2 8
2 8
2 8
2 8
2 7
2 7
2 7
2 6
2 6
2 6
2 6
2 6
2 6
2 6
2 6
2 6
2 7
2 8
2 10
2 10
2 10
2 10
2 10
2 10
2 8
2 8
2 8
2 4
0 4
0 4
0 4
0 4
0 4
0 4
0 4
0 4
0 4
0 4
0 6
0 8
0 9
0 15
0 20
0 62
0 64
0 74
0 104
1 151
1 176
1 217
1 220
1 222
1 224
1 224
1 222
1 228
1 228
1 230
1 230
1 231
1 231
1 234
1 249
1 253
1 254
1 254
1 258
2 265
2 268
2 268
2 271
2 271
2 271
3 272
3 268
3 266
4 263
4 257
4 234
4 147
3 119
3 87
3 82
3 78
3 74
3 61
3 62
3 63
3 62
3 62
3 66
3 60
3 61
3 61
3 61
3 61
3 62
3 59
3 42
3 34
3 33
2 33
2 27
2 25
2 25
2 25
1 23
1 22
1 22
0 21
0 21
0 21
0 23
0 21
0 22
0 69
0 70
0 73
0 72
0 72
0 71
2 68
2 66
2 69
2 69
2 74
3 75
3 74
3 74
3 74
3 75
3 79
3 80
3 81
3 82
3 105
3 120
3 148
3 165
3 204
4 228
5 234
6 244
6 244
6 243
6 245
6 245
6 247
6 245
6 245
6 244
6 198
6 198
6 193
6 193
6 193
6 193
4 183
4 182
4 181
4 180
4 172
3 173
3 173
3 173
3 172
3 172
3 174
3 172
3 168
3 163
3 129
3 124
3 95
3 80
3 44
1 24
1 20
0 10
3 33
3 34
3 33
3 33
3 32
3 32
3 32
3 32
3 32
3 32
3 33
4 33
4 34
4 34
4 37
4 37
4 37
4 37
4 37
4 36
4 36
4 36
4 36
4 36
4 34
4 34
4 35
4 35
4 35
5 35
5 35
5 35
5 32
5 32
4 31
4 33
3 8
3 8
3 8
3 8
3 8
4 17
4 17
4 17
4 17
4 17
3 16
3 16
3 15
3 15
3 12
3 12
3 12
4 13
4 13
4 13
4 13
4 13
4 12
3 12
3 12
3 12
3 12
3 12
3 12
3 12
3 12
3 13
3 13
3 13
3 16
3 15
3 15
3 15
3 14
3 14
3 14
2 6
2 6
2 6
2 6
2 6
2 6
2 6
2 6
2 6
2 6
2 6
2 6
1 5
1 5
1 5
1 6
1 6
1 6
1 6
1 6
1 6
1 6
1 6
1 6
1 5
1 5
1 10
2 10
2 10
2 7
1 10
1 14
1 19
1 37
1 41
1 41
1 41
1 41
1 41
1 42
1 42
1 42
1 42
1 42
1 42
1 41
1 41
1 41
1 41
1 41
1 41
1 41
1 41
1 41
1 41
1 41
2 42
2 42
2 42
2 42
2 43
2 43
2 38
1 38
1 38
1 38
1 33
1 28
1 24
1 4
1 3
1 3
1 3
1 3
1 3
1 3
1 3
1 3
1 3
1 3
1 3
1 3
1 3
1 3
1 3
1 4
1 4
1 5
3 9
3 10
3 10
4 10
3 9
3 9
3 9
3 8
3 8
3 8
3 8
3 8
3 8
3 8
3 8
3 8
3 8
3 8
4 8
4 8
4 8
4 8
4 8
4 7
4 7
4 7
5 8
5 10
5 11
5 11
5 11
5 11
5 11
5 10
5 10
4 9
3 6
3 5
3 5
2 5
2 5
2 5
2 5
2 5
2 5
2 5
2 5
2 5
3 5
3 5
3 5
3 5
3 6
3 6
2 6
2 6
2 6
2 6
2 6
2 6
2 6
2 6
1 6
1 4
1 3
1 5
1 6
1 6
1 6
1 6
1 6
1 6
1 5
1 5
1 5
1 5
1 6
1 7
1 7
1 7
1 7
1 7
1 7
2 7
1 7
1 7
1 7
1 7
1 6
1 6
1 6
1 6
1 6
1 6
1 6
1 6
1 6
1 6
1 5
1 5
1 5
1 3
1 2
1 2
1 2
1 2
1 2
1 2
1 2
1 2
1 1
1 0
1 0
1 1
1 1
1 1
1 2
1 2
1 2
0 2
0 2
0 3
0 4
0 6
0 6
0 6
0 6
0 6
0 6
0 7
1 7
1 8
1 8
1 8
2 16
2 16
2 16
2 16
2 22
2 22
2 22
2 23
2 23
2 23
2 23
2 23
2 31
2 33
2 34
2 33
2 42
2 44
2 44
2 44
2 44
2 45
2 45
2 54
2 56
2 55
2 57
2 60
2 60
2 62
2 63
2 62
1 61
2 61
2 61
2 61
1 53
1 53
1 53
1 53
1 47
1 46
1 45
1 45
1 44
1 48
1 48
1 48
1 39
1 39
1 37
2 40
2 30
2 29
2 29
2 29
2 29
2 31
2 31
2 22
2 24
2 20
2 19
2 18
2 18
2 18
2 19
2 19
2 19
1 19
1 19
2 21
2 24
3 32
3 32
3 37
3 37
3 37
4 55
4 55
6 60
6 72
6 75
6 76
6 76
6 76
6 76
5 110
5 113
5 114
5 120
5 123
5 123
5 125
5 124
5 124
5 120
5 119
5 119
5 119
5 119
5 119
5 119
5 119
5 119
5 119
5 119
4 115
5 110
4 107
4 107
4 110
4 110
4 111
4 92
4 89
3 81
3 69
3 69
3 69
3 69
3 69
3 65
3 16
3 18
3 21
4 20
4 20
4 20
4 20
4 20
4 21
4 21
4 21
4 21
4 21
4 21
4 24
4 28
4 34
4 41
4 44
3 55
3 56
3 52
3 52
3 52
3 46
3 45
3 46
1 46
1 45
1 45
1 46
1 46
1 46
1 46
0 45
0 45
0 44
0 43
0 41
0 41
0 40
0 40
0 41
0 40
0 42
1 43
2 43
2 43
2 44
2 44
2 39
2 31
2 27
2 20
2 17
2 12
2 29
2 39
2 49
2 50
2 53
2 53
2 52
2 51
2 51
2 51
2 51
2 50
2 50
2 50
2 50
2 50
2 50
2 49
2 49
2 49
2 49
2 49
2 48
3 49
3 46
2 46
1 46
1 46
1 45
1 47
1 47
2 52
2 60
10 68
10 70
10 70
10 51
10 43
10 36
11 42
11 39
12 41
12 44
12 44
12 45
12 45
12 46
12 51
12 51
14 53
14 53
14 53
14 53
14 54
15 58
15 61
18 64
18 64
18 64
17 63
17 64
17 62
16 62
16 62
16 63
16 61
15 59
13 55
10 44
8 41
8 37
8 36
8 35
8 34
8 33
7 24
6 24
6 27
8 34
10 64
10 64
12 64
12 62
11 62
9 61
9 60
9 60
9 60
9 60
9 56
9 53
9 50
7 49
7 49
7 49
7 52
7 53
7 53
7 53
7 52
7 53
7 57
7 57
7 58
9 91
10 93
14 94
28 192
28 198
28 202
28 208
28 227
28 231
28 228
25 214
23 192
23 189
22 189
22 189
22 191
22 191
22 194
23 196
23 196
23 197
23 197
22 197
22 197
22 197
22 197
22 197
22 192
29 200
31 204
31 213
31 213
32 213
34 217
33 217
31 215
29 183
28 182
28 180
15 77
15 68
15 62
15 59
15 48
15 47
15 53
15 50
15 50
15 50
15 51
15 57
15 59
15 58
15 56
14 57
14 57
13 57
13 57
13 57
13 57
13 57
13 58
12 58
12 58
5 48
3 44
4 36
4 36
3 36
1 26
1 25
1 25
1 25
1 26
1 26
1 26
1 25
1 25
1 25
1 25
1 24
1 17
1 17
1 17
1 18
1 14
1 12
1 12
1 19
1 31
1 31
1 34
1 34
1 35
1 40
1 46
0 48
0 51
0 54
0 54
1 55
1 55
1 61
1 61
1 63
1 66
1 68
1 67
1 76
1 77
1 78
1 79
1 79
1 82
1 83
1 84
1 84
1 84
1 84
1 84
1 80
1 80
1 79
1 79
1 69
1 58
2 58
2 55
2 55
2 55
1 50
1 42
1 39
1 33
1 33
2 33
2 31
2 28
2 27
2 27
2 24
2 21
2 20
4 20
5 12
5 13
5 13
5 12
5 11
5 8
5 8
5 7
5 7
5 7
5 7
5 7
5 7
5 7
5 7
4 8
4 8
4 8
4 15
4 15
4 14
4 14
5 18
5 25
5 43
5 46
5 46
4 48
4 48
4 48
4 46
4 46
4 46
4 50
4 54
2 55
1 55
1 53
1 53
1 53
1 53
1 54
1 54
1 54
1 53
1 53
1 53
1 53
1 53
1 54
1 54
1 56
2 59
2 61
2 57
2 59
2 60
2 60
1 55
1 48
1 27
1 27
1 27
1 27
1 27
1 27
1 28
1 28
1 28
1 21
1 17
1 16
1 16
1 16
1 16
1 16
1 16
1 16
1 16
1 16
1 16
1 16
1 17
1 17
1 17
1 18
2 18
3 16
2 13
2 9
4 7
4 5
4 5
4 5
4 5
4 4
4 5
4 6
4 6
4 6
4 6
4 6
4 6
4 6
4 6
4 7
4 7
4 7
4 7
4 7
4 7
4 7
4 7
4 7
4 7
4 7
4 7
4 9
4 11
4 12
5 16
6 17
5 17
4 17
4 19
4 18
2 18
2 18
2 18
5 23
5 24
6 24
8 30
8 30
8 30
8 30
8 30
8 30
8 30
8 30
8 28
8 28
8 28
8 28
8 28
8 28
8 28
8 28
8 28
8 28
8 28
8 28
8 28
8 26
8 23
8 19
7 19
6 15
6 15
6 15
6 14
6 14
6 14
6 14
6 14
3 9
3 8
2 7
0 0
0 0
0 0
0 0
0 0
0 0
0 1
0 1
0 1
0 1
0 1
0 1
0 2
0 2
0 2
0 2
0 2
0 2
0 2
0 2
0 2
0 2
0 2
0 2
0 2
0 2
0 2
0 2
1 2
1 2
1 2
1 2
1 2
1 2
1 2
1 2
1 2
1 2
1 2
1 1
1 1
1 1
1 1
1 1
1 1
1 1
1 1
1 1
1 0
1 0
1 0
1 0
1 0
1 0
1 0
1 0
1 0
1 0
2 0
2 0
2 0
2 0
2 0
2 0
1 1
1 6
1 6
1 6
1 7
1 7
1 7
1 7
1 8
1 8
1 8
1 10
1 10
1 10
1 10
1 10
1 10
1 10
1 10
1 10
1 12
1 12
1 13
1 51
2 53
2 56
2 57
2 58
2 58
2 58
1 61
1 72
1 73
1 79
1 79
1 81
1 82
1 77
1 78
1 78
1 85
1 86
1 87
1 87
1 89
1 89
1 88
1 88
1 88
1 88
1 88
2 88
2 87
2 88
2 86
2 86
2 86
2 86
2 82
2 42
1 41
1 41
1 41
1 41
1 41
1 41
1 34
1 25
1 26
1 32
1 33
1 33
1 30
1 30
1 31
2 30
2 20
2 19
2 19
2 19
2 18
3 27
3 33
3 39
2 44
2 46
2 46
2 46
2 45
2 45
2 45
2 45
2 56
2 62
2 65
2 70
2 70
2 70
2 70
2 70
2 70
2 67
3 68
3 68
3 66
3 55
3 56
3 56
2 57
2 57
2 57
2 57
2 57
2 57
2 57
2 57
2 57
1 42
1 36
1 33
1 34
1 33
1 36
1 36
1 38
1 39
1 39
1 40
1 25
1 21
1 18
1 15
1 15
1 18
1 24
1 56
1 62
1 64
0 65
0 69
0 69
0 73
0 79
0 92
0 94
0 94
0 94
0 94
0 95
0 95
0 97
0 97
0 97
0 97
0 96
0 92
0 90
0 90
0 87
0 87
0 96
0 94
0 98
0 98
0 98
0 99
0 99
0 99
0 99
0 96
0 90
0 56
0 51
0 47
0 46
0 42
1 44
1 41
1 33
1 20
1 24
1 24
1 41
1 41
1 40
1 40
1 38
1 38
1 48
1 48
1 48
1 49
1 51
1 52
2 55
2 54
3 45
3 44
3 42
3 42
3 42
3 42
3 43
3 43
3 43
3 43
3 43
3 43
3 43
4 51
4 51
4 52
3 50
3 50
3 54
3 53
3 51
4 51
4 34
4 36
4 36
4 36
4 36
4 35
4 26
4 24
4 23
4 21
4 21
3 21
2 33
2 37
2 38
2 38
2 38
2 39
2 41
2 42
2 41
3 52
3 53
3 53
3 53
3 53
3 53
2 44
2 45
2 46
2 46
2 46
2 42
2 40
2 40
1 40
2 39
2 39
2 40
2 40
2 40
2 40
2 40
2 40
2 40
2 40
2 39
2 37
2 21
2 20
2 20
2 19
2 19
2 18
2 17
2 17
2 17
1 7
1 6
1 6
1 7
1 6
1 6
1 5
1 5
1 4
1 7
1 7
1 7
5 61
4 61
4 63
4 65
4 65
4 64
4 65
4 65
4 65
4 64
4 65
4 65
4 65
4 65
4 65
4 65
4 65
4 65
4 65
4 67
4 68
4 68
4 68
4 68
4 67
4 68
4 68
4 68
4 69
4 70
4 74
4 74
4 75
4 71
4 70
4 71
0 18
0 18
0 16
0 15
0 15
0 16
0 15
0 15
0 15
0 15
0 14
0 14
0 13
0 13
0 14
0 15
0 15
0 15
0 14
0 13
0 13
0 26
0 27
0 28
0 27
0 26
0 26
0 25
0 24
0 22
0 18
0 18
0 18
0 21
0 21
0 22
0 23
0 23
0 23
0 24
0 31
0 31
0 35
0 38
0 38
0 38
0 38
0 38
0 38
0 38
0 38
0 37
0 64
0 66
0 72
0 72
0 72
0 59
0 58
0 57
0 66
0 68
0 69
0 69
0 69
0 71
0 79
0 79
0 83
0 99
0 98
0 98
0 99
0 99
0 100
0 99
0 92
0 91
0 86
0 84
0 84
0 84
0 84
0 84
0 84
0 83
0 83
0 81
0 50
0 50
0 50
0 50
0 50
0 50
0 50
0 50
0 41
0 39
0 38
0 38
0 38
0 38
0 39
0 47
0 47
0 31
1 35
1 35
1 34
1 33
1 34
1 35
1 37
1 37
1 37
1 38
1 38
1 38
1 38
1 38
1 39
1 40
1 40
1 39
1 39
1 39
1 39
1 39
1 39
1 39
1 40
1 43
1 44
1 45
1 45
1 44
1 44
1 39
1 27
0 19
0 19
0 18
0 18
0 18
0 17
0 18
0 17
0 16
0 14
0 14
0 13
0 12
0 12
0 12
0 12
0 12
0 11
0 11
0 11
0 11
0 13
1 17
1 23
1 24
1 24
1 24
1 23
1 16
1 16
1 19
1 19
1 19
1 19
1 19
1 19
1 19
1 19
1 19
1 16
1 16
1 16
1 16
1 16
1 16
1 16
1 16
1 21
1 21
1 21
1 21
1 28
1 28
1 28
1 28
1 28
1 29
1 26
0 22
0 19
0 20
0 20
0 20
0 20
0 20
0 22
0 19
0 20
0 21
0 22
0 22
0 22
0 22
0 22
0 22
0 22
0 22
0 22
0 22
0 22
0 22
0 22
0 22
0 17
0 17
0 17
0 17
0 11
2 12
2 12
2 12
2 13
2 12
2 12
2 10
2 9
2 8
2 9
2 10
2 11
2 11
2 9
2 9
2 8
2 6
2 6
2 6
2 6
2 8
2 8
2 8
2 8
2 8
2 8
2 8
2 8
2 8
2 8
2 8
2 8
2 8
2 8
2 7
2 7
0 6
0 6
0 6
0 5
0 5
0 5
0 5
0 5
0 5
0 3
0 3
0 3
0 3
0 3
0 6
0 6
0 7
0 8
0 9
0 9
0 7
0 7
0 7
0 7
0 7
0 7
0 7
0 7
0 7
0 7
0 7
0 7
0 7
0 7
0 7
0 7
0 7
0 7
0 7
0 8
0 8
0 10
0 10
0 10
0 11
0 10
1 11
1 13
2 14
2 13
2 11
2 11
2 9
2 8
2 8
2 8
2 8
2 8
2 8
2 8
2 8
2 8
2 8
2 8
2 8
2 8
2 8
2 8
2 8
2 8
2 8
2 8
2 8
2 8
2 8
2 7
2 6
2 5
2 5
2 4
2 4
2 4
1 0
1 0
0 0
0 0
0 1
0 1
0 1
0 1
0 1
3 1
4 1
4 1
4 1
4 1
4 1
4 1
4 1
4 5
4 7
4 7
4 7
4 7
4 7
4 7
4 7
4 7
4 7
4 8
4 9
4 9
4 9
4 14
4 15
4 15
4 16
4 17
4 20
4 23
4 25
4 39
4 42
4 42
3 44
3 47
3 48
1 49
0 53
0 54
0 54
0 57
0 56
0 57
0 57
0 54
0 52
0 52
0 52
0 52
0 52
0 52
0 52
0 52
0 52
0 51
0 48
0 47
0 48
0 47
0 46
0 50
0 54
0 52
0 49
0 46
0 44
0 28
0 32
0 35
0 35
0 33
0 33
0 32
0 36
0 36
0 36
0 36
0 36
0 35
0 35
0 35
0 35
0 35
1 35
2 35
2 35
2 35
2 35
2 35
2 35
2 35
2 34
2 34
2 35
2 34
2 34
2 29
2 25
2 25
2 25
2 25
2 25
2 25
2 17
2 14
2 14
2 14
2 14
2 14
2 4
2 4
2 4
2 4
2 4
2 4
2 4
2 4
2 4
1 4
0 4
0 4
0 4
0 5
0 5
0 5
0 5
0 5
0 6
0 6
0 4
0 4
0 4
0 4
0 4
0 4
0 4
0 4
0 4
0 3
0 2
0 2
0 2
0 2
0 2
0 3
0 3
0 3
0 3
0 3
0 3
0 3
0 3
0 3
0 3
0 3
0 3
0 3
0 3
0 2
0 2
0 2
0 2
0 2
0 1
0 1
0 1
0 1
0 1
0 1
0 1
0 1
0 1
0 1
0 1
0 1
0 5
0 5
0 5
0 5
0 5
0 4
0 4
0 4
0 4
0 4
0 4
0 4
0 4
0 4
0 4
0 4
0 4
0 4
0 4
0 4
0 5
0 5
0 5
0 5
0 7
0 9
0 12
0 24
0 24
0 24
0 24
0 24
0 24
0 24
0 25
0 31
0 29
0 29
0 31
0 31
0 31
0 31
0 31
0 31
0 31
0 31
0 31
0 31
0 31
0 32
0 34
0 35
0 37
0 37
0 51
0 51
0 54
0 60
0 60
0 62
0 61
0 61
0 59
0 49
0 50
0 50
0 50
0 50
0 52
0 52
0 52
0 44
0 44
0 44
0 42
0 42
0 42
0 42
0 42
0 42
0 42
1 42
1 42
1 42
1 42
1 40
1 39
1 34
1 23
1 23
1 22
1 21
1 19
1 13
1 12
1 11
1 8
1 7
1 7
1 5
1 4
1 4
1 4
1 6
1 4
1 4
1 3
1 3
1 3
1 3
1 3
1 3
1 3
1 3
1 4
1 6
1 7
0 9
0 9
0 9
0 9
0 9
0 9
0 9
0 9
0 9
0 9
0 9
0 8
0 8
0 8
0 8
0 6
1 7
1 8
2 10
2 13
2 14
2 14
2 14
2 14
2 19
2 25
2 25
2 30
2 180
2 189
2 195
2 202
2 202
2 200
2 205
2 204
2 205
2 207
2 208
2 208
3 208
3 208
3 208
3 208
3 208
3 208
3 208
3 208
3 209
3 209
3 210
3 210
2 209
2 201
1 195
1 193
1 193
1 194
1 194
1 194
1 193
1 184
1 184
1 172
1 28
1 29
1 26
1 26
1 113
1 113
1 114
1 113
1 113
1 112
1 111
0 111
0 113
0 117
0 119
0 118
0 118
0 119
0 119
0 119
0 118
0 118
0 119
0 119
0 139
0 139
0 136
0 137
0 167
0 166
0 167
0 167
0 167
0 167
0 167
0 167
0 166
0 158
0 153
0 151
0 64
0 63
0 62
0 63
0 63
0 63
0 63
0 63
0 61
0 57
0 55
0 55
0 54
0 54
0 54
0 54
0 54
0 54
0 54
0 55
0 35
0 34
0 34
0 34
0 3
0 3
0 3
0 3
0 3
0 3
0 3
0 3
0 4
0 4
0 4
0 4
0 4
0 4
0 4
0 3
0 3
0 3
0 3
0 4
0 4
0 4
0 4
0 3
0 4
1 7
1 8
1 7
1 7
1 8
1 9
1 9
1 9
1 9
1 9
1 9
1 9
1 9
1 9
1 9
1 9
1 9
1 9
1 8
1 8
1 8
1 8
1 8
1 8
1 8
1 8
2 8
2 8
2 8
2 8
2 7
2 8
2 8
2 8
1 7
1 6
1 3
1 2
1 2
1 3
1 3
1 2
1 2
1 2
1 2
1 2
1 2
1 2
1 3
1 3
1 3
1 3
1 4
1 4
1 4
0 4
0 4
0 4
0 4
0 4
0 4
0 4
0 4
0 4
0 4
0 4
0 4
0 3
0 3
0 3
0 3
0 3
0 3
0 3
0 3
0 2
0 2
0 2
0 2
0 2
0 2
0 2
0 2
1 12
1 11
1 10
1 10
1 11
1 11
1 11
1 11
1 11
2 12
2 12
2 13
2 13
2 13
2 13
2 13
2 13
2 13
2 13
2 13
2 13
2 13
2 13
2 13
2 13
2 13
2 13
2 13
2 13
2 13
2 13
2 13
2 13
2 14
2 14
2 14
1 4
1 4
1 3
1 3
1 4
1 5
0 6
0 6
0 7
0 6
0 7
0 6
0 6
0 6
0 8
0 8
0 9
0 9
0 11
0 15
0 15
0 15
0 15
0 15
0 15
0 15
0 16
0 16
0 16
2 16
2 16
5 16
5 15
6 15
6 15
8 15
8 15
8 15
8 15
8 15
8 14
8 13
8 12
8 11
8 11
8 13
8 12
8 13
8 13
8 13
8 7
8 5
8 6
8 6
8 6
8 8
8 8
8 8
8 8
8 8
8 8
9 8
9 7
10 7
10 7
8 7
7 7
5 7
5 7
4 7
4 7
2 7
2 7
2 7
2 7
2 7
2 7
2 7
2 7
3 7
3 7
3 5
3 5
3 4
3 4
3 4
3 3
3 3
3 2
3 2
3 2
3 0
4 0
4 0
4 0
3 0
3 0
3 0
3 0
3 0
3 0
3 1
3 1
3 1
3 1
3 1
3 2
3 2
5 2
6 2
6 2
6 2
6 2
6 2
6 4
5 4
5 4
5 4
5 4
5 8
5 16
5 17
6 18
7 20
7 21
7 23
8 23
6 23
6 23
6 23
6 23
6 23
6 23
6 23
6 23
6 22
6 22
6 22
6 22
6 22
6 22
6 22
6 21
5 21
4 21
3 21
3 21
3 21
3 21
3 21
3 19
3 19
3 19
3 19
3 18
2 15
2 4
2 4
1 3
1 2
0 2
1 2
1 2
1 2
1 2
1 2
1 2
1 2
1 2
1 2
1 2
1 2
1 2
1 2
1 2
1 2
1 2
1 2
1 2
1 2
1 2
1 2
1 2
1 2
1 3
4 7
5 10
5 10
5 13
7 14
8 14
8 14
9 14
19 14
47 15
47 14
47 13
46 13
46 13
46 13
46 13
48 14
49 14
49 15
49 15
49 15
49 15
49 15
49 15
50 16
50 16
50 16
50 16
51 16
54 16
54 16
53 16
54 16
54 15
53 15
53 14
48 10
48 7
49 9
49 6
47 6
45 6
38 6
27 5
16 5
13 5
13 5
13 5
13 5
13 5
13 5
12 4
11 3
10 3
10 3
10 3
10 3
10 3
11 3
11 3
11 3
13 3
19 3
21 3
22 3
19 3
20 3
22 3
31 3
30 3
30 3
30 3
30 3
30 3
28 1
30 1
31 1
31 1
31 1
31 1
31 1
31 1
31 1
31 1
31 1
31 1
33 1
33 2
33 2
37 3
43 4
47 5
50 5
50 5
58 7
52 7
49 6
48 6
49 6
49 6
49 6
48 6
48 6
45 6
35 6
35 6
35 6
35 6
35 6
35 6
35 6
33 6
32 6
32 6
32 6
32 6
33 6
33 6
34 6
33 6
42 7
42 7
41 6
41 6
35 6
28 5
26 5
26 4
23 4
23 4
17 2
17 2
17 2
17 2
15 2
15 2
15 2
15 2
15 2
15 2
15 2
15 2
15 2
15 2
15 2
16 2
26 3
26 3
26 3
26 3
26 3
25 3
25 3
25 3
24 5
24 6
15 4
15 5
15 5
15 5
14 5
14 5
14 5
12 5
12 5
12 5
12 5
12 6
18 6
18 7
20 7
21 8
21 8
21 10
23 10
24 10
26 13
27 14
26 14
26 15
25 16
26 16
17 15
17 17
17 17
17 17
17 17
17 16
17 16
17 16
17 17
17 16
17 16
17 18
19 18
19 18
19 18
19 17
19 17
19 17
19 17
19 17
18 18
18 18
12 18
12 18
10 18
8 17
8 16
8 15
7 15
5 15
3 12
3 11
3 11
3 10
3 9
2 7
2 7
2 7
3 7
3 7
3 7
3 7
3 7
3 7
3 4
3 3
3 3
4 2
2 4
2 16
2 18
3 20
4 21
5 22
5 22
5 23
5 22
5 24
5 24
5 24
5 24
5 25
5 27
5 29
5 29
6 45
6 45
6 46
12 48
13 48
13 48
13 48
13 49
13 49
12 49
13 49
13 49
13 49
13 49
13 49
13 49
13 49
13 49
12 48
12 46
11 34
10 33
10 31
10 30
9 29
9 28
9 30
9 30
9 29
9 29
9 30
9 30
9 29
9 25
9 25
9 25
9 9
9 8
9 10
3 8
2 8
2 8
2 8
2 8
2 8
1 8
1 8
1 8
1 8
1 8
1 12
1 14
1 19
1 20
1 21
1 21
1 22
1 22
1 22
1 22
1 31
1 31
1 28
1 28
1 28
1 28
1 30
1 30
1 30
1 30
1 30
1 30
0 29
0 29
0 28
0 28
0 27
0 27
0 27
0 29
1 30
1 34
1 35
1 36
1 37
1 38
1 32
1 29
1 25
1 24
1 24
1 24
1 23
1 23
1 23
1 23
1 14
1 14
1 14
1 14
1 14
1 14
1 11
1 11
1 11
1 11
1 11
1 11
1 11
1 11
1 11
1 11
1 11
1 11
1 11
1 9
0 6
3 3
3 3
3 3
3 2
3 1
3 1
3 1
3 1
3 1
3 1
3 1
3 1
4 1
5 6
5 7
5 11
5 11
5 11
5 12
5 13
5 13
5 13
5 13
5 13
5 15
5 15
5 15
5 15
5 15
5 15
5 16
5 16
5 16
5 16
5 16
5 16
2 15
2 15
2 15
3 15
3 15
4 15
4 18
4 24
6 61
6 64
6 66
7 71
6 71
5 68
6 65
6 64
6 64
6 64
6 63
6 62
6 62
6 62
6 62
8 62
9 60
9 60
9 60
9 60
9 60
9 59
9 59
9 59
9 76
9 76
9 100
9 100
9 100
9 100
9 97
8 97
16 131
15 130
15 128
15 113
12 83
12 78
12 78
12 77
12 76
11 75
11 76
11 76
11 76
11 76
11 76
11 76
11 76
9 76
9 76
8 77
8 77
8 77
8 77
8 77
8 77
8 77
8 77
8 77
8 60
8 60
8 36
8 36
8 36
8 36
8 36
8 36
0 2
0 3
0 3
0 3
0 3
0 3
0 3
0 3
0 3
0 3
0 2
0 2
0 2
0 2
0 2
0 2
0 2
0 2
0 2
0 1
0 1
0 1
0 1
0 1
0 1
0 1
0 1
0 1
0 1
0 1
0 5
0 5
0 5
0 5
0 5
0 5
0 5
0 4
0 4
0 4
0 4
0 4
0 4
0 4
0 5
0 5
0 5
0 5
0 5
0 5
0 5
0 5
0 5
0 5
0 5
0 5
0 5
0 5
0 6
0 6
0 7
0 7
0 7
0 7
0 7
0 7
0 3
0 3
0 3
0 3
0 3
0 4
0 4
0 6
1 9
1 9
1 10
1 10
1 10
1 10
1 9
1 9
1 9
1 9
1 9
1 9
1 15
1 15
1 20
1 20
2 20
2 21
2 21
2 21
2 19
2 20
2 20
2 20
2 20
2 20
2 20
2 20
2 20
2 20
2 20
2 20
2 20
2 18
2 18
2 16
1 13
1 13
1 13
1 13
1 14
1 14
1 14
1 14
4 14
8 18
10 18
10 18
10 13
10 14
9 9
9 8
9 8
9 8
9 8
9 8
9 7
9 7
9 7
9 8
9 8
9 8
9 8
9 8
9 8
9 8
9 8
9 8
9 8
9 8
9 8
9 8
9 8
9 8
9 8
9 8
9 7
9 8
9 8
8 8
5 8
1 2
0 2
0 2
0 2
0 2
0 4
0 4
0 5
0 5
0 5
0 6
0 6
0 6
0 7
0 8
0 8
0 8
0 8
0 8
0 8
0 8
0 8
0 8
0 8
0 8
0 8
0 8
0 8
0 8
0 8
0 8
0 8
0 7
0 7
0 7
0 7
0 7
0 8
0 9
2 11
2 12
2 10
2 10
2 9
2 9
2 9
2 10
2 11
2 9
2 9
2 9
2 9
2 9
2 10
2 10
2 10
2 10
2 10
3 10
3 10
3 10
3 10
3 10
3 10
3 10
3 10
3 10
4 10
5 10
6 10
7 10
7 10
7 11
7 10
7 9
5 7
5 6
5 6
5 6
5 6
5 6
5 6
5 4
5 3
5 2
5 2
5 2
5 2
5 3
5 3
4 3
4 3
4 3
4 3
4 3
4 3
4 3
4 3
4 3
4 3
4 3
4 3
3 3
3 3
1 3
1 3
0 3
0 3
0 2
0 2
0 2
1 2
1 2
1 2
1 2
1 2
1 2
1 2
2 2
8 2
8 3
8 3
8 3
8 4
8 3
8 2
8 3
8 3
8 3
8 6
8 6
8 8
8 8
8 8
9 8
9 8
9 8
9 8
9 8
9 8
9 8
9 8
9 9
9 9
9 9
9 9
9 9
8 9
8 9
11 9
12 14
12 15
12 16
12 19
11 19
6 19
6 18
6 17
6 17
5 17
5 17
5 17
5 16
5 16
5 17
5 14
5 14
5 12
5 12
5 12
5 12
5 12
5 12
5 12
5 12
5 12
5 12
5 12
5 11
5 11
5 11
5 9
7 9
7 9
7 8
4 8
3 3
2 1
2 0
2 0
2 0
2 0
2 0
2 0
2 0
2 0
2 0
2 0
2 0
2 0
2 0
2 0
2 0
2 0
2 0
2 0
2 0
2 0
2 0
2 1
2 1
2 1
2 2
2 2
2 2
2 2
2 3
2 3
0 3
1 5
1 5
2 5
2 6
2 6
3 6
3 6
3 6
3 6
3 6
3 6
3 6
3 6
3 6
3 6
3 6
3 6
3 6
3 6
3 6
3 6
3 6
3 6
4 7
4 9
4 9
4 8
4 12
4 12
4 11
4 11
4 11
4 11
4 10
5 10
8 11
10 9
10 9
10 9
10 8
11 8
10 8
10 8
10 8
10 9
10 10
10 10
10 10
10 10
10 10
10 10
10 10
10 10
10 10
10 11
10 12
10 15
10 15
11 16
10 14
10 13
11 15
11 15
11 14
11 16
11 16
13 16
14 16
14 16
14 16
13 16
8 15
6 15
6 15
6 15
6 15
6 15
6 15
6 15
6 15
6 14
6 15
6 15
6 15
6 17
6 17
7 19
7 19
7 19
7 19
7 18
7 17
8 14
8 13
7 15
7 15
6 15
5 14
5 14
5 10
3 9
3 9
3 9
3 9
2 9
2 9
2 9
2 9
1 9
1 9
1 12
1 12
1 12
1 12
1 12
1 12
1 12
1 10
1 10
1 11
1 9
1 9
0 7
0 7
0 7
0 7
0 7
0 7
0 7
0 7
0 5
0 5
0 5
0 4
0 4
0 4
0 4
1 4
1 4
1 4
1 4
1 4
1 4
1 4
1 4
1 4
1 1
1 1
1 1
1 1
1 0
1 0
1 0
1 0
1 0
1 0
1 0
1 0
1 0
1 0
1 0
1 1
1 1
1 1
1 1
1 4
1 4
2 6
2 6
2 6
2 6
2 6
2 6
1 6
2 6
2 6
2 6
2 6
2 6
2 6
3 6
3 6
3 6
3 6
3 6
3 6
3 6
3 6
3 6
3 7
3 7
3 7
3 7
3 7
3 7
3 7
3 7
3 6
3 6
3 6
6 6
6 2
6 2
5 1
5 2
5 2
6 2
9 3
14 4
16 5
16 5
16 5
16 5
16 8
16 9
16 9
17 9
18 9
19 9
19 10
19 10
19 10
19 10
19 10
19 10
19 9
19 9
19 9
19 9
19 9
19 9
19 9
19 9
19 9
19 9
19 9
16 9
16 9
15 9
18 9
18 8
18 8
16 8
14 6
10 4
7 3
7 4
7 6
7 4
7 4
7 4
8 4
6 4
5 4
4 4
4 3
4 3
4 3
4 3
5 7
5 7
5 7
6 8
7 8
7 8
7 8
7 8
7 8
7 8
7 13
7 13
7 13
7 13
7 13
7 13
6 14
6 14
6 14
7 14
8 14
9 14
10 16
20 34
20 35
21 37
23 37
23 37
24 38
24 38
24 38
24 38
24 38
24 38
24 38
23 38
22 34
22 35
22 36
21 35
21 35
21 35
21 36
21 36
21 36
21 36
20 31
20 31
20 31
19 31
19 30
20 30
20 30
20 30
20 30
19 30
19 30
17 30
16 22
7 4
4 4
3 4
3 5
3 5
2 5
2 7
2 6
2 6
2 6
3 7
4 10
4 10
4 10
3 10
5 9
5 10
5 10
5 10
5 9
5 9
5 9
5 11
6 11
6 11
6 11
6 12
6 12
5 12
5 12
5 12
5 12
5 12
5 12
5 12
5 12
5 12
5 11
5 11
5 10
5 10
5 13
5 11
5 12
5 12
8 12
7 11
6 8
6 8
6 8
6 8
4 9
4 9
5 9
5 10
5 10
5 10
4 10
4 8
4 8
5 7
10 8
10 8
10 8
10 8
10 8
10 8
10 8
10 8
10 8
10 8
10 8
10 8
11 8
12 8
12 8
12 8
13 4
17 4
18 4
18 4
31 2
33 2
33 2
34 4
34 4
34 4
35 4
36 4
35 4
36 3
36 3
36 3
36 3
36 3
36 4
35 4
30 3
30 3
30 3
30 3
31 4
33 4
33 4
33 4
33 4
33 4
33 5
33 8
30 9
30 9
28 9
27 9
27 9
24 9
23 9
20 9
7 9
7 9
7 9
7 7
7 7
7 7
6 7
5 7
4 7
4 7
10 19
10 19
10 19
10 19
10 18
10 18
10 18
10 18
10 18
10 18
9 17
7 17
7 17
7 17
7 17
7 17
7 15
7 15
7 14
7 14
7 14
7 14
7 14
7 14
7 14
7 14
7 14
7 16
7 18
8 19
9 21
9 22
10 22
18 22
27 22
32 22
27 10
27 10
27 10
27 10
27 10
27 11
27 11
27 11
27 11
27 11
27 9
27 12
28 24
28 26
30 26
31 26
31 26
31 26
31 26
31 26
30 26
30 26
30 26
30 26
30 26
30 26
31 26
31 25
31 23
23 22
21 25
21 24
21 24
17 24
7 25
6 25
6 25
6 25
6 25
6 25
6 25
6 24
6 24
6 24
6 24
6 24
6 24
6 21
5 8
4 7
3 7
2 10
2 15
2 17
2 17
2 17
2 27
2 28
2 36
2 43
2 48
2 52
1 53
1 52
1 52
1 63
0 58
0 58
0 58
0 58
0 58
0 60
0 61
0 63
0 64
0 68
0 68
0 68
0 68
0 69
0 70
0 75
0 78
0 146
0 159
0 171
0 173
0 175
0 172
0 179
0 188
0 190
0 185
0 186
0 184
0 205
0 204
0 205
0 205
0 206
0 206
0 196
0 198
0 198
0 200
0 212
0 224
0 225
0 242
0 257
0 287
0 341
0 359
0 363
0 369
0 368
0 368
0 361
0 342
0 264
0 263
0 264
0 265
0 264
0 261
0 251
0 243
0 242
0 230
0 226
0 226
1 201
1 205
1 203
1 241
1 240
1 240
1 239
1 236
1 235
1 229
1 210
1 183
1 175
1 189
1 189
1 164
1 111
1 161
1 160
1 161
1 161
1 160
1 160
1 160
1 158
1 158
1 157
1 156
1 156
1 156
1 156
1 158
1 159
1 159
1 157
1 156
0 151
0 146
0 143
0 106
0 106
0 106
0 106
0 106
0 107
0 104
0 104
0 104
1 103
1 83
1 71
1 69
1 67
1 4
1 4
1 4
1 4
1 4
1 4
1 4
1 4
1 4
1 4
1 4
1 5
1 5
1 8
1 11
1 12
1 19
1 19
1 19
1 19
1 19
1 19
1 19
1 19
1 19
1 19
1 19
1 18
1 18
1 18
1 20
0 20
0 20
0 20
0 20
0 20
0 20
0 20
0 20
0 20
0 20
0 20
0 20
1 20
1 20
2 21
2 21
3 21
3 21
3 18
3 10
3 6
3 4
3 5
3 5
3 8
3 8
3 9
3 11
3 11
3 9
3 26
3 26
3 29
3 29
3 29
3 30
3 30
3 30
3 31
3 31
3 31
3 31
3 31
3 31
3 31
3 31
3 31
2 31
2 31
2 31
1 30
1 29
1 29
1 29
1 30
1 30
1 30
1 30
1 32
1 32
1 29
1 29
1 25
1 26
1 26
5 27
5 10
6 10
6 8
6 8
6 8
6 7
6 7
6 7
6 6
6 7
6 8
6 9
6 9
6 9
6 9
6 9
6 9
6 9
6 8
6 8
7 9
7 12
8 18
8 18
8 18
8 18
8 18
8 18
8 15
8 15
8 16
8 16
8 16
8 15
8 15
4 14
4 15
3 18
3 19
3 19
3 19
3 19
3 20
3 20
3 20
3 19
3 17
3 17
3 17
3 18
3 18
3 18
6 42
6 42
7 43
7 43
6 42
5 39
4 34
5 34
5 34
5 34
5 34
5 34
5 34
5 33
5 33
5 33
5 33
5 33
5 33
5 33
5 32
5 34
5 35
5 37
5 36
5 36
5 36
5 36
5 37
5 37
5 36
5 36
5 36
5 34
5 34
4 34
1 10
1 10
1 10
1 10
1 10
1 10
2 10
1 10
1 10
1 10
1 10
1 10
1 11
1 12
1 20
5 22
5 22
5 22
5 22
5 23
5 22
5 17
5 16
5 14
5 14
5 14
5 14
5 15
5 14
5 14
5 14
5 14
5 14
5 14
5 14
5 14
5 16
5 16
5 16
4 16
4 16
4 17
4 17
4 17
4 17
4 17
4 17
5 17
5 18
5 16
5 9
1 9
1 9
1 11
1 11
1 10
1 11
3 16
3 16
3 16
3 17
3 17
3 17
3 20
3 20
3 20
4 20
4 20
4 20
4 20
4 20
4 20
4 18
4 18
4 18
6 18
7 28
7 31
7 33
7 33
8 33
8 33
8 34
7 33
7 31
7 31
7 31
7 30
7 30
7 28
7 28
7 28
6 26
5 22
5 22
5 22
5 21
5 21
5 21
4 17
4 17
4 17
4 17
4 17
4 20
4 20
4 25
4 25
4 25
4 25
3 25
1 22
0 11
0 10
0 8
0 8
0 8
0 8
0 8
0 9
0 11
0 11
0 11
0 11
0 11
0 12
0 12
0 12
0 12
0 12
0 14
0 14
0 14
0 14
0 14
0 14
0 16
0 16
0 16
0 16
0 13
0 13
0 8
0 8
0 8
0 8
0 8
0 8
0 8
0 8
0 13
0 13
0 12
2 12
2 12
2 13
2 11
2 11
2 11
2 13
2 15
2 14
2 14
2 14
2 14
2 14
2 12
2 12
2 12
2 12
2 12
2 12
2 10
2 10
2 11
2 12
2 12
2 12
2 22
2 22
2 22
2 24
2 24
2 24
2 24
2 24
2 20
2 21
2 21
0 21
0 21
0 20
0 25
0 27
0 25
0 24
0 25
0 25
0 25
0 25
0 26
0 30
0 31
0 31
1 44
1 44
1 43
1 43
1 43
2 44
2 44
2 46
2 46
2 46
2 36
2 37
2 37
2 37
2 37
2 37
2 37
2 37
2 36
3 37
3 38
4 43
5 43
5 44
12 45
12 43
12 44
12 48
12 50
12 51
12 54
12 54
12 53
12 49
12 48
12 48
11 35
11 35
11 35
11 36
10 35
10 34
10 33
10 33
10 33
10 33
10 33
10 36
10 36
10 37
11 38
11 40
11 40
11 40
10 39
9 36
9 35
8 33
8 33
8 32
1 26
1 25
1 24
1 18
1 16
1 16
1 13
1 13
1 13
1 13
1 13
1 15
1 16
1 16
1 15
1 15
1 15
1 16
1 15
2 18
2 21
2 21
2 23
2 19
2 15
2 15
1 15
1 13
1 13
1 13
1 13
1 12
1 12
1 13
1 13
1 13
1 13
1 13
1 13
1 13
1 13
1 13
1 15
1 16
1 16
1 16
1 16
1 14
1 13
1 14
1 15
1 15
1 15
1 14
1 14
0 8
0 8
0 8
0 8
0 8
0 8
0 8
0 8
0 8
0 8
0 8
0 8
0 9
0 9
0 8
0 8
0 8
0 8
0 8
0 8
0 8
0 8
0 8
0 5
0 5
0 5
0 5
0 5
0 5
0 5
0 4
0 3
0 3
0 3
0 3
0 3
0 3
0 3
0 3
0 3
0 3
0 4
0 4
0 4
0 4
0 4
0 4
0 4
0 3
0 3
0 3
0 5
0 7
0 7
0 8
0 10
0 10
0 10
0 10
0 11
0 12
0 12
0 13
0 13
0 13
0 13
0 13
0 13
0 14
0 14
0 13
0 12
0 12
0 12
0 12
0 12
0 12
0 11
0 11
0 11
0 11
0 11
0 11
0 11
0 12
0 12
0 12
0 10
0 8
0 8
0 7
0 5
0 5
0 5
0 5
0 2
0 2
0 2
0 2
0 6
0 6
1 23
2 23
2 24
2 26
2 29
2 44
2 44
2 45
3 48
3 48
3 49
3 49
3 51
3 51
3 51
3 52
3 52
3 52
3 51
3 51
3 52
3 52
3 54
3 54
3 54
3 54
3 54
3 54
3 54
3 54
3 54
3 57
3 57
3 56
2 52
2 51
2 36
1 37
1 35
1 34
1 32
1 19
1 18
1 18
0 16
0 21
0 20
0 20
0 18
0 18
0 18
0 17
0 17
0 20
0 20
0 21
0 20
0 20
0 18
0 21
1 21
1 21
1 21
1 21
1 21
1 21
1 21
1 18
1 17
2 17
2 18
2 18
2 16
2 17
2 17
2 17
2 17
2 15
2 15
2 15
2 15
2 10
2 10
2 10
2 10
2 10
2 10
2 10
2 10
2 7
2 7
1 6
1 6
1 6
1 6
1 3
1 3
1 3
2 4
2 5
2 5
2 5
2 7
2 7
2 7
1 7
1 6
1 6
1 6
1 4
1 4
1 4
1 4
1 4
1 5
1 5
1 6
1 6
1 6
1 7
1 12
1 13
1 13
1 13
1 13
1 14
1 14
1 14
1 16
1 16
1 16
2 17
2 18
2 18
1 18
1 17
1 17
1 17
1 15
1 15
1 15
1 15
1 15
1 15
1 15
1 15
2 15
2 15
2 15
2 15
2 14
2 14
2 13
2 13
2 13
2 12
2 7
2 6
2 6
2 6
2 5
2 5
2 6
2 6
2 5
2 4
2 4
2 3
2 3
2 3
2 2
2 2
2 2
2 2
2 2
2 2
2 2
2 2
2 3
2 3
2 3
3 3
2 3
2 3
2 3
2 3
2 3
2 3
2 4
3 5
3 6
3 7
3 7
3 7
5 8
5 8
5 8
5 8
4 7
4 7
4 12
4 12
4 13
4 14
4 14
4 15
4 15
4 16
4 17
4 17
4 17
4 17
4 17
5 17
5 16
5 16
5 16
4 16
4 19
5 23
5 23
5 24
5 24
4 24
4 24
4 24
4 23
4 22
4 22
4 21
2 20
2 20
2 20
2 20
2 20
2 20
2 16
2 17
2 17
2 16
2 21
2 20
2 21
2 19
2 19
2 19
2 19
2 20
1 20
1 20
1 20
1 20
1 20
1 20
0 16
0 12
0 12
0 11
0 11
0 11
0 11
0 11
0 11
0 12
0 54
0 88
0 105
0 109
0 111
0 118
0 118
0 119
0 118
0 118
0 117
0 117
0 112
0 112
0 112
0 112
0 112
0 112
0 111
0 110
0 110
0 110
0 110
0 110
0 111
1 112
1 112
1 112
1 112
1 112
1 112
1 112
1 112
1 117
1 118
1 115
1 66
1 38
1 47
1 49
1 50
1 44
1 43
1 43
1 42
1 42
1 42
1 42
1 42
1 42
2 42
2 43
2 43
2 44
2 44
2 44
2 43
2 48
2 48
2 48
1 48
1 47
1 48
1 49
1 49
1 50
1 50
1 50
1 52
1 43
1 44
2 47
2 46
2 40
2 21
4 31
4 29
4 29
4 29
4 29
4 29
4 29
4 29
4 29
4 30
4 30
3 30
3 28
3 28
3 28
3 27
3 26
3 26
3 25
3 30
3 56
3 60
3 64
3 62
3 62
3 63
3 80
3 91
3 109
3 118
3 126
3 129
2 127
2 129
1 131
1 133
0 128
0 131
0 142
0 143
0 143
0 143
0 143
0 143
0 143
0 143
0 143
0 143
0 143
0 143
0 144
0 168
0 170
0 168
0 169
0 165
0 134
0 133
0 133
0 134
0 134
0 132
0 96
0 80
0 76
0 66
0 63
0 62
0 66
0 65
0 63
0 60
0 54
0 49
0 39
0 38
0 38
0 38
0 38
0 38
0 38
0 38
0 38
0 38
0 38
0 39
0 37
0 10
0 10
0 10
0 10
0 10
0 10
0 10
0 8
0 8
0 8
0 8
0 8
0 8
0 8
0 8
1 8
1 8
1 7
1 9
1 10
1 10
1 10
1 10
1 10
1 9
1 9
1 10
1 10
1 10
1 10
1 10
1 10
1 11
1 11
1 11
1 13
1 14
1 14
1 14
1 14
1 14
1 14
1 14
1 14
1 14
1 14
1 14
1 14
0 15
0 18
0 18
0 18
0 34
0 33
0 31
0 31
0 31
0 36
0 36
0 36
0 37
0 38
0 37
0 36
0 37
0 37
0 37
0 37
0 36
0 36
0 36
0 35
0 33
0 33
0 33
0 33
0 33
0 33
0 33
0 33
0 33
0 33
1 34
1 34
1 33
1 30
1 33
1 33
1 15
1 16
1 20
1 20
1 20
1 16
1 15
1 15
1 17
1 20
2 22
2 24
2 24
2 25
2 26
2 26
2 26
2 26
2 26
2 26
2 26
2 26
2 26
2 26
2 26
2 26
2 26
2 26
2 26
2 26
1 25
1 25
1 25
1 24
1 29
1 28
1 27
1 32
1 35
1 78
1 101
1 101
1 102
1 102
1 103
1 100
0 101
0 99
0 100
0 99
0 98
0 98
0 98
0 98
0 98
0 103
0 103
0 103
0 103
0 110
4 331
4 341
4 345
4 347
4 353
4 353
4 363
4 363
4 368
4 368
4 354
5 355
5 349
5 348
5 341
5 335
6 328
8 338
8 336
8 336
8 334
8 333
8 332
8 330
8 331
8 331
8 331
8 332
8 332
8 333
8 333
8 334
8 336
8 337
8 337
8 325
5 94
6 86
6 86
8 86
8 80
9 80
9 81
9 80
9 75
11 128
12 135
11 135
11 134
11 128
11 125
10 83
8 76
8 73
8 73
8 73
8 72
8 72
8 72
8 72
8 72
8 72
8 72
8 72
8 72
8 71
8 70
7 69
7 68
6 68
6 70
6 71
4 71
4 76
4 76
4 76
4 78
9 79
9 78
9 78
9 76
7 22
9 25
9 25
9 28
9 28
10 26
10 26
10 26
10 26
10 25
10 25
10 25
10 25
10 26
10 38
10 43
10 45
10 47
10 47
10 48
10 48
10 48
10 48
10 66
10 69
10 71
10 77
10 75
10 83
9 84
9 123
8 137
4 201
4 227
4 231
3 240
3 254
1 264
1 265
1 262
1 265
0 266
0 271
0 271
0 271
0 272
0 273
0 274
0 275
0 278
0 274
0 277
0 280
0 278
0 280
0 280
0 280
0 280
0 280
0 260
0 254
0 252
0 246
0 243
0 228
0 221
0 183
0 173
0 103
0 79
0 74
0 62
0 52
0 39
0 42
0 47
0 54
0 67
0 73
0 89
0 158
0 168
0 177
0 183
0 195
0 190
0 178
0 174
0 173
0 175
0 175
0 177
0 177
0 178
0 178
0 178
0 178
0 178
0 178
0 179
0 179
0 180
0 183
0 183
0 183
0 185
0 185
0 185
0 195
2 203
4 263
7 867
7 887
7 881
7 881
7 862
7 790
7 808
7 803
7 800
7 784
7 784
7 787
7 786
7 786
7 785
7 791
7 798
7 798
7 797
7 797
7 800
6 803
6 805
6 805
6 806
6 806
6 805
6 802
6 802
6 801
6 800
6 799
6 799
6 791
4 767
3 640
1 71
1 65
1 68
3 71
4 83
4 83
4 79
5 91
6 97
6 102
6 109
6 107
6 106
6 104
6 106
6 119
6 125
6 148
6 155
6 354
6 356
6 371
6 384
6 400
6 406
6 410
9 593
9 610
8 666
8 703
8 763
8 768
8 767
8 767
8 760
9 756
9 751
9 746
9 747
7 745
5 734
4 737
4 737
4 726
5 714
5 710
5 707
5 707
5 712
5 713
5 711
5 682
5 666
5 659
5 651
5 449
5 442
5 438
5 434
5 419
5 412
5 405
2 215
2 189
2 128
2 105
2 56
2 57
2 56
2 56
2 81
5 257
5 269
5 284
5 321
5 345
5 359
5 372
5 657
5 686
5 731
5 779
5 794
5 822
5 820
5 820
5 825
5 824
5 820
5 821
5 814
5 823
5 822
5 824
5 823
5 823
5 823
5 823
5 824
5 824
5 824
5 824
6 860
6 858
6 855
6 857
6 836
2 655
2 663
2 636
3 628
3 637
3 631
2 615
2 330
2 294
2 239
2 205
2 198
2 171
2 169
3 173
4 195
4 201
4 204
4 204
4 202
4 196
4 192
4 191
4 196
4 202
4 210
4 212
4 214
4 216
4 218
4 217
2 175
2 175
2 175
2 178
2 179
2 172
1 145
0 140
0 116
0 95
0 95
0 106
0 118
0 128
0 131
0 149
0 150
0 177
0 181
0 193
0 177
0 300
0 307
0 313
0 308
0 303
0 301
0 300
0 315
0 325
0 330
0 343
0 352
0 427
0 443
0 462
0 516
0 536
0 673
0 673
0 677
0 687
1 727
1 734
1 743
1 748
1 773
2 782
2 1019
2 1036
2 1049
3 1039
3 1061
3 1051
3 1122
3 1115
3 1112
3 988
3 988
3 995
3 1006
3 1026
3 1030
3 1050
3 1028
3 1026
3 1020
3 1008
3 994
3 917
3 880
3 838
3 802
3 790
3 642
3 645
3 636
3 624
2 596
2 592
2 586
2 581
2 569
1 523
0 197
0 168
0 165
0 163
0 165
0 159
0 149
1 146
1 137
1 132
1 124
1 112
1 99
1 94
1 95
1 67
1 60
1 53
1 52
1 52
1 52
1 53
1 54
1 54
1 54
1 54
1 52
1 42
1 39
1 38
1 28
1 28
1 27
2 27
2 29
2 27
2 26
2 23
2 22
2 22
2 20
2 20
1 21
1 20
1 21
1 24
1 27
2 30
2 34
2 41
2 49
2 64
2 75
2 107
2 110
2 112
2 114
2 113
2 122
2 185
2 211
2 232
2 249
2 548
2 550
2 558
2 560
1 624
1 625
2 626
2 623
2 623
2 622
2 622
2 621
2 623
2 628
2 657
2 658
2 658
3 663
3 661
3 660
2 658
2 660
2 656
3 644
3 660
4 667
6 660
7 693
8 698
9 700
9 700
10 693
10 626
10 583
10 575
10 569
10 268
10 264
10 252
10 251
9 191
9 191
9 190
9 190
9 190
9 190
9 191
9 191
9 188
9 183
9 155
9 155
9 161
9 181
10 232
77 1848
83 1921
182 2672
183 2697
184 2773
186 2761
194 2811
192 2815
192 2806
191 2824
190 2848
190 2860
190 2880
191 2910
191 2945
191 3011
191 3106
191 3281
191 3678
191 3765
191 3774
191 3775
191 3788
191 3793
191 3793
191 3793
191 3793
191 3812
191 3835
191 3837
191 3996
191 4000
191 4002
191 4009
192 3994
186 3881
117 2206
113 2146
7 1316
4 1282
4 1271
4 1267
4 1264
4 1256
4 1251
4 1232
4 1196
4 1190
4 1164
3 1140
3 1102
4 980
4 881
17 733
58 381
70 318
70 521
70 521
70 513
70 510
71 510
71 515
71 528
71 544
75 536
75 536
75 373
84 366
203 462
206 448
206 439
206 439
206 441
218 1226
218 1226
218 1225
218 1223
218 1223
218 1230
218 1230
218 1230
218 1230
218 1227
218 1224
218 1223
218 1224
218 1225
209 1225
209 1224
191 1204
160 1194
149 1199
149 999
149 1003
149 1003
149 1002
149 971
149 965
149 952
146 963
129 960
130 961
118 956
113 1257
15 1168
15 1176
14 1187
12 1194
12 1195
3 412
3 412
3 412
3 414
3 411
3 406
3 411
3 402
3 402
3 401
3 401
3 401
3 402
3 402
3 402
3 402
3 402
3 416
3 408
3 408
3 409
3 409
3 411
3 409
3 411
3 411
3 380
3 384
1 383
1 382
0 82
0 69
0 51
0 47
0 47
0 81
0 81
0 81
0 80
0 77
0 77
0 75
0 71
0 72
0 72
0 73
0 76
0 78
0 78
0 78
0 78
0 78
0 78
0 63
0 62
0 62
1 62
1 62
1 62
1 62
1 61
1 61
1 58
1 56
1 56
1 55
1 54
1 50
1 47
1 46
1 46
1 12
1 12
1 11
1 11
1 10
1 11
1 11
1 17
1 61
1 83
1 114
1 225
1 233
1 295
0 397
0 478
0 499
0 503
0 503
0 505
0 505
0 505
0 505
0 501
0 501
0 501
0 503
0 504
0 504
0 504
0 504
0 504
0 504
0 504
0 504
0 504
0 503
0 505
0 505
0 505
0 504
0 504
0 504
0 492
0 391
0 390
0 386
0 281
0 267
0 167
0 79
0 26
0 9
0 8
0 8
0 7
0 7
0 7
0 5
0 5
0 5
0 5
0 4
0 4
0 4
0 4
0 4
0 4
0 4
0 4
0 4
0 4
0 4
0 2
0 2
0 2
0 2
0 2
0 2
0 1
0 1
0 1
0 1
0 1
0 1
0 1
0 1
0 1
0 1
0 1
0 2
3 1
3 1
3 1
3 1
3 1
3 1
3 1
3 1
3 1
3 1
3 1
3 1
3 1
3 1
3 1
3 1
3 1
3 1
3 1
3 1
3 1
3 1
3 1
3 1
3 1
3 1
3 1
3 1
3 1
3 1
3 1
3 15
3 15
3 18
3 18
3 17
0 18
0 18
0 18
0 18
0 18
0 18
0 18
0 18
0 21
0 21
0 21
0 21
0 21
0 21
0 21
0 22
1 22
1 22
1 23
1 23
1 23
1 23
1 23
1 23
1 23
1 23
1 23
1 23
1 23
1 23
1 22
1 6
1 6
0 5
0 5
0 5
0 5
0 5
0 5
0 5
0 5
0 5
0 5
0 2
0 2
0 2
0 14
0 14
0 14
0 14
0 14
0 23
0 23
0 23
0 22
0 22
1 22
1 22
1 22
1 22
1 23
1 23
1 23
1 23
1 23
1 23
1 23
1 23
1 23
1 23
1 23
1 23
0 23
0 23
0 23
0 23
0 23
0 23
0 24
0 24
0 24
0 24
0 12
0 12
0 12
0 12
0 12
0 2
0 3
0 3
0 3
0 3
0 3
0 2
0 2
0 2
0 2
0 2
0 2
0 2
0 2
0 2
0 2
0 2
0 2
0 2
0 2
0 2
0 2
0 2
0 2
0 2
0 2
0 2
0 1
0 1
0 1
0 1
0 1
0 2
0 2
0 1
0 1
0 1
0 1
0 1
0 1
0 1
0 1
0 1
0 1
0 1
0 1
0 1
0 1
0 1
0 1
0 1
0 1
0 1
0 1
0 1
0 1
0 1
0 1
0 1
0 1
0 1
0 1
0 1
0 1
0 1
0 0
0 0
0 0
0 0
0 0
1 0
1 0
1 0
1 0
1 0
1 0
1 0
1 0
1 0
1 0
1 0
1 0
1 0
1 0
1 0
1 0
1 0
1 0
1 0
1 0
1 1
1 1
1 1
1 1
1 2
1 2
1 2
1 2
1 2
1 2
1 2
1 2
2 2
2 2
2 2
2 2
1 2
1 2
1 2
1 2
1 5
1 5
1 6
1 6
1 6
1 6
1 6
1 6
1 6
1 6
1 6
1 6
1 6
1 6
1 6
1 5
1 5
1 5
1 5
1 5
1 5
1 5
1 5
1 5
1 5
1 6
1 6
1 6
0 6
0 6
0 6
0 6
0 5
0 5
0 5
0 5
0 2
0 1
0 1
0 1
0 1
0 1
0 1
0 1
0 1
0 1
0 1
0 1
0 1
0 1
0 1
0 1
0 1
0 1
0 1
0 1
0 2
0 2
0 2
0 2
0 2
0 1
0 1
0 1
0 1
0 1
0 1
0 1
0 1
0 1
0 1
0 2
0 2
0 2
0 2
0 2
0 6
0 6
0 7
0 7
0 7
0 7
0 7
0 7
0 7
0 7
0 7
0 7
0 7
0 7
0 7
0 7
0 6
0 6
0 6
0 6
0 6
0 6
0 6
0 6
0 6
0 6
0 6
0 6
0 6
0 6
0 6
0 5
0 5
0 5
0 6
0 6
0 1
0 1
0 1
0 1
0 1
0 1
0 1
0 1
0 1
0 1
0 1
0 1
0 1
0 2
0 2
0 2
0 3
0 3
0 3
0 3
0 3
0 3
0 3
0 3
0 3
0 3
0 3
0 3
0 3
0 3
0 3
0 3
0 3
0 3
0 2
0 2
0 2
0 2
0 2
0 2
0 2
0 2
0 2
0 2
0 2
0 2
0 2
0 2
0 2
0 0
0 0
0 0
0 0
0 0
0 0
0 1
0 1
0 1
0 1
0 1
0 2
0 2
0 2
0 2
0 2
0 2
0 2
0 2
0 2
0 2
0 2
0 2
0 2
0 2
0 2
0 2
0 2
0 2
0 2
0 2
0 2
0 2
0 2
0 2
0 2
0 2
0 2
0 3
0 4
0 4
0 4
0 4
0 4
0 4
0 4
0 4
0 3
0 3
0 3
0 3
0 3
0 3
0 3
0 3
0 3
0 3
0 3
0 3
0 3
0 3
0 3
0 3
0 3
0 3
0 3
0 3
0 3
0 3
0 3
0 3
0 3
0 3
0 3
0 1
0 0
0 2
0 2
0 2
0 2
0 2
0 3
0 4
0 4
0 4
0 4
0 4
0 4
0 4
0 4
0 4
0 4
0 4
0 4
1 4
1 4
1 4
1 4
1 4
1 4
1 4
1 4
1 4
1 4
1 4
1 4
1 4
1 4
1 4
1 4
1 4
1 4
1 2
1 2
1 2
1 2
1 2
1 1
1 0
1 0
1 0
1 0
2 2
2 2
2 2
2 2
2 2
2 2
2 2
2 2
1 2
1 2
1 2
1 2
1 2
1 2
1 2
1 2
1 2
1 2
1 2
1 2
1 2
1 2
1 2
1 2
1 2
1 2
1 2
1 2
1 2
1 2
4 5
4 5
4 6
4 6
4 6
4 7
3 5
3 5
3 5
3 5
3 6
3 6
3 6
3 6
3 6
3 6
3 6
3 6
3 6
3 6
3 6
3 6
3 7
3 7
3 7
3 8
3 8
3 8
3 8
3 8
3 8
3 8
3 8
3 8
3 8
3 8
0 3
0 3
0 3
0 4
0 4
0 4
0 4
0 4
0 4
0 5
0 4
0 4
0 4
0 4
0 4
0 4
0 4
0 4
0 4
0 4
0 4
1 4
3 3
3 3
3 2
3 2
3 2
3 2
3 2
3 2
3 2
3 2
3 2
3 2
3 2
3 2
3 2
3 2
3 2
3 1
3 1
3 1
3 1
3 1
3 1
3 0
3 0
3 0
3 1
3 2
3 2
3 2
3 2
3 2
3 2
1 2
1 2
1 2
0 2
0 2
0 2
1 2
1 2
1 2
1 3
1 3
2 3
2 3
2 3
2 3
2 3
2 3
2 3
2 3
2 3
2 7
2 7
2 8
3 10
3 10
4 11
4 10
4 11
4 11
4 11
4 11
4 11
4 11
4 11
4 11
4 11
4 11
4 11
4 11
4 11
4 11
4 11
3 10
4 11
4 11
4 11
4 11
3 11
3 11
3 12
3 13
3 13
3 13
3 13
3 13
3 13
3 9
3 9
2 8
2 6
2 6
1 5
1 6
1 4
1 4
1 4
1 4
1 4
1 4
1 4
1 4
1 4
1 4
1 4
1 4
1 4
1 4
1 4
1 4
0 3
0 2
0 2
0 2
0 2
0 2
0 2
0 1
0 1
0 1
0 1
0 1
0 1
0 1
0 2
0 1
0 6
0 6
0 7
0 7
0 7
0 7
0 7
0 7
0 7
0 7
0 7
0 7
0 7
0 7
0 7
0 7
0 7
0 7
0 7
0 7
0 7
0 7
0 7
0 7
0 7
0 7
0 7
0 7
0 7
0 7
0 7
0 7
0 6
0 7
0 7
0 7
0 2
0 2
0 1
1 1
1 1
1 1
1 1
1 1
1 1
1 1
1 1
1 1
1 1
1 1
1 1
1 1
1 1
1 1
1 1
1 1
1 1
1 1
1 1
1 3
1 3
1 3
1 3
1 3
1 3
1 3
1 3
1 3
1 3
1 2
1 2
1 2
1 2
1 2
1 2
1 2
1 2
1 2
1 2
1 2
1 2
1 2
1 2
1 2
1 2
1 2
1 2
1 2
1 2
1 2
1 2
1 2
1 2
1 2
1 2
1 0
1 0
1 0
1 0
1 0
1 0
1 0
1 0
1 0
1 0
1 0
1 0
2 1
2 1
2 1
2 1
1 2
1 2
1 2
1 2
1 2
1 2
1 2
1 2
1 2
1 2
1 2
1 2
1 2
1 2
1 2
1 2
1 2
1 2
1 2
1 2
1 2
1 2
1 2
1 2
1 2
1 2
1 2
1 2
1 2
1 2
1 2
1 2
0 2
0 1
0 1
0 1
0 0
0 0
0 0
0 0
0 0
0 0
0 0
0 0
0 0
0 0
0 0
0 0
1 0
1 0
1 0
1 0
1 0
1 0
1 0
1 0
1 0
1 0
1 0
1 0
1 0
2 0
2 0
2 0
2 0
2 0
2 0
2 0
2 0
2 0
2 0
2 0
2 0
2 0
2 0
2 0
2 0
2 0
2 0
2 0
2 0
2 0
2 0
2 0
1 0
1 0
1 0
1 0
1 0
1 0
1 0
1 0
1 1
1 1
1 1
1 1
1 1
0 1
0 1
0 1
0 1
0 1
0 1
0 1
0 1
0 1
0 1
0 1
0 1
0 1
0 1
0 1
0 1
0 1
0 1
0 1
0 1
0 1
0 2
0 2
0 2
0 2
0 2
0 2
0 2
0 2
0 2
0 2
0 1
0 1
0 1
0 1
0 1
0 1
0 1
0 1
0 1
0 1
0 1
0 1
0 1
0 1
0 1
0 1
0 1
0 1
0 1
1 1
1 1
1 1
1 1
1 1
1 1
1 1
1 0
1 0
1 0
1 0
1 0
1 0
1 0
1 0
1 0
1 0
1 0
1 0
1 0
1 0
1 0
1 0
1 0
1 0
1 0
1 1
1 1
1 1
1 1
1 1
1 1
1 1
1 1
1 1
1 1
0 1
0 1
0 1
1 2
1 2
1 2
1 2
1 2
1 2
2 2
2 2
2 2
2 2
2 2
2 2
2 2
2 2
2 2
2 2
2 2
2 2
2 2
2 2
2 2
2 2
2 2
2 1
2 1
2 1
2 1
2 1
2 1
2 1
2 2
2 6
2 6
2 6
2 6
2 6
1 5
1 5
1 5
1 5
1 5
0 6
0 6
0 6
0 6
0 6
0 6
0 6
0 6
0 6
0 6
0 6
0 6
0 6
0 6
0 6
0 6
0 6
0 6
0 6
0 5
0 4
0 4
0 4
0 4
0 4
0 3
0 1
0 1
0 1
0 1
1 1
1 1
1 1
1 1
1 1
1 1
1 0
1 0
1 0
1 0
1 0
1 0
1 0
1 0
1 0
1 0
1 0
1 0
1 0
1 0
1 0
1 0
1 0
1 0
1 0
1 0
1 0
1 0
1 0
1 0
1 0
2 0
2 0
2 0
1 0
1 0
1 0
1 0
1 0
1 0
1 0
1 0
1 0
1 0
1 0
1 0
1 0
1 0
1 0
1 0
1 0
1 0
1 0
1 0
1 0
1 0
1 0
1 0
1 0
1 0
1 0
1 0
1 0
1 0
1 0
1 0
1 0
0 0
0 0
0 0
0 0
1 0
1 0
1 0
1 0
1 0
1 0
1 0
1 0
1 0
1 0
1 0
1 0
1 0
1 0
1 0
1 0
1 0
1 0
1 0
1 0
1 1
1 1
1 1
1 1
1 1
1 4
1 4
1 4
1 4
1 4
1 4
1 4
1 4
1 4
1 4
1 4
0 4
0 4
0 4
0 4
0 4
0 4
0 4
0 4
0 4
0 4
0 4
0 4
0 4
0 4
0 4
0 4
0 4
0 4
0 4
0 4
0 3
0 3
0 3
0 3
0 3
0 0
0 0
0 0
0 0
0 0
0 0
0 0
0 0
0 0
0 0
0 0
0 0
0 0
0 0
0 0
0 0
0 0
0 0
0 0
0 0
0 0
0 0
0 0
0 0
0 0
0 0
0 0
0 0
0 0
0 0
0 0
0 0
0 0
0 0
0 1
0 1
0 1
0 1
0 1
0 1
0 1
0 1
0 1
0 1
0 1
0 1
0 1
0 1
0 1
0 1
0 1
0 1
0 1
0 1
0 1
0 1
0 1
0 1
0 1
0 1
0 1
0 1
0 1
0 1
0 1
0 1
0 1
0 1
0 1
0 1
0 0
0 1
0 1
0 1
0 1
0 1
0 1
0 1
0 1
0 1
0 1
0 1
0 1
0 3
0 3
0 3
0 3
0 3
0 3
0 3
0 3
0 3
0 3
0 3
0 3
0 3
0 3
0 3
0 3
0 3
0 3
0 3
0 3
0 3
0 3
0 3
0 3
0 2
0 2
0 2
0 2
0 2
0 2
0 2
0 2
0 2
0 2
0 2
0 2
0 0
0 0
0 0
0 0
0 0
0 0
0 0
0 0
0 0
0 0
0 0
0 0
0 0
0 0
0 0
0 0
0 0
0 0
0 0
0 0
0 0
0 0
0 0
0 0
0 0
0 0
0 0
0 0
0 0
0 0
0 0
0 0
0 0
0 0
0 0
0 0
0 0
0 2
0 2
0 2
0 2
0 2
0 2
0 2
0 2
0 2
0 2
0 2
0 2
0 2
0 2
0 2
0 2
0 2
0 2
0 2
0 2
0 2
0 2
0 2
0 2
0 2
0 2
0 2
0 2
0 2
0 2
0 2
0 2
0 2
0 1
0 1
0 1
0 0
1 1
1 1
1 1
1 1
1 1
1 1
1 1
1 1
1 1
1 1
1 1
1 1
1 1
1 1
2 1
2 1
2 1
2 1
2 1
2 1
2 1
2 1
3 1
3 1
3 1
3 1
3 1
3 1
3 1
3 1
3 1
3 1
3 1
3 1
3 1
3 0
2 0
2 0
2 0
2 0
2 0
2 0
2 0
2 0
2 0
2 0
2 0
2 0
2 0
2 0
1 0
1 0
1 0
1 0
1 0
1 0
1 0
1 0
0 0
0 0
0 0
0 0
0 0
0 0
0 0
0 0
0 0
0 0
0 0
0 0
0 0
0 0
0 0
0 0
0 0
0 0
0 0
0 0
0 0
0 0
0 0
0 0
0 0
0 0
0 0
0 0
0 0
0 0
0 0
0 0
1 0
1 0
1 1
1 1
1 1
1 1
1 1
1 1
1 1
1 1
1 1
1 1
1 1
1 1
1 1
1 1
1 1
1 1
1 1
1 1
1 1
2 1
2 1
2 1
2 1
2 1
2 1
2 1
2 1
2 1
2 1
2 1
2 1
2 1
2 1
2 1
1 1
1 1
1 0
1 0
1 0
2 0
2 0
2 0
3 0
3 0
3 0
3 0
3 1
3 1
4 6
4 8
4 8
4 9
4 9
4 9
4 9
3 10
3 10
3 11
3 11
3 11
3 11
3 11
3 11
3 11
3 11
3 11
3 11
3 11
3 12
3 12
3 12
3 13
3 13
2 13
2 12
2 12
2 12
2 12
1 12
1 12
1 12
1 11
1 10
1 10
0 4
0 2
0 2
0 2
0 2
0 2
0 2
0 2
0 2
0 2
0 2
0 2
0 2
0 2
0 2
0 2
0 2
0 2
0 2
0 2
0 1
0 1
0 1
0 0
0 0
0 0
0 0
0 0
0 0
0 0
0 0
0 0
0 0
0 0
0 0
0 0
0 0
0 0
0 0
1 0
1 0
1 0
1 0
1 0
1 0
1 0
1 0
1 0
1 0
1 0
1 0
1 0
1 0
1 0
1 0
1 0
1 0
1 0
1 1
1 4
1 4
1 4
1 4
1 5
1 5
1 5
1 5
1 5
1 5
2 6
2 7
2 7
2 7
2 7
2 7
1 7
1 7
1 7
1 7
1 7
1 7
1 7
1 7
1 7
1 7
1 7
1 7
1 8
1 8
1 9
1 9
1 9
1 10
1 10
1 9
1 6
1 6
1 6
1 6
1 5
1 5
1 5
1 5
1 5
1 5
0 3
0 4
0 4
0 4
0 4
0 4
0 4
0 4
0 4
0 4
0 4
1 4
1 4
1 4
1 4
1 4
1 2
1 1
1 1
1 1
1 1
1 1
1 1
1 2
1 2
1 2
1 2
1 3
1 3
1 3
1 3
1 5
1 7
1 8
1 8
1 8
1 8
1 7
1 8
1 8
1 8
1 8
1 8
1 8
1 8
1 8
1 8
0 8
0 8
0 8
0 8
0 8
0 8
0 8
0 8
0 8
0 8
0 8
0 8
0 7
0 7
0 6
0 6
0 6
0 6
0 5
0 5
0 3
0 1
0 0
0 0
0 0
0 0
0 0
0 0
0 0
0 0
0 0
0 0
0 0
0 0
0 0
0 0
0 0
0 0
0 0
0 0
0 0
0 0
0 0
0 0
0 0
0 0
0 0
2 2
2 2
2 2
2 2
2 2
2 2
2 2
2 2
2 2
2 2
2 2
2 2
2 2
2 2
2 3
2 3
2 3
2 3
2 3
2 3
2 3
2 3
2 3
2 3
2 3
2 3
2 3
2 3
2 3
2 3
2 3
2 3
2 3
2 3
2 3
2 3
0 3
0 3
0 3
0 3
0 3
0 3
0 3
0 3
0 3
0 3
0 3
0 3
0 3
0 3
0 2
0 2
0 2
0 2
0 2
0 2
0 2
0 2
0 2
0 2
0 2
0 2
0 2
0 2
0 2
0 2
0 2
0 2
0 2
0 2
0 2
0 2
0 0
0 0
0 0
0 0
0 0
0 0
0 0
0 0
0 0
0 0
0 0
0 0
0 0
0 0
0 0
0 0
0 0
0 0
0 0
0 0
0 0
0 1
0 1
0 1
0 1
0 1
0 1
0 1
0 1
0 1
0 2
0 2
0 2
0 2
0 2
0 2
0 2
0 2
0 2
0 2
0 2
0 2
0 2
0 2
0 2
0 2
0 2
0 2
0 2
0 2
0 2
0 2
0 2
0 2
0 2
0 2
0 2
0 1
0 1
0 1
0 1
0 1
0 1
0 1
0 1
0 1
0 1
0 1
0 1
0 1
0 2
0 2
0 2
0 2
0 2
0 2
0 2
0 2
0 5
0 5
0 5
0 5
0 5
0 5
0 5
0 5
0 5
0 5
0 5
0 5
0 5
0 5
0 5
0 5
0 6
0 6
0 6
0 6
0 6
0 6
0 6
0 6
0 5
0 4
0 4
0 4
0 4
0 4
0 4
0 4
0 4
0 4
0 4
0 4
0 1
0 1
0 1
0 1
0 1
0 1
0 1
0 1
0 1
0 1
0 1
0 1
0 1
0 3
0 3
0 3
0 2
0 2
0 2
0 5
0 6
0 6
0 7
0 7
0 7
0 7
0 7
0 7
0 7
0 7
0 7
0 8
0 8
0 11
0 11
0 11
0 11
0 11
0 11
0 11
0 11
0 11
0 12
0 12
0 12
0 12
0 12
0 12
0 12
0 10
0 10
0 10
0 10
0 10
0 10
0 7
0 6
0 5
0 5
0 5
0 5
0 5
0 5
0 5
0 5
0 5
0 5
0 4
0 4
0 1
0 1
0 1
0 1
0 1
0 1
0 1
0 1
0 1
0 0
0 0
0 0
0 0
0 0
0 0
0 0
0 0
0 0
0 0
0 0
0 0
0 0
0 0
0 0
0 0
0 0
0 0
0 0
0 0
0 0
0 0
0 0
0 0
0 0
0 0
0 0
0 0
0 0
0 0
0 0
0 0
0 0
0 0
0 0
0 0
0 0
0 0
0 0
0 0
1 0
1 0
1 0
1 0
1 0
1 0
1 0
1 0
1 0
1 0
1 0
1 0
1 0
1 0
1 0
1 0
1 0
1 0
1 0
1 0
1 0
1 0
1 0
1 0
1 0
1 0
1 0
1 0
1 0
1 0
1 0
1 0
1 0
1 0
1 0
1 0
0 0
0 0
0 0
0 0
0 0
0 0
0 0
0 0
0 0
0 0
0 0
0 0
0 0
0 0
0 0
0 0
0 1
0 1
0 1
0 1
0 1
0 1
0 1
0 1
0 1
0 1
0 1
0 1
0 1
0 1
0 1
0 1
0 1
0 1
0 1
0 1
0 1
0 1
0 1
0 1
0 1
0 1
0 1
0 1
0 1
0 1
0 1
0 1
0 1
0 1
0 1
0 1
0 0
0 0
0 0
0 0
0 0
0 0
0 0
0 0
0 0
0 0
0 0
0 0
0 1
0 1
0 1
0 1
0 1
0 1
0 1
0 1
0 1
0 1
0 1
0 1
0 1
0 1
0 1
0 1
0 1
0 1
0 1
0 1
0 1
0 1
0 1
0 1
0 1
0 1
0 1
0 1
0 1
0 1
0 1
0 1
0 1
0 1
0 1
0 1
0 0
0 0
0 0
0 0
0 0
0 0
0 0
0 0
0 0
0 0
0 0
0 0
0 0
0 0
0 0
0 0
0 0
0 0
0 0
0 0
0 0
0 0
0 0
0 0
0 0
0 0
0 0
0 0
0 0
0 0
0 0
0 0
0 0
0 0
0 0
1 0
1 0
1 0
1 0
2 0
2 0
2 0
2 0
3 0
3 0
3 0
3 0
3 0
3 0
3 0
3 0
3 0
3 0
3 0
3 0
3 0
3 0
3 0
3 0
3 0
3 0
3 0
3 0
3 0
3 0
3 0
3 0
3 0
3 0
3 0
3 0
2 0
2 0
2 0
2 0
1 0
1 0
1 0
1 0
0 0
0 0
0 0
0 0
0 0
0 0
0 0
0 0
0 0
0 0
0 0
0 0
0 0
0 0
0 0
0 0
0 0
0 0
0 0
0 0
0 0
0 0
0 0
0 0
0 0
0 0
0 0
0 0
0 0
0 0
0 0
0 0
0 0
0 0
0 0
0 0
0 0
0 0
0 0
0 0
1 0
1 0
1 0
1 0
1 0
1 0
1 0
1 0
1 0
1 0
1 0
1 0
1 0
1 0
1 0
1 0
1 0
1 0
1 0
1 1
1 1
1 1
1 1
1 1
1 1
1 1
1 1
1 1
1 1
1 1
1 1
1 1
1 1
1 1
1 1
1 1
0 1
0 1
0 1
0 1
0 1
10 1
10 1
11 1
11 1
11 1
11 1
11 1
11 1
11 1
12 1
12 1
12 1
12 1
12 1
12 0
7 0
7 0
7 0
7 0
7 0
7 0
7 0
7 0
7 0
7 0
7 0
7 0
7 0
7 0
7 0
7 0
7 0
7 0
7 0
7 0
7 0
7 0
7 0
6 0
6 0
10 1
10 1
10 1
9 1
9 1
9 1
9 1
9 1
9 1
9 1
9 1
5 1
4 1
4 1
4 1
4 1
4 1
4 1
5 1
5 1
5 1
6 1
6 1
6 1
6 1
6 1
6 1
6 1
6 1
7 1
8 1
8 1
9 1
8 1
8 1
8 1
5 0
5 0
5 0
5 0
5 0
5 0
5 0
5 0
5 0
5 0
5 0
5 0
5 0
5 0
5 0
5 0
5 0
5 0
4 0
3 0
3 0
3 0
3 0
3 0
4 0
4 0
4 0
4 0
4 0
2 0
2 0
2 0
1 0
1 0
1 0
1 0
1 0
1 0
1 0
3 0
4 0
4 0
4 0
4 0
4 0
4 0
4 0
4 0
4 0
4 0
4 0
4 0
4 0
4 0
4 0
4 0
4 0
4 0
4 0
4 0
3 0
3 0
3 0
3 0
3 0
3 0
3 0
3 0
3 0
3 0
3 0
3 0
3 0
3 0
2 0
0 0
0 0
0 0
0 0
0 0
0 0
0 0
0 0
0 0
0 0
0 0
0 0
0 0
0 0
0 0
0 0
0 0
0 0
0 0
0 0
0 0
0 0
0 0
0 0
0 0
0 0
0 0
0 0
0 0
0 0
0 0
0 0
0 0
0 0
0 0
0 0
0 0
1 0
1 0
1 0
1 0
1 0
1 0
1 0
1 0
1 0
1 0
1 0
1 0
1 0
1 0
1 0
1 0
1 0
1 0
1 0
1 0
1 0
1 0
1 0
1 0
1 0
1 0
1 0
1 0
1 0
1 0
1 0
1 0
1 0
1 0
1 0
1 0
0 0
0 0
0 0
0 0
0 0
0 0
0 0
0 0
0 0
0 0
0 0
0 0
1 0
1 0
2 0
2 0
2 0
2 0
2 0
2 0
2 0
2 0
2 0
2 0
2 0
2 0
2 0
2 0
2 0
2 0
2 0
2 0
2 0
2 0
2 0
2 0
2 0
2 0
2 0
2 0
2 0
2 0
2 0
2 0
2 0
2 0
2 0
2 0
1 0
1 0
0 0
0 0
0 0
0 0
1 0
2 0
2 0
2 0
2 0
2 0
2 0
2 0
2 0
2 0
2 0
2 0
2 0
2 0
2 0
2 0
2 0
2 0
2 0
2 0
2 0
2 0
2 0
2 0
2 0
2 0
2 0
2 0
2 0
2 0
2 0
2 0
2 0
2 0
2 0
1 0
0 0
0 0
0 0
0 0
0 0
0 0
0 0
0 0
0 0
0 0
1 0
1 0
1 0
1 0
1 0
1 0
1 1
1 2
1 2
1 2
1 2
1 2
1 2
1 2
1 2
1 2
1 2
1 2
1 2
1 2
1 2
1 2
1 2
1 2
1 2
1 2
1 2
1 2
1 2
1 2
1 2
1 2
1 2
1 2
1 2
1 2
0 2
0 2
0 2
0 2
0 2
0 2
0 1
0 0
0 0
0 0
0 0
0 0
0 0
0 1
0 1
0 1
0 1
0 1
0 1
0 1
0 1
0 1
0 1
0 1
0 1
0 1
0 1
0 1
0 1
2 1
2 1
2 1
2 1
2 1
2 1
2 1
2 1
2 1
2 1
2 1
2 1
2 1
2 1
2 1
2 1
2 1
2 1
2 1
2 0
2 0
2 0
2 0
2 0
2 0
2 0
2 0
2 0
2 0
2 0
2 0
2 0
2 0
2 0
2 0
2 0
0 0
0 0
0 0
0 0
0 0
0 0
0 0
0 0
0 0
0 0
0 0
0 0
0 0
0 0
0 0
0 0
0 0
0 0
0 0
0 0
0 0
0 0
0 0
0 0
0 0
0 0
0 0
0 0
0 0
0 0
0 0
0 1
0 2
0 2
0 2
0 2
0 2
0 2
0 2
0 2
0 2
0 2
0 2
0 2
0 2
0 2
0 2
0 2
0 2
0 2
0 2
0 2
0 2
0 2
0 2
0 2
0 2
0 2
0 2
0 2
0 2
0 2
0 2
0 2
0 3
0 4
0 4
0 2
0 2
0 2
0 2
0 2
0 2
0 2
0 2
0 2
0 2
0 2
0 2
0 2
0 2
0 2
0 2
0 2
1 2
1 2
1 2
1 2
1 2
1 2
1 2
1 2
1 2
1 2
1 2
1 2
1 2
1 2
1 2
1 2
2 1
2 1
2 1
2 1
2 1
2 1
2 1
2 1
2 1
2 1
2 1
2 1
2 1
2 2
2 2
2 2
2 2
3 2
3 2
3 2
2 2
2 2
2 2
2 2
3 2
3 2
3 2
3 2
3 2
3 2
4 2
6 2
6 2
18 2
18 2
18 2
17 2
17 1
17 1
17 1
17 1
17 1
17 1
17 1
17 1
17 1
17 1
17 1
17 1
17 0
16 0
16 0
16 0
16 0
16 0
17 0
17 0
17 0
17 0
19 0
18 0
18 0
18 0
17 0
17 0
18 0
18 0
16 0
16 0
4 1
5 1
6 1
6 1
6 1
6 1
6 1
6 1
6 1
6 1
6 1
6 1
6 1
6 1
6 1
6 1
6 1
6 1
6 1
6 1
6 1
7 1
6 1
6 1
6 1
6 1
4 1
4 1
5 1
5 1
5 1
4 1
3 1
3 2
3 2
3 2
2 2
2 2
2 2
2 2
2 2
2 2
2 2
2 2
2 2
2 2
2 2
2 2
2 2
2 2
2 2
2 2
2 2
4 2
6 2
5 2
5 2
5 2
5 2
5 2
5 2
5 2
12 3
12 3
11 3
11 4
11 4
11 4
11 4
11 2
11 2
11 2
11 2
11 2
11 2
11 2
11 2
11 2
11 2
11 2
11 2
11 2
11 2
11 2
11 2
11 2
11 2
11 2
11 2
9 2
17 4
21 4
21 4
21 4
21 4
21 4
21 4
21 4
14 2
14 2
14 2
14 2
14 2
14 2
14 2
14 2
14 2
14 2
14 2
17 3
17 4
17 4
17 4
17 4
17 4
17 4
17 4
17 4
17 4
18 4
18 4
19 4
19 4
17 4
17 4
17 4
8 2
5 2
5 2
5 2
5 2
5 2
5 2
5 2
5 2
5 2
5 2
5 2
5 2
9 2
9 2
9 2
9 2
9 2
9 2
6 1
6 0
6 0
6 0
10 0
11 0
11 0
34 0
36 0
60 0
59 0
59 0
58 0
58 0
59 0
59 0
59 0
59 0
59 0
59 0
59 0
59 0
60 0
66 0
67 0
65 0
66 0
66 0
66 0
66 0
61 0
61 0
61 0
61 0
62 0
62 0
61 0
61 0
61 0
61 0
57 0
55 0
47 0
41 0
42 0
19 0
20 0
20 0
21 0
21 0
20 0
21 0
21 0
21 0
23 0
23 0
23 0
23 0
24 0
19 0
19 0
21 0
20 0
20 0
20 0
20 0
20 0
20 0
20 0
20 0
19 0
19 0
19 0
20 0
20 0
20 0
26 0
26 0
26 0
20 0
18 0
17 0
16 0
16 0
16 0
16 0
16 0
15 0
15 0
15 0
13 0
13 0
13 0
19 0
26 0
34 0
34 0
32 0
32 0
32 0
32 0
32 0
32 0
33 0
33 0
33 0
33 0
33 0
33 0
32 0
32 0
31 0
26 0
26 0
28 0
28 0
28 0
29 0
31 0
31 0
31 0
31 0
31 0
31 0
31 0
31 0
31 0
31 0
38 0
33 0
25 0
16 0
16 0
17 0
17 0
17 0
17 0
17 0
17 0
16 0
16 0
16 0
16 0
16 0
16 0
17 0
17 0
19 0
62 1
93 1
101 1
105 1
105 1
109 1
108 1
108 1
111 1
111 1
111 1
111 1
111 1
111 1
111 3
111 3
103 3
102 3
102 3
101 3
101 3
102 3
106 3
106 3
107 3
107 3
107 3
107 3
107 3
108 3
106 3
104 3
107 3
83 1
79 1
71 1
48 0
39 0
31 0
29 0
30 0
26 0
25 0
25 0
22 0
22 0
22 0
22 0
22 0
22 0
22 0
22 0
22 0
22 0
22 0
22 0
22 0
19 0
15 0
17 0
17 0
17 0
17 0
17 0
17 0
16 0
16 0
15 0
10 0
8 0
7 0
6 0
5 0
4 0
3 0
3 0
2 0
2 0
2 0
2 0
2 0
3 0
3 0
3 0
3 0
4 0
4 0
4 0
4 0
4 0
4 0
4 0
4 0
5 0
5 0
3 0
3 0
3 0
3 0
3 0
3 0
3 0
3 0
4 0
4 0
4 0
4 0
4 0
4 0
4 0
4 0
4 0
4 0
4 0
4 0
4 0
4 0
3 0
3 0
3 0
3 0
2 0
3 0
3 0
3 0
3 0
6 0
6 0
6 0
5 0
5 0
6 0
7 0
7 0
8 0
9 0
9 0
9 0
9 0
8 0
9 0
9 0
9 0
9 0
9 0
9 0
9 0
9 0
9 0
9 0
9 0
9 0
9 0
18 0
19 0
19 0
19 0
19 0
18 0
18 0
18 0
18 0
15 0
15 0
15 0
15 0
16 0
16 0
16 0
18 0
17 0
17 0
21 0
23 0
25 0
24 0
24 0
24 0
24 0
24 0
24 0
24 0
24 0
24 0
25 0
29 0
29 0
29 0
29 0
20 0
19 0
19 0
19 0
19 0
22 0
25 0
49 0
48 0
48 0
48 0
48 0
47 0
45 0
45 0
45 0
44 0
44 0
43 0
38 0
37 0
36 0
36 0
38 0
38 0
38 0
38 0
38 0
38 0
38 0
38 0
43 0
40 0
40 0
41 0
41 0
41 0
48 0
48 0
48 0
48 0
46 0
41 0
19 0
19 0
19 0
19 0
19 0
19 0
19 0
19 0
19 0
19 0
19 0
19 0
18 0
18 0
17 0
17 0
16 0
16 0
16 0
16 0
16 0
15 0
15 0
15 0
9 0
9 0
11 0
11 0
12 0
13 0
9 0
9 0
9 0
9 0
10 0
10 0
10 0
10 0
17 0
17 0
17 0
17 0
17 0
17 0
17 0
17 0
17 0
17 0
17 0
17 0
18 0
18 0
18 0
18 0
19 0
24 0
25 0
25 0
25 0
26 0
26 0
26 0
23 0
21 0
20 0
18 0
19 0
19 0
19 0
19 0
18 0
18 0
18 0
18 0
11 0
11 0
11 0
11 0
11 0
11 0
11 0
11 0
19 0
20 0
20 0
20 0
19 0
19 0
17 0
17 0
17 0
14 0
13 0
13 0
13 0
12 0
12 0
11 0
12 0
12 0
11 0
11 0
11 0
11 0
11 0
11 0
11 0
11 0
11 0
11 0
11 0
11 0
11 0
11 0
11 0
10 0
10 0
9 0
3 0
2 0
2 0
2 0
2 0
1 0
1 0
1 0
1 0
1 0
3 0
3 0
3 0
3 0
2 0
2 0
2 0
2 0
2 0
2 0
2 0
2 0
3 0
3 0
3 0
4 0
4 0
4 0
5 0
6 0
7 0
7 0
7 0
7 0
7 0
8 0
8 0
9 0
9 0
9 0
8 0
8 0
8 0
9 0
9 0
9 0
8 0
9 0
12 0
14 0
16 0
16 0
16 0
16 0
16 0
16 0
16 0
17 0
16 0
16 0
17 0
17 0
18 0
19 0
20 0
18 0
18 0
18 0
18 0
19 0
20 0
19 0
18 0
18 0
18 0
18 0
18 0
18 0
17 0
17 0
17 0
17 0
15 0
14 0
11 0
11 0
9 0
9 0
9 0
9 0
9 0
9 0
8 0
8 0
8 0
8 0
7 0
6 0
4 0
2 0
0 0
0 0
0 0
0 0
0 0
0 0
0 0
0 0
0 0
0 0
0 0
0 0
0 0
0 0
0 0
0 0
0 0
0 0
0 0
0 0
0 0
0 0
0 0
0 0
1 0
1 0
1 1
1 1
1 1
1 1
1 1
1 1
1 1
1 1
1 1
1 1
1 1
1 1
1 1
1 1
1 1
2 1
2 1
2 1
2 1
2 1
3 1
3 1
3 1
3 1
3 1
3 1
3 1
4 1
5 1
5 1
5 1
5 1
5 1
5 1
4 1
4 0
4 0
4 0
4 0
4 0
4 0
4 0
4 0
4 0
4 0
5 0
6 0
6 0
7 0
6 0
7 0
7 0
7 0
7 0
7 0
7 0
6 0
6 0
6 0
6 0
6 0
6 0
5 0
4 0
4 0
4 0
4 0
4 0
4 0
4 0
4 0
5 0
5 0
5 0
5 0
5 0
5 0
5 0
5 0
5 0
5 0
6 0
7 1
7 1
6 1
6 1
6 1
6 1
7 1
7 1
7 1
7 1
7 1
7 1
8 1
8 1
8 1
9 4
11 4
11 4
11 4
10 4
10 4
10 4
10 4
10 4
10 4
10 4
10 4
10 4
10 4
10 4
10 4
10 4
10 4
10 4
10 4
6 3
5 3
5 3
5 3
4 3
4 3
4 3
4 3
4 4
4 4
4 4
4 4
4 4
3 4
3 4
3 3
2 1
0 2
0 2
0 2
0 2
0 2
0 2
0 2
0 2
0 2
0 2
2 2
8 2
8 2
8 2
8 2
8 2
8 2
8 2
8 2
8 2
8 2
8 2
8 2
8 2
8 2
8 2
8 2
8 1
9 1
9 1
9 1
9 1
9 1
9 1
9 1
9 0
9 0
9 0
9 0
9 0
9 0
9 0
13 0
25 0
25 0
24 0
23 0
18 0
19 0
19 0
19 0
19 0
19 0
19 0
19 0
19 0
19 0
19 0
18 0
18 1
18 1
18 1
18 1
20 1
20 1
20 1
20 1
20 1
20 1
20 1
20 1
20 1
20 1
20 1
15 1
15 1
12 1
12 1
11 1
4 1
4 1
4 1
4 1
3 1
2 1
2 1
2 1
2 1
2 1
2 1
2 1
2 0
2 0
2 0
3 0
3 0
3 0
3 0
3 0
1 0
1 0
1 0
1 0
1 0
1 0
1 0
1 0
1 0
1 0
1 0
1 0
1 0
1 0
1 0
1 0
1 0
1 0
1 0
2 0
2 0
2 0
2 0
2 0
2 0
2 0
2 0
2 0
2 0
2 0
2 0
1 0
1 0
1 0
1 0
1 0
1 0
1 0
2 0
2 0
2 0
2 0
2 0
2 0
2 0
2 0
2 0
2 0
2 0
2 0
2 0
2 0
2 0
2 0
2 0
1 0
1 0
1 0
1 0
1 0
1 0
1 0
1 0
1 0
1 0
1 0
1 0
1 0
1 0
2 0
2 0
2 0
2 0
2 0
1 0
1 0
1 0
1 0
1 0
1 0
1 0
1 0
1 0
1 0
1 0
1 0
1 0
1 0
1 0
1 0
1 0
1 0
1 0
2 0
3 0
4 0
4 0
4 0
4 0
4 0
4 0
4 0
4 0
4 0
4 0
3 0
3 0
3 0
3 0
4 0
4 0
4 0
4 0
4 0
4 0
4 0
4 0
4 0
5 0
6 0
9 0
12 0
13 0
13 0
13 0
14 0
13 0
13 0
13 0
13 0
13 0
12 0
12 0
12 0
12 0
14 0
18 0
18 0
18 0
18 0
18 0
18 0
18 0
18 0
18 0
17 0
17 0
17 0
17 0
17 0
17 0
17 0
16 0
16 0
13 0
13 0
10 0
9 0
8 0
8 0
8 0
7 0
7 0
6 0
6 0
9 0
9 0
8 0
8 0
7 0
7 0
7 0
3 0
3 0
3 0
3 0
3 0
3 0
3 0
3 0
3 0
3 0
3 0
3 0
3 0
3 0
3 0
3 0
3 0
3 0
3 0
3 0
3 0
3 0
3 0
3 0
3 0
3 0
3 0
3 0
4 0
1 0
1 0
1 0
1 0
1 0
1 0
1 0
1 0
2 0
2 0
2 0
2 0
2 0
2 0
3 0
3 0
4 0
5 0
5 0
7 0
7 0
7 0
7 0
8 0
8 0
8 0
11 0
12 0
12 0
12 0
12 0
12 0
12 0
12 0
12 0
11 0
11 0
11 0
11 0
11 0
11 0
11 0
12 0
12 0
11 0
12 0
12 0
12 0
12 0
11 0
10 0
10 0
10 0
9 0
8 0
7 0
7 0
7 0
7 0
6 0
6 0
6 0
4 0
3 0
3 0
3 0
3 0
3 0
3 0
5 0
5 0
6 0
7 0
7 0
7 0
7 0
7 0
7 0
6 0
6 0
6 0
5 0
5 0
5 0
5 0
6 0
6 0
11 0
13 0
13 0
13 0
13 0
13 0
14 0
14 0
16 0
16 0
18 0
18 0
18 0
18 0
18 0
19 0
19 0
19 0
17 0
17 0
16 0
17 0
17 0
17 0
17 0
17 0
17 0
17 0
17 0
17 0
17 0
17 0
15 0
16 0
15 0
15 0
12 0
12 0
12 0
12 0
12 0
12 0
13 0
13 0
11 0
11 0
9 0
9 0
9 0
9 0
10 0
9 0
10 0
11 0
10 0
9 0
9 0
10 0
10 0
10 0
11 0
11 0
11 0
11 0
11 0
11 0
13 0
13 0
14 0
11 0
11 0
11 0
11 0
11 0
11 0
11 0
11 0
13 0
13 0
13 0
13 0
13 0
12 0
12 0
12 0
11 0
12 0
14 0
13 0
14 0
14 0
14 0
16 0
18 0
21 0
20 0
20 0
21 0
21 0
21 0
21 0
21 0
18 0
18 0
20 0
20 0
26 0
27 0
28 0
28 0
28 0
28 0
26 0
26 0
25 0
25 0
29 0
31 0
32 0
32 0
32 0
31 0
30 0
28 0
26 0
24 0
24 0
22 0
22 0
19 0
21 0
21 0
20 0
20 0
20 0
20 0
20 0
23 0
23 0
23 0
21 0
21 0
16 0
14 0
14 0
14 0
14 0
14 0
14 0
14 0
13 0
12 0
8 0
9 0
8 0
8 0
9 0
9 0
9 0
9 0
9 0
9 0
9 0
9 0
9 0
9 0
7 0
7 0
7 0
7 0
7 0
7 0
5 0
2 0
2 0
2 0
2 0
3 0
4 0
4 0
4 0
4 0
4 0
4 0
4 0
4 0
4 0
4 0
6 0
6 0
6 0
5 0
6 0
6 0
6 0
11 0
11 0
12 0
19 0
19 0
19 0
20 0
20 0
20 0
20 0
20 0
28 0
33 0
33 0
34 0
34 0
34 0
34 0
33 0
32 0
32 0
32 0
32 0
32 0
32 0
32 0
32 0
32 0
31 0
30 0
29 0
29 0
29 0
28 0
28 0
28 0
23 0
23 0
21 0
15 0
15 0
15 0
14 0
14 0
14 0
14 0
14 0
5 0
1 0
1 0
0 0
0 0
0 0
0 0
0 0
0 0
0 0
0 0
0 0
0 0
0 0
0 0
0 0
0 0
0 0
0 0
0 0
0 0
0 0
0 0
0 0
7 0
11 0
14 0
19 0
19 0
19 0
19 0
19 0
20 0
21 0
23 0
28 0
28 0
28 0
28 0
28 0
29 0
29 0
29 0
29 0
29 0
29 0
29 0
29 0
29 0
29 0
29 0
29 0
29 0
29 0
29 0
38 0
46 0
50 0
50 0
50 0
41 0
38 0
36 0
33 0
33 0
31 0
31 0
30 0
30 0
29 0
31 0
27 0
31 0
30 0
30 0
29 0
29 0
27 0
27 0
27 0
27 0
27 0
28 0
29 0
30 0
30 0
30 0
30 0
30 0
27 0
27 0
24 0
19 0
16 0
16 0
16 0
16 0
15 0
15 0
15 0
15 0
16 0
16 0
16 0
16 0
16 1
12 1
8 1
7 1
7 1
7 1
6 1
6 1
7 1
7 1
7 1
11 1
13 1
13 1
21 1
20 1
20 1
19 1
19 1
24 1
25 1
26 1
26 1
26 1
25 1
26 1
27 1
27 1
27 1
27 1
26 1
26 1
26 1
26 1
26 1
26 1
25 0
25 0
25 0
31 0
31 0
31 0
31 0
31 0
30 0
30 0
30 0
25 0
22 0
22 0
15 0
15 0
15 0
14 0
16 0
12 0
11 0
11 0
11 0
10 0
11 0
11 0
10 0
10 0
10 0
28 0
34 0
35 0
36 0
36 0
36 0
36 0
36 0
36 0
37 0
32 0
32 0
32 0
32 0
32 0
32 0
32 0
32 0
32 0
32 0
32 0
32 0
32 0
32 0
32 0
29 0
29 0
29 0
29 0
29 0
29 0
28 0
27 0
26 0
26 0
25 0
6 0
6 0
4 0
4 0
4 0
4 0
5 0
5 0
8 0
17 0
34 1
34 1
35 1
35 1
35 1
35 1
35 1
35 1
35 1
35 1
35 1
35 1
35 1
35 1
35 1
35 1
35 1
35 1
35 1
35 1
35 1
35 1
35 1
35 1
35 1
37 1
37 1
35 1
37 1
39 1
43 1
44 1
43 1
41 1
36 1
22 1
14 0
14 0
13 0
13 0
13 0
15 0
15 0
17 0
17 0
17 0
17 0
17 0
17 0
17 0
17 0
17 0
17 0
17 0
17 0
17 0
17 0
16 0
16 0
16 0
19 0
18 0
18 0
18 0
14 0
13 0
10 0
9 0
9 0
9 0
9 0
9 0
8 0
8 1
8 1
8 1
8 1
6 1
6 1
4 1
4 1
5 1
5 1
5 1
5 1
5 1
5 1
5 1
5 1
5 1
5 1
5 1
5 1
5 1
5 1
5 1
1 2
1 2
1 2
1 2
1 2
1 2
1 2
8 2
8 2
8 2
8 2
8 1
8 1
9 1
9 1
10 1
10 1
10 1
11 1
11 1
11 1
10 1
10 1
10 1
10 1
10 1
10 1
10 1
10 1
10 1
10 1
10 1
10 1
10 1
10 1
10 1
10 0
13 0
13 0
17 0
21 0
21 0
21 0
14 0
14 0
16 0
16 0
16 0
17 0
16 0
15 0
15 0
15 0
15 0
14 0
14 0
14 0
14 0
14 0
14 0
14 0
14 0
14 0
14 0
14 0
14 0
14 0
14 0
14 0
14 0
14 0
21 0
22 0
19 0
19 0
15 0
11 0
11 0
11 0
11 0
11 0
9 0
9 0
9 0
14 0
15 0
15 0
15 0
15 0
15 0
17 0
17 0
17 0
17 0
17 0
17 0
17 0
17 0
17 0
17 0
17 0
17 0
16 0
16 0
16 0
15 0
15 0
9 0
9 0
14 0
14 0
14 0
14 0
14 0
14 0
14 0
14 0
14 0
13 0
13 0
7 0
7 0
7 0
7 0
7 0
7 0
6 0
6 0
6 0
6 0
6 0
6 0
6 0
6 0
6 0
6 0
6 0
6 0
6 0
6 0
6 0
6 0
6 0
6 0
6 0
1 0
2 0
3 0
6 0
7 0
7 0
7 0
7 0
7 0
7 0
7 0
7 0
7 0
7 0
6 0
6 0
6 0
6 0
6 0
6 0
6 0
6 0
7 0
7 0
9 0
9 0
9 0
9 0
9 0
9 0
9 0
9 0
9 0
9 0
9 0
9 0
9 0
8 0
6 0
3 0
3 0
3 0
3 0
3 0
3 0
3 0
3 0
3 0
3 0
3 0
3 0
3 0
3 0
3 0
4 0
4 0
4 0
4 0
3 0
3 0
1 0
1 0
1 0
1 0
1 0
1 0
1 0
1 0
1 0
1 0
1 0
1 0
1 0
1 0
1 0
1 0
1 0
1 0
1 0
1 0
1 0
1 0
1 0
1 0
1 0
2 0
2 0
2 0
2 0
2 0
1 0
1 0
1 0
1 0
1 0
1 0
1 0
1 0
1 0
1 0
1 0
1 0
1 0
1 0
1 0
1 0
1 0
1 0
1 0
1 0
1 0
2 0
2 0
2 0
2 0
2 0
2 0
2 0
2 0
2 0
2 0
1 0
1 0
1 0
1 0
1 0
1 0
1 0
1 0
2 0
2 0
2 0
2 0
2 0
2 0
2 0
2 0
2 0
2 0
2 0
2 0
2 0
2 0
2 0
2 0
2 0
2 0
1 0
2 0
2 0
2 0
2 0
2 0
2 0
2 0
2 0
2 0
2 0
2 0
2 0
3 0
4 0
4 0
4 0
4 0
3 0
3 0
3 0
3 0
3 0
3 0
3 0
3 0
3 0
3 0
3 0
3 0
3 0
3 0
3 0
3 0
3 0
3 0
3 0
2 0
2 0
2 0
2 0
2 0
2 0
2 0
3 0
3 0
3 0
3 0
3 0
2 0
1 0
1 0
1 0
1 0
1 0
1 0
1 0
1 0
1 0
1 0
1 0
1 0
1 0
1 0
1 0
1 0
2 0
2 0
2 0
2 0
2 0
2 0
2 0
1 0
1 0
1 0
1 0
1 0
1 0
1 0
1 0
1 0
3 0
3 0
3 0
3 0
4 0
5 0
5 0
5 0
5 0
5 0
5 0
5 0
5 0
5 0
5 0
5 0
5 0
5 0
5 0
5 0
4 0
4 0
4 0
4 0
4 0
6 0
7 0
7 0
7 0
8 0
8 0
9 0
9 0
9 0
9 0
9 0
8 0
8 0
16 0
29 0
31 0
30 0
31 0
31 0
52 0
52 0
52 0
52 0
52 0
53 0
53 0
53 0
53 0
53 0
53 0
54 0
54 0
53 0
53 0
53 0
53 0
51 0
51 0
53 0
53 0
52 0
52 0
51 0
51 0
51 0
51 0
51 0
50 0
58 0
52 0
39 0
37 0
37 0
36 0
36 0
15 0
15 0
15 0
14 0
14 0
15 0
15 0
15 0
18 0
20 0
20 0
19 0
19 0
19 0
19 0
19 0
19 0
19 0
19 0
19 0
19 0
25 0
25 0
25 0
25 0
25 0
25 0
26 0
26 0
15 0
15 0
15 0
17 0
17 0
17 0
17 0
17 0
17 0
17 0
17 0
17 0
16 0
17 0
18 0
15 0
14 0
14 0
14 0
14 0
14 0
14 0
15 0
18 0
18 0
18 0
20 0
20 0
22 0
22 0
22 0
23 0
23 0
23 0
27 0
27 0
27 0
28 0
28 0
26 0
26 0
26 0
26 0
26 0
27 0
28 0
32 0
33 0
34 0
33 0
32 0
32 0
33 0
33 0
33 0
33 0
34 0
34 0
32 0
41 1
41 1
40 1
38 1
38 1
30 1
30 1
30 1
29 1
28 1
28 1
23 1
23 1
23 1
22 1
22 1
22 1
22 1
22 1
23 1
24 1
29 1
28 1
24 1
25 1
40 1
58 1
74 1
83 1
93 1
98 1
100 1
104 1
104 1
104 1
105 1
95 0
95 0
95 0
95 0
95 0
98 0
98 0
98 0
102 0
107 0
127 0
169 0
177 0
182 0
188 0
189 0
189 0
188 0
188 0
184 0
187 0
180 0
178 0
173 0
167 0
154 0
143 0
127 0
119 0
115 0
115 0
112 0
106 0
106 0
106 0
106 0
106 0
108 0
110 0
111 0
111 0
108 0
108 0
105 0
101 0
96 0
78 0
41 0
34 0
31 0
25 0
30 0
30 0
31 0
31 0
31 0
28 0
27 0
26 0
25 0
22 0
21 0
21 0
21 0
20 0
20 0
26 0
32 0
66 0
89 0
150 0
151 0
151 0
150 0
148 0
148 0
160 0
163 0
170 0
181 0
186 0
187 0
186 0
185 0
184 0
183 0
183 0
178 0
178 0
177 0
177 0
177 0
177 0
177 0
177 0
178 0
192 0
320 1
334 1
334 1
334 1
336 1
326 1
309 1
276 1
261 1
203 1
203 1
204 1
207 1
207 2
206 2
194 2
186 2
179 2
175 2
171 2
167 2
167 2
167 2
167 2
167 2
167 2
167 2
167 2
171 2
170 2
253 2
253 2
237 2
228 2
219 2
198 2
114 1
112 1
112 1
112 1
114 1
114 1
113 1
115 1
116 1
117 1
120 1
122 1
119 1
119 0
119 0
119 0
119 0
119 0
118 0
118 0
117 0
174 0
184 0
189 0
180 0
221 0
218 0
217 0
215 0
216 0
149 0
149 0
149 0
150 0
160 0
160 0
160 0
160 0
160 0
161 0
159 0
159 1
172 1
174 1
173 1
172 1
170 1
168 1
168 1
168 1
169 1
177 1
188 1
190 1
194 1
196 1
196 1
137 1
130 1
128 1
154 1
117 1
116 1
115 1
114 1
109 1
102 1
98 1
97 1
96 1
90 1
90 1
90 1
90 1
90 1
89 0
89 0
90 0
79 0
78 0
87 0
126 0
130 0
135 0
132 0
130 0
129 0
124 0
122 0
118 0
113 0
114 0
109 0
109 0
108 0
105 0
81 0
81 0
82 0
83 0
83 0
83 0
83 0
83 0
83 0
83 0
79 0
79 0
79 0
76 0
74 0
74 0
67 0
53 0
46 0
43 0
43 0
20 0
19 0
14 0
11 0
10 0
10 0
11 0
12 0
18 0
22 0
31 0
40 0
42 0
43 0
45 0
43 0
48 0
48 0
47 0
47 0
47 0
47 0
47 0
47 0
47 0
47 0
47 0
47 0
47 0
47 0
46 0
46 0
46 0
46 0
46 0
44 0
44 0
43 0
43 0
43 0
42 0
40 0
36 0
32 0
21 0
16 0
16 0
11 0
10 0
9 0
8 0
8 0
2 0
1 0
1 0
1 0
2 0
2 0
3 0
3 0
3 0
3 0
3 0
3 2
3 2
3 2
3 2
3 3
3 3
3 3
3 3
3 3
3 3
3 3
3 3
3 3
3 3
3 3
3 4
3 4
3 4
2 4
2 4
2 4
2 4
2 4
2 4
2 4
2 4
3 4
3 4
3 4
2 4
2 4
1 4
1 4
1 4
1 4
1 4
1 2
1 2
1 2
1 2
1 1
1 1
1 1
1 1
1 1
1 1
1 1
1 1
2 1
2 1
4 1
4 0
4 0
4 0
4 0
4 0
4 0
4 0
4 0
4 0
4 0
4 0
3 0
3 1
3 1
3 1
3 1
3 1
3 1
3 1
3 1
3 1
3 1
3 1
3 2
3 3
3 3
3 3
3 4
4 6
5 7
5 7
5 9
4 11
5 13
5 13
4 13
4 13
4 14
4 14
4 15
6 18
6 18
6 18
6 18
6 18
6 19
6 19
6 19
6 18
6 18
6 18
6 18
6 18
6 18
6 18
6 18
6 18
6 18
8 18
8 17
8 17
9 17
8 17
11 16
14 15
13 14
13 14
13 11
12 10
12 9
12 15
11 15
11 15
11 14
11 13
11 12
10 9
10 9
10 9
10 9
10 9
10 9
10 9
10 10
10 10
11 10
11 10
11 10
11 10
11 10
11 10
13 15
13 15
13 15
11 15
11 15
11 14
10 14
10 14
7 14
4 14
4 15
4 15
4 15
4 14
4 14
4 8
4 8
4 8
4 8
4 8
4 10
3 10
3 10
3 10
4 10
4 10
4 10
3 10
4 9
5 9
5 9
6 9
9 9
9 9
9 9
9 9
7 3
7 3
8 3
8 3
8 3
8 3
8 3
8 3
8 3
9 2
9 2
9 3
9 3
9 3
9 3
9 3
9 3
9 3
9 3
9 3
9 2
9 2
9 2
9 2
8 2
7 2
7 2
7 2
7 2
6 2
6 2
5 2
2 2
2 2
3 2
3 2
3 2
3 2
2 2
2 2
3 2
3 2
9 2
9 2
9 2
8 2
8 2
8 1
8 1
8 0
8 0
8 0
8 0
8 0
9 0
10 0
10 0
10 0
10 0
10 0
10 0
10 0
10 0
10 0
10 0
10 0
10 0
9 0
9 0
9 0
9 0
9 0
9 0
9 0
9 0
9 0
8 0
10 0
4 0
4 0
4 0
4 0
4 0
4 1
4 2
4 3
4 5
5 7
5 7
5 7
4 7
3 8
3 8
3 13
3 13
3 13
3 13
3 13
3 13
3 13
3 13
3 15
7 18
12 19
21 19
22 20
24 20
24 20
24 20
24 20
24 21
24 21
24 21
22 21
22 21
22 21
23 21
23 21
23 21
23 20
22 19
22 18
22 16
22 12
23 12
23 11
23 11
23 11
23 11
23 8
23 8
23 8
21 8
20 8
19 8
19 8
17 8
14 6
11 3
6 2
5 2
3 1
3 1
3 1
3 1
3 1
3 0
3 0
3 0
3 0
3 1
3 1
2 1
2 3
2 3
3 3
3 4
3 5
3 5
4 5
3 5
3 5
3 5
3 5
3 5
3 5
3 5
3 5
3 5
3 5
3 5
2 5
2 5
2 5
2 5
2 5
2 5
2 5
2 5
2 5
2 5
2 5
2 5
2 4
2 4
2 6
2 8
2 8
2 8
2 6
2 6
1 6
1 8
1 7
1 7
0 7
0 7
0 7
0 7
0 7
0 7
0 7
0 7
0 7
0 7
0 7
0 7
0 7
0 7
0 7
0 7
0 7
0 7
0 7
0 7
0 8
0 8
0 8
0 8
0 8
0 7
0 5
0 4
0 4
0 4
0 1
0 1
1 1
1 3
1 3
1 3
1 4
1 4
1 5
1 5
1 5
1 5
1 5
1 5
1 5
1 5
1 5
1 5
1 5
1 5
1 5
1 5
1 5
1 5
1 5
1 5
1 4
1 4
1 4
0 6
0 6
0 6
0 7
2 18
2 20
2 20
2 20
2 19
2 19
3 19
3 19
3 19
3 25
3 24
3 24
3 24
3 24
3 24
3 24
3 24
3 24
3 24
3 24
3 24
3 24
3 24
3 24
3 24
3 24
3 24
3 25
4 27
6 27
6 27
6 27
6 26
6 25
6 25
6 22
4 11
4 10
4 10
4 10
4 10
3 10
3 10
3 10
3 10
3 3
3 3
3 3
3 3
3 3
3 3
5 11
7 15
7 16
8 16
8 16
8 16
8 16
8 16
8 16
8 16
8 16
8 16
6 14
6 14
5 14
5 15
5 15
5 15
5 16
5 16
5 16
5 16
5 16
5 16
8 16
8 16
8 16
9 16
9 16
9 16
9 16
9 16
9 16
9 16
8 16
8 18
4 6
4 6
4 6
4 6
4 7
4 7
4 7
4 8
4 8
4 8
4 8
4 8
4 8
4 7
14 10
16 9
16 14
16 16
16 18
16 18
17 18
17 18
17 18
17 18
13 18
13 18
13 18
13 18
13 18
13 18
13 18
13 18
13 18
13 18
13 18
13 16
13 15
13 14
13 14
13 14
14 13
14 13
14 13
14 13
14 13
14 13
14 13
14 13
14 13
14 13
2 9
2 9
2 2
3 2
3 0
3 1
2 1
2 1
2 1
2 1
2 1
2 1
2 1
2 1
2 1
2 2
2 2
2 2
2 2
2 2
2 2
2 2
2 2
1 2
1 2
1 2
1 2
1 2
1 2
1 2
1 2
1 2
1 2
2 7
2 7
2 7
2 7
1 7
1 7
1 7
1 7
1 6
1 6
1 6
1 6
1 6
2 6
3 6
3 6
3 6
3 6
3 5
3 5
3 5
3 5
3 7
3 7
3 7
3 7
3 7
3 7
3 7
3 12
3 12
3 13
3 13
3 13
3 13
3 15
2 10
2 11
2 11
2 11
2 11
2 11
3 11
3 11
4 11
5 11
5 11
5 11
5 11
4 12
3 12
3 12
3 13
8 13
13 13
13 13
13 13
13 13
13 11
13 11
13 11
13 11
13 11
13 11
13 11
13 6
13 6
13 5
13 5
13 5
13 4
13 2
13 2
13 2
13 2
13 2
13 2
13 2
11 2
11 2
13 2
12 2
14 3
14 3
14 3
14 2
14 2
14 1
13 1
9 1
4 1
4 1
4 1
4 1
4 1
4 1
4 1
4 1
4 1
4 1
4 1
4 1
4 1
4 1
4 1
4 1
5 1
5 1
5 1
5 1
5 1
5 1
5 1
5 1
6 1
7 2
6 2
6 2
11 2
11 2
11 2
11 2
11 2
11 2
11 2
11 2
11 2
11 2
11 2
11 2
11 2
11 2
11 2
11 2
11 2
11 2
11 2
11 2
11 2
11 2
17 2
17 2
16 2
16 2
16 2
16 2
16 2
16 2
16 3
16 3
14 3
14 2
13 1
13 1
6 1
6 1
6 1
6 1
6 1
6 1
6 1
6 1
6 1
6 1
6 1
6 1
6 1
6 1
7 1
7 1
7 1
7 1
7 1
7 1
7 1
5 1
1 1
1 1
1 1
1 1
1 1
1 1
1 1
1 0
1 0
1 0
1 0
1 0
1 0
1 0
1 0
1 0
1 0
1 0
1 0
1 0
6 0
7 0
8 0
8 0
8 0
8 0
8 0
8 0
8 0
8 0
8 0
8 0
8 0
8 0
8 0
8 0
8 0
8 0
8 0
8 0
8 0
8 0
8 0
8 0
8 0
8 0
8 0
10 0
10 0
12 0
21 0
41 0
100 0
101 0
101 0
99 0
93 0
93 0
93 0
93 0
94 0
96 0
96 0
96 0
96 0
96 0
96 0
96 0
96 0
96 0
96 0
96 0
101 0
102 0
104 0
104 0
105 0
107 0
109 0
114 0
126 0
182 0
189 0
195 0
199 0
198 0
189 0
172 0
118 0
117 0
117 0
118 0
118 0
118 0
118 0
120 0
119 0
118 0
118 0
118 0
118 0
118 0
118 0
118 0
118 0
118 0
118 0
118 0
113 0
111 0
110 0
90 0
90 0
86 0
84 0
79 0
71 0
39 0
37 0
28 0
24 0
21 0
19 0
19 0
19 0
19 0
19 0
18 0
18 0
18 0
18 0
19 0
19 0
18 0
18 0
18 0
18 0
18 0
18 0
18 0
18 0
18 0
18 0
18 0
18 0
17 0
16 0
15 0
7 0
6 0
4 0
3 0
2 0
1 0
1 0
1 0
1 0
1 0
1 0
3 0
3 0
7 0
9 0
9 0
9 0
9 0
9 0
8 0
8 0
8 0
8 0
8 0
8 0
8 0
8 0
8 0
8 0
8 0
8 0
8 0
8 0
8 0
8 0
8 0
8 0
8 0
8 0
8 0
8 0
8 0
8 0
8 0
5 0
3 0
2 0
2 0
1 0
0 0
0 0
0 0
0 0
0 0
0 0
0 0
0 0
0 0
0 0
0 0
0 0
0 0
0 0
0 0
0 0
0 0
0 0
0 0
0 0
0 0
0 0
0 0
0 0
0 0
0 0
0 0
0 0
0 0
0 0
0 0
0 0
0 0
0 0
0 0
0 0
0 0
0 0
0 0
0 0
0 0
0 0
0 0
0 0
0 0
0 1
0 1
0 1
0 1
0 1
0 1
0 1
0 1
2 1
2 3
2 3
2 3
2 3
2 3
2 3
2 3
2 3
2 3
2 3
2 3
2 3
2 3
2 3
2 3
2 3
2 3
2 3
2 3
2 3
2 3
2 3
2 3
2 3
2 3
2 3
2 3
3 2
4 2
7 2
7 2
7 2
7 2
9 2
9 2
11 2
11 0
11 0
11 0
11 0
11 1
11 1
11 1
11 1
11 1
11 1
11 1
11 1
11 1
11 1
11 1
11 1
11 1
11 1
11 1
11 1
11 1
11 1
11 1
11 1
11 1
11 1
10 1
10 1
9 1
6 1
4 1
4 1
3 1
3 1
3 2
0 2
0 2
0 2
0 2
0 2
0 2
0 2
0 2
0 2
0 2
0 2
0 2
0 2
0 2
0 2
0 2
0 2
0 2
0 2
0 2
0 2
1 2
5 2
6 2
6 2
6 2
6 2
6 2
6 2
6 2
6 2
6 2
8 2
8 2
8 1
8 1
9 0
9 0
9 0
9 0
9 0
9 0
9 0
9 0
9 0
9 0
9 0
10 0
10 0
10 0
10 0
10 0
10 0
10 0
10 0
10 0
10 0
9 0
5 0
4 0
4 0
4 0
4 0
4 0
4 0
4 0
4 0
4 0
2 0
2 0
2 0
2 0
1 0
1 0
1 0
1 0
1 0
1 0
1 0
1 0
1 0
1 0
0 0
0 0
0 0
0 0
0 0
0 0
0 0
0 0
0 0
0 0
0 0
0 0
0 0
0 0
0 0
0 0
0 0
0 0
1 0
1 0
3 0
3 0
3 0
3 0
3 0
3 0
4 0
6 0
6 0
6 0
7 0
7 0
7 0
7 0
7 0
7 0
7 0
7 0
7 0
7 0
7 0
7 0
7 0
7 0
7 0
7 0
7 0
7 0
7 0
7 0
7 0
7 0
7 0
7 0
6 0
6 0
3 0
3 0
2 0
3 0
8 0
8 0
9 0
9 0
9 0
8 0
8 0
8 0
8 0
8 0
8 0
8 0
8 0
8 0
8 0
8 0
8 0
8 0
8 0
8 0
8 0
8 0
8 0
8 0
8 0
8 0
8 0
8 0
8 0
8 0
8 0
8 0
8 0
8 0
8 0
7 0
2 0
2 0
1 0
0 0
0 0
0 0
1 0
1 0
1 0
1 0
1 0
1 0
1 0
1 0
1 0
1 0
1 0
1 0
1 0
1 0
1 0
1 0
1 0
1 0
1 0
2 0
2 0
2 0
2 0
2 0
2 0
2 0
2 0
2 0
2 0
2 0
3 0
3 0
3 0
3 0
3 0
3 0
2 0
2 0
2 0
2 0
2 0
2 0
2 0
4 0
4 0
4 0
4 0
4 0
4 0
4 0
5 0
5 0
5 0
5 0
5 0
4 0
4 0
4 0
4 0
4 0
4 0
4 0
5 0
5 0
5 0
4 0
4 0
4 0
4 0
4 0
4 0
4 0
4 0
4 0
4 0
4 0
4 0
4 0
4 0
2 0
2 0
2 0
2 0
2 0
2 0
2 0
1 0
1 0
1 0
1 0
1 0
1 0
1 0
1 0
1 0
2 0
2 0
1 0
1 0
1 0
1 0
1 0
1 0
1 0
1 0
1 0
1 0
1 0
1 0
1 0
1 0
1 0
1 0
1 0
1 0
1 0
1 0
1 0
1 0
1 0
1 0
[truncated: 22,833,525 more chars]
