# Supplementary material for: From Insect to Man: Photorhabdus Sheds Light on the Emergence of Human Pathogenicity
Source: PLoS One. 2015 Dec 17;10(12):e0144937. doi: 10.1371/journal.pone.0144937 (PMC4683029; doi:10.1371/journal.pone.0144937)
Supplement: S2 Data — (ZIP) [file pone.0144937.s002.zip › ATCC43949_37C_Expo_rep2.plot]

0 0
0 0
0 0
0 0
0 0
0 0
0 0
0 0
0 0
0 0
0 0
0 0
0 0
0 0
0 0
0 0
3 0
3 1
3 1
3 1
3 1
3 1
3 1
3 4
9 7
9 7
9 7
9 7
9 7
9 7
10 7
10 7
10 7
10 7
10 7
10 7
10 7
10 7
13 8
21 8
21 8
21 8
21 8
21 8
21 8
21 8
21 8
21 8
21 8
25 9
27 9
29 9
29 9
29 9
29 9
27 9
25 9
23 9
26 10
26 10
30 10
30 10
30 10
30 10
30 10
30 10
30 10
30 10
30 10
30 10
30 11
30 11
30 11
30 11
31 11
31 12
31 12
31 13
34 16
34 16
34 16
34 16
37 20
38 20
40 20
41 20
41 20
41 20
41 20
44 20
44 19
44 19
50 23
50 23
50 23
50 22
51 20
48 18
49 17
49 17
49 17
48 17
49 17
49 17
49 17
49 17
49 17
49 17
49 17
49 17
49 17
46 16
38 16
38 16
38 16
39 16
39 16
40 16
40 16
40 16
40 16
39 16
36 15
33 15
33 15
33 15
33 15
37 15
37 15
37 15
37 15
34 14
34 14
34 15
34 15
34 15
37 15
37 15
37 15
37 15
37 15
37 15
39 15
47 15
47 15
47 15
47 16
46 16
40 15
40 16
42 14
39 12
39 12
38 12
38 12
35 8
34 8
32 7
32 7
32 7
32 7
32 7
33 7
33 7
34 7
31 3
31 3
33 3
33 3
32 3
34 3
35 3
37 3
39 3
39 3
38 3
41 4
41 4
41 4
41 4
41 4
41 4
41 4
41 4
41 4
41 4
41 4
41 4
40 4
40 4
39 4
39 4
39 4
39 4
39 7
39 7
38 7
38 7
38 7
38 7
34 8
34 8
33 8
33 8
33 8
33 8
30 7
30 7
30 7
27 7
27 7
31 7
31 7
31 7
30 7
28 7
20 7
20 7
20 7
19 6
19 6
19 6
19 5
17 5
17 5
17 5
17 5
19 5
19 5
19 5
19 5
19 5
19 5
19 5
18 5
16 5
16 5
15 5
15 5
15 5
13 5
13 5
12 5
9 5
7 5
7 5
7 5
7 5
7 5
6 4
6 4
8 4
8 4
8 4
8 4
8 4
8 5
8 5
9 5
10 7
10 7
10 9
12 10
12 10
12 10
12 9
12 8
12 7
12 7
12 7
12 7
12 7
12 7
13 6
13 6
13 6
13 6
13 6
13 6
13 6
13 6
13 6
13 6
17 6
13 6
13 6
14 6
14 6
14 6
14 6
14 6
14 6
14 6
14 6
14 6
16 6
18 6
18 6
18 8
18 8
16 10
16 10
16 10
16 10
16 10
16 10
16 10
16 10
16 10
16 10
16 10
16 10
16 10
16 10
16 10
16 10
16 10
16 10
16 10
15 10
15 10
15 10
15 11
15 11
13 11
13 11
13 11
13 11
13 11
12 10
12 10
10 9
10 8
10 8
10 5
9 5
10 5
10 5
10 5
9 5
9 5
9 5
10 5
11 5
11 5
11 5
11 5
11 5
13 5
13 5
13 5
13 5
13 5
13 5
13 5
13 5
9 5
9 5
8 5
8 5
8 5
8 5
8 5
8 5
8 5
8 5
9 5
9 5
8 5
8 5
8 5
8 3
9 2
9 1
9 1
9 1
9 1
9 1
9 1
9 1
9 1
9 1
10 1
10 1
10 1
10 1
10 1
10 1
10 1
10 1
10 1
10 1
11 1
10 1
10 0
11 0
11 0
13 0
13 0
13 0
13 0
13 0
13 0
13 0
13 0
13 0
13 0
13 1
13 2
13 2
13 2
13 2
13 2
13 2
13 2
12 2
11 2
13 2
12 2
12 2
13 2
13 2
13 2
13 2
13 2
13 2
13 2
13 2
13 2
13 2
13 3
13 3
13 3
13 3
13 5
13 7
13 7
14 8
14 11
13 12
14 13
15 14
14 14
14 16
13 18
14 18
14 20
16 22
18 23
19 23
19 23
19 23
19 23
19 23
19 23
18 23
18 23
18 24
19 24
19 24
19 24
19 24
19 24
19 24
19 24
18 24
18 24
19 24
18 25
18 25
16 25
16 25
16 25
16 25
16 25
16 26
15 27
15 28
15 30
15 31
15 30
15 30
15 30
15 30
15 30
15 30
15 30
15 30
15 30
15 30
13 30
13 30
15 30
13 30
17 30
19 30
20 30
20 30
20 30
20 30
20 30
20 26
20 22
21 21
24 21
26 21
26 21
28 19
26 19
26 18
24 16
24 14
24 13
24 13
25 13
25 13
26 13
24 12
26 12
26 10
26 10
23 8
23 8
23 8
23 8
23 8
23 9
24 11
26 11
27 11
29 12
29 12
29 12
30 12
30 12
30 12
30 12
32 12
32 12
32 12
31 12
31 11
31 11
31 11
31 11
31 11
31 11
31 11
31 10
31 9
31 7
31 6
31 7
31 7
31 7
31 7
31 7
33 7
35 7
43 7
47 7
53 7
55 7
55 7
60 7
62 7
61 7
60 7
58 7
58 7
91 7
92 7
92 7
92 7
94 7
92 7
92 7
88 7
87 7
87 7
86 7
86 7
86 7
86 7
86 7
86 7
86 8
84 8
84 8
83 8
82 8
80 8
80 8
81 8
82 8
83 8
83 8
84 8
85 8
85 7
82 5
83 5
83 3
81 2
80 1
79 1
77 1
77 1
75 1
74 1
74 1
72 1
72 1
72 1
77 1
79 1
81 1
100 1
102 1
102 1
102 1
102 1
102 1
102 1
102 1
102 0
102 0
105 0
116 0
117 0
116 0
119 0
110 0
108 0
105 0
103 0
103 0
98 0
96 0
96 0
94 0
94 0
94 0
61 0
61 0
61 0
61 0
59 0
59 0
59 0
59 0
60 0
60 0
60 0
60 0
60 0
60 0
61 0
62 0
62 0
62 0
62 0
62 0
62 0
62 0
61 0
60 0
59 0
62 0
61 0
60 0
61 0
62 0
63 0
62 0
62 0
61 0
61 0
61 0
61 0
61 0
61 0
61 0
61 0
61 0
61 0
60 0
56 0
54 0
52 0
31 0
31 0
31 0
31 0
31 0
31 0
31 0
31 0
26 0
26 0
24 0
16 0
15 0
14 0
10 0
10 0
10 0
9 0
9 0
9 0
9 0
9 0
10 0
10 0
10 0
10 0
10 0
10 0
12 0
12 0
13 0
13 0
13 0
13 0
13 0
13 0
13 0
13 0
13 0
12 0
12 2
11 2
54 57
54 59
55 67
55 70
55 70
55 72
55 73
55 73
55 73
53 73
54 73
54 73
56 73
56 74
55 74
56 74
56 74
56 74
56 74
58 75
58 75
58 75
58 75
58 75
58 75
58 75
59 75
59 75
59 75
59 75
59 75
59 75
59 75
59 75
61 77
62 77
62 77
62 77
62 77
62 77
62 77
62 77
62 77
63 77
63 78
64 82
108 115
110 116
111 116
111 116
111 116
113 116
113 116
113 116
115 115
113 115
113 115
113 115
113 115
113 115
113 115
112 115
112 116
120 116
120 116
120 116
120 116
120 116
120 116
120 116
120 115
120 113
120 113
78 49
77 45
77 46
85 51
90 51
95 52
132 73
137 73
136 73
134 73
133 73
133 72
131 72
130 72
131 72
130 72
131 72
131 72
131 72
129 71
130 71
130 71
130 71
130 71
130 71
130 71
129 71
129 71
129 71
129 71
129 71
129 71
129 71
129 70
127 68
126 68
126 68
126 68
126 68
126 68
129 68
129 68
129 67
126 63
117 56
117 54
79 30
78 30
78 30
78 30
79 30
79 30
77 30
76 30
77 30
77 31
77 32
77 32
77 32
77 32
77 32
77 32
77 32
69 32
69 32
69 32
69 32
69 33
69 33
70 33
73 32
78 32
78 32
72 31
69 28
58 25
51 20
48 19
46 18
18 3
15 3
15 3
15 2
15 2
15 2
15 2
14 2
14 2
14 2
14 2
16 2
17 2
17 2
18 2
18 2
20 2
20 2
20 2
20 2
26 2
153 2
263 2
288 2
297 2
302 2
328 2
334 2
334 2
334 2
334 2
334 2
334 2
334 2
331 2
332 2
332 2
332 2
332 2
332 2
332 2
333 2
333 2
333 2
332 2
332 1
334 1
458 1
470 2
498 2
558 3
560 3
560 3
562 3
560 3
563 2
563 2
564 2
564 2
563 2
564 2
563 2
563 2
560 2
558 2
553 2
553 2
553 2
553 2
553 2
553 2
553 2
553 2
553 2
553 2
553 2
553 2
553 2
553 2
553 2
553 2
553 2
553 2
553 2
553 2
552 2
551 2
550 2
550 2
549 2
555 2
556 2
557 2
549 2
425 2
323 2
299 2
293 2
287 2
265 2
262 2
262 2
262 2
262 2
262 2
262 2
262 2
262 2
261 2
262 2
262 2
262 2
262 2
262 2
261 2
262 2
262 2
259 2
257 2
254 2
118 2
115 1
90 1
28 0
28 0
26 0
26 0
26 0
22 0
21 0
21 0
21 0
21 0
20 0
21 0
23 0
24 0
24 0
24 0
24 0
24 0
27 0
31 0
31 0
33 0
45 1
107 2
107 2
108 2
110 2
112 2
112 2
113 2
114 2
115 2
115 2
115 2
117 2
117 2
117 2
117 2
116 2
117 2
111 2
112 2
108 2
108 2
105 2
103 2
104 2
104 2
105 2
105 2
109 2
111 2
111 2
111 2
111 2
111 2
111 2
111 2
111 2
111 2
111 2
111 2
111 2
112 2
112 2
111 2
111 2
111 2
111 2
110 2
110 2
110 2
110 2
110 2
111 2
112 2
112 2
112 2
112 2
112 2
112 2
113 2
113 2
112 2
112 2
110 2
109 2
109 2
110 2
110 2
110 2
106 2
103 2
85 1
82 1
66 0
18 0
18 0
16 0
14 0
13 0
13 0
13 0
13 0
13 0
13 0
13 0
12 0
12 0
12 0
12 0
12 0
11 0
14 0
13 0
13 0
13 0
13 0
13 0
13 0
12 0
12 0
12 0
11 0
9 0
9 0
9 0
9 0
9 0
9 0
9 0
9 0
8 0
8 0
8 0
8 0
7 0
7 0
7 0
7 0
7 0
11 0
11 0
11 0
11 0
11 0
11 0
10 0
10 0
10 0
10 0
10 0
10 0
10 0
9 0
9 1
9 1
10 1
10 1
10 1
10 1
9 1
9 1
9 1
9 1
9 1
9 1
9 1
9 1
9 1
9 0
9 0
9 0
9 0
9 0
9 0
9 0
9 0
9 0
9 0
9 0
9 0
9 0
9 0
9 0
9 0
6 0
6 0
6 0
6 0
6 0
6 0
6 0
6 0
6 0
6 0
6 0
6 0
6 0
6 0
6 0
6 0
6 0
6 0
6 0
6 0
6 0
7 0
8 0
17 0
20 0
32 0
34 0
45 0
41 0
41 0
41 0
40 0
40 0
40 0
40 0
40 0
40 0
39 0
39 0
39 0
39 0
39 0
39 0
39 0
40 0
41 0
42 0
42 2
43 2
43 2
43 2
43 2
51 3
72 3
73 3
76 4
76 4
76 4
76 4
77 4
78 5
83 5
83 5
83 5
83 5
83 5
83 5
83 5
83 5
83 5
87 5
87 5
88 5
88 4
88 4
89 3
89 3
89 3
89 3
89 3
91 3
91 3
91 3
95 3
95 3
96 3
99 3
107 3
108 3
110 3
117 3
121 3
121 3
142 3
142 3
141 3
131 3
129 3
116 3
114 3
104 3
104 3
104 3
104 3
104 3
104 3
104 3
104 3
104 3
104 3
104 3
104 3
105 3
106 3
106 4
107 4
111 4
109 4
109 4
123 4
131 4
133 4
133 4
131 4
129 4
123 3
104 2
103 2
112 2
128 3
154 3
155 3
155 3
152 2
145 2
141 2
141 2
141 2
141 2
141 2
141 2
142 2
142 2
139 2
139 2
139 2
139 2
139 2
139 2
139 2
138 2
138 2
138 2
137 2
137 2
137 2
132 2
132 2
131 2
129 2
121 2
121 2
118 2
130 2
129 2
128 2
109 2
109 2
115 2
115 2
115 2
115 2
115 2
116 2
116 2
116 2
116 2
116 2
116 2
116 2
115 2
115 2
115 2
115 2
115 2
113 2
113 2
113 1
111 1
108 1
108 1
108 1
96 1
90 1
88 1
94 3
94 3
94 3
94 3
93 3
92 3
68 3
55 2
40 2
40 2
42 2
47 2
47 2
47 2
48 2
49 2
50 2
52 2
52 2
51 2
53 2
53 2
53 2
53 2
53 2
53 2
53 2
53 2
53 2
53 2
54 2
54 2
54 2
54 2
54 2
54 2
54 2
54 2
54 2
53 2
59 2
137 7
138 7
137 7
138 7
138 7
135 7
135 7
135 7
135 7
135 7
134 7
134 7
134 7
134 7
134 7
134 7
134 7
136 7
136 7
138 7
139 7
142 9
142 17
142 19
142 20
142 20
142 20
141 20
141 20
138 20
136 20
136 20
130 19
129 19
129 19
129 19
129 19
129 19
129 23
129 25
129 25
125 25
123 25
119 25
119 25
119 25
118 25
116 25
116 25
114 25
114 25
114 25
112 25
111 25
111 25
111 25
111 25
111 25
111 25
112 25
112 25
112 25
111 25
111 25
111 25
111 25
111 25
106 25
111 25
111 25
111 25
102 25
99 25
15 19
15 19
14 18
13 18
13 18
12 16
12 16
12 14
22 14
26 14
27 14
29 14
37 14
53 14
55 14
62 14
155 14
158 14
163 14
166 14
176 12
258 10
259 8
262 8
265 7
265 7
265 7
267 7
267 7
267 7
269 7
272 7
274 6
280 6
284 6
299 6
313 6
322 6
337 2
338 0
338 0
338 0
337 0
337 0
336 0
336 0
336 0
336 0
337 0
338 0
338 0
338 0
338 0
338 0
338 0
338 0
338 0
338 0
338 0
337 0
337 0
337 0
337 0
337 0
337 0
337 0
337 0
337 0
331 0
331 0
331 0
330 0
331 0
330 0
330 0
335 0
335 0
335 0
336 0
336 0
337 0
326 0
323 0
322 0
319 0
309 0
296 0
294 0
274 0
189 0
183 0
162 0
158 0
154 0
85 0
85 0
83 0
82 0
80 0
80 0
78 0
78 0
78 0
77 0
72 0
65 0
59 0
57 0
46 0
32 0
25 0
11 0
11 0
13 0
14 0
16 0
16 0
16 0
16 0
16 0
16 0
15 0
14 0
14 0
14 0
14 0
14 0
14 0
14 0
14 0
14 0
14 0
14 0
14 0
14 0
14 0
14 0
14 0
14 0
14 0
14 0
14 0
14 0
13 0
13 0
12 0
12 0
13 0
9 0
9 0
9 0
8 0
9 0
9 0
9 0
9 0
10 0
10 0
10 0
10 0
10 0
10 0
10 0
10 0
10 0
10 0
13 0
13 0
13 0
13 0
13 0
13 0
13 0
13 0
13 0
13 0
13 0
13 0
13 0
13 0
13 0
13 0
13 0
13 0
13 0
13 0
11 0
18 0
17 0
109 1
113 1
113 1
114 1
115 1
116 1
116 1
116 1
119 1
120 1
122 1
122 1
123 1
123 1
124 1
124 1
126 1
138 1
140 1
141 1
142 1
142 1
142 1
142 1
142 1
142 1
142 1
142 1
143 1
143 1
145 1
144 1
143 1
143 1
143 1
142 1
141 1
141 1
142 1
142 1
163 1
164 1
164 1
165 1
165 1
166 1
167 1
168 1
169 1
168 1
166 1
167 1
167 1
167 1
167 1
168 2
168 2
171 2
170 2
185 2
203 2
224 2
229 2
229 2
229 2
232 2
238 2
239 2
262 2
262 2
262 2
255 2
253 2
167 1
164 1
164 1
164 1
164 1
163 1
163 1
163 1
160 1
158 1
157 1
157 1
157 1
158 2
163 2
163 2
160 2
147 2
145 2
145 2
144 2
144 2
144 2
144 2
144 2
144 2
145 2
145 2
148 2
149 2
148 2
148 2
148 2
149 2
149 2
149 2
149 2
148 2
149 2
149 2
126 2
125 2
125 2
126 2
127 2
126 2
141 2
142 2
181 2
183 2
183 2
182 2
185 2
184 2
186 2
185 1
252 1
245 1
242 1
228 1
211 1
199 1
203 1
202 1
205 2
204 3
199 3
199 3
180 3
180 3
180 3
179 3
176 3
175 3
175 3
175 3
175 3
175 3
177 3
177 3
177 3
182 3
182 3
182 4
182 4
181 4
180 3
174 3
174 3
175 3
176 3
176 3
176 3
176 3
176 3
176 3
181 3
181 3
181 3
180 3
180 3
176 3
175 3
173 3
173 3
175 3
182 3
296 4
312 4
312 4
315 4
317 4
319 4
356 4
361 4
362 4
363 4
365 4
365 4
346 4
345 4
308 4
334 4
335 4
346 4
384 4
383 4
399 4
406 4
357 4
356 4
356 4
355 4
353 4
355 4
352 4
354 4
351 3
350 2
350 2
350 2
350 2
350 2
350 2
350 2
350 2
350 2
351 2
351 2
351 2
351 2
349 2
350 2
350 2
345 1
345 1
347 1
347 1
347 1
346 1
345 1
345 1
344 1
343 1
343 1
343 1
343 1
343 1
349 1
346 1
346 1
346 1
346 1
346 1
345 1
342 1
338 1
336 1
307 1
277 1
166 0
163 0
139 0
136 0
127 0
121 0
74 0
71 0
70 0
62 0
62 0
63 0
63 0
63 0
63 0
63 0
63 0
66 0
52 0
55 0
45 0
48 0
40 0
40 0
40 0
38 0
37 0
28 0
28 0
26 0
27 0
32 0
39 0
39 0
39 0
40 0
40 0
41 0
42 0
53 0
70 0
72 0
241 2
243 2
244 2
244 3
244 3
244 3
244 3
242 3
245 3
245 3
245 3
245 3
245 3
250 3
251 3
252 3
252 3
251 3
251 3
247 3
245 3
246 3
246 3
246 3
246 3
246 3
246 3
246 3
245 3
245 3
244 3
244 3
244 3
269 3
269 3
270 3
270 3
272 3
272 3
272 3
276 3
276 3
275 3
275 3
275 13
275 13
281 14
289 14
282 14
277 14
276 14
277 14
275 14
275 14
311 20
313 20
314 20
317 20
319 20
317 20
317 20
315 20
310 20
298 20
298 20
294 20
295 20
295 20
294 20
293 20
290 20
277 21
276 21
111 18
111 18
111 18
111 18
109 18
109 18
109 18
109 18
110 18
110 18
110 18
110 18
109 18
109 18
114 18
113 18
113 18
123 18
123 18
124 18
124 18
124 18
124 18
124 18
124 18
124 18
124 18
122 18
122 18
122 18
122 18
122 18
138 18
127 19
136 20
138 20
138 20
137 20
138 20
138 20
134 20
134 20
134 20
131 21
131 10
131 10
126 10
118 10
116 8
116 8
142 8
147 8
146 8
146 8
110 4
108 4
107 4
104 4
103 4
103 4
103 4
102 4
102 4
102 4
104 4
105 4
113 4
114 4
114 4
114 4
114 4
115 3
118 3
118 3
120 3
120 3
120 3
123 3
124 3
184 3
186 3
185 4
188 4
188 4
189 4
187 4
184 4
179 4
178 4
178 4
169 4
171 4
174 4
177 4
182 6
182 6
185 6
187 6
187 6
199 6
197 6
199 6
217 6
222 6
440 6
431 6
414 4
426 4
424 4
426 4
429 4
430 4
430 4
430 4
430 4
430 4
430 3
430 3
431 3
430 3
431 3
431 3
430 3
401 3
399 3
397 3
397 3
398 3
398 3
419 3
436 3
443 3
443 3
444 3
444 3
443 3
443 3
441 3
439 3
433 3
435 3
436 3
436 3
436 3
434 3
431 3
430 3
429 3
428 3
426 3
423 3
423 3
355 3
352 3
351 2
347 2
340 2
340 2
340 2
340 2
341 2
342 2
344 2
354 2
369 2
368 2
362 2
355 0
357 0
356 0
355 0
362 0
352 0
352 0
348 0
336 0
335 0
124 0
122 0
122 0
109 0
107 0
105 0
104 0
102 0
102 0
102 0
104 0
106 0
109 0
109 0
109 0
108 0
108 0
108 0
108 0
108 0
108 0
108 0
109 0
108 0
108 0
80 0
70 0
66 0
68 0
73 0
86 1
87 1
87 1
87 1
87 1
87 1
84 1
90 1
94 2
120 2
129 2
129 2
136 3
155 3
155 3
163 3
280 3
301 3
334 3
442 4
452 4
455 4
462 4
478 4
483 5
543 6
562 6
643 7
648 7
640 7
621 7
624 7
625 7
626 7
627 7
626 7
626 7
619 7
619 7
619 7
619 7
619 7
620 7
621 7
621 7
621 7
621 7
621 7
621 7
621 7
621 7
621 7
621 7
621 7
617 7
616 7
615 7
615 7
613 7
613 7
613 7
613 7
613 7
613 7
613 7
613 7
613 7
612 7
612 7
611 7
610 7
608 7
602 7
589 6
589 6
589 6
588 6
588 6
587 6
585 6
566 6
563 5
545 5
536 5
535 5
527 4
497 4
479 4
456 4
346 4
328 4
304 4
211 3
208 3
198 3
189 3
166 2
151 1
97 1
91 0
13 0
11 0
8 0
8 0
8 0
8 0
8 0
7 0
7 0
8 0
8 0
8 0
8 0
8 0
8 0
8 0
8 0
8 0
8 0
8 0
8 0
8 0
8 0
8 0
8 0
8 0
7 0
7 0
7 0
7 0
7 0
7 0
7 0
7 0
7 0
7 0
7 0
7 0
5 0
4 0
4 0
4 0
4 0
4 0
4 0
4 0
4 0
4 0
4 0
4 0
4 0
3 0
3 0
3 0
3 0
3 0
3 0
3 0
3 0
4 0
5 0
5 0
4 0
5 0
5 0
5 0
4 0
4 0
4 0
4 0
4 0
4 0
4 0
4 0
4 0
4 0
4 0
4 0
4 0
4 0
3 0
3 0
5 0
5 0
5 0
6 0
6 0
6 0
6 0
6 0
6 0
6 0
6 0
6 0
6 0
6 0
6 0
6 0
6 0
6 0
6 0
6 0
6 0
6 0
6 0
6 0
8 0
8 0
8 0
9 0
9 0
9 0
9 0
10 0
10 0
10 0
10 0
10 0
10 0
10 0
10 0
10 0
10 0
10 0
11 0
11 0
11 1
10 1
10 1
10 1
10 1
10 1
9 1
9 1
9 1
9 1
8 1
8 1
8 1
8 1
8 1
8 1
8 0
8 0
12 0
12 0
12 0
12 0
12 0
12 0
12 0
12 0
12 0
11 0
11 0
9 0
9 0
9 0
9 0
9 0
9 0
9 0
9 0
9 0
9 0
9 0
9 0
9 0
9 0
9 0
10 0
10 0
11 0
11 0
11 0
11 0
11 0
11 0
11 0
9 0
9 0
9 0
8 0
8 0
8 0
8 0
7 0
8 0
8 0
8 0
8 0
8 0
8 0
8 0
8 0
8 0
8 0
7 0
7 0
8 0
8 0
9 0
9 0
9 0
9 0
9 0
9 0
9 0
9 0
9 0
9 0
9 0
9 0
10 0
10 0
10 0
10 0
6 0
6 0
6 0
6 0
6 0
6 0
6 0
6 0
6 0
6 0
6 0
6 0
6 0
6 0
6 0
6 0
6 0
6 0
6 0
6 0
6 0
6 0
6 0
6 0
6 0
6 0
5 0
5 0
4 0
4 0
4 0
4 0
4 0
4 0
4 0
4 0
5 0
5 0
5 0
5 0
10 0
10 0
10 0
9 0
9 0
9 0
9 0
9 0
9 0
9 0
9 0
9 0
9 0
9 0
10 0
10 0
11 0
53 0
56 0
61 0
71 0
72 0
75 0
75 0
75 0
75 0
75 0
75 0
74 0
74 0
74 0
74 0
75 0
75 0
75 0
75 0
75 0
75 0
77 0
77 0
77 0
80 0
85 0
86 0
86 0
87 0
87 0
87 0
91 0
92 0
106 0
130 0
130 0
132 0
133 0
135 0
136 0
139 0
156 0
156 0
156 0
156 0
156 0
156 0
156 0
156 0
156 0
156 0
153 0
153 0
153 0
153 0
153 0
148 0
148 0
148 0
148 0
148 0
148 0
149 0
149 0
150 0
150 0
150 0
150 0
152 0
152 0
154 0
152 0
150 0
107 0
103 0
110 0
106 0
101 0
101 0
103 0
104 0
106 0
108 0
113 0
113 0
115 0
116 0
116 0
115 0
115 0
117 0
126 0
126 0
126 0
125 0
149 0
148 0
148 0
143 0
142 0
142 0
142 0
142 0
142 0
138 0
135 0
124 0
111 0
120 0
136 0
137 0
134 0
134 0
129 0
116 0
116 0
114 0
114 0
115 0
115 0
116 0
116 0
117 0
117 0
117 0
117 0
118 0
118 0
118 0
119 0
119 0
121 0
121 0
121 0
121 0
121 0
121 0
120 0
120 0
120 0
120 0
119 0
120 0
118 0
118 0
120 0
119 0
134 0
121 0
121 0
121 0
124 0
120 0
118 0
115 0
113 0
120 0
125 0
134 0
141 0
141 0
141 0
140 0
139 0
130 0
128 0
127 0
124 0
103 0
103 0
104 0
106 0
105 0
105 0
106 0
106 0
106 0
105 0
105 0
104 0
94 0
86 0
68 0
62 0
61 0
61 0
61 0
63 0
63 0
63 0
73 0
74 0
75 0
74 0
75 0
75 0
75 0
75 0
76 0
75 0
75 0
75 0
75 0
75 0
75 0
75 0
75 0
75 0
75 0
75 0
75 0
75 0
76 0
77 0
80 0
79 0
79 0
74 0
73 0
73 0
58 0
58 0
53 0
53 0
50 0
48 0
48 0
46 0
46 0
39 0
36 0
27 0
22 0
22 0
31 0
39 0
52 0
64 0
97 0
98 0
98 0
98 0
98 0
97 0
94 0
96 0
96 0
95 0
93 0
93 0
93 0
93 0
94 0
97 0
100 0
101 0
101 0
101 0
102 0
107 0
107 0
107 0
107 0
100 0
100 0
102 0
102 0
106 0
106 0
110 0
110 0
109 0
109 0
109 0
109 0
109 0
109 0
109 0
109 0
109 0
110 0
110 0
110 0
116 0
116 0
114 0
114 0
113 0
114 0
114 0
115 0
115 0
115 0
115 0
115 0
115 0
115 0
115 0
115 0
115 0
115 0
115 0
115 0
115 0
115 0
114 0
114 0
105 0
97 0
83 0
73 0
40 0
40 0
40 0
40 0
40 0
39 0
39 0
38 0
38 0
39 0
40 0
48 0
48 1
47 1
48 1
46 1
44 1
43 1
43 1
42 1
42 1
38 1
38 1
38 1
38 1
38 1
37 1
34 1
34 1
30 1
30 1
26 1
26 1
26 1
26 1
26 1
26 1
26 1
26 1
26 1
26 1
28 1
30 1
46 1
61 1
72 1
74 1
73 1
75 1
74 1
73 1
73 1
74 1
75 1
75 1
75 1
75 1
75 1
75 1
75 1
78 1
78 1
79 1
80 1
81 1
82 1
82 1
84 1
84 1
84 1
84 1
85 1
84 1
84 1
84 1
84 1
84 1
98 1
98 1
98 1
100 1
100 1
98 1
97 1
90 1
90 0
91 0
89 0
96 0
111 0
139 1
144 1
144 1
144 1
145 1
145 1
146 1
146 1
145 1
145 1
145 1
145 1
145 1
145 1
145 1
145 1
146 1
146 1
147 1
147 1
147 1
147 1
147 1
147 1
143 1
142 1
127 1
112 1
97 1
104 1
104 1
102 1
102 1
102 1
101 1
100 1
99 1
99 1
99 1
99 1
99 1
99 1
99 1
96 1
96 1
94 1
94 1
93 1
92 1
92 1
90 1
90 1
89 1
89 1
89 1
89 1
89 1
88 1
85 1
85 1
75 1
75 1
75 1
73 1
80 1
83 1
83 1
81 1
79 1
76 1
52 1
50 1
51 1
30 0
28 0
28 0
27 0
25 0
25 0
25 0
25 0
25 0
25 0
25 0
27 0
27 0
27 0
27 0
27 0
27 0
27 0
27 0
29 0
29 0
35 0
35 0
35 0
34 0
34 0
34 0
34 0
34 0
28 0
28 0
28 0
28 0
28 0
29 0
29 0
30 0
34 0
36 0
39 0
38 0
39 0
39 0
39 0
39 0
39 0
39 0
39 0
39 0
39 0
39 0
39 0
39 0
39 0
39 0
39 0
39 0
39 0
39 0
39 0
39 0
39 0
39 0
40 0
32 0
30 0
30 0
33 0
54 0
57 0
59 0
53 0
54 0
54 0
54 0
54 0
54 0
54 0
54 0
54 0
54 0
54 0
55 0
55 0
53 0
53 0
53 0
53 0
53 0
53 0
53 0
53 0
52 0
52 0
46 0
46 0
46 0
46 0
46 0
46 0
46 0
46 0
46 0
47 0
47 0
47 0
49 0
49 0
49 0
48 0
44 0
42 0
39 0
40 0
41 0
43 0
43 0
45 0
45 0
45 0
51 0
51 0
51 0
51 0
51 0
51 0
51 0
51 1
51 1
51 2
51 2
53 2
63 2
98 2
110 2
123 4
139 4
152 4
159 4
164 4
189 4
176 4
173 4
172 4
171 4
169 4
169 4
169 4
169 4
169 6
169 6
169 6
169 6
169 7
169 7
168 7
168 7
168 7
172 7
179 7
181 7
181 7
181 7
181 7
181 7
180 7
178 7
178 7
178 8
178 8
178 8
178 8
178 8
180 8
181 8
181 8
181 8
182 8
182 8
178 8
177 8
173 8
173 8
173 8
173 8
173 8
173 8
171 8
168 8
161 8
162 8
163 8
163 8
140 8
141 8
141 8
123 8
123 8
123 8
123 7
123 7
123 7
123 6
123 6
120 6
106 6
95 6
92 6
84 4
73 4
59 4
51 4
48 4
23 4
26 4
35 4
39 4
46 4
46 4
46 4
46 4
46 4
46 2
47 2
47 2
48 2
48 1
48 1
48 1
47 1
47 1
43 1
38 1
36 1
36 1
36 1
38 1
58 4
79 4
81 4
81 4
82 3
82 3
81 3
80 3
80 3
79 3
80 3
79 3
79 3
78 3
82 3
86 3
86 3
86 3
86 3
86 3
86 3
86 3
87 3
84 3
81 3
81 3
77 3
75 3
75 3
75 3
73 3
73 3
73 3
73 3
75 3
76 3
76 3
76 3
76 3
77 3
77 3
79 3
82 3
89 3
93 3
93 3
91 3
90 3
90 3
90 3
87 3
82 3
82 3
81 3
81 3
81 3
81 3
81 3
81 3
81 3
81 3
80 3
80 3
80 3
80 3
80 3
80 3
81 3
83 3
83 3
82 3
81 3
78 3
59 0
40 0
46 0
46 0
45 0
48 0
48 0
48 0
49 0
49 0
48 0
48 0
48 0
48 0
42 0
40 0
40 0
40 0
40 0
40 0
43 0
43 0
43 0
43 0
43 0
43 0
43 0
43 0
43 0
43 0
42 0
41 0
41 0
41 0
39 0
39 0
39 0
39 0
39 0
38 0
38 0
36 0
33 0
23 0
20 0
20 0
20 0
20 0
20 0
20 0
20 0
20 0
20 0
20 0
20 0
20 0
21 0
23 0
28 0
35 0
35 0
35 0
35 0
37 0
37 0
38 0
38 0
36 0
35 0
35 0
35 0
38 0
41 0
38 0
37 0
31 0
33 0
33 0
32 0
32 0
32 0
31 0
32 0
39 0
39 0
39 0
39 0
40 1
45 2
45 2
45 2
45 2
44 2
45 2
46 2
46 2
46 2
46 2
46 2
46 2
46 2
46 2
46 2
65 2
94 2
96 2
104 2
140 2
140 2
141 2
141 2
141 2
141 2
141 2
141 2
141 2
141 2
141 2
141 2
141 2
141 2
141 2
141 2
141 2
141 2
143 2
144 2
145 2
145 2
145 2
142 2
137 2
131 2
131 2
131 2
144 2
142 2
142 2
142 2
142 2
142 2
142 2
142 2
141 2
139 2
138 2
141 2
142 2
143 2
141 2
141 2
142 2
142 2
146 2
149 2
153 2
151 2
172 3
174 3
179 3
183 2
181 1
182 1
190 1
191 1
216 1
262 2
288 3
292 3
296 3
300 3
302 3
304 3
304 3
306 3
307 3
285 3
261 3
258 3
253 3
221 3
221 3
317 3
323 3
329 3
330 3
330 3
330 3
330 3
330 3
334 3
343 3
357 3
360 3
362 3
362 3
362 3
360 3
360 3
359 3
358 3
356 3
356 3
356 3
359 3
358 3
360 3
360 3
346 3
346 3
346 3
346 3
346 3
347 3
347 3
350 3
354 3
354 3
352 3
349 3
347 3
344 3
341 3
343 3
343 4
343 4
338 4
336 3
332 3
327 3
307 3
306 3
301 3
297 3
295 3
294 3
285 3
282 3
255 3
232 3
223 2
224 2
220 2
212 2
210 2
209 2
209 2
208 2
210 2
200 2
200 2
199 2
197 2
195 2
192 2
99 2
99 2
94 2
85 2
85 2
85 2
85 2
85 2
85 2
86 2
82 2
80 2
80 2
80 2
80 2
80 2
80 2
80 2
80 2
80 2
80 2
80 2
77 2
76 2
75 2
75 2
76 2
77 2
77 2
78 2
78 2
77 2
77 2
76 2
74 2
74 2
74 2
74 2
72 2
74 2
74 2
73 2
73 2
73 2
72 2
72 2
71 2
70 2
70 2
70 2
72 2
84 2
85 2
87 2
85 2
81 2
59 1
45 1
37 0
34 0
34 0
34 0
34 0
34 0
34 0
34 0
34 0
34 0
34 0
34 0
34 0
35 0
35 0
35 0
35 0
35 0
37 0
41 0
41 0
41 0
41 0
41 0
39 0
37 0
37 0
37 0
37 0
37 0
37 0
37 0
38 0
38 0
38 0
38 0
38 0
38 0
38 0
38 0
38 0
38 0
38 0
38 0
40 0
39 0
39 0
39 0
43 0
43 0
43 0
43 0
44 0
43 0
42 0
42 0
42 0
42 0
42 0
42 0
42 0
42 0
42 0
42 0
39 0
37 0
28 0
28 0
26 0
26 0
26 0
26 0
16 0
16 0
17 0
17 0
16 0
16 0
16 0
16 0
16 0
16 0
16 0
16 0
16 0
16 0
16 0
16 0
16 0
16 0
16 0
12 0
10 0
10 0
12 0
12 0
12 0
12 0
12 0
12 0
12 0
12 0
12 0
12 0
12 0
21 0
21 0
99 0
104 0
104 0
108 0
108 0
108 0
108 0
107 0
107 0
107 0
105 0
105 0
105 0
105 0
101 0
108 0
112 0
121 0
120 0
120 0
120 0
120 0
122 0
155 0
157 0
157 0
180 0
181 0
181 0
182 0
182 0
182 0
183 0
183 0
184 0
184 0
184 0
184 0
184 0
184 0
183 0
183 0
183 0
183 0
183 0
186 0
186 0
186 0
185 0
185 0
185 0
185 0
185 0
186 0
183 0
190 0
189 0
189 0
189 0
188 0
184 0
180 0
179 0
178 0
176 0
178 0
180 0
189 0
190 0
190 0
190 0
188 0
188 0
120 0
117 0
132 0
141 0
144 0
145 0
146 0
146 0
146 0
149 0
150 0
150 0
150 0
150 0
150 0
140 0
136 0
131 0
131 0
131 0
129 0
121 0
118 0
93 0
92 0
92 0
69 0
69 0
70 0
68 0
68 0
68 0
68 0
68 0
68 0
68 0
68 0
70 0
70 0
72 0
73 0
73 0
73 0
74 0
74 0
71 0
71 0
71 0
71 0
71 0
71 0
71 0
71 0
70 0
70 0
63 0
66 0
66 0
66 0
69 0
77 0
79 0
93 0
100 0
97 0
503 0
503 0
495 0
502 0
551 0
557 0
573 0
576 0
578 0
579 0
576 0
569 0
566 0
565 0
564 0
564 0
563 0
560 0
560 0
569 0
568 0
568 0
568 0
572 0
572 0
581 0
588 0
589 0
592 0
593 0
594 0
594 0
594 0
594 0
594 0
594 0
593 0
592 0
592 0
593 0
595 0
600 0
603 0
621 0
633 0
639 0
651 0
650 0
652 0
665 0
694 0
938 1
940 1
940 1
953 2
953 2
954 2
956 2
977 2
982 2
994 2
1015 2
1014 2
1012 2
1007 2
1008 2
1010 2
1006 2
999 2
994 2
982 2
976 2
973 2
571 2
568 2
566 2
557 2
507 2
501 2
493 2
492 2
491 2
481 2
474 2
471 2
471 2
472 2
474 2
484 2
484 2
484 2
485 2
478 2
483 2
527 3
537 3
566 3
598 4
657 4
662 4
661 4
661 4
665 5
666 5
667 5
671 5
679 5
945 5
962 5
975 5
995 7
1000 7
1000 8
993 8
983 8
972 8
954 8
944 8
1082 8
1074 8
1069 7
1062 7
1083 8
1060 8
830 7
824 7
823 7
820 7
820 7
821 7
821 7
801 7
800 7
791 7
771 7
771 7
772 7
772 7
769 7
769 7
769 7
769 7
769 7
769 7
769 7
771 7
772 7
794 7
793 7
793 7
794 7
795 7
796 7
802 7
802 7
802 7
802 7
802 7
803 7
802 7
801 7
791 7
791 7
789 7
787 7
775 7
763 7
702 6
693 6
667 6
642 5
579 5
571 5
567 5
564 5
558 4
545 4
522 4
515 4
496 4
276 3
266 3
252 2
236 1
234 1
234 1
234 1
234 1
226 1
219 1
218 1
76 1
77 1
75 1
75 1
45 0
43 0
43 0
46 0
45 0
45 0
45 0
45 1
45 1
45 1
45 1
45 1
45 1
45 1
45 1
45 1
45 1
48 1
54 1
53 1
144 2
147 2
147 2
148 2
147 2
125 2
125 2
125 2
124 2
122 2
121 2
119 2
119 2
119 2
119 2
119 2
118 2
118 2
117 2
117 2
117 2
117 2
117 2
117 2
117 2
117 2
115 2
114 2
113 2
113 2
113 2
113 2
110 2
110 2
110 2
113 2
113 2
113 2
115 2
115 2
115 2
115 2
115 2
115 2
115 2
115 2
117 2
121 2
159 2
203 2
219 2
221 2
237 2
238 2
238 2
238 2
237 2
274 3
274 3
274 3
274 2
273 2
274 2
274 2
275 2
275 2
275 2
275 2
275 2
275 2
269 2
267 2
267 2
176 1
175 1
176 1
176 1
176 1
176 1
176 1
177 1
179 1
179 1
179 1
179 1
179 1
179 1
179 1
179 1
179 1
179 1
179 2
179 2
180 2
180 2
180 2
180 2
180 2
180 2
180 2
180 2
180 2
180 2
180 2
179 2
177 2
175 1
173 1
173 1
172 1
172 1
170 1
170 1
169 1
170 1
167 1
167 1
165 1
163 1
153 1
141 1
108 1
72 1
60 1
56 1
48 1
46 1
45 0
43 0
43 0
10 0
10 0
10 0
10 0
10 0
10 0
10 0
10 0
10 0
10 0
10 0
10 0
9 0
9 0
9 0
9 0
9 0
10 0
10 0
9 0
9 0
8 0
8 0
12 1
12 1
12 1
12 1
12 1
12 1
13 1
13 1
13 1
13 1
14 1
16 1
15 1
19 1
20 1
20 1
22 1
23 1
23 1
23 1
23 1
23 1
23 1
23 1
23 1
23 1
23 1
23 1
23 1
23 1
23 1
23 1
23 1
23 1
22 1
22 1
21 1
21 1
22 1
22 1
22 1
22 1
22 1
20 1
20 1
20 1
20 1
20 1
21 1
21 1
21 1
21 1
21 1
21 1
21 1
21 1
21 1
21 1
21 1
21 1
21 1
21 1
21 1
21 1
21 1
21 1
21 1
20 1
20 1
25 1
25 1
24 1
24 1
19 0
19 0
19 0
19 0
19 0
19 0
18 0
23 0
26 0
26 0
36 0
36 0
36 0
32 0
30 0
31 0
34 0
35 0
36 0
37 0
38 0
38 0
44 0
53 0
54 0
54 0
54 0
54 0
54 0
54 0
54 0
54 0
54 0
55 0
55 0
55 0
55 0
55 0
54 0
54 0
54 0
54 0
57 0
57 0
57 0
58 0
58 0
58 0
57 0
57 0
60 0
61 0
61 0
61 0
61 0
61 0
61 0
61 0
61 0
61 0
61 0
61 0
61 0
61 0
61 0
61 0
61 0
61 0
61 0
56 0
56 0
56 0
56 0
56 0
56 0
56 0
56 0
56 0
56 0
56 0
50 0
47 0
45 0
35 0
35 0
36 0
37 0
40 0
41 0
37 0
37 0
36 0
35 0
33 0
28 0
23 0
18 0
17 0
17 0
17 0
17 0
17 0
17 0
17 0
17 0
17 0
16 0
16 0
16 0
16 0
17 0
17 0
17 0
17 0
17 0
14 0
14 0
14 0
13 0
13 0
13 0
13 0
13 0
11 0
12 0
12 0
12 0
12 0
12 0
12 0
14 0
14 0
14 0
14 0
14 0
14 0
14 0
14 0
14 0
14 0
15 0
15 0
15 0
17 0
18 0
18 0
18 0
18 0
18 0
18 0
20 0
20 0
29 0
29 0
29 0
30 0
29 0
29 0
28 0
27 0
23 0
22 0
20 0
22 0
27 0
28 0
28 0
28 0
28 0
28 0
29 0
29 0
29 0
30 0
30 0
30 0
35 0
39 0
39 0
39 0
40 0
40 0
40 0
38 0
39 0
39 0
39 0
39 0
37 0
39 0
39 0
39 0
39 0
39 0
40 0
40 0
56 0
56 0
56 0
56 0
56 0
55 0
55 0
54 0
55 0
55 0
55 0
53 0
53 0
54 0
53 0
55 0
55 0
55 0
55 0
55 0
53 0
52 0
52 0
52 0
52 0
52 0
52 0
52 0
52 0
46 0
46 0
47 0
47 0
47 0
47 0
47 0
47 0
47 0
47 0
47 0
43 0
40 0
39 0
39 0
39 0
39 0
39 0
38 0
38 0
38 0
38 0
38 0
36 0
27 0
26 0
26 0
26 0
26 0
25 0
25 0
25 0
25 0
25 0
25 0
25 0
25 0
23 0
23 0
20 0
20 0
20 0
20 0
23 0
8 0
8 0
8 0
6 0
6 0
6 0
6 0
6 0
7 0
7 0
7 0
7 0
7 0
8 0
8 0
7 0
7 0
7 0
7 0
7 0
7 0
7 0
7 0
8 0
8 0
8 0
8 0
8 0
7 0
7 0
7 0
18 0
18 0
20 0
20 0
20 0
20 1
20 1
23 2
23 2
25 2
25 2
25 2
25 2
25 2
25 2
25 2
25 2
26 2
26 2
26 2
26 2
28 2
28 2
28 2
28 2
28 2
28 2
28 2
29 2
29 2
29 2
29 2
38 2
38 2
51 2
52 2
81 2
81 2
82 2
84 2
84 2
82 2
82 2
82 2
82 2
87 2
88 2
93 2
108 2
112 2
112 2
117 2
118 2
119 2
118 2
118 2
118 2
118 2
118 2
118 2
119 2
119 2
119 2
119 2
119 2
118 2
118 2
119 2
119 2
121 2
124 1
124 0
124 0
113 0
113 0
111 0
111 0
111 0
111 0
111 0
109 0
109 0
107 0
107 0
107 0
106 0
106 0
105 0
105 0
105 0
105 0
104 0
104 0
103 0
102 0
102 0
102 0
102 0
102 0
102 0
107 0
106 0
106 0
106 0
98 0
90 0
91 0
81 0
81 0
58 0
55 0
53 0
53 0
53 0
52 0
52 0
52 0
52 0
45 0
45 0
42 0
26 0
21 0
20 0
15 0
16 0
16 0
16 0
16 0
16 0
16 0
15 0
15 0
15 0
15 0
15 0
15 0
15 0
15 0
15 0
17 0
17 0
15 0
12 0
12 0
12 0
12 0
12 0
12 0
12 0
12 0
12 0
12 0
11 0
11 0
11 0
11 0
11 0
16 0
16 0
16 1
16 1
16 1
16 1
20 1
22 4
23 4
26 4
26 4
27 4
27 4
27 4
27 4
22 4
25 4
29 4
32 4
32 4
30 4
30 4
29 4
29 4
29 4
29 4
29 4
36 4
45 4
45 4
45 4
45 4
45 4
45 4
45 4
45 4
45 4
46 4
48 4
48 4
48 4
50 4
51 4
54 5
56 5
56 5
57 5
63 5
63 5
63 5
63 5
69 5
74 5
74 5
74 5
72 5
72 5
73 5
73 5
77 5
79 5
79 5
79 5
79 5
79 5
79 5
80 5
133 5
134 5
138 5
137 5
137 4
141 4
140 4
140 4
140 3
141 3
141 3
152 3
160 3
163 1
168 1
170 1
170 1
168 1
168 1
168 1
186 1
187 1
190 1
190 1
188 1
188 1
188 1
188 1
188 1
190 1
190 1
190 1
192 1
186 1
188 1
188 1
188 1
188 1
189 1
193 1
194 1
198 1
198 1
196 1
193 1
191 1
189 1
182 1
179 1
176 0
170 1
170 1
170 1
166 1
166 1
166 1
171 1
169 1
165 1
166 1
166 1
166 1
166 1
166 1
166 1
175 0
171 0
168 0
168 0
169 0
170 0
199 1
199 1
151 1
151 1
148 1
148 1
148 1
142 1
140 1
140 1
140 1
139 1
139 1
128 1
118 1
114 1
105 1
105 1
105 1
105 1
105 1
104 1
92 1
94 1
90 1
90 1
91 1
91 1
91 1
91 1
101 1
99 1
100 1
102 1
102 1
103 1
94 1
94 1
94 1
93 1
90 1
88 1
86 1
85 1
86 1
86 1
87 1
87 1
87 1
88 1
88 1
107 2
113 2
118 3
122 3
122 3
122 3
122 3
117 3
118 3
118 3
116 3
119 3
118 3
118 3
116 3
116 3
108 3
109 3
109 3
110 3
111 3
109 3
82 2
82 2
82 2
82 2
82 2
82 2
82 2
82 2
82 2
84 2
85 2
101 2
102 2
488 2
519 2
541 2
583 2
680 2
782 2
802 2
811 2
828 2
831 2
980 2
987 2
1001 2
1000 2
1002 2
1003 2
1010 2
1028 2
1035 2
1040 2
1038 2
1037 2
1037 2
1036 2
1037 2
1037 2
1038 2
1038 2
1038 2
1038 2
1037 2
1036 2
1036 2
1035 2
1035 2
1035 2
1034 2
1032 2
1009 1
1008 1
1001 0
994 0
993 0
990 0
992 0
990 0
990 0
992 0
991 0
987 0
987 0
987 0
987 0
987 0
987 0
986 0
986 0
984 0
983 0
983 0
983 0
983 0
983 0
983 0
983 0
983 0
983 0
1020 0
1023 0
1046 0
1057 0
1052 0
1042 0
684 0
649 0
615 0
555 0
473 0
405 0
391 0
381 0
374 0
368 0
233 0
228 0
220 0
226 0
224 0
222 0
218 0
195 0
192 0
186 0
186 0
186 0
184 0
184 0
184 0
184 0
184 0
184 0
184 0
184 0
184 0
183 0
183 0
183 0
183 0
183 0
183 0
183 0
183 0
183 0
184 0
184 0
182 0
182 0
181 0
183 0
181 0
179 0
181 0
181 0
181 0
182 0
183 0
184 0
187 0
189 0
189 0
189 0
240 0
299 0
362 0
385 0
407 0
411 0
417 0
429 0
429 0
388 0
426 0
393 0
346 0
340 0
340 0
339 0
337 0
337 0
335 0
334 0
318 0
317 0
318 0
319 0
315 0
315 0
315 0
320 0
334 0
480 0
492 0
502 0
543 0
555 0
558 0
563 0
565 0
566 0
566 0
567 0
589 0
590 0
590 0
597 0
597 0
597 0
598 0
598 0
600 2
604 2
604 2
604 3
604 3
605 3
605 3
604 5
604 5
604 5
603 5
602 5
600 6
600 6
599 6
599 6
599 6
599 6
598 6
598 6
602 6
601 6
595 6
581 6
559 6
507 6
455 6
404 6
399 6
380 6
380 6
375 6
366 6
362 6
361 6
320 6
325 6
325 6
328 6
350 6
354 6
354 6
353 6
353 6
353 6
351 6
351 6
349 6
330 6
326 6
327 7
326 7
304 7
287 7
159 7
152 7
143 7
103 8
97 8
95 8
92 8
91 8
91 8
91 8
91 6
69 6
69 6
69 6
67 6
67 6
67 5
67 5
67 4
67 4
67 4
67 3
68 3
68 3
68 3
70 2
70 2
70 2
70 2
70 2
70 2
70 2
70 2
70 2
70 2
74 2
74 2
74 2
73 2
68 2
69 2
68 2
68 2
68 2
68 2
67 2
65 2
64 2
63 2
62 2
62 2
62 2
62 2
62 2
62 2
54 2
51 2
47 2
25 2
21 2
22 2
22 2
22 2
68 2
70 2
71 2
71 2
80 2
82 2
82 1
81 1
81 1
81 1
77 1
77 1
79 1
77 0
78 0
91 0
98 0
98 0
98 0
98 0
98 0
98 0
98 0
98 0
100 0
103 0
103 0
104 0
105 0
105 0
105 0
105 0
105 0
105 0
106 1
105 1
124 2
125 2
125 2
129 2
129 2
130 2
130 2
130 2
130 2
126 2
126 2
125 2
125 2
125 2
123 2
124 2
128 2
128 2
128 2
135 2
136 2
141 2
169 2
184 2
190 2
194 2
207 2
210 2
209 2
212 2
212 2
212 2
212 2
212 2
211 2
211 2
211 2
170 2
170 2
171 2
169 2
164 2
161 2
158 2
158 1
158 1
159 0
159 0
159 0
157 0
157 0
155 0
142 0
140 0
141 0
140 0
140 0
141 0
150 0
154 0
156 0
156 0
155 0
155 0
154 0
154 0
154 0
154 0
154 0
154 0
154 0
153 0
152 0
133 0
133 0
133 0
129 0
129 0
129 0
129 0
129 0
129 0
129 0
129 0
129 0
129 0
129 0
129 0
127 0
122 0
121 0
119 0
104 0
99 0
95 0
62 0
63 0
61 0
75 0
63 0
62 0
63 0
60 0
60 0
60 0
60 0
60 0
60 0
60 0
60 0
53 0
55 0
56 0
56 0
59 0
59 0
59 0
58 0
58 0
57 0
57 0
57 0
57 0
57 0
57 0
57 0
55 0
54 0
52 0
51 0
51 0
44 0
39 0
36 0
35 0
36 0
40 0
43 0
46 0
46 0
46 0
46 0
46 0
46 0
46 0
46 0
46 0
46 0
46 0
46 0
47 0
47 0
48 0
48 0
48 0
48 0
48 0
51 0
51 0
53 0
56 0
56 0
60 0
60 0
60 0
60 0
62 0
62 0
63 0
57 0
57 0
40 0
39 0
38 0
35 0
35 0
35 0
35 0
36 0
38 0
43 0
50 0
54 0
55 0
51 0
53 0
53 0
50 0
50 0
50 0
50 0
50 0
50 0
50 0
50 0
50 0
50 0
50 0
50 0
50 0
50 0
50 0
50 0
50 0
50 0
50 0
50 0
46 0
43 0
38 0
37 0
34 0
34 0
34 0
34 0
34 0
31 0
31 0
31 0
31 0
31 0
31 0
31 0
30 0
29 0
28 0
28 0
28 0
29 0
29 0
27 0
28 0
29 0
29 0
29 0
28 0
28 0
28 0
27 0
26 0
26 0
25 0
25 0
28 1
29 1
29 1
29 1
29 1
29 1
29 1
28 1
27 1
25 1
19 1
16 1
13 1
12 1
14 1
13 1
15 1
15 1
15 1
15 1
19 1
21 1
21 1
21 1
21 1
21 1
21 1
21 1
21 1
21 1
21 1
21 1
21 2
25 2
26 2
32 2
32 2
31 2
30 2
28 2
28 2
29 2
29 2
32 2
32 2
32 2
32 2
32 2
32 2
32 2
32 2
32 2
32 2
32 2
33 2
33 2
33 2
33 2
32 2
32 2
32 2
32 2
32 2
32 2
32 2
32 2
32 2
32 2
32 2
32 2
32 2
32 2
32 2
29 1
28 1
28 1
28 1
28 1
28 1
28 1
30 1
30 1
30 1
30 1
31 1
31 1
30 1
32 1
32 1
30 1
30 1
30 1
30 1
25 1
24 1
24 1
24 1
24 1
23 1
23 1
23 1
23 1
23 1
23 1
24 1
23 0
19 0
18 0
14 0
14 0
14 0
14 0
14 0
14 0
13 0
13 0
9 0
9 0
9 0
9 0
9 0
9 0
9 0
9 0
9 0
9 0
9 0
8 0
8 0
8 0
8 0
8 0
8 0
10 0
13 0
14 0
18 0
18 0
18 0
20 0
20 0
20 0
20 0
20 0
20 0
26 0
27 0
31 0
32 0
33 0
33 0
34 0
36 0
36 0
43 0
50 0
53 0
54 0
54 0
53 0
51 0
51 0
53 0
53 0
64 1
64 1
65 1
65 1
67 1
67 1
67 1
68 1
68 1
68 1
69 1
69 1
67 1
72 1
74 1
74 1
74 1
75 1
76 1
76 1
76 1
76 1
75 1
74 1
74 1
74 1
74 1
74 1
74 1
74 1
75 1
75 1
75 1
75 1
75 1
75 1
76 1
77 1
81 1
83 1
83 1
83 1
81 1
78 1
79 1
76 1
76 1
76 1
74 1
74 1
75 1
76 1
76 1
76 1
70 1
68 1
65 1
64 1
58 1
56 1
54 1
53 1
51 1
48 1
41 1
40 1
39 1
38 1
42 1
43 1
55 1
54 1
54 0
41 0
41 0
41 0
39 0
39 0
39 0
39 0
39 0
39 0
40 0
40 0
40 0
38 0
35 0
33 0
32 0
32 0
35 0
38 0
38 0
38 0
38 0
38 0
39 0
39 0
39 0
39 0
39 0
40 0
38 0
37 0
37 0
37 0
36 0
36 0
39 0
40 0
40 0
37 0
37 0
37 0
37 0
37 0
37 0
36 0
36 0
36 0
36 0
36 0
36 0
34 0
34 0
34 0
33 0
33 0
33 0
34 0
34 0
34 0
34 0
37 0
39 0
41 0
41 1
45 1
45 1
46 1
44 1
43 1
44 1
33 1
33 1
33 1
33 1
33 1
33 1
33 1
35 1
35 1
36 1
39 1
40 1
41 1
42 1
48 1
51 1
52 1
52 1
53 1
54 2
48 2
46 3
46 3
45 3
45 3
44 3
44 3
44 3
44 3
44 3
44 3
43 3
43 3
43 3
43 3
43 3
43 3
43 3
44 3
44 3
44 3
53 3
53 3
55 3
56 3
56 3
57 3
57 3
58 3
58 3
58 3
58 3
58 3
58 3
58 3
58 3
58 3
60 3
60 3
59 3
59 3
59 3
59 3
56 3
51 2
50 2
50 2
46 2
45 2
44 2
44 2
42 1
39 0
41 0
53 0
53 0
54 0
54 0
54 0
53 0
53 0
52 0
52 0
49 0
47 0
43 0
35 0
35 0
35 0
33 0
33 0
32 0
31 0
31 0
31 0
31 0
31 0
31 0
31 0
31 0
31 0
30 0
29 0
29 0
29 0
29 0
29 0
29 0
29 0
29 0
29 0
29 0
29 0
29 0
22 0
22 0
21 0
21 0
21 0
20 0
20 0
19 0
19 0
19 0
19 0
19 0
19 0
19 0
19 0
19 0
17 0
17 0
17 0
17 0
17 0
17 0
17 0
17 0
17 0
17 0
17 0
17 0
17 0
17 0
17 0
17 0
15 0
1 0
1 0
0 0
0 0
0 0
0 0
0 0
0 0
0 0
0 0
0 0
0 0
0 0
0 0
0 0
0 0
0 0
0 0
0 0
0 0
0 0
0 0
0 0
0 0
0 0
0 0
1 0
1 0
1 0
1 0
1 0
1 0
1 0
1 0
1 0
1 0
1 0
1 0
1 0
1 0
1 0
0 0
0 0
0 0
0 0
0 0
0 0
0 0
0 0
0 0
0 0
0 0
0 0
0 0
0 0
0 0
0 0
0 0
0 0
0 0
0 0
0 0
0 0
0 0
0 0
0 0
0 0
0 0
0 0
0 0
0 0
0 0
0 0
0 0
0 0
0 0
0 0
0 0
0 0
0 0
0 0
0 0
0 0
0 0
0 0
0 0
0 0
0 0
0 0
0 0
0 0
0 0
0 0
0 0
0 0
0 0
0 0
0 0
1 0
1 0
1 0
1 0
1 0
1 0
1 0
1 0
1 0
1 0
1 0
1 0
1 0
1 0
1 0
1 0
1 0
1 0
1 0
1 0
1 0
1 0
1 0
1 0
1 0
1 0
1 0
1 0
1 0
1 0
1 0
1 0
1 0
1 0
1 0
1 0
1 0
1 0
1 0
1 0
1 0
1 0
1 0
1 0
1 0
1 0
1 0
1 0
1 0
1 0
1 0
1 0
2 0
2 0
2 0
2 0
2 0
2 0
2 0
2 0
3 0
3 0
3 0
3 0
4 0
5 0
5 0
5 0
5 0
5 0
5 0
5 0
5 0
4 0
4 0
4 0
4 0
4 0
4 0
4 0
4 0
4 0
4 0
4 0
4 0
4 0
4 0
4 0
4 0
4 0
4 0
4 0
4 0
4 0
4 0
4 0
4 0
4 0
4 0
4 0
4 0
4 0
4 0
4 0
4 0
4 0
4 0
4 0
4 0
4 0
4 0
4 0
4 0
4 0
4 0
4 0
4 0
4 0
4 0
4 0
2 0
2 0
2 0
2 0
2 0
2 0
2 0
3 0
3 0
3 0
2 0
2 0
2 0
2 0
2 0
2 0
2 0
2 0
1 0
1 0
2 0
2 0
2 0
2 0
2 0
2 0
2 0
2 0
2 0
2 0
2 0
2 0
2 0
2 0
2 0
1 0
1 0
1 0
1 0
1 0
1 0
1 0
1 0
1 0
1 0
1 0
1 0
1 0
1 0
1 0
1 0
1 0
1 0
1 0
1 0
1 0
1 0
1 0
1 0
1 0
1 0
1 0
1 0
1 0
1 0
1 0
1 0
1 0
1 0
1 0
1 0
1 0
1 0
1 0
1 0
1 0
1 0
1 0
1 0
1 0
0 0
0 0
0 0
0 0
0 0
0 0
0 0
0 0
0 0
0 0
0 0
0 0
0 0
0 0
0 0
0 0
0 0
0 0
0 0
0 0
0 0
0 0
0 0
0 0
0 0
0 0
0 0
0 0
0 0
0 0
0 0
0 0
0 0
0 0
0 0
0 0
0 0
0 0
0 0
0 0
0 0
0 0
0 0
0 0
0 0
0 0
0 0
0 0
0 0
0 0
0 0
0 0
0 0
0 0
0 0
0 0
0 0
2 0
2 0
4 0
4 0
4 0
4 0
4 0
4 0
4 0
4 0
4 0
4 0
4 0
4 0
4 0
4 0
4 0
4 0
4 0
4 0
4 0
4 0
4 0
4 0
4 0
4 0
4 0
4 0
4 0
4 0
4 0
4 0
4 0
4 0
4 0
4 0
4 0
4 0
4 0
4 0
4 0
4 0
4 0
4 0
4 0
4 0
4 0
4 0
4 0
4 0
2 0
2 0
0 0
0 0
0 0
0 0
0 0
0 0
0 0
0 0
0 0
0 0
0 0
0 0
0 0
0 0
0 0
0 0
0 0
0 0
0 0
0 0
0 0
0 0
0 0
0 0
0 0
0 0
0 0
0 0
0 0
0 0
0 0
0 0
0 0
0 0
0 0
0 0
0 0
0 0
0 0
0 0
0 0
0 0
0 0
0 0
0 0
0 0
0 0
0 0
0 0
0 0
0 0
0 0
0 0
0 0
0 0
0 0
0 0
0 0
0 0
0 0
0 0
0 0
0 0
0 0
0 0
0 0
0 0
0 0
0 0
0 0
0 0
0 0
0 0
0 0
0 0
0 0
0 0
0 0
0 0
0 0
0 0
0 0
0 0
0 0
0 0
0 0
0 0
0 0
0 0
0 0
0 0
0 0
0 0
0 0
0 0
0 0
0 0
0 0
0 0
0 0
0 0
0 0
0 0
0 0
0 0
0 0
0 0
0 0
0 0
0 0
0 0
0 0
0 0
0 0
0 0
0 0
0 0
0 0
0 0
0 0
0 0
0 0
0 0
0 0
0 0
0 0
0 0
0 0
0 0
0 0
0 0
0 0
0 0
0 0
0 0
0 0
0 0
0 0
0 0
0 0
0 0
0 0
0 0
0 0
0 0
0 0
0 0
0 0
0 0
0 0
0 0
0 0
0 0
0 0
0 0
0 0
0 0
0 0
0 0
0 0
0 0
0 0
0 0
0 0
0 0
0 1
0 1
0 1
0 1
0 1
0 1
0 1
0 1
0 1
0 1
0 1
0 1
0 1
0 1
0 1
0 1
0 0
0 0
0 0
0 0
0 0
0 0
0 0
0 0
0 0
0 0
0 0
0 0
0 0
0 0
0 0
0 0
0 0
0 0
0 0
0 0
0 0
0 0
0 0
0 0
0 0
0 0
0 0
0 0
0 0
0 0
0 0
0 0
0 0
0 0
0 0
0 0
0 0
0 0
0 0
0 0
0 0
0 0
0 0
0 0
0 0
0 0
0 0
0 0
0 0
0 0
0 0
0 0
0 0
0 0
0 0
0 0
0 0
0 0
0 0
0 0
2 1
2 1
3 1
3 1
3 1
3 1
3 1
3 1
3 1
3 1
3 1
3 1
3 1
3 1
3 1
2 1
2 1
1 1
1 1
1 1
1 1
1 1
1 1
0 0
0 0
0 0
0 0
0 0
0 0
0 0
0 0
0 0
0 0
0 0
0 0
0 0
0 0
0 0
0 0
0 0
0 0
0 0
0 0
0 0
0 0
0 0
0 0
0 0
0 0
0 0
0 0
0 0
0 0
0 0
0 0
0 0
0 0
0 0
0 0
0 0
0 0
0 0
0 0
0 0
0 0
0 0
0 0
0 0
0 0
0 0
0 0
0 0
0 0
0 0
0 0
0 0
0 0
0 0
0 0
0 0
1 0
1 0
1 0
1 0
1 0
1 0
1 0
1 0
1 0
1 0
1 0
1 0
1 0
1 0
1 0
0 0
0 0
0 0
0 0
0 0
0 0
0 0
0 0
0 0
0 0
0 0
0 0
0 0
0 0
0 0
0 0
0 0
0 0
0 0
0 0
0 0
0 0
0 0
0 0
0 0
0 0
0 0
0 0
0 0
0 0
0 0
0 0
0 0
0 0
0 0
0 0
0 0
0 0
0 0
0 0
0 0
0 0
0 0
0 0
0 0
0 0
0 0
0 0
0 0
0 0
0 0
0 0
0 0
0 0
0 0
0 0
0 0
0 0
0 0
0 0
0 0
0 0
0 0
0 0
0 0
0 0
0 0
0 0
0 0
0 0
0 0
0 0
0 0
0 0
0 0
0 0
0 0
0 0
0 0
0 0
0 0
0 0
0 0
0 0
0 0
0 0
0 0
0 0
0 0
0 0
0 0
0 0
0 0
0 0
0 0
0 0
0 0
0 0
0 0
0 0
0 0
0 0
0 0
0 0
0 0
0 0
0 0
0 0
0 0
0 0
0 0
0 0
0 0
0 0
0 0
0 0
0 0
0 0
0 0
0 0
0 0
1 0
1 0
1 0
1 0
1 0
1 0
2 0
2 0
2 0
2 0
2 0
2 0
2 0
2 0
2 0
2 0
2 0
2 0
2 0
2 0
2 0
2 0
2 0
2 0
2 0
2 0
2 0
2 0
2 0
2 0
2 0
2 0
2 0
2 0
2 0
2 0
2 0
2 0
2 0
2 0
2 0
2 0
2 0
2 0
2 0
2 0
2 0
2 0
2 0
2 0
2 0
2 0
2 0
2 0
2 0
2 0
2 0
2 0
2 0
2 0
2 0
2 0
2 0
2 0
2 0
2 0
2 0
2 0
2 0
2 0
2 0
2 0
2 0
1 0
1 0
1 0
1 0
1 0
1 0
0 0
0 0
0 0
0 0
0 0
0 0
0 0
0 0
0 0
0 0
0 0
0 0
0 0
0 0
0 0
0 0
0 0
0 0
0 0
0 0
0 0
0 0
0 0
0 0
0 0
0 0
0 0
0 0
0 0
0 0
0 0
0 0
0 0
0 0
0 0
0 0
0 0
0 0
0 0
0 0
0 0
0 0
0 0
0 0
0 0
0 0
0 0
0 0
0 0
0 0
0 0
0 0
0 0
0 0
0 0
0 0
0 0
0 0
0 0
0 0
0 0
0 0
0 0
0 0
0 0
0 0
0 0
0 0
0 0
0 0
0 0
0 0
0 0
0 0
0 0
0 0
0 0
0 0
0 0
0 0
0 0
0 0
0 0
0 0
0 0
0 0
0 0
0 0
0 0
0 0
0 0
0 0
0 0
0 0
0 0
0 0
0 0
0 0
0 0
0 0
0 0
0 0
0 0
0 0
0 0
0 0
0 0
0 0
0 0
0 0
0 0
0 0
0 0
0 0
0 0
0 0
0 0
0 0
0 0
0 0
0 0
0 0
0 0
0 0
0 2
0 2
0 2
0 2
0 2
0 2
0 2
0 2
0 2
0 2
0 2
0 3
0 3
0 4
0 4
0 4
0 5
0 5
0 5
0 5
0 5
0 5
0 6
0 6
0 6
0 6
0 6
0 6
0 6
0 6
0 6
0 6
0 6
0 6
0 6
0 6
0 6
0 6
0 6
0 6
0 6
0 6
0 25
0 35
0 35
2 92
2 94
2 94
2 103
2 103
2 104
2 103
2 103
2 102
2 103
2 103
2 103
2 103
2 103
2 103
2 103
2 103
2 103
2 103
2 103
2 103
2 103
2 103
2 104
2 105
2 107
2 107
2 107
2 107
2 107
2 107
2 107
2 104
2 102
2 99
2 99
2 99
2 99
2 100
2 100
2 100
2 100
2 107
2 109
2 109
2 110
2 110
2 110
2 110
2 109
2 109
2 105
2 93
2 91
2 90
2 89
2 87
2 87
2 87
2 101
2 103
2 103
2 103
2 106
2 102
2 102
2 102
2 102
2 102
2 101
2 100
2 90
2 90
0 43
0 41
0 41
0 41
0 41
0 40
0 40
0 39
0 39
0 37
0 37
0 37
0 37
0 37
0 37
0 37
0 37
0 42
0 42
0 42
0 42
0 42
0 44
0 44
0 49
0 49
0 49
0 49
0 49
0 49
0 49
0 49
0 49
0 49
0 49
0 49
0 49
0 49
0 50
0 50
0 50
0 50
0 41
0 37
0 37
0 37
0 37
0 37
0 37
0 37
0 37
0 37
0 37
0 37
0 39
0 39
0 38
0 38
0 38
0 19
0 18
0 11
0 10
0 8
0 8
0 8
0 8
0 10
0 10
0 11
0 10
0 10
0 10
0 10
0 10
0 10
0 10
0 10
0 10
0 11
0 11
0 11
0 11
0 11
0 12
0 12
0 12
0 13
0 14
0 14
0 16
0 16
0 17
0 19
0 19
0 18
0 18
0 15
0 15
0 15
0 15
0 15
0 15
0 15
0 15
0 15
0 15
0 15
0 15
0 15
0 15
0 14
0 14
0 14
0 14
0 15
0 15
0 15
0 15
0 15
0 15
0 15
0 15
0 15
0 15
0 15
0 16
0 14
0 14
0 14
0 14
0 14
0 14
0 14
1 14
1 14
1 14
1 14
1 14
1 14
1 12
1 12
1 12
1 12
1 13
1 13
1 13
1 13
1 13
1 15
1 15
1 15
1 14
1 14
1 14
1 14
1 15
1 14
1 14
1 16
2 21
2 20
2 21
2 19
2 21
2 19
2 18
2 18
2 18
2 18
2 18
2 18
2 18
2 18
2 18
2 18
2 18
2 19
2 19
2 19
2 20
2 20
2 20
2 20
2 20
2 20
2 20
2 20
2 20
2 20
2 20
2 20
2 22
2 22
2 22
2 50
2 52
2 52
2 52
2 51
2 51
2 51
2 51
2 51
2 51
2 51
2 59
1 63
1 103
1 103
1 138
1 140
2 148
2 374
2 451
5 965
5 1031
6 1081
6 1120
7 1137
7 1272
7 1349
10 1354
16 1380
16 1384
16 1385
16 1386
16 1386
16 1387
16 1386
16 1389
16 1390
18 1410
19 1422
19 1430
19 1434
19 1436
19 1437
19 1437
19 1437
19 1437
19 1437
19 1437
19 1441
19 1441
19 1450
19 1461
19 1464
19 1497
19 1519
19 1524
19 1536
19 1541
19 1543
19 1543
19 1543
19 1543
19 1543
19 1545
20 1546
20 1549
20 1549
20 1550
20 1550
20 1552
20 1546
20 1540
20 1540
20 1512
20 1511
20 1511
20 1511
20 1511
20 1511
20 1511
20 1511
20 1511
20 1511
20 1510
20 1500
20 1495
20 1188
20 1165
19 858
19 829
19 803
19 787
19 714
15 273
15 216
15 221
14 220
13 212
12 208
12 206
9 261
3 245
3 274
3 283
3 284
3 284
3 286
3 286
1 283
1 381
1 358
1 349
1 342
1 343
1 343
1 343
1 343
1 343
1 343
1 343
1 343
1 339
1 339
1 329
1 325
1 323
1 306
1 285
1 279
0 267
0 261
0 258
0 258
0 312
0 313
0 323
0 323
0 324
0 323
0 322
0 322
0 322
0 323
0 325
0 326
0 334
0 334
0 334
0 335
0 335
0 335
0 372
0 380
0 385
0 391
0 393
0 431
0 431
0 429
0 437
0 446
0 467
0 473
0 475
0 475
0 475
0 475
0 474
0 463
0 464
0 470
0 470
0 471
0 416
0 408
0 374
0 370
0 370
0 371
0 435
0 444
0 447
0 351
0 365
0 363
0 362
0 362
0 362
0 362
0 362
0 365
0 366
0 373
0 400
0 439
0 493
0 503
0 501
0 501
0 484
0 484
0 483
0 483
0 483
0 486
0 485
0 426
0 443
0 433
0 429
0 428
0 428
0 429
0 429
0 429
0 436
0 433
0 435
0 436
0 436
0 436
0 435
0 434
0 435
0 392
0 392
0 386
0 371
0 370
0 313
0 307
0 307
0 307
0 307
0 307
0 307
0 306
0 306
0 306
0 306
0 306
0 306
0 305
0 301
0 299
0 300
0 300
0 317
0 329
0 398
0 400
0 397
0 328
0 314
0 313
0 312
0 302
0 303
0 302
0 303
0 303
0 302
0 304
0 302
0 300
0 294
0 256
0 221
0 163
0 159
0 159
0 159
0 159
0 159
0 159
0 159
0 159
0 159
0 159
0 159
0 142
0 142
0 141
0 141
0 141
0 147
0 149
0 148
0 141
0 139
0 137
0 135
0 130
0 130
0 130
0 130
0 128
0 128
0 127
0 127
0 127
0 127
0 127
0 127
0 127
0 128
0 128
0 128
0 128
0 128
0 128
0 128
0 128
0 142
0 152
0 159
0 161
0 162
0 160
0 150
0 134
0 123
0 55
0 55
0 54
0 54
0 54
0 54
0 54
0 49
0 48
0 47
0 47
0 47
0 47
0 47
0 47
0 47
0 47
0 47
0 47
0 47
0 47
0 47
0 47
0 47
0 47
0 47
0 47
0 47
0 47
0 47
0 47
0 47
0 47
0 47
0 47
0 47
0 38
0 33
0 32
0 31
0 31
0 31
0 31
0 31
0 31
0 31
0 31
0 31
0 32
0 33
0 36
0 38
0 39
0 40
0 40
0 40
0 39
0 39
0 40
0 40
0 40
0 42
0 43
0 42
1 27
1 21
1 29
1 191
1 193
1 208
1 209
1 212
1 212
1 215
1 214
1 214
1 215
1 215
1 215
1 216
0 216
0 216
0 216
0 216
0 216
0 216
0 216
0 216
0 256
0 297
0 301
0 303
0 307
0 308
0 310
0 311
0 312
0 312
0 313
0 313
0 313
0 313
0 313
0 313
0 313
0 313
0 313
0 313
0 313
0 313
0 313
0 313
0 313
0 313
0 313
0 313
0 313
0 313
0 313
0 313
0 313
0 311
0 308
0 306
0 306
0 305
0 304
0 304
0 304
0 304
0 304
0 303
0 304
2 304
2 301
2 300
2 300
2 299
2 297
2 289
2 127
2 139
2 141
2 143
2 144
2 144
3 144
3 144
3 143
3 143
3 144
3 144
3 144
3 146
4 152
4 154
4 163
4 170
4 171
4 171
4 171
4 129
4 80
4 79
4 81
4 81
5 98
5 111
5 158
5 161
5 162
5 161
5 161
5 161
5 162
5 163
5 173
7 264
7 267
8 289
8 293
8 298
8 298
8 299
8 300
8 300
8 300
8 303
8 303
8 303
8 303
8 304
8 305
8 309
8 312
8 312
8 312
8 312
8 312
8 312
8 312
14 1125
14 1128
14 1132
14 1150
24 2238
23 2347
24 2533
28 2852
28 2899
30 2933
28 2947
29 2963
29 2933
29 2936
29 2944
29 2943
29 2945
29 2946
29 2946
29 2946
29 2946
29 2944
29 2944
29 2945
29 2943
29 2944
29 2938
29 2939
29 2931
29 2929
29 2941
29 2952
29 2958
29 2961
29 2962
29 2962
29 2963
29 2963
28 2948
28 2921
28 2832
28 2829
28 2802
31 2814
33 2815
34 2814
34 2804
34 2796
31 2702
23 1809
23 1762
23 1752
23 1757
23 1757
23 1756
23 1749
23 1749
23 1749
23 1749
19 1066
19 1059
19 1059
19 1059
19 1058
19 1056
19 1054
19 1053
19 1053
19 1052
19 1052
19 1052
19 1052
19 1052
19 1051
19 1049
19 1046
19 1033
9 324
9 298
7 149
7 148
8 115
8 109
9 110
9 130
9 155
9 153
9 148
9 147
9 146
9 146
9 146
10 146
10 146
10 146
10 146
10 146
10 146
10 146
10 145
11 142
11 140
10 147
10 132
10 131
10 124
12 122
12 121
13 120
13 122
13 123
13 122
13 122
12 122
12 120
12 119
9 110
7 118
7 120
6 121
6 131
6 131
6 132
6 133
6 131
6 124
6 124
6 128
6 135
6 146
8 453
9 459
9 485
9 503
9 510
9 524
9 524
9 524
9 524
9 524
9 524
9 524
9 524
9 524
10 558
10 559
10 585
10 589
10 594
10 593
10 594
10 595
10 597
9 600
9 601
9 601
9 596
9 546
9 526
9 526
10 528
10 528
10 528
10 528
10 530
9 535
9 547
9 554
9 567
9 593
9 610
9 615
9 625
8 625
8 627
8 619
8 621
8 614
8 615
6 616
6 616
5 616
5 616
5 619
5 619
5 618
5 624
5 625
5 625
5 621
5 613
5 612
5 612
5 601
6 600
7 599
7 598
7 597
7 597
7 595
8 587
8 580
8 565
6 242
5 232
5 185
5 166
5 156
5 141
5 140
5 139
5 139
5 139
5 139
5 139
5 139
5 139
4 101
4 91
4 60
4 54
4 52
4 52
4 52
4 52
6 52
10 52
10 52
10 52
10 52
10 52
10 52
10 52
10 52
10 52
10 53
10 53
10 53
10 50
10 47
10 43
10 37
11 28
11 20
11 19
11 17
11 17
11 17
11 17
11 13
11 13
11 13
11 12
11 12
11 12
11 12
11 10
11 10
11 9
11 2
11 2
11 2
11 2
11 2
11 2
11 2
11 2
10 2
9 2
9 2
9 2
9 2
9 2
8 2
8 2
8 2
8 2
8 2
8 2
8 2
8 2
8 2
8 2
8 2
8 2
8 2
8 2
8 2
8 2
8 2
8 2
9 2
9 2
9 2
7 2
6 2
4 2
4 2
4 2
2 1
2 1
2 1
2 1
2 1
2 1
2 1
1 1
1 1
1 0
1 0
1 0
1 0
1 0
1 0
1 0
1 0
1 0
1 0
1 0
1 0
1 0
1 0
1 0
1 0
1 0
1 0
1 0
1 0
1 0
1 0
1 0
1 0
1 0
1 0
1 0
1 0
1 0
1 0
1 0
1 0
1 0
1 0
1 0
1 0
1 0
1 0
1 0
1 0
1 0
1 0
1 0
1 0
1 0
1 0
1 0
1 0
1 0
1 0
1 0
1 0
1 0
1 0
1 0
1 0
0 0
0 0
0 0
0 1
0 1
0 1
0 1
0 1
0 1
0 2
0 2
0 2
0 2
0 2
0 2
0 2
0 2
0 2
0 2
0 2
0 2
0 2
0 2
0 2
0 2
0 2
0 2
0 2
0 2
0 2
0 2
0 2
0 2
0 2
0 2
0 2
0 2
0 2
0 2
0 2
0 2
0 2
0 2
0 2
0 2
0 2
0 2
0 2
0 2
0 2
0 2
0 2
0 2
0 2
0 2
0 2
0 2
0 2
0 2
0 2
0 3
0 3
0 3
0 3
0 3
0 3
0 3
0 4
0 4
0 4
0 4
0 4
0 4
0 4
0 4
0 4
0 3
0 3
0 3
0 3
0 3
0 3
0 2
0 2
0 2
0 2
0 2
0 2
0 2
0 2
0 2
0 2
0 2
0 2
0 2
0 2
0 2
0 2
0 3
0 3
0 3
0 3
0 3
0 3
0 3
0 3
0 3
0 3
0 3
0 3
0 3
0 3
0 3
0 3
0 3
0 4
0 4
0 4
0 4
0 4
0 4
0 4
0 4
0 4
0 4
0 4
0 4
0 4
0 4
0 6
0 5
1 11
2 13
2 17
2 18
2 18
2 18
2 18
2 18
2 18
2 17
2 17
2 17
2 17
2 17
2 17
2 17
2 17
2 17
2 17
2 17
2 17
2 17
2 17
2 17
2 17
2 17
2 17
2 17
2 17
2 18
2 18
2 18
2 18
2 18
2 18
2 18
2 18
2 18
2 18
2 18
2 17
2 17
2 17
2 17
2 17
2 17
2 17
2 18
2 19
2 19
2 20
2 20
2 20
2 20
2 21
2 20
2 19
2 16
2 14
2 14
2 14
2 14
2 14
2 14
2 14
2 14
2 14
2 14
2 14
2 14
2 15
2 15
1 14
0 9
0 7
0 7
0 7
0 7
0 7
2 7
2 7
2 7
2 7
2 7
2 7
2 7
2 7
2 7
2 7
2 8
2 8
2 8
2 8
2 10
2 10
2 10
2 32
2 32
3 42
3 42
3 42
3 42
3 41
3 41
3 41
3 41
3 41
3 41
3 41
3 41
3 41
3 41
3 41
3 41
3 41
3 42
3 42
4 42
5 42
5 42
5 41
5 38
5 38
5 37
5 37
5 37
5 37
5 36
5 36
5 36
5 36
5 36
5 36
5 36
5 36
5 36
5 36
5 36
5 36
5 36
5 36
5 36
7 59
7 58
7 58
7 57
7 57
7 57
7 57
7 57
7 57
7 57
5 57
5 57
5 57
5 57
5 58
5 58
5 58
5 58
5 58
5 58
5 56
6 64
6 64
6 66
8 95
8 97
8 104
7 76
7 76
7 77
7 77
7 77
7 77
11 85
11 85
12 85
12 85
11 85
11 85
11 85
11 85
11 85
11 85
11 85
11 85
11 85
11 84
11 84
11 84
10 84
10 84
10 84
10 84
10 84
10 84
10 84
11 84
11 84
11 84
11 84
11 85
11 85
11 85
11 85
11 85
11 85
11 87
11 88
11 90
11 90
11 90
11 90
11 90
8 57
8 57
8 57
8 57
8 57
7 47
7 47
7 47
7 49
7 49
7 71
7 70
7 70
7 70
7 70
7 70
7 70
7 70
7 70
7 70
7 70
7 70
7 70
7 69
6 40
6 39
6 39
6 39
6 39
6 38
5 38
5 38
5 38
2 30
2 30
1 30
1 30
1 30
1 32
1 32
1 32
1 32
1 32
1 32
1 32
1 32
1 32
1 32
1 32
1 32
1 32
1 32
1 32
1 32
1 32
1 32
0 32
0 32
0 32
0 32
0 31
0 32
0 32
0 32
0 32
0 32
0 30
0 29
0 27
0 27
0 27
0 27
0 27
0 27
0 27
0 27
0 27
0 27
0 27
0 27
0 26
0 26
0 27
0 7
0 8
0 8
0 8
0 8
0 8
0 8
0 8
0 8
0 8
0 8
0 8
0 8
0 8
0 8
0 8
0 8
0 8
0 8
0 8
0 8
0 8
0 8
0 8
0 8
0 9
0 9
0 9
0 9
0 9
0 9
0 9
0 11
0 11
0 11
0 11
0 11
0 11
0 17
0 19
0 20
0 26
0 26
0 26
0 26
0 35
0 45
0 56
0 62
0 77
0 85
0 87
0 87
0 92
0 92
0 92
0 92
0 92
0 92
0 92
0 92
0 92
0 92
0 92
0 92
0 94
0 95
0 95
0 95
0 95
0 94
0 96
0 94
0 95
0 94
0 94
0 94
0 95
0 94
0 94
0 94
0 94
0 94
0 94
0 94
0 94
0 94
0 94
0 94
0 94
0 94
0 94
0 95
0 95
0 95
0 94
0 94
0 93
0 92
0 92
0 92
0 92
0 91
0 116
0 118
0 119
0 144
0 146
0 144
0 144
0 144
0 137
0 135
0 135
0 127
0 129
0 128
0 128
0 111
0 105
0 91
0 81
0 74
0 74
0 74
0 74
0 74
0 74
0 74
0 74
0 74
0 74
0 74
0 74
0 74
0 74
0 75
0 76
0 74
0 73
0 73
0 74
0 75
0 75
0 72
0 72
0 70
0 70
0 70
0 70
0 69
0 69
0 70
0 70
0 70
0 70
0 70
0 70
0 71
0 71
0 71
0 71
0 71
0 71
0 71
0 70
0 70
0 70
0 71
0 70
0 70
0 74
0 74
0 74
0 74
0 74
0 37
0 26
0 21
0 19
0 17
0 17
0 17
0 18
0 18
0 18
0 15
0 14
0 14
0 14
0 14
0 14
0 12
0 12
0 12
0 12
0 13
0 13
0 13
0 14
0 15
0 19
0 22
0 26
0 26
0 27
0 28
0 28
0 28
0 28
0 31
0 62
0 71
0 71
0 70
0 69
0 69
0 69
0 69
0 69
0 70
0 70
0 70
0 70
0 70
0 69
0 69
0 69
0 69
0 69
0 69
0 69
0 69
0 69
0 69
0 71
0 71
0 71
0 71
0 71
0 70
0 69
0 69
0 69
0 65
0 65
0 66
0 68
0 68
0 70
0 70
0 70
0 70
0 70
0 70
0 71
0 71
0 71
0 71
0 71
0 73
0 76
0 77
0 77
0 78
0 79
0 79
0 80
0 80
0 80
0 81
0 88
0 88
0 87
0 83
0 82
0 81
0 82
0 84
0 84
0 84
0 85
0 85
0 80
0 48
0 38
0 38
0 38
0 38
0 39
0 39
0 39
0 39
0 38
0 38
0 38
0 44
0 47
0 49
0 80
0 83
0 92
0 94
0 93
0 96
0 105
0 112
0 118
0 121
0 124
0 128
0 130
0 130
0 130
0 130
0 130
1 130
1 130
1 129
1 129
1 129
1 129
1 129
1 129
1 129
1 129
1 129
1 129
1 128
1 128
1 128
1 127
1 126
1 117
1 113
1 113
1 114
1 113
1 111
1 111
1 111
1 111
1 111
1 108
1 103
1 103
1 103
1 102
1 101
1 97
1 95
1 93
1 92
1 92
1 90
1 90
1 90
1 89
1 88
1 88
1 88
1 88
1 88
1 88
1 88
1 88
1 88
1 88
1 88
1 85
1 84
1 75
1 47
1 47
1 49
1 50
1 50
1 45
1 35
1 29
1 27
1 25
1 22
1 18
1 17
1 17
1 17
1 17
1 17
0 17
0 15
0 15
0 18
0 18
0 18
0 18
0 18
0 18
0 18
0 18
0 18
0 18
0 18
0 18
0 16
0 15
0 15
0 15
0 15
0 14
0 14
0 14
0 14
0 14
0 14
0 15
0 16
0 18
0 19
0 20
0 20
0 20
0 20
0 22
0 22
0 22
0 22
0 22
0 22
0 29
0 36
0 36
0 36
1 36
1 39
1 41
1 41
1 47
1 48
1 49
1 50
1 50
1 50
1 49
1 48
1 47
1 47
1 43
1 42
1 45
1 46
1 46
1 74
1 79
1 80
1 82
1 82
1 82
1 82
1 82
1 82
1 84
1 88
1 90
1 90
1 91
1 91
1 91
1 91
1 91
1 91
1 91
1 91
1 91
1 91
1 91
1 91
1 91
1 91
1 92
1 110
1 110
1 110
1 110
1 112
1 112
1 112
1 112
1 111
1 110
1 107
1 106
1 106
1 106
1 106
1 90
1 88
1 89
1 90
1 92
1 92
1 91
1 83
1 73
1 77
1 75
0 73
0 85
0 84
0 84
0 80
0 79
0 79
0 78
0 78
0 77
0 77
0 77
0 77
0 77
0 77
0 77
0 74
0 72
0 70
0 36
0 38
0 37
0 37
0 33
0 33
0 33
0 33
0 33
0 33
0 33
0 35
0 35
0 31
0 32
0 32
0 32
0 32
0 32
0 32
0 34
0 34
0 34
0 34
0 34
0 34
0 34
0 34
0 34
0 34
0 34
0 32
0 32
0 36
0 37
0 37
0 37
0 37
0 38
0 38
0 38
0 38
0 38
0 35
0 34
0 34
0 28
0 27
0 27
0 26
0 26
0 26
0 26
0 26
0 26
0 12
0 12
0 12
0 12
0 12
1 12
2 12
2 11
2 11
2 11
2 11
2 11
2 11
2 11
2 11
2 11
2 10
2 10
2 10
3 9
4 9
4 9
7 9
12 9
12 9
12 9
14 9
14 9
14 9
14 8
17 8
17 8
17 7
17 7
17 7
17 7
17 7
17 7
17 7
17 7
17 7
17 7
17 7
17 7
17 7
17 7
17 8
17 8
18 8
18 8
18 8
18 4
18 3
18 3
18 4
18 4
18 3
18 3
18 3
18 3
18 3
18 3
18 3
18 3
18 3
18 3
18 3
18 3
18 3
18 3
18 3
18 3
18 3
18 3
18 3
18 3
18 3
18 3
17 3
16 3
16 3
16 3
16 3
16 5
16 5
16 5
16 5
14 5
14 5
14 5
14 5
14 5
11 5
9 5
9 5
9 5
4 5
4 5
4 5
4 5
1 5
1 5
1 4
1 4
1 4
1 4
1 4
1 4
1 4
1 4
1 4
1 4
1 4
1 4
1 4
1 4
1 4
1 4
1 4
1 3
1 3
0 3
0 4
0 4
0 4
0 4
0 4
0 3
0 3
0 3
0 3
0 3
0 3
0 3
0 3
0 3
0 3
0 3
0 4
0 4
0 4
0 4
0 4
0 5
0 5
0 5
0 8
0 11
0 11
0 18
0 18
0 23
0 23
0 24
0 25
0 25
0 24
0 24
0 24
0 24
0 25
0 28
0 30
0 42
0 45
0 55
0 57
0 66
0 67
0 67
0 68
0 68
0 68
0 68
0 68
0 68
0 68
0 68
0 68
0 68
0 68
0 68
0 68
0 68
0 68
0 68
0 68
0 68
0 68
0 68
0 68
0 68
0 68
0 68
0 68
0 67
0 67
0 69
0 69
0 69
0 70
0 72
0 72
0 74
0 74
0 74
0 74
0 74
0 74
0 76
0 76
0 75
0 95
0 95
0 95
0 95
0 94
0 91
0 91
0 86
0 84
0 84
0 81
0 82
0 84
0 84
0 83
0 82
0 82
0 82
0 82
0 82
0 85
0 86
0 84
0 80
0 67
0 62
0 48
0 48
0 48
0 48
0 49
0 49
0 49
0 49
0 49
0 49
0 49
0 49
0 49
0 49
0 49
0 49
0 49
0 49
0 49
0 49
0 49
0 49
0 50
0 62
0 62
0 62
0 68
0 69
0 70
0 72
0 72
0 72
0 70
0 70
0 69
0 69
0 67
0 67
0 65
0 65
0 65
0 65
0 65
0 65
0 65
0 65
0 65
0 45
0 45
0 45
0 45
0 45
0 45
0 45
0 45
0 45
0 45
0 41
0 35
0 32
0 32
0 32
0 32
0 32
0 32
0 32
0 32
0 28
0 27
0 28
0 28
0 28
0 28
0 28
0 40
0 41
0 41
0 40
0 42
0 42
0 42
0 42
0 42
0 43
0 44
0 44
0 46
0 46
0 47
0 47
0 47
0 47
0 47
0 46
0 45
0 44
0 25
0 24
0 23
0 23
0 23
0 22
0 22
0 22
0 24
0 28
0 37
0 37
0 37
0 37
0 37
0 37
0 37
0 37
0 37
0 37
0 37
0 37
0 37
0 37
0 37
0 37
0 38
0 38
0 38
0 38
0 38
0 38
0 38
0 38
0 38
0 39
0 39
0 40
0 40
0 41
0 41
0 41
0 41
0 41
0 41
0 41
0 40
0 41
0 40
0 40
0 39
0 28
0 36
0 36
0 36
0 36
0 36
0 36
0 36
0 40
0 39
0 40
0 40
0 38
0 38
0 37
0 37
0 37
0 37
0 37
0 37
0 37
0 37
0 37
0 37
0 37
0 37
0 37
0 37
0 37
0 37
0 35
0 31
0 23
0 32
0 32
0 32
0 32
0 32
0 32
0 32
0 32
0 32
0 32
0 32
0 32
0 32
0 32
0 32
0 31
0 31
0 31
0 31
0 32
0 34
0 37
0 41
0 45
0 44
0 43
0 43
0 43
0 40
0 40
0 40
0 41
0 41
0 41
0 41
0 41
0 42
0 42
0 42
0 42
0 41
0 33
0 32
0 34
0 35
0 35
0 35
0 35
0 35
0 35
0 35
0 35
0 35
0 35
0 35
0 35
0 35
0 35
0 35
0 35
0 35
0 35
0 35
0 35
0 35
0 35
0 36
0 36
0 36
0 36
0 36
0 35
0 34
0 24
0 25
0 25
0 25
0 27
0 26
0 26
0 26
0 26
0 26
0 26
0 26
0 26
0 26
0 26
0 26
0 26
0 26
0 25
0 24
0 21
0 18
0 16
0 14
0 14
0 14
0 13
0 13
0 13
0 13
0 13
0 11
0 11
0 11
0 11
0 11
0 18
0 18
0 18
0 19
0 19
0 14
0 14
0 12
0 12
0 12
0 12
0 12
0 12
0 12
0 12
0 12
0 12
0 12
0 12
0 12
0 12
0 12
0 12
0 12
0 12
0 12
0 12
0 12
0 12
0 12
0 12
0 12
0 12
0 12
0 13
0 16
0 17
0 18
0 17
0 17
0 17
0 15
0 15
0 15
0 15
0 15
0 15
0 15
0 15
0 15
0 15
0 15
0 16
0 16
0 16
0 16
0 17
0 17
0 17
0 17
0 17
0 19
0 20
0 20
0 20
0 20
0 20
0 20
0 20
0 20
1 28
1 28
1 28
1 21
1 24
1 26
2 65
2 67
2 68
2 68
2 68
2 71
2 75
2 75
2 75
2 75
2 75
2 75
2 75
2 75
2 75
2 75
2 75
2 75
2 75
2 75
2 75
2 75
2 75
2 75
2 75
2 75
2 75
2 75
2 75
2 75
2 77
2 76
2 76
2 75
2 78
2 79
2 79
2 79
2 82
2 82
2 82
2 84
2 83
2 83
2 88
2 93
2 96
2 96
2 96
2 95
2 95
1 95
0 93
0 93
0 92
0 92
0 92
0 92
0 91
0 92
0 92
0 92
0 93
0 95
0 95
0 95
0 95
0 85
0 85
0 77
0 77
0 74
0 67
0 33
0 31
0 31
0 31
0 31
0 32
0 32
0 32
0 32
0 32
0 32
0 32
0 32
0 32
0 32
0 32
0 32
0 32
0 55
0 57
0 60
0 60
0 60
0 60
0 60
0 60
0 60
0 60
0 60
0 60
0 58
0 58
0 57
0 56
0 51
0 51
0 51
0 51
0 51
0 51
0 50
0 40
0 38
0 36
0 35
0 35
0 35
0 35
0 35
0 35
0 35
0 35
0 35
0 36
0 36
0 36
0 36
0 35
0 35
0 35
0 35
0 35
0 33
0 32
0 32
0 32
0 33
0 34
0 34
0 34
0 34
0 35
0 35
0 36
0 36
0 36
0 36
0 36
0 35
0 35
0 35
0 37
0 37
0 37
0 37
0 43
0 45
0 45
0 49
0 47
0 47
0 26
0 24
0 21
0 21
0 21
0 21
0 21
0 21
0 21
0 21
0 21
0 21
0 21
0 21
0 19
0 19
0 19
0 19
0 19
0 19
0 19
0 19
0 19
0 19
0 19
0 19
0 19
0 19
0 19
0 19
0 19
0 19
0 19
0 19
0 19
0 18
0 18
0 18
0 18
0 18
0 18
0 18
0 18
0 18
0 18
0 18
0 22
0 22
0 19
0 18
0 22
0 25
0 28
0 29
0 29
0 28
0 28
0 28
0 29
0 29
0 29
0 29
0 29
0 28
0 28
0 28
0 28
0 20
0 17
0 17
0 17
0 17
0 17
0 17
0 17
0 17
0 17
0 17
0 17
0 17
0 19
0 20
0 20
0 20
0 22
0 22
0 22
0 22
0 22
0 22
0 22
0 22
0 22
0 22
0 22
0 22
0 22
0 22
0 22
0 22
0 22
0 22
0 22
0 22
0 22
0 22
0 22
0 22
0 22
0 22
0 23
0 24
0 24
0 24
0 25
0 26
0 26
0 30
0 30
0 26
0 28
0 28
0 28
0 25
0 27
0 24
0 22
0 22
0 22
0 22
0 22
0 21
0 21
0 21
0 21
0 23
0 24
0 24
0 25
0 25
1 29
1 29
1 29
1 30
1 30
1 30
1 30
1 31
1 31
1 31
1 31
1 30
1 30
1 30
1 29
1 29
1 27
1 28
1 28
1 28
1 28
1 28
1 28
1 28
1 28
1 28
1 28
1 29
1 29
1 29
1 29
1 29
1 29
1 30
1 30
1 31
1 33
1 37
1 37
1 76
1 76
1 76
1 77
1 76
1 75
1 77
1 76
1 178
1 177
1 177
1 173
1 176
1 178
1 211
1 312
1 342
1 347
1 343
1 352
1 360
1 370
1 379
1 389
1 393
1 397
1 397
1 406
1 404
1 410
1 409
1 409
1 408
1 407
0 402
0 402
0 402
0 401
0 401
0 401
0 401
0 400
0 399
0 399
0 399
0 399
0 399
0 399
0 399
0 399
0 398
0 397
0 396
0 395
0 395
0 395
0 394
0 394
1 395
1 395
1 395
1 395
1 395
1 395
1 397
1 397
1 397
1 395
1 393
1 392
1 390
1 377
1 367
0 172
0 172
0 172
0 172
0 14
0 14
0 14
0 14
0 14
0 14
0 14
0 14
0 14
0 14
0 10
0 7
0 6
0 6
0 5
0 5
0 5
0 5
0 5
0 4
0 3
0 3
0 3
0 3
0 3
0 3
0 3
0 3
0 3
0 3
0 3
0 3
0 3
0 3
0 3
0 3
0 3
0 3
0 3
0 3
0 3
0 3
0 3
0 3
0 3
0 3
0 3
0 3
0 4
0 4
0 4
0 4
0 4
0 4
0 3
0 3
0 3
0 3
0 3
0 5
0 3
0 3
0 3
0 3
0 3
0 2
0 2
0 2
0 2
0 2
0 2
0 2
0 2
0 2
0 2
0 2
0 2
0 2
0 2
0 2
0 2
0 2
0 2
0 2
0 2
0 2
0 2
0 2
0 2
0 3
0 3
0 3
0 3
0 3
0 3
0 3
0 3
0 3
0 3
0 3
0 3
0 3
0 3
0 3
0 3
0 3
0 3
0 3
0 3
0 3
0 3
0 3
0 3
0 3
0 3
0 3
0 3
0 3
0 3
0 3
0 3
0 3
0 3
0 3
0 4
0 4
0 4
0 4
0 4
0 4
0 5
0 4
0 3
0 3
0 3
0 3
0 3
0 3
0 3
0 3
0 3
0 3
0 4
0 4
0 4
0 4
0 4
0 4
0 4
0 4
0 4
1 4
1 4
1 4
1 4
1 4
1 4
1 4
1 4
1 4
1 5
1 5
1 4
1 4
1 4
1 4
1 4
0 4
0 5
0 5
0 5
0 5
0 5
0 5
0 5
0 5
0 5
0 5
0 5
0 5
0 5
0 5
0 5
0 5
0 5
0 5
0 5
0 5
0 5
0 5
0 5
0 5
0 5
0 5
0 5
0 5
0 5
0 3
0 3
0 3
0 3
0 3
0 3
0 3
0 3
0 3
0 3
0 3
0 3
0 3
0 3
0 3
0 3
0 3
0 3
0 2
0 2
0 2
0 2
0 2
0 3
0 3
0 4
0 5
0 16
0 16
0 16
0 17
0 17
0 17
0 17
0 17
0 16
0 16
0 16
0 16
0 16
0 16
0 16
0 16
0 16
0 15
0 15
0 15
0 15
0 15
0 15
0 15
0 15
0 15
0 15
0 15
0 15
0 15
0 16
0 16
0 17
0 17
0 16
0 16
0 15
0 15
0 16
0 16
0 16
0 16
0 16
0 16
0 16
0 16
0 16
0 16
0 16
0 16
0 16
0 16
0 16
0 16
0 16
0 16
0 16
0 16
0 16
0 17
0 18
0 20
0 21
0 23
0 23
0 23
0 23
0 23
0 23
0 25
0 25
0 22
0 22
0 12
0 12
0 12
0 12
0 12
0 12
0 14
0 14
0 14
0 14
0 14
0 14
0 14
0 14
0 14
0 14
0 14
0 14
0 14
0 14
0 14
0 14
0 14
0 14
0 14
0 14
0 14
0 14
0 14
0 14
0 13
0 13
0 12
0 12
0 12
0 11
0 11
0 11
0 11
0 11
0 11
0 11
0 11
0 12
0 12
0 12
0 12
0 12
0 12
0 14
0 14
0 14
1 15
1 16
2 19
4 137
4 149
4 158
4 188
4 195
4 195
4 200
4 200
4 204
4 206
4 208
4 208
4 208
4 208
4 206
4 206
4 206
4 206
4 206
4 206
4 206
4 206
4 206
4 206
4 204
4 204
4 204
4 204
4 204
4 204
4 204
4 204
4 204
4 208
4 221
4 256
4 261
4 261
4 261
4 262
4 263
4 264
4 265
4 265
4 265
4 265
4 265
4 265
4 265
4 265
4 265
4 265
4 265
4 265
4 266
4 267
8 344
8 345
8 352
8 354
8 354
8 353
8 355
8 355
8 356
7 356
7 356
7 354
7 353
7 353
7 352
7 351
6 339
4 183
4 174
4 180
5 191
5 191
5 190
5 188
5 187
5 182
5 181
5 181
5 181
5 181
5 182
5 183
5 183
5 183
5 183
5 183
5 183
5 183
5 183
5 183
5 230
5 230
5 231
5 231
6 231
6 232
7 232
7 232
7 232
7 232
7 228
7 211
7 165
7 160
7 160
7 160
7 162
7 162
7 161
7 161
7 161
7 166
7 169
7 171
7 173
7 173
7 175
7 176
7 176
7 179
7 178
7 177
7 176
3 98
3 97
3 93
3 93
3 87
3 87
3 87
3 87
3 86
3 86
3 86
3 86
3 86
3 86
3 86
3 86
3 86
3 86
3 86
3 82
2 75
2 75
2 75
2 75
2 82
2 82
2 86
2 87
2 102
2 102
2 102
2 104
2 105
2 105
2 105
2 105
2 105
2 105
2 105
2 104
1 56
1 56
1 56
1 56
1 56
1 55
0 54
0 54
0 54
0 54
0 54
0 54
0 52
0 52
0 52
0 52
0 48
1 49
2 42
2 42
2 43
3 43
3 43
3 43
3 41
3 41
3 38
3 38
3 38
3 35
3 36
3 36
3 36
3 36
3 36
3 36
3 36
3 36
3 36
3 36
3 36
3 36
3 36
3 36
3 36
3 36
3 36
3 36
3 36
3 36
3 36
3 36
4 36
4 36
6 43
6 43
6 43
6 37
6 38
6 34
6 33
6 18
6 17
6 17
6 13
6 13
6 13
6 13
6 13
6 13
6 13
6 13
6 13
6 13
6 13
6 13
6 13
6 13
6 13
6 13
6 13
6 13
6 13
6 13
6 13
6 13
5 13
5 13
5 13
5 13
3 14
3 14
3 12
3 12
1 12
1 12
1 12
1 12
1 12
1 12
1 12
1 12
1 12
1 11
1 11
1 11
2 11
2 12
2 13
2 13
2 13
2 13
2 13
2 13
2 13
2 13
2 14
2 15
2 15
2 15
2 16
2 16
2 16
2 16
2 16
2 16
2 14
1 8
1 8
1 9
1 8
1 9
1 9
1 9
1 9
1 9
1 9
1 9
1 9
1 9
1 9
1 9
1 10
1 10
1 13
1 13
1 13
1 13
1 13
1 13
1 13
1 13
1 13
1 13
1 13
1 13
1 12
1 12
1 12
1 12
1 12
1 12
1 12
1 11
1 11
1 11
1 11
1 15
1 15
1 15
1 15
1 15
1 15
1 15
1 15
1 15
1 15
1 15
1 15
0 15
0 14
0 13
0 13
0 13
0 13
0 13
0 13
0 13
0 13
0 11
0 11
0 11
0 11
0 12
0 12
0 12
0 12
0 12
0 12
0 12
0 12
0 11
0 10
0 10
0 10
0 10
0 10
0 10
0 10
0 10
0 10
0 10
0 10
0 10
0 10
0 9
0 9
0 6
0 6
0 6
0 6
0 6
0 6
0 6
0 6
0 6
0 6
0 6
0 6
0 6
0 6
0 6
0 6
0 6
0 6
0 6
0 6
0 6
0 6
0 6
0 2
0 2
0 2
0 2
0 2
0 2
0 3
0 3
0 3
0 3
0 3
0 3
0 3
0 3
0 3
0 3
0 4
0 4
0 4
0 4
0 4
0 7
0 7
0 7
0 7
0 7
0 5
0 5
0 5
0 5
0 5
0 5
0 5
0 5
0 6
0 6
0 6
0 6
0 6
0 7
0 7
0 7
0 7
0 7
0 7
0 7
0 7
0 7
0 7
0 7
0 7
0 7
0 7
0 7
0 7
0 7
0 7
0 7
0 7
0 7
0 7
0 7
0 7
0 7
0 7
0 7
0 7
0 7
0 7
0 7
0 7
0 7
0 7
0 7
0 7
0 7
0 7
0 7
0 7
0 6
0 7
1 7
1 7
1 7
1 7
1 7
1 7
1 7
1 7
1 6
1 6
1 6
1 6
1 6
1 3
1 2
1 2
0 2
0 2
0 2
0 2
0 2
0 2
0 2
0 2
0 2
0 2
0 1
0 1
0 0
0 0
0 0
0 0
0 0
0 0
0 0
0 0
0 0
0 0
0 0
0 0
0 0
0 0
0 0
0 0
0 0
0 0
0 0
0 0
0 0
0 1
0 1
0 1
0 1
0 1
0 1
0 1
0 1
0 2
0 2
0 2
0 2
0 2
0 2
0 2
0 2
0 2
0 2
0 2
0 2
0 2
0 2
0 2
0 2
0 2
0 2
0 2
0 2
0 2
0 2
0 2
0 2
0 2
0 2
0 2
0 2
0 2
0 2
0 2
0 2
0 2
0 2
0 2
0 2
0 2
0 2
0 2
0 2
0 2
0 2
0 2
0 2
0 2
0 2
0 2
0 2
0 2
0 2
0 2
0 2
0 2
0 4
0 4
0 4
0 4
0 4
0 4
0 4
0 4
0 5
0 5
0 5
0 5
0 4
0 4
0 4
0 4
0 4
0 4
0 4
0 4
0 3
0 3
0 3
0 3
0 3
0 3
0 3
0 3
0 3
0 3
0 3
0 3
0 3
0 3
0 3
0 3
0 3
0 3
0 3
0 3
0 3
0 3
0 3
0 3
0 3
0 3
0 3
0 3
0 3
0 3
0 3
0 3
0 3
0 3
0 3
0 3
0 3
0 3
0 3
0 3
0 3
0 3
0 3
0 3
0 3
0 4
0 6
0 6
0 6
0 6
0 6
0 6
0 6
0 4
0 7
0 7
0 7
0 7
0 7
0 7
0 7
0 6
0 6
0 6
0 6
0 6
0 6
0 6
0 6
0 6
0 6
0 6
0 6
0 6
0 6
0 6
0 6
0 6
0 6
0 7
0 7
0 7
0 7
0 7
0 7
0 7
0 7
1 12
1 12
1 12
2 24
2 26
2 26
2 27
2 28
2 29
2 29
2 29
2 29
2 29
2 29
2 29
2 30
2 30
2 30
2 30
2 30
2 30
2 30
2 30
2 30
3 30
3 30
3 30
3 30
3 30
3 30
3 29
3 28
3 27
3 27
3 27
3 27
3 27
3 27
3 27
2 27
1 23
1 23
1 23
1 23
1 23
0 22
0 22
0 22
0 23
0 23
0 23
0 23
0 23
0 23
0 23
0 23
0 23
0 20
0 19
0 19
0 19
0 17
0 17
0 14
0 14
0 14
0 14
0 14
0 14
0 14
0 14
0 14
0 14
0 14
0 14
0 14
0 3
0 3
0 3
0 3
0 3
0 2
0 2
0 2
0 2
0 2
0 2
0 2
0 1
0 1
0 1
0 1
0 1
0 1
0 1
0 1
0 1
0 3
0 3
0 4
0 4
0 5
0 7
0 7
0 10
0 10
0 10
0 10
0 10
0 10
0 11
0 11
0 11
0 11
0 11
0 11
0 11
0 11
0 11
0 12
0 12
0 11
0 11
0 11
0 11
0 12
0 12
0 12
0 12
0 12
0 12
0 12
0 12
0 12
0 12
0 12
0 12
0 12
0 12
0 12
0 12
0 12
0 12
0 12
0 12
0 13
0 16
0 19
0 19
0 19
0 19
0 19
0 19
0 19
0 20
0 20
0 21
0 21
0 21
0 21
0 22
0 22
0 22
0 24
1 24
1 24
1 24
1 24
1 24
1 23
1 22
1 24
1 23
1 23
1 23
1 21
1 21
1 18
1 18
0 18
0 19
0 19
0 19
0 18
0 18
0 18
0 18
0 18
0 18
0 18
0 18
0 18
0 17
0 17
0 17
0 17
0 17
0 17
0 16
0 16
0 16
0 16
0 16
0 16
0 16
0 16
0 16
0 16
0 16
0 16
0 16
0 17
0 18
0 18
0 18
0 18
0 15
0 14
0 14
0 12
0 8
0 7
0 7
0 7
0 7
0 7
0 7
0 6
0 6
0 5
0 5
0 5
0 5
0 5
0 5
0 5
0 4
0 5
0 5
0 5
0 5
0 5
0 5
0 5
0 5
0 4
0 4
0 4
0 4
0 4
0 4
0 4
0 4
0 4
0 4
0 4
0 4
0 4
0 4
0 4
0 4
0 4
0 4
0 4
0 4
0 4
0 4
0 4
0 4
0 4
0 4
0 4
0 4
0 6
0 6
0 6
0 6
0 5
0 5
0 4
0 4
0 5
0 5
0 5
0 5
0 5
0 5
0 5
0 5
0 5
0 5
0 5
0 5
0 5
0 5
0 5
0 5
0 5
0 5
0 5
0 5
0 5
0 5
0 5
0 5
0 5
0 5
0 5
0 5
0 5
0 4
0 4
0 4
0 4
0 4
0 4
0 4
0 4
0 4
0 4
0 5
0 5
0 5
0 5
0 5
0 5
0 4
0 4
0 4
0 4
0 4
0 4
0 4
0 4
0 4
0 7
0 7
0 7
0 7
0 7
0 7
0 10
0 10
0 10
0 10
0 10
0 8
0 9
0 9
0 11
0 12
0 12
0 12
0 12
0 11
0 11
0 11
0 11
0 11
0 11
0 11
0 11
0 11
0 11
0 11
0 11
0 11
0 11
0 11
0 11
0 11
0 11
0 11
0 11
0 11
0 11
0 11
0 11
0 11
0 11
0 11
0 11
0 11
0 11
0 11
0 11
0 11
0 11
0 11
0 11
0 12
0 12
0 11
0 11
0 12
0 12
0 12
0 12
0 12
0 12
0 12
0 12
0 12
0 12
0 12
0 9
0 9
0 10
0 10
0 11
0 12
0 12
0 15
0 15
0 12
0 12
0 15
0 15
0 15
0 16
0 15
0 15
0 13
0 12
0 12
0 12
0 12
0 12
0 12
0 12
0 12
0 12
0 12
0 12
0 12
0 12
0 12
0 12
0 12
0 12
0 12
0 12
0 12
0 12
0 12
0 12
0 12
0 12
0 12
0 12
0 12
0 12
0 12
0 13
0 13
0 13
0 13
0 13
0 13
0 13
0 13
0 13
0 12
0 11
0 9
0 9
0 9
0 9
0 9
0 9
0 9
0 9
0 9
0 9
0 9
0 9
0 9
0 9
0 9
0 9
0 8
0 8
0 8
0 6
0 6
0 4
0 4
0 4
0 4
0 2
0 2
0 2
0 1
0 1
0 1
0 1
0 1
0 1
0 1
0 1
0 1
0 1
0 1
0 1
0 1
0 1
0 1
0 1
0 1
0 1
0 1
0 1
0 1
0 1
0 1
0 1
0 1
0 1
0 1
0 1
0 1
0 1
0 1
0 1
0 1
0 1
0 0
0 0
0 0
0 0
0 0
0 0
0 0
0 0
0 0
0 0
0 0
0 0
0 0
0 1
0 1
0 1
0 1
0 1
0 1
0 1
0 1
0 1
0 1
0 1
0 1
0 1
0 1
0 1
0 4
0 4
0 4
0 7
0 7
0 7
0 7
0 7
0 7
0 7
0 7
0 7
0 7
0 7
0 7
0 7
0 7
0 7
0 7
0 7
0 7
0 7
0 7
0 7
0 7
0 7
0 7
0 7
0 7
0 7
0 7
0 7
0 7
0 7
0 7
0 7
0 7
0 7
0 8
0 8
0 8
0 9
0 14
0 14
0 14
0 14
0 14
0 15
0 15
0 18
0 18
0 18
0 17
0 17
0 17
0 17
0 17
0 17
0 17
0 17
0 17
0 17
0 17
0 17
0 17
0 17
0 17
0 17
0 17
0 17
0 21
0 22
0 22
0 19
0 19
0 19
0 16
0 16
0 16
0 16
0 16
0 16
0 16
0 16
0 16
0 16
0 16
0 16
0 16
0 16
0 16
0 16
0 16
0 16
0 16
0 16
0 16
0 16
0 16
0 16
0 14
0 13
0 13
0 13
0 13
0 13
0 12
0 13
0 13
0 13
0 13
0 13
0 13
0 13
0 13
0 9
0 9
0 7
0 6
0 6
0 6
0 6
0 6
0 6
0 6
0 6
0 6
0 6
0 6
0 6
0 6
0 6
0 6
0 6
0 6
0 6
0 6
0 6
0 6
0 6
0 6
0 6
0 6
0 2
0 1
0 1
0 1
0 1
0 1
0 1
0 1
0 1
0 1
0 1
0 4
0 4
0 4
0 4
0 4
1 4
1 4
1 4
1 4
1 4
1 4
1 4
1 4
1 4
1 4
1 4
1 4
1 4
1 4
1 4
1 4
1 4
1 4
1 4
1 4
1 4
1 3
1 3
1 3
1 3
1 3
1 3
1 3
1 3
1 3
1 3
1 3
1 3
1 3
1 4
1 4
1 6
1 6
1 6
1 9
1 12
1 27
1 34
1 34
1 35
1 36
1 36
1 40
1 41
1 41
1 41
1 41
1 41
1 41
1 41
1 41
1 41
1 41
1 41
1 41
1 41
1 41
1 41
1 41
1 41
1 41
1 41
1 39
1 36
1 34
1 34
1 34
1 34
0 34
0 34
0 35
0 35
0 35
0 35
0 35
0 35
0 35
0 35
0 35
0 35
0 35
0 35
0 33
0 33
0 33
0 33
0 33
0 31
0 35
0 35
0 35
0 35
0 40
0 40
0 40
0 40
0 40
0 40
0 40
0 40
0 40
0 40
0 39
0 39
0 37
0 37
0 37
0 40
0 36
0 24
0 20
0 19
0 19
0 17
0 17
0 16
0 16
0 16
0 16
0 16
0 16
0 16
0 16
0 16
0 16
0 16
0 16
0 16
0 16
0 16
0 16
0 16
0 16
0 16
0 16
0 16
0 16
0 16
0 16
0 16
0 16
0 16
0 16
0 15
0 15
0 15
0 15
0 15
0 15
0 15
0 23
0 23
0 23
0 25
0 25
0 25
0 25
0 29
0 29
0 29
0 30
0 26
0 26
0 26
0 26
0 21
0 21
0 21
0 21
0 21
0 21
0 21
0 22
0 22
0 22
0 23
0 23
0 23
0 23
0 23
0 18
0 18
0 18
0 17
0 17
0 17
0 17
0 17
0 17
0 17
0 17
0 17
0 17
0 17
0 17
0 17
0 17
0 17
0 17
0 17
0 17
0 17
0 17
0 17
0 17
0 17
0 17
0 17
0 17
0 17
0 17
0 17
0 17
0 17
0 17
0 17
0 17
0 17
0 17
0 17
0 17
0 16
0 16
0 7
0 6
0 5
0 5
0 5
0 5
0 5
0 3
0 2
0 2
0 2
0 2
0 2
0 2
0 2
0 2
0 2
0 2
0 2
0 2
0 2
0 2
0 1
0 1
0 1
0 0
0 0
0 0
0 0
0 0
0 0
0 0
0 0
0 0
0 0
0 0
0 0
0 0
0 0
0 0
0 0
0 0
0 0
0 0
0 0
0 0
0 0
0 0
0 0
0 0
0 0
0 0
0 0
0 0
1 0
1 0
1 0
1 0
1 0
1 0
1 0
1 0
1 0
1 0
1 1
1 2
1 3
1 4
1 4
1 4
1 4
1 4
1 5
1 5
1 6
1 7
1 11
1 11
1 19
1 20
1 21
1 21
1 22
1 22
1 22
1 22
1 22
1 22
1 22
1 22
1 22
1 22
1 22
1 22
1 22
1 22
1 22
1 22
1 22
1 22
1 22
1 22
1 22
1 22
1 22
1 22
1 22
1 22
1 22
1 22
1 22
1 22
1 22
1 22
1 22
1 22
1 22
1 22
1 22
1 22
1 22
1 22
1 22
1 22
1 22
1 22
1 22
0 22
0 22
0 22
0 22
0 22
0 22
0 22
0 22
0 22
0 22
0 20
0 18
0 14
0 14
0 14
0 14
0 14
0 17
0 16
0 17
0 17
0 17
0 15
0 14
0 7
0 6
0 5
0 5
0 5
0 5
0 5
0 5
0 5
0 5
0 5
0 5
0 5
0 5
0 5
0 6
0 6
0 6
0 6
0 6
0 6
0 6
0 6
0 6
0 6
0 6
0 6
0 6
0 7
0 7
0 7
0 7
0 7
0 8
0 8
0 8
0 8
0 8
0 8
0 8
0 8
0 8
0 8
0 7
0 7
0 7
0 7
0 7
0 7
0 7
0 7
0 7
0 7
0 7
0 7
0 7
0 7
0 7
0 7
0 7
0 7
0 7
0 7
0 7
0 7
0 7
0 4
0 3
0 4
0 4
0 3
0 3
0 3
0 4
0 4
0 4
0 4
0 4
0 4
0 4
0 4
0 4
0 4
0 4
0 4
0 4
0 4
0 4
0 3
0 3
0 3
0 3
0 3
0 3
0 3
0 3
0 3
0 3
0 3
0 4
0 4
0 4
0 4
0 4
0 4
0 4
0 6
0 7
0 7
0 7
0 7
0 7
0 7
0 7
0 7
0 7
0 7
0 7
0 7
0 7
0 6
0 6
0 6
0 6
0 6
0 6
0 6
0 6
0 6
0 6
0 6
0 6
0 6
0 6
0 7
0 7
0 8
0 8
0 8
0 8
0 8
0 7
0 7
0 7
0 7
0 7
0 7
0 7
0 7
0 7
0 7
0 7
0 7
0 7
0 7
0 7
0 7
0 7
0 7
0 7
0 7
0 7
0 7
0 7
0 7
0 7
0 7
0 7
0 7
0 7
0 7
0 7
0 6
0 6
0 6
0 6
0 6
0 6
0 6
0 3
0 2
0 2
0 2
0 2
0 2
0 2
0 2
0 2
0 2
0 2
0 2
0 2
0 2
0 2
0 2
0 2
0 2
0 2
0 2
0 2
0 2
0 2
0 2
0 2
0 2
0 2
0 2
0 1
0 1
0 0
0 0
0 0
0 0
0 0
0 0
0 1
0 1
0 1
0 1
0 1
0 1
0 1
0 1
0 1
0 1
0 1
0 1
0 1
0 1
0 1
0 1
0 1
0 1
0 1
0 1
0 1
0 1
0 1
0 1
0 1
0 1
0 1
0 1
0 1
0 1
0 1
0 1
0 1
0 1
0 1
0 1
0 2
0 2
0 2
0 2
0 2
0 2
0 2
0 2
0 2
0 2
0 2
0 2
0 2
0 3
0 3
0 5
0 5
0 5
0 5
0 5
0 5
0 5
0 5
0 5
0 5
0 5
0 5
0 5
0 5
0 5
0 5
0 5
0 5
0 5
0 5
0 5
0 5
0 4
0 4
0 4
0 4
0 4
0 4
0 4
0 4
0 4
0 4
0 4
0 4
0 4
0 4
0 4
0 4
0 4
0 4
0 4
0 5
0 5
0 5
0 5
0 5
0 5
0 5
0 5
0 6
0 6
0 6
0 6
0 6
0 6
0 6
0 6
0 6
0 5
0 5
0 5
0 5
0 6
0 8
0 8
0 8
0 16
0 16
0 16
0 17
0 17
0 16
0 22
0 20
0 20
0 20
0 20
0 20
0 20
0 20
0 20
0 20
0 20
0 20
0 20
0 20
0 20
0 21
0 21
0 21
0 21
0 21
0 21
0 21
0 21
0 21
0 21
0 21
0 21
0 21
0 21
0 21
0 21
0 21
0 21
0 21
0 21
0 21
0 21
0 21
0 22
0 22
0 22
0 22
0 20
0 20
0 19
0 19
0 19
0 19
0 19
0 17
0 17
0 17
0 17
0 17
0 17
0 17
0 18
0 18
0 18
0 18
0 18
0 18
0 18
0 17
0 16
0 16
0 16
0 6
0 4
0 4
0 4
0 4
0 4
0 3
0 3
0 3
0 3
0 3
0 3
0 3
0 3
0 3
0 3
0 3
0 3
0 3
0 3
0 3
0 2
0 2
0 2
0 2
0 2
0 2
0 2
0 2
0 2
0 2
0 2
0 2
0 2
0 2
0 2
0 2
0 2
0 2
0 6
0 6
0 6
0 6
0 6
0 5
0 5
0 5
0 5
0 8
0 8
0 8
0 8
0 8
0 8
0 8
0 8
0 8
0 9
0 9
0 9
0 9
0 9
0 8
0 8
0 8
0 8
0 8
0 8
0 8
0 9
0 9
0 12
0 20
0 20
0 20
0 20
0 20
0 20
0 21
0 21
0 22
0 22
0 23
0 24
0 24
0 24
0 24
0 26
0 26
0 26
0 26
0 26
0 26
0 26
0 26
0 26
0 26
0 26
0 26
0 26
0 26
0 26
0 26
0 26
0 26
0 26
0 26
0 26
0 26
0 26
0 26
0 26
0 21
0 21
0 21
0 21
0 20
0 20
0 20
0 20
0 20
0 17
0 17
0 17
0 17
0 17
0 17
0 17
0 17
0 18
0 17
0 17
0 17
0 17
0 17
0 17
0 17
0 17
0 17
0 17
0 17
0 17
0 16
0 16
0 13
0 5
0 5
0 5
0 5
0 5
0 5
0 5
0 5
0 4
0 3
0 3
0 3
0 3
0 3
0 3
0 1
0 2
0 2
0 2
0 2
0 2
0 2
0 2
0 2
0 3
0 3
0 4
0 4
0 4
0 4
0 4
0 4
0 4
0 4
0 5
0 5
0 6
0 6
0 6
0 6
0 6
0 6
0 6
0 6
0 6
0 6
0 6
0 6
0 6
0 6
0 6
0 6
0 6
0 6
0 6
0 5
0 5
0 5
0 5
0 5
0 8
0 8
0 8
0 8
0 8
0 8
0 10
0 10
0 10
0 10
0 14
0 16
0 20
0 20
0 22
0 22
0 22
0 22
0 22
0 22
0 22
0 22
0 22
0 22
0 22
0 22
0 27
0 27
0 27
0 26
0 26
0 26
0 26
0 26
0 26
0 25
0 24
0 23
0 23
0 21
0 21
0 20
0 20
0 20
0 20
0 20
0 20
0 18
0 17
0 16
1 14
1 14
1 14
1 14
1 14
1 14
1 14
1 14
1 14
1 14
1 14
1 14
1 14
1 14
1 14
1 14
1 14
1 14
1 14
1 14
1 14
1 14
1 14
1 12
1 11
1 11
1 11
1 11
1 11
1 11
1 11
1 11
1 10
1 5
1 5
1 5
1 5
1 5
1 5
1 5
1 5
1 5
1 5
1 5
1 5
1 5
1 5
1 5
1 5
1 0
1 0
1 0
1 0
1 0
1 0
1 0
1 0
1 0
1 0
1 0
1 0
2 2
2 3
2 3
2 4
2 4
2 4
2 4
2 4
2 5
2 26
2 26
2 33
1 33
1 35
1 35
1 37
1 48
1 50
1 52
2 117
2 138
2 141
2 147
2 168
2 176
2 194
2 203
2 208
2 216
2 218
2 223
2 224
2 224
2 224
3 292
3 292
3 297
3 300
3 303
3 304
3 304
3 304
3 306
3 307
3 308
3 315
3 315
3 320
3 326
3 329
3 333
3 336
3 336
3 337
3 339
3 339
3 339
3 339
3 339
3 339
3 339
3 339
3 339
3 339
3 339
3 339
3 340
3 340
3 340
3 340
3 340
3 340
3 341
2 340
2 341
2 341
2 342
2 342
2 341
2 341
2 341
2 340
2 318
2 317
2 312
2 312
2 311
2 311
2 305
2 294
2 290
2 286
1 211
1 195
1 189
1 181
1 162
1 145
1 126
1 137
1 139
1 138
1 139
1 139
1 158
1 158
1 156
0 86
0 86
0 128
0 124
0 124
0 124
0 125
0 125
0 125
0 124
0 124
0 116
0 116
0 113
0 107
0 107
0 103
0 103
0 103
0 102
0 100
0 100
0 100
0 100
0 100
0 100
0 100
0 100
0 100
0 101
0 101
0 101
0 101
0 101
0 101
0 101
0 101
0 101
0 100
0 96
0 97
0 97
0 97
0 97
0 97
0 97
0 97
0 97
0 97
0 95
0 95
0 95
0 96
0 97
0 96
0 99
0 99
0 99
0 99
0 99
0 99
0 99
0 99
0 99
0 98
0 82
0 77
0 77
0 76
0 76
0 58
0 58
0 58
0 57
0 57
0 10
0 9
0 9
0 8
0 8
0 8
0 8
0 8
0 8
0 8
0 8
0 8
0 8
0 8
0 8
0 8
0 9
0 9
0 10
0 12
0 12
0 12
0 12
0 12
0 12
0 12
0 12
0 12
0 12
0 12
0 12
0 13
0 13
0 13
0 13
0 13
0 14
0 15
0 14
0 14
0 14
0 14
0 14
0 14
0 14
0 14
0 18
0 19
0 32
0 33
0 33
0 34
0 35
0 32
0 32
0 32
0 32
0 32
0 32
0 32
0 33
0 33
0 34
0 34
0 34
0 32
0 32
0 32
0 32
0 32
0 32
0 32
0 32
0 32
0 32
0 32
0 32
0 32
0 32
0 32
0 32
0 32
0 32
0 32
0 32
0 32
0 32
0 32
0 32
0 31
0 31
0 28
0 28
0 28
0 28
0 28
0 28
0 29
0 29
0 29
0 29
0 29
0 29
0 29
0 28
0 28
0 28
0 28
0 28
0 27
0 26
0 26
0 26
0 26
0 26
0 26
0 26
0 28
0 30
0 34
0 35
0 28
0 27
0 26
0 23
0 23
0 23
0 23
0 23
0 23
0 23
0 23
0 22
0 22
0 22
0 21
0 22
0 22
0 22
0 22
0 22
0 22
0 22
0 22
0 22
0 22
0 30
0 30
0 30
0 30
0 30
0 34
0 34
0 34
0 34
0 34
0 34
0 34
0 34
0 34
0 34
0 34
0 34
0 35
0 35
0 35
0 35
0 35
0 35
0 35
0 34
0 34
0 34
0 35
0 36
0 36
0 36
0 36
0 36
0 36
0 36
0 36
0 36
0 37
0 37
0 38
0 38
0 38
0 38
0 38
0 37
0 35
0 27
0 25
0 19
0 19
0 19
0 19
0 19
0 20
0 20
0 20
0 20
0 20
0 20
0 20
0 20
0 20
0 20
0 19
0 19
0 19
0 19
0 19
0 25
0 26
0 34
0 40
0 43
0 36
0 38
0 39
0 41
0 45
0 44
0 45
0 45
0 45
0 45
0 45
0 45
0 45
0 45
0 45
0 45
0 45
0 45
0 45
0 45
0 45
0 46
0 46
0 46
0 46
0 47
0 47
0 46
0 45
0 48
0 48
0 49
0 56
0 75
0 103
0 109
0 114
0 119
0 119
0 118
0 119
0 119
0 119
0 119
0 118
0 118
0 118
0 118
0 118
0 118
0 118
0 118
0 118
0 111
0 109
0 109
0 108
0 107
0 107
0 107
0 107
0 110
0 110
0 113
0 113
0 113
0 114
0 113
0 110
0 109
0 99
0 99
0 97
0 96
0 96
0 94
0 93
0 84
0 75
0 74
0 74
0 74
0 74
0 74
0 74
0 74
0 74
0 74
0 74
0 74
0 74
0 74
0 74
0 74
0 73
0 73
0 73
0 73
0 72
0 72
0 72
0 72
0 71
0 70
0 67
0 57
0 30
0 19
0 17
0 15
0 16
0 16
0 16
0 15
0 15
0 15
0 15
0 15
0 17
0 17
0 17
0 17
0 17
0 17
0 18
0 19
0 22
0 24
0 28
0 30
0 63
0 65
0 65
0 65
0 63
0 64
0 61
0 65
0 66
0 65
0 65
0 65
0 67
0 71
0 69
0 69
0 69
0 68
0 68
0 68
0 68
0 68
0 68
0 68
0 68
0 68
0 68
0 68
0 68
0 71
0 71
0 71
0 72
0 72
0 72
0 72
0 72
0 72
0 72
0 72
0 72
0 72
0 72
0 72
0 72
0 72
0 72
0 72
0 72
0 68
0 68
0 68
0 68
0 67
0 68
0 68
0 68
0 68
0 67
0 67
0 66
0 65
0 65
0 68
0 69
0 72
0 72
0 72
0 71
0 69
0 68
0 64
0 60
0 30
0 32
0 32
0 33
0 32
0 31
0 31
0 27
0 26
0 28
0 29
0 27
0 27
0 27
0 27
0 27
0 27
0 27
0 27
0 27
0 27
0 27
0 28
0 28
0 30
0 31
0 31
0 31
0 32
0 28
0 28
0 28
0 28
0 28
0 28
0 28
0 28
0 28
0 28
0 28
0 28
0 28
0 28
0 28
0 28
0 28
0 28
0 28
0 28
0 30
0 30
0 30
0 30
0 30
0 29
0 29
0 29
0 29
0 29
0 29
0 29
0 29
0 29
0 25
0 23
0 21
0 21
0 21
0 21
0 19
0 19
0 19
0 14
0 10
0 10
0 10
0 10
0 10
0 10
0 10
0 10
0 9
0 7
0 25
0 25
0 25
0 30
0 30
0 30
0 30
0 30
0 30
0 30
0 30
0 29
0 28
0 28
0 25
0 25
0 25
0 25
0 25
0 26
0 26
0 26
0 26
0 26
0 26
0 26
0 26
0 26
0 26
0 26
0 26
0 26
0 26
0 26
0 28
0 28
0 28
0 28
0 28
0 26
0 26
0 26
0 27
0 28
0 29
0 29
0 29
0 29
0 29
0 29
0 29
0 29
0 29
0 29
0 30
0 34
0 39
0 44
0 44
0 45
0 45
0 45
0 45
0 45
0 45
0 45
0 45
0 45
0 47
0 47
0 48
0 50
0 50
0 32
0 32
0 32
0 27
0 27
0 27
1 28
1 33
1 33
1 33
1 34
1 34
1 34
1 34
1 34
1 34
1 34
1 34
1 33
1 33
1 33
1 33
1 33
1 33
1 33
1 34
1 34
1 34
1 34
0 34
0 34
0 34
0 34
0 32
0 31
0 32
0 33
0 34
0 35
0 35
0 37
0 38
0 37
0 37
0 37
0 37
0 37
0 38
0 38
0 39
0 40
0 40
0 40
0 40
0 39
0 30
0 26
0 26
0 26
0 26
0 26
0 26
0 26
0 26
0 26
0 26
0 26
0 27
0 29
0 29
0 27
0 26
0 26
0 26
0 26
0 29
0 29
0 29
0 33
0 32
0 27
0 27
0 26
0 27
0 27
0 27
0 27
0 27
0 27
0 27
0 27
0 27
0 27
0 27
0 27
0 27
0 27
0 27
0 26
0 26
0 26
0 26
0 26
0 26
0 26
0 26
0 25
0 29
0 28
0 29
0 28
0 27
0 28
0 26
0 26
0 26
0 26
0 26
0 26
0 26
0 25
0 25
0 23
0 24
0 24
0 24
0 24
0 24
0 24
0 22
0 22
0 24
0 24
0 24
0 24
0 24
0 24
0 25
0 25
0 26
0 25
0 21
0 21
0 21
0 21
0 21
0 21
0 21
0 18
0 18
0 21
0 17
0 17
0 17
0 17
0 17
0 16
0 17
0 17
0 17
0 17
0 17
0 17
0 17
0 18
0 18
0 18
0 18
0 18
0 18
0 18
0 18
0 18
0 18
0 20
0 20
0 20
0 21
0 21
0 21
0 14
0 13
0 13
0 13
0 13
0 13
0 13
0 13
0 13
0 13
0 13
0 13
0 13
0 13
0 13
0 13
0 12
0 12
0 12
0 12
0 14
0 14
0 14
0 14
0 12
0 12
0 12
0 12
0 12
0 12
0 11
0 9
0 9
0 9
0 9
0 9
0 9
0 9
0 9
0 9
0 9
0 8
0 8
0 5
0 7
0 7
0 7
0 7
0 8
0 8
0 7
0 7
0 7
0 7
0 7
0 7
0 7
0 7
0 7
0 7
0 7
0 7
0 7
0 7
0 7
0 7
0 8
0 7
0 7
0 7
0 7
0 7
0 7
0 7
0 8
0 9
0 9
0 9
0 9
0 9
0 9
0 9
0 9
0 9
0 9
0 9
0 9
0 9
0 9
0 9
0 9
0 9
0 9
0 7
0 7
0 7
0 7
0 7
0 7
0 7
0 7
0 7
0 7
0 7
0 7
0 7
0 7
0 7
0 7
0 7
0 7
0 7
0 7
0 7
0 7
0 7
0 7
0 5
0 5
0 5
0 5
0 4
0 4
0 4
0 4
0 4
0 4
0 4
0 4
0 4
0 4
0 4
0 4
0 4
0 4
0 4
0 4
0 4
0 4
0 3
0 2
0 2
0 2
0 2
0 2
0 2
0 2
0 1
0 0
0 0
0 0
0 0
0 0
0 0
0 0
0 0
0 0
0 0
0 0
0 0
0 0
0 0
0 0
0 0
0 0
0 0
0 0
0 0
0 0
0 0
0 0
0 0
0 0
0 0
0 0
0 0
0 0
0 0
0 0
0 0
0 0
0 0
0 0
0 4
0 5
0 6
0 6
0 6
0 6
0 6
0 6
0 6
0 6
0 6
0 6
0 6
0 6
0 7
0 3
0 3
0 3
0 3
0 3
0 3
0 3
0 3
0 3
0 3
0 3
0 3
0 3
0 3
0 6
0 6
0 6
0 6
0 6
0 6
0 6
0 6
0 6
0 6
0 6
0 7
0 7
0 7
0 7
0 7
0 7
0 7
0 7
0 7
0 8
0 8
0 8
0 8
0 8
0 8
0 8
0 8
0 8
0 8
0 8
0 8
0 8
0 8
0 8
0 8
0 8
0 8
0 8
0 8
0 8
0 7
0 7
0 7
0 7
0 7
0 6
0 6
0 6
0 6
0 6
0 6
0 6
0 5
0 5
0 5
0 5
0 5
0 5
0 5
0 5
0 5
0 5
0 5
0 5
0 5
0 5
0 5
0 5
0 5
0 5
0 5
0 5
0 2
0 2
0 2
0 2
0 2
0 2
0 2
0 2
0 2
0 2
0 2
0 1
0 1
0 1
0 1
0 1
0 1
0 1
0 1
0 1
0 0
0 1
0 1
0 1
0 1
0 2
0 2
0 2
0 2
0 2
0 2
0 2
0 2
0 2
0 2
0 2
0 2
0 2
0 2
0 2
0 3
0 4
0 4
0 4
0 4
0 4
0 4
0 4
0 4
0 4
0 6
0 6
0 6
0 9
0 9
0 9
0 13
0 13
0 13
0 13
0 13
0 13
0 13
0 13
0 13
0 13
0 13
0 13
0 13
0 13
0 13
0 13
0 13
0 13
0 13
0 13
0 13
0 13
0 13
0 15
0 15
0 15
0 15
0 15
0 15
0 15
0 15
0 16
0 23
0 24
0 26
0 26
0 26
0 26
0 25
0 25
0 25
0 25
0 24
0 24
0 24
0 24
0 24
0 24
0 24
0 24
0 24
0 24
0 24
0 24
0 24
0 24
0 24
0 23
0 22
0 22
0 22
0 22
0 22
0 22
0 22
0 22
0 22
0 20
0 20
0 20
0 17
0 17
0 17
0 13
0 13
0 13
0 13
0 13
0 13
0 13
0 13
0 13
0 13
0 13
0 13
0 13
0 13
0 13
0 13
0 13
0 13
0 13
0 13
0 13
0 13
0 13
0 11
0 11
0 11
0 11
0 11
0 11
0 11
0 11
0 9
0 2
0 0
0 0
0 0
0 0
0 0
0 0
0 0
0 0
0 0
0 0
0 0
0 0
0 0
0 0
0 0
0 0
0 0
0 0
0 0
0 0
0 0
0 0
0 0
0 0
0 0
0 0
0 0
0 0
0 0
0 0
0 0
0 0
0 0
0 0
0 0
0 0
0 0
0 0
0 0
0 0
0 0
0 0
0 0
0 0
0 0
0 0
0 0
0 0
0 0
0 0
0 0
0 0
0 0
0 1
0 1
0 1
0 1
0 1
0 1
0 1
0 1
0 1
0 1
0 1
0 1
0 1
0 1
0 1
0 1
0 1
1 1
1 1
1 1
1 1
1 1
1 1
1 1
1 1
1 1
1 1
1 1
1 1
1 1
1 1
1 1
0 1
0 1
0 1
0 1
0 1
0 1
0 1
0 1
0 2
0 2
0 2
0 2
0 2
0 2
0 2
0 2
0 2
0 2
0 2
0 2
0 2
0 2
0 2
0 2
0 2
0 3
0 3
0 3
0 3
0 3
0 4
0 7
0 10
0 12
0 16
0 17
0 18
0 19
0 19
0 19
0 19
0 18
0 18
0 18
0 18
0 18
0 19
0 19
0 19
0 19
0 19
0 19
0 19
0 19
0 19
0 19
0 19
0 19
0 19
0 19
0 19
0 19
0 19
0 19
0 19
0 19
0 19
0 20
0 20
0 20
0 20
0 20
0 20
0 20
0 21
0 21
0 21
0 21
0 21
0 21
0 21
0 20
0 20
0 20
0 20
0 20
0 20
0 20
0 20
0 20
0 20
0 20
0 20
0 20
0 20
0 19
0 19
0 19
0 18
0 18
0 18
0 16
0 16
0 15
0 10
0 8
0 6
0 4
0 4
0 4
0 3
0 3
0 3
0 3
0 3
0 3
0 3
0 3
0 2
0 2
0 2
0 2
0 4
0 5
0 5
0 5
0 5
0 5
0 5
0 5
0 6
0 6
0 6
0 11
0 11
0 11
0 11
0 11
0 11
0 11
0 10
0 10
0 10
0 11
0 11
0 11
0 11
0 10
0 10
0 10
0 10
0 10
0 10
0 10
0 10
0 10
0 11
0 11
0 12
0 12
0 12
0 12
0 12
0 12
0 12
0 12
0 12
0 12
0 12
0 12
0 12
0 12
0 12
0 12
0 12
0 12
0 12
0 12
0 12
0 12
0 12
0 12
0 12
0 12
0 12
0 12
0 12
0 12
0 12
0 12
0 13
0 13
0 13
0 13
0 13
0 11
0 10
0 10
0 10
0 10
0 11
0 11
0 11
0 10
0 10
0 10
0 5
0 6
0 6
0 6
0 6
0 6
0 7
0 7
0 7
0 7
0 6
0 6
0 6
0 6
0 6
0 6
0 6
0 6
0 6
0 6
0 6
0 6
0 6
0 5
0 5
0 4
0 4
0 4
0 4
0 4
0 4
0 4
0 4
0 4
0 4
0 4
0 4
0 4
0 4
0 4
0 4
0 4
0 4
0 4
0 4
0 4
0 4
1 4
1 4
1 4
1 6
1 6
1 6
1 6
1 6
1 6
1 6
1 5
1 5
1 5
1 5
1 5
1 5
0 5
0 5
0 5
0 5
0 4
0 4
0 4
0 4
0 4
0 4
0 4
0 3
0 3
0 3
0 3
0 3
0 2
0 2
0 2
0 2
0 2
0 2
0 2
0 2
0 2
0 5
4 7
5 8
5 8
5 8
5 8
5 8
5 8
5 8
5 8
5 8
5 8
5 8
5 8
5 8
10 12
10 12
10 12
10 12
10 12
10 12
10 12
10 12
10 12
10 12
10 12
10 12
10 12
10 12
10 12
10 12
12 12
12 12
12 12
12 12
12 10
12 10
12 10
12 10
12 10
12 10
12 10
12 10
12 10
12 10
12 10
12 10
12 10
12 10
12 10
12 10
12 10
12 11
12 11
12 11
12 11
12 11
12 11
12 11
12 11
12 11
12 11
12 11
12 11
12 11
12 11
12 11
12 11
12 11
12 11
12 11
12 11
12 11
12 8
7 5
7 5
7 5
7 5
7 5
7 5
7 5
7 5
7 5
7 5
7 5
7 5
7 5
7 5
1 1
1 1
1 1
1 1
0 1
0 1
0 1
0 1
0 1
0 1
0 1
0 1
0 1
0 1
0 1
0 1
0 1
0 1
0 1
0 1
0 1
0 1
0 1
0 1
0 1
1 1
1 1
1 1
1 1
2 1
2 1
2 1
2 1
2 1
2 1
2 1
2 1
2 0
2 0
2 0
2 0
2 0
2 0
1 0
1 0
1 0
1 0
0 0
0 0
0 0
0 0
0 0
0 0
0 0
0 0
0 0
0 0
0 0
0 0
0 0
0 0
0 0
0 0
0 0
0 0
0 0
0 0
0 0
0 0
0 0
0 0
0 0
0 0
0 0
0 0
0 0
0 0
0 0
0 0
0 0
0 0
0 0
0 0
0 0
0 0
0 0
0 0
0 0
0 0
0 0
0 0
0 0
0 0
0 0
0 0
0 0
0 0
0 0
0 0
0 0
0 5
0 5
0 5
0 5
0 5
0 5
0 5
0 5
0 5
0 5
0 5
0 5
0 5
0 5
0 5
0 5
0 5
0 5
0 5
0 5
0 5
0 5
0 5
0 5
0 5
0 5
0 8
0 10
0 11
0 11
1 11
1 13
1 14
1 14
1 16
1 17
1 17
1 17
1 17
1 17
1 18
1 18
1 20
1 20
1 20
1 20
1 20
1 20
1 20
0 19
0 19
0 19
0 19
0 19
0 19
0 19
0 19
0 21
0 29
0 32
0 40
0 42
0 42
0 42
0 42
0 42
0 42
0 43
0 43
0 43
0 43
0 44
0 45
0 40
0 40
0 40
0 41
0 41
0 41
0 41
0 41
0 41
0 42
0 45
0 46
0 46
0 46
0 46
0 46
0 46
0 46
0 46
0 47
0 53
0 58
0 63
0 63
0 73
0 74
0 76
0 78
0 99
0 102
0 102
0 101
0 101
0 101
0 99
0 100
0 100
0 108
0 111
0 131
0 146
0 146
0 144
0 144
0 145
0 146
0 148
0 159
0 160
0 160
0 161
0 161
0 164
0 165
0 165
0 165
0 165
0 162
0 153
0 150
0 142
0 142
0 142
0 146
0 146
0 146
0 145
0 145
0 145
0 145
0 145
0 144
0 143
0 143
0 143
0 143
0 142
0 142
0 142
0 142
0 141
0 141
0 139
0 137
0 137
0 137
0 137
0 137
0 137
0 137
0 137
0 136
0 133
0 126
0 124
0 121
0 118
0 112
0 104
0 96
0 95
0 66
0 56
0 54
0 54
0 54
0 54
0 54
0 51
0 50
0 38
0 36
0 12
0 8
0 8
0 4
0 4
0 4
0 4
0 4
0 4
0 4
0 4
0 4
0 4
0 4
0 4
0 4
0 4
0 4
0 4
0 4
0 4
0 4
0 4
0 4
0 1
0 1
0 1
0 0
0 0
0 0
0 0
0 0
0 0
0 0
0 0
0 0
0 0
0 0
1 0
1 0
1 0
1 0
1 0
1 0
1 0
1 0
1 0
1 0
1 0
1 0
1 0
1 0
1 0
1 0
1 0
1 0
1 0
1 0
1 0
1 0
1 0
1 0
1 0
1 0
1 0
1 0
1 0
1 0
1 0
1 0
1 0
1 0
1 0
1 0
1 0
1 0
1 0
1 0
1 0
1 0
0 0
0 0
0 0
0 0
0 0
0 0
0 0
0 0
0 0
0 0
0 0
0 0
0 0
0 0
0 0
0 0
0 0
0 0
0 0
0 0
0 0
0 0
0 0
0 0
0 0
0 0
0 0
0 0
0 0
0 0
1 0
1 0
1 0
1 0
1 0
1 0
1 0
1 0
1 0
1 0
1 0
1 0
1 0
1 0
1 0
1 0
0 0
0 0
0 0
0 0
0 0
0 0
0 0
0 0
0 0
0 0
0 0
0 0
0 0
6 0
6 0
6 0
6 0
6 0
6 0
7 0
7 0
7 0
7 0
7 0
7 0
7 0
7 0
7 0
7 0
7 0
7 0
7 0
7 0
7 0
7 0
7 0
7 0
7 0
7 0
7 0
7 0
7 0
7 0
7 0
8 0
8 0
8 0
8 0
8 0
8 0
8 0
8 0
9 0
9 0
9 0
11 0
25 0
41 1
42 1
42 1
43 1
45 1
45 1
45 1
45 1
45 1
45 1
51 1
52 1
54 2
58 2
58 2
58 2
59 2
59 2
59 2
59 2
59 2
59 2
59 2
59 2
59 2
59 2
59 2
58 3
58 3
53 3
54 3
57 3
79 3
90 3
92 3
92 3
92 3
92 3
92 3
92 3
92 3
92 3
92 3
92 2
92 2
92 2
92 2
93 2
93 2
93 2
93 2
93 2
93 2
93 2
93 2
93 2
93 2
101 2
101 2
101 2
100 2
100 2
101 2
101 2
103 2
103 2
103 2
103 2
103 2
110 2
112 2
124 2
124 2
113 1
115 1
114 2
115 2
113 2
113 2
113 2
113 2
113 2
112 2
105 2
104 2
104 1
100 1
100 1
99 1
99 1
99 1
99 1
99 1
102 1
103 1
104 1
109 1
127 1
138 1
145 1
145 1
147 1
147 1
148 1
143 1
121 1
110 1
110 1
109 1
109 1
107 1
107 1
107 1
107 1
107 1
107 1
107 1
107 1
107 1
107 1
106 1
108 1
108 1
108 1
108 1
108 1
108 1
108 1
108 1
108 1
100 1
100 1
100 1
100 1
100 1
99 1
99 1
97 1
97 1
96 1
96 1
94 1
83 1
81 1
61 1
54 1
54 1
53 0
53 0
53 0
53 0
53 0
53 0
55 0
58 0
60 0
62 0
62 0
64 0
69 0
79 0
79 0
104 0
193 0
251 0
280 0
292 0
312 0
330 0
342 0
362 0
361 0
358 0
357 0
356 0
356 0
356 0
356 0
356 0
356 0
359 0
361 0
361 0
370 0
392 0
400 0
402 0
411 0
411 0
411 0
411 0
411 0
411 0
411 0
410 0
411 0
413 0
413 0
415 0
415 0
415 0
415 0
415 0
415 0
416 0
418 0
418 0
419 1
419 2
419 2
419 2
419 2
419 2
419 2
419 2
418 2
418 2
418 2
418 2
417 2
417 2
413 2
406 2
435 3
440 3
463 4
434 5
408 6
382 6
353 6
347 6
326 6
366 6
359 6
357 6
349 6
279 6
268 6
246 6
232 6
215 8
198 8
194 8
178 8
175 8
175 8
176 8
176 8
176 8
177 8
177 8
177 8
177 8
176 8
174 8
172 8
170 8
155 8
233 8
415 9
433 9
442 9
442 9
443 9
445 10
446 11
448 11
464 11
467 11
465 11
466 11
464 11
466 11
466 11
472 11
473 11
473 11
476 11
477 10
479 12
479 12
479 11
479 11
479 12
479 12
479 13
479 13
480 13
480 13
480 13
480 14
480 14
480 16
479 16
478 16
471 16
443 14
433 13
405 12
404 12
404 12
404 12
402 12
398 12
399 12
356 12
355 12
355 12
355 12
354 11
354 10
354 10
354 10
355 8
355 8
355 8
355 8
355 8
355 8
354 8
354 8
355 8
354 8
354 8
354 8
349 8
350 8
349 8
347 8
321 8
297 8
197 8
66 7
48 7
43 7
43 7
41 7
40 7
40 7
39 7
24 7
23 7
24 7
22 7
23 7
23 7
22 7
19 7
18 8
18 8
15 9
12 9
10 7
10 8
10 8
10 8
10 7
10 7
10 7
10 6
10 6
10 6
10 5
10 5
10 7
10 7
10 7
10 8
10 12
11 13
11 13
11 19
11 19
11 33
12 34
12 36
12 38
11 38
11 39
11 41
11 43
11 43
11 43
11 43
11 43
11 43
10 43
10 43
10 43
11 43
11 43
11 43
11 43
20 43
19 43
19 43
19 43
21 43
21 43
33 44
35 44
34 44
34 44
34 44
34 44
34 44
40 50
40 51
43 53
42 53
42 53
42 53
43 53
44 53
46 56
53 68
52 77
54 79
54 80
54 80
54 80
54 77
54 76
56 75
56 75
56 75
56 75
56 75
56 76
56 76
56 77
56 77
56 77
56 77
56 79
56 79
56 80
56 77
56 78
56 78
56 78
56 79
55 76
55 71
55 70
55 69
55 52
54 53
54 53
54 55
54 54
54 52
54 51
54 50
54 50
54 50
54 50
54 50
54 51
54 62
54 68
54 74
53 82
51 83
51 83
51 83
43 83
43 83
43 83
41 83
37 83
37 83
21 79
19 79
20 79
19 79
19 79
19 79
18 78
11 69
6 67
3 65
1 63
1 63
1 63
1 62
1 62
1 59
1 48
1 46
1 46
1 46
1 46
1 47
1 47
1 48
1 47
1 45
1 43
1 43
1 43
1 42
1 43
1 42
1 42
1 42
1 43
1 43
1 43
1 42
1 42
1 42
1 42
1 42
3 41
3 42
3 43
3 58
3 59
3 67
3 67
3 67
3 66
3 67
3 67
3 68
3 78
3 78
3 80
3 81
1 81
1 80
1 70
1 63
1 55
1 52
1 52
1 52
1 52
1 53
1 54
1 54
1 54
1 68
0 70
0 77
0 80
0 81
0 81
0 82
0 82
0 82
0 82
0 81
0 81
0 81
0 81
0 81
0 81
0 86
0 86
0 86
0 87
0 87
0 88
0 93
0 93
0 95
0 96
0 100
0 100
0 101
0 101
0 101
0 101
0 101
0 101
0 101
0 101
0 100
0 100
0 100
0 100
0 99
0 99
0 99
0 99
0 99
0 98
0 96
0 82
0 81
0 72
0 72
0 74
0 75
0 75
0 75
0 100
0 91
0 91
0 87
0 87
0 87
0 87
0 87
0 87
0 87
0 84
0 84
0 84
0 84
0 83
0 82
0 82
0 81
0 61
0 56
0 56
0 56
0 56
0 55
0 54
0 54
0 54
0 54
0 54
0 55
0 55
0 55
0 55
0 56
0 51
0 51
0 51
0 50
0 50
0 49
0 42
0 41
0 41
0 39
0 35
0 34
0 34
0 34
0 34
0 35
0 35
0 36
0 38
0 39
0 39
0 39
0 39
0 39
0 39
0 39
0 39
0 39
0 39
0 39
0 40
0 39
0 39
0 39
0 39
0 37
0 36
0 36
0 35
0 8
0 8
0 8
0 8
0 8
0 8
0 8
0 8
0 9
0 9
0 9
0 10
0 10
0 10
0 10
0 10
0 10
0 13
0 13
0 14
0 14
0 15
0 34
0 34
0 34
0 34
0 34
0 34
0 34
0 34
0 36
0 38
0 39
0 39
0 42
0 42
0 43
0 43
0 44
0 44
0 44
0 45
0 44
0 45
0 45
0 45
0 45
0 53
0 53
0 52
0 52
0 51
0 48
0 48
0 48
0 48
0 48
0 49
0 49
0 49
0 49
0 49
0 49
0 49
0 48
0 48
0 48
0 48
0 48
0 48
0 49
0 50
0 50
0 50
0 50
0 50
0 51
0 51
0 51
0 51
0 50
0 48
0 48
0 48
0 48
0 48
0 48
0 48
0 48
0 48
0 45
0 46
0 47
0 47
0 45
0 25
0 22
0 22
0 22
0 22
0 22
0 22
0 22
0 20
0 41
0 41
0 42
0 40
0 39
0 39
0 39
1 39
1 39
1 39
1 38
1 38
1 38
1 38
1 38
1 38
1 31
1 31
1 31
1 31
1 31
1 31
1 31
1 31
1 31
1 31
1 30
1 30
1 30
1 38
1 38
1 38
1 69
1 69
1 71
1 75
1 76
1 76
1 75
1 74
1 78
1 78
1 82
1 84
1 84
1 84
1 84
1 84
1 85
1 84
1 84
1 84
1 84
1 84
1 94
1 94
1 94
1 94
1 94
1 94
1 93
1 91
1 92
1 93
1 93
1 93
1 101
1 103
1 107
2 117
2 131
2 136
2 137
2 112
2 120
2 116
2 116
2 117
2 118
2 119
1 120
1 120
1 120
1 120
1 120
0 120
0 120
0 121
0 121
0 123
0 123
0 125
0 125
0 125
0 125
0 125
0 131
0 133
0 136
1 140
1 140
1 141
1 142
1 142
1 142
1 113
1 116
1 116
1 117
1 119
2 121
2 121
2 121
2 116
2 114
2 109
2 106
2 114
2 114
2 114
2 114
2 114
2 114
2 114
2 114
2 114
2 115
2 101
2 101
2 96
2 96
2 96
2 96
2 96
2 96
2 95
3 91
3 90
3 89
3 82
3 79
3 78
3 67
3 63
3 59
3 59
4 59
4 49
4 48
4 47
4 46
4 45
4 44
4 43
4 43
4 43
4 43
4 43
4 44
4 47
4 46
4 46
4 44
4 44
6 44
6 44
6 44
6 44
6 44
6 38
6 35
6 31
5 27
5 27
5 27
5 27
5 27
5 27
5 24
5 22
5 21
3 21
3 20
3 20
3 19
4 20
4 20
4 20
4 20
4 19
4 11
4 11
4 11
4 11
4 12
4 12
4 12
4 12
4 12
4 11
4 11
4 11
4 11
4 11
4 11
4 11
4 11
4 11
4 11
4 11
4 11
4 11
4 11
4 11
4 11
4 10
4 10
4 10
4 10
3 10
3 10
3 10
3 10
3 10
3 10
3 10
3 10
3 10
3 10
3 10
3 10
3 9
3 6
3 6
3 6
3 6
3 6
1 4
1 4
1 4
1 4
1 4
1 4
1 4
1 4
1 4
1 4
1 4
1 5
1 5
1 5
1 5
0 5
0 5
0 5
0 4
0 4
0 4
0 3
0 4
0 5
0 5
0 5
0 4
0 4
0 4
0 4
0 3
0 3
0 3
0 3
0 3
0 3
0 3
0 4
0 4
0 4
0 4
0 4
0 4
0 4
0 5
0 5
0 5
0 5
0 5
2 5
2 5
2 5
2 4
2 4
2 4
2 4
2 4
2 4
2 9
2 10
2 11
2 11
2 12
2 13
2 13
2 13
2 13
2 13
2 13
2 13
2 13
2 13
2 13
2 13
2 14
2 14
2 15
2 16
2 16
2 16
2 16
2 16
2 16
2 16
2 15
2 15
2 15
2 15
2 15
2 15
2 15
2 15
2 15
2 15
2 15
2 14
2 13
2 13
2 13
2 13
2 13
2 13
2 13
2 13
2 13
2 13
2 13
2 13
2 13
2 13
2 13
2 14
2 15
3 16
5 16
5 16
5 16
5 15
5 15
5 16
5 17
5 17
3 17
3 17
3 17
3 17
3 17
3 17
3 17
3 18
3 18
3 11
3 11
3 11
3 11
3 10
3 9
3 10
3 10
3 10
3 10
3 10
3 10
3 12
3 12
3 12
3 12
3 11
3 11
3 9
3 9
3 10
3 11
3 11
5 23
5 25
5 28
5 30
5 30
5 30
5 32
5 32
5 32
5 32
5 34
5 34
5 34
5 34
5 34
5 34
5 34
5 34
5 34
5 34
6 34
6 34
6 34
6 34
6 34
6 34
6 34
6 34
6 35
6 35
6 34
6 33
5 32
3 32
3 32
3 32
3 32
3 30
3 30
3 30
3 30
4 30
4 30
4 30
4 30
4 30
4 30
4 29
4 27
4 29
4 30
4 30
4 30
4 30
4 30
4 29
4 31
5 34
5 34
5 35
5 35
5 35
5 32
5 32
5 31
5 31
5 31
5 31
5 31
5 31
5 31
5 30
5 28
3 17
3 16
3 16
3 19
5 21
6 22
6 21
6 21
6 21
6 21
6 19
6 19
6 19
6 20
6 20
6 21
6 21
6 21
6 21
6 22
5 22
5 22
5 22
5 22
5 22
5 25
7 30
7 29
7 29
7 29
7 29
7 31
7 32
7 32
7 32
7 33
7 34
9 34
9 34
9 35
9 35
8 35
8 35
8 39
9 39
9 39
9 39
9 39
9 39
9 37
9 36
9 36
9 36
9 36
9 37
9 36
8 35
8 32
8 33
9 32
9 32
9 32
9 32
9 32
9 32
9 32
9 32
9 32
9 32
9 32
9 32
11 32
13 32
29 36
30 36
30 36
30 31
27 30
27 29
27 29
27 29
27 29
27 29
29 30
29 30
29 32
29 31
29 31
29 29
29 27
29 27
29 27
29 26
29 26
29 26
29 26
29 25
29 25
29 21
27 18
27 18
27 18
27 18
27 18
27 17
27 16
27 18
27 18
27 19
27 19
25 22
25 29
25 36
25 40
25 50
25 50
24 49
24 59
24 60
24 60
24 60
24 60
24 68
24 69
24 70
24 71
24 72
24 71
24 72
24 72
24 78
24 79
23 79
23 79
23 79
23 79
23 79
23 79
23 79
23 79
23 79
23 79
22 79
20 79
10 79
5 77
1 76
1 76
1 76
1 76
1 76
1 76
1 76
1 76
1 78
0 78
0 77
0 77
0 75
0 76
0 76
0 76
0 76
0 76
0 76
0 77
0 77
0 77
0 77
0 77
0 77
0 77
0 77
0 77
0 77
0 77
0 77
0 78
0 78
0 77
0 78
0 78
0 77
0 73
0 64
0 57
0 52
0 43
0 40
0 39
0 36
0 35
0 36
0 36
0 38
0 28
0 27
0 28
0 28
0 27
0 27
0 27
0 27
0 19
0 19
0 19
0 19
0 19
0 19
0 19
0 21
0 21
0 21
0 22
0 22
0 22
0 21
0 21
0 20
0 19
0 19
0 19
0 19
0 18
0 18
0 18
0 18
0 17
0 17
0 17
0 17
0 17
0 15
0 14
0 15
0 15
0 15
0 15
0 14
0 14
0 14
0 14
0 14
0 14
0 14
0 14
0 15
0 15
1 17
1 17
1 17
1 19
1 18
1 17
1 17
1 17
1 17
1 20
1 20
1 20
1 18
1 18
1 19
1 18
1 19
1 18
1 18
1 16
1 16
1 15
1 15
1 15
1 15
1 15
1 15
1 15
1 15
1 15
1 19
1 19
1 19
1 19
1 20
1 26
1 48
1 48
1 47
1 48
1 48
1 48
1 48
1 48
1 48
1 49
1 51
1 51
1 51
1 51
1 51
1 51
1 51
1 51
1 51
1 51
1 51
1 51
1 51
1 50
1 50
1 50
1 50
1 54
1 54
1 54
1 56
1 59
1 60
1 61
1 62
1 61
1 63
0 60
0 60
0 60
0 58
0 58
0 58
0 58
0 58
0 58
0 54
0 48
0 48
0 45
0 45
0 44
0 44
0 43
0 43
0 43
0 43
0 43
0 43
0 43
0 43
0 43
0 43
0 43
0 44
0 44
0 46
0 39
0 40
0 40
0 40
0 40
0 36
1 27
1 27
1 27
1 27
1 27
1 28
1 29
1 29
1 29
1 29
1 27
1 28
1 28
1 28
1 30
1 31
1 31
1 31
1 31
1 31
1 34
1 34
1 34
1 34
1 34
1 35
1 35
1 31
1 35
1 36
1 34
1 31
1 28
1 27
1 26
1 26
1 24
1 27
1 28
1 28
1 28
1 28
1 29
1 29
3 38
3 38
3 38
3 38
3 38
3 38
3 38
3 38
3 38
3 38
3 38
3 38
3 38
3 41
3 41
3 41
3 41
3 41
3 41
3 41
3 40
3 41
3 39
3 39
3 39
3 39
3 41
3 42
3 42
2 48
2 48
2 47
2 50
2 55
2 56
2 56
2 57
2 59
2 60
2 60
2 59
2 59
2 59
2 55
2 55
2 55
2 55
2 57
2 57
2 54
2 54
2 54
2 54
2 54
2 53
2 53
2 52
2 48
2 48
2 48
2 48
2 48
2 48
2 48
2 48
2 48
2 47
2 46
2 45
2 45
2 45
2 45
2 45
0 34
0 34
0 34
0 34
0 34
0 32
1 48
1 49
1 49
1 49
1 49
1 49
1 49
1 46
1 46
1 46
1 46
1 46
1 46
1 46
1 45
1 45
1 45
1 48
1 48
1 48
1 46
1 45
1 42
1 27
1 26
1 26
1 26
1 26
1 26
1 26
1 25
1 24
1 24
1 24
1 24
1 24
1 24
1 25
1 24
1 25
1 25
1 23
1 23
1 23
1 23
1 23
1 23
1 23
1 23
1 23
1 23
1 23
1 24
1 24
1 24
1 24
1 24
1 24
1 29
1 30
1 34
1 34
1 34
1 36
1 36
1 36
1 36
1 36
1 36
1 36
1 36
1 36
1 35
0 19
0 28
0 28
0 28
0 28
0 28
0 28
0 28
0 28
0 28
0 28
0 28
0 28
0 28
0 28
0 28
0 28
0 25
0 25
1 25
1 25
1 26
1 27
1 26
1 26
1 26
1 26
1 26
1 27
1 27
1 33
1 33
1 33
1 34
1 35
1 35
1 35
1 34
1 35
1 35
1 35
1 35
1 35
1 35
1 35
1 35
1 35
1 35
1 35
1 35
1 35
1 39
1 45
1 73
2 77
2 82
3 82
3 98
3 108
3 120
3 123
3 132
3 136
3 136
3 141
3 144
3 144
3 144
3 144
3 145
3 145
3 145
3 145
3 151
3 142
3 143
3 143
3 144
3 144
3 144
3 144
3 144
3 144
3 144
3 144
3 149
3 149
3 154
3 154
3 154
3 155
3 155
2 155
2 154
2 153
2 152
2 152
2 152
2 152
2 152
2 152
2 151
2 151
2 142
2 138
2 138
2 138
2 137
2 137
2 137
2 135
2 133
2 132
2 132
2 132
2 132
2 132
2 132
2 133
2 133
2 133
2 134
2 134
2 134
2 128
2 118
1 63
0 53
0 52
0 52
0 51
0 36
0 31
0 26
0 24
0 22
0 19
0 17
0 18
0 18
0 18
0 17
0 17
0 17
0 17
0 17
0 10
0 10
0 8
0 8
0 8
0 8
0 8
0 8
0 8
0 8
0 8
0 8
0 7
0 7
0 7
0 7
0 7
0 7
0 7
1 9
2 9
2 9
2 9
2 9
2 9
2 9
2 9
2 9
2 9
2 9
2 9
2 9
2 9
2 9
2 9
2 9
2 9
2 9
2 9
2 9
2 9
2 9
2 11
2 11
2 11
2 10
2 10
2 10
2 9
2 8
2 8
2 7
2 7
2 6
2 6
2 6
2 6
2 6
2 6
2 6
2 6
2 6
2 6
2 8
2 8
2 7
2 7
2 7
2 7
2 8
2 8
2 8
2 8
2 9
2 9
2 8
2 8
2 8
2 8
2 8
2 8
2 8
2 8
2 8
2 8
2 8
2 8
2 8
2 8
2 8
2 8
2 8
1 6
0 6
0 6
0 6
0 6
0 6
0 6
0 6
0 6
0 6
0 6
0 6
0 8
0 9
0 11
0 11
0 11
0 11
0 11
0 11
0 11
0 11
0 10
0 9
0 9
0 9
0 9
0 9
0 9
0 9
0 9
0 9
0 9
0 9
0 9
0 9
0 9
0 9
0 9
0 9
0 9
0 9
0 9
0 9
0 7
0 7
0 7
0 7
0 7
0 7
0 6
0 6
0 6
0 6
0 5
0 5
0 5
0 5
0 5
0 5
0 5
0 5
0 5
0 5
0 5
0 5
0 5
0 5
0 5
0 5
0 5
0 7
0 7
0 7
0 7
0 7
0 7
0 7
0 8
0 10
0 16
0 16
0 17
0 17
1 17
1 15
1 14
1 12
1 12
1 12
1 12
1 12
1 12
1 12
1 12
1 12
1 12
1 12
1 12
1 12
0 12
0 12
0 13
0 13
0 13
0 13
0 13
0 13
0 13
0 13
0 13
0 13
0 13
0 13
0 13
0 13
0 13
0 13
0 13
0 13
0 13
0 13
0 13
0 13
0 13
0 13
0 13
0 13
0 13
0 13
0 13
0 13
0 13
0 13
0 13
0 13
0 13
0 13
0 13
0 13
0 13
0 13
0 14
0 14
2 12
3 12
3 12
3 13
3 13
3 13
3 12
3 12
3 11
3 5
3 5
3 5
3 5
3 6
3 6
3 6
3 6
3 7
3 7
3 7
3 7
3 7
3 7
3 8
3 8
3 8
3 8
3 8
3 9
3 9
3 9
3 8
3 10
3 10
3 10
3 10
3 10
3 10
3 10
3 10
3 10
3 10
3 10
3 10
3 10
3 10
3 10
3 10
3 10
3 10
3 10
3 10
3 10
3 10
3 10
3 10
3 10
3 10
3 10
3 12
3 12
3 13
3 13
3 21
3 21
3 24
3 24
3 33
3 35
3 36
3 35
3 35
3 35
1 35
0 35
0 35
0 35
0 35
0 35
0 34
0 42
0 41
0 43
0 43
1 42
1 41
1 41
1 41
1 41
1 41
1 41
1 41
1 41
1 41
1 41
1 41
1 40
1 40
1 40
1 40
1 40
1 39
1 39
1 39
1 39
1 37
1 37
1 37
1 37
1 37
1 37
1 37
1 37
1 37
1 37
1 37
1 37
1 37
1 37
1 37
1 37
1 37
1 37
1 37
1 37
1 37
1 37
1 37
1 37
1 37
1 37
1 37
1 35
1 34
1 35
1 35
1 30
1 30
1 26
1 26
1 15
1 15
1 14
1 13
1 13
1 13
1 13
1 13
1 13
1 13
1 13
1 13
1 13
1 5
1 5
1 5
1 5
0 5
0 5
0 5
0 5
0 5
0 5
0 6
0 6
0 6
0 6
0 6
0 6
0 6
0 6
0 6
0 6
0 6
0 6
0 6
0 6
0 6
0 6
0 6
0 6
0 6
0 6
0 6
0 6
0 6
0 6
0 6
0 9
0 9
0 9
0 9
0 9
0 9
0 9
0 9
0 9
0 9
0 10
0 10
0 10
0 12
0 12
0 12
0 12
0 12
0 12
0 11
0 11
0 8
0 8
0 8
0 8
0 8
0 8
0 8
0 8
0 8
0 8
0 8
0 8
0 8
0 8
0 8
0 8
0 7
0 7
0 8
0 14
0 24
0 43
0 50
0 53
0 56
0 60
0 61
0 60
0 60
0 61
0 64
0 64
0 64
0 65
0 65
0 65
0 65
0 65
0 65
0 67
0 69
0 69
0 69
0 71
0 71
0 73
0 74
0 83
0 88
0 95
0 102
0 106
0 104
0 108
1 110
1 115
1 115
1 118
1 119
1 119
1 119
1 119
1 118
1 118
1 118
1 116
1 116
1 116
1 116
0 116
0 116
0 116
0 116
0 116
0 116
0 116
0 116
0 117
0 117
0 117
0 119
0 119
0 119
0 119
0 119
0 119
0 119
0 119
0 119
0 119
0 119
0 119
0 110
0 98
0 72
0 68
0 67
0 66
0 66
0 66
0 66
0 65
0 65
0 62
0 62
0 61
0 61
0 61
0 61
0 61
0 61
0 62
0 60
0 58
0 58
0 58
0 56
0 56
0 53
0 51
0 42
0 37
0 26
0 22
0 18
0 17
0 12
0 12
0 7
0 7
0 4
0 3
0 3
0 3
0 3
0 3
0 3
0 3
0 3
0 3
0 3
0 3
0 4
0 4
0 4
0 4
0 4
0 4
0 4
0 4
1 3
1 3
1 3
1 3
1 3
1 3
1 3
1 3
1 3
1 3
1 3
1 3
1 3
1 3
1 2
0 2
0 2
0 2
0 2
0 2
0 3
0 3
0 3
0 3
0 3
0 3
0 3
0 3
0 3
0 3
0 3
0 3
0 3
0 3
0 4
0 4
0 5
0 5
0 6
0 6
0 7
0 7
0 7
0 8
0 8
0 8
0 10
0 10
0 10
0 10
0 13
0 14
0 14
0 14
0 14
0 15
0 15
0 15
0 15
0 15
0 15
0 15
0 15
0 15
0 15
0 14
0 15
0 15
0 15
0 15
0 15
0 15
0 15
0 15
0 15
0 15
0 15
0 15
0 15
0 15
0 15
0 15
0 16
0 16
0 16
0 16
0 16
0 17
0 18
0 18
0 18
0 18
0 18
0 17
0 17
0 17
0 18
0 19
0 19
0 19
0 19
0 19
0 19
0 19
0 20
0 20
0 20
0 19
0 19
0 18
0 21
0 20
0 20
0 19
0 19
0 19
0 18
0 17
0 16
0 14
0 13
0 13
0 13
0 10
0 9
0 9
0 9
0 9
0 8
0 8
0 8
0 8
0 8
0 8
0 8
0 9
0 9
0 9
0 9
0 8
0 8
0 9
0 9
0 9
0 9
0 9
0 9
0 9
0 9
0 9
0 9
0 10
0 10
0 10
0 10
0 9
0 9
0 9
0 9
0 9
0 8
0 7
0 7
0 7
0 7
0 7
0 7
0 7
0 7
0 7
0 7
0 7
0 8
0 11
0 12
0 12
0 12
0 15
0 15
0 15
0 45
0 49
0 54
0 52
0 57
0 58
0 63
0 69
0 76
0 76
0 76
0 76
0 76
0 76
0 76
0 76
0 76
0 76
0 76
0 76
0 76
0 76
0 76
0 76
0 78
0 78
0 78
0 78
0 77
0 77
0 77
0 77
0 77
0 77
0 76
0 76
0 76
0 76
0 76
0 79
0 79
0 79
0 80
0 82
0 82
0 82
0 82
0 82
0 82
0 83
0 83
0 83
0 83
0 87
0 87
0 87
0 87
0 87
0 87
0 87
0 87
0 87
0 87
0 87
0 86
0 86
0 83
0 83
0 83
0 83
0 79
0 78
0 76
0 40
0 34
0 29
0 29
0 29
0 28
0 24
0 16
0 13
0 13
0 13
0 13
0 13
0 13
0 17
0 17
0 18
0 18
0 19
0 22
0 22
0 22
0 22
0 22
0 21
0 21
0 21
0 21
0 21
0 21
0 21
0 21
0 21
0 21
0 21
0 21
0 21
0 21
0 21
0 18
0 18
0 18
0 32
0 29
0 27
0 27
0 27
0 27
0 27
0 27
0 27
0 27
0 27
0 24
0 24
0 24
0 24
0 24
0 24
0 24
0 24
0 24
0 24
0 29
0 29
0 29
0 31
0 31
0 31
0 31
0 35
0 36
0 38
0 38
0 38
0 38
0 38
1 38
1 38
1 38
1 38
1 41
1 42
1 42
1 42
1 42
1 43
1 39
1 38
1 38
1 38
1 37
1 34
1 34
0 34
0 34
0 34
0 34
0 34
0 34
0 35
0 37
0 39
0 40
0 40
0 41
0 41
0 41
0 41
0 41
0 41
0 41
0 43
0 43
0 44
0 28
0 28
0 28
0 28
0 25
0 25
0 25
0 25
0 25
0 25
0 25
0 25
0 25
0 25
0 25
0 25
0 25
0 25
0 25
0 25
0 25
0 20
0 20
0 20
0 20
0 20
0 20
0 19
0 16
0 16
0 16
0 16
0 16
0 16
0 17
0 20
0 20
0 20
0 20
0 16
0 16
0 16
0 16
0 16
0 15
0 15
0 15
0 15
0 15
0 15
0 15
0 15
0 15
0 15
0 15
0 16
0 16
0 16
0 14
0 11
0 11
0 12
0 12
0 10
0 10
0 9
0 9
0 9
0 9
0 9
0 9
0 9
0 8
0 7
0 7
0 11
0 13
0 16
0 18
0 18
0 18
0 18
0 18
0 18
0 18
0 18
0 18
0 19
0 23
0 26
0 26
0 26
0 26
0 26
0 26
0 26
0 26
0 26
0 26
0 26
0 30
0 30
0 30
0 30
0 31
0 32
0 32
0 31
0 29
0 29
0 29
0 29
0 29
0 29
0 29
0 29
0 29
0 29
0 29
0 29
0 29
0 30
0 30
0 30
0 30
0 30
0 31
0 31
0 30
0 30
0 28
0 28
1 28
1 29
1 27
1 27
1 27
1 27
1 27
1 27
1 27
1 27
1 27
1 29
1 31
1 103
1 106
1 110
0 106
0 106
0 104
0 110
0 115
0 120
0 132
0 132
0 138
0 139
0 140
0 140
0 140
0 140
0 137
0 137
0 138
0 138
0 138
0 138
0 138
0 138
0 138
0 138
0 138
0 134
0 134
0 133
0 133
0 133
0 132
0 132
0 132
0 131
0 131
0 131
0 132
0 134
0 135
0 137
0 137
0 137
0 139
0 143
0 144
0 144
0 143
0 143
0 143
0 143
0 143
0 143
0 143
0 143
0 143
0 143
0 144
0 144
0 142
0 141
0 141
0 141
0 149
0 149
0 149
0 161
0 163
0 164
0 164
0 161
0 90
0 90
0 92
0 94
0 95
0 94
0 98
0 99
0 91
0 75
0 74
0 74
0 74
0 73
0 73
0 73
0 77
0 77
0 79
0 82
0 83
0 219
0 220
0 221
0 224
0 224
0 225
0 225
0 233
0 233
0 233
0 233
2 765
2 782
3 1318
3 1405
3 1451
3 1486
3 1493
3 1502
3 1505
3 1518
3 1521
3 1523
3 1525
3 1524
3 1536
3 1535
2 1537
2 1538
2 1539
2 1539
2 1539
2 1542
2 1542
2 1544
2 1550
2 1554
2 1556
2 1557
2 1559
2 1563
2 1564
2 1564
2 1564
2 1556
2 1556
2 1556
2 1538
2 1534
2 1523
2 1521
2 1516
2 1515
2 1515
2 1510
2 1510
2 1509
2 1506
2 1494
2 1494
2 1494
2 1494
2 1493
2 1493
2 1491
2 1489
2 1489
2 1487
2 1476
2 1468
2 1464
2 1462
2 1456
1 712
1 704
1 682
1 676
0 78
0 78
0 72
0 64
0 64
0 64
0 64
0 64
0 63
0 33
0 33
0 33
0 33
0 33
0 33
0 35
0 32
0 31
0 30
0 30
0 30
0 14
0 11
0 10
0 10
0 10
0 10
0 10
0 7
0 7
0 7
0 6
0 6
0 6
0 6
0 6
0 4
0 4
0 4
0 4
0 4
0 4
0 4
0 4
0 4
0 4
0 4
0 3
0 3
0 3
0 3
0 3
0 3
0 3
0 3
0 3
0 3
0 3
0 3
0 3
0 3
0 3
0 3
0 3
0 3
0 3
0 3
0 3
0 3
0 3
0 3
0 3
0 3
0 3
0 3
0 3
0 3
0 6
0 6
0 6
0 6
0 6
0 6
0 8
0 8
0 8
0 8
0 8
0 6
0 6
0 6
0 6
0 6
0 6
0 6
0 6
0 5
0 5
0 5
0 5
0 5
0 5
0 5
0 5
0 5
0 5
0 5
0 5
0 5
0 5
0 5
0 5
0 5
0 5
0 5
0 5
0 5
0 5
0 5
0 5
0 5
0 5
0 5
0 5
0 5
0 5
0 5
0 5
0 5
0 5
0 5
0 5
0 5
0 5
0 5
0 5
0 5
0 5
0 5
0 5
0 5
0 5
0 5
0 5
0 5
0 6
0 6
0 6
0 6
0 6
0 3
0 3
0 3
0 3
0 3
0 3
0 1
0 1
0 1
0 1
0 1
0 1
0 1
0 1
0 1
0 1
0 1
0 1
0 1
0 1
0 1
0 1
0 1
0 1
0 1
0 1
0 1
0 1
0 1
0 1
0 1
0 1
0 1
0 1
0 1
0 1
0 1
0 1
0 1
0 1
0 1
0 1
0 1
0 1
0 1
0 1
0 1
0 1
0 1
0 1
0 1
0 1
0 1
0 1
0 1
0 1
0 1
0 1
0 1
0 1
0 1
0 1
0 2
0 2
0 2
0 2
0 2
0 2
0 1
0 1
0 1
0 1
0 1
0 2
0 2
0 2
0 3
0 3
0 3
0 3
0 3
0 3
0 3
0 3
0 3
0 7
0 7
0 7
0 7
0 7
0 14
0 15
0 15
0 16
0 16
0 16
0 16
0 16
0 16
0 16
0 16
0 16
0 16
0 16
0 16
0 16
0 16
0 16
0 16
0 17
0 17
0 17
0 17
0 17
0 17
0 17
0 17
0 17
0 17
0 17
0 17
0 17
0 17
0 17
0 17
0 17
0 21
0 23
0 24
0 24
0 28
0 28
0 29
0 31
0 31
0 30
0 30
0 31
0 31
0 31
0 31
0 31
0 30
0 28
0 28
0 26
0 25
0 23
0 21
0 19
0 18
0 18
0 18
0 18
0 18
0 18
0 18
0 18
0 18
0 18
0 18
0 18
0 18
0 13
0 13
0 13
0 13
0 13
0 13
0 13
0 13
0 13
0 13
0 13
0 13
0 13
0 13
0 13
0 13
0 13
0 13
0 13
0 13
0 13
0 13
0 13
0 13
0 13
0 13
0 13
0 13
0 13
0 11
0 9
0 11
0 11
0 11
0 11
0 11
0 10
0 12
0 10
0 10
0 10
0 10
0 10
0 9
0 9
0 9
0 9
0 8
0 8
0 8
0 9
0 9
0 9
0 9
0 9
0 9
0 9
0 9
0 9
0 9
0 9
0 9
0 9
0 9
0 9
0 9
0 9
0 9
0 9
0 9
0 9
0 9
0 9
0 9
0 9
0 9
0 9
0 9
0 9
0 9
0 9
0 9
0 9
0 9
0 9
0 9
0 9
0 9
0 9
0 9
0 9
0 9
0 8
0 8
0 8
0 8
0 11
0 12
0 13
0 17
0 17
0 17
0 18
0 18
0 16
0 16
0 16
0 16
0 16
0 16
0 12
0 12
0 12
0 12
0 12
0 12
0 12
0 12
0 12
0 12
0 12
0 12
0 11
0 11
0 11
0 11
0 11
0 13
0 13
0 13
0 13
0 13
0 13
0 13
0 13
0 13
0 13
0 13
0 13
0 13
0 13
0 13
0 13
0 13
0 13
0 13
0 13
0 13
0 13
0 13
0 13
0 13
0 13
0 13
0 13
0 13
0 13
0 13
0 13
0 13
0 13
0 13
0 13
0 13
0 13
0 13
0 13
0 13
0 13
0 9
0 8
0 8
0 3
0 3
0 3
0 3
0 3
0 3
0 3
0 4
0 4
0 4
0 3
0 3
0 3
0 3
0 3
0 3
0 3
0 3
0 4
0 6
0 6
0 6
0 6
0 6
0 6
0 6
0 6
0 6
0 4
0 4
0 4
0 4
0 4
0 4
0 4
0 4
0 4
0 4
0 4
0 4
0 7
0 7
0 7
0 8
0 8
0 8
0 10
0 10
0 10
0 10
0 10
0 10
0 10
0 10
0 10
0 10
0 10
0 10
0 10
0 10
0 10
0 10
0 10
0 10
0 10
0 10
0 10
0 10
0 10
0 10
0 10
0 10
0 10
0 9
0 9
0 9
0 9
0 9
0 9
0 9
0 9
0 9
0 9
0 9
0 9
0 9
0 9
0 9
0 13
0 13
0 12
0 12
0 10
0 10
0 10
0 11
0 11
0 14
0 14
0 14
0 14
0 14
0 14
0 14
0 14
0 14
0 14
0 14
0 14
0 14
0 13
0 13
0 13
0 11
0 9
0 9
0 8
0 8
0 8
0 8
0 8
0 8
0 8
0 8
0 8
0 8
0 8
0 8
0 8
0 8
0 8
0 8
0 8
0 8
0 8
0 8
0 8
0 8
0 8
0 8
0 8
1 8
1 8
1 8
1 8
1 8
1 8
1 8
1 8
4 8
8 8
9 8
10 8
10 8
21 8
21 8
21 8
21 8
21 8
21 8
21 8
21 4
21 4
21 4
21 4
21 4
21 4
21 4
21 2
21 2
22 0
22 0
22 0
23 0
23 0
23 0
23 0
23 0
23 0
23 0
23 0
23 0
23 0
23 0
23 0
23 0
23 0
23 0
23 0
23 0
23 0
23 0
23 0
23 0
23 0
23 0
23 0
23 0
24 0
26 1
32 1
34 1
35 2
35 2
35 2
35 3
35 3
35 3
35 4
36 4
36 4
36 4
37 5
37 5
36 5
36 5
36 5
36 5
36 5
36 5
36 5
36 5
32 5
28 6
27 6
26 6
26 6
15 6
15 6
15 7
15 7
15 7
15 7
15 7
15 7
15 7
15 7
15 7
15 7
15 7
15 7
15 7
15 7
15 7
15 7
15 7
17 7
20 7
20 7
20 7
20 7
20 7
20 7
20 7
20 7
20 7
20 7
20 7
20 7
20 7
20 7
20 7
20 7
20 7
20 7
20 7
20 7
20 7
20 7
20 7
19 7
19 7
16 6
9 6
8 5
8 4
8 5
8 4
8 4
7 4
7 4
7 5
7 6
8 6
8 6
7 6
7 6
7 6
7 6
7 6
7 6
7 6
7 6
7 6
7 6
7 6
7 5
7 5
7 5
7 5
7 5
7 5
7 4
7 5
7 5
7 5
7 5
7 5
7 5
7 5
7 5
7 5
7 10
7 10
7 10
7 10
7 10
7 10
7 10
2 10
1 10
1 10
1 10
1 10
1 10
1 10
1 10
1 10
1 10
1 10
1 10
1 10
1 10
1 10
1 10
1 10
1 11
1 11
1 11
1 11
1 11
1 11
1 11
1 11
1 11
1 11
1 11
1 11
1 10
1 10
1 10
1 10
1 10
2 10
2 7
2 7
1 7
1 7
1 7
1 7
1 7
1 7
1 7
1 7
1 7
1 7
1 7
1 7
1 7
1 7
1 7
1 8
1 8
1 8
1 8
1 8
1 8
1 8
1 10
1 10
1 17
1 17
1 17
1 18
1 18
1 14
1 14
1 14
1 14
1 14
1 14
1 14
1 14
1 14
1 14
1 14
1 14
1 14
1 14
1 14
1 14
1 14
1 14
1 14
1 14
1 15
1 15
1 15
1 15
1 14
1 14
1 14
1 14
1 14
1 14
1 14
1 14
1 14
1 14
1 14
1 18
1 18
1 18
1 18
1 18
1 18
0 18
0 18
0 18
0 18
0 18
0 18
0 18
0 18
0 18
0 18
0 22
0 22
0 22
0 22
0 22
0 22
0 22
0 23
0 22
0 20
0 20
0 20
0 18
0 20
0 20
0 20
0 20
0 12
0 12
0 12
0 12
0 12
0 13
0 13
0 13
0 13
0 14
0 14
0 14
0 14
0 14
0 14
0 14
0 14
0 14
0 14
0 14
0 14
0 14
0 14
0 14
0 14
0 13
0 13
0 13
0 13
0 13
0 13
0 13
0 13
0 13
0 13
0 13
0 13
0 11
0 11
0 11
0 5
0 5
0 5
0 5
0 5
0 5
0 5
0 5
0 5
0 5
0 6
0 6
0 6
0 6
0 6
0 6
0 6
0 7
0 7
0 7
0 7
0 7
0 7
0 5
0 5
0 5
0 4
0 4
0 4
0 4
0 4
0 4
0 4
0 4
0 4
0 4
0 4
0 4
0 3
0 3
0 3
0 2
0 2
0 2
0 2
0 2
0 2
0 2
0 2
0 2
0 2
0 2
0 2
0 2
0 2
0 2
0 2
0 2
0 2
0 2
0 3
0 3
0 3
0 3
0 3
0 3
0 3
0 3
0 3
0 3
0 3
0 6
0 6
0 6
0 6
0 6
0 6
0 6
0 6
0 6
0 6
0 6
0 6
0 5
0 5
0 5
0 5
0 5
0 5
0 5
0 4
0 4
0 4
0 4
0 4
0 4
0 4
0 4
0 4
0 4
0 4
0 4
0 4
0 4
0 4
0 4
0 4
0 4
0 4
0 4
0 4
0 4
0 4
0 4
0 4
0 4
0 4
0 4
0 4
0 4
0 4
1 4
1 4
1 4
1 5
1 6
1 6
1 6
3 6
3 6
3 6
3 6
3 6
3 5
3 8
3 8
3 8
3 8
3 8
3 8
3 8
3 7
3 7
3 7
3 4
3 4
3 4
3 4
3 4
3 4
3 4
3 4
3 4
3 4
3 4
3 4
3 4
3 4
3 4
3 4
3 4
3 4
3 4
3 4
3 4
3 4
3 4
3 4
3 4
3 4
3 4
3 4
3 4
3 4
3 4
3 4
3 4
3 4
3 4
3 4
3 4
3 4
3 4
3 4
3 4
3 4
3 4
3 4
3 4
3 4
3 4
3 4
3 4
3 4
2 4
1 4
1 4
0 3
0 3
0 3
0 3
0 3
0 3
0 3
0 3
0 3
0 3
0 0
0 0
0 0
0 0
0 0
0 0
0 0
0 0
0 0
1 0
1 0
1 0
1 0
1 0
1 0
1 0
1 0
1 0
1 0
1 0
1 0
1 0
1 0
1 0
1 0
1 0
1 0
1 0
1 0
2 0
2 0
2 0
2 0
2 0
2 0
2 0
2 0
2 0
2 0
2 0
2 0
2 0
2 0
2 0
1 0
1 0
1 0
1 0
1 0
1 2
1 2
1 2
1 2
1 2
1 2
1 2
1 3
1 3
1 3
1 3
1 3
1 3
1 3
1 3
1 4
1 4
1 4
1 8
1 9
1 10
1 11
1 11
1 11
2 16
2 17
2 23
2 28
2 35
2 35
2 35
1 35
1 35
1 35
1 35
1 36
1 36
1 36
1 36
1 36
1 36
1 37
1 37
1 37
1 37
1 37
1 37
1 37
1 37
1 37
1 37
1 37
1 37
1 37
1 37
1 37
1 37
1 37
1 37
1 37
1 39
1 39
1 39
1 39
1 39
1 39
1 39
1 37
1 37
1 37
1 36
1 35
1 35
1 33
1 33
1 33
1 33
1 33
1 32
1 31
1 30
1 30
1 30
1 30
1 30
1 30
1 30
1 30
1 29
1 29
1 28
1 23
1 23
1 23
1 23
1 23
1 23
0 16
0 13
0 6
0 5
0 5
0 5
0 5
0 5
0 5
0 5
0 5
0 4
0 4
0 4
0 5
0 5
0 5
0 4
0 4
0 4
0 4
0 4
0 4
0 4
0 4
0 4
0 4
0 4
0 4
0 4
0 4
0 4
0 4
0 4
0 4
0 4
0 2
0 2
0 2
0 2
0 2
0 2
0 2
0 2
0 2
0 6
0 6
0 6
0 6
0 6
0 6
0 6
0 6
0 6
0 6
0 6
0 6
0 6
0 6
0 6
0 6
0 6
0 6
0 6
0 6
0 6
0 6
0 6
0 6
0 8
0 8
0 8
0 8
0 8
0 8
0 8
0 8
0 7
0 7
0 7
0 7
0 7
0 7
0 7
0 7
0 7
0 7
0 6
0 6
0 6
0 5
0 5
0 5
0 5
0 5
0 5
0 5
0 5
0 5
0 5
0 5
0 5
0 5
0 5
0 5
0 5
0 5
0 5
0 5
0 5
0 5
0 5
0 5
0 5
0 5
0 5
0 5
0 5
0 0
0 0
0 0
0 0
0 0
0 0
0 0
0 2
0 3
0 5
0 5
0 5
0 5
0 5
0 5
0 5
0 5
0 5
0 5
0 5
0 5
0 5
0 7
0 7
0 7
0 7
0 7
0 7
0 7
0 7
0 7
0 7
0 7
0 7
0 7
0 7
0 7
1 8
1 8
1 9
1 9
1 9
1 9
1 9
2 9
2 9
2 9
2 9
2 9
3 9
3 9
3 9
3 9
3 9
3 9
3 9
3 9
3 9
3 9
3 9
3 9
3 9
3 9
3 9
3 9
3 9
3 9
3 9
3 9
3 9
3 9
3 9
3 9
3 9
3 9
3 9
3 9
3 9
3 9
3 9
3 7
3 5
3 4
3 4
3 4
3 4
3 4
3 4
3 4
3 4
3 4
3 4
3 5
3 5
3 5
3 3
3 3
3 3
3 3
3 3
3 3
3 3
3 3
3 3
3 3
3 3
3 3
3 3
3 3
3 3
2 2
2 3
2 2
2 2
2 2
2 2
2 2
1 2
1 2
1 2
0 2
0 2
0 2
0 2
0 2
0 2
0 2
0 2
0 2
0 2
0 2
0 2
0 2
0 2
0 2
0 2
0 2
0 2
0 2
0 2
0 2
0 2
0 2
0 2
0 2
0 2
0 2
0 2
0 2
0 2
0 2
0 2
0 2
0 2
0 2
0 2
0 2
0 2
0 2
0 2
0 2
0 2
0 3
0 3
0 2
0 2
0 2
0 2
0 2
0 2
0 2
0 2
0 2
0 2
0 2
0 2
0 2
0 2
0 2
0 2
0 2
0 2
0 2
0 2
0 1
0 1
0 1
0 1
0 1
0 1
0 1
0 1
0 1
0 1
0 1
0 1
0 1
0 1
0 1
0 1
0 1
0 1
0 1
0 1
0 1
0 1
0 2
0 2
0 2
0 2
0 2
0 2
0 2
0 3
0 3
0 3
0 3
0 3
0 3
0 3
0 3
0 3
0 3
0 4
0 4
0 4
0 4
0 4
0 4
0 4
0 4
0 4
0 4
0 4
0 4
0 3
0 3
0 3
0 3
0 5
0 5
0 5
0 5
0 5
0 5
0 5
0 5
0 5
0 5
0 5
0 5
0 5
0 5
0 5
0 3
0 3
0 3
0 3
0 3
0 3
0 3
0 3
0 3
0 3
0 3
0 3
0 3
0 3
0 3
0 3
0 3
0 3
0 3
0 3
0 3
0 3
0 3
0 3
0 3
0 2
0 2
0 2
0 2
0 1
0 1
0 1
0 1
0 2
0 2
0 2
0 2
0 5
0 5
0 5
0 5
0 5
0 5
0 5
0 5
0 5
0 5
0 5
0 5
0 5
0 5
0 5
0 4
0 4
0 4
0 4
0 4
0 4
0 4
0 4
0 4
0 4
0 4
0 4
0 4
0 4
0 4
0 4
0 4
0 4
0 4
0 4
0 4
0 4
0 4
0 4
0 4
0 4
0 4
0 4
0 4
0 4
0 4
0 4
0 4
1 8
1 8
1 8
1 8
1 8
1 8
1 8
1 8
1 8
1 8
1 8
1 8
1 8
1 8
1 8
1 8
1 8
1 8
1 8
1 8
1 8
1 8
1 8
1 8
1 8
1 5
1 7
1 7
1 7
1 7
1 6
1 6
1 6
1 6
1 6
1 6
1 7
1 7
1 7
1 7
1 7
1 7
1 7
1 7
1 7
1 7
1 7
1 7
1 7
1 7
1 7
1 7
1 7
1 7
1 7
1 7
1 7
1 8
1 9
1 9
1 9
1 9
1 9
1 9
1 9
1 9
1 9
1 9
1 9
1 9
1 9
1 9
1 9
0 5
0 5
0 5
0 5
0 5
0 5
0 8
0 8
0 8
0 8
0 8
0 8
0 8
0 8
0 8
0 9
0 10
0 11
0 11
0 11
0 11
0 11
0 11
0 11
3 11
3 11
3 9
3 9
3 9
3 9
3 9
3 9
3 9
3 9
3 9
3 9
3 8
3 8
3 8
3 8
3 8
3 8
3 8
3 8
3 8
4 8
5 8
11 8
11 9
11 9
11 9
11 9
11 9
14 9
15 9
37 9
37 9
37 8
37 7
37 7
37 7
37 7
37 7
37 7
37 7
37 7
48 7
49 6
49 5
52 5
55 5
56 5
56 5
56 5
56 5
56 5
56 5
56 5
59 4
61 4
78 4
81 4
85 4
85 4
85 4
85 4
85 4
85 4
85 3
85 2
85 1
85 1
85 1
85 1
85 1
85 1
85 1
82 1
82 1
83 1
83 1
83 1
83 1
83 1
83 1
83 1
83 1
83 1
83 1
83 1
83 1
83 1
82 1
81 1
81 1
79 1
79 1
79 1
81 1
83 1
80 1
79 0
79 0
78 0
79 0
78 0
75 0
74 0
55 0
62 0
62 0
62 0
62 0
62 0
61 0
59 0
59 0
59 0
59 0
49 0
49 0
49 0
38 0
37 0
36 0
36 0
36 0
37 0
37 0
37 0
37 0
35 0
33 0
21 0
22 0
33 0
33 0
34 0
34 0
34 0
35 0
36 0
36 0
36 0
39 0
39 0
40 0
40 0
40 0
40 0
40 0
40 0
39 0
39 0
39 0
39 0
39 0
39 0
39 0
39 0
39 0
39 0
39 0
40 0
42 1
43 2
43 2
44 2
42 2
42 2
43 2
42 2
40 2
39 2
39 2
39 2
38 2
36 2
36 2
36 2
36 2
33 2
29 2
29 2
29 2
30 2
30 2
30 2
30 2
30 2
30 2
30 2
30 3
30 3
30 3
33 5
33 5
33 5
33 5
33 10
30 10
28 11
28 11
28 13
28 13
28 13
27 13
25 13
15 13
14 13
14 13
14 13
15 16
17 16
17 16
17 16
17 16
14 16
14 17
14 17
14 18
14 18
14 18
15 18
15 18
15 18
15 18
15 18
15 18
15 18
15 18
16 18
17 18
18 19
20 19
22 19
22 19
23 18
22 17
22 17
22 18
26 17
26 16
26 14
25 14
25 14
25 14
25 14
26 16
26 15
26 15
26 15
26 15
26 15
26 15
26 15
26 15
26 15
25 15
25 15
27 15
29 15
29 15
29 15
52 13
53 13
53 13
54 13
51 12
52 12
52 12
52 12
52 11
52 11
52 9
52 9
52 8
53 8
58 8
58 8
58 8
58 8
58 8
58 10
57 10
56 6
53 6
53 6
53 6
53 6
53 6
53 6
53 5
53 5
53 5
53 5
52 5
52 5
52 5
52 5
52 5
52 5
52 5
52 5
51 5
50 5
49 5
46 5
49 5
49 5
47 5
49 5
48 4
49 4
49 4
52 4
124 6
125 6
125 6
126 5
126 5
125 4
125 4
125 4
125 4
125 4
125 4
137 4
137 4
137 4
137 4
137 4
137 4
136 4
134 4
134 4
134 4
111 4
111 4
130 5
129 8
129 8
128 8
130 8
131 8
131 8
131 8
131 8
131 8
129 8
129 8
124 8
124 8
124 8
124 8
124 8
126 6
126 6
126 6
126 6
127 6
127 6
158 6
158 6
158 6
160 6
160 6
161 6
161 6
162 6
165 6
176 7
193 7
196 7
196 7
196 7
196 7
196 7
196 7
196 7
196 7
195 8
195 8
195 8
194 8
194 8
192 8
188 8
186 8
115 6
115 6
115 6
116 6
117 6
117 6
117 6
117 6
122 6
170 6
174 6
165 6
169 6
169 6
169 6
174 6
178 6
181 8
181 8
182 8
182 8
182 8
182 8
163 4
163 4
163 4
163 4
160 4
160 4
160 4
170 4
176 4
189 4
204 4
205 4
205 4
205 4
206 4
210 4
215 4
260 5
268 5
268 5
268 5
267 5
301 6
271 6
275 6
280 6
278 5
278 5
277 5
276 5
263 5
251 5
244 5
242 5
242 5
245 5
245 5
257 6
262 6
267 6
277 6
279 6
279 5
281 5
283 5
282 5
283 5
285 5
284 5
283 5
281 5
281 5
281 5
281 5
281 5
277 5
275 5
273 5
260 5
223 5
229 5
224 5
221 5
221 5
217 5
216 4
214 4
211 3
211 3
210 3
210 3
210 3
210 3
210 3
210 3
210 3
210 3
210 3
205 3
204 3
192 3
187 3
183 3
168 3
167 3
167 3
167 3
164 3
159 3
154 3
111 2
107 2
104 2
91 2
91 2
69 1
69 1
69 1
66 1
66 1
66 1
66 1
66 1
66 1
62 1
62 1
61 1
60 1
56 1
56 1
43 0
38 0
29 0
17 0
15 0
9 0
6 0
2 0
2 0
2 0
1 0
1 0
1 0
1 0
1 0
1 0
1 0
1 0
1 0
1 0
0 0
0 0
0 0
0 0
0 0
0 0
0 0
0 0
0 0
0 0
0 0
0 0
0 0
0 0
0 0
0 0
0 0
0 0
0 0
0 0
0 0
0 0
0 0
0 0
0 0
0 0
0 0
0 0
0 0
0 0
0 0
0 0
0 0
0 0
0 0
0 0
0 0
0 0
0 0
0 0
0 0
0 0
0 0
0 0
0 0
0 1
0 1
0 1
2 3
3 3
3 4
3 4
3 4
3 4
3 4
3 4
3 4
3 4
3 4
3 4
3 3
3 3
3 3
3 3
3 3
3 3
3 3
3 3
3 3
4 3
4 3
4 3
4 3
4 3
4 3
4 3
4 3
4 3
4 3
4 3
4 3
4 3
4 3
4 3
4 3
4 3
4 3
4 3
4 3
4 3
4 3
4 3
4 3
4 3
4 3
4 3
4 3
4 3
4 3
4 3
4 3
4 3
4 3
4 3
4 3
4 3
4 3
4 3
4 3
4 3
4 3
4 3
4 3
4 3
4 3
4 3
4 3
4 3
4 3
4 3
4 3
2 0
1 0
1 0
1 0
1 0
1 0
1 0
1 0
1 0
1 0
1 0
1 0
1 0
1 0
1 0
1 0
1 0
1 0
1 0
1 0
1 0
0 0
0 0
0 0
0 0
0 0
0 0
0 0
0 0
0 0
0 0
0 0
0 0
0 0
0 0
0 0
0 0
0 0
0 0
0 0
0 0
0 0
0 0
0 0
0 1
0 1
2 1
2 1
2 8
2 8
2 8
2 8
2 8
2 8
2 8
2 8
2 8
2 8
2 8
2 8
2 8
2 8
2 8
2 8
2 8
2 8
2 8
2 8
2 8
2 8
2 8
2 8
2 8
2 8
2 8
2 8
2 8
2 8
2 8
2 8
2 8
2 8
2 8
2 8
2 8
2 8
2 8
2 8
2 8
2 8
2 8
2 8
2 8
2 8
2 8
2 9
2 9
2 10
2 10
2 10
2 10
5 17
5 17
6 17
6 17
6 17
7 17
7 17
7 17
7 17
7 17
7 17
7 18
7 18
7 18
7 18
7 18
7 17
7 17
5 16
5 16
5 10
4 10
4 10
4 10
4 10
4 10
4 10
4 10
4 10
4 10
4 10
4 10
4 10
4 10
4 10
4 12
4 12
4 12
4 16
4 16
4 16
4 16
4 16
4 16
4 16
4 16
4 16
4 16
4 16
4 16
4 16
4 16
4 16
4 16
4 16
4 16
4 16
4 16
4 16
4 16
4 16
4 16
4 16
4 17
4 17
4 17
4 19
4 18
4 18
3 18
3 18
3 18
3 18
0 11
0 11
0 11
0 11
0 11
0 11
0 11
0 11
0 11
0 11
0 11
0 10
0 10
0 10
0 10
0 10
0 10
0 10
0 10
0 10
0 10
0 10
0 10
0 10
0 10
0 10
0 10
0 10
0 10
0 10
0 10
0 16
0 16
0 16
0 16
0 14
0 14
0 13
0 9
0 9
0 9
0 9
0 8
0 8
0 8
0 8
0 8
0 8
0 8
0 8
0 8
0 8
0 8
0 8
0 8
0 8
0 8
0 8
0 8
0 8
0 8
0 8
0 8
0 7
0 7
0 7
0 7
0 6
0 6
0 7
0 7
0 7
0 7
0 7
0 7
0 7
0 7
0 7
0 7
0 7
0 7
0 7
0 7
0 7
0 7
0 7
0 7
0 7
0 7
0 8
0 9
0 9
0 9
0 9
0 9
0 9
0 9
0 9
0 9
0 9
0 9
0 9
0 9
0 9
0 3
0 3
0 3
0 3
0 3
0 3
0 3
0 3
0 3
0 3
0 3
0 3
0 3
0 3
0 3
0 3
0 3
0 3
0 3
0 3
0 3
0 3
0 3
0 3
0 3
0 3
0 3
0 3
0 3
0 3
0 3
0 3
0 3
0 3
0 3
0 3
0 3
0 3
0 2
0 2
0 4
0 4
0 4
0 5
0 5
0 5
0 5
0 5
0 5
0 5
0 5
0 5
0 5
0 5
0 5
0 5
0 5
0 5
0 4
0 3
0 3
0 3
0 3
0 3
0 3
0 3
0 3
0 3
0 3
0 3
0 3
0 3
0 3
0 3
0 3
0 3
0 3
0 3
0 3
0 3
0 3
0 3
0 3
0 3
0 4
0 4
0 4
0 4
0 4
0 4
0 4
0 4
0 4
0 4
0 5
0 5
0 121
0 129
0 134
0 143
0 144
0 144
0 146
0 150
0 154
0 156
0 157
0 159
0 162
0 165
0 165
0 165
0 165
0 164
0 163
0 166
0 168
0 168
0 168
0 168
0 168
0 168
0 168
0 168
0 168
0 168
0 168
0 168
0 168
0 168
0 168
0 169
0 171
0 172
0 172
0 172
0 172
0 172
0 172
0 172
0 172
0 172
0 173
0 173
0 173
0 173
0 173
0 173
0 270
0 272
0 273
0 273
0 273
0 273
0 273
0 273
0 273
0 293
0 297
0 314
0 316
0 316
0 316
0 316
0 315
0 315
0 315
0 315
0 319
0 195
0 188
0 192
0 188
0 194
0 194
0 193
0 189
0 180
0 176
0 175
0 175
0 176
0 177
0 177
0 177
0 177
0 176
0 175
0 171
0 171
0 171
0 171
0 171
0 171
0 171
0 171
0 171
0 171
0 171
0 171
0 171
0 171
0 171
0 171
0 170
0 169
0 169
0 169
0 169
0 169
0 169
0 169
0 169
0 169
0 169
0 168
0 168
0 168
0 168
0 166
0 164
0 64
0 64
0 64
0 64
0 64
0 64
0 64
0 64
0 63
0 43
0 37
0 20
0 20
0 20
0 20
0 20
0 20
0 20
0 20
0 20
0 16
0 16
0 16
0 10
0 10
0 3
0 3
0 3
0 3
0 3
0 2
0 2
0 2
0 1
0 0
0 0
0 0
0 0
0 0
0 0
0 0
0 0
0 0
0 0
0 0
0 0
0 0
0 0
0 0
0 0
0 0
0 0
0 0
0 0
0 0
0 0
0 0
0 0
0 0
0 0
0 0
0 0
0 0
0 0
0 0
0 0
0 0
0 0
0 0
0 0
0 0
0 0
0 0
0 0
0 0
0 0
0 0
0 0
0 0
0 0
0 0
0 0
0 0
0 0
0 0
0 0
0 0
0 0
0 0
0 0
0 0
0 0
0 0
0 0
0 0
0 0
0 0
0 0
0 0
0 0
0 0
0 0
0 0
0 0
0 0
0 0
0 0
0 0
0 0
0 0
0 0
0 0
0 0
0 0
2 0
2 0
2 0
2 0
2 0
2 0
2 0
2 0
2 0
2 0
3 0
3 0
3 0
3 0
3 0
3 0
3 0
3 0
3 0
3 0
3 0
3 0
3 0
3 0
3 0
3 0
2 0
2 0
2 0
2 0
2 0
2 0
2 0
2 0
2 0
2 0
2 0
2 0
2 0
2 0
2 0
2 0
2 0
2 0
2 0
2 0
2 0
2 0
2 0
2 0
2 0
2 0
2 0
2 0
2 0
2 0
2 0
2 0
2 0
2 0
2 0
2 0
2 0
2 0
1 0
1 0
1 0
0 0
0 0
0 0
0 0
0 0
0 0
0 0
0 0
0 0
0 0
0 0
0 0
0 0
0 0
0 0
0 0
0 0
0 0
0 0
0 0
0 0
0 0
0 0
0 0
0 0
0 0
0 0
0 0
0 0
0 1
0 1
0 1
0 2
0 2
0 2
0 2
0 2
0 2
0 2
0 2
0 2
0 2
0 2
0 2
0 2
0 2
0 2
0 2
0 2
0 2
0 2
0 2
0 3
0 3
0 3
0 3
0 3
0 3
0 3
0 3
0 3
0 3
0 3
0 3
0 3
0 3
0 4
0 4
0 4
0 4
0 4
0 6
0 6
0 6
0 6
0 6
0 6
0 6
0 6
0 6
0 6
0 6
0 6
0 6
0 6
0 6
0 6
0 6
0 6
0 6
0 6
0 6
0 6
0 6
0 6
0 6
0 6
0 6
0 6
0 6
0 6
0 6
0 5
0 4
0 4
0 4
0 6
0 6
0 6
0 6
0 6
0 6
0 6
0 6
0 6
0 6
0 6
0 6
0 6
0 6
0 6
0 4
0 4
0 4
0 4
0 3
0 3
0 3
0 3
0 3
0 3
0 3
0 3
0 3
0 3
0 3
0 3
0 3
0 3
0 2
0 2
0 2
0 2
0 0
0 0
0 0
0 0
0 0
0 0
0 0
0 0
0 0
0 0
0 0
0 0
0 0
0 0
0 1
0 1
0 1
0 1
0 1
0 1
0 1
0 1
0 1
0 1
0 1
0 1
0 2
0 2
0 2
0 2
0 2
0 2
0 2
0 2
0 2
0 2
0 2
0 2
0 3
0 3
0 3
0 3
0 3
0 3
0 3
0 3
0 3
0 3
0 3
0 3
0 3
0 3
0 3
0 3
0 3
0 3
0 3
0 3
0 3
0 3
0 3
0 3
0 3
0 3
0 3
0 3
0 3
0 3
0 3
0 3
0 4
0 4
0 4
0 5
0 5
0 5
0 5
0 5
0 5
0 5
0 5
0 5
0 5
0 5
0 5
0 5
0 5
0 4
0 4
0 4
0 4
0 4
0 4
0 4
0 4
0 4
0 4
1 4
1 3
1 3
1 3
1 4
1 5
1 6
1 6
1 6
1 6
1 6
1 6
1 8
1 8
1 7
0 10
0 59
0 63
0 68
0 77
0 87
0 92
0 100
0 100
0 100
0 100
0 100
0 101
0 101
0 101
0 102
0 103
0 103
0 103
0 103
0 102
0 102
0 101
0 101
0 101
0 101
0 101
0 101
0 101
0 110
0 121
0 132
0 140
0 175
0 179
0 179
0 179
0 179
0 179
0 180
0 180
0 179
0 179
0 179
0 179
0 179
0 179
0 181
0 181
0 181
0 181
0 181
0 181
0 181
0 181
0 182
0 182
0 182
0 182
0 182
0 182
0 181
0 180
0 180
0 180
0 183
0 183
0 185
0 185
0 185
0 185
0 185
0 183
0 179
0 108
0 100
0 99
0 99
0 99
0 99
0 99
0 99
0 99
0 99
0 99
0 98
0 98
0 98
0 97
0 95
0 94
0 94
0 94
0 94
0 94
0 94
0 94
0 94
0 94
0 94
0 94
0 94
0 84
0 68
0 45
0 30
0 2
0 2
0 2
0 2
0 2
0 2
0 2
0 2
0 2
0 2
0 2
0 2
0 2
0 2
0 1
0 1
0 1
0 1
0 1
0 1
0 1
0 1
0 1
0 0
0 0
0 0
0 0
0 0
0 0
0 0
0 0
0 0
0 0
0 0
0 0
0 0
0 0
0 0
0 0
1 0
1 0
1 1
1 1
1 1
1 1
1 1
1 1
1 1
1 1
1 1
1 1
1 1
1 1
1 1
1 1
1 1
0 1
0 1
0 1
0 1
0 0
0 0
0 0
0 0
0 0
0 0
0 0
0 0
0 0
0 0
0 0
0 0
0 0
0 0
0 0
0 0
0 0
0 0
0 0
0 0
0 0
0 0
0 0
0 0
0 0
0 0
0 0
0 0
0 0
0 0
0 0
0 0
0 0
0 0
0 0
0 0
0 0
0 0
0 0
0 0
1 0
1 0
1 0
1 0
1 0
1 0
1 0
1 0
1 0
1 0
1 0
1 0
1 0
1 0
1 0
1 0
1 0
0 0
0 0
0 0
0 0
0 0
0 0
0 0
0 0
0 0
0 0
0 0
0 0
0 0
0 0
0 0
0 0
0 0
0 0
0 0
0 0
0 0
0 0
0 0
0 0
0 0
0 0
0 0
0 0
0 0
0 0
0 0
0 0
0 0
0 0
0 0
0 0
0 0
0 0
0 0
0 0
0 0
0 0
0 0
0 0
0 0
0 0
0 0
0 0
0 0
0 0
0 0
0 0
0 0
0 0
0 0
1 0
1 0
1 0
1 0
1 0
1 0
1 0
1 0
1 0
1 0
1 0
1 0
1 0
1 0
1 0
1 0
1 0
1 0
1 0
1 0
0 0
0 0
0 0
0 0
0 0
0 0
0 0
0 0
0 0
0 0
0 0
0 0
0 0
0 0
0 0
0 0
0 0
0 0
0 0
0 0
0 0
0 0
0 0
0 0
0 0
0 0
0 0
0 0
0 0
0 0
0 0
0 0
0 0
0 0
0 0
0 0
0 0
0 0
0 0
0 0
0 0
0 0
0 0
0 0
0 0
0 0
0 0
0 0
0 0
0 0
0 0
0 0
0 0
0 0
0 0
0 0
0 0
0 0
0 0
0 0
0 0
0 0
0 0
0 0
0 0
0 0
0 0
0 0
0 0
0 0
0 0
0 0
0 0
0 0
0 0
0 0
0 0
0 0
0 0
0 0
0 0
0 0
0 0
0 0
0 0
0 0
0 0
2 0
21 0
42 0
42 0
42 0
43 0
43 0
43 0
49 0
49 0
49 0
49 0
49 0
49 0
49 0
49 0
49 0
49 0
49 0
49 0
49 0
49 0
49 0
49 0
49 0
49 0
49 0
49 0
49 0
49 0
49 0
49 0
49 0
51 0
52 0
52 0
52 0
52 0
52 0
52 0
53 0
53 0
53 0
53 0
53 0
53 0
53 0
53 0
62 0
80 0
80 0
80 0
80 0
80 0
80 0
79 0
79 0
76 0
78 0
85 0
92 0
92 0
96 0
96 0
95 0
95 0
94 0
92 0
92 0
92 0
91 0
90 0
88 0
83 0
81 0
67 0
67 0
67 0
67 0
67 0
67 0
61 0
61 0
61 0
61 0
61 0
61 0
61 0
61 0
61 0
62 0
62 0
62 0
62 0
62 0
62 0
62 0
62 0
62 0
62 0
62 0
62 0
63 0
63 0
62 0
62 0
59 0
59 0
59 0
59 0
59 0
59 0
59 0
61 0
68 0
85 0
103 0
119 0
122 0
107 0
107 0
107 0
94 0
94 0
94 0
94 0
86 0
87 0
87 0
87 0
84 0
84 0
83 0
76 0
76 0
74 0
74 0
74 0
74 0
74 0
74 0
74 0
74 0
74 0
74 0
74 0
77 0
78 0
78 0
78 0
78 0
78 1
78 1
78 1
79 1
85 1
86 1
86 1
86 1
86 1
86 1
88 1
90 1
91 1
91 1
91 1
92 1
93 1
93 1
93 1
93 1
93 1
93 1
93 1
93 1
92 1
92 1
92 1
91 1
91 1
91 1
91 1
91 1
94 1
159 1
164 2
159 2
153 2
135 2
118 2
103 2
101 2
101 2
97 2
98 2
98 2
98 2
98 2
98 2
97 2
96 2
96 3
97 3
98 3
98 3
98 3
98 3
98 3
98 3
98 3
98 3
98 3
98 3
98 3
98 3
98 3
98 3
98 3
98 3
95 3
94 3
94 2
94 2
94 2
97 2
96 2
96 2
94 2
90 2
89 2
89 2
89 2
89 2
89 2
85 2
85 2
84 2
84 2
84 2
83 2
82 2
84 3
85 3
87 3
87 3
87 3
87 3
87 3
87 3
87 3
88 3
88 3
88 3
88 3
87 3
75 3
74 3
15 2
14 2
14 2
14 2
12 2
13 2
13 2
11 2
11 2
11 2
11 2
11 2
11 2
11 2
11 2
11 2
11 2
11 1
11 1
11 1
11 1
11 1
11 1
11 1
11 1
11 1
11 1
11 1
11 1
11 1
11 1
11 1
11 1
11 1
11 1
11 1
11 1
11 1
11 1
11 1
8 1
8 1
8 1
8 1
8 1
8 1
8 1
8 1
8 1
8 1
8 1
8 1
8 1
8 1
8 1
8 1
9 1
7 0
6 0
4 0
4 0
4 0
4 0
4 0
4 0
4 0
3 0
4 0
4 0
4 0
3 0
3 0
3 0
3 0
4 0
5 0
5 0
6 0
5 0
8 0
10 0
10 0
10 0
10 0
10 0
10 0
10 0
10 0
10 0
10 0
10 0
10 0
10 0
10 0
10 0
10 0
10 0
10 0
10 0
10 0
10 0
10 0
10 0
10 0
10 0
10 0
10 0
10 0
10 0
11 0
11 0
11 0
11 0
11 0
11 0
11 0
11 0
11 0
11 0
11 0
11 0
12 0
12 0
12 0
12 0
12 0
12 0
12 0
11 0
11 0
11 0
14 0
14 0
14 0
14 0
14 0
14 0
14 0
14 0
13 0
11 0
11 0
10 0
11 0
11 0
11 0
12 0
12 0
12 0
12 0
12 0
12 0
11 0
10 0
10 0
10 0
10 0
10 0
10 0
10 0
10 0
10 0
10 0
10 0
11 0
11 0
12 0
12 0
12 0
12 0
12 0
12 0
12 0
13 0
13 0
14 0
14 0
14 0
14 0
14 0
14 0
13 0
13 0
13 0
13 0
13 0
13 0
13 0
13 0
13 0
13 0
13 0
13 0
13 0
12 0
12 0
12 0
12 0
12 0
12 0
12 0
12 0
12 0
12 0
6 0
6 0
6 0
4 0
4 0
4 0
4 0
4 0
4 0
4 0
4 0
4 0
3 0
3 0
3 0
3 0
3 0
3 0
3 0
4 0
4 0
4 0
4 0
4 0
4 0
4 0
4 0
4 0
2 0
2 0
2 0
2 0
2 0
2 0
4 0
4 0
4 0
4 0
5 0
6 0
7 0
7 0
7 0
7 0
7 0
7 0
7 0
7 0
7 0
7 0
7 0
7 0
7 0
7 0
7 0
7 0
7 0
7 0
9 0
9 0
9 0
9 0
9 0
9 0
9 0
15 1
15 1
22 1
22 1
23 1
27 1
27 1
28 1
28 1
28 1
29 1
28 1
28 1
28 1
28 1
28 0
28 0
28 0
28 0
28 0
28 0
28 0
28 0
27 0
27 0
27 0
27 0
27 0
27 0
27 0
27 0
27 0
26 0
23 0
21 0
21 0
21 0
21 0
21 0
21 0
21 0
21 0
21 0
22 0
22 0
22 0
22 0
18 0
18 0
16 0
16 0
16 0
16 0
16 0
16 0
16 0
16 0
14 0
12 0
12 0
12 0
12 0
10 0
10 0
10 0
10 0
8 0
8 0
8 0
8 0
8 0
8 0
8 0
6 0
6 0
5 0
5 0
5 0
3 0
2 0
2 0
2 0
2 0
2 0
2 0
2 0
2 0
2 0
2 0
2 0
2 0
2 0
2 0
2 0
2 0
2 0
2 0
2 0
2 0
2 0
2 0
2 0
2 0
2 0
2 0
2 0
2 0
2 0
2 0
2 0
2 0
2 0
2 0
2 0
2 0
2 0
1 0
1 0
1 0
1 0
1 0
1 0
1 0
1 0
1 0
1 0
1 0
1 0
1 0
1 0
1 0
1 0
1 0
1 0
1 0
1 0
1 0
1 0
1 0
1 0
1 0
1 0
1 0
1 0
1 0
0 0
0 1
0 1
0 1
0 1
0 1
0 1
0 1
0 1
0 1
0 1
0 1
1 1
1 1
1 1
1 1
1 1
1 1
1 1
3 1
3 1
4 2
4 2
4 2
4 2
4 2
4 2
4 2
4 2
4 2
4 2
4 2
4 2
4 2
4 2
4 2
4 2
4 2
4 2
4 2
4 2
4 2
4 2
4 2
4 2
4 2
4 2
4 2
14 2
14 2
14 2
14 2
14 2
14 2
14 2
14 2
14 2
14 2
14 2
14 2
14 2
14 2
14 2
14 2
14 2
14 2
14 2
14 2
14 2
14 2
14 2
14 2
14 2
14 2
14 1
14 2
14 2
14 2
14 2
14 2
14 2
14 2
14 2
14 2
14 2
13 2
13 2
13 2
13 2
13 2
13 2
13 2
11 1
11 1
10 1
10 1
10 1
10 1
10 1
10 1
10 1
10 1
10 1
10 1
10 1
10 1
10 1
10 1
10 1
10 1
10 1
10 1
10 1
10 1
10 1
10 1
10 1
10 1
10 1
10 1
10 1
0 1
0 1
0 1
0 1
0 1
0 1
0 1
0 1
0 1
0 1
0 1
0 1
0 1
0 1
0 1
0 1
0 1
0 1
0 1
0 1
0 1
0 1
0 1
0 1
0 1
0 1
0 1
0 0
0 0
0 0
0 0
0 0
0 0
0 0
0 0
0 0
0 0
0 0
0 0
0 0
0 0
0 0
0 0
0 0
0 0
0 0
0 0
0 0
0 0
0 0
0 0
0 0
0 0
0 0
0 0
0 1
0 1
0 1
0 1
0 1
0 1
0 1
0 1
0 1
0 1
0 1
0 1
0 1
0 1
0 1
0 1
0 1
0 1
0 1
0 1
0 1
0 1
0 1
0 1
0 1
0 2
0 3
0 3
0 3
0 4
0 4
0 4
0 5
0 5
1 6
1 6
1 6
1 6
1 6
1 6
1 6
1 6
1 6
1 6
1 6
1 7
1 7
1 7
1 7
1 13
1 12
1 12
1 14
2 22
2 22
2 22
2 22
2 22
2 22
2 22
2 22
2 22
2 22
2 22
2 22
2 22
2 22
2 22
2 22
2 22
2 22
2 22
2 22
2 21
2 21
2 21
2 21
2 21
2 21
2 21
2 21
2 21
2 21
2 21
2 21
2 21
2 21
2 21
2 21
2 21
2 21
2 21
2 21
2 21
2 23
4 48
4 49
4 50
4 51
4 51
4 50
4 50
4 50
4 50
5 56
5 55
5 58
4 63
4 69
4 69
4 69
4 69
4 71
4 70
4 70
4 69
4 69
4 69
4 68
4 64
4 64
4 61
4 61
4 61
4 60
4 58
3 56
3 56
3 56
3 56
3 56
3 57
3 57
3 57
3 57
3 57
3 57
3 58
3 59
3 68
3 70
3 72
3 73
3 73
3 73
3 73
3 73
3 73
3 73
3 72
3 72
3 73
3 73
3 73
3 73
3 73
3 73
3 73
3 73
3 73
3 73
3 73
3 78
3 90
3 90
3 90
3 90
3 90
1 60
1 58
1 62
1 70
1 87
1 87
1 91
1 91
1 91
0 85
0 88
0 80
1 78
1 77
1 77
1 77
1 77
1 75
1 75
1 75
1 75
1 75
1 75
1 75
1 75
1 75
1 75
1 75
1 75
1 75
1 75
1 75
1 75
1 75
1 75
1 75
1 76
1 77
1 77
1 77
1 77
1 77
1 75
1 74
1 62
1 62
1 59
1 58
1 57
1 57
1 57
1 56
1 55
1 55
1 53
1 53
1 52
1 52
1 52
1 52
1 52
1 52
1 52
1 52
1 52
1 53
1 53
1 47
1 32
1 31
1 27
2 42
2 40
2 42
2 42
2 40
2 40
2 28
2 27
1 26
1 31
1 31
1 30
1 29
1 32
1 32
1 32
1 32
1 32
1 32
1 32
1 32
1 32
1 32
1 32
1 32
1 32
1 32
1 32
1 32
1 32
1 32
1 32
1 32
1 32
1 32
1 32
1 32
1 32
1 31
1 30
1 30
1 30
1 30
1 30
1 30
1 30
1 30
1 30
1 30
1 30
1 30
1 30
1 30
1 30
1 30
1 30
1 30
1 30
1 30
1 30
1 30
1 30
1 30
1 30
1 30
1 30
1 30
1 29
1 29
1 29
1 29
1 29
1 29
0 14
0 13
0 11
0 11
0 11
0 8
0 8
0 8
0 8
0 4
0 6
0 6
0 5
0 3
0 3
0 3
0 3
0 3
0 3
0 3
0 4
0 4
0 4
0 4
0 4
0 4
0 4
0 4
0 4
0 4
0 4
0 5
0 5
0 5
0 5
0 5
0 5
0 5
0 5
0 5
0 5
0 5
0 5
0 5
0 5
0 5
0 5
0 5
0 5
0 5
0 5
0 5
0 5
0 5
0 5
0 5
0 5
0 5
0 5
0 5
0 5
0 5
0 5
0 5
0 5
0 5
0 5
0 5
0 5
0 5
0 5
0 5
0 5
0 5
0 9
0 9
0 9
0 9
0 9
0 9
0 9
0 9
0 7
0 6
0 6
0 6
0 6
0 6
0 6
0 6
0 6
0 6
0 6
0 5
0 5
0 5
0 5
0 5
0 5
0 5
0 5
0 5
0 5
0 5
0 4
0 4
0 4
0 4
0 4
0 4
0 4
0 4
0 4
0 4
0 4
0 5
0 6
0 6
0 7
0 7
0 7
0 7
0 7
0 7
0 7
0 13
0 13
0 13
0 14
0 14
0 14
0 14
0 14
0 14
0 14
0 14
0 14
0 14
0 14
0 14
0 14
0 14
0 14
0 14
0 14
0 14
0 14
0 10
0 10
0 10
0 10
0 11
0 11
0 11
0 11
0 11
0 11
0 11
0 11
0 11
0 11
0 11
0 11
0 11
0 11
0 11
0 11
0 11
0 11
0 11
0 11
0 11
0 11
0 11
0 11
1 11
1 11
1 11
1 11
1 11
1 11
1 11
1 11
1 11
1 11
1 11
1 11
1 11
1 10
1 9
0 9
0 8
0 8
0 8
0 8
0 8
0 8
0 8
0 2
0 2
0 2
0 1
0 1
0 1
0 1
0 1
0 1
0 1
0 1
0 1
0 1
0 1
0 1
0 1
0 1
0 1
0 1
0 1
0 1
0 1
0 1
0 1
0 1
0 1
0 0
0 0
0 0
0 0
0 0
0 0
0 0
0 0
0 0
0 0
0 0
0 0
0 0
0 0
0 0
0 0
0 0
0 0
0 0
0 0
0 0
0 0
0 0
0 0
0 0
0 0
0 0
0 0
0 0
0 0
0 0
0 0
0 0
0 0
0 0
0 0
0 0
0 0
0 0
0 0
0 0
2 0
2 0
2 0
2 0
2 0
2 0
2 0
2 0
2 0
2 0
2 0
2 0
2 0
2 0
2 0
2 0
2 0
2 0
2 0
2 0
2 0
2 0
2 0
2 0
2 0
2 0
2 0
2 0
2 0
2 0
2 0
2 0
2 0
2 0
2 0
2 0
2 0
2 0
2 0
2 0
2 0
0 0
0 0
0 0
0 0
0 0
0 0
0 0
0 0
0 0
0 0
0 0
0 0
0 0
0 0
0 0
0 0
0 0
0 0
0 0
0 0
0 0
0 0
0 0
0 0
0 0
0 0
0 0
0 0
0 0
0 0
0 0
0 0
0 0
1 0
1 0
2 0
2 0
2 0
2 0
2 0
2 0
2 0
2 0
2 0
4 0
4 0
4 0
4 0
4 0
4 0
4 0
3 0
3 0
3 0
3 0
3 0
3 0
3 0
3 0
3 0
3 0
3 0
3 0
3 0
3 0
3 0
3 0
3 0
3 0
3 0
3 0
3 0
3 0
3 0
3 0
3 0
3 0
3 0
3 0
3 0
3 0
4 0
4 0
4 0
4 0
4 0
4 0
4 0
4 0
4 0
4 0
4 0
4 0
4 0
4 0
4 0
4 0
4 0
4 0
4 0
4 0
4 0
4 0
4 0
4 0
4 0
3 0
3 0
3 0
3 0
3 0
3 0
3 0
3 0
3 0
3 0
3 0
1 0
1 0
1 0
1 0
1 0
1 0
1 0
1 0
1 0
1 0
1 0
1 0
1 0
1 0
1 0
1 0
1 0
1 0
1 0
1 0
1 0
1 0
1 0
1 0
1 0
1 0
1 0
1 0
1 0
1 0
1 0
1 0
1 0
1 0
1 0
1 0
1 0
0 0
0 0
0 0
1 0
1 0
1 0
1 0
1 0
2 0
2 0
2 0
2 0
2 0
2 0
2 0
2 0
2 0
2 0
2 0
3 0
3 0
3 0
3 0
3 0
3 0
3 0
3 0
3 0
3 0
3 0
3 0
3 0
3 0
3 0
3 0
3 0
3 0
3 0
3 0
3 0
3 0
3 0
3 0
20 0
21 0
21 0
21 0
30 0
30 1
30 1
30 1
30 1
30 1
30 1
30 1
30 1
30 1
30 1
30 1
30 1
30 1
30 1
30 1
30 1
30 1
30 1
30 1
30 1
30 1
31 1
31 1
38 1
38 1
38 1
38 1
38 1
37 1
37 1
37 1
37 1
37 1
36 1
36 1
36 1
36 1
36 1
36 1
36 1
36 1
36 1
35 1
35 1
35 1
35 1
35 1
35 1
35 1
35 1
35 1
35 1
35 1
35 1
35 1
35 1
35 1
36 1
36 1
36 1
36 1
36 1
36 1
36 1
37 1
37 1
37 1
38 1
20 1
20 1
20 1
20 1
11 1
11 0
12 0
44 1
53 1
53 1
53 1
53 1
52 1
52 1
52 1
51 1
51 1
51 1
51 1
51 1
51 1
51 1
51 1
51 1
51 1
51 1
50 1
50 1
43 1
43 1
44 1
44 1
44 1
44 1
44 1
45 1
46 1
47 1
47 1
49 1
49 1
49 1
49 1
49 1
49 1
49 1
49 1
49 1
49 1
49 1
49 1
49 1
49 1
49 1
49 1
49 1
49 1
49 1
49 1
49 1
49 1
49 1
48 1
48 1
48 1
48 1
48 1
48 1
48 1
48 1
48 1
49 1
49 1
49 1
47 1
44 1
48 1
47 1
43 1
38 1
11 0
9 0
9 0
9 0
8 0
8 0
8 0
8 0
8 0
8 0
8 0
8 0
8 0
8 0
8 0
8 0
8 0
8 0
8 0
8 0
8 0
8 0
8 0
7 0
7 0
7 0
7 0
7 0
7 0
7 0
7 0
7 0
6 0
6 0
6 0
6 0
8 0
11 0
11 0
11 0
11 0
11 0
11 0
11 0
11 0
11 0
11 0
11 0
11 0
11 0
13 0
13 0
13 0
13 0
13 0
13 0
13 0
13 0
13 0
13 0
13 0
13 0
13 0
12 0
12 0
12 0
12 0
12 0
12 0
7 0
7 0
7 0
7 0
7 0
7 0
7 0
7 0
7 0
8 0
8 0
8 0
8 0
8 0
8 0
8 0
8 0
8 0
8 0
8 0
8 0
8 0
8 0
8 0
8 0
8 0
8 0
8 0
8 0
8 0
9 0
11 0
16 0
20 0
23 0
23 0
23 0
23 0
23 0
23 0
21 0
18 0
18 0
18 0
18 0
18 0
18 0
18 0
18 0
18 0
18 0
18 0
18 0
18 0
16 0
16 0
16 0
16 0
16 0
16 0
16 0
16 0
16 0
16 0
16 0
16 0
16 0
16 0
16 0
16 0
16 0
16 0
16 0
16 0
16 0
16 0
16 0
16 0
16 0
16 0
16 0
16 0
15 0
15 0
15 0
15 0
15 0
15 0
15 0
15 0
15 0
15 0
15 0
15 0
15 0
15 0
15 0
15 0
15 0
15 0
15 0
15 0
15 0
14 0
12 0
5 0
0 0
0 0
0 0
0 0
0 0
0 0
0 0
0 0
0 0
0 0
0 0
0 0
0 0
0 0
0 0
0 0
0 0
0 0
0 0
0 0
0 0
0 0
0 0
0 0
0 0
0 0
0 0
0 0
0 0
0 0
0 0
0 0
0 0
0 0
0 0
0 0
0 0
0 0
0 0
0 0
0 0
0 0
0 0
0 0
0 0
0 0
0 0
0 0
0 0
0 0
0 0
0 0
0 0
0 0
0 0
0 0
0 0
0 0
0 0
1 0
1 0
1 0
1 0
1 0
1 0
1 0
1 0
1 0
1 0
1 0
1 0
1 0
1 0
1 0
1 0
1 0
1 0
1 0
1 0
1 0
1 0
1 0
1 0
1 0
1 0
1 0
1 0
1 0
1 0
1 0
1 0
1 0
1 0
1 0
1 0
1 0
1 0
1 0
1 0
1 0
2 0
2 0
2 0
2 0
2 0
2 0
2 0
2 0
2 0
2 0
2 0
2 0
2 0
2 0
2 0
2 0
2 0
2 0
2 0
2 0
2 0
2 0
2 0
2 0
2 0
2 0
2 0
2 0
2 0
2 0
2 0
2 0
1 0
1 0
1 0
1 0
1 0
1 0
1 0
1 0
1 0
1 0
1 0
1 0
1 0
1 0
1 0
1 0
1 0
1 0
1 0
1 0
1 0
1 0
1 0
1 0
1 0
4 0
6 0
7 0
7 0
7 0
7 0
7 0
7 0
7 0
7 0
7 0
7 0
7 0
7 0
7 0
7 0
6 0
6 0
6 0
6 0
6 0
6 0
6 0
6 0
6 0
6 0
6 0
6 0
6 0
6 0
6 0
6 0
6 0
6 0
6 0
6 0
6 0
6 0
6 0
6 0
6 0
6 0
6 0
6 0
6 0
6 0
6 0
6 0
6 0
6 0
6 0
6 0
6 0
6 0
6 0
6 0
6 0
6 0
6 0
6 0
6 0
8 0
8 0
8 0
8 0
8 0
8 0
8 0
8 0
8 0
8 0
8 0
8 0
5 0
3 0
2 0
2 0
2 0
2 0
2 0
2 0
2 0
2 0
2 0
2 0
2 0
2 0
2 0
2 0
2 0
2 0
2 0
2 0
2 0
2 0
2 0
2 0
2 0
2 0
2 0
2 0
2 0
2 0
2 0
2 0
2 0
2 0
2 0
2 0
3 0
3 0
3 0
3 0
3 0
4 0
8 4
8 4
8 4
8 4
8 4
8 4
8 4
8 4
8 4
8 4
9 4
10 4
11 4
11 4
11 4
11 4
11 4
11 4
11 4
9 4
9 5
9 5
10 5
13 5
13 5
36 7
37 7
37 7
37 7
37 7
37 7
37 7
38 7
38 7
38 7
38 6
38 6
37 6
37 6
37 6
37 6
37 6
37 6
37 6
37 8
37 8
37 8
37 8
37 8
37 8
37 8
37 8
37 8
37 8
37 9
37 9
37 9
37 9
37 9
37 9
37 9
37 9
37 9
37 9
37 9
37 9
36 9
36 9
36 9
36 8
36 8
36 8
34 8
31 4
31 4
31 4
31 4
31 4
31 4
31 4
31 4
31 4
28 4
28 4
26 4
25 4
26 4
26 4
25 4
25 6
25 5
25 5
25 5
24 5
24 5
24 5
24 5
22 4
2 2
1 2
1 2
1 2
1 2
1 2
1 2
1 2
1 2
1 2
1 2
1 2
1 2
1 2
1 2
1 2
1 2
1 2
1 2
1 2
1 2
1 2
1 2
3 2
3 2
3 2
4 2
4 2
4 2
4 2
4 2
4 2
4 2
4 2
4 2
4 2
4 2
4 2
4 2
4 2
4 2
3 2
3 2
3 2
3 2
3 2
3 2
3 2
3 2
3 2
3 2
3 2
3 2
3 2
3 2
3 2
3 2
3 2
5 2
5 2
5 2
4 2
4 2
4 2
4 0
4 0
4 0
4 0
4 0
4 0
4 0
4 0
4 0
4 0
4 0
4 0
4 0
4 0
4 0
4 0
4 0
4 0
4 0
4 0
4 0
4 0
4 0
4 0
4 0
4 0
10 1
12 1
12 1
12 1
11 1
11 1
10 1
10 1
10 1
10 1
10 1
10 1
10 1
10 1
10 1
10 1
10 1
10 1
10 1
10 1
10 1
10 1
10 1
10 1
10 1
10 1
10 1
10 1
10 1
10 1
10 1
10 1
10 1
10 1
10 1
10 1
10 1
10 1
10 1
10 1
10 1
8 1
8 1
8 1
8 1
8 1
8 1
8 1
8 1
8 1
8 1
8 1
8 1
8 1
8 1
8 1
8 1
8 1
8 1
8 1
14 1
14 1
14 1
14 1
14 1
14 1
14 1
14 1
14 1
14 1
14 1
14 1
14 1
8 0
6 0
6 0
6 0
6 0
6 0
6 0
6 0
6 0
6 0
7 0
7 0
7 0
7 0
7 0
7 0
7 0
7 0
7 0
7 0
7 0
7 0
7 0
7 0
7 0
7 0
7 0
7 0
7 0
7 0
7 0
7 0
7 0
7 0
7 0
7 0
7 0
7 0
7 0
7 0
7 0
7 0
7 0
7 0
7 0
7 0
8 0
8 0
8 0
8 0
8 0
8 0
8 0
8 0
8 0
8 0
8 0
8 0
13 0
13 0
7 0
7 0
6 0
6 0
6 0
6 0
6 0
6 0
6 0
6 0
6 0
6 0
6 0
6 0
6 0
6 0
6 0
6 0
6 0
6 0
6 0
6 0
6 0
5 0
5 0
5 0
5 0
5 0
5 0
5 0
5 0
5 0
5 0
6 2
6 2
6 2
7 2
7 2
7 2
7 2
7 2
7 2
7 2
7 2
7 2
7 2
7 2
7 2
7 2
7 2
7 2
7 2
7 2
7 2
7 2
7 2
7 2
7 2
7 2
7 2
7 2
7 2
7 2
7 2
8 2
8 2
15 2
15 2
15 2
22 3
23 3
18 3
18 3
18 3
18 3
18 3
18 3
18 3
18 3
18 3
18 3
18 3
18 3
18 3
18 3
18 3
18 3
18 3
18 3
18 3
18 3
18 3
18 3
18 3
18 3
18 3
18 3
18 3
18 3
18 3
21 3
21 3
22 3
23 3
23 3
23 3
22 1
24 2
24 2
23 2
23 2
23 2
23 2
23 2
23 2
24 2
24 2
24 2
31 2
31 2
31 3
32 3
35 3
35 3
35 3
35 3
35 3
35 3
35 3
35 3
40 3
40 3
40 3
40 3
40 3
40 3
40 3
38 3
38 3
30 3
30 2
30 2
25 2
24 2
24 2
24 2
24 2
24 2
24 2
24 2
24 2
24 2
24 2
24 2
24 2
24 2
24 2
24 2
24 2
24 2
24 2
24 2
24 2
24 2
24 2
24 2
24 2
24 2
24 2
24 2
24 2
24 2
24 2
21 2
21 2
20 2
19 2
19 2
17 2
17 2
17 1
17 1
17 1
17 1
17 1
17 1
17 1
17 1
15 1
15 1
15 1
9 1
9 1
9 0
8 0
5 0
5 0
5 0
5 0
5 0
5 0
5 0
5 0
0 0
0 0
0 0
0 0
0 0
0 0
0 0
0 0
0 0
0 0
0 0
0 0
0 0
0 0
0 0
0 0
0 0
0 0
0 0
0 0
0 0
0 0
0 0
0 0
0 0
0 0
0 0
0 0
0 0
0 0
0 0
0 0
0 0
0 0
0 0
0 0
0 0
0 0
0 0
0 0
0 0
2 0
2 0
2 0
2 0
2 0
2 0
2 0
2 1
2 1
2 1
2 1
2 1
2 1
2 1
2 1
2 1
2 1
2 1
2 1
2 1
2 1
2 1
2 1
3 0
3 0
3 0
3 0
3 0
3 0
3 0
3 0
3 0
3 0
3 0
3 0
3 0
3 0
3 0
3 0
3 0
3 0
3 0
3 0
3 0
3 0
3 0
3 0
3 0
3 0
3 0
3 0
3 0
3 0
3 0
3 0
3 0
3 0
3 0
3 0
3 0
3 0
3 0
3 0
3 0
3 0
3 0
3 0
3 0
3 0
3 0
3 0
3 0
3 0
1 0
1 0
1 0
1 0
1 0
1 0
1 0
1 0
1 0
1 0
1 0
1 0
1 0
1 0
1 0
1 0
2 0
2 0
2 0
2 0
2 0
2 0
2 0
1 0
1 0
1 0
1 0
1 0
1 0
1 0
1 0
1 0
1 0
1 0
1 0
1 0
1 0
1 0
1 0
1 0
1 0
1 0
1 0
1 0
1 0
1 0
1 0
1 0
1 0
1 0
1 0
1 0
1 0
1 0
1 0
1 0
1 0
1 0
1 0
1 0
1 0
1 0
1 0
1 0
1 0
1 0
1 0
1 0
1 0
1 0
1 0
1 0
1 0
1 0
1 0
1 0
1 0
1 0
1 0
1 0
1 0
1 0
1 0
1 0
1 0
1 0
1 0
1 0
1 0
0 0
0 0
0 0
0 0
0 0
0 0
0 0
0 0
0 0
0 0
0 0
0 0
0 0
0 0
0 0
0 0
0 0
0 0
0 0
0 0
0 0
0 0
0 0
0 0
0 0
0 0
0 0
0 0
0 0
0 0
0 0
0 0
0 0
0 0
0 0
0 0
0 0
0 0
0 0
0 0
0 0
0 0
0 0
0 0
0 0
0 0
0 0
0 0
0 0
0 0
0 0
0 0
0 0
0 0
0 0
0 0
0 0
0 0
0 0
0 0
0 0
0 0
0 0
0 0
0 0
0 0
0 0
0 0
0 0
0 0
0 0
0 0
0 0
0 0
0 0
0 0
0 0
0 0
0 0
0 0
0 0
0 0
0 0
0 0
0 0
0 0
0 0
0 0
0 0
0 0
0 0
0 0
0 0
0 0
0 0
0 0
0 0
0 0
0 0
0 0
0 0
0 0
0 0
0 0
0 0
0 0
0 0
0 0
0 0
0 0
0 0
0 0
0 0
0 0
0 0
0 0
0 0
0 0
0 0
0 0
0 0
0 0
0 0
0 0
0 0
0 0
0 0
0 0
0 0
0 0
0 0
0 0
0 0
0 0
0 0
0 0
0 0
0 0
0 0
0 0
0 0
0 0
0 0
0 0
0 0
0 0
0 0
0 0
0 0
0 0
0 0
0 0
0 0
0 0
0 0
0 0
0 0
0 0
0 0
0 0
0 0
0 0
0 0
0 0
0 0
0 0
0 0
0 0
0 0
0 0
0 0
0 0
0 0
0 0
0 0
0 0
0 0
0 0
0 0
0 0
0 0
0 0
0 0
0 0
0 0
0 0
0 0
0 0
0 0
0 0
0 0
0 0
0 0
0 0
0 0
0 0
0 0
0 0
0 0
0 0
0 0
0 0
0 0
0 0
0 0
0 0
0 0
0 0
0 0
0 0
0 0
0 0
0 0
0 0
0 0
0 0
0 0
0 0
0 0
0 0
0 0
0 0
0 0
0 0
0 0
0 0
0 0
0 0
0 0
0 0
0 0
0 0
0 0
0 0
0 0
0 0
0 0
0 0
0 0
0 0
0 0
0 0
0 0
0 0
0 0
0 0
0 0
0 0
0 0
0 0
0 0
0 0
0 0
0 0
0 0
0 0
0 0
0 0
0 0
0 0
0 0
0 0
0 0
0 0
0 0
0 0
0 0
0 0
0 0
0 0
0 0
0 0
0 0
0 0
0 0
0 0
0 0
0 0
0 0
0 0
0 0
0 0
0 0
0 0
0 0
0 0
0 0
0 0
0 0
0 0
0 0
0 0
0 0
0 0
0 0
0 0
0 0
0 0
0 0
0 0
0 0
0 0
0 0
0 0
0 0
0 0
0 0
0 0
0 0
0 0
0 0
0 0
0 0
0 0
0 0
0 0
0 0
0 0
0 0
0 0
0 0
0 0
0 0
0 0
0 0
0 0
0 0
0 0
0 0
0 0
0 0
0 0
0 0
0 0
0 0
0 0
0 0
0 0
0 0
0 0
0 0
0 2
0 3
0 3
0 4
0 4
0 4
0 4
0 4
0 4
0 4
0 4
0 4
0 4
0 4
0 4
0 4
0 4
0 4
0 4
0 4
0 4
0 4
0 4
0 4
0 4
0 4
0 4
0 4
0 4
0 4
0 4
0 4
0 4
0 4
0 4
0 4
0 4
0 4
0 4
0 4
0 4
0 4
0 4
0 4
0 4
0 4
0 4
0 4
0 4
0 4
0 4
0 4
0 4
0 4
0 4
0 4
0 4
0 4
0 5
0 5
0 5
0 5
0 5
0 5
0 5
0 4
0 4
0 4
1 4
1 4
1 4
1 4
1 2
1 2
1 1
1 1
1 1
1 1
1 1
1 1
1 1
1 1
1 1
1 1
1 1
1 1
1 1
1 1
1 1
1 1
2 1
2 1
2 1
2 1
2 1
2 1
2 1
2 1
2 1
2 1
2 1
2 1
2 1
2 1
2 1
2 1
2 1
2 1
2 1
2 1
2 1
2 1
2 1
2 1
2 1
2 1
2 1
2 1
2 1
2 1
2 1
2 1
2 1
2 1
2 1
2 1
2 1
3 3
3 3
3 3
3 3
3 2
4 2
4 2
4 2
4 2
4 2
5 2
5 2
5 2
8 2
7 2
7 2
7 2
7 2
7 2
7 3
7 3
7 3
7 3
7 3
7 3
7 3
9 3
11 4
11 4
11 4
11 4
11 4
11 4
11 4
11 3
11 3
10 3
10 3
10 3
10 3
10 3
10 3
10 3
10 3
10 3
9 3
9 3
8 3
8 3
8 3
8 3
8 3
8 3
8 3
8 3
8 3
8 3
8 3
8 3
8 3
8 3
8 3
8 3
8 3
8 3
8 3
8 3
8 3
8 4
8 4
8 4
8 4
8 4
7 2
7 2
7 2
7 2
7 2
6 2
6 2
6 2
6 2
6 2
6 2
6 2
6 2
4 2
4 2
4 2
4 2
4 2
4 3
4 3
4 4
4 5
2 5
2 5
2 6
1 6
1 6
0 5
0 5
0 5
0 5
0 5
0 5
0 5
0 5
0 5
0 5
0 5
0 5
0 5
0 5
0 5
0 5
0 5
0 5
0 5
0 5
0 5
0 5
0 5
0 5
0 5
0 5
0 5
0 5
0 5
0 5
0 5
0 5
0 5
0 5
0 5
0 5
0 5
0 5
0 5
0 5
0 5
0 4
0 4
0 4
0 4
0 4
0 4
0 4
0 4
0 5
0 5
0 5
0 5
0 6
0 6
0 6
0 6
0 6
0 6
0 6
0 6
0 6
0 6
0 6
0 5
0 4
0 4
0 3
0 3
0 3
0 2
0 2
0 2
0 2
0 2
0 2
0 2
0 2
0 2
0 2
0 2
0 2
0 2
0 2
0 2
0 2
0 2
0 2
0 2
0 2
0 2
0 2
0 2
0 2
0 2
0 2
0 2
0 2
0 2
0 2
0 2
0 2
0 2
0 2
0 2
0 2
0 3
0 3
0 3
0 3
0 3
0 3
0 3
0 4
0 4
0 4
0 4
0 4
0 4
0 4
0 4
0 4
0 3
0 3
0 2
0 2
0 2
0 2
0 2
0 2
0 2
0 2
0 2
0 2
0 2
0 2
0 2
0 2
0 2
0 2
0 2
0 2
0 2
0 2
0 2
0 2
0 2
0 2
0 2
0 2
0 2
0 2
0 2
0 2
0 2
0 2
0 2
0 2
0 2
0 2
0 2
0 2
0 2
0 2
0 3
0 3
0 3
0 3
0 3
0 3
0 3
0 3
0 3
0 3
0 3
0 3
0 3
0 3
0 3
0 2
0 2
0 2
0 2
0 2
0 2
0 2
0 1
0 1
0 1
0 1
0 1
0 1
0 1
0 1
1 1
1 1
1 1
1 1
1 1
1 1
1 1
1 1
1 1
1 1
1 1
1 1
1 1
1 1
1 1
1 1
1 1
1 1
1 1
1 1
1 1
1 1
1 1
1 1
1 1
1 1
1 1
1 1
1 1
1 1
1 1
1 1
1 1
1 1
1 1
1 1
1 1
1 1
1 1
1 1
1 1
1 1
1 1
1 0
1 0
1 0
1 0
1 0
1 0
1 0
1 0
1 0
1 0
1 0
1 0
1 0
1 0
1 0
1 0
1 0
1 0
1 0
1 0
1 0
1 0
1 0
1 0
1 0
1 0
1 0
1 0
1 0
1 0
0 0
0 0
0 0
0 0
0 0
0 0
0 0
0 0
0 0
0 0
1 0
1 0
1 0
1 0
1 0
1 0
1 0
1 0
1 0
1 0
1 0
1 0
1 0
1 0
1 0
1 0
1 0
0 0
0 0
0 0
0 0
0 0
0 0
0 0
0 0
0 0
0 0
1 1
1 1
1 1
1 1
1 1
1 1
1 1
1 1
1 1
1 1
1 1
1 1
1 1
1 1
1 1
1 1
1 1
1 1
1 1
1 1
1 1
1 1
1 1
1 1
1 1
1 1
1 1
1 1
1 1
1 1
1 1
1 1
1 1
1 1
1 1
1 1
1 1
1 1
1 1
1 1
1 1
1 1
1 1
1 1
1 1
1 1
1 1
1 1
1 1
1 1
1 1
1 1
1 1
0 1
0 1
0 1
0 1
0 1
0 1
0 2
0 2
0 2
0 2
0 2
0 2
0 2
0 2
0 2
0 2
0 2
0 2
0 2
0 2
0 1
0 1
0 1
0 1
0 1
0 1
0 1
0 1
0 1
0 1
0 1
0 1
0 1
0 1
0 1
0 1
0 1
0 1
0 1
0 1
0 1
0 1
0 1
0 1
0 1
0 1
0 1
0 1
0 1
0 1
0 1
0 1
0 1
0 1
0 1
0 1
0 1
0 1
0 1
0 1
0 1
0 1
0 1
0 1
0 1
0 1
0 1
0 1
0 1
0 1
0 1
0 1
0 1
0 1
0 1
0 1
0 1
0 1
0 1
0 0
0 0
0 0
0 0
0 0
0 0
0 0
0 0
0 0
0 0
0 0
0 0
0 0
0 0
0 0
0 0
0 0
0 0
0 0
0 0
0 0
0 0
0 0
0 0
0 0
0 0
0 0
0 0
0 0
0 0
0 0
0 0
0 0
0 0
0 0
0 0
0 0
0 0
0 0
0 0
0 0
0 0
0 0
0 0
0 0
0 0
0 0
0 0
0 0
0 0
0 0
0 0
0 0
0 0
0 0
0 0
0 0
0 0
0 0
0 0
0 0
0 0
0 0
0 0
0 0
0 0
0 0
0 0
0 0
0 0
0 0
0 0
0 0
0 1
0 1
0 2
0 2
0 2
0 2
0 2
0 4
0 4
0 4
0 4
0 6
0 9
0 9
0 9
0 10
0 10
0 10
0 10
0 10
0 10
0 10
0 10
0 10
0 10
0 10
0 10
0 14
0 14
0 14
0 14
0 14
0 14
0 14
0 14
0 14
0 14
0 14
0 14
0 14
0 14
0 14
0 14
0 14
0 14
0 14
0 14
0 14
0 14
0 14
0 14
0 14
0 14
0 14
0 14
0 14
0 14
0 14
0 14
0 14
0 14
0 15
0 15
0 15
0 15
0 15
0 14
0 13
0 13
0 13
0 13
0 13
0 15
0 16
0 16
0 16
0 16
0 16
0 16
0 16
0 15
0 15
0 15
0 15
0 13
0 10
0 10
0 10
0 10
0 10
0 11
0 11
0 11
0 11
0 11
0 11
0 12
0 12
0 12
0 12
0 8
0 8
0 8
0 8
0 8
0 9
0 9
0 9
0 9
0 9
0 10
0 11
0 13
0 14
0 14
0 15
0 15
0 15
0 15
0 15
0 19
0 19
0 21
0 24
0 24
0 24
0 25
0 25
0 26
0 26
0 26
0 26
0 26
0 26
0 25
1 395
1 401
1 429
4 1481
4 1598
4 1671
4 1692
4 1770
4 1775
5 2056
5 2100
6 2231
7 2377
7 2413
7 2518
7 2532
7 2538
7 2542
9 2662
9 2663
10 2665
10 2665
10 2665
10 2665
10 2668
10 2668
10 2668
10 2668
10 2667
10 2666
10 2667
10 2667
10 2667
10 2667
10 2666
10 2666
10 2666
10 2666
10 2665
10 2665
10 2665
10 2665
10 2664
10 2664
10 2664
10 2664
10 2664
10 2664
10 2662
10 2659
10 2658
10 2659
10 2686
10 2689
10 2690
10 2689
10 2684
10 2674
10 2507
10 2274
10 1784
10 1704
10 1629
10 1627
10 1627
10 1626
10 1625
10 1625
9 1624
8 1622
8 1621
8 1617
8 1614
8 1613
8 1608
8 1568
6 860
6 785
6 777
6 771
6 767
6 761
4 439
4 281
3 262
3 252
3 247
3 211
3 205
3 204
3 202
0 83
0 82
0 80
0 80
0 102
0 119
0 139
0 157
0 157
0 157
0 156
0 155
0 155
0 155
0 155
0 156
0 164
0 166
0 166
0 168
0 170
0 170
0 171
0 171
0 179
0 183
0 195
0 256
0 338
0 355
0 364
0 367
0 380
0 386
0 371
0 406
0 467
0 472
0 473
0 478
1 1342
1 1345
1 1489
1 1494
1 1494
1 1501
1 1514
1 1646
1 1651
1 1656
1 1656
1 1679
2 1706
2 1714
2 1716
2 1733
2 1738
2 1739
2 1745
2 1747
2 1749
2 1749
2 1750
2 1750
2 1751
2 1738
2 1732
2 1732
2 1731
2 1728
2 1727
2 1727
2 1728
2 1730
2 1730
2 1730
2 1730
2 1707
2 1674
2 1654
2 1652
2 1652
2 1651
2 1651
2 1651
2 1651
2 1651
2 1651
2 1650
2 1639
2 1634
2 1633
2 1633
2 1633
2 1635
2 1635
2 1633
2 1624
2 1617
2 1598
2 1489
2 1418
2 1400
2 1390
2 1388
2 1374
2 1367
2 1347
2 1296
3 1219
3 1217
3 1210
3 1201
2 201
2 201
2 199
2 196
2 72
2 72
2 66
1 32
1 29
1 29
1 29
1 29
1 28
1 28
1 28
1 21
1 21
1 21
1 20
1 20
1 20
1 20
1 20
1 20
1 19
1 19
1 12
1 12
1 12
1 12
1 12
1 12
1 12
1 13
2 15
4 15
4 15
4 15
4 14
4 13
4 14
4 14
4 14
4 30
4 30
4 30
4 32
4 48
4 66
4 68
4 68
4 69
4 71
4 71
4 69
4 70
4 70
4 70
4 70
4 70
4 70
4 70
4 73
4 73
3 73
3 73
3 73
3 72
3 69
3 69
3 69
3 69
3 69
3 70
3 72
3 72
3 73
3 73
3 71
3 71
3 71
3 71
3 71
3 71
3 73
3 73
3 73
3 74
3 74
3 74
3 74
3 74
3 74
3 75
3 84
3 87
3 89
3 91
3 90
3 90
3 90
3 91
3 91
3 114
2 114
2 113
2 115
2 111
0 112
0 114
0 114
0 114
0 114
0 114
0 115
0 115
0 100
0 100
0 100
0 98
0 82
0 63
0 61
0 61
0 61
0 60
0 60
0 60
0 60
0 59
0 59
0 59
0 62
0 129
0 142
0 140
0 139
0 139
0 139
0 139
0 139
0 139
0 139
0 139
0 139
0 137
0 136
0 134
0 134
0 132
0 132
0 132
0 132
0 132
0 132
0 132
0 132
0 129
0 129
0 129
0 129
1 127
1 125
1 124
1 124
1 122
1 119
1 116
1 116
1 116
1 114
1 114
1 114
1 114
1 113
1 113
1 86
1 86
1 86
1 86
1 86
1 86
2 86
2 86
2 86
2 86
2 85
2 84
2 84
2 84
2 84
3 84
3 84
3 84
3 84
3 84
3 84
3 84
3 84
3 86
3 87
3 87
3 87
3 87
3 87
3 82
2 11
2 4
2 4
2 4
2 4
2 4
2 4
2 5
2 5
2 5
2 5
2 5
2 5
2 5
2 5
2 5
2 5
2 5
2 5
2 5
2 5
2 5
2 5
2 5
2 5
2 5
2 5
2 5
1 5
1 5
1 5
1 5
1 5
1 5
1 5
1 5
1 5
1 5
1 5
1 5
1 5
1 5
1 5
1 5
1 5
1 5
1 5
1 5
1 5
0 5
0 5
0 5
0 5
0 5
0 5
0 5
0 5
0 5
0 5
0 5
0 5
0 5
0 5
0 5
0 5
0 5
0 3
0 2
0 2
0 2
0 2
1 2
1 1
1 1
1 1
1 1
1 1
1 1
1 1
1 1
1 0
1 0
1 0
1 0
1 0
1 0
0 0
0 0
0 0
0 0
0 0
0 0
0 0
0 0
0 0
0 0
0 0
0 0
0 0
0 0
0 0
0 0
0 0
0 0
0 0
0 0
0 0
0 0
0 0
1 0
1 0
1 0
1 3
1 3
1 3
1 3
1 3
1 3
1 4
1 4
1 4
1 4
1 40
1 40
1 97
1 97
1 97
1 103
1 103
1 105
1 106
1 108
1 108
1 108
1 108
1 108
1 108
1 108
2 112
2 112
2 112
2 112
2 112
2 112
2 112
2 112
2 112
2 112
2 112
2 113
2 113
2 114
2 114
2 114
2 114
2 114
2 116
2 116
2 116
2 119
2 121
2 122
2 126
2 126
2 126
2 126
2 129
2 129
2 129
2 129
2 129
2 129
2 129
2 128
2 127
2 127
2 127
2 127
2 127
2 127
2 127
2 127
1 128
1 128
1 128
1 110
1 107
1 89
1 83
1 70
1 69
1 62
1 56
1 56
1 56
1 43
1 42
1 26
1 26
1 26
1 27
2 28
2 30
2 31
2 31
2 31
9 42
9 48
10 52
11 60
11 63
10 59
10 59
10 59
10 59
10 59
10 62
10 66
10 69
10 71
10 70
10 70
10 70
10 69
10 72
10 72
10 72
10 71
10 71
10 70
14 69
14 70
14 72
14 71
14 70
14 67
14 67
14 67
14 67
14 62
14 62
14 63
14 63
14 63
14 63
14 63
14 63
14 63
14 63
14 63
14 63
14 65
14 65
14 64
14 64
14 64
14 64
14 64
14 64
14 64
14 64
14 64
15 65
19 67
20 67
20 67
20 67
20 70
20 73
20 73
20 73
20 79
20 78
20 78
19 77
19 72
19 75
19 73
19 73
12 62
12 60
10 55
10 47
10 44
10 44
10 44
10 45
10 46
10 46
10 43
10 41
10 38
10 36
10 36
10 36
10 36
10 34
10 36
10 38
10 40
10 40
10 40
10 40
6 38
6 36
6 31
6 31
6 34
6 34
6 34
6 34
6 34
6 34
6 34
6 33
6 33
6 34
6 35
6 35
6 35
6 35
6 35
6 35
6 34
6 33
6 32
6 33
6 33
6 33
6 34
6 34
6 34
6 34
6 34
6 34
4 33
0 31
0 31
0 31
0 31
0 28
0 25
0 25
0 25
0 19
0 19
0 19
0 19
0 19
0 16
0 16
1 16
6 16
6 16
6 17
6 18
6 18
6 21
6 21
6 20
6 20
6 20
6 20
6 20
6 20
6 20
6 20
7 22
7 21
7 21
7 18
7 18
7 17
7 17
7 20
7 27
7 28
7 28
7 28
7 28
7 25
7 25
7 25
7 28
7 30
7 32
7 35
7 57
7 118
7 133
7 364
7 374
7 399
7 402
7 421
10 452
10 573
10 634
10 646
10 665
10 687
10 689
9 697
8 728
8 732
8 762
8 1025
8 1027
8 1028
8 1039
9 1053
9 1056
9 1073
9 1088
9 1093
10 1110
10 1111
10 1111
10 1120
10 1125
10 1132
10 1141
10 1142
10 1154
10 1156
6 1158
6 1182
6 1187
6 1241
6 1250
6 1255
6 1260
6 1261
6 1260
6 1260
6 1261
6 1261
6 1264
6 1264
6 1264
5 1261
5 1261
5 1260
5 1259
5 1257
5 1257
5 1257
5 1257
5 1251
5 1249
5 1253
5 1253
5 1251
5 1254
5 1253
5 1251
5 1245
5 1240
5 1237
5 1233
5 1211
5 1152
5 1123
5 827
5 831
5 832
5 853
5 853
2 814
2 724
2 667
2 668
2 669
1 661
0 662
0 650
0 621
0 611
0 579
0 294
0 295
0 261
0 251
0 251
0 245
0 224
0 211
0 208
0 196
0 199
0 200
0 200
0 201
0 199
0 198
0 197
0 191
0 198
0 210
0 230
0 231
0 211
0 221
0 223
0 226
0 228
0 228
0 228
0 239
0 244
0 246
0 249
0 250
0 250
0 250
0 251
0 251
0 251
0 251
0 253
0 251
0 250
0 249
0 260
0 261
0 267
0 265
0 275
0 287
0 315
0 324
0 339
0 342
0 339
0 339
0 339
0 340
0 323
0 325
0 303
0 294
0 293
0 291
0 291
0 290
0 288
0 271
0 271
0 271
0 267
0 266
0 266
0 264
0 262
0 264
0 264
0 264
0 261
0 268
0 268
0 266
0 270
0 264
0 263
0 264
0 262
0 262
0 263
0 269
0 271
0 258
0 236
0 209
0 194
0 170
0 172
0 201
0 202
0 206
0 208
0 209
0 198
0 191
0 191
0 188
0 205
0 209
0 210
0 209
0 209
0 209
0 209
0 207
0 205
0 206
0 207
0 198
0 222
0 218
0 221
0 210
0 197
0 165
0 159
0 149
0 146
0 150
0 155
0 156
0 162
0 210
0 262
0 271
0 272
0 276
0 277
0 277
0 277
0 279
0 281
0 281
0 281
0 280
0 280
0 280
0 280
0 280
0 277
0 277
0 276
0 276
0 265
0 265
0 267
0 267
0 267
0 267
0 267
0 267
0 267
0 262
0 261
0 261
0 262
0 262
0 261
0 263
0 260
0 252
0 226
0 324
0 323
0 335
0 348
0 365
0 370
0 372
0 386
0 381
0 407
0 413
0 415
0 418
0 421
0 421
0 420
0 420
0 419
0 418
0 408
0 383
0 383
0 383
0 383
0 384
0 388
0 389
0 388
0 389
0 383
0 380
0 379
0 372
0 323
0 262
0 255
0 253
0 249
0 248
0 248
0 248
0 244
0 244
0 244
0 244
0 244
0 245
0 246
0 247
0 247
0 246
0 252
0 252
0 252
0 252
0 253
0 253
0 253
0 253
0 253
0 253
0 253
0 253
0 256
0 253
0 252
0 252
0 302
0 304
0 307
0 313
0 319
2 338
2 449
4 997
5 1114
6 1332
6 1367
6 1390
6 1398
6 1394
6 1386
6 1350
6 1346
6 1346
6 1346
6 1348
6 1350
6 1352
6 1352
6 1353
6 1353
6 1356
6 1357
6 1360
6 1361
6 1363
6 1362
6 1360
6 1359
6 1358
6 1357
6 1357
6 1358
6 1359
6 1360
6 1360
6 1360
6 1360
6 1360
6 1360
6 1360
6 1360
7 1377
9 1506
9 1511
9 1520
9 1522
9 1522
9 1521
9 1503
9 1494
9 1493
9 1499
8 1474
8 1485
8 1825
8 1898
8 1914
8 1969
8 1971
8 1972
8 2128
8 2129
8 2141
8 2153
8 2157
8 2161
8 2159
8 2157
8 2129
8 2129
8 2127
8 2114
8 2110
8 2064
6 1511
5 1170
4 1035
4 949
4 945
4 948
4 948
4 948
4 953
4 955
4 956
4 966
4 976
4 978
4 985
4 1003
4 1006
4 1042
4 1042
4 1045
4 1051
4 1049
4 1053
4 1085
4 1128
4 1154
4 1171
4 1180
4 1183
4 1192
4 1192
4 1192
4 1191
4 1192
4 1193
4 1193
4 1193
4 1192
4 1192
4 1192
3 1172
1 1037
1 1033
1 1028
1 1028
1 1047
1 1047
1 1054
1 1060
1 1065
1 1067
1 1070
1 1051
0 662
0 613
0 585
0 523
0 515
0 815
0 655
0 668
0 647
0 633
0 629
0 630
0 630
0 631
0 605
0 605
0 615
0 615
0 611
0 611
0 611
0 611
0 611
0 611
0 612
0 609
0 610
0 608
0 604
0 609
0 614
0 616
0 605
0 607
0 606
0 590
0 586
0 546
0 546
0 546
0 546
0 547
0 536
0 473
0 460
0 447
0 453
0 453
0 454
0 454
0 455
0 463
0 463
0 462
0 461
0 461
0 461
0 462
0 462
0 464
0 475
0 479
0 482
0 542
0 552
0 551
0 577
0 573
0 600
0 599
0 592
0 588
0 589
0 589
0 589
0 585
0 585
0 679
0 377
0 378
0 361
1 361
1 361
1 359
1 358
1 357
1 357
1 357
1 357
1 347
1 347
1 347
1 347
1 347
1 347
1 346
1 347
1 347
1 347
1 346
1 346
1 346
1 339
1 332
1 350
1 423
1 424
1 424
1 424
1 423
1 431
1 434
1 437
1 444
1 440
1 438
1 427
1 422
1 421
1 413
1 411
1 413
1 413
1 412
1 406
1 406
1 410
1 410
1 410
1 411
1 407
1 405
1 404
1 388
1 386
1 381
1 304
1 291
1 276
1 274
1 274
1 237
1 235
0 235
0 235
0 235
0 235
0 235
0 235
0 234
0 139
0 140
0 139
0 139
0 140
0 141
0 155
0 158
0 158
0 160
0 160
0 166
0 166
0 167
0 169
0 169
0 169
0 169
0 173
0 172
0 175
0 175
0 177
0 177
0 183
0 183
0 183
0 158
0 78
0 70
0 70
0 71
0 73
0 68
0 70
0 74
0 109
0 110
0 111
0 112
0 110
0 108
0 109
0 110
0 109
0 109
0 109
0 107
0 109
0 103
0 101
0 102
0 100
0 100
0 100
0 100
0 100
0 101
0 104
0 104
0 104
0 104
0 104
0 104
0 104
0 105
0 105
0 117
0 117
0 117
0 118
0 137
0 175
0 175
0 176
0 176
0 178
0 176
0 176
0 155
0 151
0 163
0 192
1 202
1 205
1 215
1 217
1 217
1 217
1 216
1 219
1 215
1 215
1 229
1 262
1 288
1 289
1 302
1 302
1 303
1 302
1 303
1 303
1 304
1 304
1 305
1 314
2 326
2 323
2 286
2 285
3 286
3 284
3 284
3 284
3 283
3 282
3 281
3 281
3 281
3 281
3 279
3 280
3 287
3 290
3 292
3 292
3 292
3 292
3 292
3 291
3 288
3 288
3 288
3 288
3 288
3 288
3 288
3 288
3 287
3 271
3 271
3 268
3 265
3 237
3 176
3 160
3 159
3 159
3 158
3 158
3 157
3 157
3 157
3 148
3 138
2 125
2 123
2 122
2 121
2 121
2 121
2 121
2 120
2 120
2 119
2 110
2 69
2 43
2 43
2 42
2 42
2 44
2 46
2 54
2 57
2 59
3 64
3 76
2 108
2 102
2 101
2 102
2 102
1 105
1 105
1 106
1 106
1 106
1 107
1 107
1 107
1 107
1 107
1 106
1 104
1 97
1 93
1 93
1 93
1 93
1 94
1 97
1 97
1 97
1 97
1 97
1 97
1 98
1 98
1 98
1 98
1 98
1 98
1 98
1 98
1 98
1 98
1 98
1 98
1 98
1 98
1 98
1 98
1 98
1 98
1 98
1 98
1 98
1 98
1 98
1 98
1 98
1 98
1 98
1 98
1 98
1 98
1 98
1 105
1 108
1 108
1 108
1 108
1 108
1 106
1 100
1 95
1 93
1 91
0 84
0 68
0 30
0 29
1 29
1 28
1 28
1 24
1 24
1 23
1 23
1 23
1 22
1 22
1 22
1 22
1 22
1 25
1 29
1 29
1 92
1 94
1 94
1 96
1 94
1 92
1 92
1 92
1 92
1 92
1 92
1 93
1 150
1 164
1 176
1 176
1 177
1 177
1 178
1 178
1 181
1 181
1 182
1 182
1 182
1 198
1 198
1 198
1 202
1 202
1 203
1 203
1 203
1 205
1 205
1 205
1 205
1 205
1 206
1 210
1 212
1 210
1 204
1 200
1 205
1 208
1 208
1 208
1 208
1 211
1 211
1 211
1 211
1 210
1 210
1 200
1 209
0 209
0 211
0 212
0 220
1 538
1 546
1 639
1 697
1 707
1 717
1 724
1 724
1 724
1 721
1 720
1 722
1 664
1 663
1 663
1 664
1 664
1 665
1 684
1 685
1 687
1 687
1 686
1 679
1 605
1 600
1 600
1 600
1 600
1 601
1 601
1 605
1 602
1 604
1 607
1 611
2 622
2 600
2 600
2 594
2 587
2 587
2 587
2 588
2 588
2 585
2 584
2 584
2 586
2 586
2 587
2 585
2 584
2 584
2 586
2 585
2 582
2 579
2 580
2 579
2 580
2 578
2 588
2 592
2 593
2 597
2 1277
3 1301
3 1397
3 1444
3 1473
3 1476
3 1457
2 1110
2 1038
2 980
2 975
2 977
2 977
2 980
2 981
2 981
2 981
2 981
2 982
3 982
3 983
3 984
3 982
3 982
3 981
3 961
3 960
3 959
3 959
3 959
3 959
3 959
3 959
3 959
3 964
3 988
3 987
3 991
3 990
3 992
3 990
3 983
3 983
2 972
2 973
3 970
3 970
4 970
4 972
4 972
4 972
4 972
4 971
4 972
4 971
4 967
4 967
4 967
4 967
4 972
4 973
4 971
4 973
4 973
4 972
4 970
4 970
4 968
4 955
4 955
4 947
4 949
4 941
3 226
2 132
2 282
2 311
2 342
2 355
2 917
2 1117
2 1257
2 1269
2 1270
2 1301
2 1303
2 1304
2 1304
2 1307
2 1307
2 1307
2 1310
2 1312
2 1314
2 1316
2 1316
2 1318
2 1318
2 1318
2 1318
2 1318
2 1319
3 1525
3 1526
3 1529
3 1529
3 1529
3 1524
3 1501
3 1501
3 1498
3 1523
3 1523
3 1523
3 1524
3 1530
3 1532
3 1530
2 1530
2 1530
1 1530
1 1528
1 1528
1 1528
1 1530
1 1533
1 1533
1 1534
1 1534
1 1534
1 1534
1 1534
1 1526
1 1526
1 1525
1 1525
1 1525
1 1525
1 1529
1 1531
1 1540
1 1558
1 1571
2 1579
2 1579
2 1576
2 1547
2 1535
2 1374
2 1348
2 1323
2 1304
2 740
2 459
2 400
2 401
2 412
2 378
2 377
2 378
2 378
2 374
2 374
2 374
2 368
2 365
2 365
2 387
2 396
2 405
2 405
2 404
2 402
2 402
2 400
1 183
1 262
1 260
1 260
1 261
2 253
9 490
9 506
9 510
9 496
9 519
9 524
9 531
9 525
9 527
9 527
9 527
9 618
9 618
9 619
9 619
9 620
9 621
9 621
9 621
9 621
9 622
9 622
9 623
9 625
9 625
9 629
9 629
9 629
9 629
9 645
9 642
9 647
9 646
9 635
9 626
8 624
8 625
8 628
8 620
8 618
8 615
8 615
8 615
8 614
8 614
8 613
8 617
8 614
8 598
8 592
8 588
8 583
8 583
8 582
8 582
8 582
8 581
8 553
8 520
8 456
9 433
9 405
10 413
10 411
10 411
10 411
10 409
10 409
10 406
10 405
10 403
10 403
9 398
2 180
2 166
2 166
2 166
2 180
2 180
2 180
2 179
2 178
2 176
2 175
2 83
2 86
2 83
2 81
2 81
2 80
2 80
2 80
2 80
2 80
2 80
2 80
2 78
2 79
2 80
2 80
2 80
2 80
2 63
2 62
3 69
3 69
3 70
3 76
3 76
3 76
3 94
3 99
3 102
3 120
3 124
3 128
3 129
3 131
3 131
3 125
3 123
3 123
3 123
3 128
3 139
3 141
3 142
3 141
3 142
3 145
3 146
4 148
3 149
2 149
2 149
2 141
2 139
2 139
2 139
2 140
2 141
2 142
3 160
3 160
3 160
7 188
7 189
7 194
7 194
7 194
7 179
7 182
7 183
7 185
7 186
7 186
7 186
7 188
7 185
7 185
7 187
7 197
7 207
7 216
7 228
7 242
7 244
8 244
8 246
8 246
8 246
8 246
8 249
8 252
8 252
8 254
8 249
18 241
19 237
19 236
19 230
19 230
19 224
19 201
20 195
20 182
20 169
20 168
20 169
20 169
20 174
20 180
20 183
20 183
20 183
20 184
20 174
20 165
20 163
20 168
20 168
20 168
20 177
20 177
19 178
19 177
19 177
19 177
19 176
19 177
19 178
19 179
19 189
19 188
19 187
17 171
17 171
17 171
14 145
14 145
14 141
14 141
14 142
14 148
14 149
14 148
14 147
14 147
14 147
14 147
14 145
14 145
14 144
14 140
14 129
14 105
14 91
14 86
14 85
14 85
13 85
13 87
13 87
13 86
13 85
13 82
13 81
11 79
11 97
10 96
0 107
0 117
0 248
0 255
0 261
0 276
0 276
0 276
0 276
0 276
0 276
0 273
0 273
0 265
0 261
0 259
0 259
0 262
0 273
0 398
0 411
0 413
1 916
1 981
1 996
1 1002
1 1042
1 1080
1 1148
1 1150
1 1154
1 1158
1 1253
1 1260
1 1259
1 1274
1 1284
1 1286
1 1285
1 1284
1 1284
1 1282
1 1282
1 1282
1 1282
1 1279
1 1271
1 1266
1 1266
1 1265
1 1273
1 1273
1 1273
1 1277
1 1277
1 1277
1 1277
1 1277
1 1278
1 1282
1 1280
1 1280
1 1280
1 1281
3 1281
9 1285
11 1296
11 1297
11 1300
11 1302
11 1303
11 1267
11 1251
11 1228
11 1205
11 971
11 964
11 846
11 817
11 807
11 807
11 809
11 809
11 809
11 809
11 809
11 809
11 809
11 809
11 808
11 805
11 801
11 795
11 787
11 784
11 354
11 372
12 394
12 393
12 385
12 517
12 473
12 501
12 580
12 595
12 531
12 531
12 530
12 501
12 497
12 496
12 498
12 497
12 499
12 499
12 504
12 505
12 506
12 506
12 508
12 509
12 509
12 509
12 501
12 501
12 501
12 499
12 498
9 498
9 498
9 498
9 499
7 496
5 503
0 510
0 511
0 509
0 509
0 502
0 492
0 493
0 491
0 490
0 487
0 486
0 485
0 485
0 485
0 486
0 486
0 486
0 486
0 486
0 486
0 484
0 484
0 484
0 484
0 484
0 484
0 484
0 484
0 484
0 484
0 484
0 484
0 485
0 484
0 462
0 393
0 352
0 345
0 347
0 203
0 197
0 171
0 86
0 75
0 47
0 46
0 45
0 45
0 45
0 45
0 43
0 44
0 47
0 49
0 51
0 52
0 51
0 50
0 49
0 48
0 52
0 52
0 53
0 72
0 70
0 71
0 71
0 71
0 71
0 71
0 70
0 68
0 62
0 56
0 55
0 55
0 55
0 55
0 54
0 53
0 53
0 52
0 53
0 54
0 54
0 54
0 57
0 71
0 81
0 84
0 85
0 105
0 105
0 105
0 109
0 109
0 109
0 109
0 109
0 110
0 110
0 111
0 110
0 135
0 137
0 136
0 136
0 137
0 138
0 138
0 136
0 133
0 132
0 157
0 157
0 233
0 234
0 246
0 272
0 286
0 288
0 291
0 291
0 291
0 291
0 290
0 293
0 307
0 306
0 306
0 307
0 306
0 314
0 311
0 314
0 315
0 298
1 310
1 309
1 313
1 314
1 314
1 370
1 375
1 376
1 377
1 390
1 394
1 394
1 394
1 395
1 395
1 421
1 716
1 725
1 730
1 731
1 730
1 729
1 725
1 710
1 697
2 696
2 696
2 677
2 677
2 677
2 676
2 676
2 676
2 676
2 676
2 676
2 675
2 675
2 675
2 650
2 650
2 650
2 651
2 658
2 658
2 659
2 659
2 682
2 682
2 661
2 696
2 578
2 577
2 579
2 602
2 593
2 596
2 596
2 597
2 597
2 595
2 593
2 592
2 572
2 572
2 575
2 579
2 580
2 573
2 575
2 574
2 574
2 569
1 563
1 562
1 560
1 561
1 559
1 502
1 504
1 504
1 506
1 491
1 496
1 496
1 496
1 496
1 497
1 454
1 152
1 149
1 144
1 133
1 133
1 133
1 133
1 131
1 132
0 158
0 161
0 163
0 163
0 164
0 169
0 170
0 170
0 170
0 170
0 170
0 170
0 170
0 170
0 172
0 171
0 170
0 170
0 165
0 165
0 164
0 164
0 148
0 142
0 131
0 115
0 115
0 114
0 111
0 85
0 81
0 81
0 80
0 82
0 83
0 88
0 103
0 111
0 124
0 131
0 131
0 159
0 159
0 163
0 208
0 217
0 223
0 223
0 224
0 225
0 225
0 224
0 223
0 224
0 225
0 228
0 233
0 230
0 237
0 242
0 469
0 483
0 498
0 833
0 878
0 917
0 945
0 971
0 1124
0 1147
0 1240
0 1272
0 1281
0 1271
0 1327
0 1327
0 1330
0 1333
0 1335
0 1336
0 1338
0 1365
0 1383
0 1383
0 1384
0 1387
0 1387
0 1386
0 1388
0 1388
0 1387
0 1387
0 1391
0 1391
0 1392
0 1392
0 1392
0 1393
0 1395
0 1396
0 1396
0 1396
0 1395
0 1401
0 1399
0 1402
0 1400
0 1394
0 1384
0 1369
0 1363
0 1330
0 1208
0 1163
0 1087
0 1031
0 1005
0 874
0 685
0 616
0 615
0 614
0 614
0 615
0 623
0 622
0 622
0 618
0 604
0 587
0 549
0 523
0 508
0 505
0 496
0 479
0 261
0 249
0 247
0 247
0 246
0 242
0 233
0 159
0 160
0 176
0 168
0 136
0 166
0 166
0 168
0 167
0 165
0 163
0 137
0 120
0 119
0 119
0 119
0 119
0 119
0 119
0 119
0 119
0 119
1 115
1 115
1 115
1 116
1 117
1 119
1 117
1 116
1 129
1 133
1 134
1 126
1 126
1 125
1 124
0 122
0 116
0 116
0 114
0 115
0 113
0 113
0 113
0 115
0 113
0 113
0 114
0 117
0 117
0 117
0 116
0 113
0 110
0 109
0 109
0 112
0 112
0 112
0 115
0 115
0 118
0 132
0 200
0 200
0 203
0 204
0 208
0 207
0 207
0 210
0 210
0 205
0 196
0 180
0 177
0 176
0 148
0 148
0 148
0 148
0 151
0 164
0 167
0 170
0 175
0 199
0 200
0 201
0 201
0 201
0 201
0 201
0 201
0 201
0 201
0 201
0 206
0 205
0 239
0 240
0 242
0 230
0 226
0 226
0 226
0 226
0 226
0 226
0 226
0 226
0 227
0 227
0 226
0 226
0 229
0 229
0 235
0 237
0 237
0 236
0 235
0 235
0 239
0 240
0 245
0 242
0 244
0 245
0 243
0 245
0 245
0 244
0 249
0 249
0 234
0 164
0 164
0 164
0 161
0 157
0 159
0 159
0 158
0 158
0 148
0 153
0 153
0 154
0 157
0 160
0 172
0 175
0 181
0 178
0 165
0 159
0 157
0 152
0 130
0 130
0 129
0 130
0 132
0 133
0 135
0 137
0 137
0 140
0 141
0 133
0 132
0 93
0 93
0 91
0 91
0 89
0 91
0 92
0 92
0 93
0 93
0 100
0 100
0 100
0 100
0 100
0 100
0 99
0 98
0 89
0 87
0 87
0 87
0 87
0 87
0 84
0 82
0 78
0 78
0 78
0 78
0 77
0 88
1 102
1 113
1 130
1 136
1 141
1 176
1 176
1 176
1 174
1 174
1 167
1 162
1 163
1 163
1 168
1 168
1 168
1 170
1 168
1 164
1 156
1 154
1 151
1 151
1 151
1 151
1 151
1 150
1 150
1 150
1 150
1 148
1 145
1 145
1 144
1 142
1 142
1 138
1 138
1 138
1 138
1 138
1 138
1 138
1 138
1 138
1 136
1 135
1 136
1 135
1 135
1 129
1 129
1 129
1 129
1 129
1 129
1 129
1 129
1 129
1 130
1 130
1 130
1 130
1 130
1 130
1 145
1 216
1 368
1 491
1 587
2 634
2 626
1 613
1 607
1 592
1 586
1 581
1 549
1 549
1 550
1 549
1 550
1 588
1 614
1 624
1 624
1 670
1 671
1 670
1 672
1 672
1 673
1 673
1 678
1 679
1 679
1 680
1 680
1 679
1 678
1 678
1 679
1 679
1 679
1 679
1 679
1 679
1 679
1 679
1 679
1 679
1 679
1 679
1 679
1 679
1 679
1 682
1 686
1 692
1 692
1 691
1 691
1 691
1 690
1 688
1 690
1 699
1 705
1 707
1 708
1 705
1 705
1 702
1 701
1 701
1 701
1 705
1 703
1 675
1 544
1 445
1 336
1 240
0 200
0 200
0 200
0 202
0 206
0 207
0 215
2 294
2 294
2 296
2 297
2 314
2 282
2 268
2 264
2 267
2 219
3 222
3 222
3 220
3 220
3 220
3 220
3 215
3 214
3 214
3 232
3 238
3 260
3 264
3 269
3 268
3 269
3 272
3 279
3 279
3 279
3 279
3 281
3 283
4 289
4 298
4 307
4 307
5 314
7 324
7 324
7 320
7 315
7 314
7 315
7 318
7 335
7 341
7 348
7 355
7 353
7 350
7 352
7 366
7 366
7 365
7 365
7 365
7 365
7 366
7 361
7 363
7 362
7 383
7 445
7 449
7 449
7 440
7 440
7 437
7 438
7 446
7 451
7 443
5 371
5 371
5 371
5 371
5 352
5 344
5 329
5 325
5 323
5 339
4 343
4 350
4 837
4 842
4 846
4 855
4 867
4 870
4 869
4 852
4 847
4 827
4 823
4 818
4 818
4 817
4 819
4 814
4 814
4 814
4 814
4 815
4 812
3 811
3 804
3 796
2 796
1 789
0 779
0 801
2 800
2 799
2 798
2 798
3 832
3 816
4 800
4 790
4 791
4 789
4 786
4 786
4 772
4 774
4 775
5 780
5 780
5 780
5 782
5 780
5 777
5 776
5 749
5 687
5 683
5 682
5 680
4 679
4 679
4 678
4 669
4 660
4 652
4 653
4 669
4 697
4 705
4 735
4 738
4 763
4 802
6 1955
6 1994
6 2130
6 2279
7 1808
7 1987
7 2019
7 2032
7 1990
7 1990
7 1990
7 1990
7 1990
7 1993
7 1993
7 1996
7 1999
7 2003
7 2012
7 2015
7 2015
7 2015
7 2013
7 2010
7 2010
7 2007
7 2006
7 2006
7 2006
7 2006
7 2014
7 2060
6 2175
6 2202
5 2206
5 2206
5 2193
5 2194
4 2193
4 2196
4 2195
4 2193
4 2194
4 2212
4 2265
4 2263
3 2259
3 2256
3 2287
3 2291
3 2291
3 2290
3 2295
3 2296
3 2298
3 2299
3 2307
3 2434
3 2435
3 2436
3 2436
3 2441
3 2468
3 2481
3 2484
3 2489
3 2469
3 2457
3 2432
3 2406
3 2391
3 2383
3 2235
1 837
1 670
1 655
1 685
1 675
2 810
2 801
2 803
2 811
2 814
2 819
2 830
2 870
2 924
2 927
2 924
2 923
2 920
2 911
2 909
2 909
2 914
2 928
2 941
2 969
2 1023
2 1104
2 1123
2 1125
2 1133
2 1124
2 1084
2 951
2 951
2 954
2 954
2 953
2 953
2 954
2 951
2 953
2 953
2 952
2 931
2 876
2 875
2 872
2 867
2 836
2 832
2 857
2 869
2 882
2 988
2 1008
2 1036
2 1035
2 897
2 898
2 894
2 895
2 892
2 864
2 897
2 1079
2 1084
2 1083
2 1067
2 1066
2 1066
2 1066
2 1068
2 1069
2 1073
2 1079
2 1081
1 1043
0 1034
0 864
0 856
0 838
0 836
0 825
0 761
0 758
0 749
0 720
0 718
0 718
0 718
0 718
0 718
0 718
0 718
0 713
0 701
0 674
0 610
0 565
0 540
0 543
0 544
0 544
0 539
0 527
0 526
0 526
0 525
0 525
0 525
0 525
0 523
0 524
0 526
0 530
0 536
0 536
0 536
0 536
0 536
0 536
0 538
0 538
0 511
0 502
0 483
0 374
0 347
0 325
0 312
0 312
0 313
0 313
0 312
0 312
0 315
0 255
0 65
0 67
0 70
0 72
0 74
0 111
0 389
0 494
0 585
0 603
0 600
0 596
0 592
0 590
0 590
0 591
0 591
0 591
0 591
0 591
0 591
0 591
0 592
0 592
0 593
0 593
0 594
0 598
0 599
0 599
0 601
0 601
0 602
0 604
0 605
0 601
0 596
0 602
0 603
0 606
0 609
0 666
0 695
0 973
1 1651
1 1754
1 1911
1 1951
1 1965
1 1980
1 2214
1 2240
1 2269
1 2296
1 2326
1 2332
1 2336
1 2334
1 2340
1 2353
1 2353
1 2356
1 2357
1 2357
1 2372
1 2465
1 2482
1 2490
1 2524
1 2526
1 2534
1 2548
1 2745
2 2971
2 3043
2 3218
2 3369
3 3469
3 3507
3 3195
3 3041
3 2987
3 2981
3 2981
3 2981
3 2981
3 2982
3 3031
3 3030
3 3032
3 3039
3 3206
3 4254
3 4283
4 4919
4 4926
4 4933
4 4934
4 4937
4 4936
4 4933
4 4932
4 4937
4 4942
4 4948
4 4948
4 4943
4 4949
4 4953
4 4954
4 4941
4 4940
4 4932
4 4907
4 4834
4 4783
4 4378
3 3776
3 3690
3 3638
3 3632
3 3631
3 3622
3 3368
3 3339
3 3322
3 3312
3 3303
3 3303
3 3303
3 3299
3 3288
3 3274
3 3275
4 3274
4 3318
4 3321
4 3313
4 3198
4 3182
4 3175
4 3165
4 3163
4 3153
4 3125
4 2922
3 2689
3 2582
3 2463
5 2318
4 2229
3 2145
3 2145
3 2142
3 2141
3 2141
3 2141
3 2141
3 2141
3 2141
3 2092
3 2090
3 2090
3 2083
3 1900
3 852
3 820
2 179
2 176
2 170
2 166
2 166
2 166
2 165
2 164
2 161
2 161
2 161
2 161
2 162
2 157
2 152
2 159
2 162
2 171
2 174
2 175
2 181
2 182
2 182
2 169
2 160
2 160
2 160
2 159
2 159
2 159
2 158
3 165
3 165
3 163
3 164
3 164
3 166
3 173
3 191
3 198
3 198
3 151
3 146
3 137
3 137
3 137
3 137
3 138
3 137
3 133
3 133
3 97
3 98
3 98
3 97
1 95
1 98
1 98
1 98
1 98
2 162
2 170
2 174
2 179
2 180
2 187
2 208
2 210
2 207
2 207
2 208
2 208
2 208
2 207
2 207
2 207
2 208
2 208
2 209
2 209
2 209
2 211
2 210
2 211
3 243
3 244
3 246
4 246
7 358
7 353
7 353
7 358
7 358
7 354
7 363
7 390
7 390
7 391
7 390
7 390
7 391
7 391
7 391
7 399
6 396
6 414
6 446
6 459
6 470
6 474
6 468
6 455
7 628
7 668
7 710
7 813
7 876
7 895
7 902
7 910
7 931
7 943
7 945
7 960
7 958
7 958
7 959
8 967
8 994
8 1024
9 1060
9 1069
9 1081
8 1014
8 1006
8 1012
8 1010
8 1007
8 998
8 986
8 989
8 996
8 1001
8 1002
8 1004
8 1007
8 1040
8 1043
8 1048
8 1049
8 1049
8 1093
8 1094
8 1093
8 1089
8 1089
8 1091
7 1063
7 1064
7 1063
7 1096
4 961
4 961
4 963
4 956
4 954
4 953
4 954
4 927
4 932
4 932
4 932
4 931
4 932
4 944
4 945
4 936
4 919
4 908
4 868
4 856
4 845
4 838
4 831
4 813
3 606
3 511
3 471
4 656
4 593
4 595
4 602
4 666
4 644
4 637
4 632
4 620
4 619
4 619
4 619
2 612
2 606
2 587
2 580
2 576
2 574
2 569
2 575
2 575
12 604
12 605
12 605
12 606
12 604
12 603
12 600
12 602
12 599
12 595
12 566
12 576
12 572
12 571
12 571
12 528
12 529
12 529
12 530
12 530
12 528
12 529
12 527
12 527
11 487
11 487
11 486
11 484
11 484
11 484
11 484
11 483
11 487
11 482
11 482
11 482
11 497
11 490
11 480
11 478
11 478
11 477
11 477
11 475
11 474
11 475
11 475
11 475
11 475
11 481
11 482
11 481
10 195
10 192
10 167
10 158
10 87
10 87
10 86
10 87
10 89
10 90
10 101
10 101
10 101
10 101
10 101
10 101
10 101
10 101
10 100
10 94
10 94
0 67
0 67
0 67
0 67
0 66
0 64
0 63
0 62
0 62
0 61
0 56
0 51
0 49
0 48
0 48
0 49
0 49
0 49
0 49
0 49
0 48
0 48
0 48
0 48
0 48
0 49
0 50
0 50
0 50
0 51
0 51
0 51
0 47
0 47
0 47
0 46
0 30
0 30
0 30
0 30
0 30
0 30
0 30
0 30
0 30
0 34
0 34
0 34
0 34
0 25
0 25
0 26
0 25
0 26
0 26
0 26
0 26
0 26
0 26
0 24
0 21
0 21
0 11
0 13
0 13
0 13
0 13
0 13
0 13
0 13
0 13
0 13
0 13
0 13
0 13
0 13
0 13
0 13
0 12
0 11
0 10
0 11
0 13
0 13
0 13
0 13
1 14
1 13
1 13
1 13
1 13
1 13
1 13
1 13
1 13
1 13
1 13
1 14
1 14
1 14
1 14
1 14
1 13
0 13
0 13
0 13
0 13
0 13
0 12
0 12
0 12
0 12
0 12
0 12
0 12
0 12
0 12
0 12
0 7
0 7
0 7
0 7
0 6
0 7
0 6
0 6
0 5
0 5
0 5
0 5
0 5
0 5
0 5
0 5
0 5
0 5
0 5
0 5
0 5
0 5
0 5
0 5
0 5
0 5
0 5
0 5
0 5
0 5
0 5
0 5
0 5
0 5
0 5
0 5
0 5
0 2
0 2
0 2
0 2
0 2
0 2
0 2
0 2
0 3
0 3
0 3
0 3
0 3
0 3
0 3
0 7
0 14
0 20
3 192
4 192
4 194
4 209
4 213
4 215
4 217
4 224
4 225
4 225
4 225
4 225
4 235
4 237
4 240
5 287
5 354
7 463
58 3831
59 3925
60 4116
61 4195
62 4222
62 4231
62 4343
62 4364
62 4369
62 4371
62 4376
62 4389
62 4404
62 4417
62 4432
62 4433
62 4434
62 4435
62 4436
62 4436
62 4436
62 4438
62 4439
62 4440
62 4451
63 4456
63 4462
70 4627
71 4633
71 4637
71 4638
71 4638
71 4635
71 4636
71 4637
71 4640
71 4640
72 4644
72 4647
72 4647
72 4646
72 4644
72 4644
72 4643
72 4642
72 4641
72 4640
72 4640
72 4641
72 4639
72 4640
72 4641
72 4633
72 4631
72 4622
68 4435
68 4431
67 4431
66 4422
67 4424
69 4503
69 4500
69 4494
69 4495
69 4495
69 4496
69 4482
69 4472
69 4473
69 4464
68 4392
68 4352
62 4132
14 572
14 530
14 667
14 674
13 669
13 669
13 547
13 544
13 551
13 548
13 548
13 534
13 533
13 531
13 516
13 518
13 522
13 526
13 527
13 528
13 528
13 527
13 534
13 536
13 528
45 2485
52 2519
46 2535
46 2547
46 2546
46 2553
46 2555
46 2622
46 2628
46 2633
46 2631
46 2633
45 2627
45 2780
45 2783
45 2794
45 2794
45 2947
45 2954
45 2956
45 2957
45 2987
45 2988
45 2988
45 2990
45 3075
45 3097
45 3759
45 4043
45 4196
45 4568
45 4676
45 4713
45 4793
44 4818
43 4742
43 4745
43 4744
43 4754
43 4765
43 4796
43 4803
43 4854
43 4894
44 4935
44 4981
44 5046
44 5131
44 5152
44 5246
44 5123
44 5159
44 5164
44 5161
45 5268
45 5305
45 5308
45 5340
50 5621
50 5633
50 5635
50 5625
51 5795
51 5800
51 5803
51 5904
52 7459
52 7675
52 7802
52 8150
52 8229
51 8298
51 8790
14 6756
10 6726
9 6508
9 6491
9 6493
9 6506
9 6436
9 6365
9 6357
9 6342
9 6342
9 6340
9 6344
9 6290
9 6311
9 6298
9 6295
9 6126
9 6127
9 6111
9 6126
9 6257
9 6281
9 6281
9 6274
9 6270
9 6238
9 5293
9 4903
9 4799
9 4770
9 4753
9 4733
9 4702
9 4763
9 4766
9 4765
9 4756
9 4771
9 8407
9 8430
9 8471
9 8466
9 8472
8 8460
8 8411
8 8316
8 8212
8 8189
8 8060
8 8044
8 8039
8 8037
8 8036
7 7923
7 7876
7 7859
7 7812
1 7392
1 7365
1 7335
0 7192
0 7183
0 7179
0 7172
0 6841
0 4886
0 4587
0 4457
0 4434
0 4441
0 4449
0 4452
0 4455
0 4457
1 4477
1 4477
1 4529
1 4515
1 4511
2 4848
3 4876
3 4901
3 5014
3 5126
5 5758
6 5777
9 6096
11 6492
12 6682
17 7482
18 7532
18 7563
18 7572
18 7467
18 7500
18 7548
18 7548
18 7551
18 7564
18 7565
18 7569
18 7571
18 7593
18 7630
18 7686
18 7879
18 7807
18 7858
18 7956
18 8068
19 8850
19 5162
19 5117
19 4988
19 4924
19 4914
19 4915
19 4915
19 4916
19 4920
19 4922
19 4922
19 4923
19 4921
19 4925
19 4924
19 4924
19 4922
19 4925
19 4932
19 4948
19 5032
19 5205
19 5234
19 5234
19 5236
19 5234
19 5234
19 5225
19 5218
19 5220
19 5223
19 5221
19 5219
19 5220
19 5216
19 5216
18 5188
18 5176
18 5136
18 5128
18 5136
17 4781
16 4805
16 4801
16 4765
16 4557
12 3541
7 2983
7 2871
7 2854
7 2786
9 2336
10 2326
10 2314
10 2308
10 2270
10 2242
10 2225
10 2233
10 2230
11 2252
11 2261
11 2287
11 2297
11 2391
11 2299
11 2291
11 2125
11 2146
11 2093
11 1964
11 1840
10 1043
10 1010
10 1014
10 1018
10 1022
10 1043
10 1045
10 1046
10 1046
10 1043
10 1045
10 1054
10 1060
10 1065
10 1070
10 1077
11 2225
11 2228
11 2245
11 2250
11 2281
11 2259
11 2171
11 2157
11 2182
11 2186
11 2204
11 2221
11 2226
11 2236
11 2230
11 2233
11 2232
12 2269
12 2274
12 2281
12 2274
12 2278
12 2278
12 2277
12 2279
12 2262
12 2247
12 2151
12 2131
12 2122
12 2116
12 2189
12 2190
10 2198
9 2205
8 2189
3 2047
3 2055
3 2057
3 2058
3 2052
3 2053
3 2052
3 2047
3 2042
2 1998
2 1999
2 2000
2 1988
2 1866
2 1919
2 1925
2 1934
2 1939
3 1947
3 1947
3 1946
3 1924
3 1915
3 1908
3 1903
3 1900
3 1879
3 1881
3 1889
3 1906
3 1921
3 2045
3 2040
3 2054
3 2050
3 2044
3 2165
4 1138
13 1820
15 1854
17 1909
18 1887
18 1811
18 1723
18 1711
18 1705
18 1707
18 1704
18 1698
18 1694
18 1689
18 1689
18 1691
18 1705
17 1678
25 1871
26 1882
27 1898
28 1904
28 1908
30 2061
31 2114
32 2153
33 2181
35 2196
35 2210
36 2217
36 2230
36 2157
36 2185
36 2174
36 2152
36 2165
36 2165
36 2164
36 2158
36 2172
36 2176
36 2515
36 2675
36 3149
36 3162
36 3183
36 3179
36 3180
36 3176
36 3167
36 3099
36 3078
36 3070
36 3047
35 3035
35 3059
35 3059
35 3058
35 3060
35 3060
35 3055
35 3055
35 3055
35 3048
35 3040
35 3032
35 3025
35 2904
35 2897
35 2882
35 2872
46 2869
45 2674
40 2284
30 1745
31 1748
30 1752
30 1763
31 1764
31 1764
31 1766
31 1787
31 1786
31 1786
31 1788
31 1793
31 1797
31 1795
31 1791
31 1780
31 1773
21 1573
22 1563
22 1551
22 1550
22 1547
21 1403
20 1360
18 1318
17 1287
16 1272
16 1286
15 1281
15 1280
15 1273
15 1254
15 1250
15 1246
15 1225
21 1231
21 1234
84 1693
88 1676
88 1669
88 1310
88 1149
88 689
88 684
88 667
88 669
88 669
95 673
95 673
95 673
95 673
104 693
105 694
105 710
105 686
105 688
105 677
105 676
105 676
105 677
105 677
105 692
105 692
105 692
105 692
105 691
105 693
107 714
108 718
108 722
97 721
97 721
96 722
95 720
95 708
95 704
95 692
94 702
94 702
94 701
94 679
94 678
94 679
94 678
94 673
94 669
94 669
94 665
94 660
94 659
94 687
93 685
93 685
93 690
93 688
93 669
93 657
93 658
93 652
93 652
93 633
93 633
93 632
93 632
93 634
93 635
93 637
92 636
79 624
78 617
13 458
12 469
12 499
12 512
12 510
12 510
12 510
12 509
12 508
12 509
3 501
3 501
3 501
3 497
2 479
2 482
2 470
2 495
2 496
2 496
2 521
3 521
3 527
3 529
3 519
3 522
3 523
3 528
6 663
6 676
5 657
5 656
5 657
5 655
5 657
5 656
5 659
5 680
5 685
5 777
5 765
5 769
5 768
5 768
6 768
6 767
6 767
6 767
6 768
6 770
6 770
6 770
7 793
7 764
7 764
7 773
7 772
8 777
8 794
10 895
10 906
10 912
10 914
10 921
10 925
10 929
10 930
11 949
12 984
15 1013
17 1067
18 1082
19 1086
18 757
18 740
18 707
18 672
18 675
18 676
19 679
19 679
19 679
19 678
19 684
19 685
19 685
19 689
19 726
19 729
19 730
20 744
25 902
25 910
25 905
24 914
25 935
25 936
25 941
25 940
25 943
25 934
22 811
22 809
22 809
22 816
22 819
22 821
22 820
22 821
22 814
22 821
22 821
22 712
22 769
22 767
22 747
22 747
21 747
21 746
21 746
21 745
21 745
21 745
21 746
21 746
20 725
20 725
20 725
19 716
19 714
19 713
17 674
17 501
18 492
18 442
18 440
18 441
18 442
18 443
18 444
16 421
16 412
12 387
11 382
10 375
9 367
9 367
9 399
9 413
9 431
8 432
8 433
8 438
8 437
8 446
8 457
11 545
12 750
14 993
14 1043
15 1233
21 1481
23 1506
22 1523
18 1437
20 1461
20 1448
20 1443
19 1433
19 1433
19 1432
19 1431
20 1434
20 1439
20 1449
20 1451
39 1616
39 1609
44 1658
44 1675
44 1676
44 1675
44 1690
44 1664
44 1668
44 1666
45 1621
45 1665
45 1666
45 1663
45 1665
45 1671
45 1672
45 1674
45 1679
45 1748
45 1763
45 1774
45 1773
45 1773
45 1773
45 1774
45 1782
46 1786
46 1789
47 1789
46 1790
46 1756
46 1750
111 1982
112 1975
112 1977
112 1976
112 1975
112 1973
112 1975
112 1976
112 1977
112 2011
112 2010
112 1923
112 1828
112 1742
112 1740
112 1736
112 1669
112 1666
112 1660
112 1643
106 1490
104 1150
101 981
99 947
98 897
97 837
96 821
96 807
95 807
95 810
95 811
96 816
96 812
96 808
96 806
96 804
95 799
95 793
96 794
95 790
74 585
76 585
76 587
76 579
76 585
77 587
77 567
78 564
79 564
79 562
78 549
81 507
81 543
82 548
82 566
82 563
82 563
82 560
82 551
82 482
82 469
82 459
82 463
83 466
83 467
85 465
85 456
86 454
86 455
84 455
74 454
73 453
71 448
19 184
18 184
18 182
18 182
18 181
18 181
18 181
18 181
18 179
18 144
18 143
18 139
18 139
18 139
18 139
18 213
18 214
18 214
18 215
18 229
18 246
20 254
20 306
20 305
19 333
19 465
19 485
19 493
19 493
19 498
19 499
18 493
18 497
18 497
18 499
18 502
18 566
17 749
16 766
15 776
13 804
11 807
11 805
11 805
11 797
10 797
10 797
9 798
7 799
7 799
3 791
3 789
3 754
3 746
3 727
3 741
3 745
3 797
3 800
3 818
4 823
4 847
4 845
2 849
2 854
1 856
1 872
1 872
1 892
1 897
1 900
1 926
1 924
1 924
1 924
1 974
1 976
1 987
2 1002
2 1009
2 1009
2 1010
1 1016
1 1133
1 1137
1 1177
1 1185
1 1186
1 1105
1 1107
1 1110
1 1169
1 1327
1 1798
2 2351
2 2384
2 2440
2 2411
2 2369
2 2403
2 2412
2 2416
2 2486
2 2802
2 2815
2 2817
2 2823
2 2819
2 2815
2 2744
2 2528
2 2505
2 2490
2 2483
2 2480
2 2486
2 2486
2 2483
2 2483
2 2482
2 2482
0 2482
0 2483
0 2484
0 2485
0 2485
0 2488
0 2510
0 2509
0 2503
0 2478
0 2477
0 2455
1 2455
1 2427
1 2422
1 2415
1 2410
1 2403
1 2388
1 2385
1 2350
1 2336
1 2329
1 2284
1 2267
1 2268
1 2273
1 2152
1 2150
1 2136
2 2172
2 2157
2 2153
2 2152
2 2154
2 1832
2 1832
2 1789
2 1594
2 1592
2 1585
2 1584
2 1579
2 1514
2 1340
2 874
2 735
2 724
2 719
2 717
2 753
2 782
2 793
2 794
2 720
2 400
2 398
2 403
2 403
2 403
2 403
2 407
2 423
2 469
2 594
2 660
2 698
2 692
2 692
2 692
2 692
2 692
2 693
2 705
2 707
2 707
2 710
3 770
3 766
3 745
3 744
3 744
3 744
3 744
3 744
2 738
2 740
2 740
2 740
2 740
2 740
2 740
3 741
3 742
3 745
3 761
4 795
4 820
4 823
4 820
3 813
3 793
3 716
3 646
3 641
3 643
3 647
3 647
3 656
3 677
3 680
3 666
3 668
3 669
3 670
3 673
3 685
3 686
3 931
3 923
3 934
3 933
3 933
3 898
3 868
3 857
3 852
3 851
3 849
3 847
3 838
3 839
3 839
3 838
3 832
3 812
3 700
3 623
3 576
3 544
3 544
3 544
3 544
3 544
3 541
3 541
3 529
3 527
3 526
3 524
1 462
1 463
1 453
0 450
0 450
0 450
0 447
0 448
0 449
0 457
0 457
0 458
0 504
0 504
0 502
0 511
0 510
0 505
0 483
0 453
0 432
0 431
0 431
0 435
1 460
1 467
1 520
1 712
1 5506
2 5687
3 7079
4 7526
4 7629
4 8651
4 8837
4 8903
4 8910
4 8918
4 8917
4 8907
4 8911
4 8682
4 8695
4 8711
4 8714
4 8721
4 8731
4 8747
4 8780
4 8967
5 9159
5 9276
5 9286
5 9294
6 9475
6 9552
6 9556
6 9610
6 9622
6 9627
6 9631
6 9635
6 9627
6 9628
6 9628
6 9637
6 9681
6 9696
6 9730
7 10423
7 10440
8 10455
8 10505
8 10530
8 10548
8 10566
8 10580
8 10590
8 10591
8 10608
8 10623
8 10625
7 10596
7 10596
7 10592
6 10519
6 10518
6 10519
6 10514
6 10517
6 10515
6 10513
6 10510
6 10510
6 10497
6 10495
6 10502
6 10493
6 10401
6 10318
5 9466
4 2440
4 2156
4 2142
4 2131
4 2127
4 2120
4 2104
4 2097
4 2097
4 2095
4 2094
4 2093
4 2091
4 2106
4 2104
4 2099
4 2120
4 2114
4 2103
4 2079
4 2058
4 1855
3 1647
2 1546
1 1549
1 1648
1 1626
1 1976
1 2319
1 3414
1 3701
2 5095
2 6206
2 7294
2 7450
2 7476
2 7688
2 7724
2 7673
2 7680
2 7629
1 8024
1 9024
1 9120
1 9189
1 9187
1 9217
1 9228
1 9248
1 9404
1 9454
1 9471
1 9549
1 9694
1 9809
1 9849
1 9885
1 9909
1 9942
1 9968
1 9978
1 9979
1 9981
1 9985
1 9991
1 10011
1 10041
1 10044
1 10073
1 10079
1 10084
1 10086
1 10109
1 10101
1 10124
1 10134
1 10141
1 10159
1 10186
1 10193
1 10198
1 10197
1 10196
1 10194
1 10195
1 10195
1 10130
1 10129
1 10114
1 10108
1 10107
1 10114
1 10118
1 10121
1 10161
1 10177
1 10254
1 10258
1 10114
1 9858
1 9486
1 9175
1 7979
1 7458
0 5992
0 4920
0 3938
0 3783
0 3779
0 3564
0 3547
0 3537
0 3535
0 3505
0 2271
0 1020
0 859
0 803
0 794
0 794
0 788
0 768
0 718
0 695
0 685
0 658
0 571
0 471
0 447
0 437
0 428
0 401
0 380
0 369
0 368
0 368
0 368
0 429
0 421
0 419
0 417
2 398
2 400
2 409
2 407
2 382
2 380
2 372
2 364
2 357
2 354
2 339
2 336
2 333
2 333
2 333
2 334
2 409
2 411
2 416
2 442
4 475
4 519
4 563
4 554
4 557
4 539
4 505
4 487
4 433
4 424
4 424
4 423
4 468
4 615
4 618
4 620
4 625
4 625
4 625
4 625
4 626
4 626
4 615
4 617
4 622
4 649
4 649
4 649
4 641
4 650
4 650
4 653
4 653
4 653
4 654
4 654
4 657
4 657
4 657
4 660
4 660
4 662
4 664
4 686
4 691
4 693
4 706
4 708
4 707
4 643
4 648
4 646
4 652
2 655
2 650
1 636
0 633
0 631
0 628
0 626
0 626
0 626
0 626
0 623
0 663
0 667
0 676
0 686
0 686
0 613
0 610
0 590
0 560
0 517
0 477
0 472
0 470
0 538
0 546
0 553
0 790
0 819
0 849
0 852
0 829
0 789
0 635
0 635
0 636
0 693
0 723
0 756
0 760
0 766
0 767
0 764
0 769
0 762
0 739
0 736
0 736
0 736
0 728
0 729
0 725
0 724
0 724
0 724
0 724
0 722
0 720
0 723
0 728
0 736
0 739
0 736
0 709
0 702
0 701
0 697
0 705
0 711
0 713
0 716
0 716
0 719
0 717
0 725
0 737
0 744
0 749
0 775
0 795
0 799
0 814
0 822
0 890
0 954
0 1216
0 1174
0 1186
0 1188
0 1171
0 1183
0 1174
0 1175
0 1175
0 1175
0 1195
0 1203
0 1177
0 1163
0 1150
0 927
0 892
0 877
0 873
0 868
0 868
0 869
0 864
0 855
0 808
0 774
0 765
0 764
0 767
0 793
0 793
0 792
0 790
0 790
0 795
0 822
0 856
0 964
0 996
0 1058
0 1291
0 1344
0 1348
0 1351
0 1352
0 1353
0 1350
0 1339
0 1338
0 1342
0 1344
0 1375
0 1386
0 1387
0 1380
0 1365
0 1353
0 1351
0 1361
0 1361
0 1361
0 1355
0 1344
0 1322
0 1328
0 1322
0 1295
0 1269
0 1262
0 1260
0 1247
0 1164
0 1015
0 772
0 758
0 752
0 752
0 759
0 763
0 768
0 769
0 772
0 773
0 750
0 741
0 737
0 737
0 737
0 731
0 730
0 734
0 748
0 748
0 747
0 745
0 745
0 748
0 747
0 747
0 749
0 751
0 753
0 731
0 732
0 733
0 733
0 735
0 729
0 697
0 646
0 545
0 515
0 416
0 210
0 158
0 157
0 156
0 158
0 158
0 158
0 160
0 159
0 151
0 148
0 113
0 99
0 100
0 100
0 111
0 111
0 111
0 101
0 102
0 101
0 106
0 119
0 120
0 102
0 103
0 102
0 102
0 103
0 117
0 125
0 141
0 152
0 229
0 247
0 259
0 259
0 255
0 256
0 253
0 253
0 253
0 252
0 250
0 250
0 250
0 251
0 256
0 256
0 258
0 254
0 237
0 241
0 238
0 238
0 238
0 235
0 235
0 234
0 234
0 232
0 224
0 222
0 223
0 225
0 232
0 240
0 241
0 242
0 246
0 246
0 246
0 250
0 250
0 249
0 249
0 249
0 248
0 249
0 249
0 248
0 279
0 282
0 282
0 301
0 301
0 302
0 300
0 292
0 292
0 292
0 291
0 290
0 287
0 277
0 272
1 269
1 272
1 272
1 269
1 269
1 267
1 250
1 248
1 250
1 240
1 167
1 150
1 146
1 146
1 147
0 141
0 142
0 148
0 160
0 167
0 169
0 171
0 172
0 171
0 168
0 215
0 213
0 243
0 245
0 245
0 249
0 490
0 499
0 513
0 525
0 529
0 556
0 557
0 586
0 688
0 692
0 700
0 701
0 701
0 700
0 701
0 735
0 791
0 798
0 847
0 898
0 974
0 1091
0 1499
0 1661
0 1691
0 1782
0 1833
0 1796
0 1812
0 1868
0 1987
0 2189
0 2319
0 2330
0 2365
0 2368
0 2371
0 2374
0 2374
0 2375
0 2388
0 2389
0 2424
0 2430
0 2431
0 2431
0 2432
0 2432
0 2429
0 2422
0 2402
0 2398
0 2396
0 2395
0 2395
0 2395
0 2606
0 2604
0 2611
0 2626
0 2612
0 2610
0 2611
0 2611
0 2609
0 2606
0 2586
0 2482
0 2486
0 2485
0 2425
0 2420
0 2426
0 2197
0 2190
0 2191
1 2358
1 2381
1 2362
1 2375
1 2339
1 2277
1 2284
1 2294
1 2294
1 2361
1 2365
1 2368
1 2314
1 2208
1 2203
1 2150
1 2119
1 2075
1 1979
1 1572
1 1438
1 1442
1 1360
1 1352
1 1347
1 1337
1 1276
1 1157
1 859
1 840
1 877
1 922
1 970
1 978
1 982
1 985
1 984
1 983
1 978
1 953
1 954
1 960
1 986
2 1021
2 1073
2 1080
2 1086
2 1088
2 1087
2 1094
2 1097
2 1133
2 1133
2 911
2 915
2 1082
2 1057
2 1060
2 1066
2 1067
2 1067
2 1084
2 1084
2 1083
2 1083
2 1088
2 1181
2 1211
2 1236
2 1261
2 1316
2 1321
3 1323
2 1148
2 1146
2 1144
2 1126
2 1121
2 1120
2 1109
2 1106
2 1099
2 1031
2 1033
2 1032
2 1037
2 1039
2 1039
2 1036
2 1027
2 1010
2 975
2 944
2 936
2 927
2 927
2 928
2 936
2 976
2 1014
2 1018
2 986
2 1011
2 968
2 884
2 835
3 863
3 863
3 862
5 1028
5 1071
5 1082
7 1128
7 1132
7 1121
7 1107
6 1060
6 1074
6 1060
6 1068
6 1063
6 1072
6 1110
6 1110
11 1452
11 1622
11 1655
11 1785
11 1592
11 1607
11 1605
11 1602
11 1604
11 1604
11 1603
11 1603
11 1600
11 1590
11 1570
10 1486
10 1458
10 1455
10 1469
10 1438
10 1440
10 1440
10 1438
10 1437
10 1430
10 1424
10 1424
10 1423
10 1559
10 1575
10 1604
10 1634
10 1648
10 1648
10 1642
10 1639
10 1638
10 1639
10 1649
10 1649
10 1648
10 1648
10 1646
10 1649
10 1646
10 1644
10 1634
10 1584
10 1536
10 1530
10 1538
10 1528
10 1527
10 1530
10 1529
9 1486
9 1476
8 1457
7 1279
6 1230
6 1222
5 1199
6 1395
6 1411
6 1416
6 1418
7 1703
7 1681
7 1671
7 1677
7 1673
7 1666
7 1665
2 1174
2 1096
2 1071
2 982
3 987
3 986
3 986
3 987
3 989
6 1027
6 1033
6 1032
6 1035
7 1039
7 1032
7 1035
7 1031
7 1025
7 1018
7 1018
7 1019
7 1022
7 1024
7 1028
7 1032
8 1087
9 1093
9 1096
9 955
9 931
9 908
9 875
9 865
9 865
9 878
9 879
9 879
9 917
9 908
9 909
10 1004
10 1009
10 1018
10 1047
10 1111
11 1517
11 1558
11 1597
11 1667
18 2982
19 3124
19 3583
21 3720
22 3853
25 4500
28 4726
28 4971
63 10283
64 10642
67 11094
70 11248
70 11279
72 11176
77 11511
77 11496
78 11490
78 11095
78 11088
78 11070
78 11049
78 11048
78 11066
77 11057
77 11051
77 11048
77 11046
77 11046
77 11047
77 11047
77 11052
77 11063
78 11075
77 11083
77 11086
77 11087
77 11089
76 11086
77 11103
77 11103
77 11104
77 11122
78 11124
78 11137
78 11151
78 11187
78 11239
78 11255
78 11263
77 11193
77 11193
77 11188
77 11178
77 11179
77 11179
77 11179
77 11178
77 11178
77 11168
77 11167
77 11167
77 11128
77 11128
77 11126
76 11027
82 11803
88 11882
89 11985
89 11956
88 11572
88 11580
88 11539
87 11194
74 9041
75 8748
75 8664
76 8677
76 8669
75 8585
76 8494
75 7821
28 1946
27 1687
26 1631
25 1623
25 1624
25 1616
25 1612
25 1613
24 1614
23 1618
23 1636
23 1642
23 1652
23 1673
24 1713
24 1750
24 1800
24 1906
24 2052
24 2121
25 2340
26 2423
26 2519
27 2714
26 2924
25 3005
25 3038
25 3045
26 3081
25 3116
30 3634
37 5308
44 7179
45 7352
44 7552
45 7582
45 7581
45 7531
45 7514
45 7535
46 7550
46 7582
46 7646
46 7685
46 7693
46 7723
46 7726
46 7773
46 7904
47 8168
47 8269
47 17300
47 17357
49 17672
49 17730
49 17747
49 17768
43 17008
37 16931
37 16805
37 16798
37 16771
37 16716
39 16732
39 16744
39 16749
39 16717
38 16724
37 16698
36 16691
36 16679
34 16672
34 16671
34 16699
35 16776
36 16891
36 16888
36 16973
36 16975
36 16975
36 16977
36 16980
38 17314
38 17310
38 17321
38 17318
80 18562
80 18506
81 18560
84 18546
92 18589
181 22918
184 23000
186 22874
186 22818
187 22721
186 22322
186 22134
186 22013
186 22002
186 21996
185 21948
185 21862
178 21085
170 19027
164 17743
164 17703
164 17702
166 17739
167 17737
167 17737
167 17729
167 17689
167 17712
187 17964
210 18603
211 18669
212 18743
213 18767
213 18867
213 18798
213 18619
212 18343
212 18304
211 8870
211 8901
207 8713
207 8711
206 8403
206 8405
206 8350
206 8326
205 8271
205 8277
205 8281
204 8270
202 8259
202 8259
202 8256
202 8276
203 8274
203 8275
203 8276
203 8276
203 8275
203 8268
203 8221
202 8122
201 7982
201 7979
201 7872
201 7854
201 7829
198 7828
198 7823
198 7778
198 7752
198 7732
197 7707
157 6658
152 6563
149 6466
146 6430
146 6354
50 1709
47 1677
47 1583
47 1569
47 1547
45 1313
46 1310
45 1331
45 1338
45 1476
51 1496
54 1524
54 1572
55 1570
55 1562
58 1566
81 1884
106 2671
141 2903
158 3250
160 3336
157 3332
158 3310
144 3144
123 2552
126 2527
163 2529
164 2537
164 2489
164 2537
164 2538
168 2510
168 2454
169 2424
169 2373
169 2458
169 2454
169 2456
169 2459
170 2475
170 2476
170 2475
171 2482
171 2482
171 2519
171 2539
171 2560
171 2567
170 2555
169 2588
169 2591
169 2589
168 2591
168 2591
168 2591
168 2591
168 2592
167 2591
167 2591
167 2591
167 2590
167 2591
167 2591
167 2592
167 2592
167 2591
167 2591
167 2590
167 2588
166 2588
165 2588
165 2590
165 2588
165 2589
165 2590
165 2590
165 2592
165 2592
165 2592
164 2589
164 2565
164 2556
164 2410
159 2371
156 2327
152 2250
147 2255
146 2252
143 2243
100 1907
78 1075
30 760
15 378
11 297
11 297
11 300
11 300
2 292
2 288
2 287
2 284
1 231
1 228
1 228
1 228
1 228
1 224
1 224
1 125
1 124
1 122
1 122
1 124
1 126
1 126
0 121
0 118
0 72
0 66
0 60
0 57
0 48
0 32
0 31
0 30
0 29
0 29
0 29
0 32
0 33
0 33
0 34
0 39
0 40
0 40
0 43
0 44
0 45
1 203
1 206
1 214
1 230
1 245
2 252
2 256
2 256
2 258
2 265
2 267
2 272
2 283
2 288
2 291
2 292
2 293
2 298
2 300
2 302
2 298
2 295
2 295
2 295
2 292
2 292
2 292
2 292
2 291
2 290
2 291
2 291
2 291
2 291
2 291
2 292
2 292
2 292
2 292
2 292
2 292
2 292
2 292
2 292
2 292
2 292
2 292
2 284
2 279
2 279
2 280
2 279
2 289
2 299
2 300
2 301
2 307
2 309
2 313
2 313
2 311
2 313
2 317
2 314
2 315
2 318
2 322
2 325
2 331
2 336
2 338
2 337
0 329
0 154
0 146
0 142
0 142
0 141
0 137
0 137
0 137
0 135
0 127
0 126
0 117
0 108
0 102
0 102
0 102
0 99
0 95
0 94
0 94
0 92
0 92
0 92
0 93
0 98
0 129
0 197
0 211
0 211
1 219
1 220
1 222
1 222
1 223
1 223
1 223
1 223
1 223
1 223
1 223
1 223
1 223
1 224
1 224
1 224
1 224
1 224
1 224
1 223
1 223
1 222
1 222
1 212
1 199
1 201
1 214
2 242
2 282
3 521
3 568
8 1371
8 1442
8 1468
8 1687
9 1883
13 2046
14 2105
14 2109
14 2108
14 2106
14 2108
15 2115
15 2114
15 2115
15 2123
15 2124
15 2126
15 2128
15 2128
15 2128
15 2128
18 2210
18 2210
18 2212
18 2214
18 2218
18 2219
18 2218
18 2222
18 2228
18 2681
18 2804
18 2961
18 3064
18 3080
18 3093
18 3094
18 3100
18 3059
25 4412
25 4413
25 4415
25 4421
25 4422
27 4468
87 8112
104 8482
106 8583
106 8634
107 8650
111 8771
117 8897
117 8907
117 8916
117 8915
117 8914
117 8916
117 8917
117 8917
117 8926
117 8928
117 8934
117 8973
118 9504
119 9538
120 9553
121 9589
120 9587
120 9547
120 9527
120 9577
118 9231
117 8932
110 8015
108 7758
107 7725
107 7723
107 7729
108 7696
109 7707
109 7872
114 8526
115 8656
125 9426
149 9524
149 9557
149 9663
150 9667
149 9726
148 9780
148 9781
148 9783
159 10181
159 10182
153 10065
153 10068
153 10056
148 9977
148 9970
149 9967
148 9959
148 9978
148 9929
148 8739
146 6858
146 6583
144 6321
144 6311
144 6309
144 6312
144 6300
144 6298
144 6298
144 6293
144 6286
146 6265
156 6255
155 6212
161 4369
152 4148
151 4075
151 4080
152 4080
152 4079
148 4074
148 4074
148 4073
148 4073
148 4072
148 4071
148 4071
148 4071
148 4063
156 5539
156 5558
158 5619
157 4970
155 4942
155 4816
154 4781
154 4777
154 4784
154 4839
154 4768
154 4772
154 4768
154 4771
154 4769
154 4769
155 4766
155 4753
153 4746
153 4759
151 4694
141 3995
141 3826
132 3104
106 3091
102 3088
102 3088
102 3099
102 3099
102 3084
101 3122
101 3123
88 2722
88 2720
88 2667
86 2664
86 2680
86 2672
86 2673
86 2685
86 2691
86 2669
86 2693
86 2702
86 2709
89 2749
90 2753
90 2768
90 2763
90 2762
90 2765
92 2889
92 2896
92 2897
92 2905
93 3346
99 3650
294 7651
249 7450
270 7879
318 8953
331 9361
363 10505
382 11217
387 11255
387 11264
387 11264
388 11289
389 11311
389 11316
389 11316
389 11322
390 11304
381 9820
380 9796
382 9705
382 9691
382 9689
391 9717
391 9717
391 9716
391 9706
391 9628
391 9601
390 9599
390 9603
390 9603
395 9672
395 9672
395 9680
395 9681
395 9680
395 9649
395 9650
395 9649
394 9594
394 9595
394 9594
394 9595
398 9594
401 9635
402 9641
402 9641
402 9601
402 9594
402 9594
400 9592
400 9592
400 9609
400 9587
400 9621
400 9719
400 9860
400 9897
398 9876
399 9843
399 9834
402 11937
398 11878
396 11936
397 11949
397 11928
398 11933
399 11919
399 11918
398 11898
396 11945
395 11919
390 11355
354 10342
102 4957
80 4363
68 4108
37 3136
37 3139
37 3106
37 3098
34 3084
34 3086
34 3084
33 3062
32 3048
32 3047
32 3041
36 3156
36 3191
61 3192
386 3554
390 3558
402 4051
402 4050
398 4026
398 4028
404 4074
405 4082
405 4088
406 4145
406 4145
406 4141
406 4168
400 4112
401 4184
404 4204
404 4215
404 4219
406 4221
408 4248
410 4332
415 4492
417 4547
426 5177
430 5228
427 5256
425 5204
424 5227
424 5239
428 5302
429 5367
432 6263
435 6802
435 6912
435 6983
435 7187
436 7220
436 7102
436 7003
438 7012
438 7011
437 7007
436 6984
433 4865
433 4837
433 4717
432 4690
432 4689
432 4688
431 4688
431 4668
438 4730
438 4701
438 4704
438 4713
438 4714
438 4703
438 4702
438 4707
438 4709
438 4691
438 4689
438 4690
440 4735
440 4737
440 4754
443 4858
443 4862
441 4865
441 5054
423 4928
382 4888
380 4882
69 4493
68 4489
58 3973
50 3949
45 3952
45 3951
41 3916
41 3918
41 3916
52 3855
54 3841
54 3834
54 3811
54 3802
54 3734
52 3716
52 3710
52 3724
50 3719
50 3714
50 3644
47 3470
47 3360
36 2671
36 2661
37 2661
37 2663
37 2661
37 2648
37 2634
36 2435
33 1126
32 854
32 821
32 765
32 729
32 654
32 652
35 631
90 4179
93 4198
93 4281
93 4307
93 4309
93 4314
93 4316
93 4318
94 4349
93 4349
93 4353
93 4353
88 4291
88 4261
88 4270
88 4255
88 4256
88 4255
93 4503
93 4505
94 4562
94 4573
94 4576
95 4642
93 4598
93 4594
94 4579
91 4488
91 4496
91 4495
91 4305
91 4311
90 4306
90 4309
90 4316
90 4323
90 4324
90 4334
90 5303
89 5354
88 5455
88 5457
88 5489
77 5534
77 5635
77 5641
77 5643
77 5642
76 5641
76 5644
76 5643
76 5627
76 5625
76 5624
76 5625
76 5625
76 5625
76 5625
76 5626
78 5630
78 5630
78 5629
78 5629
78 5629
78 5629
78 5634
78 5635
78 5639
79 5721
78 5726
76 5785
75 5788
73 5764
12 2077
12 2303
12 2224
12 2482
12 2532
12 2910
12 2839
12 3150
12 3128
12 3141
13 3365
13 3398
12 3451
12 3502
12 3510
12 3545
12 3551
11 3555
7 3314
7 3307
6 3253
6 3258
6 3257
5 3189
5 3181
5 3191
5 3190
5 3193
5 3194
5 3198
5 3198
5 3196
5 3199
6 3200
6 3201
6 3192
6 3195
6 3181
6 2214
6 2230
6 2199
5 2205
5 2202
5 2184
5 2178
5 2178
5 2203
5 2204
5 2203
6 2240
6 2248
6 2264
6 2304
6 2356
6 2381
6 2391
6 2412
8 2460
8 2495
6 2527
6 2568
6 2577
6 2585
6 2589
6 2615
6 2627
7 2643
7 2642
6 2559
6 2553
6 2478
6 2464
6 2460
6 2443
6 2194
6 2144
6 1903
6 1843
6 1456
6 1416
6 1094
6 1078
6 1068
5 820
5 805
5 761
5 720
5 711
5 725
5 722
5 722
5 709
5 708
5 704
5 707
5 723
6 743
8 808
8 806
8 811
8 806
8 800
8 794
8 793
8 793
7 790
7 789
7 787
7 812
7 817
7 814
7 778
7 707
7 630
7 625
7 625
7 625
7 626
7 627
8 645
8 664
8 670
7 637
7 611
7 588
7 531
7 484
7 467
7 460
7 445
5 396
5 355
6 328
8 408
8 411
8 413
8 413
8 390
8 372
7 356
7 356
7 356
7 356
7 356
7 356
7 357
8 357
8 357
8 343
42 430
42 430
42 429
42 435
43 464
109 1615
116 1655
143 1943
145 1998
145 1999
156 2083
158 2113
158 2100
159 2100
159 2098
160 2164
160 2165
160 2196
160 2195
160 2179
159 2157
157 2087
157 2085
157 2085
157 2086
157 2086
157 2086
157 2086
157 2085
157 2085
157 2087
158 2093
158 2065
158 2064
158 2066
158 2066
158 2080
158 2080
158 2080
158 2079
158 2079
158 2080
158 2082
157 2073
157 2627
155 2742
155 2837
155 2911
155 2936
155 2946
155 2951
155 2958
156 2962
156 2963
157 2975
159 2990
158 2987
158 2840
158 2834
158 2760
158 2760
158 2759
158 2762
158 2756
158 2757
158 2753
158 2753
154 2753
154 2755
150 2753
135 2749
110 2749
98 2749
97 2746
95 2748
87 2742
88 2736
84 2656
18 1215
12 1163
8 1152
8 1138
7 1131
8 1142
8 1141
8 1147
8 1164
8 1167
7 1106
7 1111
7 1084
7 1086
7 1087
7 1134
8 1139
9 1140
23 1149
33 1156
33 1162
33 1165
33 1166
33 1169
34 1172
34 1190
33 1185
33 1186
35 1193
35 1190
35 1191
35 1183
36 1201
36 1209
51 1795
57 1834
57 1862
57 1859
57 1846
57 1264
58 1085
58 1007
58 972
58 967
58 959
58 956
58 956
56 1360
56 1365
56 1384
54 1389
54 1417
54 1420
54 1418
54 1419
54 1424
54 1419
54 1416
54 1420
54 1429
54 1430
54 1431
54 1436
54 1434
54 1436
54 1438
54 1445
54 1455
54 1458
55 1459
55 1459
54 1457
55 1457
55 1460
56 1460
56 1460
57 1459
57 1459
56 1448
56 1447
56 1437
56 1415
56 1410
56 1405
56 1420
56 1419
57 1441
56 1439
56 1385
52 1385
52 1380
39 1369
30 1361
30 1352
30 1350
30 1353
30 1348
30 1346
30 1327
30 1327
30 1323
28 1319
28 1318
28 1313
28 1300
27 1294
27 1276
10 681
8 654
8 651
8 651
8 651
8 649
7 646
7 637
7 641
8 652
21 673
54 754
54 748
55 331
58 333
58 308
58 292
58 269
58 264
58 263
58 263
58 261
58 257
58 258
58 255
58 248
58 249
58 249
58 246
58 247
59 252
62 261
70 266
70 257
70 256
70 254
70 285
70 287
70 287
69 291
68 291
70 291
72 291
72 291
74 285
77 288
77 470
79 477
79 494
79 500
79 475
79 476
78 451
78 451
77 451
77 451
77 451
77 451
77 452
77 454
77 451
77 450
77 450
77 449
77 449
77 450
77 450
77 464
77 465
77 467
77 474
77 476
77 488
77 479
77 496
77 503
77 504
81 514
81 1075
81 1079
81 1096
81 1102
79 1090
55 1055
31 981
31 978
30 976
30 976
30 976
30 978
30 979
30 1010
30 1045
30 1045
30 1045
30 1045
30 1045
30 1045
30 1044
30 1044
30 1044
30 1048
31 1052
36 1061
35 1064
52 1098
52 1098
57 1102
74 1226
75 1256
76 1252
75 1252
71 1250
88 1343
87 1346
86 1352
85 1369
85 1374
85 1388
85 1211
84 1207
84 1194
84 1205
88 1207
96 1217
100 1222
100 1229
100 1229
100 1231
100 1233
103 1234
103 1233
103 1233
103 1233
103 1238
104 1247
106 1250
126 1251
294 1254
311 1254
313 1239
316 1235
316 1233
319 1227
320 1225
321 1213
321 1213
321 1197
321 1199
321 1198
317 1186
317 606
317 603
317 577
317 555
318 556
319 569
320 571
321 582
321 585
321 588
321 588
321 588
321 586
321 548
321 486
321 466
321 463
321 463
321 463
321 463
321 463
321 463
321 463
319 463
318 462
311 446
304 427
281 405
277 405
276 399
263 231
263 230
263 227
263 224
263 177
244 132
244 127
243 126
243 123
243 122
243 115
243 115
242 109
242 107
241 105
237 104
227 92
223 89
223 87
223 86
223 85
223 85
223 85
223 85
223 84
223 84
223 81
214 73
190 73
167 73
24 69
12 70
8 71
5 71
4 71
2 73
2 73
2 74
2 74
2 73
2 59
2 58
2 56
2 56
2 56
2 56
2 55
1 50
1 38
1 38
1 29
1 25
1 22
1 26
1 53
4 67
4 72
4 72
4 70
4 70
4 70
4 70
4 70
4 71
4 72
4 73
4 75
4 75
3 73
3 73
3 76
3 74
3 75
3 75
3 75
3 75
3 75
3 75
3 75
3 75
3 75
3 75
3 75
3 74
3 74
3 75
3 75
3 75
3 76
3 76
3 76
3 76
3 76
3 76
3 76
3 76
3 76
3 76
3 76
3 78
3 83
3 84
3 85
3 85
3 84
3 84
3 82
3 81
3 80
3 80
3 80
3 80
3 80
3 81
3 81
3 90
3 94
3 102
3 102
3 102
3 102
3 102
3 108
3 112
3 112
3 113
3 107
3 82
0 70
0 68
0 73
0 78
0 94
0 100
0 110
0 109
0 110
0 110
0 109
0 105
0 111
0 111
0 111
0 108
0 108
0 108
0 108
0 108
0 108
0 108
0 108
0 108
0 108
0 108
0 108
0 108
0 108
0 108
0 107
0 107
0 107
0 110
0 117
0 122
0 134
0 134
0 135
0 135
0 135
0 138
0 147
0 157
0 165
0 160
0 162
0 163
0 183
0 183
1 187
2 877
2 904
3 1096
3 1181
3 1185
3 1189
3 1192
3 1199
4 1200
4 1197
4 1218
4 1251
4 1300
4 1316
4 1357
4 1385
4 1383
4 1383
4 1388
4 1386
4 1387
4 1385
4 1379
4 1378
4 1375
4 1367
4 1353
4 1345
4 1338
4 1338
4 1344
4 1346
4 1468
4 1477
4 1470
4 1497
4 1497
4 1497
4 1504
4 1509
4 1529
4 1559
4 1620
4 1623
4 1627
4 1650
4 1655
4 1670
4 1685
5 1729
5 1763
5 1764
5 1767
5 1766
5 1765
5 1756
5 1746
5 1742
5 1713
5 1713
5 1913
5 1917
5 1981
5 1984
5 1972
5 1972
5 1976
5 1984
5 1988
5 1985
5 1970
5 1973
4 1931
2 1050
2 1011
2 1024
1 1023
1 1024
1 1030
1 1030
1 1025
1 1029
1 1020
1 973
1 940
1 902
1 868
1 825
1 815
1 816
1 815
1 815
1 815
1 819
1 819
1 821
1 822
1 830
1 830
1 829
1 830
1 830
1 830
1 830
1 826
1 672
1 669
1 670
1 671
1 733
2 735
2 748
2 749
2 736
2 704
2 643
2 644
2 640
2 615
2 611
2 590
1 576
1 516
1 505
1 505
1 505
1 505
1 505
1 503
1 504
1 504
1 504
1 501
1 428
1 426
1 341
1 332
1 330
1 313
1 305
1 304
1 310
1 317
1 319
2 323
2 331
2 355
2 367
2 351
2 351
3 356
3 356
3 358
3 360
3 372
3 541
3 561
3 567
3 636
3 684
3 738
3 1726
3 1842
3 1927
3 2102
3 2174
3 2227
3 2521
5 2898
5 2925
5 2953
6 2968
6 2968
6 2972
6 2973
6 2973
6 2979
6 2984
6 2992
6 2992
6 2992
5 2991
5 2924
5 2920
5 2888
5 2876
5 2871
5 2870
5 2871
5 2878
5 2884
5 2901
5 2905
5 2906
5 2913
5 2914
5 2920
5 2930
5 2931
5 2931
5 2931
5 2935
5 2941
5 2949
5 2963
5 2971
5 2782
5 2785
5 2785
5 2732
5 2751
5 2767
6 3379
6 3426
7 3440
9 3521
9 3527
8 3596
8 3717
8 3793
8 3880
8 3887
8 3889
7 3884
7 3891
7 3991
7 4001
7 4030
7 3924
7 4202
7 4340
7 4652
7 4915
7 5325
7 3895
7 3794
7 3787
7 3838
7 3842
7 3849
7 3850
5 3468
5 3440
4 3397
4 3395
4 3396
4 3394
4 3396
4 3399
4 3401
4 3407
4 3404
4 3405
4 3421
4 3423
4 3468
4 3491
4 3498
4 3520
4 3530
4 3531
4 3541
4 3531
4 3564
4 3542
4 3539
4 3547
4 3539
4 3531
4 3568
4 3563
4 3588
4 3588
4 3729
4 3728
4 3715
4 3710
5 4398
5 4398
5 4398
5 4465
5 4610
5 4625
5 4623
5 4593
3 3852
3 3836
1 3780
1 3757
1 3745
1 3616
1 3489
1 3434
1 3405
1 3405
1 3404
1 3410
1 3410
1 3416
1 3413
1 3440
1 3391
1 3059
1 2898
1 2514
1 2289
1 1740
1 1738
1 1714
1 1709
1 1677
1 1693
1 1686
1 1686
1 1687
1 1704
1 1704
1 1699
1 1705
1 1703
1 1700
1 1700
1 1701
1 1688
1 1692
1 1691
1 1691
1 1689
1 1648
1 1613
1 1603
1 1600
1 1598
1 1598
1 1594
1 1590
1 1553
1 1552
1 1552
1 1544
1 1544
1 1543
1 1491
1 1476
1 1461
1 1458
1 1311
1 1310
1 1302
1 1299
0 560
0 555
0 511
0 478
0 371
0 363
0 361
0 361
0 361
0 362
0 369
1 441
1 565
4 656
4 716
9 1267
9 1395
9 1489
11 1498
11 1506
11 1492
11 1373
11 1373
11 1269
11 1263
11 1266
11 1269
11 1339
11 1351
11 1364
11 1363
11 1362
11 1357
11 1356
11 1341
11 1346
11 1353
11 1353
11 1334
11 1335
11 1339
11 1336
11 1335
11 1339
11 1341
11 1339
11 1337
11 1335
11 1335
11 1334
11 1334
11 1334
11 1335
11 1339
11 1351
11 1354
11 1355
11 1355
11 1354
11 1353
11 1353
11 1352
11 1351
11 1350
11 1350
11 1352
11 1351
11 1351
12 1351
12 1351
12 1350
11 1350
10 1349
10 1349
10 1372
10 1436
10 1443
10 1453
10 1463
10 1467
10 1470
10 1475
10 1470
10 1459
9 1379
8 1194
5 1103
5 1005
2 551
2 454
2 380
1 372
1 355
1 355
1 355
1 354
1 356
1 355
1 416
1 430
1 376
1 376
1 397
1 421
1 468
1 605
1 746
1 852
2 1043
2 1044
2 1044
2 1044
2 1045
2 1041
2 1041
2 1042
2 1087
2 1089
2 1095
3 1109
3 1112
3 1127
3 1132
3 1133
3 1158
3 1156
3 1147
3 1141
3 1207
3 1206
3 1206
3 1208
3 1292
5 2041
5 2121
5 2285
5 2436
5 2501
5 2523
5 2538
5 2544
4 2545
4 2548
4 2549
5 2818
8 3009
8 3149
8 3181
8 3130
8 3122
8 3110
8 3106
8 3106
8 3107
8 3102
8 3106
8 3216
9 3261
9 3292
9 3286
9 3308
9 3303
9 3302
9 3299
9 3300
9 3306
9 3330
9 3352
9 3351
9 3358
9 3361
11 3348
15 3973
15 4257
21 5181
21 5731
23 7058
23 7235
23 7111
23 7274
23 7350
22 7425
24 7664
24 7687
24 7733
24 7738
24 7753
24 7823
24 7829
24 8164
24 8190
24 8229
25 10378
25 10408
25 10448
25 10669
25 10775
25 10774
25 10778
25 10779
25 10783
25 10793
25 10794
25 10797
25 10788
25 10619
23 9852
23 9773
23 9710
47 9670
49 9670
49 9678
49 9682
49 9689
49 9688
49 9689
49 9684
48 9303
45 8871
45 8668
45 8612
45 8595
45 8595
46 8637
46 8681
46 8693
55 8939
55 8944
55 8943
56 8799
58 8693
58 8649
59 8616
61 8588
62 8595
63 8600
63 8628
63 8698
63 8702
64 8664
65 8644
65 8726
66 8724
66 8718
66 8646
71 8147
74 7945
73 7310
88 7004
88 5619
88 5384
89 5306
89 5034
89 4849
89 4608
89 4561
89 4540
92 4494
93 4496
93 4505
93 4469
95 4638
98 4218
99 4229
99 4179
97 1958
97 1929
97 1855
97 1642
97 1529
97 1519
97 1513
97 1513
96 1515
96 1536
96 1536
96 1537
96 1561
97 1599
97 1612
97 1612
97 1612
72 1604
70 1601
70 1594
70 1595
70 1591
70 1592
73 1596
180 2766
183 2773
183 2774
183 2772
183 2773
183 2774
183 2771
182 2718
182 2739
182 2723
170 2507
170 3246
170 3247
170 3259
171 3276
170 3280
173 3314
172 3299
172 3294
172 3280
173 3228
172 3175
172 3168
171 3160
171 3161
171 3061
173 3060
173 3053
165 2956
157 2830
155 2804
153 2771
137 2559
134 2558
134 2559
134 2562
134 2562
134 2603
136 2706
137 2790
139 2985
139 3009
138 3021
138 3004
138 2969
137 2791
134 2773
133 2730
133 2730
133 2728
133 2726
133 2726
133 2726
133 2728
133 2734
134 2749
134 2749
134 2747
134 2716
134 2715
134 2709
134 2677
133 2650
133 2636
133 2635
133 2636
132 2636
132 2634
131 2636
129 2636
128 2638
108 2625
109 2644
13 1444
12 1463
12 1460
12 1462
12 1464
12 1468
12 1467
3 1415
3 1383
3 1381
3 1367
2 561
2 560
2 547
2 483
2 479
2 460
2 462
2 474
2 478
2 491
2 542
2 542
2 542
2 541
2 540
2 540
2 541
3 598
3 658
3 660
3 662
3 658
3 657
3 655
3 651
3 651
3 629
3 686
3 655
3 546
3 533
3 534
3 534
3 534
3 534
3 534
3 534
3 534
3 534
3 534
3 534
3 532
3 528
3 521
2 509
2 509
2 509
2 517
2 517
2 518
2 520
2 518
2 519
2 521
2 519
2 522
2 528
2 525
2 524
2 521
2 523
1 477
1 464
1 453
1 452
1 452
1 457
2 473
2 482
2 482
2 482
2 481
2 486
2 537
2 585
2 607
2 614
2 615
2 615
2 609
2 597
2 592
2 577
2 530
2 530
2 530
2 534
2 532
2 532
2 531
1 437
1 412
1 409
1 413
1 449
4 506
4 517
17 687
18 700
20 704
20 605
20 579
20 523
20 519
20 518
20 518
20 518
20 518
20 518
20 518
20 518
20 524
23 534
34 538
38 542
39 542
39 542
39 542
39 542
41 553
41 545
42 555
42 554
42 553
42 553
42 552
42 551
43 551
43 549
43 542
43 545
44 555
44 568
44 568
44 587
44 609
44 637
47 1440
47 1462
47 1514
46 1525
46 1539
46 1671
46 1693
46 1694
46 1690
46 1620
46 1574
46 1565
46 1570
46 1571
46 1571
46 1571
46 1572
46 1575
46 1575
46 1576
46 1581
46 1586
46 1583
46 1583
46 1583
46 1584
46 1585
46 1592
46 1595
46 1602
46 1565
43 1509
42 1487
27 1307
27 1366
27 1370
27 1388
28 1484
28 1493
28 1503
28 1502
28 1503
28 1503
28 1504
27 1510
27 1510
27 1513
25 1608
21 1606
9 1632
6 1630
6 1631
6 1630
6 1630
6 1630
3 1643
3 1641
3 1643
3 1641
3 1656
3 1658
3 1657
3 1659
3 1658
3 1659
3 1659
3 1652
3 1643
3 1629
3 1619
3 1605
3 1577
3 1522
1 634
1 685
1 675
1 672
1 685
1 687
1 684
1 692
1 695
1 697
1 697
1 700
1 693
2 697
2 698
2 698
2 697
2 697
2 704
2 718
2 714
2 708
2 710
2 711
2 710
4 710
4 710
5 702
5 699
5 691
5 691
5 696
5 739
5 738
5 675
5 669
5 645
4 554
4 553
4 540
4 541
4 548
4 582
4 587
4 749
4 751
3 754
3 658
3 640
3 622
4 625
4 623
4 626
4 631
4 635
4 608
5 617
5 612
5 614
5 602
5 609
5 640
5 663
5 678
5 687
5 700
5 717
5 790
5 823
5 839
5 938
5 945
5 1242
6 1237
6 1104
6 1066
6 1062
6 1245
6 1246
6 1246
6 1254
6 1296
6 1302
6 1301
6 1557
6 1570
6 1576
6 1579
6 1581
6 1581
6 1577
6 1565
6 1553
6 1555
6 1555
6 1555
6 1556
6 1556
4 1555
4 1555
3 1555
3 1553
3 1553
3 1552
3 1549
3 1505
2 1504
2 1503
2 1503
2 1500
2 1498
2 1491
2 1493
2 1493
2 1483
2 1451
2 1445
2 1270
2 1267
1 1267
1 1265
1 1265
2 1260
2 1259
2 1273
2 1272
2 1265
1 1262
1 1270
1 1311
1 1319
1 1336
1 1403
1 1469
1 1447
5 2316
5 2444
5 2629
6 2694
6 3441
6 3554
6 3885
6 4615
6 4676
6 5259
6 5005
6 5254
6 5292
6 5329
6 5461
6 5365
6 5519
7 5637
7 5722
7 5688
7 5719
7 5714
7 5457
7 5450
8 5448
8 5456
8 5456
8 5468
8 5472
8 5486
8 5486
8 5485
8 5487
8 5495
8 5494
8 5495
8 5533
8 5565
8 5588
8 5651
8 5681
8 5928
8 5932
8 5934
9 5936
9 5948
9 5948
9 5947
10 5942
10 5942
10 5938
10 5937
11 5937
11 5951
11 5958
11 5992
12 6852
12 6901
12 6937
12 7067
11 7067
11 7145
11 7505
11 7579
11 7657
12 7702
12 7698
12 7667
12 7666
12 7654
12 7565
12 7507
12 7475
8 6493
8 6396
8 6262
7 6211
7 5527
7 5102
7 4380
10 3643
10 3580
10 3581
10 3578
10 3498
10 3499
10 3490
10 3364
10 3306
10 3551
10 3482
10 3394
10 3393
10 3366
10 3391
9 3390
9 3412
9 3415
9 3410
13 3419
13 3461
14 3466
14 3476
14 3477
14 3485
14 3483
14 3473
14 3473
14 3476
14 3429
15 3417
15 3381
15 3320
15 3292
15 3053
15 3058
14 3057
13 3156
13 3151
13 3153
13 3170
13 3183
14 3236
14 3240
14 3240
13 3241
13 3231
13 3219
13 3175
12 2240
12 2236
12 2209
12 2090
12 2080
12 1938
12 1525
13 1443
13 1429
12 1380
12 1360
12 1365
12 1366
12 1370
12 1374
12 1386
12 1406
12 1403
12 1369
12 1360
12 1328
12 1203
12 1167
12 1160
9 1090
9 1089
9 1100
9 1133
10 1180
10 1181
10 1176
9 1162
9 1122
9 653
9 653
9 637
9 634
9 654
9 646
9 643
9 615
9 607
9 600
5 591
5 536
4 543
4 516
4 523
4 530
4 597
4 678
4 691
4 688
5 694
4 687
4 690
4 689
4 689
4 690
4 701
4 702
4 595
4 592
4 586
4 580
5 592
4 551
4 550
4 548
4 531
4 533
4 533
4 518
4 516
3 504
3 501
3 496
3 488
3 485
3 481
3 479
3 462
3 461
3 461
4 486
5 484
5 480
5 476
5 473
5 457
8 472
9 484
9 493
10 513
12 545
20 970
20 989
20 1001
20 1006
20 1002
20 969
20 912
20 908
20 908
20 909
20 908
21 910
21 910
21 910
22 909
22 891
22 893
22 897
22 897
23 953
23 953
24 966
24 970
24 957
25 950
25 939
25 930
24 850
24 787
22 779
22 778
22 778
22 777
22 799
22 803
22 834
23 894
23 903
23 916
23 914
22 916
22 924
22 1039
22 1015
22 1024
23 1315
23 1316
23 1320
23 1320
23 1322
23 1327
23 1329
21 1343
21 1354
21 1363
21 1457
21 1468
22 1654
22 1675
22 1698
20 1747
18 1875
18 2167
21 2548
22 2588
22 2607
22 2647
24 2723
24 2736
23 2716
23 2712
23 2693
19 2639
14 2229
14 2210
14 2209
14 2210
13 2210
12 2210
12 2211
12 2212
12 2213
12 2215
12 2214
12 2212
12 2211
12 2210
11 2210
11 2221
11 2264
11 2303
11 2407
11 2400
11 2465
11 2445
11 2442
11 2440
11 2441
11 2441
11 2443
11 2442
11 2441
13 2445
14 2445
15 2446
15 2447
15 2420
15 2412
14 2359
14 2292
14 2270
14 2264
14 2261
14 2259
14 2249
14 2112
14 2108
14 2099
12 1756
12 1790
12 1790
12 1789
11 1756
11 1750
11 1752
11 1751
11 1742
11 1732
11 1640
11 1628
10 1377
10 1352
10 1277
10 1234
9 1135
8 816
4 503
4 488
4 484
4 476
4 429
4 427
4 429
4 493
5 570
5 572
5 604
6 611
6 614
6 614
6 613
6 619
6 629
6 640
7 647
7 680
7 686
7 747
7 758
7 761
7 762
7 739
7 691
7 637
7 534
7 486
7 435
7 428
7 432
7 434
7 444
7 452
11 462
11 471
11 471
9 471
8 471
7 471
7 471
7 471
7 480
7 481
7 482
7 494
7 496
7 653
8 756
8 771
8 787
8 797
8 800
8 814
8 779
8 783
8 782
8 781
8 781
8 778
8 780
8 779
8 779
8 780
8 778
8 779
8 779
8 779
8 774
8 773
8 773
8 768
9 764
9 763
9 760
9 760
9 754
9 752
8 668
8 577
8 580
8 580
8 582
8 582
8 582
8 582
8 576
8 565
8 542
7 538
7 504
7 500
7 440
7 429
7 428
7 425
7 425
7 426
7 432
7 432
7 432
7 432
7 432
7 425
7 421
7 414
7 408
3 396
3 389
3 389
3 390
3 390
3 407
3 407
4 410
4 400
4 399
4 398
4 382
4 377
4 217
3 90
3 80
3 144
3 222
3 246
3 264
3 345
3 368
3 442
3 447
3 448
3 454
3 457
3 462
3 506
3 523
6 780
6 822
6 833
7 883
9 890
9 893
9 893
9 897
9 897
9 897
9 898
9 898
9 901
9 904
9 904
8 904
8 899
8 900
8 895
8 894
8 895
8 898
8 900
8 897
8 897
8 917
8 917
8 920
8 920
8 920
8 922
8 983
8 990
8 996
8 1002
8 1003
10 1033
12 1043
12 1044
12 1044
12 1046
12 1044
12 1048
12 1047
12 1047
12 1047
12 1046
12 1046
12 1027
12 1026
11 1025
11 1027
11 1027
11 1027
11 1025
11 1025
11 1025
11 1018
12 1020
12 921
12 879
12 865
12 847
12 767
12 741
12 665
12 664
12 661
12 657
12 657
11 652
10 608
10 584
9 312
9 280
10 265
8 218
5 212
5 221
5 222
5 218
5 224
5 224
5 223
5 232
5 225
5 224
4 228
4 228
4 230
4 233
4 233
4 246
4 247
4 244
4 243
4 245
4 249
6 271
8 375
8 378
8 414
8 418
9 433
9 493
9 512
9 515
9 549
9 575
7 559
7 562
7 562
8 562
8 562
9 562
9 563
9 563
9 566
9 571
9 571
9 594
9 595
11 608
11 608
11 607
11 608
11 609
11 609
11 609
11 614
11 615
10 593
10 596
10 586
10 590
10 592
10 593
10 594
10 591
10 590
10 590
10 591
9 594
9 597
9 608
9 1048
11 1102
11 1151
11 1164
9 1165
9 1183
9 1231
9 1250
9 1299
9 1352
9 1359
9 1362
9 1350
9 1353
9 1355
9 1352
9 1365
9 1386
10 1385
10 1415
10 1416
10 1418
10 1416
10 1417
10 1424
10 1422
9 1348
10 1294
10 1335
10 1416
10 1501
10 1683
11 1720
26 2872
35 3903
38 3987
37 4034
38 4037
42 4118
42 4295
51 4718
55 5307
57 5504
57 5544
57 5559
57 5561
57 5557
57 5560
57 5541
57 5551
55 5536
55 5536
55 5535
55 5540
55 5544
55 5557
55 5569
55 5566
55 5572
55 5615
55 5611
55 5615
55 5612
55 5610
55 5610
55 5617
55 5701
55 5708
55 5714
55 5720
55 5718
55 5712
55 5696
54 5033
53 4957
52 4895
51 4686
51 4684
51 4664
51 4563
51 4479
51 4425
51 4338
51 4298
51 4298
51 4297
51 4296
51 4289
51 4289
51 4279
51 4274
50 4269
50 4226
49 4202
49 4200
48 4181
48 4173
48 4137
48 4109
48 4099
48 4078
48 4038
48 3978
45 3875
44 3777
44 3730
19 1823
8 1027
8 982
8 958
8 944
0 346
0 288
0 245
0 222
0 219
0 233
0 248
0 246
0 251
0 251
0 251
0 251
0 272
0 280
0 289
0 300
0 317
0 315
0 332
0 330
0 330
0 291
2 585
7 701
12 938
12 1012
25 2742
26 2785
27 2762
30 3078
30 3078
30 3105
31 3216
31 3666
31 3680
31 3746
31 3755
31 3759
31 3759
31 3786
31 3785
31 3783
31 3787
31 3790
31 3791
31 3791
31 3791
31 3790
31 3790
31 3790
31 3793
31 3792
31 3792
31 3794
31 3800
31 3810
32 3820
32 3824
32 3824
32 3824
32 3823
32 3819
40 3819
43 3819
44 3819
45 3819
45 3819
45 3819
45 3819
45 3820
45 3820
45 3820
45 3820
45 3820
45 3816
44 3815
45 3814
45 3809
45 3775
45 3764
45 3762
45 3761
44 3751
44 3751
44 3750
43 3682
40 3617
38 3593
38 3596
42 3633
42 3627
42 3621
42 3622
42 3799
41 3789
39 3479
39 3423
35 3249
34 3198
22 1304
22 1293
21 1257
21 1233
22 1237
22 1210
21 1107
21 651
21 626
21 599
21 605
21 605
21 606
21 603
22 604
22 603
22 627
22 631
22 640
22 872
22 941
22 1177
22 1291
23 1332
23 1387
23 1391
23 1393
23 1903
23 1903
23 1896
22 1888
22 1890
21 2436
21 2449
16 2466
11 2566
10 2710
10 2715
10 2718
9 2762
9 2763
9 2763
9 2764
9 2763
9 2764
9 2764
9 2767
9 2767
9 2768
9 2768
8 2770
8 2770
8 2767
8 2766
8 2766
8 2766
8 2759
8 2758
8 2758
8 2759
8 2771
8 2804
8 2887
3 2832
3 2862
3 2841
3 2849
3 2658
3 2657
3 2654
3 2649
3 2594
3 2546
3 2526
3 2529
3 2537
2 2519
2 2515
2 2521
2 2522
2 2507
2 2503
1 2500
1 2528
1 2582
1 2587
1 2589
1 2590
1 2590
1 2600
2 2657
3 2640
3 2404
3 2337
3 2109
3 2009
3 1965
3 1912
3 1909
3 1901
3 1385
3 1392
3 1386
3 1388
3 1388
3 841
3 829
3 804
3 675
3 568
3 567
3 566
3 521
3 521
3 521
3 527
3 624
3 637
3 638
3 634
3 634
3 634
3 650
3 700
3 765
3 775
3 1139
3 1166
3 1196
5 1231
5 1305
5 1313
5 1318
5 1305
5 1264
5 1121
5 1101
5 1067
5 1062
5 1053
5 1052
5 1052
5 1052
5 1052
5 1051
5 1051
5 1050
5 1047
5 1038
5 1038
8 1039
8 1031
8 1030
8 1030
8 1030
9 1037
9 1008
9 950
9 952
9 951
9 946
9 945
8 889
6 850
6 849
6 848
6 847
6 847
6 847
6 849
6 852
6 852
6 851
6 850
6 842
6 841
6 839
6 840
6 834
6 834
6 836
7 839
7 839
8 839
8 838
8 837
8 837
8 837
8 816
8 728
8 716
8 724
8 726
9 732
9 736
9 710
10 630
10 573
10 574
10 172
11 165
11 126
9 99
9 95
9 94
9 95
9 96
9 101
9 101
9 101
9 101
9 101
9 101
9 101
9 102
9 102
8 102
8 101
8 101
8 101
12 103
13 103
14 103
14 103
14 103
14 103
14 99
14 99
13 91
13 88
13 86
13 84
13 84
13 83
13 84
13 83
13 83
13 84
13 85
13 85
13 85
13 85
13 81
13 80
13 80
13 80
13 84
13 85
13 86
13 86
13 91
19 127
20 142
23 148
23 178
22 180
22 190
22 196
22 196
22 197
22 197
22 197
22 185
22 184
22 188
22 190
21 185
21 184
21 183
20 170
20 184
20 196
20 200
20 205
20 216
20 214
20 217
20 241
20 242
20 247
20 250
20 264
20 266
20 266
21 292
21 293
21 303
21 312
21 318
21 330
21 330
21 342
18 342
12 340
12 349
8 349
6 352
6 352
6 352
5 356
5 356
5 355
5 356
5 369
6 458
6 459
6 459
6 461
6 465
6 472
6 475
6 475
6 476
6 476
6 475
6 475
6 475
6 475
6 475
6 471
5 474
5 473
5 486
5 472
4 442
4 432
3 430
3 396
3 391
3 380
3 376
3 376
3 375
3 384
3 384
3 384
4 382
4 376
4 373
4 373
4 373
4 373
4 372
4 340
4 331
4 329
4 332
4 335
4 363
6 373
6 349
6 364
6 411
6 404
6 394
6 396
6 396
5 359
5 349
5 345
5 346
5 345
5 343
5 344
5 331
5 331
6 331
6 323
6 323
5 322
5 322
5 322
5 319
5 319
5 319
5 317
5 298
4 213
4 213
9 262
9 262
9 268
9 263
9 259
9 259
9 259
9 258
9 259
9 259
9 274
9 276
9 289
9 301
9 301
9 314
9 311
9 308
9 307
9 305
9 432
11 481
13 554
13 620
13 703
13 704
13 705
13 700
13 712
13 714
12 715
12 715
12 716
12 716
12 716
14 716
14 716
16 718
18 740
19 782
19 781
19 772
19 740
18 731
18 727
18 705
18 686
18 687
18 688
18 690
18 690
18 683
18 683
18 684
18 684
18 686
18 686
18 685
18 686
17 686
17 686
17 686
17 686
17 686
17 685
17 685
17 685
17 686
17 686
16 688
16 694
16 694
16 695
9 626
9 618
9 605
9 591
9 590
9 588
9 587
9 587
9 585
9 584
10 572
11 575
11 564
11 557
11 554
11 550
11 550
11 550
11 550
11 549
10 370
9 319
7 192
7 179
6 157
6 155
6 152
9 151
8 138
7 130
8 127
8 128
8 127
8 126
8 128
8 131
8 136
8 136
8 126
7 91
8 96
8 97
8 248
7 257
7 287
6 329
6 418
6 448
6 548
6 558
6 597
6 617
6 645
6 658
6 687
6 723
6 736
6 740
6 740
6 749
6 844
6 955
7 2322
7 4241
7 6066
7 6401
7 6638
8 7135
8 7171
8 7220
8 7252
9 7321
9 7334
9 7338
9 7343
9 7344
9 7348
9 7364
9 7421
9 7547
10 7789
10 7849
10 7877
9 7876
8 7881
8 7885
8 7870
8 7879
8 7991
8 7995
8 8015
8 8030
8 8035
8 8037
8 8037
8 8045
8 8049
8 8051
8 8058
8 8060
5 8059
5 8063
5 8062
5 8111
5 8147
5 8157
5 8149
5 8137
5 8133
5 8125
5 8128
5 8147
6 8190
5 8406
5 8393
5 7599
5 7571
5 6855
5 6763
5 6649
5 6558
5 6463
5 6449
5 6438
5 6384
5 6348
5 6192
5 5923
5 5631
5 5647
5 5649
5 5634
5 5623
5 5496
5 5302
4 3829
4 2736
4 1878
4 1750
4 1645
2 1287
2 1254
2 1242
3 1781
3 1786
3 1811
3 1816
3 1817
3 1817
3 1813
3 1768
3 1661
2 1503
2 1445
2 1400
2 1382
2 1374
2 1370
2 1363
2 1363
2 1363
2 1261
2 2315
2 2372
5 2717
5 2717
5 2719
5 2715
5 2710
6 3484
6 3504
6 3521
6 3532
6 3533
6 3539
6 3534
6 3478
6 3442
6 3440
6 3454
6 3457
6 3460
6 3460
6 3462
6 3445
5 3415
5 3188
5 3188
5 3181
5 3179
5 3178
5 3178
5 3180
5 3231
5 3231
5 3235
5 3235
5 3235
5 3211
5 3243
5 3256
5 3259
5 3221
5 3218
5 3225
5 3225
5 3225
5 3225
5 3225
5 3221
5 3221
5 3222
5 3225
5 3217
5 3215
5 3212
4 2645
5 2641
5 2604
5 2599
5 2597
5 2601
5 2601
5 2600
5 2600
5 2604
5 2562
5 2562
5 2562
5 2561
5 2561
5 2561
5 2557
5 2557
4 2543
4 1441
4 1377
2 1036
2 1031
2 1029
2 1858
2 1855
1 1061
1 1057
1 1049
1 1040
1 1037
1 1036
1 1034
1 1033
1 1033
1 1028
1 1016
1 1014
1 1013
1 1019
1 1021
1 1027
1 1023
1 1023
1 1023
1 1186
1 1190
1 1201
1 1203
1 1204
1 1152
1 1150
1 1150
0 1150
0 1150
0 1150
0 1116
0 1097
0 1101
0 1111
0 1117
0 1129
0 1129
0 1130
0 1132
0 1137
0 1155
0 1160
0 1177
0 1176
0 1176
0 1176
0 1179
0 1174
0 1175
1 1177
1 1184
1 1184
1 1180
1 1180
1 1180
1 1180
2 1178
2 1176
2 1176
2 1176
2 1175
2 1183
2 1204
2 1204
2 1210
2 1215
2 1247
2 1253
2 1260
2 1260
2 1253
2 425
2 428
2 433
2 431
2 449
2 450
2 450
2 450
2 456
2 457
3 652
3 673
3 683
4 838
4 850
4 853
5 915
5 910
7 929
7 953
7 1102
7 955
7 970
7 959
7 972
7 969
8 968
9 979
9 979
9 1004
9 1127
9 1129
9 1179
11 1530
11 1742
12 1794
14 4479
14 4918
14 6121
14 6402
14 7071
14 7482
15 9309
15 9972
15 10615
15 11233
16 11348
16 11442
16 11545
16 11548
16 11559
15 11633
15 11650
14 11664
14 11717
14 11740
14 12049
15 12122
16 12168
18 12774
19 12937
19 13095
19 13112
19 13101
19 13096
19 13113
19 13114
19 13114
19 13085
19 13077
19 13054
19 13058
19 13053
19 13053
19 13047
19 13027
19 13063
19 13360
17 14205
17 14833
17 15151
17 15157
15 15154
12 14964
12 15006
13 15004
15 14881
15 14920
14 14919
16 15028
16 15121
14 15111
14 15119
13 14593
12 14143
14 14815
14 14853
15 14819
15 14885
15 14833
15 14820
15 14823
15 14773
15 14564
15 14410
15 14202
15 14110
15 13836
14 13558
14 10589
14 10038
14 9895
14 9758
14 9191
14 8700
14 6947
14 6295
14 5678
14 5358
14 5345
14 5331
14 5291
14 5453
14 5796
14 6190
14 6270
14 6274
14 6242
14 8472
15 8948
14 8997
13 9489
11 8770
11 8733
11 8743
11 8741
11 8741
11 8729
11 8716
11 8713
11 8708
11 8706
11 8704
11 8709
11 8762
11 8850
11 9191
11 9534
11 9537
11 9470
11 9009
11 7992
10 7436
10 7208
10 7210
10 7442
10 7445
10 7464
10 7469
8 7427
8 7379
8 7366
5 7175
5 7076
5 7081
5 7079
4 7060
4 7059
2 6340
2 6294
1 6259
1 6209
1 6209
1 6231
1 6243
1 6245
1 6247
1 6250
1 6253
1 6254
1 6254
1 6254
1 6254
1 6255
1 6255
1 6255
1 6255
1 6257
1 6280
1 6286
1 6282
1 6388
1 6447
1 6444
1 6419
1 6204
1 5677
1 5315
1 5296
1 5260
1 5215
1 2925
0 2011
0 1946
0 1389
0 1378
0 1358
0 1358
0 1357
0 1363
0 1360
0 1362
0 1362
0 1350
0 1349
0 1346
0 1337
0 1282
0 1229
0 987
0 653
0 643
0 634
0 634
0 632
0 626
0 615
0 613
0 374
0 370
0 346
0 337
0 337
0 336
0 336
0 356
0 587
0 589
0 912
0 1061
0 1129
0 1222
0 1230
0 1290
0 1320
0 1429
0 1436
0 1462
0 1482
0 1484
0 1487
0 1487
0 1487
0 1490
0 1494
0 1494
1 1673
1 1715
1 1832
1 1854
1 1853
1 1823
1 1806
1 1801
1 1701
1 1637
1 1635
1 1630
1 1629
1 1618
1 1618
1 1618
1 1619
1 1619
1 1624
1 1623
1 1626
1 1626
1 1627
1 1628
1 1630
1 1630
1 1620
1 1614
1 1646
1 1650
1 1689
1 1690
1 1793
1 1794
1 1796
1 1796
1 1796
1 1793
1 1787
1 1782
1 1777
1 1772
1 1772
1 1770
1 1768
1 1766
1 1762
1 1761
1 1762
1 1762
1 1760
1 1764
1 1758
1 1487
1 1473
1 1132
1 942
1 797
1 734
1 733
1 720
1 717
1 620
1 617
1 608
1 607
1 617
1 635
1 689
1 700
1 702
1 698
1 696
0 509
0 413
0 345
0 340
0 343
0 362
0 367
0 369
0 377
0 378
0 392
0 396
0 399
0 400
0 401
0 403
0 415
0 421
0 415
0 410
0 409
0 409
0 409
0 410
0 411
0 411
0 409
0 423
0 386
0 380
0 343
0 338
0 221
0 221
0 219
0 210
0 210
0 210
0 211
0 211
0 211
0 211
0 211
0 211
0 211
0 211
0 211
0 211
1 210
1 209
1 204
1 204
1 206
1 211
1 333
1 353
1 359
1 396
1 399
1 408
1 408
1 408
1 410
0 541
0 540
0 534
0 527
0 509
0 496
0 492
0 493
0 496
0 495
0 498
0 499
0 499
0 495
0 490
0 462
0 477
0 481
0 490
0 492
0 491
0 494
0 498
0 500
0 498
0 493
0 483
0 478
0 478
0 477
0 477
0 477
0 476
0 475
0 475
0 476
0 485
0 492
0 493
0 493
0 493
0 493
0 494
0 494
0 494
0 495
0 495
0 495
0 494
0 494
0 494
0 505
0 513
0 515
0 526
0 526
0 526
0 543
0 544
0 546
0 551
0 550
0 546
0 535
0 400
0 373
0 353
0 301
0 292
0 288
0 287
0 287
0 285
0 148
0 147
0 147
0 147
0 147
0 118
0 118
0 114
0 115
0 114
0 114
0 113
0 118
0 121
0 120
0 121
0 107
0 107
0 104
0 104
0 104
0 104
0 105
0 105
0 106
0 106
0 106
0 106
0 106
0 106
0 106
0 105
0 105
0 105
0 105
0 100
0 86
0 59
0 57
0 56
0 56
0 56
0 55
0 55
0 55
0 54
0 54
0 54
0 54
0 52
0 52
0 39
0 26
0 26
0 21
0 21
0 20
0 15
0 15
0 15
0 15
0 15
0 13
0 13
0 13
0 13
0 13
0 13
0 13
0 12
0 12
0 12
0 12
0 12
0 12
0 12
0 12
0 14
0 14
0 14
0 14
0 13
0 13
0 13
0 11
0 7
0 3
0 3
0 2
0 2
0 2
0 2
0 2
0 2
0 2
0 2
0 2
0 2
0 2
0 2
0 2
0 2
0 2
0 2
0 2
0 2
0 2
0 2
0 2
0 2
0 2
0 2
0 2
0 2
0 2
0 2
0 2
0 2
0 2
0 2
0 2
0 2
0 2
0 2
0 2
0 2
0 2
0 2
0 2
0 2
0 2
0 2
0 2
0 2
0 2
0 2
0 2
0 2
0 2
0 2
0 2
0 2
0 2
0 2
0 2
0 2
0 2
0 2
0 2
0 2
0 0
0 0
0 0
0 0
0 0
0 0
0 0
0 0
0 0
0 0
0 0
0 0
0 0
0 0
0 0
0 0
0 0
0 0
0 0
0 0
0 0
0 0
0 0
0 0
0 0
0 0
0 0
0 0
1 0
1 0
1 0
1 0
1 0
1 0
1 0
1 0
1 0
1 0
1 0
1 0
1 0
1 0
1 0
1 0
1 0
0 0
0 0
0 0
0 0
0 0
0 0
0 0
0 0
0 0
0 0
0 0
0 0
0 0
0 0
0 0
0 0
0 0
0 0
0 0
0 0
0 0
0 0
0 0
0 0
0 0
0 0
0 0
0 0
0 0
0 0
0 0
0 0
0 0
0 0
0 0
0 0
0 0
0 0
0 0
0 0
0 0
0 0
0 0
0 0
0 0
0 0
0 0
0 0
0 0
0 0
0 0
0 1
0 1
0 1
0 1
0 1
0 1
0 1
0 1
0 1
0 1
0 1
0 1
0 1
0 1
0 1
0 0
0 0
0 0
0 0
0 0
0 0
0 0
0 0
0 0
0 0
0 0
0 0
0 0
0 0
0 0
0 0
0 0
0 0
0 0
0 0
0 0
0 0
0 0
0 0
0 0
0 0
0 0
0 0
0 0
0 0
0 0
0 0
0 0
0 0
0 0
0 0
0 0
0 0
0 0
0 0
0 0
0 0
0 0
0 0
0 0
0 0
0 0
0 0
0 0
0 0
0 0
0 0
0 0
0 0
0 0
0 0
0 0
0 0
0 0
0 0
0 0
0 0
0 0
0 0
0 0
0 0
0 0
0 0
0 0
0 0
0 0
0 0
0 0
0 0
0 0
0 0
0 0
0 0
0 0
0 0
0 0
0 0
0 0
0 0
0 0
0 0
0 0
0 0
0 0
0 0
0 0
0 0
0 0
0 0
0 0
0 0
0 0
0 0
0 0
0 0
0 0
0 0
0 0
0 0
0 0
0 0
0 0
0 0
0 0
0 0
0 0
0 0
0 0
0 0
0 0
0 0
0 0
0 0
0 0
0 0
0 0
0 0
0 0
0 0
0 0
0 0
0 0
0 0
0 0
0 0
0 0
0 0
0 0
0 0
0 0
0 0
0 0
0 0
0 0
0 0
0 0
0 0
0 0
0 0
0 0
0 0
0 0
0 0
0 0
0 0
0 0
0 0
0 0
0 0
0 0
0 0
0 0
0 0
0 0
0 0
0 0
0 0
0 0
0 0
0 0
0 0
0 0
0 0
0 0
0 0
0 0
0 0
0 0
0 0
0 0
0 0
0 0
0 0
0 0
0 0
0 0
0 0
0 0
0 0
0 0
0 0
0 0
0 0
0 0
0 0
0 0
0 0
0 0
0 0
0 0
0 0
0 0
0 0
0 0
0 0
0 0
0 0
0 0
0 0
0 0
0 0
0 0
0 0
0 0
0 0
0 0
0 0
0 0
0 0
0 0
0 0
0 0
0 0
0 0
0 0
0 0
0 0
0 0
0 0
0 0
0 0
0 0
0 0
0 0
0 0
0 0
0 0
0 0
0 0
0 0
0 0
0 0
0 0
0 0
0 0
0 0
0 0
0 0
0 0
0 0
0 0
0 0
0 0
0 0
0 0
0 0
0 0
0 0
0 0
0 0
0 0
0 0
0 0
0 0
0 0
0 0
0 0
0 0
0 0
0 0
0 0
0 0
0 0
0 0
0 0
0 0
0 0
0 0
0 0
0 0
0 0
0 0
0 0
0 0
0 1
0 2
0 3
0 6
0 16
0 18
0 29
0 34
0 43
0 46
0 47
0 49
0 50
0 50
0 50
0 50
0 50
0 50
0 50
0 50
0 50
0 50
0 50
0 50
0 50
0 50
0 50
0 50
0 50
0 50
0 50
0 50
0 50
0 50
0 50
0 50
0 50
0 50
0 50
0 50
0 50
0 50
0 50
0 50
0 50
0 50
0 50
0 50
0 50
0 50
0 50
0 50
0 50
0 50
0 50
0 50
0 50
0 50
0 50
0 50
0 50
0 46
0 46
2 46
3 48
10 46
10 46
10 46
10 44
10 44
10 44
21 44
21 42
21 38
21 37
21 35
21 30
21 24
21 18
21 6
21 4
21 3
21 16
23 67
28 109
28 118
28 122
28 124
28 129
29 140
29 140
29 141
29 142
29 142
29 142
29 142
29 142
29 142
29 142
29 143
29 155
29 156
29 156
29 156
29 156
29 156
29 156
29 156
29 156
29 156
30 157
30 159
30 159
30 160
30 161
30 161
30 161
30 161
30 161
30 161
31 162
34 165
52 200
53 202
54 202
54 202
54 202
54 202
54 202
54 202
54 202
54 202
54 202
54 202
54 202
54 201
51 201
51 200
44 200
44 202
48 237
48 238
50 258
50 258
39 258
39 258
39 258
39 260
39 262
39 262
39 261
39 261
39 261
39 260
39 254
39 237
35 179
31 137
31 128
31 127
31 127
31 127
31 127
31 127
31 126
31 125
31 125
31 126
31 126
31 126
31 125
31 125
31 124
31 113
31 112
31 112
31 112
31 112
31 112
31 112
31 112
31 112
31 112
30 111
30 109
30 109
30 108
30 107
30 107
29 107
29 107
26 106
25 105
20 94
17 91
7 67
7 66
6 66
6 66
6 66
6 69
6 69
6 69
6 69
6 70
6 70
6 71
6 72
6 72
6 72
6 72
6 72
6 70
2 35
2 34
0 14
0 14
0 14
0 14
0 14
0 11
0 10
0 10
0 11
0 11
0 11
0 14
0 14
0 16
0 14
0 13
0 14
0 15
0 16
0 18
0 19
0 19
0 21
0 22
0 22
0 21
0 21
0 21
0 21
0 21
0 21
0 22
0 24
0 24
0 24
0 24
0 24
0 24
0 24
0 24
0 24
0 24
0 24
0 24
0 24
0 24
0 24
0 24
0 24
0 25
0 25
0 25
1 25
5 29
5 29
5 29
5 29
5 29
5 26
5 26
5 26
5 25
5 24
5 25
5 25
5 25
5 26
5 27
5 27
5 27
5 27
5 29
5 31
5 32
5 36
5 57
5 80
5 141
5 164
5 195
5 215
5 215
5 273
6 280
6 284
6 286
6 285
6 289
6 292
11 443
11 444
11 445
12 450
12 451
12 452
12 449
12 450
12 451
12 466
12 480
12 486
12 486
14 486
14 486
15 485
16 485
16 485
16 485
16 485
16 485
16 485
16 485
16 485
16 485
16 485
16 485
16 485
16 485
17 485
17 485
20 485
20 485
20 483
28 482
32 483
45 508
42 507
42 507
42 507
43 508
43 508
43 507
43 507
43 507
43 507
45 507
45 507
45 509
45 513
48 644
48 659
49 695
49 703
49 711
49 715
49 729
49 732
50 732
50 712
51 680
52 612
52 591
52 567
52 561
52 558
51 503
51 502
51 524
51 527
51 525
51 523
51 518
46 364
46 365
46 363
45 361
45 359
45 359
45 359
45 358
45 354
44 340
44 327
42 322
40 322
37 322
35 322
30 322
23 323
23 323
23 324
38 1051
39 1102
39 1103
39 1104
40 1127
36 1127
36 1129
36 1133
36 1135
36 1135
36 1135
37 1135
35 1139
34 1139
34 1140
32 1141
30 1140
25 1115
23 1112
23 1113
23 1113
23 1112
23 1112
23 1112
23 1114
23 1115
23 1115
23 1119
23 1117
23 1111
23 1099
21 927
21 914
21 914
21 917
21 908
21 906
21 888
21 884
20 881
19 880
19 880
18 880
19 879
19 874
19 873
19 873
19 871
19 867
19 841
19 840
19 840
19 840
19 840
19 842
19 840
19 840
19 840
19 840
19 840
19 840
19 840
19 841
19 842
19 842
19 845
19 845
19 845
19 846
17 845
17 845
17 845
15 835
3 99
2 30
2 30
2 30
2 24
2 24
2 25
2 25
2 25
2 25
1 25
1 25
1 21
1 21
1 20
1 20
1 20
1 20
1 20
1 20
1 20
1 20
1 20
1 21
1 21
1 21
1 21
1 17
1 17
1 17
1 15
1 15
1 15
1 14
1 16
1 16
1 19
1 19
1 19
1 19
1 19
1 19
0 19
0 19
0 19
0 19
0 19
0 20
0 20
0 20
0 20
0 20
0 20
0 19
0 18
0 20
0 21
0 21
0 21
0 22
0 22
0 22
0 21
0 20
0 20
0 16
0 16
0 16
0 16
0 15
0 14
0 14
0 13
0 13
0 13
0 13
0 13
0 13
0 13
0 12
0 12
0 12
0 12
0 12
0 12
0 12
0 12
0 13
0 14
0 14
0 14
0 14
0 14
0 14
0 14
0 14
0 13
0 13
0 13
0 13
0 13
0 13
0 13
0 13
0 13
0 13
0 11
0 8
0 8
0 8
0 8
0 8
0 8
0 8
0 8
0 8
0 8
0 8
0 8
0 8
0 8
1 9
1 9
1 11
1 16
1 16
1 16
1 15
1 13
1 12
1 12
1 13
1 12
2 23
2 23
2 23
1 24
1 27
1 27
2 28
2 30
2 30
2 31
2 33
2 33
2 35
2 36
2 38
2 40
2 43
2 43
2 44
2 47
2 49
2 49
2 51
2 51
2 51
2 51
2 51
2 50
2 49
2 49
2 49
2 49
2 49
2 48
2 48
2 48
2 50
2 51
2 51
2 51
2 52
2 53
2 54
2 54
2 54
2 54
2 54
2 54
2 54
2 54
2 54
2 54
2 54
2 54
2 54
2 54
2 54
2 54
2 54
2 54
2 53
2 54
2 54
2 52
2 49
2 49
2 50
2 50
2 53
3 57
3 60
2 60
3 64
3 53
3 53
3 53
3 52
3 49
3 49
2 48
2 47
2 47
2 46
2 44
2 42
2 36
2 35
2 33
2 28
2 28
2 28
2 28
2 29
2 30
2 30
2 31
2 31
2 31
2 31
2 31
2 31
2 31
2 31
2 31
2 31
2 31
2 31
2 31
2 31
2 29
2 28
2 28
2 28
2 27
2 26
2 25
2 25
2 25
2 25
2 25
2 25
2 25
2 25
2 25
2 25
2 25
2 25
2 25
2 25
2 25
2 25
2 24
2 24
2 23
2 15
0 15
0 9
0 8
0 8
0 7
0 7
0 7
0 6
0 6
0 6
0 3
0 3
0 3
0 3
0 3
0 5
0 6
0 8
0 8
0 8
0 8
0 8
0 8
0 8
0 12
0 14
0 15
0 15
0 16
0 16
0 16
0 15
0 15
0 14
0 14
0 14
0 14
0 14
0 14
0 15
0 15
0 17
0 17
0 17
0 17
0 17
0 17
0 17
0 17
0 17
0 17
0 17
0 17
0 17
0 17
0 17
0 17
0 17
0 17
0 17
0 17
0 17
0 18
0 18
0 18
0 18
0 18
0 18
0 18
0 18
0 18
0 18
0 18
0 18
0 18
0 18
0 18
0 18
0 18
0 18
0 18
0 18
0 19
0 19
0 19
0 19
0 19
0 19
0 16
0 17
0 14
0 21
0 23
0 23
0 32
0 32
0 32
0 28
0 28
0 27
0 27
0 27
0 27
0 27
0 27
0 26
0 26
0 27
0 27
0 27
0 26
0 27
0 27
0 27
0 26
0 26
0 26
0 26
0 26
0 26
0 26
0 26
0 26
0 26
0 26
0 26
0 26
0 26
0 26
0 26
0 26
0 26
0 26
0 26
0 26
0 25
0 25
0 25
0 25
0 25
0 25
0 25
0 25
0 25
0 25
0 25
0 25
0 25
0 25
0 25
0 25
0 25
0 25
0 29
0 29
0 28
0 46
0 47
0 51
0 51
0 58
0 59
0 60
0 66
0 61
0 54
0 54
0 51
0 51
0 51
0 51
0 48
0 48
0 48
0 48
0 48
0 49
0 49
0 49
0 49
0 48
0 48
0 48
0 48
0 47
0 47
0 47
0 47
0 47
0 47
0 49
0 50
0 50
0 50
0 50
0 50
0 50
0 50
0 50
0 50
0 50
0 50
0 50
0 50
0 49
0 49
0 49
0 49
0 50
0 49
0 50
0 49
0 49
0 49
0 48
0 51
0 52
0 60
0 60
0 61
0 61
0 59
0 59
0 59
0 59
0 59
0 59
0 59
0 59
0 51
0 53
0 53
0 54
0 46
0 47
0 45
0 42
0 40
0 41
0 41
0 41
0 41
1 41
1 41
1 41
1 41
1 41
1 41
1 41
1 40
1 40
1 40
1 40
1 41
1 41
1 41
1 41
1 41
1 41
1 41
1 39
1 39
1 38
1 38
1 38
1 38
1 38
1 38
1 38
1 38
1 38
1 38
1 38
1 38
1 38
1 38
1 38
1 40
1 40
1 41
1 41
1 40
1 39
1 38
0 39
0 39
0 39
0 38
0 34
0 33
0 24
0 24
0 23
0 23
0 23
0 23
0 23
0 26
0 26
0 27
0 27
0 26
0 17
0 18
0 19
0 20
0 18
0 18
0 17
0 16
0 16
0 15
0 18
0 18
0 18
0 18
0 18
1 18
2 38
4 154
6 309
7 424
7 454
7 467
7 482
7 485
7 485
7 486
7 486
7 486
7 486
7 486
7 486
7 486
7 486
7 486
7 486
7 486
7 486
7 486
7 486
7 486
7 486
7 486
7 486
7 486
7 486
7 485
7 485
7 486
7 485
7 485
7 484
7 484
7 488
7 499
7 500
7 499
7 499
7 499
7 499
7 499
7 500
7 500
7 500
7 500
7 589
7 593
7 601
7 610
6 609
6 612
6 634
6 646
6 650
6 648
6 648
6 648
6 645
6 645
6 650
6 651
6 654
6 849
6 858
6 870
6 873
6 875
6 877
6 894
6 895
4 846
3 646
1 519
1 444
1 437
1 437
1 437
1 438
1 439
1 447
1 455
1 458
1 461
1 461
1 461
1 461
1 461
1 462
1 462
1 463
1 463
1 463
1 466
1 467
1 469
2 479
2 479
2 480
2 480
2 480
2 480
2 479
2 484
2 487
2 487
2 487
2 484
2 473
2 472
2 472
2 472
2 472
2 472
2 472
2 471
3 471
3 471
4 471
3 380
3 376
3 367
3 355
3 356
3 352
3 330
3 318
3 315
3 317
3 316
4 316
4 317
4 317
5 311
7 319
7 312
8 115
8 113
8 94
8 91
8 88
8 88
8 70
8 70
8 70
8 70
8 70
8 72
8 72
8 72
8 71
8 71
8 64
8 55
8 54
8 53
8 51
8 51
8 51
8 51
11 51
11 51
11 51
11 50
10 51
10 51
10 49
10 49
10 46
10 35
10 35
10 34
10 34
10 33
10 34
10 33
10 33
10 29
10 29
10 29
10 29
10 29
10 29
10 31
10 39
10 39
10 40
10 41
10 41
9 41
9 41
8 41
8 42
8 42
8 45
8 62
8 59
8 60
8 60
8 60
8 60
8 58
7 58
6 58
6 57
5 57
5 58
3 49
3 50
3 49
3 46
3 46
3 46
3 46
3 45
3 44
3 41
3 41
2 44
2 44
2 42
2 42
2 42
4 44
4 50
4 50
4 50
4 50
4 50
4 50
4 50
4 50
4 50
2 50
2 52
2 52
2 56
2 55
2 56
2 56
2 57
2 57
2 57
2 57
2 57
2 57
2 57
2 56
2 57
2 57
2 57
2 58
2 58
2 57
2 57
2 57
2 56
2 47
2 47
2 47
2 47
2 47
2 48
2 49
2 49
2 48
2 48
2 42
2 28
2 28
2 27
2 27
2 27
2 27
2 27
2 27
2 29
2 43
2 43
2 43
2 43
2 42
2 42
2 42
2 42
2 42
2 42
2 43
2 43
2 43
2 43
3 40
3 40
3 45
2 45
2 45
1 43
1 37
1 37
1 36
1 36
1 36
1 36
1 36
1 36
1 36
0 37
0 35
0 35
0 29
0 30
0 31
0 33
0 40
0 40
0 41
0 60
0 64
0 67
0 78
0 79
0 81
0 89
0 89
0 88
0 88
0 88
0 88
0 88
0 101
0 101
0 103
0 109
0 109
0 110
0 109
0 108
0 108
0 108
0 108
0 108
0 108
0 108
0 108
0 108
0 108
0 108
0 108
0 108
0 106
0 91
0 90
0 89
0 89
0 89
0 89
0 89
0 89
0 89
0 89
0 88
0 88
0 88
0 88
0 88
0 88
0 76
0 71
0 62
0 58
0 58
0 58
0 58
0 58
0 58
0 63
0 63
0 63
0 63
0 63
0 64
0 65
1 77
1 77
1 80
1 80
1 78
1 77
1 81
1 70
1 65
1 63
1 55
1 55
1 55
1 55
1 55
1 55
1 57
1 57
1 57
1 56
1 43
1 41
1 40
1 36
1 35
1 35
1 35
1 35
1 35
1 35
1 36
1 37
1 38
1 38
1 42
1 42
1 42
1 42
1 43
1 45
1 54
1 55
1 55
1 55
1 55
1 55
1 55
1 56
1 70
1 79
8 156
9 161
14 199
14 200
15 206
18 232
18 238
18 261
18 265
18 268
18 270
18 271
18 271
18 273
18 277
18 290
18 293
18 298
18 308
18 308
18 307
18 305
20 335
19 324
19 325
19 322
19 322
19 322
19 322
19 322
19 322
19 322
19 322
19 322
19 322
19 322
19 322
19 322
19 322
19 320
19 322
19 322
20 325
20 325
20 325
20 325
21 325
21 326
21 326
21 327
21 327
21 327
21 327
21 326
21 333
22 336
22 338
22 328
24 329
24 319
24 319
24 314
24 309
24 291
24 284
24 282
24 282
24 282
24 282
24 282
26 282
27 281
26 279
19 214
19 208
11 168
11 166
10 164
10 154
10 143
10 125
10 123
10 124
10 125
10 125
10 126
12 133
12 127
12 109
12 104
12 98
12 89
13 91
13 91
13 90
11 60
11 61
11 61
11 61
11 61
11 61
11 61
11 61
11 61
11 61
11 61
11 61
12 61
12 63
12 69
12 81
12 84
12 84
14 83
14 85
15 82
16 82
16 82
16 82
15 81
15 81
15 81
15 81
15 81
15 81
15 81
15 81
14 73
13 70
14 69
13 65
12 65
12 65
12 66
12 66
12 52
12 52
12 52
12 51
12 52
12 53
12 54
12 55
10 54
10 54
10 54
10 54
10 54
10 54
10 54
10 55
10 55
10 55
10 55
10 54
10 54
10 53
10 52
11 55
9 45
14 50
33 50
33 51
33 51
33 51
34 46
34 46
34 46
34 45
34 45
34 45
34 45
34 58
36 66
36 83
38 119
38 128
38 131
38 144
38 144
37 150
38 148
39 175
39 165
39 166
39 190
37 189
37 187
35 192
34 192
34 192
34 193
34 194
34 194
35 196
35 196
35 196
35 197
35 197
35 197
34 197
33 197
33 197
33 199
33 203
33 209
33 254
33 256
33 280
33 281
33 283
33 288
33 288
33 287
33 289
33 288
33 289
33 289
33 289
34 293
34 308
34 315
34 317
34 317
34 318
34 319
33 321
33 321
33 321
32 321
32 320
26 318
20 318
15 313
3 313
3 313
3 313
3 313
3 313
3 313
3 313
3 315
3 316
3 316
3 315
3 290
3 282
3 261
3 222
3 218
3 217
3 204
3 203
3 203
3 198
2 146
2 145
2 145
2 144
2 144
3 144
3 145
3 146
3 156
3 156
3 155
3 155
2 152
2 152
2 154
2 154
2 154
2 154
2 154
2 155
2 161
2 158
2 154
2 145
2 100
2 97
2 75
2 85
2 82
2 79
2 77
2 77
2 77
2 78
2 78
2 77
2 77
1 71
1 54
1 46
1 44
1 43
1 43
2 44
2 43
2 43
2 43
2 43
2 44
2 49
2 50
2 52
2 53
2 52
2 52
2 52
2 56
2 59
2 60
2 61
2 61
2 60
2 60
3 60
3 65
3 65
4 65
4 66
4 66
4 66
4 66
4 66
4 66
4 66
4 66
4 66
4 66
5 68
4 71
4 70
4 71
6 62
7 62
7 62
7 62
7 62
7 62
7 62
7 62
7 62
7 63
7 63
7 59
7 55
7 55
7 56
7 56
7 56
7 56
7 55
9 46
9 46
9 46
9 45
20 80
20 80
20 81
21 82
22 82
22 83
24 84
24 85
24 84
24 84
24 84
24 84
23 85
23 85
23 85
23 85
23 85
23 84
23 80
23 78
23 77
23 76
23 76
23 76
23 76
23 73
23 67
23 67
23 66
23 65
23 65
23 65
22 63
22 59
21 59
21 59
21 59
21 61
21 61
21 61
21 61
28 65
28 65
28 65
28 63
28 62
27 59
27 59
27 59
26 56
24 53
22 53
21 53
20 53
20 53
20 53
20 53
20 53
20 53
20 52
20 53
20 53
20 53
24 65
24 65
25 68
25 72
25 72
25 72
25 72
25 72
25 71
25 70
14 37
14 36
13 38
13 38
13 38
12 38
12 36
12 36
12 36
12 36
12 36
12 36
12 33
12 33
12 33
12 33
12 33
12 33
15 33
18 35
18 35
34 42
34 42
34 42
34 41
34 41
34 41
34 41
34 41
34 41
34 41
34 41
34 42
35 42
36 42
37 42
80 85
86 85
86 85
86 86
86 87
79 84
79 84
79 86
81 85
81 86
83 88
83 87
83 87
83 87
83 87
83 87
83 87
85 93
85 95
85 96
85 107
86 126
86 147
86 169
87 179
87 183
87 183
83 170
82 168
82 167
82 165
82 165
83 165
83 165
83 165
83 165
83 165
83 164
83 164
83 162
83 162
85 163
85 163
86 163
86 163
86 163
86 163
86 163
86 164
86 164
86 166
86 166
86 166
86 166
86 166
83 166
80 163
80 165
64 159
64 159
64 159
64 159
64 159
64 159
64 159
64 159
64 159
64 159
64 159
64 160
62 160
58 160
56 160
14 107
9 107
9 106
10 106
11 106
11 105
8 99
8 99
7 99
5 99
3 97
3 97
3 97
3 97
3 116
3 126
3 142
4 157
4 157
4 160
4 150
4 142
4 127
4 114
4 107
4 105
4 107
4 107
4 107
4 109
4 109
4 109
4 109
4 113
4 113
4 119
4 121
4 133
4 135
3 134
2 134
2 134
2 134
1 136
1 159
1 160
1 160
1 160
1 164
1 270
2 273
2 290
2 340
2 351
2 366
2 370
2 370
2 377
2 381
2 392
2 394
2 396
2 409
2 410
2 414
2 415
2 415
2 415
2 415
2 413
2 413
2 413
2 413
2 413
2 413
2 413
2 412
3 414
3 414
3 414
3 414
3 414
3 414
3 414
3 414
3 415
3 415
3 401
4 419
4 419
3 408
3 403
3 395
3 389
3 381
3 372
3 354
3 343
3 341
3 341
3 341
3 341
3 342
3 342
3 341
3 341
3 338
3 341
3 327
3 313
3 302
3 300
3 298
3 298
3 297
3 297
3 295
3 293
3 295
3 295
3 299
3 295
3 190
2 185
2 175
2 111
2 94
2 93
2 94
2 96
2 88
2 83
2 73
2 75
2 76
2 75
2 75
2 73
2 73
2 73
2 73
2 73
2 73
2 73
2 73
2 73
2 73
2 73
2 74
2 74
1 72
1 72
1 72
1 72
1 72
1 72
1 75
1 79
1 79
2 84
2 79
1 49
1 40
1 83
1 84
1 85
1 85
1 85
1 86
1 88
1 88
1 88
1 88
1 88
1 88
1 88
1 89
1 90
1 90
1 90
1 87
1 88
1 88
1 88
1 88
1 88
1 88
1 88
1 88
1 87
1 87
1 85
1 84
1 81
1 81
1 82
1 82
1 83
1 83
1 83
1 83
1 82
1 80
1 77
1 79
1 87
1 86
1 88
1 88
1 88
1 88
1 88
1 88
1 88
1 88
1 86
1 86
1 86
1 86
1 86
1 86
1 86
1 86
1 86
1 86
1 86
1 86
1 86
1 86
1 83
1 81
1 80
0 73
0 73
0 72
0 72
0 29
0 28
0 29
0 29
0 28
0 28
0 27
0 27
0 27
0 27
0 27
0 27
0 26
0 25
0 24
0 25
0 25
0 27
0 29
0 29
0 29
0 29
0 29
0 29
0 29
0 31
0 32
1 35
1 38
1 38
1 38
1 38
1 41
1 41
1 41
1 44
1 44
1 45
1 45
1 49
1 49
1 45
1 34
1 32
1 31
1 31
1 31
1 31
1 38
1 38
1 39
1 39
1 39
1 39
1 39
1 39
1 39
1 39
1 39
1 39
1 39
1 39
1 39
1 41
1 42
1 42
1 42
1 42
1 42
1 42
1 42
1 43
1 47
1 49
1 49
1 51
1 65
1 66
1 66
1 71
1 73
1 75
1 77
1 77
1 77
1 77
1 77
1 77
1 76
1 74
1 74
1 71
1 71
1 70
1 70
1 70
1 70
1 70
1 68
1 68
0 65
0 63
0 63
0 64
0 64
0 61
0 60
0 60
0 57
0 57
0 57
0 57
0 53
0 54
0 54
0 54
0 55
0 56
0 56
0 56
0 56
0 49
0 49
0 48
0 48
0 48
0 48
0 48
0 48
0 48
0 49
1 48
2 48
2 49
2 49
2 49
2 46
2 46
2 51
4 277
5 306
5 338
5 391
5 403
5 409
5 404
5 414
5 419
5 413
5 427
5 426
5 429
5 428
5 434
5 444
5 453
5 538
5 584
5 609
5 614
5 617
5 623
5 624
5 624
5 624
5 625
6 628
7 631
7 632
7 632
7 632
7 632
7 631
7 630
7 630
7 634
7 639
7 640
7 640
7 645
7 647
7 647
7 650
7 650
7 650
7 679
7 681
7 709
7 715
7 731
7 733
7 732
7 732
7 732
7 732
7 732
7 732
5 732
5 732
5 732
5 732
5 732
5 732
5 731
5 733
5 733
5 733
4 733
3 731
4 730
4 730
4 722
2 419
1 406
1 386
1 378
1 370
1 365
1 365
1 356
1 351
1 350
1 326
1 325
1 322
1 316
1 308
1 298
1 287
1 190
1 151
1 128
1 126
1 125
1 118
2 118
2 117
2 117
2 117
3 116
3 115
3 115
3 115
3 115
3 115
3 117
3 117
3 115
3 113
3 106
3 106
3 106
3 99
3 99
3 99
3 95
3 95
3 95
3 67
3 61
3 35
3 28
3 10
3 9
3 9
4 9
4 9
4 9
4 9
4 9
4 9
4 9
4 9
4 9
4 9
4 9
4 9
4 7
4 7
4 7
4 7
4 8
2 8
2 8
2 9
2 9
4 9
4 9
4 7
4 7
4 6
4 6
4 6
4 6
4 7
4 7
4 7
4 7
4 7
4 7
4 7
4 7
4 7
4 7
4 7
3 6
3 6
3 6
3 7
3 10
3 10
8 21
8 20
8 20
8 20
8 21
8 21
8 21
8 19
8 19
8 19
8 19
8 19
8 19
8 19
8 19
8 20
8 20
8 20
8 20
8 20
8 20
8 20
8 20
8 20
8 20
7 20
7 20
7 20
7 20
7 20
7 20
7 20
7 20
7 20
7 20
7 20
7 20
7 20
7 20
7 20
7 20
7 20
8 20
8 19
8 19
8 20
8 19
8 19
6 19
6 19
6 19
6 19
6 19
6 19
6 19
6 18
6 18
6 18
6 18
6 18
6 18
6 18
6 18
6 18
6 18
6 18
6 18
6 18
6 18
6 18
6 17
6 14
5 14
1 2
1 2
1 2
1 2
1 2
2 3
2 4
2 4
2 3
2 3
2 3
2 3
2 3
2 3
2 3
2 3
2 3
2 3
2 3
2 3
2 3
2 3
2 3
2 3
2 3
2 3
3 3
3 3
3 3
3 3
3 3
3 3
3 3
3 3
3 3
3 3
3 3
3 3
3 3
3 3
3 3
2 3
1 3
1 4
1 4
1 3
1 3
1 3
1 3
1 3
1 3
1 3
1 3
1 3
1 3
1 3
1 3
1 3
1 3
1 3
1 3
1 3
1 3
1 3
1 3
1 3
1 3
1 3
1 3
1 3
1 3
1 3
1 3
1 3
1 3
1 8
1 8
1 7
0 6
0 6
0 6
0 6
0 6
0 6
0 6
0 6
0 6
0 6
1 6
1 6
1 6
1 6
1 6
1 6
2 7
2 7
2 7
2 7
2 7
2 7
3 10
3 10
3 10
3 10
3 10
3 10
3 10
2 10
2 10
2 10
2 10
2 10
2 10
2 10
2 10
2 10
2 9
2 9
2 9
2 9
2 9
2 9
2 9
2 9
2 9
2 9
2 9
2 9
2 9
2 9
2 9
2 9
2 9
2 9
2 9
2 9
2 9
2 9
2 9
2 9
2 9
2 9
2 9
2 9
2 9
2 9
2 9
2 9
2 4
2 4
2 4
2 5
2 5
2 5
2 5
2 5
2 5
2 5
2 5
2 5
2 5
2 5
2 5
2 7
2 7
2 8
2 11
1 10
1 10
1 10
1 9
1 9
1 9
0 11
0 11
0 11
0 12
0 12
0 14
0 14
0 14
0 14
0 14
0 14
0 14
0 14
0 14
0 14
0 14
0 14
0 14
0 14
0 15
0 15
0 15
0 16
0 16
0 16
0 16
0 16
0 20
1 34
1 44
1 46
1 46
1 46
1 46
1 46
1 46
1 46
1 46
1 46
1 46
1 46
1 46
1 46
1 46
1 46
1 46
1 46
1 46
1 46
1 46
1 46
1 45
1 45
1 45
1 45
1 45
1 45
1 45
1 45
1 45
1 45
1 45
1 46
1 44
1 43
1 48
1 48
1 54
1 57
1 57
1 57
1 57
1 57
1 53
1 57
1 57
1 59
1 59
1 59
1 60
1 60
1 60
1 60
1 61
1 63
1 95
1 96
1 99
1 100
1 100
1 100
1 100
1 99
1 99
1 99
1 105
1 106
2 109
2 109
2 110
2 106
1 94
1 86
1 91
1 91
1 91
1 91
1 91
1 91
1 91
1 91
1 90
1 90
1 90
1 90
1 90
1 90
1 90
1 90
1 90
1 90
1 90
1 90
1 90
1 90
1 90
1 90
1 90
1 90
1 90
1 91
1 91
1 91
1 91
1 92
1 91
2 92
2 90
2 87
2 84
2 79
2 93
2 95
2 100
2 105
2 105
2 105
2 102
2 101
2 98
2 100
2 99
2 99
3 108
3 108
5 168
6 168
8 172
8 141
8 142
8 138
8 139
8 139
8 137
12 172
12 174
12 176
12 178
12 172
12 171
11 172
11 171
11 173
11 173
17 260
18 269
18 270
18 272
18 273
18 272
18 272
18 275
18 275
18 275
18 275
18 275
18 275
18 276
19 276
19 276
19 276
19 285
19 285
19 285
19 285
19 285
19 285
19 285
19 285
19 285
19 284
19 285
19 285
19 284
19 284
19 291
20 301
20 304
20 305
19 304
19 306
19 306
19 306
19 306
19 281
19 277
19 280
27 398
27 398
27 398
27 396
27 397
27 397
27 395
27 395
27 398
26 389
25 387
21 320
21 318
21 324
21 343
21 356
21 364
21 364
21 364
21 365
17 326
17 324
17 323
17 323
17 323
17 323
17 320
17 319
17 317
17 309
31 357
29 355
29 357
29 357
29 357
29 362
35 543
35 553
35 602
37 645
38 659
38 668
38 670
39 687
41 689
41 690
41 696
41 687
41 687
41 687
41 688
41 689
41 702
41 702
41 702
41 702
41 702
41 705
41 707
41 707
41 707
40 691
40 688
40 750
40 750
40 750
40 750
39 750
38 750
39 753
39 752
39 752
39 746
33 611
33 611
33 611
33 595
34 595
34 595
34 595
34 597
34 593
34 592
34 591
34 590
34 592
34 585
34 558
34 528
34 514
34 512
34 512
34 515
34 518
34 518
34 518
34 519
34 521
34 563
34 570
33 590
33 590
33 589
12 461
12 486
12 484
12 484
13 483
6 409
5 260
4 244
4 238
4 226
4 219
4 219
4 219
3 206
3 206
3 207
3 209
3 209
9 280
9 280
9 279
10 278
10 272
10 271
10 276
10 275
10 280
11 299
11 299
11 300
12 306
13 312
13 312
14 257
14 263
14 262
14 265
14 264
14 264
13 262
13 262
13 262
13 261
13 261
13 261
13 261
13 261
12 261
12 260
12 260
12 260
12 259
12 257
12 257
12 256
12 258
12 257
12 263
12 264
12 353
12 413
12 415
12 422
12 425
12 427
12 431
12 428
12 425
12 382
12 362
12 352
12 347
12 346
12 346
12 318
12 318
12 318
11 318
11 312
11 310
11 310
11 310
11 310
11 310
11 310
11 307
11 306
11 306
11 303
11 304
11 303
2 227
2 227
2 224
2 223
2 223
0 217
0 217
0 216
0 212
0 200
0 202
0 204
0 204
0 202
0 203
0 196
0 193
0 193
0 192
0 192
0 192
0 192
0 194
0 194
0 194
0 194
0 194
0 194
0 194
0 194
0 194
0 194
0 195
0 195
0 195
0 195
0 195
0 193
0 190
0 190
0 209
0 113
0 56
0 49
0 47
0 47
0 47
0 46
0 46
0 45
0 44
0 46
0 48
0 51
0 51
0 51
0 51
0 51
0 51
0 51
0 51
0 51
0 51
0 51
0 59
0 80
0 95
0 96
0 126
0 127
0 127
0 126
0 127
0 150
0 162
0 182
0 188
0 194
0 196
0 196
0 198
0 198
0 198
0 197
0 202
0 201
0 204
0 204
0 205
0 205
0 205
0 205
0 205
0 205
0 205
0 206
0 206
0 206
0 206
0 206
0 206
0 206
0 206
0 205
0 205
0 204
0 205
0 205
0 204
0 204
0 204
0 204
1 204
1 172
1 144
1 144
1 141
1 141
1 137
1 136
1 136
2 139
2 139
2 138
2 134
2 128
2 123
2 123
2 123
2 123
2 121
2 121
2 121
2 121
2 121
2 121
2 121
2 121
2 119
2 105
2 105
2 87
3 87
3 87
3 87
3 87
3 57
3 46
3 28
3 28
3 28
3 28
3 28
3 28
3 28
3 28
3 27
3 17
3 8
3 6
3 6
3 6
3 6
3 6
3 6
3 6
3 6
3 6
3 3
3 3
3 3
3 3
4 3
4 3
4 3
4 3
4 3
4 3
4 3
4 2
4 2
4 2
4 2
4 2
4 3
8 3
9 6
10 6
10 6
10 6
10 6
34 25
34 26
34 27
33 26
72 73
72 74
73 82
78 85
78 85
108 89
108 92
108 92
109 92
124 92
151 122
155 128
159 129
159 132
163 133
165 133
165 133
165 133
165 133
165 133
164 133
170 134
170 134
170 134
170 134
170 137
170 137
170 137
170 137
170 137
170 137
170 137
170 137
170 137
170 137
171 137
171 137
171 137
171 137
171 137
171 137
171 137
171 137
171 137
171 137
171 137
171 137
171 137
171 137
171 137
170 137
170 137
170 137
170 137
170 137
170 137
169 138
169 145
169 145
169 146
169 146
163 146
163 145
129 140
103 116
97 116
97 116
97 116
97 116
97 117
97 116
96 114
36 85
23 51
23 51
23 51
23 51
20 51
20 51
20 51
18 51
18 51
6 50
3 18
2 18
2 18
2 17
1 17
3 20
3 20
3 20
3 20
3 20
3 23
3 22
3 44
3 49
3 49
3 49
3 49
3 49
3 49
3 50
3 50
3 50
3 50
3 50
3 50
3 50
3 50
4 50
4 50
4 50
4 50
4 50
4 50
4 50
4 52
4 52
4 52
4 52
4 52
4 53
4 53
4 53
4 53
4 54
4 60
4 60
4 59
4 52
4 52
4 51
4 51
4 51
4 51
4 51
4 52
4 52
4 52
4 52
4 52
4 54
4 57
4 59
4 59
4 59
4 59
4 59
2 59
2 66
2 70
2 70
1 70
1 70
1 70
1 69
1 69
1 69
1 69
1 65
1 66
1 66
1 66
1 72
1 72
0 69
0 69
0 48
0 42
0 42
0 39
0 39
0 39
0 39
0 39
0 39
0 39
0 39
0 39
0 39
0 39
0 39
0 39
0 39
0 39
0 39
0 39
0 39
0 39
0 37
0 37
0 37
0 38
0 37
0 37
0 37
0 38
0 54
0 53
0 47
0 46
0 46
0 46
0 46
0 46
0 46
0 46
0 46
0 46
0 46
0 46
0 46
0 46
0 52
0 49
0 45
0 46
0 46
0 46
0 45
0 45
0 40
0 38
0 35
0 35
0 35
0 35
0 35
0 35
0 35
0 35
0 36
0 36
0 35
0 35
0 35
0 29
0 29
0 29
0 29
0 28
0 28
0 28
0 28
0 28
0 28
0 28
0 28
0 28
1 28
1 28
2 32
2 32
2 32
2 32
2 32
2 32
2 32
2 32
2 32
2 32
2 32
2 32
2 34
2 34
2 34
2 35
2 37
2 37
2 33
2 20
2 20
2 20
2 20
2 20
2 20
2 20
2 20
2 20
2 21
2 25
2 31
2 40
2 46
2 48
2 54
2 54
2 57
2 64
2 76
2 102
2 104
2 104
2 105
2 106
2 106
0 106
0 106
0 106
0 108
0 108
0 108
0 108
0 108
0 107
0 106
0 106
0 106
0 106
0 108
0 108
0 108
0 108
0 108
0 108
0 108
0 108
0 108
0 108
0 108
0 108
0 109
0 109
0 110
0 107
0 107
0 107
0 108
0 117
0 117
0 117
0 117
0 119
0 120
0 123
0 126
0 124
0 124
0 124
0 123
0 121
0 121
0 121
0 121
0 121
0 121
0 122
0 122
0 122
0 122
0 124
0 124
0 124
0 119
0 113
0 108
0 104
0 104
0 103
0 95
0 118
0 112
0 91
0 70
0 67
0 67
0 67
0 66
0 66
0 66
0 68
0 69
0 69
0 69
0 69
0 69
0 70
0 70
0 71
0 71
0 71
0 71
0 70
0 70
0 70
0 70
0 70
0 71
0 72
0 72
0 72
0 72
0 72
0 72
0 72
0 72
0 71
0 70
0 70
0 70
0 69
0 57
0 50
0 50
0 48
0 48
0 46
0 44
0 42
0 42
0 42
0 42
0 42
0 42
0 42
0 40
0 40
0 40
0 40
0 38
0 38
0 37
0 37
0 39
0 39
0 39
0 37
0 35
0 34
0 33
0 34
0 35
0 33
0 13
0 13
0 13
0 13
0 13
0 15
0 15
0 15
0 15
0 15
0 13
0 13
0 15
0 15
0 16
0 16
0 15
0 15
0 14
0 14
0 14
0 14
0 14
0 14
0 14
0 14
0 14
0 13
0 12
0 12
0 12
0 12
0 12
0 12
0 12
0 12
0 12
0 12
0 12
0 12
0 12
0 12
0 12
0 12
0 12
0 12
0 12
0 12
0 12
0 12
0 12
0 12
0 12
0 12
0 12
0 12
0 21
0 21
0 21
0 21
0 21
0 21
0 21
0 19
0 19
0 19
0 19
0 19
0 19
0 19
0 18
0 17
0 17
0 17
0 17
0 17
0 19
0 19
0 18
0 18
0 18
0 18
0 19
0 18
0 16
0 14
0 14
0 13
0 13
0 13
0 13
0 13
0 13
0 13
0 13
0 13
0 13
0 13
0 13
0 13
0 13
0 14
0 20
0 21
0 21
0 23
0 23
0 23
0 23
0 23
0 23
0 23
0 23
0 23
0 23
0 24
0 24
0 24
0 24
0 24
0 24
0 24
0 24
0 24
0 24
0 24
0 24
0 24
0 24
0 15
0 15
0 15
0 15
0 15
0 18
0 18
0 18
0 18
0 18
0 18
0 21
0 21
0 21
0 21
0 21
0 21
0 21
0 21
0 21
0 19
0 18
0 18
0 18
0 18
0 17
0 17
0 17
0 17
0 17
0 17
0 17
0 17
0 17
0 17
0 17
0 17
0 17
0 17
0 19
0 19
0 39
0 77
0 83
0 84
0 83
0 76
0 77
0 77
0 77
0 78
0 79
0 80
0 81
0 81
0 81
0 80
0 80
0 80
0 80
0 80
0 80
0 80
0 80
0 80
0 80
0 80
175 80
217 80
237 80
245 80
246 80
247 80
247 80
247 80
249 80
264 81
286 81
294 78
297 81
299 81
299 81
299 81
299 81
299 78
299 78
299 78
299 78
299 78
299 78
299 78
299 78
299 78
299 78
299 78
298 78
296 78
294 78
292 77
292 95
295 158
290 183
288 190
288 190
289 190
289 190
289 190
289 190
289 190
289 190
289 190
289 189
289 188
289 188
289 161
287 127
267 123
266 122
242 122
240 122
234 122
204 122
180 121
155 119
155 118
155 118
155 117
155 117
155 117
156 117
156 117
155 117
160 117
158 117
160 117
162 117
160 117
138 117
114 117
105 117
72 117
71 117
66 117
64 117
63 117
61 117
61 117
61 117
61 117
61 116
55 116
50 115
49 113
49 113
49 113
49 113
49 113
50 113
51 113
51 113
51 113
52 113
52 113
52 113
53 113
53 113
54 113
58 113
58 113
58 113
58 113
59 111
60 88
57 6
59 1
62 1
62 1
62 1
62 1
62 1
62 1
63 1
64 1
65 1
84 1
96 1
123 1
130 1
132 1
158 1
158 1
158 1
158 1
158 1
159 1
159 1
159 1
158 1
160 1
162 2
163 2
163 2
168 2
172 2
279 2
278 2
296 2
319 2
335 2
361 2
359 2
358 2
358 2
332 2
333 2
333 2
336 2
336 2
340 2
347 2
355 2
358 2
374 2
374 2
555 1
560 1
560 1
580 1
589 1
590 1
589 1
590 1
592 1
593 1
594 1
595 1
595 1
595 1
594 1
593 3
595 3
593 3
594 3
594 3
593 3
593 3
592 3
589 3
589 3
589 3
589 3
589 3
590 3
591 3
609 3
629 3
830 4
815 4
829 4
811 4
808 4
809 4
786 4
786 4
791 4
812 4
821 4
823 4
825 4
826 4
825 3
866 3
861 3
853 3
854 3
846 3
841 3
730 3
708 3
689 1
660 1
643 1
614 1
615 1
609 1
610 1
610 1
604 1
604 1
601 1
599 1
597 1
591 1
588 1
586 1
586 1
586 1
421 1
419 1
435 1
431 1
423 1
422 1
422 1
422 1
419 1
419 1
419 1
419 1
420 1
427 1
436 1
445 2
444 2
446 2
462 2
466 2
466 2
468 2
469 2
470 2
470 2
471 2
473 2
474 2
473 2
463 2
445 6
429 6
231 5
217 5
201 5
195 5
195 5
195 6
199 6
196 6
190 6
182 7
178 7
177 7
173 7
170 7
180 7
147 8
148 8
147 8
144 8
144 8
147 8
233 8
386 9
388 9
389 9
389 9
389 9
387 9
384 9
384 9
384 9
384 9
385 9
385 9
386 9
386 9
386 9
388 9
391 9
400 9
406 9
405 9
405 9
390 9
385 9
384 9
384 9
384 9
385 9
386 9
386 9
386 9
386 9
386 10
371 10
360 10
359 9
369 9
370 9
354 9
352 9
352 9
361 9
360 9
360 9
359 9
359 9
359 9
358 8
362 8
362 8
358 4
360 4
363 4
365 4
365 4
382 5
419 6
806 7
822 7
830 7
831 7
820 6
819 6
818 6
815 5
813 5
808 5
804 5
805 5
807 5
808 5
808 5
795 5
723 5
573 4
572 4
572 4
572 4
572 4
570 4
570 4
571 4
571 4
571 6
571 6
573 6
574 6
577 11
579 11
575 11
578 11
570 11
566 11
609 11
615 11
616 11
628 12
628 12
629 12
633 11
633 11
644 11
644 11
647 11
664 11
673 11
740 11
900 11
1247 11
1245 11
1244 11
1255 11
1265 11
1330 11
1407 11
1414 11
1416 11
1418 11
1418 11
1417 11
1421 11
1428 11
1440 11
1463 10
1617 10
1618 10
1953 12
1993 12
1987 12
1975 12
1616 9
1627 9
1646 9
1722 9
1822 7
1839 7
1843 7
1843 7
1849 7
1941 8
1943 8
1943 8
1943 8
1943 8
1956 8
1961 8
1975 8
1976 8
1976 8
1978 8
1978 8
1980 8
1979 8
1981 8
1981 8
1981 8
1981 8
1989 8
1988 8
1988 8
1985 5
1991 5
1994 5
1986 5
1978 5
1967 5
1888 5
1883 5
1844 5
1816 4
1814 4
1792 4
1790 4
1790 4
1786 4
1783 4
1778 4
1764 4
1745 4
1628 4
1627 4
1309 4
1306 4
1303 4
1288 4
1269 4
1220 4
1128 4
1119 4
1116 4
1109 4
1107 4
1107 5
1095 5
1080 5
1063 5
1036 5
874 5
846 5
445 2
416 2
407 2
354 2
344 2
324 2
307 2
292 2
221 2
208 1
202 2
180 1
180 1
111 1
109 1
112 1
110 1
107 1
92 1
88 1
77 1
77 1
89 1
89 1
89 1
92 1
99 1
99 1
100 1
101 1
116 1
112 1
112 1
113 1
113 1
136 1
156 1
156 1
158 1
162 1
193 1
214 1
515 1
518 1
522 1
522 1
522 1
522 1
522 1
522 1
524 1
529 1
531 1
531 1
480 1
480 1
479 1
479 1
485 1
598 1
726 1
1040 3
1090 3
1093 3
1096 3
1101 4
1107 4
1108 4
1165 4
1166 4
1171 4
1179 4
1183 4
1183 4
1183 4
1183 4
1184 4
1184 4
1186 4
1186 4
1187 4
1188 4
1191 4
1194 3
1198 3
1198 3
1199 3
1197 3
1193 3
1195 3
1195 3
1199 3
1199 3
1201 3
1202 3
1205 3
1209 3
1215 3
1204 3
1217 3
1217 3
1217 3
1215 3
1198 3
1197 3
1192 3
1189 3
1181 3
1147 3
1130 3
1124 3
1120 3
1136 3
1130 3
1100 3
827 3
825 3
825 3
827 3
827 3
827 3
828 3
828 3
823 3
821 3
821 3
810 3
810 3
802 3
674 3
654 3
605 3
479 3
430 3
198 1
193 1
183 0
199 0
202 0
199 0
198 0
144 0
145 0
140 0
137 0
136 0
136 0
137 0
137 0
137 0
137 0
137 0
137 0
137 0
135 0
133 0
132 0
132 0
132 0
131 0
130 0
132 0
137 0
138 0
133 0
131 0
125 0
123 0
114 0
111 0
107 0
107 0
95 0
95 0
96 0
96 0
96 0
96 0
121 0
121 0
128 0
137 1
138 1
138 1
137 1
114 1
101 1
96 1
96 1
96 1
115 1
116 1
115 1
116 1
116 1
116 1
116 1
114 1
114 1
121 2
125 2
123 2
130 2
129 2
129 2
130 2
130 2
127 2
127 2
125 2
108 2
100 2
101 2
101 2
101 2
98 2
94 2
96 2
96 2
100 2
104 2
108 2
110 2
111 2
110 2
109 2
110 2
110 2
110 2
110 2
110 2
110 2
110 2
109 2
109 2
105 2
105 2
105 2
107 2
107 2
108 2
110 2
110 2
110 2
110 2
118 2
136 2
160 2
161 2
161 2
172 2
146 2
144 1
143 1
134 1
135 1
136 1
136 1
138 1
138 1
139 1
140 1
144 1
132 1
133 1
133 1
135 1
135 1
135 1
135 1
135 1
135 1
128 0
124 0
125 0
120 0
120 0
120 0
119 0
119 0
119 0
120 0
120 0
126 0
125 0
125 0
127 0
127 0
188 0
189 0
188 0
187 0
183 0
179 0
177 0
175 0
175 0
175 0
174 0
196 0
196 0
196 0
197 0
197 0
197 0
197 0
197 0
198 0
199 0
197 0
220 0
225 0
229 0
242 0
246 0
260 0
260 0
261 0
253 0
239 0
217 0
217 0
219 0
210 0
211 0
255 1
256 1
257 1
259 1
263 1
267 1
286 1
289 1
287 1
287 1
283 1
278 1
276 1
279 1
276 1
275 1
275 1
275 1
276 1
279 1
279 1
279 1
279 1
277 1
277 1
276 1
275 1
277 1
277 1
277 1
277 1
272 1
272 1
271 1
274 1
276 1
217 1
215 1
213 1
238 1
240 1
241 1
313 2
336 2
352 2
355 2
356 2
335 2
335 2
335 2
335 2
348 2
350 2
347 2
347 2
352 2
351 2
352 2
331 2
323 2
317 2
305 2
305 2
338 2
346 2
425 2
440 2
807 2
812 2
814 2
826 2
832 2
842 2
798 1
798 1
798 1
796 1
792 1
789 1
774 1
773 1
772 1
771 1
773 1
778 1
779 1
776 1
775 1
776 1
778 1
777 1
774 1
774 1
784 1
804 1
1345 2
1366 2
1472 3
1489 3
1495 3
1493 3
1493 3
1492 3
1493 3
1492 3
1492 3
1495 3
1850 5
2078 5
2098 5
2103 5
2125 5
2103 5
2108 5
2095 4
1988 4
1947 4
1927 4
1922 4
1886 4
1888 4
1890 4
1890 4
1897 2
1965 2
1967 3
1967 3
1972 3
1968 3
1971 5
1995 5
2016 5
2040 6
2104 6
2224 6
2263 6
2391 6
2443 6
2421 6
2511 6
2221 6
2251 6
2412 6
2394 6
2397 6
2392 6
2415 6
2416 6
2417 6
2420 6
2421 6
2418 6
2414 6
2415 6
2415 6
2415 6
2413 6
2408 6
2408 6
2407 6
2406 6
2407 6
2414 6
2414 6
2420 7
2430 7
2418 7
2398 7
1869 6
1843 6
1738 5
1740 5
1726 5
1733 5
1735 5
1734 5
1733 5
1734 5
1734 5
1713 5
1378 5
1168 5
1157 5
1155 5
1135 5
1125 5
1122 5
1123 5
1126 5
1128 5
1145 5
1154 5
1154 5
1151 5
1134 5
1136 5
1130 5
1074 4
1073 4
1096 3
1099 3
1124 3
1126 1
1067 1
1027 1
1000 1
941 1
819 1
793 1
596 1
557 1
515 1
448 1
749 3
764 3
612 4
613 4
612 4
612 4
594 4
590 4
590 4
588 4
588 4
588 4
588 4
588 4
589 4
589 4
589 4
590 4
590 4
593 4
591 4
596 4
589 4
588 4
581 3
565 3
561 3
562 3
561 3
561 3
559 3
550 3
549 3
541 3
541 4
541 4
541 4
540 4
538 4
538 4
536 4
535 4
539 4
548 4
553 4
574 4
573 4
683 4
700 4
700 4
685 4
742 5
744 5
745 5
741 5
731 5
721 5
722 5
726 5
705 5
698 5
677 5
664 5
663 5
664 5
664 5
664 5
663 5
664 5
663 5
618 5
613 5
604 5
303 3
293 3
291 2
290 2
282 2
282 2
282 2
282 2
282 2
282 2
282 2
282 2
282 2
284 2
284 2
284 2
284 2
284 2
284 2
284 2
284 2
282 2
282 2
281 2
281 2
281 2
283 2
286 2
286 2
297 2
298 2
300 2
300 2
300 2
304 1
306 1
306 1
306 1
308 1
314 1
366 1
514 1
558 1
568 1
555 1
555 1
588 1
493 1
480 1
474 1
473 1
417 0
418 0
418 0
416 0
415 0
417 0
418 0
412 0
413 0
414 0
416 0
416 0
419 0
424 0
424 0
424 0
424 0
425 0
426 0
425 0
424 0
424 0
428 0
428 0
433 0
433 0
434 1
452 1
454 1
454 2
459 2
460 2
461 2
470 4
475 6
460 6
460 6
460 6
460 6
445 6
445 6
445 6
445 6
445 6
557 7
562 7
569 7
571 7
699 11
695 11
676 11
660 11
649 11
647 11
634 11
637 11
624 11
627 11
611 11
623 11
647 11
660 11
814 11
1226 13
1313 15
1367 15
1360 13
1343 13
1303 13
1287 13
1288 13
1288 13
1287 13
1293 14
1298 14
1299 14
1299 14
1299 14
1299 14
1297 14
1296 14
1293 14
1292 14
1290 14
1290 14
1289 14
1288 14
1288 14
1288 14
1288 14
1288 14
1288 14
1288 14
1288 14
1287 14
1283 14
1283 14
1276 13
1265 13
1243 13
894 12
846 11
498 11
444 11
348 10
336 10
198 7
193 7
38 4
36 4
35 4
35 5
34 5
34 14
38 14
38 14
37 14
37 14
37 14
37 14
37 14
22 11
21 14
21 14
20 15
20 15
21 17
21 17
21 26
19 30
19 34
19 37
18 43
17 54
17 104
15 198
14 249
13 284
14 314
14 339
15 379
15 402
15 443
15 450
15 453
15 456
15 460
19 479
20 483
21 485
21 490
21 490
24 497
24 497
24 497
25 497
32 498
32 498
31 498
33 498
41 498
41 499
41 499
41 499
41 499
41 499
41 503
41 503
41 504
41 505
47 537
47 537
47 547
47 552
48 775
49 815
51 832
52 843
52 845
54 855
54 851
54 853
54 851
54 852
55 852
55 852
52 845
49 847
49 850
50 852
51 846
51 846
51 847
51 847
49 847
49 847
49 848
49 848
48 848
48 846
48 843
48 833
48 829
48 823
49 818
48 815
48 790
48 720
46 591
46 534
46 522
46 507
46 504
45 462
45 457
45 416
45 412
45 411
45 407
45 406
41 389
40 382
39 381
37 378
39 376
36 370
34 370
34 370
34 370
28 369
27 369
27 369
25 369
18 369
18 369
18 369
18 369
18 369
18 369
19 369
19 369
23 370
22 368
17 339
16 339
16 328
16 321
16 90
15 34
13 27
13 26
13 27
12 23
12 25
16 39
16 39
16 38
16 41
16 41
16 36
16 32
15 32
14 31
14 31
14 31
14 31
14 31
14 31
14 31
14 31
14 31
14 31
14 31
14 31
14 31
14 31
13 31
14 31
14 31
14 31
14 34
20 35
52 101
55 103
60 107
61 107
61 107
75 111
77 114
77 115
77 123
80 123
80 123
80 122
80 120
82 120
82 120
80 120
80 120
80 120
80 120
80 120
80 121
80 121
80 121
80 121
80 121
80 121
80 121
80 121
85 121
89 121
88 121
88 121
83 117
83 117
82 117
82 116
82 116
82 119
82 124
82 125
82 130
82 134
82 136
82 137
82 134
79 120
79 121
79 121
79 121
79 121
79 121
79 121
79 122
79 122
79 122
79 122
79 122
79 122
79 124
79 124
79 124
79 124
79 124
79 124
79 124
79 124
79 124
78 124
77 124
76 124
73 124
66 121
54 117
27 52
26 50
19 46
8 43
5 43
3 42
3 39
3 37
3 30
0 30
0 30
0 30
0 30
0 30
0 30
0 30
0 30
0 30
0 30
0 30
0 29
0 29
0 29
0 29
0 29
0 29
0 30
0 30
0 30
0 30
0 30
0 30
0 30
0 30
0 32
1 33
1 34
1 34
1 30
1 29
1 23
1 20
1 16
1 14
1 14
1 14
1 13
1 13
1 13
1 13
1 13
1 13
2 14
2 14
2 14
2 14
2 14
2 14
2 12
2 12
2 12
2 12
2 12
2 12
2 12
2 12
2 12
2 12
2 12
2 12
2 13
2 13
2 14
2 14
2 14
2 14
2 14
2 14
2 15
2 15
2 15
2 15
2 15
2 15
2 15
2 15
2 15
2 15
2 15
2 16
3 22
4 22
4 22
4 24
4 24
4 24
4 24
4 24
4 24
4 25
4 25
4 26
4 26
4 27
4 27
4 28
4 27
4 26
3 26
3 23
3 20
3 20
3 20
3 19
3 21
3 21
3 21
3 21
3 21
3 21
3 21
3 21
3 21
3 21
3 21
2 19
2 19
2 19
2 19
2 19
2 19
2 19
2 19
2 19
2 19
2 19
2 19
2 19
2 19
2 19
2 19
2 19
2 20
2 19
2 18
2 18
2 18
2 18
2 18
2 18
2 18
2 17
2 17
2 17
2 17
2 17
2 17
2 16
2 16
1 16
0 16
0 16
0 15
0 9
0 9
0 9
0 7
0 7
0 7
0 25
0 26
0 27
0 27
0 42
0 53
0 59
0 59
0 59
0 59
0 59
0 59
0 59
0 59
0 59
0 59
0 59
0 59
0 57
0 57
0 57
0 57
0 58
0 58
0 58
0 58
0 59
0 60
0 60
0 60
0 60
0 60
0 60
0 60
0 60
0 60
0 60
0 60
0 60
0 60
0 60
0 60
0 60
0 60
0 60
0 60
0 60
0 60
0 60
0 60
0 61
0 61
0 61
0 61
0 61
0 62
0 62
0 62
0 62
0 62
0 62
0 62
0 62
0 62
0 62
0 62
0 62
0 60
0 60
0 60
0 60
0 60
0 60
0 35
0 30
0 20
1 12
1 6
1 6
1 16
1 16
1 16
1 16
1 16
1 16
1 16
1 16
1 17
1 17
1 17
2 20
2 20
2 20
2 20
2 20
2 19
2 19
2 19
2 19
2 18
2 17
2 17
2 17
2 17
3 18
3 19
3 19
3 20
3 20
3 20
3 20
3 20
3 20
3 20
3 22
3 22
3 22
3 22
3 22
3 22
3 21
3 24
3 24
3 24
3 24
3 24
3 23
3 23
3 23
3 23
3 23
3 24
3 24
3 25
3 25
3 25
3 27
3 27
3 27
3 27
1 27
1 27
1 27
1 27
1 27
1 27
1 27
1 27
1 27
1 27
1 27
1 27
1 16
1 16
1 16
1 16
1 16
1 16
1 15
1 15
1 15
1 15
1 15
1 12
1 12
1 12
1 12
1 12
1 12
1 12
1 12
1 12
1 12
1 12
1 12
1 12
1 12
1 12
1 11
1 11
1 10
1 10
1 10
1 10
1 10
1 10
1 9
1 8
1 8
1 8
1 8
1 8
1 8
1 8
1 5
1 6
1 6
1 6
1 6
1 6
1 6
1 6
1 6
1 6
1 5
1 4
1 4
1 6
1 6
1 4
1 4
1 4
1 4
1 4
1 4
1 4
1 5
1 7
1 7
1 7
1 15
1 17
0 17
0 20
0 20
0 21
0 21
0 21
0 21
0 23
0 23
0 23
0 23
0 23
0 23
0 23
0 23
0 23
0 23
0 23
0 23
0 23
0 23
0 23
0 23
0 23
0 23
0 23
0 23
0 23
0 22
2 26
2 26
2 26
2 26
2 26
2 26
2 26
2 26
2 26
2 26
2 26
2 26
2 26
2 26
2 26
2 26
2 26
2 25
2 28
2 28
2 28
2 28
2 28
2 29
2 29
2 29
2 29
2 29
2 29
2 27
2 29
2 29
2 29
2 29
2 29
2 29
2 29
2 29
2 29
2 28
2 30
2 30
2 21
2 20
2 20
2 18
2 17
2 17
2 18
2 18
2 18
2 16
2 17
2 17
2 17
2 17
2 17
2 17
2 17
2 17
2 17
2 17
2 17
2 17
2 18
2 18
2 18
2 18
2 18
2 18
1 18
1 18
1 18
0 13
0 13
0 13
0 13
0 12
0 12
0 12
0 12
0 12
0 12
0 12
0 12
0 12
0 12
0 12
0 12
0 12
0 12
0 10
0 10
0 10
0 10
0 10
0 9
0 9
0 12
0 13
0 13
0 13
0 13
0 11
0 11
0 11
0 11
0 11
0 11
0 11
0 11
0 11
0 11
0 10
0 10
0 10
0 9
0 10
0 10
0 11
0 11
0 10
0 10
0 10
0 10
0 9
0 9
0 10
0 10
0 13
0 53
0 70
0 70
0 77
0 77
0 81
0 81
0 81
0 81
0 81
0 81
0 81
0 81
0 81
0 81
0 81
0 81
0 81
0 81
0 81
0 81
0 81
0 81
0 81
0 81
0 81
0 82
0 82
0 82
0 82
0 82
0 82
0 82
0 83
0 82
0 82
0 82
0 82
0 107
0 107
0 108
0 107
0 106
0 106
0 106
0 106
0 106
0 106
0 107
0 107
0 109
0 110
0 110
0 111
0 112
0 111
0 112
0 112
0 111
0 111
0 111
0 111
0 110
0 110
0 110
0 110
0 110
0 110
0 110
0 110
0 109
0 108
0 104
0 59
0 39
0 39
0 39
0 39
0 37
0 37
0 38
0 38
0 38
0 38
0 38
0 39
0 39
0 39
0 40
0 43
0 43
0 43
0 44
0 44
0 44
0 44
0 44
0 44
0 45
0 44
0 46
0 46
0 45
0 45
0 45
0 45
0 45
0 45
0 45
0 45
0 45
0 20
0 20
0 17
0 17
0 18
0 19
0 20
1 24
1 24
1 24
1 23
1 23
1 19
1 19
1 19
1 17
1 17
1 17
1 17
1 51
2 53
2 54
2 54
2 55
2 55
2 55
2 55
2 55
2 55
2 55
2 55
2 55
2 55
2 55
2 55
2 55
2 55
2 55
2 55
2 55
2 54
2 54
2 53
2 53
2 53
2 53
2 53
2 53
2 53
2 53
2 53
2 49
2 49
2 49
2 59
2 60
2 64
2 65
3 81
3 84
3 83
3 84
3 83
3 83
3 87
3 87
3 87
3 87
3 87
3 87
3 87
3 87
3 87
3 87
3 87
3 87
3 86
3 85
3 83
3 82
2 79
2 79
2 79
2 79
13 80
14 80
16 80
16 80
16 80
16 81
16 81
16 81
16 36
16 34
16 23
16 22
16 21
16 21
16 20
16 20
16 20
16 20
16 20
16 20
16 20
16 20
16 20
16 20
17 21
17 21
17 21
17 21
17 29
17 30
17 32
23 32
25 33
25 33
25 33
25 33
25 33
25 33
25 33
25 33
25 34
25 34
26 34
26 34
26 34
25 31
25 30
25 17
25 16
25 18
25 18
25 20
25 20
25 20
25 20
25 20
25 20
25 20
25 20
25 20
25 20
25 21
27 21
28 21
30 21
30 21
30 21
30 21
30 21
30 21
30 21
30 21
30 21
19 20
17 20
16 20
16 21
16 22
15 21
15 23
15 23
15 24
15 24
15 24
15 24
15 24
15 24
15 24
15 24
15 24
15 24
15 24
15 24
15 24
14 24
14 27
14 27
14 27
14 29
14 29
14 29
14 21
14 21
12 19
8 18
6 17
6 17
6 17
6 17
6 17
6 18
6 18
6 18
6 18
6 18
6 18
6 20
6 20
6 20
6 20
6 20
6 20
6 18
6 18
6 16
6 16
6 16
6 16
6 16
6 16
6 16
6 16
6 16
6 16
6 15
4 15
3 15
1 17
1 17
1 17
1 17
1 18
1 18
1 18
1 18
1 18
1 18
1 18
1 18
1 16
1 15
1 15
1 14
1 13
1 13
1 13
1 13
1 13
1 13
1 13
1 13
1 13
2 13
2 13
2 13
2 13
2 13
2 13
2 10
2 10
2 11
2 9
2 9
2 9
2 9
2 8
2 8
1 8
0 8
0 8
0 8
0 8
0 8
0 7
0 7
0 7
0 7
0 7
0 7
0 5
0 5
0 5
0 5
0 5
0 5
0 5
0 5
0 5
0 6
0 6
0 7
0 7
0 8
0 9
0 10
0 21
0 22
0 27
0 27
0 27
0 27
0 27
0 27
0 27
0 26
0 26
0 27
0 27
0 27
0 27
0 27
0 27
0 27
0 28
0 28
0 28
0 28
0 28
0 28
0 28
0 28
0 28
0 28
0 28
0 29
0 31
0 31
0 31
0 31
0 31
0 31
1 31
1 31
1 29
1 29
1 29
1 29
1 29
1 29
1 29
1 29
1 29
1 29
1 29
1 29
1 29
1 29
0 29
0 30
0 30
0 30
0 30
0 30
1 32
2 33
2 33
2 33
2 33
2 33
2 32
2 32
2 32
2 32
2 31
2 30
2 29
2 26
2 26
2 15
2 13
2 9
2 8
2 8
2 8
2 8
2 8
2 8
2 8
2 8
2 7
2 7
2 7
2 6
2 6
2 6
2 6
2 6
2 7
2 9
2 9
2 9
1 9
1 9
0 9
0 9
0 8
0 8
0 6
0 6
0 6
0 6
0 6
0 6
0 6
0 6
0 6
0 6
0 6
0 6
0 6
0 6
0 6
0 6
0 7
0 7
0 7
0 7
0 7
0 7
0 7
0 7
0 7
0 7
0 7
0 7
0 7
0 4
0 4
0 4
0 4
0 4
0 4
0 4
0 4
0 4
0 4
0 4
0 4
0 4
0 4
0 4
0 11
0 11
0 11
0 11
0 21
0 21
0 26
0 35
0 39
0 39
0 40
0 42
0 42
0 43
0 43
0 43
0 43
0 43
0 43
0 42
0 40
0 40
0 40
0 40
0 40
0 40
0 40
0 40
0 40
0 40
0 40
0 40
0 40
0 40
1 40
1 41
1 41
1 41
1 41
1 41
1 41
1 41
1 41
1 41
1 40
1 40
1 40
1 40
1 40
2 41
2 41
2 41
2 41
2 41
2 41
2 41
2 41
2 41
2 41
2 41
2 41
2 41
2 41
2 41
2 41
2 41
2 41
2 41
2 41
2 41
2 40
2 40
2 40
2 34
2 34
2 34
2 34
2 24
2 24
2 14
2 8
4 7
4 7
4 7
5 5
5 5
5 4
5 4
5 4
5 4
5 4
5 4
5 4
5 4
5 4
5 4
5 4
5 4
5 5
4 5
4 7
4 7
4 7
4 9
4 9
4 9
4 9
3 9
3 8
3 8
3 8
3 8
3 8
3 8
3 8
3 8
3 8
3 8
3 8
3 8
3 8
3 8
2 7
2 7
2 7
2 7
1 7
1 7
0 7
0 7
0 7
0 7
0 7
0 7
0 7
0 7
0 7
0 7
0 7
0 7
0 7
0 7
0 7
0 7
0 7
0 7
0 7
0 7
0 7
0 7
0 7
0 7
0 6
0 5
0 5
0 5
0 6
0 9
0 9
0 9
0 9
0 9
0 9
0 9
8 9
8 9
8 9
8 9
8 9
8 9
8 9
8 5
8 5
8 4
8 4
8 4
8 4
8 4
8 4
8 4
8 4
8 4
8 4
8 6
8 6
8 6
8 6
8 6
8 6
8 6
8 6
8 6
8 6
8 6
8 6
8 6
8 6
8 6
8 6
8 6
8 6
8 6
8 6
8 6
8 6
8 6
8 6
8 6
8 6
8 6
8 6
8 6
8 6
8 6
8 6
8 6
8 6
8 6
8 6
8 6
8 6
8 6
8 6
8 6
8 6
8 6
11 6
11 6
11 6
11 5
11 2
11 2
11 2
11 2
11 2
11 2
11 2
3 2
3 2
3 2
3 2
3 2
3 2
3 2
3 2
3 2
3 2
3 2
3 2
3 2
3 2
3 2
3 2
3 2
3 2
3 2
3 0
3 0
3 0
3 0
3 0
3 0
3 0
3 0
3 0
3 0
3 0
3 0
3 0
3 0
3 0
3 0
3 0
3 0
3 0
3 0
3 0
4 0
6 0
11 0
14 0
14 0
14 0
14 0
14 0
14 0
14 0
14 0
16 0
16 0
16 0
16 0
16 0
16 0
16 0
16 0
16 0
16 0
16 0
13 0
13 0
13 0
13 0
13 0
13 0
13 0
13 0
13 0
13 0
13 0
13 0
13 0
13 0
13 0
13 0
13 0
13 0
13 0
13 0
13 0
13 0
13 0
13 0
13 0
13 0
13 0
13 0
13 0
13 0
13 0
13 0
13 0
13 0
13 0
13 0
13 0
13 0
13 0
13 0
13 0
13 0
13 0
13 0
13 0
13 0
13 0
12 1
11 1
11 1
11 1
8 1
8 1
4 1
2 1
2 1
2 1
2 1
2 1
2 1
2 1
2 1
0 1
0 1
0 1
0 1
0 1
0 1
0 1
0 1
0 1
0 1
0 1
0 1
0 1
0 1
0 1
0 1
0 1
0 2
0 2
0 2
0 2
0 2
0 2
0 2
0 2
0 2
0 2
0 2
0 2
0 2
0 2
0 2
0 2
0 2
0 2
0 2
0 2
0 2
0 2
0 2
0 2
0 2
0 2
0 2
0 2
0 2
0 4
0 4
0 4
0 4
0 4
0 4
0 4
0 4
0 3
0 3
0 3
0 3
0 3
0 3
0 3
0 3
0 3
0 3
0 3
0 3
0 3
0 3
0 3
0 4
0 4
0 4
0 4
0 4
0 4
0 4
0 4
0 4
0 4
0 4
0 5
0 5
0 5
0 5
0 4
0 4
0 4
0 4
0 3
0 3
0 3
0 3
0 3
0 3
0 3
0 3
0 3
0 3
0 3
0 3
0 3
0 3
0 3
0 3
0 3
0 3
0 3
0 3
0 3
0 3
0 3
0 3
0 3
0 3
0 3
5 4
5 4
5 4
5 4
5 2
5 2
5 2
9 2
10 2
10 2
10 2
10 2
10 2
10 2
10 2
10 2
10 2
10 3
10 3
12 3
12 3
14 3
14 3
13 3
13 3
13 3
13 3
13 3
13 3
13 3
13 3
13 3
13 3
13 3
13 3
13 3
13 3
13 3
13 2
13 2
13 2
13 2
13 2
13 2
13 2
13 2
13 2
13 2
13 2
13 2
13 2
13 2
13 2
13 2
13 2
13 2
13 2
13 2
13 2
13 2
13 2
13 2
13 2
13 2
13 2
13 2
13 2
13 2
13 2
13 2
13 2
13 2
11 2
8 1
8 1
7 1
7 1
5 1
4 1
4 1
1 1
1 1
1 1
1 1
1 1
0 1
0 2
0 3
0 3
0 3
0 2
0 2
0 2
0 2
0 2
0 2
0 2
0 2
0 2
0 2
0 2
0 2
1 2
1 2
1 2
1 2
1 2
1 2
1 2
1 2
1 2
1 2
1 2
1 2
1 2
1 2
1 2
0 2
0 3
0 3
0 3
0 3
0 3
0 3
0 3
0 3
0 3
0 3
0 3
0 3
0 3
0 3
0 3
0 3
0 3
0 3
0 3
0 3
0 3
0 3
0 3
0 3
0 3
0 3
0 3
0 3
0 3
0 3
0 3
0 3
0 6
0 6
0 6
0 6
0 6
0 6
0 6
0 6
0 6
0 5
0 4
0 4
0 4
0 4
0 4
0 4
0 4
0 4
0 4
0 4
0 4
0 4
0 4
0 4
0 4
0 4
0 4
0 4
0 4
0 4
0 4
0 4
0 4
0 4
0 4
0 4
0 4
0 4
0 6
0 6
0 6
0 6
0 6
0 6
0 6
0 6
0 6
14 6
14 6
14 6
15 9
16 11
16 11
16 11
16 11
16 11
16 11
16 11
16 11
16 11
16 11
16 11
16 11
16 11
16 11
16 11
16 11
16 11
16 11
16 11
16 11
16 11
16 11
16 8
16 8
16 8
16 8
16 8
18 8
18 9
18 9
18 9
18 9
18 9
18 9
18 9
18 9
18 9
18 9
18 9
18 9
18 9
18 9
18 9
18 9
18 9
18 9
18 9
18 9
18 9
18 9
18 9
18 9
18 9
18 9
18 9
18 9
18 9
18 9
18 9
18 8
18 7
18 7
18 7
18 6
18 6
18 6
18 6
19 6
22 6
13 2
14 2
15 2
15 1
17 1
19 1
19 1
19 1
19 1
19 1
19 1
19 1
19 1
19 1
19 1
19 1
19 1
19 1
19 1
19 1
19 1
19 1
19 1
19 1
19 1
19 1
19 1
20 1
20 1
20 1
20 1
18 1
18 0
19 0
19 0
19 0
19 0
19 0
19 0
19 0
19 0
19 0
19 0
19 0
19 0
19 0
19 0
19 0
19 1
20 4
20 5
20 5
20 5
20 5
20 7
20 7
20 7
20 7
20 7
20 7
20 7
20 7
20 7
21 7
21 7
24 7
24 7
24 7
24 7
24 7
24 7
23 7
20 7
13 7
12 8
11 8
11 8
8 8
8 8
8 8
8 8
8 8
8 8
8 8
8 8
10 8
10 8
10 8
10 8
10 8
10 8
11 8
11 8
11 8
11 8
11 8
12 8
12 8
12 8
12 8
11 8
11 8
11 8
11 8
11 8
11 8
11 8
11 8
11 8
11 9
11 9
11 9
11 9
11 9
11 9
11 9
11 9
11 9
11 9
11 9
11 8
11 8
10 2
10 2
10 2
10 2
10 4
10 4
10 5
10 5
10 5
10 5
10 5
10 5
10 5
10 5
9 5
9 5
6 5
6 5
6 5
6 5
6 5
6 5
6 5
6 5
6 5
5 4
5 5
4 5
4 5
4 6
4 6
4 6
4 6
4 6
3 6
3 6
2 6
2 6
2 6
2 6
1 6
1 6
1 7
1 7
1 7
1 7
1 7
0 7
0 7
0 7
0 7
0 7
0 7
0 7
0 7
0 7
0 7
0 6
0 6
0 6
0 5
0 5
0 5
0 5
0 5
0 5
0 5
0 5
0 5
0 5
0 5
0 5
0 13
0 13
0 13
0 13
0 14
0 12
0 11
0 11
0 11
0 11
0 11
0 11
0 11
0 11
0 11
0 11
0 11
0 11
0 11
0 11
0 11
0 11
0 11
0 12
0 12
0 12
0 12
0 12
0 12
0 12
0 11
0 11
0 11
0 11
0 11
0 11
0 11
0 11
0 11
0 11
0 11
0 11
0 11
0 11
0 11
0 11
0 11
0 11
0 11
0 20
0 20
0 37
0 37
0 37
0 37
0 38
0 38
0 38
0 40
0 59
0 66
0 91
0 96
0 114
0 120
0 120
0 125
0 131
0 138
0 138
0 139
0 139
0 139
0 131
0 131
0 131
0 130
0 130
0 130
0 130
0 130
0 130
0 130
0 130
0 130
0 130
0 130
0 130
0 130
0 130
0 130
0 130
0 130
0 130
0 130
0 130
0 127
0 127
0 126
0 126
0 128
0 128
0 127
0 130
0 130
0 130
0 130
0 130
0 130
0 130
0 130
0 130
0 130
0 130
0 130
0 130
0 130
0 130
0 130
0 130
0 130
0 131
0 77
0 77
0 32
0 32
0 29
0 29
0 29
0 29
0 29
0 29
0 30
0 25
0 19
0 21
0 12
0 12
0 12
0 12
0 12
0 11
0 11
0 11
0 11
0 11
0 11
0 11
0 11
0 11
0 11
0 13
0 13
0 13
0 13
0 13
0 13
0 13
0 13
0 13
0 13
0 13
0 13
0 13
0 13
0 13
0 13
0 13
0 13
0 13
0 13
0 13
0 13
0 9
0 9
0 9
0 6
0 6
0 6
0 6
0 6
0 6
0 6
0 7
0 7
0 7
0 7
0 7
0 7
0 7
0 6
0 6
0 8
0 8
0 8
0 8
0 8
0 8
0 8
0 8
0 8
0 8
0 8
0 8
0 8
0 7
0 7
0 5
0 3
0 3
0 3
0 3
0 3
0 3
0 3
0 3
0 3
0 3
0 3
0 3
0 3
0 3
0 3
0 2
0 0
0 1
0 1
0 1
0 1
0 1
0 1
0 1
0 1
0 1
0 1
0 1
0 1
0 1
0 2
0 2
0 2
0 2
0 2
1 2
1 2
1 4
1 4
1 4
1 4
1 4
1 4
1 4
1 4
1 4
1 4
1 4
1 4
1 4
1 4
0 4
0 4
0 4
0 4
0 4
0 4
0 5
0 5
0 5
0 5
0 5
0 5
0 9
0 9
0 9
0 9
0 12
0 12
0 12
0 12
0 12
0 12
0 13
0 13
0 13
0 13
0 13
0 13
0 13
0 13
0 13
0 13
0 14
0 15
0 15
0 19
0 19
0 19
0 19
0 18
0 18
0 18
0 19
0 19
0 19
0 20
0 20
0 20
0 20
0 20
0 20
0 20
0 19
0 19
0 19
0 19
0 19
0 19
0 18
0 17
0 17
0 17
0 17
0 17
0 18
0 18
0 18
0 18
0 20
0 20
0 20
0 20
0 20
0 20
0 21
0 21
0 21
0 21
0 21
0 20
0 20
0 20
0 20
0 20
0 20
0 16
0 16
0 16
0 16
0 14
0 14
0 14
0 14
0 14
0 14
0 13
0 13
0 13
0 13
0 13
0 13
0 13
0 13
0 13
0 12
0 12
0 11
0 11
0 7
0 7
0 6
0 5
0 5
0 5
0 5
0 4
0 4
0 4
0 3
0 3
0 3
0 3
0 3
0 3
0 3
0 3
0 3
0 3
0 3
0 3
0 3
0 3
0 3
0 3
0 3
0 3
0 3
0 3
0 3
0 3
0 3
0 2
0 2
0 2
0 2
0 3
0 3
0 2
0 2
0 2
0 2
0 2
0 2
0 2
0 2
0 2
0 3
0 3
0 3
0 3
0 3
0 3
0 2
0 2
0 2
0 2
0 2
0 2
0 2
0 2
0 2
0 2
0 2
0 2
0 2
0 2
0 2
0 2
0 2
0 2
0 2
0 2
0 2
0 2
0 2
0 2
0 2
0 2
0 2
0 2
0 2
0 2
0 2
0 2
0 2
0 2
0 2
0 2
0 2
0 2
0 2
0 2
0 2
0 2
0 2
0 2
0 2
0 2
0 2
0 2
0 2
0 2
0 2
0 2
0 2
0 2
0 2
0 2
0 1
0 1
0 1
0 1
0 1
0 1
0 1
0 1
0 1
0 1
0 1
0 0
0 0
0 0
0 0
0 0
0 0
0 0
0 0
0 0
0 0
0 0
0 0
0 0
0 0
0 0
0 0
0 0
0 0
0 0
0 0
0 0
0 0
0 1
0 1
0 2
0 2
0 2
0 2
0 2
0 2
0 2
0 2
0 2
0 2
0 2
0 2
0 2
0 1
0 1
0 1
0 1
0 1
0 1
0 1
0 1
0 1
0 1
0 1
0 1
0 1
0 1
0 1
0 1
0 1
0 1
0 1
0 1
0 1
0 1
0 1
0 1
0 1
0 1
0 1
0 1
0 1
0 1
0 1
0 1
0 1
0 1
0 1
0 1
0 1
0 1
0 1
0 1
0 1
0 1
0 1
0 1
0 1
0 1
0 1
0 1
0 1
0 1
0 1
0 1
0 1
0 1
0 1
0 1
0 1
0 1
0 1
0 0
0 0
0 0
0 0
0 0
0 0
0 0
0 0
0 0
0 0
0 0
0 0
0 0
0 0
0 0
0 0
0 0
0 0
0 0
0 0
0 0
0 0
0 0
0 1
0 1
0 1
0 1
0 1
0 1
0 1
0 1
0 1
0 1
0 1
0 1
0 1
0 1
0 1
0 1
0 1
0 1
0 1
0 0
0 0
0 0
0 0
0 0
0 0
0 0
0 0
0 0
0 0
0 0
0 0
0 0
0 0
0 0
0 0
0 0
0 0
0 0
0 0
0 0
0 0
0 0
0 0
0 0
0 0
0 0
0 0
0 0
0 0
0 0
0 0
0 0
0 0
0 0
0 0
0 0
0 0
0 0
0 0
0 0
0 0
0 0
0 0
0 0
0 0
0 0
0 0
0 0
0 0
0 0
0 0
0 0
0 0
0 0
0 0
0 0
0 0
0 0
0 0
0 0
0 0
0 0
0 0
0 0
0 0
0 0
0 0
0 0
0 0
0 0
0 0
0 0
0 0
0 0
0 0
0 0
0 0
0 0
0 0
1 0
1 0
1 0
1 0
1 0
1 0
1 0
1 0
1 0
1 0
2 0
2 0
2 0
2 0
9 0
9 0
9 0
9 0
9 0
9 0
9 0
9 0
9 0
9 0
9 0
9 0
9 0
9 0
9 0
9 0
9 0
9 0
9 0
9 0
22 0
29 0
29 0
29 0
29 0
33 0
33 0
33 0
33 0
33 0
33 0
33 0
33 0
33 0
33 0
33 0
33 0
33 0
33 0
33 0
33 0
33 0
33 0
33 0
33 0
36 0
57 0
187 2
209 2
226 2
226 2
227 2
277 2
277 2
283 2
312 2
315 2
315 2
406 2
417 2
420 2
690 2
700 2
744 2
799 2
921 3
1048 4
1055 4
1063 4
1063 4
1063 4
1063 4
1068 4
1065 4
1069 4
1070 4
1128 4
1131 4
1143 5
1357 9
1422 10
1455 10
1460 10
1462 10
1452 10
1452 10
1454 10
1454 10
1455 10
1457 10
1482 10
1524 10
1535 10
1529 10
1533 10
1535 10
1542 10
1559 10
1555 10
1555 10
1562 10
1563 10
1564 10
1564 10
1565 10
1565 12
1565 12
1580 12
1580 12
1580 12
1580 12
1581 12
1581 12
1581 12
1581 12
1594 12
1597 12
1597 12
1804 16
1838 16
1720 16
1720 16
1713 16
1722 16
1703 16
1572 16
1568 19
1494 20
1419 20
1419 20
1419 20
1409 20
1363 20
1363 20
1189 20
1185 20
1144 20
1108 20
1013 19
910 18
910 18
907 18
908 18
908 18
910 18
909 18
907 18
911 17
921 17
888 16
899 16
879 15
647 12
618 12
819 14
821 15
797 15
806 15
810 15
813 15
814 15
814 15
811 15
807 13
785 13
779 13
778 13
773 13
774 13
774 13
766 13
766 13
766 13
759 13
756 13
755 13
755 13
761 13
760 13
759 13
742 13
742 13
735 13
735 13
733 13
733 13
733 13
733 13
732 13
725 13
723 13
523 8
482 7
471 7
453 7
451 7
443 7
437 6
446 6
524 7
518 6
519 6
515 6
512 6
512 6
514 6
513 6
517 6
520 6
520 6
520 6
520 6
521 6
518 6
516 6
516 6
516 6
515 6
516 6
515 6
508 6
482 6
443 6
419 4
378 4
376 4
364 4
169 1
168 1
168 1
158 1
160 1
157 1
157 1
157 1
157 1
157 1
157 1
156 1
156 1
155 1
155 1
153 1
153 1
153 1
153 1
153 1
153 1
153 1
153 1
147 1
147 1
147 1
147 1
147 1
147 1
147 1
147 1
147 1
147 1
147 1
147 1
147 1
150 1
152 1
158 1
195 1
235 1
237 1
248 1
217 1
293 1
254 0
282 0
342 0
391 0
408 0
417 0
417 0
419 0
415 0
415 0
415 0
423 1
421 1
432 1
439 1
439 1
439 1
441 1
443 1
448 1
451 1
451 1
458 1
458 1
457 1
444 1
443 1
435 1
432 1
430 1
428 1
428 1
425 1
427 1
427 1
428 1
429 1
429 1
433 1
436 1
436 1
436 1
436 1
436 1
436 1
436 1
436 1
436 1
436 1
436 1
436 1
436 1
436 1
436 1
436 1
436 1
436 1
436 1
436 1
436 1
436 1
436 1
436 1
436 1
431 1
425 1
397 1
369 1
329 1
321 1
311 1
305 1
227 1
208 1
179 1
111 1
62 1
47 1
42 1
40 1
39 1
39 1
38 1
39 1
33 0
31 0
45 0
58 0
59 0
58 0
57 0
60 0
61 0
61 0
61 0
59 0
59 0
58 0
56 0
56 0
56 0
59 0
59 0
60 0
71 0
82 0
87 0
91 0
91 0
91 0
90 0
87 0
85 0
86 0
86 0
87 0
90 0
90 0
90 0
92 0
93 0
96 0
96 0
97 0
97 0
97 0
97 0
97 0
97 0
97 0
97 0
97 0
97 0
97 0
97 0
97 0
97 0
97 0
98 0
108 0
118 0
264 0
267 0
310 0
318 0
319 0
379 0
381 0
381 0
381 0
380 0
380 0
380 0
380 0
380 0
379 0
379 0
380 0
378 0
404 1
393 1
392 1
392 1
392 1
382 1
381 1
382 1
382 1
387 1
387 1
392 1
390 1
389 1
390 1
384 1
385 1
384 1
375 1
370 1
363 1
360 1
360 1
359 1
359 1
360 1
381 1
388 1
394 1
397 1
397 1
397 1
396 1
394 1
394 1
391 1
391 1
396 1
405 1
447 1
474 1
476 1
476 1
476 1
476 1
476 1
480 1
480 1
480 1
480 1
485 1
502 1
530 1
527 1
577 2
431 2
423 2
384 2
403 2
406 2
349 2
349 2
352 2
352 2
352 2
352 2
352 2
353 2
523 2
523 2
546 2
555 2
3083 2
3076 1
3160 1
3299 2
3319 2
3320 2
3320 2
3324 2
3321 2
3320 2
3317 2
3319 2
3317 2
3318 2
3318 2
3319 2
3318 2
3319 2
3322 2
3335 2
3364 3
3389 3
3461 4
3469 4
3475 4
3476 4
3475 4
3449 4
3442 4
3437 4
3433 4
3533 4
3579 4
3675 4
3726 4
4022 4
4022 4
4021 4
3982 4
3857 4
3816 4
3784 4
3798 5
3802 5
3809 5
3809 5
3809 5
3787 5
3766 5
3764 5
3738 5
3732 5
3769 5
3803 5
4162 5
4191 4
4216 4
4443 4
4452 4
4409 4
4404 4
4370 4
4363 4
4353 4
4353 4
4353 4
4353 4
4357 4
4347 4
4355 4
4350 4
4318 4
4298 4
1922 4
1873 4
1835 4
1719 3
1712 3
1713 3
1711 3
1711 3
1711 3
1709 3
1710 3
1710 3
1726 3
1755 3
1761 3
1763 3
1772 3
1802 3
1796 3
1775 3
1747 2
1710 2
1663 1
1666 1
1694 1
1700 1
1711 1
1817 1
2448 1
2851 2
4041 3
5555 4
5572 4
5472 4
5471 4
5200 4
5292 4
5336 4
5345 4
5347 4
5325 4
5300 4
5286 3
5283 3
5284 3
5284 3
5284 3
5285 3
5285 3
5285 3
5290 3
5294 3
5244 3
5207 3
4889 3
4840 3
4818 3
4592 3
4580 3
4576 3
4571 3
4566 3
4566 3
4566 3
4566 3
4566 3
4565 3
4563 3
4562 3
4551 3
4551 3
4551 3
4551 3
4551 3
4552 3
4552 3
4551 3
4558 4
4557 4
4556 4
4556 4
4556 4
4556 4
4552 4
4550 4
4535 4
4508 4
4502 4
4494 4
4498 4
4467 4
4467 4
4497 4
4496 4
4496 4
4489 4
4456 4
4406 4
4399 4
4383 4
4160 4
3472 4
2908 3
1206 2
242 1
203 1
203 1
203 1
198 1
189 1
179 1
156 1
155 1
155 1
155 1
155 1
155 1
155 1
155 1
155 1
155 1
155 1
155 1
155 1
154 1
153 1
152 1
149 1
143 1
144 1
144 1
146 1
146 1
146 1
146 1
146 1
147 1
156 1
158 1
164 2
185 2
185 2
187 2
193 2
197 2
200 2
200 2
200 2
200 2
200 2
194 1
194 1
205 1
257 1
260 1
267 1
369 1
377 1
378 1
379 1
379 1
379 1
367 1
367 1
365 1
357 1
356 1
362 1
406 1
422 1
395 1
377 1
366 1
369 1
363 1
360 1
354 1
351 1
352 1
353 1
353 1
353 1
353 1
353 1
353 1
353 1
353 1
353 1
353 1
353 1
353 1
353 1
353 1
359 1
363 1
362 1
362 1
363 1
363 1
365 1
368 1
367 1
370 1
376 1
388 1
392 1
393 1
393 1
390 1
389 1
378 1
377 1
376 0
354 0
353 0
348 0
341 0
336 0
332 0
331 0
332 0
333 0
333 0
327 0
320 0
306 0
254 0
247 0
237 0
126 0
115 0
116 0
115 0
118 0
118 0
100 0
99 0
99 0
99 0
99 0
96 0
81 0
68 0
68 0
68 0
67 0
66 0
66 0
65 0
65 0
65 0
87 0
90 0
91 0
91 0
91 0
93 0
94 0
94 0
94 0
94 0
94 0
94 0
94 0
94 0
93 0
87 0
84 0
84 0
84 0
90 0
118 0
166 0
214 0
224 0
225 0
217 0
201 0
198 0
197 0
196 0
196 0
196 0
196 0
196 0
196 0
196 0
196 0
196 0
196 0
198 0
200 0
200 0
200 0
214 0
220 0
221 0
221 0
221 0
224 0
223 0
223 0
223 0
223 0
222 0
222 0
219 0
218 0
217 0
218 0
219 0
219 0
219 0
219 0
219 0
220 0
220 0
220 0
221 0
226 0
227 0
228 0
227 0
227 0
199 0
197 0
192 0
192 0
191 0
190 0
189 0
191 0
191 0
191 0
190 0
190 0
190 0
190 0
190 0
189 0
189 0
189 0
188 0
174 0
151 0
102 0
51 0
45 0
44 0
44 0
44 0
44 0
44 0
44 0
44 0
44 0
44 0
44 0
44 0
44 0
44 0
42 0
46 0
44 0
59 0
63 0
66 0
54 0
51 0
50 0
50 0
53 0
52 0
52 0
57 0
58 0
58 0
59 0
59 0
71 0
71 0
72 0
72 0
73 0
73 0
73 0
73 0
73 0
71 0
72 0
72 0
72 0
68 0
68 0
67 0
68 0
68 0
69 0
69 0
72 0
73 0
73 0
74 0
81 0
78 0
78 0
78 0
78 0
78 0
78 0
78 0
78 0
80 0
80 0
80 0
81 0
81 0
82 0
82 0
82 0
82 0
82 0
82 0
82 0
82 0
82 0
82 0
82 0
83 0
97 0
144 2
505 2
647 2
774 2
814 2
840 4
854 4
833 4
851 4
855 4
854 4
854 4
854 4
868 4
889 4
889 4
889 4
883 4
883 4
884 4
884 4
884 4
872 4
873 4
873 4
873 4
872 4
873 4
874 4
877 4
878 4
905 4
910 4
917 4
935 4
975 4
1027 4
1071 4
1266 4
1269 4
1279 5
1287 5
1288 5
1312 5
1323 5
1328 5
1322 5
1322 5
1322 5
1321 5
1325 5
1325 5
1325 5
1325 5
1327 5
1325 5
1331 5
1331 5
1331 5
1331 5
1330 5
1328 5
1328 5
1328 5
1328 5
1328 3
1330 3
1332 3
1334 3
1331 3
1327 3
1325 3
1311 3
1216 3
1026 3
952 5
845 5
813 5
788 3
779 3
797 4
789 4
810 4
808 4
807 4
807 4
787 4
773 4
775 4
1095 8
1126 8
1128 8
1129 8
1130 8
1133 8
1133 8
1133 8
1135 8
1135 8
1134 8
1133 8
1127 8
1125 8
1123 8
1093 8
1080 8
1059 8
981 8
939 7
899 7
874 7
695 7
692 7
683 7
658 7
643 7
622 7
619 7
616 7
615 7
614 7
614 7
614 7
611 7
612 7
612 7
612 7
609 7
608 7
602 7
602 7
599 7
599 7
600 8
607 8
609 8
610 8
612 8
612 8
610 8
608 8
611 8
613 8
611 8
614 8
614 8
607 8
499 8
468 6
463 6
459 6
459 6
448 6
432 5
420 5
395 5
394 5
392 5
384 5
385 5
370 4
351 2
55 1
39 1
39 1
40 1
40 1
40 1
40 1
40 1
41 1
41 1
45 2
46 2
65 4
66 4
65 5
65 5
65 5
64 5
64 5
64 5
64 5
64 5
64 5
64 5
66 5
67 5
70 5
71 5
249 5
260 5
261 5
263 5
265 5
265 5
265 5
264 5
264 5
266 5
281 5
293 5
320 5
322 5
321 5
321 5
314 4
318 4
320 4
320 4
318 4
318 4
317 4
319 4
321 4
319 4
318 4
314 4
313 4
312 4
309 4
309 4
311 4
322 4
364 4
389 4
763 5
782 5
793 5
803 5
816 5
830 5
828 5
831 5
834 5
845 5
845 6
846 6
869 6
871 6
871 6
874 6
875 6
874 6
873 5
870 4
870 4
852 2
852 2
853 2
854 2
854 2
854 2
855 2
855 2
855 2
855 2
854 2
854 2
853 2
852 2
850 2
853 2
679 2
680 2
682 2
681 2
676 2
676 2
674 2
669 2
688 2
680 2
684 2
749 2
766 2
1096 2
1124 2
1126 2
1144 2
1145 2
1154 2
1221 2
2538 4
3766 7
4480 7
4515 7
4548 7
4564 7
5457 7
5470 7
6766 7
6895 7
7176 7
7344 9
7541 9
7541 9
7591 9
7667 9
7446 8
7491 8
7773 9
7768 9
7769 9
7765 9
7763 9
7764 9
7761 9
7756 9
7756 8
7757 8
7735 8
7735 8
7733 8
7732 8
7730 8
7729 8
7729 8
7729 8
7728 8
7728 8
7728 8
7726 8
7725 8
7724 8
7725 8
7725 8
7725 8
7725 8
7735 8
7743 8
7749 8
7751 8
7748 8
7740 8
7731 8
7722 8
7716 8
7715 8
7719 8
7717 8
7717 8
7718 8
7717 8
7671 8
7660 8
7622 8
7524 8
7497 8
7188 8
7090 8
7051 8
6953 8
6641 8
6198 7
5939 7
3055 3
2464 3
2269 3
2244 3
2229 3
1003 3
2053 5
2169 5
1772 5
1753 5
1716 5
1662 3
1628 3
1627 3
1612 3
1583 3
1564 3
1535 3
1308 2
1307 2
1307 2
1308 2
1314 2
1313 2
1315 2
1315 2
1316 2
1318 2
1320 2
1320 2
1320 2
1320 2
1321 2
1321 2
1321 2
1321 2
1322 2
1329 2
1331 2
1336 2
1336 2
1348 2
1354 2
1353 2
1353 2
1353 2
1340 2
1340 2
1335 2
1333 2
1334 2
1331 2
1331 2
1331 2
1332 2
1329 2
1327 2
1329 2
1332 2
1334 2
1334 2
1333 2
1332 2
1332 2
1330 2
1326 2
1314 2
1303 2
1289 2
1289 2
1288 2
1288 2
1287 2
1227 2
1202 2
1197 2
1171 2
1134 2
1081 2
120 0
67 0
67 0
66 0
62 0
60 0
48 0
48 0
47 0
47 0
48 0
47 0
46 0
47 0
48 0
48 0
44 0
44 0
72 0
71 0
70 0
70 0
69 0
69 0
69 0
69 0
69 0
69 0
88 0
93 0
96 0
97 0
96 0
98 0
99 0
118 0
118 0
121 0
122 0
122 0
123 0
123 0
123 0
136 0
138 0
138 0
138 0
139 0
140 0
139 0
138 0
135 0
135 0
134 1
147 1
148 1
149 1
167 1
167 1
168 1
168 1
169 1
169 1
169 1
169 1
169 1
169 1
169 1
169 1
169 1
169 1
169 1
169 1
169 1
169 1
169 1
168 1
168 1
168 1
168 1
168 1
168 1
168 1
167 1
167 1
166 1
167 1
169 1
169 1
168 1
165 1
140 1
140 1
139 1
139 1
138 1
141 1
170 1
167 1
167 1
166 1
146 0
134 0
126 0
119 0
107 0
104 0
103 0
79 0
75 0
88 0
201 0
244 0
245 0
247 0
253 0
247 0
248 0
248 0
248 0
247 0
248 0
250 0
260 0
260 0
260 0
260 0
260 0
260 0
260 0
255 0
256 0
257 0
258 0
261 0
261 0
261 0
261 0
261 0
261 0
261 0
261 0
262 0
262 0
262 0
262 0
262 0
262 0
262 0
262 0
265 0
265 0
265 0
265 0
265 0
265 0
265 0
265 0
265 0
258 0
258 0
258 0
264 0
264 0
264 0
263 0
263 0
269 0
271 0
269 0
217 0
217 0
216 0
191 0
191 0
189 0
189 0
189 0
189 0
189 0
189 0
188 0
184 0
185 0
107 0
79 0
80 0
76 0
77 0
77 0
97 0
98 0
98 0
97 0
95 0
91 0
85 0
87 0
87 0
87 0
88 0
90 0
90 1
94 1
94 1
93 1
93 1
89 1
90 1
90 1
90 1
90 1
90 1
89 1
89 1
90 1
90 1
91 1
92 1
92 1
101 1
101 1
101 1
98 1
98 1
98 1
98 1
98 1
98 1
99 1
99 1
114 1
116 1
119 1
129 1
123 1
123 1
123 1
123 1
123 1
115 1
113 1
113 1
112 1
112 1
112 1
112 1
112 1
112 1
112 1
112 1
112 1
112 1
112 1
112 1
124 1
108 1
164 1
167 1
166 1
170 1
162 1
161 1
138 1
138 1
144 1
147 1
147 1
212 1
217 1
215 1
216 0
216 0
212 0
212 0
212 0
209 0
209 0
209 0
210 0
213 0
216 0
239 0
245 0
245 0
244 0
245 0
245 0
244 0
244 0
242 0
242 0
242 0
233 0
234 0
239 0
315 0
320 0
336 0
338 0
339 0
338 0
338 0
340 0
331 0
329 0
325 0
317 0
317 0
317 0
317 0
318 0
318 0
318 0
318 0
318 0
318 0
318 0
318 0
318 0
318 0
318 0
318 0
318 0
318 0
317 0
316 0
316 0
305 0
303 0
241 0
238 0
230 0
226 0
228 0
227 0
237 0
236 0
231 0
231 0
229 0
175 0
173 0
173 0
173 0
179 0
179 0
181 0
185 0
186 0
200 0
200 0
203 1
202 1
196 1
181 1
177 1
177 1
272 1
271 1
276 1
277 1
278 1
287 1
288 1
287 2
285 2
277 2
269 2
194 2
191 2
177 2
182 2
182 2
182 2
184 2
185 2
182 2
182 2
181 2
181 2
181 2
181 2
180 2
179 2
179 2
179 2
179 2
179 2
179 2
179 2
179 2
180 2
182 2
187 2
412 2
428 2
430 2
444 2
447 2
447 2
448 2
448 2
448 2
447 2
447 2
448 2
447 2
446 2
439 2
440 2
439 2
439 2
435 2
432 2
432 2
432 2
432 2
426 2
427 2
426 2
417 2
417 2
401 1
399 1
399 1
396 0
397 0
396 0
396 0
396 0
303 0
301 0
299 0
296 0
294 0
289 0
288 0
288 0
288 0
287 0
287 0
287 0
286 0
284 0
278 0
278 0
278 0
276 0
277 0
277 0
277 0
277 0
277 0
277 0
277 0
277 0
277 0
277 0
280 0
281 0
281 1
288 1
287 1
286 1
272 1
245 1
233 1
49 1
41 1
39 1
26 1
25 1
24 1
24 1
24 1
24 1
24 0
24 0
24 0
24 0
24 0
25 0
25 0
25 0
25 0
25 0
25 0
25 0
25 0
27 0
26 0
27 0
26 0
26 0
26 0
26 0
26 0
26 0
27 0
27 0
27 0
28 0
28 0
28 0
28 0
28 0
28 0
28 0
28 0
28 0
28 0
28 0
28 0
28 0
28 0
28 0
28 0
28 0
28 0
28 0
28 0
28 0
28 0
28 0
28 0
28 0
28 0
28 0
28 0
29 0
29 0
25 0
24 0
23 0
16 0
13 0
10 0
8 0
8 0
8 0
8 0
8 0
8 0
8 0
8 0
8 0
8 0
8 0
8 0
8 0
8 0
8 0
8 0
8 0
7 0
7 0
7 0
7 0
7 0
7 0
7 0
7 0
5 0
5 0
4 0
4 0
4 0
4 0
5 0
5 0
5 0
4 0
3 0
3 0
2 0
2 0
2 0
2 0
2 0
2 0
2 0
2 0
2 0
2 0
2 0
2 0
2 0
2 0
2 0
2 0
2 0
2 0
2 0
2 0
3 0
3 0
3 0
3 0
3 0
3 0
3 0
6 0
5 0
5 0
5 0
5 0
5 0
5 0
5 0
5 0
5 0
5 0
5 0
5 0
5 0
5 0
5 0
6 0
6 0
6 0
8 4
8 4
8 4
8 5
8 5
8 5
8 5
8 5
8 5
8 5
8 5
8 6
8 7
8 7
8 7
8 7
8 7
8 7
8 7
8 7
8 7
7 7
7 7
7 7
7 7
7 7
7 7
7 7
7 7
7 7
7 7
7 7
7 7
7 7
7 7
7 7
7 7
7 7
7 7
7 7
7 7
7 7
7 7
7 7
7 7
7 7
7 7
6 7
6 7
6 7
6 7
6 7
6 7
4 7
1 7
1 7
1 7
1 7
1 7
1 7
1 7
1 7
1 7
1 7
1 7
1 7
3 8
28 8
38 8
65 8
65 8
65 8
65 8
64 4
65 3
67 3
72 3
72 3
72 3
72 3
72 3
72 3
72 3
72 3
72 2
72 2
72 2
72 2
72 2
72 2
72 2
72 2
73 2
73 2
73 3
73 3
81 3
81 3
81 3
81 3
81 3
83 3
83 3
83 3
83 3
83 3
83 3
83 3
83 3
83 3
83 3
83 3
83 3
83 3
94 3
95 3
95 3
95 3
113 3
114 3
114 3
114 3
115 3
115 3
115 3
115 3
116 3
116 3
116 3
116 3
116 3
116 3
118 3
118 3
119 3
119 3
119 3
122 3
122 3
118 2
93 2
84 2
58 2
58 2
57 2
57 2
63 2
71 2
99 3
167 7
186 8
188 8
190 8
190 8
192 8
194 8
194 8
206 8
208 8
244 8
252 8
252 8
288 8
290 8
289 8
289 8
290 8
290 7
290 7
282 7
282 7
282 7
282 7
282 7
280 7
280 7
280 7
280 7
280 7
280 7
280 7
280 7
280 7
280 7
285 7
291 7
293 7
283 7
283 7
283 7
283 7
265 7
264 7
264 7
263 7
263 7
263 7
263 7
263 7
261 7
263 7
263 7
262 7
262 7
262 7
260 7
260 7
259 7
259 7
259 7
256 7
256 7
256 7
256 7
258 7
259 7
250 7
244 8
241 8
206 8
191 8
156 7
69 2
58 2
57 2
56 2
56 2
60 2
60 2
12 3
12 2
11 2
16 2
16 2
16 2
16 2
16 2
16 2
16 2
15 2
15 2
15 2
15 2
15 2
15 2
15 2
15 2
15 2
15 2
15 2
15 2
15 2
15 2
15 2
15 2
15 2
15 2
15 2
14 2
14 2
14 2
14 2
14 2
14 2
14 2
14 2
14 2
14 2
14 2
14 2
14 2
14 2
14 2
14 2
14 2
14 2
14 2
15 2
16 2
17 2
18 2
18 2
18 2
18 2
18 2
18 2
18 2
17 2
17 2
17 2
17 1
17 1
17 1
21 1
24 1
24 1
24 1
24 1
24 1
24 1
19 0
19 0
19 0
19 0
19 0
14 0
14 0
14 0
14 0
14 0
14 0
14 0
14 0
14 0
14 0
14 0
14 0
14 1
14 1
14 1
14 1
14 1
14 1
14 1
14 1
14 1
14 1
14 1
19 1
19 1
19 1
22 1
22 1
22 1
22 1
23 1
23 1
23 1
23 1
23 1
23 1
23 1
23 1
23 1
27 2
28 2
28 2
28 2
27 2
27 2
26 2
25 2
23 2
23 2
23 2
23 2
23 2
23 2
23 2
23 2
21 2
21 2
21 2
21 2
20 2
20 2
16 2
14 2
14 2
14 2
14 2
14 2
17 2
17 2
17 2
18 2
18 2
18 2
18 3
18 3
21 3
21 3
21 3
21 3
21 3
21 3
21 3
21 3
21 3
21 2
21 2
22 2
22 2
22 2
22 2
22 1
22 1
22 1
22 1
22 1
22 1
17 1
17 1
17 1
14 1
14 1
14 1
14 1
13 1
14 1
16 1
18 1
19 1
19 1
19 1
19 1
19 1
15 0
14 0
14 0
14 0
14 0
14 0
14 0
14 0
14 0
14 0
14 0
14 0
15 0
15 0
15 0
16 0
16 0
16 0
16 0
16 0
16 0
16 0
16 0
16 0
16 0
16 0
16 0
17 0
14 0
14 0
14 0
13 0
13 1
13 1
13 1
13 1
10 1
10 1
10 1
10 1
10 1
10 1
10 1
10 1
10 1
11 1
11 1
10 1
10 1
10 1
10 1
10 1
10 1
10 1
10 1
10 1
10 1
10 1
8 1
12 1
18 1
19 1
19 1
19 1
19 1
19 1
17 1
15 1
15 1
15 1
15 1
15 1
15 1
15 1
15 1
15 1
15 1
15 1
15 1
15 1
16 1
18 1
19 1
19 1
18 1
18 1
18 1
17 1
17 1
17 1
17 1
17 1
17 1
17 1
18 1
19 1
19 1
19 1
19 1
18 1
18 2
19 2
19 3
19 3
19 3
19 2
19 2
21 2
22 2
22 2
22 2
22 2
23 2
23 2
23 2
27 2
28 2
28 2
27 2
27 2
27 2
27 2
27 2
27 2
27 2
27 2
27 2
27 2
27 2
27 2
27 2
26 2
22 2
16 2
16 2
16 2
16 2
16 2
16 2
17 2
17 5
17 5
17 5
17 5
17 5
17 5
17 5
17 5
17 5
17 5
17 5
17 5
17 5
18 5
15 5
15 5
15 5
15 5
15 5
13 5
13 5
13 5
13 5
14 5
14 5
19 5
19 5
22 5
22 5
23 5
23 5
23 5
24 4
24 3
56 3
56 3
56 3
56 3
56 3
56 3
54 3
53 3
53 3
53 3
52 3
61 3
60 3
61 3
59 2
61 2
61 2
61 2
62 2
62 3
64 2
64 2
66 2
69 2
71 2
71 2
71 2
71 2
72 2
72 2
72 2
74 2
74 2
74 2
80 2
82 4
82 4
82 4
81 4
81 3
81 3
82 3
82 3
90 3
100 3
121 3
129 3
130 3
131 3
131 3
132 3
132 3
130 3
130 3
130 3
130 3
130 3
130 3
130 3
130 3
130 3
130 3
129 3
129 3
123 3
122 3
123 3
123 3
122 3
122 3
120 3
120 3
120 3
88 3
89 3
98 3
111 3
113 3
113 3
177 3
178 3
178 3
177 3
178 3
167 3
167 3
166 3
165 3
164 3
165 3
165 3
165 2
166 2
164 2
164 2
159 2
152 2
152 2
153 2
153 2
153 2
153 2
154 2
155 2
156 2
321 4
321 4
400 4
410 2
417 2
420 2
421 3
426 3
428 3
425 3
428 3
441 3
439 3
419 3
412 3
411 3
409 3
409 3
408 3
407 3
406 3
406 3
407 3
407 3
415 3
417 3
417 3
417 3
502 6
514 6
582 6
691 6
787 6
791 6
789 6
790 6
791 6
791 6
791 6
791 6
791 6
791 6
788 6
782 6
766 6
764 6
763 6
702 6
702 7
702 7
701 7
702 8
702 9
702 9
702 9
702 9
702 9
699 9
699 9
699 9
699 9
699 9
724 10
724 10
725 10
721 10
721 10
721 10
721 10
721 10
720 10
718 10
717 10
555 7
549 7
469 7
458 7
453 7
449 7
449 7
445 7
446 7
448 7
438 7
426 7
424 7
425 7
425 7
426 7
426 7
426 7
426 7
426 7
426 7
426 7
425 7
425 7
416 7
414 7
414 7
411 7
318 4
303 4
221 4
95 3
42 3
41 3
42 3
44 3
44 3
44 2
44 2
44 2
44 2
44 2
44 2
46 2
48 2
50 2
52 2
56 2
58 2
59 2
59 2
59 1
59 1
59 1
61 1
61 1
62 1
63 1
74 1
75 1
74 1
75 1
54 0
54 0
55 0
56 0
57 0
62 0
66 0
66 0
66 0
66 0
66 0
66 0
66 0
66 0
66 0
66 0
66 0
66 0
66 0
62 0
60 0
58 0
58 0
58 0
58 0
58 0
57 0
57 0
57 0
57 0
57 0
57 0
57 0
57 0
57 0
57 0
57 0
57 0
57 0
57 0
57 0
57 0
54 0
53 0
53 0
52 0
50 0
49 0
49 0
48 0
48 0
48 0
48 0
47 0
45 0
44 0
40 0
40 0
36 0
38 0
38 0
37 0
34 0
34 0
34 0
33 0
34 0
33 0
32 0
24 0
29 0
31 0
124 1
127 1
127 1
125 1
124 1
123 1
118 1
115 1
114 1
114 1
114 1
114 1
114 1
114 1
114 1
114 1
116 1
116 1
116 1
116 1
116 1
116 1
116 1
116 1
116 1
116 1
117 1
119 1
119 1
119 1
122 1
123 1
123 1
123 1
119 1
119 1
119 1
121 1
121 1
121 1
121 1
122 1
122 1
123 1
131 1
131 1
132 1
132 1
132 1
132 1
134 1
136 1
138 1
140 1
157 1
157 1
157 1
156 1
154 1
153 1
148 1
148 1
148 1
148 1
147 1
152 1
158 1
158 1
158 1
158 1
157 1
153 1
150 1
61 0
60 0
60 0
60 0
60 0
60 0
60 0
60 0
60 0
60 0
60 0
60 0
60 0
60 0
60 0
60 0
58 0
58 0
58 0
58 0
58 0
58 0
58 0
58 0
58 0
58 0
55 0
55 0
55 0
56 0
53 0
52 2
52 2
52 2
52 2
52 2
52 2
50 2
49 2
49 2
49 2
48 2
48 2
47 2
37 2
40 2
41 2
41 2
42 2
42 2
44 2
41 2
39 2
38 2
21 2
21 2
23 2
23 2
23 2
24 2
24 2
24 2
24 2
24 3
28 3
24 3
18 3
17 3
17 3
17 3
18 3
21 3
22 3
33 3
50 3
50 3
50 3
51 3
51 3
51 3
51 3
52 3
52 3
52 3
52 3
53 3
54 3
54 3
54 3
54 3
54 3
54 3
54 3
54 3
61 3
64 3
64 3
64 3
64 3
64 4
67 4
67 4
69 4
70 4
70 2
70 2
70 2
70 2
71 2
73 2
74 2
76 2
80 2
82 2
99 2
99 2
99 2
98 2
96 2
93 2
92 2
91 2
91 2
91 2
111 2
137 2
137 2
137 2
136 2
137 2
136 2
136 2
133 3
133 3
133 3
136 3
134 2
134 2
134 2
134 2
134 2
141 2
143 2
723 6
719 6
717 6
712 7
697 6
698 6
713 6
725 6
732 6
732 6
733 6
733 6
733 6
735 7
738 7
742 6
742 6
742 6
742 6
743 6
747 6
749 6
750 6
754 6
751 6
748 6
749 6
749 6
749 6
750 6
752 6
770 6
860 8
970 9
991 9
992 9
996 9
996 9
998 9
995 9
995 9
995 9
1007 9
1031 9
1100 9
1108 9
1450 9
1453 9
1456 9
1463 9
1465 9
1464 9
1494 9
1494 9
1478 9
1454 9
1463 9
1465 9
1466 9
1465 9
1465 9
1465 9
1465 9
1465 9
1464 9
1462 9
1462 9
1460 9
1462 9
1462 9
1462 9
1458 9
1455 9
870 4
869 4
868 4
868 4
869 4
869 4
852 4
842 4
835 4
838 4
838 4
838 4
839 4
839 3
836 3
851 3
858 3
909 3
920 3
951 3
1353 4
1362 5
1360 5
1358 5
1356 5
1355 5
1345 5
1342 5
1334 5
1268 5
1258 5
1178 4
1275 12
1216 12
1206 13
1211 13
1240 13
1244 22
1888 49
1900 52
1900 57
1952 59
1953 59
1949 59
1877 59
1868 59
1561 59
1562 59
1569 59
1573 59
1588 59
1593 59
1572 59
1572 59
1569 59
1599 59
1627 59
1663 60
1796 64
1931 66
1960 66
1965 66
1969 66
1971 66
1971 66
1973 66
1988 66
2114 68
2150 68
2183 69
2200 71
2203 71
2205 71
2209 72
2209 73
2255 73
2260 73
2280 73
2532 76
2542 77
2544 77
2550 77
2567 77
2592 78
2618 79
2713 79
2720 79
2812 79
2829 81
2822 82
2730 81
2680 76
2613 73
2184 66
2182 65
2098 59
2098 59
2098 59
2099 59
2098 59
2107 59
2127 59
2154 59
2155 59
2150 59
2113 59
2110 55
2095 49
2090 49
2056 49
2049 48
1506 27
1539 26
1523 26
1486 26
1486 26
1487 26
1488 26
1486 26
1498 26
1506 27
1527 27
1554 27
1562 29
1577 29
1590 29
1587 29
1535 28
1498 28
1455 27
1398 27
1285 23
1166 22
1140 22
1168 22
1210 22
1247 22
1259 22
1260 22
1404 22
1248 18
1205 16
1189 15
1175 13
1184 13
1194 15
1165 15
1165 15
1130 14
1104 14
1096 13
946 11
941 11
915 11
908 11
901 11
894 11
882 10
805 10
784 10
747 10
732 10
729 9
729 9
730 9
730 9
730 9
732 9
733 9
733 9
733 9
731 9
731 9
727 9
718 9
699 9
704 9
712 9
726 9
726 9
774 9
774 9
774 9
775 9
771 9
734 6
734 6
735 6
735 6
737 6
739 6
737 6
712 6
698 5
621 5
591 4
577 3
546 3
529 3
523 3
522 3
517 3
514 3
512 3
511 3
502 3
458 3
445 3
409 3
354 3
341 3
304 3
192 3
185 3
174 3
152 3
145 3
129 3
84 0
82 0
73 0
69 0
69 0
69 0
68 0
68 0
68 0
68 0
68 0
68 0
68 0
68 0
69 0
69 0
73 0
74 0
74 0
74 0
74 0
74 0
74 0
74 0
74 0
74 0
74 0
74 0
75 0
76 0
71 0
67 0
63 0
63 0
75 0
41 0
41 0
41 0
40 0
40 0
41 0
41 0
50 0
59 0
58 0
54 0
53 0
53 0
53 0
54 0
57 0
59 0
59 0
59 0
59 0
59 0
60 0
59 0
59 0
60 0
58 0
58 0
60 0
60 0
60 0
59 0
59 0
59 0
60 0
60 0
60 0
60 0
60 0
60 0
60 0
60 0
60 0
60 0
60 0
60 0
62 0
72 0
72 0
73 0
73 0
73 0
94 0
92 0
92 0
119 0
120 0
120 0
120 0
122 0
122 0
122 0
124 0
125 0
125 0
125 1
126 1
125 1
124 1
125 1
126 1
126 1
127 1
115 1
115 1
115 1
115 1
116 1
116 1
115 1
115 1
103 1
93 1
92 1
91 1
92 1
92 1
93 1
92 1
89 1
87 1
88 1
91 1
99 1
104 1
110 1
111 1
115 1
115 1
116 1
137 1
155 1
156 1
158 1
158 1
158 1
157 1
157 1
157 1
157 1
158 1
158 1
158 1
158 1
158 1
158 1
158 1
170 1
196 1
253 1
300 1
326 1
361 1
376 1
395 1
420 1
472 1
481 1
456 1
458 1
457 1
457 1
455 1
456 1
455 1
454 1
455 1
456 1
456 0
456 0
456 0
456 0
455 0
457 0
457 0
456 0
456 0
456 0
456 0
457 0
457 0
457 0
457 0
457 0
458 0
458 0
456 0
455 0
455 0
476 0
477 0
482 0
486 0
486 0
481 0
479 0
470 0
466 0
460 0
457 0
452 0
452 0
451 0
426 0
407 0
406 0
405 0
405 0
406 0
410 0
445 0
447 0
447 0
446 0
446 0
446 0
446 0
533 0
539 0
541 0
529 0
497 0
437 0
390 0
356 0
326 0
308 0
285 0
244 0
194 0
189 0
188 0
190 0
190 0
191 0
191 0
190 0
191 0
192 0
193 0
192 0
192 0
191 0
191 0
191 0
192 0
190 0
190 0
190 0
190 0
190 0
190 0
189 0
188 0
188 0
189 0
190 0
185 0
193 0
192 0
188 0
188 0
173 0
171 0
212 0
208 0
211 0
212 0
213 0
214 0
227 0
227 0
227 0
230 0
231 0
232 0
233 0
232 0
232 0
232 0
229 0
221 0
224 0
202 0
203 0
208 0
212 0
210 0
201 0
194 0
122 0
121 0
118 0
122 0
160 0
173 0
181 1
184 1
183 1
183 1
186 1
182 1
195 1
205 1
205 1
204 1
207 1
205 1
204 1
204 1
203 1
202 1
201 1
201 1
201 1
202 1
202 1
203 1
207 1
208 1
210 1
220 1
225 1
228 1
230 1
231 1
232 1
232 1
238 1
274 1
274 1
271 1
275 1
286 1
276 1
274 1
271 1
228 1
227 1
215 1
211 1
210 1
209 1
198 1
206 1
206 1
203 1
206 1
205 1
204 1
204 1
204 1
207 1
207 1
207 1
202 1
200 1
199 1
195 1
191 1
191 1
191 1
191 1
191 1
191 1
191 1
189 0
154 0
149 0
146 0
143 0
143 0
143 0
141 0
143 0
129 0
119 0
119 0
119 0
119 0
117 0
117 0
116 0
116 0
116 0
115 0
115 0
118 0
127 0
129 0
129 0
129 0
164 0
184 0
237 0
244 0
264 0
282 0
288 0
288 0
287 0
280 0
242 0
243 0
243 0
243 0
233 0
233 0
234 0
234 0
234 0
235 0
235 0
235 0
234 0
239 0
244 0
237 0
235 0
235 0
231 0
231 0
231 0
231 0
231 0
228 0
228 0
230 0
230 0
231 0
231 0
246 0
246 0
454 0
463 0
525 0
529 0
635 0
643 0
766 0
879 0
1343 4
1471 5
1535 6
1551 6
1552 6
1554 6
1553 6
1562 6
1565 6
1604 6
1828 6
1999 6
2029 6
2067 6
2098 6
2136 6
2206 6
2323 6
2325 6
2328 6
2320 6
2305 6
2290 6
2273 6
2244 6
2226 6
2161 6
2147 6
2214 7
2200 7
2173 7
2175 7
2177 7
2179 7
2180 7
2181 7
2179 7
2178 7
2179 7
2183 7
2208 7
2211 7
2215 7
2225 7
2225 7
2225 7
2227 7
2236 8
2237 8
2237 8
2239 8
2239 8
2239 8
2241 8
2241 8
2241 8
2242 8
2242 8
2242 8
2241 8
2242 8
2238 8
2238 8
2238 8
2241 8
2044 8
2042 8
2015 8
2030 8
1924 8
1956 8
1819 8
1727 8
1274 3
1176 2
1145 2
1137 2
1134 2
1121 2
1094 2
1014 2
963 2
912 2
756 2
660 2
638 2
581 2
502 2
448 2
427 2
348 2
347 2
342 2
340 2
340 3
355 3
351 3
350 3
322 3
312 3
308 3
252 2
265 2
267 2
266 2
264 2
268 2
269 2
332 3
455 3
530 3
543 3
544 3
528 3
525 3
519 3
518 3
519 3
519 3
518 3
504 2
504 2
503 2
501 2
501 2
502 2
500 2
499 2
499 2
498 2
498 2
498 2
498 2
498 2
498 2
510 2
510 2
508 2
508 2
502 2
473 2
448 2
444 2
368 2
367 2
368 2
367 2
367 2
361 2
361 2
361 2
361 2
361 2
361 2
361 2
360 2
360 2
360 2
360 2
360 2
361 2
361 2
361 2
368 2
368 2
381 2
382 2
383 1
382 1
526 1
571 1
574 1
574 1
563 1
562 1
554 1
553 1
552 1
551 1
536 1
511 1
369 0
300 0
263 0
261 0
263 0
263 0
264 0
265 0
263 0
262 0
262 0
262 0
262 0
262 0
264 0
264 0
263 0
263 0
263 0
263 0
263 0
264 0
264 0
264 0
264 0
264 0
264 0
257 0
281 0
297 0
297 0
296 0
298 0
307 0
309 0
310 0
311 0
313 0
316 0
316 0
316 0
316 0
316 0
316 0
316 0
316 0
317 0
317 0
318 0
318 0
319 0
319 0
322 0
322 0
325 0
315 0
352 0
345 0
350 0
343 0
319 0
182 0
171 0
166 0
165 0
169 0
173 0
170 0
169 0
180 0
181 0
191 0
197 0
199 0
200 0
199 0
199 0
199 0
199 0
199 0
199 0
199 0
199 0
199 0
199 0
199 0
199 0
199 0
199 0
200 0
200 0
204 0
208 0
208 0
208 0
223 0
245 0
247 0
319 0
334 0
514 0
509 0
502 0
504 0
505 0
511 0
502 0
501 0
500 0
499 0
493 0
562 0
563 0
568 0
580 0
583 0
585 0
589 0
592 0
593 0
598 0
597 0
597 0
599 0
602 0
604 0
613 0
611 0
609 0
580 0
569 0
553 0
549 0
548 0
548 0
548 0
546 0
545 0
542 0
539 0
538 0
538 0
526 0
525 0
514 0
511 0
511 0
511 0
511 0
511 0
512 0
512 0
512 0
512 0
512 0
513 0
513 0
513 0
513 0
513 0
513 0
513 0
515 0
515 0
511 0
507 0
505 0
505 0
489 0
468 0
465 0
390 0
376 0
197 0
185 0
176 0
174 0
164 0
161 0
159 0
160 0
163 0
162 0
164 0
95 0
94 0
88 0
74 0
69 0
72 0
71 0
72 0
119 1
121 1
124 1
124 1
122 1
120 2
113 2
107 2
107 2
101 2
98 2
99 2
98 2
98 2
98 2
98 2
98 2
98 2
98 2
98 2
96 2
96 2
96 2
96 2
96 2
96 2
96 2
96 2
97 2
97 2
97 2
97 2
97 2
97 2
97 2
98 2
97 2
97 2
97 2
97 2
99 2
99 2
104 2
101 2
101 2
100 2
101 2
103 2
291 2
312 2
313 2
313 2
313 2
313 2
313 2
320 2
342 2
345 2
349 2
347 2
348 2
344 2
341 2
341 2
338 2
338 2
338 2
340 2
340 2
340 2
336 2
333 2
320 1
281 1
276 1
274 1
273 1
272 1
276 0
278 0
279 0
280 0
278 0
278 0
278 0
278 0
278 0
278 0
278 0
278 0
278 0
279 0
287 0
297 0
298 0
308 0
320 0
326 0
326 0
325 0
327 0
326 0
417 0
433 0
563 2
564 2
563 2
565 2
567 2
568 2
568 2
569 2
569 2
567 2
567 2
562 2
568 2
570 2
571 2
558 2
552 2
381 2
388 2
386 2
388 2
383 2
383 2
382 2
375 2
359 2
354 2
354 2
354 2
355 2
355 2
355 2
355 2
355 2
355 2
355 2
355 2
354 2
354 2
354 2
355 2
355 2
355 2
355 2
354 2
356 2
356 2
351 2
351 2
351 2
351 2
351 2
351 2
351 2
351 2
351 2
351 2
349 2
346 2
344 2
342 2
335 2
330 2
331 2
308 2
315 3
335 3
336 3
335 3
329 3
320 3
228 3
220 3
95 1
95 1
95 1
92 1
90 1
90 1
90 1
88 1
88 1
87 1
87 1
85 1
81 1
80 1
77 1
74 1
64 1
56 1
49 1
47 1
48 1
48 1
48 1
48 1
48 1
46 1
46 1
46 1
46 1
47 1
47 1
47 1
47 1
48 1
48 1
48 1
49 1
49 1
54 1
55 1
56 2
76 2
77 2
84 2
88 2
94 2
97 2
97 2
97 2
96 2
95 2
96 3
96 3
96 3
97 3
97 3
97 3
97 3
98 3
98 3
98 3
98 3
117 3
117 3
116 3
108 2
90 2
86 2
86 2
86 2
86 2
84 2
83 2
85 2
85 2
179 2
181 2
186 2
188 2
245 3
250 3
251 3
253 3
253 3
255 3
257 3
259 3
259 3
259 3
259 3
259 3
259 3
259 3
264 3
267 3
270 3
270 3
270 3
270 3
273 3
273 3
273 3
272 3
272 3
272 3
272 3
271 3
271 3
270 3
269 3
269 3
271 3
270 3
268 2
247 2
246 2
240 2
235 2
231 2
229 2
229 2
375 4
377 4
381 5
379 4
379 4
377 4
376 4
378 4
378 4
378 4
378 4
378 4
378 5
377 5
359 5
359 5
359 5
359 5
359 5
360 5
360 5
364 5
364 5
362 5
361 5
375 5
437 5
359 4
1603 4
1688 4
1705 4
1664 3
1661 3
1661 3
1659 3
1662 3
1668 3
1700 3
1806 3
1914 3
1922 3
1942 3
1941 3
2176 3
2183 3
2181 3
2259 3
2431 4
2441 4
2443 4
2442 4
2464 4
3625 8
3882 8
3999 8
4005 8
4009 8
4010 8
4011 8
4014 8
4013 8
4012 8
4015 8
4005 8
4003 8
3999 8
3999 8
3999 8
3999 8
4000 8
3999 8
3997 8
4000 8
3847 5
3849 5
3848 5
3851 5
3850 5
3851 5
3851 5
3851 5
3852 5
3853 5
3856 5
3856 5
3856 5
3856 5
3856 5
3858 5
3868 5
3893 5
3899 5
4001 5
4002 5
3997 5
3998 5
3995 5
3958 5
3948 5
3848 5
3837 5
2639 5
2571 5
2545 5
2539 5
2538 5
2523 5
2522 5
2515 5
2503 5
2509 5
2409 5
2327 5
2324 5
2280 5
2274 4
2056 4
2044 4
2035 5
1955 5
1779 5
1733 5
1687 5
1271 2
1224 2
395 1
339 1
248 1
232 1
230 1
230 1
231 1
230 1
229 0
227 0
225 0
225 0
232 0
237 0
237 0
240 0
246 0
259 0
259 0
259 0
257 0
255 0
255 0
251 0
248 0
248 0
249 0
251 0
251 0
250 0
253 0
253 0
253 0
253 0
253 0
251 0
251 0
237 0
212 0
199 0
119 0
119 0
117 0
117 0
113 0
114 0
115 0
116 0
117 0
120 0
122 0
122 0
125 0
126 0
126 0
125 0
124 0
121 0
64 0
61 0
60 0
60 0
60 0
60 0
60 0
60 0
61 0
61 0
60 0
64 0
67 0
73 1
73 1
73 1
73 1
73 1
73 1
73 1
74 1
73 1
74 3
77 3
78 3
79 3
77 3
68 3
67 3
67 3
58 3
54 4
48 4
48 4
48 4
48 4
48 4
48 4
48 4
47 4
47 4
46 4
44 4
44 4
44 4
41 4
41 4
41 4
41 4
41 4
41 4
41 4
41 4
41 4
41 4
41 4
47 4
48 4
48 4
48 4
46 4
46 4
44 4
43 4
40 4
38 4
37 4
33 4
33 4
34 4
39 4
39 4
39 4
39 4
39 4
39 4
39 4
39 4
40 4
56 4
56 4
55 4
60 4
60 4
53 4
53 2
47 1
47 1
72 1
79 1
82 1
82 1
83 1
102 1
108 1
112 1
110 1
111 1
111 1
110 1
111 1
111 1
117 1
131 1
132 0
132 0
141 0
142 0
143 0
143 0
143 0
143 0
148 0
148 0
149 0
149 0
149 0
150 0
150 0
150 0
150 0
150 0
150 1
150 1
151 1
155 1
154 1
154 1
154 1
149 1
148 1
148 1
144 1
144 1
144 1
144 1
144 1
144 1
144 1
144 1
144 1
144 1
143 1
138 1
138 1
138 1
138 1
138 1
138 1
138 1
138 1
137 1
121 1
121 1
121 1
114 1
114 1
124 1
124 1
124 1
128 1
100 1
94 1
86 1
85 1
85 1
60 1
56 1
53 1
53 1
51 1
55 1
55 1
58 1
57 1
54 1
42 1
42 1
42 1
34 1
34 1
33 1
33 1
33 1
33 1
29 1
29 1
29 2
29 2
29 2
29 2
29 2
32 2
32 2
32 1
33 1
33 1
32 1
30 1
32 1
34 1
48 1
52 0
55 0
55 0
55 0
55 0
55 0
55 0
55 0
55 0
55 0
55 0
55 0
55 0
55 0
55 0
55 0
55 0
55 0
55 0
55 0
55 0
55 0
55 0
55 0
55 0
55 0
55 0
54 0
43 0
43 0
39 0
39 0
39 0
39 0
39 0
39 0
40 0
41 0
40 0
40 0
39 0
38 0
35 0
35 0
32 0
33 0
33 0
33 0
33 0
33 0
33 0
33 0
41 0
42 0
43 0
43 0
45 0
45 0
47 0
50 0
50 0
50 0
50 0
47 0
47 0
47 0
46 0
46 0
46 0
46 0
44 0
42 0
28 0
24 0
21 0
21 0
21 0
22 0
22 0
23 0
23 0
23 0
23 0
23 0
23 0
23 0
23 0
23 0
23 0
23 0
23 0
23 0
23 0
23 0
23 0
23 0
23 0
23 0
23 0
23 0
23 0
23 0
25 0
25 0
27 0
28 0
29 0
29 0
29 0
28 0
29 0
29 0
29 0
29 0
29 0
29 0
29 0
29 0
31 3
32 3
32 3
32 3
42 3
41 3
41 3
34 3
33 3
33 3
32 3
28 3
44 3
43 3
40 3
40 3
40 3
52 6
58 6
59 6
69 6
70 6
71 6
71 6
71 6
71 6
71 6
71 6
71 6
71 6
71 6
71 6
70 6
70 6
69 6
69 6
70 6
70 6
70 6
70 6
70 6
70 6
70 6
70 6
71 6
71 6
71 6
71 6
71 6
71 6
71 6
71 6
71 6
71 6
71 6
71 6
69 6
69 6
69 6
67 6
66 6
65 6
65 6
65 6
65 6
63 6
63 6
63 6
63 6
64 6
64 6
68 6
70 6
85 3
84 3
84 3
90 3
80 3
80 3
80 3
81 3
81 3
83 3
83 3
95 3
86 3
92 3
104 3
111 3
110 3
110 0
133 0
135 0
157 0
157 0
159 0
159 0
161 0
161 0
162 0
162 0
162 0
162 0
162 0
162 0
162 0
162 0
163 0
163 0
165 0
166 0
173 0
178 0
180 0
181 0
184 0
185 0
184 0
186 0
186 0
186 0
186 0
186 0
186 0
194 0
440 1
480 1
481 1
481 1
485 2
485 2
485 2
489 3
489 3
489 3
489 3
489 3
489 3
492 3
496 3
496 3
494 3
494 3
496 3
498 3
500 3
486 3
486 3
486 3
480 3
479 3
480 3
480 3
480 3
480 3
478 3
480 3
471 3
462 3
458 3
450 3
460 3
478 3
464 3
437 3
435 3
405 3
404 3
403 3
402 3
401 3
401 3
400 3
400 3
400 3
400 3
400 3
400 3
400 3
400 3
399 3
399 3
396 3
395 3
385 3
381 3
380 3
380 3
377 3
376 3
375 3
372 3
360 3
354 3
350 3
337 3
309 3
235 2
49 1
42 1
42 1
42 1
10 0
10 0
10 0
11 0
11 0
12 0
13 0
13 0
13 0
13 0
14 0
14 0
14 0
14 0
14 0
14 0
14 0
14 0
14 0
14 0
14 0
14 0
14 0
14 0
14 0
14 0
14 0
14 0
14 0
14 0
14 0
13 0
13 0
8 0
8 1
8 1
10 2
10 2
10 2
9 2
13 2
13 2
13 2
13 2
14 3
14 3
14 3
14 3
14 3
14 3
14 3
14 3
14 3
14 3
14 3
14 3
14 3
14 3
14 3
14 3
14 3
14 3
14 3
14 3
13 3
13 3
13 3
18 3
18 3
17 3
19 3
20 3
20 3
20 3
20 3
20 3
19 3
18 3
18 3
17 3
17 3
17 3
17 3
15 3
15 3
15 3
15 3
15 3
15 3
15 3
15 3
15 3
15 3
16 3
16 3
16 3
16 3
16 3
16 3
16 3
16 3
16 3
16 3
16 3
16 3
17 3
17 2
17 2
17 1
15 0
15 0
15 0
15 0
11 0
11 0
11 0
11 0
10 0
10 0
11 0
11 0
11 0
11 0
11 0
11 0
11 0
11 0
11 0
11 0
11 0
11 0
18 0
22 1
121 1
125 1
129 2
144 2
155 2
155 2
162 2
166 2
168 2
168 2
166 2
165 2
165 2
165 2
165 2
165 2
165 2
165 2
165 2
164 2
164 2
164 2
164 2
165 2
166 2
175 3
184 3
184 3
184 3
184 3
184 3
184 3
184 3
185 3
195 3
201 3
207 3
209 3
212 3
213 3
216 3
216 3
216 3
217 3
222 3
221 3
221 3
221 3
228 3
231 3
232 3
234 3
235 3
235 3
234 3
236 3
232 3
238 3
237 3
234 3
232 3
228 3
228 3
228 3
229 3
229 3
232 3
232 3
233 3
233 3
233 3
226 3
216 2
125 1
121 1
122 1
114 1
107 1
105 1
102 1
98 1
95 1
95 1
95 1
95 1
95 1
95 1
95 1
95 1
95 1
95 1
95 1
95 1
95 1
94 1
94 1
93 1
85 1
81 0
75 0
75 0
72 0
72 0
72 0
70 0
69 0
67 0
59 0
56 0
49 0
47 0
45 0
41 0
40 0
40 0
41 0
42 0
38 0
38 0
37 0
37 0
30 0
27 0
23 0
24 0
23 0
22 0
21 0
20 0
20 0
15 0
18 0
18 0
18 0
18 0
19 0
19 0
18 0
18 0
17 0
16 0
14 0
14 0
14 0
14 0
14 0
14 0
14 0
13 0
14 0
14 0
14 0
11 0
11 0
11 0
11 0
11 0
11 0
11 0
11 0
11 0
11 0
11 0
11 0
11 0
11 0
11 0
10 0
10 0
10 0
10 0
10 0
9 0
9 0
9 0
9 0
9 0
9 0
10 0
12 0
12 0
12 0
12 0
12 0
12 0
12 0
12 0
11 0
11 0
10 0
9 0
9 0
9 0
9 0
9 0
9 0
9 0
8 0
8 0
8 0
8 0
7 0
8 0
8 0
5 0
5 0
5 0
5 0
5 0
5 0
5 0
5 0
5 0
6 0
6 0
6 0
6 0
6 0
6 0
6 0
6 0
6 0
5 0
5 0
5 0
5 0
5 0
5 0
5 0
5 0
5 0
5 0
5 0
6 0
6 0
6 0
6 0
6 0
6 0
6 0
6 0
6 0
6 0
7 0
8 0
10 0
10 0
10 0
10 0
10 0
9 0
8 0
7 0
7 0
7 0
7 0
7 0
10 0
10 0
10 0
10 0
10 0
12 0
12 0
13 0
13 0
18 0
18 0
20 0
20 0
20 0
20 0
20 0
20 0
19 0
19 0
19 0
19 0
19 0
19 0
19 1
19 1
19 1
19 1
19 1
19 1
18 1
18 1
18 1
18 1
18 1
18 1
18 1
18 2
18 3
18 3
22 4
22 4
22 4
22 5
22 5
22 5
22 6
22 6
23 6
25 7
24 7
24 7
24 7
24 7
24 7
23 7
23 7
23 7
24 7
24 7
24 7
23 7
21 7
21 7
21 7
22 10
22 10
22 10
22 10
22 10
22 10
22 10
22 10
25 10
22 10
23 10
23 10
23 10
36 10
37 10
38 10
38 10
38 10
34 10
33 10
32 10
32 10
44 20
44 21
44 21
44 21
44 21
44 21
129 48
131 52
133 52
133 54
133 54
134 55
134 53
140 53
151 54
157 55
162 55
162 55
164 56
164 56
165 57
167 57
167 60
175 62
179 65
179 65
176 65
185 66
190 67
191 67
191 67
191 66
191 67
191 67
193 67
194 68
200 69
200 69
200 69
200 69
200 69
200 69
201 69
205 69
204 69
204 69
204 69
204 69
204 67
204 66
204 65
203 55
203 55
203 55
203 56
203 49
203 49
203 49
205 49
204 49
214 49
213 49
212 49
209 47
187 46
172 47
170 49
170 49
171 49
171 49
172 49
174 49
174 49
174 49
174 49
174 49
174 49
171 49
171 49
99 27
99 25
95 25
93 25
92 26
90 27
88 27
85 27
75 25
67 24
62 24
61 24
61 24
61 23
61 23
60 23
57 18
54 15
52 14
50 14
47 14
38 14
33 13
31 13
31 13
31 13
31 11
31 11
28 10
26 10
18 9
18 9
17 9
17 9
17 9
17 9
17 9
14 9
14 9
14 9
14 9
14 10
14 10
14 10
14 10
14 10
14 10
14 9
14 9
14 9
14 9
14 9
14 13
12 14
6 15
6 15
6 15
6 15
6 15
6 13
6 9
6 9
5 9
5 9
2 9
2 9
2 9
2 9
2 9
2 9
2 9
2 9
2 9
2 9
2 9
3 7
3 7
3 7
3 7
3 7
3 7
3 7
3 7
3 7
3 7
3 7
3 7
1 7
1 7
2 7
2 7
2 7
2 7
2 7
4 7
5 7
5 7
5 7
5 7
5 7
5 7
5 7
5 7
5 7
5 7
5 7
5 7
5 7
5 7
5 8
5 8
5 8
5 8
5 7
5 7
5 7
5 7
5 7
5 7
5 7
5 7
5 7
6 7
6 8
6 8
6 4
6 2
6 2
6 2
6 4
6 4
7 4
8 4
8 4
9 4
9 4
9 4
9 4
9 4
10 4
10 4
10 4
11 4
12 4
12 4
12 4
14 4
21 4
31 4
33 4
33 4
33 4
33 4
33 4
33 4
34 4
34 4
34 4
34 4
34 4
34 4
34 4
33 4
34 4
34 4
34 4
34 4
31 4
31 4
31 4
31 4
33 4
33 4
36 4
44 4
47 4
56 4
59 4
59 4
59 5
59 5
59 5
59 4
59 4
59 4
59 5
59 5
59 6
59 6
59 6
59 6
59 6
59 6
59 6
59 6
58 6
58 5
58 5
58 5
58 5
58 5
58 6
58 4
58 4
55 4
55 4
55 4
54 4
57 4
56 4
56 4
56 4
55 4
55 4
55 4
54 4
53 4
52 4
52 4
51 4
45 5
35 5
34 5
38 5
39 5
40 5
41 5
41 5
40 5
40 5
40 5
40 5
40 5
40 5
39 5
39 5
39 5
39 5
39 5
40 5
40 5
39 5
39 5
39 5
35 5
32 5
30 5
24 5
23 5
12 5
12 6
13 6
13 5
13 5
13 5
13 5
13 4
13 4
13 3
13 3
13 3
13 3
13 3
13 3
14 3
14 3
33 6
36 6
36 6
36 6
36 6
36 6
36 5
36 5
36 5
37 10
37 10
38 10
38 10
38 10
38 10
35 10
35 10
35 10
35 10
35 11
35 11
35 11
35 11
35 11
35 11
35 11
36 11
34 10
34 10
33 10
30 10
29 10
28 10
27 10
27 10
27 10
27 10
27 10
27 10
27 10
27 10
28 10
28 10
28 10
28 10
28 10
28 10
28 10
28 10
28 10
28 10
28 10
29 10
29 10
29 10
29 10
29 10
29 9
28 9
28 9
28 9
28 9
28 9
28 9
28 9
28 9
29 9
29 9
26 9
27 9
27 9
21 9
21 9
9 6
10 6
10 6
11 6
13 6
13 6
14 6
14 6
14 6
12 0
12 0
12 0
12 0
13 0
14 0
14 0
14 0
14 0
14 0
14 0
15 0
16 0
16 0
16 0
16 0
16 0
15 0
15 0
15 0
15 0
15 0
15 0
15 0
15 0
15 0
15 0
15 0
15 0
15 0
15 0
15 0
13 0
13 0
12 0
12 0
12 0
12 0
12 0
12 0
12 0
12 0
12 0
11 0
11 0
11 0
11 0
11 0
11 0
11 0
11 0
11 0
11 0
11 0
11 0
9 0
9 0
8 0
8 0
8 0
7 0
7 0
7 0
6 0
3 0
3 0
3 0
3 0
2 0
2 0
2 0
2 0
2 0
2 0
2 0
2 0
2 0
2 0
2 0
3 0
3 0
3 0
2 0
1 0
1 0
1 0
1 0
3 0
4 0
4 0
7 0
7 0
9 0
9 0
9 0
10 0
11 0
11 0
11 0
12 0
12 0
16 0
16 0
16 0
16 0
16 0
16 0
16 0
16 0
16 0
16 0
16 0
16 0
16 0
16 0
16 2
16 2
16 2
20 2
20 2
20 2
20 2
20 2
20 2
20 2
20 2
20 2
20 2
20 2
20 2
20 2
20 2
20 2
19 2
19 2
19 2
19 2
19 2
19 2
19 2
19 1
19 1
19 1
19 1
19 1
19 1
19 1
19 1
19 1
19 1
19 1
19 1
18 1
18 1
18 1
18 1
18 1
18 1
18 1
18 1
16 1
15 1
15 1
12 1
12 1
10 1
10 1
10 1
9 1
8 2
8 2
7 2
6 2
5 2
2 1
2 1
1 1
1 1
1 1
1 1
1 1
1 1
1 1
1 1
1 1
1 1
1 1
1 1
1 1
1 1
1 1
0 1
0 1
0 1
0 1
0 1
0 1
0 1
0 1
0 1
0 1
0 1
0 1
0 1
0 1
0 1
0 1
0 1
0 1
0 1
0 1
0 1
0 1
0 1
0 1
0 2
0 2
0 2
0 2
0 2
0 3
0 3
0 3
0 3
0 3
0 3
0 3
0 3
0 3
0 3
0 3
0 3
0 3
0 3
0 3
0 3
0 3
0 3
0 3
0 3
0 3
0 3
0 2
0 2
0 2
0 2
0 2
0 2
0 2
1 2
1 2
1 2
1 2
1 2
1 2
1 2
1 2
1 2
1 2
1 2
1 2
1 2
1 2
1 2
1 2
1 2
1 2
1 2
1 2
1 2
1 2
1 2
1 2
1 2
1 2
1 2
1 2
1 2
1 2
1 2
1 2
2 2
6 2
6 2
6 2
7 2
7 2
7 2
7 1
7 1
7 1
7 0
7 0
7 0
7 0
7 0
7 0
7 0
7 0
7 0
7 0
7 1
7 1
7 1
7 1
7 2
7 2
7 2
7 2
7 2
7 2
7 2
7 2
7 2
7 2
7 2
7 2
7 2
7 2
7 2
7 2
7 2
6 2
6 2
6 2
6 2
6 2
6 2
6 2
6 2
6 2
6 2
6 2
6 2
6 2
6 2
6 2
6 2
6 2
6 2
6 2
6 2
6 1
6 0
6 0
6 0
6 0
6 0
6 0
6 0
4 0
4 0
4 0
4 0
3 0
1 0
1 0
1 0
0 0
0 0
0 0
0 0
0 0
0 0
0 0
0 0
0 0
0 0
0 0
0 0
0 0
1 0
1 0
1 0
1 0
1 0
1 0
2 0
2 0
2 0
6 0
12 0
18 0
19 0
29 0
29 0
29 0
29 0
31 0
31 0
32 0
32 0
32 0
32 0
32 0
32 0
32 0
32 0
32 0
32 0
32 0
35 0
35 0
35 0
35 0
35 0
35 0
35 0
35 0
35 0
35 0
35 0
35 0
35 0
35 0
35 0
35 0
35 0
35 0
35 0
35 0
35 0
35 0
36 0
36 0
36 0
36 0
36 0
36 0
36 0
37 0
37 0
37 0
37 0
37 0
37 0
37 0
37 0
37 0
37 0
37 0
37 0
36 0
36 0
36 0
36 0
36 0
36 0
36 0
36 0
35 0
35 0
35 0
29 0
22 0
19 0
18 0
8 0
7 0
7 0
7 0
6 0
6 0
7 0
8 0
11 0
11 0
11 0
11 0
13 0
13 0
13 0
15 0
29 0
34 0
34 0
34 0
34 0
34 0
34 1
35 1
35 1
35 1
35 4
35 4
35 4
35 4
35 4
35 4
35 4
35 4
35 4
35 4
35 4
35 4
35 4
34 4
34 4
34 4
34 4
34 4
34 4
34 4
33 4
33 4
33 4
33 4
33 4
33 4
33 4
33 4
33 4
33 4
33 4
33 4
33 4
33 4
33 4
33 4
33 4
33 4
34 4
34 4
34 4
34 4
34 4
34 4
34 4
34 4
34 4
34 4
34 4
34 4
34 4
34 4
31 4
31 4
30 4
28 4
28 4
29 4
28 4
26 4
24 5
20 5
19 5
10 5
3 5
3 5
3 5
3 5
3 5
3 4
2 4
2 4
2 4
2 1
1 1
1 1
1 1
1 1
1 1
1 3
1 4
1 4
1 4
1 4
1 4
1 4
1 4
1 4
1 4
1 4
1 4
1 4
1 4
1 4
1 4
3 5
3 5
3 5
3 5
3 5
3 5
3 5
3 5
3 5
3 5
3 5
3 5
3 5
3 5
3 5
3 5
2 5
2 5
2 5
2 5
2 5
2 5
2 5
2 5
2 5
2 5
2 5
2 5
2 5
2 5
2 5
2 5
2 5
2 5
2 5
2 5
2 5
2 5
2 4
2 5
2 5
2 5
2 5
2 5
2 5
2 5
2 5
2 5
2 5
2 5
2 5
2 5
2 5
2 5
2 5
2 5
2 5
2 3
2 2
2 2
2 2
2 2
2 2
2 2
2 2
3 2
3 2
3 2
3 2
5 2
6 2
6 2
6 1
5 1
5 1
6 1
6 1
6 1
6 1
6 1
6 1
6 1
6 1
6 1
6 1
6 1
6 1
6 1
6 1
6 1
6 1
6 1
6 1
7 1
7 1
7 1
7 1
7 1
7 1
7 1
7 1
7 1
7 1
7 1
7 1
7 1
7 1
7 1
7 1
7 1
7 1
7 1
7 0
7 0
8 0
8 0
9 0
11 5
11 5
11 5
11 5
11 5
12 5
20 7
21 7
21 7
21 7
21 7
23 7
23 7
23 7
23 7
23 7
23 7
23 7
23 7
23 7
23 7
22 7
22 7
22 7
22 7
20 7
19 7
19 7
19 7
18 7
18 7
17 7
18 7
19 7
19 7
19 7
19 7
19 7
19 8
19 10
19 10
19 10
19 10
19 10
19 10
19 10
19 10
19 10
19 10
18 10
18 10
18 10
18 10
18 10
18 10
18 10
18 10
18 10
18 10
18 10
18 10
18 10
18 10
18 10
18 10
18 10
18 11
18 11
18 11
18 11
17 11
17 11
16 11
13 6
13 6
13 6
12 6
12 6
11 6
4 4
3 4
2 4
1 4
0 4
0 4
0 4
0 4
0 4
3 4
3 4
3 4
3 4
3 4
3 4
3 4
3 4
3 4
3 4
3 4
3 4
3 4
3 4
3 4
3 4
3 4
3 4
3 4
3 4
3 4
3 4
3 4
3 3
3 1
3 1
3 1
3 1
3 1
3 1
3 1
3 1
3 1
3 1
3 1
3 1
3 1
3 1
3 1
3 1
3 1
3 1
3 1
3 1
3 1
3 1
3 1
3 1
1 1
1 1
1 1
2 0
2 0
2 0
2 0
2 0
2 0
2 0
2 0
2 0
2 0
2 0
2 0
2 0
2 0
2 0
1 0
1 0
1 0
1 0
1 0
1 0
1 0
1 0
1 0
1 0
1 0
1 0
1 0
1 0
1 0
1 0
1 0
1 0
1 0
1 0
1 0
1 4
2 4
2 4
2 4
2 4
2 4
2 4
2 4
2 4
2 4
2 4
2 4
2 4
2 4
2 4
2 4
2 4
2 4
2 4
2 4
2 4
2 4
2 5
2 5
2 5
2 5
2 5
2 5
2 5
2 5
2 5
2 5
2 5
2 5
2 5
2 5
2 5
2 4
2 4
3 4
4 4
4 4
4 4
4 4
4 4
4 4
4 4
4 4
4 4
4 4
4 4
4 4
4 4
4 4
4 4
4 4
4 4
4 4
4 4
3 4
8 4
8 4
8 4
8 4
9 4
10 4
17 4
17 4
17 4
17 4
17 4
17 4
17 4
17 0
16 0
16 0
16 0
16 0
16 0
16 0
16 0
16 0
16 0
16 0
16 0
16 0
16 0
16 0
16 0
16 0
16 0
16 0
16 0
16 0
16 0
16 0
16 0
16 0
16 0
16 0
16 0
16 0
16 0
16 0
16 0
16 0
16 0
16 0
16 0
16 0
16 0
16 0
15 0
14 0
14 0
14 0
14 0
14 0
14 0
14 0
14 0
14 0
14 0
14 0
14 0
14 0
14 0
14 0
14 0
14 0
14 0
14 0
14 0
9 0
9 0
9 0
9 0
7 0
6 0
0 0
0 0
0 0
0 0
0 0
0 0
0 0
0 0
0 0
0 0
0 0
0 0
0 0
0 0
0 0
0 0
0 0
0 0
0 0
0 0
0 0
0 0
0 0
0 0
0 0
0 0
0 0
0 0
0 0
0 0
0 0
0 0
0 0
0 0
0 0
0 0
0 0
0 0
0 0
0 0
0 0
0 0
0 0
0 0
0 0
0 0
0 0
0 0
0 0
0 0
0 0
0 0
0 0
0 0
0 0
0 0
0 0
0 0
0 0
0 0
0 0
0 0
0 0
0 0
0 0
0 0
0 0
0 0
0 0
0 0
0 0
0 0
0 0
0 0
0 0
0 0
0 0
0 0
0 0
0 0
0 0
0 0
0 0
0 0
0 0
0 0
0 0
0 0
0 0
0 0
0 0
0 0
0 0
0 0
0 0
0 0
0 0
0 0
0 0
0 0
0 0
0 0
0 0
0 0
0 0
0 0
0 0
0 0
0 0
0 0
0 0
0 0
0 0
0 0
0 0
0 0
0 0
0 0
0 0
0 0
0 0
0 0
0 0
0 0
0 0
0 0
0 0
0 0
0 0
0 0
0 0
0 0
0 0
0 0
0 0
0 0
0 0
0 0
0 0
0 0
0 0
0 0
0 0
0 0
0 0
0 0
0 0
0 0
0 0
0 0
0 0
0 0
0 0
0 0
0 0
0 0
0 0
0 0
0 0
0 0
0 0
0 0
0 0
0 0
0 0
0 0
0 0
0 0
0 0
0 0
0 0
0 0
0 0
0 0
0 0
0 0
0 0
0 0
0 0
0 0
0 0
0 0
0 0
0 0
0 0
0 0
0 0
0 0
0 0
0 0
0 0
0 0
0 0
0 0
0 0
0 0
0 0
0 0
0 0
0 0
0 0
0 0
0 0
0 0
0 0
0 0
0 0
0 0
0 0
0 0
0 0
0 0
0 0
0 0
0 0
0 0
0 0
0 0
0 0
0 0
0 0
0 0
0 0
0 0
0 0
0 0
0 0
0 0
0 0
0 0
0 0
0 0
0 0
0 0
0 0
0 0
0 0
0 0
0 0
0 0
0 0
0 0
0 0
0 0
0 0
0 0
0 0
0 0
0 0
0 0
0 0
0 0
0 0
0 0
0 0
0 0
0 0
0 0
0 0
0 0
0 0
0 0
0 0
0 0
0 0
0 0
0 0
0 0
0 0
0 0
0 0
0 0
0 0
0 0
0 0
0 0
0 0
0 0
0 0
0 0
0 0
0 0
0 0
0 0
0 0
0 0
0 0
0 0
0 0
0 0
0 0
0 0
0 0
0 0
0 0
0 0
0 0
0 0
0 0
0 0
0 0
0 0
0 0
0 0
0 0
0 0
0 0
0 0
0 0
0 0
0 0
0 0
0 0
0 0
0 0
0 0
0 0
0 0
0 0
0 0
0 0
0 0
0 0
0 0
0 0
0 0
0 0
0 0
0 0
0 0
0 0
0 0
0 0
0 0
0 0
0 0
0 0
0 0
0 0
0 0
0 0
0 0
0 0
0 0
0 0
0 0
0 0
0 0
0 0
0 0
0 0
0 0
0 0
0 0
0 0
0 0
0 0
0 0
0 0
0 0
0 0
0 0
0 0
0 0
0 0
0 0
0 0
0 0
0 0
1 0
1 0
1 0
1 0
1 0
1 0
1 0
1 0
1 0
1 0
1 0
1 0
1 0
1 0
1 0
0 0
0 0
0 0
0 0
0 0
0 0
0 0
0 0
0 0
0 0
0 0
0 0
0 0
0 0
0 0
0 0
0 0
0 0
0 0
0 0
0 0
0 0
0 0
0 0
0 0
0 0
0 0
1 0
1 0
1 0
1 0
1 0
1 0
1 0
1 0
1 0
1 0
1 0
1 0
1 0
1 0
1 0
1 0
1 0
1 0
1 0
1 0
1 0
1 0
1 0
1 0
1 0
1 0
1 0
1 0
1 0
1 0
1 0
1 0
1 0
1 0
1 0
1 0
1 0
1 0
1 0
1 0
1 0
1 0
1 0
1 0
1 0
1 0
1 0
1 0
1 0
1 0
1 0
1 0
1 0
1 0
1 0
1 0
1 0
1 0
1 0
1 0
1 0
1 0
1 0
1 0
1 0
1 0
2 0
2 0
2 0
2 0
3 0
3 0
3 0
2 0
2 0
2 0
2 0
2 0
3 0
3 0
3 0
3 0
3 0
3 0
3 0
5 0
5 0
5 0
5 0
6 0
7 0
8 0
8 0
9 0
9 0
9 0
9 0
9 0
9 0
9 0
9 0
10 0
10 0
12 0
12 0
12 0
12 0
12 0
12 0
12 0
12 0
12 0
12 0
12 0
12 0
14 0
14 0
15 0
15 0
15 0
18 0
18 0
18 0
20 0
20 0
21 0
22 0
21 0
21 0
22 0
24 0
25 0
29 0
28 0
29 0
31 0
35 0
34 0
33 0
33 0
33 0
33 0
33 0
30 0
30 0
31 0
31 0
31 0
31 0
31 0
31 0
31 0
31 0
31 0
31 0
31 0
31 0
31 0
30 0
30 0
32 0
38 0
37 0
37 0
37 0
37 0
37 0
37 0
38 0
38 0
38 0
38 0
38 0
34 0
34 0
34 0
32 0
32 0
32 0
32 0
32 0
31 0
31 0
31 0
31 0
31 0
30 0
30 0
27 0
25 0
24 0
24 0
24 0
40 0
48 0
68 0
68 0
68 0
68 0
68 0
67 0
65 0
65 0
62 0
64 0
62 0
62 0
61 0
62 0
95 0
107 0
111 0
113 0
118 0
119 0
130 0
130 0
138 0
138 0
148 0
148 0
157 0
157 0
157 0
158 0
159 0
159 0
160 0
161 0
161 0
161 0
160 0
160 0
162 0
157 0
158 0
158 0
159 0
159 0
159 0
159 0
162 0
203 0
204 0
205 0
205 0
205 0
205 0
205 0
205 0
205 0
205 0
205 0
205 0
205 0
205 0
205 0
205 0
205 0
205 0
205 0
204 0
204 0
203 0
200 0
161 0
142 0
137 0
115 0
116 0
116 0
117 0
116 0
116 0
116 0
116 0
116 0
113 0
110 0
107 0
101 0
89 0
80 0
26 0
11 0
6 0
6 0
6 0
6 0
6 0
6 0
6 0
6 0
6 0
6 0
6 0
6 0
6 0
6 0
7 0
7 0
7 0
7 0
7 0
7 0
7 0
7 0
7 0
7 0
7 0
7 0
7 0
7 0
7 0
7 0
7 0
7 0
8 0
8 0
8 0
8 0
9 0
9 0
9 0
9 0
11 0
11 0
11 0
11 0
11 0
11 0
11 0
11 0
11 0
11 0
11 0
11 0
11 0
12 0
12 0
12 0
8 0
10 0
13 0
13 0
13 0
13 0
13 0
11 0
11 0
11 0
11 0
12 0
12 0
12 0
12 0
12 0
13 0
13 0
13 0
13 0
15 0
15 0
15 0
15 0
15 0
14 0
14 0
14 0
14 0
14 0
14 0
13 0
13 0
12 0
12 0
12 0
12 0
12 0
12 0
12 0
12 0
12 0
12 0
12 0
12 0
12 0
12 0
12 0
12 0
11 0
11 0
11 0
11 0
11 0
11 0
11 0
12 0
11 0
11 0
11 0
12 0
12 0
12 0
12 0
12 0
12 0
13 0
12 0
12 0
12 0
9 0
6 0
6 0
6 0
6 0
6 0
6 0
6 0
6 0
5 0
5 0
5 0
5 0
5 0
5 0
5 0
6 0
7 0
7 0
10 0
10 0
10 0
11 0
11 0
11 0
11 0
12 0
39 0
39 0
39 0
39 0
40 0
40 0
40 0
40 0
41 0
41 0
41 0
42 0
42 0
42 0
42 0
42 0
42 0
42 0
42 0
42 0
42 0
42 0
42 0
42 0
42 0
42 0
42 0
42 0
42 0
44 0
44 0
44 0
43 0
43 0
43 0
43 0
42 0
41 0
41 0
41 0
41 0
39 0
39 0
39 0
39 0
40 0
40 0
40 0
42 0
42 0
42 0
42 0
48 0
50 0
50 0
49 0
46 0
47 0
46 0
44 0
44 0
43 0
42 0
40 0
40 0
38 0
38 0
38 0
37 0
37 0
35 0
22 0
22 0
16 0
16 0
16 0
16 0
15 0
15 0
15 0
15 0
14 0
14 0
14 0
14 0
14 0
14 0
14 0
14 0
14 0
14 0
14 0
14 0
14 0
14 0
14 0
14 0
13 0
13 0
13 0
13 0
13 0
13 0
13 0
12 0
12 0
12 0
12 0
12 0
12 0
12 0
12 0
8 0
8 0
9 0
7 0
8 0
8 0
8 0
8 0
7 0
4 0
3 0
3 0
3 0
3 0
3 0
3 0
3 0
3 0
2 0
3 0
3 0
3 0
3 0
3 0
3 0
3 0
5 0
5 0
5 0
6 0
7 0
8 0
8 0
8 0
8 0
8 0
8 0
8 0
8 0
8 0
9 0
9 0
9 0
9 0
10 0
10 0
11 0
10 0
12 0
12 0
12 0
12 0
12 0
12 0
12 0
12 0
13 0
13 0
13 0
13 0
13 0
13 0
13 0
13 0
13 0
13 0
13 0
13 0
13 0
13 0
13 0
13 0
13 0
12 0
12 0
12 0
11 0
10 0
10 0
10 0
10 0
10 0
10 0
10 0
10 0
10 0
11 0
11 0
11 0
11 0
10 0
10 0
7 0
7 0
7 0
7 0
7 0
7 0
7 0
7 0
7 0
7 0
7 0
6 0
8 0
9 0
12 0
13 0
13 0
14 0
14 0
14 0
13 0
13 0
13 0
13 0
13 0
12 0
12 0
10 0
10 0
10 0
10 0
10 0
10 0
10 0
10 0
10 0
10 0
10 0
10 0
12 0
12 0
12 0
13 0
13 0
13 0
13 0
13 0
13 0
13 0
13 0
13 0
13 0
14 0
14 0
14 0
14 0
14 0
14 0
14 0
15 0
15 0
15 0
15 0
16 0
15 0
15 0
15 0
15 0
15 0
15 0
15 0
15 0
15 0
15 0
15 0
15 0
15 0
16 0
16 0
17 0
17 0
17 0
17 0
16 0
16 0
13 0
12 0
10 0
9 0
9 0
9 0
9 0
9 0
9 0
8 0
8 0
8 0
8 0
8 0
8 0
8 0
8 0
8 0
8 0
12 0
16 0
21 0
24 0
24 0
23 0
20 0
20 0
19 0
19 0
19 0
19 0
19 0
19 0
19 0
19 0
19 0
19 0
22 0
25 0
26 0
26 0
26 0
26 0
26 0
26 0
26 0
26 0
26 0
26 0
27 0
27 0
26 0
26 0
26 0
26 0
26 0
27 0
27 0
27 0
27 0
28 0
28 0
27 0
27 0
27 0
27 0
27 0
27 0
27 0
27 0
27 0
27 0
29 0
31 0
30 0
31 0
33 0
33 0
35 0
36 0
36 0
36 0
38 0
38 0
38 0
38 0
38 0
38 0
38 0
37 0
36 0
36 0
33 0
30 0
25 0
23 0
25 0
24 0
25 0
25 0
25 0
25 0
25 0
26 0
26 0
26 0
26 0
26 0
26 0
26 0
22 0
21 0
21 0
21 0
21 0
21 0
21 0
22 0
22 0
22 0
22 0
22 0
22 0
22 0
22 0
22 0
22 0
22 0
22 0
21 0
21 0
20 0
19 0
19 0
20 0
20 0
20 0
20 0
20 0
20 0
20 0
18 0
15 0
16 0
15 0
13 0
12 0
10 0
8 0
7 0
7 0
6 0
6 0
6 0
6 0
6 0
6 0
6 0
6 0
6 0
6 0
6 0
5 0
5 0
5 0
5 0
5 0
5 0
4 0
4 0
4 0
4 0
4 0
4 0
4 0
4 0
4 0
4 0
4 0
3 0
3 0
3 0
3 0
3 0
3 0
4 0
4 0
4 0
5 0
5 0
4 0
4 0
4 0
4 0
4 0
4 0
4 0
4 0
4 0
4 0
4 0
4 0
4 0
4 0
4 0
5 0
5 0
5 0
5 0
6 0
6 0
9 0
9 0
9 0
9 0
9 0
8 0
9 0
9 0
9 0
9 0
9 0
11 0
11 0
13 0
13 0
13 0
14 0
14 0
14 0
14 0
14 0
14 0
14 0
14 0
14 0
15 0
15 0
15 0
18 0
18 0
18 0
18 0
18 0
18 0
20 0
20 0
21 0
19 0
18 0
18 0
18 0
17 0
17 0
17 0
17 0
17 0
17 0
17 0
17 0
17 0
17 0
17 0
17 0
17 0
17 0
17 0
17 0
17 0
17 0
17 0
17 0
17 0
17 0
18 0
18 0
18 0
18 0
17 0
17 0
15 0
13 0
12 0
12 0
10 0
10 0
10 0
8 0
8 0
8 0
8 0
8 0
8 0
8 0
8 0
8 0
8 0
8 0
8 0
8 0
8 0
8 0
8 0
8 0
8 0
8 0
8 0
8 0
7 0
6 0
6 0
5 0
5 0
5 0
5 0
5 0
5 0
5 0
2 0
2 0
2 0
2 0
2 0
2 0
2 0
2 0
2 0
2 0
2 0
2 0
2 0
2 0
2 0
2 0
2 0
2 0
2 0
5 0
5 0
5 0
5 0
5 0
5 0
5 0
5 0
5 0
4 0
3 0
3 0
3 0
3 0
3 0
4 0
4 0
4 0
4 0
4 0
4 0
4 0
4 0
4 0
4 0
4 0
4 0
4 0
4 0
4 0
4 0
4 0
4 0
4 0
4 0
5 0
5 0
5 0
5 0
5 0
5 0
5 0
5 0
5 0
5 0
5 0
5 0
5 0
5 0
5 0
5 0
5 0
5 0
5 0
5 0
5 0
5 0
5 0
6 0
6 0
6 0
6 0
6 0
6 0
6 0
6 0
6 0
6 0
6 0
6 0
6 0
7 0
7 0
5 0
11 0
11 0
12 0
12 0
15 0
15 0
16 0
16 0
16 0
16 0
16 0
15 0
15 0
15 0
14 0
14 0
14 0
14 0
14 0
14 0
14 0
15 0
15 0
15 0
15 0
17 0
18 0
18 0
19 0
20 0
20 0
21 0
22 0
23 0
24 0
24 0
24 0
24 0
25 0
25 0
25 0
25 0
25 0
25 0
25 0
25 0
25 0
25 0
25 0
25 0
27 0
26 0
27 0
27 0
27 0
27 0
27 0
24 0
24 0
24 0
25 0
25 0
25 0
27 0
27 0
27 0
26 0
26 0
20 0
20 0
19 0
19 0
19 0
19 0
19 0
19 0
18 0
18 0
18 0
18 0
18 0
18 0
18 0
18 0
18 0
17 0
17 0
17 0
17 0
16 0
16 0
16 0
16 0
16 0
16 0
16 0
13 0
11 0
11 0
10 0
10 0
10 0
10 0
8 0
8 0
7 0
5 0
5 0
5 0
6 0
6 0
5 0
5 0
5 0
5 0
5 0
5 0
5 0
5 0
5 0
5 0
5 0
5 0
4 0
4 0
3 0
2 0
2 0
2 0
2 0
2 0
2 0
2 0
2 0
2 0
2 0
1 0
1 0
1 0
1 0
1 0
1 0
1 0
1 0
1 0
1 0
1 0
1 0
1 0
1 0
1 0
1 0
1 0
1 0
1 0
1 0
1 0
1 0
1 0
1 0
1 0
1 0
1 0
1 0
1 0
1 0
1 0
1 0
1 0
1 0
1 0
1 0
0 0
0 0
0 0
0 0
0 0
0 0
0 0
0 0
0 0
0 0
0 0
0 0
0 0
0 0
0 0
0 0
1 0
1 0
1 0
1 0
1 0
1 0
1 0
1 0
1 0
1 0
1 0
1 0
1 0
1 0
1 0
1 0
1 0
1 0
1 0
1 0
1 0
2 0
2 0
2 0
2 0
2 0
2 0
2 0
2 0
2 0
2 0
2 0
2 0
2 0
2 0
2 0
2 0
2 0
2 0
2 0
2 0
2 0
2 0
2 0
2 0
2 0
3 0
3 0
3 0
3 0
3 0
3 0
3 0
3 0
3 0
3 0
3 0
3 0
3 0
3 0
3 0
3 0
3 0
4 0
4 0
4 0
4 0
4 0
4 0
4 0
3 0
3 0
3 0
3 0
3 0
3 0
3 0
3 0
3 0
3 0
4 0
4 0
4 0
4 0
4 0
4 0
4 0
4 0
4 0
4 0
4 0
3 0
3 0
3 0
3 0
3 0
3 0
3 0
3 0
3 0
3 0
3 0
4 0
4 0
5 0
5 0
5 0
5 0
6 0
6 0
6 0
5 0
5 0
5 0
5 0
5 0
5 0
6 0
9 0
8 0
8 0
8 0
8 0
11 0
11 0
11 0
11 0
11 0
11 0
11 0
11 0
11 0
11 0
11 0
11 0
11 0
11 0
12 0
12 0
12 0
12 0
12 0
12 0
12 0
11 0
11 0
11 0
11 0
11 0
11 0
12 0
12 0
12 0
12 0
12 0
12 0
12 0
12 0
12 0
12 0
12 0
13 0
14 0
14 0
14 0
16 0
16 0
16 0
16 0
16 0
16 0
17 0
18 0
18 0
18 0
17 0
17 0
16 0
16 0
18 0
17 0
18 0
18 0
18 0
20 0
20 0
20 0
21 0
22 0
23 0
23 0
20 0
20 0
22 0
21 0
22 0
20 0
20 0
20 0
20 0
20 0
21 0
21 0
21 0
21 0
21 0
20 0
20 0
20 0
21 0
21 0
21 0
21 0
21 0
21 0
21 0
21 0
22 0
22 0
22 0
21 0
21 0
21 0
21 0
21 0
20 0
21 0
21 0
20 0
20 0
20 0
19 0
19 0
19 0
18 0
18 0
18 0
18 0
17 0
17 0
17 0
17 0
17 0
17 0
16 0
15 0
18 0
17 0
17 0
17 0
16 0
16 0
12 0
12 0
12 0
12 0
8 0
7 0
7 0
7 0
7 0
7 0
7 0
6 0
6 0
6 0
6 0
6 0
6 0
6 0
6 0
6 0
6 0
6 0
6 0
6 0
6 0
6 0
6 0
6 0
6 0
6 0
5 0
5 0
5 0
6 0
6 0
6 0
6 0
6 0
6 0
6 0
6 0
6 0
6 0
6 0
6 0
6 0
5 0
5 0
5 0
5 0
5 0
5 0
5 0
5 0
5 0
5 0
5 0
5 0
5 0
5 0
5 0
5 0
4 0
4 0
3 0
3 0
3 0
2 0
1 0
1 0
1 0
1 0
1 0
1 0
1 0
1 0
1 0
1 0
1 0
1 0
1 0
1 0
1 0
1 0
0 0
0 0
0 0
0 0
0 0
0 0
0 0
0 0
0 0
0 0
0 0
0 0
0 0
0 0
0 0
0 0
0 0
0 0
0 0
0 0
0 0
0 0
0 0
0 0
0 0
0 0
0 0
0 0
0 0
0 0
0 0
0 0
0 0
0 0
0 0
0 0
0 0
0 0
0 0
0 0
0 0
0 0
0 0
0 0
0 0
0 0
0 0
0 0
0 0
0 0
0 0
0 0
0 0
0 0
0 0
0 0
0 0
0 0
0 0
0 0
0 0
0 0
0 0
1 0
2 0
2 0
4 0
4 0
4 0
4 0
4 0
4 0
4 0
4 0
4 0
4 0
4 0
4 0
4 0
4 0
5 0
5 0
5 0
5 0
5 0
5 0
5 0
5 0
5 0
5 0
5 0
5 0
5 0
5 0
5 0
5 0
5 0
5 0
5 0
5 0
5 0
5 0
5 0
5 0
5 0
5 0
5 0
5 0
5 0
5 0
5 0
5 0
5 0
5 0
5 0
5 0
5 0
5 0
5 0
5 0
5 0
5 0
5 0
6 0
6 0
6 0
6 0
6 0
6 0
6 0
6 0
8 0
6 0
6 0
5 0
5 0
4 0
3 0
3 0
3 0
3 0
3 0
3 0
3 0
3 0
3 0
3 0
3 0
3 0
3 0
3 0
3 0
3 0
3 0
3 0
3 0
3 0
3 0
3 0
3 0
3 0
3 0
3 0
3 0
3 0
3 0
3 0
3 0
3 0
3 0
3 0
3 0
3 0
3 0
3 0
3 0
3 0
3 0
3 0
3 0
3 0
3 0
3 0
3 0
3 0
3 0
3 0
3 0
3 0
3 0
3 0
3 0
2 0
2 0
2 0
2 0
2 0
2 0
2 0
2 0
0 0
0 0
0 0
0 0
0 0
0 0
0 0
0 0
0 0
0 0
0 0
0 0
0 0
0 0
0 0
0 0
0 0
0 0
0 0
0 0
0 0
0 0
0 0
0 0
0 0
0 0
0 0
0 0
0 0
0 0
0 0
0 0
0 0
0 0
0 0
0 0
0 0
0 0
0 0
0 0
0 0
0 0
0 0
0 0
0 0
0 0
0 0
0 0
0 0
0 0
0 0
0 0
0 0
1 0
1 0
1 0
1 0
1 0
1 0
1 0
1 0
1 0
1 0
1 0
1 0
1 0
1 0
1 0
1 0
1 0
1 0
1 0
1 0
1 0
1 0
1 0
1 0
1 0
1 0
1 0
2 0
2 0
2 0
3 0
5 0
5 0
5 0
5 0
5 0
5 0
5 0
5 0
5 0
5 0
5 0
5 0
5 0
5 0
5 0
5 0
5 0
5 0
5 0
5 0
5 0
5 0
5 0
5 0
5 0
5 0
5 0
5 0
5 0
5 0
5 0
5 0
5 0
5 0
5 0
5 0
5 0
5 0
5 0
5 0
5 0
5 0
4 0
4 0
4 0
4 0
4 0
4 0
4 0
4 0
4 0
4 0
4 0
4 0
4 0
4 0
4 0
4 0
2 0
2 0
2 0
2 0
2 0
2 0
2 0
1 0
1 0
1 0
1 0
1 0
1 0
1 0
1 0
0 0
0 0
0 0
0 0
0 0
0 0
0 0
0 0
0 0
0 0
0 0
0 0
0 0
0 0
0 0
0 0
0 0
0 0
0 0
0 0
0 0
0 0
0 0
0 0
0 0
0 0
0 0
0 0
0 0
0 0
0 0
0 0
0 0
0 0
0 0
0 0
0 0
0 0
0 0
0 0
0 0
0 0
0 0
0 0
0 0
0 0
0 0
0 0
0 0
0 0
0 0
0 0
0 0
0 0
0 0
0 0
0 0
0 0
0 0
0 0
1 0
1 0
1 0
1 0
1 0
1 0
1 0
1 0
1 0
1 0
1 0
1 0
1 0
1 0
1 0
1 0
1 0
1 0
1 0
1 0
1 0
1 0
2 0
2 0
2 0
2 0
2 0
2 0
2 0
2 0
3 0
3 0
3 0
3 0
3 0
3 0
3 0
3 0
3 0
3 0
3 0
3 0
3 0
3 0
3 0
3 0
3 0
3 0
3 0
3 0
3 0
3 0
3 0
3 0
3 0
3 0
3 0
3 0
3 0
3 0
3 0
3 0
3 0
3 0
3 0
3 0
3 0
2 0
2 0
2 0
2 0
2 0
2 0
2 0
2 0
2 0
2 0
2 0
2 0
2 0
2 0
2 0
2 0
2 0
2 0
2 0
2 0
2 0
2 0
2 0
2 0
2 0
2 0
2 0
2 0
1 0
1 0
1 0
1 0
1 0
1 0
1 0
1 0
0 0
0 0
0 0
0 0
0 0
1 0
1 0
1 0
1 0
1 0
2 0
4 0
4 0
4 0
4 0
9 0
9 0
9 0
9 0
9 0
10 0
10 0
10 0
10 0
10 0
10 0
10 0
11 0
12 0
12 0
12 0
12 0
12 0
12 0
15 0
15 0
16 0
18 0
18 0
18 0
21 0
21 0
21 0
21 0
29 1
29 1
32 1
39 1
143 1
148 2
148 2
148 2
148 2
149 2
149 2
166 2
168 2
176 2
180 2
197 2
198 2
198 2
198 2
198 2
199 2
199 2
200 2
201 2
201 2
201 2
201 2
203 2
203 2
203 2
203 3
203 3
203 3
203 3
202 3
202 3
202 3
202 3
227 3
226 3
223 3
222 3
222 3
220 3
218 3
218 3
218 3
218 3
218 3
240 3
240 3
240 3
240 3
241 3
242 2
243 2
243 2
242 2
245 2
245 2
245 2
249 2
265 2
348 3
352 3
360 3
380 4
390 4
404 4
403 4
442 4
438 4
457 4
1242 4
1722 4
2440 6
2752 8
3038 10
4127 10
4473 10
4533 10
4576 10
4580 10
4601 10
4669 10
4680 10
5036 10
5047 10
5237 10
5313 10
5556 12
5983 13
7336 16
7550 16
7557 16
7566 16
7569 16
7596 16
7608 17
7626 17
7638 16
7663 16
7670 16
7686 16
7689 16
7720 16
7722 16
7727 16
7743 16
7772 16
8957 17
8959 18
9114 20
9152 20
9160 20
9185 20
9187 20
9183 20
9208 20
9206 20
9207 20
9209 20
9197 20
9197 20
9197 20
9198 21
9204 21
9205 21
9212 21
9319 23
9357 23
9397 23
9401 23
9412 23
9485 24
9488 23
9409 22
9407 22
9393 22
9381 22
9368 22
9354 22
9356 22
9312 20
9314 18
9317 18
8569 17
7820 17
7330 15
7007 15
6616 13
5574 13
5250 13
5195 13
5166 13
5157 13
5140 13
5048 13
5022 13
4642 13
4619 13
4385 13
4177 13
3781 13
3570 12
2330 8
2142 8
2144 8
2135 8
2114 8
2106 8
2104 8
2104 8
2099 8
2330 8
2328 8
2330 8
2327 8
2310 8
2312 8
2336 8
2399 8
2399 8
1215 7
1171 6
1057 5
1034 5
1404 5
1398 5
1471 5
1491 5
1587 5
2103 9
2136 9
2230 10
2249 11
2298 11
2464 11
2534 13
2600 14
2621 14
2577 13
2455 11
2439 11
2497 14
2613 18
2627 23
2581 26
2581 26
2582 26
2584 26
2590 27
2572 27
2578 27
2572 27
2595 27
2678 27
2710 27
2750 27
2698 27
2843 27
2857 27
3039 27
3087 27
3114 28
3139 28
3201 28
3261 28
3506 28
3566 28
3652 30
3656 30
3659 30
3662 30
3670 30
3670 30
3710 30
3737 30
3737 30
3739 30
3730 30
3718 30
3714 30
3710 30
3702 30
3688 30
3669 29
3500 29
3486 30
3479 30
3463 30
3450 30
3602 30
3627 30
3772 31
3791 31
3849 31
3868 30
4331 29
4359 30
4011 29
4021 29
3897 29
3732 29
3735 29
3339 22
3339 21
3255 20
3256 19
3420 21
3272 20
3288 18
3800 19
8085 27
8555 27
8609 27
8889 27
8867 25
9720 24
10078 26
11060 27
11533 29
12047 29
12349 29
12429 29
12578 29
12620 29
12640 29
12623 29
12563 29
12526 29
12484 29
12435 30
12289 30
12306 30
12120 30
12100 30
12091 30
12067 30
11910 31
11796 31
11712 31
11681 31
11640 30
11650 30
11650 30
11649 30
11666 30
11716 32
11714 33
11804 35
11805 35
11848 35
11846 35
12095 34
12118 34
12137 34
12237 34
12347 34
12205 34
12216 34
13172 35
13313 35
13897 35
14053 34
14266 35
14268 35
14169 35
14108 35
13925 35
13945 35
13628 35
13625 35
13596 35
13592 35
13576 35
13552 35
13528 35
13507 35
13401 35
12908 34
12683 34
12322 32
12037 32
10403 31
10014 30
6801 21
6626 20
6308 19
6241 19
6042 18
5309 16
4893 13
4014 10
3800 8
3534 8
3451 8
3426 8
3383 8
3382 8
3365 8
3382 8
3420 8
3434 8
3592 9
3633 9
3649 9
3690 9
3738 9
3843 10
4263 10
4488 12
4516 11
4559 11
4597 11
4650 11
4676 11
4840 11
4906 11
4903 11
4887 11
4842 9
4792 8
4680 6
4622 6
4608 6
4591 6
4382 6
4371 6
4323 6
4274 6
4204 5
4165 5
3910 5
3106 4
3112 4
2745 4
2697 4
2562 5
2563 5
2565 5
2566 5
2569 5
2550 5
2554 5
2564 5
2569 5
2581 5
2585 5
2612 5
2598 5
2605 5
2581 5
2595 5
2600 5
2613 5
2609 5
2598 5
2600 5
2601 5
2600 5
2600 5
2595 5
2601 5
2602 5
2603 5
2609 5
2634 5
2563 5
2552 5
2588 5
2610 5
2617 5
2617 5
2561 5
2440 5
2398 5
2177 4
2140 4
2072 4
1937 3
1801 3
1620 3
1006 1
972 1
965 1
962 1
928 1
883 1
831 1
790 1
710 1
706 1
705 1
705 1
706 1
705 1
705 1
703 1
687 1
679 1
639 1
622 1
597 1
591 1
562 1
531 1
481 1
278 0
267 0
261 0
262 0
262 0
262 0
260 0
260 0
257 0
257 0
255 0
255 0
254 0
253 0
250 0
249 0
248 0
247 0
247 0
247 0
246 0
245 0
245 0
244 0
243 0
243 0
242 0
239 0
231 0
227 0
223 0
218 0
172 0
156 0
149 0
41 0
34 0
26 0
23 0
18 0
16 0
6 0
5 0
5 0
4 0
4 0
4 0
3 0
2 0
0 0
0 0
0 0
0 0
0 0
0 0
0 0
0 0
0 0
0 0
0 0
0 0
0 0
0 0
0 0
0 0
0 0
0 0
0 0
0 0
0 0
0 0
0 0
0 0
0 0
0 0
0 0
0 0
0 0
0 0
0 0
0 0
0 0
0 0
0 0
0 0
0 0
0 0
0 0
0 0
0 0
0 0
0 0
0 0
0 0
0 0
0 0
0 0
0 0
0 0
0 0
0 0
0 0
0 0
0 0
0 0
0 0
0 0
0 0
0 0
0 0
0 0
0 0
0 0
0 0
0 0
0 0
0 0
0 0
0 0
0 0
0 0
0 0
0 0
0 0
0 0
0 0
0 0
0 0
0 0
0 0
0 0
0 0
0 0
0 0
0 0
0 0
0 0
0 0
0 0
0 0
0 0
0 0
0 0
0 0
0 0
0 0
0 0
0 0
0 0
0 0
0 0
0 0
0 0
0 0
0 0
0 0
0 0
0 0
0 0
0 0
0 0
0 0
0 0
5 0
5 0
5 0
5 0
5 0
5 0
5 0
5 0
5 0
5 0
5 0
5 0
5 0
5 0
5 0
5 0
5 0
5 0
5 0
5 0
5 0
5 0
5 0
5 0
5 0
5 0
5 0
5 0
5 0
6 0
6 0
6 0
6 0
6 0
6 0
6 0
6 0
6 0
6 0
6 0
6 0
6 0
6 0
6 0
6 0
6 0
6 0
6 0
6 0
6 0
7 0
7 0
7 0
7 0
7 0
7 0
7 0
7 0
7 0
7 0
7 0
7 0
7 0
7 0
7 0
7 0
7 0
7 0
8 0
12 0
12 0
12 0
11 0
7 0
7 0
8 0
8 0
9 0
9 0
9 0
9 0
9 0
9 0
9 0
9 0
9 0
9 0
9 0
9 0
9 0
9 0
9 0
9 0
9 0
9 0
9 0
9 0
9 0
9 0
9 0
10 0
9 0
9 0
9 0
9 0
9 0
9 0
9 0
9 0
9 0
9 0
9 0
9 0
9 0
10 0
10 0
10 0
10 0
10 0
10 0
10 0
10 0
10 0
9 0
9 0
9 0
9 0
9 0
9 0
9 0
9 0
9 0
9 0
9 0
9 0
9 0
9 0
9 0
9 0
9 0
8 0
7 0
4 0
4 0
6 0
6 0
6 0
6 0
5 0
7 0
25 0
26 0
26 0
28 0
28 0
28 0
28 0
28 0
28 0
28 0
28 0
28 0
28 0
28 0
28 0
29 0
30 0
30 0
30 0
30 0
30 0
30 0
30 0
29 0
29 0
29 0
31 0
31 0
31 0
31 0
32 0
33 0
33 0
33 0
33 0
33 0
33 0
32 0
32 0
32 0
32 0
32 0
32 0
32 0
32 0
32 0
32 0
32 0
32 0
32 0
32 0
32 0
32 0
32 0
32 0
32 0
32 0
32 0
32 0
32 0
32 0
34 0
38 0
38 0
38 0
38 0
38 0
36 0
43 0
43 0
43 0
45 0
171 0
498 0
507 0
677 0
698 0
718 0
738 0
839 0
852 0
855 0
855 0
855 0
855 0
858 0
859 0
869 0
878 0
880 0
884 0
884 0
884 0
884 0
884 0
884 0
884 0
884 0
898 0
896 1
897 1
897 1
897 1
896 1
895 1
895 1
895 1
895 1
895 1
904 1
909 1
910 1
910 1
933 1
933 1
933 1
933 1
933 1
933 1
936 1
936 1
937 1
937 1
937 1
937 1
937 1
937 1
937 1
937 1
937 1
937 1
937 1
937 1
940 1
958 1
959 1
961 1
961 1
964 1
963 1
962 1
955 1
954 1
951 1
911 1
776 2
481 2
470 2
301 2
280 2
250 2
228 2
141 2
129 2
127 2
127 2
127 2
127 2
157 2
157 3
170 3
178 3
179 3
175 3
175 3
174 3
174 3
174 3
178 3
181 3
181 3
168 3
168 2
167 2
169 2
169 2
169 2
169 2
171 2
171 2
172 2
175 2
172 2
242 2
252 2
264 2
246 2
247 2
247 2
247 2
247 2
247 2
244 2
244 2
243 2
243 3
243 3
243 3
243 3
243 3
243 3
243 3
244 3
244 3
243 3
243 3
241 3
220 3
217 3
218 3
218 3
215 3
215 3
215 3
214 3
215 3
215 3
215 3
210 2
215 2
215 2
216 2
216 2
216 2
216 2
216 2
216 2
216 2
216 2
215 2
212 2
173 1
165 1
160 1
141 1
144 1
144 1
144 1
144 1
144 1
147 1
142 1
149 1
149 1
150 1
150 1
151 1
149 1
151 1
152 1
155 1
155 1
161 1
230 1
241 1
244 1
176 1
176 1
178 1
304 2
536 2
796 2
938 2
997 2
1083 2
1138 2
1173 2
1203 2
1234 1
1243 1
1246 1
1254 2
1304 2
1307 2
1308 2
1307 2
1308 2
1307 2
1348 4
1355 4
1357 4
1359 4
1356 4
1356 4
1356 4
1356 4
1361 4
1364 4
1365 4
1372 4
1376 4
1377 4
1375 4
1381 4
1383 4
1383 4
1396 4
1417 4
1449 4
1449 4
1449 4
1449 4
1449 4
1450 4
1449 4
1461 4
1461 4
1464 4
1459 4
1461 4
1467 4
1466 4
1470 4
1467 4
1465 4
1461 4
1461 4
1460 4
1460 4
1459 4
1453 4
1451 4
1451 4
1441 4
1426 4
1419 4
1363 4
1342 4
1293 4
1268 4
1244 4
1204 4
965 3
756 3
544 3
481 3
422 3
346 3
282 3
268 3
237 3
222 3
216 3
212 3
199 2
154 2
152 2
151 2
151 2
151 2
150 2
107 0
98 0
100 0
96 0
96 0
96 0
96 0
96 0
111 0
106 0
104 0
97 0
96 0
95 0
93 0
91 0
89 0
89 0
84 0
68 0
60 0
61 0
66 0
66 0
66 0
66 0
66 0
55 0
54 0
51 0
51 0
48 0
43 0
43 0
38 0
38 0
38 0
38 0
38 0
38 0
38 0
38 0
38 0
38 0
38 0
38 0
39 0
39 0
38 0
38 0
38 0
38 0
38 0
38 0
38 0
38 0
38 0
38 0
38 0
38 0
38 0
38 0
38 0
38 0
38 0
37 0
37 0
37 0
37 0
37 0
37 0
37 0
36 0
32 0
31 0
31 0
30 0
30 0
31 0
29 0
29 0
9 0
9 0
9 0
9 0
9 0
9 0
9 0
9 0
9 0
10 0
10 0
10 0
10 0
7 0
7 0
7 0
7 0
7 0
7 0
7 0
7 0
7 0
7 0
7 0
7 0
7 0
7 0
7 0
7 0
7 0
7 0
7 0
7 0
7 0
7 0
7 0
7 0
7 0
10 0
11 0
12 0
14 0
16 0
16 0
16 0
17 0
17 0
17 0
18 0
18 0
18 0
18 0
18 0
18 0
19 0
19 0
19 0
19 0
19 0
19 0
19 0
19 0
19 0
19 0
19 0
19 0
19 0
18 0
18 0
18 0
18 0
18 0
18 0
19 0
19 0
19 0
19 0
19 0
19 0
18 0
18 0
18 0
19 0
19 0
20 0
20 0
19 0
17 0
17 0
17 0
17 0
17 0
17 0
17 0
17 0
17 0
17 0
17 0
17 0
17 0
17 0
17 0
18 0
22 0
22 0
22 0
22 0
22 0
20 0
21 0
21 0
19 0
19 0
17 0
14 0
14 0
14 0
14 0
13 0
13 0
13 0
12 0
12 0
12 0
12 0
12 0
12 0
11 0
11 0
11 0
11 0
11 0
11 0
11 0
11 0
11 0
11 0
12 0
12 0
12 0
12 0
12 0
12 0
11 0
10 0
10 0
10 0
9 0
9 0
9 0
9 0
9 0
9 0
9 0
9 0
9 0
8 0
8 0
8 0
8 0
8 0
8 0
8 0
8 0
8 0
7 0
7 0
7 0
7 0
7 0
7 0
7 0
7 0
7 0
7 0
6 0
1 0
1 0
1 0
1 0
1 0
1 0
1 0
1 0
1 0
1 0
1 0
1 0
1 0
1 0
1 0
1 0
1 0
1 0
1 0
1 0
1 0
1 0
1 0
1 0
1 0
1 0
1 0
1 0
1 0
1 0
1 0
1 0
1 0
1 0
0 0
0 0
0 0
0 0
0 0
0 0
0 0
2 0
2 0
2 0
2 0
2 0
2 0
2 0
2 0
2 0
3 0
6 0
7 0
7 0
7 0
7 0
7 0
7 0
7 0
7 0
7 0
7 0
7 0
7 0
7 0
7 0
7 0
7 0
7 0
7 0
7 0
7 0
7 0
7 0
7 0
7 0
7 0
7 0
7 0
7 0
7 0
7 0
7 0
7 0
7 0
7 0
7 0
7 0
7 0
7 0
7 0
7 0
7 0
7 0
7 0
7 0
7 0
7 0
7 0
7 0
7 0
8 0
12 0
13 0
13 0
13 0
13 0
13 0
13 0
13 0
13 0
13 0
13 0
11 0
11 0
11 0
11 0
11 0
11 0
11 0
11 0
10 0
7 0
6 0
6 0
6 0
6 0
6 0
6 0
6 0
6 0
6 0
6 0
6 0
6 0
6 0
6 0
6 0
6 0
6 0
6 0
6 0
6 0
6 0
6 0
6 0
6 0
6 0
6 0
6 0
6 0
6 0
6 0
6 0
6 0
6 0
6 0
6 0
6 0
6 0
6 0
6 0
6 0
6 0
6 0
6 0
6 0
6 0
6 0
6 0
5 0
5 0
5 0
3 0
2 0
1 0
0 0
0 0
0 0
0 0
0 0
0 0
0 0
0 0
0 0
0 0
0 0
0 0
0 0
0 0
0 0
0 0
0 0
0 0
0 0
0 0
0 0
0 0
0 0
0 0
0 0
0 0
0 0
0 0
0 0
0 0
0 0
0 0
0 0
0 0
0 0
0 0
0 0
0 0
0 0
0 0
0 0
0 0
0 0
0 0
0 0
0 0
0 0
0 0
0 0
0 0
0 0
0 0
0 0
0 0
0 0
0 0
0 0
0 0
0 0
0 0
0 0
0 0
0 0
0 0
0 0
0 0
0 0
0 0
0 0
0 0
0 0
0 0
0 0
0 0
0 0
0 0
0 0
0 0
0 0
0 0
0 0
0 0
0 0
0 0
0 0
0 0
0 0
0 0
0 0
0 0
0 0
0 0
0 0
0 0
0 0
0 0
0 0
0 0
0 0
0 0
0 0
0 0
0 0
0 0
0 0
0 0
0 0
0 0
0 0
0 0
0 0
0 0
0 0
0 0
0 0
0 0
0 0
0 0
0 0
0 0
0 0
0 0
0 0
0 0
0 0
0 0
0 0
0 0
0 0
0 0
0 0
0 0
0 0
0 0
0 0
0 0
0 0
0 0
0 0
0 0
0 0
0 0
0 0
0 0
0 0
0 0
0 0
0 0
0 0
0 0
0 0
0 0
0 0
0 0
0 0
0 0
0 0
0 0
0 0
0 0
0 0
0 0
0 0
0 0
0 0
0 0
0 0
0 0
0 0
0 0
0 0
0 0
0 0
0 0
0 0
0 0
0 0
0 0
0 0
0 0
0 0
0 0
0 0
0 0
0 0
0 0
0 0
0 0
0 0
0 0
0 0
0 0
0 0
0 0
0 0
0 0
0 0
0 0
0 0
0 0
0 0
0 0
0 0
0 0
0 0
0 0
0 0
0 0
0 0
0 0
0 0
0 0
0 0
0 0
0 0
0 0
0 0
0 0
0 0
0 0
0 0
0 0
0 0
0 0
0 0
0 0
0 0
0 0
0 0
0 0
0 0
0 0
0 0
0 0
0 0
0 0
0 0
0 0
0 0
0 0
0 0
0 0
0 0
0 0
0 0
0 0
0 0
0 0
0 0
0 0
0 0
0 0
0 0
0 0
0 0
0 0
0 0
0 0
0 0
0 0
0 0
0 0
0 0
0 0
0 0
0 0
0 0
0 0
0 0
0 0
0 0
0 0
0 0
0 0
0 0
0 0
0 0
0 0
0 0
0 0
0 0
0 0
0 0
0 0
0 0
0 0
0 0
0 0
0 0
0 0
0 0
0 0
0 0
0 0
0 0
0 0
0 0
0 0
0 0
0 0
0 0
0 0
0 0
0 0
0 0
0 0
0 0
0 0
0 0
0 0
0 0
0 0
0 0
0 0
0 0
0 0
0 0
0 0
0 0
0 0
0 0
0 0
0 0
0 0
0 0
0 0
0 0
0 0
0 0
0 0
0 0
0 0
0 0
0 0
0 0
0 0
0 0
0 0
0 0
0 0
0 0
0 0
0 0
0 0
0 0
0 0
0 0
0 0
0 0
0 0
0 0
0 0
0 0
0 0
0 0
0 0
0 0
0 0
0 0
0 0
0 0
0 0
0 0
0 0
0 0
0 0
0 0
0 0
0 0
0 0
0 0
0 0
0 0
0 0
0 0
0 0
0 0
0 0
0 0
0 0
0 0
0 0
0 0
0 0
0 0
0 0
0 0
0 0
0 0
0 0
0 0
0 0
0 0
0 0
0 0
0 0
0 0
0 0
0 0
0 0
0 0
0 0
0 0
0 0
0 0
0 0
0 0
0 0
0 0
0 0
0 0
0 0
0 0
0 0
0 0
0 0
0 0
0 0
0 0
0 0
0 0
0 0
0 0
0 0
0 0
0 0
0 0
0 0
0 0
0 0
0 0
0 0
0 0
0 0
0 0
0 0
0 0
0 0
0 0
0 0
0 0
0 0
0 0
0 0
0 0
0 0
0 0
0 0
0 0
0 0
0 0
0 0
0 0
0 0
0 0
0 0
0 0
0 0
0 0
0 0
0 0
0 0
0 0
0 0
0 0
0 0
0 0
0 0
0 0
0 0
0 0
0 0
0 0
0 0
0 0
0 0
0 0
0 0
0 0
0 0
0 0
0 0
0 0
0 0
0 0
0 0
0 0
0 0
0 0
0 0
0 0
0 0
0 0
0 0
0 0
0 0
0 0
0 0
0 0
0 0
0 0
0 0
0 0
0 0
0 0
0 0
0 0
0 0
0 0
0 0
0 0
0 0
0 0
0 0
0 0
0 0
0 0
0 0
0 0
0 0
0 0
0 0
0 0
0 0
0 0
0 0
0 0
0 0
0 0
0 0
0 0
0 0
0 0
0 0
0 0
0 0
0 0
0 0
0 0
0 0
0 0
0 0
0 0
0 0
0 0
0 0
0 0
0 0
0 0
0 0
0 0
0 0
0 0
0 0
0 0
0 0
0 0
0 0
0 0
0 0
0 0
0 0
0 0
0 0
0 0
0 0
0 0
0 0
0 0
0 0
0 0
0 0
0 0
0 0
0 0
0 0
0 0
0 0
0 0
0 0
0 0
0 0
0 0
0 0
0 0
0 0
0 0
0 0
0 0
0 0
0 0
0 0
0 0
0 0
0 0
0 0
0 0
0 0
0 0
0 0
0 0
0 0
0 0
0 0
0 0
0 0
0 0
0 0
0 0
0 0
0 0
0 0
0 0
0 0
0 0
0 0
0 0
0 0
0 0
0 0
0 0
0 0
0 0
0 0
0 0
0 0
0 0
0 0
0 0
0 0
0 0
0 0
0 0
0 0
0 0
0 0
0 0
0 0
0 0
0 0
0 0
0 0
0 0
0 0
0 0
0 0
0 0
0 0
0 0
0 0
0 0
0 0
0 0
0 0
0 0
0 0
0 0
0 0
0 0
0 0
0 0
0 0
0 0
0 0
0 0
0 0
0 0
0 0
0 0
0 0
0 0
0 0
0 0
0 0
0 0
0 0
0 0
0 0
0 0
0 0
0 0
0 0
0 0
0 0
0 0
0 0
0 0
0 0
0 0
0 0
0 0
0 0
0 0
0 0
0 0
0 0
0 0
0 0
0 0
0 0
0 0
0 0
0 0
0 0
0 0
0 0
0 0
0 0
0 0
0 0
0 0
0 0
0 0
0 0
0 0
0 0
0 0
0 0
0 0
0 0
0 0
0 0
0 0
0 0
0 0
0 0
0 0
0 0
0 0
0 0
0 0
0 0
0 0
0 0
0 0
0 0
0 0
0 0
0 0
0 0
0 0
0 0
0 0
0 0
0 0
0 0
0 0
0 0
0 0
0 0
0 0
0 0
0 0
0 0
0 0
0 0
0 0
0 0
0 0
0 0
0 0
0 0
0 0
0 0
0 0
0 0
0 0
0 0
0 0
0 0
0 0
0 0
0 0
0 0
0 0
0 0
0 0
0 0
0 0
0 0
0 0
0 0
0 0
0 0
0 0
0 0
0 0
0 0
0 0
0 0
0 0
0 0
0 0
0 0
0 0
0 0
0 0
0 0
0 0
0 0
0 0
0 0
0 0
0 0
0 0
0 0
0 0
0 0
0 0
0 0
0 0
0 0
0 0
0 0
0 0
0 0
0 0
0 0
0 0
0 0
0 0
0 0
0 0
0 0
0 0
0 0
0 0
0 0
0 0
0 0
0 0
0 0
0 0
0 0
0 0
0 0
0 0
0 0
0 0
0 0
0 0
0 0
0 0
0 0
0 0
0 0
0 0
0 0
0 0
0 0
0 0
0 0
0 0
0 0
0 0
0 0
0 0
0 0
0 0
0 0
0 0
0 0
0 0
0 0
0 0
0 0
0 0
0 0
0 0
0 0
0 0
0 0
0 0
0 0
0 0
0 0
0 0
0 0
0 0
0 0
0 0
0 0
0 0
0 0
0 0
0 0
0 0
0 0
0 0
0 0
0 0
0 0
0 0
0 0
0 0
0 0
0 0
0 0
0 0
0 0
0 0
0 0
0 0
0 0
0 0
0 0
0 0
0 0
0 0
0 0
0 0
0 0
0 0
0 0
0 0
0 0
0 0
0 0
0 0
0 0
0 0
0 0
0 0
0 0
0 0
0 0
0 0
0 0
0 0
0 0
0 0
0 0
0 0
0 0
0 0
0 0
0 0
0 0
0 0
0 0
0 0
0 0
0 0
0 0
0 0
0 0
0 0
0 0
0 0
0 0
0 0
0 0
0 0
0 0
0 0
0 0
0 0
0 0
0 0
0 0
0 0
0 0
0 0
0 0
0 0
0 0
0 0
0 0
0 0
0 0
0 0
0 0
0 0
0 0
0 0
0 0
0 0
0 0
0 0
0 0
0 0
0 0
0 0
0 0
0 0
0 0
0 0
0 0
0 0
0 0
0 0
0 0
0 0
0 0
0 0
0 0
0 0
0 0
0 0
0 0
0 0
0 0
0 0
0 0
0 0
0 0
0 0
0 0
0 0
0 0
0 0
0 0
0 0
0 0
0 0
0 0
0 0
0 0
0 0
0 0
0 0
0 0
0 0
0 0
0 0
0 0
0 0
0 0
0 0
0 0
0 0
0 0
0 0
0 0
0 0
0 0
0 0
0 0
0 0
0 0
0 0
0 0
0 0
0 0
0 0
0 0
0 0
0 0
0 0
0 0
0 0
0 0
0 0
0 0
0 0
0 0
0 0
0 0
0 0
0 0
0 0
0 0
0 0
0 0
0 0
0 0
0 0
0 0
0 0
0 0
0 0
0 0
0 0
0 0
0 0
0 0
0 0
0 0
0 0
0 0
0 0
0 0
0 0
0 0
0 0
0 0
0 0
0 0
0 0
0 0
0 0
0 0
0 0
0 0
0 0
0 0
0 0
0 0
0 0
0 0
0 0
0 0
0 0
0 0
0 0
0 0
0 0
0 0
0 0
0 0
0 0
0 0
0 0
0 0
0 0
0 0
0 0
0 0
0 0
0 0
0 0
0 0
0 0
0 0
0 0
0 0
0 0
0 0
0 0
0 0
0 0
0 0
0 0
0 0
0 0
0 0
0 0
0 0
0 0
0 0
0 0
0 0
0 0
0 0
0 0
0 0
0 0
0 0
0 0
0 0
0 0
0 0
0 0
0 0
0 0
0 0
0 0
0 0
0 0
0 0
0 0
0 0
0 0
0 0
0 0
0 0
0 0
0 0
0 0
0 0
0 0
0 0
0 0
0 0
0 0
0 0
0 0
0 0
0 0
0 0
0 0
0 0
0 0
0 0
0 0
0 0
0 0
0 0
0 0
0 0
0 0
0 0
0 0
0 0
0 0
0 0
0 0
0 0
0 0
0 0
0 0
0 0
0 0
0 0
0 0
0 0
0 0
0 0
0 0
0 0
0 0
0 0
0 0
0 0
0 0
0 0
0 0
0 0
0 0
0 0
0 0
0 0
0 0
0 0
0 0
0 0
0 0
0 0
0 0
0 0
0 0
0 0
0 0
0 0
0 0
0 0
0 0
0 0
0 0
0 0
0 0
0 0
0 0
0 0
0 0
0 0
0 0
0 0
0 0
0 0
0 0
0 0
0 0
0 0
0 0
0 0
0 0
0 0
0 0
0 0
0 0
0 0
0 0
0 0
0 0
0 0
0 0
0 0
0 0
0 0
0 0
0 0
0 0
0 0
0 0
0 0
0 0
0 0
0 0
0 0
0 0
0 0
0 0
0 0
0 0
0 0
0 0
0 0
0 0
0 0
0 0
0 0
0 0
0 0
0 0
0 0
0 0
0 0
0 0
0 0
0 0
0 0
0 0
0 0
0 0
0 0
0 0
0 0
0 0
0 0
0 0
0 0
0 0
0 0
0 0
0 0
0 0
0 0
0 0
0 0
0 0
0 0
0 0
0 0
0 0
0 0
0 0
0 0
0 0
0 0
0 0
0 0
0 0
0 0
0 0
0 0
0 0
0 0
0 0
0 0
0 0
0 0
0 0
0 0
0 0
0 0
0 0
0 0
0 0
0 0
0 0
0 0
0 0
0 0
0 0
0 0
0 0
0 0
0 0
0 0
0 0
0 0
0 0
0 0
0 0
0 0
0 0
0 0
0 0
0 0
0 0
0 0
0 0
0 0
0 0
0 0
0 0
0 0
0 0
0 0
0 0
0 0
0 0
0 0
0 0
0 0
0 0
0 0
0 0
0 0
0 0
0 0
0 0
0 0
0 0
0 0
0 0
0 0
0 0
0 0
0 0
0 0
0 0
0 0
0 0
0 0
0 0
0 0
0 0
0 0
0 0
0 0
0 0
0 0
0 0
0 0
0 0
0 0
0 0
0 0
0 0
0 0
0 0
0 0
0 0
0 0
0 0
0 0
0 0
0 0
0 0
0 0
0 0
1 0
1 0
2 0
2 0
2 0
2 0
2 0
2 0
2 0
2 0
2 0
2 0
2 0
2 0
2 0
2 0
2 0
2 0
2 0
2 0
2 0
2 0
2 0
2 0
2 0
2 0
2 0
2 0
2 0
2 0
2 0
2 0
2 0
2 0
2 0
2 0
2 0
2 0
2 0
2 0
2 0
2 0
2 0
2 0
2 0
2 0
2 0
2 0
2 0
2 0
2 0
2 0
2 0
2 0
2 0
2 0
2 0
2 0
2 0
2 0
2 0
2 0
2 0
2 0
1 0
1 0
1 0
1 0
1 0
1 0
0 0
0 0
0 0
0 0
0 0
0 0
0 0
0 0
0 0
0 0
0 0
0 0
0 0
0 0
1 0
1 0
1 0
1 0
1 0
1 0
1 0
1 0
1 0
1 0
1 0
1 0
1 0
1 0
1 0
1 0
1 0
1 0
1 0
1 0
1 0
1 0
1 0
1 0
1 0
1 0
1 0
1 0
1 0
1 0
1 0
1 0
1 0
1 0
1 0
1 0
1 0
1 0
1 0
1 0
1 0
1 0
1 0
1 0
3 0
4 0
4 0
4 0
4 0
4 0
4 0
4 0
4 0
4 0
4 0
4 0
4 0
4 0
4 0
4 0
4 0
4 0
4 0
4 0
4 0
4 0
4 0
4 0
4 0
4 0
4 0
4 0
4 0
4 0
4 0
4 0
4 0
4 0
4 0
4 0
4 0
4 0
4 0
4 0
4 0
4 0
4 0
4 0
4 0
4 0
4 0
4 0
4 0
4 0
4 0
4 0
4 0
4 0
4 0
4 0
4 0
5 0
5 0
5 0
5 0
5 0
5 0
5 0
5 0
4 0
4 0
3 0
3 0
3 0
3 0
3 0
3 0
3 0
2 0
2 0
1 0
1 0
1 0
1 0
1 0
1 0
1 0
1 0
1 0
1 0
1 0
1 0
1 0
1 0
1 0
1 0
1 0
1 0
1 0
1 0
1 0
1 0
1 0
1 0
1 0
1 0
1 0
1 0
1 0
1 0
1 0
1 0
1 0
1 0
1 0
1 0
1 0
1 0
1 0
1 0
1 0
1 0
1 0
1 0
1 0
1 0
1 0
1 0
1 0
1 0
1 0
1 0
1 0
1 0
0 0
0 0
0 0
0 0
0 0
0 0
0 0
0 0
0 0
0 0
0 0
0 0
0 0
0 0
0 0
0 0
0 0
0 0
0 0
0 0
0 1
0 1
0 1
0 1
0 1
0 1
0 1
0 1
0 1
0 1
0 1
0 1
0 1
0 1
0 1
0 1
0 1
0 1
0 1
0 1
0 1
0 1
0 1
0 1
0 1
0 1
0 1
0 1
0 1
0 1
0 1
0 1
0 1
0 1
0 1
0 1
0 1
0 1
0 2
0 2
0 3
0 3
0 3
0 3
0 4
0 4
0 4
0 4
0 4
0 4
0 4
0 4
0 4
0 4
0 4
0 4
0 4
0 4
0 4
0 4
0 5
0 5
0 5
0 5
0 5
0 5
0 5
0 5
0 5
0 5
0 5
0 5
0 5
0 4
0 4
0 4
0 4
0 4
0 4
0 4
0 4
0 4
0 4
0 4
0 4
0 4
0 4
0 4
0 4
0 4
0 4
0 4
0 4
0 4
0 4
0 4
0 4
0 4
0 4
0 4
0 4
0 4
0 4
0 4
0 4
0 4
0 4
0 4
0 4
0 4
0 4
0 2
0 2
0 1
0 1
0 1
0 1
0 1
0 1
0 1
0 1
0 1
0 1
0 1
0 1
0 1
0 1
0 1
0 1
0 1
0 1
0 1
0 1
0 0
0 0
0 0
0 0
0 0
0 0
0 0
0 0
0 0
0 0
0 0
0 0
0 0
0 0
0 0
0 0
0 0
0 0
0 0
0 0
0 0
0 0
0 0
0 0
0 0
0 0
0 0
0 0
0 0
0 0
0 2
0 2
0 2
0 2
0 2
0 2
0 2
0 2
0 3
0 4
0 4
0 4
0 4
0 4
0 4
0 4
0 4
0 4
0 4
0 4
0 4
0 4
0 4
0 4
0 4
0 4
0 4
0 4
0 4
0 4
0 4
0 4
0 4
0 4
0 4
0 4
0 4
0 4
0 4
0 4
0 4
0 4
0 4
0 4
0 4
0 4
0 4
0 4
1 4
1 4
1 4
1 4
1 4
1 4
1 4
1 4
1 4
1 4
1 4
1 4
1 4
1 4
1 4
1 4
1 4
1 4
1 4
1 4
1 4
5 4
5 4
5 4
5 4
5 1
5 1
5 0
5 0
5 0
5 0
5 0
5 0
5 0
5 0
5 0
5 0
5 0
5 0
5 0
5 0
5 0
5 0
5 0
5 0
5 1
5 1
5 1
5 1
5 1
5 1
6 1
6 1
6 1
6 1
7 1
8 1
8 1
9 1
9 1
9 1
9 1
9 1
9 1
9 1
9 1
9 1
9 1
9 1
10 1
10 1
10 1
10 1
9 1
9 1
9 1
9 1
9 1
9 1
9 1
9 1
9 1
9 1
9 1
9 1
9 1
9 1
9 1
9 1
9 1
9 1
9 1
9 1
9 1
5 1
5 1
5 1
5 1
5 1
5 1
5 1
5 1
5 1
5 1
5 1
5 1
5 1
5 1
5 1
5 1
5 1
5 1
5 1
5 1
5 1
5 1
5 1
5 1
5 0
5 0
5 0
5 0
5 0
5 0
4 0
4 0
4 0
4 0
3 0
2 0
2 0
1 0
1 0
1 0
1 0
1 0
1 0
1 0
1 0
1 0
1 0
1 0
0 0
0 0
0 0
0 0
0 0
0 1
0 1
0 1
0 1
0 1
0 1
0 1
0 1
0 1
0 1
0 1
0 1
0 1
0 1
0 1
0 1
0 1
0 1
0 1
0 1
0 1
0 1
0 1
0 1
0 1
0 1
0 1
0 1
0 1
0 1
0 1
0 1
0 1
0 1
0 1
0 1
0 1
0 1
0 1
0 1
0 1
0 1
0 1
0 1
0 1
0 1
0 1
0 1
0 2
0 2
0 2
0 2
0 2
0 2
0 2
0 2
0 2
0 2
0 2
2 2
2 2
2 2
2 2
2 2
2 2
2 2
2 2
2 2
2 2
2 2
2 2
2 2
2 2
2 1
2 1
2 1
2 1
2 1
2 1
2 1
2 1
2 1
2 1
2 1
2 1
2 1
2 1
2 1
2 1
2 1
2 1
2 1
2 1
2 1
2 1
2 1
2 1
2 1
2 1
2 1
2 1
2 1
2 1
2 1
2 1
2 1
2 1
2 1
2 1
2 1
2 1
2 1
2 1
2 1
2 1
2 1
2 1
2 1
2 0
2 0
2 0
2 0
2 0
2 0
2 0
2 0
1 0
1 0
1 0
1 0
1 0
1 0
0 0
0 0
0 0
0 0
0 0
0 0
0 0
0 0
0 0
0 0
0 0
0 0
0 0
0 0
0 0
0 0
0 0
0 0
0 0
0 0
0 0
0 0
0 0
0 0
0 0
0 0
0 0
0 0
0 0
0 0
0 0
0 0
0 0
0 0
0 0
0 0
0 2
0 2
0 2
0 2
0 2
0 2
0 2
0 2
0 2
0 2
0 2
0 2
0 2
0 2
0 2
0 2
0 2
0 2
0 2
0 2
0 2
0 2
0 2
0 2
0 2
0 2
0 2
0 2
0 2
0 2
0 2
0 2
0 2
0 2
0 2
0 2
0 2
0 2
0 2
0 2
0 2
0 2
0 2
0 2
0 2
0 2
0 2
0 2
0 2
0 2
0 2
0 2
0 2
0 2
0 2
0 2
0 2
0 2
0 2
0 2
0 2
0 2
0 2
0 2
0 2
0 2
0 2
0 2
0 2
0 2
0 2
0 2
0 2
0 0
0 0
0 0
0 0
0 0
0 0
0 0
0 0
0 0
0 0
0 0
0 0
0 0
0 0
0 0
0 0
0 0
0 0
0 0
0 0
0 0
0 0
0 0
0 0
0 0
0 0
0 0
0 0
0 0
0 0
0 0
0 0
0 0
0 0
0 0
0 0
0 0
0 0
0 0
0 0
0 0
0 0
0 0
0 0
0 0
0 0
0 0
0 0
0 0
0 0
0 0
0 0
0 0
0 0
0 0
0 0
0 0
0 0
0 0
0 0
0 0
0 0
0 0
0 0
0 0
0 0
0 0
0 0
0 0
0 0
0 0
0 0
0 0
0 0
0 0
0 1
0 4
0 4
0 5
0 5
0 5
0 5
0 5
0 5
0 5
0 5
0 5
0 6
0 6
0 6
0 6
0 6
0 6
0 6
0 6
0 6
0 6
0 6
0 6
0 6
0 6
0 6
0 6
0 6
0 6
0 6
0 6
0 6
0 6
0 6
0 6
0 6
0 6
0 6
0 6
0 6
0 6
0 7
0 8
0 8
0 8
0 8
0 8
0 8
0 8
0 8
0 8
0 8
0 8
0 8
0 8
0 8
0 8
0 8
0 8
0 8
0 8
0 8
0 8
0 8
0 8
0 8
0 8
0 8
0 8
0 8
0 7
1 9
1 6
1 5
1 5
1 5
1 5
1 7
7 15
7 19
7 21
7 24
7 25
7 25
7 24
7 24
6 23
6 23
6 23
6 23
6 23
6 23
6 23
6 23
6 23
6 23
6 23
6 23
6 23
6 23
6 23
6 23
6 23
6 23
6 23
6 23
6 23
6 23
6 23
6 23
6 23
6 23
6 23
6 23
6 21
6 21
6 21
6 21
10 28
10 28
10 28
10 29
11 29
11 29
11 29
11 29
12 29
12 29
12 29
12 29
12 29
12 29
12 29
12 29
12 29
12 29
12 29
12 29
12 29
12 29
12 29
12 29
12 29
12 29
12 28
12 27
12 27
12 27
12 27
12 27
12 23
6 9
6 17
6 17
6 17
6 17
6 17
6 17
6 17
6 17
6 17
6 17
6 18
6 18
6 18
6 18
6 18
6 18
6 18
6 18
6 18
6 18
6 18
6 18
6 18
6 18
6 18
6 18
6 18
6 18
6 18
6 18
6 18
6 18
6 18
6 18
6 18
5 18
5 18
5 16
5 16
2 10
2 10
2 10
2 10
1 10
1 10
1 10
1 10
0 10
0 10
0 10
0 10
0 10
0 10
0 10
0 11
0 11
0 11
0 11
0 11
0 11
0 12
0 12
0 12
0 12
0 12
0 12
0 12
0 12
0 12
0 12
0 12
0 12
0 12
0 3
0 3
0 3
0 3
0 3
0 3
0 5
0 5
0 5
0 5
0 4
0 4
0 4
0 4
0 4
0 4
0 4
0 4
0 4
0 4
0 4
0 4
0 4
0 4
0 4
0 4
0 4
0 4
0 4
0 4
0 4
0 4
0 4
0 4
0 4
0 4
0 4
0 4
0 4
0 4
0 4
0 4
0 4
0 4
0 4
0 4
0 4
0 4
0 4
0 5
0 5
0 5
0 5
0 5
0 4
0 4
0 4
0 4
0 4
0 4
0 3
0 3
0 3
0 3
0 3
0 3
0 3
0 3
0 3
0 3
0 3
0 3
0 3
0 3
0 3
0 3
0 3
0 3
0 3
0 1
0 1
0 1
0 1
0 1
0 1
0 1
0 1
0 1
0 1
0 1
0 1
0 1
0 1
0 1
0 1
0 1
0 1
0 1
0 1
0 1
0 1
0 2
0 2
0 2
0 2
0 2
0 3
0 4
0 4
0 4
0 4
0 4
0 4
0 4
0 4
0 4
0 4
0 4
0 4
0 4
0 4
0 4
0 3
0 3
0 3
0 3
0 3
0 3
0 3
0 3
0 3
0 3
0 3
0 3
0 3
0 3
0 3
0 3
0 3
0 3
0 3
0 3
0 3
0 3
0 3
0 3
0 3
0 3
0 3
0 3
0 3
0 3
0 3
0 3
0 3
0 3
0 3
0 5
0 5
0 5
0 5
0 5
0 5
0 5
0 5
0 5
0 5
0 5
0 5
0 5
0 5
0 5
0 5
0 5
0 4
0 4
0 4
0 4
0 4
0 4
0 2
0 2
0 2
0 2
0 2
0 2
0 2
0 2
0 2
0 2
0 2
0 2
0 2
0 2
0 2
0 2
0 2
0 2
0 2
0 2
0 2
0 2
0 2
0 2
0 2
0 2
0 2
0 2
0 2
0 2
0 2
0 2
0 2
0 2
0 2
0 2
0 2
0 2
0 2
0 2
0 4
0 4
0 6
0 8
0 8
0 8
0 8
0 8
0 8
0 8
0 7
0 7
0 7
0 7
0 7
0 7
0 7
0 7
0 7
0 7
0 7
0 7
0 7
0 7
0 7
0 7
0 7
0 7
0 7
0 7
0 7
0 7
0 7
0 7
0 7
0 7
0 7
0 7
0 7
0 7
0 7
0 7
0 7
0 7
0 7
0 7
0 7
0 7
0 7
0 7
0 7
0 7
0 7
0 7
0 7
0 7
0 7
0 7
0 7
0 7
0 7
0 7
0 7
0 7
0 7
0 7
0 7
0 7
1 7
1 7
1 7
1 7
1 7
1 5
1 5
1 2
1 0
1 0
1 0
1 0
1 0
1 0
1 0
0 0
0 0
0 0
0 0
0 0
0 0
0 0
0 0
0 0
0 0
0 0
0 0
0 1
0 1
0 1
0 1
0 1
0 1
0 4
0 6
0 8
0 10
0 10
1 10
1 10
1 10
1 10
1 10
1 10
1 10
1 10
1 10
1 10
1 10
1 10
1 10
1 10
1 10
1 10
1 10
1 10
1 10
1 10
1 10
1 10
1 10
1 10
1 10
1 10
1 10
1 10
1 10
1 10
1 10
1 10
1 10
1 10
1 10
1 10
1 10
1 10
1 10
1 10
1 10
1 10
1 10
1 10
1 10
1 10
1 10
1 10
1 10
1 10
1 10
1 10
1 10
1 10
1 10
1 10
1 10
1 10
1 10
2 10
3 10
3 10
3 9
3 9
3 9
3 9
3 9
3 8
3 6
3 3
3 3
3 1
3 1
2 1
2 1
2 1
2 1
2 1
2 1
2 1
2 1
2 1
2 1
2 1
2 1
2 0
2 0
2 0
2 0
2 0
2 0
2 0
2 0
2 0
2 0
2 0
2 0
2 0
2 0
2 0
2 0
2 0
2 0
2 0
2 0
2 0
2 0
2 0
2 0
4 0
5 0
5 0
5 0
5 0
5 0
5 0
5 0
5 0
5 0
5 0
5 0
5 0
5 0
5 0
5 0
5 0
5 0
5 0
5 0
5 0
5 0
5 0
4 0
3 0
3 0
3 0
3 0
3 0
3 0
3 0
3 0
3 0
3 0
3 0
3 0
3 0
3 0
3 0
3 0
3 0
3 0
3 0
3 0
3 0
3 0
3 0
3 0
3 0
3 0
3 0
3 0
3 0
3 0
3 0
3 0
3 0
3 0
3 0
3 0
3 0
3 0
3 0
3 0
3 0
3 0
3 0
3 0
3 0
3 0
3 0
3 0
2 0
1 0
0 0
0 0
0 0
0 0
0 0
0 0
0 0
0 0
0 0
0 0
0 0
0 0
0 0
0 0
0 0
0 0
0 0
0 0
0 0
0 0
0 0
0 0
0 0
0 0
0 0
0 0
0 0
0 0
0 0
0 0
0 0
0 0
0 0
0 0
0 0
0 0
0 0
0 0
0 0
0 0
0 0
0 0
0 0
0 0
0 0
0 0
0 0
0 0
0 0
0 0
0 0
0 0
0 0
0 0
0 0
0 0
0 0
0 0
0 0
0 0
0 0
0 0
0 0
0 0
0 0
0 0
0 0
0 0
0 0
0 0
0 0
0 0
0 0
0 0
0 0
0 0
0 0
0 0
0 0
0 0
0 0
0 0
0 0
0 0
0 0
0 0
0 0
0 0
0 0
0 0
0 0
0 0
0 0
0 0
0 0
0 0
0 0
0 0
0 0
0 0
0 0
0 0
0 0
0 0
0 0
0 0
0 0
0 0
0 0
0 0
0 0
0 0
0 0
0 0
0 0
0 0
0 0
0 0
0 0
0 0
0 0
0 0
0 0
0 0
0 0
0 0
0 0
0 0
0 0
0 1
0 2
0 2
0 2
0 2
0 2
0 2
0 2
0 2
0 2
0 2
0 2
0 2
0 2
0 2
0 2
0 2
0 2
0 2
0 2
0 2
0 2
0 2
0 2
0 2
0 2
0 2
0 2
0 2
0 2
0 2
0 2
0 2
0 2
0 2
0 2
0 2
0 2
0 2
0 2
0 2
0 2
0 2
0 2
0 2
0 2
0 2
0 2
0 2
0 2
0 2
0 2
0 2
0 2
0 2
0 2
0 2
0 2
0 2
0 2
0 2
0 2
0 1
0 0
0 0
0 0
0 0
0 0
0 0
0 0
0 0
0 0
0 0
0 0
0 0
0 0
0 0
0 0
0 0
0 0
0 0
0 0
0 0
0 0
0 0
0 0
0 0
0 0
0 0
0 0
0 0
0 0
0 0
0 0
0 0
0 0
0 0
0 0
0 0
0 0
0 0
0 0
0 0
0 0
0 0
0 0
0 0
0 0
0 0
0 0
0 0
0 0
0 0
0 0
0 0
0 0
0 0
0 0
0 0
0 0
0 0
0 0
0 0
0 0
0 0
0 0
0 0
0 0
0 0
0 0
0 0
0 0
0 0
0 0
0 0
0 0
0 0
0 0
0 0
0 0
0 0
0 0
0 0
0 0
0 0
0 0
0 0
0 0
0 0
0 0
0 0
0 0
0 0
0 0
0 0
0 0
0 0
0 0
0 0
0 0
0 0
0 0
0 0
0 0
0 0
0 0
0 0
0 0
0 0
0 0
0 0
0 0
0 0
0 0
0 0
0 0
0 0
0 0
0 0
0 0
0 0
0 0
0 0
0 0
0 0
0 0
0 0
0 0
0 0
0 0
0 0
0 0
0 0
0 0
0 0
0 0
0 0
0 0
0 0
0 0
0 0
0 0
0 0
0 0
0 0
0 0
0 0
0 0
0 0
0 0
0 1
0 1
0 1
0 1
0 1
0 1
0 1
0 1
0 1
0 1
0 1
0 1
0 1
0 1
0 1
0 1
0 1
0 1
0 1
0 1
0 1
0 1
0 1
0 1
0 1
0 1
0 1
0 1
0 1
0 1
0 1
0 1
0 1
0 1
0 1
0 1
0 1
0 1
0 1
0 1
0 1
0 1
0 1
0 1
0 1
0 1
0 1
0 1
0 1
0 1
0 1
0 1
0 1
0 1
0 1
0 1
0 1
0 1
0 1
0 1
0 1
0 1
0 1
0 1
0 1
0 1
0 1
0 1
0 2
0 2
0 2
0 2
0 2
0 1
0 1
0 1
0 7
0 24
2 126
3 323
3 349
3 357
3 364
4 373
4 374
4 378
4 379
4 379
4 379
4 381
4 384
6 428
6 543
6 586
6 616
6 626
6 663
6 665
6 674
6 677
6 686
6 686
6 686
6 686
6 687
6 687
6 687
6 687
6 687
6 687
6 687
6 687
6 689
6 693
6 693
6 694
6 694
8 694
8 694
8 694
8 694
8 694
8 695
8 695
8 695
8 695
8 696
8 713
8 740
8 753
8 756
8 754
8 775
8 789
8 1077
9 1119
10 1163
10 1187
10 1192
10 1198
10 1190
10 1190
10 1194
10 1202
10 1205
10 1210
10 1216
10 1252
10 1251
10 1248
10 1209
8 1072
7 930
6 908
6 904
6 903
6 900
6 900
6 901
9 1003
9 1002
9 1001
10 999
10 979
8 890
8 814
8 785
8 762
8 756
8 719
8 714
8 713
8 709
8 703
8 703
8 703
8 703
8 703
8 704
12 768
12 772
12 772
12 773
12 773
12 773
12 772
12 769
12 769
10 768
10 768
10 768
10 768
10 781
10 788
10 788
10 787
10 787
10 787
10 787
10 786
10 766
10 734
10 726
10 725
10 724
10 701
13 713
13 387
12 351
11 321
11 321
11 321
11 322
11 329
11 322
11 316
12 306
12 305
12 300
12 295
12 255
12 255
12 255
12 255
12 256
12 256
12 257
12 258
12 261
12 264
12 267
11 266
9 164
9 164
9 164
8 160
8 160
8 160
8 163
8 172
8 173
8 175
8 175
8 206
8 239
8 240
7 242
7 246
7 250
7 264
7 444
7 708
4 701
4 719
4 745
4 747
4 747
4 747
4 747
4 754
4 756
4 756
4 778
4 795
4 835
4 839
4 837
4 845
4 846
4 846
4 846
4 846
4 846
4 846
4 846
4 846
4 846
4 848
4 844
1 807
1 806
1 807
1 820
1 820
1 821
1 824
1 819
1 819
1 818
0 819
0 819
0 819
0 819
0 819
0 819
0 819
0 819
0 818
1 818
1 817
1 816
2 813
2 810
2 807
2 807
2 807
2 807
2 807
2 807
2 808
2 808
2 805
2 795
2 794
2 793
2 793
2 762
2 728
2 726
2 723
2 721
2 717
2 702
2 504
2 219
2 182
2 169
2 150
2 148
2 148
2 148
2 148
2 141
2 139
2 139
2 114
2 96
2 56
2 45
2 40
2 34
2 33
2 33
2 50
2 54
2 56
2 57
2 60
2 60
2 60
2 60
2 66
2 66
2 66
2 65
2 51
2 51
2 48
2 46
2 46
2 46
2 46
2 44
2 44
2 44
2 44
2 44
2 43
2 43
2 43
0 43
0 44
0 44
0 44
0 44
0 44
0 44
0 45
0 45
0 45
0 45
0 45
0 44
0 44
0 44
0 44
0 43
0 43
0 43
0 43
0 43
0 43
0 43
0 43
0 43
0 40
0 40
0 40
0 42
0 43
0 43
0 43
0 43
0 49
1 51
1 55
1 55
1 55
1 53
1 53
1 53
1 51
1 51
1 51
1 51
1 54
1 37
1 31
1 31
1 30
1 27
1 27
1 27
1 27
1 20
1 20
1 20
1 20
1 20
1 20
1 20
1 21
1 21
1 21
1 21
1 21
1 22
1 22
1 23
1 25
1 26
1 26
1 26
1 27
1 26
1 26
1 26
1 26
1 28
1 28
1 28
1 28
1 28
1 28
1 28
1 28
1 30
1 30
1 32
1 32
1 32
1 34
1 34
1 34
1 35
1 48
1 48
1 49
1 52
1 54
1 55
1 52
1 52
1 52
1 52
1 52
1 46
0 41
0 40
0 40
0 41
0 41
0 41
0 41
0 41
0 41
0 41
0 41
0 38
0 38
0 38
0 38
0 38
0 38
0 38
0 38
0 38
0 38
0 38
0 38
0 38
0 39
0 39
0 39
0 38
0 38
0 38
0 38
0 43
0 41
0 42
0 48
0 54
0 54
0 56
0 55
1 154
1 162
1 166
1 170
1 171
1 174
1 184
1 195
1 199
1 200
1 205
1 211
1 230
3 232
3 240
3 253
3 253
3 262
3 260
3 261
3 340
4 342
4 330
4 333
4 333
4 333
4 331
4 331
4 331
4 331
4 332
4 332
4 332
4 334
4 336
4 337
4 337
4 336
4 336
4 336
4 336
4 336
4 336
4 336
4 337
4 357
4 357
4 358
4 358
4 358
4 358
4 358
4 358
4 358
4 359
4 359
4 361
4 362
4 362
4 362
5 362
5 362
5 362
5 363
5 363
5 353
5 353
5 346
5 340
5 337
5 330
5 326
5 326
4 219
4 214
4 213
4 220
4 219
4 216
4 215
4 207
4 209
4 234
4 228
4 224
4 210
2 210
2 202
2 200
2 195
2 192
2 192
1 189
1 111
1 106
1 103
1 101
2 101
2 101
2 101
2 102
2 103
2 104
2 103
2 103
2 103
2 103
2 101
2 101
2 101
2 101
2 101
2 101
2 101
3 101
3 102
3 102
3 101
3 79
3 79
3 79
3 79
3 79
3 79
3 79
3 79
3 80
3 79
3 85
3 86
3 100
3 100
2 100
2 100
2 100
2 99
2 100
2 101
2 102
2 102
2 102
2 102
2 102
2 102
2 102
2 102
2 102
2 101
2 101
2 92
2 92
2 92
2 89
2 87
2 80
27 53
27 53
27 52
27 47
27 38
27 38
28 38
28 38
29 36
29 36
29 35
29 35
30 35
30 35
30 35
29 35
37 35
37 35
37 34
37 33
37 32
37 33
38 34
38 34
38 31
38 31
38 31
38 31
38 31
38 32
38 32
38 32
37 31
37 31
37 31
37 31
37 31
37 31
37 31
39 31
39 31
39 31
41 31
41 31
41 30
41 25
41 23
41 20
41 7
42 11
42 12
42 12
42 12
42 12
42 10
43 10
45 10
46 10
46 10
46 10
46 10
47 10
48 10
48 10
49 10
49 10
49 10
50 10
59 11
62 11
63 11
64 11
64 11
39 11
39 11
39 11
39 11
39 11
39 11
38 11
38 11
37 11
37 11
37 11
37 11
36 11
36 11
36 11
36 11
28 11
28 11
28 13
28 13
28 13
28 12
27 11
27 11
27 11
27 11
27 11
27 11
27 11
27 10
27 10
27 10
27 10
27 10
27 10
27 10
27 10
31 10
31 10
30 10
30 10
30 10
29 10
29 10
29 10
29 10
29 8
29 8
29 6
28 4
28 4
28 4
28 4
28 4
28 4
27 3
25 3
24 3
24 3
24 3
24 3
23 3
21 3
21 3
21 1
21 1
22 1
20 1
11 0
9 0
8 0
7 0
7 0
7 0
7 0
7 0
7 0
7 0
7 0
7 0
7 0
7 0
7 0
7 1
7 1
8 1
9 3
9 3
9 3
9 3
9 8
9 8
10 8
10 19
10 22
10 24
19 67
19 75
20 83
20 85
20 87
20 88
20 90
20 91
20 91
20 91
19 93
19 95
19 96
20 98
19 98
38 130
43 131
43 132
43 132
42 132
44 225
45 225
45 225
46 225
46 225
46 225
46 225
46 225
46 225
46 225
46 225
46 225
46 225
46 225
46 226
46 226
46 226
48 226
48 226
48 226
48 226
49 226
50 227
49 228
49 229
51 229
51 229
51 229
53 229
53 229
53 229
53 229
53 228
53 227
53 227
53 227
53 227
53 227
53 227
53 228
53 227
53 226
52 226
51 224
50 224
50 223
51 223
51 218
52 218
51 217
51 205
51 205
51 195
42 151
42 145
41 141
41 141
41 141
41 142
41 146
41 145
41 144
40 144
34 142
32 141
32 141
26 139
24 139
10 106
9 106
8 105
8 103
8 102
7 11
6 11
6 11
3 11
3 11
3 11
3 11
3 11
3 11
3 11
3 11
3 11
3 11
3 11
3 11
3 12
3 14
2 24
2 35
2 36
2 36
2 36
2 35
2 34
2 33
2 33
2 35
2 35
2 35
2 35
2 35
2 35
3 35
3 37
3 37
3 37
3 64
3 76
3 79
5 122
5 123
5 124
5 125
5 126
5 128
5 129
4 129
4 129
3 129
3 129
3 129
3 130
3 130
3 130
3 130
3 130
3 130
3 128
3 128
3 125
3 127
3 131
4 190
4 191
4 191
4 193
4 195
4 195
4 195
4 195
4 196
4 196
4 196
4 196
4 196
4 196
4 196
4 196
4 196
4 196
4 196
4 196
4 196
4 196
4 196
4 196
4 196
4 196
4 195
4 193
4 182
4 171
4 171
4 175
5 184
5 183
5 183
5 182
5 182
5 178
5 178
5 178
5 178
5 177
4 179
4 179
4 178
4 177
4 177
4 144
4 137
4 134
2 93
2 93
2 93
2 96
2 97
2 95
4 94
4 105
4 105
4 105
4 105
4 105
4 105
4 105
4 106
4 106
4 106
4 106
6 113
6 114
12 162
12 159
12 165
11 107
11 109
11 111
11 110
11 110
11 110
11 110
11 111
11 111
11 111
11 111
11 113
11 113
11 113
11 115
11 116
11 116
11 116
11 116
11 116
11 116
11 116
11 116
11 116
11 116
11 119
11 121
11 121
11 121
11 121
11 121
11 115
10 103
10 103
10 102
10 102
10 102
10 102
10 103
10 103
10 103
10 102
10 101
10 104
10 104
10 104
10 104
10 104
10 104
10 104
10 104
10 104
10 103
10 99
6 96
4 96
4 96
4 81
4 81
4 81
4 77
4 77
4 77
4 77
4 76
4 76
4 76
4 85
4 85
4 82
0 34
0 33
0 31
0 30
0 29
0 26
0 26
0 26
0 26
0 26
1 27
1 28
1 46
1 46
1 44
1 44
1 45
1 43
1 42
3 44
3 44
3 46
3 52
3 54
3 60
3 61
3 61
3 61
3 57
3 56
3 57
3 61
3 62
3 62
3 62
3 62
3 62
3 62
3 62
3 62
3 62
3 61
3 61
3 61
3 61
3 61
3 58
3 58
3 58
3 59
3 59
3 59
3 59
3 59
3 62
3 62
3 62
3 61
3 61
3 61
3 61
3 61
3 61
3 61
3 61
3 63
4 63
4 63
4 63
4 63
4 52
4 52
4 50
4 50
4 50
4 50
4 50
4 48
4 48
4 48
4 49
4 49
5 49
4 50
4 74
4 55
5 65
5 62
5 62
5 63
5 65
4 65
3 63
3 63
3 63
3 58
3 58
3 57
3 56
3 56
3 56
3 56
3 56
3 55
3 51
3 50
3 50
3 50
3 50
3 50
3 50
3 50
3 50
3 50
3 51
3 51
3 52
3 52
3 53
3 53
3 53
3 57
3 56
3 56
4 56
4 56
4 56
4 52
4 52
4 52
4 52
4 51
4 51
4 51
4 51
4 51
4 51
4 51
4 49
3 49
3 49
3 49
3 50
3 50
3 50
3 57
3 57
3 57
3 57
3 57
3 57
3 57
3 57
3 57
3 57
2 57
1 48
1 15
3 15
3 15
3 15
3 15
3 15
3 15
3 16
3 16
4 17
4 19
4 25
4 32
4 32
4 32
4 37
2 37
2 37
2 37
2 42
2 42
2 44
2 44
2 44
2 45
2 45
2 54
2 54
2 55
2 55
2 54
2 54
2 52
2 52
2 52
2 52
2 52
2 48
2 48
2 48
1 48
1 48
1 48
1 48
1 48
1 48
1 48
1 48
2 48
2 48
3 49
3 49
3 49
3 49
3 49
3 49
3 49
3 49
3 45
3 42
3 42
3 34
3 34
3 34
3 33
3 36
3 36
3 37
4 47
4 47
4 47
4 47
4 47
4 47
4 47
4 47
4 49
4 49
4 49
3 49
3 47
3 47
3 45
3 43
3 37
3 30
3 30
3 30
3 30
3 30
3 31
3 31
3 29
3 29
3 31
3 31
3 31
3 30
3 30
3 21
3 21
3 20
3 20
3 20
3 20
3 20
3 20
3 20
3 20
3 20
3 20
3 20
3 20
3 20
3 20
3 20
3 20
2 20
2 20
2 23
2 25
2 26
2 25
1 25
1 25
1 25
1 25
1 25
1 25
1 25
1 25
1 25
1 25
1 25
1 26
1 26
1 27
1 27
1 23
1 23
1 23
0 13
0 13
0 13
0 13
0 13
0 13
0 14
0 14
0 13
0 13
0 19
0 19
0 22
0 22
0 22
0 22
0 23
0 23
0 23
0 23
0 23
0 23
0 23
0 23
0 23
0 23
0 21
0 21
0 21
0 21
0 21
0 21
0 21
0 22
0 22
0 22
0 22
0 22
0 23
0 23
0 23
0 23
0 23
0 23
0 23
0 23
0 23
0 23
0 23
0 22
0 23
0 17
0 17
0 17
0 18
0 19
0 20
0 20
0 20
0 20
0 20
0 20
0 20
0 20
0 20
0 20
0 19
0 19
0 18
0 18
0 18
0 18
0 18
0 18
0 18
0 18
0 18
0 21
0 25
0 24
0 26
0 26
2 40
2 35
2 35
2 33
2 33
2 33
2 33
2 32
2 32
2 32
2 32
2 32
2 32
2 31
2 31
2 32
2 32
2 32
2 32
2 32
2 32
2 32
2 32
2 32
2 32
2 32
2 33
2 32
2 32
2 32
2 32
2 32
2 32
2 32
2 33
2 35
2 37
2 37
2 39
2 52
2 52
2 52
2 54
2 55
2 58
2 58
2 57
2 56
2 56
2 56
2 56
2 56
2 56
2 56
2 56
2 56
2 56
2 65
2 65
2 65
2 65
2 65
2 65
2 65
2 63
2 63
2 61
2 61
2 58
2 54
2 54
2 54
3 55
1 45
1 46
1 47
1 46
1 52
1 52
1 52
1 52
1 52
1 52
1 52
1 52
1 52
1 52
1 52
1 51
1 51
1 51
2 51
3 51
3 51
3 51
3 51
3 51
3 50
3 50
3 50
3 50
3 50
3 50
3 50
3 50
3 50
3 50
4 49
4 49
4 49
4 49
4 46
4 34
4 33
4 33
4 32
4 27
4 26
4 25
4 25
4 25
4 25
4 25
4 25
4 25
4 26
4 27
4 27
4 27
4 27
4 18
4 20
4 20
4 20
4 20
4 21
4 22
4 22
4 22
6 23
6 24
6 25
6 25
6 25
6 24
5 21
5 16
5 16
5 16
5 16
5 10
5 10
5 10
5 10
5 10
5 10
5 10
5 10
5 10
5 10
5 10
5 10
5 10
4 10
4 10
3 10
3 10
3 10
3 10
3 10
3 10
3 10
3 10
3 10
3 10
3 10
3 10
3 10
3 10
3 10
2 10
2 10
2 10
2 10
2 9
2 9
2 9
2 9
2 9
2 9
2 9
2 9
6 9
6 9
6 9
6 9
6 10
6 10
6 7
6 7
6 7
6 7
6 7
6 7
6 6
6 6
6 6
6 5
6 4
6 4
6 4
6 4
4 3
4 1
4 1
5 1
6 1
6 1
6 1
6 1
6 1
6 1
6 1
6 1
6 1
6 1
6 1
6 2
6 2
6 3
6 3
6 3
6 3
6 3
6 3
6 3
6 3
6 3
6 3
6 3
6 4
6 4
6 4
6 4
6 4
6 6
6 6
6 6
6 8
6 8
6 8
6 8
6 8
6 8
6 8
6 8
6 8
6 8
6 11
6 12
6 12
6 15
6 15
6 16
4 16
0 16
0 16
0 16
0 16
0 15
0 16
0 16
0 16
0 16
0 16
0 16
0 16
0 19
0 20
0 20
0 20
0 21
0 21
0 22
0 22
0 22
0 22
0 22
0 22
0 22
0 22
0 22
0 22
0 22
0 22
0 22
0 22
0 22
0 22
0 22
0 21
0 21
0 20
0 20
0 20
0 20
0 20
0 20
0 20
0 20
0 20
0 20
0 21
0 19
0 18
0 18
0 18
0 18
0 16
0 16
0 16
0 16
0 16
0 16
0 16
0 16
0 16
0 16
0 16
0 16
0 16
0 13
0 12
0 11
0 9
0 9
0 8
0 8
0 8
0 8
0 8
0 8
0 8
0 7
0 7
0 7
0 7
0 7
0 7
0 7
0 6
0 5
0 5
0 5
0 4
0 5
0 4
0 21
0 24
1 24
1 24
1 24
1 24
1 24
1 24
2 24
2 24
2 24
2 26
2 26
2 27
2 27
2 27
2 27
2 27
2 27
2 27
2 27
2 27
2 27
2 27
2 27
2 27
2 27
2 27
2 26
2 26
2 26
2 26
2 26
2 26
2 26
2 26
2 26
2 26
2 26
2 26
2 26
2 26
2 26
2 26
2 28
2 28
2 28
2 28
2 28
2 28
2 28
2 28
2 28
2 29
2 29
2 29
2 29
2 29
2 29
2 29
2 29
2 29
2 29
2 29
2 29
2 29
2 27
2 27
2 27
2 27
2 27
2 26
0 24
0 7
0 9
0 9
0 9
0 9
0 10
0 17
1 63
1 74
1 75
1 78
1 77
1 77
1 76
1 76
1 76
1 76
1 76
1 76
1 76
1 76
1 76
1 76
1 76
1 76
1 76
1 76
1 76
1 76
1 76
1 76
1 76
1 76
1 76
1 76
1 76
1 76
1 76
1 76
1 76
1 76
1 76
1 76
1 76
1 77
1 78
1 80
1 83
1 89
3 244
6 632
6 675
7 709
8 732
8 733
8 733
8 735
8 736
9 737
9 737
9 737
9 737
9 738
9 738
9 738
9 738
9 743
9 743
9 743
10 896
10 897
10 897
10 897
10 896
10 896
10 896
10 896
10 894
10 894
9 882
9 831
9 830
9 831
9 832
9 832
9 832
9 833
9 837
9 837
9 837
9 837
9 837
9 837
9 838
9 838
9 838
9 838
9 838
9 838
9 838
9 838
9 838
9 838
9 838
9 838
9 838
9 837
9 837
9 837
9 837
9 837
9 837
9 837
9 837
9 837
9 837
10 932
10 927
10 944
10 938
10 931
10 923
7 715
4 307
4 300
4 370
4 614
4 632
4 634
4 635
4 635
3 636
3 642
4 672
4 674
4 674
17 753
17 752
21 753
21 752
21 756
21 758
20 605
20 615
20 617
21 634
21 649
23 679
23 713
23 721
23 727
23 733
23 737
23 737
23 739
23 739
23 739
23 739
23 739
23 739
23 739
23 744
23 756
23 770
23 771
23 778
23 777
23 777
23 778
23 783
23 795
24 826
27 905
28 911
28 930
28 941
28 945
29 945
29 945
29 946
29 946
29 949
29 949
29 955
29 955
29 956
29 1003
29 1006
28 1005
27 902
27 903
27 884
27 884
27 886
26 878
35 1030
35 1034
35 1032
33 953
32 673
33 634
34 643
34 644
34 644
34 643
35 637
35 636
35 637
33 638
22 589
22 586
22 586
22 586
22 587
22 585
20 585
20 585
20 584
19 570
19 562
19 547
19 519
19 511
19 510
19 511
19 510
19 509
19 508
20 544
20 549
20 550
20 550
20 550
20 597
21 591
21 570
21 558
21 558
21 549
21 548
21 547
21 544
21 537
20 522
19 472
16 426
16 405
18 402
18 399
19 471
25 471
25 473
25 473
25 474
25 472
25 473
26 465
26 465
26 464
27 423
27 489
27 505
26 502
26 502
26 502
26 501
26 499
26 489
16 316
16 315
16 316
16 316
16 314
16 318
16 316
19 325
19 364
19 391
18 394
17 396
17 391
17 389
17 389
17 389
17 390
17 390
17 389
17 389
17 389
17 389
17 389
17 388
17 382
17 382
17 384
17 384
17 384
19 409
18 409
19 410
20 410
20 374
20 374
20 372
36 489
36 489
36 435
35 431
37 431
37 426
37 426
40 432
40 432
43 434
43 436
49 486
50 488
50 490
49 494
50 497
49 500
49 501
63 441
58 444
58 441
58 441
58 440
68 497
78 514
78 519
79 521
79 521
80 515
80 429
81 428
81 428
81 431
81 432
81 433
81 435
81 435
81 433
81 435
81 434
81 435
81 435
81 429
81 428
80 421
80 381
80 352
80 346
80 346
80 347
80 347
80 347
80 348
80 348
80 351
80 353
80 361
80 362
80 364
80 365
80 365
79 365
79 365
79 365
79 365
79 365
75 344
74 346
74 345
74 353
74 352
74 350
70 346
31 214
31 214
31 215
29 214
4 198
4 198
4 198
4 198
4 199
4 203
4 226
1 239
1 268
1 286
1 289
1 288
1 283
1 285
1 282
1 277
1 276
1 276
2 273
2 216
1 208
1 207
1 207
1 207
1 206
1 206
1 206
1 206
1 202
1 202
1 201
1 199
1 198
1 198
1 196
1 196
1 196
1 214
1 213
1 213
1 217
1 218
1 228
2 232
2 233
2 237
2 237
2 242
2 241
2 239
2 239
2 235
2 225
2 223
2 223
2 225
2 225
2 226
2 229
2 233
2 234
2 233
2 230
2 230
2 230
2 220
2 220
2 220
2 220
2 220
2 224
2 223
7 254
7 254
7 256
7 261
7 260
7 257
7 253
7 221
7 163
7 137
7 124
7 121
7 124
6 124
6 122
6 121
6 121
6 121
6 122
6 125
6 125
6 116
6 116
6 116
6 116
6 116
6 116
6 118
6 198
6 204
6 210
6 214
6 215
6 215
6 215
6 215
6 215
6 215
6 196
6 196
6 196
6 196
6 194
5 182
5 180
5 180
5 180
5 180
5 175
5 176
5 175
5 175
5 175
5 175
5 175
5 175
5 173
5 172
5 171
5 168
5 163
5 162
5 162
5 162
5 162
5 162
5 162
5 162
5 162
5 164
5 165
4 161
4 161
0 138
0 136
0 133
0 133
0 135
0 135
0 136
0 136
0 136
0 132
0 132
0 132
0 128
0 128
0 128
0 129
0 130
0 130
0 130
0 127
0 127
0 127
0 127
0 127
0 127
0 127
1 135
1 135
1 54
1 50
1 40
1 38
1 37
1 37
1 37
1 37
1 37
1 37
1 37
1 37
1 37
1 38
1 38
1 46
1 46
1 46
1 46
1 47
1 47
1 45
1 54
1 54
1 54
1 55
1 55
1 57
1 62
1 68
1 69
1 72
1 72
1 72
1 73
1 73
1 73
1 73
1 73
1 75
1 74
1 79
1 101
1 151
1 155
1 157
1 173
1 173
1 178
1 181
1 184
1 187
1 188
1 189
1 190
1 192
2 197
2 203
2 316
2 321
2 321
2 325
2 325
2 325
2 325
2 326
2 326
2 326
2 326
2 326
2 326
1 313
1 313
1 313
1 312
1 317
1 317
1 317
1 317
1 317
1 317
1 317
1 317
1 317
1 317
1 316
1 316
1 314
1 308
1 311
1 311
1 311
1 311
1 311
1 313
1 303
1 307
1 316
1 317
1 318
1 313
1 309
1 307
1 307
1 307
1 307
1 307
0 306
0 307
0 308
0 312
0 393
0 391
0 390
0 372
0 343
0 297
0 289
0 273
0 271
0 270
0 270
0 269
0 269
0 269
0 286
0 312
1 353
1 354
1 358
1 364
1 253
1 256
1 257
1 254
1 254
1 254
1 254
1 253
1 253
1 253
1 253
1 253
1 253
1 253
1 253
1 253
1 253
1 248
1 248
1 248
1 248
1 248
1 249
1 249
1 249
1 249
1 249
1 250
1 250
1 262
1 262
1 259
1 260
1 259
1 260
1 260
1 258
1 260
1 244
1 241
1 244
1 244
1 244
1 244
1 244
1 253
1 253
1 254
1 262
1 263
1 263
1 264
1 257
1 158
1 167
1 166
1 169
1 156
1 174
1 174
1 174
1 174
1 174
1 174
1 176
1 177
1 178
2 173
2 135
1 89
1 86
1 87
1 87
1 87
1 86
1 86
1 85
1 85
1 85
1 85
1 85
1 88
1 89
1 89
1 89
1 89
1 89
1 89
1 89
1 89
1 89
1 89
1 89
1 89
1 89
1 95
1 97
1 115
1 141
1 143
1 144
1 145
1 133
1 133
1 133
1 132
1 132
1 136
1 135
1 135
1 131
1 131
1 131
1 128
1 128
1 128
1 129
1 127
1 118
1 119
1 119
1 112
1 114
1 114
1 114
1 114
1 115
1 107
1 105
1 104
1 103
1 86
1 88
1 88
1 88
1 88
1 87
1 84
0 83
0 82
0 81
0 81
0 81
0 81
0 80
0 80
0 80
0 80
0 80
0 80
0 80
0 80
0 82
0 82
0 81
0 80
0 80
0 80
0 80
0 80
0 80
0 80
0 81
0 81
0 81
0 111
0 111
0 112
0 107
0 105
0 83
0 56
0 56
0 53
0 53
0 52
0 51
0 54
0 54
0 54
0 50
0 50
0 50
0 50
0 50
0 50
0 51
0 57
0 59
0 63
0 68
0 69
0 69
0 69
0 68
0 66
0 66
0 66
0 67
0 66
0 67
0 67
0 67
0 67
0 67
0 65
0 65
0 82
0 82
0 83
0 83
0 83
0 83
0 83
0 83
0 83
0 83
0 83
0 83
0 83
0 83
0 83
0 84
0 83
0 83
0 83
0 83
0 85
0 87
0 88
0 133
0 145
0 147
0 149
0 151
0 154
0 160
0 164
0 133
0 139
0 138
0 143
0 148
0 148
0 165
0 165
0 166
0 166
0 166
0 166
0 163
0 165
0 167
0 167
0 173
0 173
0 176
0 176
0 178
0 180
0 172
0 167
0 165
0 160
0 159
0 159
0 159
0 159
0 160
0 160
0 160
0 160
0 161
0 160
0 160
0 165
0 165
0 165
0 165
0 164
0 148
0 148
0 148
0 154
0 156
0 156
0 156
0 156
0 156
0 156
0 156
0 156
0 159
0 160
0 159
0 160
0 158
0 157
0 155
0 155
0 154
0 160
0 158
0 107
0 99
0 98
0 99
0 95
0 99
0 95
0 92
0 89
0 86
0 86
0 81
0 77
0 76
0 60
0 61
0 60
0 60
0 61
0 61
0 61
0 60
0 58
0 59
0 51
0 51
0 56
0 56
0 53
0 51
0 51
0 53
0 56
0 55
0 55
0 56
0 56
0 55
0 56
0 55
0 56
0 56
0 56
0 56
0 55
0 51
0 51
0 51
0 51
0 50
0 50
0 50
0 50
0 45
0 43
0 43
0 43
0 43
0 43
0 42
0 42
0 42
0 38
0 38
0 38
0 37
0 37
0 36
0 36
0 36
0 35
0 29
0 29
0 33
0 33
0 38
0 38
0 39
0 35
0 34
0 33
0 33
0 33
0 33
0 33
0 32
0 32
0 32
0 43
0 45
0 45
0 45
0 45
0 45
0 42
0 41
0 39
0 38
0 38
0 33
0 38
0 38
0 39
0 40
0 37
0 35
0 35
0 36
0 39
0 39
0 41
0 40
0 67
0 67
0 74
0 89
0 90
0 131
0 133
0 138
0 145
0 145
0 145
0 149
0 149
0 152
0 152
0 152
0 166
0 166
0 166
0 184
0 184
0 184
0 184
0 184
0 184
0 184
0 183
0 181
0 180
0 180
0 180
0 181
0 182
0 186
0 195
0 195
0 194
0 195
0 194
0 194
0 194
0 194
0 194
0 194
0 195
0 195
0 195
0 195
0 195
0 181
0 181
0 181
0 181
0 181
0 185
0 194
0 199
0 200
0 200
0 200
0 200
0 194
0 199
0 199
0 201
0 201
0 201
0 201
0 197
0 196
0 197
0 195
0 194
0 168
0 166
0 156
0 142
0 136
0 94
0 93
0 88
0 83
0 83
0 83
0 82
0 83
0 82
0 82
0 80
0 68
0 68
0 67
0 42
1 43
1 43
1 43
1 71
1 161
7 291
10 385
10 398
10 416
10 422
10 428
10 426
10 426
10 429
10 422
10 423
10 424
10 424
10 426
10 426
10 426
10 426
10 426
10 426
10 426
10 426
14 426
14 426
14 427
14 427
14 427
14 427
14 427
14 427
14 424
14 421
16 419
16 419
16 419
17 420
17 419
17 419
17 414
17 414
17 411
17 410
17 409
17 409
17 410
17 410
17 409
17 409
17 409
17 405
17 406
17 406
17 406
17 408
17 408
17 409
17 410
17 417
17 427
19 432
19 434
19 435
19 434
19 434
19 434
18 434
18 435
17 435
19 433
19 430
19 429
19 425
19 302
19 274
13 103
11 86
12 114
12 127
12 125
13 126
13 142
23 242
23 259
23 278
23 343
23 376
23 376
23 379
23 388
23 391
23 391
23 393
22 397
22 398
21 398
19 398
19 398
21 397
21 398
21 405
21 438
21 459
21 459
21 458
21 458
19 458
19 458
19 458
18 457
18 456
18 456
18 453
18 453
18 453
18 458
18 458
18 459
18 465
18 473
18 490
18 490
18 491
18 493
18 492
18 493
18 493
18 491
18 490
18 489
18 510
18 700
18 705
16 734
16 741
16 741
16 742
16 742
16 742
16 826
16 829
15 835
14 840
14 840
14 841
14 845
14 846
14 842
14 836
14 793
12 779
12 771
12 769
12 762
12 725
1 572
1 554
0 549
0 549
0 521
0 522
0 522
0 515
0 516
0 516
0 516
0 512
0 515
0 518
0 518
0 521
0 521
3 527
3 516
3 486
3 471
3 471
3 471
3 471
3 471
3 471
3 471
3 471
3 472
3 472
3 474
3 474
3 474
3 469
3 469
3 467
3 459
3 451
3 434
3 433
3 431
3 429
3 429
3 428
3 432
3 431
3 430
3 430
3 404
3 200
3 185
3 140
3 133
3 130
3 129
3 129
3 128
3 38
3 34
3 25
3 28
3 28
3 28
3 27
3 27
3 27
3 27
3 27
3 27
3 27
3 27
3 27
3 27
3 27
3 29
3 29
3 29
3 29
3 27
3 25
3 25
3 24
3 25
3 24
3 22
3 20
3 20
3 20
3 20
3 19
0 13
0 13
0 12
0 12
0 12
0 12
0 13
0 14
0 14
0 14
0 14
0 16
0 16
0 14
0 14
0 15
0 16
0 16
0 17
0 17
0 18
0 30
1 30
1 30
1 30
1 30
1 31
1 29
1 30
1 31
1 31
1 31
1 31
1 31
1 32
1 32
1 32
2 32
2 32
2 32
2 32
2 34
2 34
2 31
3 34
3 36
3 37
3 37
3 40
3 43
4 52
6 63
6 65
6 67
6 76
6 76
6 77
6 75
9 80
9 80
10 83
10 83
10 83
13 94
13 94
13 95
13 96
14 97
14 97
14 97
14 100
14 101
15 105
15 107
15 111
15 115
15 122
17 156
17 158
18 172
19 180
19 186
30 285
30 295
31 320
40 377
40 383
40 397
40 407
40 480
40 493
40 505
40 531
41 533
43 527
43 567
43 568
43 569
43 570
73 569
73 567
76 566
76 566
76 566
76 566
76 566
77 566
77 565
77 566
77 567
77 567
77 566
77 566
77 566
77 579
77 594
77 597
76 594
76 590
76 590
76 590
76 587
76 581
75 614
73 610
73 639
73 640
73 635
73 636
73 637
73 667
70 676
70 677
69 676
69 677
69 678
65 652
65 652
65 651
65 651
63 635
63 636
63 637
63 640
63 641
62 636
62 633
62 631
62 620
62 607
60 564
60 553
60 554
59 547
59 539
42 412
41 396
40 391
40 379
40 376
40 377
40 373
40 276
40 269
40 256
40 254
39 251
36 246
35 237
35 237
33 237
33 237
3 237
3 237
1 236
1 236
0 236
0 236
0 244
0 248
0 268
0 268
0 271
0 309
0 309
0 310
0 313
0 305
0 294
0 293
0 293
0 293
0 293
0 292
0 291
0 287
0 249
0 241
0 211
0 233
0 231
0 229
0 228
0 196
0 180
0 179
0 179
0 178
0 177
0 177
0 177
0 176
0 176
0 176
0 176
0 174
0 173
0 171
0 173
0 171
0 170
0 172
0 172
0 172
0 178
0 178
0 176
0 181
0 183
0 190
0 178
0 178
0 178
0 176
0 177
0 172
0 162
0 164
0 159
0 159
0 159
0 160
0 160
0 160
0 160
0 160
0 160
0 160
0 160
0 160
0 160
0 153
0 148
0 127
0 129
0 127
0 96
0 96
0 95
0 90
0 83
0 81
0 80
0 80
0 80
0 80
0 81
0 81
0 81
0 82
0 82
0 82
0 57
0 57
0 57
0 57
0 57
0 57
0 57
0 57
0 57
0 57
0 57
0 57
0 57
0 58
0 58
0 58
0 58
0 55
0 59
0 60
0 60
0 61
0 58
0 58
0 58
0 53
0 53
0 53
0 44
0 42
0 36
0 38
0 39
0 39
0 36
0 35
0 35
0 38
0 36
0 35
0 34
0 34
0 36
0 40
0 40
0 44
0 44
0 44
0 54
0 55
0 57
0 59
0 64
0 121
0 126
0 123
0 130
0 126
0 131
0 131
0 134
0 134
0 134
0 134
0 134
0 134
0 134
0 133
0 133
0 133
0 132
0 132
0 138
0 138
0 138
0 138
0 139
0 176
0 176
0 176
0 176
0 179
0 181
0 181
0 183
0 185
0 190
0 211
0 213
0 215
0 216
0 212
0 208
0 208
0 208
0 208
0 208
0 208
0 207
0 207
0 207
0 207
0 219
0 215
0 215
0 226
0 231
0 242
0 243
0 243
0 242
0 287
0 292
0 305
0 315
0 316
0 312
0 313
0 312
0 312
0 313
0 304
0 302
0 298
0 295
0 283
0 246
0 241
0 239
0 239
0 239
0 237
0 237
0 237
0 238
0 244
0 249
0 250
0 252
0 252
0 252
0 252
0 252
0 254
0 254
0 248
2 248
2 249
2 248
2 248
2 206
2 206
2 206
2 205
2 202
2 201
2 201
2 200
2 198
2 191
2 166
2 166
2 166
2 166
2 164
2 164
2 166
2 167
2 275
2 292
2 300
2 300
2 307
2 350
2 366
2 371
2 387
2 385
2 375
2 372
2 361
2 359
2 358
2 354
2 304
2 300
2 288
2 285
2 281
2 284
2 298
2 300
2 475
3 594
4 687
4 702
2 708
2 707
2 705
2 704
2 697
2 698
2 699
3 704
3 704
3 704
3 704
3 703
3 692
3 693
3 693
3 694
3 804
3 804
3 810
3 814
3 818
3 819
3 819
3 821
3 821
3 821
3 821
3 821
3 821
3 821
3 821
3 819
3 818
3 818
3 818
3 818
3 818
4 818
4 818
4 817
4 816
4 815
4 815
4 814
4 810
4 658
4 636
4 629
4 628
4 627
4 615
4 599
3 572
3 570
3 570
3 570
3 570
3 570
3 570
3 570
3 570
3 570
3 570
3 570
3 570
3 570
3 567
3 551
2 544
2 366
2 194
1 138
1 140
1 139
1 139
1 139
1 139
1 139
1 139
1 139
0 134
0 135
0 133
0 133
0 134
0 134
0 152
0 154
0 154
0 43
0 46
0 40
0 35
0 30
0 29
0 28
0 28
0 28
0 28
0 28
0 28
0 28
0 28
0 28
0 28
0 28
0 28
0 28
0 28
0 29
0 29
0 29
0 29
0 29
0 29
0 29
0 30
0 30
0 30
0 30
0 30
0 30
0 30
0 30
0 30
0 30
0 30
0 31
0 51
0 51
0 52
0 52
0 53
0 54
0 54
0 54
0 54
0 54
0 54
0 55
0 55
0 55
0 55
0 55
0 55
0 52
0 51
0 51
0 51
0 51
0 51
0 51
1 51
1 51
1 50
1 50
1 50
1 49
1 48
1 29
2 27
2 27
2 27
2 27
2 27
2 28
2 28
2 28
2 28
2 28
2 28
2 28
2 28
2 28
2 28
2 28
2 28
2 28
2 28
2 28
2 27
2 27
2 26
2 26
2 26
6 26
6 26
6 26
6 26
6 25
6 25
6 25
6 25
6 25
6 25
6 25
6 25
6 25
6 25
6 25
2 22
2 1
2 0
2 0
2 0
4 0
4 0
4 0
4 0
4 0
4 0
4 0
4 0
4 0
4 0
4 0
4 0
4 0
4 0
4 0
4 0
6 0
6 0
8 0
8 0
7 0
7 0
7 0
7 0
7 0
7 0
7 0
7 0
6 0
6 0
6 0
6 0
6 0
6 0
6 0
6 0
6 0
6 0
6 0
6 0
7 0
7 0
8 0
9 1
9 1
10 1
10 1
10 1
10 1
10 1
10 1
10 1
10 1
10 1
10 1
10 1
10 1
10 1
10 1
6 1
6 1
6 1
3 1
3 0
3 0
3 0
2 0
2 0
2 0
2 0
4 0
2 0
4 0
4 0
4 0
4 0
4 0
4 0
4 0
4 0
4 0
4 0
4 0
4 0
4 0
4 0
4 0
4 0
4 0
4 0
4 0
4 0
4 0
4 0
4 0
4 0
4 0
4 0
4 0
4 0
4 0
4 0
4 0
4 0
4 0
4 0
4 0
4 0
10 0
20 0
20 0
22 0
22 0
22 0
22 0
22 0
24 0
26 0
26 0
26 0
26 0
26 0
26 0
26 0
26 0
26 0
26 0
26 0
26 0
26 0
26 0
26 0
26 0
26 0
26 0
26 0
26 0
26 0
26 0
26 0
26 0
26 0
26 0
24 0
24 0
22 0
22 0
22 0
22 0
22 0
22 0
22 0
22 0
22 0
22 0
22 0
22 0
22 0
22 0
22 0
22 0
22 0
22 0
22 0
22 0
22 0
22 0
22 0
22 0
22 0
23 0
22 0
22 0
22 0
21 0
21 0
21 0
21 0
21 0
21 0
21 0
16 0
7 0
7 0
5 0
5 0
5 0
5 0
5 0
3 0
1 0
1 0
1 0
1 0
1 0
1 0
3 0
6 0
6 0
6 0
6 0
6 0
6 0
6 0
6 0
6 0
6 0
6 0
6 0
6 0
6 0
6 0
6 0
6 0
6 0
6 0
6 0
7 0
7 0
7 0
7 0
7 0
7 0
7 0
7 0
7 0
7 0
7 0
7 0
7 0
7 0
7 0
7 0
7 0
7 0
7 0
7 0
7 0
11 0
12 0
12 0
13 0
13 0
12 0
12 0
12 0
12 0
12 0
12 0
14 0
14 0
14 0
14 0
14 0
14 0
14 0
14 0
14 0
14 0
14 0
14 0
14 0
14 0
15 0
15 0
15 0
15 0
15 0
15 0
33 0
30 0
31 0
31 0
31 0
31 0
33 0
33 0
33 0
33 0
33 0
33 0
33 0
32 0
32 0
32 0
32 0
32 0
32 0
32 0
32 0
31 0
35 0
35 0
35 0
37 0
37 0
41 0
50 0
52 0
55 0
57 0
57 0
61 0
73 0
78 0
87 0
97 0
114 0
136 0
151 0
181 0
356 0
923 0
945 0
996 0
999 0
1000 0
1001 0
1001 0
1005 0
1011 0
1012 0
1010 0
1012 0
1013 0
1014 0
1014 0
1015 0
1015 0
1015 0
1015 0
1019 0
1020 0
1020 1
1020 1
1022 1
1064 1
1065 1
1087 1
1075 1
1230 1
1223 1
1172 1
1313 1
1273 1
1356 1
1465 1
1903 1
1931 1
1935 1
1936 1
1937 1
1941 1
1945 1
1947 1
1949 1
1951 1
1951 1
1951 1
1951 1
1952 1
1963 1
1970 1
1972 1
1970 1
1972 1
1973 1
1973 1
1971 1
1967 1
1965 1
1965 1
1964 1
1963 1
1963 1
1957 1
1954 2
1946 2
1940 2
1932 2
1917 3
1900 3
1896 7
1862 8
1719 8
1266 14
1265 15
1224 17
1292 19
1293 19
1295 29
1295 29
1293 29
1295 30
1323 31
1322 31
1561 75
1562 76
1561 77
1572 86
1572 87
1572 87
1570 87
1570 87
1565 87
1564 87
1564 87
1564 87
1565 87
1527 88
1506 88
1474 88
1511 88
1381 89
1382 89
1372 89
1217 88
1161 88
1009 88
922 87
538 87
526 89
523 89
524 89
524 89
523 90
519 90
520 90
522 90
526 90
529 91
530 91
532 91
530 91
515 89
504 87
504 88
504 88
504 88
504 88
502 88
503 88
502 88
499 88
502 88
502 88
502 88
502 86
509 86
504 82
505 82
504 82
504 79
501 77
505 77
505 75
504 75
507 75
476 71
456 67
434 65
420 65
420 65
420 65
419 65
418 65
419 64
397 63
395 62
166 11
175 12
182 12
196 9
215 9
220 9
224 9
432 47
493 59
564 61
585 61
592 62
611 62
615 61
618 61
615 61
571 61
545 60
556 60
565 60
567 60
568 60
575 60
576 60
615 60
652 58
676 58
793 58
800 58
1372 57
1377 57
1377 57
1376 57
1374 57
1373 56
1373 56
1373 56
1373 56
1373 56
1373 56
1374 55
1374 55
1374 55
1375 55
1376 55
1377 55
1377 55
1377 55
1376 55
1376 55
1373 55
1370 55
1366 55
1374 55
1373 55
1373 55
1392 55
1393 55
1446 56
1464 56
1542 56
1619 57
1704 56
1750 56
1754 56
1752 56
1752 56
1752 56
1751 56
1750 56
1745 56
1756 56
1760 55
1766 55
1790 55
1939 55
2095 55
2089 56
2074 55
2053 53
1764 12
1682 5
1608 4
1567 4
1513 3
1506 3
1501 3
1499 3
1501 3
1504 3
1504 3
1521 3
1518 3
1579 3
1589 3
1603 3
1619 3
1645 3
1618 3
1588 3
1578 3
1574 3
1098 3
1292 7
1403 8
1435 11
1444 11
1462 11
1497 11
1572 11
1593 11
1741 11
1749 11
1751 11
1757 11
1762 11
1766 12
1765 12
1765 12
1767 12
1768 12
1768 12
1768 12
1770 12
1774 12
1774 12
1770 14
1771 14
1766 14
1733 14
1711 14
1590 13
1563 13
1398 13
1342 12
1261 12
1218 12
1214 12
1218 12
1221 12
1219 12
1226 12
1242 12
1243 12
1226 12
1222 12
1214 12
1160 12
1069 12
971 12
952 11
955 11
955 11
956 11
958 11
966 11
976 11
978 11
978 11
977 11
978 11
976 11
970 11
962 11
923 11
998 11
925 9
983 9
966 9
1175 10
1154 11
1177 11
1231 11
1229 11
1218 11
1181 11
914 7
773 3
751 3
747 3
746 3
726 3
720 3
714 3
622 3
619 3
619 3
616 3
609 3
606 2
606 2
606 2
606 2
606 2
607 2
606 2
602 2
598 2
598 2
596 2
591 2
591 2
591 2
593 2
593 2
593 2
593 2
586 2
586 2
585 2
585 2
583 2
582 2
582 2
567 2
558 2
557 2
558 2
558 2
556 2
556 2
557 2
558 2
559 2
559 2
559 2
559 2
555 2
546 2
533 2
527 2
529 2
564 2
596 2
599 2
599 2
607 2
602 2
530 2
527 2
458 2
461 2
239 1
216 0
206 0
152 0
151 0
156 0
159 0
174 0
175 0
176 0
177 0
177 0
177 0
177 0
180 0
194 0
200 0
201 0
201 0
233 0
239 0
239 0
570 0
577 0
582 0
607 0
627 0
628 1
631 1
661 1
686 1
697 1
748 1
751 1
756 1
760 1
799 1
801 1
801 1
801 1
801 1
801 1
801 2
801 2
801 2
799 2
799 2
804 2
801 2
800 2
800 2
801 2
799 2
798 2
802 2
806 2
804 2
805 2
805 1
805 1
819 1
813 1
805 1
720 1
671 1
647 1
641 1
636 1
635 1
632 1
632 1
663 2
665 2
674 2
678 2
689 2
690 2
690 2
690 2
688 2
677 2
676 2
681 2
680 2
683 2
689 2
688 2
686 2
660 2
655 2
647 2
647 2
646 2
641 2
641 2
344 2
335 2
327 2
318 2
313 2
396 1
388 1
359 1
345 1
340 1
292 1
288 1
283 1
283 1
244 1
244 1
244 1
259 1
273 1
279 1
399 1
403 1
402 1
404 1
404 1
401 1
400 1
408 1
408 1
467 5
468 5
469 5
461 5
458 5
458 5
458 5
458 5
458 5
444 5
445 5
445 5
446 14
449 15
450 16
449 16
449 16
444 16
451 16
474 15
457 15
454 15
442 15
437 15
426 15
424 15
426 15
428 15
434 15
434 15
434 15
458 16
479 16
530 17
621 17
662 17
690 17
694 18
694 18
691 18
691 18
690 18
692 18
720 21
722 22
723 22
709 22
707 22
697 22
611 22
607 22
587 22
584 22
584 22
585 22
584 22
585 22
585 22
603 22
626 24
628 24
721 25
705 25
703 25
596 25
597 25
598 25
599 25
599 25
599 25
595 25
592 25
592 25
533 21
533 21
533 21
532 21
531 21
531 20
531 20
530 20
530 20
530 20
529 20
527 19
582 11
588 11
588 10
769 10
768 10
767 10
745 10
717 10
713 10
713 10
713 10
713 10
712 10
711 10
711 10
714 10
710 10
705 10
712 10
679 9
659 9
587 8
634 9
622 9
623 10
619 10
619 10
624 10
617 9
624 9
624 9
594 7
593 7
593 7
587 7
583 7
583 7
582 7
582 7
582 7
582 7
582 7
581 7
581 7
580 7
579 7
554 7
532 5
524 6
389 5
389 5
354 5
354 5
354 5
354 5
355 5
355 5
355 5
355 5
355 5
355 5
355 5
355 5
355 4
355 4
355 4
355 4
355 4
355 4
355 4
355 4
354 4
354 4
351 4
349 4
347 4
220 4
221 4
241 4
243 4
243 4
242 4
242 4
242 4
242 4
241 4
241 4
240 4
238 4
238 4
237 4
228 4
223 4
221 4
213 4
49 1
40 1
36 0
36 0
36 0
36 0
37 0
34 0
34 0
34 0
34 0
34 0
34 0
34 0
34 0
34 0
34 0
34 1
34 1
34 1
34 1
35 1
35 1
35 1
35 1
35 1
35 1
35 1
35 1
35 1
35 1
35 1
35 1
33 1
33 1
33 1
33 1
33 1
33 0
33 0
33 0
33 0
33 0
33 0
33 0
33 0
34 0
34 0
33 0
34 0
34 0
40 0
60 0
60 0
60 0
59 0
37 0
37 0
37 0
37 0
37 0
37 0
37 0
37 0
37 0
37 1
37 1
37 1
37 1
37 1
37 1
37 1
37 1
32 1
32 1
32 1
32 1
33 1
33 1
33 1
33 1
35 1
35 1
34 1
36 1
36 1
36 1
36 1
36 1
36 1
40 1
40 1
45 1
45 1
44 1
44 1
44 1
44 1
44 1
44 1
44 1
44 1
44 1
47 1
47 1
47 1
47 1
47 1
47 1
47 1
46 1
46 1
46 1
46 1
46 1
46 1
46 1
46 1
46 1
45 1
44 2
44 2
40 2
37 2
30 2
17 2
17 2
17 2
17 2
17 2
17 2
23 2
23 2
29 2
30 2
132 2
135 1
137 1
137 0
137 0
137 0
137 0
137 0
137 0
137 0
137 0
137 0
137 0
137 0
137 0
136 0
136 0
136 0
137 0
135 0
135 0
135 0
134 0
135 0
135 0
135 0
136 0
140 0
143 0
145 0
156 0
157 0
159 0
159 0
161 0
161 0
161 0
161 0
169 0
169 0
172 0
169 0
173 0
175 0
461 2
463 2
467 2
470 2
472 2
472 2
472 2
503 2
504 2
552 2
577 2
580 2
580 2
580 2
583 2
586 2
586 2
587 2
590 2
592 2
597 2
597 2
598 2
598 2
600 2
603 2
605 2
600 2
609 2
507 2
508 2
507 2
508 2
508 2
508 2
508 2
508 2
509 2
510 2
510 2
510 2
510 2
510 2
510 2
521 2
523 2
546 2
545 2
545 2
548 2
557 2
555 2
555 2
595 2
595 2
595 2
599 2
591 2
657 2
642 2
642 2
640 2
640 2
638 2
637 2
637 2
637 2
630 2
629 2
629 2
630 2
630 2
629 2
340 0
352 0
351 0
351 0
349 0
349 0
348 0
312 0
307 0
268 0
244 0
244 0
244 0
244 0
242 0
239 0
238 0
235 0
233 0
232 0
227 0
227 0
226 0
226 0
224 0
216 0
215 0
210 0
209 0
216 0
388 0
466 1
479 2
482 2
484 2
484 2
484 2
484 2
483 2
481 2
482 2
483 2
486 2
486 2
477 2
469 2
446 2
445 2
442 2
439 2
433 2
431 2
432 2
386 2
386 2
387 2
386 2
381 2
326 2
327 2
326 2
326 2
326 2
326 2
328 2
346 2
354 2
358 2
383 2
384 2
390 2
389 2
392 2
472 2
472 2
652 2
652 2
653 2
654 2
655 2
656 2
657 2
656 2
656 2
656 2
656 2
656 2
656 2
656 2
656 2
660 2
660 2
659 2
664 2
664 2
666 2
670 2
730 2
722 2
769 2
763 2
730 2
714 2
541 1
512 0
502 0
502 0
500 0
499 0
499 0
498 0
498 0
498 0
498 0
498 0
496 0
497 0
497 0
497 0
496 0
496 0
495 0
495 0
495 0
496 0
499 0
500 0
500 0
500 0
500 0
498 0
493 0
493 0
492 0
490 0
481 0
480 0
479 0
470 0
466 0
447 0
457 0
470 0
467 0
464 0
451 0
352 0
347 0
130 0
115 0
114 0
68 0
68 0
67 0
67 0
67 0
67 0
67 0
68 0
68 0
68 0
68 0
68 0
68 0
69 0
77 0
77 0
82 0
86 0
82 0
83 0
83 0
72 0
72 0
74 0
74 0
74 0
72 0
72 0
72 0
72 0
72 0
72 0
72 0
72 0
72 0
72 0
72 0
72 0
72 0
72 0
72 0
72 0
72 0
72 0
72 0
72 0
73 0
70 0
70 0
70 0
70 0
70 0
70 0
70 0
70 0
70 0
70 0
70 0
69 0
68 0
68 0
70 0
64 0
39 0
27 0
27 0
27 0
27 0
27 0
78 0
80 0
84 0
85 0
85 0
94 0
94 0
94 0
94 0
95 0
120 0
175 0
196 0
253 0
255 0
254 0
254 0
254 0
246 0
248 0
254 0
279 0
281 0
295 0
295 0
296 0
295 0
294 0
294 0
295 0
298 0
298 0
309 0
309 0
309 0
309 0
309 0
310 0
310 0
310 0
310 0
310 0
310 0
311 0
314 0
318 0
318 0
317 0
318 0
318 0
319 0
321 0
321 0
323 0
326 0
327 0
327 0
329 0
329 0
329 0
329 0
329 0
329 0
329 0
329 0
324 0
324 0
324 0
320 0
317 0
289 0
288 0
285 0
218 0
216 0
215 0
213 0
164 0
163 0
169 0
183 0
211 0
209 0
209 0
174 0
170 0
133 0
135 0
135 0
135 0
136 0
142 0
181 0
179 0
163 0
166 0
154 0
154 0
154 0
154 0
154 0
154 0
153 0
155 0
155 0
144 0
144 0
144 0
144 0
143 0
143 0
143 0
143 0
143 0
143 0
143 0
140 0
138 0
137 0
138 0
138 0
137 0
137 0
136 0
134 0
134 0
133 0
130 0
129 0
129 0
146 0
146 0
146 0
146 0
146 0
146 0
146 0
146 0
146 0
146 0
146 0
146 0
146 0
146 0
146 0
146 0
146 0
146 0
146 0
146 0
145 0
135 0
123 0
98 0
90 0
90 0
90 0
90 0
92 0
98 0
94 0
90 0
90 0
87 0
81 0
37 0
37 0
33 0
32 0
33 0
46 0
49 0
49 0
49 0
49 0
47 0
46 0
47 0
47 0
47 0
48 0
48 0
48 0
48 0
49 0
51 0
60 0
60 0
74 0
74 0
75 0
76 0
79 0
80 0
81 0
82 0
92 0
93 0
94 0
94 0
106 0
106 0
106 0
89 0
89 0
90 0
90 0
90 0
90 0
90 0
90 0
90 0
90 0
90 0
90 0
90 0
90 0
90 0
90 0
90 0
90 0
90 0
90 0
90 0
90 0
91 0
95 0
96 0
96 0
96 0
96 0
91 0
88 0
88 0
88 0
88 0
88 0
84 0
84 0
84 0
84 0
84 0
78 0
57 0
56 0
55 0
54 0
39 0
39 0
39 0
38 0
36 0
36 0
35 0
35 0
35 0
35 0
35 0
34 0
34 0
33 0
28 0
28 0
26 0
23 0
20 0
16 0
10 0
10 0
10 0
10 0
10 0
10 0
8 0
8 0
8 0
8 0
10 0
11 0
11 0
11 0
11 0
11 0
11 0
11 0
11 0
11 0
11 0
11 0
11 0
11 0
11 0
11 0
11 0
11 0
11 0
11 0
11 0
10 0
7 0
6 0
6 0
6 0
6 0
6 0
6 0
6 0
6 0
6 0
6 0
6 0
6 0
6 0
6 0
6 0
6 0
6 0
6 0
6 0
6 0
6 0
6 0
8 0
8 0
8 0
8 0
8 0
8 0
8 0
8 0
8 0
8 0
8 0
8 0
8 0
8 0
8 0
8 0
8 0
8 0
8 0
8 0
8 0
8 0
8 0
8 0
8 0
8 0
8 0
6 0
4 0
2 0
2 0
2 0
2 0
2 0
2 0
2 0
2 0
2 0
2 0
2 0
2 0
2 0
2 0
2 0
2 0
2 0
2 0
2 0
2 0
2 0
2 0
2 0
2 0
2 0
2 0
2 0
8 0
8 0
8 0
8 0
8 0
11 0
12 0
12 0
12 0
12 0
12 0
12 0
12 0
12 0
12 0
12 0
12 0
10 0
10 0
10 0
10 0
10 0
10 0
10 0
10 0
10 0
10 0
10 0
10 0
10 0
10 0
10 0
10 0
10 0
10 0
10 0
10 0
10 0
10 0
10 0
10 0
10 0
10 0
10 0
10 0
10 0
10 0
10 0
10 0
10 0
10 0
10 0
10 0
10 0
10 0
10 0
10 0
10 0
10 0
10 0
10 0
10 0
10 0
10 0
10 0
10 0
10 0
10 0
10 0
10 0
10 0
10 0
10 0
4 0
4 0
4 0
4 0
4 0
1 0
0 0
0 0
0 0
0 0
0 0
0 0
0 0
0 0
0 0
0 0
0 0
0 0
0 0
0 0
0 0
0 0
0 0
1 0
1 0
1 0
1 0
1 0
1 0
1 0
1 0
1 0
1 0
1 0
1 0
1 0
1 0
1 0
1 0
1 0
1 0
1 0
1 0
1 0
1 0
1 0
1 0
1 0
1 0
1 0
1 0
1 0
1 0
1 0
1 0
1 0
1 0
1 0
1 0
1 0
1 0
1 0
1 0
1 0
1 0
1 0
1 0
1 0
1 0
1 0
1 0
1 0
1 0
1 0
1 0
1 0
1 0
1 0
1 0
1 0
1 0
1 0
1 0
1 0
1 0
4 0
4 0
4 0
4 0
4 0
4 0
4 0
4 0
4 0
4 0
4 0
3 0
3 0
3 0
3 0
3 0
3 0
3 0
3 0
3 0
3 0
3 0
3 0
5 0
5 0
5 0
5 0
5 0
5 0
5 0
5 0
5 0
5 0
5 0
5 0
5 0
5 0
5 0
5 0
5 0
5 0
5 0
5 0
5 0
6 0
6 0
6 0
7 0
7 0
7 0
8 0
8 0
8 0
8 0
8 0
8 0
8 0
8 0
8 0
8 0
8 0
8 0
8 0
8 0
8 0
8 0
8 0
8 0
8 0
8 0
8 0
8 0
8 0
5 0
5 0
5 0
5 0
5 0
5 0
5 0
5 0
5 0
5 0
5 0
5 0
5 0
5 0
5 0
5 0
5 0
8 0
8 0
9 0
9 0
9 0
9 0
7 0
7 0
7 0
7 0
7 0
7 0
7 0
7 0
7 0
7 0
7 0
7 0
7 0
7 0
7 0
7 0
7 0
7 0
7 0
7 0
7 0
5 0
5 0
5 0
5 0
5 0
5 0
4 0
4 0
4 0
4 0
4 0
4 0
4 0
4 0
4 0
4 0
4 0
4 0
4 0
4 0
4 0
4 0
4 0
4 0
4 0
4 0
4 0
4 0
4 0
4 0
4 0
4 0
4 0
4 0
4 0
4 0
4 0
4 0
4 0
4 0
4 0
4 0
4 0
4 0
7 0
6 0
4 0
4 0
3 0
3 0
3 0
3 0
3 0
3 0
3 0
3 0
3 0
3 0
3 0
3 0
3 0
3 0
3 0
3 0
3 0
3 0
3 0
3 0
3 0
3 0
3 0
3 0
3 0
3 0
3 0
3 0
3 0
3 0
3 0
3 0
3 0
3 0
3 0
3 0
3 0
3 0
3 0
3 0
3 0
3 0
3 0
3 0
3 0
3 0
3 0
3 0
3 0
3 0
3 0
3 0
3 0
3 0
3 0
3 0
3 0
3 0
3 0
3 0
3 0
3 0
3 0
6 0
6 0
6 0
6 0
5 0
5 0
3 0
3 0
3 0
3 0
3 0
3 0
3 0
3 0
3 0
3 0
3 0
3 0
3 0
3 0
3 0
3 0
3 0
3 0
3 0
3 0
3 0
3 0
3 0
3 0
3 0
3 0
3 0
3 0
3 0
3 0
3 0
3 0
3 0
3 0
3 0
3 0
3 0
3 0
3 0
3 0
3 0
3 0
3 0
3 0
5 0
5 0
5 0
6 0
6 0
6 0
6 0
6 0
6 0
6 0
6 0
6 0
6 0
6 0
6 0
6 0
6 0
7 0
7 0
7 0
7 0
7 0
7 0
4 0
3 0
3 0
3 0
3 0
3 0
3 0
3 0
3 0
3 0
3 0
3 0
3 0
3 0
3 0
3 0
3 0
3 0
3 0
3 0
3 0
3 0
3 0
3 0
3 0
3 0
3 0
3 0
3 0
3 0
3 0
3 0
3 0
3 0
3 0
3 0
3 0
3 0
3 0
3 0
3 0
3 0
3 0
3 0
3 0
3 0
3 0
3 0
3 0
3 0
1 0
1 0
1 0
1 0
1 0
1 0
1 0
1 0
1 0
1 0
1 0
1 0
1 0
1 0
1 0
1 0
1 0
0 0
0 0
0 0
0 0
0 0
0 0
0 0
0 0
0 0
0 0
0 0
0 0
0 0
0 0
0 0
0 0
0 0
0 0
0 0
0 0
0 0
0 0
0 0
0 0
0 0
0 0
0 0
0 0
0 0
0 0
1 0
1 0
1 0
1 0
1 0
1 0
1 0
1 0
1 0
1 0
1 0
1 0
1 0
1 0
1 0
1 0
1 0
1 0
2 0
2 0
2 0
2 0
2 0
1 0
1 0
1 0
1 0
1 0
1 0
1 0
1 0
1 0
1 0
1 0
0 0
0 0
0 0
0 0
0 0
0 0
0 0
0 0
0 0
0 0
0 0
0 0
0 0
0 0
0 0
1 0
1 0
1 0
1 0
1 0
1 0
1 0
1 0
1 0
1 0
1 0
1 0
3 0
3 0
3 0
2 0
2 0
2 0
2 0
2 0
2 0
2 0
2 0
2 0
2 0
2 0
2 0
2 0
2 0
2 0
2 0
2 0
2 0
2 0
2 0
2 0
2 0
2 0
2 0
2 0
2 0
2 0
2 0
2 0
2 0
2 0
2 0
2 0
2 0
2 0
2 0
2 0
2 0
2 0
2 0
2 0
2 0
2 0
2 0
2 0
2 0
2 0
2 0
2 0
2 0
2 0
2 0
2 0
2 0
2 0
2 0
2 0
2 0
2 0
2 0
2 0
2 0
2 0
2 0
2 0
2 0
2 0
2 0
2 0
2 0
0 0
0 0
0 0
0 0
0 0
0 0
0 0
0 0
0 0
0 0
0 0
0 0
0 0
0 0
0 0
0 0
0 0
0 0
0 0
0 0
0 0
0 0
0 0
0 0
0 0
0 0
0 0
0 0
0 0
0 0
0 0
0 0
0 0
0 0
0 0
0 0
0 0
0 0
0 0
0 0
0 0
0 0
0 0
0 0
0 0
0 0
0 0
0 0
0 0
0 0
0 0
2 0
4 0
4 0
4 0
4 0
4 0
4 0
4 0
4 0
4 0
4 0
4 0
4 0
4 0
4 0
4 0
4 0
4 0
4 0
4 0
4 0
4 0
4 0
4 0
4 0
4 0
4 0
4 0
4 0
4 0
4 0
4 0
4 0
4 0
4 4
4 4
4 4
4 4
4 4
4 4
4 4
4 4
4 4
4 4
4 4
4 4
4 4
4 4
4 4
4 4
4 4
4 4
4 4
4 4
4 4
4 4
4 4
4 4
4 4
4 4
4 4
4 4
4 4
4 4
4 4
4 4
4 4
4 4
4 4
4 4
4 5
1 6
2 6
1 7
2 13
2 17
2 18
2 18
2 18
2 18
2 18
2 18
2 18
2 18
2 18
2 18
2 18
2 18
2 18
2 18
2 18
2 18
2 18
2 18
2 18
2 18
2 18
4 18
6 18
7 18
7 18
7 18
7 18
7 18
7 18
7 18
7 18
7 14
7 14
7 14
7 14
7 15
7 15
7 15
7 15
7 15
7 15
7 15
7 15
7 15
7 15
7 15
7 15
7 15
7 15
7 15
7 15
7 15
7 15
7 15
7 15
7 15
7 26
7 26
7 26
7 26
7 26
7 26
7 26
7 26
7 26
8 26
9 26
9 25
9 24
8 23
8 19
7 13
7 14
7 14
7 14
7 14
7 14
7 14
7 14
7 15
7 15
7 15
7 15
7 15
7 16
7 16
7 16
7 16
7 16
7 16
7 16
7 16
7 17
7 17
4 17
2 17
2 17
3 18
4 19
4 18
5 18
5 19
5 19
5 19
5 19
5 19
5 19
5 19
20 18
20 18
20 18
20 18
20 18
20 18
20 18
20 18
20 18
20 18
20 18
21 18
21 18
22 18
22 18
22 18
22 18
22 18
22 18
22 18
25 18
25 6
25 6
25 6
26 6
28 6
28 6
28 6
27 5
27 5
30 5
29 5
29 5
29 5
29 5
32 5
32 5
32 5
32 5
32 5
32 5
32 5
32 5
32 5
32 4
32 4
32 4
32 4
32 4
32 4
32 4
32 4
32 4
32 5
34 5
39 6
43 6
45 5
45 5
44 5
44 5
44 5
43 4
43 3
43 3
42 3
42 2
42 2
42 2
42 2
42 2
42 2
42 2
28 2
29 2
30 2
30 2
36 2
36 2
36 2
36 2
36 2
36 2
36 2
35 2
35 2
34 2
34 2
34 2
34 2
34 2
34 2
33 2
35 2
35 3
35 3
34 3
36 3
36 3
36 3
36 3
34 3
34 3
33 3
33 3
33 3
33 3
33 3
30 3
30 3
30 3
30 3
30 3
30 3
30 3
30 3
30 3
30 3
30 3
30 3
30 3
30 3
30 3
30 3
30 3
30 3
31 1
29 1
25 1
24 1
33 1
47 2
52 2
54 2
56 2
57 2
58 2
58 2
59 2
60 2
60 2
61 2
61 2
61 2
61 2
61 2
61 2
60 2
59 2
58 2
55 2
55 2
55 2
55 2
55 2
56 2
56 2
56 3
56 4
59 6
64 7
66 7
66 7
67 7
73 8
81 8
78 8
78 7
78 7
77 7
74 7
75 7
77 7
78 5
79 5
79 5
79 5
79 5
79 5
79 5
79 5
79 5
79 5
79 5
79 5
79 5
79 5
79 5
79 5
79 5
79 5
79 5
79 5
79 5
79 5
78 5
78 5
78 5
77 5
73 5
67 5
65 5
58 6
45 4
35 3
35 3
34 3
32 3
32 3
32 3
32 3
32 3
31 3
31 3
30 3
30 3
27 3
27 3
27 3
27 3
27 3
27 3
27 4
27 4
27 4
27 4
27 4
27 4
26 4
26 5
25 5
25 5
21 5
20 4
19 4
19 4
16 4
9 3
4 3
4 3
4 3
4 3
4 3
4 3
3 3
1 3
0 3
0 3
0 3
0 3
0 3
0 3
0 3
0 3
0 3
0 3
0 3
0 3
0 3
0 3
0 3
0 3
0 3
0 3
0 3
0 3
0 3
0 3
0 3
0 3
0 3
0 3
0 3
0 3
0 3
0 2
0 3
0 3
0 3
0 3
0 3
0 3
0 3
0 3
0 3
0 3
0 3
0 3
0 3
0 3
0 3
0 3
0 3
0 3
0 3
0 2
0 2
0 2
0 2
0 2
0 2
0 2
0 1
0 1
0 1
0 2
0 2
0 2
0 2
0 2
0 2
0 2
0 2
0 2
0 2
0 4
0 4
0 4
0 4
0 4
0 4
0 4
0 4
0 4
0 4
0 4
0 4
0 4
0 4
0 4
0 4
0 4
0 4
0 9
0 11
0 11
0 11
0 11
0 11
0 11
0 11
0 11
0 11
0 11
0 11
0 11
0 11
0 11
0 11
0 10
0 10
0 10
0 11
0 11
0 13
0 13
0 13
0 13
0 13
0 13
0 13
0 15
1 15
1 15
1 15
1 15
1 18
1 18
1 17
1 15
1 15
1 14
2 22
2 24
2 25
3 53
3 54
2 55
2 55
2 57
2 57
2 57
2 57
2 57
2 57
2 57
2 57
2 57
2 61
3 61
3 61
3 61
3 61
3 61
4 61
4 61
4 61
4 61
4 61
4 61
4 61
4 61
4 61
4 61
4 60
4 60
4 54
4 54
4 54
4 54
4 54
4 54
4 54
4 54
4 55
4 55
4 55
4 55
4 55
4 55
4 55
4 55
4 55
4 55
4 55
4 55
4 59
4 61
4 62
4 62
4 62
4 62
4 62
4 62
4 61
4 63
4 65
4 65
4 66
4 63
4 64
4 64
4 62
4 62
3 62
2 65
2 64
2 62
2 35
2 33
2 33
2 32
2 32
2 32
2 32
2 32
2 32
2 32
2 32
2 32
2 34
2 28
1 28
1 28
1 28
1 28
1 28
0 28
0 28
0 28
0 29
0 29
0 29
0 39
0 39
0 39
0 40
0 40
0 40
0 40
0 40
0 40
0 40
0 40
0 40
0 40
0 40
0 39
0 39
0 39
0 39
0 39
0 39
0 40
0 40
0 40
0 40
0 40
0 40
0 37
0 35
0 36
0 38
0 38
0 37
0 38
0 37
0 37
0 35
0 34
0 36
0 36
0 39
0 39
0 39
0 39
0 39
0 39
0 28
0 28
0 28
0 28
0 28
0 28
0 28
0 28
0 28
0 28
0 28
0 30
0 31
0 31
0 31
0 29
0 29
0 29
0 30
0 30
0 30
0 30
0 30
0 30
0 30
0 29
0 29
0 29
0 17
0 17
0 17
0 17
0 17
0 16
0 16
0 16
0 16
0 16
0 16
0 16
0 16
0 17
0 17
0 17
0 17
0 17
0 16
0 16
0 16
0 16
0 16
0 18
0 18
0 18
0 18
0 18
0 15
0 13
0 13
0 13
0 13
0 18
0 18
0 18
0 18
0 14
0 14
0 11
0 11
0 11
0 11
0 11
0 11
0 11
0 11
0 11
0 11
0 11
0 11
0 11
0 11
0 11
0 11
0 11
0 9
0 8
0 8
0 8
0 8
0 8
0 8
0 19
0 19
0 19
0 20
0 20
0 20
0 20
0 20
0 22
0 29
0 48
0 65
1 336
1 359
1 401
2 530
5 717
5 834
8 954
8 960
9 972
9 984
9 986
9 985
9 985
9 985
9 986
9 986
9 986
9 986
9 988
9 1016
9 1026
9 1025
9 1029
9 1034
10 1053
10 1057
10 1058
11 1067
11 1067
11 1068
11 1067
11 1055
11 1048
11 1048
11 1054
11 1308
11 1308
11 1316
11 1317
12 1317
12 1317
12 1316
12 1329
12 1330
12 1330
12 1328
12 1328
12 1333
11 1334
11 1349
11 1350
10 1353
10 1355
10 1357
10 1362
10 1459
10 1495
10 1576
10 1627
10 1770
10 1851
10 1864
10 1869
10 1888
10 1889
10 1890
10 1891
11 1893
11 1892
11 1887
11 1880
11 1851
10 1792
8 1268
8 1151
7 1041
7 1020
7 1005
6 1002
4 964
4 976
4 977
4 992
4 994
4 994
4 993
4 998
4 1001
4 1001
4 1001
4 1001
4 995
4 967
4 949
4 947
4 945
3 939
3 936
3 936
8 1046
7 1039
7 1040
7 1041
7 1040
7 1039
7 1038
6 1038
6 1029
6 770
6 771
6 767
6 762
6 762
6 762
6 758
6 745
6 743
6 743
6 745
6 745
6 746
6 744
6 730
6 731
6 730
6 731
6 725
6 714
6 596
6 553
6 492
6 418
6 295
6 208
8 213
8 213
8 191
8 191
8 190
8 190
7 211
7 211
7 211
7 211
7 210
7 210
7 210
7 210
7 208
7 208
7 212
7 198
7 201
7 202
7 202
7 193
7 189
7 189
7 189
7 188
7 185
7 185
7 185
7 185
7 186
7 186
7 186
7 185
7 185
7 184
7 179
7 175
2 64
2 64
2 64
2 64
2 65
2 66
2 66
2 66
2 66
2 66
2 65
2 65
2 65
2 65
2 65
2 65
2 65
2 65
2 65
2 63
2 63
2 62
2 61
2 61
2 59
2 57
2 57
2 57
2 57
2 57
2 68
2 68
2 68
2 61
2 76
0 71
0 78
0 121
0 122
0 125
0 125
0 100
0 102
0 103
0 103
0 107
0 108
0 114
0 114
0 114
0 114
0 109
0 109
0 105
0 104
0 105
0 105
0 105
0 105
0 105
0 107
0 107
0 107
0 110
0 110
0 109
0 109
0 109
0 109
0 109
0 109
0 111
0 111
0 110
0 110
0 110
0 110
0 109
0 110
0 110
0 110
0 110
0 110
0 110
0 110
0 110
0 110
0 110
0 111
0 115
0 115
0 115
0 115
0 115
0 115
0 115
0 115
0 115
0 115
0 115
0 115
0 115
0 115
0 103
0 103
0 101
0 101
0 85
0 82
0 75
0 30
0 29
0 28
0 28
0 27
0 26
0 25
0 25
0 21
0 20
0 14
0 14
0 14
0 14
0 14
0 14
0 14
0 14
0 13
0 15
0 15
0 15
0 16
0 14
1 14
1 14
1 11
1 11
1 11
1 11
1 11
1 9
1 9
1 9
1 9
1 9
2 9
2 9
2 9
2 9
2 9
2 9
2 22
2 25
2 28
2 29
2 33
2 35
2 35
2 35
2 35
2 34
2 30
2 30
2 30
2 30
2 30
2 30
2 30
2 30
2 30
2 30
2 30
2 30
2 30
2 30
2 30
2 30
2 30
2 30
2 30
2 30
2 30
2 30
2 30
2 30
2 30
2 30
2 30
2 30
3 30
3 30
3 30
3 30
3 30
3 30
3 30
3 30
3 30
3 30
3 30
3 30
3 29
3 29
4 32
4 32
4 32
3 32
3 40
3 40
3 40
3 40
3 40
3 41
3 41
3 41
3 41
3 41
3 41
2 41
2 41
3 41
4 43
4 43
4 42
4 29
4 43
4 40
4 39
4 35
4 40
4 40
4 40
4 40
4 40
4 40
4 40
4 40
4 46
4 47
4 49
4 49
4 49
4 50
4 50
4 50
4 50
4 50
4 51
4 51
4 51
4 55
4 59
4 59
4 59
4 59
4 59
4 60
4 60
4 60
4 60
4 60
4 60
3 60
3 60
3 60
3 60
3 60
3 62
3 62
3 62
3 63
3 63
3 63
3 63
3 62
2 63
3 60
3 60
3 62
3 62
3 55
3 55
3 55
3 57
3 57
3 60
3 62
3 63
3 63
3 64
3 64
3 65
3 65
2 64
1 63
1 64
1 64
3 64
3 46
3 46
3 45
3 45
3 35
3 35
3 35
5 32
5 33
5 35
5 35
5 35
5 27
5 27
5 24
5 24
5 23
5 23
5 23
5 23
5 23
5 25
5 29
5 31
5 34
5 34
5 34
5 37
5 38
5 38
5 37
5 37
5 38
5 38
5 38
5 42
5 43
5 48
5 51
5 51
5 51
5 51
5 69
5 67
5 74
6 86
6 89
6 89
6 89
6 89
6 89
6 145
6 151
6 149
6 155
6 159
6 161
6 163
6 163
5 163
5 158
4 156
4 155
4 156
4 159
4 171
4 174
4 190
4 191
4 198
4 198
4 198
4 199
4 199
4 199
4 199
4 199
4 200
4 201
4 201
2 201
2 200
2 198
2 198
2 199
2 199
2 200
2 200
2 200
2 200
2 200
2 200
2 200
2 201
2 195
2 192
2 191
2 190
2 190
2 190
2 189
2 188
2 188
2 188
2 189
2 191
2 198
2 207
2 209
2 209
2 206
2 202
2 201
2 201
2 201
2 179
2 178
2 173
1 159
1 158
1 158
1 158
1 158
1 143
0 89
0 83
0 83
0 82
0 82
0 83
0 83
0 83
0 84
0 84
0 84
0 84
0 83
0 79
0 66
0 63
0 47
0 46
0 38
0 38
0 37
0 37
0 37
0 37
0 37
0 37
0 35
0 35
0 35
0 35
0 35
0 35
0 34
0 33
0 33
0 33
0 33
0 33
0 33
0 33
0 33
0 33
0 31
0 31
1 31
1 31
1 31
2 32
3 34
3 34
3 35
3 40
3 45
3 44
3 41
3 38
3 29
3 23
3 28
3 26
3 30
3 31
3 31
3 31
3 33
3 34
3 35
3 35
3 41
3 41
3 41
3 41
3 41
3 42
5 46
5 50
5 52
5 52
5 51
5 52
5 52
5 52
5 52
5 52
5 52
5 52
5 56
5 56
5 56
11 106
11 106
11 105
11 105
11 105
11 105
11 105
15 108
19 118
26 136
26 137
26 142
26 143
26 143
26 141
26 141
26 141
26 141
26 141
26 141
26 141
26 141
26 141
26 141
26 142
30 147
30 147
30 147
29 147
29 148
31 155
30 159
31 158
31 159
33 169
33 165
33 164
33 165
33 176
33 175
33 183
33 202
33 196
33 199
33 198
33 198
33 198
33 198
33 197
33 194
33 193
33 192
33 189
33 189
33 189
33 188
33 189
33 187
31 185
31 180
31 178
31 178
31 178
31 179
31 189
31 190
31 191
31 191
31 191
28 191
29 186
29 185
29 184
19 123
19 123
19 123
19 125
19 125
11 114
11 116
11 113
8 109
8 100
8 101
8 110
8 122
8 130
8 133
8 135
8 135
8 135
8 147
8 158
8 165
8 170
8 171
8 172
8 172
4 171
4 177
3 178
3 181
3 179
2 169
2 166
2 172
2 172
2 159
2 158
2 158
2 156
2 143
2 142
2 136
2 125
2 124
2 121
2 121
2 121
2 121
2 121
2 121
2 121
2 121
2 121
2 123
2 123
2 124
2 124
2 123
2 123
2 123
2 123
2 123
2 123
2 124
2 122
2 111
2 112
2 111
2 111
2 111
2 111
1 111
1 111
1 111
1 111
1 110
1 110
1 109
1 109
1 109
1 105
1 104
1 103
1 103
1 95
1 87
1 81
1 70
1 69
1 68
1 68
1 75
1 65
2 55
2 55
2 51
2 51
2 52
2 51
2 46
3 39
3 39
3 48
4 55
4 57
4 57
4 53
4 53
4 53
4 52
4 52
4 51
4 49
4 49
4 49
4 49
4 49
4 49
4 49
4 49
4 49
4 49
4 49
4 49
4 49
4 49
4 47
4 47
4 46
4 46
4 46
4 46
4 46
4 46
4 46
4 46
4 45
4 45
4 45
4 45
4 45
4 45
4 45
4 45
3 45
3 45
3 45
3 45
3 45
3 45
3 45
3 46
3 46
3 46
3 46
3 46
7 48
7 51
7 56
7 62
7 65
7 84
7 84
7 84
7 74
7 73
6 64
6 64
6 65
6 67
6 67
6 68
6 68
5 69
5 69
5 55
4 49
4 46
4 45
4 45
4 45
4 45
4 45
4 45
4 46
4 46
4 46
4 46
4 46
4 48
5 59
5 59
5 59
5 59
6 59
6 59
7 59
7 59
11 79
11 79
11 79
15 105
15 111
16 111
16 112
16 110
16 113
16 113
16 113
16 114
16 116
16 119
16 119
16 120
16 120
16 120
16 119
16 119
16 119
16 119
16 120
16 120
16 124
17 126
18 128
17 133
17 138
17 139
17 136
14 137
14 134
14 121
14 114
14 109
14 107
14 107
14 107
14 107
14 107
14 106
14 106
14 105
14 101
14 100
14 100
14 100
14 100
14 100
14 100
14 100
14 100
14 100
14 100
14 100
14 100
15 101
15 101
15 101
15 101
15 101
15 101
15 101
15 99
13 86
13 86
12 84
12 84
12 84
11 84
12 83
12 83
8 61
7 61
6 60
2 24
2 19
2 18
2 10
2 10
2 7
2 7
2 7
2 7
2 7
2 7
2 7
2 7
2 7
2 7
2 8
2 8
2 8
3 8
3 8
3 8
3 8
3 6
3 5
3 4
3 3
3 3
3 2
4 3
4 3
4 3
4 3
4 2
4 2
4 2
4 2
4 2
4 2
4 2
4 2
4 2
4 2
4 2
5 2
5 2
5 2
5 3
5 3
5 3
5 3
5 3
5 3
5 3
5 3
4 2
4 2
4 2
4 2
4 2
4 2
4 2
4 2
4 2
4 2
4 2
4 2
4 2
4 2
3 2
3 3
3 3
3 3
3 3
3 3
3 3
3 7
3 8
3 8
3 8
4 8
4 8
4 8
4 8
4 8
4 8
4 8
4 9
4 68
5 71
5 72
5 72
4 72
4 72
4 72
4 83
4 93
4 95
4 110
4 111
4 112
3 116
3 115
3 115
3 116
3 132
3 138
3 140
3 140
3 144
3 144
3 144
3 144
3 144
3 144
3 144
3 144
2 144
2 145
2 145
2 146
2 150
2 151
2 152
2 152
2 152
2 152
2 152
2 152
2 152
2 152
2 152
2 152
2 152
2 174
2 174
2 174
2 175
2 175
2 175
2 175
2 175
2 175
2 174
2 175
2 175
2 205
2 211
2 216
2 218
2 217
2 218
2 219
1 221
1 221
1 223
1 223
1 232
1 231
1 233
1 232
0 172
0 172
0 241
0 242
0 245
1 246
1 251
1 235
1 227
1 240
1 252
1 253
1 253
1 251
1 252
1 253
1 252
1 228
1 227
1 228
1 228
1 225
1 225
1 228
1 231
1 231
1 234
1 258
1 259
1 259
1 259
1 259
1 258
1 254
1 254
1 253
1 253
1 255
1 262
1 262
1 263
1 263
1 263
1 261
1 261
1 261
1 242
1 245
1 245
1 255
1 255
1 255
1 255
1 255
1 255
1 255
1 255
1 255
1 223
1 213
1 209
1 208
1 208
1 207
1 207
1 205
1 205
1 203
1 204
1 196
1 195
1 195
1 195
1 195
1 193
1 123
1 121
1 117
0 116
0 107
0 107
0 110
0 86
0 76
0 79
0 78
0 102
0 102
0 101
0 104
0 104
0 105
0 112
0 116
0 117
0 118
0 118
0 116
2 116
2 114
2 90
3 90
3 90
4 89
4 88
4 88
8 118
8 118
8 118
8 118
8 118
8 114
8 114
9 125
9 125
9 126
9 126
9 126
9 126
9 122
10 119
10 119
10 109
10 109
10 109
10 111
10 111
10 112
10 112
10 113
10 113
10 113
10 113
10 113
10 140
10 150
10 152
10 155
10 155
10 155
10 154
10 152
10 151
10 151
10 150
10 150
10 149
10 149
10 149
10 149
10 149
10 150
10 150
10 152
12 233
12 233
12 232
12 227
12 224
12 203
12 202
12 202
12 203
12 203
12 202
12 191
12 188
12 187
12 187
12 185
12 185
10 185
9 185
9 185
9 185
9 184
7 184
7 184
7 184
4 151
4 151
4 151
4 151
4 151
4 148
4 149
3 140
3 141
3 140
3 140
3 140
3 140
3 140
2 140
2 141
2 141
2 141
2 141
2 139
2 139
2 140
2 141
2 142
2 142
2 142
2 142
2 137
2 102
2 101
2 101
2 101
2 101
2 102
2 102
2 102
2 102
2 102
2 102
2 102
2 103
2 103
2 103
2 103
2 103
2 102
2 100
2 98
0 12
0 11
0 10
0 10
0 12
0 13
0 13
0 13
0 13
0 13
0 14
0 14
0 14
0 14
0 14
0 14
0 14
0 15
0 15
0 15
0 16
0 27
0 30
0 47
0 48
0 49
0 50
0 51
0 52
0 60
0 60
0 60
0 80
0 80
0 80
0 80
0 81
0 82
0 85
0 85
0 88
0 88
0 89
0 89
0 89
0 89
0 87
0 85
0 97
0 97
0 98
0 98
0 119
0 119
0 126
0 126
0 128
0 128
0 127
0 127
0 127
0 127
0 127
0 127
0 127
0 127
0 133
0 133
0 133
0 133
0 133
0 136
0 137
0 137
0 137
0 139
0 139
0 137
0 135
0 135
0 135
0 135
0 135
0 134
0 134
0 134
0 134
0 134
0 134
0 134
0 133
0 133
0 133
0 132
0 119
0 119
0 102
0 101
0 92
0 92
0 85
0 85
0 73
0 70
0 59
0 39
0 39
0 39
0 39
1 36
1 36
1 35
1 35
1 35
1 35
1 34
1 34
1 34
1 34
1 34
1 34
1 34
1 34
1 33
1 33
1 20
1 19
1 19
1 19
1 18
1 18
1 18
1 18
1 19
1 19
1 19
1 19
1 19
1 16
1 11
1 11
1 11
1 15
1 17
1 14
1 14
1 14
1 14
1 13
1 13
1 13
1 13
1 13
1 13
1 13
1 13
1 13
1 13
1 16
1 16
1 16
2 18
2 29
2 29
2 30
2 31
2 31
2 30
2 29
2 28
2 29
2 29
2 29
2 29
2 29
2 28
2 28
2 28
2 28
2 28
2 28
2 28
1 28
1 28
1 28
1 29
1 29
1 29
1 30
1 30
1 31
1 31
1 31
1 31
1 31
1 31
1 30
1 30
1 30
1 30
1 30
1 30
1 30
1 30
1 30
1 29
1 29
1 29
1 29
1 29
1 30
1 30
1 30
1 30
1 30
1 24
1 23
1 23
1 23
1 23
1 23
1 23
1 22
1 22
1 22
1 22
2 21
2 21
2 21
2 21
2 21
2 17
2 17
2 17
1 12
1 5
1 5
1 4
1 4
1 4
1 5
1 5
1 6
1 5
1 5
1 5
1 5
1 5
1 5
1 5
1 5
1 5
1 5
1 5
1 5
1 5
1 5
1 5
1 4
1 4
1 4
1 4
1 4
1 3
1 3
1 3
1 3
1 3
1 3
1 3
1 3
1 3
1 3
1 3
1 3
1 3
1 3
1 3
1 3
1 3
1 3
1 3
1 3
1 2
1 2
1 2
1 2
1 2
1 2
1 2
1 2
1 2
1 2
1 2
2 2
2 2
2 2
2 2
2 2
1 2
1 2
1 2
1 2
1 2
1 3
1 3
1 3
1 3
2 3
3 4
4 5
4 5
4 5
4 4
4 4
4 3
4 3
5 3
7 3
7 3
7 3
7 3
7 3
7 3
7 3
7 3
7 3
7 3
7 3
7 3
7 3
7 3
7 3
7 3
7 3
7 3
7 3
7 3
7 3
7 3
7 3
7 3
7 4
7 4
7 4
7 5
7 9
7 10
7 11
7 12
7 12
7 12
7 12
7 13
7 14
7 14
7 14
7 14
7 14
7 14
7 14
7 14
7 15
7 15
7 15
6 15
6 15
5 16
5 16
5 16
5 16
5 16
5 20
4 22
4 29
4 31
4 33
4 36
4 36
4 36
4 36
4 36
3 40
5 40
6 59
6 59
6 59
6 60
4 60
3 60
4 70
4 71
4 71
4 71
4 71
4 71
4 71
4 71
4 71
5 71
5 72
6 72
6 72
6 72
6 72
6 72
6 72
6 72
6 72
6 72
6 73
6 74
6 74
6 77
6 84
6 86
6 88
6 89
6 87
6 83
6 80
6 84
6 85
6 85
6 86
6 87
6 85
6 84
6 84
6 84
6 84
6 84
6 84
6 84
6 84
6 83
6 82
6 81
6 81
6 83
6 83
6 84
6 84
6 84
6 82
6 77
6 76
6 75
6 71
7 68
7 65
7 65
7 65
7 64
7 63
7 65
5 65
4 51
4 52
5 52
5 52
5 52
5 52
4 37
4 36
4 36
4 37
4 32
4 32
4 32
4 32
3 32
3 32
3 31
2 31
2 31
2 31
2 31
3 34
3 34
3 34
3 34
3 34
3 34
3 34
3 34
3 33
3 29
3 29
3 26
3 26
3 26
4 25
4 24
4 16
4 14
4 14
4 14
4 15
4 15
4 15
4 15
4 15
4 15
4 15
4 15
4 15
4 15
4 15
4 17
4 17
4 17
4 15
4 15
4 15
4 18
4 22
4 25
4 27
4 30
3 30
3 30
3 32
3 32
3 32
3 32
3 31
3 47
3 45
3 46
3 47
3 47
2 48
2 48
2 48
2 48
2 47
2 47
2 47
2 47
2 47
2 48
2 49
2 50
2 55
2 55
2 55
2 55
2 55
2 56
2 55
1 54
1 56
1 56
1 57
1 57
1 57
1 57
1 57
1 57
0 62
0 62
0 62
0 62
0 62
0 62
0 62
0 62
0 62
0 62
0 61
0 61
0 61
0 61
0 61
0 60
0 60
0 60
0 60
0 61
0 61
0 61
0 60
0 64
0 64
0 65
0 80
0 81
0 79
0 74
0 71
0 69
1 67
1 67
1 67
1 65
1 65
1 65
1 64
1 61
1 46
1 45
1 44
1 44
1 44
1 44
1 46
0 46
0 46
0 46
0 46
0 46
0 46
0 46
0 45
0 43
0 43
0 38
0 38
0 38
0 38
0 38
0 37
0 37
0 36
0 36
0 38
0 43
0 43
0 44
0 44
0 46
0 46
0 41
0 44
0 44
0 44
0 44
0 45
0 46
0 46
0 46
0 46
0 46
0 46
0 46
0 48
0 48
0 48
0 47
0 47
0 47
0 46
0 46
0 46
0 42
0 42
0 42
0 39
0 22
0 22
0 22
0 22
0 22
0 24
0 25
0 25
0 25
0 25
0 25
0 44
0 44
0 44
0 50
0 270
0 284
0 292
0 395
0 403
0 408
0 508
0 509
0 519
0 524
0 535
0 536
0 540
0 540
0 540
0 540
0 541
0 541
0 541
0 541
0 542
0 542
0 542
0 552
0 549
0 542
0 537
0 557
0 556
0 556
0 554
0 554
0 552
0 548
0 548
0 547
0 547
0 544
0 537
0 532
0 531
1 531
1 531
1 531
1 531
1 529
1 529
1 529
1 529
1 529
1 529
1 529
1 529
1 529
1 529
1 529
1 529
0 529
0 529
0 525
0 525
0 521
0 521
0 518
0 516
0 516
0 516
0 516
0 516
0 515
0 515
0 515
0 499
0 283
0 279
0 278
0 57
0 55
0 53
0 52
0 52
0 53
0 44
0 43
0 42
0 40
0 40
0 40
0 40
0 40
0 40
0 40
0 40
0 40
0 40
0 40
0 31
0 31
0 30
0 28
0 3
0 3
0 3
0 3
0 3
0 3
0 4
0 4
0 4
0 4
0 4
0 4
0 4
0 4
0 4
0 4
0 4
0 4
0 4
0 4
0 4
0 4
2 6
2 6
2 6
2 7
2 7
2 7
2 7
2 7
2 8
2 8
2 8
2 8
2 8
2 8
2 8
2 8
2 8
2 8
2 8
2 8
2 8
2 8
2 8
2 8
2 8
2 8
2 8
2 8
2 8
2 8
2 8
2 7
2 7
2 4
2 7
2 6
2 6
2 7
2 7
2 7
2 7
2 7
2 7
2 7
2 7
2 7
2 7
2 7
2 7
2 11
2 11
2 11
2 11
2 14
2 14
2 14
2 14
2 13
2 20
2 20
2 20
2 20
2 20
2 20
2 20
2 20
2 20
2 20
2 20
2 20
2 20
2 20
2 20
0 19
0 19
0 19
0 18
0 18
0 18
0 18
0 18
0 17
0 17
0 17
0 17
0 17
0 17
0 17
0 17
0 17
0 17
0 17
0 17
0 15
0 15
1 15
1 15
1 15
1 15
1 15
1 15
1 15
1 15
1 15
1 15
1 15
1 15
1 14
1 14
1 14
1 14
1 14
1 14
1 14
1 14
1 14
1 14
1 14
1 14
1 14
1 14
1 14
1 9
1 9
1 8
1 8
1 8
1 10
1 11
1 11
3 11
3 4
4 5
4 5
4 5
4 5
4 10
5 12
5 12
5 12
5 15
5 19
5 19
5 19
5 19
5 19
5 19
5 19
5 19
5 20
5 20
5 20
5 20
6 20
8 20
8 21
8 22
9 22
9 22
11 22
11 22
11 22
12 23
12 23
12 23
12 23
12 23
12 23
11 23
11 23
11 23
11 23
11 23
12 23
12 23
12 23
12 23
12 23
12 23
12 23
12 23
12 23
12 23
12 23
12 23
12 23
12 22
12 21
12 22
12 22
12 22
12 22
12 22
12 22
12 22
12 22
12 22
12 22
12 22
12 22
12 21
12 20
12 20
10 15
10 15
9 13
9 11
9 11
9 10
9 7
8 6
8 5
8 5
8 5
8 5
8 5
8 5
8 5
8 5
8 5
8 5
8 5
8 4
8 4
8 4
8 4
7 3
5 3
5 3
5 3
4 3
4 3
2 3
2 3
2 3
1 2
1 2
1 3
1 4
1 5
1 8
1 8
1 13
1 19
1 21
1 24
0 25
0 26
0 26
0 27
0 27
0 27
0 27
0 28
0 28
0 28
0 28
0 28
0 28
0 28
0 28
0 27
0 27
0 27
0 27
0 27
0 27
0 27
0 27
0 27
3 29
3 36
3 37
3 38
3 38
3 38
3 37
3 37
3 37
3 37
3 37
3 37
3 37
3 37
3 37
3 37
3 37
3 37
3 37
3 37
3 37
3 37
3 37
3 37
3 39
3 39
3 39
3 39
3 39
3 39
3 35
3 31
3 31
3 31
3 31
3 31
3 31
3 31
3 36
3 36
3 37
3 38
3 38
3 36
5 39
20 33
25 31
25 31
25 28
25 26
25 25
25 26
26 26
26 26
31 26
31 26
31 26
31 26
31 26
31 26
31 26
31 26
33 26
33 26
35 26
35 26
42 26
45 26
53 26
58 26
59 26
59 26
59 26
56 24
56 16
56 16
56 15
56 15
56 15
56 15
56 15
56 15
56 15
57 15
57 15
57 15
59 15
59 15
59 15
65 16
66 16
68 16
68 16
72 16
82 18
84 18
85 18
85 16
85 16
85 16
85 16
85 16
85 16
85 16
85 16
85 16
85 16
85 16
85 16
85 16
85 16
85 10
86 10
87 8
87 6
87 6
87 6
84 4
67 4
65 4
65 4
65 4
65 4
65 4
65 3
63 3
63 3
60 3
62 3
66 3
66 3
66 3
66 3
66 3
66 3
67 3
67 3
65 3
63 3
54 3
51 3
44 3
42 3
41 3
42 3
42 3
42 3
42 3
42 3
42 3
42 3
42 3
42 3
43 3
46 3
49 3
47 3
63 3
64 3
62 3
62 3
59 3
56 2
53 2
51 2
48 2
48 2
39 0
40 1
41 1
43 1
44 1
44 1
47 1
50 1
50 1
51 1
51 1
51 1
51 1
51 1
50 1
50 1
50 1
50 1
48 1
48 1
49 1
49 1
49 1
49 1
49 1
49 1
49 1
49 1
49 1
49 1
49 1
49 1
48 1
47 1
46 1
43 1
43 1
43 1
43 1
43 1
43 1
42 2
42 2
42 2
42 2
42 2
42 7
44 7
44 7
42 7
41 7
41 9
38 9
40 11
37 11
37 11
37 10
37 10
37 10
36 10
35 10
35 10
35 10
22 10
22 10
22 10
21 10
21 10
21 10
21 10
21 10
21 10
20 10
20 10
17 9
15 9
12 9
10 9
9 9
7 9
3 9
3 9
3 9
4 10
7 10
8 11
10 11
10 11
10 11
10 11
10 11
10 11
10 11
11 11
11 11
11 11
11 11
11 11
11 11
11 11
11 14
11 19
11 24
11 25
11 27
11 28
11 28
11 28
11 28
11 28
11 29
11 29
11 30
11 30
11 30
11 33
11 33
12 54
15 54
15 49
15 49
15 49
15 49
15 50
15 46
15 46
13 46
13 46
13 46
13 46
13 51
13 57
13 58
13 58
13 59
13 59
13 59
12 59
12 60
12 60
12 60
12 60
12 60
12 60
12 60
12 60
12 65
12 65
12 65
12 65
12 65
12 65
12 65
11 66
11 66
11 66
11 65
8 65
6 65
5 65
5 65
5 66
5 66
5 67
5 67
5 69
4 68
4 68
4 68
4 68
4 68
4 67
4 67
4 62
4 56
6 53
6 53
6 59
6 58
6 57
6 57
6 57
6 57
6 56
6 55
6 55
6 55
6 54
6 52
6 52
5 32
2 32
2 32
2 32
2 32
2 32
2 32
2 32
2 32
2 32
2 32
2 32
2 31
2 27
2 20
2 20
2 20
2 19
2 19
2 18
2 25
2 31
2 32
2 33
2 33
2 33
3 33
3 33
3 33
3 28
3 28
3 28
3 28
3 28
3 28
3 27
3 26
3 26
3 26
3 26
3 26
4 26
4 26
4 26
9 25
9 25
9 24
9 24
9 22
9 22
9 22
9 22
9 22
9 22
9 23
9 25
9 25
7 25
7 24
7 24
7 18
7 18
7 18
7 18
7 18
7 18
9 19
10 19
11 22
11 22
11 22
11 22
11 22
11 22
11 22
11 24
11 25
11 26
11 26
11 26
11 26
11 26
12 28
17 47
17 55
17 58
17 60
17 67
17 205
17 218
17 233
17 247
17 247
17 243
17 241
17 240
17 242
17 242
17 242
16 242
16 242
16 242
16 242
16 242
16 242
16 242
16 242
16 242
16 242
16 243
16 243
16 243
16 245
15 245
15 245
15 245
15 245
10 245
10 246
10 246
10 251
10 252
10 252
10 252
10 252
10 252
10 252
10 251
10 249
10 249
10 249
10 249
10 249
10 249
10 249
10 249
10 249
10 249
10 248
8 247
6 245
6 243
6 243
6 243
6 245
6 245
6 245
6 244
6 236
6 236
6 229
6 225
6 219
6 219
6 217
6 215
0 129
0 125
0 116
0 103
0 47
0 15
0 10
0 11
0 11
0 11
0 11
0 11
0 11
0 11
0 11
0 11
0 11
0 11
0 11
0 11
0 11
0 12
0 12
0 12
0 12
0 12
0 11
0 11
0 11
0 10
0 10
0 10
0 10
0 10
0 10
0 11
0 17
0 16
0 16
0 16
0 16
0 16
0 16
0 16
0 16
0 16
0 16
0 16
0 17
0 32
0 32
0 37
0 37
0 37
0 37
0 37
0 37
0 37
0 37
0 37
0 37
0 35
0 35
0 35
0 35
0 35
0 35
0 35
0 35
0 35
0 35
0 35
0 35
0 35
0 35
0 36
0 36
0 37
0 37
0 37
0 36
0 36
0 36
0 36
0 36
0 37
0 37
0 37
0 38
0 39
0 41
0 41
0 41
0 42
0 42
0 42
0 42
0 42
0 42
0 42
0 42
0 41
0 41
0 41
0 41
0 41
0 41
0 41
0 40
0 32
0 30
0 30
0 30
0 30
0 30
0 30
0 31
0 31
0 31
1 35
1 35
1 35
1 19
1 19
1 13
1 13
1 13
1 14
1 13
1 13
1 13
1 13
1 13
2 13
2 13
2 13
2 13
2 13
2 13
2 13
2 13
2 13
2 13
2 13
2 13
2 13
2 13
2 13
2 12
2 13
2 12
2 12
2 12
2 12
2 12
2 12
2 12
3 19
3 19
3 19
3 19
3 15
3 15
3 15
3 15
3 15
3 14
3 14
3 14
3 14
3 14
3 14
3 14
3 14
3 14
3 14
3 14
3 14
3 14
3 14
3 14
3 14
3 14
3 14
3 14
3 14
3 14
3 13
3 13
3 12
3 12
3 12
2 11
2 11
2 11
2 11
2 11
2 11
2 11
2 11
2 11
2 12
2 12
2 12
2 13
2 13
1 13
1 13
1 13
1 13
1 13
1 13
1 13
1 13
1 13
1 13
1 13
1 13
1 13
1 13
2 13
2 13
3 12
3 12
3 12
3 12
4 12
4 12
4 12
4 12
3 5
3 5
3 5
3 5
3 5
3 5
4 5
4 5
4 5
4 5
5 5
5 5
5 5
5 5
5 5
5 5
5 5
5 11
5 11
5 11
5 11
5 11
5 11
5 11
5 11
5 11
5 11
5 11
5 11
5 11
5 11
5 11
5 11
5 10
5 10
5 9
6 9
6 9
6 9
6 9
6 11
6 11
6 9
6 9
6 9
6 9
6 8
6 8
6 8
6 8
6 8
6 8
6 8
6 8
6 8
6 8
6 8
6 8
6 8
6 8
6 8
6 8
6 8
5 8
5 8
4 8
4 8
4 8
4 8
3 8
3 8
3 8
3 8
3 8
6 8
8 12
10 12
10 12
10 12
9 12
9 12
9 12
9 12
8 12
8 12
8 12
8 12
8 12
8 12
8 12
8 6
8 6
8 6
8 6
8 6
8 6
8 6
8 6
8 6
8 6
8 6
8 6
8 6
8 6
8 6
8 6
8 6
9 6
9 6
8 6
8 6
8 7
8 7
8 5
8 5
8 5
8 5
8 5
8 5
8 5
8 5
8 5
8 5
8 5
8 5
8 5
8 5
8 5
8 5
8 5
8 5
8 5
8 5
8 5
8 6
8 6
8 6
8 6
8 6
8 6
8 7
9 7
16 8
17 8
18 8
18 7
18 7
14 7
13 4
11 4
11 4
11 4
11 4
11 4
11 4
11 4
11 4
11 4
11 4
11 4
11 4
11 4
11 4
11 4
11 4
11 4
11 6
11 6
14 7
14 8
14 11
17 11
17 11
17 11
17 13
17 13
17 13
17 13
17 13
17 13
16 14
16 14
16 13
16 13
16 13
16 13
16 13
16 13
16 14
16 14
16 14
17 18
17 21
17 21
17 21
17 21
17 21
17 21
17 21
17 29
28 31
28 35
31 35
31 35
31 35
33 37
33 37
33 36
33 36
33 37
34 37
34 37
34 37
32 36
32 36
21 35
21 35
16 37
16 37
16 37
16 37
16 37
16 37
16 37
16 37
16 37
16 38
16 38
16 38
16 38
16 39
16 39
16 39
16 39
16 39
16 39
16 39
16 39
16 40
16 38
16 38
17 40
17 40
19 34
20 34
21 33
21 33
21 33
21 32
21 31
21 31
21 31
21 31
21 30
21 30
21 30
21 30
21 30
21 30
21 30
21 30
21 27
21 26
21 26
21 17
21 17
21 17
21 18
21 19
21 19
21 19
21 18
21 13
9 12
9 12
8 12
8 12
8 12
6 11
6 11
6 11
6 10
6 9
6 9
11 9
11 9
11 9
11 9
11 9
11 9
11 7
11 7
11 7
11 7
11 7
11 7
11 8
11 8
11 8
11 8
11 9
11 9
11 9
11 9
11 9
11 9
11 9
11 9
11 9
11 11
12 12
13 13
13 13
15 14
14 11
14 11
13 11
11 11
11 11
11 11
11 11
11 11
11 11
11 11
11 11
11 11
11 11
11 11
11 11
11 11
11 11
11 11
11 11
11 11
11 11
11 11
11 11
11 11
12 12
12 12
12 12
12 11
12 11
12 11
12 11
12 11
12 10
12 10
12 10
12 10
13 10
17 11
21 11
23 11
23 11
23 11
23 11
18 11
18 11
18 11
22 12
22 13
22 13
24 13
24 13
24 13
24 13
24 13
24 13
24 11
24 10
24 10
24 10
24 9
24 9
24 9
24 10
24 10
24 10
24 10
24 10
24 10
24 10
30 9
29 7
29 7
27 6
27 6
27 6
26 5
26 5
26 5
26 5
26 5
26 5
26 5
26 5
26 5
26 5
26 5
26 5
26 5
26 5
27 6
27 6
28 6
31 9
31 9
31 9
31 9
31 9
30 8
30 8
31 8
31 8
31 8
31 8
31 9
31 9
31 9
32 15
32 15
31 16
32 16
28 16
24 16
89 65
90 68
95 72
100 74
100 75
100 76
101 79
97 79
97 79
97 79
95 79
95 80
94 80
94 80
94 80
95 80
95 80
95 80
95 80
95 80
95 80
95 80
95 80
95 79
95 79
95 79
95 79
95 79
95 80
95 81
88 81
88 81
88 81
88 81
88 81
88 81
88 82
88 82
88 82
88 82
88 83
88 83
88 83
89 83
89 84
89 85
89 88
96 90
96 93
94 93
93 92
93 93
92 93
89 90
89 90
89 90
89 90
89 90
89 90
89 90
88 90
88 90
88 90
88 90
88 89
88 89
88 88
87 82
86 82
86 82
86 83
86 82
81 76
18 23
13 19
12 17
14 17
23 17
24 17
25 17
40 17
49 18
49 18
50 18
50 17
50 17
50 17
50 17
49 17
49 19
49 19
49 19
49 20
49 22
49 23
49 23
51 26
61 29
61 29
61 29
62 29
62 28
62 27
62 27
62 27
62 27
62 29
62 30
62 30
63 30
63 30
63 30
63 30
63 29
63 29
63 29
62 29
63 28
63 26
63 23
56 20
56 19
56 19
56 19
56 18
57 18
75 47
76 47
76 47
76 47
76 47
76 47
76 47
76 47
76 47
76 49
76 50
82 54
82 54
82 54
84 54
84 54
85 54
85 53
85 53
84 53
81 53
79 53
77 53
78 53
70 53
68 53
60 53
49 53
46 52
45 52
45 52
45 52
45 52
69 54
111 69
129 73
129 70
129 70
130 70
130 70
130 68
130 67
130 67
127 64
119 61
119 61
119 61
118 61
118 61
118 61
119 63
121 64
121 65
121 65
121 63
121 63
120 63
120 63
120 63
120 63
120 63
120 63
120 63
121 63
122 65
122 66
124 68
125 70
127 70
127 70
127 71
122 70
122 70
106 40
106 40
106 40
106 40
106 37
106 37
106 38
106 38
106 38
106 38
110 38
104 38
107 50
108 53
106 57
106 60
106 62
106 62
106 62
106 62
106 62
106 62
106 62
105 62
105 64
105 66
105 69
105 71
105 72
96 71
95 78
81 77
77 78
55 77
19 63
11 60
11 60
11 60
11 60
11 60
5 60
5 60
5 60
6 60
6 60
6 60
6 60
6 60
6 60
6 59
6 58
4 58
4 57
4 58
4 58
4 59
7 86
7 88
8 108
8 111
8 111
8 114
8 114
8 115
8 113
7 123
6 122
6 121
6 121
6 120
6 125
6 128
6 130
6 156
6 196
6 208
6 208
6 208
6 208
6 261
6 268
6 278
6 294
6 453
6 469
7 474
6 480
6 476
6 484
6 496
6 517
6 517
6 519
7 519
8 521
8 524
8 528
11 601
11 608
11 607
11 607
11 606
11 606
11 604
11 613
11 638
13 682
13 716
13 746
13 807
13 860
13 1107
13 1148
12 1148
12 1152
12 1153
12 1153
12 1153
12 1152
12 1156
12 1159
12 1163
12 1163
12 1163
12 1161
12 1158
12 1152
12 1150
12 1144
9 1108
9 1104
8 1091
8 1091
8 1091
8 1087
8 1087
8 1084
8 1081
8 1068
8 1068
8 1068
9 1068
9 1067
9 1062
9 1060
9 1056
8 1000
7 844
7 742
7 739
7 739
7 739
7 738
7 736
7 731
7 707
6 588
6 586
6 589
6 589
6 588
6 592
6 589
6 582
6 582
6 580
5 580
2 578
2 575
2 571
1 506
1 503
1 474
1 474
1 474
1 474
1 472
1 466
1 431
1 388
1 328
1 300
1 292
1 271
1 29
1 25
1 24
1 21
1 21
1 21
1 21
1 20
1 20
1 19
1 19
1 19
1 19
1 19
1 19
1 19
1 19
1 19
1 19
1 19
1 19
1 18
1 18
1 18
1 37
1 38
1 40
1 40
1 40
0 40
0 40
0 39
0 38
0 38
0 38
0 38
0 38
0 38
0 38
0 38
0 38
0 38
0 38
0 39
0 39
0 39
0 40
0 37
0 37
0 37
0 29
0 30
0 33
0 33
0 33
0 33
0 33
0 33
0 33
0 33
1 34
1 34
1 34
1 34
1 34
1 34
1 34
1 34
1 34
1 37
1 39
1 39
1 39
1 39
1 39
1 39
1 39
1 39
1 39
1 40
0 40
0 41
0 55
0 56
0 57
0 57
0 57
0 58
0 58
0 58
0 58
0 58
0 58
0 59
0 59
0 59
1 65
1 49
1 51
1 49
1 49
1 49
1 49
1 49
1 49
1 49
1 49
1 49
1 49
1 49
1 49
1 49
1 49
1 49
1 49
1 49
1 48
1 48
1 48
1 47
1 47
1 47
1 47
1 47
1 46
1 38
1 38
1 38
1 38
1 38
1 38
1 38
1 39
1 43
1 43
1 43
1 43
1 43
1 43
1 43
1 43
1 43
1 40
1 38
1 38
1 42
1 42
2 42
3 43
14 74
14 74
15 78
15 78
15 78
16 77
16 61
16 61
16 60
16 59
16 59
16 60
16 60
16 60
27 60
27 60
27 60
27 60
27 60
27 60
26 55
26 50
26 50
26 49
26 49
26 49
26 49
26 49
26 49
26 49
26 49
26 49
26 49
26 49
26 49
26 49
26 49
26 49
26 49
26 49
26 49
26 49
26 49
26 49
26 49
26 49
26 49
26 49
26 49
26 53
28 79
28 84
28 90
28 94
29 98
29 98
30 99
30 92
30 89
30 89
30 89
30 89
30 89
30 89
30 89
30 89
30 88
30 89
30 89
30 89
30 88
29 88
28 88
16 61
18 61
17 61
17 61
17 61
17 61
17 61
17 61
17 61
17 60
17 59
17 58
16 58
14 57
6 57
6 57
6 57
6 57
6 57
6 57
6 57
6 57
6 57
6 57
6 58
6 58
7 67
7 67
7 68
7 68
7 71
7 71
7 73
7 74
7 74
7 75
7 77
7 77
7 77
10 111
10 113
10 119
10 120
10 118
10 118
10 119
10 144
10 144
10 145
10 142
8 112
8 110
8 105
8 103
7 99
7 99
6 96
6 97
6 97
6 97
6 97
6 97
6 97
6 97
6 97
6 97
6 97
6 97
6 97
6 97
6 97
6 97
6 96
6 92
4 92
4 92
4 92
4 92
4 92
4 92
4 92
4 101
4 101
4 101
4 104
4 106
4 106
4 106
4 106
4 106
4 106
4 107
4 107
4 107
4 107
4 107
4 106
4 106
4 105
3 99
3 99
3 98
3 96
3 93
3 119
3 117
3 118
3 124
3 125
3 125
3 125
2 124
0 91
3 91
3 85
3 85
3 85
3 85
3 91
3 65
3 66
3 68
3 68
3 68
3 68
3 68
3 68
3 68
3 68
3 66
3 66
3 66
3 66
3 66
3 66
3 66
3 67
3 67
3 68
3 68
3 68
3 68
3 69
3 69
3 69
3 69
3 69
3 69
3 69
3 69
3 69
4 69
4 69
4 70
16 64
16 64
16 64
16 61
16 59
16 59
16 59
16 59
16 59
16 64
16 66
16 66
16 67
16 72
16 73
18 73
18 75
18 77
19 76
20 76
20 83
20 83
20 83
20 56
20 58
20 50
20 51
20 51
20 51
20 51
20 51
20 53
17 59
18 66
19 71
19 72
19 73
19 67
19 66
19 67
19 71
19 73
19 72
19 83
19 83
19 83
19 84
19 84
19 86
19 87
19 87
19 87
19 87
19 86
19 86
19 86
19 86
19 85
19 85
19 85
19 85
19 84
19 84
19 84
19 84
19 84
19 84
18 84
18 84
18 84
17 84
17 84
17 84
3 79
3 79
3 79
3 79
3 78
3 79
3 79
3 79
3 79
3 72
3 69
3 69
3 68
3 62
3 62
3 62
0 62
0 61
0 61
0 67
0 71
0 71
0 71
0 69
0 66
0 61
0 60
0 59
0 59
0 59
0 59
0 56
0 46
0 45
0 42
0 43
0 41
0 41
0 40
0 37
0 35
0 36
0 54
0 45
0 48
0 48
0 48
0 47
0 45
0 45
0 45
0 45
0 45
0 45
0 46
0 46
0 46
0 46
0 46
0 46
0 46
0 46
0 46
0 46
0 47
0 47
0 48
0 48
0 48
0 51
0 51
0 51
0 51
0 51
0 52
0 52
0 52
0 52
0 51
0 51
0 51
0 51
0 51
0 51
0 51
0 50
0 50
0 50
0 50
0 50
0 50
0 49
0 39
0 33
0 33
0 33
0 34
0 34
0 34
0 35
0 34
0 34
0 34
0 34
0 35
0 35
0 35
0 35
0 34
0 35
0 35
0 35
0 35
0 35
0 43
0 25
0 25
0 25
0 26
0 52
0 52
0 52
0 54
0 57
0 119
0 121
0 122
0 141
0 141
0 143
0 143
0 144
0 144
0 144
0 144
0 145
0 145
0 144
0 146
0 147
0 147
0 147
0 144
0 145
0 145
0 145
0 145
0 143
0 143
0 143
0 143
0 143
0 147
0 147
0 151
0 154
0 156
0 156
0 159
0 159
0 159
0 159
0 159
0 159
0 161
0 161
0 161
0 161
0 161
0 160
0 160
0 160
0 159
0 161
0 161
0 161
0 159
0 159
0 159
0 158
0 157
0 157
0 157
0 157
0 157
0 158
0 158
0 149
0 148
0 148
0 148
1 148
1 122
1 122
1 121
1 119
1 116
1 50
1 49
1 47
1 20
1 20
1 18
1 15
1 13
1 13
1 13
1 13
1 12
2 13
2 13
2 13
2 13
2 13
2 13
2 13
2 12
2 12
2 13
2 13
2 13
2 13
2 13
2 13
2 13
2 13
2 15
2 16
2 15
2 15
2 15
2 13
2 13
2 13
2 13
2 13
2 13
2 10
2 10
2 10
2 10
2 10
2 10
2 10
2 10
2 10
2 10
2 10
2 10
2 10
2 13
2 12
2 12
2 12
2 11
2 11
2 11
2 11
2 11
3 11
3 9
3 9
3 9
3 9
2 9
2 8
2 8
2 8
2 8
2 8
2 9
2 9
2 9
2 9
2 9
2 9
2 13
2 13
2 13
2 13
2 15
2 15
1 14
1 14
1 14
1 16
1 16
1 16
1 16
1 16
1 16
1 15
1 15
1 15
1 15
1 15
1 15
1 15
1 14
1 13
1 12
1 12
1 12
1 12
1 12
1 12
1 13
1 13
1 13
1 13
1 13
1 13
1 13
1 13
1 13
1 13
1 13
1 13
2 13
3 13
3 13
3 13
3 13
3 9
3 10
3 10
3 9
3 9
3 9
3 9
2 9
2 9
2 9
2 9
2 9
2 9
2 9
3 10
3 10
4 10
4 10
4 10
4 10
4 9
4 9
4 9
5 9
5 9
5 9
5 5
5 5
5 5
5 5
5 6
5 7
5 8
4 8
4 9
4 9
4 12
4 12
4 13
4 13
4 13
4 13
4 13
4 13
4 14
4 14
4 14
4 14
4 14
4 14
4 14
4 16
4 19
4 19
4 19
4 20
4 20
4 20
4 20
4 20
4 20
4 20
4 20
4 20
4 20
4 20
4 20
3 20
2 20
2 20
2 20
2 20
2 20
2 20
2 19
2 19
2 19
2 19
2 19
2 19
2 19
2 19
2 19
2 19
2 19
2 20
2 20
1 19
1 19
1 19
1 19
1 19
1 19
1 19
1 19
1 19
0 21
0 74
0 102
0 132
0 138
0 141
0 143
0 142
0 144
0 143
0 143
0 142
0 140
0 137
1 137
1 136
1 135
1 135
1 135
1 135
1 135
1 134
1 134
1 134
1 134
1 134
1 133
1 133
1 130
1 128
1 128
1 128
1 128
1 128
1 138
1 141
1 141
1 146
1 149
2 181
2 183
2 189
2 190
2 191
2 191
2 191
2 191
2 192
2 192
2 192
2 192
2 192
2 192
2 192
2 192
2 192
2 192
2 192
2 192
2 220
2 223
2 223
2 222
2 223
2 224
2 236
2 259
2 284
2 303
2 311
2 312
2 313
2 327
2 328
2 259
2 242
3 230
3 241
3 241
3 239
3 239
3 239
3 239
3 239
3 239
3 239
3 239
2 239
2 240
2 240
2 240
2 241
2 243
2 243
2 243
2 243
3 245
3 246
3 246
3 246
3 246
3 247
3 247
3 247
3 247
3 246
3 245
3 236
3 232
3 231
3 228
4 224
3 197
3 193
3 187
3 187
3 187
3 186
3 186
3 186
3 186
3 186
3 186
3 190
3 190
3 190
3 194
3 213
3 219
3 221
3 221
3 220
3 190
3 191
3 195
3 195
3 194
3 193
3 173
3 126
3 119
3 101
4 98
4 97
4 94
4 84
4 82
4 80
4 66
3 61
3 53
3 54
3 54
3 54
3 54
3 54
3 54
3 54
3 54
3 54
3 54
3 56
3 56
3 62
3 62
3 61
3 61
3 61
3 61
2 59
2 58
2 58
2 58
2 58
2 58
2 59
2 59
2 57
2 57
2 57
2 53
2 53
2 51
2 51
1 47
1 45
1 43
1 43
1 43
1 43
1 43
1 43
1 43
1 43
1 43
1 43
1 43
1 43
1 43
1 41
1 19
1 19
1 19
1 19
1 19
1 17
1 17
1 13
1 14
1 14
1 15
1 17
1 19
1 19
1 19
0 46
0 48
0 49
0 53
0 53
0 54
0 54
0 52
0 52
0 51
1 52
2 52
2 52
2 52
2 52
2 52
2 52
2 52
2 52
2 50
2 50
2 44
2 44
2 44
2 44
2 44
2 44
2 44
2 44
2 44
2 44
2 44
2 43
2 49
2 49
2 49
2 50
2 51
2 56
2 70
2 71
2 73
2 82
2 84
2 85
2 87
2 94
2 98
2 98
2 98
2 99
2 99
2 99
2 99
2 100
2 101
2 101
2 101
2 101
2 101
2 102
2 102
2 102
2 104
2 104
2 104
2 103
2 103
2 103
0 101
0 99
0 100
0 109
0 107
0 135
0 212
0 212
0 217
0 218
0 218
0 218
0 218
0 217
0 219
0 218
0 218
0 218
0 218
0 218
0 218
0 218
0 237
0 237
0 237
0 237
0 242
3 536
4 544
5 550
5 554
5 555
6 555
6 564
6 565
6 571
6 572
6 563
6 567
6 563
6 562
6 560
7 544
7 521
7 526
7 510
7 509
7 509
7 508
7 508
7 505
7 503
7 503
7 503
7 502
7 503
7 501
6 502
6 504
6 505
6 510
6 510
6 510
6 510
6 510
6 510
7 510
7 497
7 497
7 497
7 488
7 488
10 592
10 602
10 605
10 604
10 595
10 578
10 533
10 477
10 477
10 476
10 476
10 476
10 476
10 503
10 503
10 504
10 505
10 509
10 510
10 511
10 510
10 509
10 508
10 508
10 508
10 509
10 508
10 501
7 218
7 244
6 243
5 244
5 245
5 245
5 245
5 243
5 236
5 236
5 236
5 234
5 234
5 233
5 233
4 225
4 220
4 219
4 219
4 219
4 219
4 222
4 229
4 235
4 237
4 238
4 241
4 241
4 240
4 240
4 239
4 254
4 255
4 253
4 254
4 254
4 261
4 261
1 262
1 274
1 350
1 389
1 388
1 399
1 411
0 309
0 309
0 316
0 349
0 354
1 358
1 401
1 404
1 407
1 408
1 409
1 409
1 409
1 381
1 381
1 380
1 379
1 375
1 375
1 374
1 374
1 374
1 374
1 374
1 373
1 370
1 370
1 369
1 364
1 334
1 334
1 333
1 333
1 332
1 332
1 332
1 332
1 332
1 334
1 335
1 335
1 337
2 375
2 482
2 487
3 496
3 496
3 511
3 509
3 504
3 498
3 490
3 491
3 494
3 492
3 492
3 491
3 490
3 490
3 473
3 472
3 472
3 473
3 472
3 463
3 469
3 466
3 451
3 385
3 347
3 348
3 364
3 373
3 498
3 1868
3 1906
3 1892
3 1891
2 1891
2 1847
2 1886
2 1885
2 1885
2 1884
2 1885
2 1885
2 1886
2 1886
2 1888
2 1888
2 1888
2 1888
2 1888
3 1888
3 1888
3 1894
3 1896
3 1899
3 1901
5 2069
5 2069
5 2082
5 2082
5 2098
5 2098
5 2100
5 2107
5 2117
5 2124
5 2132
5 2137
5 2154
5 2152
5 2155
5 2175
4 2134
4 2033
4 2028
3 2030
3 2049
3 2040
3 2040
3 2039
3 2037
3 2035
4 2070
4 2099
4 2138
4 2152
4 2695
4 2703
4 2759
4 2809
4 2831
4 2846
4 2860
4 2862
4 2877
4 2957
5 3059
5 3072
5 3073
5 3072
5 3097
5 3581
5 3575
5 3397
5 2099
5 2108
5 2121
5 2158
6 2983
6 3098
6 3183
6 3284
6 3296
6 3337
6 3339
6 3354
6 3354
6 3355
6 3356
6 3364
6 3380
6 3405
6 3415
5 3428
7 3437
7 3433
7 3430
7 3425
7 3427
5 3252
5 3248
5 3235
6 3356
6 3339
6 3339
6 3338
6 3329
6 3321
6 3314
6 3308
6 3299
6 3290
6 3294
6 3294
6 3271
6 3267
6 3265
6 3264
6 3250
6 3238
6 3234
6 3258
6 3257
6 3255
6 3252
5 3189
5 3161
5 3146
5 3123
5 2552
5 2523
5 2514
5 2484
5 2460
5 2442
5 2422
5 2419
5 2384
5 2314
4 2256
4 2250
4 2247
4 2250
4 2217
3 1684
3 1696
2 1633
2 1647
2 1651
2 1641
2 1611
1 748
1 667
1 561
1 489
1 508
1 474
1 482
1 478
1 506
1 510
1 509
1 496
1 488
1 482
1 470
1 551
1 561
1 575
1 605
1 621
1 848
1 876
1 916
1 1060
0 959
1 1253
1 1261
1 1269
1 1282
1 1287
1 1285
1 1288
1 1292
1 1287
1 1292
1 1293
1 1294
1 1297
1 1298
1 1303
1 1304
1 1306
1 1323
1 1305
1 1309
1 1427
1 1431
1 1438
1 1436
1 1436
1 1484
1 1485
1 1486
1 1487
1 1486
1 1488
1 1488
1 1488
1 1486
1 1488
1 1486
1 1452
1 1450
1 1456
1 1454
1 1453
1 1520
1 1500
1 1495
1 1465
1 1466
1 1479
2 1978
2 2003
2 2039
2 2042
2 2062
2 2072
2 2175
2 2170
2 2164
2 2140
2 2145
2 2163
2 2182
2 2228
2 2240
3 2270
3 2183
3 2193
3 2182
3 2158
3 2140
3 1905
3 1847
3 1759
3 1668
2 1634
2 1326
2 1341
2 1325
2 1310
2 1313
2 1314
2 1317
2 1313
2 1302
2 1295
2 1301
2 1310
2 1309
2 1312
2 1309
2 1308
2 1305
2 1310
2 1308
2 1307
3 1213
3 1218
3 1221
3 1232
3 1253
3 1211
3 1231
3 1232
3 1233
3 1233
3 1231
3 1234
3 1322
3 1375
3 1410
3 1429
3 1999
3 2002
3 2008
3 2009
3 2058
3 1978
3 1970
[truncated: 24,954,790 more chars]
