# Supplementary material for: From Insect to Man: Photorhabdus Sheds Light on the Emergence of Human Pathogenicity
Source: PLoS One. 2015 Dec 17;10(12):e0144937. doi: 10.1371/journal.pone.0144937 (PMC4683029; doi:10.1371/journal.pone.0144937)
Supplement: S2 Data — (ZIP) [file pone.0144937.s002.zip › ATCC43949_37C_Expo_rep3.plot]

40 3
41 3
41 3
41 3
41 4
41 4
41 4
41 4
41 4
41 4
46 4
46 4
46 4
46 4
46 5
46 5
46 5
46 5
46 7
46 7
46 7
46 7
46 7
46 7
51 9
51 9
51 9
51 10
51 10
51 10
51 10
51 10
51 10
51 10
51 10
51 10
51 10
51 10
65 10
71 10
72 10
73 10
73 10
73 10
73 10
73 10
73 10
74 10
75 10
74 10
75 10
75 10
75 10
75 10
70 10
49 8
43 8
38 9
39 9
39 9
39 9
39 9
39 9
39 9
37 9
37 9
37 9
37 9
37 8
37 8
39 8
40 9
40 9
41 9
41 9
42 9
42 9
42 10
43 10
43 11
43 11
43 11
43 11
43 11
43 12
43 12
43 12
43 12
43 12
43 12
43 12
43 13
47 15
48 15
48 15
48 17
48 18
48 18
48 18
50 18
52 18
52 19
55 19
56 19
56 19
56 19
58 29
58 32
59 32
61 32
57 32
57 32
58 32
58 32
59 31
59 31
69 32
71 30
73 30
73 30
73 30
73 30
73 30
73 28
69 27
69 27
69 27
69 27
70 27
70 27
70 27
70 27
70 27
69 27
69 27
68 27
69 27
65 27
57 27
53 27
53 27
52 27
53 27
56 27
56 27
56 27
56 27
55 27
54 27
56 27
56 27
56 27
56 27
56 27
56 27
54 27
54 27
53 26
53 26
53 26
53 26
53 26
53 26
53 26
53 26
53 26
53 26
53 26
52 26
51 26
51 26
50 25
50 25
50 25
50 27
50 27
52 28
52 27
51 27
51 25
51 25
51 25
51 25
52 25
54 25
54 25
54 25
54 25
54 25
55 25
56 24
56 23
51 19
51 19
51 20
51 20
51 20
51 21
46 21
44 21
45 23
46 22
45 21
45 21
45 21
45 21
42 9
42 9
41 9
41 10
40 10
45 10
43 10
43 9
41 9
40 9
31 9
31 9
31 9
31 9
31 9
31 9
30 9
30 9
30 9
30 9
31 9
31 9
30 9
30 9
30 9
31 9
31 9
31 9
30 9
30 9
29 9
29 10
28 10
29 10
28 10
27 10
27 10
24 10
23 10
23 10
23 10
23 10
21 10
21 10
21 10
21 10
21 10
23 10
24 10
25 10
28 10
28 10
29 10
29 10
29 10
29 10
29 10
29 10
29 10
29 10
29 10
28 10
28 10
28 10
29 10
29 10
29 10
29 10
29 8
29 8
27 7
27 7
27 7
27 7
27 7
27 7
26 7
26 7
24 7
24 7
24 7
24 7
24 8
23 8
22 8
22 8
22 6
24 7
24 7
25 7
33 7
33 7
33 7
33 8
32 6
31 6
32 6
33 6
33 6
33 6
33 6
33 6
32 6
32 5
32 5
27 5
27 5
29 5
29 5
32 5
31 5
31 5
31 5
32 7
32 7
32 7
33 7
37 7
39 7
40 7
40 7
40 7
42 9
43 9
43 9
43 9
43 9
43 9
43 9
43 9
43 8
43 8
43 8
42 8
42 8
42 8
42 8
42 8
42 8
42 8
42 8
42 8
44 8
45 8
45 8
45 8
45 8
42 8
42 8
40 8
37 8
37 8
36 8
37 8
37 8
37 8
37 8
37 8
37 8
37 8
38 8
38 8
38 8
41 8
41 8
41 8
41 8
42 8
42 8
42 8
45 8
46 8
46 8
46 8
46 8
46 8
46 8
47 8
49 8
49 8
49 8
49 7
49 7
49 7
58 7
58 7
58 8
53 7
54 7
50 6
46 6
46 6
46 6
46 5
46 5
46 5
47 5
48 5
48 5
49 5
49 5
49 5
49 5
49 5
49 5
49 5
47 5
45 5
47 5
46 5
46 5
46 5
47 5
46 3
46 3
61 3
60 3
58 3
57 3
56 3
55 2
56 2
55 1
55 1
55 1
55 1
55 1
55 2
55 2
55 2
55 2
55 2
55 2
55 2
55 3
55 3
55 3
57 3
57 4
57 4
57 4
57 4
55 4
54 4
55 4
56 4
56 4
56 4
56 4
56 4
56 4
56 4
55 4
55 4
55 4
55 4
55 4
55 4
53 4
52 5
52 5
53 5
53 5
51 5
51 5
51 5
51 5
51 5
51 5
50 5
48 5
47 5
47 5
47 5
47 5
47 5
47 4
45 4
44 4
44 4
44 4
44 4
44 4
44 4
36 4
36 4
36 4
35 4
37 4
38 4
38 4
38 4
38 4
38 4
38 4
38 4
38 4
37 4
39 4
39 4
41 5
41 5
41 5
40 5
41 5
41 5
41 5
41 5
39 5
39 5
39 5
40 5
39 5
39 5
38 5
21 5
24 5
26 5
25 5
28 6
29 6
31 6
34 6
35 6
35 6
35 5
35 5
35 5
35 5
35 5
35 4
35 4
36 4
36 4
36 4
36 4
36 4
36 4
36 3
35 3
35 3
35 3
35 3
35 3
33 3
33 3
33 3
33 3
33 3
33 3
33 3
35 3
36 3
38 3
38 3
38 3
42 3
44 3
48 2
48 2
48 2
52 2
56 2
56 2
63 3
62 3
62 3
63 3
63 3
63 3
63 3
63 3
61 3
61 3
61 3
61 3
61 3
60 3
60 3
60 3
60 3
60 3
60 3
60 3
58 3
58 3
61 3
60 3
63 3
62 3
62 3
62 3
63 3
64 3
63 3
73 4
87 4
88 4
93 4
94 4
95 3
95 3
95 3
96 3
94 3
94 3
94 3
95 3
97 3
97 4
99 5
102 5
103 5
103 5
103 5
103 5
101 5
99 4
100 4
98 4
97 4
96 4
98 4
102 4
106 4
109 4
110 4
117 4
117 4
118 4
117 4
117 4
117 4
117 4
117 4
118 4
118 4
118 4
118 4
120 4
120 4
120 4
120 4
120 4
120 4
120 4
120 4
120 4
120 4
119 4
119 4
117 5
117 5
114 5
111 5
111 5
108 5
107 5
104 5
105 5
106 6
101 6
102 6
101 6
96 5
96 5
96 5
95 5
95 5
95 5
95 5
96 6
96 6
96 6
96 6
96 6
96 6
96 6
96 6
96 6
96 6
96 6
97 6
96 6
96 6
92 6
91 6
91 6
89 6
89 5
91 5
92 5
88 5
98 5
97 5
90 5
81 5
80 5
78 5
76 5
75 5
78 5
79 5
79 5
84 5
84 5
87 5
87 5
84 5
87 3
88 3
93 3
94 3
95 3
95 3
97 3
95 3
96 3
95 3
97 3
98 3
98 3
98 3
94 3
90 3
89 5
125 63
118 65
119 77
121 84
126 85
128 105
130 106
130 107
130 107
129 107
129 107
130 107
131 107
130 107
130 108
130 108
132 108
134 108
140 110
202 139
204 142
208 142
210 141
210 141
210 141
210 141
212 141
213 141
213 141
213 141
212 141
214 141
215 141
214 141
221 145
229 145
238 146
238 146
237 146
237 147
238 149
237 149
237 149
237 149
237 149
236 148
239 149
239 149
240 150
253 163
257 168
268 168
292 201
296 206
302 206
303 208
302 208
302 208
302 208
302 208
302 208
300 208
300 208
299 208
295 208
293 208
292 208
283 208
283 208
282 208
281 208
281 208
279 208
278 208
277 208
275 208
274 208
273 208
272 209
272 209
267 208
266 208
266 208
263 208
257 208
250 208
248 208
248 208
247 208
246 208
248 208
246 206
244 204
243 205
243 204
243 204
242 204
242 202
242 202
240 197
205 121
204 107
203 107
198 106
196 106
196 106
199 105
204 107
207 108
207 109
207 109
211 110
210 110
218 110
218 107
223 106
213 105
191 102
192 100
146 76
143 76
143 76
143 76
144 76
144 77
144 77
143 77
145 77
145 77
145 77
145 77
144 77
143 77
140 77
131 69
126 69
118 69
118 69
120 69
120 69
120 68
121 68
122 68
122 68
124 68
123 67
117 65
116 65
102 61
87 48
87 44
81 43
61 10
61 10
57 10
57 10
57 10
58 11
58 11
58 11
58 11
58 11
59 11
59 11
59 11
59 11
59 11
59 11
60 11
61 11
62 11
62 11
91 13
118 13
136 13
154 13
159 13
161 13
162 12
161 12
160 12
160 11
160 11
160 11
162 11
163 11
163 11
163 11
163 11
163 11
163 11
162 11
162 11
162 11
162 11
162 11
162 11
162 11
162 11
162 11
162 11
162 11
163 12
162 12
162 12
160 12
152 11
151 10
149 8
149 7
149 7
147 7
146 7
137 5
136 5
131 4
130 3
130 3
127 3
128 3
128 4
127 4
127 4
126 4
126 4
126 4
126 4
123 4
123 4
123 4
123 4
122 4
122 4
122 4
122 4
122 4
122 4
121 4
119 4
119 4
119 4
119 4
121 4
123 4
123 4
123 4
124 4
123 4
123 4
123 4
123 4
123 4
123 4
123 4
123 4
124 4
124 4
125 4
125 4
125 4
125 4
130 4
129 4
132 4
133 4
135 4
139 4
138 4
135 4
127 3
127 3
147 4
116 4
103 4
92 4
74 4
74 4
73 4
72 4
72 4
72 4
72 4
72 4
71 4
70 4
69 4
69 4
69 4
69 4
69 4
69 4
69 4
69 4
69 4
69 4
70 4
70 4
70 4
71 4
70 4
70 4
70 4
70 3
71 3
71 3
71 3
71 3
71 3
71 3
77 3
77 3
77 3
77 3
77 3
77 3
78 3
78 3
80 3
81 3
79 3
79 2
82 2
82 2
85 2
89 2
92 2
92 2
94 2
95 2
97 2
98 2
98 2
98 2
98 2
98 2
98 2
99 2
99 2
99 2
99 2
97 2
95 2
93 2
91 2
91 2
90 2
90 2
90 2
91 2
91 2
91 2
91 2
91 2
90 2
90 2
89 2
89 2
89 2
89 2
88 2
86 2
82 2
84 2
84 2
84 2
81 2
79 2
78 1
68 0
68 0
63 0
43 0
43 0
43 0
44 0
44 0
44 0
44 0
44 0
44 0
44 0
44 0
44 0
44 0
44 0
44 0
44 0
44 0
44 0
44 0
45 0
45 0
47 0
47 0
47 0
45 0
45 0
45 0
44 0
44 0
44 0
44 0
43 0
43 0
44 0
43 0
43 0
41 0
42 0
38 0
38 0
34 0
36 0
36 0
37 0
41 0
44 0
45 0
47 0
48 0
48 0
44 0
49 0
48 0
45 0
44 0
44 0
42 0
40 0
40 0
39 0
39 0
39 0
39 0
44 0
44 0
43 0
43 0
43 0
43 0
43 0
43 0
43 0
43 0
43 0
43 0
43 0
43 0
43 0
43 0
43 0
43 0
43 0
43 0
43 0
43 0
43 0
43 0
47 0
47 0
46 0
44 0
42 0
40 0
41 0
41 0
42 0
43 0
45 0
45 0
46 0
46 0
46 0
46 0
46 0
46 0
46 0
47 0
47 0
47 0
47 0
46 0
50 0
50 0
51 0
51 0
59 0
70 1
74 1
74 1
77 1
78 1
77 1
79 1
82 1
86 1
90 2
102 3
103 3
103 3
105 3
106 4
109 4
109 4
111 4
111 4
113 4
113 4
112 4
112 4
112 4
112 4
111 4
110 4
108 4
105 4
103 4
101 4
99 4
98 4
98 4
96 4
92 4
92 4
92 4
93 4
92 4
92 4
92 4
91 4
91 4
93 4
93 4
96 4
90 4
90 4
90 4
90 5
90 5
90 5
90 5
90 5
91 5
91 5
91 5
91 5
91 5
91 5
92 5
92 5
92 5
93 5
100 5
101 5
111 5
115 5
116 5
114 5
112 5
113 5
114 5
114 5
117 5
117 5
116 5
114 5
115 5
114 5
113 5
112 5
111 5
111 5
111 5
112 5
113 5
114 5
113 5
112 5
117 5
119 5
157 5
167 5
165 5
164 5
159 5
165 5
156 5
143 3
140 3
141 3
143 3
144 3
146 3
143 2
141 2
136 1
133 1
124 1
124 1
124 1
122 1
122 1
122 1
122 1
121 1
120 2
119 2
118 2
118 2
118 2
118 2
118 2
119 2
119 2
119 2
119 2
119 2
119 2
120 2
120 2
120 2
120 2
121 2
122 2
125 2
129 2
130 2
133 2
134 2
137 2
137 2
136 2
136 2
134 2
134 2
134 2
135 2
134 1
136 1
140 1
145 1
148 1
147 1
147 1
148 1
149 1
151 1
153 1
152 1
156 1
157 1
156 1
155 1
154 1
146 1
143 1
143 1
143 1
142 1
142 1
141 1
141 1
137 1
137 1
137 1
140 1
140 1
142 1
142 1
147 1
215 3
232 3
234 3
232 3
235 3
243 3
244 3
243 3
236 3
228 3
197 3
188 3
187 3
186 3
186 3
180 3
180 3
180 3
179 3
178 3
177 3
176 3
174 3
174 3
174 3
174 3
174 3
174 3
174 3
174 2
174 2
174 2
172 2
172 2
172 2
172 2
172 2
172 2
173 2
173 2
173 2
171 2
171 2
171 2
174 2
176 2
176 2
176 2
175 2
175 7
177 9
176 9
176 9
175 9
169 9
167 9
167 9
165 9
164 9
161 9
163 9
162 9
163 9
164 9
164 9
164 9
163 9
161 9
158 9
158 9
154 9
152 9
152 9
152 9
150 9
151 9
148 9
147 9
146 9
141 9
139 9
136 9
134 9
134 9
134 9
134 9
134 9
134 9
134 9
134 9
134 9
134 9
135 9
137 9
144 11
151 11
150 11
146 11
142 11
139 11
73 10
68 10
67 10
64 11
64 11
55 11
56 11
57 11
61 11
64 11
64 11
68 11
68 11
69 11
74 11
73 11
75 11
75 11
81 11
81 11
82 11
83 11
83 11
83 11
83 11
84 11
84 11
84 11
84 11
84 11
84 11
85 11
86 11
88 11
89 11
89 11
89 11
89 11
89 12
89 12
89 12
89 12
89 12
89 12
85 12
87 11
87 10
87 10
92 8
93 7
91 6
91 6
91 6
91 6
93 6
93 6
92 6
92 6
95 6
96 6
95 6
95 6
94 6
93 6
92 6
92 6
92 6
92 6
91 6
91 6
90 6
90 6
90 6
90 6
90 6
89 6
89 6
89 6
89 6
89 6
89 6
89 6
89 6
89 6
89 6
89 6
89 6
89 6
88 6
88 6
88 6
81 6
79 8
76 8
61 6
54 6
54 6
53 6
53 6
51 6
50 4
50 5
49 5
49 5
46 5
44 5
44 5
44 5
38 5
34 5
31 5
30 5
30 5
31 5
30 5
32 5
31 5
31 5
27 5
27 5
26 5
25 5
25 5
25 5
25 6
26 6
26 6
26 6
26 6
26 6
26 6
26 6
26 6
25 6
25 6
31 6
36 6
37 6
37 5
41 5
43 5
43 5
44 5
44 5
44 5
41 5
41 5
41 6
38 5
37 5
39 5
37 5
37 5
37 5
38 5
39 5
39 5
39 5
38 5
37 5
37 5
39 5
39 5
39 5
42 5
43 5
43 5
43 5
43 5
43 5
43 5
43 5
43 5
43 5
43 5
43 5
43 5
43 5
43 5
43 5
50 5
57 5
60 5
62 5
62 5
65 5
65 5
66 5
66 5
81 5
82 5
82 5
82 3
82 3
80 3
80 3
82 3
87 3
89 3
89 3
89 3
89 2
89 2
89 2
90 2
90 2
90 2
90 2
90 2
90 2
90 2
89 2
89 2
89 2
87 2
87 2
87 2
87 1
87 1
87 1
87 1
94 1
105 1
111 1
112 1
110 1
110 1
110 1
115 1
115 1
115 1
115 1
116 1
115 1
115 1
108 1
104 1
103 1
102 1
98 1
98 1
100 1
99 1
99 1
101 2
102 2
105 2
107 1
107 1
109 1
110 1
111 1
111 1
110 1
110 1
110 1
110 1
117 2
116 2
116 2
115 2
111 2
111 2
108 2
107 2
107 2
107 2
107 2
107 2
107 2
107 2
107 2
107 2
108 2
108 2
108 2
108 2
114 2
116 2
119 2
112 2
108 2
105 2
109 2
110 2
111 2
112 2
115 2
114 2
102 2
102 2
102 2
101 3
101 3
101 3
101 3
102 3
101 3
104 3
104 3
104 3
104 3
104 3
104 3
104 3
104 3
105 3
105 3
105 3
105 3
118 4
121 4
125 4
125 4
125 4
125 4
140 4
143 4
168 4
171 4
170 4
165 4
155 4
150 4
150 4
150 4
150 4
150 4
146 4
146 4
146 4
148 4
147 4
147 4
147 4
147 4
147 4
144 4
144 4
144 4
144 4
147 4
167 4
184 4
203 4
203 4
209 4
204 4
265 4
272 4
272 4
274 4
277 4
278 4
278 4
278 4
280 4
272 3
276 3
276 3
278 3
278 3
279 3
279 3
279 3
279 3
279 3
279 3
280 3
283 3
283 3
283 3
283 3
281 3
281 3
281 3
282 3
277 3
276 3
272 3
272 3
259 2
259 2
259 2
260 2
259 2
258 2
266 2
267 2
272 3
276 3
281 3
280 3
280 3
280 3
281 3
268 3
268 3
268 3
267 3
266 3
266 4
266 4
269 4
268 4
269 4
273 4
273 4
272 4
270 4
256 3
256 3
254 3
254 3
253 3
250 3
235 3
234 3
210 3
209 3
209 3
209 3
209 3
209 3
209 3
209 3
209 3
210 3
210 3
210 3
210 3
208 3
216 4
219 4
219 4
218 4
215 4
212 4
210 4
199 4
183 4
170 4
122 3
108 3
103 3
101 3
97 3
96 3
69 3
69 3
68 3
68 3
68 3
69 3
69 3
70 3
70 3
69 3
69 3
69 3
67 3
71 3
73 3
75 3
76 3
77 3
77 3
76 3
76 3
72 3
71 3
71 3
71 3
71 3
71 3
69 3
68 3
68 3
68 3
68 3
68 3
70 3
76 3
77 3
106 5
106 4
108 4
101 4
100 4
95 4
93 4
89 4
91 4
91 4
90 3
90 3
90 3
92 3
92 3
93 3
93 3
94 3
94 3
90 3
91 3
91 3
89 3
89 3
89 3
89 3
89 3
112 3
117 3
117 3
117 3
117 3
117 3
118 4
116 4
116 4
116 4
117 4
117 4
117 4
117 4
117 4
117 4
116 3
116 7
117 7
118 7
117 7
110 7
109 7
109 7
112 7
112 7
115 7
121 7
122 7
122 7
123 7
125 7
125 7
125 7
126 7
126 7
124 7
124 7
123 7
123 7
122 7
122 8
122 8
122 8
121 8
121 8
121 8
120 8
119 8
117 8
112 8
115 8
113 8
116 10
120 11
121 11
121 11
124 11
124 11
128 11
133 11
138 11
137 11
143 11
142 11
142 11
141 11
138 11
137 11
136 11
131 11
129 11
129 11
103 9
103 9
102 9
102 9
103 9
116 9
122 9
122 9
121 9
122 9
122 9
123 9
123 9
121 9
121 9
121 9
122 9
122 9
122 9
122 9
120 10
119 10
118 10
127 10
127 10
149 11
152 11
131 11
130 11
132 11
135 11
135 11
135 11
134 10
134 10
134 10
134 10
135 10
137 10
138 10
141 10
142 9
143 9
144 9
144 7
144 7
143 7
143 7
143 7
142 7
143 7
141 7
141 7
136 7
131 7
131 7
131 7
130 7
130 7
130 7
129 7
129 7
130 7
131 7
135 7
136 7
137 7
139 6
140 6
141 6
177 6
182 6
262 6
269 6
273 6
281 6
284 6
291 10
289 10
285 10
282 8
280 7
278 7
275 7
275 8
274 9
270 9
264 9
263 9
258 9
260 9
261 9
262 9
262 9
262 9
262 9
262 9
262 9
262 9
262 9
263 10
262 10
264 10
264 11
263 11
252 11
249 11
249 11
247 11
257 14
260 14
260 14
264 14
267 15
267 15
267 15
267 15
266 15
266 15
267 14
271 14
272 14
269 14
262 14
263 15
233 14
232 14
230 14
230 14
239 14
251 14
263 14
270 14
273 14
274 14
275 14
272 14
272 14
276 14
277 14
274 13
274 13
274 13
274 13
277 13
275 13
275 13
275 13
276 13
276 13
276 13
278 13
278 13
278 13
278 13
278 13
278 13
278 13
278 13
278 13
287 13
291 13
310 13
322 13
321 13
325 13
332 13
331 12
333 12
371 12
353 12
362 12
320 12
329 12
333 11
338 11
349 10
351 8
381 8
398 8
444 10
457 10
462 10
463 9
466 9
469 9
469 9
474 10
480 10
482 10
479 10
481 11
483 12
483 12
488 12
488 12
489 12
489 12
489 12
488 12
486 11
486 11
483 10
482 10
481 10
481 10
480 10
480 10
480 9
470 6
467 6
467 6
465 6
462 5
461 5
460 5
459 5
460 5
457 5
456 5
456 5
456 5
456 5
455 5
456 5
456 5
455 5
453 5
451 5
436 5
420 5
413 5
407 5
406 5
405 5
405 5
404 5
403 5
399 5
398 5
398 5
397 5
397 5
398 5
395 5
395 5
397 5
397 5
396 5
396 5
395 5
394 5
394 5
394 5
394 5
394 5
393 5
393 5
393 5
390 5
370 4
368 4
351 4
342 4
340 4
323 4
303 4
291 4
282 4
239 4
232 4
218 4
181 4
179 4
172 4
156 4
127 5
106 5
86 5
81 5
40 3
38 3
36 3
36 3
35 2
35 2
36 1
32 1
30 1
29 1
29 1
28 1
27 1
26 1
26 1
26 1
26 1
27 1
27 1
29 1
30 1
30 1
31 1
31 1
31 1
31 1
31 1
31 1
30 1
30 1
30 1
29 1
34 2
37 2
37 2
37 2
37 2
37 2
37 2
37 2
36 2
36 2
36 2
36 2
36 2
36 2
36 2
36 2
37 2
38 2
39 2
39 2
39 2
39 2
39 2
40 2
40 2
40 2
40 2
40 2
40 2
40 2
40 2
40 2
40 2
39 2
38 2
38 2
38 2
38 2
38 2
38 2
38 2
37 2
37 2
37 2
37 2
38 2
37 2
35 2
35 2
35 2
40 2
39 2
39 2
39 2
38 2
38 2
38 2
38 2
36 1
34 1
32 1
32 1
32 1
32 1
32 1
33 1
33 1
33 1
33 1
33 1
34 1
35 1
34 1
34 1
35 1
35 1
34 1
35 1
36 1
36 1
36 1
36 1
35 1
35 1
35 1
34 1
33 1
32 3
31 3
31 3
33 3
36 3
36 3
36 3
35 3
35 3
35 3
34 3
33 3
32 3
30 2
30 2
30 2
30 2
30 2
30 2
30 2
30 2
30 2
30 2
31 2
31 2
32 2
32 2
32 2
31 2
31 2
29 2
29 2
30 2
31 2
31 2
31 2
31 2
31 2
31 2
31 2
31 2
32 2
32 2
49 2
50 2
50 2
50 2
50 2
50 2
50 2
50 2
50 2
51 2
52 2
56 2
59 2
62 2
62 2
62 2
62 2
61 2
61 2
58 2
56 2
56 2
56 2
56 2
56 2
56 2
55 2
55 2
55 2
54 2
54 2
54 2
53 2
53 2
53 2
52 2
52 2
54 2
54 2
54 2
54 2
54 2
54 2
54 2
53 2
53 2
53 2
52 2
51 2
51 2
51 2
51 2
51 2
51 2
51 2
51 2
51 2
51 0
53 1
53 1
51 1
48 1
48 1
49 1
49 2
51 2
51 2
51 2
51 2
50 2
49 2
49 2
49 2
50 2
51 2
51 2
51 2
51 2
51 2
51 2
50 2
50 2
49 2
49 2
49 2
49 2
48 2
49 2
49 2
49 2
48 2
48 2
48 2
48 2
48 2
48 2
48 2
45 2
45 2
45 2
27 2
25 2
25 3
25 3
25 3
25 3
25 3
25 3
26 3
25 3
25 3
24 3
41 3
40 3
42 3
41 3
43 3
43 3
44 3
43 3
43 3
43 3
43 3
42 3
42 3
44 3
48 3
48 3
48 3
48 3
48 3
48 3
48 3
48 3
48 3
48 3
48 3
46 3
46 3
46 3
46 3
45 3
47 3
49 3
50 3
52 3
53 3
54 3
54 3
54 3
54 3
54 3
54 3
54 3
54 3
54 3
54 3
54 3
52 2
54 2
54 2
54 2
54 2
53 2
51 1
52 1
52 1
52 1
53 1
53 1
53 1
54 1
55 1
54 1
54 1
54 1
56 1
57 1
60 1
60 1
74 1
76 1
76 1
76 1
79 1
79 1
79 1
87 1
88 1
88 1
88 1
88 1
88 1
88 1
92 1
94 1
95 1
96 1
96 1
97 1
98 0
98 0
99 0
99 0
99 0
99 0
98 0
99 0
99 0
100 0
99 0
100 0
81 0
83 0
82 0
81 0
79 0
79 0
79 0
79 0
79 0
82 1
82 1
82 1
82 1
80 1
76 1
76 1
76 1
76 1
76 1
76 1
76 1
76 1
76 1
77 1
79 1
80 1
81 1
81 1
81 1
84 1
86 1
88 1
89 1
87 1
87 1
86 1
86 1
86 1
87 1
87 1
87 1
91 1
91 1
91 1
96 1
98 1
100 1
99 1
99 1
99 1
100 1
101 1
101 1
102 1
103 1
103 1
102 1
103 1
102 1
104 3
104 3
103 3
101 3
102 3
99 3
95 3
94 3
91 3
78 3
79 3
80 3
81 4
83 4
84 4
82 4
77 4
77 4
76 4
76 4
74 4
74 4
74 4
60 4
59 4
59 4
60 4
59 4
59 4
59 4
59 4
60 4
61 4
63 4
63 4
63 4
62 4
62 4
62 4
62 4
61 3
60 3
60 3
60 3
60 3
60 3
60 3
60 3
60 3
60 3
60 3
60 3
61 3
61 3
61 3
61 3
61 3
61 3
59 3
59 3
59 3
59 3
59 3
60 3
59 3
59 3
58 3
58 3
56 3
57 3
53 3
54 3
51 3
52 3
53 3
60 3
65 3
70 3
69 3
75 3
77 3
79 4
75 4
79 4
79 4
72 4
71 4
70 4
71 4
71 4
71 4
70 4
69 4
69 4
69 4
69 4
69 4
69 4
68 4
68 4
65 2
64 2
67 2
68 2
67 2
67 2
67 2
66 2
66 2
66 2
66 2
65 2
63 1
59 1
58 1
57 1
58 1
59 1
59 1
59 1
61 1
61 1
61 1
62 1
68 1
69 1
68 1
68 1
67 1
67 1
69 1
69 1
89 1
93 1
93 1
100 1
103 1
104 1
104 1
104 1
104 1
104 1
104 1
104 1
104 1
103 1
103 1
103 1
103 1
103 1
103 1
103 1
102 1
102 1
102 1
102 1
102 1
102 1
102 1
102 1
102 1
100 1
100 1
98 1
99 1
99 1
99 1
98 1
113 1
119 1
126 1
129 1
128 1
131 1
131 1
120 1
123 1
124 1
127 1
122 1
121 1
118 0
118 0
114 0
114 0
116 0
118 0
118 0
118 0
118 0
118 0
118 0
118 0
118 0
118 0
118 0
118 0
118 0
119 0
119 0
119 0
119 0
124 0
124 0
123 0
124 0
125 0
127 0
128 0
128 0
128 0
129 0
129 0
135 0
140 0
156 0
161 0
162 0
162 0
163 0
161 0
162 0
162 0
158 0
152 0
153 0
153 0
153 0
153 0
153 0
152 0
146 0
129 0
126 0
125 0
119 0
118 0
117 0
117 0
117 0
117 0
117 0
117 0
117 0
117 0
117 0
117 0
117 0
117 0
117 0
117 0
117 0
118 0
119 0
119 0
120 0
120 0
120 0
120 0
120 0
120 0
121 0
121 0
120 0
117 0
114 0
110 0
109 0
95 0
89 0
82 0
81 0
81 0
77 0
76 0
76 0
70 0
68 0
66 0
65 0
65 0
65 0
64 0
64 0
64 0
62 0
61 0
61 0
63 0
63 0
63 0
63 0
63 0
64 0
64 0
67 0
67 0
67 0
66 0
65 0
62 0
62 0
55 0
56 0
56 0
56 0
60 0
60 0
60 0
59 0
58 0
55 0
44 0
34 0
34 0
24 0
22 0
22 0
22 0
22 0
22 0
22 0
23 0
23 0
24 0
24 0
24 0
24 0
24 0
24 0
24 0
24 0
24 0
24 1
25 1
25 1
27 1
27 1
27 1
27 1
27 1
27 1
28 1
28 1
27 1
26 1
26 1
26 1
28 1
28 1
29 1
30 1
31 1
31 1
33 1
37 1
51 1
54 1
56 1
56 1
56 1
55 1
55 1
55 1
55 1
56 1
56 1
56 1
56 1
56 1
56 1
55 1
55 1
55 1
55 1
55 1
55 1
55 1
55 1
56 1
56 1
56 1
56 1
56 1
56 1
56 1
56 1
55 1
55 1
55 1
55 1
56 1
56 1
55 1
56 1
53 1
53 1
53 1
53 1
53 1
53 1
54 1
54 1
53 1
52 1
49 1
46 1
46 1
48 1
49 1
50 1
50 1
50 1
50 1
49 1
49 1
49 1
49 1
49 1
49 1
49 1
48 1
48 1
47 1
47 1
47 1
47 1
47 1
47 1
48 1
48 1
48 1
48 1
48 0
47 0
47 0
45 0
45 0
45 0
45 0
45 0
45 0
45 0
45 0
45 0
45 0
45 0
47 0
45 0
45 0
42 0
41 0
38 0
37 0
26 0
24 0
19 0
19 0
18 0
18 0
18 0
18 0
18 0
18 0
17 0
17 0
17 0
17 0
17 0
17 0
17 0
17 0
17 0
18 0
19 0
19 0
19 0
19 0
18 0
18 0
18 0
18 0
18 0
18 0
18 0
18 0
18 0
18 0
17 0
17 0
18 0
17 0
17 0
16 0
16 0
16 0
15 0
15 0
16 0
16 0
16 0
16 0
18 0
19 0
19 0
19 0
19 0
19 0
15 0
15 0
14 0
14 0
14 0
14 0
14 0
15 0
15 0
15 0
15 0
15 0
15 0
15 0
15 0
15 0
15 0
15 0
17 0
18 0
18 0
18 0
18 0
20 0
22 0
22 0
27 0
28 0
29 0
33 0
33 0
33 0
34 0
34 0
33 0
33 0
33 0
32 0
32 0
31 0
29 0
29 0
29 0
29 0
34 1
33 1
34 1
34 1
34 1
34 1
34 1
34 1
35 1
35 1
35 1
35 1
35 1
35 1
37 1
40 1
41 1
43 1
43 1
43 1
42 1
42 1
43 1
43 1
43 1
43 1
43 1
43 1
43 1
43 1
43 1
43 1
43 1
43 1
44 1
45 1
46 1
46 1
45 1
69 1
72 1
76 1
77 1
79 1
78 1
78 1
78 1
78 1
77 1
76 1
75 1
78 1
79 1
79 1
79 1
79 1
79 1
79 1
79 1
79 1
79 1
79 1
79 1
78 1
79 1
80 1
80 1
80 1
81 1
81 1
81 1
82 1
82 1
81 1
76 1
76 1
76 1
75 1
75 1
79 1
84 1
91 1
88 1
89 1
88 1
85 1
85 1
85 1
84 1
84 1
84 1
84 1
84 1
84 1
84 1
84 1
83 1
83 1
83 1
84 1
78 0
78 0
79 0
80 0
82 0
82 0
82 0
82 0
82 0
86 0
86 0
86 0
87 0
87 0
85 0
82 0
82 0
80 0
80 0
79 0
79 0
79 0
78 0
78 0
78 0
80 0
80 0
80 0
80 0
80 0
80 0
80 0
80 0
80 0
84 1
84 1
84 1
85 1
84 1
64 1
63 1
61 1
61 1
61 1
61 1
62 1
62 1
62 1
61 1
66 1
65 1
64 1
63 1
63 1
63 1
63 1
63 1
65 2
65 2
66 2
64 2
63 2
63 2
62 2
61 2
60 2
60 2
59 2
59 2
59 2
58 2
57 2
59 2
60 2
60 2
60 2
62 2
61 2
61 2
58 2
53 2
48 2
48 2
48 2
48 2
48 2
48 2
48 2
48 2
48 2
48 2
48 2
48 2
48 2
50 2
50 2
50 2
50 2
51 2
50 2
50 2
51 2
51 2
50 2
47 2
47 2
48 2
46 2
53 2
52 2
52 2
61 2
77 2
95 2
95 2
95 2
97 2
99 2
99 2
99 2
100 2
100 2
102 2
104 2
102 2
103 2
109 2
115 2
151 2
162 3
170 3
177 3
178 3
181 3
176 2
176 2
174 2
175 2
180 2
180 2
180 4
181 4
183 4
183 4
184 4
184 4
184 4
185 4
183 4
180 4
180 4
180 4
180 4
179 4
178 4
180 4
180 4
179 3
179 3
179 3
179 3
179 3
179 3
180 3
182 3
182 3
182 3
183 3
183 3
183 3
184 3
184 3
182 3
182 3
183 3
184 3
182 3
181 3
182 3
182 4
182 4
182 4
182 4
182 4
184 5
197 5
203 5
209 6
211 6
213 6
213 6
213 6
211 6
212 6
210 6
210 6
209 6
209 6
209 6
208 6
207 6
206 6
206 6
211 6
222 6
222 6
219 6
220 6
213 6
213 6
210 6
201 6
177 6
162 6
159 6
159 6
159 6
159 6
159 6
159 6
159 6
159 6
154 5
154 5
152 5
153 5
150 3
140 3
105 3
96 3
90 3
85 3
84 3
84 3
84 3
83 3
81 3
80 3
80 3
76 3
76 3
75 3
75 3
74 3
73 3
73 3
73 3
71 3
71 3
71 3
71 3
71 3
72 3
74 3
76 3
74 3
74 3
82 3
83 3
83 3
85 3
85 3
84 3
83 3
83 3
84 3
85 3
85 3
87 3
87 3
88 3
88 3
86 3
87 3
87 3
87 3
90 3
91 3
90 2
89 2
89 2
88 2
86 2
80 2
68 1
56 1
53 1
51 0
51 0
50 0
50 0
46 0
46 0
46 0
46 0
46 0
46 0
46 0
46 0
45 0
45 0
44 0
44 0
44 0
36 0
36 0
35 0
35 0
35 0
35 0
35 0
35 0
35 0
35 0
35 0
35 0
35 0
35 0
35 0
35 0
34 0
33 0
33 0
32 0
32 0
31 0
31 0
31 0
31 0
31 0
31 0
31 0
31 0
31 0
31 0
31 0
31 0
31 0
31 0
31 0
31 0
31 0
31 0
31 0
31 0
31 0
31 0
31 0
31 0
31 0
31 0
31 0
29 0
26 0
26 0
24 0
21 0
16 0
16 0
15 0
14 0
14 0
14 0
13 0
12 0
10 0
10 0
9 0
6 0
6 0
6 0
6 0
6 0
4 0
6 0
2 0
2 0
3 0
3 0
6 0
6 0
9 0
10 0
11 0
11 0
13 0
13 0
13 0
15 0
26 0
26 0
26 0
26 0
31 0
32 0
39 0
48 0
54 0
54 0
54 0
54 0
54 0
54 0
54 0
54 1
54 1
54 1
54 1
54 1
54 1
54 1
56 1
57 1
58 1
58 1
58 1
58 1
58 1
58 1
59 1
59 1
60 1
60 1
60 1
61 1
61 1
62 1
63 1
63 1
63 1
64 1
64 1
64 1
65 1
65 1
65 1
65 1
65 1
65 1
65 1
67 1
75 1
76 1
81 1
81 1
85 1
97 1
98 1
127 1
127 1
131 1
131 1
133 1
134 1
134 1
134 1
133 1
133 1
136 1
141 2
146 2
146 2
146 2
146 2
146 2
146 2
146 2
146 2
146 2
146 2
146 2
145 2
145 2
145 2
146 2
148 1
147 1
147 1
148 1
149 1
152 1
150 1
149 1
150 1
150 1
150 1
150 1
149 1
147 1
134 1
134 1
132 1
117 1
117 1
118 1
113 1
113 2
113 2
113 2
113 2
113 2
113 2
112 2
113 2
113 2
113 2
113 2
114 2
115 3
115 3
115 3
111 3
110 3
110 3
112 3
112 3
112 3
112 3
112 3
113 3
115 3
115 3
116 3
117 3
116 3
117 3
118 3
119 3
129 3
166 3
189 3
509 3
522 3
525 3
535 3
536 3
536 3
536 3
535 4
534 4
526 4
510 4
507 4
502 4
501 4
504 4
501 4
498 4
479 4
478 4
475 4
475 4
475 4
475 4
477 4
476 4
476 4
476 4
472 4
469 3
464 3
464 3
465 3
465 3
465 3
475 3
475 3
475 3
474 3
474 3
474 3
475 3
475 3
474 3
471 4
469 4
469 4
469 4
468 4
470 4
471 4
471 4
495 4
497 4
497 4
498 5
498 5
498 5
499 5
500 5
502 5
504 5
504 5
504 4
503 4
503 4
504 4
505 4
516 4
521 4
537 4
553 4
575 4
584 4
585 4
588 4
595 4
598 4
597 3
597 3
608 3
784 6
791 6
801 6
815 6
818 6
820 6
821 6
824 6
827 6
825 6
832 6
920 6
925 6
925 6
927 6
946 6
940 6
917 6
873 6
831 6
548 6
546 6
547 6
547 6
547 6
551 6
551 6
551 5
552 5
554 5
554 6
554 6
554 6
554 6
553 6
551 6
551 6
553 6
553 6
557 6
572 6
573 6
573 6
572 6
572 6
573 6
573 6
573 6
573 6
573 7
573 7
572 7
572 7
571 7
561 7
561 7
561 7
562 7
561 7
568 7
569 7
571 7
574 6
574 6
576 6
576 6
575 6
575 5
571 5
566 5
556 5
542 5
541 5
540 5
540 5
541 5
541 5
541 5
539 5
538 5
537 5
538 5
539 5
538 5
538 5
531 5
526 5
514 5
506 5
493 5
477 5
459 5
454 5
451 5
448 5
442 5
429 5
400 5
394 5
385 5
230 2
228 2
221 2
212 2
211 2
211 2
209 2
212 2
206 2
198 2
197 2
109 2
108 2
108 2
109 2
87 2
81 2
81 2
81 2
80 2
79 2
77 2
76 2
76 2
74 2
73 2
73 2
73 2
74 2
74 2
73 1
72 1
72 1
74 1
72 1
75 5
74 5
75 5
77 5
73 5
61 5
64 6
64 6
67 6
68 6
67 6
68 6
68 6
68 6
68 5
68 5
68 5
69 5
69 5
71 5
75 5
79 5
79 5
78 5
76 5
75 5
74 5
71 5
70 6
69 6
74 9
76 10
75 10
74 10
74 10
74 10
74 10
79 10
89 10
89 10
91 10
92 10
92 10
92 10
95 10
95 10
94 10
93 10
95 10
100 10
101 10
104 10
112 11
114 11
115 11
116 11
116 11
119 11
120 11
125 11
125 11
127 11
127 11
127 11
127 11
129 11
128 11
129 11
129 11
127 11
125 11
124 11
121 11
120 11
119 11
119 11
119 11
119 11
120 11
120 11
120 11
121 11
124 11
124 11
124 12
126 12
126 12
126 12
126 12
127 12
127 12
127 12
127 12
126 12
126 12
126 12
127 12
126 12
126 12
125 12
122 7
121 7
121 7
119 7
119 7
117 7
116 7
114 7
113 7
111 7
111 7
112 7
113 7
114 7
116 7
116 7
116 7
115 7
115 7
110 7
107 7
102 7
99 7
98 7
93 7
94 7
113 7
111 7
114 6
114 6
105 2
99 2
103 2
104 2
104 2
105 2
109 2
111 2
112 2
118 3
118 3
119 3
125 3
124 3
123 3
123 3
124 3
123 3
119 3
114 3
108 3
104 2
101 2
99 2
97 2
95 2
91 2
91 2
88 2
85 2
85 2
84 2
84 2
83 2
81 2
80 2
80 2
80 2
80 2
80 2
80 2
80 2
80 2
79 2
79 2
79 2
79 2
79 2
78 2
77 2
77 2
76 2
73 1
73 1
72 1
71 1
71 1
71 1
70 1
70 1
70 1
70 1
70 1
69 1
69 1
69 1
67 1
67 1
67 1
67 1
67 1
67 1
67 1
67 1
67 1
67 1
67 1
67 3
67 3
66 3
66 3
65 3
65 3
63 3
62 3
62 3
62 3
62 3
62 3
62 3
62 3
60 3
60 1
57 1
57 1
57 1
37 1
36 1
34 1
35 1
35 1
34 1
31 1
30 1
29 1
27 1
23 1
18 1
16 1
10 0
9 0
8 0
3 0
3 0
3 0
3 0
2 0
2 0
2 0
2 0
2 0
2 0
2 0
2 0
2 0
2 0
2 0
2 0
2 0
2 0
2 0
2 0
2 0
2 0
2 0
3 0
3 0
3 0
3 0
5 0
8 0
8 0
12 0
12 0
12 0
12 0
14 0
16 0
16 0
16 0
17 0
17 0
19 0
20 0
20 0
20 0
20 0
20 0
20 0
20 0
20 0
20 0
20 0
20 0
20 0
20 0
20 0
20 0
21 0
21 0
21 0
21 0
21 0
21 0
21 0
22 0
22 0
22 0
22 0
23 0
27 0
38 0
41 0
46 0
46 0
46 0
47 0
48 0
48 0
47 0
47 0
47 0
47 0
47 0
47 0
47 0
47 0
48 0
48 0
52 0
54 0
56 0
59 0
59 0
59 0
59 0
60 0
62 0
62 0
62 0
69 0
72 0
74 0
74 1
74 1
74 1
74 1
75 1
75 1
75 1
75 1
75 1
75 1
76 1
76 1
76 1
76 1
75 3
75 3
75 3
75 3
75 3
75 3
75 3
75 3
74 3
74 3
74 3
72 3
70 3
69 3
69 3
67 3
68 3
71 3
80 3
87 3
88 3
97 3
100 3
99 3
99 3
98 3
97 3
97 3
97 3
97 3
97 3
97 3
97 3
97 3
97 3
97 3
100 3
104 3
122 3
124 3
124 3
123 3
123 3
125 3
125 3
127 3
127 3
127 3
126 3
128 3
129 3
128 3
128 3
132 3
122 3
119 3
114 3
116 3
119 3
117 3
118 3
119 3
123 3
124 3
125 3
128 3
128 3
128 3
128 3
127 3
125 3
125 3
121 3
122 3
121 3
118 3
119 3
119 3
118 3
119 3
124 3
123 3
120 3
115 3
114 3
112 2
112 2
112 2
112 2
111 2
111 2
111 2
111 2
111 2
111 2
111 2
110 1
110 1
110 1
110 0
110 0
110 0
110 0
110 0
110 0
111 0
111 0
111 0
111 0
111 0
111 0
111 0
111 0
110 1
109 1
107 1
107 1
105 1
84 1
81 2
81 2
75 2
75 2
75 2
76 2
75 2
75 2
75 2
75 2
75 2
76 2
76 2
76 2
69 2
66 2
67 2
64 2
73 2
66 2
65 3
67 3
69 3
69 3
69 3
72 3
70 3
70 3
71 3
71 3
70 3
70 3
77 3
80 3
74 3
74 3
73 3
71 3
70 3
69 3
68 3
66 3
64 3
63 3
62 3
61 3
58 3
58 3
58 4
58 4
75 5
77 5
78 5
77 5
78 5
102 5
103 5
105 5
106 5
106 5
106 5
103 5
105 5
108 5
115 5
116 5
116 5
117 5
117 5
118 5
120 5
134 5
141 5
143 5
147 6
148 6
150 6
150 6
150 6
150 6
150 6
150 6
151 6
156 6
159 6
160 6
161 6
162 6
162 6
162 6
162 6
162 6
163 6
162 5
164 5
164 5
163 5
163 5
163 5
163 4
164 4
165 4
165 4
165 4
165 4
164 4
164 4
164 4
166 4
166 4
166 3
165 3
165 3
162 3
164 4
165 4
165 4
163 4
156 4
153 4
150 3
150 3
151 3
151 3
149 3
146 3
146 3
145 3
144 3
144 3
141 3
143 3
135 3
136 3
136 3
136 3
136 3
136 3
136 3
136 3
136 3
136 3
136 3
136 3
136 3
136 3
135 3
135 2
134 2
126 2
116 2
115 2
110 2
109 2
100 2
83 2
83 2
80 2
81 2
81 2
81 2
79 2
77 2
77 2
75 3
76 3
76 3
75 3
74 3
74 3
67 3
56 3
46 3
42 3
38 2
38 2
38 2
39 2
40 2
40 2
41 2
43 2
44 2
41 2
40 2
40 2
42 2
42 2
45 2
45 2
46 2
46 2
46 2
46 2
44 2
44 2
44 2
44 2
44 2
43 2
43 2
43 2
43 2
44 2
44 2
44 2
44 2
45 2
45 2
45 2
45 2
45 2
46 2
47 2
47 1
44 1
45 1
45 1
45 1
46 1
46 1
46 2
46 2
45 2
45 2
46 2
46 2
46 2
46 2
44 2
43 2
43 2
43 2
44 2
45 2
46 2
48 2
48 2
48 2
48 2
48 2
48 2
48 2
48 2
48 2
48 2
48 2
48 2
48 2
48 2
48 2
48 2
47 2
48 2
47 2
48 2
48 2
48 2
47 2
47 2
45 2
45 2
45 2
44 1
42 1
41 1
41 1
43 1
43 1
45 1
46 1
50 1
52 1
54 1
57 1
140 1
143 1
189 1
191 1
192 1
198 1
203 1
204 1
206 1
206 1
207 1
210 1
210 1
209 1
209 1
208 1
208 1
206 1
206 1
207 1
211 1
213 1
214 1
213 1
213 1
213 2
213 2
212 2
211 2
218 2
222 2
228 2
231 2
232 2
258 2
259 2
260 2
264 2
270 2
272 2
273 2
273 2
273 2
274 2
272 2
272 2
272 1
271 1
271 1
271 1
271 1
271 1
270 1
270 1
271 1
271 1
271 1
271 1
270 1
268 1
268 1
268 1
268 1
268 1
268 1
268 1
274 1
285 1
289 1
289 1
292 2
350 7
351 7
352 7
365 7
368 7
367 7
367 7
365 7
371 7
376 7
378 7
379 7
380 7
382 7
383 7
384 7
383 7
382 7
377 7
376 7
378 7
375 7
375 7
376 7
382 7
385 7
378 7
373 7
371 8
308 8
306 8
273 8
271 8
271 8
267 8
264 9
265 9
264 9
265 9
263 9
258 9
257 9
256 9
256 9
256 9
255 9
253 9
252 9
251 8
249 8
249 8
249 8
249 8
249 8
246 8
247 8
245 8
246 8
237 9
243 10
255 10
257 10
274 11
255 11
254 11
253 11
251 11
240 11
238 12
242 12
260 12
264 12
266 12
269 12
270 12
270 12
271 12
271 12
271 12
281 12
281 12
282 12
308 12
317 12
334 12
338 12
502 12
508 12
513 12
519 12
538 12
562 12
568 12
570 12
574 12
561 12
574 12
574 12
574 12
568 10
527 6
527 6
525 6
519 7
518 8
518 8
520 8
518 8
513 8
509 8
505 8
506 8
503 8
503 8
503 8
503 8
504 8
506 8
507 8
507 8
503 8
503 9
501 9
498 10
473 10
472 9
503 9
507 9
528 10
554 12
554 12
554 12
554 12
554 12
556 12
555 11
554 11
558 11
559 11
558 11
558 11
559 11
560 11
560 11
562 11
562 11
565 11
565 11
566 11
566 11
567 11
564 11
564 11
561 11
567 11
561 11
562 11
567 11
566 10
560 9
545 9
537 8
522 8
512 8
513 8
514 8
511 9
511 9
508 8
503 8
489 8
485 8
487 8
485 8
485 8
484 8
483 8
482 8
477 8
475 8
476 8
470 8
451 8
429 8
423 8
415 8
269 8
263 8
257 8
256 8
272 8
278 8
330 8
346 8
360 8
358 8
341 8
351 9
353 9
353 9
369 9
371 9
371 9
367 8
368 7
367 7
367 7
367 7
368 7
368 7
371 7
372 7
372 7
373 7
372 7
373 7
375 7
375 7
386 6
458 6
474 6
492 5
514 5
528 5
532 5
530 5
493 5
491 5
469 3
445 2
452 2
452 2
454 2
454 2
454 2
454 2
454 2
453 2
453 2
457 2
457 2
461 2
461 2
461 2
460 2
460 2
457 2
457 2
457 2
456 2
455 2
455 2
455 2
454 2
453 2
452 2
448 2
445 2
446 2
448 2
471 2
470 1
471 1
471 1
469 1
470 1
471 2
471 2
471 3
471 3
471 3
471 3
467 3
467 3
470 3
471 3
479 3
496 3
504 3
504 3
503 3
503 3
496 3
495 3
495 3
499 3
502 3
499 3
497 3
479 3
425 3
394 3
382 3
377 3
358 3
364 3
361 3
349 2
347 2
347 2
331 2
330 2
330 2
331 2
331 2
331 2
331 2
330 2
329 2
329 2
326 3
326 3
327 3
306 3
301 3
295 3
291 3
276 3
261 3
206 3
196 3
187 3
163 3
162 3
160 3
158 3
157 3
157 3
157 3
155 3
146 3
145 3
145 3
147 3
150 3
150 3
153 3
152 3
152 3
150 3
150 3
147 3
163 3
163 3
178 3
176 3
178 3
178 3
178 3
178 3
178 3
179 3
178 3
178 3
174 3
173 3
172 4
167 4
165 4
166 4
151 4
152 4
158 4
158 4
159 4
160 4
160 3
162 3
162 2
163 2
163 2
163 2
166 2
164 2
155 2
150 2
142 2
124 2
120 2
124 2
124 2
126 2
177 3
176 3
174 3
173 3
167 3
167 4
169 4
169 4
169 4
163 4
161 4
160 4
161 4
156 4
155 4
156 4
158 4
159 4
158 4
159 4
158 4
157 4
157 4
157 4
157 4
159 4
159 4
160 4
161 3
161 3
169 3
179 3
188 2
192 2
205 2
214 2
230 4
234 4
239 4
241 4
241 4
240 4
239 4
238 4
238 4
239 4
242 4
246 4
250 4
250 4
253 4
252 4
249 4
246 4
246 4
246 4
245 4
246 4
246 4
246 4
234 4
234 4
223 4
224 4
222 4
222 4
224 4
243 4
247 4
250 4
258 4
258 4
258 4
259 4
260 4
259 4
259 4
257 4
256 4
256 4
251 4
250 4
250 4
245 4
242 4
242 4
243 4
243 5
243 5
242 5
240 5
239 5
239 5
240 5
239 5
237 5
237 5
231 5
229 4
212 4
182 5
182 5
181 5
179 5
178 5
174 4
174 4
202 5
203 5
202 5
202 5
204 5
204 5
204 5
203 5
202 5
201 5
200 5
200 5
199 5
200 5
205 5
207 5
210 5
223 5
225 5
229 5
228 5
216 5
215 5
223 5
207 5
225 5
222 5
216 5
207 5
197 3
193 3
188 3
185 3
184 3
184 3
184 3
184 3
185 3
186 3
192 3
203 3
204 3
206 3
206 3
209 3
209 3
208 3
206 3
207 4
206 4
206 4
206 4
207 4
208 4
212 4
210 4
210 4
205 4
204 4
205 4
187 4
185 5
181 5
175 5
173 5
173 5
173 5
174 5
174 5
175 5
175 5
175 5
175 5
176 5
176 5
176 5
176 5
176 5
176 5
181 5
180 4
180 4
181 4
181 4
182 4
182 4
182 4
182 4
182 4
182 4
181 4
186 4
186 4
185 3
185 3
187 3
185 3
186 3
187 3
187 3
155 2
153 2
152 2
150 2
150 2
150 2
152 2
153 2
152 2
153 2
153 2
153 2
152 2
147 2
140 2
137 2
133 2
125 2
123 2
119 2
121 2
119 2
115 2
113 2
109 2
92 2
92 2
92 2
92 2
91 2
92 2
92 2
92 2
93 2
93 2
93 2
89 2
85 2
79 2
69 2
52 2
52 2
52 2
53 2
53 2
53 2
54 2
54 2
55 1
55 1
54 1
52 1
52 1
50 1
46 1
46 1
45 1
45 1
45 1
46 1
45 1
48 0
51 0
53 0
58 0
65 0
75 0
74 0
74 0
73 1
72 1
71 1
75 1
75 1
77 1
77 1
76 1
77 1
76 1
76 1
85 1
90 1
100 1
100 1
100 1
101 1
103 1
105 1
115 1
115 1
115 1
113 1
113 1
115 1
115 1
114 1
114 1
114 1
114 1
119 1
118 1
118 1
119 1
136 1
143 5
146 8
144 8
145 8
144 8
145 8
146 8
147 8
147 8
146 8
145 8
145 8
145 8
147 9
147 9
146 9
148 9
148 9
153 9
154 9
156 9
156 9
159 9
159 9
159 9
170 12
172 12
175 12
175 12
174 12
174 12
171 12
171 12
171 12
171 12
172 12
172 12
175 12
175 12
176 12
177 12
177 12
177 12
177 12
178 12
179 12
179 12
179 12
179 12
181 12
181 12
181 13
181 13
181 13
185 13
186 13
184 13
182 13
179 13
177 13
166 13
158 12
156 12
156 12
156 12
156 12
156 12
156 12
153 12
152 12
148 12
148 12
147 12
138 12
135 12
131 12
127 12
124 12
117 12
117 12
117 12
116 12
115 12
113 12
102 12
101 12
101 12
101 12
101 12
101 12
105 12
105 12
113 12
116 12
116 12
116 12
125 12
128 12
127 11
113 12
107 7
107 6
111 7
109 7
113 7
120 9
121 9
120 10
125 10
125 10
124 10
124 10
124 9
125 9
125 9
133 10
134 10
136 10
138 10
141 12
144 12
143 13
159 14
154 12
153 12
147 12
147 12
145 12
145 12
143 12
142 12
142 12
142 12
142 12
142 12
142 12
142 12
141 12
142 12
142 12
144 12
144 12
142 12
148 12
148 12
157 12
157 12
157 12
157 12
159 12
160 13
161 12
161 12
160 11
155 11
154 11
155 11
156 11
159 11
160 11
160 11
159 11
157 11
156 11
156 11
157 11
156 11
155 11
155 11
155 11
156 11
157 11
157 11
158 11
163 11
163 11
165 11
164 11
165 11
169 11
171 11
173 11
201 11
203 11
203 11
203 11
205 11
206 11
207 11
204 11
199 11
196 11
187 11
181 11
183 11
188 11
191 10
192 10
193 10
190 10
189 10
187 8
187 8
186 8
182 8
169 6
167 7
167 7
168 7
167 7
171 7
179 7
180 7
180 6
178 6
174 6
173 6
169 6
168 5
161 3
156 3
155 3
140 2
145 2
152 2
157 2
157 2
157 2
158 2
158 2
158 2
157 2
158 2
158 2
159 2
158 2
158 2
160 2
161 2
168 2
176 2
186 3
190 3
185 3
188 3
180 3
186 3
197 3
201 3
202 3
201 2
201 2
203 2
207 2
207 2
205 2
206 2
204 2
205 2
206 2
210 2
213 2
216 2
215 2
216 2
216 2
219 2
221 3
226 3
225 3
222 3
223 3
223 3
222 3
213 3
210 3
213 3
217 3
216 3
215 3
211 3
208 3
188 3
188 3
188 3
189 3
188 3
187 3
185 3
185 3
185 3
185 3
184 3
182 3
176 3
161 3
155 3
155 3
155 3
154 3
154 3
154 3
152 3
152 2
152 2
153 2
153 2
153 2
152 2
150 2
150 2
142 2
142 2
142 2
143 2
143 2
143 2
142 2
142 2
142 2
142 2
143 2
148 2
145 2
138 2
135 2
135 2
135 2
133 2
133 2
132 2
131 2
130 2
130 2
128 2
128 2
127 2
125 2
123 2
105 1
99 1
93 1
87 1
87 1
85 1
84 1
66 1
62 1
56 1
56 1
56 1
56 1
55 1
55 1
55 1
54 1
53 1
52 1
50 1
46 1
44 1
39 1
38 1
38 1
37 1
37 1
33 1
30 0
27 0
26 0
26 0
26 0
26 0
26 0
25 0
25 0
20 0
17 0
17 0
17 0
17 0
17 0
17 0
17 0
17 0
17 0
17 0
17 0
17 0
17 0
17 0
17 0
17 0
16 0
16 0
16 0
16 0
16 0
16 0
16 0
16 0
16 0
16 0
16 0
16 0
15 0
15 0
14 0
14 0
14 0
14 0
14 0
14 0
13 0
12 0
12 0
12 0
12 0
12 0
12 0
11 0
11 0
2 0
0 0
0 0
0 0
0 0
0 0
0 0
0 0
0 0
0 0
0 0
0 0
0 0
0 0
0 0
0 0
0 0
0 0
0 0
0 0
0 0
0 0
0 0
0 0
0 0
0 0
0 0
0 0
0 0
0 0
0 0
0 0
0 0
0 0
0 0
0 0
0 0
0 0
0 0
0 0
0 0
0 0
0 0
0 0
0 0
0 0
0 0
0 0
0 0
0 0
0 0
0 0
0 0
0 0
0 0
0 0
0 0
0 0
0 0
0 0
0 0
0 0
0 0
0 0
0 0
0 0
0 0
0 0
0 0
0 0
0 0
0 0
0 0
0 0
0 0
0 0
0 0
0 0
0 0
0 0
0 0
0 0
0 0
0 0
0 0
0 0
0 0
0 0
1 0
1 0
1 0
1 0
1 0
1 0
1 0
1 0
1 0
1 0
4 0
4 0
4 0
4 0
4 0
4 0
4 0
4 0
4 0
4 0
4 0
4 0
4 0
4 0
4 0
4 0
4 0
4 0
4 0
4 0
4 0
4 0
4 0
4 0
5 0
7 0
7 0
8 0
8 0
8 0
8 0
8 0
8 0
8 0
8 0
8 0
8 0
9 0
9 0
9 0
9 0
9 0
9 0
9 0
9 0
9 0
9 0
9 0
9 0
9 0
9 0
9 0
9 0
9 0
9 0
9 0
9 0
9 0
9 0
9 0
9 0
9 0
10 0
10 0
10 0
10 0
10 0
10 0
10 0
10 0
10 0
10 0
10 0
10 0
10 0
10 0
10 0
10 0
10 0
10 0
10 0
10 0
10 0
10 0
10 0
10 0
10 0
10 0
10 0
10 0
9 0
9 0
9 0
9 0
9 0
9 0
9 0
9 0
9 0
9 0
6 0
6 0
6 0
6 0
6 0
7 0
7 0
7 0
7 0
7 0
7 0
7 0
7 0
7 0
7 0
7 0
7 0
7 0
7 0
7 0
7 0
7 0
6 0
6 0
6 0
4 0
4 0
3 0
3 0
3 0
3 0
3 0
3 0
3 0
3 0
3 0
3 0
2 0
2 0
2 0
2 0
2 0
2 0
2 0
2 0
2 0
2 0
2 0
2 0
2 0
2 0
2 0
2 0
2 0
2 0
3 0
3 0
3 0
3 0
3 0
3 0
3 0
2 0
2 0
2 0
2 0
2 0
2 0
2 0
2 0
2 0
2 0
2 0
2 0
2 0
2 0
2 0
2 0
2 0
2 0
2 0
2 0
2 0
2 0
2 0
2 0
2 0
2 0
2 0
2 0
2 0
2 0
2 0
2 0
2 0
2 0
2 0
2 0
2 0
2 0
2 0
2 0
2 0
2 0
2 0
1 0
1 0
1 0
1 0
1 0
1 0
1 0
1 0
1 0
1 0
1 0
1 0
1 0
1 0
1 0
1 0
1 0
1 0
1 0
1 0
1 0
1 0
1 0
1 0
1 0
1 0
1 0
1 0
1 0
1 0
1 0
1 0
1 0
1 0
1 0
1 0
1 0
1 0
1 0
1 0
1 0
1 0
1 0
1 0
1 0
1 0
1 0
1 0
1 0
1 0
0 0
0 0
0 0
0 0
0 0
0 0
0 0
0 0
0 0
0 0
0 0
0 0
0 0
0 0
0 0
0 0
0 0
0 0
0 0
0 0
0 0
0 0
0 0
0 0
0 0
0 0
0 0
0 0
0 0
0 0
0 0
0 0
0 0
0 0
0 0
0 0
0 0
0 0
0 0
0 0
0 0
0 0
0 0
0 0
0 0
0 0
0 0
0 0
0 0
0 0
0 0
0 0
0 0
0 0
0 0
0 0
0 0
0 0
0 0
0 0
0 0
0 0
0 0
0 0
0 0
0 0
0 0
0 0
0 0
0 0
0 0
0 0
0 0
0 0
0 0
0 0
0 0
0 0
0 0
0 0
0 0
0 0
0 0
0 0
0 0
0 0
0 0
0 0
0 0
0 0
0 0
0 0
0 0
0 0
0 0
0 0
0 0
0 0
0 0
0 0
0 0
0 0
0 0
0 0
0 0
0 0
0 0
0 0
0 0
0 0
0 0
0 0
0 0
0 0
0 0
0 0
0 0
0 0
0 0
0 0
0 0
0 0
0 0
0 0
0 0
0 0
0 0
0 0
0 0
0 0
0 0
0 0
0 0
0 0
0 0
0 0
0 0
0 0
0 0
0 0
0 0
0 0
0 0
0 0
0 0
0 0
0 0
0 0
0 0
0 0
0 0
0 0
0 0
0 0
0 0
0 0
0 0
0 0
0 0
0 0
0 0
0 0
0 0
0 0
0 0
0 0
0 0
0 0
0 0
0 0
0 0
0 0
0 0
0 0
0 0
0 0
0 0
0 0
0 0
0 0
0 0
0 0
0 0
0 0
0 0
0 0
0 0
0 0
0 0
0 0
0 0
0 0
0 0
0 0
0 0
0 0
0 0
0 0
0 0
0 0
0 0
0 0
0 0
0 0
0 0
0 0
0 0
0 0
0 0
0 0
0 0
0 0
0 0
0 0
0 0
0 0
0 0
0 0
0 0
0 0
0 0
0 0
0 0
0 0
0 0
0 0
0 0
0 0
0 0
0 0
0 0
0 0
0 0
0 0
0 0
0 0
0 0
0 0
0 0
0 0
0 0
0 0
0 0
0 0
0 0
0 0
0 0
0 0
0 0
0 0
0 0
0 0
0 0
0 0
0 0
0 0
0 0
0 0
0 0
0 0
0 0
0 0
0 0
0 0
0 0
0 0
0 0
0 0
0 0
0 0
0 0
0 0
0 0
0 0
0 0
0 0
0 0
0 0
0 0
0 0
0 0
0 0
0 0
0 0
0 0
0 0
0 0
0 0
0 0
0 0
0 0
0 0
0 0
0 0
0 0
0 0
0 0
0 0
0 0
0 0
0 0
0 0
0 0
0 0
0 0
0 0
0 0
0 0
0 0
0 0
0 0
0 0
0 0
0 0
0 0
0 0
0 0
0 0
0 0
0 0
0 0
0 0
0 0
0 0
0 0
0 0
0 0
0 0
0 0
0 0
0 0
0 0
0 0
0 0
0 0
0 0
0 0
0 0
0 0
0 0
0 0
0 0
0 0
0 0
0 0
0 0
0 0
0 0
0 0
0 0
0 0
0 0
0 0
0 0
0 0
0 0
0 0
0 0
0 0
0 0
0 0
0 0
0 0
0 0
0 0
0 0
0 0
0 0
0 0
0 0
0 0
0 0
0 0
0 0
0 0
0 0
0 0
0 0
0 0
0 0
0 0
0 0
0 0
0 0
0 0
0 0
0 0
0 0
0 0
0 0
0 0
0 0
0 0
0 0
0 0
0 0
0 0
0 0
0 0
0 0
0 0
0 0
0 0
0 0
0 0
0 0
0 0
0 0
0 0
0 0
0 0
0 0
0 0
0 0
0 0
0 0
0 0
0 0
0 0
0 0
0 0
0 0
0 0
0 0
0 0
0 0
0 0
0 0
0 0
0 0
0 0
0 0
0 0
0 0
0 0
0 0
0 0
0 0
0 0
0 0
0 0
0 0
0 0
0 0
0 0
0 0
0 0
0 0
0 0
0 0
0 0
0 0
0 0
0 0
0 0
0 0
0 0
0 0
0 0
0 0
0 0
0 0
0 0
0 0
0 0
0 0
0 0
0 0
0 0
0 0
0 0
0 0
0 0
0 0
0 0
0 0
0 0
0 0
0 0
0 0
0 0
0 0
0 0
0 0
0 0
0 0
0 0
0 0
0 0
0 0
0 0
0 0
0 0
0 0
0 0
0 0
0 0
0 0
0 0
0 0
0 0
0 0
0 0
0 0
0 0
0 0
0 0
0 0
0 0
0 0
0 0
0 0
0 0
0 0
0 0
0 0
0 0
0 0
0 0
0 0
0 0
0 0
0 0
0 0
0 0
0 0
0 0
0 0
0 0
0 0
0 0
0 0
0 0
0 0
0 0
0 0
0 0
0 0
0 0
0 0
0 0
0 0
0 0
0 0
0 0
0 0
0 0
0 0
0 0
0 0
0 0
0 0
0 0
0 0
0 0
0 0
0 0
0 0
0 0
0 0
0 0
0 0
0 0
0 0
0 0
0 0
0 0
0 0
0 0
0 0
0 0
0 0
0 0
0 0
0 0
0 0
0 0
0 0
0 0
0 0
0 0
0 0
0 0
0 0
0 0
0 0
0 0
0 0
0 0
0 0
0 0
0 0
0 0
0 0
0 0
0 0
0 0
0 0
0 0
0 0
0 0
0 0
0 0
0 0
0 0
0 0
0 0
0 0
0 0
0 0
0 0
0 0
0 0
0 0
0 0
0 0
0 0
0 0
0 0
0 0
0 0
0 0
0 0
0 0
0 0
0 0
0 0
0 0
0 0
0 0
0 0
0 0
0 0
0 0
0 0
0 0
0 0
0 0
0 0
0 0
0 0
0 0
0 0
0 0
0 0
0 0
0 0
0 0
0 0
0 0
0 0
0 0
0 0
0 0
0 0
0 0
0 0
0 0
0 0
0 0
0 0
0 0
0 0
0 0
0 0
0 0
0 0
0 0
0 0
0 0
0 0
0 0
0 0
0 0
0 0
0 0
0 0
0 0
0 0
0 0
0 0
0 0
0 0
0 0
0 0
0 0
0 0
0 0
0 0
0 0
0 0
0 0
0 0
0 0
0 0
0 0
0 0
0 0
0 0
0 0
0 0
2 0
2 0
2 0
2 0
2 0
2 0
2 0
2 0
2 0
2 0
2 0
2 0
2 0
2 0
2 0
2 0
2 0
2 0
2 0
2 0
2 0
2 0
2 0
2 0
2 1
2 1
2 4
2 4
2 4
2 4
2 4
2 4
2 4
2 4
2 4
2 4
2 4
2 4
2 4
2 4
2 4
2 4
2 4
2 4
2 4
2 4
2 4
2 4
2 4
2 4
2 4
2 4
2 4
2 4
2 4
2 5
2 21
2 29
3 122
3 131
3 134
3 151
3 152
3 154
3 155
3 155
3 156
3 156
3 157
3 157
3 157
3 157
3 157
3 158
3 162
3 162
3 162
3 162
3 162
3 162
3 162
3 162
3 166
3 167
3 169
3 171
3 176
3 178
2 180
1 182
1 195
1 196
1 202
1 208
1 218
1 218
1 219
1 219
1 219
1 219
1 219
1 220
2 221
2 221
2 222
2 222
2 222
2 224
2 225
2 227
2 229
2 230
2 230
2 229
2 228
2 228
2 228
2 227
2 230
2 230
2 231
2 231
2 230
2 228
2 227
2 223
2 223
2 223
2 223
2 223
2 223
2 224
2 224
2 224
2 224
2 223
2 223
2 220
2 220
2 220
2 219
2 219
2 219
2 219
2 219
2 218
2 216
2 213
2 214
2 214
2 215
2 215
2 216
2 217
2 219
2 218
2 205
2 192
1 105
1 97
1 98
1 97
1 97
1 97
1 97
1 97
1 97
1 99
1 98
1 99
1 99
1 99
1 100
1 98
1 94
1 94
1 97
1 97
1 97
1 97
1 98
1 95
1 93
1 90
1 89
1 90
1 86
1 85
1 83
1 79
1 69
1 70
1 66
1 62
1 66
1 69
1 72
1 76
1 79
1 82
1 83
1 85
0 87
0 87
0 86
0 86
0 86
0 83
0 81
0 81
0 79
0 79
0 79
0 79
0 79
0 79
0 79
0 80
0 77
0 84
0 89
0 88
0 88
0 91
0 91
0 91
0 91
0 91
0 91
0 91
0 92
0 91
0 91
0 91
0 91
0 91
0 91
0 91
0 91
0 91
0 91
0 91
0 91
0 92
0 92
0 92
0 92
0 92
0 93
0 92
0 91
0 91
0 91
0 88
0 86
0 83
0 83
0 83
0 83
0 83
0 82
0 82
0 83
0 82
0 84
0 85
0 84
0 82
0 82
0 81
0 81
0 80
0 79
0 79
0 79
0 79
0 77
0 77
0 77
0 77
0 76
0 76
0 76
0 76
0 77
0 75
0 76
0 76
0 77
0 76
0 74
0 74
0 74
0 75
0 65
0 62
0 57
0 52
0 46
0 43
0 43
0 41
0 41
0 41
0 41
0 41
0 40
0 40
0 40
0 40
0 40
0 41
0 48
0 48
0 53
0 53
0 53
0 54
0 55
0 48
0 42
0 41
0 39
0 39
0 39
0 41
0 50
1 50
1 50
1 51
1 50
1 50
1 51
1 51
3 51
3 51
3 52
4 56
5 56
6 58
8 58
9 73
9 72
9 77
10 78
12 103
12 178
12 205
12 226
12 239
12 246
12 284
12 311
12 315
12 322
12 333
12 339
12 352
12 371
12 378
12 379
12 380
12 381
12 382
12 384
12 384
12 386
12 386
12 388
12 388
12 388
12 388
12 389
12 390
12 390
12 390
12 391
12 395
12 395
12 395
12 395
12 395
12 395
12 395
12 392
12 394
12 394
12 394
12 394
12 395
12 389
12 391
12 393
12 395
12 411
12 411
12 411
12 411
12 411
12 416
12 417
12 422
12 423
12 425
12 425
12 425
13 425
13 426
13 442
13 443
13 443
13 446
12 434
11 434
11 419
12 419
12 419
12 419
12 417
12 417
12 417
12 417
11 417
11 417
9 415
6 419
5 412
3 408
2 408
2 409
2 409
2 408
2 437
2 441
2 451
2 453
2 452
2 449
2 449
2 449
2 446
2 427
2 424
2 422
2 421
2 375
2 247
2 222
2 223
2 223
2 228
2 226
2 224
2 218
2 212
2 198
2 191
2 172
2 151
2 150
2 150
2 150
2 150
2 148
2 147
2 148
2 147
2 147
2 147
2 148
2 148
2 148
2 147
2 147
1 147
1 147
1 143
1 142
1 142
1 142
1 142
1 143
3 176
3 179
3 181
3 185
3 186
4 192
4 193
4 193
4 195
4 195
4 196
4 196
4 182
4 184
4 189
4 194
4 192
4 188
4 186
4 182
4 182
4 182
4 186
4 195
5 197
5 197
5 177
5 177
5 176
5 173
5 172
5 172
4 172
4 172
4 172
4 172
4 173
4 174
4 176
4 178
4 178
4 180
4 182
4 177
4 177
4 177
4 176
4 175
4 176
4 175
4 141
4 140
4 127
4 126
4 126
4 126
4 126
4 127
4 127
4 127
4 127
4 128
4 128
5 129
5 128
6 127
6 131
6 131
6 127
6 127
6 127
6 128
6 128
6 130
6 155
6 159
6 163
6 165
6 164
6 166
6 167
6 167
6 166
6 165
6 165
6 165
6 165
6 163
6 163
6 163
6 163
6 163
6 163
6 163
6 162
5 158
5 158
5 158
5 155
5 149
4 110
4 109
3 108
3 110
3 110
3 110
3 111
3 111
3 110
3 110
3 105
3 102
3 98
3 96
3 90
3 85
3 85
3 85
3 85
3 85
3 85
3 84
3 78
3 73
2 72
2 72
2 72
2 72
2 74
2 74
2 74
2 74
2 74
2 74
2 74
2 74
2 73
2 71
2 68
2 68
2 69
2 66
2 67
2 66
2 69
2 69
2 69
2 70
2 69
2 70
2 71
2 71
2 71
2 71
2 72
2 72
2 72
2 85
5 91
6 102
6 107
6 107
6 107
5 108
5 106
4 105
4 102
5 103
5 100
5 100
5 99
5 98
5 98
5 96
6 71
6 66
6 64
6 64
6 64
6 62
6 62
6 62
6 62
6 62
6 62
6 62
6 62
6 62
6 62
6 62
6 62
6 62
6 62
6 62
6 62
6 62
6 62
6 62
6 62
6 62
7 64
7 67
7 66
7 63
7 63
7 63
7 63
7 63
7 63
7 63
7 63
7 64
7 64
7 64
7 66
8 72
9 76
10 79
10 80
10 81
10 81
10 81
10 81
10 81
10 81
10 81
10 81
10 82
11 87
11 87
11 89
11 118
11 127
13 197
14 204
15 220
15 226
15 233
15 235
15 235
15 234
15 233
16 233
16 233
16 227
16 227
16 226
16 225
16 225
16 226
16 224
16 224
16 225
16 224
14 223
14 222
13 218
13 206
12 196
11 194
11 191
10 191
10 191
10 190
10 190
10 189
10 191
10 191
10 192
10 192
10 192
10 191
10 191
10 191
10 191
10 192
10 192
10 191
10 191
10 195
10 197
10 198
10 201
11 202
11 202
11 204
11 205
11 205
11 204
11 204
11 204
11 205
11 205
11 204
11 204
11 204
11 203
11 202
11 202
11 202
10 201
10 198
10 198
10 198
10 198
10 199
10 199
10 199
10 199
10 199
10 199
10 198
10 197
10 199
8 202
12 193
18 223
18 221
18 224
18 232
18 241
20 241
20 248
20 250
20 250
20 251
20 245
20 242
19 208
19 177
18 177
18 178
18 178
16 131
16 121
16 115
16 113
16 112
16 111
16 111
15 111
15 111
15 111
15 111
15 111
16 119
16 133
16 133
16 136
16 135
17 136
17 139
17 139
17 142
18 143
18 144
18 145
19 149
19 149
19 149
19 149
19 150
20 150
20 151
20 151
20 152
20 149
20 151
20 151
20 152
20 163
25 273
26 290
26 304
28 336
28 345
28 348
27 354
28 364
28 359
28 361
28 362
28 368
33 377
33 378
33 379
33 380
33 381
33 381
33 381
33 383
33 384
33 387
33 388
33 388
33 388
33 389
33 389
33 389
33 389
33 389
33 389
33 389
33 389
33 389
33 388
33 388
33 388
33 392
33 393
35 403
35 405
35 405
35 398
34 398
30 400
22 359
21 355
21 350
21 347
21 344
20 344
20 337
20 335
20 338
20 342
19 343
19 342
19 341
19 342
19 343
19 343
18 338
18 340
18 339
18 340
18 341
18 340
18 340
18 340
18 343
18 347
18 358
18 360
18 360
17 354
17 342
16 342
16 338
16 338
16 340
16 339
16 343
16 342
16 342
16 342
16 346
16 346
16 348
16 347
16 344
16 343
16 347
16 350
16 353
17 352
17 353
18 357
18 357
18 357
22 346
16 211
16 205
14 192
14 193
14 200
13 198
14 197
14 186
14 184
13 182
13 179
13 174
9 163
9 163
9 164
9 163
9 165
9 167
9 168
9 166
9 168
9 164
9 164
9 164
9 164
9 164
9 164
9 165
9 164
9 166
9 166
9 166
9 166
9 166
8 167
7 167
7 166
7 163
7 160
7 152
7 152
7 152
7 151
7 158
7 155
7 155
7 155
7 155
7 168
7 169
7 170
7 169
7 171
7 165
7 163
7 164
7 164
7 165
7 165
7 162
7 162
7 164
7 169
8 175
8 177
8 186
8 191
8 191
8 193
9 191
9 188
9 178
9 175
9 173
9 171
9 170
9 169
10 168
10 170
10 170
10 170
10 162
10 161
10 162
10 160
10 157
10 153
10 156
10 156
10 154
10 150
9 141
9 162
8 157
7 154
7 160
6 155
8 167
8 169
5 160
5 156
5 155
6 152
6 150
7 143
7 143
7 142
7 142
7 142
7 141
7 142
7 142
7 141
7 140
7 138
7 138
7 136
7 132
7 132
7 131
7 131
7 131
7 130
7 130
7 130
7 130
7 130
7 130
7 129
7 128
7 128
7 128
7 128
7 128
7 128
7 128
7 128
7 128
7 128
7 127
7 125
7 118
7 111
7 105
7 102
7 64
7 62
7 44
7 41
7 40
7 37
7 36
7 34
7 33
7 32
7 17
7 17
7 14
7 8
7 8
7 8
6 7
6 5
6 5
6 5
6 5
7 4
7 4
7 4
6 4
6 4
6 4
6 4
6 4
6 4
6 4
6 4
5 4
5 4
5 4
5 4
5 4
5 4
5 4
5 4
5 4
5 4
5 4
5 4
5 4
5 4
4 5
5 5
5 5
5 4
4 4
4 4
4 5
4 5
4 5
4 5
4 5
2 5
2 5
2 5
2 5
2 5
2 4
2 4
2 4
2 4
2 4
2 4
2 4
2 4
2 4
2 4
2 4
2 4
2 4
2 4
2 4
2 4
2 4
2 4
2 4
2 4
2 4
2 4
2 4
2 4
2 4
2 4
2 4
2 4
2 4
2 4
2 4
2 4
2 4
2 4
2 4
2 4
2 4
2 4
2 2
2 2
2 2
2 2
2 2
2 2
2 2
2 2
2 2
2 2
2 2
2 2
2 2
2 2
2 2
2 2
2 2
2 2
2 2
2 2
2 2
1 2
1 2
1 2
1 2
1 2
1 2
1 2
1 2
1 2
1 2
1 2
1 2
1 2
1 2
1 2
1 2
1 2
1 2
1 2
1 2
1 2
1 2
1 2
1 2
1 2
1 1
0 1
0 1
0 1
0 1
0 0
0 0
0 0
0 0
0 0
0 0
0 0
0 0
0 0
0 0
0 0
0 0
0 0
0 0
0 0
0 0
0 0
0 0
0 0
0 0
0 0
0 0
0 0
0 0
0 0
0 0
0 0
0 0
0 0
0 0
0 0
0 0
0 0
0 0
0 1
0 1
0 2
0 8
0 8
0 8
0 9
0 10
0 11
0 11
0 11
0 11
0 11
0 14
0 14
0 15
0 18
0 18
0 18
0 18
0 18
0 18
0 18
0 19
0 19
0 19
0 19
0 19
0 19
0 19
0 19
0 19
0 19
0 19
0 19
0 19
0 19
0 19
0 19
0 19
0 20
0 20
0 23
0 24
0 24
0 25
0 25
0 25
0 25
0 25
0 25
0 25
0 25
0 26
0 26
0 27
0 27
0 27
0 27
0 28
0 29
1 36
1 37
1 41
1 42
1 43
1 44
1 44
1 44
1 44
1 44
1 44
1 44
1 44
1 44
1 44
1 44
1 44
1 44
1 44
1 48
1 48
1 48
1 48
1 48
1 49
1 50
1 51
1 51
1 51
1 52
1 53
1 53
2 52
2 52
2 52
2 52
2 52
2 52
2 52
2 50
3 49
3 36
3 37
5 39
5 39
5 39
5 38
4 38
4 38
5 38
5 39
5 40
5 40
6 40
6 39
6 39
6 39
6 39
6 40
6 40
6 40
6 40
6 40
6 40
6 40
6 40
6 40
6 41
6 41
7 41
7 41
7 44
7 44
8 44
8 45
8 49
8 49
8 49
8 48
8 49
8 49
8 45
8 46
8 45
8 45
8 44
8 44
8 42
8 43
8 43
8 43
8 43
8 39
8 38
9 38
9 40
12 66
13 67
15 86
15 87
15 85
15 85
15 85
15 84
15 83
15 83
15 83
15 83
15 85
15 85
15 85
15 86
15 86
15 86
15 86
23 103
23 103
23 105
23 105
23 104
23 105
23 106
23 106
23 106
23 103
23 102
23 101
23 101
23 103
25 103
25 103
25 103
25 103
25 103
25 103
25 103
25 103
25 103
25 103
25 102
24 102
24 102
23 102
22 100
22 100
22 100
22 100
22 100
27 109
26 110
26 110
26 109
25 109
25 110
25 110
25 110
25 110
25 111
25 110
25 109
25 111
25 112
25 112
25 113
25 113
25 115
25 145
25 147
25 160
24 160
24 162
23 161
23 161
23 161
23 160
23 162
23 162
23 163
23 162
23 162
23 160
23 159
23 159
23 159
23 160
23 160
23 160
23 160
23 161
23 162
23 162
23 163
23 163
22 161
22 161
21 159
15 119
15 115
15 127
15 128
15 128
15 129
15 129
15 129
15 128
15 128
15 128
15 128
15 126
15 126
15 125
15 125
15 125
15 125
13 125
6 103
5 108
5 109
5 110
5 110
5 110
5 110
5 110
5 110
5 110
5 110
5 110
5 110
5 108
5 108
5 108
5 108
5 108
5 108
5 108
5 108
5 108
5 108
5 108
5 108
5 108
5 108
5 108
5 109
5 110
4 110
4 113
4 113
0 103
0 103
0 102
0 102
0 102
0 102
0 103
0 107
0 107
0 105
0 106
0 106
0 104
0 104
1 102
1 103
1 103
1 99
1 60
1 57
1 56
1 56
1 55
1 54
1 53
1 53
1 53
1 48
1 47
1 46
1 46
1 44
1 45
1 45
1 45
1 47
1 47
1 47
1 45
1 43
1 42
1 42
1 42
1 41
1 42
1 44
1 44
2 48
2 48
2 47
2 34
2 37
2 39
2 41
2 42
2 42
2 42
2 43
2 43
2 44
2 45
2 45
2 45
2 46
2 49
2 49
2 51
2 51
2 54
2 55
2 56
2 56
2 55
2 56
2 56
2 56
2 58
2 58
2 58
2 58
2 58
2 58
2 59
2 59
2 59
2 59
2 59
2 59
2 60
2 64
2 62
2 62
2 62
2 63
2 63
2 64
2 68
2 74
2 76
2 80
2 80
2 82
2 82
2 82
2 84
2 85
2 84
2 80
2 81
2 81
2 80
2 80
2 80
2 80
1 80
1 80
1 80
1 80
1 80
1 80
1 80
1 80
1 80
1 80
1 80
1 80
1 80
1 80
1 80
1 81
1 82
1 82
1 81
1 83
1 83
1 81
1 81
1 81
1 81
1 81
1 82
1 82
1 82
1 82
1 80
1 79
1 79
0 74
0 74
0 74
0 70
0 66
0 63
1 72
1 71
1 74
1 94
1 98
1 101
2 104
2 104
2 103
2 105
2 105
2 103
2 105
2 105
2 106
2 97
2 100
2 98
2 95
2 95
2 95
2 95
2 95
2 94
2 94
2 96
2 96
2 96
2 96
2 95
2 95
2 94
2 95
2 95
2 95
2 93
2 92
2 92
3 94
3 96
3 94
3 93
3 90
3 88
3 81
3 79
3 79
3 78
3 78
3 77
3 76
3 76
3 76
3 78
3 79
3 79
3 79
3 79
3 79
3 79
3 79
3 79
3 78
3 78
3 78
3 78
3 78
3 79
3 80
3 80
3 81
3 81
3 80
3 88
3 91
3 93
3 96
3 97
3 97
3 99
3 99
3 110
3 118
3 121
3 124
3 124
3 124
3 123
3 123
3 123
4 124
4 124
4 124
4 123
4 123
4 123
4 123
4 123
4 123
4 123
2 99
2 90
2 84
2 83
2 83
2 84
2 84
2 84
2 83
2 81
2 81
2 77
2 76
2 77
2 77
2 77
2 75
2 74
2 74
2 74
2 73
2 74
2 74
2 74
2 73
2 73
2 76
2 77
2 78
2 78
2 76
2 76
2 76
2 76
2 76
2 75
2 76
2 76
1 74
1 75
1 76
1 69
1 69
1 69
1 69
2 69
2 71
3 71
3 71
3 70
3 70
3 71
3 72
3 72
3 72
3 72
3 72
3 72
3 72
3 72
3 72
3 72
3 73
3 72
3 72
3 72
3 72
3 72
3 71
2 71
2 70
2 70
2 70
2 61
2 56
2 55
2 53
2 54
2 54
2 52
2 50
2 35
2 25
2 25
2 25
2 26
2 27
2 27
2 27
2 27
2 26
2 26
2 26
2 26
2 28
2 32
2 35
2 35
2 38
2 40
2 40
2 42
2 44
2 44
2 46
2 48
2 50
2 50
2 50
2 50
2 50
2 50
2 50
2 52
2 52
2 51
2 51
2 51
2 51
2 51
2 51
2 51
2 51
2 51
2 51
2 47
2 48
2 47
2 47
2 50
2 51
2 51
2 51
2 51
2 52
2 50
2 50
2 50
2 48
2 46
2 46
2 46
2 46
2 46
2 45
1 45
1 44
0 44
0 44
0 44
0 44
0 42
0 42
0 42
1 42
1 42
1 42
1 42
1 42
1 42
1 42
1 42
1 41
1 41
1 41
1 41
1 41
1 40
1 40
1 40
1 40
1 40
1 40
1 39
1 39
1 38
1 38
1 37
1 37
1 37
1 36
1 36
1 35
1 35
1 34
2 33
2 32
2 32
2 32
2 32
2 32
2 32
2 32
2 32
2 30
2 25
2 18
2 19
2 19
2 23
2 29
2 28
2 28
2 27
2 25
2 25
2 25
2 25
3 27
3 27
3 27
3 27
3 28
3 26
3 26
3 26
3 26
3 27
3 27
3 27
4 31
4 31
5 34
5 33
5 34
5 34
5 34
5 34
5 32
5 31
5 30
5 30
5 30
5 32
6 36
6 38
6 38
6 39
6 41
6 43
6 44
6 44
6 44
6 44
6 44
5 45
5 45
5 47
5 47
5 48
5 48
5 48
5 49
5 49
5 49
5 49
5 49
5 50
5 52
5 52
5 52
5 52
5 52
5 52
5 52
5 52
5 52
5 53
5 53
5 53
5 53
5 53
5 53
6 54
6 54
6 54
6 54
6 59
7 60
7 61
7 61
7 62
7 62
6 62
6 62
6 62
6 62
6 62
6 62
6 63
6 64
6 64
6 64
6 64
6 65
6 67
6 68
6 68
6 67
6 63
6 58
6 57
6 58
6 58
6 58
6 57
7 57
7 58
6 56
6 58
6 58
6 58
6 57
6 57
6 57
6 57
6 58
6 57
6 57
6 56
5 51
5 51
4 47
4 47
4 47
4 47
4 47
4 47
4 47
4 47
4 47
4 45
4 44
4 42
3 39
3 38
3 38
3 37
3 38
3 39
3 40
3 40
3 39
3 39
3 39
3 39
3 37
3 37
3 37
3 37
3 37
3 37
3 37
3 37
3 37
3 37
3 37
3 36
3 35
3 36
3 38
3 38
3 38
3 38
3 38
3 38
3 39
3 38
3 40
3 42
3 42
3 42
2 42
2 42
2 42
2 42
2 42
2 36
1 35
1 36
1 36
1 36
1 36
1 36
1 36
1 36
1 36
1 36
1 36
1 35
1 34
1 34
1 34
1 33
1 34
1 29
1 27
2 28
2 30
2 30
3 33
3 32
3 32
3 33
3 33
3 32
2 32
2 33
2 33
2 31
2 31
2 31
2 31
2 31
2 31
2 31
2 30
2 30
2 30
2 30
2 30
2 30
2 31
3 33
3 33
3 33
3 33
3 33
3 33
3 33
3 33
3 33
3 33
3 33
3 33
3 32
3 31
3 31
3 31
3 28
3 26
3 26
3 26
3 26
3 26
3 26
3 26
3 26
3 28
3 28
3 29
3 29
3 30
3 30
3 30
3 30
3 30
3 30
3 29
3 29
3 30
3 30
3 31
3 33
3 33
3 31
3 29
3 29
3 29
3 28
3 29
3 29
3 29
3 29
3 31
3 31
3 31
3 31
3 31
3 29
3 29
3 29
3 29
3 29
3 29
3 29
3 29
3 29
3 29
3 29
3 29
3 29
3 29
3 35
1 34
1 37
1 38
1 36
1 33
1 33
1 31
1 31
1 30
1 30
1 30
1 30
1 30
1 29
1 29
1 30
1 30
1 30
1 30
1 30
1 30
1 30
1 30
1 30
1 30
1 31
1 31
1 31
1 31
0 30
0 30
0 30
0 32
0 33
0 34
0 35
0 35
0 36
0 36
0 36
0 36
0 36
0 36
0 37
0 38
1 43
1 49
1 51
1 56
1 59
1 59
1 62
1 64
1 64
1 62
1 62
1 62
1 64
1 63
1 65
1 65
1 65
1 65
1 65
1 65
1 63
1 60
1 61
1 71
2 71
2 71
2 72
2 72
2 72
2 72
2 72
2 71
2 71
2 72
2 72
2 70
2 71
2 71
2 71
3 71
3 71
3 71
3 71
3 71
3 72
3 72
3 73
3 73
3 73
3 73
3 72
3 73
3 73
3 73
3 67
3 64
3 62
3 61
3 62
3 62
3 62
3 62
3 62
3 62
3 62
3 62
3 61
3 61
3 61
3 62
3 62
3 62
3 62
3 62
3 62
3 62
3 62
3 62
3 62
3 61
3 61
3 61
3 61
3 61
3 61
3 61
3 61
3 58
3 56
3 56
3 56
3 56
3 55
3 55
3 55
3 55
3 55
3 54
3 52
5 56
5 53
5 50
5 49
5 45
5 45
5 45
5 44
5 44
5 44
5 44
5 43
5 41
5 39
5 39
5 38
5 38
6 38
6 38
6 38
6 39
6 38
6 38
6 38
5 26
5 26
5 26
5 26
5 26
5 27
5 27
5 27
5 27
5 27
5 26
4 26
4 26
4 25
4 25
4 25
4 25
4 25
4 25
4 25
4 24
4 24
4 24
4 25
4 26
4 26
4 27
4 34
4 33
4 34
4 34
4 36
4 37
4 43
4 43
4 44
4 44
4 45
4 45
4 45
4 45
4 45
4 45
4 45
4 44
4 45
4 46
4 46
4 46
4 46
4 49
4 49
4 50
4 50
4 50
4 50
4 50
4 50
4 51
4 51
4 51
4 51
4 52
3 52
3 52
3 52
3 53
3 53
3 53
3 53
3 53
3 53
3 54
3 55
3 55
3 55
1 39
1 38
1 38
1 38
1 38
1 38
1 38
1 38
1 38
1 38
1 38
1 38
1 38
1 38
1 38
1 38
1 41
0 41
0 41
0 41
0 40
0 40
0 40
0 40
0 40
0 40
0 41
0 41
0 42
0 41
0 55
0 55
0 56
0 56
0 55
0 54
0 54
0 54
0 54
0 54
0 54
0 54
0 54
0 54
0 54
0 54
0 54
0 55
0 56
0 58
0 56
0 48
0 48
0 49
0 50
0 48
0 44
0 41
0 40
0 40
0 40
0 39
0 39
0 39
0 39
0 39
0 39
0 39
0 39
0 38
0 37
0 40
0 42
0 42
0 39
0 40
0 42
0 46
0 52
0 57
0 57
0 58
0 59
0 60
0 62
0 62
0 61
0 61
0 63
0 64
0 63
0 63
0 63
0 63
0 64
0 63
0 63
0 63
0 63
0 63
0 63
0 63
0 63
0 63
0 64
0 64
0 64
0 64
0 64
0 65
0 65
0 65
0 65
0 65
0 65
0 65
0 62
0 62
0 62
0 62
0 62
0 62
0 63
0 63
0 63
0 63
0 62
0 62
0 61
0 61
0 45
0 45
0 45
0 45
0 46
0 46
0 48
0 49
0 49
0 49
0 48
0 48
0 48
0 48
0 47
0 47
0 47
0 47
0 47
0 47
0 47
0 47
0 47
0 46
0 45
0 45
0 45
0 46
0 46
0 46
0 46
0 46
0 46
0 45
0 44
0 44
0 45
0 45
0 45
0 46
0 45
0 41
0 39
0 37
0 32
0 31
0 28
0 26
0 22
0 21
0 22
0 23
0 22
0 23
0 22
0 22
0 22
0 21
0 20
0 19
0 19
0 19
0 19
0 18
0 18
0 18
0 18
0 18
0 18
2 18
2 18
2 18
3 18
3 18
3 17
3 17
3 17
3 17
3 17
3 17
3 17
3 17
3 17
3 17
3 17
3 17
3 17
3 17
3 17
3 17
3 17
3 17
3 16
3 16
3 16
3 16
3 16
3 16
3 16
3 16
3 16
3 16
3 16
3 16
3 14
3 12
3 11
3 11
3 11
3 11
3 11
3 11
4 12
5 12
5 12
5 10
5 9
5 9
5 12
5 12
5 12
5 12
5 12
5 12
5 12
5 12
5 13
5 13
5 13
5 13
5 13
5 13
5 13
5 13
5 13
5 13
5 11
5 11
5 11
5 11
5 11
5 10
5 10
5 10
5 10
5 10
5 12
5 12
5 11
5 12
5 13
5 12
5 12
5 12
5 13
5 15
5 16
5 19
5 22
5 22
5 22
5 22
5 22
5 22
4 22
4 22
3 22
3 22
3 22
3 22
3 22
3 22
2 22
2 22
2 22
2 22
2 24
2 25
2 27
2 26
2 27
1 27
1 27
0 26
0 26
0 26
0 26
0 26
0 26
0 26
0 27
0 27
0 27
0 27
0 28
0 29
0 29
0 29
0 29
0 29
0 27
0 27
0 27
0 27
0 27
0 27
0 27
0 27
0 27
0 28
0 27
0 29
0 30
0 30
0 30
0 30
0 31
0 31
0 31
0 31
0 31
0 31
0 32
0 32
0 32
0 32
0 32
0 32
0 32
0 32
0 32
0 32
0 32
0 32
0 33
0 33
0 33
0 32
0 32
0 32
0 34
0 34
0 34
0 34
0 34
0 35
0 33
0 32
0 32
0 31
0 31
0 28
0 27
0 25
0 21
0 20
0 20
0 20
0 21
0 21
0 22
0 23
0 24
0 24
0 24
0 24
0 24
0 24
0 24
0 25
0 29
0 29
0 30
0 30
0 29
0 29
0 27
0 26
0 24
0 24
0 23
0 23
0 23
0 23
0 23
0 23
0 23
0 23
0 23
0 23
0 22
0 22
0 22
0 22
0 21
0 27
0 27
0 27
0 30
0 30
0 31
0 34
0 35
0 35
0 35
0 35
0 35
0 35
0 35
0 34
0 34
0 31
1 30
1 30
1 30
1 29
1 29
1 29
1 29
1 29
1 29
1 29
1 30
1 30
1 30
1 30
1 30
1 30
1 30
1 30
1 30
1 30
1 30
1 30
1 29
1 29
1 29
1 30
1 29
1 29
1 28
1 28
1 28
1 28
1 28
1 28
1 28
1 28
1 28
1 28
1 28
1 28
2 28
2 28
2 28
2 28
2 28
2 29
2 27
2 26
2 27
2 27
2 26
2 26
2 26
2 26
2 26
2 26
2 26
2 26
2 22
2 22
2 21
2 25
2 25
2 25
2 25
2 25
2 25
2 25
2 25
2 25
2 25
2 25
2 25
2 25
2 28
2 29
2 29
2 30
4 32
4 32
4 32
4 34
4 34
4 28
5 28
5 28
5 23
5 23
4 23
4 22
4 21
4 21
4 21
4 21
4 21
4 21
4 22
4 22
4 22
4 22
4 22
4 22
4 22
4 22
4 23
4 23
4 23
4 23
4 23
4 23
4 22
4 22
4 23
4 23
4 23
4 23
4 37
4 37
4 37
4 37
4 37
4 38
4 39
4 38
4 38
4 38
4 38
4 38
4 38
4 38
4 38
4 38
4 38
4 37
4 37
4 37
4 37
4 37
4 37
4 37
3 37
3 37
3 37
3 37
3 37
3 36
3 35
3 35
3 35
3 35
3 35
3 35
3 36
3 36
3 37
3 37
3 37
3 36
3 37
3 41
3 42
3 37
3 37
3 37
3 37
3 37
3 37
3 36
3 36
3 36
3 36
1 36
1 36
1 36
1 34
1 34
1 35
1 34
1 32
1 32
1 32
1 31
1 32
1 31
0 31
0 31
0 31
0 30
0 30
0 30
0 30
0 30
0 30
0 30
0 30
0 30
0 29
0 29
0 29
0 29
0 31
0 32
0 32
0 32
0 31
0 31
0 31
0 32
0 32
0 32
0 32
0 32
0 31
0 31
0 30
0 30
0 16
0 16
0 16
0 16
0 16
0 15
0 15
0 15
0 15
0 15
0 15
0 15
0 15
0 15
0 15
0 15
0 15
0 15
0 15
0 15
0 15
0 15
0 15
0 15
0 15
0 15
0 15
0 15
0 15
0 15
0 15
0 15
0 15
0 15
0 15
0 15
0 14
0 14
0 13
0 13
0 12
0 11
0 8
0 7
0 7
0 8
0 8
0 8
0 8
0 8
0 8
0 8
0 8
0 8
0 8
0 8
0 8
0 8
0 9
0 9
0 9
0 9
0 8
0 9
0 10
0 10
0 11
0 12
0 12
0 12
0 12
0 11
0 11
0 11
0 12
0 13
0 13
0 13
0 13
0 13
0 13
0 13
0 13
0 14
0 13
0 13
0 13
0 14
0 14
0 14
0 14
0 13
0 13
0 13
0 13
0 13
0 13
0 13
0 13
0 13
0 13
0 13
0 13
0 13
0 13
0 13
0 13
0 13
0 13
0 13
0 13
0 13
0 13
0 14
0 14
0 14
0 14
0 15
0 15
0 15
0 15
0 15
0 15
0 15
0 17
0 17
0 18
0 18
0 18
0 19
0 20
0 21
0 22
0 22
0 22
0 22
0 22
0 22
0 23
0 23
0 23
0 23
0 23
0 23
0 23
0 22
0 22
0 22
0 22
0 22
0 22
0 22
0 22
0 22
0 25
0 26
0 26
0 24
0 24
0 24
0 24
0 23
0 23
0 20
0 19
0 19
0 18
0 19
0 17
0 18
0 18
0 19
0 19
0 19
0 19
0 19
0 19
0 19
0 19
0 19
0 19
0 19
0 18
0 18
0 18
0 18
0 18
0 17
0 17
0 17
0 17
0 17
0 17
0 17
0 17
0 17
0 19
0 20
0 20
0 20
0 20
0 20
0 20
0 20
0 20
0 20
0 20
0 20
0 20
0 20
0 20
0 20
0 20
0 19
0 19
0 19
0 19
0 18
0 18
0 18
0 18
0 18
0 18
0 17
0 15
0 15
0 15
0 15
1 20
1 22
1 24
1 24
1 24
1 24
1 25
1 26
1 28
1 27
1 28
1 28
1 28
1 28
1 28
1 28
1 28
1 28
1 28
1 29
1 29
1 29
1 29
1 29
1 28
1 28
1 25
1 25
1 25
1 25
1 25
1 25
1 26
1 26
1 27
1 28
1 28
1 28
1 28
1 27
1 26
1 26
1 26
1 25
1 25
1 26
1 26
1 27
1 27
1 27
1 27
1 27
1 27
1 28
1 28
1 28
1 28
1 28
1 28
1 28
1 28
1 28
1 29
1 29
1 29
1 29
1 29
1 29
1 26
1 26
1 26
1 26
1 26
1 26
1 26
1 26
1 26
1 26
1 26
1 26
1 26
1 26
1 27
1 27
1 27
1 27
1 27
1 27
1 27
1 27
1 27
1 27
1 27
1 27
1 27
1 27
1 27
1 27
1 26
0 25
0 17
0 16
0 13
0 13
0 13
0 13
0 11
0 11
0 11
0 10
0 10
0 10
0 10
0 10
0 11
0 11
0 11
0 11
0 10
0 10
0 10
0 12
0 16
0 16
0 16
0 17
0 18
1 26
3 55
3 70
3 81
3 89
3 94
4 100
4 108
4 109
4 118
4 119
4 120
4 120
4 120
4 121
4 121
4 124
4 123
4 122
4 122
4 122
4 122
4 122
4 122
4 122
4 122
4 121
4 121
4 122
4 123
5 152
5 155
5 159
5 163
5 163
5 162
5 163
5 164
5 164
5 165
5 165
5 166
5 166
5 166
5 167
5 167
5 167
5 168
5 169
5 169
5 169
5 169
5 169
5 168
5 168
5 168
5 170
5 170
5 171
6 174
6 174
6 174
6 174
6 174
6 175
6 176
6 176
6 176
6 176
6 176
9 198
9 200
9 199
9 199
9 199
10 200
10 201
11 214
13 216
13 216
15 217
15 217
17 217
17 216
17 216
17 216
17 216
17 216
17 216
17 216
17 216
17 216
17 214
17 212
17 206
17 203
17 203
17 204
17 204
14 203
14 185
14 134
13 122
13 122
13 122
13 122
13 122
13 122
13 119
13 110
13 110
13 110
13 112
13 114
13 113
13 112
13 113
13 115
13 118
13 120
14 121
14 121
14 121
14 121
14 120
14 120
14 123
14 124
14 123
14 123
13 93
13 94
13 90
13 90
13 101
13 114
13 115
13 116
13 116
13 115
13 115
13 114
13 114
13 115
13 114
13 114
13 113
13 112
13 112
13 112
13 112
13 112
13 112
13 112
13 112
13 112
13 112
13 112
12 110
12 107
13 107
13 108
13 108
13 108
13 108
13 107
12 107
12 107
12 110
12 116
6 89
3 89
3 89
3 89
3 89
3 89
3 85
2 76
2 76
2 75
2 75
2 75
2 75
2 75
2 75
2 75
2 75
2 75
2 75
2 75
2 75
2 75
2 76
2 76
2 75
2 75
2 73
2 73
2 73
2 73
2 73
2 73
2 73
2 71
2 71
2 73
2 73
2 73
2 73
2 73
2 74
2 72
2 70
2 69
2 69
2 62
2 60
2 59
2 59
2 59
1 59
1 59
1 59
1 58
1 64
1 64
1 61
1 58
1 60
1 60
1 59
1 57
1 56
1 54
1 32
1 26
1 26
1 26
1 26
1 26
1 26
1 26
1 26
1 26
1 26
1 26
1 26
1 26
1 26
1 26
1 26
1 26
1 26
1 26
1 26
1 26
1 25
1 26
1 26
1 26
0 25
0 25
0 25
0 25
0 25
0 25
0 25
0 24
0 21
0 16
0 17
0 17
0 17
0 17
0 16
0 16
0 16
0 16
0 16
0 16
0 16
0 16
0 16
0 16
0 16
0 16
0 16
0 17
0 18
0 18
0 18
0 17
0 17
0 17
0 17
0 17
0 17
0 17
0 17
0 17
0 17
0 16
0 16
0 16
0 16
0 15
0 15
0 15
0 15
0 17
0 21
0 21
0 21
0 21
0 21
0 21
0 21
0 21
0 22
0 22
0 22
0 21
0 21
0 21
0 15
0 15
0 14
0 14
0 13
0 13
0 13
0 13
0 13
0 13
0 13
0 13
0 13
0 13
0 13
0 13
0 13
0 13
0 13
0 13
0 14
0 15
0 15
0 15
0 15
0 15
0 15
0 15
0 15
0 15
0 16
0 16
0 17
0 16
0 16
0 16
0 16
0 17
0 17
0 18
0 18
0 18
0 18
0 18
0 18
0 18
0 17
0 17
0 17
0 17
0 18
0 18
0 18
0 18
0 18
0 19
0 19
0 19
0 20
0 20
0 20
0 21
0 21
0 20
0 19
0 19
0 20
0 20
0 20
0 20
0 20
0 20
0 20
0 20
0 20
0 20
0 20
0 20
0 20
0 20
0 21
0 21
0 22
0 22
0 22
0 20
0 15
0 16
0 16
0 17
0 17
0 17
0 17
0 19
0 19
0 19
0 19
0 19
0 19
0 19
0 19
0 19
0 19
0 19
0 19
0 19
0 19
0 19
0 19
0 19
0 19
0 19
0 19
0 19
0 19
0 19
0 20
0 20
0 19
0 19
0 18
2 18
2 18
2 18
2 18
2 18
2 18
2 19
2 19
2 19
3 18
3 16
3 18
3 18
3 18
3 18
3 18
4 18
4 18
4 17
4 17
4 17
4 17
4 17
4 18
4 17
4 17
4 17
4 17
4 17
4 17
4 17
4 17
4 17
4 17
4 15
4 15
4 15
4 15
4 15
4 15
4 14
4 14
4 14
4 14
4 13
4 13
4 13
4 13
4 13
4 13
4 13
4 13
4 13
4 13
4 13
4 15
4 15
4 15
4 15
4 14
4 14
4 13
4 13
4 13
4 13
4 11
4 10
4 10
4 9
4 9
4 10
4 10
4 8
4 8
4 8
4 8
4 8
4 8
4 8
4 8
4 8
4 8
4 8
4 9
4 9
4 9
4 9
4 9
4 9
4 9
4 9
4 9
4 9
4 9
4 8
4 8
4 9
4 9
4 9
2 9
0 9
0 9
0 9
0 9
0 8
0 8
0 8
0 8
0 8
0 8
0 7
0 6
0 6
0 6
0 6
0 6
0 6
0 6
0 6
0 6
0 5
0 5
0 5
0 5
0 5
0 5
0 5
0 5
0 5
0 5
0 5
0 5
0 5
0 5
0 5
0 5
0 5
0 5
0 5
0 5
0 5
0 5
0 5
0 5
0 5
0 5
0 5
0 5
0 5
0 5
0 5
0 5
0 5
0 5
0 4
0 4
0 5
0 5
0 5
0 5
0 5
0 5
0 5
0 5
0 5
0 4
0 4
0 4
0 4
0 4
0 4
0 4
0 4
0 6
0 6
0 6
0 6
0 6
0 6
0 6
0 6
0 6
0 6
0 5
0 5
0 5
0 6
0 6
0 7
0 7
0 7
0 7
0 7
0 7
0 7
0 7
0 6
0 6
0 6
0 6
0 6
0 6
0 6
0 8
0 8
0 8
0 8
0 8
0 8
0 8
0 8
0 8
0 8
0 8
0 8
0 8
0 8
0 9
0 9
0 10
0 11
0 11
0 12
0 13
0 19
0 19
0 21
0 23
0 23
0 24
0 24
0 24
0 24
0 24
0 24
0 24
0 25
0 25
0 25
0 25
0 25
0 25
0 25
0 25
0 25
0 25
0 25
0 25
0 25
0 25
0 25
0 25
0 25
0 25
0 24
0 23
0 23
0 22
0 22
0 23
0 23
0 23
0 23
0 23
0 23
0 24
0 27
0 28
0 30
0 32
0 33
0 34
0 32
0 33
0 33
0 33
0 35
0 37
0 37
0 37
0 37
0 37
0 37
0 37
0 37
0 36
0 36
0 36
0 36
0 37
0 37
0 37
0 37
0 37
0 37
0 37
0 37
0 37
0 37
0 37
0 37
0 37
0 37
0 35
0 35
0 35
0 35
0 35
0 35
0 35
0 35
0 35
0 35
0 35
0 35
0 35
0 35
0 33
0 32
0 31
0 31
0 30
0 30
0 26
0 19
0 19
0 19
0 19
0 19
0 19
0 19
0 19
0 19
0 19
0 19
0 19
0 18
0 18
0 18
0 18
0 18
0 18
0 18
0 18
0 18
0 18
0 18
0 18
0 18
0 18
0 17
0 16
0 16
0 16
0 16
0 16
0 16
0 16
0 16
0 15
0 15
0 15
0 15
0 15
0 15
0 14
0 9
0 7
0 6
0 5
0 5
0 5
0 5
0 5
0 4
0 4
0 2
0 1
0 1
0 1
0 1
0 1
0 1
0 1
0 1
0 1
0 1
0 1
0 1
0 0
0 0
0 0
0 0
0 0
0 0
0 0
0 0
0 0
0 0
0 0
0 0
0 0
0 0
0 0
0 0
0 0
0 0
0 0
0 0
0 0
0 0
0 0
0 0
0 0
0 0
0 0
0 0
0 0
0 0
0 0
0 0
0 0
0 0
0 0
0 0
0 0
0 0
0 0
0 0
0 0
0 0
0 0
0 0
0 1
0 1
0 2
0 2
0 2
0 2
0 2
0 2
0 2
0 2
0 2
0 2
0 2
0 4
0 4
0 4
0 4
0 4
0 4
0 4
0 4
0 4
0 4
0 4
0 4
0 4
0 4
0 4
0 4
0 4
0 4
0 5
0 5
0 5
0 5
0 5
0 5
0 5
0 5
0 5
0 5
0 6
0 6
0 7
0 7
0 7
0 7
0 8
0 8
0 8
0 8
0 8
0 8
0 11
0 12
0 12
0 12
0 12
0 12
0 12
0 12
0 12
0 12
0 12
0 12
0 12
0 12
0 12
0 12
0 12
0 12
0 12
0 12
0 12
0 12
0 12
0 12
0 12
0 12
0 12
0 12
0 12
0 12
0 12
0 13
0 13
0 13
0 13
0 13
0 13
0 13
0 13
0 13
0 13
0 13
0 13
0 13
0 13
0 13
0 13
0 12
0 12
0 11
0 11
0 11
0 11
0 11
0 11
0 11
0 11
0 11
0 11
0 12
0 10
0 10
0 10
0 10
0 10
0 10
0 10
0 10
0 10
0 10
0 10
0 10
0 10
0 10
0 11
0 13
0 13
0 13
0 12
0 12
0 12
0 12
0 12
0 12
0 12
0 12
0 12
0 12
0 11
0 10
0 9
0 10
0 11
0 11
0 11
0 12
0 12
0 13
0 13
0 13
0 10
0 9
0 9
0 9
0 9
0 9
0 9
0 9
0 9
0 10
0 10
0 10
0 11
0 11
0 12
0 13
0 14
0 14
0 14
0 14
0 14
0 14
0 14
0 14
0 14
0 14
0 14
0 14
0 14
0 14
0 14
0 13
0 13
0 14
0 14
0 14
0 14
0 14
0 14
0 14
0 14
0 14
0 14
0 14
0 14
0 14
0 14
0 14
0 14
0 14
0 14
0 14
0 14
0 14
0 14
0 14
0 14
0 14
0 14
0 13
0 13
0 13
0 13
0 13
0 13
0 13
0 13
0 13
0 13
0 14
0 14
0 14
0 14
0 13
0 12
0 11
0 11
0 11
0 11
0 11
0 11
0 11
0 11
0 11
0 11
0 11
0 11
0 16
0 16
0 20
0 20
0 20
0 20
0 20
0 20
0 19
0 19
0 18
0 18
0 18
0 18
0 18
0 18
0 18
0 18
0 18
0 18
0 18
0 18
0 15
0 15
0 15
0 16
0 16
0 16
0 15
0 14
0 14
0 14
0 15
0 15
0 15
0 15
0 15
0 15
0 15
0 15
0 15
0 15
0 15
0 15
0 15
0 15
0 14
0 14
0 14
0 14
0 14
0 14
0 14
0 14
0 14
0 14
0 14
0 14
0 14
0 14
0 14
0 14
0 14
0 14
0 14
0 14
0 14
0 14
0 14
0 14
0 14
0 14
0 13
0 13
0 13
0 14
0 14
0 15
0 15
0 16
0 16
0 16
0 17
0 17
0 17
0 17
0 17
0 17
0 17
0 17
0 17
0 17
0 17
0 17
0 17
0 17
0 17
0 17
0 17
0 17
0 13
0 13
0 8
0 8
0 7
0 7
0 7
0 7
0 7
0 7
0 7
0 7
0 7
0 7
0 7
0 8
0 8
0 9
0 9
0 10
0 16
0 17
0 18
0 18
0 19
0 20
0 21
0 21
0 21
0 21
0 21
0 21
0 20
0 20
0 20
0 20
0 20
0 20
0 20
0 20
0 20
0 20
0 20
0 20
0 20
0 20
0 20
0 21
0 21
0 21
0 21
0 21
0 21
0 22
0 22
0 22
0 22
0 22
0 22
0 22
0 22
0 22
0 22
0 22
0 22
0 22
0 23
0 24
0 24
0 24
0 24
0 24
0 24
0 24
0 24
0 23
0 23
0 22
0 23
0 22
0 22
0 21
0 20
0 20
0 20
0 20
0 24
0 25
0 27
0 30
0 33
0 35
0 36
0 37
0 37
0 37
0 37
0 37
0 37
0 37
0 37
0 37
0 37
0 37
0 37
0 37
0 37
0 37
0 37
0 37
0 37
0 37
0 37
0 37
0 37
0 36
0 35
0 34
0 32
0 31
0 25
0 25
0 24
0 24
0 24
0 23
0 22
0 22
0 22
0 22
0 22
0 22
0 22
0 22
0 22
0 22
0 22
0 22
0 22
0 22
0 22
0 22
0 22
0 22
0 22
0 21
0 21
0 21
0 21
0 21
0 21
0 22
0 23
0 22
0 22
0 22
0 22
0 22
0 22
1 25
1 25
1 25
1 25
1 26
1 26
1 25
1 25
1 25
1 25
1 25
1 25
1 25
1 25
1 27
1 27
1 27
1 28
1 29
1 28
1 29
1 29
1 27
1 27
1 27
1 27
1 26
1 21
1 20
1 17
1 16
1 14
1 13
1 12
1 12
1 12
1 12
1 13
1 13
1 14
1 15
1 15
1 15
1 15
1 16
1 16
1 16
1 16
1 16
1 16
1 16
1 16
1 16
1 16
1 16
1 16
1 16
1 16
1 16
1 16
1 16
1 16
1 16
1 16
1 16
1 16
1 16
1 16
1 16
1 16
1 16
1 16
1 16
1 16
1 16
1 16
1 16
1 16
1 18
1 18
1 21
1 21
1 21
1 21
1 22
1 26
1 34
1 36
1 37
1 38
1 38
1 38
2 40
2 41
2 41
2 42
2 43
2 43
2 43
2 44
1 41
1 41
1 41
1 41
1 40
1 39
1 39
1 39
1 39
1 39
1 39
1 38
1 38
1 37
1 47
1 50
1 50
1 48
1 48
1 49
1 48
1 48
1 48
1 49
1 49
1 49
1 49
1 49
1 49
1 49
1 50
1 51
1 55
1 55
1 54
1 54
1 54
1 53
1 52
1 52
1 52
1 52
1 52
1 51
1 51
1 51
1 51
1 51
1 51
1 51
1 51
1 51
1 51
1 51
1 51
1 51
1 51
1 51
1 51
1 51
1 51
1 51
1 51
1 51
1 51
1 51
1 51
1 51
1 51
1 51
1 52
1 51
1 51
1 51
1 51
1 51
1 51
1 51
1 49
1 49
1 46
1 46
1 45
1 45
1 43
1 38
1 30
1 30
1 29
1 30
1 30
1 28
0 24
0 25
0 25
0 25
0 24
0 24
0 24
0 24
0 24
0 24
0 24
0 24
0 24
0 24
0 29
0 29
0 29
0 29
0 29
0 29
0 29
0 29
0 15
0 15
0 15
0 15
0 15
0 15
0 15
0 15
0 15
0 14
0 14
0 14
0 14
0 14
0 14
0 14
0 13
0 12
0 8
0 8
0 8
0 8
0 9
0 9
0 9
0 9
0 9
0 9
0 9
0 9
0 9
0 9
0 9
0 9
0 9
0 9
0 9
0 9
0 9
0 9
0 9
0 9
0 9
0 9
0 9
0 9
0 9
0 9
0 9
0 9
0 9
0 9
0 9
0 9
0 9
0 9
0 8
0 8
0 8
0 8
0 8
0 8
0 9
0 9
0 9
0 9
0 9
0 9
0 9
0 9
0 9
0 9
0 9
0 8
0 8
0 8
0 8
0 8
0 8
0 7
0 7
0 7
0 7
0 7
0 7
0 7
0 7
0 7
0 7
0 7
0 7
0 7
0 2
0 2
0 2
0 2
0 2
0 2
0 2
0 2
0 3
0 3
0 3
0 3
0 3
0 3
0 3
0 3
0 3
0 3
0 3
0 4
0 4
0 4
0 5
0 5
0 5
0 5
0 5
0 5
0 5
0 5
0 4
0 4
0 4
0 4
0 4
0 4
0 4
0 4
0 4
0 4
0 4
0 4
0 7
0 7
0 10
0 10
0 11
0 13
0 14
0 14
0 15
0 16
0 17
0 17
0 17
0 17
0 17
0 17
0 17
0 17
0 18
0 18
0 18
0 18
0 18
0 18
0 18
0 18
0 18
0 18
0 17
0 17
0 17
0 17
0 17
0 17
0 17
0 17
0 17
0 17
0 17
0 17
0 17
0 17
0 18
0 18
0 18
0 18
0 18
0 18
0 18
0 18
0 18
0 18
0 18
0 18
0 18
0 18
0 18
0 18
0 18
0 18
0 18
0 18
0 18
0 20
0 20
0 21
0 21
0 21
0 21
0 21
0 21
0 21
0 24
0 24
0 25
0 25
0 25
0 24
0 24
0 24
0 23
0 24
0 24
0 24
0 24
0 24
0 24
0 24
0 24
0 24
0 24
0 24
0 24
0 24
0 24
0 24
0 24
0 24
0 24
0 22
0 21
0 16
0 15
0 15
0 14
0 14
0 14
0 14
0 13
0 13
0 13
0 13
0 13
0 13
0 13
0 14
0 14
0 14
0 13
0 13
0 13
0 13
0 13
0 13
0 13
0 13
0 13
0 13
0 13
0 13
0 13
0 13
0 13
0 13
0 13
0 14
0 14
0 14
0 14
0 14
0 14
0 14
0 13
0 13
0 13
0 13
0 13
0 13
0 13
0 13
0 13
0 13
0 13
0 13
0 13
0 14
0 14
0 14
0 14
0 14
0 14
0 14
0 14
0 11
0 11
0 11
0 11
0 11
0 11
0 11
0 11
0 10
0 8
0 8
0 7
0 7
0 7
0 6
0 6
0 6
0 6
0 4
0 4
0 4
0 4
0 4
0 4
0 4
0 4
0 4
0 4
0 4
0 4
0 4
0 4
0 4
0 4
0 4
0 4
0 4
0 4
0 4
0 4
0 4
0 4
0 4
0 4
0 4
0 4
0 3
0 3
0 3
0 3
0 3
0 3
0 3
0 3
0 3
0 3
0 3
0 3
0 3
0 3
0 3
0 3
0 3
0 3
0 3
0 4
0 5
0 6
0 6
0 6
0 6
0 6
0 5
0 5
0 5
0 5
0 5
0 5
0 5
0 5
0 5
0 5
0 5
0 5
0 5
0 5
0 5
0 5
0 6
0 6
0 7
0 7
0 5
0 5
1 5
1 5
1 5
1 7
1 7
1 7
1 7
1 7
1 7
1 7
1 7
1 7
1 7
1 7
1 7
1 7
1 7
1 7
1 7
1 7
1 7
1 7
1 7
1 7
1 7
1 7
1 7
1 7
1 7
1 7
1 8
1 8
1 8
1 8
1 8
1 8
1 9
1 9
1 9
1 9
1 9
1 9
1 9
1 9
1 9
1 9
1 9
1 10
1 10
1 10
1 10
1 10
1 12
1 12
1 13
1 13
1 14
1 14
1 16
1 16
1 16
1 16
1 16
1 17
1 19
1 20
1 20
1 20
1 20
1 22
1 22
1 20
2 20
2 19
2 19
2 19
2 19
2 19
2 19
2 19
2 19
2 19
2 19
2 19
2 19
2 20
2 20
2 20
2 20
2 20
2 20
2 20
2 20
2 20
2 19
2 19
2 18
2 18
2 18
2 18
1 18
1 18
1 19
1 17
1 17
1 17
1 17
1 17
1 17
1 17
1 17
1 17
1 17
1 17
1 17
1 17
1 17
1 17
1 17
1 17
1 17
1 17
1 17
1 17
1 17
1 17
1 17
1 17
1 17
1 17
1 16
1 16
1 16
1 16
1 16
1 16
1 15
1 15
1 15
1 15
1 15
1 15
1 15
1 15
1 15
1 15
1 15
1 14
1 14
1 14
1 14
1 14
1 12
1 11
1 10
1 10
1 9
1 9
1 8
1 8
1 8
1 8
1 8
1 4
1 4
1 4
1 4
1 4
1 4
1 2
1 2
1 2
0 2
0 2
0 2
0 2
0 2
0 2
0 2
0 2
0 2
0 2
0 2
0 2
0 2
0 1
0 1
0 1
0 1
0 1
0 1
0 1
0 1
0 1
0 1
0 1
0 1
0 1
0 1
0 1
0 1
0 1
0 0
0 0
0 0
0 0
0 0
0 0
0 0
0 0
0 0
0 0
0 0
0 0
0 0
0 0
0 0
0 0
0 0
0 0
0 1
0 1
0 1
0 2
0 2
0 2
0 2
0 2
0 2
0 2
0 2
0 2
0 2
0 2
0 2
0 9
0 10
0 10
0 10
0 10
0 10
0 10
0 10
0 10
0 12
0 12
0 12
0 12
0 12
0 12
0 12
0 12
0 13
0 13
0 13
0 13
0 14
0 14
0 14
0 14
0 14
0 14
0 14
0 14
0 14
0 15
0 16
0 18
0 25
0 25
0 26
0 26
0 26
0 27
0 27
0 27
0 28
0 28
0 28
0 28
0 28
0 28
0 28
0 31
0 32
0 32
0 32
0 32
0 32
0 32
0 33
0 33
0 33
0 33
0 35
0 35
0 35
0 35
0 35
0 35
0 35
0 36
0 36
0 38
0 39
0 39
0 40
0 40
0 41
0 41
0 41
0 41
0 41
0 41
0 41
0 41
0 41
0 41
0 40
0 40
0 40
0 40
0 40
0 39
0 39
0 39
0 39
0 39
0 39
0 40
0 40
0 40
0 41
0 40
0 40
0 33
0 33
0 33
0 33
0 33
0 33
0 33
0 33
0 33
0 31
0 31
0 31
0 31
0 31
0 31
0 31
0 31
0 31
0 31
0 31
0 31
0 30
0 30
0 30
0 30
0 30
0 30
0 30
0 30
0 30
0 29
0 28
0 24
0 17
0 17
0 17
0 16
0 16
0 16
0 17
0 17
0 17
0 17
0 17
0 17
0 17
0 25
0 25
0 21
0 21
0 21
0 21
0 22
0 22
0 22
0 21
0 21
0 21
0 21
0 20
0 20
0 19
0 19
0 19
0 19
0 18
0 18
0 18
0 17
0 17
0 17
0 15
0 15
0 15
0 15
0 15
0 15
0 15
0 15
0 15
0 15
0 15
0 15
0 15
0 15
0 15
0 15
0 15
0 15
0 15
0 15
0 15
0 15
0 14
0 13
0 13
0 13
0 13
0 13
0 13
0 13
0 13
0 15
0 18
0 20
0 21
0 22
0 22
0 22
0 23
0 23
0 23
0 23
0 23
0 23
0 22
0 22
0 22
0 22
0 22
0 22
0 22
0 22
0 22
0 22
0 22
0 21
0 21
0 21
0 21
0 22
0 22
0 22
0 22
0 22
0 22
0 22
0 22
0 22
0 22
0 22
0 22
0 22
0 22
0 22
0 22
0 14
0 15
0 15
0 15
0 15
0 15
0 14
0 14
0 14
0 14
0 13
0 13
0 13
0 13
0 13
0 13
0 13
0 13
0 13
0 13
0 12
0 12
0 12
0 12
0 12
0 12
0 12
0 12
0 12
0 12
0 12
0 13
0 13
0 13
0 13
0 12
0 12
0 12
0 12
0 13
0 13
0 13
0 13
0 13
0 13
0 13
0 12
0 12
0 10
0 10
0 10
0 10
0 10
0 10
0 10
0 10
0 10
0 7
0 6
0 6
0 8
0 8
0 8
0 8
0 8
0 8
0 10
0 12
0 12
0 15
0 16
0 17
0 18
0 22
0 27
0 27
0 33
0 42
0 47
0 49
0 51
0 61
0 62
0 65
0 74
0 77
0 81
0 81
0 86
0 86
0 87
0 88
0 88
0 88
0 88
1 89
1 89
1 89
1 89
1 89
1 89
1 89
1 89
1 91
1 91
1 92
1 93
1 93
1 95
1 96
1 97
1 97
1 100
1 100
1 105
1 105
1 105
1 105
1 105
1 105
1 105
1 105
1 105
1 105
1 106
1 106
1 106
1 107
1 107
1 107
1 107
1 109
1 112
1 112
1 115
1 115
1 115
1 117
1 118
1 117
1 127
1 142
1 143
1 145
1 146
1 147
1 146
1 149
1 149
1 149
1 150
1 151
1 152
1 152
1 152
1 151
1 148
1 148
1 147
1 147
1 148
1 149
1 156
0 152
0 150
0 147
0 146
0 142
0 135
0 133
0 133
0 133
0 133
0 134
0 133
0 133
0 134
0 131
0 130
0 128
0 126
0 121
0 109
0 106
0 100
0 96
0 95
0 95
0 96
0 96
0 96
0 96
0 96
0 96
0 96
0 97
0 106
0 110
0 112
0 114
0 115
0 115
0 115
0 114
0 115
0 117
0 116
0 115
0 114
0 113
0 112
0 114
0 113
0 112
0 110
0 110
0 110
0 110
0 109
0 109
0 109
0 107
0 107
0 107
0 107
0 107
0 107
0 106
0 106
0 106
0 103
0 99
0 101
0 101
0 101
0 101
0 99
0 97
0 94
0 93
0 64
0 64
0 59
0 57
0 56
0 55
0 55
0 55
0 55
0 55
0 55
0 56
0 56
0 57
0 57
0 57
0 57
0 57
0 57
0 57
0 54
0 52
0 46
0 46
0 45
0 47
0 47
0 48
0 48
0 49
0 51
0 52
0 54
0 53
0 51
0 50
0 50
0 52
0 51
0 51
0 51
0 51
0 51
0 51
0 51
0 52
0 54
0 54
0 71
0 75
0 79
0 89
0 91
0 90
0 90
0 89
0 79
0 73
0 71
0 69
0 69
0 69
0 69
0 69
0 68
0 66
0 65
0 65
0 64
0 64
0 64
0 63
0 61
0 61
0 62
0 62
0 62
0 62
0 62
0 62
0 62
0 62
0 62
0 62
0 62
0 62
0 62
0 62
0 62
0 62
0 62
0 62
0 63
0 63
0 63
0 65
0 67
0 68
0 69
0 69
0 69
0 69
0 71
0 73
0 73
0 73
0 74
0 74
0 74
0 74
0 74
0 73
0 73
0 72
0 72
0 72
0 72
0 70
0 70
0 70
0 70
0 70
0 70
0 70
0 72
0 70
0 74
0 76
0 76
0 75
0 75
0 75
0 73
0 72
0 72
0 72
0 72
0 70
0 70
0 70
0 69
0 68
0 67
0 66
0 63
0 63
0 63
0 63
0 43
0 41
0 40
0 32
0 32
0 34
0 34
0 35
0 35
0 35
0 38
0 40
0 40
0 40
0 40
0 41
0 41
0 41
0 41
0 41
0 41
0 41
0 41
0 40
0 41
0 41
0 40
0 40
0 40
0 40
0 41
0 41
0 41
0 42
0 42
0 43
0 43
0 43
0 43
0 43
0 46
0 49
0 53
0 52
0 51
0 51
0 50
0 47
0 47
0 48
0 50
0 50
0 50
0 50
0 49
0 47
0 47
0 47
0 46
0 46
0 46
0 46
0 46
0 46
0 46
0 46
0 46
0 47
0 48
0 48
0 50
0 50
0 51
0 53
0 53
0 53
0 51
0 48
0 45
0 44
0 44
0 45
0 45
0 44
0 44
0 44
0 44
0 44
0 44
0 44
0 44
0 44
0 44
0 44
0 43
0 43
0 42
0 42
0 41
0 39
0 39
0 39
0 39
0 39
0 45
0 61
0 65
0 70
0 73
0 76
0 74
0 73
0 73
0 74
0 75
0 75
0 75
0 75
0 76
0 76
0 77
0 79
0 78
0 77
0 78
0 76
0 76
0 75
0 74
0 74
0 74
0 73
0 73
0 73
0 73
0 73
0 72
0 73
0 73
0 73
0 70
0 71
0 71
0 71
0 70
0 70
0 69
0 67
0 65
0 64
0 70
0 70
0 70
0 70
0 70
0 70
0 70
0 70
0 70
0 70
0 70
0 70
0 70
0 70
0 70
0 70
0 70
0 69
0 68
0 67
0 67
0 67
0 67
0 67
0 69
0 69
0 70
0 73
0 73
0 74
0 75
0 74
0 76
0 76
0 76
0 76
0 76
0 78
0 78
0 79
0 79
0 79
0 79
0 79
0 79
0 79
0 79
0 85
0 84
0 85
0 83
0 83
0 79
0 68
0 56
0 52
0 51
0 48
0 49
0 47
0 48
0 48
0 51
0 55
0 66
0 66
0 66
0 65
0 65
0 64
0 64
0 64
0 64
0 64
0 63
0 63
0 63
0 63
0 62
0 62
0 63
0 63
0 63
0 63
0 63
0 62
0 61
0 62
0 62
0 62
0 61
0 59
0 58
0 58
0 58
0 58
0 58
0 58
0 58
0 58
0 50
0 50
0 51
0 53
0 53
0 53
0 54
0 54
0 54
0 54
0 54
0 54
0 54
0 54
0 63
1 63
1 67
1 67
1 67
1 66
1 68
1 68
1 69
1 74
1 77
1 97
1 107
1 108
1 111
1 109
1 106
1 108
1 108
1 111
1 111
1 111
1 112
1 111
1 111
1 109
1 109
1 108
1 108
1 108
1 108
1 106
1 107
1 105
1 106
1 108
1 109
1 111
1 111
1 111
1 113
1 115
1 115
1 116
1 116
1 117
1 117
1 116
1 104
1 101
1 101
1 101
1 101
1 101
1 101
1 101
1 101
2 102
2 104
2 105
2 105
2 105
2 105
2 108
2 108
2 109
2 148
2 150
2 155
2 158
2 160
2 160
2 159
2 159
2 159
2 159
2 160
2 161
2 161
2 163
2 163
2 163
2 163
2 163
2 163
2 163
2 163
2 163
2 162
2 160
2 160
2 160
2 159
2 159
2 160
2 160
2 163
2 163
2 162
2 161
2 152
1 153
1 149
1 150
1 150
1 150
1 148
1 145
1 141
1 124
1 110
1 104
1 103
1 103
1 102
1 101
1 99
1 97
1 93
1 93
1 93
1 93
1 93
1 94
1 94
1 94
1 94
1 94
1 94
1 96
1 96
1 95
1 92
1 92
1 90
1 85
1 84
1 84
1 85
1 83
1 83
1 84
1 86
1 84
1 84
1 84
1 96
1 100
1 108
1 117
1 145
1 149
1 152
1 153
1 153
1 153
1 153
0 151
0 152
0 151
0 151
0 151
0 154
0 151
0 151
0 151
0 112
0 112
0 105
0 102
0 102
0 102
0 102
0 102
0 102
0 102
0 103
0 105
0 106
0 105
0 105
0 105
1 105
1 105
1 105
1 105
1 105
1 105
1 106
1 107
1 107
1 107
1 107
1 107
1 105
1 105
1 104
1 104
1 104
1 105
1 106
1 106
1 107
1 108
1 111
1 112
1 111
1 112
1 112
1 112
1 111
1 111
1 111
1 111
1 112
1 112
1 112
1 112
1 112
1 112
1 112
1 112
1 111
1 111
1 111
1 111
1 111
1 111
1 112
1 110
1 110
1 110
1 110
1 109
1 109
1 109
1 109
1 109
1 108
1 107
4 116
4 114
4 116
4 116
4 117
4 114
4 96
4 89
5 74
5 60
5 56
5 54
5 53
5 54
5 54
5 55
5 55
5 55
5 53
5 52
5 52
5 50
5 52
5 52
5 50
5 49
5 46
5 46
5 46
5 47
5 48
5 49
5 49
5 65
5 68
5 74
5 77
6 75
6 76
5 77
6 77
6 77
6 77
6 77
6 77
6 77
6 78
6 77
6 76
6 76
6 76
6 76
6 76
6 76
6 76
6 78
6 78
6 82
6 81
6 82
6 79
6 77
6 80
6 80
6 80
6 80
6 80
6 79
6 79
6 79
6 80
6 80
6 80
6 79
6 79
6 79
6 79
6 79
6 79
6 79
6 79
6 80
6 80
6 80
6 80
6 81
7 88
7 88
7 87
7 87
7 87
7 87
7 87
7 87
7 88
7 88
7 89
7 90
7 91
7 92
4 87
4 88
4 86
4 86
4 86
4 86
4 85
4 84
3 84
3 84
3 83
3 83
3 83
3 82
3 82
3 81
3 83
3 83
3 84
3 84
3 84
3 84
3 80
3 81
3 81
3 81
3 81
3 80
3 81
3 79
3 77
3 76
3 75
3 55
3 51
2 51
1 51
1 51
1 51
1 51
1 51
1 51
1 51
1 51
1 51
1 52
1 52
1 53
1 53
1 52
1 52
1 55
1 55
1 60
1 59
1 58
1 60
1 59
1 61
1 59
1 59
1 59
1 57
1 57
1 57
1 58
1 58
1 58
1 58
1 58
1 57
1 57
1 57
1 59
2 63
2 63
2 64
2 66
2 66
2 68
2 68
2 68
2 68
2 68
2 68
2 67
1 58
1 60
1 60
1 60
1 58
1 58
1 58
1 58
1 58
1 58
1 57
1 57
1 57
1 56
1 49
1 49
1 49
1 49
1 49
1 49
1 49
1 49
1 49
1 49
1 49
1 49
1 49
1 49
1 49
1 49
1 47
1 47
1 46
1 46
1 46
1 46
1 46
1 45
1 45
1 46
1 47
1 48
1 49
1 51
1 52
1 54
1 56
1 56
1 59
1 60
1 61
1 61
1 61
1 61
1 61
1 61
1 61
1 61
2 62
2 60
2 60
2 59
2 59
2 59
2 59
2 53
2 47
2 47
2 44
2 42
2 39
2 39
2 38
2 42
2 42
2 42
2 42
2 42
2 42
2 42
2 42
2 42
2 42
2 42
2 42
2 41
1 40
1 36
1 37
1 38
1 37
1 33
1 32
1 32
1 34
1 35
1 36
1 36
1 36
1 35
1 35
1 34
1 34
1 34
1 34
1 37
1 40
1 42
1 43
1 43
1 44
1 45
1 44
1 45
1 46
1 47
1 48
1 47
1 47
1 47
1 47
1 47
1 48
1 48
1 48
1 49
1 49
1 50
1 50
1 50
1 51
1 53
1 53
1 53
1 53
1 53
1 53
1 52
1 52
1 50
1 50
1 50
1 49
1 46
1 46
1 44
1 42
1 42
1 38
1 38
1 38
1 38
1 38
1 38
1 38
1 38
1 38
1 38
0 37
0 37
0 37
0 37
0 37
0 38
0 38
0 38
0 38
0 38
0 38
0 38
0 38
0 38
0 38
0 34
0 34
0 33
0 33
0 33
0 33
0 33
0 33
0 33
0 33
0 33
0 33
0 34
0 34
0 34
0 32
0 32
0 32
0 32
0 32
0 32
0 29
0 28
0 28
0 27
0 27
0 27
0 26
0 26
0 26
0 26
0 26
0 21
0 17
0 16
0 16
0 16
0 14
0 12
0 12
0 12
0 11
0 10
0 10
0 10
0 9
0 10
0 11
0 11
0 11
0 10
0 10
0 10
0 11
0 11
0 11
0 11
0 9
0 8
0 8
0 8
0 8
0 8
0 8
0 8
0 8
0 8
0 8
0 7
0 7
0 7
0 7
0 8
0 10
0 12
0 12
0 12
0 12
0 12
0 12
0 12
0 12
0 13
0 13
0 13
0 13
0 13
0 14
0 18
0 18
0 19
0 20
0 21
0 21
0 21
0 21
0 21
0 21
0 21
0 21
0 21
0 22
0 23
0 23
0 23
0 24
0 24
0 24
0 24
0 24
0 24
0 24
0 23
0 23
0 23
0 23
0 23
0 23
0 23
0 23
0 23
0 23
0 23
0 25
0 25
0 25
0 25
0 27
0 27
0 27
0 27
0 27
0 27
0 27
0 27
0 27
0 27
0 27
0 27
0 27
0 27
0 27
0 27
0 27
0 27
0 27
0 26
0 25
0 26
0 26
0 26
0 26
0 26
0 25
0 25
0 25
0 25
0 25
0 25
0 25
0 25
0 23
0 24
0 24
0 24
0 24
0 24
0 24
0 24
0 24
0 24
0 24
0 24
0 23
0 22
0 22
0 22
0 22
0 23
0 23
0 23
0 23
0 22
0 22
0 23
0 23
0 23
0 22
0 17
0 18
0 16
0 17
0 16
0 16
0 17
0 17
0 17
0 17
0 17
0 17
0 16
0 15
0 15
0 15
0 15
0 14
0 14
0 14
0 14
0 14
0 14
0 15
0 15
0 15
0 15
0 15
0 15
0 16
0 16
0 16
0 16
0 16
0 17
0 14
0 14
0 14
0 14
0 13
0 13
0 13
0 13
0 13
0 13
0 13
0 13
0 14
0 19
0 19
0 19
0 19
0 19
0 19
0 19
0 19
0 19
0 18
0 18
0 18
0 18
0 19
0 19
0 19
0 19
0 19
0 19
0 19
0 19
0 21
0 22
0 23
0 23
0 23
0 23
0 24
0 24
0 24
0 24
0 24
0 24
0 24
0 24
0 24
0 24
0 23
0 23
0 23
0 23
0 23
0 21
0 21
0 21
0 21
0 21
0 21
0 21
0 21
0 21
0 21
0 21
0 20
0 19
0 19
0 19
0 19
0 18
0 18
0 18
0 18
0 18
0 18
0 18
0 18
0 18
0 18
0 24
0 25
0 25
0 26
0 25
0 27
0 37
0 41
0 44
0 54
0 55
0 56
0 60
0 61
0 61
0 62
0 62
0 62
0 59
0 59
0 59
0 59
0 62
0 62
0 62
0 62
0 62
0 62
0 63
0 63
0 64
0 62
0 61
0 61
0 61
0 61
0 61
0 61
0 61
0 60
0 62
0 62
0 62
0 62
0 62
0 62
0 62
0 62
0 62
0 62
0 63
0 63
0 63
0 61
0 60
0 59
0 59
0 59
0 58
0 57
0 57
0 57
0 57
0 57
0 57
0 58
0 58
0 58
0 59
0 60
0 60
0 60
0 61
0 60
0 60
0 60
0 60
0 60
0 61
0 62
0 62
0 63
0 63
0 63
0 64
0 64
0 65
0 65
0 65
0 66
0 66
0 66
0 66
0 66
0 66
0 66
0 66
0 66
0 65
0 65
0 61
0 62
0 62
0 62
0 63
0 59
0 47
0 47
0 42
0 40
0 40
0 37
0 34
0 34
0 34
0 33
0 33
0 32
0 32
0 32
0 32
0 32
0 29
0 29
0 29
0 28
0 28
0 27
0 26
0 26
0 25
0 26
0 26
0 26
0 26
0 27
0 27
0 27
0 27
0 26
0 26
0 26
0 26
0 26
0 25
0 25
0 25
0 25
0 25
0 25
0 24
0 24
0 25
0 26
0 26
0 27
0 27
0 27
0 27
0 27
0 27
0 27
0 27
0 29
0 29
0 30
0 32
0 31
0 31
0 31
0 30
0 30
0 30
0 30
0 30
0 30
0 29
0 28
0 29
0 28
0 28
0 28
0 27
0 26
0 25
0 25
0 24
0 25
0 26
0 26
0 28
0 28
0 29
0 29
0 29
0 30
0 30
0 34
0 35
0 34
0 33
0 32
0 30
0 34
0 34
0 34
0 34
0 34
0 34
0 34
0 34
0 34
0 34
0 34
0 34
0 34
0 34
0 34
0 34
0 34
0 35
0 35
0 35
0 35
0 35
0 35
0 35
0 35
0 35
0 35
0 35
0 34
0 34
0 34
0 34
0 34
0 34
0 34
0 34
0 34
0 34
0 34
0 34
0 34
0 34
0 34
0 34
0 34
0 34
0 34
0 33
0 33
0 31
0 31
0 31
0 31
0 31
0 31
0 30
0 30
0 30
0 30
0 30
0 29
0 25
0 23
0 23
0 23
0 23
0 23
0 26
0 26
0 26
0 26
0 26
0 26
0 26
0 26
0 25
0 25
0 25
0 24
0 24
0 24
0 24
0 24
0 24
0 20
0 20
0 20
0 19
0 19
0 19
0 19
0 19
0 18
1 18
1 12
1 12
1 12
1 12
1 12
1 12
1 5
1 5
1 5
1 5
1 5
1 5
1 5
1 5
1 5
1 5
1 5
1 5
1 5
1 5
1 5
1 5
1 5
1 5
1 7
2 9
2 10
2 10
2 10
2 10
2 10
2 10
2 10
2 10
2 10
2 10
2 10
2 10
2 10
2 10
2 10
2 10
2 10
2 10
2 10
2 10
2 10
2 10
2 10
2 10
2 10
2 10
2 10
2 10
2 10
2 10
2 10
2 10
2 10
2 10
2 10
2 10
2 10
2 10
2 10
2 10
2 10
2 10
2 10
2 10
2 10
2 10
2 10
2 7
2 7
2 7
2 7
2 7
2 7
2 7
2 7
2 7
2 7
2 7
2 7
2 7
2 7
2 7
2 7
2 7
2 7
2 7
2 7
2 7
2 7
2 7
2 9
2 9
2 9
1 9
1 9
1 9
1 9
1 9
1 9
1 9
1 8
1 8
1 8
1 8
1 8
1 8
1 9
1 9
1 9
1 9
1 9
1 9
1 9
1 9
1 9
1 9
1 9
1 7
1 6
0 4
0 3
0 3
0 3
0 3
0 3
0 6
0 6
0 6
0 6
0 6
0 6
0 6
0 6
0 6
0 6
0 6
0 6
0 6
0 6
0 6
0 6
0 6
0 6
0 6
0 6
0 6
0 6
0 6
0 6
0 6
0 6
0 6
0 6
0 6
0 7
0 7
0 7
0 7
0 7
0 7
0 7
0 7
1 7
1 7
1 7
1 7
1 7
1 7
1 7
1 7
1 7
1 7
1 7
1 7
1 7
1 7
1 7
1 8
1 8
1 8
2 11
2 13
2 13
2 13
2 13
2 15
2 15
2 15
2 15
2 16
2 15
2 15
2 15
3 16
3 16
3 16
3 18
3 18
3 18
3 18
3 18
3 18
3 18
3 18
3 18
3 18
3 17
3 17
3 17
3 17
3 18
3 21
3 21
3 22
3 25
3 25
3 25
3 25
3 25
3 25
3 25
3 25
3 25
3 25
3 25
3 22
3 22
3 22
3 25
3 30
3 30
3 31
3 31
3 31
3 31
3 33
3 36
3 38
3 38
4 42
4 42
4 42
4 44
4 44
4 45
4 45
4 45
4 46
4 50
5 52
5 54
5 58
5 58
5 58
5 59
5 60
5 60
5 60
5 60
5 60
5 60
4 60
4 60
4 60
4 60
4 61
4 61
4 61
4 61
4 61
4 61
4 61
4 61
4 61
4 63
4 64
4 64
4 63
4 64
4 64
3 60
3 59
3 59
3 59
3 59
3 56
3 56
3 56
3 56
3 55
3 55
3 55
2 54
2 54
2 54
2 54
2 54
2 54
2 54
2 55
2 54
2 54
2 54
2 54
2 54
2 54
2 55
2 55
2 55
2 55
2 55
2 53
2 53
2 52
2 49
2 49
2 49
2 51
2 51
2 51
2 51
2 51
2 51
2 51
2 53
2 53
2 54
2 53
2 48
2 40
2 39
2 39
2 38
2 38
2 38
2 36
2 33
2 33
2 32
1 25
1 25
1 25
1 23
1 23
1 22
1 22
1 20
1 20
0 19
0 18
1 18
1 16
1 16
1 16
1 15
1 15
1 15
1 15
1 15
1 15
1 15
1 15
1 15
1 15
1 15
1 14
1 14
1 14
1 14
1 14
1 14
1 14
1 14
1 13
1 11
1 10
1 9
1 9
1 9
1 9
1 9
1 9
1 9
1 9
1 9
1 9
1 9
1 9
1 9
1 9
1 9
1 9
1 9
1 9
1 9
1 9
1 8
1 8
1 5
1 5
1 5
1 5
1 5
1 5
1 5
1 5
1 5
1 5
1 5
1 5
1 5
1 5
1 5
1 5
1 5
1 5
1 5
1 4
1 4
1 4
1 4
1 4
1 3
1 2
1 2
1 2
1 1
1 1
1 1
1 1
1 1
1 1
2 1
2 1
2 1
2 1
2 1
2 1
2 1
2 1
2 1
2 1
2 1
2 1
2 1
2 1
2 1
2 0
2 0
2 0
1 0
1 0
1 0
1 0
1 0
1 0
1 0
1 0
1 0
1 0
1 0
1 0
1 0
1 0
1 0
1 0
1 0
1 0
1 0
1 0
1 0
1 0
1 0
1 0
1 0
3 0
8 0
10 0
30 0
30 0
30 0
34 0
40 0
42 0
56 1
56 1
56 1
58 1
61 1
61 1
61 1
61 1
61 1
61 1
61 1
61 1
61 1
61 1
61 1
61 1
61 1
61 1
61 1
61 1
61 1
61 1
61 1
61 1
62 1
62 1
63 1
65 1
65 1
65 1
65 1
65 1
65 1
65 1
65 1
65 1
73 1
88 1
90 3
92 3
95 3
95 3
95 3
97 3
98 3
98 3
98 3
98 3
110 3
112 3
116 3
121 3
121 4
121 4
122 4
123 4
123 4
125 4
125 4
125 4
125 4
125 4
125 4
125 4
128 4
129 4
130 4
136 4
138 4
139 4
139 4
140 4
140 4
142 4
144 4
148 4
151 4
152 4
154 4
155 4
158 4
159 4
163 4
169 4
174 4
181 4
182 4
188 4
188 4
188 4
188 4
185 4
180 4
178 4
159 4
160 4
159 4
157 4
150 4
148 4
134 3
139 3
139 3
139 3
140 3
142 4
144 4
148 4
165 4
181 4
190 4
192 4
193 4
194 5
194 5
195 5
195 5
196 6
201 6
202 6
203 6
203 6
203 6
203 6
200 6
202 6
202 6
201 6
202 6
202 6
202 6
202 6
201 6
201 6
199 6
196 6
190 5
177 4
175 4
173 4
170 4
170 4
170 4
169 4
168 4
167 4
167 4
166 4
153 4
150 4
148 4
145 4
145 3
145 3
144 3
143 3
143 3
141 3
141 3
142 3
142 3
141 3
141 3
142 3
142 3
145 3
145 3
139 3
139 3
143 3
143 3
142 3
143 3
141 3
136 3
142 3
143 3
145 3
146 4
145 4
140 4
139 4
129 4
126 4
124 4
118 4
118 4
112 4
112 4
112 4
112 4
114 4
114 4
114 4
114 4
116 4
117 4
126 4
138 4
137 4
138 4
138 4
141 4
142 4
139 4
133 4
131 4
116 5
108 6
98 6
94 5
94 5
93 5
107 4
107 4
107 4
107 4
106 4
105 4
105 4
105 4
109 4
109 4
110 4
111 4
115 4
116 4
116 4
115 4
115 4
115 4
115 4
115 4
115 4
117 4
117 4
117 4
117 4
117 4
117 4
117 4
117 4
117 4
117 4
117 4
117 4
117 4
119 4
119 4
119 4
120 4
120 4
124 4
124 4
124 4
125 4
125 4
125 4
125 4
123 4
122 4
121 5
120 6
120 13
116 13
114 14
110 14
105 14
104 15
130 15
172 17
182 18
185 18
185 18
184 21
181 21
181 21
184 21
185 21
185 21
185 21
188 21
188 21
188 21
189 21
189 21
189 21
189 21
190 21
193 21
193 22
191 23
192 23
192 23
192 23
190 23
189 23
178 23
168 23
168 23
165 24
160 24
157 24
155 25
154 25
153 24
153 24
153 23
152 22
150 22
150 22
148 22
148 22
134 22
134 22
134 23
134 23
133 23
130 23
130 23
129 23
126 23
124 24
123 24
122 24
119 24
118 25
118 25
118 28
118 32
118 34
119 34
119 37
120 37
118 37
118 37
118 37
118 37
118 37
118 37
118 37
118 38
117 38
117 38
117 38
117 38
117 38
116 38
116 38
116 38
115 38
115 38
112 39
112 39
111 39
111 39
111 39
111 39
111 39
111 39
108 38
107 38
107 36
106 30
105 31
104 32
105 32
96 31
82 30
48 28
24 28
18 28
17 27
17 27
16 24
16 24
16 24
15 24
12 25
13 25
16 25
15 25
15 25
14 31
14 33
14 34
14 34
14 35
15 34
11 35
11 34
11 33
11 33
12 38
12 38
12 40
12 41
12 41
12 41
12 42
12 43
12 43
12 52
12 51
12 51
12 52
12 54
13 56
13 58
14 61
19 72
19 86
19 98
19 108
19 108
19 110
21 110
22 112
22 112
22 112
22 112
22 112
22 112
23 111
23 110
23 110
23 110
23 110
22 107
22 106
22 105
22 105
22 103
21 103
21 103
21 104
21 104
21 105
21 106
21 106
21 106
21 105
21 105
21 105
21 105
21 105
21 105
21 106
21 108
21 108
22 108
23 109
24 109
24 122
24 131
24 132
24 132
24 135
24 135
24 139
24 139
24 140
24 140
24 139
23 138
23 138
23 142
23 142
23 145
23 151
23 159
23 174
23 186
23 191
21 192
21 191
20 191
19 193
19 193
19 193
17 193
16 193
16 199
16 193
16 195
16 195
16 195
16 194
16 194
16 192
16 190
16 189
16 189
15 185
15 185
15 183
15 182
15 182
15 179
15 178
15 177
14 177
14 168
14 162
13 162
12 162
12 162
10 162
10 158
8 154
5 142
5 123
5 123
5 121
5 121
5 119
5 119
3 118
2 118
2 117
2 117
2 117
2 116
2 116
2 116
2 116
2 116
2 114
2 112
2 112
2 113
2 117
2 117
2 118
2 118
2 118
2 118
2 118
2 118
2 119
2 119
2 121
2 123
2 122
2 122
2 122
2 120
2 122
2 121
2 121
2 119
2 117
1 118
1 107
1 107
1 121
1 122
1 135
1 137
1 134
1 134
1 134
1 134
1 133
1 140
1 143
1 147
1 149
1 143
1 136
1 129
1 112
1 103
1 101
1 102
1 102
1 103
1 102
1 104
1 106
1 106
2 136
2 132
2 150
2 156
2 162
2 164
2 164
2 164
2 164
2 164
2 163
2 163
2 163
2 163
2 163
2 163
2 163
2 162
2 162
2 160
2 160
2 161
2 161
2 161
2 162
2 162
2 165
1 165
1 169
1 169
1 169
1 170
1 171
1 171
1 171
1 171
2 176
2 176
2 181
2 184
2 184
3 184
3 186
3 186
3 186
3 187
3 187
4 188
4 187
4 184
4 182
4 182
4 181
4 181
4 179
4 179
4 179
4 179
4 177
4 176
4 175
4 175
4 175
4 175
4 175
4 175
4 173
4 173
4 173
4 173
4 173
4 170
4 167
4 164
4 150
4 144
4 131
4 132
4 137
4 138
4 165
4 169
4 172
4 161
4 157
4 153
4 150
4 150
4 154
4 154
4 159
4 161
4 163
4 163
4 166
4 165
3 163
3 161
3 158
3 151
3 112
3 104
3 101
3 98
3 98
3 98
3 99
3 99
3 101
3 101
3 102
3 102
3 102
3 102
3 102
3 102
3 102
3 103
3 105
3 106
3 105
3 105
3 107
3 108
3 111
3 114
3 110
3 112
3 108
3 111
3 113
3 119
3 124
3 125
3 126
3 127
2 123
2 123
1 116
1 115
1 114
0 114
0 114
0 113
0 113
0 111
0 111
0 110
0 111
0 112
0 117
0 117
0 117
0 117
0 118
0 118
0 118
0 118
0 118
0 118
0 118
0 119
0 121
0 121
0 121
0 121
0 121
0 121
0 121
0 121
0 120
0 120
0 120
0 120
0 124
1 132
1 132
1 132
1 126
1 125
1 96
1 90
1 90
1 90
1 89
1 90
1 91
1 85
1 85
1 83
1 83
1 81
1 78
1 76
1 75
1 75
1 75
1 77
1 78
1 78
1 79
1 80
1 80
1 80
1 79
1 84
1 86
2 86
2 88
2 88
2 87
2 87
2 88
2 95
2 95
2 95
2 96
2 103
2 109
2 115
2 121
2 122
2 125
2 124
2 121
2 117
2 118
2 116
2 114
2 111
2 109
2 102
2 98
2 97
2 97
2 96
2 94
2 95
2 95
2 94
2 94
2 94
2 93
2 95
2 92
2 94
2 94
2 96
2 98
2 100
2 95
2 95
2 95
2 95
2 95
2 95
2 95
2 95
2 96
2 96
2 96
2 97
2 98
2 98
2 121
2 127
2 127
2 140
2 142
3 143
3 142
3 142
4 143
4 141
4 139
3 132
3 133
3 133
3 133
3 132
3 132
3 133
3 132
3 132
3 132
3 131
3 130
3 130
3 130
3 130
3 129
3 129
3 129
3 129
3 129
3 129
3 127
3 127
4 141
4 141
4 148
4 185
4 192
6 214
6 225
6 224
5 223
5 222
5 222
5 222
5 229
5 233
5 239
5 236
5 234
5 237
5 227
5 221
5 215
5 212
5 209
5 217
6 229
6 234
6 235
6 237
6 238
6 238
6 238
6 242
6 248
6 250
6 251
6 251
6 251
7 251
7 252
7 251
7 253
7 253
7 255
7 255
7 262
7 261
7 261
7 259
7 261
7 260
8 258
8 257
8 257
8 257
8 257
8 260
8 261
8 262
8 262
8 262
8 261
8 261
8 261
8 261
8 258
8 256
7 221
7 218
7 218
7 217
7 213
7 213
7 213
8 212
7 212
7 211
7 210
7 209
7 211
7 210
7 210
7 210
7 210
7 210
7 210
7 213
7 212
7 213
7 216
7 220
7 228
7 232
7 233
7 235
7 236
7 236
7 237
7 237
7 250
7 249
6 233
6 235
6 231
6 193
6 184
4 166
4 156
4 156
4 157
4 157
4 158
4 159
4 150
4 144
4 139
4 137
4 137
4 135
4 135
4 147
4 149
4 148
4 148
4 147
3 129
3 124
3 121
3 121
3 122
3 121
3 121
3 117
3 114
3 114
3 114
3 113
2 114
1 114
1 115
1 115
1 113
1 113
1 111
1 110
1 102
1 103
1 103
1 103
1 103
0 101
0 100
0 102
0 102
0 101
0 101
0 97
0 99
0 106
0 109
0 109
0 109
0 109
0 112
0 111
0 111
0 111
0 109
0 110
0 110
0 110
0 110
0 110
0 109
0 109
0 109
0 109
0 109
0 108
0 106
0 106
0 106
0 106
0 105
0 107
0 107
0 106
0 107
0 105
0 104
0 101
0 90
0 86
0 81
0 82
0 82
0 82
0 82
0 80
0 71
0 70
0 70
0 62
0 61
0 61
0 62
0 62
0 66
0 63
0 64
0 64
0 64
0 65
0 64
0 65
0 65
0 66
0 66
0 64
0 63
0 52
0 52
0 52
0 52
0 47
0 49
0 49
0 50
0 50
0 49
0 53
0 54
0 59
0 59
0 64
0 65
0 67
0 69
0 69
0 70
0 70
0 71
0 71
0 71
0 71
0 71
0 71
0 72
0 73
0 78
0 79
0 79
0 80
0 81
0 81
0 81
0 81
0 79
0 74
0 71
0 71
0 72
0 72
0 70
0 70
0 70
0 70
0 70
0 69
0 69
0 69
0 70
0 71
0 74
0 76
0 78
0 81
0 81
0 82
0 82
0 84
0 84
1 84
3 91
3 95
3 100
3 99
3 100
3 106
3 105
3 109
3 111
3 110
3 110
3 110
3 110
3 110
3 109
3 110
3 110
3 110
3 110
4 111
4 112
4 112
4 110
4 109
4 105
4 105
4 105
4 107
4 112
4 114
4 116
4 116
4 118
4 117
4 119
4 121
4 121
4 119
4 119
4 119
4 120
4 122
5 122
10 167
10 168
10 172
10 177
10 170
11 171
11 173
11 173
11 170
11 169
11 166
11 166
11 164
11 165
11 165
11 165
11 164
11 164
11 164
11 164
11 165
11 164
11 161
11 158
11 158
11 159
11 159
11 165
11 166
11 167
11 167
11 165
11 165
11 165
11 165
11 164
11 164
11 163
11 163
11 164
11 164
12 167
12 167
13 167
13 166
13 166
13 162
13 160
13 160
13 160
14 164
15 167
15 166
15 166
15 165
15 169
14 169
13 165
13 162
13 159
13 160
13 158
13 152
13 151
13 146
13 148
13 152
13 152
13 152
13 152
13 152
12 154
12 152
12 152
12 152
12 153
12 153
12 154
12 155
12 156
12 155
12 154
12 154
13 149
13 147
13 141
13 137
13 135
13 133
13 131
14 131
14 131
14 131
14 130
14 130
14 131
14 131
14 133
13 135
12 139
8 96
9 93
9 90
10 87
10 87
10 85
10 83
10 86
12 90
12 91
14 92
14 88
14 88
14 87
14 87
14 86
15 87
15 89
19 91
33 96
38 96
38 97
38 97
38 97
38 97
38 96
38 95
38 87
38 87
38 87
38 87
38 87
38 87
38 88
38 88
38 88
39 88
40 88
40 88
40 87
40 87
39 85
39 85
38 86
38 86
38 87
38 89
38 88
38 88
38 86
37 81
36 77
36 77
36 78
36 80
36 74
35 75
35 72
35 73
35 73
35 74
35 73
35 72
35 74
35 76
35 77
35 72
35 72
35 72
35 73
35 73
35 72
35 71
35 71
35 72
35 71
35 71
35 71
35 71
35 72
35 72
35 74
35 74
34 74
34 74
34 74
35 74
35 77
35 77
35 77
34 78
34 78
34 78
34 78
34 77
34 76
33 79
33 77
33 74
32 70
32 71
32 76
31 77
30 77
30 80
30 82
30 82
30 82
28 82
28 81
27 81
27 85
27 87
27 88
27 90
25 90
16 91
12 89
9 89
4 84
1 84
1 85
1 85
1 85
1 85
1 85
1 85
1 85
1 87
1 87
1 87
1 87
1 87
1 85
1 85
1 85
1 85
1 85
1 85
1 83
1 83
1 83
1 83
1 82
1 81
1 81
1 81
2 81
2 81
3 77
3 78
3 77
3 78
3 79
3 79
3 81
3 81
3 81
3 81
3 81
3 79
3 78
3 77
3 76
4 77
4 77
6 78
7 84
7 83
7 83
7 82
7 84
7 87
7 87
7 86
7 86
7 87
7 87
7 87
7 85
7 83
6 81
6 82
6 87
6 90
8 94
8 95
8 94
8 94
8 95
8 94
8 92
8 93
8 93
8 93
8 94
8 89
8 89
8 88
8 88
8 85
8 78
8 76
12 74
12 75
12 77
12 78
13 76
14 73
14 73
14 71
15 67
15 66
15 65
15 63
15 62
15 60
15 58
15 58
15 58
15 59
16 73
16 74
16 76
17 85
17 85
17 85
17 85
17 83
17 83
17 83
23 83
23 83
23 83
24 83
24 83
24 83
24 83
24 85
24 85
24 96
24 96
24 96
24 96
24 97
24 97
18 97
16 97
15 96
15 96
15 96
15 96
15 94
15 89
15 88
15 88
15 93
18 129
18 131
19 132
19 134
19 137
19 138
19 142
19 140
19 140
18 141
17 137
17 135
17 135
17 136
17 141
17 138
17 139
17 140
17 147
17 147
17 148
17 148
17 148
17 149
17 150
17 147
17 145
16 145
15 146
15 145
15 145
15 146
15 146
15 146
15 146
15 146
15 147
15 147
16 146
17 148
17 149
17 150
18 151
18 151
18 151
18 151
12 151
12 149
12 147
12 146
12 145
11 145
11 145
11 144
11 145
11 145
11 144
11 146
11 146
11 146
11 146
11 146
11 147
11 146
10 133
10 132
10 134
9 127
9 129
9 130
9 131
9 135
9 139
9 151
9 152
9 152
9 152
8 152
9 152
9 152
9 151
9 149
9 149
9 136
9 136
9 136
9 136
9 133
10 133
10 133
21 153
21 153
21 155
21 156
22 156
22 156
22 160
22 160
22 162
22 154
19 123
20 131
20 128
20 127
20 127
20 125
20 125
19 127
19 127
19 128
19 128
19 129
19 130
19 127
19 118
19 117
19 114
19 114
19 109
19 108
19 108
19 109
19 107
19 107
19 110
19 111
19 123
19 120
19 121
19 121
19 121
19 122
19 122
19 122
19 124
19 125
19 124
18 123
18 122
18 122
18 120
18 119
17 119
17 122
17 123
17 126
17 144
17 144
17 145
17 148
17 154
17 158
17 159
17 159
17 158
17 158
17 158
17 157
17 158
17 158
17 158
17 158
17 157
17 158
17 158
17 158
17 151
17 150
17 149
17 149
17 148
17 143
17 141
16 129
16 128
16 128
16 128
16 128
16 128
16 128
16 130
16 130
16 130
16 132
16 133
16 134
15 134
12 134
13 134
13 137
3 115
2 115
2 114
2 114
2 114
3 115
4 117
4 120
4 117
4 118
4 115
4 109
4 108
4 107
4 107
4 109
4 109
4 107
4 104
4 101
4 100
4 97
4 98
4 98
4 98
4 99
4 99
4 99
4 99
4 99
4 99
4 98
4 97
4 97
4 89
4 88
4 74
4 74
4 75
4 81
4 83
4 85
4 87
4 89
4 88
4 89
4 89
4 90
4 90
3 90
3 89
3 88
3 88
3 85
3 85
3 83
4 63
4 61
4 61
4 62
5 62
5 62
5 61
5 61
5 61
5 61
5 61
5 59
5 59
5 59
5 59
5 59
5 59
5 58
5 58
5 58
5 58
5 58
5 58
5 57
5 57
5 57
5 57
5 57
5 57
5 57
5 57
5 57
5 57
5 57
5 55
5 55
5 54
5 52
5 52
5 49
5 50
5 50
4 48
4 46
4 46
4 45
4 46
4 46
4 46
3 49
2 39
2 48
2 51
2 50
2 51
2 54
2 54
2 54
2 54
2 52
2 52
2 52
2 60
2 60
2 60
2 60
2 60
2 60
2 60
2 60
2 60
2 61
2 62
2 62
2 63
2 69
2 72
2 72
2 73
2 74
2 74
2 77
2 74
2 69
2 66
2 67
2 65
2 64
2 64
2 63
2 63
2 62
2 62
2 62
1 62
1 62
1 62
1 60
1 59
1 59
1 59
0 58
0 57
0 57
0 57
0 57
0 57
0 58
0 58
0 58
0 62
0 62
0 62
0 63
0 63
0 63
0 64
0 64
0 64
0 64
0 64
0 63
0 63
0 63
0 63
0 66
0 67
0 66
0 66
0 66
0 67
0 67
0 67
0 67
0 67
0 67
0 65
0 65
0 64
0 64
0 64
0 64
0 64
0 65
0 65
0 65
0 64
0 65
0 64
0 37
0 33
0 31
0 31
0 31
0 31
0 31
0 31
0 31
0 31
0 29
0 28
0 29
0 29
0 29
0 30
0 30
0 30
0 30
0 31
0 31
0 30
0 30
0 28
0 28
0 29
0 28
0 30
0 31
0 30
0 30
0 28
0 25
0 23
0 23
0 23
0 23
0 23
0 23
0 23
0 23
0 23
0 23
0 23
0 23
0 23
0 23
0 23
0 23
0 23
0 23
0 23
0 23
0 23
0 23
0 23
0 23
0 23
0 23
0 23
0 21
0 18
0 18
0 18
0 18
0 18
0 18
0 17
0 17
0 17
0 17
0 17
0 17
0 17
0 16
0 15
0 14
0 13
0 13
0 13
0 12
0 12
0 12
0 12
0 12
0 13
0 13
0 13
0 14
0 14
0 14
0 14
0 14
1 17
1 16
1 15
1 15
1 15
1 16
1 16
1 18
1 18
1 18
1 18
1 18
1 18
1 18
1 18
1 18
1 18
1 18
1 18
1 17
1 16
1 16
1 16
1 16
1 16
1 16
1 14
1 14
1 14
1 14
1 13
1 13
1 11
1 11
1 9
1 9
1 10
1 10
1 10
1 10
1 10
1 10
1 11
1 11
1 11
1 11
1 11
1 11
1 11
1 11
1 11
1 11
1 12
1 12
1 12
1 12
1 12
1 12
1 13
1 14
1 15
1 16
1 16
1 15
1 15
1 15
1 15
1 15
1 15
1 15
1 15
1 15
1 15
1 15
1 15
1 15
1 15
1 15
1 15
1 15
1 15
1 15
1 15
1 15
1 15
1 15
1 15
1 16
1 16
1 16
2 21
2 21
2 20
2 20
3 22
3 25
3 26
3 27
3 32
4 49
5 49
6 55
6 55
6 56
6 56
7 55
7 55
7 54
7 54
7 54
7 54
7 54
7 54
7 54
7 54
7 54
7 55
7 56
7 56
7 56
7 56
7 56
7 56
7 56
7 56
7 56
7 56
7 56
7 57
7 57
7 57
7 59
7 60
7 60
7 60
7 60
7 61
7 61
7 61
7 63
7 63
7 64
7 64
7 65
7 69
7 70
7 74
7 75
7 83
7 83
7 83
8 84
9 83
10 85
10 88
10 89
10 91
10 90
10 90
10 91
10 91
10 90
10 100
10 100
10 101
10 101
10 101
10 101
10 101
10 101
10 103
10 103
10 103
10 103
11 103
11 103
11 103
11 103
11 103
11 103
11 103
11 103
11 103
11 103
11 103
11 103
11 103
11 103
11 103
11 103
10 98
10 97
10 97
10 95
7 89
7 90
5 84
6 83
6 78
5 67
5 68
5 66
5 68
8 74
8 75
8 77
8 77
8 76
8 76
8 76
8 76
8 77
8 77
8 77
9 77
9 77
9 76
9 76
9 76
9 77
9 77
9 77
9 77
9 77
9 77
9 78
10 83
10 83
10 85
10 85
10 85
10 84
10 83
10 84
10 84
10 83
10 81
10 81
10 81
10 79
10 79
10 78
10 79
10 87
10 83
10 80
10 75
10 74
10 66
10 63
10 63
9 64
8 64
7 63
7 62
7 62
7 60
7 60
8 62
8 61
8 62
8 58
8 58
8 58
8 57
8 57
8 57
8 57
8 57
8 57
8 55
8 55
7 55
7 55
7 55
7 55
7 55
7 55
7 55
7 55
7 55
7 55
7 55
7 56
7 56
7 57
7 57
7 56
7 56
7 55
7 55
7 52
7 52
7 52
7 54
7 53
6 53
6 52
6 52
6 54
6 52
6 53
5 52
3 45
3 43
3 42
3 41
3 41
3 41
3 42
3 43
3 42
3 42
3 42
2 42
2 42
2 42
2 42
2 42
2 41
2 41
2 41
2 41
2 40
3 40
3 39
2 35
2 35
2 31
2 30
2 30
2 30
2 33
2 33
2 34
2 34
2 34
2 35
2 35
2 35
2 36
2 36
2 35
2 24
2 24
2 25
2 25
2 25
2 25
2 25
2 25
2 23
2 23
2 23
2 22
2 21
2 21
2 21
1 21
1 24
1 24
1 24
1 25
1 26
1 27
1 27
1 27
1 28
2 30
2 31
2 33
2 33
2 33
2 33
2 33
2 33
2 33
2 33
2 33
2 33
2 33
2 33
2 33
2 32
2 32
2 32
2 32
2 32
2 32
2 32
2 32
2 33
2 34
2 34
2 34
2 34
2 34
2 35
2 36
2 35
2 33
2 34
2 38
2 39
2 39
2 39
2 39
2 39
3 39
3 38
3 37
3 37
3 37
3 37
3 37
3 37
3 37
3 37
3 39
3 39
3 41
3 41
3 41
3 41
2 41
2 41
2 41
2 41
2 41
2 41
2 41
2 41
2 37
2 37
2 35
2 35
2 34
2 34
2 34
2 34
2 36
2 36
2 36
2 36
2 35
2 35
2 35
2 35
2 35
2 35
2 37
2 37
2 37
2 37
2 37
2 39
2 39
2 39
2 37
2 34
2 34
2 34
2 33
1 33
1 32
1 32
1 32
1 31
1 30
1 26
1 26
1 26
1 26
1 26
1 26
1 26
1 26
1 26
1 26
1 26
1 26
1 26
1 26
1 27
1 26
1 24
1 24
1 24
1 24
1 24
1 26
1 26
1 25
1 25
1 24
1 22
1 22
1 22
1 26
1 27
1 27
0 27
0 23
0 23
0 23
0 23
0 23
0 23
0 23
0 24
0 24
0 25
0 25
0 25
0 26
0 25
0 25
0 25
0 24
0 23
0 22
0 22
0 22
0 22
0 22
0 22
0 22
0 22
0 22
0 22
0 22
0 22
0 22
0 22
0 22
0 23
0 23
0 23
0 23
0 24
0 22
0 22
0 22
0 22
0 22
0 22
0 22
0 22
0 22
0 22
0 23
0 24
0 25
0 25
0 25
0 23
0 23
0 23
0 23
0 23
0 23
0 23
0 22
0 22
0 22
0 22
0 22
0 22
0 21
0 21
0 21
0 21
0 21
0 22
0 22
0 22
0 22
0 23
0 23
0 23
0 22
0 22
0 22
0 22
0 22
0 23
0 24
0 24
0 24
0 23
0 22
0 22
0 23
0 22
0 21
0 21
0 20
0 20
0 19
0 17
0 17
0 17
0 17
0 17
0 17
0 17
0 17
0 18
0 18
0 17
0 17
0 16
0 16
0 16
0 16
0 16
0 16
0 16
0 16
0 16
0 16
0 16
0 16
0 16
0 17
0 17
0 17
0 17
0 17
0 17
0 17
0 17
0 17
0 17
0 17
0 16
0 16
0 16
0 17
0 16
0 16
0 16
0 16
0 16
0 16
0 15
0 15
0 15
0 15
0 15
0 11
0 11
0 11
0 11
0 12
0 12
0 12
0 12
0 12
0 12
0 12
0 12
0 12
0 13
0 14
0 14
0 15
0 15
0 15
0 15
0 15
0 15
0 15
0 14
0 14
0 14
0 14
0 13
0 13
0 13
0 13
0 13
0 13
0 12
0 12
0 10
0 10
0 11
0 11
0 11
0 10
0 10
0 9
0 9
0 9
0 9
0 11
0 11
0 11
0 15
1 20
1 24
2 59
3 62
3 65
3 67
3 71
3 71
3 73
3 73
3 74
3 74
3 74
3 74
3 73
3 73
3 73
3 73
3 73
4 74
4 74
4 74
4 74
4 73
4 73
4 73
4 73
4 73
4 73
4 74
4 74
4 74
4 74
4 74
4 74
4 73
4 78
4 79
4 79
4 79
4 79
4 81
4 82
4 83
4 83
4 83
4 83
4 83
4 84
4 84
4 84
4 84
4 84
4 84
4 85
4 94
4 95
4 95
4 97
4 98
4 98
4 98
4 103
4 102
4 103
4 104
4 104
4 104
4 104
4 104
4 104
4 104
4 104
4 104
4 104
4 104
4 104
4 104
4 104
4 104
4 104
4 104
4 104
4 104
4 105
4 105
4 105
4 102
4 104
4 102
4 114
4 111
4 111
4 110
4 110
4 110
4 110
4 110
4 110
3 102
2 98
1 89
1 62
1 60
1 59
1 58
1 55
1 55
1 54
1 54
1 54
1 57
1 57
1 57
1 57
1 57
1 57
1 57
0 56
0 56
0 56
0 56
0 56
0 57
0 57
0 57
0 57
0 57
0 57
0 56
0 56
0 56
0 56
0 56
0 56
0 56
0 50
0 51
0 51
0 51
0 51
0 49
0 48
0 47
0 47
0 51
0 51
0 51
0 51
0 51
0 51
0 51
0 51
0 53
0 51
0 42
0 41
0 41
0 41
0 41
0 41
0 41
0 36
0 36
0 33
0 33
0 32
0 32
0 32
0 32
0 32
0 32
0 32
0 32
0 32
0 34
0 35
0 35
0 35
0 35
0 35
0 35
0 35
0 35
0 33
0 33
0 34
0 34
0 33
0 32
0 19
0 19
0 20
0 20
0 20
0 23
0 26
0 27
0 28
0 28
0 29
0 29
0 30
0 30
0 30
0 31
0 31
0 31
0 31
0 31
0 31
0 28
0 28
0 28
0 28
0 28
0 28
0 28
0 28
0 28
0 28
0 28
0 28
0 27
0 27
0 27
0 27
0 27
0 27
0 27
0 27
0 27
0 27
0 28
0 28
0 28
0 27
0 27
0 29
0 28
0 29
0 31
0 29
0 29
0 30
0 26
0 27
0 27
0 28
0 28
0 29
0 30
0 30
0 28
0 28
0 28
0 28
0 28
0 28
0 28
0 30
0 30
0 30
0 30
0 30
0 30
0 30
0 30
0 30
0 30
0 30
0 31
0 31
0 31
0 31
0 29
0 28
0 28
0 29
0 29
0 30
0 31
0 31
0 31
0 31
0 31
0 30
0 30
0 30
0 30
0 32
0 32
0 31
0 32
0 32
0 30
0 26
0 25
0 26
0 26
0 25
0 24
0 24
0 24
0 24
0 24
0 24
0 24
0 24
0 25
0 25
0 25
0 25
0 25
0 25
0 25
0 25
0 25
0 28
0 29
0 29
0 29
0 29
0 29
0 29
0 29
0 29
0 29
0 29
0 29
0 29
0 28
0 28
0 27
0 28
0 32
0 32
0 33
0 31
0 30
0 29
0 29
0 30
0 31
0 29
0 29
0 29
0 29
0 28
0 29
0 29
0 28
0 30
0 31
0 31
0 31
0 31
0 33
0 33
0 33
0 33
0 33
0 33
0 33
0 33
0 33
0 33
0 33
0 33
0 33
0 33
0 32
0 32
0 32
0 32
0 32
0 35
0 35
0 33
0 32
0 34
0 35
0 35
0 35
0 35
0 35
0 35
0 35
0 35
0 34
0 33
0 32
0 32
0 32
0 32
0 31
0 31
0 30
0 30
0 30
0 32
0 32
0 43
0 43
0 43
0 44
0 44
0 44
0 44
0 44
0 44
0 44
0 44
0 44
0 47
0 45
0 45
0 45
0 43
0 43
0 43
0 43
0 43
0 43
0 43
0 43
0 43
0 43
0 43
0 43
0 43
0 43
0 43
0 43
0 42
0 37
0 37
0 37
0 37
0 37
0 38
1 37
1 49
1 52
1 55
1 58
1 58
1 58
1 60
1 58
1 59
1 60
1 58
1 57
1 59
1 58
1 58
1 57
1 57
1 57
1 57
1 57
1 57
1 57
1 57
1 57
1 57
1 58
1 58
1 58
1 58
1 58
1 58
1 58
1 58
1 58
1 55
1 55
1 55
1 54
1 53
1 55
1 55
1 55
1 55
1 55
1 55
1 55
1 55
1 55
1 55
1 55
1 55
1 56
1 56
1 56
1 58
1 58
1 57
1 58
1 57
1 57
1 46
1 46
1 44
1 43
1 42
1 42
1 42
1 42
1 42
1 42
1 42
1 42
1 41
1 41
1 41
1 41
1 41
1 41
1 41
1 41
1 41
1 41
1 41
1 41
1 41
1 41
1 39
1 38
1 38
1 38
1 38
1 38
1 37
1 37
1 36
1 36
1 35
1 35
1 33
0 31
0 14
0 13
0 13
0 12
0 12
0 12
0 12
0 10
0 9
0 8
0 8
0 8
0 8
0 8
0 8
0 8
0 8
0 8
0 8
0 8
0 8
0 8
0 8
0 8
0 8
0 8
0 8
0 8
0 8
0 8
0 8
0 8
0 8
0 6
0 6
0 6
0 6
0 6
0 5
0 5
0 5
0 5
0 5
0 5
0 5
0 5
0 5
0 5
0 5
0 5
0 4
0 4
0 4
0 4
0 2
0 2
0 2
0 1
0 0
0 0
0 0
0 0
0 0
0 0
0 0
0 0
0 0
0 0
0 0
0 0
0 0
0 0
0 0
0 0
0 0
0 0
0 0
0 0
0 0
0 2
0 4
0 4
0 4
0 4
0 5
0 5
0 5
0 5
0 5
0 5
0 5
0 5
0 5
0 5
0 5
0 5
0 5
0 5
0 5
0 5
0 5
0 5
0 5
0 5
0 5
0 5
0 5
0 5
0 5
0 5
0 7
0 7
0 7
0 7
0 7
0 7
0 7
0 7
0 7
0 7
0 7
0 7
0 7
0 7
0 7
0 7
0 7
0 7
0 7
0 7
0 7
0 7
0 7
0 7
0 7
0 7
0 7
0 7
0 7
0 7
0 7
0 7
0 7
0 7
0 7
0 7
0 7
0 7
0 7
0 7
0 8
0 8
0 8
0 8
0 8
0 8
0 8
0 8
0 8
0 8
0 8
0 9
0 9
0 10
0 10
0 10
0 10
0 10
0 10
0 10
0 10
0 10
0 10
0 10
0 10
0 10
0 10
0 10
0 10
0 8
1 6
1 6
1 6
1 6
1 5
1 5
1 5
2 5
2 5
2 5
2 5
2 5
2 5
2 5
2 5
2 5
2 5
2 5
2 5
2 5
2 5
2 5
2 5
2 5
3 10
3 10
3 11
3 13
3 13
3 14
3 12
3 12
3 12
3 12
3 12
3 12
3 12
3 12
3 12
3 12
3 12
3 12
3 14
3 15
3 15
3 15
3 15
3 15
3 16
3 16
3 16
3 16
3 16
3 16
3 16
3 16
3 16
3 16
3 16
3 17
3 19
4 25
4 26
5 31
5 36
5 37
5 37
6 44
6 44
6 44
6 44
6 44
6 46
6 48
7 48
7 49
7 49
7 49
7 49
7 49
7 49
7 48
7 48
7 47
7 47
7 47
7 47
7 47
7 50
7 50
7 51
7 51
7 51
7 51
7 51
7 51
7 52
8 52
8 52
9 52
8 52
8 55
8 55
8 57
8 58
8 58
8 58
7 60
7 60
7 60
7 60
7 60
7 60
7 61
7 61
7 61
7 61
7 61
7 61
7 61
7 62
7 63
6 63
6 63
5 55
5 58
5 58
5 57
5 57
5 57
5 57
5 57
5 57
5 57
5 57
5 57
5 57
5 57
5 57
6 57
6 57
6 57
6 55
6 54
6 55
6 55
6 55
6 55
6 54
6 57
6 62
6 65
6 65
6 65
6 66
6 67
6 67
6 67
6 66
6 65
5 63
5 55
5 52
5 46
5 45
5 45
4 44
4 37
4 37
4 41
4 40
4 39
4 40
3 39
3 38
3 39
3 39
3 40
3 40
3 40
3 40
3 40
3 40
3 40
3 40
3 40
3 40
3 40
3 37
3 37
3 36
3 36
3 36
3 39
3 40
3 40
3 40
1 40
1 39
1 39
1 39
1 37
1 37
0 34
0 35
0 36
0 36
0 34
0 34
0 34
0 34
0 34
0 34
0 33
0 33
0 33
0 33
0 33
0 33
0 33
0 32
0 31
0 31
0 31
0 31
0 28
0 28
0 28
0 28
0 28
0 28
0 30
0 30
0 30
0 30
0 31
0 35
0 35
0 35
0 35
0 35
0 35
0 35
0 35
0 36
0 36
0 36
0 37
0 37
0 33
0 28
0 26
0 25
0 25
0 25
0 24
0 24
0 24
0 24
0 24
0 25
0 26
0 26
0 26
0 26
0 26
0 26
0 26
0 26
0 22
0 22
0 24
0 24
0 24
0 23
0 23
0 22
0 22
0 22
0 22
0 22
0 22
0 22
0 22
0 22
0 22
0 22
0 23
0 25
0 25
0 25
1 25
1 25
1 22
1 22
1 22
1 21
1 21
1 21
1 21
1 21
1 21
1 21
1 19
1 19
1 19
1 19
1 19
1 19
1 19
1 19
1 21
1 23
1 23
1 24
1 26
1 26
1 26
1 26
1 26
1 26
1 26
1 26
1 26
1 26
1 27
1 27
1 29
1 29
1 29
1 29
1 27
1 27
1 27
1 27
1 26
1 22
1 22
1 22
1 22
1 22
1 22
1 22
1 22
1 20
1 20
1 20
1 19
1 19
1 19
1 19
1 19
1 19
1 19
1 19
1 19
1 19
1 31
1 33
1 34
1 33
1 32
1 32
1 32
1 34
1 35
1 36
1 37
1 37
1 37
1 38
1 36
1 36
1 38
1 38
1 40
1 42
1 42
1 42
2 43
2 44
2 44
2 45
2 45
2 45
1 45
1 44
1 44
1 42
1 42
1 42
1 42
1 41
1 41
1 41
1 41
1 41
1 40
1 39
1 39
1 39
1 39
1 39
1 39
1 39
1 39
1 39
1 39
1 40
1 40
3 40
3 39
4 38
5 36
5 35
5 35
5 35
8 35
16 35
18 35
18 35
18 35
18 35
18 35
19 35
20 35
20 35
20 34
20 34
21 34
21 34
21 34
21 34
21 34
21 34
21 34
21 34
21 34
21 34
21 34
21 33
21 42
26 42
27 43
27 43
27 43
27 43
27 43
27 43
27 43
27 43
31 43
34 43
34 42
34 42
34 42
34 41
34 30
34 29
34 29
34 29
34 29
34 29
34 28
34 27
34 26
34 26
34 26
34 26
34 27
34 27
34 27
34 28
34 29
34 33
34 30
34 28
34 28
34 29
33 29
33 31
33 31
33 30
33 30
33 30
33 30
33 30
33 30
34 30
36 30
36 30
36 30
36 30
36 30
36 30
36 30
36 30
36 30
36 30
36 30
36 30
36 30
36 30
36 31
36 31
36 32
36 32
36 32
36 31
35 31
34 31
34 31
32 31
32 31
32 31
31 31
30 31
28 31
21 31
19 31
19 31
19 32
20 32
20 34
19 34
18 33
18 32
18 32
17 32
17 32
17 32
17 32
17 32
17 32
17 35
17 35
17 35
17 35
17 34
17 34
16 34
14 26
10 26
9 25
9 25
9 25
9 25
9 25
9 25
9 25
8 25
4 25
5 27
5 27
5 43
5 43
5 44
5 47
5 47
5 47
5 48
5 48
5 48
5 48
5 48
5 47
5 44
5 44
5 45
5 44
5 42
5 37
5 36
5 36
5 36
5 36
5 36
5 36
5 34
5 34
5 32
5 32
5 32
5 32
5 32
5 32
5 32
5 32
3 32
2 32
2 32
2 32
2 32
2 32
2 32
2 32
2 32
2 32
2 32
2 32
3 32
3 32
3 32
3 31
4 31
4 30
4 32
4 32
4 32
4 32
4 32
4 32
4 32
4 32
4 32
4 32
4 32
4 33
4 34
4 34
4 34
3 33
3 33
3 31
3 31
3 31
3 31
3 31
3 31
3 31
3 31
3 31
3 31
3 30
3 28
3 28
3 28
3 28
3 28
3 29
3 30
3 30
3 31
3 31
3 31
3 31
3 31
3 31
3 31
3 39
3 40
3 42
2 42
3 43
3 24
3 23
3 23
3 23
3 24
3 24
3 25
4 25
5 31
5 31
5 31
5 31
5 31
5 31
5 31
5 31
5 31
5 31
5 31
5 31
5 32
5 32
5 32
5 32
5 32
5 32
5 32
5 32
5 32
5 33
5 33
5 33
5 33
5 33
5 33
5 33
5 33
5 33
4 33
4 33
4 31
4 31
4 31
4 31
4 31
4 31
4 31
4 31
4 31
4 31
3 31
3 31
3 31
3 32
3 32
3 33
3 33
3 34
3 39
3 39
3 39
3 39
3 39
3 38
3 37
3 37
3 37
3 37
3 37
3 37
3 37
3 37
3 39
3 41
3 41
3 41
3 41
3 41
3 41
3 41
3 41
3 41
3 41
3 41
3 40
3 40
3 39
3 39
3 38
3 38
3 38
3 38
3 37
3 37
3 33
3 25
3 25
3 25
3 24
2 25
2 25
2 23
2 23
2 23
2 23
2 23
2 23
1 23
0 17
0 17
0 17
0 17
0 17
0 17
0 17
0 16
0 16
0 16
0 16
0 16
0 16
0 16
0 16
0 16
0 16
0 16
0 16
0 16
0 15
0 15
0 15
1 15
1 15
1 15
1 15
1 15
1 15
1 15
1 16
1 16
1 16
1 16
1 16
1 16
1 16
1 17
1 15
1 15
1 15
2 18
2 18
2 18
2 18
2 17
2 17
2 16
2 16
2 16
2 12
2 12
2 12
2 12
2 12
2 12
2 12
2 11
2 11
2 11
2 10
2 10
2 10
2 10
2 9
2 8
2 8
2 8
2 8
2 9
2 9
2 12
2 12
2 12
2 12
2 12
2 12
2 12
2 12
2 12
2 12
2 13
2 13
2 13
2 13
3 12
3 12
3 12
3 12
3 12
3 12
3 11
3 11
3 11
3 11
3 11
3 11
3 11
3 11
3 11
3 11
3 11
3 12
3 12
3 12
3 12
3 12
3 14
3 14
3 15
3 16
3 16
3 16
3 16
3 16
3 16
3 16
4 16
4 16
3 16
3 16
3 16
3 16
3 18
3 18
3 18
3 19
3 19
3 19
3 18
3 18
3 17
3 17
3 17
3 17
3 17
3 17
3 17
3 17
3 17
3 18
2 15
2 16
2 16
2 16
2 16
2 16
2 15
2 15
2 15
2 15
2 15
2 15
2 15
2 17
2 17
2 17
2 17
2 17
2 17
2 17
2 17
2 17
2 17
2 16
2 16
2 16
2 16
4 15
4 14
4 15
4 14
4 14
4 15
4 15
4 15
4 15
4 15
4 15
3 15
3 15
3 14
3 15
3 15
3 15
3 15
3 15
3 15
3 15
3 14
3 14
3 14
3 14
3 14
3 15
3 14
3 14
3 14
3 14
3 14
3 14
3 14
3 14
3 14
3 14
3 14
3 14
4 12
4 12
4 11
4 9
4 8
4 8
4 8
4 8
4 8
4 8
3 8
3 8
3 8
3 8
3 8
3 8
3 8
3 8
3 8
3 7
3 7
4 7
4 7
4 7
4 7
4 7
4 7
4 7
4 7
4 7
4 7
4 6
4 6
4 5
4 5
4 5
4 5
4 6
4 6
4 6
4 6
4 6
4 6
4 6
4 6
4 6
4 6
4 4
4 4
4 4
4 4
4 4
4 4
4 4
4 4
4 5
4 5
4 5
4 5
4 5
3 5
2 5
2 5
2 4
2 4
2 4
2 4
2 4
2 4
2 4
2 4
2 4
2 4
2 5
2 6
2 7
2 10
2 11
2 12
2 12
2 12
2 12
4 12
4 12
4 12
6 12
6 11
6 11
6 11
6 11
6 11
6 11
6 11
6 11
6 11
6 11
6 11
6 11
6 11
6 11
5 11
5 11
5 11
5 11
6 11
6 11
6 11
6 11
6 11
6 11
6 11
6 11
6 11
6 11
6 11
6 11
6 11
6 11
6 11
5 11
5 11
5 11
5 11
5 11
5 11
5 11
5 11
5 11
5 10
5 10
5 10
5 10
5 10
5 11
5 12
5 12
5 12
5 11
5 11
5 11
5 11
5 11
5 11
5 11
5 11
5 11
5 11
5 11
5 11
5 11
5 11
5 11
5 11
5 11
5 11
5 10
5 10
5 10
5 10
5 10
5 10
5 10
5 10
5 10
5 10
5 10
5 10
5 10
6 10
6 10
6 10
6 9
6 7
6 7
6 4
6 4
6 3
6 3
6 4
6 4
6 4
6 4
4 4
4 4
2 4
2 4
2 4
2 4
2 4
2 4
2 4
2 4
2 4
2 4
2 4
2 4
2 4
2 4
2 4
2 4
2 4
2 4
2 4
2 4
1 4
1 4
1 4
1 4
1 4
1 4
1 4
1 4
1 4
1 4
1 4
1 4
1 4
1 4
1 4
1 4
1 4
1 4
1 4
1 4
1 4
1 5
1 5
1 5
1 5
1 6
1 6
1 6
1 5
1 5
1 4
1 4
1 4
1 4
1 4
1 4
1 4
1 4
1 4
1 4
1 4
1 4
1 4
1 4
1 4
1 4
1 4
1 4
1 4
1 4
1 4
1 4
1 4
1 4
1 4
1 4
1 4
1 4
1 4
1 4
0 4
0 4
0 4
0 4
0 7
0 7
0 7
0 7
0 7
0 7
0 7
0 7
0 7
0 7
0 6
0 6
0 6
0 6
0 6
0 6
0 6
0 6
0 7
0 7
0 7
0 7
0 8
0 8
0 8
0 8
0 8
0 8
0 8
0 8
0 8
0 8
0 8
0 8
0 8
0 8
0 8
0 8
0 8
0 8
0 8
0 8
0 8
0 8
0 8
0 8
0 8
0 8
0 8
0 8
0 8
0 8
0 8
0 8
0 8
0 7
0 7
0 7
0 7
0 6
0 6
0 6
0 6
0 6
0 6
0 6
0 6
0 6
0 6
0 6
0 7
0 7
0 7
0 7
0 7
0 7
0 7
0 7
0 7
0 7
0 8
0 8
0 8
0 8
0 8
0 8
0 8
0 8
0 8
0 8
0 8
0 8
0 8
0 9
0 9
0 11
0 11
0 11
0 11
0 9
0 8
0 8
0 8
0 8
0 8
0 8
0 8
0 8
0 6
0 6
0 6
0 6
0 6
0 6
0 6
0 6
0 6
0 6
0 5
0 5
0 5
0 5
0 5
0 5
0 5
0 5
0 5
0 5
0 5
0 5
0 5
0 5
0 5
0 5
0 5
0 5
0 5
0 5
0 5
0 5
0 5
0 5
0 5
0 5
0 5
0 5
0 5
0 5
0 5
0 5
0 5
0 5
0 7
0 7
0 7
0 7
0 7
0 7
0 12
0 12
0 12
0 11
0 12
0 12
0 12
0 12
0 12
0 12
0 12
0 12
0 12
0 13
0 13
0 14
0 17
0 23
0 23
0 25
0 25
0 25
0 25
0 25
0 25
0 25
0 25
0 25
0 25
0 25
0 25
0 26
0 26
0 25
0 25
0 25
0 25
0 23
0 23
0 23
0 23
0 23
0 23
0 23
0 23
0 23
0 23
0 23
0 23
0 23
0 23
0 23
0 23
0 23
0 23
0 23
0 23
0 23
0 23
0 23
0 23
0 23
0 23
0 23
0 23
0 23
0 23
0 23
0 23
0 23
0 23
0 23
0 23
0 23
0 23
0 23
0 23
0 23
0 23
0 23
0 23
0 23
0 23
0 23
0 23
0 23
0 23
0 23
0 23
0 23
0 23
0 23
0 23
0 22
0 21
0 21
0 21
0 21
0 21
0 20
0 15
0 15
0 15
0 15
0 15
0 15
0 15
0 15
0 15
0 15
0 15
0 14
0 14
0 12
0 12
0 12
0 6
0 3
0 1
0 1
0 1
0 1
0 1
0 1
0 1
0 1
0 1
0 1
0 1
0 1
0 1
0 0
0 0
0 0
0 0
0 0
0 0
0 0
0 0
0 0
0 0
0 0
0 0
0 0
0 0
0 0
0 0
0 0
0 0
0 0
0 0
0 0
0 0
0 0
0 0
0 0
0 0
0 0
0 0
0 0
0 0
0 0
0 0
0 0
0 0
0 0
0 0
0 0
0 0
0 0
0 0
0 0
0 0
0 0
0 0
0 0
0 0
0 0
0 0
0 0
0 0
0 0
0 0
0 0
0 0
0 0
0 0
0 0
0 0
0 0
0 0
0 0
0 0
0 0
0 0
0 0
0 0
0 0
0 0
0 0
0 0
0 0
0 0
0 0
0 0
0 0
0 0
0 0
0 0
0 0
0 0
0 1
0 1
0 1
0 1
0 1
0 1
0 1
0 1
0 1
0 1
0 1
0 1
2 1
5 1
5 1
5 1
5 1
8 1
8 1
8 1
8 1
8 1
104 1
105 1
106 2
109 2
109 2
113 2
113 2
113 2
113 2
113 2
113 2
113 2
113 2
114 2
114 2
114 2
114 2
114 2
114 2
114 2
114 2
114 2
114 2
114 3
114 3
114 3
114 3
114 3
114 3
114 3
114 3
114 3
116 3
120 3
131 3
138 3
139 3
141 3
148 3
149 3
151 3
162 5
163 5
163 5
165 5
166 5
166 5
166 5
166 5
166 5
166 5
167 5
167 5
167 5
167 5
167 5
187 5
193 5
195 5
200 5
210 5
211 5
247 5
247 5
323 5
332 5
342 5
349 5
358 5
362 5
371 5
373 5
391 5
391 5
396 5
397 5
397 5
398 4
399 4
399 4
399 4
400 4
400 4
400 4
400 4
399 5
401 5
403 6
405 6
406 6
404 6
401 6
401 6
400 6
400 6
397 6
397 6
415 7
416 7
417 7
327 7
328 6
329 6
329 6
329 6
328 6
328 6
328 6
330 6
333 7
334 7
334 7
336 7
335 7
337 7
337 7
350 7
351 7
360 7
380 7
387 7
388 6
391 6
392 6
392 6
392 6
394 6
394 6
394 6
394 6
391 6
389 6
364 6
363 6
363 6
362 6
358 6
367 6
362 6
360 6
365 6
358 4
359 4
359 4
361 4
361 4
361 4
361 4
361 4
360 4
359 4
349 4
348 4
346 4
345 4
337 4
295 4
266 4
262 4
239 4
226 4
223 4
218 4
212 4
181 4
171 4
169 4
168 4
162 4
163 4
159 4
159 4
147 4
146 4
148 4
148 4
148 4
147 4
148 4
148 4
148 4
150 4
150 4
150 3
149 3
148 3
144 3
141 2
135 2
135 2
135 2
135 2
135 2
135 2
135 2
135 2
134 2
115 1
116 1
115 1
114 1
116 1
115 1
115 1
114 1
111 1
110 1
108 0
106 0
104 0
105 0
106 0
107 0
109 0
108 0
106 0
93 0
91 0
82 0
57 0
53 0
54 0
56 0
71 0
73 0
72 0
72 0
72 0
71 0
75 0
83 0
84 0
124 0
126 0
129 1
129 2
129 2
120 5
119 8
121 9
117 10
115 10
114 11
114 11
109 11
109 11
109 11
109 11
110 11
110 11
110 11
111 11
111 11
111 11
111 11
111 11
111 11
111 11
114 11
113 11
117 11
117 11
117 11
121 11
127 11
127 11
127 11
126 11
128 12
131 14
139 14
141 14
136 14
137 15
135 16
138 16
140 16
142 16
142 16
145 16
145 16
142 16
143 16
143 16
143 16
144 17
144 17
144 17
144 17
144 17
144 17
144 17
144 17
144 17
144 17
144 17
144 18
144 18
143 18
143 18
143 18
143 18
144 19
146 19
146 19
146 19
146 19
146 19
145 20
147 20
146 20
146 20
147 20
145 20
145 20
145 20
145 20
145 20
146 20
146 20
136 20
140 20
137 20
129 21
125 21
125 21
124 21
122 21
119 22
111 22
102 22
102 22
78 22
78 23
75 21
74 19
74 13
76 12
77 11
77 11
77 11
78 11
78 11
78 11
78 11
81 12
82 12
85 12
85 12
85 12
85 12
85 12
86 12
122 15
123 15
121 15
122 16
122 17
120 17
121 17
118 17
118 18
119 18
116 18
114 18
115 18
115 18
112 17
108 17
102 16
101 17
98 17
99 16
100 16
99 15
96 15
114 17
112 18
110 18
109 18
115 20
130 21
140 21
142 21
143 21
145 20
146 20
146 20
146 20
147 20
147 20
152 20
154 20
153 20
153 20
154 19
154 19
155 19
154 19
160 19
160 18
158 18
158 18
157 18
158 18
160 19
160 19
166 19
186 19
189 19
193 20
195 21
195 21
199 21
201 21
202 21
205 23
204 24
204 24
205 24
203 24
199 23
199 23
200 22
203 22
203 22
203 22
203 22
205 23
210 23
224 24
233 24
233 25
233 24
233 24
232 24
233 24
234 23
242 23
265 25
268 26
269 26
269 26
269 26
283 26
280 25
278 25
276 25
275 25
276 25
278 25
278 25
273 25
239 20
239 20
239 20
238 20
261 20
263 20
283 20
287 20
291 20
301 20
305 21
313 21
322 21
326 21
327 21
327 22
326 21
324 20
324 20
324 20
324 20
321 18
320 18
299 16
299 16
297 16
289 16
281 15
272 15
268 15
267 15
266 15
266 15
266 15
266 15
265 15
265 15
264 15
259 15
258 15
258 15
258 15
258 15
258 15
257 15
255 15
250 15
250 15
250 15
249 15
246 15
241 15
239 14
233 13
219 13
208 12
206 12
202 12
201 11
200 11
195 11
193 11
193 11
191 8
191 8
191 8
191 8
191 8
191 8
191 8
190 8
189 8
188 8
185 8
179 8
175 7
166 7
158 6
155 5
154 5
149 5
146 5
145 5
144 3
138 3
130 3
116 2
115 2
114 2
112 2
112 2
95 2
90 2
90 2
90 2
89 2
88 2
87 2
86 2
86 2
80 2
79 2
77 2
70 2
61 2
58 2
38 2
34 2
26 1
16 1
14 1
9 1
2 0
0 0
0 0
0 0
0 0
0 0
0 0
0 0
0 0
0 0
0 0
0 0
0 0
0 0
0 0
0 0
0 0
0 0
0 0
0 0
0 0
0 0
0 0
0 0
0 0
0 0
0 0
0 0
0 0
0 0
0 0
0 0
0 0
0 0
0 0
0 0
0 0
0 0
0 0
0 0
0 0
0 0
0 0
0 0
0 0
0 0
0 0
0 0
0 0
0 0
0 0
0 0
0 0
0 0
0 0
0 0
0 0
0 0
0 0
0 0
0 0
0 1
4 5
4 6
5 14
5 16
5 17
5 17
5 17
5 17
5 17
5 17
5 17
5 17
5 17
5 17
5 17
5 17
5 18
5 18
5 18
5 18
5 18
5 18
5 19
5 19
5 19
5 19
5 19
5 19
5 19
5 19
5 19
5 19
5 19
5 19
5 19
5 19
5 19
5 19
5 19
5 19
5 19
5 19
5 19
5 19
5 19
5 19
5 19
5 19
5 19
5 19
5 19
5 19
5 19
5 19
5 19
5 19
5 19
5 19
5 19
5 20
5 20
5 20
5 20
5 20
5 20
5 20
5 20
5 20
5 20
5 20
5 20
5 20
5 18
5 18
5 18
5 18
5 18
5 18
5 18
5 18
5 18
5 18
5 19
5 19
5 19
5 19
5 19
5 20
5 20
5 20
5 23
5 23
5 23
5 23
5 23
5 24
5 24
5 24
5 24
5 24
0 13
0 10
0 10
0 10
0 9
0 9
0 9
0 9
0 9
0 9
0 9
0 9
0 9
0 9
0 9
0 9
0 8
0 8
1 8
2 8
2 10
4 18
4 18
4 18
4 19
4 20
5 20
5 20
5 20
5 20
5 21
5 21
5 21
5 21
5 21
5 21
5 21
5 21
5 21
5 21
5 21
5 21
5 21
5 21
5 21
5 21
5 21
10 25
10 26
10 26
10 26
10 26
10 26
11 26
11 26
11 28
11 28
12 28
12 28
12 27
13 27
13 27
14 29
14 29
14 29
14 30
14 30
14 30
14 30
14 30
14 31
14 31
14 31
14 31
14 31
14 31
14 31
14 31
14 31
14 31
14 31
14 31
15 31
15 31
15 33
16 38
16 38
16 37
16 37
16 37
16 34
16 34
16 34
16 34
16 34
16 34
16 34
16 34
16 34
16 34
16 34
16 34
16 34
16 34
16 35
16 35
16 35
16 35
16 34
16 34
16 34
16 34
16 34
16 34
16 34
16 33
16 34
16 34
15 34
14 33
14 32
12 25
12 24
12 24
12 24
12 23
11 23
11 23
11 23
11 23
11 22
11 22
11 22
11 22
11 22
11 22
11 23
11 23
11 23
11 23
11 23
11 24
11 24
11 24
11 24
11 24
11 24
5 19
4 19
4 19
4 19
4 19
3 19
3 19
3 19
3 17
3 17
2 17
2 17
2 17
2 17
2 16
2 16
2 16
2 17
2 16
2 16
2 17
2 17
2 17
2 16
2 16
2 16
2 16
2 16
2 16
2 16
2 18
2 35
2 41
2 43
2 48
1 47
1 47
1 45
0 40
0 40
0 41
0 41
0 44
0 44
0 44
0 44
0 44
0 44
0 43
0 44
0 45
0 45
0 45
0 45
0 45
0 45
0 45
0 44
0 44
0 43
0 43
0 43
0 44
0 46
1 46
1 46
1 46
1 45
1 45
1 45
1 45
1 45
1 45
1 45
1 45
1 45
1 45
1 45
1 45
1 45
1 45
1 45
1 45
1 46
1 46
1 46
1 46
1 47
1 47
1 46
1 46
1 46
1 46
1 46
1 45
1 45
1 47
1 47
1 47
1 47
1 47
1 47
1 47
1 47
1 47
1 47
1 48
1 48
1 48
1 47
1 47
1 48
1 48
1 49
1 49
1 49
1 49
1 48
1 47
1 47
1 46
1 46
1 46
1 47
1 47
1 48
1 48
1 47
1 46
1 45
1 42
1 24
1 18
1 17
1 17
1 17
1 17
1 17
1 17
1 17
1 17
1 17
1 14
1 14
1 14
1 14
1 14
1 14
1 14
1 13
1 12
1 12
1 12
1 12
1 12
1 12
1 12
1 12
1 12
1 12
1 12
1 12
1 11
1 9
0 9
0 9
0 9
0 9
0 9
0 9
0 9
0 9
0 9
0 9
0 9
0 9
0 9
0 9
0 9
0 9
0 9
0 9
0 9
0 8
0 8
0 8
0 8
0 7
0 7
0 7
0 7
0 7
0 7
0 7
0 6
0 6
0 5
0 5
0 5
0 5
0 5
0 5
0 5
0 5
0 5
0 5
0 4
0 4
0 4
0 3
0 3
0 3
0 2
0 2
0 2
0 2
0 2
0 2
0 2
0 2
0 2
0 2
0 2
0 1
0 1
1 118
1 126
1 132
1 133
2 133
2 134
2 134
2 134
2 134
2 140
2 143
3 152
3 156
3 157
3 158
3 160
3 160
3 161
3 161
3 162
3 164
3 164
3 164
3 166
3 166
3 168
3 169
3 169
3 170
3 170
3 170
3 170
3 170
3 171
3 172
3 173
3 174
3 174
3 174
3 174
3 174
3 175
3 177
3 177
3 177
3 177
3 177
3 177
3 177
3 177
3 177
3 177
3 177
3 177
3 177
3 177
3 177
3 177
3 177
3 177
3 177
3 177
3 177
3 177
3 177
3 177
3 177
3 177
3 178
3 178
3 178
3 178
3 179
3 180
4 182
4 183
4 183
4 183
4 183
4 184
4 184
4 184
4 184
4 185
4 186
4 186
4 187
4 187
4 187
4 187
4 187
4 187
4 187
4 187
4 187
4 187
4 187
4 186
4 185
4 181
3 52
2 50
2 49
3 49
4 49
4 49
4 49
4 47
4 47
4 41
4 36
3 28
3 26
3 25
3 25
3 24
3 24
3 23
3 23
3 23
3 22
4 22
5 21
5 20
5 20
5 19
6 18
8 18
8 18
8 18
8 18
8 18
8 18
8 17
8 16
8 15
8 14
8 14
8 14
8 14
8 14
8 12
8 11
8 11
8 11
8 11
8 11
8 11
8 11
8 11
8 11
8 11
8 11
8 11
8 11
8 11
8 11
8 11
8 11
8 11
8 11
8 11
8 11
8 11
8 11
8 11
8 11
8 10
8 10
8 10
8 10
8 10
8 9
8 7
7 5
7 5
7 5
7 5
7 5
7 4
7 5
7 5
7 5
7 4
7 3
7 3
7 2
7 2
7 2
7 2
7 2
7 2
7 2
7 2
7 2
7 2
7 2
7 2
7 2
7 2
7 2
7 2
6 2
5 2
5 2
6 2
6 2
6 2
5 2
5 2
5 2
5 2
5 2
5 2
5 3
5 3
5 3
5 3
5 3
5 3
4 3
4 2
3 2
3 2
3 2
3 2
3 2
1 2
1 3
1 3
1 3
1 3
1 3
1 3
1 3
1 3
1 3
1 3
1 3
1 3
1 3
1 3
1 3
1 3
2 3
2 3
2 3
2 3
2 3
2 3
2 3
2 3
2 3
2 3
2 3
2 3
2 3
2 3
2 3
2 3
3 3
3 3
3 3
3 3
3 3
3 3
3 3
3 3
3 3
3 3
3 3
3 3
3 3
3 3
3 3
3 3
3 3
3 3
3 3
3 3
3 2
3 2
3 2
3 2
3 2
3 2
3 2
3 2
3 2
3 2
3 2
3 2
3 2
3 2
3 2
4 2
4 2
4 2
4 2
4 2
4 2
4 2
4 2
4 2
3 2
3 3
3 3
3 3
3 3
3 4
3 4
3 4
3 5
3 5
3 6
3 7
3 7
3 7
3 7
3 7
3 7
3 8
3 8
3 8
3 8
3 9
3 9
3 9
3 11
3 11
3 12
3 12
3 13
3 16
4 26
4 30
4 37
4 37
4 37
4 38
4 38
3 38
3 38
3 38
3 39
3 39
3 39
3 39
3 39
3 39
3 40
3 40
3 42
3 43
3 43
3 47
3 47
3 47
3 47
2 47
2 47
2 47
2 47
2 47
2 47
2 47
2 47
2 47
2 47
2 47
2 47
2 47
2 47
2 47
2 47
2 47
2 48
2 48
2 48
2 48
2 48
2 48
2 48
2 48
2 48
2 48
2 48
2 48
2 48
2 48
2 48
2 48
2 48
2 49
2 49
1 48
1 48
1 49
1 49
1 48
1 48
1 48
1 48
1 48
1 48
1 47
1 47
1 47
1 47
1 46
1 45
1 45
1 45
1 45
1 46
1 44
1 44
1 44
1 44
1 45
1 45
1 45
1 45
1 45
1 45
1 45
1 45
1 45
1 39
1 32
1 32
1 31
1 31
0 27
0 25
0 20
0 16
0 16
0 21
0 22
0 22
0 23
0 23
0 25
0 24
0 25
0 25
0 26
0 26
0 26
0 25
0 25
0 25
0 25
0 22
0 21
0 23
0 24
0 24
0 25
0 25
0 25
0 25
0 25
0 25
0 25
0 25
0 25
0 26
0 29
0 30
0 35
0 38
0 38
0 39
0 39
0 38
0 38
0 38
0 38
0 38
0 38
0 38
0 38
0 38
0 38
0 38
0 37
0 37
0 38
0 42
0 42
0 43
0 43
0 43
0 44
0 44
0 43
0 43
0 43
0 43
0 43
0 43
0 43
0 43
0 43
0 43
0 42
0 42
0 43
0 44
0 44
0 45
0 46
0 45
0 45
0 44
0 44
0 44
0 43
0 43
0 45
0 46
0 46
0 46
0 44
0 45
0 45
0 45
0 45
0 45
0 45
0 45
0 46
0 45
0 45
0 47
1 89
1 93
1 99
1 116
1 139
1 173
1 220
2 240
2 256
2 262
2 284
2 289
2 295
2 295
2 295
2 295
2 296
2 295
2 295
2 294
2 304
2 308
2 307
2 307
2 307
2 307
2 309
2 309
2 309
2 310
2 309
2 307
2 300
2 298
2 299
2 300
2 300
2 299
2 299
2 299
2 299
2 299
2 299
2 299
2 299
2 299
2 299
2 299
2 299
3 299
3 299
3 298
3 294
3 293
3 292
3 292
3 292
3 292
3 291
3 291
3 291
3 291
3 291
3 291
3 291
3 291
3 293
3 292
3 291
3 292
3 291
3 291
3 290
3 289
3 289
3 288
3 289
3 289
3 289
3 289
3 289
3 289
3 289
3 289
3 287
3 286
3 286
3 285
3 283
3 282
3 282
3 281
3 280
3 280
3 280
3 279
3 278
3 277
3 272
3 261
2 173
2 159
1 153
1 149
1 142
1 93
1 87
1 71
1 54
1 50
1 34
1 30
1 25
1 24
1 23
1 23
1 22
1 22
1 21
1 21
0 6
0 6
0 6
0 6
0 6
0 6
0 6
0 6
0 6
0 6
0 6
0 6
0 6
0 6
0 5
0 5
0 5
0 5
0 5
0 5
0 5
0 5
0 5
0 5
0 5
0 5
0 5
0 5
0 5
0 5
0 5
0 5
0 5
0 5
0 5
0 5
0 5
0 5
0 3
0 3
0 3
0 3
0 3
0 3
0 3
0 2
0 1
0 1
0 1
0 1
0 1
0 1
0 1
0 1
0 1
0 1
0 1
0 1
0 1
0 1
0 1
0 1
0 1
0 1
0 1
0 1
0 1
0 1
0 1
0 1
0 0
0 0
0 0
0 0
0 0
0 0
0 0
0 0
0 0
0 0
0 0
0 0
0 0
0 0
0 0
0 0
0 0
0 0
0 0
0 0
0 0
0 0
0 0
0 0
0 0
0 0
0 0
0 0
0 0
0 0
0 0
0 0
0 0
0 0
0 0
0 0
0 0
0 0
0 0
0 0
0 0
0 0
0 0
0 0
0 0
0 0
0 0
0 0
0 0
0 0
0 0
0 0
0 0
0 0
0 0
0 0
0 0
0 0
0 2
0 2
0 2
0 2
0 2
0 2
0 2
0 2
0 2
2 4
2 6
2 6
2 6
2 7
2 8
2 8
2 8
2 8
2 8
2 8
2 8
2 8
2 8
2 9
2 9
2 9
2 9
2 9
2 9
2 9
2 9
2 9
2 9
2 9
2 9
2 9
2 9
2 9
2 9
2 9
2 9
2 9
2 9
2 9
2 9
2 9
2 9
2 9
2 9
2 9
2 9
2 9
2 9
2 9
2 9
2 9
2 9
2 9
2 9
2 9
2 9
2 9
2 9
2 9
2 9
2 9
2 9
2 9
2 12
2 13
2 13
2 13
2 13
2 13
2 13
2 13
2 13
2 13
2 13
2 15
2 15
2 16
2 16
2 16
2 16
2 16
2 16
2 16
2 16
2 16
2 16
2 16
2 16
4 16
4 16
4 16
4 16
4 16
4 16
4 16
4 14
4 14
4 15
4 15
4 15
4 15
4 14
4 14
4 13
2 12
2 11
2 11
2 11
2 11
2 10
2 10
2 10
2 10
2 10
2 10
2 9
2 9
2 9
2 9
2 9
2 9
2 9
2 9
2 9
2 9
2 9
2 9
2 9
2 9
2 9
2 9
2 9
3 9
3 9
3 9
3 9
3 9
3 11
3 11
12 14
12 14
12 14
12 14
12 14
12 14
12 14
12 14
12 14
12 14
12 14
12 14
12 14
15 14
18 16
19 16
19 16
19 16
19 16
19 16
21 16
21 16
26 15
27 15
28 12
28 12
28 12
28 12
29 12
29 12
29 12
29 12
29 12
29 12
29 12
29 10
29 10
29 9
29 9
29 9
29 9
29 9
29 9
29 9
29 9
29 9
28 9
28 9
29 9
30 9
30 9
35 9
35 9
36 9
37 9
39 9
40 9
40 9
40 8
41 8
41 8
45 8
45 8
45 8
46 8
51 7
51 7
52 7
52 7
52 7
52 7
52 7
52 7
52 7
52 7
52 7
52 7
53 7
54 7
54 7
54 7
54 7
54 7
54 7
55 7
55 7
55 7
55 7
55 7
55 7
56 7
61 7
61 7
61 7
61 7
61 7
61 7
64 7
64 5
64 5
56 2
56 2
57 2
58 2
58 2
58 2
61 2
62 2
59 2
61 2
64 2
65 2
80 0
80 0
81 0
83 0
83 0
89 0
92 0
95 0
98 0
101 0
97 0
97 0
97 0
97 0
100 1
102 1
101 1
101 1
102 1
102 1
102 1
102 1
104 1
104 1
107 1
107 1
108 1
108 1
108 1
107 1
107 1
107 1
107 1
107 1
107 1
107 1
106 1
129 1
144 1
145 1
144 1
146 1
145 1
143 1
142 1
144 1
144 1
145 1
146 1
143 1
142 1
141 1
142 1
139 1
139 1
138 1
138 1
138 1
138 1
138 1
137 1
137 1
137 1
142 1
144 1
143 1
143 1
143 1
144 1
144 1
144 1
146 1
146 1
146 1
148 1
148 1
148 1
147 1
146 1
141 1
141 1
141 1
141 1
141 1
140 1
137 1
137 1
137 1
137 1
137 1
136 1
136 1
134 1
137 1
140 1
141 1
136 1
136 1
132 1
128 1
118 1
116 1
113 1
113 1
112 1
112 1
110 1
105 1
101 1
101 1
102 1
102 1
101 1
101 1
100 0
99 0
99 0
99 0
99 0
99 0
99 0
100 0
99 0
99 0
97 0
98 0
97 0
98 0
98 0
98 0
98 0
97 0
98 0
98 0
99 0
85 0
78 0
54 0
50 0
50 0
50 0
48 0
50 0
50 0
50 0
50 0
50 0
50 0
50 0
50 0
50 0
50 0
50 0
51 0
52 0
52 0
52 0
52 0
52 0
52 0
52 0
52 0
52 0
47 0
46 0
46 0
47 0
47 0
46 1
46 1
46 1
42 1
42 1
42 1
43 1
45 1
49 1
49 1
49 1
49 1
49 1
49 1
49 1
49 1
53 1
57 1
59 1
64 1
71 1
73 1
75 1
76 1
79 1
78 1
77 1
77 1
77 1
77 1
75 1
72 1
69 1
69 1
68 1
65 1
64 1
64 1
64 1
64 1
64 1
64 1
64 1
65 1
66 1
67 1
68 1
67 1
66 1
65 1
65 1
65 1
67 1
66 1
65 1
65 1
64 1
63 1
63 1
63 1
63 1
63 1
62 1
62 1
61 1
61 1
60 1
60 1
60 1
60 1
60 1
61 1
62 1
72 1
71 1
72 1
72 1
73 1
73 1
73 1
73 1
73 1
73 1
73 1
73 1
72 1
71 1
71 1
71 1
71 1
74 1
74 1
74 1
74 1
74 1
73 1
73 1
73 1
73 1
73 1
73 0
73 0
73 0
73 0
74 0
72 0
66 0
66 0
66 0
66 0
66 0
66 0
66 0
66 0
66 0
63 0
55 0
51 0
49 0
47 0
45 0
44 0
42 0
39 0
34 0
34 0
32 0
32 0
32 0
33 0
34 0
34 0
33 0
33 0
34 0
39 0
39 0
39 0
39 0
38 0
38 0
38 0
38 0
38 0
37 0
35 0
35 0
35 0
36 0
35 0
35 0
35 0
35 0
35 0
35 0
35 0
35 0
35 0
35 0
35 0
35 0
35 0
35 0
35 0
35 0
35 0
35 0
38 0
39 0
39 0
39 0
40 0
41 0
29 0
28 0
28 0
28 0
29 0
31 0
33 0
33 0
33 0
34 0
34 0
34 0
36 0
36 0
36 1
37 1
37 1
34 1
34 1
34 1
34 1
34 1
35 1
34 1
35 1
35 1
35 1
35 1
35 1
35 1
35 1
34 1
34 1
33 1
31 1
30 1
30 1
30 1
30 1
30 1
29 1
30 1
31 1
31 1
31 1
31 1
31 1
31 1
31 1
32 1
32 1
33 2
33 2
33 2
35 2
34 2
34 2
33 2
33 2
33 2
32 2
31 2
27 2
27 2
27 2
28 2
28 2
29 2
30 2
31 2
32 2
32 2
33 2
33 2
33 2
32 2
32 2
32 2
32 2
32 2
32 2
32 2
32 2
32 2
32 2
32 2
32 2
32 2
32 2
32 2
32 2
32 2
32 2
32 2
29 2
28 2
28 2
26 2
24 2
24 2
24 2
24 2
23 2
23 2
23 2
21 2
18 2
18 2
18 2
17 2
17 2
17 2
15 2
16 2
16 1
16 1
16 1
16 1
16 1
16 1
16 1
16 1
15 1
15 1
14 1
14 1
14 1
14 1
14 1
14 1
14 1
14 1
14 1
14 1
14 1
14 1
14 1
14 2
16 2
16 2
14 2
12 2
11 2
12 2
12 2
12 2
12 2
12 2
13 2
13 2
14 2
15 1
15 1
15 1
15 1
15 1
15 1
15 1
15 1
15 1
15 1
15 1
15 1
15 1
15 1
14 1
14 1
13 1
11 1
11 1
11 1
11 1
10 1
10 1
12 1
13 1
13 1
14 1
14 1
14 1
14 1
14 1
14 1
14 2
15 2
15 2
15 2
15 2
15 2
15 2
15 2
15 2
15 2
15 2
15 2
15 2
15 2
15 2
15 2
15 2
16 2
16 2
16 2
17 2
17 2
18 2
18 2
18 2
19 2
19 2
19 2
19 2
19 2
18 2
18 2
18 2
18 2
18 2
18 2
18 2
18 2
18 2
18 2
18 2
18 2
18 2
18 2
18 2
18 2
18 2
18 2
17 2
17 2
17 2
17 2
17 2
17 2
17 1
15 1
15 1
14 1
14 1
14 1
13 1
13 1
13 1
13 1
13 1
12 1
12 1
11 1
11 1
10 1
10 1
10 1
10 1
10 1
10 1
10 1
10 1
10 1
10 1
10 1
10 1
10 1
10 1
10 1
10 1
9 1
9 1
9 1
9 1
9 1
9 1
6 1
6 1
6 1
5 1
5 1
5 1
5 1
5 1
5 1
5 0
4 0
4 0
4 0
4 0
4 0
4 0
4 0
4 0
4 0
4 0
4 0
4 0
4 0
4 0
4 0
4 0
3 0
2 0
2 0
2 0
2 0
1 0
1 0
1 0
0 0
0 0
0 0
0 0
0 0
0 0
0 0
0 0
0 0
1 0
1 0
1 0
1 0
1 0
1 0
1 0
1 0
1 1
1 1
2 1
2 1
2 1
2 1
2 1
2 1
2 1
2 1
2 1
2 1
2 1
2 1
2 1
2 1
2 2
2 2
2 2
2 2
2 2
2 2
2 2
2 2
2 2
2 2
2 2
2 2
2 2
2 3
2 3
2 3
2 3
2 3
2 3
2 3
2 3
2 3
2 3
2 3
2 3
2 3
2 3
2 3
2 3
2 3
2 3
2 3
2 3
2 3
2 3
2 3
2 3
2 3
2 3
2 3
2 3
2 3
2 3
2 3
2 3
2 3
2 3
2 3
3 3
3 3
3 3
3 3
3 3
3 3
3 3
3 3
3 3
3 3
3 3
3 4
3 4
3 4
3 4
3 4
3 4
3 4
3 4
3 4
3 4
3 4
3 4
4 4
4 4
4 4
3 4
3 4
3 4
3 4
3 4
3 4
3 4
3 4
3 4
3 4
3 3
3 3
2 3
2 4
2 4
2 3
2 3
2 3
2 3
2 3
2 3
2 3
2 3
2 3
3 4
3 4
3 4
3 5
3 5
3 6
3 6
3 6
3 6
3 6
3 6
3 6
3 6
3 6
3 6
3 6
3 6
3 6
3 6
3 6
3 6
3 6
3 6
3 6
3 6
4 6
4 6
4 6
4 6
4 7
4 7
4 7
4 7
4 7
4 7
4 7
4 7
4 7
4 7
4 7
4 7
4 8
5 16
5 17
5 17
5 18
5 23
5 25
4 25
4 25
4 25
4 25
4 25
4 25
4 28
5 28
6 29
6 29
6 29
7 29
7 28
7 28
7 28
7 28
7 28
7 28
7 29
7 29
7 29
7 29
7 29
7 29
7 29
6 29
6 29
6 29
6 29
6 29
6 29
6 29
6 29
6 29
6 29
6 31
6 31
6 33
6 33
6 35
6 34
6 34
6 34
6 34
6 34
6 35
6 33
6 33
6 33
6 34
6 34
6 34
5 34
5 34
5 34
5 34
5 33
5 34
5 34
5 34
5 34
5 39
5 41
5 42
5 42
5 43
5 43
5 43
5 43
5 45
5 52
5 63
5 66
4 68
4 69
4 69
4 71
4 72
4 73
4 69
4 69
4 68
4 68
4 68
4 68
4 68
4 68
4 68
4 68
4 68
4 68
4 68
4 68
3 65
3 57
3 56
3 56
3 56
3 56
3 56
3 56
3 56
3 56
3 56
3 56
3 55
3 52
2 52
1 53
1 53
1 54
2 63
2 64
4 66
4 66
4 66
4 67
4 68
4 67
4 67
4 70
4 70
4 70
4 72
4 74
4 74
4 75
4 76
4 77
4 77
4 77
4 77
4 77
4 77
4 77
4 74
4 74
4 71
4 70
4 68
4 68
4 67
4 67
4 67
4 68
4 68
4 68
4 68
4 69
4 68
4 68
4 68
4 67
4 67
4 67
4 67
4 67
4 68
4 68
4 68
4 67
4 61
4 59
4 59
4 58
4 58
4 58
4 58
4 58
4 54
4 48
4 39
4 37
4 36
4 34
4 33
4 31
4 30
4 30
4 30
4 30
4 30
4 30
4 30
4 30
4 30
4 30
4 31
4 32
4 32
4 32
4 32
4 34
4 34
4 34
4 34
4 34
4 35
4 35
4 35
4 35
4 35
4 35
4 35
4 35
3 35
3 40
3 40
3 40
3 40
3 42
1 33
1 32
0 30
0 30
0 30
0 28
0 28
0 29
0 37
0 37
0 41
0 41
0 42
0 41
0 41
0 40
0 40
1 44
1 44
1 45
1 45
1 45
1 46
1 46
1 46
1 46
1 46
1 46
1 46
1 47
1 47
2 47
1 44
1 43
1 42
1 42
1 42
1 41
1 41
1 41
1 41
1 42
1 42
1 42
1 42
1 41
1 41
1 41
1 41
1 41
1 41
1 41
1 41
1 41
1 41
1 41
1 41
1 41
1 41
1 41
1 41
1 41
1 41
1 41
1 42
1 43
1 47
1 48
1 48
1 48
1 48
1 48
1 49
1 51
1 54
1 56
1 54
1 55
1 55
1 55
1 54
1 53
1 54
1 53
1 56
1 57
1 57
1 57
1 62
1 63
1 66
1 66
1 67
1 67
1 67
1 63
1 63
1 62
1 63
1 60
1 59
1 59
2 61
2 61
2 62
2 62
2 62
2 58
2 52
2 46
2 46
2 45
2 48
2 48
2 48
2 48
2 48
2 48
2 48
2 46
2 50
2 50
2 50
2 50
4 53
4 53
4 55
4 56
4 60
4 60
3 59
3 58
3 58
3 58
3 58
3 59
3 59
3 59
3 59
3 59
3 58
3 58
3 58
3 58
3 58
3 58
3 58
3 58
3 58
3 58
3 58
3 58
3 58
3 58
3 58
3 58
3 58
3 58
3 58
3 58
3 58
3 58
3 58
3 58
3 53
3 46
3 46
3 45
3 45
3 45
3 45
3 45
4 44
4 44
4 43
4 42
4 42
4 42
4 42
4 42
4 41
4 41
4 40
4 40
4 37
4 37
4 37
4 37
4 31
4 27
4 26
4 26
4 26
4 28
4 28
4 28
4 28
4 28
4 27
4 24
4 24
4 24
3 23
3 22
3 21
3 20
3 20
3 20
3 20
3 20
3 19
3 19
3 18
3 18
3 18
3 18
3 18
3 18
3 18
3 18
3 15
3 15
2 15
2 15
1 12
1 12
1 9
1 5
2 3
2 3
2 3
2 3
2 3
2 3
2 3
2 3
2 3
2 3
2 3
2 3
2 3
2 3
2 3
2 3
2 3
2 3
2 3
2 3
2 3
2 3
2 3
2 3
2 4
2 4
2 4
2 4
2 4
2 4
2 4
2 4
2 4
2 4
2 4
2 4
2 4
6 4
6 4
6 4
6 4
6 4
6 4
6 4
5 4
5 4
5 4
5 4
5 4
5 4
5 4
5 4
5 4
5 4
5 4
5 4
5 4
5 4
5 4
5 4
5 4
5 2
5 2
5 2
5 2
5 2
5 2
5 2
5 2
5 2
5 2
5 2
5 2
5 2
5 2
5 2
5 2
5 2
5 2
5 2
5 2
5 2
5 2
5 2
5 2
5 2
5 2
5 2
5 2
5 2
6 2
8 2
8 1
8 1
8 1
8 1
8 1
8 1
8 1
7 1
5 1
4 1
3 1
3 1
3 1
3 1
3 1
3 1
3 1
3 1
3 1
3 1
3 1
3 1
3 1
3 1
3 1
3 1
3 1
3 1
3 1
3 0
3 0
3 0
3 0
3 0
3 0
3 0
3 0
3 0
3 0
3 0
3 0
3 0
3 0
3 0
3 0
3 0
3 0
3 0
3 0
3 0
3 0
3 0
3 0
3 0
3 0
4 0
4 0
4 0
4 0
4 0
4 0
4 0
4 0
4 0
4 0
4 0
4 0
4 0
4 0
4 0
4 0
4 0
4 0
4 0
4 0
4 0
4 0
4 0
5 0
5 0
5 0
5 0
6 0
6 0
6 0
6 0
6 0
6 0
6 0
6 0
6 0
6 0
6 0
6 0
5 0
5 0
5 0
5 0
3 0
3 0
3 0
3 0
3 0
3 0
3 0
3 0
3 0
3 0
3 0
3 0
3 0
3 0
3 0
3 0
3 0
3 0
3 0
3 0
3 0
3 0
3 0
3 0
3 0
3 0
3 0
3 0
3 0
3 0
3 0
3 0
3 0
3 0
3 0
3 0
3 0
3 0
3 0
3 0
3 0
3 0
3 0
3 0
3 0
3 0
3 0
3 0
3 0
3 0
3 0
3 0
3 0
3 0
3 0
3 0
2 0
2 0
2 0
2 0
2 0
4 0
4 0
4 0
4 0
4 0
4 0
4 0
5 0
5 0
5 0
5 0
5 0
5 0
5 0
5 0
5 0
6 0
6 0
5 0
5 0
5 0
5 0
7 0
7 0
7 0
7 0
8 0
8 0
9 0
9 0
9 0
9 0
10 0
10 0
10 0
10 0
10 0
10 0
10 0
10 0
10 0
10 0
10 0
10 0
10 0
10 0
10 0
10 0
10 0
10 0
10 0
10 0
11 0
11 0
11 0
11 0
11 0
11 0
11 0
11 0
11 0
11 0
11 0
11 0
11 0
11 0
11 0
11 0
11 0
11 0
11 0
11 0
11 0
11 0
11 0
12 0
12 0
18 0
21 0
21 0
21 0
21 0
21 0
21 0
21 0
22 0
22 0
22 0
22 0
22 0
22 0
22 0
22 0
22 0
22 0
22 0
22 0
22 0
22 0
22 0
20 0
20 0
20 0
20 0
20 0
20 0
20 0
19 0
19 0
19 0
19 0
19 0
19 0
19 0
19 0
20 0
19 0
19 0
19 0
18 0
18 0
18 0
16 0
15 0
15 0
15 0
15 0
15 0
15 0
15 0
15 0
15 0
14 0
14 0
14 0
14 0
15 0
16 0
16 0
16 0
16 0
16 0
17 0
17 0
17 0
17 0
17 0
17 0
17 0
17 0
17 0
17 0
16 0
16 0
16 0
16 0
16 0
16 0
16 0
16 0
16 0
16 0
16 0
19 0
19 0
20 0
20 0
20 0
20 0
23 0
23 0
22 0
19 0
18 0
19 0
17 0
16 0
15 0
14 0
14 0
14 0
14 0
14 0
14 0
14 0
14 0
14 0
14 0
14 0
14 0
14 0
14 0
14 0
14 0
14 0
14 0
14 0
14 0
14 0
14 0
14 0
14 0
14 0
14 0
14 0
14 0
14 0
14 0
14 0
14 0
14 0
14 0
14 0
14 0
15 0
14 0
14 0
14 0
14 0
14 0
14 0
14 0
14 0
15 0
15 0
15 0
15 0
15 0
15 0
15 0
15 0
15 0
15 0
15 0
15 0
14 0
14 0
13 0
13 0
13 0
13 0
13 0
12 0
12 0
12 0
12 0
12 0
12 0
12 0
13 0
14 0
21 0
25 0
28 0
28 0
29 0
30 0
30 0
30 0
29 0
29 0
28 0
27 0
27 0
27 0
26 0
26 0
26 0
25 0
23 0
23 0
23 0
22 0
22 0
22 0
22 0
22 0
22 0
22 0
22 0
22 0
22 0
22 0
23 0
23 0
23 0
23 0
23 0
23 0
23 0
23 0
23 0
23 0
24 0
24 0
24 0
24 0
24 0
24 0
24 0
24 0
24 0
24 0
24 0
24 0
24 0
24 0
24 0
24 0
24 0
24 0
24 0
24 0
24 0
23 0
23 0
24 0
24 0
24 0
24 0
24 0
24 0
26 0
25 0
25 0
25 0
25 0
25 0
24 0
24 0
24 0
24 0
24 0
24 0
24 0
24 0
24 0
24 0
24 0
24 0
23 0
23 0
23 0
23 0
23 0
23 0
22 0
22 0
22 0
21 0
20 0
8 0
6 0
6 0
6 0
6 0
6 0
6 0
6 0
6 0
6 0
6 0
6 0
6 0
6 0
6 0
6 0
6 0
6 0
6 0
6 0
6 0
6 0
6 0
6 0
6 0
6 0
6 0
6 0
6 0
6 0
6 0
6 0
5 0
4 0
4 0
4 0
4 0
4 0
4 0
4 0
4 0
4 0
3 0
3 0
3 0
3 0
3 0
3 0
3 0
3 0
3 0
3 0
3 0
3 0
3 0
3 0
3 0
3 0
3 0
3 0
6 0
6 0
6 0
6 0
9 0
9 0
9 0
9 0
9 0
9 0
9 0
7 0
7 0
8 0
8 0
8 0
8 0
8 0
8 0
8 0
8 0
8 0
8 0
8 0
8 0
8 0
8 0
8 0
8 0
8 0
8 0
8 0
8 0
7 0
7 0
7 0
7 0
7 0
7 0
7 0
7 0
7 0
7 0
7 0
7 0
7 0
7 0
9 0
9 0
9 0
9 0
9 0
9 0
9 0
9 0
9 0
9 0
9 0
9 0
9 0
9 0
9 0
9 0
9 0
9 0
9 0
9 0
9 0
9 0
9 0
9 0
9 0
10 0
10 0
11 0
11 0
11 0
11 0
11 0
11 0
11 0
11 0
11 0
11 0
11 0
11 0
11 0
11 0
11 0
11 0
11 0
11 0
11 0
11 0
11 0
11 0
11 0
11 0
10 0
11 0
9 0
9 0
9 0
9 0
6 0
6 0
6 0
6 0
6 0
6 0
6 0
6 0
6 0
5 0
5 0
5 0
5 0
5 0
5 0
5 0
5 0
5 0
5 0
5 0
5 0
5 0
5 0
5 0
5 0
5 0
5 0
5 0
5 0
5 0
5 0
5 0
5 0
5 0
5 0
5 0
5 0
5 0
5 0
5 0
5 0
5 0
5 0
3 0
3 0
3 0
4 0
4 0
4 0
4 0
4 0
4 0
4 0
4 0
4 0
4 0
4 0
4 0
4 0
4 0
4 0
4 0
4 0
4 0
4 0
4 0
4 0
4 0
3 0
2 0
2 0
2 0
2 0
2 0
2 0
2 0
2 0
2 0
2 0
2 0
2 0
2 0
2 0
2 0
2 0
2 0
2 0
3 0
3 0
3 0
3 0
3 0
3 0
3 0
3 0
4 0
5 0
5 0
5 0
5 0
5 0
5 0
5 0
5 0
5 0
5 0
5 0
6 0
6 0
8 0
8 0
9 0
9 0
9 0
9 0
9 0
9 0
9 0
10 0
10 0
10 0
10 0
10 0
10 0
11 0
11 0
11 0
11 0
11 0
11 0
11 0
11 0
11 0
11 0
11 0
11 0
11 0
11 0
11 0
11 0
11 0
11 0
11 0
11 0
11 0
11 0
10 0
10 0
10 0
10 0
10 0
10 0
10 0
10 0
10 0
11 0
11 0
11 0
11 0
11 0
11 0
11 0
11 0
11 0
11 0
11 0
11 0
11 0
11 0
11 0
11 0
11 0
11 0
12 0
12 0
13 0
13 0
13 0
13 0
13 0
13 0
13 0
14 0
14 0
14 0
14 0
14 0
13 0
13 0
13 0
13 0
13 0
13 0
13 0
13 0
11 0
10 0
10 0
10 0
11 0
11 0
13 0
13 0
15 0
16 0
18 0
18 1
17 1
17 1
15 1
15 1
14 1
14 1
14 1
14 1
14 1
14 1
14 1
13 1
13 1
13 1
13 1
13 1
13 1
13 1
14 1
14 1
14 1
14 1
14 1
14 1
14 1
14 1
14 1
14 1
14 1
14 1
14 1
14 1
14 1
14 1
14 1
14 1
15 1
15 1
15 1
15 1
15 1
15 1
15 1
15 1
15 2
16 2
18 2
19 2
18 2
18 2
18 2
18 2
18 2
19 2
20 2
21 2
22 2
22 2
22 2
23 2
23 2
22 2
23 2
23 2
22 2
22 2
21 2
21 2
21 2
21 2
21 2
21 2
21 2
21 2
21 2
20 2
20 2
20 2
20 2
20 2
20 2
20 2
20 2
20 2
20 2
20 2
20 2
20 2
20 2
20 2
37 2
44 2
44 2
46 2
44 2
44 2
42 2
40 2
40 2
40 1
41 1
41 1
41 1
41 1
41 1
41 1
41 1
41 1
41 1
41 1
41 1
40 1
41 1
42 1
42 1
45 1
45 1
45 1
44 1
44 1
44 1
45 1
46 1
46 1
46 1
46 1
46 1
46 1
46 1
47 1
50 1
51 1
51 1
51 1
51 1
51 1
50 1
50 1
50 1
50 1
50 1
50 0
50 0
50 0
49 0
47 0
46 0
45 0
45 0
47 0
50 1
50 1
50 1
49 3
47 3
48 3
48 3
63 3
63 3
64 3
64 3
65 3
65 3
65 3
65 3
65 3
65 3
65 3
66 3
66 3
66 3
66 3
66 3
66 3
66 3
66 3
66 3
66 3
66 3
66 4
66 4
66 4
66 4
66 5
66 5
66 5
64 5
63 5
62 5
61 5
47 5
39 5
39 5
39 5
39 5
40 5
40 5
40 5
40 5
40 5
39 5
39 5
39 5
39 5
39 5
39 5
39 6
39 6
39 6
39 6
39 6
38 6
38 6
37 6
37 6
36 6
36 6
36 6
38 6
38 6
38 6
37 6
37 6
37 6
37 6
37 6
38 6
38 6
38 6
38 6
34 6
34 6
34 6
34 6
34 6
36 6
37 6
37 6
37 6
37 6
37 6
37 6
37 6
37 6
37 6
39 6
39 6
39 6
39 6
39 5
37 3
38 3
41 3
41 3
39 3
38 3
41 3
26 3
26 3
25 3
25 3
24 3
24 3
24 3
25 3
40 3
41 3
41 3
40 3
42 3
46 3
48 3
48 3
48 3
48 3
48 3
48 3
49 3
49 3
49 2
49 2
49 2
49 1
49 1
49 1
50 1
52 1
52 1
52 1
56 1
59 1
60 1
62 1
62 1
63 1
64 1
76 1
77 1
78 1
81 1
82 0
84 1
85 1
88 1
88 1
88 1
88 1
88 1
88 1
88 1
88 1
90 1
94 1
98 1
107 3
107 3
115 3
115 3
116 3
116 3
116 3
116 3
115 3
115 3
116 3
117 3
121 4
123 4
123 4
123 4
123 4
123 4
124 4
124 4
123 4
123 4
122 4
122 4
121 4
121 4
121 4
121 4
121 4
121 4
120 4
119 4
119 4
119 4
117 4
117 4
116 4
115 4
112 4
112 4
112 4
113 4
108 4
108 4
108 4
107 4
105 4
105 4
105 4
105 4
104 4
89 4
89 4
89 4
87 4
87 4
85 4
85 4
85 4
85 4
85 4
85 4
85 4
85 4
85 4
85 4
85 4
85 4
85 4
84 4
83 4
83 4
81 4
81 4
79 4
75 4
70 4
68 4
67 4
66 4
66 4
65 4
55 4
55 4
49 3
45 3
44 3
43 3
41 3
39 3
40 3
42 3
42 3
41 3
40 3
38 3
38 3
34 3
33 3
33 3
26 1
25 1
17 1
16 1
15 1
15 1
15 1
15 1
15 1
13 1
12 1
12 1
6 0
5 0
5 0
6 0
10 0
10 0
10 0
10 0
11 0
11 0
11 0
11 0
11 0
11 0
11 0
11 0
11 0
11 0
11 0
11 0
11 0
11 0
13 0
13 0
13 0
13 0
13 0
13 0
14 0
14 0
14 0
14 0
14 0
14 0
14 0
14 0
14 0
14 0
14 0
14 0
14 0
15 0
15 0
15 0
15 0
15 0
15 0
15 0
15 0
16 0
16 0
16 0
16 0
16 0
16 0
16 0
16 0
16 0
16 0
16 0
16 0
16 0
16 0
16 0
16 0
16 0
18 0
18 0
18 0
18 0
19 0
19 0
19 0
19 0
19 0
18 0
19 0
19 0
16 0
16 0
16 0
16 0
16 0
16 0
15 0
15 0
15 0
15 0
15 0
15 0
15 0
15 0
15 0
15 0
16 0
17 0
17 0
17 0
17 0
17 0
17 0
17 0
18 0
17 0
16 0
17 0
17 0
16 0
16 0
16 0
16 0
16 0
16 0
16 0
16 0
16 0
16 0
16 0
16 0
16 0
16 0
16 0
14 0
14 0
14 0
14 0
14 0
14 0
13 0
13 0
13 0
13 0
13 0
13 0
13 0
13 0
13 0
13 0
13 0
13 0
13 0
12 0
12 0
12 0
12 0
12 0
12 0
12 0
13 0
12 0
12 0
12 0
12 0
13 0
13 0
13 0
13 0
13 0
13 0
13 0
15 0
15 0
15 0
15 0
15 0
15 0
13 0
13 0
13 0
13 0
12 0
12 0
12 0
12 0
12 0
12 0
11 0
11 0
11 0
11 0
11 0
11 0
11 0
11 0
11 0
11 0
11 0
11 0
11 0
11 0
11 0
11 0
11 0
11 0
10 0
10 0
10 0
10 0
10 0
10 0
10 0
10 0
9 0
6 0
5 0
5 0
5 0
5 0
5 0
5 0
5 0
5 0
5 0
5 0
5 0
5 0
6 0
6 0
6 0
6 0
6 0
6 0
6 0
6 0
6 0
6 0
6 0
6 0
6 0
6 0
6 0
6 0
6 0
6 0
6 0
6 0
6 0
6 0
6 0
6 0
6 0
6 0
6 0
6 0
6 0
6 0
6 0
6 0
4 0
3 0
3 0
3 0
3 0
2 0
2 0
2 0
2 0
2 0
2 0
2 0
2 0
2 0
2 0
2 0
2 0
2 0
2 0
2 0
2 0
2 0
2 0
2 0
2 0
2 0
2 0
2 0
2 0
2 0
2 0
2 0
2 0
2 0
2 0
2 0
2 0
2 0
2 0
2 0
3 0
3 0
3 0
2 0
2 0
2 0
2 0
2 0
2 0
2 0
2 0
2 0
2 0
2 0
2 0
2 0
2 0
2 0
2 0
2 0
2 0
2 0
2 0
2 0
2 0
2 0
2 0
2 0
1 0
1 0
1 0
1 0
1 0
1 0
1 0
1 0
1 0
1 0
1 0
1 0
1 0
1 0
1 0
1 0
1 0
1 0
1 0
1 0
1 0
1 0
1 0
1 0
1 0
1 0
1 0
1 0
1 0
1 0
1 0
1 0
1 0
1 0
1 0
1 0
1 0
1 0
1 0
1 0
1 0
1 0
1 0
1 0
1 0
1 0
1 0
1 0
1 0
1 0
1 0
1 0
1 0
1 0
1 0
1 0
1 0
1 0
1 0
1 0
1 0
1 0
1 0
1 0
1 0
1 0
1 0
1 0
1 0
1 0
1 0
1 0
0 0
0 0
0 0
0 0
0 0
0 0
0 0
0 0
0 0
0 0
0 0
0 0
0 0
0 0
0 0
0 0
0 0
0 0
0 0
0 0
0 0
0 0
0 0
0 0
0 0
0 0
0 0
0 0
0 0
0 0
0 0
0 0
0 0
0 0
0 0
0 0
0 0
0 0
0 0
0 0
0 0
0 0
0 0
0 0
0 0
0 0
0 0
0 0
0 0
0 0
0 0
0 0
0 0
0 0
0 0
0 0
0 0
0 0
0 0
0 0
0 0
0 0
0 0
0 0
0 0
0 0
0 0
0 0
0 0
0 0
0 0
0 0
0 0
0 0
0 0
0 0
0 0
0 0
0 0
0 0
0 0
0 0
0 0
0 0
0 0
0 0
0 0
0 0
0 0
0 0
0 0
0 0
0 0
0 0
0 0
0 0
0 0
0 0
0 0
0 0
0 0
0 0
0 0
0 0
0 0
0 0
0 0
0 0
0 0
0 0
0 0
0 0
0 0
0 0
0 0
0 0
0 0
0 0
0 0
0 0
0 0
0 0
0 0
0 0
0 0
0 0
0 0
0 0
0 0
0 0
0 0
0 0
0 0
1 0
1 0
1 0
1 0
1 0
1 0
1 0
1 0
1 0
1 0
1 0
1 0
1 0
1 0
1 0
1 0
1 0
1 0
1 0
2 0
2 0
2 0
2 0
2 0
2 0
2 0
2 0
2 1
2 1
2 1
2 1
2 1
2 1
2 1
2 1
2 1
2 1
2 1
2 1
2 1
2 1
3 1
3 1
3 1
3 1
3 1
3 1
3 1
3 1
3 1
3 1
3 1
3 1
3 1
3 2
3 2
3 2
3 2
3 2
3 2
3 2
3 2
3 2
3 2
3 2
3 2
3 2
3 2
3 2
3 2
4 2
4 2
4 2
4 2
4 2
4 2
4 2
4 2
4 2
4 2
5 2
5 2
5 2
5 2
5 2
6 2
6 2
6 2
6 2
6 2
6 2
6 2
6 2
6 2
6 2
6 2
6 2
6 2
6 2
5 2
5 2
5 2
5 2
5 2
5 2
5 2
5 2
5 2
5 2
5 2
5 2
5 2
5 2
5 2
5 2
5 2
5 2
5 2
5 2
5 2
5 2
5 2
5 2
5 2
5 1
6 1
6 1
6 1
6 1
6 1
6 1
6 1
6 1
6 1
6 1
6 1
6 1
6 1
6 1
6 1
6 1
5 1
5 1
5 1
5 1
5 1
5 1
5 1
5 2
5 2
7 2
7 2
7 2
7 2
7 1
7 1
7 1
7 1
7 1
7 1
7 1
7 1
7 1
7 1
7 1
7 1
7 1
7 1
7 1
7 1
6 1
6 1
6 1
6 1
7 1
7 1
7 1
6 1
6 1
6 1
6 1
6 1
6 1
6 1
6 1
5 1
5 1
5 1
5 1
5 1
5 1
5 1
5 1
5 1
5 1
5 1
5 1
5 1
5 1
5 1
5 1
5 1
5 1
5 1
5 1
5 1
5 1
5 1
6 1
6 1
7 1
7 1
7 1
7 1
7 1
7 1
7 1
7 2
7 2
6 2
6 2
6 2
6 2
6 2
6 2
5 2
5 2
5 2
5 2
5 2
5 2
5 2
5 2
5 2
5 2
5 2
5 2
5 2
5 2
5 2
5 2
5 2
5 2
5 2
5 2
5 2
5 2
5 2
5 1
5 1
3 1
3 1
3 1
3 1
3 1
3 1
3 1
3 1
3 1
3 1
3 1
3 1
3 1
3 1
3 1
3 1
3 1
3 1
3 1
3 1
3 1
3 1
3 1
3 1
2 1
2 1
2 1
2 1
2 1
2 1
2 1
2 1
2 1
2 1
2 1
2 1
2 1
2 1
2 1
2 1
2 1
2 1
2 1
2 1
2 1
3 1
3 1
3 1
3 1
3 1
3 2
5 2
5 2
5 2
5 2
5 2
5 2
4 2
4 2
4 2
3 2
3 2
3 2
3 2
3 2
3 2
3 1
3 1
3 1
3 1
3 1
3 1
3 1
3 1
3 1
3 1
3 1
3 1
3 1
3 1
3 1
3 1
3 1
3 1
3 1
3 1
3 1
3 1
3 1
3 1
3 1
3 1
3 1
3 1
3 1
3 1
3 1
3 1
3 1
4 1
4 1
4 1
4 1
5 1
5 1
5 1
5 1
5 1
5 1
5 1
5 1
5 1
5 1
5 1
5 1
5 1
5 1
5 1
5 1
5 1
5 1
5 1
5 1
5 1
5 1
5 1
5 1
5 1
5 1
5 1
5 1
5 1
5 1
5 1
5 1
5 1
5 1
5 1
5 1
5 1
5 1
5 1
5 1
5 2
5 2
4 2
4 2
4 2
4 2
2 2
2 1
2 1
2 1
2 1
2 1
2 1
2 1
2 1
2 1
2 1
2 1
2 1
2 1
2 1
2 1
2 1
2 1
2 1
2 1
2 1
2 1
2 1
2 1
2 1
2 1
2 1
2 1
2 1
2 1
2 1
2 1
2 1
2 1
2 1
2 1
2 1
2 1
2 1
2 1
2 1
2 1
2 1
2 1
2 1
2 1
2 1
2 1
2 1
3 1
1 1
1 1
1 1
1 1
1 1
1 1
1 1
1 1
1 1
1 1
1 1
1 1
1 1
1 1
2 1
2 1
2 1
2 1
2 1
2 1
2 1
2 1
2 1
2 1
2 1
2 1
2 1
2 1
2 1
2 1
2 1
2 1
2 1
2 1
2 1
2 1
2 1
2 1
2 1
2 1
2 1
2 1
2 1
2 1
2 0
2 0
2 0
2 0
2 0
2 0
2 0
2 0
2 0
2 0
2 0
2 0
2 0
2 0
2 0
2 0
2 0
2 0
2 0
2 0
2 0
2 0
2 0
2 0
2 0
2 0
2 0
2 0
2 0
2 0
2 0
2 0
2 0
2 0
2 0
2 0
2 0
2 0
2 0
2 0
2 0
2 0
2 0
2 0
2 0
2 0
2 0
2 0
2 0
2 0
2 0
2 0
2 0
2 0
1 0
1 0
1 0
1 0
1 0
1 0
1 1
1 1
1 1
1 1
1 1
1 1
1 1
1 1
1 1
1 1
0 1
0 1
0 1
0 1
0 1
0 1
0 1
0 1
0 1
0 1
0 1
0 1
0 1
0 1
0 1
0 1
0 1
0 1
0 2
0 2
0 2
0 2
0 2
0 2
0 2
0 2
0 2
0 2
0 2
0 2
0 2
0 2
0 2
0 2
0 2
0 2
0 2
0 2
0 2
0 2
0 2
0 2
0 2
0 2
0 2
0 2
0 2
0 2
0 3
0 3
0 3
0 3
0 3
0 3
0 3
0 3
0 3
0 3
0 3
0 3
0 3
0 3
0 3
0 3
0 3
0 3
0 3
0 3
0 3
0 3
0 3
0 3
0 3
0 3
0 3
0 3
0 3
0 3
0 3
0 3
0 3
0 3
0 3
0 3
0 3
0 3
0 3
0 3
0 3
0 3
0 2
0 2
0 2
0 2
0 2
0 2
0 2
0 2
0 2
0 2
0 2
1 2
1 2
1 2
1 2
1 2
1 2
1 2
1 2
1 2
1 2
1 2
1 2
1 2
1 2
1 2
1 2
1 2
1 1
1 1
1 1
1 2
1 2
1 2
1 2
1 2
1 2
1 2
1 2
1 2
1 2
1 2
1 2
1 2
1 2
1 2
1 2
1 2
1 2
1 2
1 2
1 2
1 2
1 2
1 3
1 4
1 4
1 4
1 4
1 4
1 4
1 4
1 4
1 4
1 4
1 4
1 4
1 4
1 4
1 4
1 4
1 4
1 4
1 4
1 4
1 4
1 4
1 4
1 4
1 4
2 4
2 4
2 4
2 5
2 6
2 6
2 6
2 6
2 6
2 6
2 6
2 6
2 6
2 6
2 6
2 6
2 6
2 6
2 7
2 7
2 7
2 7
2 7
2 7
2 7
2 7
1 7
1 7
1 7
1 7
1 7
1 7
1 7
1 7
1 7
1 7
1 7
1 7
1 7
1 7
1 7
1 7
1 7
1 7
1 7
1 7
1 7
1 7
1 7
1 7
1 7
1 6
1 6
1 6
1 6
1 6
1 6
1 6
1 6
1 6
1 6
1 6
1 6
1 6
1 4
1 4
1 4
1 4
1 4
1 4
1 4
1 4
1 4
1 4
1 4
1 3
1 3
1 3
1 3
1 3
1 3
1 3
1 3
1 3
1 3
1 3
1 3
1 3
1 3
1 3
1 3
1 3
1 3
1 3
1 3
1 3
1 3
1 3
1 3
1 3
0 3
0 3
0 3
0 1
0 1
0 1
0 1
0 1
0 1
0 1
0 1
0 1
0 1
0 1
0 1
0 1
0 1
0 1
0 0
0 0
0 0
0 0
0 0
0 0
0 0
0 0
0 0
0 0
0 0
0 0
0 0
0 0
0 0
0 0
0 0
0 0
0 0
0 2
0 3
0 3
0 3
0 5
0 5
0 5
0 5
0 5
0 5
0 5
0 5
0 5
0 5
0 5
0 5
0 4
0 4
0 4
0 4
0 4
0 4
0 4
0 4
0 7
0 8
0 23
1 137
2 163
2 182
2 186
2 190
2 197
2 227
2 229
2 247
2 262
2 268
2 291
2 293
2 293
2 294
2 294
2 294
2 294
2 294
2 295
2 295
2 298
2 303
2 306
2 307
2 316
2 316
2 316
2 319
2 319
2 319
2 320
2 321
2 321
2 321
2 321
2 321
2 322
2 322
2 322
2 322
2 322
2 322
2 323
2 323
2 323
2 324
2 324
2 324
2 324
2 324
2 324
2 324
2 326
2 330
2 331
2 331
2 328
2 325
2 324
2 324
2 324
2 324
2 324
2 324
3 327
4 328
4 330
4 330
4 328
4 328
4 328
4 328
4 328
4 328
4 329
4 328
4 331
4 342
4 342
4 354
4 358
4 358
4 359
4 360
4 362
4 361
4 361
4 349
4 351
4 337
4 337
4 336
4 338
4 345
4 343
4 345
4 354
4 353
4 338
3 234
2 268
2 269
2 271
2 270
2 264
2 227
2 208
2 204
2 204
2 203
2 193
2 193
2 193
2 193
2 193
2 194
2 197
2 197
2 197
3 201
3 196
3 195
3 195
3 192
3 187
3 188
3 203
3 201
3 201
3 201
3 201
3 201
3 201
3 217
6 269
6 277
6 284
6 286
8 293
9 314
9 323
9 325
9 332
9 334
9 335
9 335
9 336
10 340
10 342
10 342
10 342
10 341
10 337
10 334
10 333
10 333
10 333
10 333
10 333
10 333
10 333
10 334
10 334
10 335
8 331
8 329
8 327
8 326
8 326
8 326
8 326
8 327
8 327
8 327
8 327
8 327
8 319
8 307
8 304
8 295
8 292
9 292
9 293
10 291
10 290
10 290
10 291
10 289
10 285
10 286
10 286
11 293
11 290
11 282
12 281
12 280
12 261
12 262
12 264
12 265
12 207
12 207
12 206
12 208
12 203
12 211
13 213
14 214
20 214
20 214
20 214
20 214
20 215
20 215
20 215
20 214
20 230
21 236
22 238
21 240
25 247
25 267
26 273
26 274
26 269
26 268
26 246
26 244
26 244
26 236
26 235
26 235
26 232
26 220
21 162
20 157
20 154
20 155
20 149
20 149
20 148
20 149
20 136
20 134
20 135
20 144
19 146
20 151
20 154
20 155
20 155
20 155
20 156
20 164
20 164
20 165
20 166
20 166
20 166
20 166
20 166
20 165
20 165
20 164
20 164
20 165
20 165
20 165
20 164
20 164
20 164
20 162
20 161
20 164
20 165
20 165
20 174
20 177
20 181
20 185
20 193
19 196
19 203
18 205
18 207
18 208
18 205
18 205
18 205
18 205
18 205
17 196
17 197
17 197
16 198
16 196
16 197
16 195
16 193
16 191
16 191
16 191
16 194
16 198
15 198
14 189
14 189
13 191
7 192
6 195
6 195
6 196
6 196
6 196
6 197
6 197
6 173
6 172
6 168
6 160
2 154
2 135
1 130
1 129
1 129
1 128
1 128
1 128
1 128
1 128
1 128
1 128
1 128
1 128
1 128
1 127
1 126
1 126
1 125
1 125
1 125
1 125
1 125
1 125
1 123
1 113
1 111
0 104
0 102
0 101
0 101
0 101
0 100
0 91
0 91
0 90
0 90
0 90
0 90
0 90
0 90
0 90
0 91
0 92
0 92
0 92
0 92
0 92
0 91
0 91
0 91
0 91
0 91
0 87
0 86
0 86
0 75
0 72
0 66
0 58
0 40
0 34
0 34
0 34
0 33
0 33
0 33
0 33
0 33
0 31
0 31
0 31
0 31
0 29
0 29
0 29
0 29
0 29
0 29
0 29
0 27
0 26
0 24
0 22
0 22
0 23
0 15
0 14
0 14
0 15
0 15
0 15
0 15
0 13
0 10
0 9
0 9
0 9
0 9
0 9
0 9
0 5
0 5
0 5
0 5
0 5
0 5
0 5
0 5
0 5
0 5
0 5
0 5
0 5
0 5
0 5
0 5
0 5
0 5
0 5
0 5
0 5
0 5
0 5
0 5
0 5
0 5
0 5
0 5
0 5
0 5
0 5
0 5
0 5
0 5
0 4
0 4
0 4
0 3
0 3
0 3
0 3
0 3
0 3
0 3
0 4
0 4
0 4
0 4
0 4
0 4
0 4
0 4
0 4
0 4
0 4
0 4
0 4
0 4
0 4
0 4
0 4
0 4
0 4
0 4
0 4
0 4
0 4
0 4
0 4
0 4
0 4
0 4
0 4
0 4
0 4
0 4
0 4
0 2
0 2
0 2
0 2
0 2
0 2
0 2
0 1
0 1
0 1
0 1
0 1
0 1
0 1
0 1
0 1
0 1
0 1
0 3
0 3
0 3
0 3
0 3
0 3
0 3
0 3
0 3
1 3
1 3
1 3
1 3
1 3
1 3
1 3
1 3
1 3
1 3
1 3
1 3
1 3
1 3
1 3
1 3
1 3
1 3
1 3
1 3
1 3
1 3
1 3
1 3
1 3
1 3
1 3
1 3
1 3
1 3
1 3
1 3
1 3
1 3
1 3
1 3
1 3
1 3
1 3
1 3
1 2
1 2
1 2
1 2
1 2
1 2
1 2
1 2
1 2
1 2
1 2
1 2
1 2
1 2
1 2
1 2
1 2
1 2
1 2
1 2
1 2
1 2
1 3
1 4
1 6
1 6
1 6
1 6
1 7
1 7
1 7
1 8
1 8
1 10
1 10
1 10
1 10
1 10
1 11
1 11
1 11
1 11
2 14
2 15
2 16
2 16
2 17
3 29
3 32
3 38
3 62
3 62
3 62
3 63
3 63
3 64
3 65
3 71
2 72
2 72
2 73
2 73
2 74
2 74
2 74
2 75
2 76
2 77
2 78
2 79
2 79
2 80
2 80
2 81
2 83
2 83
3 83
4 87
4 87
4 88
4 88
4 90
4 90
4 90
5 90
5 90
5 90
5 90
5 91
5 93
5 93
5 94
5 95
5 95
5 97
5 99
5 99
7 99
7 99
7 99
7 99
7 107
7 108
7 110
7 112
8 113
8 113
8 114
8 114
8 118
8 118
9 121
9 123
9 123
9 126
9 127
9 127
9 132
9 134
9 134
9 133
9 138
9 141
9 145
9 144
9 144
9 144
9 145
9 145
9 145
9 145
9 144
9 143
9 139
9 138
9 137
9 137
9 138
9 141
9 142
8 143
8 144
8 143
8 153
8 157
8 158
8 159
7 145
7 143
7 135
7 118
7 119
7 119
7 119
7 118
7 115
7 118
7 113
7 112
7 112
7 113
7 113
7 112
7 111
7 111
7 111
7 110
7 110
7 109
7 109
7 110
7 109
7 108
6 107
6 106
6 106
5 106
2 102
2 102
2 101
2 101
2 103
2 103
2 103
2 103
2 104
2 106
2 106
2 107
2 105
2 105
2 104
2 103
3 104
4 103
4 100
4 103
4 102
4 103
4 104
5 104
5 96
5 94
5 93
5 92
4 91
4 91
4 91
4 91
4 90
4 90
3 88
3 85
3 85
4 91
4 94
4 99
4 98
5 96
5 95
5 98
5 94
5 90
5 90
5 90
5 91
5 98
5 100
5 119
5 163
5 199
5 379
5 416
5 435
7 438
7 467
7 496
7 580
7 637
7 642
7 659
7 662
7 658
7 651
7 648
7 649
7 649
7 651
7 656
7 656
7 656
7 656
7 656
7 656
7 656
7 655
7 661
7 660
7 661
7 665
7 668
7 674
7 674
7 677
7 693
8 695
8 698
8 705
8 705
8 755
8 763
8 768
8 772
8 775
8 848
8 850
8 856
8 862
8 906
8 921
8 950
8 956
8 968
8 968
8 968
8 967
8 966
8 967
8 975
8 979
8 980
8 983
7 988
6 990
6 1000
6 1013
6 1017
6 1022
5 1022
5 1023
5 1023
5 1027
5 1026
5 1027
5 1027
5 1028
5 1029
5 1029
5 1029
5 1027
5 1031
5 1030
5 1031
5 1030
4 1031
2 1029
3 1023
3 1019
2 1004
2 995
2 964
2 965
2 961
2 965
2 977
2 979
2 969
2 966
3 950
3 918
4 896
4 694
4 681
4 680
4 678
4 670
4 634
4 580
4 540
4 551
4 561
4 568
4 570
4 577
4 585
4 595
4 624
4 622
4 623
4 624
4 626
4 630
4 631
4 633
4 633
4 633
4 626
4 624
4 621
4 623
4 622
4 618
4 618
4 615
4 602
3 599
3 596
3 592
3 573
3 526
3 528
3 528
3 527
3 521
3 440
3 437
3 426
3 420
3 374
3 354
3 339
3 328
3 324
3 324
3 324
3 323
3 322
3 321
3 309
3 305
3 304
3 303
3 301
3 292
3 286
3 273
3 263
3 263
3 263
3 261
3 259
3 257
3 256
3 255
3 254
3 254
3 253
3 253
3 252
3 250
2 248
2 248
2 247
2 247
2 229
2 227
2 223
2 220
2 221
2 219
2 218
2 214
1 195
0 174
0 159
0 156
0 155
0 154
0 154
0 154
0 147
0 147
0 146
0 145
0 145
0 145
0 144
0 144
0 136
0 124
0 106
0 101
0 98
0 85
0 83
0 67
0 35
0 35
0 31
0 31
0 31
0 29
0 29
0 29
0 29
0 28
0 28
0 27
0 24
0 23
0 23
0 20
0 20
0 19
0 28
0 29
0 34
0 41
0 47
0 48
0 47
0 51
0 50
0 53
0 54
0 55
0 55
0 55
0 55
0 55
0 56
0 58
0 61
0 63
0 67
0 69
0 69
0 70
0 70
0 70
0 70
0 70
0 70
0 70
0 72
1 77
1 81
1 83
1 84
1 84
1 84
1 83
1 84
1 86
1 88
1 88
1 88
1 89
1 91
1 92
1 91
1 91
1 91
1 91
1 91
1 91
1 91
1 91
2 91
2 92
2 92
2 91
2 91
2 91
2 92
2 85
2 85
2 84
2 84
2 85
2 85
2 85
2 85
2 85
2 86
2 87
2 87
2 89
2 90
2 90
2 90
2 91
2 91
2 91
2 91
2 91
2 91
2 91
2 90
2 91
2 91
2 91
2 91
2 91
2 91
2 91
2 91
2 91
2 113
2 120
2 122
2 123
2 124
2 129
2 150
2 249
2 299
2 369
2 398
2 420
3 438
3 448
3 449
3 447
3 447
3 446
3 447
3 447
4 467
4 470
4 474
4 475
4 470
4 469
4 468
4 474
3 475
3 484
3 488
3 494
4 513
4 516
4 521
5 530
5 530
4 528
4 557
4 556
4 562
4 563
4 566
4 566
4 569
4 567
4 592
4 610
4 613
4 622
4 624
4 634
4 634
4 636
4 636
4 638
4 636
4 634
4 634
4 635
4 640
4 642
4 645
4 644
4 644
4 643
4 643
4 643
4 642
4 640
4 639
4 638
4 638
4 637
4 637
4 637
4 637
4 637
4 637
4 635
4 635
4 635
4 633
4 631
4 635
4 626
4 626
4 628
4 626
4 624
4 622
4 629
4 626
4 626
4 632
4 634
5 660
5 671
5 671
5 673
5 656
5 653
6 670
6 689
6 687
6 653
6 606
6 520
6 507
5 492
5 511
5 507
5 515
5 517
5 524
5 528
5 530
5 533
5 534
5 534
4 508
4 512
4 511
4 512
4 511
4 512
4 512
4 511
4 510
5 500
6 500
6 492
5 476
5 474
6 477
6 491
6 505
6 502
6 473
6 471
6 466
6 467
6 465
6 461
6 457
6 450
6 428
6 419
6 413
6 409
6 406
6 398
6 395
6 402
6 409
6 411
6 480
6 483
6 489
6 481
6 479
6 477
6 477
6 475
6 477
7 505
7 508
7 510
7 510
7 511
7 510
7 513
7 513
7 548
7 550
7 551
7 552
7 553
7 553
7 552
7 552
7 553
9 571
10 572
10 571
10 571
9 572
9 568
9 566
9 569
9 572
9 560
9 562
9 563
9 564
9 615
8 596
9 604
9 631
9 627
9 626
9 614
9 564
9 531
9 520
9 520
9 519
9 514
9 515
9 514
9 502
9 505
9 501
9 498
9 494
9 492
9 492
9 487
9 486
9 487
9 487
9 482
9 483
9 484
9 484
9 481
9 478
9 478
9 478
8 476
7 475
7 476
7 475
7 478
6 468
5 476
5 459
5 463
5 459
5 460
5 461
5 460
5 468
5 491
5 491
6 493
6 496
6 496
6 498
6 498
6 498
6 495
7 493
7 485
7 476
7 475
7 400
7 403
7 398
7 399
7 399
7 405
7 404
7 403
6 401
6 370
6 367
6 368
6 369
6 377
6 377
6 376
6 377
6 350
7 351
7 349
7 349
7 349
6 352
6 352
6 351
6 349
4 319
4 319
4 319
4 318
4 318
4 314
5 330
5 332
5 328
5 338
5 342
5 349
5 345
4 280
4 270
4 250
4 242
4 247
4 248
4 249
5 252
5 256
5 256
5 256
6 259
6 253
6 252
6 248
7 240
7 236
7 232
7 234
8 237
8 241
8 248
8 253
8 356
9 367
9 371
10 376
10 402
11 408
12 420
12 430
12 434
13 448
13 457
13 459
13 467
13 464
13 464
13 468
13 468
13 438
13 442
13 439
13 438
13 436
13 435
13 434
13 418
13 412
13 413
12 411
12 408
12 408
12 409
12 410
12 414
12 416
11 415
11 417
11 417
11 418
11 425
11 425
11 429
11 427
11 431
11 431
12 438
12 441
12 476
12 489
12 515
12 530
11 531
11 530
11 531
11 532
11 530
11 524
11 525
11 538
11 572
11 608
11 619
12 643
12 643
12 645
12 649
12 656
12 656
13 658
13 661
13 650
12 624
12 621
12 622
12 624
12 616
12 618
12 616
12 616
12 616
12 617
12 615
12 609
12 605
12 610
11 607
11 604
11 603
12 609
10 606
10 606
10 607
10 608
9 608
8 609
8 608
8 604
8 600
8 591
8 585
8 562
7 458
7 458
7 458
6 458
6 423
5 416
5 407
5 396
4 394
4 402
4 397
4 397
4 385
4 386
4 385
4 423
6 515
6 538
6 539
6 549
6 551
6 570
6 567
6 574
6 574
6 573
6 577
6 576
6 575
6 574
6 568
6 567
6 564
6 563
6 563
6 564
6 563
7 567
7 568
7 580
8 582
9 617
11 606
10 597
10 586
10 571
10 543
10 532
10 504
10 499
10 494
10 493
10 491
10 493
10 492
10 491
10 485
10 461
10 410
10 380
10 374
9 373
9 372
9 372
9 371
9 366
9 366
8 363
8 359
8 359
8 359
8 359
8 357
8 356
8 356
8 355
8 357
8 357
8 359
8 359
8 360
8 361
8 362
8 360
8 359
8 359
8 359
7 356
7 354
8 451
8 453
8 456
8 455
8 456
8 456
8 456
8 456
8 456
8 456
8 456
8 456
8 456
8 457
8 464
8 465
8 477
8 477
8 484
8 486
8 462
8 461
8 460
8 459
8 455
8 452
8 407
6 292
6 281
6 279
6 277
6 275
6 259
6 258
6 250
6 250
6 249
6 249
6 248
6 248
6 250
6 250
6 249
8 250
8 253
8 282
8 288
8 289
8 284
7 278
7 269
5 274
4 239
4 240
4 240
4 241
4 243
4 283
4 290
4 305
4 309
4 320
4 323
4 326
4 324
4 324
5 324
5 325
5 326
5 326
5 327
5 328
5 329
5 329
5 329
5 329
5 329
6 329
6 329
6 329
6 330
6 329
6 330
6 333
6 335
6 337
6 337
6 335
6 337
6 337
6 352
6 360
6 364
6 362
6 361
6 362
6 361
6 379
6 379
6 381
5 278
5 288
5 289
5 292
5 293
5 315
15 492
15 506
21 563
21 591
21 600
21 610
21 622
21 621
21 615
31 615
31 608
31 609
31 598
31 599
31 599
31 602
31 601
31 602
31 602
31 601
31 601
31 601
31 602
31 602
31 602
31 602
31 605
31 605
31 605
31 605
31 606
31 606
31 606
31 606
31 605
31 608
31 608
28 605
28 602
28 570
28 567
28 568
28 568
28 565
28 562
28 552
28 554
28 554
28 559
28 555
29 549
29 501
29 492
29 492
29 491
29 481
29 481
29 480
29 480
29 477
28 475
29 475
29 475
30 476
30 474
30 478
37 624
37 633
39 663
40 683
40 695
39 699
39 700
39 701
39 712
40 713
40 712
40 706
40 704
40 703
40 703
40 703
40 703
40 692
42 682
42 675
42 671
42 672
42 670
42 665
44 663
44 629
44 625
44 616
44 589
44 578
44 576
44 576
43 574
42 565
33 384
29 349
28 324
30 321
31 322
31 322
31 320
28 319
29 319
22 316
22 316
22 317
22 318
22 322
22 325
22 330
22 334
22 336
22 350
22 364
22 372
22 376
22 377
22 423
22 455
22 470
25 478
25 496
25 497
25 500
25 515
25 521
25 534
25 534
25 532
25 533
25 532
25 533
25 533
25 533
25 532
34 633
35 649
36 667
37 673
37 675
37 673
37 673
37 669
37 668
37 696
37 701
37 705
37 710
37 711
37 711
37 711
36 708
36 706
35 706
35 702
34 702
34 695
33 691
32 684
30 642
25 531
24 504
24 501
24 500
24 503
24 506
24 509
24 509
25 498
25 496
25 497
25 500
25 499
25 501
25 501
25 500
25 498
25 495
23 493
22 493
22 492
22 493
22 493
22 494
21 494
21 494
21 495
22 496
22 497
22 501
23 501
23 500
23 503
24 501
24 497
24 497
24 497
22 498
22 502
22 508
24 520
25 557
27 574
29 588
29 590
29 589
32 592
33 600
33 599
34 601
34 605
34 606
35 596
35 578
35 555
35 554
35 549
35 505
35 472
35 459
32 458
32 446
32 442
32 440
32 424
32 438
31 430
31 434
31 435
31 433
31 433
31 434
31 436
31 438
30 435
20 305
20 307
20 289
19 288
19 287
19 307
22 427
22 449
22 459
22 430
24 459
23 472
22 489
22 491
22 492
22 496
22 497
22 497
22 509
22 517
22 518
22 518
22 518
22 518
22 510
22 512
22 512
22 511
22 511
23 509
23 508
25 505
25 506
25 509
25 509
25 509
26 505
26 505
26 503
26 506
24 507
24 509
24 513
24 516
24 515
26 515
25 513
25 513
25 512
26 511
26 510
26 509
26 509
26 510
26 507
25 507
27 573
27 592
28 598
28 599
28 598
28 592
28 594
27 588
27 590
23 570
23 546
20 532
19 523
18 519
17 516
16 511
16 502
16 502
16 499
16 496
16 495
16 495
16 495
16 495
16 496
16 496
16 496
16 497
16 499
16 500
17 502
17 502
17 500
17 498
17 457
17 456
17 416
17 417
17 417
17 418
17 418
17 417
17 415
17 413
17 412
17 410
17 406
17 401
16 385
16 375
14 250
13 232
12 223
12 220
12 213
12 212
12 211
13 211
13 207
13 204
13 204
13 202
13 186
13 180
13 179
13 179
13 179
13 178
13 177
13 176
13 176
13 175
13 175
12 175
12 174
10 172
10 171
10 169
10 169
9 169
9 167
9 166
9 166
9 164
9 164
9 163
9 158
9 156
9 156
7 156
7 156
7 156
7 156
6 156
6 156
6 157
5 157
5 155
5 155
5 155
4 67
4 48
4 42
4 39
4 37
3 36
3 30
3 29
3 24
3 22
3 22
3 22
3 20
3 21
3 20
3 21
3 19
3 19
3 19
3 18
3 17
3 17
3 17
3 17
3 18
3 19
3 18
3 15
3 14
3 15
2 20
2 24
2 41
2 42
2 42
2 44
2 45
2 44
2 44
2 47
2 50
2 59
2 61
2 68
2 72
4 72
4 75
4 76
4 76
4 77
4 78
4 78
5 87
4 90
4 90
4 92
4 97
4 98
4 98
4 98
4 98
4 103
4 104
4 104
4 104
4 104
4 104
4 105
4 106
4 106
4 106
4 107
4 112
4 112
4 114
4 124
4 128
4 133
4 138
4 140
4 142
4 142
4 142
4 142
4 142
4 144
4 144
4 144
4 144
4 145
4 146
4 147
4 149
4 150
4 150
4 148
4 148
4 148
4 149
4 149
3 149
3 151
3 151
3 151
3 151
3 180
3 182
3 190
3 199
3 202
3 203
3 207
3 207
3 207
3 209
3 209
3 210
3 210
4 212
4 217
4 223
4 234
4 314
4 352
4 354
4 363
4 379
4 412
4 421
3 415
3 411
3 408
5 394
6 397
6 398
6 395
6 395
6 397
6 397
6 397
6 393
6 390
6 392
6 397
6 394
5 394
5 396
5 396
5 398
5 397
5 397
5 395
4 385
4 383
4 383
4 385
4 380
4 380
4 381
4 385
4 382
4 380
4 380
4 382
4 382
4 382
4 387
4 388
5 392
5 400
5 412
5 413
5 421
5 440
5 441
5 431
5 437
5 436
5 444
5 446
5 447
5 449
5 456
5 456
5 467
5 473
5 483
5 483
5 487
5 487
5 487
5 487
5 486
5 488
5 493
5 496
5 500
5 539
5 549
5 555
5 562
5 565
5 583
5 583
5 582
6 559
6 561
6 562
6 550
6 534
7 532
7 527
7 525
7 525
7 524
7 526
7 525
7 522
6 517
6 513
6 508
6 496
6 414
6 388
6 374
6 369
6 360
6 353
6 353
6 353
6 352
5 350
3 347
3 350
3 351
3 351
3 354
3 354
3 349
3 350
3 350
3 344
3 340
3 336
3 334
3 334
3 338
3 337
3 340
3 341
3 343
3 344
3 345
3 346
3 348
3 347
3 348
3 348
3 347
3 343
3 342
3 341
3 341
3 340
2 339
2 336
2 331
2 329
2 325
2 317
2 325
2 323
3 320
3 303
3 302
3 299
3 292
3 291
3 285
3 286
3 286
3 284
3 279
3 279
3 261
3 254
3 259
3 266
3 263
3 264
3 264
3 264
3 263
3 269
3 279
3 287
3 291
4 258
4 245
4 244
4 242
4 240
4 222
4 221
4 217
3 207
3 207
2 199
2 198
2 197
2 197
2 195
2 195
2 195
2 193
2 193
2 193
2 197
2 197
2 196
2 198
2 197
2 196
2 196
2 196
2 198
2 202
2 202
2 205
2 205
2 204
2 201
2 199
2 192
2 193
2 191
2 191
2 202
2 204
2 204
2 204
2 204
2 204
2 204
2 204
2 203
2 199
2 198
2 195
3 220
3 219
3 223
3 232
3 234
3 235
3 238
3 239
3 241
3 244
3 262
3 316
3 376
3 391
3 398
3 410
3 411
3 424
3 428
3 429
3 437
3 411
3 424
2 425
3 424
3 425
3 436
4 463
4 467
4 468
4 470
4 472
4 472
4 473
4 472
4 470
4 465
4 460
4 454
4 451
4 451
4 451
4 449
5 448
4 439
4 408
4 400
4 399
4 399
4 401
4 400
4 399
4 400
4 401
4 401
4 401
4 403
4 403
4 402
4 404
4 404
4 404
4 404
4 406
4 408
4 409
4 409
4 409
4 412
4 437
4 445
4 453
5 527
5 542
5 547
5 555
5 583
5 588
5 624
5 629
5 635
5 638
5 637
5 637
5 637
5 643
5 641
5 644
5 634
5 634
5 637
5 651
5 655
5 655
5 658
5 659
5 664
5 664
5 668
5 682
4 644
4 644
4 646
4 661
4 662
4 667
4 667
4 665
4 660
4 653
4 614
3 476
2 459
2 446
2 438
2 441
2 449
2 448
2 445
2 441
2 437
2 436
2 436
2 437
2 438
2 442
2 441
2 418
2 423
2 422
2 421
2 421
2 424
2 425
2 430
2 431
2 433
3 438
3 449
3 453
3 455
3 455
2 456
2 472
2 471
2 477
2 482
2 486
2 485
2 484
2 486
2 486
2 497
2 499
2 501
3 512
4 529
4 537
4 541
4 547
4 548
4 548
4 546
4 545
4 546
4 544
4 543
4 545
4 531
4 499
4 483
3 459
3 418
3 405
3 406
3 397
3 357
3 294
3 294
3 292
3 296
3 299
3 314
3 499
3 524
3 542
3 558
3 584
3 657
3 678
3 783
4 830
4 851
5 873
5 896
5 898
5 909
5 910
5 897
5 900
5 903
5 902
5 960
5 969
5 970
5 973
5 976
5 978
6 989
6 990
6 995
6 998
6 997
6 996
6 987
6 990
6 984
6 984
6 984
6 984
6 984
6 985
6 986
7 990
7 987
7 987
7 988
7 986
8 986
8 990
8 1004
7 1003
8 1004
8 1005
8 1003
8 1006
8 1009
8 1006
9 994
9 991
9 996
9 1100
10 1109
10 1096
10 1120
10 1129
10 1128
10 1155
10 1162
10 1163
9 1163
9 1160
9 1144
9 1138
8 1133
8 1122
8 1119
8 1112
8 1108
8 1105
8 1105
8 1111
8 1110
8 1111
8 1110
8 1114
8 1116
8 1111
8 1113
8 1107
8 1102
8 1095
8 1086
8 1088
8 1074
8 1077
8 1064
8 1063
8 1062
8 1056
8 1043
8 1016
8 990
8 794
8 758
9 748
9 743
9 736
9 718
8 695
7 603
7 592
7 579
7 564
7 560
7 563
7 573
7 574
7 581
7 595
8 631
8 629
8 572
7 566
7 566
7 571
7 568
7 570
7 569
7 585
7 578
7 577
7 578
7 580
7 580
7 575
7 576
7 576
7 576
8 578
8 580
9 580
9 583
8 605
8 605
8 622
8 626
8 627
7 623
7 621
7 609
7 620
6 615
7 613
7 612
7 609
5 610
5 607
5 601
5 601
5 589
5 484
5 483
5 466
5 452
5 430
5 426
5 393
5 386
5 384
5 382
5 380
5 374
5 374
5 372
5 372
5 372
5 369
5 368
5 368
5 369
5 373
5 373
5 374
5 374
5 368
5 366
5 362
4 362
4 362
4 362
4 361
4 360
4 355
4 353
4 351
4 351
4 351
4 358
4 375
4 376
4 404
4 408
4 408
4 406
3 399
3 398
3 406
3 417
4 433
4 398
4 408
4 410
4 400
4 406
4 406
4 402
4 397
4 395
4 377
3 335
3 336
3 333
3 330
3 327
3 321
3 321
3 322
4 322
4 304
4 304
4 302
4 302
4 306
4 313
4 329
4 336
4 343
4 340
4 336
4 335
3 334
3 336
3 301
3 302
3 287
3 283
3 283
3 282
3 281
2 290
2 290
2 289
2 297
2 299
2 300
2 293
2 293
2 288
2 289
2 290
2 293
2 293
2 298
3 315
3 322
3 415
3 426
3 433
3 438
3 440
3 440
3 442
3 444
3 446
3 447
3 449
3 449
3 449
3 448
3 444
3 433
4 433
4 434
4 435
4 436
4 436
4 436
4 436
4 436
4 436
4 437
4 443
4 449
4 449
4 449
4 449
4 446
4 427
4 415
4 412
4 383
4 389
4 391
4 390
4 389
4 386
3 371
3 366
3 347
3 341
3 334
3 321
3 320
3 315
3 314
3 306
3 303
3 308
3 322
3 322
3 325
3 327
3 329
3 329
3 329
3 329
3 330
2 330
2 330
2 330
2 328
2 327
2 322
2 309
2 295
2 292
2 287
2 287
2 287
2 287
2 285
2 282
2 282
2 292
2 317
2 327
2 329
2 330
2 330
2 313
2 305
2 300
2 299
2 312
2 389
3 537
3 656
4 744
4 783
5 786
4 779
4 777
4 776
4 769
4 769
4 673
4 672
4 668
4 673
4 675
4 683
4 684
4 695
4 699
4 701
3 701
3 707
3 718
3 732
3 741
3 745
3 749
3 749
3 750
3 751
3 752
3 755
3 755
3 756
3 755
3 755
3 745
3 745
3 744
3 744
3 744
3 744
3 743
3 743
3 737
3 732
3 729
3 727
3 726
4 726
4 729
5 730
5 731
5 733
5 733
5 733
5 732
5 733
5 728
5 729
5 748
7 768
7 775
7 770
7 777
7 773
7 773
7 774
7 775
7 778
7 778
7 777
7 779
7 781
7 784
7 784
8 795
8 797
8 799
9 800
9 805
9 805
9 808
10 877
10 881
10 886
10 885
10 885
10 859
10 780
10 713
10 709
10 700
10 720
13 751
13 754
13 759
13 756
13 723
13 637
12 557
12 493
11 433
11 423
11 424
11 427
11 435
11 433
11 447
11 445
11 447
11 447
11 446
11 440
11 436
11 433
11 437
11 421
11 451
11 488
11 531
11 538
11 533
11 514
11 513
11 512
11 510
11 510
11 518
11 527
11 534
11 541
11 553
11 554
11 555
11 555
11 556
11 556
11 564
11 575
11 590
11 787
11 800
11 806
11 808
11 810
11 811
11 814
11 815
10 816
10 811
9 811
9 812
9 812
9 814
9 819
9 819
9 817
9 816
9 812
9 796
7 766
7 760
7 750
7 744
7 746
7 745
7 743
7 742
6 740
6 740
6 740
6 741
6 740
6 739
6 740
5 728
5 726
5 724
4 719
4 717
4 714
4 706
3 641
3 640
3 639
3 639
3 641
3 644
3 645
3 643
3 640
2 634
1 617
0 569
0 566
0 563
0 563
0 561
0 560
2 561
2 563
2 563
2 555
2 555
2 554
2 549
2 548
2 534
2 533
2 531
2 534
2 535
2 535
2 537
2 525
2 532
2 525
2 498
2 434
2 399
2 393
2 388
2 388
2 386
2 385
2 385
2 380
2 369
2 357
3 359
3 369
3 376
3 384
3 385
4 385
4 404
4 602
5 633
5 697
5 755
5 582
5 740
5 802
6 813
6 813
6 816
6 818
6 819
6 858
6 860
6 862
6 862
6 864
6 869
6 869
6 869
6 873
6 874
7 882
7 879
7 879
7 879
7 878
7 883
7 883
7 886
7 898
7 896
7 899
7 903
7 907
7 904
7 904
7 904
8 904
8 905
8 904
8 904
8 904
8 903
8 903
8 905
8 906
8 907
8 904
9 906
12 905
13 912
13 912
13 924
13 927
13 927
13 930
13 940
13 961
13 982
13 987
13 989
13 997
11 994
11 996
11 1007
11 1006
11 1011
11 1012
11 1013
11 1014
11 1017
11 1028
11 1028
11 1034
11 1038
10 1055
10 1055
10 1059
10 1048
10 1050
10 1053
10 1054
10 1055
9 1056
9 1054
9 1065
9 1064
9 1061
9 1054
9 1039
9 1037
9 1036
8 1028
8 1018
8 1008
8 1014
8 1020
8 1005
8 898
8 609
8 539
7 575
7 585
7 587
7 553
7 581
7 590
7 598
7 608
7 633
7 639
7 601
7 605
7 604
7 604
7 602
7 599
7 601
7 603
7 603
7 604
6 597
6 603
6 605
6 606
6 606
6 600
6 597
6 598
6 584
6 584
6 579
6 574
6 572
6 572
6 572
5 572
5 571
5 570
5 571
5 570
5 571
5 571
5 574
5 574
5 575
4 576
4 576
2 574
1 573
0 562
0 562
0 559
0 560
0 559
0 552
0 535
0 504
0 491
0 488
0 486
0 474
0 462
0 460
0 458
0 459
0 452
0 450
0 450
0 450
0 449
0 442
0 440
0 432
0 427
0 405
0 405
0 407
0 407
0 406
0 405
0 404
0 407
0 410
0 419
0 406
0 410
0 417
0 443
0 445
0 456
0 460
0 463
0 468
0 468
0 441
0 418
0 394
0 384
0 376
0 368
0 315
0 308
0 301
0 266
0 231
0 225
0 223
0 215
0 188
0 176
0 176
0 176
0 178
0 179
0 182
0 184
0 190
0 190
0 200
0 203
0 208
0 203
0 199
0 199
0 199
0 198
0 199
0 199
0 198
0 198
0 199
0 199
0 198
0 198
0 198
0 198
0 198
0 199
0 200
0 203
0 205
0 206
0 204
0 202
0 200
0 199
0 199
0 198
0 197
0 201
0 205
0 218
1 272
1 281
1 305
1 314
1 330
1 337
1 357
1 365
2 370
2 378
2 384
2 388
2 390
2 391
2 392
2 392
2 412
2 414
2 414
2 420
2 427
3 442
3 441
3 439
3 449
3 450
3 452
3 450
4 485
6 520
8 526
11 565
11 596
14 606
14 603
14 582
14 576
14 575
14 567
14 578
14 578
14 578
14 579
14 577
14 576
14 575
16 577
16 589
16 593
16 596
16 607
16 610
17 616
17 617
17 620
17 620
17 635
17 642
17 648
18 650
18 654
18 653
18 649
18 649
18 643
18 632
18 623
18 624
18 631
18 634
18 633
18 633
18 633
18 634
18 640
18 640
18 642
18 642
18 642
18 643
18 643
18 648
18 648
18 648
18 650
18 647
18 646
18 640
18 631
18 626
18 625
18 630
18 630
18 628
18 628
18 629
18 620
18 610
18 606
17 579
17 542
17 534
17 534
17 528
17 524
17 509
17 486
16 477
16 476
16 472
16 467
16 466
16 468
16 467
16 471
16 469
16 451
16 451
16 443
16 445
15 443
13 426
12 423
11 418
9 413
9 409
9 405
9 400
8 360
7 321
7 294
6 276
5 262
4 255
4 257
4 260
4 259
4 246
4 243
4 234
4 232
4 232
4 236
4 237
4 237
4 239
2 237
2 223
2 215
2 215
2 201
2 202
1 198
1 198
1 198
1 195
1 180
1 174
0 164
1 164
1 167
1 170
1 170
1 170
1 170
1 168
1 165
1 162
1 152
1 149
1 149
1 149
1 151
1 150
1 141
1 141
1 141
1 141
1 141
1 141
1 141
1 136
1 139
2 172
2 170
2 170
2 172
2 174
2 174
2 182
2 185
2 194
2 195
2 194
2 194
2 194
2 196
2 196
2 193
2 188
2 188
2 185
2 188
2 186
2 187
2 190
2 195
2 209
3 224
3 235
3 246
8 287
9 301
9 309
11 312
11 313
11 311
11 316
11 315
11 312
11 313
11 311
11 309
11 307
11 302
11 304
11 303
11 302
12 312
12 312
12 312
12 311
12 311
12 311
16 305
16 306
16 308
16 314
18 375
18 380
18 387
19 394
19 409
19 413
19 425
19 432
20 442
20 454
20 455
20 454
20 457
21 474
22 496
22 531
22 540
22 547
22 546
22 548
22 550
21 548
21 543
21 541
21 542
21 542
21 543
21 546
21 549
21 553
21 558
21 559
22 559
22 560
22 558
22 558
22 557
22 557
22 556
22 557
22 559
22 558
22 557
22 557
22 548
22 524
24 576
24 578
24 587
24 596
24 602
24 599
24 595
24 585
24 585
24 586
24 586
24 584
24 584
24 594
24 597
24 598
24 599
24 599
24 601
24 605
24 605
43 644
44 636
45 625
45 606
45 588
45 587
39 543
39 529
39 525
37 516
37 510
37 500
37 497
37 496
37 497
37 496
37 495
37 495
37 496
37 497
37 494
37 495
37 487
37 486
37 487
37 515
37 520
35 525
34 525
33 525
33 525
33 526
34 521
32 470
32 474
32 472
31 503
31 512
31 509
31 509
31 525
30 551
29 540
29 547
29 543
29 543
29 533
28 505
28 496
28 491
28 491
28 490
28 490
28 490
28 489
28 488
28 499
28 499
28 501
28 506
28 505
28 503
27 618
27 615
27 619
27 619
27 618
27 619
27 620
27 624
27 624
27 624
27 625
27 625
27 628
27 641
27 664
27 663
26 660
24 607
24 609
24 586
24 580
24 568
24 568
24 567
24 568
24 568
24 567
24 567
24 566
24 566
24 596
24 594
21 595
21 596
21 597
21 592
20 587
18 585
2 536
2 536
2 535
2 535
2 535
2 533
2 533
2 533
2 533
1 533
1 533
1 533
1 533
1 532
1 534
1 534
1 534
1 533
1 535
1 533
1 533
1 531
1 527
1 525
1 514
1 493
1 487
1 484
1 483
1 484
1 484
1 477
0 472
0 466
0 458
0 450
0 402
0 372
0 356
0 334
0 319
0 290
0 277
0 272
0 272
0 266
0 265
0 265
0 266
0 266
0 266
0 266
0 266
0 267
0 267
0 268
0 258
0 257
0 250
0 246
0 245
0 238
0 107
0 107
0 104
0 92
0 91
0 91
0 91
0 86
0 86
0 87
0 88
0 88
0 88
0 88
0 75
0 76
0 75
0 74
0 73
0 71
0 72
0 73
0 73
0 74
0 73
0 71
0 70
0 69
0 69
1 67
1 32
1 32
1 32
1 32
1 31
1 30
1 30
1 30
1 30
1 30
1 30
1 30
1 30
1 30
0 30
0 30
0 30
0 30
0 30
0 31
0 31
0 31
0 29
0 29
0 29
0 29
0 24
0 24
0 24
0 24
0 23
0 22
0 22
0 22
0 21
0 21
0 21
0 19
0 18
0 18
0 17
0 17
0 17
0 17
0 17
0 17
0 17
0 17
0 17
0 17
0 17
0 17
0 17
0 17
0 17
0 16
0 16
0 15
0 15
0 15
0 15
0 14
0 14
0 13
0 13
0 13
0 13
0 11
0 11
0 11
0 11
0 11
0 11
0 11
0 11
0 11
0 11
1 11
1 14
2 20
2 22
4 142
5 151
5 160
5 184
5 195
5 202
5 203
5 211
5 213
5 214
5 214
5 214
5 222
5 226
5 231
10 320
24 457
32 671
191 6676
201 7086
215 7480
223 7665
224 7776
224 7793
224 7812
224 7819
226 7827
226 7828
226 7854
226 7875
228 7909
228 7940
229 7963
229 7970
229 7976
229 7979
229 7981
229 7983
229 7982
229 7984
229 7986
229 7988
229 7989
229 7989
229 7991
229 7996
229 7998
229 7999
229 8001
230 8002
230 8002
244 8114
245 8117
245 8120
245 8128
245 8132
246 8138
246 8140
246 8146
247 8161
247 8166
247 8168
248 8169
250 8173
250 8175
250 8184
252 8644
252 8681
251 8863
251 8880
251 8892
251 8919
251 8935
251 8945
251 8962
251 8977
251 8987
251 9016
251 9019
251 9031
251 9032
251 9036
251 9036
251 9036
250 9041
250 9042
250 9043
250 9113
252 9122
349 11374
395 11476
400 11595
402 11616
404 11641
404 11688
404 11700
405 11757
406 11764
405 11779
405 11796
403 11681
402 11685
403 12083
403 12148
403 12233
403 12257
405 12371
405 12356
404 12378
403 12411
403 12420
402 12404
400 12366
398 12344
393 12283
382 12074
361 11663
345 11101
191 5296
192 5202
191 5153
189 5130
189 5097
189 5105
189 5109
189 5107
187 5116
187 5131
187 5128
187 5137
186 5275
187 5295
190 5321
190 5366
191 5414
191 5456
191 5473
192 5515
192 5527
192 5553
192 5561
193 5618
193 5645
193 5867
194 6020
195 6110
196 6225
208 6295
208 6316
206 6337
205 6344
192 6238
192 6242
192 6241
192 6242
191 6247
192 6293
192 6298
192 6354
193 6376
194 6425
194 6466
194 6477
192 6482
191 6478
191 6503
190 6038
190 6010
190 5847
190 5837
190 5867
190 5855
189 5847
189 5845
189 5841
189 5861
189 5857
189 5826
189 5814
189 5814
188 5821
190 5855
196 6391
197 6655
196 6789
197 6885
197 6899
181 6840
177 6957
83 4550
47 4518
45 4470
45 4464
45 4461
45 4451
47 4449
46 4373
46 4348
46 4349
46 4319
46 4304
52 4839
52 4415
52 4447
52 4505
51 4614
50 4517
50 4521
50 4502
50 4481
50 4472
50 4470
50 4447
50 4452
50 4437
50 4427
50 4431
50 4438
51 4436
51 4436
51 4432
51 4421
51 4416
51 4408
50 4405
50 4407
44 4368
44 4350
44 4328
45 4285
46 4104
46 4079
46 4056
46 3993
47 3937
48 3915
48 3876
47 3846
47 3840
45 3815
45 3803
45 3737
46 3676
44 3398
42 3214
42 3148
41 3127
31 3110
31 3110
31 3105
31 3104
31 3088
31 3084
31 3082
31 3055
31 3048
30 3028
30 3008
30 2931
28 2897
28 2891
28 2883
27 2882
27 2880
27 2880
27 2837
27 2854
27 2884
27 2940
37 3088
38 3123
38 3145
39 3201
41 3276
43 3526
44 3525
45 3645
48 3780
48 3850
54 4161
52 4162
50 4098
46 3441
46 3154
46 2993
47 2990
47 3006
47 3147
47 3157
47 3159
47 3166
47 3172
47 3183
47 3195
48 3224
47 3279
47 3325
47 3333
47 3328
47 3318
49 3300
43 2721
43 2688
43 2544
43 2434
43 2363
43 2338
44 2327
44 2310
45 2312
45 2310
44 2309
44 2305
44 2294
44 2294
44 2316
44 2347
44 2359
44 2369
44 2380
44 2385
44 2389
44 2395
44 2400
44 2404
74 2426
74 2429
74 2427
74 2426
72 2425
72 2421
72 2410
72 2409
71 2416
71 2411
70 2412
71 2410
71 2410
73 2407
73 2404
73 2399
72 2393
73 2444
76 2480
76 2493
77 2509
78 2518
78 2523
78 2532
80 2544
80 2559
81 2601
80 2617
80 2673
80 2681
80 2685
80 2690
80 2679
80 2680
81 2687
81 2682
84 2696
86 2986
86 3025
83 3097
84 3167
86 3129
87 3067
86 3049
79 2954
79 2920
79 2916
78 2874
76 2746
71 2396
69 2244
69 2216
70 2204
68 2183
61 1953
61 1940
61 1942
61 1939
60 1926
60 1919
60 1915
60 1889
60 1721
60 1717
60 1716
60 1712
60 1715
60 1692
60 1695
59 1683
59 1637
59 1587
59 1581
58 1598
58 1608
57 1627
57 1649
58 1660
57 1664
57 1661
57 1666
57 1685
57 1690
57 1723
57 1729
57 1750
57 1763
57 1796
57 1815
57 1818
57 1804
57 1764
58 1768
57 1768
57 1790
57 1792
57 1795
53 1793
51 1789
51 1785
23 1760
21 1760
21 1760
21 1761
21 1761
21 1759
21 1756
21 1756
21 1749
22 1750
22 1737
22 1747
22 1754
22 1756
24 1755
31 1773
33 1776
33 1716
32 1697
33 1690
33 1678
32 1675
32 1670
32 1658
32 1636
32 1619
31 1571
31 1525
31 1529
32 1544
32 1547
41 1603
41 1605
41 1684
42 1676
42 1685
43 1752
44 1544
55 1988
56 1996
55 1975
54 2001
54 1999
55 1901
55 1881
55 1860
55 1843
55 1833
55 1827
55 1846
54 1849
57 1868
58 1883
58 1904
60 1912
66 2062
67 2086
70 2100
70 2125
70 2134
70 2162
71 2196
71 2209
73 2234
74 2254
77 2294
78 2304
79 2341
81 2311
82 2327
82 2311
82 2309
82 2323
83 2305
83 2297
84 2282
84 2262
83 2255
83 2245
83 2239
83 2237
82 2216
82 2210
82 2192
82 2201
82 2203
82 2209
82 2173
82 2206
81 2216
80 2201
81 2251
81 2257
81 2264
80 2217
80 2217
82 2224
82 2224
82 2224
82 2225
82 2225
81 2224
83 2224
83 2224
83 2224
83 2226
83 2240
83 2254
86 2262
85 2267
85 2270
85 2316
84 2311
83 2309
81 2299
78 2282
77 2280
75 2275
76 2270
76 2263
79 2248
138 2345
146 2349
147 2344
149 2346
149 2329
151 2315
152 2286
152 2253
150 2231
149 2198
144 2133
142 2117
142 1949
142 1940
142 1937
137 1778
134 1482
125 1257
125 1246
125 1247
125 1242
125 1242
125 1239
125 1239
125 1282
129 1306
129 1310
129 1315
126 1294
126 1277
124 1245
124 1220
124 1194
118 1180
112 1039
112 1022
112 1019
112 999
111 998
111 974
109 950
110 950
107 933
107 927
106 894
106 894
104 865
103 863
103 852
103 850
103 848
103 831
103 831
103 830
102 824
102 824
102 825
102 835
102 841
102 844
103 841
103 842
103 840
103 820
102 794
102 765
102 732
102 707
102 700
102 699
102 644
102 635
102 632
102 766
101 795
100 821
100 838
100 843
101 899
101 907
101 956
101 974
102 988
103 1009
102 1009
102 997
101 983
98 970
98 966
98 956
98 890
98 888
99 886
98 886
92 893
90 900
89 902
88 899
76 898
71 894
21 783
19 782
18 778
18 777
18 774
18 777
17 776
17 769
17 761
17 761
17 760
18 759
20 765
19 763
19 740
18 740
17 728
17 728
17 726
17 727
19 747
19 736
20 745
19 743
18 699
16 692
18 689
18 703
26 844
27 861
27 869
27 884
28 896
28 903
29 918
30 919
30 934
31 966
31 978
31 977
31 965
30 942
30 936
30 935
30 935
30 919
30 914
30 910
30 911
30 911
30 914
30 914
31 937
32 938
31 941
34 958
34 974
34 980
34 978
34 999
34 1004
36 1006
37 1013
38 1012
38 1019
38 1020
43 1030
47 1067
51 1095
54 1155
60 1258
62 1298
63 1335
62 1176
62 1145
63 1103
64 1094
65 1110
66 1064
66 1061
65 1032
63 1023
62 1011
64 1030
64 1028
64 1039
64 1324
67 1427
67 1436
67 1446
68 1487
91 1740
92 1760
96 1788
100 1796
103 1822
103 1826
104 1834
104 1835
104 1838
104 1836
104 1835
104 1833
104 1832
104 1832
104 1828
104 1829
104 1835
105 1832
105 1832
105 1829
104 1829
102 1826
102 1838
102 1846
102 1840
102 1840
102 1835
102 1833
101 1835
101 1813
102 1818
112 1826
113 1823
110 1821
110 1821
110 1811
107 1789
99 1651
99 1644
99 1642
99 1637
99 1623
99 1623
99 1621
102 1617
102 1594
101 1560
101 1554
101 1554
101 1552
101 1551
101 1552
101 1547
101 1546
101 1545
101 1544
101 1546
101 1540
101 1554
101 1558
102 1563
102 1550
101 1549
100 1554
99 1574
101 1646
105 1778
107 2010
108 2098
112 2342
113 2659
111 2709
110 2741
110 2806
110 2846
104 2845
96 2785
97 2803
92 2729
92 2727
91 2705
89 2681
89 2675
88 2677
89 2694
95 2804
94 2796
96 2824
97 2851
96 2849
94 2849
136 3130
135 3092
134 3096
134 3061
134 2691
133 2672
133 2662
135 2588
130 2547
115 2392
116 2396
119 2393
120 2386
120 2382
121 2385
121 2386
121 2386
121 2388
121 2389
121 2387
121 2390
121 2404
121 2408
121 2418
121 2429
121 2425
120 2428
120 2427
119 2448
120 2463
121 2459
121 2450
121 2446
121 2463
122 2471
122 2472
122 2487
122 2473
120 2464
117 2459
112 2447
118 2456
119 2458
120 2455
120 2454
120 2450
120 2447
120 2445
123 2447
123 2448
124 2448
131 2445
130 2444
128 2446
131 2486
131 2486
130 2505
130 2506
130 2516
130 2517
131 2520
131 2520
132 2520
136 2519
137 2519
144 2528
149 2523
150 2478
150 2472
149 2419
149 2410
149 2463
149 2469
150 2357
146 2073
143 1708
140 1487
139 1436
137 1371
137 1357
137 1328
137 1354
137 1353
137 1343
137 1302
135 1285
133 1224
133 1189
130 1251
129 1257
129 1258
129 1271
128 1276
125 1257
118 1155
118 1162
117 1163
110 1154
106 1154
101 1147
68 860
67 862
67 861
67 865
68 870
68 873
68 872
68 867
68 870
59 849
57 854
55 849
55 851
55 853
55 849
55 849
55 849
55 847
55 844
55 839
56 824
56 823
56 824
56 816
55 804
55 804
55 801
55 797
55 773
55 766
54 763
54 759
54 749
53 728
53 725
53 723
53 703
52 703
52 701
48 697
43 692
39 690
39 688
38 675
38 672
38 672
38 672
37 671
30 668
30 664
28 662
27 658
26 656
26 653
24 604
24 603
24 591
24 591
24 582
23 581
20 580
19 579
12 568
11 566
8 562
3 544
3 539
3 537
3 528
3 519
3 506
3 428
1 399
1 394
1 385
1 385
1 383
1 367
1 351
1 318
1 305
1 275
1 274
1 274
1 274
1 271
1 271
1 267
1 161
1 157
1 140
1 131
1 127
1 125
1 120
1 113
1 112
1 106
1 100
1 91
1 86
1 80
1 76
1 72
1 67
1 63
1 61
1 56
1 51
1 38
1 21
1 13
1 12
1 11
0 10
0 10
1 10
1 10
1 12
1 12
1 12
1 15
1 17
1 36
1 122
1 137
1 150
3 172
3 233
3 245
3 257
3 267
3 281
3 292
3 295
4 301
5 301
5 301
5 301
5 302
5 326
5 322
5 328
5 333
5 341
5 346
5 375
7 391
7 417
7 428
7 445
7 551
7 556
7 567
7 572
7 581
7 591
7 613
7 625
7 650
7 665
7 708
7 720
7 723
7 729
7 736
7 742
7 744
7 747
7 759
8 771
10 813
11 864
11 873
11 876
11 884
11 889
11 895
11 903
11 904
11 907
11 910
11 910
11 910
11 912
11 916
11 930
11 936
13 955
13 965
13 972
14 984
14 986
14 986
14 986
14 987
14 988
14 991
14 993
14 994
14 1001
14 1008
15 1013
15 1027
15 1029
15 1035
15 1037
15 1042
15 1043
15 1043
14 1055
14 1055
14 1100
14 1100
14 1099
14 1102
15 1112
15 1131
15 1139
15 1141
15 1140
15 1140
15 1137
14 1048
14 997
14 998
13 985
12 951
12 926
12 925
12 926
12 924
12 911
12 925
12 937
12 944
12 954
14 962
14 963
19 1031
20 1010
24 1022
24 1018
24 1016
23 1010
22 1010
22 975
20 954
20 942
20 933
20 914
20 793
20 793
21 795
21 796
21 796
29 784
29 733
29 708
29 688
29 636
29 624
29 624
29 623
29 623
29 621
29 619
29 617
29 612
28 609
28 603
27 560
27 520
27 504
27 498
27 497
27 499
27 497
27 498
27 498
27 499
27 498
26 498
27 508
26 506
25 494
25 478
25 476
25 461
25 454
26 456
26 449
26 449
26 453
28 463
30 519
29 543
29 565
30 606
36 1135
36 1173
37 1435
38 1535
38 1567
39 1834
39 1916
39 1919
39 1917
39 1930
39 1932
40 1939
40 1940
40 1889
40 1896
40 1895
40 1896
39 1899
39 1919
39 1922
39 1928
39 1932
41 1941
41 1947
41 1963
43 1969
54 2022
58 2057
61 2049
61 2047
61 2070
61 2075
61 2082
61 2077
61 2037
61 2037
61 2029
62 2024
60 2023
60 2024
51 1959
52 2084
53 2095
54 2100
54 2107
54 2113
54 2118
54 2125
54 2133
54 2139
54 2146
54 2144
54 2154
52 2159
51 2150
51 2149
51 2148
44 2147
44 2145
44 2147
44 2153
44 2152
44 2150
44 2152
44 2150
44 2154
44 2158
44 2161
44 2163
44 2167
44 2167
44 2170
45 2175
46 2181
47 2181
48 2244
48 2263
48 2339
48 2410
49 2471
49 2519
49 2527
49 2553
48 2566
47 2559
47 2560
47 2568
46 2631
46 2691
45 2740
45 2783
44 2788
44 2786
44 2789
44 2773
42 2721
39 2641
39 2561
38 2519
37 2286
31 1521
31 1445
31 1411
31 1416
31 1421
31 1430
31 1456
31 1495
31 1512
31 1519
32 1533
31 1519
31 1522
31 1515
31 1525
31 1526
31 1519
31 1478
31 1520
31 1520
31 1527
32 1555
32 1618
32 1646
32 1650
28 1664
18 1629
16 1656
13 1662
13 1665
13 1639
13 1642
13 1639
13 1642
13 1640
13 1643
13 1645
13 1645
14 1661
14 1663
13 1659
12 1555
12 1559
12 1563
12 1565
12 1590
12 1589
12 1593
12 1592
12 1592
12 1599
12 1606
12 1600
12 1612
12 1616
12 1620
12 1643
12 1640
12 1644
12 1645
13 1639
13 1639
13 1655
13 1656
14 1665
14 1666
14 1668
14 1679
14 1684
15 1714
18 1741
17 1738
17 1738
15 1731
14 1724
13 1652
13 1586
13 1479
13 1440
12 1393
12 1356
12 1353
12 1325
14 1353
14 1343
14 1333
14 1312
20 1230
20 1108
20 1058
20 1057
20 1056
20 1056
20 1055
20 1056
20 1057
20 1058
20 1055
20 1051
20 1048
20 1048
20 1043
20 1041
20 1037
20 1020
20 1002
20 933
20 890
20 882
19 883
19 874
19 866
19 861
19 857
19 844
19 841
19 839
19 833
18 768
18 764
18 904
18 873
18 838
18 818
18 810
18 797
18 786
18 758
18 761
18 758
18 755
19 756
19 771
19 778
19 794
19 827
20 867
21 877
21 874
21 877
21 860
21 849
21 854
20 859
20 860
21 842
21 849
21 843
21 837
21 817
21 815
21 803
21 798
21 801
21 799
21 798
21 768
21 765
21 762
20 767
20 769
20 771
20 753
20 753
19 734
19 728
19 719
19 710
19 705
17 675
15 649
16 656
16 653
16 659
16 661
16 663
16 702
16 711
16 714
16 734
16 745
16 752
16 762
14 732
14 745
14 756
14 767
8 762
8 763
8 761
8 763
8 767
8 774
8 773
8 773
9 767
9 780
9 779
9 776
9 776
9 774
9 773
9 773
9 769
9 770
9 769
9 769
9 769
9 768
9 765
9 764
9 772
9 771
9 772
10 899
10 928
10 949
10 952
10 953
10 941
7 755
6 743
6 723
6 735
6 763
6 780
6 779
6 773
6 767
6 768
6 766
5 755
5 743
5 739
5 722
5 668
5 657
4 668
4 660
4 664
4 664
4 663
4 662
4 651
4 650
3 646
3 646
3 658
3 658
3 660
3 662
3 660
3 660
3 662
3 667
3 674
3 675
3 674
3 672
3 663
3 663
3 683
3 690
3 699
3 699
3 733
3 750
3 760
4 778
4 792
4 818
3 870
3 911
3 906
3 913
3 914
3 866
3 863
3 861
3 845
4 833
4 823
4 813
4 810
4 811
4 819
4 821
4 815
4 820
4 823
4 825
4 822
4 826
4 827
4 840
3 848
3 912
3 931
3 935
3 938
3 946
3 946
3 944
3 945
3 944
3 945
3 947
3 949
3 949
3 950
3 948
3 931
3 924
2 917
2 788
2 768
2 761
2 758
2 759
2 757
2 755
2 753
2 742
2 716
2 691
2 687
2 687
2 687
2 686
2 686
2 683
2 679
2 674
2 666
2 666
2 661
2 656
2 633
2 624
2 624
2 624
2 636
2 637
2 647
2 657
2 639
2 636
2 625
2 629
2 634
2 630
2 634
2 640
2 640
4 640
4 636
4 636
4 637
4 637
4 642
4 633
4 602
4 589
4 573
4 567
4 534
4 512
3 498
3 486
3 478
3 440
3 376
3 366
3 360
4 359
4 360
4 360
4 362
4 363
4 362
3 359
3 355
3 347
3 346
3 341
3 320
3 304
3 298
3 298
3 301
3 304
3 310
3 304
3 306
3 290
3 280
3 192
3 176
4 174
4 177
5 183
5 183
5 186
5 187
5 194
5 205
5 212
5 248
5 272
5 276
5 288
5 291
5 291
5 293
5 293
5 292
5 290
5 293
5 333
6 347
6 355
6 357
6 359
6 374
6 380
6 391
6 399
6 410
6 413
6 415
6 419
6 422
6 422
6 425
6 422
6 421
6 418
6 421
6 422
6 424
6 424
6 417
6 418
6 405
6 393
6 394
6 388
6 387
6 382
6 374
6 368
6 373
6 372
6 371
4 368
4 368
4 366
4 365
4 365
4 362
4 365
5 369
5 390
5 393
5 393
5 394
5 424
5 426
5 427
5 449
5 452
5 452
4 453
4 453
4 454
4 454
4 456
4 455
4 454
4 458
4 461
4 462
4 464
4 466
4 464
4 466
4 464
4 466
4 466
4 476
4 484
4 473
4 476
4 476
3 476
3 475
2 474
2 474
2 473
2 483
2 483
2 488
2 487
2 483
2 466
2 441
2 428
2 392
2 371
2 372
2 370
2 376
3 497
3 509
3 523
3 538
3 557
3 578
2 545
4 562
4 615
4 625
4 630
4 614
4 606
4 582
4 586
4 609
4 613
4 613
4 616
4 641
4 678
4 723
5 880
5 968
5 992
6 1051
6 1085
6 1092
6 1103
6 1145
6 1143
6 1157
6 1168
6 1181
6 1191
6 1193
6 1199
6 1199
6 1198
6 1202
6 1207
6 1212
7 1224
7 1226
7 1222
7 1222
7 1220
7 1216
7 1209
6 1201
6 1179
6 1177
6 1178
6 1169
6 1138
6 1136
6 1139
6 1139
6 1151
6 1151
6 1152
6 1154
6 1155
6 1165
6 1169
6 1173
6 1180
6 1175
6 1180
6 1192
6 1218
6 1219
6 1220
6 1218
6 1217
6 1214
7 1244
7 1239
7 1226
7 1225
7 1231
7 1236
7 1242
7 1253
7 1260
7 1291
7 1298
7 1287
7 1291
7 1284
7 1318
7 1334
7 1345
7 1367
7 1392
7 1413
7 1431
7 1431
7 1428
7 1412
6 1310
6 1304
6 1293
6 1267
6 1233
6 1199
6 1194
4 1170
4 1136
4 1132
4 1130
4 1130
4 1127
4 1129
4 1124
4 1104
4 1090
4 1082
4 1072
4 1050
4 1024
4 949
2 798
2 729
2 722
2 668
2 669
2 687
2 686
2 630
2 634
2 614
2 592
2 579
2 579
2 576
2 571
2 571
2 568
2 562
2 563
2 568
1 587
1 599
1 614
1 629
1 665
1 673
1 686
1 690
1 699
1 698
1 698
1 697
1 695
2 689
2 689
2 688
2 673
2 677
2 675
2 678
2 672
2 670
2 670
2 663
2 658
2 655
2 649
2 633
2 608
2 608
2 607
2 611
2 650
3 689
2 693
2 709
2 742
2 744
2 748
2 763
2 763
2 759
2 761
4 819
5 861
5 887
5 909
5 909
5 855
5 846
5 837
5 856
5 821
5 801
5 789
5 788
5 795
5 803
12 1120
13 1298
13 1332
13 1396
13 1385
13 1403
13 1414
13 1418
13 1424
13 1430
13 1438
13 1436
13 1438
13 1434
13 1434
13 1435
13 1439
13 1444
13 1447
13 1448
13 1448
13 1447
13 1446
13 1447
13 1446
13 1449
13 1451
13 1435
13 1435
13 1445
13 1449
13 1453
13 1467
13 1466
13 1470
15 1579
16 1596
16 1630
17 1680
17 1905
17 1915
17 1930
17 1897
17 1892
17 1885
18 1897
18 1910
20 1926
20 1933
20 1954
20 1972
21 1976
20 1978
20 1985
20 1986
19 1987
19 1992
19 1994
19 1994
20 2001
20 1998
20 1994
20 1996
21 1997
21 1994
21 2000
22 1997
22 2004
22 2002
22 2012
22 2005
24 2069
25 2084
25 2080
24 2031
24 1980
24 1928
24 1908
24 1894
24 1893
24 1894
24 1866
24 1886
24 1882
23 1853
21 1785
21 1751
21 1722
21 1699
21 1695
21 1691
21 1687
22 1685
22 1639
22 1639
22 1636
22 1631
22 1611
22 1608
21 1581
16 1168
16 1063
16 1039
15 1034
15 1029
15 1036
15 1041
15 1038
15 1040
15 1041
15 1045
15 1043
15 1044
15 1064
15 1063
15 1063
15 1061
15 1068
15 1093
16 1094
16 1095
16 1098
17 1203
17 1209
17 1231
18 1243
19 1249
20 1294
20 1328
20 1353
26 1964
26 2034
28 2111
28 2179
30 2183
28 2106
27 2193
26 2157
26 2110
26 1886
26 1870
26 1837
26 1837
26 1835
26 1837
26 1817
26 1769
26 1747
27 1741
27 1745
27 1744
26 1742
26 1744
25 1740
25 1741
25 1739
25 1734
25 1730
25 1731
24 1724
26 1761
29 1764
29 1771
28 1783
28 1782
28 1782
29 1787
29 1776
29 1773
29 1770
29 1769
28 1680
27 1682
27 1674
32 1667
32 1666
33 1667
33 1667
33 1668
33 1670
33 1669
33 1667
33 1661
34 1663
34 1661
34 1661
34 1660
34 1660
34 1660
34 1660
34 1660
34 1668
34 1674
34 1674
34 1675
34 1678
34 1711
34 1718
34 1746
34 1763
37 1809
37 1849
37 1846
37 1848
37 1852
37 1851
38 1849
38 1852
38 1850
38 1848
38 1840
38 1841
38 1841
38 1831
38 1828
40 1827
40 1830
40 1852
40 1850
40 1851
41 1878
41 1914
38 1787
39 1811
42 1818
40 1824
41 1832
41 2017
41 1981
39 1889
33 1208
34 1171
34 1163
36 1342
40 1788
45 2454
47 2563
50 2663
49 2722
49 2758
51 2764
52 2777
52 2794
53 2813
53 2825
53 2844
53 2850
53 2839
52 2851
52 2840
52 2840
57 2861
58 2859
59 2875
59 2895
59 2895
59 2915
59 2922
59 2932
59 2934
56 2903
55 2921
55 2907
55 2905
56 2903
56 2903
56 2896
79 3348
79 3386
81 3436
81 3445
81 3464
81 3467
81 3476
75 3488
76 3494
76 3496
76 3499
76 3501
76 3516
76 3523
76 3533
75 3539
75 3549
75 3549
77 3554
77 3560
78 3570
78 3579
81 3646
81 3953
82 3977
82 3991
83 4011
84 4040
84 4064
84 4031
84 4022
84 3992
83 3949
81 3905
81 3860
81 3891
81 3932
81 3939
81 3942
81 3942
81 3945
81 3959
82 4017
82 4050
80 4072
79 4075
79 4070
78 4065
77 4063
77 4055
83 4063
90 4242
92 4258
93 4240
97 4211
97 4204
97 4155
93 4142
90 4126
89 4097
88 3798
87 3795
88 3755
88 3728
88 3639
88 3590
86 3268
82 2665
77 2180
77 2158
77 2155
76 2142
76 2125
76 2121
76 2113
75 2101
75 2097
75 2089
75 2074
75 2074
75 2075
75 2074
75 2075
74 2079
70 2067
69 2094
68 2069
68 2077
70 2076
75 2158
84 2383
95 2424
100 2465
100 2518
99 2518
99 2525
99 2531
96 2525
97 2529
97 2507
74 1975
75 1977
75 1962
78 1958
81 1944
81 1938
84 1937
84 1929
86 1928
86 1927
88 1947
88 1941
86 1916
86 1910
86 1903
86 1909
86 1910
87 1943
87 1936
87 1927
86 1919
86 1899
84 1835
84 1504
83 1490
84 1480
83 1510
83 1514
83 1507
85 1529
86 1517
85 1510
85 1510
85 1499
85 1460
85 1415
85 1395
85 1395
84 1389
84 1376
83 1365
82 1351
82 1279
82 1228
81 1224
81 1230
80 1242
80 1248
80 1249
78 1260
71 1210
66 1033
64 1023
64 1022
60 1017
59 1011
59 1011
59 1008
59 1006
59 1002
59 1000
59 996
59 995
59 995
59 996
59 996
59 996
60 996
60 994
60 994
60 994
60 994
60 996
60 996
61 996
61 1003
62 997
63 998
63 1004
63 1003
63 1003
62 1008
62 997
62 987
64 987
61 958
60 960
59 954
59 953
41 848
32 565
16 500
14 425
14 414
14 411
14 416
15 420
14 421
14 432
14 432
14 434
14 434
14 434
14 434
14 434
14 437
14 438
14 439
11 430
11 428
11 407
11 402
11 397
11 398
11 391
11 388
11 380
11 337
11 334
11 331
11 331
11 328
11 332
11 321
11 299
10 277
10 267
10 258
11 245
11 245
11 250
11 253
11 259
11 262
11 259
11 258
11 261
11 265
14 340
14 341
14 348
14 361
15 357
15 356
15 354
15 351
14 346
15 334
15 313
15 298
15 298
15 298
15 297
15 298
15 298
15 298
15 298
15 299
15 299
14 300
14 301
14 301
13 298
12 299
12 301
12 303
12 303
12 305
12 305
12 305
12 305
13 298
14 295
14 296
14 296
14 295
13 295
11 289
11 289
11 286
12 286
12 302
12 300
13 302
13 303
13 303
12 298
12 296
12 293
12 292
12 299
13 304
13 306
13 308
13 307
13 305
12 307
12 305
12 296
12 293
12 291
12 292
12 292
12 291
12 290
13 286
13 287
14 287
14 288
14 287
15 284
16 283
16 296
16 295
16 301
16 301
16 303
16 303
16 304
16 305
16 303
16 300
16 287
16 287
16 284
16 282
16 281
16 281
15 276
15 271
14 267
14 261
14 257
14 253
14 253
14 256
14 257
14 278
11 203
10 207
10 210
10 217
10 240
11 249
12 276
12 292
12 296
11 294
11 296
11 299
11 300
11 303
11 306
11 306
11 311
11 314
11 314
13 314
13 315
13 316
13 315
13 315
13 316
13 314
14 310
16 334
16 335
29 364
30 366
30 373
32 400
42 577
46 600
48 609
54 686
65 786
69 892
71 931
71 938
72 947
72 958
75 947
74 950
74 949
74 948
74 946
74 946
74 946
74 947
74 944
74 938
73 931
73 931
73 932
73 928
73 928
73 925
73 924
73 924
73 925
73 925
73 925
73 925
73 924
72 922
72 920
72 919
71 918
71 919
71 919
70 917
70 918
70 903
70 892
68 892
68 904
70 935
71 942
71 941
71 945
71 948
71 961
71 965
71 966
71 963
71 966
71 967
71 967
71 967
71 967
71 967
71 965
71 965
72 963
72 962
72 955
72 938
72 912
71 908
71 897
71 886
71 881
71 852
69 799
68 764
68 758
68 757
68 757
68 757
67 746
67 741
67 737
67 737
67 733
67 727
66 723
66 725
66 724
66 722
64 720
61 717
61 714
61 703
60 695
60 694
45 615
37 605
36 582
22 524
20 495
19 452
11 254
10 187
9 148
6 141
5 132
5 121
11 125
11 119
10 114
10 102
11 93
11 89
11 90
11 92
13 92
13 101
15 116
19 128
46 499
47 517
47 529
50 545
50 551
51 554
51 556
51 607
51 611
51 619
58 692
58 695
58 699
58 699
58 699
58 703
59 708
59 708
59 714
59 712
59 716
59 720
59 731
59 750
59 809
59 825
59 828
57 821
56 829
56 834
57 840
58 851
59 877
65 919
65 927
65 983
65 994
65 1004
65 1009
64 1013
64 1030
64 1031
64 1037
65 1271
66 1305
67 1321
67 1342
68 1360
89 1656
89 1668
89 1694
89 1712
89 1720
89 1729
90 1734
90 1749
91 1753
91 1755
91 1758
91 1759
91 1776
91 1787
93 1787
93 1787
93 1792
93 1791
93 1792
93 1794
93 1796
93 1805
93 1820
94 1902
137 2394
141 2543
153 2684
158 2817
165 2907
175 3139
182 3299
183 3321
183 3321
183 3324
184 3333
186 3337
187 3337
187 3339
186 3341
185 3341
180 3345
181 3349
181 3340
182 3339
182 3347
184 3503
184 3508
181 3505
178 3525
177 3513
173 3500
168 3487
146 3162
146 3164
152 3241
152 3246
153 3252
159 3595
159 3653
159 3668
159 3701
160 3719
152 3675
152 3676
152 3737
152 3738
156 3851
159 3853
163 3882
163 3887
163 3933
164 3935
164 3941
165 3942
165 3964
165 3958
165 3901
165 3882
165 3885
166 3876
165 3870
164 3862
165 3857
163 3846
162 3818
160 3785
169 3777
198 3704
202 3684
204 3687
204 3681
204 3679
204 3655
204 3648
203 3636
202 3373
201 3362
201 3326
200 3304
199 3286
179 2971
179 2969
179 2939
179 2925
179 2925
178 2920
179 2918
179 2901
178 2891
178 2889
178 2886
178 2883
178 2865
175 2843
175 2832
175 2827
176 2822
174 2806
173 2794
173 2780
174 2762
173 2692
171 2602
164 2338
106 1614
99 1512
93 1477
93 1468
93 1464
93 1461
92 1459
90 1445
90 1441
90 1435
90 1432
88 1432
87 1430
86 1431
85 1426
85 1423
84 1402
84 1395
83 1386
83 1377
83 1360
82 1226
82 1234
82 1233
82 1214
82 1210
83 1192
84 1167
84 1150
84 1137
78 1068
78 1053
75 1045
68 636
67 628
67 560
67 534
66 516
66 497
66 494
66 429
66 423
64 302
60 297
56 270
56 267
56 221
56 216
56 201
56 195
56 164
56 158
55 153
55 148
54 139
54 136
54 134
54 136
53 126
53 124
44 111
19 91
16 82
6 82
6 84
5 79
5 79
5 80
5 87
5 100
6 111
7 112
7 113
7 121
11 121
53 1050
57 1075
58 1090
59 1139
59 1150
62 1171
62 1178
64 1191
64 1225
64 1239
64 1273
65 1286
65 1302
65 1313
66 1348
66 1355
66 1361
66 1363
72 1464
72 1467
73 1510
73 1519
73 1529
73 1602
73 1605
73 1615
73 1651
73 1659
73 1672
73 1686
73 1690
73 1695
73 1696
73 1699
73 1701
73 1711
73 1711
74 1717
78 1845
78 1865
78 1910
78 1918
78 1927
78 1942
78 1949
78 1953
77 1953
78 1955
78 1959
78 1963
78 1980
78 1980
78 1983
78 1984
78 1978
78 1978
78 1980
78 1972
78 1974
83 1984
83 1988
83 1992
84 1994
84 1994
84 1996
84 1997
84 1997
85 2003
85 2017
84 2023
84 2026
84 2045
84 2049
84 2050
84 2068
84 2075
84 2097
84 2105
83 2133
83 2145
83 2259
83 2293
84 2317
85 2429
85 2487
88 2579
89 2611
89 2713
90 2741
90 2792
90 2797
90 2816
90 2817
90 2822
90 2813
89 2807
85 2813
80 2844
77 2840
74 2820
33 1870
32 1872
31 1841
31 1835
31 1834
31 1826
31 1817
32 1800
32 1765
32 1755
32 1729
32 1730
32 1736
34 1817
34 1792
35 1812
34 1814
34 1815
27 1717
27 1718
27 1672
27 1667
27 1659
27 1585
27 1586
27 1573
27 1546
26 1537
26 1534
26 1571
26 1579
26 1583
26 1600
27 1623
27 1633
27 1624
29 1632
34 1630
30 1496
30 1492
30 1444
30 1435
30 1426
30 1416
30 1416
30 1417
31 1411
30 1410
34 1466
43 1584
47 1584
49 1588
52 1597
52 1598
52 1591
52 1600
51 1605
51 1640
56 1673
54 1683
54 1724
55 1750
55 1764
55 1767
55 1770
55 1771
55 1770
54 1764
54 1745
54 1744
54 1730
54 1722
54 1718
54 1717
54 1696
54 1678
53 1657
52 1647
52 1611
52 1579
52 1457
52 1409
51 1390
50 1229
50 1200
47 1093
47 1081
46 985
46 960
46 936
46 932
46 912
46 910
46 905
46 905
48 926
49 953
55 1012
56 1018
57 1036
57 1039
57 1038
58 1035
59 1035
59 1031
59 1026
62 1040
63 1052
66 1181
66 1186
66 1188
66 1179
66 1171
63 1072
62 1063
62 1063
62 1062
62 1064
62 1065
63 1093
75 1132
84 1148
89 1155
90 1158
90 1159
90 1158
90 1155
92 1153
103 1188
105 1142
105 1141
105 1143
104 1106
104 1100
104 1086
103 1077
101 1071
102 1097
101 1092
100 1125
99 1130
99 1139
98 1141
97 1141
97 1136
97 1121
96 1115
96 1115
90 1038
86 941
86 937
86 941
87 943
88 981
107 1525
109 1555
117 1743
120 1743
120 1738
129 1833
135 1850
136 1850
137 1864
137 1866
138 1863
139 1872
140 1976
140 2037
140 2117
140 2186
141 2280
141 2296
141 2307
141 2327
142 2338
143 2350
143 2358
143 2362
143 2364
145 2382
146 2408
145 2409
145 2417
146 2433
146 2433
146 2429
146 2429
146 2425
146 2424
146 2426
146 2440
146 2437
147 2437
147 2431
147 2420
145 2404
141 2365
136 2282
136 2283
136 2285
136 2292
137 2292
141 2298
142 2311
144 2341
144 2349
139 2325
139 2306
138 2200
138 2202
136 2209
137 2216
137 2200
137 2216
135 2213
134 2241
133 2241
143 2256
168 2263
166 2253
149 2282
147 2283
144 2283
145 2286
146 2280
146 2341
142 2345
141 2350
132 2313
132 2320
132 2321
132 2331
131 2335
131 2339
131 2389
130 2395
130 2396
128 2339
128 2338
128 2281
128 2277
128 2263
128 2256
128 2257
128 2257
128 2256
127 2259
126 2265
127 2263
128 2273
127 2268
127 2262
126 2262
118 2144
89 1422
89 1428
89 1413
88 1414
87 1385
87 1400
84 1418
118 2047
123 2130
131 2188
131 2184
131 2175
130 2055
129 1983
129 1896
133 1844
133 1834
132 1834
131 1826
131 1802
132 1799
132 1798
132 1793
132 1793
133 1820
130 1809
129 1804
132 1812
138 1813
139 1803
139 1840
139 1840
140 1893
140 1902
140 1906
140 1907
140 1908
140 1908
139 1906
139 1905
139 1905
139 1903
141 1894
141 1880
141 1877
141 1876
142 1874
141 1873
137 1864
134 1841
133 1825
132 1824
131 1819
131 1819
131 1811
131 1807
130 1799
129 1772
129 1765
130 1763
132 1764
129 1739
126 1754
118 1725
92 1714
87 1697
84 1648
83 1636
83 1643
83 1640
83 1629
83 1564
83 1561
85 1548
87 1533
87 1527
87 1516
87 1505
87 1496
87 1489
87 1431
87 1432
87 1431
87 1430
86 1454
86 1455
85 1460
85 1465
87 1463
97 1520
108 1589
162 1789
166 1836
166 1840
172 1859
171 1844
171 1834
171 1804
170 1785
171 1994
172 1994
170 1971
169 1969
169 1964
169 1941
169 1912
166 1854
130 1204
126 1157
125 1148
126 1148
126 1146
126 1128
124 1110
123 1089
122 1081
122 1080
121 1070
121 1069
122 1068
122 1065
122 1064
122 1064
122 1063
121 1032
120 1028
119 1020
118 1021
110 1015
110 1015
110 975
110 980
109 906
109 905
109 899
109 894
109 886
109 884
109 884
109 884
109 884
108 881
106 880
106 879
106 879
106 879
105 877
104 875
104 874
104 872
104 869
104 864
104 865
104 859
104 858
104 855
104 854
104 851
103 848
102 842
101 837
101 836
101 819
101 819
101 816
101 813
100 809
100 805
100 799
100 799
100 798
100 797
98 797
98 795
96 794
96 794
95 792
95 791
95 789
95 787
94 786
94 779
94 773
94 768
94 738
91 731
91 715
87 699
81 679
68 591
57 483
12 330
13 318
16 320
16 314
16 312
16 307
17 317
20 326
21 93
24 109
23 160
23 189
22 223
30 271
31 277
30 283
31 285
31 286
33 289
33 296
33 297
33 297
33 300
33 311
33 335
33 352
33 363
33 365
33 378
33 385
33 388
33 388
34 391
34 394
34 394
35 397
35 402
35 402
35 403
35 404
35 398
36 399
36 401
36 407
36 409
36 413
36 417
36 433
37 435
37 435
37 437
37 438
37 439
37 440
37 441
37 441
37 446
37 448
37 450
37 455
37 457
37 457
37 459
37 465
37 467
37 468
37 474
37 475
37 478
37 481
37 475
37 477
37 481
37 481
37 480
37 483
37 494
37 503
38 513
39 514
39 516
39 521
39 525
39 528
39 529
39 530
39 529
39 529
39 531
39 533
39 533
39 533
38 532
37 532
36 531
35 532
36 533
32 692
29 714
24 730
20 734
12 735
9 721
9 717
10 718
10 721
11 715
12 696
12 690
9 679
9 606
9 594
11 560
12 531
12 526
12 525
12 525
12 521
12 521
12 518
12 519
12 518
12 513
12 498
12 473
12 467
12 463
12 460
12 450
12 446
12 444
12 445
11 443
11 445
11 440
11 440
11 433
11 433
11 434
11 434
11 434
11 434
11 431
11 429
11 430
11 428
11 424
11 411
11 412
11 412
11 414
11 419
11 420
11 420
11 419
11 420
11 420
11 420
11 421
11 419
11 417
11 416
11 414
11 409
11 409
11 411
11 431
11 429
11 435
11 434
11 443
11 459
11 474
11 476
11 482
11 479
11 460
10 454
9 450
9 450
9 449
9 441
9 437
9 436
9 435
9 435
9 433
9 431
9 430
9 430
10 430
10 491
10 501
10 514
10 513
10 521
8 526
8 363
7 349
6 344
6 343
6 348
6 363
6 370
6 379
6 377
5 378
6 383
6 380
6 363
6 363
6 358
4 359
3 359
3 359
3 358
3 358
3 357
3 357
3 363
3 361
3 359
3 360
3 356
3 361
3 361
3 367
3 372
3 373
3 378
3 381
3 383
5 383
5 388
5 392
5 393
5 399
5 399
5 402
5 403
5 404
5 404
5 407
7 409
7 409
7 415
7 415
7 415
7 438
7 629
7 651
7 722
8 776
8 790
8 797
9 809
9 809
9 810
9 804
9 802
9 800
9 799
11 830
13 906
16 974
18 985
19 960
19 979
19 1017
20 1017
21 1016
21 1011
21 1004
21 1004
21 1003
21 1003
21 1004
20 1002
20 1004
20 1010
20 1012
20 1097
20 1116
20 1122
22 1151
23 1154
23 1158
23 1182
23 1193
23 1202
22 1210
22 1140
22 1135
22 1121
22 1121
22 1115
22 1116
23 1133
23 1157
25 1196
25 1201
25 1199
25 1185
25 1182
25 1176
25 1176
25 1179
24 1177
24 1180
24 1181
24 1189
24 1197
24 1210
25 1218
25 1223
25 1231
25 1235
26 1262
26 1268
26 1270
26 1273
26 1269
26 1267
26 1268
26 1266
26 1259
25 1246
24 1243
24 1238
24 1232
24 1223
25 1225
23 1209
21 1208
21 1183
21 1171
21 1160
21 1152
21 1143
21 1126
21 1111
21 1115
21 1102
21 1093
21 1090
21 1067
21 1033
21 1022
21 966
20 829
20 816
20 815
20 814
20 812
19 811
19 834
19 834
19 832
18 830
18 833
18 832
18 825
11 741
10 700
9 682
9 680
10 674
10 659
10 614
10 601
10 586
10 583
10 582
10 585
10 586
10 592
10 599
10 599
10 596
10 603
10 586
10 512
10 498
10 491
7 477
7 475
7 475
7 466
7 462
8 455
12 538
12 549
12 556
12 579
13 592
14 604
12 593
12 576
12 543
12 526
12 523
12 525
13 530
13 534
13 632
13 646
13 645
13 670
13 673
13 700
14 1219
14 1277
14 1305
13 1418
13 1471
13 1477
14 1611
13 1591
13 1597
13 1615
13 1620
13 1626
13 1627
13 1632
14 1624
13 1628
13 1632
13 1638
13 1639
13 1639
13 1641
13 1630
13 1630
13 1619
13 1620
13 1619
13 1625
13 1626
13 1621
13 1621
13 1614
13 1621
13 1630
13 1632
13 1634
13 1633
13 1634
13 1642
13 1643
13 1658
13 1661
13 1686
13 1697
13 1722
13 1753
13 1793
13 1798
13 1798
12 1815
12 1880
12 1905
12 2227
12 2275
12 2282
12 2335
12 2342
11 2376
13 2447
13 2494
14 2542
14 2556
14 2556
14 2575
14 2570
14 2581
14 2575
14 2573
14 2569
14 2571
14 2555
14 2558
13 2555
13 2554
13 2552
13 2552
13 2566
13 2600
13 2607
13 2603
12 2605
8 2510
8 2496
8 2467
8 2449
7 2449
7 2550
7 2559
7 2569
7 2579
7 2716
7 2716
8 2744
8 2783
8 2770
8 2704
8 2676
9 2660
9 2655
9 2632
9 2559
8 1940
8 1901
8 1901
8 1815
8 1817
8 1836
7 1839
7 1845
7 1859
7 1840
7 1906
7 1920
7 2169
7 2336
7 2385
7 2391
7 2396
7 2395
7 2397
7 2436
7 2586
7 2625
7 2663
7 2742
7 2802
7 2819
7 2820
7 2821
7 2821
7 2821
7 2817
7 2801
7 2791
7 2793
7 2791
7 2795
7 2792
7 2777
7 2769
7 2765
7 2758
7 2726
7 2702
7 2659
7 2618
7 2531
7 2526
7 2492
7 2472
7 2407
7 2367
7 2049
7 2041
7 2037
7 2045
7 2038
6 1984
5 1915
4 1907
4 1887
4 1882
4 1883
4 1857
4 1851
4 1846
4 1844
4 1843
4 1843
4 1839
4 1837
4 1837
5 1841
5 1839
5 1838
5 1832
5 1804
5 1769
5 1765
5 1806
5 1812
5 1815
5 1809
5 1802
5 1799
5 1790
5 1649
5 1633
5 1611
5 1597
2 1428
2 1420
2 1387
2 1343
2 1334
2 1315
2 1309
1 1306
1 1306
1 1302
1 1309
2 1340
4 1410
7 1485
8 1539
13 1796
13 1862
15 1914
15 1923
22 1907
23 1889
23 1829
24 1803
24 1531
24 1318
24 1288
24 1284
29 1325
29 1328
30 1334
30 1302
30 1194
31 1177
32 1148
32 1060
32 1011
32 1010
32 1010
32 1008
33 1009
33 1008
35 1021
36 1021
36 1024
36 1025
36 1033
36 1025
37 1023
37 1026
37 1029
37 1038
38 1072
38 1083
38 1085
38 1099
38 1106
38 1112
38 1114
38 1122
39 1123
39 1125
39 1119
39 1120
39 1117
39 1124
39 1117
39 1121
39 1122
39 1120
39 1120
40 1120
40 1130
40 1128
40 1129
40 1149
41 1189
42 1190
42 1203
44 1230
44 1250
44 1265
44 1326
43 1327
43 1337
43 1339
43 1342
43 1345
43 1343
43 1342
44 1310
44 1314
44 1314
45 1312
45 1318
45 1316
45 1314
45 1317
45 1321
46 1381
46 1391
46 1410
46 1423
45 1451
45 1460
45 1463
45 1462
45 1462
45 1455
45 1449
45 1443
45 1430
44 1376
42 1255
39 1127
38 1061
34 878
34 821
33 815
33 823
26 827
25 854
24 870
24 873
24 874
24 894
24 897
23 896
19 835
19 836
19 844
19 848
18 866
18 896
20 1162
21 1195
22 1270
22 1364
24 1411
25 1426
24 1437
24 1444
22 1436
22 1433
22 1423
23 1434
27 1473
31 1535
34 1539
35 1534
35 1535
35 1524
34 1485
36 1485
36 1493
36 1590
36 1632
36 1651
37 1721
37 1724
37 1739
37 1766
37 1776
37 1846
37 1879
37 1890
38 1954
39 1964
39 1984
39 2022
39 2072
39 2095
40 2308
41 2665
42 2882
44 3364
45 3754
46 4565
47 4674
47 4699
49 4834
49 4850
51 4899
52 5006
52 5003
52 5016
52 5020
51 5012
51 5008
51 5007
51 4981
52 4983
52 4984
52 4997
52 4998
52 4998
52 5000
52 5015
53 5008
52 4938
52 4927
52 4918
52 4922
52 4901
52 4898
52 4899
52 4897
52 4900
52 4902
52 4904
83 4927
83 4930
84 4937
87 4958
88 4985
111 5045
117 5046
117 5062
115 5019
115 4980
115 4951
115 4927
113 4913
113 4913
113 4948
114 4970
115 4984
120 5177
121 5179
121 5178
121 5162
121 5155
121 5126
121 5046
121 4780
124 4890
123 4883
122 4926
122 4973
122 4988
122 4987
122 4984
124 4982
123 4987
121 4994
120 4990
115 5042
115 5011
113 5133
116 5326
118 5338
119 5353
119 5350
116 5333
116 5323
116 5186
116 5141
115 5144
118 5136
118 5126
118 5109
119 5075
123 5049
159 5573
185 5816
189 5919
187 5749
189 5707
189 5402
190 5347
190 5237
190 5282
190 4958
187 4615
188 4767
186 4510
185 4366
178 3928
177 3882
177 3875
179 3869
179 3865
179 3866
179 3858
180 3857
180 3853
180 3852
179 3854
179 3859
180 3862
179 3863
179 3861
179 3855
179 3847
179 3846
178 3847
178 3846
178 3829
178 3829
178 3826
178 3828
178 3829
178 3808
178 3803
178 3803
178 3804
178 3842
178 3851
175 3857
175 3855
144 3835
142 3826
140 3818
138 3780
137 3768
110 3704
109 3711
109 3709
109 3707
108 3709
108 3709
108 3711
108 3713
108 3708
108 3661
108 3627
104 3602
102 3420
102 3468
102 3553
102 3814
101 3875
102 3896
102 3894
101 3839
97 3674
95 3657
95 3562
95 3520
95 3510
95 3510
93 3506
92 3504
92 3500
96 3497
95 3480
94 3389
93 3375
93 3240
91 3086
90 3052
90 3042
90 3036
90 3033
91 3010
91 2992
91 2985
88 3126
84 3090
80 3088
76 3096
65 3080
67 3085
16 1709
16 1701
16 1701
16 1683
16 1689
16 1697
16 1690
16 1671
16 1528
15 1516
15 1514
13 1267
13 1275
13 1287
13 1320
14 1351
14 1358
13 1353
13 1355
13 1361
13 1363
13 1363
13 1363
13 1363
13 1367
13 1364
13 1363
13 1363
13 1364
13 1366
14 1360
14 1383
14 1386
14 1386
14 1388
14 1387
14 1391
14 1393
14 1391
14 1402
14 1413
14 1414
14 1410
14 1373
14 1372
14 1367
14 1366
14 1366
14 1364
14 1366
14 1378
14 1407
14 1417
14 1414
14 1416
14 1427
14 1432
14 1445
14 1448
14 1446
14 1448
13 1450
13 1447
13 1444
14 1404
14 1343
14 1232
13 990
13 944
13 936
17 936
17 936
17 934
17 933
16 930
16 929
16 933
16 936
17 953
16 953
16 962
14 957
14 940
14 943
14 965
15 995
15 1027
15 1036
15 1040
15 1043
15 1034
14 1001
14 989
14 963
14 778
14 774
15 758
23 762
24 768
27 731
27 710
27 695
27 691
27 685
28 685
37 721
41 835
45 869
67 1147
69 1165
69 1176
68 1159
68 1160
70 1095
70 1084
70 1076
71 1073
71 1074
71 1077
71 1082
71 1085
71 1086
71 1088
71 1089
71 1095
71 1102
71 1109
71 1115
71 1113
71 1110
72 1128
72 1103
72 1120
72 1133
72 1131
72 1141
72 1139
73 1140
73 1134
75 1132
75 1124
75 1128
76 1147
77 1186
77 1192
77 1227
77 1243
80 1291
86 2260
86 2339
92 2492
93 2541
94 2614
98 2877
98 2925
98 2941
98 2947
98 2944
97 2960
97 2958
97 2994
97 3014
97 3018
97 3022
97 3014
97 3015
98 3016
98 3024
100 3071
100 3085
97 3156
97 3195
97 3243
97 3252
97 3265
97 3274
97 3379
97 3383
97 3374
98 3376
98 3367
99 3355
99 3358
99 3355
99 3317
98 3260
98 3256
98 3252
98 3252
98 3261
98 3260
98 3264
98 3271
98 3287
97 3293
95 3294
86 3290
68 3285
63 3304
59 3310
57 3312
57 3316
57 3316
56 3302
56 3285
52 3220
50 3118
48 3057
36 2823
36 2820
36 2821
36 2826
36 2827
36 2826
36 2823
37 2823
37 2826
37 2826
38 2821
47 2833
49 2840
49 2849
50 2973
50 2976
50 2972
52 2983
56 3034
57 3053
57 3067
57 3068
55 3036
56 3033
56 3033
55 3009
54 3010
54 3010
54 3015
54 3005
54 3005
54 2998
54 2995
55 2989
55 2960
53 2892
52 2871
51 2833
51 2772
49 2580
39 1502
36 1314
34 1198
34 1181
34 1190
34 1195
34 1196
34 1174
34 1171
33 1161
33 1148
33 1139
33 1095
33 1098
33 1106
35 1130
36 1170
38 1320
38 1678
38 1713
36 1689
35 1694
35 1634
35 2003
35 2017
35 2060
35 2125
35 2173
35 2061
35 2070
36 2128
35 2136
35 2149
35 2168
37 2184
37 2208
37 2211
37 2223
37 2232
37 2246
37 2251
37 2250
37 2260
37 2260
37 2252
37 2230
37 2227
37 2226
37 2216
37 2205
36 2172
36 2169
36 2165
36 2162
36 2156
36 2148
36 2177
36 2175
36 2176
36 2182
36 2185
35 2192
34 2193
34 2191
34 2188
34 2181
34 2176
34 2171
33 2167
32 2171
30 2183
21 2163
20 2160
20 2148
20 2031
19 2026
19 2021
17 1980
11 1919
11 1913
11 1906
12 1907
12 1903
12 1903
12 1899
12 1899
12 1892
12 1885
12 1880
12 1873
12 1862
11 1854
11 1852
12 1849
12 1853
13 1864
13 1879
13 1900
13 1911
13 1927
13 1927
14 1961
14 1973
14 1970
14 1972
14 1995
14 2018
16 2039
18 2184
18 2252
20 2351
20 2374
23 2490
23 2552
23 2631
22 2750
22 2767
21 2836
21 2464
21 2544
21 2552
21 2555
22 2587
22 2165
22 2135
21 2063
21 2064
20 2038
18 2044
18 2045
17 1995
17 2000
17 1969
17 1958
17 1950
17 1921
18 1921
18 1934
18 1929
18 1917
18 1920
18 1924
18 1926
18 1954
18 1969
18 1975
18 1982
18 1991
19 1994
19 1999
19 2002
19 2019
19 2028
19 2032
19 2038
19 2047
20 2012
20 2024
20 2037
20 2044
20 2047
20 2049
20 2050
20 2055
20 2063
20 2069
20 2084
20 2092
20 2092
21 2086
21 2110
21 2123
21 2138
20 2146
21 2143
21 2148
21 2153
21 2153
21 2155
21 2157
23 2157
24 2191
24 2190
26 2194
26 2198
29 2203
31 2211
31 2212
34 2331
35 2353
35 2355
35 2363
34 2360
34 2394
37 2402
37 2379
37 2357
37 2320
37 2313
37 2300
37 2298
36 2215
38 2223
40 2195
40 2197
39 2158
38 2112
38 2076
36 1925
35 1856
34 1776
33 1720
31 1584
30 1433
29 1245
29 1107
29 1095
29 1075
29 1097
29 1066
29 1059
29 1048
28 987
28 979
28 971
27 984
28 995
28 992
28 999
28 998
29 1049
29 1059
29 1067
30 1089
30 1102
29 1122
29 1127
29 1109
29 1195
30 1252
30 1282
30 1316
30 1317
30 1295
30 1297
30 1312
30 1309
30 1307
29 1331
29 1326
29 1323
29 1309
28 1311
28 1310
28 1305
28 1303
28 1299
28 1271
28 1250
28 1236
28 1234
28 1234
28 1231
28 1227
28 1218
28 1209
28 1192
28 1183
28 1175
28 1167
27 1091
27 1085
27 1078
27 1071
27 1067
27 1066
27 1059
27 1049
27 1044
24 1044
20 1040
16 997
14 993
14 985
14 979
14 973
14 956
14 953
11 832
9 820
9 812
9 796
9 788
9 766
9 762
9 757
9 753
9 749
9 740
9 740
9 730
8 724
6 701
4 699
4 699
4 699
4 696
4 695
4 694
4 688
4 686
4 683
4 682
4 680
4 680
4 673
4 669
4 666
4 627
4 618
4 613
4 610
4 606
4 596
4 590
4 557
3 501
3 498
3 492
3 488
2 435
2 424
2 523
1 502
1 490
1 478
1 474
1 459
1 371
0 297
1 307
1 327
1 355
1 375
1 375
1 361
1 363
1 382
1 356
1 375
2 443
2 457
2 464
2 469
3 472
3 477
3 481
3 483
3 485
3 486
3 486
3 487
4 493
4 495
4 496
4 502
4 518
4 522
4 535
4 539
4 557
5 560
8 561
9 575
10 578
10 579
10 586
10 590
10 591
10 593
10 600
10 603
10 615
10 618
10 621
11 651
11 660
12 801
12 809
12 854
13 868
13 876
13 911
13 980
15 1270
20 1696
21 1744
22 1762
22 1849
23 1947
23 1991
23 2010
23 2013
23 2016
24 2020
24 2024
24 2029
24 2032
24 2035
24 2035
24 2035
24 2036
24 2041
24 2039
24 2039
24 2039
24 2040
24 2039
24 2039
24 2039
24 2041
24 2040
24 2048
24 2046
24 2220
24 2275
24 2302
24 2318
24 2340
24 2348
24 2356
24 2353
24 2262
24 2259
26 2269
24 2272
24 2274
24 2271
24 2245
24 2235
24 2195
24 2154
24 2135
24 2124
24 2132
24 2139
24 2142
24 2122
24 2117
24 2113
23 2026
23 2023
23 2027
23 2026
23 2029
23 2024
23 2027
23 2035
23 2038
23 2040
24 2047
26 2043
25 2052
24 2095
24 2096
26 2109
26 2097
27 2130
27 2134
27 2146
27 2167
26 2169
25 2184
24 2231
24 2246
24 2388
27 2632
28 2687
29 2824
29 2854
29 2881
35 2961
35 2954
35 2960
35 2954
34 2906
34 2893
33 2769
33 2754
32 2709
32 2695
35 2716
37 2674
37 2569
34 2237
29 1905
29 1896
29 1894
29 1867
29 1810
29 1792
30 1797
31 1833
33 1861
34 1870
42 1915
42 1913
43 1912
43 1915
44 1914
44 1914
44 1918
44 1913
44 1913
45 1916
46 1927
46 1938
46 1942
59 2027
61 2034
61 2056
61 2071
63 2071
63 2084
63 1808
63 1816
63 1770
63 1769
63 1770
63 1768
63 1766
64 1757
64 1746
64 1746
63 1738
63 1730
63 1729
63 1727
63 1725
63 1724
63 1720
63 1708
64 1704
64 1693
65 1681
66 1674
66 1672
66 1670
67 1669
67 1665
68 1665
68 1663
68 1674
68 1679
68 1676
68 1687
68 1685
70 1679
70 1680
70 1674
69 1665
66 1664
62 1631
61 1557
60 1557
60 1536
62 1538
65 1536
66 1510
66 1484
66 1473
66 1478
66 1516
66 1430
65 1392
64 1192
63 926
54 739
54 738
56 738
63 753
67 757
76 799
89 821
106 853
124 838
126 864
132 888
134 895
135 900
135 894
138 890
138 914
140 1016
142 1136
144 1161
145 1171
148 1221
149 1226
151 1245
151 1250
148 1245
146 1215
144 1189
140 1168
137 1170
137 1171
137 1184
136 1201
136 1209
137 1213
137 1245
137 1267
137 1302
137 1343
136 1332
135 1316
135 1320
122 1231
121 1207
121 1189
121 1198
119 1194
119 1192
119 1184
119 1172
119 1171
119 1171
119 1171
119 1171
119 1169
118 1178
118 1181
118 1181
118 1182
118 1182
118 1181
118 1181
135 1184
134 1183
135 1194
136 1197
136 1200
141 1260
140 1281
140 1290
141 1295
140 1298
140 1300
139 1302
139 1301
139 1301
139 1287
139 1279
139 1272
140 1256
155 1251
159 1244
160 1252
160 1254
160 1255
160 1271
160 1271
159 1271
160 1291
160 1290
159 1285
156 1276
155 1270
156 1274
156 1273
156 1254
156 1195
155 1192
154 1180
154 1173
153 1173
155 1175
150 1169
149 1170
131 1150
127 1141
109 1094
98 1076
87 1045
77 1036
77 1002
68 979
67 960
67 958
66 955
64 927
63 910
62 770
61 733
61 731
61 729
59 677
58 671
57 658
57 654
58 654
63 705
65 712
65 723
68 735
71 830
70 799
72 840
72 864
72 880
75 900
75 888
76 862
77 856
77 880
77 880
77 881
77 878
77 877
77 878
77 870
77 872
77 882
77 882
82 991
83 998
83 1044
83 1057
84 1081
85 1091
87 1104
88 1114
88 1151
87 1169
86 1177
86 1182
86 1190
67 1187
67 1250
67 1233
66 1232
65 1225
61 1166
60 1161
62 1161
62 1161
62 1158
62 1157
63 1157
63 1158
63 1160
63 1171
63 1228
60 1233
59 1335
44 1361
44 1391
54 1546
69 1644
71 1671
72 1669
72 1683
73 1683
72 1668
74 1672
76 1663
76 1655
76 1655
82 1662
82 1691
85 1724
85 1720
85 1722
85 1729
85 1732
86 1746
84 1750
84 1758
84 1779
84 1794
85 1824
86 1921
86 2141
93 2268
95 2395
105 3096
106 3181
107 3237
107 3262
107 3333
110 3485
116 3619
121 3866
122 4056
123 4093
123 4130
122 4147
121 4174
118 4194
118 4205
117 4214
116 4126
115 4130
114 4124
112 4051
108 3990
107 4144
108 4156
108 4147
108 4121
106 4038
105 4022
104 4025
104 4025
104 4026
104 4028
104 4028
104 4033
104 4036
105 4038
105 4037
105 4033
105 4024
105 4033
98 3943
98 3956
98 3907
97 3906
96 3908
94 3915
94 3897
94 3879
94 3843
94 3838
94 3836
94 3831
94 3826
94 3826
94 3751
95 3757
95 3817
94 3819
94 3815
93 3807
92 3806
92 3811
92 3812
93 3956
92 4004
92 4086
92 4127
91 4161
91 4106
93 4150
88 3996
81 3976
80 3926
43 3604
31 3617
31 3585
31 3578
31 3580
28 3523
29 3529
29 3521
29 3519
29 3515
29 3528
30 3644
30 3605
31 3597
31 3572
31 3555
31 3549
32 3537
34 3510
36 3479
37 3460
39 3431
40 3422
41 3422
41 3287
40 3183
39 3004
44 3536
37 2910
49 3624
57 3862
146 8225
149 8517
150 8479
164 8982
166 8953
169 9016
169 9210
169 9780
169 9795
170 9901
170 9965
170 9968
170 9869
171 9895
171 9888
171 9882
175 9890
175 9879
175 9847
175 9842
175 9846
176 9843
176 9852
176 9870
176 9882
176 9930
177 9955
177 9985
178 10017
178 10056
182 10128
182 10130
183 10130
183 10127
183 10120
192 10118
233 10110
236 10073
236 10072
238 10070
243 10480
245 10593
245 10679
245 10851
246 11076
247 11347
247 11846
248 11908
249 11969
250 12056
250 12085
251 12111
251 12062
252 12077
252 12081
252 12085
252 12093
252 12099
252 12097
248 11948
248 11840
248 11725
248 11743
248 11727
246 11739
244 11763
245 11815
246 11891
246 11948
246 12071
247 12310
247 12646
247 12770
251 13754
250 13814
251 13881
251 13917
251 13943
258 14142
259 14165
257 14067
258 14166
257 14236
257 14256
256 14400
256 15431
255 15495
254 15525
254 15530
253 15523
250 15511
249 15474
251 15510
251 15483
250 15461
248 15356
242 14689
241 14516
224 13665
204 13216
117 8617
118 8535
117 8360
119 8217
117 8155
117 8079
117 7805
117 7335
118 7284
117 7239
117 7298
116 7318
116 7545
117 7602
116 7622
116 7653
113 7663
113 7799
113 7806
112 7829
112 7864
111 7913
111 7912
111 7892
126 7891
124 7835
123 7817
123 7781
122 7742
121 7695
121 8079
121 8091
119 8116
119 8119
119 8125
111 8121
66 8114
65 8108
66 8106
67 8099
60 7587
60 7551
61 7415
61 7221
58 7024
61 6775
61 6251
61 6208
61 6177
61 6100
61 6092
62 6058
62 6049
62 6050
62 6073
62 6068
62 6094
63 6135
63 6143
63 6141
63 6160
63 6174
65 6222
67 6393
69 6412
68 6362
67 6291
66 6237
66 6173
66 5973
67 5764
66 5383
67 5521
63 4541
64 4603
64 4558
64 4564
64 4566
57 4364
59 4415
59 4328
57 4257
58 4144
60 4109
60 3939
59 2892
59 2877
59 2843
59 2835
57 2828
57 2818
57 2812
56 2695
57 2696
58 2693
58 2692
59 2693
59 2687
61 2679
62 2686
62 2695
66 2730
70 2746
71 2805
73 2812
74 2800
75 2811
74 2792
73 2750
73 2730
73 2630
73 2582
73 2344
72 2287
72 2272
72 2251
73 2223
73 2102
73 2077
73 2051
73 2019
72 1971
69 1967
69 1992
54 1985
54 1992
54 1996
54 1997
54 1994
53 1987
52 1544
53 1542
53 1525
53 1521
52 1526
52 1533
52 1521
51 1522
51 1519
51 1517
51 1491
51 1492
50 1491
52 1505
52 1502
50 1499
50 1497
50 1488
49 1487
48 1484
49 1480
49 1479
50 1474
50 1471
51 1441
53 1442
53 1412
53 1355
53 1354
53 1344
53 1316
53 1306
51 1190
52 1024
51 1014
51 1015
72 1031
76 1042
79 1043
93 1090
96 1074
95 1085
94 845
94 835
94 770
94 741
95 736
94 750
94 739
93 663
93 673
92 670
92 667
91 663
91 658
91 657
90 657
90 656
90 656
90 653
90 655
88 655
88 652
87 649
86 652
86 652
86 649
85 652
83 705
78 712
78 731
74 696
72 673
72 648
70 642
70 642
69 639
69 639
69 642
69 645
69 653
69 661
69 667
69 667
69 665
69 662
68 671
68 671
68 671
68 674
68 676
68 677
68 677
68 665
69 729
70 722
70 722
69 751
69 754
69 755
68 758
68 760
68 759
68 775
68 773
68 768
68 769
67 778
67 785
68 786
69 793
69 788
69 780
69 791
68 793
68 817
68 826
68 842
69 856
69 871
74 1003
75 1031
74 1062
78 1074
75 1076
74 1078
74 1082
86 1101
87 1094
87 1089
88 1093
88 1096
85 1079
80 1067
79 1074
74 1071
58 1074
54 1061
49 1048
38 961
39 958
39 945
38 936
38 932
37 921
37 927
37 922
36 908
36 896
36 942
36 938
36 945
38 961
38 961
38 961
38 962
38 961
38 962
38 961
38 961
38 961
38 961
38 956
38 959
38 957
38 983
39 984
42 984
42 922
42 889
42 847
42 845
42 845
42 848
42 850
42 849
42 851
42 850
42 850
42 842
42 829
42 817
42 813
42 814
42 814
42 813
42 796
42 796
43 789
43 790
43 794
43 790
44 789
42 762
42 721
56 739
56 732
56 715
56 718
56 717
56 712
56 712
56 708
57 693
57 686
59 689
59 684
59 680
59 679
58 680
54 669
53 670
53 660
52 629
52 625
51 636
53 641
53 628
53 615
52 619
48 455
47 456
47 437
48 437
48 453
48 447
48 441
40 426
38 420
36 418
36 418
35 418
35 416
35 416
35 416
35 425
35 410
36 416
36 442
36 441
36 439
36 440
36 447
36 482
37 544
37 572
37 641
37 647
37 656
37 601
37 610
36 606
35 596
35 598
35 598
35 599
35 599
36 601
37 603
38 608
38 636
39 816
41 823
41 827
42 832
42 830
40 837
43 843
44 908
44 923
44 926
44 928
44 929
44 926
44 928
44 927
44 928
44 928
44 930
45 930
46 930
46 931
46 933
46 932
46 937
46 939
46 937
46 937
45 938
45 937
46 935
46 942
46 958
45 962
45 962
42 975
42 974
42 974
43 976
44 978
44 988
44 1006
44 1020
43 1018
43 1017
43 1006
43 1007
43 1003
43 1003
43 999
43 1062
43 1059
43 1064
43 1067
43 1075
40 1015
40 1007
38 987
38 1000
37 998
37 996
37 996
37 999
36 994
36 976
36 973
36 976
36 973
36 982
36 985
36 988
36 992
36 992
35 993
35 991
35 981
35 982
35 1006
35 1017
35 1034
36 1055
36 1101
35 1097
34 1082
34 1003
34 1016
34 1018
34 1035
34 1016
34 1029
34 1030
34 1029
35 1033
35 1027
35 1031
36 1054
36 1113
35 1330
34 1659
34 2060
33 2179
31 2149
30 2349
30 2377
30 2410
30 2408
30 2441
25 2440
25 2395
25 2387
25 2387
25 2388
25 2401
25 2446
25 2547
25 2731
25 2812
25 2857
26 2877
24 2901
24 2911
24 3046
24 3063
24 3097
24 3124
24 3143
24 3158
24 3161
25 3163
24 3166
25 3185
24 3180
23 3178
20 3198
20 3194
10 3160
10 3174
10 3186
11 3187
10 3185
10 3179
10 3156
9 3146
9 3146
9 3153
9 3182
9 3206
11 3241
11 3243
11 3239
11 3173
14 3411
14 3413
15 3425
16 3426
16 3429
16 3430
16 3433
16 3440
16 3438
16 3439
16 3468
16 3467
16 3460
16 3453
16 3448
16 3444
16 3447
16 3438
16 3443
17 3490
17 3497
19 3535
20 3547
20 3557
20 3571
20 3579
21 4077
21 4073
21 4159
21 4152
21 4128
21 4109
21 4055
21 4050
21 4039
21 4036
21 4037
21 4027
21 4031
20 4021
20 4016
20 4004
20 3989
20 3959
19 3888
19 3704
18 3279
18 2946
18 2757
18 2696
18 2714
18 2525
18 2487
18 2485
18 2502
18 2533
18 2613
19 2651
20 2671
20 2672
21 2671
21 2627
21 2513
22 2392
21 2323
22 2292
22 2248
22 2241
22 2243
22 2246
22 2095
22 2094
22 2056
22 2031
21 2014
20 2008
20 2007
19 2005
19 2001
19 1978
19 1967
19 1965
20 1949
20 1951
20 1936
20 1927
19 1916
19 1913
19 1912
19 1906
19 1905
19 1903
19 1902
19 1893
19 1858
19 1835
17 1813
16 1908
16 1920
16 1937
14 1712
14 1727
13 1750
12 1751
12 1757
12 1764
12 1767
12 1767
12 1766
12 1764
12 1725
12 1726
12 1722
12 1721
12 1726
12 1728
12 1722
12 1718
12 1929
11 1881
11 1929
8 1882
8 1881
9 1868
9 1854
9 1833
8 1219
8 1208
8 1153
8 1152
8 1158
8 1153
8 1160
8 1163
8 1167
8 1166
8 1154
8 1149
8 1153
8 1168
8 1174
8 1186
8 1199
8 1207
8 1218
8 1218
8 1214
8 1226
8 1220
8 1243
8 1157
8 1163
7 1154
7 1128
7 1099
7 1076
7 1005
7 959
6 949
6 945
5 938
5 922
5 903
4 896
4 893
3 895
3 893
3 888
3 886
3 873
2 875
2 869
2 874
2 874
2 880
2 879
2 881
2 886
2 886
3 884
3 883
3 883
3 883
3 880
3 880
3 880
3 880
3 886
3 905
3 906
3 909
3 913
3 931
4 935
5 954
6 953
6 949
6 833
6 831
6 810
6 768
6 758
6 709
6 699
6 698
6 697
6 699
7 794
7 817
7 826
8 926
8 927
8 942
8 993
8 1000
8 1008
9 1021
9 1015
10 787
10 785
10 735
10 742
10 742
9 744
10 760
11 768
11 817
11 906
11 915
11 927
11 971
13 1071
14 1191
24 2308
24 2653
26 3273
26 3391
27 3606
27 3772
27 4222
27 4431
27 4677
27 4972
27 5003
27 5029
27 5059
27 5064
28 5050
30 5058
30 5039
31 5095
31 5098
31 5104
31 5159
32 5261
33 5313
53 5722
54 5932
57 6127
57 6157
57 6289
57 6312
57 6335
57 6359
57 6370
70 6452
71 6480
71 6531
71 6570
71 6588
71 6589
71 6612
71 6619
71 6627
71 6677
71 6690
71 6697
71 6701
70 6705
69 6704
68 6704
68 6699
68 6698
68 6700
68 6703
69 6713
82 6788
85 6777
85 6777
86 6804
86 6804
86 6816
87 6815
86 6810
85 6855
86 6893
86 6910
87 6909
87 7080
93 7365
94 7436
103 8161
103 8255
104 8286
104 8300
104 8308
104 8304
104 8215
104 8186
104 8178
103 8084
103 8082
103 8067
103 7999
103 7991
103 7992
103 8033
102 8131
101 8143
101 8160
101 8121
101 8099
102 8085
101 8039
100 7956
110 8004
109 7803
109 7493
109 7390
108 7365
108 7263
106 7119
103 6795
98 5819
98 5546
98 5492
98 5445
97 5263
97 5092
97 4605
97 4417
97 4266
98 4201
100 4323
100 4346
100 4364
100 4386
98 4412
96 4438
96 4453
96 4402
95 4408
95 4404
95 4354
94 4214
92 4082
71 3563
71 3433
71 3401
71 3398
70 3265
70 3262
70 3242
68 3230
68 3225
58 3139
57 3103
57 3042
57 3032
57 3022
57 3016
56 2986
57 3012
57 3004
57 2943
57 2925
57 2925
58 2918
58 2918
58 2924
58 2927
58 2933
58 2938
57 2941
56 2944
56 2933
43 2817
43 2823
43 2843
43 2843
43 2842
43 2845
42 2838
42 2795
42 2740
40 2729
38 2711
36 2690
34 2483
27 2137
24 1996
23 1309
23 1284
23 1275
23 1260
23 1255
23 1271
22 1265
22 1268
23 1296
27 1345
28 1413
28 1429
28 1422
28 1417
28 1575
28 1517
28 1408
28 1396
28 1385
28 1378
27 1383
26 1372
26 1369
26 1372
15 1255
14 1246
15 1206
15 1188
15 1189
14 1198
14 1235
14 1235
14 1260
14 1266
14 1292
14 1307
14 1321
14 1354
14 1359
14 1353
14 1288
13 1208
13 1165
13 1197
13 1195
13 1174
13 1145
13 1110
13 1065
13 1053
13 1044
13 1021
13 1014
13 1016
13 1018
13 1029
14 1030
14 1128
14 1127
14 1142
14 1141
14 1141
14 1150
14 1155
14 1156
14 1159
14 1165
14 1166
14 1165
14 1165
14 1165
13 1131
13 1132
13 1132
13 1132
13 1132
12 1133
12 1130
10 1121
8 1119
8 1107
8 1111
8 1115
8 1138
8 1150
9 1138
9 1110
9 1108
9 1108
9 1101
9 1103
9 1104
9 1098
9 1099
9 1099
9 1098
9 1099
9 1099
9 1098
9 1098
9 1098
9 1108
9 1123
9 1127
9 1134
9 1114
8 1114
8 1107
7 1073
4 1024
3 957
3 934
3 929
3 921
3 738
3 733
3 711
3 698
3 691
3 693
3 690
3 691
3 690
3 689
3 688
2 681
2 672
1 646
1 632
1 631
1 598
1 592
1 550
1 537
1 503
1 484
1 474
1 449
1 441
1 429
1 427
1 414
1 408
1 354
1 334
1 333
1 333
1 333
1 333
1 333
1 333
1 331
1 328
1 322
1 318
1 309
1 309
1 202
1 201
1 174
1 170
1 169
1 158
1 155
1 154
1 149
1 144
1 144
1 142
1 142
1 142
1 142
1 141
1 141
1 141
1 141
1 141
1 141
1 141
1 140
1 139
1 123
1 108
1 80
1 70
0 69
0 69
0 69
0 69
0 69
0 59
0 57
0 56
0 54
0 54
0 54
0 57
0 67
0 83
0 104
0 115
0 109
0 91
0 95
1 110
1 112
1 144
1 148
1 151
1 153
1 166
1 170
1 200
1 310
1 323
2 331
2 330
2 337
2 337
2 340
2 344
3 346
3 347
3 348
3 350
3 350
3 350
3 350
3 350
3 350
3 350
3 350
3 350
3 351
3 351
3 351
3 353
3 353
3 353
3 353
3 353
3 353
3 354
3 354
3 354
3 356
3 357
3 359
3 360
3 361
3 362
3 362
3 362
3 362
3 362
3 362
3 363
3 363
3 363
3 363
3 363
3 362
3 362
3 360
3 360
3 360
3 360
3 360
3 361
3 361
3 361
3 361
3 361
3 361
3 361
3 361
3 361
3 359
3 359
3 359
3 359
3 360
3 360
3 360
3 360
3 360
3 360
3 360
2 360
2 359
2 359
2 359
2 359
2 359
2 359
2 355
2 351
2 339
2 319
2 297
2 287
2 283
2 281
2 273
1 253
1 251
1 207
1 205
1 203
1 200
1 192
1 189
1 153
1 34
1 29
0 27
0 26
0 21
0 16
0 14
0 12
0 12
0 12
0 11
0 11
0 11
0 11
0 11
0 11
0 10
0 9
0 9
0 9
0 9
0 9
0 9
0 9
0 9
0 11
0 11
0 11
0 11
0 10
0 10
0 10
0 8
0 7
0 5
0 4
0 4
0 4
0 4
0 4
0 4
0 4
0 4
0 4
0 4
0 4
0 4
0 4
0 4
0 4
0 4
0 4
0 4
0 4
0 4
0 3
0 3
0 3
0 3
0 3
0 3
0 3
0 3
0 3
0 3
0 3
0 3
0 3
0 2
0 2
0 2
0 2
0 2
0 2
0 2
0 2
0 2
0 2
0 2
0 2
0 2
0 2
0 2
0 2
0 2
0 2
0 2
0 2
0 2
0 2
0 2
0 2
0 2
0 2
0 2
0 2
0 2
0 2
0 2
0 2
0 2
0 2
0 2
0 2
0 2
0 2
0 2
0 2
0 2
0 2
0 2
0 2
0 2
0 2
0 2
0 2
0 2
0 2
0 2
0 2
0 2
0 1
0 1
0 1
0 1
0 0
0 0
0 0
0 0
0 0
0 0
0 0
0 0
0 0
0 0
0 0
0 0
0 0
0 0
0 0
0 0
0 0
0 0
0 0
0 0
0 0
0 0
0 0
0 0
0 0
0 0
0 0
0 0
0 0
0 0
0 0
0 0
0 0
0 0
0 0
0 0
0 0
0 0
0 0
0 0
0 0
0 0
0 0
0 0
0 0
0 0
0 0
0 0
0 0
0 0
0 0
0 0
0 0
0 0
0 0
0 0
0 0
0 0
0 0
0 0
0 0
0 0
0 0
0 0
0 0
0 0
0 0
0 0
0 0
0 0
0 0
0 0
0 0
0 0
0 0
0 0
0 0
0 0
0 0
0 0
0 0
0 0
0 0
0 0
0 0
0 0
0 0
0 0
0 0
0 0
0 0
0 0
0 0
0 0
0 0
0 0
0 0
0 0
0 0
0 0
0 0
0 0
0 0
0 0
0 0
0 0
0 0
0 0
0 0
0 0
0 0
0 0
0 0
0 0
0 0
0 0
0 0
0 0
0 0
0 0
0 0
0 0
0 0
0 0
0 0
0 0
0 0
0 0
0 0
0 0
0 0
0 0
0 0
0 0
0 0
0 0
0 0
0 0
0 0
0 0
0 0
0 0
0 0
0 0
0 0
0 0
0 0
0 0
0 0
0 0
0 0
1 0
1 0
1 0
1 0
1 0
1 0
1 0
1 0
1 0
1 0
1 0
1 0
1 0
1 0
1 0
1 0
1 0
1 0
1 0
1 0
1 0
2 0
2 0
2 0
2 0
3 0
4 0
4 0
4 0
4 0
4 0
4 0
4 0
4 0
4 0
4 0
4 0
4 0
4 0
4 0
4 0
4 0
4 0
4 0
4 0
4 0
4 0
4 0
4 0
4 0
4 0
4 0
4 0
4 0
4 0
4 0
5 0
5 0
5 0
6 0
7 0
7 0
7 0
7 0
7 0
7 0
7 0
7 0
7 0
7 0
7 0
7 0
7 0
7 0
7 0
7 0
7 0
7 1
7 1
7 1
7 1
7 1
7 1
7 1
7 1
7 1
7 1
7 1
7 1
7 1
7 1
7 1
7 1
7 0
7 0
7 0
7 0
7 0
7 0
7 0
6 0
6 0
6 0
6 0
6 0
6 0
6 0
6 0
6 0
6 0
6 0
6 0
6 0
6 0
6 0
6 0
5 0
4 0
4 0
4 0
4 0
3 0
3 0
3 0
3 0
3 0
3 0
3 0
3 0
3 0
3 0
3 0
3 0
3 0
3 0
3 0
3 0
3 0
3 0
3 0
3 0
3 0
3 0
3 0
3 0
3 0
3 0
3 0
3 0
3 0
3 0
3 0
3 0
3 0
3 0
3 0
2 0
2 0
1 0
1 0
0 0
0 0
0 0
0 0
0 0
0 0
0 0
0 0
0 0
0 0
0 0
0 0
0 0
0 0
0 0
0 0
0 0
0 0
0 0
0 0
0 0
0 0
0 0
0 0
0 0
0 0
0 0
0 0
0 0
0 0
0 0
0 0
0 0
0 0
0 0
0 0
0 0
0 0
0 0
0 0
0 0
0 0
0 0
0 0
0 0
0 0
0 0
0 0
1 0
1 0
1 0
1 0
1 0
1 2
1 2
1 4
1 8
1 9
1 18
1 22
2 25
2 26
2 26
2 28
2 28
2 28
2 28
2 28
2 28
2 28
2 28
2 28
2 28
2 28
2 28
2 28
2 28
2 28
2 28
2 28
2 28
2 28
2 28
2 28
2 28
2 28
2 28
2 28
2 28
2 28
2 28
2 28
2 29
2 29
2 31
2 31
2 31
2 31
2 31
2 31
2 31
2 31
2 31
2 32
2 32
2 32
2 33
3 33
5 33
13 33
36 34
51 34
56 34
64 34
65 34
68 34
71 35
72 36
72 36
73 36
73 36
73 36
73 36
73 36
73 36
73 38
73 38
73 38
73 38
76 38
76 38
76 38
76 38
76 41
76 46
77 71
84 101
84 117
85 119
85 123
86 135
87 157
87 158
87 161
87 161
88 163
97 166
152 191
161 194
162 193
163 193
166 192
166 192
166 191
166 189
167 186
167 182
167 177
169 168
169 167
169 167
169 169
169 170
169 170
170 171
172 178
173 179
176 195
176 196
176 196
176 196
176 196
176 199
176 201
176 202
176 202
176 203
176 203
176 203
176 203
176 203
176 209
176 209
176 209
176 210
176 210
176 212
176 212
176 212
176 212
176 212
176 211
176 212
176 212
176 210
176 210
176 210
176 210
176 211
176 211
177 209
178 210
178 210
177 211
177 210
177 210
177 209
175 209
170 209
162 211
139 215
123 215
120 216
114 215
113 215
110 214
109 214
108 213
108 213
108 213
108 213
108 213
108 213
108 213
108 212
111 208
111 208
112 209
112 205
112 207
112 208
112 204
113 200
113 197
113 180
112 148
105 121
105 110
104 105
105 102
104 102
103 100
100 103
95 102
94 102
81 91
65 88
29 71
27 71
28 72
27 72
26 73
26 73
26 78
25 78
23 81
23 82
25 83
25 87
25 87
25 87
25 85
25 85
24 85
23 84
21 77
21 74
18 60
18 60
18 60
18 61
18 61
18 57
18 56
18 56
18 56
18 56
18 56
19 57
19 57
19 57
19 50
19 50
19 50
19 50
19 50
19 48
19 48
19 48
19 48
19 47
19 47
19 47
19 47
19 47
18 47
18 47
18 45
18 45
18 45
17 45
17 45
17 45
17 45
17 45
17 45
16 44
16 44
16 44
16 41
16 39
16 39
16 38
16 38
16 38
16 38
16 38
16 38
16 38
16 38
16 39
16 39
16 39
15 39
15 39
13 38
12 37
11 37
11 37
8 32
8 32
9 31
9 31
9 30
10 31
10 27
10 27
10 29
10 30
9 30
11 32
11 34
12 39
13 60
13 70
10 81
10 90
10 98
7 98
9 104
9 109
10 113
10 114
10 108
14 106
14 103
18 114
18 113
18 112
18 114
18 115
18 115
18 115
18 115
19 114
20 114
20 116
21 115
21 115
21 116
21 116
21 115
21 114
21 114
21 114
21 114
21 114
21 114
20 113
20 113
20 115
20 116
20 118
20 118
21 118
21 118
25 118
31 118
31 118
31 118
31 118
31 118
37 119
38 120
38 120
38 120
38 119
38 121
38 121
38 121
38 121
38 121
38 121
38 121
38 121
38 122
39 141
39 142
39 148
39 150
39 150
39 150
39 152
39 153
40 153
40 153
40 154
40 154
41 154
43 154
44 153
57 190
64 208
64 213
66 223
69 231
70 232
71 234
73 234
73 235
73 235
73 235
73 231
72 226
72 216
70 215
70 216
70 212
70 209
70 205
69 202
69 197
68 190
67 175
66 164
66 162
66 165
66 163
67 165
65 181
65 179
64 180
65 185
64 186
63 186
63 185
61 175
61 174
61 174
61 174
61 174
61 175
61 175
61 175
60 175
59 175
59 173
58 173
58 173
58 174
58 175
58 176
58 178
58 178
58 178
58 183
58 182
58 182
58 181
56 182
55 182
55 181
55 181
55 181
55 183
55 184
55 189
51 189
51 189
51 188
51 189
50 191
45 190
44 190
44 192
44 192
44 192
44 189
44 188
44 187
44 187
44 187
44 188
44 187
44 187
44 183
43 162
43 162
43 161
43 161
43 161
43 161
43 158
42 158
42 158
42 158
42 158
33 158
29 163
29 164
29 165
14 103
13 102
13 100
11 89
11 87
11 86
11 86
9 86
9 86
9 86
8 85
8 85
8 82
8 82
8 83
8 83
8 81
8 82
8 82
8 82
8 82
8 82
8 82
8 84
7 80
7 75
7 77
5 73
5 53
5 56
5 57
5 57
5 57
5 57
5 57
5 57
5 57
5 57
5 57
5 57
6 58
6 58
6 58
6 58
6 58
6 58
6 58
6 58
6 55
6 56
6 52
6 52
6 52
6 53
6 47
6 47
7 47
7 47
7 47
7 46
7 46
7 46
7 46
7 44
7 43
5 39
5 39
5 39
5 39
5 38
5 37
5 37
5 37
5 35
5 35
5 35
5 35
6 36
6 36
6 36
6 36
6 36
6 36
6 36
6 36
6 37
6 37
6 37
6 38
6 38
6 38
6 38
6 38
6 38
6 38
6 37
5 41
3 39
3 39
3 35
3 35
3 35
3 34
3 35
3 35
3 35
3 35
3 35
3 34
3 34
3 34
3 36
3 39
3 40
3 41
3 42
3 42
3 42
3 44
4 45
4 47
4 48
4 49
4 48
4 55
4 53
4 51
4 50
4 49
4 45
4 45
4 46
4 46
4 46
4 46
4 46
4 48
4 48
4 49
4 49
3 49
3 50
3 51
3 51
3 56
3 58
3 59
3 64
3 64
3 63
3 62
3 62
3 63
3 65
3 66
4 68
3 68
3 68
3 68
3 68
3 68
3 68
3 68
3 68
3 69
3 69
3 69
3 70
3 70
3 70
3 70
2 70
2 70
2 73
2 78
2 83
2 83
2 85
2 85
2 85
2 85
2 85
2 85
2 85
2 85
2 84
2 84
2 84
2 83
2 83
2 83
2 85
2 85
2 85
2 85
2 85
2 77
2 78
2 78
2 79
2 81
2 86
3 90
3 89
3 89
3 94
3 94
3 95
3 95
3 96
3 96
3 95
3 89
3 89
3 91
3 90
3 90
3 88
2 88
2 86
2 85
2 84
2 82
2 82
2 77
2 77
2 78
2 79
2 80
2 80
2 80
2 80
2 81
2 81
2 82
2 82
2 80
2 80
2 79
2 80
2 79
2 78
2 78
2 78
2 69
2 66
2 66
2 61
2 61
2 61
2 61
2 61
2 60
2 60
2 60
1 59
1 58
1 59
1 59
1 59
1 59
1 57
1 57
1 56
1 54
1 58
1 58
1 57
1 62
1 63
1 62
1 62
1 62
1 61
1 58
1 55
1 54
1 54
2 55
2 55
2 55
2 55
3 55
3 55
3 56
3 56
3 56
3 57
3 57
3 57
3 57
3 55
3 55
3 55
3 55
3 55
3 56
3 56
3 56
3 55
3 53
3 47
2 43
2 43
2 43
2 37
2 38
2 39
2 38
2 40
2 40
2 41
2 40
2 38
2 37
2 36
2 35
2 35
2 34
2 34
2 34
2 34
2 35
2 36
2 37
2 37
2 37
2 36
2 34
2 32
2 33
3 36
3 36
3 37
3 38
3 39
3 41
3 41
3 41
3 42
3 44
3 44
3 44
3 44
3 46
3 45
3 47
3 47
3 47
3 47
3 47
3 47
3 47
3 47
3 47
3 47
3 47
4 46
4 46
4 46
4 47
4 49
5 77
5 78
5 77
5 77
5 76
5 72
5 72
5 71
5 71
5 71
5 72
5 69
5 69
5 69
5 69
5 71
4 71
4 71
4 72
4 72
3 71
3 72
3 72
3 72
3 73
3 74
3 74
3 76
3 81
3 86
3 89
3 89
3 89
3 89
3 91
3 91
3 91
3 91
3 91
3 92
3 91
3 92
3 95
3 95
3 94
3 94
3 94
3 92
3 92
3 93
3 93
3 93
3 93
3 93
3 92
3 92
3 92
3 92
3 93
3 93
3 92
3 95
3 139
3 143
3 143
3 142
3 143
3 145
3 144
2 158
2 157
2 161
2 162
2 165
2 165
2 165
2 165
1 163
1 161
1 160
1 160
1 161
1 163
1 164
1 170
1 170
1 171
1 171
1 171
1 171
1 170
1 170
1 172
1 176
2 185
2 187
2 193
2 195
2 200
2 199
1 172
1 171
1 171
1 171
1 172
1 172
1 172
1 172
1 173
1 173
1 173
1 175
1 176
1 179
1 182
1 191
1 221
1 221
1 225
1 226
1 228
1 227
1 230
1 237
1 236
1 236
1 237
1 237
1 233
2 224
2 225
2 225
2 225
2 225
2 224
2 230
2 233
2 233
2 235
2 234
2 234
2 232
2 232
2 232
2 232
2 230
2 231
2 230
2 229
2 228
2 228
2 228
2 227
2 227
2 226
3 225
3 224
4 223
4 222
4 222
4 221
4 217
4 179
4 178
4 176
4 176
4 174
4 171
4 169
4 147
4 146
4 146
4 146
4 145
4 145
4 144
4 144
4 144
4 144
4 144
4 144
4 141
4 140
4 138
4 132
4 132
4 131
3 131
3 131
3 131
3 131
3 130
3 127
3 115
2 107
2 104
2 104
2 103
2 98
2 97
2 97
2 97
2 97
2 97
2 96
2 96
2 96
2 96
2 95
2 95
2 93
2 92
2 89
2 86
2 81
2 68
2 31
2 31
2 29
2 29
2 27
2 25
2 21
2 20
2 20
2 19
2 19
2 20
2 18
2 18
2 17
2 15
2 14
2 13
2 12
2 5
2 4
2 4
2 4
2 3
2 3
2 3
2 2
2 2
2 2
2 10
2 10
2 10
2 12
2 12
2 14
2 19
2 23
2 27
2 28
0 29
0 29
0 29
0 29
0 30
0 30
0 31
0 33
0 33
0 34
0 36
0 37
0 37
0 40
0 42
0 44
0 44
0 44
0 44
0 44
0 44
0 44
0 44
0 45
0 47
0 48
0 50
0 51
0 53
0 53
0 53
0 54
0 54
0 55
0 103
0 120
0 123
1 123
1 125
1 136
1 143
1 144
1 148
1 148
1 149
1 150
1 153
1 156
1 162
1 163
1 164
2 189
2 191
2 200
2 202
2 202
2 204
2 206
2 206
2 206
2 206
2 206
2 208
2 209
2 210
2 209
2 209
1 190
1 190
1 190
1 190
1 196
1 197
2 198
3 202
4 204
4 207
4 207
4 263
4 265
4 269
4 270
4 270
4 272
4 274
4 274
4 276
4 278
4 278
4 279
4 272
5 275
5 274
5 273
5 272
5 269
5 264
5 261
5 258
5 257
5 258
5 262
6 269
6 274
6 276
6 281
6 285
6 288
6 299
6 298
6 297
6 302
6 301
6 299
6 299
6 299
6 299
6 301
6 315
6 314
6 314
6 313
6 312
6 308
6 308
6 308
6 308
6 308
6 307
6 307
6 307
6 307
6 307
7 305
7 236
7 236
7 232
6 232
6 231
6 221
6 212
6 212
6 211
7 211
7 211
7 210
7 210
7 201
7 200
7 200
7 199
7 194
7 194
7 186
7 185
7 197
7 198
7 198
7 201
7 201
7 201
7 200
7 199
7 198
7 197
7 199
7 202
7 203
8 215
8 216
8 217
7 212
7 213
7 211
6 209
6 205
6 204
7 204
7 145
7 146
7 145
7 144
7 145
7 144
7 141
7 140
7 140
6 137
6 136
6 134
6 135
6 135
6 139
6 143
6 144
6 147
6 148
6 158
6 160
6 161
5 158
5 154
5 149
5 142
5 135
5 131
5 129
5 122
5 117
5 117
5 118
5 113
5 113
5 113
5 112
5 111
5 109
5 106
6 96
6 97
6 97
6 99
6 99
7 103
7 105
7 105
7 104
7 104
7 104
7 104
7 104
6 105
6 105
5 106
5 106
5 106
5 106
5 107
5 107
5 106
5 106
5 106
5 106
5 106
5 106
5 107
5 105
5 105
5 104
5 104
5 104
5 104
5 103
5 103
5 101
5 88
5 86
5 86
5 92
5 95
5 96
5 99
5 99
5 104
5 103
5 100
5 99
5 96
4 87
4 87
4 86
3 87
3 83
3 86
3 93
2 96
2 96
2 97
2 99
2 99
2 101
2 101
2 98
2 100
2 103
2 104
2 104
2 110
2 109
2 113
2 122
2 125
2 119
2 119
2 118
2 115
2 113
2 104
2 101
2 100
2 100
2 98
2 100
2 99
2 100
2 100
2 100
2 101
2 101
2 102
2 103
3 102
3 102
3 102
3 109
3 112
3 112
3 112
2 112
2 139
2 141
2 139
2 138
1 134
1 134
1 134
1 135
1 136
1 138
1 141
1 140
1 140
1 142
1 141
1 140
1 140
1 140
1 139
1 140
1 140
1 140
1 140
1 139
1 139
1 139
1 137
1 137
1 137
1 137
1 138
1 140
1 141
1 154
3 181
3 183
3 191
3 194
3 197
3 194
3 198
5 212
5 210
5 208
5 207
5 205
5 205
5 205
5 205
5 206
5 209
5 211
5 210
5 208
5 194
5 193
5 189
5 188
5 187
5 185
5 185
5 184
5 184
5 184
6 184
6 182
6 183
6 183
6 177
6 175
6 167
6 163
6 164
6 165
6 165
6 170
6 173
6 174
6 174
6 182
6 184
6 185
7 190
7 202
19 263
21 276
31 334
32 338
32 345
33 365
36 369
37 393
36 396
36 405
36 404
36 408
36 406
36 407
36 411
36 446
36 404
37 423
37 430
37 433
37 434
37 425
40 445
40 450
41 452
41 452
41 449
41 453
41 458
41 459
41 460
41 460
41 460
41 460
41 460
41 464
41 465
41 468
41 469
41 471
41 471
41 471
41 472
41 471
43 471
43 470
46 471
46 471
47 466
46 461
45 433
45 430
45 428
46 426
47 425
48 425
49 425
47 411
47 412
47 411
47 410
47 408
47 408
47 404
47 404
47 405
47 404
47 401
47 401
47 401
47 401
47 401
47 401
47 401
47 401
46 401
46 401
46 400
46 400
46 401
45 399
45 400
45 403
45 408
46 424
46 429
47 431
48 428
63 427
66 424
66 420
66 410
66 402
67 400
67 396
66 372
65 368
65 348
64 346
62 344
50 299
51 290
40 243
39 237
39 229
39 225
40 215
40 201
40 199
40 201
40 200
40 196
40 196
43 204
43 199
44 160
44 160
43 140
44 130
44 127
43 123
42 117
43 102
43 101
42 101
42 101
42 101
42 98
42 93
42 92
42 92
42 92
43 92
58 97
78 98
81 93
81 93
81 89
81 89
83 89
83 89
83 89
83 89
82 89
81 89
80 89
78 86
78 86
78 86
77 87
76 86
76 86
76 85
75 85
74 85
73 85
73 85
73 84
73 84
73 84
73 84
73 84
73 84
73 84
73 83
73 82
73 82
73 82
73 82
73 82
73 82
73 82
73 82
73 82
73 83
73 83
73 83
73 83
72 83
72 84
72 84
72 79
71 74
71 67
70 51
69 50
63 43
61 40
52 40
50 36
50 36
50 36
50 36
50 36
50 36
50 36
50 35
50 35
50 32
50 32
50 31
50 31
50 31
50 31
50 31
50 30
49 30
49 30
49 30
49 31
49 31
49 31
48 31
43 22
43 21
43 21
43 21
43 21
43 21
43 21
42 21
42 20
42 20
42 20
42 20
42 21
41 21
41 20
40 20
36 20
34 20
26 18
16 18
8 13
1 12
1 10
1 12
1 12
1 16
1 19
1 23
1 25
1 25
2 28
2 30
2 30
2 32
2 33
2 32
2 32
2 32
2 32
2 32
2 32
2 32
2 34
2 34
2 36
2 37
2 37
2 37
2 40
2 46
3 52
4 56
4 58
4 64
4 65
4 68
4 70
4 72
4 74
4 78
4 86
4 101
5 120
5 125
5 126
6 126
6 126
7 133
8 134
8 133
8 132
8 135
8 135
8 135
8 135
8 135
8 135
8 135
8 135
9 136
9 138
9 139
9 139
9 140
9 140
11 144
11 147
11 148
11 148
11 152
12 152
12 152
13 154
13 166
13 171
15 194
15 199
15 201
15 206
16 206
16 207
16 211
16 211
16 213
16 216
17 222
17 248
19 259
19 260
19 263
19 263
19 263
19 263
19 265
19 268
19 272
19 274
20 278
21 282
22 283
22 287
22 287
23 286
23 289
23 288
23 289
22 288
22 292
22 291
22 291
21 286
21 285
21 285
21 285
21 284
21 284
21 284
21 284
22 285
22 289
22 293
22 294
24 297
24 301
24 303
25 311
33 365
34 369
34 374
35 373
34 368
34 363
34 363
34 356
34 355
34 353
34 352
33 348
33 351
33 348
33 340
33 328
30 312
29 306
29 307
29 308
29 308
29 310
28 312
28 312
30 313
30 311
30 310
30 310
30 310
30 310
30 310
30 310
30 309
29 306
29 306
29 305
29 305
29 305
29 305
29 299
28 297
31 314
31 315
32 314
31 313
32 313
34 320
35 308
35 310
33 282
33 276
32 272
32 268
32 265
32 264
32 265
32 265
32 264
32 261
31 242
30 228
30 222
30 224
33 243
33 244
33 250
33 253
33 254
33 251
33 248
32 246
31 240
30 238
30 239
30 237
30 240
28 238
28 237
28 236
28 232
28 222
28 222
43 304
47 305
51 311
52 316
51 317
51 319
51 319
51 319
50 319
52 320
52 319
53 325
54 328
54 325
54 322
54 318
54 309
53 299
46 243
44 236
44 232
44 229
44 231
44 231
44 229
44 237
45 244
45 242
45 243
45 246
45 241
45 241
45 239
45 232
44 233
44 233
44 233
44 233
44 234
44 233
44 231
44 230
44 230
44 235
44 238
44 238
44 241
44 242
45 260
45 262
45 265
45 265
45 264
45 263
45 263
45 265
44 264
44 264
44 264
40 249
40 250
39 251
39 251
39 250
37 235
36 238
36 237
36 236
36 236
36 234
36 234
35 235
35 234
35 234
35 235
34 236
34 235
34 233
34 233
34 234
34 228
33 211
33 210
33 205
33 203
33 202
33 202
33 202
33 202
33 202
33 200
33 200
33 199
32 197
32 197
32 197
32 198
31 196
31 196
31 194
10 106
6 105
4 95
5 92
5 91
5 90
5 84
5 84
8 84
9 84
9 83
9 83
9 83
9 84
10 94
10 103
10 109
13 118
13 127
13 131
13 133
13 140
13 144
15 150
15 151
15 149
15 141
15 142
15 139
15 140
16 140
16 140
16 144
16 152
16 156
16 157
16 158
16 159
16 159
16 158
16 158
15 159
15 158
15 153
15 153
15 151
15 150
15 149
14 134
17 162
17 180
17 199
17 205
17 206
17 208
17 210
17 211
17 212
17 211
17 212
17 213
17 230
17 242
17 247
18 250
18 247
18 250
18 252
18 253
18 253
18 254
18 254
19 253
19 252
19 251
19 251
19 251
19 251
19 251
19 251
19 250
19 249
19 249
19 249
19 249
20 250
20 250
20 252
20 263
20 279
20 284
20 288
20 288
20 288
20 289
20 289
20 288
19 288
19 288
19 288
19 287
19 286
19 284
19 287
19 287
19 288
19 290
19 291
13 291
12 291
12 291
12 291
12 290
12 287
11 273
11 268
11 266
10 252
10 247
10 244
11 247
11 244
10 242
9 235
9 234
9 231
8 230
8 230
8 234
8 234
7 236
7 236
8 235
9 232
9 233
9 232
10 234
11 238
11 238
11 237
11 236
11 236
11 237
11 238
11 238
11 238
10 238
10 235
10 229
8 195
8 161
8 162
8 161
8 161
8 169
8 168
8 182
9 184
9 176
9 195
9 201
9 189
9 191
9 189
8 187
8 186
8 185
8 182
8 184
8 182
7 181
7 181
7 183
7 183
7 184
7 184
7 184
7 184
7 191
7 198
7 207
7 211
7 224
7 232
7 237
6 235
6 236
6 232
6 220
6 204
6 201
6 199
6 199
6 199
6 199
6 199
6 199
6 199
6 197
6 197
6 197
6 197
6 197
6 194
6 195
7 193
10 192
10 192
10 193
10 192
10 191
10 195
10 193
10 193
10 193
10 193
10 194
10 194
10 197
10 197
9 193
9 194
9 194
9 194
9 198
9 202
9 205
9 205
9 199
9 198
9 194
9 191
7 187
7 184
7 180
7 180
5 171
5 172
5 172
5 172
5 172
5 186
5 185
5 186
5 195
5 195
5 197
5 198
5 198
5 197
5 195
5 194
5 193
5 192
5 181
5 176
5 161
4 155
4 151
4 134
4 135
5 136
6 136
6 137
6 148
6 148
6 148
6 150
6 149
6 150
6 154
6 154
6 154
6 154
6 154
6 169
6 173
6 171
6 165
6 160
6 155
6 147
6 137
6 127
6 127
6 128
6 131
6 141
6 160
6 166
6 169
6 172
6 176
6 177
6 180
6 181
6 182
6 182
6 182
6 185
6 191
6 191
6 192
6 193
6 193
5 193
2 192
2 193
2 193
2 193
2 192
2 193
3 202
3 203
3 203
3 202
3 201
3 200
3 199
3 198
3 197
3 197
3 197
3 197
3 193
3 185
3 185
3 185
3 184
3 185
3 186
3 188
3 188
3 187
3 187
3 189
3 189
4 190
4 189
4 194
4 193
4 180
4 175
4 167
4 165
4 165
4 165
4 165
4 165
4 165
4 166
4 167
4 167
4 167
4 168
4 170
4 171
4 165
4 171
4 171
4 173
3 173
2 172
2 171
2 164
2 163
2 163
2 162
2 163
2 163
2 162
2 162
2 157
2 158
2 165
2 189
2 202
2 210
2 231
2 234
2 235
3 238
3 240
3 255
3 261
3 259
3 255
3 252
3 238
3 235
3 235
3 234
3 234
3 234
3 229
3 228
3 230
3 231
3 231
3 225
3 225
3 226
3 233
3 248
3 256
3 259
3 261
3 265
3 271
3 271
3 270
3 260
2 254
2 254
2 255
2 255
2 254
2 253
2 252
2 252
2 251
2 251
2 253
2 253
2 267
2 267
2 277
2 284
2 290
2 289
2 288
2 287
2 287
2 287
2 287
3 287
2 298
2 302
2 304
2 300
2 301
2 302
2 302
2 302
2 302
3 304
3 306
3 306
3 308
3 309
3 308
3 307
3 307
3 308
3 342
3 338
3 339
3 339
3 333
3 333
3 327
3 317
3 319
3 320
3 319
3 317
3 313
3 307
3 306
3 306
3 312
3 318
3 320
3 321
4 311
4 260
4 251
4 240
4 241
4 241
3 239
4 239
4 239
4 227
4 224
4 223
4 221
4 213
4 204
4 202
4 202
4 202
4 202
4 201
4 202
4 203
4 201
4 199
4 195
4 195
4 195
4 195
4 185
4 173
4 166
4 164
4 161
4 155
4 153
4 154
4 154
4 154
4 154
4 154
4 153
4 153
4 153
4 159
4 159
4 159
6 190
6 191
6 191
6 191
6 174
6 174
6 167
6 158
6 154
6 153
6 153
6 153
6 154
6 155
6 154
5 149
5 137
5 133
5 134
5 134
5 133
6 132
6 132
6 133
6 133
5 133
5 131
5 129
5 130
5 130
5 130
5 130
5 130
5 129
5 93
5 93
5 92
5 92
5 92
5 92
5 92
5 92
5 90
5 86
5 84
5 84
5 85
5 85
5 84
5 83
5 75
5 69
5 69
5 67
4 67
4 67
4 67
4 64
4 60
3 60
3 60
3 60
3 60
3 60
3 60
3 60
3 60
3 61
3 61
5 63
5 63
5 63
5 65
5 65
5 64
5 63
5 63
5 63
5 63
5 63
5 63
5 63
5 63
5 62
5 62
5 62
5 62
5 62
5 61
5 61
5 61
5 61
5 61
5 62
5 61
5 61
5 61
5 56
5 54
5 53
3 20
3 20
3 20
3 20
5 23
6 24
6 23
7 24
7 24
7 24
7 24
7 24
7 24
7 24
7 24
7 24
7 24
7 24
7 23
7 23
7 22
6 19
6 19
6 19
6 19
6 17
6 17
6 17
6 16
6 16
6 16
6 16
6 16
6 16
6 16
6 16
6 16
6 17
6 17
6 17
6 17
6 17
6 17
6 17
6 17
6 16
6 14
6 14
6 14
6 14
6 14
6 14
6 13
6 13
6 13
6 14
6 14
6 14
6 14
6 14
6 14
6 14
6 14
6 14
6 14
6 14
6 14
7 15
7 15
5 16
5 17
5 17
6 14
9 18
9 18
9 18
10 18
10 19
11 19
11 19
11 19
11 19
11 18
11 18
11 18
11 18
11 18
11 18
11 18
11 18
11 18
11 18
11 18
11 18
11 18
11 18
11 18
11 18
11 18
11 18
11 19
10 19
10 19
10 17
9 16
8 15
7 15
7 15
7 15
7 15
7 15
7 15
7 15
7 15
7 15
7 15
7 15
7 15
7 15
8 15
8 15
8 15
8 15
8 15
8 15
8 15
8 15
8 15
8 15
8 15
8 16
8 16
8 16
8 16
8 16
8 16
8 15
8 15
8 15
8 15
8 15
8 15
8 15
8 15
8 17
8 17
8 17
8 17
8 17
8 17
9 17
9 17
9 18
9 18
9 18
9 18
9 19
9 19
9 19
9 19
9 19
10 19
10 19
10 27
10 27
10 28
12 33
11 32
11 32
11 29
11 30
11 30
7 30
6 29
6 30
6 30
6 33
6 36
7 39
7 40
7 40
7 40
7 41
7 41
7 41
7 41
7 41
7 41
7 43
7 43
7 43
7 43
7 43
7 42
7 42
7 42
7 42
7 42
7 42
8 42
8 45
8 63
8 89
8 90
8 91
8 92
8 92
8 93
8 93
8 93
8 93
8 93
8 93
8 93
8 93
8 93
8 93
8 93
8 93
8 93
8 93
8 93
8 93
8 93
8 93
8 93
8 93
8 94
8 94
8 95
8 94
8 103
9 104
9 113
10 113
11 114
11 114
11 116
11 118
11 123
11 127
11 133
11 138
11 139
11 139
11 140
11 142
11 143
10 143
10 142
10 142
10 142
10 141
10 140
10 140
10 141
10 141
10 141
10 142
10 142
10 142
9 141
9 136
9 130
8 133
8 133
7 129
7 129
7 129
8 129
8 131
9 133
7 134
8 131
9 130
9 129
9 129
9 130
8 127
8 127
8 127
8 127
8 126
8 126
8 126
8 126
8 126
8 126
8 124
8 124
8 124
8 124
8 124
8 124
8 124
8 124
8 125
8 126
8 124
7 121
7 114
7 98
7 76
7 77
7 79
7 79
7 80
7 80
7 80
7 80
7 80
7 80
7 80
7 80
10 99
10 101
11 109
11 118
11 133
12 134
12 137
12 137
12 139
12 141
12 144
12 144
12 152
12 160
12 197
12 195
12 205
11 200
11 198
11 186
10 186
10 186
10 186
11 196
11 196
13 195
14 193
14 187
14 184
15 184
15 184
15 184
15 186
20 228
20 239
20 239
20 242
20 242
20 241
20 253
20 254
20 253
20 253
20 253
20 252
20 252
20 253
20 253
20 253
23 300
24 299
24 302
25 304
26 304
27 304
25 302
25 301
25 299
25 299
23 297
23 297
23 297
23 296
23 296
25 303
25 312
25 315
25 316
25 318
25 318
25 320
25 321
25 322
25 322
25 324
25 326
30 330
32 333
32 334
45 364
50 369
51 375
51 374
51 377
51 379
52 380
52 379
53 379
53 380
53 382
53 380
53 380
53 379
53 379
53 380
53 380
53 380
53 380
53 380
52 381
51 355
49 351
49 349
48 336
48 319
48 319
51 312
51 309
51 308
51 306
51 305
51 302
55 426
55 436
55 437
58 471
60 514
60 520
60 529
61 555
60 563
61 571
61 578
58 561
58 561
58 562
58 562
58 564
58 567
58 565
58 567
58 570
58 567
53 524
53 525
53 525
53 525
53 525
53 525
53 513
53 514
53 513
53 513
53 513
53 513
56 515
57 512
57 512
57 513
52 468
52 472
52 472
51 480
51 541
51 550
52 554
52 556
52 559
52 562
52 562
52 560
51 560
51 560
51 559
50 551
50 546
50 543
50 543
50 543
50 543
58 554
60 559
60 560
60 560
59 561
59 560
55 552
53 555
53 557
30 515
29 516
29 516
29 515
29 524
29 520
29 526
29 531
30 534
30 533
30 532
30 532
30 532
29 532
29 532
29 532
29 533
29 534
29 534
29 536
29 533
29 531
29 531
29 531
29 531
29 530
29 530
29 534
30 534
30 531
30 533
31 533
31 531
27 347
25 324
25 305
25 294
25 285
25 283
25 277
23 250
23 242
23 237
23 235
23 235
23 234
23 234
23 235
23 232
23 228
23 225
23 222
23 223
23 224
23 223
23 219
23 220
23 219
23 219
23 222
23 253
23 257
23 265
23 283
23 286
23 292
20 290
18 290
18 289
18 286
18 283
18 277
18 267
18 264
18 204
18 197
17 194
17 196
17 193
17 190
17 190
17 189
17 205
17 206
18 209
18 211
18 213
18 213
17 213
17 213
17 211
7 190
7 190
7 190
7 190
7 189
7 189
7 190
7 185
6 183
5 180
5 180
5 181
5 181
5 170
5 171
5 167
5 163
4 164
4 168
4 169
4 172
4 177
4 178
4 179
4 183
4 183
4 184
4 184
4 185
4 184
4 184
4 185
4 184
4 184
4 183
4 182
4 180
3 180
1 179
1 178
1 178
1 170
1 165
1 164
1 162
1 160
1 168
1 169
2 185
2 183
2 184
2 185
2 185
2 186
2 188
2 185
2 184
2 188
2 190
2 199
2 203
2 203
2 203
2 203
2 203
2 208
2 217
2 216
2 259
2 236
2 243
2 234
2 233
2 231
2 229
2 228
2 232
2 233
2 232
2 229
2 232
2 233
2 233
2 229
2 230
2 228
2 227
2 226
2 225
2 225
2 225
2 207
2 207
1 202
1 201
1 201
1 201
1 201
1 201
1 201
1 201
1 201
1 201
1 201
1 202
1 202
1 202
1 200
1 200
1 200
1 200
1 200
1 201
1 201
1 197
1 195
1 195
1 193
2 188
2 188
2 185
2 180
2 178
2 175
2 175
2 173
2 172
2 172
2 172
2 172
2 171
2 171
2 171
2 170
2 170
2 170
2 169
2 168
2 167
2 167
2 168
2 167
2 167
2 166
1 166
1 165
1 155
1 152
1 136
1 136
1 134
1 133
1 129
1 128
1 124
1 123
1 123
1 112
2 104
2 103
2 102
2 102
2 102
2 102
2 101
2 99
2 91
2 88
2 23
2 23
2 14
2 7
2 6
2 7
2 7
2 7
2 7
2 10
2 10
2 10
2 10
2 10
2 10
2 10
2 10
2 11
2 11
2 11
2 11
2 11
2 11
2 11
2 12
2 12
2 12
2 25
2 27
2 41
2 43
2 43
2 44
2 44
2 44
2 43
2 48
4 54
5 64
5 74
5 82
5 100
6 99
6 100
6 100
6 99
6 99
6 99
6 100
6 100
5 104
5 107
5 107
5 107
5 107
5 107
6 107
6 107
6 107
6 107
6 107
6 107
6 107
6 107
6 107
6 107
6 107
6 107
6 107
6 107
6 107
6 107
6 110
6 112
6 113
7 113
8 116
8 116
8 116
8 116
8 116
8 116
8 116
8 116
8 124
8 124
8 126
8 127
8 129
8 129
8 129
8 129
8 132
8 133
8 134
8 134
8 135
8 137
8 142
8 142
8 142
8 143
8 145
8 146
8 146
8 146
8 146
8 146
8 146
8 138
8 140
8 140
8 143
8 147
8 149
8 173
8 174
10 182
10 184
10 184
10 183
10 185
10 186
10 188
10 189
10 185
10 179
10 160
10 156
10 156
10 156
10 156
10 156
10 152
9 150
9 150
7 145
7 134
7 133
7 131
7 122
6 114
6 114
6 114
6 114
6 115
6 115
6 115
6 115
6 114
6 108
6 107
6 107
6 107
6 107
6 107
5 107
5 107
5 107
5 107
5 107
5 107
5 107
5 107
5 107
5 107
5 107
5 107
5 107
5 107
5 107
5 107
5 103
5 101
5 100
4 100
3 97
3 97
3 96
3 96
3 96
3 96
3 96
3 96
3 88
2 86
2 86
2 85
2 83
2 83
2 83
2 83
2 80
2 80
2 79
2 79
2 77
2 76
2 71
2 70
2 70
2 68
2 67
2 65
2 64
2 64
2 63
2 59
2 59
2 60
2 58
2 58
2 52
2 48
2 35
1 26
1 26
0 15
0 15
0 15
0 14
0 7
0 5
0 2
0 3
0 4
0 4
0 8
0 9
0 9
0 10
0 10
0 10
0 9
0 9
0 9
0 9
0 9
0 9
1 10
3 11
4 19
4 20
4 20
4 22
4 22
4 23
4 27
4 27
4 28
4 30
4 30
4 30
4 30
4 30
4 30
4 30
4 30
4 31
4 31
4 33
4 33
4 33
4 34
4 34
4 34
4 34
4 34
4 37
4 38
4 38
4 41
4 45
4 47
4 47
5 49
6 49
6 49
6 49
6 53
6 53
6 53
6 53
6 54
6 54
6 54
6 54
6 54
6 54
6 56
6 58
6 61
6 67
6 70
6 74
6 74
6 76
6 76
6 76
6 76
6 76
6 76
6 76
6 77
6 77
6 77
6 77
6 79
8 86
8 106
8 126
8 130
8 130
8 130
8 130
8 129
8 128
8 128
8 128
8 128
8 130
8 130
8 130
8 131
8 130
8 126
8 126
8 128
8 134
8 174
8 181
8 184
8 184
8 186
8 188
8 190
8 195
8 199
8 199
7 198
5 198
4 189
4 188
4 188
4 187
4 186
4 185
5 182
5 182
5 181
5 180
5 180
5 180
5 182
5 182
5 182
5 182
5 181
5 181
5 184
5 192
5 194
5 197
5 199
5 201
5 204
5 204
5 204
5 200
5 199
5 199
4 195
4 193
3 193
3 192
3 191
3 191
3 193
4 195
4 192
4 194
4 198
6 204
6 209
6 211
6 211
6 210
6 212
6 224
6 228
6 231
6 229
6 224
6 221
8 223
8 224
8 224
8 229
8 233
8 236
8 237
8 238
8 238
8 239
8 238
8 238
8 239
8 227
6 210
6 196
6 189
6 189
6 189
6 192
6 193
6 193
6 193
6 193
6 193
6 192
6 192
6 194
6 194
6 195
6 195
6 194
6 193
6 188
6 178
6 131
6 126
6 126
6 126
6 127
6 124
6 123
6 115
6 110
6 110
6 110
6 111
6 111
6 111
6 111
6 111
6 111
6 111
5 109
5 109
4 108
4 108
4 114
4 116
4 114
4 115
4 116
4 116
4 115
4 118
4 122
4 116
4 116
4 116
4 115
4 112
4 112
4 116
4 117
4 121
4 120
4 119
4 120
4 123
4 130
4 130
4 131
4 131
4 128
4 121
4 119
3 117
2 112
2 107
2 106
2 105
2 105
2 102
2 100
0 84
0 76
0 74
0 73
0 72
0 72
0 72
0 71
0 70
0 63
0 60
0 58
0 58
0 58
0 58
0 57
0 57
0 56
0 55
0 55
0 55
0 55
0 55
0 54
0 54
0 50
0 50
0 50
0 49
1 60
1 62
1 66
1 66
2 67
2 68
2 69
2 70
2 70
2 76
2 77
3 81
3 81
4 82
4 82
4 82
4 81
4 81
4 81
4 84
4 99
5 104
5 115
5 120
5 122
5 126
5 126
5 126
5 129
5 131
5 134
5 146
5 154
5 155
5 150
5 150
5 150
5 149
5 148
5 148
5 148
5 145
5 145
5 145
5 145
5 145
5 146
5 146
5 145
5 142
5 142
5 149
5 154
5 156
5 159
5 156
6 152
7 180
7 189
7 198
7 201
7 202
7 202
7 201
7 201
7 201
7 201
7 201
7 201
7 201
7 201
7 202
7 202
7 202
7 202
7 202
7 203
7 203
7 203
7 203
7 203
7 203
7 203
7 203
7 203
7 204
7 204
7 204
7 204
7 204
7 204
7 204
7 204
7 204
7 204
8 204
8 204
7 203
7 203
7 202
6 183
6 180
6 180
6 180
6 180
6 180
6 180
6 178
5 176
5 174
5 172
4 168
4 165
4 165
4 165
4 165
4 165
4 164
4 162
4 158
3 140
3 130
3 130
3 128
3 126
3 123
3 123
3 123
3 123
3 119
3 114
3 96
3 90
3 90
3 90
3 91
3 90
3 90
4 90
8 89
67 88
74 88
80 88
95 88
100 88
103 88
110 88
110 88
111 88
111 88
115 89
117 79
117 74
117 73
117 70
116 67
115 64
115 35
115 18
115 13
115 13
115 12
115 12
115 12
115 12
115 12
116 12
116 12
116 12
116 12
116 12
116 11
116 11
116 11
117 11
117 11
120 11
120 11
120 11
120 11
122 11
123 11
124 11
124 11
125 11
125 11
146 11
158 11
159 11
159 11
159 11
159 11
159 11
159 11
160 11
159 11
159 11
159 11
159 11
159 11
159 11
159 11
159 11
160 11
160 11
160 11
162 11
165 11
168 11
168 11
168 11
167 10
166 10
166 10
167 10
167 9
167 9
168 9
169 8
169 8
168 8
168 7
168 7
167 7
167 6
167 6
167 6
169 6
169 6
169 6
169 6
170 6
170 6
169 6
171 6
171 5
171 5
169 6
168 6
161 6
103 6
98 7
92 7
83 6
86 6
89 6
82 4
106 4
118 2
121 2
136 3
135 3
148 3
163 3
184 3
194 3
198 3
205 3
207 3
209 3
215 4
217 4
220 4
219 4
219 4
219 4
219 4
220 4
220 4
220 4
220 4
221 4
221 4
222 4
229 4
229 4
230 4
239 4
241 4
242 4
240 4
238 4
243 4
245 4
246 4
244 4
220 4
218 4
217 4
218 4
218 4
227 4
228 4
240 6
259 7
270 7
272 7
355 7
364 7
365 7
378 7
378 7
378 7
378 7
386 7
384 7
383 7
383 7
382 7
382 7
385 7
386 7
388 7
389 7
391 7
392 7
392 7
397 7
399 7
405 7
405 7
405 7
405 7
405 7
406 7
409 7
410 7
423 7
438 8
502 11
504 11
504 11
505 11
504 11
502 11
502 11
502 11
501 10
503 10
505 10
505 10
505 9
506 9
498 9
499 9
496 9
494 9
479 8
468 8
466 8
448 8
433 8
422 8
413 8
398 8
385 8
389 8
399 8
401 8
400 9
401 8
403 8
400 8
400 8
400 8
401 8
401 8
400 8
399 9
399 9
400 9
397 9
396 9
394 9
388 10
388 12
387 12
379 13
379 13
379 13
383 13
381 13
381 13
379 13
380 13
381 13
381 13
382 13
401 13
414 13
424 13
434 13
429 12
411 11
395 10
386 11
380 11
304 11
300 15
298 18
290 33
292 33
293 33
289 35
293 37
292 40
292 41
292 41
292 41
290 41
288 41
286 41
288 41
285 41
288 41
299 41
365 41
369 40
379 40
379 40
380 40
379 40
384 40
418 41
428 43
425 43
416 43
404 44
389 44
337 41
336 41
337 41
349 41
353 41
357 41
361 41
362 41
361 41
360 41
360 40
364 40
363 40
362 40
363 40
360 40
356 40
355 40
357 41
357 41
357 41
359 41
374 42
401 42
531 51
551 51
555 52
544 50
536 51
540 52
543 51
543 52
548 53
560 53
563 54
593 54
598 54
598 54
599 54
601 54
601 54
605 54
609 54
612 54
615 54
618 54
613 52
613 52
612 52
611 52
613 52
610 52
609 52
610 51
609 51
600 51
599 51
595 51
590 51
573 51
609 51
606 46
594 46
618 45
622 45
625 45
628 45
637 39
639 37
655 36
657 35
660 22
661 22
661 22
664 22
653 20
653 20
654 20
660 20
671 20
674 20
692 30
716 36
713 36
722 40
712 40
704 42
626 43
623 43
628 43
636 43
637 43
639 44
768 47
810 49
852 48
862 48
873 48
898 48
943 48
1002 51
1166 51
1253 51
1249 51
1249 51
1262 52
1380 65
1451 68
1490 68
1497 68
1495 68
1510 68
1515 68
1533 68
1537 69
1546 69
1550 69
1558 69
1558 68
1543 68
1526 67
1525 67
1515 66
1504 63
1384 54
1378 54
1382 54
1391 54
1412 54
1409 54
1406 54
1405 54
1399 53
1391 53
1389 52
1368 52
1367 52
1367 52
1366 52
1368 53
1364 53
1363 53
1366 53
1363 53
1360 53
1358 53
1358 53
1358 53
1356 53
1354 53
1352 53
1476 54
1501 54
1505 54
1522 54
1560 55
1570 55
1572 55
1574 55
1574 55
1528 55
1521 55
1525 55
1530 55
1531 55
1529 55
1520 55
1515 55
1514 54
1502 53
1500 52
1497 52
1498 52
1499 52
1618 52
1619 52
1617 52
1610 52
1603 52
1600 52
1596 51
1555 34
1554 34
1551 34
1545 34
1544 33
1544 30
1544 29
1546 29
1538 29
1521 29
1516 28
1515 28
1223 24
1094 24
1062 24
1030 24
1016 23
990 23
951 23
910 22
896 22
853 22
845 20
815 16
813 15
704 5
685 5
662 4
657 4
654 5
638 5
633 5
616 5
608 5
594 5
597 5
596 5
586 5
583 5
581 5
580 5
580 5
581 6
583 6
638 7
692 8
963 12
987 12
1020 12
1035 12
1052 12
1072 12
1090 12
1135 12
1154 12
1156 12
1167 12
1170 12
1170 11
1173 11
1173 11
1171 11
1171 11
1171 11
1172 11
1172 11
1172 11
1171 11
1170 11
1166 11
1043 10
1020 10
1011 10
992 10
963 9
951 9
946 9
942 9
939 9
934 10
934 10
930 10
912 10
912 10
914 10
914 10
914 10
914 10
911 10
909 10
902 10
899 10
895 10
789 10
789 10
788 10
788 10
816 10
837 10
839 10
839 10
836 10
834 10
834 10
834 10
834 10
831 10
820 10
816 10
813 10
802 11
795 12
793 12
792 11
788 11
788 11
787 11
784 11
782 11
782 11
771 11
765 11
764 11
762 10
758 10
754 10
748 10
750 10
750 10
750 10
751 10
751 10
751 10
753 10
752 10
748 10
748 10
750 10
750 10
753 10
747 10
629 9
604 7
551 7
448 6
417 6
208 3
196 3
186 3
191 3
189 3
179 3
177 3
153 3
150 3
150 3
139 3
139 3
139 3
139 3
139 3
139 3
139 3
139 3
139 3
143 3
147 3
149 3
154 3
155 3
155 3
153 3
148 3
149 3
149 3
151 3
152 2
149 2
150 2
150 2
146 2
142 2
141 2
140 2
140 2
141 2
141 2
141 2
142 2
142 2
151 4
151 4
150 8
150 8
149 9
147 9
146 9
107 9
89 9
87 7
87 7
86 7
117 8
118 8
122 9
124 9
126 9
126 9
126 9
126 9
125 9
129 11
129 11
130 11
146 11
145 11
146 11
149 11
150 11
149 11
148 11
150 11
151 11
152 11
159 11
159 11
157 11
155 11
153 11
153 11
153 11
158 13
167 14
173 14
172 14
172 14
170 14
170 14
162 14
160 14
160 14
160 14
158 14
158 14
158 14
158 14
160 15
155 15
157 15
155 15
157 14
158 14
161 14
162 14
163 14
163 14
164 14
173 14
182 14
187 14
194 14
195 14
210 14
210 14
207 14
205 14
205 14
205 14
201 14
203 14
204 14
204 14
209 14
214 14
228 14
230 14
231 14
230 14
231 14
236 14
237 14
236 14
237 14
237 14
247 18
248 18
250 18
251 18
253 18
266 18
271 13
275 13
290 13
295 13
298 12
325 12
328 12
331 12
337 12
340 12
355 12
350 12
325 10
326 10
324 10
320 9
320 9
319 9
323 11
327 11
380 12
379 10
379 10
381 10
368 10
367 10
366 10
366 10
364 10
367 10
367 10
367 10
374 10
382 10
379 10
382 10
381 10
389 8
391 9
392 9
390 9
385 10
382 10
376 10
377 10
377 11
377 11
377 11
377 11
377 11
377 11
378 10
380 10
381 10
383 10
389 10
406 10
409 10
405 10
399 10
403 11
411 12
462 13
489 13
502 13
507 13
503 13
497 13
491 13
485 13
482 13
479 13
466 13
465 13
465 13
461 13
459 13
456 13
455 13
453 13
453 13
455 13
454 13
453 13
437 13
438 13
443 14
443 14
438 14
437 14
434 15
433 15
432 15
430 15
425 11
423 11
424 11
424 11
420 11
413 11
403 11
399 11
412 11
414 11
407 11
386 11
382 11
381 11
382 11
381 11
385 11
404 10
479 10
497 10
767 10
785 10
798 10
892 11
922 9
921 9
869 8
873 8
873 8
872 8
867 8
867 8
867 8
866 8
866 8
866 8
867 8
866 8
858 8
850 8
847 8
845 8
845 8
835 8
833 8
833 8
842 8
849 7
876 7
879 7
911 7
924 6
942 6
945 6
946 6
950 6
966 6
977 6
993 6
1025 6
1084 6
1095 6
1120 6
1153 6
1165 7
1196 7
1221 7
1226 6
1258 5
1250 5
1245 5
1248 5
1251 5
1254 5
1260 5
1263 5
1266 5
1280 5
1283 6
1284 6
1284 6
1285 6
1288 7
1288 7
1288 7
1287 7
1288 7
1285 7
1293 7
1294 7
1296 7
1292 7
1288 6
1289 6
1290 6
1289 6
1291 5
1300 5
1302 5
1312 5
1314 5
1311 5
1315 5
1314 5
1304 5
1297 5
1293 5
1294 5
1276 5
1270 5
1270 5
1269 5
1265 5
1262 5
1255 5
1252 5
1239 5
1218 5
1160 5
1122 5
882 5
872 5
847 4
740 3
731 3
736 3
739 3
743 3
747 3
748 3
748 3
748 3
751 3
753 3
753 3
753 3
753 3
752 3
753 3
793 5
800 5
802 5
804 5
813 5
814 5
819 5
810 5
793 5
770 5
762 5
733 5
723 5
710 5
709 5
705 5
701 5
662 5
643 5
622 5
589 5
540 5
518 5
459 5
439 5
413 4
384 4
365 4
354 4
260 4
255 4
254 4
253 4
252 4
250 4
250 4
249 4
247 4
244 4
243 3
243 3
244 3
246 3
249 2
252 3
268 3
283 4
387 4
423 5
424 5
426 5
455 7
458 7
459 7
460 7
463 8
465 8
463 8
455 8
453 8
445 9
444 10
446 10
443 10
443 10
443 10
445 10
446 10
445 10
446 10
448 11
448 11
448 11
448 11
447 11
446 11
429 11
422 11
411 10
401 10
400 10
399 10
397 10
395 10
396 10
394 10
400 10
398 10
391 10
392 10
394 10
392 10
391 10
392 10
389 10
389 10
389 10
380 10
378 10
375 10
327 9
321 9
320 9
323 9
315 9
315 9
313 9
319 9
319 9
319 9
318 9
317 9
317 9
316 9
316 9
314 9
314 9
315 9
314 9
316 9
317 9
316 9
316 9
314 9
313 9
313 9
313 10
313 10
312 10
312 10
311 10
311 10
311 10
311 10
311 10
311 10
311 10
311 10
309 10
309 10
306 10
300 10
300 10
293 9
284 9
253 8
247 8
113 8
93 7
88 7
87 7
55 4
53 4
50 4
50 3
49 2
48 2
48 2
46 2
46 2
46 2
46 2
46 2
46 2
46 2
46 2
46 2
44 2
40 2
39 2
39 1
39 1
39 1
39 1
39 1
39 1
39 1
39 1
39 1
39 1
39 1
39 1
39 1
38 1
36 1
35 1
24 1
24 1
24 1
23 1
23 1
23 1
23 1
23 1
23 1
23 1
23 1
23 1
24 1
24 10
24 10
22 11
19 11
19 12
19 12
18 12
18 12
12 12
12 12
12 12
12 12
12 12
11 12
11 12
11 12
11 12
10 12
11 12
11 12
8 12
7 12
7 12
7 13
7 13
7 13
6 13
6 12
6 12
6 12
6 12
6 12
6 12
6 12
6 13
6 13
6 17
6 17
6 17
6 17
6 17
6 17
6 17
5 17
5 17
5 17
5 17
5 17
5 17
5 17
5 17
5 17
5 17
5 17
5 17
5 17
5 17
6 17
5 17
4 17
4 17
5 17
5 17
6 17
6 17
13 28
13 30
13 32
13 33
13 34
13 35
13 35
13 35
13 35
13 37
13 43
14 44
14 46
14 52
14 57
17 74
24 81
24 93
24 96
24 108
27 124
27 198
28 312
28 358
30 393
30 418
30 436
31 481
31 507
31 510
31 516
31 515
31 525
31 536
31 560
31 576
31 578
31 578
32 582
34 582
34 583
34 584
34 587
34 713
34 736
34 747
34 778
34 814
34 839
34 847
34 857
33 867
33 867
33 867
33 867
33 867
33 889
34 913
34 915
34 917
35 923
35 927
35 929
35 930
35 930
33 930
34 932
34 932
34 933
34 932
34 932
34 928
34 928
36 928
36 928
36 928
41 929
41 929
41 929
41 929
43 929
43 930
43 930
43 930
43 930
43 930
43 930
43 930
43 930
43 930
43 932
43 932
42 933
42 933
42 933
42 933
42 933
42 932
41 932
41 932
36 920
37 920
37 917
38 918
39 917
39 915
39 914
39 911
38 904
38 881
37 870
38 869
36 860
36 847
36 837
35 813
28 781
28 776
28 772
28 768
25 730
23 664
21 556
21 518
21 502
21 498
21 494
21 447
21 444
21 440
21 437
21 436
21 422
21 418
21 389
21 368
21 367
21 366
22 369
21 369
22 373
25 378
36 388
39 249
39 235
40 222
39 141
38 94
39 93
39 93
39 96
40 96
41 96
41 96
41 96
41 95
40 93
39 83
39 83
39 82
38 80
38 79
38 78
38 77
38 77
38 77
37 76
37 77
38 76
38 76
38 76
38 76
37 76
36 76
35 76
34 76
33 75
33 76
33 76
32 78
31 78
31 77
31 77
31 77
31 78
31 80
31 82
31 85
31 85
31 87
31 86
31 87
31 86
31 85
31 85
31 85
31 86
30 86
30 86
30 86
30 87
28 84
28 83
27 83
27 83
27 86
27 85
27 85
27 84
27 83
27 83
26 83
26 83
26 84
26 84
26 85
26 85
26 85
26 85
26 86
26 86
26 86
26 86
26 86
26 86
26 86
26 86
26 86
26 87
26 87
26 86
26 86
26 86
26 86
25 88
25 88
24 87
24 86
23 82
21 82
19 75
9 62
3 42
3 42
2 36
2 36
2 37
2 37
0 36
0 34
0 32
0 32
0 33
0 32
0 33
0 33
0 33
0 33
1 33
1 33
1 33
1 33
1 32
1 32
1 32
1 32
1 32
1 32
1 32
1 32
1 32
1 32
1 33
1 33
1 33
1 32
1 33
1 36
1 40
1 39
1 39
1 39
1 39
1 39
1 35
1 33
1 32
1 29
1 29
1 27
1 27
1 26
2 26
2 26
2 29
2 31
2 29
2 29
2 29
2 29
2 28
2 28
2 28
2 28
2 28
2 28
2 28
2 28
2 28
2 28
2 28
4 29
4 37
4 35
4 38
4 38
4 39
4 39
4 39
4 40
5 42
5 43
5 43
5 46
6 45
6 45
6 45
6 45
6 45
6 50
6 50
6 52
6 52
6 53
6 51
7 51
7 51
7 51
7 51
7 51
7 52
7 57
6 61
6 65
6 67
6 81
6 82
6 85
6 86
6 86
6 86
6 86
6 85
6 85
6 84
6 84
6 84
6 84
6 84
6 84
6 84
6 84
6 84
6 84
6 84
6 84
6 84
6 84
6 85
6 85
6 85
6 86
6 85
6 85
6 85
6 84
6 83
6 80
6 80
6 80
6 80
6 80
6 82
6 83
6 84
6 85
6 85
6 88
6 91
6 91
6 91
6 92
5 92
5 92
5 89
5 88
5 88
5 88
5 88
5 88
5 87
5 87
5 88
5 87
5 87
4 84
4 84
4 85
4 85
4 85
3 86
5 92
5 83
5 83
5 86
5 99
5 109
5 114
5 119
4 117
3 115
3 117
3 118
3 117
3 118
5 120
5 121
5 122
5 123
5 121
5 126
6 124
6 124
6 125
5 127
5 129
5 129
5 130
5 132
5 131
5 129
6 123
6 118
6 115
6 112
6 98
6 97
6 97
6 97
6 100
6 100
6 101
6 101
6 101
6 102
6 102
6 102
6 102
6 102
6 103
6 103
6 103
6 103
6 113
6 115
6 117
6 117
6 117
6 117
6 117
6 117
6 116
6 116
6 116
6 116
6 116
6 116
6 116
6 112
7 112
7 111
7 111
7 110
7 109
7 108
7 107
7 106
7 106
7 104
7 104
7 104
8 105
8 105
8 105
8 104
8 104
8 104
8 104
8 105
8 106
8 107
8 113
8 112
8 111
8 116
8 121
8 124
8 125
8 127
8 128
8 127
6 110
6 106
6 101
6 102
6 103
6 109
6 105
6 101
6 101
6 101
6 101
6 99
6 98
6 96
4 96
4 96
4 96
4 96
4 93
4 88
3 87
3 87
3 86
3 84
3 82
3 82
3 82
3 80
3 79
3 79
2 79
2 79
2 79
2 80
2 80
2 80
2 80
2 80
2 77
2 77
2 76
2 76
2 76
2 75
2 75
2 75
2 75
2 75
2 74
2 75
2 75
2 74
2 60
2 59
2 59
2 59
2 59
2 59
2 59
2 59
2 59
2 59
2 59
2 59
2 59
2 59
2 59
2 59
1 59
1 59
1 59
1 59
1 59
1 59
1 58
1 58
1 57
1 57
1 57
1 57
0 55
0 55
0 55
0 55
0 55
0 55
0 55
0 54
0 53
0 50
0 45
0 44
0 44
0 39
0 26
0 24
0 19
0 19
0 19
0 19
0 18
0 16
0 16
0 15
0 10
0 7
0 7
0 5
0 5
0 5
0 4
0 4
0 4
0 4
0 2
0 2
0 2
0 2
0 2
1 2
1 1
1 1
1 1
1 1
2 4
2 4
2 4
2 4
2 4
2 4
2 4
2 3
2 3
2 3
2 3
2 4
2 5
2 5
2 6
2 6
2 6
2 7
2 32
2 32
2 35
2 36
2 38
2 39
2 41
2 41
2 42
2 43
2 45
2 47
2 70
2 71
2 72
2 74
2 75
2 75
2 75
2 76
2 77
2 78
2 78
2 78
2 78
2 78
2 78
2 78
2 78
2 79
2 80
2 81
2 81
2 81
2 81
2 81
2 81
2 81
2 81
2 81
2 81
2 81
2 81
2 81
2 81
2 81
2 81
2 81
2 82
2 84
2 84
2 84
2 84
2 84
2 85
2 86
2 86
2 88
2 88
2 88
2 90
2 91
2 92
2 93
2 93
2 93
2 93
2 93
2 93
2 93
2 93
2 93
2 93
2 93
2 93
2 93
1 93
1 93
1 93
0 93
0 93
0 93
0 90
0 90
0 90
0 90
0 91
0 91
0 92
0 93
0 93
0 93
0 93
0 92
0 92
0 92
0 91
0 92
0 91
0 92
0 63
0 63
0 58
0 58
0 58
0 58
0 58
0 62
0 61
0 61
0 61
0 60
0 36
0 35
0 35
0 33
0 32
0 32
0 32
0 31
0 31
0 30
0 31
0 31
0 32
0 33
0 34
0 34
0 35
0 34
0 34
0 34
0 35
0 35
0 35
0 35
0 38
1 39
1 41
1 71
1 87
1 91
1 102
1 108
1 112
1 112
1 114
1 114
1 113
1 110
1 128
1 130
1 135
1 137
1 140
1 140
1 141
1 140
1 140
1 141
1 139
1 139
1 139
1 142
1 144
1 145
1 147
1 151
1 151
1 153
1 156
1 158
1 159
1 159
1 159
1 159
1 159
1 159
1 159
1 159
1 159
1 159
1 160
1 160
1 160
1 160
1 158
1 157
1 157
1 157
1 157
1 157
1 160
1 159
1 159
1 160
1 159
1 159
1 160
1 164
1 166
2 173
2 172
2 172
2 173
2 173
2 173
2 168
2 168
2 167
2 166
2 166
2 166
2 167
2 167
2 168
2 168
2 168
2 168
2 171
2 171
2 170
2 169
2 169
2 167
2 165
2 165
2 165
2 163
2 163
2 163
2 163
2 162
2 161
2 161
2 161
2 157
1 155
1 149
1 111
1 93
1 92
1 95
1 95
1 95
1 96
1 97
1 97
1 97
1 99
1 80
1 77
1 73
1 69
1 68
1 69
1 70
2 73
2 72
2 71
2 70
2 70
2 68
2 62
2 62
3 61
3 60
3 56
3 56
3 53
3 52
3 50
3 50
3 50
3 50
3 50
3 50
3 50
3 50
3 50
3 50
3 51
3 50
3 50
3 51
3 51
5 51
5 52
5 52
5 52
5 52
5 53
5 49
5 49
5 49
5 49
5 48
5 47
5 43
5 38
5 38
4 27
4 27
4 26
4 26
4 27
4 29
4 31
5 43
5 47
5 49
5 50
5 51
5 53
6 60
6 60
6 60
6 60
6 60
6 57
6 58
6 58
6 58
6 58
6 58
6 58
6 58
6 58
6 58
6 58
7 58
7 58
7 58
7 58
7 58
7 58
7 58
7 58
8 60
8 61
8 61
8 59
8 56
9 56
9 56
9 54
9 52
9 52
9 50
9 49
9 49
9 50
9 50
9 50
9 50
8 49
8 49
8 46
10 46
10 46
10 46
10 46
10 46
10 46
10 54
9 54
9 56
9 56
9 56
9 57
10 58
10 58
10 58
10 58
10 58
10 58
10 58
10 58
10 58
10 58
10 58
10 57
10 57
10 57
10 56
10 56
8 56
8 55
8 55
8 55
8 55
8 54
8 54
8 55
8 55
8 55
8 55
8 55
8 56
8 56
8 56
8 55
8 55
8 55
8 55
8 53
8 49
8 47
6 24
6 25
6 26
7 28
7 29
7 30
7 31
8 31
8 32
8 35
8 34
8 34
8 36
8 36
8 36
8 37
9 37
9 38
8 38
10 38
10 39
10 40
10 40
11 43
11 46
11 46
11 48
11 49
11 49
11 49
10 47
9 47
9 48
9 47
9 47
9 47
9 47
9 47
9 47
10 47
12 47
12 48
12 48
12 47
12 48
12 49
12 50
12 50
12 50
12 52
10 52
10 52
10 52
10 51
10 52
10 52
10 44
10 44
10 43
10 43
10 43
10 41
9 41
9 41
9 41
9 41
9 41
9 41
9 41
9 46
9 47
9 47
9 47
9 47
9 47
9 47
9 47
9 47
9 47
9 47
9 47
9 47
9 47
9 47
9 47
10 46
10 46
10 46
10 46
10 47
10 46
10 46
10 46
10 46
10 46
9 46
9 46
9 46
9 44
9 44
9 44
9 41
9 37
8 34
8 34
8 34
10 34
10 34
10 34
10 30
10 30
10 29
10 27
10 27
10 27
10 26
11 25
10 24
10 24
8 24
8 24
8 23
8 23
7 20
8 17
8 17
8 17
10 25
11 28
9 33
9 35
9 37
11 40
11 49
11 49
11 52
11 52
11 53
11 53
10 53
10 52
10 52
10 52
10 52
10 50
10 50
10 50
10 49
10 49
10 49
10 49
10 49
10 49
10 49
10 48
10 48
10 48
10 49
10 50
10 50
10 50
10 52
10 52
10 52
10 52
10 52
10 52
10 52
10 52
10 46
10 47
10 47
10 47
10 47
10 47
10 47
10 47
10 47
10 47
10 47
10 47
10 47
9 47
9 47
9 47
9 47
9 47
10 48
10 50
11 54
12 64
12 65
12 65
12 65
12 66
12 66
12 67
12 67
12 69
12 69
12 69
12 69
13 69
13 70
13 70
11 72
8 72
8 72
8 72
8 72
8 72
8 72
9 72
9 72
9 72
9 72
9 72
9 72
9 75
9 77
9 79
9 79
9 79
9 80
9 90
8 90
8 91
7 75
6 72
6 66
6 64
6 60
6 59
6 53
6 53
6 52
6 52
6 52
6 53
6 53
6 55
6 57
6 57
6 57
6 57
6 56
6 57
6 57
6 60
6 61
6 63
6 64
6 64
6 64
6 66
6 68
6 69
6 69
6 68
6 69
6 68
6 67
6 67
6 69
6 70
6 70
6 71
5 71
5 72
5 72
5 71
5 71
5 71
5 71
5 71
5 71
5 71
5 71
5 71
5 71
5 72
5 75
5 76
5 77
6 77
6 78
5 77
5 77
5 74
5 69
4 59
4 61
4 61
4 61
4 62
4 62
3 63
3 63
3 61
3 61
3 62
3 62
3 61
5 61
5 61
5 61
5 64
5 64
5 65
7 65
7 65
8 66
7 72
7 73
7 73
7 74
7 74
7 74
7 71
7 69
7 67
7 67
7 83
7 85
6 77
6 81
6 88
6 88
6 89
6 91
6 91
6 91
6 91
6 91
6 91
6 91
6 91
6 91
6 90
6 90
6 87
6 85
6 85
6 86
6 86
6 85
6 87
6 89
6 89
6 89
6 93
6 96
6 95
6 95
6 93
6 93
6 94
7 97
7 99
7 98
7 98
7 98
7 96
7 96
7 94
7 94
7 93
7 92
7 92
7 92
7 92
7 92
7 92
7 93
7 95
8 97
8 98
9 98
9 98
9 101
9 101
9 99
9 98
9 97
8 97
8 97
8 97
8 99
9 104
9 106
10 106
10 106
11 108
11 108
11 106
11 107
11 103
11 104
11 105
11 105
10 105
10 105
8 105
7 106
7 106
6 104
6 101
6 102
6 101
6 102
6 102
7 101
8 96
8 95
9 97
9 96
9 96
9 96
9 96
9 96
9 96
9 95
9 73
9 67
9 68
9 68
9 63
9 63
11 65
11 65
11 65
11 65
11 65
11 65
11 65
12 65
12 65
15 65
15 65
15 66
15 66
16 73
16 73
16 72
16 73
16 72
16 68
16 65
16 60
16 59
16 48
16 46
16 46
16 46
16 46
16 46
16 47
15 46
16 48
18 55
18 67
19 68
19 68
19 69
20 72
20 72
20 72
20 73
20 73
20 75
20 75
20 75
20 75
20 73
20 72
19 69
18 69
18 69
18 66
18 65
18 63
18 63
18 63
18 63
18 63
18 62
18 62
18 62
16 57
16 55
16 55
16 55
15 53
16 53
16 54
16 53
16 53
16 53
16 54
16 60
16 61
16 61
16 61
19 61
19 60
19 60
19 62
19 62
19 61
19 61
19 61
18 62
17 62
17 62
16 61
16 61
16 61
16 61
16 61
16 61
16 61
16 61
16 61
16 61
16 59
16 58
16 58
16 58
19 56
26 60
30 60
30 61
30 60
30 60
30 60
29 60
29 60
26 59
26 61
26 61
26 61
25 54
25 55
25 55
25 55
25 55
25 55
25 55
25 55
25 55
25 56
25 57
25 57
25 57
25 57
25 56
24 56
23 55
23 50
21 44
21 36
21 37
21 37
21 36
20 32
20 31
20 31
20 31
20 32
20 32
20 32
20 32
20 32
20 32
20 32
20 32
20 32
20 32
20 32
20 33
20 33
20 33
20 35
21 35
21 35
21 35
21 35
21 36
21 37
21 37
21 38
21 38
20 37
20 38
20 38
20 39
21 42
21 44
21 50
21 46
21 47
21 48
21 48
18 47
18 48
18 48
18 45
18 47
18 47
18 47
18 47
18 47
18 47
18 47
18 48
18 49
18 49
18 49
18 51
18 51
18 51
18 51
18 51
18 52
18 52
18 53
17 53
17 53
15 53
7 49
5 49
5 49
5 50
5 54
9 69
11 76
11 79
11 79
11 78
11 78
11 79
11 79
11 79
11 79
11 79
11 81
11 83
11 84
11 85
11 85
11 83
11 83
11 83
11 83
11 84
12 90
12 93
13 98
13 97
13 95
13 95
13 93
13 93
13 93
13 93
13 94
13 96
14 96
14 96
14 96
14 96
14 96
14 96
14 97
14 97
14 100
14 100
14 102
14 104
14 101
14 101
14 102
15 105
16 107
16 113
16 114
16 117
18 116
18 116
18 119
18 119
18 122
19 130
19 131
19 146
19 145
18 143
18 140
18 133
18 132
18 127
18 127
18 125
18 125
18 125
18 124
18 124
18 122
18 122
18 122
18 122
18 125
18 125
19 125
19 124
19 122
19 122
19 121
19 121
19 120
19 119
17 119
17 119
19 117
20 117
21 113
21 113
21 113
20 111
20 111
20 109
20 109
20 108
32 111
30 99
29 93
28 91
28 91
28 91
28 91
28 91
28 90
28 90
28 91
28 90
28 88
28 87
28 87
28 87
28 87
28 88
28 88
28 93
28 95
27 91
27 89
28 87
27 83
27 83
27 83
27 83
27 83
27 83
27 83
27 83
27 82
27 80
26 81
26 81
26 83
26 83
26 83
26 83
26 81
31 81
31 77
31 75
31 74
31 73
32 77
32 77
32 78
33 75
32 79
33 74
33 72
33 70
31 70
31 67
31 63
31 62
31 59
30 56
30 56
30 41
30 41
30 40
30 40
30 40
31 40
31 41
32 41
32 41
32 41
32 42
32 42
32 42
32 42
32 42
32 42
33 42
33 39
33 39
32 39
32 39
32 39
32 40
32 40
32 40
32 40
32 40
32 40
30 40
30 40
29 40
28 40
28 40
28 40
28 40
28 40
27 40
27 40
26 40
14 36
14 36
14 36
15 36
15 37
15 38
15 48
16 49
16 50
16 51
17 50
17 56
19 56
19 58
19 58
19 58
19 58
19 57
19 59
19 57
19 54
21 55
21 56
21 56
21 56
21 58
21 58
21 59
21 59
21 59
21 61
21 61
21 61
21 61
20 61
20 61
20 60
20 61
20 61
20 61
20 61
16 65
16 66
16 69
17 71
17 71
16 66
15 67
15 67
13 64
13 60
13 60
13 60
13 59
13 59
13 60
13 60
14 61
14 61
15 61
15 61
15 61
15 61
14 61
14 61
13 61
13 62
13 62
13 62
15 62
15 62
15 61
15 61
15 61
15 61
15 61
15 61
15 61
16 61
16 62
16 62
16 62
16 62
16 61
16 61
16 60
16 60
16 60
16 60
16 60
16 60
16 60
16 61
17 61
17 61
17 61
17 61
17 61
17 61
17 61
17 61
17 61
17 61
16 61
17 57
16 55
16 45
15 46
16 48
16 51
16 53
15 47
13 47
13 45
13 47
13 49
14 50
30 56
31 51
33 56
38 57
39 59
44 63
46 63
46 63
46 60
46 61
46 61
47 63
48 63
48 61
48 61
48 61
48 60
48 60
48 60
48 59
48 59
48 62
47 63
47 63
47 59
47 57
47 56
47 55
47 54
47 54
47 53
47 54
47 54
47 54
47 54
47 54
47 53
47 54
47 53
47 52
46 54
46 54
44 54
43 54
43 54
45 54
47 54
49 54
49 54
49 52
50 52
51 52
51 56
51 56
51 56
51 56
51 56
50 56
50 55
50 55
49 55
49 55
49 55
49 55
49 55
49 55
49 55
49 55
49 55
49 55
49 55
49 55
51 58
53 59
53 59
53 58
51 58
51 58
51 59
51 59
51 60
52 60
53 60
53 59
53 60
53 60
53 60
53 60
53 60
53 58
53 53
52 50
52 45
52 45
51 45
51 45
51 44
51 44
52 44
51 44
28 35
27 32
27 31
26 29
24 29
19 27
18 28
18 28
18 28
18 27
18 27
18 25
17 25
17 25
17 25
17 26
17 27
19 31
20 31
21 34
30 34
36 33
39 56
39 62
39 64
39 67
39 66
39 71
40 73
40 74
42 74
47 73
48 73
50 73
52 73
53 73
54 73
54 77
54 77
55 77
55 75
54 75
56 76
55 78
53 81
53 84
53 84
52 85
52 86
51 86
50 88
50 88
50 84
50 84
50 84
50 85
50 85
50 85
50 85
50 85
50 88
50 90
50 91
50 91
50 94
50 95
50 95
50 96
50 96
50 98
49 100
49 102
47 100
45 99
45 99
45 100
45 100
45 99
45 99
45 99
45 98
43 97
43 97
43 97
43 97
43 97
43 104
43 104
43 104
43 105
43 105
43 105
43 105
43 105
43 108
43 108
43 111
43 112
42 113
42 113
41 112
41 112
41 112
41 112
41 111
41 111
41 109
41 109
41 109
41 109
41 109
41 109
41 109
41 109
41 109
39 108
38 107
35 102
33 101
33 101
25 101
18 92
16 66
16 60
16 59
16 59
16 58
16 57
13 57
11 57
8 57
5 56
5 56
5 56
4 56
4 56
4 56
4 52
3 52
3 52
3 52
3 52
1 51
0 49
0 44
0 41
0 41
0 41
0 40
0 40
0 40
0 40
0 40
0 40
0 40
0 39
0 39
0 39
0 39
0 39
0 35
0 34
0 33
0 31
0 30
0 29
0 28
0 28
0 27
0 26
0 24
0 22
0 21
0 21
0 21
0 20
0 20
0 19
0 19
0 19
0 19
0 19
0 19
0 18
0 18
0 17
0 10
0 9
0 9
0 9
0 9
0 9
0 11
0 10
0 8
0 8
0 5
0 3
0 3
0 3
0 3
0 3
0 3
0 3
0 3
0 5
0 5
0 5
0 7
0 7
0 7
0 7
0 7
0 7
0 7
0 7
0 7
0 7
0 7
0 7
0 7
0 7
0 7
0 7
0 8
0 8
0 8
0 15
0 29
0 32
0 60
0 61
0 62
0 68
0 73
0 75
0 76
0 76
0 76
0 76
0 82
1 85
1 86
2 95
2 99
2 100
2 102
2 104
2 114
2 115
2 116
2 116
2 116
2 116
2 116
2 117
2 117
2 117
2 118
2 118
2 118
2 118
2 118
2 118
2 118
2 118
2 120
2 120
2 120
2 120
2 120
2 120
2 120
2 120
2 121
2 121
2 122
2 122
2 122
2 122
2 122
2 122
2 122
2 122
2 127
2 129
2 129
2 129
2 129
2 130
2 130
2 129
2 129
2 130
2 131
2 132
2 133
3 132
3 132
3 132
3 132
3 132
3 137
3 137
3 137
3 135
3 136
3 135
3 134
3 134
3 134
3 134
3 137
3 137
3 137
3 139
3 140
3 141
3 141
3 142
3 141
3 141
3 141
3 140
3 140
3 140
3 140
3 129
3 113
3 103
3 78
3 81
3 81
3 81
3 81
3 81
3 86
4 90
4 89
4 89
4 82
4 80
4 78
3 66
3 63
3 63
3 62
3 60
3 50
3 51
3 51
3 51
3 51
3 51
3 51
3 50
3 51
3 51
3 50
3 50
3 50
3 50
3 50
3 50
3 50
3 51
3 48
3 49
3 49
2 49
4 49
4 53
4 53
4 56
4 59
4 59
4 62
4 62
4 64
4 64
4 66
4 66
4 66
4 64
4 62
4 62
4 63
4 61
4 61
4 60
4 60
4 59
4 62
4 62
4 61
4 61
4 61
4 61
4 61
4 61
4 60
4 60
4 55
4 54
4 54
4 54
4 55
4 65
4 66
4 67
4 68
4 77
4 77
4 84
4 84
4 98
4 100
4 102
4 104
4 104
4 103
4 103
4 103
4 103
4 104
4 104
4 104
4 103
4 103
4 103
4 103
4 99
4 99
4 99
4 99
3 98
2 92
2 91
2 91
2 91
2 91
2 107
2 107
2 107
2 111
2 111
2 117
2 117
2 116
2 120
2 120
2 120
2 121
2 122
2 123
2 123
2 122
2 122
2 122
2 123
2 128
2 128
2 128
2 128
2 128
2 126
1 126
1 126
0 126
0 127
0 128
0 119
0 115
0 115
0 117
0 117
0 116
0 115
0 116
0 116
0 114
0 114
0 113
0 113
0 114
0 112
0 111
0 112
0 114
0 114
0 115
0 115
0 112
0 112
0 113
0 113
0 113
0 114
0 114
0 114
0 115
0 116
0 116
0 117
0 115
0 115
0 114
0 103
0 103
0 102
0 102
0 93
0 85
0 83
0 82
0 63
0 62
0 61
0 60
0 60
0 60
0 60
0 60
0 60
0 60
0 60
0 63
0 63
0 69
0 69
0 70
0 70
0 70
0 70
0 71
0 71
0 71
0 70
0 70
0 70
0 70
0 53
0 55
0 50
0 49
0 53
0 47
0 48
0 48
0 46
0 46
0 45
0 48
0 48
0 50
0 49
0 48
0 47
0 46
0 46
0 46
0 47
0 48
0 50
0 50
0 50
0 50
0 50
0 48
0 47
0 46
0 46
0 45
0 43
0 43
0 43
0 43
0 42
0 42
0 42
0 42
0 42
0 45
0 44
0 43
0 43
0 42
0 42
0 40
0 41
0 41
0 41
0 41
0 41
0 39
0 38
0 38
0 38
0 38
0 38
0 38
0 37
0 37
0 36
0 36
0 36
0 36
0 36
0 36
0 36
0 35
0 36
0 36
0 36
0 36
0 37
0 38
0 38
0 38
0 38
0 38
0 39
0 39
0 39
0 39
0 39
0 36
0 35
0 30
0 30
0 29
0 29
0 29
0 29
0 28
0 28
0 28
0 28
0 28
0 28
0 28
0 26
0 25
0 24
0 24
0 20
0 20
0 19
0 19
0 19
0 19
0 17
0 16
0 17
0 16
0 17
0 17
0 18
0 18
0 18
0 18
0 17
0 14
0 13
0 13
0 13
0 13
0 13
0 13
0 13
0 13
0 13
0 13
0 13
0 13
0 13
0 13
0 13
0 13
0 13
0 13
0 13
0 10
0 10
0 10
0 10
0 9
0 9
0 9
0 9
0 9
0 9
0 9
0 9
0 9
0 9
0 9
0 9
0 9
0 9
0 9
0 9
0 9
0 9
0 9
0 9
0 9
0 9
0 9
0 8
0 8
0 8
0 8
0 8
0 8
0 7
0 5
0 5
0 5
0 5
0 5
0 5
0 5
0 5
0 5
0 5
0 5
0 5
0 5
0 5
0 5
0 5
0 5
0 5
0 5
0 5
0 5
0 5
0 5
0 5
0 5
0 5
0 5
0 5
0 5
0 5
0 5
0 5
0 5
0 3
0 3
0 1
0 1
0 1
0 0
0 0
0 0
0 0
0 0
0 0
0 0
0 0
0 0
0 0
0 0
0 0
0 0
0 0
0 0
0 0
0 0
0 0
0 0
0 0
0 0
0 0
0 0
0 0
0 0
0 0
0 0
0 0
0 0
0 0
0 0
0 0
0 0
0 0
0 0
0 0
0 0
0 0
0 0
0 0
0 0
0 0
0 0
0 0
0 0
0 0
0 0
0 0
0 0
0 0
0 0
0 0
0 0
0 0
0 0
0 0
0 0
0 0
0 0
0 0
0 0
0 0
0 0
0 0
0 0
0 0
0 0
0 0
0 0
0 0
0 0
0 0
0 0
0 0
0 0
0 0
0 0
0 0
0 0
0 0
0 0
0 0
0 0
0 0
0 0
0 0
0 0
0 0
0 0
0 0
0 0
0 0
0 0
0 0
0 0
0 0
0 0
0 0
0 0
0 0
0 0
0 0
0 0
0 0
0 0
0 0
0 0
0 0
0 0
0 0
0 0
0 0
0 0
0 0
0 0
0 0
0 0
0 0
0 0
0 0
0 0
0 0
0 0
0 0
0 0
0 0
0 0
0 0
0 0
0 0
0 0
0 0
0 0
0 0
0 0
0 0
0 0
0 0
0 0
0 0
0 0
0 0
0 0
0 0
0 0
0 0
1 0
1 0
1 0
1 0
1 0
1 0
1 0
1 0
1 0
1 0
1 0
1 0
1 0
1 0
1 0
1 0
1 0
1 0
1 0
1 0
1 0
1 0
1 0
1 0
1 0
1 0
2 0
2 0
2 0
2 0
2 0
3 0
8 0
21 1
46 2
55 2
64 2
69 2
73 2
192 5
224 5
252 5
266 5
283 6
296 6
314 6
322 6
322 6
354 7
359 7
361 7
366 7
379 9
384 10
385 10
389 11
395 11
397 11
397 11
399 11
402 11
405 11
418 11
448 16
452 16
453 18
454 18
460 18
462 19
463 19
464 19
468 19
481 19
482 19
482 19
484 19
486 19
488 19
492 19
493 19
501 19
513 20
514 20
516 20
518 20
518 20
518 20
525 20
525 20
525 20
528 20
532 20
535 20
535 20
535 20
536 20
536 20
536 20
538 20
540 21
540 21
541 21
553 21
568 21
575 21
891 35
1261 41
1366 44
1443 47
1471 47
1493 48
1498 49
1499 50
1560 55
1780 66
1807 68
1822 71
1823 71
1829 71
1832 71
1835 71
1835 71
1836 71
1838 71
1849 71
1864 72
1869 71
1874 71
1885 71
1900 71
1906 71
2155 71
2158 71
2151 71
2132 70
2133 70
2117 71
2102 70
2080 70
1937 67
1900 67
1875 66
1869 66
1858 64
1859 64
1863 64
1864 64
1864 64
1859 63
1858 63
1858 63
1856 63
1851 63
1849 63
1848 63
1846 63
1843 63
1845 63
1854 63
2127 71
2147 71
2154 72
2155 72
2125 67
2153 67
2153 66
2149 66
2143 66
2140 65
2139 65
2137 65
2135 65
2125 65
2137 65
2149 65
2149 65
2147 65
2146 65
2144 65
2136 65
2134 65
2127 64
2125 64
2122 64
2144 64
2145 64
2153 65
2154 65
2156 65
2154 65
2149 65
2147 64
2143 64
2145 64
2148 64
2155 64
2159 64
2159 64
2170 63
2163 62
2159 62
2147 61
2130 60
2092 60
2043 59
1732 42
1409 36
1317 36
1258 35
1216 35
1181 35
1116 30
1109 28
1087 26
896 15
887 15
887 15
893 15
904 15
907 16
912 16
924 16
923 16
930 16
918 16
909 15
907 15
899 15
888 15
910 15
920 14
1001 15
1039 16
1086 16
1221 19
1341 20
1362 20
1363 20
1374 20
1379 20
1384 20
1390 20
1393 20
1411 21
1410 21
1405 21
1404 21
1403 21
1397 21
1406 21
1418 21
1417 21
1425 21
1427 21
1428 21
1410 21
1409 21
1284 14
1281 14
1145 11
1143 11
1141 11
1138 11
1138 11
1119 11
1134 11
1135 11
1135 11
1138 11
1144 11
1182 12
1199 12
1217 12
1221 12
1211 12
1218 12
1228 12
1256 12
1323 12
1331 13
1329 13
1331 13
1332 13
1334 13
1310 13
1307 12
1297 11
1295 11
1290 11
1290 12
1290 12
1288 12
1290 13
1287 13
1283 13
1279 13
1279 13
1278 13
1265 13
1265 13
1267 13
1267 13
1264 13
1264 13
1264 13
1262 13
1259 13
1259 13
1259 13
1259 13
1259 13
1259 13
1257 13
1256 13
1250 13
1248 13
1245 13
1240 12
1232 12
1257 13
1256 13
1246 13
1247 13
1252 13
1247 13
1205 13
1195 13
1185 13
1174 13
1114 13
1079 13
803 10
769 11
701 10
577 8
486 8
470 8
471 8
468 8
467 8
463 8
482 8
493 8
489 7
512 7
566 7
569 9
569 9
569 10
558 11
549 11
549 11
540 11
523 11
522 11
524 11
524 11
525 11
520 11
523 11
551 11
558 11
558 11
554 11
552 11
533 11
523 11
521 11
514 11
496 11
455 10
422 10
399 10
388 9
388 9
384 9
365 9
350 9
330 9
325 9
325 9
323 11
323 11
321 10
322 10
322 10
322 10
322 10
323 10
323 10
326 10
327 10
332 10
333 10
332 11
337 11
334 11
344 11
378 11
400 12
427 15
433 16
450 17
471 17
486 17
556 17
558 17
561 17
576 17
580 17
589 17
590 17
591 17
590 17
590 17
598 17
609 18
635 18
649 20
636 19
637 19
634 19
632 19
616 19
616 19
610 19
631 19
733 19
757 19
784 19
827 19
856 19
857 19
858 19
871 19
877 19
920 19
924 19
929 19
945 19
940 19
956 18
950 17
922 17
907 16
859 16
856 16
888 16
888 17
935 27
936 28
933 29
936 29
942 29
939 29
935 31
933 31
932 31
928 31
920 31
897 31
896 31
904 31
905 31
908 31
907 31
910 31
914 31
914 31
921 31
926 30
928 30
928 30
928 30
926 30
926 30
927 30
929 30
930 30
930 30
931 30
934 27
939 27
942 27
947 27
949 27
955 28
959 28
991 28
991 29
1180 31
1190 31
1193 29
1205 29
1245 27
1252 27
1249 27
1230 27
1193 27
1167 27
1157 25
1154 24
1136 23
1121 23
1116 22
1075 22
1077 22
1074 23
1063 23
1064 23
1058 23
1058 23
1060 23
1056 23
1050 23
1038 22
1027 22
993 22
974 20
971 20
972 20
979 20
1009 20
1059 20
1109 20
1164 20
1154 20
1056 21
1036 21
998 21
983 21
973 21
969 21
963 21
961 21
958 21
925 21
913 21
908 21
896 21
898 21
872 21
874 21
874 21
900 21
905 21
900 20
877 20
880 20
848 9
848 8
848 6
843 6
841 6
845 6
847 6
849 6
856 6
859 6
868 7
876 7
873 7
870 6
911 6
1069 8
1166 8
1389 10
1716 10
1764 10
1771 10
1774 10
1775 10
1775 10
1777 10
1797 10
1817 10
1823 10
1821 10
1823 10
1822 10
1828 10
1818 10
1812 11
1807 11
1803 11
1797 10
1792 9
1793 9
1758 9
1751 9
1567 9
1559 9
1556 9
1553 9
1501 9
1498 9
1503 9
1507 9
1512 9
1525 9
1525 9
1526 8
1527 8
1527 8
1507 8
1496 8
1493 8
1491 8
1489 8
1486 8
1483 8
1482 8
1477 8
1476 8
1471 8
1471 8
1472 8
1476 8
1487 8
1482 8
1475 8
1440 8
1415 8
1362 8
1312 7
1274 7
1272 7
1272 7
1266 7
1257 7
1245 7
1241 7
1241 7
1240 7
1241 7
1242 7
1241 7
1242 9
1247 9
1249 9
1249 12
1248 12
1245 13
1242 13
1209 13
1200 13
1195 13
1185 13
1186 13
1185 13
1187 13
1187 13
1210 14
1217 14
1209 14
1273 14
1269 14
1261 15
1253 15
1219 13
1192 13
1175 13
1163 13
1074 13
913 11
749 11
420 9
270 9
258 9
257 9
257 9
257 9
259 9
274 9
275 9
274 9
290 11
290 11
290 10
289 10
289 10
290 10
293 10
294 10
295 10
296 10
297 10
295 10
304 11
351 11
357 11
360 11
415 12
423 12
425 12
426 12
426 12
423 12
411 12
403 12
402 12
403 12
402 12
409 12
409 12
410 12
413 12
418 12
418 12
419 12
421 12
422 12
423 12
424 12
431 12
430 12
426 12
419 12
408 12
409 12
409 12
407 12
406 12
406 12
406 12
406 12
404 12
403 12
404 11
409 11
410 11
417 11
422 11
428 11
427 11
427 11
430 11
428 9
420 9
420 9
426 6
430 6
437 6
437 6
440 6
440 6
440 6
440 6
439 6
441 6
440 6
438 6
412 5
401 5
394 5
344 5
351 5
353 4
358 4
356 4
352 4
347 4
343 4
337 4
337 4
362 4
369 4
370 4
374 4
375 4
380 4
380 4
378 4
358 4
356 4
357 4
341 2
340 2
341 2
339 2
343 2
343 2
345 2
346 2
350 2
346 2
344 2
386 2
385 1
343 1
339 1
335 1
278 0
272 0
270 0
270 0
271 0
271 0
272 0
272 0
272 0
272 0
272 0
265 0
265 0
264 0
264 0
261 0
261 0
260 0
260 0
258 0
257 0
257 0
250 0
251 0
251 0
253 0
252 0
263 0
263 0
263 0
263 0
263 0
261 0
261 0
260 0
260 0
257 0
254 0
270 0
261 0
261 1
258 1
268 1
269 1
265 1
266 1
271 1
259 1
251 1
237 1
224 1
226 1
226 1
228 1
228 1
228 1
227 1
227 1
226 1
227 1
227 1
227 1
219 1
218 1
216 1
215 1
210 1
212 1
211 1
208 1
207 1
209 1
230 1
226 1
227 1
226 1
225 1
223 1
220 1
219 1
218 1
218 1
217 1
215 1
215 1
214 1
213 1
216 1
215 1
216 1
250 1
251 1
258 1
261 1
254 1
205 1
200 1
196 1
196 1
196 1
196 1
196 1
196 1
196 1
196 1
196 1
198 1
208 1
241 1
256 1
270 1
280 1
280 1
282 1
283 1
283 1
287 1
288 1
288 1
288 1
288 1
287 1
287 1
286 1
286 1
286 1
285 1
274 1
274 1
275 1
276 1
276 1
276 1
281 1
281 1
279 1
278 1
277 1
260 1
253 1
246 0
242 0
239 0
239 0
238 0
239 0
237 0
234 0
234 0
236 0
237 0
235 0
235 0
234 0
240 0
241 0
243 0
243 0
243 0
241 0
243 0
242 0
244 0
245 0
244 0
244 0
243 0
242 0
245 0
245 0
248 0
244 0
226 0
225 0
222 0
224 0
225 0
226 0
227 0
233 0
240 0
242 0
244 0
244 2
248 2
247 2
248 2
253 2
253 2
241 2
207 2
207 2
201 2
200 2
199 2
199 2
199 2
199 2
200 2
200 2
201 2
210 2
240 2
243 2
248 2
252 2
249 2
236 2
208 2
217 2
230 2
231 2
280 2
277 2
282 2
283 2
283 2
289 2
292 2
299 2
301 2
301 2
301 2
301 2
303 2
304 2
306 2
308 2
308 2
309 2
308 2
309 2
308 2
303 7
302 7
302 7
302 7
307 7
308 7
311 7
311 7
312 7
310 8
309 8
308 8
309 8
309 8
308 8
313 8
314 8
314 8
315 8
316 8
317 8
314 8
317 8
317 8
318 8
318 8
319 8
320 8
321 8
319 8
347 9
368 10
370 10
371 10
368 10
368 10
370 10
368 10
366 10
373 11
382 11
393 12
480 13
514 22
516 23
516 25
512 26
515 26
515 26
520 26
535 24
534 24
533 24
532 24
523 24
520 24
518 24
518 24
518 24
517 24
517 24
514 24
512 24
513 24
515 24
514 24
510 24
506 25
484 25
472 25
471 25
473 25
467 25
463 26
458 26
437 26
428 26
418 26
418 26
383 26
380 26
376 26
376 26
371 26
366 26
366 26
365 26
363 26
364 26
363 26
364 26
361 25
359 25
358 25
356 24
356 24
354 24
354 24
354 24
354 24
355 21
355 21
352 21
353 21
351 21
352 21
355 21
358 21
361 19
366 19
367 19
368 19
366 18
366 18
364 18
364 18
363 18
361 18
361 18
366 18
364 18
362 18
360 18
359 18
354 18
355 18
351 18
342 18
321 17
299 16
231 12
199 12
197 12
197 12
196 12
193 8
193 8
193 8
194 8
193 8
189 10
183 9
156 11
142 7
141 7
139 7
136 6
133 6
129 7
127 7
113 7
112 7
111 7
114 7
115 7
117 7
118 7
120 7
152 7
160 7
164 7
165 8
164 8
165 8
169 8
171 8
171 8
170 7
179 8
182 8
188 8
188 9
187 9
186 8
173 8
180 8
181 8
182 8
180 8
185 9
185 9
187 9
190 9
191 9
191 9
191 9
192 9
191 9
190 9
190 9
190 9
191 9
193 9
193 9
202 11
204 11
207 11
209 11
216 12
216 12
215 11
213 11
211 10
216 10
218 10
226 10
226 10
224 10
220 10
216 10
215 10
214 10
218 10
218 10
214 10
211 10
211 10
211 10
217 10
215 10
216 10
217 10
219 10
238 12
374 14
407 14
424 14
427 14
429 14
431 14
431 14
432 14
432 14
432 14
431 14
430 14
430 14
426 14
426 14
426 14
424 12
421 12
419 12
419 12
426 12
425 12
424 12
423 12
424 11
424 11
424 11
424 11
430 11
430 11
428 12
429 12
431 11
428 11
398 11
398 11
396 11
397 11
399 13
400 13
396 13
396 13
398 13
408 13
420 12
448 31
448 30
448 31
448 32
448 32
445 32
434 33
434 34
432 34
431 34
425 33
425 33
424 33
424 33
422 33
422 33
421 33
421 33
421 33
421 33
421 33
419 33
419 33
418 33
418 33
407 31
405 31
402 31
400 31
395 30
395 30
394 30
394 30
395 31
476 53
487 55
491 56
492 56
493 56
493 57
493 57
498 57
509 57
516 57
526 57
533 57
544 57
544 58
548 58
534 58
530 59
519 59
493 57
463 57
438 56
347 56
339 56
335 56
336 56
341 56
340 56
343 56
343 56
343 56
343 56
345 56
346 56
346 56
347 56
347 56
350 56
351 56
351 56
351 56
350 56
344 56
344 56
344 56
344 56
343 56
342 56
340 56
337 56
334 56
334 56
334 55
332 55
333 55
333 55
330 55
327 55
326 55
327 55
327 53
328 53
327 53
331 53
323 53
307 53
284 51
258 32
258 30
259 30
260 30
261 30
262 30
265 30
265 30
265 30
265 30
265 30
269 30
269 30
269 30
270 30
270 30
270 30
271 30
271 30
271 30
271 30
273 30
273 30
273 30
273 30
295 31
295 31
295 31
280 28
267 28
266 28
264 28
257 28
243 25
153 5
134 3
130 3
128 3
133 3
134 3
139 3
135 2
139 1
137 1
137 1
135 1
135 1
135 1
137 1
133 1
142 1
144 1
143 1
142 1
142 1
137 1
137 1
137 1
137 1
133 1
137 1
136 1
137 1
137 1
137 1
135 1
133 1
132 2
133 2
133 2
131 2
131 2
131 2
131 2
131 2
131 2
131 2
131 2
132 2
132 2
132 2
132 2
132 2
131 2
131 2
131 2
130 2
129 2
128 2
132 2
131 2
132 2
133 2
132 2
134 2
138 4
133 4
137 4
135 4
134 4
134 4
134 4
133 4
132 4
172 6
172 6
169 6
168 6
169 6
171 6
171 6
167 6
167 6
166 6
165 6
165 6
165 6
164 6
163 6
163 6
165 6
162 6
161 6
160 6
152 6
137 5
137 5
137 5
138 5
145 5
158 5
160 5
161 5
163 5
164 5
160 5
158 5
152 5
151 5
150 5
146 5
144 5
138 5
135 5
137 5
139 5
139 5
134 5
132 5
134 5
125 5
126 5
126 5
126 5
126 5
125 5
127 5
128 5
128 5
127 5
123 5
123 5
122 5
122 5
122 5
122 5
122 4
121 4
121 4
123 4
123 4
123 4
123 4
123 4
125 4
125 4
126 4
127 4
125 4
125 4
125 4
125 4
125 4
125 4
125 4
125 4
124 4
125 4
124 4
123 4
123 4
122 4
118 4
114 4
111 4
106 2
105 2
104 2
104 2
104 2
104 2
103 2
102 2
102 2
63 0
63 0
63 0
62 0
63 0
65 0
71 0
72 0
74 0
76 0
76 0
76 0
76 0
83 0
83 0
84 0
90 0
91 0
94 0
95 0
98 0
97 0
97 0
95 0
94 0
87 0
77 0
75 0
74 0
79 0
79 0
79 0
79 0
79 0
77 0
77 0
77 0
77 0
86 0
82 0
81 0
78 0
78 0
79 0
76 0
73 0
73 0
72 0
72 0
72 0
72 0
72 0
70 0
69 0
69 0
69 0
69 0
69 0
69 0
69 0
69 0
69 0
70 0
70 0
70 0
68 0
68 0
68 0
68 0
67 0
66 0
66 0
65 0
64 0
64 0
64 0
64 0
64 0
64 0
64 0
63 0
63 0
63 0
62 0
62 0
61 0
61 0
61 0
61 0
61 0
61 0
60 0
60 0
60 0
60 0
61 0
62 0
62 0
61 0
61 0
59 0
58 0
56 0
54 0
53 0
49 0
46 0
45 0
43 0
43 0
42 0
41 0
40 0
36 0
36 0
33 0
24 0
22 0
22 0
22 0
19 0
19 0
19 0
19 0
19 0
19 0
19 0
18 0
18 0
14 0
14 0
14 0
14 0
14 0
14 0
13 0
13 0
10 0
5 0
5 0
4 0
4 0
4 0
6 0
12 0
12 0
12 0
12 0
14 0
14 0
14 0
14 0
14 0
27 0
27 0
30 0
32 0
33 0
33 0
33 0
36 0
36 0
36 0
38 0
41 0
41 0
44 0
44 0
44 0
44 0
44 0
44 0
44 0
44 0
44 0
45 0
45 0
45 0
45 0
45 0
45 0
45 0
45 0
45 0
45 0
47 0
48 0
49 0
100 0
103 0
117 0
124 0
126 0
130 0
133 0
135 0
140 0
146 0
242 0
268 0
277 0
290 0
295 1
297 1
309 1
313 1
313 1
313 1
313 1
313 1
313 1
313 1
313 1
315 1
315 1
315 1
315 1
316 1
316 1
316 1
316 1
316 1
316 1
316 1
316 1
317 1
317 1
318 1
318 1
318 1
320 1
321 1
322 1
322 1
322 1
322 1
322 1
325 1
324 1
324 1
324 1
324 1
324 1
319 1
315 1
315 1
315 1
315 1
312 1
312 1
312 1
310 1
310 1
298 1
298 1
294 1
292 1
292 1
291 1
289 1
289 1
290 1
290 1
287 1
285 1
285 1
283 1
284 1
285 1
285 1
285 1
286 1
286 1
286 1
286 1
284 1
284 1
284 1
284 1
284 1
282 1
281 1
281 1
281 1
280 1
278 1
276 1
275 1
231 1
225 1
212 1
209 1
203 1
194 1
191 1
173 1
152 1
137 1
58 1
53 1
43 1
26 0
33 0
32 0
32 0
31 0
31 0
32 0
32 0
32 0
32 0
31 0
32 0
32 0
32 0
35 0
35 0
35 0
35 0
35 0
35 0
35 0
37 0
37 0
36 0
37 0
37 0
36 0
36 0
35 0
35 0
34 0
33 0
33 0
33 0
33 0
33 0
33 0
33 0
34 0
34 0
34 0
34 0
34 0
34 0
34 0
34 0
34 0
34 0
34 0
34 0
34 0
34 0
34 0
34 0
34 0
34 0
34 0
35 0
34 0
34 0
33 0
32 0
33 0
33 0
33 0
32 0
33 0
32 0
32 0
32 0
32 0
33 0
33 0
34 0
34 0
34 0
34 0
34 0
34 0
34 0
34 0
34 0
35 0
35 0
35 0
35 0
34 0
32 0
31 0
30 0
29 0
29 0
29 0
29 0
29 0
28 0
28 0
35 0
35 0
36 0
37 0
32 0
33 0
33 0
39 0
43 0
43 0
43 0
43 0
43 0
43 0
42 0
42 0
42 0
40 0
41 0
41 0
41 0
41 0
41 0
41 0
39 0
39 0
39 0
38 0
38 0
38 0
38 0
38 0
38 0
38 0
38 0
38 0
38 0
38 0
38 0
38 0
38 0
38 0
38 0
38 0
38 0
38 0
39 0
39 0
39 0
40 0
40 0
45 0
45 0
50 6
50 7
51 8
51 8
51 10
51 10
51 10
52 10
53 10
53 10
53 10
53 10
52 10
52 10
53 10
53 10
52 10
53 10
53 10
53 10
53 10
52 11
52 11
51 11
51 11
51 11
51 11
51 11
51 11
51 11
51 11
51 11
50 11
50 11
50 11
50 11
51 11
52 11
52 11
51 11
50 11
50 11
50 11
49 11
48 11
49 11
49 11
42 11
42 11
41 11
39 11
35 11
33 11
34 11
29 11
28 11
29 11
29 11
30 11
30 11
30 11
31 11
34 11
34 11
33 11
34 11
49 13
67 13
72 13
78 16
79 16
80 18
81 18
81 19
81 19
82 19
82 19
83 19
83 19
84 19
85 19
88 19
88 19
88 19
88 19
88 19
88 19
88 19
86 19
87 19
87 19
87 20
87 20
87 20
88 20
91 20
102 20
102 20
97 20
97 19
92 12
92 10
93 10
93 10
93 10
92 10
92 10
90 10
89 10
89 10
89 10
89 10
89 10
88 10
106 10
106 10
106 10
107 10
113 11
117 11
127 12
146 11
180 11
192 11
193 11
193 11
193 11
194 11
194 11
194 11
193 11
195 11
196 11
197 11
197 12
199 12
201 12
202 12
202 12
202 12
203 13
203 13
203 13
203 13
202 13
201 13
201 13
199 13
200 13
200 13
201 13
202 13
204 13
203 13
204 13
205 13
204 13
205 13
205 13
205 13
203 13
201 13
201 13
199 13
198 12
194 12
180 11
161 11
160 11
155 8
155 8
154 6
154 6
154 5
154 5
154 5
154 5
153 5
153 5
153 5
153 5
150 5
150 5
150 5
150 5
150 5
150 5
150 7
149 7
152 7
153 8
153 8
153 8
151 8
151 8
148 8
137 8
137 8
138 8
138 8
138 8
138 8
138 8
138 8
138 8
138 8
138 8
138 8
138 8
138 8
138 8
138 8
138 8
137 8
121 8
120 8
103 8
97 8
88 7
76 6
70 6
55 6
29 6
24 6
24 6
24 6
25 7
26 8
27 8
27 8
26 8
25 8
31 8
31 8
32 7
32 7
32 7
31 7
31 6
31 6
30 6
30 6
30 6
30 6
30 6
30 6
29 6
29 6
29 6
29 6
29 6
29 6
29 6
29 6
29 6
28 6
28 6
27 6
27 6
27 6
28 6
28 6
27 5
27 5
26 5
25 5
27 5
28 5
31 5
33 5
35 6
35 6
35 6
35 6
35 6
36 6
36 6
35 6
35 6
35 6
35 6
35 6
35 6
39 6
39 4
41 3
41 3
41 3
42 2
38 2
39 2
39 2
39 2
39 2
39 2
39 2
39 2
39 2
38 2
39 2
39 2
38 2
38 2
38 2
38 2
38 2
38 2
39 2
39 2
39 2
39 2
39 2
39 2
39 2
39 2
39 2
39 2
39 2
39 2
39 2
39 2
40 2
40 2
45 2
45 1
45 1
44 0
42 0
41 0
40 0
40 1
43 1
36 1
36 1
37 1
37 2
37 2
37 2
37 2
37 2
37 2
37 2
37 2
37 2
37 2
37 2
37 2
37 2
37 2
37 2
37 2
35 2
35 2
35 3
36 3
36 3
36 3
36 3
36 3
36 3
36 3
37 3
37 3
37 3
38 3
37 3
34 3
33 3
29 3
29 3
28 3
28 3
54 4
56 4
56 4
57 4
61 4
66 4
68 4
68 4
70 4
70 5
70 5
79 5
83 6
81 6
82 6
82 6
81 6
81 6
82 6
83 6
83 6
83 6
83 6
83 6
83 6
83 6
87 6
86 6
86 6
86 6
86 6
87 6
87 6
90 6
91 6
91 6
91 6
91 6
91 6
91 6
94 6
97 6
98 6
98 6
98 7
98 7
98 7
97 7
97 7
97 7
97 7
93 7
93 7
93 7
93 7
93 7
93 6
93 6
91 6
90 6
89 6
90 6
89 6
91 5
91 5
91 5
91 5
91 5
91 5
91 5
91 5
91 5
91 5
91 5
92 5
92 5
92 5
92 5
92 5
96 5
96 5
95 4
96 4
97 4
97 4
97 4
97 4
96 4
99 4
99 4
103 4
104 4
103 4
103 4
102 4
107 4
107 4
109 4
109 4
106 4
81 3
79 3
76 3
76 3
75 3
80 2
79 2
80 2
79 2
79 2
70 2
61 2
59 1
58 1
58 1
59 1
59 1
60 1
61 1
62 1
62 1
64 1
69 1
69 1
71 1
72 1
75 1
75 1
83 1
82 1
83 1
83 2
82 2
83 2
81 2
82 2
83 2
83 2
85 2
88 2
87 2
86 2
87 2
88 2
88 1
89 1
90 1
91 1
91 1
91 1
91 1
91 1
91 1
91 2
91 2
93 2
93 2
101 2
101 2
101 2
101 2
102 2
102 2
100 2
100 2
100 2
100 2
100 2
100 2
100 2
100 2
100 2
100 2
100 2
99 2
99 2
99 2
99 2
97 2
95 2
95 2
94 2
93 2
93 2
93 2
93 2
93 2
91 2
90 2
92 2
90 2
92 2
93 2
93 2
94 2
89 2
88 2
87 2
87 2
87 2
86 2
86 2
84 2
88 2
86 2
84 2
86 2
89 2
90 2
90 2
91 2
92 2
94 2
94 2
96 2
97 2
98 2
98 2
98 2
109 2
111 2
109 2
103 2
103 2
101 2
98 2
93 2
100 2
96 1
96 1
95 1
94 1
94 1
89 1
90 1
90 1
88 1
88 1
85 1
83 3
79 3
79 3
80 3
80 3
81 3
81 3
85 3
84 3
85 3
85 3
86 3
86 3
86 3
88 3
88 3
87 3
88 3
81 3
82 3
83 3
82 3
81 3
85 3
86 3
88 3
88 3
88 3
91 3
91 3
91 3
91 3
91 3
91 3
91 3
91 3
91 3
91 3
95 3
95 3
96 3
96 3
97 3
98 3
98 3
96 3
98 3
98 3
99 3
97 3
95 3
95 3
92 3
93 3
100 3
114 3
124 3
136 3
139 3
169 3
175 3
175 3
185 3
186 3
178 4
178 4
177 4
177 4
175 4
174 4
174 4
172 4
169 4
167 4
165 4
163 4
162 4
163 4
160 4
160 4
153 4
153 4
152 4
154 4
153 4
173 4
198 6
206 7
229 7
261 7
290 7
296 7
300 7
302 7
302 7
303 6
305 5
305 5
305 5
305 5
305 5
302 5
302 5
301 5
301 5
301 5
301 5
298 5
297 5
298 5
298 5
297 5
296 5
296 4
294 4
295 4
295 4
294 4
295 4
295 4
320 4
322 5
323 8
316 10
316 10
314 10
313 10
314 11
312 11
312 11
312 11
312 11
312 11
312 11
312 11
312 11
312 11
312 11
308 11
309 11
308 11
307 11
306 12
307 12
310 12
311 12
308 12
310 12
309 12
309 12
309 12
309 12
309 12
306 12
296 12
281 12
270 12
259 12
257 12
231 12
229 12
228 12
218 12
219 12
217 12
217 12
222 12
220 12
220 12
220 12
220 12
220 12
220 12
220 12
220 12
220 12
222 12
222 12
225 12
231 12
233 12
233 12
227 12
236 12
235 12
214 11
182 9
171 9
137 9
106 9
92 9
93 9
91 9
91 9
91 9
95 9
97 9
98 9
102 9
103 9
103 9
103 9
103 9
103 9
103 9
105 9
105 9
105 9
106 9
105 9
105 9
105 9
105 9
105 9
108 9
111 9
124 9
124 9
121 9
122 9
98 7
95 6
94 2
94 2
96 2
96 2
98 2
98 1
99 1
102 1
104 1
106 1
107 1
108 1
108 1
109 1
109 1
109 1
111 1
109 1
109 1
108 1
110 0
111 0
106 0
105 0
105 0
106 0
107 0
107 0
108 0
110 0
119 0
119 0
118 0
118 0
118 0
122 0
126 0
127 0
129 0
132 0
131 0
128 0
127 0
125 2
122 2
123 3
123 3
126 3
127 3
127 3
126 3
126 3
126 3
123 3
120 3
119 3
118 3
111 3
110 3
107 3
107 3
99 3
102 3
104 3
105 3
105 3
115 3
117 3
125 3
128 3
153 7
153 7
161 7
158 8
156 8
155 8
150 8
150 8
150 8
150 8
151 8
151 8
150 8
149 8
149 8
150 8
158 10
160 10
160 10
160 10
161 10
163 10
163 10
161 10
151 10
152 10
158 10
158 10
159 10
159 10
164 10
168 10
169 11
170 11
170 11
170 11
170 11
170 13
171 13
174 13
176 13
176 13
175 13
176 13
178 13
179 13
186 13
188 14
190 12
202 12
201 12
210 12
247 12
251 12
337 12
337 12
336 12
337 12
336 12
336 12
328 12
328 12
328 12
328 12
328 12
323 12
319 12
321 12
318 12
317 11
317 11
317 11
317 11
317 11
316 11
316 11
316 11
313 11
312 11
313 11
311 11
311 11
311 12
312 12
312 12
314 12
314 12
313 12
313 12
313 12
314 12
314 12
317 12
316 12
319 12
317 12
303 12
301 11
296 11
295 11
270 7
267 7
264 8
264 10
269 13
272 13
271 14
271 14
283 14
288 14
295 14
300 14
321 14
318 14
319 14
321 15
319 13
318 13
322 13
324 13
327 13
323 13
320 13
321 13
322 13
323 13
317 13
329 14
329 14
329 14
328 14
325 14
321 13
319 13
321 13
325 13
328 13
327 11
324 11
318 11
315 11
315 11
318 11
317 11
317 12
316 12
324 13
327 12
327 12
312 12
306 12
289 12
277 12
273 12
194 12
207 12
209 12
210 12
211 12
212 12
212 12
212 12
213 12
214 12
214 12
216 12
215 12
217 12
223 12
224 12
225 12
225 12
225 12
227 13
227 13
229 13
230 14
230 15
230 15
229 15
229 15
233 14
232 14
234 14
241 14
243 14
247 13
266 13
266 13
265 13
267 13
264 13
256 13
256 11
255 11
268 11
275 11
298 10
308 10
308 10
311 10
311 10
322 9
331 7
333 6
332 6
332 6
325 6
318 6
314 6
309 6
306 8
290 8
292 8
319 8
324 8
658 30
663 31
671 37
683 37
722 37
791 41
869 41
916 43
925 43
924 43
926 43
917 42
917 42
915 42
915 42
915 42
916 42
916 42
916 43
919 43
924 43
927 43
929 43
928 43
926 43
928 43
925 42
927 49
922 49
942 55
939 54
937 54
935 54
935 54
934 54
932 54
931 58
933 58
946 58
945 58
950 62
950 62
950 62
951 62
1039 62
1047 62
1202 63
1216 63
1220 63
1225 63
1225 63
1220 63
1227 63
1228 63
1233 63
1235 63
1236 63
1238 60
1265 60
1280 61
1287 61
1302 61
1307 62
1319 63
1324 63
1347 63
1519 67
1539 69
1543 69
1545 69
1546 69
1529 69
1531 69
1530 69
1539 69
1537 69
1597 69
1601 68
1595 68
1587 68
1591 68
1576 69
1567 69
1565 69
1565 69
1562 69
1550 69
1540 69
1534 69
1532 69
1531 69
1530 69
1527 69
1525 69
1516 69
1512 69
1515 69
1512 69
1493 69
1460 69
1157 38
1160 37
1122 38
1130 38
1118 39
1209 37
1203 36
1196 36
1197 36
1198 36
1199 43
1481 57
1499 61
1585 77
1633 88
1652 89
1659 90
1659 90
1656 91
1654 91
1650 91
1655 91
1666 91
1702 91
1793 96
1810 98
1804 95
1799 90
1801 90
1788 86
1806 87
1878 91
1898 91
1902 91
1907 91
1911 91
1904 87
1899 88
1890 87
1880 87
1873 86
1871 86
1868 86
1860 87
1791 89
1777 89
1657 88
1648 88
1656 88
1655 88
1654 88
1833 88
1838 88
1852 88
1887 88
1898 88
1899 89
1904 91
1901 94
1895 93
1887 93
1882 98
1881 100
1861 100
1841 100
1816 100
1682 95
1696 99
1738 100
1773 100
1827 103
1854 104
1868 104
1869 104
1876 104
1874 104
1835 104
1834 103
1833 103
1834 103
1832 103
1830 102
1861 102
1866 102
1883 103
1974 103
1995 103
1998 103
2008 103
2014 103
2028 103
2053 104
2056 105
2058 106
2052 106
2050 106
2042 106
2033 106
2029 106
2019 106
1977 105
1948 105
1922 100
1889 100
1822 96
1752 93
1712 91
1698 90
1695 90
1679 89
1661 79
1453 65
1435 59
1328 53
1312 51
1304 51
1300 49
1300 49
1270 48
1231 47
1207 47
1187 44
1169 44
1156 43
1124 40
1112 40
1077 40
1064 40
1061 40
1056 39
1041 38
990 34
982 34
980 34
974 33
970 33
969 33
969 33
969 33
969 33
968 33
968 33
965 33
959 33
957 29
953 29
939 29
932 29
920 29
903 29
871 29
747 27
732 27
723 27
676 26
671 26
663 25
652 23
621 19
617 18
612 17
609 17
605 14
599 14
590 13
552 13
536 13
454 10
420 8
402 8
361 5
335 4
328 4
322 4
318 4
316 4
312 4
308 4
308 4
290 4
285 4
269 4
223 4
208 4
185 3
125 3
116 3
103 3
82 3
76 3
60 3
31 1
24 1
21 0
21 0
21 0
21 0
20 0
18 0
18 0
18 0
17 0
17 0
17 0
16 0
15 0
15 0
15 0
13 0
13 0
13 0
11 0
9 0
8 0
6 0
7 0
9 0
11 0
14 0
20 0
20 0
25 0
26 0
29 0
30 0
35 0
40 0
41 0
44 0
44 0
44 0
46 0
54 0
80 0
91 1
92 1
97 1
100 1
107 1
108 1
117 1
118 1
120 1
121 1
128 1
128 1
128 1
128 1
131 1
136 1
160 1
170 1
171 1
190 1
197 1
198 1
199 1
205 1
207 1
209 1
215 1
217 1
218 1
218 1
218 1
219 1
219 1
219 1
220 1
220 1
220 1
220 1
220 2
221 3
221 4
222 4
223 4
223 4
222 4
224 4
226 4
227 4
229 4
229 4
230 4
231 4
233 4
235 4
259 6
265 6
278 10
282 10
287 10
290 10
293 12
307 13
312 13
314 13
315 13
316 13
317 13
317 13
318 13
319 13
319 13
320 13
324 13
324 13
324 13
325 13
327 13
329 13
332 13
335 13
339 13
361 13
383 13
400 13
429 13
444 13
461 13
456 13
464 13
493 14
517 14
527 14
529 14
528 14
527 14
530 14
529 14
528 15
519 15
496 15
488 14
487 14
484 14
481 14
476 14
475 14
466 14
465 14
476 14
486 15
495 17
558 17
581 17
590 18
602 18
602 18
584 18
579 18
580 18
565 18
563 18
561 18
559 18
569 19
568 19
568 19
564 19
565 19
566 19
567 19
570 19
570 19
574 19
575 19
579 19
580 19
580 20
580 20
580 18
577 17
578 17
578 17
581 17
592 17
637 19
634 19
634 19
631 19
631 19
635 19
641 19
769 21
817 21
856 21
840 17
839 14
841 13
840 13
838 13
842 13
842 13
828 12
830 12
833 12
847 12
857 12
863 14
866 14
878 14
877 14
880 14
886 14
886 15
889 16
889 16
889 16
888 16
889 16
880 16
876 16
878 16
847 16
803 16
776 16
762 16
742 16
734 16
729 16
708 16
678 15
650 15
646 15
645 15
645 15
645 15
643 15
665 15
677 14
777 14
785 14
786 14
785 14
788 14
788 14
822 14
825 14
828 15
827 15
815 13
800 13
774 11
730 11
712 13
699 13
691 13
687 13
687 13
686 13
678 13
695 14
697 14
697 14
700 14
684 13
685 14
686 14
688 14
694 14
698 14
700 14
702 17
704 17
701 17
704 17
701 17
703 17
710 16
728 19
729 19
731 19
729 19
719 19
715 19
716 19
679 17
675 17
673 17
675 17
660 17
642 17
622 17
486 15
468 15
439 15
452 15
472 15
482 15
494 15
498 15
509 15
514 15
513 16
528 16
605 17
609 17
601 17
595 15
596 15
587 14
584 13
581 13
575 13
572 13
569 13
569 13
568 13
567 13
564 13
571 14
573 14
569 14
582 15
582 15
581 15
581 15
581 15
583 16
588 16
592 16
596 19
604 19
617 19
622 19
615 19
637 19
614 19
592 19
583 19
505 19
502 20
500 20
499 20
499 20
497 20
464 20
460 20
458 19
457 19
457 19
457 19
455 19
455 19
455 17
455 17
454 17
455 17
451 17
451 16
451 16
432 16
433 16
435 16
437 16
437 16
438 15
439 15
438 15
432 13
446 13
447 12
445 12
444 12
445 12
440 12
440 12
429 11
421 11
401 9
400 9
401 9
401 9
399 9
396 9
394 9
393 9
391 9
384 9
396 9
396 9
401 9
400 9
395 9
389 9
389 9
374 9
365 9
349 10
339 10
347 10
339 11
337 11
334 10
316 10
240 9
240 9
247 9
256 9
274 9
279 9
279 9
278 9
281 9
281 9
281 9
282 9
292 10
301 11
308 11
299 10
298 10
295 10
281 9
282 9
285 9
294 8
352 8
399 7
400 7
407 7
410 6
413 5
415 5
486 5
484 5
516 5
585 5
643 5
664 5
690 5
695 5
715 5
727 8
735 18
759 24
761 25
762 25
766 25
767 25
769 25
769 25
770 25
770 25
772 25
771 25
772 25
783 26
787 26
791 26
794 26
793 26
796 26
794 26
789 26
780 26
774 26
771 26
771 26
771 26
765 26
765 26
766 26
766 28
766 28
767 28
767 28
768 28
770 27
769 27
769 27
768 27
768 27
774 27
775 27
784 27
792 27
805 27
804 27
792 27
790 27
792 33
792 33
794 34
790 34
786 35
782 35
775 35
777 35
773 34
766 34
761 34
764 34
763 34
760 35
760 36
756 36
752 36
744 36
734 36
736 36
753 36
813 36
830 36
873 36
881 36
882 36
875 35
884 34
889 35
893 35
889 37
885 37
871 36
829 36
817 37
824 36
792 37
711 37
700 35
670 34
640 34
614 34
602 34
561 32
557 32
517 32
499 29
491 29
495 29
479 29
473 29
457 27
451 30
450 24
427 22
426 22
426 22
425 22
425 22
426 22
433 22
449 22
451 22
566 23
576 23
581 23
582 23
579 23
577 23
579 23
581 23
584 23
584 23
584 23
583 23
578 23
576 22
576 22
575 22
574 23
575 23
577 23
577 22
575 22
574 22
574 22
576 22
577 22
590 22
596 23
596 23
595 23
588 23
587 23
578 23
743 31
780 31
782 31
785 32
780 32
773 25
774 25
779 25
778 25
778 25
779 25
779 25
776 25
775 25
776 25
773 25
769 25
769 25
768 24
770 23
770 23
766 23
762 23
759 23
742 23
716 23
672 24
661 24
621 24
613 23
609 23
601 23
598 23
593 22
590 22
590 21
587 21
583 21
577 21
537 19
516 19
510 19
510 19
509 19
521 19
524 19
530 19
533 19
536 19
533 19
531 19
528 19
524 19
522 19
522 19
520 19
522 19
523 15
523 15
522 15
523 15
522 15
523 15
522 15
517 15
508 15
497 15
486 15
381 13
371 13
369 13
368 13
368 13
367 13
361 13
359 13
354 13
354 13
354 13
355 13
356 13
361 13
365 13
403 14
410 13
419 13
421 13
423 13
423 13
423 13
419 13
419 13
415 13
406 12
404 12
401 12
398 12
389 12
372 12
348 11
195 2
187 2
187 2
185 2
187 2
187 2
187 2
179 2
179 2
179 2
179 2
179 2
176 2
177 2
181 2
182 2
188 2
192 2
193 2
195 2
195 2
194 2
194 2
271 5
272 4
278 4
293 4
301 4
305 4
319 4
334 4
341 4
353 4
354 4
394 4
413 5
456 5
504 7
654 7
901 7
922 7
929 7
940 8
942 8
931 8
926 8
924 8
922 8
920 8
921 8
920 8
920 8
920 8
920 8
921 8
920 8
918 8
918 8
919 8
919 8
919 8
919 8
918 8
918 8
918 8
918 8
922 8
931 8
938 10
949 10
952 11
952 11
954 12
954 12
954 12
954 12
954 12
965 12
963 12
960 12
958 12
954 12
949 12
922 11
911 11
908 11
907 11
905 11
905 11
905 11
905 11
903 11
905 11
913 11
909 11
909 11
909 11
908 11
903 11
902 11
898 11
905 11
901 11
905 11
904 11
904 11
903 10
903 10
903 10
906 10
911 10
914 10
914 10
918 10
916 10
917 10
910 10
908 10
905 10
900 10
899 10
895 11
890 11
788 8
772 8
760 8
752 8
746 8
744 8
738 8
722 8
714 8
698 8
677 8
630 8
521 7
494 8
455 7
418 7
240 7
235 7
231 7
226 6
225 6
226 6
227 6
236 6
237 6
239 6
257 6
257 6
270 6
610 9
673 10
686 10
696 11
710 14
721 14
720 14
721 14
725 14
725 14
725 14
724 14
724 13
718 12
716 13
710 13
701 11
693 11
690 11
690 11
690 11
691 11
691 11
693 11
694 11
681 11
678 11
678 11
679 11
681 11
696 11
702 11
708 11
711 11
713 11
714 11
714 11
714 11
718 11
717 11
713 11
706 11
705 11
702 11
715 11
728 11
733 11
739 12
750 12
744 12
744 13
746 13
745 13
748 13
825 13
842 12
898 15
904 15
898 15
894 15
894 15
886 15
885 15
880 15
878 15
878 15
877 15
877 15
883 16
885 16
883 16
882 16
878 16
877 16
877 17
870 17
868 17
864 17
869 17
869 17
869 17
873 17
871 16
869 16
866 16
864 16
864 16
862 16
862 16
861 16
856 16
857 16
855 16
857 16
847 16
836 15
823 14
771 14
748 14
710 14
406 10
397 10
388 10
382 10
376 7
376 7
378 7
379 7
378 7
378 7
378 7
378 7
378 7
378 7
377 7
376 7
376 7
376 7
376 7
377 7
377 7
377 7
380 7
378 7
378 7
379 7
381 7
381 7
380 7
379 7
362 7
356 7
348 7
347 7
347 7
346 7
346 7
347 7
345 7
344 7
379 7
374 7
380 7
374 7
360 7
358 6
357 6
341 6
356 8
362 8
360 7
353 7
346 7
342 7
280 7
273 7
223 4
223 4
226 4
229 4
229 4
230 4
229 4
229 4
235 4
243 4
243 4
244 4
237 2
236 2
230 2
221 2
212 2
209 2
204 2
202 2
200 2
200 2
198 2
197 2
211 2
208 2
211 2
215 2
217 2
220 2
220 2
222 2
221 2
221 2
245 2
246 2
248 2
244 2
250 2
250 2
249 2
252 6
251 6
247 7
248 8
248 8
249 8
248 8
246 8
245 8
247 8
246 8
246 8
247 8
247 8
247 8
248 8
250 8
252 8
256 8
256 8
256 8
267 9
268 9
268 9
269 9
269 9
272 9
281 11
313 11
342 11
365 11
381 11
536 11
544 11
938 12
953 12
958 12
965 13
972 16
981 16
987 17
1032 17
1031 17
1020 17
1020 17
1013 17
1014 17
1011 17
1010 17
1008 17
1015 17
991 15
983 15
982 15
986 15
996 15
996 15
995 15
993 15
993 15
994 16
994 16
994 16
995 16
994 16
993 16
993 16
986 16
980 16
979 16
980 16
978 16
983 16
983 16
988 16
988 16
987 16
991 16
995 16
996 16
1030 22
1039 22
1106 27
1099 27
1100 27
1096 27
1094 27
1093 27
1094 27
1096 27
1095 27
1097 27
1132 30
1111 30
1110 30
1108 30
1108 30
1103 30
1105 29
1106 30
1150 28
1154 29
1155 29
1154 29
1158 29
1570 30
1767 35
1820 38
1916 40
1920 40
1932 40
1935 40
1937 40
1940 41
1941 41
1957 41
1969 41
2013 41
2023 41
2028 41
2038 41
2039 40
2038 40
2062 40
2061 40
2052 40
2050 40
2037 38
2008 39
1957 39
1890 37
1884 38
1772 38
1792 37
1458 36
1455 36
1454 36
1448 36
1432 34
1426 34
1410 34
1378 34
1375 34
1360 34
1356 34
1475 40
1480 40
1479 40
1477 40
1478 40
1472 40
1470 40
1471 40
1469 40
1463 40
1455 40
1455 41
1455 41
1454 41
1452 41
1453 40
1451 40
1452 40
1511 40
1518 40
1519 40
1522 40
1525 40
1525 40
1536 40
1541 40
1541 40
1542 40
1545 41
1549 42
1550 42
1545 42
1530 41
1527 41
1503 40
1479 33
1479 32
1428 31
1423 31
1421 31
1424 31
1420 31
1418 31
1416 31
1408 31
1404 31
1403 31
1378 28
1379 28
1375 27
1374 27
1368 25
1362 25
1362 25
1345 24
1270 22
1218 21
1174 20
967 19
940 17
613 15
532 15
505 13
445 11
441 11
441 11
439 10
437 10
437 10
438 10
439 10
437 10
429 10
428 10
429 10
427 10
427 10
427 10
404 10
403 10
397 10
393 10
383 9
380 9
377 9
377 9
376 8
369 8
346 8
342 8
342 8
341 8
341 8
340 8
338 8
337 8
334 8
323 8
316 7
294 6
206 2
203 2
203 2
203 2
202 2
202 2
202 2
202 2
202 2
202 2
201 2
201 2
201 2
201 2
200 2
196 2
194 2
188 2
120 1
115 1
114 1
113 1
109 0
107 0
96 0
88 0
88 0
83 0
82 0
78 0
78 0
78 0
77 0
74 0
74 0
74 0
74 0
74 0
74 0
72 0
71 0
71 0
73 0
77 0
82 0
78 0
78 0
78 0
72 0
70 1
72 1
75 1
72 1
72 1
69 1
68 1
70 1
69 1
69 1
63 1
59 1
58 1
57 1
52 1
52 1
51 1
52 1
52 1
50 1
50 1
45 1
45 1
45 1
45 1
48 1
50 1
50 1
49 1
50 1
112 1
117 2
119 2
125 2
126 2
156 2
177 2
193 2
206 2
219 2
219 2
219 2
220 2
220 2
222 2
236 2
251 2
251 2
272 2
273 2
274 2
278 2
281 2
282 2
285 2
286 2
289 2
291 2
292 4
293 4
294 4
295 4
296 4
298 4
301 4
302 4
302 4
302 4
302 4
303 4
303 4
303 4
304 4
305 4
305 4
305 4
305 4
305 4
305 4
305 4
305 4
306 4
307 4
307 4
308 4
306 4
306 4
306 4
306 4
306 4
305 6
305 6
305 6
302 6
296 6
292 6
289 6
290 6
290 6
290 6
286 5
283 5
278 5
275 5
275 5
275 5
275 5
275 5
275 5
275 5
274 5
274 5
274 5
274 5
274 5
274 5
274 5
274 5
274 5
274 5
275 5
275 5
276 5
275 5
280 5
276 5
302 5
298 5
299 5
304 5
244 5
238 4
233 4
226 4
223 4
182 4
183 4
177 4
172 4
163 4
163 4
160 4
159 4
160 4
158 4
142 4
133 4
131 4
114 3
112 2
109 2
106 2
105 2
106 2
104 2
102 2
102 2
101 2
101 2
101 2
107 2
106 2
105 2
104 2
105 2
105 2
105 2
105 2
107 2
108 3
108 3
108 3
106 3
106 3
106 3
106 3
105 3
105 3
105 3
105 3
105 3
105 3
108 3
109 3
108 3
108 3
108 2
108 2
109 2
111 3
117 2
118 2
118 2
116 2
116 2
116 2
133 3
135 3
135 3
135 3
135 3
134 3
136 3
139 3
146 3
147 3
148 3
148 3
148 3
148 5
148 5
152 5
154 5
154 5
154 5
154 5
153 5
152 5
157 5
159 5
157 5
160 5
160 5
158 5
159 5
162 5
138 5
142 5
141 5
141 5
145 5
143 5
144 5
149 5
148 5
144 5
130 5
130 5
130 5
130 5
130 5
130 5
127 5
127 5
128 5
128 5
127 5
128 5
128 5
129 5
131 5
132 5
131 5
132 5
133 5
133 5
133 5
133 5
132 5
132 5
126 5
126 5
126 5
127 5
125 5
126 5
127 6
129 6
128 6
127 5
127 5
127 5
127 5
127 5
129 5
130 5
133 5
137 5
139 5
163 5
168 5
172 5
185 5
192 5
196 5
196 5
195 5
197 5
191 5
195 5
195 5
195 5
195 6
197 6
198 6
200 6
184 5
182 5
182 5
184 5
184 5
198 5
194 5
193 5
185 5
184 5
184 5
186 5
187 5
188 3
187 4
186 4
184 4
187 4
186 4
184 4
184 4
184 4
187 4
183 4
182 4
180 4
179 4
176 4
172 4
169 4
166 4
159 4
157 4
157 4
158 4
158 4
156 5
152 5
154 5
156 5
156 5
157 5
159 5
163 5
166 5
167 5
169 5
169 5
166 5
166 5
164 5
167 5
168 5
166 5
167 5
171 5
173 5
174 5
173 5
172 5
172 5
173 5
177 5
179 5
185 5
186 5
188 5
188 5
189 5
207 4
207 4
209 4
211 4
215 4
225 4
231 4
229 4
230 4
232 4
231 4
227 4
224 4
218 4
200 4
205 4
192 4
189 4
187 4
186 4
187 4
195 4
326 5
403 6
405 5
406 5
406 5
407 5
405 5
407 5
411 6
413 6
414 6
414 6
413 6
417 6
409 6
408 6
415 6
422 6
421 6
420 6
419 6
417 6
417 6
417 6
416 6
415 6
415 6
415 6
417 6
416 6
416 6
411 6
410 6
410 6
410 6
411 6
413 6
414 6
414 6
413 6
415 6
415 6
415 6
414 6
414 5
415 5
416 5
414 5
410 5
407 5
405 5
404 5
402 5
400 5
399 5
397 5
398 5
397 5
397 5
397 5
395 5
394 5
394 5
390 5
387 5
386 5
385 5
384 6
383 6
383 6
383 6
379 6
377 6
370 6
369 6
367 6
364 6
362 6
345 6
344 6
339 6
336 6
333 6
323 6
317 6
316 6
313 6
312 6
315 6
316 6
314 6
311 6
307 6
302 6
283 6
265 6
249 6
228 6
202 5
116 4
41 3
25 3
24 2
24 2
23 2
23 2
24 2
25 1
27 1
28 1
29 1
30 1
38 1
40 1
40 1
40 1
40 1
39 1
41 1
42 1
43 1
44 1
47 1
47 1
47 1
56 1
56 1
56 1
58 1
61 1
61 1
61 1
62 1
62 1
62 1
62 1
61 1
63 1
63 1
63 1
68 2
70 2
70 2
70 3
80 3
82 3
81 3
83 3
83 3
85 3
85 3
86 3
86 3
85 4
85 4
84 4
83 4
83 4
84 4
84 4
84 4
84 4
85 4
85 4
84 3
84 3
84 3
86 3
86 3
86 3
88 4
90 4
90 7
92 8
94 8
94 8
94 8
96 8
97 8
97 8
97 8
97 8
97 8
97 8
97 8
97 8
96 8
96 8
92 8
90 8
90 8
90 8
90 8
91 8
90 8
92 8
93 8
103 8
104 8
106 8
105 8
105 8
105 8
106 8
105 8
105 8
104 8
104 8
109 10
120 10
127 10
130 11
126 11
132 13
131 13
131 13
131 13
130 13
128 13
128 13
127 13
126 13
123 13
124 13
124 13
117 13
116 13
115 13
113 13
112 13
113 13
114 13
114 13
119 13
126 13
140 13
160 14
192 14
197 14
198 14
200 12
200 12
200 12
201 12
199 12
202 12
201 12
201 12
202 12
203 12
208 12
208 12
208 12
208 11
210 11
210 11
210 11
209 11
210 11
213 11
216 11
217 11
215 11
215 11
215 12
216 12
216 12
217 12
217 12
217 12
214 9
212 8
212 7
210 7
208 7
208 7
208 7
206 7
205 7
205 7
206 7
206 7
206 7
206 7
206 7
206 7
206 7
206 7
206 7
212 7
211 7
211 7
210 7
210 7
210 7
208 7
209 7
201 7
200 7
198 7
198 7
198 7
198 7
198 7
198 7
198 7
198 7
195 7
187 5
177 5
168 3
168 3
167 3
160 2
160 2
160 2
160 2
160 2
160 2
160 2
160 2
161 2
159 2
160 2
161 2
163 2
163 2
164 3
161 3
161 3
159 3
153 2
155 2
145 2
127 2
113 2
89 2
68 2
67 2
65 2
63 2
67 3
69 3
67 3
61 3
59 3
58 3
58 3
59 3
57 3
55 3
56 3
56 3
56 3
55 3
56 3
56 3
56 3
54 3
51 3
54 3
56 3
57 3
58 3
56 2
57 2
57 2
55 2
56 2
57 2
62 2
63 2
63 2
63 2
63 2
63 2
65 2
65 2
65 2
65 2
65 2
65 2
64 2
66 2
66 2
66 2
68 2
68 2
77 2
72 2
77 3
77 4
77 4
76 4
76 4
77 4
77 4
76 4
76 4
77 4
77 4
78 4
78 4
77 4
77 4
74 4
74 4
74 4
74 4
72 4
72 4
73 4
74 4
74 4
74 4
74 4
74 4
74 4
74 4
74 4
74 4
73 4
73 4
71 4
70 4
67 4
67 4
66 4
66 3
66 3
65 3
65 3
63 3
62 3
62 3
65 3
66 3
68 3
70 3
70 3
70 3
65 2
65 2
62 2
61 2
61 2
61 2
61 2
60 2
60 2
59 2
60 2
60 2
60 2
59 2
58 2
57 2
57 2
56 2
54 2
52 2
51 2
50 1
55 1
62 1
62 1
62 1
64 1
64 1
63 1
58 1
60 1
60 1
61 1
63 1
63 1
62 1
62 1
62 1
62 1
63 2
65 2
65 2
64 2
64 2
62 2
61 2
54 2
49 2
48 1
47 1
47 1
49 1
49 1
49 1
49 1
48 1
55 1
55 1
55 1
55 1
55 1
54 1
57 1
58 1
58 1
59 1
61 1
61 2
61 2
61 2
60 2
62 2
62 2
63 2
65 3
65 3
65 3
65 3
65 3
65 3
65 4
65 4
68 5
78 5
78 5
81 5
83 5
83 5
83 5
85 5
87 5
87 9
99 12
99 14
95 14
93 20
91 20
93 21
92 21
92 21
93 21
94 25
99 25
140 28
151 28
154 28
155 28
155 28
156 28
157 28
156 27
156 27
156 27
157 27
157 27
157 27
158 28
157 28
157 28
156 28
155 28
153 28
147 28
143 28
146 28
149 28
153 28
159 28
160 29
162 29
160 29
159 29
160 29
157 29
157 29
159 29
164 30
168 30
168 30
177 31
182 31
185 31
186 31
186 31
186 33
202 67
205 79
207 83
214 87
214 92
214 95
214 96
213 102
215 102
213 103
212 103
207 104
208 104
208 105
209 105
212 107
214 112
214 119
214 124
214 125
215 130
212 132
212 134
213 134
213 135
212 135
210 134
209 134
208 134
208 134
208 134
208 134
208 134
209 133
209 133
209 134
208 133
207 133
200 133
199 136
197 136
195 136
195 136
194 140
191 140
189 139
190 140
182 133
183 135
185 137
186 137
186 137
184 136
184 135
185 135
183 134
180 132
171 133
130 130
122 130
120 130
120 130
120 130
119 131
118 132
118 132
118 132
118 132
118 131
117 131
117 131
117 131
116 131
116 131
116 131
116 131
114 134
117 134
118 134
118 134
110 134
109 134
103 134
101 133
100 134
101 133
102 133
102 137
101 137
101 137
98 136
90 134
86 136
78 136
73 135
71 134
69 132
69 131
68 131
65 123
57 86
54 78
51 76
40 72
38 73
38 69
38 69
39 63
39 61
41 60
41 60
41 69
40 68
39 66
39 66
40 64
40 61
37 58
37 58
37 58
37 51
37 50
36 50
36 49
36 49
36 48
36 48
36 48
36 48
36 48
42 48
42 48
41 48
41 49
41 48
44 48
44 48
43 46
44 45
44 44
44 44
44 44
44 44
45 40
45 41
44 41
45 39
44 39
42 38
40 35
39 35
39 34
39 34
39 34
40 34
41 36
41 36
41 36
41 36
41 38
41 39
41 39
41 39
42 37
42 37
42 37
44 38
44 38
44 38
46 39
46 39
46 39
46 39
47 39
46 39
46 38
46 43
44 46
45 46
45 49
44 49
43 50
43 51
43 51
43 51
43 52
42 53
41 50
41 51
41 51
39 51
39 51
39 49
39 49
37 50
35 49
35 49
36 49
36 49
36 49
36 48
36 48
36 48
36 47
36 47
36 48
37 48
36 48
38 48
39 48
40 48
47 38
51 38
51 38
58 38
59 36
58 34
63 32
65 32
68 32
72 32
78 32
86 35
86 35
88 37
88 37
88 37
88 38
89 38
89 38
83 38
83 38
83 38
82 37
82 37
79 37
79 37
78 37
76 37
76 39
76 42
76 42
76 41
76 42
76 42
76 41
75 41
75 41
75 41
74 41
76 42
76 43
76 44
75 44
76 50
74 49
74 52
74 51
74 51
74 50
74 50
74 50
74 51
74 51
74 51
74 51
72 52
72 51
72 51
70 52
69 52
69 52
69 53
69 53
69 53
68 52
68 45
66 41
68 41
68 39
68 39
69 39
69 37
69 35
69 35
69 35
69 34
69 34
69 34
69 35
69 35
69 35
69 34
69 34
69 34
70 34
71 39
75 39
75 40
76 40
76 40
76 40
76 40
76 40
76 39
76 39
74 39
73 39
70 39
69 39
68 39
63 39
95 43
95 43
87 43
85 43
84 43
78 43
78 43
74 43
68 43
67 43
59 40
61 41
60 39
60 39
60 39
60 39
60 39
60 39
60 39
60 39
60 39
60 39
62 39
62 39
64 39
69 39
69 38
72 37
72 34
72 34
72 34
72 33
72 33
72 33
72 33
72 33
73 33
72 33
71 32
71 31
71 30
75 30
75 23
75 23
75 20
75 20
75 20
75 20
75 20
75 20
75 19
75 19
75 19
76 18
76 16
76 16
75 16
76 16
76 15
76 16
76 16
76 16
76 17
76 17
76 17
76 17
75 17
75 17
75 17
74 17
75 17
76 15
76 15
76 15
76 15
76 15
76 15
76 14
76 14
76 15
76 15
76 15
74 15
73 15
73 10
71 11
71 10
70 10
70 10
70 10
70 10
70 10
70 10
70 10
69 10
65 10
65 10
63 10
56 10
53 10
28 6
30 6
30 6
35 6
37 6
37 7
38 13
39 13
39 13
36 13
36 13
34 12
34 12
34 11
34 12
34 12
34 12
34 12
34 12
34 12
34 12
34 12
33 12
33 12
33 12
29 12
29 12
26 12
26 12
26 12
26 12
26 12
26 12
26 12
28 12
28 12
27 12
26 12
26 12
27 12
27 12
24 12
24 12
24 12
24 12
24 12
24 13
24 14
24 14
24 14
24 14
24 14
25 15
24 15
24 15
24 15
24 15
24 15
24 15
24 14
24 15
24 15
24 14
24 14
24 14
21 14
20 14
20 14
20 14
20 14
20 14
19 14
19 14
19 14
20 14
20 14
21 14
21 14
22 14
23 13
24 13
24 13
24 13
30 22
28 21
30 22
30 23
30 24
30 25
30 25
30 25
28 25
28 25
28 25
26 25
26 25
26 25
26 25
26 25
26 25
28 25
27 25
26 25
25 25
23 25
23 21
21 19
21 19
21 19
21 19
21 19
21 19
21 19
21 19
21 18
21 18
21 18
21 18
21 18
21 18
21 18
21 18
21 18
21 18
21 18
21 18
21 18
21 18
21 18
21 18
21 19
21 19
21 19
21 19
19 19
19 19
19 19
18 19
18 19
18 19
18 19
17 19
17 20
17 20
16 20
16 20
16 19
16 18
16 18
16 18
16 18
16 18
16 17
16 17
16 18
16 18
16 18
15 18
15 18
15 18
15 17
15 17
15 17
15 17
15 17
15 17
15 17
15 17
15 17
15 17
15 17
15 17
16 17
16 17
15 17
15 18
15 20
15 20
15 20
14 21
14 20
13 18
12 17
6 11
6 11
6 11
6 10
6 9
6 8
6 8
6 8
6 8
6 8
6 8
6 8
6 8
6 8
8 8
8 8
8 9
6 9
6 9
6 9
6 9
6 9
6 8
6 8
6 8
6 8
6 8
6 8
6 8
6 8
6 8
6 8
6 8
6 8
6 8
6 8
6 8
6 8
6 8
6 8
6 8
6 8
6 8
6 8
6 8
6 8
6 7
6 9
6 9
6 9
6 9
6 9
6 9
6 9
6 9
6 9
6 9
6 8
6 8
6 8
6 8
6 9
6 10
6 12
6 14
6 15
6 15
6 15
6 15
6 15
8 15
8 14
8 14
8 14
8 14
8 14
8 14
8 14
8 14
8 14
8 14
9 14
9 14
9 14
9 14
10 14
10 14
12 13
11 13
10 13
10 13
10 12
10 13
9 12
9 12
8 12
8 12
8 12
8 13
8 13
8 13
8 13
8 13
8 13
8 13
8 13
8 13
8 13
8 13
7 14
7 15
7 15
7 15
7 16
6 15
6 16
6 18
6 19
6 19
6 19
6 19
6 19
6 20
6 20
6 20
6 20
6 20
6 21
6 21
6 21
6 21
6 22
6 25
6 25
6 25
6 25
6 25
6 25
6 25
6 25
6 25
6 25
6 25
6 26
6 27
6 29
6 30
6 28
6 28
6 28
6 28
6 28
6 28
6 28
6 28
6 28
6 28
6 28
6 28
6 28
6 27
6 26
6 25
6 24
6 24
6 23
6 23
6 23
6 23
4 23
4 23
4 23
4 23
4 23
4 23
4 23
4 23
4 23
4 23
4 24
4 25
3 25
3 25
3 25
2 25
2 25
2 25
0 25
0 25
0 25
0 25
0 24
0 24
0 24
0 24
0 24
1 23
2 23
2 22
2 22
2 22
2 22
2 22
3 22
3 22
3 19
3 19
3 18
4 18
4 18
4 18
4 18
4 18
4 17
4 16
4 15
4 15
4 15
4 16
4 16
4 16
4 16
4 15
4 15
4 15
4 15
4 16
4 15
4 17
4 21
4 20
4 19
4 19
4 19
4 19
4 19
6 19
6 19
6 21
6 22
6 22
6 22
6 23
6 23
6 23
6 21
6 20
6 20
6 20
6 20
6 20
6 20
6 21
6 21
6 22
6 22
6 22
6 22
6 22
6 22
6 23
6 23
6 21
6 22
6 22
6 22
6 22
6 22
6 22
6 22
6 22
6 22
7 22
9 22
9 22
9 22
9 22
9 22
9 21
9 20
9 20
10 20
10 20
10 20
10 20
10 20
10 20
10 20
10 20
10 20
10 20
9 20
9 20
9 20
9 20
8 20
8 20
8 20
8 20
8 20
8 20
8 20
8 20
7 20
7 20
7 21
7 21
6 21
6 21
6 22
6 23
6 23
6 23
6 23
6 21
6 21
6 19
6 18
6 18
6 18
6 18
6 18
6 16
6 16
6 16
6 16
7 15
7 15
7 13
7 9
7 9
7 9
7 9
7 9
7 9
7 9
5 9
5 9
5 9
5 8
5 8
5 7
5 8
5 8
5 8
5 8
5 8
5 8
5 8
5 8
5 8
5 8
5 7
5 7
5 6
5 6
5 6
5 6
5 6
5 6
5 5
5 5
5 5
5 4
5 4
5 4
5 4
5 4
5 4
5 4
4 4
4 4
3 4
2 4
2 4
2 4
2 4
2 4
2 4
2 4
2 4
1 4
1 4
1 5
1 5
1 5
1 5
1 6
2 6
2 6
2 6
2 6
2 6
2 6
2 6
2 6
2 6
2 6
2 6
2 6
2 6
2 5
2 5
2 5
2 5
2 5
2 5
2 5
2 5
2 3
2 3
2 3
2 3
2 3
2 3
2 3
2 3
2 3
2 3
2 3
2 3
2 3
2 3
1 3
1 3
1 3
1 3
1 3
1 3
1 3
1 4
1 4
1 4
1 4
1 4
1 4
1 4
1 4
1 4
1 4
1 4
1 4
1 5
1 5
1 7
2 7
2 8
2 8
3 8
3 8
3 8
3 8
3 8
3 8
3 8
3 8
3 8
3 8
3 8
3 8
3 8
3 8
3 8
2 8
2 8
4 8
4 8
4 8
5 8
5 8
5 8
5 8
5 8
5 8
5 8
5 8
5 8
6 9
6 9
6 9
6 9
6 10
6 10
7 9
7 9
7 9
7 9
6 8
6 8
6 8
6 8
6 8
6 8
6 8
6 8
6 8
6 8
6 8
6 8
6 8
8 8
9 8
10 9
10 9
10 9
10 9
10 9
10 9
10 9
10 9
10 9
10 9
10 9
10 9
10 9
10 9
10 9
10 9
10 9
10 9
10 9
10 15
10 15
10 16
10 16
10 16
10 16
10 16
10 16
10 16
10 15
10 15
10 15
10 15
10 15
10 15
10 15
10 15
10 15
10 17
10 16
10 16
10 15
10 14
10 13
10 13
10 12
10 12
9 12
9 12
9 12
9 12
9 12
9 12
9 12
9 12
9 12
9 12
9 12
9 12
9 12
9 12
9 12
9 12
9 12
7 14
7 14
7 14
6 14
6 14
6 14
6 14
6 14
6 14
6 14
6 14
6 14
5 13
5 13
5 13
5 13
5 13
5 13
4 13
4 13
4 13
4 13
4 13
4 13
4 13
4 13
4 13
4 13
4 13
4 13
4 13
4 13
2 14
2 14
2 14
0 13
0 13
0 13
0 13
0 15
0 15
0 15
0 15
0 15
0 15
0 15
0 15
0 15
0 15
0 15
0 15
0 15
0 15
0 15
0 15
0 15
0 8
0 8
0 8
0 9
0 9
0 9
0 9
0 9
0 9
0 9
0 9
0 9
2 8
2 7
2 7
2 7
2 7
2 7
2 7
2 7
2 7
2 7
2 7
2 7
2 8
2 8
2 8
2 8
2 8
2 8
2 8
2 8
2 8
2 8
2 8
2 8
2 8
2 8
2 8
2 8
2 8
2 8
2 8
2 8
2 6
2 6
2 6
2 6
2 6
2 6
2 6
2 6
2 6
2 6
2 6
2 6
2 6
2 6
2 6
2 6
2 6
2 6
2 6
2 6
2 6
2 6
2 6
2 6
2 6
2 6
2 6
2 6
2 6
2 6
2 5
2 5
2 5
2 5
2 5
2 5
2 5
2 5
2 5
2 3
2 3
2 3
2 3
2 3
2 3
2 3
2 3
2 3
2 3
2 3
2 3
2 3
2 3
2 3
2 3
2 3
2 3
2 3
2 3
2 2
2 2
2 2
2 2
2 2
2 2
2 2
0 2
0 2
0 2
0 2
0 2
0 2
0 2
0 2
0 2
0 2
0 2
0 2
0 2
0 2
0 1
0 1
0 1
0 1
0 1
0 1
0 1
0 1
0 1
0 1
0 1
0 1
0 1
0 1
0 1
0 1
0 1
0 1
0 1
0 1
0 1
0 1
0 1
0 1
0 1
0 1
0 1
0 1
0 1
0 1
0 1
0 0
0 0
0 0
0 0
0 0
0 0
0 0
0 0
0 0
0 0
0 0
0 0
0 0
0 0
0 0
0 0
0 0
0 0
0 0
0 0
0 0
0 0
0 0
0 0
0 0
0 0
0 0
0 0
0 0
0 0
0 0
0 0
0 0
0 0
0 0
0 0
0 0
0 0
0 0
0 0
0 0
0 0
0 0
0 0
0 0
0 0
0 0
0 0
0 0
0 0
0 0
0 0
0 0
0 1
0 1
0 1
0 1
0 2
0 2
0 2
0 2
0 2
0 2
0 2
0 2
0 2
0 2
0 2
0 2
0 2
0 2
0 2
0 2
0 2
0 2
0 2
0 2
0 2
0 2
0 2
0 2
0 2
0 2
0 2
0 2
0 2
0 2
0 2
0 2
0 2
0 2
0 2
0 2
0 2
0 2
0 2
0 2
0 2
0 2
0 2
0 2
0 2
0 2
0 2
0 2
0 2
0 2
0 2
0 2
0 2
0 2
0 2
0 2
0 2
0 2
0 2
0 2
0 2
0 2
0 2
0 2
0 2
0 2
0 2
0 2
0 2
0 2
0 2
0 2
0 2
0 2
0 2
0 2
0 2
0 2
0 2
0 2
0 2
0 2
0 2
0 2
0 2
0 2
0 2
0 2
0 2
0 2
0 2
0 2
0 2
0 2
0 2
0 2
0 1
0 1
0 1
0 0
0 0
0 0
0 0
0 0
0 0
0 0
0 0
0 0
0 0
0 0
0 0
0 0
0 0
0 0
0 0
0 0
0 0
0 0
0 0
0 0
0 0
0 0
0 0
0 0
0 0
0 0
0 0
0 0
0 0
0 0
0 0
0 0
0 0
0 0
0 0
0 0
0 0
0 0
0 0
0 0
0 0
0 0
0 0
0 0
0 0
0 0
0 0
0 0
0 0
0 0
0 0
0 0
0 0
0 0
0 0
0 0
0 0
0 0
0 0
0 0
0 0
0 0
0 0
0 0
0 0
0 0
0 0
0 0
0 0
0 0
0 0
0 0
0 0
0 0
0 0
0 0
0 0
0 0
0 0
0 0
0 0
0 0
0 0
0 0
0 0
0 0
0 0
0 0
0 0
0 0
0 0
0 0
0 0
0 0
0 0
0 0
0 0
0 0
0 0
0 0
0 0
0 0
0 0
0 0
0 0
1 0
1 0
1 0
1 0
1 0
1 0
1 0
2 0
2 0
3 0
3 0
3 0
3 0
3 0
4 0
5 0
8 0
28 0
32 0
34 0
34 0
34 0
34 0
34 0
34 0
34 0
34 0
34 0
35 0
35 0
35 0
35 0
35 0
35 0
35 0
35 0
35 0
35 0
35 0
35 0
35 0
35 0
35 0
35 0
35 0
35 0
35 0
35 0
36 0
36 0
42 0
45 0
45 0
45 0
45 0
45 0
45 0
46 0
46 0
47 0
47 0
47 0
47 0
47 0
47 0
47 0
47 0
47 0
47 0
48 0
48 0
48 0
48 0
48 0
48 0
48 0
48 0
48 0
50 0
50 0
50 0
53 0
53 0
53 0
55 0
55 0
55 0
55 0
55 0
55 0
55 0
55 0
55 0
55 0
55 0
55 0
55 0
55 0
55 0
55 0
54 0
54 0
54 0
54 0
54 0
54 0
50 0
49 0
49 0
48 0
48 0
49 0
57 0
58 0
56 0
55 0
53 0
36 0
34 0
32 0
32 0
32 0
33 0
33 0
33 0
33 0
33 0
33 0
32 0
32 0
32 0
32 0
32 0
32 0
32 0
32 0
32 0
32 0
32 0
32 0
32 0
32 0
32 0
32 0
32 0
32 0
32 0
32 0
31 0
31 0
24 0
23 0
23 0
23 0
23 0
23 0
23 0
22 0
22 0
21 0
21 0
21 0
21 0
21 0
21 0
21 0
21 0
21 0
21 0
20 0
20 0
20 0
20 0
20 0
20 0
20 0
20 0
20 0
18 0
18 0
17 0
15 0
15 0
15 0
13 0
13 0
13 0
13 0
13 0
13 0
13 0
13 0
13 0
13 0
13 0
13 0
13 0
13 0
13 0
13 0
13 0
13 0
13 0
14 0
14 0
14 0
13 0
12 0
13 0
13 0
13 0
12 0
5 0
4 0
4 0
3 0
3 0
3 0
3 0
3 0
3 0
3 0
3 0
3 0
3 0
3 0
3 0
3 0
3 0
3 0
3 0
3 0
3 0
3 0
3 0
3 0
3 0
3 0
3 0
3 0
3 0
3 0
3 0
3 0
3 0
3 0
3 0
3 0
3 0
3 0
2 0
2 0
2 0
2 0
2 0
2 0
2 0
2 0
2 0
2 0
2 0
2 0
2 0
2 0
2 0
2 0
2 0
2 0
2 0
2 0
2 0
2 0
2 0
2 0
2 0
2 0
2 0
2 0
2 0
2 0
2 0
2 0
2 0
2 0
2 0
2 0
2 0
2 0
2 0
2 0
2 0
2 0
2 0
2 0
2 0
2 0
2 0
2 0
2 0
2 0
2 0
2 0
2 0
1 0
1 0
1 0
1 0
1 0
0 0
0 0
0 0
0 0
0 0
0 0
0 0
0 0
0 0
0 0
0 0
0 0
0 0
0 0
0 0
0 0
0 0
0 0
0 0
0 0
0 0
0 0
0 0
0 0
0 0
0 0
0 0
0 0
0 0
0 0
0 0
0 0
0 0
0 0
0 0
0 0
0 0
0 0
0 0
0 0
0 0
0 0
0 0
0 0
0 0
0 0
0 0
0 0
0 0
0 0
0 0
0 0
0 0
0 0
0 0
0 0
0 0
0 0
0 0
0 0
0 0
0 0
0 0
0 0
0 0
0 0
0 0
0 0
0 0
0 0
0 0
0 0
0 0
0 0
0 0
0 0
0 0
0 0
0 0
0 0
0 0
0 0
0 0
0 0
0 0
0 0
0 0
0 0
0 0
0 0
0 0
0 0
0 0
0 0
0 0
0 0
0 0
0 0
0 0
0 0
0 0
0 0
0 0
0 0
0 0
0 0
0 0
0 0
0 0
0 0
0 0
0 0
0 0
0 0
0 0
0 0
0 0
0 0
0 0
0 0
0 0
0 0
0 0
0 0
0 0
0 0
0 0
0 0
0 0
0 0
0 0
0 0
0 0
0 0
0 0
0 0
0 0
0 0
0 0
0 0
0 0
0 0
0 0
0 0
0 0
0 0
0 0
0 0
0 0
0 0
0 0
0 0
0 0
0 0
0 0
0 0
0 0
0 0
0 0
0 0
0 0
0 0
0 0
0 0
0 0
0 0
0 0
0 0
0 0
0 0
0 0
0 0
0 0
0 0
0 0
0 0
0 0
0 0
0 0
0 0
0 0
0 0
0 0
0 0
0 0
0 0
0 0
0 0
0 0
0 0
0 0
0 0
0 0
0 0
0 0
0 0
0 0
0 0
0 0
0 0
0 0
0 0
0 0
0 0
0 0
0 0
0 0
0 0
0 0
0 0
0 0
0 0
0 0
0 0
0 0
0 0
0 0
0 0
0 0
0 0
0 0
0 0
0 0
0 0
0 0
0 0
0 0
0 0
0 0
0 0
0 0
0 0
0 0
0 0
0 0
0 0
0 0
0 0
0 0
0 0
0 0
0 0
0 0
0 0
0 0
0 0
0 0
0 0
0 0
0 0
0 0
0 0
0 0
0 0
0 0
0 0
0 0
0 0
0 0
0 0
0 0
0 0
0 0
0 0
0 0
0 0
0 0
0 0
0 0
0 0
0 0
0 0
0 0
0 0
0 0
0 0
0 0
0 0
0 0
0 0
0 0
0 0
0 0
0 0
0 0
0 0
0 0
0 0
0 0
0 0
0 0
0 0
0 0
0 0
0 0
0 0
0 0
0 0
0 0
0 0
0 0
0 0
0 0
0 0
0 0
0 0
0 0
0 0
0 0
0 0
0 0
0 0
0 0
0 0
0 0
0 0
0 0
0 0
0 0
0 0
0 0
0 0
0 0
0 0
0 0
0 0
0 0
0 0
0 0
0 0
0 0
0 0
0 0
0 0
0 0
0 0
0 0
0 0
0 0
0 0
0 0
0 0
0 0
0 0
0 0
0 0
0 0
0 0
0 0
0 0
0 0
0 0
0 0
0 0
0 0
0 0
0 0
0 0
0 0
0 0
0 0
0 0
0 0
0 0
0 0
0 0
0 0
0 0
0 0
0 0
0 0
0 0
0 0
0 0
0 0
0 0
0 0
0 0
0 0
0 0
0 0
0 0
0 0
0 0
0 0
0 0
0 0
0 0
0 0
0 0
0 0
0 0
0 0
0 0
0 0
0 0
0 0
0 0
0 0
0 0
0 0
0 0
0 0
0 0
0 0
0 0
0 0
0 0
0 0
0 0
0 0
0 0
0 0
0 0
0 0
0 0
0 0
0 0
0 0
0 0
0 0
0 0
0 0
0 0
0 0
0 0
0 0
0 0
0 0
0 0
0 0
0 0
0 0
0 0
0 0
0 0
0 0
0 0
0 0
0 0
0 0
0 0
0 0
0 0
0 0
0 0
0 0
0 0
0 0
0 0
0 0
0 0
0 0
0 0
0 0
0 0
0 0
0 0
0 0
0 0
0 0
0 0
0 0
0 0
0 0
0 0
0 0
0 0
0 0
0 0
0 0
0 0
0 0
0 0
0 0
0 0
0 0
0 0
0 0
0 0
0 0
0 0
0 0
0 0
0 0
0 0
0 0
0 0
0 0
0 0
0 0
0 0
0 0
0 0
0 0
0 0
0 0
0 0
0 0
0 0
0 0
0 0
0 0
0 0
0 0
0 0
0 0
0 0
0 0
0 0
0 0
0 0
0 0
0 0
0 0
0 0
0 0
0 0
0 0
0 0
0 0
0 0
0 0
0 0
0 0
0 0
0 0
0 0
0 0
0 0
0 0
0 0
0 0
0 0
0 0
0 0
0 0
0 0
0 0
0 0
0 0
0 0
0 0
0 0
0 0
0 0
0 0
0 0
0 0
0 0
0 0
0 0
0 0
0 0
0 0
0 0
0 0
0 0
0 0
0 0
0 0
0 0
0 0
0 0
0 0
0 0
0 0
0 0
0 0
0 0
0 0
0 0
0 0
0 0
0 0
0 0
0 0
0 0
0 0
0 0
0 0
0 0
0 0
0 0
0 0
0 0
0 0
0 0
0 0
0 0
0 0
0 0
0 0
0 0
0 0
0 0
0 0
0 0
0 0
0 0
0 0
0 0
0 0
0 0
0 0
0 0
0 0
0 0
0 0
0 0
0 0
0 0
0 0
0 0
0 0
0 0
0 0
0 0
0 0
0 0
0 0
0 0
0 0
0 0
0 0
0 0
0 0
0 0
0 0
0 0
0 0
0 0
0 0
0 0
0 0
0 0
0 0
0 0
0 0
0 0
0 0
0 0
0 0
0 0
0 0
0 0
0 0
0 0
0 0
0 0
0 0
0 0
0 0
0 0
0 0
0 0
0 0
0 0
0 0
0 0
0 0
0 0
0 0
0 0
0 0
0 0
0 0
0 0
0 0
0 0
0 0
0 0
0 0
0 0
0 0
0 0
0 0
0 0
0 0
0 0
0 0
0 0
0 0
0 0
0 0
0 0
0 0
0 0
0 0
0 0
0 0
0 0
0 0
0 0
0 0
0 0
0 0
0 0
0 0
0 0
0 0
0 0
0 0
0 0
0 0
0 0
0 0
0 0
0 0
0 0
0 0
0 0
0 0
0 0
0 0
0 0
0 0
0 0
0 0
0 0
0 0
0 0
0 0
0 0
0 0
0 0
0 0
0 0
0 0
0 0
0 0
0 0
0 0
0 0
0 0
0 0
0 0
0 0
0 0
0 0
0 0
0 0
0 0
0 0
0 0
0 0
0 0
0 0
0 0
0 0
0 0
0 0
0 0
0 0
0 0
0 0
0 0
0 0
0 0
0 0
0 0
0 0
0 0
0 0
0 0
0 0
0 0
0 0
0 0
0 0
0 0
0 0
0 0
0 0
0 0
0 0
0 0
0 0
0 0
0 0
0 0
0 0
0 0
0 0
0 0
0 0
0 0
0 0
0 0
0 0
0 0
0 0
0 0
0 0
0 0
0 0
0 0
0 0
0 0
0 0
0 0
0 0
0 0
0 0
0 0
0 0
0 0
0 0
0 0
0 0
0 0
0 0
0 0
0 0
0 0
0 0
0 0
0 0
0 0
0 0
0 0
0 0
0 0
0 0
0 0
0 0
0 0
0 0
0 0
0 0
0 0
0 0
0 0
0 0
0 0
0 0
0 0
0 0
0 0
0 0
0 0
0 0
0 0
0 0
0 0
0 0
0 0
0 0
0 0
0 0
0 0
0 0
0 0
0 0
0 0
0 0
0 0
0 0
0 0
0 0
0 0
0 0
0 0
0 0
0 0
0 0
0 0
0 0
0 0
0 0
0 0
0 0
0 0
0 0
0 0
0 0
0 0
0 0
0 0
0 0
0 0
0 0
0 0
0 0
0 0
0 0
0 0
0 0
0 0
0 0
0 0
0 0
0 0
0 0
0 0
0 0
0 0
0 0
0 0
0 0
0 0
0 0
0 0
0 0
0 0
0 0
0 0
0 0
0 0
0 0
0 0
0 0
0 0
0 0
0 0
0 0
0 0
0 0
0 0
0 0
0 0
0 0
0 0
0 0
0 0
0 0
0 0
0 0
0 0
0 0
0 0
0 0
0 0
0 0
0 0
0 0
0 0
0 0
0 0
0 0
0 0
0 0
0 0
0 0
0 0
0 0
0 0
0 0
0 0
0 0
0 0
0 0
0 0
0 0
0 0
0 0
0 0
0 0
0 0
0 0
0 0
0 0
0 0
0 0
0 0
0 0
0 0
0 0
0 0
0 0
0 0
0 0
0 0
0 0
0 0
0 0
0 0
0 0
0 0
0 0
0 0
0 0
0 0
0 0
0 0
0 0
0 0
0 0
0 0
0 0
0 0
0 0
0 0
0 0
0 0
0 0
0 0
0 0
0 0
0 0
0 0
0 0
0 0
0 0
0 0
0 0
0 0
0 0
0 0
0 0
0 0
0 0
0 0
0 0
0 0
0 0
0 0
0 0
0 0
0 0
0 0
0 0
0 0
0 0
0 0
0 0
0 0
0 0
0 0
0 0
0 0
0 0
0 0
0 0
0 0
0 0
0 0
0 0
0 0
0 0
0 0
0 0
0 0
0 0
0 0
0 0
0 0
0 0
0 0
0 0
0 0
0 0
0 0
0 0
0 0
0 0
0 0
0 0
0 0
0 0
0 0
0 0
0 0
0 0
0 0
0 0
0 0
0 0
0 0
0 0
0 0
0 0
0 0
0 0
0 0
0 0
0 0
0 0
0 0
0 0
0 0
0 0
0 0
0 0
0 0
0 0
0 0
0 0
0 0
0 0
0 0
0 0
0 0
0 0
0 0
0 0
0 0
0 0
0 0
0 0
0 0
0 0
0 0
0 0
0 0
0 0
0 0
0 0
0 0
0 0
0 0
0 0
0 0
0 0
0 0
0 0
0 0
0 0
0 0
0 0
0 0
0 0
0 0
0 0
0 0
0 0
0 0
0 0
0 0
0 0
0 0
0 0
0 0
0 0
0 0
0 0
0 0
0 0
0 0
0 0
0 0
0 0
0 0
0 0
0 0
0 0
0 0
0 0
0 0
0 0
0 0
0 0
0 0
0 0
0 0
0 0
0 0
0 0
0 0
0 0
0 0
0 0
0 0
0 0
0 0
0 0
0 0
0 0
0 0
0 0
0 0
0 0
0 0
0 0
0 0
0 0
0 0
0 0
0 0
0 0
0 0
0 0
0 0
0 0
0 0
0 0
0 0
0 0
0 0
0 0
0 0
0 0
0 0
0 0
0 0
0 0
0 0
0 0
0 0
0 0
0 0
0 0
0 0
0 0
0 0
0 0
0 0
0 0
0 0
0 0
0 0
0 0
0 0
0 0
0 0
0 0
0 0
0 0
0 0
0 0
0 0
0 0
0 0
0 0
0 0
0 0
0 0
0 0
0 0
0 0
0 0
0 0
0 0
0 0
0 0
0 0
0 0
0 0
0 0
0 0
0 0
0 0
0 0
0 0
0 0
0 0
0 0
0 0
0 0
0 0
0 0
0 0
0 0
0 0
0 0
0 0
0 0
0 0
0 0
0 0
0 0
0 0
0 0
0 0
0 0
0 0
0 0
0 0
0 0
0 0
0 0
0 0
0 0
0 0
0 0
0 0
0 0
0 0
0 0
0 0
0 0
0 0
0 0
0 0
0 0
0 0
0 0
0 0
0 0
0 0
0 0
0 0
0 0
0 0
0 0
0 0
0 0
0 0
0 0
0 0
0 0
0 0
0 0
0 0
0 0
0 0
0 0
0 0
0 0
0 0
0 0
0 0
0 0
0 0
0 0
0 0
0 0
0 0
0 0
0 0
0 0
0 0
0 0
0 0
0 0
0 0
0 0
0 0
0 0
0 0
0 0
0 0
0 0
0 0
0 0
0 0
0 0
0 0
0 0
0 0
0 0
0 0
0 0
0 0
0 0
0 0
0 0
0 0
0 0
0 0
0 0
0 0
0 0
0 0
0 0
0 0
0 0
0 0
0 0
0 0
0 0
0 0
0 0
0 0
0 0
0 0
0 0
0 0
0 0
0 0
0 0
0 0
0 0
0 0
0 0
0 0
0 0
0 0
0 0
0 0
0 0
0 0
0 0
0 0
0 0
0 0
0 0
0 0
0 0
0 0
0 0
0 0
0 0
0 0
0 0
0 0
0 0
0 0
0 0
0 0
0 0
0 0
0 0
0 0
0 0
0 0
0 0
0 0
0 0
0 0
0 0
0 0
0 0
0 0
0 0
0 0
0 0
0 0
0 0
0 0
0 0
0 0
0 0
0 0
0 0
0 0
0 0
0 0
0 0
0 0
0 0
0 0
0 0
0 0
0 0
0 0
0 0
0 0
0 0
0 0
0 0
0 0
0 0
0 0
0 0
0 0
0 0
0 0
0 0
0 0
0 0
0 0
0 0
0 0
0 0
0 0
0 0
0 0
0 0
0 0
0 0
0 0
0 0
0 0
0 0
0 0
0 0
0 0
0 0
0 0
0 0
0 0
0 0
0 0
0 0
0 0
0 0
0 0
0 0
0 0
0 0
0 0
0 0
0 0
0 0
0 0
0 0
0 0
0 0
0 0
0 0
0 0
0 0
0 0
0 0
0 0
0 0
0 0
0 0
0 0
0 0
0 0
0 0
0 0
0 0
0 0
0 0
0 0
0 0
0 0
0 0
0 0
0 0
0 0
0 0
0 0
0 0
0 0
0 0
0 0
0 0
0 0
0 0
0 0
0 0
0 0
0 0
0 0
0 0
0 0
0 0
0 0
0 0
0 0
0 0
0 0
0 0
0 0
0 0
0 0
0 0
0 0
0 0
0 0
0 0
0 0
0 0
0 0
0 0
0 0
0 0
0 0
0 0
0 0
0 0
0 0
0 0
0 0
0 0
0 0
0 0
0 0
0 0
0 0
0 0
0 0
0 0
0 0
0 0
0 0
0 0
0 0
0 0
0 0
0 0
0 0
0 0
0 0
0 0
0 0
0 0
0 0
0 0
0 0
0 0
0 0
0 0
0 0
0 0
0 0
0 0
0 0
0 0
0 0
0 0
0 0
0 0
0 0
0 0
0 0
0 0
0 0
0 0
0 0
0 0
0 0
0 0
0 0
0 0
0 0
0 0
0 0
0 0
0 0
0 0
0 0
0 0
0 0
0 0
0 0
0 0
0 0
0 0
0 0
0 0
0 0
0 0
0 0
0 0
0 0
0 0
0 0
0 0
0 0
0 0
0 0
0 0
0 0
0 0
0 0
0 0
0 0
0 0
0 0
0 0
0 0
0 0
0 0
0 0
0 0
0 0
0 0
0 0
0 0
0 0
0 0
0 0
0 0
0 0
0 0
0 0
0 0
0 0
0 0
0 0
0 0
0 0
0 0
0 0
0 0
0 0
0 0
0 0
0 0
0 0
0 0
0 0
0 0
0 0
0 0
0 0
0 0
0 0
0 0
0 0
0 0
0 0
0 0
0 0
0 0
0 0
0 0
0 0
0 0
0 0
0 0
0 0
0 0
0 0
0 0
0 0
0 0
0 0
0 0
0 0
0 0
0 0
0 0
0 0
0 0
0 0
0 0
0 0
0 0
0 0
0 0
0 0
0 0
0 0
0 0
0 0
0 0
0 0
0 0
0 0
0 0
0 0
0 0
0 0
0 0
0 0
0 0
0 0
0 0
0 0
0 0
0 0
0 0
0 0
0 0
0 0
0 0
0 0
0 0
0 0
0 0
0 0
0 0
0 0
0 0
0 0
0 0
0 0
0 0
0 0
0 0
0 0
0 0
0 0
0 0
0 0
0 0
0 0
0 0
0 0
0 0
0 0
0 0
0 0
0 0
0 0
0 0
0 0
0 0
0 0
0 0
0 0
0 0
0 0
0 0
0 0
0 0
0 0
0 0
0 0
0 0
0 0
0 0
0 0
0 0
0 0
0 0
0 0
0 0
0 0
0 0
0 0
0 0
0 0
0 0
0 0
0 0
0 0
0 0
0 0
0 0
0 0
0 0
0 0
0 0
0 0
0 0
0 0
0 0
0 0
0 0
0 0
0 0
0 0
0 0
0 0
0 0
0 0
0 0
0 0
0 0
0 0
0 0
0 0
0 0
0 0
0 0
0 0
0 0
0 0
0 0
0 0
0 0
0 0
0 0
0 0
0 0
0 0
0 0
0 0
0 0
0 0
0 0
0 0
0 0
0 0
0 0
0 0
0 0
0 0
0 0
0 0
0 0
0 0
0 0
0 0
0 0
0 0
0 0
0 0
0 0
0 0
0 0
0 0
0 0
0 0
0 0
0 0
0 0
0 0
0 0
0 0
0 0
0 0
0 0
0 0
0 0
0 0
0 0
0 0
0 0
0 0
0 0
0 0
0 0
0 0
0 0
0 0
0 0
0 0
0 0
0 0
0 0
0 0
0 0
0 0
0 0
0 0
0 0
0 0
0 0
0 0
0 0
0 0
0 0
0 0
0 0
0 0
0 0
0 0
0 0
0 0
0 0
0 0
0 0
0 0
0 0
0 0
0 0
0 0
0 0
0 0
0 0
0 0
0 0
0 0
0 0
0 0
0 0
0 0
0 0
0 0
0 0
0 0
0 0
0 0
0 0
0 0
0 0
0 0
0 0
0 0
0 0
0 0
0 0
0 0
0 0
0 0
0 0
0 0
0 0
0 0
0 0
0 0
0 0
0 0
0 0
0 0
0 0
0 0
0 0
0 0
0 0
0 0
0 0
0 0
0 0
0 0
0 0
0 0
0 0
0 0
0 0
0 0
0 0
0 0
0 0
0 0
0 0
0 0
0 0
0 0
0 0
0 0
0 0
0 0
0 0
0 0
0 0
0 0
0 0
0 0
0 0
0 0
0 0
0 0
0 0
0 0
0 0
0 0
0 0
0 0
0 0
0 0
0 0
0 0
0 0
0 0
0 0
0 0
0 0
0 0
0 0
0 0
0 0
0 0
0 0
0 0
0 0
0 0
0 0
0 0
0 0
0 0
0 0
0 0
0 0
0 0
0 0
0 0
0 0
0 0
0 0
0 0
0 0
0 0
0 0
0 0
0 0
0 0
0 0
0 0
0 0
0 0
0 0
0 0
0 0
0 0
0 0
0 0
0 0
0 0
0 0
0 0
0 0
0 0
0 0
0 0
0 0
0 0
0 0
0 0
0 0
0 0
0 0
0 0
0 0
0 0
0 0
0 0
0 0
0 0
0 0
0 0
0 0
0 0
0 0
0 0
0 0
0 0
0 0
0 0
0 0
0 0
0 0
0 0
0 0
0 0
0 0
0 0
0 0
0 0
0 0
0 0
0 0
0 0
0 0
0 0
0 0
0 0
0 0
0 0
0 0
0 0
0 0
0 0
0 0
0 0
0 0
0 0
0 0
0 0
0 0
0 0
0 0
0 0
0 0
0 0
0 0
0 0
0 0
0 0
0 0
0 0
0 0
0 0
0 0
0 0
0 0
0 0
0 0
0 0
0 0
0 0
0 0
0 0
0 0
0 0
0 0
0 0
0 0
0 0
0 0
0 0
0 0
0 0
0 0
0 0
0 0
0 0
0 0
0 0
0 0
0 0
0 0
0 0
0 0
0 0
0 0
0 0
0 0
0 0
0 0
0 0
0 0
0 0
0 0
0 0
0 0
0 0
0 0
0 0
0 0
0 0
0 0
0 0
0 0
0 0
0 0
0 0
0 0
0 0
0 0
0 0
0 0
0 0
0 0
0 0
0 0
0 0
0 0
0 0
0 0
0 0
0 0
0 0
0 0
0 0
0 0
0 0
0 0
0 0
0 0
0 0
0 0
0 0
0 0
0 0
0 0
0 0
0 0
0 0
0 0
0 0
0 0
0 0
0 0
0 0
0 0
0 0
0 0
0 0
0 0
0 0
0 0
0 0
0 0
0 0
0 0
0 0
0 0
0 0
0 0
0 0
0 0
0 0
0 0
0 0
0 0
0 0
0 0
0 0
0 0
0 0
0 0
0 0
0 0
0 0
0 0
0 0
0 0
0 0
0 0
0 0
0 0
0 0
0 0
0 0
0 0
0 0
0 0
0 0
0 0
0 0
0 0
0 0
0 0
0 0
0 0
0 0
0 0
0 0
0 0
0 0
0 0
0 0
0 0
0 0
0 0
0 0
0 0
0 0
0 0
0 0
0 0
0 0
0 0
0 0
0 0
0 0
0 0
0 0
0 0
0 0
0 0
0 0
0 0
0 0
0 0
0 0
0 0
0 0
0 0
0 0
0 0
0 0
0 0
0 0
0 0
0 0
0 0
0 0
0 0
0 0
0 0
0 0
0 0
0 0
0 0
0 0
0 0
0 0
0 0
0 0
0 0
0 0
0 0
0 0
0 0
0 0
0 0
0 0
0 0
0 0
0 0
0 0
0 0
0 0
0 0
0 0
0 0
0 0
0 0
0 0
0 0
0 0
0 0
0 0
0 0
0 0
0 0
0 0
0 0
0 0
0 0
0 0
0 0
0 0
0 0
0 0
0 0
0 0
0 0
0 0
0 0
0 0
0 0
0 0
0 0
0 0
0 0
0 0
0 0
0 0
0 0
0 0
0 0
0 0
0 0
0 0
0 0
0 0
0 0
0 0
0 0
0 0
0 0
0 0
0 0
0 0
0 0
0 0
0 0
0 0
0 0
0 0
0 0
0 0
0 0
0 0
0 0
0 0
0 0
0 0
0 0
0 0
0 0
0 0
0 0
0 0
0 0
0 0
0 0
0 0
0 0
0 0
0 0
0 0
0 0
0 0
0 0
0 0
0 0
0 0
0 0
0 0
0 0
0 0
0 0
0 0
0 0
0 0
0 0
0 0
0 0
0 0
0 0
0 0
0 0
0 0
0 0
0 0
0 0
0 0
0 0
0 0
0 0
0 0
0 0
0 0
0 0
0 0
0 0
0 0
0 0
0 0
0 0
0 0
0 0
0 0
0 0
0 0
0 0
0 0
0 0
0 0
0 0
0 0
0 0
0 0
0 0
0 0
0 0
0 0
0 0
0 0
0 0
0 0
0 0
0 0
0 0
0 0
0 0
0 0
0 0
0 0
0 0
0 0
0 0
0 0
0 0
0 0
0 0
0 0
0 0
0 0
0 0
0 0
0 0
0 0
0 0
0 0
0 0
0 0
0 0
0 0
0 0
0 0
0 0
0 0
0 0
0 0
0 0
0 0
0 0
0 0
0 0
0 0
0 0
0 0
0 0
0 0
0 0
0 0
0 0
0 0
0 0
0 0
0 0
0 0
0 0
0 0
0 0
0 0
0 0
0 0
0 0
0 0
0 0
0 0
0 0
0 0
0 0
0 0
0 0
0 0
0 0
0 0
0 0
0 0
0 0
0 0
0 0
0 0
0 0
0 0
0 0
0 0
0 0
0 0
0 0
0 0
0 0
0 0
0 0
0 0
0 0
0 0
0 0
0 0
0 0
0 0
0 0
0 0
0 0
0 0
0 0
0 0
0 0
0 0
0 0
0 0
0 0
0 0
0 0
0 0
0 0
0 0
0 0
0 0
0 0
0 0
0 0
0 0
0 0
0 0
0 0
0 0
0 0
0 0
0 0
0 0
0 0
0 0
0 0
0 0
0 0
0 0
0 0
0 0
0 0
0 0
0 0
0 0
0 0
0 0
0 0
0 0
0 0
0 0
0 0
0 0
0 0
0 0
0 0
0 0
0 0
0 0
0 0
0 0
0 0
0 0
0 0
0 0
0 0
0 0
0 0
0 0
0 0
0 0
0 0
0 0
0 0
0 0
0 0
0 0
0 0
0 0
0 0
0 0
0 0
0 0
0 0
0 0
0 0
0 0
0 0
0 0
0 0
0 0
0 0
0 0
0 0
0 0
0 0
0 0
0 0
0 0
0 0
0 0
0 0
0 0
0 0
0 0
0 0
0 0
0 0
0 0
0 0
0 0
0 0
0 0
0 0
0 0
0 0
0 0
0 0
0 0
0 0
0 0
0 0
0 0
0 0
0 0
0 0
0 0
0 0
0 0
0 0
0 0
0 0
0 0
0 0
0 0
0 0
0 0
0 0
0 0
0 0
0 0
0 0
0 0
0 0
0 0
0 0
0 0
0 0
0 0
0 0
0 0
0 0
0 0
0 0
0 0
0 0
0 0
0 0
0 0
0 0
0 0
0 0
0 0
0 0
0 0
0 0
0 0
0 0
0 0
0 0
0 0
0 0
0 0
0 0
0 0
0 0
0 0
0 0
0 0
0 0
0 0
0 0
0 0
0 0
0 0
0 0
0 0
0 0
0 0
0 0
0 0
0 0
0 0
0 0
0 0
0 0
0 0
0 0
0 0
0 0
0 0
0 0
0 0
0 0
0 0
0 0
0 0
0 0
0 0
0 0
0 0
0 0
0 0
0 0
0 0
0 0
0 0
0 0
0 0
0 0
0 0
0 0
0 0
0 0
0 0
0 0
0 0
0 0
0 0
0 0
0 0
0 0
0 0
0 0
0 0
0 0
0 0
0 0
0 0
0 0
0 0
0 0
0 0
0 0
0 0
0 0
0 0
0 0
0 0
0 0
0 0
0 0
0 0
0 0
0 0
0 0
0 0
0 0
0 0
0 0
0 0
0 0
0 0
0 0
0 0
0 0
0 0
0 0
0 0
0 0
0 0
0 0
0 0
0 0
0 0
0 0
0 0
0 0
0 0
0 0
0 0
0 0
0 0
0 0
0 0
0 0
0 0
0 0
0 0
0 0
0 0
0 0
0 0
0 0
0 0
0 0
0 0
0 0
0 0
0 0
0 0
0 0
0 0
0 0
0 0
0 0
0 0
0 0
0 0
0 0
0 0
0 0
0 0
0 0
0 0
0 0
0 0
0 0
0 0
0 0
0 0
0 0
0 0
0 0
0 0
0 0
0 0
0 0
0 0
0 0
0 0
0 0
0 0
0 0
0 0
0 0
0 0
0 0
0 0
0 0
0 0
0 0
0 0
0 0
0 0
0 0
0 0
0 0
0 0
0 0
0 0
0 0
0 0
0 0
0 0
0 0
0 0
0 0
0 0
0 0
0 0
0 0
0 0
0 0
0 0
0 0
0 0
0 0
0 0
0 0
0 0
0 0
0 0
0 0
0 0
0 0
0 0
0 0
0 0
0 0
0 0
0 0
0 0
0 0
0 0
0 0
0 0
0 0
0 0
0 0
0 0
0 0
0 0
0 0
0 0
0 0
0 0
0 0
0 0
0 0
0 0
0 0
0 0
0 0
0 0
0 0
0 0
0 0
0 0
0 0
0 0
0 0
0 0
0 0
0 0
0 0
0 0
0 0
0 0
0 0
0 0
0 0
0 0
0 0
0 0
0 0
0 0
0 0
0 0
0 0
0 0
0 0
0 0
0 0
0 0
0 0
0 0
0 0
0 0
0 0
0 0
0 0
0 0
0 0
0 0
0 0
0 0
0 0
0 0
0 0
0 0
0 0
0 0
0 0
0 0
0 0
0 0
0 0
0 0
0 0
0 0
0 0
0 0
0 0
0 0
0 0
0 0
0 0
0 0
0 0
0 0
0 0
0 0
0 0
0 0
0 0
0 0
0 0
0 0
0 0
0 0
0 0
0 0
0 0
0 0
0 0
0 0
0 0
0 0
0 0
0 0
0 0
0 0
0 0
0 0
0 0
0 0
0 0
0 0
0 0
0 0
0 0
0 0
0 0
0 0
0 0
0 0
0 0
0 0
0 0
0 0
0 0
0 0
0 0
0 0
0 0
0 0
0 0
0 0
0 0
0 0
0 0
0 0
0 0
0 0
0 0
0 0
0 0
0 0
0 0
0 0
0 0
0 0
0 0
0 0
0 0
0 0
0 0
0 0
0 0
0 0
0 0
0 0
0 0
0 0
0 0
0 0
0 0
0 0
0 0
0 0
0 0
0 0
0 0
0 0
0 0
0 0
0 0
1 0
4 0
5 0
5 0
5 0
6 0
6 0
17 0
42 2
59 2
74 3
83 3
87 3
91 3
93 3
96 3
98 3
100 3
102 3
106 3
121 3
123 3
123 3
123 3
125 3
125 3
127 3
127 3
128 3
128 3
128 3
128 3
129 3
129 3
131 3
132 3
133 3
133 3
133 3
134 3
135 3
135 3
136 3
136 3
136 3
136 3
136 3
137 4
137 4
137 4
137 4
138 4
138 4
138 4
138 5
138 5
138 5
138 5
140 5
140 5
141 5
141 5
142 5
142 5
142 5
143 5
143 5
143 5
144 5
144 5
146 5
147 5
147 5
149 5
149 5
149 5
150 5
152 5
152 5
152 5
152 5
152 5
152 5
152 5
152 5
152 5
152 5
152 5
152 5
152 5
152 5
152 5
152 5
152 5
152 5
152 5
152 5
152 5
152 5
152 5
151 5
147 5
147 5
144 5
144 5
142 5
139 5
111 4
92 3
72 3
69 2
58 2
57 2
52 2
51 2
48 2
46 2
44 2
42 2
38 2
27 2
26 2
26 2
24 2
24 2
24 2
20 2
19 2
18 2
18 2
18 2
18 2
18 2
18 2
14 2
13 2
12 2
12 2
12 2
11 2
10 2
10 1
10 1
10 1
10 1
9 1
9 1
9 1
9 1
9 1
9 1
9 0
9 0
9 0
9 0
9 0
9 0
9 0
9 0
9 0
8 0
8 0
7 0
7 0
7 0
6 0
6 0
6 0
6 0
6 0
4 0
3 0
3 0
1 0
1 0
0 0
0 0
0 0
0 0
0 0
0 0
0 0
0 0
0 0
0 0
0 0
0 0
0 0
0 0
0 0
0 0
0 0
0 0
0 0
0 0
0 0
0 0
0 0
0 0
0 0
0 0
0 0
0 0
0 0
0 0
0 0
0 0
0 0
0 0
0 0
0 0
0 0
0 0
0 0
0 0
0 0
0 0
0 0
0 0
0 0
0 0
0 0
0 0
0 0
0 0
0 0
0 0
0 0
0 0
0 0
0 0
0 0
0 0
0 0
0 0
0 0
0 0
0 0
0 0
0 0
0 0
0 0
0 0
0 0
0 0
0 0
0 0
0 0
0 0
0 0
0 0
0 0
0 0
0 0
0 0
0 0
0 0
0 0
0 0
0 0
0 0
0 0
0 0
0 0
0 0
0 0
0 0
0 0
0 0
0 0
0 0
0 0
0 0
0 0
0 0
0 0
0 0
0 0
0 0
0 0
0 0
0 0
0 0
0 0
0 0
0 0
0 0
0 0
0 0
0 0
0 0
0 0
0 0
0 0
0 0
0 0
0 0
0 0
0 0
0 0
0 0
0 0
0 0
0 0
0 0
0 0
0 0
0 0
0 0
0 0
0 0
0 0
0 0
0 0
0 0
0 0
0 0
0 0
0 0
0 0
0 0
0 0
0 0
0 0
0 0
0 0
0 0
0 0
0 0
0 0
0 0
0 0
0 0
0 0
0 0
0 0
0 0
0 0
0 0
0 0
0 0
0 0
0 0
0 0
0 0
0 0
0 0
0 0
0 0
0 0
0 0
0 0
0 0
0 0
0 0
0 0
0 0
0 0
0 0
0 0
0 0
0 0
0 0
0 0
0 0
0 0
0 0
0 0
0 0
0 0
0 0
0 0
0 0
0 0
0 0
0 0
0 0
0 0
0 0
0 0
0 0
0 0
0 0
0 0
0 0
0 0
0 0
0 0
0 0
0 0
0 0
0 0
0 0
0 0
0 0
0 0
0 0
0 0
0 0
0 0
0 0
0 0
0 0
0 0
0 0
0 0
0 0
0 0
0 0
0 0
0 0
0 0
0 0
0 0
0 0
0 0
0 0
0 0
0 0
0 0
0 0
0 0
0 0
0 0
0 0
0 0
0 0
0 0
0 0
0 0
0 0
0 0
0 0
0 0
0 0
0 0
0 0
0 0
0 0
0 0
0 0
0 0
0 0
0 0
0 0
0 0
0 0
0 0
0 0
0 0
0 0
0 0
0 0
0 0
0 0
0 0
0 0
0 0
0 0
0 0
0 0
0 0
0 0
0 0
0 0
0 0
0 0
0 0
0 0
0 0
0 0
0 0
0 0
0 0
0 0
0 0
0 0
0 0
0 0
0 0
0 0
0 0
0 0
0 0
0 0
0 0
0 0
0 0
0 0
0 0
0 0
0 0
0 0
0 0
0 0
0 0
0 0
0 0
0 0
0 0
0 0
0 0
0 0
0 0
0 0
0 0
0 0
0 0
0 0
0 0
0 0
0 0
0 0
0 0
0 0
0 0
0 0
0 0
0 0
0 0
0 0
0 0
0 0
0 0
0 0
0 0
0 0
0 0
0 0
0 0
0 0
0 0
0 0
0 0
0 0
0 0
0 0
0 0
0 0
0 0
0 0
0 0
0 0
0 0
0 0
0 0
0 0
0 0
0 0
0 0
0 0
0 0
0 0
0 0
0 0
0 0
0 0
0 0
0 0
0 0
0 0
0 0
0 0
0 0
0 0
0 0
0 0
0 0
0 0
0 0
0 0
0 0
0 0
0 0
0 0
0 0
0 0
0 0
0 0
0 0
0 0
0 0
0 0
0 0
0 0
0 0
0 0
0 0
0 0
0 0
0 0
0 0
0 0
0 0
0 0
0 0
0 0
0 0
0 0
0 0
0 0
0 0
0 0
0 0
0 0
0 0
0 0
0 0
0 0
0 0
0 0
0 0
0 0
0 0
0 0
0 0
0 0
0 0
0 0
0 0
0 0
0 0
0 0
0 0
0 0
0 0
0 0
0 0
0 0
0 0
0 0
0 0
0 0
0 0
0 0
0 0
0 0
0 0
0 0
0 0
0 0
0 0
0 0
0 0
0 0
0 0
0 0
0 0
0 0
0 0
0 0
0 0
0 0
0 0
0 0
0 0
0 0
0 0
0 0
0 0
0 0
0 0
0 0
0 0
0 0
0 0
0 0
0 0
0 0
0 0
0 0
0 0
0 0
0 0
0 0
0 0
0 0
0 0
0 0
0 0
0 0
0 0
0 0
0 0
0 0
0 0
0 0
0 0
0 0
0 0
0 0
0 0
0 0
0 0
0 0
0 0
0 0
0 0
0 0
0 0
0 0
0 0
0 0
0 0
0 0
0 0
0 0
0 0
0 0
0 0
0 0
0 0
0 0
0 0
0 0
0 0
0 0
0 0
0 0
0 0
0 0
0 0
0 0
0 0
0 0
0 0
0 0
0 0
0 0
0 0
0 0
0 0
0 0
0 0
0 0
0 0
0 0
0 0
0 0
0 0
0 0
0 0
0 0
0 0
0 0
0 0
0 0
0 0
0 0
0 0
0 0
0 0
0 0
0 0
0 0
0 0
0 0
0 0
0 0
0 0
0 0
0 0
0 0
0 0
0 0
0 0
0 0
0 0
0 0
0 0
0 0
0 0
0 0
0 0
0 0
0 0
0 0
0 0
0 0
0 0
0 0
0 0
0 0
0 0
0 0
0 0
0 0
0 0
0 0
0 0
0 0
0 0
0 0
0 0
0 0
0 0
0 0
0 0
0 0
0 0
0 0
0 0
0 0
0 0
0 0
0 0
0 0
0 0
0 0
0 0
0 0
0 0
0 0
0 0
0 0
0 0
0 0
0 0
0 0
0 0
0 0
0 0
0 0
0 0
0 0
0 0
0 0
0 0
0 0
0 0
0 0
0 0
0 0
0 0
0 0
0 0
0 0
0 0
0 0
0 0
0 0
0 0
0 0
0 0
0 0
0 0
0 0
0 0
0 0
0 0
0 0
0 0
0 0
0 0
0 0
0 0
0 0
0 0
0 0
0 0
0 0
0 0
0 0
0 0
0 0
0 0
0 0
0 0
0 0
0 0
0 0
0 0
0 0
0 0
0 0
0 0
0 0
0 0
0 0
0 0
0 0
0 0
0 0
0 0
0 0
0 0
0 0
0 0
0 0
0 0
0 0
0 0
0 0
0 0
0 0
0 0
0 0
0 0
0 0
0 0
0 0
0 0
0 0
0 0
0 0
0 0
0 0
0 0
0 0
0 0
0 0
0 0
0 0
0 0
0 0
0 0
0 0
0 0
0 0
0 0
0 0
0 0
0 0
0 0
0 0
0 0
0 0
0 0
0 0
0 0
0 0
0 0
0 0
0 0
0 0
0 0
0 0
0 0
0 0
0 0
0 0
0 0
0 0
0 0
0 0
0 0
0 0
0 0
0 0
0 0
0 0
0 0
0 0
0 0
0 0
0 0
0 0
0 0
0 0
0 0
0 0
0 0
0 0
0 0
0 0
0 0
0 0
0 0
0 0
0 0
0 0
0 0
0 0
0 0
0 0
0 0
0 0
0 0
0 0
0 0
0 0
0 0
0 0
0 0
0 0
0 0
0 0
0 0
0 0
0 0
0 0
0 0
0 0
0 0
0 0
0 0
0 0
0 0
0 0
0 0
0 0
0 0
0 0
0 0
0 0
0 0
0 0
0 0
0 0
0 0
0 0
0 0
0 0
0 0
0 0
0 0
0 0
0 0
0 0
0 0
0 0
0 0
0 0
0 0
0 0
0 0
0 0
0 0
0 0
0 0
0 0
0 0
0 0
0 0
0 0
0 0
0 0
0 0
0 0
0 0
0 0
0 0
0 0
0 0
0 0
0 0
0 0
0 0
0 0
0 0
0 0
0 0
0 0
0 0
0 0
0 0
0 0
0 0
0 0
0 0
0 0
0 0
0 0
0 0
0 0
0 0
0 0
0 0
0 0
0 0
0 0
0 0
0 0
0 0
0 0
0 0
0 0
0 0
0 0
0 0
0 0
0 0
0 0
0 0
0 0
0 0
0 0
0 0
0 0
0 0
0 0
0 0
0 0
0 0
0 0
0 0
0 0
0 0
0 0
0 0
0 0
0 0
0 0
0 0
0 0
0 0
0 0
0 0
0 0
0 0
0 0
0 0
0 0
0 0
0 0
0 0
0 0
0 0
0 0
0 0
0 0
0 0
0 0
0 0
0 0
0 0
0 0
0 0
0 0
0 0
0 0
0 0
0 0
0 0
0 0
0 0
0 0
0 0
0 0
0 0
0 0
0 0
0 0
0 0
0 0
0 0
0 0
0 0
0 0
0 0
0 0
0 0
0 0
0 0
0 0
0 0
0 0
0 0
0 0
0 0
0 0
0 0
0 0
0 0
0 0
0 0
0 0
0 0
0 0
0 0
0 0
0 0
0 0
0 0
0 0
0 0
0 0
0 0
0 0
0 0
0 0
0 0
0 0
0 0
0 0
0 0
0 0
0 0
0 0
0 0
0 0
0 0
0 0
0 0
0 0
0 0
0 0
0 0
0 0
0 0
0 0
0 0
0 0
0 0
0 0
0 0
0 0
0 0
0 0
0 0
0 0
0 0
0 0
0 0
0 0
0 0
0 0
0 0
0 0
0 0
0 0
0 0
0 0
0 0
0 0
0 0
0 0
0 0
0 0
0 0
0 0
0 0
0 0
0 0
0 0
0 0
0 0
0 0
0 0
0 0
0 0
0 0
0 0
0 0
0 0
0 0
0 0
0 0
0 0
0 0
0 0
0 0
0 0
0 0
0 0
0 0
0 0
0 0
0 0
0 0
0 0
0 0
0 0
0 0
0 0
0 0
0 0
0 0
0 0
0 0
0 0
0 0
0 0
0 0
0 0
0 0
0 0
0 0
0 0
0 0
0 0
0 0
0 0
0 0
0 0
0 0
0 0
0 0
0 0
0 0
0 0
0 0
0 0
0 0
0 0
0 0
0 0
0 0
0 0
0 0
0 0
0 0
0 0
0 0
0 0
0 0
0 0
0 0
0 0
0 0
0 0
0 0
0 0
0 0
0 0
0 0
0 0
0 0
0 0
0 0
0 0
0 0
0 0
0 0
0 0
0 0
0 0
0 0
0 0
0 0
0 0
0 0
0 0
0 0
0 0
0 0
0 0
0 0
0 0
0 0
0 0
0 0
0 0
0 0
0 0
0 0
0 0
0 0
0 0
0 0
0 0
0 0
0 0
0 0
0 0
0 0
0 0
0 0
0 0
0 0
0 0
0 0
0 0
0 0
0 0
0 0
0 0
0 0
0 0
0 0
0 0
0 0
0 0
0 0
0 0
0 0
0 0
0 0
0 0
0 0
0 0
0 0
0 0
0 0
0 0
0 0
0 0
0 0
0 0
0 0
0 0
0 0
0 0
0 0
0 0
0 0
0 0
0 0
0 0
0 0
0 0
0 0
0 0
0 0
0 0
0 0
0 0
0 0
0 0
0 0
0 0
0 0
0 0
0 0
0 0
0 0
0 0
0 0
0 0
0 0
0 0
0 0
0 0
0 0
0 0
0 0
0 0
0 0
0 0
0 0
0 0
0 0
0 0
0 0
0 0
0 0
0 0
0 0
0 0
0 0
0 0
0 0
0 0
0 0
0 0
0 0
0 0
0 0
0 0
0 0
0 0
0 0
0 0
0 0
0 0
0 0
0 0
0 0
0 0
0 0
0 0
0 0
0 0
0 0
0 0
0 0
0 0
0 0
0 0
0 0
0 0
0 0
0 0
0 0
0 0
0 0
0 0
0 0
0 0
0 0
0 0
0 0
0 0
0 0
0 0
0 0
0 0
0 0
0 0
0 0
0 0
0 0
0 0
0 0
0 0
0 0
0 0
0 0
0 0
0 0
0 0
0 0
0 0
0 0
0 0
0 0
0 0
0 0
0 0
0 0
0 0
0 0
0 0
0 0
0 0
0 0
0 0
0 0
0 0
0 0
0 0
0 0
0 0
0 0
0 0
0 0
0 0
0 0
0 0
0 0
0 0
0 0
0 0
0 0
0 0
0 0
0 0
0 0
0 0
0 0
0 0
0 0
0 0
0 0
0 0
0 0
0 0
0 0
0 0
0 0
0 0
0 0
0 0
0 0
0 0
0 0
0 0
0 0
0 0
0 0
0 0
0 0
0 0
0 0
0 0
0 0
0 0
0 0
0 0
0 0
0 0
0 0
0 0
0 0
0 0
0 0
0 0
0 0
0 0
0 0
0 0
0 0
0 0
0 0
0 0
0 0
0 0
0 0
0 0
0 0
0 0
0 0
0 0
0 0
0 0
0 0
0 0
0 0
0 0
0 0
0 0
0 0
0 0
0 0
0 0
0 0
0 0
0 0
0 0
0 0
0 0
0 0
0 0
0 0
0 0
0 0
0 0
0 0
0 0
0 0
0 0
0 0
0 0
0 0
0 0
0 0
0 0
0 0
0 0
0 0
0 0
0 0
0 0
0 0
0 0
0 0
0 0
0 0
0 0
0 0
0 0
0 0
0 0
0 0
0 0
0 0
0 0
0 0
0 0
0 0
0 0
0 0
0 0
0 0
0 0
0 0
0 0
0 0
0 0
0 0
0 0
0 0
0 0
0 0
0 0
0 0
0 0
0 0
0 0
0 0
0 0
0 0
0 0
0 0
0 0
0 0
0 0
0 0
0 0
0 0
0 0
0 0
0 0
0 0
0 0
0 0
0 0
0 0
0 0
0 0
0 0
0 0
0 0
0 0
0 0
0 0
0 0
0 0
0 0
0 0
0 0
0 0
0 0
0 0
0 0
0 0
0 0
0 0
0 0
0 0
0 0
0 0
0 0
0 0
0 0
0 0
0 0
0 0
0 0
0 0
0 0
0 0
0 0
0 0
0 0
0 0
0 0
0 0
0 0
0 0
0 0
0 0
0 0
0 0
0 0
0 0
0 0
0 0
0 0
0 0
0 0
0 0
0 0
0 0
0 0
0 0
0 0
0 0
0 0
0 0
0 0
0 0
0 0
0 0
0 0
0 0
0 0
0 0
0 0
0 0
0 0
0 0
0 0
0 0
0 0
0 0
0 0
0 0
0 0
0 0
0 0
0 0
0 0
0 0
0 0
0 0
0 0
0 0
0 0
0 0
0 0
0 0
0 0
0 0
0 0
0 0
0 0
0 0
0 0
0 0
0 0
0 0
0 0
0 0
0 0
0 0
0 0
0 0
0 0
0 0
0 0
0 0
0 0
0 0
0 0
0 0
0 0
0 0
0 0
0 0
0 0
0 0
0 0
0 0
0 0
0 0
0 0
0 0
0 0
0 0
0 0
0 0
0 0
0 0
0 0
0 0
0 0
0 0
0 0
0 0
0 0
0 0
0 0
0 0
0 0
0 0
0 0
0 0
0 0
0 0
0 0
0 0
0 0
0 0
0 0
0 0
0 0
0 0
0 0
0 0
0 0
0 0
0 0
0 0
0 0
0 0
0 0
0 0
0 0
0 0
0 0
0 0
0 0
0 0
0 0
0 0
0 0
0 0
0 0
0 0
0 0
0 0
0 0
0 0
0 0
0 0
0 0
0 0
0 0
0 0
0 0
0 0
0 0
0 0
0 0
0 0
0 0
0 0
0 0
0 0
0 0
0 0
0 0
0 0
0 0
0 0
0 0
0 0
0 0
0 0
0 0
0 0
0 0
0 0
0 0
0 0
0 0
0 0
0 0
0 0
0 0
0 0
0 0
0 0
0 0
0 0
0 0
0 0
0 0
0 0
0 0
0 0
0 0
0 0
0 0
0 0
0 0
0 0
0 0
0 0
0 0
0 0
0 0
0 0
0 0
0 0
0 0
0 0
0 0
0 0
0 0
0 0
0 0
0 0
0 0
0 0
0 0
0 0
0 0
0 0
0 0
0 0
0 0
0 0
0 0
0 0
0 0
0 0
0 0
0 0
0 0
0 0
0 0
0 0
0 0
0 0
0 0
0 0
0 0
0 0
0 0
0 0
0 0
0 0
0 0
0 0
0 0
0 0
0 0
0 0
0 0
0 0
0 0
0 0
0 0
0 0
0 0
0 0
0 0
0 0
0 0
0 0
0 0
0 0
0 0
0 0
0 0
0 0
0 0
0 0
0 0
0 0
0 0
0 0
0 0
0 0
0 0
0 0
0 0
0 0
0 0
0 0
0 0
0 0
0 0
0 0
0 0
0 0
0 0
0 0
0 0
0 0
0 0
0 0
0 0
0 0
0 0
0 0
0 0
0 0
0 0
0 0
0 0
0 0
0 0
0 0
0 0
0 0
0 0
0 0
0 0
0 0
0 0
0 0
0 0
0 0
0 0
0 0
0 0
0 0
0 0
0 0
0 0
0 0
0 0
0 0
0 0
0 0
0 0
0 0
0 0
0 0
0 0
0 0
0 0
0 0
0 0
0 0
0 0
0 0
0 0
0 0
0 0
0 0
0 0
0 0
0 0
0 0
0 0
0 0
0 0
0 0
0 0
0 0
0 0
0 0
0 0
0 0
0 0
0 0
0 0
0 0
0 0
0 0
0 0
0 0
0 0
0 0
0 0
0 0
0 0
0 0
0 0
0 0
0 0
0 0
0 0
0 0
0 0
0 0
0 0
0 0
0 0
0 0
0 0
0 0
0 0
0 0
0 0
0 0
0 0
0 0
0 0
0 0
0 0
0 0
0 0
0 0
0 0
0 0
0 0
0 0
0 0
0 0
0 0
0 0
0 0
0 0
0 0
0 0
0 0
0 0
0 0
0 0
0 0
0 0
0 0
0 0
0 0
0 0
0 0
0 0
0 0
0 0
0 0
0 0
0 0
0 0
0 0
0 0
0 0
0 0
0 0
0 0
0 0
0 0
0 0
0 0
0 0
0 0
0 0
0 0
0 0
0 0
0 0
0 0
0 0
0 0
0 0
0 0
0 0
0 0
0 0
0 0
0 0
0 0
0 0
0 0
0 0
0 0
0 0
0 0
0 0
0 0
0 0
0 0
0 0
0 0
0 0
0 0
0 0
0 0
0 0
0 0
0 0
0 0
0 0
0 0
0 0
0 0
0 0
0 0
0 0
0 0
0 0
0 0
0 0
0 0
0 0
0 0
0 0
0 0
0 0
0 0
0 0
0 0
0 0
0 0
0 0
0 0
0 0
0 0
0 0
0 0
0 0
0 0
0 0
0 0
0 0
0 0
0 0
0 0
0 0
0 0
0 0
0 0
0 0
0 0
0 0
0 0
0 0
0 0
0 0
0 0
0 0
0 0
0 0
0 0
0 0
0 0
0 0
0 0
0 0
0 0
0 0
0 0
0 0
0 0
0 0
0 0
0 0
0 0
0 0
0 0
0 0
0 0
0 0
0 0
0 0
0 0
0 0
0 0
0 0
0 0
0 0
0 0
0 0
0 0
0 0
0 0
0 0
0 0
0 0
0 0
0 0
0 0
0 0
0 0
0 0
0 0
0 0
0 0
0 0
0 0
0 0
0 0
0 0
0 0
0 0
0 0
0 1
0 1
0 2
0 2
1 2
2 2
2 2
2 2
2 2
2 2
2 2
2 2
3 2
3 2
3 2
3 2
3 2
3 2
3 2
3 2
3 2
3 2
3 2
3 2
3 2
3 2
3 2
3 2
3 2
3 2
3 2
3 2
3 2
3 2
3 2
3 2
3 2
3 2
3 2
3 2
3 2
3 2
3 2
3 2
3 2
3 2
3 2
3 2
3 2
3 2
3 2
3 2
3 2
3 2
3 2
3 2
3 2
3 2
3 2
3 2
3 2
3 2
3 2
3 2
3 2
3 2
3 2
3 2
3 2
3 2
3 2
3 2
3 2
3 2
3 2
3 2
3 2
3 2
3 2
3 2
3 2
3 2
3 2
3 2
3 2
3 2
3 2
3 2
3 2
3 2
3 2
3 2
3 2
2 2
1 2
1 1
1 1
1 1
1 0
1 0
1 0
1 0
1 0
1 0
1 0
1 0
1 0
1 0
1 0
1 0
1 0
1 0
0 0
0 0
0 0
0 0
0 0
0 0
0 0
0 0
0 0
0 0
0 0
0 0
0 0
0 0
0 0
0 0
0 0
0 0
0 0
0 0
0 0
0 0
0 0
0 0
0 0
0 0
0 0
0 0
0 1
0 1
0 1
0 1
0 1
0 1
0 1
0 1
0 1
0 1
0 1
0 1
0 1
0 1
0 1
0 1
0 1
0 1
0 1
0 1
0 1
0 1
0 1
0 1
0 1
0 1
0 1
0 1
0 1
0 1
0 1
0 1
0 1
0 1
0 1
0 1
0 1
0 1
0 1
0 1
0 1
0 1
0 1
0 1
0 1
0 1
0 1
0 1
0 1
0 1
0 2
0 3
1 5
1 5
1 5
1 6
1 6
1 6
1 6
1 6
1 6
1 6
1 6
1 6
1 6
1 6
1 6
1 6
1 6
1 6
1 6
1 6
1 6
1 6
1 6
1 6
1 6
1 6
1 6
1 6
1 6
1 6
2 6
2 6
2 6
2 6
2 6
2 8
2 8
3 8
3 8
3 8
3 8
3 8
3 11
3 11
3 11
3 11
3 11
3 10
3 10
3 10
3 10
3 10
3 10
3 10
3 10
3 10
3 10
3 10
3 10
3 10
3 10
3 10
4 10
4 10
4 10
4 10
4 10
4 10
4 10
4 10
4 10
4 10
4 10
4 10
4 10
4 10
4 10
4 10
4 10
4 10
4 10
4 10
4 10
4 10
4 10
4 10
4 10
4 10
4 10
4 10
4 10
5 10
5 15
5 15
5 15
5 15
5 15
5 13
5 13
5 13
5 10
5 10
5 10
5 10
5 10
5 11
5 11
5 11
5 11
5 11
5 11
5 11
5 11
5 11
5 11
5 11
5 11
5 11
5 11
5 11
5 11
5 11
4 11
4 11
4 11
4 11
4 13
4 13
4 13
4 13
5 12
4 12
4 12
4 12
4 12
4 9
4 9
4 9
4 9
4 8
4 8
4 8
4 8
4 8
4 8
4 8
4 8
4 8
4 8
4 8
4 8
4 8
4 8
4 8
4 8
4 8
4 8
6 8
9 10
9 10
9 10
9 10
8 10
8 10
8 10
8 10
8 10
8 10
8 10
8 10
8 10
8 10
8 10
8 10
8 10
8 10
8 10
8 10
8 11
8 11
8 11
8 11
8 11
8 11
8 11
8 11
8 9
8 10
8 8
8 8
8 8
7 7
7 7
7 7
7 7
7 7
7 7
7 7
7 7
6 6
6 6
6 7
6 7
6 7
6 7
6 7
6 7
6 7
6 7
6 7
6 8
6 8
6 8
6 8
6 8
6 9
6 9
6 9
6 9
6 9
6 9
6 9
6 9
6 9
6 10
6 10
6 8
6 8
6 8
6 8
5 10
5 10
5 10
5 10
5 10
5 13
5 15
5 15
5 15
5 15
5 15
5 15
5 15
5 15
5 15
5 15
5 15
5 15
5 15
5 15
5 15
5 15
5 15
5 15
3 15
3 15
3 15
2 15
0 13
0 13
0 13
0 14
0 14
0 14
0 14
0 14
0 14
0 14
0 14
0 15
0 15
0 15
0 15
0 15
0 15
0 15
0 15
0 14
0 14
0 14
0 14
0 14
0 14
0 14
0 14
0 13
0 13
0 13
0 13
0 13
0 13
0 13
0 13
0 13
0 13
0 13
0 13
0 13
0 12
0 12
0 12
0 12
0 12
0 12
0 12
0 12
0 12
0 12
0 12
0 12
0 11
0 11
0 11
0 10
0 10
0 10
0 10
0 10
0 10
0 10
0 10
0 10
0 10
0 10
0 9
0 9
0 9
0 9
0 9
0 9
0 7
0 7
0 7
0 7
0 7
0 4
0 2
0 2
0 2
0 2
0 2
0 2
0 2
0 2
0 2
0 2
0 2
0 2
0 2
0 2
0 2
0 2
0 2
0 2
0 2
0 2
0 2
0 2
0 1
0 1
0 1
0 1
1 1
1 1
1 1
1 1
1 0
1 0
1 0
1 0
1 0
1 1
1 1
1 1
1 1
1 1
1 1
1 1
1 1
1 1
1 1
1 1
1 1
1 1
1 1
1 1
1 1
1 1
1 1
1 1
1 1
1 2
1 2
1 2
1 2
1 2
1 2
1 2
1 3
1 3
1 3
1 3
1 3
1 3
1 3
1 3
1 3
1 3
1 3
1 3
1 3
1 3
1 3
1 3
1 3
1 3
1 3
2 3
2 3
2 3
2 3
2 3
2 3
2 3
2 4
2 4
2 4
2 4
2 4
2 4
2 4
2 5
2 5
2 5
2 6
2 6
2 6
2 6
2 6
2 6
2 6
2 6
2 6
2 6
2 6
2 6
2 6
2 6
2 6
2 6
2 7
2 7
2 7
2 7
2 7
2 7
3 7
3 7
3 7
3 7
3 7
3 7
2 7
2 7
2 7
2 7
2 7
2 7
2 7
2 7
2 7
2 6
3 6
3 6
3 6
3 6
3 6
3 6
3 6
3 6
3 6
3 6
3 6
3 6
3 6
3 6
3 6
3 6
3 6
3 6
3 6
3 5
3 5
3 5
3 5
3 5
3 5
3 5
3 4
3 4
3 4
3 4
3 4
3 4
3 4
3 4
3 4
3 4
3 4
3 4
3 4
3 4
3 4
3 4
3 4
3 4
3 3
2 3
2 3
2 3
2 3
3 4
3 4
3 4
3 4
3 4
3 4
3 6
3 7
3 7
3 6
3 6
3 6
3 6
4 6
6 6
6 6
6 6
6 6
6 6
6 6
6 6
6 6
6 6
6 6
6 6
6 5
6 5
6 5
6 5
6 5
6 5
6 5
6 6
6 6
5 7
5 7
5 7
5 7
5 7
5 7
5 7
5 7
5 7
5 7
5 7
5 7
5 7
5 7
4 7
4 7
4 7
4 7
4 7
4 7
4 7
4 7
4 7
4 7
4 7
4 7
4 8
4 8
4 8
4 8
4 8
4 8
4 8
4 8
4 8
4 8
4 8
4 8
4 8
4 8
4 8
4 8
4 8
4 8
4 8
4 8
4 8
4 8
4 8
4 8
4 8
4 8
4 8
4 8
4 8
4 8
4 8
4 8
4 8
4 8
4 8
4 8
4 8
4 7
4 7
4 7
3 5
3 4
3 4
3 4
3 4
3 4
3 4
3 6
3 6
3 6
3 6
1 6
1 6
0 5
0 5
0 5
0 5
0 5
0 6
0 7
0 7
0 7
0 7
0 7
0 7
0 7
0 7
0 7
0 9
0 9
0 9
0 9
0 8
0 7
0 7
0 7
0 7
0 7
0 7
0 7
0 7
0 7
0 7
0 7
0 7
0 7
0 7
0 7
0 7
0 7
0 7
0 7
0 8
1 8
1 8
1 8
1 8
1 8
1 7
1 7
1 7
1 7
1 7
1 7
1 7
1 7
1 7
1 7
1 7
1 7
1 7
1 7
1 7
1 7
1 7
1 7
1 7
1 7
1 7
1 7
1 6
1 6
1 6
1 6
1 6
1 6
1 6
1 6
1 6
1 6
1 6
1 6
1 6
1 6
1 7
1 7
1 7
1 7
1 7
1 7
1 7
1 7
1 7
1 7
1 7
1 7
1 7
1 5
1 5
1 5
1 5
1 5
1 5
1 5
1 5
1 5
1 5
1 5
1 4
1 4
1 4
1 6
1 6
1 6
1 6
1 6
1 6
1 7
1 5
1 5
1 5
1 5
1 5
1 5
1 5
1 5
1 5
1 5
1 5
1 5
1 5
1 5
1 5
1 5
1 5
1 5
1 5
1 5
1 5
1 5
1 5
1 4
1 4
0 5
0 5
0 5
0 5
0 5
0 5
0 5
0 5
0 5
0 5
0 5
0 5
0 5
0 5
0 5
0 5
0 5
0 5
0 5
0 5
0 5
0 5
0 5
0 5
0 5
0 5
0 5
0 5
0 5
0 5
0 5
0 5
0 5
0 5
0 5
0 5
0 5
0 5
0 5
1 4
1 4
1 4
1 4
1 4
1 4
1 4
1 4
1 4
1 4
1 4
1 4
1 4
1 4
1 4
1 4
1 4
1 4
1 4
1 4
1 4
1 4
1 4
1 4
1 4
1 4
1 4
1 4
1 4
1 2
1 2
1 2
1 2
1 2
1 2
1 1
1 1
1 1
1 1
1 1
1 1
1 1
1 1
1 1
1 1
1 1
1 1
1 1
1 1
1 1
1 1
1 1
1 1
1 1
1 1
1 2
1 2
1 2
1 2
1 2
1 2
1 1
1 1
1 1
1 1
1 1
1 1
2 1
2 1
2 1
2 1
2 1
2 1
2 1
2 1
2 1
2 2
2 2
2 4
2 5
2 5
2 5
2 5
2 5
2 5
2 5
2 5
2 5
2 5
2 5
2 5
2 5
2 5
2 5
2 5
2 5
2 5
2 5
2 5
2 5
1 5
1 5
1 5
1 5
1 5
1 5
1 7
1 7
1 7
1 7
1 7
1 7
1 7
1 7
1 7
1 7
1 7
1 7
1 7
1 7
1 7
1 7
1 7
1 7
1 7
1 7
1 7
1 7
1 7
1 7
1 7
1 7
1 7
1 7
1 7
1 7
1 7
1 7
1 7
1 7
1 7
1 7
1 7
1 7
1 7
1 7
1 7
1 7
1 7
1 6
1 6
1 6
1 6
1 6
1 9
1 9
1 9
1 9
1 9
1 9
1 9
1 9
1 9
1 9
1 9
1 9
1 9
0 9
0 9
0 9
0 9
0 9
0 9
0 9
0 9
0 8
0 8
0 6
0 6
0 6
0 6
0 6
0 6
0 6
0 6
0 6
0 6
0 6
0 6
0 6
0 6
0 6
0 6
0 6
0 6
0 6
0 6
1 6
1 6
1 6
1 6
1 6
1 6
2 6
2 6
2 6
2 4
2 4
2 4
2 4
2 4
2 4
2 4
2 4
2 4
2 4
2 4
2 4
2 4
2 4
2 4
2 4
2 4
2 4
2 4
2 4
2 4
2 4
2 4
2 4
2 4
2 4
2 4
2 4
2 4
2 4
2 4
2 4
3 4
7 4
8 4
8 4
9 4
11 4
11 4
12 4
12 4
12 3
12 3
12 3
12 2
12 2
12 2
12 2
12 1
12 1
13 1
13 1
13 1
13 1
13 1
13 1
14 1
17 1
19 1
23 1
23 1
23 1
23 1
23 1
23 1
23 1
23 1
23 1
23 1
23 1
23 0
23 0
23 0
23 0
23 0
23 0
23 0
23 0
23 0
23 0
23 0
23 0
23 0
23 0
23 0
23 0
23 0
23 0
23 0
23 0
22 0
22 0
22 0
22 0
22 0
22 0
22 0
21 0
21 0
21 0
21 0
21 0
21 0
21 0
21 0
21 0
21 0
21 0
21 0
21 0
21 0
21 0
21 0
21 0
21 0
21 0
21 0
21 0
21 0
21 0
21 0
21 0
21 0
22 0
23 0
23 0
23 0
23 0
24 0
24 0
24 0
24 0
23 0
19 0
18 0
18 0
17 0
15 0
15 0
14 0
14 0
14 0
14 0
14 0
14 0
14 0
14 0
14 0
14 0
14 0
13 0
12 0
13 0
14 0
13 0
13 0
10 0
9 0
5 0
5 0
5 0
5 0
5 0
5 0
5 0
5 0
5 0
5 0
5 0
5 0
5 0
5 0
6 0
6 0
6 0
6 0
6 0
6 0
6 0
6 0
6 0
6 0
6 0
6 0
6 0
7 0
7 0
7 0
7 0
7 0
7 0
7 0
7 0
7 0
7 0
7 0
7 0
7 0
7 0
7 0
7 0
7 0
7 0
7 0
7 0
7 0
7 0
7 0
7 0
7 0
7 0
7 0
7 0
7 0
7 0
7 0
7 0
7 0
7 0
7 0
7 0
7 0
7 0
6 0
5 0
5 0
5 0
5 0
4 0
4 0
4 0
4 0
4 0
4 0
4 0
4 0
4 0
4 0
4 0
4 0
4 0
4 0
4 0
4 0
4 0
4 0
4 0
4 0
4 0
4 0
4 0
4 0
2 0
2 0
2 0
2 0
2 0
2 0
2 0
2 0
2 0
2 0
2 0
2 0
3 0
3 0
3 0
3 0
3 0
3 0
3 0
2 0
2 0
2 0
2 0
2 0
2 0
2 0
2 0
2 0
2 0
2 0
2 0
2 0
2 0
1 0
1 0
1 0
1 0
1 0
1 0
1 0
3 0
3 0
3 0
3 0
3 0
3 0
3 0
3 0
3 0
3 0
3 0
3 0
3 0
3 0
3 0
3 0
3 0
3 0
3 0
3 0
3 0
3 0
3 0
3 0
3 0
3 0
3 0
3 0
3 0
3 0
3 0
3 0
3 0
3 0
3 0
3 0
3 0
3 0
3 0
3 0
3 0
3 0
3 0
3 0
3 0
3 0
3 0
3 0
3 0
3 0
3 0
3 0
3 0
3 0
3 0
3 0
3 0
3 0
3 0
3 0
3 0
3 0
3 0
3 0
3 0
3 0
3 0
3 0
3 0
4 0
4 0
4 0
3 0
3 0
3 0
3 0
3 0
3 0
3 0
3 0
3 0
3 0
3 0
3 0
3 0
3 0
3 0
3 0
3 0
3 0
3 0
3 0
3 0
3 0
3 0
4 0
4 0
4 0
4 0
4 0
2 0
2 0
2 0
2 0
2 0
2 0
2 0
2 0
2 0
2 0
2 0
2 0
2 0
2 0
2 0
2 0
2 0
2 0
2 0
2 0
2 0
2 0
2 0
2 0
2 0
2 0
2 0
2 0
2 0
2 0
2 0
2 0
2 0
2 0
2 0
2 0
2 0
2 0
2 0
2 0
2 0
2 0
2 0
2 0
2 0
2 0
2 0
2 0
2 0
2 0
2 0
2 0
2 0
2 0
2 0
2 0
2 0
2 0
2 0
2 0
2 0
2 0
2 0
2 0
2 0
2 0
2 0
2 0
1 0
1 0
1 0
1 0
1 0
1 0
1 0
1 0
1 0
1 0
1 0
1 0
1 0
1 0
1 0
1 0
1 0
1 0
1 0
1 0
1 0
1 0
1 0
1 0
1 0
1 0
1 0
0 0
0 0
0 0
0 0
0 0
0 0
0 0
0 0
0 0
0 0
0 1
0 1
0 1
0 1
0 1
0 1
0 1
0 1
0 1
0 1
0 1
0 2
0 2
0 2
0 2
0 2
0 2
0 2
0 2
0 2
0 2
0 2
0 2
0 2
0 2
0 2
0 2
0 2
0 2
0 2
0 2
0 2
0 2
0 2
0 2
0 2
0 2
0 2
0 2
0 2
0 2
0 2
0 2
0 2
0 2
0 2
0 2
1 2
1 2
1 2
1 2
1 2
1 2
1 2
1 2
1 2
1 2
1 2
1 2
1 2
1 2
1 2
1 2
1 2
1 2
1 3
1 3
1 4
1 4
1 4
1 4
1 4
1 4
1 4
1 4
1 5
1 5
1 7
1 17
2 54
2 64
2 68
2 69
2 71
2 72
3 74
3 77
3 77
3 78
4 79
4 80
4 90
5 113
5 124
6 137
6 146
6 157
8 159
8 160
8 161
8 162
8 162
8 162
8 162
8 162
8 163
8 164
9 164
9 164
9 164
9 164
9 163
9 163
9 163
9 163
10 164
10 164
10 166
10 168
10 171
11 174
11 174
11 175
11 176
11 177
11 177
11 179
11 182
11 191
11 194
11 199
11 200
17 217
17 224
18 272
19 294
19 308
19 313
19 314
20 319
20 319
20 323
20 329
20 332
20 336
21 337
21 340
22 340
22 340
22 340
22 340
22 341
23 360
23 362
23 363
23 363
23 363
23 363
24 363
24 363
24 363
24 368
26 378
26 378
26 378
26 378
26 381
26 382
27 381
27 379
27 376
27 375
27 375
27 378
27 383
27 395
26 396
26 389
26 370
28 358
28 356
28 351
28 352
28 348
27 348
27 347
27 347
26 346
26 345
26 344
26 338
26 312
24 296
24 286
23 281
22 275
22 266
22 265
22 263
22 263
22 263
22 266
22 268
22 273
22 274
22 274
22 277
21 277
21 277
21 277
21 277
21 278
21 279
22 288
22 288
20 286
20 292
20 292
20 292
20 288
20 284
20 283
20 282
20 281
20 288
20 291
20 293
20 300
20 297
20 296
20 293
20 290
12 287
12 281
10 226
10 211
10 205
10 209
10 209
9 209
9 206
9 199
9 198
9 194
9 194
9 206
9 204
8 206
8 209
8 210
8 211
8 206
6 187
5 188
5 187
6 188
6 188
6 188
6 191
6 194
6 198
6 194
5 195
5 194
5 194
4 192
4 190
4 190
4 191
4 191
4 191
4 192
4 194
4 190
5 185
5 170
4 167
4 167
4 166
3 160
3 160
3 159
3 159
3 159
3 159
3 159
3 159
3 159
3 159
3 159
3 158
3 158
3 157
3 157
3 158
3 161
3 160
3 160
3 160
3 159
3 159
3 155
3 153
3 150
3 148
3 148
3 145
3 145
3 145
3 145
3 145
3 152
3 151
2 149
2 149
2 149
2 146
2 146
2 145
2 148
2 149
2 149
2 148
2 145
2 147
2 144
2 142
3 139
3 132
3 132
3 133
3 133
3 116
3 108
3 108
3 108
3 107
3 107
3 106
3 106
3 106
3 105
3 104
3 104
3 104
3 89
3 89
3 83
3 82
3 82
3 82
3 81
3 81
3 81
3 81
2 80
2 84
2 84
2 82
2 81
2 76
2 76
2 67
2 67
2 66
2 66
2 66
2 70
2 73
2 75
2 77
2 78
2 76
1 76
1 76
1 76
1 76
2 77
2 78
2 78
2 80
2 80
2 80
2 80
2 80
2 81
2 81
2 81
2 81
2 81
2 81
2 81
2 81
2 81
2 80
2 77
2 77
2 77
2 77
2 77
2 77
2 77
2 77
2 76
2 76
2 76
2 76
2 75
2 75
2 75
2 75
2 65
2 65
2 59
2 59
2 57
2 53
2 51
2 51
2 50
2 49
2 49
2 51
2 51
2 37
2 37
2 36
1 36
1 36
1 36
1 35
1 35
1 35
1 35
1 35
1 34
1 39
1 38
1 39
1 41
2 42
2 42
2 43
2 43
2 44
2 44
2 44
2 44
2 44
2 43
2 42
2 42
2 42
2 42
2 42
2 42
2 40
2 40
2 39
2 39
2 39
2 39
2 39
2 39
2 41
2 47
2 47
2 44
2 42
2 42
2 40
2 38
3 39
3 39
3 39
3 39
2 39
2 37
2 36
2 35
2 34
2 34
2 34
2 34
2 34
2 34
2 34
2 34
2 34
2 34
2 34
2 37
2 37
2 38
2 38
2 38
2 38
2 38
2 38
2 38
2 38
2 38
2 39
2 39
2 40
2 40
2 40
2 40
2 40
2 42
2 42
2 45
2 47
2 48
2 50
2 58
4 117
4 118
4 118
4 118
4 117
4 120
4 128
4 128
4 129
4 129
4 129
4 131
4 137
4 141
4 146
4 152
4 152
4 155
4 162
4 163
4 161
4 161
4 161
4 159
3 158
3 157
3 156
3 156
3 156
3 157
3 158
3 158
3 158
3 160
3 160
3 160
3 159
3 159
3 159
3 160
3 157
3 157
3 157
3 157
3 158
3 158
3 158
3 158
3 156
3 148
3 147
3 148
3 151
3 150
3 152
3 153
2 154
2 154
3 154
3 154
4 155
4 156
4 156
5 171
5 172
5 174
5 174
5 174
5 174
5 174
5 174
5 174
5 175
5 175
6 176
6 174
6 175
6 175
6 178
6 190
6 190
6 191
6 191
6 193
6 192
6 194
6 195
6 194
8 197
8 197
8 198
8 198
9 199
10 187
9 184
9 179
9 170
9 168
8 165
9 164
9 108
9 108
9 108
9 109
9 107
9 100
9 100
9 101
9 100
9 99
9 99
9 100
9 93
9 86
9 83
9 83
9 82
9 81
8 67
8 67
8 67
8 67
8 66
8 66
8 67
8 67
8 67
8 68
8 68
8 68
8 67
8 67
8 67
8 66
8 66
8 66
8 66
8 66
8 66
8 66
8 66
8 66
8 66
8 66
8 67
8 67
8 68
8 69
8 69
8 66
8 65
8 63
8 60
8 58
8 57
19 56
21 56
21 57
21 56
21 46
20 46
20 45
20 44
20 43
20 43
20 43
20 43
20 45
20 45
20 46
20 46
23 47
23 44
23 43
22 42
22 41
22 38
22 38
23 36
23 26
23 26
23 25
23 25
25 23
25 23
25 20
25 18
23 18
23 18
23 18
23 18
23 18
24 17
26 18
26 19
26 20
28 20
27 21
27 21
27 22
26 22
26 25
27 24
27 25
27 27
27 26
27 26
27 26
28 26
28 26
28 25
28 25
28 25
28 25
28 25
28 25
28 26
28 26
28 26
28 26
28 26
28 26
28 26
28 27
28 26
28 27
28 27
28 26
28 26
28 27
28 27
28 26
28 26
28 26
28 25
28 25
28 25
29 25
30 26
30 26
30 26
30 26
30 26
30 26
30 25
30 24
30 24
30 24
31 24
31 24
31 23
31 23
31 23
31 23
30 23
20 23
18 22
18 22
18 22
18 22
18 22
18 22
18 22
18 22
18 23
18 23
18 23
18 21
18 21
18 20
16 20
15 19
15 19
15 19
15 19
15 19
15 19
14 19
16 20
17 20
17 20
16 21
16 21
13 21
13 21
13 21
13 21
13 22
13 22
13 22
12 22
12 22
12 22
11 20
11 20
11 18
9 17
9 17
9 16
11 15
11 15
11 11
11 11
11 8
11 8
11 8
11 8
11 8
10 8
11 8
11 8
12 9
18 16
18 16
19 17
20 18
21 17
21 24
22 26
22 28
22 29
22 29
22 29
22 31
22 44
23 43
24 43
24 43
24 44
24 43
24 43
24 43
24 44
23 44
23 44
23 44
23 44
23 44
22 44
22 44
22 44
22 44
22 44
22 44
22 45
22 45
22 46
22 47
23 47
23 53
23 53
23 53
23 53
23 54
23 54
23 54
23 54
23 54
23 54
23 55
23 55
23 55
23 56
23 56
23 55
23 55
23 55
23 55
23 55
23 55
23 55
23 57
23 57
23 57
23 57
23 57
22 57
20 57
20 56
20 56
20 56
20 55
20 55
20 55
20 55
20 55
20 55
20 54
20 54
20 54
20 55
19 55
18 55
17 55
17 55
17 55
17 55
17 55
17 55
15 55
14 55
14 55
14 55
14 55
14 55
14 55
13 55
10 55
10 55
9 55
9 54
8 54
3 45
3 45
2 44
0 42
0 41
0 29
0 29
0 29
0 27
0 25
0 23
0 23
0 16
0 16
0 16
0 16
0 16
0 16
0 16
0 16
0 15
1 20
1 27
1 34
1 34
2 34
2 34
2 34
2 34
2 35
2 37
2 38
2 37
2 38
2 36
2 35
2 36
2 31
2 32
2 31
2 38
3 47
3 53
5 56
7 76
7 78
7 82
7 82
7 83
7 82
7 84
7 84
7 84
7 84
7 84
7 84
7 84
7 85
7 85
7 85
7 85
7 85
7 85
7 85
7 85
7 85
7 85
7 85
7 85
7 85
7 86
8 87
9 88
11 88
11 88
11 88
12 88
12 88
12 88
12 88
12 88
12 88
12 88
12 91
12 91
12 92
12 92
12 92
12 92
12 92
12 92
12 92
12 92
12 94
12 95
12 96
12 96
13 105
13 105
13 105
13 105
13 105
13 105
13 105
13 105
13 105
13 106
13 106
13 106
13 106
13 106
13 106
13 106
13 106
13 105
13 106
13 106
13 106
13 106
13 106
13 106
12 100
12 92
12 86
11 86
11 86
11 87
11 87
11 87
11 87
11 85
11 86
11 85
11 90
11 90
10 93
10 98
13 157
13 162
12 170
12 161
11 159
11 148
11 143
9 132
9 131
9 128
9 134
9 134
9 134
9 132
9 136
9 136
9 136
9 136
9 136
9 135
9 137
9 137
9 137
9 137
9 137
9 137
9 137
9 137
9 137
9 137
9 137
9 137
9 137
10 137
8 136
5 135
5 135
5 135
5 135
5 135
5 135
5 134
5 134
5 134
5 134
5 134
5 130
5 130
5 130
5 130
5 131
6 133
7 133
7 133
7 133
7 134
7 132
7 131
7 143
7 146
6 139
6 140
6 140
6 140
7 141
8 146
9 146
9 146
9 147
9 145
9 145
9 145
9 145
9 145
9 145
9 145
9 145
9 144
9 143
9 143
11 143
11 143
11 143
11 145
11 145
11 145
12 144
12 141
12 135
12 135
13 140
13 139
13 139
13 139
14 140
14 146
14 144
14 145
14 139
14 138
11 86
11 87
11 88
11 87
11 89
11 89
11 88
11 88
11 87
11 87
11 81
12 84
13 86
13 86
14 85
15 85
15 85
16 85
16 85
16 85
16 83
16 83
16 83
16 83
16 83
16 83
16 83
16 83
20 83
20 83
20 83
20 83
19 83
19 83
19 83
19 83
19 83
19 83
19 83
19 83
19 83
19 83
19 83
19 82
19 82
19 81
19 81
19 85
20 85
20 85
20 85
19 85
18 85
18 85
18 85
18 84
18 82
18 95
18 83
18 95
18 92
16 93
16 96
15 101
14 101
13 96
13 96
13 96
13 95
12 96
12 98
12 98
12 98
12 98
12 100
13 102
13 103
13 102
13 103
13 103
13 103
13 103
14 104
14 102
14 102
14 102
13 102
13 102
13 102
13 102
12 97
12 98
12 98
11 96
11 91
11 85
11 84
11 85
11 84
11 80
11 72
11 72
11 69
11 69
11 67
11 67
12 68
12 68
12 68
12 68
12 74
11 73
11 75
12 78
9 80
9 87
9 87
9 87
9 87
9 91
9 91
9 92
9 93
9 93
9 93
7 93
7 93
5 95
4 96
4 98
4 99
4 99
4 100
4 100
4 100
4 101
4 101
4 101
4 101
4 101
4 101
4 101
4 101
4 101
4 101
4 101
4 101
4 97
4 97
4 101
4 102
4 102
5 102
5 106
5 104
5 104
5 90
5 73
5 73
5 75
5 76
6 81
6 81
6 82
6 84
6 84
6 85
6 85
6 86
6 84
6 83
6 86
6 85
6 88
6 88
5 88
5 87
5 87
5 87
5 86
5 86
4 86
4 86
4 87
4 88
4 88
4 88
4 88
4 88
4 88
4 88
4 86
4 87
5 86
5 86
5 87
5 86
5 85
5 85
5 85
5 84
5 84
5 84
5 84
4 83
4 83
4 82
4 83
4 83
4 82
3 70
3 68
3 65
3 63
3 60
3 54
3 56
3 56
3 56
3 53
3 53
3 53
3 52
3 52
3 52
3 53
3 53
3 50
3 50
3 46
3 46
3 46
3 46
3 46
3 46
3 46
3 46
3 46
3 46
3 46
3 46
3 47
3 48
3 48
3 49
3 49
3 49
3 49
2 51
3 56
3 59
3 62
3 63
3 58
3 60
3 58
3 60
3 63
3 66
3 66
3 67
3 61
3 63
3 63
3 64
3 66
3 65
3 65
3 63
3 64
3 64
4 60
4 60
4 58
4 58
4 58
4 58
4 58
4 58
4 58
4 58
4 58
4 58
4 56
4 56
4 56
4 56
4 56
4 56
4 56
4 56
4 55
3 55
3 55
3 55
3 54
3 54
3 54
3 54
3 54
3 54
3 54
4 54
4 55
4 55
4 55
4 55
4 55
4 57
4 56
4 56
4 56
4 55
4 55
4 55
4 54
4 53
4 53
4 53
4 53
4 52
4 52
4 54
4 56
4 56
4 56
4 57
4 57
4 57
4 58
4 58
4 58
4 58
4 59
4 60
4 60
4 60
4 60
4 60
4 60
4 60
4 59
4 58
4 58
4 57
4 59
4 57
4 57
4 54
3 38
3 39
3 40
3 40
5 79
5 78
5 80
5 82
5 80
5 77
5 78
5 72
4 72
4 70
4 70
4 69
4 68
4 68
4 68
4 68
3 67
3 67
3 67
3 67
3 67
3 67
3 67
3 67
3 67
3 69
3 70
3 72
3 72
3 72
3 80
3 81
3 82
3 82
3 82
3 83
3 84
5 85
5 96
5 138
5 144
5 149
5 151
4 152
4 155
8 155
10 155
10 155
10 157
11 157
11 220
11 222
11 225
11 227
11 226
11 234
11 234
11 235
11 236
11 237
11 237
11 237
11 237
11 237
11 237
11 236
11 236
11 236
11 236
11 234
11 232
11 232
11 232
11 231
11 231
11 231
11 230
11 231
12 232
12 232
12 233
12 233
12 234
12 234
12 236
12 237
12 237
12 237
12 237
12 237
12 238
12 238
12 237
12 236
13 235
13 235
13 235
13 234
13 232
13 228
11 188
11 186
11 185
11 185
11 186
11 186
11 186
11 186
11 186
11 194
11 194
11 195
11 195
11 195
11 195
11 195
11 195
11 195
11 195
11 199
11 202
11 203
11 205
11 203
11 203
11 204
11 203
11 202
11 204
11 202
11 188
11 188
11 189
11 188
11 187
11 183
11 180
9 176
9 151
13 129
15 131
16 132
16 132
16 131
14 131
12 131
10 130
10 130
10 128
9 128
9 62
9 62
9 59
9 59
9 59
9 46
9 45
9 44
9 42
9 42
9 49
9 49
9 49
9 49
10 49
15 49
15 49
15 49
15 49
15 51
15 57
15 57
15 57
15 57
14 58
14 58
14 58
14 57
14 57
14 57
14 57
14 58
14 54
14 54
14 54
14 54
14 54
14 54
14 54
14 53
14 53
14 53
14 53
14 53
13 53
13 53
13 53
13 53
13 53
13 53
13 53
14 53
14 55
14 56
14 55
14 55
14 55
14 55
14 55
14 45
14 44
14 44
14 43
14 43
14 43
14 43
14 43
14 44
14 43
14 40
14 39
14 40
14 38
14 38
14 38
14 34
14 34
14 36
14 36
14 35
14 35
14 38
14 37
14 37
14 35
15 35
15 35
14 35
12 36
8 34
8 31
8 30
8 30
9 30
9 31
9 33
9 33
9 33
9 34
9 34
10 37
10 37
10 37
10 37
10 37
10 37
11 38
11 38
12 38
12 38
11 31
11 37
12 37
12 39
11 39
7 43
7 45
7 45
7 45
7 40
7 37
7 37
7 37
7 37
7 37
7 37
7 37
7 37
7 37
7 37
7 36
7 36
7 36
7 36
7 36
7 36
7 36
7 36
7 36
8 36
8 36
8 36
8 36
9 36
9 36
9 37
9 37
11 37
14 37
14 37
13 37
13 37
13 35
13 35
13 35
15 35
15 35
15 35
17 35
17 35
17 35
17 35
19 35
19 35
19 35
19 35
19 35
19 33
19 33
21 32
21 32
21 30
21 30
21 30
21 30
21 33
21 33
22 32
23 32
25 33
27 33
26 30
26 30
26 30
26 30
26 30
26 30
26 30
26 29
26 29
26 29
26 29
26 29
25 28
25 28
25 26
25 25
25 25
25 25
25 26
24 25
24 25
24 23
23 23
23 24
23 24
23 22
23 26
22 31
22 31
22 32
21 31
21 30
21 30
21 30
21 26
21 24
21 24
21 24
21 24
21 24
21 24
21 24
21 23
21 23
21 23
21 23
22 23
22 23
22 23
22 23
22 23
22 24
22 24
22 24
22 24
22 25
22 30
22 30
21 31
21 31
20 31
19 31
18 31
18 31
18 30
18 30
14 30
13 30
13 29
13 29
13 29
13 29
12 29
12 29
10 29
10 29
10 29
7 29
7 29
7 29
7 29
7 29
7 29
7 29
7 29
7 29
7 29
7 29
5 29
5 29
5 29
5 29
5 29
5 29
5 26
5 26
2 26
1 26
1 25
1 25
1 25
1 25
1 25
1 25
1 25
1 25
1 25
1 26
1 26
1 26
1 26
1 26
1 26
1 26
1 26
1 26
1 26
1 26
1 24
1 23
1 23
1 23
1 23
1 21
1 21
1 17
1 11
1 10
1 10
1 9
1 9
1 9
1 9
1 9
1 9
1 9
1 9
1 9
1 9
1 9
0 9
0 9
0 9
0 9
0 9
0 9
0 9
0 9
0 10
0 12
0 12
0 13
0 13
0 14
0 14
0 13
0 7
0 7
0 7
0 7
0 7
0 7
0 7
0 7
0 7
0 7
0 7
0 7
0 7
0 8
0 8
0 8
0 8
0 8
0 8
0 8
0 9
0 9
0 9
0 9
0 9
0 9
0 10
0 10
0 11
0 11
0 12
0 12
2 28
2 28
2 31
2 32
2 34
2 36
2 40
2 41
2 42
2 43
2 47
2 49
2 51
2 53
2 53
2 53
2 58
2 59
2 59
2 59
2 60
2 60
2 60
2 60
2 60
2 60
2 60
2 60
2 60
2 60
2 60
2 60
2 60
2 60
2 60
2 60
2 61
3 62
3 63
3 63
3 63
3 63
3 63
3 64
3 65
3 66
3 68
9 139
9 143
11 149
13 157
14 170
15 173
15 173
15 174
15 174
15 181
15 194
16 213
16 239
16 247
16 246
16 254
17 258
17 263
17 263
17 264
17 264
17 264
17 264
17 266
17 266
17 267
17 267
17 268
17 268
17 278
17 278
17 280
17 282
17 287
17 296
17 304
17 325
17 325
17 330
17 334
17 333
17 333
17 331
17 331
17 336
17 337
18 339
17 340
17 343
17 344
17 349
17 348
17 347
16 332
16 333
16 330
16 333
16 331
16 334
17 367
17 371
17 373
17 373
17 371
17 381
17 389
17 386
17 387
17 389
17 381
17 411
17 424
17 435
18 449
18 455
18 461
18 464
18 469
18 470
18 474
18 474
18 475
18 475
18 475
18 482
18 485
19 510
21 510
21 510
21 508
20 509
21 507
21 503
21 502
21 501
21 499
22 498
22 506
20 500
18 492
11 426
10 426
10 425
11 425
11 420
11 421
11 421
11 421
11 419
11 403
11 391
10 379
10 351
10 348
10 357
10 358
9 358
9 357
9 356
9 360
10 360
10 364
10 364
10 363
10 363
10 364
10 364
10 363
10 361
10 354
10 354
10 353
10 350
10 347
10 339
10 330
10 316
10 320
10 318
10 326
10 327
13 373
14 381
14 382
14 376
15 376
15 377
15 375
16 374
16 372
16 365
16 364
16 363
16 360
16 359
16 357
16 353
16 352
17 345
16 311
16 311
17 322
17 323
17 326
17 326
17 319
17 317
17 315
17 315
17 316
17 275
17 264
18 255
17 231
17 230
17 227
17 228
17 223
17 225
18 257
18 262
18 261
18 263
18 262
18 253
18 251
17 226
14 226
14 226
14 229
14 232
15 254
16 270
16 277
16 280
16 277
15 278
15 267
14 268
14 268
14 273
14 272
14 273
14 273
14 273
14 273
14 273
14 275
14 274
14 274
14 274
14 274
14 274
14 266
14 254
14 251
14 252
14 251
14 250
14 250
13 248
13 245
13 245
13 245
13 250
13 251
13 256
13 264
13 264
13 262
13 263
13 264
13 265
13 265
13 268
13 271
13 273
15 277
15 277
15 274
14 268
8 218
7 218
6 217
6 216
6 214
6 214
6 212
8 209
9 209
9 210
9 216
9 234
9 241
9 241
9 262
9 266
9 268
9 268
9 263
9 258
9 249
9 248
9 247
9 247
9 246
9 246
9 248
9 245
9 245
9 246
9 246
8 246
8 251
8 252
8 252
8 257
8 269
8 273
7 240
7 238
7 235
7 235
7 235
7 237
7 236
7 233
7 238
7 244
6 244
8 245
8 227
7 211
7 209
7 209
8 209
8 207
8 207
8 207
8 207
8 202
8 202
8 203
8 204
7 202
7 202
7 200
7 198
7 197
7 196
7 197
7 197
7 198
7 198
8 198
8 198
8 198
8 200
9 217
9 222
10 231
10 241
10 251
10 251
10 244
10 243
10 241
10 235
10 235
10 235
10 235
10 233
10 231
10 231
8 226
8 223
8 223
7 209
7 207
7 207
7 207
7 207
7 206
7 206
7 206
7 207
7 207
7 207
6 205
6 205
6 202
6 190
6 179
6 174
6 174
6 152
6 152
6 149
6 149
6 148
6 148
6 148
6 148
6 151
6 150
6 152
6 154
6 152
6 152
6 153
6 153
5 154
5 152
5 148
5 148
5 150
5 142
5 127
5 120
5 119
5 119
5 119
5 120
5 123
5 121
5 121
5 120
5 115
5 109
7 110
5 103
5 102
5 103
5 103
5 103
5 103
5 103
5 103
5 103
5 103
5 101
5 100
5 100
5 100
5 100
5 100
5 99
5 99
5 99
5 99
5 98
5 97
5 97
5 97
4 97
4 97
4 94
4 92
2 73
2 62
2 51
2 44
2 38
2 38
2 38
2 37
2 34
2 33
2 33
2 32
2 32
2 32
2 31
2 31
2 31
2 31
2 31
2 31
2 31
2 31
2 31
2 31
2 31
2 30
2 30
2 29
2 29
2 29
2 29
2 30
2 30
2 30
2 28
2 28
2 28
2 28
2 28
2 28
2 28
2 28
2 28
2 28
2 28
2 25
2 24
2 22
2 20
2 20
2 20
2 19
2 19
2 18
2 18
2 15
2 13
2 11
2 11
2 11
2 9
2 8
2 8
2 8
2 8
2 6
2 6
2 6
2 6
2 6
2 5
0 4
0 4
0 3
0 2
0 2
0 2
0 2
0 2
0 2
0 2
0 2
0 2
0 2
0 2
0 2
0 2
0 2
0 2
0 2
0 2
0 2
0 2
0 2
0 2
0 2
0 2
0 1
0 1
0 1
0 1
0 1
0 1
0 1
0 1
0 1
0 1
0 1
0 1
0 1
0 1
0 1
0 1
0 1
0 1
0 1
0 1
0 1
0 1
0 1
0 1
0 1
0 1
0 1
0 3
0 4
0 7
0 29
0 31
0 31
0 35
0 37
0 40
0 43
0 44
0 44
0 44
0 44
0 44
0 44
0 44
0 44
0 44
0 44
1 49
1 49
1 50
1 50
1 51
1 51
1 51
1 51
1 51
1 51
1 52
1 52
1 52
1 52
1 54
1 54
1 54
1 54
1 64
1 64
1 64
1 64
1 67
1 68
1 69
1 72
1 73
1 74
2 74
2 75
2 76
2 76
2 81
2 81
2 81
4 95
4 97
4 97
4 97
4 96
4 96
4 97
4 97
4 97
4 97
4 97
4 97
4 97
4 97
4 97
4 97
4 97
4 97
4 97
4 97
4 98
4 98
4 98
5 101
5 101
5 101
5 101
5 104
5 104
5 104
5 107
5 110
5 115
5 118
5 120
5 119
5 119
5 119
5 118
5 118
5 118
5 118
5 118
5 117
5 117
5 112
5 110
5 105
5 87
5 86
5 85
5 84
5 82
5 82
5 80
5 80
5 81
5 81
5 81
5 81
5 81
5 81
5 81
5 80
5 80
4 75
4 76
4 76
4 76
4 76
4 75
4 75
4 75
4 76
4 78
4 79
4 82
4 83
4 84
4 82
4 82
4 82
4 81
4 74
4 75
4 75
4 73
4 72
4 71
4 69
4 66
4 69
4 67
3 72
3 72
3 72
3 72
3 70
3 69
2 70
1 57
1 57
1 57
1 57
1 59
1 59
1 59
1 59
1 60
1 60
1 60
1 60
1 60
1 60
1 62
1 62
1 63
1 72
1 72
1 73
1 74
2 76
2 77
1 75
1 75
1 75
1 77
1 74
1 72
1 70
1 65
1 61
1 60
1 59
1 59
1 59
1 59
1 60
1 60
1 60
1 60
1 60
1 59
1 59
1 59
1 59
1 59
1 59
1 57
1 57
1 57
1 58
1 58
1 58
1 58
1 58
1 57
1 57
1 57
1 64
1 66
1 66
1 69
1 69
1 68
1 69
1 69
1 70
1 70
1 71
1 71
1 71
1 72
1 73
1 71
1 71
1 71
2 71
2 70
2 71
2 72
2 72
2 89
2 92
2 92
2 95
2 97
2 97
2 100
2 103
2 102
2 99
2 101
2 100
2 101
2 102
2 101
2 102
2 102
2 100
2 100
2 101
2 102
2 101
2 100
2 101
2 105
2 105
2 105
2 103
2 103
2 103
2 102
2 101
2 101
2 100
2 100
2 89
2 89
2 88
1 87
1 86
1 88
1 91
1 91
1 91
1 92
1 100
1 101
1 102
1 102
1 102
1 102
1 102
1 104
1 107
1 109
1 108
1 108
1 108
1 109
1 110
1 110
1 111
1 110
1 110
1 114
1 115
1 115
2 115
3 116
3 116
3 116
3 126
3 127
3 127
3 127
3 128
3 127
3 120
3 120
3 119
3 119
3 119
3 122
3 121
3 123
3 123
3 124
3 124
3 124
3 124
3 122
3 122
3 120
3 119
3 117
2 116
2 114
2 114
2 113
2 111
2 93
2 85
2 87
2 87
2 87
2 88
2 87
2 83
2 83
2 82
2 80
2 79
2 79
2 78
2 78
2 77
2 77
2 76
2 76
2 76
2 73
2 73
2 73
2 74
2 72
2 72
2 73
2 74
2 77
2 77
2 78
2 81
2 81
2 81
2 81
2 83
2 82
2 82
2 82
2 82
2 79
2 76
2 76
2 75
2 72
2 67
2 66
2 66
2 66
2 67
2 66
2 65
2 64
2 60
2 58
2 58
2 58
2 58
2 58
2 57
2 57
3 59
3 64
3 74
3 71
3 79
3 79
2 80
1 78
1 79
1 79
1 80
1 78
1 79
1 82
1 82
1 82
1 91
1 92
1 93
1 92
1 93
1 89
1 89
1 88
1 87
1 88
1 88
1 88
1 91
1 90
1 91
1 92
1 96
1 98
1 100
1 100
1 100
1 100
1 101
1 101
1 101
1 99
1 100
1 99
1 96
1 96
1 95
1 95
1 95
1 95
1 95
1 95
1 95
1 95
1 95
1 95
1 95
1 97
2 106
2 108
2 109
2 111
2 111
2 111
2 111
2 110
2 111
2 109
2 109
2 109
2 105
2 105
2 106
2 106
2 105
2 105
2 105
2 105
2 105
3 105
3 109
3 108
3 108
3 108
3 107
3 107
3 107
3 107
3 106
3 106
3 106
3 106
3 107
4 112
4 124
4 125
4 128
4 130
5 135
5 132
4 126
5 123
5 114
5 112
5 106
5 106
5 106
5 106
5 103
5 103
5 95
5 95
5 95
5 90
5 90
5 89
5 81
6 81
6 81
6 79
7 79
8 95
10 178
13 255
13 274
13 284
14 284
14 291
14 292
14 291
14 307
14 306
14 335
14 336
14 334
14 335
14 335
14 335
14 340
14 341
14 341
14 341
14 340
14 340
14 341
14 342
14 344
14 346
14 346
14 347
14 347
14 347
15 347
16 349
16 351
16 353
16 357
16 355
15 349
15 351
15 350
15 351
16 352
16 353
16 353
16 352
16 351
16 350
16 350
16 350
16 350
16 350
16 349
16 349
16 350
20 353
20 356
21 357
24 360
23 370
23 377
24 381
25 385
27 391
27 389
27 388
27 387
27 387
27 387
27 387
27 385
27 385
26 379
26 372
25 374
27 382
27 398
27 416
27 421
27 422
27 423
26 429
26 466
26 471
26 477
25 496
25 497
25 496
25 499
25 499
25 499
25 499
25 500
26 504
26 502
26 503
24 502
24 502
24 503
22 504
22 503
22 477
18 369
18 322
20 347
20 351
20 373
20 371
20 372
20 373
20 359
20 360
20 346
20 347
20 349
20 349
20 352
20 352
20 348
20 347
20 347
20 347
20 348
20 348
20 348
20 347
20 346
20 343
20 347
20 347
19 356
19 356
18 355
19 357
19 357
19 365
19 387
19 395
18 400
18 398
18 398
18 398
18 397
18 397
18 397
18 402
19 403
19 403
19 403
19 403
18 405
18 405
17 406
15 403
15 400
9 396
9 392
5 390
5 386
5 366
5 356
5 351
5 348
5 346
5 346
5 349
5 349
5 349
5 356
5 356
5 358
5 359
5 371
5 361
5 359
5 347
5 320
5 309
5 306
5 306
5 304
5 296
5 246
5 239
5 238
5 243
5 242
5 244
5 244
5 245
5 246
5 246
5 245
4 239
4 240
4 240
4 240
4 238
4 236
4 229
4 225
4 222
4 221
3 221
2 189
2 183
2 161
2 164
2 163
2 168
2 171
2 168
2 150
2 149
2 144
2 146
2 145
2 144
2 144
2 144
2 144
2 144
2 145
2 146
2 147
2 147
2 148
2 148
2 144
2 144
2 134
2 135
2 135
1 130
1 122
1 113
1 92
1 86
1 83
1 95
1 95
1 96
1 99
1 99
1 100
1 97
0 102
0 103
1 103
1 101
1 100
1 99
1 100
1 100
1 100
1 100
1 100
1 100
1 100
1 100
1 101
1 101
1 101
1 101
1 101
1 97
1 96
2 96
2 92
2 92
2 90
3 90
3 78
3 78
3 78
3 78
3 78
3 78
3 78
3 80
3 81
4 88
4 89
4 89
4 88
4 85
4 86
4 84
4 85
4 87
4 96
4 98
4 101
4 107
4 108
4 118
4 132
4 132
4 136
4 139
4 139
5 139
5 139
5 140
5 140
6 141
6 141
6 137
6 136
6 129
7 128
7 129
7 130
7 130
7 130
7 128
7 131
12 138
13 139
13 140
15 141
15 147
16 168
16 168
20 168
20 172
20 176
23 277
23 285
25 312
27 389
27 399
28 407
29 414
30 483
30 484
30 488
30 510
30 526
30 527
30 571
30 582
30 589
30 596
30 600
30 596
29 595
29 597
29 603
29 613
29 623
29 625
29 632
29 641
29 644
29 647
29 656
29 662
29 662
29 664
29 666
29 667
29 667
29 667
29 667
29 667
29 668
28 668
28 669
28 669
28 670
27 671
27 682
27 689
27 696
27 716
27 753
27 775
27 776
27 778
27 782
26 781
26 783
26 810
26 817
26 823
26 834
26 836
26 840
26 842
26 831
26 826
26 827
26 820
26 818
26 812
26 798
26 799
26 799
26 798
26 801
25 805
25 805
24 810
24 816
24 821
24 822
24 821
24 822
23 823
23 823
23 823
23 821
20 821
20 820
19 819
18 817
10 814
6 811
5 810
4 807
4 799
4 780
4 780
4 776
4 767
4 760
6 618
6 587
5 573
4 543
4 546
3 546
2 532
2 448
2 440
2 428
2 417
2 414
2 408
2 392
2 376
2 371
2 366
2 358
2 365
2 366
2 401
2 403
2 394
2 383
2 383
2 383
2 377
2 375
2 378
2 376
2 372
2 375
2 379
2 380
2 381
2 381
2 381
2 381
2 381
2 382
2 380
2 381
2 386
2 386
2 381
2 369
2 364
2 355
2 314
2 311
2 295
2 291
2 287
2 290
2 279
2 273
2 242
2 233
2 226
2 223
2 222
2 217
2 214
2 214
2 214
3 224
3 223
3 225
3 225
4 226
4 229
4 225
4 224
4 221
4 218
4 216
4 215
4 207
4 206
4 204
4 202
4 202
4 202
4 201
4 201
4 200
4 200
4 201
4 201
4 202
3 198
2 198
2 198
2 200
2 205
2 218
2 223
2 225
2 225
2 220
2 220
3 220
3 219
4 219
4 214
4 212
4 209
4 200
4 200
4 199
4 200
4 192
4 189
4 188
4 186
6 188
6 188
6 188
6 185
6 181
6 142
6 133
6 129
6 127
6 127
6 125
6 122
6 122
6 115
6 113
6 113
6 111
6 107
6 106
6 105
6 106
6 106
6 106
6 117
6 116
9 126
9 131
9 129
9 145
9 147
9 147
9 149
9 149
9 154
9 143
9 143
9 143
9 141
9 139
9 139
9 138
9 138
9 138
9 138
9 139
9 138
9 140
9 141
9 141
10 141
9 134
9 135
9 134
9 133
8 133
8 134
8 134
8 131
8 130
8 128
8 127
8 136
10 164
10 166
10 168
10 168
10 167
10 169
10 170
10 170
10 170
10 171
10 170
10 168
10 168
10 167
10 167
11 169
10 163
10 156
9 145
9 143
9 141
9 140
9 141
9 142
9 155
9 158
9 165
9 170
9 172
9 171
9 172
9 172
9 172
9 172
9 172
9 172
9 172
9 173
7 171
7 175
7 182
7 184
7 185
7 187
7 188
7 188
7 190
7 197
7 210
7 222
7 222
7 226
7 226
7 228
7 228
7 228
7 232
8 232
8 231
8 232
8 232
8 221
8 221
5 206
5 202
5 198
5 187
5 183
5 184
5 184
5 185
5 185
5 185
5 188
5 188
5 188
5 188
5 190
5 196
5 199
5 203
5 211
5 215
5 215
5 213
5 212
5 213
4 216
4 207
4 215
4 213
4 216
4 217
4 213
4 213
3 211
3 212
4 212
4 259
4 252
3 230
3 235
3 238
4 244
4 247
5 250
5 252
5 270
5 273
5 275
5 275
5 276
5 276
5 276
5 275
4 272
4 272
4 273
4 273
4 273
4 271
4 268
4 268
4 266
4 258
4 255
4 246
4 245
4 244
4 244
4 245
4 245
5 247
5 248
5 249
5 248
5 248
5 248
6 245
6 241
6 236
6 238
6 238
6 235
7 237
7 236
7 235
7 228
7 206
7 211
7 219
7 221
7 230
7 229
7 233
7 237
7 232
6 230
6 230
6 231
6 231
6 232
6 231
6 231
6 231
6 233
6 233
6 233
6 231
6 229
6 230
6 230
6 230
6 228
6 232
6 232
6 227
6 224
6 217
6 211
6 207
6 204
6 202
6 202
6 201
6 201
6 201
7 202
7 202
7 195
10 195
13 198
13 198
13 206
13 210
22 225
23 231
22 234
22 188
22 194
22 192
22 185
22 180
21 177
21 176
20 173
20 170
21 156
21 157
21 160
22 169
22 169
22 173
22 173
22 174
24 176
24 178
25 179
25 177
25 177
25 177
25 177
25 177
25 177
25 177
25 176
25 176
25 174
25 174
25 174
25 173
25 173
24 171
24 169
24 169
24 169
25 169
25 169
24 169
24 167
24 165
24 163
24 163
24 161
23 160
23 159
23 158
23 153
23 149
23 143
23 131
23 131
23 127
23 126
23 123
23 118
23 117
23 116
23 116
23 116
23 116
23 115
24 115
24 114
24 113
24 111
24 111
24 111
24 111
24 111
24 108
24 108
24 102
24 98
24 94
24 93
24 93
25 93
25 94
26 94
29 95
29 95
31 95
29 95
29 95
29 97
28 96
28 94
28 94
24 93
24 91
21 86
18 78
18 69
18 64
15 49
15 43
15 42
15 39
15 37
15 36
15 35
15 33
15 31
15 30
15 30
15 29
14 27
14 26
12 19
11 8
11 7
11 7
11 7
11 7
11 7
11 6
10 6
10 6
10 6
10 6
10 6
10 6
10 6
10 6
10 6
10 6
11 6
11 6
11 6
12 6
12 6
12 6
12 6
12 6
12 7
11 9
11 9
11 9
11 9
12 9
12 9
14 9
14 9
15 9
15 9
15 9
15 9
15 9
15 9
15 9
15 9
15 8
15 8
15 8
15 8
15 8
15 8
15 8
16 8
16 8
16 8
15 8
15 8
15 8
15 8
15 8
15 8
14 8
14 8
14 8
14 8
14 8
10 8
10 8
9 8
9 8
9 8
7 7
6 7
6 6
6 6
8 6
10 6
19 6
23 6
27 3
27 3
27 3
27 3
29 3
29 3
29 3
29 3
30 3
30 3
30 3
30 3
30 3
30 3
30 3
30 3
30 3
30 3
30 3
31 3
31 3
32 3
35 3
35 3
40 3
41 3
41 3
41 3
41 3
44 3
46 3
47 3
47 3
47 3
47 3
47 3
50 3
50 3
52 3
54 3
54 3
54 3
54 3
55 3
61 4
68 4
68 4
70 4
70 4
70 4
70 2
69 1
69 1
67 1
67 1
67 1
66 1
66 1
68 1
70 1
72 1
73 1
74 1
80 1
84 1
86 1
92 1
115 1
119 1
119 1
121 1
121 1
121 2
121 2
121 2
121 2
121 2
121 2
122 2
122 3
122 3
122 3
122 3
122 3
122 3
123 3
123 3
125 3
124 3
125 3
126 3
127 3
127 3
140 3
141 3
137 3
138 3
132 3
131 3
126 3
124 3
124 3
125 3
125 4
126 4
126 4
126 4
125 4
125 4
125 4
125 4
125 4
125 4
125 4
126 4
126 4
125 4
125 3
125 3
124 3
125 3
125 3
123 3
125 3
133 4
146 4
146 4
147 4
145 4
152 4
151 4
150 4
150 4
150 4
155 4
155 4
163 5
162 5
164 5
164 5
194 5
197 5
204 5
206 6
202 6
197 6
198 6
195 6
194 6
195 6
198 6
199 6
199 6
200 6
198 6
198 6
198 6
198 6
197 6
195 6
192 6
188 6
192 6
186 6
188 6
187 6
191 6
173 5
183 5
203 5
320 6
334 8
342 8
354 7
367 7
400 8
422 8
437 8
439 8
439 8
441 8
442 8
444 8
444 8
444 8
443 8
441 8
441 8
440 8
441 8
440 8
437 8
437 8
425 8
425 8
425 8
423 8
423 8
421 7
421 7
421 7
421 7
420 7
419 7
419 7
419 7
420 7
420 7
420 7
420 7
420 7
420 7
420 7
420 7
420 7
420 7
420 7
421 7
422 7
425 7
423 7
427 7
429 7
431 7
427 6
423 8
425 10
433 10
442 10
457 9
511 9
608 9
641 9
679 9
687 9
701 9
712 8
721 8
747 8
830 8
897 8
971 9
1079 9
1089 9
1244 9
1270 10
1341 10
1431 10
1643 10
1679 10
1685 10
1695 10
1700 10
1705 10
1710 10
1725 10
1791 10
1798 10
1805 10
1948 10
1994 10
2084 10
2197 10
2237 9
2278 9
2280 9
2291 9
2273 9
2311 9
2279 9
2213 6
2219 7
2205 7
2244 7
2248 7
2239 7
2239 7
2264 7
2264 7
2274 7
2284 7
2284 7
2295 7
2298 7
2299 7
2300 7
2301 7
2313 7
2313 7
2312 7
2312 7
2313 7
2315 7
2320 7
2319 7
2321 7
2322 7
2322 7
2323 7
2324 7
2328 7
2329 10
2332 10
2336 13
2345 13
2350 13
2350 13
2353 14
2358 14
2361 14
2364 15
2370 15
2370 16
2421 20
2440 20
2442 25
2458 27
2461 27
2464 28
2459 29
2462 29
2440 29
2531 29
2525 30
2790 79
2792 83
2794 81
2790 92
2777 103
2763 103
2713 104
2634 107
2604 107
2577 107
2560 107
2546 107
2573 107
2560 109
2513 108
2449 108
2554 108
2517 109
2445 109
2437 109
2271 109
2191 109
2067 111
1960 111
1617 111
1603 111
1591 111
1586 111
1580 111
1578 111
1580 111
1586 112
1588 112
1648 113
1649 114
1626 115
1591 115
1577 115
1527 121
1494 122
1458 122
1452 122
1439 123
1446 123
1398 123
1391 124
1370 125
1374 125
1384 125
1362 125
1381 125
1374 125
1393 125
1550 139
1670 158
1745 166
1772 171
1782 171
1794 177
1800 178
1802 178
1802 178
1803 178
1795 179
1798 180
1798 180
1798 181
1809 181
1818 181
1831 181
1872 181
1877 181
1882 181
1885 181
1896 179
1909 179
1919 179
1943 175
1944 174
1958 172
1951 172
1949 170
1955 170
1956 169
1951 169
1962 169
1964 168
1960 168
1954 167
1918 163
1910 159
2067 158
2110 158
2128 158
2132 157
2135 155
2121 154
2149 153
2058 151
2058 150
1986 92
2011 88
2981 89
3003 89
3026 85
3092 85
3300 88
3522 85
3690 86
3882 87
3918 87
3941 87
3912 87
3884 85
3871 85
3828 84
3635 84
3637 84
3623 84
3619 84
3611 84
3638 84
3649 82
3649 82
3650 82
3654 81
3662 83
3662 83
3661 83
3662 83
3656 83
3667 90
3655 93
3601 92
3591 91
3569 91
3574 91
3638 92
3691 86
3835 86
3886 86
3996 86
4115 86
4283 90
4314 90
4325 89
4322 90
4338 90
4385 89
4892 90
5222 93
5291 92
5238 88
5034 69
4962 61
4865 51
4849 50
4846 49
4848 49
4844 50
4830 50
4837 50
4845 50
4849 49
4858 49
4864 49
4861 48
4854 48
4852 49
4802 49
4796 49
4805 49
4806 50
4807 50
4793 50
4790 51
4793 51
4797 51
4812 51
4811 51
4813 51
4817 51
4816 51
4810 51
4804 51
4791 51
4777 50
4779 50
4772 50
4714 50
4708 50
4592 49
4555 49
4548 49
4534 48
4531 48
4523 48
4484 47
4434 47
4333 47
4180 47
4113 47
3302 46
3258 46
3088 43
3055 43
2790 41
2722 41
2588 41
2522 40
2523 40
2631 41
2637 41
2646 43
2654 42
2788 44
2796 44
2779 44
2823 45
2826 45
2824 45
2794 45
2790 45
2786 45
2785 45
2782 45
2776 44
2777 44
2775 44
2772 44
2768 44
2747 35
2742 34
2735 34
2716 34
2707 34
2700 34
2607 33
2552 33
2340 31
2304 31
2215 31
2151 29
2012 25
1992 25
1972 25
1949 24
1908 23
1793 23
1144 16
963 10
927 9
922 9
923 8
924 8
924 8
923 8
925 8
921 8
924 8
926 7
896 7
908 7
905 7
900 7
903 8
903 8
902 8
903 8
901 8
886 8
880 8
874 8
868 8
861 8
859 9
848 10
844 10
888 10
959 12
969 13
969 13
966 13
971 13
962 13
965 13
961 12
957 12
958 12
958 12
957 12
956 12
956 12
957 12
959 12
958 12
954 12
950 12
950 12
946 12
940 12
931 12
909 12
903 12
893 12
881 12
869 12
804 12
795 12
797 12
801 11
694 9
686 9
662 9
652 9
546 8
540 8
539 7
486 7
486 7
488 7
488 7
491 7
498 7
498 7
499 7
497 7
496 7
495 7
496 7
498 7
501 7
499 7
496 7
495 7
495 7
494 7
495 7
491 7
485 7
469 7
460 7
421 7
405 7
395 7
391 7
382 7
381 7
379 7
379 7
378 7
379 7
375 7
365 6
365 6
363 6
361 6
360 6
358 6
358 6
355 6
352 6
333 6
332 6
330 6
327 5
326 5
323 5
322 5
317 5
314 5
313 5
307 5
305 3
304 3
298 3
288 3
270 3
185 3
125 0
117 0
115 0
115 0
115 0
114 0
110 0
113 0
112 0
115 0
118 0
118 0
120 0
119 0
114 0
114 0
113 0
112 0
112 0
112 0
112 0
109 0
106 0
106 0
92 0
88 0
86 0
86 0
83 0
75 0
70 0
68 0
73 0
78 0
81 0
80 0
77 0
69 0
74 0
78 0
80 0
82 0
84 0
85 0
84 0
90 0
91 0
97 0
102 0
108 0
108 0
139 2
180 2
188 2
198 3
199 3
199 3
200 3
202 3
206 4
225 9
228 9
228 10
231 11
270 11
288 11
380 12
573 14
704 15
780 16
815 16
825 29
827 50
838 64
843 76
844 80
901 85
905 85
911 85
916 85
918 85
920 86
920 86
921 86
921 86
921 86
921 86
926 86
926 86
926 86
927 86
963 88
1009 91
1035 91
1238 99
1248 100
1252 100
1255 100
1260 100
1264 101
1268 101
1269 101
1274 101
1274 102
1277 103
1278 103
1281 104
1280 104
1281 104
1277 104
1277 104
1278 104
1280 104
1280 104
1280 104
1283 104
1285 104
1285 104
1285 104
1285 104
1285 104
1285 104
1286 104
1286 104
1286 104
1286 104
1288 104
1289 104
1290 104
1295 104
1290 104
1282 104
1268 104
1267 104
1266 104
1263 104
1265 104
1263 104
1262 104
1265 104
1355 109
1366 110
1382 110
1383 110
1384 110
1418 110
1429 110
1427 110
1454 110
1449 110
1447 109
1407 106
1370 104
1364 104
1354 104
1353 104
1354 104
1353 104
1352 104
1348 104
1329 98
1326 98
1309 94
1303 93
1260 91
1213 86
1034 68
831 52
747 50
715 48
705 46
700 46
696 35
688 31
688 28
684 27
637 22
634 22
632 22
629 22
629 22
629 22
629 22
628 22
628 22
626 22
625 22
621 22
620 22
616 22
611 21
552 18
499 15
474 15
277 6
276 6
278 6
279 6
277 6
276 6
273 6
273 6
271 6
271 6
270 6
270 6
269 6
268 6
268 6
267 6
267 6
267 6
265 6
264 6
263 6
261 6
259 6
259 6
259 6
259 6
259 6
259 6
259 6
259 6
259 6
259 6
256 6
255 6
252 6
247 6
245 6
245 6
244 6
243 6
240 6
240 6
239 6
227 5
215 5
198 5
38 1
28 0
18 0
17 0
9 0
9 0
9 0
9 0
8 0
7 0
7 0
7 0
7 0
7 0
7 0
7 0
7 0
6 0
6 0
6 0
6 0
6 0
6 0
6 0
6 0
6 0
6 0
6 0
6 0
6 0
6 0
6 0
6 0
6 0
6 0
6 0
6 0
6 0
6 0
6 0
6 0
6 0
6 0
6 0
7 0
7 0
8 0
8 0
8 1
9 1
9 1
10 1
12 4
12 4
11 4
11 4
8 4
7 4
7 4
7 4
7 4
7 4
8 4
8 4
8 4
8 4
8 4
8 4
8 4
8 4
8 4
8 4
9 4
11 4
11 4
11 4
11 4
11 4
11 4
11 4
11 4
18 4
19 4
19 4
19 4
19 4
19 4
21 4
23 4
30 4
40 4
41 4
43 4
48 4
51 5
52 5
51 5
51 5
53 5
54 5
55 5
56 5
59 6
64 6
66 6
66 6
66 6
66 6
66 6
66 6
66 6
66 6
66 6
67 6
67 6
67 6
67 6
67 6
67 6
67 6
67 6
68 6
68 6
68 6
69 6
71 6
71 6
71 6
71 6
71 6
72 6
74 6
76 6
91 6
92 6
173 7
179 7
180 7
182 7
182 7
184 5
185 5
185 5
186 4
185 4
186 4
197 5
208 5
208 4
209 4
210 4
212 4
211 4
211 4
211 4
213 4
214 4
215 4
215 4
215 4
215 4
216 4
216 4
217 4
217 4
217 4
217 4
216 4
215 4
216 4
216 4
218 4
218 4
221 4
221 4
222 4
221 4
220 4
220 4
226 4
226 4
223 4
224 4
224 4
225 4
224 4
233 4
232 4
238 6
237 6
227 6
227 6
225 6
220 5
219 5
219 5
224 5
229 5
230 5
233 5
231 5
237 5
235 4
234 4
235 4
244 4
245 4
245 4
245 4
245 4
245 4
245 4
244 4
243 4
243 4
243 4
243 4
242 4
242 4
242 4
240 4
241 4
255 4
257 5
260 5
260 5
260 5
260 6
258 6
246 6
242 6
238 6
232 6
196 5
196 5
159 5
156 5
159 5
159 5
158 5
158 5
156 5
155 5
154 5
153 5
152 4
143 4
132 4
132 4
131 4
130 4
129 5
130 5
131 5
134 5
170 6
200 6
204 6
205 7
206 8
208 8
212 8
213 8
215 8
222 8
223 8
223 8
223 8
223 8
222 8
219 8
219 8
219 8
217 8
216 8
216 9
215 9
215 9
214 9
208 9
207 9
207 9
208 9
208 9
210 9
210 9
201 9
200 9
192 7
193 7
203 7
208 7
210 7
210 7
212 7
214 7
213 7
209 7
265 8
273 8
320 8
315 8
316 8
316 8
317 8
309 8
308 8
308 8
308 8
308 8
309 8
309 8
309 8
310 8
311 8
311 8
311 8
314 8
315 8
314 8
313 8
308 7
300 7
298 6
297 6
295 6
294 6
294 6
293 6
292 6
291 6
291 6
291 6
290 6
290 6
289 6
289 6
287 6
287 6
287 6
287 6
287 6
287 6
290 6
290 6
315 6
315 6
315 6
313 6
314 6
310 5
312 5
310 5
306 5
293 5
244 2
239 2
236 2
237 2
237 2
237 2
236 2
234 2
234 2
229 2
229 2
229 2
229 2
229 2
229 2
229 2
229 2
228 2
228 2
227 2
227 1
227 1
227 1
227 1
227 1
227 1
227 1
226 1
225 1
223 1
222 1
220 1
216 1
211 1
217 1
220 1
223 1
219 1
219 1
220 1
218 1
214 1
204 1
144 0
138 0
98 0
99 0
99 0
99 0
101 0
102 0
102 0
102 0
102 0
102 0
102 0
103 0
103 0
102 0
102 0
101 0
99 0
99 0
99 0
101 0
110 0
110 0
109 0
110 0
111 0
111 0
113 0
114 0
114 0
115 0
116 0
117 0
118 1
118 1
118 1
121 1
121 1
121 1
121 1
120 1
120 1
120 1
120 1
118 1
120 1
133 1
142 1
141 1
141 1
143 1
147 1
149 1
148 1
155 1
154 1
154 1
146 1
148 1
148 1
149 1
149 1
147 1
148 1
148 1
170 3
169 3
170 3
170 3
170 3
169 3
169 3
169 3
169 3
169 3
170 3
172 3
175 3
183 3
183 3
185 3
188 3
189 3
210 3
264 3
267 3
278 3
274 3
273 3
268 3
260 3
251 3
245 3
249 3
253 3
256 3
263 3
265 3
265 3
265 3
267 3
269 3
275 3
277 3
278 3
277 3
276 3
279 3
282 3
283 3
283 3
283 3
283 3
282 3
283 3
283 3
283 3
284 3
285 3
283 3
278 3
270 3
271 3
272 3
283 3
286 3
290 3
304 5
306 5
305 5
305 5
305 4
305 4
307 4
307 4
308 4
305 4
307 4
340 4
353 4
358 4
363 4
361 4
346 4
349 4
344 4
314 4
306 4
307 4
310 4
309 4
308 4
305 4
305 4
299 4
300 4
300 4
300 4
301 4
301 4
300 4
300 4
302 4
301 4
304 4
284 2
284 2
288 2
290 3
293 3
292 4
294 4
294 4
292 4
291 4
289 4
320 4
325 4
321 4
320 4
320 4
317 4
312 4
291 4
243 4
244 4
238 4
238 5
237 5
237 5
236 5
235 5
232 5
224 5
213 5
212 5
208 5
207 5
209 5
209 5
205 5
200 5
198 5
197 5
197 5
199 5
199 5
199 5
197 5
197 5
197 5
197 5
197 5
197 5
196 5
197 5
237 5
241 5
239 5
240 5
240 5
241 5
243 5
242 5
231 4
224 4
217 4
209 3
207 3
208 3
208 3
208 3
207 3
205 3
205 3
204 3
206 3
208 3
169 3
178 3
182 3
184 3
185 3
186 3
183 3
184 3
184 3
184 3
180 3
179 3
183 3
183 3
183 3
183 3
183 3
182 3
182 3
183 3
183 3
186 3
186 3
187 3
186 3
186 3
184 3
181 3
180 3
176 2
174 2
171 1
168 1
166 1
166 1
165 1
163 1
161 1
131 1
127 1
127 1
127 1
127 1
127 1
127 1
127 1
127 1
127 1
125 1
125 0
125 0
125 0
125 0
125 0
125 0
125 0
125 0
125 0
125 0
125 0
123 0
123 0
123 0
122 0
122 0
122 0
118 0
117 0
117 0
116 0
116 0
116 0
111 0
111 0
111 0
109 0
107 0
107 0
71 0
70 0
70 0
69 0
68 0
67 0
65 0
65 0
64 0
61 0
61 0
61 0
60 0
60 0
60 0
59 0
58 0
58 0
58 0
55 0
46 0
41 0
38 0
23 0
15 0
13 0
13 0
12 0
12 0
12 0
12 0
12 0
9 0
4 0
1 0
1 0
1 0
0 0
0 0
0 0
0 0
0 0
0 0
0 0
0 0
0 0
0 0
0 0
0 0
0 0
0 0
0 0
0 0
0 0
0 0
0 0
0 0
0 0
0 0
0 0
0 0
0 0
0 0
0 0
0 0
0 0
0 0
0 0
0 0
0 0
0 0
0 0
0 0
0 0
0 2
1 22
1 22
1 22
1 27
1 27
3 29
3 29
4 49
4 54
4 58
4 61
4 73
4 73
4 77
4 78
4 78
4 78
4 78
4 78
4 78
4 78
4 78
4 78
4 78
4 78
4 78
4 79
4 80
5 80
5 80
5 80
5 80
5 80
5 80
5 80
5 80
5 80
5 80
6 80
9 80
9 80
9 80
9 80
9 80
9 81
9 81
9 81
9 82
9 82
9 82
9 82
9 82
9 82
9 82
9 82
9 83
9 83
9 83
10 84
11 85
16 99
16 99
16 99
18 99
18 99
18 99
18 99
19 99
20 99
20 99
20 99
20 99
20 100
20 100
20 100
20 100
20 100
20 100
20 100
20 100
20 101
20 108
20 108
20 109
20 110
21 111
27 160
27 161
27 169
27 171
27 172
27 175
27 175
27 175
27 175
27 175
27 174
27 174
27 174
27 174
26 157
26 157
26 157
24 151
25 150
25 149
25 145
24 125
26 117
26 110
26 107
26 106
26 106
26 103
26 103
26 103
26 103
26 103
26 103
26 103
26 103
26 103
26 103
26 103
26 103
26 103
26 102
26 101
27 101
27 101
27 101
28 101
28 101
28 101
28 101
29 101
28 101
28 101
27 101
25 101
25 101
25 101
26 101
27 101
28 99
28 99
28 98
28 97
28 97
28 97
28 97
28 97
28 97
28 97
28 96
28 95
28 95
27 94
27 93
26 93
19 82
19 82
19 82
19 82
19 82
19 82
19 82
18 82
17 82
17 82
17 82
17 81
17 81
17 81
17 81
16 81
16 81
16 81
16 81
16 81
18 81
18 73
18 73
18 71
18 70
17 67
11 15
11 13
11 6
11 6
11 5
11 1
11 1
11 2
11 2
11 1
11 1
11 1
11 1
11 1
11 1
11 1
11 1
11 1
11 1
11 1
11 1
11 1
9 1
10 1
10 1
10 2
11 2
11 2
11 3
11 3
11 3
11 3
11 3
11 3
11 3
11 3
11 3
11 3
11 3
11 3
10 3
10 3
8 3
8 3
8 3
8 3
10 3
12 3
12 3
12 3
11 3
11 3
12 3
12 3
12 3
14 3
16 3
14 3
14 3
14 3
14 3
14 3
14 3
14 3
14 3
14 3
14 3
14 3
14 3
14 3
14 3
14 3
14 3
14 3
14 3
14 3
15 3
15 4
15 4
15 4
15 5
15 5
15 5
15 5
15 5
15 5
15 5
15 5
15 5
15 5
15 5
15 5
15 5
14 5
13 5
13 5
13 5
13 5
13 5
13 5
13 5
13 5
14 5
14 5
14 5
14 5
14 5
14 4
14 4
14 4
14 4
14 4
14 4
14 4
14 4
14 4
14 4
14 4
14 4
14 4
14 4
14 4
14 4
13 4
13 4
12 3
12 3
12 3
12 2
12 2
12 2
13 2
13 2
13 2
13 2
13 2
13 2
13 2
13 2
13 2
13 2
13 2
13 2
13 2
13 2
12 2
10 2
9 2
8 2
8 2
8 2
8 2
7 2
6 2
5 2
6 2
5 2
5 2
5 2
5 2
5 2
5 2
5 2
5 2
5 2
6 2
7 2
7 2
8 2
8 2
11 2
16 2
21 2
21 2
21 2
21 2
20 2
20 1
20 1
20 1
20 0
20 0
20 0
20 0
20 0
20 0
20 0
20 0
20 0
20 0
20 0
20 0
20 0
20 0
20 0
20 0
20 0
20 0
20 0
20 0
20 0
20 0
19 0
19 0
19 0
19 0
19 0
19 0
20 0
20 0
20 0
20 0
20 0
20 0
20 0
20 0
20 0
20 0
20 0
20 0
20 0
20 0
20 0
20 0
20 0
20 0
20 0
20 0
20 0
20 0
20 0
19 0
19 0
19 0
19 0
20 0
20 0
20 0
20 1
20 1
20 1
20 1
20 1
20 1
20 1
20 1
20 1
20 1
20 1
20 1
20 1
25 1
25 1
25 1
25 1
23 1
23 1
23 1
27 1
28 1
31 2
31 2
32 2
31 2
30 2
30 2
26 2
28 2
32 2
33 2
28 2
27 2
26 2
26 2
26 2
26 2
26 2
26 2
26 2
26 2
26 2
26 2
28 2
30 2
30 2
31 2
31 2
31 2
31 2
31 2
31 2
31 2
31 2
32 2
32 2
32 2
32 2
32 2
32 2
32 2
34 3
34 3
34 4
34 4
34 4
34 4
34 4
34 4
33 4
34 4
34 4
34 4
34 4
34 4
34 4
34 4
34 4
34 4
34 4
34 4
34 4
34 4
34 4
34 4
35 4
35 4
35 4
35 4
35 4
35 4
35 4
35 4
35 4
35 4
35 4
34 4
34 4
34 3
34 3
34 3
34 3
34 3
34 3
34 4
34 4
34 4
34 4
34 4
34 4
34 4
34 4
29 4
29 4
29 4
29 3
28 3
28 3
26 3
25 3
24 3
22 3
22 3
21 3
21 3
20 3
19 3
19 3
17 3
13 3
13 3
13 3
12 3
11 3
11 3
11 3
11 3
11 3
10 3
10 3
9 3
9 3
9 3
8 3
7 3
7 3
6 3
6 3
6 3
6 3
6 3
6 3
6 3
9 3
8 3
8 3
8 3
8 3
8 2
8 2
8 2
6 1
6 1
6 1
6 1
7 1
7 1
10 4
11 6
11 6
10 6
10 6
10 6
10 6
10 6
10 6
10 6
10 6
10 6
10 6
10 6
10 6
10 6
10 6
11 6
10 6
10 6
10 6
10 6
10 6
10 6
10 6
10 6
10 6
10 6
10 6
10 6
10 6
10 6
10 6
10 6
10 6
10 6
10 6
10 5
10 5
10 5
10 5
10 5
10 5
10 5
10 5
10 5
10 5
10 5
10 5
10 5
10 5
9 5
9 5
9 6
9 6
9 6
9 6
9 6
9 6
9 6
9 6
9 6
9 6
9 6
9 6
9 6
9 6
9 6
9 6
9 6
9 6
9 6
9 6
9 6
9 6
9 6
9 6
9 6
9 6
9 6
9 6
9 6
9 6
9 6
9 6
9 6
6 6
6 6
6 6
6 6
6 6
6 6
6 6
6 6
6 6
6 6
6 6
5 6
5 5
4 5
2 1
1 1
1 1
1 1
1 1
1 1
1 1
1 1
1 1
1 1
1 1
1 1
1 1
1 1
1 1
1 1
0 1
0 1
0 1
0 1
0 1
0 1
0 1
0 1
0 1
0 1
0 1
0 1
0 1
0 1
0 1
0 1
0 1
0 1
0 1
0 1
0 1
0 1
0 1
0 1
0 1
0 1
0 1
0 1
0 1
0 1
0 1
0 1
1 1
2 1
2 1
2 0
2 0
2 0
3 0
3 0
3 0
3 0
3 0
3 0
3 0
3 0
3 0
3 0
3 0
3 0
3 0
3 0
3 0
3 0
3 0
3 0
3 0
3 0
3 0
3 0
3 0
3 0
3 0
3 0
3 0
3 0
4 0
4 0
4 0
4 0
4 0
7 1
7 1
7 1
7 1
7 1
7 1
7 1
7 1
7 1
7 1
7 1
7 1
7 1
7 1
7 1
7 1
7 1
7 1
7 1
7 1
7 1
7 1
8 1
8 1
8 1
8 1
8 1
8 1
8 1
8 1
8 1
8 1
8 1
8 1
8 1
8 1
8 1
8 1
8 1
8 1
8 1
8 1
8 1
8 1
8 1
8 1
8 1
8 1
8 1
8 1
8 1
8 1
8 2
8 2
8 2
8 2
9 3
9 3
9 3
9 4
9 4
9 4
8 4
8 4
8 4
8 4
8 4
7 4
7 4
7 4
7 4
7 4
7 4
7 4
7 4
7 4
7 4
7 4
7 4
7 4
7 4
7 4
7 4
7 4
7 4
7 4
7 4
8 4
8 4
8 4
9 4
9 4
9 4
9 4
9 4
10 4
12 5
12 5
12 4
12 4
9 4
9 4
9 4
9 4
9 4
9 4
10 4
10 4
10 4
10 5
10 5
11 5
11 5
11 5
11 5
11 5
11 5
12 5
12 5
13 6
13 6
14 6
13 6
13 6
13 6
13 6
13 6
15 6
15 6
15 6
15 6
15 6
15 6
15 6
15 6
15 6
15 6
15 6
16 6
16 6
16 6
16 6
16 6
16 6
16 6
16 6
16 6
16 6
16 6
16 6
16 6
16 6
16 5
16 5
16 5
16 5
15 4
15 3
15 3
15 3
15 3
14 3
14 3
14 3
17 3
17 3
17 3
17 2
18 2
18 2
18 2
18 2
18 2
18 2
18 2
18 2
18 2
18 2
18 2
18 2
18 2
18 2
18 2
18 2
20 2
20 2
20 2
19 2
19 2
18 2
18 2
18 2
18 3
18 3
18 3
18 3
16 3
17 4
23 4
27 4
27 4
27 4
27 4
27 4
27 4
27 4
50 6
50 6
53 5
54 5
54 5
54 5
54 6
54 6
54 6
54 6
54 6
53 6
53 6
52 5
51 5
51 5
52 5
53 5
55 5
56 5
58 5
59 5
59 5
60 5
60 5
62 5
62 5
64 5
65 5
65 5
65 5
66 5
65 5
65 5
65 5
66 6
66 6
66 6
66 6
66 6
66 6
67 6
68 6
68 6
68 6
68 6
68 6
68 6
68 6
68 6
69 6
69 6
69 6
70 6
76 6
84 6
91 6
100 6
102 7
102 7
104 7
104 7
104 7
104 7
105 7
105 7
105 7
106 7
106 7
107 7
109 7
109 7
110 7
110 7
110 7
110 7
110 7
114 7
113 7
113 7
113 7
113 7
113 7
114 7
114 6
114 6
114 6
114 6
112 6
111 6
110 5
108 4
101 4
101 4
101 4
101 4
101 4
102 4
101 4
100 4
79 2
81 2
85 2
91 2
123 2
135 2
141 2
144 3
146 3
146 3
146 3
147 3
148 3
148 3
148 5
148 5
147 5
146 5
144 5
143 5
139 5
139 5
139 5
140 5
139 5
138 5
140 5
138 5
138 5
138 5
138 5
137 5
137 5
137 5
137 5
136 4
137 4
151 4
169 6
177 7
176 8
179 8
178 8
178 8
178 8
183 8
184 8
185 8
186 8
186 8
185 8
184 8
184 8
181 8
175 9
165 9
157 9
152 8
149 8
147 8
145 8
146 8
146 8
146 8
145 8
145 8
145 8
144 8
144 8
143 8
141 8
139 8
139 8
139 8
139 8
139 8
137 8
137 8
136 8
136 8
135 8
135 8
135 8
135 8
135 8
135 8
135 8
135 8
135 8
135 8
135 8
135 8
135 8
135 8
135 8
135 8
135 8
134 8
134 8
128 8
122 8
117 8
102 8
86 8
72 8
67 8
64 8
59 7
59 7
59 7
59 7
58 7
57 7
57 7
57 5
57 5
57 5
57 5
57 5
57 5
57 5
55 5
55 5
54 5
54 5
54 5
53 5
53 5
53 5
53 5
53 5
52 5
51 5
51 5
51 5
48 5
31 4
20 3
9 2
8 1
7 1
7 1
7 1
7 1
7 1
2 1
2 1
1 1
1 1
1 1
1 1
1 0
1 0
1 0
1 0
1 0
1 0
1 0
1 0
1 0
1 0
0 0
0 0
0 0
0 0
0 0
0 0
0 0
0 0
0 0
0 0
0 0
0 0
0 0
0 0
0 0
0 0
0 0
0 0
0 0
0 0
0 1
0 1
0 1
0 1
0 1
0 1
0 1
0 1
0 1
0 1
0 1
0 1
0 1
0 1
0 1
0 1
0 1
0 1
0 1
0 1
0 1
0 1
0 1
0 1
0 1
0 1
0 1
0 1
0 1
0 1
0 1
1 1
1 1
1 1
1 1
1 1
1 1
1 1
1 1
1 1
1 1
1 1
1 1
1 1
1 1
1 1
1 2
1 2
1 2
1 2
1 2
1 2
2 17
2 19
2 19
2 20
2 20
2 20
2 20
2 20
2 20
2 20
2 20
3 20
3 20
3 20
3 20
3 20
3 20
3 20
3 21
4 21
4 21
4 21
4 21
4 21
4 21
4 21
4 21
4 21
5 22
5 22
5 22
5 22
5 22
5 22
5 22
5 22
5 22
5 22
5 22
5 36
5 38
5 43
7 98
7 106
7 110
7 112
7 117
7 125
7 126
7 127
7 127
7 127
7 127
7 128
7 128
7 128
7 127
7 127
7 127
7 129
7 129
7 129
7 129
7 130
7 131
7 135
7 140
7 142
7 142
7 142
7 142
7 142
7 142
7 142
7 142
7 142
7 142
7 142
7 142
8 143
8 149
8 149
8 149
8 150
8 150
8 170
8 173
8 176
8 180
8 180
8 181
8 181
8 182
8 182
8 182
8 183
8 184
8 184
8 184
8 183
7 169
7 169
7 169
7 175
7 181
7 184
7 184
7 184
7 184
7 184
7 185
6 187
6 187
6 188
6 189
6 189
6 189
6 189
5 192
5 192
5 193
6 194
7 194
8 194
8 194
8 194
8 194
8 192
7 191
7 191
7 206
7 206
7 206
7 207
7 205
7 207
7 207
7 207
7 204
7 189
7 184
8 179
6 115
6 108
6 108
6 109
6 108
6 110
6 110
6 110
6 110
6 111
6 112
6 111
6 110
6 111
6 111
6 111
6 111
6 111
6 113
6 114
6 114
6 113
6 113
6 106
6 101
6 101
6 101
6 101
7 101
7 103
7 109
7 111
7 111
7 113
6 117
6 117
6 117
6 116
6 111
6 111
6 111
6 111
6 109
8 86
8 84
8 80
8 78
8 79
8 79
8 79
8 79
8 80
8 79
8 79
8 77
9 78
9 79
9 78
9 78
9 79
9 77
9 69
9 66
9 66
10 66
10 66
10 66
10 66
10 63
10 65
10 65
10 63
10 63
10 63
10 63
11 63
11 59
11 61
10 62
9 61
9 60
8 60
8 61
8 61
8 61
8 61
8 59
8 59
8 45
8 45
8 45
8 44
8 44
8 44
8 44
8 44
8 44
8 44
8 44
7 44
7 42
8 42
8 42
8 40
8 39
8 38
8 38
8 38
8 38
8 38
8 37
8 36
8 36
8 36
8 36
8 36
8 36
8 34
8 32
8 32
8 32
9 32
9 32
9 32
9 33
9 33
9 33
8 30
8 30
8 28
6 24
6 22
6 22
5 21
5 16
5 16
5 16
5 16
5 16
5 16
5 16
5 16
5 16
5 16
5 20
5 28
7 83
7 92
7 100
7 133
8 180
9 234
9 303
9 307
10 335
9 352
9 359
9 359
9 360
10 359
11 361
10 362
10 364
10 364
10 370
12 387
12 391
13 391
13 393
13 397
13 412
14 417
14 418
14 428
16 432
15 434
16 443
16 441
16 445
16 452
16 458
16 473
16 497
16 507
16 512
16 514
16 522
16 527
17 536
17 537
17 537
17 536
17 537
17 537
17 537
17 539
17 539
17 541
17 541
17 543
17 543
16 544
16 545
16 545
16 545
16 546
16 548
16 548
16 549
16 549
16 551
16 551
16 551
16 551
16 551
16 551
16 551
17 551
18 567
17 567
17 570
17 571
18 570
18 569
18 576
18 575
18 578
18 578
18 605
19 606
19 607
19 606
19 606
19 606
19 607
19 607
19 606
19 609
19 609
19 609
19 611
19 610
19 610
19 608
19 600
21 590
18 463
17 427
17 393
17 383
17 373
17 359
17 332
20 335
19 296
19 294
19 290
19 286
19 286
19 304
18 301
18 304
18 304
18 300
18 299
16 281
15 281
15 278
15 274
15 269
15 263
14 264
15 265
15 258
13 254
13 248
12 243
12 243
12 254
12 242
12 233
12 222
12 197
12 191
12 188
12 186
12 177
12 171
11 167
11 168
11 168
11 168
11 168
11 168
11 168
11 167
11 172
11 175
11 175
11 176
11 178
11 178
11 178
11 178
11 178
11 177
11 174
11 175
11 174
11 174
11 173
12 174
12 174
12 173
12 173
12 174
11 174
11 173
10 156
10 154
10 154
10 153
9 152
9 150
9 140
9 140
9 140
9 139
9 113
8 110
8 108
8 108
8 108
8 108
8 108
8 108
8 108
8 105
8 105
8 104
8 101
8 101
8 100
8 96
8 93
6 78
6 78
6 78
6 78
6 78
6 78
6 79
6 79
3 73
3 73
3 73
3 72
3 72
3 71
2 55
2 55
2 52
2 51
2 51
2 49
2 48
2 48
2 48
2 47
2 45
2 45
2 42
1 41
1 39
1 39
1 39
1 39
1 38
1 23
1 23
1 23
1 23
1 23
1 23
1 23
1 23
1 23
1 23
1 23
1 22
1 22
1 22
1 22
1 22
1 19
1 14
1 11
1 10
1 10
1 8
1 7
1 7
1 7
1 7
1 7
1 7
1 7
1 6
1 7
1 10
1 9
0 8
0 8
0 8
0 9
0 9
0 9
0 9
0 9
0 10
0 10
0 10
1 10
1 10
1 10
1 10
1 12
1 12
2 12
2 13
2 13
2 13
2 13
2 13
2 14
2 14
2 15
2 15
2 15
2 15
2 15
2 14
2 13
3 16
3 16
3 17
3 17
4 22
4 24
4 26
4 28
4 29
4 29
4 29
4 29
4 30
4 30
4 30
4 30
4 31
4 31
4 31
4 31
4 31
4 31
4 31
5 32
5 32
6 42
6 42
6 44
6 45
6 46
6 48
6 54
8 54
8 55
8 56
8 57
8 57
8 57
8 57
8 57
8 57
8 57
8 57
8 57
8 57
8 57
8 57
8 57
8 57
8 57
8 57
8 58
8 58
8 58
8 58
8 58
10 65
10 65
10 65
10 65
10 65
10 65
10 65
10 65
10 65
10 65
10 62
10 62
10 62
10 63
10 62
10 62
12 63
14 63
14 64
14 64
14 64
14 64
14 83
13 88
13 91
13 91
13 92
13 91
13 90
12 90
12 95
12 96
12 98
12 98
12 98
12 97
12 96
12 93
12 93
12 93
12 94
12 95
12 95
12 95
11 94
11 93
11 93
11 94
10 89
10 88
10 83
10 83
10 82
10 84
10 85
10 85
10 85
10 85
10 85
10 86
10 85
10 86
10 86
10 87
10 89
10 92
10 91
9 91
9 91
9 80
10 84
13 90
13 89
13 87
13 86
13 85
11 84
11 88
11 88
11 87
11 87
11 88
11 88
11 88
11 88
11 88
11 89
11 94
11 96
11 98
11 99
11 100
11 101
11 101
11 101
11 103
11 104
11 106
11 119
11 122
9 116
9 116
9 116
9 120
9 120
9 121
9 122
10 125
9 126
9 129
9 129
9 129
9 129
9 128
6 128
6 131
6 131
6 130
6 130
6 130
6 130
6 125
6 105
6 104
6 103
6 104
7 105
7 110
7 110
7 110
7 105
7 106
7 104
7 104
7 104
7 104
7 105
7 105
7 105
7 120
7 134
8 136
9 158
9 164
9 172
9 175
9 175
9 175
9 176
9 176
9 177
8 177
8 179
8 185
8 185
8 204
9 207
9 217
11 215
11 217
11 273
11 277
11 302
13 374
13 375
13 376
12 377
12 382
11 395
10 532
9 548
9 552
10 576
10 583
10 595
10 602
10 601
10 601
10 601
10 602
10 602
10 602
10 602
10 603
10 603
11 603
11 602
11 595
11 597
11 597
11 596
11 595
11 595
11 591
11 589
11 591
13 592
13 588
13 577
13 578
13 579
13 584
13 587
13 586
13 591
12 586
12 590
12 591
12 591
12 596
12 596
12 598
12 598
12 598
12 599
12 597
12 597
12 597
12 597
12 597
13 620
13 621
14 622
14 632
15 644
17 651
17 650
18 647
18 647
18 647
18 647
18 645
18 644
18 653
18 652
18 652
18 649
18 646
16 640
16 612
16 602
14 596
14 587
14 585
14 581
14 580
14 580
14 579
14 578
14 578
14 583
14 584
14 581
14 572
14 567
14 553
13 548
13 544
13 539
13 533
13 456
13 447
13 407
11 355
11 348
11 343
11 338
11 329
10 288
10 157
10 154
10 156
10 158
10 151
10 149
10 149
10 149
10 153
10 153
10 157
10 167
10 176
10 177
10 177
10 177
10 178
10 180
10 178
10 177
10 177
11 181
14 186
16 203
21 232
25 270
26 271
25 277
25 290
25 289
25 295
26 345
26 412
26 439
27 447
40 648
41 801
42 825
46 869
50 906
51 910
51 955
51 957
51 958
52 959
52 963
52 979
58 1000
61 1017
61 1020
62 1018
59 996
58 997
57 995
57 987
56 981
55 973
55 972
55 972
55 972
67 980
68 983
68 983
68 984
68 974
69 984
69 986
71 986
72 986
72 996
75 1003
82 1026
83 1035
83 1038
83 1040
83 1040
83 1040
83 1040
84 1040
84 1040
84 1038
84 1034
84 1034
84 1034
84 1034
84 1034
84 1034
84 1034
84 1033
84 1033
84 1033
84 1035
84 1035
84 1040
84 1040
84 1045
84 1072
84 1076
84 1077
84 1084
84 1093
84 1087
84 1093
84 1124
84 1122
84 1125
83 1127
83 1128
83 1126
84 1126
84 1097
83 1100
83 1099
83 1101
84 1105
83 1102
83 1103
84 1096
84 1095
83 1091
83 1089
83 1087
81 1081
77 1062
71 1027
71 1008
71 1033
70 1057
71 1056
70 1057
69 1048
64 992
62 885
62 876
60 853
43 409
41 409
40 386
39 368
39 365
38 336
39 353
39 354
39 357
38 357
38 357
38 352
36 359
36 360
35 361
35 362
35 362
35 362
35 362
35 361
35 360
35 360
28 361
28 360
27 359
16 352
11 349
11 342
11 339
11 338
9 327
9 325
9 323
9 322
8 320
8 304
8 293
8 292
8 291
8 289
8 289
8 290
8 290
8 290
8 290
8 291
8 291
8 288
8 288
8 288
8 288
8 288
8 289
8 289
9 288
9 288
9 286
9 286
9 280
9 285
9 279
9 259
9 252
9 252
9 246
9 235
9 234
9 227
9 210
9 211
9 208
9 206
9 205
9 205
8 213
9 214
9 214
9 213
9 211
8 209
10 233
10 233
10 232
9 232
9 236
9 236
9 235
9 235
10 236
10 235
10 234
9 201
9 158
8 146
8 147
9 149
11 150
12 148
12 148
12 146
12 145
11 138
12 136
12 137
12 132
12 121
11 108
11 109
11 109
11 109
11 107
11 102
11 101
11 101
11 101
11 101
11 101
11 101
11 101
11 101
11 101
12 101
12 99
12 100
12 101
12 96
12 96
12 97
12 97
12 98
13 98
13 98
13 98
13 98
13 98
13 98
12 98
12 98
12 100
12 100
12 100
12 100
12 101
12 101
12 101
12 100
12 100
12 100
12 100
12 100
12 100
12 100
12 99
12 99
13 99
14 98
14 98
14 99
14 102
14 100
14 107
15 111
17 110
17 107
17 107
17 103
17 101
17 101
17 103
17 103
19 102
19 102
19 101
30 102
30 94
30 91
30 91
30 91
29 101
28 99
27 72
27 72
27 72
27 71
27 71
27 70
26 70
26 70
26 70
26 70
26 70
25 70
25 68
25 68
25 68
25 65
23 64
22 63
22 64
22 65
22 64
22 64
21 63
21 59
21 58
21 58
21 58
21 57
21 58
21 58
21 58
21 58
21 59
21 59
21 59
21 59
21 59
21 59
21 59
21 60
20 60
20 65
21 78
21 79
21 80
21 84
21 84
21 83
21 84
20 85
20 86
20 88
20 88
20 88
20 89
20 89
20 89
20 89
20 86
20 86
20 86
20 86
20 86
20 86
20 86
20 86
20 86
20 86
20 86
20 84
20 84
20 84
20 84
20 85
19 86
18 86
18 86
17 82
17 75
17 71
17 69
17 65
15 64
15 64
15 63
15 62
16 62
17 62
19 61
21 61
19 61
16 61
16 61
8 59
8 61
7 61
8 63
8 62
8 53
8 53
8 52
8 52
8 52
8 54
8 54
8 53
8 53
8 53
8 53
8 53
8 53
8 55
8 55
8 55
8 54
8 52
8 52
8 52
8 51
8 51
8 51
8 50
8 50
8 50
8 50
8 50
8 50
8 49
8 49
8 49
8 50
8 50
8 51
8 51
8 51
8 51
8 51
8 50
8 50
9 49
9 48
9 43
8 31
8 30
8 27
8 24
8 24
8 24
8 28
8 28
8 27
8 26
8 27
8 27
8 27
8 27
8 27
8 27
8 27
8 27
8 29
8 29
8 29
8 29
8 29
8 29
8 30
9 31
11 34
11 34
11 34
11 33
11 33
11 32
11 30
11 29
11 29
11 29
11 29
11 29
12 72
13 74
13 77
12 80
12 82
12 84
11 84
11 93
9 100
7 105
8 127
8 129
8 131
8 132
8 130
8 130
7 135
8 152
8 160
8 163
8 163
8 165
8 165
8 163
8 164
8 164
8 164
8 165
8 165
8 167
8 167
8 171
8 174
8 176
8 177
8 177
8 177
8 177
8 177
8 178
8 178
8 178
8 178
8 178
8 179
9 180
9 209
9 211
9 214
10 214
10 214
10 216
10 220
10 222
10 226
10 230
10 248
10 254
10 275
11 281
12 288
13 290
13 290
13 289
13 290
13 295
13 295
13 293
13 293
15 304
15 302
16 305
16 310
17 313
18 313
18 313
18 314
18 314
19 317
19 320
19 320
19 319
19 321
19 321
19 320
19 320
18 321
18 321
16 318
16 319
16 319
16 320
16 320
16 322
16 322
16 323
16 326
16 327
17 327
17 333
16 293
15 295
16 296
16 299
16 299
16 299
16 297
16 288
15 280
15 273
15 260
15 265
15 264
15 265
15 265
15 262
14 251
14 236
14 235
14 234
14 233
14 231
14 231
14 231
14 230
14 231
14 230
14 230
14 230
14 228
14 228
14 222
14 220
14 218
14 217
14 217
14 217
14 217
14 218
14 217
14 217
14 217
14 217
13 217
14 216
13 213
13 183
13 182
13 178
12 179
11 178
12 179
16 194
18 197
18 187
18 179
18 163
18 159
16 139
16 145
15 147
15 148
15 146
15 145
15 144
15 160
16 160
16 158
16 159
14 147
14 149
14 150
14 151
12 148
12 149
12 149
12 148
12 148
11 144
11 139
11 140
11 140
11 139
11 140
12 140
12 141
13 144
13 145
13 145
13 145
13 145
13 145
13 143
13 139
13 140
13 139
13 136
12 132
12 133
12 131
17 231
17 237
16 240
16 239
16 240
16 243
16 256
16 265
16 287
16 286
16 288
16 283
16 283
17 284
18 284
18 284
18 284
18 284
18 285
18 284
18 286
18 287
18 287
18 288
18 290
18 294
18 294
18 294
18 294
18 294
18 294
18 293
18 293
18 292
18 294
18 294
18 294
18 294
18 294
18 294
18 294
18 295
18 295
18 295
17 295
17 296
17 296
17 296
17 295
16 293
16 292
15 290
11 269
8 266
8 265
8 266
8 265
8 264
8 262
8 252
8 251
8 250
8 249
8 248
8 247
8 227
7 227
7 226
7 224
7 224
7 223
7 224
7 223
7 223
7 224
7 230
7 231
7 231
7 232
7 232
7 230
7 230
7 230
7 231
7 229
7 229
7 227
7 227
7 226
7 227
7 226
7 227
7 234
7 240
7 244
7 244
7 246
6 239
5 237
5 233
1 101
0 99
0 98
0 100
0 84
0 89
0 86
0 77
0 78
0 76
0 82
0 83
0 83
0 83
0 83
0 83
0 83
0 83
0 83
1 85
1 85
2 110
2 112
2 112
2 108
2 110
2 110
2 109
2 109
2 109
2 109
2 109
2 109
2 109
2 106
2 111
2 113
2 117
2 120
2 121
2 125
2 124
2 130
2 132
2 133
2 140
2 144
2 144
2 159
2 160
2 165
2 172
3 215
3 214
4 227
4 231
5 239
5 242
5 242
5 243
5 243
5 247
5 247
5 248
5 248
5 248
5 254
5 257
5 261
6 262
6 263
6 262
6 262
6 265
6 261
6 260
6 259
6 259
6 258
6 258
6 260
6 260
6 261
6 260
6 261
6 261
6 260
6 260
6 260
6 259
6 259
6 259
6 250
6 245
6 243
6 243
6 241
6 241
6 241
6 241
6 241
6 240
6 236
6 233
6 230
6 229
6 229
6 231
6 226
6 224
6 220
6 219
6 220
6 222
6 226
5 225
4 229
4 228
4 226
4 227
4 225
4 201
5 215
5 216
5 217
5 215
5 215
5 215
5 215
5 214
5 215
5 215
5 215
5 216
5 215
5 210
5 208
5 200
5 200
5 199
5 195
5 195
5 191
5 189
5 190
6 177
6 174
6 173
6 147
6 144
6 138
6 132
4 98
4 97
4 97
4 97
3 93
3 93
3 94
3 94
3 98
5 100
10 121
11 122
11 123
11 124
11 109
10 106
10 106
10 105
10 102
10 101
10 100
10 100
10 100
10 100
10 100
10 100
10 100
10 100
10 100
10 101
10 101
10 101
10 101
10 101
10 101
10 101
10 101
10 101
11 109
11 112
11 115
11 115
11 115
11 114
11 114
11 114
11 114
11 114
11 114
11 113
11 113
11 113
11 113
11 111
11 111
11 109
11 110
11 111
12 112
12 112
13 112
18 111
18 111
18 112
18 107
18 107
18 107
18 105
18 104
18 103
17 87
17 86
17 86
17 87
17 89
17 93
17 95
17 95
17 96
17 96
17 96
17 95
17 95
17 95
17 96
17 96
17 96
17 96
17 94
17 94
17 89
17 85
17 85
16 84
16 84
16 84
16 84
16 84
16 84
16 81
16 82
16 82
16 82
16 81
16 78
16 75
16 74
15 74
11 70
8 57
8 47
8 47
8 47
8 46
8 46
9 48
10 48
10 47
10 47
10 45
10 45
10 45
10 45
10 45
10 45
10 45
10 47
11 47
11 48
11 48
11 48
11 48
11 49
11 49
11 51
11 51
11 50
11 52
10 45
10 47
10 45
10 49
10 50
10 51
10 51
10 52
10 53
10 53
12 53
12 53
12 54
12 54
12 55
12 55
12 53
12 54
11 54
11 57
11 58
11 58
11 58
6 55
6 55
6 54
6 53
6 53
6 53
6 54
6 54
6 54
6 54
6 55
6 55
6 54
6 62
6 58
6 65
6 66
6 64
6 64
6 64
6 65
6 65
6 65
6 64
6 64
6 63
6 63
6 63
6 64
6 64
6 64
6 64
6 64
6 64
6 64
6 66
6 67
6 67
6 67
6 66
6 66
6 66
6 67
6 68
6 68
6 68
6 68
6 68
6 68
6 70
7 74
7 74
7 75
7 75
6 74
5 73
5 73
5 73
5 74
6 82
8 84
8 85
8 87
8 91
10 93
9 92
9 91
9 90
9 91
9 94
9 95
9 108
9 108
9 107
10 106
10 106
10 104
11 102
11 100
11 100
11 98
11 97
11 97
11 95
11 95
11 92
11 92
9 92
9 91
9 92
9 92
10 91
10 91
10 91
10 91
10 89
10 88
9 86
9 85
9 85
9 85
9 88
9 90
9 92
9 92
9 92
9 92
9 93
9 97
10 99
11 99
11 99
11 99
11 86
11 80
11 79
11 78
11 78
11 78
11 78
11 78
11 78
11 78
11 78
11 82
11 82
11 81
11 81
11 81
11 81
11 81
11 81
11 81
11 81
11 79
11 77
11 78
11 78
11 78
11 78
11 77
11 77
11 77
11 77
11 78
11 78
11 78
11 78
11 77
11 76
10 71
10 70
10 70
10 70
10 70
9 70
9 69
9 67
7 66
7 56
5 53
5 53
5 52
5 50
5 48
5 48
5 48
5 47
5 45
5 44
5 44
4 32
3 32
3 32
3 32
3 30
3 30
3 30
3 30
3 32
3 32
3 34
3 35
3 36
3 36
3 36
3 36
3 36
3 36
3 35
3 35
0 35
0 35
0 35
0 35
0 35
0 36
0 35
0 35
0 35
0 35
0 32
0 34
0 33
0 33
0 33
0 31
0 30
0 26
0 24
0 25
0 25
0 28
0 28
0 28
0 28
0 32
0 33
0 33
0 33
0 35
0 35
0 36
0 36
0 32
0 33
0 33
0 33
0 33
0 33
0 33
0 33
0 34
0 34
0 33
0 32
0 31
0 31
0 31
1 31
1 32
1 31
1 31
1 30
1 30
1 31
1 31
1 32
1 32
1 32
1 32
2 32
2 32
2 32
2 32
2 32
2 32
2 32
2 31
2 31
2 31
2 31
2 31
2 31
2 31
2 31
2 31
2 31
2 31
2 31
2 34
2 34
2 37
3 41
3 43
3 44
3 44
4 44
4 41
5 38
5 38
5 38
5 38
5 41
5 43
5 43
5 43
5 44
5 44
5 45
5 44
5 44
5 44
5 44
6 51
6 55
6 55
6 55
6 55
6 55
6 57
6 58
6 54
6 54
6 53
6 53
6 52
6 52
6 52
6 51
6 49
6 49
6 48
6 47
6 47
6 47
7 46
7 48
7 48
7 48
7 47
7 47
7 47
7 47
7 47
7 46
7 46
7 46
7 46
7 46
7 45
7 45
7 45
7 47
7 47
7 48
8 48
9 61
8 60
7 60
7 59
7 59
7 57
7 57
7 56
7 57
7 57
7 58
7 60
7 59
7 60
7 68
7 68
7 68
7 68
7 68
7 69
8 90
8 93
8 96
8 105
9 201
9 214
9 217
9 223
9 224
9 227
9 235
9 235
9 237
9 236
9 237
9 233
8 229
8 229
8 229
9 229
8 229
8 230
7 227
[truncated: 25,882,006 more chars]
