# Supplementary material for: From Insect to Man: Photorhabdus Sheds Light on the Emergence of Human Pathogenicity
Source: PLoS One. 2015 Dec 17;10(12):e0144937. doi: 10.1371/journal.pone.0144937 (PMC4683029; doi:10.1371/journal.pone.0144937)
Supplement: S3 Data — (ZIP) [file pone.0144937.s003.zip]

Archive with 10 entries (10 files):
- pPAU1_28C_Expo_rep1.plot
- pPAU1_28C_Expo_rep2.plot
- pPAU1_28C_Expo_rep3.plot
- pPAU1_28C_Stat_rep1.plot
- pPAU1_28C_Stat_rep2.plot
- pPAU1_37C_Expo_rep1.plot
- pPAU1_37C_Expo_rep2.plot
- pPAU1_37C_Expo_rep3.plot
- pPAU1_37C_Stat_rep1.plot
- pPAU1_37C_Stat_rep2.plot
