# Supplementary material for: From Insect to Man: Photorhabdus Sheds Light on the Emergence of Human Pathogenicity
Source: PLoS One. 2015 Dec 17;10(12):e0144937. doi: 10.1371/journal.pone.0144937 (PMC4683029; doi:10.1371/journal.pone.0144937)
Supplement: S3 Data — (ZIP) [file pone.0144937.s003.zip › pPAU1_28C_Expo_rep1.plot]

6 0
6 0
6 0
6 0
6 0
7 0
7 0
7 0
9 0
9 0
9 0
9 0
9 0
9 0
11 0
12 0
12 0
12 0
12 0
12 0
12 0
11 0
11 0
8 0
3 0
3 0
3 0
4 0
4 0
6 0
6 0
6 0
7 0
7 0
8 0
9 0
10 0
10 0
10 0
10 0
10 0
10 0
10 0
10 0
11 0
16 0
20 0
20 0
21 0
21 0
19 0
18 0
18 0
18 0
18 0
18 0
18 0
18 0
21 0
24 0
25 0
25 0
23 0
20 0
20 1
19 1
29 1
29 1
31 1
31 1
29 1
29 1
28 1
28 1
28 1
28 1
28 1
30 1
30 1
29 1
27 1
26 1
22 1
24 1
24 1
24 1
24 1
24 1
24 1
25 1
29 1
29 1
29 2
28 2
25 1
23 3
22 3
21 3
21 3
20 3
20 3
20 3
12 3
12 3
10 3
10 3
10 3
10 3
10 3
10 3
11 3
11 3
11 3
9 3
9 3
9 3
9 3
10 3
10 3
8 6
9 6
9 6
33 6
33 6
32 6
36 6
39 6
41 6
41 5
41 5
42 5
42 3
42 3
42 3
44 3
44 3
44 4
44 4
44 4
43 6
43 6
43 6
43 6
43 6
43 6
45 6
45 6
45 6
45 6
45 6
45 6
45 5
45 5
44 5
44 2
44 2
38 2
38 2
15 2
18 2
18 2
13 2
10 2
9 2
9 2
11 2
10 2
11 2
16 2
16 2
16 2
16 2
16 1
16 1
16 1
16 0
16 0
16 0
16 0
16 0
16 0
15 0
16 0
16 0
16 0
15 0
15 0
15 0
15 0
16 0
26 0
27 0
27 0
29 0
32 0
30 0
31 0
32 0
32 0
32 0
30 0
29 0
29 0
28 0
27 0
27 0
25 0
25 0
25 0
26 0
27 0
26 0
32 0
33 0
33 0
33 0
33 1
32 1
32 1
32 1
48 11
56 11
56 11
56 11
56 11
54 11
43 11
43 11
41 11
41 11
38 11
39 10
39 10
38 10
42 15
36 5
36 5
35 5
37 5
38 5
44 5
45 5
45 5
45 5
45 5
43 5
43 5
43 5
40 5
39 5
38 5
38 5
38 5
39 5
39 5
38 5
28 5
20 5
20 5
20 5
21 5
22 5
27 5
33 5
52 6
57 6
62 6
75 7
81 7
89 7
86 2
88 2
88 2
87 2
85 2
82 2
78 2
76 2
76 2
76 2
76 2
81 2
80 2
80 2
80 2
80 2
84 2
87 2
87 2
87 2
88 2
88 2
90 2
91 2
91 2
91 2
91 2
93 1
146 2
166 2
153 1
159 1
154 1
139 3
135 3
133 3
133 3
132 3
134 3
134 3
134 3
134 3
133 3
133 3
134 3
133 3
133 3
128 3
128 5
128 5
128 3
127 3
123 3
121 3
121 3
121 3
120 3
117 3
114 3
113 3
109 3
107 3
101 3
85 2
25 0
21 0
17 0
12 0
12 0
10 0
9 0
8 0
5 0
5 0
3 0
4 0
4 0
4 0
3 0
3 0
3 0
3 0
3 0
3 0
3 0
3 0
3 0
3 0
3 0
3 0
3 0
3 2
3 3
3 3
3 3
3 3
5 3
5 3
5 4
5 4
5 4
5 4
5 4
5 4
7 4
7 4
7 4
5 4
5 4
4 4
4 4
4 4
5 4
8 4
9 3
12 3
12 3
12 3
12 3
12 3
12 3
13 3
13 3
13 3
13 3
13 3
13 3
13 1
13 0
14 1
14 1
14 1
12 1
12 1
12 1
12 1
12 1
12 1
13 2
13 2
12 2
12 2
13 2
13 2
13 2
15 2
16 2
15 2
14 2
14 2
12 2
10 2
10 2
10 2
10 2
10 2
10 3
11 3
11 3
14 3
16 3
21 3
23 3
23 3
23 3
22 2
22 2
22 2
22 1
23 1
24 1
56 1
58 1
60 1
173 5
198 6
198 6
199 6
198 6
198 6
197 6
211 6
211 6
211 6
211 6
211 6
211 6
211 6
211 6
100 2
100 3
100 3
100 3
98 3
98 3
96 3
91 3
88 3
87 3
87 4
88 4
88 4
88 4
88 4
87 4
86 4
86 7
55 7
50 7
41 6
40 6
25 5
26 5
26 5
24 5
23 6
23 6
9 6
9 6
9 6
9 6
7 5
5 3
6 3
6 3
6 3
6 2
6 2
6 2
6 2
15 2
14 2
14 2
14 1
17 1
17 1
30 3
30 3
30 3
29 3
29 3
28 3
28 3
28 3
29 3
29 2
29 3
29 3
28 3
29 3
30 3
42 4
43 4
45 4
46 4
46 4
46 4
47 4
48 4
49 4
52 4
51 4
51 4
51 4
50 4
50 4
44 4
44 4
44 4
44 4
41 4
41 4
28 2
28 2
28 2
28 2
28 2
29 2
29 2
28 2
25 2
26 2
28 1
28 1
26 1
25 0
24 0
15 0
15 1
13 1
13 1
13 1
13 1
11 1
11 1
9 1
5 2
5 2
5 2
5 2
5 2
5 2
5 2
5 2
5 2
5 2
5 2
5 2
4 2
4 2
4 3
4 3
4 3
5 3
5 3
5 3
5 3
2 3
2 3
2 3
1 3
1 3
1 3
1 3
1 2
1 2
1 2
3 2
3 2
3 1
3 1
6 1
6 1
7 1
7 1
15 1
15 1
15 1
15 1
15 1
15 0
15 0
15 0
15 0
15 0
15 0
15 0
15 1
15 1
15 1
15 1
15 1
15 1
15 1
15 1
15 1
15 1
20 1
29 1
38 2
49 2
49 3
51 3
49 3
47 4
45 4
48 4
48 4
48 4
47 4
46 4
41 4
42 4
42 4
42 4
42 4
42 4
40 4
42 4
42 4
43 4
43 4
43 4
43 3
43 4
43 5
45 5
43 5
44 6
44 7
45 7
45 7
45 7
40 7
31 8
20 6
13 6
13 6
13 6
13 6
12 5
12 6
9 6
9 6
10 6
10 6
10 6
10 6
10 6
10 6
10 6
12 6
12 6
12 6
10 6
10 6
10 6
10 6
11 6
11 6
11 5
11 4
8 3
9 3
9 2
9 2
46 2
59 2
59 2
59 2
90 2
91 2
95 5
96 5
108 5
109 5
108 5
109 4
109 4
109 4
109 4
109 4
109 4
109 4
112 4
115 4
116 4
114 4
114 4
115 4
114 4
114 4
114 4
112 4
113 4
118 5
118 5
117 5
115 5
113 5
90 4
87 4
64 4
65 5
65 5
65 5
37 5
33 2
39 4
39 5
27 5
26 6
26 6
26 6
27 6
39 6
39 6
40 6
41 6
40 6
38 6
35 6
34 7
34 7
33 7
32 7
31 7
31 7
29 7
30 7
28 7
27 6
28 6
28 6
28 6
30 6
34 6
36 6
36 6
34 5
37 5
37 5
37 5
37 5
31 1
32 1
42 1
42 1
47 1
56 1
56 1
44 1
47 1
47 1
47 1
66 1
66 1
66 1
67 0
67 0
67 0
67 0
66 28
66 28
72 28
77 28
77 28
77 28
77 28
78 28
78 28
77 28
73 28
81 28
80 28
79 28
78 28
78 0
76 0
76 0
75 0
74 0
64 0
58 0
55 0
49 0
48 0
47 0
47 1
51 5
51 5
34 5
39 6
46 6
46 6
46 6
46 6
47 6
47 6
47 6
40 6
35 6
35 6
35 6
35 6
34 6
34 6
33 6
33 6
20 6
20 6
20 6
20 6
20 6
21 6
21 6
19 6
19 6
19 6
19 6
19 6
20 6
37 5
40 5
40 3
44 1
44 1
44 1
40 1
33 1
33 1
33 1
33 1
33 1
41 1
41 1
41 1
43 1
44 1
45 1
55 1
69 1
80 1
82 1
85 2
85 2
85 2
86 2
88 2
89 2
90 2
90 2
90 2
90 3
90 3
89 3
88 3
89 3
71 3
66 2
66 2
63 1
62 1
61 1
60 1
60 1
60 1
59 1
59 1
59 1
51 1
51 1
51 1
50 1
49 1
44 1
35 1
25 1
20 1
22 1
20 1
27 1
28 1
32 1
54 1
54 1
57 2
73 2
75 2
75 1
77 1
77 1
77 1
76 1
76 1
76 1
78 7
78 7
78 7
78 7
78 7
78 7
79 6
79 6
95 6
98 6
99 6
101 6
99 6
99 6
99 6
97 6
101 2
95 2
92 3
93 3
93 3
91 3
90 3
101 3
80 3
79 3
77 3
65 3
65 3
65 3
65 3
59 1
58 1
58 1
58 1
59 1
60 1
60 1
57 1
56 1
55 1
53 1
53 1
52 1
41 1
41 1
42 1
41 1
40 1
38 1
38 1
39 1
43 1
44 1
43 0
40 0
40 0
32 0
31 0
14 0
13 0
13 0
13 1
13 1
13 1
13 1
13 1
13 1
13 1
13 1
12 1
12 1
12 1
12 1
12 1
12 1
11 1
11 0
13 0
15 0
20 0
19 0
17 0
18 0
18 0
16 0
16 0
19 0
18 0
17 0
17 0
17 0
17 0
17 0
17 0
17 0
17 0
17 0
17 0
17 0
17 0
17 0
17 0
17 0
18 0
18 0
18 0
18 0
18 0
18 0
17 1
17 1
18 1
17 1
16 1
13 1
12 2
11 2
13 2
12 2
12 2
12 2
12 2
7 2
7 2
7 2
7 2
6 2
6 2
6 2
6 2
6 2
6 2
6 2
6 2
5 2
5 2
5 2
5 2
5 2
5 2
5 2
5 2
5 2
5 2
5 2
5 1
4 1
4 4
4 4
3 4
3 4
1 3
1 3
0 3
0 3
0 3
0 3
0 3
0 3
0 3
0 3
0 3
0 0
0 0
0 0
0 0
0 0
0 0
0 0
0 0
0 0
0 0
0 0
0 0
0 0
0 0
0 0
0 0
0 0
1 0
1 0
1 0
1 0
1 0
1 0
1 0
1 1
1 1
1 1
1 1
1 1
1 2
1 2
1 2
1 2
1 2
1 2
1 2
1 2
1 2
1 2
2 2
2 1
2 1
3 1
3 1
3 1
3 0
3 0
3 0
3 1
3 1
3 1
3 1
3 1
2 1
2 1
2 1
2 1
2 1
2 1
2 1
2 1
2 1
2 1
2 1
2 1
2 1
2 1
2 1
2 1
2 1
2 1
2 1
2 1
2 1
2 1
1 1
1 1
1 1
0 1
0 1
0 1
0 1
0 1
0 1
0 0
0 0
0 0
0 0
0 0
0 0
0 0
0 0
0 0
0 0
0 0
0 2
0 2
0 2
1 2
1 2
1 2
1 2
1 2
1 2
2 2
3 2
3 2
3 2
3 2
3 2
3 0
3 0
3 0
3 0
3 0
3 0
3 0
4 2
5 2
5 2
5 2
6 2
6 2
6 2
6 2
6 2
6 2
8 2
7 2
7 2
7 2
7 2
7 2
7 2
7 2
7 2
7 2
7 2
7 2
7 2
6 2
130 13
128 13
129 13
129 13
129 13
130 13
130 13
132 13
132 13
132 13
132 12
131 11
129 11
129 11
129 11
4 0
4 0
4 0
4 0
4 0
4 0
4 0
8 0
10 0
11 0
11 0
11 0
11 0
11 1
13 1
14 1
14 1
14 1
15 1
15 1
15 1
15 1
15 1
14 1
14 1
14 1
13 1
13 1
11 1
11 1
11 1
11 1
11 1
11 1
11 1
12 1
13 1
14 1
14 1
14 1
13 1
13 1
11 1
9 0
8 0
7 0
7 0
7 0
7 0
5 0
5 0
4 0
4 0
5 0
13 1
13 1
13 1
13 1
13 1
13 1
13 1
13 1
13 1
13 1
19 3
19 3
19 3
19 3
19 3
19 3
19 3
18 3
17 3
16 3
16 3
16 3
16 3
16 3
17 3
17 3
11 1
11 1
11 1
11 1
10 1
7 1
5 1
6 1
6 1
6 1
2 0
2 0
2 0
2 0
2 0
2 0
3 0
3 0
3 0
3 0
6 0
7 0
7 0
7 0
15 0
15 0
15 0
15 0
15 0
15 0
15 0
15 0
15 0
15 0
14 0
14 0
14 0
14 0
15 0
15 0
15 0
15 0
15 0
14 0
14 0
14 0
13 0
13 0
13 0
13 0
13 0
13 0
13 0
12 1
12 1
11 1
10 1
9 1
9 1
9 1
1 1
1 1
1 1
1 1
1 1
1 1
1 1
1 1
1 0
1 0
1 0
1 0
1 0
1 0
0 0
0 0
0 0
0 0
0 0
0 0
0 0
0 0
0 0
0 0
0 0
0 0
0 0
0 0
0 0
0 0
0 0
0 0
0 0
1 0
1 0
1 0
1 0
1 0
1 0
1 1
1 1
1 1
1 1
1 1
1 1
1 1
1 1
7 1
6 1
9 1
9 1
9 1
9 1
9 1
9 1
9 1
9 0
9 0
9 0
9 0
9 0
9 0
9 0
9 0
11 0
11 0
3 0
3 1
3 79
3 82
3 82
3 82
3 82
3 82
4 91
4 91
4 91
4 91
4 91
4 91
4 91
4 91
11 91
12 91
12 91
12 9
12 9
12 9
12 9
12 9
11 0
11 0
11 0
11 0
11 0
11 0
11 0
10 0
10 0
9 0
8 0
8 0
8 0
8 0
8 0
8 0
8 0
8 0
8 0
8 0
8 0
8 0
8 0
7 0
7 0
7 0
7 0
6 0
0 0
0 0
0 0
0 0
0 0
0 0
0 0
0 0
0 0
0 0
0 0
0 0
0 0
0 0
0 0
0 0
0 0
0 0
0 0
0 0
0 0
0 0
0 0
0 0
0 0
0 0
0 0
0 0
0 0
1 0
1 0
1 0
1 0
1 0
1 0
1 0
1 0
1 0
1 0
1 0
1 0
1 0
1 0
1 0
1 0
0 0
0 0
1 0
1 0
2 0
2 0
2 0
2 0
2 0
2 0
2 0
2 0
2 0
2 0
2 0
2 0
2 0
2 0
2 0
2 0
2 0
2 0
2 0
2 0
2 0
2 0
2 0
2 0
2 0
2 0
4 1
4 1
3 1
3 1
3 1
3 1
3 1
3 1
3 1
3 1
2 1
2 1
2 1
2 1
2 1
0 0
0 0
0 0
1 0
1 0
1 0
2 0
2 0
2 0
3 0
3 0
3 0
3 0
3 0
3 0
3 0
4 0
4 0
4 0
4 0
4 0
4 0
4 0
4 0
4 0
4 0
4 0
4 0
4 0
4 0
4 0
4 0
4 0
4 0
4 0
4 0
4 0
3 0
3 0
3 0
3 0
3 0
2 0
1 0
1 0
1 0
1 0
1 0
1 0
1 0
2 0
2 0
1 0
1 0
1 0
1 0
1 0
1 0
1 0
1 0
1 0
1 0
1 0
1 0
1 0
1 0
1 0
1 0
1 0
1 0
1 0
1 0
1 0
1 0
1 0
1 0
1 0
1 0
1 0
1 0
1 0
1 0
1 0
1 0
1 0
0 0
0 0
0 0
0 0
3 0
3 0
3 0
3 0
3 0
3 0
3 0
3 0
3 0
3 0
3 0
3 0
3 0
3 0
3 1
3 1
3 1
3 1
3 1
3 1
3 1
3 1
3 1
3 1
3 1
3 1
3 1
3 1
3 1
3 0
3 0
3 0
3 0
3 0
3 0
2 0
0 0
0 0
0 0
0 0
0 0
0 0
0 0
0 0
0 0
0 0
0 0
0 0
0 0
0 0
0 0
0 0
0 0
0 0
0 0
0 0
0 0
0 0
0 0
1 0
1 0
3 0
3 0
3 0
3 0
3 0
3 0
3 0
3 0
3 0
3 4
3 4
3 4
3 22
3 26
3 30
4 30
4 30
4 30
4 30
4 30
4 30
4 30
4 30
4 30
4 30
4 30
4 30
4 30
5 30
5 30
4 30
4 30
4 30
4 30
3 30
3 30
1 30
1 30
1 30
1 30
1 30
1 30
1 30
1 30
1 30
1 26
1 24
1 23
1 1
1 1
1 0
1 0
1 0
1 0
1 0
1 2
1 2
1 2
1 3
1 5
1 6
1 6
1 6
1 6
0 6
0 8
0 8
0 14
0 14
0 33
1 31
1 31
1 32
1 33
1 34
2 38
2 40
2 40
2 40
2 40
2 40
2 40
2 40
2 40
2 40
2 40
2 40
2 40
2 40
2 40
2 40
2 40
2 40
2 40
2 38
2 41
2 44
2 45
3 47
3 50
3 121
3 122
4 128
4 123
4 125
3 108
2 115
3 150
3 148
3 149
3 148
3 146
3 146
3 146
3 146
3 146
3 146
3 147
3 148
3 148
3 149
3 149
3 149
3 149
3 149
3 150
3 150
3 151
3 159
3 171
4 200
4 200
4 250
5 253
4 258
4 255
4 178
4 177
3 178
3 179
3 178
3 177
3 174
2 142
2 143
2 142
2 142
2 145
2 147
2 148
2 153
2 159
2 159
2 160
2 158
2 158
2 158
2 158
2 158
2 163
2 167
2 167
2 168
2 165
2 151
1 135
0 103
0 101
0 48
0 48
0 45
0 43
0 37
0 35
0 33
0 33
0 33
0 33
0 33
0 32
0 36
0 40
0 40
0 40
0 38
0 38
0 32
0 25
0 25
0 24
0 24
0 24
0 22
0 22
0 25
0 21
0 19
0 19
0 26
0 26
0 26
0 26
0 26
0 26
0 26
0 26
0 26
0 26
0 26
0 27
0 27
0 27
0 27
0 27
0 27
0 24
0 22
0 18
0 17
0 17
0 17
0 17
0 17
0 17
0 17
0 17
0 18
0 18
0 17
0 17
0 13
0 11
0 11
0 10
0 2
0 2
0 2
1 47
1 48
1 49
1 49
8 49
8 50
8 51
8 52
8 54
8 54
8 54
8 58
8 58
8 58
8 58
8 58
8 58
8 58
8 59
1 59
1 59
1 59
1 59
1 59
1 59
1 59
1 59
1 59
1 59
1 59
1 59
1 59
1 59
1 59
1 58
1 58
0 15
0 14
0 14
0 14
0 14
0 13
0 10
0 8
0 8
0 8
0 8
0 4
0 4
0 4
0 4
0 5
0 6
0 5
0 5
0 5
1 7
1 6
1 6
1 6
121 6
121 6
122 6
122 6
122 6
122 7
122 7
122 7
122 7
122 7
122 7
122 9
122 8
122 9
122 9
2 9
2 9
2 9
2 9
2 9
2 10
2 11
2 12
2 12
2 12
2 12
2 12
2 11
2 9
2 9
2 8
2 8
2 8
2 8
2 8
2 8
2 8
2 8
1 8
1 8
1 8
0 0
0 0
0 0
0 0
0 0
0 0
0 0
0 0
0 0
0 0
0 0
0 0
0 0
0 0
0 0
0 0
0 0
0 0
0 0
0 0
0 0
0 0
0 0
0 0
0 0
0 0
0 0
0 0
0 0
0 0
0 0
0 0
0 0
0 0
0 0
0 0
0 0
0 0
0 0
0 0
0 0
0 0
0 0
0 0
0 0
0 0
0 0
0 0
0 0
0 0
0 0
0 0
0 0
0 0
0 0
0 0
0 0
0 0
0 0
0 0
0 0
0 0
0 0
0 0
0 0
0 0
0 0
0 0
0 0
0 0
0 0
0 1
0 1
0 1
0 1
0 1
0 1
0 1
0 1
0 1
0 1
0 1
0 1
0 1
0 1
0 1
0 0
0 0
0 0
0 0
0 0
0 0
0 0
0 0
0 0
0 0
0 0
1 0
1 0
1 0
1 0
1 0
1 0
1 0
1 0
1 0
1 0
1 0
1 0
1 0
1 0
1 0
0 0
0 0
0 0
0 0
0 0
0 0
0 0
0 0
0 0
0 0
0 0
0 0
0 0
0 0
0 0
0 0
0 0
0 0
0 0
0 0
0 0
0 0
0 0
0 0
0 0
0 0
0 0
0 0
0 0
0 0
0 0
1 0
1 0
1 0
1 0
1 0
1 0
1 0
1 0
1 0
1 0
1 0
1 0
1 0
2 0
2 0
2 0
1 0
1 0
1 0
1 0
1 0
1 0
1 0
2 0
2 0
2 0
2 0
2 0
2 0
2 0
2 0
2 0
2 0
2 0
2 0
2 0
2 0
3 0
3 0
3 0
3 0
3 0
3 0
2 0
2 0
2 0
2 0
2 0
2 0
2 0
2 0
2 0
2 0
2 0
2 0
2 0
2 0
2 0
2 0
1 0
3 0
3 0
4 0
4 0
5 0
5 0
5 0
5 0
5 0
5 0
5 0
5 0
5 0
5 0
5 0
3 0
9 0
7 0
9 0
9 0
9 0
9 0
9 0
9 0
9 0
9 0
9 0
10 0
29 0
52 0
52 0
52 0
52 0
52 0
53 0
53 0
52 0
52 0
52 0
52 0
52 0
52 0
53 0
53 0
53 0
53 0
54 0
54 0
54 0
53 0
59 0
61 0
56 0
58 0
61 0
61 0
61 0
61 0
61 0
61 0
61 0
60 0
60 0
57 0
39 0
17 0
17 0
17 0
17 0
18 0
19 0
22 0
22 0
22 0
22 0
22 0
22 0
22 0
21 0
27 0
33 0
41 0
69 0
71 0
70 0
70 0
64 0
62 0
61 0
60 0
58 0
58 1
58 1
58 1
58 1
59 1
61 1
61 1
61 1
60 1
60 1
60 1
59 1
59 1
59 1
59 1
66 1
65 1
65 0
65 0
65 0
63 0
63 0
62 0
61 0
51 0
44 0
41 0
14 0
13 0
14 0
14 0
14 0
14 0
14 0
14 0
14 0
13 0
13 5
13 5
14 5
14 5
14 5
14 5
14 5
14 5
13 5
16 5
17 5
17 5
17 5
16 5
10 5
10 0
10 0
10 0
10 0
11 0
11 0
11 0
11 0
12 0
13 1
14 1
11 1
12 1
11 1
11 1
12 1
12 1
13 1
13 1
13 1
13 1
13 1
13 1
13 1
13 0
13 0
13 0
13 0
22 0
44 0
50 0
49 0
49 0
49 0
49 0
52 0
57 0
56 0
56 0
56 0
55 0
55 0
55 0
54 0
52 0
52 0
51 0
51 0
52 0
52 0
52 0
52 0
52 0
52 0
52 0
51 0
51 0
51 0
50 0
49 0
48 0
48 0
48 0
48 0
35 0
19 0
14 0
15 0
16 0
16 0
21 0
25 0
24 0
27 0
36 0
38 0
42 0
50 0
52 0
53 0
53 0
54 0
54 0
54 0
53 0
53 0
53 0
55 0
64 0
125 0
127 0
129 0
129 0
129 0
129 0
130 0
130 0
129 0
129 0
129 0
129 0
128 0
129 0
128 0
126 0
126 0
117 0
111 1
110 1
105 1
97 1
96 1
92 1
85 1
83 1
82 1
82 1
81 1
82 1
87 1
88 1
88 1
82 1
68 2
59 2
19 2
28 2
44 2
55 2
56 2
56 2
55 2
55 2
55 2
55 2
55 2
55 2
55 2
54 2
54 2
54 2
54 2
54 1
57 1
56 1
56 1
56 1
56 1
56 1
62 1
62 1
62 1
62 1
61 1
57 1
55 0
53 0
52 0
51 0
49 0
47 0
32 0
22 0
16 0
14 0
14 0
14 0
14 0
14 0
14 0
14 0
14 0
14 0
14 0
13 0
13 0
13 0
12 0
12 0
9 0
9 0
10 0
7 0
7 0
7 0
4 0
4 0
4 0
6 1
6 1
5 1
5 1
5 1
5 1
5 1
5 1
5 1
5 1
5 1
5 1
6 1
6 1
6 1
6 1
5 1
5 1
5 1
5 1
5 1
7 1
7 1
8 1
8 1
8 1
8 1
8 1
8 1
7 1
7 1
6 1
6 1
7 1
7 1
7 1
5 0
5 2
4 2
4 2
4 2
4 2
4 4
4 4
4 4
4 4
4 4
3 4
3 4
3 4
3 4
3 4
3 2
3 2
3 2
3 2
4 2
2 2
2 2
2 2
2 2
2 2
2 3
4 3
5 3
5 3
5 4
7 4
7 4
6 4
6 4
6 4
6 4
6 4
6 4
6 4
6 4
6 3
6 2
6 2
6 2
6 2
6 2
6 2
6 2
6 2
6 2
6 2
6 2
6 2
6 2
6 2
5 2
5 2
4 2
4 2
4 2
4 2
4 1
2 1
2 1
2 1
2 0
0 0
0 0
0 0
0 0
0 0
0 0
0 0
0 0
0 0
3 0
3 0
3 0
3 0
3 1
3 1
3 1
3 1
3 9
3 10
3 13
3 13
3 13
3 13
3 13
3 13
0 13
0 13
0 13
0 13
0 13
0 13
0 13
0 13
0 13
0 13
0 13
0 13
0 13
0 13
0 13
0 13
0 13
0 13
0 13
0 11
0 12
0 12
0 12
0 12
0 12
0 12
0 12
0 13
0 3
0 2
0 2
0 3
0 3
0 3
0 3
0 3
0 3
0 3
0 3
0 3
0 4
0 5
0 6
0 6
0 6
0 6
0 5
0 5
0 5
0 5
0 5
2 6
2 6
2 6
2 6
2 6
2 5
2 5
2 5
2 5
2 5
2 5
2 5
2 5
2 5
2 5
0 5
0 6
0 6
0 6
0 6
0 6
0 6
0 6
0 6
0 6
0 5
0 3
0 3
0 3
0 3
0 3
0 1
0 1
0 4
0 20
0 22
0 27
0 29
0 31
0 33
1 36
1 39
1 40
1 40
1 40
1 40
1 40
1 42
1 42
1 42
1 43
1 43
1 44
1 45
1 45
1 45
1 45
1 45
1 45
1 45
1 45
1 48
1 48
1 48
1 50
1 50
1 50
1 50
1 49
1 45
0 23
0 16
0 15
0 15
0 15
2 16
2 18
2 21
4 23
4 24
4 24
4 24
4 24
4 21
4 21
4 22
4 22
4 25
4 27
4 27
4 27
4 27
4 27
4 27
4 27
4 29
4 33
4 34
4 35
4 34
4 32
4 32
5 32
5 32
5 32
4 29
4 29
4 29
4 29
4 29
4 31
3 30
1 26
1 22
1 21
1 21
1 21
1 21
1 21
1 21
6 34
6 33
6 31
6 28
6 26
6 26
6 26
6 26
6 27
6 27
6 27
6 22
6 20
6 16
6 16
6 16
6 16
6 16
5 16
5 16
5 17
5 17
5 17
6 19
6 19
6 19
6 17
6 17
6 17
6 17
6 17
5 17
3 17
3 17
3 17
3 17
1 4
1 4
1 4
1 4
1 4
1 6
1 6
1 6
1 5
1 5
1 5
1 5
1 6
1 6
1 6
1 9
1 9
1 8
1 9
1 10
1 11
1 11
1 11
0 10
0 14
0 14
0 14
3 14
3 14
6 15
6 15
6 15
6 17
6 18
6 18
6 18
7 18
7 18
7 24
7 24
7 25
7 23
7 23
7 23
7 23
2 22
2 22
2 23
2 21
2 22
2 22
2 20
2 20
2 20
2 18
2 17
2 17
2 17
2 17
2 17
2 13
2 13
1 13
1 13
1 13
1 13
1 13
1 13
1 10
1 10
1 10
1 10
1 9
1 9
1 3
1 3
1 3
1 3
1 3
1 3
0 3
0 3
0 3
0 2
0 2
0 1
0 1
0 1
0 1
0 1
0 1
0 1
0 0
0 0
0 0
0 0
1 0
1 0
1 0
1 1
1 1
1 1
1 1
1 1
1 1
1 1
1 1
1 1
1 1
1 1
1 1
1 1
1 1
1 1
1 1
1 1
1 1
1 1
1 1
1 1
1 1
1 1
1 1
1 1
2 1
2 1
2 1
2 1
2 1
2 1
2 1
2 2
1 16
1 17
1 17
1 16
1 16
1 16
1 16
1 16
1 16
1 17
1 18
1 19
1 19
1 19
1 19
1 5
1 6
1 7
1 11
1 11
1 11
0 11
0 11
0 12
0 17
1 24
2 31
2 35
2 39
2 41
2 43
2 52
2 54
2 57
2 57
2 57
2 57
2 56
2 57
2 57
2 57
2 57
2 57
2 57
2 57
2 57
3 57
3 57
3 57
3 57
3 57
3 56
3 55
3 54
3 50
3 50
3 50
3 50
3 49
3 48
3 41
2 26
1 18
1 9
1 5
1 4
1 3
1 8
1 8
1 10
1 11
1 11
1 18
1 21
1 28
0 29
0 32
0 36
0 42
0 42
0 43
0 48
0 48
0 48
0 48
0 48
0 48
0 49
0 50
0 50
0 50
0 51
0 52
0 53
0 53
0 53
0 54
0 54
0 54
0 55
0 54
0 56
0 56
0 50
0 50
0 47
0 47
0 43
1 34
1 38
1 33
1 33
1 30
1 27
1 24
1 23
1 22
1 16
1 16
1 16
1 16
1 16
1 16
1 16
1 16
1 17
1 17
1 17
1 17
1 16
1 17
1 20
1 18
1 18
1 18
1 17
2 17
2 16
2 19
2 19
2 19
2 19
2 20
1 20
1 16
1 11
1 11
1 11
1 12
1 12
1 13
0 13
0 13
0 13
0 14
0 17
0 17
0 18
0 18
0 17
0 17
0 18
0 19
0 18
0 17
0 17
0 17
0 14
0 14
0 14
0 14
0 14
1 21
1 21
1 19
1 20
1 20
1 20
2 19
2 19
2 19
2 21
2 20
2 27
2 27
2 29
2 31
2 31
2 31
2 31
2 29
2 27
2 27
1 26
1 27
1 27
1 27
1 26
1 26
1 51
1 51
1 53
1 57
1 57
1 57
1 57
1 57
1 57
0 49
0 49
0 50
0 51
0 51
0 52
0 53
0 53
0 53
0 47
0 47
0 41
0 41
0 38
0 38
0 38
0 38
0 39
0 39
0 39
0 39
0 39
0 38
0 36
0 36
0 36
0 36
0 10
0 8
0 6
0 6
0 6
0 5
0 6
0 6
0 7
0 8
0 8
0 6
0 6
0 6
0 5
1 4
1 4
1 4
1 4
1 4
1 4
1 4
1 4
2 4
2 4
2 4
2 4
2 4
2 4
2 4
2 4
2 4
2 4
2 4
2 4
2 4
2 4
2 4
2 4
1 4
1 3
1 3
1 3
1 3
1 1
1 2
1 2
1 2
1 2
1 2
0 2
0 3
0 3
0 3
0 3
0 3
0 3
1 24
1 24
1 24
1 24
1 24
1 23
1 23
1 23
1 23
1 23
2 22
2 26
2 27
2 27
2 28
1 7
1 7
2 7
3 7
4 10
6 10
6 12
6 12
6 12
6 11
5 11
5 11
5 11
5 11
5 12
5 12
5 12
5 13
5 13
4 13
2 13
2 13
2 13
2 13
2 13
2 13
2 13
2 13
2 13
2 13
2 13
2 12
2 8
2 7
2 7
2 7
2 7
1 6
1 6
1 6
0 3
0 3
0 3
0 3
0 3
0 3
0 4
0 4
0 4
0 4
0 3
0 3
1 3
1 2
1 2
1 2
1 2
1 2
1 2
1 2
1 2
1 2
1 2
1 2
1 2
1 2
1 2
1 2
1 2
1 2
1 2
1 2
1 2
1 2
1 2
1 2
1 1
1 2
1 2
2 2
2 3
2 3
1 2
1 2
1 2
1 2
1 3
1 3
1 3
1 3
1 3
1 3
1 3
1 3
1 3
1 3
1 3
1 3
1 4
1 4
1 4
1 5
1 5
1 5
1 5
1 5
1 5
1 6
1 6
1 6
1 7
1 7
1 7
0 6
0 6
0 6
0 5
0 5
0 5
0 5
0 5
0 5
0 5
0 5
0 5
0 5
0 5
0 5
0 4
0 4
0 4
0 4
0 4
0 4
0 4
0 4
0 4
0 4
1 7
1 6
1 6
1 6
1 6
1 5
1 5
1 6
1 5
1 5
1 5
1 5
1 5
1 5
1 5
1 5
1 5
1 5
1 5
1 7
1 7
1 7
1 7
1 8
1 8
1 8
1 8
1 8
1 8
1 8
1 8
1 8
1 9
1 8
0 5
0 4
0 3
0 3
0 3
0 3
0 3
1 3
1 3
1 2
1 2
1 2
1 3
1 3
1 3
1 3
2 3
2 3
2 3
2 3
3 3
3 5
3 5
2 5
3 10
3 11
3 11
3 12
3 12
3 12
3 12
5 12
5 12
5 12
5 12
6 12
6 12
6 12
6 12
6 12
6 11
6 11
6 11
6 11
6 11
6 11
4 11
4 12
3 12
3 13
2 13
2 13
2 13
2 13
1 13
1 13
1 11
1 11
1 11
1 11
0 5
0 4
0 4
0 3
0 3
0 3
0 3
0 3
0 3
0 3
0 3
0 3
0 3
0 3
0 3
0 3
0 3
0 3
0 3
0 3
0 3
0 3
0 3
0 0
0 0
0 0
0 0
0 0
0 0
0 0
0 0
0 0
0 0
0 0
0 0
0 0
0 0
0 0
0 0
0 0
0 0
0 0
0 0
0 0
0 0
0 0
0 0
0 0
0 0
0 0
0 0
0 0
0 0
0 0
0 0
0 0
0 0
0 0
0 0
0 0
0 0
0 0
0 0
0 0
0 0
0 0
0 0
0 0
0 0
0 0
0 0
0 0
0 0
0 0
0 0
0 0
0 0
0 0
0 0
0 0
0 0
0 0
0 0
0 0
0 0
0 0
0 0
0 0
0 0
0 0
0 0
0 0
0 0
0 0
0 0
0 0
0 2
0 3
0 3
0 3
5 3
5 3
5 3
5 3
5 3
5 3
5 3
5 3
5 3
5 3
5 3
5 3
5 3
5 3
5 3
5 3
3 3
3 3
0 3
0 3
0 3
0 3
0 3
0 3
0 3
0 3
0 3
0 3
0 3
0 3
0 3
0 3
0 1
0 0
0 0
0 0
0 0
0 0
0 0
0 0
0 0
0 0
0 0
0 0
0 0
0 0
0 0
0 0
0 0
0 0
0 0
0 0
0 0
0 0
0 0
0 0
0 0
0 0
0 0
0 0
0 1
0 1
0 1
0 1
0 1
0 1
0 1
0 1
0 1
0 1
0 1
0 1
0 1
0 1
0 1
0 1
0 1
0 1
0 1
0 1
0 1
0 1
0 1
0 1
0 1
0 1
0 1
0 1
0 2
0 2
1 2
1 2
1 2
1 2
1 2
1 1
1 1
1 1
1 2
1 3
1 3
1 3
1 3
1 3
1 4
1 4
1 4
1 4
1 4
1 4
1 4
1 4
1 4
1 4
1 4
1 4
1 4
1 4
1 4
1 4
1 6
1 6
1 6
1 6
1 5
1 5
0 5
0 5
0 5
0 5
0 5
0 5
0 5
0 5
0 4
0 3
0 3
1 3
1 3
1 3
1 3
1 3
1 3
1 3
1 3
1 3
1 3
1 3
1 3
1 3
1 3
1 3
0 3
0 3
0 3
0 3
0 0
0 0
0 0
0 0
0 0
0 0
0 0
0 0
0 0
0 0
0 0
0 0
0 0
0 0
0 0
1 2
1 2
1 2
1 2
1 2
1 2
1 2
1 2
1 2
1 2
1 2
1 2
1 2
1 2
1 2
1 2
1 2
1 2
1 2
1 2
1 2
1 2
1 2
1 2
1 2
1 2
1 2
1 2
1 2
1 2
1 2
1 2
1 2
1 2
1 2
1 2
0 0
0 0
0 0
0 0
0 0
1 0
1 0
1 0
1 0
1 0
1 0
1 0
1 0
1 0
1 0
1 0
1 0
1 0
1 0
1 0
1 0
0 0
0 0
0 0
0 0
0 0
0 0
0 0
0 0
0 0
0 0
0 0
0 1
0 1
0 1
0 1
0 1
0 1
0 1
0 1
0 1
0 1
0 1
0 1
0 1
0 1
0 1
0 1
0 1
0 2
0 2
0 2
0 2
0 2
0 2
0 2
0 2
0 2
0 2
0 2
0 2
0 2
0 2
0 2
0 2
0 2
0 2
0 2
0 1
0 1
0 1
0 1
0 1
0 1
0 1
0 1
1 1
1 1
1 1
1 1
1 1
1 1
1 1
1 1
1 44
1 43
1 43
1 43
1 44
1 44
1 44
1 44
1 44
1 44
1 44
1 44
1 44
1 44
1 44
1 1
1 1
1 1
9 1
9 1
9 1
9 1
10 1
10 1
10 1
10 1
10 1
9 1
9 1
9 1
9 1
9 1
9 1
1 1
1 2
1 2
1 2
2 7
2 7
2 7
2 6
2 6
1 6
1 6
1 6
1 6
1 6
1 6
1 6
1 6
1 6
1 6
1 6
1 6
1 6
1 6
1 6
1 6
1 6
1 6
1 6
1 6
1 6
1 6
1 6
1 6
1 6
1 6
1 6
1 5
1 3
0 3
0 2
0 0
0 0
0 0
0 0
0 0
0 0
0 0
0 0
0 0
0 0
0 0
0 0
0 0
0 0
0 0
0 0
0 0
0 0
0 0
0 0
0 0
0 0
0 0
0 0
0 0
0 0
0 0
0 0
0 0
0 0
0 0
0 0
0 0
148 1
148 1
149 1
149 1
149 1
149 1
149 1
149 1
149 1
149 2
149 2
149 2
149 2
149 2
149 2
1 1
1 1
0 1
0 1
0 1
0 1
0 1
0 1
0 1
0 1
0 1
0 1
0 1
0 1
0 1
0 1
0 1
1 1
1 1
1 1
1 2
1 2
1 2
1 3
1 3
1 3
1 3
1 3
1 3
2 4
2 3
2 4
1 4
1 4
1 4
1 4
1 3
1 3
1 2
1 2
1 2
1 2
1 2
1 2
0 2
0 2
0 2
0 2
0 2
0 2
0 2
0 2
0 2
0 2
0 4
0 4
0 5
1 6
1 6
1 6
1 6
1 6
1 6
1 6
1 6
1 5
1 5
1 4
1 4
1 4
1 4
4 5
4 5
4 5
4 5
4 5
4 5
5 5
5 5
5 5
5 5
5 5
5 5
5 5
5 5
5 5
7 7
9 8
9 9
9 9
6 6
5 5
4 4
4 4
4 4
5 6
5 6
5 6
5 6
5 6
5 6
5 7
5 7
5 9
5 11
5 12
5 12
5 12
5 12
5 12
4 11
4 10
4 10
3 10
5 10
8 11
8 11
9 11
9 11
9 11
9 10
9 9
8 8
6 7
6 7
6 7
6 7
6 7
6 7
6 7
6 7
6 7
5 7
5 7
5 7
5 8
5 8
5 6
5 6
5 4
5 2
5 2
5 2
5 2
5 2
5 2
5 2
5 2
5 2
5 2
3 2
0 1
0 1
0 1
0 1
0 1
0 1
0 1
0 1
0 1
0 1
0 1
0 2
0 2
0 2
0 2
0 2
0 2
0 2
0 2
0 2
0 1
0 1
0 1
0 1
0 1
0 1
0 1
0 1
0 1
0 1
0 1
0 1
0 1
3 3
3 4
3 4
3 4
6 6
6 8
6 8
6 8
6 8
6 8
6 8
6 8
6 8
6 8
6 7
6 7
3 6
3 6
3 5
3 5
3 5
0 1
0 1
0 1
0 1
0 1
0 1
0 1
0 1
0 1
0 1
0 1
0 1
0 1
0 1
0 1
0 0
0 0
0 0
0 0
0 0
0 0
0 0
0 0
0 0
0 0
0 0
0 0
0 0
0 0
0 0
0 0
0 0
0 0
0 0
0 0
0 0
0 0
0 0
0 0
0 0
0 0
0 0
0 0
0 0
0 0
0 0
0 0
0 0
0 0
0 0
0 0
0 0
0 0
0 0
0 0
0 0
0 0
0 0
0 0
0 0
0 0
0 0
0 0
0 0
0 0
0 0
0 3
0 3
0 3
0 3
0 3
0 3
0 3
0 3
0 3
0 3
0 3
0 3
0 3
0 3
1 3
1 0
1 0
1 0
1 0
1 0
1 0
1 0
1 0
1 0
1 0
1 0
1 0
1 0
1 0
1 0
0 0
0 0
0 0
0 0
0 0
0 0
0 0
0 0
0 0
0 0
0 0
0 0
0 0
0 0
0 0
0 0
0 0
0 0
0 0
0 0
0 0
0 0
0 0
0 0
0 0
0 0
0 0
0 0
0 0
0 0
0 0
0 0
0 0
0 0
0 0
0 0
0 0
0 0
0 0
0 0
0 0
0 0
0 0
0 0
0 0
0 0
2 0
2 0
2 0
2 0
2 0
2 0
2 0
2 0
2 0
2 0
2 0
2 0
2 0
2 0
2 0
2 0
2 0
2 0
2 0
2 0
2 0
2 0
2 0
2 0
2 0
2 0
2 0
2 0
2 0
2 0
2 0
2 0
2 0
2 0
2 0
2 0
0 0
1 0
1 0
1 0
1 0
1 0
1 0
1 0
1 0
1 0
1 0
1 0
1 0
1 0
1 0
1 0
1 0
1 0
1 0
1 0
1 0
1 0
1 0
1 0
1 0
1 0
4 0
4 0
4 0
4 0
4 0
4 0
4 0
4 1
4 2
4 4
7 122
6 136
6 136
6 136
6 136
7 211
7 214
7 218
7 218
7 218
7 218
7 218
7 218
7 218
7 218
7 218
7 218
7 218
7 218
7 218
6 218
2 7
2 7
2 3
2 3
2 3
0 3
0 3
0 3
0 3
0 3
0 3
0 3
0 2
0 1
0 1
0 1
1 1
1 1
1 1
1 1
1 1
1 1
1 1
1 1
1 1
1 1
1 1
1 1
1 1
1 0
1 0
1 0
0 0
0 0
0 0
0 0
0 0
0 0
0 0
0 0
0 0
0 0
0 0
0 0
0 0
0 0
0 0
0 0
0 0
0 0
0 0
0 0
0 0
0 0
0 0
0 0
0 0
0 0
0 0
0 0
0 0
0 0
0 0
0 0
0 0
0 0
0 0
0 0
0 0
0 0
0 0
0 0
0 1
0 1
0 1
0 1
0 1
0 1
0 1
0 1
0 1
0 1
0 1
0 1
0 1
0 1
0 1
0 1
0 0
0 0
0 0
0 0
0 0
0 0
0 0
0 0
0 0
0 0
0 0
0 0
0 0
0 0
0 0
0 0
0 0
0 0
0 4
0 31
0 35
1 42
1 44
1 44
1 44
1 44
1 46
1 47
1 47
1 47
1 47
1 47
1 47
1 47
1 47
1 47
1 47
0 44
0 44
0 44
0 44
0 44
0 44
0 44
0 44
0 44
0 44
0 44
0 44
0 44
0 44
0 44
0 44
0 44
0 37
0 8
0 8
0 4
0 3
0 3
0 3
0 4
0 3
0 2
0 3
0 6
0 9
0 13
0 13
19 13
19 13
19 13
19 13
19 14
19 14
20 21
21 26
21 28
21 29
21 29
21 29
21 29
21 29
21 29
2 29
2 29
2 29
2 29
2 29
2 29
1 22
1 22
2 30
2 30
2 30
2 30
2 30
2 28
1 23
1 23
1 20
1 19
1 16
1 12
1 12
1 12
1 12
1 12
0 12
0 12
0 12
0 11
0 58
0 59
0 59
0 60
0 60
0 62
2 67
2 84
2 92
2 111
2 117
2 124
2 124
2 123
2 123
2 123
2 116
3 116
3 115
3 115
3 115
3 115
1 115
1 115
1 115
1 115
1 115
1 115
1 115
1 115
1 116
1 116
1 116
1 116
1 116
1 118
1 68
1 68
1 110
1 115
1 126
1 127
1 125
1 102
1 95
1 81
1 89
1 82
1 84
1 85
1 85
1 85
1 83
1 83
1 83
1 83
1 83
1 83
1 83
1 83
1 83
1 83
1 83
1 83
1 83
1 83
0 82
0 82
0 83
0 83
0 83
0 81
0 78
0 74
0 26
0 21
0 18
0 15
0 19
0 19
0 19
0 19
0 9
0 9
0 8
0 12
0 13
0 20
0 20
0 20
0 20
0 20
0 20
0 21
0 21
0 21
0 23
0 23
0 23
0 23
0 23
0 23
0 23
0 23
0 22
0 22
0 21
0 22
0 22
0 22
0 22
0 22
0 22
0 24
0 20
0 20
0 20
0 20
0 20
1 25
1 24
1 20
1 19
2 13
2 13
2 13
2 14
3 23
3 32
3 34
3 37
3 36
3 35
3 35
3 34
3 29
3 29
3 29
3 29
3 33
3 34
3 34
3 34
3 34
3 34
3 34
3 35
3 35
3 35
3 34
3 34
3 34
3 36
4 36
4 36
2 36
2 36
2 35
1 35
1 35
1 36
1 35
1 33
1 17
1 13
1 10
1 8
1 8
1 8
1 8
1 9
1 10
1 11
1 18
1 18
1 14
1 13
1 16
1 17
1 18
1 19
1 24
2 28
1 31
1 29
1 30
1 31
1 31
1 33
1 39
1 41
1 41
1 41
1 41
1 41
1 41
1 40
1 40
1 40
1 40
1 40
1 40
1 40
1 40
1 34
1 34
1 33
1 32
1 30
1 24
1 28
1 42
1 41
1 34
1 35
1 83
0 88
0 89
0 90
0 88
0 88
0 87
0 86
0 86
0 85
0 84
0 83
0 83
0 83
0 83
0 83
0 83
0 83
0 83
0 83
0 83
0 84
0 84
0 84
0 84
0 84
0 84
0 84
0 84
0 83
0 82
0 89
0 78
2 82
2 82
2 81
2 30
2 24
2 23
2 22
2 22
2 22
2 22
2 22
2 22
2 22
2 22
2 22
2 22
2 22
2 22
2 22
2 22
2 22
2 22
2 22
2 22
2 21
2 21
2 21
2 21
2 21
2 22
2 22
2 22
2 23
2 26
0 17
1 32
2 37
2 38
2 38
2 47
2 49
2 49
2 49
2 49
2 58
2 60
3 61
3 64
3 65
3 65
3 65
3 66
3 66
3 66
3 68
3 68
3 68
3 68
3 68
3 68
3 68
3 68
3 67
3 67
3 67
3 66
3 70
3 71
3 70
3 67
3 57
2 40
1 36
1 36
1 39
2 64
1 72
1 81
1 88
1 89
2 82
2 89
2 91
2 90
2 91
2 92
2 92
2 92
2 92
2 92
2 90
2 90
2 90
2 90
2 90
2 90
1 90
1 90
1 97
1 105
1 105
1 105
1 102
1 102
1 102
5 102
5 102
5 102
5 103
5 102
5 86
4 28
4 22
4 22
4 22
4 22
4 22
4 22
4 20
4 20
0 19
0 19
0 19
0 18
0 18
0 18
0 19
0 19
0 20
0 25
0 25
0 25
0 25
0 26
0 18
0 16
0 17
0 17
0 48
0 50
0 53
0 57
0 59
0 63
0 62
0 62
0 62
177 2927
177 2928
177 2929
177 2929
177 2930
177 2930
177 2931
177 2938
177 2939
177 2939
177 2939
177 2939
177 2939
177 2938
177 2938
175 2919
168 2801
168 2800
168 2814
168 2817
0 88
0 97
0 95
0 107
0 109
0 116
0 120
0 88
0 85
0 87
0 81
1 86
1 87
1 92
1 95
1 98
1 103
1 104
1 104
1 102
1 102
1 102
1 102
1 95
1 94
1 94
1 94
1 94
1 94
1 94
1 94
1 93
1 94
1 97
1 78
1 80
2 79
2 69
18 98
18 81
18 73
18 66
18 63
18 63
18 63
18 63
18 61
17 55
17 48
18 42
18 42
18 40
18 39
2 10
2 10
2 10
2 10
2 10
2 10
2 10
2 10
2 10
2 10
2 10
2 10
2 10
2 10
2 10
2 10
2 5
2 5
2 1
1 1
1 1
1 1
1 1
1 1
1 0
3 17
3 17
3 17
3 17
3 17
3 17
3 18
2 19
2 19
2 19
2 19
2 19
2 19
2 19
2 19
2 19
2 20
2 25
2 27
2 29
2 33
3 33
3 33
3 35
3 36
3 36
3 36
3 36
3 37
3 37
3 37
4 52
4 54
4 54
4 56
4 56
2 40
2 46
2 46
2 47
2 48
2 48
2 48
2 47
2 48
2 51
2 51
2 55
2 55
2 55
2 58
1 55
1 58
4 340
4 368
4 389
4 388
4 387
4 448
4 489
4 521
4 570
4 592
4 601
4 642
4 682
4 691
3 677
3 675
3 674
0 373
0 373
1 373
1 368
1 368
1 366
1 366
1 365
1 365
1 365
1 364
1 362
1 361
1 357
1 357
1 356
15 355
14 352
14 351
14 345
14 334
14 312
14 311
14 297
14 199
14 132
14 95
14 28
14 8
14 6
14 6
0 4
0 4
0 7
0 73
0 74
0 88
0 90
0 121
0 124
0 131
0 148
0 172
0 183
0 186
0 187
10 191
10 192
10 196
11 197
11 199
11 199
11 200
11 200
11 200
11 200
11 203
11 203
11 203
11 203
11 203
1 199
1 199
1 199
1 198
0 198
0 199
0 199
0 200
0 200
0 128
0 127
0 111
0 112
0 82
0 81
0 74
0 51
0 39
0 33
0 36
0 35
0 35
0 39
0 35
0 36
0 37
0 36
0 36
0 36
0 36
1 38
1 49
1 57
1 64
1 86
1 94
1 109
1 137
1 153
24 175
24 175
24 175
24 175
24 174
24 223
24 225
24 228
24 237
24 242
24 254
24 254
24 254
24 255
24 248
1 243
1 238
1 238
1 240
1 239
1 239
1 239
1 237
1 237
1 238
1 237
1 237
0 235
0 208
0 201
0 200
0 177
0 172
13 156
16 127
16 112
16 98
16 98
16 102
16 102
16 103
16 51
16 50
16 46
16 34
16 32
16 19
16 19
16 19
0 18
0 14
0 14
0 13
0 13
0 12
0 10
0 9
0 8
0 8
0 7
0 8
0 9
0 9
0 9
0 12
0 12
0 12
0 12
43 13
43 15
45 15
45 15
50 17
50 17
50 13
50 13
50 12
50 12
50 10
50 10
50 10
50 10
50 10
49 10
7 10
5 10
5 10
0 8
0 8
0 9
0 9
0 9
0 9
0 9
0 9
0 7
0 7
0 7
0 7
0 7
0 12
2 15
2 15
2 17
2 16
2 15
2 16
2 16
2 16
2 16
4 16
4 16
25 16
25 16
25 16
25 16
25 16
25 16
25 16
25 16
29 16
29 16
29 15
29 15
29 15
29 15
27 15
7 15
6 17
6 19
6 19
6 19
6 19
6 19
6 20
6 18
2 8
0 5
0 5
0 5
0 5
0 5
0 5
0 5
0 5
0 5
0 5
0 5
0 5
0 5
0 5
0 5
0 5
0 5
0 5
2 9
2 9
2 9
2 10
2 11
2 11
2 13
2 13
2 13
2 11
2 10
2 10
2 10
2 11
2 11
2 11
2 11
2 11
2 11
2 12
2 12
2 12
2 12
2 12
2 16
2 18
2 19
2 19
2 52
2 59
2 61
2 67
2 69
2 75
2 77
4 146
2 156
2 177
2 189
2 189
2 192
2 197
4 297
4 323
4 336
4 360
4 371
4 379
4 431
4 434
4 434
4 435
4 435
5 435
5 435
5 434
5 434
5 435
5 436
5 445
5 442
5 438
5 439
5 436
5 391
5 387
5 387
5 387
5 386
5 381
4 376
3 279
3 267
3 264
3 262
3 262
3 261
3 250
1 99
1 77
1 49
1 13
1 13
1 13
5 13
5 13
6 14
7 13
7 13
7 14
7 13
7 13
7 13
7 12
7 12
7 4
7 7
7 7
7 10
7 12
7 15
7 16
7 16
8 19
8 20
8 20
8 21
8 21
8 23
8 28
8 48
8 71
8 102
8 152
8 220
7 239
9 254
8 462
7 460
7 460
4 461
4 461
2 462
3 462
3 462
3 461
3 461
3 461
3 462
3 462
3 462
3 461
1 457
1 456
1 453
1 449
1 448
1 448
0 448
0 447
0 448
0 452
0 456
0 458
0 458
0 460
0 410
0 390
0 352
0 310
0 262
0 244
0 238
0 32
0 32
0 32
0 32
0 32
0 32
0 32
0 32
0 35
0 35
0 35
0 35
0 32
0 32
0 32
0 32
0 32
0 32
0 42
0 42
5 42
5 42
5 42
5 40
5 38
5 33
5 37
7 51
9 72
9 80
9 81
9 84
9 82
9 83
9 85
9 86
4 86
4 86
4 86
4 86
4 86
4 86
4 83
4 83
4 80
4 80
4 80
4 81
4 81
4 83
4 83
4 84
5 84
5 83
5 79
5 77
5 77
5 77
5 80
5 80
5 80
5 80
4 73
2 46
2 21
3 25
3 25
3 25
3 24
2 24
2 22
2 20
2 20
2 20
2 21
2 21
2 23
2 24
2 25
2 25
2 25
2 25
2 25
2 23
2 23
2 21
2 22
2 23
2 24
2 24
3 25
3 23
3 23
3 23
3 20
3 20
3 20
3 20
3 20
3 20
4 74
4 72
4 72
4 72
4 81
4 82
4 82
4 82
4 82
4 82
4 82
4 82
4 82
4 81
4 80
4 80
4 80
4 80
4 80
4 72
5 73
5 73
5 72
5 71
5 70
5 70
4 63
4 65
5 106
5 121
6 137
6 146
6 148
6 148
6 148
6 148
3 89
3 88
3 88
3 88
3 88
3 89
3 91
3 94
3 94
3 94
3 94
3 94
3 95
3 95
3 95
3 96
3 99
3 101
3 102
3 101
2 100
2 100
4 100
4 101
4 101
4 101
4 101
4 98
3 40
3 30
2 18
2 14
2 14
4 14
4 14
4 14
4 14
2 14
2 14
2 14
2 13
2 12
2 8
3 8
3 7
3 8
3 8
3 8
3 8
3 9
3 9
3 6
3 5
3 3
3 2
3 2
3 2
3 2
3 2
3 2
3 2
3 2
3 2
3 2
3 2
3 2
3 2
3 2
3 2
1 2
1 2
1 2
1 2
1 2
2 2
2 1
2 1
2 1
2 1
1 0
1 0
1 0
1 4
1 4
1 4
1 4
1 4
1 4
1 4
1 4
1 4
1 4
1 4
1 4
1 4
1 4
1 4
1 0
1 0
1 0
1 0
1 0
1 0
1 0
1 0
1 0
1 0
1 0
1 0
0 0
0 0
0 0
0 0
0 0
0 0
0 0
0 0
0 0
0 0
0 0
0 0
0 0
0 0
0 0
0 0
0 0
0 0
0 0
0 0
0 0
0 0
0 0
0 0
0 0
0 0
0 2
0 2
0 2
0 2
0 2
0 2
0 2
0 2
0 2
0 2
0 2
0 2
0 2
0 2
0 2
0 2
0 2
0 2
0 2
0 2
0 2
0 2
0 2
0 2
0 2
0 2
0 2
0 2
0 2
0 2
0 2
0 2
0 2
0 2
0 2
0 2
0 0
0 0
0 0
0 0
0 0
0 0
0 0
0 0
0 0
0 0
0 0
0 0
0 0
0 0
0 0
0 0
0 0
0 0
0 0
0 0
0 1
0 1
0 1
0 1
0 1
0 1
0 1
0 1
0 1
0 1
0 1
0 1
0 1
0 1
0 1
0 1
0 0
0 0
0 0
0 0
0 0
0 0
0 0
0 0
0 0
0 0
0 0
0 0
0 0
0 0
0 0
0 0
0 0
0 0
0 0
0 0
0 0
0 0
0 0
0 0
1 0
1 0
1 0
1 0
1 0
1 0
1 0
1 0
1 0
1 0
1 0
1 0
1 0
1 0
1 0
1 0
1 0
1 0
1 0
1 0
1 0
1 0
1 0
1 0
1 0
1 0
1 0
1 0
1 0
1 0
1 0
1 0
1 0
1 0
1 0
1 0
0 0
0 0
0 0
0 0
0 0
0 0
0 0
0 0
0 8
0 8
0 8
0 8
0 8
0 8
0 8
0 8
0 8
0 8
0 8
0 8
0 8
0 8
0 8
0 8
0 0
0 0
0 0
0 0
0 0
0 1
0 1
0 1
0 1
0 1
0 1
0 1
0 1
0 1
0 1
0 1
0 1
0 1
0 1
0 2
0 1
0 1
0 1
0 1
0 1
0 1
0 1
0 1
0 1
0 1
0 1
0 1
0 1
0 1
0 1
0 0
0 0
0 0
0 0
0 0
0 0
0 0
0 0
0 0
0 0
0 0
0 0
0 0
0 0
0 0
0 0
0 0
0 0
0 0
0 0
0 0
0 0
0 0
0 0
0 0
0 0
0 0
0 0
0 0
0 0
0 3
0 3
0 3
0 3
0 3
0 3
0 3
0 3
0 3
0 3
0 3
0 3
0 3
0 3
0 3
0 3
0 0
0 0
0 0
0 0
0 0
0 0
1 1
1 1
1 1
1 2
1 2
1 2
1 2
1 2
1 2
1 2
1 2
1 2
1 2
1 2
1 3
1 3
1 3
1 3
1 3
1 3
1 3
1 3
1 3
1 3
1 3
1 3
2 3
2 4
2 5
2 5
2 4
2 4
2 4
2 4
2 4
2 4
1 2
1 2
1 3
1 4
1 4
1 4
1 4
1 4
1 5
1 5
1 5
1 5
1 5
1 5
1 5
1 5
1 5
1 5
1 4
1 4
1 3
1 3
1 3
1 3
1 3
3 11
2 12
2 13
2 14
2 14
2 15
2 15
2 15
2 17
2 17
2 19
2 21
14 114
15 115
15 117
15 118
15 119
15 119
16 125
16 124
16 124
16 124
16 124
16 124
16 124
16 124
16 124
16 124
16 124
16 124
16 124
16 124
16 125
17 134
17 144
17 149
16 164
16 163
16 163
18 163
18 164
18 163
18 164
18 164
18 162
18 162
18 159
17 158
4 63
4 61
5 57
5 57
5 57
5 58
5 59
5 60
5 60
5 61
5 60
5 60
5 62
5 64
5 67
5 68
9 81
9 82
9 82
9 84
8 85
7 75
7 61
7 59
5 34
6 33
6 33
6 33
6 32
6 32
6 32
6 32
6 32
6 32
6 32
6 31
6 31
8 31
7 33
7 33
7 33
9 58
9 60
9 58
9 58
9 58
9 58
9 58
9 56
9 53
9 50
9 49
5 31
5 30
5 31
4 30
4 30
5 37
5 38
5 39
5 39
5 39
5 41
5 42
5 42
5 42
15 47
15 47
15 49
15 50
15 50
15 50
14 50
13 49
13 47
13 47
13 47
11 22
11 21
11 21
11 21
11 21
11 22
11 22
11 22
11 22
13 21
13 21
13 20
13 22
13 21
14 24
14 25
14 19
14 19
14 18
14 17
14 17
14 17
14 16
13 16
14 16
3 11
3 11
3 9
3 8
3 8
3 8
2 8
2 8
2 8
2 8
2 7
2 7
2 7
2 7
2 7
2 7
2 7
2 9
2 50
2 52
2 56
2 59
2 63
2 64
2 67
1 64
1 67
1 70
1 73
1 74
1 74
1 74
1 75
1 76
1 78
0 81
1 118
1 145
1 158
1 160
1 164
1 164
1 164
1 164
1 164
1 164
1 164
1 164
1 164
1 164
1 164
1 164
1 164
1 156
1 106
1 105
1 104
1 103
1 104
1 103
1 102
1 98
1 94
1 93
1 93
1 94
2 95
2 99
2 102
2 101
2 97
1 90
1 44
1 20
1 15
1 15
1 14
1 14
1 14
1 14
1 14
1 15
1 15
1 15
1 15
1 15
1 15
1 20
1 28
1 30
1 33
1 32
1 32
1 32
1 32
1 33
1 33
0 33
0 38
0 40
0 39
0 37
0 37
0 33
0 31
0 31
0 30
0 31
0 31
0 31
0 31
0 31
0 31
0 31
0 31
0 31
0 31
0 31
0 33
0 33
0 36
0 35
0 34
0 33
0 26
0 26
0 24
0 24
0 24
0 24
0 24
0 23
0 21
0 21
0 15
0 13
0 13
0 14
0 64
0 67
0 70
0 73
0 79
0 81
0 88
0 95
0 102
0 105
0 135
0 148
0 161
0 174
0 175
0 175
0 173
0 172
0 168
0 166
0 165
0 164
0 164
0 164
0 164
0 164
0 164
0 164
0 164
0 165
0 165
0 165
0 165
0 163
0 163
0 161
0 100
0 92
0 94
0 148
0 162
1 169
2 173
2 176
2 169
2 172
2 142
2 107
2 106
2 107
2 107
2 107
2 107
2 109
2 110
2 110
2 111
2 111
2 109
2 114
2 114
2 115
2 117
2 342
2 344
2 351
2 352
2 362
2 365
2 374
2 390
2 424
2 447
2 445
2 445
0 364
0 358
0 356
0 355
0 130
0 131
0 130
0 130
0 129
0 129
0 130
0 130
0 130
0 130
0 128
0 127
0 126
0 126
0 126
0 125
0 121
0 122
0 122
0 118
0 115
0 112
0 105
0 105
0 92
0 92
0 84
0 67
0 37
0 18
0 20
0 18
0 23
0 24
0 24
0 24
0 24
0 23
0 22
0 21
0 21
0 21
0 21
0 21
0 21
0 21
0 21
0 21
0 21
0 22
0 23
0 21
0 41
0 42
0 42
0 46
0 46
0 46
0 47
0 47
0 47
0 48
0 48
0 41
0 38
0 38
0 37
1 30
1 27
1 27
1 28
1 29
1 29
1 30
1 30
1 31
1 31
1 32
1 32
1 32
1 32
1 32
1 32
1 32
1 32
1 32
1 32
1 32
1 32
1 30
1 31
1 27
1 27
1 26
1 25
1 25
1 25
1 25
1 26
1 29
1 29
1 30
1 30
0 15
0 14
0 13
0 11
0 10
0 10
0 10
0 10
0 9
0 9
0 9
0 9
0 9
0 9
0 9
0 9
0 9
0 9
0 9
0 10
0 11
0 11
0 13
0 24
0 23
0 23
0 22
0 21
0 21
0 21
0 22
0 22
0 17
0 18
0 18
0 18
0 18
0 20
0 20
0 21
0 22
0 23
0 23
0 23
0 23
0 23
0 23
0 23
0 23
0 23
1 23
1 23
1 24
1 24
1 24
1 24
1 26
1 29
1 27
1 16
1 18
1 17
1 17
1 17
1 17
1 17
0 18
0 18
0 19
0 18
0 18
0 18
0 19
0 18
0 16
0 16
0 16
0 16
0 16
0 16
0 16
0 16
1 16
1 17
1 17
1 17
1 17
1 17
1 15
1 15
1 15
1 13
1 11
1 8
1 7
1 7
1 5
1 6
1 9
1 9
1 11
1 11
1 10
1 10
1 9
1 8
1 8
1 8
1 8
1 8
1 7
1 8
1 7
1 9
1 9
1 12
1 13
1 13
0 13
0 12
0 12
0 12
0 12
0 12
0 12
0 12
0 11
0 11
0 13
0 18
0 20
0 20
0 20
0 20
0 17
0 18
0 17
0 18
0 18
0 18
0 18
0 18
0 18
0 18
0 18
0 18
0 18
0 18
0 18
0 15
0 14
0 12
0 12
0 12
0 12
0 12
0 12
0 12
0 12
0 12
0 12
0 12
0 12
0 12
0 9
0 2
0 1
0 1
0 1
0 1
0 1
0 3
0 4
0 5
0 6
0 6
0 6
0 6
0 6
0 6
0 6
0 6
0 6
0 6
0 7
0 7
0 8
1 9
1 10
1 10
1 10
1 10
1 12
1 16
2 17
2 17
2 19
2 19
2 19
2 19
2 20
2 20
2 20
1 20
1 20
1 20
1 20
1 18
1 17
1 15
0 14
0 14
0 14
0 14
0 14
0 14
0 22
0 28
0 29
0 29
0 28
0 29
0 28
0 32
0 32
0 32
0 31
0 32
0 30
0 26
0 25
0 25
0 25
0 25
0 25
0 24
0 24
0 24
0 24
0 24
0 24
0 24
0 24
0 32
0 33
0 33
0 34
0 34
0 34
0 34
0 35
0 36
0 30
0 26
0 25
0 25
0 24
0 24
0 20
0 18
0 17
0 17
0 17
0 17
0 17
0 17
0 17
0 17
0 17
0 17
0 17
0 17
0 17
0 17
0 17
0 17
0 17
0 17
0 17
0 7
0 6
0 6
0 6
0 6
0 6
0 4
0 3
0 1
0 1
0 2
0 2
0 4
0 4
0 4
0 5
0 6
0 6
0 6
0 5
0 5
0 5
0 5
0 5
0 5
0 5
0 5
0 5
0 5
0 5
0 5
0 4
0 4
0 4
0 4
0 5
0 5
0 5
0 5
0 5
0 5
0 4
1 4
1 4
1 4
1 5
1 5
1 5
1 3
2 3
2 3
2 2
2 6
2 6
2 6
2 6
2 9
2 9
2 9
2 11
2 11
2 11
2 11
2 11
2 11
2 11
2 12
2 12
2 12
2 14
2 15
2 15
2 18
2 18
2 18
2 19
1 19
1 19
2 20
2 20
2 20
2 21
2 21
2 21
1 21
1 20
1 20
1 20
1 16
1 17
1 17
1 17
1 14
1 12
1 12
1 12
1 13
1 13
1 16
1 16
1 16
1 16
1 18
1 19
1 20
1 18
1 21
1 20
2 68
2 68
2 68
2 67
2 68
2 67
1 66
1 66
1 66
1 65
1 65
1 65
1 65
1 63
1 63
0 12
0 12
0 12
0 12
0 12
0 12
0 12
0 12
0 13
0 13
0 13
0 11
0 11
3 11
3 10
3 7
3 7
3 6
3 6
3 2
3 2
3 2
3 2
3 3
3 3
3 2
3 2
3 2
3 2
1 3
0 2
0 2
0 3
0 3
0 6
0 6
0 7
0 16
0 18
0 18
0 18
0 18
0 18
0 19
0 19
0 19
0 19
0 21
0 22
0 24
0 24
0 24
0 24
0 15
0 23
0 24
0 25
0 26
0 26
0 25
0 25
0 25
0 25
0 25
0 25
0 24
0 24
0 24
0 24
0 24
0 22
0 24
0 23
0 22
0 21
0 21
0 21
0 22
0 22
0 23
0 24
0 25
0 25
0 22
0 22
0 21
0 21
0 21
0 21
0 24
0 13
0 13
0 12
0 11
0 11
0 11
0 11
0 11
0 11
0 11
0 11
0 11
0 11
0 11
1 9
1 9
1 9
1 9
1 9
1 9
1 9
1 9
1 8
1 7
1 7
1 5
1 5
1 4
1 3
1 4
0 5
0 5
0 5
0 5
1 6
1 3
1 3
1 3
1 3
1 4
1 4
1 4
1 4
1 4
1 4
1 4
1 4
1 4
1 4
1 4
0 4
0 4
0 4
0 4
0 4
0 4
0 4
0 4
0 4
0 4
0 4
0 5
0 5
0 5
0 6
0 5
0 4
0 4
0 4
0 4
0 3
0 3
1 3
1 3
1 2
1 2
1 2
1 2
1 1
1 1
1 0
1 0
1 0
1 0
1 0
1 0
1 0
1 0
0 0
0 0
0 0
0 0
0 0
0 0
0 0
0 0
0 0
0 0
0 0
18 26
18 26
18 26
18 26
18 26
18 26
18 27
18 27
18 27
18 27
19 38
19 38
19 38
19 38
19 38
17 38
3 12
3 12
2 12
2 12
1 12
1 11
1 11
1 11
1 11
0 0
0 0
0 0
0 0
0 0
0 0
0 0
0 0
0 0
0 0
0 0
0 0
0 0
0 0
0 0
0 0
0 0
0 0
0 0
0 0
0 0
0 0
0 0
0 0
0 0
3 21
3 21
3 21
3 21
3 21
3 21
3 21
3 21
3 21
3 21
3 21
3 21
3 34
3 34
3 34
0 13
0 13
0 13
1 13
1 13
1 13
1 13
2 13
2 13
2 13
2 13
2 13
2 0
2 0
2 0
2 0
2 0
2 0
2 0
1 0
1 0
1 0
0 0
0 0
0 0
0 0
0 0
0 0
0 0
0 0
0 0
0 0
0 0
0 0
0 0
0 0
0 0
0 0
0 0
0 0
0 0
0 0
0 0
0 0
0 1
0 1
0 1
0 1
0 1
0 1
0 1
0 1
0 1
0 1
0 1
0 1
0 1
0 1
0 1
0 1
0 1
0 1
0 1
0 1
0 1
0 1
2 2
7 2
7 2
13 2
13 2
22 2
35 2
37 2
41 2
42 2
45 2
46 2
51 1
55 1
55 1
55 1
55 1
55 1
55 1
56 1
56 1
56 1
56 1
56 1
56 1
56 1
56 1
56 1
56 1
56 1
56 1
56 1
55 1
55 1
51 1
50 1
49 0
47 0
47 0
43 0
40 0
29 0
26 0
25 0
23 0
33 0
31 0
40 0
36 0
36 0
36 0
36 0
35 0
36 0
43 0
43 0
43 0
45 0
46 0
47 0
49 0
51 0
51 0
51 0
51 0
51 0
51 0
51 0
53 0
53 0
53 0
53 0
52 0
51 0
49 0
52 0
69 0
68 0
68 0
66 0
66 0
58 0
56 0
49 0
48 0
47 0
47 0
47 0
49 0
51 0
48 0
49 0
49 0
45 0
43 0
42 0
42 0
43 0
43 0
45 0
45 0
45 0
45 0
44 1
43 1
44 1
44 1
44 1
44 1
45 1
44 1
40 1
22 2
22 2
19 2
19 2
17 2
17 8
17 8
17 7
15 7
15 7
15 7
15 7
13 7
9 7
8 7
7 7
7 6
7 6
7 6
7 6
7 0
7 0
7 0
5 0
5 0
5 0
4 0
4 0
4 0
3 0
3 0
3 0
57 4
57 4
57 4
57 4
57 4
57 4
57 4
57 4
57 4
58 4
59 4
58 4
58 4
58 4
59 4
59 4
5 0
5 0
5 0
5 0
5 0
5 0
5 0
4 0
2 0
2 0
1 0
1 0
1 0
2 0
1 0
23 0
23 0
24 0
24 0
24 0
24 0
24 0
24 0
24 0
24 0
24 0
24 0
24 0
23 0
23 0
1 0
1 0
1 0
1 0
1 0
1 0
1 0
1 0
1 0
1 0
1 0
1 0
1 0
1 0
1 0
1 0
1 0
1 0
5 0
5 0
5 0
5 0
5 0
4 0
4 0
4 0
4 0
4 0
35 6
36 6
36 7
36 7
36 7
36 7
36 7
36 7
36 7
36 7
36 7
36 7
37 7
37 7
37 7
37 8
5 2
5 2
5 2
5 2
5 2
5 2
8 2
11 2
11 2
11 2
7 2
7 2
7 3
12 4
12 4
13 4
13 4
13 4
14 4
14 4
14 4
14 4
13 3
13 3
13 3
13 3
13 3
13 3
13 3
14 3
15 3
18 3
21 3
21 3
21 3
21 2
21 2
21 2
21 2
22 2
22 2
25 1
22 1
20 1
22 1
23 1
24 1
24 0
24 0
18 0
18 0
18 0
21 0
25 0
25 0
25 0
26 0
27 0
27 0
27 0
29 0
31 0
33 0
36 0
42 0
45 0
45 0
43 0
49 0
52 0
52 0
53 1
53 1
53 1
53 1
52 1
52 1
48 1
48 1
47 1
47 1
46 1
46 1
46 1
46 1
46 1
46 0
44 0
42 0
40 1
39 2
39 2
37 2
36 2
39 2
42 2
38 2
38 2
38 2
35 2
32 2
30 2
29 2
29 2
18 2
17 2
17 2
17 2
17 2
17 2
17 2
17 2
17 5
17 6
17 6
17 13
16 13
16 13
16 13
16 13
16 13
16 13
16 13
16 13
15 11
15 11
15 11
13 11
12 11
13 8
12 1
10 2
10 2
12 2
14 2
17 3
16 3
16 3
16 3
16 3
16 3
17 3
17 3
16 3
16 4
18 3
18 4
24 4
24 4
24 5
24 5
24 5
24 5
24 5
24 5
24 5
24 5
24 5
24 5
24 5
26 5
27 4
23 4
26 4
25 4
23 4
23 4
23 4
21 4
14 4
12 3
12 3
11 3
11 4
11 4
12 4
12 4
12 4
12 4
11 4
11 3
10 3
8 2
7 2
7 2
7 1
7 1
8 1
8 1
8 1
7 0
8 0
8 0
8 0
8 0
9 0
7 0
6 0
4 0
3 0
3 0
3 0
3 0
3 0
3 1
3 1
3 1
3 1
3 1
3 1
3 1
3 1
3 1
3 1
3 1
3 1
3 1
3 1
3 1
3 1
3 1
3 1
3 1
2 1
2 1
2 1
2 1
1 1
1 1
1 1
1 1
1 1
4 2
4 2
4 3
4 3
4 3
4 3
4 3
4 3
4 2
4 2
4 2
8 2
8 2
9 2
14 2
18 2
18 2
18 2
18 2
20 2
20 2
22 2
30 2
30 2
30 2
30 2
30 2
30 2
30 2
30 2
30 2
29 2
29 2
29 2
29 2
31 2
28 1
30 1
31 0
31 0
32 0
32 0
32 0
33 0
33 0
33 0
33 0
31 0
31 0
30 0
24 0
21 0
21 0
21 0
21 0
18 13
18 14
17 14
9 14
9 14
9 14
9 14
9 14
9 14
9 14
9 14
9 14
10 14
10 14
10 14
10 1
18 1
16 1
15 1
14 1
14 1
13 1
13 1
13 1
12 1
12 1
12 1
12 1
13 1
13 1
13 1
3 0
3 0
3 0
3 0
3 0
3 0
3 0
3 0
4 0
9 0
17 0
19 0
19 0
19 0
19 0
19 0
21 0
26 0
27 0
87 2
87 2
87 2
88 3
87 3
87 3
87 3
86 3
86 3
86 3
86 3
86 3
87 3
87 3
87 3
88 3
88 3
88 3
88 3
93 3
96 3
102 3
104 3
104 3
104 3
105 3
100 3
93 3
92 3
92 3
91 3
91 3
95 3
97 3
103 4
103 4
43 1
43 1
43 1
43 1
43 1
43 1
43 1
43 1
43 1
55 1
61 1
68 1
69 1
69 1
68 0
68 0
68 0
67 0
68 0
60 0
57 0
54 0
54 0
54 0
56 0
66 0
66 0
70 1
70 1
70 1
71 1
73 1
69 1
63 1
55 1
56 1
56 2
60 2
61 2
64 2
67 2
70 2
71 2
71 2
73 3
78 4
112 4
127 4
140 4
152 4
153 4
153 4
153 4
153 4
174 5
177 5
176 4
173 4
171 4
169 4
167 4
159 4
160 4
154 4
154 4
153 4
153 4
152 4
151 4
151 4
151 4
151 4
151 3
148 3
145 3
141 3
136 3
131 3
121 3
114 3
107 2
81 1
60 1
33 1
29 1
21 0
28 0
27 0
28 0
27 0
12 0
11 0
11 0
11 0
11 0
13 0
12 0
12 0
12 0
12 0
12 0
10 0
10 0
10 0
10 0
10 0
10 0
10 0
10 0
10 0
10 0
10 0
8 0
8 0
8 0
10 1
10 2
9 3
9 3
9 3
8 3
8 3
2 3
2 3
2 3
2 3
2 3
2 3
2 3
2 3
2 3
2 3
2 3
2 3
2 3
2 3
2 3
2 3
2 3
2 3
2 3
2 3
2 3
2 3
2 3
2 3
2 3
2 3
2 3
2 3
2 2
0 1
0 0
0 0
0 0
0 0
0 0
0 0
0 0
0 0
0 0
0 0
0 0
1 0
2 0
2 0
2 0
2 0
2 0
2 0
2 0
2 0
2 0
2 0
2 0
2 0
2 0
2 1
2 1
2 1
2 1
2 1
2 1
2 1
2 1
3 1
3 1
3 1
4 1
5 1
5 1
5 1
5 2
5 2
5 2
5 2
6 2
6 2
5 2
4 2
4 2
4 2
4 2
4 2
4 2
4 2
4 2
4 2
4 2
4 2
4 2
4 2
4 2
4 1
4 1
4 1
4 1
4 1
4 1
4 1
4 1
7 1
8 1
11 1
10 1
11 1
12 1
12 1
12 0
12 0
12 0
12 1
11 1
11 1
13 3
13 3
13 3
13 3
13 3
13 3
13 3
13 4
13 4
13 4
13 4
13 4
13 4
13 4
13 4
13 4
13 4
13 4
13 4
13 4
13 4
13 4
12 4
8 4
7 4
5 4
5 4
3 4
2 4
2 4
2 4
2 4
2 4
2 3
2 3
2 3
0 1
0 1
0 1
0 1
0 1
0 1
0 1
0 0
0 0
0 0
0 4
0 4
0 4
0 4
0 4
0 4
0 4
0 4
0 4
0 4
0 4
0 4
0 4
0 4
0 4
0 2
0 2
0 2
1 7
1 8
1 8
1 8
1 9
1 9
1 9
1 9
1 9
1 9
2 9
2 9
2 9
2 9
2 9
2 9
2 15
2 16
2 16
2 18
2 18
2 18
2 18
2 18
2 18
2 18
2 18
2 18
2 22
2 24
2 24
2 18
2 19
2 17
2 19
2 19
1 13
1 12
2 12
3 12
3 12
3 12
3 12
3 12
3 12
3 12
2 12
2 12
2 12
2 12
2 12
2 12
2 12
2 12
2 10
2 10
2 10
2 11
2 11
2 11
2 11
3 11
3 11
3 8
3 2
3 1
3 1
3 2
3 2
10 5
10 5
11 5
11 5
11 4
10 4
9 4
9 4
9 4
9 4
9 4
9 4
9 4
9 4
9 4
9 4
9 4
9 4
9 5
9 5
9 5
9 5
9 5
9 5
9 5
9 5
9 5
9 5
8 5
8 5
8 6
8 6
8 6
8 7
8 6
6 5
0 3
0 3
0 3
0 3
0 3
0 4
0 4
0 4
0 4
0 4
0 4
0 4
0 3
0 3
0 3
0 3
0 3
0 3
0 2
0 3
0 2
0 2
0 5
0 10
0 10
0 10
0 11
0 11
0 11
0 18
0 19
0 22
0 23
0 23
0 24
0 26
0 26
0 26
0 26
0 26
0 26
0 26
0 27
0 31
0 31
0 31
0 32
0 32
0 32
0 32
0 32
0 32
0 32
0 32
0 31
0 31
0 31
0 31
0 28
0 23
0 22
0 22
0 22
0 22
3 35
3 25
3 25
3 26
3 26
3 27
3 28
3 28
3 29
3 32
3 32
3 32
3 32
3 32
3 32
3 29
3 28
3 29
3 42
3 46
3 46
3 47
3 48
3 48
3 48
3 49
3 49
3 49
3 49
3 60
3 60
3 60
3 63
4 67
4 67
3 65
1 50
1 48
1 48
1 48
1 48
1 45
1 46
1 46
1 45
1 42
1 42
1 42
1 42
1 42
1 41
1 40
1 40
2 39
6 27
6 23
6 23
6 22
6 21
6 21
6 21
6 20
6 21
6 24
5 24
5 13
5 12
5 11
5 10
5 7
5 7
1 6
1 7
1 7
1 7
1 9
1 9
1 9
1 8
1 8
1 8
1 8
1 8
1 8
1 8
2 8
2 8
1 8
1 8
1 8
1 8
1 8
1 8
1 8
1 8
1 8
1 8
1 8
1 7
1 4
0 4
0 4
0 3
0 2
0 2
0 2
0 2
0 2
0 1
0 1
0 0
0 0
0 0
0 1
0 2
0 3
0 5
0 5
0 5
0 5
0 5
0 5
0 5
0 5
0 5
0 5
0 5
0 6
0 6
0 6
0 6
0 6
0 6
0 4
0 4
0 4
0 4
0 4
0 4
0 4
0 4
0 4
0 3
0 3
0 3
0 4
0 5
0 5
0 5
0 4
0 4
0 3
0 3
0 3
0 3
0 3
0 3
0 3
0 3
0 3
0 3
1 3
1 3
1 3
1 3
1 3
1 3
1 3
1 3
1 3
1 3
1 3
1 6
1 10
1 10
1 10
1 10
1 9
1 9
1 9
1 9
1 8
1 9
1 11
1 11
1 11
1 10
1 11
1 11
1 11
1 11
1 11
1 11
1 13
1 13
1 13
1 13
0 13
0 13
0 13
0 13
0 13
0 13
0 13
0 13
0 13
0 13
0 12
0 9
0 6
0 6
0 6
0 6
0 6
0 6
0 6
0 6
0 6
0 4
0 7
0 11
0 11
0 11
0 10
0 10
0 10
0 8
0 11
0 11
0 21
0 22
0 22
0 22
0 22
0 22
0 22
0 22
0 22
0 22
0 22
0 22
0 22
0 23
0 23
0 23
0 23
0 23
0 26
0 27
0 28
0 29
0 29
0 30
0 32
0 29
0 27
0 25
0 25
0 25
0 25
0 25
0 26
0 26
0 24
0 23
0 18
0 18
0 18
0 18
0 18
0 18
0 18
0 18
0 18
0 18
0 18
0 19
0 19
0 19
0 20
0 21
0 21
0 21
0 16
0 17
2 77
2 76
2 76
2 75
2 73
2 73
2 72
2 71
2 71
3 106
3 107
3 111
3 116
3 120
3 123
1 62
1 57
1 57
1 57
1 57
1 57
1 57
1 57
1 57
1 57
1 59
1 58
1 62
1 65
1 65
1 63
1 63
1 63
1 63
1 63
1 63
1 63
1 63
1 63
1 63
1 63
1 63
1 63
1 63
1 60
0 14
0 13
0 12
0 12
0 14
0 16
0 17
0 20
0 21
0 22
0 33
0 39
0 39
0 49
0 50
0 52
0 53
0 54
0 52
0 52
1 53
1 53
1 53
1 53
1 53
1 53
1 53
1 53
1 53
1 53
1 54
1 57
1 57
1 58
1 63
1 65
1 67
1 69
1 67
1 65
1 64
1 61
1 61
1 60
1 62
1 60
1 52
1 48
1 48
1 39
1 36
1 35
1 34
2 35
2 33
2 31
1 30
1 31
1 31
1 32
1 32
1 32
1 32
2 32
2 32
2 32
2 32
5 37
5 37
4 34
4 31
4 29
4 26
4 24
4 24
4 24
4 23
4 22
4 22
4 18
4 17
4 16
4 16
4 16
4 16
4 15
4 15
4 14
4 13
4 10
4 10
4 10
4 10
4 10
4 10
4 10
4 10
4 10
4 10
3 10
3 11
3 22
3 24
0 16
0 16
0 16
0 16
0 15
1 15
1 15
1 15
1 15
1 15
1 16
1 16
1 17
1 17
1 17
1 17
1 17
1 17
1 17
1 17
1 17
0 17
0 17
0 17
1 19
4 19
4 19
4 20
4 20
4 20
4 20
4 20
4 20
4 18
4 8
4 5
4 5
4 5
4 5
4 6
4 6
4 6
4 5
4 5
4 5
4 5
4 5
4 6
4 6
4 6
4 7
4 8
4 10
4 10
4 12
4 14
4 14
4 15
4 15
4 15
3 15
0 14
0 14
0 13
0 13
0 13
0 14
0 14
0 15
0 15
0 15
0 15
0 15
0 14
0 14
0 15
0 15
0 15
0 15
0 15
0 16
0 16
0 16
0 16
0 15
0 17
0 17
0 16
0 14
0 14
0 11
0 9
0 9
0 9
0 9
0 9
0 7
0 7
0 7
0 7
0 7
0 9
0 9
0 9
0 8
0 7
0 7
0 7
0 7
0 7
0 7
0 7
0 7
0 7
0 7
0 7
0 7
0 7
0 7
0 6
0 6
0 5
0 7
0 8
0 8
0 9
0 9
0 10
0 10
0 10
0 10
0 10
0 10
0 10
0 11
0 10
0 10
0 8
0 8
0 8
0 10
0 10
0 11
0 11
0 11
0 11
0 11
0 11
0 11
0 11
0 10
0 10
0 10
0 10
0 10
0 11
0 10
0 10
0 7
0 7
0 7
0 6
1 6
1 5
1 5
1 5
1 5
1 5
1 6
1 6
1 6
1 7
1 7
1 7
1 8
1 7
1 6
1 6
1 5
1 5
1 5
1 5
1 5
1 5
1 5
1 5
1 5
1 5
1 5
1 6
1 6
1 5
1 5
1 5
1 6
1 6
1 6
1 6
0 10
0 10
0 10
0 12
0 12
0 14
0 13
0 12
0 10
0 10
0 10
0 10
0 10
0 10
0 10
0 10
0 10
0 10
0 10
0 10
0 10
0 9
0 9
0 9
0 9
0 9
1 9
1 8
1 8
1 8
1 8
1 7
1 7
2 7
2 7
2 7
2 3
2 1
2 0
2 0
2 0
1 0
1 0
1 0
1 0
1 0
1 0
1 0
1 0
1 0
1 0
1 1
1 1
1 1
1 1
1 1
1 1
1 1
1 1
1 1
1 1
1 2
1 2
1 4
1 4
1 16
1 17
1 16
0 19
0 20
0 20
0 20
0 20
0 22
0 36
0 43
0 48
0 51
0 51
0 51
0 51
0 51
0 51
0 51
0 51
0 51
0 51
0 51
0 51
0 51
0 51
0 51
0 51
0 51
0 51
0 51
0 56
0 57
0 66
1 75
1 76
1 68
1 69
1 72
1 70
1 79
1 81
1 82
1 82
1 80
1 60
1 54
1 52
1 51
1 51
1 51
1 51
1 51
1 51
1 51
1 51
1 51
1 51
1 51
1 51
1 51
1 52
1 52
1 52
1 52
1 53
1 52
1 45
1 39
1 29
0 21
0 19
0 16
0 16
0 13
0 10
0 5
0 2
0 3
0 3
0 3
0 4
0 6
0 7
1 17
1 18
1 19
1 19
1 19
1 20
2 20
2 20
2 20
2 20
2 20
2 20
2 20
2 19
2 18
2 18
2 18
2 17
2 17
2 18
3 18
3 18
2 34
2 34
2 34
2 35
2 36
2 38
2 40
2 41
2 44
2 45
2 50
2 51
2 53
2 52
1 43
3 42
3 42
3 42
3 42
3 42
3 42
3 42
3 43
3 43
3 43
3 43
3 43
3 43
3 43
3 43
3 44
3 44
1 44
1 43
0 43
0 45
0 29
0 29
0 29
0 28
1 31
1 33
1 39
1 39
1 36
1 35
1 30
1 23
1 23
1 23
1 23
1 23
1 25
1 26
1 29
1 30
1 31
1 32
1 31
1 31
1 31
1 31
1 31
1 31
1 31
1 31
2 28
2 28
2 28
2 28
2 28
2 28
2 28
2 27
2 27
2 25
1 21
1 11
1 10
1 9
1 9
1 9
0 9
0 9
0 9
0 9
0 9
0 8
0 7
0 4
0 3
0 2
0 1
0 3
0 3
0 3
0 3
0 3
0 3
0 3
0 3
0 3
0 3
0 3
0 3
0 3
0 3
0 3
0 3
0 3
0 3
0 3
0 3
0 3
0 3
0 3
0 3
0 3
0 3
0 3
0 3
0 4
0 6
0 9
0 9
0 13
0 15
0 16
0 16
0 17
0 18
0 18
0 18
0 18
0 18
0 18
0 18
0 19
0 20
0 20
0 20
0 20
0 20
0 21
0 25
0 45
0 81
0 97
0 115
0 123
0 129
0 131
0 144
0 148
0 149
0 149
0 149
0 148
0 146
0 143
0 139
0 134
0 133
0 134
0 139
0 141
0 152
0 162
0 165
0 196
0 196
0 196
0 196
0 242
0 242
0 243
0 243
0 244
0 244
0 241
0 236
0 209
0 168
0 149
0 134
0 131
0 130
0 128
0 118
0 116
0 116
0 116
0 116
0 116
0 120
0 185
2 207
2 216
2 222
2 219
2 216
2 222
2 211
2 210
2 209
2 182
2 184
2 184
2 183
2 137
2 137
2 136
2 136
2 136
2 136
2 136
2 137
2 137
2 137
2 137
2 134
2 134
2 134
2 134
2 134
2 134
2 134
2 134
2 133
2 133
2 124
1 19
0 12
0 13
0 13
0 13
0 13
0 13
0 13
0 12
0 10
0 7
0 7
0 7
0 7
0 7
0 7
0 6
0 6
0 6
0 6
0 21
0 27
2 39
2 79
2 81
2 83
2 84
2 84
2 84
2 84
2 84
2 86
2 86
2 87
2 87
2 87
2 87
2 87
2 86
2 86
2 87
2 87
2 87
2 87
2 86
2 85
2 85
2 83
2 83
2 83
2 85
2 86
2 95
2 96
2 96
2 95
1 76
0 57
0 54
0 21
0 25
0 25
0 30
0 31
0 41
0 43
0 50
0 58
0 63
0 70
0 70
0 72
0 72
0 72
0 72
0 72
0 76
0 80
0 86
0 87
0 99
0 99
0 99
0 99
0 99
0 111
0 132
0 144
0 159
0 176
0 183
0 183
0 186
0 191
0 202
0 199
0 198
0 195
0 195
0 195
0 180
0 167
0 163
0 165
0 167
0 167
0 171
0 173
0 173
0 173
0 173
0 172
0 168
0 164
0 158
0 155
0 145
0 146
0 146
0 146
0 146
0 132
0 95
0 80
0 57
0 48
0 47
0 46
0 38
0 30
0 25
0 24
0 23
0 24
0 24
0 36
0 40
0 41
0 36
0 31
0 29
0 29
0 28
0 28
0 28
0 28
0 28
0 28
0 30
0 30
0 30
0 30
0 29
0 29
0 29
0 29
0 29
0 29
0 26
0 25
0 25
0 25
0 25
0 24
0 24
0 24
0 24
0 24
0 24
0 21
0 19
0 9
0 2
0 2
0 1
0 1
0 2
0 3
0 3
0 3
0 4
0 4
0 4
0 4
0 4
0 5
0 5
0 5
0 6
0 6
0 10
0 11
0 11
0 11
0 11
0 11
0 12
0 12
0 13
0 13
0 13
0 13
0 13
0 13
0 13
0 13
0 13
0 13
0 13
0 13
0 13
0 13
0 12
0 12
0 12
0 11
0 10
0 9
0 9
0 9
0 9
0 8
0 8
0 9
0 8
0 8
0 4
0 4
0 4
0 4
0 4
0 4
0 3
0 3
0 2
0 3
0 3
0 3
0 3
0 3
0 4
0 4
0 4
0 4
0 4
0 4
0 4
0 4
0 4
0 3
0 3
0 3
0 3
0 4
0 4
0 4
0 6
0 11
0 12
0 11
0 12
0 12
0 12
0 12
0 12
0 12
0 13
0 13
0 13
0 13
0 14
0 17
0 18
0 19
0 24
0 24
0 23
2 83
3 87
3 87
3 87
3 89
3 90
4 92
4 93
4 93
4 101
4 107
4 109
4 111
4 111
4 111
4 109
1 47
1 47
1 50
1 50
1 52
1 52
3 65
3 65
3 64
3 64
3 64
3 64
3 63
3 63
3 59
3 60
3 62
3 58
3 57
3 58
3 53
3 49
3 49
3 49
3 48
3 48
2 45
2 45
2 46
2 38
2 31
2 29
2 29
2 29
2 29
2 29
2 29
2 29
2 28
2 28
3 26
3 26
1 13
1 13
1 12
1 12
1 12
1 13
2 13
2 12
2 12
2 11
2 8
2 6
2 6
2 5
2 5
2 5
2 5
2 5
2 5
2 5
2 5
2 5
2 4
2 4
2 4
2 4
2 1
2 1
2 1
2 1
2 2
2 4
2 4
2 4
1 4
1 6
1 7
1 8
1 11
1 13
2 25
2 25
1 25
2 29
2 31
2 48
3 51
3 52
3 54
3 56
3 58
3 67
3 67
3 67
3 67
3 67
3 67
3 67
3 67
3 67
4 67
4 67
4 68
4 68
4 68
4 67
4 66
4 64
4 64
4 64
4 64
4 62
4 62
4 61
4 56
4 55
3 44
3 44
3 44
2 38
2 37
2 21
3 16
3 15
3 12
3 10
3 9
5 9
5 9
5 9
5 9
6 26
6 26
6 26
5 26
5 26
5 26
5 26
5 25
5 25
5 25
5 25
2 25
2 26
2 29
2 31
1 18
1 25
1 28
1 29
1 29
1 28
1 33
1 33
1 33
1 33
1 33
0 27
0 26
0 26
0 26
0 28
0 28
0 29
0 29
0 31
0 32
0 32
0 32
0 32
0 32
0 32
0 32
0 32
0 32
0 32
0 32
0 33
0 32
0 31
0 26
0 25
0 21
0 14
0 12
0 12
0 12
0 12
0 7
0 8
0 9
0 13
0 14
0 14
0 14
0 14
0 14
0 11
0 12
0 12
0 12
0 9
0 9
0 9
0 9
0 9
0 9
0 9
0 9
0 9
0 9
0 9
0 8
0 8
0 8
0 8
0 8
0 9
0 9
0 9
0 17
0 17
0 17
0 17
0 17
0 16
0 15
0 11
0 9
1 9
1 10
1 10
1 11
1 11
1 11
1 11
1 12
1 12
1 12
1 13
1 13
1 13
1 13
1 13
0 13
0 14
0 14
0 14
0 14
0 15
0 15
0 15
0 15
1 17
1 17
1 17
1 10
1 10
1 10
1 10
1 10
1 11
1 11
1 11
1 11
1 11
1 9
1 9
1 9
1 9
1 9
1 9
1 8
1 8
1 8
1 7
1 7
1 7
1 7
1 7
1 7
1 6
1 6
1 6
1 6
1 5
1 5
1 5
1 3
0 1
0 1
0 1
0 1
0 1
0 2
0 8
0 8
0 8
0 8
0 8
0 8
0 8
0 8
0 10
0 10
0 10
3 21
3 22
3 25
3 25
3 25
3 25
3 25
5 25
5 27
5 30
5 30
5 30
5 30
5 32
5 32
6 32
6 32
6 32
6 32
6 32
6 33
6 33
6 33
6 33
6 32
6 26
6 25
6 25
6 25
6 25
6 25
6 25
6 26
6 27
6 27
6 28
3 18
0 13
0 13
0 21
0 22
0 24
0 25
0 25
0 22
0 20
0 21
0 20
0 22
0 21
0 21
0 20
0 21
0 22
0 23
0 23
0 24
0 24
0 24
0 24
0 24
0 24
0 24
0 24
0 24
2 27
2 29
2 28
2 34
3 71
3 84
3 92
3 99
3 103
3 102
8 102
8 104
8 104
8 103
8 103
6 103
6 103
6 103
6 103
6 98
6 98
6 98
6 97
6 98
6 97
1 98
1 99
1 100
1 100
1 100
1 100
1 100
1 100
1 100
1 100
1 99
1 95
1 95
1 95
1 77
0 31
0 15
0 12
0 12
0 12
0 11
0 5
0 5
0 5
0 5
0 5
0 5
0 5
0 5
1 5
1 5
2 4
2 3
2 3
2 3
2 3
2 1
2 1
2 0
2 0
2 0
2 0
2 0
2 0
1 0
5 0
5 0
5 0
5 3
5 3
5 3
5 3
5 5
5 5
5 6
5 6
5 6
5 6
5 6
5 6
1 6
1 16
1 19
1 26
1 34
1 44
2 48
1 55
1 55
1 56
1 57
1 57
1 61
1 61
1 61
1 63
1 63
1 63
1 64
1 65
1 65
1 65
1 65
1 65
1 60
1 60
1 60
1 60
1 59
1 59
1 59
1 60
1 60
1 61
1 61
1 61
1 61
1 51
1 46
1 36
1 31
0 23
0 28
0 21
0 21
0 20
0 20
0 20
0 18
0 18
0 17
0 17
0 16
0 21
0 21
0 20
0 22
0 23
1 33
2 42
2 49
3 52
3 54
3 54
3 54
3 55
3 55
3 55
3 55
3 56
3 59
3 63
3 65
3 68
3 68
3 67
3 64
3 64
3 56
3 61
3 61
3 62
3 62
3 62
3 62
3 63
3 69
3 69
3 69
3 65
3 65
3 65
3 62
3 60
2 48
1 41
0 35
0 31
0 30
0 32
0 40
1 47
1 54
1 54
1 59
1 59
1 88
2 89
2 89
2 92
2 112
2 119
2 135
2 136
2 136
3 140
3 142
3 144
3 149
3 149
3 148
3 149
3 145
3 146
2 146
2 146
2 150
2 158
2 166
2 188
2 194
3 220
3 220
3 220
3 219
3 217
3 209
2 199
2 193
2 188
2 186
2 182
2 143
2 130
2 123
2 117
2 104
2 101
2 115
2 114
2 113
1 107
1 106
1 105
1 101
1 101
1 101
1 126
1 124
1 167
1 175
1 177
1 171
1 162
1 152
1 128
1 125
0 102
0 102
0 102
0 103
0 104
0 106
0 105
0 105
0 104
0 104
0 104
0 104
0 104
0 103
0 103
0 103
0 103
0 87
0 87
0 87
0 87
0 87
0 87
1 93
1 93
1 91
1 64
1 63
1 17
1 13
1 12
1 12
1 13
1 13
1 13
1 13
1 13
1 13
1 13
1 14
1 21
1 19
1 19
1 19
1 19
1 19
1 19
1 19
1 20
2 21
2 21
2 21
2 20
2 20
2 20
2 20
2 20
2 20
2 20
1 13
1 12
1 12
1 12
1 11
1 11
1 11
1 11
1 11
1 10
1 10
1 10
1 10
1 11
1 11
1 11
1 9
1 2
1 2
1 2
1 2
1 2
1 2
1 2
1 2
1 2
0 1
0 1
0 1
0 1
0 5
0 5
0 5
0 5
0 5
0 6
0 6
0 6
0 6
0 6
0 6
0 6
0 6
0 6
0 6
0 6
1 7
1 7
1 7
3 8
3 8
3 8
3 8
3 8
3 8
3 8
3 8
3 8
3 8
3 8
3 8
3 8
2 8
2 8
2 8
2 8
2 4
2 4
2 4
2 4
2 4
2 3
2 3
2 3
2 3
2 3
2 3
2 3
4 28
6 58
7 69
7 71
7 73
7 75
6 80
5 78
5 78
5 78
5 78
5 78
5 78
5 78
5 78
5 79
5 79
4 79
4 79
4 79
4 79
4 79
4 79
4 79
4 81
4 81
4 83
4 85
4 86
4 91
4 112
4 112
4 112
5 113
5 113
3 85
1 42
2 43
2 46
2 50
2 49
2 49
2 49
2 49
2 50
2 50
2 50
2 50
2 50
2 50
2 50
2 50
2 50
2 49
2 49
2 49
2 49
2 49
2 49
4 59
4 65
5 64
5 62
5 62
5 60
5 55
5 35
5 35
5 35
4 34
4 34
3 33
3 26
3 24
3 22
3 19
3 19
3 19
3 19
3 19
3 19
3 20
3 19
3 19
3 19
3 19
3 19
3 19
3 19
3 20
3 20
3 20
4 20
3 21
3 21
2 11
2 4
1 3
1 3
1 2
1 2
1 2
1 2
1 2
1 2
1 2
1 2
1 3
1 3
1 3
1 3
1 3
1 3
1 3
1 3
1 3
1 4
1 4
1 4
1 4
1 4
1 4
1 5
1 5
1 4
2 19
3 21
5 28
4 29
4 28
4 28
4 28
4 28
4 28
4 28
4 28
4 28
4 30
4 30
4 30
3 15
3 25
3 24
3 27
3 28
3 28
3 30
3 30
3 30
3 30
3 30
3 30
3 27
3 27
3 27
3 27
3 17
3 17
3 16
3 20
3 20
3 20
2 17
0 11
0 10
0 10
0 10
0 10
0 10
0 10
0 10
0 12
0 11
0 42
0 40
0 40
0 40
11 41
11 41
11 43
11 43
11 43
11 43
11 43
11 43
11 43
11 43
11 43
11 43
11 43
11 11
11 11
0 11
0 11
0 9
0 5
0 5
0 5
0 5
0 5
0 5
0 5
0 5
0 5
0 5
0 5
0 5
0 3
0 3
0 3
0 3
0 3
0 3
0 2
0 1
0 1
0 1
0 1
0 0
0 0
0 0
0 2
0 2
0 2
0 2
0 2
0 2
0 2
0 2
0 2
0 2
0 2
0 2
0 2
0 2
0 2
0 0
0 0
0 0
2 0
2 0
2 0
2 0
2 0
2 0
2 0
2 1
2 3
2 4
2 4
2 4
2 4
2 4
2 4
0 5
0 5
0 5
0 5
0 5
0 5
0 5
0 5
0 5
0 5
0 5
0 5
0 5
0 5
0 5
0 5
0 6
0 6
0 6
0 6
0 7
0 7
0 8
0 8
0 8
0 9
0 10
0 10
0 9
0 7
0 6
0 6
0 5
0 5
0 7
0 7
0 7
0 7
0 7
0 7
0 7
0 7
0 7
0 7
0 7
0 7
0 7
0 7
0 7
0 7
0 7
0 6
0 6
0 6
0 6
0 6
0 5
0 5
0 3
0 3
0 3
0 2
0 4
0 4
0 7
0 7
0 7
0 7
0 7
0 7
0 5
0 5
0 5
0 5
0 6
0 7
0 7
0 7
0 7
0 7
0 7
0 7
0 7
0 7
0 7
0 7
0 7
0 7
0 7
0 7
0 6
27 7
27 7
27 9
27 9
30 9
30 9
30 9
30 5
30 6
30 6
30 6
30 6
30 6
30 6
30 6
30 7
30 7
30 7
30 7
0 6
0 5
0 5
0 5
0 5
0 5
0 5
0 6
0 6
0 7
0 7
0 7
0 7
0 7
0 7
0 7
0 7
0 7
0 7
0 5
0 5
0 5
0 5
0 5
0 6
0 4
0 4
0 4
0 4
0 7
0 11
0 11
0 11
0 11
0 11
0 11
0 13
0 15
0 19
0 19
0 20
0 20
0 21
0 20
0 20
0 20
0 20
0 20
0 20
0 20
0 20
0 20
0 21
0 21
0 21
0 21
0 22
0 22
0 23
0 24
0 23
0 23
0 23
0 23
0 20
0 19
0 15
0 15
0 14
0 14
0 14
0 13
0 12
0 10
0 7
0 7
0 6
0 6
0 5
0 5
0 5
0 4
0 4
0 4
0 4
0 4
0 4
0 4
0 3
0 3
0 3
0 3
0 3
0 3
0 3
0 1
0 1
0 1
0 2
0 2
0 2
0 2
0 2
0 2
0 2
0 2
0 2
0 2
0 2
0 2
0 3
0 3
0 3
0 3
0 3
0 3
0 3
0 3
0 3
3 4
3 4
3 4
3 4
3 4
3 4
3 4
3 4
3 4
3 3
3 3
3 3
3 3
3 3
3 3
0 2
0 3
0 3
0 3
0 3
0 10
0 11
0 11
0 12
0 12
0 12
0 13
0 13
0 13
0 13
13 26
13 26
13 26
13 26
13 26
13 21
13 21
13 21
13 21
13 21
13 21
13 21
13 21
13 21
13 21
0 8
0 8
0 8
0 8
0 8
0 8
0 8
0 7
0 7
0 7
0 11
0 8
0 10
0 12
0 14
0 15
0 14
0 14
0 14
0 14
0 15
0 15
0 15
0 15
0 15
0 15
0 15
0 14
0 14
0 14
0 14
0 14
0 14
0 14
0 14
0 15
0 15
0 16
0 17
0 17
0 17
0 17
0 17
0 17
0 17
0 16
0 9
0 7
0 7
0 7
0 4
0 4
0 5
1 7
1 6
1 6
1 6
1 6
1 6
1 6
1 6
1 6
1 6
8 7
8 8
8 8
8 8
8 8
8 8
8 8
8 9
8 9
8 10
8 9
8 8
8 8
8 8
8 9
1 8
1 9
1 9
1 9
1 9
1 9
1 10
1 10
0 9
0 9
0 8
0 6
0 6
0 6
0 6
0 6
0 6
0 6
0 6
0 6
0 6
0 6
0 5
0 5
0 5
0 5
0 5
0 5
0 4
0 4
0 4
0 4
0 4
0 4
0 4
0 3
0 3
0 2
0 2
0 2
0 2
0 2
0 1
0 1
0 1
0 1
0 3
0 3
0 3
0 4
0 4
0 4
0 4
0 4
0 4
0 3
0 3
0 3
0 3
0 3
0 3
0 3
0 3
0 3
1 4
1 4
1 4
1 4
1 5
1 5
1 5
1 5
1 5
1 5
1 5
1 5
1 5
1 5
1 5
1 5
1 5
1 5
1 3
1 3
1 3
1 3
1 3
1 3
1 3
1 3
1 3
1 3
1 3
2 9
3 10
3 27
3 27
3 27
3 27
3 27
2 24
2 24
2 24
2 24
2 24
2 24
2 24
2 25
2 25
1 25
1 25
1 25
1 25
1 25
1 25
1 25
1 25
1 26
1 26
1 26
1 26
1 27
1 27
1 27
1 27
1 27
1 27
1 27
0 27
0 20
0 20
0 3
0 3
0 12
0 18
0 22
0 23
0 23
0 23
0 23
0 23
0 23
0 23
0 22
0 22
0 22
0 22
0 22
0 22
0 22
0 22
0 22
0 22
0 21
0 21
0 21
0 21
0 20
0 20
0 20
0 20
0 20
0 22
0 22
0 22
0 22
0 22
0 22
0 22
0 12
0 5
0 2
0 2
0 4
0 5
0 6
0 6
0 6
0 7
0 9
0 9
0 9
0 9
0 9
0 9
0 9
0 9
0 9
0 9
0 9
0 9
0 9
1 9
1 9
2 10
2 11
2 11
2 11
2 10
2 10
2 12
2 13
2 13
2 17
2 21
2 23
2 24
2 25
2 35
2 31
2 30
2 31
2 31
2 31
2 31
2 29
2 30
2 30
2 30
2 30
2 30
2 30
2 30
2 30
2 30
2 30
2 30
2 30
1 29
1 29
0 28
0 28
0 28
0 28
0 26
0 26
0 24
0 24
0 23
0 15
0 15
0 12
0 11
0 11
0 3
0 2
0 2
0 1
0 6
0 6
0 6
0 6
0 5
0 5
0 5
0 8
0 9
0 9
0 10
0 10
0 11
0 11
0 12
0 12
0 12
0 13
0 17
0 18
0 19
0 19
0 19
0 19
1 20
1 20
1 20
1 20
1 20
1 20
1 20
1 20
1 20
1 20
1 20
1 20
1 15
1 15
1 16
1 16
1 16
1 16
1 16
1 13
1 12
1 12
1 11
1 11
1 18
1 25
1 25
1 29
1 34
1 53
2 54
2 63
2 64
3 71
3 72
3 76
2 78
2 82
2 94
2 94
2 92
2 93
2 93
2 93
2 97
2 97
2 97
2 97
2 97
2 100
3 100
3 103
3 103
3 103
3 103
3 103
3 103
3 104
3 104
3 103
3 91
3 89
4 87
4 83
4 75
4 53
3 42
4 39
4 38
3 30
3 30
3 29
3 23
3 23
3 11
3 11
3 10
3 10
3 7
3 6
4 5
4 5
4 5
4 5
5 5
5 3
4 3
4 1
4 1
4 1
4 1
4 1
4 1
4 0
4 0
4 0
4 0
4 0
3 0
3 0
3 0
3 0
2 0
2 0
2 0
2 1
2 1
2 21
2 21
2 21
2 21
2 21
2 21
2 21
2 21
2 21
1 22
1 22
1 23
1 24
0 26
0 26
1 26
1 26
1 27
1 27
1 27
1 33
1 33
1 33
1 33
1 35
1 35
1 34
1 35
1 37
1 39
2 37
4 37
5 38
5 38
7 37
7 37
7 17
7 17
7 17
7 17
7 17
7 17
7 17
7 17
7 17
7 17
7 17
9 25
10 27
10 27
10 27
9 27
9 27
9 26
9 26
9 26
9 20
9 20
9 20
9 20
8 18
8 18
8 18
7 14
7 14
7 12
7 12
5 12
4 13
4 13
2 14
2 14
2 14
2 14
2 16
2 16
2 16
2 18
2 18
2 18
2 18
2 18
2 17
0 7
0 7
0 7
0 7
0 7
0 10
0 10
0 10
0 10
0 12
1 12
1 13
1 13
2 14
2 14
2 17
2 17
2 17
2 18
2 18
2 17
2 16
2 16
2 15
2 15
2 15
2 15
2 15
2 14
2 15
2 14
2 14
2 15
2 15
2 15
2 15
2 15
2 15
2 15
2 15
2 15
4 12
12 29
11 29
11 27
11 26
11 26
11 25
11 25
10 25
10 26
11 27
11 27
11 27
11 27
11 27
11 27
11 27
11 27
11 27
11 28
11 27
11 27
11 27
11 27
11 27
11 28
11 27
11 27
11 27
11 27
11 27
10 27
10 27
10 29
10 30
7 30
7 34
1 21
3 21
3 22
3 23
3 23
3 24
3 26
3 26
2 22
2 21
2 20
2 20
2 20
2 20
2 20
2 20
2 19
1 19
1 19
1 18
1 18
1 18
1 18
1 18
1 16
1 17
1 17
1 19
2 20
2 21
2 22
1 22
3 22
3 22
3 21
3 18
3 15
3 17
3 16
3 16
3 15
3 14
3 13
3 13
3 13
3 13
3 13
3 13
3 13
11 20
11 21
11 22
11 21
12 222
12 222
12 222
12 222
12 222
12 222
12 222
12 222
12 222
12 223
12 222
8 225
3 224
3 28
3 28
1 27
1 32
1 38
1 48
1 48
1 48
1 49
1 49
1 60
1 62
1 62
1 62
2 72
5 73
5 73
5 73
5 71
5 66
5 55
5 54
5 54
5 54
5 54
5 53
5 53
5 54
5 54
5 54
5 54
5 53
5 51
4 48
4 33
5 33
5 33
5 35
5 35
5 34
5 34
5 34
5 33
5 33
5 32
5 32
5 21
5 18
3 18
3 18
2 7
0 6
0 6
0 6
0 6
1 7
2 7
2 7
2 7
2 6
2 6
2 6
2 6
2 6
2 6
2 6
2 6
2 6
2 6
2 3
2 2
1 2
1 2
1 0
1 0
1 0
1 0
1 0
1 0
1 0
1 0
1 0
1 0
1 0
1 0
1 0
2 2
2 2
2 2
2 2
2 2
2 2
1 2
1 2
1 2
1 2
1 2
1 2
1 2
1 2
1 2
1 2
1 2
1 4
1 4
1 4
1 4
1 4
1 4
1 4
1 4
1 4
1 4
1 4
1 4
1 4
1 4
1 4
1 4
1 4
1 4
1 4
0 2
0 2
0 2
0 2
0 2
0 2
0 2
0 2
0 2
0 5
0 5
0 5
0 5
0 5
0 5
0 5
0 5
0 3
0 3
1 3
1 3
1 3
1 3
1 3
1 3
1 1
1 1
1 1
1 1
1 1
1 1
1 1
1 1
1 1
0 1
0 1
0 1
0 1
0 1
0 1
0 1
0 1
0 1
0 1
0 1
0 0
0 0
0 3
0 8
0 9
0 9
0 9
0 9
0 9
0 9
0 9
0 9
0 10
0 10
0 10
0 10
0 10
0 10
0 10
0 10
0 10
0 10
0 10
0 10
2 10
2 10
2 10
2 10
2 10
2 10
2 10
2 10
2 10
2 10
2 10
2 10
2 10
2 8
2 8
0 3
0 2
0 2
0 2
0 3
0 3
0 3
0 3
0 4
0 3
0 3
0 3
0 3
0 3
0 3
0 3
0 3
0 3
0 3
0 3
0 3
0 3
0 3
0 3
0 3
0 3
0 3
0 3
0 3
0 3
0 3
0 8
0 8
0 10
0 12
0 13
0 15
0 15
0 16
0 16
0 15
0 16
0 16
0 15
0 15
0 15
0 16
0 16
0 16
0 16
0 16
0 17
0 20
0 26
0 28
0 28
0 27
0 30
0 32
0 32
0 35
1 84
1 96
1 106
1 121
1 125
1 130
1 132
1 134
1 132
1 131
1 131
1 129
1 129
1 129
1 129
1 129
1 130
1 130
1 130
1 130
1 130
1 129
1 129
1 129
1 129
1 130
1 129
1 123
1 119
3 119
2 118
2 118
2 119
2 116
2 113
2 91
2 31
2 24
2 36
2 49
2 65
2 71
2 72
2 76
2 76
2 79
2 81
2 81
2 81
2 83
2 84
2 84
2 85
2 85
2 88
2 89
2 89
2 90
2 90
2 91
3 100
3 99
3 103
3 103
3 103
1 104
1 104
1 105
1 107
1 120
1 121
1 142
1 141
1 126
1 106
1 102
1 94
1 95
1 94
1 91
1 92
1 91
1 91
1 91
1 91
1 88
1 87
1 86
1 85
1 85
1 83
1 83
1 83
1 80
1 79
1 79
0 70
0 69
0 66
0 66
0 68
0 70
0 68
0 64
0 54
0 51
0 48
0 24
0 26
0 28
0 27
0 28
0 28
0 26
0 28
0 30
0 32
0 33
0 33
0 33
0 35
0 35
0 35
0 35
0 35
0 38
0 41
0 42
0 44
0 46
0 47
0 47
0 48
0 48
0 46
0 47
0 46
0 45
0 52
0 54
0 52
0 55
0 54
0 55
0 58
0 65
0 72
0 105
0 111
1 123
1 136
2 146
2 146
2 153
2 154
2 162
2 163
2 165
2 166
2 167
2 170
2 167
4 167
5 172
5 175
5 177
5 183
5 187
5 188
5 190
5 190
5 191
5 193
5 190
6 189
6 188
6 190
6 196
6 220
6 224
6 221
6 211
6 176
6 128
6 125
5 121
5 125
5 125
5 125
5 118
5 117
5 104
6 102
6 116
10 174
10 187
11 267
11 282
9 282
8 280
8 273
8 273
8 270
7 265
7 264
7 262
7 261
7 259
7 259
7 262
6 251
6 255
6 253
6 252
6 225
6 221
6 222
6 222
6 221
6 221
6 221
6 220
6 215
6 212
5 214
5 214
5 214
5 214
4 205
3 164
1 99
1 84
0 23
0 23
0 23
0 23
0 26
0 25
0 25
0 33
0 52
0 62
0 65
0 66
0 77
0 81
1 107
1 122
4 133
4 153
4 153
4 155
4 156
4 157
4 157
4 157
4 158
4 162
4 165
4 165
4 163
4 163
4 163
4 164
4 164
4 164
4 164
4 164
4 164
4 164
10 166
10 166
10 166
11 167
11 165
11 158
11 141
11 140
12 141
30 174
30 162
30 150
28 107
28 97
26 94
27 70
27 69
27 68
27 68
27 71
27 71
27 68
27 63
27 62
27 62
27 62
27 62
27 66
27 70
27 71
27 71
27 71
27 71
29 75
29 78
29 76
23 70
23 72
23 72
23 74
23 73
23 75
22 65
22 67
20 65
3 39
3 40
3 41
3 43
0 43
0 53
0 78
0 85
0 85
0 86
0 87
0 87
0 87
0 84
0 92
0 104
0 104
0 104
0 105
0 104
0 104
0 104
0 104
0 103
0 98
0 96
0 96
0 97
0 95
0 94
0 93
0 92
0 87
0 77
0 74
1 74
1 74
1 74
1 74
1 73
1 73
1 71
1 45
1 41
1 41
1 41
1 46
1 51
1 63
1 60
0 53
0 43
0 44
0 44
0 43
0 50
0 50
0 50
0 50
0 50
0 51
0 55
0 55
0 55
0 57
0 58
0 58
0 59
0 59
0 59
0 57
0 57
0 57
0 57
0 61
0 61
0 62
0 54
0 58
0 60
0 59
0 59
1 52
1 44
1 33
1 32
1 31
1 30
1 29
1 29
1 29
1 27
1 28
1 28
1 29
1 29
1 28
1 26
1 26
2 25
3 23
3 22
3 22
3 23
3 23
3 22
3 18
3 18
3 18
3 20
5 41
6 62
6 66
6 68
6 64
6 63
6 63
5 65
5 64
5 64
5 64
4 64
4 64
4 67
4 66
4 66
4 65
4 71
4 71
4 71
4 71
4 72
4 72
4 71
4 71
3 71
3 73
3 78
3 78
3 79
3 83
3 93
3 93
3 94
2 94
2 88
0 45
0 39
0 35
0 35
0 37
2 37
2 37
4 37
4 37
4 37
4 37
4 38
5 38
6 50
6 50
6 50
6 49
6 43
6 43
6 43
6 42
6 43
6 55
6 58
8 62
8 68
6 70
6 82
6 83
6 83
6 78
6 67
6 67
6 66
6 66
6 66
10 97
10 99
10 99
10 99
10 99
10 99
10 99
8 98
8 98
8 97
7 97
7 97
7 97
6 82
21 82
22 83
22 85
22 85
22 85
22 84
22 84
22 82
22 67
21 66
20 64
20 56
20 53
20 36
20 36
20 36
20 37
4 37
4 37
4 37
3 37
3 37
0 6
0 4
0 4
0 5
0 5
0 5
1 5
1 5
1 5
1 5
1 3
1 3
1 3
1 3
1 3
1 3
1 2
1 2
1 2
1 2
1 2
1 2
1 2
1 2
1 2
1 2
1 2
1 2
1 3
1 3
1 2
1 2
1 2
1 2
1 2
1 2
1 1
1 2
1 2
1 2
1 2
1 2
1 8
1 8
1 8
1 9
1 9
1 9
1 10
1 10
1 10
2 11
2 12
2 12
2 12
2 12
2 12
2 12
2 12
2 12
2 12
2 11
2 11
2 11
2 10
2 10
1 8
1 8
1 8
1 8
1 8
1 8
1 8
1 8
1 8
1 8
1 8
1 7
0 2
0 2
0 2
0 2
0 2
0 2
0 1
0 0
0 0
0 0
0 0
0 0
0 1
0 1
0 1
0 1
0 1
0 1
0 1
0 2
0 2
0 2
0 3
0 3
0 4
1 8
1 8
1 9
1 9
1 9
1 9
1 9
1 9
1 9
1 9
1 9
1 9
1 9
1 9
1 10
1 10
1 11
1 11
1 11
1 11
1 11
1 11
1 11
1 10
1 11
1 11
1 11
1 18
1 18
1 18
1 17
1 17
1 17
1 15
1 15
1 15
0 11
0 11
0 10
0 10
0 10
0 10
0 10
0 10
0 10
0 10
0 63
0 71
0 72
1 74
1 76
1 76
2 76
2 76
2 76
3 76
3 82
3 82
3 82
3 82
3 81
3 81
3 81
3 75
3 75
4 75
4 75
4 77
4 77
4 77
4 77
4 77
4 77
4 77
4 77
4 78
4 78
4 79
4 79
4 79
4 79
4 79
2 19
2 13
2 12
2 13
2 13
2 14
2 14
2 14
2 14
1 12
1 7
1 7
1 7
1 7
1 7
1 19
1 20
1 20
1 20
0 20
0 20
0 18
0 18
0 19
1 23
1 23
1 24
1 25
1 27
1 26
1 27
1 26
1 27
1 27
1 28
1 29
1 29
2 42
2 41
2 43
2 47
2 62
3 66
3 73
3 78
3 79
3 79
3 82
3 83
3 83
3 83
3 70
3 70
3 69
3 70
6 77
6 80
6 84
6 83
6 83
6 84
6 84
6 85
6 86
6 86
6 86
7 108
7 110
7 110
7 112
7 111
7 112
7 112
6 99
6 99
6 93
6 90
5 72
5 67
5 61
5 61
5 59
5 59
5 59
5 58
5 57
5 59
5 59
5 61
5 62
4 59
1 50
1 47
1 44
1 45
1 45
1 45
2 44
2 43
2 43
2 41
2 39
1 15
1 13
1 13
1 12
1 10
1 10
1 10
1 10
1 10
1 9
1 9
1 10
1 11
1 13
2 15
6 18
6 18
6 18
6 18
6 18
6 17
6 17
6 14
6 13
13 29
13 29
13 29
13 29
13 27
13 27
13 27
12 27
12 27
12 27
12 27
12 27
12 27
12 27
12 27
12 27
12 27
13 35
14 35
14 35
14 35
14 37
14 38
14 36
14 35
14 36
13 31
9 29
9 29
9 29
7 30
5 30
5 29
5 29
14 39
14 39
11 24
11 28
11 28
13 29
14 29
14 29
14 29
14 29
14 29
14 29
14 29
14 29
14 29
14 29
14 29
14 29
14 29
13 21
12 22
12 22
12 22
12 20
12 17
12 17
21 43
21 48
28 55
28 55
28 56
28 57
28 56
29 58
29 57
30 57
21 52
20 52
20 52
20 53
20 53
19 53
18 53
18 53
18 53
18 55
18 55
18 55
18 55
18 55
18 59
18 60
18 60
18 59
18 59
18 59
17 60
20 80
21 83
20 84
19 85
19 84
11 57
11 51
5 47
5 47
5 46
5 46
5 46
5 43
5 43
4 41
4 34
4 34
4 33
4 33
4 33
4 33
4 33
4 33
4 33
4 33
4 33
4 35
4 40
4 42
4 39
4 38
4 38
4 39
4 39
4 45
5 45
2 23
1 20
1 20
1 27
1 28
1 29
1 29
1 29
1 29
1 29
1 30
1 31
1 30
1 31
1 44
1 44
1 44
1 44
1 44
1 44
1 44
1 44
1 46
1 46
1 54
1 54
1 52
1 49
1 49
2 51
6 60
8 60
9 62
9 63
9 57
8 58
8 75
8 74
8 74
8 69
8 70
8 69
8 69
8 69
8 69
8 68
8 67
8 67
8 67
8 65
8 53
8 53
8 52
8 52
8 52
8 52
8 52
8 53
8 43
8 40
8 48
8 51
8 49
8 48
8 48
6 48
1 39
1 41
1 39
1 38
1 38
1 37
2 21
2 25
2 24
2 24
2 23
2 23
2 23
2 23
2 23
2 23
2 30
2 32
2 37
2 38
2 38
2 38
2 38
2 37
2 37
2 39
2 45
2 49
2 53
2 60
2 48
2 48
2 49
0 63
0 60
0 60
0 60
0 58
0 59
0 59
0 59
0 59
0 59
0 56
0 56
0 56
0 56
0 57
0 57
0 57
0 57
0 56
0 50
0 47
0 43
0 44
0 44
0 42
3 64
3 65
3 66
3 62
3 54
3 53
3 50
3 45
3 47
3 47
3 47
3 32
3 32
3 32
3 32
3 32
3 32
3 32
3 32
3 32
3 31
4 31
6 32
6 31
6 32
6 33
6 34
6 34
6 34
6 35
6 35
6 35
6 35
6 34
6 34
6 33
3 9
3 9
3 9
3 9
3 9
3 9
3 9
3 11
3 16
3 22
3 22
3 23
3 23
3 23
3 23
3 23
3 23
3 23
3 23
3 23
3 23
2 23
0 21
0 21
0 20
0 19
0 18
0 19
0 20
0 19
0 19
0 18
0 18
0 18
0 18
0 18
0 18
0 19
0 19
0 31
0 32
0 33
0 31
0 30
0 19
0 19
0 21
0 21
0 21
0 21
0 21
0 21
0 21
0 21
0 21
0 21
0 21
0 21
0 21
0 21
0 21
0 22
0 22
0 21
0 21
0 21
0 22
0 22
0 30
0 30
0 45
0 57
0 61
0 62
0 58
0 47
0 48
0 48
0 47
0 47
0 47
0 47
0 45
0 45
0 45
0 45
0 45
0 45
0 45
0 45
0 45
0 45
0 45
0 45
0 46
0 47
0 48
0 48
0 49
0 49
0 48
1 49
1 50
1 50
1 41
1 40
1 21
1 14
1 19
2 18
2 18
2 20
2 19
2 19
2 19
2 24
2 24
2 24
2 24
2 24
2 24
2 24
2 24
2 24
2 24
2 24
2 24
2 24
2 24
2 24
2 27
2 27
2 26
2 26
1 26
1 30
1 30
1 30
1 30
1 30
1 30
2 31
2 26
1 21
1 20
1 20
1 20
1 20
1 20
1 20
1 21
1 16
1 16
1 16
1 16
1 16
0 15
0 16
0 16
0 16
0 16
0 17
0 19
1 23
4 178
4 179
4 176
5 173
5 173
5 170
5 169
5 167
5 167
5 166
5 166
5 166
5 166
5 166
6 173
7 174
4 19
4 19
4 20
5 22
5 22
10 22
10 22
10 22
10 22
10 22
10 22
10 22
10 22
10 21
10 22
10 22
10 22
10 21
10 18
9 15
8 15
8 15
8 14
8 14
8 14
8 14
8 14
8 14
8 14
8 14
8 14
8 14
8 14
8 19
5 10
5 11
3 11
3 20
3 21
3 21
3 22
0 22
0 22
0 23
0 23
0 23
0 23
0 23
0 23
0 17
0 17
0 17
0 16
0 16
0 16
0 17
0 18
0 22
0 23
0 23
0 23
0 23
0 23
0 23
0 23
0 23
0 22
0 22
0 22
0 22
0 23
1 22
1 19
1 11
1 11
1 12
1 12
1 12
1 12
1 11
1 11
1 12
1 12
1 12
1 12
1 17
1 17
1 17
1 17
1 17
1 17
1 16
1 14
1 11
1 10
1 10
1 10
1 10
1 10
1 12
1 12
1 12
1 12
4 22
4 22
4 22
3 21
3 18
4 24
4 23
4 23
5 23
5 23
5 23
5 24
5 24
5 24
5 24
5 24
5 24
5 24
5 19
5 19
5 19
5 19
5 19
5 19
5 19
7 19
13 21
13 21
13 21
13 21
13 21
13 21
13 19
13 19
13 19
13 19
9 7
9 3
9 3
8 3
8 3
8 3
8 4
8 8
8 9
8 9
8 9
8 9
8 11
8 11
8 14
8 14
8 14
8 14
8 14
8 14
8 14
8 14
6 14
6 14
5 14
5 14
0 12
0 12
0 12
0 12
0 12
0 12
1 12
1 12
1 11
1 10
1 3
1 0
1 0
1 0
1 0
1 0
1 0
1 0
1 0
1 0
1 0
1 0
0 0
0 0
0 0
0 0
0 0
0 0
0 0
0 0
0 0
0 0
0 0
0 0
0 0
0 0
1 2
1 2
1 2
1 2
1 2
1 2
1 2
1 2
1 2
1 2
1 2
1 2
1 2
1 2
1 2
1 2
1 2
1 3
1 3
1 3
1 3
1 6
1 7
1 8
1 10
1 10
1 10
1 10
1 10
1 10
1 10
1 10
2 10
2 10
2 10
2 10
1 8
1 8
1 8
1 8
1 8
1 8
1 8
1 8
1 8
1 8
3 8
5 8
18 8
19 9
20 9
22 9
22 11
23 10
54 11
55 11
55 11
57 9
57 8
58 7
58 6
58 6
58 6
58 6
58 6
58 6
58 6
58 6
57 6
57 5
57 5
57 5
57 5
57 6
57 6
56 6
57 6
57 6
57 6
57 6
55 6
55 6
53 6
53 6
43 5
41 6
44 8
42 8
42 6
42 6
9 4
11 4
11 4
11 4
11 4
10 4
10 4
12 4
17 4
40 4
40 4
41 4
56 10
56 10
58 10
58 10
57 10
57 10
57 10
57 10
56 10
56 10
56 10
56 10
56 10
61 10
61 10
47 4
46 4
46 4
46 4
46 3
43 1
43 1
43 1
40 2
40 2
39 2
39 2
42 2
42 2
42 1
38 1
25 1
26 1
16 1
20 1
23 1
24 1
27 1
25 1
27 1
32 1
33 1
43 1
54 1
68 1
75 1
78 1
77 1
94 1
95 1
95 1
94 1
94 1
94 2
94 2
94 1
94 1
94 1
94 1
95 1
95 1
96 1
95 1
90 1
90 1
92 1
92 1
91 1
88 1
87 1
84 1
81 1
76 2
69 2
69 2
68 2
59 2
51 3
38 3
30 3
20 3
17 3
15 3
15 3
10 2
6 2
6 2
6 2
6 3
6 3
6 3
6 3
7 3
7 3
7 3
6 3
6 3
5 3
5 3
5 3
5 3
3 2
3 2
3 2
3 2
3 2
3 2
3 2
3 2
3 2
3 2
3 3
3 3
1 2
1 8
1 8
1 8
2 8
3 8
6 8
6 8
6 8
6 8
5 8
5 7
5 7
5 8
5 8
5 8
5 8
5 8
6 8
6 8
6 2
6 3
7 3
651 6
651 6
654 8
654 9
654 9
654 9
654 9
654 9
659 10
659 10
659 9
659 9
659 9
658 9
657 10
15 7
12 7
8 5
7 5
6 6
6 6
6 6
6 6
3 6
3 6
3 6
3 5
3 5
3 5
3 5
3 5
2 5
2 5
2 5
2 4
2 3
2 3
2 3
2 3
2 3
2 3
2 3
2 3
2 3
2 3
2 3
2 3
2 3
2 3
2 3
2 2
2 2
2 3
1 3
1 3
1 2
1 2
1 2
1 2
0 1
0 1
0 1
0 1
0 1
2 1
2 1
2 1
2 1
2 1
2 1
2 1
2 1
2 2
2 2
2 2
2 2
2 2
2 2
2 3
2 3
2 3
3 4
3 4
3 6
3 6
3 7
3 7
3 7
3 6
3 6
3 6
3 6
3 6
3 6
3 6
3 6
3 6
3 6
3 6
3 6
1 6
1 6
1 5
1 5
1 5
1 6
1 6
1 9
1 9
1 9
1 10
1 10
1 20
1 20
1 20
1 22
1 22
0 19
0 21
0 20
0 20
2 20
2 20
6 20
6 20
6 20
6 21
6 22
6 27
6 28
6 61
6 64
6 64
7 68
7 72
7 76
7 76
6 76
5 76
1 76
1 76
1 75
1 75
1 71
1 71
1 71
1 71
1 71
1 60
1 58
1 57
1 56
1 56
1 56
1 56
1 56
1 56
1 56
1 56
1 56
2 57
2 57
2 55
2 53
2 51
2 48
2 16
2 14
1 12
1 5
1 3
1 3
1 9
1 10
1 10
1 10
1 13
1 13
1 13
1 13
1 13
1 23
1 27
1 33
1 34
1 36
1 37
1 37
1 39
1 39
1 40
1 40
1 40
1 40
0 40
0 40
0 39
0 39
0 39
0 39
0 38
0 43
0 44
0 44
0 45
0 45
0 45
0 40
0 38
0 40
0 40
0 42
0 44
0 49
0 49
0 49
0 50
0 37
0 32
0 29
0 29
0 27
0 26
0 26
0 26
0 26
0 25
0 25
0 25
0 24
0 29
0 32
0 34
0 35
0 36
0 41
0 42
0 42
0 40
0 40
0 39
0 40
0 40
0 40
0 40
0 40
0 40
0 36
0 31
0 29
0 29
0 29
0 29
0 29
0 29
0 28
0 28
0 28
0 28
0 28
0 28
0 28
0 29
0 29
0 33
0 33
0 34
0 37
0 39
0 38
0 37
0 27
0 26
0 26
0 26
0 26
0 25
0 26
0 26
0 26
0 29
0 29
0 29
0 30
0 32
0 33
0 34
0 34
0 35
0 35
0 35
0 35
0 35
0 35
0 35
0 35
0 39
0 40
0 38
0 36
0 30
0 24
0 24
0 25
0 26
0 26
0 26
0 26
0 25
0 25
0 27
0 27
0 27
0 26
0 26
0 26
0 23
0 21
0 20
0 20
0 19
0 18
0 18
0 18
0 18
0 20
0 19
0 19
0 19
0 19
0 20
0 20
0 17
0 16
0 16
0 17
0 14
0 13
0 11
0 9
0 7
0 7
0 7
0 7
0 7
0 7
0 7
0 8
0 9
0 10
0 10
0 10
0 11
0 11
0 13
0 13
0 14
0 14
0 14
0 13
0 13
0 11
0 11
0 11
0 11
0 9
0 9
0 9
0 9
0 9
0 9
0 6
0 6
0 6
0 6
0 6
0 6
0 6
0 6
0 6
0 6
0 6
0 6
0 5
0 4
2 4
2 4
2 4
2 2
2 2
2 2
2 2
2 2
2 2
2 2
2 2
2 2
2 2
2 2
2 2
2 2
0 2
0 2
0 2
0 2
0 2
0 2
0 2
0 2
0 2
0 2
0 2
0 2
0 2
0 2
0 2
0 2
0 2
0 2
5 1
6 1
6 0
6 0
6 0
6 0
6 0
6 0
6 0
6 0
6 0
6 0
6 0
6 0
6 0
6 0
0 0
0 0
0 4
0 4
0 4
0 4
0 4
0 4
0 4
0 4
0 4
0 5
0 5
0 5
0 6
0 6
0 6
0 6
0 6
26 6
26 6
26 7
26 7
26 7
26 7
26 7
26 7
26 7
26 7
26 7
26 7
26 7
26 8
26 8
0 8
0 8
0 8
0 8
0 4
0 4
0 4
0 5
0 5
0 6
0 6
0 6
0 7
0 6
0 7
0 7
0 6
0 6
0 6
0 6
0 6
0 6
0 6
0 5
0 5
0 5
0 5
0 5
0 8
0 8
0 8
0 8
0 8
0 8
0 7
0 8
0 9
0 10
0 10
0 10
0 11
0 12
0 12
0 10
0 10
0 10
0 10
0 10
0 10
0 9
0 10
0 10
0 8
0 11
0 11
0 11
0 11
0 12
0 14
0 14
0 14
0 14
0 14
0 14
0 11
0 11
0 11
0 11
0 8
0 8
0 8
0 7
9 8
9 8
9 8
9 7
9 6
9 6
9 6
9 6
9 6
9 6
9 6
9 5
9 4
9 4
9 4
9 5
7 5
7 5
0 4
0 4
0 6
0 3
0 3
0 3
0 3
0 3
0 4
0 9
0 9
0 11
0 12
0 12
0 15
1 16
1 16
1 16
1 16
1 20
1 24
1 25
1 25
1 25
1 25
1 25
1 25
1 31
1 32
1 32
0 33
0 33
0 33
0 32
0 32
50 32
50 32
50 31
50 30
50 30
50 30
50 30
50 29
50 29
50 27
50 20
50 20
50 20
50 20
50 20
0 20
0 17
0 14
0 13
0 13
0 13
0 12
0 12
0 12
0 13
0 13
0 12
0 9
0 7
0 8
2 1475
2 1479
15 1497
15 1497
15 1500
15 1500
15 1500
15 1500
15 1500
15 1499
15 1499
15 1499
15 1499
15 1499
15 1499
15 1494
15 1482
15 1474
0 10
0 8
0 8
0 7
0 5
0 5
0 5
0 5
0 5
0 5
0 7
0 8
0 8
0 9
0 9
0 9
0 4
0 4
0 4
0 4
0 7
0 7
2 7
2 7
2 7
2 7
2 7
2 7
2 6
2 7
2 7
2 7
2 7
2 7
2 10
2 10
2 11
2 12
0 12
0 13
0 13
0 16
0 18
0 19
0 19
0 19
0 17
0 17
0 17
0 16
0 16
0 16
0 16
0 16
0 16
0 16
0 15
0 15
0 15
0 15
0 15
0 15
0 15
0 15
0 15
0 20
0 20
0 20
0 20
0 19
0 19
0 18
0 18
0 18
0 18
0 18
0 19
0 15
0 14
0 13
0 13
0 13
0 14
0 14
0 14
0 14
0 15
0 17
0 17
0 17
0 17
0 17
0 15
0 15
0 15
0 15
0 15
0 15
0 15
0 16
0 16
0 9
0 9
0 9
0 14
0 14
0 12
0 12
0 12
0 12
0 12
0 11
0 9
0 9
0 9
0 11
0 11
0 11
0 10
0 10
0 10
0 9
0 9
0 8
0 8
0 8
0 9
0 9
0 9
0 9
0 9
0 9
0 9
0 9
0 9
0 8
0 8
0 8
0 8
0 8
0 3
0 3
0 3
0 3
0 3
0 3
0 3
0 3
0 3
0 3
0 2
0 1
0 1
0 1
0 1
0 1
0 0
0 0
0 0
0 0
0 0
0 0
0 0
0 0
0 0
0 0
0 1
0 1
0 1
0 1
0 1
0 1
0 1
0 1
0 1
0 1
0 1
0 1
0 1
0 1
0 1
0 0
0 0
0 0
0 0
0 0
0 0
0 0
0 0
0 0
0 0
0 0
4 0
4 0
4 0
4 0
4 0
4 0
4 0
4 0
4 0
4 0
4 0
4 0
4 0
4 0
4 0
0 0
0 0
0 0
0 0
0 0
0 0
0 0
0 0
0 1
0 4
0 4
0 4
0 4
0 4
0 4
0 4
0 4
0 4
0 4
0 4
0 4
0 4
0 4
0 4
0 4
0 4
0 4
0 4
0 4
0 4
0 4
0 4
0 4
0 4
0 4
0 4
0 4
0 4
0 4
0 5
0 5
0 5
0 5
0 8
0 7
0 4
0 4
0 4
1 25
1 25
1 26
1 27
1 29
1 34
1 37
1 37
1 37
1 39
1 39
1 44
1 44
1 46
1 47
2 55
2 56
2 57
2 58
2 58
2 60
2 60
2 60
2 60
2 62
2 62
2 62
2 65
2 65
2 74
2 74
2 72
4 77
4 99
4 103
4 104
3 79
3 78
3 73
3 74
3 74
6 74
6 74
6 75
6 75
6 73
6 73
6 66
6 64
8 63
8 60
7 57
7 56
7 56
7 55
7 56
7 59
7 61
7 65
7 66
7 64
7 64
7 66
7 63
5 63
5 56
5 56
5 55
3 43
3 21
3 21
3 21
3 20
3 20
3 20
3 20
3 20
0 41
0 41
0 40
0 40
0 40
0 41
0 41
0 41
0 41
0 40
0 40
0 40
0 40
0 39
0 37
0 32
0 32
0 29
0 28
0 29
0 32
0 29
0 29
0 29
0 28
0 28
0 28
0 28
0 28
0 28
0 28
0 28
0 28
0 28
0 28
0 28
0 6
0 6
0 6
0 8
0 9
0 13
0 15
0 15
0 15
0 16
0 16
0 20
0 22
0 27
0 35
0 42
0 46
0 48
0 49
0 49
0 47
0 48
1 49
1 49
1 48
1 48
1 48
1 48
1 48
1 48
1 49
1 49
1 49
1 49
1 49
1 49
1 49
0 65
0 71
0 69
0 69
0 68
0 66
0 72
0 72
0 75
0 75
0 70
0 58
0 54
0 53
0 53
0 50
0 50
0 52
0 54
0 56
0 65
1 73
1 84
1 87
1 89
1 92
1 131
1 133
1 133
1 132
1 132
1 132
1 134
1 134
1 134
1 133
0 111
0 110
0 110
0 110
0 107
0 106
0 98
0 97
0 95
0 95
0 93
0 93
0 88
0 88
0 85
0 85
0 84
0 82
0 80
0 75
0 61
0 47
0 46
0 46
0 42
0 36
0 1
0 77
0 77
0 77
0 78
0 78
0 80
1 80
1 80
1 81
1 81
1 83
1 84
1 85
1 88
1 88
1 12
1 12
1 12
1 12
1 12
1 12
0 12
0 12
0 12
0 12
0 12
0 12
0 12
0 13
0 20
0 20
0 20
0 20
0 19
0 19
0 19
0 20
0 21
0 21
0 21
0 23
0 21
0 23
0 23
0 22
0 26
0 24
0 23
0 20
0 20
0 20
0 19
0 19
0 19
0 19
0 19
0 19
0 19
0 19
0 19
0 19
0 18
0 19
0 19
0 19
0 11
0 11
0 11
0 11
0 10
0 10
0 10
0 10
0 10
0 11
0 12
0 14
0 12
0 12
0 11
0 11
0 12
0 12
0 11
0 11
0 11
0 11
0 11
0 11
0 11
0 12
0 12
0 12
0 12
0 12
0 12
0 12
0 12
0 20
0 27
0 29
0 35
1 303
1 309
1 311
1 315
1 315
1 316
1 317
1 318
1 317
1 315
1 311
1 311
1 312
1 312
1 312
0 26
0 26
0 23
0 24
0 24
0 24
0 24
0 24
1 24
1 23
1 23
1 26
1 26
1 26
1 26
1 26
1 25
1 25
1 23
1 22
1 22
1 22
1 15
2 11
2 8
2 8
2 8
2 7
2 6
2 5
2 5
2 6
2 6
2 9
2 14
2 14
2 14
2 14
2 14
2 13
2 13
2 13
2 13
2 13
1 13
1 13
1 13
3 10
3 10
3 10
3 10
3 10
3 10
3 10
4 10
4 10
4 10
4 9
4 9
3 9
3 9
3 9
1 9
1 9
1 9
1 10
1 9
1 9
1 7
1 4
1 1
1 1
1 1
1 2
2 2
2 2
2 2
2 3
2 3
2 4
2 4
2 4
2 4
2 4
1 4
1 4
1 4
1 4
1 4
1 5
1 5
1 5
1 4
1 4
1 4
1 5
1 6
1 6
1 9
1 9
1 9
1 10
1 10
1 11
1 11
1 11
1 11
1 11
1 11
1 12
0 12
1 21
1 21
1 23
1 27
1 29
1 31
1 34
1 34
1 34
1 34
1 34
1 34
1 34
1 32
1 30
1 31
1 32
1 32
1 32
1 33
1 32
1 39
1 39
1 38
1 40
1 41
1 38
1 38
1 38
1 38
1 38
1 38
1 38
1 38
1 38
1 38
0 47
0 37
0 35
0 30
0 26
0 24
0 25
0 25
0 25
0 25
0 25
0 26
0 26
0 27
0 35
0 20
0 19
0 19
0 19
0 18
0 18
0 18
0 18
0 18
0 18
0 17
0 17
0 17
0 17
0 18
0 18
0 18
0 33
0 32
0 32
0 32
0 32
0 32
1 32
1 32
1 31
1 31
1 30
1 31
1 32
1 33
1 34
1 34
2 35
2 35
2 23
2 22
2 22
2 22
2 22
2 22
2 22
2 22
2 22
2 22
2 22
2 24
2 24
2 24
2 24
2 23
2 22
2 22
2 8
2 8
2 8
2 8
2 8
2 8
1 8
1 8
1 8
1 8
0 7
1 42
1 46
1 52
1 51
1 52
1 50
1 55
1 55
1 55
1 56
1 56
1 56
1 57
1 57
1 56
1 56
1 56
1 56
1 54
1 54
1 54
1 54
1 55
1 55
1 55
1 55
1 55
1 55
1 55
1 57
1 57
1 57
1 57
1 57
1 57
1 51
0 13
0 7
0 5
0 6
0 6
0 7
0 7
0 10
0 10
0 9
0 9
0 11
0 11
0 12
0 12
0 15
0 17
0 18
0 18
0 17
0 17
0 18
0 19
0 21
0 21
0 22
0 22
0 23
0 23
0 21
0 21
0 21
0 21
0 21
0 23
0 23
0 23
0 23
1 23
1 23
1 23
1 22
1 22
1 19
1 20
1 20
1 20
1 17
1 15
1 15
1 14
1 12
1 10
1 9
1 9
1 9
1 9
1 7
1 6
1 5
1 5
1 7
1 7
1 8
1 8
1 8
1 10
1 10
1 9
1 11
1 10
1 10
1 10
1 10
0 9
0 10
0 11
0 11
0 12
0 13
0 15
0 17
0 17
0 17
0 17
0 17
0 17
0 17
0 18
0 18
0 17
0 18
0 18
0 18
0 18
0 18
0 18
0 15
0 16
0 15
0 15
0 15
0 13
0 13
0 13
0 12
0 12
0 12
0 12
0 12
0 12
0 12
0 10
0 10
0 7
0 6
0 4
0 5
0 5
0 5
0 5
0 5
0 6
0 6
0 5
0 6
0 23
0 23
0 24
0 24
0 24
0 24
0 24
0 24
0 25
0 26
0 27
0 28
0 28
0 27
0 27
0 27
0 27
0 27
0 27
0 28
0 28
0 28
0 28
0 28
0 28
0 28
0 28
0 27
0 27
0 27
0 27
0 28
0 28
0 27
0 27
11 26
11 9
11 9
11 10
11 12
11 12
11 12
11 12
11 12
11 10
11 9
11 7
11 7
11 7
11 7
11 7
1 7
1 7
1 7
1 7
1 6
1 6
1 6
1 6
1 6
1 6
1 6
1 6
1 6
1 6
1 6
0 6
0 5
0 4
0 4
0 4
0 4
0 3
0 3
0 2
0 0
0 0
0 1
0 1
0 1
0 1
0 1
0 1
0 1
0 1
0 1
0 1
0 1
0 1
0 1
0 5
0 5
0 5
0 6
0 6
0 6
0 6
0 6
0 6
0 6
0 8
0 8
0 8
0 8
0 12
0 12
0 12
0 19
0 19
0 19
0 20
0 23
0 24
0 24
0 36
0 39
0 47
0 49
0 50
0 50
0 58
0 59
0 59
0 62
0 62
0 62
0 57
0 57
0 57
0 57
0 57
0 58
0 58
0 59
0 57
0 57
0 56
0 56
0 56
0 56
0 50
0 50
0 52
0 45
0 46
0 45
0 44
0 43
0 43
0 40
0 22
0 19
0 17
0 15
0 15
0 15
0 15
0 15
0 15
0 12
0 12
0 12
0 13
0 13
0 13
0 12
0 12
0 12
0 12
0 11
0 11
0 11
0 10
0 10
0 10
0 10
0 10
0 10
0 8
0 7
0 3
0 4
0 4
0 4
0 4
0 4
0 4
0 4
0 4
0 5
0 5
0 6
0 11
0 15
0 23
0 24
0 26
0 26
0 30
0 30
0 31
0 31
0 31
0 31
0 32
0 32
0 32
0 32
0 32
0 32
0 33
0 33
0 33
0 33
0 33
0 33
0 33
0 31
0 31
0 31
0 31
0 30
0 30
0 30
0 30
0 30
0 30
0 30
0 26
0 21
0 13
0 14
0 13
0 12
0 9
0 8
0 8
0 8
0 8
0 12
0 16
0 16
0 16
0 16
0 16
0 16
0 15
0 15
0 15
0 15
0 15
0 15
0 15
0 15
0 14
0 15
0 15
0 13
0 13
0 12
0 9
0 9
0 9
0 8
0 7
0 6
0 6
0 6
0 6
0 8
0 8
0 8
0 8
0 8
0 8
0 5
0 3
0 3
0 3
0 3
0 3
0 4
0 4
0 4
0 4
0 5
0 6
0 8
0 7
0 7
0 7
0 7
0 7
0 7
0 7
0 7
0 7
0 7
0 7
0 7
0 7
0 7
0 7
0 7
0 9
0 9
0 12
0 13
0 13
0 13
0 13
0 13
0 13
0 13
0 13
0 13
0 13
0 12
0 12
0 12
0 11
0 10
0 6
0 6
0 4
0 4
0 5
0 5
0 5
0 5
0 5
0 5
0 5
0 5
0 7
0 11
0 11
0 16
0 17
0 17
0 17
0 14
0 13
0 13
0 13
0 13
0 13
0 13
0 13
0 13
0 13
0 13
0 17
0 18
0 19
0 19
0 19
0 25
0 25
0 25
0 25
0 26
0 26
0 26
0 26
0 26
0 26
0 26
0 26
0 26
0 24
1 19
1 19
1 15
1 14
1 14
1 14
1 14
1 14
1 14
1 14
1 14
1 14
1 15
1 15
1 15
1 15
1 15
1 11
1 11
1 11
1 11
1 10
1 5
1 6
1 6
1 6
1 6
1 6
1 6
1 6
1 6
1 6
1 8
1 8
1 8
1 8
1 8
1 8
1 8
1 8
1 8
1 8
1 8
1 8
1 8
1 8
1 8
1 6
1 5
1 7
1 9
0 9
0 9
0 9
0 8
0 6
0 8
0 8
0 8
0 6
0 6
0 6
0 6
0 12
0 12
0 12
0 12
0 12
0 12
0 13
0 13
0 13
0 13
0 13
0 13
0 13
1 52
1 52
1 52
1 46
1 46
1 46
1 46
1 46
1 45
1 42
1 42
1 42
1 42
1 42
1 42
0 4
0 2
0 2
0 2
0 2
0 2
0 2
0 2
0 2
0 2
0 2
0 3
0 3
0 3
0 2
0 3
0 3
0 3
0 3
0 3
0 3
0 3
0 3
0 3
0 3
0 3
0 3
0 3
1 3
1 3
1 3
1 3
1 3
1 3
1 3
1 3
1 2
1 2
1 2
1 2
1 2
1 2
1 2
1 2
1 2
1 2
1 2
1 2
1 2
1 2
1 1
1 1
1 1
1 1
1 1
1 2
1 2
1 2
1 2
1 2
1 2
1 2
1 2
1 2
0 2
0 2
0 2
0 2
0 2
0 2
1 2
1 4
1 4
1 4
1 4
1 4
2 4
2 4
2 4
2 4
2 6
2 6
2 6
2 5
2 5
2 5
2 5
2 5
2 5
2 6
2 5
2 5
2 5
2 9
2 9
2 9
2 9
2 9
2 9
2 9
2 9
2 11
2 12
2 12
2 11
2 10
1 10
0 9
0 9
0 9
0 9
0 9
0 9
0 9
0 9
0 9
0 7
0 7
0 7
0 7
0 7
0 7
0 7
0 7
0 7
0 7
0 7
0 7
0 7
0 3
0 4
0 4
0 4
0 4
1 4
1 4
1 2
1 1
1 1
1 1
1 1
1 1
1 1
1 1
1 1
1 1
1 1
1 1
1 2
1 2
1 2
1 4
1 4
1 5
1 5
1 5
1 5
1 5
1 5
1 5
1 5
1 5
1 5
1 5
1 6
1 5
1 5
2 5
1 5
1 5
1 5
1 5
1 5
1 5
1 5
1 5
1 5
1 5
1 5
1 5
1 5
1 6
0 7
0 7
0 6
0 6
0 5
0 4
0 4
0 3
0 3
0 3
0 3
0 11
0 12
0 12
0 12
0 12
0 12
0 11
0 11
0 11
0 11
0 11
0 11
0 11
0 13
0 14
0 7
0 9
0 9
0 10
0 11
0 11
0 11
0 11
0 12
0 11
0 10
0 10
0 11
0 11
0 11
0 11
0 11
0 11
0 11
0 12
0 15
0 15
0 15
0 15
0 15
0 15
0 15
0 15
0 17
0 17
0 18
0 20
0 20
0 20
0 17
0 16
0 14
0 12
0 12
0 12
0 11
0 11
0 11
0 11
0 11
0 11
0 11
0 10
0 10
0 10
0 10
0 10
0 10
0 10
0 10
0 11
0 7
0 7
0 7
0 7
0 9
0 9
0 9
0 9
0 7
0 8
0 9
0 9
0 9
0 10
0 10
0 14
0 15
0 15
0 16
0 16
0 28
0 28
0 28
0 27
0 27
0 28
0 28
0 28
0 29
0 37
0 37
0 39
0 42
0 46
0 49
0 55
0 56
0 56
0 56
0 56
0 51
0 51
0 51
0 50
0 47
0 45
0 44
0 44
0 44
0 58
0 62
0 64
0 71
0 75
0 76
0 78
0 66
0 66
0 66
0 66
0 66
0 66
0 66
0 66
0 63
0 47
0 42
0 52
0 52
0 51
0 51
0 52
0 52
0 52
0 52
0 52
0 52
0 52
0 52
0 52
0 55
0 55
0 55
0 56
0 52
0 30
0 26
2 87
2 87
2 86
2 86
2 86
2 86
2 86
2 86
2 83
2 83
2 83
2 83
2 83
2 83
2 83
0 19
0 8
0 7
0 7
0 7
0 6
0 6
0 6
0 6
0 6
0 6
0 8
0 8
0 8
0 5
0 5
0 4
0 4
0 4
0 3
0 3
0 3
0 2
0 2
0 2
0 2
0 2
0 2
0 2
0 2
0 2
0 2
0 2
0 2
3 6
3 9
3 10
3 10
4 11
5 11
5 11
5 14
5 14
5 14
6 14
7 18
7 22
7 22
9 23
9 23
8 19
9 19
10 21
10 21
8 21
8 21
8 21
8 21
8 21
8 21
8 21
8 22
8 22
8 22
7 22
7 23
6 23
6 23
6 23
6 23
6 23
6 20
6 19
6 19
5 18
5 18
5 18
5 16
5 19
5 20
4 20
1 12
1 10
1 8
0 8
0 8
0 8
0 8
0 8
0 8
0 7
1 7
1 7
1 7
1 8
1 10
1 10
5 14
5 13
5 13
5 13
5 12
5 12
5 12
5 12
5 13
6 14
7 20
7 22
7 23
7 23
7 23
7 20
7 23
7 21
7 22
7 24
7 24
7 32
7 42
7 46
7 49
7 50
7 51
7 51
7 51
6 51
6 51
6 50
6 50
6 50
4 48
3 48
1 44
1 45
1 45
1 45
1 45
1 45
1 45
0 45
0 43
0 38
0 34
0 34
0 34
0 34
0 34
0 34
0 32
0 33
0 33
0 31
0 32
0 23
0 14
0 11
0 8
0 7
0 8
0 8
0 8
0 8
0 8
0 8
0 8
0 8
0 8
0 8
0 7
0 7
0 7
0 7
0 7
0 7
0 7
0 7
0 7
0 7
0 7
0 7
0 7
0 7
0 7
0 9
0 8
0 7
0 6
0 6
0 6
0 6
0 6
0 6
0 6
0 5
0 5
0 5
0 5
0 7
0 7
0 7
0 7
0 7
0 7
0 7
0 7
0 7
0 7
0 7
0 7
0 7
0 7
0 7
0 7
0 7
0 7
0 7
0 7
0 7
0 7
0 5
0 2
0 2
0 2
0 2
0 2
0 2
0 2
0 3
0 4
0 4
0 4
0 4
0 2
0 2
0 2
0 2
0 2
0 5
0 5
0 6
0 6
0 7
0 7
0 7
0 7
0 7
0 7
0 8
0 8
0 8
0 8
0 9
0 9
0 9
0 9
0 9
0 9
0 9
0 9
0 9
0 9
0 9
0 8
0 8
0 7
0 7
0 7
0 7
0 8
0 8
0 8
0 7
0 7
0 5
0 5
0 7
0 11
0 10
0 9
0 10
0 15
0 20
0 21
0 22
0 22
0 22
0 22
0 22
0 22
0 23
0 23
0 23
0 23
0 23
0 23
0 23
0 24
0 23
0 23
0 23
0 23
0 23
0 23
0 23
0 22
0 23
0 22
0 23
0 24
0 25
0 26
0 24
0 19
0 22
0 25
0 31
0 30
0 31
0 31
0 31
0 31
0 32
0 38
0 38
0 39
0 40
0 49
0 50
0 52
0 56
0 56
0 57
0 58
0 57
0 55
0 55
0 55
0 55
0 55
0 55
0 55
0 54
0 54
0 54
0 53
0 54
0 59
0 58
0 55
0 48
1 45
1 40
1 41
1 41
1 41
1 41
1 43
1 44
1 38
1 38
1 36
1 34
5 22
5 17
5 17
5 16
5 16
5 16
5 16
5 16
5 20
5 22
5 22
5 22
9 22
9 23
9 23
5 23
5 22
6 22
6 21
6 20
6 15
6 15
6 15
6 15
5 15
5 17
5 14
5 14
1 15
1 15
1 16
1 15
1 16
1 17
1 17
1 23
1 23
1 23
1 23
1 23
1 23
1 23
1 22
1 17
1 18
1 18
1 31
1 38
1 39
1 39
1 39
1 40
165 43
164 42
164 41
164 44
164 43
164 44
164 46
164 46
164 46
164 47
164 47
164 46
164 46
164 46
164 44
164 44
0 42
0 41
0 41
0 35
0 35
0 35
0 35
0 35
0 39
0 46
0 53
0 56
0 58
0 60
0 46
0 40
0 41
0 43
0 43
0 43
0 43
0 45
0 47
0 43
0 44
0 44
0 41
0 41
0 41
0 41
0 43
0 44
0 45
1 52
1 53
1 60
1 70
1 70
1 71
1 71
1 71
1 71
1 72
1 71
1 66
1 59
1 48
1 42
1 40
1 40
1 40
1 40
1 40
1 39
1 39
1 40
1 40
1 38
1 34
1 33
1 33
1 37
1 39
1 42
1 45
1 44
1 42
1 39
1 39
0 31
0 28
0 22
0 14
0 14
0 13
0 13
0 14
0 14
0 14
0 14
0 14
0 14
0 14
0 14
0 14
0 14
0 13
0 14
0 14
0 15
0 15
0 15
0 15
0 16
0 16
0 17
0 17
0 12
0 11
0 15
0 12
0 12
0 12
0 12
0 12
0 12
0 12
0 15
0 15
0 15
0 15
0 15
0 14
0 14
0 14
0 14
0 14
0 14
0 14
0 14
0 14
0 14
0 14
0 12
0 12
0 12
0 12
0 13
0 13
0 12
0 10
0 18
0 19
0 19
0 21
0 16
0 16
0 16
0 16
0 16
0 16
0 16
0 16
0 14
0 14
0 14
0 14
0 14
0 14
0 14
0 14
0 14
0 14
0 14
0 14
0 14
0 14
0 14
0 14
0 14
0 14
0 14
0 19
0 20
0 20
0 20
0 20
0 12
0 11
0 10
0 8
0 10
0 11
0 22
0 22
0 23
0 24
0 24
0 24
0 27
0 27
0 27
0 27
0 27
0 27
0 27
0 28
0 28
0 28
0 28
0 28
0 28
0 28
0 28
0 28
0 28
0 27
0 27
0 25
0 22
0 22
0 22
1 25
1 25
1 25
1 25
1 25
1 23
1 19
1 7
1 6
1 6
1 5
1 5
1 5
1 5
1 6
1 6
1 6
1 6
1 6
1 6
1 5
1 5
1 6
1 6
1 6
1 6
1 6
1 6
1 6
1 6
1 6
1 6
1 5
1 5
1 6
1 11
0 12
0 14
0 25
0 29
0 33
0 36
1 36
1 36
1 36
1 35
1 35
1 36
1 37
2 39
2 39
2 41
2 42
2 42
3 46
3 46
3 47
2 47
2 47
2 49
2 49
2 49
2 49
2 50
2 50
2 50
2 50
3 52
3 53
3 53
3 52
5 67
5 60
5 64
5 64
5 65
5 68
5 68
5 68
5 68
5 68
5 69
5 69
5 68
5 68
4 66
4 66
4 64
4 63
4 64
3 63
3 62
3 62
3 62
3 64
3 62
3 62
4 61
4 61
4 60
4 58
4 58
4 58
3 55
3 54
3 53
3 49
1 12
1 10
1 10
1 14
1 15
1 14
1 14
1 14
1 14
1 14
1 13
1 13
1 13
1 13
1 14
1 14
1 14
1 14
1 12
1 10
1 10
0 10
0 10
0 7
0 7
0 7
0 7
0 7
0 7
0 7
1 14
1 16
2 17
2 18
2 18
8 19
8 19
8 19
8 19
8 14
8 13
8 13
8 14
8 15
8 19
8 20
8 20
8 22
8 22
8 22
8 21
8 21
8 21
8 21
8 21
8 21
8 21
8 21
8 21
8 21
8 21
8 21
8 21
8 22
8 22
8 22
7 15
7 12
4 14
4 17
4 21
0 21
0 25
0 27
0 34
0 41
0 89
0 97
0 106
0 115
0 115
0 116
0 116
0 115
2 120
2 122
2 122
2 123
2 125
2 125
2 125
2 125
2 126
2 126
2 126
2 126
3 126
3 126
3 126
3 125
3 126
4 127
4 133
4 145
4 149
4 148
4 145
4 149
4 140
4 139
4 136
4 125
4 71
4 66
4 55
4 51
4 50
4 50
4 50
4 50
3 45
2 43
2 50
2 53
2 54
2 56
2 56
2 56
2 55
2 55
1 54
1 54
1 54
1 54
1 56
1 56
1 55
1 65
1 56
1 43
1 39
1 37
1 38
1 31
1 30
1 30
1 30
1 30
1 30
1 30
1 30
1 32
1 33
1 34
1 36
1 37
1 35
1 34
1 26
1 25
1 25
1 23
1 23
1 23
1 23
1 25
1 25
1 25
1 26
1 26
1 24
1 24
1 24
0 14
0 14
0 14
0 14
0 14
0 13
0 13
0 14
0 15
0 18
0 26
0 27
0 27
0 27
0 23
0 24
0 22
0 24
0 61
0 62
0 79
0 78
0 78
0 78
0 78
0 78
0 78
1 78
1 77
1 77
1 77
1 77
1 77
1 77
1 77
1 77
1 80
1 80
1 80
1 82
1 82
1 85
1 88
0 87
0 86
0 86
0 79
0 81
0 81
0 81
0 81
0 78
0 75
0 75
0 37
0 36
0 20
0 20
1 20
1 20
1 20
1 20
1 20
1 20
1 18
1 18
1 18
1 18
1 18
1 18
1 17
1 17
1 15
0 15
0 15
0 15
0 15
0 9
0 4
0 4
0 4
0 2
0 2
0 2
0 2
0 2
0 2
0 2
0 2
0 2
0 3
0 3
0 4
0 4
0 3
0 7
0 9
0 14
0 14
0 14
0 15
0 17
0 18
0 18
0 18
0 19
0 19
0 19
0 19
0 19
0 20
1 21
1 22
1 22
1 22
1 22
1 22
1 22
1 22
1 22
1 22
1 22
1 22
1 21
1 21
1 21
1 21
1 21
1 20
1 19
1 19
1 14
1 12
1 7
1 8
1 8
1 9
1 7
3 6
3 7
3 7
3 6
3 7
3 7
3 8
3 8
3 7
2 7
2 6
2 6
2 8
2 8
2 8
0 8
0 8
0 8
0 7
0 7
0 7
0 9
0 9
0 9
0 9
0 9
0 8
0 8
0 8
0 8
0 8
0 8
0 7
0 7
0 7
0 7
0 6
0 6
0 8
0 7
0 7
0 7
0 7
0 7
0 7
0 7
0 7
0 7
0 5
0 5
0 5
0 5
0 5
0 11
0 13
0 13
2 15
2 13
2 14
2 14
2 14
2 14
2 14
2 14
2 14
2 14
2 14
2 14
2 14
2 14
2 15
2 15
2 18
3 17
3 16
3 16
3 16
3 16
3 15
3 15
3 15
3 20
4 22
4 22
4 22
4 22
4 22
4 22
4 21
4 16
4 14
4 15
2 13
2 13
2 13
2 13
2 13
2 14
11 14
11 14
11 14
11 14
12 14
12 17
12 17
12 17
12 17
12 15
12 12
12 13
12 14
12 14
12 15
3 17
3 18
3 17
3 17
3 14
2 13
2 13
5 15
5 15
5 15
5 15
5 15
5 14
5 14
5 13
5 13
5 13
5 13
5 15
5 15
5 14
5 14
5 14
5 14
5 15
4 16
3 23
3 23
3 23
3 23
3 23
3 23
3 23
3 21
3 22
3 21
3 23
3 22
3 22
3 22
3 22
3 22
3 22
0 20
0 20
0 20
0 20
0 20
0 20
0 20
0 20
0 20
0 20
0 20
0 18
0 18
0 18
0 18
0 18
0 18
0 17
0 15
0 4
0 4
0 4
0 4
0 4
0 5
0 5
0 6
0 5
0 5
0 2
0 2
0 2
0 2
0 2
0 3
0 3
0 3
0 3
0 3
0 3
0 3
0 3
0 3
0 3
0 3
0 3
0 3
0 3
0 3
0 3
0 3
0 3
0 3
0 3
0 3
0 3
0 3
1 3
1 2
1 2
2 1
2 1
2 1
2 1
2 1
2 1
2 1
2 1
2 1
2 1
2 0
2 1
2 1
2 1
2 2
2 2
2 2
2 2
2 2
2 2
2 2
2 2
2 2
2 3
2 3
2 3
2 3
2 3
2 6
2 7
2 7
2 8
2 8
1 8
1 8
1 8
0 8
0 8
0 8
0 8
0 8
0 8
0 8
0 8
0 9
0 9
0 9
0 7
0 7
0 7
0 7
0 8
1 10
1 10
1 10
1 10
1 10
1 10
1 10
1 9
1 9
1 9
1 9
1 9
1 6
1 4
1 4
1 4
1 4
1 4
1 4
1 4
1 4
1 4
1 6
1 6
2 6
2 7
2 8
2 9
2 8
2 8
3 9
3 9
3 10
3 10
3 10
3 11
2 9
2 9
2 12
1 12
1 12
1 12
1 21
1 21
1 21
2 21
3 22
3 22
3 22
3 22
4 22
4 22
4 22
4 22
4 22
4 22
4 22
4 21
4 19
4 19
4 19
4 18
4 16
4 16
3 16
3 15
2 17
2 17
2 17
2 16
2 16
2 15
2 15
2 15
2 12
2 13
2 13
2 13
2 4
2 4
1 4
0 4
0 3
0 3
0 3
0 3
0 3
0 3
0 3
0 3
0 3
0 3
0 3
0 3
2 3
2 3
2 3
2 3
2 3
2 3
2 3
2 3
2 1
2 1
2 2
2 2
2 2
2 2
2 2
0 2
0 2
1 2
1 2
1 2
1 2
6 4
6 4
6 4
6 4
6 5
6 5
6 5
13 6
14 6
14 6
14 6
14 6
14 6
15 6
15 6
15 6
15 5
10 4
10 4
10 4
10 4
10 4
3 3
3 3
3 3
3 2
3 2
3 2
2 2
2 2
1 2
1 2
1 2
1 2
1 3
1 3
1 3
1 3
1 3
1 3
1 2
1 2
1 2
1 2
0 2
0 2
0 1
0 1
0 1
0 1
0 1
0 1
0 1
0 1
0 1
0 1
0 1
0 1
0 1
0 1
0 1
0 1
0 1
0 1
0 2
0 3
0 3
0 3
0 4
0 4
0 6
0 8
0 8
0 8
0 8
0 8
0 8
0 8
0 8
0 8
0 8
0 8
0 8
0 8
0 8
0 8
0 8
0 8
0 8
0 8
0 8
0 7
0 7
0 7
1 7
1 7
1 7
1 7
1 7
1 7
1 6
1 6
1 6
1 6
2 7
2 6
2 3
2 3
2 3
2 3
2 3
2 3
2 3
2 3
2 5
2 9
2 9
2 9
2 9
2 9
2 9
2 9
2 9
2 9
2 9
2 9
2 9
2 9
2 9
2 9
1 9
1 10
1 10
1 10
1 11
1 11
1 12
1 11
1 11
1 11
0 9
0 9
0 9
0 9
0 9
0 9
0 8
0 8
0 8
0 7
0 5
0 2
0 2
0 2
0 2
0 2
0 2
0 2
0 2
0 2
0 2
1 26
1 26
1 26
1 26
1 26
1 26
1 26
1 26
1 26
1 25
1 26
1 25
1 25
1 25
1 26
0 26
0 9
0 11
0 12
0 13
0 14
0 15
0 16
0 16
0 16
0 15
0 15
0 15
0 15
0 15
0 15
0 15
0 15
0 15
0 15
0 15
0 17
0 17
0 17
0 17
0 17
0 17
0 17
0 17
0 17
0 18
0 18
0 18
0 18
0 18
0 16
0 7
0 9
0 9
1 9
1 11
1 10
1 9
1 8
1 9
1 9
1 9
1 12
1 13
1 14
1 14
1 14
1 14
1 16
1 16
1 16
1 20
1 18
1 19
1 20
1 20
1 20
1 20
1 22
1 21
1 20
1 20
1 20
1 20
1 19
1 19
1 19
1 19
1 37
1 37
0 35
0 34
0 34
0 34
0 34
0 33
0 33
0 32
0 30
0 29
0 29
0 29
0 30
0 10
0 9
0 8
0 8
0 4
0 4
0 4
0 8
0 9
0 9
0 9
0 7
0 7
0 7
0 7
0 7
0 7
0 7
0 7
0 7
0 7
0 7
0 7
0 7
0 7
0 7
0 8
0 8
0 8
0 8
0 8
0 8
0 8
0 8
0 8
0 7
0 7
0 8
0 8
0 8
0 8
0 8
0 8
0 3
0 4
0 4
0 4
0 4
0 3
0 3
0 3
0 3
0 3
0 3
0 3
0 3
0 3
0 3
0 3
0 3
0 3
0 3
0 3
0 3
0 15
0 19
0 19
0 19
0 19
0 19
0 19
0 19
0 21
0 21
0 22
0 21
0 21
0 21
0 21
0 21
0 21
0 22
0 22
0 24
0 25
0 31
0 31
0 31
0 31
0 33
0 33
0 33
0 33
0 33
0 33
0 33
0 33
0 33
0 33
0 34
0 22
0 20
0 20
0 20
0 20
0 20
0 19
0 19
0 18
1 18
1 16
1 16
1 19
1 24
1 25
1 25
1 25
1 24
1 23
1 21
1 21
1 16
1 21
1 21
0 21
0 21
0 22
0 22
0 23
0 24
0 28
0 29
0 30
0 30
0 29
0 28
0 30
0 29
0 29
0 30
0 31
0 31
0 30
0 33
0 33
0 33
0 33
0 33
0 30
0 25
0 24
0 24
0 24
0 24
0 24
0 24
0 24
0 23
0 18
0 18
0 18
0 16
0 15
0 16
0 15
0 14
0 9
0 11
0 11
0 10
0 10
0 9
0 9
0 8
0 8
0 9
0 9
0 9
0 11
0 8
0 8
0 9
0 8
0 10
0 10
0 10
0 10
0 10
0 10
0 10
0 11
0 12
0 12
0 12
0 13
0 13
0 12
0 13
0 13
0 13
0 13
0 15
0 15
0 17
0 20
0 27
0 30
0 30
0 30
0 30
0 30
0 31
0 32
0 33
0 35
0 36
0 35
0 37
0 38
0 37
0 37
0 37
0 37
1 40
1 41
1 42
1 42
1 50
1 53
1 54
1 57
1 63
2 64
2 65
2 78
2 83
2 85
2 84
2 84
2 80
2 78
2 72
2 73
2 73
2 75
2 76
2 73
2 65
2 62
2 61
2 58
2 57
2 57
2 59
2 59
2 60
2 62
2 62
2 82
1 79
1 77
1 78
1 76
1 64
1 61
1 59
0 59
0 59
0 58
0 56
0 43
0 37
0 37
0 37
0 37
0 37
0 37
0 34
0 31
0 30
0 29
0 28
0 28
0 29
0 29
0 34
0 34
0 34
0 34
0 31
0 32
0 32
0 30
0 30
0 9
0 11
0 12
0 11
0 11
0 11
0 11
0 11
0 11
0 11
0 11
0 11
0 12
0 12
0 12
2 22
2 22
3 23
3 23
4 23
4 23
4 23
4 23
4 23
4 22
4 22
4 22
4 16
4 15
4 15
4 15
4 16
3 15
3 15
2 15
2 13
2 12
2 12
2 12
2 12
2 12
2 12
2 12
2 12
2 12
2 12
2 12
2 12
2 12
2 13
2 13
0 3
0 3
0 2
0 2
0 2
0 2
0 2
0 2
0 2
0 2
0 1
0 1
0 1
0 1
0 1
0 2
0 2
0 2
0 2
0 2
0 2
0 2
0 2
0 3
0 3
0 3
0 4
0 4
0 4
0 4
0 11
0 12
0 12
0 12
0 11
0 11
0 11
0 12
0 13
0 15
0 15
0 17
0 17
0 18
0 18
0 18
1 17
1 17
1 17
1 17
1 17
1 17
1 17
1 17
1 18
1 23
1 23
1 23
1 23
1 22
1 22
0 22
0 21
0 21
0 21
0 21
0 14
0 13
0 14
0 19
0 20
0 21
0 20
0 25
0 24
0 25
0 24
0 22
0 22
0 22
0 22
0 22
0 22
0 22
0 22
0 22
0 22
0 22
0 22
0 22
0 21
0 16
0 19
0 19
0 20
0 24
0 26
0 26
0 26
0 26
0 27
0 27
0 27
0 27
0 26
0 20
0 19
0 19
0 18
0 14
0 14
0 11
0 11
0 11
0 11
0 11
0 11
0 11
0 12
1 13
1 13
1 17
1 18
1 22
1 22
1 23
1 23
1 24
2 21
2 21
2 20
2 16
2 14
2 14
2 14
2 14
2 13
2 13
2 13
2 13
2 13
2 13
2 13
1 13
1 13
1 13
1 13
1 17
1 17
1 17
1 17
1 17
1 17
1 18
1 17
0 17
0 16
0 11
0 8
0 6
0 6
0 10
0 10
0 11
0 15
0 15
0 18
0 20
11 20
11 20
11 20
11 20
11 20
11 22
11 23
11 23
11 23
11 23
11 23
11 23
11 23
11 20
11 20
11 15
1 31
1 31
1 31
1 31
1 31
1 31
1 31
1 30
1 30
1 31
1 31
1 32
1 32
1 26
1 26
1 25
1 21
1 21
1 22
1 23
1 25
1 25
1 28
1 27
1 27
1 26
1 25
1 26
1 27
1 27
1 27
1 27
1 27
1 27
1 28
1 28
0 15
0 24
0 24
0 24
0 25
0 29
0 29
0 29
0 30
0 29
0 29
0 28
0 28
0 28
0 28
0 28
0 28
0 28
0 27
0 26
0 24
0 24
0 20
0 20
0 20
0 20
0 23
0 23
0 27
0 29
0 30
0 32
0 36
0 36
0 35
0 34
0 33
0 24
0 24
0 24
0 22
0 19
0 19
0 18
0 22
0 22
0 22
0 23
0 23
0 24
0 25
0 25
0 25
0 25
0 25
0 25
1 25
1 25
1 25
1 25
1 25
1 25
1 22
1 22
1 17
1 17
1 16
1 17
1 18
1 29
1 29
1 32
1 32
1 32
1 32
1 32
1 33
1 34
1 37
1 38
1 34
1 33
1 39
1 39
1 39
1 38
1 37
1 37
1 37
1 37
1 37
1 38
0 38
0 38
0 38
0 39
0 37
0 37
0 36
0 36
0 35
0 35
0 35
0 31
0 25
0 14
0 14
0 13
0 13
0 13
0 13
0 13
0 11
0 10
0 10
0 9
0 9
0 9
0 3
0 3
0 3
0 4
0 4
0 4
0 4
0 4
0 3
0 1
0 1
0 2
0 2
0 2
0 2
0 2
0 2
0 2
0 2
0 2
0 2
0 2
1 6
1 6
1 6
1 6
1 6
1 6
1 6
1 6
1 6
1 6
1 6
1 6
1 6
1 6
1 6
1 6
1 6
1 5
1 5
1 5
1 5
3 5
3 5
3 5
3 5
3 4
3 4
3 4
3 4
3 6
3 6
3 6
3 9
3 9
3 9
3 9
2 5
2 5
2 5
2 5
2 6
2 6
2 6
2 7
2 7
2 7
2 7
2 7
2 7
2 4
2 4
1 4
1 4
1 5
0 5
0 6
0 7
0 7
0 7
0 7
0 7
0 7
0 7
0 7
0 7
0 6
0 6
0 7
0 9
0 9
0 9
0 10
0 10
0 10
0 14
0 63
0 82
0 106
0 114
0 119
0 123
0 127
0 128
0 127
0 127
0 128
0 128
0 128
0 127
0 125
0 124
0 124
0 124
0 125
0 126
0 126
0 126
0 128
1 129
1 130
1 130
1 130
1 133
1 137
1 139
1 140
1 139
1 139
1 139
1 139
1 134
1 54
1 30
0 26
0 27
0 27
0 27
0 27
0 26
0 26
0 25
0 25
0 27
0 27
0 28
0 28
0 29
0 29
0 28
0 28
0 28
0 25
0 24
0 24
0 24
0 23
0 23
0 22
0 25
0 20
0 20
0 21
0 21
0 22
0 24
0 25
0 22
0 35
0 35
0 36
0 37
0 37
0 37
0 37
0 36
0 37
0 37
0 37
0 35
0 35
0 34
0 34
0 33
0 33
0 33
0 33
0 33
0 33
0 33
0 32
0 32
0 32
0 32
0 32
0 26
0 24
1 23
2 23
3 23
3 25
3 24
3 24
3 24
3 10
3 9
3 6
3 6
3 6
3 7
3 12
3 13
3 14
3 15
3 15
3 15
3 15
3 15
3 15
3 15
3 15
3 16
3 49
3 54
3 60
3 68
3 69
4 73
4 74
4 74
4 74
4 76
4 77
3 77
2 77
1 75
1 72
3 87
4 87
4 87
4 89
4 89
3 91
3 91
3 91
3 90
3 85
3 81
3 81
3 81
3 81
3 80
3 83
3 84
3 86
3 86
3 85
3 80
3 48
3 44
3 37
3 33
3 33
3 28
3 27
3 27
3 27
3 26
3 25
3 25
3 29
3 29
3 29
1 12
0 12
0 12
0 12
0 11
0 10
0 10
0 10
0 10
0 10
0 10
0 10
0 10
0 14
0 21
0 18
0 18
0 17
0 17
0 17
0 17
0 18
0 18
0 21
0 21
0 22
0 24
0 27
0 28
0 28
0 28
0 28
0 29
0 25
0 25
0 25
0 25
0 26
0 26
0 27
0 28
0 33
0 35
0 37
0 38
0 38
0 39
0 39
0 42
0 43
0 49
0 77
0 77
0 81
1 88
1 93
1 96
1 99
1 99
1 98
1 97
1 95
1 92
1 91
1 90
2 90
2 90
2 90
2 90
2 90
2 90
2 90
2 89
2 89
2 89
2 87
2 85
2 81
2 79
2 77
2 77
2 77
2 76
2 75
2 69
2 56
1 27
0 15
0 13
0 8
0 8
0 7
0 5
0 6
0 6
0 6
0 6
0 6
0 6
0 6
0 6
0 6
0 6
0 7
1 16
1 16
1 18
1 18
1 18
1 19
1 20
1 20
1 20
1 20
1 22
1 22
1 22
1 23
1 24
1 24
1 23
1 25
1 30
1 50
1 53
1 53
2 54
2 54
2 54
2 52
2 52
2 52
2 52
2 54
2 55
2 55
2 56
2 56
2 59
2 58
1 50
1 54
1 52
1 52
0 54
0 54
0 66
0 67
0 69
0 71
0 69
0 68
0 69
0 71
0 73
0 74
0 75
0 77
0 69
0 46
0 46
0 37
0 37
0 43
0 43
0 44
0 45
0 45
0 43
0 43
0 42
0 41
0 40
0 40
0 37
0 37
0 37
0 35
0 36
0 35
0 35
0 33
0 33
0 32
0 29
0 26
0 27
0 28
0 28
0 25
0 22
0 22
0 22
0 17
0 17
0 17
0 19
0 31
0 32
0 28
0 30
0 33
0 33
0 36
0 38
0 38
0 38
0 38
0 38
0 38
0 37
0 37
0 37
0 38
0 49
0 49
0 50
0 51
0 50
0 51
0 71
0 80
0 87
0 89
0 90
0 89
0 89
0 89
0 89
0 89
0 89
0 89
0 82
0 67
0 64
0 64
0 64
0 62
0 61
0 61
0 60
0 61
0 61
0 61
0 61
0 61
0 60
0 60
0 59
0 59
0 51
1 60
1 60
1 59
1 55
1 51
1 36
2 24
2 22
2 22
2 21
2 22
2 22
2 38
2 43
2 51
2 66
3 68
3 76
3 88
3 92
3 96
3 98
3 98
3 98
3 98
3 98
3 98
3 98
3 100
4 113
4 114
4 114
4 114
4 114
4 112
4 107
3 102
3 102
3 101
3 102
3 100
3 99
2 102
2 112
2 117
2 120
2 124
2 126
2 108
2 101
2 98
2 86
1 81
1 76
1 61
1 60
1 57
1 56
1 61
1 63
1 66
1 66
1 66
1 66
1 66
0 53
0 52
0 52
0 52
0 52
0 52
0 52
0 52
0 51
0 51
0 49
0 45
0 44
0 40
0 31
0 31
0 30
0 27
0 21
0 20
0 21
0 22
0 39
0 41
0 55
0 65
0 76
0 79
0 91
0 88
0 88
0 89
0 89
0 89
0 89
0 89
0 89
0 88
0 88
0 88
0 88
0 88
0 87
0 87
0 97
0 100
0 102
0 109
0 109
0 109
0 110
0 109
0 109
0 109
0 109
0 108
10 112
10 110
10 74
10 62
10 45
10 42
10 41
10 42
11 38
11 35
11 35
11 35
11 35
11 35
11 35
11 36
1 31
1 31
1 32
1 32
1 32
1 34
1 34
1 34
0 24
0 21
0 19
0 13
0 13
0 13
0 13
0 10
0 9
0 8
0 8
0 9
0 10
0 10
0 10
0 10
0 10
0 10
0 10
2 9
2 9
2 10
2 10
2 10
2 10
2 10
2 10
2 7
2 7
2 7
2 6
2 6
2 4
2 5
2 5
2 5
2 5
2 5
2 5
2 5
2 7
2 6
2 6
2 6
2 6
2 6
2 6
2 8
2 12
2 16
1 21
1 21
1 21
1 21
1 22
0 21
0 21
0 21
0 21
0 21
0 21
0 21
0 21
0 20
0 20
0 20
0 20
0 20
0 20
0 20
0 20
0 20
0 20
0 20
0 20
0 21
0 22
1 48
1 48
2 71
2 71
2 70
2 67
2 66
2 60
2 58
2 57
2 57
2 57
2 57
2 57
2 57
2 57
2 57
2 58
2 58
2 59
2 59
2 59
2 60
2 60
2 60
2 61
2 62
2 68
2 69
2 69
2 70
2 70
2 70
2 72
2 71
2 66
1 40
1 39
0 21
0 19
0 28
1 98
1 98
1 98
1 98
1 98
1 98
1 98
1 98
1 96
1 96
1 97
1 98
1 98
1 98
1 98
1 98
1 97
1 98
1 98
1 97
1 96
1 96
1 88
1 88
1 88
1 88
1 88
4 89
5 90
6 90
6 90
6 90
6 90
5 87
5 87
5 78
5 9
5 8
5 9
5 9
5 9
5 12
5 12
2 8
2 9
2 9
2 11
2 11
2 13
2 13
2 14
2 15
2 15
2 16
2 16
2 16
2 19
2 20
2 20
2 20
2 20
2 20
2 20
2 20
1 20
0 19
0 22
0 24
0 28
0 31
0 32
0 32
0 32
0 32
0 30
0 30
0 30
0 27
0 28
0 28
0 29
0 36
0 34
0 33
0 40
0 41
0 41
0 40
0 40
0 40
0 40
0 40
0 37
0 36
0 37
0 39
0 39
1 49
1 51
1 52
1 52
1 53
1 49
2 43
2 41
2 41
2 42
2 42
2 42
2 42
2 41
2 42
2 42
2 41
2 41
2 40
2 37
2 31
2 30
2 30
2 20
2 20
2 18
2 18
2 18
2 19
2 18
2 23
2 23
3 26
3 26
3 24
3 25
1 15
1 15
1 15
1 13
1 14
1 14
1 16
1 16
1 16
1 15
1 16
3 16
3 16
5 16
5 15
5 15
5 15
5 15
6 15
6 15
6 15
6 15
6 15
6 15
6 15
6 15
6 15
6 15
1 13
1 12
1 8
1 8
1 4
1 5
1 7
1 7
2 11
2 22
2 23
2 25
2 23
2 24
2 23
2 24
2 24
2 25
2 25
2 25
2 25
2 25
2 25
2 25
2 25
2 26
1 31
1 32
1 35
1 35
1 35
1 35
1 35
4 35
4 35
4 36
4 35
4 35
4 34
4 34
4 34
3 32
3 24
3 22
3 18
3 12
3 12
3 12
3 12
3 12
3 12
3 12
3 11
3 11
3 10
3 10
3 11
3 12
3 12
3 13
3 14
3 14
3 9
3 9
4 6
4 6
4 6
4 6
4 6
1 5
1 5
1 5
1 5
1 5
1 5
1 5
1 4
1 4
1 4
1 3
1 3
1 3
1 3
1 3
1 3
1 3
1 3
1 3
1 3
1 3
1 3
1 3
1 3
1 2
1 0
1 0
1 0
1 0
1 0
1 1
0 1
0 1
0 1
0 1
0 1
0 2
0 3
0 3
0 3
0 3
0 3
0 3
0 3
0 3
0 3
0 4
0 4
0 4
0 4
0 5
0 5
0 6
0 6
0 6
0 6
0 6
0 6
0 12
0 26
0 43
0 50
0 53
0 54
0 54
0 57
0 61
0 61
0 60
0 60
0 60
0 59
0 59
0 59
0 62
0 64
0 65
0 66
1 84
1 84
1 84
1 84
1 85
1 89
1 90
1 90
1 90
2 103
2 102
2 101
2 101
2 99
2 99
1 81
1 73
1 54
1 35
1 34
1 31
1 31
1 31
1 27
1 28
1 30
1 30
1 30
1 32
1 35
1 34
1 41
1 43
1 40
1 40
1 59
1 59
1 59
1 59
1 58
1 57
1 55
1 53
1 52
1 51
0 40
0 40
0 41
0 41
0 41
0 41
0 41
0 41
0 43
0 46
0 46
2 82
3 85
3 86
3 86
3 86
3 84
3 85
4 85
4 83
4 82
4 82
4 73
4 71
4 70
4 70
4 51
4 51
4 51
4 51
4 51
4 51
4 51
4 51
3 52
3 51
3 51
3 51
3 51
3 51
3 51
3 60
3 60
3 60
3 58
3 55
3 53
0 15
0 14
0 14
0 17
0 16
0 16
0 16
0 16
0 16
1 6
1 6
1 6
1 6
1 6
1 6
2 7
2 7
2 9
2 9
2 10
2 12
2 12
2 12
2 11
2 11
2 12
2 14
2 15
2 16
2 16
2 16
2 16
2 16
2 17
2 17
2 19
2 22
2 23
2 23
2 20
2 20
2 21
2 21
2 21
2 22
1 21
1 28
1 37
1 40
1 45
1 46
0 46
0 44
0 44
0 44
0 44
0 41
0 41
0 41
0 41
0 41
0 41
0 37
0 37
0 36
0 36
0 36
0 36
0 36
0 35
0 35
0 34
0 31
0 30
4 30
4 30
4 29
4 30
4 29
4 30
4 34
4 32
4 27
4 17
4 15
4 11
4 10
4 10
4 11
4 11
4 12
4 14
4 14
4 14
4 23
4 23
4 24
4 29
4 37
4 38
4 38
4 38
4 38
4 38
3 38
3 38
3 40
3 41
2 40
2 40
0 40
0 42
0 42
0 42
0 41
0 41
0 36
0 35
0 35
0 35
0 34
0 34
0 35
0 35
0 34
0 36
0 34
0 32
0 31
0 31
0 26
0 23
0 22
0 22
0 14
0 14
0 14
0 14
0 15
0 17
0 19
0 20
0 18
0 18
0 19
0 19
0 17
0 17
0 17
0 17
0 17
0 16
0 16
0 16
0 16
0 16
0 16
0 16
0 15
0 15
0 14
0 13
0 13
0 13
0 13
0 12
0 8
0 8
0 9
0 10
0 10
0 10
0 10
0 9
0 8
0 7
0 5
0 4
0 3
0 3
0 2
0 2
0 2
0 3
0 3
0 3
0 3
0 3
0 7
0 7
0 7
0 7
0 10
0 10
0 10
0 11
0 11
0 11
0 11
0 11
0 12
0 13
0 16
0 16
0 18
0 18
0 19
0 17
0 17
0 17
0 17
0 18
0 18
0 21
0 21
0 22
0 22
0 22
0 23
0 23
0 23
0 23
0 23
0 23
0 19
0 19
0 19
0 19
0 19
0 19
0 19
0 18
0 17
0 17
1 18
2 35
2 37
2 37
2 34
2 39
2 41
2 46
2 45
2 45
2 45
2 45
2 45
2 46
2 46
2 43
2 41
2 40
2 39
2 39
2 39
2 39
2 39
2 39
2 39
2 39
2 39
2 39
2 40
2 40
2 44
2 44
2 44
2 44
2 44
1 44
1 38
0 13
0 11
0 7
0 7
0 7
0 8
0 8
0 8
0 5
0 10
0 10
0 10
0 8
0 9
0 9
0 9
0 9
0 10
0 11
0 11
0 17
0 18
0 18
0 19
0 19
0 20
0 21
1 23
1 24
1 24
1 24
1 24
1 24
1 24
1 24
1 24
1 24
1 24
1 24
1 24
1 24
1 23
1 23
1 23
1 22
1 18
1 19
1 19
1 18
1 19
1 19
1 19
1 19
1 18
1 17
1 17
1 13
1 18
1 18
1 18
1 18
1 17
1 12
0 13
0 13
0 13
0 16
0 16
0 16
0 16
0 16
0 16
0 16
0 16
0 16
0 16
0 16
0 18
0 18
0 18
0 19
0 18
0 20
0 20
0 20
0 19
0 19
0 20
0 20
0 20
0 20
0 22
0 16
0 13
0 12
0 12
0 13
0 14
0 15
0 15
0 19
0 20
0 19
0 20
0 20
0 20
0 29
0 31
0 31
0 33
0 35
0 35
0 35
0 32
0 32
0 32
0 32
0 31
0 29
0 30
0 30
0 34
0 35
0 39
0 39
0 39
0 40
2 45
2 45
2 47
2 50
2 51
2 49
2 48
2 48
2 47
2 41
2 41
2 37
2 37
2 37
2 36
2 26
2 19
2 19
2 19
1 16
1 16
1 18
1 19
1 19
1 22
1 39
1 44
1 44
1 40
1 40
1 38
1 38
1 39
1 39
1 39
1 38
0 36
0 38
0 35
0 35
0 33
0 33
0 33
0 33
0 33
0 33
0 33
0 33
0 33
0 33
0 33
0 33
0 34
0 34
0 42
0 42
0 42
0 41
0 42
0 40
0 36
0 21
0 18
0 18
0 18
0 18
0 18
0 18
0 17
0 17
0 17
0 17
0 17
0 15
0 15
0 15
0 16
0 16
0 16
0 16
0 16
0 17
0 17
0 18
0 18
0 18
0 19
0 19
0 18
0 18
0 10
0 16
0 15
0 14
0 13
0 13
0 13
0 13
0 12
0 12
0 12
0 12
0 12
0 12
0 14
0 14
0 15
0 15
1 16
1 16
1 16
1 15
1 16
1 16
1 16
1 15
1 13
1 13
1 13
1 14
1 26
1 26
1 28
1 28
2 28
2 28
2 32
2 25
3 25
3 25
3 25
3 25
3 25
3 25
3 25
3 26
3 27
3 28
3 28
2 28
2 27
2 29
2 28
2 28
1 27
1 27
1 27
1 29
1 27
1 27
2 27
2 27
2 27
2 27
2 27
2 25
2 11
2 10
5 8
5 8
5 8
5 10
5 10
5 10
5 10
5 10
4 10
4 10
4 10
4 10
4 9
4 9
4 8
2 6
2 6
2 6
2 5
2 4
2 4
2 4
2 4
2 4
2 3
2 2
2 2
2 2
2 2
2 2
2 2
2 2
2 2
2 3
2 9
1 14
1 17
1 17
1 17
1 16
1 16
1 16
0 17
0 17
0 17
0 17
0 18
0 18
0 18
0 18
0 31
0 31
1 31
1 34
1 34
1 34
1 34
1 34
1 34
1 34
1 35
1 35
1 35
1 35
1 35
1 35
1 35
1 35
1 35
1 32
1 25
1 23
1 20
1 20
1 20
1 20
1 20
1 20
1 20
1 20
1 20
1 20
0 19
0 19
1 19
1 19
1 4
1 3
1 3
1 3
1 3
1 3
1 3
1 3
1 4
1 4
1 3
1 3
1 3
1 5
1 7
1 14
1 45
1 55
1 57
1 61
1 66
1 71
1 72
1 74
1 74
1 74
1 75
1 75
1 75
1 77
1 78
1 78
1 78
1 79
0 79
0 79
0 79
0 79
0 79
0 79
0 79
0 79
0 79
0 79
0 78
0 78
0 78
0 78
0 78
0 77
0 74
0 56
0 31
0 31
0 47
0 46
0 47
0 47
0 46
0 47
0 48
0 45
0 44
0 45
0 45
0 45
0 43
0 43
0 43
0 45
0 50
0 64
0 64
0 65
0 67
0 67
0 67
0 72
0 72
0 73
62 77
62 77
62 77
62 77
62 76
62 76
62 76
62 75
62 68
62 61
62 42
62 39
62 39
62 39
62 38
0 32
1 32
2 39
51 43
51 43
51 44
51 70
51 73
51 77
51 76
51 75
51 69
51 61
51 61
51 63
51 61
51 61
51 61
0 53
0 52
0 52
0 51
0 51
0 51
0 51
0 51
0 51
0 51
0 52
0 52
0 52
0 52
0 52
0 52
0 52
0 52
0 53
0 53
0 46
0 45
0 44
0 41
0 15
0 15
0 12
0 14
0 16
0 21
0 26
0 27
0 25
0 25
0 25
1 29
1 30
1 30
1 31
1 32
1 32
1 35
1 35
1 36
2 34
2 34
2 34
2 34
2 35
2 35
1 33
2 38
2 48
2 48
2 58
2 62
2 63
2 78
2 76
2 74
2 76
2 77
2 77
2 78
2 79
2 80
2 97
2 104
2 107
2 115
2 119
2 118
2 118
2 118
2 118
2 118
2 118
2 113
2 115
2 116
1 115
1 115
1 115
1 114
1 114
1 115
1 116
0 111
0 90
0 87
0 85
0 84
0 84
0 69
0 67
0 65
0 65
0 77
0 76
0 76
0 75
0 73
0 43
0 42
0 34
0 31
0 37
0 50
0 53
0 92
0 92
0 92
0 92
0 91
0 90
0 90
0 91
0 91
0 91
0 91
0 90
0 89
0 89
0 89
0 89
0 88
0 88
0 87
0 86
0 86
0 86
0 85
0 85
0 68
0 69
0 69
0 69
0 96
0 102
0 106
0 106
0 105
0 93
0 80
0 79
0 42
0 42
0 42
0 42
0 42
0 42
0 42
0 41
0 41
0 41
0 41
0 41
0 41
0 41
0 41
0 41
0 41
0 41
0 41
0 41
0 41
0 47
0 49
0 49
0 50
0 50
0 50
0 47
0 17
0 12
0 12
0 15
0 19
0 23
0 24
0 28
0 28
0 28
0 28
0 28
0 29
0 30
0 31
0 31
0 31
0 31
0 31
0 32
0 32
0 34
0 35
0 36
0 37
0 37
0 37
0 37
0 36
0 32
0 30
0 28
0 28
0 28
0 28
0 28
0 30
0 33
0 35
0 30
0 30
0 26
0 25
0 23
0 24
0 29
0 29
0 34
0 33
0 34
0 34
0 34
0 38
0 61
0 86
0 90
0 100
0 109
0 110
0 111
0 113
0 119
0 121
0 123
0 134
2 227
2 279
2 297
2 313
2 316
3 322
3 325
3 324
3 326
3 326
3 326
3 324
3 324
3 325
3 324
3 321
3 316
3 315
3 314
3 314
3 315
3 315
4 319
4 315
4 277
4 257
4 253
4 246
4 238
4 239
4 243
4 247
4 247
4 250
4 246
3 199
1 61
2 50
2 45
2 48
2 48
2 48
2 48
3 61
3 59
3 64
3 65
3 65
3 65
3 65
3 66
3 66
3 65
3 69
3 69
3 70
3 70
5 149
4 147
4 154
4 153
4 157
4 157
4 158
4 162
5 168
5 166
5 168
5 169
5 166
5 167
5 167
5 168
4 165
4 168
4 168
4 169
4 171
4 219
3 207
3 210
3 204
3 205
3 205
3 204
3 204
3 204
3 204
3 203
3 198
3 198
3 190
3 190
1 108
1 108
1 101
1 103
1 101
1 100
1 98
1 92
1 81
1 73
1 73
1 73
1 72
2 82
2 84
2 84
2 84
2 83
2 81
2 80
3 79
2 32
2 30
2 26
2 30
2 30
2 30
2 30
2 30
2 30
2 29
2 29
2 29
2 28
2 28
2 29
2 29
1 27
1 27
1 27
1 37
1 38
1 40
1 40
1 40
1 41
1 42
1 42
1 42
0 24
0 24
0 79
0 86
0 88
0 89
0 88
0 88
0 88
5 166
5 168
5 167
5 171
5 171
5 171
5 171
5 171
5 170
5 170
5 170
5 170
5 170
5 170
5 170
0 92
0 93
0 93
0 80
0 80
0 78
0 77
0 77
0 77
0 78
1 82
1 81
1 79
1 79
1 24
1 19
1 16
1 16
1 17
1 17
1 16
1 15
1 9
2 10
2 8
2 8
2 8
2 8
2 8
2 8
2 8
2 8
2 8
2 8
2 8
2 8
2 7
2 7
2 7
2 7
2 7
2 7
3 7
3 8
3 8
4 6
3 2
3 2
3 2
3 2
3 2
3 3
3 3
6 6
6 7
6 7
6 7
6 7
6 7
5 6
5 6
5 6
5 6
5 15
5 15
5 15
5 18
5 20
5 20
5 21
5 20
5 20
5 20
5 20
5 20
5 20
5 20
5 20
4 20
4 20
4 20
3 20
3 21
3 21
3 21
3 21
3 24
4 23
4 23
1 21
1 22
1 24
1 24
1 26
1 27
1 27
1 42
1 44
1 45
1 40
1 39
1 41
0 39
0 39
0 39
0 39
0 42
0 42
0 42
0 42
0 42
0 42
0 42
0 41
0 41
0 41
0 41
0 41
0 40
0 41
0 41
0 42
0 39
0 39
0 39
1 38
1 37
1 35
1 34
1 30
1 29
1 28
1 7
1 7
3 11
4 14
4 14
4 14
4 15
4 17
4 17
4 16
4 14
4 14
4 14
4 14
4 14
4 14
4 14
4 14
4 15
4 16
4 20
4 22
4 24
4 28
4 27
4 27
4 27
4 27
4 27
3 27
3 27
3 27
3 27
3 27
3 27
3 25
3 24
2 24
0 21
0 18
0 17
0 17
0 17
0 16
0 16
0 17
0 17
0 17
0 17
0 17
0 17
0 18
0 18
0 21
0 20
0 18
0 15
0 12
0 11
0 6
0 6
0 6
1 6
1 6
1 6
1 6
2 6
2 6
2 6
2 6
2 7
2 7
2 7
2 7
2 7
2 7
2 7
2 7
1 7
1 7
1 6
1 6
1 6
1 6
1 6
1 9
1 8
1 7
1 8
1 5
1 5
1 5
1 5
1 4
1 4
1 5
1 5
1 5
1 5
1 5
1 5
1 5
0 5
0 5
0 5
0 5
0 5
0 5
0 6
0 7
1 24
1 24
1 24
1 29
1 29
1 29
1 29
1 34
1 35
1 37
1 37
1 37
1 37
1 36
1 36
1 39
1 46
1 49
1 51
1 54
1 55
1 55
1 57
1 57
1 57
1 57
1 58
1 59
1 60
1 65
1 67
1 69
1 70
1 73
1 69
1 68
0 52
0 52
0 52
0 47
0 47
0 47
0 45
0 43
0 41
0 39
0 39
0 36
0 35
0 35
0 35
0 33
1 23
1 20
1 18
1 16
1 16
1 16
1 16
1 16
1 16
1 16
1 15
1 14
1 13
1 9
1 7
1 5
1 5
1 2
1 2
1 2
1 2
1 2
1 2
1 2
2 6
2 6
2 6
2 6
2 6
2 6
2 6
2 6
2 6
2 8
2 8
2 8
1 7
1 9
1 10
1 10
1 10
1 10
1 11
1 11
1 11
1 12
1 11
1 11
1 11
1 11
1 11
1 11
1 12
1 12
1 13
1 13
1 13
1 13
1 13
1 12
0 10
0 11
0 12
0 12
0 15
0 16
0 17
0 17
0 20
0 18
0 18
0 18
0 18
0 18
0 19
0 18
0 19
0 20
0 21
0 22
0 22
0 22
0 22
0 25
0 25
0 25
0 25
0 25
0 24
0 24
0 21
0 21
0 21
0 21
0 21
0 21
0 19
0 17
0 17
0 17
0 15
0 15
0 14
0 14
0 10
0 10
0 10
0 9
0 9
0 6
0 6
0 6
0 5
0 4
0 4
0 3
0 3
0 4
0 3
0 1
0 1
0 1
0 1
0 1
0 1
0 5
0 6
0 6
0 6
0 6
0 6
0 6
0 9
0 9
0 9
1 11
1 11
1 15
1 21
1 27
1 28
1 29
1 29
2 29
2 30
2 30
2 30
2 30
2 30
2 33
2 33
2 33
2 33
2 32
2 32
2 33
2 36
2 36
2 36
2 36
2 36
2 32
2 31
2 31
2 31
2 31
2 33
1 35
1 34
1 34
1 33
0 38
0 39
0 35
0 32
0 47
0 47
0 47
0 48
0 49
0 49
0 48
0 48
0 48
0 48
0 47
0 47
0 47
0 47
0 47
0 46
0 45
0 43
0 43
0 43
0 43
0 45
0 45
0 45
0 46
0 46
0 46
0 45
0 43
0 42
0 42
0 42
0 36
0 35
0 35
0 31
5 13
5 12
5 11
5 12
5 12
5 12
5 12
5 11
5 11
5 11
5 11
5 11
5 11
5 11
5 11
0 11
0 12
2 12
2 12
2 12
2 11
2 9
2 9
2 9
2 9
2 10
2 9
2 9
2 9
2 6
2 5
2 5
2 6
2 8
2 8
2 9
2 9
2 10
2 11
2 10
2 10
2 10
2 10
2 10
2 10
2 10
2 10
2 10
2 11
2 11
2 11
2 11
2 10
0 33
0 45
0 52
4 54
4 56
4 58
4 60
4 60
4 59
4 59
4 59
4 59
4 59
4 59
4 59
4 57
4 55
4 55
0 54
0 53
0 53
0 53
0 53
0 53
0 55
0 55
0 55
0 55
0 57
0 58
0 63
0 72
0 73
0 73
0 72
0 69
1 32
1 25
1 23
1 23
1 23
1 23
1 23
1 23
1 24
1 24
1 24
1 24
1 24
1 24
1 26
1 26
0 26
0 24
0 23
0 23
0 23
0 24
0 24
0 27
0 27
0 27
0 28
0 26
0 25
0 24
0 20
0 9
0 10
0 15
0 15
0 19
0 19
0 19
0 19
0 19
0 19
0 19
0 19
0 18
0 16
0 16
0 16
0 15
0 15
0 15
0 15
0 15
0 15
0 15
0 15
0 15
0 15
0 15
0 15
0 12
0 12
0 12
0 10
0 10
0 10
0 10
0 10
0 10
0 10
0 5
0 6
0 3
0 6
0 7
0 7
0 9
0 10
0 10
0 10
0 10
0 10
0 10
0 10
0 12
0 12
0 12
0 12
0 12
0 12
0 12
0 12
0 12
0 15
0 15
0 15
0 15
0 18
0 17
0 17
0 20
0 23
0 32
0 49
0 62
0 80
0 82
0 84
0 82
0 82
0 84
0 88
0 99
0 103
0 119
0 119
0 120
0 124
0 124
0 124
0 123
0 123
0 123
0 123
0 123
0 123
0 123
0 122
0 121
0 120
0 120
0 120
0 119
0 118
0 118
0 118
0 116
0 112
0 106
0 88
0 71
0 55
0 56
0 54
0 54
0 53
0 51
0 53
0 42
0 42
0 33
0 60
0 60
0 60
0 60
0 60
0 59
0 59
0 59
0 61
0 62
0 62
0 62
0 62
0 62
0 62
0 63
0 64
0 67
0 66
0 65
0 65
0 65
0 65
0 62
0 62
0 62
0 62
0 64
0 65
0 66
0 67
0 66
0 60
0 52
0 47
0 45
0 21
0 23
0 24
0 24
0 25
0 24
0 25
0 24
0 24
0 23
0 23
0 23
0 23
0 22
0 22
0 22
0 21
0 18
0 18
0 17
0 17
0 17
0 17
0 17
0 16
0 16
0 15
0 9
0 8
0 8
0 7
0 7
0 6
0 6
0 6
0 5
0 3
0 1
0 1
0 1
0 1
0 1
0 0
3 6
3 6
3 6
3 6
3 6
3 6
3 6
3 7
3 8
3 9
3 10
3 10
3 10
3 10
3 10
3 10
3 10
3 10
3 10
3 10
3 10
3 10
3 10
3 10
3 10
3 19
3 19
3 19
4 19
4 19
6 20
6 21
6 21
6 21
6 21
6 21
3 15
3 15
3 16
3 17
3 18
3 18
3 19
3 18
3 17
3 15
3 15
3 16
3 20
3 21
3 21
3 21
3 21
3 21
3 21
3 25
3 32
3 47
3 53
3 54
3 67
2 63
2 67
2 80
0 81
0 82
0 82
0 82
0 82
0 82
0 82
0 82
0 82
0 82
0 81
0 80
0 80
0 81
0 80
0 80
0 80
0 80
0 82
0 87
0 85
0 93
0 99
0 103
0 115
0 149
2 174
2 223
2 221
2 209
2 209
2 209
2 203
2 198
2 202
2 231
2 232
2 235
2 236
2 238
3 245
3 260
3 263
3 267
3 269
3 269
3 270
3 270
3 269
3 269
3 269
3 244
3 247
3 246
3 246
3 237
3 240
3 233
3 219
3 214
2 191
2 164
1 149
2 108
2 101
2 99
2 97
2 93
2 89
2 84
2 85
2 87
2 87
2 84
2 83
2 82
1 73
1 55
1 48
1 45
1 45
1 44
1 41
1 39
1 38
1 37
1 35
1 20
1 19
1 19
1 19
1 18
1 18
1 22
1 36
1 38
1 38
1 38
1 37
0 29
0 29
0 29
1 34
1 34
1 33
1 32
1 32
1 31
1 31
1 31
1 31
1 31
1 31
1 31
1 31
1 31
1 31
0 25
0 25
0 25
0 25
0 25
0 25
0 25
0 25
0 25
0 24
0 24
0 24
0 18
0 6
0 7
0 9
0 7
0 8
0 8
0 8
0 8
0 9
0 9
0 8
0 9
0 10
0 10
0 10
0 11
0 11
0 11
0 12
0 13
0 13
0 13
0 16
0 16
0 15
0 15
0 15
0 15
0 16
0 17
0 17
0 18
0 21
0 25
0 33
0 39
0 110
0 110
0 107
0 108
0 108
0 107
0 112
0 112
0 112
0 119
0 121
0 123
0 167
0 173
0 177
0 187
0 189
0 191
0 193
0 193
0 194
0 194
0 190
0 190
0 190
0 190
0 190
0 194
0 197
0 197
1 201
2 205
2 194
3 193
3 190
3 187
3 114
3 114
3 115
3 116
3 113
3 115
3 111
3 113
3 113
3 115
3 116
2 104
2 50
2 46
2 43
2 43
2 43
2 43
2 43
2 42
2 42
2 43
2 45
2 47
2 51
2 56
2 59
2 59
2 57
2 56
2 53
2 52
2 49
1 34
1 34
1 34
1 35
2 36
2 52
2 53
5 140
6 138
6 140
6 138
6 139
6 137
6 137
6 137
6 137
6 139
6 138
6 137
6 138
6 140
6 142
6 142
6 141
6 139
6 135
7 146
9 150
9 149
9 148
9 146
8 145
9 146
9 146
9 146
9 147
10 148
10 150
11 150
11 149
10 147
10 130
10 126
6 38
6 37
5 37
5 37
5 37
5 37
5 37
5 37
5 37
5 36
5 33
5 32
5 31
5 31
5 31
4 31
4 34
4 33
3 31
5 17
5 18
5 16
5 16
5 16
5 16
3 15
2 15
2 15
2 13
2 13
2 11
2 11
2 11
2 11
2 11
2 11
2 11
2 11
2 11
2 11
2 11
2 11
2 11
2 11
2 11
2 11
2 11
2 11
2 11
2 11
2 11
2 11
2 8
2 5
2 3
0 1
0 1
0 1
0 1
0 1
0 1
0 1
0 1
0 1
0 1
0 1
0 1
0 1
0 1
0 1
0 1
5 9
5 9
5 9
5 9
5 11
5 13
5 14
5 14
5 14
5 15
5 15
5 15
5 15
5 15
5 15
5 14
5 14
5 14
5 15
5 15
5 15
5 15
5 15
5 15
5 15
5 15
5 15
5 15
5 15
5 18
5 18
5 18
5 18
5 18
5 18
5 18
0 9
0 5
0 5
0 5
0 6
0 6
0 6
0 6
0 6
0 4
0 25
0 26
1 26
2 26
2 26
4 29
4 29
4 31
4 31
4 31
4 33
4 33
4 34
4 36
4 45
4 46
4 25
4 27
4 27
4 25
3 25
2 25
2 25
2 25
2 25
2 25
2 25
2 25
2 24
2 24
2 22
2 22
2 22
2 22
2 22
2 22
2 22
2 21
1 21
0 21
0 21
0 15
1 15
1 14
1 13
1 14
1 17
1 17
1 17
1 16
5 8
6 8
6 11
6 11
6 11
6 12
6 12
6 12
6 12
6 12
6 12
6 12
6 12
6 14
6 14
6 14
6 14
6 14
6 14
6 14
6 15
6 16
6 17
6 17
6 17
6 17
6 18
6 18
5 16
5 16
5 17
5 17
5 14
5 14
5 19
5 19
0 17
1 17
1 14
1 15
1 16
1 16
1 16
1 16
1 17
1 19
1 19
1 19
1 19
1 19
1 19
1 19
1 19
1 19
1 19
1 19
1 21
1 21
1 22
1 22
1 22
1 22
1 23
1 24
1 24
2 33
2 33
2 34
2 40
2 41
2 34
2 34
1 33
1 31
1 33
1 33
1 34
1 34
1 34
1 34
1 33
1 32
1 32
1 32
1 33
1 35
1 37
1 40
1 41
1 41
1 42
2 45
2 45
2 46
2 47
2 45
2 47
2 47
2 45
2 45
2 46
1 34
1 36
1 33
1 33
1 33
1 33
0 34
0 36
0 33
0 33
0 33
0 33
0 35
0 37
0 47
0 66
0 94
0 109
0 120
0 128
0 140
0 146
0 148
0 151
0 152
0 154
0 153
1 154
1 151
1 153
1 153
1 151
1 151
1 151
1 152
1 152
1 147
1 143
1 143
1 141
1 145
1 145
1 143
1 151
1 152
1 152
1 152
1 151
1 150
1 154
1 134
1 100
1 83
1 76
1 65
2 60
2 49
2 48
2 44
2 44
2 44
1 39
1 39
1 40
1 49
1 72
1 87
1 96
1 105
3 106
3 107
3 109
3 110
3 110
3 110
3 111
3 108
3 108
3 108
3 101
3 103
3 103
3 99
3 99
3 94
1 85
1 81
1 81
1 82
1 82
1 83
0 83
0 82
0 81
0 81
0 81
0 81
0 87
0 87
0 83
0 69
0 51
0 31
0 29
0 27
0 50
0 50
0 61
0 64
0 105
0 109
0 117
0 120
0 119
0 121
0 122
0 123
0 123
0 123
0 123
0 123
0 124
0 123
0 122
0 124
0 126
0 136
0 137
0 137
0 137
0 139
0 139
0 139
0 137
0 137
0 137
0 136
0 135
0 135
0 131
0 130
0 100
0 98
0 85
0 77
0 34
0 29
0 30
0 31
0 30
0 29
0 37
0 38
0 47
0 48
2 56
2 56
2 54
2 54
2 61
2 58
2 93
2 85
2 87
2 87
2 85
2 84
2 84
2 83
2 80
2 80
2 80
2 80
2 80
2 80
2 80
2 80
2 79
2 79
2 79
2 79
2 79
2 79
2 76
2 75
2 75
2 75
2 67
2 69
2 63
3 81
1 75
1 77
1 76
1 74
1 70
1 72
1 35
1 38
1 36
1 37
1 39
1 44
1 45
1 47
1 52
1 57
1 60
1 66
1 67
1 67
1 65
3 68
3 66
3 67
4 68
4 69
4 71
4 77
5 100
5 114
5 136
5 140
5 204
5 204
5 203
4 189
4 190
4 199
4 199
4 200
4 197
4 195
4 196
4 196
4 197
4 200
4 196
5 193
5 193
5 190
5 183
5 178
5 176
5 173
5 173
5 177
5 177
3 173
3 176
3 175
2 174
2 175
2 176
2 176
1 145
1 114
1 102
1 100
1 38
1 38
1 37
1 36
1 35
1 26
1 26
1 26
1 25
1 24
1 25
4 78
4 79
8 80
8 80
7 79
7 78
7 78
7 77
7 77
7 77
7 78
7 77
7 74
7 74
7 73
7 68
7 67
7 66
7 65
7 65
7 65
7 65
8 67
8 67
8 67
8 68
8 68
8 68
8 68
8 68
8 68
8 68
8 70
6 70
6 74
6 73
3 19
2 18
1 15
1 16
1 16
1 16
1 16
1 16
1 15
1 13
3 13
3 13
3 11
3 11
3 11
3 13
3 13
3 13
3 13
3 13
3 13
3 14
2 15
2 16
2 16
2 16
2 18
2 22
2 28
2 31
2 31
2 32
2 30
2 30
2 26
2 26
2 26
2 26
2 28
2 28
2 28
2 28
2 28
2 28
2 28
2 28
0 26
0 26
0 26
0 26
0 28
0 28
0 29
0 30
0 31
0 32
0 32
0 31
0 28
0 27
0 27
0 27
0 25
0 20
0 14
0 12
0 13
0 13
0 13
0 13
0 12
0 12
0 12
0 12
0 10
0 10
0 10
0 10
0 10
0 10
0 38
0 45
0 52
0 55
0 55
0 55
0 54
0 50
0 50
0 48
0 48
0 48
0 48
0 48
0 48
0 48
0 49
0 49
0 53
0 52
0 52
0 52
0 51
0 52
0 53
0 54
0 55
0 56
0 56
0 56
0 56
0 57
0 57
0 57
0 57
0 58
6 22
6 15
6 14
6 13
6 13
6 13
6 13
6 13
6 13
6 13
6 14
6 14
6 14
6 14
6 14
0 13
0 12
0 12
0 8
0 8
0 8
0 15
0 16
0 17
0 22
0 28
0 28
0 31
0 31
0 36
0 36
0 36
1 39
1 43
1 44
1 44
1 44
1 45
1 47
1 47
1 48
1 48
1 48
1 49
1 49
1 49
1 49
1 54
1 61
1 64
1 72
1 76
1 80
1 81
1 80
1 90
1 89
1 70
1 67
1 65
1 65
1 65
1 65
1 62
1 63
1 59
1 61
1 61
0 58
0 53
0 52
0 53
0 53
0 52
3 50
3 50
3 50
3 58
3 76
3 78
3 81
3 83
3 82
3 71
3 64
3 61
3 56
3 54
3 51
3 54
3 54
3 44
3 44
3 44
3 44
3 45
3 46
3 50
3 50
3 50
3 49
3 51
3 47
3 51
3 51
3 51
3 51
3 51
3 52
3 53
0 54
0 55
0 56
0 45
0 32
0 30
0 29
1 26
1 26
1 26
1 29
1 33
1 75
1 89
1 95
1 101
1 107
1 107
1 107
1 107
1 107
1 106
1 107
1 104
1 104
1 104
0 104
0 102
0 102
0 99
1 99
1 99
2 112
2 112
2 110
2 110
2 108
2 109
2 110
2 110
2 108
2 108
2 108
2 108
2 108
2 108
2 105
2 99
2 44
2 30
2 28
2 27
2 27
2 27
2 26
2 28
2 27
2 27
2 27
2 27
3 28
3 28
4 29
4 27
4 28
4 29
3 29
3 28
3 15
3 14
3 13
3 13
3 14
3 15
3 15
3 14
3 15
3 15
3 16
3 18
3 26
3 27
3 27
3 27
3 28
3 28
2 24
2 25
1 26
2 24
1 25
1 22
1 23
1 23
1 23
1 23
1 22
1 22
1 21
1 20
1 20
1 20
1 20
1 20
1 19
1 19
1 20
1 21
1 21
1 20
1 20
1 21
1 21
1 21
1 19
1 18
1 10
1 9
1 8
1 8
1 8
1 8
1 9
1 8
0 7
0 7
0 9
0 9
0 9
0 11
0 13
0 13
0 14
1 14
3 14
3 15
3 15
3 15
3 18
3 18
3 19
3 19
3 29
3 30
3 31
3 85
3 85
3 107
3 117
3 123
1 126
1 130
1 131
1 134
1 135
1 137
1 137
1 138
1 139
1 139
1 138
1 138
1 135
1 136
1 137
1 136
0 136
0 136
0 136
0 136
0 136
0 135
0 134
0 134
0 132
0 132
0 130
0 130
0 119
0 117
0 114
0 45
0 33
0 21
0 16
0 16
0 16
0 15
0 16
0 8
0 9
0 9
0 22
0 23
0 25
0 28
0 29
0 28
0 28
0 28
0 27
0 25
0 24
0 29
0 32
0 34
0 41
0 45
0 45
0 45
1 56
1 56
1 58
1 72
1 72
1 79
1 83
1 83
1 83
1 84
1 84
1 84
1 84
1 84
1 85
1 85
1 85
1 83
1 69
1 69
1 67
1 64
1 63
1 62
1 66
1 66
1 71
1 71
1 71
1 68
1 67
1 64
1 58
1 59
1 59
1 59
0 48
0 48
0 47
0 34
0 34
0 30
0 29
0 29
0 31
0 53
0 57
0 61
0 66
0 77
0 76
0 76
0 76
0 77
0 77
0 79
0 80
0 81
0 81
0 81
0 78
0 77
0 71
0 70
0 70
0 70
0 71
0 70
0 70
0 67
0 65
0 65
0 77
0 81
0 85
0 89
0 106
0 111
1 125
1 128
1 129
1 107
1 104
1 98
1 88
1 84
1 83
1 83
1 81
1 79
1 79
1 79
1 78
1 82
0 83
0 84
0 83
0 83
1 83
1 90
1 91
1 95
1 95
1 97
1 98
1 100
1 99
1 98
1 90
3 87
17 85
18 82
18 64
18 60
18 41
18 40
18 42
18 54
18 55
18 58
18 59
20 64
20 66
20 68
20 68
20 68
20 68
20 68
3 66
3 63
3 63
3 63
3 62
3 62
3 63
3 60
4 60
4 60
4 62
4 63
4 68
6 70
6 71
6 78
5 73
5 67
5 67
5 67
5 68
5 69
5 69
5 69
5 66
5 52
5 49
5 45
6 43
4 40
4 40
4 37
4 39
4 47
4 62
4 65
4 68
4 86
4 90
4 94
4 123
4 151
5 157
3 161
3 160
3 157
3 153
3 161
3 158
1 159
1 159
1 156
1 156
1 158
1 158
1 158
1 158
1 157
1 157
1 157
1 159
1 163
1 164
1 182
1 190
1 192
1 201
1 201
1 209
1 198
1 224
1 231
0 236
0 228
0 216
0 208
0 185
0 182
0 184
1 191
1 192
1 193
1 194
1 177
1 177
1 177
1 177
1 177
1 177
1 178
1 184
1 186
1 186
1 184
1 184
1 184
1 184
1 178
1 179
1 157
1 166
1 169
1 164
1 162
1 162
1 156
1 105
1 92
1 84
1 74
1 72
1 70
1 70
1 70
1 70
0 60
0 60
0 59
0 59
0 47
0 48
0 48
0 46
0 44
0 44
0 44
0 38
0 40
0 43
0 46
0 46
0 49
0 49
0 46
0 47
0 42
0 21
0 19
0 34
0 36
0 38
0 38
0 40
0 40
0 41
0 42
0 43
0 43
6 43
6 43
6 43
6 43
6 43
6 44
6 44
6 47
6 48
6 49
6 50
6 50
6 50
6 49
6 50
0 46
0 41
0 40
0 38
0 36
0 36
0 36
0 36
1 35
1 35
1 40
1 24
1 28
1 29
1 29
1 28
1 29
1 29
1 29
1 29
1 31
1 31
1 31
1 31
1 31
1 31
0 28
0 26
0 25
0 25
0 24
0 24
0 24
0 24
0 24
0 23
0 24
0 25
0 24
0 24
0 23
0 24
0 24
0 24
0 24
0 25
0 11
0 13
0 17
0 21
0 23
0 22
0 22
0 22
0 20
0 20
0 22
0 21
0 21
0 21
0 23
0 23
1 23
1 24
1 24
1 23
1 23
1 24
1 24
1 23
1 23
1 23
1 24
1 23
1 24
1 24
1 28
1 28
0 29
0 30
0 31
0 31
0 30
0 27
0 19
0 18
0 19
0 19
0 19
0 21
0 22
0 23
0 22
0 22
0 21
0 20
0 20
0 20
0 20
0 20
0 21
0 21
0 21
0 20
0 20
0 20
0 19
0 21
0 21
0 21
0 21
0 23
0 19
0 20
0 18
0 17
0 15
0 12
0 12
0 12
0 12
0 13
0 13
0 13
0 13
0 11
0 8
0 8
0 8
0 8
0 8
0 7
0 7
0 8
0 8
0 9
0 10
0 11
0 11
0 11
0 11
0 11
0 11
0 9
0 9
0 9
0 8
0 6
0 7
0 5
0 4
0 5
0 5
0 9
0 9
0 9
0 9
0 9
0 9
0 9
0 9
0 9
0 9
0 9
0 9
0 9
0 9
0 8
0 8
0 8
0 8
0 8
0 8
0 7
0 7
0 7
0 7
0 7
0 7
0 7
0 8
0 8
0 8
0 9
0 7
0 11
0 14
0 17
0 18
1 14
1 14
1 14
1 15
1 16
1 28
1 33
1 34
1 39
1 40
1 46
1 47
1 47
1 50
1 50
0 52
0 53
0 58
0 64
0 66
0 66
0 66
0 68
0 68
0 68
0 69
0 69
0 68
0 69
0 68
0 68
0 68
0 63
0 59
0 57
0 56
0 56
0 56
0 57
0 56
0 53
0 32
0 27
0 25
0 24
0 24
0 24
0 24
0 24
0 15
0 12
0 12
0 13
0 14
0 15
0 15
0 14
0 13
0 22
0 24
0 29
0 32
0 33
0 37
0 38
0 40
0 43
0 45
0 47
0 49
0 49
0 49
0 49
0 50
0 50
0 50
0 51
0 52
0 53
0 55
0 63
0 73
0 78
0 78
0 77
0 87
0 95
0 98
0 106
0 104
0 103
0 103
0 102
0 102
0 95
0 95
0 89
0 87
0 88
0 86
0 85
0 80
0 78
0 78
0 76
0 75
0 75
0 75
0 74
0 74
0 73
0 73
0 75
0 90
0 90
0 90
0 78
0 95
0 90
0 91
0 94
0 79
0 63
0 64
0 64
0 64
0 64
0 63
0 82
0 79
0 78
0 77
0 78
0 78
0 78
0 78
0 79
0 79
0 79
0 79
0 79
0 79
0 80
0 80
0 80
0 79
0 79
0 76
0 72
0 59
0 58
0 58
0 58
0 32
0 29
0 26
0 26
0 26
0 26
0 25
0 25
0 25
0 25
0 25
0 6
0 4
0 4
0 3
0 3
0 3
0 2
0 3
0 3
0 3
0 3
0 3
0 2
0 2
0 2
0 2
0 2
0 2
0 2
0 9
0 13
0 14
0 15
0 18
0 18
0 18
0 18
0 18
0 18
0 18
0 18
0 18
0 18
0 18
0 25
0 25
2 25
2 25
2 31
2 32
2 32
2 32
2 32
2 33
2 33
2 33
2 33
2 33
2 33
2 35
2 37
0 38
2 51
2 52
2 52
2 46
2 40
2 37
2 42
2 42
2 42
2 42
2 43
2 43
2 46
2 45
2 46
2 63
2 67
2 67
2 60
2 61
2 59
2 52
2 50
2 50
2 48
2 48
2 50
2 50
2 50
2 50
2 51
2 52
2 51
2 51
2 51
2 50
0 36
0 36
0 36
0 36
0 36
0 36
0 36
0 36
0 36
0 36
0 35
0 35
0 32
0 31
0 26
0 7
0 6
0 6
0 7
0 7
0 7
0 7
0 7
0 6
0 6
0 6
0 5
0 5
0 5
0 5
0 6
0 9
0 9
0 9
0 10
0 10
0 10
0 10
0 10
0 10
0 10
0 10
0 13
0 16
0 19
3 23
3 28
3 28
3 28
3 28
3 33
3 33
3 33
3 40
3 41
3 40
3 41
3 41
3 42
3 48
3 49
3 61
3 63
4 63
4 63
4 62
5 94
5 94
5 94
5 94
5 94
5 94
5 94
5 94
5 95
5 95
5 95
5 95
5 97
5 89
5 87
2 51
3 52
3 52
3 52
4 57
4 58
5 58
5 60
5 52
5 47
5 51
5 52
6 58
7 58
7 53
7 52
6 34
6 35
6 35
6 35
6 36
6 36
6 36
6 37
6 37
6 37
6 37
6 37
6 37
6 36
6 36
6 36
6 36
6 28
7 28
7 28
6 27
5 22
5 22
5 20
4 15
4 15
3 15
3 15
3 15
3 15
4 12
4 10
2 4
2 4
2 4
2 4
2 4
2 3
2 3
2 3
2 3
2 3
2 3
2 2
2 2
2 3
2 3
2 3
2 3
1 3
1 3
1 4
1 4
1 5
1 5
0 5
0 5
0 4
0 5
0 6
0 7
0 7
0 7
0 7
0 8
0 8
0 7
0 8
0 14
0 31
0 40
0 48
0 49
0 51
0 58
0 60
0 59
0 59
0 59
0 59
0 59
0 59
0 59
0 59
0 62
0 62
0 62
0 62
0 61
0 61
0 61
0 63
0 65
0 65
3 64
8 139
8 138
8 138
9 138
11 138
18 137
37 137
37 137
37 135
37 129
37 106
37 93
37 86
37 88
37 87
37 87
37 89
37 90
37 91
37 92
37 94
8 94
8 94
8 94
8 95
8 92
8 92
8 93
8 93
8 93
8 92
8 91
7 91
6 89
4 89
4 88
0 13
0 14
0 15
0 15
0 15
0 16
0 16
0 16
0 16
0 16
0 16
0 13
2 14
2 13
2 12
2 12
2 12
2 10
2 10
2 9
2 7
2 7
2 7
2 11
2 11
2 11
2 10
2 10
2 10
2 10
2 10
2 10
2 10
2 9
2 9
2 12
2 13
2 14
2 15
2 16
2 16
2 15
2 21
2 21
2 22
2 22
2 22
2 26
0 25
0 25
0 25
0 25
0 24
0 24
0 24
0 24
0 24
0 18
0 18
0 14
0 14
0 14
0 14
0 16
0 16
0 16
0 16
0 16
0 16
0 17
0 16
0 13
0 14
0 12
1 11
1 11
1 11
1 11
1 11
1 10
1 12
1 12
1 12
1 10
1 10
1 10
1 10
1 11
1 12
1 12
2 12
2 12
2 12
3 13
3 14
3 14
3 15
3 15
3 15
3 13
3 13
3 13
3 13
3 11
3 11
3 10
3 9
2 9
2 9
3 9
5 9
5 9
5 9
5 9
5 9
5 10
5 7
5 7
5 7
5 5
5 5
5 5
5 5
5 5
5 5
5 5
5 6
4 7
4 8
4 10
4 10
4 10
4 9
4 9
4 9
4 9
4 9
4 9
4 11
4 11
4 11
3 11
2 11
1 11
1 11
1 11
0 10
0 10
0 10
0 10
0 9
0 9
0 9
0 9
0 9
0 9
0 9
0 9
0 9
0 9
0 9
0 7
0 7
0 5
0 3
0 4
0 5
0 5
0 5
0 5
0 5
0 4
0 4
0 4
0 3
0 3
0 3
0 3
0 4
0 4
0 4
0 4
0 4
0 6
0 6
0 6
0 6
0 6
0 8
0 8
0 8
0 8
0 8
0 8
0 8
0 9
0 9
0 10
0 10
0 10
0 10
0 7
0 7
0 9
0 9
0 9
0 9
0 9
0 9
0 9
0 9
0 9
0 9
0 9
0 8
0 8
0 8
0 8
0 8
0 6
0 6
0 7
0 7
0 6
0 15
0 17
0 17
0 17
0 17
0 17
0 17
0 16
0 15
0 16
0 16
0 24
0 24
0 24
0 24
0 22
0 22
0 22
0 22
0 22
0 22
0 23
0 23
0 23
0 23
0 23
0 23
0 24
0 24
0 24
0 24
0 24
0 24
0 15
0 14
0 14
0 3
0 3
0 3
0 4
0 4
0 4
0 4
0 4
0 4
0 3
0 3
0 3
0 3
0 3
0 3
0 3
0 3
0 3
0 3
0 6
0 6
0 6
0 6
0 6
0 5
0 5
0 5
0 5
0 5
0 5
0 5
0 5
0 5
0 6
0 6
0 6
0 6
0 6
0 6
0 5
0 5
0 5
0 4
0 4
0 4
0 4
0 4
0 4
0 5
0 5
0 5
0 5
0 5
0 5
0 5
0 2
0 2
0 2
0 2
0 2
0 2
0 4
0 4
0 6
0 7
0 12
0 14
0 14
0 17
0 19
0 19
0 22
0 22
0 22
0 22
0 22
0 22
0 22
0 22
0 22
0 22
0 22
0 22
0 22
0 21
0 21
0 21
0 21
0 21
0 21
0 21
0 21
0 21
0 21
0 20
0 20
0 19
0 17
0 15
0 13
0 13
0 8
0 4
0 3
0 1
0 1
2 1
2 1
2 1
2 1
2 1
2 1
2 2
2 2
2 4
2 5
2 6
2 6
2 7
2 7
2 8
1 8
1 8
2 8
2 8
2 8
2 8
2 8
2 8
2 7
2 7
2 7
2 7
2 7
2 7
2 8
2 8
2 8
2 12
2 15
2 15
1 16
3 16
4 17
5 17
5 17
5 18
5 18
5 17
5 17
5 15
7 14
7 12
7 12
7 11
7 11
7 11
7 12
7 12
6 12
6 12
6 12
6 12
6 12
6 12
6 12
6 12
6 12
5 12
5 13
3 13
3 12
3 13
3 12
3 8
3 7
3 7
2 6
1 12
1 11
0 11
0 11
0 10
0 10
0 10
0 10
0 10
0 12
0 33
0 40
0 41
0 43
0 43
0 37
0 38
0 38
0 39
0 39
0 39
0 39
0 39
0 39
0 39
0 40
0 21
0 18
0 18
0 18
0 18
0 19
0 19
0 19
0 21
0 21
0 21
0 21
0 21
0 21
1 42
1 42
1 46
1 46
1 46
1 44
1 41
1 35
1 34
1 33
1 33
1 31
1 31
1 31
1 30
1 30
1 30
1 30
1 30
1 32
2 31
2 31
2 31
2 31
2 32
2 32
3 32
3 33
3 33
3 33
3 31
3 34
3 34
3 35
3 35
2 35
2 13
2 12
2 10
2 10
2 10
2 10
2 9
2 9
2 8
2 8
2 9
2 21
3 27
3 27
3 28
3 29
3 31
3 32
3 30
3 30
1 30
1 30
1 30
1 30
1 29
1 29
1 28
1 28
1 29
1 29
1 29
1 26
1 26
1 25
1 27
1 27
1 28
1 29
1 29
1 29
1 29
1 30
1 31
1 33
1 37
1 37
0 42
0 31
0 23
0 23
0 24
0 24
1 21
1 21
1 21
1 21
1 21
1 21
1 21
1 21
1 21
1 22
1 22
1 22
1 23
1 23
1 28
0 30
0 32
0 33
0 30
0 30
0 30
0 38
0 38
0 78
0 88
2 97
2 99
2 98
2 99
2 104
2 115
2 122
2 132
3 138
3 148
3 150
3 150
3 150
3 150
3 151
3 151
3 151
3 151
3 151
3 151
12 175
12 176
12 177
15 191
16 201
16 198
16 204
16 198
16 197
16 195
16 193
16 192
16 191
16 188
14 143
14 140
14 136
14 132
14 129
14 126
14 118
13 96
13 84
13 74
13 74
13 74
13 74
13 75
13 75
13 75
13 74
13 74
13 74
13 74
13 74
13 72
4 41
4 38
4 31
0 14
0 9
0 7
1 4
3 4
5 4
8 4
11 5
11 5
11 5
11 5
11 4
11 4
11 4
11 4
11 4
11 4
11 4
11 4
11 4
11 4
11 4
11 4
11 5
11 4
11 5
11 5
11 5
11 5
13 6
13 6
15 6
15 6
15 8
17 15
17 15
18 16
18 16
18 16
15 16
14 16
12 17
9 18
10 19
15 20
15 20
15 21
15 21
15 21
15 22
15 21
15 21
15 21
15 21
15 20
15 22
18 26
19 72
28 90
28 92
29 99
29 102
30 113
29 124
29 134
51 146
50 149
49 151
49 153
49 151
47 143
47 144
49 147
49 147
50 147
52 147
52 147
52 146
50 145
47 142
44 141
44 142
44 141
44 142
44 142
44 144
44 145
44 145
45 147
47 166
50 166
48 161
46 155
42 101
33 83
33 75
33 69
33 64
33 58
33 57
31 51
10 39
10 36
11 37
11 37
11 38
10 38
10 38
9 34
9 34
8 34
8 34
8 34
8 34
8 34
8 34
8 34
8 34
8 33
8 33
9 33
9 31
9 30
10 29
8 29
10 10
17 12
37 12
57 9
71 36
77 41
81 91
81 96
81 103
81 112
83 132
83 149
83 189
83 191
82 190
82 190
82 189
82 189
82 189
82 195
82 198
82 198
82 218
83 218
83 223
83 223
83 224
83 224
83 229
83 230
82 232
81 239
80 248
82 255
82 256
81 257
54 255
44 257
34 256
22 248
13 212
6 202
6 106
5 87
5 81
5 80
3 79
3 83
3 78
3 80
3 80
3 80
3 80
3 80
3 80
3 74
3 70
2 70
2 51
2 51
2 46
2 46
8 136
8 150
9 154
9 150
9 149
8 167
7 162
16 462
16 468
16 517
16 518
16 519
16 519
16 521
16 524
16 523
16 525
16 528
16 529
16 529
16 530
16 525
7 218
7 217
7 217
7 217
7 217
7 217
7 217
7 218
7 218
7 218
7 216
5 216
5 216
5 213
0 119
0 107
0 93
0 93
0 93
0 72
0 73
0 73
0 67
0 16
0 16
0 17
0 16
0 16
0 15
0 11
0 9
0 12
0 12
0 16
0 16
0 31
0 30
0 30
0 32
0 33
0 33
0 34
0 34
0 37
0 38
0 39
0 39
0 40
0 40
1 40
1 39
1 39
1 38
1 40
1 41
1 40
1 62
1 60
1 60
1 60
1 59
1 59
1 59
1 56
1 56
1 56
1 56
1 55
1 55
1 52
1 52
1 36
1 35
1 36
1 35
1 35
1 35
1 35
1 34
1 32
1 31
1 34
1 34
1 33
1 33
0 33
0 35
0 35
0 39
0 39
0 39
0 39
1 19
1 20
1 18
1 20
1 23
1 27
1 31
1 32
1 33
1 34
1 34
1 37
1 38
1 38
1 39
2 39
2 39
2 38
2 38
2 38
2 38
2 38
2 38
2 38
2 38
2 38
2 38
2 37
2 37
2 38
2 36
2 45
2 46
2 43
2 44
2 45
1 44
1 43
1 42
1 50
1 42
1 45
1 46
1 43
1 43
1 43
1 41
1 41
1 41
1 42
1 35
0 35
0 35
0 35
0 35
0 35
0 35
0 35
0 39
0 42
0 58
0 60
0 63
0 64
0 65
0 64
0 63
0 60
0 56
0 54
0 60
0 62
0 62
0 62
0 63
0 55
0 53
0 50
0 44
0 44
0 44
0 44
0 44
0 47
0 47
0 46
0 48
0 62
0 64
1 65
1 89
1 96
2 97
2 97
2 95
2 97
2 82
2 82
2 81
2 82
2 83
2 82
3 95
3 98
3 99
3 99
3 92
3 91
3 91
3 93
3 94
3 96
5 141
7 144
6 146
6 154
6 154
6 161
6 169
6 166
6 165
6 165
6 158
6 140
6 145
6 143
5 121
5 122
5 122
5 118
5 117
5 112
5 112
5 111
5 109
5 109
5 109
5 108
4 94
4 92
4 92
4 93
4 93
4 97
4 97
4 97
4 96
4 90
2 34
0 29
0 26
0 20
0 20
0 21
0 22
0 21
0 20
0 20
0 20
0 14
0 12
0 12
0 12
0 12
0 13
0 13
0 13
0 13
0 13
0 13
0 14
0 14
0 14
0 12
0 11
0 11
0 13
0 11
0 11
0 8
0 8
0 8
0 8
0 8
0 8
0 7
0 8
0 9
0 10
0 10
0 10
0 10
0 10
0 10
0 10
0 10
0 10
0 10
0 10
0 10
0 8
0 8
0 8
0 8
0 8
0 7
0 7
0 11
0 17
1 27
2 40
2 45
2 47
2 47
2 56
3 58
5 57
5 58
5 58
5 58
5 58
5 56
5 53
5 52
5 52
5 52
5 52
5 52
5 52
5 52
5 52
5 52
5 52
5 53
5 53
5 53
5 52
5 52
5 51
6 52
6 54
6 55
6 55
7 62
7 53
6 40
5 34
5 29
5 30
5 27
5 20
4 20
3 20
3 20
3 19
3 19
6 19
9 24
10 24
10 24
10 24
10 24
10 24
10 24
10 24
10 24
10 24
10 24
11 24
11 24
11 24
11 26
11 26
11 26
11 26
10 25
10 25
10 24
10 22
9 11
9 11
9 10
9 10
9 10
8 8
8 8
8 8
8 8
8 9
8 9
8 12
8 13
5 16
1 17
1 27
5 45
5 47
5 47
5 47
5 49
6 50
7 52
6 52
6 53
7 75
7 75
7 77
7 75
7 75
7 78
7 88
7 97
7 103
7 107
7 109
8 111
7 112
7 113
7 114
7 114
7 119
7 127
9 133
29 171
37 262
37 268
37 269
37 305
37 304
37 296
37 283
33 270
33 270
33 276
35 291
35 301
35 303
36 407
36 414
36 421
35 420
35 430
35 437
35 470
35 471
35 473
35 468
35 459
35 451
35 451
35 451
34 459
34 465
34 466
34 465
34 465
32 459
29 452
23 445
10 401
2 276
1 274
1 263
1 261
1 262
1 263
1 264
1 262
1 260
1 253
1 235
1 225
1 217
0 63
0 43
0 38
0 38
0 39
0 38
0 37
0 41
0 36
0 36
0 36
0 34
0 33
0 32
0 22
0 16
0 16
0 16
0 16
0 17
0 20
0 20
0 18
0 18
0 19
0 23
0 26
0 29
0 38
0 48
0 54
0 60
0 60
0 60
0 57
0 57
0 57
0 56
0 55
0 55
0 55
0 55
0 55
0 52
0 52
0 54
0 56
1 69
1 84
2 109
2 123
2 132
2 158
2 167
2 172
2 186
2 189
2 197
2 203
2 209
2 220
2 275
2 319
2 353
2 351
2 348
2 344
2 342
2 342
2 343
2 347
2 347
2 348
2 348
2 350
3 350
3 355
3 355
3 358
4 363
4 363
4 351
4 352
3 337
4 330
3 304
3 298
3 287
3 254
3 249
3 244
3 237
4 251
5 247
5 247
5 243
6 236
6 121
6 111
6 92
6 90
6 84
6 85
6 84
6 83
6 82
6 81
6 81
6 80
6 80
6 78
5 76
5 67
5 64
5 63
4 56
4 81
4 81
4 77
4 77
3 78
3 78
3 75
3 75
3 75
3 75
3 75
3 69
1 41
1 39
2 37
2 40
1 36
1 36
1 48
2 52
2 56
2 56
2 55
2 55
2 57
2 57
3 67
3 71
3 79
3 94
4 97
4 101
4 101
4 102
4 105
4 112
6 91
7 100
7 100
7 100
7 101
7 102
7 104
7 104
6 105
6 106
6 105
6 108
6 108
6 107
6 106
6 108
7 118
9 118
9 104
8 103
8 102
8 102
8 102
8 105
8 105
8 102
7 83
7 70
7 67
7 66
6 63
6 62
8 62
9 74
9 69
8 58
6 53
6 55
6 55
6 55
6 53
6 53
6 51
6 50
6 50
6 50
6 50
6 49
6 49
6 49
6 48
6 47
6 48
4 55
5 55
5 54
5 54
5 55
5 55
3 52
3 52
3 52
3 51
4 54
6 55
6 54
31 54
31 51
30 50
30 38
30 36
30 36
30 36
30 34
30 34
30 33
30 33
30 33
30 33
30 33
119 33
94 31
93 30
93 30
93 30
93 30
93 30
93 16
92 11
92 10
92 11
92 12
92 15
92 19
91 27
2 36
2 45
2 56
2 60
1 59
1 60
2 62
2 62
2 64
2 66
2 66
2 66
2 65
2 65
2 65
2 65
2 65
2 65
2 65
2 66
2 66
2 66
2 66
2 66
2 66
2 66
2 65
2 65
2 82
2 125
2 136
2 152
3 226
3 239
3 232
3 256
3 259
3 261
4 268
5 269
5 284
4 286
3 288
3 290
3 286
3 286
3 286
3 286
3 284
3 284
3 284
3 285
3 286
3 286
3 287
3 287
3 288
3 289
3 292
3 293
6 363
6 366
6 373
6 390
6 372
6 319
6 320
6 307
6 228
7 231
7 231
7 190
7 177
7 173
5 163
5 158
5 154
5 152
5 152
5 152
5 153
5 153
5 153
5 163
4 163
4 164
3 164
3 163
3 166
3 167
3 170
3 172
3 173
4 180
4 176
4 175
2 98
2 97
2 97
2 76
2 64
3 57
3 49
3 52
2 50
2 44
2 44
3 47
3 47
3 46
4 46
4 46
4 44
4 45
4 45
4 45
5 45
8 50
29 170
31 177
33 190
37 197
36 200
36 203
36 215
37 215
37 213
37 233
37 232
36 225
36 224
36 221
36 220
36 221
36 221
36 222
37 229
37 229
38 225
38 223
38 221
38 221
38 222
38 220
38 220
38 220
37 220
38 219
38 221
38 221
37 220
36 219
35 218
31 190
8 54
7 49
7 49
5 43
5 46
5 46
5 46
4 46
4 48
4 27
4 27
4 27
4 27
5 31
6 32
6 32
6 32
7 31
6 24
5 26
4 26
4 26
4 25
3 24
3 24
4 39
4 39
10 41
30 86
30 89
30 90
30 90
30 92
30 90
29 93
29 103
29 178
29 185
29 187
29 194
29 197
39 291
39 306
39 323
39 322
39 323
39 323
39 323
38 324
38 325
38 324
38 324
37 325
37 326
37 327
37 324
37 324
37 325
38 324
38 324
38 324
34 304
33 302
29 300
11 251
12 251
12 250
12 250
12 248
12 247
12 241
12 220
12 129
12 117
12 103
10 99
10 100
2 25
2 24
2 23
1 23
1 22
1 29
1 53
1 59
1 61
1 66
1 69
1 76
1 146
1 153
2 154
2 157
2 166
1 180
1 199
1 200
1 200
1 201
1 201
1 201
1 201
1 201
1 201
1 200
1 203
1 202
1 201
1 202
1 201
1 198
1 199
1 200
1 201
1 204
1 226
1 229
1 269
1 306
1 316
1 340
1 341
1 340
1 336
1 313
0 219
0 215
0 225
0 223
0 225
0 228
0 219
0 220
0 220
0 221
0 221
0 223
0 223
0 223
0 222
0 222
0 221
0 221
0 220
0 220
0 221
0 225
0 224
0 224
0 222
0 220
0 197
0 193
0 138
0 97
1 57
1 35
1 34
1 34
2 37
2 37
2 37
2 36
2 19
2 17
3 16
3 16
3 16
3 16
3 17
3 17
3 17
3 15
5 20
5 20
5 19
5 19
5 20
5 20
5 19
5 20
5 19
5 18
5 18
5 18
5 18
5 18
5 18
5 18
5 18
5 18
4 18
4 17
4 17
4 17
3 14
3 14
3 17
3 17
3 18
3 18
2 21
2 21
2 22
4 29
4 41
4 206
4 210
3 236
2 232
2 231
3 232
3 232
3 232
3 232
3 234
3 234
3 240
3 249
3 256
3 255
3 258
3 255
3 255
3 255
3 255
3 255
3 255
3 255
3 255
3 255
3 255
3 254
3 249
3 248
3 248
2 246
2 244
3 244
3 244
2 237
1 224
1 57
1 55
1 29
1 26
1 25
1 25
1 25
1 25
1 25
1 25
1 25
1 19
1 10
1 6
1 6
1 4
1 4
1 4
1 4
1 4
1 4
1 4
1 4
1 4
1 4
1 4
1 4
1 4
1 4
1 4
1 4
1 4
0 3
0 6
0 6
0 6
0 7
0 7
0 7
0 7
0 7
0 7
0 7
0 6
0 6
0 6
0 7
0 7
1 21
2 27
3 32
3 32
3 33
3 34
3 34
3 34
3 34
3 34
3 36
3 40
3 40
4 41
4 43
5 49
5 48
5 48
5 49
5 50
5 53
9 126
9 142
10 154
11 165
14 380
14 402
14 465
14 492
16 687
20 833
25 1024
26 1069
45 1391
45 1415
45 1449
46 1458
48 1505
48 1525
53 1589
53 1589
53 1590
53 1603
53 1616
53 1625
53 1631
53 1627
53 1624
58 1659
59 1664
59 1726
58 1807
58 1843
58 1900
58 1924
63 2018
65 2027
63 1971
64 2030
64 2044
65 2022
74 1778
73 1744
70 1643
73 1604
70 1378
69 1316
62 1195
64 1102
40 696
40 676
40 676
40 674
40 674
40 675
40 676
40 676
40 675
40 659
40 639
40 638
41 635
41 637
41 635
36 593
35 592
35 522
35 412
35 373
35 333
35 315
28 192
27 159
24 91
23 84
23 78
50 98
36 66
36 67
33 64
33 65
33 71
34 77
34 83
34 85
34 86
34 87
34 87
34 87
34 91
34 91
34 90
34 90
35 90
36 157
36 177
44 258
44 283
44 284
44 283
44 286
44 284
43 286
42 287
42 287
42 288
44 289
44 286
42 322
42 322
42 321
41 317
16 317
16 346
16 391
17 390
16 403
20 406
21 406
21 406
33 412
66 422
74 429
76 449
77 456
82 495
86 554
86 564
86 567
85 573
84 506
84 483
76 391
100 512
102 513
102 524
103 530
103 531
103 534
104 534
105 535
105 536
103 537
103 539
103 498
104 501
104 496
104 491
104 453
100 426
99 378
98 392
101 393
100 386
99 390
97 394
71 405
54 394
47 388
44 373
45 345
41 289
39 265
39 265
39 271
39 269
38 270
32 266
32 267
11 133
11 127
11 121
11 111
11 111
11 111
10 108
9 106
9 106
9 104
9 103
9 107
8 107
8 108
8 117
8 124
7 129
6 115
4 105
4 110
4 111
20 509
21 531
22 546
24 651
24 663
24 654
25 668
25 669
25 668
25 665
25 667
25 669
25 747
25 767
25 804
25 830
25 840
25 878
25 890
26 907
32 930
32 958
32 967
32 972
32 974
32 975
32 976
32 969
32 969
32 959
32 948
32 947
32 940
32 934
32 935
31 918
13 411
10 374
10 331
12 335
12 334
15 351
16 358
16 370
16 373
17 383
17 406
17 418
17 330
16 283
17 274
18 296
19 291
20 256
19 241
18 208
14 195
14 176
14 170
14 171
14 171
14 172
14 168
14 169
14 169
14 184
16 203
16 205
16 212
14 300
14 301
14 308
15 312
16 318
19 333
19 334
18 331
15 315
15 302
15 293
15 291
14 289
12 260
12 241
12 236
12 233
10 216
12 231
12 229
12 225
12 226
12 225
11 252
11 252
11 251
11 249
11 251
11 251
11 242
12 242
12 239
12 224
14 222
14 221
14 219
20 133
20 133
20 127
20 124
19 118
17 105
17 105
17 104
17 105
18 115
18 118
20 117
20 110
20 113
20 113
18 112
18 111
18 109
17 89
17 89
17 89
17 89
17 89
17 64
17 66
17 69
17 69
19 70
24 162
24 164
38 283
38 292
38 306
35 296
35 308
34 306
30 312
31 311
30 320
32 317
33 320
34 321
34 321
34 320
34 318
32 307
31 305
31 306
31 308
32 308
32 308
32 308
32 309
33 314
31 323
30 327
30 343
31 354
31 359
29 360
29 367
29 382
28 442
35 670
30 632
29 646
15 528
17 613
19 684
18 700
17 716
17 717
17 716
17 719
17 709
16 707
16 704
15 703
15 705
15 706
15 706
15 708
15 708
15 705
15 704
16 703
18 719
20 715
26 750
26 748
26 746
26 742
26 725
25 712
25 709
25 709
25 706
25 684
24 546
16 242
13 126
12 112
12 105
12 102
14 104
14 108
14 108
14 112
14 111
14 110
14 114
13 122
16 150
16 202
16 299
17 414
17 449
18 482
18 487
18 490
17 491
17 492
16 476
13 471
7 427
7 427
9 450
10 452
10 459
10 462
10 462
10 467
10 464
12 464
12 464
12 463
17 469
17 470
16 471
16 472
15 473
15 468
15 469
15 465
15 468
15 470
15 453
15 442
15 409
14 322
19 230
18 164
19 163
18 154
20 214
22 323
22 355
23 372
23 372
23 372
23 373
23 373
22 350
22 341
22 335
22 335
22 335
23 324
23 321
24 323
24 325
24 325
19 316
19 315
19 315
19 314
19 312
19 309
19 308
19 307
19 304
19 304
19 307
16 308
16 308
16 319
11 300
11 300
10 282
10 291
8 227
6 93
6 86
7 80
7 82
7 82
7 81
7 82
7 85
7 86
8 89
8 90
23 130
22 143
20 143
22 153
22 152
23 152
23 158
23 159
23 162
23 163
23 163
32 176
32 183
31 184
42 332
44 347
46 362
46 359
46 361
51 382
53 394
53 381
59 407
59 393
59 392
60 394
59 393
59 393
60 398
63 434
64 487
72 554
77 623
90 806
91 815
93 835
75 798
76 828
76 838
77 851
77 854
77 856
77 855
77 855
77 866
77 880
78 896
70 886
69 917
69 912
58 760
54 745
53 737
53 737
53 737
47 690
47 685
47 686
102 665
145 679
172 681
175 684
175 685
175 683
173 656
170 599
169 568
173 761
166 644
151 436
150 421
148 406
148 404
149 404
150 411
150 406
150 403
150 405
150 402
150 399
150 375
149 361
148 360
148 366
148 334
148 333
148 334
148 333
148 333
147 326
147 322
145 323
124 317
123 317
70 311
31 299
15 296
12 311
11 312
12 314
12 324
12 329
11 336
1 96
1 108
1 343
1 336
1 360
1 407
1 450
1 458
1 454
1 454
1 453
1 453
1 453
1 452
1 452
1 452
1 452
1 452
1 452
1 453
1 454
1 455
1 465
1 471
1 487
1 488
2 488
2 509
2 509
2 510
2 492
2 491
1 495
1 490
1 486
1 477
3 477
3 465
3 232
3 232
5 265
7 210
7 192
7 215
7 226
7 231
7 260
7 263
7 268
7 268
7 269
7 270
7 271
7 273
7 273
7 273
6 272
6 270
6 257
6 252
6 238
8 238
8 239
8 225
8 224
8 212
8 211
8 210
8 208
8 199
8 190
8 187
6 178
6 179
6 166
6 159
3 100
2 98
2 83
2 63
3 61
3 59
3 29
3 26
3 26
3 25
3 24
3 24
3 24
3 23
3 23
3 22
3 22
3 23
3 23
3 23
3 24
1 20
1 19
1 11
1 10
1 9
1 8
1 8
1 9
1 9
1 9
1 8
1 6
1 5
1 5
1 5
0 5
0 5
0 4
6 5
6 5
6 5
6 5
6 5
6 5
6 5
6 5
6 5
6 5
6 4
6 4
6 4
6 4
6 4
0 3
0 3
0 3
0 3
0 3
0 3
0 3
0 3
0 3
0 3
0 3
0 3
0 3
0 3
0 3
0 2
0 2
0 2
0 2
0 2
0 2
0 2
0 2
0 2
0 2
0 2
0 2
0 2
0 2
0 1
0 1
0 1
0 1
0 1
0 1
0 1
0 1
0 1
0 0
0 4
0 4
0 4
0 4
4 4
4 4
4 4
4 4
4 4
4 4
4 4
4 4
4 4
4 4
4 4
4 0
4 1
4 1
4 1
0 1
0 1
0 1
0 1
0 1
0 1
0 1
0 1
0 1
0 1
0 1
0 1
0 1
0 1
0 1
0 1
0 1
0 1
0 1
0 1
0 1
0 1
0 1
0 1
0 1
0 1
0 1
1 1
1 1
1 1
1 1
1 1
1 1
1 0
1 0
1 0
1 0
1 0
1 0
1 0
1 0
1 0
0 0
0 0
0 0
0 0
0 0
0 0
0 0
0 0
0 0
0 0
0 0
0 0
0 0
0 0
1 0
1 0
1 0
1 0
1 0
1 0
1 0
1 0
1 0
1 0
1 0
1 0
1 0
1 0
1 0
1 0
1 0
1 0
1 0
1 0
1 0
1 0
1 0
1 0
1 0
1 0
1 0
1 0
1 0
1 0
1 0
1 0
1 0
1 0
1 0
1 0
0 0
0 0
0 0
0 0
0 0
0 0
0 0
0 0
0 0
0 0
0 0
0 0
0 0
1 0
1 0
1 0
1 0
1 0
1 0
1 0
1 0
1 0
1 0
1 0
1 0
1 0
1 0
1 0
1 0
1 0
1 0
1 0
1 0
1 0
1 0
1 0
1 0
1 0
1 0
1 0
1 0
1 0
1 0
3 84
5 85
5 85
6 85
6 85
6 85
5 85
5 85
5 85
5 85
5 85
5 85
5 85
5 85
5 85
3 1
3 1
3 1
3 1
3 1
3 1
3 1
3 1
3 1
4 1
4 1
4 1
4 1
4 1
5 1
5 1
6 1
5 1
5 1
5 2
5 2
5 2
3 1
3 1
3 1
3 1
3 1
3 1
3 1
3 1
3 1
3 1
3 1
3 1
3 1
3 1
3 1
3 1
18 5
18 5
18 5
18 7
18 10
18 10
18 10
17 10
17 10
17 10
17 10
17 11
16 11
16 11
15 11
15 10
15 10
15 10
15 10
15 10
17 10
17 10
17 10
18 10
18 10
18 10
18 10
18 10
18 10
18 10
18 10
18 10
18 10
18 10
18 10
18 10
3 5
3 1
3 1
2 1
2 1
2 1
2 1
2 1
2 1
2 1
2 1
2 0
2 0
2 0
2 0
5 0
5 0
5 0
6 0
6 0
4 0
4 0
4 0
5 0
6 0
6 0
6 0
6 0
6 0
6 0
6 0
6 2
7 2
9 2
9 7
88 12502
94 12506
98 12507
98 12507
97 12507
97 12507
97 12507
97 12507
97 12507
97 12507
97 12507
98 12507
98 12507
99 12507
99 12507
65 12456
19 10
19 6
20 6
20 6
20 6
20 6
21 6
23 6
22 6
22 6
22 6
22 6
22 6
22 6
41 8
43 8
43 7
41 7
39 6
39 6
39 6
32 3
30 2
30 2
30 2
30 2
30 2
35 3
35 3
35 3
34 3
33 3
33 3
33 3
33 3
33 3
33 4
32 4
30 4
30 4
30 4
30 4
29 4
27 4
24 4
21 4
25 4
24 4
23 4
23 4
12 2
12 5
12 5
12 5
12 5
12 6
12 5
12 5
12 5
13 8
13 8
13 8
13 8
9 7
9 7
9 7
10 7
11 7
12 7
12 7
12 7
12 7
12 7
12 7
12 7
12 7
12 7
12 7
12 7
12 7
11 8
12 8
9 8
11 8
10 8
9 8
9 5
9 5
9 5
9 5
9 5
8 4
8 4
8 4
8 4
12 1
12 1
12 1
12 1
12 1
12 1
12 1
11 1
10 1
10 1
10 1
15 2
15 2
16 2
30 2
30 2
31 2
31 2
32 2
32 2
32 2
32 1
31 1
31 1
28 1
28 1
28 1
28 1
28 1
28 1
29 1
29 1
29 1
29 1
29 1
29 1
24 1
24 1
25 1
38 1
41 1
41 1
41 1
41 1
42 1
42 1
41 2
36 1
36 1
33 1
20 1
22 1
22 1
23 3
23 3
23 3
23 3
23 3
23 4
23 4
23 4
23 4
23 4
23 4
22 4
22 4
22 4
23 4
23 4
23 4
23 4
18 4
19 4
15 4
15 4
6 4
6 4
6 4
6 4
6 4
6 4
7 3
7 3
7 3
7 3
7 3
6 3
4 3
4 3
3 1
3 1
3 1
3 1
3 1
4 0
4 0
4 0
4 0
4 0
4 0
4 0
4 0
3 0
3 0
3 0
3 0
3 0
3 0
3 0
3 0
3 0
3 0
3 0
3 0
3 0
8 0
7 0
7 0
7 0
7 0
7 0
7 0
7 0
7 0
7 0
7 0
7 0
7 0
7 0
9 0
3 0
3 0
3 0
2 0
2 0
2 0
2 0
2 0
2 0
2 0
2 0
2 0
2 0
2 0
2 0
2 0
2 0
2 0
2 0
2 0
2 0
2 0
2 0
2 0
2 0
2 0
2 0
2 0
2 0
2 0
2 0
2 0
1 0
1 0
1 0
0 0
0 0
0 0
0 0
1 0
1 0
1 4
1 4
1 4
1 4
1 4
1 4
1 5
1 5
1 5
1 5
1 5
1 5
1 5
1 5
1 5
1 5
1 5
1 5
1 5
1 5
1 5
1 5
1 5
1 5
1 5
1 5
2 5
2 5
1 5
1 2
1 2
1 2
11 3
11 3
15 3
24 5
27 3
27 3
27 3
27 3
27 3
27 3
27 3
27 4
27 4
27 4
27 9
27 9
27 9
27 9
27 9
27 10
27 10
27 10
27 10
28 10
28 10
28 10
28 10
28 10
28 10
28 10
25 10
25 10
25 10
25 10
22 10
22 10
15 8
13 8
5 8
1 7
0 7
0 7
0 6
0 6
0 6
0 6
0 6
0 6
0 6
0 16
0 11
0 10
0 10
0 10
0 10
0 13
0 13
0 13
0 18
0 18
0 18
0 18
0 19
0 19
0 19
0 9
0 9
0 9
0 9
0 9
0 9
0 9
0 9
0 9
0 9
0 28
0 31
0 39
0 40
0 43
0 48
0 55
0 64
0 66
0 78
0 105
0 122
0 128
0 145
0 150
0 156
0 156
0 156
0 157
0 151
0 151
0 162
0 171
0 171
0 171
0 173
0 173
0 173
0 174
0 174
0 174
0 174
0 174
0 174
0 171
0 171
0 152
0 149
0 140
0 134
0 135
0 130
0 121
0 112
0 107
0 102
0 21
0 5
0 5
0 5
0 4
0 4
0 4
0 4
0 4
0 5
0 5
0 5
0 5
0 5
0 5
0 5
0 5
0 5
0 5
0 5
0 5
0 6
0 6
0 6
0 6
0 6
0 6
0 6
0 5
0 5
0 5
0 5
0 5
0 4
0 4
0 4
0 3
0 3
0 3
0 3
0 3
0 3
0 2
0 2
0 1
0 1
0 2
0 2
0 2
0 2
0 2
0 2
0 2
0 2
0 3
0 33
0 33
0 32
0 32
0 32
0 32
0 32
0 32
0 32
0 31
0 31
0 31
0 31
0 31
0 31
0 1
0 1
0 1
0 1
0 1
0 1
0 1
0 1
0 1
0 1
0 1
0 1
0 1
0 1
0 1
0 1
0 1
0 1
0 1
0 0
0 0
0 0
0 0
0 0
0 0
0 0
0 0
0 0
0 0
0 0
0 0
0 0
0 0
0 0
0 0
0 0
0 0
0 0
0 0
0 0
0 0
0 0
0 0
0 0
0 0
0 0
0 0
0 0
0 0
0 0
0 0
0 0
0 0
0 0
0 0
0 0
0 0
0 0
0 0
0 0
0 0
0 0
0 0
0 0
0 0
0 0
0 0
0 0
0 0
0 0
0 0
0 0
0 0
0 0
0 0
0 0
0 0
0 0
0 0
0 0
0 0
0 0
0 0
0 0
0 0
0 0
0 0
0 0
0 0
0 0
0 0
0 0
0 0
0 0
0 0
0 0
0 0
0 0
0 0
0 0
0 0
0 1
0 1
0 1
0 1
0 1
0 1
0 1
0 1
0 1
0 1
0 1
0 1
0 1
0 1
0 1
0 1
0 1
0 1
0 1
0 2
0 2
0 2
0 4
0 5
0 5
0 5
0 5
0 5
0 5
0 5
0 5
0 5
0 5
0 5
0 5
0 4
0 4
0 4
0 4
0 4
26 4
26 4
120 6
120 6
120 6
120 6
120 6
120 6
120 6
120 6
120 6
120 6
120 6
120 6
120 6
120 5
120 5
9 3
0 0
0 0
0 0
0 0
0 0
0 0
0 1
0 1
0 1
0 1
0 1
0 1
0 1
0 1
0 1
0 1
0 1
0 1
0 1
0 1
0 1
1 1
1 1
1 1
1 1
1 1
1 1
1 1
1 1
1 1
1 1
1 1
1 1
1 1
1 2
1 2
1 3
1 6
1 6
1 6
1 6
1 6
1 5
1 5
1 5
1 5
1 5
1 5
1 5
1 5
1 5
1 5
1 5
1 5
1 5
1 5
1 5
0 5
0 5
0 5
0 5
0 5
0 5
0 5
1 6
1 9
1 9
1 9
1 9
1 9
1 9
1 9
1 8
1 5
1 5
1 5
1 5
1 5
1 5
2 14
2 14
3 15
3 15
3 15
3 15
3 16
3 20
3 24
3 26
3 26
3 27
3 27
3 27
4 27
4 27
4 27
4 27
4 27
5 27
5 27
6 26
6 24
13 24
13 24
13 24
13 23
13 23
13 23
13 24
13 24
17 24
17 24
20 25
24 25
25 25
26 21
29 23
28 24
31 26
31 26
31 30
31 34
31 28
30 25
31 24
35 26
36 26
37 26
37 26
38 26
38 26
38 26
38 27
38 27
38 27
37 27
37 27
37 26
30 25
31 25
31 25
31 25
31 26
31 26
31 26
31 25
27 25
26 25
24 24
23 22
21 19
19 18
18 18
17 16
15 12
15 11
15 4
14 4
14 4
15 4
16 4
16 2
16 2
15 2
15 2
17 3
18 3
19 2
20 2
20 3
18 3
18 3
18 3
18 3
17 3
23 3
23 3
23 3
23 2
23 2
23 2
23 2
23 3
23 3
23 3
20 3
20 3
20 3
20 3
20 3
20 3
20 3
20 3
19 3
18 3
20 3
22 3
20 3
19 3
20 3
19 3
16 2
16 2
15 2
15 2
18 2
18 2
18 3
19 4
20 4
20 5
14 5
14 5
14 5
14 5
14 5
14 5
13 5
13 4
13 5
19 5
19 5
19 5
19 5
20 5
20 5
19 5
19 5
19 5
19 5
21 5
20 6
17 6
16 6
16 6
14 6
14 6
15 6
15 6
15 6
15 6
12 5
12 5
12 4
11 3
10 4
10 3
11 3
11 3
11 3
12 3
13 3
15 3
15 3
15 4
15 3
9 4
9 4
9 4
9 4
8 4
7 6
7 7
8 8
8 9
8 9
8 9
8 8
8 8
8 8
8 8
8 9
8 9
7 9
7 9
7 9
8 9
8 9
8 8
8 8
8 8
8 7
7 7
7 7
9 7
10 7
8 7
8 7
6 7
6 7
6 7
6 7
6 6
8 6
8 6
8 6
11 6
11 4
11 3
10 2
10 2
10 2
10 1
11 1
11 1
11 1
11 1
11 1
11 1
11 1
11 1
11 1
10 1
10 1
12 1
12 0
12 0
12 0
12 0
14 1
13 2
12 2
13 2
13 3
14 3
14 3
14 3
14 3
13 3
11 4
11 4
11 4
9 4
9 4
9 4
4 5
4 5
4 5
4 6
3 6
3 6
3 6
3 6
3 6
3 6
4 6
4 6
4 6
4 6
4 8
4 9
4 9
4 9
6 9
7 11
9 10
12 10
11 10
10 10
9 9
9 9
10 8
10 8
10 8
11 8
11 8
12 8
12 8
12 8
12 7
12 7
12 5
12 5
12 5
12 4
12 4
12 4
15 4
15 4
15 4
15 4
14 4
14 4
35 4
35 4
35 2
35 1
35 1
38 1
38 1
45 0
44 0
50 0
51 1
53 2
53 4
54 4
53 4
53 4
55 4
55 4
55 4
55 4
55 4
55 4
55 4
55 4
55 4
55 4
55 4
55 4
55 4
55 4
52 4
52 4
52 4
52 4
52 4
52 4
31 4
26 4
23 4
19 4
18 4
21 4
19 4
16 4
16 4
10 4
8 3
6 1
6 0
6 0
6 0
6 0
4 0
11 2
12 3
12 3
12 3
12 10
12 11
12 11
12 11
12 11
12 11
12 11
12 11
13 11
13 11
13 11
13 11
13 11
13 10
13 11
13 11
13 4
13 4
12 3
11 3
10 3
10 3
10 3
11 3
11 3
11 3
13 4
13 4
13 4
12 4
15 4
21 4
15 2
16 2
16 2
16 2
16 2
17 2
19 2
19 2
19 2
19 2
19 2
18 2
18 1
18 1
18 1
19 1
19 1
19 1
19 1
19 1
19 1
19 1
19 1
19 1
18 1
18 1
17 1
37 1
38 1
38 1
37 0
36 0
36 0
36 0
31 0
28 0
28 0
27 1
27 1
27 1
28 1
28 1
28 1
45 2
45 2
45 2
45 2
45 2
48 2
50 2
54 2
53 2
53 2
53 2
54 3
54 3
54 3
54 3
54 3
54 3
54 3
54 3
54 3
31 3
30 3
31 3
31 3
31 3
31 3
30 2
30 2
29 2
29 2
29 1
29 1
27 1
24 1
22 1
22 1
9 0
9 0
9 0
8 0
8 0
8 0
6 0
2 0
2 0
2 0
2 0
2 0
2 0
2 0
4 0
4 0
4 0
4 0
4 0
4 0
4 0
4 0
3 0
3 0
3 0
3 0
3 0
3 0
3 0
3 0
3 0
2 0
2 0
2 0
2 0
2 0
2 0
2 0
2 0
2 0
2 0
2 0
2 0
2 0
2 0
2 0
2 0
2 0
2 0
2 0
0 0
0 0
0 0
0 0
0 0
0 0
0 0
0 0
0 0
0 0
0 0
0 0
0 0
0 0
0 0
0 0
0 0
0 0
0 0
0 0
0 0
0 0
0 0
0 0
0 0
0 0
0 0
0 0
0 0
0 0
0 0
0 0
0 0
0 0
0 0
0 0
0 0
0 0
0 0
0 0
0 0
0 0
0 0
0 0
0 0
0 0
0 0
0 0
0 0
0 0
0 0
0 0
0 0
0 0
0 0
0 0
0 0
0 0
0 0
0 0
0 0
1 0
1 0
1 0
1 0
1 0
1 0
1 0
1 0
1 0
1 0
1 0
1 0
1 0
1 0
1 0
1 0
1 0
1 0
1 0
1 0
1 0
1 0
1 0
1 0
1 0
1 0
1 0
1 0
1 0
1 0
1 0
1 0
1 0
1 0
0 0
0 0
0 0
0 0
0 0
0 0
0 0
0 0
0 0
0 0
0 0
0 0
0 0
0 0
0 0
0 0
0 0
0 0
0 0
0 0
0 0
0 0
0 0
0 0
0 0
0 0
173 6
173 6
173 6
173 6
173 6
173 6
173 6
173 6
173 6
173 6
173 6
173 6
173 6
173 6
173 6
0 0
0 0
0 0
0 0
0 0
0 0
0 0
0 0
0 0
0 0
0 0
0 0
0 0
0 1
0 1
0 1
2 2
2 2
2 2
2 2
2 2
2 2
2 2
2 2
2 2
2 2
2 2
4 2
19 1
20 1
20 1
20 1
18 0
18 0
18 0
18 0
18 0
18 0
18 0
18 0
18 0
18 0
16 0
16 0
0 0
0 0
0 0
0 0
0 0
0 0
0 0
0 0
0 0
0 0
0 0
0 0
0 0
0 0
0 0
0 0
0 0
0 0
0 0
1 0
1 0
1 0
1 0
1 0
1 0
1 0
1 0
1 0
1 0
1 0
1 0
1 0
1 0
1 0
1 0
1 0
0 0
0 0
0 0
2 13
2 13
2 13
2 13
2 13
2 13
2 13
2 13
2 13
2 13
2 13
2 13
3 13
3 13
3 13
1 0
1 0
1 0
1 0
1 0
1 0
1 0
1 0
1 0
1 0
1 0
1 0
1 0
0 0
0 0
0 0
0 0
0 0
0 0
0 0
0 0
0 0
0 0
0 0
0 0
0 0
0 0
0 0
0 0
0 0
0 0
0 0
0 0
0 0
0 0
0 0
0 0
0 0
0 0
0 0
0 0
0 0
0 0
0 0
0 0
0 0
0 0
0 0
0 0
1 0
1 0
1 0
1 0
1 0
1 0
1 0
27 0
27 0
27 0
27 0
27 0
27 0
27 0
27 0
26 0
26 0
26 0
26 0
26 0
26 0
26 0
27 0
1 0
1 0
1 0
1 0
1 0
1 0
1 0
1 0
1 0
1 0
1 0
1 0
1 0
1 0
0 0
0 0
0 0
0 0
0 0
0 0
0 0
0 0
0 0
0 0
0 0
0 0
0 0
0 0
0 0
0 0
0 0
0 0
0 0
0 0
0 0
0 0
0 0
0 0
0 0
0 0
0 0
0 0
0 0
0 0
0 0
0 0
0 0
0 0
0 0
0 0
0 0
0 0
0 0
0 0
0 0
0 0
0 0
0 0
0 0
0 0
0 0
0 0
0 0
0 0
0 0
0 0
0 0
0 0
0 0
0 0
0 0
1 0
1 0
1 0
1 0
1 0
1 0
1 0
1 0
1 0
1 0
1 0
1 0
1 0
1 0
1 1
1 1
1 2
1 2
1 2
1 2
13 2
13 2
13 2
13 2
13 2
13 2
13 2
13 2
13 2
13 2
13 2
13 2
12 2
12 2
12 2
0 2
0 2
0 2
0 2
0 2
0 2
0 2
1 2
1 2
1 1
1 1
1 1
1 1
1 1
1 1
1 0
1 0
1 0
1 0
1 0
1 0
1 0
1 0
1 1
0 1
0 1
0 1
0 1
0 1
0 2
0 2
0 2
0 2
0 2
0 2
0 2
0 2
0 2
0 1
0 1
0 1
0 1
0 1
0 1
0 1
0 1
0 1
0 1
0 1
0 1
0 1
0 1
0 1
0 1
0 1
0 1
1 1
1 1
1 1
1 1
1 1
1 1
1 1
1 2
1 2
1 1
1 1
1 1
1 1
2 1
2 1
2 1
2 1
3 2
3 2
3 2
2 2
2 3
2 3
2 3
2 3
2 3
2 3
2 3
2 3
2 3
2 3
2 3
2 3
2 3
2 3
2 3
2 3
2 3
2 3
2 3
2 3
2 3
2 3
2 2
1 2
1 2
1 2
2 2
2 2
1 2
1 2
1 1
1 1
1 0
1 0
1 0
1 0
1 0
1 0
1 0
1 0
1 0
1 0
1 0
1 0
1 0
1 0
1 0
1 0
1 0
1 0
1 0
1 0
1 0
1 0
1 0
1 0
1 0
1 0
6 0
6 0
6 0
6 0
6 0
6 0
6 0
6 0
6 0
6 0
6 0
6 0
6 0
6 0
6 0
6 0
5 0
1 0
1 0
1 0
1 0
2 0
2 0
2 0
2 0
2 0
2 0
2 0
4 0
4 0
4 0
4 0
4 0
3 0
3 0
3 0
3 0
4 0
4 0
4 0
4 0
5 0
5 0
5 0
5 0
5 0
5 0
5 0
5 0
5 0
5 0
5 0
4 0
4 0
4 0
4 0
4 0
4 0
4 0
4 0
3 0
2 0
2 0
2 0
1 0
1 0
1 0
1 0
1 0
1 0
1 0
1 0
1 0
0 0
0 0
0 0
0 0
0 0
0 0
0 0
0 0
0 0
0 0
0 0
0 0
0 0
0 0
0 0
0 0
0 0
0 0
0 0
0 0
0 0
0 0
0 0
0 0
0 0
0 0
0 0
0 0
0 0
0 0
0 0
0 0
0 0
14 0
14 0
14 0
14 0
14 0
14 0
14 0
14 0
14 0
14 0
14 0
14 0
14 0
14 0
14 0
0 0
0 0
0 0
0 0
0 0
0 0
0 0
0 0
0 0
0 0
0 0
0 0
0 0
0 0
0 0
0 0
0 0
0 0
0 0
0 0
0 0
0 0
0 0
0 0
0 0
0 0
0 0
0 0
0 0
0 0
0 0
0 0
0 0
0 0
0 0
0 0
0 0
0 0
0 0
0 0
0 0
0 0
0 0
0 0
0 0
0 0
0 0
0 0
0 0
0 0
0 0
0 0
1 0
3 0
3 0
3 0
3 0
3 0
3 0
3 0
3 0
3 0
3 0
6 0
7 0
7 0
7 0
7 0
7 0
7 0
7 0
7 0
7 0
7 0
7 0
7 0
7 0
7 0
6 0
6 0
6 0
6 0
6 0
6 0
6 0
6 0
6 0
5 0
5 0
3 0
3 0
3 0
3 0
3 0
3 0
3 0
3 0
3 0
3 0
1 0
0 0
0 0
0 0
0 0
0 0
0 0
0 0
