# Supplementary material for: From Insect to Man: Photorhabdus Sheds Light on the Emergence of Human Pathogenicity
Source: PLoS One. 2015 Dec 17;10(12):e0144937. doi: 10.1371/journal.pone.0144937 (PMC4683029; doi:10.1371/journal.pone.0144937)
Supplement: S3 Data — (ZIP) [file pone.0144937.s003.zip › pPAU1_28C_Expo_rep2.plot]

17 0
17 0
17 0
17 0
17 0
17 0
17 0
18 0
27 0
27 0
30 0
31 0
31 0
31 0
31 0
31 1
31 1
30 1
28 1
28 1
28 1
28 1
28 1
18 1
18 1
17 1
17 1
18 1
18 1
18 1
18 1
17 0
17 0
17 0
17 0
17 0
17 0
17 0
17 0
17 0
17 0
17 0
17 0
16 0
16 0
22 0
34 0
34 0
35 0
35 0
33 0
32 0
32 0
35 0
36 0
36 0
36 0
36 0
38 0
40 0
42 0
35 0
35 0
33 0
34 0
33 0
34 0
34 0
34 0
34 0
34 0
34 0
34 0
34 0
34 0
34 0
34 0
34 0
34 0
34 0
35 0
37 0
37 0
38 0
38 0
38 0
38 0
40 0
41 0
43 0
44 0
45 0
45 0
46 0
46 0
46 0
46 0
47 0
47 0
48 0
48 0
48 0
48 0
49 0
49 0
49 0
49 0
48 0
47 0
47 0
47 0
47 0
47 0
45 0
45 0
43 0
44 1
43 1
37 1
44 1
44 1
44 1
127 2
130 2
130 2
130 2
125 2
127 2
131 2
135 2
144 2
148 1
148 1
148 1
149 1
150 1
149 1
149 1
149 1
147 1
147 1
148 1
150 1
153 1
154 1
155 1
155 1
155 1
155 1
155 1
155 1
154 1
153 1
153 1
153 1
153 1
152 1
152 1
150 1
149 1
149 1
144 1
135 1
124 1
120 1
119 1
118 2
117 2
117 2
113 2
112 2
111 2
110 2
110 2
111 2
109 2
108 2
108 2
108 2
109 2
110 2
108 2
108 2
108 2
108 2
106 2
106 2
106 2
107 2
107 2
133 2
133 2
133 2
134 2
135 2
72 1
71 1
72 1
72 1
72 1
70 1
62 1
61 1
48 1
49 1
49 1
49 1
48 1
47 1
47 1
47 1
48 1
56 1
56 1
55 1
54 1
54 1
53 1
50 1
51 1
67 18
97 18
98 18
98 18
98 18
98 18
98 18
98 18
100 18
103 18
105 18
106 18
108 18
108 18
108 18
108 1
108 1
109 1
109 1
106 0
110 0
109 0
109 0
107 0
107 0
107 0
107 0
107 0
107 0
108 0
108 0
109 0
109 0
109 0
109 0
109 0
109 0
109 0
110 0
110 0
114 0
206 0
312 0
309 0
380 0
390 0
527 0
669 0
715 0
755 0
767 0
772 0
772 0
774 0
774 0
783 0
784 0
782 0
782 0
782 0
782 0
788 0
788 0
788 0
787 0
779 0
779 0
779 0
779 0
779 0
778 0
777 0
777 0
763 0
734 0
733 0
733 0
735 0
744 0
744 0
742 0
745 0
739 0
736 17
731 17
735 17
736 17
735 17
734 17
732 17
731 17
730 17
730 17
728 17
728 17
728 17
728 17
728 17
728 24
728 25
720 8
712 8
707 8
705 8
704 8
704 8
704 9
704 9
702 9
690 9
688 9
670 9
649 9
608 2
311 2
232 2
51 2
37 2
35 2
32 2
18 2
17 2
15 2
14 2
12 2
13 2
13 2
13 2
13 2
13 2
13 2
13 2
13 2
13 2
14 2
14 2
14 2
14 2
14 2
14 2
14 2
14 3
14 3
14 3
14 3
14 3
14 3
14 3
14 3
14 5
14 5
13 5
13 5
13 5
10 5
10 5
11 6
11 6
8 6
7 6
7 6
7 6
7 6
13 7
13 7
19 8
19 8
19 8
19 8
19 8
20 8
20 8
20 7
20 7
20 7
20 7
20 7
20 7
20 7
21 6
21 6
21 6
19 6
19 6
21 6
20 6
20 6
21 6
49 7
49 7
49 7
49 6
49 5
50 5
57 5
57 5
56 5
56 5
56 5
56 5
57 5
57 5
57 5
57 5
57 5
57 5
57 5
57 5
57 5
61 5
70 5
76 6
77 6
77 6
77 5
77 5
77 5
77 5
88 7
88 7
97 7
121 7
121 7
139 7
314 7
316 10
316 10
316 9
316 11
315 11
315 11
315 11
315 11
315 9
315 9
315 9
309 8
309 8
303 7
130 7
130 7
132 4
132 4
134 2
134 2
134 2
134 2
134 2
134 2
134 2
134 2
133 2
132 3
135 3
135 3
134 3
147 12
144 12
141 12
129 12
129 12
98 11
98 11
98 11
91 11
94 11
93 11
78 11
78 10
70 10
70 10
68 10
58 1
57 1
57 1
57 1
56 1
56 1
56 2
56 2
56 2
56 2
73 2
72 1
72 1
72 1
145 6
147 6
147 6
147 7
147 7
147 7
147 8
147 9
137 9
139 9
129 9
129 9
129 9
129 9
129 9
129 9
130 9
130 9
130 9
130 9
130 9
130 9
131 9
131 9
135 9
135 9
134 9
134 9
133 11
133 11
130 11
130 11
130 11
130 12
130 12
130 12
130 12
130 12
130 12
128 12
125 12
125 12
125 12
125 12
125 12
126 12
126 12
126 12
126 12
123 12
124 12
94 12
94 12
94 12
96 12
98 13
103 13
104 13
104 13
99 13
99 13
98 13
79 13
76 13
76 13
76 12
76 12
76 12
76 12
76 12
76 12
76 12
75 11
25 5
24 5
24 5
24 5
24 5
24 5
24 4
25 4
22 4
22 4
22 4
24 4
25 4
26 4
28 4
28 4
27 4
27 4
27 5
27 5
27 5
27 5
27 5
27 5
26 5
30 5
46 5
46 5
46 4
46 4
46 4
46 4
48 4
48 3
48 3
48 3
48 3
48 3
48 3
48 3
48 3
48 3
48 3
48 3
48 3
47 3
47 3
47 3
49 3
92 3
193 3
208 3
206 3
235 3
234 3
230 2
226 2
222 2
222 2
222 2
222 2
222 2
224 2
227 2
227 2
228 2
228 2
229 2
202 2
202 2
202 2
202 2
203 2
203 2
203 2
203 2
203 2
203 3
198 3
198 3
332 11
374 11
375 11
376 11
371 11
370 11
370 11
366 11
367 11
369 11
369 11
369 10
369 10
369 10
369 10
370 10
373 10
372 10
372 10
363 10
364 10
365 9
366 9
366 11
366 11
364 13
364 15
365 17
367 19
376 19
376 21
377 21
377 23
465 33
469 34
471 36
471 36
481 36
480 36
481 36
479 36
677 41
636 41
562 45
561 46
637 51
640 51
640 51
640 51
727 50
728 50
729 50
730 50
731 50
730 51
731 51
732 51
732 51
732 51
732 51
731 51
731 51
731 51
731 51
731 51
730 51
730 51
729 51
730 50
729 50
721 49
622 48
607 46
463 26
455 28
455 28
455 28
455 28
384 12
432 13
432 13
431 13
432 14
431 14
432 12
432 12
432 12
432 11
431 10
431 10
430 10
430 10
421 9
421 9
420 9
414 8
414 8
410 8
410 8
403 8
401 8
391 8
380 7
380 7
379 7
379 7
383 7
380 7
382 7
383 7
373 7
373 7
351 6
351 6
238 6
235 5
221 5
224 5
177 5
177 5
175 5
174 5
86 4
92 4
85 3
85 1
108 1
110 0
115 0
119 0
121 0
125 0
126 0
126 316
127 316
140 316
153 316
153 316
153 316
152 316
155 316
155 316
155 316
155 316
168 316
165 316
165 316
165 316
165 0
165 0
166 0
167 0
127 0
127 0
127 0
126 0
126 0
126 0
126 0
126 0
126 0
126 0
126 0
127 0
131 0
132 0
135 0
135 0
135 0
138 0
138 0
139 0
139 0
140 0
149 0
169 0
180 0
181 0
185 0
180 0
178 0
182 0
182 0
185 0
186 0
188 0
188 0
186 0
186 0
187 0
181 0
181 0
195 0
205 0
206 0
207 0
203 0
204 0
203 0
181 0
178 0
168 0
167 0
166 0
162 0
162 0
162 0
160 0
149 0
136 0
138 0
159 0
177 0
180 0
180 0
191 0
197 0
191 0
241 0
243 0
251 0
276 0
276 0
276 0
276 0
275 0
278 0
278 0
278 0
279 0
278 0
278 0
278 0
278 0
278 0
278 0
276 0
273 0
276 1
275 1
276 1
276 1
274 1
275 1
274 1
274 1
272 1
262 1
237 1
224 1
223 1
219 1
221 1
248 1
243 1
238 1
233 0
232 0
229 0
229 0
229 0
229 0
228 0
227 0
226 0
220 0
209 0
210 3
209 3
208 3
208 3
208 3
208 3
209 3
209 3
209 3
212 3
212 3
210 3
210 3
210 3
209 3
208 3
725 0
697 0
693 0
694 0
691 0
681 0
676 0
665 0
621 0
619 0
614 0
589 0
589 0
589 0
588 0
63 0
59 0
59 0
59 0
59 0
60 0
60 0
57 0
57 0
55 0
54 0
55 0
55 0
52 0
52 0
52 0
52 0
51 0
51 0
57 0
57 0
57 0
57 0
57 0
57 0
57 0
52 0
50 0
23 0
23 0
23 0
19 0
19 0
19 0
19 0
19 0
19 0
19 0
19 0
19 0
17 0
17 0
17 0
17 0
17 0
17 0
17 0
17 0
16 0
16 0
16 0
13 0
12 0
11 0
11 0
11 0
11 0
11 0
11 0
11 0
10 0
9 0
9 0
9 1
9 1
9 2
9 2
9 2
9 2
9 2
9 2
9 2
9 2
9 2
9 2
9 2
9 2
9 2
9 2
9 1
9 0
9 0
9 0
9 0
8 0
10 0
10 0
10 0
10 0
10 0
10 0
10 0
4 0
4 0
4 0
4 0
4 0
4 0
4 0
4 0
4 0
5 0
6 0
6 0
6 0
6 0
6 0
7 0
6 0
7 0
7 0
7 0
7 0
7 0
7 0
7 0
6 0
6 29
6 29
7 29
7 29
7 29
7 29
7 29
7 29
7 29
7 29
7 29
7 29
7 30
7 30
7 30
7 2
7 2
7 1
7 1
7 1
7 1
7 1
7 1
7 1
7 1
7 1
8 1
8 1
9 1
9 1
9 1
9 1
9 1
9 1
10 2
10 2
10 2
10 2
10 4
10 4
10 4
7 4
7 4
7 4
7 15
7 15
7 15
7 16
7 16
6 15
6 15
6 15
6 15
6 15
6 15
6 13
6 14
6 14
5 14
5 14
5 3
5 3
5 3
4 2
4 2
3 2
3 3
3 3
3 3
3 3
3 3
3 2
3 2
3 2
3 2
2 2
3 2
3 2
3 2
3 2
3 2
3 1
3 1
3 0
3 0
3 0
3 0
3 0
3 0
3 0
3 0
2 0
2 0
2 0
2 0
2 0
3 0
3 0
3 0
2 0
1 0
1 0
2 0
2 0
3 0
3 0
5 0
5 0
5 0
5 0
5 0
5 0
5 0
5 0
5 0
5 0
5 1
5 1
4 1
4 1
4 1
4 1
4 1
4 1
4 1
4 1
4 1
4 1
4 1
4 1
4 1
4 0
4 0
4 0
4 0
4 0
4 0
4 0
5 0
5 0
8 0
11 1
13 2
13 2
13 2
13 2
14 2
14 2
14 2
14 2
14 2
14 2
14 2
14 2
14 2
12 2
614 5
613 4
614 4
614 4
614 4
613 4
612 4
613 4
613 4
613 4
613 4
613 5
613 5
613 5
613 5
11 2
12 2
13 2
13 3
13 3
13 3
12 3
12 3
10 3
10 3
11 3
11 3
11 2
11 2
11 2
15 2
16 2
21 2
22 3
22 3
22 3
24 3
24 3
24 3
24 3
24 3
24 3
24 3
24 3
25 3
25 3
25 3
25 3
25 3
25 3
25 3
25 3
27 3
27 3
27 3
26 3
26 3
24 3
18 4
17 4
17 4
16 4
16 4
16 4
16 4
16 4
16 4
16 4
16 4
16 4
16 4
16 4
16 4
16 3
16 3
16 3
16 2
16 2
16 2
68 6
68 6
68 6
68 6
68 6
68 6
68 6
68 6
68 6
70 6
72 6
72 7
73 6
73 6
73 6
73 6
21 2
21 2
21 2
20 2
20 2
19 2
17 2
15 2
13 2
13 1
7 0
7 0
6 0
5 0
4 0
4 0
4 0
4 0
4 0
4 0
4 0
5 0
5 0
5 0
8 0
8 0
8 0
8 0
8 0
8 0
8 0
8 0
8 0
8 0
8 0
8 0
8 0
8 0
8 0
8 0
8 0
8 0
8 0
7 0
7 0
6 0
6 0
6 0
6 0
6 0
6 0
6 0
6 0
10 0
10 0
10 0
10 0
10 0
10 0
10 0
10 0
10 0
10 0
10 0
10 0
10 0
8 0
8 0
4 0
4 0
4 0
5 0
5 0
5 0
5 0
5 0
5 0
5 0
5 0
5 0
5 0
5 0
5 0
5 0
5 0
5 0
4 0
5 0
5 0
5 0
5 0
5 0
5 0
5 0
5 0
5 0
5 0
4 0
4 0
4 0
5 0
6 1
6 1
6 1
6 1
10 1
10 5
12 6
12 6
12 6
12 6
12 6
12 6
9 6
9 6
9 6
9 6
9 6
9 5
8 5
8 5
8 5
8 5
8 5
8 4
8 4
6 0
6 2
6 118
6 123
6 123
6 123
6 123
6 123
8 148
8 148
8 148
8 148
8 148
8 148
8 148
9 148
9 148
9 148
9 147
9 26
9 26
9 25
9 25
9 25
7 0
7 0
7 0
7 0
7 0
7 0
7 0
6 0
6 0
5 0
4 0
4 0
4 0
4 0
4 0
4 0
4 0
4 0
4 0
4 0
4 0
4 0
4 0
4 0
4 0
4 0
4 0
4 0
0 0
0 0
0 0
0 1
0 1
0 1
0 1
0 2
0 2
0 2
0 2
0 2
0 2
0 2
0 2
0 2
0 2
0 2
0 2
0 2
0 2
0 2
0 2
0 0
0 0
0 0
1 1
1 1
1 1
1 2
1 2
1 2
1 2
2 2
2 2
2 2
2 2
2 2
2 2
2 2
2 2
2 2
1 1
1 1
1 1
1 3
1 3
1 3
2 3
6 4
6 4
6 4
6 4
6 4
6 4
6 4
6 4
6 4
9 4
9 4
9 4
9 4
9 4
9 4
7 5
7 5
7 5
7 5
7 5
7 5
7 5
8 6
8 6
8 6
8 6
18 6
18 6
18 6
18 6
18 6
18 6
18 5
18 5
18 5
18 5
18 5
18 5
18 4
17 4
17 4
7 4
7 4
7 4
8 4
8 2
8 2
8 2
8 2
8 0
8 0
8 0
8 0
8 0
8 0
9 0
9 1
9 1
9 1
8 1
8 1
8 1
8 1
8 1
8 1
8 1
8 1
8 1
8 1
8 1
8 1
8 0
8 0
4 0
4 0
4 0
6 0
6 0
6 0
6 0
6 0
6 0
3 0
3 0
3 0
3 0
3 0
3 0
3 0
3 0
3 0
1 1
1 1
1 1
1 1
1 1
1 2
1 2
1 2
1 2
1 2
1 2
1 2
1 2
1 4
1 4
1 4
1 3
1 4
1 4
1 4
1 4
1 4
1 4
1 3
1 3
1 3
1 3
1 3
1 3
1 3
1 3
1 3
1 2
1 3
1 3
1 1
0 1
0 1
0 1
1 1
1 1
1 1
1 1
1 1
1 1
1 1
1 1
2 1
2 1
2 1
2 1
2 1
2 1
2 1
2 1
2 1
2 1
2 1
2 2
2 2
2 2
2 2
2 2
2 2
2 2
1 2
1 2
1 2
1 2
1 2
1 2
1 2
1 3
1 4
1 5
1 5
1 5
1 5
1 5
1 5
1 5
1 7
1 7
1 7
1 7
4 7
4 7
5 7
5 6
5 6
5 6
6 4
6 4
6 4
6 4
6 4
6 2
6 2
6 2
6 2
3 2
3 2
2 2
2 2
2 3
2 2
2 2
2 3
2 3
2 15
2 15
2 15
1 36
1 41
1 45
1 45
1 45
1 45
1 45
1 45
1 45
1 45
1 45
1 45
1 46
1 46
1 46
1 46
1 46
1 46
1 46
1 45
1 45
1 45
1 45
2 45
2 45
2 45
2 45
2 45
2 45
2 45
2 44
2 44
2 44
2 44
2 44
2 44
3 46
3 46
2 46
2 46
2 46
2 46
2 46
2 49
2 48
2 47
2 47
2 49
2 50
2 50
2 50
2 50
0 49
0 54
0 55
0 55
0 55
0 68
0 92
0 93
0 93
0 84
0 75
0 76
0 76
1 75
1 76
1 76
1 76
1 74
1 72
1 72
1 72
1 57
1 54
1 54
1 54
2 54
2 55
2 55
1 57
1 60
1 61
1 62
1 126
1 127
1 128
1 132
1 232
1 240
1 246
1 246
0 249
0 249
0 255
0 255
0 255
0 255
0 255
0 256
0 256
0 259
0 259
0 259
0 259
0 259
0 259
0 262
0 262
0 262
0 273
0 273
0 278
0 279
0 279
0 281
0 281
0 284
0 305
0 304
0 307
0 307
0 313
0 314
0 319
0 319
0 303
0 302
0 302
1 299
1 281
1 210
1 210
1 210
1 163
1 164
1 168
1 169
1 169
7 172
7 170
7 168
7 168
7 168
6 168
6 193
6 202
6 218
6 229
6 287
6 292
6 297
6 281
6 276
0 266
0 266
0 261
0 259
0 254
0 254
0 251
0 202
0 199
0 196
0 195
0 195
0 195
0 195
0 195
0 195
0 195
0 195
0 194
0 194
0 190
0 189
0 189
0 189
0 189
0 189
0 184
0 184
0 184
0 184
0 183
0 183
0 181
0 183
0 185
0 185
0 177
0 161
0 161
0 160
0 160
5 157
5 157
5 154
5 154
5 159
5 159
5 159
5 159
5 159
5 159
5 159
5 159
5 159
5 159
5 156
0 153
0 153
0 150
0 150
0 150
0 150
0 150
0 149
0 118
0 97
0 88
0 80
0 15
0 14
0 11
0 11
0 11
0 12
0 12
49 11
49 11
49 11
49 11
49 11
49 11
49 11
49 11
49 11
49 11
49 11
49 11
49 11
49 11
49 11
0 11
0 11
0 11
0 11
0 11
0 11
0 11
0 11
0 11
0 11
0 11
0 11
0 11
0 11
0 11
0 11
0 9
0 8
0 8
0 8
0 8
0 10
0 10
0 10
0 10
0 10
0 10
0 10
0 5
0 5
0 5
0 5
0 5
0 7
0 7
0 7
0 7
1 9
1 9
1 9
1 9
161 9
161 9
161 9
161 9
161 9
161 9
161 9
161 9
161 9
161 9
161 9
160 9
160 10
160 10
160 10
0 9
0 9
0 9
0 9
0 9
0 9
0 9
0 9
0 9
0 9
0 9
1 9
1 9
1 9
1 9
1 9
1 9
1 9
1 9
1 9
1 9
1 9
1 8
1 8
1 8
1 8
1 1
0 1
0 0
0 0
0 0
0 0
0 0
0 0
0 0
0 0
0 0
0 0
0 0
0 0
0 0
0 0
0 0
0 0
0 0
0 0
0 0
0 0
0 0
0 0
0 0
0 0
0 0
0 0
0 0
0 0
0 0
0 0
0 0
0 0
0 0
0 1
0 2
0 2
0 2
0 2
0 2
0 2
0 2
0 2
0 2
0 2
0 2
0 2
0 2
0 2
0 1
0 1
0 0
0 0
0 0
0 0
0 0
0 0
0 0
0 0
0 0
0 0
0 0
0 0
0 0
0 0
0 0
0 0
0 0
0 1
0 1
0 1
0 1
0 1
0 1
0 1
0 1
0 1
0 1
0 1
0 1
0 1
0 1
0 1
0 1
0 1
0 1
0 1
0 0
0 0
0 0
0 0
0 0
0 0
0 0
0 0
0 0
0 0
0 0
0 0
0 0
0 0
0 0
0 0
0 0
0 0
0 0
0 0
0 0
0 0
0 0
0 0
0 0
0 0
0 0
0 0
0 0
0 0
0 0
0 0
0 0
0 0
0 0
0 0
0 0
0 0
0 1
1 1
1 1
1 1
1 1
1 1
1 1
1 1
1 1
1 1
1 1
1 1
1 1
1 1
1 1
1 1
0 0
0 0
0 0
0 0
0 0
0 0
0 0
0 0
0 1
0 1
0 2
0 2
0 2
0 2
3 3
3 5
3 5
4 5
4 6
4 6
7 6
7 6
7 6
7 6
7 5
7 5
7 5
7 5
7 5
7 4
4 3
4 2
3 2
3 2
3 1
3 0
0 0
0 0
2 0
2 0
2 0
2 192
2 192
2 192
2 192
2 192
4 192
4 192
4 192
4 192
4 192
4 192
4 192
4 192
4 192
4 192
4 0
4 0
4 0
4 0
4 0
7 0
7 0
11 1
11 1
11 1
11 1
11 1
11 1
10 1
10 1
10 1
10 1
10 1
10 1
12 1
17 1
30 1
27 0
27 0
27 0
27 0
27 0
27 0
27 0
27 0
27 0
27 0
27 0
36 1
45 1
48 1
48 1
48 1
48 1
48 1
48 1
48 1
48 1
48 1
48 1
48 1
48 1
48 1
48 0
49 0
49 0
49 0
49 0
49 0
49 0
47 0
47 0
47 0
49 0
49 0
49 0
49 0
49 0
48 0
47 0
47 0
47 0
47 0
47 0
47 0
47 0
50 0
50 0
50 0
51 0
51 0
54 0
54 0
54 0
54 0
54 0
54 0
54 0
54 0
60 0
65 0
66 0
88 0
89 0
80 0
80 0
68 0
65 0
63 0
57 0
56 0
56 0
56 0
56 0
56 0
56 0
90 1
90 1
90 1
90 1
90 1
87 1
82 3
81 3
82 3
82 3
83 3
83 3
83 3
83 3
83 3
83 3
50 2
50 2
51 2
51 2
50 2
50 0
50 0
50 0
51 0
51 0
51 0
51 0
51 0
51 0
49 0
49 0
52 10
52 10
52 10
52 10
52 10
52 10
52 10
52 10
54 10
54 10
54 10
53 10
53 10
53 10
52 10
48 0
47 0
47 0
47 2
47 2
47 2
47 2
48 2
49 4
40 8
33 8
33 8
10 8
9 9
9 9
9 9
9 9
9 9
10 7
10 7
10 7
10 7
10 7
11 7
11 1
11 1
11 1
11 1
37 1
104 1
106 0
106 0
105 0
106 0
109 0
114 0
121 0
131 0
149 0
155 0
163 0
166 0
168 0
168 0
167 0
168 0
168 0
168 0
168 0
168 0
167 0
173 0
231 0
234 0
234 0
234 0
234 0
234 0
234 0
234 0
234 0
233 0
233 0
233 0
233 0
233 0
231 0
231 0
231 0
231 0
231 0
231 0
232 0
232 0
232 0
233 0
234 0
234 0
235 0
235 0
230 0
230 0
230 0
229 0
229 1
229 1
230 1
230 1
232 1
262 2
310 2
324 2
329 2
329 2
329 2
327 2
325 2
325 2
324 2
322 2
314 1
296 1
236 1
237 1
243 1
247 0
247 0
246 0
245 0
238 0
223 0
207 0
208 0
203 0
201 0
201 0
202 0
204 0
211 0
217 0
219 0
219 0
216 0
208 0
201 0
152 0
152 0
154 0
154 0
154 0
154 0
153 0
153 0
153 0
153 0
153 0
153 0
153 0
153 0
153 0
153 0
152 0
153 0
154 0
153 0
152 0
152 0
152 0
152 0
151 2
151 2
151 2
151 2
151 2
151 2
151 2
157 2
157 3
154 3
154 3
153 3
127 3
100 3
51 3
44 1
41 1
41 1
41 1
41 1
41 1
40 1
40 1
40 1
16 0
15 0
15 0
15 0
15 0
15 0
7 0
7 0
7 0
7 0
7 0
3 0
0 0
0 0
0 0
0 0
0 0
0 0
0 0
0 0
0 0
0 0
1 0
1 0
1 0
1 0
1 0
1 0
1 0
1 0
1 0
1 0
1 0
1 0
1 0
1 0
2 0
2 0
3 0
3 0
3 0
3 0
4 0
4 0
4 0
4 0
6 0
6 0
6 0
6 0
6 0
6 0
6 114
6 114
6 114
6 114
6 115
6 115
6 115
6 115
15 115
13 115
13 115
13 115
13 115
13 115
13 115
13 1
13 1
13 1
14 1
14 1
14 1
14 1
14 1
14 1
14 1
14 1
14 1
14 1
14 1
14 1
14 1
14 1
14 1
14 1
14 1
14 1
14 1
4 1
4 1
4 1
4 1
4 1
4 1
3 1
3 1
3 1
3 1
3 1
3 1
3 2
3 2
3 2
3 2
3 2
3 2
3 2
3 2
2 2
2 2
1 2
1 2
1 2
1 2
0 2
0 2
0 1
0 1
0 1
0 1
0 1
0 1
0 1
0 1
0 1
0 1
3 1
3 1
3 0
3 0
3 0
3 0
3 0
3 8
4 12
4 13
4 14
4 14
4 14
4 14
4 14
4 14
1 14
1 14
1 18
1 18
1 19
1 19
1 13
1 13
1 13
1 13
1 13
1 13
1 13
1 13
1 13
1 13
1 13
1 13
1 9
1 9
1 9
1 9
1 9
1 9
1 9
1 9
1 9
1 12
1 12
1 12
1 10
1 719
1 719
1 719
1 719
1 719
1 719
1 719
1 719
1 719
1 719
1 719
1 716
1 716
1 716
1 716
1 7
1 7
1 7
1 7
1 7
3 7
3 7
3 7
3 7
3 7
3 7
3 7
3 7
3 7
3 7
3 8
3 8
3 8
3 8
2 2
0 2
0 2
0 2
0 2
0 4
0 4
0 6
0 6
0 6
0 5
0 5
0 5
0 6
0 6
0 6
0 9
0 20
0 26
0 35
3 188
3 203
3 227
3 245
3 256
3 262
3 273
3 274
3 274
3 275
3 275
3 275
3 275
3 275
3 275
3 275
3 282
3 284
3 285
3 288
3 289
3 289
3 290
3 290
3 291
3 300
3 316
3 316
3 320
3 323
3 326
3 326
3 326
3 326
3 326
3 325
3 324
3 325
3 324
3 334
3 334
3 335
3 337
3 339
3 346
3 363
3 365
3 365
3 367
6 492
6 495
6 496
7 496
7 496
9 496
9 496
9 496
9 500
9 499
9 499
9 497
9 502
9 502
10 503
11 503
11 503
11 501
15 500
15 500
13 499
13 482
13 464
13 421
10 256
10 234
10 233
10 232
10 232
10 235
10 237
10 240
10 242
10 242
10 242
10 242
10 242
10 242
10 241
10 241
10 233
10 230
10 231
10 230
10 230
10 229
10 229
10 227
10 226
10 219
10 201
10 203
10 200
10 199
10 199
10 199
10 199
10 200
10 200
12 199
12 205
12 204
12 205
12 196
12 196
12 195
12 196
12 184
12 188
12 188
12 189
11 189
11 184
5 57
5 94
5 94
5 96
5 97
5 97
2 97
2 97
2 92
2 94
2 94
2 94
2 89
2 89
2 88
2 88
2 88
2 88
2 88
2 88
2 88
2 88
2 89
2 89
2 89
2 89
2 89
3 89
3 89
5 86
5 81
5 80
5 81
5 81
6 81
6 81
8 81
8 81
8 86
8 86
8 85
8 85
8 84
8 84
8 84
5 84
3 84
3 83
3 83
2 81
2 82
2 77
1 76
1 71
1 70
1 70
1 68
1 68
1 68
1 67
1 60
1 60
2 60
2 60
2 58
2 56
2 56
2 56
1 45
3 45
3 45
3 45
3 45
3 45
3 8
3 8
3 6
2 4
2 4
2 4
2 4
2 4
2 2
2 2
2 2
2 3
2 3
2 3
2 3
2 3
2 3
2 3
2 3
2 3
2 3
2 3
2 4
3 4
3 4
4 4
4 4
4 4
4 4
4 4
4 4
4 4
4 5
4 5
4 5
4 5
4 5
4 5
4 5
5 5
5 5
5 5
5 5
5 5
3 5
3 6
3 6
5 6
5 6
5 6
5 6
5 6
5 6
5 6
5 6
5 6
4 6
4 11
4 56
4 56
4 56
4 56
4 55
4 55
4 56
4 57
4 57
4 57
4 57
4 59
4 59
4 59
5 60
5 11
5 11
5 11
5 13
5 13
5 14
5 15
5 14
5 15
5 26
5 60
5 93
5 103
5 123
5 129
4 136
4 152
4 157
4 159
4 159
4 159
4 158
4 159
3 159
3 161
2 169
2 172
2 172
2 173
2 174
2 174
2 174
2 173
2 173
2 173
2 173
2 173
3 173
3 173
3 173
3 173
3 173
3 174
3 174
3 174
3 173
3 173
1 172
1 171
1 171
1 171
1 171
1 174
0 174
0 174
0 176
0 179
0 242
0 254
0 256
0 256
0 260
0 260
0 264
0 263
0 263
0 263
0 263
0 263
0 262
0 262
0 262
0 263
0 263
0 265
0 265
0 264
0 266
0 265
0 264
0 264
0 262
0 255
0 212
0 174
0 157
0 157
0 153
0 147
0 146
0 143
0 143
0 145
0 148
0 160
0 160
0 164
0 160
0 152
0 148
0 148
0 147
0 146
0 146
0 146
0 151
0 151
0 152
0 156
0 157
0 157
0 157
0 157
0 158
0 160
0 159
0 160
0 161
0 162
0 162
0 170
0 172
0 179
0 180
0 180
0 180
0 180
0 179
0 176
0 170
0 98
0 101
0 102
0 106
0 106
0 107
0 107
0 108
0 108
1 108
1 110
1 111
1 113
1 113
1 114
1 114
1 114
1 288
1 288
1 292
2 298
2 298
2 298
2 297
2 294
2 289
2 288
2 285
2 289
2 280
2 280
2 279
2 279
2 279
2 279
2 278
3 270
3 257
3 256
3 255
4 255
4 256
4 256
4 258
4 260
4 261
4 261
4 262
4 257
4 258
4 256
4 256
4 255
4 255
4 259
4 260
4 266
4 266
4 266
4 264
4 264
4 271
4 275
9 266
9 264
9 259
9 261
9 261
9 267
9 268
9 268
9 268
9 265
9 264
9 261
9 260
9 256
9 256
9 255
4 256
4 255
3 254
3 253
3 252
3 251
3 249
3 249
3 248
3 247
3 243
3 52
3 52
3 48
1 26
1 26
1 26
0 26
0 26
0 26
0 26
0 25
0 22
0 22
0 24
0 24
0 24
0 24
1 24
1 24
1 24
1 24
1 24
1 24
1 24
1 23
1 23
1 23
1 23
1 22
1 22
1 20
1 20
1 20
1 20
1 18
1 18
1 18
1 18
1 18
1 17
2 17
2 17
2 15
2 15
2 6
2 5
2 5
2 6
2 6
2 6
3 7
3 7
3 8
3 8
3 8
3 10
2 11
2 123
2 123
2 123
2 123
2 123
2 122
2 122
2 122
2 122
2 122
2 120
2 120
2 120
2 120
2 120
2 6
2 6
2 6
3 6
3 6
5 6
5 6
5 6
5 6
5 6
5 5
5 5
5 5
5 5
5 5
5 5
5 5
5 5
4 5
3 5
2 5
1 5
1 5
1 5
1 5
1 5
1 5
1 5
1 5
1 5
1 5
1 5
1 5
1 5
1 5
1 5
1 5
1 5
1 5
1 5
1 4
1 5
1 5
1 5
2 5
4 5
4 4
4 4
4 3
4 3
4 3
3 3
3 2
3 2
3 2
3 2
3 1
3 1
3 1
3 1
3 1
3 1
3 1
3 1
3 1
3 1
3 1
3 1
3 1
3 1
3 1
3 1
3 1
3 1
3 1
4 1
4 1
4 1
4 1
4 1
4 1
4 1
4 1
4 1
4 1
4 1
4 1
4 1
4 1
4 2
4 2
4 2
5 2
5 2
5 2
4 2
4 2
4 2
4 2
4 2
4 2
4 2
4 2
4 2
4 1
4 1
4 1
4 1
4 1
4 2
4 2
4 2
6 3
6 3
6 2
6 2
5 2
5 2
3 3
3 3
3 3
3 5
3 5
3 5
3 5
3 5
3 5
3 5
2 5
2 5
3 5
3 5
3 5
3 5
3 5
3 6
3 4
5 4
5 4
5 4
5 4
5 4
5 4
5 4
5 4
5 4
5 4
5 5
5 5
5 5
5 4
5 4
6 4
6 4
7 5
8 5
8 5
8 10
8 10
8 11
8 11
8 13
8 12
8 12
8 12
8 14
8 14
8 14
8 14
9 14
8 15
8 15
8 10
8 10
8 10
8 10
8 8
11 8
11 8
12 8
11 8
11 8
11 5
11 5
10 5
8 4
8 4
7 4
7 4
7 3
7 3
7 3
7 3
7 3
7 3
7 3
3 3
3 3
3 3
3 3
3 3
3 3
3 3
14 3
14 3
14 3
14 3
14 3
14 3
14 3
13 3
13 3
13 3
13 3
13 3
13 3
13 3
13 3
2 3
2 6
3 6
3 7
3 7
3 7
3 7
2 7
2 8
2 7
1 7
1 7
1 7
1 7
1 6
1 6
1 6
1 6
0 6
0 6
0 6
0 6
0 6
0 6
0 5
0 4
0 4
0 4
0 4
1 4
1 4
1 4
1 4
1 4
1 4
4 4
4 4
4 4
4 4
4 4
4 4
4 4
4 4
4 4
4 4
4 5
4 5
3 5
3 5
3 5
2 5
2 5
0 5
0 5
0 5
0 5
0 5
0 5
0 5
0 5
0 4
0 4
0 4
0 4
0 4
0 4
0 4
0 4
0 4
0 4
0 4
0 7
0 7
0 9
0 5
0 5
0 5
0 5
0 5
0 5
0 5
0 5
0 5
0 5
0 5
0 5
0 5
0 5
0 5
0 5
0 5
0 5
0 5
0 5
0 5
0 5
0 5
0 5
0 5
0 5
0 5
0 5
0 5
0 5
0 5
0 5
0 5
0 5
0 5
0 5
0 5
0 5
0 5
0 5
10 6
10 6
10 6
10 6
10 6
10 6
10 6
10 6
10 6
10 6
10 6
10 6
10 6
10 6
10 6
10 6
10 6
10 6
0 5
0 5
0 5
0 5
0 5
0 5
0 5
0 5
0 5
0 5
0 5
0 4
0 2
0 2
0 0
0 0
0 0
0 0
0 0
0 0
0 0
0 1
0 1
0 2
0 2
0 2
0 2
0 2
0 2
0 2
0 2
0 2
0 2
0 2
0 2
0 2
0 2
0 2
0 2
0 2
0 2
0 2
0 2
0 2
0 2
0 2
0 2
0 2
0 2
0 2
0 2
0 2
0 2
0 2
0 2
0 2
0 2
0 2
0 2
0 2
0 2
0 2
0 2
2 2
2 2
2 2
2 2
2 3
2 3
2 3
2 4
2 4
2 4
2 4
2 5
2 7
2 7
2 8
0 10
0 10
0 10
0 12
0 13
0 12
0 12
0 13
0 11
0 11
0 11
0 11
0 11
0 11
0 11
0 11
0 11
0 11
0 11
0 11
0 11
0 11
0 11
0 11
0 11
0 11
0 11
0 11
0 11
0 11
0 11
0 11
0 11
0 11
0 11
0 11
0 11
1 11
1 11
1 11
1 11
1 11
1 11
1 11
1 11
1 11
1 11
1 11
1 11
1 11
1 11
1 11
1 11
0 11
0 11
0 11
0 11
0 11
0 11
0 11
0 11
0 11
0 8
0 5
0 5
0 4
0 4
0 4
0 4
0 3
0 3
0 3
0 3
0 2
0 2
0 2
0 1
0 1
0 1
1 1
1 0
1 0
1 0
1 0
1 0
1 1
1 1
1 1
1 1
1 1
1 1
1 1
1 1
1 1
0 1
0 1
0 1
0 1
0 1
0 1
0 0
0 0
0 0
0 0
0 1
1 1
1 1
1 1
1 1
1 1
1 1
1 1
1 1
1 1
1 1
1 1
1 1
1 1
1 1
1 1
0 1
0 1
0 1
0 1
0 1
0 1
0 1
1 2
1 2
1 2
3 5
3 6
3 6
3 6
3 6
3 6
3 6
3 6
3 6
3 7
3 7
3 7
2 7
2 6
2 6
2 6
0 5
0 5
0 4
0 4
0 4
0 4
0 4
1 4
1 4
1 5
1 5
1 5
1 5
1 5
1 5
1 5
1 5
1 5
1 5
1 5
1 5
1 5
1 5
0 5
0 4
0 4
0 4
1 4
1 4
1 4
1 4
1 3
1 3
1 3
1 3
1 3
1 3
1 3
1 3
1 3
1 3
1 3
1 3
0 3
0 3
0 3
0 3
0 3
0 3
0 151
0 151
0 151
0 151
0 151
0 151
0 151
0 151
0 150
0 149
0 149
0 149
0 149
0 149
0 149
0 2
0 2
0 1
7 1
7 1
7 1
7 1
7 1
7 1
7 1
7 1
7 1
7 1
7 1
7 1
7 1
7 1
7 1
0 1
0 1
0 1
0 1
0 1
0 1
0 1
0 1
0 1
0 1
0 1
0 1
0 1
0 1
0 1
0 1
0 1
0 1
0 1
0 1
0 1
15 3
15 3
15 3
15 3
15 3
15 3
15 3
15 3
15 3
15 3
15 3
15 3
15 3
15 3
15 3
1 1
8 1
8 1
8 1
9 0
9 0
9 0
9 1
9 1
9 1
9 1
9 1
9 1
9 1
9 1
9 1
9 1
9 1
9 1
9 1
10 1
10 1
10 0
10 0
10 0
10 0
10 0
10 0
10 0
10 0
10 0
10 0
10 0
10 0
10 0
13 1
12 1
394 2
394 2
394 3
394 3
394 3
394 3
394 3
394 3
394 3
394 3
394 3
394 3
394 4
394 4
394 10
12 9
12 9
12 8
12 8
12 8
9 8
9 8
9 8
9 7
9 7
9 7
10 7
10 6
10 6
10 0
10 0
10 0
11 0
11 0
11 0
11 0
10 0
4 0
4 1
4 1
3 1
2 1
2 1
2 1
2 1
2 1
2 1
1 1
1 3
1 3
1 5
1 5
1 5
1 4
1 4
1 4
10 4
10 4
10 4
10 4
10 4
10 4
10 4
10 4
10 4
10 1
10 1
10 0
10 0
10 0
10 0
10 0
1 0
1 0
3 0
3 0
3 0
3 0
3 0
3 0
3 0
3 0
3 0
3 0
3 0
3 0
9 0
9 0
9 0
9 0
9 0
9 0
11 0
14 0
14 0
14 0
14 0
14 0
12 0
12 0
13 0
13 0
13 0
13 0
13 0
7 0
7 0
8 0
7 0
7 0
8 22
8 22
8 22
8 22
8 23
8 23
8 23
8 23
8 23
8 23
8 23
8 23
8 23
8 23
8 23
8 23
6 1
6 1
6 1
6 0
6 0
7 1
19 1
20 1
20 1
20 1
20 1
20 1
20 2
20 2
20 2
20 2
20 2
20 2
20 2
20 2
20 2
9 1
9 1
8 1
8 1
8 1
8 1
8 0
8 0
8 0
8 0
8 0
8 0
8 0
8 1
8 1
8 1
7 1
7 1
6 1
4 1
4 1
4 1
4 1
4 1
4 1
4 1
3 1
3 1
3 1
3 1
3 1
3 1
3 0
2 0
2 0
2 0
2 0
2 0
2 0
2 0
2 0
2 0
2 0
2 1
2 1
2 1
2 1
2 1
2 1
2 2
2 2
2 2
4 2
4 2
4 6
4 7
102 7
102 7
102 6
102 6
102 6
102 6
102 6
102 6
102 6
102 6
102 6
102 5
100 5
99 5
99 0
99 0
91 0
0 0
0 0
0 0
0 0
0 0
0 0
0 0
0 0
0 1
0 1
0 1
0 1
0 1
0 1
0 1
0 1
0 1
0 1
0 1
0 1
0 2
0 2
0 2
0 1
1 1
1 1
1 2
1 2
1 2
1 2
1 2
1 2
1 3
1 3
1 3
1 3
1 3
1 2
1 2
1 2
0 3
0 3
0 2
0 2
0 3
0 3
2 4
2 4
2 4
2 4
2 4
2 4
2 3
2 3
2 3
2 3
2 4
2 4
2 4
2 3
3 4
1 3
1 3
1 3
1 3
1 3
1 3
1 3
1 3
1 3
1 3
1 2
1 2
1 2
2 2
2 1
2 1
1 1
1 1
1 1
6 2
6 2
6 2
6 2
6 3
6 3
6 3
6 3
6 3
6 3
6 3
5 3
5 3
5 3
5 3
4 3
0 3
0 3
0 2
0 1
0 1
0 1
0 1
0 1
0 2
0 2
0 2
0 2
0 2
0 2
0 2
0 2
0 2
0 2
0 2
0 2
0 2
0 1
0 1
0 1
0 1
0 1
0 1
0 1
0 1
0 1
0 1
0 1
0 1
0 1
0 1
0 1
0 1
0 1
0 1
0 1
0 1
0 1
0 1
0 1
0 1
0 1
0 1
0 1
0 1
0 1
0 1
0 1
1 1
1 1
1 1
1 1
1 1
1 1
1 1
1 1
2 1
2 1
2 1
2 1
2 1
2 1
2 1
2 1
2 1
2 1
2 1
2 1
2 1
2 1
2 1
2 1
2 1
2 1
2 1
2 1
2 0
2 0
2 0
2 0
2 0
2 0
2 0
2 0
2 0
2 0
2 1
2 1
2 1
2 1
2 1
2 1
2 1
2 1
2 2
2 2
3 2
3 2
3 2
3 2
3 2
3 2
3 2
3 2
3 2
3 2
3 2
3 2
3 2
3 2
3 2
2 2
2 2
2 2
5 469
5 484
5 484
5 484
5 484
5 581
5 584
55 584
55 584
56 584
56 584
56 584
56 584
56 584
56 584
55 584
55 584
55 584
55 584
55 584
55 584
52 3
52 3
1 3
1 2
0 2
0 2
0 2
0 2
0 2
30 2
30 2
30 2
30 2
30 11
30 11
30 11
30 11
31 11
31 10
31 11
31 11
31 11
31 11
31 11
2 11
1 11
1 11
1 11
1 2
1 2
1 2
2 2
1 1
1 1
1 0
1 0
1 0
1 0
1 0
1 0
1 0
1 0
1 0
1 0
1 0
1 0
0 0
0 0
0 0
0 0
0 0
0 0
0 0
0 0
0 0
0 0
0 0
0 0
0 0
0 0
0 0
0 0
0 0
0 0
0 0
0 0
0 0
0 0
0 0
0 0
0 0
0 0
0 0
0 1
0 1
0 1
0 1
0 1
0 1
0 1
0 1
0 1
0 1
0 1
0 1
0 1
0 1
0 1
0 0
0 0
0 0
0 0
0 0
0 0
0 0
0 0
0 0
0 0
0 0
0 0
0 0
0 2
0 2
0 2
0 2
0 4
0 10
0 71
0 77
0 92
0 93
1 93
1 94
1 96
1 97
1 98
1 96
1 96
1 96
1 96
1 96
1 96
1 95
1 94
1 94
1 83
0 83
0 83
0 83
0 83
0 83
0 83
0 85
0 85
0 85
0 85
0 85
0 85
0 85
0 85
0 85
0 86
0 86
0 120
0 120
1 120
1 120
1 121
1 121
1 121
1 122
1 122
1 122
1 122
1 122
1 122
1 121
5 121
5 121
5 121
4 121
4 121
4 121
5 133
16 171
16 171
16 171
16 171
16 171
16 175
16 176
16 180
12 203
12 207
12 213
12 213
12 213
12 213
11 199
11 193
17 134
17 131
17 123
17 122
17 119
18 119
7 79
7 79
7 78
7 78
7 78
7 78
7 78
7 79
7 79
7 79
1 99
1 99
1 99
1 111
0 158
0 161
0 164
1 166
1 167
1 165
9 167
9 167
9 167
9 179
9 179
9 179
9 179
9 179
9 167
9 167
9 130
9 130
9 130
9 130
9 127
9 127
1 127
1 125
1 125
1 125
1 125
1 125
1 128
1 128
1 128
0 128
0 128
0 128
2 128
2 128
2 127
2 133
2 149
2 150
2 150
2 152
2 151
2 152
2 140
2 106
2 92
2 83
2 85
2 85
0 91
0 91
0 87
0 85
0 86
0 86
0 86
0 85
0 83
0 84
0 83
0 83
0 83
0 83
0 83
1 83
1 82
1 82
1 82
1 82
1 80
1 80
1 80
1 52
1 52
1 50
1 49
1 48
1 48
1 48
0 48
0 48
0 33
0 33
0 32
0 28
0 28
0 28
0 28
0 28
0 28
0 28
0 28
0 28
0 28
0 28
0 28
0 28
0 28
0 28
0 28
0 28
0 28
0 28
0 28
0 28
0 28
0 28
0 28
0 27
0 27
0 17
0 16
0 16
0 15
0 15
0 15
0 15
0 15
0 40
0 40
0 34
0 33
0 29
0 29
0 29
0 29
0 34
1 45
1 47
1 47
1 46
1 46
1 46
1 44
1 21
1 21
1 21
1 21
1 21
1 21
1 21
1 20
1 20
0 20
0 22
0 22
0 23
0 23
0 24
0 26
0 26
0 26
0 26
0 26
0 27
0 27
0 27
0 27
0 27
0 27
0 25
0 24
0 24
0 24
0 23
0 22
0 22
0 22
0 22
0 24
0 25
0 26
0 29
0 33
0 34
0 34
0 34
0 40
0 40
0 39
0 42
0 42
1 42
1 44
1 47
2 49
2 49
2 49
2 57
2 57
2 57
2 57
2 57
2 57
2 57
2 57
2 57
1 57
1 57
1 40
1 39
0 39
0 39
0 31
0 31
0 31
0 31
0 31
0 31
0 31
1 31
1 31
1 31
1 31
1 31
1 31
1 31
1 31
1 29
1 29
1 29
1 26
1 25
1 25
1 25
1 25
0 25
0 25
0 25
0 25
0 25
0 25
0 25
0 25
0 25
0 25
0 25
0 25
0 25
0 24
0 24
0 23
0 23
0 28
0 31
0 63
0 61
0 67
0 70
0 72
0 66
0 64
0 64
0 63
0 64
0 61
0 60
0 60
0 60
0 56
0 56
0 56
0 56
0 56
0 56
0 56
0 56
0 57
0 57
0 55
0 55
0 55
0 55
0 55
0 55
0 55
0 55
0 55
0 55
0 55
0 55
0 55
1 56
1 56
1 56
1 56
1 65
1 67
1 69
1 69
1 69
1 69
1 70
1 70
1 72
1 73
1 73
0 74
0 74
0 74
0 74
0 74
0 75
0 75
0 75
0 75
0 75
0 76
0 83
0 89
0 90
0 90
0 90
0 98
0 98
0 98
0 96
0 88
0 116
0 111
0 108
0 114
0 384
0 406
0 434
0 455
0 458
0 459
0 477
0 482
0 492
0 492
0 493
0 493
0 497
0 497
0 497
0 497
0 497
0 497
0 496
0 496
0 496
0 496
0 497
0 495
0 496
0 500
0 629
1 633
1 637
1 643
4 644
4 650
4 652
4 644
5 647
5 647
5 648
5 635
5 637
5 637
5 636
5 636
5 638
5 633
5 633
1 633
1 633
1 634
1 635
1 635
1 636
1 641
1 641
0 642
0 651
0 650
0 650
0 648
0 654
0 561
0 545
2 545
2 543
2 541
2 522
2 521
2 522
2 522
2 523
2 517
2 533
3 540
33 6025
33 5782
33 5757
33 5750
33 5753
31 5755
31 5770
31 5777
31 5777
31 5776
31 5776
31 5776
31 5776
31 5764
31 5764
28 5718
28 5739
28 5740
28 5889
28 5910
0 538
1 618
1 623
1 630
1 630
1 630
1 631
1 513
1 508
1 508
1 507
1 519
1 520
1 519
1 535
1 533
1 540
1 543
1 543
1 541
1 541
1 541
1 542
1 542
1 542
1 537
1 538
1 537
1 536
1 536
1 536
1 536
1 533
1 534
1 532
1 530
1 529
1 529
23 627
23 600
23 585
24 639
24 633
24 633
24 634
24 635
24 637
24 635
24 636
24 636
24 637
24 606
24 582
2 482
2 484
2 484
2 485
2 485
2 483
2 484
2 476
2 476
2 477
2 476
2 476
2 475
2 475
2 475
2 472
2 330
2 326
2 242
2 175
2 172
1 139
1 137
1 136
1 128
1 128
1 128
1 128
1 130
1 130
1 129
1 114
1 111
1 111
1 99
2 101
2 98
2 98
2 98
2 98
2 98
2 98
2 98
5 98
5 98
5 98
5 98
5 97
5 97
5 97
4 97
6 97
6 96
6 96
6 95
6 95
6 109
6 111
5 122
5 121
5 121
4 43
4 47
4 50
4 52
4 48
2 48
2 49
2 49
2 49
2 55
2 56
2 65
2 65
2 66
2 69
2 72
2 85
2 626
0 643
1 680
1 686
1 708
1 888
1 984
2 1037
2 1159
2 1194
2 1217
2 1278
2 1327
2 1344
2 1409
2 1409
2 1416
2 884
2 916
3 916
3 919
5 931
4 964
4 966
4 969
4 970
4 970
4 969
4 978
4 982
4 979
4 981
4 982
18 983
17 985
17 985
15 994
15 994
15 994
15 994
15 995
15 995
15 995
15 995
15 995
15 995
15 995
15 995
1 994
1 994
1 994
1 982
1 980
1 977
1 976
1 974
1 971
1 967
1 967
1 967
1 967
1 969
1 967
9 1151
9 1149
9 1142
10 1139
10 1130
10 1130
10 1129
10 1127
10 1120
10 1123
10 1104
10 1099
9 1137
10 1148
10 1146
2 787
2 656
2 614
2 476
2 442
1 437
1 439
3 677
3 680
3 635
3 674
3 687
3 720
3 692
3 695
3 728
3 720
3 731
3 733
3 741
3 743
3 744
1 746
1 738
1 737
1 738
1 740
1 739
1 738
1 737
1 739
1 731
1 731
1 731
1 731
1 727
1 727
1 727
1 730
17 730
17 739
17 739
17 739
17 738
17 739
17 739
17 738
17 738
17 738
17 738
17 738
17 738
17 738
17 738
1 740
1 740
1 740
1 740
1 740
1 740
1 740
1 740
1 739
1 739
1 739
1 739
1 739
1 726
1 707
1 697
1 605
0 588
157 573
157 505
157 495
157 479
157 479
157 478
157 477
157 475
157 210
157 204
157 158
157 99
157 83
157 49
157 49
157 47
0 41
0 36
0 27
1 26
1 25
1 25
1 24
1 24
1 24
1 25
1 25
1 23
1 22
4 21
4 21
4 19
4 19
4 19
3 19
192 21
195 21
196 21
196 21
234 21
234 21
234 12
234 12
234 11
231 10
231 10
231 10
231 10
231 10
231 10
230 10
43 8
43 8
40 8
0 8
0 6
0 6
0 6
0 7
0 8
0 8
0 8
0 9
0 9
0 9
0 9
0 9
0 10
0 10
0 10
0 10
0 9
0 9
0 7
0 7
0 7
0 7
1 7
1 5
113 5
113 5
113 6
113 6
113 6
113 6
113 6
113 6
122 6
122 6
122 6
122 6
122 6
122 6
121 6
14 6
10 6
10 6
10 6
10 6
9 6
9 6
9 6
9 6
1 6
1 8
1 8
0 8
0 8
0 8
0 8
0 8
0 8
0 8
0 8
0 8
0 8
0 8
0 8
0 8
0 8
0 8
0 8
0 12
0 12
0 12
0 12
0 12
0 15
0 15
0 15
0 15
0 14
0 14
0 14
0 14
0 14
0 14
0 14
0 14
0 14
0 13
0 13
0 13
0 13
0 13
0 14
0 16
0 20
0 28
0 28
0 151
0 155
0 155
0 163
0 164
0 168
0 170
1 277
1 290
1 314
1 326
1 327
1 335
1 340
1 462
1 482
1 491
1 515
1 522
2 529
2 561
2 561
2 561
2 561
2 561
2 561
2 561
2 562
2 562
2 562
2 564
2 566
2 566
2 571
2 575
2 575
2 575
2 578
2 578
2 579
2 579
2 579
2 579
2 579
2 579
2 589
2 617
2 659
2 733
2 856
2 867
2 868
2 1094
2 1094
2 1094
2 1094
2 1094
2 1094
2 1095
2 1095
2 1100
2 1101
2 1104
2 1108
2 1108
2 1108
2 1110
3 1111
3 1111
3 1111
3 1107
3 1100
3 1098
3 970
4 965
4 991
4 990
4 992
4 990
4 983
3 840
3 829
3 827
3 824
3 824
3 825
3 819
3 655
3 646
4 618
3 572
3 571
2 571
2 571
2 571
3 571
3 571
3 571
2 571
2 571
2 571
2 571
2 571
2 570
1 568
1 568
1 563
1 559
1 559
1 559
0 559
0 559
0 559
0 560
0 561
0 562
0 566
0 566
0 532
0 485
0 440
0 374
0 270
0 264
0 258
0 28
0 28
0 27
0 27
0 26
0 26
0 26
0 25
0 29
0 29
0 29
0 29
0 28
0 28
0 27
0 27
0 27
0 28
1 36
2 38
637 40
637 40
637 41
637 41
637 41
637 41
637 43
637 65
637 87
637 91
637 91
637 91
637 91
638 90
638 90
638 90
2 87
2 87
2 87
2 87
2 87
2 88
2 88
2 88
2 88
2 88
2 88
2 89
2 91
2 91
2 92
2 92
4 92
4 92
4 93
4 93
4 93
4 93
4 93
4 93
4 93
4 92
4 89
4 104
4 103
4 103
4 103
4 103
4 104
2 104
2 98
2 95
2 95
2 95
2 95
2 95
2 95
2 95
2 96
2 98
2 98
2 95
2 95
2 94
2 94
2 93
2 93
2 92
2 94
2 94
2 94
1 137
1 141
1 145
1 152
1 149
1 149
1 149
1 148
1 145
0 117
0 100
0 100
0 100
0 173
0 173
0 173
0 173
0 173
0 173
0 173
0 173
0 173
0 173
0 172
0 172
0 173
0 173
0 173
0 99
0 98
0 96
0 96
0 96
0 96
0 96
0 96
0 95
0 95
0 95
0 95
0 95
0 95
0 95
0 95
0 94
0 75
0 75
0 75
0 75
0 75
0 75
0 75
0 75
0 75
0 75
0 75
0 75
0 75
0 75
0 75
0 75
0 75
0 75
0 75
0 75
0 75
0 75
51 75
51 75
51 74
51 74
51 74
51 73
51 18
51 12
51 6
51 2
51 2
51 2
51 2
51 2
51 3
0 3
0 3
0 3
0 3
0 3
0 3
0 3
0 3
0 3
0 3
0 3
0 3
0 3
1 3
1 3
2 3
2 1
2 1
2 1
2 1
2 1
2 2
2 2
3 2
3 2
3 2
3 2
3 2
2 2
2 2
1 2
1 2
1 2
1 2
1 2
1 2
1 1
1 1
1 1
1 1
1 1
1 1
1 0
1 0
1 0
1 5
1 5
1 5
1 5
1 5
1 5
1 5
1 5
1 5
0 5
0 5
1 5
1 6
1 6
1 6
1 1
1 1
1 1
1 1
1 1
1 1
1 1
1 1
1 1
1 1
1 1
1 1
0 1
0 0
0 0
0 0
0 0
0 0
0 0
0 0
0 0
0 0
0 0
0 0
0 0
0 0
0 0
0 0
0 2
0 2
0 2
0 2
0 2
0 2
0 2
0 2
0 2
0 2
0 2
0 2
0 2
0 2
0 2
0 2
0 2
0 2
0 2
0 3
0 3
0 3
0 3
0 3
0 3
0 3
0 3
0 3
0 3
0 3
0 3
0 3
0 3
0 3
0 2
0 2
0 2
0 2
0 2
0 2
0 2
0 2
0 2
0 2
0 2
0 2
0 1
0 1
0 1
0 1
0 0
0 0
0 0
0 0
0 0
0 0
0 0
0 0
0 0
0 0
0 0
0 0
0 0
0 0
0 0
0 0
0 0
0 0
0 0
0 0
0 0
0 0
0 0
0 0
0 0
0 0
0 0
0 0
0 0
0 0
0 0
0 0
0 0
0 0
0 0
0 0
0 0
0 0
0 0
0 0
0 0
0 0
0 0
0 0
0 0
0 0
0 0
0 0
0 0
0 0
0 0
0 0
0 0
1 0
2 0
2 0
2 0
2 0
2 0
2 0
2 0
2 0
2 0
2 0
2 0
2 0
2 0
2 0
2 0
2 0
1 0
1 0
0 0
0 0
0 0
0 0
0 0
0 3
0 3
0 3
1 3
1 5
1 5
1 5
1 5
1 5
1 5
1 5
1 5
1 6
1 6
1 6
1 3
1 3
1 3
1 3
0 2
0 2
0 2
0 2
0 29
0 31
0 31
0 30
0 29
1 29
1 29
1 29
1 29
1 29
1 29
1 29
2 35
2 35
2 35
2 35
2 6
2 7
2 7
2 7
1 7
1 7
1 7
1 7
1 7
1 7
1 7
1 7
1 7
0 1
0 1
0 1
0 0
0 0
0 0
0 0
0 0
0 1
0 1
0 1
0 1
0 1
0 1
0 1
0 1
0 1
0 1
0 1
0 1
0 1
0 1
0 1
0 0
0 0
0 0
0 0
0 0
1 0
1 0
1 0
1 0
1 0
1 0
1 0
1 0
1 0
1 0
1 0
1 0
1 0
1 0
1 0
0 1
0 1
0 1
0 1
0 1
0 1
0 1
0 3
0 3
0 5
0 5
0 5
0 5
0 5
0 5
0 5
0 4
0 4
0 4
0 4
0 4
0 4
0 4
0 4
0 4
0 2
0 2
0 2
0 3
0 3
0 3
0 9
0 9
2 11
2 11
3 11
3 12
3 13
3 13
3 13
3 13
3 13
3 11
3 11
3 11
3 11
3 11
3 11
1 9
1 9
1 9
1 9
0 9
0 8
0 8
0 8
0 8
0 9
0 9
0 9
0 9
0 9
0 9
0 9
0 9
0 9
0 9
0 9
0 9
0 35
0 35
0 35
0 35
1 35
1 35
1 35
1 35
1 35
1 35
1 35
1 35
1 35
1 35
1 35
1 35
1 35
1 34
1 34
0 35
0 39
0 40
0 45
1 36
1 37
1 37
1 40
1 41
1 41
1 42
1 42
1 44
1 88
1 94
1 100
4 208
4 211
4 215
4 215
4 220
4 219
4 222
4 224
4 224
4 224
4 224
4 240
4 240
4 240
4 240
4 240
4 240
4 240
4 241
4 241
4 241
4 242
4 242
4 242
4 243
4 244
4 243
4 245
4 245
4 245
4 243
4 243
4 245
4 243
4 243
4 257
4 257
4 257
4 259
4 264
4 284
4 285
4 286
4 287
4 287
4 287
4 287
4 287
4 284
4 303
4 306
4 309
6 336
6 340
6 340
6 344
7 353
7 353
7 330
7 315
7 277
6 267
6 264
6 264
6 231
10 265
10 265
10 265
10 266
10 266
10 265
10 259
10 258
7 186
7 186
7 187
7 187
7 182
7 182
7 178
7 176
7 174
7 173
7 173
7 153
7 153
7 153
7 153
7 153
7 153
7 154
7 152
7 151
7 148
7 148
7 148
7 148
7 148
7 147
7 148
7 149
7 149
7 149
7 149
7 149
7 149
7 149
7 149
7 149
7 150
7 148
7 142
7 132
7 106
7 106
7 98
7 98
7 97
7 96
7 96
7 96
7 96
9 93
9 89
9 89
7 58
7 55
7 55
7 55
8 45
8 45
8 45
8 45
8 45
8 41
8 41
8 42
8 47
2 16
2 22
2 26
2 27
2 27
2 27
0 27
0 27
0 27
0 28
0 27
0 27
0 27
0 27
0 41
0 42
0 42
0 44
0 61
0 61
0 62
0 64
0 69
0 70
0 73
0 74
0 76
0 76
0 78
0 82
0 82
0 82
0 82
0 82
0 81
0 80
0 80
0 81
0 81
0 81
0 81
0 81
0 81
0 81
0 80
2 80
2 80
2 80
2 80
2 80
2 80
2 80
2 80
2 80
2 80
2 80
2 80
2 78
2 78
2 76
0 76
0 77
0 77
0 78
0 79
0 80
0 80
0 88
0 92
0 93
0 93
0 89
0 77
1 58
1 41
1 39
1 38
1 38
1 36
1 36
1 36
1 36
1 36
1 36
1 36
1 37
1 38
1 46
0 51
0 51
0 52
0 40
0 38
0 38
0 38
0 38
0 38
0 36
0 35
0 35
0 35
0 32
0 24
0 23
0 25
0 25
0 25
0 25
0 23
0 24
0 40
0 61
0 64
0 65
0 79
0 79
0 79
0 82
0 82
0 84
0 85
0 85
0 85
0 85
0 85
0 86
0 85
0 85
0 85
0 86
0 86
0 86
0 217
0 217
0 217
0 217
1 216
1 223
1 394
1 398
1 396
1 398
1 402
1 403
1 407
1 408
1 408
1 408
1 408
1 403
1 403
1 403
1 402
0 404
0 405
0 406
0 407
0 408
0 406
0 406
0 406
0 400
0 401
0 400
0 402
0 406
0 406
0 406
0 408
0 408
0 413
0 418
0 429
0 521
0 520
0 527
0 527
4 814
4 858
5 892
5 905
5 922
6 915
6 909
6 793
6 656
6 646
6 645
6 646
6 646
6 646
6 647
5 647
5 644
5 646
5 656
5 667
5 678
5 686
5 691
6 696
6 1757
6 1756
6 1762
6 1767
7 1766
7 1767
8 1781
8 1782
8 1785
8 1832
8 1774
8 1785
8 1795
8 1795
8 1796
8 1795
9 772
9 772
9 772
9 773
8 771
8 770
7 770
7 770
7 769
7 766
7 766
7 765
7 762
7 762
7 764
6 694
6 694
6 694
6 693
6 693
6 689
6 677
6 670
6 670
6 661
6 651
6 624
6 549
6 461
6 444
11 566
11 561
11 555
7 295
6 289
6 282
6 282
7 276
7 274
7 273
7 273
7 273
7 272
7 272
7 271
7 271
7 271
7 270
7 271
7 280
7 276
7 264
7 342
7 332
7 321
7 324
6 317
6 317
6 319
6 311
6 307
6 310
6 310
6 297
6 298
6 297
6 271
6 178
6 171
6 165
6 165
6 164
6 164
6 164
6 164
6 164
6 163
6 163
6 163
6 163
6 163
6 163
6 163
6 163
6 163
6 162
6 162
6 163
6 173
6 242
6 242
6 243
6 243
6 243
6 243
6 243
6 243
6 247
6 247
5 251
5 251
5 251
5 251
1 128
1 129
1 128
0 128
0 126
0 125
0 118
0 118
0 118
0 118
0 118
0 118
0 118
0 118
0 118
0 118
0 118
0 117
0 116
0 124
0 124
0 125
0 123
0 123
0 123
0 120
0 118
0 119
0 116
0 116
0 116
0 113
0 113
0 113
0 112
0 109
0 109
0 108
0 108
0 108
0 108
0 108
0 108
0 108
1 108
1 110
1 110
2 113
2 113
2 113
2 113
2 113
2 113
2 113
2 113
2 113
2 112
2 110
2 94
2 26
2 26
1 26
0 26
0 26
0 26
2 26
5 27
5 27
5 27
5 27
5 27
5 27
5 27
5 19
5 19
5 19
5 19
5 19
5 19
5 19
5 19
3 19
3 19
0 19
0 19
0 19
0 19
0 19
1 19
1 19
2 20
2 22
2 14
2 14
2 14
2 15
2 15
2 16
2 17
2 21
2 21
2 21
2 21
2 22
2 22
2 22
2 22
2 22
2 23
2 23
2 23
2 23
2 23
2 24
2 26
2 27
2 27
2 27
2 25
2 25
2 22
2 22
2 22
2 22
2 22
2 22
2 22
2 22
2 22
2 23
2 23
2 23
2 21
2 21
2 18
2 17
2 17
2 17
2 16
2 16
2 16
2 16
2 16
2 16
2 16
2 16
2 16
2 16
1 17
1 17
1 17
1 17
1 17
1 17
1 17
0 17
0 20
0 20
0 20
0 20
0 20
0 20
0 20
0 19
0 16
0 15
0 16
0 14
0 13
0 13
0 13
0 11
0 11
0 11
0 11
0 11
0 11
0 11
0 11
0 11
0 11
1 11
1 11
1 11
1 11
1 11
1 10
1 8
1 7
1 7
1 7
2 7
2 7
2 7
2 7
2 7
1 7
1 7
1 7
1 7
1 7
1 7
1 6
1 6
1 6
1 6
0 5
0 5
0 5
0 5
0 5
0 5
0 6
0 6
0 10
0 12
1 18
1 19
1 21
1 22
1 22
1 23
1 24
1 28
1 28
1 28
1 30
1 30
1 30
1 27
1 27
1 27
1 27
2 27
2 26
2 26
2 26
2 27
2 27
2 27
2 27
2 27
2 27
2 27
2 27
2 27
2 27
2 27
3 27
2 27
2 27
2 27
2 27
5 28
5 29
5 29
5 29
5 29
5 30
5 30
5 30
5 30
5 30
5 30
5 30
12 30
12 30
12 30
12 30
11 30
11 30
11 30
11 30
9 30
9 30
9 30
9 31
9 31
9 30
9 27
10 29
1 27
1 27
1 27
1 27
1 26
1 26
1 19
1 17
1 12
1 11
1 10
1 9
1 41
1 78
1 78
0 76
0 77
0 78
0 78
0 78
0 78
0 78
0 78
0 78
0 78
0 78
1 78
1 46
1 46
1 12
1 12
1 12
1 13
1 15
1 17
1 18
1 18
1 18
1 18
1 20
1 20
0 20
0 21
1 23
1 22
1 25
1 24
4 24
4 24
4 25
4 25
4 25
4 25
4 25
4 25
4 25
4 25
4 25
4 25
4 25
4 25
4 24
4 25
4 25
4 25
4 25
4 25
4 25
4 24
4 26
4 31
4 31
4 30
4 31
4 31
4 31
4 31
4 31
4 31
4 31
4 31
4 31
4 31
4 32
4 36
4 36
4 32
4 34
4 33
4 32
4 31
4 31
4 31
4 31
4 31
4 31
4 31
4 31
4 31
4 32
4 34
4 35
4 36
4 36
4 40
4 38
4 128
4 123
4 122
4 122
4 122
4 122
3 119
3 119
3 119
3 118
2 117
2 118
0 118
0 119
0 118
0 27
0 29
0 31
0 29
0 29
0 29
0 29
0 29
0 38
0 39
0 40
0 40
0 40
6 40
6 40
6 40
6 40
6 48
6 48
6 48
6 48
6 47
6 44
6 44
6 43
6 34
6 34
6 34
6 34
0 34
0 34
0 34
0 34
0 34
0 34
0 32
0 30
0 39
0 39
0 41
0 39
0 39
0 39
0 40
0 40
0 40
0 40
0 40
0 40
0 40
0 41
0 38
0 36
0 26
0 25
0 25
0 22
1 22
1 22
1 22
1 22
1 22
1 22
1 21
1 21
1 21
1 21
1 20
1 23
1 25
1 25
1 24
1 24
0 22
0 21
0 19
0 19
0 19
0 19
0 19
0 19
1 19
1 20
1 19
1 19
1 19
1 19
1 17
1 15
1 15
1 8
1 8
1 8
1 6
1 6
1 6
1 6
2 6
2 6
2 6
2 6
1 6
1 6
1 6
1 7
1 7
1 7
1 7
1 7
1 7
1 7
1 7
0 7
0 7
0 7
0 7
0 7
0 7
0 7
0 7
0 6
0 6
0 6
0 3
0 3
0 2
0 1
0 1
0 1
0 2
0 2
0 2
0 2
0 2
0 2
0 2
0 2
0 2
0 2
0 2
0 2
0 2
0 2
0 2
0 2
0 1
0 1
0 1
0 1
0 1
0 1
0 1
0 1
0 2
0 2
0 1
0 1
0 1
0 1
0 1
0 1
0 1
0 4
0 4
0 4
0 4
0 4
0 4
0 3
0 3
0 3
0 3
1 3
1 3
1 3
1 3
1 3
1 3
1 0
1 0
1 0
1 0
1 0
1 0
1 0
1 0
1 0
3 0
2 2
80 23
80 23
80 23
82 23
82 23
82 23
82 23
82 23
82 23
82 23
82 97
82 97
82 97
80 98
80 98
75 98
2 75
2 75
3 120
2 120
1 120
1 120
1 126
2 126
2 126
3 52
3 52
3 52
3 52
3 51
3 51
3 51
3 51
2 51
2 51
2 51
2 52
2 8
2 5
1 5
1 5
1 5
1 5
1 1
1 1
1 1
1 1
1 1
1 1
0 2
2 354
2 354
2 354
2 354
2 354
2 354
2 354
2 354
2 354
2 354
2 354
2 354
3 455
3 455
3 455
1 102
1 102
1 102
5 102
5 102
5 102
5 102
5 102
5 102
5 102
5 102
5 102
5 1
4 1
4 1
4 2
4 2
4 2
2 2
0 2
0 2
0 2
0 2
0 2
1 2
1 2
1 2
1 2
1 2
1 2
1 2
1 1
1 1
1 1
1 1
1 1
1 1
1 1
1 1
1 1
1 1
1 1
1 1
1 1
1 0
1 0
1 0
1 0
1 0
1 0
1 0
1 0
1 0
1 0
1 0
1 0
1 0
1 0
1 0
1 0
1 0
1 0
1 0
1 0
1 0
1 0
1 0
6 0
8 0
29 0
35 0
44 0
51 0
56 0
67 0
69 0
78 0
94 0
102 0
105 0
106 0
106 0
107 0
118 0
118 0
119 0
121 0
122 0
124 0
125 0
125 0
125 0
125 0
125 0
125 0
125 0
125 0
124 0
124 0
124 0
123 0
123 0
123 0
123 0
125 1
132 1
137 1
151 1
165 1
183 1
187 1
187 1
187 1
188 1
186 1
186 1
186 1
187 1
188 1
186 1
188 0
189 0
189 0
190 0
190 0
190 0
190 0
190 0
190 0
190 0
190 0
190 0
190 0
190 0
190 0
191 0
191 0
190 0
188 0
185 1
183 1
189 1
181 1
179 1
164 1
164 1
161 1
149 1
140 1
127 1
111 1
100 1
98 1
91 1
91 0
90 0
68 0
68 0
67 0
63 2
47 2
44 2
43 2
42 2
41 2
41 2
41 2
41 2
41 2
41 2
42 2
44 2
44 2
44 12
44 12
41 12
41 12
54 12
54 12
54 14
52 14
53 14
49 14
49 25
49 25
49 25
45 25
45 26
44 16
44 16
39 15
36 14
23 14
22 14
19 12
20 12
19 12
19 12
19 1
19 1
19 1
19 1
19 0
19 0
19 0
19 0
19 0
19 0
19 0
19 0
246 6
246 6
246 6
246 6
245 6
236 6
236 6
236 6
237 6
237 6
236 6
235 6
235 6
235 6
357 8
357 8
130 2
130 2
130 2
130 2
130 2
130 2
129 2
129 2
126 2
126 2
126 2
126 2
126 2
126 2
4 0
54 0
53 0
53 0
53 0
53 0
53 0
53 0
53 0
53 0
53 0
53 0
53 0
53 0
53 0
53 0
3 0
3 1
3 1
3 1
4 1
4 1
4 1
4 1
8 1
8 1
7 1
6 1
5 1
5 1
5 1
5 1
5 0
5 0
9 0
9 0
12 0
12 0
12 0
12 0
12 0
12 0
12 0
13 0
39 9
43 10
43 10
43 10
43 10
43 10
43 10
43 10
43 10
43 10
43 10
46 10
46 10
46 10
46 10
51 11
26 1
26 1
24 1
24 1
24 1
24 1
31 1
33 1
33 1
33 1
38 1
38 1
38 1
41 1
41 1
47 2
48 2
48 2
48 2
48 3
48 3
48 3
48 3
48 3
48 3
48 3
48 3
55 3
55 3
56 3
58 3
66 3
68 3
68 3
67 3
68 3
68 3
65 3
65 3
65 3
65 3
65 3
66 3
66 3
68 3
70 3
70 3
66 3
64 3
57 3
54 3
54 3
54 3
54 3
54 3
54 3
53 3
54 3
54 3
54 3
60 3
63 3
73 3
77 3
78 3
80 3
80 3
79 3
79 3
79 3
79 3
79 3
76 2
76 2
76 2
76 2
76 2
76 2
76 2
70 2
69 2
69 2
69 2
64 2
65 2
65 2
62 2
62 2
62 1
60 1
60 1
60 1
60 0
60 0
60 1
60 1
63 1
65 1
65 1
65 1
56 1
56 1
56 1
52 1
34 1
32 1
32 1
32 1
30 1
32 1
32 1
34 2
34 3
35 4
35 4
168 18
168 18
167 20
167 20
167 20
167 20
167 20
167 20
167 20
167 20
167 20
167 19
166 19
163 19
162 17
160 5
27 3
25 1
25 1
21 1
16 1
16 1
19 1
20 1
20 1
20 1
20 1
20 1
21 1
21 1
28 1
28 1
41 3
41 3
41 3
42 3
43 3
43 3
43 3
43 3
43 3
43 3
43 3
43 3
43 3
44 3
39 3
26 1
26 1
27 1
27 1
27 0
27 0
27 0
22 0
22 0
22 0
22 0
22 0
22 0
22 0
22 1
22 1
22 1
22 1
22 1
20 1
17 1
18 1
17 1
17 1
17 1
17 1
17 1
17 1
17 1
18 1
18 0
18 0
18 0
23 0
23 0
23 0
22 0
22 0
23 0
23 0
22 0
22 0
22 0
22 0
22 0
22 0
22 0
22 0
20 0
18 0
18 0
19 1
19 1
19 1
18 1
18 1
12 1
12 1
12 1
12 1
12 1
11 1
10 1
10 2
10 2
11 2
10 1
10 1
10 1
10 1
10 1
9 1
9 1
9 1
9 1
8 1
8 1
8 1
8 0
8 0
7 0
15 0
15 0
15 0
30 0
37 0
38 0
38 0
38 0
65 0
72 0
73 0
124 0
126 0
126 0
126 0
126 0
126 0
126 0
127 0
128 0
127 0
126 2
126 2
126 2
128 2
124 2
125 2
126 2
126 2
126 2
125 2
125 2
125 2
125 2
125 2
125 2
125 2
125 2
126 2
126 2
126 2
126 2
126 2
126 2
126 28
126 28
126 28
127 28
127 28
127 28
127 28
127 28
127 28
127 28
127 28
127 28
127 28
127 28
127 28
127 2
158 2
158 2
158 2
158 2
158 2
158 2
158 2
158 2
159 2
159 2
159 2
159 2
159 2
151 1
151 1
120 0
104 0
97 0
97 0
97 0
96 0
69 0
63 0
62 0
15 0
28 0
29 0
30 0
30 0
30 0
31 0
46 0
98 3
113 3
551 7
562 8
563 8
563 8
563 8
561 8
561 8
562 8
609 9
622 9
624 9
629 9
629 9
631 9
631 6
631 6
631 6
630 6
630 6
644 6
649 6
655 6
664 6
664 6
675 7
675 7
678 7
679 7
675 7
678 7
679 7
680 7
685 7
705 7
718 7
719 7
719 7
720 7
721 7
719 7
714 7
715 7
717 7
736 7
822 7
976 9
1138 9
1198 10
1277 10
1280 10
1286 10
1284 10
1284 10
1337 10
1340 10
1334 10
1334 10
1334 10
1336 10
1337 10
1337 10
1341 10
1342 10
1338 10
1325 10
1323 10
1323 10
1323 10
1323 10
1322 11
1316 11
1288 11
1274 11
857 6
863 6
881 6
914 6
939 6
940 5
935 5
931 5
883 5
882 5
878 5
879 5
878 4
879 4
882 4
881 4
894 4
908 4
908 4
893 4
882 4
875 4
875 4
875 4
868 3
868 4
865 4
865 4
865 4
864 4
861 4
855 4
851 4
837 4
825 4
824 4
824 4
822 4
820 4
820 4
813 3
784 3
756 3
732 3
602 2
424 1
227 1
184 0
108 0
115 0
113 0
109 0
107 0
51 0
50 0
50 0
16 0
9 0
13 0
13 0
13 0
13 0
13 0
13 0
13 0
13 0
13 0
13 0
13 0
13 0
13 0
13 0
13 0
13 0
15 2
10 2
10 2
10 2
15 6
15 6
15 6
15 6
15 6
15 6
15 6
15 6
15 6
15 6
15 6
15 6
15 4
14 4
14 4
14 4
14 4
14 4
14 4
14 4
14 4
14 4
14 4
14 4
14 4
14 4
14 4
15 4
15 4
15 4
15 4
15 4
15 4
15 4
15 4
15 4
16 4
19 4
19 4
19 4
19 4
19 4
18 4
18 4
14 5
14 5
14 5
14 5
14 5
14 5
14 5
14 5
14 5
14 5
14 5
14 5
14 5
14 5
14 5
14 5
14 5
14 5
15 5
15 5
15 5
15 5
15 5
16 5
16 5
16 5
16 5
16 5
16 5
11 1
11 1
11 1
11 1
11 1
11 1
11 3
11 3
11 3
13 4
12 4
12 4
12 4
13 4
13 4
13 4
13 4
13 4
13 4
13 4
13 4
13 4
13 4
13 4
13 4
13 4
13 4
13 4
13 4
13 4
13 4
21 4
21 4
32 4
32 4
32 4
31 4
28 4
28 4
28 4
28 4
28 4
28 4
28 4
24 3
24 3
24 3
24 3
24 3
24 3
24 3
24 3
24 3
24 3
24 3
24 3
24 3
24 3
24 3
24 3
24 3
24 3
23 3
23 1
23 1
23 1
21 1
20 1
20 1
20 1
18 1
16 1
16 1
16 1
12 1
12 1
11 1
11 1
11 1
11 1
11 1
11 1
8 0
8 0
4 0
4 0
3 0
3 0
3 0
3 0
3 0
3 0
3 1
3 1
3 1
3 1
3 1
3 1
4 1
4 1
4 1
4 1
4 1
4 1
4 1
4 1
1 1
1 2
1 3
1 3
1 6
1 7
1 9
0 9
0 9
0 9
0 9
0 9
0 9
0 9
2 9
2 9
2 9
2 9
2 9
2 9
2 13
2 15
2 15
7 15
8 15
8 15
8 15
9 15
10 15
10 15
10 15
13 15
19 17
19 17
19 19
19 15
33 21
33 19
33 19
35 19
37 19
39 19
39 19
41 19
41 19
41 19
41 19
41 19
41 19
41 18
41 17
41 17
41 17
41 16
41 16
41 16
41 16
41 16
41 16
41 16
41 16
41 16
41 16
41 16
43 16
46 16
48 16
48 16
48 16
50 17
50 17
50 17
50 17
50 17
50 16
50 15
50 15
50 11
50 11
50 12
50 12
49 12
49 12
49 12
49 12
49 11
49 11
47 11
47 11
47 11
47 11
47 11
47 11
47 11
47 11
46 11
41 11
40 11
43 11
43 11
43 11
42 11
41 11
38 11
37 11
33 6
33 9
31 9
30 10
10 5
9 5
9 5
3 5
0 5
0 7
0 7
0 7
0 7
1 7
1 7
1 7
1 4
1 4
1 4
1 3
1 3
1 3
1 3
1 3
1 1
1 1
1 1
1 1
1 2
0 2
0 3
0 3
0 3
0 9
0 10
0 11
0 11
0 11
0 12
0 12
0 12
0 12
0 12
0 12
0 12
0 12
0 12
0 13
0 13
0 16
0 17
0 17
0 17
0 19
0 19
0 19
0 19
0 19
0 19
0 19
0 24
0 25
1 69
1 71
2 106
2 107
2 107
2 109
4 164
4 177
4 180
4 180
4 183
4 194
4 200
4 200
4 202
4 213
4 203
4 201
4 202
4 202
4 202
4 203
4 203
4 203
4 203
4 203
4 203
4 203
4 203
4 203
4 203
4 203
4 206
4 206
4 206
4 206
4 206
4 206
4 205
4 204
4 204
4 204
4 205
4 206
4 198
4 198
4 198
4 198
4 198
4 197
4 197
4 198
4 198
4 198
4 198
4 198
4 196
4 194
4 188
4 186
4 176
5 165
5 161
5 161
5 161
5 164
5 163
5 163
5 163
5 163
5 160
5 135
5 134
5 109
5 109
5 65
5 64
1 23
1 22
1 13
1 13
1 13
1 13
1 13
1 13
1 12
1 12
1 12
0 10
1 10
1 10
3 10
3 10
3 10
3 10
3 10
3 11
3 11
3 11
3 11
3 11
3 11
3 11
3 11
2 11
2 8
1 8
0 8
0 8
0 44
0 44
0 44
0 44
0 43
0 43
0 42
0 41
0 42
0 42
0 42
0 42
0 42
0 46
0 46
0 44
0 10
0 10
0 9
0 9
0 9
0 11
0 11
0 11
0 12
0 12
0 12
0 12
0 12
0 8
0 4
0 6
0 6
0 6
0 6
0 6
0 6
0 6
0 5
0 4
0 4
0 4
0 4
0 4
0 4
0 4
1 4
1 5
1 5
1 5
1 5
1 5
1 5
1 5
1 5
1 5
1 5
1 5
1 5
1 5
1 5
0 5
0 5
0 5
1 5
1 5
1 5
1 5
1 5
1 5
1 10
1 10
1 10
1 10
1 10
1 11
1 11
1 11
1 11
0 11
0 13
0 14
0 14
0 14
0 14
0 14
0 16
0 22
0 27
0 31
0 32
0 32
0 32
0 32
0 30
0 30
0 30
0 30
0 30
0 30
0 30
0 30
2 30
2 30
2 28
2 27
2 27
2 27
2 27
2 29
2 29
2 29
2 29
2 29
2 29
2 29
2 30
0 30
0 30
0 29
0 30
0 30
0 30
0 30
0 30
0 31
0 31
0 31
0 31
0 31
0 31
0 31
0 31
0 31
0 31
0 31
0 31
0 30
0 30
0 30
0 36
0 36
0 35
0 32
0 53
0 58
0 62
0 62
0 62
0 63
0 63
0 63
0 63
0 62
0 62
0 64
0 64
0 64
0 63
0 61
0 53
0 44
0 41
0 39
0 39
0 38
0 38
0 38
0 38
0 39
0 41
0 44
0 46
0 46
0 46
0 46
0 47
0 48
1 49
1 49
1 49
1 49
1 715
1 715
1 715
1 715
1 715
1 758
1 758
1 758
1 759
1 932
1 938
1 951
1 961
1 972
1 979
1 317
0 310
0 305
0 306
0 307
0 308
0 335
0 337
0 341
0 345
0 346
0 349
0 353
0 355
0 356
0 357
0 357
0 357
0 357
0 356
0 337
0 335
0 336
0 340
0 341
0 350
0 357
0 371
0 375
0 375
0 375
0 375
0 375
0 375
0 376
0 376
0 377
0 418
0 419
0 419
0 517
0 535
0 539
0 539
0 540
0 544
0 521
0 494
0 476
0 456
0 450
0 450
0 449
0 448
0 448
0 448
0 448
0 448
0 449
0 455
0 522
0 522
0 522
0 522
0 518
0 518
0 513
0 379
0 371
0 368
0 359
0 349
0 349
0 349
0 351
0 351
0 350
0 350
0 349
0 312
0 302
0 301
0 306
0 307
0 297
0 294
0 289
0 285
0 284
0 284
0 285
0 285
0 289
0 293
0 315
1 326
1 317
3 334
3 311
3 278
3 259
3 252
3 252
3 250
3 250
3 247
3 247
3 247
3 247
3 246
3 246
3 246
3 245
3 186
3 177
3 177
3 177
3 174
3 173
3 173
4 174
4 175
4 178
4 180
4 180
4 182
4 182
5 182
5 182
5 184
5 184
5 183
5 173
4 96
4 96
3 83
3 81
3 81
3 81
5 81
5 78
5 78
4 78
4 82
4 82
4 82
4 86
4 87
4 88
4 88
4 87
4 87
4 86
4 84
2 83
2 82
2 80
2 79
2 75
2 75
2 75
2 76
2 76
2 78
2 77
2 76
2 72
1 50
1 43
1 41
1 28
1 28
1 28
1 28
1 28
1 28
1 28
1 28
1 28
1 29
1 30
1 30
1 30
1 30
1 31
1 30
1 30
1 33
1 34
1 34
1 34
1 34
0 34
0 34
0 32
0 30
0 28
0 29
0 28
0 28
0 28
0 28
0 27
0 27
0 27
0 27
0 27
0 27
0 26
0 26
0 26
0 26
0 27
0 28
0 28
0 29
0 28
0 28
0 32
0 31
0 29
0 30
0 31
0 29
0 27
0 27
0 27
0 27
0 27
0 27
0 27
0 27
0 27
0 32
0 33
0 33
0 32
0 31
0 32
0 32
0 32
0 32
0 32
0 32
0 33
0 33
0 33
0 35
0 35
0 35
0 35
0 35
0 34
0 34
0 34
0 34
0 36
0 36
0 35
0 35
0 32
0 32
0 32
0 32
0 32
0 32
0 30
0 30
0 30
0 30
0 29
0 29
0 29
0 29
0 29
0 29
0 29
0 29
0 29
0 29
0 29
0 29
0 29
0 29
0 28
0 27
0 27
0 27
0 25
0 24
0 23
0 17
0 16
0 12
0 11
0 11
0 11
0 11
0 11
0 12
0 12
0 12
0 12
0 13
0 15
0 15
0 12
0 10
0 10
0 10
0 10
0 9
0 9
0 9
0 8
0 9
0 11
0 11
0 11
0 11
0 10
0 10
0 10
0 10
0 11
0 11
0 10
0 10
0 9
0 8
0 8
0 8
0 6
0 6
0 6
0 6
0 6
0 7
0 7
0 7
0 7
0 7
0 7
0 7
0 7
0 7
0 7
0 7
0 6
0 6
0 8
0 8
0 7
0 7
0 7
0 7
0 7
0 7
0 7
0 7
0 7
0 8
0 8
0 8
0 8
0 8
0 9
0 9
0 12
0 14
0 15
0 15
0 15
0 16
0 17
0 17
0 16
0 14
2 14
2 14
2 16
2 16
2 17
2 18
2 18
2 18
2 18
2 18
2 18
2 18
2 18
2 18
2 19
2 19
2 22
0 24
0 39
0 43
0 45
0 45
0 47
0 47
0 46
0 46
0 46
0 46
0 46
0 46
0 46
0 46
0 46
0 47
0 47
0 47
0 47
0 49
0 49
0 49
0 49
0 49
0 49
0 49
0 49
0 47
0 47
0 47
0 49
3 53
3 69
4 99
4 122
4 127
4 131
4 133
4 133
4 130
4 153
5 158
5 161
5 159
5 160
5 163
2 154
2 148
1 143
1 143
1 143
1 143
1 143
1 143
1 143
1 143
1 143
0 143
0 143
0 143
1 143
1 143
1 143
1 143
1 143
1 142
1 145
1 146
1 148
1 155
1 155
1 155
1 155
1 152
1 154
1 154
1 155
0 159
0 162
0 170
0 190
0 209
0 213
0 217
0 225
0 227
0 227
0 228
0 229
0 229
2 229
2 229
2 228
2 228
2 228
2 228
2 228
2 228
2 226
2 226
2 226
2 224
2 223
2 217
2 212
2 192
0 164
0 146
0 146
0 144
0 142
0 138
0 133
0 118
0 114
0 113
0 109
0 108
0 100
0 100
0 101
3 104
3 104
3 104
3 104
3 104
3 104
3 104
3 104
3 104
3 104
3 104
3 104
4 104
4 104
4 104
5 105
5 106
2 104
2 100
2 99
2 97
2 84
2 84
2 79
2 79
2 78
2 78
2 77
2 76
2 73
2 69
2 52
2 27
2 20
3 17
3 17
3 15
3 14
3 14
3 14
3 14
3 15
3 15
3 15
3 16
3 17
3 17
3 17
3 17
3 17
2 17
2 17
2 16
2 15
2 15
2 15
2 15
2 15
2 15
2 15
3 15
2 11
1 10
1 10
1 10
1 10
1 10
1 10
1 10
1 10
1 10
1 12
1 14
1 13
1 13
0 13
0 13
0 13
0 13
0 13
0 13
0 13
0 14
0 14
0 14
0 14
0 14
0 14
0 13
0 13
1 13
1 13
1 13
1 13
1 13
1 13
1 13
1 14
1 14
1 13
1 12
1 13
1 13
1 14
2 15
1 15
1 15
1 16
1 16
1 16
1 19
1 19
1 20
1 23
1 21
1 23
1 22
1 23
1 23
0 23
0 25
0 37
0 39
0 39
0 41
0 41
0 43
0 45
0 60
0 122
0 258
0 359
0 395
0 442
0 457
0 472
0 474
0 494
0 496
0 496
0 500
0 504
0 504
0 504
0 500
0 495
0 492
0 492
0 492
0 492
0 493
0 494
0 494
0 493
0 496
0 496
0 496
0 494
0 493
0 492
0 492
0 491
0 492
0 493
1 493
1 494
1 494
1 494
1 493
1 492
1 492
1 492
1 492
1 491
1 484
1 494
1 494
1 494
1 495
0 506
3 883
3 958
3 983
3 1004
3 1006
3 996
3 1012
3 993
3 987
3 985
3 947
3 942
3 902
3 876
3 773
3 771
3 675
3 674
3 675
3 710
3 721
4 734
5 1102
6 1073
6 1063
6 1060
6 1056
6 1053
6 1052
6 1052
6 1045
6 1044
6 1044
6 1043
6 1043
6 1043
6 1043
6 1043
6 1043
6 1043
6 1044
6 1044
6 1044
6 1043
6 1043
6 1043
6 1044
6 1043
6 1043
6 1042
6 1043
6 1043
6 1043
6 1043
6 1043
6 1042
6 1042
6 1042
6 1041
6 1042
6 1042
6 1041
6 1041
6 1040
6 1040
6 1040
6 1040
6 1041
6 1041
6 1040
6 1034
6 1031
6 1005
3 492
3 478
3 479
3 480
3 483
3 492
3 502
3 500
3 496
3 494
3 489
3 505
3 586
3 608
3 648
3 670
3 673
3 675
3 678
3 651
3 653
2 646
1 278
0 303
0 295
0 304
0 307
1 327
1 334
2 342
2 350
2 360
2 378
2 381
2 384
2 385
2 385
2 385
2 385
2 385
2 387
2 390
2 391
2 392
1 392
1 391
0 391
0 391
0 391
0 393
0 394
0 394
0 396
0 396
0 396
0 403
0 404
0 415
0 415
0 414
0 415
0 417
0 422
0 424
0 424
0 424
0 427
0 427
0 427
0 432
0 433
0 434
0 435
0 435
0 436
0 435
0 436
0 428
0 416
0 406
0 402
0 401
0 399
0 398
0 362
0 267
0 207
0 152
0 127
0 125
0 123
0 114
0 109
0 106
0 103
0 100
0 95
0 96
0 113
0 113
0 110
0 106
0 105
0 91
0 86
0 86
0 91
0 91
0 90
0 90
0 90
0 96
0 96
0 94
0 93
0 98
0 104
0 104
0 104
0 104
0 105
0 107
0 107
0 108
0 108
0 107
0 101
0 102
0 102
0 101
0 99
0 99
0 94
0 89
0 82
0 75
0 75
0 75
0 75
0 73
0 73
0 73
0 67
0 67
0 66
0 66
0 66
0 66
0 66
0 66
0 66
0 66
0 66
0 65
0 64
0 63
0 63
0 63
0 60
0 53
0 47
0 45
0 45
0 45
0 45
0 45
0 46
0 46
0 44
2 44
2 42
2 28
2 27
2 26
2 26
2 26
2 26
2 25
2 25
2 20
3 19
3 19
3 21
3 36
5 40
6 40
6 40
6 40
6 35
6 29
6 29
7 29
7 30
7 29
7 28
7 28
7 27
7 27
7 28
7 28
7 27
7 27
7 27
7 27
9 27
9 27
8 28
8 28
8 28
7 28
9 28
9 28
7 26
7 26
7 26
4 26
4 26
4 26
4 26
4 26
4 26
4 26
4 27
4 27
4 27
4 30
4 30
4 30
4 30
4 30
4 30
4 30
4 31
4 32
4 42
4 46
4 46
4 58
4 61
4 60
4 132
4 135
4 139
4 148
4 152
4 154
4 164
4 166
4 170
4 203
4 221
4 226
4 232
4 238
4 237
4 233
4 156
4 153
4 153
4 153
4 153
4 151
5 151
5 151
7 156
7 155
6 155
5 152
5 152
5 152
3 151
3 151
3 151
3 151
3 151
3 151
4 151
4 151
4 151
4 148
4 148
4 146
4 146
4 146
4 146
4 146
4 146
4 146
4 146
4 146
4 146
4 146
4 146
4 146
4 146
4 143
4 141
4 140
4 127
4 128
4 122
4 166
4 166
4 167
5 177
5 167
6 161
6 145
6 143
6 144
6 134
6 133
6 133
6 131
6 126
10 125
10 125
13 126
11 125
11 119
11 119
11 114
11 90
16 79
17 79
17 77
17 77
17 77
17 77
17 77
16 77
16 77
16 77
16 77
16 81
15 80
15 85
15 81
10 101
10 101
9 101
9 101
9 108
9 127
9 127
9 135
9 138
9 139
9 142
8 147
8 147
8 149
9 149
12 149
12 148
12 148
12 148
12 148
12 148
12 149
12 149
12 149
12 149
12 149
12 149
12 149
12 152
12 159
12 163
12 164
8 164
8 164
8 163
8 163
8 105
8 105
8 87
7 75
7 70
6 65
6 62
6 59
6 54
5 56
3 54
4 55
6 56
4 54
4 55
4 107
4 108
4 108
4 108
4 108
4 108
4 108
4 108
4 109
4 111
4 111
3 111
3 110
3 110
0 110
0 58
0 58
0 58
0 58
0 58
0 60
0 60
0 60
0 60
0 60
0 59
0 52
0 40
0 40
0 36
0 35
0 35
0 35
0 36
0 36
0 34
0 34
0 34
0 34
0 34
0 34
0 34
0 34
0 33
0 33
0 33
0 34
0 34
3 34
3 33
3 28
3 22
3 22
3 20
3 20
3 20
3 19
3 17
3 15
3 15
3 18
3 18
3 22
0 22
0 22
0 22
0 21
0 21
0 21
0 21
0 20
0 20
0 20
2 20
2 20
2 20
2 20
2 20
2 20
2 20
2 21
2 21
2 18
2 18
2 19
2 19
2 21
2 21
2 21
2 21
2 21
2 21
0 21
0 14
0 12
0 12
0 12
0 12
0 12
0 12
0 12
0 12
0 12
0 12
1 12
1 12
1 11
1 11
1 11
1 11
1 11
1 11
1 11
1 11
1 11
1 11
1 11
1 11
1 12
0 12
0 12
0 12
2 20
2 20
2 22
2 21
2 23
2 29
3 36
3 36
3 37
3 37
3 37
3 35
3 33
3 30
3 30
3 30
3 30
3 30
3 30
3 30
4 30
4 30
4 30
4 31
4 31
4 31
5 31
5 31
5 31
5 31
5 31
5 30
5 30
5 30
5 31
5 30
5 29
5 29
5 28
5 28
5 28
5 28
5 28
4 26
4 26
4 26
4 26
4 26
4 26
4 31
4 55
4 55
4 58
5 68
5 68
5 68
5 68
5 68
5 68
5 68
5 68
5 68
5 68
5 68
5 68
5 41
5 41
5 41
5 41
5 41
5 41
5 41
5 41
3 32
3 33
3 31
3 31
3 31
3 23
2 18
2 18
2 18
2 18
2 18
2 18
2 20
2 20
2 20
2 20
2 21
2 26
2 27
2 62
2 64
2 69
2 70
2 70
1 69
1 69
1 72
1 75
1 93
1 93
1 93
1 93
1 94
1 95
1 94
1 94
1 94
1 94
1 94
1 93
2 93
2 93
2 93
2 97
2 97
35 105
35 105
35 106
35 118
35 235
35 265
35 289
35 300
34 298
34 308
35 327
35 332
35 332
35 332
35 328
2 328
2 328
2 329
2 332
2 337
2 337
2 336
2 335
2 335
2 333
1 332
1 331
1 331
1 330
1 329
1 329
1 329
1 329
1 329
1 329
1 329
1 329
1 329
1 329
1 329
1 328
1 328
1 326
1 326
1 325
1 320
1 315
1 283
1 283
1 306
1 308
1 322
1 343
1 357
1 356
1 359
1 342
1 340
1 340
1 341
1 334
1 328
1 331
1 337
1 341
1 341
1 341
1 340
0 340
0 340
2 340
3 340
3 340
3 339
3 340
3 339
4 301
4 168
4 151
4 149
4 147
4 147
4 147
4 132
4 126
2 125
2 125
2 126
1 134
1 134
1 141
0 140
0 135
0 135
0 136
0 136
0 137
0 139
0 138
0 139
0 139
0 142
0 142
0 142
0 142
0 142
0 142
0 142
0 147
0 147
0 148
0 151
0 151
0 151
0 152
0 152
0 154
0 153
0 156
0 168
0 172
0 171
0 148
0 147
0 132
0 110
0 94
0 102
0 94
0 93
0 93
0 92
0 91
0 91
0 100
0 91
0 90
0 91
0 91
0 91
1 91
2 91
2 96
2 104
3 107
3 111
3 110
3 110
3 110
3 109
3 107
3 107
3 107
3 108
3 109
3 109
3 109
3 110
3 111
3 110
3 110
3 102
3 103
3 99
3 99
3 100
3 100
3 101
3 103
3 102
3 101
3 102
3 102
3 102
3 101
3 101
3 101
3 112
3 117
3 127
3 129
3 125
3 123
3 123
3 127
3 136
3 170
3 214
3 222
3 251
4 276
4 331
6 344
4 356
4 354
4 399
5 438
5 452
5 456
5 458
5 451
5 462
5 463
5 467
5 468
4 496
4 502
4 572
4 579
2 585
2 587
2 593
2 600
2 601
2 605
2 606
2 604
1 600
1 600
1 600
1 600
1 600
1 601
1 603
1 604
1 643
1 642
1 641
1 640
1 640
1 640
1 639
1 639
1 639
1 640
1 637
1 624
1 624
1 613
1 613
1 612
1 572
1 572
1 565
1 560
1 559
1 559
1 555
1 553
1 552
1 513
1 442
1 405
1 371
1 371
1 381
1 382
1 381
1 376
1 363
1 344
1 336
1 331
1 324
1 280
1 278
1 267
1 266
1 239
0 193
1 193
1 193
1 193
1 190
1 187
5 191
5 189
5 185
5 153
5 144
5 56
5 38
5 36
5 34
5 32
5 31
5 30
5 30
5 31
5 31
5 33
5 33
5 33
5 33
5 33
5 34
5 34
5 34
5 35
5 36
5 36
7 36
7 36
7 36
7 40
7 40
7 40
7 40
7 40
7 40
7 40
7 40
7 40
7 39
7 39
7 36
7 36
8 36
8 36
8 36
7 36
7 36
8 36
10 39
9 39
9 39
10 38
10 36
10 23
10 20
10 16
12 16
12 16
12 16
12 16
12 16
12 16
12 17
12 17
12 17
12 17
12 17
12 17
12 17
12 17
12 17
12 17
12 16
9 12
9 12
9 12
9 12
9 12
9 12
9 12
9 12
9 12
9 12
10 12
10 12
10 12
10 11
11 11
11 10
11 10
11 10
11 10
11 10
11 10
11 10
11 10
11 10
11 10
11 10
8 10
8 10
8 10
7 6
7 6
7 6
7 6
17 11
17 15
17 15
18 15
18 15
18 15
19 29
20 40
20 126
26 175
31 192
31 194
31 209
30 211
29 211
27 213
19 214
19 214
18 214
18 214
18 214
18 214
18 214
17 213
13 213
13 213
13 214
13 214
13 214
13 214
13 248
14 255
14 261
14 263
14 263
14 266
14 266
14 266
14 266
14 266
14 265
14 265
14 265
14 265
14 265
14 265
15 266
15 267
15 268
15 268
15 268
15 268
15 268
15 268
15 268
15 268
15 268
15 268
15 268
15 269
15 269
15 269
14 269
14 269
14 270
14 270
14 271
14 272
14 272
14 272
14 271
14 270
14 264
13 255
10 231
10 231
9 216
8 215
5 213
3 205
2 161
2 82
1 71
1 67
1 67
1 67
1 67
1 67
1 61
1 61
1 60
1 59
1 59
1 59
1 59
1 59
1 59
1 63
1 66
1 68
1 68
1 67
1 65
1 25
0 21
0 16
0 15
0 15
0 15
0 15
0 15
0 15
0 32
0 32
0 32
0 32
0 32
0 32
0 36
0 37
0 36
0 35
0 35
0 35
0 35
0 35
0 35
0 35
0 18
0 18
0 18
0 18
0 18
6 3615
8 3616
8 3616
8 3616
8 3615
8 3615
8 3615
8 3615
8 3615
8 3616
8 3616
8 3616
8 3617
8 3617
8 3618
2 37
2 83
0 91
0 94
0 95
0 96
0 96
0 96
0 96
0 96
0 96
0 96
0 95
0 95
0 95
0 94
0 40
0 40
0 41
0 42
0 42
0 41
0 37
0 34
0 33
0 32
0 31
0 31
0 31
0 31
0 31
0 31
0 31
2 124
2 124
2 124
2 124
80 124
80 124
80 124
80 124
80 124
80 124
80 120
80 119
80 119
80 119
80 119
80 119
80 119
78 26
78 26
0 26
0 26
0 26
0 26
0 26
0 26
0 25
0 25
0 25
0 25
0 25
0 25
0 25
0 25
0 25
0 24
0 25
0 25
0 25
0 26
0 26
0 18
0 14
0 4
0 4
0 4
0 3
0 3
0 3
0 6
0 6
0 6
0 6
0 6
0 6
0 6
0 6
0 6
0 6
0 6
0 5
0 5
0 5
0 5
0 2
0 2
0 2
3 2
3 2
3 3
3 3
3 3
3 3
3 3
3 3
3 3
3 4
3 5
3 5
3 5
3 5
3 5
0 5
0 5
0 5
0 5
0 5
0 5
0 5
0 6
0 6
0 6
0 6
0 6
0 6
0 6
0 6
0 6
0 6
0 6
0 5
0 5
0 6
0 6
0 5
0 5
0 5
0 6
0 6
2 6
2 6
2 6
2 5
2 5
2 5
2 5
2 5
2 5
2 5
2 5
2 5
2 5
2 5
2 5
0 5
0 5
0 5
0 5
0 5
0 5
0 5
0 5
0 5
0 5
0 5
0 5
0 5
0 5
0 5
0 5
0 5
0 5
0 5
0 5
0 19
0 21
0 22
0 22
0 22
0 21
0 21
0 21
0 21
0 22
0 22
0 22
0 22
0 22
0 22
0 22
0 22
0 22
0 32
0 32
0 33
0 33
0 33
0 33
0 32
0 32
0 32
0 32
0 32
79 32
79 32
79 36
79 36
291 36
291 36
291 36
291 34
291 35
291 36
291 37
291 37
291 40
291 41
291 41
291 41
291 41
291 41
291 45
0 48
0 49
0 50
0 50
0 51
0 52
0 52
0 52
0 52
0 52
0 52
0 52
0 52
0 52
0 52
0 52
0 52
0 52
0 52
0 59
0 58
0 57
0 58
0 58
0 57
0 42
0 41
0 41
0 41
0 41
0 40
0 40
0 40
0 40
0 40
0 40
0 40
0 40
0 40
0 40
0 40
0 40
0 40
0 29
0 29
0 28
0 27
0 27
0 27
0 27
0 27
0 27
0 27
0 27
0 27
0 26
0 24
0 34
0 37
0 56
0 63
0 74
0 75
0 78
0 77
3 81
3 81
3 81
3 82
3 86
3 87
3 86
3 82
3 80
3 78
3 78
3 78
3 78
3 78
3 78
3 78
0 78
0 78
0 78
0 77
0 77
0 77
0 78
0 76
0 76
0 74
0 70
0 51
0 51
0 50
0 41
0 40
0 40
0 40
0 40
0 40
0 40
0 41
0 41
0 41
0 41
0 41
0 42
0 42
0 42
0 42
0 42
0 42
0 42
0 42
0 42
0 42
0 42
0 42
3 43
3 45
3 45
3 45
3 45
3 45
3 45
3 45
3 45
3 45
3 45
3 46
3 44
3 37
3 34
0 13
0 13
0 13
0 13
0 10
0 34
0 33
0 33
0 33
0 32
0 32
0 32
0 32
0 32
0 32
1 32
1 32
1 32
1 32
1 32
1 8
1 8
1 8
1 7
1 7
1 7
1 8
1 9
1 9
1 9
0 9
0 9
1 9
1 9
1 9
1 9
1 14
1 14
1 14
1 14
1 19
1 18
1 23
1 23
1 24
1 24
1 23
1 23
1 23
0 23
0 23
0 23
0 21
0 21
0 21
0 21
0 21
0 21
0 19
0 19
0 19
0 19
0 19
0 19
0 19
2 24
2 24
2 25
5 26
5 25
5 25
5 25
5 25
5 25
5 24
5 23
5 23
5 22
5 21
5 21
4 21
4 16
4 15
4 16
4 16
4 17
4 17
4 18
4 18
4 18
4 18
4 18
4 18
109 30
109 30
109 30
109 30
109 29
109 29
109 27
109 24
109 23
109 23
109 23
109 23
109 23
109 23
109 23
4 11
4 11
4 11
4 11
4 11
4 4
4 6
4 7
4 8
2 7
2 7
2 7
2 7
2 7
2 7
2 7
2 7
2 7
2 7
2 7
2 7
2 7
2 7
2 7
2 7
2 7
2 7
4 7
4 8
4 8
4 8
4 9
4 9
2 8
2 9
2 9
2 9
2 9
2 9
2 9
2 9
3 9
3 9
3 9
3 8
3 8
3 8
3 8
3 6
3 6
3 5
3 5
3 5
3 5
3 5
3 5
2 5
2 5
2 5
2 5
2 5
2 5
2 5
2 5
2 5
2 5
2 5
2 5
2 5
2 6
2 7
2 7
2 7
2 7
2 7
2 7
2 7
2 7
2 7
2 5
2 4
2 3
2 3
2 3
2 3
2 3
2 3
2 3
2 3
2 3
2 3
2 4
2 5
2 9
2 9
3 30
4 34
4 50
4 50
4 51
2 51
2 53
2 54
2 54
2 53
2 53
2 53
4 53
4 53
4 53
4 53
4 53
4 53
4 53
4 53
4 53
4 53
4 53
4 53
4 53
4 53
4 53
4 53
4 53
4 53
4 53
4 53
4 53
4 53
4 53
4 53
4 53
4 53
4 53
4 53
4 53
4 53
4 53
4 53
4 53
4 52
4 51
4 51
4 50
4 50
4 49
4 49
4 49
4 49
4 49
4 49
4 49
4 49
4 49
4 49
4 49
4 50
4 51
4 51
4 51
4 51
4 51
4 51
4 51
4 50
4 50
4 47
4 47
3 26
0 22
0 5
0 5
0 5
0 7
0 8
0 9
0 9
0 9
0 9
0 10
0 10
0 10
0 10
0 10
0 10
0 10
0 10
0 10
0 11
1 11
1 11
1 11
1 11
1 11
12 12
12 12
12 12
12 12
12 12
12 12
12 12
12 12
12 12
12 14
11 14
11 15
11 15
12 16
12 25
12 25
12 26
12 28
12 28
12 28
12 28
12 28
12 28
12 28
12 31
12 31
12 32
12 33
11 33
11 35
11 35
11 35
11 35
11 35
11 35
11 34
11 36
12 37
12 37
12 38
12 38
12 38
12 37
12 37
12 37
12 37
12 36
12 35
12 35
12 35
12 35
12 35
11 33
11 33
11 32
11 32
11 32
11 32
11 31
11 31
11 31
11 32
11 32
12 34
12 34
12 34
12 34
12 33
12 33
12 33
16 33
21 34
21 34
10 33
10 33
10 33
10 33
10 34
10 35
10 38
10 38
10 38
10 36
10 36
10 36
10 36
10 36
10 27
10 26
10 26
10 24
10 24
10 24
10 24
10 24
10 24
10 24
10 23
10 23
10 22
10 23
10 28
10 41
10 88
10 98
10 136
11 147
11 208
13 213
13 223
13 226
13 240
13 246
13 252
13 253
13 255
13 254
13 260
13 245
13 246
13 247
13 248
13 247
13 246
13 247
13 251
12 256
12 262
12 262
12 272
12 276
12 277
12 277
12 277
12 277
12 279
11 278
11 278
11 278
11 278
10 278
10 278
9 278
6 276
1 266
2 269
1 266
1 264
3 369
3 369
3 357
3 337
3 315
3 307
3 307
3 307
3 305
3 301
3 298
3 299
3 298
3 298
3 298
3 298
3 298
4 298
4 299
4 299
4 346
4 346
4 346
4 346
4 345
4 343
4 338
4 318
4 301
4 291
4 288
4 274
4 228
3 227
3 219
3 219
3 207
3 204
3 201
3 200
3 197
3 197
3 193
3 193
3 193
3 193
3 192
3 192
3 192
3 188
3 186
3 188
3 182
4 182
4 170
4 169
4 169
4 169
4 169
4 168
4 168
4 170
4 170
4 170
4 172
4 174
4 170
4 170
2 170
2 170
2 165
2 164
2 161
0 62
0 62
0 62
0 62
0 60
0 60
0 60
0 60
0 61
0 61
0 62
1 71
1 75
1 75
1 75
1 75
1 75
1 75
1 73
1 72
1 27
1 27
1 27
1 25
1 24
1 24
1 23
1 23
1 23
1 23
1 23
1 23
1 23
1 23
1 23
1 23
1 23
1 23
1 24
1 24
1 26
1 28
1 28
1 28
1 28
1 28
1 28
1 28
1 28
1 28
1 30
1 30
2 70
2 72
2 72
2 72
2 73
2 74
2 76
2 79
2 90
2 90
2 93
2 97
2 93
2 99
2 97
2 97
2 97
2 97
2 96
2 95
2 95
2 94
2 94
2 83
2 83
2 83
2 83
2 83
2 83
2 83
3 83
3 81
2 71
2 69
2 69
2 70
2 72
2 72
2 72
2 73
2 73
2 73
2 73
2 73
2 73
1 73
1 73
1 73
1 74
1 73
1 72
1 72
1 73
1 73
1 73
1 73
1 73
1 76
1 76
1 74
1 74
1 70
1 70
2 70
5 71
5 71
5 71
5 70
5 70
5 70
5 70
4 70
4 70
4 24
4 25
4 25
4 25
4 24
4 23
0 18
0 19
0 19
0 19
0 16
0 18
0 20
0 19
0 19
0 19
0 19
0 19
0 19
0 19
0 19
0 19
0 18
0 18
0 18
0 19
0 22
0 27
0 30
0 32
0 43
0 44
0 54
0 61
0 64
0 63
0 62
2 189
2 188
2 194
2 194
2 195
2 195
2 228
2 228
2 228
2 228
2 228
2 227
2 464
2 464
2 464
0 347
4 1571
4 1571
4 1571
4 1569
4 1569
4 1569
4 1569
4 1594
4 1601
4 1604
4 1633
4 1736
4 1790
0 675
0 720
0 769
0 828
0 834
0 848
0 847
0 847
0 846
0 847
0 851
0 850
0 852
0 852
0 852
0 852
0 852
0 852
0 846
0 840
0 821
0 819
0 819
0 819
0 819
0 819
0 819
0 819
0 819
0 819
0 819
0 819
0 819
0 818
0 812
0 809
0 807
0 802
0 801
0 786
0 782
0 781
0 781
0 780
0 775
0 769
0 718
0 716
0 665
0 665
0 345
0 344
0 343
0 342
0 342
0 342
0 342
0 50
0 47
0 33
0 19
0 19
0 19
0 19
0 19
0 19
0 19
0 19
0 19
0 18
0 13
0 5
0 5
0 5
0 5
1 5
1 5
1 5
1 5
1 5
1 5
1 5
1 5
1 6
1 7
1 7
1 7
1 7
1 7
1 7
1 7
0 7
0 7
0 7
0 7
0 7
0 7
0 8
0 7
0 7
0 8
0 9
0 11
0 12
0 12
0 12
0 12
0 12
0 12
0 12
0 11
0 11
0 11
0 11
0 11
0 11
0 11
1 11
1 11
1 11
1 10
1 11
1 10
1 10
1 9
1 16
1 16
1 16
1 16
1 16
1 16
1 16
0 16
0 16
0 16
0 16
0 16
0 16
0 16
0 15
0 8
1 8
1 8
1 8
1 8
1 8
1 8
1 8
1 8
1 8
1 8
1 11
1 11
1 11
1 11
1 11
0 11
0 11
0 11
0 11
0 11
0 11
0 11
0 11
0 11
0 11
0 11
0 11
0 10
0 10
0 11
0 12
0 13
0 11
0 9
0 7
0 7
0 7
0 7
0 9
0 9
0 9
0 9
0 9
0 9
0 9
0 9
0 9
0 9
0 9
0 9
3 9
3 8
3 8
4 8
4 8
4 8
4 8
4 8
4 8
4 8
4 9
4 9
4 10
4 10
4 10
1 10
1 10
1 10
1 10
0 10
0 10
0 10
0 11
0 11
0 11
0 11
0 11
0 11
0 11
0 11
0 11
0 11
0 11
0 7
0 7
0 8
0 8
0 6
0 6
0 6
0 6
0 6
0 6
0 6
0 6
0 7
1 8
1 8
1 15
1 18
1 24
1 26
1 27
1 26
1 28
1 28
1 28
1 28
1 28
1 29
1 29
0 28
0 28
0 28
0 28
0 28
0 31
0 48
0 61
0 70
0 75
0 76
0 96
0 94
0 96
0 123
0 402
0 521
0 601
0 718
0 754
0 788
0 807
0 809
0 810
0 809
0 809
0 809
0 809
0 809
0 809
0 809
3 809
3 809
3 809
3 809
3 809
3 809
3 809
3 856
3 856
3 864
3 857
3 854
3 856
3 857
3 857
0 858
0 854
0 849
0 963
0 969
0 976
0 982
0 982
0 972
0 977
0 972
0 974
0 987
0 990
0 985
0 983
0 979
0 979
0 977
0 977
0 978
0 988
0 996
0 996
0 998
0 991
0 992
0 992
0 993
0 987
0 988
0 987
0 987
0 974
0 970
0 967
0 973
0 985
0 1011
0 1027
0 1051
0 951
0 623
0 505
0 448
0 408
0 406
0 407
0 407
0 408
0 408
0 408
0 409
0 409
0 410
0 412
0 417
0 429
0 445
0 462
0 462
0 468
0 471
0 471
0 470
1 412
1 414
1 393
1 393
1 389
1 385
1 383
1 383
1 384
1 383
1 380
1 246
1 246
1 243
1 238
0 221
0 222
0 222
0 223
0 222
0 218
0 218
0 217
0 217
0 217
0 217
0 218
0 218
0 218
0 209
0 207
0 206
0 205
0 205
0 204
0 205
0 207
0 208
0 207
0 207
0 204
0 204
0 221
0 221
0 272
0 313
0 316
0 319
0 323
0 572
0 820
0 1164
0 1260
0 1395
1 1487
2 1526
2 1568
2 1584
2 1586
2 1605
2 1611
2 1623
2 1633
2 1655
2 1667
2 1645
4 1647
4 1641
4 1645
4 1641
7 1652
7 1658
7 1664
7 1665
7 1662
7 1666
7 1674
7 1674
7 1690
7 1694
7 1702
7 1705
7 1705
7 1706
7 1706
7 1707
4 1707
4 1707
4 1707
4 1706
4 1707
4 1707
4 1721
4 1715
4 1708
4 1708
4 1713
5 1816
5 2017
5 2049
6 2229
6 2248
7 2251
7 2259
8 2246
8 2242
8 2247
8 2269
8 2293
8 2292
8 2301
8 2325
8 2341
9 2370
9 2390
9 2382
10 2477
10 2134
10 1622
10 1389
10 1360
10 1348
10 1319
9 1204
9 1077
9 1046
9 1015
9 999
9 999
9 999
9 998
8 996
8 973
8 973
8 963
8 952
8 917
8 917
8 917
5 899
5 898
5 894
5 891
5 889
5 887
5 889
13 1096
13 1099
13 1096
13 1090
15 1090
15 1066
15 1056
15 1043
15 1042
15 1043
15 1043
15 1043
15 1042
15 1041
15 1041
15 1042
15 1041
15 1039
15 1035
13 1034
13 1034
12 1031
12 1030
12 1019
10 872
12 746
13 721
11 591
13 600
13 597
13 594
13 593
13 588
13 583
13 585
13 578
13 575
13 569
13 546
13 531
13 491
13 476
13 522
13 407
13 410
13 416
13 413
13 415
13 415
13 419
13 423
13 412
13 412
13 412
13 417
13 417
13 417
13 418
13 418
13 418
13 420
14 429
14 431
14 434
14 439
14 442
14 442
14 444
14 446
14 449
14 458
14 459
14 449
3 240
3 241
3 241
3 243
2 265
0 256
0 259
0 261
0 267
0 274
0 280
0 331
0 349
0 350
0 349
0 349
0 349
0 350
0 350
0 350
0 350
0 350
0 352
0 352
0 350
0 350
0 350
0 349
0 345
0 346
0 346
0 345
0 346
0 346
0 314
0 308
0 308
0 311
0 310
0 307
0 306
0 290
0 232
0 230
0 225
0 218
0 218
0 218
0 215
0 211
0 200
0 184
0 184
0 182
0 182
1 192
1 192
1 191
1 192
1 192
1 194
1 190
1 189
1 185
1 187
1 186
1 186
1 186
1 185
1 179
0 158
0 158
0 158
0 159
0 159
1 167
1 166
1 144
1 142
1 139
1 136
1 131
1 122
2 114
2 47
2 44
2 43
2 43
2 43
2 43
2 42
2 42
2 42
2 42
2 42
2 41
2 41
2 41
2 41
2 42
3 47
3 45
4 51
4 58
4 68
4 67
4 77
5 79
5 81
8 104
20 200
22 310
22 318
22 324
22 330
22 333
27 341
27 342
27 342
27 342
27 343
27 344
29 386
29 391
29 390
29 391
29 391
29 397
29 397
29 397
30 397
30 399
30 401
30 400
30 403
30 407
30 424
31 427
31 427
31 427
31 427
31 428
31 428
31 428
31 432
41 589
41 592
41 592
40 575
40 577
40 577
40 577
39 565
39 567
39 567
39 567
38 567
38 567
38 567
38 567
38 568
38 568
38 569
38 571
38 571
38 570
40 570
40 570
40 578
40 580
39 586
39 584
39 579
38 559
38 557
37 543
37 533
37 494
37 494
37 468
37 465
37 463
33 442
21 307
21 292
21 291
20 291
19 292
19 290
16 282
16 282
16 282
16 282
16 282
16 281
13 238
137 235
137 235
137 235
137 235
137 227
137 227
137 227
136 227
136 223
136 222
136 220
136 215
136 211
136 194
136 193
136 193
133 193
12 192
12 192
11 191
11 190
11 187
1 18
1 18
1 18
1 18
0 11
0 11
0 11
0 11
0 9
0 9
0 9
0 9
0 9
0 9
0 9
0 9
0 8
0 6
0 4
0 4
0 4
0 4
0 5
0 5
0 5
0 5
0 5
0 6
0 6
0 6
0 6
0 6
0 6
0 6
0 6
0 7
0 8
0 8
0 7
0 7
0 8
0 9
0 10
0 10
0 12
0 12
0 12
0 12
0 12
0 12
0 13
0 15
0 15
0 15
0 15
0 15
0 14
0 14
2 14
2 14
2 14
2 14
2 14
2 14
2 14
2 14
2 13
2 13
2 14
2 14
2 14
2 14
2 14
2 14
0 14
0 14
0 13
0 14
0 14
0 14
0 15
0 15
0 16
0 16
0 16
0 16
0 16
0 16
0 16
0 16
0 16
0 16
0 16
0 16
0 16
0 16
0 16
0 16
0 16
0 16
0 15
0 15
0 15
0 15
0 15
0 13
0 13
0 12
0 12
0 12
0 12
0 12
0 11
0 10
0 10
0 8
0 7
0 7
0 7
0 7
0 7
0 7
0 7
0 7
0 7
0 7
0 7
0 7
0 7
0 7
0 13
0 18
0 18
0 18
0 18
0 18
0 18
1 18
1 18
1 15
1 15
1 14
1 16
1 16
1 16
1 16
1 12
1 26
1 28
1 145
1 158
1 166
0 172
0 172
0 172
0 172
0 172
2 172
2 173
2 175
2 175
2 177
2 177
2 183
2 183
2 182
2 182
2 178
2 177
2 177
2 177
2 177
0 177
0 177
0 179
0 179
0 179
0 179
0 179
0 179
0 179
0 178
0 178
0 178
0 178
0 201
0 203
0 211
0 218
0 227
0 227
0 228
0 228
0 228
0 227
0 226
0 226
0 227
0 229
0 232
0 233
0 234
0 231
0 226
0 227
0 235
0 228
0 229
0 222
0 220
0 221
0 222
0 222
0 223
0 277
0 276
0 276
0 293
0 293
0 291
0 293
0 290
0 178
0 170
0 170
1 174
2 178
2 190
2 197
2 201
2 204
2 202
2 201
2 201
2 196
2 196
2 189
3 199
3 203
3 219
4 238
4 241
4 255
4 255
4 255
4 263
4 293
4 299
4 326
4 347
4 347
4 375
4 383
6 387
6 426
6 447
6 449
6 447
5 422
5 421
4 404
4 399
4 387
4 385
4 384
4 384
4 384
4 384
2 384
2 382
2 376
2 376
2 376
2 378
4 407
4 407
4 408
4 406
4 385
4 373
4 371
6 371
6 371
6 371
6 371
6 371
6 371
6 195
6 194
6 189
6 186
6 66
6 66
6 66
6 66
6 66
6 66
6 68
6 68
7 67
8 66
10 68
10 68
10 68
11 71
11 71
13 72
13 70
13 67
13 67
12 67
12 67
12 65
11 54
11 53
11 50
11 50
11 49
11 48
11 47
11 47
11 47
11 46
11 46
11 45
11 46
11 46
11 46
11 50
11 50
11 50
11 50
11 52
11 52
12 58
12 58
12 62
12 62
12 62
12 62
12 62
13 71
13 71
13 70
12 74
15 89
15 87
11 57
11 57
11 56
13 59
13 59
13 59
13 59
9 56
9 56
9 56
9 56
9 58
9 58
9 59
9 60
9 60
9 60
9 60
9 60
9 60
9 60
9 60
9 60
9 60
9 60
9 60
9 60
9 56
9 54
9 55
10 55
13 59
12 59
12 60
12 60
12 60
12 60
12 60
12 60
12 60
12 60
12 60
12 60
12 60
12 60
11 60
11 60
11 60
11 61
11 61
11 61
11 60
11 60
11 61
11 58
17 88
18 89
18 90
18 88
18 85
16 74
16 74
15 67
14 62
13 59
13 60
13 60
11 60
11 59
11 57
11 52
10 46
10 45
10 44
10 44
10 44
10 45
10 45
10 45
10 45
10 45
10 45
11 55
12 57
19 74
20 79
20 80
20 86
20 87
20 91
20 102
20 105
20 105
20 107
20 118
20 118
20 118
19 118
19 118
20 119
20 120
20 122
21 127
21 125
18 122
19 139
19 139
19 141
19 142
19 142
19 143
19 144
19 147
19 152
19 152
18 150
18 150
18 153
18 153
18 153
18 151
18 150
18 150
18 150
18 150
18 150
18 151
18 149
12 121
11 119
11 119
11 119
11 119
11 119
11 119
11 119
11 122
11 122
11 124
11 125
11 125
11 125
11 125
11 125
11 125
11 126
11 131
11 140
11 145
13 156
13 157
15 168
15 168
16 184
16 183
16 173
15 171
8 141
5 139
5 135
5 128
5 128
5 121
6 113
6 115
6 113
6 112
6 104
6 105
6 105
6 105
6 105
6 105
6 105
7 103
7 101
7 100
7 100
7 85
7 85
7 86
7 86
7 86
7 84
7 84
7 83
8 79
8 79
8 79
8 79
8 78
8 78
7 79
7 85
7 85
7 85
7 85
7 85
7 85
7 83
8 83
8 83
8 89
8 89
8 89
8 89
8 89
8 89
8 88
7 85
7 84
7 100
7 100
7 100
5 100
5 128
5 129
5 135
5 133
5 126
5 116
5 108
5 102
5 102
5 98
4 98
3 79
3 79
3 79
3 79
3 77
3 77
3 77
3 79
3 79
3 79
2 78
2 73
2 71
2 71
3 73
3 73
3 75
3 75
3 76
3 77
3 77
3 77
3 77
3 77
3 77
3 77
3 77
3 76
3 76
2 76
3 76
3 77
3 80
2 83
2 88
2 87
2 87
2 87
2 87
2 87
2 82
2 82
2 82
2 82
2 82
1 81
1 81
0 74
0 74
0 58
0 52
0 51
0 41
0 41
0 41
0 41
0 44
0 44
0 51
0 54
0 56
0 56
0 40
0 42
0 51
0 54
0 55
0 55
0 56
0 55
0 54
0 54
0 54
0 54
0 54
0 54
0 54
0 54
0 53
0 53
0 53
0 57
0 58
0 60
0 60
0 62
0 62
0 60
0 60
0 56
0 54
0 54
0 54
0 54
0 54
0 54
0 54
0 54
0 54
0 54
0 54
0 54
0 54
0 62
0 61
0 56
0 49
0 49
0 49
0 49
0 49
0 49
0 49
0 49
0 49
0 49
0 49
0 49
0 49
1 49
1 50
1 52
1 56
1 57
1 57
1 57
1 57
1 56
1 56
1 52
1 51
1 41
1 42
1 44
1 44
1 43
1 42
1 37
1 37
0 37
0 37
0 36
0 36
0 36
1 36
1 36
1 36
1 36
1 36
1 36
1 36
1 36
1 36
1 36
1 32
1 31
1 27
1 26
1 25
0 25
0 26
0 26
0 26
0 27
0 27
0 27
0 29
0 29
0 29
0 29
0 30
0 30
0 31
0 31
0 31
0 30
0 21
0 21
0 20
0 18
0 18
0 16
0 16
0 16
0 16
0 15
0 15
0 15
0 15
5 1336
5 1344
5 1345
5 1342
5 1342
5 1340
5 1337
5 1337
5 1338
5 1338
5 1339
5 1339
5 1339
5 1340
5 1351
5 1353
0 34
0 35
0 35
0 42
0 42
0 40
0 40
0 40
0 40
0 40
0 40
0 40
0 40
1 40
1 40
1 40
2 40
2 40
2 46
2 47
2 54
2 55
2 55
2 55
2 55
2 55
2 55
2 55
2 55
2 55
2 55
2 54
2 54
2 69
2 69
2 69
4 70
4 71
4 71
4 71
4 70
4 70
4 70
4 70
4 70
5 70
5 70
5 70
5 80
5 66
5 68
5 68
3 67
3 67
3 67
3 67
3 65
3 64
3 63
3 63
2 63
2 63
2 63
2 63
2 63
2 62
2 61
2 60
2 59
3 59
3 58
3 42
3 35
3 30
3 30
3 30
1 30
1 30
1 30
1 30
1 30
1 30
1 30
1 30
1 30
1 31
1 31
1 31
1 31
1 31
1 31
1 25
2 21
2 18
2 17
2 17
2 17
2 18
2 18
2 19
2 52
2 54
2 54
2 87
2 89
2 92
2 92
2 93
2 101
2 100
2 100
2 100
2 100
2 100
2 100
2 100
2 100
2 100
2 100
2 100
2 100
2 89
2 88
2 87
2 87
2 87
2 87
2 87
2 87
2 87
2 87
2 87
2 87
2 87
2 87
2 87
2 87
2 87
2 87
2 87
2 87
2 87
1 87
1 86
1 86
1 86
1 86
1 86
1 86
1 82
1 78
1 70
1 70
1 70
1 70
1 70
1 70
1 70
1 70
1 70
1 70
1 70
1 70
1 69
0 69
0 40
0 40
0 43
0 42
0 14
0 15
0 13
0 10
0 10
0 10
0 10
0 7
0 7
0 7
0 6
0 6
0 6
0 5
0 4
0 2
0 4
0 4
0 4
0 4
0 4
2 4
2 4
2 4
2 4
2 4
2 4
2 4
3 5
3 5
3 5
3 5
9 6
9 6
10 7
10 7
10 7
8 7
10 7
10 7
10 7
10 7
10 7
10 7
10 7
10 7
12 7
12 7
13 7
13 7
13 7
13 7
13 7
13 7
13 7
13 7
13 7
12 7
12 7
12 7
12 7
9 7
9 7
8 7
8 7
8 7
9 7
9 7
9 9
9 9
9 9
9 9
9 9
9 9
9 9
9 9
9 9
9 9
15 9
18 9
30 9
34 9
35 9
39 7
43 7
44 9
69 11
69 11
69 9
70 10
70 10
70 9
71 9
73 9
103 9
104 9
104 9
106 9
106 10
112 12
112 12
112 9
112 9
112 9
112 9
105 6
105 5
105 4
105 4
105 4
105 4
103 4
103 4
104 3
111 3
119 5
126 5
128 5
139 7
140 7
141 7
145 6
145 6
145 6
147 6
149 5
149 4
149 4
149 4
149 4
149 4
149 4
149 4
149 4
171 8
172 8
171 8
171 8
171 8
178 8
185 8
195 8
198 8
198 8
198 8
198 8
203 8
214 8
221 8
202 4
201 4
196 4
189 4
176 4
172 4
170 4
166 4
164 4
164 4
141 4
142 4
143 4
144 4
144 4
139 4
137 4
136 4
103 3
102 3
104 3
96 2
96 2
86 2
86 2
82 2
82 2
78 2
76 2
78 2
78 2
78 2
78 2
80 3
80 3
80 3
80 3
78 3
77 3
74 5
73 5
73 5
68 3
68 3
68 3
67 3
67 3
67 3
67 3
67 3
67 3
67 4
67 4
67 4
67 3
67 3
67 3
67 3
65 3
65 3
64 3
58 3
61 3
48 3
44 3
26 3
16 2
16 2
17 2
18 2
18 2
17 2
17 2
13 2
15 2
15 2
15 2
16 2
16 2
17 2
17 2
17 2
16 2
16 2
16 2
16 2
15 2
15 2
15 2
15 2
15 2
15 2
15 2
15 2
15 2
15 2
15 2
15 2
15 2
15 8
15 8
15 8
15 8
15 8
15 8
15 8
15 7
15 7
15 7
15 7
15 7
15 7
15 6
15 6
15 6
15 6
15 6
15 6
15 0
15 0
15 0
1559 0
1559 0
1595 0
1595 0
1595 0
1595 0
1595 0
1595 0
1604 0
1604 0
1604 0
1604 0
1604 0
1604 0
1599 0
60 0
54 0
18 0
16 0
15 1
15 1
14 1
14 1
5 1
5 1
5 1
2 1
3 1
3 1
2 1
2 1
2 1
2 1
2 1
2 1
2 0
2 0
2 0
2 0
2 0
2 0
2 0
2 0
2 0
2 0
2 0
2 0
2 0
2 1
2 1
2 1
2 1
2 1
2 1
2 1
2 1
2 1
2 1
2 1
2 1
2 1
2 1
2 1
2 1
2 1
2 1
2 1
2 1
2 1
2 1
2 1
2 1
2 1
2 1
2 1
2 1
2 1
2 1
2 1
2 1
2 1
2 1
2 1
2 1
2 1
2 1
2 2
2 2
2 2
2 2
2 2
2 2
1 2
1 2
1 2
1 2
1 2
1 2
1 2
1 2
0 2
0 2
0 2
0 2
0 2
0 3
0 3
0 5
0 6
0 7
0 7
0 7
0 15
0 16
0 16
0 22
0 23
0 23
0 24
0 24
0 24
0 23
1 24
4 33
4 33
4 33
4 33
4 39
4 46
4 49
4 70
4 72
4 73
4 72
4 73
4 74
4 75
3 75
3 75
0 66
1 66
1 66
1 66
1 66
1 69
1 76
1 82
1 83
1 84
1 84
1 84
1 84
2 84
2 84
2 84
2 84
1 84
1 84
1 84
1 83
1 83
1 83
1 83
1 83
1 83
1 83
1 83
0 83
0 77
0 75
0 75
0 75
0 75
0 75
0 76
0 76
0 76
0 75
0 75
0 75
0 74
0 73
0 75
0 75
0 74
0 65
0 62
0 61
0 60
0 59
0 61
0 61
0 62
0 65
0 69
0 73
0 74
0 76
0 86
0 86
0 92
0 93
0 94
0 74
0 75
0 75
0 75
0 74
0 72
0 72
0 72
0 75
0 85
0 100
0 102
0 104
0 112
0 105
0 98
0 94
0 94
0 94
0 94
0 94
0 94
0 95
0 96
0 96
0 96
0 98
0 98
0 101
0 101
0 102
0 103
0 103
0 103
0 103
0 103
0 103
0 103
0 103
0 103
0 107
0 108
0 109
0 110
0 104
0 104
0 104
0 104
0 99
0 99
0 99
0 98
0 95
0 100
0 100
0 100
0 106
0 106
0 106
0 113
0 133
0 168
0 219
0 258
0 278
0 281
0 282
0 285
0 276
0 271
0 267
0 266
0 266
0 267
0 269
0 270
0 270
0 270
0 271
0 271
0 271
0 268
0 266
0 266
0 267
0 267
0 264
0 265
0 265
0 265
0 264
0 264
0 265
0 265
0 272
0 271
0 270
0 270
0 274
0 270
0 279
0 267
0 263
0 265
0 263
0 264
0 264
0 287
0 292
0 294
0 297
0 298
0 296
0 288
0 270
0 263
0 256
0 255
0 255
0 250
0 250
0 248
0 248
0 248
0 248
0 249
0 251
0 250
0 249
0 228
0 228
0 207
0 193
0 162
0 103
0 88
0 86
0 83
0 82
0 82
0 82
0 81
0 80
0 81
0 83
0 84
0 83
0 84
0 84
0 84
0 84
0 84
0 84
0 85
0 85
0 85
0 82
0 81
0 81
0 81
0 80
0 80
0 79
0 79
0 79
0 78
0 83
0 75
0 75
0 75
0 74
0 74
0 71
0 57
0 54
0 54
0 54
0 54
0 54
0 53
0 22
0 23
0 21
0 19
0 18
0 17
0 16
0 16
0 16
0 16
0 16
0 16
0 16
0 16
0 16
0 16
0 15
0 34
0 33
0 31
0 32
0 32
0 32
0 32
0 32
0 32
0 34
0 34
0 34
0 34
0 34
0 35
0 36
0 36
0 36
0 36
5 35
5 33
5 32
5 32
5 32
5 32
5 32
5 32
5 32
5 32
5 31
5 31
5 31
5 31
5 31
5 31
0 31
0 31
0 31
0 32
0 32
0 32
0 32
0 27
0 28
0 27
0 27
0 28
0 29
0 29
0 29
0 29
0 29
0 29
2 29
110 32
110 32
110 32
110 32
110 31
110 31
110 33
110 32
110 32
110 33
110 34
110 35
110 36
110 37
110 38
0 35
0 35
0 35
0 35
0 15
0 15
0 15
17 15
17 15
17 15
17 15
17 15
17 15
17 13
17 13
17 12
17 12
17 12
17 11
17 10
17 12
17 13
0 14
0 14
0 14
0 14
0 14
0 14
0 14
0 14
0 14
0 14
0 14
0 14
0 14
0 14
0 15
0 16
0 16
0 16
0 16
0 16
0 15
0 15
0 15
0 15
0 15
0 17
0 17
0 17
0 18
0 17
0 15
0 23
0 23
0 23
0 24
0 24
0 24
0 24
0 25
0 25
0 25
0 25
0 23
0 23
0 23
0 22
0 12
0 12
0 10
0 10
76 11
76 11
76 11
76 11
76 11
76 11
76 11
76 11
76 11
76 11
76 11
76 11
76 11
76 11
76 11
76 11
68 11
65 11
4 10
2 9
2 9
0 6
0 4
0 4
0 7
0 7
0 7
0 24
0 25
0 28
0 30
0 33
0 38
0 54
0 55
0 55
0 58
0 68
0 73
0 73
0 73
0 73
0 73
0 73
0 74
0 74
0 74
0 74
0 73
0 73
0 73
0 72
0 72
57 72
57 72
57 72
57 72
57 72
57 72
57 72
57 72
57 71
57 71
57 71
57 71
57 71
57 71
57 71
0 71
0 71
0 71
0 71
0 71
0 71
0 72
0 72
0 72
0 72
0 72
0 70
0 68
0 66
0 65
3 805
3 805
56 804
56 804
56 803
56 803
56 803
56 803
56 803
56 802
56 802
56 802
56 801
56 801
56 801
56 800
56 800
56 786
0 52
0 53
0 53
0 51
0 59
0 40
0 40
0 39
0 39
0 39
0 39
0 40
0 40
0 40
0 40
0 40
0 39
0 39
0 39
0 44
0 45
0 45
8 46
8 46
8 46
8 46
8 46
8 46
8 45
8 45
8 45
8 45
8 45
8 45
8 45
9 45
9 45
9 45
2 44
2 44
2 44
2 44
2 44
2 44
2 44
2 44
2 43
2 43
2 42
2 41
3 41
2 41
2 41
1 38
1 38
1 38
1 38
1 37
1 37
1 37
1 37
1 37
1 37
1 37
1 37
0 40
0 39
0 43
0 45
0 46
0 46
0 41
0 37
0 37
0 36
0 34
0 35
0 21
0 18
0 18
0 19
0 19
0 19
0 19
0 19
0 19
0 19
0 19
0 21
0 21
0 21
0 21
0 15
0 15
0 15
0 15
0 15
0 15
0 15
0 15
0 15
0 15
0 16
0 16
0 16
0 16
0 16
0 16
0 16
0 16
0 16
0 16
0 16
0 16
0 16
0 16
0 16
0 15
0 15
0 15
0 15
0 15
0 15
0 15
0 15
0 15
0 15
0 15
0 15
0 15
0 15
0 15
0 15
0 15
0 15
0 15
0 15
0 15
0 11
0 10
0 6
0 6
0 5
0 5
0 5
0 5
0 5
0 5
0 5
0 3
0 3
0 3
0 2
0 2
0 2
0 2
0 2
0 3
0 3
0 3
0 3
0 1
0 1
0 1
0 1
0 1
0 1
0 1
0 2
0 2
0 2
0 2
0 2
0 1
0 1
0 1
0 1
0 1
0 4
0 5
0 5
0 5
0 5
0 5
0 4
0 4
0 4
0 4
0 4
0 4
0 4
0 4
13 5
13 5
13 5
13 5
13 5
13 5
13 5
13 5
13 5
13 5
13 5
14 5
14 5
14 5
14 5
1 4
1 4
1 4
1 4
1 4
2 4
2 5
2 5
2 5
3 6
3 6
3 6
3 6
3 6
3 6
3 6
3 6
3 6
3 6
3 6
2 6
3 6
3 6
3 6
3 6
3 6
3 6
3 6
3 7
3 7
3 7
3 8
3 8
3 8
3 8
3 8
3 8
2 8
2 8
2 9
2 10
2 11
2 11
2 35
2 29
2 29
2 29
2 35
3 101
3 108
4 110
4 113
7 120
7 131
8 136
9 136
11 137
11 144
11 146
15 156
15 156
15 164
17 166
18 189
18 197
18 200
18 200
18 216
18 219
17 227
17 228
17 228
17 232
17 236
17 238
17 239
17 239
17 239
16 239
18 244
20 266
24 322
23 335
23 339
23 341
23 341
23 341
23 341
23 363
23 363
23 363
23 364
23 364
23 365
23 366
23 366
23 366
23 366
23 366
23 365
23 364
23 363
23 363
23 363
23 362
23 362
23 362
23 362
23 362
23 362
23 362
23 348
23 345
23 323
23 309
23 309
23 305
23 285
23 282
23 281
23 273
21 218
21 211
20 205
20 205
9 205
9 205
9 203
4 203
4 203
4 195
4 194
3 185
3 186
3 185
3 181
3 170
0 164
0 160
0 159
0 135
0 121
0 110
0 104
0 107
1 112
1 100
1 102
1 98
1 100
1 100
1 99
1 99
1 73
1 51
1 49
1 49
1 49
1 49
1 48
1 48
1 24
1 24
1 23
1 23
1 27
1 48
1 54
1 56
1 57
1 57
1 58
1 73
1 83
1 111
1 148
1 193
1 221
1 229
1 233
1 236
1 247
1 259
1 273
1 279
1 282
1 286
1 519
1 520
1 522
1 522
1 523
1 524
1 526
1 611
2 612
2 612
2 612
2 689
2 707
2 718
2 736
2 739
2 739
2 752
2 750
2 753
2 753
2 755
2 755
1 755
1 755
1 756
1 756
1 755
1 757
1 756
1 748
0 743
0 743
0 743
0 742
0 741
0 744
0 745
0 745
0 745
0 744
0 744
0 750
0 749
0 748
0 749
0 750
0 750
0 750
0 756
0 757
0 751
0 729
0 725
0 724
0 724
0 724
0 722
0 678
0 604
0 577
0 572
0 565
0 550
0 549
0 550
0 583
0 566
0 541
0 530
0 524
0 513
0 494
0 182
0 282
0 281
0 280
0 197
0 197
1 197
1 198
1 198
1 198
1 198
1 180
1 174
1 174
1 174
1 180
1 83
1 81
1 79
1 80
1 80
1 80
0 80
0 80
0 79
1 79
1 79
1 79
1 79
1 79
1 77
1 77
1 76
1 76
1 76
2 76
2 74
2 78
2 78
2 82
1 85
1 99
1 93
1 96
1 95
1 94
1 95
1 95
1 95
1 88
0 85
0 85
0 85
0 85
0 85
0 85
0 85
0 85
0 85
0 85
0 85
0 85
0 85
0 86
0 83
0 78
0 37
0 37
0 37
0 37
0 31
0 31
0 31
0 31
0 31
0 31
0 31
0 31
0 31
0 31
0 30
0 30
0 30
0 30
0 31
0 31
0 31
0 31
0 31
0 30
0 30
0 30
0 30
0 31
0 31
0 31
0 31
0 31
0 36
0 69
0 75
0 93
0 101
0 1435
0 1447
0 1454
0 1463
0 1464
0 1465
0 1465
0 1465
1 1465
1 1462
1 1458
1 1443
1 1442
1 1442
1 1442
1 47
1 47
1 41
1 41
1 41
1 41
1 41
1 41
0 42
0 42
0 42
0 42
0 42
0 42
0 42
0 43
0 43
0 43
0 43
0 43
0 43
0 43
0 43
0 43
0 43
0 44
0 44
0 44
0 44
0 44
0 43
0 43
0 43
0 44
0 49
0 49
0 49
0 49
2 49
2 49
2 49
2 48
2 48
2 48
2 48
2 48
2 48
6 48
6 48
6 48
6 48
6 48
7 48
7 46
5 46
5 46
5 41
5 39
5 36
5 25
5 22
5 13
1 14
1 14
1 15
1 15
1 15
1 15
0 13
0 14
0 14
0 14
0 14
0 15
0 29
0 29
0 29
0 29
0 29
0 29
0 29
0 28
0 28
0 28
0 28
0 27
0 27
0 27
0 27
0 28
0 29
0 28
0 28
0 28
0 28
0 29
0 32
0 33
0 36
0 36
0 36
0 36
0 36
0 37
0 38
0 38
0 34
0 31
0 31
0 41
0 41
0 41
0 41
0 41
0 42
0 60
0 62
0 65
0 65
0 66
0 66
0 67
0 67
0 68
0 77
0 78
0 80
0 82
0 82
0 86
0 86
5 84
5 91
5 91
5 91
5 90
5 90
5 88
5 87
5 87
5 87
5 87
5 107
5 109
5 111
5 111
1 110
0 173
0 164
0 162
0 163
0 163
0 163
0 163
0 163
0 163
0 163
0 163
0 166
0 166
0 167
0 167
0 87
0 86
0 86
0 86
0 85
0 85
0 84
0 82
0 81
0 81
0 81
0 81
0 81
0 82
0 81
0 80
0 80
0 80
0 80
0 81
0 81
0 82
0 82
0 83
0 83
0 81
0 66
0 64
0 64
0 65
0 64
0 65
0 64
0 63
0 61
0 42
0 41
0 39
0 37
0 37
0 37
0 38
0 38
0 38
0 38
0 38
0 38
0 38
0 38
2 38
2 38
2 38
2 38
2 16
2 16
2 14
2 14
2 14
3 14
3 14
3 14
3 23
3 23
3 25
1 153
1 157
1 168
1 173
1 174
1 169
1 175
1 175
1 175
1 175
0 184
0 184
0 189
0 199
0 205
0 215
0 215
0 215
0 215
0 215
0 218
0 218
0 218
0 218
0 218
0 218
0 218
0 218
0 218
0 219
0 219
0 219
0 219
0 220
0 220
0 219
0 220
0 223
0 217
0 213
0 212
0 212
0 212
0 212
0 211
0 211
0 211
0 211
0 211
0 211
0 210
0 210
0 210
0 210
0 210
0 210
0 209
0 209
0 211
0 211
0 214
0 214
0 214
0 214
0 214
0 214
0 214
0 213
0 212
0 212
0 210
0 210
0 204
0 72
0 70
0 70
0 70
0 70
0 75
0 73
0 73
0 73
0 73
0 64
0 63
0 58
0 44
0 43
0 35
0 37
0 37
0 37
0 37
0 34
0 34
0 34
0 34
0 34
0 34
0 34
0 34
0 34
0 34
0 34
0 35
0 34
0 34
0 34
0 34
0 32
0 32
0 38
0 38
0 38
0 38
0 38
0 39
0 39
0 39
0 39
0 39
0 39
0 39
0 39
0 39
0 117
0 112
0 112
0 112
0 113
0 111
0 110
0 110
0 110
0 111
0 112
0 112
0 111
0 110
0 109
0 109
0 109
0 110
0 109
0 108
0 108
0 108
0 108
0 106
0 107
0 106
0 101
0 97
0 97
0 97
0 97
0 97
0 98
0 98
0 97
0 94
0 94
0 94
0 102
0 105
0 106
0 106
0 106
0 106
0 106
0 106
0 106
0 106
0 109
0 110
0 110
0 110
0 107
0 107
0 107
0 107
0 107
0 107
0 108
0 108
0 108
0 108
0 108
0 108
0 107
0 108
0 108
0 108
0 108
0 109
0 109
0 109
13 107
13 25
13 25
13 25
13 25
13 24
13 25
13 23
13 23
13 19
13 19
13 18
13 18
13 18
13 18
13 18
0 18
0 18
0 17
0 17
0 17
0 17
0 17
0 17
0 17
0 17
0 17
0 17
0 18
0 18
0 18
0 18
0 18
0 18
0 18
0 18
0 20
0 22
0 22
0 16
0 10
0 7
0 7
0 7
0 7
0 7
0 7
0 7
0 7
0 7
0 7
0 10
0 10
0 8
0 8
0 12
0 12
0 12
0 12
0 11
0 11
0 13
0 13
0 13
0 14
0 14
0 14
0 14
0 14
0 25
0 25
0 25
0 41
0 48
0 49
0 52
2 68
2 69
2 68
2 98
3 102
3 105
3 107
3 111
3 112
3 113
3 115
3 116
3 116
3 116
3 116
2 116
1 115
1 116
1 117
1 119
0 120
0 120
0 121
0 121
0 119
0 118
0 114
0 114
0 114
0 95
0 95
0 95
0 96
0 101
1 101
1 101
2 82
2 81
2 79
2 75
2 73
2 73
2 74
2 78
2 78
2 82
2 79
2 77
2 82
2 76
2 77
1 77
1 76
1 76
1 76
0 76
0 76
0 72
0 68
0 67
0 67
0 66
0 66
0 68
0 68
0 68
0 69
0 70
0 70
0 57
0 58
0 56
0 56
0 56
0 56
0 59
0 41
0 38
0 38
0 38
0 40
0 40
0 41
0 41
0 40
0 40
0 40
0 39
0 39
0 39
0 40
0 37
0 35
0 35
0 35
0 35
0 35
0 35
0 35
0 36
0 36
0 36
0 36
0 36
0 36
0 34
0 30
0 30
0 30
0 30
0 30
0 30
0 31
0 31
0 31
0 30
0 26
0 26
0 20
0 18
0 17
0 14
0 13
0 13
0 13
0 13
0 13
0 13
0 13
0 37
0 37
0 37
0 37
0 37
0 37
0 37
0 35
0 35
0 35
0 34
0 33
0 33
0 33
0 33
0 33
0 33
0 9
0 9
0 8
0 8
0 8
0 8
0 8
0 5
0 5
0 5
0 5
0 11
0 14
0 14
0 14
0 13
0 13
0 13
0 13
0 13
0 15
0 15
0 16
0 16
0 16
0 17
0 16
0 16
1 17
1 17
1 17
1 17
1 17
1 17
1 17
1 18
2 18
2 18
2 18
2 16
2 16
2 16
2 17
1 17
1 18
1 19
1 18
1 18
1 18
1 18
1 19
0 19
0 19
0 19
0 19
0 19
0 20
0 22
0 22
0 22
0 22
0 22
0 22
0 27
0 27
0 26
0 27
0 27
0 27
0 28
0 28
0 28
0 28
0 29
0 29
0 35
1 35
1 35
1 41
1 41
3 44
3 45
3 47
3 47
3 38
3 36
3 37
3 37
3 37
3 37
3 37
2 37
2 36
2 36
2 36
0 37
0 37
0 38
0 39
0 39
0 39
0 38
0 38
0 38
0 39
0 39
0 39
0 39
0 38
0 38
0 38
0 38
0 38
0 38
1 38
1 37
1 37
1 36
1 35
1 35
1 35
1 35
1 35
1 35
1 35
1 35
1 36
1 36
1 36
0 35
0 33
0 33
0 33
0 33
0 33
0 33
0 20
0 20
0 10
0 10
0 10
0 10
0 9
0 9
0 9
0 9
0 20
0 20
0 20
0 20
0 20
0 20
0 19
0 19
0 19
0 19
0 18
0 18
0 18
0 18
0 18
0 7
0 7
0 7
0 10
0 10
0 10
0 10
0 9
0 8
1 8
1 6
1 7
1 7
3 7
3 7
3 7
4 18
4 18
4 18
4 18
4 18
4 18
4 18
4 18
3 18
3 18
3 17
3 17
3 17
3 63
3 63
3 63
2 51
2 51
2 51
2 51
2 51
2 51
2 50
2 50
2 50
2 50
2 50
2 50
2 4
2 4
2 4
2 4
2 4
2 4
2 4
2 4
2 4
2 4
2 4
2 4
2 4
2 4
2 3
2 3
2 3
2 3
2 3
2 3
2 3
2 3
2 3
2 3
2 3
2 3
2 3
2 3
2 3
2 3
2 3
2 3
2 0
2 0
2 0
2 0
1 0
1 0
0 0
0 0
0 0
0 0
0 0
0 0
0 0
0 0
0 0
0 0
0 0
0 0
0 0
0 0
0 0
0 0
0 0
0 0
0 3
0 3
0 3
0 3
0 3
0 3
0 3
0 3
0 3
0 3
0 3
0 3
0 3
0 3
0 3
0 3
0 3
0 3
0 3
0 3
0 3
0 3
0 3
0 3
0 3
0 3
0 3
0 3
0 3
0 3
0 3
0 3
0 3
0 4
0 4
1 4
1 4
1 4
1 4
1 4
1 4
1 4
1 4
1 4
1 4
1 4
1 4
1 4
1 4
1 4
0 4
0 4
0 4
0 4
0 6
0 6
0 6
0 6
0 6
0 6
0 6
0 6
0 6
0 6
0 6
0 6
0 6
0 6
0 6
0 6
0 6
0 6
0 6
0 3
0 3
0 3
0 3
0 3
0 3
0 3
0 3
0 3
0 3
0 3
0 3
0 3
0 3
0 3
0 3
0 3
0 3
0 3
0 3
0 3
0 3
0 4
0 4
0 4
0 4
0 5
0 5
0 5
0 5
0 5
0 5
0 6
0 7
0 7
0 7
0 7
0 8
0 8
0 8
0 12
0 12
0 14
0 14
0 15
0 15
0 15
0 15
0 14
0 14
0 14
0 13
0 13
0 13
0 12
0 12
0 9
0 8
0 8
0 11
0 11
0 11
0 12
0 12
0 53
0 58
0 58
0 59
0 59
0 59
0 59
0 59
0 59
0 59
0 59
0 59
0 59
0 58
0 58
0 17
0 17
0 17
0 17
0 17
0 17
0 17
0 17
0 17
0 17
0 17
0 17
0 17
0 17
0 17
0 17
0 16
0 16
0 16
0 16
0 24
0 24
0 24
0 27
0 27
0 29
0 29
0 29
0 30
0 31
0 31
0 33
0 33
0 34
0 33
0 33
0 29
0 27
0 27
0 35
0 34
0 34
0 34
0 33
0 33
0 33
0 33
0 33
0 33
0 33
0 33
0 33
0 33
0 33
0 33
0 37
0 37
0 37
0 37
0 34
0 34
0 34
0 34
0 35
0 37
0 40
0 41
0 50
0 50
0 50
0 53
0 53
0 57
0 57
0 67
0 67
0 70
0 70
0 70
2 77
2 77
2 78
2 78
2 79
2 83
2 101
2 107
2 112
2 128
2 140
2 143
2 147
2 146
2 137
2 133
0 128
0 117
0 117
0 115
0 108
0 108
0 107
0 116
0 116
0 118
0 135
0 136
0 136
0 136
1 136
1 136
1 136
1 122
1 122
1 122
1 116
1 116
2 116
2 116
2 116
2 116
2 117
2 117
2 117
1 117
1 117
1 117
1 117
1 117
1 117
1 117
1 117
0 117
0 117
0 119
0 119
0 121
0 122
0 121
0 121
0 115
0 114
0 111
0 182
0 177
0 173
0 170
0 170
0 170
0 166
0 166
0 165
0 158
0 155
0 155
0 155
0 156
0 151
0 47
0 28
0 27
0 26
0 30
0 24
0 24
0 25
0 25
0 24
0 25
0 27
0 27
0 27
0 26
0 26
0 26
0 26
0 26
0 26
0 17
0 17
0 17
0 17
0 17
0 17
0 17
1 17
1 17
1 17
1 17
1 17
1 18
1 18
1 39
2 38
2 40
2 40
4 42
173 44
173 46
173 47
173 47
172 47
172 50
172 55
173 57
173 56
173 56
173 55
173 33
176 32
176 32
177 32
5 32
5 33
6 33
6 32
6 32
7 32
8 33
8 33
9 33
9 33
9 33
9 33
6 33
6 33
5 33
5 33
5 33
5 32
5 32
5 32
5 32
5 32
5 32
5 28
5 28
5 30
5 33
5 40
5 50
4 52
4 50
4 53
4 53
4 53
4 53
4 53
4 53
4 53
4 53
4 53
4 54
4 55
4 57
4 57
4 57
4 57
4 57
4 57
4 57
4 60
4 61
4 63
4 67
4 76
4 76
4 75
4 75
4 72
4 71
4 70
4 68
4 68
4 68
4 63
4 60
3 55
3 54
3 55
4 55
4 55
4 55
4 57
4 57
4 57
4 56
3 56
3 56
3 56
2 56
1 55
1 55
1 55
1 55
1 55
1 55
1 55
1 55
1 55
1 55
1 55
1 55
1 55
1 56
1 58
1 61
1 61
1 61
1 60
1 57
1 54
1 45
1 26
1 24
1 24
1 21
1 21
1 21
1 21
1 21
1 21
1 21
1 21
1 21
1 21
1 20
1 20
1 20
1 20
1 20
1 20
1 20
1 20
1 20
1 21
1 19
1 16
2 14
2 14
2 14
2 14
2 14
2 12
2 12
2 12
2 12
2 11
2 11
2 12
2 12
1 12
1 11
1 11
0 11
0 10
0 8
0 8
0 8
0 8
0 8
0 9
1 10
1 10
1 10
1 10
1 10
1 10
1 10
1 10
1 10
1 10
1 10
1 10
1 10
1 10
1 10
1 9
1 7
1 3
1 3
1 3
1 3
1 3
1 3
1 3
1 3
1 3
1 3
1 3
1 3
1 3
1 3
1 3
1 3
1 3
1 3
1 7
1 8
1 8
1 8
1 8
1 8
1 8
1 8
2 9
2 9
2 9
2 9
2 9
2 9
2 9
2 9
2 9
2 9
2 9
2 9
2 9
2 9
2 14
1 14
1 16
1 15
1 15
1 15
1 15
1 15
1 16
1 16
1 16
1 16
1 16
1 16
1 17
0 16
0 19
0 17
0 19
0 22
0 27
0 29
0 30
0 30
0 30
0 31
0 31
0 31
0 31
0 31
0 31
0 31
0 31
0 31
0 31
0 31
0 31
0 31
0 31
0 31
0 31
0 31
0 31
0 31
0 31
0 31
0 32
0 33
0 37
0 37
0 43
0 42
0 49
0 63
0 67
0 84
0 86
0 89
0 89
0 90
0 91
0 91
0 105
0 106
0 108
0 115
0 177
0 196
0 199
0 221
0 222
0 222
0 224
0 219
0 220
0 220
0 220
0 220
0 220
0 220
0 223
0 222
0 222
0 222
0 223
0 223
0 223
0 223
0 221
1 216
3 215
3 213
3 214
3 209
3 209
3 213
3 213
3 213
3 208
3 206
3 201
3 200
21 199
21 199
21 199
18 199
18 199
18 199
18 199
18 199
18 199
18 252
18 262
18 273
20 277
20 283
20 283
2 284
2 282
2 278
2 269
2 258
2 248
2 244
2 243
2 237
2 258
2 255
2 240
2 242
0 241
0 241
0 243
0 240
0 238
0 241
0 241
0 245
0 229
0 180
0 166
0 163
0 162
0 165
0 165
0 160
0 163
0 161
0 161
0 162
0 163
0 164
0 164
1 164
992 167
992 167
992 166
994 167
994 167
994 167
994 167
994 169
994 171
994 172
994 172
994 173
995 185
995 182
996 177
996 182
5 178
5 178
4 178
4 178
4 178
4 178
4 178
4 178
6 190
8 218
8 295
8 316
8 319
8 333
8 279
8 268
8 256
8 250
8 243
8 244
8 244
8 244
8 244
8 244
8 244
8 243
9 243
10 242
10 240
10 211
10 210
10 208
10 203
10 203
10 203
10 201
10 201
10 201
10 201
10 201
10 197
10 199
10 199
10 199
10 199
10 201
10 201
10 201
10 218
10 217
10 217
10 217
10 217
10 217
10 217
10 217
10 217
10 215
10 213
10 214
8 214
8 217
8 230
8 213
8 213
8 205
8 197
6 186
4 171
3 138
1 113
0 110
0 91
0 91
0 91
0 81
0 82
0 82
0 84
0 84
0 82
0 77
0 69
0 49
0 40
0 40
0 40
0 36
0 36
0 36
0 37
0 37
0 37
0 38
0 42
0 43
0 44
0 57
0 58
0 58
0 58
0 57
0 57
0 58
0 58
0 58
0 58
0 58
0 58
0 58
0 58
0 57
0 57
0 57
0 58
0 58
0 58
0 58
0 57
0 57
0 57
0 57
0 57
0 57
0 57
0 57
0 57
0 56
0 56
0 55
0 55
0 55
0 56
0 56
0 53
0 40
0 40
0 40
0 40
0 40
0 43
0 43
0 40
0 37
0 34
0 34
0 34
0 34
0 34
0 33
0 31
0 31
0 31
0 31
0 31
0 30
0 30
0 30
0 30
0 30
0 31
0 31
0 33
0 32
0 32
0 32
0 31
0 27
0 25
0 23
0 12
0 13
0 14
0 19
0 19
0 19
0 18
0 19
0 19
0 20
0 20
0 20
0 20
0 20
0 20
0 20
0 20
0 20
0 20
0 20
0 20
0 22
0 22
0 22
0 22
0 22
0 22
0 22
0 22
1 23
1 23
1 23
2 25
2 25
2 25
2 23
2 23
2 22
2 22
2 22
2 22
2 24
2 24
2 21
2 20
2 19
2 19
2 19
2 19
2 19
2 19
2 19
2 19
2 19
2 20
2 20
2 20
2 20
2 20
2 20
2 20
2 21
2 22
2 21
2 20
2 19
2 19
6 38
6 42
6 44
6 58
6 73
6 80
6 81
6 82
6 81
6 75
6 75
6 75
6 75
6 75
6 75
6 75
6 74
7 74
7 74
7 75
7 75
7 75
7 75
7 75
7 74
7 74
8 74
7 69
7 69
7 69
7 69
7 69
7 74
5 74
5 74
5 74
5 98
5 100
5 101
5 101
5 101
5 102
5 102
5 102
5 102
5 102
5 102
5 100
5 100
5 100
5 100
5 100
5 100
8 100
9 102
9 103
11 104
12 103
12 103
10 104
10 104
10 104
10 104
10 105
10 105
10 105
10 105
10 104
10 103
10 102
17 108
17 107
17 104
14 66
14 51
14 54
14 54
14 54
14 54
14 59
14 59
14 59
14 60
14 61
14 62
14 62
14 62
14 62
14 62
14 62
14 60
14 60
14 59
14 59
15 59
15 59
15 59
15 60
15 61
15 61
15 61
15 61
15 67
15 68
15 69
15 65
15 66
16 69
16 71
16 62
16 77
16 113
16 117
16 119
16 122
16 122
16 122
16 122
16 122
16 123
16 123
16 123
15 123
15 122
15 122
15 122
13 121
13 122
13 123
13 124
13 125
13 124
13 124
13 125
13 125
13 125
13 125
13 125
13 125
11 125
10 125
10 125
11 123
7 119
7 119
7 119
7 119
7 120
7 117
7 117
7 117
7 116
7 114
7 114
7 113
7 113
7 119
7 118
7 119
7 119
7 119
7 119
7 119
7 119
7 119
7 119
7 119
6 119
6 119
6 120
6 120
6 122
6 128
6 130
7 135
7 156
7 166
7 173
7 178
7 180
7 181
7 179
7 164
7 143
7 107
7 105
7 101
7 97
7 97
7 97
6 97
6 97
6 95
6 96
6 100
6 104
5 104
5 104
4 104
4 103
3 99
3 98
1 95
1 95
1 95
0 94
0 94
0 94
0 94
0 94
0 94
0 94
0 95
0 95
0 95
0 96
0 97
0 100
0 104
0 105
0 104
0 104
0 105
0 106
0 108
0 111
0 167
0 169
0 177
0 173
0 170
0 171
0 173
0 181
0 185
0 193
0 194
0 201
0 201
0 201
0 205
0 205
0 203
0 201
0 196
0 182
0 180
0 174
0 135
0 126
0 125
0 117
0 113
0 114
0 114
0 114
0 114
0 114
0 114
0 114
0 114
0 114
0 114
0 114
0 114
0 114
0 114
0 113
0 113
0 113
0 113
0 114
0 114
0 114
0 118
0 118
0 118
0 118
0 118
0 118
0 118
0 118
0 118
0 118
0 120
0 134
0 140
0 144
0 143
0 142
0 137
0 133
0 133
0 135
0 135
0 134
0 130
0 124
0 120
0 56
0 46
0 36
0 25
0 25
0 25
0 26
0 26
1 26
1 26
1 25
1 27
1 27
1 27
1 28
1 28
1 28
1 28
1 24
1 24
1 24
1 25
1 26
0 26
0 24
0 24
0 24
0 21
0 19
0 19
0 19
0 19
0 19
0 19
0 19
0 19
0 19
0 19
0 19
0 19
0 19
0 19
0 19
0 19
0 19
0 16
0 14
0 12
0 12
0 12
0 13
0 14
0 14
0 14
0 14
0 15
0 18
0 19
0 19
0 18
0 18
0 19
0 18
0 18
0 18
0 18
0 18
0 18
0 20
0 20
0 20
0 20
0 20
0 20
0 20
0 20
0 20
0 20
0 20
0 19
0 19
0 19
0 19
0 19
0 16
0 17
0 16
0 14
0 13
0 13
0 13
0 13
0 13
0 14
0 14
0 14
0 17
0 16
0 16
0 16
0 16
0 16
0 16
0 16
0 16
0 16
0 16
0 16
0 16
0 16
0 16
0 16
0 16
0 16
0 16
0 16
0 16
0 16
0 16
0 18
0 18
1 18
1 18
1 18
1 18
1 18
1 18
1 18
1 16
1 14
1 11
1 10
1 10
1 10
1 10
1 12
1 13
1 18
3 24
3 24
3 28
3 27
3 28
3 28
3 28
3 30
3 30
3 30
3 30
3 30
3 30
4 30
4 30
4 30
4 30
4 30
4 30
4 30
4 29
4 29
4 29
4 29
4 30
4 32
4 35
4 36
8 44
12 52
13 57
13 52
13 56
13 56
13 56
13 55
13 55
13 54
13 55
13 55
13 55
13 55
13 55
13 55
35 55
35 55
40 55
40 61
40 73
44 79
45 79
45 80
45 77
45 77
45 71
44 68
44 64
44 67
44 68
22 68
22 68
22 68
22 68
22 68
22 68
22 68
22 68
22 67
22 65
22 64
22 64
22 63
23 63
21 63
21 63
21 63
21 61
21 63
21 63
21 63
21 64
21 64
21 65
21 65
21 65
21 66
20 66
19 68
21 66
21 64
21 64
21 62
21 62
21 60
21 56
21 56
19 56
19 56
19 55
19 53
18 50
14 46
7 41
7 39
7 39
2 39
2 39
2 39
2 39
2 39
2 38
2 38
2 38
3 38
3 38
3 38
3 38
4 38
4 38
4 38
4 31
4 18
4 10
4 10
4 10
4 10
4 10
4 10
4 10
4 10
4 7
4 5
4 5
4 6
4 6
4 6
4 9
4 9
4 9
4 9
4 9
4 9
4 9
4 9
4 9
4 9
4 9
3 9
2 9
2 8
2 7
2 7
2 6
2 6
2 6
2 6
2 6
2 6
2 5
2 5
2 3
2 3
2 3
2 3
2 4
2 4
2 4
2 5
2 5
2 5
2 5
2 5
2 5
3 5
3 5
3 5
3 5
4 6
4 6
4 6
4 6
4 6
4 6
4 5
4 5
4 5
3 5
3 5
3 5
3 6
2 9
2 10
2 10
3 10
3 10
3 10
3 10
3 10
3 10
3 10
3 10
3 10
3 10
3 10
3 10
4 10
4 10
6 10
6 10
7 7
7 8
7 9
7 9
7 11
7 14
7 14
7 14
7 15
7 15
7 18
7 19
7 19
7 19
7 19
7 19
7 19
7 19
7 19
8 19
8 19
8 19
8 21
8 21
8 23
8 23
8 23
8 24
8 23
8 24
8 24
8 26
8 26
8 26
8 25
7 28
7 27
6 27
4 27
4 27
4 27
4 26
4 26
4 26
3 26
3 26
3 26
3 27
3 28
3 28
3 28
4 28
4 28
4 28
3 26
4 26
4 25
3 24
2 24
2 24
2 24
2 24
2 24
2 24
2 24
2 24
1 23
1 23
1 23
1 23
1 23
0 23
0 22
0 22
0 22
0 21
0 21
0 21
0 18
0 18
0 18
0 18
0 17
0 9
0 9
0 9
0 9
0 9
0 9
0 5
0 5
0 10
0 10
0 11
0 11
0 11
0 11
0 11
0 11
0 12
0 12
0 12
0 12
0 12
0 10
0 10
0 5
0 4
0 3
0 3
0 3
0 3
0 3
0 3
0 3
0 3
0 3
0 3
0 3
0 3
4 66
4 69
4 69
4 69
4 69
4 70
4 70
26 70
26 70
26 70
26 70
28 70
28 70
32 70
32 70
32 70
32 70
28 3
28 3
28 3
28 3
28 3
6 3
6 4
6 4
6 4
6 4
4 4
0 4
0 4
0 4
0 8
0 8
0 8
0 8
0 9
0 9
0 9
0 9
0 9
0 9
0 9
0 9
0 9
0 9
0 9
0 5
0 5
0 5
0 5
0 4
0 4
0 4
0 4
0 4
0 4
0 4
0 4
0 4
0 4
0 4
0 4
0 4
0 4
0 5
0 8
0 10
0 12
2 12
3 12
3 12
3 12
3 12
3 12
3 12
3 12
3 12
3 12
3 11
3 11
3 11
3 11
3 12
3 12
3 12
2 12
2 12
2 12
2 11
2 11
2 11
2 11
2 11
2 11
2 11
2 11
2 10
2 10
2 10
2 10
2 11
2 12
2 14
2 15
2 15
2 15
2 15
2 12
2 12
2 12
2 12
2 12
2 12
3 12
4 12
4 12
4 12
4 12
4 12
4 12
4 10
4 10
4 10
4 10
4 10
4 11
4 11
5 11
5 11
5 11
5 10
5 10
5 9
5 9
5 9
5 9
5 9
5 8
3 7
3 7
3 6
2 5
1 5
1 5
1 5
1 5
1 5
1 5
2 5
2 5
1 4
1 4
1 4
1 4
1 4
1 3
1 3
1 3
1 3
1 3
1 4
2 53
2 53
2 53
1 53
1 53
1 53
1 53
1 54
1 54
1 54
1 57
1 57
1 56
1 54
1 55
0 72
0 24
0 25
1 28
1 29
1 32
2 34
2 35
2 35
2 35
2 36
2 36
2 36
2 36
2 36
2 36
2 36
2 36
2 36
2 42
2 42
1 42
1 42
1 42
0 42
0 42
0 42
0 42
0 42
0 43
0 43
0 43
0 43
0 43
0 43
0 43
0 43
0 43
0 43
0 43
0 43
0 43
0 43
0 44
0 44
0 44
0 44
0 44
0 44
0 44
0 44
0 44
0 44
0 44
0 48
0 49
0 51
0 51
0 60
0 60
0 61
0 61
0 60
0 61
0 61
0 61
0 61
0 61
0 61
0 61
1 61
1 63
1 60
1 92
1 91
1 91
1 91
1 91
1 90
1 88
1 87
1 87
1 90
1 88
1 87
1 87
1 85
1 88
1 41
1 41
1 40
1 40
1 35
0 34
0 34
0 34
0 34
0 34
0 30
0 30
0 30
0 30
0 29
0 29
0 29
0 29
0 29
0 29
0 29
0 29
0 29
2 29
2 29
2 29
2 29
2 29
2 28
2 28
2 28
2 28
2 28
2 28
2 28
2 28
2 28
2 28
0 27
0 24
0 23
0 21
0 19
0 9
0 9
0 9
0 9
0 10
0 9
0 9
0 9
0 9
0 9
0 9
0 9
0 9
1 9
1 9
1 8
1 8
1 8
1 10
1 14
1 14
1 32
1 41
1 43
1 46
1 46
1 46
1 48
1 51
0 49
0 51
0 60
0 60
0 60
0 60
0 60
0 60
0 60
0 60
0 60
0 60
0 60
0 61
0 64
0 64
0 64
0 64
0 64
0 64
0 64
0 64
0 64
0 64
0 64
0 64
0 64
0 64
0 64
2 64
2 64
2 64
2 64
2 64
2 64
2 66
2 67
2 67
2 67
2 69
2 75
2 87
2 90
2 92
0 92
0 92
0 92
0 91
0 91
0 90
0 89
0 90
0 90
0 79
0 82
0 82
0 73
0 79
0 85
0 87
0 85
0 85
0 74
0 69
0 69
0 58
0 56
0 56
0 56
0 56
0 56
0 60
0 61
0 60
0 65
0 65
0 63
0 63
0 63
0 63
0 63
0 64
0 64
0 66
0 66
0 66
0 63
0 53
0 51
0 51
0 51
0 51
0 51
0 50
0 50
0 51
0 63
0 68
0 72
0 72
0 72
0 72
0 76
0 80
0 88
0 90
0 98
0 99
0 101
1 102
1 103
1 104
1 103
1 103
1 93
1 93
1 93
1 93
1 96
1 96
1 96
1 96
1 99
1 99
0 98
0 99
0 97
0 93
0 92
0 91
0 88
0 86
0 87
0 87
0 89
0 89
0 90
0 91
0 91
0 93
0 94
0 93
0 93
0 93
0 90
0 89
0 105
0 99
0 98
0 99
0 106
0 145
0 147
0 242
1 251
1 352
1 373
1 382
1 410
1 505
1 539
1 549
2 622
2 633
2 635
2 642
2 642
2 642
2 640
2 621
2 627
2 618
2 617
2 612
2 599
1 588
2 568
2 546
2 528
2 514
2 502
2 501
2 500
2 501
2 503
2 519
2 522
2 526
2 528
2 529
2 530
2 530
2 530
2 530
2 530
2 529
2 532
2 535
2 535
2 535
2 555
2 555
2 557
2 556
2 557
2 560
2 563
2 561
2 561
3 562
3 564
3 564
3 558
4 563
4 563
4 563
4 564
4 562
4 561
4 560
4 555
6 552
6 374
7 371
7 354
7 351
7 189
7 183
7 137
7 133
7 130
7 129
7 129
7 129
7 133
6 94
6 89
4 89
4 89
8 89
8 89
10 89
10 86
10 82
10 82
10 82
10 82
10 82
10 82
9 82
9 81
9 81
9 81
9 81
4 81
4 80
4 79
2 73
2 57
2 53
2 52
2 50
2 52
2 52
2 52
2 52
2 56
2 57
2 58
2 59
2 59
2 59
2 59
1 39
1 40
0 39
0 39
1 31
1 31
1 28
1 28
1 25
1 25
1 25
1 25
1 25
1 18
1 18
1 18
1 18
1 18
1 18
0 18
0 18
0 18
0 18
0 18
0 18
0 18
0 18
0 18
0 18
0 18
0 20
0 20
0 20
0 22
0 18
0 18
0 18
0 18
0 18
0 18
0 18
0 18
0 18
0 19
0 19
0 19
0 19
0 19
0 19
0 19
0 19
0 19
0 19
0 19
0 20
0 42
0 43
0 45
0 50
0 51
0 55
0 55
0 53
0 51
0 51
0 51
0 49
0 47
0 49
0 51
0 53
0 56
0 57
0 58
0 56
0 65
0 66
0 71
0 71
0 71
0 71
0 71
0 71
0 71
0 71
0 71
0 71
0 71
0 71
0 71
0 71
0 71
0 71
0 71
0 71
0 71
0 71
0 71
0 71
0 71
0 71
0 71
0 71
0 69
0 69
0 69
0 68
0 68
0 68
0 68
0 69
0 69
0 69
0 69
0 68
0 68
0 68
0 68
0 68
0 68
0 68
0 70
1 70
1 71
1 71
1 71
1 71
1 68
5 53
5 50
5 46
5 40
5 39
5 36
5 36
5 36
5 36
5 37
4 37
4 35
4 35
4 34
4 30
0 23
0 22
0 22
0 21
0 49
0 41
0 41
0 36
0 36
0 36
0 36
0 36
0 36
0 36
0 36
0 36
0 39
0 39
0 48
0 51
0 52
0 52
0 52
0 59
0 59
14 60
14 61
14 63
14 63
15 64
16 64
16 64
16 64
16 64
16 64
16 64
16 63
16 63
16 56
16 57
16 59
2 67
2 69
2 69
2 70
2 71
2 71
2 71
2 71
2 71
2 75
2 73
2 73
2 72
2 71
2 71
2 72
2 72
2 72
2 75
2 82
2 87
2 88
2 93
2 93
2 93
2 97
2 98
2 103
2 108
2 109
2 110
2 110
2 109
2 108
2 108
2 108
2 77
2 77
2 77
2 74
2 74
2 75
2 75
2 75
2 75
2 76
2 76
2 76
2 73
2 73
2 62
2 62
2 62
2 62
2 62
2 64
2 64
2 63
3 61
3 60
3 60
2 59
2 59
2 61
2 61
2 64
2 65
2 72
2 98
2 99
2 99
2 99
2 98
1 89
1 90
1 89
1 88
0 85
0 88
0 88
0 92
0 97
0 95
0 95
0 96
0 96
0 96
0 95
0 93
0 93
0 93
0 94
0 89
0 84
0 83
0 82
0 82
0 82
0 78
0 76
0 68
0 66
0 65
0 64
0 64
0 64
0 64
0 64
0 64
0 64
0 64
0 64
0 64
0 63
0 63
0 63
0 63
0 63
0 62
0 61
0 61
0 61
0 61
0 61
0 61
0 61
0 61
0 61
0 59
0 59
0 59
0 58
0 57
0 56
0 56
0 56
0 54
0 54
0 51
0 53
0 44
0 15
0 14
0 14
0 11
0 11
0 10
0 10
0 10
0 10
0 10
0 10
0 10
0 10
0 7
0 7
0 7
0 6
0 6
0 6
0 6
0 6
0 6
0 5
0 3
0 3
0 3
0 3
0 3
0 3
0 3
0 3
0 3
0 3
0 3
0 3
0 3
0 3
0 3
0 3
0 3
0 3
0 3
0 3
0 3
0 3
0 3
0 3
0 3
0 3
0 3
0 3
0 3
0 3
0 3
0 3
0 3
0 3
0 3
0 3
0 3
1 3
1 3
1 3
1 4
1 5
1 5
1 5
1 5
1 5
1 5
1 5
1 2
1 2
1 2
1 2
1 2
1 2
1 2
1 1
1 2
1 2
1 2
1 2
1 2
1 2
1 3
1 3
1 3
1 7
1 7
1 7
1 7
1 7
1 7
1 7
1 7
1 7
1 9
1 9
1 9
1 9
1 11
1 11
1 11
1 11
1 11
1 29
1 29
1 36
1 39
2 319
4 365
4 428
4 435
4 442
4 448
4 452
4 453
4 453
5 453
5 453
5 454
5 451
5 451
5 451
5 451
4 451
4 453
5 453
5 453
5 453
5 454
5 454
21 454
21 455
20 457
20 462
20 461
20 469
20 473
20 476
20 476
20 476
20 477
20 479
22 612
22 613
22 617
4 618
4 618
4 617
4 617
4 617
4 617
4 617
4 616
4 616
4 617
4 617
4 617
4 617
4 613
4 613
4 612
4 612
4 611
4 605
5 605
5 604
5 597
5 591
5 589
5 585
5 585
5 579
5 577
5 577
5 575
5 575
5 575
5 571
5 563
4 543
2 228
2 176
2 175
2 174
2 175
2 176
2 175
2 179
2 178
2 178
4 178
4 177
4 178
4 180
4 189
4 209
4 275
4 279
4 283
4 294
4 295
4 296
4 296
4 292
4 291
2 289
2 285
2 285
2 275
2 272
2 277
5 394
4 395
4 395
4 391
3 264
3 263
3 260
3 259
3 259
3 260
3 260
3 260
3 260
3 260
3 260
3 259
3 258
3 258
3 258
3 259
3 260
3 260
3 260
3 260
3 260
3 260
3 260
3 261
3 261
3 261
3 261
3 261
3 261
3 262
3 261
3 261
3 261
3 261
3 260
3 260
3 260
3 260
3 260
3 260
3 260
3 260
3 258
3 256
3 256
3 257
3 259
3 260
3 268
3 271
3 270
3 268
3 261
3 236
3 171
3 167
3 162
3 153
3 152
3 151
3 151
3 151
3 151
3 151
3 151
3 151
3 150
3 148
3 144
0 26
0 25
0 23
0 22
0 21
0 20
0 29
0 29
0 29
0 28
2 28
2 28
2 28
2 28
2 28
2 28
2 28
2 29
2 29
2 29
2 29
2 22
2 22
2 22
2 23
0 28
0 28
0 32
0 32
0 32
0 32
0 32
0 32
0 30
0 30
0 30
0 29
0 30
0 30
0 30
0 35
0 53
0 54
0 60
0 61
0 61
0 61
0 65
0 69
0 78
0 138
1 200
1 204
1 217
1 223
1 224
1 227
1 234
1 234
1 236
1 236
1 236
1 236
1 236
1 236
1 236
1 237
1 314
1 316
1 316
1 316
1 316
1 315
1 315
1 316
1 316
1 316
1 318
1 318
1 317
1 317
1 317
1 317
1 317
1 317
1 318
0 318
0 318
0 318
0 316
0 316
0 316
0 316
0 316
0 315
0 317
0 319
0 345
0 414
0 419
0 416
0 417
0 417
0 417
0 423
0 425
0 426
0 425
0 425
0 425
0 425
0 427
0 429
0 351
0 329
0 328
0 325
0 324
0 321
0 321
0 323
0 316
0 267
0 214
0 196
0 194
0 197
0 190
1 190
1 186
1 196
1 196
1 195
1 195
1 195
1 195
1 195
1 195
1 195
1 193
1 115
1 115
1 115
0 116
1 144
1 133
1 151
1 152
1 152
1 153
1 151
1 151
1 151
1 151
1 153
1 153
1 153
1 152
1 152
0 123
0 123
0 113
0 117
0 120
0 129
0 130
0 130
0 130
0 127
0 125
0 97
0 95
0 88
0 88
0 92
0 94
0 103
0 112
0 112
0 113
0 112
0 111
0 112
0 115
0 113
0 114
1 117
1 261
1 262
1 262
1 261
1 261
1 261
1 257
7 255
7 254
7 236
7 322
7 327
8 339
8 359
8 364
7 365
7 367
7 368
7 368
7 368
7 369
7 370
2 370
2 371
2 371
2 371
2 371
2 373
1 373
0 373
0 373
0 372
0 365
0 364
0 364
0 363
0 363
0 363
0 363
0 373
0 373
0 381
0 390
0 391
0 396
0 402
0 402
0 401
0 394
0 382
0 358
0 347
0 332
0 332
0 332
0 332
0 365
0 365
0 365
0 363
0 354
0 351
0 342
0 323
0 344
0 337
0 343
0 333
2 325
2 267
4 190
4 143
4 133
4 132
4 142
4 144
4 151
4 154
4 157
4 158
4 159
4 160
4 161
4 166
4 172
4 177
4 181
4 185
4 186
4 186
4 183
4 183
4 182
4 181
4 181
4 181
4 181
4 183
4 190
4 192
4 199
4 201
4 201
4 202
4 202
4 207
4 219
4 232
4 232
4 237
4 240
4 245
4 234
4 234
4 224
3 211
1 207
1 203
1 195
1 193
1 196
1 197
1 197
1 198
0 197
0 197
0 195
0 195
0 194
0 135
0 135
0 134
0 134
0 133
0 104
0 104
0 103
0 97
0 101
0 97
0 94
0 93
0 94
0 145
0 151
0 150
0 150
0 149
0 144
0 144
0 155
0 247
0 256
0 315
1 389
1 433
1 453
1 473
1 468
1 463
1 458
1 457
1 456
1 458
1 460
1 460
1 460
1 460
1 460
1 461
1 461
1 447
1 446
1 446
1 445
1 438
1 438
1 441
1 440
1 439
1 431
1 431
1 429
1 427
1 419
8 472
8 471
8 471
8 469
8 468
8 468
8 468
8 468
8 455
8 438
8 430
8 426
8 423
8 423
8 425
8 424
2 370
1 374
1 374
1 375
1 377
1 377
1 377
1 377
1 348
1 290
1 258
1 254
1 254
1 248
1 247
1 247
1 245
1 245
1 253
1 298
1 304
1 306
1 302
1 192
1 149
0 94
0 91
0 91
0 90
0 90
0 90
0 89
0 89
0 89
0 87
0 86
0 84
0 84
0 84
0 84
0 86
0 85
0 85
0 85
0 85
0 85
0 85
0 85
0 85
0 83
0 83
0 82
0 82
0 82
0 82
0 80
0 80
0 79
0 79
0 79
0 78
0 78
0 77
0 77
0 77
0 77
2 77
2 77
2 77
2 77
2 77
2 77
2 77
2 77
2 73
2 71
2 69
2 69
2 69
2 69
2 69
2 68
2 68
0 69
0 77
1 128
1 131
2 187
2 196
3 417
3 420
3 424
3 378
3 372
3 373
3 373
3 375
3 376
3 377
3 379
3 378
3 378
3 379
3 379
3 379
3 379
3 379
3 380
3 380
6 380
6 381
6 381
7 387
7 386
7 387
7 388
7 388
7 388
9 388
9 389
9 390
9 391
9 391
9 391
9 391
7 390
7 391
7 394
7 393
7 393
7 393
7 393
7 393
7 393
7 393
7 394
7 394
7 396
7 395
7 395
7 395
7 394
7 397
7 398
7 398
7 399
7 399
7 399
7 403
7 403
7 403
7 403
8 403
22 505
38 1216
38 1218
39 1216
38 1212
37 1160
37 1158
36 1098
36 1088
35 854
35 853
35 853
35 853
35 854
35 860
35 859
4 42
5 45
4 45
4 45
4 64
4 68
4 68
4 68
4 68
4 68
4 68
4 67
4 67
4 68
4 68
4 69
4 62
4 63
4 64
3 64
3 64
3 64
2 63
2 62
2 61
2 60
2 61
2 61
2 61
2 61
2 61
2 58
2 58
2 58
2 58
2 58
2 58
2 58
2 58
2 57
2 57
2 56
2 56
2 58
2 58
2 58
2 55
2 56
2 56
2 55
2 55
2 55
2 62
2 62
3 69
2 69
2 68
2 70
2 68
2 66
2 66
2 66
2 66
2 65
2 65
2 66
2 66
2 66
2 66
2 66
2 65
2 58
2 56
1 52
1 47
1 47
1 47
1 23
1 23
1 23
1 23
1 24
3 25
3 24
3 24
3 24
4 27
4 28
4 26
4 26
4 26
4 26
4 26
4 26
4 25
4 25
4 25
4 25
4 24
4 22
4 24
4 24
4 24
4 24
4 24
4 24
4 24
4 25
4 25
4 25
4 25
4 28
5 28
5 31
6 31
6 31
6 31
6 31
6 31
6 31
6 25
6 27
6 27
6 26
6 40
6 63
6 83
5 87
5 93
5 96
5 98
5 102
3 102
3 103
3 102
3 102
3 102
3 102
3 101
3 101
3 101
3 102
3 102
3 102
3 102
3 103
3 103
3 103
3 103
3 103
3 103
3 103
3 103
3 103
3 102
3 101
3 101
3 101
3 101
2 93
2 88
2 88
2 88
2 91
2 91
2 91
2 91
2 91
2 91
2 91
2 91
2 91
2 91
2 91
2 91
2 91
2 91
2 92
2 90
2 92
2 77
2 77
2 62
1 62
1 60
1 56
1 53
0 46
0 38
0 34
0 34
0 34
1 34
1 32
1 31
1 30
1 27
1 23
1 20
1 14
1 12
1 11
1 11
1 9
1 8
1 8
1 9
1 10
0 10
0 10
0 10
0 10
0 10
0 10
0 9
0 9
0 10
0 10
0 9
0 9
0 9
0 9
0 9
0 9
0 9
0 9
0 9
0 9
0 9
0 9
0 9
0 9
0 9
0 9
0 10
0 10
0 10
0 12
0 15
0 16
0 16
0 16
0 16
0 16
0 16
0 22
0 51
0 88
0 93
0 98
0 99
0 96
0 99
0 99
0 105
0 104
0 106
0 112
0 114
0 123
0 129
0 131
0 132
0 155
0 157
1 213
1 213
1 213
1 213
1 214
1 216
1 217
1 220
1 221
1 227
1 230
1 230
1 229
1 228
1 226
0 172
0 172
0 172
0 172
0 169
0 169
0 169
0 170
0 166
0 162
0 158
0 156
0 156
0 164
0 163
0 162
0 162
0 162
0 162
0 163
0 163
0 163
0 163
0 163
0 163
0 163
0 164
0 163
0 163
0 163
0 161
0 163
0 162
0 162
0 162
0 162
0 161
0 161
0 154
0 122
0 102
0 122
0 118
0 118
0 118
0 117
0 115
0 109
0 108
0 105
0 101
0 99
0 89
0 81
0 80
0 80
0 55
0 55
0 57
0 53
0 53
0 53
0 53
0 53
0 51
0 50
1 49
1 46
1 45
1 45
1 45
1 48
1 49
1 50
1 50
1 52
1 60
1 61
1 61
1 61
1 60
1 60
1 60
1 59
0 59
0 60
0 49
0 53
0 51
0 55
0 55
0 55
0 55
0 56
0 57
0 57
0 57
0 56
0 57
0 57
0 56
0 54
0 53
0 53
0 53
0 53
0 53
0 53
0 53
0 53
0 53
0 53
0 53
0 53
0 37
0 37
0 37
0 37
0 37
0 37
0 37
0 37
0 37
0 37
0 37
0 37
0 37
0 36
0 34
0 32
0 32
0 30
0 30
0 30
0 30
0 30
0 30
0 32
0 32
0 32
0 32
0 32
0 32
0 32
0 31
0 30
0 30
0 30
0 26
0 19
0 20
0 20
0 20
0 20
0 21
0 23
0 23
1 23
1 21
1 18
1 14
1 13
1 9
1 10
1 10
1 10
1 9
1 7
1 7
1 7
1 7
1 7
1 7
0 7
0 7
0 7
0 7
0 7
0 7
0 7
0 7
0 7
0 7
0 7
0 7
0 7
0 7
0 7
0 7
0 7
0 7
0 7
0 7
0 8
0 8
0 8
0 8
0 8
0 8
0 8
0 8
0 9
0 9
0 9
0 9
0 9
0 9
0 9
0 7
0 7
0 6
0 6
0 6
0 6
0 6
0 6
0 6
0 7
0 7
0 7
0 7
0 7
0 7
0 6
0 6
0 6
0 6
0 5
0 5
0 5
0 4
0 4
0 4
0 4
0 4
0 4
0 4
0 4
0 4
0 4
0 4
0 4
0 4
0 6
0 8
0 8
0 8
0 8
0 8
0 8
0 8
0 9
0 9
0 10
0 10
0 10
0 11
0 12
0 12
0 14
0 15
0 16
0 17
0 17
0 17
0 17
0 17
0 17
0 17
0 27
0 27
2 28
2 28
2 28
2 27
2 27
2 27
2 26
2 26
2 26
2 25
4 25
4 25
5 25
5 24
5 24
3 24
3 25
3 26
3 26
3 25
3 16
3 16
3 16
3 16
3 16
3 16
3 16
2 16
2 16
2 16
2 13
2 13
1 15
1 15
1 15
1 14
2 14
2 14
2 13
2 13
2 13
2 43
2 44
2 46
2 45
2 42
2 43
2 46
2 46
2 47
2 47
0 47
0 47
0 47
0 47
0 46
0 46
0 46
0 45
0 44
0 45
0 44
0 44
0 44
0 44
0 45
0 46
0 47
5 48
5 49
5 50
5 50
5 50
5 50
5 48
5 48
5 48
5 48
5 48
5 48
5 48
5 48
5 48
0 49
0 49
0 47
0 47
0 47
0 47
0 45
0 44
0 43
0 45
0 45
0 45
0 45
0 45
0 45
0 45
0 48
0 48
0 48
0 48
0 48
1 48
1 48
1 48
1 48
1 48
1 48
1 48
1 48
1 48
1 45
1 16
1 14
1 13
1 17
1 16
1 16
0 16
0 17
0 16
0 16
0 16
0 16
0 16
0 17
0 17
0 17
0 17
0 17
0 18
0 18
0 23
0 24
0 26
0 25
0 24
0 24
0 26
0 26
0 26
0 26
0 26
0 26
0 26
0 26
0 26
0 26
0 31
0 31
0 31
0 31
0 31
0 29
0 29
0 26
0 30
0 31
0 32
0 33
0 33
0 31
0 31
0 29
0 29
0 29
0 30
0 31
0 32
0 35
0 33
1 35
1 36
1 36
1 36
1 38
1 38
2 44
2 46
2 46
2 46
2 65
2 66
2 66
2 66
2 66
4 66
4 70
3 71
3 76
3 84
3 85
3 87
2 87
2 88
2 89
2 89
2 89
2 90
2 90
2 96
2 96
2 117
2 114
2 111
2 110
2 109
2 108
2 107
2 106
2 106
2 105
2 105
2 103
2 103
2 101
2 101
2 101
2 86
2 86
2 86
2 76
2 75
2 76
2 76
2 69
2 69
2 69
2 69
2 65
2 61
2 59
2 59
2 59
2 59
2 59
2 56
2 56
2 56
2 55
1 53
1 54
1 49
1 48
0 47
0 48
0 49
0 50
0 49
0 49
0 49
0 49
0 52
0 55
0 44
0 46
0 60
0 63
0 68
0 66
0 64
0 61
0 56
0 46
0 44
0 43
0 44
0 43
0 42
0 44
0 45
0 45
0 45
0 44
0 44
0 41
0 41
0 41
0 41
0 40
0 40
0 40
0 40
0 40
0 40
0 40
0 40
0 40
0 40
0 40
0 41
0 42
0 42
0 42
0 43
0 43
0 42
0 41
0 41
0 41
0 41
0 41
0 41
0 41
0 41
0 41
0 41
0 41
0 41
0 41
0 43
0 42
0 42
0 43
0 42
0 42
0 42
0 40
0 40
0 37
0 37
0 38
0 49
0 50
0 51
0 50
1 48
1 46
1 48
1 32
1 30
1 29
1 29
1 29
1 29
1 29
1 29
1 29
1 29
1 30
1 30
1 30
1 25
0 25
0 25
0 26
0 26
0 27
0 27
0 27
0 27
0 27
1 27
1 27
3 27
3 27
3 29
3 39
3 50
3 54
3 54
3 54
3 56
3 56
3 56
3 56
3 56
3 55
3 55
1 55
1 54
1 53
0 53
0 53
0 53
0 53
0 53
0 53
0 53
0 53
0 53
0 53
0 53
0 51
0 51
0 51
0 50
0 50
0 50
0 50
0 50
0 49
0 48
0 48
0 46
0 35
0 36
0 34
0 33
0 33
0 33
0 33
0 33
0 34
0 35
0 36
0 36
0 36
0 36
0 36
0 40
0 40
0 39
0 40
0 40
0 40
0 40
0 40
0 39
0 38
0 37
0 37
0 37
0 38
0 38
0 40
0 40
0 40
0 40
0 29
0 12
0 12
0 11
0 11
0 11
1 11
1 14
1 14
1 14
1 16
1 16
1 16
1 16
1 16
1 16
1 16
1 16
1 16
1 16
1 16
1 16
0 16
0 16
0 16
0 16
0 16
0 16
0 16
0 16
0 17
0 42
0 44
0 70
0 72
0 72
0 72
0 74
0 75
0 77
0 76
0 76
0 76
0 76
0 76
0 76
0 75
0 75
0 75
0 74
0 75
0 78
0 78
0 78
0 74
0 74
0 74
0 74
0 74
0 74
0 74
0 74
0 74
0 74
0 74
0 74
0 74
0 74
0 71
0 69
0 74
0 97
0 99
1 102
1 102
1 100
1 97
2 89
2 83
2 82
2 78
2 79
2 80
2 75
2 74
2 76
2 76
2 77
2 77
2 78
2 78
2 79
1 79
1 79
1 79
1 79
1 79
46 83
46 83
46 83
46 83
46 83
46 83
46 82
46 82
46 81
46 75
46 75
46 75
46 75
46 75
46 75
1 71
1 71
1 76
33 80
34 83
34 87
34 133
34 138
34 139
34 139
34 138
34 149
34 144
34 141
34 143
34 143
34 142
34 142
3 140
2 142
1 133
1 133
1 133
1 133
0 133
0 133
0 132
0 132
0 131
0 131
0 126
0 121
0 105
0 104
0 105
0 107
0 108
0 108
0 108
0 111
0 111
0 114
0 113
0 114
0 114
0 113
0 114
6 175
6 177
6 180
6 179
6 179
6 179
6 183
6 183
6 183
6 183
6 183
6 183
6 184
6 189
6 190
0 159
0 159
0 159
0 159
0 159
0 168
0 164
0 164
0 180
0 179
0 183
0 200
0 200
0 215
0 211
0 214
0 218
0 177
0 177
0 176
0 176
2 175
2 164
2 161
2 160
2 163
2 174
2 181
2 194
2 190
2 189
2 189
2 191
2 191
2 191
2 191
0 191
0 191
0 191
0 193
0 193
0 197
0 197
0 188
0 188
0 182
0 177
0 175
0 175
0 175
0 179
0 179
0 178
2 197
2 199
2 201
2 200
2 196
2 146
2 139
2 116
2 113
2 113
2 113
2 117
2 117
2 117
2 117
2 116
2 118
2 112
2 106
2 104
2 104
2 104
2 104
2 104
2 104
2 104
2 104
2 104
2 93
2 88
2 87
3 85
4 96
4 90
4 89
4 88
5 87
5 87
5 125
5 125
5 233
5 247
5 256
5 261
5 264
5 260
5 242
5 239
5 222
5 222
5 222
4 222
4 217
4 218
4 218
4 218
4 218
4 218
4 218
4 218
4 218
4 216
4 216
4 216
4 220
4 219
4 219
4 219
4 219
4 219
4 218
4 218
4 216
2 197
2 208
2 208
2 212
2 212
2 212
2 215
2 216
2 218
2 218
2 221
2 221
2 221
2 221
2 221
2 221
2 221
2 222
2 222
2 228
2 230
2 230
2 230
2 230
2 233
2 236
2 236
2 236
2 236
2 236
2 235
1 228
0 181
0 195
0 166
0 164
0 162
0 162
0 163
0 164
0 75
0 77
0 77
0 84
0 81
0 81
0 88
0 100
0 126
0 132
0 144
0 145
0 155
0 161
0 180
0 216
0 345
1 527
1 575
1 619
1 695
1 728
1 744
2 758
3 910
3 922
3 940
3 995
5 1844
5 2169
5 2228
5 2301
5 2313
5 2330
5 2390
5 2401
5 2416
5 2419
4 2425
4 2421
3 2422
3 2421
3 2421
3 2419
3 2423
3 2424
3 2428
3 2436
5 2873
5 2889
5 2939
5 2932
5 2894
4 2876
4 2876
4 2912
4 2946
4 2966
4 2983
4 2982
4 2980
4 2982
4 2988
4 2992
4 2992
4 2997
4 2890
4 2894
4 2813
4 3379
4 3386
4 3410
4 3391
4 3376
4 3375
4 3379
4 3374
4 3374
4 3372
4 3369
4 3347
4 3314
4 3307
4 3307
4 3303
4 3299
4 3285
4 3279
4 3260
4 3140
3 2996
3 2971
3 2939
3 2842
3 2768
3 2702
3 2689
3 2682
3 2670
3 2657
2 2521
3 1539
3 1497
3 1479
3 1480
3 1480
3 1477
3 1427
3 1457
3 1440
3 1441
3 1442
3 1442
3 1442
3 1444
3 1444
3 1444
3 1437
3 1433
3 1427
3 1419
1 940
1 925
1 891
1 896
1 887
1 887
1 878
1 828
1 788
1 764
1 762
1 765
1 765
1 802
1 968
1 971
1 991
1 998
1 997
2 990
15 988
15 399
15 396
15 393
15 406
15 398
15 399
15 399
15 399
15 399
15 399
15 399
15 400
15 400
15 400
15 399
15 402
2 403
2 405
2 409
2 413
5 408
5 409
5 407
5 406
5 405
5 417
5 417
5 417
5 417
5 417
5 417
5 417
4 418
4 418
4 418
4 419
1 419
13 526
15 519
15 459
15 455
15 455
15 453
15 453
15 454
15 453
15 453
15 453
15 453
15 456
15 456
15 455
4 348
4 346
3 346
3 324
3 324
3 323
3 321
3 321
3 321
3 319
3 319
3 311
3 308
2 263
2 89
2 87
2 74
2 73
2 73
2 72
2 72
2 71
2 61
2 50
2 35
2 32
2 31
2 31
2 31
2 32
2 32
2 32
2 31
2 31
2 31
7 31
7 27
7 26
7 29
7 29
7 29
7 29
7 29
7 29
7 29
7 30
7 18
7 18
7 18
7 18
2 18
2 18
2 19
2 22
2 24
2 24
2 26
2 26
2 26
0 26
0 24
0 23
0 23
0 37
0 38
0 38
0 38
0 39
0 39
0 41
0 41
0 41
0 41
0 41
0 40
0 40
0 40
0 40
0 40
0 40
0 45
0 45
0 46
0 46
0 48
0 48
0 48
0 50
0 50
0 50
0 51
0 51
0 52
0 53
0 56
0 57
0 82
0 100
0 106
0 116
0 120
0 120
0 119
0 119
0 120
0 121
0 121
0 121
0 121
0 121
0 121
0 118
0 118
0 119
0 119
0 129
0 130
0 132
0 131
0 131
0 131
0 131
0 129
0 129
0 127
0 127
0 123
0 123
0 123
0 120
0 119
0 118
0 117
0 134
0 134
0 149
0 139
0 141
0 141
0 142
0 142
0 142
0 141
0 141
0 142
0 142
0 142
0 142
0 144
0 144
0 145
0 145
0 145
0 137
0 137
0 131
0 129
0 126
0 126
0 126
0 126
0 126
0 124
0 124
0 124
0 124
0 123
0 123
0 122
0 87
0 52
0 49
0 34
0 33
0 33
0 33
0 33
0 32
0 31
0 31
0 31
0 32
0 33
0 35
0 35
0 35
0 34
0 34
0 23
0 14
0 12
0 11
0 11
0 11
0 11
0 11
0 10
0 10
0 10
0 10
0 10
0 10
0 10
0 12
0 12
0 25
0 26
0 28
0 35
0 35
0 35
0 35
0 34
0 34
0 34
0 36
0 42
0 45
0 45
0 45
0 46
0 46
0 45
0 46
0 47
0 47
0 47
2 47
2 47
2 47
2 47
2 47
2 47
3 47
3 47
3 47
3 47
3 47
3 47
3 47
3 47
3 47
3 47
1 47
1 47
1 47
1 47
1 49
1 51
1 56
1 57
1 58
1 58
1 58
1 58
0 57
0 55
0 55
0 58
0 58
0 58
0 56
0 56
0 56
0 56
0 56
0 56
0 56
0 56
0 57
0 62
0 65
0 69
0 70
0 71
0 70
0 68
0 64
0 50
0 50
0 47
0 42
0 42
0 42
0 42
0 42
0 43
0 43
1 42
1 37
1 36
1 35
1 35
1 34
1 32
1 31
1 30
1 30
1 30
1 30
1 29
1 29
1 29
1 29
0 29
0 29
0 29
0 29
0 29
0 29
0 29
0 29
0 29
0 29
0 30
0 30
0 30
0 31
0 31
0 31
0 31
0 31
0 28
0 28
0 27
0 27
0 27
0 27
0 26
0 26
0 26
0 24
0 24
0 24
0 24
0 24
0 24
0 24
0 25
0 25
0 25
0 25
0 22
0 20
0 17
0 15
0 13
0 13
0 12
0 12
0 12
0 12
0 12
0 11
0 5
0 5
0 5
0 5
0 7
0 9
0 9
0 9
0 13
0 13
0 17
0 18
0 18
0 21
0 22
0 22
0 24
0 24
0 25
0 26
0 26
0 27
0 27
0 27
0 30
0 30
0 31
0 31
0 34
0 34
0 34
0 34
0 33
0 33
0 33
0 33
0 32
0 32
0 32
0 32
0 30
1 30
1 29
1 29
1 30
1 30
1 30
1 30
1 30
1 30
1 30
1 31
1 32
1 32
1 32
1 32
0 32
0 33
0 31
0 28
1 28
1 25
1 25
1 25
1 25
1 25
1 25
1 25
1 25
1 25
1 25
1 25
1 28
1 28
1 32
1 33
1 35
2 36
3 69
3 73
3 73
3 71
4 71
4 72
4 71
4 70
4 69
4 69
4 69
4 67
4 67
4 66
4 63
4 63
4 63
4 63
4 62
4 59
4 61
4 61
4 59
3 58
3 59
3 59
3 59
2 59
2 59
2 61
4 63
4 63
4 63
4 65
4 67
4 66
4 66
9 66
9 67
9 68
9 69
9 69
9 69
9 69
9 69
9 69
7 68
7 67
7 68
7 68
7 68
7 68
2 64
2 64
2 64
2 64
2 64
2 65
2 67
2 68
2 68
2 71
2 71
2 74
2 74
2 74
2 91
2 88
2 90
2 91
2 87
2 84
2 80
17 46
17 46
17 42
16 42
16 42
16 41
16 41
16 41
16 41
16 41
16 41
16 41
16 42
16 42
16 42
0 41
0 39
0 39
0 39
0 39
0 37
0 37
0 37
0 37
0 37
0 37
0 37
0 37
0 37
0 36
0 37
0 37
0 37
0 35
0 35
0 35
0 35
0 34
0 34
0 34
0 34
0 35
0 35
0 35
0 35
0 36
0 37
0 45
0 44
0 74
0 75
0 75
0 80
0 133
0 146
0 153
13 153
13 153
13 149
13 140
13 137
13 133
13 133
13 132
13 134
13 133
13 131
13 131
13 131
13 127
13 127
0 127
0 127
0 127
0 127
0 131
0 131
0 131
0 131
0 127
0 127
0 127
0 126
0 126
0 127
0 129
0 129
0 131
0 131
0 131
0 131
0 131
0 131
0 131
0 131
0 131
0 131
0 131
0 131
0 130
0 130
0 130
0 130
0 129
0 129
0 129
0 129
0 129
0 129
0 129
0 129
0 130
0 130
0 130
0 129
0 129
0 128
0 126
0 116
0 95
0 65
0 57
0 56
0 59
0 62
0 60
0 24
0 21
0 20
0 20
0 20
0 20
0 20
0 20
0 21
0 23
0 26
0 26
0 26
0 26
0 26
0 26
0 26
0 26
0 26
0 26
1 26
2 26
2 23
2 23
2 23
2 23
2 23
2 23
2 23
2 23
2 23
2 23
2 20
2 20
2 19
1 19
1 19
0 26
0 28
0 31
0 33
0 34
0 35
0 36
0 36
0 36
0 38
0 38
0 38
0 38
0 38
0 38
0 38
0 40
0 42
0 45
0 45
0 45
0 46
0 46
0 46
0 46
0 63
0 74
0 102
0 169
0 209
0 257
0 259
0 267
0 268
0 265
0 276
0 295
0 308
0 332
0 405
0 413
0 412
0 412
0 412
0 411
0 412
0 414
0 418
0 419
1 419
1 418
1 418
1 421
1 421
1 425
1 430
1 453
1 457
1 456
1 456
1 454
2 454
2 455
2 455
1 455
1 456
1 456
1 458
1 458
1 459
1 458
1 455
1 451
1 427
1 409
1 396
0 381
0 381
0 381
0 380
0 380
0 380
0 377
0 376
0 376
1 376
1 375
1 375
1 376
1 374
1 373
1 371
1 371
1 371
1 372
1 371
1 367
1 367
1 351
1 341
0 325
0 266
0 241
0 202
0 199
0 199
0 201
0 198
0 197
0 180
0 154
0 139
0 74
0 74
0 71
0 71
0 71
0 71
0 68
0 62
0 60
0 59
0 59
0 59
0 59
0 58
0 57
0 50
0 42
0 18
0 17
0 17
0 17
0 17
0 18
0 18
0 18
0 18
0 17
0 17
0 17
0 15
0 14
0 14
0 22
0 22
0 22
0 23
0 23
0 23
0 23
3 24
3 24
3 24
3 21
3 26
3 27
3 27
3 27
3 27
3 27
3 26
3 26
3 26
3 26
3 26
0 26
1 25
1 25
1 25
1 25
1 25
1 25
1 25
1 25
1 23
1 24
1 24
1 30
1 29
1 39
1 39
0 40
0 40
0 41
0 41
0 41
0 41
0 41
0 41
0 41
0 41
0 41
0 41
0 42
0 44
0 45
0 45
0 45
0 45
0 46
0 49
0 50
0 65
0 66
0 69
0 69
1 68
1 68
1 72
1 77
1 117
1 133
1 136
1 144
1 150
1 152
1 143
1 144
1 144
1 141
1 140
0 144
0 146
0 149
0 149
0 149
0 148
0 144
0 143
0 143
0 143
0 143
0 143
0 143
0 143
0 143
0 143
0 144
0 144
0 144
0 144
0 149
0 172
0 231
0 289
0 402
0 428
0 429
0 440
0 440
0 438
0 445
0 434
1 572
1 574
1 575
1 576
1 576
1 578
1 584
1 585
1 596
1 600
1 601
1 601
1 604
1 601
2 625
2 630
2 600
2 621
2 626
2 628
2 619
2 639
2 674
2 643
2 641
2 632
2 633
2 633
2 629
2 628
2 672
2 671
2 671
2 671
2 671
2 677
2 679
2 681
2 684
2 684
2 684
2 658
2 627
2 611
2 603
2 603
2 602
2 553
2 553
2 552
2 544
2 544
2 542
2 542
2 542
2 542
2 542
2 542
2 548
2 548
2 549
2 539
2 519
2 484
1 411
1 332
1 322
0 311
0 309
0 302
0 290
0 289
0 289
0 289
0 288
0 287
0 287
0 287
0 285
1 277
1 277
1 265
1 254
1 254
1 254
1 245
1 242
1 239
1 227
1 116
1 112
1 117
1 120
1 128
0 345
0 274
0 276
0 274
0 274
0 274
0 275
0 275
0 275
0 275
0 275
0 275
0 273
0 272
0 271
0 272
0 271
0 271
0 274
0 276
0 276
0 278
0 278
0 280
0 282
0 282
0 282
0 282
0 282
0 282
0 282
0 282
1 282
1 282
1 282
1 282
1 282
1 275
1 274
1 279
1 280
1 281
1 282
1 325
1 325
1 327
2 355
2 360
2 365
2 538
2 563
2 569
3 597
3 603
3 609
3 611
3 613
3 613
3 620
3 625
3 626
3 633
3 638
3 642
3 656
3 662
3 662
3 666
3 689
3 686
3 731
3 730
3 726
2 457
3 515
3 518
3 771
2 729
2 729
2 729
2 729
2 731
2 731
2 731
2 721
2 721
2 721
2 721
2 720
2 719
2 719
2 717
2 717
2 717
2 718
2 718
2 718
2 719
19 723
20 723
20 724
59 733
59 734
59 734
59 734
58 734
58 734
58 734
58 735
58 740
58 743
58 745
58 747
58 747
58 746
58 746
58 707
58 706
58 708
58 708
58 704
61 686
61 508
61 499
64 500
64 501
66 501
66 501
66 503
66 501
66 502
66 493
66 503
66 508
66 498
66 490
66 488
66 475
66 471
66 469
66 464
66 464
66 462
66 415
66 412
66 412
64 411
59 338
59 333
51 78
47 69
47 68
47 68
39 60
39 60
39 60
39 60
39 60
39 60
39 60
39 60
39 60
38 60
38 60
33 59
32 58
29 58
27 58
27 58
27 58
27 58
27 56
25 54
25 52
1 41
0 37
0 37
0 37
0 37
0 37
0 37
1 37
1 37
1 38
1 38
1 37
1 37
1 36
1 36
1 36
1 36
1 35
1 35
1 35
1 35
1 33
0 33
0 32
0 30
0 30
0 30
0 28
0 28
0 26
0 21
0 5
0 1
0 2
0 2
0 2
0 2
0 2
0 2
0 2
0 3
0 3
0 3
0 3
0 3
0 3
1 23
1 23
1 22
1 22
2 23
2 26
2 26
2 26
2 27
2 27
2 28
2 28
2 27
2 27
2 27
2 27
2 28
2 28
2 28
2 28
2 29
9 29
9 29
9 38
9 38
9 38
9 38
9 38
9 38
9 38
9 38
9 38
9 38
9 38
9 38
9 38
2 38
2 38
2 38
2 38
2 38
2 38
2 38
2 38
2 38
2 38
2 237
2 238
2 239
2 239
2 239
2 239
2 239
2 239
2 239
2 239
2 239
2 239
2 239
3 251
3 253
3 255
3 56
3 56
3 56
5 56
5 56
5 56
5 56
5 56
5 55
5 55
5 55
4 35
4 34
4 32
3 29
3 29
3 29
3 29
1 29
1 28
1 29
1 29
1 30
1 30
1 30
1 30
1 30
1 29
1 29
1 29
1 29
1 28
1 28
1 41
1 32
1 37
1 40
1 40
1 40
1 40
1 40
2 40
3 40
3 40
3 42
3 42
3 42
3 42
3 42
3 42
3 42
3 42
3 42
3 43
3 43
3 45
3 48
3 48
3 48
3 47
3 47
3 47
3 47
3 47
3 53
3 54
3 54
3 55
2 65
2 65
2 53
2 55
2 53
2 52
2 52
2 54
2 55
2 55
2 57
3 58
3 58
3 58
3 58
4 58
4 58
4 58
4 58
4 59
4 61
4 61
4 62
4 62
4 62
4 62
4 61
4 59
4 59
4 60
3 60
3 64
3 64
3 71
3 80
3 83
3 87
3 86
3 75
3 71
3 64
3 64
4 64
4 64
4 64
4 64
4 63
4 63
4 61
4 61
4 60
4 59
4 60
4 60
4 63
4 64
4 69
3 72
2 69
2 67
2 65
2 65
2 63
2 64
2 65
2 65
2 65
2 65
2 68
2 68
2 67
2 67
2 66
2 65
2 63
2 62
2 55
2 55
2 56
2 58
2 70
2 90
2 175
2 292
1 340
1 403
1 422
1 469
1 472
1 475
1 489
1 489
1 488
1 490
1 495
3 520
4 532
4 549
4 560
4 561
4 561
4 561
4 563
4 561
4 558
4 555
4 552
4 571
4 573
4 578
2 574
2 580
2 579
2 579
2 576
2 580
1 597
1 601
1 607
1 606
1 607
1 609
1 609
1 610
1 616
1 614
1 612
1 612
1 604
1 580
0 557
0 550
0 527
0 555
0 556
0 586
11 585
11 585
11 583
11 583
11 583
11 580
11 580
11 580
11 580
11 580
11 578
11 575
11 517
11 488
11 484
11 426
0 424
0 420
0 389
0 317
0 282
0 267
0 254
0 246
0 212
0 211
0 211
0 221
0 226
0 234
0 237
0 239
0 227
0 202
0 189
0 188
0 250
1 267
2 299
2 308
2 469
2 487
2 523
2 535
2 538
3 573
3 575
3 576
3 573
3 573
3 573
3 572
3 563
3 551
3 548
3 638
3 638
3 640
3 639
3 638
2 636
2 630
2 630
2 629
2 622
2 622
2 622
2 619
2 619
2 618
2 616
2 615
2 582
2 580
2 581
2 580
2 580
2 580
2 580
2 580
2 581
2 582
2 582
2 584
2 584
2 584
4 595
4 597
4 597
4 600
4 601
4 587
4 587
4 579
4 581
4 577
4 579
4 580
4 578
4 581
4 571
4 571
4 568
4 567
4 559
4 558
4 558
4 557
4 551
4 485
4 475
3 451
3 439
5 287
5 270
5 272
5 264
5 402
5 353
6 376
6 374
7 411
7 442
7 445
7 451
7 452
7 466
7 464
7 368
8 372
8 372
8 376
8 375
8 379
8 381
8 381
8 384
8 385
8 385
8 391
8 403
8 403
8 405
8 426
8 428
8 431
8 468
8 467
8 482
8 494
8 503
9 587
10 669
10 694
11 716
12 735
12 740
12 749
12 753
10 746
10 747
10 748
10 747
10 747
12 954
14 959
17 969
19 971
21 976
23 985
23 985
23 984
23 976
23 971
23 973
23 972
23 973
23 973
23 972
23 973
22 976
21 983
21 985
21 997
20 997
20 994
17 942
17 940
15 898
15 888
15 668
15 668
15 589
15 584
15 560
15 521
15 521
15 505
15 502
14 489
14 488
14 484
14 484
14 484
14 483
14 483
14 482
14 479
14 478
14 477
14 475
14 474
14 471
14 453
14 451
14 442
14 422
14 419
14 413
14 411
14 411
15 411
15 404
15 384
14 304
13 292
13 293
13 317
13 330
13 329
13 328
13 327
13 327
13 331
11 335
11 339
10 333
6 114
6 108
3 97
1 81
0 80
0 79
0 79
0 78
0 75
0 73
2 68
2 68
2 68
2 64
2 64
2 71
2 73
2 72
2 73
2 69
2 69
2 69
2 69
2 69
2 69
0 69
0 70
0 71
0 71
0 74
0 75
0 76
0 76
0 76
0 76
0 78
0 78
0 78
0 79
0 79
0 79
0 78
0 78
0 78
1 78
1 78
1 77
1 77
1 77
1 77
1 77
1 77
1 77
1 77
1 77
1 77
1 78
1 78
1 73
0 70
0 70
0 71
0 73
0 45
0 30
0 27
0 27
0 28
0 30
0 30
0 31
0 30
0 30
0 30
0 30
0 30
1 30
1 34
1 34
1 30
1 74
1 78
1 92
1 96
1 95
1 95
1 95
1 95
1 87
1 86
1 87
1 86
1 85
1 85
1 85
1 85
0 85
0 85
0 85
0 84
0 84
0 84
0 82
0 80
0 80
0 80
0 80
0 80
0 78
0 78
0 79
0 78
0 77
0 78
2 78
2 78
7 78
7 79
7 79
7 79
7 79
7 79
7 79
7 79
7 79
7 80
7 82
7 84
7 89
5 92
5 93
0 93
0 93
0 93
0 115
0 200
0 207
0 269
0 277
0 283
0 303
0 347
0 384
0 398
0 401
0 422
1 426
1 426
1 436
1 459
1 461
1 464
1 466
1 421
1 417
1 409
1 408
1 405
1 406
1 406
1 406
1 406
0 406
0 405
0 405
0 405
0 404
0 403
0 403
0 403
0 403
0 403
0 403
0 403
0 403
0 403
0 404
0 404
0 404
0 404
0 405
0 405
0 405
0 402
0 401
0 401
0 401
0 400
0 399
0 399
0 395
0 391
0 390
1 399
1 416
1 416
1 417
1 419
1 414
1 377
1 358
1 364
1 364
1 368
1 371
1 370
1 369
1 159
1 157
1 153
1 145
1 134
1 131
1 107
1 105
1 105
1 105
1 105
1 103
1 107
1 109
1 105
1 103
1 103
1 105
1 104
1 104
1 106
1 110
1 110
1 116
1 116
1 116
1 125
1 124
1 121
1 121
1 124
1 145
1 157
1 159
1 159
1 161
1 161
1 161
1 162
1 162
1 162
1 162
1 158
1 158
1 157
1 158
1 157
1 155
1 154
1 153
1 154
1 154
1 154
1 154
1 154
1 154
1 157
1 159
2 161
1 153
1 140
1 143
1 149
1 150
1 149
1 148
1 145
1 103
1 95
1 86
1 85
1 85
1 85
1 85
1 85
1 85
1 85
1 85
1 85
1 85
1 85
1 84
1 84
1 81
1 81
1 79
1 79
1 74
1 74
1 71
1 71
5 71
5 71
6 78
6 75
6 81
6 78
6 78
6 78
6 78
6 78
6 78
6 78
6 75
6 59
6 43
6 43
2 37
1 34
1 32
1 29
1 26
1 26
1 28
1 28
1 28
1 28
1 28
1 28
1 28
1 28
1 28
1 28
1 27
1 27
1 29
1 29
1 29
1 29
1 27
1 25
0 25
0 23
0 20
0 18
0 11
0 10
0 10
0 10
0 10
0 10
0 10
0 9
0 9
0 9
0 9
0 9
0 10
0 13
0 47
0 47
0 49
5 49
6 49
6 50
6 50
6 51
6 53
6 53
7 57
7 62
7 105
7 109
7 118
7 242
7 247
7 293
8 309
9 317
3 326
3 328
3 329
3 336
3 338
3 340
2 340
2 340
2 340
2 340
2 339
2 339
2 337
1 337
1 337
1 338
1 351
1 349
1 349
1 351
1 353
1 354
1 354
1 354
1 354
1 355
1 378
1 381
1 403
1 405
1 405
1 405
1 407
1 404
1 403
1 402
1 404
1 404
1 404
1 405
2 405
2 405
2 425
2 421
2 429
2 428
2 429
2 426
3 422
3 422
3 402
3 392
3 387
3 363
3 363
3 366
3 367
3 368
3 367
3 367
3 382
3 381
3 381
3 379
2 377
2 346
2 342
2 336
1 253
1 236
1 217
1 216
1 217
1 218
1 218
1 220
1 213
1 212
1 212
1 212
1 212
1 212
1 217
1 217
1 217
1 220
1 229
1 231
1 229
1 217
1 217
1 216
1 213
2 214
2 217
3 250
3 256
3 262
3 265
3 285
3 281
3 304
3 305
3 306
3 304
3 308
3 310
3 310
3 310
4 313
3 314
3 314
3 314
3 314
3 317
3 299
3 298
3 293
3 292
3 292
3 293
3 293
3 293
3 293
3 293
3 294
3 294
3 292
3 290
3 289
3 289
3 289
3 289
3 273
3 271
3 270
3 267
3 267
3 269
3 270
3 269
3 202
3 200
3 192
3 187
3 186
3 186
3 185
3 185
3 185
3 185
3 185
3 185
3 185
3 185
3 185
3 185
3 185
3 183
3 181
3 181
3 186
3 188
3 194
3 197
3 198
2 194
2 196
1 159
1 156
98 154
99 155
99 112
99 104
99 59
99 59
99 60
99 81
99 80
99 84
99 86
99 90
98 92
98 92
98 101
98 118
97 123
96 125
0 126
0 127
0 127
0 127
0 128
0 128
0 128
0 130
0 138
0 144
0 148
0 154
0 154
0 154
0 154
0 171
0 171
0 171
0 171
0 171
0 171
1 172
1 172
1 172
1 169
1 169
1 166
1 161
1 157
1 165
1 166
1 149
1 151
1 161
1 177
1 179
1 184
1 255
1 259
1 266
1 310
1 337
1 355
1 370
1 371
1 379
1 371
1 380
1 373
1 369
1 370
1 369
1 368
1 365
1 364
1 363
1 365
1 365
1 365
1 369
1 388
1 391
1 374
1 426
1 441
1 439
1 447
1 450
1 454
1 443
0 395
0 407
0 408
0 400
0 402
0 407
0 411
0 409
0 409
0 408
0 408
0 405
0 407
0 405
0 402
0 402
0 402
0 402
0 402
0 402
0 402
0 402
0 402
0 401
0 399
0 399
0 399
0 396
0 396
0 396
0 393
0 447
0 439
0 433
0 480
0 468
0 397
0 325
0 319
0 315
0 280
0 266
0 261
0 248
0 246
0 238
0 250
0 248
0 248
0 200
0 195
0 194
0 194
0 192
0 192
0 192
0 191
0 196
0 207
0 214
0 219
0 223
0 223
2 223
2 221
2 202
2 166
2 151
2 152
2 150
2 152
2 150
2 148
2 146
2 143
2 142
2 142
2 141
32 144
31 144
33 143
33 143
33 143
32 143
32 143
32 143
32 143
32 143
32 143
32 143
32 143
32 145
32 145
2 140
2 140
0 140
0 142
0 142
0 142
0 142
0 142
0 142
0 142
0 154
0 93
0 116
0 117
1 117
1 121
1 122
1 114
1 114
1 112
1 113
1 114
1 113
1 113
1 112
1 111
1 91
1 93
1 87
1 86
1 86
3 86
3 86
3 86
3 86
3 83
3 83
3 80
3 72
3 72
4 72
4 72
4 72
4 72
4 72
4 72
2 72
2 73
2 72
2 69
2 69
2 65
3 66
3 67
3 67
3 67
3 67
3 67
3 67
3 70
3 70
3 70
3 69
3 71
3 71
3 71
3 71
3 71
2 71
2 71
2 72
2 70
2 72
3 76
3 79
3 79
3 83
3 85
3 88
3 90
3 93
3 94
3 91
2 67
2 59
2 46
2 46
2 43
1 44
1 44
1 43
1 43
1 43
1 41
1 38
1 38
1 38
1 38
1 38
1 39
1 38
1 38
1 41
1 41
1 41
1 41
1 41
1 41
1 41
1 41
1 41
1 42
1 42
0 40
0 38
0 39
0 39
0 39
0 39
0 40
0 40
0 40
0 40
0 40
0 40
0 39
0 38
0 38
0 37
0 39
0 41
0 41
0 40
0 40
0 40
0 39
0 38
0 38
0 39
0 39
0 39
0 39
0 40
0 37
0 35
0 36
0 35
0 28
0 28
0 24
0 23
0 22
0 21
0 21
0 20
0 20
0 20
0 20
0 20
0 20
0 20
0 19
0 19
0 19
0 19
0 19
0 19
0 19
0 22
0 22
0 22
0 22
0 21
0 23
0 23
0 20
0 20
0 20
0 20
0 20
0 20
0 20
0 20
0 20
0 20
0 22
0 29
0 34
0 33
0 33
0 33
1 32
1 34
1 35
1 63
1 78
1 91
1 93
1 93
1 96
1 98
1 100
1 117
1 117
1 123
1 138
1 153
0 157
0 159
0 160
0 206
0 206
0 205
0 205
0 205
0 205
0 205
0 219
0 222
0 225
0 227
0 227
0 224
0 224
0 222
0 220
0 220
0 220
0 220
0 220
0 220
0 223
0 223
0 223
0 223
0 223
0 223
0 223
0 223
0 223
0 224
0 222
0 222
0 222
0 222
0 222
0 212
0 207
0 211
0 220
0 221
0 221
0 222
0 222
0 222
0 222
0 222
0 221
0 217
0 213
0 213
0 213
0 213
0 215
0 215
0 215
0 212
0 174
0 166
0 189
0 199
0 213
0 216
0 218
0 223
1 218
1 206
1 213
1 215
1 213
2 266
2 270
2 273
2 230
2 232
2 232
2 231
2 231
2 231
2 231
2 213
3 210
3 204
3 202
3 202
3 202
3 202
3 202
3 202
3 202
3 202
3 203
3 203
3 204
3 201
3 201
2 201
2 201
2 201
2 201
2 200
2 200
2 200
2 199
2 199
2 199
2 199
2 199
2 200
2 200
2 201
2 201
2 195
2 194
2 194
2 194
2 194
2 195
2 195
2 195
2 195
2 195
2 195
2 195
2 195
2 223
2 224
2 245
2 244
2 246
2 243
2 243
2 208
2 196
2 185
2 186
2 184
2 166
1 135
1 134
1 144
1 145
1 144
0 87
0 88
0 83
0 80
0 81
0 81
0 80
0 80
0 80
0 80
0 80
0 80
0 80
0 80
0 80
0 80
0 80
0 80
0 80
0 80
0 80
0 80
0 80
0 80
0 81
0 81
0 81
0 82
0 82
0 83
0 83
0 83
0 83
0 83
0 83
0 83
2 84
2 84
3 83
3 83
3 83
3 83
3 83
3 84
3 84
3 84
3 84
3 84
3 86
3 86
3 88
1 91
1 95
0 96
0 95
0 63
0 57
0 36
0 54
0 54
0 54
0 54
0 56
0 55
2 76
3 75
5 77
10 123
10 123
10 128
10 119
10 120
10 120
10 100
10 99
10 99
10 98
10 98
10 98
9 98
9 98
8 98
8 98
8 98
8 99
8 99
8 99
8 99
8 99
8 99
8 99
8 99
8 99
8 100
8 101
8 105
8 105
8 106
8 107
8 107
8 101
8 96
8 95
8 90
8 87
8 85
8 86
8 90
8 91
8 91
8 91
8 91
8 89
8 88
8 81
8 81
8 79
8 79
8 79
8 81
8 75
8 75
8 75
8 75
8 71
8 66
8 66
8 66
8 66
11 72
11 72
12 72
14 72
14 72
15 72
14 68
15 66
15 61
12 65
11 64
9 33
9 33
9 32
9 32
9 32
9 32
9 33
9 36
9 36
9 43
9 43
10 43
10 44
10 44
40 3691
40 3691
40 3689
40 3690
40 3692
40 3691
40 3693
40 3694
40 3694
40 3694
40 3694
40 3694
42 3695
42 3694
42 3689
11 47
13 53
13 55
13 55
13 69
13 69
13 68
13 68
13 67
13 70
13 75
13 73
12 76
12 79
12 79
12 79
12 80
12 81
12 81
12 81
12 83
12 83
12 83
12 82
12 82
12 82
12 82
12 82
11 82
11 82
11 82
9 84
9 84
6 75
6 75
5 75
5 75
4 75
4 75
3 73
2 73
2 73
2 71
2 71
2 71
2 71
2 71
2 71
2 71
2 70
2 71
2 69
2 69
1 61
1 61
1 61
1 61
1 61
1 61
1 61
1 61
1 61
1 60
1 60
1 59
1 58
1 58
1 58
1 61
1 61
1 61
1 63
1 62
1 61
2 129
2 133
2 136
3 125
4 174
4 174
4 174
4 173
4 172
4 168
4 184
5 237
5 266
5 270
5 282
5 282
5 280
5 280
4 280
4 278
4 278
4 278
4 278
4 279
4 279
4 279
4 279
4 279
4 279
4 279
4 277
4 279
4 279
4 279
4 279
4 279
4 279
4 279
4 278
4 278
4 278
4 278
4 278
5 277
5 278
5 278
5 278
5 278
5 278
5 277
5 278
5 277
5 277
5 278
5 279
5 279
5 279
5 281
4 281
4 285
4 285
4 286
4 286
4 287
4 287
4 287
4 287
4 286
4 285
4 285
4 282
2 279
2 278
1 118
1 114
1 111
1 110
1 111
1 111
1 36
1 36
2 36
2 36
2 41
2 36
3 25
3 26
3 23
3 23
3 23
3 23
3 23
3 23
3 23
3 23
3 23
3 23
4 23
4 23
4 24
4 24
4 24
4 24
4 24
4 22
4 22
4 22
4 22
4 27
4 30
4 33
7 34
7 36
7 36
7 36
7 92
7 94
7 94
7 94
7 104
7 104
7 104
7 104
7 103
7 103
7 103
7 103
7 102
7 102
7 102
7 44
7 44
7 40
7 40
7 39
8 39
8 40
8 41
8 41
8 41
8 41
8 41
9 41
9 41
9 41
9 42
14 43
15 45
15 45
15 45
15 45
15 44
14 44
14 43
13 43
13 43
13 33
13 34
12 33
12 33
12 43
12 43
12 44
12 45
12 53
12 53
12 53
12 54
12 55
12 55
11 55
11 55
11 54
11 55
11 55
11 55
11 43
11 43
11 43
11 43
11 42
11 38
11 36
11 36
8 34
8 34
8 34
8 34
8 34
8 32
8 32
8 32
8 21
8 21
8 21
8 20
8 20
8 20
8 20
8 20
8 20
8 20
7 20
7 20
7 20
7 19
7 21
7 21
7 19
7 19
7 19
7 18
7 35
7 35
7 35
6 35
6 35
6 37
6 36
0 34
0 34
0 34
0 34
0 34
0 34
0 33
0 32
0 32
0 32
0 32
0 32
0 31
0 14
0 14
0 15
0 13
0 13
0 8
0 9
0 9
0 9
0 9
0 9
0 9
0 9
0 9
0 7
0 7
0 7
0 7
0 7
0 7
0 7
0 7
0 7
0 7
0 7
0 7
0 7
0 7
1 7
1 7
1 7
1 7
1 7
1 7
1 7
1 7
1 8
1 8
1 8
1 9
1 9
1 9
1 9
1 9
1 9
1 9
1 9
1 6
1 6
1 6
1 8
1 8
1 8
1 8
1 8
2 8
2 8
2 8
2 6
2 6
2 6
2 6
2 6
2 6
2 6
2 6
2 4
2 5
2 5
2 5
3 7
3 20
3 20
3 20
3 21
3 21
3 49
3 49
3 49
3 48
3 48
3 48
3 48
3 50
3 50
3 50
3 50
3 37
3 37
3 37
3 35
3 35
3 35
3 35
3 35
3 35
3 35
3 35
3 6
3 5
3 5
2 5
2 5
2 5
2 5
2 6
2 6
2 6
2 5
2 4
2 4
2 4
2 5
2 5
2 5
2 5
2 5
2 5
2 5
2 5
2 6
2 6
2 6
2 7
2 7
2 7
2 7
2 9
1 9
1 13
1 13
1 13
1 13
1 13
1 13
1 13
1 13
1 13
1 13
1 13
1 12
1 12
1 12
0 10
0 10
0 10
0 10
0 10
0 10
0 10
0 10
0 10
0 10
0 10
0 11
0 11
0 11
0 11
0 12
0 12
0 13
0 13
0 13
0 13
0 13
0 13
0 14
0 14
0 17
0 18
0 22
0 22
0 22
0 22
0 22
0 23
0 23
0 23
0 23
0 23
0 23
0 23
0 23
0 22
0 23
0 22
0 22
0 22
0 22
0 22
0 22
0 22
0 22
0 21
0 21
0 21
0 20
0 20
0 18
0 17
0 15
0 15
0 17
0 17
0 17
0 17
0 18
0 19
0 19
0 19
0 19
0 19
0 19
0 19
0 25
0 25
0 25
0 33
0 33
0 33
0 33
0 33
0 33
0 33
0 33
0 34
0 33
0 33
0 33
0 34
0 34
0 34
0 34
0 34
0 34
0 35
0 35
0 35
0 35
0 34
0 31
0 31
0 33
0 34
1 35
2 36
2 36
3 36
3 35
3 35
3 35
3 33
3 33
3 35
3 35
3 36
3 36
4 35
4 35
4 35
4 35
4 36
4 36
4 36
4 36
5 36
5 36
5 36
5 36
5 36
5 37
5 41
4 39
4 39
4 38
3 25
3 24
3 23
2 15
2 20
2 20
2 20
2 20
2 20
2 20
2 20
2 20
2 21
2 21
2 113
2 115
2 116
2 117
2 119
2 114
2 118
2 118
2 118
2 117
2 117
2 117
2 117
2 117
2 117
2 116
2 26
2 26
2 27
2 27
2 27
2 27
2 26
2 26
2 26
2 26
2 27
2 27
1 25
1 24
1 43
1 44
1 48
1 48
1 49
1 49
1 49
1 44
1 41
1 40
1 41
1 42
1 41
1 43
1 42
1 43
1 43
1 43
1 42
0 42
0 42
0 42
0 44
0 44
0 43
0 43
0 44
0 46
0 46
0 46
0 46
0 46
0 46
0 46
0 46
0 46
0 46
0 44
0 44
0 44
0 44
0 44
0 45
0 45
0 47
0 48
0 47
0 64
0 64
0 64
0 65
0 65
0 64
0 64
0 63
0 63
0 63
0 62
0 62
0 62
0 62
0 61
0 61
0 61
0 62
0 65
0 68
0 67
0 71
0 72
0 75
0 75
0 75
0 53
0 56
0 56
0 56
0 55
0 55
0 55
0 55
0 56
1 53
6 61
6 58
6 59
6 59
6 60
6 59
6 57
6 57
6 57
6 57
6 57
6 57
6 57
6 57
6 57
4 57
4 64
0 65
0 70
0 70
0 70
0 70
0 70
0 70
0 70
0 71
0 213
0 219
0 445
2 473
2 499
4 507
4 508
4 517
4 515
6 544
6 549
6 539
6 552
6 555
7 556
8 558
9 559
9 559
10 559
14 600
14 601
15 601
17 602
17 603
72 676
71 681
72 686
73 686
74 688
74 664
74 655
74 645
74 641
74 639
74 634
74 635
74 635
74 637
74 635
74 638
74 643
74 648
74 649
74 650
74 649
74 646
74 630
74 598
74 584
74 582
75 582
76 583
76 583
76 583
76 583
76 583
76 584
76 585
76 585
76 585
76 591
76 589
76 577
72 463
72 415
71 359
65 226
66 222
67 223
70 223
73 223
73 223
73 221
73 220
73 214
72 120
71 115
71 109
71 109
71 108
71 107
71 105
71 82
71 80
71 80
71 80
69 85
69 84
69 90
68 118
68 131
67 132
67 132
67 132
65 132
63 131
63 131
10 85
12 92
12 89
11 89
11 89
11 89
11 89
11 89
13 89
21 95
34 96
34 96
34 98
34 98
34 101
34 101
34 99
34 94
34 107
34 107
34 106
34 108
36 134
37 217
42 252
48 325
47 335
47 333
47 347
47 358
47 358
237 416
238 416
239 425
239 428
239 428
239 423
239 427
239 428
239 428
239 429
239 429
239 429
236 430
235 431
233 431
231 431
231 431
231 430
231 430
231 430
231 430
233 430
233 429
244 429
308 430
375 430
458 432
488 432
509 433
510 434
510 434
510 423
510 413
518 384
520 325
530 258
531 258
528 255
528 255
525 252
525 252
525 252
524 251
521 224
521 223
523 278
523 252
520 237
520 237
519 237
517 237
514 231
502 229
502 228
502 228
508 228
508 223
508 220
509 222
509 223
509 213
509 220
510 228
548 249
547 385
546 331
598 553
598 563
595 577
593 604
594 673
593 714
595 788
413 788
413 787
413 787
413 785
413 785
413 785
413 789
413 791
413 793
413 796
413 797
413 800
437 1320
439 1361
439 1384
440 1389
441 1396
442 1423
446 1429
442 1436
438 1445
435 1560
429 1560
330 1558
265 1557
195 1556
142 1555
126 1555
106 1554
106 1554
102 1553
100 1554
99 1553
89 1552
88 1552
69 1551
66 1551
65 1551
54 1550
54 1550
54 1550
54 1550
53 1550
51 1549
51 1549
49 1473
49 1473
49 1466
48 1445
48 1440
48 1441
48 1441
48 1441
48 1441
48 1441
48 1442
50 1676
50 1671
49 1672
48 1672
48 1670
48 1667
48 1665
48 1650
48 1486
48 1449
36 1081
36 1043
36 1038
36 1042
36 1040
34 800
33 796
33 794
33 794
33 796
33 805
33 810
33 810
32 806
32 805
32 799
28 798
28 796
27 782
4 253
4 222
4 200
2 192
2 187
1 177
1 174
1 174
1 166
0 52
0 51
0 51
0 51
0 49
0 50
0 50
0 50
1 51
1 52
2 52
2 52
2 52
2 52
2 52
2 52
2 52
2 52
2 52
2 52
2 52
2 52
2 52
2 52
1 52
1 52
1 52
1 52
1 53
1 52
1 53
1 53
1 53
1 53
1 52
1 52
1 52
1 49
1 49
1 49
1 49
1 48
1 47
1 46
1 46
1 46
1 46
1 46
1 40
1 40
1 40
1 40
1 40
1 40
1 32
1 29
1 26
1 26
5 31
5 31
5 31
5 31
5 31
5 31
5 32
5 36
5 40
5 39
5 38
5 24
5 27
5 34
5 47
1 69
1 82
1 94
1 97
1 102
1 103
1 105
1 105
1 103
1 103
0 103
1 103
1 103
1 103
1 104
1 106
1 107
1 108
1 112
1 134
1 145
1 153
1 153
1 154
1 154
1 154
0 154
0 168
0 167
0 167
0 166
0 166
0 166
0 166
0 166
0 166
0 165
0 164
0 164
0 164
0 164
0 164
0 166
0 166
0 167
0 167
0 155
0 155
0 155
2 154
2 154
2 154
2 155
2 159
2 159
2 159
2 159
2 160
2 161
2 163
2 163
2 164
2 167
2 168
0 169
0 167
0 185
0 186
0 190
0 197
0 191
0 178
0 154
1 143
1 136
1 126
1 125
1 124
1 125
1 130
1 130
1 131
1 131
1 131
3 140
3 140
5 165
5 166
5 163
5 163
5 162
5 158
5 130
5 120
5 118
5 117
5 117
5 117
5 122
5 122
5 123
5 124
5 124
5 124
5 135
5 135
5 136
5 137
6 174
6 179
6 183
6 188
6 187
6 194
6 197
6 195
6 196
6 196
6 195
6 172
6 173
6 159
6 158
6 158
6 158
6 156
6 156
6 151
6 149
6 147
6 145
6 144
6 144
6 144
6 144
6 144
6 144
6 144
6 144
6 135
6 135
6 130
6 126
6 121
4 115
4 97
1 93
1 93
1 93
1 93
1 93
2 93
2 83
2 83
2 84
2 84
2 84
2 84
2 84
2 69
2 69
2 69
2 69
2 69
2 69
2 69
1 68
1 73
1 77
1 86
1 85
1 83
1 85
1 85
1 83
1 87
1 87
1 87
1 87
1 86
1 84
0 47
0 44
0 42
0 37
0 34
0 34
0 34
0 34
0 34
0 34
0 34
0 33
0 33
0 33
0 33
0 33
0 33
0 33
0 33
0 33
0 34
0 46
0 54
0 54
0 54
0 54
0 55
0 55
0 57
0 57
0 60
0 60
0 60
0 62
0 62
0 62
0 61
0 53
0 53
0 53
0 53
0 53
0 53
0 52
0 52
0 52
0 51
0 51
0 51
0 51
0 51
0 51
0 51
0 52
1 56
1 56
1 57
2 57
2 59
2 51
2 40
2 37
2 30
2 29
2 27
2 26
2 26
2 22
2 22
2 22
2 24
3 24
5 34
5 36
5 36
5 36
5 36
5 36
5 36
5 36
5 36
5 36
5 36
5 36
5 37
5 37
5 38
6 39
6 39
6 39
6 44
6 44
6 44
6 44
7 32
7 32
7 32
7 32
7 32
7 31
7 31
11 33
14 59
14 58
14 58
14 58
14 58
14 58
16 74
16 75
17 94
17 100
17 100
18 102
18 104
18 104
23 142
24 143
24 146
29 187
29 191
29 197
29 198
30 201
30 205
30 235
30 259
28 275
28 279
28 279
28 280
28 280
28 280
28 281
29 285
29 289
29 300
34 334
35 375
40 536
40 556
43 572
43 605
43 606
42 605
40 596
41 594
41 596
41 613
41 645
41 674
41 681
43 826
44 834
44 845
44 867
44 878
44 884
44 912
44 914
43 917
43 918
43 917
43 919
43 920
43 920
43 940
41 941
40 941
40 943
40 944
40 955
30 955
24 952
20 951
14 790
14 790
14 791
14 793
14 802
14 815
14 815
1 690
1 683
1 677
1 677
1 680
1 681
1 681
1 681
1 681
1 682
1 672
1 672
2 672
2 674
2 668
2 670
2 673
2 676
2 684
2 690
2 695
2 726
2 731
2 734
2 742
2 743
3 740
3 730
2 727
2 686
2 617
2 679
2 712
2 712
2 733
2 733
2 733
2 734
2 733
2 720
2 687
2 660
2 653
2 479
1 466
1 478
1 505
1 524
2 529
2 528
2 528
2 524
2 549
3 552
3 555
3 565
3 562
3 554
3 554
3 553
3 552
3 553
3 546
3 566
3 572
3 573
3 579
3 581
3 568
3 563
3 554
3 540
3 540
3 536
3 540
3 540
3 540
3 541
3 541
3 541
3 541
3 542
3 542
3 545
3 544
3 552
3 552
3 548
3 546
3 546
3 535
3 521
3 514
4 507
3 500
3 497
3 496
3 495
3 545
3 554
3 570
3 564
3 575
3 407
3 380
3 353
3 348
3 321
3 320
3 319
2 319
2 318
2 314
2 314
2 315
2 314
2 294
2 289
2 259
2 230
2 209
3 262
3 263
3 262
3 267
3 267
2 265
2 270
2 269
2 269
2 267
2 266
2 266
1 266
1 268
1 263
1 262
1 267
2 267
2 269
3 281
3 285
3 289
3 287
3 286
3 287
3 287
3 287
3 301
3 304
3 307
3 309
3 307
3 314
3 311
2 309
2 308
2 311
2 275
2 252
2 251
2 251
2 251
2 251
2 251
2 247
2 241
2 236
2 235
2 229
2 215
2 181
2 179
2 180
2 176
2 167
2 167
2 159
2 159
2 158
2 158
2 158
2 158
2 158
2 161
2 162
2 163
2 162
2 165
2 166
2 167
3 183
3 184
3 184
2 119
2 118
2 111
2 101
2 101
2 101
2 95
2 95
2 95
2 94
2 94
2 94
2 94
2 95
2 95
2 110
2 114
1 116
1 117
1 109
1 105
1 105
1 116
1 121
1 132
1 134
1 135
1 121
1 119
1 119
90 122
90 124
90 118
90 120
90 120
90 112
90 104
90 104
90 103
90 101
90 101
90 101
91 100
91 99
113 99
24 97
24 97
24 96
24 96
24 96
24 99
24 116
24 119
24 125
24 196
24 199
24 199
24 205
23 210
1 214
1 216
1 216
2 222
2 217
2 216
2 216
2 216
2 214
2 213
2 212
1 197
1 196
1 196
1 196
1 196
1 196
1 196
1 196
1 197
1 197
1 197
1 197
1 197
1 197
1 197
1 248
1 247
1 294
1 279
1 278
1 287
1 286
1 332
1 329
1 379
1 381
1 374
1 376
1 377
1 392
2 394
2 393
2 393
2 392
2 391
2 390
2 391
2 391
2 391
2 392
2 393
2 396
2 396
2 396
2 397
2 397
1 423
1 426
3 427
4 499
4 501
4 501
4 509
4 507
4 483
4 499
4 479
5 364
38 373
38 334
38 322
38 314
38 309
35 300
35 299
35 280
35 279
35 276
35 277
35 277
35 277
35 277
35 307
3 306
3 307
3 307
3 308
3 308
4 308
4 308
4 308
4 308
4 314
4 312
4 314
4 313
4 313
4 309
4 278
4 215
4 194
4 189
4 182
4 172
4 162
4 161
4 161
4 141
4 140
4 140
4 136
4 135
615 157
615 157
616 157
617 157
616 172
640 466
640 478
642 489
643 498
643 498
643 501
643 507
643 505
643 505
643 512
34 511
34 510
34 514
34 513
34 511
33 460
33 463
33 464
33 464
33 465
33 453
33 433
33 428
32 425
32 435
32 436
33 437
48 534
48 536
78 535
79 535
79 535
79 535
79 537
79 537
79 538
79 538
79 538
79 537
79 537
86 647
86 649
86 652
86 653
53 652
53 652
53 652
53 651
54 647
54 644
54 643
54 642
54 642
54 641
53 616
53 617
52 613
51 597
50 595
50 595
50 595
50 594
50 594
50 594
50 594
50 594
50 594
50 594
50 645
50 644
48 649
48 671
48 903
25 656
25 671
25 680
24 683
24 729
24 733
24 749
24 749
24 755
24 763
24 771
24 774
24 774
24 774
24 772
24 772
24 769
24 771
24 771
24 771
24 770
26 770
26 769
26 766
26 744
25 743
25 736
9 635
14 635
14 637
14 637
14 635
14 635
14 634
14 634
14 634
14 634
14 634
14 630
14 631
7 468
7 492
7 491
2 533
2 625
2 728
2 775
2 777
2 777
2 787
2 854
2 878
2 1000
2 1040
2 1051
2 1055
2 1062
2 1080
2 1096
2 1100
2 1100
2 1102
2 1103
2 1103
2 1103
2 1103
3 1104
3 1104
3 1103
1 1118
1 1108
1 1046
1 819
1 796
1 774
1 771
1 771
1 771
1 772
1 773
1 773
1 769
1 752
1 748
1 744
1 739
1 738
1 738
1 736
1 734
1 734
1 734
1 734
1 734
1 733
1 733
1 733
1 733
1 733
1 734
1 734
1 734
1 734
1 734
1 733
1 733
1 733
1 733
1 733
1 733
1 731
1 731
1 729
1 726
1 693
1 681
1 602
1 464
1 233
1 152
1 146
1 146
1 149
1 148
1 133
1 60
1 47
1 45
1 44
1 45
1 48
1 45
1 209
1 209
1 217
1 216
1 227
1 227
1 228
0 228
0 228
0 228
0 208
0 208
0 208
0 208
2 208
2 208
2 208
2 208
2 208
2 208
2 207
2 206
2 203
2 200
2 201
2 201
2 201
2 201
2 204
0 204
0 205
0 204
0 205
0 206
0 208
0 222
0 230
0 230
0 290
0 291
0 291
0 291
0 291
0 291
0 291
0 291
0 291
0 292
0 294
0 304
0 307
0 294
0 294
0 235
0 235
0 238
0 238
0 238
0 238
0 238
0 238
0 238
0 239
0 234
0 234
0 234
0 234
0 233
0 233
0 233
0 232
0 226
0 226
0 52
0 52
0 43
0 37
0 30
0 30
0 29
0 29
0 29
0 29
0 29
0 74
0 75
0 77
0 77
0 77
0 77
0 77
0 77
0 77
0 77
0 77
0 77
0 77
0 77
0 77
0 78
0 78
0 74
0 74
0 74
0 74
0 74
0 74
0 73
0 70
0 68
0 68
0 68
0 68
0 95
0 95
0 95
0 95
0 95
0 95
0 95
0 94
0 97
0 91
0 98
0 98
0 95
0 98
0 99
0 99
0 99
0 100
0 101
0 110
0 110
0 111
0 113
0 132
0 134
0 140
0 244
0 247
0 247
2 738
2 779
3 801
3 907
4 1592
4 1649
5 1882
6 1944
7 2290
7 2974
7 3360
7 3503
9 4696
9 4812
9 4913
9 4911
9 5011
9 5036
9 5237
9 5236
10 5237
10 5237
10 5237
10 5243
10 5256
10 5257
10 5257
11 5341
11 5343
12 5345
12 5350
12 5353
12 5360
12 5364
12 5637
11 5676
11 5766
12 5899
12 5925
12 5939
12 6005
12 6004
12 5957
13 5927
13 5257
13 5258
14 5282
14 5280
14 4627
14 4626
14 4626
14 4627
14 4624
14 4622
14 4623
14 4624
14 5198
14 5234
15 5970
15 6047
15 6058
14 6029
14 6033
14 6030
14 6024
14 5943
14 5681
14 5442
14 5288
14 5252
14 5303
17 5303
17 5298
15 5187
15 5267
23 5328
24 5378
22 4858
22 4812
22 4579
22 4524
21 4396
26 4216
32 3988
33 3823
31 2738
31 2691
31 2683
31 2679
31 2680
31 2680
31 2680
31 2680
31 2681
33 2681
36 3243
37 3261
37 3279
37 3282
37 3277
35 3204
35 3202
35 3208
36 3205
36 3199
36 3201
36 3191
36 2903
36 2842
35 2718
35 2668
35 2667
35 2666
34 2618
34 2616
34 2619
34 2617
34 2614
34 2657
34 2656
34 2657
34 2662
34 2670
35 2672
36 2686
36 2717
36 2719
36 2717
36 2697
36 2134
34 2002
32 1212
32 1175
31 1166
31 1166
31 1164
31 1164
31 1164
31 1165
31 1165
31 1165
31 1165
31 1174
31 1122
30 1123
30 1121
30 1107
30 1010
22 935
21 825
21 826
21 828
21 1425
21 1428
21 1439
11 1438
9 1432
9 1428
9 1426
9 1426
9 1426
9 1427
9 1426
9 1427
9 1447
9 1450
7 1462
6 1461
2 894
2 885
1 867
1 864
1 888
1 894
1 891
1 885
0 885
0 882
0 883
0 883
0 891
0 892
0 893
0 895
0 894
0 899
0 992
0 992
0 1000
4 1182
5 1197
5 1160
8 1255
9 1289
9 1293
9 1302
9 1307
9 1298
9 1293
14 1344
14 1344
14 1344
14 1345
14 1346
14 1346
14 1346
14 1346
14 1356
14 1357
14 1357
14 1376
14 1378
14 1379
14 1381
14 1381
14 1372
14 1369
14 1371
14 1393
14 1389
14 1391
14 1465
14 1459
14 1460
14 1443
14 785
14 784
14 766
19 761
19 696
19 699
19 700
19 701
19 702
19 709
19 709
19 705
19 681
19 669
19 687
19 683
19 681
19 679
14 671
14 684
14 639
14 635
14 633
14 602
14 602
14 602
14 598
14 599
14 595
15 616
16 615
16 617
17 619
17 618
17 615
17 614
17 606
8 435
8 416
8 411
8 411
9 381
9 373
9 362
9 351
10 347
10 332
5 277
5 277
5 277
5 277
5 276
5 276
5 276
5 276
5 275
5 275
6 278
6 266
7 271
8 295
8 296
8 301
8 302
8 302
10 300
10 272
10 273
10 269
10 192
10 193
10 190
10 190
10 188
10 188
10 187
10 187
10 187
11 186
11 185
9 185
9 185
9 179
9 179
9 175
9 169
9 166
8 121
8 122
8 125
8 122
8 122
8 90
8 90
8 89
8 89
9 110
9 133
9 140
12 244
12 243
12 249
10 232
9 233
9 232
9 236
9 235
9 235
9 234
9 234
9 235
9 234
9 234
9 235
9 231
9 231
9 231
9 232
9 240
9 241
9 241
9 242
9 244
9 336
9 357
9 371
9 373
9 375
9 375
9 377
9 383
8 430
8 699
7 703
7 713
7 712
7 775
7 804
7 798
7 804
7 806
7 805
7 805
7 799
7 807
7 847
7 934
7 989
7 999
7 1011
7 1013
6 1014
6 1013
7 1013
7 1019
8 1020
8 1019
12 1052
13 1071
13 1069
13 1062
13 1025
12 954
12 890
11 887
11 888
10 890
10 890
10 904
10 906
10 888
10 875
10 791
10 791
10 790
10 789
10 789
10 778
10 772
10 774
10 776
10 780
10 796
10 803
10 817
10 821
10 862
10 931
10 945
10 953
10 952
10 937
10 940
10 934
10 934
10 935
10 931
10 915
10 904
10 897
10 894
10 893
10 886
10 876
9 806
7 583
7 527
7 523
7 523
7 523
7 523
7 527
7 529
7 537
7 539
7 539
7 539
7 530
7 481
7 390
7 337
7 336
7 328
7 326
7 326
7 327
6 326
6 325
5 323
5 321
0 293
0 269
0 257
0 247
0 256
0 256
0 255
0 256
0 256
0 256
0 256
0 240
0 238
0 238
0 237
0 234
0 235
0 235
0 235
0 236
0 236
0 236
0 233
0 231
0 227
0 213
0 205
0 188
0 185
0 140
0 69
1 65
1 59
1 59
1 60
1 56
1 55
1 56
1 55
1 55
1 56
4 72
5 73
5 73
6 79
7 79
7 79
7 79
7 83
7 89
7 94
7 95
8 115
8 127
8 130
21 321
21 341
21 349
21 354
21 356
25 409
27 423
38 428
60 691
64 695
69 713
70 722
70 722
73 728
76 738
94 893
110 1138
118 1209
128 1380
140 1670
144 1689
145 1706
147 1702
149 1734
149 1747
149 1751
149 1752
149 1751
149 1754
150 1755
150 1756
150 1759
150 1758
150 1758
150 1757
150 1755
150 1756
150 1756
150 1756
150 1754
150 1750
150 1750
150 1750
150 1746
150 1744
150 1744
150 1745
151 1746
151 1739
150 1741
150 1740
150 1740
150 1743
150 1743
150 1778
150 1775
150 1779
150 1787
150 1793
145 1772
145 1791
145 1793
144 1794
144 1794
143 1792
143 1792
143 1775
143 1761
143 1755
143 1751
142 1717
142 1701
142 1697
129 1510
129 1493
129 1475
129 1472
129 1469
109 1394
109 1399
84 1388
51 875
46 871
46 869
46 870
46 869
46 865
42 838
24 682
17 435
16 417
15 348
0 186
0 184
0 182
0 190
0 195
0 196
0 229
0 229
0 231
0 229
0 229
0 228
0 225
0 226
0 226
0 229
0 230
0 232
0 232
0 233
0 233
0 242
0 242
0 259
0 260
0 261
0 261
0 259
0 275
0 274
0 290
0 304
0 312
0 323
0 331
0 302
0 308
0 322
0 311
0 324
0 326
0 327
0 332
0 340
0 342
0 360
0 360
0 360
0 360
0 360
0 358
0 358
0 358
0 357
0 358
0 348
0 342
0 341
0 341
0 341
0 333
0 333
0 330
0 330
0 329
0 327
0 328
0 328
0 330
0 335
0 336
0 328
0 325
0 238
0 222
0 219
0 202
0 195
0 192
0 148
0 136
0 134
0 134
0 134
0 134
0 133
0 133
0 130
0 125
0 120
0 118
0 114
0 115
0 115
0 97
0 97
0 49
0 39
0 39
0 9
0 9
0 9
0 9
0 10
0 10
0 10
0 9
0 9
0 9
0 8
0 8
0 5
28 4
28 3
28 3
28 3
30 3
30 3
30 3
30 3
30 2
30 2
32 2
32 2
32 2
32 2
32 2
5 2
4 2
4 2
4 2
3 2
2 2
2 2
3 2
3 2
3 2
1 2
1 2
1 2
1 2
1 2
1 1
1 1
1 1
1 1
1 1
1 1
1 1
0 1
0 1
0 1
0 1
0 1
0 1
0 1
0 2
0 3
0 3
0 4
0 4
0 5
0 5
0 6
0 6
0 5
7 8
7 8
7 10
7 10
7 10
7 10
7 10
7 10
7 10
7 10
7 10
7 10
7 10
7 10
7 10
0 7
0 7
0 7
0 7
0 7
0 7
0 7
0 7
0 7
0 7
0 7
0 7
0 7
0 7
0 7
0 7
0 7
0 7
0 7
0 7
0 7
0 7
0 7
0 7
0 7
0 7
0 7
0 7
0 7
1 7
1 7
1 7
1 7
1 7
1 7
1 7
1 7
1 7
1 7
1 7
1 7
1 7
1 7
1 7
1 7
1 8
0 8
0 8
0 5
0 5
0 5
0 8
0 8
0 6
0 6
0 5
0 5
0 6
0 6
0 6
0 6
0 6
0 6
0 6
0 5
0 5
0 2
0 2
0 1
0 1
0 1
0 1
0 1
0 1
0 1
0 1
0 1
0 1
1 1
2 1
3 1
3 1
4 1
4 1
4 1
4 2
4 2
4 2
4 2
4 2
4 2
4 2
4 2
4 2
4 2
2 2
1 2
1 2
1 2
1 2
1 1
1 2
1 2
1 2
1 2
1 2
1 2
1 2
1 2
1 2
1 2
1 2
1 2
1 2
1 2
1 2
1 1
1 1
1 1
1 1
1 1
1 1
1 1
1 1
1 1
1 1
1 1
1 2
1 2
1 1
1 1
1 1
1 1
1 2
1 2
1 2
1 2
1 2
1 2
1 127
1 127
2 127
2 126
2 126
2 126
2 126
2 126
2 126
2 126
4 126
4 126
4 126
4 126
5 126
5 2
4 2
4 2
4 2
4 1
4 1
4 1
4 1
4 1
4 1
5 1
5 1
5 1
5 1
5 1
5 1
5 1
5 1
5 1
5 1
5 1
5 1
5 1
5 1
5 1
5 1
5 1
5 1
5 1
5 1
5 1
5 2
5 2
5 2
5 2
5 2
6 2
6 2
27 2
27 2
27 2
27 2
27 3
27 3
27 3
27 3
27 3
27 4
27 4
27 4
27 4
27 3
27 3
26 3
25 3
25 3
25 3
25 3
25 3
25 3
24 3
24 4
24 4
24 4
24 4
24 4
24 5
24 5
24 5
25 5
25 5
25 5
24 5
29 7
29 7
29 7
30 7
30 6
30 6
30 6
30 6
30 6
30 5
29 5
29 5
29 5
30 5
30 5
30 5
31 5
32 5
36 5
36 5
35 5
35 5
36 5
36 5
45 5
45 5
45 6
45 6
45 13
68 14
74 14
75 13
77 15
86 16
90 17
90 29
150 21432
150 21434
129 21433
129 21433
129 21433
129 21433
129 21433
129 21432
129 21432
129 21432
129 21432
129 21431
129 21431
129 21431
129 21433
110 21302
68 20
69 6
70 6
70 6
70 6
70 6
71 6
72 6
72 6
72 6
72 6
72 6
73 7
73 7
75 5
75 5
75 5
74 5
74 5
74 5
74 5
68 3
75 3
75 3
75 3
75 3
74 3
88 3
87 2
87 2
88 2
87 2
87 2
87 2
87 2
87 2
87 2
86 2
86 2
83 2
83 2
83 2
83 2
82 2
72 2
64 2
64 2
62 2
60 2
56 2
27 1
24 1
19 1
19 1
19 1
19 1
10 0
10 0
10 0
10 0
10 0
10 0
10 0
10 0
10 0
10 0
10 0
10 0
10 0
10 0
10 0
10 0
10 0
10 0
10 0
10 0
10 0
10 0
13 0
13 0
13 0
13 0
13 0
13 0
13 0
11 0
11 0
12 0
12 0
12 0
12 0
12 0
12 0
10 0
10 0
13 0
13 0
15 0
15 0
15 0
8 0
8 0
8 0
7 0
7 0
8 0
8 0
17 0
17 0
32 0
32 0
33 0
33 0
33 0
33 0
33 0
33 0
33 0
33 0
33 0
33 0
33 0
33 0
33 0
33 0
33 0
33 0
33 0
33 0
33 0
33 0
33 0
33 0
33 0
33 0
34 0
34 0
34 0
35 0
35 0
35 0
35 0
35 0
35 0
35 0
35 0
39 0
39 0
41 1
41 1
41 1
41 1
41 1
41 1
41 1
41 1
42 4
42 4
42 4
42 4
43 5
43 5
43 5
43 5
43 5
43 5
43 5
43 5
38 6
39 6
29 6
29 6
20 6
20 6
20 6
17 2
17 2
17 2
16 2
16 2
16 2
15 2
9 2
9 1
9 1
9 1
9 1
9 1
9 1
9 1
9 1
9 1
9 1
9 1
9 1
9 1
9 1
9 1
9 1
9 1
9 1
9 1
9 1
8 1
8 1
7 1
7 1
7 1
7 1
7 1
13 1
13 1
13 1
13 1
13 1
13 1
15 1
15 1
15 1
11 1
11 1
9 0
9 0
10 0
18 0
13 0
13 0
13 0
13 0
13 0
13 1
11 1
11 1
11 1
11 1
11 1
11 1
11 1
11 1
10 1
2 1
2 1
1 1
1 1
1 1
1 0
1 0
1 0
1 0
1 0
1 0
1 0
1 0
1 0
1 0
1 0
1 0
1 0
1 0
1 0
1 0
4 0
4 0
5 0
11 0
21 0
21 2
21 2
21 2
21 2
21 2
21 2
21 3
21 3
21 3
21 3
21 4
21 5
21 5
21 5
21 5
21 5
21 5
20 5
21 5
21 5
21 5
21 5
21 5
21 5
21 5
21 5
21 5
22 5
22 5
22 5
22 6
22 6
22 6
21 6
21 6
21 6
21 6
21 6
21 6
21 6
21 7
21 7
23 9
22 9
22 9
22 8
24 9
24 9
26 10
26 10
26 10
26 10
26 10
26 10
26 10
28 9
28 9
28 7
28 7
28 7
28 7
28 7
28 7
28 7
28 6
28 6
27 6
27 6
23 6
21 6
13 6
6 3
3 3
3 3
3 3
3 3
3 3
3 3
0 2
0 1
0 2
0 81
0 93
0 93
0 93
0 93
0 93
0 97
0 102
0 109
0 115
0 115
0 115
0 115
0 115
0 115
0 115
0 24
0 24
0 24
0 24
0 24
0 24
0 24
0 35
0 36
0 43
0 53
1 54
1 59
1 59
1 68
1 72
1 90
1 103
1 109
1 117
1 117
1 127
1 126
1 128
1 128
1 129
1 135
0 135
0 136
0 137
0 138
0 156
0 166
0 166
0 170
0 170
0 170
0 170
0 170
0 170
0 170
0 177
0 180
0 180
0 180
0 185
0 184
0 184
0 180
0 178
0 178
0 177
0 178
0 180
0 178
0 178
0 88
0 29
0 29
0 29
0 24
0 21
0 21
0 21
0 21
0 20
0 19
0 19
0 19
0 19
0 19
0 19
0 19
0 20
0 20
0 20
0 20
0 20
0 20
1 20
1 21
2 21
2 21
2 22
2 22
2 22
2 22
2 22
2 22
2 22
2 22
2 22
2 22
2 23
1 23
1 23
1 23
1 23
0 21
0 7
0 5
0 4
0 4
0 4
0 5
0 5
0 5
0 5
2 4
2 4
2 4
2 41
2 41
2 41
2 41
2 41
2 41
2 41
2 41
2 41
2 39
2 39
2 39
3 39
3 39
2 40
2 2
2 2
2 2
2 2
2 2
2 2
2 2
2 2
2 2
2 2
2 2
2 2
1 2
1 2
0 1
0 1
0 1
0 1
0 1
0 1
0 0
0 0
0 0
2 0
2 0
2 0
2 0
2 1
2 1
2 2
2 2
2 2
2 2
2 2
2 2
2 2
2 2
2 2
0 2
0 2
0 2
0 2
0 1
0 1
0 1
0 1
0 1
0 1
0 1
0 1
0 1
0 1
0 1
0 1
0 1
0 1
0 1
0 1
0 1
0 1
0 1
0 1
0 1
0 1
0 1
0 1
0 1
0 1
0 1
1 1
1 1
1 1
1 1
1 1
1 1
1 1
1 1
1 1
1 1
1 1
1 1
1 1
1 1
1 1
1 1
0 1
0 1
0 1
0 1
0 1
0 1
0 1
0 1
0 1
0 1
0 1
0 1
0 1
0 1
0 1
0 0
0 0
0 0
0 0
0 0
0 0
0 0
0 0
0 0
0 0
0 0
0 0
0 0
0 0
0 0
0 0
0 0
0 0
0 0
0 0
0 0
0 0
0 0
0 0
0 0
0 0
0 0
0 0
0 0
0 0
0 0
1 0
1 0
1 0
1 0
1 0
1 0
1 0
1 1
1 1
1 1
31 2
31 2
211 6
211 6
211 6
210 6
210 6
210 6
210 6
210 6
210 6
210 6
210 6
210 5
210 5
210 5
210 5
3 0
0 0
0 0
0 0
0 0
0 0
0 0
0 1
0 1
0 1
0 1
0 1
0 1
0 1
0 1
0 1
0 1
0 1
0 1
0 1
0 1
0 1
0 1
0 1
0 1
0 1
0 1
0 1
0 1
0 1
0 1
0 2
0 2
0 2
0 2
0 3
0 3
0 3
0 3
0 3
0 3
0 3
0 3
0 3
0 3
0 3
0 3
0 3
0 3
0 3
0 3
0 3
0 3
0 3
0 2
0 2
0 2
0 2
0 2
0 2
0 2
0 2
0 2
0 2
0 2
1 6
2 10
2 10
2 10
2 10
2 10
3 10
3 10
5 10
5 10
5 10
5 10
5 12
5 12
5 14
5 38
5 41
5 51
5 54
5 59
5 63
5 64
6 71
4 84
4 94
4 99
4 101
4 103
4 103
4 103
5 103
5 103
5 103
5 103
5 103
6 103
7 105
7 107
22 109
22 109
22 111
22 111
22 110
22 108
23 108
23 108
24 109
25 109
25 109
25 109
25 109
25 109
25 109
26 109
27 109
27 109
27 109
28 109
28 109
29 109
36 109
40 109
41 109
41 109
40 116
40 116
41 118
42 118
42 118
42 118
41 118
41 118
40 118
40 114
42 111
42 111
43 111
45 111
44 113
47 113
49 113
49 112
49 112
49 112
52 116
52 114
54 121
54 115
54 94
54 95
54 69
54 63
54 53
54 47
56 42
57 40
57 35
57 30
57 30
57 29
57 28
57 28
58 28
57 28
57 28
60 28
63 28
63 28
62 28
62 28
61 28
49 28
49 28
49 26
49 26
49 26
49 26
48 26
49 27
53 38
52 38
52 38
53 38
56 38
60 38
60 38
58 38
58 38
57 38
57 38
56 38
56 38
54 38
44 38
39 38
35 38
35 38
32 29
32 29
31 27
28 25
28 25
28 26
27 26
27 27
27 27
27 28
24 28
24 28
23 28
23 28
23 28
22 28
22 28
22 28
22 28
22 29
21 28
21 28
21 20
21 19
21 19
21 19
21 19
21 19
23 19
22 21
20 20
20 20
20 20
20 20
20 20
20 20
20 20
20 20
19 20
19 20
19 20
20 20
19 20
20 20
19 20
19 20
19 20
19 20
19 20
20 20
20 20
20 20
21 20
21 20
18 19
12 7
10 7
10 7
9 7
9 7
5 6
5 6
7 6
8 6
8 7
9 7
9 7
9 7
9 7
9 7
9 7
9 7
9 7
9 7
9 7
9 7
9 7
9 7
9 7
9 7
9 7
9 6
10 5
10 3
10 3
10 3
10 4
11 4
11 4
11 4
11 4
11 4
11 3
11 3
11 3
11 3
11 3
11 4
11 3
11 3
11 3
7 3
7 3
7 3
7 3
7 3
7 3
7 3
7 3
7 3
7 3
8 3
8 4
67 5
68 5
68 5
68 5
68 5
69 5
69 5
68 5
68 5
67 5
67 5
67 5
66 5
65 5
65 5
65 4
65 4
64 4
64 4
64 3
64 3
4 2
2 2
2 2
2 2
2 2
2 2
2 2
2 3
2 3
2 3
3 3
3 3
3 3
3 3
3 3
3 3
3 3
3 3
4 3
9 3
11 3
15 3
16 2
16 2
16 2
16 1
15 1
17 1
17 1
18 1
18 1
18 1
18 1
18 1
14 1
14 1
14 0
14 0
14 0
14 0
14 0
14 0
14 0
14 0
14 0
28 1
29 1
29 1
57 1
57 1
57 1
57 1
57 1
57 1
57 1
57 1
57 1
57 1
57 1
57 1
57 1
57 0
57 0
57 0
60 0
60 0
60 0
60 0
60 0
60 0
60 0
60 0
60 0
60 0
60 0
60 0
60 0
60 0
60 0
60 0
60 0
60 0
60 0
59 0
59 0
59 0
59 0
57 0
58 0
58 0
56 0
57 0
56 0
52 0
33 0
32 0
32 0
32 0
34 0
37 0
35 0
35 0
34 2
35 2
35 3
35 13
36 13
35 18
35 18
35 19
35 19
35 19
35 19
35 19
35 19
35 19
35 19
35 19
35 17
34 17
34 17
22 6
20 6
20 1
20 0
19 0
19 0
19 0
25 0
27 0
27 0
34 0
35 1
35 2
34 2
34 2
34 2
32 3
33 3
33 3
33 4
34 4
35 4
38 4
38 4
38 4
38 4
38 4
60 4
60 4
67 4
67 4
89 4
89 4
89 4
89 4
89 4
89 4
88 4
88 4
88 4
132 4
132 4
131 4
174 4
179 4
184 4
187 4
187 4
187 4
185 4
185 4
161 4
161 4
158 4
141 4
141 4
139 4
139 4
139 4
139 4
135 4
135 4
138 4
135 4
141 4
141 4
138 4
138 4
138 4
138 4
140 4
140 4
140 4
140 4
140 4
140 4
140 4
138 4
135 4
129 4
129 4
129 4
129 3
129 2
129 2
127 2
127 2
127 2
127 2
127 1
127 1
126 0
121 0
107 0
102 0
71 0
63 0
29 0
29 0
29 0
29 0
28 0
14 0
14 0
2 0
2 0
2 0
2 0
2 0
0 0
0 0
0 0
0 0
0 0
0 0
0 0
1 0
1 0
1 0
1 0
1 0
1 0
1 0
1 0
1 0
1 0
1 1
1 1
1 1
1 1
1 3
0 3
0 3
0 3
0 4
0 4
0 4
4 22
4 22
4 22
4 22
4 22
4 21
4 21
4 21
4 21
4 19
4 19
4 19
4 18
4 18
4 18
4 19
4 19
4 19
4 19
4 19
4 19
4 19
0 1
0 1
0 1
0 1
0 1
0 1
0 1
0 1
0 0
0 0
0 0
0 0
0 0
0 0
0 0
0 0
0 0
0 0
0 0
0 0
0 0
0 0
0 0
0 0
0 0
0 0
0 0
0 0
0 0
0 0
0 0
0 0
0 0
0 0
0 0
0 0
0 0
0 2
0 2
0 2
0 2
0 2
0 2
0 2
0 2
0 2
0 2
0 2
0 2
0 2
0 2
0 2
0 0
0 0
0 0
0 0
0 0
0 0
0 0
0 0
0 0
0 0
0 0
0 0
0 0
0 0
0 0
1 0
1 0
1 0
1 0
1 0
1 0
1 0
1 0
1 0
1 0
1 0
1 0
1 0
1 0
1 0
0 0
0 0
0 0
0 0
0 0
0 0
0 0
0 0
0 0
0 0
0 0
0 0
0 0
0 0
0 0
0 0
0 0
0 0
0 0
0 0
0 0
0 0
0 0
2 1
2 1
201 1
201 1
201 1
201 1
201 1
201 1
201 1
201 1
201 1
201 1
201 1
201 1
201 1
200 0
199 0
0 0
3 1
3 1
3 1
3 1
3 1
3 1
3 1
3 1
3 1
3 1
3 1
3 1
3 2
3 2
3 2
0 6
0 6
0 6
0 6
0 6
0 6
0 6
0 6
0 6
0 6
0 6
0 6
241 9
244 9
244 9
244 10
244 5
244 5
244 5
244 5
244 5
244 5
244 5
244 5
244 5
244 5
244 5
244 5
0 1
0 1
0 0
0 0
0 0
0 0
0 0
2 0
2 0
2 0
2 0
3 0
4 0
4 1
4 1
4 2
4 3
8 20
9 22
10 29
10 29
10 29
12 29
12 30
12 30
12 31
9 31
10 32
10 32
9 32
9 31
9 31
9 31
9 31
9 31
9 28
4 5
3 5
1 4
47 28
47 27
47 27
46 26
46 25
46 24
46 24
46 24
46 24
46 24
46 24
46 24
49 24
49 24
49 24
3 0
3 0
3 0
3 0
3 0
3 0
5 0
5 0
5 0
5 0
5 0
5 0
5 0
2 0
2 0
2 0
2 0
2 0
2 0
2 0
2 0
2 0
2 0
2 0
2 0
2 0
2 0
2 0
2 0
2 0
2 0
2 0
2 0
2 0
2 0
2 0
2 0
2 0
2 0
2 0
2 0
2 0
3 0
3 0
3 0
3 0
3 0
3 0
3 0
16 0
16 0
16 0
16 0
16 0
16 0
16 0
237 0
237 0
236 0
236 0
236 0
237 0
237 0
237 0
224 0
224 0
224 0
224 1
224 1
224 1
224 1
224 1
3 1
3 1
3 1
3 1
2 1
2 1
0 1
0 1
0 1
0 1
0 1
0 0
0 0
0 0
0 0
0 0
0 0
0 0
0 0
0 0
0 0
0 0
0 0
0 0
0 0
0 0
0 0
0 0
0 0
0 0
0 0
0 0
0 0
0 0
0 0
0 0
0 0
0 0
0 0
0 0
0 0
0 0
0 0
0 0
0 0
0 0
0 0
0 0
0 0
0 0
0 0
0 0
0 0
0 0
0 0
0 0
0 0
0 0
0 0
0 0
0 0
0 0
0 0
0 2
0 2
1 4
1 4
1 4
1 4
1 4
1 4
1 4
1 4
1 4
1 4
2 4
2 4
2 4
2 4
2 4
2 4
2 4
2 4
2 4
2 4
3 4
3 4
3 4
3 4
3 4
3 4
47 5
47 5
47 5
47 5
47 5
47 5
47 3
47 3
47 3
47 3
47 3
47 3
47 3
47 3
47 3
3 2
3 2
3 2
4 2
4 2
4 2
4 2
4 2
4 2
4 2
4 2
4 2
4 1
4 0
4 0
4 0
4 0
4 0
4 0
4 0
4 1
4 1
4 1
4 1
4 1
4 1
4 1
4 1
4 1
4 1
4 1
5 2
4 2
4 2
4 2
4 2
4 1
4 1
4 1
4 1
4 1
4 1
3 1
3 1
3 1
3 1
3 1
2 1
2 1
2 1
2 1
2 1
1 1
1 1
1 1
1 0
1 0
1 0
1 0
1 0
1 0
1 0
1 0
1 0
1 0
1 0
1 0
1 0
1 0
1 0
1 0
1 0
1 0
1 0
1 0
1 0
0 0
0 0
0 0
0 0
0 0
0 0
1 0
1 0
1 0
1 0
1 0
1 1
1 1
1 1
1 1
1 1
1 1
1 1
1 1
1 1
1 1
1 1
1 1
1 1
1 1
5 1
7 1
30 0
30 0
30 0
30 0
31 0
31 0
31 0
31 0
31 0
31 0
31 0
31 0
31 0
31 0
31 0
33 0
33 0
33 0
34 0
35 0
36 0
40 0
48 0
54 0
57 0
57 0
57 0
57 0
57 0
59 0
59 0
62 0
67 0
67 0
67 0
67 0
67 0
67 0
67 0
66 0
66 0
65 0
65 0
65 0
65 0
65 0
65 0
65 0
65 0
60 0
60 0
60 0
59 0
59 0
60 0
60 0
60 0
60 0
61 0
61 0
61 0
61 0
61 0
61 0
61 0
61 0
61 0
61 0
61 0
60 0
59 0
58 0
56 0
33 0
33 0
33 0
33 0
32 0
33 0
33 0
36 0
36 0
36 0
36 0
36 0
36 0
36 0
36 0
34 0
33 0
33 0
27 0
24 0
20 0
11 0
6 0
5 0
5 0
5 0
5 0
5 0
5 0
4 0
4 0
2 0
2 0
2 0
2 0
2 0
2 0
3 0
3 0
3 0
3 0
3 0
3 0
3 0
3 0
3 0
3 0
3 0
3 0
3 0
3 0
3 0
3 0
3 0
3 0
3 0
3 0
3 0
2 2
2 2
2 2
2 2
2 2
2 2
5 2
59 2
59 2
60 2
61 2
64 2
64 2
64 2
64 2
64 3
64 3
66 1
66 1
66 2
66 2
66 2
12 2
12 2
14 2
14 2
11 2
11 2
11 2
11 2
11 2
11 1
11 1
11 1
11 0
11 0
11 0
11 0
10 0
10 0
10 0
10 0
10 0
10 0
10 0
10 0
11 0
12 0
14 0
14 0
14 0
14 0
13 0
13 0
13 0
13 0
13 0
13 0
13 0
13 0
13 0
13 0
14 0
14 0
14 0
14 0
14 0
14 0
14 0
14 0
14 0
14 0
14 0
14 0
18 0
23 0
23 0
24 0
25 0
22 0
22 0
19 0
19 0
18 0
22 0
22 0
22 0
22 0
22 0
24 0
24 0
24 0
21 0
21 0
21 0
21 0
21 0
18 0
18 0
18 0
14 0
14 0
14 0
12 2
12 2
12 2
12 2
13 2
13 2
13 2
13 2
13 2
13 2
13 2
11 2
11 2
9 2
9 2
9 0
9 0
7 0
7 0
7 0
7 0
7 0
7 0
7 0
7 0
7 0
