# Supplementary material for: From Insect to Man: Photorhabdus Sheds Light on the Emergence of Human Pathogenicity
Source: PLoS One. 2015 Dec 17;10(12):e0144937. doi: 10.1371/journal.pone.0144937 (PMC4683029; doi:10.1371/journal.pone.0144937)
Supplement: S3 Data — (ZIP) [file pone.0144937.s003.zip › pPAU1_28C_Expo_rep3.plot]

61 0
61 0
62 0
62 0
64 0
65 0
66 0
66 0
116 2
116 2
116 2
117 2
117 2
119 2
119 2
120 17
120 17
120 17
120 17
120 17
120 17
120 17
120 18
73 16
76 16
96 16
130 16
158 16
158 16
158 17
159 17
158 2
159 2
160 2
163 2
163 2
167 2
167 1
168 1
169 1
167 1
168 1
168 1
168 1
169 1
168 0
170 0
170 0
172 0
173 0
172 0
172 0
171 0
174 0
176 0
177 0
177 0
177 0
178 0
179 0
181 0
179 0
190 0
194 0
193 0
184 0
182 0
183 0
183 0
183 0
181 0
179 0
174 0
174 0
174 0
171 2
172 3
174 3
176 3
173 3
170 3
171 3
168 3
169 3
170 3
170 3
170 3
171 3
168 3
170 3
174 3
177 2
182 3
189 6
204 6
208 6
212 6
213 6
214 6
214 6
215 6
217 6
218 6
221 6
222 6
223 6
223 6
223 6
226 6
227 6
227 6
228 6
228 6
225 6
225 6
223 6
223 12
224 12
224 12
224 12
225 12
219 13
264 13
264 13
252 13
235 13
214 13
197 13
197 13
197 13
196 13
197 7
200 7
202 7
202 7
201 7
199 7
199 7
199 7
208 7
209 7
209 8
209 9
211 9
211 8
218 8
217 8
223 8
223 8
222 8
222 8
222 8
222 8
219 8
216 8
218 8
216 8
218 8
215 6
233 6
231 6
227 6
216 6
211 6
212 6
211 6
208 6
205 6
205 6
205 6
208 6
209 6
208 6
211 6
211 6
210 6
210 6
208 6
205 6
205 6
205 6
202 5
202 5
201 5
200 5
200 4
198 4
196 4
196 4
195 4
192 4
190 4
184 4
179 2
171 2
169 2
166 2
165 2
160 2
160 2
160 2
157 2
162 2
165 2
171 2
173 2
172 2
171 2
168 2
169 3
170 3
171 3
181 3
184 3
184 3
183 3
183 3
183 3
178 3
180 3
202 66
205 65
162 65
162 65
162 65
159 65
156 65
155 65
156 65
156 65
157 65
156 65
151 65
158 65
223 66
242 4
248 4
244 4
259 3
269 3
268 3
268 3
268 3
263 3
265 4
259 4
258 4
254 4
254 4
254 4
252 4
252 4
252 4
252 4
252 4
252 4
251 4
250 4
253 4
235 4
236 4
236 4
237 4
238 5
240 5
240 5
242 5
244 5
246 5
253 5
252 5
251 5
248 5
246 5
246 5
245 5
245 5
245 5
245 5
245 5
245 5
251 5
251 5
252 5
252 5
251 5
252 5
250 5
250 5
250 5
250 6
249 6
250 6
251 6
250 6
251 6
254 6
255 6
255 6
254 8
253 8
254 8
253 8
249 67
243 67
245 67
244 67
244 67
245 67
244 67
243 67
242 67
231 67
231 67
231 67
234 68
234 68
233 69
233 77
233 79
221 19
219 19
220 19
222 19
224 19
227 19
228 19
233 19
232 19
231 19
227 19
221 19
211 19
201 9
130 8
121 8
112 8
110 8
112 8
109 8
112 8
111 8
110 8
110 8
110 7
115 7
116 7
115 7
116 7
116 8
116 8
117 8
117 8
118 8
118 8
118 8
118 8
118 8
116 9
115 9
114 9
117 9
116 9
114 8
112 9
112 9
111 10
106 10
102 10
99 10
99 10
99 11
99 11
99 11
108 11
107 11
107 11
131 11
134 11
135 11
137 11
185 12
188 14
196 14
196 14
197 16
200 16
213 17
215 17
217 17
219 16
221 16
222 16
220 16
220 16
219 16
216 17
215 16
214 16
216 15
216 15
215 15
209 15
210 15
209 15
209 15
209 15
209 16
208 16
210 16
209 16
210 16
210 16
210 16
210 18
207 17
206 17
206 17
203 17
201 15
199 15
199 15
195 15
194 15
192 15
189 15
187 15
181 15
180 15
178 15
179 15
178 15
178 15
177 15
177 15
178 15
184 15
179 15
171 17
174 18
173 18
184 19
186 19
183 19
344 20
345 20
344 20
344 20
343 20
343 20
342 20
342 20
344 20
343 19
344 19
345 19
346 19
359 20
363 20
198 19
197 20
194 20
194 19
194 19
194 20
197 20
197 20
197 20
197 20
196 19
196 19
194 20
194 20
193 20
187 20
187 20
223 30
197 30
194 30
171 30
172 29
137 28
137 27
128 29
127 29
126 27
123 27
107 26
107 26
105 26
104 26
104 26
67 16
67 16
66 16
66 16
66 15
66 15
66 15
66 15
66 15
66 15
64 15
63 15
64 15
63 15
75 19
77 21
77 21
75 21
75 22
75 21
75 22
75 22
76 22
76 24
76 25
76 25
76 25
90 26
91 26
91 26
93 28
102 29
102 29
102 29
101 29
101 29
101 29
101 30
120 30
119 30
120 30
123 30
130 30
133 30
130 29
131 29
131 29
130 28
128 27
117 27
116 27
114 27
114 27
115 27
117 27
117 27
117 27
122 27
123 27
126 27
131 27
131 28
128 28
126 28
126 27
119 26
130 29
130 29
131 29
132 29
132 28
137 29
138 29
137 28
142 28
142 28
142 28
144 29
149 30
149 30
153 30
153 29
152 29
152 29
152 29
152 29
152 29
153 29
152 29
151 29
152 29
152 26
153 27
153 27
152 27
152 27
153 28
157 29
159 29
159 29
162 29
165 30
165 30
165 31
167 31
167 31
169 30
169 30
169 30
169 30
169 30
172 30
171 30
193 32
183 26
182 24
184 24
185 25
186 26
188 26
187 25
186 25
187 23
187 23
187 22
187 22
187 22
172 21
174 20
175 20
175 20
167 19
166 19
167 19
169 19
173 19
194 20
221 19
200 20
204 20
277 24
312 24
307 24
303 24
301 24
300 24
299 24
298 24
298 24
298 24
298 24
298 24
298 24
296 24
296 24
296 24
297 24
292 24
288 24
296 24
291 23
292 23
293 23
291 23
295 23
295 23
282 20
282 19
287 19
290 19
295 19
289 18
295 18
294 18
290 18
290 18
290 18
290 17
284 16
284 16
280 16
284 16
286 17
291 17
296 19
296 20
300 23
301 23
302 23
324 23
328 23
328 23
330 22
331 22
331 22
331 22
330 21
326 20
324 20
324 19
320 21
322 21
322 21
321 20
320 21
319 22
322 22
320 22
338 22
340 23
342 26
340 26
344 27
328 25
329 25
326 25
327 25
326 23
326 22
323 22
325 22
325 22
332 24
332 24
332 24
332 24
332 24
330 24
329 24
327 24
327 24
326 24
325 24
325 24
324 24
309 23
290 22
262 20
225 20
217 20
161 17
157 17
157 17
157 17
157 17
157 17
172 18
172 20
172 20
172 20
172 20
173 20
176 20
177 20
177 20
177 20
176 20
178 20
178 20
168 20
168 20
166 20
165 20
170 20
163 20
164 20
165 20
163 20
161 20
159 20
159 20
161 20
157 20
159 20
159 20
160 20
167 20
169 20
169 20
168 20
167 20
159 20
156 18
152 17
148 16
147 16
151 12
158 12
159 11
138 11
142 11
145 11
141 11
147 11
152 11
161 11
169 11
169 11
169 11
172 11
175 455
174 454
184 454
189 452
190 452
190 450
184 450
191 450
174 449
176 449
174 449
178 450
170 450
171 450
179 451
185 6
200 6
205 6
212 7
212 7
210 7
210 6
205 6
208 6
210 6
212 6
212 6
212 6
212 6
212 6
214 6
217 6
218 6
218 6
218 6
218 6
216 6
216 7
216 7
214 7
214 7
214 7
214 7
214 7
214 7
214 7
200 4
199 4
199 4
200 5
199 5
203 5
205 5
208 5
212 6
214 6
225 6
242 6
269 6
279 6
298 6
314 6
314 6
313 6
314 6
315 6
317 6
317 6
314 6
312 6
310 6
306 6
306 6
304 6
304 6
303 6
297 6
299 6
320 10
323 10
324 10
326 10
329 10
330 10
328 10
323 10
318 10
312 10
311 10
311 10
310 10
309 10
312 11
332 13
327 13
319 13
311 13
312 13
312 13
308 13
308 13
306 13
296 13
289 13
288 13
292 13
292 13
285 13
288 13
285 13
289 13
287 11
290 11
289 11
278 11
264 11
251 11
248 11
245 10
245 10
245 10
242 10
241 10
238 10
237 10
235 10
235 10
235 10
235 10
234 10
233 10
230 10
229 10
230 10
237 15
237 15
237 18
237 17
237 17
237 17
237 17
237 17
237 17
237 17
238 17
238 17
238 17
237 17
233 17
229 16
233 12
224 10
220 13
219 13
217 12
209 12
200 12
185 12
157 12
152 12
139 12
128 12
128 12
128 12
127 12
115 12
114 12
114 12
114 12
115 12
116 12
116 12
113 12
113 12
111 12
105 12
104 12
100 12
87 8
86 8
83 8
82 8
79 8
80 8
80 8
79 8
79 8
79 8
78 8
78 8
78 8
72 7
68 6
47 5
47 5
46 5
45 5
45 5
45 5
45 5
47 5
47 5
46 5
47 5
47 5
42 5
42 5
40 5
35 5
34 5
32 5
32 5
30 5
30 5
30 5
30 5
29 5
28 5
28 5
28 5
28 5
28 5
28 5
28 5
28 5
28 5
28 5
28 5
28 6
28 6
28 6
28 6
28 6
28 6
28 6
28 6
28 6
28 6
28 6
28 6
28 6
28 6
28 6
28 5
29 5
36 5
36 5
35 5
36 5
32 3
46 1
40 1
38 1
38 1
38 1
38 1
38 1
33 1
33 1
33 1
33 1
33 1
33 1
33 1
33 1
33 1
33 1
35 1
35 1
35 1
35 1
35 1
35 1
35 1
35 1
35 1
36 1
36 1
36 1
36 1
37 1
37 1
38 9
39 9
39 9
39 9
39 9
39 9
39 9
39 9
39 9
39 9
42 10
42 10
42 10
42 10
43 10
44 2
44 2
44 2
42 2
42 2
43 2
42 2
42 2
42 2
42 2
42 2
42 2
43 2
44 2
44 2
44 2
44 2
44 2
46 2
46 2
46 2
46 2
46 2
46 4
46 4
46 4
46 4
46 4
46 4
46 9
46 9
46 11
46 11
46 11
46 11
46 11
46 11
46 11
46 11
47 11
49 9
49 9
50 9
51 9
54 9
55 4
57 4
54 2
48 1
48 1
48 1
47 1
49 1
40 1
43 1
44 1
43 1
43 1
43 1
43 1
43 1
43 1
44 1
44 1
44 1
45 1
45 1
45 2
45 2
45 2
43 2
43 2
43 2
43 2
43 2
43 2
43 2
43 2
42 2
42 2
42 2
44 2
44 1
43 1
41 1
41 1
40 1
41 1
41 1
41 1
41 2
41 2
41 2
41 2
41 2
38 2
40 3
42 3
42 3
58 4
59 4
63 4
63 5
62 5
62 5
61 5
63 5
63 5
63 5
63 6
62 5
62 5
61 5
60 5
60 5
60 5
60 5
59 5
58 5
58 5
58 5
58 5
56 5
56 5
56 5
56 4
56 4
57 4
57 4
57 4
58 4
59 4
59 4
59 5
59 5
59 5
59 5
59 5
59 5
58 5
57 6
547 16
548 16
548 16
545 16
546 16
560 16
561 16
560 15
560 15
560 15
559 15
553 16
549 16
548 16
547 16
57 5
57 5
57 5
57 5
57 5
57 5
56 5
56 5
56 5
57 5
56 6
56 6
56 6
56 6
58 6
60 6
60 6
60 6
62 6
62 6
62 6
62 6
62 6
65 8
65 8
62 8
62 8
62 8
62 8
62 8
62 8
62 8
62 8
62 8
62 7
62 7
63 7
65 7
65 7
64 7
60 6
59 6
53 6
41 4
41 4
40 4
40 4
40 4
40 4
40 4
40 4
40 4
40 4
40 4
40 4
40 4
40 4
41 4
41 4
41 5
41 5
41 5
41 5
41 5
117 13
117 13
117 13
117 13
117 13
117 13
117 13
118 13
121 13
125 13
126 12
127 12
127 12
128 12
129 12
130 12
52 4
52 4
52 4
52 4
49 4
43 4
42 4
42 4
42 4
41 4
30 4
30 4
30 4
30 4
29 4
29 4
29 4
29 4
29 4
29 4
29 4
29 4
29 4
29 4
30 5
30 5
30 4
34 4
34 4
33 3
34 3
35 3
35 3
35 3
33 3
31 3
31 3
31 3
30 3
30 3
30 3
30 3
30 3
28 1
28 1
28 1
28 1
28 1
28 1
28 1
28 1
28 1
28 1
67 2
67 2
66 2
63 2
63 2
64 2
63 2
66 2
66 2
66 2
66 2
66 2
66 2
66 2
66 2
27 1
27 1
27 1
27 1
27 1
27 1
27 1
27 1
27 1
26 1
39 2
45 2
45 2
45 2
46 2
46 2
46 2
46 2
46 2
46 2
46 2
46 2
46 2
47 7
44 7
40 7
39 7
38 7
37 7
37 7
36 7
38 7
44 9
48 12
48 12
48 12
48 12
48 12
48 13
79 16
78 11
78 11
77 11
77 11
77 11
76 11
75 11
76 11
72 9
71 9
67 7
66 7
66 7
66 7
66 6
66 6
65 5
65 5
34 2
29 2
31 151
31 152
30 152
30 152
30 152
30 152
32 199
32 199
32 199
32 199
31 199
31 199
31 199
32 199
31 199
31 199
31 199
29 49
28 49
28 49
28 49
30 49
29 2
29 2
31 2
35 2
35 2
35 2
35 2
34 2
34 2
34 2
31 2
31 3
31 3
31 4
31 4
31 4
31 4
31 4
31 4
31 4
31 4
31 4
32 5
32 5
32 5
31 4
31 3
31 3
14 3
13 3
13 3
13 3
13 3
22 3
23 3
23 3
23 3
23 3
23 3
25 3
25 3
25 3
25 3
25 3
25 2
25 2
25 2
25 2
25 2
16 2
15 2
15 2
15 2
17 2
16 2
19 2
19 2
19 2
24 2
26 2
28 2
29 2
29 2
30 2
29 2
29 2
29 2
29 2
29 2
29 2
29 2
27 2
24 1
24 1
24 1
24 1
24 1
23 2
23 2
23 2
23 2
23 2
23 2
23 2
23 2
24 2
25 2
25 2
25 2
25 2
25 2
24 2
24 3
24 3
24 3
25 3
25 3
27 3
27 3
25 3
23 3
23 3
22 3
49 7
51 7
51 7
52 7
52 7
52 6
52 6
52 6
52 6
51 6
50 6
51 6
51 6
51 6
52 6
21 2
21 2
23 2
22 2
22 2
22 2
22 2
22 2
22 2
22 2
22 2
22 2
22 2
22 2
21 2
21 2
21 2
22 2
22 2
22 2
22 1
22 1
22 1
22 1
22 1
22 1
22 1
22 1
22 1
22 1
22 1
22 1
21 1
21 1
21 1
21 1
21 1
20 1
20 1
20 1
15 1
12 1
11 1
11 1
10 1
10 1
10 1
12 1
12 1
12 1
12 1
12 1
12 1
13 2
13 2
13 2
13 2
13 2
13 2
13 1
13 1
13 1
13 1
13 1
13 1
13 1
13 1
13 1
12 0
12 0
12 0
12 0
12 0
12 0
12 0
12 0
12 0
11 0
11 0
11 0
11 0
11 0
11 0
11 0
11 0
8 0
8 0
7 0
7 0
7 0
7 0
7 0
7 0
7 0
4 0
4 0
4 0
4 1
4 1
4 1
4 1
4 1
3 1
3 3
3 3
3 3
3 3
4 3
4 3
4 3
4 3
4 3
4 3
4 2
5 2
5 2
5 2
5 2
5 0
5 0
5 0
5 0
5 0
4 2
4 2
4 2
4 2
5 2
5 2
5 2
5 2
5 2
5 2
5 2
5 2
5 2
5 2
5 2
5 2
5 2
5 2
5 1
5 0
5 0
4 0
4 0
3 0
2 0
2 0
2 0
2 0
2 0
2 1
2 1
2 2
2 2
2 3
2 4
4 5
4 21
4 23
4 28
4 57
4 70
4 78
4 78
4 79
4 79
4 79
4 79
4 79
4 79
4 80
4 80
4 80
4 80
4 80
4 80
4 80
4 80
3 80
3 82
3 82
3 82
3 82
3 82
3 82
3 83
3 83
3 83
3 84
3 87
3 86
3 97
3 97
3 97
3 97
3 97
3 97
3 99
3 99
3 99
3 99
3 99
3 99
3 104
3 101
3 101
3 104
3 110
3 111
3 113
3 113
3 114
2 113
2 122
2 126
3 134
3 143
3 184
3 185
3 191
3 197
3 197
3 204
3 213
3 212
4 215
4 215
4 215
4 215
4 215
4 215
4 213
4 214
4 214
4 214
4 214
4 215
4 215
4 217
4 217
3 242
3 242
3 243
3 244
3 288
3 289
3 290
3 307
5 404
5 413
5 428
5 426
6 430
6 431
6 437
6 435
4 433
4 410
4 407
4 404
4 376
4 376
4 373
4 372
4 372
4 372
4 372
4 372
4 372
4 372
4 398
4 399
4 400
4 400
4 401
5 402
5 405
5 416
6 465
7 468
7 483
8 495
10 574
11 575
12 585
12 592
12 564
12 565
12 566
12 569
12 579
12 568
12 568
12 568
11 568
11 568
11 573
11 580
11 583
11 594
11 594
11 595
12 595
12 599
12 599
12 599
12 599
15 610
16 621
16 624
16 629
16 629
16 626
16 622
16 618
15 624
15 614
15 574
15 574
15 573
15 567
19 618
19 608
19 611
19 612
19 610
19 611
19 616
22 634
22 646
23 652
23 653
28 669
29 669
30 669
30 666
30 671
30 669
30 670
31 670
32 601
33 601
33 600
33 600
33 594
33 593
33 543
33 537
31 472
31 471
31 462
31 464
31 465
31 466
30 466
32 466
31 466
31 465
31 465
31 464
31 465
31 464
31 464
31 464
30 464
30 464
30 464
30 464
30 464
30 464
28 464
28 464
28 463
28 461
29 461
29 461
29 459
28 444
28 386
27 377
27 366
25 359
23 274
23 273
23 267
23 265
23 264
24 263
26 263
126 260
126 250
126 247
129 247
130 247
131 247
131 245
131 245
131 242
131 238
131 227
131 223
131 223
130 223
130 219
32 219
31 218
30 210
28 196
27 189
27 185
27 181
27 181
27 181
27 175
27 174
27 161
27 155
27 151
27 147
27 145
25 142
22 84
22 84
21 77
21 73
21 72
21 66
20 58
19 49
17 48
16 47
16 47
13 29
13 29
12 28
12 28
12 21
12 21
12 19
12 19
11 17
19 17
19 15
19 14
19 16
330 21
330 21
330 21
330 21
330 20
330 18
330 16
330 15
330 14
330 14
330 14
322 14
322 14
322 13
322 13
11 7
11 7
11 7
11 7
11 7
11 7
11 7
11 8
11 8
12 7
12 7
12 7
12 6
11 6
10 5
10 5
10 5
10 5
10 5
10 5
10 5
10 5
10 4
10 4
9 4
9 3
2 0
2 0
0 0
0 0
0 0
0 0
0 0
0 0
0 0
0 0
0 0
0 0
0 0
0 0
0 0
0 0
0 0
0 0
0 0
0 0
0 0
0 0
0 0
0 0
0 0
0 0
0 0
0 0
0 0
0 0
0 0
0 0
0 0
0 1
0 1
0 1
0 1
0 1
0 1
0 1
0 1
0 1
0 3
0 3
0 3
0 3
1 3
1 4
1 3
1 3
1 3
1 3
1 3
1 3
1 3
1 3
1 3
1 3
1 1
1 1
1 1
1 0
0 0
0 0
0 0
0 0
0 0
0 0
0 0
0 1
0 1
0 3
0 3
0 3
0 3
0 3
0 3
0 3
0 3
0 3
0 3
0 3
0 3
0 3
0 3
0 3
0 1
0 1
0 0
0 0
0 0
0 0
0 0
0 0
0 0
0 0
0 0
1 0
1 0
1 0
1 0
1 0
1 0
1 0
1 0
1 1
1 1
1 1
1 1
1 3
1 3
1 3
0 3
0 3
0 3
0 4
0 4
0 4
0 4
0 4
0 4
0 4
0 4
1 4
1 1
1 1
1 1
1 1
1 1
1 1
1 1
1 1
1 1
2 2
2 2
2 1
2 1
2 1
2 1
2 1
1 1
2 1
3 1
4 1
4 1
4 1
4 1
4 1
3 0
4 0
5 1
7 1
7 1
7 2
7 2
7 2
10 4
10 5
10 5
9 5
11 5
11 5
11 5
11 5
10 5
10 5
10 4
8 4
9 4
9 4
9 3
9 3
6 1
6 0
7 0
7 0
6 0
6 0
6 0
6 1
11 1
15 1
16 1
38 31
38 31
41 31
43 31
43 31
44 31
51 31
55 31
56 31
56 31
56 31
57 31
58 32
62 32
78 32
85 3
85 3
90 3
94 3
94 3
98 4
98 4
110 4
110 4
111 4
111 4
111 4
111 4
112 4
111 4
111 4
111 4
111 4
111 4
111 4
111 4
115 4
108 3
108 3
110 3
110 3
134 3
134 3
134 3
138 3
138 3
144 3
150 3
175 6
180 8
182 8
183 10
183 10
183 10
183 10
183 10
183 11
182 12
181 12
181 12
185 12
188 12
200 13
203 13
203 13
204 13
207 13
208 13
209 13
210 13
213 13
213 13
213 13
218 13
222 13
226 11
226 11
226 11
226 11
226 11
226 11
226 11
226 11
226 11
226 11
226 11
227 11
227 11
227 11
229 10
231 10
243 10
243 10
244 10
247 10
248 10
251 10
247 10
247 10
258 10
233 9
253 9
290 9
293 10
294 10
292 10
266 10
267 10
267 10
265 10
263 10
261 11
260 11
260 11
259 10
259 10
301 13
300 13
298 13
298 13
298 13
298 14
298 14
299 14
299 14
299 14
306 14
306 14
307 13
307 13
307 13
312 12
271 10
271 10
271 10
271 10
267 10
263 10
262 10
262 10
268 10
251 10
252 8
253 8
255 8
257 8
253 7
247 7
240 33
235 32
236 32
236 31
239 31
240 31
240 31
240 31
251 32
276 33
280 33
282 33
277 33
273 33
263 32
247 5
250 5
251 5
254 7
254 7
256 8
266 8
267 8
275 8
283 9
292 11
295 11
302 11
327 11
337 13
338 14
340 15
344 15
346 17
353 21
353 21
358 21
358 21
359 21
374 21
445 21
451 21
463 21
492 21
545 21
552 21
550 21
546 21
549 21
552 21
549 21
530 21
532 20
526 20
490 20
484 19
483 19
481 19
480 19
476 19
476 19
476 19
476 19
476 19
475 19
475 19
474 19
474 19
475 19
474 19
476 19
476 19
475 19
482 18
486 18
489 18
494 18
526 20
560 20
576 20
587 20
587 20
587 20
581 20
581 20
587 20
595 20
603 20
615 20
627 20
632 20
641 20
639 20
635 20
661 22
661 22
656 23
654 23
653 24
653 24
684 24
685 23
686 23
686 23
691 25
694 25
696 25
699 25
689 23
665 23
661 23
660 22
660 22
659 22
656 21
655 21
656 21
661 21
655 21
658 20
659 19
652 19
637 19
634 17
629 17
614 9
608 9
583 8
557 7
550 5
549 5
550 5
548 6
548 7
547 7
546 7
545 8
528 8
499 8
481 8
420 8
417 8
411 8
385 8
340 11
337 11
336 11
332 11
331 11
330 11
327 11
327 11
323 11
323 11
322 11
321 12
320 12
320 12
319 12
320 10
319 10
319 10
319 10
319 10
316 10
320 10
321 10
321 10
320 10
320 10
315 10
314 10
310 10
299 10
292 10
286 10
246 10
211 8
182 8
174 8
166 8
166 8
166 8
166 8
166 8
164 8
160 8
153 8
137 8
131 8
131 8
131 8
130 8
123 6
102 6
100 6
99 6
90 6
91 6
97 6
88 6
87 6
90 6
98 5
91 4
89 4
94 5
88 5
88 5
89 5
90 5
90 5
90 5
91 5
89 5
86 6
83 6
83 6
82 5
73 5
72 5
69 5
69 4
69 4
70 4
70 4
70 4
70 4
70 4
70 5
70 4
69 4
68 4
63 4
67 5
64 5
64 5
64 5
64 5
64 5
66 27
66 27
66 29
66 29
66 34
66 35
65 36
65 36
69 36
64 36
65 36
66 36
66 36
66 37
66 37
64 15
64 15
64 15
63 17
63 18
64 18
64 19
64 21
64 22
64 22
60 22
60 22
60 22
60 22
59 22
59 22
59 22
59 22
59 22
59 22
59 23
59 25
55 24
56 24
56 25
56 25
56 24
56 24
56 25
56 25
55 25
55 25
56 25
54 25
53 25
53 25
53 25
53 22
52 22
52 22
51 22
49 21
46 21
46 21
38 21
33 20
33 20
23 20
15 20
12 20
12 19
9 19
9 19
9 19
9 19
9 18
9 18
9 18
8 18
8 17
18 20
18 23
18 23
18 26
18 26
18 26
18 27
18 36
18 43
17 42
17 45
17 45
17 45
17 46
17 46
17 46
7 40
7 40
7 39
7 39
7 39
7 39
7 30
7 30
7 30
7 30
7 30
7 28
7 28
7 22
7 20
7 21
7 22
6 23
6 23
5 23
4 24
4 24
4 22
4 22
4 22
4 25
4 25
4 26
4 26
3 26
3 26
8 530
8 529
8 529
8 530
8 531
8 531
8 531
8 531
8 531
8 528
8 529
8 527
8 527
8 527
7 527
2 22
3 22
3 22
3 22
3 22
35 24
35 24
35 24
35 24
35 24
33 24
33 24
33 25
33 25
33 25
33 26
33 26
32 26
32 26
32 26
0 24
0 24
0 24
0 24
0 23
0 23
0 23
0 24
0 24
0 24
0 25
0 25
0 25
0 25
0 25
0 25
0 26
0 28
0 40
1 73
1 80
1 94
1 102
1 108
1 111
1 126
1 118
1 117
1 117
1 118
1 120
2 121
2 123
2 124
2 127
2 128
2 130
2 132
2 132
2 132
2 132
3 157
3 157
3 157
3 158
3 158
3 162
3 164
3 166
3 166
3 165
3 164
3 163
3 164
3 163
3 164
3 165
3 166
3 166
3 166
3 167
3 167
3 167
3 172
3 176
3 178
3 178
3 179
3 178
3 178
3 179
3 178
3 177
3 177
3 177
3 177
3 177
3 177
3 177
3 182
3 182
3 182
3 182
3 182
3 182
3 182
3 182
3 180
3 180
3 180
3 180
3 179
3 179
3 179
3 179
3 178
3 173
3 173
3 173
3 173
3 173
3 173
3 173
3 174
3 174
3 174
3 175
3 174
3 176
3 180
3 180
3 182
4 182
4 183
5 184
6 207
6 207
6 203
6 170
5 122
5 116
5 115
5 109
5 109
5 108
5 109
5 109
5 109
5 113
5 112
4 108
4 106
4 105
4 104
4 102
4 102
4 103
4 101
4 101
3 101
3 101
3 73
3 73
3 71
3 72
3 70
3 71
3 70
3 70
3 69
3 69
3 69
3 69
3 67
3 67
3 66
3 64
3 63
3 63
5 63
5 62
5 64
5 64
6 58
6 57
7 58
7 61
7 61
16 61
16 63
25 65
25 65
25 65
25 65
24 66
24 66
23 66
23 67
23 67
25 71
25 71
25 71
25 72
25 72
24 72
23 72
8 69
6 69
6 69
6 69
6 69
6 70
6 70
6 70
4 67
4 67
5 67
6 67
6 67
6 67
6 67
6 67
6 66
6 66
5 68
4 67
4 65
4 65
4 64
4 59
4 59
4 58
4 58
4 57
4 56
3 30
3 30
3 29
3 27
3 28
3 28
3 28
3 28
3 28
3 28
3 28
3 28
3 27
3 25
3 25
3 25
3 25
3 25
3 25
3 25
3 25
4 24
4 24
4 25
4 27
4 27
4 27
4 27
4 27
4 26
4 25
4 24
4 23
4 23
4 23
4 23
5 23
5 23
5 23
5 22
5 22
5 22
5 22
5 22
5 22
5 22
5 19
5 19
4 19
4 19
4 15
4 13
3 12
3 12
3 11
3 11
3 12
3 20
4 37
4 37
4 38
4 38
4 37
4 37
4 37
4 37
4 36
4 36
4 38
4 40
4 40
4 40
4 41
3 23
3 23
3 26
2 28
2 28
2 28
2 28
2 28
1 28
1 36
1 57
1 76
1 85
1 93
1 98
1 104
1 112
1 112
1 113
1 112
1 115
1 115
1 118
1 119
1 120
1 121
1 123
1 124
1 124
1 124
1 123
1 123
1 123
1 123
1 123
1 123
1 123
3 123
3 123
3 123
3 123
3 123
3 123
3 123
3 123
3 124
3 124
3 125
2 125
2 125
2 124
2 123
3 123
1 123
1 124
1 129
1 134
1 142
2 146
2 158
2 159
2 160
2 162
2 162
2 162
2 162
2 162
2 163
2 164
2 164
2 164
2 164
2 164
2 164
2 164
2 166
2 167
2 166
2 167
2 169
2 170
2 171
2 175
2 175
2 168
2 170
2 170
2 170
2 170
2 171
2 172
2 173
2 176
2 186
2 189
2 187
2 185
2 184
2 184
2 184
2 183
2 183
2 180
2 177
2 181
2 180
2 183
2 184
2 181
2 173
2 166
2 137
2 128
2 124
2 124
2 123
2 123
2 123
2 125
2 126
2 145
2 147
2 144
2 148
2 147
2 148
2 146
2 146
2 146
2 146
2 146
2 146
2 146
2 147
2 147
2 149
2 149
2 149
2 149
2 149
2 148
2 148
2 148
2 148
2 148
2 147
0 147
0 146
0 146
0 146
0 146
0 146
0 146
0 144
0 143
0 138
0 132
0 121
0 120
0 110
0 110
0 106
0 105
0 105
0 106
0 106
0 110
0 109
0 108
0 108
0 108
0 108
0 109
0 110
0 113
0 113
0 112
0 112
0 112
0 109
0 109
0 108
0 107
0 106
0 105
0 103
0 103
0 103
0 103
0 101
0 100
0 99
0 96
6 87
6 85
6 84
6 84
6 84
6 86
6 86
6 86
6 87
6 86
6 85
6 81
6 80
6 78
6 78
6 78
0 78
1 61
1 61
1 60
1 60
1 60
1 55
1 54
1 52
1 51
1 51
1 30
1 28
1 27
1 21
1 21
1 21
1 22
1 22
1 22
1 22
1 22
1 21
1 25
1 25
1 28
1 28
1 28
2 30
2 30
2 30
2 31
2 32
2 32
2 32
2 32
2 32
2 33
2 33
2 33
2 33
2 32
2 32
2 32
2 32
2 31
2 31
2 31
2 31
2 31
2 31
4 31
4 31
4 31
4 32
4 31
4 32
4 29
4 33
4 33
4 33
4 33
4 34
4 33
4 30
4 30
4 33
2 33
3 56
3 55
3 55
3 55
5 54
5 53
5 53
5 53
5 53
5 52
5 54
5 59
5 58
5 56
5 58
4 38
4 38
4 38
6 38
4 38
10 38
10 36
10 35
10 35
10 36
10 36
10 37
10 37
10 37
10 42
10 42
11 43
11 43
10 41
8 41
2 42
2 42
2 42
2 42
2 42
2 42
2 42
2 42
2 42
2 42
2 42
2 42
2 41
3 41
3 41
3 41
3 41
3 42
3 42
3 42
3 36
3 36
3 36
3 43
3 42
2 43
2 43
2 43
2 43
2 43
2 43
2 43
2 43
2 43
2 42
2 42
2 42
2 42
2 42
2 42
2 42
2 42
2 42
2 42
2 42
2 42
3 42
3 42
3 42
3 42
3 42
3 41
3 41
3 39
3 37
3 36
3 36
3 36
3 37
3 37
3 37
3 37
3 37
3 36
4 37
4 41
4 41
4 41
4 40
4 40
4 40
4 40
4 41
4 41
4 41
4 39
4 33
4 32
4 32
5 33
5 32
5 32
5 32
5 32
5 32
5 32
5 32
5 32
5 31
5 31
5 31
5 30
5 30
6 29
5 24
5 24
4 23
4 24
4 24
4 24
4 23
4 23
4 23
4 23
4 22
4 22
4 22
4 22
4 24
4 24
4 24
4 24
4 24
4 24
4 24
4 25
4 29
4 32
4 36
6 36
6 37
6 38
6 38
6 30
6 30
6 27
6 27
6 27
6 27
6 27
6 27
6 27
7 27
7 27
7 27
7 27
7 27
7 31
7 31
7 31
7 31
7 31
7 31
7 34
7 34
7 34
6 34
6 35
6 35
5 36
5 36
5 36
5 32
5 31
5 31
5 31
5 31
6 31
6 28
6 28
6 28
5 28
5 26
5 25
5 24
5 20
5 20
5 20
5 19
5 19
5 19
5 19
5 19
5 19
5 19
5 19
4 19
3 20
3 20
3 20
3 20
3 20
3 20
4 20
4 20
5 20
5 20
7 20
7 20
7 20
7 20
7 20
7 19
7 18
7 18
7 18
7 18
8 18
7 18
7 30
6 30
6 33
4 35
4 35
4 36
4 35
4 36
4 35
4 35
4 35
4 33
4 33
2 32
2 31
1 31
1 31
1 24
1 22
1 22
1 22
1 22
1 21
1 21
1 21
1 21
1 21
1 21
1 21
1 21
1 21
1 21
2 21
2 21
2 21
2 21
2 21
2 21
2 24
2 24
2 24
2 24
2 24
2 26
2 26
2 27
2 27
2 28
1 28
1 28
1 28
1 28
1 28
1 26
1 26
1 26
1 26
1 26
1 27
1 28
1 29
1 30
1 31
1 33
1 33
1 33
1 33
1 33
1 33
1 33
1 33
1 33
1 33
1 33
6 33
6 33
6 34
6 34
6 34
6 34
6 34
6 35
6 36
6 36
6 36
6 37
6 38
6 39
6 39
2 39
1 39
1 39
1 40
1 40
1 40
1 40
1 40
1 40
0 40
0 39
0 24
0 22
0 23
0 23
0 23
0 21
0 19
0 18
0 18
0 19
0 20
0 21
0 23
336 31
337 32
337 32
337 32
337 46
337 47
338 47
338 47
338 50
338 50
338 51
338 52
338 52
338 52
338 52
338 53
335 53
334 53
1 46
1 46
1 46
1 32
1 32
1 32
1 32
1 32
1 32
1 32
1 32
1 32
1 30
1 29
1 29
1 29
1 28
1 28
1 28
1 28
1 28
1 29
1 28
1 28
1 28
1 28
2 29
2 28
2 27
2 25
2 25
2 24
2 22
2 23
2 23
2 23
2 23
2 25
2 25
2 25
2 25
2 25
1 25
1 24
1 24
1 24
1 24
1 24
1 24
1 24
1 23
1 21
1 20
2 20
2 20
2 19
2 19
2 19
2 19
2 19
2 19
2 19
2 19
2 18
2 17
2 17
2 17
2 17
1 17
1 17
1 17
1 16
1 16
1 16
1 16
1 16
1 16
1 16
1 12
1 12
1 11
1 8
1 7
1 6
1 6
1 6
1 6
1 5
0 5
0 5
0 2
0 2
0 1
0 1
0 1
0 1
0 1
0 1
0 1
0 1
0 1
0 1
0 1
0 1
0 1
0 1
0 1
0 1
0 1
0 1
0 1
0 1
0 1
0 1
0 1
0 1
0 1
0 1
0 1
0 1
0 1
0 1
0 1
0 1
0 1
0 1
0 1
0 1
0 1
0 1
0 1
0 1
0 1
0 1
0 1
0 1
0 1
0 0
0 0
0 0
0 0
0 0
0 0
0 0
0 0
0 0
0 0
0 0
0 0
0 0
0 0
0 0
0 0
0 2
0 2
0 2
0 2
0 2
0 2
0 3
0 3
0 4
1 4
1 4
1 4
1 4
1 4
1 4
1 4
1 4
1 4
1 4
1 4
1 4
1 6
1 6
1 5
1 5
1 5
1 5
1 5
1 6
1 7
1 8
1 8
1 8
1 8
1 10
1 10
1 10
1 13
1 13
1 13
1 13
1 13
1 13
1 13
2 13
2 13
2 13
2 13
3 13
3 13
4 13
4 13
7 14
7 14
8 14
9 14
10 14
10 14
10 14
10 14
10 14
9 14
9 14
9 14
9 14
8 14
8 14
6 14
5 13
4 13
4 13
3 13
2 13
2 13
2 13
2 13
2 13
2 13
2 14
2 14
2 14
2 14
2 14
2 14
2 14
2 14
2 14
2 14
2 14
2 14
2 14
2 14
2 14
2 14
2 14
2 14
2 14
2 14
2 14
2 14
2 12
2 12
2 12
2 12
2 12
2 12
2 12
2 12
2 12
1 12
1 12
1 12
1 12
1 12
1 12
1 13
1 14
1 16
1 16
1 16
10 374
10 371
10 371
10 371
10 371
10 371
10 371
10 370
10 370
10 369
10 368
10 368
10 368
10 368
10 366
1 9
1 8
1 5
7 5
7 5
7 5
7 5
7 5
7 5
7 5
7 5
7 6
7 6
7 7
7 7
7 7
7 7
7 7
2 7
2 9
2 11
2 11
2 14
2 14
2 14
2 14
2 14
2 14
2 13
2 13
2 13
2 13
2 13
2 13
2 12
2 12
2 12
3 12
3 12
16 12
16 12
16 12
16 12
16 11
16 11
16 11
16 11
16 11
16 11
16 11
16 11
16 11
16 12
16 12
3 12
3 12
3 13
3 13
3 13
3 13
3 13
3 13
3 13
3 13
3 13
3 13
3 13
3 13
3 14
3 14
3 15
3 16
3 16
3 20
3 20
3 20
3 21
3 21
3 21
3 21
3 20
3 18
3 18
3 17
3 17
3 17
3 17
3 15
3 15
3 15
4 15
373 25
373 25
375 25
375 25
375 25
375 27
375 28
376 28
377 28
377 29
377 30
376 30
376 30
376 30
376 31
6 21
5 21
3 20
3 20
3 20
3 20
3 20
3 20
3 20
3 20
3 20
3 20
3 19
3 16
3 15
3 15
3 14
6 14
6 14
6 14
7 20
7 20
8 20
12 20
12 20
12 20
12 20
12 20
12 20
16 20
16 20
15 20
12 20
12 20
12 20
12 20
11 14
12 14
8 14
8 14
8 14
110 20
110 20
110 20
106 20
106 20
106 19
106 22
106 21
106 21
107 21
108 21
108 21
107 21
107 21
107 21
106 21
5 16
5 16
5 16
5 16
5 16
5 15
5 15
5 15
5 14
5 13
5 10
5 10
5 10
5 10
9 10
9 10
9 10
9 10
9 10
9 10
9 10
9 10
9 11
9 11
9 11
9 11
10 11
10 11
10 11
10 11
10 14
11 14
9 14
6 12
6 11
6 11
6 10
6 9
10 30
10 30
10 30
11 30
11 29
11 29
11 29
11 29
11 29
11 29
10 29
9 29
9 29
9 29
9 29
5 29
5 7
5 7
5 7
5 7
5 7
5 7
6 7
6 7
6 7
6 7
15 9
14 9
15 9
15 9
15 9
15 9
15 9
15 9
15 9
15 9
15 9
14 10
14 10
14 12
14 12
14 12
5 11
4 11
4 11
4 11
4 11
4 11
4 11
4 11
4 11
4 11
3 8
3 8
2 8
2 8
2 8
2 8
2 8
2 8
2 8
2 8
2 7
2 7
2 7
2 7
2 7
2 7
2 7
2 7
2 7
2 7
2 7
2 7
2 7
2 7
2 7
2 8
2 8
2 8
2 8
2 8
2 8
2 8
2 8
2 8
2 8
2 8
1 8
6 8
8 8
8 11
8 9
99 9
99 9
99 9
99 9
99 9
99 9
99 9
99 9
99 9
99 9
98 9
98 9
92 9
92 9
91 5
91 5
89 5
0 5
0 5
0 5
0 5
0 5
0 5
0 5
0 5
0 5
0 5
0 5
0 5
0 5
0 5
0 6
0 6
0 4
0 4
0 3
0 3
1 3
1 3
1 3
1 3
1 3
1 3
1 3
1 3
1 3
1 2
1 2
1 2
1 2
1 2
1 2
1 2
1 2
0 2
0 2
0 2
0 2
0 2
0 2
0 2
1 3
1 3
3 4
3 4
3 4
3 4
3 4
3 4
3 4
3 5
3 5
3 5
3 5
3 5
3 5
3 5
3 5
1 5
1 5
1 5
1 5
1 5
3 88
3 87
3 87
3 87
3 87
3 87
3 88
3 88
3 88
3 88
3 88
3 88
3 88
3 88
5 89
3 6
3 6
3 6
3 7
3 8
3 8
3 8
3 9
3 9
4 9
4 9
4 9
4 9
4 9
4 9
2 8
2 8
2 8
2 7
2 7
2 6
2 6
2 6
2 5
1 5
1 5
1 7
1 7
1 7
1 7
1 7
1 7
2 6
2 6
2 6
2 6
2 6
2 6
2 6
2 6
2 6
2 6
2 6
2 6
2 6
2 6
2 6
2 6
2 6
2 6
2 6
2 6
2 6
2 6
2 6
2 6
2 6
2 6
2 6
4 6
4 6
4 6
4 6
3 5
3 5
3 5
3 6
4 6
4 6
4 6
4 11
4 14
4 13
4 13
4 13
4 13
4 13
4 13
4 13
4 13
4 12
4 12
4 12
3 13
3 13
3 13
3 13
3 13
3 11
3 11
3 11
3 10
3 10
3 10
3 10
3 10
3 10
3 10
3 12
3 17
4 17
4 17
4 17
4 17
4 18
4 18
4 19
4 20
4 20
4 20
4 20
4 20
4 20
4 20
4 20
4 21
4 22
3 22
3 22
3 22
3 22
3 22
3 22
3 22
3 22
3 23
2 23
2 23
2 23
2 23
2 23
3 25
3 25
22 1351
23 1373
23 1373
23 1376
23 1376
30 1554
30 1561
42 1562
42 1561
42 1561
42 1561
42 1561
42 1561
42 1561
42 1561
42 1561
42 1561
42 1561
42 1562
42 1562
42 1562
15 31
15 30
3 29
3 28
3 27
1 25
1 25
1 25
1 25
10 25
10 25
10 25
10 23
10 28
10 26
10 27
10 26
15 25
15 25
15 25
15 25
15 26
15 26
15 26
7 26
7 26
6 26
6 26
6 19
6 19
7 18
7 18
2 18
2 20
2 20
2 22
2 21
2 21
2 21
2 21
2 21
3 21
3 21
3 21
3 17
3 14
3 14
3 14
3 14
3 13
3 13
3 13
3 12
3 12
3 11
3 10
2 10
2 10
2 10
2 10
2 8
2 7
2 7
2 7
2 7
2 7
2 7
2 7
2 7
2 7
2 7
3 7
3 7
3 7
3 7
3 9
2 9
2 7
2 7
2 7
2 6
2 6
2 6
2 6
2 6
2 6
1 6
1 6
1 6
1 6
1 5
1 4
1 4
1 4
1 4
1 4
1 4
1 2
1 2
1 2
1 2
1 2
1 2
1 2
1 2
1 2
1 2
1 3
1 3
1 3
1 3
1 3
1 4
3 5
3 5
3 5
3 5
3 5
4 5
4 5
4 5
4 5
4 4
4 4
4 4
4 4
4 4
4 4
2 3
2 3
1 3
1 3
1 2
1 1
1 1
0 1
0 1
0 1
0 1
0 1
0 1
0 1
0 1
0 1
0 1
0 1
0 1
0 3
0 3
0 3
0 3
0 3
0 7
0 13
0 14
0 18
0 18
178 22
178 22
178 22
178 22
178 24
178 25
181 127
189 130
189 133
189 133
189 133
189 133
189 136
189 141
189 142
11 140
11 140
11 140
11 143
11 146
11 146
8 41
9 41
18 41
18 41
18 44
18 44
18 43
18 44
10 32
10 34
10 34
10 34
10 34
10 32
10 32
10 32
10 32
10 32
1 32
1 32
0 31
0 32
0 103
0 107
0 108
0 112
0 112
0 112
3 117
3 117
3 116
4 116
4 116
4 116
4 117
4 120
4 127
4 129
4 131
4 131
4 132
4 133
4 134
4 136
1 136
1 136
0 137
0 138
0 138
0 140
0 140
0 140
0 140
0 140
0 140
0 140
0 140
0 141
0 141
0 167
0 240
0 252
0 268
0 275
0 278
0 294
0 294
0 294
0 296
0 299
0 303
0 309
0 311
0 311
0 296
0 289
0 288
0 285
0 284
0 284
0 283
0 283
0 283
0 283
0 286
0 286
0 286
0 288
0 287
0 287
0 288
0 288
0 288
0 287
0 287
0 287
0 288
0 287
0 285
0 285
0 285
0 287
0 288
0 288
0 286
0 286
0 284
0 287
0 287
0 288
0 288
0 288
0 288
0 286
0 286
0 286
0 286
0 286
0 286
0 286
0 286
0 283
0 204
0 204
0 203
0 203
0 203
0 203
0 203
0 203
0 203
0 202
0 202
0 202
0 202
0 199
0 191
0 192
0 196
0 197
0 202
0 204
0 204
0 203
0 204
0 206
0 204
0 205
0 207
0 224
0 237
0 233
0 235
1 235
1 235
1 238
1 238
1 236
1 235
1 222
1 149
1 135
1 130
1 127
1 126
1 109
1 109
1 107
1 108
2 152
3 158
3 163
3 163
3 177
3 181
3 186
3 194
3 194
3 196
3 196
3 196
3 198
3 208
3 208
3 205
3 204
2 204
2 202
2 202
2 202
2 204
2 207
2 210
2 211
2 212
2 218
2 217
2 217
2 217
2 218
2 217
2 218
2 218
2 218
2 219
3 222
3 224
3 220
3 221
4 224
4 224
4 246
4 246
4 246
4 246
4 246
4 246
4 247
4 249
4 252
3 252
3 252
3 252
3 250
2 249
2 253
2 238
2 239
2 240
2 240
2 240
2 240
2 243
2 243
2 243
2 245
2 244
2 244
2 241
2 234
2 228
2 228
2 228
2 227
2 226
2 224
2 224
2 223
2 219
2 193
2 197
2 200
1 200
1 202
1 204
1 201
1 201
1 201
1 201
1 201
1 201
1 200
1 200
1 200
1 200
1 199
1 200
1 199
1 195
0 141
0 138
0 139
1 139
1 125
1 116
1 110
1 106
1 106
1 106
1 106
1 106
1 104
1 92
1 92
1 93
1 93
1 91
2 91
2 91
2 90
2 85
2 82
2 80
2 80
2 79
2 74
2 74
2 75
2 75
2 74
2 74
2 72
1 72
1 73
1 75
1 82
1 83
1 86
1 89
1 110
1 112
1 121
1 128
1 130
1 132
1 132
1 133
1 136
1 136
1 136
1 136
1 138
1 139
1 139
1 137
1 133
1 129
1 128
1 128
1 127
1 127
1 128
1 122
1 122
1 122
1 122
1 127
1 125
1 126
1 126
1 125
1 127
1 131
1 135
1 154
2 214
2 251
3 285
4 307
4 317
7 320
7 367
7 375
8 383
8 382
8 384
8 392
8 393
8 395
8 397
8 399
8 399
8 399
8 399
8 401
8 401
5 400
5 399
6 398
7 397
7 396
7 397
6 398
7 400
7 400
46 400
47 404
47 407
47 401
47 403
47 405
47 405
47 405
47 406
46 403
46 401
46 401
47 404
47 403
47 403
8 404
8 404
8 403
9 403
8 404
8 404
9 409
9 409
9 412
9 422
9 423
9 424
9 419
9 417
9 406
9 398
9 394
9 390
9 384
9 362
10 358
10 358
10 357
10 359
10 363
10 376
10 375
248 10917
248 10915
248 10914
248 10913
248 10912
250 10912
250 10918
251 10946
251 10944
251 10946
251 10951
251 10952
252 10953
252 10944
252 10943
252 10911
246 10815
246 10815
250 10850
251 10856
19 436
21 442
21 445
21 448
22 447
22 443
23 441
23 397
20 295
20 243
20 216
22 219
22 223
23 224
33 273
33 272
34 287
34 291
34 291
34 284
34 283
33 282
34 279
35 279
35 280
35 280
35 281
35 280
35 282
35 283
35 283
35 292
34 295
34 298
34 301
34 302
35 306
35 306
99 895
98 892
98 890
98 887
98 885
98 885
98 887
96 886
96 883
96 878
96 877
96 872
96 872
96 872
96 873
32 285
32 285
32 285
32 284
32 284
32 283
32 279
32 278
32 277
31 275
31 273
31 273
31 272
31 271
31 271
31 271
31 270
31 270
31 270
31 270
30 270
30 270
30 268
30 268
30 261
30 260
30 259
30 259
30 259
31 259
31 259
31 269
29 277
29 279
28 255
28 250
28 249
28 239
28 235
27 234
27 234
27 234
27 234
30 233
30 229
25 191
24 187
24 187
23 170
23 158
23 156
22 152
22 152
22 153
22 152
22 152
24 159
24 157
28 254
24 248
23 246
14 201
14 214
14 213
14 216
14 220
14 221
14 222
14 221
14 223
14 225
14 225
14 231
14 232
14 231
14 235
13 237
13 259
30 2394
22 2299
22 2318
22 2325
22 2333
22 2382
22 2423
22 2440
22 2493
22 2511
22 2522
22 2555
22 2590
22 2598
22 2597
22 2598
22 2594
6 421
6 421
8 420
8 420
8 418
8 417
8 418
8 418
8 418
8 418
8 418
8 418
9 418
9 418
9 418
9 418
266 437
264 436
264 436
264 436
264 436
264 437
264 442
264 462
264 467
264 466
264 467
264 469
269 469
271 471
272 471
18 464
18 469
17 500
17 548
17 561
17 562
17 560
17 557
17 551
17 551
17 582
17 585
17 587
17 592
17 596
24 864
24 866
24 868
24 868
24 876
24 877
24 878
24 880
24 879
24 887
24 896
24 898
24 898
24 898
24 898
15 635
15 634
15 635
16 643
18 640
18 634
18 623
18 622
18 621
17 614
17 613
17 608
17 608
17 612
17 608
17 604
18 586
18 579
18 574
18 568
18 568
18 567
16 558
16 558
16 537
16 536
16 523
16 454
16 399
16 364
16 316
16 299
16 299
16 298
16 300
16 299
16 299
16 298
16 298
193 329
193 329
193 332
193 332
193 332
193 337
193 342
193 344
193 345
193 345
193 347
193 347
193 347
193 347
193 349
17 342
16 342
16 342
16 342
16 342
16 342
16 341
16 334
16 312
16 309
16 309
16 309
15 307
8 308
7 305
7 306
4 289
5 280
948 271
958 227
958 225
958 221
958 221
958 225
958 225
958 225
958 194
958 194
958 188
958 185
958 184
958 173
957 172
957 171
7 146
7 137
7 133
7 133
7 133
7 133
7 125
7 116
5 115
5 115
5 115
5 115
5 114
4 114
4 113
3 106
1 106
1 104
1 103
43 108
43 114
44 113
44 112
91 115
91 114
91 108
91 108
91 107
90 104
90 95
90 94
90 92
90 92
90 92
90 92
49 91
48 91
48 91
0 87
0 86
0 86
0 86
0 88
0 88
0 88
0 88
0 87
0 87
0 93
0 94
0 94
1 79
1 82
1 90
1 95
1 94
1 88
1 89
1 88
1 88
1 87
1 86
1 86
19 86
19 86
19 84
19 84
19 85
19 85
19 85
19 85
19 86
19 86
19 87
19 88
19 88
19 88
19 88
2 88
2 86
2 86
2 81
2 80
2 79
2 73
3 73
3 73
4 73
4 80
4 77
4 77
4 77
4 77
4 75
4 74
4 74
4 74
4 74
4 72
4 72
4 72
4 72
4 72
4 72
4 72
4 71
4 76
4 76
4 76
4 71
4 71
4 71
4 71
4 71
4 71
4 71
4 74
4 75
4 74
4 71
4 64
4 64
4 64
4 64
4 64
4 64
4 66
4 66
4 66
5 66
7 70
7 76
8 80
8 84
10 135
11 137
11 142
12 149
14 156
14 160
14 165
16 222
16 229
16 254
16 267
16 268
16 266
16 270
16 336
16 368
16 380
15 402
15 417
15 420
16 449
16 454
16 457
16 456
15 461
15 809
15 813
15 817
15 819
15 819
15 825
15 832
15 835
15 836
15 837
15 839
15 839
15 847
15 846
15 847
15 846
15 846
15 846
15 846
15 846
14 847
14 847
14 847
14 847
13 847
13 847
13 847
13 838
13 838
13 838
13 839
13 839
13 840
13 841
14 842
14 844
14 850
14 850
14 852
14 856
15 857
16 857
16 859
16 859
16 859
16 859
16 859
16 854
16 854
16 855
16 860
16 861
16 861
16 861
16 860
16 859
15 859
15 857
15 857
14 858
14 858
14 858
14 858
14 858
14 858
14 851
14 851
11 844
11 844
9 844
4 844
3 841
3 839
3 836
3 833
3 765
3 762
3 759
3 759
3 758
3 756
3 747
3 661
3 651
3 651
3 649
3 649
3 648
3 635
3 530
3 508
3 485
4 455
4 459
4 459
3 454
3 449
3 447
3 443
3 437
3 89
3 89
3 83
3 84
3 80
3 78
3 76
3 74
3 76
3 75
3 76
3 77
3 78
3 78
3 78
3 79
3 79
3 79
4 85
4 86
268 89
268 89
268 89
268 89
268 92
268 92
268 94
269 101
270 107
270 107
270 107
270 108
270 107
270 106
269 106
269 106
5 100
5 103
5 103
5 100
5 99
5 99
5 99
6 99
6 99
6 100
6 100
6 99
7 100
7 101
8 102
8 103
8 105
8 105
8 107
8 107
8 112
8 113
8 115
8 114
8 114
8 114
8 114
8 116
11 129
11 130
10 133
10 133
10 133
10 133
9 130
9 131
9 132
9 131
10 132
10 131
12 131
12 131
12 141
12 143
12 143
12 143
12 143
12 143
12 143
12 144
12 145
12 145
12 142
11 139
11 137
9 135
8 126
9 120
9 120
9 120
9 119
9 122
9 128
9 129
9 125
9 124
9 124
9 124
9 207
10 206
10 206
10 206
10 203
10 203
10 202
10 201
10 201
10 201
10 199
11 198
11 198
11 197
10 187
10 103
10 103
10 103
10 102
10 102
10 102
10 102
10 100
8 93
8 87
8 86
8 86
8 85
8 85
8 85
8 85
8 85
8 82
8 79
7 75
7 76
7 76
7 78
7 78
7 77
7 76
7 76
7 76
7 76
6 76
6 74
6 74
6 74
6 72
6 72
6 70
6 70
6 64
6 63
89 63
89 64
89 64
89 64
89 64
89 60
86 49
86 47
86 44
86 46
86 46
86 46
86 46
86 42
86 39
3 37
3 37
3 37
3 37
3 36
3 33
3 31
3 31
3 31
3 31
3 31
3 31
3 31
3 33
3 32
3 32
3 30
2 26
2 25
2 25
2 25
2 25
2 25
2 25
2 21
2 16
2 13
2 16
2 20
2 26
2 26
2 26
1 27
1 28
1 31
1 31
1 31
1 31
1 31
1 31
1 31
1 31
0 31
0 31
0 30
0 43
0 43
0 43
0 43
1 44
1 44
1 44
1 44
1 44
1 44
1 44
1 44
1 47
1 47
1 47
1 34
1 34
1 34
1 34
0 32
0 33
0 33
0 33
0 31
0 31
0 31
0 31
0 29
0 29
0 29
0 29
0 29
0 29
0 29
0 29
0 29
0 28
0 28
0 28
0 28
0 28
0 27
0 27
0 27
0 27
0 27
0 27
0 27
0 26
0 25
0 24
0 24
0 24
0 24
0 25
0 25
4 25
4 25
4 25
4 25
4 25
4 25
4 25
4 25
4 25
4 25
4 24
4 24
4 21
4 21
6 21
6 21
6 21
2 21
2 21
2 20
2 20
2 20
2 20
2 20
2 19
2 16
2 13
2 9
2 4
0 4
0 4
0 4
0 4
0 1
0 1
0 1
0 1
0 1
0 1
0 1
0 1
0 1
0 1
0 1
0 1
0 1
0 1
0 1
0 1
0 1
0 1
0 1
0 1
0 1
0 1
0 1
0 1
0 1
0 1
0 1
0 1
0 1
0 1
0 1
0 2
0 2
0 2
0 2
0 2
0 2
0 2
0 1
0 1
0 1
0 1
0 1
0 1
0 1
0 1
0 0
0 0
0 0
0 0
0 0
0 0
0 0
0 0
0 0
0 1
0 1
0 1
0 1
0 1
0 1
0 1
0 1
0 1
0 1
0 1
0 1
0 1
0 1
0 1
0 0
0 0
0 0
0 0
0 0
0 0
0 0
0 0
0 0
0 0
0 0
0 5
0 5
0 5
0 5
0 5
0 5
0 5
0 5
0 5
0 5
0 5
0 5
0 5
0 5
0 5
0 0
0 0
0 0
0 0
0 0
0 0
0 0
0 0
0 9
0 9
0 9
0 9
0 9
0 9
0 9
4 9
4 9
4 9
4 9
4 9
20 13
20 13
20 13
20 13
20 4
20 4
20 4
20 4
20 4
20 6
16 6
16 6
16 6
16 6
16 6
16 6
16 6
0 2
0 2
0 2
0 2
0 2
0 2
0 9
0 8
0 7
0 7
0 7
0 7
0 7
0 7
0 7
0 7
0 7
0 7
0 7
0 7
0 7
0 7
0 0
0 0
0 0
0 0
0 0
0 0
0 1
0 1
0 1
0 1
0 1
0 1
0 1
0 1
0 1
0 1
0 1
0 1
0 1
0 1
0 1
0 1
0 1
0 1
0 1
0 1
0 1
0 1
0 5
0 6
0 19
0 20
0 20
0 21
0 21
0 21
0 21
0 21
0 21
0 21
0 21
0 21
0 21
0 21
0 21
0 21
0 9
0 9
0 6
0 7
0 7
0 7
0 27
0 27
0 28
0 28
2 28
2 29
3 29
3 29
3 29
3 29
3 29
3 29
3 29
3 29
3 29
3 29
3 29
3 28
3 28
1 28
1 28
0 28
0 28
0 28
0 28
0 28
0 28
0 28
0 28
0 28
0 30
0 32
0 34
0 44
0 44
0 45
0 45
0 45
0 65
0 71
0 71
0 71
0 71
1 72
1 72
1 72
1 72
1 71
2 71
2 72
3 72
3 73
3 73
3 73
3 72
3 72
5 68
5 68
5 68
5 69
5 69
7 74
7 76
7 76
7 79
6 82
6 83
6 85
6 85
6 86
6 86
4 88
5 89
16 213
17 216
17 216
17 216
17 215
17 214
17 216
17 216
17 215
17 215
17 215
17 215
17 216
19 221
19 220
19 222
19 222
19 223
19 223
19 224
19 224
19 224
19 224
19 223
19 226
19 227
19 228
19 213
19 213
21 219
21 222
21 223
21 226
21 229
21 245
23 293
23 294
24 297
33 317
33 318
33 319
33 320
33 322
33 322
33 323
33 323
33 322
33 323
33 326
35 331
37 337
37 345
38 336
38 340
38 339
38 340
38 341
38 340
38 338
38 336
38 325
38 325
38 325
38 328
38 326
38 326
38 326
38 326
38 326
38 326
37 329
37 329
37 334
39 338
39 339
38 340
38 340
38 340
38 339
38 339
38 338
38 338
38 338
38 338
38 339
38 339
38 339
37 339
36 309
36 307
36 307
36 307
36 307
36 307
36 307
36 307
37 306
37 323
36 319
36 319
25 196
24 193
24 193
24 193
24 196
24 209
24 212
24 214
24 217
24 224
24 236
24 246
23 250
21 244
21 245
21 247
21 247
21 247
21 247
21 247
21 247
21 247
25 248
25 248
25 243
25 244
25 240
25 239
25 241
23 235
23 235
23 234
23 232
23 225
23 212
21 204
21 203
21 206
6 186
6 194
6 193
6 193
6 192
3 190
3 189
3 190
3 189
3 188
3 185
3 179
3 174
3 163
2 136
2 134
2 134
2 135
2 142
2 155
2 158
2 157
2 163
2 168
2 169
2 168
2 169
2 172
3 174
3 178
3 182
3 182
3 179
3 181
3 184
1 185
1 189
1 189
1 190
1 191
1 191
1 191
1 191
1 195
1 194
1 193
1 193
1 195
1 195
1 197
1 199
1 199
1 201
1 201
1 199
1 199
1 199
1 199
1 199
1 179
1 179
1 178
1 175
1 175
2 178
2 181
2 175
2 178
2 180
2 177
2 175
2 170
2 156
2 153
2 151
2 153
2 152
2 151
2 151
2 151
2 151
2 152
2 152
2 153
2 154
2 163
3 165
3 177
3 185
3 187
3 186
3 186
3 186
3 184
3 184
3 184
3 184
3 187
3 187
3 184
3 184
3 173
3 169
3 165
3 166
3 166
3 166
3 163
3 165
4 165
4 166
4 166
4 166
4 166
4 166
4 166
4 168
4 160
4 146
4 139
4 144
4 144
4 144
5 146
5 140
5 134
4 131
4 129
3 129
3 127
3 127
3 127
3 133
3 130
3 124
3 127
3 122
3 130
7 181
7 185
7 188
8 192
8 196
8 198
8 206
8 207
8 210
8 212
8 221
8 220
8 221
8 223
8 223
8 223
8 224
8 224
8 224
8 224
8 224
8 224
8 224
8 223
8 222
8 222
7 218
7 213
7 211
7 203
7 200
7 199
7 197
7 194
7 193
8 194
8 194
13 192
14 199
48 295
54 329
61 359
61 380
64 408
65 426
70 452
70 451
73 452
73 449
73 445
73 444
73 445
73 445
73 445
68 445
68 445
68 446
68 448
69 445
71 459
71 460
71 460
72 469
78 947
78 950
82 966
82 981
83 991
83 1008
83 1014
83 1017
83 1024
83 1029
83 1029
84 1042
85 1043
85 1044
85 1043
85 1042
83 575
83 573
84 576
135 699
137 698
137 714
137 716
142 721
145 721
149 723
149 721
149 717
149 708
149 704
149 703
149 695
147 692
147 693
146 689
146 685
146 677
143 623
143 620
143 618
142 619
142 625
142 625
142 624
142 627
142 623
142 622
142 610
142 610
142 610
142 608
142 606
142 605
142 605
142 606
142 606
142 606
142 606
142 606
142 606
142 606
142 606
142 606
142 604
142 604
142 603
142 604
142 605
142 618
142 619
142 618
141 646
141 645
141 646
142 661
138 648
93 492
89 481
88 560
88 553
87 554
87 560
87 561
87 552
87 551
87 549
87 548
86 546
86 545
86 544
86 545
87 544
87 571
87 575
87 582
86 590
84 577
84 578
84 578
79 561
78 559
78 553
75 522
75 510
75 501
75 494
75 488
75 487
75 486
75 487
75 494
74 489
73 493
73 494
64 495
61 504
55 504
50 502
50 499
16 369
14 368
14 354
11 350
8 347
6 345
4 346
4 347
4 348
4 348
4 349
4 351
4 350
4 351
4 351
4 351
4 351
4 353
5 353
5 353
5 354
6 350
6 343
8 342
8 340
8 338
8 338
8 338
8 339
8 342
8 343
8 345
8 347
8 347
8 354
9 353
9 355
8 355
7 355
6 355
6 356
6 373
6 379
6 379
6 379
6 377
6 377
6 376
6 376
6 376
5 377
5 376
5 350
5 348
5 349
5 339
5 336
5 334
5 324
3 220
3 217
3 196
3 191
3 186
3 179
3 177
3 177
3 180
3 180
3 180
3 180
3 179
2 178
2 152
2 143
2 136
2 130
2 128
2 127
2 125
2 125
2 125
2 125
2 125
2 125
2 127
2 127
2 128
2 127
2 126
2 119
2 112
2 108
2 104
2 103
2 101
2 93
2 92
2 92
2 92
2 94
2 94
2 94
2 94
2 99
2 100
2 94
2 96
2 96
2 96
2 95
2 93
2 94
2 97
2 106
2 116
2 117
2 117
1 116
1 115
1 113
1 114
1 114
1 114
1 116
1 118
1 119
1 123
1 125
2 148
2 155
2 155
2 155
2 154
2 146
2 151
2 153
2 155
2 156
2 156
2 155
2 138
2 131
2 130
2 131
2 131
2 131
2 131
2 131
2 131
2 129
2 129
2 127
2 127
2 126
1 119
1 118
1 118
1 118
1 122
1 120
1 120
1 120
1 120
1 120
1 120
1 120
1 117
1 117
2 117
2 117
2 120
2 121
2 122
2 122
2 120
2 119
2 120
2 120
2 134
2 134
2 136
2 135
2 135
2 138
2 136
2 135
2 140
2 142
2 142
2 142
2 142
2 142
2 142
2 142
2 142
2 143
2 143
2 143
2 140
2 140
2 140
2 140
2 139
2 134
2 131
2 132
2 130
2 130
2 130
2 130
2 130
2 124
2 123
2 114
2 105
2 112
2 115
2 117
2 118
2 118
2 122
2 122
2 123
2 120
2 119
2 118
2 118
2 116
1 82
1 78
1 80
1 78
1 78
1 78
1 77
1 76
1 76
1 75
1 75
1 75
2 75
2 76
2 75
2 75
2 75
2 75
2 75
2 75
2 75
2 75
2 75
2 74
3 74
3 75
3 75
2 75
2 75
2 76
2 76
2 76
2 76
2 76
2 76
2 76
3 76
3 77
4 80
4 80
3 83
3 83
3 82
3 81
3 83
3 80
3 80
3 80
3 80
3 80
3 67
3 69
1 67
1 69
1 72
1 68
1 68
1 68
1 65
1 63
1 63
1 63
1 63
1 63
2 77
2 83
2 83
2 82
2 82
2 81
2 81
2 81
2 81
2 81
2 81
2 81
2 81
2 80
2 80
2 71
2 71
2 66
2 66
2 66
2 66
2 64
2 64
2 56
2 52
2 52
2 51
2 50
2 46
2 45
2 49
2 50
2 51
2 52
2 52
2 60
2 57
2 56
2 56
2 56
2 55
2 54
2 54
2 53
2 52
2 52
2 52
3 52
3 52
3 51
3 51
3 52
3 53
3 54
3 54
3 55
3 56
3 59
3 63
3 63
3 65
3 66
3 67
3 67
3 67
3 66
3 66
3 65
3 66
3 66
3 66
3 66
3 70
3 71
2 70
2 67
2 67
2 66
2 65
2 62
2 60
2 62
2 62
2 60
2 62
2 63
2 64
2 66
2 75
2 76
2 75
2 77
2 85
2 84
5 324
5 324
5 324
5 325
5 325
4 337
4 332
4 332
4 334
4 335
4 335
4 335
4 335
4 335
4 336
1 97
1 105
1 105
1 105
1 107
1 107
1 107
1 108
1 109
1 109
1 109
1 109
1 109
40 110
40 109
40 109
40 109
40 111
40 113
40 120
40 119
40 113
40 113
40 110
40 107
40 104
40 99
40 99
40 100
1 100
1 100
1 101
1 106
1 106
1 106
1 109
0 109
0 127
0 127
0 128
0 129
0 129
0 127
0 128
0 127
0 126
0 126
0 124
0 122
0 117
0 117
0 116
0 113
0 97
0 97
0 96
0 98
0 97
0 97
0 97
0 97
0 98
0 95
0 94
0 95
0 95
0 97
0 99
0 99
0 99
0 99
0 94
0 93
0 93
0 93
0 91
0 90
0 90
0 87
0 79
1 79
2 77
2 76
2 69
2 69
2 69
2 69
2 69
2 69
2 70
2 58
2 58
2 55
2 54
2 54
2 54
2 53
2 53
2 53
2 52
2 52
1 44
1 44
1 44
2 41
2 41
2 41
2 41
2 41
2 41
2 41
2 41
2 40
2 39
2 39
2 38
2 38
2 39
2 37
2 31
1 32
1 32
1 32
1 33
1 33
1 31
1 32
1 31
1 31
1 30
1 30
1 28
1 25
1 24
1 24
1 21
1 21
1 20
1 17
1 17
1 16
1 16
1 16
1 16
1 16
1 16
1 15
1 15
1 15
1 15
1 15
1 15
1 15
1 15
1 15
1 11
1 9
1 8
2 8
2 8
2 8
2 6
3 12
3 11
3 11
3 11
3 11
3 11
3 11
3 11
3 11
3 11
3 10
3 10
2 10
2 9
2 9
2 9
2 3
2 3
1 3
1 4
1 4
1 4
1 4
1 4
1 4
1 4
1 5
104 33
104 33
104 33
104 33
104 33
104 34
104 34
104 34
122 35
122 35
123 68
123 68
123 68
125 68
125 68
116 68
24 43
24 43
26 44
26 44
24 43
24 43
24 43
7 42
7 42
6 9
7 9
7 9
7 8
5 7
5 6
5 6
5 6
3 5
3 5
3 4
4 3
4 1
4 2
4 2
4 2
3 2
3 2
3 3
3 3
3 3
3 4
3 4
3 4
3 4
46 770
46 770
45 770
45 770
45 770
45 771
45 771
45 771
45 771
44 771
44 771
44 771
46 820
46 820
46 820
3 54
3 53
3 53
3 53
3 53
3 54
3 54
3 54
3 54
3 54
3 54
3 54
1 5
1 5
1 5
1 6
1 6
1 6
1 6
1 6
1 6
1 5
1 5
1 5
0 5
0 5
0 5
4 5
4 4
4 4
4 3
4 3
4 3
4 3
4 3
4 3
4 3
4 3
4 3
4 3
4 3
4 3
0 3
0 3
0 3
0 3
0 3
0 3
0 3
0 3
0 3
0 3
0 3
0 3
0 3
0 3
0 3
0 3
0 3
0 3
0 3
0 3
0 3
2 3
2 3
6 3
17 3
87 3
134 3
203 3
216 3
269 3
323 3
350 2
363 2
369 2
370 2
370 2
371 1
371 1
372 1
374 1
374 1
374 1
374 1
378 1
388 1
388 2
389 3
390 3
407 2
422 2
454 2
461 2
463 2
463 2
464 2
464 2
465 2
469 2
469 2
469 2
468 2
467 2
467 2
467 2
467 2
475 2
476 2
478 2
478 2
478 2
478 2
478 2
478 2
479 2
479 2
479 2
479 2
479 2
479 2
479 2
479 2
479 2
479 2
479 2
479 2
480 2
480 2
480 2
481 2
481 2
480 2
480 2
481 2
482 2
484 2
485 2
483 2
484 2
487 2
500 2
530 2
531 2
532 2
530 2
527 2
518 2
510 2
504 2
490 2
480 2
473 2
463 2
462 2
462 2
429 2
425 2
399 2
373 2
332 2
328 2
324 2
318 2
315 2
311 2
300 2
283 2
277 2
239 2
234 3
217 3
200 3
184 6
181 6
180 6
180 6
179 6
179 7
178 7
176 7
177 6
177 6
177 29
177 29
174 29
162 29
162 30
162 26
161 26
134 26
110 26
86 26
82 26
79 25
79 25
80 25
79 25
78 2
77 2
76 2
76 2
77 2
77 2
77 2
77 2
77 2
77 2
77 2
76 2
306 21
306 21
305 21
306 21
306 21
306 21
306 21
306 21
307 21
307 21
307 21
307 21
307 22
309 22
482 23
484 23
256 4
254 4
256 4
252 4
252 4
250 4
245 4
245 4
236 4
244 4
241 4
238 4
238 4
238 4
58 3
302 7
281 7
280 7
280 7
280 7
280 7
280 7
283 7
287 7
288 7
288 7
288 7
288 7
288 7
288 7
38 3
38 3
38 3
38 3
39 3
39 3
39 3
39 3
39 3
41 4
44 3
63 3
68 3
68 3
69 3
68 4
68 4
68 4
104 4
103 4
102 4
102 4
102 4
102 4
102 4
101 3
102 3
102 3
102 12
102 12
102 11
102 11
111 11
115 11
113 11
113 11
114 11
114 11
113 11
114 12
113 12
113 12
113 12
137 15
155 6
167 6
168 6
170 8
218 8
226 9
241 9
245 9
245 9
247 10
250 10
250 10
251 10
252 10
252 10
252 10
252 10
261 10
282 11
295 12
301 12
300 12
300 11
298 11
298 11
298 11
297 11
296 11
295 11
296 12
304 12
305 12
305 12
305 12
314 12
308 12
319 12
320 12
321 12
322 12
322 12
323 12
323 12
326 12
327 12
332 12
332 12
332 12
329 12
325 12
324 12
324 12
331 12
332 12
339 12
340 12
340 12
342 12
346 12
351 12
354 12
354 12
354 12
354 12
352 12
347 12
347 12
333 12
331 12
345 12
350 12
359 13
359 13
359 13
322 13
322 13
322 13
322 13
322 13
324 13
330 13
331 13
336 13
339 13
349 13
352 13
352 15
352 16
351 18
347 17
347 19
347 19
346 19
347 19
348 19
348 19
343 19
345 19
341 19
322 16
302 15
291 15
284 13
279 12
196 12
194 12
190 12
193 12
193 11
196 12
194 12
195 12
197 13
196 14
196 14
294 52
293 52
296 52
296 52
292 52
292 52
292 52
292 52
297 52
298 52
299 52
299 52
292 51
297 51
311 50
309 33
210 11
206 11
202 11
193 11
185 11
178 11
177 11
177 11
176 11
176 11
175 11
175 11
174 11
174 11
176 11
176 11
186 11
186 11
186 11
187 11
189 12
182 12
181 12
174 12
173 12
174 12
174 12
171 12
170 12
177 12
178 12
169 12
169 12
169 11
168 11
165 11
164 11
189 11
165 11
161 11
161 10
161 11
164 11
165 11
173 11
176 11
181 11
196 11
197 11
186 11
186 11
183 11
179 10
166 7
165 6
165 6
166 5
166 4
167 4
167 4
168 4
168 4
167 4
166 4
169 4
170 4
166 4
164 4
164 4
164 4
164 4
164 4
164 4
163 4
163 4
158 4
150 4
153 3
153 3
152 3
152 3
150 2
150 2
150 2
150 2
151 2
151 2
151 2
151 2
151 2
151 2
151 2
145 2
143 2
142 2
141 2
137 2
129 2
120 2
119 2
119 2
119 2
119 2
119 2
120 2
118 2
117 2
117 2
117 2
118 2
118 2
118 2
121 2
122 2
122 2
129 2
133 2
133 2
134 3
134 3
135 2
139 3
140 3
155 4
155 4
156 4
152 4
160 4
162 4
151 4
152 4
159 4
162 4
159 3
160 3
149 3
152 3
130 3
129 3
126 3
124 3
124 2
134 2
131 2
126 2
123 2
119 2
113 2
111 2
112 2
113 2
113 2
113 2
113 2
113 2
113 2
111 19
114 19
113 19
113 19
112 19
112 19
112 19
112 19
108 19
109 19
109 19
109 19
109 19
109 19
109 19
109 2
136 2
136 2
136 2
136 2
134 2
133 2
133 2
133 2
137 3
136 3
137 3
137 5
137 5
137 5
137 5
131 6
146 7
150 7
153 7
155 7
155 7
156 8
160 8
176 7
215 7
243 8
243 8
244 8
245 8
247 8
251 9
268 10
285 10
287 10
306 11
306 11
307 12
306 11
309 11
310 12
306 12
304 13
302 13
298 13
294 13
294 13
293 13
294 13
293 13
288 12
304 12
321 11
390 11
431 11
457 12
462 12
464 13
464 13
464 13
456 13
468 13
473 13
472 12
473 12
470 12
468 12
471 12
471 12
471 15
472 16
463 16
463 16
463 16
463 16
463 16
462 16
461 16
461 16
461 16
461 16
461 16
461 16
461 16
461 16
461 13
458 13
458 12
458 12
459 12
459 12
459 12
459 12
459 12
459 12
459 12
459 12
459 12
459 12
459 12
459 12
459 12
459 12
459 12
459 12
459 12
459 12
459 12
461 12
457 12
458 12
457 12
458 11
452 11
450 11
439 11
411 9
402 8
397 8
391 8
382 8
381 8
380 8
378 8
366 8
342 8
321 8
320 8
313 7
311 7
308 6
305 6
291 6
280 17
279 17
263 15
262 15
261 15
260 15
259 15
258 14
258 14
258 14
257 14
257 14
253 14
247 14
244 14
233 4
206 4
190 4
173 5
130 5
85 4
49 4
42 3
34 3
106 3
106 3
104 4
102 5
87 6
86 6
86 6
86 5
89 5
96 3
96 4
95 4
95 4
95 4
98 4
98 4
98 4
98 4
98 4
98 4
98 4
97 4
97 4
97 4
97 4
97 5
93 5
94 5
95 5
98 8
98 8
98 8
97 8
98 8
100 8
101 8
101 8
101 8
104 8
107 8
108 8
108 7
109 7
108 7
109 7
111 7
132 7
133 7
133 7
132 7
132 7
131 7
131 7
130 7
130 7
130 7
130 7
130 7
130 7
130 7
130 8
131 8
132 8
132 8
131 8
131 8
132 8
132 8
130 8
140 9
140 9
140 9
141 9
162 9
162 9
162 10
166 10
166 10
166 10
166 10
166 10
166 10
166 10
166 10
169 12
171 12
174 12
174 12
177 12
177 12
177 12
177 12
177 10
177 10
177 10
177 10
177 10
177 10
177 10
177 10
105 7
105 7
105 7
105 7
105 7
105 7
103 7
103 7
98 7
96 6
96 6
96 6
96 6
92 6
91 6
92 6
92 6
92 6
92 6
92 6
92 6
92 6
92 6
92 6
92 6
92 6
92 6
91 6
91 6
89 3
89 3
89 3
89 3
88 3
87 3
90 3
90 3
90 3
86 3
83 3
83 3
83 3
82 3
82 3
80 3
79 3
56 3
56 3
56 3
56 3
56 3
56 3
56 3
56 3
56 3
56 3
56 3
56 3
56 3
56 3
56 4
55 4
55 4
55 4
54 4
54 4
52 4
50 4
46 4
43 3
43 3
42 3
42 3
21 3
21 3
21 2
18 2
18 2
18 2
18 2
18 2
18 2
17 2
18 2
14 0
13 0
10 0
10 0
7 0
7 0
7 0
7 0
7 0
7 0
7 0
7 0
7 0
7 0
7 0
7 0
7 0
7 0
7 0
7 0
7 0
7 0
7 0
7 0
7 0
10 1
11 1
12 1
13 8
13 10
13 12
12 13
12 13
19 16
19 18
19 18
19 18
19 18
19 18
19 18
19 18
19 18
19 18
19 18
19 18
18 16
18 16
18 16
18 16
17 16
17 16
13 16
13 16
13 16
13 16
13 16
14 17
14 18
14 20
14 20
14 21
14 21
14 21
14 21
14 21
14 21
14 21
14 21
14 21
14 21
14 21
13 21
13 22
13 22
14 22
14 22
14 22
14 22
14 22
14 22
14 22
14 22
14 22
14 22
14 22
14 22
14 22
14 22
14 21
13 21
13 23
13 23
13 23
13 23
13 24
13 24
13 24
13 24
13 24
13 24
13 24
13 24
13 25
13 25
13 26
13 26
13 26
13 26
13 26
14 25
14 25
14 26
14 26
14 27
14 27
14 27
14 27
14 27
14 27
14 26
14 26
14 26
15 26
14 26
14 26
11 25
11 25
10 25
10 18
10 16
8 17
8 16
8 15
2 13
2 11
2 11
2 11
2 11
2 15
2 15
2 15
2 15
2 15
2 15
2 15
2 14
2 14
3 14
3 16
3 16
3 16
3 16
3 16
3 13
3 14
3 14
2 11
2 12
2 12
2 12
2 12
2 13
3 27
3 30
3 32
3 33
3 38
3 38
3 38
3 38
3 41
3 42
3 42
3 42
3 45
3 45
3 48
3 48
3 48
3 49
3 49
3 49
3 49
3 49
3 49
3 49
3 49
3 49
4 49
4 49
4 47
4 48
4 48
4 49
4 49
4 50
4 50
5 52
5 52
5 52
5 53
5 53
5 53
5 53
5 53
5 53
5 57
5 57
5 58
5 58
5 58
5 59
5 59
5 58
5 58
5 58
5 58
5 57
5 58
5 58
5 58
5 58
4 58
4 58
4 58
4 58
4 60
4 60
5 60
5 60
5 60
5 60
5 60
5 59
5 59
5 59
5 59
5 59
5 59
5 59
5 59
5 57
5 57
5 57
5 57
5 57
5 57
4 56
4 55
4 55
4 55
13 55
14 55
14 53
14 53
14 52
15 51
15 50
15 49
15 49
14 48
14 45
14 31
14 30
14 28
14 26
14 22
14 22
4 19
4 19
4 16
4 16
4 16
4 16
4 15
4 15
4 12
4 11
4 11
4 11
4 11
4 11
4 11
4 11
4 13
4 13
4 13
4 13
3 13
3 13
3 13
3 13
3 14
3 13
3 13
3 12
3 12
2 11
2 11
2 11
2 10
2 10
2 10
2 10
2 10
2 9
2 6
2 5
2 5
2 6
2 5
2 4
2 5
2 6
2 6
2 6
2 6
2 7
2 7
2 7
2 7
2 7
2 7
2 7
2 7
2 8
2 9
1 9
1 9
1 10
1 9
1 13
6 18
6 17
6 17
6 17
6 17
6 17
6 17
6 17
7 17
7 17
7 18
7 19
7 21
7 21
7 21
2 16
2 16
2 16
2 18
2 18
3 19
3 19
3 19
2 20
1 20
1 21
1 21
1 21
1 21
1 21
1 21
1 22
1 22
1 21
1 23
0 24
0 27
0 33
0 38
0 38
0 38
0 38
0 39
0 40
0 40
0 40
0 40
1 40
1 41
1 40
2 41
2 41
2 39
2 39
2 39
2 39
2 39
2 38
2 37
2 36
2 36
2 36
2 36
2 37
2 37
1 37
2 41
2 42
2 42
2 42
3 42
3 42
3 42
3 42
3 42
3 42
3 42
3 41
3 40
3 40
3 40
2 40
1 40
1 40
1 40
0 40
0 40
0 40
0 40
0 40
0 40
0 40
0 40
0 38
0 36
0 36
0 36
0 36
0 36
0 33
0 33
0 33
0 33
0 33
0 33
0 33
0 33
0 33
0 34
0 34
0 32
0 34
0 37
0 37
0 38
0 38
0 38
0 38
0 38
0 37
0 37
0 37
0 36
0 36
0 37
0 33
0 31
0 29
0 29
1 29
1 29
1 28
1 28
1 28
1 27
1 26
1 26
1 24
1 20
1 19
1 19
1 19
1 19
1 19
2 23
2 23
1 24
1 24
1 24
1 24
3 697
3 697
3 697
3 697
3 697
3 702
3 702
3 702
3 702
5 717
6 718
6 720
6 720
6 721
6 722
4 54
7 49
7 50
8 51
8 51
8 53
8 53
8 53
8 53
8 53
8 54
8 54
8 54
8 54
8 54
8 54
8 54
8 54
8 54
8 54
8 54
8 54
8 54
8 54
8 54
8 54
8 54
8 54
8 54
8 54
8 54
8 54
8 54
10 55
10 55
10 55
10 55
10 55
10 55
10 55
10 56
10 59
10 59
10 57
10 56
10 56
10 53
11 50
11 49
11 49
11 49
11 49
11 49
11 49
11 49
11 48
11 48
11 48
11 48
11 48
11 48
11 48
11 48
10 48
10 48
10 48
10 50
10 51
10 52
10 54
10 56
10 56
10 56
10 58
10 59
10 59
10 59
10 61
9 61
9 57
9 53
9 54
9 54
9 55
9 53
9 53
10 51
10 50
10 50
10 48
10 48
10 48
10 48
9 49
7 35
7 34
7 33
7 35
7 35
7 33
6 33
3 30
2 29
2 28
2 28
2 28
2 28
2 28
2 28
2 27
2 27
2 27
2 27
2 27
2 27
2 27
2 28
2 29
2 29
2 30
2 31
2 32
2 32
2 33
2 34
2 34
2 35
2 35
2 36
2 36
2 36
2 36
2 36
0 36
0 36
0 36
0 36
0 36
0 36
0 35
0 32
0 32
0 32
0 32
0 32
0 32
0 32
0 32
0 32
0 32
0 32
0 32
0 33
0 33
0 34
0 34
0 34
0 34
0 34
0 34
0 34
0 34
0 34
0 35
0 35
0 36
0 32
0 31
0 29
0 29
0 29
0 28
0 27
0 25
0 24
0 22
0 22
0 22
0 22
0 21
0 20
0 20
0 20
0 19
0 19
0 19
0 19
0 23
0 25
0 25
0 25
0 26
0 26
0 26
0 29
0 29
0 30
0 27
0 25
0 26
0 26
0 26
0 26
0 26
0 26
0 26
0 26
0 26
0 26
0 27
0 27
0 27
0 27
0 27
0 27
0 28
0 27
0 25
0 25
0 25
0 23
0 23
0 22
0 22
0 22
0 21
0 21
0 22
0 21
0 22
0 22
0 23
0 23
0 22
0 22
0 24
0 24
0 24
0 24
0 24
0 26
0 28
0 28
0 28
0 28
0 27
0 27
0 27
0 27
0 27
0 27
0 26
0 26
0 26
0 26
0 26
0 26
0 26
0 26
0 26
0 26
0 26
0 26
0 24
0 24
0 24
0 24
0 24
0 24
0 24
0 24
0 24
0 24
0 24
0 24
0 24
0 24
0 25
0 25
0 25
0 25
0 25
0 25
0 25
0 25
0 25
0 23
0 20
0 21
0 21
0 21
0 20
0 20
0 19
0 16
0 16
0 15
0 15
0 15
0 14
0 14
0 14
2 14
2 14
3 16
3 16
3 16
3 17
3 17
3 17
3 18
3 18
3 18
3 18
3 18
3 17
3 17
3 17
3 16
3 16
3 16
3 16
3 16
3 17
3 16
3 16
3 16
3 16
3 16
3 16
3 16
3 16
3 16
4 17
4 17
4 15
4 15
4 15
4 15
4 15
4 12
5 10
5 10
5 10
5 10
5 10
5 10
5 10
5 11
5 11
5 11
5 11
5 12
5 12
5 12
5 12
4 12
4 12
4 12
4 12
4 12
4 12
4 12
4 12
4 12
4 12
4 12
4 12
4 12
4 14
4 14
4 14
4 14
4 15
4 15
4 15
4 15
4 15
4 16
4 16
4 16
4 16
4 16
4 16
4 16
4 14
4 14
4 14
4 12
4 11
4 11
4 11
4 10
4 10
4 11
4 11
2 12
2 13
2 14
2 14
2 14
2 16
2 16
2 16
1 14
1 14
1 14
1 13
1 13
1 13
1 12
1 12
1 12
1 12
1 12
1 12
1 12
1 12
1 12
1 12
1 12
1 12
1 12
2 11
2 11
2 11
2 11
2 16
2 18
2 23
2 25
2 26
2 28
1 29
1 29
1 31
1 36
17 40
17 42
17 44
17 44
16 45
16 44
16 44
16 45
16 45
16 47
16 47
16 46
16 46
16 46
16 46
5 46
3 46
0 46
0 46
2 46
2 46
2 46
2 46
2 47
2 47
2 47
2 48
2 48
2 49
2 49
2 49
2 49
2 49
2 49
2 49
2 49
0 49
0 50
0 53
0 55
0 58
0 59
0 61
0 66
0 70
0 70
0 70
0 70
0 70
3 70
3 70
3 70
3 70
3 69
3 70
3 69
3 69
3 69
3 67
3 66
3 64
3 64
3 64
3 64
3 64
0 64
0 64
0 64
0 64
0 65
0 65
0 65
0 65
0 65
0 65
0 65
0 65
0 65
0 65
0 65
1 65
1 65
1 65
1 64
1 63
1 63
1 63
1 63
1 63
1 61
1 59
1 57
1 53
1 52
1 51
1 49
1 48
0 48
0 40
0 36
0 33
0 32
0 31
0 31
0 31
0 35
0 37
0 48
0 50
0 50
0 50
0 50
0 50
0 50
0 50
0 49
0 49
0 49
0 49
0 49
0 49
0 49
0 49
0 49
0 52
0 55
0 58
0 58
0 57
0 57
0 57
0 57
0 57
0 56
0 56
0 55
0 55
0 55
0 54
1 53
1 50
1 46
1 43
1 40
1 38
1 38
1 38
1 38
2 38
2 38
2 38
2 38
2 38
2 37
2 38
2 38
2 38
2 38
2 39
2 39
2 39
2 39
2 39
2 39
2 39
2 39
2 39
2 40
2 40
2 39
2 52
2 52
2 53
2 52
2 65
2 65
2 66
2 70
2 70
2 74
3 74
3 74
3 74
3 74
3 74
3 74
3 74
3 74
3 77
3 77
3 78
3 79
3 79
3 78
3 76
2 76
2 76
2 76
2 75
2 74
2 74
2 75
2 75
2 74
2 74
2 70
2 63
2 56
2 57
2 58
2 64
2 65
2 68
2 71
2 74
2 76
2 79
2 81
2 81
2 81
2 83
2 83
2 82
2 82
2 79
2 74
2 72
2 72
2 72
2 72
2 72
2 72
2 72
2 72
2 72
2 72
2 72
2 72
2 73
1 73
1 73
1 73
1 72
1 72
1 72
1 72
1 72
1 72
0 72
0 72
0 72
0 72
0 72
0 72
0 71
1 85
1 86
1 86
1 86
1 87
6 111
6 125
6 128
6 131
6 133
6 135
6 146
6 146
6 146
6 146
6 135
6 135
6 133
6 132
6 119
6 119
6 114
6 114
6 112
6 108
6 109
6 110
6 110
6 110
6 111
6 111
6 111
6 111
6 111
6 111
6 111
6 110
6 112
6 114
6 115
6 117
6 120
6 120
6 121
6 121
6 121
6 121
6 122
6 124
6 124
6 124
6 124
6 124
6 123
6 123
6 116
6 116
6 113
6 110
6 110
6 110
6 110
6 109
6 112
6 114
6 121
6 125
6 126
6 127
6 127
6 128
6 128
6 128
6 129
6 129
6 129
6 129
6 129
6 129
6 129
6 129
6 129
6 130
6 131
6 131
6 132
6 135
6 135
6 136
6 136
6 136
6 136
6 137
6 137
6 137
6 138
4 138
4 136
2 130
2 127
1 117
1 119
1 119
1 120
0 114
0 71
0 69
0 71
0 73
0 78
0 78
0 79
0 78
0 80
0 80
0 85
0 85
0 86
0 88
0 90
0 91
0 91
0 91
0 92
0 92
0 90
0 88
0 88
0 88
0 87
0 87
0 87
0 86
0 86
0 86
0 87
0 87
0 84
0 83
0 83
0 80
0 78
0 78
0 77
0 77
0 77
0 77
1 76
1 74
1 74
1 74
1 74
1 75
1 74
1 72
1 71
1 69
1 68
1 68
1 67
1 68
1 68
1 64
0 61
0 62
0 58
0 58
0 63
0 65
1 64
1 63
1 64
1 63
1 65
2 66
2 67
3 72
3 74
3 74
3 74
3 74
3 74
4 73
4 73
4 73
4 71
4 68
4 68
4 67
4 80
4 81
4 81
4 81
4 80
4 80
4 80
4 80
5 79
5 79
5 79
5 78
5 75
4 75
4 75
4 62
4 59
4 55
4 57
4 56
4 54
4 54
4 53
3 53
3 51
3 51
3 44
3 43
3 43
3 43
3 41
3 46
5 46
5 46
6 46
6 46
7 46
7 46
7 46
7 46
7 43
8 44
8 44
8 44
8 44
9 47
9 47
9 47
9 47
8 47
8 46
10 46
10 46
11 46
11 46
11 46
13 47
13 47
13 47
13 47
13 47
13 47
13 47
13 46
13 46
13 46
13 46
13 46
13 48
13 49
13 49
12 48
12 48
12 47
12 46
12 45
10 41
9 39
9 34
10 32
10 32
10 32
10 31
10 34
10 32
10 31
10 30
10 23
10 23
10 23
10 23
10 23
10 23
10 23
10 22
9 22
9 22
9 22
9 22
10 22
10 24
10 24
10 24
10 24
10 24
10 24
9 24
9 24
8 24
8 24
8 24
8 24
8 24
8 24
8 24
8 24
9 29
9 29
9 29
9 30
9 30
9 30
9 30
9 30
9 30
9 30
9 34
9 34
8 34
11 186
11 189
10 181
9 181
9 180
9 180
9 179
9 180
9 181
9 182
9 186
9 192
10 192
10 192
10 192
10 192
6 38
6 38
6 38
6 38
6 38
6 36
4 36
4 36
3 36
3 37
3 37
2 36
2 36
4 40
4 40
4 40
4 40
4 40
4 43
4 43
4 46
6 46
6 46
7 45
7 47
7 48
7 48
7 48
7 50
7 50
7 50
7 50
5 46
5 46
5 46
5 46
5 46
5 46
5 43
5 43
5 43
5 43
5 43
5 43
5 43
5 43
5 43
5 43
5 43
5 43
5 43
5 43
5 43
5 43
4 42
4 40
4 39
4 39
4 39
4 41
4 41
4 41
4 41
4 41
4 41
4 41
4 41
16 42
16 44
16 44
16 44
16 44
16 44
16 44
16 44
16 44
16 45
16 45
16 44
16 44
16 48
16 45
4 48
4 49
5 48
5 47
5 46
5 56
5 55
5 57
5 59
5 59
5 60
5 59
5 52
5 50
4 50
4 50
4 52
4 53
4 54
4 54
4 55
4 58
4 58
4 58
4 58
4 58
4 58
4 57
4 57
4 57
4 57
4 57
4 57
4 58
4 58
4 58
4 55
4 55
4 52
2 53
2 53
1 52
1 48
1 48
1 48
1 48
1 46
3 48
3 48
3 49
3 49
3 96
3 97
3 97
3 97
3 96
3 96
3 96
3 96
3 96
3 96
3 96
1 96
1 96
1 98
1 98
1 52
1 52
1 51
1 51
1 51
1 50
1 50
1 49
1 49
1 49
1 49
1 47
1 47
1 47
1 47
1 47
1 47
1 47
1 47
1 46
1 44
1 44
1 45
1 45
1 45
1 45
1 46
1 46
1 44
1 45
1 44
1 44
1 39
1 38
1 38
1 43
0 44
0 44
0 46
0 38
0 38
0 36
0 34
0 34
0 32
0 33
0 33
0 37
0 37
0 36
0 31
0 32
0 33
0 33
0 32
0 29
0 29
0 29
0 29
0 29
0 29
0 29
0 29
0 30
0 30
0 29
0 29
0 29
0 29
0 29
1 29
1 29
1 29
1 29
1 29
1 29
1 29
1 29
1 29
1 29
1 28
4 27
4 27
6 28
6 28
7 30
7 29
7 29
7 29
8 29
8 29
8 29
8 29
8 31
8 31
8 31
5 31
5 31
5 30
3 28
2 28
2 28
2 28
2 28
1 28
1 29
1 29
1 29
1 29
2 29
2 29
2 29
2 32
2 32
2 33
2 33
2 33
2 32
2 32
2 32
2 32
3 34
3 34
3 34
3 34
2 35
2 34
2 33
2 32
2 32
2 32
2 32
2 31
2 30
2 30
2 23
1 21
1 19
1 18
1 16
1 16
1 16
1 16
1 16
1 16
1 15
1 15
1 14
1 13
1 14
1 14
2 15
2 15
2 15
2 15
3 15
4 26
7 156
7 156
7 156
7 169
7 168
7 171
7 171
7 171
7 171
7 171
8 171
8 171
8 171
6 171
6 171
3 31
3 31
3 31
3 32
3 32
3 32
3 33
3 34
3 34
3 34
2 34
2 34
2 34
2 32
2 32
2 32
2 32
2 32
2 32
2 32
2 33
2 31
2 31
2 31
2 32
2 31
2 31
2 40
2 43
2 43
2 45
2 45
2 45
2 46
2 46
2 45
2 49
2 50
2 49
2 50
2 50
2 50
2 51
2 51
2 51
2 51
2 51
2 51
2 51
2 51
2 51
2 51
2 51
53 51
53 52
53 52
53 54
53 72
53 77
53 86
53 95
53 99
53 102
76 116
76 117
76 122
76 122
76 124
25 123
25 123
25 124
25 128
25 128
25 128
25 127
25 125
25 125
25 126
3 128
2 132
2 134
2 134
2 135
2 135
2 135
2 135
2 134
2 134
2 121
2 121
2 121
2 122
2 122
2 122
2 122
2 122
2 122
2 122
2 122
2 122
1 122
1 122
1 122
1 122
1 123
1 123
3 122
3 121
3 121
3 121
3 122
3 123
3 124
3 124
4 129
4 129
4 135
4 135
4 135
4 136
4 136
4 136
3 136
3 136
3 135
3 135
4 136
4 131
4 129
5 130
8 129
8 130
8 130
8 130
8 137
8 136
8 131
8 131
8 131
8 131
8 131
8 132
8 132
8 132
7 135
7 135
6 135
4 133
4 133
4 133
4 134
4 134
4 134
4 158
4 158
4 157
4 148
4 120
4 112
4 111
4 113
4 111
4 110
4 102
3 102
3 96
3 96
3 95
3 95
3 95
3 95
4 92
4 92
4 92
4 92
4 92
4 91
4 89
4 87
4 82
4 81
4 81
4 80
4 80
4 82
4 82
4 83
4 83
4 84
4 92
4 91
4 91
4 91
4 92
4 96
4 99
6 103
6 110
6 110
6 111
7 114
7 116
7 116
9 114
9 114
9 116
8 116
8 116
8 116
8 117
8 115
8 114
8 114
8 113
7 107
7 107
8 101
8 101
9 101
9 101
9 102
9 104
11 119
11 119
11 123
11 123
10 122
10 116
10 116
10 115
10 115
10 114
10 114
10 116
10 111
10 115
10 114
10 113
10 114
10 120
10 126
10 125
10 129
10 135
10 137
10 135
10 139
10 140
10 147
10 150
10 150
10 150
11 150
11 125
11 130
11 130
11 131
11 130
11 129
11 130
11 125
11 128
11 128
11 128
11 130
11 132
11 132
11 132
11 132
11 132
11 132
10 132
10 132
10 132
13 132
13 132
13 132
13 131
13 132
13 132
13 132
13 135
13 135
13 135
13 133
13 134
13 133
13 133
13 131
13 122
10 122
10 120
10 120
10 120
9 117
9 113
8 105
8 102
8 101
7 101
7 98
7 97
7 97
5 97
5 97
5 95
5 95
5 95
5 95
5 94
5 99
5 99
5 101
4 101
4 101
4 101
4 101
4 101
2 101
2 100
2 99
2 99
1 85
1 85
1 81
1 81
1 81
1 81
5 83
5 83
6 84
6 80
6 79
6 68
6 55
6 51
6 47
6 48
6 48
6 44
6 41
6 40
6 40
8 39
8 37
8 37
8 36
8 36
8 49
10 51
10 52
10 54
9 54
9 54
9 48
9 49
9 48
9 48
9 48
9 48
9 46
9 46
9 46
9 46
9 46
9 46
9 45
9 45
9 31
9 31
9 31
9 31
9 32
9 32
9 32
9 31
9 30
9 31
9 30
9 30
9 29
9 27
9 27
9 27
9 29
9 29
9 29
9 29
9 29
9 29
9 29
9 29
9 29
9 29
9 29
9 29
9 29
9 29
9 29
9 29
9 28
9 28
9 28
9 28
9 28
9 28
10 28
10 28
11 31
11 31
11 27
11 27
11 25
11 27
12 29
12 30
12 30
12 31
12 31
12 31
12 31
12 31
12 34
12 34
12 34
12 34
12 33
12 33
8 31
8 30
7 28
7 28
7 27
7 27
7 27
7 27
7 28
7 27
7 27
6 28
6 29
6 29
6 38
6 47
6 62
8 65
8 74
8 75
8 74
7 70
7 69
7 68
7 68
7 69
7 69
7 69
7 69
7 69
6 69
6 69
6 70
6 70
6 71
6 71
6 71
5 71
5 73
5 73
5 72
5 72
5 73
5 73
5 72
5 72
5 72
5 72
5 72
5 71
5 71
5 71
5 71
5 71
5 71
5 71
5 69
5 69
5 69
5 69
5 69
5 69
5 69
5 69
5 69
7 69
7 70
7 70
7 70
7 72
7 72
7 72
7 72
7 73
7 73
7 73
7 73
9 73
10 74
10 74
9 71
9 70
9 69
9 69
9 70
9 69
8 66
8 66
8 66
9 65
9 65
9 65
9 65
9 68
9 66
9 66
9 64
9 65
9 65
9 65
9 65
9 65
9 66
9 66
8 65
8 65
8 66
8 65
8 65
8 60
8 59
8 59
8 56
8 41
6 25
6 20
6 15
6 15
7 24
7 24
7 25
7 34
7 34
7 34
7 43
7 43
7 43
7 42
7 42
7 43
7 45
7 47
7 68
7 68
6 59
6 59
6 59
6 58
6 58
11 2350
11 2350
11 2349
11 2349
11 2349
11 2350
11 2350
11 2350
11 2350
11 2350
11 2350
11 2353
11 2355
11 2355
11 2355
6 63
9 141
9 141
9 141
9 141
9 141
9 141
9 141
9 141
9 141
9 141
7 141
7 139
7 139
7 139
7 137
4 60
4 61
4 61
4 62
4 62
4 62
4 62
2 62
0 62
0 62
0 61
0 61
0 61
0 61
1 60
1 60
1 60
2 131
2 131
2 131
2 131
275 134
275 138
277 138
277 138
277 139
278 139
278 143
278 146
278 147
277 148
277 148
277 146
277 145
276 78
276 78
4 75
3 75
1 75
1 75
1 71
1 71
0 71
0 71
0 71
0 71
0 71
0 71
0 71
0 72
0 72
0 63
0 63
0 63
0 54
0 54
0 54
0 54
0 54
0 53
0 50
0 49
0 27
0 28
0 27
0 41
0 41
0 42
0 42
0 43
0 43
0 43
0 43
0 43
0 42
1 42
1 42
1 42
1 42
1 42
1 26
1 26
1 26
6 26
6 25
6 25
6 25
6 25
6 25
6 25
5 25
5 25
5 25
6 25
6 25
6 25
6 25
6 26
1 26
1 26
1 25
1 24
1 23
1 21
1 21
1 21
1 22
1 22
0 22
0 22
0 22
0 22
0 22
0 22
0 22
0 22
0 22
0 22
0 24
0 25
0 27
0 27
0 27
0 28
0 27
0 27
0 25
0 22
0 19
0 18
0 18
0 19
0 21
0 21
0 20
0 20
1 19
1 19
1 19
1 19
1 19
1 19
1 19
1 19
1 19
1 19
1 19
1 19
1 19
1 18
1 17
1 18
1 18
1 19
1 19
1 19
1 19
1 19
1 19
1 19
1 29
1 31
1 33
1 33
1 34
1 34
1 34
1 32
1 32
1 32
1 33
1 33
1 34
3 34
3 34
3 34
3 36
3 37
3 37
3 37
3 40
3 44
3 51
4 52
4 53
4 59
4 69
4 72
2 72
142 77
142 77
142 78
142 78
142 78
142 78
143 78
143 77
143 78
142 78
142 78
143 80
143 80
143 81
143 81
143 80
143 80
143 79
143 79
3 75
3 76
2 76
2 76
2 77
2 77
2 79
2 82
2 82
2 83
2 81
2 80
2 79
2 79
2 79
2 78
2 78
2 78
2 78
2 78
2 78
2 78
2 78
2 76
2 75
2 75
2 77
2 77
1 77
1 77
1 78
1 78
1 78
1 78
1 80
1 80
1 80
1 80
1 80
1 80
1 80
1 81
1 80
1 79
1 79
1 78
1 78
1 78
1 78
1 78
1 78
1 77
1 63
1 61
1 61
1 61
1 60
1 61
1 61
1 63
1 63
1 63
1 64
1 64
1 63
3 65
3 65
3 64
3 63
3 64
3 64
3 63
3 58
3 55
3 50
3 51
3 49
3 43
3 34
3 32
3 32
1 32
1 32
1 32
1 32
1 32
2 32
2 32
2 31
2 30
2 29
2 29
1 27
1 27
1 27
1 27
1 27
1 27
1 27
1 27
1 27
1 27
1 27
1 27
1 25
1 25
1 24
1 22
1 27
1 26
1 26
1 26
1 25
1 25
1 25
1 25
1 25
1 25
1 27
19 28
19 32
19 32
19 31
19 32
19 30
19 30
19 29
20 29
20 29
20 28
20 28
20 28
20 28
20 28
2 25
2 25
2 25
2 26
2 29
2 47
2 49
2 50
2 51
2 57
3 57
3 57
3 57
3 56
3 55
5 55
5 55
5 55
5 55
5 55
5 54
5 54
5 54
5 54
5 54
5 51
4 51
4 51
4 51
4 52
2 52
2 49
6 49
6 48
6 48
5 48
5 49
5 49
5 50
5 52
5 67
5 69
5 80
5 85
5 89
5 91
6 92
7 92
7 91
4 91
4 91
4 92
4 92
4 93
4 91
4 91
4 91
4 91
4 91
4 91
4 93
4 92
3 91
3 92
3 92
2 92
1 93
1 94
1 95
1 96
1 96
1 96
1 96
1 96
1 91
1 90
1 88
1 88
1 88
1 89
1 90
1 92
1 91
1 98
1 98
1 96
1 95
0 95
0 95
0 96
0 104
2 106
2 106
114 121
114 121
114 122
114 122
114 122
114 122
114 122
114 122
114 122
114 122
114 121
114 113
114 100
112 102
112 107
0 107
0 101
0 104
0 104
2 103
2 103
2 103
2 103
2 103
2 103
2 103
2 103
2 103
2 103
2 102
2 102
2 102
2 102
2 103
2 103
2 103
2 102
2 102
2 102
2 102
2 102
2 102
2 101
2 101
2 101
2 100
2 99
2 71
2 65
2 65
2 67
2 65
2 66
2 66
2 67
2 67
2 67
2 69
3 70
3 69
3 69
3 69
3 69
3 69
3 69
3 68
3 67
3 64
3 64
3 63
3 62
3 62
3 62
2 59
2 59
2 59
2 59
2 59
2 60
2 60
2 60
2 59
2 59
2 60
2 61
2 65
2 68
2 66
2 67
2 67
2 62
2 62
2 62
2 64
2 64
2 65
2 65
2 56
2 55
2 55
2 55
2 55
2 54
2 54
2 54
2 54
2 54
2 56
2 61
2 63
2 94
2 95
2 92
2 90
2 89
1 76
2 75
2 73
2 73
2 73
2 73
2 73
2 74
2 74
2 75
2 75
2 75
2 79
2 79
2 80
2 80
1 80
1 80
1 79
0 79
0 79
0 79
0 79
0 79
0 78
0 78
0 78
0 78
0 79
0 79
0 79
0 79
0 79
0 80
0 80
0 79
0 80
0 81
0 81
0 83
0 83
0 84
0 84
0 83
0 83
0 83
0 83
0 83
0 83
0 83
0 83
0 83
0 83
0 83
0 83
0 83
0 83
0 83
0 82
0 82
0 82
0 82
0 82
0 81
0 81
0 81
0 81
0 81
0 79
0 78
0 71
0 67
0 67
0 67
0 67
0 66
0 66
0 65
0 65
0 65
0 62
0 60
0 59
0 59
0 59
0 59
0 59
0 59
0 58
0 57
0 57
0 57
0 57
0 51
0 48
0 18
0 16
0 16
0 16
0 15
0 15
0 15
0 15
0 15
0 15
0 15
0 15
0 14
0 14
0 13
0 13
0 12
0 9
0 9
0 8
0 8
0 8
0 8
0 8
0 8
0 8
0 8
0 8
0 8
0 8
0 8
0 8
0 7
0 7
0 7
0 6
0 6
0 6
0 6
0 6
0 6
0 4
0 2
3 1
3 1
3 1
3 2
3 2
3 2
3 3
4 5
4 14
4 17
4 17
4 17
5 17
5 17
5 17
5 17
5 17
5 17
5 17
5 17
5 17
5 17
5 17
5 17
5 18
5 18
5 18
5 18
5 18
5 18
5 18
5 18
5 18
5 18
5 18
5 18
5 18
5 18
5 18
5 18
5 19
5 19
5 19
5 20
5 20
5 20
5 20
5 20
5 20
5 20
5 22
5 22
5 22
5 22
5 22
5 22
5 24
6 27
6 39
6 48
6 52
6 61
6 66
6 87
8 90
8 95
8 102
8 104
8 110
9 113
9 114
9 115
9 116
10 121
10 120
10 123
10 124
10 137
10 136
10 137
8 139
8 141
8 141
8 142
7 143
7 151
7 156
7 155
7 160
7 161
7 161
7 162
7 162
7 162
7 163
7 163
7 163
8 171
8 171
8 171
5 171
5 173
5 173
5 171
5 172
5 172
4 171
4 168
4 160
4 158
4 158
4 158
3 158
5 158
5 158
5 158
5 157
5 157
5 157
5 157
5 157
5 157
5 156
5 156
5 156
5 156
5 156
5 156
3 156
3 156
3 156
3 156
3 156
3 156
3 156
3 156
3 158
3 158
3 158
3 160
3 164
3 167
3 167
3 168
3 170
4 174
4 175
4 177
4 177
4 177
4 175
4 175
4 175
4 175
4 175
4 176
4 173
3 170
3 157
3 147
3 143
3 135
3 126
3 105
3 105
3 102
3 102
3 98
3 98
10 99
10 99
10 100
10 104
9 100
9 98
9 97
9 96
10 81
10 81
10 80
10 78
10 77
10 76
10 75
10 74
10 66
11 66
12 66
14 103
15 110
15 110
15 111
14 111
14 112
14 111
14 111
14 111
13 103
13 115
13 115
13 115
13 116
24 218
25 220
25 220
25 220
26 220
26 223
26 223
27 222
27 222
27 222
27 222
27 222
27 224
27 226
27 226
27 226
26 226
26 226
26 226
26 226
26 226
26 225
26 225
26 225
26 230
26 230
26 230
26 233
26 237
26 237
26 237
26 238
27 241
27 242
27 243
27 246
30 250
30 250
30 246
30 249
30 251
30 250
30 248
29 244
29 244
29 242
29 242
29 242
29 242
29 242
29 242
29 252
29 253
29 253
29 253
30 254
30 252
31 252
31 251
31 251
31 251
31 251
31 251
31 251
31 250
31 250
30 238
24 238
24 235
24 233
23 227
23 227
22 227
22 228
22 228
22 228
22 228
22 229
22 229
22 230
22 230
22 230
22 229
22 229
21 228
20 229
17 181
17 178
18 178
18 179
18 179
18 181
18 182
18 182
18 182
18 182
18 169
18 167
17 167
16 165
6 62
7 62
7 62
8 62
8 62
8 62
7 61
7 61
7 61
7 61
7 63
7 64
7 63
7 62
7 62
7 62
7 69
10 73
10 73
10 73
9 73
9 72
9 72
9 72
9 67
9 68
9 68
9 64
9 63
9 66
9 68
9 67
8 65
8 63
8 62
6 60
5 55
10 334
10 331
10 329
10 327
10 327
10 326
10 325
10 325
10 325
10 325
10 325
10 325
10 325
10 325
10 321
5 41
33 674
33 673
33 674
33 674
33 674
33 674
33 674
33 674
33 674
33 676
33 676
33 681
33 681
6 51
5 50
5 50
5 54
5 53
5 89
5 86
5 85
5 85
5 85
5 85
5 85
5 85
5 85
5 85
5 83
5 83
5 83
5 83
5 82
5 46
5 46
4 46
4 45
4 45
4 43
4 42
4 42
4 42
4 42
4 42
4 42
4 42
4 42
4 42
4 42
4 42
4 42
4 42
4 42
4 42
4 42
4 42
4 42
4 40
4 39
4 37
4 37
2 37
2 36
2 27
0 21
0 21
0 21
0 21
0 21
0 21
0 16
0 16
0 16
0 15
0 15
0 15
0 15
0 15
0 15
0 14
0 14
0 14
0 14
0 14
0 14
0 14
0 14
0 14
0 14
0 14
0 14
1 14
1 14
1 14
1 14
1 14
1 14
1 14
1 14
1 14
1 14
1 14
1 14
1 14
1 14
1 14
1 14
1 15
0 16
0 11
0 9
0 2
0 2
0 2
0 2
0 2
0 2
0 2
0 2
0 3
0 3
0 3
0 3
0 2
0 2
0 2
0 2
0 2
1 6
1 6
1 9
1 9
1 9
1 9
1 10
1 10
1 9
1 11
1 11
1 11
1 11
1 11
1 11
1 11
1 11
0 9
0 9
0 9
0 10
0 9
0 9
0 9
1 9
1 9
1 9
1 9
1 10
1 10
1 10
1 10
1 10
1 10
1 10
1 9
1 9
1 10
1 10
1 10
0 10
0 10
0 10
0 10
0 10
0 10
0 9
0 9
0 10
0 11
0 11
0 11
0 11
0 11
0 14
0 15
1 19
1 19
1 19
1 19
2 19
2 19
2 21
2 28
2 28
2 27
2 27
2 28
2 36
2 37
2 41
2 41
3 42
3 42
4 42
3 42
5 43
5 42
6 43
6 43
6 43
6 43
6 43
6 43
6 43
6 45
6 45
4 45
4 45
3 45
3 45
1 44
1 44
0 44
0 44
0 44
0 44
0 44
0 44
0 44
0 40
0 40
0 39
0 39
0 39
0 39
0 39
0 39
0 43
0 41
0 41
0 42
0 43
0 43
0 43
0 43
0 43
0 43
0 43
0 43
0 43
0 43
0 43
0 43
0 46
0 47
0 48
0 45
0 48
0 48
0 51
0 51
0 51
0 53
0 53
0 53
0 53
0 54
0 54
0 54
0 54
0 55
0 56
0 59
0 63
0 64
0 66
0 65
0 73
0 75
0 83
1 90
1 122
1 129
2 134
2 145
2 147
2 158
2 159
2 184
2 184
2 187
2 184
2 182
2 181
2 182
2 182
2 183
2 175
2 175
2 171
2 171
2 170
2 170
2 170
2 170
2 170
2 172
2 171
2 171
2 171
2 171
2 171
2 171
2 171
2 169
3 170
3 171
3 174
2 175
2 176
2 179
2 182
2 186
2 186
2 189
2 189
2 192
2 192
2 192
2 198
2 198
2 198
2 198
2 199
2 201
2 202
2 204
2 201
2 203
2 205
2 207
2 208
2 210
2 214
2 216
2 216
2 218
2 219
2 224
2 240
2 258
3 266
5 279
5 284
5 283
5 292
5 295
5 295
5 298
5 300
5 300
5 301
5 302
5 303
5 305
5 308
5 307
5 305
6 306
6 305
6 310
6 310
6 307
6 301
7 301
7 300
7 299
7 294
7 290
7 278
6 266
6 212
6 209
6 204
6 205
6 209
6 211
6 214
7 189
9 189
9 188
9 190
9 190
9 190
9 192
9 206
9 211
9 213
9 214
9 214
9 214
10 214
10 215
10 216
7 223
7 225
7 223
7 222
7 222
7 222
7 222
7 223
7 224
8 229
8 228
7 227
7 227
7 223
7 220
7 220
7 218
7 220
7 219
7 221
7 217
7 219
7 227
7 244
7 274
7 287
7 309
8 323
8 332
8 337
8 341
8 341
8 349
8 349
8 347
8 348
8 345
8 355
8 360
8 370
8 378
9 384
8 386
8 395
8 396
8 383
8 381
6 377
5 366
5 365
5 368
5 373
5 380
5 382
5 382
5 383
5 386
5 394
5 395
5 401
5 399
5 401
5 412
5 416
3 417
3 427
3 421
3 421
3 424
3 433
4 468
8 555
10 587
14 667
15 688
15 693
15 695
15 698
15 698
15 696
15 694
15 691
15 688
15 686
15 686
15 687
15 687
15 687
15 687
15 686
15 684
16 670
29 748
29 751
29 751
29 751
29 752
29 751
28 750
28 748
28 742
28 746
28 746
28 747
28 748
28 749
28 749
28 749
28 745
27 739
27 740
27 740
27 740
27 741
27 740
27 729
27 727
27 727
27 724
27 723
27 727
27 726
27 711
27 667
27 623
27 629
27 624
27 625
27 624
27 627
27 625
27 628
27 623
27 628
29 642
29 646
29 649
29 634
29 624
28 611
28 603
28 594
28 585
28 593
30 597
31 595
31 591
34 598
34 591
34 585
34 583
34 575
34 567
36 580
36 584
36 580
36 578
36 572
36 569
36 557
36 555
36 553
36 532
36 530
36 518
36 512
37 514
37 511
37 502
38 483
35 406
31 337
31 318
27 276
26 280
26 290
27 331
27 346
27 352
27 355
27 363
27 365
26 364
26 371
26 374
26 375
26 376
26 381
26 387
22 411
22 411
21 410
12 327
12 329
12 329
12 333
12 333
12 333
12 336
13 335
13 335
13 331
13 343
13 342
13 340
13 340
13 342
13 343
13 345
13 345
13 344
13 343
13 343
13 342
13 345
12 346
12 352
12 352
12 351
12 352
12 346
12 347
12 345
12 342
12 341
12 333
12 331
12 335
12 335
12 333
12 334
12 330
12 326
12 321
8 306
8 302
6 300
6 296
6 297
6 299
6 315
6 311
6 305
6 284
6 282
5 280
5 278
4 280
4 281
4 283
4 283
4 283
4 284
2 272
2 270
2 269
2 267
2 263
2 262
3 263
3 265
3 265
3 250
3 248
3 248
4 252
4 253
4 253
4 254
3 264
3 262
3 261
3 258
3 254
3 251
3 238
2 186
2 180
2 176
2 173
2 164
3 159
3 155
3 150
3 147
3 147
3 146
3 211
3 202
3 184
3 183
3 183
3 181
3 180
3 182
3 181
3 180
3 179
3 176
3 175
3 176
3 185
4 184
4 195
4 199
4 201
4 202
4 202
4 202
4 203
5 227
5 229
6 229
6 228
6 228
7 228
7 219
7 220
7 255
7 261
7 264
7 264
7 266
7 267
7 266
8 266
8 266
8 263
8 267
8 268
8 273
8 277
8 278
8 278
8 280
8 282
8 282
8 282
8 281
8 281
8 264
9 268
9 267
10 268
10 263
10 263
10 263
10 263
10 264
10 263
10 263
10 261
10 258
10 255
10 254
10 252
9 252
9 251
8 250
8 253
9 260
9 260
9 264
9 264
9 264
8 260
8 259
8 259
8 257
8 242
8 242
8 242
8 242
8 242
8 242
8 240
8 240
8 240
7 240
7 240
7 240
6 240
6 240
5 240
5 239
5 239
5 239
5 167
172 177
174 171
174 171
174 172
174 167
174 168
174 174
174 174
174 175
174 176
174 177
174 177
174 176
174 164
173 149
173 146
172 146
4 134
4 134
4 133
4 133
4 132
3 108
3 107
3 108
3 108
3 109
3 109
3 110
3 110
3 74
2 67
2 63
2 62
2 61
2 62
2 62
2 63
2 63
2 63
2 61
2 60
2 52
2 50
2 49
2 48
2 46
2 48
2 47
1 49
1 53
1 55
1 53
1 51
1 53
1 52
1 52
1 52
1 53
1 59
1 57
1 71
1 74
1 80
2 94
2 104
2 105
2 107
2 107
2 107
2 106
2 101
1 97
1 99
1 95
1 95
1 95
1 95
1 95
1 95
1 96
1 96
1 97
1 97
1 97
1 101
1 101
1 101
1 100
1 100
1 100
1 101
1 101
1 103
1 104
1 104
1 104
1 103
1 103
1 103
1 103
1 103
1 103
1 103
1 103
1 102
1 97
1 95
1 94
1 94
1 93
1 93
3 93
3 93
3 93
3 93
3 92
3 91
3 91
3 91
3 91
3 90
3 90
3 85
3 84
3 83
3 83
3 83
3 82
3 82
3 82
3 82
3 82
3 82
3 81
3 83
3 87
4 91
5 109
5 109
5 110
5 111
5 111
5 111
5 111
5 112
5 112
5 110
5 111
6 109
6 107
6 109
6 126
6 125
6 125
6 126
6 124
6 123
6 131
6 125
6 125
6 108
6 108
6 101
5 84
5 79
5 79
5 79
5 79
5 82
5 85
5 114
5 117
5 121
5 122
5 122
5 122
5 122
5 123
5 124
5 127
5 128
5 128
5 128
5 132
5 128
5 128
5 132
5 133
5 132
5 133
5 132
5 133
5 134
5 132
5 132
5 132
5 133
5 133
5 133
5 133
5 133
5 133
5 132
5 132
5 133
5 132
5 132
5 132
5 148
5 148
5 148
3 147
3 148
3 148
3 148
3 148
3 148
3 155
3 155
3 156
4 160
4 160
4 160
4 160
4 160
4 160
4 160
4 160
4 160
4 160
4 161
4 162
4 162
4 162
4 160
3 151
2 146
1 130
1 133
1 135
1 138
1 138
1 139
0 139
0 138
0 138
0 137
1 137
1 140
2 143
5 154
5 139
5 139
5 139
5 140
5 140
5 140
5 127
5 129
5 126
5 127
7 132
7 133
7 138
7 138
7 137
7 136
7 136
12 147
12 145
12 122
12 119
12 120
12 119
24 121
24 121
24 124
24 125
24 126
24 123
24 121
24 119
25 117
25 116
25 116
25 115
25 115
25 114
25 114
13 112
13 113
13 105
13 105
13 106
13 110
13 110
13 110
13 110
13 110
13 110
13 110
13 110
13 110
13 111
13 111
15 112
15 112
15 112
15 97
15 97
15 96
15 96
15 96
15 96
15 97
15 97
15 97
15 89
15 91
15 90
16 90
16 93
18 110
18 114
18 116
19 118
19 118
21 122
23 154
23 159
24 169
25 173
25 178
25 177
25 176
25 177
25 173
25 170
25 169
25 168
25 167
25 167
25 166
25 166
25 166
25 166
24 167
22 162
22 153
21 151
20 146
20 146
20 147
20 148
20 147
20 147
20 147
20 147
20 146
20 146
20 144
18 139
18 141
18 136
19 136
17 135
18 140
18 140
14 130
14 130
14 129
14 129
14 127
14 128
14 126
13 138
12 136
12 140
12 144
12 144
12 144
12 146
12 151
12 152
12 152
12 152
12 150
12 150
12 151
12 151
12 151
12 153
12 153
12 139
12 135
12 137
12 137
12 137
12 137
12 143
12 143
12 144
12 144
12 143
13 144
13 146
13 145
13 145
13 144
13 144
13 144
13 143
13 143
13 143
13 143
13 145
13 144
13 144
13 144
12 144
11 143
11 141
7 126
14 144
17 144
24 143
26 143
28 142
29 106
29 104
29 89
28 89
28 87
28 87
28 87
28 87
28 87
28 87
28 85
28 85
28 85
28 85
28 85
28 85
28 85
28 85
28 85
29 85
29 85
29 84
30 90
30 91
31 90
31 92
31 92
31 97
31 98
31 107
31 110
31 111
31 111
31 112
30 130
30 130
30 130
31 132
31 130
30 132
30 138
30 139
30 140
30 139
30 140
30 162
30 163
30 163
30 165
30 168
30 164
30 165
30 162
29 164
29 162
29 165
29 165
29 166
31 168
31 168
31 168
32 168
32 170
32 168
32 168
32 168
32 187
32 185
32 185
32 186
32 186
32 182
32 183
32 181
31 181
31 179
31 179
31 180
31 180
31 180
31 180
31 180
31 180
31 180
31 180
31 183
31 183
31 182
31 182
31 182
31 183
32 187
32 192
27 193
27 194
22 169
17 170
10 169
10 170
10 166
10 167
11 166
11 167
11 164
11 165
11 165
11 166
11 166
11 166
11 166
11 166
11 166
11 166
12 171
14 172
14 179
14 179
14 182
14 182
13 182
13 182
13 182
12 173
12 169
12 168
12 168
12 168
12 168
12 168
12 159
12 157
12 155
9 155
9 154
9 137
9 138
9 137
9 135
9 136
9 134
9 130
9 129
9 127
9 129
9 126
9 103
9 103
7 102
7 102
7 100
7 99
7 101
7 101
7 95
7 94
7 121
7 124
7 128
7 127
7 127
7 127
6 128
6 126
6 125
6 125
6 123
6 105
6 105
6 103
6 103
6 103
6 101
6 101
6 101
6 101
6 101
6 101
6 100
6 100
6 100
6 100
6 100
6 100
6 100
6 99
6 97
6 97
6 96
6 96
5 95
5 95
4 89
4 85
2 83
2 83
2 81
2 79
2 79
1 78
1 75
1 74
1 74
1 73
1 72
1 72
1 72
1 70
1 70
1 70
1 70
1 70
1 70
1 69
0 63
0 61
0 56
0 56
0 53
0 53
0 53
0 53
0 53
0 53
0 53
0 53
0 53
0 53
0 53
0 53
0 53
0 53
0 53
0 53
0 53
0 53
0 51
0 51
0 51
0 51
0 51
0 51
0 51
0 49
0 47
0 47
0 44
0 43
0 43
0 43
0 42
0 42
0 41
0 41
0 39
0 32
0 1
0 0
0 0
0 0
0 1
0 2
0 4
0 9
0 11
0 13
0 13
0 13
0 13
0 13
0 13
0 13
0 13
0 13
0 13
0 13
0 14
0 17
0 23
0 24
0 24
0 24
0 27
0 27
0 28
0 28
0 28
0 28
0 28
0 30
1 34
1 47
1 50
1 56
1 56
2 57
3 57
4 58
4 58
4 63
4 75
4 84
4 85
4 85
4 85
4 87
4 87
4 87
4 88
4 88
4 88
4 88
3 88
4 89
4 90
4 90
4 90
4 90
4 91
4 91
4 91
4 91
4 91
4 91
4 91
4 91
4 91
4 91
4 91
4 92
4 96
4 96
4 98
4 101
4 101
4 101
4 101
4 101
4 101
5 103
5 104
5 104
5 104
5 108
5 108
5 111
5 111
5 111
5 108
5 108
6 109
6 111
6 111
6 111
5 111
5 114
17 667
17 672
17 672
17 672
17 672
17 670
17 669
17 665
17 663
17 662
17 663
17 663
17 664
17 666
18 680
18 683
6 125
6 126
6 126
6 130
6 129
6 127
6 121
6 119
6 119
6 119
6 118
6 118
6 118
6 119
6 121
6 121
6 123
6 120
5 116
5 103
5 101
5 109
5 110
5 111
4 113
4 112
4 105
4 95
4 90
4 90
4 90
4 90
4 90
4 101
4 101
4 100
4 100
4 100
4 99
4 100
4 100
2 99
2 98
2 98
2 98
2 97
2 97
2 97
2 97
2 85
2 85
2 87
2 87
2 87
2 103
2 103
2 104
2 104
2 98
2 105
2 107
2 106
2 108
2 111
2 111
5 119
5 118
5 118
5 117
5 117
6 115
6 113
6 112
6 109
6 109
6 109
6 109
6 109
5 107
5 106
5 106
5 106
5 105
5 103
5 103
5 103
5 103
5 103
5 102
5 102
5 102
5 101
5 99
5 99
5 98
5 97
5 97
5 96
4 79
4 74
4 75
4 76
4 77
4 81
4 81
5 81
5 83
5 82
5 86
5 86
5 86
5 85
5 85
5 85
5 82
5 82
5 80
5 80
5 79
5 79
4 78
4 63
4 62
4 61
4 59
5 59
5 59
5 59
5 57
5 57
5 57
5 57
5 57
5 57
5 57
5 57
5 57
5 57
5 57
5 57
5 57
5 57
5 57
5 57
6 58
6 58
6 58
6 58
6 58
6 60
6 60
6 59
6 60
6 60
6 44
6 44
6 43
6 43
6 45
6 38
6 40
6 39
6 37
5 34
5 34
3 27
3 26
3 27
3 27
3 27
2 25
2 25
2 25
2 25
2 25
2 25
2 26
2 26
2 26
2 26
2 26
2 26
2 26
2 25
2 25
2 25
2 25
2 25
2 25
2 25
4 26
4 26
4 26
4 26
4 26
4 28
4 28
5 32
5 33
6 33
6 33
13 41
13 41
13 36
13 34
13 35
12 32
25 32
25 32
27 32
27 32
28 32
28 32
28 32
31 32
33 32
35 32
35 32
35 32
35 32
35 32
35 32
36 32
37 32
37 32
36 32
36 32
36 32
36 32
36 32
36 32
36 32
36 32
37 32
38 32
42 32
45 32
46 32
47 32
47 32
52 32
54 32
55 32
66 32
67 31
69 31
74 31
80 31
88 31
109 27
109 28
110 28
113 30
124 31
126 35
150 46
151 47
152 47
152 48
153 48
152 45
152 44
152 45
152 45
152 45
152 45
152 45
152 45
152 45
152 45
152 40
152 40
152 40
152 40
152 37
152 36
152 35
151 35
153 35
160 39
163 39
186 39
211 39
234 41
249 41
254 41
254 41
257 41
262 42
263 44
266 44
268 43
270 43
271 43
271 38
273 37
277 33
277 33
276 28
276 28
276 28
270 22
270 24
299 28
299 27
299 27
298 27
284 27
284 27
283 27
281 27
279 27
279 27
278 27
278 27
278 27
276 27
275 27
246 24
248 24
248 24
248 24
247 24
246 24
246 24
247 24
247 24
248 24
248 24
248 24
248 24
248 24
247 24
246 24
242 24
237 24
228 24
228 24
227 24
217 24
213 24
208 24
207 24
194 24
192 24
190 24
189 24
184 24
181 24
169 24
169 23
167 24
163 22
157 20
154 16
132 12
133 12
134 12
135 13
139 13
139 13
140 13
140 12
140 12
140 12
140 16
140 17
140 18
140 18
142 18
142 18
142 18
142 18
143 18
143 18
136 18
121 18
121 18
129 18
110 18
107 18
86 18
79 18
59 16
47 16
45 16
45 16
44 14
40 13
41 13
40 13
41 13
40 13
40 13
40 13
40 13
39 13
39 13
39 13
39 13
39 14
40 14
40 11
40 11
40 11
40 11
40 11
40 12
40 12
40 12
40 12
40 12
40 12
41 12
41 12
40 12
40 12
42 77
42 77
42 77
42 78
42 78
42 78
42 78
42 78
42 78
42 78
41 78
41 78
41 78
41 78
41 78
41 78
41 78
41 78
40 78
38 13
38 14
40 14
529 14
529 14
841 16
841 17
841 17
841 17
841 17
841 17
854 17
854 17
854 17
854 16
853 14
853 14
853 14
374 13
372 13
60 11
52 11
52 10
52 11
52 11
51 11
38 11
38 11
35 10
30 5
30 5
30 5
24 5
24 5
24 5
24 5
24 5
24 5
24 5
24 5
23 5
21 5
19 5
19 5
16 5
16 5
16 5
16 5
16 5
16 5
16 5
16 5
16 5
15 5
15 5
14 5
14 5
14 7
14 7
14 7
14 7
14 7
13 6
13 6
13 6
13 6
13 6
13 6
13 6
13 6
13 5
13 6
13 6
13 6
13 6
13 6
13 6
12 6
12 6
12 6
12 6
12 7
12 7
11 6
10 6
10 6
10 6
10 6
10 6
10 6
10 6
10 6
10 6
10 6
10 6
10 6
10 6
10 6
10 6
9 6
9 6
7 6
7 6
0 6
0 6
0 6
0 6
0 7
0 7
0 7
0 7
0 7
0 7
0 8
0 11
0 13
0 13
0 14
0 20
0 23
0 23
0 25
0 25
0 25
0 27
1 28
56 34
63 36
63 36
63 36
63 38
64 41
64 43
64 49
64 51
65 51
65 50
65 50
65 50
65 50
65 50
66 50
3 42
3 42
3 43
3 43
3 43
3 43
3 43
4 43
4 45
4 45
4 45
4 45
3 45
3 45
2 45
2 43
2 43
2 43
2 43
2 43
2 43
2 43
1 43
1 43
1 43
1 43
1 44
1 46
1 46
2 45
2 46
2 46
2 46
2 48
2 48
2 48
2 48
3 48
3 48
3 47
3 48
3 48
3 48
3 48
3 48
3 48
3 48
3 48
3 48
3 49
3 49
3 49
2 49
2 49
2 49
2 49
2 49
2 49
2 49
2 49
2 49
2 49
2 48
2 54
2 56
2 58
2 58
2 59
2 59
2 59
2 58
2 58
2 58
2 64
8 68
9 68
9 68
9 69
9 69
9 72
9 69
9 70
9 68
9 66
9 67
9 68
9 69
9 68
9 68
8 67
8 66
8 62
8 62
8 65
8 65
8 66
8 66
8 66
8 69
8 69
8 70
8 71
8 72
8 72
8 70
8 71
8 71
8 71
8 69
8 69
8 69
8 69
8 70
8 70
8 70
8 70
8 70
8 71
8 71
8 71
2 72
2 72
2 72
2 72
2 73
2 77
2 85
2 93
2 104
1 106
1 108
1 112
1 112
1 113
1 113
1 113
1 114
1 114
1 114
1 114
1 114
1 114
1 114
1 114
1 114
1 114
1 115
1 115
1 115
1 115
1 116
1 119
1 118
1 119
1 119
1 120
1 124
1 124
1 125
1 125
1 123
1 117
1 113
1 111
1 112
2 110
2 110
2 110
2 110
2 110
2 110
2 109
2 101
2 93
2 93
1 94
1 95
1 94
1 94
1 90
1 90
1 91
1 92
1 91
1 89
1 85
1 84
1 83
1 83
1 87
2 88
2 88
2 88
2 85
2 86
2 85
1 85
1 85
1 81
1 81
1 79
1 77
1 76
1 77
1 78
1 77
1 77
1 77
1 77
1 77
1 77
1 77
1 77
1 77
1 77
1 78
1 78
1 79
1 79
1 79
1 78
1 80
1 80
1 79
1 71
1 55
1 46
1 44
1 44
1 45
1 44
1 43
1 41
1 41
2 59
2 59
2 60
2 59
2 59
2 59
2 59
2 59
2 60
2 64
2 64
2 64
3 64
3 64
3 64
3 64
4 62
4 60
4 59
4 60
4 61
4 61
4 57
4 58
4 57
4 57
4 57
4 59
3 59
3 58
3 56
3 56
3 56
3 56
3 56
3 56
3 56
3 56
3 56
3 55
3 55
3 55
3 54
3 54
3 53
3 53
49 58
49 58
49 58
49 58
49 58
49 58
49 58
49 57
49 57
49 53
48 52
48 51
48 51
48 51
48 55
48 55
2 50
2 50
2 49
2 49
2 49
2 49
2 49
2 50
2 50
2 50
2 50
2 50
2 50
2 50
2 52
2 53
2 52
3 52
3 52
47 52
47 52
47 52
47 52
47 50
47 50
47 48
47 48
47 48
47 47
47 48
47 47
47 47
46 47
46 46
2 45
2 45
2 45
2 45
1 28
1 28
1 26
4 29
4 29
4 29
4 29
4 29
4 28
4 24
4 24
4 23
4 23
4 23
4 23
4 22
3 22
3 22
0 21
0 19
0 18
0 17
0 17
0 17
0 17
0 17
0 17
0 15
0 15
0 15
0 15
0 15
0 15
0 16
0 18
0 18
1 20
1 20
1 20
1 20
1 21
1 21
1 21
1 21
1 21
1 21
1 21
1 21
1 20
1 20
1 20
1 20
1 23
1 23
1 23
1 23
1 23
1 23
1 23
1 24
1 19
1 19
1 19
1 19
1 19
1 19
1 19
1 19
38 23
38 23
38 23
38 23
38 23
38 23
38 22
38 21
38 19
38 19
38 19
38 19
38 20
38 21
38 21
38 22
35 23
26 21
4 19
2 19
1 21
1 21
1 20
1 20
1 20
1 20
1 20
1 27
1 28
1 28
1 28
1 29
1 28
1 29
1 29
1 27
1 29
1 35
1 36
1 36
1 36
1 36
1 36
1 37
1 37
1 37
2 37
2 37
2 37
2 37
2 37
2 38
2 38
141 39
141 40
141 39
141 39
141 43
141 45
141 44
141 44
141 44
141 44
139 44
139 44
139 45
139 43
139 43
0 40
0 40
0 41
0 41
0 41
0 43
0 43
0 45
0 45
0 45
0 46
1 47
1 46
1 49
1 57
39 2897
39 2900
60 2907
60 2907
60 2907
60 2907
60 2907
60 2907
60 2907
60 2907
60 2908
59 2908
59 2908
59 2908
59 2908
57 2905
57 2894
57 2890
0 47
0 46
0 46
0 46
0 46
0 46
0 51
0 51
0 51
0 51
0 52
0 53
0 52
0 52
0 50
0 49
0 49
0 49
0 50
0 48
0 48
0 43
12 43
12 43
12 43
12 42
12 35
12 35
12 33
12 33
12 33
12 34
12 30
12 27
12 25
12 25
12 25
12 25
0 25
0 25
0 33
0 33
0 33
0 33
0 33
0 33
0 34
0 34
0 34
0 34
0 33
0 33
0 33
0 32
0 32
0 33
0 29
0 28
0 28
0 28
0 28
0 29
0 29
0 29
0 29
0 37
0 39
0 41
0 41
0 42
1 45
1 47
1 45
1 47
1 47
1 49
1 50
1 47
1 46
1 46
1 45
1 45
1 46
1 46
1 46
1 46
1 46
1 46
1 46
1 47
1 47
1 47
1 47
1 47
1 47
1 47
1 47
1 47
1 47
1 47
1 48
1 48
1 48
1 48
1 48
1 49
1 50
1 51
1 51
1 51
1 53
1 53
1 53
1 53
1 53
1 53
1 53
1 53
1 52
1 52
2 53
3 54
3 54
3 55
3 56
3 56
3 56
3 56
3 56
3 56
3 56
3 54
3 54
3 54
3 54
3 54
3 54
3 55
3 55
3 55
3 47
3 47
3 48
3 48
3 48
3 49
3 49
3 51
3 51
3 51
3 51
3 53
3 53
3 54
3 54
5 52
77 58
108 57
108 57
108 57
108 57
108 57
108 57
108 59
108 61
108 50
108 49
108 45
108 45
108 43
107 42
33 37
33 37
2 35
2 34
2 33
2 32
3 33
3 33
3 33
3 33
3 33
3 33
3 33
3 33
3 33
3 33
3 33
3 32
3 32
3 32
3 32
6 31
5 31
5 31
5 31
5 31
5 31
6 31
6 31
6 31
6 32
6 32
6 32
6 32
6 33
6 34
3 33
3 34
3 33
3 31
3 31
3 31
3 31
2 31
2 31
2 32
2 32
0 34
0 34
0 36
0 35
0 35
0 34
0 34
0 34
0 34
0 34
0 34
0 34
0 34
0 34
1 34
1 33
1 33
1 33
1 32
1 32
1 32
1 32
1 32
1 32
1 32
1 33
1 33
1 31
1 31
1 29
1 29
1 29
1 32
1 30
1 30
1 33
1 35
1 68
1 72
1 81
1 84
1 87
1 95
1 105
1 105
1 107
1 112
1 112
1 121
1 122
1 142
1 145
1 151
1 158
1 160
1 162
1 162
1 163
1 163
1 162
1 161
1 162
1 162
1 162
1 162
2 162
2 162
2 162
2 162
2 167
3 187
3 190
3 192
3 194
5 195
5 198
5 201
5 201
5 201
5 201
5 201
5 201
4 201
4 201
6 201
6 201
21 201
21 201
21 199
19 196
19 196
19 197
19 196
19 196
19 199
19 199
19 199
19 199
19 199
16 199
16 197
1 197
1 191
1 191
1 191
1 191
1 189
1 190
1 191
1 191
1 191
1 191
0 191
0 191
0 191
0 191
0 194
0 195
0 195
0 195
0 194
0 194
0 194
0 194
0 195
0 195
0 195
0 195
0 195
0 196
0 198
0 199
0 198
0 197
0 200
0 195
0 193
0 149
0 144
0 137
0 136
0 139
0 135
0 136
0 137
0 135
0 128
0 126
0 116
0 167
0 144
0 144
0 139
0 138
0 136
0 138
0 138
0 139
0 139
0 139
0 139
0 141
0 143
0 148
0 152
0 159
0 171
0 172
0 171
0 153
0 139
0 137
0 137
0 137
1 137
1 137
1 136
1 136
1 136
1 136
1 136
1 136
1 137
1 138
1 139
1 139
1 139
1 157
1 158
0 159
0 163
0 165
0 165
0 172
0 170
0 173
0 174
0 177
0 179
0 180
0 180
0 180
0 182
0 184
1 184
1 184
1 184
1 187
1 187
1 187
1 187
1 187
1 187
1 188
1 188
1 201
1 198
1 198
1 199
1 202
0 202
0 202
0 202
0 201
0 200
0 201
0 202
0 202
0 202
0 201
0 199
0 198
0 198
0 196
0 193
0 191
0 191
0 187
0 186
0 185
0 183
0 181
0 181
0 175
0 175
0 175
0 174
0 175
0 176
0 117
3 300
3 296
3 295
3 286
3 287
3 284
3 284
3 283
3 283
3 283
3 283
3 281
3 284
3 282
3 285
0 100
0 99
0 100
1 100
1 100
1 100
1 100
1 100
1 100
1 100
1 98
1 98
1 98
1 98
1 97
1 98
1 96
1 96
0 94
0 94
0 94
0 94
0 72
0 73
0 74
0 75
1 70
1 73
1 65
1 63
2 64
2 65
2 61
2 58
2 58
2 61
2 61
2 60
2 58
2 58
2 59
2 62
2 61
2 62
2 63
2 63
2 63
2 62
2 62
2 62
2 49
2 49
2 49
2 49
2 49
2 49
2 49
2 48
2 48
2 47
2 51
2 51
2 51
2 51
2 51
2 51
2 51
2 51
2 51
2 51
2 52
2 52
2 52
2 52
2 52
2 52
2 52
2 53
2 53
2 56
2 56
2 57
2 62
2 78
2 84
2 91
2 94
8 1307
8 1312
8 1312
8 1318
8 1320
8 1320
8 1322
8 1320
8 1320
8 1318
8 1309
8 1307
8 1308
8 1306
8 1303
2 51
2 51
2 51
2 50
2 49
2 49
2 49
2 49
2 49
2 49
2 50
2 51
2 51
2 53
2 54
2 55
2 55
2 55
2 56
2 56
2 55
2 54
2 54
1 49
1 47
1 46
1 46
0 46
0 46
0 46
0 45
1 45
1 47
1 47
1 61
1 64
1 64
1 66
1 66
1 64
1 63
1 62
1 63
1 63
1 62
1 62
1 63
24 68
24 68
24 70
24 71
24 73
24 73
24 73
24 73
24 73
24 73
24 73
24 69
24 69
24 69
24 69
2 69
2 69
2 69
2 69
2 69
2 69
2 68
2 68
2 68
2 68
2 68
2 68
2 67
2 67
2 67
2 67
2 67
2 68
2 68
3 68
3 69
3 69
3 67
3 66
3 61
3 59
3 54
3 56
3 55
3 55
3 55
3 55
3 55
3 55
2 56
2 57
2 57
2 58
2 59
2 60
2 64
2 64
2 66
2 66
2 66
2 66
2 66
3 68
3 67
3 66
3 66
3 64
3 63
3 74
3 74
3 79
3 79
3 80
3 80
3 80
3 81
3 80
3 78
2 81
2 81
2 81
2 81
2 80
1 80
6 80
6 90
6 84
6 73
6 71
6 71
6 68
6 65
6 65
6 68
6 68
6 68
6 69
6 69
6 70
1 69
5 186
5 173
5 170
5 169
5 169
5 168
5 168
5 168
5 168
5 168
5 168
5 168
5 168
5 168
5 168
0 46
0 46
0 46
0 46
0 46
0 46
0 46
0 46
0 47
1 48
1 48
1 48
1 48
1 50
1 50
1 50
1 50
1 48
1 48
1 49
1 48
1 48
1 48
1 50
0 49
0 49
0 49
0 47
0 47
0 47
0 48
0 48
0 48
0 48
0 47
0 44
0 44
0 43
0 42
0 41
0 38
0 37
0 36
0 37
0 38
0 38
0 38
0 38
0 38
3 38
3 38
3 38
3 37
3 25
3 25
3 22
4 22
4 21
4 21
4 21
4 20
4 22
4 21
6 20
3 38
3 39
3 44
3 49
3 49
3 52
3 55
3 55
2 55
2 56
2 56
2 56
2 56
2 56
1 53
1 55
1 55
1 55
1 54
1 53
1 53
1 53
1 53
1 53
1 53
1 52
1 52
1 53
1 53
1 54
1 54
1 55
1 55
1 57
1 58
1 58
1 58
1 59
2 59
2 59
2 59
2 59
2 59
2 59
2 59
2 60
2 60
2 60
2 60
2 59
2 59
2 60
2 61
2 61
2 61
2 60
2 60
2 60
2 59
2 57
2 57
2 57
2 57
2 57
2 58
2 58
2 60
2 60
2 60
2 60
2 60
2 60
2 61
2 61
2 61
2 61
2 61
2 61
2 61
2 61
2 60
2 60
2 60
2 60
2 60
2 60
2 60
2 61
2 61
2 62
2 62
2 64
2 65
2 65
2 64
2 63
1 62
1 62
1 86
1 82
1 56
1 52
1 52
1 52
1 53
1 53
1 52
1 53
1 53
1 53
1 54
1 57
1 53
1 54
1 58
1 65
1 66
1 66
1 66
1 66
1 66
1 66
1 66
1 67
1 68
1 69
1 66
1 65
1 65
1 63
1 57
1 57
1 57
1 55
1 54
1 54
1 54
1 53
0 53
0 53
0 53
0 53
0 54
0 54
0 54
0 52
0 52
0 52
0 53
0 52
0 53
0 52
0 51
0 52
0 52
0 52
0 52
0 52
0 53
0 53
0 53
0 53
0 53
0 53
0 52
0 52
0 49
0 49
0 48
0 48
0 48
0 49
0 48
0 48
0 48
0 49
0 49
0 49
0 50
0 50
0 50
0 51
0 51
0 51
0 51
0 51
0 51
0 50
0 50
0 49
0 51
0 51
0 51
0 52
0 52
0 51
0 51
2 52
2 28
2 28
2 28
2 28
2 39
2 39
2 37
2 37
2 37
2 36
2 36
2 36
2 35
2 35
2 35
0 33
0 31
0 30
0 30
0 30
0 30
0 30
0 30
0 30
0 30
1 29
1 27
1 26
1 26
1 26
1 26
1 26
1 26
1 27
1 27
1 27
1 30
1 30
1 30
1 30
0 30
0 30
0 30
0 31
0 30
0 30
0 30
0 30
0 29
0 29
0 29
0 29
0 26
0 26
0 29
0 29
0 29
0 29
0 28
0 29
0 28
0 28
0 28
0 28
0 28
0 28
0 29
0 29
0 29
0 29
0 29
0 34
0 40
0 39
0 40
1 46
1 46
2 46
3 51
3 52
3 55
4 59
4 60
4 63
4 67
5 67
5 67
5 67
5 69
5 69
5 66
5 66
5 64
6 63
6 61
6 64
6 64
6 66
6 66
6 68
6 68
6 70
6 70
6 71
6 59
6 59
6 60
6 61
6 63
5 66
5 67
5 67
5 67
5 69
5 72
5 71
5 71
6 71
6 71
6 71
6 71
6 71
6 71
6 71
6 71
6 71
6 71
6 71
6 73
6 73
6 73
6 73
6 74
6 74
6 74
6 74
6 75
6 75
6 75
6 79
6 79
6 80
6 80
6 80
6 80
6 80
6 81
6 82
6 83
6 83
6 89
6 89
6 89
6 89
6 87
6 87
6 90
6 90
6 90
6 90
6 90
5 91
5 91
5 91
5 93
5 92
5 92
5 91
6 90
6 90
6 89
6 80
6 76
6 76
6 77
6 77
6 77
5 76
4 66
4 64
3 59
3 55
3 55
3 54
3 54
3 54
3 55
3 54
3 53
3 54
3 54
3 55
3 56
2 53
2 53
2 51
2 51
2 48
2 48
2 50
2 49
2 48
2 47
2 50
3 125
3 125
3 126
3 124
3 122
3 119
3 116
2 115
2 117
2 117
2 116
2 116
2 116
2 116
2 113
2 113
2 113
1 37
1 37
1 37
1 37
1 37
1 39
1 39
1 37
1 38
1 38
1 38
1 40
1 41
1 41
1 41
1 40
1 40
1 40
1 34
1 31
1 31
1 31
1 31
1 34
1 34
1 34
1 31
1 31
1 31
1 27
1 27
1 26
1 28
1 28
1 28
1 29
1 37
1 38
1 38
1 39
1 39
1 39
1 39
1 37
1 37
1 38
1 39
0 41
0 41
0 41
0 41
0 41
0 41
0 40
0 40
0 40
0 40
0 40
0 40
0 40
0 40
0 40
0 40
0 40
0 40
0 38
0 39
0 38
0 38
1 38
1 36
1 37
1 37
1 42
1 42
1 44
1 44
1 45
1 58
1 59
2 61
2 62
2 62
2 62
2 62
2 60
2 60
2 61
2 62
2 63
2 63
2 61
2 62
2 62
2 62
2 62
2 62
2 62
2 62
2 62
2 62
2 62
2 62
2 63
2 63
2 61
2 61
2 61
2 60
2 60
2 60
2 58
2 57
2 57
5 57
5 57
5 57
5 58
5 58
5 58
5 58
5 58
5 58
5 55
5 54
5 54
5 55
5 55
5 56
2 55
2 56
3 56
4 53
4 52
4 52
4 51
4 42
4 42
4 42
4 42
4 41
4 41
4 41
4 41
4 41
4 40
4 60
3 59
3 59
3 59
3 61
3 61
3 61
3 61
3 62
3 62
3 62
3 62
3 62
3 62
3 62
3 41
3 41
4 45
4 59
4 59
5 60
4 62
4 63
4 63
5 69
5 67
6 67
6 62
6 62
6 59
6 59
8 166
8 150
8 149
7 149
7 148
6 148
6 148
6 148
5 148
5 148
4 148
4 148
4 150
7 354
7 354
7 353
5 245
5 245
5 245
5 245
5 245
5 245
5 245
5 245
5 245
5 245
5 244
5 244
2 39
2 39
2 39
2 39
2 39
2 39
2 39
2 39
2 39
2 39
2 39
2 39
2 39
2 39
2 40
2 46
2 48
2 48
2 49
2 49
2 49
2 47
2 47
2 47
2 47
2 46
1 46
1 46
1 46
2 81
3 81
3 84
3 88
3 88
3 87
3 87
3 87
3 87
3 87
3 88
3 89
3 89
3 89
3 91
3 92
3 93
3 94
3 94
3 95
3 94
3 95
3 95
3 95
3 95
3 95
3 95
3 95
3 94
2 87
2 77
2 77
2 74
2 72
2 71
2 71
2 65
2 65
2 65
2 65
2 65
2 65
2 65
3 65
3 65
3 65
3 66
3 66
3 66
3 66
3 66
3 66
3 67
3 67
3 67
3 65
3 65
3 65
3 65
3 65
3 69
3 69
3 69
3 70
3 70
3 70
3 70
3 70
3 71
3 71
3 71
3 71
3 72
3 73
3 73
3 70
3 70
3 70
3 71
3 70
3 70
3 70
3 70
3 70
3 70
3 69
3 63
3 61
3 61
3 60
3 60
3 60
3 60
3 60
3 60
3 60
3 61
3 59
3 59
3 59
1 27
1 27
1 24
1 20
1 21
1 23
1 25
1 25
1 25
1 26
1 25
1 24
1 23
1 24
1 22
1 19
1 20
1 21
1 21
1 21
1 20
1 20
1 20
1 20
1 20
1 20
1 20
1 21
1 22
1 22
1 22
1 22
1 22
1 22
1 22
1 22
1 22
1 24
1 25
1 25
1 25
1 25
1 26
0 26
0 26
0 26
0 26
0 26
0 26
0 26
0 26
0 26
0 25
0 25
0 25
0 25
0 25
0 24
0 24
0 24
1 25
1 25
1 25
1 25
2 47
2 50
2 50
2 49
2 49
2 49
2 48
2 48
2 48
2 46
2 46
2 46
1 46
1 47
1 46
0 24
0 24
0 24
0 24
0 24
0 24
0 24
0 24
0 24
0 25
0 25
0 25
0 25
0 25
0 25
0 27
0 27
2 27
2 29
2 29
2 30
2 30
2 32
2 32
2 31
2 31
2 30
2 30
2 32
2 34
2 33
2 34
0 34
0 33
0 32
0 30
0 30
0 29
0 29
0 29
0 28
0 28
0 28
0 28
0 28
0 29
0 29
0 29
0 28
0 27
0 27
0 27
0 30
0 31
0 31
0 31
0 31
0 30
0 28
0 28
0 28
0 29
0 29
0 31
0 32
0 34
0 35
0 36
0 39
0 39
0 41
0 42
0 43
0 44
0 45
0 46
0 48
0 48
0 48
2 54
2 54
2 56
2 57
2 58
2 59
2 63
2 61
2 63
2 66
2 69
2 71
2 76
2 77
2 77
2 77
0 72
0 70
0 69
0 68
0 68
0 67
0 67
0 68
0 69
0 70
1 80
1 80
1 80
1 83
3 82
3 82
3 82
3 82
3 82
3 80
3 78
3 77
3 76
3 76
3 81
3 77
3 78
3 78
3 78
1 78
1 78
1 78
1 76
1 77
1 75
1 75
1 74
1 74
1 74
1 74
1 76
1 77
2 79
2 79
2 79
2 79
2 81
2 83
29 728
29 728
29 727
29 727
29 730
29 730
29 730
29 730
29 730
29 727
29 726
29 726
29 726
29 727
29 727
2 84
2 82
2 82
2 81
2 76
2 72
2 70
2 69
2 69
2 65
2 65
3 65
3 66
3 64
3 64
3 61
3 62
3 62
3 62
3 64
3 64
3 63
3 63
3 63
3 62
3 62
3 59
2 49
2 42
2 42
2 42
2 42
2 42
3 43
3 76
6 77
6 78
6 78
8 78
176 102
176 103
176 103
177 103
178 104
178 104
178 103
178 106
177 96
177 96
177 102
177 69
179 69
179 69
180 69
9 45
9 45
9 45
9 45
9 54
9 54
9 56
9 51
9 52
9 51
9 51
9 51
7 51
7 51
7 51
6 51
6 50
6 50
6 50
6 50
6 50
6 50
6 50
6 48
6 47
5 45
5 45
5 45
5 45
5 43
5 42
5 43
5 43
5 45
5 45
5 45
5 46
5 46
5 47
5 47
5 47
6 48
6 48
6 47
7 48
7 48
7 48
7 48
7 48
7 48
7 48
7 51
7 52
7 57
7 57
7 57
7 56
7 58
7 57
7 58
7 59
7 59
7 58
7 58
7 56
7 54
8 53
8 60
9 60
9 60
9 60
9 61
9 61
9 61
9 62
9 61
9 60
9 60
9 62
6 62
7 62
6 62
6 61
7 61
7 61
7 61
6 60
6 60
6 60
6 61
6 60
6 58
6 54
6 54
6 55
6 48
6 49
6 51
5 51
5 52
5 51
5 51
5 51
5 51
5 42
7 42
7 40
7 40
7 41
7 41
7 41
8 41
8 42
8 44
8 45
8 44
8 45
9 45
9 45
9 45
7 45
7 45
7 45
8 45
8 45
8 45
8 45
8 45
8 45
8 45
8 45
8 44
7 45
7 43
7 43
7 43
7 42
7 42
7 42
6 42
6 41
6 40
6 40
6 40
5 40
5 40
5 40
5 40
5 40
5 40
5 40
5 37
5 33
5 31
5 31
5 31
5 31
5 29
5 29
5 27
5 27
5 28
5 28
5 28
5 28
5 27
4 27
4 20
3 20
3 20
3 20
3 20
3 20
3 20
3 19
3 19
3 20
3 20
3 18
2 18
2 19
2 21
2 21
2 22
2 25
3 27
3 28
3 29
3 30
3 29
3 29
3 29
3 29
3 29
3 28
3 28
3 27
3 25
3 26
3 25
2 25
2 28
2 28
2 28
2 28
2 30
2 30
2 32
2 31
2 31
2 31
1 31
1 30
1 28
1 26
1 26
1 25
1 25
1 25
1 25
1 25
1 26
1 26
0 36
0 38
1 39
1 42
1 47
1 52
1 52
1 53
1 53
1 52
1 52
1 52
1 52
1 52
1 52
1 52
1 52
1 52
1 52
1 52
1 52
1 52
1 52
1 52
1 52
1 52
1 52
1 54
1 54
1 54
1 54
1 54
1 54
1 55
1 55
1 54
1 60
1 69
1 72
1 75
1 77
1 81
1 81
1 81
1 81
1 81
1 84
1 84
1 87
1 88
1 99
1 105
1 106
1 109
1 109
1 110
1 108
1 107
1 107
1 107
2 106
2 105
2 101
2 100
2 102
2 102
2 102
2 102
2 108
2 109
2 116
2 117
2 117
2 118
2 119
1 119
1 119
1 119
1 116
1 114
1 114
1 114
2 111
2 116
2 115
2 116
36 117
36 116
36 116
36 116
36 115
36 114
36 113
36 113
36 113
36 113
36 113
36 113
36 113
35 116
35 102
1 98
1 98
1 98
1 96
1 95
1 96
1 96
1 96
1 96
1 97
2 98
2 100
2 100
2 100
2 100
2 101
2 101
2 103
2 106
2 106
2 114
2 114
2 118
2 121
2 137
2 164
1 166
1 165
1 168
1 170
1 170
1 170
1 170
1 171
1 170
1 156
1 150
549 155
549 156
549 152
549 156
549 156
549 157
549 157
549 156
549 155
549 157
549 156
549 153
549 140
549 136
549 135
549 133
5 128
3 128
1 128
1 128
1 128
1 128
1 128
1 128
1 129
1 130
1 135
1 137
1 139
1 142
1 135
1 136
1 131
1 134
1 135
1 134
1 134
1 134
1 134
1 134
1 134
0 134
0 134
0 134
0 134
0 128
0 128
0 127
0 127
0 127
0 129
0 133
0 133
0 133
0 133
0 133
0 134
0 134
0 138
0 139
0 139
0 135
0 135
0 135
1 157
1 155
1 154
1 155
1 153
1 153
1 153
1 153
1 152
1 151
1 149
1 149
1 150
1 152
1 151
1 131
1 130
1 129
1 129
1 121
1 121
1 113
1 111
1 92
1 61
1 60
1 59
1 51
1 49
1 50
1 53
1 53
1 54
1 54
1 57
1 57
1 57
1 57
1 59
2 57
2 57
2 58
2 57
2 57
2 57
2 56
2 56
2 55
3 55
3 52
3 52
3 52
3 53
3 51
3 51
3 51
3 51
3 51
3 51
3 51
3 49
3 44
3 38
3 35
2 34
2 34
2 34
2 34
2 33
2 33
2 33
2 33
2 33
2 33
2 33
2 33
2 33
2 33
2 33
2 33
2 33
3 33
3 33
3 33
3 33
3 33
3 31
3 27
3 27
3 27
3 27
3 27
3 26
3 26
3 22
3 21
5 21
5 19
5 19
5 19
5 19
6 20
6 20
6 21
6 21
6 21
6 21
6 21
6 21
6 22
6 22
7 22
7 20
7 16
7 17
6 16
7 17
7 17
7 17
7 17
7 17
7 18
7 18
7 19
7 19
7 25
7 25
7 24
7 24
7 23
7 22
7 21
7 22
7 22
7 23
7 23
7 23
7 25
7 27
6 27
6 27
6 26
6 26
6 26
6 27
6 27
6 27
6 27
6 27
6 29
6 31
6 31
6 31
6 31
7 32
7 32
8 32
8 32
8 32
8 32
8 31
8 31
8 32
8 32
8 33
8 32
8 32
8 31
8 31
8 31
8 31
8 31
8 31
8 31
8 31
8 31
8 31
8 31
8 31
8 31
8 31
7 31
7 31
7 31
7 31
7 31
7 31
7 31
7 31
8 34
8 36
8 37
8 38
8 41
8 43
8 45
7 45
7 45
7 45
7 45
6 44
6 43
6 43
6 43
6 43
6 45
6 46
6 46
6 48
6 47
6 47
6 47
6 47
6 48
6 46
6 47
5 46
5 47
5 47
5 47
5 46
5 46
5 46
5 49
5 49
6 53
6 54
6 54
6 54
6 55
6 55
8 54
12 57
12 57
12 56
12 55
12 54
12 54
12 52
12 52
12 52
14 55
14 56
14 58
14 57
14 57
14 57
14 57
14 56
14 54
14 52
14 52
14 52
14 52
13 51
13 51
12 51
12 51
12 51
12 50
12 50
12 50
12 50
12 50
12 49
12 49
12 49
12 49
12 49
12 49
12 50
12 50
12 50
12 55
12 56
12 58
12 61
12 62
12 62
12 62
12 62
12 62
12 62
12 63
12 63
12 62
12 63
12 63
12 61
11 56
11 50
11 50
11 50
11 50
11 50
11 50
10 50
10 50
10 50
10 50
10 50
10 50
10 50
10 49
10 48
10 47
10 47
10 47
10 46
10 46
10 46
9 46
9 46
9 45
9 43
9 42
9 42
9 41
9 41
9 41
9 41
9 39
9 39
9 36
9 33
8 27
8 27
7 27
7 27
5 26
5 27
4 28
2 25
2 25
2 26
2 26
2 27
2 27
2 27
0 27
0 27
0 26
0 24
0 23
0 23
0 25
0 25
0 25
0 25
0 25
0 25
0 25
0 25
0 25
0 25
0 24
0 24
0 24
0 25
0 25
0 25
0 26
0 26
0 31
0 36
0 42
0 43
0 46
0 50
0 52
0 52
0 52
0 50
0 46
0 47
0 45
0 42
0 40
0 40
0 39
0 42
0 42
0 42
0 42
0 44
0 47
0 47
0 47
0 57
0 56
0 71
0 70
0 70
0 70
0 70
0 70
0 70
0 70
0 70
0 70
0 70
0 70
0 70
0 70
0 70
0 70
0 71
0 70
0 70
0 70
0 70
0 70
0 70
0 70
0 70
0 71
0 71
0 71
0 71
0 71
0 72
0 72
0 71
0 72
0 72
0 72
0 72
0 72
0 72
0 71
0 71
0 70
0 71
0 71
0 70
0 69
0 69
0 69
0 69
0 69
0 69
0 68
0 68
0 68
0 68
0 66
0 67
0 67
0 67
0 67
0 67
0 67
0 67
0 67
0 67
0 66
0 67
0 67
0 67
0 67
0 67
0 67
0 66
0 62
0 56
0 52
0 51
0 49
0 45
0 44
0 44
0 43
0 43
0 43
0 44
0 47
0 50
0 50
0 50
0 50
0 47
0 48
0 49
0 47
0 47
0 44
0 44
0 44
0 35
0 34
0 19
0 19
0 19
0 19
0 19
0 20
0 20
0 20
0 20
0 20
0 20
0 20
0 20
0 20
0 20
0 20
0 18
0 18
0 18
0 18
0 19
0 19
0 21
0 22
0 22
0 22
0 22
0 23
0 23
0 23
0 24
0 24
0 24
0 23
0 23
0 22
0 22
0 21
0 21
0 21
0 21
0 21
0 21
0 21
0 21
0 20
0 20
0 20
0 20
0 20
0 20
0 20
0 20
0 20
0 21
0 21
0 22
0 22
0 22
0 22
0 22
1 22
1 22
1 22
1 22
1 22
1 22
1 22
1 22
1 22
1 22
1 24
1 25
1 25
1 26
1 26
1 25
1 24
1 26
1 28
1 28
1 28
1 29
1 29
1 28
1 26
1 23
1 23
1 22
1 22
1 23
1 22
1 23
1 23
1 25
1 25
1 26
1 25
1 25
1 25
1 25
1 25
1 25
1 25
1 25
1 24
1 24
1 24
1 24
1 24
1 24
1 25
1 25
1 25
1 25
1 25
1 25
1 25
1 26
1 26
1 26
1 26
1 24
1 24
1 24
1 24
1 24
1 23
1 23
1 23
1 22
2 22
2 22
2 22
2 22
2 24
2 24
2 24
2 24
2 23
2 24
2 24
2 23
2 23
2 23
2 23
2 23
2 23
2 24
2 25
2 25
2 25
2 25
2 25
2 23
2 22
2 22
2 22
2 22
2 22
2 22
2 23
2 24
2 25
2 25
2 25
2 26
2 33
3 33
3 33
3 33
3 29
3 28
3 26
2 25
2 25
2 25
2 25
2 25
2 25
16 25
16 25
16 24
16 24
16 25
16 29
16 29
16 29
16 29
16 29
16 28
16 27
16 29
16 31
16 27
2 27
3 27
3 27
3 27
3 26
3 26
3 26
3 26
3 26
3 26
3 26
3 26
3 26
3 27
3 27
3 27
3 27
3 27
6 27
6 27
6 27
6 28
6 28
6 27
6 27
6 28
6 28
6 28
6 28
6 27
6 27
6 27
6 27
6 27
6 27
6 27
5 27
5 27
5 27
5 26
5 25
5 24
5 24
5 24
6 24
6 24
7 24
7 24
7 24
7 24
7 25
7 25
7 25
7 25
7 24
7 24
7 24
7 24
7 24
7 24
7 25
7 24
7 22
7 21
7 21
7 21
7 21
7 21
7 21
7 21
6 21
6 20
6 13
6 13
6 13
6 14
6 14
6 14
6 14
6 14
6 14
6 15
6 15
6 16
6 16
6 16
6 16
6 16
6 16
6 16
6 11
8 13
8 13
8 13
8 13
8 13
8 12
8 9
8 8
8 7
8 8
7 8
7 8
7 7
7 7
7 6
8 6
8 7
9 7
9 7
9 7
9 7
9 7
9 7
9 7
9 7
9 7
9 7
6 7
6 8
6 8
6 9
6 9
6 8
6 8
6 7
6 7
6 7
6 7
6 7
6 7
6 12
6 12
6 21
7 22
7 22
7 21
7 21
6 21
6 21
6 21
6 21
6 21
6 22
6 22
5 23
5 23
5 23
5 24
5 24
5 23
5 23
5 23
5 23
5 23
5 23
5 23
5 23
5 23
5 23
5 22
5 22
5 22
5 22
5 22
5 22
5 22
5 22
5 22
5 22
5 22
5 22
5 22
5 23
5 24
5 24
5 24
6 25
6 25
6 25
6 25
7 28
7 28
7 29
7 29
7 29
7 29
7 29
7 29
7 29
7 28
5 26
5 26
5 26
5 26
5 26
5 26
5 26
5 26
5 26
5 27
5 27
5 27
5 27
5 27
6 27
5 28
5 28
4 28
4 28
4 28
4 28
4 28
4 28
4 28
4 28
4 28
4 28
4 28
4 28
4 28
3 29
3 29
3 29
3 29
3 29
3 29
3 29
3 30
3 31
3 30
3 24
3 24
3 15
2 14
2 14
2 14
2 14
2 14
2 13
2 13
2 13
2 13
2 13
2 13
2 13
2 13
2 13
2 15
2 16
2 16
2 17
3 17
3 17
3 17
3 17
3 17
3 17
4 17
4 17
4 17
4 17
4 17
4 17
4 18
4 18
4 18
4 18
4 18
4 18
24 54
24 54
24 54
24 54
23 55
23 55
34 55
1878 137
1878 138
1878 140
1878 140
1877 138
1877 137
1879 137
1879 137
1879 137
1879 136
1859 101
1859 101
1859 100
1859 100
1859 100
6 15
4 16
4 14
4 14
4 14
4 14
2 14
2 14
2 12
4 13
4 13
4 13
4 13
4 13
4 13
4 13
4 13
4 13
4 14
4 16
4 17
4 17
4 17
4 17
2 16
2 16
2 16
2 16
2 16
2 15
2 15
2 15
2 15
2 15
2 15
2 15
2 15
2 14
2 14
2 14
2 14
3 14
3 14
3 16
3 16
3 16
3 16
3 16
3 16
3 17
3 17
3 17
3 17
3 17
2 15
2 15
2 11
2 10
2 10
2 10
2 10
2 10
2 10
2 10
2 10
2 10
2 10
1 10
1 10
1 10
1 10
1 10
1 9
1 9
1 9
1 9
1 9
1 9
1 9
1 12
1 12
1 13
1 13
2 15
2 15
1 15
1 15
1 15
1 15
1 15
1 16
1 16
1 16
1 18
1 18
1 18
1 18
1 18
0 18
0 18
0 22
0 23
0 23
0 23
0 23
0 23
0 23
0 23
0 23
0 23
0 23
0 23
0 23
0 23
0 23
0 23
0 18
0 18
0 17
0 14
0 15
0 15
0 15
0 15
0 16
0 16
0 17
0 17
0 17
0 17
0 17
0 17
0 17
0 17
0 20
0 19
0 19
0 20
0 22
5 129
5 129
5 129
5 128
5 127
5 127
5 127
5 126
5 126
5 126
6 128
6 128
6 128
6 128
6 130
6 134
1 27
1 28
1 29
1 29
1 32
2 32
2 32
2 33
2 33
2 33
2 33
2 33
2 33
2 33
2 33
2 33
2 33
2 33
2 33
2 33
2 33
1 33
1 33
1 32
1 29
1 29
1 29
1 29
1 27
1 27
1 27
1 27
1 27
1 28
1 29
1 29
1 29
1 29
1 27
1 27
1 27
1 29
1 29
1 29
1 30
1 30
1 30
1 30
1 30
1 30
1 30
1 30
1 30
2 30
2 30
2 30
2 34
2 35
2 35
2 35
2 34
2 34
2 37
2 38
2 38
2 37
2 37
2 37
2 38
2 38
2 37
2 34
2 156
2 156
3 156
3 156
3 156
4 156
4 156
4 153
4 153
4 153
4 153
4 151
4 151
4 151
4 151
4 30
4 30
3 30
3 28
3 28
3 28
2 28
1 28
1 29
1 30
1 29
1 27
1 23
1 22
1 22
1 22
1 20
1 19
1 19
1 18
1 18
1 19
1 19
1 19
1 20
1 23
1 23
1 23
1 24
1 24
1 24
1 25
1 26
1 26
1 26
1 26
1 26
1 26
1 26
1 26
1 26
1 27
1 27
1 26
1 26
1 26
1 24
1 23
1 23
1 23
1 23
1 23
1 23
1 23
1 21
1 21
1 20
1 20
3 23
3 24
3 25
3 25
3 26
3 26
3 31
3 35
2 35
2 35
2 35
2 35
2 35
2 35
2 34
2 34
2 37
2 36
2 35
2 35
2 34
2 34
2 33
2 32
2 32
2 32
2 32
2 32
2 32
2 31
2 31
2 31
2 31
2 31
2 31
2 31
2 31
2 31
2 31
2 31
2 31
2 31
2 31
2 31
2 31
2 31
2 31
2 31
2 31
2 30
2 30
2 29
2 32
2 35
2 40
2 47
2 50
2 50
2 50
2 50
2 52
2 53
2 53
2 52
2 52
2 52
2 51
2 48
2 49
2 51
2 52
3 52
3 52
3 52
3 51
3 51
3 51
3 51
3 53
3 53
3 52
3 52
3 52
3 53
3 54
3 54
3 54
3 55
3 55
3 55
2 55
2 55
2 55
2 57
2 58
2 58
2 59
1 59
1 59
1 59
0 56
0 55
0 54
0 54
0 54
0 54
0 50
0 45
0 45
0 45
0 45
0 45
0 45
0 45
0 45
0 43
0 43
0 42
0 42
1 42
1 43
1 43
1 44
1 44
1 44
1 44
1 44
1 44
1 44
1 44
1 44
1 44
1 44
1 45
0 45
0 45
0 45
0 45
0 45
0 45
0 45
0 45
0 45
0 45
0 45
0 45
0 45
0 45
0 45
0 46
0 45
0 47
0 42
0 39
0 32
0 27
0 25
0 25
0 24
0 24
0 23
0 22
0 21
0 21
0 22
0 24
0 26
0 27
0 26
0 28
0 30
0 30
0 33
0 42
0 48
0 48
0 54
0 56
0 54
0 54
0 53
0 54
0 55
1 55
1 55
1 57
1 57
2 62
2 57
2 58
2 61
2 61
2 61
2 62
2 60
2 61
2 60
2 62
2 62
2 63
2 64
2 67
2 67
2 70
2 71
2 71
2 71
2 71
2 70
2 70
2 70
2 70
2 69
2 69
2 69
2 68
2 67
2 68
2 64
2 64
2 64
2 64
2 63
2 63
2 63
2 65
2 65
2 66
2 66
2 66
2 67
2 67
2 68
2 69
2 69
2 67
3 65
8 65
8 65
8 65
8 63
10 64
10 64
10 64
10 64
10 64
10 64
10 64
10 67
10 66
10 67
10 67
7 68
10 69
10 70
11 70
9 70
9 70
9 69
9 69
9 69
9 69
9 69
9 69
9 65
9 61
9 61
9 60
3 59
3 53
3 50
3 49
2 49
2 49
2 48
2 47
2 39
2 38
2 38
2 38
2 38
1 38
2 38
2 36
2 35
2 34
2 34
1 28
1 27
1 25
1 23
1 23
1 23
4 21
4 21
4 20
4 19
4 18
4 18
4 18
4 18
4 18
4 18
4 18
4 17
4 17
4 17
4 17
4 17
1 17
1 17
1 17
1 18
1 18
1 19
3 22
3 21
5 25
5 25
5 26
5 25
5 25
5 26
5 26
5 26
5 24
5 24
5 22
5 23
5 23
5 22
5 22
5 21
5 20
5 20
5 20
5 20
5 20
5 20
5 20
5 20
5 20
5 23
5 23
5 23
5 24
5 24
5 24
5 24
5 24
5 22
5 21
5 21
5 21
5 20
5 20
5 21
5 21
5 21
5 21
5 21
5 21
5 21
5 21
5 21
5 21
5 21
5 21
5 21
6 21
6 21
6 21
6 21
6 21
6 21
6 21
6 21
6 21
6 21
6 21
6 21
6 21
5 21
5 21
5 21
5 20
5 20
4 20
4 20
4 20
4 20
4 20
4 20
4 20
4 20
4 20
4 20
4 20
4 20
4 20
4 20
4 20
4 20
4 20
4 20
4 20
4 21
4 28
4 28
4 28
4 26
4 26
4 25
4 25
4 25
2 22
0 22
0 17
0 16
0 15
0 14
1 14
1 14
1 14
1 14
1 14
1 14
1 13
1 13
1 13
1 14
1 14
1 14
1 14
1 17
1 18
0 18
0 18
0 18
0 18
0 18
0 18
0 14
0 14
0 15
0 16
0 17
0 17
0 19
0 19
0 19
0 19
0 19
1 25
1 25
51 26
51 26
51 26
51 26
51 26
51 25
51 25
51 25
51 25
51 26
51 27
51 27
51 27
51 21
51 23
51 23
0 23
1 23
1 24
1 24
1 24
1 25
1 27
1 27
1 30
1 30
1 30
1 30
1 30
1 30
1 30
1 30
1 30
1 30
1 30
1 31
1 31
1 31
1 31
1 31
1 31
1 31
1 31
1 31
1 31
1 31
1 31
1 31
1 31
1 31
1 31
2 30
2 23
2 23
2 23
2 23
2 23
2 24
2 24
2 25
2 25
2 25
2 25
3 25
3 25
3 25
3 25
3 25
3 25
3 25
4 26
5 26
4 26
4 26
4 26
4 25
4 25
4 25
4 25
3 21
3 22
3 22
3 22
3 24
3 25
3 25
3 25
3 25
3 25
3 24
3 24
3 23
3 23
3 21
3 21
3 21
3 21
3 21
3 21
3 21
3 21
3 20
3 20
3 20
3 20
3 20
3 20
3 20
3 20
3 19
3 19
3 19
3 19
3 19
3 17
3 16
2 15
2 15
2 14
2 14
2 14
2 13
2 10
2 9
2 8
2 8
2 8
2 8
2 8
3 8
3 8
3 8
3 10
3 10
3 11
3 10
3 10
3 10
3 10
3 10
3 10
3 10
3 10
3 10
3 10
3 10
1 10
1 9
1 8
1 7
1 7
1 7
1 7
1 7
1 7
1 7
1 7
1 6
1 6
1 5
1 5
1 5
1 5
1 5
1 6
1 6
1 6
4 6
4 6
4 6
4 5
4 5
4 5
4 6
4 7
4 7
4 7
4 7
4 7
4 7
4 6
4 6
4 5
1 4
1 4
1 4
1 4
1 4
1 4
1 4
1 4
1 4
1 4
1 4
1 4
1 4
1 4
1 4
1 4
1 4
1 4
1 4
1 4
1 4
1 4
1 3
1 3
1 3
1 4
1 4
1 4
1 4
1 4
1 4
1 4
1 4
1 4
1 4
1 4
1 4
1 4
1 4
1 4
1 4
1 5
1 5
2 5
2 5
2 5
1 5
1 5
1 6
1 6
1 6
1 7
1 7
1 8
1 8
1 8
1 8
1 8
0 7
0 7
0 8
0 8
0 8
0 11
0 11
0 12
0 11
0 11
0 10
0 10
0 11
0 11
0 11
0 11
0 11
0 11
0 14
0 14
0 14
0 14
0 16
0 16
0 17
0 17
0 33
1 39
1 51
1 56
1 61
1 64
2 65
2 66
3 79
4 79
4 80
4 80
4 81
4 81
4 81
4 82
3 84
3 84
3 86
3 88
3 88
3 88
3 89
22 89
22 91
21 93
21 93
21 97
21 100
22 100
22 100
22 101
22 101
22 101
22 101
22 101
22 101
22 102
4 102
4 101
4 101
4 101
4 101
4 97
3 97
3 99
3 99
3 100
3 100
3 100
3 100
3 100
3 100
3 100
3 100
3 103
3 103
3 103
3 103
3 103
3 103
3 102
3 104
3 103
3 103
3 102
3 102
3 104
3 110
3 111
3 111
3 111
3 111
3 112
3 112
3 112
3 112
5 116
5 116
5 115
5 116
5 116
5 119
5 119
5 117
5 117
5 116
5 116
5 116
5 116
5 116
5 116
5 114
5 114
5 115
5 113
5 112
5 111
5 109
5 101
4 71
4 63
3 62
3 65
4 68
4 69
4 68
4 67
4 51
4 51
4 57
4 57
4 56
4 56
4 56
4 52
4 51
4 51
4 49
4 48
4 47
4 47
4 47
5 47
5 45
5 45
6 46
6 55
6 54
6 53
6 54
6 54
6 54
6 54
6 54
6 55
6 54
6 54
4 55
4 55
4 55
4 55
4 55
4 55
4 55
4 53
4 53
4 52
4 52
4 52
4 52
4 52
4 52
4 53
4 53
4 52
4 52
4 53
4 55
4 59
4 61
4 61
4 59
4 59
4 59
4 58
4 57
4 55
4 50
4 48
4 48
4 48
4 47
4 48
4 48
4 48
4 48
3 42
3 43
3 43
3 43
3 43
3 42
3 45
3 45
3 46
3 46
3 46
3 46
3 46
3 46
3 46
3 46
2 47
2 47
2 49
2 51
2 51
2 49
2 49
3 49
3 53
3 56
3 59
3 66
3 67
3 69
3 69
3 70
3 70
3 65
3 65
3 68
3 68
3 69
3 69
3 69
3 72
3 82
3 83
3 84
4 84
4 84
4 84
4 86
4 88
4 86
5 87
5 98
5 98
5 104
5 107
5 109
5 111
5 113
5 112
5 112
5 112
5 111
5 111
5 111
5 111
5 111
5 111
5 111
5 111
5 111
5 110
5 109
5 108
5 108
5 107
5 107
5 108
5 116
5 113
5 111
5 110
5 108
5 108
5 108
5 108
5 109
5 110
4 110
4 110
4 110
4 110
4 110
4 111
4 113
4 116
4 116
4 116
4 117
5 125
5 131
5 131
5 133
5 137
5 137
5 139
5 140
5 141
5 142
5 141
5 141
5 141
5 141
5 141
4 132
4 132
4 131
4 130
5 129
7 128
7 128
7 128
7 128
7 129
7 143
7 141
7 134
7 126
6 120
6 118
6 115
6 115
6 115
6 115
3 115
3 114
4 114
4 114
4 114
3 114
3 114
3 109
3 100
3 100
3 99
4 116
4 115
4 203
4 202
4 199
4 194
4 178
4 172
4 171
4 169
4 167
4 167
4 167
4 167
4 167
2 150
2 150
2 60
2 60
2 60
2 61
2 61
2 61
2 61
2 61
2 61
2 61
2 61
3 60
3 60
3 58
3 58
3 58
3 51
3 51
3 51
3 51
3 51
3 51
3 50
3 50
3 49
3 49
2 49
2 49
2 49
2 49
2 49
2 49
2 44
2 43
2 42
2 42
2 42
2 41
3 36
3 33
3 32
3 29
3 29
4 27
4 26
4 25
4 25
4 25
4 25
4 25
4 25
4 25
4 25
4 25
4 25
3 25
3 23
5 23
4 23
4 23
4 22
4 16
3 3
3 4
3 4
3 4
3 4
3 4
3 4
3 4
3 4
3 4
1 4
1 4
0 2
0 2
0 2
0 2
0 2
0 4
0 4
0 4
0 4
0 4
0 4
0 8
0 9
0 10
0 11
0 13
0 24
0 28
0 31
0 32
0 33
0 34
0 37
0 41
0 41
0 41
0 42
0 43
0 44
0 45
0 46
0 46
0 47
0 48
0 48
0 48
0 49
0 49
0 49
0 49
0 49
0 51
0 51
0 51
0 51
0 54
0 56
0 57
0 57
0 57
0 58
0 58
0 60
0 62
0 63
0 63
0 63
0 68
0 73
0 86
0 86
0 91
0 92
0 103
0 105
0 111
0 111
0 112
0 114
0 115
0 123
0 125
0 125
0 125
0 126
0 126
0 126
0 126
0 126
0 126
0 126
0 126
0 126
0 126
0 126
0 126
0 126
0 126
0 126
0 125
0 125
0 126
0 126
0 126
0 126
0 128
0 128
0 128
0 128
0 128
0 128
0 128
0 129
0 129
0 129
0 128
0 128
0 128
0 128
0 128
0 128
0 121
0 119
0 118
0 116
0 106
0 102
0 99
0 99
0 98
0 97
0 95
0 92
0 88
0 88
0 88
0 88
0 86
0 82
0 82
0 82
0 82
0 82
0 82
0 82
0 82
0 81
9 113
9 113
9 113
9 113
9 112
9 112
9 112
9 112
9 108
9 105
9 105
9 105
9 105
9 104
9 103
9 102
0 70
0 70
1 70
1 68
1 65
1 60
1 44
2 44
2 39
2 38
2 21
2 18
2 18
2 18
2 18
2 14
2 13
2 5
1 4
1 4
1 4
1 5
1 6
1 6
1 7
1 7
1 7
1 7
1 7
1 7
1 7
1 7
1 7
1 7
1 7
1 7
1 7
1 7
1 7
1 7
1 7
1 7
1 7
1 7
1 7
1 7
1 7
1 7
1 7
1 7
1 5
1 5
1 5
1 5
1 6
1 6
1 6
2 6
2 6
2 8
2 9
5 12
7 124
7 125
7 126
7 126
7 127
7 127
7 127
7 127
7 127
7 127
8 127
8 127
9 127
9 128
9 128
9 128
9 128
9 128
9 128
9 128
9 128
10 128
10 128
11 137
11 137
11 142
11 143
11 143
11 144
11 145
11 145
11 146
11 146
11 146
11 146
11 146
11 147
11 147
11 160
11 161
11 161
11 160
11 161
11 161
11 161
10 161
10 161
10 164
10 168
10 169
10 177
10 177
10 177
10 177
10 177
10 177
10 177
10 180
10 180
10 178
10 178
10 178
10 177
10 176
10 176
10 176
10 176
10 176
10 176
10 176
10 176
10 176
10 176
10 177
10 178
10 178
10 178
10 178
10 179
10 180
10 181
10 184
10 186
10 186
10 191
10 191
10 191
10 191
10 191
10 191
11 193
90 195
90 211
90 211
90 212
89 215
87 215
86 212
86 208
85 209
83 99
81 99
81 99
81 99
81 98
81 101
81 102
0 81
0 81
0 81
0 84
0 84
0 84
0 83
0 83
0 83
0 83
0 83
0 83
0 83
0 83
0 83
0 83
0 74
0 74
0 68
0 68
0 69
0 68
0 67
0 67
0 67
0 67
0 67
0 67
0 67
0 66
0 66
0 51
0 51
0 51
0 51
0 50
0 50
0 50
0 50
0 49
0 47
0 45
0 43
0 38
0 38
0 37
0 37
0 37
0 37
0 37
0 36
0 35
0 35
0 35
5 54
5 54
5 57
5 57
5 57
5 57
5 57
5 56
5 56
5 56
5 56
5 57
5 58
5 58
5 63
5 62
5 61
5 61
5 61
6 60
6 56
6 55
6 55
6 49
6 49
6 49
6 49
6 49
6 50
7 51
7 51
7 51
8 54
12 50
13 48
13 49
13 50
13 50
13 48
13 48
13 47
11 49
11 50
11 50
11 49
11 48
11 48
13 49
13 50
13 48
13 48
13 48
13 48
13 48
13 47
13 47
13 48
13 48
13 48
13 48
13 48
13 48
13 47
13 47
11 47
11 47
11 46
11 46
11 46
11 47
11 50
11 53
11 56
11 58
11 61
11 61
11 61
11 62
11 62
11 62
11 61
11 61
11 61
11 61
11 62
11 62
11 63
11 63
11 63
11 64
11 64
11 65
11 65
11 65
11 65
11 66
11 65
11 68
11 71
11 72
7 52
7 53
7 53
7 53
7 53
7 53
7 54
7 54
7 54
7 56
7 56
7 55
7 53
7 53
7 50
7 50
7 50
7 50
7 50
7 50
7 50
7 50
7 50
7 50
7 48
7 48
8 48
7 48
7 45
6 45
6 45
6 45
5 41
1 41
1 40
1 40
1 40
1 40
1 40
1 40
1 40
1 37
1 36
1 35
0 35
0 36
0 36
0 36
0 36
0 36
0 36
0 36
0 36
0 36
0 36
0 36
0 35
0 34
0 34
0 32
0 31
0 27
0 27
0 27
0 27
0 27
0 27
0 27
0 27
0 25
0 22
0 21
0 19
0 19
0 18
0 18
0 18
0 18
0 18
0 19
0 19
0 19
0 27
0 28
0 30
0 30
0 31
0 31
0 31
0 30
0 32
0 38
0 58
0 81
0 87
0 98
0 100
2 98
3 98
3 96
3 96
4 94
4 93
4 93
4 93
4 93
4 93
5 94
5 95
5 96
5 96
5 113
3 114
3 114
3 114
3 114
2 118
2 122
2 125
2 133
6 153
6 154
6 154
6 154
6 154
6 154
6 138
6 138
6 138
6 138
6 139
6 139
6 139
6 139
6 139
6 139
6 139
6 139
6 139
6 140
6 140
6 140
6 140
6 140
6 141
6 141
6 142
6 142
6 142
6 142
6 142
6 142
6 142
6 142
6 142
6 142
7 142
7 142
7 142
7 150
7 155
7 155
7 156
7 157
7 159
7 159
7 160
11 210
11 210
11 210
11 210
11 211
11 211
11 211
11 212
11 213
11 211
11 211
11 213
11 210
11 213
11 214
11 205
11 212
11 212
11 208
11 209
11 209
11 211
11 213
11 216
11 200
11 182
11 168
11 165
11 166
11 163
11 199
10 199
10 199
10 198
10 198
10 198
10 198
10 198
10 198
10 197
9 196
9 195
9 194
9 192
9 192
9 152
14 153
16 150
16 149
16 146
16 143
16 139
15 130
13 116
13 117
13 119
13 119
13 119
13 119
13 119
13 123
13 124
13 125
13 125
13 125
13 125
13 125
13 126
13 127
13 129
13 142
13 151
13 153
13 153
13 156
13 157
13 159
13 159
13 159
13 159
13 159
13 159
13 160
13 160
13 160
13 160
13 160
13 164
13 164
12 164
12 164
12 164
12 155
12 147
12 146
12 145
12 145
12 145
12 145
12 143
8 96
8 96
8 96
8 95
8 95
8 96
8 95
8 95
8 95
8 98
8 98
8 97
8 97
8 93
8 91
8 91
8 90
8 91
8 91
9 89
9 91
9 89
9 87
9 81
9 81
9 80
9 78
9 78
9 77
9 77
9 77
9 77
9 77
9 77
9 77
8 77
8 77
8 77
8 77
8 77
8 77
8 78
8 78
8 78
8 78
8 77
2 76
1 76
0 76
0 76
0 76
0 76
0 76
0 76
0 75
0 73
0 73
0 73
0 73
0 73
0 74
0 81
0 86
0 86
0 86
1 85
1 85
1 85
1 83
1 79
1 63
1 60
1 58
1 58
1 55
1 54
1 52
1 53
1 53
1 53
1 53
1 53
1 52
1 53
1 53
1 57
1 58
1 55
1 56
1 56
1 56
1 56
1 55
1 55
1 55
1 55
1 55
1 55
1 55
1 55
1 55
1 55
1 55
1 55
1 55
1 54
1 53
1 51
1 49
1 48
1 47
1 45
1 45
1 43
1 41
1 40
1 33
1 33
1 32
1 32
1 32
1 32
1 33
1 33
1 32
1 33
1 33
1 33
1 50
1 50
1 50
1 50
2 50
2 50
2 50
2 51
2 51
2 51
2 51
2 51
2 52
2 51
2 50
2 35
2 35
2 35
2 35
2 35
1 35
1 35
1 34
1 34
1 39
1 39
1 39
1 39
1 39
1 39
1 39
1 39
1 32
1 24
1 23
1 27
1 27
0 27
0 30
0 32
0 34
0 40
0 43
0 66
0 70
0 71
0 71
0 74
0 75
0 75
0 75
0 75
0 75
0 74
0 74
0 74
0 73
0 70
0 68
0 67
0 67
0 67
0 68
0 68
0 68
0 68
0 68
0 68
0 68
0 68
0 68
0 68
0 69
0 69
0 70
0 70
0 70
0 70
0 70
0 70
0 70
0 71
0 71
0 72
0 74
0 75
0 75
0 75
0 75
0 74
0 74
0 74
0 77
0 76
0 76
0 77
0 77
0 76
0 76
0 76
0 76
0 76
0 78
0 78
0 78
0 78
0 78
0 77
0 77
0 76
0 76
0 76
0 76
0 76
0 76
0 76
0 77
0 77
0 77
0 77
0 77
0 77
0 77
0 77
0 72
0 74
0 75
0 75
0 74
0 73
0 73
0 73
0 73
0 75
0 74
0 73
0 78
0 76
0 76
0 73
0 71
0 65
0 55
0 43
0 42
0 43
0 45
0 44
0 44
0 45
0 45
0 47
0 49
0 49
0 49
0 49
0 49
0 47
0 47
0 46
0 46
0 46
0 45
0 45
0 45
0 45
0 46
0 52
0 58
0 59
0 59
0 59
0 61
0 61
0 61
0 61
0 61
0 61
0 61
0 67
0 67
0 67
0 67
0 65
0 63
1 72
1 73
1 73
1 74
1 75
1 76
1 79
1 75
1 75
1 75
1 75
1 75
1 75
1 76
1 75
1 76
1 78
1 77
1 80
1 88
2 88
9 109
9 109
9 109
9 109
9 110
9 110
9 110
9 110
9 110
9 110
9 109
9 109
9 109
9 105
9 105
8 105
3 86
3 86
3 85
3 82
3 80
4 80
4 79
4 79
4 82
4 84
4 84
5 91
5 90
5 83
5 80
5 80
5 81
5 81
5 81
5 81
5 81
5 80
5 78
5 77
5 75
5 75
5 75
5 74
5 73
5 72
5 72
5 72
5 72
5 72
5 73
5 74
5 76
5 78
6 80
7 81
7 82
8 83
8 84
8 85
9 84
10 77
11 71
11 70
13 69
13 69
13 68
13 68
13 69
13 68
13 67
13 67
13 67
13 61
13 62
13 62
13 62
13 63
13 64
12 54
12 54
12 55
12 54
12 54
12 54
12 49
12 49
12 48
12 48
12 48
12 48
12 48
12 48
12 48
12 46
12 44
13 41
13 39
13 37
12 34
11 34
12 34
12 34
12 34
12 34
12 34
12 34
12 34
12 34
12 35
12 35
12 35
12 36
11 36
11 36
11 36
11 36
11 37
11 38
11 38
11 44
10 44
10 44
10 44
11 41
11 40
11 40
10 31
10 31
10 30
10 30
10 31
10 30
10 30
10 30
10 32
10 32
11 33
11 34
11 34
10 36
11 36
11 36
11 36
11 36
11 36
11 33
11 33
11 34
11 39
12 40
12 42
15 40
15 40
14 38
14 36
15 33
14 33
15 33
15 33
14 33
14 36
13 36
13 36
11 36
11 37
11 37
7 37
7 36
7 36
6 36
5 36
6 36
5 36
5 36
5 36
5 36
5 35
6 34
6 34
6 34
6 33
6 33
6 35
6 35
6 35
6 35
6 35
6 35
6 35
6 35
6 35
6 35
6 36
6 36
6 36
6 36
6 37
6 37
6 37
6 37
5 39
8 43
8 43
8 47
8 50
8 50
8 52
8 60
8 59
8 59
8 60
8 59
8 59
8 59
8 59
8 58
5 52
5 52
5 51
5 46
5 46
5 45
5 45
5 45
5 45
5 45
5 45
5 45
5 45
5 45
5 44
5 44
5 43
5 43
5 40
5 40
4 38
4 38
4 38
4 37
3 37
3 37
3 37
3 37
3 37
3 37
3 37
3 33
3 28
3 27
3 29
3 29
3 31
3 31
3 32
3 33
3 35
3 37
3 37
2 45
2 43
2 43
2 44
2 45
2 45
2 46
1 46
1 46
1 46
1 46
1 46
1 46
1 46
1 45
1 45
1 45
1 45
0 45
0 45
0 45
0 45
0 45
0 43
0 43
0 43
0 43
0 44
0 45
0 45
0 47
0 47
0 47
0 47
0 49
0 49
0 56
0 62
0 66
0 67
0 71
0 72
0 71
0 74
13 73
13 74
14 79
14 79
14 70
14 70
14 73
14 73
14 73
14 73
14 74
14 74
15 75
15 75
15 75
16 75
3 72
4 72
6 73
6 73
405 102
405 101
405 101
405 101
405 101
405 101
405 101
405 101
405 101
405 101
405 101
405 101
405 102
405 103
405 103
1 74
1 74
3 79
20 82
20 83
21 85
21 103
21 103
21 104
21 106
21 106
21 107
21 103
21 103
21 104
21 104
21 105
22 109
4 107
4 105
4 110
4 101
4 99
4 101
4 105
4 113
4 113
4 113
4 114
5 114
5 114
5 114
5 109
5 109
5 110
5 110
5 112
5 114
5 115
5 116
5 116
5 116
5 116
5 116
4 116
4 116
4 116
216 130
215 130
215 130
215 127
215 125
215 123
222 141
222 141
222 140
222 138
222 130
222 122
222 120
222 119
222 120
10 107
10 119
10 116
9 113
9 113
9 120
2 103
2 103
2 110
2 108
2 111
2 119
2 119
2 126
2 128
2 130
2 132
2 133
2 133
2 133
3 135
3 135
3 135
3 136
3 138
3 140
3 141
3 141
3 139
3 140
3 140
3 140
3 140
3 140
3 140
3 140
4 140
4 140
4 140
4 140
3 136
3 135
3 135
2 134
2 119
3 118
3 119
3 119
3 119
3 118
3 119
3 118
3 118
3 134
3 137
3 139
3 138
3 140
3 139
3 139
3 136
2 136
2 134
2 126
2 126
2 126
2 125
2 129
2 129
2 129
2 131
2 135
2 135
2 135
2 133
2 130
2 129
2 130
2 130
2 131
2 131
2 131
2 134
2 134
2 134
2 134
2 132
2 132
2 131
2 131
2 131
2 131
2 133
2 166
2 183
2 189
2 191
2 191
2 187
2 183
2 185
2 162
2 166
2 168
2 169
2 157
2 156
2 157
2 157
2 153
2 153
2 151
2 151
2 147
2 146
2 146
2 145
1 144
1 144
1 145
1 141
1 140
1 141
1 142
1 146
1 147
1 146
0 147
0 148
0 150
0 150
0 151
0 168
0 173
0 177
0 177
0 182
0 185
0 189
0 188
0 190
0 193
0 193
0 192
0 190
0 189
0 193
0 193
0 194
0 194
0 194
0 194
0 191
1 170
3 170
3 168
3 169
3 169
3 163
3 164
3 163
3 163
3 163
3 163
3 164
3 164
4 164
4 165
4 165
4 167
4 161
4 161
4 162
4 167
4 171
4 172
4 179
4 178
4 179
4 180
4 181
4 182
4 186
4 197
4 201
4 203
4 206
4 212
4 216
4 224
4 242
4 247
4 246
4 221
6 232
7 266
7 275
7 279
7 282
7 286
7 287
7 284
7 283
7 282
7 282
7 283
7 283
7 282
8 286
8 287
8 289
8 290
8 290
8 290
8 290
9 293
9 297
9 296
9 296
9 296
5 296
5 296
5 294
5 291
5 283
5 279
5 282
5 281
5 281
5 279
5 279
5 280
5 262
5 260
5 256
5 256
5 254
5 249
5 243
5 240
5 240
5 240
5 242
5 243
5 245
5 245
5 244
5 248
5 247
5 247
5 249
5 249
5 250
5 250
5 250
5 258
5 254
5 254
5 254
5 253
5 252
5 251
5 252
5 253
5 253
5 251
5 251
5 251
5 251
5 249
6 249
6 248
6 247
6 243
7 243
7 238
7 238
7 240
7 238
7 234
7 234
7 230
7 223
7 214
7 213
7 211
7 212
7 172
7 172
7 155
7 137
7 130
7 129
7 102
5 75
4 70
4 69
4 68
4 68
4 67
7 71
7 71
7 73
7 73
7 73
7 74
8 82
36 81
35 71
35 70
35 70
35 69
35 69
35 67
35 66
34 64
34 64
34 64
35 64
37 64
38 64
38 63
38 63
37 63
10 63
10 63
10 61
10 62
10 63
10 63
10 63
10 62
10 62
10 62
10 69
10 70
10 73
10 73
10 73
10 73
10 73
10 73
10 70
10 68
10 68
14 138
14 136
15 133
15 132
15 132
15 131
15 132
15 132
15 132
15 132
15 124
15 124
15 124
15 124
15 124
11 54
11 54
11 54
11 53
11 53
11 54
11 54
11 54
11 54
11 54
10 53
10 55
10 55
10 55
9 51
9 51
9 48
9 48
9 48
9 48
9 48
9 48
9 49
9 47
9 48
9 48
9 45
9 45
9 45
9 46
9 47
9 47
9 47
9 47
9 47
21 47
21 47
22 47
22 47
22 47
19 43
19 43
19 42
19 40
18 40
18 41
17 33
17 33
17 33
17 32
5 33
5 33
4 33
4 36
4 37
4 37
4 35
4 35
4 35
2 37
2 37
2 38
2 38
2 42
2 42
2 43
2 42
2 42
3 43
3 44
3 44
3 44
3 43
3 42
3 36
3 35
3 32
3 32
3 32
3 32
3 32
3 31
3 31
3 31
3 31
3 31
3 31
2 29
2 29
2 29
2 28
2 34
2 36
2 37
2 41
2 42
3 53
3 59
3 60
3 65
3 65
3 66
3 67
3 67
3 67
3 66
3 66
4 66
4 66
4 66
4 66
4 63
4 63
4 63
4 63
4 63
4 63
4 64
4 64
4 64
4 64
4 69
4 66
4 66
4 65
4 65
4 65
4 65
4 65
4 64
4 63
4 63
4 63
4 63
4 63
4 65
4 64
3 65
3 65
3 65
3 64
3 65
3 66
3 66
3 66
3 64
3 65
3 65
3 65
3 65
3 66
6 68
6 68
6 66
6 65
6 65
6 63
6 64
6 65
6 65
6 65
6 64
6 64
6 59
6 58
6 58
3 55
3 55
2 55
2 55
2 55
2 55
2 55
2 55
3 55
3 55
3 55
3 55
4 57
4 58
5 60
5 67
5 68
5 71
5 71
5 69
5 69
5 69
5 69
5 70
5 69
5 61
5 61
5 57
6 56
6 54
6 43
6 35
6 35
6 35
6 35
6 35
6 34
6 34
6 34
6 34
6 34
5 34
5 34
5 35
3 35
3 35
3 35
3 35
3 35
3 35
3 35
3 38
3 38
3 38
3 38
3 33
3 33
3 33
3 32
3 32
3 32
3 32
3 32
3 32
3 32
3 32
3 31
3 31
3 31
3 28
3 28
3 28
3 28
4 27
4 27
4 26
4 26
4 26
4 26
4 26
4 26
4 26
4 26
4 30
4 29
4 30
4 30
4 29
4 29
4 29
4 29
4 28
4 38
4 38
4 38
4 38
4 38
4 39
4 42
4 42
4 42
5 42
4 42
4 46
4 46
4 47
5 51
5 51
5 52
5 52
5 53
9 54
8 51
8 51
7 49
7 42
6 41
7 39
7 39
7 39
7 39
7 40
7 41
7 41
7 41
7 40
3 40
3 38
3 39
3 39
3 39
3 39
2 39
2 43
2 44
2 44
2 44
2 45
2 45
2 45
2 45
2 45
2 45
2 45
2 45
2 45
2 45
2 45
2 45
2 45
2 45
2 42
2 42
2 42
2 42
2 42
2 42
2 42
2 42
2 42
2 42
2 42
2 42
2 42
2 42
2 42
2 42
2 42
2 42
2 42
1 42
1 42
1 42
1 42
1 42
1 42
2 42
2 42
2 42
2 42
2 42
2 42
2 41
2 37
2 37
2 37
2 37
2 37
2 37
3 49
3 49
3 49
3 35
3 35
3 35
3 36
4 41
4 40
4 40
4 40
4 40
4 40
4 41
4 37
3 37
3 36
2 36
2 37
2 39
2 42
2 42
2 44
2 46
3 47
3 48
3 48
3 48
3 48
3 47
3 47
3 47
3 47
3 47
3 45
3 44
3 44
3 44
3 44
3 43
3 43
3 42
3 43
3 43
3 38
3 38
3 39
3 42
3 41
3 43
3 53
3 53
3 53
3 54
3 54
3 54
3 54
3 56
3 56
3 56
3 56
3 56
3 56
3 56
3 56
3 57
3 58
3 58
3 58
3 58
3 58
3 58
3 58
3 59
3 62
3 62
3 62
3 62
3 64
3 64
3 65
3 65
3 65
3 65
3 65
3 65
3 65
2 65
2 65
2 65
2 65
2 65
2 65
2 66
2 66
2 66
2 66
2 66
2 66
2 65
2 54
2 54
2 54
2 55
2 55
2 55
2 54
1 49
1 49
1 49
1 50
1 52
1 52
1 51
5 51
5 50
5 49
5 47
5 46
5 43
5 43
5 42
5 40
5 38
4 37
4 36
4 36
4 36
4 36
0 37
0 37
0 37
0 37
0 38
0 38
0 40
0 41
0 41
0 41
0 41
0 46
0 46
0 45
1 46
1 45
1 44
1 41
1 38
1 36
1 36
7 25
7 25
7 25
7 25
7 24
7 24
7 25
7 24
7 24
7 24
7 24
7 25
7 25
7 25
7 25
1 25
1 24
1 24
1 24
2 24
2 24
2 23
2 23
2 24
2 23
2 23
2 23
2 23
2 21
2 21
2 20
2 20
2 20
2 20
2 21
2 22
2 23
2 24
2 25
2 25
2 25
2 25
2 25
2 24
2 24
2 25
2 25
2 25
2 27
2 28
2 29
2 29
2 29
2 35
2 38
2 40
26 42
26 43
26 46
26 44
26 47
26 47
26 47
26 47
26 47
26 47
26 47
26 47
26 47
26 47
26 47
2 45
2 45
2 45
2 45
2 45
2 45
2 44
2 44
2 43
2 41
2 42
2 42
2 41
2 41
2 39
2 39
2 39
2 39
2 39
2 36
2 36
2 36
1 35
1 35
1 35
1 35
1 35
1 35
1 35
1 35
1 34
1 34
1 34
1 34
1 34
1 33
1 33
1 33
1 33
1 32
1 32
1 32
1 32
1 32
1 32
1 32
1 33
1 33
0 31
0 31
0 32
0 33
0 33
0 33
0 33
0 33
0 33
0 33
0 33
0 33
0 33
0 34
0 34
0 32
0 31
0 31
0 31
0 30
0 30
0 30
0 30
0 30
0 29
0 31
0 31
0 32
0 33
0 31
0 31
0 30
0 30
0 29
0 18
0 18
0 18
0 18
0 18
0 14
0 14
0 12
0 13
0 13
0 14
0 14
0 14
0 14
0 14
0 14
0 14
0 15
0 15
0 16
0 16
0 16
0 16
0 16
0 16
0 16
0 16
0 16
0 16
0 17
0 17
0 17
0 16
0 16
0 16
0 17
0 17
0 17
0 22
0 25
0 28
0 29
0 30
0 30
0 29
0 29
0 31
0 31
0 32
0 35
0 35
0 35
0 35
0 35
0 35
0 35
0 35
0 35
0 35
0 35
0 35
0 35
0 35
0 35
0 35
0 35
0 36
1 38
1 35
1 35
1 35
1 35
1 35
1 35
1 35
1 35
1 35
1 35
1 35
1 34
1 35
1 35
1 35
0 33
0 34
0 34
0 34
0 34
0 34
0 35
0 35
0 33
0 33
0 31
0 31
0 31
0 31
0 31
0 31
0 31
0 30
0 30
0 30
0 30
0 30
0 30
0 30
0 30
0 30
0 31
0 30
0 31
0 31
0 31
0 31
0 32
0 32
0 32
0 31
0 32
0 32
0 32
0 32
0 33
0 33
0 32
0 32
0 33
0 33
0 33
0 33
0 33
0 33
0 33
0 33
0 31
0 29
0 29
0 22
0 21
0 19
0 19
0 18
0 17
0 18
0 18
0 16
0 17
0 14
0 14
0 14
0 14
0 14
0 14
0 14
0 14
0 14
0 15
0 17
0 17
0 17
0 18
0 18
0 19
0 20
0 24
0 23
0 22
0 23
0 24
0 24
0 24
0 24
0 24
0 24
0 24
0 24
0 24
0 24
0 23
0 23
0 23
0 23
0 23
0 22
0 22
0 24
0 23
0 25
1 25
1 42
1 42
1 43
1 44
1 47
1 49
1 49
1 49
1 49
1 50
1 50
1 50
1 50
1 50
1 50
1 51
0 51
0 52
0 51
0 50
0 50
0 49
0 49
0 50
0 49
0 49
0 49
0 49
0 49
0 49
0 49
0 49
0 47
0 47
0 47
0 48
0 48
0 47
0 47
0 47
0 47
0 47
0 47
0 47
0 47
0 50
0 50
0 50
0 50
0 50
0 50
0 50
0 50
0 50
0 49
0 48
0 48
0 48
0 48
0 48
0 48
0 48
0 48
0 55
0 77
0 91
1 116
1 122
1 120
1 129
1 132
1 135
3 134
3 139
3 333
3 331
3 332
3 333
3 332
3 332
3 334
3 334
3 339
3 341
3 341
3 341
3 339
3 339
3 339
3 335
3 140
3 140
3 141
3 141
3 141
3 142
3 141
3 141
3 140
3 140
3 124
3 123
3 122
3 123
3 129
3 130
3 130
3 136
3 137
3 140
3 142
3 145
3 145
3 145
3 145
3 145
3 145
3 145
3 145
3 146
3 147
3 138
3 133
3 133
3 131
3 131
3 131
3 131
3 131
3 131
3 134
3 134
3 133
3 134
3 135
3 135
3 135
3 135
3 135
3 136
3 137
6 243
6 243
6 244
6 245
6 242
6 244
6 244
6 244
6 244
6 244
6 244
6 244
7 244
7 244
7 244
5 167
5 167
5 167
5 165
5 161
5 159
5 156
5 145
5 128
5 119
2 95
3 93
2 93
2 88
2 85
2 78
2 77
2 78
2 78
2 77
2 78
2 82
2 82
2 82
2 80
2 81
2 74
2 74
2 74
2 74
2 73
2 73
2 72
2 72
2 71
2 68
2 64
2 64
2 64
2 64
2 64
2 64
2 64
2 66
2 64
2 69
2 72
2 76
2 78
2 77
2 77
2 76
2 76
2 73
2 73
2 72
2 72
2 72
2 77
4 80
4 82
4 155
4 163
4 165
4 175
4 179
4 185
4 185
4 185
4 188
4 188
4 188
4 188
4 188
4 192
4 192
4 194
4 194
4 194
4 196
4 209
3 212
3 220
3 220
3 221
3 192
3 193
3 191
3 193
3 193
3 191
3 191
3 191
3 191
3 191
3 191
3 176
3 176
3 176
3 176
3 176
3 176
3 176
3 176
3 176
3 176
3 176
3 176
3 176
3 176
4 176
4 176
4 176
6 176
6 177
6 177
8 177
9 178
9 178
9 180
9 179
9 180
9 183
9 184
11 185
11 186
11 187
12 187
12 187
12 187
12 190
12 189
12 188
12 188
12 190
12 190
13 192
13 192
13 193
13 193
13 194
13 194
13 193
13 194
14 199
14 200
14 195
14 195
14 199
14 200
14 201
14 202
14 201
14 201
15 202
15 202
15 202
16 203
16 199
14 195
14 190
14 103
14 97
15 95
15 95
15 92
15 92
15 91
15 91
15 91
16 91
16 91
16 91
16 92
15 87
15 87
15 85
15 84
15 83
15 81
15 81
15 82
15 69
15 68
15 68
15 68
15 69
15 69
15 67
15 67
15 67
16 68
16 68
16 68
16 68
16 68
16 69
16 78
16 78
16 80
16 81
16 83
16 83
16 83
16 83
16 83
16 83
16 83
17 83
18 83
18 83
17 84
17 83
15 83
15 83
15 82
11 82
9 83
9 83
9 82
9 84
9 86
9 84
8 83
8 83
8 81
8 82
8 82
8 85
8 85
9 84
9 87
20 98
21 98
21 97
21 98
20 96
20 101
20 102
20 103
20 103
21 106
21 106
21 98
20 80
20 73
20 72
20 72
20 71
20 71
20 70
20 69
20 69
20 68
20 69
20 68
20 68
20 67
20 66
20 66
20 66
20 66
20 66
19 67
27 74
28 75
28 86
28 87
28 87
28 87
27 87
27 87
27 87
27 86
27 86
27 86
27 87
27 89
31 487
31 488
31 490
31 489
31 489
32 502
32 502
32 502
32 502
32 502
32 502
32 502
32 502
32 501
32 501
32 535
29 137
29 137
30 136
30 127
30 127
29 112
30 111
35 109
33 110
34 110
34 110
34 110
34 110
33 111
33 81
33 83
33 84
33 84
33 90
33 90
33 90
33 90
33 90
33 88
33 87
33 85
33 84
33 83
33 83
33 84
33 84
33 86
33 85
33 86
33 83
32 83
32 79
32 74
20 61
20 61
20 59
20 60
20 60
20 61
20 62
20 62
20 62
19 60
19 59
19 59
19 60
19 61
19 61
19 61
19 60
19 60
19 60
19 62
19 62
19 62
19 61
19 61
19 61
19 61
19 66
19 67
19 68
19 68
19 76
18 75
10 68
10 66
10 56
10 57
10 59
10 60
10 59
10 59
10 59
10 61
10 61
10 61
10 59
10 57
10 57
11 60
11 59
11 60
11 60
11 60
11 62
11 66
11 69
10 69
10 70
10 71
10 71
9 72
10 73
10 74
10 74
9 77
9 86
9 90
9 91
9 91
4 91
2 91
2 91
2 91
2 91
2 91
2 92
2 91
2 91
2 89
2 88
2 87
2 81
2 81
2 82
2 82
2 82
2 83
2 83
2 83
2 83
2 88
2 89
2 90
2 88
2 86
2 86
2 86
2 86
2 86
2 92
2 92
2 92
2 92
2 92
2 91
2 90
2 87
2 86
2 86
2 86
2 87
2 91
2 97
2 124
2 171
2 196
2 207
2 216
2 232
2 237
2 254
2 265
2 266
2 268
2 274
2 274
2 283
2 289
2 291
2 291
2 293
2 285
2 285
2 286
2 286
2 286
2 287
2 285
2 301
2 332
2 336
2 343
2 342
2 345
2 345
2 345
2 350
2 359
1 362
1 366
1 368
1 368
1 368
1 366
1 363
1 366
1 368
1 367
0 367
0 370
0 374
0 373
0 369
0 365
0 370
0 368
0 371
209 401
209 402
209 404
209 408
209 410
209 411
209 411
209 412
209 411
209 412
209 412
209 413
209 412
209 405
209 405
209 405
0 402
0 403
0 403
0 404
0 404
0 404
0 401
0 399
0 397
0 396
0 399
0 400
0 477
0 492
0 502
0 504
0 498
0 497
0 495
0 496
0 519
0 544
0 558
0 571
0 627
0 641
0 660
0 664
0 651
0 626
0 597
0 580
0 569
0 560
0 550
0 533
0 531
0 515
0 515
0 515
0 513
0 509
0 508
0 506
0 492
0 490
0 490
0 490
0 489
0 489
0 488
0 488
1 488
1 487
1 483
1 468
1 439
1 433
1 421
1 420
1 420
2 420
2 461
2 461
2 453
2 446
3 442
3 444
3 444
3 445
3 460
3 458
3 458
3 458
3 547
3 545
3 542
2 540
2 543
2 564
2 564
2 566
2 565
2 563
2 532
2 532
2 531
2 531
2 530
2 529
2 529
2 530
2 530
2 529
2 530
2 531
2 531
2 532
2 532
2 532
2 533
2 534
2 534
2 534
2 540
3 557
3 557
3 559
3 561
3 560
3 557
4 551
4 441
4 441
4 431
4 428
4 398
4 397
4 395
4 395
5 364
5 387
6 375
8 365
8 311
8 305
8 301
8 303
8 304
8 305
8 307
8 308
8 310
8 316
8 318
8 318
8 324
8 324
8 329
8 332
8 332
8 335
8 335
8 335
8 338
9 338
9 347
9 350
9 351
9 351
9 351
11 356
11 358
11 363
11 365
11 369
11 370
11 370
11 368
11 366
10 366
10 366
10 325
10 321
10 321
9 319
8 322
8 326
8 327
7 329
7 315
7 313
7 309
7 309
7 219
7 219
7 217
7 218
7 217
7 199
7 200
8 198
8 197
8 195
8 196
8 199
8 198
8 198
8 197
8 197
10 198
10 197
10 197
10 196
10 195
10 195
10 196
10 195
10 196
10 194
10 192
10 192
10 191
10 189
10 185
9 167
9 168
9 171
9 172
9 172
9 172
8 174
8 178
8 181
8 182
8 182
8 182
8 181
6 182
6 185
6 187
6 151
6 152
4 152
4 151
4 150
4 149
4 143
4 142
6 139
6 138
6 136
6 134
6 131
6 129
6 117
6 119
6 121
6 120
6 120
6 120
6 120
6 120
6 120
6 117
6 116
6 107
6 104
6 104
6 104
6 107
5 101
5 98
5 97
5 96
5 92
5 90
5 89
5 90
5 90
5 91
5 90
5 88
5 89
5 89
10 89
10 84
10 79
10 77
10 76
10 75
10 76
10 76
10 77
10 80
10 80
9 80
9 79
9 79
9 73
4 71
4 70
4 70
4 73
4 70
4 67
4 67
4 67
4 67
4 67
2 66
2 66
2 66
2 66
2 66
2 66
2 66
2 66
2 64
2 62
2 59
3 84
3 87
3 91
3 94
3 98
3 97
3 93
3 93
3 92
3 93
3 91
3 87
3 85
3 84
3 84
3 85
3 85
3 85
3 81
3 79
3 79
3 78
3 79
3 80
3 87
4 87
4 87
4 90
2 87
2 89
2 93
2 95
2 95
2 95
2 95
2 89
3 88
3 88
3 88
3 88
3 88
2 88
2 88
2 88
2 88
2 88
2 84
2 84
2 84
2 81
2 80
1 79
1 81
1 81
1 82
2 82
2 82
3 85
3 86
3 85
3 86
3 91
3 94
4 100
4 101
4 110
4 110
4 110
4 117
5 132
5 134
5 133
5 132
5 134
5 138
5 138
5 138
5 138
5 137
5 137
5 137
5 137
5 137
5 138
5 139
4 138
4 139
4 140
4 140
4 140
4 141
4 141
4 141
4 142
4 146
4 146
4 147
4 148
4 150
4 150
3 116
3 115
3 117
3 116
3 115
3 115
4 115
4 115
4 113
4 113
10 112
10 113
10 116
13 119
15 146
15 147
15 158
15 159
15 161
15 161
15 162
15 162
15 161
15 160
15 154
15 152
15 151
15 149
15 148
15 148
15 149
15 148
16 152
16 152
16 152
16 152
16 153
16 156
16 157
17 159
17 159
17 159
17 160
15 160
15 161
15 161
15 163
15 164
15 164
15 164
15 163
15 164
15 161
15 162
15 159
15 158
15 157
15 151
15 160
15 159
15 161
15 163
15 171
14 170
14 171
15 168
15 169
15 169
15 159
15 146
15 147
15 147
15 147
15 147
15 146
15 146
15 146
15 148
15 149
15 150
15 150
15 150
15 150
15 149
15 149
15 148
15 148
15 147
15 147
15 147
15 147
15 148
15 148
14 145
13 142
13 141
12 136
12 135
12 134
12 134
12 134
12 134
12 129
12 128
12 127
12 127
13 127
13 127
13 137
13 138
8 139
7 140
7 137
5 134
3 101
3 99
3 97
3 97
4 95
4 95
4 101
4 101
4 102
4 101
4 100
4 100
4 100
4 100
4 100
4 98
4 98
4 96
3 93
2 93
2 93
2 87
2 86
2 82
2 80
1 76
1 76
1 76
2 76
2 74
2 73
2 73
2 76
2 76
2 78
2 80
2 81
2 80
2 80
2 79
2 78
2 78
2 78
1 74
1 58
1 58
1 58
1 54
1 45
1 44
1 43
1 39
1 39
1 39
1 39
1 38
1 36
1 35
1 35
1 35
1 35
1 37
1 40
1 38
1 38
1 38
2 39
2 39
2 39
2 39
2 40
2 42
2 42
2 46
3 54
3 58
3 60
3 89
3 89
3 101
5 104
5 115
5 120
4 123
4 125
4 127
4 129
4 132
4 133
3 133
3 133
3 135
2 134
2 134
2 123
0 123
0 124
0 125
0 125
0 124
0 124
0 124
0 124
0 124
0 124
0 124
0 124
0 124
0 124
0 124
0 124
0 124
0 124
0 124
0 124
0 124
0 127
0 127
0 127
0 127
0 127
0 127
0 125
0 127
0 132
0 133
0 133
0 133
0 133
0 134
0 133
0 132
0 130
0 130
0 128
0 125
0 125
0 125
0 126
0 126
0 127
0 127
0 132
0 132
0 131
0 134
0 141
0 145
0 149
0 151
0 153
0 154
0 155
0 158
0 165
0 164
0 174
0 175
0 174
0 174
0 175
0 169
0 170
0 170
0 169
0 168
0 169
0 169
0 171
0 171
0 170
0 173
0 173
0 169
0 162
0 156
0 150
0 115
0 107
0 101
0 101
0 97
0 96
0 98
0 97
0 94
0 93
0 90
0 90
0 90
0 90
0 89
0 89
0 90
0 91
0 91
0 89
0 90
0 92
0 92
0 92
0 92
0 99
0 99
0 99
0 99
0 99
0 97
0 97
0 97
0 97
0 97
0 97
0 97
0 97
0 97
0 94
0 87
0 87
0 87
1 87
1 87
1 87
1 85
1 80
1 79
1 79
1 80
1 80
1 80
1 80
1 80
1 80
1 80
1 80
1 81
0 81
0 81
0 80
0 80
0 80
0 80
0 77
0 77
0 77
0 76
0 69
0 66
0 67
0 67
0 67
0 67
113 70
114 68
114 61
114 62
114 52
114 51
114 51
114 54
114 55
114 55
114 56
114 56
114 56
114 57
114 56
112 55
111 55
110 55
0 51
0 45
0 45
0 46
0 46
0 45
0 48
0 48
0 52
0 51
0 52
0 54
0 54
0 53
0 53
0 56
0 58
0 59
0 60
0 61
0 61
0 64
0 64
0 63
0 61
0 60
0 59
0 58
0 58
0 59
0 58
0 57
0 57
0 57
0 57
0 57
0 58
0 62
0 62
0 63
0 66
0 71
0 71
0 74
0 75
0 75
0 76
1 79
1 79
1 79
1 79
1 79
1 79
1 79
1 80
2 81
2 80
2 79
2 80
2 80
2 80
2 80
2 80
3 85
3 93
3 93
3 95
3 96
3 96
3 97
3 96
2 99
2 100
2 101
3 120
3 120
3 119
3 119
3 120
3 117
3 115
3 115
3 115
3 116
3 116
3 116
3 119
3 119
3 119
3 118
3 120
3 119
3 119
3 119
3 119
3 119
3 119
3 119
3 120
3 120
3 120
3 125
3 126
3 127
3 168
3 168
3 168
3 168
3 165
3 162
3 160
3 159
3 160
3 160
3 160
3 159
3 156
3 156
3 154
3 110
3 109
3 106
3 106
3 106
3 106
3 106
3 106
3 106
3 106
3 108
3 110
3 110
3 110
5 110
5 110
5 108
5 106
5 103
5 101
5 99
5 96
5 94
5 95
5 95
5 93
5 94
5 94
4 92
113 108
111 108
112 108
112 108
112 109
112 109
112 108
112 108
112 107
112 108
112 108
112 110
112 110
112 110
112 107
2 86
2 82
1 82
1 84
1 82
1 83
1 79
1 78
1 77
1 78
1 83
0 66
0 77
2 78
2 78
2 78
2 79
2 79
2 79
2 81
2 80
2 81
2 80
2 77
2 77
3 75
3 72
3 71
3 72
3 71
3 71
5 71
5 71
5 72
5 72
5 70
5 70
5 69
5 65
5 65
5 61
5 61
5 59
5 59
5 59
5 60
2 60
2 60
2 59
2 58
2 58
2 58
2 58
2 58
2 58
2 58
2 58
2 58
2 58
2 60
2 60
2 60
2 61
2 61
2 61
2 60
2 57
2 56
2 55
2 55
2 56
2 56
2 56
2 56
2 57
2 57
2 64
2 64
2 66
2 68
2 68
2 71
2 70
2 69
2 69
2 68
2 68
2 69
2 69
2 68
2 68
2 68
2 68
2 68
2 67
2 67
2 65
2 65
2 65
2 65
2 63
2 63
2 63
2 62
2 62
2 62
2 60
2 60
2 59
2 55
1 36
1 33
1 32
0 32
0 32
0 31
0 31
0 30
0 30
0 31
0 31
0 32
0 34
0 35
0 35
0 35
0 35
0 35
0 35
0 35
0 35
0 35
0 34
0 34
0 34
0 34
0 34
0 34
0 34
0 34
0 34
0 34
0 35
0 35
0 34
0 34
0 35
0 35
0 35
0 35
0 35
0 35
0 36
0 36
0 36
0 36
0 36
0 36
0 37
0 36
0 36
0 36
0 36
0 38
0 38
0 38
0 39
0 39
0 41
0 41
0 40
0 40
0 40
0 40
0 38
0 37
0 31
0 30
0 26
1 24
1 24
1 21
1 21
1 49
1 50
1 54
1 55
1 71
1 71
1 72
1 72
1 72
1 72
1 75
1 93
1 100
1 105
2 105
2 105
2 107
2 107
2 107
2 109
2 107
2 109
2 111
2 114
2 116
2 118
2 118
2 118
2 118
2 118
2 119
2 119
2 119
2 119
2 119
2 119
2 117
2 117
2 114
2 113
2 114
2 114
2 115
2 115
2 115
2 114
2 114
2 114
2 114
2 115
2 115
2 115
2 115
2 115
2 115
3 115
3 115
3 116
3 116
3 116
3 117
3 117
3 117
3 117
3 117
3 118
3 119
3 121
3 121
3 122
3 123
3 123
3 123
3 123
3 123
3 122
3 122
3 122
3 122
3 123
3 121
3 119
3 119
3 119
3 119
3 119
3 120
3 124
3 135
3 136
3 136
3 139
3 147
3 152
3 155
3 156
2 156
2 157
2 158
2 157
2 108
2 108
2 105
2 85
2 85
2 85
2 85
1 85
1 83
1 82
1 80
1 75
1 74
1 74
1 74
1 74
1 74
1 72
1 71
1 62
1 62
1 59
1 59
1 60
1 61
1 65
1 66
1 66
1 66
1 66
1 66
1 66
1 66
1 66
1 66
1 67
1 67
1 70
1 70
1 70
1 72
1 74
1 74
1 77
1 78
1 78
1 80
1 80
1 81
1 80
1 80
1 82
1 82
1 81
1 82
0 85
0 85
0 83
0 84
0 84
0 83
0 83
0 83
0 83
0 83
0 82
0 81
0 81
0 81
0 80
0 79
0 79
0 79
0 79
0 79
0 79
0 79
0 79
0 79
0 79
0 79
0 79
0 78
0 75
0 76
0 75
0 76
0 69
0 60
0 60
0 60
0 52
0 42
0 42
0 44
0 44
0 44
0 44
0 44
0 44
0 44
0 43
0 42
0 42
0 41
0 41
0 42
0 42
1 43
1 43
1 44
1 44
1 47
1 52
1 52
1 52
1 52
1 52
1 53
1 53
1 56
1 57
1 81
0 80
0 79
0 75
0 74
0 74
0 108
0 108
0 108
0 108
0 108
0 107
0 107
0 108
0 110
1 129
1 130
1 135
1 132
1 136
1 133
1 100
1 99
1 99
1 97
1 97
1 99
1 100
1 101
1 104
1 104
1 105
1 106
1 104
1 105
1 105
1 105
1 106
1 106
1 106
1 106
1 107
1 109
1 108
1 107
1 108
1 113
1 113
1 113
1 113
1 123
1 127
1 128
1 128
1 128
2 130
2 129
2 129
2 129
2 130
3 129
3 129
3 126
3 126
3 126
3 126
3 127
3 128
3 128
3 128
3 131
3 131
3 131
3 131
3 132
4 132
4 132
4 132
4 132
4 130
4 131
4 134
4 135
4 135
4 137
4 137
4 138
4 137
4 137
4 137
4 128
4 128
4 128
4 128
5 127
7 133
7 134
10 176
10 177
10 181
10 158
10 158
17 504
17 504
17 504
17 504
17 513
17 513
17 513
17 517
17 519
17 522
17 522
17 521
17 520
16 494
16 491
9 143
9 150
9 149
9 149
9 158
9 158
9 158
9 159
9 159
9 156
9 168
9 166
9 173
9 174
9 173
9 171
9 171
9 172
9 172
9 170
9 171
9 170
9 173
9 192
9 192
9 192
9 192
9 191
9 191
9 186
9 187
9 188
9 189
9 180
9 180
9 180
9 190
9 190
8 188
8 187
8 187
8 188
8 187
7 187
7 188
7 189
7 189
9 293
9 293
10 294
10 288
10 287
9 287
9 285
9 286
9 286
9 286
9 286
9 286
9 286
9 287
10 290
10 291
10 289
9 283
9 282
9 282
9 282
9 282
9 282
9 283
9 283
9 283
9 283
9 283
9 283
9 282
8 282
6 277
6 278
3 230
3 230
3 231
3 232
3 234
3 249
3 263
3 263
4 263
4 252
4 253
4 251
4 249
4 247
4 243
4 243
4 243
4 244
4 244
4 244
4 244
4 233
4 232
4 231
4 223
4 223
4 225
4 225
4 225
4 220
4 210
4 209
4 199
4 199
4 199
5 199
5 199
6 200
6 202
6 204
6 203
6 203
6 200
6 181
6 180
6 178
6 178
6 178
6 177
6 177
7 187
7 187
6 191
6 189
6 189
6 189
6 179
6 179
6 178
6 178
6 178
6 177
6 177
6 177
6 177
5 175
6 175
5 72
5 72
5 70
5 70
5 70
5 71
5 71
5 70
5 71
5 71
7 71
8 70
12 71
12 70
12 67
12 67
12 67
12 67
12 67
12 68
12 68
12 69
12 69
12 68
12 68
12 70
12 70
12 70
12 69
12 69
12 69
12 62
12 63
12 63
12 64
12 68
12 71
12 70
13 58
13 47
13 48
12 48
26 166
26 166
26 167
27 167
37 172
38 172
38 172
38 173
38 173
38 174
39 174
40 174
40 174
40 174
40 174
26 56
26 56
26 54
26 54
26 52
26 52
26 52
26 52
26 52
26 52
26 52
25 51
25 53
25 53
25 52
25 51
25 58
25 58
25 58
25 58
25 58
25 58
25 58
25 58
26 58
26 57
25 46
25 46
26 42
26 42
26 42
26 42
26 42
26 43
26 46
26 46
26 46
26 46
26 46
26 45
26 45
25 45
25 45
25 45
25 45
25 45
25 45
25 45
25 44
25 56
25 56
25 57
25 57
22 57
22 57
18 56
18 56
17 56
17 56
17 56
17 56
17 56
17 56
17 56
17 55
17 55
17 54
17 54
17 53
18 54
18 56
18 60
18 60
18 61
18 63
18 62
18 63
18 59
18 56
18 54
18 52
17 51
17 56
17 54
14 54
12 54
10 54
9 54
9 54
5 51
4 51
4 52
4 51
5 51
5 51
5 51
5 51
5 51
5 51
5 51
5 51
5 50
5 46
5 50
5 50
5 50
5 50
5 50
5 50
5 50
5 50
5 50
5 49
5 48
5 47
5 48
5 42
5 42
5 42
5 42
5 42
5 42
5 42
5 42
4 42
4 42
4 42
4 42
3 42
3 42
3 42
3 43
3 43
3 43
3 40
3 40
3 40
3 42
3 42
3 42
3 42
3 43
3 44
3 44
3 45
3 45
3 44
3 44
3 43
3 32
3 32
3 30
3 30
3 29
3 29
3 29
3 29
3 29
3 29
3 29
3 28
3 28
3 27
3 27
3 27
3 27
3 27
3 27
3 27
2 25
2 20
2 18
2 18
2 19
2 18
2 16
2 16
2 16
3 43
3 43
3 43
3 43
3 43
3 43
3 43
3 43
3 43
4 44
4 44
4 43
4 43
3 42
3 42
2 42
2 42
2 42
2 42
2 43
2 43
2 43
1 16
1 16
1 16
1 12
1 21
1 21
1 21
1 21
1 21
1 21
1 21
1 21
1 19
1 18
1 16
1 16
1 16
1 16
1 16
1 16
1 16
1 16
1 18
1 20
1 21
1 21
1 21
1 21
1 21
1 21
1 21
1 21
1 23
1 24
1 24
1 24
1 25
1 23
1 22
1 21
1 21
1 21
1 20
1 20
1 20
1 20
1 20
1 20
1 19
1 19
1 19
1 19
1 19
1 19
1 20
1 20
1 20
1 20
1 20
1 21
1 21
1 22
1 22
1 22
1 22
1 22
1 22
1 22
1 22
1 24
1 24
1 26
1 29
1 29
1 31
1 31
1 31
1 39
1 40
1 40
1 40
1 40
0 40
0 40
0 40
0 40
0 40
0 39
0 39
0 38
0 38
0 38
0 38
0 38
0 38
0 38
0 38
0 38
0 38
0 38
0 38
0 38
0 38
0 38
0 29
0 29
0 29
0 29
0 30
0 31
0 31
0 31
0 31
0 31
0 31
0 31
0 31
0 31
0 31
0 33
0 33
0 33
0 28
0 28
0 28
0 28
0 28
0 28
0 30
0 32
0 32
0 32
0 30
0 31
0 31
0 30
0 30
0 30
0 33
0 33
0 33
0 33
0 41
0 44
0 51
0 51
0 52
1 53
1 53
2 54
2 54
2 54
2 54
2 53
2 53
2 53
2 53
2 53
2 53
3 53
3 52
3 52
3 51
3 51
3 51
3 51
3 51
3 51
3 50
3 47
3 45
3 45
3 45
4 45
3 42
3 42
3 42
3 34
3 33
3 33
3 33
3 40
3 40
3 41
3 41
3 41
3 41
3 41
3 41
3 41
3 41
10 177
10 177
10 177
10 177
10 177
10 171
10 171
10 170
10 169
10 169
10 169
10 169
10 169
10 169
10 171
10 171
3 35
3 34
3 33
3 33
3 33
3 33
3 33
3 33
3 34
3 34
3 35
3 36
3 34
3 32
3 33
3 33
3 33
3 33
3 33
3 31
4 31
4 30
4 29
4 27
4 27
4 27
4 26
4 26
4 25
4 25
4 25
4 25
4 25
4 25
4 25
3 19
3 18
3 12
3 11
3 5
2 4
2 3
1 3
1 3
1 3
1 3
1 3
1 3
1 3
1 3
1 3
1 3
1 3
1 3
1 4
1 4
1 4
1 4
1 4
1 4
1 5
0 16
0 16
0 17
0 18
0 18
0 18
0 18
0 18
0 18
0 20
0 20
0 21
0 21
0 21
0 21
0 21
0 21
0 22
0 22
1 22
1 22
2 23
2 23
2 24
2 24
2 25
2 25
2 29
2 30
2 30
2 32
2 33
2 32
2 33
1 33
2 33
11 34
11 33
11 33
11 33
11 33
11 33
11 31
11 31
11 31
11 31
11 31
11 30
11 30
11 30
12 30
10 30
8 30
1 30
1 30
1 30
1 30
1 30
1 30
1 30
1 30
1 30
1 30
1 34
3 52
4 66
4 74
5 77
5 80
5 82
5 90
5 97
5 103
5 106
5 119
5 135
6 139
6 139
6 139
6 142
6 142
5 144
5 144
5 144
9 146
9 146
51 176
52 176
52 180
52 182
52 185
52 185
52 189
52 188
52 188
54 189
54 188
54 188
54 188
54 188
54 177
54 179
54 179
54 180
54 181
54 182
54 182
54 188
54 188
54 192
54 193
54 192
54 192
54 192
54 191
55 191
56 191
57 191
57 192
58 193
58 193
58 197
58 201
60 202
63 204
65 204
66 202
70 200
72 198
74 198
76 198
78 198
77 197
83 203
83 201
83 202
83 200
83 200
83 200
83 200
83 200
83 200
83 201
83 201
83 201
83 201
83 201
84 201
85 201
85 201
84 201
84 201
84 202
85 202
85 202
85 202
85 202
86 202
87 202
87 202
87 202
87 202
87 202
87 194
84 171
84 164
84 157
84 157
85 155
86 152
86 138
86 121
86 110
86 108
87 99
87 96
86 96
86 97
86 97
88 99
88 99
88 126
88 192
91 225
87 229
89 232
51 196
63 211
90 223
119 228
176 237
185 259
185 259
187 259
187 259
187 259
190 259
190 259
192 259
192 259
202 258
202 256
202 255
202 254
202 255
202 254
202 254
202 248
205 253
206 247
205 251
205 252
205 252
205 252
205 252
205 253
195 259
194 259
194 260
193 261
193 266
193 261
192 257
191 255
188 254
186 253
184 252
180 252
177 256
173 255
173 254
172 254
172 254
167 249
167 249
166 252
166 252
166 252
166 252
166 252
165 252
165 255
165 255
165 256
165 266
164 269
164 270
164 274
170 338
170 343
170 356
170 367
168 383
169 458
169 495
169 504
169 574
171 630
172 652
172 689
172 723
173 736
173 805
173 808
173 807
173 809
173 809
173 809
172 807
171 810
171 811
171 811
171 813
171 813
170 810
170 808
169 809
169 809
168 816
167 817
167 820
166 785
166 714
161 696
155 689
145 688
88 683
67 687
63 685
50 687
30 680
23 661
23 662
24 664
23 666
23 670
21 670
21 670
19 674
19 677
19 678
19 678
19 677
18 677
18 677
19 683
19 683
19 684
16 680
16 683
16 679
16 681
17 682
17 682
17 682
17 682
16 677
16 676
16 678
37 2373
37 2368
37 2368
37 2367
37 2366
37 2369
37 2370
37 2382
37 2382
37 2381
37 2385
37 2389
37 2389
37 2390
37 2388
16 693
16 692
16 692
16 692
16 696
16 697
16 694
16 689
16 688
16 686
16 674
15 674
15 668
14 663
8 540
8 528
8 496
6 423
6 422
6 380
6 347
6 320
6 248
4 154
4 144
4 140
4 138
4 136
4 132
4 133
4 133
5 133
5 133
5 135
5 133
5 126
5 126
5 124
5 124
5 124
5 129
5 128
5 128
5 132
5 123
5 120
4 117
3 112
3 109
3 97
3 97
3 98
3 97
3 92
3 92
3 88
3 87
3 88
3 86
3 84
3 82
3 78
3 78
3 77
3 71
3 70
3 70
3 72
3 72
3 73
3 77
2 71
2 72
2 72
1 71
1 72
1 73
1 74
0 75
0 76
0 76
0 124
0 123
0 123
0 123
0 123
0 127
0 127
0 130
0 130
0 132
0 132
0 121
0 121
0 116
0 113
0 63
0 64
0 64
0 64
0 62
0 60
0 60
0 60
0 56
0 55
0 54
0 54
0 56
0 56
0 56
0 56
0 56
0 56
0 58
0 63
0 64
0 64
0 67
0 67
0 66
0 67
0 68
0 70
0 72
0 72
0 72
0 72
0 72
0 71
0 72
0 71
0 71
0 70
0 74
0 76
0 77
0 77
0 77
0 76
0 73
0 73
0 69
0 68
0 67
0 67
0 67
0 68
0 70
0 74
0 78
0 77
0 77
0 77
0 78
0 80
0 80
0 79
0 80
0 80
0 81
0 81
0 85
0 85
0 83
0 86
0 86
0 84
0 86
0 85
0 80
0 79
0 77
0 75
0 75
0 70
0 69
0 66
0 67
0 66
0 66
0 67
0 67
0 67
0 67
0 67
0 67
0 67
0 63
0 61
0 59
0 59
0 57
0 55
0 55
0 55
0 55
0 55
0 55
0 55
0 55
0 55
0 55
0 55
0 55
0 55
0 55
0 56
0 54
0 55
0 55
0 54
0 53
0 50
0 50
0 28
0 31
0 30
1 23
1 21
1 19
1 18
1 18
1 31
1 30
1 30
1 30
1 30
1 30
1 30
1 30
1 30
1 30
1 30
1 33
1 33
1 34
1 36
1 37
1 37
1 38
1 38
1 44
1 50
1 68
1 68
1 68
4 70
4 70
4 70
4 70
4 70
4 70
4 70
4 70
4 70
4 70
4 70
4 70
4 70
4 70
4 69
1 69
1 69
1 69
2 69
2 69
2 69
2 69
2 69
2 70
2 77
2 77
2 81
2 81
2 81
2 81
2 82
2 82
2 82
2 83
1 83
1 83
1 83
1 83
1 83
1 83
1 83
2 83
2 83
2 83
2 83
2 83
2 83
2 83
2 83
2 86
2 86
2 86
2 93
2 97
3 97
3 98
3 99
3 99
3 101
3 103
3 103
3 104
3 105
3 105
3 107
3 107
3 106
3 100
3 94
3 94
3 94
2 93
2 94
2 92
2 92
2 93
2 79
2 80
2 81
2 81
2 81
2 81
2 81
2 81
4 86
4 87
4 89
4 87
5 88
5 87
5 86
6 85
6 86
6 85
6 85
6 78
6 70
6 55
6 55
6 55
6 55
6 56
7 60
7 63
14 66
18 123
20 124
20 124
22 124
22 124
22 124
22 124
22 124
22 124
22 124
22 123
22 125
22 125
22 125
22 126
22 126
22 126
24 125
24 125
24 118
24 117
24 118
24 118
24 118
24 118
24 117
24 121
24 122
24 126
24 128
24 128
24 129
24 131
24 132
24 134
24 145
23 145
23 145
23 145
23 145
23 145
23 146
23 146
23 146
23 160
23 161
23 161
23 158
22 158
22 161
22 169
22 174
22 180
22 180
22 181
22 183
22 184
22 184
22 184
22 182
22 185
22 195
22 201
22 233
22 303
22 313
22 322
22 353
22 358
23 361
24 362
24 362
24 362
25 373
25 398
25 417
25 428
27 568
28 576
26 578
26 598
26 606
26 614
25 640
25 642
25 646
24 646
24 650
24 650
25 650
25 650
24 650
24 650
24 651
24 655
24 657
24 688
23 719
19 729
12 757
9 749
6 767
6 780
6 785
5 786
5 786
5 792
3 797
3 800
3 801
3 844
3 877
3 925
3 934
3 942
3 948
3 956
3 958
3 956
3 971
3 974
3 971
3 971
3 978
3 977
3 977
4 973
4 973
4 971
4 968
4 970
4 968
4 969
4 969
4 967
4 957
4 958
4 959
4 960
4 960
4 960
5 965
5 965
5 963
5 943
5 942
6 942
6 942
6 939
6 939
6 933
6 926
6 917
6 917
6 916
6 914
6 912
6 912
6 908
7 909
8 901
8 893
10 888
10 844
10 755
10 750
10 740
10 736
11 732
11 733
10 742
10 741
10 743
10 735
10 707
8 695
8 681
9 494
9 483
9 478
9 478
9 476
9 475
9 471
9 474
9 472
9 471
9 472
10 475
11 477
11 478
11 478
10 482
10 481
10 477
10 478
10 435
10 398
10 383
10 368
10 321
14 307
14 303
14 302
14 299
14 306
14 303
15 304
15 303
16 303
16 235
16 207
16 180
16 171
16 161
17 157
17 151
17 150
17 149
18 134
18 131
18 131
19 130
19 124
19 123
19 121
18 121
18 121
18 120
18 124
17 121
17 122
17 124
16 125
15 125
15 125
15 135
15 134
15 133
15 133
15 134
14 134
14 134
14 134
14 136
14 135
13 135
14 142
14 147
14 151
14 151
14 152
14 153
14 153
14 157
14 170
14 182
15 186
15 193
15 193
14 197
14 198
13 199
13 200
13 204
14 192
14 190
14 188
13 187
13 177
13 173
13 169
13 170
13 167
13 165
13 163
14 164
14 162
14 162
14 162
14 164
14 167
14 166
14 166
14 166
14 167
14 167
14 168
13 166
12 167
12 170
12 170
12 166
12 166
12 166
12 155
13 158
13 162
13 173
13 173
13 173
8 169
8 170
7 172
7 169
7 164
7 175
5 176
5 175
5 173
5 172
5 172
5 172
5 174
5 177
5 177
5 184
5 193
5 201
5 199
5 199
5 199
4 199
4 199
4 199
5 200
5 202
5 206
5 218
5 217
6 220
20 226
20 229
20 236
20 238
20 238
20 229
20 230
20 230
20 230
20 229
20 229
20 229
20 230
20 228
130 234
116 231
116 221
116 216
117 213
117 213
117 213
117 212
117 212
117 208
116 191
116 178
116 176
116 176
116 183
6 175
6 174
6 174
6 173
5 167
4 167
4 167
4 167
4 167
4 167
4 166
4 166
4 165
4 165
5 165
5 165
4 163
4 161
4 161
4 161
4 157
4 157
4 156
4 156
4 155
4 154
4 153
4 151
4 150
4 150
4 147
4 147
4 147
4 147
3 147
2 146
2 144
2 136
2 125
2 122
2 122
2 120
2 119
2 117
3 113
3 106
3 90
3 87
3 85
3 84
3 83
3 83
3 84
3 83
3 82
3 83
3 79
3 75
3 70
5 70
5 72
4 72
4 73
4 75
4 75
2 73
2 71
2 65
2 52
6 52
6 48
6 41
6 33
6 28
4 25
4 25
4 23
4 23
4 21
4 22
4 22
4 22
4 22
4 44
0 43
0 44
0 44
0 44
0 44
0 44
0 44
0 44
0 44
0 44
0 42
0 40
0 40
0 41
0 45
0 31
2 12
3 11
3 11
3 12
3 12
3 12
3 12
3 12
3 12
3 12
3 12
3 13
3 13
6 13
6 16
6 28
6 31
6 39
26 183
28 192
33 209
35 213
35 214
35 216
35 226
36 230
36 231
36 245
33 245
33 245
33 244
36 276
37 277
37 277
37 277
37 278
37 278
37 278
37 278
37 279
37 281
37 283
37 283
37 283
37 284
37 284
37 285
63 285
63 285
63 285
63 285
63 287
63 288
63 290
63 291
63 291
63 290
63 290
63 290
63 290
63 288
63 288
37 289
37 290
40 291
40 291
40 290
40 290
40 292
40 292
40 292
40 292
40 298
40 304
40 305
40 307
40 309
40 309
40 309
41 309
41 310
41 317
41 321
41 323
41 323
41 326
41 326
41 326
41 328
41 334
41 366
41 372
41 387
41 390
41 402
41 410
41 416
41 426
41 423
41 424
41 424
40 424
40 427
40 425
40 425
40 426
39 427
40 435
40 439
40 442
40 441
40 445
40 444
40 442
40 439
39 426
39 421
35 412
12 255
31 259
32 256
30 255
30 258
30 262
30 270
30 269
30 284
30 271
30 270
29 271
28 276
25 249
25 248
25 262
6 258
8 259
7 264
7 269
7 271
7 270
7 270
7 283
7 294
7 361
7 373
7 379
7 383
7 390
6 403
6 409
6 412
6 412
6 412
6 411
6 409
6 409
6 409
6 410
6 412
6 411
6 411
6 411
6 411
5 410
3 409
3 409
3 409
3 409
3 407
3 407
3 407
3 407
3 401
3 392
3 390
3 390
3 390
3 389
3 389
3 389
3 387
3 381
3 377
3 377
3 377
3 375
3 378
3 379
3 381
3 366
3 338
3 340
3 316
3 317
3 316
3 317
3 483
3 488
3 550
3 555
3 559
2 560
2 557
2 557
2 557
2 556
2 555
2 538
2 537
2 535
2 534
3 530
3 529
4 535
4 533
4 532
4 532
4 526
4 525
4 524
4 524
4 520
5 520
5 517
5 508
5 508
5 493
5 498
5 498
5 495
5 493
5 491
5 488
4 477
4 476
2 473
2 469
2 464
2 457
2 461
2 460
2 447
2 423
2 336
2 331
2 324
2 322
2 322
2 322
2 321
2 319
2 325
2 324
2 326
2 348
2 349
2 352
2 352
2 355
4 373
4 373
4 374
4 375
4 375
4 375
4 383
5 384
5 386
5 387
5 387
5 387
6 392
6 420
6 430
6 430
6 433
6 434
6 434
6 436
6 437
6 459
6 461
6 464
6 462
6 463
6 463
6 460
6 459
6 452
6 447
6 435
6 432
6 426
6 425
6 422
6 417
6 250
7 246
7 183
7 183
7 180
7 180
7 180
8 181
8 181
8 181
8 181
9 182
10 185
14 235
14 235
14 236
14 236
13 230
13 230
13 230
13 229
13 229
13 228
13 228
13 227
13 227
12 227
12 227
12 227
12 227
12 227
12 222
12 221
12 220
12 221
12 225
12 227
12 229
12 229
12 229
12 230
13 231
13 231
13 227
13 227
13 227
13 227
13 226
13 228
15 231
15 240
15 242
15 241
15 242
15 242
15 233
14 233
14 231
14 210
14 211
14 210
14 212
14 208
12 200
12 200
12 200
12 202
12 203
12 205
14 293
15 313
15 334
16 346
21 659
21 704
20 835
20 857
22 1063
24 1250
25 1504
24 1587
43 2143
43 2205
43 2284
43 2312
43 2399
43 2424
44 2619
44 2623
44 2624
45 2624
45 2624
45 2626
47 2699
47 2699
47 2700
50 2759
50 2769
54 3002
54 3062
61 3258
61 3359
62 3389
64 3590
67 3671
74 3741
79 3860
82 3907
82 3922
90 3994
90 3996
89 4000
88 4024
83 3974
83 3980
87 4066
87 4069
86 4073
87 4095
87 4104
87 4108
89 4117
89 4118
90 4122
97 4133
105 4152
105 4165
105 4197
106 4199
107 4204
103 4174
104 4214
104 4230
104 4232
104 4234
104 4230
104 4225
124 4285
125 4291
125 4299
126 4314
126 4321
126 4323
126 4339
128 4427
128 4435
128 4434
128 4440
128 4436
128 4437
129 4433
129 4436
129 4441
129 4446
129 4449
129 4457
130 4472
130 4478
130 4478
131 4482
131 4740
131 4755
131 4761
131 4783
131 4803
131 4823
131 4854
132 4914
132 4994
128 4880
128 4861
128 4822
128 4721
123 4291
122 4192
121 4022
121 3937
120 3827
118 3729
117 3527
115 3330
97 2630
97 2576
97 2567
97 2574
97 2586
97 2588
97 2585
97 2593
97 2599
96 2603
97 2624
99 2635
105 2594
113 2895
114 2877
110 2828
110 2833
107 2571
107 2425
97 2201
97 2166
95 2105
91 1932
85 1833
77 1738
78 1740
78 1737
79 1745
75 1702
75 1711
75 1753
75 1737
75 1778
76 1845
76 1849
76 1880
76 1887
76 1875
77 1894
77 2019
75 2012
75 2015
75 2005
67 2004
62 2014
60 2005
60 1973
60 1971
60 1967
60 1904
59 1863
59 1852
59 1848
58 1846
57 1861
56 1860
40 1815
41 1813
40 1804
40 1801
40 1806
40 1803
39 1784
38 1698
38 1697
38 1693
38 1692
38 1690
38 1695
37 1692
37 1683
37 1680
37 1679
37 1676
37 1668
36 1651
35 1651
37 1832
39 1868
40 1637
42 1731
42 1800
43 1869
43 1882
43 1870
43 1842
43 1794
43 1715
43 1708
43 1708
43 1709
43 1711
43 1716
43 1711
43 1712
43 1718
43 1722
44 1725
44 1761
45 1767
49 1849
49 1851
49 1847
49 1835
49 1808
51 1853
51 1849
51 1848
51 1846
50 1841
45 1821
44 1789
37 1734
33 1483
32 1483
32 1464
33 1460
33 1460
37 1461
37 1459
38 1465
38 1479
42 1500
42 1506
42 1506
40 1476
39 1481
39 1486
39 1511
39 1506
39 1478
38 1466
38 1408
37 1358
37 1359
36 1333
36 1326
35 1303
34 1287
34 1160
34 1159
34 1155
34 1154
34 1145
33 1127
33 1127
34 1167
35 1172
35 1196
37 1201
37 1215
38 1263
38 1281
38 1280
35 1263
35 1257
36 1246
35 1247
37 1255
37 1249
37 1239
37 1245
37 1244
37 1246
37 1246
37 1254
37 1254
37 1254
37 1248
37 1248
37 1249
37 1248
37 1247
37 1244
37 1243
40 1250
40 1239
36 967
35 908
36 882
38 869
38 770
37 672
37 674
37 677
37 674
36 676
36 669
36 666
37 661
37 665
42 676
42 668
43 680
43 678
43 677
43 680
43 674
40 635
40 620
36 535
36 536
36 537
35 543
35 600
34 553
34 556
34 552
34 551
35 584
40 675
43 697
61 885
62 897
62 910
62 913
64 930
64 933
65 936
65 931
65 925
65 906
61 882
61 883
61 878
59 873
59 863
59 838
59 830
59 826
59 813
59 813
59 817
59 819
59 826
59 847
59 900
59 939
61 978
61 1017
61 1041
61 1043
61 1046
61 1066
63 1111
66 1263
66 1261
66 1285
65 1288
66 1370
70 1462
69 1435
69 1430
70 1428
73 1432
73 1431
72 1422
72 1424
70 1418
70 1422
70 1423
70 1418
70 1417
70 1416
70 1417
70 1412
70 1411
70 1414
75 1419
76 1434
100 1530
101 1534
101 1545
108 1599
109 1601
105 1603
101 1606
101 1607
97 1616
97 1617
97 1617
97 1623
97 1624
97 1617
97 1606
97 1608
100 1627
100 1629
100 1635
100 1644
99 1648
93 1637
93 1640
94 1644
96 1646
96 1665
97 1672
99 1692
99 1692
98 1694
98 1693
98 1687
98 1685
98 1788
98 1743
101 1776
101 1767
101 1784
101 1787
100 1783
94 1693
93 1663
75 1472
75 1493
75 1497
81 1507
80 1508
80 1510
78 1507
78 1510
78 1523
78 1527
78 1528
78 1524
77 1539
77 1539
78 1537
79 1539
79 1545
78 1544
78 1542
79 1538
82 1530
82 1502
83 1479
83 1435
83 1396
83 1361
81 1322
87 1285
87 1253
87 1245
87 1243
88 1225
87 1126
84 942
82 841
85 831
85 829
85 820
86 792
87 791
87 790
87 799
84 793
84 829
84 831
84 843
85 843
85 839
84 859
84 865
84 879
84 887
84 890
84 891
84 893
83 891
79 905
77 898
49 805
47 832
47 827
44 789
44 816
44 808
45 806
46 804
78 798
133 803
155 809
156 802
171 806
171 809
182 880
187 889
187 866
204 940
206 941
206 934
208 932
209 934
211 939
214 938
213 934
212 925
219 933
224 940
229 1219
226 1248
226 1275
226 1286
228 1286
228 1230
229 1211
227 1182
228 1197
230 1191
230 1190
230 1194
230 1194
231 1190
232 1201
235 1268
240 1366
234 1485
236 1642
239 1978
239 2026
240 2108
241 2138
241 2196
241 2209
241 2245
240 2230
241 2252
241 2251
240 2252
240 2280
240 2310
239 2314
239 2316
237 2316
237 2318
236 2310
236 2305
236 2304
236 2304
235 2303
230 2301
230 2298
230 2298
230 2296
229 2296
228 2306
227 2334
226 2358
222 2365
222 2370
222 2372
221 2372
221 2371
220 2371
220 2361
220 2365
220 2328
220 2327
220 2313
220 2325
220 2345
220 2339
220 2412
220 2470
222 2752
222 2855
222 2954
222 3176
221 3309
221 3344
221 3613
221 3636
221 3622
221 3617
221 3597
220 3578
219 3580
198 3579
196 3582
148 3601
91 3607
68 3600
67 3607
67 3612
67 3612
66 3530
57 3515
47 3529
34 3447
32 3444
32 3446
17 3437
10 3408
10 3402
9 3392
9 3391
9 3370
9 3359
9 3342
9 3066
10 3038
10 3014
10 3013
10 3006
10 2940
10 2932
10 2927
9 2905
9 2903
9 2901
9 2901
9 2900
9 2894
9 2826
8 2702
8 2642
7 2524
7 2287
6 1882
6 1838
5 1803
5 1784
5 1782
4 1780
4 1764
6 1763
6 1739
6 1732
6 1714
6 1692
6 1661
6 1659
6 1659
6 1659
6 1659
6 1659
6 1659
6 1659
6 1659
6 1659
6 1658
6 1656
6 1656
6 1655
6 1649
6 1628
6 1602
6 1578
6 1573
6 1573
6 1569
6 1567
6 1564
6 1564
6 1565
6 1565
6 1566
6 1563
6 1560
6 1543
6 1526
6 1507
6 1429
6 1271
4 1036
5 947
5 791
5 585
5 460
5 444
4 137
4 121
4 110
4 110
4 109
6 103
6 100
6 96
6 95
6 72
6 56
6 55
5 47
5 45
5 45
4 39
4 39
4 23
4 22
4 21
4 18
4 17
4 19
4 19
4 19
4 18
4 17
4 16
4 16
4 16
4 16
4 16
4 16
18 20
18 19
18 19
18 19
18 19
18 19
20 19
20 20
20 18
20 18
20 18
20 18
20 18
20 18
20 18
6 14
6 14
6 14
6 14
6 14
6 14
5 14
3 14
3 14
2 12
2 12
2 12
2 12
2 12
2 12
2 12
2 12
2 12
2 12
2 12
2 12
2 12
2 12
2 12
2 12
2 12
2 12
2 12
2 12
3 15
3 15
4 15
4 15
4 16
4 17
4 17
4 16
4 15
4 13
27 32
27 32
27 31
27 31
28 31
28 31
28 31
28 31
28 31
28 31
28 31
28 31
28 30
28 30
28 30
5 14
6 14
6 14
4 14
3 14
3 14
3 14
3 14
3 14
3 14
3 14
3 14
3 14
3 14
3 14
3 14
2 14
2 14
2 14
2 14
2 14
2 14
3 14
4 14
4 14
4 14
4 14
4 14
4 14
4 14
4 14
4 13
4 13
4 13
4 13
4 13
4 13
5 13
5 13
5 13
4 13
4 14
4 14
4 14
4 14
4 14
4 15
4 15
4 15
4 15
4 15
4 15
4 15
4 15
4 15
4 15
5 15
5 18
5 18
5 18
5 20
5 20
5 20
5 21
5 21
5 22
5 22
5 22
5 22
5 22
5 22
6 22
6 22
6 22
6 22
4 19
4 25
5 25
5 25
6 23
6 23
6 23
6 23
7 23
7 20
7 17
6 17
8 17
8 17
8 17
8 17
8 17
7 17
7 19
7 19
6 19
6 20
6 20
6 20
6 21
6 20
6 29
4 28
6 28
6 28
5 28
5 28
7 28
7 28
8 28
8 29
8 29
8 29
8 29
8 29
8 29
8 20
8 20
6 20
7 20
10 20
12 20
11 20
11 20
12 20
13 20
13 20
15 21
16 21
17 21
17 21
17 21
17 21
18 21
19 21
19 22
19 22
18 22
18 22
30 1121
33 1121
34 1120
34 1119
34 1119
34 1119
34 1118
34 1118
34 1118
34 1118
34 1118
34 1118
35 1118
36 1118
41 1118
32 19
32 19
32 19
32 16
32 17
32 16
32 13
32 13
35 13
39 13
39 13
39 13
42 13
44 13
53 13
53 13
53 13
53 13
53 14
54 14
54 14
54 14
54 9
54 9
54 9
54 9
55 9
55 9
55 9
55 9
55 9
55 12
55 12
55 13
55 13
55 13
59 12
59 12
203 20
208 20
208 21
214 24
215 23
215 23
216 23
218 24
267 35
278 35
284 37
284 39
285 39
285 39
287 39
286 39
291 38
290 38
294 38
294 38
330 38
331 38
332 38
332 40
332 40
333 40
333 40
333 40
329 40
328 40
328 40
329 40
328 40
327 40
328 40
329 40
337 40
436 40
465 40
469 38
469 38
468 38
466 37
468 37
468 37
468 37
467 37
467 37
464 37
463 37
467 37
470 37
471 37
471 37
470 37
470 37
470 37
470 37
470 37
470 37
469 37
462 37
461 37
462 38
461 38
461 38
460 37
462 38
462 40
465 40
465 57
818 51729
819 51729
818 51729
816 51729
814 51729
806 51729
807 51730
807 51731
807 51731
809 51731
809 51731
819 51732
819 51731
819 51731
819 51731
812 51408
466 65
465 42
467 42
471 42
471 42
471 42
471 38
472 38
475 38
475 38
475 38
471 38
474 37
329 29
328 26
326 26
320 24
316 23
316 24
313 24
311 22
256 11
250 11
247 10
247 10
246 10
239 10
249 11
246 11
247 11
247 11
245 11
244 11
217 11
217 14
217 14
218 14
219 14
218 15
218 15
218 15
218 15
218 15
217 15
195 15
190 15
189 15
183 15
179 15
162 12
81 12
67 12
67 12
67 12
66 12
66 12
62 12
62 12
62 12
62 12
63 12
63 12
63 12
62 12
63 12
62 12
62 12
62 12
62 12
65 12
83 12
90 12
90 12
90 12
90 12
91 12
92 11
93 11
93 11
93 11
91 13
91 12
89 12
88 13
88 13
88 13
88 13
89 13
89 13
88 13
87 12
83 11
80 10
79 10
78 10
77 10
77 10
77 10
78 10
77 9
73 9
73 9
72 8
71 9
72 9
72 9
73 9
72 9
71 9
73 9
73 9
73 9
71 9
65 8
68 8
68 8
67 8
67 8
67 7
67 7
67 7
67 7
67 7
67 7
67 7
69 7
68 7
61 6
60 6
56 6
56 6
56 6
56 6
56 6
56 6
57 6
56 6
56 6
56 5
57 5
57 5
57 5
57 5
58 5
57 5
57 5
62 6
62 6
63 9
62 9
62 9
62 9
61 10
61 10
61 11
60 11
60 21
60 22
61 22
61 22
62 24
62 24
62 24
62 24
62 24
61 24
57 24
58 24
52 24
59 24
45 24
45 24
45 24
45 24
45 23
42 13
43 13
43 12
43 12
43 12
43 12
41 12
41 12
40 11
40 11
40 11
40 11
38 11
38 11
39 11
41 11
42 11
42 11
42 11
42 11
38 10
39 10
40 10
41 10
41 11
41 11
39 11
41 11
39 10
39 10
39 10
38 10
38 10
38 10
36 10
71 13
71 13
71 13
71 13
71 13
71 13
83 16
83 16
83 16
83 16
84 16
84 16
84 16
84 16
85 16
48 13
48 13
48 13
48 13
48 13
48 13
38 10
38 10
38 10
67 11
68 11
74 16
80 16
83 17
87 17
86 17
86 17
86 17
85 17
85 17
85 17
81 16
81 16
80 13
80 13
80 13
79 8
79 8
79 8
79 8
79 9
79 9
79 8
79 8
79 8
78 6
77 5
77 5
77 4
77 4
78 4
78 8
76 8
76 8
65 8
65 8
65 9
65 10
65 10
65 10
65 10
64 10
64 10
64 10
64 10
64 10
63 10
63 9
63 9
63 9
63 9
63 9
63 9
62 9
61 9
60 9
59 9
59 9
59 11
59 11
59 11
56 11
55 12
55 12
55 11
55 11
55 11
53 11
53 13
53 13
53 13
53 13
53 13
53 13
53 13
53 14
53 14
53 21
53 23
53 25
53 25
51 25
51 27
51 31
51 35
50 37
50 41
50 43
50 43
50 43
50 43
50 43
50 43
50 43
50 44
50 44
50 44
48 44
46 44
18 43
17 43
9 43
5 43
2 42
1 42
1 42
1 42
1 42
1 42
1 42
0 42
0 42
0 120
0 120
0 120
0 120
0 120
0 120
0 120
0 120
0 119
0 119
0 119
0 119
0 119
0 119
0 119
0 119
0 41
0 41
0 41
0 36
0 36
0 36
0 36
0 36
0 36
0 36
0 36
0 36
0 36
0 36
0 36
0 36
0 36
0 36
0 36
0 37
0 37
0 37
0 37
0 37
0 37
0 37
0 37
0 37
0 38
0 38
0 36
0 36
0 39
0 39
0 41
0 41
0 41
0 41
0 41
0 40
0 39
0 40
0 40
0 40
0 40
0 41
0 41
0 41
0 42
0 36
0 35
0 34
0 34
0 33
0 34
0 30
0 22
0 21
0 21
0 21
0 20
0 20
0 20
0 20
0 19
0 19
0 19
0 19
0 19
0 19
0 19
0 19
0 20
0 20
0 25
0 25
0 25
0 25
0 25
0 25
0 25
0 26
0 26
0 27
0 27
0 27
0 27
0 27
0 28
0 28
0 28
0 28
0 28
0 28
0 28
0 28
0 27
0 27
0 26
0 26
0 26
0 26
0 26
0 27
0 27
0 27
0 35
1 35
1 35
1 35
1 35
2 58
2 58
2 58
2 58
2 58
2 58
2 58
2 58
2 57
2 56
2 56
1 56
1 48
1 48
1 48
0 25
0 26
0 25
0 25
1 25
1 24
1 20
1 20
1 19
1 19
1 19
1 19
1 19
1 19
1 19
1 18
1 18
1 19
1 19
1 19
0 17
0 17
0 14
0 13
0 13
0 14
0 14
0 14
0 12
0 12
0 12
1 12
1 12
1 14
1 14
1 14
1 14
1 14
1 14
1 14
1 14
1 14
1 14
1 14
1 14
1 14
1 13
1 13
1 8
1 7
1 7
1 7
1 7
1 7
1 7
1 7
1 7
1 7
1 7
1 7
1 7
1 7
1 6
1 6
1 6
2 6
2 6
2 6
2 6
2 6
2 6
2 6
2 8
2 8
2 8
2 9
2 9
2 9
2 9
2 9
2 9
2 9
2 9
2 10
2 10
2 10
2 11
2 11
2 11
3 11
3 11
3 11
3 11
3 11
3 11
3 11
3 11
3 11
3 10
3 9
3 11
3 13
3 13
3 14
2 14
2 14
2 14
2 15
2 15
2 15
2 15
2 15
1 15
1 15
1 15
1 15
1 15
1 14
1 14
1 14
1 14
2 14
2 14
2 16
2 16
2 15
2 15
2 14
3 14
3 14
2 14
2 14
2 16
2 15
2 15
2 15
2 15
1 15
1 15
1 15
1 15
52 16
54 16
232 31
232 31
232 31
232 31
232 31
233 32
233 32
233 32
233 32
233 32
233 32
233 32
233 32
231 32
231 32
7 16
2 16
2 16
2 16
2 16
2 18
2 18
1 19
1 19
1 19
1 19
1 20
1 20
1 20
1 18
1 17
1 17
1 17
1 17
1 17
1 17
1 17
1 17
1 17
1 17
1 17
1 18
1 18
1 15
1 15
1 16
1 17
1 17
1 17
1 17
1 17
1 17
1 17
1 17
1 17
1 17
1 17
1 15
1 14
1 14
1 14
1 13
1 13
1 13
1 13
1 13
1 13
1 13
1 13
1 12
1 12
1 12
1 12
1 12
1 12
1 14
1 14
1 16
1 16
1 15
2 15
3 18
3 18
3 18
3 18
2 18
3 17
3 17
3 17
3 15
3 15
3 15
3 16
3 18
3 18
14 18
14 20
24 22
24 22
24 22
24 22
24 22
24 23
24 23
24 23
24 23
24 25
25 24
27 24
30 24
34 24
35 24
35 24
39 24
39 24
41 24
47 24
64 25
90 28
99 29
101 27
102 27
102 26
103 26
106 28
126 28
166 27
188 27
197 28
203 28
205 28
205 29
206 29
206 31
208 32
209 33
210 33
212 34
212 34
212 34
213 34
214 33
216 33
216 33
216 33
218 32
221 32
233 32
239 32
240 32
243 32
244 32
246 32
247 32
249 32
249 32
250 32
265 32
267 32
275 32
282 32
290 34
290 34
291 34
303 36
303 36
303 38
303 39
306 39
306 40
307 41
311 41
326 44
327 44
327 44
327 41
327 40
327 37
327 37
326 37
326 36
325 36
325 35
325 34
325 34
325 34
324 34
324 34
324 34
324 34
324 34
324 34
325 34
325 32
324 32
314 31
314 31
304 31
304 31
305 31
306 31
306 31
306 28
306 28
307 28
307 28
307 31
303 32
302 32
300 33
297 33
295 33
290 33
280 33
276 33
267 33
262 33
240 32
218 28
211 27
199 27
197 27
197 27
189 27
188 28
182 28
148 29
132 29
131 28
128 28
128 28
128 27
127 27
127 25
125 24
124 23
122 23
122 22
122 22
122 22
121 22
122 22
121 22
121 22
121 22
119 22
112 22
101 22
96 22
94 22
92 22
91 22
90 22
89 22
89 22
90 22
89 22
74 22
71 23
63 22
53 21
45 21
45 21
43 21
34 19
34 20
35 17
32 16
33 16
32 16
32 16
26 18
14 15
14 15
14 16
14 16
18 16
22 20
29 24
42 25
42 27
42 28
45 37
46 37
48 39
49 39
52 39
52 40
56 40
56 41
57 43
60 45
59 45
59 45
60 45
60 45
61 45
63 44
66 44
85 44
87 45
96 46
96 46
97 48
97 50
100 49
102 46
102 46
102 46
103 45
103 45
104 46
110 47
115 47
116 47
116 51
117 51
117 53
116 54
136 55
136 54
136 54
136 53
135 53
134 53
134 53
134 53
134 53
134 53
134 53
305 55
305 55
305 55
305 55
305 55
384 70
384 70
384 70
390 70
392 70
404 70
411 69
448 69
449 69
468 70
477 70
485 70
487 70
487 70
487 70
486 70
241 53
243 53
242 53
243 52
243 52
243 52
243 52
243 52
245 52
245 52
251 52
251 52
251 51
251 50
251 49
250 49
250 48
249 47
249 47
249 47
249 46
249 46
249 46
248 46
245 45
239 44
237 42
229 38
215 36
215 36
214 35
212 26
210 25
208 25
206 25
207 25
207 25
215 23
215 23
215 20
215 17
218 17
220 17
219 17
219 17
227 17
224 17
223 17
237 17
236 17
226 16
226 16
226 12
225 11
221 11
220 11
220 11
220 11
219 11
219 11
217 10
210 9
206 9
207 9
207 5
208 5
210 2
212 1
194 1
194 1
194 1
195 1
208 1
212 1
213 2
214 2
214 2
215 2
215 2
216 2
218 2
219 2
220 2
220 2
222 2
215 2
203 2
191 2
189 2
189 2
182 2
154 2
153 2
133 1
122 1
117 1
116 1
116 1
116 1
115 1
110 1
109 1
109 2
108 3
109 4
110 14
110 14
110 15
110 15
110 17
106 17
106 17
106 17
106 18
106 18
106 18
113 18
116 18
116 16
116 16
114 16
115 6
117 6
137 5
136 5
136 3
136 3
136 3
136 3
136 3
136 3
137 4
135 4
135 4
133 4
128 4
127 4
112 4
112 4
111 4
111 4
103 4
102 4
102 5
102 5
103 5
102 5
100 5
76 6
76 6
77 6
77 6
76 6
77 6
77 6
77 6
77 6
77 6
77 6
77 6
76 6
77 6
77 6
75 6
74 6
74 6
70 5
68 5
67 5
65 5
63 5
61 5
51 5
48 5
47 4
45 4
45 4
44 4
44 4
44 4
44 4
42 4
42 4
43 4
42 4
43 8
43 8
43 8
41 8
41 8
41 8
43 8
43 8
43 8
43 8
43 8
43 8
43 8
43 8
42 8
41 4
41 4
41 5
41 5
41 5
41 5
39 5
39 5
39 5
39 5
39 5
39 5
39 4
39 4
37 4
37 4
31 4
30 4
28 3
27 3
27 3
23 2
20 2
5 2
5 2
5 2
5 2
5 2
5 2
5 2
5 1
4 1
3 1
3 1
3 1
3 1
3 1
3 1
3 1
3 1
3 1
3 1
3 1
3 1
3 1
3 1
3 1
3 1
3 0
3 0
3 0
1 0
1 0
0 0
0 0
0 0
0 0
0 1
36 27
36 27
36 27
36 27
36 27
36 27
36 27
36 27
36 27
36 27
36 27
36 27
36 27
36 27
36 27
36 26
36 26
36 26
36 26
36 26
36 26
36 26
0 0
0 0
0 0
0 0
0 0
0 0
0 1
0 1
0 1
0 1
0 1
0 2
0 3
0 3
0 3
0 3
0 3
0 3
0 3
0 3
0 3
0 3
0 3
0 3
0 3
0 3
0 2
0 2
0 2
0 2
0 2
0 2
0 2
0 2
0 2
0 2
0 2
2 19
2 19
2 19
2 19
2 19
2 19
2 19
2 19
2 19
2 19
2 19
2 19
2 19
2 19
2 19
0 2
0 2
0 2
1 2
1 2
2 3
2 3
2 3
2 3
2 3
2 3
2 3
2 3
2 3
2 3
2 3
2 3
2 3
1 3
1 3
0 2
0 2
0 2
0 2
0 2
0 2
0 2
0 2
0 2
0 2
0 2
0 2
0 2
0 2
0 2
0 2
0 2
0 2
0 2
0 2
0 2
0 2
0 2
0 2
0 2
0 2
0 2
1 2
1 2
1 2
1 2
1 2
1 2
2 2
2 1
2794 20
2794 20
2794 20
2794 20
2794 20
2794 19
2794 19
2793 19
2793 19
2793 19
2793 19
2793 19
2793 19
2792 19
2792 19
0 0
3 1
3 1
3 1
3 1
3 1
3 1
3 1
3 1
3 1
3 1
3 1
3 1
3 5
3 5
3 5
0 34
0 34
0 34
0 34
0 34
0 34
0 34
0 34
0 34
0 34
0 34
14 34
398 50
399 50
399 50
399 50
399 20
399 20
399 20
399 20
399 20
399 20
399 20
399 20
399 20
399 20
385 20
385 20
0 0
0 0
0 0
0 0
0 0
8 0
8 0
8 0
8 0
8 0
8 0
9 1
9 1
9 2
9 2
11 4
13 5
26 17
29 20
33 24
33 24
34 25
35 25
36 26
28 26
29 28
28 28
28 29
28 29
28 29
28 28
28 28
28 28
27 26
25 26
24 20
8 7
6 6
6 4
11 51
9 48
9 48
9 47
8 47
7 47
7 47
8 47
8 47
8 47
8 47
8 47
12 47
12 47
12 47
8 0
8 0
8 0
8 0
8 0
7 0
7 0
7 0
7 0
6 0
6 0
6 0
6 0
2 0
2 0
2 0
1 0
1 0
1 0
1 0
1 0
1 0
1 0
1 1
1 1
1 1
1 1
1 1
1 1
1 1
1 1
1 1
1 1
1 1
1 1
1 1
1 1
1 1
1 1
1 1
1 1
1 1
1 0
1 0
1 0
1 0
1 0
1 0
1 0
1 0
1 0
1 0
1 0
1 0
1 0
1 0
286 3
287 3
287 3
287 3
287 3
286 3
286 3
286 3
286 3
286 3
286 3
286 3
286 3
286 3
286 3
286 3
0 0
0 0
0 0
0 0
0 0
0 0
0 0
0 0
0 0
0 0
0 0
0 0
0 0
0 0
0 0
0 0
0 0
0 0
0 0
0 0
0 0
0 0
0 0
0 0
0 0
0 0
0 0
0 0
0 0
0 0
0 0
0 0
0 0
0 0
0 0
0 0
0 0
1 0
1 0
1 0
1 0
1 0
1 0
1 0
1 0
1 0
1 0
2 0
2 0
3 0
4 0
4 0
4 0
6 0
6 0
6 0
7 0
7 0
7 0
7 0
7 0
7 0
7 0
7 2
7 2
7 3
7 3
7 3
6 3
5 3
5 3
5 3
5 3
5 3
5 3
5 3
5 3
5 3
5 4
5 4
5 4
5 4
6 3
7 2
7 2
6 2
6 2
7 2
7 2
7 2
7 2
173 5
173 5
173 5
173 5
173 5
173 4
173 4
173 4
173 4
173 4
173 4
173 4
173 4
173 4
173 4
7 1
7 1
7 1
7 1
7 1
7 1
7 1
7 1
7 1
7 1
7 1
7 1
7 1
7 1
7 1
7 1
7 1
7 1
7 1
7 2
7 3
7 4
7 5
7 5
7 5
7 5
7 5
7 6
7 6
7 6
7 6
6 6
6 6
7 6
7 5
7 5
7 3
7 3
7 3
7 3
7 3
6 3
6 2
6 2
5 2
5 2
5 2
5 2
5 2
5 2
5 2
5 2
5 2
5 2
5 2
5 2
5 3
5 3
5 3
5 2
5 2
5 2
5 2
5 2
5 2
5 2
5 2
5 2
5 2
5 2
5 1
6 1
6 1
7 1
7 1
7 1
5 1
5 1
5 1
5 1
5 1
4 1
5 1
5 1
5 1
5 1
5 1
5 1
5 1
5 1
5 1
5 1
5 1
5 1
5 1
6 1
6 1
6 1
7 1
8 1
8 1
9 1
11 1
11 1
11 1
11 1
13 1
13 1
15 1
15 1
15 1
15 1
15 1
15 1
15 1
15 1
15 1
15 1
15 1
15 1
15 1
15 1
15 1
15 1
15 1
15 1
15 1
15 1
15 1
15 1
15 1
15 1
15 1
14 1
14 1
15 1
15 1
17 1
17 0
17 0
17 0
17 0
16 0
16 0
16 0
16 0
16 0
16 0
16 0
16 0
16 0
16 0
15 0
15 0
15 0
15 0
15 0
13 0
13 0
14 0
14 0
16 0
16 0
16 0
16 0
16 0
16 0
16 0
16 0
16 0
16 0
15 0
15 0
14 0
14 0
14 0
12 0
12 0
12 0
12 0
12 0
13 0
12 0
12 0
12 0
12 0
12 0
12 0
13 0
13 0
14 0
14 0
14 0
14 0
12 0
10 0
9 0
7 0
4 0
4 0
4 0
4 0
4 1
4 1
4 2
4 2
4 2
4 2
4 2
4 2
5 2
5 2
5 2
5 5
5 5
5 5
5 6
6 7
6 7
7 7
7 7
7 7
7 7
7 7
7 7
7 7
7 7
7 7
7 4
7 4
7 4
9 4
9 4
9 4
8 4
8 4
8 4
8 4
8 4
8 4
8 4
13 4
13 4
13 8
13 8
14 8
14 8
14 8
14 8
14 8
14 8
14 9
14 9
14 9
15 9
18 9
14 9
14 9
14 10
13 6
12 6
12 6
12 6
12 6
12 6
12 6
12 6
12 6
12 5
12 5
12 5
12 5
11 5
11 5
11 8
11 8
11 8
11 8
11 8
11 8
11 8
12 8
12 8
12 8
12 8
12 8
12 8
11 8
11 8
11 8
10 7
10 7
10 7
10 7
10 5
10 5
19 5
20 5
20 4
21 4
21 4
22 4
22 4
27 4
35 3
37 3
40 3
46 3
47 3
48 3
47 3
47 3
46 3
46 2
46 2
46 2
46 2
46 1
51 1
52 1
52 1
52 1
52 1
52 1
52 1
52 1
52 1
52 1
52 1
52 1
51 1
50 1
50 1
51 1
45 1
45 1
45 1
45 3
45 3
45 3
45 3
45 4
45 4
45 4
45 4
45 4
45 4
45 4
45 4
45 4
44 4
44 4
44 2
44 2
44 2
41 2
41 1
41 1
41 0
41 0
41 0
41 0
41 0
