# Supplementary material for: From Insect to Man: Photorhabdus Sheds Light on the Emergence of Human Pathogenicity
Source: PLoS One. 2015 Dec 17;10(12):e0144937. doi: 10.1371/journal.pone.0144937 (PMC4683029; doi:10.1371/journal.pone.0144937)
Supplement: S3 Data — (ZIP) [file pone.0144937.s003.zip › pPAU1_28C_Stat_rep1.plot]

5 0
5 0
5 0
5 0
5 0
5 0
5 0
6 0
6 1
6 1
6 1
6 1
6 1
6 1
8 1
9 32
9 33
9 33
9 33
8 33
8 33
8 33
8 33
7 32
7 32
7 32
7 33
7 33
7 33
5 33
5 33
4 1
4 1
4 1
5 1
5 1
5 1
5 1
5 1
5 1
5 1
5 1
5 1
5 1
6 1
9 1
12 1
12 1
12 1
11 1
11 1
11 1
11 1
13 1
13 1
13 1
13 1
13 1
13 1
14 1
14 1
13 1
13 1
13 1
13 1
12 1
12 1
12 1
12 1
12 1
12 1
12 1
12 1
12 1
12 1
12 4
12 4
12 4
12 4
12 4
12 4
12 4
12 4
12 4
12 4
12 4
12 4
12 4
12 4
12 4
12 4
12 1
12 1
12 1
18 1
18 1
18 1
18 1
18 1
18 0
18 0
18 0
18 0
18 0
18 0
18 0
18 0
18 0
18 0
19 0
19 0
19 0
19 0
19 0
19 0
19 0
19 0
18 0
13 0
16 0
16 0
16 0
34 1
33 1
33 1
33 1
32 1
32 1
36 1
38 1
38 2
42 2
41 2
41 2
41 2
41 2
41 2
41 2
41 2
41 2
41 2
41 2
41 2
41 2
41 2
41 2
41 4
41 4
41 4
41 4
41 4
41 4
41 4
41 4
41 4
41 4
41 4
42 4
42 4
43 4
43 4
43 2
36 2
34 2
33 2
33 2
34 2
34 2
34 2
34 2
34 2
34 2
34 2
34 2
34 2
34 2
33 2
33 2
31 2
30 2
30 2
28 2
28 2
28 2
28 2
25 2
25 2
25 2
25 2
25 2
30 2
30 2
30 2
30 2
30 2
18 1
18 1
20 1
20 1
20 1
20 1
16 1
14 1
14 0
10 0
10 0
10 0
10 0
10 0
10 0
10 0
10 0
12 0
12 0
12 0
12 0
12 0
12 0
13 0
15 0
20 2
24 2
24 2
24 2
24 2
24 2
24 2
24 2
24 2
25 2
24 2
24 2
23 2
23 2
23 2
24 0
24 0
24 0
25 0
36 0
37 0
37 0
37 0
37 0
37 0
37 0
37 0
37 0
37 0
37 0
37 0
37 0
37 0
37 0
37 0
37 0
37 0
37 0
37 0
37 0
38 0
72 0
120 0
120 0
150 0
152 0
209 0
267 0
289 0
349 0
353 0
353 0
357 0
357 0
357 0
368 0
376 0
376 0
376 0
376 0
376 0
387 0
387 0
387 0
387 0
385 0
385 0
385 0
385 0
385 0
381 0
379 0
378 0
374 0
372 0
372 0
376 0
376 0
380 0
381 0
383 0
384 0
383 0
385 2
386 2
387 2
387 2
387 2
387 2
387 2
387 2
386 2
374 2
372 2
372 2
372 2
372 2
372 2
370 2
370 2
364 0
358 0
350 0
348 0
348 0
348 0
349 0
350 0
347 0
345 0
340 0
333 0
323 0
299 0
150 0
120 0
18 0
13 0
12 0
11 0
9 0
7 0
7 0
6 0
6 0
8 0
8 0
9 0
9 0
9 0
9 0
9 0
9 0
9 0
9 0
9 0
9 0
9 0
9 0
9 0
9 0
9 0
9 0
9 0
9 0
9 0
9 1
9 1
9 1
8 1
8 1
6 1
6 1
6 2
5 2
5 2
5 2
5 2
5 2
5 2
5 2
5 2
5 2
7 2
7 2
7 2
7 2
7 2
7 2
7 2
7 2
7 2
7 2
7 2
7 2
7 2
7 2
7 2
7 2
5 2
5 2
5 2
5 2
5 2
8 2
8 2
8 2
10 2
14 2
14 2
14 2
14 2
14 2
14 2
14 2
14 2
13 2
12 2
11 2
11 2
11 2
11 2
11 2
11 2
11 2
11 2
11 2
11 2
11 2
11 3
11 3
11 3
11 3
11 3
12 3
12 3
12 3
12 3
18 3
18 2
18 2
35 2
35 2
39 2
39 2
42 2
42 1
42 1
42 1
42 1
42 1
42 1
42 1
42 1
42 1
42 1
40 1
40 1
40 1
40 1
40 1
40 1
43 1
47 1
47 1
47 2
47 2
47 2
47 2
47 2
47 2
47 2
47 2
47 2
49 2
51 3
51 9
46 9
46 9
43 9
42 9
36 9
36 9
38 9
39 9
42 9
43 9
41 9
41 9
39 9
39 9
39 9
40 4
40 4
40 4
40 4
40 4
40 4
40 4
40 4
40 4
40 4
44 4
43 4
43 4
43 4
58 11
60 11
60 11
60 11
60 11
60 11
60 11
60 11
49 11
49 11
45 11
45 11
44 11
44 11
44 11
44 11
44 11
44 11
44 11
44 11
44 11
44 11
44 11
44 11
48 11
48 11
45 11
45 11
45 11
45 11
41 11
41 11
41 10
41 12
40 12
40 13
40 13
40 13
40 13
39 13
39 13
37 13
37 12
37 12
35 12
35 12
37 12
37 12
36 12
35 12
35 12
28 12
27 13
27 12
28 12
29 12
33 12
35 12
36 12
35 11
35 11
35 11
30 11
30 11
30 11
31 11
31 11
31 11
31 11
31 11
31 11
31 11
31 11
22 5
20 5
20 5
20 5
20 5
20 5
20 5
20 5
20 5
20 5
20 5
20 5
21 5
21 5
21 5
21 5
21 5
21 5
21 5
21 5
21 5
21 5
21 5
21 5
17 5
17 5
20 5
20 5
20 5
20 5
20 5
20 5
20 5
20 3
20 3
20 2
20 2
20 2
20 2
20 2
20 2
20 4
20 5
20 5
20 5
20 5
18 5
18 5
17 5
26 6
36 6
38 6
37 4
34 4
33 4
30 5
29 5
27 7
27 7
27 7
27 7
27 7
27 7
27 7
27 7
27 7
27 7
27 7
28 7
28 7
28 7
28 7
28 7
28 7
28 7
28 7
28 7
28 7
28 7
28 7
46 7
49 7
48 7
48 7
49 7
49 7
49 7
49 7
49 7
49 7
49 7
49 7
49 7
49 7
49 7
49 7
49 7
48 7
48 7
46 7
47 7
47 7
49 8
49 8
49 8
49 8
49 8
49 8
49 8
52 8
52 8
50 8
50 8
71 13
71 10
71 11
72 13
77 14
77 13
77 13
77 13
141 19
136 20
130 27
132 30
156 33
156 33
156 34
156 33
178 36
180 34
180 34
180 35
183 35
185 37
187 37
189 37
189 37
189 37
189 37
189 37
188 37
186 37
187 37
187 37
186 37
186 37
185 37
183 37
183 37
183 37
173 36
172 36
152 32
152 33
152 33
152 33
152 33
142 28
158 33
158 35
158 35
159 38
159 38
159 38
159 38
159 38
159 37
159 36
159 36
157 36
155 36
154 36
154 36
154 36
151 36
151 37
151 37
150 37
148 37
146 37
140 37
134 36
134 36
134 36
134 36
140 36
142 36
142 35
143 33
136 32
136 32
118 31
118 31
75 23
73 22
71 21
74 21
60 19
62 17
63 17
63 17
39 16
39 17
39 17
39 16
43 16
43 14
43 14
41 14
41 14
41 15
42 15
42 15
42 15
45 15
50 15
50 15
50 15
50 15
51 15
51 13
51 13
51 13
57 14
57 14
57 14
57 14
57 14
57 14
57 14
57 14
40 8
40 7
40 7
40 5
40 5
40 5
40 5
40 5
40 5
40 5
40 5
41 5
43 5
43 5
43 5
43 5
43 5
44 4
45 4
45 4
47 5
47 5
52 5
63 6
73 6
75 6
75 7
68 7
67 7
68 7
68 7
70 7
71 7
72 7
72 7
72 7
72 7
75 7
72 7
73 7
79 7
92 7
92 7
94 6
95 5
96 5
96 5
92 5
92 5
92 5
92 5
92 5
90 4
91 4
91 4
91 4
90 4
85 4
90 4
93 4
102 4
105 4
110 4
114 4
125 5
124 5
141 5
143 5
144 7
150 9
150 9
150 9
150 9
150 9
150 9
150 9
150 9
150 9
150 9
150 9
150 9
150 9
150 9
150 9
149 9
148 9
150 9
150 9
151 9
151 9
150 9
149 9
149 9
147 8
145 8
134 7
118 6
105 6
103 6
102 6
101 6
114 9
111 9
109 9
107 9
107 9
106 9
107 9
107 9
107 9
107 9
107 9
104 9
101 9
90 9
90 9
90 9
90 9
89 9
89 9
89 9
89 9
88 9
88 9
88 9
88 9
88 9
88 9
88 9
88 9
85 9
82 10
76 9
70 9
67 9
63 10
56 10
49 10
43 9
27 9
24 9
24 7
18 5
18 5
18 5
18 5
18 5
18 5
18 5
18 5
18 5
18 5
18 5
18 5
18 5
17 5
17 5
19 5
20 5
19 5
18 5
18 5
18 5
18 5
18 5
19 5
19 5
19 5
19 5
19 5
18 5
18 5
14 5
14 3
5 1
5 1
5 1
5 0
5 0
5 0
5 0
5 0
5 0
5 0
5 0
5 0
5 0
5 0
5 0
4 0
4 0
4 0
4 0
4 0
4 0
4 0
4 0
4 0
4 0
4 0
4 0
4 0
4 0
4 0
4 0
4 0
4 0
4 0
4 0
4 0
4 0
4 0
4 0
4 0
4 0
4 0
4 0
4 0
4 0
4 0
4 0
4 0
4 0
4 0
4 0
4 0
4 0
4 0
4 0
4 0
2 0
2 0
2 0
2 0
2 0
1 0
1 0
1 0
1 0
1 0
1 0
1 0
1 0
1 0
1 0
1 0
1 0
1 0
2 0
2 0
2 0
2 0
2 0
2 0
2 0
2 0
2 0
2 0
3 0
3 0
3 0
3 0
3 0
3 2
3 2
3 2
3 2
3 2
3 2
3 2
3 2
3 2
3 2
3 2
3 2
3 2
3 2
3 2
3 0
3 0
3 0
3 0
4 0
4 0
4 0
4 0
4 0
4 0
4 0
4 0
4 0
4 0
4 0
4 0
4 0
4 0
4 0
4 0
3 0
3 0
3 0
3 0
3 0
3 0
2 0
2 0
2 0
2 2
2 2
2 2
2 2
2 2
2 2
2 2
2 2
2 2
2 2
2 2
2 2
2 2
2 2
1 2
1 2
1 0
1 0
1 0
1 0
1 0
1 0
1 0
1 0
0 0
0 0
0 0
0 0
0 0
0 0
0 1
0 1
0 1
1 1
1 1
1 1
1 1
1 1
1 1
1 1
1 1
1 1
1 1
1 1
1 1
1 0
1 0
1 0
1 0
1 0
1 0
1 0
1 0
1 0
1 0
1 0
1 0
1 0
1 0
1 0
1 0
2 0
2 0
2 0
2 0
3 0
3 0
3 0
3 0
3 0
3 0
3 0
3 0
3 0
3 0
3 0
3 0
3 0
3 0
3 1
3 1
3 1
3 2
3 2
3 2
3 2
3 2
3 2
3 2
3 2
3 2
3 3
3 3
3 3
3 3
3 3
3 2
7 2
8 2
8 2
8 2
8 2
8 2
8 2
8 2
8 2
7 2
7 2
7 1
7 1
7 1
7 1
38 1
37 0
37 1
37 1
38 1
41 1
41 1
41 2
41 2
41 2
41 2
41 2
41 2
41 2
41 2
10 2
10 2
10 2
10 2
10 2
10 2
10 2
9 2
9 2
9 2
9 3
8 3
10 3
10 3
13 3
17 3
17 3
22 3
22 3
22 3
22 3
22 3
22 3
22 3
22 3
22 3
22 3
22 3
22 3
22 3
22 4
22 4
22 4
22 4
22 4
22 4
22 4
21 4
21 4
21 4
21 4
21 4
19 4
15 3
15 3
15 3
13 2
12 2
12 2
12 2
12 2
12 2
12 2
12 2
12 2
12 2
12 2
12 2
12 2
12 2
12 2
12 2
12 2
10 2
12 3
12 3
12 3
12 3
12 3
12 3
12 3
12 3
12 3
12 4
13 5
13 5
13 5
13 5
13 5
13 5
9 4
7 4
7 4
7 3
7 3
7 3
7 3
7 3
6 3
5 3
1 3
1 3
1 3
1 3
1 3
1 3
1 3
1 3
1 3
1 3
1 3
1 3
1 3
1 2
4 2
5 2
5 2
6 2
6 2
6 2
6 2
6 2
6 2
6 2
6 2
6 2
6 2
6 2
6 2
6 2
5 2
5 2
5 2
5 1
5 1
5 0
5 0
5 0
5 0
5 0
5 0
5 0
5 0
5 0
5 0
5 0
5 0
5 0
5 0
5 0
5 0
5 0
5 0
5 0
5 0
5 0
5 0
4 0
4 0
4 1
4 1
4 1
4 1
4 1
4 1
4 1
4 1
4 1
4 1
4 1
4 1
4 1
4 1
4 1
4 0
4 0
4 0
6 0
6 0
6 0
6 0
6 1
6 1
6 1
6 1
6 1
6 1
3 1
3 2
3 2
2 3
2 3
2 3
2 4
2 4
5 5
5 6
11 6
11 5
11 5
11 5
11 5
11 5
11 5
11 5
11 4
11 3
11 3
11 3
11 3
11 2
11 2
11 2
11 2
11 2
11 2
5 1
5 1
5 6
5 6
5 6
5 6
5 6
5 6
5 6
5 6
5 6
5 6
5 6
5 6
5 6
5 6
5 6
5 6
5 6
5 1
5 1
5 1
5 1
5 1
5 1
5 1
5 1
5 1
5 1
5 1
5 1
5 1
5 1
5 1
3 1
3 1
3 1
3 1
3 1
3 1
3 1
3 1
3 1
3 1
3 1
3 1
3 1
3 1
3 1
3 1
3 1
3 1
0 0
0 0
0 0
0 0
0 0
0 0
0 0
0 0
1 0
1 0
1 0
1 1
1 1
1 1
1 1
1 1
1 1
1 1
1 1
1 1
1 1
1 8
1 17
1 17
0 17
0 17
0 17
0 17
2 16
2 16
2 16
2 16
2 16
2 16
2 16
2 16
2 16
2 9
2 0
2 0
2 0
2 0
2 0
2 0
2 0
1 0
1 0
1 0
1 0
3 0
3 0
3 0
3 0
3 0
3 0
3 0
3 0
4 0
5 0
5 0
5 0
5 0
5 0
5 0
5 0
5 0
5 1
5 1
5 1
6 1
6 1
6 1
6 1
6 2
6 2
10 2
10 2
10 2
10 2
10 2
10 2
10 2
10 1
10 1
10 1
9 1
9 1
9 1
9 1
9 0
5 0
5 0
5 0
5 0
5 0
5 0
5 0
5 0
5 0
5 0
5 0
5 0
5 0
5 0
5 0
5 0
5 0
5 0
5 0
5 0
5 0
5 0
5 0
5 0
5 0
5 0
5 0
5 0
5 0
5 0
5 0
5 0
2 0
2 0
4 0
4 0
4 0
4 0
4 0
4 0
3 0
2 0
2 0
2 0
2 0
2 0
2 0
2 0
2 0
2 0
0 0
0 0
0 0
0 0
0 0
0 0
0 0
0 0
0 0
0 0
0 0
0 0
0 0
0 2
0 2
0 2
0 2
0 2
0 2
0 2
0 2
0 2
0 2
0 2
0 2
0 2
0 2
0 2
0 2
0 2
0 2
0 2
0 2
0 2
0 2
0 0
0 0
0 0
0 0
1 0
1 0
1 0
1 0
1 0
1 0
1 0
1 0
1 0
1 0
1 0
1 0
1 0
1 0
1 0
1 0
1 0
1 0
12 0
12 0
12 0
12 0
12 0
12 0
12 0
12 0
12 0
12 0
12 0
12 0
12 0
12 0
12 1
12 1
1 1
1 1
1 1
2 1
2 1
3 1
3 1
3 1
3 2
3 2
3 2
3 2
3 2
3 2
3 2
3 2
3 2
3 2
4 1
5 1
5 1
4 1
4 1
4 0
4 0
4 0
4 0
4 0
4 0
4 0
4 0
4 0
4 0
4 0
4 1
4 1
4 7
4 7
4 8
3 20
3 26
3 32
3 34
3 34
3 34
3 34
3 34
3 34
3 34
3 34
3 34
3 34
3 34
3 34
3 33
3 33
3 33
3 33
3 33
3 33
3 33
3 33
3 33
3 33
3 33
3 33
3 33
3 33
3 33
3 33
2 33
2 33
2 33
2 33
2 33
2 33
2 33
2 33
2 33
2 33
2 33
2 33
2 33
2 33
2 33
2 34
2 36
2 36
2 37
2 37
2 37
0 37
0 39
1 37
1 39
1 39
2 46
3 63
3 63
3 64
3 62
3 60
3 60
3 60
3 60
3 60
3 60
3 60
3 60
3 54
3 55
3 55
3 40
3 38
3 36
3 36
3 36
3 38
3 38
3 41
3 44
3 45
3 48
3 99
3 99
3 99
3 107
4 176
4 178
4 184
4 184
4 188
4 188
4 188
2 188
2 187
2 187
2 187
2 187
2 187
2 188
2 188
2 188
2 189
2 189
2 189
2 191
2 191
2 191
2 192
2 192
2 203
2 203
2 203
2 203
2 204
2 214
3 251
3 248
3 250
3 255
3 260
3 260
3 262
3 263
3 259
3 259
3 257
3 257
3 250
2 198
2 198
2 197
2 160
2 160
2 161
2 162
2 163
3 169
3 169
3 170
3 170
3 170
3 169
3 176
3 186
3 203
3 224
4 322
4 328
4 330
4 328
4 312
3 304
3 303
3 283
3 280
3 263
3 263
3 263
2 241
2 240
2 240
2 240
2 238
2 237
2 239
2 243
2 248
2 248
2 248
2 249
2 249
2 248
2 247
2 247
2 246
2 246
2 246
2 241
2 241
2 242
2 242
2 242
2 242
2 239
2 238
3 246
3 246
3 234
2 203
2 202
2 202
2 202
3 197
3 198
3 197
3 196
3 196
3 196
3 196
3 196
3 196
3 196
3 196
3 196
3 195
3 195
3 195
2 194
2 194
2 188
2 188
2 188
2 188
2 188
2 188
2 176
1 149
1 141
1 124
1 22
1 19
1 13
1 13
1 12
1 12
1 12
3 12
3 12
3 12
3 12
3 12
3 12
3 12
3 12
3 12
3 12
3 12
3 12
3 12
3 11
3 11
1 11
1 11
1 11
1 11
1 11
1 11
1 11
1 11
1 11
1 11
1 11
1 10
1 10
1 10
1 12
1 13
1 13
2 8
2 8
2 8
3 8
3 9
3 9
3 9
3 8
3 8
3 8
3 8
3 8
3 8
3 8
3 8
2 8
4 13
4 14
4 14
4 14
4 16
4 16
4 17
4 17
4 17
4 17
4 17
4 17
4 17
4 17
4 17
4 19
4 19
4 19
4 19
4 19
4 19
4 19
4 19
4 19
4 19
4 19
4 19
4 19
4 19
4 19
4 19
4 20
4 20
4 20
4 20
4 20
4 20
4 20
4 20
4 20
4 20
4 20
4 20
4 20
4 20
4 20
4 20
4 20
4 19
1 3
0 1
0 0
0 0
0 0
0 0
0 0
1 0
1 0
1 0
1 0
1 0
1 0
1 0
1 0
1 0
1 0
1 0
1 0
1 0
1 0
1 0
0 0
0 0
0 0
0 0
0 0
0 0
0 0
0 0
0 0
0 0
0 0
0 0
0 0
0 0
0 0
0 0
0 0
0 0
0 0
0 0
0 0
2 0
2 0
2 3
2 3
2 3
2 3
2 3
2 3
2 3
2 3
2 3
2 3
2 3
2 3
2 3
1 3
0 3
0 0
0 0
0 0
0 0
0 0
0 0
0 0
0 0
0 0
0 0
0 0
0 0
0 0
2 0
2 0
2 0
2 0
2 0
2 0
2 0
2 0
2 0
2 0
2 0
2 0
2 0
2 0
2 0
1 0
0 0
0 0
0 0
0 0
0 0
0 0
0 0
0 0
1 0
1 0
1 0
1 0
1 0
1 0
1 0
1 0
1 0
1 0
1 0
1 0
1 0
1 0
1 0
1 0
0 0
0 0
0 0
0 0
0 0
0 0
0 0
0 0
0 0
0 0
0 0
0 0
0 0
0 0
0 0
0 0
0 0
0 0
0 0
0 0
0 0
0 0
0 0
0 0
0 0
0 0
0 0
0 0
0 0
0 0
0 0
0 0
0 0
0 0
0 0
0 0
0 0
0 0
0 2
0 5
0 6
0 10
0 12
0 12
0 12
0 12
0 13
0 13
0 13
0 13
1 13
1 13
1 13
1 13
1 11
1 11
1 11
1 7
1 7
1 2
1 1
1 1
1 0
1 0
1 0
0 0
0 0
0 0
0 0
0 0
5 397
5 397
5 397
5 397
5 397
5 397
5 397
6 397
6 397
6 397
6 397
6 397
6 397
6 397
6 397
3 0
3 0
3 0
3 0
3 0
3 0
3 0
3 0
3 0
3 0
3 0
3 0
3 0
3 0
3 0
3 0
3 0
3 0
3 0
3 0
5 0
17 0
18 0
18 0
18 0
18 0
19 0
19 0
19 0
19 0
20 0
21 0
27 0
53 0
69 1
71 1
72 1
72 1
72 1
72 1
72 1
72 1
72 1
72 1
72 1
72 1
72 1
72 1
72 1
72 1
72 1
72 1
73 1
74 1
74 1
74 1
74 1
74 1
74 1
74 1
74 1
74 1
75 1
75 1
75 1
74 1
74 1
74 1
74 1
74 1
74 1
74 1
74 1
74 1
79 1
80 1
83 1
83 1
83 1
83 1
83 1
83 1
83 1
83 1
89 1
91 1
91 1
109 1
109 1
110 1
110 1
97 1
95 1
92 1
79 1
78 1
78 1
78 1
78 1
77 1
77 1
90 1
90 1
90 1
90 1
86 1
71 1
57 1
55 1
56 1
56 1
56 1
56 1
56 1
56 1
57 1
57 1
44 1
44 1
46 1
46 1
46 1
46 0
46 0
45 0
44 0
44 0
45 0
45 0
45 0
45 0
43 0
43 0
42 1
42 1
41 1
41 1
41 1
41 1
41 1
41 1
42 1
43 1
43 1
44 1
44 1
45 1
39 1
39 0
36 0
36 0
36 0
36 0
37 0
37 0
37 0
38 0
34 0
31 0
30 0
13 0
13 0
13 0
13 0
13 0
13 0
13 0
13 0
13 0
13 0
13 0
14 0
14 0
14 0
14 0
14 0
20 0
40 0
40 0
41 0
41 0
43 0
46 0
47 0
51 0
58 0
67 0
73 0
78 0
79 0
79 0
79 0
77 0
77 0
77 0
77 0
77 0
76 0
77 0
80 0
149 0
151 0
152 0
152 0
152 0
152 0
152 1
152 1
152 1
153 1
154 1
154 1
154 1
155 1
154 1
153 1
153 1
152 1
152 2
153 2
152 2
152 2
153 2
154 2
155 2
155 2
155 2
155 2
155 2
152 2
149 2
149 2
149 2
149 2
150 2
150 2
151 3
157 3
165 3
167 3
167 3
167 3
167 3
167 3
166 3
166 3
166 3
166 3
165 3
157 3
138 3
138 3
138 3
137 3
134 3
130 3
130 3
128 3
120 3
116 3
113 4
106 4
105 3
105 3
106 3
108 5
109 6
110 6
110 6
110 6
109 6
98 6
87 6
33 6
33 6
33 6
35 6
34 6
34 6
35 5
35 4
35 4
32 4
32 4
32 4
32 4
32 4
32 4
32 4
32 4
32 4
32 4
32 4
32 4
31 4
30 4
30 4
30 4
30 4
30 4
30 4
30 4
30 4
30 4
31 4
32 4
31 4
30 4
30 4
26 3
19 3
12 2
12 2
12 2
12 2
12 2
12 2
12 2
12 2
12 2
12 2
8 1
8 1
8 1
8 1
8 1
8 1
7 1
7 1
6 1
6 1
6 1
5 1
3 0
3 0
3 0
3 0
1 0
0 0
0 0
0 0
0 0
0 0
0 0
0 0
0 0
0 0
0 0
0 0
0 0
0 0
0 0
0 0
0 0
0 0
0 0
0 0
0 0
0 0
0 0
0 0
0 0
0 0
0 0
0 0
0 0
0 0
0 0
0 0
0 0
0 0
0 0
0 1
82 2072
82 2072
82 2072
82 2072
82 2072
83 2072
83 2072
83 2072
89 2074
89 2074
89 2074
89 2074
89 2074
89 2074
89 2074
10 2
10 2
10 2
10 2
10 2
10 2
10 2
10 2
10 2
10 2
10 2
10 2
10 2
10 2
10 2
10 2
10 2
8 2
8 2
8 2
8 2
8 2
2 0
3 0
3 0
3 0
3 0
3 0
3 0
3 0
3 0
3 0
3 0
3 0
3 0
3 0
3 0
3 0
2 0
2 0
2 0
2 0
2 0
2 0
2 0
2 0
2 0
0 0
0 0
0 0
0 0
0 0
0 0
0 0
0 0
0 0
0 0
0 0
0 0
0 0
0 0
0 0
0 0
1 0
1 2
1 2
1 2
1 3
1 6
1 6
1 6
1 6
1 6
1 6
1 6
1 6
1 6
1 6
0 6
0 6
0 6
0 6
0 5
0 5
0 5
0 5
0 5
0 5
0 5
0 5
0 5
0 5
0 5
0 5
0 5
0 5
0 5
0 5
0 5
0 5
0 5
0 5
0 5
0 5
0 5
0 5
0 5
0 5
0 5
0 5
0 5
0 5
0 5
0 5
0 5
0 5
0 5
0 5
0 5
0 5
0 5
0 5
0 1
0 1
0 1
0 1
0 1
0 1
0 1
0 1
0 1
0 1
0 1
0 1
0 1
0 1
0 1
0 1
0 1
0 1
0 1
0 0
0 0
0 0
0 0
0 0
0 2
0 2
0 4
0 4
0 4
0 4
0 4
0 4
0 4
0 4
0 4
0 7
0 9
0 14
1 15
12 88
12 91
12 98
12 100
12 104
13 107
13 118
13 118
13 118
14 118
14 118
14 118
14 118
14 119
14 119
14 122
14 125
14 130
14 132
14 132
14 132
14 132
14 132
14 132
14 132
14 140
14 149
14 150
14 152
15 154
15 154
15 154
15 154
15 154
15 154
15 154
15 154
15 154
15 154
15 154
15 154
17 154
18 154
18 154
18 155
19 159
19 159
19 159
19 161
38 202
38 200
38 201
38 200
38 198
38 198
38 198
38 198
38 197
38 196
38 196
38 199
38 203
38 203
38 203
38 203
38 203
38 203
38 203
38 203
38 202
38 195
38 187
35 169
24 103
24 96
24 95
24 94
24 90
24 90
24 90
24 90
24 90
24 90
24 90
24 90
24 90
24 89
24 89
24 85
24 78
24 75
24 72
24 72
24 72
24 72
24 72
24 72
24 72
24 63
24 51
24 49
24 49
23 48
23 48
23 48
23 48
23 49
23 49
23 49
23 51
23 51
23 51
23 51
23 51
21 52
20 52
19 52
18 52
18 52
18 52
15 51
14 51
0 9
0 26
0 26
0 26
0 26
0 26
0 26
0 26
0 26
0 26
0 26
0 26
0 22
0 22
0 22
0 22
0 22
0 22
0 22
0 22
0 22
0 22
0 22
0 22
0 22
0 22
0 22
0 22
0 22
0 22
0 22
0 22
0 22
0 22
0 22
0 22
0 22
0 22
0 22
0 22
0 22
0 22
0 22
0 22
0 22
0 22
0 22
0 22
0 22
0 22
0 22
0 22
0 22
0 21
0 21
0 21
0 21
0 20
0 20
0 20
0 18
0 18
0 18
0 18
0 17
0 17
0 17
0 17
0 17
0 17
0 17
0 17
0 17
0 17
0 0
0 0
0 0
0 0
0 0
0 0
0 0
0 0
0 0
0 0
0 0
0 0
0 0
0 0
0 0
0 0
0 0
0 0
0 0
0 0
0 0
0 0
1 0
1 0
1 0
1 0
1 0
1 0
1 0
1 0
1 0
1 0
1 0
1 0
1 0
1 0
1 0
1 0
0 0
0 0
0 0
0 0
0 0
0 0
0 0
0 2
0 2
0 2
0 2
0 2
0 2
0 2
0 2
0 2
0 2
0 2
0 2
0 2
0 2
0 2
0 2
0 2
0 2
0 2
0 2
0 2
0 2
0 2
0 2
0 2
0 3
0 3
0 3
0 3
0 3
0 3
0 4
0 4
0 4
0 4
0 4
0 4
0 5
0 10
0 15
0 20
0 22
0 28
0 29
0 30
0 32
0 34
0 34
0 35
0 35
0 36
0 36
0 36
0 37
0 39
0 39
0 39
0 41
0 41
0 41
0 41
0 41
0 41
0 41
0 41
1 41
1 41
1 41
1 41
1 41
1 41
1 41
1 41
1 39
1 39
1 39
1 39
1 39
1 39
1 39
1 39
0 39
0 39
0 39
0 39
0 56
0 59
0 59
0 59
0 59
0 59
0 59
0 59
0 59
0 59
0 59
0 59
0 59
0 58
0 58
0 58
0 58
0 58
0 58
0 58
0 59
0 60
0 61
0 61
0 61
0 60
0 53
0 44
0 37
0 38
0 37
0 37
0 36
0 35
0 37
0 38
0 38
0 39
0 38
0 39
0 38
0 36
0 36
0 36
0 36
0 34
0 34
0 34
0 34
0 34
0 34
0 34
0 34
0 34
0 34
0 34
0 34
0 34
0 34
0 34
0 34
0 35
0 36
0 39
0 39
0 41
0 43
0 43
0 43
0 43
0 43
0 43
0 42
0 25
0 23
0 23
0 25
0 25
0 25
0 25
0 25
0 25
0 26
0 26
0 26
0 26
0 26
0 26
0 26
0 26
0 65
0 65
0 64
0 63
0 62
0 61
0 61
0 60
0 58
0 58
0 58
0 58
0 54
0 54
0 54
0 53
0 53
0 52
0 52
0 52
0 50
0 50
0 50
0 50
0 50
0 50
0 50
0 50
0 50
0 50
0 50
0 50
0 50
0 50
0 51
0 51
0 51
0 51
0 51
0 51
0 51
0 51
0 51
0 51
0 50
0 49
0 45
0 45
0 43
0 42
0 42
0 42
0 42
0 42
0 42
0 42
0 42
0 42
0 42
0 40
0 40
0 40
0 40
0 40
0 40
0 40
0 40
0 40
0 40
0 40
0 40
0 40
0 39
0 1
0 1
0 1
0 1
0 1
0 1
0 1
0 1
0 1
0 1
0 1
0 1
0 1
0 1
0 1
0 1
0 1
0 1
0 1
0 1
0 1
0 1
0 1
0 1
0 1
0 1
0 1
0 1
0 1
0 1
0 1
0 1
0 1
0 1
0 0
0 0
0 0
0 0
0 0
0 1
0 1
0 1
0 1
0 1
0 1
0 1
0 1
0 1
0 1
0 1
0 1
0 1
0 1
0 1
0 1
0 1
0 1
3 8
3 8
3 8
3 8
3 8
3 8
3 8
3 8
3 8
3 8
3 9
3 11
3 11
3 11
3 11
0 4
0 4
0 4
0 4
0 4
0 4
0 4
0 4
0 4
0 6
0 6
0 6
0 6
0 6
0 6
0 6
0 6
0 6
0 6
0 6
0 6
0 6
0 6
0 6
0 4
0 4
0 4
0 4
0 4
0 4
0 4
0 4
0 4
0 4
0 4
0 4
0 4
0 4
0 4
0 4
0 3
0 3
0 3
0 6
0 6
0 6
0 6
0 6
0 6
0 6
0 6
0 6
0 6
0 6
0 6
0 6
0 6
0 6
0 6
0 6
0 6
0 6
0 6
0 6
0 6
0 6
0 6
0 6
0 4
0 3
0 3
0 3
0 3
0 3
0 3
0 3
0 3
0 3
0 3
0 3
0 3
0 3
0 3
0 3
0 3
2 3
2 3
2 3
2 3
2 3
2 3
2 3
2 3
2 3
2 3
2 3
2 3
2 3
2 3
2 3
2 3
2 3
2 3
2 3
2 3
2 3
2 3
2 3
2 3
2 3
2 3
2 3
3 4
3 4
3 4
3 4
3 1
3 1
3 1
3 1
3 1
3 1
3 1
3 1
3 1
3 1
3 1
3 1
3 1
3 1
3 1
3 1
3 1
3 1
3 1
3 1
3 1
3 1
3 1
3 1
3 1
3 1
3 1
3 1
3 1
3 1
3 1
3 1
3 1
3 1
3 1
3 1
3 1
3 1
3 1
3 1
3 1
4 1
2 1
3 1
3 1
3 1
3 1
3 1
3 1
3 1
3 1
3 1
3 1
3 1
3 1
3 1
2 1
2 1
2 1
2 1
2 1
2 1
2 1
2 1
2 1
4 1
4 1
4 1
4 1
3 0
3 0
3 0
3 0
3 0
3 0
3 0
3 0
3 0
3 0
3 0
3 0
3 0
3 0
3 0
3 0
3 0
3 0
3 0
3 0
3 0
3 0
3 0
3 0
3 0
3 0
3 0
3 0
3 0
3 0
3 0
3 0
3 0
3 0
3 0
3 0
3 0
4 0
4 0
4 0
4 0
4 0
4 0
4 0
4 0
4 0
4 0
2 0
2 0
1 0
1 0
1 0
1 0
1 0
0 0
0 0
0 0
0 0
0 0
0 0
0 0
0 0
0 0
0 0
0 0
0 0
1 0
1 0
1 0
1 0
1 0
1 0
1 0
1 0
1 0
1 0
1 0
1 0
1 2
1 2
1 2
1 2
1 2
1 2
1 2
0 2
0 2
0 2
0 2
0 2
0 2
0 2
0 2
0 0
0 0
0 0
0 0
0 0
0 0
0 0
0 0
0 0
0 0
0 0
0 0
0 0
0 0
0 1
0 1
0 1
0 1
0 1
0 1
0 1
0 1
0 1
0 1
0 1
0 1
0 1
0 1
0 1
0 1
0 0
0 0
0 0
0 0
0 0
0 0
0 0
0 0
0 0
0 0
0 0
0 0
0 0
0 0
0 0
0 0
0 0
0 0
0 0
0 0
0 0
0 0
0 0
0 0
0 0
0 0
0 0
0 0
0 0
0 0
0 0
0 0
0 0
0 0
0 0
0 0
0 0
0 0
0 0
0 0
0 0
0 0
0 0
0 0
0 0
0 0
0 0
0 0
0 0
0 0
0 0
0 0
0 0
0 0
0 0
0 0
0 0
0 0
0 0
0 0
0 0
0 0
0 0
0 0
0 0
0 0
0 0
0 0
0 0
0 0
0 0
0 0
0 0
0 0
0 0
0 0
0 0
0 0
0 0
0 0
0 0
0 1
0 1
0 1
0 1
0 1
0 1
0 1
0 1
0 1
0 1
0 1
0 1
0 1
0 1
0 1
0 0
0 0
0 0
0 0
0 0
0 0
0 0
0 0
0 0
0 0
0 0
0 4
0 4
0 4
0 4
0 4
0 4
0 4
2 4
4 4
4 4
4 4
4 4
4 4
4 4
4 6
4 2
4 2
4 2
4 2
4 2
4 2
4 2
4 2
4 2
4 2
4 2
4 2
4 2
4 2
4 2
4 2
4 2
4 2
4 2
4 2
4 2
4 2
4 2
4 2
4 2
4 3
4 3
4 3
4 3
4 3
4 3
4 3
4 3
4 3
4 3
4 3
4 3
4 3
4 3
4 3
4 2
4 2
4 2
4 2
4 2
4 2
4 2
4 2
4 2
4 2
4 2
4 2
4 2
4 2
4 2
4 2
4 2
4 2
2 2
2 2
2 1
0 0
0 0
0 0
0 0
0 0
0 0
0 0
0 0
0 0
0 0
0 0
0 0
0 0
0 0
0 0
0 0
0 0
0 0
0 0
0 0
0 1
0 1
0 1
0 1
0 1
0 1
0 1
0 1
0 1
0 1
0 1
0 1
0 1
0 1
0 1
0 0
0 0
0 0
0 0
0 0
0 0
0 0
0 0
0 0
0 0
0 0
0 0
0 0
0 0
0 0
0 0
0 0
0 0
0 0
0 0
0 0
0 0
0 0
0 0
0 0
0 0
0 0
0 0
0 0
0 0
0 0
0 0
0 0
0 0
0 0
0 0
0 0
0 0
0 0
0 0
0 0
0 0
0 0
0 0
0 0
0 0
0 0
0 0
0 0
1 0
1 0
1 0
1 0
1 0
1 0
1 0
1 0
1 0
1 0
1 0
1 0
1 0
1 0
1 0
0 0
0 0
0 0
0 0
0 0
0 0
0 0
0 0
0 0
0 0
0 0
0 0
0 0
0 0
0 0
0 0
0 0
0 0
0 0
0 0
0 0
0 0
0 0
0 0
0 0
0 0
0 0
0 0
0 0
0 0
0 0
0 0
0 0
0 12
0 12
0 12
0 12
0 12
0 12
0 12
0 12
0 12
0 12
0 12
0 12
0 12
0 12
0 12
0 0
0 0
0 0
0 0
0 0
0 0
0 0
0 0
0 0
0 0
0 0
0 0
0 0
0 0
0 0
0 0
0 0
0 0
0 0
0 0
0 0
0 0
0 0
0 0
0 0
0 0
0 0
0 0
0 0
0 0
0 0
0 0
0 0
0 0
0 0
0 0
0 0
0 0
0 0
2 0
2 0
2 0
2 0
2 0
2 0
2 0
2 0
2 0
2 0
2 0
2 0
2 0
2 0
3 0
1 0
2 0
2 0
2 0
2 0
2 0
2 0
2 0
2 0
2 0
2 0
2 0
2 0
2 0
2 0
2 0
2 0
2 0
3 0
3 0
3 0
3 0
3 0
3 0
3 0
3 0
3 0
3 0
3 0
3 0
3 0
3 0
3 0
3 0
3 0
3 0
3 0
5 0
5 0
5 2
5 2
5 2
5 2
5 2
5 2
5 2
5 2
5 2
5 2
5 2
5 2
5 2
3 2
3 2
3 0
3 0
3 0
3 0
3 0
3 0
3 0
3 0
3 0
3 0
3 0
3 0
3 0
3 0
3 0
4 0
4 0
4 0
3 0
3 0
2 0
2 0
2 0
2 0
2 0
2 0
2 0
2 0
2 0
2 0
1 0
1 0
1 0
2 0
2 0
4 0
4 0
3 0
3 0
6 0
6 0
6 0
6 0
6 0
6 0
6 0
6 0
6 0
5 0
5 0
4 0
3 0
3 0
3 0
3 0
1 0
1 0
3 0
3 0
3 0
3 0
3 0
3 0
3 0
3 0
3 0
3 0
3 0
3 0
3 0
3 0
3 0
3 0
3 0
3 0
3 0
7 0
9 0
9 0
9 0
9 0
9 0
9 0
9 0
9 0
9 0
9 0
9 0
9 0
9 0
9 0
9 0
9 0
14 7
14 7
17 7
17 7
17 7
17 7
17 7
17 7
17 7
17 7
17 7
17 7
17 7
17 7
17 7
17 7
12 0
11 0
9 0
9 0
9 0
9 0
9 0
9 0
9 0
9 0
9 0
9 0
9 0
9 0
9 0
9 0
9 0
9 0
9 0
8 0
8 0
6 0
6 0
6 0
6 0
6 0
6 0
6 0
6 0
6 0
6 0
6 0
6 0
6 0
6 0
6 0
6 0
5 0
5 0
5 0
2 0
0 0
0 0
0 0
0 0
0 0
0 0
0 0
0 0
0 0
0 0
0 0
0 0
0 0
0 0
0 0
0 0
0 0
0 0
0 0
0 0
0 0
0 0
0 0
0 0
0 0
0 0
0 0
0 0
0 0
0 0
0 0
0 0
0 0
0 0
0 0
0 0
12 0
12 0
12 0
12 1
12 1
12 1
12 1
12 1
12 1
12 1
12 1
12 1
12 1
12 1
12 1
12 1
10 1
0 1
0 1
0 0
0 0
0 0
0 0
1 0
1 0
1 0
1 0
1 0
1 0
1 0
1 0
1 0
1 0
1 0
1 0
1 0
1 0
1 0
0 0
0 0
0 0
0 0
0 0
0 0
0 0
0 0
0 0
0 0
0 0
0 0
0 0
0 0
0 0
0 0
0 0
0 0
0 0
0 0
0 0
0 0
0 0
0 0
0 0
0 0
0 0
0 0
0 0
0 1
0 1
0 1
0 1
0 1
0 1
0 1
0 1
0 1
0 1
0 1
0 1
0 1
0 1
0 1
0 0
0 0
0 0
0 0
0 0
0 0
0 0
0 0
0 0
0 0
0 0
0 0
0 0
0 0
0 0
0 0
0 0
0 0
0 0
0 0
0 0
0 0
0 0
0 0
0 0
0 0
0 0
0 0
0 0
0 0
0 0
0 0
0 0
0 0
0 0
0 1
0 1
0 1
0 1
0 1
0 1
0 1
2 1
2 1
2 1
2 1
2 1
2 1
2 1
2 1
2 1
2 0
2 0
2 0
2 0
2 0
2 0
2 0
2 0
2 0
2 0
2 0
2 0
2 0
2 0
2 0
2 0
2 0
2 0
2 0
2 0
2 0
2 0
2 0
2 0
2 0
2 0
4 0
4 0
4 0
4 0
4 0
4 0
4 0
4 0
5 0
6 0
7 1
7 1
7 1
5 1
6 1
6 1
8 1
9 1
9 1
9 1
9 1
9 1
9 1
8 1
8 1
8 1
8 1
8 1
8 1
8 1
8 1
8 1
8 1
8 1
8 1
8 1
8 1
8 1
8 3
8 3
8 3
8 3
8 3
8 3
8 3
8 3
8 3
8 3
8 3
8 3
8 3
8 3
9 3
9 3
9 3
9 3
9 3
9 3
9 3
9 3
9 3
9 3
9 3
9 3
9 3
9 3
9 3
8 3
8 3
8 3
8 3
8 3
83 424
84 433
84 433
84 433
84 433
89 464
89 464
89 464
89 464
89 464
88 464
87 463
87 463
87 463
87 463
86 463
86 463
83 463
83 463
83 463
83 462
0 3
0 3
0 3
0 3
0 3
0 3
0 3
0 3
0 3
0 3
0 3
0 3
0 2
0 3
0 3
0 3
0 3
1 3
1 3
1 3
1 3
1 4
1 4
2 4
2 4
2 4
2 4
2 4
2 3
2 2
2 2
2 2
1 2
1 2
1 1
1 1
1 1
1 0
0 0
0 0
0 0
0 0
0 0
0 0
0 0
0 0
0 0
0 0
0 0
0 0
0 0
0 0
0 0
0 0
0 0
0 0
0 0
0 0
0 0
0 0
0 0
0 0
0 0
0 0
0 0
0 0
0 0
0 0
0 0
0 0
0 0
0 0
0 0
0 0
0 0
0 0
0 0
0 0
0 0
0 0
0 0
0 0
0 0
0 0
0 0
0 0
0 0
0 0
0 0
0 0
0 0
0 0
0 0
0 0
0 0
0 0
0 1
0 1
0 1
0 1
0 1
0 1
0 1
0 1
0 1
0 1
0 1
0 14
0 15
0 19
0 19
0 19
0 19
0 19
0 19
0 19
0 18
0 18
0 18
0 18
0 18
0 18
0 18
0 18
0 18
0 18
0 18
0 18
0 18
0 18
0 18
0 18
0 18
0 18
0 18
0 18
0 18
0 18
0 18
0 18
0 18
0 18
0 19
0 30
0 30
0 30
0 30
0 30
0 30
0 30
0 30
0 30
0 30
0 31
0 31
0 31
0 31
2 31
2 33
2 33
2 33
2 33
2 33
2 37
12 43
12 43
12 43
12 43
12 43
12 43
13 45
13 46
11 50
11 50
11 51
11 51
11 51
11 51
11 46
11 46
16 33
16 32
16 29
16 29
16 29
16 29
5 23
5 23
5 23
5 23
5 23
5 55
5 58
5 61
5 61
5 62
0 76
0 76
0 76
0 77
0 79
0 79
0 79
0 79
0 79
0 79
1 78
1 73
1 72
1 41
1 41
1 41
1 30
1 30
1 29
1 29
1 15
1 15
1 15
1 15
1 13
1 13
0 13
0 13
0 13
0 13
0 12
0 12
0 14
0 14
0 14
0 14
0 14
0 14
0 14
0 14
0 14
0 28
0 28
0 28
0 28
0 28
0 28
0 24
0 20
0 16
0 16
0 15
0 15
0 15
0 15
0 15
0 1
0 1
0 1
1 1
1 1
1 1
1 1
1 1
1 1
1 0
1 0
1 0
1 0
1 0
1 0
1 0
1 0
1 0
0 0
0 0
0 0
0 0
0 0
0 0
0 0
0 0
0 0
0 0
0 0
0 0
0 0
0 0
0 0
0 0
0 0
0 0
0 0
0 0
0 0
0 0
0 0
0 0
0 0
0 0
0 0
0 0
0 0
0 0
0 0
0 0
0 0
0 0
0 0
0 0
0 0
0 0
0 0
0 0
0 0
0 0
0 0
0 0
0 0
0 2
0 2
0 2
0 2
0 2
0 2
0 2
0 2
0 2
0 2
0 2
0 2
0 2
0 2
0 2
0 1
0 0
0 0
0 0
0 0
0 0
0 0
0 0
0 0
0 0
0 0
0 0
0 0
0 0
0 0
0 0
0 0
0 0
0 0
0 0
0 0
0 0
0 0
0 0
0 0
0 0
0 0
0 0
0 0
0 0
0 0
0 0
0 0
0 0
0 0
0 0
0 0
0 0
0 0
0 0
0 0
0 0
0 0
0 0
0 0
0 0
0 0
0 0
0 0
0 0
0 0
0 0
0 0
0 0
0 2
0 4
0 4
0 4
0 4
0 4
0 4
0 4
0 4
0 4
0 4
0 4
0 4
0 4
0 4
0 4
0 0
0 0
0 0
0 0
0 0
0 0
0 0
0 0
0 0
0 0
0 0
0 0
0 0
0 0
0 0
0 0
0 0
0 0
0 0
0 0
0 0
0 0
0 0
0 0
0 0
0 0
0 0
0 0
0 0
0 0
0 0
0 0
0 0
0 0
0 0
0 0
0 0
0 0
0 0
0 0
0 0
0 0
0 0
0 0
0 4
0 4
0 4
0 4
0 4
0 4
0 4
0 4
0 4
0 4
0 4
0 4
0 4
0 4
0 4
0 4
0 0
0 0
0 0
0 0
0 0
0 0
0 0
0 0
0 0
0 0
0 0
0 0
0 0
0 0
0 0
0 0
0 0
0 0
0 0
0 0
0 0
0 0
0 0
0 0
0 0
0 0
0 0
0 0
0 0
0 0
0 0
0 0
0 0
0 0
0 0
0 0
0 0
0 0
0 0
0 0
0 0
0 0
0 0
0 0
0 0
0 0
0 0
0 0
0 0
0 0
0 0
0 0
0 0
0 0
0 0
0 0
0 0
0 0
0 0
0 1
0 1
0 1
0 1
0 5
0 5
0 5
0 6
0 6
0 8
0 8
0 8
0 8
0 8
0 9
0 9
0 15
0 15
0 15
0 15
0 15
0 15
1 15
1 15
1 15
1 13
2 13
2 14
2 14
2 14
2 14
2 8
2 8
2 8
2 8
2 8
2 8
2 8
2 8
2 8
2 8
2 8
2 8
2 8
0 8
0 8
0 8
0 8
0 8
0 8
0 8
0 8
0 8
0 8
0 8
0 8
0 8
0 8
0 9
0 9
0 9
0 9
0 9
0 9
0 8
0 9
4 9
4 9
4 8
4 8
5 8
5 8
5 8
5 8
5 9
5 9
12 161
12 157
12 157
12 157
12 157
9 157
9 157
9 158
9 158
7 158
7 158
7 158
7 158
7 157
7 157
7 156
7 158
7 158
7 161
7 161
0 10
0 10
0 10
0 10
0 9
0 9
0 9
0 8
0 8
0 8
0 8
0 9
0 9
0 9
0 9
0 9
0 10
0 10
0 10
0 10
0 10
0 10
0 10
0 10
0 10
0 10
0 10
0 10
0 10
0 10
0 10
0 10
0 10
0 10
0 10
0 9
0 9
0 9
688 784
689 784
689 784
689 785
689 785
689 785
689 785
689 785
689 785
689 785
689 785
689 785
689 785
689 785
689 785
0 11
0 10
0 10
0 10
0 10
0 10
0 10
0 9
0 9
0 9
0 9
0 9
0 9
0 9
0 9
0 9
0 7
0 7
0 4
0 4
0 4
0 4
0 4
0 4
0 4
0 4
0 4
0 4
0 4
0 4
0 4
0 3
0 3
0 3
0 3
1 2
1 2
1 2
1 2
1 2
1 2
1 2
1 2
1 2
1 2
1 2
1 2
1 2
1 2
1 2
0 2
0 2
0 2
0 2
0 2
0 2
0 3
0 3
0 5
0 5
0 5
0 3
0 3
0 3
0 3
0 3
0 3
0 3
0 3
0 3
0 3
0 3
0 3
0 3
0 3
0 3
0 3
0 3
0 57
0 55
0 56
0 56
0 56
0 58
0 63
0 63
0 68
0 68
0 69
0 73
0 74
0 76
0 80
0 81
0 81
0 27
0 30
0 30
0 30
0 31
0 32
0 32
0 32
0 32
0 32
0 32
0 32
0 32
0 32
0 32
0 32
0 32
0 32
0 33
0 33
0 33
0 33
0 33
0 33
0 33
0 33
0 33
0 33
0 33
0 33
0 33
0 33
0 33
0 33
0 33
0 33
0 33
0 33
0 33
0 33
0 33
0 33
0 33
0 33
0 33
0 33
0 36
0 36
0 36
0 36
0 36
0 36
0 36
0 36
0 36
0 36
0 36
0 38
0 39
0 39
0 39
0 34
0 30
0 29
0 22
0 20
0 19
0 19
0 25
0 25
0 20
0 20
0 21
0 22
0 19
0 18
0 18
0 18
0 17
0 16
0 16
0 16
0 16
0 16
0 16
0 16
0 16
0 16
0 16
0 16
0 15
0 15
0 15
0 15
0 15
0 15
0 14
0 14
0 14
0 14
0 14
0 14
0 14
0 14
0 14
0 14
0 14
0 13
0 13
0 13
0 13
0 13
0 13
0 13
0 13
0 13
0 13
0 13
0 13
0 13
0 13
0 13
0 13
0 13
0 13
0 13
0 13
0 13
0 13
0 13
0 11
0 9
0 9
0 9
0 9
0 9
0 8
0 8
0 8
0 8
0 8
0 2
0 2
0 2
0 2
0 1
0 0
0 0
0 0
0 0
0 0
0 0
0 0
0 0
0 0
0 0
0 0
0 0
0 0
0 0
0 0
0 0
0 0
0 0
0 0
0 0
0 0
0 0
13 0
16 0
16 1
16 1
283 36
283 36
283 36
283 36
283 36
283 36
283 36
283 36
283 36
283 36
283 36
283 36
270 36
270 35
269 35
0 0
0 0
0 0
0 0
0 1
0 1
0 1
0 1
0 1
0 1
0 1
0 1
0 1
0 1
0 1
0 1
0 1
0 1
0 1
0 1
0 1
2 1
2 1
2 1
2 1
3 1
3 1
3 1
3 1
3 1
3 1
3 1
3 1
3 1
3 1
3 1
1 1
1 1
1 1
1 1
0 1
0 1
0 1
0 1
0 1
0 1
0 1
0 1
0 1
0 1
0 1
0 1
0 1
0 1
0 1
0 1
0 1
0 1
0 1
0 1
0 1
0 1
0 1
0 1
0 1
0 1
0 1
0 1
0 1
0 1
0 1
0 1
0 1
0 1
0 1
0 1
0 1
0 0
0 0
0 0
0 0
0 0
0 0
0 0
0 0
0 0
0 0
0 0
0 0
0 0
0 0
0 0
0 0
0 0
0 0
0 1
0 3
0 4
0 4
0 4
0 4
0 4
0 4
0 5
0 5
0 5
0 5
0 5
0 5
0 5
1 9
1 9
1 9
1 11
1 14
1 14
2 14
2 14
2 14
2 14
2 14
2 14
2 14
2 14
2 14
2 14
2 14
2 14
2 14
2 14
2 14
2 14
2 14
3 16
3 16
3 16
3 16
3 16
3 16
3 16
3 16
3 16
3 16
3 17
3 18
3 18
3 20
3 20
2 27
2 27
2 27
2 27
2 27
2 27
2 27
2 28
2 28
2 28
2 28
2 28
2 28
2 28
2 28
2 30
2 30
2 29
2 29
3 29
3 29
3 26
3 25
3 25
3 25
3 26
3 26
3 26
3 25
3 25
3 25
3 24
3 24
3 24
2 24
1 20
1 19
1 17
1 15
1 15
0 15
0 15
0 15
0 15
0 15
0 15
0 15
0 15
0 15
0 15
0 15
0 15
0 15
0 15
0 15
0 15
0 15
0 15
0 15
0 15
0 15
0 15
0 15
0 15
0 15
0 15
0 15
0 14
0 13
0 12
0 12
0 11
0 11
0 1
0 1
0 1
0 1
0 0
0 0
0 0
0 0
0 0
0 0
0 0
0 0
0 0
0 0
0 0
0 0
0 0
0 0
0 0
0 0
27 0
27 0
27 0
27 0
27 0
27 0
27 0
27 0
27 0
27 0
27 0
27 0
27 0
27 0
27 1
27 1
0 1
0 1
0 1
0 1
0 1
0 1
0 1
0 1
0 1
0 1
0 1
0 1
0 1
0 0
0 0
0 0
0 0
0 0
0 0
0 0
0 0
0 0
0 0
0 0
0 0
0 0
0 0
0 0
0 0
0 0
0 0
0 0
0 0
0 0
0 0
0 0
0 0
0 0
0 0
0 0
0 0
0 0
0 0
0 0
0 0
0 0
0 0
0 0
0 0
0 0
0 0
0 0
0 0
0 0
0 0
0 0
0 0
0 0
0 0
0 0
0 1
0 1
0 1
0 1
0 1
0 1
0 1
0 1
0 4
0 4
0 4
0 4
0 4
0 4
0 4
0 4
0 4
0 3
0 3
0 3
0 3
0 3
0 3
0 0
0 0
0 0
0 0
0 0
0 0
0 1
0 1
0 1
0 1
0 1
0 1
0 1
0 1
0 1
0 1
0 1
0 1
0 1
0 1
0 1
0 1
0 1
0 1
0 1
0 1
0 1
0 1
0 1
0 1
0 1
0 1
0 1
0 1
0 1
0 1
0 1
0 1
0 1
0 2
0 2
0 2
0 2
0 2
0 2
0 2
0 2
0 2
0 2
0 2
0 2
0 2
0 2
0 2
0 1
0 1
0 1
0 1
0 1
0 1
0 1
0 1
0 1
0 1
0 0
0 0
0 0
0 0
0 0
0 0
0 0
0 0
0 0
0 0
0 0
0 0
0 0
0 0
0 0
0 0
0 0
0 0
0 0
0 0
0 0
0 0
0 0
0 0
0 0
0 0
0 0
0 0
0 0
0 0
0 0
0 0
0 0
0 0
0 0
0 0
0 0
0 0
0 0
0 0
0 0
0 0
0 0
0 0
0 0
0 0
0 0
0 0
0 0
0 0
0 0
0 0
0 0
0 0
0 0
0 0
0 0
0 0
0 0
0 0
0 0
0 0
0 0
0 0
0 0
0 0
0 0
0 0
0 0
0 0
0 0
0 0
0 0
0 0
0 0
0 0
0 0
0 0
0 0
0 0
0 0
0 0
0 0
0 0
0 0
0 0
0 0
0 0
0 0
0 0
0 0
2 0
2 0
2 0
2 0
2 0
2 0
2 0
2 0
2 0
2 0
2 0
2 0
2 0
2 0
2 0
2 0
2 0
0 0
0 0
0 0
0 0
0 0
0 0
0 0
0 0
0 0
0 0
0 0
0 0
0 0
0 0
0 0
0 0
0 0
0 0
0 0
0 0
0 0
0 0
0 0
0 0
0 0
0 0
0 0
0 0
0 0
0 0
0 0
0 3
0 3
0 3
0 3
0 3
0 3
0 3
0 3
0 3
0 3
0 3
0 3
0 3
0 3
0 3
0 0
0 0
0 0
0 0
0 0
0 0
0 0
0 0
0 0
0 0
0 0
0 0
0 0
0 0
0 0
0 0
0 0
0 0
0 0
0 0
0 0
0 0
0 0
0 0
0 0
0 0
0 0
0 24
0 24
0 24
0 24
0 24
0 24
0 24
0 24
0 24
0 24
0 24
0 24
0 24
0 24
0 24
0 0
0 0
0 0
0 0
0 0
0 0
0 0
0 0
0 0
0 0
0 0
0 0
0 0
1 0
1 0
1 0
1 0
1 0
1 0
1 0
1 0
1 0
1 0
1 0
1 0
1 0
1 0
2 0
2 0
2 0
2 0
2 0
2 605
2 609
2 609
1 609
1 609
1 609
1 609
1 609
1 609
1 609
0 609
0 609
0 609
0 609
0 609
0 609
0 1
0 1
0 1
0 0
0 0
0 0
0 0
0 0
0 0
0 0
0 0
0 0
0 0
0 0
0 0
0 0
0 0
0 0
0 0
0 0
0 0
0 0
0 0
1 0
1 0
1 0
1 0
1 0
1 0
1 0
1 0
1 0
1 0
1 0
1 0
1 0
1 0
1 0
1 0
0 0
0 0
0 0
0 0
0 0
0 0
0 0
0 0
0 0
0 0
0 0
0 0
0 0
0 0
0 0
0 0
0 0
0 0
0 0
0 0
0 0
0 0
0 0
0 0
0 0
0 0
0 0
0 0
0 0
0 0
0 1
0 1
0 1
0 1
0 1
0 1
0 1
0 1
0 1
0 1
0 1
0 1
0 1
0 1
0 1
0 0
0 0
0 0
0 0
0 0
1 0
1 0
3 0
3 0
3 0
3 0
3 0
3 0
3 0
3 0
3 0
3 0
3 0
3 0
3 0
2 0
2 0
0 0
0 0
0 0
0 0
0 0
0 0
0 0
0 0
0 0
0 0
0 0
0 0
0 0
1 0
1 0
1 0
1 0
1 0
1 0
1 31
1 31
1 31
1 31
1 31
1 31
1 31
1 31
1 31
1 31
1 31
1 31
1 31
0 31
1 31
1 31
1 31
1 31
1 31
1 31
1 32
1 32
1 38
1 12
1 12
1 14
1 14
1 14
1 14
0 14
0 14
0 14
1 30
1 30
1 30
7 61
7 61
7 61
7 61
7 61
7 61
7 62
7 62
7 62
7 62
7 62
8 63
8 63
8 63
8 63
8 63
8 63
8 63
8 63
8 63
8 63
8 63
8 63
8 63
8 63
8 63
8 64
8 64
8 64
8 64
8 64
8 64
8 66
8 66
8 66
8 65
8 64
8 65
9 65
9 65
10 69
10 69
10 69
10 70
10 70
10 70
10 70
10 70
10 68
10 68
10 68
11 68
17 75
17 75
17 75
17 77
17 78
17 78
16 77
16 73
16 53
16 48
16 48
16 48
15 35
24 41
24 41
24 41
24 41
24 41
24 42
24 42
24 42
19 27
19 27
19 27
19 27
19 26
19 27
19 27
19 27
19 27
19 27
19 27
18 26
18 26
18 26
18 26
18 26
18 26
18 26
18 26
18 26
18 26
18 26
18 26
18 26
18 26
18 26
18 25
18 25
18 25
18 25
18 25
18 25
18 25
18 25
19 25
19 25
19 25
19 24
18 24
18 24
17 20
17 20
17 20
17 19
17 19
17 19
17 19
17 19
17 19
17 19
16 19
16 19
10 10
10 9
10 9
10 9
11 8
11 8
11 8
11 8
11 8
11 8
11 8
11 8
10 8
1 3
1 5
1 5
1 5
1 5
1 4
0 4
0 4
0 4
0 4
0 4
0 4
0 4
0 3
0 5
0 5
0 5
0 5
0 5
0 6
0 6
0 6
0 6
0 7
0 7
0 7
0 7
0 7
0 7
0 7
0 7
0 7
0 7
0 7
0 7
0 7
0 7
0 7
0 7
0 7
0 7
0 7
0 7
0 7
0 7
0 7
0 7
0 7
0 7
0 7
0 7
0 7
0 7
0 7
0 7
0 7
0 7
0 7
0 7
0 7
0 7
0 7
0 7
0 7
0 7
0 7
0 7
0 7
0 7
0 7
0 7
0 7
0 7
0 5
0 2
0 2
0 0
0 0
0 0
0 0
0 0
0 0
0 0
0 1
0 1
0 1
0 1
0 1
0 1
0 1
0 1
0 1
0 1
0 1
0 1
0 1
0 1
0 1
0 1
0 1
0 1
0 1
0 1
1 1
2 1
2 1
2 1
2 1
2 1
2 1
2 1
2 1
2 1
2 1
2 1
2 1
2 1
2 2
2 2
2 3
1 5
1 5
1 5
1 7
0 7
0 7
0 7
0 7
0 7
0 7
0 7
0 7
0 16
0 16
0 16
0 16
0 16
0 18
1 35
1 36
1 36
1 37
1 37
1 37
1 37
3 37
3 37
3 37
3 37
3 37
3 37
3 37
3 37
3 37
3 37
3 37
3 36
3 36
3 36
3 36
3 36
1 36
1 36
1 36
1 36
1 36
1 36
1 36
1 38
1 38
1 38
1 38
1 42
1 73
1 74
2 76
2 76
10 156
11 165
13 171
13 170
13 174
15 177
16 178
16 170
16 157
16 153
16 153
16 153
16 153
15 152
15 152
15 152
15 152
15 152
15 153
15 153
15 155
15 156
15 158
15 160
15 204
15 204
16 207
16 207
16 207
16 209
17 212
17 212
17 213
17 220
16 211
16 213
16 214
16 214
16 214
16 214
16 175
16 175
16 175
16 175
16 174
16 175
15 173
15 173
15 172
15 171
15 171
15 171
14 171
14 171
15 174
15 168
15 168
15 168
15 168
15 168
15 168
15 165
15 162
15 162
15 152
15 144
15 136
15 129
15 113
16 104
22 126
22 123
22 120
11 57
13 56
13 52
14 52
14 52
13 51
13 51
13 51
13 51
13 51
13 51
13 51
13 51
13 51
13 51
13 51
13 51
13 51
13 49
13 49
13 47
13 44
13 45
12 43
12 43
12 43
12 40
12 40
12 40
12 40
12 35
12 35
12 35
12 31
12 30
12 29
12 29
12 29
11 29
11 28
11 28
11 28
11 28
11 28
11 28
11 28
11 28
11 28
11 28
11 28
11 28
11 28
11 28
11 28
11 25
11 27
11 40
11 40
11 41
11 41
11 41
11 41
11 41
11 41
11 41
9 41
9 41
9 40
8 40
8 40
4 18
4 18
4 17
4 17
1 17
1 17
0 17
0 17
0 17
0 17
0 17
0 17
0 17
0 17
0 17
0 17
0 17
0 17
0 17
0 20
0 20
1 20
1 20
1 20
1 20
1 19
1 19
1 19
1 19
1 19
1 19
1 19
1 19
1 19
1 19
1 19
1 19
0 19
0 19
0 19
0 19
0 19
0 19
0 19
0 19
0 19
0 21
0 21
0 22
0 22
0 22
0 23
0 23
0 23
0 23
1 23
1 24
1 24
1 21
2 8
2 8
2 11
2 11
2 11
2 11
2 11
2 11
2 11
2 11
2 11
2 11
2 11
2 11
2 11
2 11
2 11
2 11
2 11
2 11
2 11
2 11
2 11
2 11
2 11
2 11
2 11
2 11
2 11
2 11
2 11
2 11
2 11
2 8
2 8
2 9
2 9
2 9
2 9
2 9
2 9
2 9
2 9
2 9
2 9
2 9
2 11
2 11
2 11
2 11
3 11
3 11
3 11
3 11
3 11
3 12
3 12
3 12
3 12
3 9
3 9
3 8
3 8
3 8
3 8
3 8
3 8
3 8
3 8
3 8
3 8
3 8
3 8
2 8
2 8
2 5
2 6
2 6
2 6
2 6
2 6
2 6
2 6
2 6
2 6
2 6
2 6
2 6
2 6
2 6
2 6
2 6
2 6
2 6
2 6
2 6
1 6
1 7
1 7
1 8
1 8
1 8
1 10
1 10
1 10
1 10
1 10
1 10
1 9
1 9
1 9
1 9
1 9
1 9
1 9
1 9
1 9
1 10
1 10
1 8
1 8
1 8
1 8
0 8
0 8
0 8
0 8
0 8
0 7
0 7
0 7
0 7
0 7
0 7
0 7
0 7
0 7
0 7
0 6
0 6
0 6
0 6
0 6
0 6
0 6
0 6
0 6
0 6
0 6
0 5
0 5
0 5
0 5
0 5
0 5
0 7
0 7
0 9
0 10
0 11
0 11
0 11
0 11
0 11
0 12
0 12
0 12
0 12
0 12
0 12
0 8
0 7
0 7
0 7
0 7
0 7
0 7
0 7
0 7
0 7
0 7
0 7
0 7
0 7
0 7
0 7
0 7
0 7
0 7
0 8
0 8
0 8
0 8
0 8
0 8
0 9
0 9
0 9
0 9
0 9
0 9
0 9
0 9
0 9
0 9
0 9
0 9
0 9
0 9
0 9
0 9
0 9
0 9
0 9
0 9
0 9
0 9
0 9
0 9
0 9
0 8
0 8
0 7
0 7
0 7
0 5
0 5
0 5
0 5
0 5
0 5
0 4
0 3
0 3
0 3
0 3
0 3
0 2
0 2
0 4
0 4
0 4
0 4
0 4
0 4
0 4
0 4
0 4
0 4
0 4
0 7
0 7
0 7
0 7
0 7
0 7
0 7
0 7
0 7
0 7
0 8
0 8
0 7
0 7
0 7
0 6
0 4
0 6
0 5
0 5
0 5
0 5
0 5
0 5
0 5
0 5
0 5
0 5
0 5
0 7
0 7
0 7
0 7
0 6
0 6
0 6
0 6
0 6
0 6
0 6
0 6
0 6
0 6
0 6
0 6
0 6
0 7
0 7
0 7
0 7
0 7
0 7
0 7
0 7
0 7
0 7
2 7
2 7
2 7
2 7
2 7
2 7
2 5
2 5
2 5
2 5
2 5
2 5
2 6
2 6
2 6
2 8
2 10
2 10
2 10
2 10
2 10
2 10
1 10
1 10
1 10
1 10
1 10
1 9
1 8
1 7
1 7
1 8
1 8
1 8
1 7
1 7
1 7
1 10
1 10
1 10
0 9
0 9
0 9
0 9
0 9
0 9
0 9
0 10
0 10
0 10
7 10
7 10
7 10
7 10
7 11
7 11
7 11
7 12
7 12
7 12
7 12
7 11
7 11
7 11
7 11
7 11
0 11
0 11
0 11
0 11
0 11
0 11
0 11
0 11
5 11
5 11
5 10
5 9
5 9
5 9
5 9
5 9
5 9
5 9
5 9
5 9
5 9
5 9
5 8
5 7
0 7
0 7
0 7
0 7
0 7
0 7
0 7
0 7
0 7
0 7
0 7
0 7
0 6
0 7
0 7
0 7
0 7
0 7
0 6
0 6
0 4
0 4
0 4
0 4
0 4
0 4
0 4
0 4
0 4
0 4
0 4
0 4
0 4
0 4
0 4
0 4
0 4
0 2
0 2
0 2
0 2
0 2
0 2
0 2
0 2
0 2
0 2
0 2
0 2
0 2
0 2
0 2
0 2
0 2
0 2
0 2
0 2
0 2
0 2
0 2
0 2
0 2
0 2
0 2
0 2
0 2
0 2
0 2
0 2
0 2
0 2
0 2
0 2
0 2
0 2
0 2
0 2
0 2
0 2
0 2
0 2
0 2
0 2
0 2
0 1
0 1
0 1
0 1
0 1
0 1
0 1
0 1
0 1
0 1
0 1
0 1
0 1
0 1
0 1
0 1
0 1
0 1
0 1
0 0
0 0
0 0
0 0
0 0
0 0
0 0
0 0
0 0
0 0
0 0
0 0
0 0
0 0
0 0
0 0
0 0
0 0
0 0
0 0
0 0
0 0
0 0
0 0
0 0
0 0
0 0
0 0
0 0
0 2
0 2
0 2
0 2
1390 1949
1391 1949
1391 1949
1391 1949
1391 1949
1391 1949
1391 1949
1391 1949
1391 1949
1391 1950
1393 1958
1393 1958
1393 1958
1393 1958
1394 1958
1342 1957
76 24
75 24
65 20
65 20
6 9
6 9
5 9
5 9
5 9
3 0
1 0
1 0
1 0
1 0
0 0
0 0
0 0
0 0
0 0
0 0
1 0
1 0
1 0
1 0
1 0
1 0
1 0
1 0
1 0
1 0
1 1
1 1
1 1
1 1
6 12
6 12
5 12
5 12
5 12
5 12
5 12
5 12
5 12
5 12
5 12
5 12
8 25
8 25
8 25
3 14
3 14
3 14
21 14
21 14
21 14
21 14
21 15
21 15
21 14
21 14
21 14
18 1
18 1
18 1
18 1
18 1
18 1
16 1
0 1
0 1
0 1
0 0
0 0
0 0
0 0
0 0
1 0
1 0
1 0
1 0
1 0
1 0
1 0
1 0
1 0
1 0
1 0
1 0
1 0
1 0
1 0
0 0
0 0
0 0
0 0
0 0
0 0
0 0
0 0
0 0
0 0
0 0
0 0
0 0
0 0
0 0
0 0
0 0
0 0
0 0
0 0
0 0
0 0
0 0
0 0
3 0
7 0
9 0
45 0
48 0
51 0
60 0
62 0
79 0
82 0
95 0
106 0
111 0
116 0
116 0
116 0
116 0
124 0
124 0
126 0
126 0
127 0
127 0
127 0
127 0
127 0
126 0
126 0
126 0
126 0
126 0
126 0
126 0
126 0
126 0
127 0
127 0
127 0
127 0
130 0
133 0
141 0
144 0
145 0
145 0
145 0
145 0
142 0
142 0
142 0
142 0
142 0
144 0
143 0
144 0
145 0
145 0
145 0
145 0
145 0
145 0
145 0
145 0
145 0
145 0
145 0
145 0
144 0
143 0
143 0
143 0
143 0
143 0
140 0
137 0
138 0
106 0
106 0
103 0
94 0
89 0
67 0
66 0
54 0
36 0
32 0
31 0
28 0
28 0
28 0
20 0
20 0
15 0
13 0
10 0
10 0
10 0
10 0
10 0
10 0
10 0
10 0
10 0
10 0
10 0
10 0
10 0
10 0
10 0
10 0
10 0
10 0
10 0
10 0
10 0
10 0
10 0
10 10
10 10
10 10
10 10
10 10
10 10
10 10
9 10
5 10
3 10
2 10
1 10
1 10
1 10
1 10
1 0
1 0
1 0
1 0
1 0
1 0
1 0
1 0
1 0
1 0
1 0
1 0
48 7
48 7
48 7
48 7
48 7
47 7
47 7
47 7
47 7
47 7
47 7
47 7
47 7
47 7
53 7
53 7
6 0
6 0
6 0
6 0
6 0
6 0
6 0
6 0
6 0
6 0
6 0
6 0
6 0
6 0
0 0
2 0
2 0
2 0
2 0
2 0
2 0
2 0
2 0
2 0
2 0
2 0
2 0
2 0
2 0
2 0
0 0
0 0
0 0
0 0
0 0
0 0
0 0
1 0
1 0
1 0
1 0
1 0
1 0
1 0
1 0
1 0
1 0
1 0
1 0
1 0
1 0
1 0
1 0
0 0
0 0
0 0
0 0
0 0
4 0
5 0
5 0
5 0
6 1
6 1
6 1
6 1
6 1
6 1
7 1
7 1
7 1
7 1
7 1
7 1
3 1
3 1
3 1
3 1
2 0
2 0
2 0
2 0
2 0
2 0
2 0
2 0
2 0
2 0
2 0
2 0
2 0
2 0
2 0
2 0
2 0
2 0
2 0
2 0
2 0
2 0
2 0
2 0
2 0
2 0
2 0
2 0
2 0
2 0
2 0
2 0
2 0
3 0
3 0
3 0
3 0
3 0
3 0
3 0
4 0
4 0
4 0
4 0
4 0
4 0
4 0
4 0
3 0
3 0
3 0
3 0
3 0
2 0
2 0
2 0
2 0
2 0
2 0
2 0
2 0
3 0
3 0
2 0
2 0
2 0
2 0
2 0
2 0
2 0
2 0
2 0
2 0
2 0
2 0
2 0
1 0
1 0
1 0
1 0
1 0
1 0
1 0
1 0
2 0
2 0
2 0
2 0
2 0
2 0
2 0
2 0
2 0
2 0
3 0
3 0
3 0
3 0
3 0
3 0
3 0
3 0
3 0
3 0
3 0
3 0
3 0
5 0
5 0
5 0
5 0
72 2
72 2
71 2
71 2
71 2
71 2
71 2
71 2
71 2
71 2
72 2
72 2
72 2
72 2
73 2
73 2
5 0
5 0
5 0
5 0
5 0
6 0
6 0
6 0
6 0
5 0
5 0
5 0
5 0
5 0
6 0
6 0
8 0
8 0
8 0
8 0
8 0
8 0
8 0
8 0
8 0
8 0
8 0
8 0
8 1
9 1
8 1
6 1
6 1
6 1
6 1
6 1
6 1
6 1
6 1
5 1
5 1
5 1
5 1
5 1
5 0
5 0
5 0
5 0
5 0
5 0
5 0
5 0
5 0
4 0
4 0
4 0
4 0
4 0
4 0
4 0
4 0
4 0
4 0
4 0
6 0
6 0
6 0
6 0
6 0
6 0
6 0
5 0
5 0
5 0
5 0
5 0
5 0
5 0
4 0
4 0
4 0
4 0
4 0
4 0
4 0
4 0
4 0
3 0
3 0
3 0
3 1
3 1
3 1
3 1
3 1
3 1
3 1
3 1
3 1
3 1
3 1
3 1
2 1
2 1
2 1
2 0
2 0
2 0
2 0
2 0
2 0
2 0
5 0
5 0
5 0
7 0
8 0
8 0
8 0
8 0
13 0
14 0
14 0
19 0
19 0
19 0
19 0
19 0
20 0
20 0
20 0
20 0
20 0
20 0
20 0
19 0
20 0
19 0
19 0
19 0
19 0
20 0
20 0
20 0
20 9
20 9
20 9
20 9
20 9
20 9
20 9
20 9
20 9
20 9
20 9
20 9
20 9
19 9
19 9
19 9
19 0
19 0
19 0
19 0
19 0
19 0
19 0
19 0
19 0
19 0
19 0
19 0
24 0
24 0
24 0
24 0
24 0
24 0
24 0
24 0
24 0
22 0
22 0
22 0
22 0
19 0
19 0
14 0
12 0
11 0
11 0
11 0
10 0
6 0
7 0
8 0
6 0
7 0
8 0
8 0
8 0
8 0
8 0
8 0
16 0
19 0
49 1
49 1
49 1
48 1
47 1
47 1
47 1
47 1
50 1
50 1
50 1
50 1
50 1
50 1
50 1
50 1
50 1
50 1
50 1
51 1
52 1
55 1
59 1
60 1
60 1
60 1
61 1
61 1
61 1
61 1
61 1
61 1
64 1
67 2
71 2
71 2
71 2
71 2
71 2
71 2
71 2
71 2
72 2
77 2
90 2
115 2
134 3
139 3
147 4
147 4
147 4
147 4
147 4
154 4
154 4
154 4
154 4
154 4
155 4
155 4
155 4
155 4
154 4
151 4
150 4
149 4
149 4
149 4
149 4
149 4
149 4
142 4
139 4
109 3
109 3
111 5
114 5
114 5
113 5
113 5
113 5
111 5
112 5
112 5
112 5
112 5
112 5
112 6
112 6
112 6
112 6
112 6
110 6
106 6
104 6
102 6
102 6
102 6
102 6
100 6
100 6
100 6
100 6
100 6
100 6
97 6
95 5
91 5
91 5
91 5
89 5
85 5
85 5
84 5
83 5
82 5
80 5
54 4
38 3
22 1
19 1
10 0
10 0
10 0
11 0
11 0
4 0
4 0
4 0
4 0
3 0
3 0
3 0
3 0
3 0
3 0
3 0
3 0
3 0
2 0
2 0
2 0
2 0
2 0
2 0
2 0
2 0
2 0
2 0
1 0
1 0
1 1
2 1
2 1
2 1
1 1
1 1
1 1
1 1
1 1
1 1
1 1
1 1
1 1
1 1
1 1
1 1
1 1
1 1
1 1
1 1
1 1
1 1
1 1
1 1
1 1
1 1
1 1
1 1
1 1
1 1
1 1
1 1
1 1
1 1
1 1
1 1
1 1
1 1
1 1
1 1
1 1
1 1
1 1
1 1
1 1
1 1
1 1
1 1
1 1
1 1
1 1
1 1
1 1
1 1
1 1
1 1
1 1
1 1
1 1
1 1
1 1
1 1
1 1
1 1
1 1
1 1
1 1
2 1
2 1
2 1
2 1
2 1
2 1
2 2
1 2
1 2
1 2
1 2
1 2
1 2
1 2
1 2
1 2
1 2
1 2
1 2
1 2
1 2
1 0
1 0
1 0
1 0
1 0
1 0
1 0
1 0
1 0
1 0
1 0
1 0
1 0
1 0
1 0
1 0
1 0
1 0
1 0
1 0
1 0
1 0
1 0
1 0
1 0
1 0
1 0
1 0
1 0
1 0
1 0
1 0
1 0
1 0
1 0
1 0
1 0
1 0
1 0
1 0
1 0
1 0
1 0
1 0
1 0
1 0
1 0
1 0
1 0
1 0
1 0
0 0
0 0
0 0
0 0
0 0
0 0
0 0
0 0
0 0
0 0
0 0
0 0
0 0
0 0
0 0
0 1
0 1
0 1
0 1
0 1
0 1
0 1
0 1
0 1
0 1
0 1
0 1
0 1
0 1
0 1
0 1
0 1
0 1
0 1
0 1
0 1
0 1
0 1
0 1
0 1
0 1
0 1
0 1
0 1
0 2
0 2
0 2
0 2
0 2
0 2
0 2
0 2
0 2
0 2
0 2
0 2
0 2
0 2
0 2
0 2
0 2
0 2
0 2
0 2
0 2
0 2
0 2
0 2
0 2
0 2
0 2
0 2
0 3
0 2
0 2
0 2
0 3
0 4
0 4
0 4
0 4
0 4
0 4
0 4
0 4
0 4
0 4
0 4
0 4
0 4
0 4
0 4
0 4
0 4
0 4
0 4
0 4
0 4
0 4
0 4
0 4
0 4
0 4
0 4
0 4
0 4
0 4
0 4
0 4
0 4
0 4
0 4
0 4
0 4
0 4
0 4
0 4
0 3
0 3
0 3
0 3
0 3
0 3
0 3
0 3
0 3
0 3
0 3
0 3
0 3
0 3
0 3
0 3
0 3
0 3
0 3
0 3
0 3
0 3
0 3
0 3
0 3
0 3
0 3
0 3
0 2
0 2
0 2
0 2
0 0
0 0
0 0
0 0
0 0
0 0
0 0
0 0
0 0
0 0
0 0
0 0
0 0
0 0
0 0
0 0
0 0
0 0
0 0
0 0
0 0
0 0
0 1
0 1
0 1
0 1
0 1
0 1
0 1
0 2
0 2
0 2
0 2
0 2
0 2
0 2
0 2
0 2
0 2
0 2
0 2
0 2
0 2
0 2
0 2
0 3
0 3
0 3
0 3
0 3
0 3
0 3
0 3
0 3
0 3
0 3
0 3
0 3
0 5
0 5
0 13
0 13
0 13
0 13
0 24
0 24
0 24
0 24
0 24
0 26
0 26
0 26
0 26
0 27
0 27
0 27
0 27
0 27
0 27
0 27
0 27
0 27
0 27
0 27
0 26
0 26
0 26
0 26
0 26
0 26
0 26
0 26
0 26
0 26
0 26
0 25
0 25
0 25
0 25
0 25
0 26
0 26
0 25
0 25
0 25
0 25
0 25
0 25
0 25
0 25
0 25
0 25
0 25
0 25
0 25
0 25
0 25
0 25
0 24
0 24
0 24
0 24
0 24
0 24
0 24
0 24
0 24
0 24
0 24
0 22
0 22
0 20
0 20
0 11
0 11
0 3
0 3
0 1
0 1
0 1
0 1
0 1
0 1
0 1
0 1
0 1
0 1
0 1
0 1
0 1
0 1
0 1
0 1
0 1
0 1
0 1
0 1
0 1
0 1
0 1
0 1
0 1
0 1
0 1
0 1
0 1
0 1
0 1
0 1
0 1
0 1
0 1
0 1
0 0
0 0
0 0
0 0
0 0
0 0
0 0
0 0
0 0
0 0
0 0
0 0
0 0
0 0
0 0
0 0
0 0
0 0
0 0
0 0
0 0
0 0
0 0
0 0
0 0
0 0
1 0
1 0
1 0
1 0
1 0
1 0
1 0
1 0
1 0
1 0
1 0
1 0
1 0
1 0
1 1
0 1
0 1
0 1
0 1
0 1
0 1
0 1
0 1
0 1
0 1
0 1
0 1
0 1
0 1
0 1
0 1
0 1
0 1
0 1
0 0
0 0
0 0
0 0
0 0
0 0
0 0
0 0
0 0
0 0
0 0
0 0
0 0
0 0
0 0
0 0
0 0
0 0
0 0
0 0
0 0
0 0
0 1
0 1
0 3
0 3
0 3
0 3
0 3
0 3
0 3
0 3
0 3
0 3
0 3
0 3
0 3
0 3
0 3
0 1
0 1
0 1
0 1
0 1
0 1
0 1
0 1
0 1
0 1
0 1
0 1
0 1
0 1
0 1
0 1
0 1
0 1
0 1
0 1
0 1
0 1
0 1
0 1
0 1
0 1
0 1
0 1
0 1
0 1
0 1
0 1
0 1
0 1
0 1
0 1
0 1
0 1
0 1
0 3
0 4
0 6
0 6
0 6
0 6
0 6
0 6
0 6
0 6
0 6
0 6
0 6
0 6
0 6
0 6
0 6
0 3
0 2
0 1
0 1
0 1
0 1
0 1
0 1
0 1
0 1
0 1
0 1
0 1
0 1
0 1
0 1
0 1
0 1
0 1
0 1
0 1
1 211
1 211
1 211
1 211
1 211
1 211
1 211
1 211
1 211
1 219
1 219
1 220
1 222
1 222
1 223
0 15
0 14
0 14
0 14
0 14
0 14
0 15
0 15
0 15
0 15
0 15
0 15
0 15
0 15
0 15
0 15
0 15
0 15
0 15
0 15
0 14
0 14
0 14
0 14
0 14
0 14
0 15
0 15
0 15
0 15
0 15
0 15
0 15
0 15
0 15
0 15
0 15
0 16
0 16
0 16
1 19
1 19
1 20
1 21
1 21
1 21
1 21
1 19
1 19
1 19
1 19
1 19
1 19
1 19
1 19
1 19
1 19
1 19
1 19
1 19
2 19
2 19
2 19
2 19
2 19
2 19
2 19
2 11
2 11
2 11
2 12
2 11
2 10
2 10
2 10
2 10
2 10
2 11
2 11
2 10
2 10
2 11
2 11
2 11
2 11
2 11
2 11
2 11
2 11
2 11
2 11
2 11
2 11
2 11
2 14
2 17
2 17
2 22
2 20
2 20
2 20
2 20
2 20
2 20
2 20
2 20
2 20
2 20
2 20
2 20
2 20
2 20
2 20
1 16
1 16
1 16
1 16
1 16
1 16
1 16
1 17
1 17
1 17
1 17
1 17
1 17
1 17
1 17
1 17
1 17
1 17
1 17
1 17
0 15
0 15
0 13
0 14
0 14
0 14
0 14
0 14
0 14
0 14
0 23
0 23
0 23
0 23
0 23
0 23
0 23
0 22
0 23
0 23
0 22
0 22
0 22
0 22
0 22
0 17
0 17
0 17
0 17
0 17
0 17
0 17
0 17
0 17
0 14
0 12
0 11
0 8
0 7
0 7
0 7
0 7
0 7
0 7
0 7
0 7
0 7
0 7
0 7
0 7
0 7
0 7
0 7
0 7
1 8
1 8
1 8
1 8
1 8
1 8
1 7
1 7
1 7
1 7
1 7
1 7
1 7
1 7
1 7
1 7
1 7
1 7
1 7
1 7
1 7
1 7
1 6
1 6
1 6
1 6
1 6
1 6
1 6
1 2
1 2
2 5
2 5
2 5
2 5
2 5
2 5
2 4
2 4
2 4
2 4
2 4
2 4
2 4
2 4
2 4
2 4
2 4
2 4
2 5
2 5
2 5
2 5
2 5
2 5
2 5
2 5
2 5
2 5
2 5
2 5
2 5
2 5
2 5
2 5
2 5
2 5
2 5
2 5
2 5
2 5
1 5
1 5
1 4
1 4
1 4
1 4
1 4
1 4
1 4
1 4
1 4
1 4
1 4
1 4
1 4
1 4
1 4
1 4
1 4
1 4
1 4
1 4
1 4
1 4
1 4
1 4
1 4
1 4
1 4
1 4
1 4
0 4
0 4
0 1
0 1
0 1
0 1
0 1
0 1
0 1
0 1
0 1
0 1
0 1
0 1
0 1
0 3
0 3
0 4
0 4
0 4
0 3
0 3
0 4
0 4
0 4
0 4
0 4
0 4
0 4
0 4
0 4
0 4
0 4
0 4
0 4
0 4
0 4
0 4
0 3
0 2
0 2
0 2
0 2
0 2
0 2
0 2
0 2
0 2
0 2
0 2
0 2
0 2
1 2
1 1
1 1
1 0
1 0
1 0
1 0
1 0
1 0
1 0
1 0
1 0
1 0
1 0
1 0
0 0
1 0
1 0
1 0
1 0
1 0
1 0
1 0
1 0
1 0
1 0
1 0
1 0
1 0
1 0
1 0
0 0
0 0
0 0
0 0
0 0
0 0
0 0
0 0
0 0
0 1
0 1
0 1
0 1
0 1
0 1
0 1
0 1
0 1
0 1
0 1
0 1
0 1
0 3
0 3
0 8
0 8
0 7
0 7
0 8
0 8
0 8
0 8
0 8
0 8
0 8
0 8
0 8
0 8
0 8
0 8
0 8
0 8
0 8
0 9
0 8
0 8
0 8
0 8
0 8
0 8
0 8
0 9
0 9
0 9
0 9
0 10
0 12
0 12
0 13
0 13
0 13
0 11
0 11
0 11
0 13
10 13
10 12
10 12
10 12
10 12
10 12
10 11
10 10
10 10
10 9
10 9
10 9
10 9
10 9
10 9
0 9
0 9
0 9
0 9
0 9
0 9
0 9
0 9
0 9
0 8
0 7
1 7
1 7
1 7
1 7
1 7
1 7
1 6
1 6
1 6
1 6
1 6
1 7
2 7
2 7
2 8
1 8
1 8
1 8
1 9
1 9
1 9
1 9
1 9
1 9
1 9
1 8
1 8
0 8
0 8
0 8
0 8
0 8
0 8
0 8
0 8
0 8
0 8
0 6
0 6
0 6
0 6
0 6
0 6
0 6
0 5
0 5
0 5
0 5
0 5
0 5
0 5
0 4
0 4
0 4
0 4
0 4
0 4
0 4
0 4
0 4
0 4
0 4
0 4
0 4
0 4
0 4
0 4
0 4
0 4
0 4
0 4
0 4
0 4
0 4
0 4
0 4
0 4
0 4
0 4
0 4
0 4
0 4
0 4
0 4
0 3
0 1
0 1
0 0
0 0
0 0
0 0
0 0
0 0
0 0
0 0
0 0
0 0
0 0
0 0
0 0
0 0
0 0
0 0
0 0
0 0
0 0
0 0
0 0
0 0
0 0
0 0
0 0
0 0
0 0
0 0
0 0
0 0
0 0
0 0
0 0
0 0
0 0
0 0
0 0
0 0
0 0
0 0
0 0
0 0
0 0
0 0
0 0
0 0
0 0
0 0
0 0
0 0
0 0
0 0
0 0
0 0
0 0
0 0
0 0
0 0
0 0
0 0
0 0
0 0
0 0
0 0
0 1
0 1
0 1
0 1
0 1
0 1
0 1
0 1
0 1
0 1
0 1
0 1
0 1
0 1
0 1
0 1
0 1
0 0
0 0
0 0
0 0
0 0
0 0
0 0
0 2
0 4
0 4
0 4
0 4
0 6
0 6
0 6
0 19
0 43
0 61
0 65
0 79
0 89
0 92
1 94
1 99
1 100
1 99
1 99
1 98
1 98
1 98
1 98
1 98
1 98
1 98
1 98
1 98
1 98
0 98
0 98
0 98
0 98
0 98
0 98
0 98
0 98
0 98
0 98
0 98
0 98
0 98
0 98
0 98
0 98
0 98
0 100
0 100
0 100
0 100
0 100
0 100
0 99
0 107
0 107
0 107
0 107
0 115
2 294
2 314
2 322
2 330
2 332
2 334
2 348
2 342
2 337
4 338
4 328
4 328
4 318
4 316
4 293
4 292
4 272
4 272
4 272
4 302
4 308
6 311
7 435
8 434
8 436
8 434
8 431
8 430
8 429
8 429
8 428
8 428
8 428
8 428
8 428
8 428
8 428
8 427
8 427
8 427
8 427
8 427
8 427
8 427
8 427
8 427
8 427
8 427
8 427
8 427
8 427
8 427
8 427
8 427
8 427
8 427
8 427
8 427
8 424
8 423
8 423
8 419
8 419
8 417
8 417
8 417
8 417
8 417
8 417
8 417
8 417
8 416
8 401
6 185
6 180
6 180
6 180
6 180
6 180
6 182
6 182
4 180
4 179
4 180
4 201
4 233
4 238
4 248
4 253
4 255
4 255
4 255
3 222
1 226
1 221
0 101
0 108
0 103
0 104
0 106
0 116
0 118
0 124
0 129
0 130
0 132
0 132
0 133
0 133
0 133
0 133
0 133
0 134
0 135
0 135
0 135
0 135
0 135
0 135
0 135
0 135
0 136
0 136
0 136
0 137
0 138
0 138
0 138
0 139
0 139
0 140
0 140
0 140
0 140
0 138
0 139
0 139
0 139
0 139
0 139
0 139
0 139
0 139
0 139
0 139
0 139
0 139
0 139
0 138
0 137
0 135
0 132
1 131
1 130
1 130
1 130
1 130
1 87
1 55
1 43
1 23
1 13
1 13
1 13
2 13
2 13
2 13
1 13
1 13
1 15
1 15
1 16
1 16
1 16
1 14
1 10
1 8
1 8
1 7
0 7
0 7
0 7
0 7
0 7
0 7
0 7
0 7
0 7
0 7
0 7
0 7
0 7
0 7
0 7
0 8
0 8
0 8
0 7
0 6
0 6
0 6
0 6
0 6
0 6
0 6
0 6
0 6
0 5
0 5
0 5
0 5
0 5
0 5
0 5
0 5
0 5
0 5
0 5
0 5
0 5
0 5
0 5
0 5
0 5
0 5
0 5
0 3
0 3
0 3
0 3
0 3
0 3
0 3
2 3
2 3
4 3
4 3
4 3
4 3
4 3
4 3
4 3
4 3
4 3
4 1
4 1
4 1
4 1
4 1
4 1
4 1
4 1
4 1
4 1
4 1
4 3
4 3
4 3
4 4
4 4
4 4
4 4
4 4
4 4
4 4
4 4
4 4
4 3
4 3
4 3
4 3
4 3
4 3
4 2
4 2
4 2
4 2
6 2
6 2
6 2
6 2
6 2
7 2
9 2
9 2
7 2
7 2
7 2
5 2
5 2
5 2
5 2
5 2
5 2
5 2
5 2
5 2
4 2
4 2
4 2
4 2
4 2
4 2
4 2
4 2
4 2
4 3
4 3
4 3
4 3
4 3
4 3
4 3
4 6
4 8
4 8
4 8
4 8
4 8
4 8
4 8
4 8
5 9
5 9
5 9
5 9
5 9
5 9
5 7
5 2
5 2
5 2
5 2
5 2
5 2
5 2
5 2
5 2
5 2
5 2
3 2
3 2
3 2
1 2
1 2
1 2
1 2
1 2
1 2
1 2
1 2
1 2
1 2
1 2
1 2
1 2
1 2
1 2
1 2
1 2
1 2
1 2
1 2
1 2
1 2
1 2
1 2
1 2
1 1
1 0
1 0
1 0
1 0
1 0
1 0
1 0
1 0
1 1
1 1
1 1
1 1
1 1
1 1
1 1
2 1
2 1
2 1
2 1
2 1
3 1
3 1
3 1
3 1
3 1
3 1
2 1
2 1
2 1
2 1
2 1
2 1
2 1
2 1
2 1
2 1
2 1
2 1
2 1
2 1
2 1
2 1
2 5
2 5
2 5
2 5
2 5
2 7
2 7
3 7
3 7
3 7
3 8
3 8
3 8
3 8
3 8
3 8
3 7
3 7
3 7
3 7
3 7
3 7
3 7
3 7
3 7
3 7
3 7
3 7
3 7
3 7
3 7
3 7
3 7
3 7
3 7
3 7
3 7
3 7
3 7
3 6
3 6
3 4
3 4
3 4
3 4
3 3
2 1
2 1
2 1
2 0
2 1
1 2
1 3
1 3
1 3
1 3
1 3
1 3
1 3
1 3
1 3
1 3
1 3
1 3
1 3
1 3
1 2
1 2
1 2
1 2
1 2
1 3
1 3
1 3
1 3
1 3
1 3
1 3
1 3
1 3
0 3
0 3
0 3
0 3
0 3
0 3
0 3
0 3
0 3
0 3
0 3
0 3
0 3
0 3
0 3
0 3
0 3
0 3
0 3
0 3
0 3
0 3
0 3
0 3
0 3
0 3
0 3
0 3
0 3
0 3
0 3
0 3
0 3
0 3
0 3
0 3
0 3
0 3
0 3
0 3
0 3
0 2
0 1
0 1
0 1
0 1
0 1
0 1
0 1
0 1
0 1
0 1
0 1
0 1
0 1
0 1
0 1
0 1
0 1
0 1
0 1
0 1
0 1
0 1
0 0
0 0
0 0
0 0
0 0
0 0
0 0
0 1
0 1
0 1
0 1
0 1
0 1
0 1
0 1
0 1
0 1
0 1
0 1
0 1
0 1
0 1
0 1
0 0
0 0
1 0
1 0
1 0
1 0
2 0
2 0
2 0
2 0
2 1
2 2
2 2
2 2
2 2
2 2
2 2
2 2
2 2
2 2
4 2
4 2
4 2
4 2
4 2
4 2
4 2
4 2
4 2
4 2
4 2
4 2
4 2
2 2
2 2
0 2
0 2
0 2
0 2
0 2
0 2
0 2
0 2
0 2
0 2
0 2
0 2
0 2
0 2
0 2
0 2
0 2
0 2
0 2
0 2
0 5
0 5
0 5
0 5
1 9
1 9
1 11
1 11
1 11
1 11
1 11
1 12
1 12
1 12
1 12
1 12
1 11
1 11
2 11
2 11
2 11
2 11
2 11
2 11
2 12
2 12
2 12
2 12
2 11
2 10
2 10
2 10
2 10
2 10
2 10
2 10
2 10
2 10
2 10
2 10
2 10
2 13
2 13
2 20
2 20
2 20
2 20
2 20
2 20
2 22
2 22
2 23
2 23
2 23
2 23
2 23
2 23
2 23
2 23
2 23
2 23
2 23
2 23
2 23
2 23
2 22
2 19
2 17
2 17
8 19
8 19
8 19
8 21
9 33
9 41
9 43
9 45
8 44
8 45
8 44
8 45
8 45
8 45
8 45
2 44
2 44
2 44
2 46
2 52
2 52
2 54
1 54
1 54
1 54
1 54
1 53
1 53
1 53
1 53
1 53
1 53
1 53
1 53
1 53
1 53
1 53
1 53
1 53
1 53
1 53
1 53
1 53
1 53
1 53
1 51
1 49
1 43
1 43
1 44
1 44
1 43
1 43
1 43
1 43
1 41
1 40
1 39
1 38
1 38
1 38
1 39
1 39
1 39
1 41
1 41
1 41
1 40
1 40
1 40
2 40
2 40
2 39
2 39
2 39
2 40
2 34
3 20
3 17
3 16
3 16
3 16
3 16
3 16
3 15
2 15
2 15
2 15
2 16
2 16
2 19
2 17
2 11
1 11
1 9
1 9
1 9
1 9
1 11
1 11
1 11
1 11
1 11
1 11
1 11
1 11
1 11
1 11
1 13
1 13
1 13
1 13
1 13
1 13
1 13
1 13
1 13
1 14
1 14
1 15
1 15
1 15
1 14
1 14
1 14
1 13
1 13
1 14
1 14
1 14
1 14
1 14
1 14
1 15
1 15
1 15
1 15
1 13
1 14
1 14
1 14
2 14
2 14
2 14
2 15
2 15
2 15
2 15
2 14
2 14
1 14
1 14
1 14
1 13
1 13
2 14
2 14
2 15
2 16
2 16
2 16
2 15
2 15
2 15
2 15
2 15
2 15
2 15
2 15
2 15
2 15
2 13
2 13
2 12
2 12
2 12
2 12
2 13
2 13
2 15
2 15
2 13
2 13
2 13
2 14
2 14
2 18
2 24
2 24
2 27
2 29
2 38
2 41
2 47
2 47
2 57
2 70
2 75
2 76
2 76
2 75
2 76
2 76
2 76
2 78
2 81
2 80
2 92
2 93
2 93
2 95
2 96
2 96
2 96
1 96
1 96
1 95
1 94
1 94
1 94
1 94
1 94
1 94
1 94
1 94
1 95
1 95
1 95
0 90
0 90
0 88
0 88
0 88
0 88
0 88
0 88
0 83
0 83
0 81
0 81
0 81
0 80
0 80
0 80
0 80
0 80
0 80
0 79
0 78
0 78
0 73
0 69
0 64
0 59
0 59
0 59
0 59
0 59
0 59
0 58
0 54
0 53
0 51
0 51
0 41
0 41
0 39
0 39
0 32
0 18
1 18
1 18
1 18
1 17
1 17
5 17
5 17
5 17
5 14
5 14
5 1
5 0
5 0
5 0
5 0
5 0
5 0
5 0
5 1
5 1
5 1
5 1
5 1
5 1
5 1
5 1
5 1
5 1
5 1
5 1
5 1
5 1
5 1
5 1
6 1
6 1
6 1
6 1
6 1
6 1
6 1
6 1
6 1
6 1
6 1
6 1
6 1
4 1
4 1
4 1
4 1
4 1
4 1
5 2
5 2
5 2
5 2
5 2
5 2
5 2
5 2
5 2
5 2
5 2
5 2
5 2
5 2
5 2
5 2
5 2
5 2
5 2
5 2
5 2
6 2
6 2
6 2
6 2
3 2
3 2
3 2
3 2
3 2
3 2
3 2
3 2
3 2
3 3
3 3
2 3
2 2
2 2
2 2
2 2
2 2
2 2
2 2
2 2
2 2
2 2
2 2
2 2
2 2
2 1
2 1
2 1
2 1
1 1
1 1
1 1
1 3
1 7
1 7
1 7
1 7
1 7
1 7
1 16
1 20
2 76
5 100
7 102
7 104
7 108
7 108
7 107
6 107
6 107
6 107
6 107
6 107
6 107
6 107
6 107
6 107
4 107
4 107
4 107
4 107
4 107
4 108
6 146
6 152
6 152
6 153
6 154
6 154
6 156
6 156
6 156
6 156
6 156
6 156
6 156
6 156
6 156
6 156
6 156
6 157
6 157
6 157
6 157
6 157
6 157
6 157
6 157
6 157
6 157
6 157
6 157
6 157
6 157
6 157
6 157
6 157
6 158
6 158
6 158
6 158
6 158
6 158
6 155
8 150
8 147
10 145
10 131
10 130
10 117
10 117
10 117
9 114
7 104
6 56
6 52
6 52
6 52
6 52
6 52
6 52
6 51
6 51
6 51
6 51
6 51
6 51
6 51
6 51
6 51
6 51
7 51
7 51
7 51
7 51
7 51
5 8
5 4
5 4
3 3
3 2
3 2
3 2
3 2
5 2
5 2
5 2
5 2
5 2
5 2
5 2
5 2
5 2
5 1
5 1
5 1
5 1
5 3
5 4
5 4
5 4
5 4
5 4
5 4
5 4
5 4
5 14
5 14
6 14
6 14
6 13
6 13
6 13
6 13
6 13
6 13
6 13
6 13
6 13
6 13
6 12
6 2
7 34
6 39
6 39
6 39
6 39
6 39
6 39
6 39
6 39
6 39
6 39
6 39
6 39
6 39
6 39
5 7
5 7
5 7
5 7
5 7
5 7
5 7
2 7
0 7
0 7
0 7
0 7
0 7
0 8
0 8
0 8
0 8
0 31
0 31
0 31
0 31
2 31
2 31
2 31
2 31
2 31
2 31
2 31
2 30
2 30
2 30
2 30
2 29
2 25
2 5
2 5
0 5
0 5
0 5
0 5
0 5
0 5
0 5
0 5
0 5
0 5
0 5
0 5
0 5
0 5
0 5
0 5
0 5
0 5
0 5
0 5
0 5
0 5
0 5
0 0
0 0
0 0
0 0
0 0
0 0
0 0
0 0
0 0
0 0
0 0
0 0
0 0
0 0
0 0
0 0
0 0
0 0
0 0
1 0
1 0
1 0
2 0
2 0
2 0
2 0
2 0
2 0
2 0
2 0
2 0
2 0
2 0
2 0
2 0
1 0
1 0
0 0
0 0
0 0
0 0
0 0
0 0
0 0
0 0
0 0
0 0
0 0
0 0
0 0
1 0
1 0
1 0
1 0
1 0
1 0
1 0
1 0
1 0
1 0
1 0
1 1
1 1
1 1
1 1
0 1
0 1
0 1
0 1
0 1
0 1
0 1
0 1
0 2
0 2
0 2
0 2
0 2
0 2
0 2
0 2
0 2
0 2
0 2
0 2
0 2
0 2
0 2
0 2
0 2
0 2
0 2
0 2
0 2
0 2
0 2
0 2
0 2
0 2
0 2
0 2
0 6
0 6
0 6
0 6
0 6
0 6
0 6
0 6
0 6
0 6
0 6
0 6
0 6
0 6
0 6
0 6
0 6
0 6
0 8
0 8
0 8
0 8
0 8
0 8
0 8
0 8
0 8
0 8
0 8
5 8
6 8
6 8
6 8
27 7
27 8
27 8
27 8
27 8
27 8
27 8
27 11
27 12
27 12
27 12
27 11
27 11
27 11
27 11
1 11
2 12
2 12
2 12
2 12
2 12
2 12
3 12
3 12
3 12
3 12
3 12
3 12
3 12
3 12
3 12
3 12
2 12
2 12
2 13
2 13
2 13
2 13
2 13
2 13
2 9
2 9
2 9
2 9
2 9
2 9
2 9
2 9
2 9
2 9
2 9
2 9
2 9
2 9
2 9
2 9
2 9
2 9
2 7
2 7
2 7
2 7
2 7
2 7
2 7
2 7
2 7
2 7
2 7
2 7
1 7
1 7
1 9
1 9
1 12
1 18
1 19
1 19
1 21
1 21
1 21
1 20
1 20
1 20
1 20
1 21
1 21
1 21
1 22
1 20
1 20
0 20
0 20
0 20
0 20
0 20
0 20
0 20
0 20
0 20
0 20
0 20
0 20
0 20
0 20
0 20
0 19
0 14
0 14
0 14
0 11
0 11
0 11
0 11
0 11
0 11
0 11
0 11
0 11
0 11
0 11
0 11
0 12
0 12
0 12
0 12
0 12
0 12
0 12
0 12
0 12
0 12
0 12
0 12
4 12
4 12
4 12
4 12
4 12
4 12
4 12
4 11
4 11
4 11
4 11
4 10
4 10
4 8
4 8
0 6
0 6
0 5
0 6
0 4
0 4
0 4
0 4
0 4
0 4
0 4
0 4
0 3
0 3
0 3
0 4
0 4
0 4
0 4
0 4
0 4
0 4
0 4
0 4
0 4
0 4
0 4
0 5
0 5
0 5
0 4
0 4
0 4
0 4
0 4
0 4
0 5
0 5
0 5
0 5
0 6
0 6
0 6
0 6
0 6
0 6
0 5
0 5
0 5
0 5
0 5
0 5
0 4
0 4
0 4
0 4
0 4
0 4
0 4
0 4
0 4
0 4
0 4
0 4
0 4
0 4
0 4
0 4
0 4
0 4
0 4
0 4
0 4
0 4
0 4
0 4
0 3
0 2
0 2
0 2
0 2
0 2
0 2
0 2
0 2
0 2
0 2
0 2
0 2
0 2
0 2
0 2
0 2
10 4
10 4
10 4
10 4
10 4
10 4
10 4
10 3
10 3
10 3
10 3
10 3
10 3
10 3
10 3
0 1
0 1
0 1
0 1
0 1
0 0
0 0
0 0
0 0
0 0
0 0
0 0
0 0
0 0
0 0
0 0
0 0
0 0
0 0
0 0
0 0
0 0
0 0
0 0
0 0
0 0
0 0
0 0
0 0
0 0
0 0
0 0
0 0
0 0
0 0
0 0
0 0
0 2
0 2
0 2
0 2
0 2
0 2
1 2
1 2
2 2
2 2
2 2
2 2
2 2
2 2
2 2
2 0
2 0
2 0
2 0
2 0
2 0
2 0
1 0
1 0
0 0
0 0
0 0
0 0
0 0
0 0
0 0
0 0
0 0
0 0
0 0
0 0
0 0
0 0
0 0
0 0
0 0
0 0
0 0
0 0
0 0
0 0
0 0
0 0
0 0
0 0
0 0
0 0
0 0
0 0
0 0
0 0
0 2
0 2
3 6
3 7
3 11
3 11
4 11
4 12
4 12
4 12
4 12
4 12
4 12
4 12
4 12
4 12
4 12
4 12
1 12
1 12
1 12
1 12
1 12
1 12
1 12
0 12
0 12
0 12
0 12
0 12
0 12
0 12
0 12
0 12
0 12
0 12
0 12
0 12
0 12
0 12
0 12
0 12
0 12
0 12
0 12
0 12
0 12
0 12
0 12
0 12
0 12
0 12
0 12
0 12
0 12
0 12
0 12
0 12
0 12
0 12
0 12
0 12
0 12
0 12
0 12
0 12
0 12
0 12
0 12
0 12
0 12
0 12
0 12
0 10
0 10
0 6
0 5
0 0
0 0
0 0
0 0
0 0
0 0
0 0
0 0
0 1
0 1
0 1
0 1
0 1
0 1
0 1
0 1
0 1
0 1
0 1
0 1
0 1
0 1
0 2
0 3
0 3
0 3
0 3
0 3
0 3
0 4
0 4
0 4
0 4
0 4
0 4
0 4
0 4
0 4
0 6
0 6
0 6
0 6
0 6
0 6
0 6
0 6
0 6
0 6
0 7
0 7
0 7
0 7
0 7
0 8
0 8
0 8
0 8
0 8
0 8
0 8
0 8
0 8
0 8
0 8
0 8
0 8
0 8
0 8
0 8
0 8
0 8
0 8
0 8
0 8
0 8
0 8
0 8
0 8
0 8
0 8
0 8
0 7
0 7
0 7
0 7
0 7
0 7
0 7
0 7
0 7
0 7
0 6
0 5
0 5
0 5
0 5
0 5
0 5
0 5
0 5
0 5
0 5
0 4
0 4
0 4
0 4
0 4
0 4
0 4
0 4
0 3
0 2
0 2
0 2
0 2
0 2
0 2
0 2
0 2
0 2
0 2
0 1
0 1
0 1
1 1
1 2
2 5
4 9
4 10
4 21
4 26
4 43
4 44
4 48
4 48
4 48
4 51
4 52
4 53
4 53
4 53
4 53
4 51
4 51
4 51
4 52
4 52
4 52
4 52
4 52
4 54
4 54
4 54
4 56
4 56
4 57
4 57
4 57
4 57
4 57
4 57
4 57
4 57
4 57
4 57
4 57
4 57
2 58
1 57
1 58
0 58
0 58
0 72
0 73
0 71
0 70
0 63
0 57
0 57
0 57
0 57
0 56
0 55
0 55
0 55
0 55
0 55
0 55
0 55
0 55
0 55
0 55
0 57
0 57
0 57
0 56
0 56
0 54
0 52
0 51
0 49
0 48
0 46
0 42
0 32
0 32
0 29
0 29
0 29
0 28
0 28
0 28
0 28
0 28
0 28
0 28
0 28
0 28
0 27
0 27
0 27
0 28
0 27
0 26
0 26
0 26
0 24
0 24
0 24
0 24
0 24
0 24
0 24
0 24
0 24
0 25
0 25
0 25
0 25
0 25
0 25
1 25
1 24
3 22
3 21
3 5
3 5
3 5
3 5
3 5
3 5
3 5
3 5
3 5
3 5
3 5
8 8
8 8
8 8
8 8
8 8
8 8
8 8
8 8
8 8
8 6
8 6
8 6
8 5
8 5
8 5
8 5
8 5
8 5
8 5
8 5
8 5
8 5
8 5
8 5
8 5
8 5
8 5
9 6
9 6
9 6
9 6
9 6
9 6
9 6
9 6
9 6
9 6
9 6
9 6
9 6
9 6
16 24
16 24
16 24
16 24
16 24
17 24
17 24
17 24
17 24
15 24
15 24
15 23
15 22
15 23
15 23
15 23
15 23
15 23
15 25
14 26
14 27
14 27
14 29
14 29
14 29
14 29
14 29
14 29
14 29
14 29
14 29
14 29
9 27
9 27
9 27
9 27
9 27
9 27
9 28
9 28
9 28
9 28
9 28
9 28
9 28
9 28
9 28
9 28
9 28
9 28
9 28
9 28
9 28
9 28
9 29
9 29
10 29
10 29
10 29
9 28
9 29
9 29
9 29
9 29
10 29
11 29
11 29
11 29
11 29
11 29
11 29
9 29
9 29
3 8
4 8
4 8
4 8
4 8
3 9
3 6
3 6
3 6
3 6
3 6
3 6
3 6
3 5
3 5
3 5
3 5
2 5
2 5
2 5
2 5
2 5
2 5
2 5
2 5
2 8
2 8
2 13
2 13
2 17
3 22
3 25
4 35
4 39
4 39
2 39
2 39
2 45
2 44
2 46
2 46
2 46
2 46
2 62
3 62
3 62
3 63
3 63
3 63
3 164
3 164
3 164
3 158
3 182
3 185
3 185
3 185
3 185
3 185
3 187
3 189
3 192
3 197
3 217
3 272
3 290
3 303
3 320
3 334
3 345
3 349
3 349
3 348
3 347
3 346
3 345
3 345
3 345
3 343
3 343
3 343
3 343
3 343
3 345
3 342
3 342
3 342
3 342
3 342
3 342
3 343
3 340
3 337
3 337
3 337
3 337
3 337
3 336
3 336
3 335
3 333
3 333
2 328
2 327
2 326
2 317
2 312
2 307
2 307
2 307
2 306
2 304
2 290
2 291
2 277
2 276
2 140
1 136
1 136
1 136
0 136
0 136
0 136
2 17
2 17
2 15
2 11
2 11
2 11
2 11
2 11
2 11
2 12
2 12
2 12
2 12
2 8
2 3
2 3
0 3
0 3
0 3
0 3
0 3
0 3
0 3
0 3
0 3
0 3
0 3
0 3
0 3
0 3
0 3
0 3
0 3
0 3
0 3
0 3
0 3
0 4
0 4
0 4
0 5
0 5
0 5
0 5
0 5
0 5
0 5
0 5
0 5
0 5
0 5
0 5
0 5
0 5
0 5
0 5
0 6
0 6
0 6
0 6
0 6
0 6
0 6
0 4
3 9
3 8
3 8
3 8
3 11
3 11
3 11
3 11
3 11
3 11
3 11
3 11
3 11
3 11
3 11
2 11
2 11
0 11
0 10
0 7
0 7
0 7
0 7
0 7
0 7
0 7
0 7
0 7
0 7
0 7
0 7
0 7
0 7
0 7
0 7
0 7
0 7
0 7
0 7
0 7
0 7
0 7
0 7
0 7
0 7
0 7
0 6
0 6
0 6
0 6
0 6
0 6
0 6
0 2
0 2
0 2
0 2
0 2
0 2
0 2
0 2
0 2
0 2
0 2
0 2
0 1
0 1
0 1
0 2
0 2
1 2
1 2
2 2
2 1
2 1
2 1
2 1
2 1
2 1
2 1
2 1
2 1
2 1
2 0
2 0
1 0
1 0
0 0
0 0
0 0
0 0
0 0
0 0
0 0
0 0
0 0
0 0
0 0
0 0
0 0
0 0
0 0
0 0
0 0
0 0
0 0
0 0
0 0
0 0
0 0
0 0
0 0
0 0
0 0
0 0
0 0
0 0
0 0
0 0
0 1
0 2
0 3
0 3
0 3
0 3
0 3
0 3
0 3
0 3
0 3
0 3
0 4
0 4
0 4
0 4
0 4
0 4
0 4
0 6
0 6
0 6
0 6
0 9
0 10
0 10
0 13
1 51
1 72
1 80
1 98
2 101
2 101
2 101
2 101
2 101
2 101
2 101
2 101
2 101
2 101
2 101
2 101
2 101
2 101
2 101
2 101
2 101
2 101
2 101
2 109
2 109
2 110
2 111
2 112
2 111
2 111
2 111
2 111
2 111
2 112
2 151
2 151
2 155
2 157
2 159
2 160
2 164
2 163
2 163
2 165
2 168
2 168
2 168
2 168
2 168
2 168
2 168
2 168
2 175
2 178
2 180
2 180
2 178
2 180
2 179
2 178
2 176
2 176
2 176
2 176
2 176
2 173
2 173
2 172
2 182
2 192
2 195
2 200
2 189
1 135
1 116
0 115
0 119
0 119
0 119
0 119
0 119
0 119
0 119
0 119
0 120
0 120
0 120
0 121
0 124
0 124
0 125
0 125
0 127
0 127
0 127
0 126
0 112
0 112
0 104
0 103
0 98
0 97
1 96
1 96
1 97
1 97
1 98
1 45
1 45
1 45
1 45
1 30
1 30
1 30
1 31
1 31
1 32
1 31
1 31
1 31
1 31
1 31
0 31
0 31
0 31
0 31
0 31
0 31
0 31
0 31
0 31
0 31
0 32
0 32
0 32
0 32
0 32
0 30
0 33
0 33
0 38
0 38
0 42
0 43
0 41
0 62
1 94
1 136
1 144
1 155
1 163
1 163
1 163
1 165
1 165
1 168
1 168
1 169
1 169
1 171
1 170
1 167
1 170
1 170
1 171
1 170
1 171
1 171
1 173
1 173
1 173
1 175
1 182
1 182
1 189
1 192
1 195
3 194
3 194
3 192
3 192
3 192
3 192
3 193
3 193
3 192
3 192
3 191
4 193
4 191
4 191
4 191
5 192
6 221
14 274
16 290
24 337
24 347
24 352
24 356
24 354
24 356
24 359
24 368
24 373
24 370
24 370
24 372
24 377
24 397
24 401
24 400
24 416
24 386
24 348
24 333
24 333
24 332
24 330
23 304
23 284
23 277
23 273
23 272
23 272
23 274
23 274
23 274
23 271
23 271
23 270
23 269
23 266
23 268
23 268
23 261
23 261
23 260
23 260
23 259
23 257
24 256
45 310
45 311
45 309
45 303
47 302
47 292
47 289
47 286
45 286
45 286
45 287
49 287
49 287
49 289
49 289
49 289
49 289
49 289
49 287
48 284
48 284
48 283
47 283
47 280
44 236
38 200
36 188
30 149
32 151
32 151
32 149
32 148
33 147
33 145
36 137
36 135
38 134
38 134
38 132
38 126
38 102
38 100
38 103
38 90
38 92
38 93
38 93
38 93
38 94
38 96
38 96
38 97
38 97
38 97
38 98
38 98
38 98
38 98
38 98
38 98
38 98
38 101
38 101
38 101
38 99
38 99
38 99
38 100
38 100
39 100
33 100
33 100
30 97
11 41
9 41
9 41
9 41
9 65
3 61
3 61
3 61
3 61
3 63
3 62
4 83
4 85
4 86
4 86
4 86
4 86
4 86
4 86
4 86
4 86
4 86
4 86
4 86
4 86
4 86
4 86
4 86
4 84
4 84
4 84
4 84
4 84
4 84
4 78
4 76
4 76
4 77
4 77
4 77
4 77
4 76
4 72
4 69
4 66
4 66
4 66
4 66
4 66
4 64
4 62
4 56
4 56
4 55
4 55
4 56
4 56
4 56
4 56
4 56
4 56
5 54
5 53
5 52
5 52
5 52
5 52
5 53
5 53
4 53
3 52
3 52
3 52
4 52
4 52
4 53
4 52
3 29
3 29
3 29
3 29
3 29
4 26
6 26
5 4
8 3
8 2
8 2
8 2
8 2
8 2
8 2
8 2
8 2
8 2
8 2
8 2
8 2
8 4
8 4
11 4
11 5
13 6
13 8
13 8
13 9
13 9
13 9
16 9
16 11
29 17
31 23
31 23
31 23
31 25
32 25
38 26
38 26
38 26
38 26
38 26
38 26
39 40
39 40
39 40
40 43
40 43
42 47
42 47
42 47
49 47
49 48
49 49
49 49
48 52
48 52
48 55
48 55
48 55
48 55
48 55
48 55
48 55
48 55
48 55
72 70
72 70
72 72
72 70
72 70
72 70
74 70
74 69
74 70
74 70
71 70
68 70
68 70
68 70
68 70
68 70
67 70
67 69
67 69
67 69
67 69
66 69
66 69
66 70
66 70
66 70
66 70
66 70
60 68
60 68
60 67
60 64
60 60
60 60
60 58
60 58
57 58
54 57
44 45
43 45
43 45
42 45
42 45
42 45
35 45
35 45
34 45
34 45
34 45
34 44
34 29
59 31
59 31
59 31
59 31
58 28
58 28
58 28
55 28
55 26
55 26
55 26
55 23
55 23
55 20
55 20
54 20
54 20
29 17
29 17
29 17
24 17
24 17
2 2
2 2
2 2
2 2
0 2
0 2
0 2
0 2
0 1
0 1
0 1
0 1
0 1
0 1
0 1
0 1
0 1
0 1
0 1
0 1
0 1
0 1
0 1
0 0
0 0
0 0
0 0
0 0
0 1
0 1
0 1
0 1
0 1
0 1
0 1
0 1
0 2
0 2
0 2
0 2
0 2
0 2
0 4
0 4
1 4
1 4
1 4
1 4
1 4
1 4
1 4
1 4
1 4
1 4
1 4
1 4
1 4
1 4
1 4
1 4
1 5
1 5
1 5
1 5
1 5
1 5
1 5
1 5
1 5
1 5
1 5
1 5
1 5
1 5
1 5
1 5
1 5
1 5
1 5
1 5
1 5
1 5
1 5
1 5
1 5
1 5
1 5
1 5
1 5
1 5
1 5
1 5
1 6
1 6
1 6
1 6
1 6
1 6
1 7
1 7
1 7
1 6
1 6
1 6
1 6
1 6
1 6
1 6
1 6
1 4
1 4
1 4
1 4
1 4
1 4
1 3
0 3
0 3
0 3
0 3
0 3
0 3
0 3
0 3
0 3
0 3
0 3
0 3
0 4
0 4
0 4
0 4
0 4
0 3
0 3
0 3
0 3
0 3
0 3
0 3
0 3
0 3
0 3
0 3
0 4
0 4
0 4
0 4
0 4
0 33
0 35
0 36
0 36
0 36
0 36
0 36
0 36
0 36
0 36
0 36
0 36
0 36
0 37
0 38
0 38
0 37
0 37
0 37
0 37
0 37
0 37
0 36
0 36
0 36
0 36
0 36
0 36
0 36
0 36
0 36
0 36
0 36
0 36
0 36
0 36
0 43
0 43
0 43
0 43
0 45
0 45
0 46
0 46
0 46
0 46
0 46
0 46
0 46
0 46
0 52
0 52
0 51
0 51
0 51
0 51
0 52
0 52
0 52
0 52
1 52
1 54
1 54
1 54
1 54
1 69
1 69
1 69
1 70
1 70
1 70
1 70
1 74
1 45
1 42
1 42
0 43
1 46
1 56
1 60
1 61
1 61
1 61
1 61
1 61
1 61
1 60
1 59
1 60
1 61
1 66
4 71
4 73
4 73
4 73
4 73
4 76
4 82
4 80
4 83
5 87
5 87
5 91
5 94
6 96
6 100
6 100
6 102
6 102
6 94
6 94
6 93
6 93
6 90
6 91
6 91
6 99
6 99
6 99
6 99
6 99
6 97
6 97
6 97
7 99
15 117
15 117
15 118
15 118
15 116
15 114
15 114
15 114
15 116
15 116
15 116
15 116
15 115
15 69
15 69
15 69
15 68
15 41
15 41
15 41
15 41
15 41
15 41
15 41
15 42
19 41
22 42
29 44
29 44
31 44
35 44
35 44
39 44
39 44
39 42
39 42
39 41
39 41
39 40
36 40
36 40
36 40
36 40
36 40
36 40
36 40
36 40
36 40
35 40
35 40
35 39
35 39
34 39
34 39
35 39
35 39
35 39
35 39
35 39
35 39
35 39
35 39
35 38
35 38
35 30
35 30
35 30
36 30
35 30
35 30
33 30
33 30
32 28
16 6
16 6
16 6
16 6
16 6
16 6
16 6
4 4
4 2
4 2
4 2
4 2
4 2
4 2
4 2
4 2
4 2
4 2
4 2
4 2
4 2
4 2
4 2
4 2
4 2
4 0
4 0
3 0
3 0
3 0
3 0
5 0
5 0
6 0
6 0
6 0
6 0
6 0
6 0
6 0
6 0
6 0
6 0
6 0
6 0
6 0
6 0
6 0
6 0
6 0
6 0
6 0
6 0
7 1
6 2
17 6
18 7
19 7
19 7
19 7
18 7
18 7
18 7
17 7
17 7
17 7
17 7
17 7
17 7
17 7
17 7
17 7
17 7
17 7
17 7
17 7
17 7
17 7
17 7
17 7
17 7
17 7
18 8
18 8
29 10
34 10
35 12
35 12
36 13
37 16
38 18
39 18
39 18
39 19
40 20
40 20
40 20
40 20
40 20
40 20
40 20
40 19
43 19
43 21
41 21
41 22
40 22
38 24
38 24
38 24
38 24
38 24
38 24
38 24
38 24
40 24
40 25
39 25
39 25
39 25
39 25
39 23
39 24
39 24
39 24
39 24
39 24
39 23
29 20
28 19
27 19
27 19
27 19
27 19
27 19
27 19
27 19
27 18
27 19
27 19
27 19
27 19
27 21
27 21
27 21
27 21
27 22
27 23
27 24
27 26
27 26
27 26
27 26
27 32
27 32
24 31
24 31
8 29
5 29
5 28
5 28
4 28
0 25
0 24
0 24
0 24
0 23
0 22
0 22
0 22
0 22
0 22
0 22
0 22
0 22
0 22
0 20
0 20
0 16
0 16
0 16
0 16
0 16
0 16
0 16
0 16
0 16
0 16
0 16
0 16
0 16
0 16
0 16
0 16
0 16
0 16
0 16
0 16
0 16
0 16
0 15
0 15
0 14
0 14
0 14
0 14
0 14
0 14
0 14
0 14
0 14
1 14
1 14
1 14
1 15
2 22
2 22
2 23
2 23
2 22
2 19
2 18
2 17
2 17
2 17
2 17
2 11
2 11
2 11
2 11
2 11
2 11
2 11
2 11
2 11
2 11
2 11
2 10
2 9
2 9
2 9
2 9
2 10
2 10
2 10
2 10
2 10
2 10
2 10
2 10
2 10
2 10
2 10
2 10
2 10
2 10
2 10
2 10
2 12
2 23
2 28
2 28
2 29
2 29
2 29
2 29
2 29
2 29
2 29
2 29
2 29
2 29
2 29
1 29
1 29
1 29
0 29
0 29
0 29
0 29
0 31
0 31
0 37
0 37
0 39
0 38
0 38
0 38
0 32
0 32
0 35
0 35
0 35
0 34
0 34
0 34
0 34
0 34
0 34
0 35
0 35
0 35
0 35
0 35
0 35
0 34
0 34
0 34
0 35
0 38
0 39
0 39
0 39
0 39
0 39
0 38
0 38
0 38
0 38
0 38
0 38
0 39
0 39
0 39
0 39
0 39
0 39
0 39
0 39
0 45
0 45
0 40
0 26
0 26
0 26
0 26
0 26
0 26
0 26
0 26
0 26
0 26
0 26
0 26
0 26
0 27
0 27
0 27
0 27
0 28
0 28
0 28
0 28
0 26
0 26
0 20
0 20
0 18
0 18
0 19
0 19
0 19
0 19
0 18
0 18
0 18
0 18
0 18
0 19
0 19
0 19
0 19
0 18
0 18
0 18
0 18
0 18
0 18
0 18
0 18
0 18
0 17
0 14
0 13
0 13
0 11
0 11
0 11
0 11
0 11
0 11
0 11
0 11
0 11
0 10
0 10
0 12
0 12
0 12
0 12
0 12
0 12
0 6
0 6
0 6
0 6
0 6
0 6
0 6
0 6
0 6
0 4
0 4
0 4
0 4
2 93
2 93
2 93
2 92
2 92
2 92
2 92
2 91
2 91
2 91
2 91
2 91
2 91
2 91
2 91
2 91
0 2
0 3
0 4
0 4
0 4
0 4
0 4
0 4
0 4
0 4
0 3
0 3
0 3
0 3
0 3
0 3
0 3
0 3
0 5
0 6
0 6
0 6
0 6
0 6
0 6
0 6
0 6
0 6
0 6
0 6
0 6
0 6
0 6
0 6
0 6
0 6
0 6
0 6
0 6
0 6
0 6
0 6
0 6
0 6
0 6
0 6
0 6
0 6
0 7
0 7
0 7
0 7
0 7
0 7
0 7
0 7
0 7
0 7
0 7
0 7
0 7
0 7
0 7
0 7
0 7
0 7
0 7
0 7
0 7
0 7
0 7
0 7
0 5
0 4
0 4
0 4
0 4
0 4
0 4
0 4
0 4
0 4
0 4
0 4
0 4
0 4
0 4
0 4
0 4
0 4
0 4
0 2
0 1
0 1
0 1
0 1
0 1
0 1
0 1
0 2
0 14
0 14
0 20
0 31
0 33
0 34
0 34
0 34
0 36
0 37
0 37
0 38
0 38
0 38
0 38
0 38
0 38
0 38
0 38
0 38
0 38
0 37
0 37
0 37
0 37
0 37
0 37
0 37
0 37
0 37
0 37
0 37
0 38
0 38
0 38
0 38
0 38
0 38
0 38
0 38
0 38
0 38
0 38
0 38
0 38
0 38
0 38
0 38
0 38
0 36
0 22
0 22
0 22
0 22
0 22
0 22
0 22
0 22
0 22
0 22
0 22
0 22
0 22
0 22
0 22
0 14
0 14
0 14
0 14
0 7
0 7
1 7
1 6
1 5
1 5
1 3
1 2
1 2
1 2
1 2
1 2
1 2
1 1
1 1
1 1
1 1
1 1
0 1
6 1
6 1
19450 33
19500 33
19500 33
19500 33
19500 33
19500 33
19500 33
19500 33
19500 33
19500 33
19500 33
19502 33
19502 33
19502 33
19502 33
19502 32
137 0
136 0
134 0
131 0
128 0
127 0
126 0
125 0
125 0
11 1
11 1
11 1
11 1
3 1
3 1
2 1
2 1
2 2
2 2
2 2
2 2
2 2
2 2
2 2
2 2
2 1
2 1
2 1
2 1
2 1
2 1
2 1
2 1
2 1
2 1
2 1
2 1
2 1
2 1
2 1
2 1
14 1
16 1
26 1
28 1
30 1
33 1
33 1
33 1
56 1
56 1
56 1
63 2
63 2
63 2
63 2
67 2
109 2
109 2
109 2
109 2
109 2
116 2
116 2
116 2
116 2
116 2
116 2
107 1
107 1
107 1
110 1
110 1
110 1
110 1
110 1
114 1
121 1
127 1
136 1
136 1
154 2
158 2
158 2
165 2
165 2
165 2
165 2
165 2
165 2
165 1
165 1
165 1
165 1
165 1
165 1
165 1
167 1
167 1
167 1
167 1
169 1
170 1
173 1
176 1
176 1
176 1
176 1
176 1
183 3
188 3
188 3
186 3
184 3
174 3
172 3
162 3
160 3
158 3
155 3
155 3
155 3
133 3
133 3
133 3
133 3
132 3
127 3
119 3
119 3
68 3
68 3
67 3
48 3
46 3
40 3
40 3
38 3
38 3
36 3
36 3
38 4
38 4
38 4
38 4
45 6
45 6
45 6
45 6
45 7
45 7
45 7
45 7
45 7
36 6
36 6
36 6
35 7
35 7
35 7
35 7
35 7
35 7
35 7
35 7
35 7
35 7
35 7
35 7
35 7
30 7
30 7
29 6
27 6
27 6
24 6
23 6
20 6
21 6
24 6
25 6
28 6
24 4
24 4
24 4
23 4
22 4
22 4
22 4
24 4
24 4
26 4
26 4
26 4
26 4
26 4
26 2
26 2
26 2
26 3
26 3
26 3
23 3
23 3
23 3
23 3
23 3
23 3
23 3
23 3
23 3
23 3
23 3
23 3
23 2
23 2
23 2
23 2
18 1
18 1
18 1
18 0
18 0
18 0
18 0
18 0
18 0
18 0
18 0
18 0
18 0
18 0
18 0
420 0
420 0
420 0
420 0
420 0
420 0
420 0
420 0
421 0
421 0
421 0
421 0
421 0
421 0
418 0
18 0
16 0
16 0
11 0
7 0
5 0
2 0
1 0
0 0
0 0
0 0
0 0
0 0
0 0
0 0
0 0
0 0
0 0
0 0
0 0
0 0
0 0
0 0
0 0
0 0
0 0
0 0
0 0
0 0
0 0
0 1
0 1
0 1
0 1
0 1
0 1
0 1
0 1
0 1
0 1
0 1
0 1
0 1
0 1
0 1
0 1
0 2
0 2
0 2
0 2
0 2
0 2
0 2
0 2
0 2
0 2
0 2
0 2
0 2
0 2
0 2
0 2
0 2
0 2
0 2
0 2
0 2
0 2
0 2
0 2
0 2
0 3
0 3
0 3
0 3
0 3
0 3
0 3
0 3
0 3
0 3
0 3
0 3
0 3
0 3
0 3
0 3
0 3
0 3
0 3
0 5
0 5
0 11
0 11
0 11
0 13
0 13
0 18
0 18
0 18
0 19
0 19
0 19
0 18
0 19
0 19
0 19
18 19
18 20
18 21
18 21
18 21
18 24
18 24
18 24
18 34
18 34
18 34
18 34
18 34
18 33
18 33
0 33
0 33
0 32
0 32
0 32
0 32
0 34
0 38
0 39
0 40
0 43
0 43
0 43
0 43
0 43
0 43
0 43
0 43
0 43
0 43
0 43
0 43
0 42
0 42
0 42
0 42
0 42
0 42
0 42
0 42
0 42
0 42
0 39
0 35
0 35
0 34
0 34
0 34
0 34
0 34
0 34
0 34
0 34
0 32
0 32
0 32
0 32
0 32
0 29
0 28
0 27
1 27
1 27
1 27
2 25
2 25
2 25
2 25
2 23
2 21
2 21
2 23
2 24
2 26
2 29
2 30
2 25
2 25
2 25
2 25
2 23
2 21
2 21
2 21
2 23
2 27
2 29
2 29
2 32
2 30
2 24
2 26
2 25
2 23
2 23
2 23
2 23
2 23
2 23
2 23
2 23
2 23
2 24
2 24
2 26
2 26
2 26
2 26
2 26
2 26
2 26
2 26
2 26
2 26
2 26
2 26
2 31
2 31
2 31
2 32
2 31
2 31
2 31
2 31
2 30
2 30
2 30
2 30
2 30
2 38
2 38
2 38
2 38
2 38
1 38
1 41
1 51
0 80
0 98
2 103
2 109
2 116
2 117
2 122
2 122
2 121
2 121
2 119
2 118
2 118
2 118
2 118
2 118
2 118
2 118
2 118
2 118
2 117
2 116
2 118
2 121
2 119
2 119
2 119
2 119
2 119
2 119
2 119
2 119
2 119
2 121
2 122
2 118
2 114
2 114
2 114
2 116
2 110
2 109
2 109
2 106
2 106
2 105
2 121
2 119
2 122
2 122
2 122
2 122
2 116
2 111
2 111
2 110
2 108
2 106
2 106
2 106
2 106
2 106
2 106
2 106
3 106
3 105
3 105
3 105
2 100
2 100
1 95
1 91
1 79
1 47
1 38
1 37
1 36
1 36
1 36
1 36
1 36
1 36
1 36
1 36
1 37
1 37
1 37
1 37
1 37
1 37
1 37
1 37
1 37
1 37
1 37
1 35
1 33
1 32
1 32
1 32
1 32
1 32
1 32
1 32
1 32
1 33
1 31
1 30
1 30
1 30
1 29
1 29
1 26
1 25
1 25
1 24
1 24
1 24
1 22
1 4
1 4
1 2
1 2
1 2
1 2
1 2
1 2
1 2
1 2
1 2
1 2
1 2
1 2
1 2
1 2
1 2
1 5
0 5
0 5
0 5
0 5
0 5
0 5
0 5
0 5
0 6
0 6
0 6
0 6
0 6
0 6
0 6
0 6
0 6
0 6
0 10
0 10
0 9
0 9
0 9
0 9
0 9
0 9
0 9
0 9
0 9
0 9
0 9
0 9
0 9
0 9
0 5
0 5
0 5
0 5
0 5
0 5
0 5
0 4
0 4
0 4
0 4
0 4
0 4
0 4
0 4
0 4
0 4
0 4
0 4
9 4
9 4
9 4
9 4
9 4
9 4
9 4
9 4
9 4
9 4
9 4
9 4
9 5
9 5
9 6
0 6
0 6
0 6
0 7
0 4
0 4
0 4
0 4
0 4
0 4
0 4
0 4
0 4
0 3
0 3
0 3
0 3
0 3
0 2
0 2
0 2
0 2
0 2
0 2
0 2
0 2
0 2
0 2
0 2
0 2
0 2
0 2
0 2
0 2
0 2
0 2
0 2
0 2
0 2
0 2
0 2
0 2
0 2
0 2
0 2
0 2
0 2
0 2
0 2
0 2
0 2
0 2
0 2
0 2
0 2
0 2
0 2
0 2
0 2
0 2
0 2
0 2
0 2
0 2
0 2
0 2
0 2
0 2
0 2
0 2
0 1
0 0
55 3
55 3
55 3
55 3
55 3
55 3
55 3
55 3
55 3
55 3
55 3
55 3
55 3
55 3
55 3
55 3
49 0
45 0
0 0
1 0
1 0
1 0
1 0
1 0
1 0
1 0
1 0
1 0
1 0
1 1
1 1
1 1
1 1
1 2
1 2
1 2
1 2
1 2
1 3
1 3
1 3
1 3
1 3
1 3
1 3
1 3
1 3
1 3
1 3
1 3
1 3
1 3
1 3
6 4
6 4
6 4
6 4
6 4
6 4
6 4
6 4
6 4
6 4
6 4
6 4
6 4
6 4
6 4
1 3
1 3
1 3
1 3
1 3
1 3
1 3
1 3
1 3
1 3
1 3
1 3
1 1
1 1
1 1
1 9
1 9
3 9
3 9
3 9
3 9
3 9
2 9
2 9
2 9
2 9
2 9
2 9
2 9
2 9
2 9
2 9
2 9
0 1
0 1
0 1
0 1
0 4
0 4
0 4
0 4
0 4
0 4
0 5
0 5
0 5
0 5
0 5
0 5
0 5
0 5
0 5
0 6
0 6
0 6
2 6
2 6
2 6
2 6
2 6
2 6
2 6
2 6
2 6
2 6
2 6
2 6
2 6
2 6
2 6
2 6
0 6
0 6
0 6
0 6
0 6
0 6
0 6
0 6
0 6
0 6
0 6
0 6
0 6
0 6
0 6
0 7
0 7
0 7
0 7
0 7
0 7
0 7
0 7
0 7
0 7
0 7
0 7
0 7
0 7
0 7
0 8
0 8
0 7
0 7
0 7
0 7
0 7
0 7
0 7
0 4
0 4
0 3
0 3
0 3
0 3
0 2
0 2
0 2
0 2
0 2
0 2
0 2
0 2
0 2
0 1
0 1
0 1
0 1
0 1
0 1
0 1
0 1
0 1
0 1
0 1
0 1
0 1
0 1
0 1
0 1
0 1
0 1
0 1
0 1
0 1
0 1
0 1
0 1
0 1
0 1
0 1
0 1
0 1
0 1
0 1
0 1
0 1
0 1
0 1
0 1
0 1
0 1
0 1
0 1
0 1
0 1
0 1
0 1
0 1
0 1
0 0
0 0
0 0
0 0
0 0
0 0
0 0
0 0
0 0
0 0
0 0
0 0
0 0
0 0
0 0
0 0
0 0
0 0
29 3
52 4
52 4
52 4
52 4
52 4
52 4
52 4
52 4
52 4
52 4
52 4
52 4
52 4
52 4
23 1
23 1
3 0
1 0
1 0
0 0
0 0
0 1
0 1
0 1
0 1
0 1
0 1
0 1
0 1
0 1
0 1
0 1
0 1
0 1
0 1
0 1
0 1
0 1
0 1
0 1
0 1
0 1
0 1
0 1
0 1
0 1
0 1
0 1
0 1
0 1
0 1
0 1
0 1
0 1
0 1
0 1
0 1
0 1
0 1
0 1
0 1
0 1
0 1
0 1
0 1
0 1
0 1
0 1
0 1
0 1
0 1
0 1
0 1
0 1
0 1
0 1
0 1
0 1
0 1
0 1
0 1
0 1
0 1
0 1
0 1
0 1
0 1
0 1
0 1
0 1
0 1
0 1
0 1
0 6
0 5
0 5
0 5
0 5
2 11
2 12
2 14
2 14
4 15
6 15
8 16
8 17
8 17
8 17
8 18
8 19
8 18
8 18
8 18
8 22
8 23
8 23
8 25
8 28
8 28
8 28
8 28
8 28
8 28
8 30
8 30
8 30
8 30
8 30
8 30
8 32
8 33
8 36
8 37
8 37
8 41
8 41
8 41
8 41
8 42
8 42
8 42
8 42
8 42
8 42
8 42
8 41
8 41
9 41
9 41
9 41
9 41
9 41
9 41
9 41
9 41
9 41
9 41
9 41
9 41
9 41
9 41
9 40
8 40
8 35
8 34
8 34
8 33
8 28
8 28
8 28
7 28
6 22
6 21
6 19
6 19
2 18
2 18
0 18
0 18
0 17
0 17
0 17
0 17
0 17
0 17
0 16
0 14
0 13
0 13
0 13
0 10
0 10
0 10
0 10
0 10
0 10
0 8
0 8
0 9
0 10
0 10
0 10
0 10
0 9
0 6
0 6
0 6
0 5
0 5
0 5
0 5
0 4
0 4
0 4
0 4
0 4
0 6
0 6
0 6
0 6
0 6
0 6
0 6
0 7
0 7
0 15
0 20
0 26
0 26
0 26
0 26
0 27
0 28
0 28
0 28
0 28
0 28
0 63
0 63
0 63
0 63
0 63
0 63
0 63
0 70
0 70
0 70
0 70
0 79
0 80
0 80
0 80
0 80
0 80
0 80
0 79
0 79
0 79
0 79
0 79
0 79
0 79
0 79
0 79
0 79
0 79
0 79
0 79
0 78
0 77
0 77
0 77
0 77
0 77
0 77
0 77
0 77
0 75
0 75
0 75
0 75
0 74
0 74
0 74
0 74
0 74
0 74
0 74
0 74
0 72
0 72
0 72
0 71
0 71
0 70
0 65
0 62
0 54
0 54
0 54
0 52
0 52
0 52
0 54
0 53
0 52
0 52
0 50
0 50
0 50
0 10
0 11
0 11
0 13
0 6
0 6
0 6
0 6
0 6
0 6
0 6
0 5
0 5
0 5
0 5
0 5
0 4
0 4
0 4
0 4
0 4
0 4
0 2
0 2
0 2
0 2
0 2
0 2
0 2
0 2
0 2
0 2
0 2
0 2
0 2
0 2
0 2
0 2
0 2
0 2
0 2
0 2
0 2
0 2
0 2
0 2
0 2
0 2
0 2
0 2
0 2
0 2
0 2
0 2
0 2
0 2
0 2
0 2
0 2
0 2
0 2
0 2
0 2
0 2
0 2
0 1
0 0
0 0
0 0
0 0
0 0
0 0
0 0
0 0
0 0
0 0
0 0
0 0
0 0
0 0
0 0
0 0
0 0
0 2
0 2
0 2
0 2
0 2
0 2
0 2
0 2
0 2
0 2
0 2
0 2
0 2
0 2
0 2
0 0
0 1
0 2
0 5
0 6
0 82
0 83
0 83
0 84
0 84
0 84
0 84
0 84
0 84
0 84
0 84
0 84
0 84
0 84
0 84
0 3
0 3
0 3
0 3
0 3
0 3
0 3
0 3
0 3
0 3
0 3
0 3
0 3
0 3
0 3
0 3
0 3
0 3
0 3
0 3
0 3
0 3
0 3
0 3
0 3
0 3
0 3
0 3
0 3
0 3
0 3
0 3
0 3
0 3
0 4
0 4
0 4
0 4
0 4
0 4
0 4
0 4
0 4
0 4
0 4
0 4
0 4
0 4
0 4
0 4
0 4
0 4
0 4
0 4
0 4
0 4
0 4
0 4
0 3
0 1
0 1
0 1
0 1
0 1
0 1
0 1
0 1
0 1
0 1
0 1
0 1
0 1
0 1
0 1
0 1
0 1
0 1
0 1
0 1
0 1
0 1
0 1
0 1
0 1
0 1
0 1
0 1
0 1
0 1
0 1
0 1
0 1
0 1
0 1
0 1
0 1
0 1
0 1
0 1
0 1
0 1
0 1
0 1
0 1
0 1
0 1
0 1
0 0
0 0
0 0
0 0
0 0
0 0
0 0
0 0
0 0
0 0
0 0
0 0
0 0
0 0
0 0
0 0
0 0
0 0
0 0
0 0
0 0
0 0
0 0
0 0
0 0
0 0
0 0
0 0
0 0
0 0
0 0
0 0
0 0
0 0
0 0
0 0
0 0
0 0
0 0
0 0
0 7
0 7
0 7
0 7
0 7
0 7
0 7
0 7
0 7
0 7
0 7
0 8
0 8
0 8
0 8
0 1
0 1
0 1
0 1
0 1
0 1
0 1
0 1
0 1
0 1
0 1
0 1
0 1
0 1
0 1
0 1
0 1
0 1
0 1
0 1
0 1
0 1
0 1
0 1
0 1
0 1
0 1
0 1
0 1
0 1
0 1
0 1
0 1
0 1
0 1
0 1
0 1
0 1
0 1
0 1
0 1
0 1
0 1
0 1
0 1
0 1
0 1
0 1
0 1
0 1
0 1
0 1
0 1
0 1
0 1
0 1
0 1
0 1
0 1
0 1
0 1
0 3
0 3
0 3
0 7
0 7
0 7
0 7
0 7
0 6
0 6
0 6
0 6
0 6
0 6
0 6
0 6
0 5
0 5
0 5
0 5
0 5
0 5
0 5
0 5
0 5
0 5
0 5
0 5
0 5
0 5
0 5
0 5
0 5
0 5
0 5
0 5
0 5
0 5
0 5
0 5
0 5
0 5
0 5
0 5
0 5
0 5
0 5
0 5
0 5
0 5
0 5
0 5
0 5
0 5
0 5
0 5
0 5
0 5
0 5
0 5
0 5
0 5
0 5
0 5
0 5
0 5
0 5
0 4
0 4
0 4
0 3
0 3
0 3
0 3
0 3
0 3
0 0
0 0
0 0
0 0
0 0
0 0
0 0
0 0
0 0
0 0
0 0
0 0
0 0
0 0
0 0
0 0
0 0
0 0
0 0
0 0
0 0
0 0
0 0
0 0
0 0
0 0
0 0
0 0
0 0
0 0
0 0
0 0
0 0
0 0
0 0
0 0
0 0
0 0
0 1
0 1
0 1
0 1
0 3
0 3
0 3
0 3
0 3
0 3
0 3
0 3
0 3
0 3
0 6
0 5
0 5
0 5
0 5
0 3
0 3
0 4
0 4
0 4
0 4
0 4
0 4
0 4
3 4
3 4
3 4
3 4
3 4
3 4
3 4
3 4
3 5
3 5
3 5
3 4
3 4
3 4
3 4
0 4
0 4
0 4
0 4
0 4
0 4
0 4
0 4
0 3
0 4
0 4
0 4
0 4
0 4
0 4
0 4
0 4
0 4
0 4
0 4
0 4
0 4
0 4
0 4
0 4
0 4
0 4
0 4
0 4
0 4
0 4
0 4
0 4
0 4
0 4
0 4
0 4
0 4
0 4
0 4
0 4
0 4
0 4
0 4
0 1
0 1
0 1
0 1
0 1
0 1
0 1
0 1
0 1
0 1
0 1
0 1
0 1
0 1
0 1
0 1
0 1
0 1
0 1
0 1
0 1
0 1
0 1
0 1
0 1
0 1
0 1
0 1
0 1
0 1
0 1
0 1
0 1
0 1
0 1
0 1
0 1
0 1
0 0
0 0
0 0
0 0
0 0
0 0
0 0
0 0
0 0
0 0
0 0
0 0
0 0
0 0
0 0
0 0
0 0
0 0
0 0
0 0
0 0
0 0
0 0
0 0
0 0
0 0
0 0
0 0
0 0
0 0
0 0
0 0
0 0
0 0
0 0
0 0
0 0
0 0
0 0
0 0
0 2
0 2
0 3
0 3
0 3
0 3
0 4
0 4
0 4
0 4
0 4
0 4
0 5
0 5
0 5
0 5
0 5
0 5
0 5
0 5
0 5
0 5
0 5
0 5
0 5
0 5
0 5
0 5
0 5
0 5
0 5
0 5
0 5
0 5
0 5
0 5
0 5
0 5
0 5
0 5
0 5
0 5
0 5
0 5
0 5
0 5
0 5
0 5
0 5
0 5
0 5
0 5
0 5
0 5
0 5
0 5
0 5
0 5
0 5
0 5
0 5
0 5
0 5
0 5
0 5
0 5
0 5
0 5
0 5
0 5
0 5
0 5
0 5
0 2
0 1
0 1
0 1
0 1
0 1
0 1
0 1
0 1
0 1
0 1
0 1
0 0
0 0
0 0
0 0
0 0
0 0
0 0
0 0
0 0
0 0
0 0
0 0
0 0
0 0
0 0
0 0
0 0
0 0
0 0
0 0
0 0
0 0
0 0
0 0
0 0
0 0
0 0
0 0
0 0
0 0
0 0
0 0
0 0
0 0
0 0
0 0
0 0
0 0
0 0
0 0
0 0
0 3
0 3
0 3
0 3
0 3
0 3
0 3
0 3
0 3
0 3
0 3
0 3
0 3
0 3
0 3
0 3
0 3
0 0
0 0
0 0
0 0
0 0
0 0
0 0
0 0
0 0
0 0
0 0
0 0
0 0
0 0
0 0
0 0
0 0
0 0
0 0
0 0
0 0
0 0
0 0
0 0
0 0
0 0
0 0
0 0
0 0
0 0
0 0
0 0
0 1
0 1
0 1
0 1
0 1
0 1
0 1
0 1
0 1
0 1
0 1
0 1
0 1
0 1
0 1
0 1
0 1
0 1
0 1
0 1
0 1
0 1
0 1
0 1
0 1
0 1
0 1
0 1
0 1
0 1
0 1
0 2
0 3
0 3
0 3
0 3
0 3
0 3
0 3
0 3
0 3
0 3
0 3
0 3
0 3
0 3
0 3
0 3
0 3
0 3
0 3
0 3
0 3
0 3
0 3
0 3
0 3
0 3
0 3
0 3
0 3
0 3
0 3
0 3
0 3
0 3
0 3
0 3
0 3
0 3
0 3
0 3
0 3
0 2
0 2
0 2
0 2
0 2
0 2
0 2
0 2
0 2
0 2
0 2
0 2
0 2
0 2
0 2
0 2
0 2
0 2
0 2
0 2
0 2
0 3
0 3
0 3
0 3
0 3
0 3
0 3
0 3
0 3
0 3
0 1
0 1
0 1
0 1
0 1
0 1
0 1
0 1
0 1
0 1
0 1
0 1
0 1
0 1
0 1
0 1
0 1
0 1
0 1
0 1
0 1
0 1
0 1
0 1
0 1
0 1
0 1
0 1
0 1
0 1
0 1
0 1
0 2
0 2
0 2
0 2
0 2
0 2
0 2
0 2
0 2
0 2
0 2
0 2
0 2
0 2
0 2
0 2
0 2
0 2
0 3
0 3
0 3
0 3
0 13
0 13
0 13
0 13
0 13
0 13
0 13
0 13
0 13
0 12
0 12
0 12
0 12
0 12
0 12
0 2
1 2
1 2
1 2
1 2
1 2
1 2
1 2
1 2
1 2
1 2
1 2
1 2
1 2
1 2
1 3
0 3
0 3
0 3
0 3
0 3
0 3
0 3
0 3
0 3
0 3
0 3
0 3
0 3
0 3
0 3
0 3
0 3
0 3
0 3
0 3
0 2
0 2
0 2
0 2
0 2
0 2
0 2
0 2
0 2
0 2
0 2
0 2
0 2
0 2
0 2
0 2
0 2
0 2
0 1
0 1
0 2
0 2
0 2
0 2
0 2
0 2
0 2
0 2
0 2
0 2
0 2
0 2
0 2
0 2
0 2
0 2
0 2
0 2
0 2
0 2
0 2
0 2
0 2
0 2
0 2
0 2
0 2
0 2
0 2
0 2
0 2
0 2
0 1
0 3
0 3
0 3
0 3
0 3
0 3
0 3
0 3
0 3
0 3
0 3
0 3
0 4
0 4
0 4
0 2
0 2
0 2
0 2
0 3
0 3
0 3
0 3
0 3
0 3
0 3
0 3
0 3
0 2
0 2
0 2
0 2
0 2
0 2
0 2
0 2
0 2
0 2
0 2
0 2
0 1
0 1
0 1
0 1
0 1
0 1
0 1
0 1
0 1
0 1
0 1
0 1
0 1
0 1
0 1
0 1
0 1
0 1
0 1
0 1
0 1
0 1
1 1
1 1
1 1
1 1
1 1
1 1
1 1
1 1
1 1
1 1
1 1
1 1
1 1
1 1
1 1
0 1
0 1
0 1
0 1
0 1
0 1
0 1
0 1
0 1
1 1
1 1
1 1
1 1
1 1
1 1
1 0
1 0
1 0
1 0
1 0
1 0
1 0
1 0
1 0
0 0
0 0
0 0
1 4
1 4
1 4
1 4
1 4
1 4
1 4
1 4
1 4
1 4
1 4
1 4
1 4
1 4
1 4
0 0
0 0
0 0
0 0
0 0
0 0
0 0
0 0
0 0
0 0
0 0
0 0
0 0
0 0
0 0
0 0
0 0
0 0
0 0
0 0
0 0
0 0
0 0
0 0
0 0
0 0
0 0
0 0
0 0
0 0
0 0
0 0
0 0
0 0
0 0
0 0
0 0
0 0
0 0
0 0
0 0
0 0
0 0
0 0
0 0
0 0
0 0
0 0
0 0
0 0
0 0
0 0
0 0
0 0
0 0
0 0
0 0
0 0
0 0
0 0
0 0
0 0
0 0
0 0
0 0
0 1
0 1
0 1
0 1
0 1
0 1
0 1
0 1
0 1
0 4
0 4
0 4
0 4
0 4
0 4
0 4
0 4
0 4
0 4
0 4
0 7
0 8
0 8
0 8
0 9
0 9
0 9
0 9
0 9
0 9
0 9
0 9
0 9
0 9
0 9
0 9
0 9
0 9
0 9
0 9
0 9
0 9
0 9
0 9
0 9
0 9
0 9
0 7
0 7
0 7
0 6
0 6
0 6
0 6
0 6
0 6
0 6
0 6
0 6
0 6
0 6
0 6
0 6
0 6
0 6
0 6
0 6
0 6
0 6
0 6
0 6
0 6
0 5
0 5
0 5
0 4
0 4
0 3
0 15
0 15
0 15
0 15
0 26
0 26
0 27
0 27
0 27
0 27
0 27
0 27
0 27
0 27
0 27
0 13
0 12
0 12
0 12
0 1
0 1
0 0
0 0
0 0
0 0
0 0
0 0
0 0
0 0
0 0
0 0
0 0
0 0
0 0
0 0
0 0
0 0
0 0
0 0
0 0
0 0
0 0
0 0
0 0
0 0
0 0
0 0
0 0
0 0
0 2
0 3
0 3
0 3
0 3
26 5
26 5
26 5
26 5
26 5
26 5
26 5
26 5
26 5
26 5
26 5
26 2
26 2
26 2
26 2
0 0
1 0
1 0
1 0
1 0
1 1
1 1
1 1
1 1
1 1
1 1
1 1
1 1
1 1
1 1
1 1
0 1
0 1
0 1
0 1
0 1
0 0
0 0
0 0
0 0
0 0
0 0
0 1
0 1
0 1
0 1
0 1
0 1
0 1
0 1
0 1
0 1
0 1
0 1
0 1
0 1
0 1
0 1
0 1
0 1
0 1
0 1
0 1
0 1
0 1
0 1
0 1
0 1
0 1
0 1
0 1
0 1
0 1
0 1
0 1
0 1
0 1
0 1
0 1
0 1
0 1
0 1
0 1
0 2
0 2
0 2
0 2
0 2
0 2
0 2
0 2
0 2
0 2
0 2
0 2
0 2
0 2
0 2
0 2
0 2
0 2
0 2
0 2
0 2
0 2
0 2
0 2
0 2
1 2
1 3
1 3
1 3
1 3
1 3
1 3
1 2
1 2
1 2
1 2
1 2
1 2
1 2
1 2
1 2
1 2
1 2
1 2
1 2
1 2
1 2
1 2
1 2
1 2
1 2
1 2
1 2
1 2
1 2
1 2
1 2
1 2
1 2
1 2
1 2
1 2
1 2
1 2
1 2
1 2
1 2
1 2
1 2
1 2
1 2
1 2
1 2
1 1
1 1
1 1
1 1
1 1
1 1
1 1
1 1
2 1
2 1
2 1
2 1
2 1
2 1
2 1
2 1
2 1
2 1
2 1
2 1
2 1
2 1
2 1
2 1
2 1
1 1
1 0
1 0
1 0
1 0
1 0
1 0
1 0
1 0
1 0
1 0
1 0
1 0
1 0
1 0
1 0
1 0
1 0
1 0
1 0
1 0
1 0
1 0
1 0
1 0
1 0
1 0
1 0
1 0
1 0
1 0
2 0
2 0
2 0
2 0
2 0
2 0
2 0
2 0
2 0
2 0
2 0
2 0
2 0
2 0
2 0
1 0
1 0
1 0
1 0
1 0
1 0
1 0
1 0
1 0
1 0
0 0
0 0
0 0
0 0
0 0
0 0
0 0
0 0
0 0
0 0
0 0
0 0
0 0
0 0
0 0
0 0
0 0
0 0
0 0
0 0
0 0
0 0
0 0
1 0
1 0
1 0
1 0
1 0
1 0
1 0
1 0
1 0
1 0
1 1
1 2
1 2
1 2
1 2
0 5
0 5
0 7
0 7
0 7
0 7
0 7
0 7
0 7
0 8
0 8
0 8
0 8
0 10
0 10
0 10
0 11
0 11
0 11
0 11
0 12
0 12
0 12
0 12
0 12
0 12
0 12
0 12
0 12
0 12
0 12
0 12
0 12
0 12
0 12
0 12
0 12
0 12
0 12
0 12
0 12
0 12
0 12
0 12
0 12
0 12
0 12
0 12
0 12
0 12
0 12
0 12
0 12
0 12
0 12
0 12
0 12
0 12
0 15
0 15
0 17
0 17
0 18
0 18
0 18
0 18
0 18
0 17
0 15
0 16
0 16
0 16
0 13
0 13
0 13
0 12
0 12
0 13
0 13
0 13
0 13
0 13
0 14
0 14
0 15
0 15
0 13
0 13
0 13
0 13
0 13
0 13
0 13
0 12
0 12
0 12
0 12
0 12
0 12
0 12
0 12
29 12
29 12
29 12
29 12
29 12
29 12
29 12
29 12
29 12
29 12
29 12
29 12
29 12
29 12
29 12
29 12
0 12
0 12
0 12
0 12
0 12
0 12
0 12
0 12
0 12
0 14
0 19
0 19
0 19
0 19
0 15
0 15
0 13
0 12
1 11
1 11
1 11
1 11
1 11
1 11
1 11
1 11
1 11
1 11
1 11
1 10
1 10
1 10
1 10
0 10
0 10
0 10
0 10
0 10
0 10
0 10
1 10
1 10
1 10
1 10
1 10
1 10
1 10
1 11
1 11
1 11
1 11
1 11
1 11
1 11
1 11
0 11
0 11
0 11
0 11
0 11
0 11
0 13
0 13
0 13
0 12
0 12
0 12
0 12
0 12
0 10
0 8
0 8
0 7
0 7
0 7
0 6
0 6
0 6
0 6
0 6
0 6
0 6
0 3
0 2
0 2
0 2
0 2
0 2
0 2
0 3
0 4
0 4
0 4
0 4
0 7
0 8
0 8
0 8
0 8
0 8
0 8
0 8
0 8
0 8
0 8
0 8
0 8
0 8
0 8
0 8
0 8
0 8
0 8
0 8
0 8
0 8
0 8
0 8
0 8
0 8
0 8
0 8
0 8
0 8
0 8
0 8
0 8
0 8
0 8
0 8
0 8
0 8
0 9
0 9
0 7
0 7
0 7
0 7
0 7
0 7
0 7
0 7
0 7
0 7
0 7
0 7
0 7
0 7
0 7
0 7
0 7
0 7
0 7
0 7
0 7
0 7
0 7
0 7
0 7
0 7
0 7
0 5
0 5
0 5
0 5
0 5
0 5
0 2
0 1
0 1
0 1
0 1
0 1
0 1
0 1
0 1
0 1
0 1
0 1
0 1
0 1
0 1
0 1
0 1
0 1
0 1
0 1
0 1
0 1
0 1
0 1
0 1
0 1
0 1
0 1
0 1
0 1
0 1
0 1
0 1
0 1
0 1
0 1
0 1
0 1
0 0
0 0
0 0
0 0
0 0
0 0
0 0
0 0
0 0
0 0
0 0
0 0
0 0
0 0
0 0
0 0
0 0
0 0
0 0
0 0
0 0
0 0
0 0
0 0
0 1
0 1
0 4
0 4
0 4
0 4
0 4
0 5
0 18
1 19
1 21
1 21
1 22
1 23
1 23
1 23
1 22
1 22
1 21
1 21
1 21
1 21
1 19
1 19
1 19
1 21
1 21
1 22
1 22
1 22
1 22
1 22
1 22
1 22
1 22
1 22
1 22
1 22
1 22
1 22
1 22
1 23
1 23
1 23
1 35
1 35
1 35
1 35
1 35
1 35
1 35
1 35
1 35
1 35
1 35
1 35
1 35
1 36
1 36
1 36
1 36
1 36
1 36
1 36
1 36
1 36
1 36
1 36
1 36
1 37
1 37
1 37
1 37
1 37
1 37
1 37
1 37
1 37
2 39
2 39
2 39
1 21
1 21
1 24
1 24
1 24
1 24
1 24
1 24
1 24
1 25
1 26
1 27
1 27
1 28
1 28
1 28
1 28
1 24
1 24
1 23
1 23
1 23
1 23
1 23
1 23
1 23
1 23
1 23
1 23
1 28
1 30
1 30
1 30
1 28
1 28
1 28
1 38
1 49
2 57
2 57
2 59
2 59
2 59
2 59
2 59
2 59
2 59
2 59
2 59
2 58
2 58
2 58
2 58
1 62
1 62
1 64
1 70
1 72
1 74
1 74
1 74
1 73
1 73
1 73
1 73
1 73
1 73
1 72
1 72
0 72
0 71
4 71
4 71
4 71
4 71
4 69
4 69
4 69
4 83
4 83
4 83
4 83
4 82
4 81
4 80
4 79
4 80
4 81
4 81
5 84
5 84
5 84
5 84
5 84
5 70
5 71
5 72
5 75
5 75
5 77
6 80
5 80
5 80
5 81
5 81
5 80
5 78
5 76
5 76
5 43
5 31
5 19
5 19
5 14
5 14
5 10
5 10
4 10
4 10
4 10
4 11
4 12
4 12
4 12
4 12
4 12
4 12
4 12
4 12
3 12
1 12
1 12
0 12
0 12
0 12
0 12
0 12
0 12
0 12
0 12
0 12
0 12
0 12
0 12
0 12
0 12
0 12
0 12
0 12
0 12
0 12
0 12
0 12
0 22
0 22
0 22
0 22
0 22
0 22
0 22
0 22
0 22
0 22
0 22
0 22
0 22
0 22
0 22
0 22
0 22
0 22
0 22
0 21
0 20
0 19
0 12
0 12
0 12
0 12
0 12
0 12
0 12
0 12
0 12
0 12
0 12
0 12
0 12
0 12
0 12
0 12
0 12
0 12
0 11
0 10
0 10
0 10
0 10
0 10
2 12
2 12
2 12
2 12
2 12
2 12
2 12
2 12
2 12
2 12
2 12
4 12
4 12
4 12
4 14
6 14
6 14
6 14
6 14
6 14
6 14
6 13
6 13
6 13
6 13
6 13
6 13
5 2
5 2
5 2
4 1
4 1
4 1
4 1
4 1
4 1
4 1
4 1
4 1
4 1
4 2
4 2
4 2
4 2
4 2
4 2
2 7
2 12
2 12
2 12
2 12
2 12
2 12
2 14
0 14
0 14
0 14
0 14
0 14
0 14
0 14
0 14
0 4
0 4
0 4
0 4
0 4
0 4
0 2
0 2
0 2
0 2
0 2
0 2
0 2
0 2
0 2
0 2
0 3
0 3
0 3
0 3
0 3
0 3
0 3
0 3
0 3
0 2
0 2
0 2
0 2
0 2
0 2
0 2
0 2
0 2
0 2
0 2
0 2
0 2
0 2
0 2
0 2
0 2
0 2
0 2
0 2
0 2
0 2
0 2
0 2
0 2
0 2
0 1
0 1
0 1
0 1
0 1
0 1
0 1
0 1
0 1
0 1
0 1
0 1
0 1
0 1
0 1
0 1
0 1
0 1
0 1
0 1
0 1
0 1
0 1
0 1
0 1
0 1
0 1
0 1
0 1
0 1
0 1
0 1
0 1
0 1
0 1
0 1
0 1
0 1
0 0
0 0
0 0
0 0
0 0
0 0
0 0
0 0
0 0
0 0
0 0
0 0
0 2
0 2
0 2
0 2
0 2
0 2
0 2
0 2
0 2
0 2
0 2
0 2
0 2
0 2
0 2
0 2
0 2
0 2
0 2
0 2
0 2
0 2
0 2
0 2
0 2
0 2
0 2
0 2
0 2
0 2
2 4
3 4
3 4
3 4
4 4
4 4
4 4
4 4
4 4
4 4
4 4
4 4
4 4
4 4
4 4
4 4
9 4
9 4
10 4
10 4
10 4
11 4
11 4
11 4
11 3
11 3
11 3
11 3
11 2
11 2
11 2
6 2
6 2
6 2
6 2
6 2
6 2
6 2
6 2
6 2
6 2
6 2
6 2
6 2
6 2
6 2
6 2
6 2
6 2
6 2
6 2
6 2
6 2
6 2
6 2
6 2
6 2
6 2
6 2
6 2
6 2
6 2
6 2
6 1
6 1
6 0
6 0
6 0
6 0
6 0
6 0
6 0
5 0
3 0
1 0
1 0
1 0
0 0
0 0
0 0
0 0
0 0
0 0
0 0
0 0
0 0
0 0
0 0
0 0
0 0
0 0
0 0
0 0
0 0
0 0
0 0
0 0
0 0
0 0
0 0
0 0
0 0
0 0
0 0
0 0
0 0
0 0
0 0
0 0
0 0
0 0
0 0
0 0
0 0
0 0
0 0
0 0
0 0
0 0
0 0
0 0
0 0
0 0
0 0
0 0
0 0
0 0
0 0
0 0
0 0
0 0
0 0
0 0
0 0
0 0
0 0
0 0
0 0
0 0
0 0
0 0
0 0
0 0
0 0
0 0
0 0
0 0
0 0
0 0
0 0
0 0
0 0
0 0
0 0
0 0
0 0
0 0
0 0
0 0
0 0
0 0
0 0
0 0
0 0
0 0
0 0
0 0
0 0
0 0
0 0
0 0
0 0
0 0
0 0
0 0
0 0
0 0
0 0
0 0
0 0
0 0
0 0
0 0
0 0
0 0
0 0
0 0
0 0
0 0
0 0
0 0
0 0
0 0
0 0
0 0
0 0
0 0
0 0
0 0
0 0
0 0
0 0
0 0
0 0
0 0
0 0
0 0
0 0
0 0
0 0
0 0
0 0
0 2
0 2
0 2
0 2
0 2
0 2
0 2
0 2
0 2
0 2
0 2
0 2
0 2
0 2
0 2
0 2
0 2
0 2
0 2
0 2
0 2
0 2
0 2
0 2
1 4
1 4
1 4
1 4
1 4
1 4
1 4
1 4
1 4
1 4
1 4
1 4
1 4
1 4
1 4
2 4
1 2
1 2
1 2
1 2
1 2
1 2
1 2
1 2
1 2
1 2
1 2
1 2
1 1
1 1
1 1
1 1
0 1
0 1
0 0
0 0
0 0
0 0
0 0
0 0
0 0
0 0
0 0
0 0
0 0
0 0
0 0
0 0
0 0
0 0
0 0
0 0
0 0
0 0
0 0
0 0
0 0
0 0
0 0
0 0
0 0
0 0
0 0
0 0
0 0
0 2
0 2
0 2
0 2
0 2
0 2
0 2
0 2
0 2
0 2
0 2
0 2
0 2
0 2
0 2
0 2
0 2
0 0
0 0
0 0
0 0
0 0
0 0
0 0
0 0
0 0
0 0
0 0
0 0
0 0
0 0
1 0
1 0
1 0
1 0
1 0
1 0
1 0
1 0
1 0
1 0
1 0
1 0
1 0
1 0
1 0
0 0
0 0
0 0
0 0
0 0
0 0
0 0
0 0
0 0
0 0
0 0
0 0
0 0
0 0
0 0
0 0
0 0
0 0
0 0
0 0
0 0
0 0
0 0
0 0
0 0
0 0
0 0
0 0
0 0
0 0
0 0
0 0
0 0
0 0
0 0
0 0
0 0
0 0
0 0
0 0
0 0
0 0
0 0
0 0
0 0
0 0
0 0
0 0
0 0
0 0
0 0
0 0
0 0
0 0
0 0
0 0
0 0
0 0
0 0
1 0
1 0
1 0
1 0
1 0
1 0
1 0
1 0
1 0
1 1
1 1
1 1
1 1
1 1
1 1
0 1
0 1
0 1
0 1
0 1
0 1
0 1
0 1
0 1
0 1
0 1
0 1
0 1
0 1
0 1
0 1
0 1
0 1
0 1
0 1
0 1
0 1
0 1
0 1
0 1
0 1
0 1
0 1
0 1
0 1
0 1
0 1
0 1
0 1
0 1
0 1
0 1
0 1
0 1
0 1
0 1
0 2
0 2
0 2
0 2
0 2
0 2
0 2
0 2
0 2
0 2
0 2
0 2
0 2
0 2
0 2
0 3
0 2
0 2
0 2
0 2
0 2
0 3
0 3
0 3
0 3
0 3
0 3
0 3
0 3
0 3
0 3
0 3
0 3
0 3
0 3
0 3
0 3
0 3
0 3
0 3
0 3
0 3
0 3
0 3
0 3
0 3
0 3
0 3
0 3
0 3
0 3
0 3
0 3
0 3
0 3
0 3
0 3
0 3
0 3
0 3
0 3
0 3
0 3
0 3
0 3
0 3
0 3
0 3
0 3
0 3
0 3
0 3
0 3
0 4
0 4
0 4
0 4
0 4
0 4
0 4
0 4
0 4
0 4
0 4
0 4
0 4
0 4
0 4
0 3
0 3
0 3
0 3
0 3
0 3
1 3
1 3
1 3
1 3
1 3
1 3
1 3
1 3
1 3
1 1
1 1
1 1
1 1
1 1
1 1
0 1
0 1
0 1
0 1
0 1
0 1
0 1
0 1
0 1
0 1
0 1
0 1
0 1
0 1
0 1
0 1
0 1
0 1
0 1
0 1
0 1
0 1
0 1
0 1
0 1
0 3
0 3
0 3
0 3
0 3
0 3
0 3
0 3
0 3
0 3
0 3
0 3
0 2
0 2
0 2
0 0
0 0
0 0
0 0
0 0
0 0
0 0
0 0
0 0
0 0
0 0
0 0
0 0
0 0
0 0
0 0
0 0
0 0
1 0
1 0
1 0
1 0
1 0
1 0
1 0
1 0
1 0
1 0
1 4
1 4
1 5
1 5
1 5
1 5
1 5
1 5
1 5
1 5
1 5
1 5
1 5
1 5
1 5
1 5
1 5
1 5
1 5
1 5
1 5
1 5
1 5
1 5
1 5
1 5
1 5
1 5
1 5
1 5
1 5
1 5
1 5
1 5
1 5
1 5
1 6
1 8
2 10
3 16
3 16
3 16
3 16
3 16
3 16
3 17
3 17
3 17
3 17
3 17
3 16
3 14
3 14
3 14
3 13
3 13
3 13
3 13
3 13
3 13
3 13
3 14
3 14
3 12
3 12
3 12
3 12
3 12
3 12
3 12
3 12
3 12
3 12
3 12
3 12
3 11
3 11
3 11
3 11
3 11
3 11
3 11
3 11
3 11
2 11
2 11
1 11
1 11
1 11
1 11
1 11
1 11
1 11
1 11
1 16
1 16
1 17
1 17
1 17
1 19
1 20
1 20
1 21
1 21
1 22
1 22
1 21
1 20
1 20
1 20
1 19
1 16
1 12
1 12
1 12
1 12
1 12
1 12
1 12
1 12
2 12
2 12
2 12
2 12
2 12
2 12
2 12
2 12
2 12
2 12
2 12
2 13
2 13
2 13
1 12
1 12
1 12
1 12
1 12
1 12
1 12
1 12
1 12
1 12
1 12
1 12
1 14
1 17
1 19
1 34
1 34
1 92
1 96
1 146
1 153
1 158
1 176
1 209
1 216
1 218
1 242
1 243
1 244
1 246
1 246
1 246
1 247
1 245
1 249
1 248
1 248
1 252
1 249
1 249
1 245
1 243
1 243
1 242
1 241
1 241
1 241
1 241
1 241
1 243
1 243
1 243
1 244
1 244
1 244
1 244
1 244
1 244
1 244
0 244
0 244
0 244
0 244
0 244
0 243
0 243
0 243
0 243
0 242
0 242
0 241
0 241
0 241
0 241
0 241
0 241
0 241
0 241
0 241
0 241
0 241
0 240
0 239
0 238
0 238
0 234
0 119
0 118
0 108
0 108
0 6
0 6
0 5
0 5
0 5
0 5
0 5
0 6
0 6
0 4
0 4
0 4
0 4
4 4
4 5
5 5
5 5
5 4
5 4
5 4
5 4
5 4
5 4
5 4
5 4
5 4
5 4
5 4
1 4
1 4
1 3
0 3
0 2
0 2
0 2
0 1
0 1
0 1
0 1
0 1
0 1
0 1
0 1
0 1
0 1
0 1
0 1
0 1
0 1
0 1
0 1
0 1
0 1
0 2
0 2
1 2
1 2
1 2
1 2
1 2
1 2
1 2
1 2
1 2
1 2
1 2
1 2
1 2
1 1
1 1
0 1
0 1
0 1
0 1
0 1
0 1
0 1
0 1
0 1
0 1
0 0
0 0
0 0
0 0
0 0
0 0
0 0
0 1
0 1
0 2
0 2
0 2
0 2
0 2
0 2
0 2
0 2
0 2
0 2
0 2
0 2
0 2
0 3
0 4
0 4
0 4
0 4
0 4
0 4
0 4
0 4
0 4
0 4
0 4
0 4
0 4
0 4
0 4
0 4
0 3
0 3
0 3
0 3
0 3
1 3
1 3
1 3
1 3
1 3
1 3
1 3
1 3
1 3
1 3
1 3
1 3
1 3
1 3
1 3
1 3
1 3
1 3
1 3
1 3
1 3
1 3
1 3
1 3
1 3
1 3
1 3
1 3
1 3
1 3
1 3
1 3
1 3
1 3
1 3
1 3
1 2
1 1
1 1
1 1
1 1
1 1
1 1
1 1
1 1
1 1
1 1
1 1
1 1
1 1
1 1
2 0
2 0
2 0
2 0
2 0
2 0
2 0
2 0
2 0
2 0
2 0
2 0
2 0
2 0
2 0
1 0
1 0
1 0
1 0
1 4
1 4
1 4
0 4
0 4
0 4
0 4
0 4
0 4
0 4
0 4
0 4
0 4
0 4
0 4
0 4
0 4
0 4
0 4
0 4
0 4
2 7
2 7
2 7
2 7
2 7
3 7
3 7
3 7
3 7
3 7
3 7
3 7
3 7
3 7
3 7
3 7
1 6
1 6
1 6
1 6
1 6
1 6
1 6
1 6
1 6
1 6
0 6
0 6
0 6
0 6
0 6
0 6
0 6
0 6
2 6
4 8
5 8
5 8
5 9
5 9
5 9
5 9
5 9
5 12
5 12
5 12
5 11
5 11
5 11
5 11
5 11
5 11
5 8
5 8
5 8
5 8
5 8
5 8
5 8
5 8
5 8
5 8
5 8
5 8
5 8
5 8
5 8
5 8
5 8
5 8
5 8
5 8
5 8
5 8
5 8
5 8
5 8
5 8
5 8
5 8
5 8
5 8
5 8
5 8
6 10
6 10
6 10
6 10
6 10
4 8
4 8
2 8
2 8
2 8
2 9
2 9
2 10
2 10
2 10
2 10
2 10
2 10
2 10
2 11
2 11
2 11
2 11
2 11
2 9
1 9
1 9
1 8
1 8
1 8
1 8
1 8
1 5
1 5
1 5
1 5
1 5
1 5
1 5
1 5
1 5
1 5
1 5
1 5
1 5
1 6
1 6
1 6
1 6
1 6
1 6
1 6
1 6
1 6
1 6
1 6
1 6
1 6
1 6
1 6
1 6
1 6
1 6
1 6
1 6
1 6
1 6
1 6
1 6
1 6
1 6
1 6
1 4
0 1
0 1
0 1
0 1
0 1
0 1
0 1
0 1
0 1
0 1
3 1
3 1
3 1
3 1
3 1
3 1
3 1
3 1
3 1
3 1
3 1
3 1
3 1
3 1
3 1
3 1
0 1
0 1
0 1
0 1
0 1
0 1
0 1
0 2
0 2
0 2
0 2
0 2
0 2
0 3
0 3
0 3
0 3
0 3
0 3
0 2
0 2
0 2
0 2
0 2
0 2
0 3
0 3
0 3
0 3
0 2
0 2
0 2
0 2
0 2
0 2
0 2
0 2
0 2
0 2
0 2
0 2
0 2
0 2
0 2
0 2
0 2
0 2
0 2
0 2
0 2
0 2
0 2
0 2
0 4
0 5
0 5
0 5
0 5
0 5
0 5
0 5
0 5
0 4
0 4
0 4
0 5
0 5
0 5
0 4
0 3
0 3
0 3
0 3
0 5
0 6
0 6
0 12
0 12
0 12
0 12
0 16
0 16
0 18
0 21
23 237
30 276
36 334
37 348
38 356
39 364
39 370
39 372
39 372
39 374
39 376
39 376
40 376
40 376
40 376
40 376
40 376
40 377
40 378
40 378
40 378
40 378
40 380
44 384
44 386
45 388
45 395
45 395
45 398
45 399
45 402
45 402
45 404
45 404
55 408
74 525
77 526
78 529
74 525
74 525
74 525
74 525
74 525
74 525
74 525
74 525
74 525
74 526
74 524
74 525
74 525
74 524
74 524
73 524
73 524
73 523
73 518
73 518
73 518
73 514
73 512
73 512
73 510
73 506
73 504
73 500
73 500
73 500
73 500
74 500
74 500
74 498
71 475
41 194
36 161
35 157
35 157
35 159
35 159
35 158
34 157
34 154
34 153
34 153
34 153
34 153
34 154
34 158
34 165
34 225
34 227
35 230
35 234
35 234
35 234
35 235
35 235
34 233
34 232
34 229
34 227
34 232
34 231
34 228
42 345
41 342
41 344
33 344
13 226
10 226
10 223
10 223
10 223
10 223
10 223
10 223
10 222
10 222
10 222
10 222
10 222
10 222
10 221
10 221
10 221
10 221
10 221
10 221
10 221
10 223
10 223
10 223
10 224
10 224
10 224
10 224
10 224
10 227
10 227
10 227
10 227
10 227
9 227
9 227
9 227
9 227
9 227
9 227
9 227
9 227
9 225
9 225
9 225
9 223
9 225
9 228
9 236
9 242
9 247
9 247
9 244
9 235
9 173
9 170
9 165
9 163
9 163
9 163
9 163
9 163
9 163
9 163
9 162
9 162
9 156
9 155
9 155
0 35
0 34
0 32
0 32
0 31
0 30
0 30
0 30
0 30
0 30
0 30
0 30
0 30
0 30
0 30
0 30
0 30
0 30
0 30
0 30
0 30
0 31
0 31
0 31
0 31
0 31
0 31
0 37
0 35
0 35
0 35
0 35
0 35
0 32
0 32
0 32
0 33
0 33
0 33
0 33
0 34
0 34
0 34
0 34
0 34
0 34
0 35
0 35
0 35
0 36
0 34
0 39
0 35
0 37
0 36
0 37
0 37
0 38
0 38
0 38
0 38
0 38
0 38
0 38
0 38
0 38
0 39
0 48
0 48
0 48
0 48
0 48
0 48
0 47
0 47
0 46
0 46
0 47
0 43
0 40
0 40
0 40
0 40
0 40
0 40
0 40
0 39
0 39
0 39
0 39
0 39
0 39
0 39
0 40
0 39
0 39
0 39
0 40
0 40
0 41
0 41
0 41
0 41
0 42
0 42
0 44
0 44
0 44
0 44
0 44
0 44
0 44
0 44
0 43
0 43
0 43
0 43
0 43
0 43
0 43
0 42
0 40
0 33
0 24
0 22
0 22
0 20
0 20
0 20
0 20
0 20
0 20
0 20
0 20
0 20
0 20
0 19
0 19
0 19
0 19
0 10
0 10
0 10
0 10
1 15
1 15
1 17
1 17
1 17
1 17
1 18
1 19
1 19
1 21
2 22
2 22
2 22
2 22
2 22
1 17
1 17
1 15
1 15
1 15
1 15
1 14
1 13
1 13
1 13
1 13
1 12
1 12
1 11
1 11
1 11
1 11
1 11
1 18
1 16
1 16
1 16
1 18
1 20
1 22
1 22
1 24
1 24
1 34
1 34
1 34
1 34
1 34
1 34
1 34
11 34
11 33
11 31
11 39
11 37
11 35
11 36
11 36
11 37
11 37
11 37
11 37
11 37
11 37
11 37
2 37
2 39
1 39
1 39
1 39
1 40
1 40
1 40
1 40
1 40
1 40
1 40
1 40
1 40
1 40
1 40
1 38
1 37
0 38
0 39
0 42
0 42
0 43
0 46
0 46
0 46
0 44
0 42
0 42
0 41
0 41
0 41
0 41
0 41
0 44
0 44
0 44
0 44
2 44
2 44
2 44
2 38
2 42
2 42
2 42
2 39
2 37
2 25
2 24
2 23
2 21
2 21
2 23
2 23
2 24
2 24
2 28
2 28
2 28
2 28
2 28
2 28
2 28
2 30
2 30
2 30
2 30
2 30
2 30
2 30
2 30
2 30
2 30
2 30
2 30
2 30
2 31
2 31
2 31
2 31
2 31
2 31
2 32
2 33
2 36
2 37
2 37
2 37
2 39
2 41
2 40
2 37
0 37
0 34
0 34
0 33
0 28
0 26
0 26
0 26
0 26
0 26
0 26
0 26
0 26
0 26
0 26
0 19
0 19
0 19
0 19
0 19
0 15
0 15
0 15
0 16
0 16
0 16
0 16
0 16
0 16
0 25
1 25
1 25
1 25
1 25
1 25
1 25
1 25
2 40
2 41
2 51
3 65
3 79
3 82
3 86
3 84
3 85
3 85
3 85
3 85
3 85
3 85
3 85
3 85
3 85
3 85
3 86
3 86
3 81
3 81
3 81
3 81
3 78
3 78
3 78
3 78
3 77
4 77
4 77
4 77
4 77
4 75
5 76
5 76
5 76
5 76
5 75
5 75
5 74
5 74
5 73
5 71
5 70
5 70
5 70
5 70
5 70
5 70
4 70
4 71
4 71
4 71
4 71
4 71
4 71
4 71
4 70
4 61
4 53
4 51
4 51
4 50
4 50
4 50
3 49
3 49
3 50
3 51
3 51
3 51
3 50
2 28
1 17
1 6
1 5
1 5
1 5
1 5
1 5
1 5
1 5
1 5
1 5
1 5
1 5
1 5
1 5
1 5
1 5
1 4
1 4
1 4
1 4
1 4
1 4
1 4
1 4
1 4
1 4
1 4
0 4
0 4
0 4
0 4
0 4
0 3
0 3
0 3
0 3
0 3
0 3
0 3
0 3
0 3
0 3
0 3
0 3
0 3
0 3
0 3
0 3
0 2
0 2
0 2
0 2
0 2
0 2
0 2
0 2
0 2
0 2
0 2
0 2
3 6
3 6
6 12
7 14
14 57
15 57
16 56
16 55
18 55
18 55
18 55
18 55
18 55
18 55
18 55
18 56
18 56
18 56
18 56
18 56
18 56
18 56
18 56
18 56
20 56
20 56
20 56
22 56
22 56
22 56
22 56
22 56
22 56
22 56
22 56
22 56
22 56
22 56
22 56
22 56
22 56
22 56
22 56
22 56
22 56
22 56
22 56
22 56
22 56
22 56
22 57
22 57
22 57
22 57
22 58
22 58
22 58
22 58
22 58
22 58
22 58
22 58
22 58
22 58
22 58
22 58
22 58
22 100
39 112
41 146
41 147
41 147
41 147
35 143
35 141
32 135
28 132
21 92
21 94
21 94
21 94
21 94
21 73
21 57
0 7
0 8
0 8
0 8
0 9
0 9
0 9
0 9
0 9
0 9
0 9
0 9
0 9
0 9
0 9
0 9
0 9
0 9
0 9
0 9
0 9
0 9
0 8
0 8
0 8
0 8
0 8
0 8
0 8
0 8
0 8
0 8
0 8
0 8
0 8
0 8
0 8
0 8
0 8
0 7
0 7
0 7
0 7
0 6
0 6
0 7
0 7
0 8
0 8
0 8
0 8
0 8
0 8
0 8
2 8
2 8
3 8
3 8
3 8
3 6
3 5
3 6
3 6
3 6
3 6
4 6
4 6
4 6
4 6
4 6
4 6
4 5
4 5
4 5
4 4
4 4
4 4
4 2
4 2
4 2
4 2
5 2
5 4
5 4
6 4
6 4
8 6
9 6
9 6
9 8
9 8
9 8
10 8
10 8
10 8
10 8
9 8
9 8
9 8
9 8
9 8
11 8
11 8
11 8
11 8
11 8
11 8
12 9
12 9
13 9
13 9
13 9
13 9
14 9
19 9
20 9
20 9
20 9
18 9
18 9
18 7
18 7
18 7
18 6
18 6
20 6
21 7
19 8
19 8
19 8
19 8
19 8
19 8
19 8
19 7
19 7
19 7
19 7
18 7
18 7
18 7
18 7
18 7
18 7
18 7
18 7
18 7
18 7
18 7
18 7
18 7
18 7
18 7
18 7
18 7
17 5
17 5
17 5
17 4
14 3
14 4
14 4
14 4
115 1449
115 1449
114 1449
114 1449
114 1449
114 1449
114 1449
114 1449
114 1449
114 1449
114 1449
114 1449
114 1449
114 1449
114 1449
13 3
14 3
13 2
13 2
12 2
12 2
11 2
10 2
10 2
4 2
1 2
1 2
1 2
1 2
1 2
1 2
1 2
1 2
1 2
1 2
1 2
1 1
1 0
1 0
1 0
1 0
1 0
1 0
1 0
1 0
1 0
1 0
1 0
1 0
1 0
1 0
1 0
1 1
1 2
1 2
1 2
1 2
1 2
1 2
1 2
1 2
1 2
1 2
1 2
1 2
1 2
1 2
1 2
1 1
1 1
1 1
1 1
1 1
1 1
1 1
1 1
1 2
1 2
1 2
1 2
1 2
1 2
2 8
2 14
2 19
2 19
2 20
1 20
1 20
1 20
1 20
1 20
1 20
1 20
1 21
1 22
1 26
1 26
0 26
0 28
0 35
0 35
0 39
0 39
0 39
0 39
0 39
0 39
0 39
0 39
0 39
0 39
0 39
0 39
0 39
0 39
0 39
0 35
0 35
0 35
0 35
0 35
0 35
0 35
0 35
0 35
0 34
0 34
0 34
0 34
0 34
0 34
0 34
0 34
0 34
0 34
0 34
0 34
0 34
0 34
0 33
0 32
0 32
0 32
0 32
0 32
0 32
0 32
0 32
0 31
0 31
0 31
0 31
0 31
0 31
0 25
0 19
0 15
3 17
3 17
3 17
3 17
3 17
3 17
3 17
3 18
3 18
3 17
3 16
3 12
3 12
3 12
3 10
3 3
3 3
3 3
3 3
3 3
3 3
3 3
3 3
3 2
3 2
3 2
3 2
3 2
3 2
3 2
3 4
3 4
3 4
3 4
3 4
3 4
3 4
3 4
3 4
3 4
3 4
3 4
3 4
3 4
3 4
3 2
3 3
3 3
3 3
3 3
3 3
3 3
3 3
3 3
3 4
3 4
3 4
3 4
3 4
3 4
3 4
3 4
3 4
3 4
3 4
3 4
3 4
3 4
3 4
3 3
3 3
3 3
3 3
0 1
3 1
3 1
3 1
3 1
3 1
3 1
3 1
3 1
3 1
3 1
5 1
5 1
5 1
5 1
5 1
5 1
5 1
5 1
5 1
5 4
5 4
5 4
5 4
5 4
5 4
5 4
5 4
5 4
5 4
5 4
5 4
5 4
5 4
5 4
5 4
5 4
5 4
5 4
5 4
5 4
5 5
5 5
5 5
5 5
5 5
5 4
5 4
5 4
5 4
5 4
5 4
5 4
5 4
5 4
5 4
5 4
5 4
5 4
5 4
5 4
5 4
5 4
5 4
5 4
5 4
5 5
5 5
5 6
5 6
5 6
3 6
3 6
2 6
0 6
0 6
0 6
0 6
0 6
0 6
0 6
0 6
0 6
0 6
0 6
0 6
0 6
0 6
0 6
0 8
0 8
0 8
0 8
0 5
0 5
0 5
0 5
0 5
0 5
0 5
0 5
0 5
0 5
0 5
0 5
0 5
0 5
0 5
2 5
2 5
2 5
2 103
2 103
4 103
4 104
4 106
4 106
4 106
4 106
4 106
4 106
4 106
4 106
4 106
4 106
4 106
4 15
4 14
4 14
4 14
4 11
4 11
4 11
4 11
4 11
4 9
4 9
4 6
4 2
4 1
4 1
4 0
4 0
4 0
4 0
4 0
4 0
4 0
4 0
4 0
4 0
4 0
4 0
4 0
4 0
4 1
4 1
4 1
4 1
4 1
4 1
4 1
4 5
4 6
4 7
4 7
4 7
4 7
4 7
4 10
4 9
4 9
4 9
4 11
4 11
4 11
4 11
4 11
4 11
4 11
4 11
2 11
2 11
2 11
2 8
2 8
0 8
0 8
0 8
1 8
1 8
1 8
1 8
1 8
1 8
1 8
1 8
1 8
1 10
1 10
1 10
2 10
2 10
2 10
2 10
2 10
2 10
2 10
1 10
1 10
1 10
1 10
1 9
1 6
1 6
1 6
0 6
0 6
0 6
0 6
0 6
0 6
0 6
0 8
0 8
0 8
0 8
0 8
0 8
0 8
0 8
0 8
0 8
0 8
0 7
0 6
0 6
0 6
0 6
0 6
0 8
0 8
0 8
0 8
0 8
0 8
0 6
0 6
0 6
0 6
0 6
0 6
0 6
0 6
0 6
0 6
0 7
0 7
0 7
0 7
0 7
0 7
0 7
2 7
2 7
2 7
2 7
2 7
2 7
2 7
2 7
2 5
2 5
2 5
2 5
2 5
2 5
2 5
2 5
1 4
1 4
0 3
0 3
0 3
0 3
0 3
0 3
0 3
0 3
0 3
0 3
0 4
0 5
0 5
0 5
0 5
0 3
0 3
0 3
0 3
0 3
0 3
0 3
0 4
0 4
0 4
0 4
0 5
0 5
0 5
0 5
0 5
0 5
0 5
0 5
0 5
0 5
0 5
0 4
0 4
0 4
0 4
0 4
0 4
0 4
0 4
0 4
0 5
0 7
0 6
0 6
0 6
0 6
0 6
0 6
0 6
1 7
1 7
1 7
1 7
2 9
2 9
2 9
2 9
2 11
2 11
2 11
2 11
2 11
2 11
2 11
2 11
2 11
2 11
2 11
2 11
2 11
2 12
2 12
2 12
2 10
4 27
4 27
4 25
4 25
4 25
4 25
4 25
4 25
4 25
4 25
4 25
4 24
4 24
4 24
4 24
4 24
2 7
2 7
2 7
2 6
2 6
2 6
2 6
2 6
2 6
2 6
2 6
2 5
2 5
2 5
2 5
2 5
2 5
2 5
2 4
2 4
1 4
0 4
0 4
0 3
0 1
0 1
2 2
2 2
2 2
2 2
3 2
3 2
3 2
3 2
3 2
3 2
4 1
4 1
4 2
4 2
4 2
4 1
2 1
2 1
2 1
1 1
1 1
1 1
1 1
1 1
1 1
1 1
1 1
1 3
1 4
1 4
1 4
1 4
1 4
1 4
1 4
1 4
1 4
1 4
1 4
1 4
1 4
1 4
1 4
1 3
1 3
1 3
1 3
1 3
1 3
2 3
2 3
2 3
2 3
2 3
2 3
2 3
2 3
2 3
2 3
2 3
2 3
2 3
2 3
2 3
2 3
2 3
2 5
2 5
2 5
2 5
2 5
2 5
2 5
2 5
2 5
2 5
2 5
2 5
2 5
2 5
2 5
2 5
2 5
1 5
1 5
1 4
1 4
1 4
1 4
1 4
1 4
1 4
1 4
1 4
1 4
1 4
1 4
1 4
1 4
1 4
1 2
1 2
1 2
1 2
1 2
1 2
1 2
1 2
1 2
1 2
1 2
1 2
1 2
1 2
2 2
3 2
11 2
11 2
11 2
11 2
11 2
10 2
10 2
10 2
10 2
10 2
10 2
10 2
10 2
9 2
9 2
1 2
1 2
0 2
0 2
0 2
0 2
0 2
0 2
0 0
0 0
0 0
0 0
0 0
0 0
0 0
0 0
0 0
0 0
0 0
0 0
0 0
0 0
0 0
0 0
0 0
0 0
0 0
0 0
0 0
0 0
0 0
0 0
0 0
0 0
0 0
0 0
0 0
0 0
0 0
0 0
0 0
0 0
0 0
0 0
0 0
0 0
0 0
0 0
0 0
2 0
2 0
2 0
2 0
2 0
2 0
2 0
2 0
2 0
2 0
2 0
2 0
2 0
2 0
2 0
1 0
1 0
1 0
1 0
0 0
0 0
0 0
0 0
0 0
0 1
0 1
0 1
0 1
0 1
0 1
0 1
0 1
0 1
0 1
0 3
0 4
0 102
0 117
0 216
0 220
0 222
0 229
0 230
0 233
0 238
0 238
0 239
0 240
0 240
0 240
0 240
0 240
0 240
0 240
0 240
0 240
0 243
0 244
0 245
0 245
0 245
0 245
0 250
0 250
0 250
0 251
0 251
0 251
0 252
0 252
0 252
0 252
0 240
0 208
0 206
0 199
0 210
0 197
0 193
0 188
0 184
1 181
1 115
1 69
1 68
1 69
2 69
2 71
2 71
2 71
2 71
2 73
2 73
2 73
2 72
2 72
2 72
2 71
2 71
2 71
2 71
2 71
4 71
4 71
4 71
4 71
4 71
4 70
4 70
4 68
4 66
4 45
4 44
4 44
4 45
4 45
4 45
2 45
2 45
2 45
6 45
6 45
6 46
6 53
6 53
6 53
6 53
6 53
6 52
6 48
6 50
6 53
6 53
6 55
6 57
2 48
2 48
2 44
2 42
2 42
2 42
2 42
2 42
2 42
2 42
2 42
2 42
2 39
2 37
2 29
2 29
2 29
2 31
2 31
1 31
1 31
1 31
0 30
0 30
0 30
0 28
0 28
0 28
0 28
2 42
2 43
2 45
2 49
2 49
2 49
2 54
2 54
2 55
2 55
2 55
2 55
3 58
3 61
3 61
1 62
1 62
1 62
1 62
1 62
1 63
1 58
1 58
2 62
2 62
2 64
2 65
2 65
2 66
2 65
2 65
2 64
2 58
2 58
2 58
2 58
2 58
2 56
2 54
2 51
2 51
2 56
2 57
3 62
3 62
3 62
3 64
3 64
3 64
3 64
3 64
3 64
3 64
3 64
4 64
4 65
4 65
4 65
4 64
4 65
4 67
4 65
4 65
4 65
4 65
5 68
5 68
5 67
6 72
6 72
6 72
6 71
6 70
6 50
6 50
6 41
6 39
6 39
6 39
6 39
6 39
6 39
6 39
6 39
6 39
5 34
5 33
5 33
5 33
5 33
5 33
5 33
5 33
5 33
5 33
5 33
4 31
4 31
4 29
4 29
4 30
4 28
4 28
4 28
4 28
4 28
4 28
4 28
4 41
4 39
4 43
4 43
4 43
4 39
4 32
4 32
3 24
3 24
3 24
3 24
3 21
3 21
3 21
3 21
3 21
3 21
3 21
2 21
5 22
5 22
5 22
5 22
3 21
3 21
3 21
3 21
3 21
3 21
3 21
3 21
3 21
3 20
4 26
1 26
1 30
1 30
1 30
1 34
1 34
1 35
1 35
1 37
1 37
1 37
1 37
1 37
1 38
0 38
0 38
0 38
0 38
0 38
0 38
0 38
0 39
0 40
0 40
0 40
0 40
0 40
0 41
0 42
0 42
0 41
0 43
0 42
0 42
0 42
0 42
0 42
0 42
0 27
0 29
0 29
0 31
0 30
0 32
0 41
0 77
0 128
0 136
0 174
0 187
0 203
0 218
0 256
0 321
0 518
0 791
0 859
1 904
1 992
1 1043
1 1062
1 1091
1 1224
1 1233
1 1240
2 1283
13 2364
15 2698
15 2756
16 2859
16 2869
16 2875
19 2900
19 2901
19 2917
19 2920
19 2921
19 2919
19 2919
19 2921
19 2921
19 2918
19 2923
19 2923
19 2926
19 2937
27 3769
27 3780
28 3915
28 3918
28 3906
28 3882
28 3879
28 3904
28 3950
28 3972
28 3992
28 3988
28 3991
28 3992
28 3994
28 3995
28 3996
28 3995
28 3863
28 3870
28 3738
31 4445
31 4459
32 4486
32 4486
32 4480
32 4480
32 4483
32 4483
32 4482
32 4479
32 4468
32 4426
32 4367
32 4352
32 4345
32 4341
32 4336
32 4316
32 4297
32 4271
32 4100
32 3895
32 3861
31 3817
31 3715
31 3612
31 3554
31 3547
31 3544
31 3544
31 3530
29 3383
15 2144
15 2082
15 2061
15 2061
15 2058
15 2057
13 2018
13 2056
13 2030
13 2030
13 2030
13 2030
13 2030
13 2030
13 2030
13 2032
13 2025
13 2024
10 2017
10 2011
4 1124
4 1109
4 1020
4 1013
4 1002
4 1002
4 996
4 951
4 881
4 861
4 856
4 856
4 855
4 855
4 900
3 898
3 898
3 892
3 892
3 888
3 880
1 146
1 137
0 126
0 126
0 126
0 126
0 126
0 126
0 125
0 125
0 125
0 125
0 125
0 124
0 122
0 123
0 123
0 123
0 123
0 123
0 123
0 110
0 110
0 110
0 110
0 114
0 114
0 114
0 114
0 114
0 114
0 114
0 114
0 114
0 114
0 114
0 114
0 115
0 115
0 58
0 56
0 56
0 56
0 56
0 56
0 56
0 56
0 56
0 56
0 56
0 56
0 56
0 55
0 55
0 55
0 54
0 54
0 54
0 54
0 54
0 54
0 54
0 54
0 55
0 55
0 54
0 8
0 8
0 8
0 8
0 8
0 8
0 8
0 8
0 6
0 6
0 6
0 6
0 6
0 6
0 6
0 6
0 6
0 6
0 6
0 6
0 6
0 6
0 5
0 5
0 5
0 5
0 5
0 5
0 5
0 5
0 5
0 5
0 1
0 1
0 1
0 2
0 2
0 2
0 2
0 2
0 2
0 2
0 2
0 2
0 2
0 2
0 2
0 2
0 2
0 2
0 2
0 2
0 2
0 2
0 2
0 2
0 2
0 2
0 2
0 2
0 2
0 2
0 2
0 2
0 2
0 2
0 2
0 3
0 3
0 3
0 2
0 2
0 2
0 2
0 2
0 2
0 2
0 2
0 2
0 2
0 2
0 2
0 3
0 3
0 3
0 3
0 3
0 3
0 3
0 3
0 3
0 3
0 3
0 3
0 3
0 3
0 3
0 3
0 3
0 4
0 4
0 4
0 5
0 5
0 5
0 5
0 5
0 5
0 4
0 4
0 4
0 4
0 4
0 4
0 4
0 4
0 4
0 4
0 4
0 4
0 4
0 4
0 4
0 4
0 4
0 4
0 4
0 4
0 4
0 4
0 4
0 4
0 4
0 4
0 4
0 4
0 4
1 6
1 6
1 6
1 6
1 6
1 6
1 6
1 6
1 6
1 6
1 6
1 6
1 6
1 6
1 6
0 4
0 4
0 4
0 3
0 2
0 2
0 2
0 2
0 2
0 2
0 2
0 2
0 2
0 2
0 2
0 2
0 2
0 2
0 2
0 2
0 1
0 1
0 1
0 0
0 0
0 0
0 0
0 0
0 0
0 0
0 0
0 0
0 0
0 0
0 0
0 0
0 0
0 0
0 1
0 7
1 7
1 7
1 8
1 8
1 8
1 8
1 8
1 8
1 8
1 8
1 8
1 8
1 8
1 8
1 8
1 8
1 8
0 8
0 8
0 8
0 8
0 8
0 8
0 8
0 8
0 8
0 8
0 8
0 8
0 8
0 8
0 8
0 8
0 8
0 8
0 8
0 8
0 8
0 8
0 8
0 8
0 8
0 8
0 8
0 8
0 8
0 8
0 8
0 8
0 8
0 8
0 8
0 8
0 8
0 8
0 8
0 9
0 9
0 9
0 9
0 9
0 9
0 9
0 9
0 9
0 9
0 10
0 10
0 10
0 9
0 9
0 9
0 3
0 3
0 3
0 2
0 2
0 2
0 2
0 2
0 2
0 2
0 2
0 2
0 2
0 2
0 2
0 2
0 2
0 2
0 2
0 2
0 2
0 2
0 2
0 2
0 2
0 2
0 2
0 2
0 2
0 2
0 2
0 2
0 2
0 2
0 2
0 2
0 2
0 2
0 2
0 2
0 2
0 2
0 2
0 2
0 2
0 2
0 2
0 2
0 2
0 2
0 2
0 2
0 2
0 2
0 2
0 2
0 1
0 1
0 1
0 1
0 1
0 1
0 1
0 2
0 2
0 2
0 2
0 1
0 1
0 1
0 1
0 1
0 1
0 1
0 1
0 1
0 1
0 1
0 1
0 1
0 1
0 1
0 1
0 1
0 1
0 1
0 1
0 1
0 1
0 2
0 2
0 2
0 2
0 2
0 2
0 3
0 3
0 3
0 3
0 3
0 3
0 3
0 3
0 3
0 4
0 4
0 4
0 4
0 4
0 4
0 4
0 3
0 3
0 3
0 3
0 3
0 3
0 3
0 3
0 3
0 3
0 3
0 3
0 3
0 3
0 3
0 3
0 3
0 4
0 4
0 4
0 4
0 4
0 4
0 4
0 3
0 3
0 3
0 3
0 3
0 3
0 3
0 3
0 3
0 3
1 3
1 3
1 3
1 3
1 3
1 3
1 3
1 3
1 3
1 3
1 3
1 3
1 3
1 3
1 3
1 3
1 3
1 2
1 2
1 2
1 2
1 2
1 2
1 2
1 2
1 2
1 2
1 2
1 2
1 2
1 2
1 2
1 1
1 1
1 1
1 1
1 1
1 1
1 1
1 1
1 1
1 1
1 1
1 1
1 1
1 1
1 1
1 1
1 1
1 1
1 1
1 1
1 0
1 0
1 0
1 0
1 0
1 0
1 0
1 0
1 0
2 0
2 0
2 0
2 0
2 0
2 0
2 0
2 0
2 0
2 0
2 0
2 2
1 2
1 2
1 3
1 3
1 3
1 3
1 3
1 3
1 3
1 3
1 3
1 3
1 3
1 3
1 3
1 3
1 3
1 3
1 3
1 3
1 3
1 3
1 3
1 3
1 3
1 3
1 3
1 3
1 3
1 3
1 3
1 3
1 3
1 3
1 3
1 3
1 3
1 3
1 3
1 3
1 3
1 3
1 3
1 3
1 3
1 3
1 3
1 3
1 3
1 3
1 3
1 3
1 3
1 3
1 3
1 3
2 3
2 3
2 10
1 10
1 10
1 10
1 15
1 20
1 20
1 20
1 20
1 20
1 20
1 20
1 20
1 20
0 20
0 20
0 20
0 19
0 19
0 19
0 19
0 19
0 17
0 17
0 17
0 17
0 17
0 11
0 10
0 9
0 9
0 9
0 9
0 8
0 8
0 8
0 8
0 8
0 8
0 8
0 8
0 8
0 8
0 8
0 8
0 8
0 8
0 8
0 8
0 8
0 8
0 8
0 8
0 8
0 8
0 8
0 8
0 8
0 8
0 8
0 8
0 9
0 9
0 9
0 9
0 9
0 9
0 9
0 7
0 5
0 4
0 3
0 3
0 4
0 4
0 4
0 3
0 2
0 2
0 2
0 2
0 2
0 2
0 2
0 2
0 2
0 2
0 2
0 2
0 2
0 2
0 2
0 2
0 2
0 2
0 2
0 2
0 2
0 2
0 2
0 2
0 2
0 2
0 2
0 2
0 2
0 2
0 2
0 2
0 1
0 1
0 1
0 1
0 1
0 1
0 1
0 1
0 1
0 1
0 1
0 1
0 6
0 6
0 6
0 6
0 6
0 6
0 6
0 6
0 6
0 6
0 6
0 6
0 7
0 7
0 7
0 6
0 6
0 6
0 6
0 6
0 6
0 6
0 7
0 8
0 10
0 9
0 9
0 8
0 8
0 8
0 9
0 9
0 10
0 10
0 10
0 10
0 10
0 11
0 11
0 11
0 12
0 12
0 12
0 12
0 12
0 12
0 12
0 12
0 12
0 12
0 12
0 10
0 10
0 8
0 8
0 8
0 8
0 8
0 8
0 8
0 8
0 8
0 8
0 8
0 8
0 8
0 8
0 8
0 8
0 8
0 8
0 8
0 8
0 8
0 8
0 8
0 8
0 8
0 8
0 8
0 8
0 8
0 8
0 8
0 8
0 8
0 8
0 8
0 8
0 8
0 8
0 8
0 8
0 8
0 8
0 7
0 5
0 5
0 5
0 5
0 5
0 5
0 5
0 4
0 4
0 3
0 3
0 3
0 3
0 3
0 2
0 2
0 2
0 1
0 1
0 1
0 1
0 0
0 0
0 0
0 0
0 0
0 0
0 0
0 0
0 0
0 0
0 0
0 0
0 0
0 0
0 0
0 0
0 0
0 0
0 0
0 0
0 0
0 0
0 0
0 0
0 0
0 0
0 0
0 0
0 0
0 0
0 0
0 2
0 2
0 2
0 2
0 2
0 2
0 2
0 2
0 2
0 2
0 2
0 2
0 2
0 2
0 2
0 2
0 2
0 2
0 2
0 2
0 2
0 2
0 2
0 5
0 5
0 7
0 7
0 7
0 7
0 7
0 7
0 7
0 7
0 7
0 7
0 7
0 7
0 7
0 7
0 7
0 7
0 7
0 7
0 7
0 7
0 7
0 7
0 7
0 7
0 7
1 7
1 7
1 7
1 7
1 7
1 7
1 8
1 9
1 9
1 9
1 9
1 9
1 7
1 7
1 7
1 7
0 5
0 5
0 7
0 7
0 7
0 7
0 7
0 5
0 5
0 5
0 5
0 5
0 5
0 5
0 5
0 5
0 5
0 5
0 5
0 5
0 5
0 5
0 5
0 10
0 13
0 23
0 26
0 26
1 27
1 27
1 27
1 28
1 31
1 33
1 34
1 34
1 34
1 34
1 34
1 34
1 34
1 34
1 34
1 34
0 34
0 34
0 34
0 34
0 30
0 30
0 30
0 30
1 30
1 30
1 31
1 33
1 33
1 31
1 31
2 31
2 31
2 31
2 31
2 33
2 33
2 33
2 33
2 33
2 33
2 33
2 33
2 33
2 33
2 33
2 29
2 25
2 25
2 25
2 25
2 25
2 23
2 23
2 23
2 23
2 23
2 23
2 23
2 23
2 23
2 23
2 22
2 23
2 23
2 23
2 23
2 22
2 19
2 17
2 8
2 8
2 9
2 9
2 9
2 8
2 8
2 8
2 8
2 8
2 8
2 8
2 8
2 8
2 8
2 8
2 8
2 7
2 7
2 7
2 7
2 7
2 7
2 7
1 4
1 4
1 4
1 4
1 4
2 11
2 8
2 8
2 8
2 8
1 8
1 8
1 8
1 8
1 8
1 8
1 8
1 8
1 8
1 8
1 8
1 8
1 8
1 8
1 8
1 8
1 8
1 8
1 8
1 8
1 8
1 8
1 8
1 8
1 8
1 8
1 8
1 8
1 8
1 8
1 8
1 8
1 7
1 7
1 7
1 7
1 8
1 8
2 9
2 9
2 9
2 12
2 12
2 12
2 28
2 34
2 34
2 35
2 35
2 35
2 35
2 35
2 35
1 35
1 35
1 35
1 36
1 36
1 36
2 37
2 37
2 37
2 37
2 37
2 37
2 41
2 41
2 41
1 33
2 37
2 38
4 62
4 61
4 61
4 61
4 62
4 62
4 62
4 62
4 62
4 62
4 62
4 62
4 62
4 62
4 62
4 62
3 62
3 62
3 62
3 62
3 62
3 62
4 64
4 64
4 64
5 66
5 68
5 68
5 68
5 68
5 68
6 68
6 68
6 68
6 68
6 68
6 68
6 68
6 66
6 62
6 62
6 62
6 62
6 61
6 61
6 60
6 44
5 42
5 42
6 42
6 42
6 42
6 42
6 42
6 43
7 43
7 45
7 45
7 44
7 44
7 44
6 43
6 43
6 43
6 43
6 43
6 43
6 38
6 38
6 37
6 37
5 32
5 31
3 7
3 7
3 7
3 7
2 4
2 4
2 4
2 4
2 4
2 4
2 4
2 4
2 4
2 4
2 4
2 3
2 2
2 1
2 1
2 1
2 1
2 1
2 1
2 1
2 1
2 1
2 1
2 1
2 1
2 1
2 1
2 1
2 1
2 1
2 1
2 1
2 1
2 1
2 1
2 1
2 1
2 1
2 1
2 1
2 1
2 1
2 1
2 1
2 1
1 1
1 1
1 1
1 1
1 1
1 1
0 1
0 0
0 0
0 0
0 0
0 0
0 0
0 0
0 0
0 0
0 1
0 1
0 1
0 1
0 1
0 1
1 3
1 3
1 3
1 4
1 4
1 5
1 5
1 5
1 5
1 6
1 6
1 5
1 5
1 5
1 5
2 5
2 5
2 5
2 5
2 5
3 5
3 5
3 5
3 7
3 7
4 7
4 7
4 7
4 7
4 7
3 7
3 7
3 7
3 7
3 7
3 7
2 7
2 7
2 7
2 7
1 7
1 7
1 7
1 7
1 7
1 7
1 16
1 16
1 16
1 16
1 16
1 20
1 20
1 20
1 20
1 20
1 20
1 20
1 20
1 22
1 22
1 23
1 16
1 16
1 16
1 16
1 16
1 12
1 12
1 12
1 12
1 12
1 12
0 9
0 9
0 9
0 8
0 8
0 8
0 8
0 8
0 8
0 7
0 7
0 7
0 7
0 7
0 7
0 7
0 7
0 7
0 7
0 7
0 8
0 8
0 9
0 7
0 8
0 8
0 8
0 8
0 8
0 8
0 8
0 8
0 8
0 8
0 8
0 7
0 7
0 7
0 7
0 7
0 7
0 7
0 7
0 7
0 7
0 5
0 5
0 5
0 5
0 5
0 5
0 5
0 5
0 5
0 5
0 5
0 5
0 5
0 5
0 3
0 3
0 2
0 2
0 2
0 2
0 2
0 2
0 2
0 2
0 2
0 2
0 2
0 2
0 2
0 2
0 2
0 2
0 2
0 2
0 2
0 2
0 2
0 2
0 2
0 2
0 2
0 2
0 2
0 2
0 2
0 2
0 2
0 2
0 2
0 2
0 1
0 0
0 0
0 0
0 0
0 0
0 0
0 0
0 0
0 0
0 0
0 0
0 0
0 0
0 0
0 0
0 0
0 0
0 0
1 0
1 0
1 0
1 0
1 0
1 0
1 0
1 0
1 0
1 0
1 0
1 0
1 0
1 0
1 0
1 0
1 1
1 1
1 1
1 1
1 1
1 1
1 1
1 1
1 4
1 11
1 17
2 19
2 20
2 21
2 23
2 23
2 23
2 25
2 25
2 25
2 25
2 25
2 26
2 28
2 30
2 30
2 30
2 30
2 30
2 30
2 30
2 30
2 30
2 30
2 34
2 34
2 34
2 36
2 37
2 37
2 37
2 37
2 37
2 37
2 37
2 37
2 37
2 37
2 37
2 37
2 37
2 37
2 37
2 37
2 37
2 38
2 38
1 33
1 33
1 32
1 33
1 33
1 34
2 36
2 36
2 36
2 36
2 36
2 36
2 36
2 36
2 36
2 36
2 36
2 36
2 36
2 35
2 35
2 35
1 34
1 34
1 29
1 27
1 23
0 21
0 21
0 19
0 17
0 18
0 18
0 18
0 18
0 20
0 20
1 22
1 22
1 20
1 18
1 18
1 29
1 30
1 30
1 30
1 52
1 53
1 61
1 61
1 58
1 58
0 58
0 58
0 57
0 57
0 57
0 57
0 57
0 57
0 57
0 64
0 64
0 64
0 65
0 65
0 65
0 65
0 65
0 65
0 65
0 64
0 64
0 64
0 64
0 64
0 64
0 65
0 60
0 60
0 60
0 59
0 59
0 59
0 59
0 61
0 62
0 62
0 62
0 62
0 62
0 60
3 62
3 62
3 62
3 62
3 62
3 62
3 62
3 61
3 61
3 60
3 60
3 60
3 60
3 60
3 62
3 62
3 62
3 62
3 60
3 59
3 59
3 59
3 58
3 51
3 51
3 49
3 49
6 21
6 19
6 18
6 18
6 60
6 59
6 63
7 64
11 71
11 76
11 77
11 77
11 77
11 78
11 78
11 70
11 71
11 71
11 73
11 75
11 75
11 75
11 75
11 77
11 77
11 77
11 77
11 79
11 79
11 79
11 79
11 78
11 80
12 81
12 81
12 82
13 83
13 83
14 85
14 88
14 88
14 88
14 90
14 90
14 90
14 90
11 88
11 89
11 89
11 89
12 89
16 98
16 98
18 101
18 103
18 103
18 103
18 103
18 103
18 103
18 101
18 101
18 101
18 101
18 101
18 101
18 101
18 101
18 102
18 103
18 104
18 104
18 104
14 100
14 100
13 97
13 97
13 45
13 45
13 38
12 38
8 34
8 30
8 30
8 29
8 29
8 27
8 27
8 27
8 26
8 26
8 26
8 26
8 26
8 26
8 26
8 24
8 24
8 24
8 24
8 22
8 22
8 22
8 22
8 20
7 20
7 20
7 20
7 20
7 21
7 21
7 19
7 19
7 19
7 20
7 21
7 21
7 21
7 21
7 21
6 22
4 22
4 23
4 23
2 13
0 13
0 11
0 9
0 9
0 9
0 9
0 9
0 9
0 9
0 9
0 9
0 9
0 9
0 9
0 9
0 9
0 8
0 7
0 6
0 6
0 6
0 6
0 6
0 6
0 6
0 6
0 7
0 7
0 8
0 8
0 8
0 8
0 8
0 8
0 9
0 9
0 9
0 9
0 9
0 9
0 9
0 9
0 9
0 9
0 9
0 8
0 9
0 8
0 8
0 8
0 8
0 8
0 8
0 8
0 8
0 8
0 8
0 7
0 7
0 6
0 6
0 6
0 4
0 3
0 3
0 3
0 3
0 3
0 3
0 3
0 3
0 3
0 3
0 4
0 4
1 4
1 4
1 4
1 4
1 6
1 6
1 7
1 7
1 7
1 7
1 7
1 7
1 5
1 4
1 4
3 4
3 4
2 4
2 4
2 4
2 4
2 4
2 4
2 4
2 4
2 4
2 4
2 4
2 4
2 4
2 4
2 4
2 3
2 3
2 3
0 3
0 3
0 3
0 3
0 3
0 3
0 3
0 3
0 3
0 3
0 3
0 3
0 3
0 3
0 3
0 4
0 5
0 6
0 6
0 6
0 6
0 6
0 6
0 8
0 10
0 12
0 13
0 15
0 15
0 16
0 17
0 20
0 21
0 21
0 25
0 25
0 25
0 25
0 25
0 25
0 25
0 25
0 23
0 23
0 22
0 22
0 22
0 22
0 22
0 22
0 22
0 22
0 22
0 22
0 22
0 22
0 22
0 22
0 22
0 22
0 22
0 22
0 22
0 22
0 22
0 22
0 22
0 22
0 22
0 22
0 22
0 23
0 23
0 23
0 23
0 23
0 23
0 23
0 23
0 23
0 23
0 23
0 23
0 23
0 23
0 23
0 23
0 23
0 20
0 14
0 14
0 14
0 14
0 14
0 14
0 14
0 6
0 7
0 7
0 7
0 6
0 6
0 4
0 4
0 4
0 4
0 4
0 3
0 3
0 3
0 3
0 3
0 3
0 3
0 3
0 3
0 3
0 3
0 3
0 3
0 3
0 3
0 3
0 3
0 3
0 3
0 3
0 3
0 6
0 6
0 6
0 6
0 6
0 7
0 7
0 7
0 7
0 7
0 7
0 7
0 7
0 7
0 7
0 7
0 6
0 6
0 6
0 6
0 6
0 6
0 6
0 6
0 6
0 6
0 7
0 7
0 7
0 7
0 7
0 7
0 7
0 7
0 7
0 6
0 6
0 5
0 5
0 5
0 5
0 5
0 5
0 5
0 5
0 5
0 5
0 5
0 5
0 5
0 5
0 5
0 5
0 5
0 5
0 5
0 5
0 5
0 5
0 6
0 6
0 6
0 6
0 6
0 6
0 6
0 6
0 6
0 6
0 6
0 6
0 6
0 5
0 2
0 2
0 2
0 2
0 2
0 2
0 2
0 2
0 2
0 2
0 5
0 5
0 5
0 5
0 5
0 5
0 5
0 5
0 5
0 5
0 5
0 5
0 5
0 5
0 5
0 2
0 1
0 1
0 1
0 1
0 1
0 1
0 1
0 1
0 1
0 1
0 1
0 1
0 1
0 1
0 1
0 1
0 1
0 1
0 2
0 2
0 2
0 2
0 3
0 3
0 3
0 3
0 3
0 3
0 3
0 4
0 6
0 7
0 7
0 13
0 13
0 16
0 18
0 18
0 18
0 19
0 19
0 21
0 21
0 21
0 21
0 21
0 21
0 21
0 21
0 21
0 21
0 21
0 21
0 21
0 21
0 21
0 21
0 22
0 22
0 22
0 22
0 22
0 22
0 22
0 26
0 29
0 32
0 32
0 32
0 32
1 32
1 32
1 32
1 32
1 32
1 32
1 32
1 32
1 32
1 33
1 33
1 33
1 33
1 33
1 33
0 33
0 33
0 33
0 33
0 33
0 31
0 30
0 30
0 30
0 30
0 30
0 30
0 30
0 31
0 31
0 31
0 31
0 30
0 28
0 28
0 28
0 21
0 19
0 18
0 18
0 19
0 18
0 18
0 18
0 17
0 17
0 17
0 17
0 17
0 17
0 17
0 17
0 17
0 17
0 17
0 17
0 17
0 17
0 17
0 17
0 16
0 16
0 16
0 16
0 16
0 16
0 16
0 7
0 6
0 7
0 8
0 8
0 8
0 8
0 8
0 8
0 8
0 8
0 8
0 8
0 8
0 8
0 7
0 7
0 7
0 7
0 7
0 7
0 7
0 7
0 7
0 7
0 7
0 7
0 7
0 7
0 7
0 7
0 7
0 7
0 7
0 6
0 6
0 6
0 6
0 6
0 6
0 6
0 6
0 3
0 3
0 3
0 3
0 2
0 2
0 2
0 2
0 2
0 2
0 2
0 2
0 2
0 2
0 2
0 2
0 2
0 2
0 3
0 5
0 5
0 5
0 5
0 5
0 5
0 5
0 5
0 5
0 5
1 5
1 6
1 6
1 6
1 4
1 4
1 4
1 5
1 5
1 5
1 5
1 5
1 5
1 5
1 6
1 6
1 7
1 7
0 7
0 7
0 8
0 8
0 8
0 8
0 10
0 10
0 10
0 10
0 10
0 10
0 10
0 10
0 10
0 13
0 13
0 13
0 13
0 13
0 13
0 13
0 13
0 13
0 13
0 13
0 13
0 13
0 13
0 13
0 13
0 10
0 10
0 10
0 10
0 10
0 10
1 11
1 11
1 11
1 13
1 13
2 13
2 12
2 11
2 10
2 8
2 8
2 8
2 8
2 8
2 8
2 8
2 9
2 9
2 9
2 9
2 9
2 9
2 10
2 11
2 11
2 11
2 16
2 18
2 18
2 18
6 18
6 18
6 18
5 16
5 17
5 17
4 17
4 17
4 16
4 16
4 16
4 20
4 20
4 21
4 21
4 21
4 21
4 21
4 21
4 21
4 21
4 21
4 21
4 21
4 21
4 21
4 21
4 21
4 20
2 20
0 20
0 20
0 20
0 20
0 20
0 20
0 20
0 23
0 23
0 22
0 21
0 21
0 19
0 19
0 18
0 18
0 18
0 18
0 18
0 21
0 21
0 21
0 18
0 18
0 18
0 18
0 18
0 18
0 18
0 17
0 17
0 17
0 16
0 16
0 16
0 16
0 14
0 14
0 14
0 8
0 4
0 4
0 4
0 4
0 4
0 3
0 3
0 3
0 3
0 3
0 3
1 3
1 3
1 3
1 3
1 3
1 3
1 3
1 3
1 3
1 3
1 3
1 3
1 3
1 3
1 3
0 3
0 3
0 3
0 3
0 3
0 3
0 3
0 3
0 3
0 3
0 5
0 5
0 5
0 5
0 5
0 5
0 5
0 5
0 5
0 5
0 5
0 5
0 5
0 5
0 5
0 5
0 2
0 2
0 2
0 2
0 2
0 2
0 2
0 2
0 2
0 2
0 2
0 2
0 2
0 3
0 4
0 4
0 4
0 4
0 4
0 4
0 4
0 4
0 4
0 4
0 4
0 4
0 4
0 4
0 4
0 3
0 3
0 3
0 3
0 3
0 3
0 3
0 3
0 3
0 3
0 3
0 3
0 3
0 3
0 3
0 3
0 3
0 3
0 3
0 3
0 3
0 3
0 3
0 3
0 3
0 3
0 3
0 3
0 1
0 1
0 1
0 1
0 1
0 1
0 1
0 1
0 1
0 1
0 1
0 1
0 1
0 1
0 1
0 1
0 1
0 1
0 1
0 1
0 1
0 1
0 1
0 1
0 1
0 1
0 1
0 1
0 1
0 1
0 0
0 0
0 0
0 0
0 0
0 0
0 0
0 0
0 0
0 0
0 0
0 0
0 0
0 0
0 0
0 0
0 0
0 0
0 0
0 0
0 0
0 0
0 0
0 0
0 0
0 0
0 0
0 0
0 0
0 0
0 0
0 0
0 0
0 0
0 0
0 0
0 0
0 0
0 0
0 0
0 0
0 0
0 0
0 0
0 0
0 0
0 0
0 0
0 0
0 0
0 0
0 0
0 0
0 0
0 0
0 0
0 0
0 0
0 0
0 0
0 0
0 0
0 0
0 0
0 0
0 0
0 0
0 0
0 0
0 0
0 0
0 0
0 0
0 0
0 0
0 0
0 0
0 0
0 0
0 0
0 0
0 0
0 1
0 1
0 2
0 2
0 3
0 3
0 4
0 4
0 4
0 4
0 4
0 5
0 5
0 5
0 5
0 7
0 7
0 7
0 7
0 7
0 7
0 7
0 7
0 7
0 7
0 7
0 7
0 7
0 7
0 7
0 7
0 7
0 7
0 7
0 7
0 7
0 7
0 7
0 7
0 7
0 7
0 7
0 7
0 7
0 7
0 7
0 7
0 7
0 7
0 7
0 7
0 7
0 7
0 7
0 7
0 7
0 7
0 7
0 7
0 7
0 7
0 7
0 7
0 7
0 7
0 7
0 7
0 7
0 7
0 7
0 7
0 7
0 5
0 4
0 4
0 4
0 4
0 4
0 4
0 3
0 4
0 4
0 3
0 3
0 3
0 6
0 6
0 6
0 4
0 4
0 4
0 4
0 4
0 4
0 4
0 4
0 4
0 4
0 4
0 4
0 4
0 4
0 4
0 4
0 4
0 4
0 4
0 4
0 4
0 4
0 4
0 4
0 4
0 4
0 4
0 4
0 4
0 4
0 4
0 4
0 4
0 4
0 4
0 4
0 4
0 4
0 4
0 4
0 4
0 4
0 4
0 4
0 4
0 4
0 4
0 4
0 4
0 4
0 4
0 4
0 4
0 4
0 4
0 4
0 4
0 4
0 4
0 4
0 4
0 4
0 4
0 4
0 4
0 3
0 3
0 4
0 4
0 4
0 1
0 1
0 1
0 1
0 1
0 1
0 1
0 1
0 1
0 1
0 1
0 1
0 1
0 1
0 1
0 1
0 1
0 1
0 1
0 1
0 1
0 1
0 1
0 1
0 1
0 1
0 1
0 1
0 1
0 1
0 1
0 1
0 1
0 1
0 1
0 1
0 1
0 1
0 1
0 1
0 1
0 1
0 1
0 1
0 1
0 1
0 1
0 1
0 1
0 1
0 1
0 3
0 3
0 3
0 3
0 3
0 3
0 3
0 4
0 4
0 4
0 4
0 4
0 4
0 4
0 4
0 4
0 4
0 4
0 4
0 3
0 3
0 3
0 2
0 2
0 2
0 2
0 2
0 2
0 2
0 2
0 2
0 2
0 2
0 2
0 2
0 2
0 2
0 2
0 2
0 2
0 2
0 2
0 2
0 2
0 2
0 2
0 2
0 2
0 2
0 2
0 2
0 2
0 2
0 2
0 2
0 2
0 2
0 2
0 2
0 2
0 2
0 2
0 2
0 1
0 1
0 1
0 1
0 1
0 1
0 0
0 0
0 0
0 0
0 0
0 0
0 0
0 0
0 0
0 0
0 0
0 0
0 0
0 0
0 0
0 0
0 0
0 0
0 0
0 0
0 0
0 0
0 0
0 0
0 0
0 0
0 0
0 0
0 0
0 1
0 1
0 1
0 1
0 1
10 143
10 143
10 143
10 143
10 143
10 143
10 143
10 143
10 143
10 143
10 143
10 143
10 144
10 144
10 144
0 2
2 3
2 3
2 3
3 3
3 3
3 3
3 3
3 3
3 3
3 3
3 3
3 3
3 4
3 4
3 4
2 4
2 4
2 4
2 5
2 5
2 5
2 5
2 5
2 5
2 5
2 5
2 5
2 5
3 5
3 5
3 5
3 5
3 4
3 4
3 4
3 4
3 4
3 4
3 3
3 3
3 3
3 3
3 3
3 3
3 3
2 3
2 3
2 3
2 3
2 3
2 3
2 3
2 2
2 2
2 2
2 2
2 2
2 2
2 2
2 2
2 2
2 2
2 2
2 2
2 2
2 2
2 2
2 2
2 2
2 2
2 2
2 2
2 2
3 3
3 3
3 3
2 3
4 5
4 5
4 5
4 5
4 5
4 5
4 7
6 11
6 13
6 13
6 15
6 15
6 15
6 15
6 14
6 14
6 14
6 14
6 14
6 14
6 14
6 14
6 14
6 14
6 14
6 14
6 14
6 14
6 14
6 14
6 14
6 14
6 14
6 14
6 14
6 14
6 14
6 14
6 14
6 14
6 14
6 14
6 14
6 14
6 14
6 14
6 14
6 14
6 14
6 14
6 14
6 14
6 14
6 14
6 14
6 14
6 14
6 14
6 14
6 14
6 14
6 14
6 14
6 14
6 14
6 14
4 14
4 14
4 14
2 8
2 8
2 8
2 8
2 8
2 8
0 3
0 3
0 3
0 3
0 3
0 1
0 1
0 1
0 0
0 0
0 0
0 0
0 0
0 0
0 0
0 0
0 0
0 0
0 0
0 0
0 0
0 0
0 1
0 1
0 1
0 1
0 1
0 1
0 1
0 1
0 1
0 1
1 1
1 1
1 1
1 1
1 1
1 1
1 1
1 1
1 1
1 1
1 1
1 1
1 1
1 1
1 1
1 1
1 1
1 0
1 0
1 0
1 0
1 0
1 0
1 0
1 0
1 0
1 0
1 0
1 0
1 0
1 0
1 0
1 1
1 1
1 1
2 2
2 2
2 2
2 2
2 2
2 2
2 2
2 2
2 2
2 2
2 2
2 2
2 2
2 2
2 2
2 2
2 2
2 2
2 2
2 2
2 2
2 2
2 2
2 2
2 2
2 2
2 2
2 2
2 2
2 2
2 2
2 2
2 2
2 2
2 2
2 2
2 2
2 2
1 2
1 2
1 3
1 3
1 3
3 3
3 3
3 3
3 3
3 3
3 3
3 3
3 3
3 3
3 3
3 3
3 3
3 3
3 2
3 2
3 2
3 2
3 2
3 2
3 2
3 2
3 2
3 2
3 4
3 4
3 4
2 4
1 2
1 2
1 2
1 2
1 2
1 2
1 2
1 2
1 2
1 2
1 2
1 2
1 2
1 2
1 2
0 2
0 0
0 0
0 0
0 0
0 0
0 0
0 0
0 0
0 0
0 0
0 0
0 0
0 0
0 0
0 0
0 0
0 0
0 0
0 0
0 0
0 0
0 0
0 0
0 0
0 0
0 0
0 0
0 0
0 1
0 1
0 1
0 1
0 1
0 2
0 2
0 2
0 2
0 2
0 2
0 2
0 2
0 2
0 2
0 2
0 2
0 2
0 2
0 2
0 2
0 2
0 2
0 2
0 2
0 1
0 1
0 1
0 1
0 1
0 1
0 1
0 1
0 1
0 1
0 1
0 1
0 1
0 1
0 1
0 1
0 1
0 1
0 1
0 1
0 1
0 1
0 1
0 1
0 1
0 1
0 1
0 1
0 1
0 1
0 1
0 1
0 1
0 1
0 1
0 1
0 1
0 1
0 1
0 1
0 1
0 1
0 1
0 1
0 1
0 1
0 1
0 1
0 0
0 0
0 0
0 0
0 0
0 0
0 0
0 0
0 0
0 0
0 0
0 0
0 0
0 0
0 0
0 0
0 0
0 0
0 0
0 0
0 0
0 0
0 0
0 0
0 0
0 0
0 0
1 0
1 0
1 0
1 0
1 0
1 0
1 0
1 0
1 0
1 0
1 0
1 0
1 0
1 0
1 0
1 0
0 0
0 0
0 0
0 0
0 0
0 0
0 0
0 0
0 0
0 0
0 0
0 0
0 0
0 0
0 0
0 0
0 0
0 0
0 0
0 0
0 0
0 0
0 0
0 0
0 0
0 0
0 0
0 0
0 0
0 0
0 0
0 0
0 0
0 0
0 0
0 0
0 0
0 0
0 0
0 0
0 0
0 0
0 0
0 0
0 0
0 0
0 0
0 0
0 0
0 0
0 0
0 0
0 0
0 0
0 0
0 0
0 0
0 0
0 0
0 0
0 0
0 0
0 0
0 0
0 0
0 0
0 0
0 0
0 0
0 0
0 0
0 0
0 0
0 0
0 0
0 0
0 0
0 0
0 0
0 0
0 0
0 0
0 0
0 0
0 0
0 0
0 0
0 0
0 0
0 0
0 0
0 0
0 0
0 0
0 0
0 0
0 1
0 1
0 1
0 1
2 1
4 1
4 1
5 1
5 1
5 1
5 1
5 1
5 1
5 1
5 1
5 1
5 1
5 1
5 2
5 2
5 2
4 2
4 2
4 2
4 2
4 2
4 2
4 2
4 2
4 2
4 2
4 2
4 2
4 2
4 2
4 2
4 2
4 2
4 2
4 3
4 3
4 3
4 3
4 3
4 3
4 3
4 3
4 3
4 3
4 4
4 5
4 5
4 5
4 5
4 5
5 6
5 6
3 6
3 6
2 6
2 6
2 6
2 6
2 6
2 6
2 6
2 6
2 6
2 6
2 6
2 6
1 6
1 6
1 5
1 5
3 6
3 7
2 5
2 5
2 8
2 7
2 7
2 7
2 7
2 7
2 7
2 7
2 7
2 7
2 7
2 7
2 6
2 6
0 4
0 4
0 4
0 4
0 4
0 4
0 4
0 4
0 4
0 4
0 4
0 4
0 4
0 4
0 4
0 4
0 4
0 4
0 4
0 4
0 4
0 4
0 4
0 4
0 4
0 4
0 4
0 4
0 4
0 4
0 3
0 5
0 5
0 5
0 5
0 5
0 5
0 5
0 5
0 5
0 5
0 5
0 5
0 5
0 5
0 5
0 5
0 5
0 5
0 5
0 5
0 5
0 5
0 5
0 5
0 5
0 5
0 5
0 5
0 2
0 2
0 2
0 2
0 2
0 2
0 2
0 2
0 2
0 2
0 2
0 2
0 2
0 2
0 2
0 2
0 2
0 2
0 2
0 2
0 2
0 2
0 2
0 2
0 2
0 2
0 2
0 2
0 3
0 3
0 3
0 3
0 3
0 3
0 3
0 3
2 10
2 10
4 26
4 32
4 34
4 34
4 34
4 36
4 36
5 36
5 36
5 36
5 41
5 41
5 41
5 41
5 41
5 41
5 41
6 44
6 44
6 44
6 44
6 44
14 45
14 45
14 45
14 44
14 44
14 44
14 44
14 44
14 44
14 44
14 43
14 41
15 41
15 41
15 41
16 41
16 42
16 43
16 43
16 43
16 43
16 43
16 43
16 43
16 43
16 43
16 43
16 43
15 43
15 43
15 43
15 43
15 43
15 43
14 42
14 42
15 43
15 43
15 43
12 31
12 29
12 29
9 16
9 14
10 14
15 14
15 14
15 14
15 14
15 14
15 14
15 5
15 5
15 5
15 5
15 5
15 5
15 5
14 4
14 4
14 4
14 4
14 4
14 4
14 4
14 6
14 7
14 7
14 7
14 7
14 7
14 7
14 7
7 6
7 5
7 5
7 5
7 5
7 5
7 5
7 5
7 5
7 6
9 6
9 6
9 6
9 7
9 8
9 9
9 8
9 8
9 11
9 11
9 11
9 14
9 17
9 25
11 28
11 28
11 28
11 28
11 28
11 28
11 29
34 31
35 31
35 31
35 31
35 31
33 30
33 30
32 30
32 30
32 30
34 30
34 30
33 30
32 30
30 30
30 30
30 30
30 30
30 30
30 30
30 30
30 30
30 30
30 30
46 31
56 31
60 31
62 32
62 33
62 33
62 33
62 33
62 33
62 33
62 30
65 27
65 26
65 26
65 26
65 26
65 26
65 26
65 26
66 24
66 24
67 29
67 29
67 27
67 27
67 27
67 27
67 26
65 26
65 26
65 26
65 27
65 25
65 25
65 25
65 25
64 23
64 23
65 23
81 27
81 59
81 59
100 96
100 98
100 100
104 105
104 120
104 124
105 130
81 128
81 128
81 128
81 128
81 128
81 128
81 129
81 130
81 130
81 130
81 131
81 131
85 204
85 213
85 215
84 217
84 217
84 220
84 220
84 223
83 227
84 257
84 256
68 254
54 254
45 253
36 253
33 253
31 252
30 252
28 252
28 252
28 252
27 252
26 252
18 252
17 252
17 252
11 252
11 252
11 252
11 252
11 252
11 251
11 251
10 244
10 244
10 242
10 239
10 237
10 237
10 237
10 237
10 237
10 237
10 236
10 237
10 237
10 237
10 238
10 238
10 238
10 238
10 232
10 203
10 195
6 140
5 135
5 134
5 135
5 132
5 131
5 132
5 132
5 132
5 132
5 132
5 132
5 132
5 131
5 129
5 129
5 129
5 129
5 126
1 50
1 44
1 43
1 40
1 39
2 38
2 38
2 37
2 34
1 4
1 4
1 4
1 4
1 4
1 4
1 4
1 4
1 5
1 5
1 5
0 5
0 5
0 5
0 5
0 5
0 5
0 5
0 5
0 5
0 5
0 5
0 5
0 5
0 5
0 5
0 6
0 6
0 6
0 6
0 6
0 6
0 6
0 6
0 6
0 6
0 6
0 6
0 6
0 6
0 6
0 6
0 6
0 6
0 6
0 6
0 6
0 6
0 6
0 6
0 5
0 5
0 5
0 5
0 5
0 5
0 5
0 5
0 5
0 5
0 5
0 5
0 5
0 5
0 5
0 5
0 5
0 5
0 5
0 3
0 3
0 3
0 3
0 3
0 3
0 5
0 5
0 5
0 5
0 5
0 5
0 4
0 4
0 4
0 4
0 4
0 4
0 4
0 4
0 4
0 4
0 4
0 6
0 6
0 7
0 9
0 9
0 9
0 9
0 8
0 12
0 12
0 12
0 12
0 12
0 12
0 12
0 12
0 12
0 12
0 12
0 12
0 12
0 12
0 12
0 12
0 12
0 12
0 12
0 8
0 8
0 7
0 8
0 8
0 8
0 8
0 8
0 8
0 8
0 8
0 8
0 8
0 8
0 8
0 8
0 8
0 9
0 8
0 8
0 8
0 8
0 8
0 8
0 8
0 8
0 8
0 9
0 9
0 7
0 7
0 7
0 7
0 8
0 8
0 8
0 8
0 8
0 8
0 8
1 10
1 10
1 10
1 10
1 10
1 10
1 8
1 8
1 6
1 6
1 6
1 6
1 7
1 7
1 7
1 7
1 7
1 7
1 7
1 7
1 7
1 7
1 7
1 7
1 7
1 8
1 8
1 8
1 8
1 8
1 8
1 8
1 8
1 7
1 7
1 7
1 7
1 7
1 7
1 7
1 7
1 7
1 7
1 7
1 7
1 7
1 7
1 7
1 7
1 7
1 6
1 6
1 6
1 6
1 6
1 6
1 6
1 3
1 3
1 2
1 2
1 2
1 2
1 2
1 2
1 2
1 1
1 1
1 1
1 1
1 1
1 1
1 1
0 1
0 1
0 3
0 3
0 3
0 3
0 3
0 3
0 3
0 3
0 3
0 3
0 3
0 3
0 3
0 3
0 3
0 1
0 1
0 1
0 1
0 1
0 1
0 1
0 1
0 0
0 0
0 0
0 0
0 0
0 0
0 0
0 0
0 0
0 0
0 0
0 0
0 0
0 0
0 0
0 0
0 0
0 0
0 0
0 3
0 3
0 3
0 3
0 3
0 3
0 3
0 3
0 3
0 3
0 3
1 3
1 3
1 3
1 3
1 0
1 0
1 0
1 0
1 0
1 0
1 0
1 0
1 0
1 0
1 0
1 0
1 0
1 0
1 0
1 0
1 0
1 0
1 0
1 0
1 0
1 0
1 0
1 0
1 0
1 0
1 0
1 0
1 0
1 0
1 0
1 0
1 0
1 0
1 0
1 0
1 0
1 0
2 0
2 0
2 0
2 0
2 0
2 0
2 0
2 0
2 0
2 0
2 0
2 0
2 0
2 0
2 0
2 0
2 0
2 0
2 0
2 0
2 0
2 0
2 0
2 0
2 0
3 0
3 0
5 2
4 2
4 2
4 2
4 2
4 2
6 2
6 2
8 3
8 3
8 4
8 4
8 4
8 4
9 4
9 4
9 4
10 7
10 7
11 7
11 7
11 7
11 7
11 8
11 10
11 11
11 11
11 11
11 12
11 12
11 12
11 12
11 12
11 12
11 12
12 15
12 19
13 27
13 28
13 28
13 31
13 31
13 31
12 31
12 31
12 31
12 31
12 33
12 33
12 33
12 38
12 38
12 38
12 38
12 38
12 40
12 41
12 41
12 41
12 41
12 41
12 41
12 41
12 41
12 41
12 41
12 41
12 41
12 41
11 43
7 43
6 43
5 43
4 35
4 35
4 35
4 36
4 37
4 37
4 37
0 31
0 30
0 30
0 29
0 29
0 29
0 29
0 29
0 29
0 29
0 26
0 26
0 26
0 26
0 26
1 26
1 26
1 26
1 25
1 25
1 25
1 27
1 27
1 27
1 27
1 27
1 27
1 27
1 27
1 21
1 16
1 17
0 17
0 17
0 18
0 18
0 18
0 18
0 18
0 18
0 17
0 17
0 17
0 11
0 12
0 12
0 12
0 14
0 14
0 14
0 14
0 14
0 16
0 16
0 16
0 17
0 17
0 17
0 17
0 17
0 17
0 17
0 15
0 15
0 15
0 15
0 15
0 15
0 13
0 13
0 12
0 12
0 12
0 12
0 12
1 12
1 12
1 12
1 12
1 12
1 12
1 12
1 12
1 12
1 12
1 12
1 12
1 12
1 14
1 14
1 12
1 12
1 12
1 12
1 11
0 11
0 11
0 11
0 12
0 13
0 13
0 12
0 12
0 11
0 11
0 11
0 11
0 10
0 10
0 10
0 10
0 10
0 10
0 10
0 10
0 10
0 9
0 8
0 8
0 6
0 6
0 7
0 7
0 7
0 7
0 7
0 7
0 8
0 8
0 9
0 9
0 9
0 9
0 9
0 9
0 9
0 9
0 9
0 10
0 10
0 10
0 10
0 10
0 10
0 10
0 9
0 9
0 9
0 9
0 9
0 9
0 9
0 9
0 9
0 9
0 9
0 9
0 9
0 8
0 7
0 7
0 5
0 5
0 5
0 5
0 5
0 5
0 5
0 5
0 5
0 5
0 4
0 4
0 4
0 3
0 3
0 3
0 3
0 3
0 3
0 3
0 3
0 3
0 3
0 4
0 4
0 4
0 4
0 4
0 4
0 4
0 4
0 4
0 4
0 3
0 3
0 3
0 4
0 4
0 4
0 3
0 3
0 3
0 3
0 3
0 3
0 3
0 3
0 3
0 3
0 4
0 4
0 4
0 4
0 4
0 4
0 4
0 5
0 6
0 6
0 6
0 6
0 6
0 6
2 8
2 8
2 8
2 8
2 8
2 8
2 8
2 8
2 8
2 8
2 8
2 8
4 8
4 8
10 8
8 6
8 6
8 6
8 6
8 6
8 6
8 7
8 8
8 8
8 13
8 13
8 13
7 14
6 14
0 15
0 15
0 15
0 15
0 14
0 14
0 14
0 14
0 14
0 14
0 14
0 14
0 13
0 13
0 13
0 13
0 13
0 13
0 13
0 13
0 13
0 13
0 13
0 13
0 13
0 13
0 19
0 19
0 22
0 21
0 21
0 22
0 22
0 24
0 24
0 25
0 27
1 26
2 25
2 25
2 26
2 26
2 26
3 26
7 27
7 27
7 27
7 27
7 27
7 27
7 27
7 27
7 27
7 27
7 27
7 27
7 27
7 27
6 27
6 27
6 31
3 30
3 30
3 30
3 30
2 26
2 26
0 24
0 16
0 17
0 16
0 14
0 14
0 17
0 17
1 17
1 17
1 17
1 17
1 17
1 17
1 17
1 17
2 23
2 23
2 24
2 24
2 24
2 21
2 21
1 21
1 21
1 21
1 21
1 21
1 21
1 21
1 21
1 21
1 14
0 6
0 6
0 6
0 6
0 5
0 5
0 5
0 5
0 5
0 5
0 5
0 5
0 5
56 5
57 6
57 6
57 6
59 6
61 11
61 13
61 13
61 13
61 13
61 13
61 13
61 13
61 13
61 13
5 13
5 13
4 12
4 12
2 12
2 8
2 8
2 8
2 8
2 8
2 8
2 8
2 8
2 7
2 11
2 11
2 11
4 15
4 15
6 15
6 15
6 15
6 15
6 15
6 15
6 16
6 16
6 16
6 16
6 16
6 18
6 18
6 18
6 17
4 17
4 17
4 17
4 17
4 17
4 17
4 17
4 17
4 17
4 17
4 17
4 17
4 17
4 17
4 17
4 17
4 17
4 17
4 17
4 17
4 17
4 17
4 17
4 17
4 21
4 21
4 20
4 20
4 27
2 22
2 23
2 23
2 24
2 25
2 25
2 25
2 25
2 25
2 25
2 25
2 25
2 25
2 25
2 25
2 25
2 25
2 25
2 25
2 25
2 26
2 26
2 26
2 26
2 22
2 22
2 21
0 19
1 20
1 20
1 20
1 20
1 20
1 20
1 20
1 18
1 18
1 19
1 19
1 19
1 13
1 13
1 13
0 13
0 14
0 12
0 13
0 13
0 13
0 13
0 15
0 16
0 22
0 29
0 29
0 29
0 30
0 30
0 30
0 30
0 30
0 30
0 30
0 30
0 30
0 30
0 30
0 30
0 30
0 32
0 31
0 31
0 25
0 25
0 25
0 25
0 25
0 25
0 25
0 25
0 25
0 25
0 25
0 25
0 25
0 25
0 25
0 25
0 25
0 25
0 25
0 25
0 25
0 25
0 25
0 25
0 25
0 25
0 25
0 25
0 25
0 25
0 25
0 25
0 25
0 25
0 25
0 25
0 25
0 25
0 24
0 24
0 24
0 24
0 24
0 24
0 19
0 17
0 10
0 9
0 9
0 9
0 9
0 9
0 5
0 2
0 2
0 2
0 2
0 2
0 3
0 3
0 13
0 13
0 13
0 13
0 13
0 13
0 13
0 14
0 14
0 14
0 12
0 12
0 12
0 12
0 12
0 12
0 12
0 12
0 12
0 12
0 12
0 12
0 12
0 12
0 12
0 12
0 12
0 12
0 12
0 12
0 12
0 12
0 12
0 12
0 12
0 12
0 12
0 13
0 58
0 58
0 58
0 58
0 58
0 58
0 58
0 58
0 58
0 58
0 58
0 58
0 58
0 58
0 58
0 12
0 12
0 12
0 12
0 12
0 12
0 12
0 12
0 12
0 12
0 12
0 12
0 12
0 12
0 12
0 12
0 12
0 12
0 11
0 11
0 1
0 1
0 0
0 0
0 0
0 0
0 0
0 0
0 0
0 0
0 0
0 1
0 1
0 1
0 1
0 1
0 1
0 1
0 1
0 1
0 1
0 1
0 1
0 1
0 1
0 1
0 0
0 0
0 0
0 0
0 0
0 0
0 0
0 0
0 0
0 0
0 0
0 0
0 0
0 0
0 0
0 0
0 0
0 0
0 0
0 0
0 0
0 0
0 0
0 0
0 0
0 0
0 0
0 0
0 0
0 0
0 0
0 0
0 0
0 0
0 0
0 0
0 0
0 0
0 0
0 2
0 10
0 10
0 10
0 61
0 61
0 62
0 77
2 131
2 134
3 150
3 153
6 200
7 245
7 277
7 293
8 332
10 334
10 339
10 340
10 343
10 344
10 347
10 347
10 347
10 347
10 347
11 347
11 348
11 348
11 349
13 349
13 349
13 348
13 348
13 348
13 348
13 348
13 352
13 354
14 356
15 358
15 358
15 358
15 359
15 359
15 353
15 348
15 270
15 269
15 271
15 271
15 193
15 193
15 193
15 193
15 193
15 193
15 193
15 193
15 205
15 202
16 213
16 215
16 217
16 215
16 216
16 216
16 216
16 208
16 191
16 184
16 172
16 170
16 172
18 172
18 172
18 168
18 172
30 162
30 162
27 136
24 132
23 118
22 113
22 109
22 95
33 87
31 83
30 61
30 60
30 60
30 60
30 60
30 60
30 60
30 60
30 60
30 60
37 74
37 75
38 76
38 76
38 75
37 75
37 75
37 75
37 75
37 75
37 75
37 75
37 72
37 72
35 68
35 67
35 67
35 67
35 67
35 67
35 67
35 67
35 67
35 68
35 68
35 68
35 68
35 68
35 68
35 68
35 68
35 68
35 68
35 68
35 56
33 52
31 32
31 32
30 30
30 30
30 30
30 30
30 30
30 30
30 30
30 30
30 30
31 32
31 30
31 30
31 30
31 30
31 26
22 23
22 21
22 21
22 21
22 44
22 45
22 45
17 44
10 43
9 41
9 41
9 41
9 41
9 41
9 41
9 41
10 45
11 45
11 48
11 48
4 34
4 33
3 32
3 32
3 34
3 34
3 34
3 34
3 34
3 34
3 35
3 35
3 35
3 35
3 35
3 35
3 35
3 35
4 41
4 43
4 43
6 55
6 56
6 57
7 64
8 65
8 65
8 65
8 65
8 67
8 68
8 70
8 70
8 70
7 70
7 70
7 70
7 70
7 70
7 70
7 70
7 70
7 71
7 71
7 71
7 71
7 71
7 71
7 71
7 71
7 72
7 72
7 72
6 77
6 77
6 77
6 77
6 47
6 47
6 47
6 47
6 41
6 41
6 41
6 42
6 42
6 43
6 43
6 43
4 39
4 38
4 37
4 38
4 38
4 38
4 38
4 43
4 42
4 42
4 42
4 38
4 38
4 38
4 37
4 37
4 37
4 38
4 38
4 38
5 38
5 39
5 39
5 39
4 39
2 27
2 27
2 27
2 27
1 26
1 26
1 26
1 24
1 22
1 20
1 18
1 18
1 18
1 18
1 18
1 18
1 18
1 18
1 18
1 18
1 18
1 17
1 17
1 18
1 18
1 18
1 18
1 18
1 18
1 17
1 17
1 17
1 12
1 12
1 12
1 12
1 12
1 12
1 12
1 12
1 12
1 12
1 12
1 12
1 12
1 12
1 12
1 12
1 12
1 11
1 10
1 9
1 9
1 12
1 12
1 8
1 8
1 8
1 8
2 8
2 8
2 9
4 9
4 9
5 9
5 8
6 8
5 8
5 7
5 7
5 7
5 7
5 7
5 7
5 7
5 7
5 7
5 7
5 7
5 7
5 7
5 6
5 6
5 6
5 6
5 6
5 7
5 7
5 8
5 8
5 8
5 8
5 8
5 8
5 8
8 20
8 22
8 23
8 23
8 27
8 29
8 32
8 33
8 33
8 33
8 33
8 33
8 33
8 37
8 40
8 42
8 42
8 42
8 42
8 42
8 42
8 43
8 43
8 43
8 43
11 44
11 45
11 45
11 45
9 44
9 42
9 42
9 42
9 42
9 42
9 42
9 43
9 43
9 43
9 42
7 42
7 42
7 42
7 42
6 42
6 42
6 42
6 42
6 42
6 43
6 43
6 43
7 43
7 43
7 50
7 51
7 51
7 51
7 51
7 51
7 51
7 51
7 51
7 53
7 52
7 52
7 51
7 51
7 51
7 51
7 50
7 49
7 46
4 33
4 26
4 26
4 26
4 26
4 24
4 24
4 23
4 23
4 23
4 23
4 23
4 24
4 20
4 17
4 15
4 15
4 15
4 15
4 15
4 14
4 14
4 14
4 13
4 13
1 12
1 11
1 11
1 12
1 13
1 13
1 13
1 13
1 13
1 13
1 13
1 12
1 12
1 12
1 12
1 12
1 12
1 12
1 12
1 12
1 12
1 12
1 12
1 12
0 11
0 11
0 11
0 11
0 11
0 4
0 3
0 4
0 4
0 4
0 4
0 4
0 4
1 4
1 4
1 4
1 4
3 11
3 11
3 11
5 13
5 14
5 14
5 15
5 15
5 16
5 16
5 16
10 18
10 27
10 29
19 83
20 85
20 88
20 88
21 88
23 101
23 101
38 108
46 132
49 133
52 133
52 133
52 133
52 134
52 135
70 171
82 246
86 267
92 328
114 419
114 428
114 437
115 436
119 454
119 464
119 471
120 471
120 471
120 471
120 471
120 474
120 475
120 475
120 475
120 476
120 476
120 476
120 476
120 476
120 476
120 476
120 476
119 476
119 476
119 476
119 476
119 476
119 476
119 475
119 475
119 475
119 476
119 477
119 477
119 515
118 518
118 518
118 520
118 522
114 513
114 514
114 514
114 514
114 513
114 513
114 513
114 507
114 489
114 483
114 477
109 473
109 471
109 467
100 422
99 422
98 418
97 421
96 421
85 399
85 400
64 385
49 326
47 324
47 324
47 324
47 324
46 324
45 316
30 282
20 186
20 176
20 146
0 65
0 67
0 68
0 70
0 70
0 70
0 73
0 73
0 74
0 74
0 73
0 72
0 72
0 72
0 72
0 72
0 72
0 72
0 72
0 72
0 72
0 75
0 75
0 83
0 83
0 83
0 85
0 85
1 87
1 88
2 90
2 93
2 92
2 92
2 92
2 54
2 53
2 58
2 57
2 57
2 58
2 60
2 60
2 60
2 60
2 60
2 60
2 61
2 61
2 61
2 62
2 62
2 62
2 62
2 62
2 61
2 61
2 55
2 55
2 52
2 50
2 50
2 50
2 48
2 48
2 48
2 48
2 48
2 48
2 51
2 51
2 50
2 50
2 44
2 39
2 38
2 36
2 36
2 36
2 33
2 33
2 32
2 32
2 32
2 32
2 32
2 32
2 32
2 31
2 30
2 30
2 31
2 31
2 31
1 27
1 27
1 12
0 11
0 10
0 4
0 5
0 6
1 6
1 6
1 6
1 6
1 6
1 6
1 5
1 5
1 5
1 5
3 5
3 5
3 5
3 5
3 5
3 5
4 5
4 5
3 4
3 4
3 4
3 4
3 4
3 4
3 4
1 4
1 4
1 4
1 4
1 4
1 4
0 4
0 4
0 4
0 4
0 4
0 4
0 4
0 4
0 4
0 2
0 2
0 2
0 2
0 2
0 2
0 2
0 2
0 2
0 2
0 2
0 2
0 2
0 2
0 2
0 3
0 3
0 3
0 3
0 3
0 3
0 3
0 2
0 2
0 4
0 4
0 4
0 4
0 4
0 4
0 4
0 3
0 3
0 3
0 3
0 3
0 3
0 3
0 3
0 3
0 3
0 3
0 3
0 3
0 3
0 3
0 3
0 3
0 3
0 3
0 3
0 3
0 3
0 3
0 3
0 3
0 3
0 3
0 3
0 3
0 3
0 3
1 3
1 3
1 3
1 3
1 3
1 3
1 3
1 3
5 3
5 3
5 3
5 3
5 3
5 3
5 2
5 2
5 1
5 1
5 1
5 1
5 1
4 1
4 1
0 1
0 1
0 0
0 0
0 0
0 0
0 0
0 0
0 0
0 0
0 0
0 1
0 1
0 1
1 1
1 1
1 1
1 1
1 1
1 1
1 1
1 1
1 1
1 1
1 1
1 1
1 1
1 1
1 1
1 1
2 1
2 1
2 1
3 1
3 1
4 1
4 1
5 1
5 1
5 1
5 1
5 1
5 1
5 1
5 1
5 1
5 1
5 1
4 1
3 1
2 1
2 1
2 1
1 1
1 1
1 1
1 1
1 2
1 2
1 2
1 2
1 2
1 2
1 2
1 2
1 2
1 2
1 2
1 2
1 2
1 2
1 3
1 3
1 3
1 3
1 3
1 3
1 3
1 3
1 3
1 3
1 3
1 3
1 3
1 2
1 2
1 2
0 2
0 1
0 1
0 1
0 1
0 1
1 6
1 6
1 6
1 6
1 6
1 6
1 6
1 6
1 6
1 6
1 6
1 6
1 6
1 6
1 6
0 1
0 1
0 1
0 1
0 1
0 1
0 1
0 1
0 1
0 1
1 1
1 1
1 1
1 1
1 1
1 1
1 1
1 1
1 1
1 1
1 1
1 1
1 0
1 0
1 0
1 0
1 0
1 0
1 0
1 0
1 0
1 1
1 1
1 1
1 1
1 1
1 1
1 1
4 1
4 1
4 1
4 1
4 1
4 1
4 1
4 1
4 1
4 1
4 1
4 1
4 1
4 1
4 1
4 1
4 1
4 1
4 1
4 1
5 1
5 1
5 1
5 1
5 1
5 1
5 1
5 1
5 1
5 1
5 1
5 1
5 1
5 1
5 1
8 1
8 1
8 1
8 1
8 1
8 1
8 1
8 1
8 1
8 1
7 1
7 1
7 1
7 1
7 1
7 1
8 1
8 1
9 1
9 1
9 1
9 1
9 1
9 1
10 1
10 1
10 1
10 1
10 23
14 23
14 23
15 23
15 33
17 56
17 60
17 97
123 128066
123 128066
120 128066
120 128066
120 128066
120 128066
120 128066
120 128066
120 128066
120 128066
120 128066
120 128066
120 128066
120 128064
120 128064
116 127037
15 19
15 1
15 1
15 1
15 0
15 0
17 0
20 0
20 0
20 0
20 0
20 0
20 0
20 0
20 0
20 0
20 0
20 0
20 0
20 0
20 0
17 0
18 1
17 1
17 1
17 1
17 1
20 1
20 1
20 1
22 1
22 1
22 1
22 1
22 1
22 1
22 1
20 1
20 1
20 1
20 1
20 1
20 1
20 1
18 1
17 1
17 1
16 1
16 1
16 1
11 1
11 1
8 1
8 1
8 1
8 1
6 1
5 1
5 1
5 1
5 1
5 1
5 1
5 1
5 1
5 1
5 1
5 1
5 1
5 1
5 1
5 1
5 1
5 1
5 1
5 1
5 1
5 3
5 3
5 3
5 4
5 4
5 4
5 4
5 4
5 4
5 4
5 4
6 4
6 4
6 4
6 4
6 4
6 4
6 4
10 3
10 3
12 3
12 3
12 3
9 3
9 3
9 3
7 3
7 3
7 3
7 3
9 3
9 3
12 3
12 3
12 1
11 1
11 1
11 1
11 1
11 1
11 1
11 1
11 1
11 1
11 1
11 1
11 1
11 1
11 1
11 1
11 1
11 1
11 1
11 1
11 1
11 1
11 1
11 1
11 1
11 1
11 1
11 1
11 1
11 3
11 3
11 3
11 5
11 5
11 5
11 7
11 7
14 8
14 8
14 8
14 8
14 8
14 7
14 7
14 5
15 12
15 12
15 12
15 12
15 12
15 12
15 12
15 13
15 13
15 13
15 13
15 13
11 13
11 13
7 13
7 13
5 13
5 13
5 13
4 7
4 7
4 7
4 7
4 7
4 7
4 7
3 7
3 7
3 7
3 7
3 7
3 7
3 7
3 7
3 7
3 7
3 7
3 7
3 7
3 7
3 7
3 7
3 7
3 7
3 7
3 7
3 7
3 4
3 4
3 3
3 3
3 3
3 3
3 3
3 4
3 4
3 4
3 4
3 4
3 4
6 4
6 4
6 4
6 4
6 4
3 3
3 3
3 3
23 3
23 2
23 2
23 2
23 1
23 1
23 1
20 1
20 1
20 1
20 1
20 1
20 5
20 5
20 5
20 5
0 5
0 5
0 5
0 5
0 5
0 5
0 5
0 5
0 5
0 5
0 5
0 0
0 0
0 0
0 0
0 0
0 0
0 0
0 0
0 0
0 0
1 0
2 0
4 1
5 2
7 2
7 2
7 2
7 2
7 2
7 2
7 2
7 2
7 2
7 2
7 2
7 2
7 2
7 2
7 2
6 3
6 3
6 3
6 3
6 3
6 3
6 3
6 3
6 3
6 3
6 4
6 4
6 4
6 4
6 4
6 4
6 5
6 5
6 5
6 5
6 5
6 5
6 5
6 5
6 5
6 5
6 5
6 5
8 7
8 7
8 7
8 6
10 6
10 6
10 6
10 6
10 6
10 7
10 7
10 7
10 7
10 7
10 7
10 6
10 6
10 6
10 6
10 6
10 6
10 6
10 6
10 6
10 6
10 6
5 6
5 5
1 5
1 4
0 4
0 4
0 4
0 4
0 4
0 4
0 4
0 4
0 7
0 11
0 10
0 10
0 10
0 10
0 10
0 12
0 16
0 16
0 20
0 20
0 20
0 20
0 20
0 20
0 19
0 15
0 15
0 15
0 15
0 15
0 15
0 15
0 30
0 30
0 36
0 51
0 51
0 57
0 57
0 78
0 82
0 108
0 117
0 126
0 160
0 165
0 183
0 187
0 197
0 199
0 199
0 203
0 203
0 203
0 203
0 203
0 223
2 229
2 229
2 237
2 238
2 238
2 236
2 234
2 235
2 236
2 236
2 237
2 237
2 237
2 237
2 237
2 237
2 218
2 210
2 208
2 205
2 213
2 219
2 214
2 209
1 122
0 53
0 54
0 54
0 55
0 51
0 51
0 52
0 52
0 52
0 52
0 52
0 52
0 53
0 53
0 53
0 53
0 64
0 65
0 65
0 65
0 65
0 65
0 65
0 67
0 68
0 68
0 68
0 68
0 68
0 68
0 68
0 68
0 68
0 69
0 69
0 68
0 68
0 73
0 72
0 69
0 69
0 69
0 53
0 53
0 52
0 47
1 48
1 46
1 45
1 45
1 45
1 45
1 45
1 45
1 45
1 45
1 45
1 45
1 44
1 44
1 44
1 44
1 44
0 43
0 40
0 39
0 39
0 37
0 32
0 27
0 24
0 24
0 23
0 23
0 22
0 22
0 22
0 22
0 22
0 21
0 21
0 21
0 21
0 21
0 21
0 20
0 20
0 20
0 20
0 8
0 8
0 8
0 8
0 8
0 8
0 8
0 8
1 8
1 8
1 8
1 8
1 8
1 8
1 8
1 8
1 8
1 7
1 7
1 7
1 6
1 2
1 2
1 2
0 2
0 2
0 2
0 2
0 0
0 0
0 0
0 0
0 0
0 0
0 0
0 0
0 0
0 0
0 0
0 0
0 0
0 0
0 0
0 0
0 0
0 0
1 0
1 0
1 0
1 0
1 0
1 0
1 0
1 0
1 0
1 0
1 0
1 0
1 0
1 0
1 0
1 0
1 0
1 1
0 1
0 1
0 1
0 1
0 1
0 1
0 1
0 1
0 1
0 1
0 1
0 2
0 2
0 2
0 2
0 1
0 1
0 1
0 1
0 1
0 1
0 1
0 1
0 1
0 1
0 1
0 1
0 1
0 1
0 1
0 1
0 1
0 1
0 1
0 1
0 1
0 1
0 1
0 1
0 1
0 1
0 1
0 1
0 1
0 1
0 1
0 1
0 1
0 1
0 1
0 1
1 1
1 1
1 1
1 1
1 1
1 1
1 1
1 1
22 2
22 2
23 2
23 2
23 2
23 2
23 2
23 2
23 2
23 2
23 2
23 2
23 2
22 2
22 2
2 1
1 1
0 1
0 1
0 1
0 1
0 1
0 1
0 1
0 1
0 0
0 0
0 0
0 0
0 0
0 0
0 0
0 0
0 0
0 0
0 0
0 0
0 0
0 0
0 0
0 0
0 0
0 0
0 0
0 0
0 0
0 0
0 0
0 0
0 0
0 0
0 0
0 0
0 0
0 0
0 0
0 0
0 0
0 0
0 0
0 0
0 0
0 0
0 0
0 0
0 0
0 0
0 0
0 0
0 0
0 0
0 0
0 0
0 0
0 0
0 0
0 0
0 0
0 0
0 0
0 2
3 8
4 8
4 8
4 8
5 8
5 8
5 8
5 8
5 8
5 8
5 8
5 14
5 17
5 19
5 56
5 56
5 72
5 73
5 81
5 85
5 95
5 115
5 126
5 142
5 144
5 146
6 149
6 153
6 153
6 153
6 153
6 153
6 153
6 153
6 153
7 155
8 155
15 155
15 157
15 157
15 159
15 160
15 160
15 162
15 162
15 162
15 162
16 162
17 162
17 162
17 162
17 162
17 162
17 162
17 162
16 162
16 162
17 162
18 162
20 162
21 161
21 161
21 161
21 166
20 166
20 166
19 166
19 164
19 164
19 164
19 164
19 164
18 162
25 156
24 156
24 156
24 156
23 156
25 156
25 156
25 156
25 154
25 150
26 151
26 120
27 119
27 121
27 96
27 95
27 65
27 59
27 48
27 42
27 36
27 39
27 38
27 35
27 35
27 34
26 32
26 32
26 32
26 32
27 32
27 32
27 32
27 32
27 32
26 32
26 32
20 32
20 30
20 30
20 30
20 30
20 30
20 30
20 30
20 56
20 56
20 56
19 56
19 56
19 56
19 56
19 56
19 56
18 56
18 56
18 56
16 56
16 56
14 56
13 56
13 56
13 56
12 50
12 50
10 50
10 50
10 50
9 50
9 50
8 50
7 50
7 50
2 50
2 50
1 50
1 50
1 50
1 50
1 50
1 50
1 50
1 50
1 47
1 44
1 33
1 32
1 32
1 32
1 32
1 32
1 32
1 32
1 33
1 28
1 27
1 27
2 27
3 27
3 27
3 27
3 27
3 27
2 27
3 27
3 27
3 27
3 27
3 27
4 27
4 27
4 27
5 27
5 27
5 27
5 27
5 27
5 27
3 1
2 1
2 1
2 1
2 1
2 1
2 4
2 4
2 4
2 4
2 7
2 7
2 7
2 7
2 7
2 7
2 7
2 7
2 7
2 7
2 7
2 7
2 7
2 7
2 7
3 7
3 7
3 7
3 7
3 7
3 8
3 9
3 9
3 10
3 10
3 10
3 10
3 10
3 10
4 10
4 10
4 10
4 12
4 12
4 12
4 13
4 13
4 13
4 12
4 12
4 12
4 12
4 12
4 12
4 12
4 12
4 12
4 12
75 26
75 26
75 26
75 25
75 25
85 33
84 33
84 33
84 33
83 33
83 33
83 33
83 33
83 33
83 33
83 33
83 33
83 34
83 34
83 34
83 34
2 9
2 9
2 9
2 9
2 6
2 6
2 6
2 6
2 6
2 6
2 6
2 6
2 6
2 6
2 6
2 6
2 6
2 6
2 6
3 6
6 6
8 6
8 6
8 6
8 4
8 4
8 4
8 3
8 3
8 3
8 3
8 3
8 3
7 3
6 3
6 3
6 1
6 1
6 1
6 1
6 1
6 1
6 1
6 1
6 1
7 1
7 1
7 1
14 1
15 1
15 1
15 1
15 1
15 1
15 1
15 1
15 1
15 1
15 1
15 1
16 3
16 3
16 6
17 6
20 10
20 10
20 10
20 10
20 10
20 9
20 9
20 10
20 10
20 12
21 15
21 15
21 15
21 15
21 15
21 15
21 15
21 15
21 15
21 15
21 15
21 15
20 15
20 15
19 15
20 15
20 15
20 15
18 15
16 15
16 15
15 15
15 15
15 15
15 15
18 15
18 15
19 15
19 15
19 15
20 16
20 92
20 93
20 93
20 93
20 93
20 93
20 93
20 93
20 93
20 93
20 93
20 93
21 93
21 93
21 93
20 93
13 16
13 15
14 15
15 15
15 15
15 15
15 15
17 15
18 15
18 15
18 17
18 19
18 17
18 17
17 14
17 14
14 11
15 12
15 12
15 13
15 11
15 11
17 11
17 10
18 10
18 10
19 9
306 9
315 9
380 10
380 10
742 11
743 11
743 11
744 11
745 11
745 11
745 11
745 11
746 11
830 11
830 11
831 11
919 11
920 11
925 11
932 11
932 11
932 11
932 11
930 11
916 11
916 11
915 11
905 11
907 11
906 11
906 11
906 11
906 11
902 11
902 11
902 11
899 11
899 11
899 11
896 11
896 11
896 11
895 11
895 11
895 11
895 11
895 11
895 11
895 11
895 11
895 11
895 11
894 11
893 11
892 11
892 11
891 8
891 7
891 7
889 7
889 7
889 7
885 3
884 3
875 3
847 2
759 2
728 2
490 2
469 2
206 2
196 2
196 2
182 2
170 0
92 0
92 0
15 0
15 0
15 0
15 0
8 0
4 0
4 0
4 0
4 0
4 0
4 0
4 0
2 0
2 0
2 0
2 0
2 0
2 0
0 0
0 0
0 0
0 0
0 0
0 0
0 0
0 0
0 0
0 0
0 0
0 0
0 0
0 0
0 0
2 2
2 2
2 2
2 2
2 2
2 2
2 2
2 2
2 2
2 2
2 2
2 2
2 2
2 2
2 2
2 2
2 1
2 1
2 1
2 1
2 1
2 1
0 0
0 0
0 0
0 0
0 1
0 1
0 2
0 2
0 2
0 2
0 2
0 2
0 2
0 2
1 2
1 2
1 2
1 2
1 2
1 2
1 2
1 2
1 2
1 2
1 2
1 2
1 2
1 2
1 2
1 2
1 2
1 2
1 2
1 2
1 2
1 2
1 2
3 95
3 95
3 95
3 95
3 95
3 95
3 95
3 93
3 93
3 93
3 93
3 93
3 93
3 93
3 93
1 0
1 0
1 0
1 0
1 0
1 1
1 1
1 1
1 1
1 1
1 1
1 1
1 1
1 1
1 1
1 1
1 1
1 1
1 1
1 1
1 1
1 1
1 1
1 1
1 1
1 1
1 1
1 1
1 1
1 1
1 1
1 1
1 1
1 1
1 1
0 1
0 1
0 1
0 1
0 1
0 1
0 1
0 1
0 1
0 1
0 1
0 1
0 1
0 1
0 1
0 1
0 1
0 1
0 1
0 1
18 1
18 1
18 1
18 1
18 1
18 1
18 1
18 1
18 1
18 1
18 1
18 1
18 1
18 1
18 1
0 1
0 1
0 1
0 1
0 1
0 1
0 1
0 1
0 0
0 0
0 0
0 0
0 0
0 1
0 2
0 2
0 4
2 6
2 6
2 6
2 6
2 6
2 6
2 6
2 6
2 6
2 6
2 6
17 5
17 5
17 4
17 4
17 1
17 1
17 1
17 1
17 2
15 1
15 1
15 1
15 1
15 1
15 1
15 1
0 2
0 3
0 3
0 3
0 3
1 4
1 4
1 4
1 4
1 6
2 6
2 7
2 8
2 8
2 9
3 9
3 7
4 8
5 9
5 9
5 9
5 9
5 9
5 9
4 9
4 8
4 7
4 6
4 5
4 5
4 3
4 3
4 3
3 3
3 3
3 1
0 1
0 1
0 1
4 1
4 1
4 1
4 1
4 1
4 1
4 1
4 1
5 1
5 1
5 1
5 1
5 1
5 1
5 1
1 1
1 1
1 1
1 1
1 1
1 1
1 1
1 1
1 1
0 1
0 0
0 0
0 0
0 0
0 0
0 0
0 0
0 0
0 0
0 0
0 0
0 0
0 0
0 0
0 0
0 0
0 0
0 0
0 0
0 0
0 0
0 0
0 0
0 0
0 0
0 0
0 0
0 0
0 0
0 0
0 0
0 0
0 0
0 0
0 0
0 0
0 0
0 0
0 0
0 0
0 0
0 0
0 0
0 0
0 0
0 0
3 0
3 0
3 0
3 0
3 0
3 0
3 0
3 0
3 0
3 0
3 0
3 0
3 0
4 0
4 0
4 0
1 0
1 0
1 0
1 0
1 0
1 0
1 0
1 0
1 0
1 0
1 0
1 0
1 0
0 0
0 0
0 0
0 0
0 0
0 0
0 0
0 0
0 0
0 0
0 0
0 0
0 0
0 0
0 0
0 0
0 0
0 0
0 0
0 0
0 0
0 0
0 0
0 0
0 0
0 0
0 0
0 0
0 0
0 0
0 0
0 0
0 0
0 0
0 2
1 5
2 5
3 5
3 5
3 5
3 5
3 5
3 5
3 5
3 5
3 5
3 5
3 5
3 5
3 5
4 11
4 11
6 18
6 18
6 18
6 18
6 18
6 18
6 18
6 18
6 18
6 18
6 20
6 20
6 20
6 20
6 20
6 20
6 20
6 20
8 20
8 20
14 20
14 20
16 20
16 20
16 20
15 20
18 20
18 20
18 20
18 20
18 20
17 20
17 18
16 19
16 19
16 19
16 19
16 19
16 19
16 18
16 16
13 15
13 15
13 15
13 16
12 16
12 16
12 16
12 16
12 16
12 16
11 16
11 16
11 11
11 6
11 6
11 5
11 5
11 5
11 5
11 5
11 6
11 6
11 6
11 6
11 6
11 6
11 6
12 6
12 6
12 6
12 6
12 6
11 5
11 5
11 5
11 5
11 4
11 4
11 4
11 4
9 4
9 4
5 2
5 2
5 2
5 2
5 2
0 2
0 2
0 2
0 2
0 2
1 2
1 2
1 2
1 2
1 2
1 2
1 2
1 2
1 2
1 2
1 2
1 2
1 1
1 1
1 1
1 1
1 1
1 1
1 1
1 1
1 1
1 1
1 1
1 1
1 0
1 0
1 0
2 2
2 2
2 2
2 2
2 2
2 2
2 3
2 3
2 3
2 3
2 3
2 3
2 3
2 3
2 3
2 1
2 1
2 1
2 1
2 2
2 2
5 3
5 3
5 3
25 3
25 3
25 3
25 3
25 3
25 3
25 3
25 3
25 3
25 3
25 3
25 3
25 3
25 3
26 3
27 3
27 3
27 3
27 4
27 4
28 4
32 5
33 5
39 5
41 5
42 5
42 5
42 5
42 5
44 5
44 5
46 5
74 10
74 10
74 10
74 10
74 10
73 10
72 10
72 10
71 10
71 10
71 10
71 10
71 10
71 10
71 10
71 8
68 8
41 5
41 5
41 5
41 5
41 5
41 5
41 5
41 5
41 5
41 5
41 5
41 5
41 5
41 5
41 5
41 5
41 5
41 5
41 5
41 4
41 3
41 2
41 2
41 2
22 2
22 2
22 2
22 2
22 2
22 2
22 2
22 2
22 2
22 2
22 2
22 2
21 2
21 2
20 2
20 2
20 2
20 2
20 1
19 1
17 2
11 1
7 4
5 4
4 5
4 5
3 5
3 5
3 5
2 5
2 5
0 5
0 5
0 5
0 5
0 5
0 5
0 5
0 5
0 5
0 5
0 5
0 5
0 5
0 5
0 5
0 5
0 5
0 5
0 5
1 6
1 6
1 6
1 6
1 4
1 4
1 4
1 4
1 4
1 4
1 4
1 4
1 4
1 4
1 4
4 4
4 4
4 4
4 4
4 4
4 4
4 4
4 13
4 13
4 13
4 13
4 13
4 13
4 13
5 13
2 13
2 13
3 15
3 15
3 15
3 15
3 15
3 15
3 15
3 6
3 6
3 6
3 6
3 6
3 6
3 3
3 3
2 3
2 3
2 3
2 3
2 3
2 3
2 3
3 3
4 3
4 4
4 4
4 4
4 4
4 4
4 4
4 4
4 4
4 4
4 4
7 4
7 3
7 3
7 3
10 3
10 3
10 3
9 3
9 3
9 3
9 3
9 3
10 3
10 3
12 3
12 3
13 3
13 3
13 3
13 3
13 3
13 3
13 3
13 3
13 3
13 3
13 3
13 3
13 3
13 3
13 3
13 3
13 3
13 3
13 3
13 3
13 3
13 2
13 2
11 1
11 1
11 1
11 1
11 1
11 1
10 1
10 1
10 1
10 1
10 1
10 1
10 1
10 1
10 1
10 1
10 1
10 1
10 1
10 1
10 1
10 1
10 1
10 1
10 0
4 0
2 0
1 0
0 0
0 0
0 0
0 0
