# Supplementary material for: From Insect to Man: Photorhabdus Sheds Light on the Emergence of Human Pathogenicity
Source: PLoS One. 2015 Dec 17;10(12):e0144937. doi: 10.1371/journal.pone.0144937 (PMC4683029; doi:10.1371/journal.pone.0144937)
Supplement: S3 Data — (ZIP) [file pone.0144937.s003.zip › pPAU1_28C_Stat_rep2.plot]

307 11
308 11
309 11
311 11
313 11
317 12
317 12
317 12
323 15
323 15
323 15
323 15
323 15
328 17
328 17
376 587
376 590
376 590
376 590
375 590
379 590
380 590
383 590
377 587
386 587
460 587
586 592
699 592
706 592
718 592
724 592
682 19
688 19
692 19
699 19
705 19
715 19
720 19
722 19
723 19
723 19
724 19
725 19
725 19
724 20
728 20
729 22
729 22
728 22
726 22
715 22
702 22
700 20
706 20
712 20
713 19
717 19
716 19
718 19
722 19
721 18
723 17
744 17
761 17
765 17
748 17
748 17
747 17
746 16
743 16
740 15
737 15
717 16
708 16
703 16
687 16
689 16
688 16
689 16
686 16
681 16
688 18
682 18
675 21
672 20
671 20
663 20
655 21
641 20
647 20
663 20
694 20
705 21
750 24
784 25
820 25
831 25
837 25
840 25
840 25
839 25
854 25
862 25
894 26
908 25
907 25
912 25
919 26
934 26
942 26
944 26
948 26
949 26
943 24
940 24
937 24
938 24
938 24
937 24
944 24
960 24
938 24
1095 26
1080 26
1041 26
991 26
898 21
815 21
808 22
808 22
808 22
812 22
825 22
828 22
826 22
821 22
815 22
812 22
813 22
834 21
836 22
839 21
842 21
853 23
851 22
877 22
887 21
903 21
906 21
909 21
907 21
907 21
906 21
903 21
898 21
899 21
889 21
896 21
883 21
933 21
918 21
893 21
854 21
843 21
834 21
831 21
823 20
822 20
823 20
825 20
835 20
836 20
838 20
849 20
852 20
856 20
851 20
852 20
850 20
842 19
839 19
835 15
835 15
833 13
832 13
834 11
834 11
830 10
826 9
817 9
799 9
771 9
743 9
707 7
683 7
647 7
648 7
647 7
636 7
634 7
632 7
610 7
625 7
621 8
645 8
658 9
660 9
663 9
650 9
650 9
657 9
658 9
672 9
674 9
672 9
671 9
674 9
669 9
666 9
661 9
679 36
689 36
539 35
540 34
540 34
536 34
531 34
531 33
530 33
525 33
529 33
533 32
521 32
535 32
832 34
923 11
959 12
959 13
1046 13
1243 13
1293 14
1309 14
1312 14
1292 13
1295 13
1279 13
1278 13
1262 13
1266 18
1266 18
1266 18
1265 18
1265 18
1263 18
1262 18
1257 18
1260 18
1258 18
1267 18
1221 18
1225 18
1243 18
1262 18
1285 18
1331 20
1344 15
1353 16
1365 16
1380 16
1423 16
1420 16
1422 17
1414 17
1409 17
1406 17
1408 17
1409 17
1408 17
1410 17
1412 18
1413 19
1453 19
1455 19
1454 19
1455 19
1454 19
1457 19
1473 21
1476 21
1484 21
1484 22
1485 22
1489 22
1496 22
1504 22
1507 22
1507 22
1523 22
1552 22
1589 25
1587 25
1592 26
1628 24
1603 56
1599 57
1617 55
1619 56
1620 56
1632 56
1631 56
1630 56
1628 56
1613 56
1612 56
1612 56
1611 57
1607 57
1606 57
1608 57
1608 58
1622 32
1609 32
1611 33
1609 33
1614 33
1615 34
1622 34
1623 34
1625 34
1616 34
1607 34
1573 34
1545 34
1460 31
988 28
909 27
784 27
758 25
758 25
732 25
731 25
725 25
724 25
723 25
717 25
722 25
725 25
727 25
734 25
735 25
735 26
739 26
739 26
739 26
739 26
737 26
735 26
734 26
728 26
726 26
722 26
720 31
712 32
696 33
659 32
654 35
652 40
637 40
634 41
615 41
606 41
603 42
600 45
600 46
606 46
601 46
603 46
639 48
641 48
642 47
641 46
727 53
733 55
753 58
751 60
759 60
761 60
769 60
771 60
756 60
755 60
755 60
758 60
756 59
748 59
736 59
705 59
690 57
651 57
627 57
618 57
597 56
543 55
535 55
516 55
498 55
496 56
494 58
484 58
483 58
481 60
485 63
485 66
485 66
483 67
483 66
478 66
479 66
465 66
454 63
424 58
423 58
417 56
411 56
408 56
406 56
397 56
393 56
384 56
384 56
382 56
384 56
381 56
378 56
379 56
387 56
410 56
401 56
393 56
393 56
394 56
419 56
421 57
422 60
433 61
428 61
427 62
426 62
418 63
416 63
414 62
414 62
418 62
421 62
422 63
424 63
426 63
450 63
469 62
460 61
459 61
456 57
456 57
460 56
462 55
467 55
470 50
472 51
471 50
474 50
474 49
469 49
465 48
465 47
461 47
457 49
457 70
414 68
404 67
358 65
356 65
270 59
265 59
252 60
245 59
241 58
229 58
202 56
201 56
198 56
198 56
196 56
191 35
191 35
190 35
194 36
195 37
198 39
198 39
197 39
195 39
195 39
188 39
188 39
188 38
188 39
214 59
219 59
220 60
221 61
220 58
218 55
218 53
218 53
219 53
220 55
221 56
222 57
225 57
260 59
266 60
270 63
271 63
301 63
303 64
305 64
306 64
306 64
309 64
311 64
367 65
364 65
357 65
359 65
366 65
376 65
364 64
365 64
364 64
361 65
361 64
344 64
342 64
338 60
337 60
336 60
337 60
337 60
335 59
334 59
333 59
330 59
337 59
335 58
326 58
324 58
321 58
297 58
354 64
352 63
353 63
360 63
360 63
378 64
385 67
383 66
393 68
398 67
398 67
398 67
404 67
405 67
413 67
412 66
412 66
411 65
411 65
411 66
411 66
409 66
409 66
408 66
407 66
408 60
412 60
412 60
412 60
412 60
412 61
417 61
421 60
425 61
424 63
429 64
431 65
428 65
429 66
427 68
429 70
432 71
435 72
436 73
436 74
445 75
449 74
491 74
470 52
477 54
485 54
489 55
491 58
500 59
500 59
500 60
500 59
500 58
495 57
492 57
483 57
453 54
449 50
452 50
450 50
419 50
417 50
415 50
414 50
415 50
436 50
488 51
437 51
441 51
540 54
609 56
617 57
614 57
614 57
616 57
617 57
618 57
621 57
622 57
622 57
623 57
623 58
622 58
619 58
618 58
616 59
614 59
613 60
619 61
616 62
616 63
613 63
610 63
608 63
582 61
551 56
555 55
560 55
575 57
573 57
554 56
564 51
561 51
551 51
551 51
553 51
558 51
552 51
552 50
547 50
549 50
553 51
558 51
568 51
569 50
574 52
575 52
579 51
615 52
619 53
618 53
617 54
617 54
616 54
616 55
613 57
608 57
605 57
605 56
599 52
598 52
598 54
598 54
596 53
594 49
599 45
596 44
645 45
648 45
655 49
647 50
645 56
618 56
614 55
603 52
600 52
595 51
596 47
592 47
599 47
601 46
604 46
608 46
608 47
606 47
607 48
606 48
604 48
599 49
598 49
599 49
599 49
600 49
588 49
570 49
555 49
506 48
413 43
392 41
313 41
302 41
301 41
301 41
302 41
302 46
348 61
348 62
345 62
347 63
347 63
348 63
349 62
350 62
353 62
351 62
351 60
358 60
359 59
348 58
346 58
348 59
349 59
351 61
341 61
340 61
334 62
331 61
324 61
320 59
319 60
320 60
312 60
313 61
313 61
323 61
345 61
361 61
368 61
369 61
371 61
369 61
365 60
358 60
358 60
358 60
362 57
367 57
373 56
334 56
337 56
337 56
335 55
362 56
370 56
387 55
410 53
416 53
418 51
423 51
428 62
439 62
466 58
482 57
483 57
485 58
482 58
497 58
451 56
453 51
450 51
478 51
463 50
464 50
478 51
542 38
579 41
590 41
599 42
604 42
601 41
604 40
599 40
605 41
612 41
614 41
616 43
616 43
617 43
617 43
630 44
642 44
642 44
639 44
639 44
639 42
636 38
637 38
637 35
632 35
632 35
630 35
630 35
630 35
628 35
627 35
586 25
586 25
586 25
586 25
589 25
614 25
629 27
633 27
636 27
647 27
668 28
713 29
806 34
846 37
888 36
922 36
921 36
914 36
921 36
923 36
937 37
934 37
934 37
934 37
933 37
931 36
933 36
931 36
926 36
920 36
891 36
883 36
952 38
953 38
956 38
957 39
952 39
952 39
944 39
939 39
932 39
925 39
922 39
920 39
918 40
920 40
923 41
986 51
984 53
966 53
950 54
945 55
945 55
936 55
923 54
906 54
891 54
874 53
870 53
875 51
872 53
856 53
854 52
849 52
849 52
822 49
825 49
817 49
777 48
722 48
700 46
693 46
686 46
683 46
683 46
676 46
665 45
660 44
658 44
654 44
654 42
654 42
651 44
651 44
639 44
632 44
631 44
631 44
640 45
640 45
649 90
649 90
649 90
649 90
648 90
648 90
648 90
649 89
651 89
651 89
650 86
648 85
642 85
633 84
625 84
588 39
587 42
588 42
578 42
552 41
523 42
484 41
408 37
393 35
362 33
331 32
330 32
328 32
326 32
323 32
323 32
324 32
324 32
325 32
324 32
324 32
313 32
310 32
295 32
284 32
280 32
278 31
236 28
235 28
234 28
233 28
233 28
233 28
233 28
233 28
233 29
231 29
230 29
229 29
227 29
208 22
194 20
123 14
123 14
123 14
123 13
122 13
122 13
121 13
123 13
123 13
123 13
123 13
122 13
116 12
116 12
116 12
115 12
115 12
114 12
114 12
110 12
109 12
108 12
108 12
97 10
96 10
97 10
97 10
96 10
96 10
96 10
96 10
96 10
96 10
96 10
96 9
97 9
96 9
96 9
96 9
97 9
97 9
97 9
97 9
97 9
98 9
98 9
98 9
101 9
101 9
105 9
106 9
104 9
114 10
111 10
113 8
115 9
90 9
119 13
122 14
117 12
117 12
118 13
117 11
115 9
100 9
100 9
101 9
102 9
102 9
102 9
102 9
102 9
103 9
103 9
109 9
109 9
109 9
110 9
110 9
110 9
110 9
110 9
111 9
111 9
111 9
114 9
113 9
113 9
112 9
115 16
115 16
116 17
117 17
118 16
119 16
119 16
119 16
120 19
121 20
128 26
131 26
133 26
133 26
138 26
138 19
139 19
140 19
144 19
145 19
148 19
148 19
151 19
151 17
152 17
153 17
153 17
152 17
154 17
153 17
153 17
153 17
153 17
154 17
154 17
154 17
154 17
155 17
157 17
161 17
162 17
164 17
166 17
166 17
167 22
167 22
166 22
166 22
167 22
168 22
171 22
172 22
172 22
175 22
179 22
201 22
207 22
233 22
260 22
311 22
328 17
374 17
380 19
458 23
461 24
466 24
468 26
465 27
469 26
482 27
479 28
485 28
484 28
485 28
485 28
484 28
486 28
491 28
494 28
495 28
496 28
497 28
506 28
505 28
505 28
500 28
499 28
500 28
500 28
500 28
513 28
515 28
517 28
531 28
542 28
544 28
555 28
556 28
558 28
556 28
555 27
554 25
552 25
553 25
555 23
554 23
555 24
556 24
555 25
555 26
549 22
604 23
610 23
624 23
792 31
822 32
836 32
836 32
836 32
858 32
858 32
857 32
855 32
856 32
856 32
857 32
859 42
859 42
858 42
858 41
858 41
857 41
858 41
859 41
861 41
860 41
861 41
860 41
856 41
854 41
853 41
847 32
851 35
851 35
851 35
851 35
851 35
850 35
850 35
849 35
844 35
854 35
856 35
864 35
852 35
836 35
1788 64
1780 60
1753 60
1719 60
1706 60
1845 59
1869 58
1784 55
1784 53
1786 53
1782 52
1765 50
1743 50
1737 48
1737 47
785 18
791 18
794 18
796 18
796 18
796 18
792 18
791 20
792 20
799 20
808 19
802 21
812 22
833 23
865 23
890 25
896 27
897 27
902 28
887 28
881 28
876 28
869 28
876 30
874 30
866 30
863 31
864 31
865 31
865 34
865 34
864 34
864 34
862 34
858 34
860 34
865 34
867 33
862 32
863 32
799 30
767 30
716 30
593 22
581 19
577 19
575 19
572 19
560 19
560 19
560 19
560 19
558 19
558 19
557 19
558 19
558 19
558 19
559 19
559 21
558 21
557 21
555 21
554 21
601 50
601 50
600 50
600 50
599 50
599 50
601 50
603 50
625 51
667 51
679 50
708 50
719 50
718 50
786 52
781 53
704 24
701 24
692 23
689 22
649 22
610 22
593 22
582 22
570 22
538 22
421 21
407 21
403 20
401 20
398 20
396 19
395 19
403 19
404 19
406 19
404 19
408 19
413 19
408 19
448 32
453 32
451 31
523 31
517 32
496 33
481 32
473 29
468 27
462 27
448 27
438 26
447 26
450 26
471 25
473 26
474 26
477 26
473 26
458 24
455 24
454 24
453 24
453 24
453 24
453 24
455 24
455 24
455 24
463 24
463 25
461 24
456 24
457 24
455 24
454 24
540 29
544 30
544 30
543 30
544 30
545 30
544 30
544 30
534 30
536 30
535 30
534 30
534 30
534 30
535 31
534 31
533 31
533 31
756 40
778 40
779 40
790 40
794 40
796 42
796 42
795 42
795 42
795 42
798 42
798 42
794 41
812 56
790 55
754 55
731 54
710 54
702 54
701 54
634 50
634 49
634 51
634 51
634 51
634 51
634 51
636 51
634 51
5223 115
5242 100
5261 101
5267 102
5266 102
5263 102
5263 102
5262 102
5261 102
5256 100
5253 100
5253 100
5247 100
5244 100
5240 100
5237 100
5224 100
5178 86
5165 84
522 19
449 19
450 116
449 118
449 118
449 119
450 119
448 120
451 183
447 183
439 183
432 183
409 183
408 182
408 183
407 183
407 183
402 183
402 183
402 82
402 82
404 82
406 82
412 82
413 18
413 18
427 18
482 18
488 17
495 17
497 17
492 16
491 16
475 15
408 11
405 11
408 11
408 11
408 11
408 11
407 11
407 11
407 11
407 11
407 11
408 11
414 12
416 12
417 12
410 11
407 11
390 11
180 3
171 3
165 3
160 3
159 3
165 6
166 6
165 6
165 6
164 6
164 6
164 6
163 6
198 136
198 137
197 137
199 137
199 137
200 137
200 137
200 137
199 135
203 160
204 162
206 162
209 167
210 168
211 168
216 169
230 169
261 39
341 39
362 39
372 40
373 40
377 40
377 40
378 39
379 15
379 11
379 11
379 11
381 10
384 10
381 9
380 8
378 8
378 8
377 9
377 10
374 10
374 10
371 10
370 9
368 9
368 9
371 9
384 9
392 9
392 9
392 9
389 9
386 8
386 8
386 8
386 8
387 8
387 8
386 8
385 8
384 9
380 9
373 9
367 9
363 9
3674 191
3682 191
3681 191
3684 191
3684 191
3682 191
3682 191
3681 191
3685 191
3695 191
3709 191
3711 191
3712 191
3712 191
3718 192
370 12
368 10
377 10
375 11
364 25
363 25
360 25
357 25
357 25
358 25
357 25
357 28
356 28
355 28
355 28
352 28
351 28
351 28
351 28
351 28
351 13
351 13
351 13
351 13
351 13
351 13
349 10
349 10
348 10
349 11
349 11
348 11
344 11
341 11
385 17
384 17
372 17
361 17
340 16
328 16
259 15
203 15
189 15
186 15
185 15
183 14
184 14
186 13
188 12
188 11
139 5
138 5
137 5
134 6
134 6
134 6
134 6
143 6
142 6
141 5
141 5
141 5
142 5
141 5
141 5
140 5
138 5
127 5
120 4
120 4
120 4
120 5
121 7
112 7
112 7
112 7
111 7
111 7
111 7
113 7
114 6
113 6
113 6
112 6
110 6
94 6
82 5
74 5
69 5
69 5
69 6
68 6
68 6
61 6
29 6
22 6
20 6
20 5
20 5
20 5
20 5
20 5
20 5
20 5
20 5
21 5
21 5
43 7
43 9
42 9
42 9
42 9
43 9
43 9
47 9
50 9
50 9
50 8
50 8
51 8
51 8
52 8
52 8
32 6
32 6
32 6
32 6
33 8
33 8
34 7
36 7
36 7
35 7
35 7
34 7
33 7
33 7
33 7
33 7
33 7
32 7
31 7
31 7
31 6
29 6
28 6
20 6
20 6
20 7
20 7
20 7
20 7
20 7
20 19
20 22
21 23
24 32
24 38
24 44
25 127
27 140
27 154
32 257
34 301
34 348
34 356
34 362
34 364
34 364
34 365
34 365
34 365
33 363
36 364
37 364
37 365
37 365
37 365
37 365
36 365
35 365
36 366
36 366
36 366
33 367
33 370
33 371
33 372
33 371
31 372
31 376
31 378
31 380
31 400
31 401
31 405
31 405
31 407
31 420
32 425
32 425
32 426
32 426
32 427
32 427
31 429
31 429
31 440
31 462
31 489
31 493
30 506
30 506
29 508
23 496
24 551
24 573
24 600
25 678
30 875
30 909
29 920
29 979
29 982
29 1012
29 1041
29 1051
29 1058
29 1065
29 1065
29 1065
29 1067
29 1068
29 1070
29 1071
29 1072
29 1074
29 1076
29 1077
29 1083
29 1086
29 1088
29 1168
29 1195
29 1207
29 1209
31 1237
31 1240
31 1246
32 1371
37 1717
37 1752
38 1815
38 1801
37 1817
38 1820
36 1848
35 1840
34 1826
33 1747
32 1733
30 1713
25 1607
25 1589
25 1580
25 1580
25 1577
25 1578
25 1578
25 1577
25 1577
25 1578
25 1631
21 1632
21 1633
21 1637
21 1637
22 1639
23 1645
26 1711
37 1853
36 1891
36 1941
41 1977
47 2374
47 2395
48 2427
53 2483
53 2450
53 2452
53 2448
54 2446
55 2449
55 2435
55 2434
55 2431
55 2433
56 2436
56 2447
56 2450
56 2471
60 2491
61 2491
61 2491
61 2492
61 2510
62 2495
62 2484
68 2476
73 2516
77 2572
80 2567
83 2585
86 2582
86 2579
83 2515
83 2485
83 2506
83 2417
79 2250
79 2230
80 2225
82 2186
93 2330
93 2296
94 2307
94 2317
95 2319
97 2325
101 2348
107 2394
120 2446
127 2462
127 2467
136 2529
139 2536
140 2542
141 2532
141 2535
143 2533
143 2530
143 2522
146 2308
146 2310
146 2305
146 2296
145 2274
145 2273
145 2151
143 2131
138 1852
137 1838
137 1808
137 1818
137 1823
138 1824
138 1823
138 1820
138 1816
138 1809
138 1807
138 1806
138 1810
138 1810
138 1809
138 1809
138 1807
138 1807
138 1807
138 1807
138 1807
138 1807
138 1808
140 1808
142 1806
142 1803
145 1804
145 1800
144 1789
141 1708
125 1537
121 1488
121 1436
120 1410
118 1004
119 999
118 971
115 924
118 922
127 927
142 937
232 943
236 938
239 936
244 941
244 942
248 938
246 932
247 925
248 918
248 894
243 870
243 865
243 865
244 865
244 838
171 837
171 833
167 802
161 766
159 720
154 713
151 697
151 696
150 696
149 691
149 683
150 643
150 619
151 596
146 588
145 577
142 549
131 382
127 378
124 345
124 323
122 312
115 292
108 257
107 221
95 212
93 208
94 204
90 142
89 142
86 128
86 126
84 117
84 119
84 117
84 114
83 105
87 108
87 107
86 106
86 104
94 104
94 103
94 102
94 101
94 98
94 99
94 85
94 82
94 81
94 80
94 80
92 80
92 80
92 80
92 80
83 76
83 76
83 76
83 76
83 77
83 77
83 77
87 80
87 79
86 79
86 77
85 77
83 77
82 74
80 73
79 71
79 71
79 71
79 70
79 70
78 70
76 70
76 70
68 67
67 65
65 63
4 7
4 4
2 2
2 2
2 2
2 2
2 2
2 2
2 2
2 2
2 2
2 2
1 2
1 2
1 2
1 2
1 2
1 2
1 2
1 2
1 2
1 2
1 2
1 2
1 2
1 2
1 2
1 2
1 2
1 2
1 2
1 2
1 2
1 4
1 4
1 4
1 4
1 4
1 4
1 4
1 4
0 4
0 4
6 11
6 11
6 11
6 11
6 11
6 9
6 9
6 8
6 8
6 8
6 8
6 8
6 8
6 8
6 8
0 1
0 1
0 1
0 1
0 1
2 1
3 0
3 0
3 0
5 0
5 0
5 0
5 0
5 0
5 0
5 0
5 0
5 0
5 0
5 0
3 0
3 0
2 0
2 0
0 0
0 0
0 0
0 0
0 0
0 0
0 0
0 0
0 0
0 0
0 0
0 0
0 0
0 0
0 0
3 0
3 0
4 0
4 0
4 0
4 0
4 0
4 0
4 0
4 0
8 0
8 0
8 0
8 0
8 0
9 0
6 0
6 0
5 0
6 0
6 0
6 0
6 0
6 0
6 0
6 0
6 0
6 0
6 0
6 0
6 0
13 0
13 0
13 0
13 0
13 0
13 0
13 0
13 0
13 0
13 0
13 0
13 0
16 0
21 0
27 0
30 1
30 1
23 1
23 1
23 1
23 1
23 1
23 1
23 1
24 1
24 1
24 1
24 1
24 1
24 1
25 2
25 2
25 2
26 2
26 2
26 2
26 2
26 2
28 2
28 2
28 2
26 2
26 2
26 2
26 2
26 2
27 0
26 0
26 0
26 0
27 0
27 0
30 0
30 0
32 1
70 724
71 724
73 724
74 724
76 724
78 724
86 724
99 724
100 726
107 726
107 726
107 726
109 726
111 727
117 727
109 3
110 3
113 3
119 3
120 3
125 4
126 4
126 4
127 2
127 2
127 2
127 2
127 2
128 2
128 1
127 1
127 1
128 1
128 1
130 1
130 1
137 2
138 2
138 2
139 2
140 2
151 2
152 2
151 3
153 3
154 4
167 4
184 4
236 4
252 9
254 11
254 14
253 14
255 14
255 16
255 16
254 36
253 61
254 61
246 61
249 61
253 61
265 64
266 64
266 64
266 64
268 64
270 64
272 64
274 65
286 65
287 59
287 59
294 56
293 57
295 21
296 21
295 21
297 21
297 22
297 22
297 22
297 22
297 22
297 22
300 22
302 22
303 22
303 22
303 22
307 22
319 22
319 22
320 22
323 22
326 22
328 22
328 22
347 22
362 24
347 24
369 24
431 24
445 24
445 24
447 24
439 25
455 25
456 25
448 25
449 25
449 34
450 34
450 34
452 34
450 34
610 34
605 34
603 34
601 34
600 33
599 33
602 33
602 33
601 33
601 33
604 33
607 33
608 24
608 24
608 24
610 24
456 24
455 24
454 24
456 24
459 24
459 24
459 24
456 24
487 24
484 24
494 25
497 24
510 25
514 24
498 23
487 23
502 225
495 220
495 220
494 217
495 217
495 217
496 217
500 217
518 218
573 218
591 218
594 218
594 218
592 218
596 215
533 10
534 10
532 10
540 10
549 10
554 10
567 10
567 10
572 10
582 11
609 14
613 13
630 14
657 18
677 18
682 23
687 23
692 26
697 26
698 28
698 29
700 30
709 30
708 30
735 30
869 32
896 32
909 32
979 32
1049 32
1054 33
1052 33
1054 32
1062 32
1070 32
1053 32
1032 32
1017 31
1013 32
947 31
938 31
937 31
936 31
937 31
911 31
919 31
920 31
920 32
918 32
917 32
916 32
916 32
916 32
915 32
916 32
918 32
918 32
918 32
923 32
923 32
921 33
927 33
969 34
1031 35
1075 35
1105 35
1109 35
1109 35
1109 35
1108 35
1120 35
1127 34
1135 34
1169 33
1216 33
1229 33
1244 34
1220 36
1216 38
1252 39
1250 39
1235 38
1230 38
1231 38
1231 38
1282 41
1286 41
1289 41
1288 43
1327 43
1332 42
1334 42
1327 43
1311 43
1265 43
1254 43
1252 43
1249 44
1246 44
1236 44
1234 43
1233 43
1229 43
1232 43
1235 43
1238 45
1231 45
1210 45
1204 45
1197 45
1164 34
1155 33
1139 29
1099 28
1082 27
1079 26
1080 27
1079 27
1083 27
1081 29
1080 29
1078 30
1046 30
975 29
924 29
824 26
805 28
790 26
765 26
713 26
708 26
703 26
695 25
692 25
689 25
686 25
682 25
679 25
678 25
676 25
675 25
674 25
671 25
673 24
674 24
670 24
670 24
670 24
672 24
672 25
679 26
680 26
680 26
682 26
679 26
677 26
675 26
662 25
642 24
633 24
613 24
515 24
461 20
386 20
349 20
331 20
331 20
330 20
327 20
331 20
323 20
322 19
317 19
311 17
299 17
297 17
289 16
277 16
267 16
243 15
241 15
237 15
216 14
222 15
266 16
243 16
241 16
249 16
264 15
225 14
215 14
232 14
228 14
230 13
230 13
233 13
233 13
234 12
241 12
250 12
251 13
247 14
245 14
240 14
219 14
215 13
213 13
213 13
210 13
217 13
217 13
217 13
218 13
219 12
219 12
218 11
216 11
214 10
203 11
201 11
201 14
202 14
202 14
201 14
200 13
344 3735
344 3733
343 3734
344 3734
344 3740
344 3741
344 3741
344 3741
356 3742
356 3742
353 3742
357 3743
359 3744
360 3744
359 3745
215 25
215 27
216 27
213 27
211 29
214 30
214 32
213 32
212 33
210 32
200 32
200 32
200 32
201 44
200 46
200 46
198 46
198 46
198 46
198 46
197 46
197 46
187 46
187 46
187 46
187 46
187 46
188 46
186 34
187 35
187 33
186 33
187 33
187 33
187 33
187 33
185 33
184 34
184 34
182 34
180 34
172 33
163 33
161 33
119 32
103 31
102 31
63 31
55 32
51 32
48 32
33 31
32 30
32 30
33 30
33 30
32 30
31 30
30 30
30 30
35 29
36 29
36 29
36 29
36 29
36 29
36 29
37 30
36 36
30 36
33 39
33 40
33 40
33 41
33 41
33 41
28 39
28 39
28 38
28 38
28 36
29 37
26 36
26 36
26 33
26 32
26 32
25 31
25 31
25 24
25 24
25 24
25 24
23 24
23 24
22 23
21 23
20 23
20 23
20 23
20 22
19 31
19 31
19 31
19 29
18 28
18 27
18 43
17 42
17 42
17 42
17 42
17 42
17 42
17 42
17 42
17 32
17 31
17 30
16 30
13 31
13 32
13 15
13 15
13 15
13 14
13 14
16 14
15 14
14 14
14 14
17 14
16 15
18 15
18 15
19 15
19 16
19 16
19 16
19 16
19 16
19 16
15 16
15 16
14 18
14 19
14 21
11 21
10 23
10 26
10 26
10 26
10 26
10 26
10 28
10 29
10 27
10 30
10 31
10 32
9 53
8 115
9 123
9 142
9 159
9 175
9 188
8 214
7 213
6 214
6 214
6 214
6 222
7 226
7 228
7 228
7 231
8 232
8 233
8 238
8 239
8 238
9 240
11 280
13 281
14 282
14 282
14 282
14 282
14 281
14 285
15 288
15 288
14 288
14 288
14 291
14 293
14 293
14 293
14 293
14 293
14 293
14 295
14 295
14 296
14 300
14 306
14 311
14 311
14 311
14 311
14 313
14 313
15 313
15 311
15 312
15 312
15 312
15 312
15 312
15 312
15 312
15 314
15 317
15 319
15 319
15 319
15 317
15 317
23 318
23 317
23 317
23 315
23 314
23 316
23 316
23 317
23 317
23 319
23 321
23 321
24 321
24 322
24 326
17 325
17 328
17 331
17 333
16 330
16 328
16 329
16 343
16 348
16 346
17 344
17 345
17 344
16 368
17 368
18 360
17 308
17 214
17 202
17 198
17 195
17 195
17 194
17 195
17 197
17 198
16 206
16 205
16 196
15 192
15 191
15 189
15 187
15 187
15 187
15 183
17 182
17 182
16 181
13 140
12 140
12 143
12 147
12 147
12 148
12 149
12 144
11 142
11 142
11 142
11 141
11 139
9 138
9 140
9 139
9 139
9 139
9 139
9 140
9 141
9 136
9 132
9 127
11 125
11 128
11 128
14 127
14 128
32 137
31 137
31 138
31 138
31 138
31 139
31 139
31 139
31 139
33 140
31 136
31 133
31 133
31 133
31 133
31 133
11 125
10 125
10 125
10 124
10 123
10 123
9 122
9 121
7 118
7 118
6 118
6 116
6 116
5 117
5 116
6 108
7 105
6 105
7 105
7 105
7 105
7 103
7 103
7 85
7 86
7 87
6 87
6 86
6 86
6 53
5 53
5 50
5 52
5 53
5 53
5 53
5 53
5 52
5 51
5 51
5 50
5 49
5 42
5 41
5 41
4 41
4 41
4 41
4 40
5 41
6 42
7 42
7 43
7 43
7 43
7 42
7 41
7 35
8 34
8 35
8 34
9 34
9 34
9 34
9 34
9 34
8 34
8 33
8 31
8 31
8 31
8 31
8 31
8 31
8 27
9 25
9 25
9 25
9 25
9 23
9 20
9 20
9 20
9 20
9 20
9 20
10 26
10 40
10 39
10 39
10 40
10 40
10 41
10 41
10 41
10 43
10 45
10 48
10 47
10 47
10 47
10 54
10 46
10 48
10 48
10 53
9 54
9 54
9 54
9 55
9 56
9 71
9 95
9 119
9 135
9 147
8 157
8 164
7 162
7 166
6 170
6 171
6 171
6 174
6 176
6 175
6 177
6 179
6 184
6 184
6 183
6 182
6 181
6 181
6 181
6 181
6 181
6 181
6 181
11 181
11 181
11 181
11 181
11 181
11 181
11 185
12 187
11 187
11 189
8 189
7 188
7 190
7 190
7 190
7 190
2 190
2 190
2 191
2 194
2 209
2 220
3 229
3 230
3 234
3 238
3 240
3 240
3 240
3 240
4 240
4 241
4 241
4 241
4 242
4 243
4 245
4 245
4 245
4 246
4 247
6 260
6 261
6 265
6 271
5 277
5 276
4 274
4 279
4 282
4 284
4 283
4 288
4 293
4 296
4 297
4 304
4 306
4 303
4 302
4 301
4 297
4 297
4 295
4 295
4 291
4 287
6 289
6 289
6 289
6 289
6 284
6 265
6 248
6 218
6 207
6 199
6 200
6 193
6 193
6 191
6 191
6 192
6 207
6 208
6 205
6 209
6 205
9 253
9 253
9 253
9 253
9 253
9 253
9 253
9 255
9 255
9 255
9 255
9 255
9 256
9 256
9 255
6 206
6 206
6 206
5 201
5 200
5 200
5 197
6 196
6 196
7 195
7 195
7 194
7 194
7 193
7 194
7 192
7 185
7 164
7 161
6 150
6 150
6 145
6 145
6 145
6 145
6 146
7 147
7 147
7 148
7 148
8 148
8 146
8 145
8 148
8 152
8 152
8 152
8 150
6 139
6 125
6 122
6 117
6 111
6 106
6 102
6 102
6 103
8 101
8 101
8 97
8 94
8 94
8 94
8 86
8 83
8 82
8 82
8 82
8 80
8 81
8 81
9 82
9 83
9 85
7 83
7 82
7 83
7 83
7 82
7 81
9 62
9 61
9 61
9 62
9 62
10 62
10 63
10 62
10 62
10 59
10 42
10 40
10 37
10 34
10 35
10 33
12 33
12 33
12 33
12 33
12 33
12 33
17 37
20 53
22 61
22 86
22 87
22 89
22 89
22 89
22 89
22 89
22 89
21 89
21 89
21 89
21 90
21 90
21 90
20 90
16 44
16 45
16 45
16 45
16 44
16 44
16 44
16 44
16 44
16 44
16 44
16 43
16 43
16 43
16 42
16 44
16 43
16 44
16 43
22 63
22 63
22 62
22 61
22 55
22 49
22 49
22 50
35 135
35 135
35 135
35 135
35 135
35 134
35 134
29 114
29 114
29 113
27 113
27 120
27 120
27 120
27 122
14 40
14 40
14 40
16 40
16 40
18 40
18 39
18 37
17 37
17 36
17 35
18 35
18 35
18 35
18 40
18 40
18 44
18 47
16 47
14 47
12 47
12 48
12 48
11 47
11 46
11 46
11 46
11 46
11 46
11 46
11 46
11 46
10 45
11 45
10 45
10 45
10 45
10 46
8 46
7 46
4 39
4 39
4 39
4 45
7 44
8 44
8 45
8 45
8 45
8 48
9 48
12 48
12 48
13 47
13 47
13 47
11 47
11 46
11 44
11 44
11 44
11 44
11 44
11 44
11 44
11 44
11 44
11 44
11 44
11 44
13 44
13 44
13 44
13 42
13 42
13 45
13 47
13 47
13 47
13 47
13 48
13 48
14 48
14 48
14 48
15 48
16 48
17 48
17 49
17 50
17 50
17 50
19 50
19 50
19 49
19 49
19 39
19 39
19 39
19 39
20 39
20 40
20 40
20 40
20 40
20 40
20 40
20 42
25 43
28 44
28 45
27 44
27 44
28 44
28 37
28 37
28 34
27 32
27 32
27 32
29 32
29 32
29 32
29 32
30 32
34 32
34 32
37 32
37 34
38 34
46 34
47 34
57 36
56 35
57 36
57 37
57 37
79 38
79 41
79 40
79 41
79 41
82 41
83 35
81 35
81 34
81 35
80 34
79 34
78 33
78 33
78 33
78 33
77 31
77 31
77 31
77 31
77 34
77 34
77 34
77 34
77 34
77 34
77 34
77 34
77 34
77 34
77 34
77 34
76 35
76 35
76 35
76 32
76 32
76 32
76 29
75 26
76 26
76 26
75 26
74 25
74 26
74 26
74 26
73 25
72 24
72 23
72 23
72 22
72 22
72 22
72 22
70 22
70 22
70 22
70 22
69 21
69 21
69 21
69 21
70 21
70 20
70 20
71 20
71 20
71 20
71 20
72 17
69 17
66 16
66 15
66 15
66 14
65 14
65 14
65 14
64 14
64 14
63 14
69 24
66 24
65 24
62 24
60 24
58 24
50 26
45 27
40 25
38 26
36 28
36 29
32 27
17 24
15 23
9 21
9 21
9 20
9 19
9 19
9 19
9 18
9 18
9 18
9 18
9 18
9 18
9 18
9 18
9 18
9 18
9 18
8 18
8 18
8 18
8 18
8 18
8 18
8 18
8 18
8 18
8 18
8 19
8 21
14 58
15 58
15 58
15 58
15 58
15 58
15 58
14 58
14 58
14 58
14 58
14 58
14 58
14 57
17 57
12 22
11 24
11 24
11 25
11 26
11 26
11 26
11 26
11 26
11 26
11 26
11 26
11 26
11 26
11 26
11 26
11 26
11 26
11 26
11 26
11 26
11 26
11 27
11 27
11 27
11 28
11 28
11 29
11 30
11 30
11 31
11 31
11 31
11 31
11 31
11 31
11 31
11 31
11 31
11 31
11 29
5 20
5 20
5 20
5 20
5 18
4 17
4 15
4 15
4 17
4 17
4 17
5 19
5 19
113 26
113 26
113 26
113 27
113 29
113 29
113 29
113 30
113 30
113 30
113 30
116 30
116 30
116 30
116 30
117 30
115 30
113 30
9 23
9 23
9 22
10 22
10 23
10 23
11 23
13 23
12 23
12 23
12 23
12 23
12 21
12 21
11 21
11 21
11 21
11 21
11 21
11 21
11 21
11 22
11 22
12 22
12 22
12 22
11 22
10 22
10 19
10 18
10 17
10 17
10 16
10 16
10 16
10 16
10 15
10 15
12 15
12 15
12 15
12 16
12 16
12 16
12 16
12 16
12 16
12 16
12 16
12 16
12 13
12 13
12 13
13 13
13 13
13 12
13 11
13 11
13 11
13 11
13 11
13 11
13 12
14 12
14 12
14 12
14 12
14 12
13 12
13 12
13 12
13 12
13 12
13 11
13 11
13 11
13 11
13 9
12 7
12 6
11 4
11 4
11 4
11 4
9 4
9 2
9 2
9 2
9 2
9 2
9 2
8 2
8 2
8 4
7 4
6 4
6 4
6 4
6 4
6 4
6 4
6 4
6 4
5 3
5 3
5 2
5 2
4 3
4 3
4 1
4 1
4 1
4 1
4 1
4 1
4 1
4 1
4 1
4 1
4 1
4 1
4 1
4 1
3 0
3 0
3 0
2 0
2 0
2 0
2 0
2 0
2 0
2 0
2 0
2 0
2 0
2 0
2 0
0 0
0 0
0 0
0 0
0 0
0 0
0 0
0 0
0 0
0 0
0 0
0 0
0 0
0 0
0 0
0 1
0 1
1 1
1 2
1 2
1 2
3 23
3 23
3 27
3 27
3 27
3 27
3 27
3 27
3 27
3 26
3 26
3 26
3 26
3 26
3 26
2 29
0 8
0 4
0 4
0 4
0 4
0 6
0 7
0 7
1 7
1 7
1 7
1 7
1 7
1 7
1 7
1 8
1 9
1 9
1 9
2 9
2 9
2 9
2 9
1 9
1 9
1 9
1 10
1 10
1 10
6 10
6 10
6 10
6 10
6 10
6 10
5 10
5 10
5 10
5 10
5 10
5 10
5 10
5 10
5 10
5 10
2 10
0 10
0 10
0 10
0 10
0 10
0 10
1 10
1 10
1 10
1 10
1 10
1 10
1 10
1 10
1 10
1 10
1 10
1 10
1 10
1 10
1 10
0 10
0 10
0 10
0 10
0 10
0 11
0 11
0 11
0 11
0 11
0 11
0 10
0 10
0 10
0 10
0 11
0 11
0 11
0 11
0 11
0 11
0 11
0 11
0 11
0 11
0 11
0 12
0 12
0 12
0 12
0 11
5 163
5 160
5 160
5 160
5 160
5 160
5 160
5 158
5 157
5 157
5 157
5 157
5 157
5 158
5 158
0 5
0 5
0 5
4 4
4 4
4 4
4 4
4 4
4 4
4 4
4 4
4 4
4 4
4 3
4 2
4 2
4 2
4 2
0 2
0 4
1 8
1 11
1 15
1 15
1 15
1 15
1 15
1 15
1 15
1 15
1 15
1 16
2 16
2 16
2 16
2 16
2 16
3 16
3 16
7 16
7 16
7 16
7 16
7 16
8 16
8 16
8 15
9 15
9 15
9 15
9 15
9 15
9 15
9 16
6 16
7 17
7 17
7 17
7 16
7 16
6 16
6 16
5 16
5 16
5 16
5 16
5 16
5 16
5 16
5 16
6 16
6 16
6 16
6 18
6 18
6 18
6 18
6 18
6 18
6 18
6 17
6 17
6 17
6 17
6 17
6 17
6 18
6 19
6 19
6 19
6 19
146 24
146 24
146 24
146 25
146 25
146 26
146 27
146 29
146 31
146 32
146 32
146 32
146 32
146 32
146 33
7 29
7 29
7 29
7 29
7 26
7 26
7 26
7 28
7 28
7 28
7 29
7 29
7 28
6 24
6 22
6 19
6 18
17 18
17 18
17 18
18 23
20 23
23 23
25 21
24 21
25 23
25 23
25 23
25 23
30 24
30 24
30 24
18 24
17 24
17 24
17 24
16 19
16 19
14 19
14 19
14 18
98 22
98 23
98 23
93 22
93 22
93 22
93 21
93 21
93 21
95 21
96 21
96 21
96 21
97 21
97 21
97 21
13 17
14 17
14 17
15 20
16 20
16 20
16 20
15 19
15 19
15 20
15 18
15 17
15 17
15 17
24 18
24 18
24 18
24 18
24 18
24 18
26 18
26 18
26 18
26 18
26 18
26 18
26 17
27 17
28 17
31 18
30 19
30 19
30 20
23 17
23 15
21 13
21 12
21 12
42 285
42 285
46 285
47 285
47 284
47 284
49 284
49 284
49 284
49 284
49 284
49 284
49 285
49 285
49 285
49 281
29 11
25 11
25 11
25 11
25 11
26 11
31 11
31 11
31 11
29 11
38 15
36 15
36 14
36 14
36 14
36 14
36 14
36 14
36 14
36 14
36 14
29 14
29 14
30 15
30 16
30 16
21 13
20 13
20 13
20 12
20 12
20 11
20 11
20 11
20 11
20 11
19 10
18 9
18 8
16 6
13 6
13 6
13 6
13 6
13 6
13 6
11 6
9 6
9 6
9 5
9 5
9 5
9 5
9 6
9 6
9 6
9 6
9 6
9 6
9 6
9 6
9 7
9 7
9 7
9 7
9 7
9 7
9 7
9 7
9 7
9 8
9 8
7 10
7 10
7 10
6 11
6 11
124 13
125 12
124 12
124 12
124 12
124 12
124 12
123 11
123 11
123 11
123 11
123 8
123 8
121 8
121 7
121 7
120 7
2 5
2 5
2 5
2 5
2 5
2 5
2 5
3 6
3 8
2 10
3 12
3 12
4 12
4 13
12 15
12 15
12 15
12 15
12 15
12 15
12 16
12 16
12 16
12 15
12 14
11 14
11 16
11 16
11 16
2 14
2 14
2 14
2 14
2 15
2 16
2 16
2 16
2 16
2 16
2 16
2 16
2 14
2 14
2 14
3 19
3 19
3 20
3 20
3 21
3 20
3 20
3 20
3 20
3 20
3 20
3 20
3 20
3 20
3 20
3 19
3 19
3 19
3 19
2 19
2 19
3 19
5 100
5 99
5 99
5 99
5 99
5 99
5 99
5 99
5 99
5 99
5 99
5 99
5 99
5 99
5 99
3 18
7 25
7 25
7 25
7 25
7 25
7 25
7 25
7 25
7 25
7 25
7 25
7 25
7 25
7 25
7 25
3 18
3 18
3 18
3 18
3 18
3 18
3 18
3 18
3 18
3 18
2 17
1 13
1 13
1 13
1 13
1 13
1 12
1 11
1 11
1 11
1 11
1 11
1 11
1 11
1 11
1 11
1 11
1 11
1 11
1 11
1 10
1 10
1 10
1 10
1 10
2 9
2 9
2 10
2 10
2 10
2 10
2 10
2 11
4 14
4 15
4 15
4 15
5 8
5 8
6 8
6 8
7 8
7 8
7 8
7 12
7 21
7 21
7 21
7 21
7 21
7 21
7 21
5 21
5 21
5 21
5 21
5 21
5 21
5 21
5 21
5 21
5 21
5 21
5 21
5 21
5 21
5 21
5 22
5 23
5 23
5 23
5 24
5 29
5 33
5 33
8 33
8 35
8 35
8 35
8 35
8 36
8 39
8 39
8 39
8 39
8 39
8 39
8 39
8 39
8 39
8 39
5 39
5 39
5 39
5 39
5 39
5 39
5 39
5 39
5 39
5 38
5 39
5 39
5 43
5 45
5 47
5 60
525 9404
544 9525
544 9525
544 9526
544 9530
605 10253
615 10310
620 10317
620 10317
620 10318
620 10318
620 10318
620 10318
620 10317
620 10317
620 10317
620 10317
620 10317
619 10317
619 10316
619 10316
14 76
14 76
9 69
8 63
3 47
1 43
0 42
0 42
0 42
0 42
0 42
0 42
0 41
0 42
0 35
0 32
1 31
1 30
1 30
1 30
1 30
1 30
1 30
1 30
1 30
1 30
1 30
1 30
1 28
1 28
1 29
1 29
0 29
0 29
0 29
0 29
0 29
0 29
0 29
0 28
0 27
0 27
0 26
0 25
0 20
0 17
0 17
0 17
0 15
0 15
0 15
0 15
0 14
0 11
0 11
0 11
0 11
0 11
0 13
0 13
0 13
0 13
0 13
0 13
0 13
0 13
0 13
0 13
0 13
0 13
0 13
0 13
0 13
0 12
0 10
0 8
0 7
0 5
0 5
0 5
0 3
0 3
0 3
0 2
0 1
0 1
0 1
0 1
0 1
0 1
0 1
0 1
0 1
0 1
0 1
0 1
0 1
0 1
0 1
0 1
0 1
0 1
0 1
0 1
0 1
0 1
0 1
0 1
0 1
0 2
0 2
0 2
0 2
3 2
3 2
3 2
3 2
3 2
3 2
3 2
3 2
3 2
3 2
3 2
3 2
3 1
3 1
3 1
0 1
0 1
0 0
0 0
0 0
0 0
0 0
0 0
0 0
0 0
0 0
0 0
0 0
0 0
0 0
0 0
0 0
0 0
0 0
0 1
0 3
0 3
0 3
0 3
0 7
0 10
0 15
2 18
3 19
1734 75
1734 75
1734 76
1734 76
1734 81
1735 81
1753 501
1816 586
1817 593
1817 593
1817 593
1817 592
1817 592
1818 617
1818 618
86 561
84 561
84 561
84 581
84 581
84 581
65 158
66 159
87 161
87 162
87 164
87 164
87 165
87 165
22 46
22 47
22 47
22 47
22 47
24 354
24 354
24 354
24 354
23 353
2 352
2 352
2 352
2 358
4 492
4 503
4 517
4 527
4 530
4 530
2 532
2 532
2 532
2 214
2 216
2 216
2 217
2 218
2 225
2 225
2 226
4 226
4 231
4 231
4 232
4 232
4 232
4 232
4 232
4 232
4 232
4 232
4 232
4 232
4 232
4 232
2 232
3 233
3 233
3 233
3 236
5 509
6 732
6 753
6 789
6 806
6 809
6 831
6 832
8 836
8 838
8 848
8 861
8 869
7 871
7 870
6 616
6 613
6 611
7 614
7 613
8 613
8 611
8 611
6 612
6 613
6 618
6 620
6 620
6 629
6 633
6 634
6 638
6 638
6 637
6 638
6 638
5 638
5 639
5 638
5 638
5 638
6 638
6 637
6 639
6 640
6 638
6 638
6 635
6 640
6 642
6 643
6 645
6 646
6 646
6 646
6 645
6 645
6 645
6 643
6 645
6 644
6 640
6 624
4 478
4 475
4 474
4 474
4 474
4 474
4 473
4 473
4 470
4 470
4 468
4 468
4 467
4 465
4 459
4 459
4 463
4 479
4 478
4 497
4 503
4 503
4 504
4 504
4 505
4 510
4 521
5 561
5 605
5 606
5 610
5 619
5 623
5 629
4 626
5 616
5 609
5 573
4 365
4 341
4 332
4 329
4 327
4 299
4 299
4 295
4 295
4 395
4 422
4 438
3 440
3 528
3 549
3 568
3 591
2 600
2 604
2 604
2 604
2 604
3 610
3 612
3 605
3 605
3 605
3 596
3 589
3 591
3 593
3 596
3 599
3 600
3 606
5 615
5 616
5 617
5 618
5 621
4 621
4 620
4 620
4 625
4 631
4 639
4 643
4 639
4 640
4 644
4 648
7 665
7 665
7 665
7 664
7 664
7 664
7 663
7 662
7 668
7 670
7 670
7 671
7 667
7 667
7 672
5 666
5 668
5 668
5 668
5 668
5 668
5 674
5 677
5 677
5 682
5 684
5 688
5 683
5 660
5 655
7 655
7 655
7 657
7 659
7 656
7 656
7 653
7 631
6 561
7 564
7 563
8 558
8 555
8 554
8 548
7 550
7 550
7 550
7 550
7 550
7 547
7 546
7 546
7 548
7 548
7 552
7 551
7 555
7 416
7 381
7 380
7 379
7 286
7 249
7 227
7 214
7 209
7 209
7 210
7 211
7 211
6 201
6 202
6 202
6 202
6 203
6 203
6 203
6 201
6 197
6 194
6 193
6 192
6 189
4 179
4 178
4 178
4 178
4 176
4 173
4 171
4 171
4 169
4 167
4 178
4 176
4 180
4 179
4 210
4 219
4 229
4 238
4 243
4 248
5 256
6 256
6 262
6 266
6 264
6 267
6 273
6 275
7 275
7 280
6 272
6 265
6 265
6 264
6 261
6 260
6 259
6 247
6 246
6 245
6 239
8 248
8 245
7 246
7 245
4 244
4 239
4 235
4 236
4 264
7 373
7 442
9 516
10 571
10 599
11 614
12 711
12 733
12 741
12 747
12 750
12 758
12 762
12 767
13 770
13 776
13 777
13 778
12 778
12 777
12 776
11 771
11 768
12 749
13 746
13 748
13 748
13 749
13 748
12 747
26 747
27 755
27 761
27 766
28 771
28 776
29 781
29 784
29 784
29 789
29 793
29 799
29 812
29 819
29 823
15 825
15 827
15 829
15 834
16 836
16 836
17 842
17 842
17 848
17 856
17 860
17 870
17 865
17 853
15 836
15 816
17 814
17 804
17 789
18 758
18 757
18 756
17 750
17 751
17 751
17 758
17 749
43 2154
43 2142
43 2142
43 2141
44 2141
44 2143
44 2145
44 2190
45 2194
45 2200
45 2214
45 2216
46 2221
46 2213
46 2215
46 2206
45 2186
45 2194
46 2271
44 2279
19 905
19 928
21 934
20 933
21 958
21 953
23 940
24 867
23 656
21 579
21 511
25 512
25 514
27 517
34 599
35 598
39 623
39 626
39 629
39 608
39 603
37 602
37 600
38 600
38 602
38 603
38 605
38 606
38 607
38 608
38 613
34 641
34 653
34 659
35 664
35 670
35 674
47 728
7373 38442
7370 38431
7370 38424
7370 38421
7370 38417
7370 38414
7370 38416
7370 38416
7370 38417
7370 38415
7370 38413
7370 38400
7370 38397
7370 38387
7370 38383
35 651
32 615
32 613
32 610
31 607
31 604
31 599
31 599
31 595
31 588
31 586
31 585
31 586
31 584
31 584
31 583
29 583
29 583
29 579
28 578
28 576
28 576
28 575
28 573
28 570
28 568
28 566
28 566
28 566
28 565
28 567
28 573
29 574
29 576
24 525
24 516
24 507
24 488
24 487
23 484
23 483
23 481
24 481
26 479
25 464
24 381
22 372
22 368
22 340
21 330
21 327
21 320
21 316
21 316
21 312
21 310
18 326
18 322
20 320
18 304
17 296
10 215
9 241
10 233
10 242
10 256
11 258
11 262
11 266
11 277
11 275
11 279
11 283
11 299
11 300
11 311
10 314
10 326
40 3340
35 3370
35 3418
36 3427
36 3451
36 3597
37 3651
37 3714
38 3818
40 3871
41 3898
41 3966
41 4033
43 4058
43 4074
43 4075
43 4068
13 993
13 993
15 992
15 993
15 992
15 992
15 992
15 992
15 993
15 993
15 993
15 993
15 993
15 994
15 994
15 994
50 997
48 997
48 997
48 997
48 997
48 997
48 1024
48 1067
48 1083
48 1089
50 1090
52 1093
55 1110
57 1116
57 1126
26 1146
27 1161
27 1189
28 1247
28 1266
29 1273
29 1272
29 1264
29 1256
29 1257
27 1364
27 1372
27 1391
27 1401
27 1415
27 1601
27 1611
27 1616
27 1622
27 1632
26 1648
26 1653
26 1656
26 1659
26 1662
26 1667
27 1670
28 1671
27 1672
28 1671
28 1498
28 1495
28 1497
28 1505
28 1501
27 1486
27 1466
27 1464
27 1468
26 1449
27 1449
27 1434
27 1430
27 1427
27 1431
27 1414
26 1399
26 1374
26 1351
26 1328
27 1325
27 1315
28 1301
28 1277
28 1233
28 1216
28 1184
28 1018
24 934
24 860
22 724
22 679
22 675
21 675
21 680
21 680
21 678
21 679
21 675
61 747
61 752
61 756
61 756
62 760
62 769
62 779
62 786
63 790
63 794
63 798
63 798
63 799
63 799
63 799
23 798
23 798
23 798
23 798
23 797
21 797
21 796
21 760
21 711
20 703
20 702
20 702
17 698
11 687
11 670
11 670
6 636
6 618
140 576
143 529
143 525
143 518
143 520
143 517
143 520
143 520
143 408
143 403
143 356
143 348
143 347
143 315
143 311
143 307
6 297
6 286
6 274
6 263
6 264
6 262
6 259
6 256
5 254
5 253
5 252
5 252
5 250
5 246
5 246
5 241
5 241
5 247
6 249
108 258
109 257
114 254
116 251
9709 1049
9709 1049
9709 1036
9708 1032
9708 1031
9707 1028
9707 1012
9707 1009
9707 1008
9707 1007
9707 1007
9706 1005
9637 1001
9637 1001
9636 1001
7 201
2 201
2 201
0 201
0 210
0 212
0 213
0 215
0 216
0 211
0 220
0 222
0 231
1 168
1 172
1 198
1 197
1 197
1 187
1 176
1 175
1 178
1 177
1 176
1 176
1 175
1 175
1 174
1 174
1 174
1 174
1 174
1 174
2 174
2 175
2 175
2 177
2 177
2 177
2 177
3 177
3 177
3 175
3 171
3 170
3 170
3 164
3 164
3 164
2 163
2 175
2 174
2 172
2 172
2 172
2 172
2 172
2 170
2 170
2 169
2 169
2 169
2 169
2 168
2 168
2 168
2 168
2 168
3 173
3 173
3 171
3 163
3 164
3 167
3 167
3 167
3 165
3 158
3 157
3 150
3 146
3 141
3 138
3 137
3 137
3 137
3 137
4 137
5 142
5 142
6 145
9 146
9 149
9 156
9 163
9 163
9 212
9 215
9 216
9 230
11 234
11 245
11 247
11 306
11 301
11 328
11 347
11 345
11 356
11 357
11 438
9 476
9 496
9 524
10 538
10 536
10 579
10 594
10 605
10 611
10 618
10 889
10 908
10 924
10 931
10 933
10 951
10 967
10 984
10 990
10 994
10 995
10 995
26 1379
26 1378
26 1380
26 1379
26 1380
26 1381
26 1383
26 1385
26 1386
26 1386
27 1386
27 1389
27 1389
27 1391
27 1391
11 987
11 987
11 988
11 989
11 990
11 991
11 994
11 994
11 994
11 1004
10 1005
10 1008
10 1010
10 1012
10 1012
10 1017
10 1018
10 1019
10 1019
10 1019
9 1013
9 1012
9 1012
11 1009
11 1008
11 1010
11 1009
11 1009
11 1010
11 1010
11 1007
11 1007
11 1008
11 1008
11 1008
9 1008
8 1008
8 1008
6 1008
6 1008
5 997
5 995
2 994
1 1008
1 1014
1 1010
1 1003
1 1000
1 948
1 933
1 933
1 933
1 932
1 926
1 919
1 819
1 806
1 798
1 793
1 787
1 783
1 766
1 623
1 600
2 576
3 564
2 564
2 570
2 556
2 538
2 531
2 524
2 514
6 233
6 230
6 219
6 217
6 207
6 204
6 201
6 202
6 209
6 209
6 209
6 209
6 210
6 211
6 216
2 208
3 206
3 205
6 222
6 222
150 225
150 225
150 226
150 223
150 221
150 221
150 224
153 232
153 259
153 261
153 259
153 260
153 259
153 256
153 256
153 256
12 269
12 272
12 275
12 273
12 272
12 272
12 272
12 271
12 270
12 271
12 271
12 272
12 272
12 274
12 275
12 275
12 273
12 272
14 276
14 275
14 293
14 295
14 296
15 296
15 299
15 299
15 299
15 299
18 323
18 330
18 333
18 338
18 341
16 340
16 323
16 316
16 316
16 318
16 318
16 317
17 317
17 320
18 328
18 333
18 333
18 334
18 335
18 334
18 335
18 336
18 337
18 342
18 339
17 325
17 331
16 314
15 291
14 287
14 285
14 282
14 281
14 277
14 279
15 282
15 277
15 276
15 278
15 279
22 813
23 813
23 812
23 810
23 802
23 796
21 794
21 794
21 793
21 792
21 787
24 784
23 783
23 777
22 761
16 227
16 226
16 226
16 226
16 225
16 225
16 223
14 217
13 201
13 188
13 188
13 187
13 187
13 187
13 186
14 187
12 187
11 156
11 154
11 151
11 152
11 152
11 155
11 155
11 154
11 154
11 154
11 153
11 153
11 152
10 150
10 150
10 150
10 149
10 148
10 144
10 144
10 122
10 122
25 121
24 120
24 119
24 119
24 119
24 119
21 91
21 86
21 78
21 76
21 76
21 77
21 75
21 70
21 69
6 65
6 66
6 66
6 65
6 65
6 62
6 59
7 59
7 60
7 63
7 71
7 74
7 73
7 72
7 68
7 67
7 66
7 50
7 50
7 50
7 48
7 48
7 48
7 49
7 59
7 59
6 58
6 65
6 89
6 113
6 115
5 115
4 116
4 116
4 131
4 132
4 132
4 133
4 132
4 132
4 132
4 132
1 132
1 132
1 132
3 134
3 134
3 134
3 134
3 134
3 134
3 134
3 134
4 134
4 134
4 134
4 134
4 134
4 134
4 134
3 131
3 131
3 131
3 131
3 131
3 130
3 130
3 130
2 127
2 126
2 126
2 126
2 126
2 126
2 126
2 126
2 125
2 124
2 124
2 124
2 124
2 124
2 125
2 125
2 125
2 125
2 125
2 124
2 124
2 124
2 124
2 123
2 122
2 120
3 119
3 119
3 118
3 117
3 116
4 115
4 115
122 120
122 121
122 121
122 123
121 122
121 122
121 122
121 119
121 111
121 107
121 106
121 105
121 103
120 103
119 103
119 103
119 103
1 97
1 96
1 96
1 95
1 93
1 90
1 79
1 76
1 73
1 67
1 44
1 20
3 16
3 15
3 15
3 15
3 0
3 0
3 0
3 0
3 0
3 0
3 0
3 0
3 0
5 0
5 0
4 0
4 0
4 0
4 0
4 0
4 0
4 0
4 0
4 0
4 0
4 0
4 0
4 0
2 0
2 0
2 0
2 0
2 0
2 0
2 0
2 1
2 1
2 1
2 1
2 1
2 1
2 1
2 1
2 3
2 3
2 3
2 3
2 3
2 3
2 3
2 2
4 2
4 2
4 2
4 2
4 2
4 2
4 2
4 0
4 0
4 1
4 1
4 2
4 2
5 2
5 2
3 2
3 2
3 2
3 2
3 2
3 2
3 2
3 2
3 2
3 2
3 1
3 1
3 0
3 0
3 1
3 1
3 1
3 1
3 1
3 4
3 4
3 4
3 4
4 4
4 4
4 4
4 4
4 4
4 4
4 4
3 3
3 3
3 3
3 3
2 0
2 0
2 0
2 0
1 0
1 0
0 0
0 6
199 11143
201 11160
201 11160
201 11160
201 11160
201 11161
201 11161
201 11161
201 11161
201 11161
201 11161
201 11161
245 11179
245 11179
245 11179
245 11179
44 27
44 27
44 27
44 23
44 22
44 73
44 73
44 73
44 73
44 73
44 73
44 73
43 73
0 55
0 55
0 55
0 55
0 55
0 55
0 55
0 1
0 0
0 0
0 0
0 0
0 0
0 0
0 0
0 0
0 0
0 0
0 0
0 0
0 0
0 0
0 0
0 0
0 0
0 0
0 0
0 0
0 0
0 0
0 0
0 0
0 0
0 0
0 0
0 0
0 0
0 0
0 0
0 0
0 0
0 0
0 0
0 0
0 0
0 0
0 0
0 0
0 0
0 0
0 2
0 2
0 2
0 3
4 3
4 3
4 3
4 3
4 3
4 3
4 3
4 3
4 3
4 3
4 3
4 1
4 1
4 1
4 1
0 1
0 1
0 1
0 1
0 1
0 18
0 19
0 19
0 19
0 19
0 20
0 20
0 20
0 20
0 20
0 20
0 20
0 20
0 20
0 20
0 20
0 20
0 20
0 20
0 20
0 20
0 20
0 20
0 20
0 20
0 20
1 21
1 21
1 23
2 23
2 27
2 30
2 32
2 33
2 33
2 34
2 34
2 34
3 76
3 76
3 76
3 76
3 76
4 79
4 80
4 80
4 80
4 80
4 80
4 82
4 82
4 82
4 82
4 82
4 81
4 81
4 83
4 89
4 89
4 89
4 92
3 71
3 73
3 74
3 75
3 75
3 75
3 78
3 78
3 80
3 80
3 82
8 86
9 209
10 222
10 221
10 221
10 222
10 223
10 224
10 224
10 225
10 226
10 226
10 227
10 228
10 234
10 234
10 236
10 241
10 242
10 242
11 242
11 242
11 242
11 242
11 242
11 244
11 246
11 252
11 237
11 237
11 245
11 257
11 262
17 320
17 329
17 336
18 346
18 347
18 348
20 349
21 350
21 350
21 350
21 350
21 350
21 350
22 350
22 350
23 352
17 295
17 298
17 305
17 312
16 332
15 331
15 331
15 334
14 332
14 330
14 326
14 325
13 324
13 325
13 326
13 329
13 330
13 332
13 332
13 332
13 331
13 332
12 330
12 332
12 332
12 336
12 336
12 338
12 336
12 337
12 340
12 342
12 342
12 342
12 342
12 341
10 334
8 328
8 328
8 327
8 307
8 305
8 304
8 304
8 306
8 304
8 303
8 303
8 301
8 308
8 307
7 295
6 180
5 177
5 177
5 178
5 179
5 188
5 188
5 190
5 193
5 197
5 210
5 226
5 236
5 233
5 235
5 235
5 235
5 235
4 235
4 235
4 236
4 236
4 237
4 237
4 233
4 233
4 225
4 224
4 221
4 204
4 204
4 200
4 192
4 190
4 184
4 179
4 178
4 178
0 177
0 181
0 181
0 181
0 180
0 180
0 180
0 180
0 179
0 178
0 176
0 173
0 168
0 157
0 130
0 130
0 131
0 135
0 148
0 151
0 153
0 155
0 157
0 159
0 159
0 158
0 159
0 159
0 160
0 165
0 167
0 166
0 167
0 167
0 175
0 172
0 173
0 169
0 169
0 167
0 164
0 163
0 163
0 166
0 166
0 165
0 165
0 165
0 165
0 165
0 165
0 165
0 163
0 163
0 163
0 163
0 163
0 163
0 162
0 151
0 150
0 150
0 149
0 149
0 150
0 150
0 146
0 147
0 149
0 143
0 139
0 136
0 102
0 100
0 98
0 98
0 97
0 94
0 94
0 95
0 96
0 97
0 97
0 98
0 97
1 101
1 107
1 110
1 120
1 121
1 124
1 126
1 127
1 126
1 126
1 129
1 130
1 130
1 129
1 129
1 130
1 126
1 130
1 128
1 132
1 132
1 132
1 132
1 132
1 132
1 132
1 132
1 132
1 131
1 131
1 131
1 129
1 122
1 105
1 106
1 111
1 111
1 112
1 115
1 114
1 111
1 111
1 110
1 112
1 110
1 109
1 107
1 105
1 105
1 98
1 100
1 101
1 111
4 151
4 158
5 159
5 165
5 171
5 170
6 179
6 199
6 201
6 203
6 208
6 210
6 212
6 213
6 213
6 214
6 217
6 217
6 218
6 219
6 219
6 219
7 221
7 206
7 206
7 206
7 203
7 201
7 202
7 200
7 199
7 200
7 200
7 199
7 197
7 194
7 195
8 195
9 201
22 280
24 306
25 326
25 338
26 359
27 372
32 386
33 387
33 383
34 380
34 377
34 366
34 367
34 364
34 364
33 364
33 365
33 365
33 364
33 362
33 374
33 375
33 376
34 384
37 680
39 681
39 700
39 711
39 718
41 726
43 731
43 734
43 735
43 739
43 739
45 742
45 742
45 743
45 743
45 742
42 449
42 446
42 445
68 477
71 487
71 505
73 513
75 519
75 525
75 525
75 525
75 521
75 513
75 514
73 514
73 511
73 509
73 506
73 501
72 500
71 490
70 448
70 443
69 442
69 441
70 448
70 443
71 441
71 435
71 438
71 436
71 427
71 427
71 428
71 428
71 426
71 425
71 425
71 426
71 426
71 426
71 426
71 425
70 423
70 423
70 423
70 422
70 418
70 421
70 419
70 416
70 417
70 418
70 415
70 416
70 427
70 426
70 424
70 426
67 414
47 302
46 294
47 352
47 356
45 365
45 369
45 373
46 373
46 372
46 370
46 370
46 370
46 370
46 373
46 374
46 375
46 383
46 385
45 388
45 395
45 387
45 387
45 387
43 372
43 370
42 362
40 337
40 328
40 325
40 323
39 321
38 319
38 319
38 320
38 322
37 321
37 325
36 328
33 327
33 334
32 333
31 330
29 326
7 260
7 261
6 239
5 235
4 233
4 233
4 234
4 236
4 237
4 237
4 237
4 239
4 239
4 239
4 239
4 239
4 239
4 241
4 240
4 239
3 237
3 233
3 236
3 237
3 237
3 238
3 235
3 235
3 234
3 234
3 234
3 235
3 235
3 235
4 236
4 237
4 237
4 238
4 239
4 240
4 240
4 245
4 250
4 250
4 249
4 248
4 249
4 249
4 249
4 249
4 249
4 247
5 238
5 238
5 240
5 236
5 231
5 226
4 220
3 142
3 137
3 118
3 116
3 115
3 112
3 113
12 113
12 114
12 115
12 116
12 114
12 116
12 114
12 99
12 95
12 88
12 84
12 82
12 81
12 81
12 82
12 82
12 82
3 82
3 82
3 82
3 81
3 81
3 81
3 81
3 79
3 76
3 73
3 69
3 68
3 68
2 62
2 65
2 65
2 65
2 66
2 66
2 66
2 67
2 67
2 65
2 61
2 63
2 63
2 63
2 63
2 60
2 59
2 59
2 64
3 73
3 76
3 76
3 75
3 75
3 74
3 73
3 75
3 74
3 72
3 73
3 73
3 71
3 74
3 93
3 100
3 102
3 102
3 102
2 105
3 103
3 103
3 104
3 103
3 102
3 102
3 95
3 89
3 91
3 91
3 91
3 92
3 92
3 92
3 92
3 92
3 92
2 91
2 91
2 89
2 81
2 81
2 84
2 84
2 84
2 84
2 84
2 84
2 84
2 84
2 84
2 84
2 83
2 81
2 82
2 82
2 82
2 83
2 85
2 88
2 89
2 88
2 88
2 88
2 106
2 106
2 108
2 109
2 109
2 109
2 109
2 109
2 112
2 112
3 111
3 111
3 111
3 111
3 111
3 111
3 111
3 112
3 111
3 112
3 112
3 110
3 109
3 109
3 109
3 109
3 108
3 107
3 106
3 107
3 107
3 107
3 107
3 106
3 103
3 96
3 90
3 95
5 99
6 100
6 100
6 100
6 103
7 101
9 105
9 102
9 103
9 103
9 107
10 103
9 82
9 79
9 81
9 79
9 79
9 79
9 82
9 83
9 82
9 82
9 82
9 83
9 83
9 83
11 79
11 80
11 81
11 81
11 81
11 81
12 81
12 81
12 81
12 81
12 83
12 83
12 82
12 80
12 80
12 80
11 80
11 79
11 79
11 79
11 78
11 77
11 79
11 78
12 79
14 78
14 78
14 79
15 78
15 78
15 77
15 75
15 74
15 73
15 74
15 74
15 58
15 57
15 55
15 55
15 55
15 55
15 54
15 56
15 53
15 52
14 52
14 52
14 52
14 52
15 55
15 55
15 55
16 55
16 55
16 55
16 55
16 55
16 56
19 56
19 56
19 56
19 56
19 56
20 56
20 53
20 53
20 53
20 52
19 52
19 52
18 51
17 51
17 44
15 42
15 42
15 42
16 42
16 39
18 38
16 37
16 42
16 43
20 47
21 39
21 43
21 43
21 41
21 41
21 41
21 41
21 40
21 37
21 37
21 37
21 38
21 37
22 37
22 37
22 37
21 37
21 36
21 36
21 35
21 35
21 35
21 36
21 39
21 44
21 44
21 44
21 46
21 46
21 46
21 46
21 46
21 53
21 55
21 59
21 59
21 59
20 59
20 58
19 59
19 59
17 62
17 60
16 61
16 61
16 61
18 61
18 59
18 62
18 61
18 63
18 62
18 62
18 66
18 71
18 71
18 72
18 72
18 73
18 74
19 181
19 181
19 181
19 181
19 181
20 183
19 180
19 182
19 187
18 189
18 191
18 191
18 191
18 191
18 191
12 82
12 84
12 84
12 85
12 85
12 85
12 85
12 86
12 86
12 86
12 86
12 86
22 86
876 95
876 94
876 95
876 95
876 97
876 99
876 106
874 107
874 109
874 104
873 103
868 100
868 98
868 97
868 97
851 97
9 88
5 88
5 89
4 89
4 90
4 92
4 92
4 92
9 133
8 133
8 133
8 133
8 134
8 134
8 134
8 134
8 129
8 129
8 126
8 121
8 117
8 117
8 117
8 114
3 76
3 76
3 76
3 78
3 78
3 77
3 77
3 77
3 76
3 75
3 74
3 73
3 73
4 75
4 74
4 73
4 74
4 74
2 71
2 65
2 64
2 64
2 62
2 62
2 60
2 58
2 53
2 53
2 53
2 53
2 53
2 52
2 51
2 51
4 51
4 51
4 51
3 44
3 44
3 40
3 35
3 36
3 37
3 36
3 36
3 36
3 36
3 36
3 33
1 33
1 33
1 34
1 34
1 34
1 34
1 34
1 34
1 34
1 34
1 34
1 34
1 34
1 31
1 32
1 30
1 26
1 21
1 19
1 16
1 16
3 17
3 17
4 16
4 16
4 17
4 17
4 17
4 18
4 17
4 16
4 14
4 14
4 14
4 13
4 13
2 11
2 11
1 11
1 11
1 10
1 10
1 10
1 10
1 10
1 10
1 10
1 10
1 11
1 11
1 11
1 11
1 11
1 11
1 9
1 9
1 9
1 10
1 11
1 11
3 30
3 30
3 29
2 29
2 29
2 29
2 29
2 28
2 28
2 28
2 26
2 26
2 25
2 25
2 26
2 26
0 7
1 7
1 7
1 7
1 7
1 7
1 7
2 8
2 8
2 9
3 13
1601 356
1602 356
1602 356
1604 355
1604 355
1604 354
1607 355
1607 355
1622 356
1622 357
1627 402
1627 402
1627 402
1628 402
1628 402
1561 398
81 55
77 55
65 55
65 55
27 55
23 55
23 55
8 60
8 60
6 14
3 13
3 13
3 13
2 13
2 13
2 13
3 13
3 14
3 14
3 14
3 15
3 15
2 15
2 9
2 10
2 9
1 10
1 13
1 13
1 13
1 13
1 13
1 13
2 14
86 1793
86 1793
86 1792
86 1792
89 1792
89 1791
89 1791
89 1790
89 1790
89 1790
89 1789
89 1789
94 1934
94 1934
94 1934
8 155
8 154
8 154
11 154
8 154
8 154
8 153
9 153
9 153
9 153
9 153
9 153
5 8
5 8
5 8
5 9
5 9
6 9
6 9
3 9
3 9
3 11
2 10
2 10
2 10
2 9
2 8
2 8
2 8
2 7
2 6
2 6
1 6
1 6
1 6
1 6
1 6
1 4
1 4
1 4
1 4
1 4
1 4
1 4
1 4
1 4
1 4
0 4
0 4
0 4
0 4
0 4
0 4
0 4
0 4
0 4
0 4
0 4
0 4
0 4
0 4
0 4
0 4
0 4
0 5
0 6
7 6
30 5
68 5
135 5
147 5
225 5
429 5
578 5
639 5
673 5
682 5
692 5
696 2
696 2
701 2
702 2
702 2
704 2
705 2
710 3
722 4
723 4
725 4
727 4
749 4
808 4
853 4
872 4
872 4
875 4
877 4
883 4
886 4
888 4
887 4
887 3
887 3
887 3
889 3
893 3
894 3
899 3
899 3
901 3
901 4
904 4
904 5
904 5
905 5
906 5
907 5
907 5
907 5
908 5
907 5
907 5
907 5
907 5
908 5
908 5
908 5
909 5
909 5
909 5
911 5
912 5
918 5
920 5
927 5
928 5
931 5
932 5
927 5
922 5
935 5
977 5
1041 6
1045 6
1045 6
1045 6
1041 6
1037 6
1034 6
1028 6
1008 6
995 6
991 6
979 6
979 6
975 6
949 5
916 5
867 5
783 5
742 5
726 4
717 4
706 4
701 4
695 4
687 4
674 4
665 4
617 4
590 4
544 6
473 7
426 9
407 10
400 10
400 10
397 10
395 10
395 10
390 10
390 10
388 10
387 36
384 36
384 37
376 36
376 36
375 34
364 34
331 34
264 32
226 31
215 31
214 31
213 32
211 32
210 32
212 6
212 6
210 5
210 5
212 5
212 5
211 5
209 5
209 5
208 5
206 6
205 6
587 16
585 16
585 16
587 16
589 16
589 16
590 16
590 16
591 16
592 16
592 16
591 16
591 16
594 16
783 18
789 18
415 8
415 8
410 8
411 9
411 9
413 11
402 11
394 11
379 11
415 11
416 11
412 11
406 11
401 11
200 9
371 9
315 8
313 8
313 9
311 9
311 8
311 8
314 8
319 9
322 9
323 9
322 9
322 9
320 9
319 9
128 9
129 9
129 9
129 10
136 9
136 9
138 9
138 9
141 9
145 9
148 9
176 10
190 10
194 10
195 10
195 9
201 8
197 8
261 7
257 7
252 7
253 7
253 7
252 8
251 8
251 8
252 7
251 7
252 12
252 12
249 12
251 12
267 14
274 13
275 13
277 14
278 15
282 16
283 15
284 15
286 17
286 17
283 17
313 24
359 22
370 26
370 27
378 28
465 34
489 34
512 33
521 33
523 32
528 33
536 34
542 34
546 35
566 38
565 38
568 39
568 39
584 39
622 41
648 42
654 46
654 46
655 46
657 46
657 46
653 46
651 46
649 45
646 46
647 45
688 45
694 45
690 45
689 45
706 45
679 45
698 48
704 48
705 48
706 48
709 48
710 48
713 48
718 48
724 48
733 48
734 48
736 48
735 48
734 47
729 47
730 47
743 47
746 47
752 47
753 47
758 47
760 47
772 47
780 47
780 48
785 48
782 48
787 48
784 47
790 47
788 47
766 47
755 47
781 50
791 52
806 54
803 54
805 54
746 54
746 54
745 54
745 54
745 54
745 53
758 53
761 53
766 54
772 54
804 57
816 61
822 61
820 66
856 68
848 65
848 66
849 66
844 65
849 63
844 63
831 63
832 63
834 63
833 61
815 54
756 47
741 47
735 47
719 45
568 39
553 37
548 34
552 34
549 34
600 35
593 34
594 35
596 36
579 34
578 34
949 85
947 85
948 86
943 85
935 85
934 85
934 85
934 85
947 87
944 87
941 87
940 87
928 87
932 86
954 86
924 83
551 35
546 34
543 33
518 33
504 33
488 31
488 31
487 31
488 31
486 31
481 31
479 31
478 31
474 31
478 31
477 31
483 31
482 31
482 31
481 31
480 32
469 32
468 33
461 34
459 34
458 34
452 34
443 35
446 34
457 34
455 35
446 35
446 35
437 35
429 35
426 35
437 35
501 35
480 29
467 29
467 29
470 29
473 29
481 29
494 29
506 30
510 31
521 31
524 31
501 30
490 30
484 28
476 26
436 22
429 22
427 22
417 17
401 14
401 14
402 14
402 15
401 15
398 15
398 15
400 15
396 15
392 15
386 15
384 15
383 15
383 15
381 15
380 15
378 17
371 18
364 19
352 19
355 19
315 20
314 19
314 18
312 17
311 18
312 18
311 18
310 18
308 19
308 19
307 19
306 19
308 19
307 19
292 17
291 17
289 17
286 17
279 17
267 17
256 17
256 17
256 17
256 17
256 17
256 17
253 17
244 17
243 17
243 17
244 17
246 17
246 17
246 17
248 17
250 16
248 16
285 16
298 17
300 17
302 17
302 17
310 17
315 17
313 16
338 16
336 16
336 16
330 16
352 17
345 17
335 16
335 16
341 16
347 16
330 15
330 15
307 17
317 17
268 17
259 17
252 17
250 17
258 17
286 17
280 16
273 16
265 16
261 15
256 15
255 15
256 15
256 15
257 15
257 15
257 15
257 15
257 15
257 20
262 20
262 20
263 20
263 20
263 20
263 19
261 19
260 19
263 19
263 19
263 19
261 18
261 18
261 18
260 13
299 13
299 11
299 9
299 8
298 8
294 8
292 8
292 8
295 8
291 8
291 7
294 9
295 9
296 9
297 9
291 10
313 10
321 10
325 10
326 10
327 10
328 10
330 10
347 10
386 10
407 11
412 11
425 11
430 11
434 11
440 11
483 17
512 21
526 22
619 23
622 23
625 23
627 23
632 23
628 23
633 28
631 29
627 29
594 29
581 29
579 29
578 29
583 28
574 25
579 25
620 25
672 23
766 23
869 23
936 25
976 19
993 19
992 19
989 19
993 19
1028 19
1037 19
1029 19
1033 17
1017 17
1016 18
1019 18
1021 19
1020 19
1012 19
987 19
988 19
988 19
991 19
990 19
990 19
991 19
992 19
991 19
992 19
992 19
992 19
992 19
991 19
991 19
987 18
988 18
990 18
990 18
993 17
993 17
995 17
995 17
995 17
995 17
997 17
997 17
997 17
997 17
997 17
996 17
996 17
996 17
996 17
996 17
996 17
995 17
999 17
995 17
995 17
996 17
994 17
992 17
990 17
975 16
924 15
909 15
902 16
898 16
897 16
895 16
893 16
888 16
873 16
849 16
826 16
823 15
801 15
796 15
784 14
774 14
739 8
724 10
708 9
629 8
623 8
620 8
615 8
612 8
609 8
608 8
606 8
606 8
606 8
599 8
585 8
577 8
552 4
505 4
474 4
415 4
315 5
207 3
136 3
110 3
85 3
126 4
126 5
123 7
116 7
80 7
77 8
76 8
75 8
76 8
79 8
79 8
80 7
80 7
85 7
88 7
88 7
88 7
88 7
88 5
88 5
88 5
84 5
84 5
85 5
85 5
84 5
83 5
83 5
83 5
86 7
86 7
84 8
82 9
78 9
74 9
76 9
76 9
76 9
78 9
80 10
81 10
82 10
83 10
83 10
84 10
84 10
93 10
100 9
102 9
102 9
102 9
99 9
98 9
98 9
98 9
97 9
99 9
99 9
100 9
100 9
100 21
100 21
100 21
99 22
99 22
99 22
99 22
97 22
97 22
102 22
103 22
103 22
103 22
111 22
111 22
111 12
111 12
111 12
112 12
112 12
112 12
112 12
112 12
112 12
116 13
118 13
119 13
120 13
123 13
123 13
123 13
123 13
123 11
124 13
124 13
124 13
124 13
124 13
124 13
124 13
80 10
80 10
80 10
79 10
79 10
79 10
78 10
76 10
75 10
75 10
75 10
74 10
68 10
66 10
66 10
66 10
65 10
65 10
65 10
65 10
65 10
64 10
64 10
64 10
64 10
64 10
64 10
63 10
62 8
60 6
59 6
59 6
59 6
59 6
57 6
57 6
57 6
56 6
53 6
51 5
51 5
51 5
51 5
51 5
50 5
47 5
34 5
34 5
34 5
33 5
33 5
33 5
33 5
33 5
33 5
33 5
33 5
33 5
33 5
33 5
33 5
30 4
30 4
30 4
28 4
26 4
26 4
25 4
24 4
21 3
20 3
19 3
19 3
12 3
12 3
12 3
12 3
12 3
12 3
12 3
12 3
12 3
11 3
12 3
6 2
6 2
6 2
4 2
3 1
3 0
3 0
3 0
3 0
3 0
3 0
3 0
3 0
3 0
3 1
3 1
3 1
3 1
3 1
3 1
3 1
3 1
3 1
3 1
3 1
4 4
4 4
6 4
7 18
7 22
7 24
7 25
7 25
9 28
9 28
9 29
9 29
10 29
10 29
10 29
10 29
10 29
10 29
9 29
9 29
9 29
9 29
9 30
9 30
9 30
9 30
8 32
8 33
8 33
8 33
8 36
8 40
8 41
8 47
8 49
8 49
8 50
8 51
8 51
8 51
8 52
8 52
8 52
7 53
7 53
8 53
8 53
7 53
7 53
7 53
7 53
7 53
7 53
7 53
7 53
7 53
7 53
7 53
7 53
7 53
6 52
6 52
6 52
6 52
6 54
6 58
6 58
6 58
6 58
6 60
6 60
6 61
6 62
6 62
6 62
6 63
6 64
6 65
6 65
6 65
6 65
6 65
6 65
6 65
6 63
6 63
6 66
6 66
6 66
6 68
6 68
6 68
6 67
6 67
6 67
6 67
6 67
6 67
5 67
5 67
4 65
5 63
3 63
3 50
3 47
3 46
3 46
3 46
1 43
1 43
1 43
1 43
1 43
2 43
2 43
2 44
2 44
2 44
2 44
2 44
2 44
2 44
2 44
2 43
2 44
2 43
2 44
2 52
2 54
1 56
1 55
1 51
1 56
1 56
1 58
1 59
1 68
1 120
1 123
1 130
1 139
2 154
2 161
2 171
2 173
2 176
2 177
3 177
3 177
3 179
3 184
3 191
3 191
3 191
3 191
3 191
3 191
3 191
3 191
3 191
3 191
3 191
2 191
2 191
2 189
2 184
2 185
2 187
2 188
2 189
2 190
2 191
2 191
2 192
2 192
2 191
2 191
2 191
2 191
2 191
2 192
2 196
2 198
2 195
2 195
2 196
2 195
2 194
2 195
2 194
2 194
2 194
2 194
2 194
2 194
2 194
2 194
3 194
3 194
3 194
2 191
2 191
2 192
2 192
2 192
2 192
2 192
2 192
2 191
2 191
2 191
2 191
1 191
1 191
1 193
1 194
1 193
1 193
1 193
1 193
1 193
1 193
1 192
1 192
1 190
1 190
1 183
1 164
1 159
1 157
1 155
1 149
1 144
1 141
1 138
1 136
1 130
1 72
1 64
1 48
1 39
0 27
1 27
1 24
1 24
1 22
1 22
1 22
1 22
1 22
1 22
1 21
1 21
1 21
1 21
1 22
1 21
2 22
1 22
1 22
1 23
1 24
1 24
1 24
1 24
1 24
1 25
1 25
1 23
1 23
1 23
1 24
0 23
0 23
0 23
0 22
0 22
0 22
0 22
0 22
0 20
0 17
0 15
0 14
0 18
0 20
0 19
0 19
0 20
0 20
0 20
0 21
0 21
0 21
0 21
1 21
1 21
1 21
1 21
1 20
1 20
1 20
1 20
1 20
1 21
1 20
1 20
265 23
265 23
265 23
265 23
265 23
265 23
265 23
265 19
265 20
265 20
265 23
265 25
265 26
265 26
265 26
1 23
1 23
0 24
0 25
0 26
0 26
0 31
1 31
1 31
1 31
1 35
1 35
1 35
1 35
1 37
1 38
1 39
1 39
1 39
1 39
1 40
2 44
1 46
1 50
1 50
1 50
1 50
1 50
3 54
3 54
3 54
3 54
3 55
3 54
3 54
3 53
2 53
2 52
2 50
2 50
2 50
2 50
2 51
2 52
0 48
0 50
0 50
0 49
0 49
0 49
0 49
0 53
0 54
0 54
0 54
17 54
17 54
17 54
17 53
17 54
17 53
17 53
17 49
17 47
17 48
17 48
17 48
17 47
17 47
17 47
0 47
0 47
0 47
0 47
0 46
0 46
0 46
0 46
0 46
0 46
0 46
0 46
0 46
0 46
0 46
0 46
0 46
0 46
0 46
1 46
1 46
1 46
1 46
1 45
1 43
1 42
1 41
1 53
1 52
2 57
2 58
3 58
3 58
3 58
2 56
2 60
2 58
2 58
2 59
2 61
2 57
2 57
2 54
2 54
2 53
2 50
1 48
3 48
3 48
3 47
3 47
3 45
3 44
3 42
3 42
3 42
3 42
3 41
3 41
3 42
3 43
3 45
1 45
1 46
1 47
10 904
10 904
10 904
10 904
10 904
10 904
10 905
10 906
10 912
11 937
11 937
12 945
12 951
12 954
12 954
3 102
4 101
4 101
5 103
5 103
5 103
5 104
6 104
6 105
6 105
6 104
6 104
6 104
6 104
6 104
6 104
6 104
6 104
6 104
6 104
6 104
6 105
6 105
6 106
6 107
6 107
6 107
6 107
6 107
6 107
6 107
6 107
6 107
6 108
6 109
6 109
6 109
6 109
6 109
6 109
6 116
6 117
6 118
6 118
6 118
6 118
6 110
5 102
5 100
5 99
5 99
5 99
5 99
5 99
5 97
5 92
5 92
5 91
5 90
5 90
5 90
5 90
5 90
5 90
5 90
5 90
5 92
5 95
5 95
5 95
5 96
5 96
5 98
5 100
5 102
5 103
5 103
5 107
5 110
5 109
5 108
5 102
5 101
5 100
5 100
5 100
5 100
5 100
5 100
5 100
5 99
5 99
5 99
5 99
3 76
3 73
3 72
3 77
3 73
2 73
2 74
1 68
1 68
0 66
0 67
0 67
0 67
0 67
0 66
0 66
0 66
0 66
0 66
0 66
0 66
0 66
0 71
0 71
0 71
0 72
0 73
0 74
0 75
0 79
0 81
0 84
0 86
0 86
0 87
0 87
0 87
0 87
0 87
0 84
0 87
0 87
0 85
0 85
0 85
1 84
1 78
1 76
1 75
1 77
1 77
1 77
1 77
1 77
1 77
1 77
1 74
1 75
1 75
1 76
0 76
0 77
0 77
0 77
0 75
0 75
0 77
0 78
0 78
0 83
0 83
0 82
0 80
0 78
0 80
0 79
0 79
0 79
0 77
0 74
0 75
0 71
0 71
0 70
0 70
0 68
0 66
0 62
0 62
0 62
0 62
0 63
0 63
0 65
0 65
0 65
0 65
0 68
0 67
0 64
0 65
0 66
0 64
0 59
0 59
0 59
0 58
0 58
0 56
0 56
0 56
0 56
0 56
0 56
0 56
0 56
0 56
0 56
0 56
0 57
0 57
0 60
0 57
0 56
0 56
0 55
0 55
0 55
0 51
0 47
0 43
0 41
0 42
0 45
0 45
0 45
0 45
0 45
0 45
0 46
0 47
0 48
0 48
0 48
0 49
0 50
0 50
0 51
0 49
0 49
0 49
0 50
0 50
0 51
0 51
0 50
0 50
0 48
0 47
0 47
0 47
0 47
0 47
0 47
0 47
0 47
0 44
0 43
0 43
0 39
0 40
0 40
0 40
0 40
0 37
0 37
0 36
0 35
0 35
0 35
0 35
0 34
0 34
0 34
0 34
0 34
0 33
0 33
0 33
1 33
1 33
1 32
1 32
1 30
1 31
1 31
1 31
1 27
1 27
1 24
1 22
1 21
1 21
1 21
1 21
1 22
1 22
1 21
1 21
1 21
1 22
1 22
1 29
1 29
1 31
1 31
1 31
1 31
1 30
1 28
1 28
1 26
1 24
1 24
1 24
1 24
1 24
1 24
1 23
1 23
1 16
1 16
1 15
1 14
1 14
1 14
1 14
1 15
1 17
1 15
1 15
1 14
1 14
1 13
1 12
5 11
5 10
24 10
24 11
24 13
24 13
24 14
24 14
24 13
24 13
24 13
24 13
24 13
24 13
24 13
24 13
20 13
1 13
1 13
1 13
1 13
1 13
1 13
1 13
2 13
2 12
2 12
2 12
2 12
2 12
2 12
2 12
2 12
2 12
2 11
2 11
2 11
2 11
2 11
3 11
2 11
2 11
2 11
2 11
1 12
1 12
1 12
1 12
1 12
1 11
1 11
1 11
1 11
1 11
1 11
0 11
0 12
0 14
0 14
0 16
0 15
0 15
0 15
0 15
0 15
0 14
0 13
0 13
0 13
0 13
0 13
0 13
0 13
0 13
0 13
0 13
0 14
0 14
0 14
0 14
0 14
0 14
0 15
0 15
0 15
0 15
0 15
0 16
0 25
0 27
0 33
0 45
0 45
0 44
0 46
0 48
3 49
3 60
3 61
3 63
3 63
3 64
3 64
3 62
7 61
7 61
7 61
7 61
7 61
7 61
7 61
7 61
4 63
4 64
4 64
4 64
4 64
4 64
4 64
0 64
0 65
0 65
0 65
0 65
0 66
0 66
0 66
0 66
0 66
0 66
0 70
0 72
0 72
0 72
0 72
0 72
0 72
0 73
0 77
0 82
0 82
0 86
0 89
0 91
0 92
0 92
0 92
3 93
3 93
3 93
3 93
4 92
4 92
4 91
4 90
4 90
4 89
4 88
4 89
4 89
4 89
4 89
4 90
1 90
1 90
1 90
1 90
1 90
1 90
1 90
1 90
1 89
1 89
1 89
1 88
1 88
1 88
1 88
1 88
1 88
1 87
1 87
1 87
1 87
1 85
1 84
1 83
1 79
1 74
1 70
1 62
1 54
1 52
1 53
1 52
1 50
1 47
1 38
1 38
1 38
1 39
1 39
1 39
1 40
1 50
1 60
1 65
1 65
1 65
1 65
1 65
1 65
1 63
1 63
1 63
1 64
1 64
1 65
1 65
1 69
1 69
1 68
1 70
1 71
1 71
1 71
1 71
1 71
1 71
1 71
2 68
3 66
4 66
4 66
4 64
4 64
5 65
6 65
6 56
6 52
6 51
6 46
6 45
6 44
6 44
6 44
7 44
7 44
7 45
7 45
7 45
5 45
5 46
5 46
5 46
5 46
5 46
5 45
5 45
5 45
5 45
5 45
5 44
5 44
5 44
5 44
5 45
5 45
67 78
67 81
67 85
67 89
70 110
70 114
70 114
73 124
73 124
73 126
73 127
73 127
73 128
73 128
73 129
12 128
12 128
12 128
12 128
12 128
12 130
12 130
12 130
12 130
9 123
9 122
9 122
9 122
9 122
9 122
9 122
9 122
9 121
9 121
9 121
9 118
9 103
9 98
9 100
9 100
9 110
9 119
9 119
9 125
9 127
9 127
80 137
80 141
80 141
80 142
81 143
81 139
81 138
81 138
81 135
81 134
81 133
80 133
80 133
80 132
80 132
9 120
9 120
10 120
9 120
9 120
9 120
9 120
9 119
8 119
8 119
8 120
8 120
8 120
8 120
8 120
8 120
8 120
7 120
7 120
7 118
7 118
7 121
7 121
7 122
10 164
10 166
10 167
10 168
10 177
11 229
12 248
12 261
12 263
12 265
12 267
12 281
12 282
11 279
11 280
11 241
11 242
10 237
8 235
7 212
7 213
7 209
7 209
7 209
7 206
7 207
7 210
7 210
7 210
7 210
7 210
7 211
7 211
7 211
7 210
7 208
7 208
7 212
7 213
7 219
7 221
7 222
7 223
7 224
7 224
7 224
7 224
7 224
7 225
7 223
7 222
7 222
7 220
7 221
5 220
5 213
5 211
5 216
5 211
5 210
5 214
5 218
5 216
5 218
5 220
5 224
5 225
5 230
5 230
5 230
5 232
5 232
5 234
5 234
5 236
5 236
5 236
5 236
5 236
5 236
5 236
5 236
4 236
4 236
4 236
4 237
5 237
5 237
5 237
5 237
5 237
5 237
5 237
5 237
5 240
5 239
4 238
2 227
2 214
2 199
2 163
2 163
2 160
2 160
2 147
2 92
1 86
1 90
1 91
1 92
1 96
1 98
1 96
1 96
1 96
1 97
1 97
1 99
1 103
1 102
1 104
1 104
1 104
1 104
1 103
1 102
1 101
1 101
1 101
1 102
1 106
1 105
1 105
1 107
1 107
1 112
1 112
1 104
1 102
1 104
1 102
1 101
1 100
1 99
1 99
1 99
1 99
1 99
1 98
1 98
1 98
1 98
1 99
1 98
1 99
1 93
1 85
1 84
1 84
1 84
1 83
1 78
1 77
0 75
0 73
0 71
0 71
0 74
0 75
0 75
0 75
0 75
0 75
0 75
0 77
0 78
0 89
0 91
0 91
0 91
0 91
0 91
0 92
0 92
0 93
0 94
0 94
0 94
0 94
2 105
2 106
2 106
2 105
2 103
2 101
2 102
2 102
2 102
2 102
2 102
2 102
2 102
2 103
2 103
0 92
0 86
0 82
0 79
0 81
0 81
0 80
0 79
0 82
0 81
0 81
0 76
0 75
0 73
0 71
0 71
0 72
0 73
0 73
0 73
1 72
1 72
1 72
1 72
1 72
1 73
1 67
1 66
1 65
1 65
1 71
1 66
1 67
2 68
2 68
2 69
3 70
3 71
5 71
5 71
5 71
8 73
8 74
8 75
8 75
8 75
11 75
12 75
12 74
14 74
14 71
14 71
15 71
15 77
15 75
15 75
15 75
15 75
15 75
15 72
15 69
15 67
15 67
15 63
15 62
15 62
15 61
15 61
15 58
15 58
15 54
15 54
15 44
15 43
16 43
16 43
17 44
17 44
18 44
19 44
19 43
19 42
19 42
19 42
23 42
23 43
23 42
23 42
23 42
23 42
23 42
23 42
23 42
23 42
23 43
26 43
26 44
26 42
26 42
26 42
26 42
26 42
26 42
26 43
26 44
26 44
26 44
26 46
26 44
26 42
26 42
26 47
26 47
26 50
27 201
28 203
29 202
29 204
29 205
29 206
28 205
28 207
28 207
28 210
28 213
28 214
28 216
28 215
28 215
28 214
27 59
25 58
24 58
24 58
24 59
21 57
22 57
22 57
22 58
22 58
22 58
18 55
17 55
19 55
19 55
19 55
18 57
18 57
19 63
20 63
20 66
20 68
20 69
22 63
22 66
22 68
23 68
25 68
25 68
25 68
25 68
25 69
23 70
23 70
23 71
23 71
23 71
23 71
23 71
23 70
23 70
21 71
20 70
19 70
19 70
19 69
19 69
19 67
19 67
18 67
18 67
18 67
18 67
18 67
15 67
15 66
15 65
15 66
15 65
16 67
16 67
16 68
16 69
17 68
16 68
14 69
14 68
15 68
15 69
15 69
15 69
16 69
16 67
16 68
15 67
15 67
15 68
15 66
15 66
15 66
15 68
15 62
14 65
14 67
16 67
15 63
14 63
15 73
15 74
15 74
15 73
15 75
15 78
15 80
15 77
15 77
15 74
15 74
15 74
15 76
15 76
15 75
15 75
15 75
15 76
15 77
14 77
14 77
14 76
14 76
14 76
14 76
14 76
14 76
14 75
14 75
15 75
14 73
13 68
13 68
14 64
14 62
13 61
11 61
11 60
11 58
9 58
9 62
11 67
11 67
12 67
12 67
12 67
12 84
12 83
12 83
12 83
12 83
12 83
12 83
12 83
13 83
13 83
13 80
13 78
13 78
11 75
11 75
11 58
11 58
11 58
11 58
11 58
11 58
11 58
11 57
11 57
10 59
11 62
11 61
11 61
11 60
10 59
10 58
10 58
10 57
10 57
10 57
10 55
10 55
10 55
9 55
9 55
9 55
9 55
10 55
10 54
10 54
10 54
10 53
10 50
10 47
10 40
10 40
8 39
8 38
8 37
7 26
7 24
7 24
7 23
7 22
7 21
7 22
7 23
7 23
7 24
7 25
7 24
7 23
7 25
7 25
7 25
7 24
7 23
8 24
8 24
8 24
8 24
8 24
8 24
8 24
8 24
8 24
8 24
7 24
7 24
8 24
8 24
7 23
7 23
6 24
6 25
6 25
6 24
5 24
5 24
5 23
5 23
5 23
5 23
5 25
5 25
6 31
6 32
7 34
7 33
7 33
7 33
7 34
7 34
7 35
7 35
7 36
7 36
7 36
7 36
7 37
7 37
6 33
6 33
7 33
6 33
7 34
7 34
10 34
11 34
11 34
11 32
11 33
11 33
11 34
11 36
11 36
11 36
13 36
13 36
16 36
17 36
28 59
28 59
28 60
28 60
28 60
28 60
27 60
27 60
27 60
27 60
27 60
27 60
27 60
27 61
27 60
16 37
16 37
16 38
16 37
16 36
16 35
16 35
16 35
16 35
16 33
16 33
16 31
15 31
15 30
15 31
15 32
16 31
16 32
16 32
16 32
18 33
17 66
18 67
18 68
20 97
20 102
20 108
20 110
20 111
19 114
19 116
19 117
19 117
19 117
18 118
18 118
18 86
18 85
18 85
18 85
18 86
18 86
18 86
18 85
18 85
19 85
19 83
19 83
19 82
19 80
19 79
19 78
19 78
19 78
19 78
19 77
19 78
19 77
19 77
19 76
19 76
20 77
20 79
20 88
20 92
21 94
22 95
22 96
24 97
23 94
24 94
19 94
23 104
22 104
22 105
23 105
23 105
23 105
23 103
23 103
23 103
25 104
25 105
23 107
23 106
23 106
23 107
23 114
23 114
63 115
63 116
63 116
63 121
63 163
63 184
63 198
63 211
63 219
63 222
96 232
96 236
96 242
96 243
96 238
55 238
55 238
55 239
55 241
55 243
56 243
56 243
56 244
56 241
56 245
23 249
23 252
23 258
23 260
24 261
24 262
22 264
22 264
22 262
21 260
20 228
20 226
20 226
20 226
20 225
20 223
20 223
20 224
20 224
20 224
20 224
20 224
20 223
20 224
20 224
22 224
22 224
22 224
22 225
22 224
23 223
25 223
27 223
27 224
27 225
27 226
29 229
29 229
29 236
29 235
29 241
29 242
29 242
29 241
27 241
25 241
24 242
24 239
25 238
26 239
27 238
27 237
26 241
26 243
26 243
26 243
26 245
25 244
22 236
20 238
20 238
20 238
20 239
20 240
20 243
20 242
19 245
17 248
17 264
19 269
19 268
19 267
19 271
19 271
19 271
19 295
19 295
19 297
19 282
19 223
19 205
19 203
20 203
21 201
19 179
20 171
20 169
20 164
20 166
20 165
20 167
20 168
20 168
20 167
20 167
19 167
19 165
19 162
19 161
19 151
19 145
19 142
18 141
18 139
17 137
17 138
17 140
18 140
18 141
18 141
18 147
18 151
18 153
18 156
18 159
18 161
20 164
22 169
23 182
23 196
23 197
23 196
23 196
22 196
22 200
21 199
22 199
23 201
23 201
22 202
22 202
20 202
19 203
19 202
19 199
19 200
16 197
16 200
15 186
15 184
15 183
15 186
15 190
15 192
18 214
18 214
18 222
17 223
16 221
15 211
14 211
14 211
14 211
14 216
14 215
15 224
15 229
15 237
16 232
16 240
16 246
16 258
16 262
16 265
16 270
16 290
16 297
23 298
23 309
24 310
23 324
23 331
23 333
23 333
23 332
23 306
22 310
22 307
22 309
22 309
22 308
22 309
20 308
19 308
13 306
13 306
13 311
13 309
13 309
13 309
13 309
13 309
13 309
13 306
13 306
13 306
13 307
13 307
14 307
14 307
14 308
14 306
14 306
14 309
14 310
14 309
14 306
13 306
13 307
13 307
13 302
12 291
11 291
11 281
11 280
10 278
10 276
10 272
9 258
9 253
9 251
9 251
9 249
9 243
9 242
8 242
7 242
7 241
7 239
7 240
7 240
7 240
9 249
10 244
10 245
10 246
10 248
10 247
10 246
10 246
9 246
9 242
9 241
9 239
6 212
6 211
6 204
6 203
5 203
5 198
6 204
6 204
7 207
7 194
7 177
6 142
6 110
6 105
5 96
7 100
8 96
8 97
8 95
8 93
8 93
9 88
9 82
9 80
10 79
10 78
10 80
11 92
11 92
11 95
11 95
11 95
11 91
11 93
11 92
11 92
11 92
11 91
11 90
12 90
12 91
12 91
12 87
12 85
12 84
12 84
12 80
12 80
12 80
12 81
13 81
13 81
13 80
14 80
12 80
12 80
12 79
12 78
12 78
12 75
12 73
12 73
12 79
12 78
12 78
12 77
12 80
12 81
12 81
12 81
13 81
13 81
13 81
14 81
14 81
14 81
14 80
14 80
14 80
14 80
14 80
14 80
14 80
15 80
15 81
15 82
14 86
14 89
20 93
22 96
22 95
23 92
23 92
23 92
23 93
23 93
23 93
23 93
23 93
23 93
23 95
23 95
23 95
23 95
14 80
12 79
11 70
11 70
10 68
10 67
10 67
13 67
13 67
13 67
13 68
10 60
10 60
10 59
10 63
10 66
11 88
13 124
13 136
13 144
13 151
13 155
9 157
9 147
9 146
9 144
9 144
9 144
9 144
9 142
9 142
9 142
6 142
6 142
6 145
6 146
6 147
6 147
6 146
6 146
6 148
6 148
6 148
7 150
7 150
7 149
6 149
6 145
6 145
5 145
5 143
5 143
5 145
5 145
5 145
5 145
5 144
5 144
4 139
4 139
4 137
4 137
4 137
4 137
4 138
4 138
4 138
4 138
4 138
4 138
4 138
4 139
4 140
4 140
4 142
4 142
4 142
4 142
4 144
4 143
4 144
4 144
4 139
4 140
4 139
4 139
4 140
3 139
3 139
3 139
3 138
3 137
3 137
3 138
3 140
3 141
3 141
3 141
3 141
3 141
3 141
3 142
3 142
3 142
3 142
3 142
3 145
3 145
3 141
3 140
3 140
3 135
3 134
3 124
3 111
2 79
1 42
1 38
1 37
1 37
1 37
1 37
1 36
2 50
2 51
2 53
2 64
2 65
2 65
3 67
3 67
3 69
3 73
3 75
3 87
3 88
3 86
3 87
3 88
3 89
3 88
3 206
3 207
3 205
3 205
3 207
3 207
3 207
3 207
3 207
3 207
3 207
3 207
3 207
3 207
4 208
4 90
66 595
66 595
66 595
66 595
66 594
66 594
66 594
66 593
66 593
66 593
66 593
66 593
66 593
66 593
65 591
4 86
4 86
4 88
4 90
4 90
4 91
4 89
3 89
3 85
3 85
3 85
3 85
3 85
3 81
3 81
3 81
3 80
4 174
4 174
4 174
5 174
102 171
102 173
106 207
106 206
106 208
106 210
106 213
106 216
106 216
106 218
106 218
106 216
106 215
105 124
105 124
7 127
7 127
3 92
3 91
3 90
3 90
3 90
3 90
3 90
3 93
3 93
3 93
3 93
3 96
3 99
2 84
2 85
2 80
2 68
2 68
2 67
1 67
1 66
1 64
1 61
1 57
1 45
1 47
1 47
1 54
1 54
1 53
1 53
1 53
1 54
1 54
1 54
1 52
1 52
1 52
1 53
1 54
1 54
1 55
1 46
6 46
6 46
20 50
20 50
19 50
19 50
19 50
19 50
19 50
19 50
19 50
19 51
19 52
19 52
19 52
14 53
14 54
0 53
0 54
0 52
0 51
0 48
0 46
0 46
0 46
0 47
1 47
1 46
1 46
1 46
1 46
1 45
1 45
1 42
1 42
1 42
1 42
1 50
1 55
1 62
2 64
2 65
2 69
2 68
2 66
2 66
2 62
2 61
2 60
2 62
2 61
2 64
2 64
2 64
2 62
2 60
1 61
1 61
1 61
1 61
1 61
1 61
1 61
1 61
1 57
1 57
1 57
1 57
1 55
1 54
1 53
1 52
1 54
1 56
1 58
1 58
5 58
5 58
5 58
5 90
6 92
6 99
6 99
6 100
6 99
6 101
6 101
6 100
6 99
6 100
6 100
2 101
2 102
2 103
2 104
2 113
2 115
2 115
2 116
2 126
2 131
2 137
3 145
3 148
3 159
3 173
4 178
5 181
130 188
130 189
130 192
130 193
131 196
131 200
131 200
131 200
131 201
130 201
130 200
130 201
130 201
130 202
130 204
128 205
128 205
128 204
127 204
1 201
1 201
1 201
1 201
1 203
1 207
1 209
1 210
1 210
1 214
1 201
1 198
1 193
1 192
1 192
1 186
1 186
1 187
1 188
1 188
1 189
1 193
1 192
1 194
1 194
1 194
1 194
1 197
1 197
1 197
1 197
1 197
1 197
2 197
3 207
4 207
4 207
4 208
4 208
4 210
4 210
4 210
4 209
4 206
4 205
4 203
4 203
4 203
4 203
4 202
4 202
4 196
4 162
3 157
3 156
3 156
3 156
3 156
3 157
3 163
3 167
4 168
4 168
4 168
4 166
6 169
6 169
6 164
6 156
6 155
6 155
6 150
6 142
6 136
6 124
7 133
7 134
7 122
7 104
7 96
7 93
5 90
5 91
5 89
5 88
5 87
5 86
5 88
5 87
5 85
5 85
4 85
4 83
4 83
4 82
4 80
4 79
4 79
4 79
4 79
4 80
4 80
4 80
4 81
4 80
4 77
4 78
4 77
4 80
4 76
4 76
6 76
6 75
6 74
6 74
6 75
6 75
6 74
6 74
283 80
283 83
284 80
284 79
285 80
285 78
285 77
283 75
283 76
283 76
283 76
283 77
283 77
283 77
283 77
6 60
4 60
4 60
4 64
4 66
4 90
4 98
4 101
4 104
4 112
4 112
4 112
4 112
6 113
6 114
25 121
25 121
25 121
25 121
25 121
25 121
25 121
25 121
25 120
25 119
25 110
25 109
24 109
24 109
24 109
5 104
5 100
5 99
5 99
3 98
3 97
4 110
4 157
4 157
4 157
4 188
6 181
6 189
6 189
8 204
9 207
9 207
10 207
10 207
10 207
10 208
11 208
10 150
10 151
11 150
11 151
9 150
9 150
9 150
9 150
8 150
8 150
7 150
7 150
7 150
7 149
6 149
6 150
7 150
7 151
6 151
6 149
6 148
6 148
6 144
6 143
6 143
6 142
6 142
6 142
6 143
6 142
6 143
6 158
7 154
7 152
7 152
7 150
7 150
6 155
6 169
6 170
6 171
92 189
92 188
92 188
92 187
92 186
92 186
91 185
108 187
107 187
107 187
106 179
106 176
106 165
106 164
107 166
25 165
25 160
25 162
27 163
27 163
27 163
27 163
27 163
10 160
10 160
10 160
10 160
10 160
10 160
10 161
10 161
10 161
10 161
10 161
10 161
10 161
10 162
10 162
10 162
10 162
10 162
10 162
10 161
10 160
10 160
9 160
9 159
9 118
9 115
9 115
9 116
8 101
9 101
9 101
9 101
9 101
9 101
9 104
9 102
9 102
9 102
9 102
9 102
9 102
9 103
9 103
16 103
15 103
15 103
15 103
15 103
15 103
15 102
15 102
15 102
14 102
14 100
14 100
14 100
14 99
14 99
7 98
7 98
7 97
7 101
7 118
8 128
8 128
8 129
8 124
8 119
8 121
8 120
8 122
8 122
8 121
8 118
8 103
8 102
8 102
8 102
8 102
8 102
8 102
8 102
8 102
8 102
10 102
10 105
10 106
40 153
41 146
41 147
38 144
38 140
36 121
36 122
35 120
34 118
34 118
34 118
34 119
34 119
34 119
34 119
34 119
7 107
7 107
7 107
7 106
7 107
7 107
7 107
7 107
7 108
7 109
9 108
9 108
9 110
9 110
9 110
9 110
9 110
9 113
10 113
10 112
10 112
10 113
11 114
11 114
11 114
9 114
9 114
9 112
9 112
9 110
9 110
9 108
9 107
9 106
9 106
9 106
9 106
9 106
10 109
10 109
10 109
10 109
10 109
10 109
10 109
10 109
10 109
10 109
10 109
10 107
10 107
10 107
10 107
9 104
9 104
9 104
9 104
9 104
9 97
7 79
7 68
7 67
7 67
7 67
5 63
5 62
5 62
5 61
5 60
5 56
5 56
4 56
4 56
4 56
4 56
4 56
4 56
3 56
3 56
3 56
3 56
3 56
3 52
3 46
2 15
2 12
2 12
2 12
2 12
2 12
2 12
2 12
2 12
2 12
2 11
2 10
2 10
2 10
2 10
2 9
2 9
2 9
2 8
2 8
2 8
2 8
2 8
2 8
2 8
2 8
2 8
2 8
2 8
2 8
2 8
2 8
2 7
0 5
0 5
0 5
0 3
0 3
0 2
0 2
1 3
1 3
1 3
4 6
4 6
4 6
4 7
4 7
4 7
5 14
5 19
5 25
5 33
5 36
5 37
5 36
5 39
5 39
6 39
6 40
6 41
6 41
6 42
6 42
6 42
6 42
6 42
6 42
6 42
6 42
6 42
6 42
6 42
6 42
6 43
6 43
6 43
6 43
6 43
6 43
6 44
6 44
6 44
6 44
6 44
6 44
6 44
6 44
6 44
6 44
6 49
6 49
6 49
6 49
6 49
6 49
6 49
6 50
6 50
6 52
6 60
6 71
8 91
9 100
10 114
10 130
10 168
11 176
13 186
13 197
13 209
13 214
13 221
13 223
13 224
13 222
13 226
13 221
13 223
13 224
17 260
17 263
23 266
21 268
22 269
22 275
22 283
22 283
23 287
24 291
24 292
24 303
24 305
24 306
24 306
24 306
25 306
19 305
19 306
19 305
18 313
18 313
17 313
15 311
15 313
15 313
15 312
15 312
15 304
14 298
14 294
14 282
14 283
14 284
14 284
14 285
14 283
13 283
13 283
13 282
13 281
13 281
13 281
13 281
13 281
14 281
14 281
14 280
14 281
14 281
14 280
14 280
14 279
14 279
14 277
14 277
14 277
14 277
14 277
14 279
14 278
14 280
14 288
13 290
13 295
13 295
13 297
13 305
13 308
13 311
14 312
14 313
14 315
14 315
14 315
14 315
14 314
13 314
13 316
13 313
13 305
12 288
11 277
10 266
10 252
10 235
12 189
12 188
13 181
13 179
16 164
27 163
59 165
68 166
73 173
75 178
75 177
73 176
73 177
73 175
72 136
71 136
70 135
70 134
71 130
71 129
71 120
73 120
73 115
77 114
80 115
97 155
100 172
100 176
101 180
101 180
100 179
100 179
100 180
100 181
100 173
103 177
103 179
103 179
107 180
183 296
185 301
189 306
189 309
191 309
191 311
192 312
195 310
195 309
196 309
197 308
198 309
198 315
199 325
199 326
199 328
199 328
199 329
199 329
200 329
200 330
198 330
198 331
198 330
197 332
197 336
198 336
199 346
198 347
199 347
199 348
199 349
199 355
199 363
200 367
202 376
202 386
202 387
203 386
202 386
202 390
202 388
202 382
202 377
202 377
201 374
201 374
201 374
201 373
201 372
201 372
201 372
201 370
201 369
201 369
200 369
200 365
201 365
201 365
201 365
200 365
200 365
199 365
198 365
195 365
184 367
163 364
150 361
144 356
138 347
136 344
136 344
135 346
134 345
134 347
134 346
134 345
134 345
134 346
133 346
131 344
131 342
129 341
129 341
124 338
124 335
109 271
108 268
108 272
108 273
108 276
108 280
108 282
108 285
106 284
106 283
100 278
96 275
86 271
81 265
14 135
15 134
15 134
15 134
15 136
18 137
19 135
18 135
18 135
18 137
18 136
18 133
20 133
20 128
22 137
22 138
22 167
19 177
19 182
19 181
19 181
19 179
19 181
19 182
20 181
21 181
21 186
20 181
20 179
23 179
21 170
21 172
21 170
21 162
19 154
18 149
18 138
40 966
40 966
40 962
40 962
40 961
40 960
40 960
40 960
40 960
40 960
40 960
40 960
40 961
40 961
40 961
18 124
24 229
24 229
24 229
26 229
26 229
26 229
26 229
26 229
26 229
26 229
26 230
26 233
27 236
21 135
21 136
21 138
21 143
21 146
22 180
22 176
22 174
22 173
22 173
22 173
22 172
22 172
22 172
22 172
22 172
22 172
22 172
20 172
20 171
18 135
18 133
18 124
18 123
18 121
18 118
18 115
18 114
18 114
17 114
17 114
17 114
17 114
17 114
17 114
17 114
17 115
17 114
16 113
14 112
13 112
13 112
13 111
13 111
13 111
13 111
11 104
11 103
10 100
10 97
7 53
4 45
3 42
3 41
3 41
3 41
3 39
3 31
3 31
3 31
1 31
1 31
1 31
1 30
1 28
1 28
1 22
1 22
1 22
1 22
1 22
1 22
1 22
1 23
1 23
1 23
1 23
1 23
1 22
1 22
1 22
1 22
1 22
1 22
1 22
1 22
1 21
1 21
1 20
1 20
1 20
1 20
1 19
1 19
0 22
0 22
0 20
0 13
0 4
1 5
1 5
2 5
2 5
2 5
3 5
3 6
3 6
3 6
3 6
3 6
3 6
3 6
3 6
3 7
2 7
2 9
2 9
2 13
2 15
2 15
2 15
3 22
3 23
3 24
5 28
5 29
5 30
5 30
5 30
5 30
5 30
5 30
5 30
6 30
6 30
6 30
6 29
6 30
4 31
4 31
4 31
4 31
4 31
4 31
4 31
4 31
4 31
4 31
4 31
4 31
4 31
4 31
4 36
5 36
5 36
5 36
5 36
5 36
5 36
5 36
5 36
5 36
5 38
5 38
5 38
5 38
5 38
5 38
5 39
4 41
4 47
4 52
4 52
4 54
4 56
4 57
4 59
4 61
4 70
4 70
4 70
4 72
4 72
4 77
4 77
4 78
4 78
4 78
4 78
4 78
4 79
4 79
4 79
4 79
5 76
5 76
5 76
5 75
4 75
4 75
4 75
4 75
4 75
4 76
4 77
4 78
4 78
4 78
3 78
3 78
2 78
2 76
2 73
2 73
2 74
2 72
2 72
2 66
2 65
2 64
2 62
2 61
2 60
2 62
0 58
0 58
0 57
0 57
0 57
0 57
0 57
0 57
0 57
0 57
0 57
0 58
0 58
0 58
0 59
1 64
1 66
1 71
1 77
1 78
1 79
1 79
1 79
1 79
1 79
1 79
1 80
1 80
1 75
1 75
1 77
1 77
1 77
1 77
1 81
1 90
1 93
1 93
1 93
2 107
2 109
2 112
2 121
4 158
4 171
5 174
5 181
5 180
5 184
5 186
5 196
5 195
5 193
5 190
5 185
5 184
6 184
6 183
6 183
6 178
6 178
6 177
6 177
6 176
6 176
6 176
6 176
6 176
6 178
6 180
6 180
6 181
5 181
5 181
5 182
5 182
5 181
5 182
5 181
5 182
5 185
5 184
5 189
5 192
6 194
6 195
6 197
6 198
6 198
6 198
6 199
6 202
6 204
6 205
6 205
6 208
6 210
6 215
6 216
6 214
6 215
6 219
6 219
6 228
6 233
6 233
6 233
6 234
6 238
6 240
6 243
8 259
8 274
9 288
9 309
8 311
8 307
8 309
9 315
9 317
9 327
9 331
9 334
9 332
9 333
9 334
9 335
9 334
9 331
9 329
9 330
9 329
9 330
9 330
9 324
9 320
9 318
9 318
9 315
8 301
8 297
8 278
8 262
7 224
7 221
6 216
6 220
6 226
6 231
6 232
7 222
7 224
7 226
7 226
7 227
7 229
6 232
6 252
6 262
6 266
6 267
6 267
6 268
6 270
6 272
6 277
6 280
6 280
6 277
6 276
6 276
6 276
6 275
6 276
6 277
7 278
7 278
7 277
7 277
7 276
7 273
7 277
7 276
6 276
6 277
7 287
7 290
7 292
7 299
9 325
9 356
9 367
9 383
10 403
10 410
10 414
10 412
10 412
10 418
10 418
10 417
10 423
11 427
11 419
11 417
10 425
10 428
11 428
10 431
11 444
11 434
11 418
11 421
10 411
11 396
11 406
11 408
11 411
13 416
13 417
13 419
13 421
13 425
14 437
14 441
14 452
14 457
14 465
15 478
15 490
15 494
16 506
16 506
16 505
16 504
16 508
17 542
20 617
20 650
26 747
26 769
27 778
28 787
29 790
29 793
28 793
28 791
28 783
28 774
28 786
28 787
28 786
28 785
28 783
28 783
28 782
28 778
28 757
41 779
41 782
42 783
43 783
44 784
46 780
46 781
47 779
47 774
47 776
49 881
50 946
50 949
50 948
50 948
52 947
51 942
51 939
51 940
51 940
49 938
49 940
49 940
49 933
49 932
49 926
45 759
45 754
45 757
45 754
45 731
44 693
44 647
44 650
44 650
44 649
44 652
44 650
44 643
44 643
44 633
44 639
45 651
45 655
43 657
43 655
43 651
43 638
43 635
42 631
41 618
40 629
40 628
40 628
39 628
43 631
42 627
42 607
42 601
42 593
39 593
40 611
40 608
38 599
37 600
36 583
37 578
37 550
37 543
37 535
36 510
36 497
36 480
36 471
39 472
38 470
38 469
38 462
36 402
33 349
33 327
29 273
29 275
29 288
29 320
29 347
29 360
29 363
29 373
32 378
30 382
30 370
30 377
30 378
30 379
30 383
30 390
28 410
28 412
26 411
11 371
11 375
11 377
11 382
11 382
12 382
12 383
12 381
12 382
12 380
12 392
12 388
12 388
12 390
12 395
12 399
13 401
13 400
13 398
13 399
12 399
12 397
12 399
12 401
12 403
12 403
12 403
12 401
12 393
12 393
12 391
12 390
12 385
12 374
12 373
12 373
12 374
12 374
11 373
11 368
11 366
11 359
11 342
11 338
11 333
11 333
11 332
11 332
11 340
11 339
11 337
12 321
12 319
12 318
12 316
12 328
12 328
12 330
14 328
14 331
13 329
12 313
12 309
12 302
12 298
12 299
13 297
13 295
13 294
13 294
9 274
9 274
9 273
11 277
11 278
11 280
11 284
11 284
11 284
11 279
11 279
11 279
11 275
11 258
11 196
11 182
13 177
12 173
12 163
13 159
13 155
13 153
13 148
13 147
15 147
17 200
17 200
17 185
17 185
17 189
17 190
17 190
18 190
18 189
18 189
18 190
18 188
18 187
18 190
18 200
19 222
21 252
21 255
22 261
22 268
22 270
21 272
22 272
31 337
31 338
31 340
31 339
32 341
32 345
32 342
33 342
33 356
35 367
35 370
35 370
36 373
36 374
36 374
36 375
36 375
36 374
36 377
36 402
36 407
36 407
36 409
36 409
36 411
36 412
36 413
36 413
36 413
36 413
36 404
36 407
36 407
35 407
35 384
35 385
35 385
35 384
35 385
35 385
33 383
33 379
33 377
33 377
33 376
34 374
34 374
34 373
33 372
33 369
33 374
33 374
33 380
32 378
32 377
29 373
28 374
28 371
28 366
28 354
28 351
29 349
29 348
29 348
29 347
31 345
31 345
31 345
30 345
30 345
30 345
28 345
28 346
27 346
26 344
26 344
23 345
22 263
479 305
479 302
478 303
477 302
478 291
478 297
478 300
478 305
478 304
478 306
478 307
478 308
478 303
478 274
475 239
475 231
474 230
18 185
18 185
15 185
6 183
6 182
2 111
2 116
2 114
2 115
2 119
2 117
2 117
2 114
2 90
2 86
2 84
2 88
2 87
2 90
2 90
2 90
3 90
3 88
3 83
3 81
3 78
3 77
3 75
3 74
3 73
3 72
3 71
3 73
3 91
4 95
4 93
4 92
4 92
4 93
4 93
4 96
7 106
7 115
8 116
8 139
8 146
10 155
12 199
16 214
16 220
15 226
15 226
15 227
15 228
15 229
15 225
15 226
15 222
16 223
16 217
17 219
17 218
17 216
16 216
13 216
13 216
13 216
13 216
13 222
13 222
13 222
13 222
13 223
13 223
13 224
12 226
12 228
12 226
12 227
12 227
12 227
12 227
12 228
12 228
12 228
12 228
12 228
11 228
11 220
11 215
11 210
11 208
11 207
11 206
11 206
11 207
11 207
11 207
11 209
11 209
11 209
11 208
11 210
11 210
11 211
11 212
11 208
11 207
11 204
11 205
11 206
11 207
11 206
11 206
11 205
11 205
11 199
11 199
12 202
12 212
12 215
11 246
11 251
11 251
11 254
11 254
11 254
11 258
11 259
11 259
11 258
13 259
13 256
13 241
13 246
14 281
14 282
15 285
15 287
14 286
12 281
12 288
12 278
11 277
11 258
11 257
9 247
7 192
7 190
7 188
7 188
7 190
7 192
7 210
10 327
11 380
10 382
10 400
10 399
10 401
10 399
10 399
10 399
11 421
11 432
11 439
11 448
11 454
11 448
11 457
11 466
11 468
11 466
11 462
11 461
11 462
11 465
11 465
11 464
12 465
12 466
12 467
12 479
12 481
12 480
12 476
12 476
12 476
12 476
12 475
12 475
12 475
13 492
13 497
13 500
12 500
12 500
12 488
12 489
12 489
12 489
12 543
12 545
12 546
12 545
12 543
12 544
12 544
12 540
14 539
14 539
14 540
14 541
14 540
14 540
14 550
13 549
13 548
13 541
13 531
13 533
14 505
14 503
14 504
14 506
14 507
14 507
14 502
11 502
11 501
11 501
11 503
18 515
22 526
25 551
23 517
23 516
23 517
23 517
23 517
23 514
23 479
23 484
22 472
22 482
27 511
28 519
28 538
28 538
28 535
28 536
29 533
50 578
52 571
53 462
53 431
53 432
53 434
53 437
53 440
55 448
54 451
54 455
54 423
56 417
56 405
56 399
56 397
56 398
56 393
56 386
56 386
56 387
56 385
56 386
57 374
57 371
57 372
57 380
57 380
57 380
57 380
57 380
57 377
58 377
58 377
58 377
58 379
58 379
58 384
58 384
58 384
57 366
59 360
59 356
59 354
59 354
59 354
59 353
59 352
59 353
59 297
59 297
59 296
60 297
61 301
62 314
65 333
65 336
64 339
64 339
65 342
69 406
70 414
72 431
72 426
72 431
71 431
70 430
70 431
70 425
69 414
69 413
69 411
69 411
69 411
69 411
68 411
63 410
63 409
61 405
59 390
58 382
57 369
57 360
57 359
57 361
57 362
57 364
57 364
57 364
57 358
57 354
57 347
57 337
54 312
53 300
50 285
50 283
47 282
52 287
48 287
33 238
30 240
28 232
27 235
27 232
27 230
27 228
27 238
25 231
25 234
25 235
25 237
25 238
25 236
25 246
25 246
25 245
25 245
26 244
27 244
27 244
27 243
27 241
27 242
27 241
27 222
27 215
27 216
27 216
27 216
28 216
32 221
34 221
39 224
39 224
38 225
39 224
39 220
39 220
40 221
40 221
41 221
42 221
43 221
44 221
44 221
44 218
44 220
44 220
42 220
42 220
42 220
42 217
41 210
42 202
52 241
62 243
77 250
88 250
89 251
87 178
87 184
86 163
86 171
86 171
86 170
87 171
87 170
88 171
88 172
88 173
88 173
88 172
88 174
88 176
88 176
88 176
89 176
89 177
89 179
89 180
88 176
88 186
88 191
90 195
93 195
93 192
93 195
93 200
93 212
95 219
97 220
98 224
98 225
99 252
99 252
99 254
99 255
93 247
93 249
94 262
95 265
98 297
98 297
98 298
98 341
99 343
99 346
99 348
103 349
103 348
103 350
103 352
103 364
106 355
106 362
106 367
103 345
99 349
99 349
99 354
99 362
99 367
99 370
99 372
99 373
101 385
101 386
101 386
96 386
96 386
90 382
89 379
84 377
84 377
83 377
83 377
82 377
82 377
82 375
82 375
81 374
80 377
80 376
79 378
79 378
79 378
79 376
78 373
78 374
77 374
77 394
75 391
65 392
59 386
47 342
41 339
17 329
12 329
12 323
13 326
14 326
14 327
14 312
14 311
14 308
13 306
13 306
13 307
13 307
13 307
13 310
13 310
13 315
13 313
15 320
15 320
15 321
15 320
15 320
15 319
15 315
15 299
15 292
13 291
12 291
12 291
12 288
12 287
12 272
11 266
11 264
10 263
10 258
10 240
10 239
10 238
10 237
10 236
10 234
10 217
9 215
9 206
9 207
9 208
9 167
8 169
8 169
8 170
7 166
6 168
6 162
6 162
6 155
6 157
12 233
12 232
12 240
12 241
12 242
12 234
12 234
12 231
12 229
12 227
12 227
10 214
10 214
10 214
10 214
10 214
10 213
10 213
10 212
10 212
10 211
12 211
12 210
12 209
12 209
12 209
12 207
12 205
12 205
14 201
14 200
14 200
14 199
14 198
14 197
14 191
12 176
12 175
12 171
12 169
12 169
12 168
12 168
12 164
11 160
11 162
10 160
10 160
10 159
10 159
10 158
10 156
10 155
10 155
10 155
10 154
10 154
10 152
9 148
9 147
8 139
8 139
8 137
6 137
6 136
6 135
6 135
6 135
6 135
6 135
6 135
6 135
6 135
6 135
6 135
6 134
6 134
6 134
6 132
6 131
6 131
6 129
6 129
6 128
6 128
6 127
6 127
6 125
6 121
6 119
6 117
6 115
6 115
6 115
6 113
6 110
6 109
6 107
6 104
6 97
0 5
0 1
0 1
0 2
1 4
1 6
1 10
1 20
1 25
1 28
1 29
1 30
1 30
1 30
1 30
1 30
1 31
1 31
1 32
1 32
1 33
1 34
1 39
1 42
1 44
1 45
1 46
1 46
1 46
1 46
1 46
1 47
1 48
1 51
1 59
1 73
1 78
2 84
2 85
2 88
2 90
2 92
2 94
2 112
2 140
3 169
3 173
3 176
3 178
3 184
3 186
3 189
3 189
3 196
3 198
3 199
4 200
11 203
12 205
12 208
11 211
11 212
11 212
11 214
11 215
11 215
11 215
11 215
11 215
11 215
11 215
11 215
12 215
12 215
13 221
13 221
13 222
13 223
13 223
13 223
14 224
14 224
14 230
14 232
14 234
14 238
14 242
14 244
14 245
14 249
15 251
15 254
15 254
15 256
15 257
16 261
16 262
18 263
20 265
22 281
30 919
30 923
30 921
30 920
29 918
30 917
32 912
33 904
33 896
33 902
34 907
34 911
34 911
34 915
40 952
40 954
33 322
33 327
33 333
34 340
34 342
35 342
35 337
35 341
35 339
35 340
35 340
35 344
35 345
35 346
35 359
35 359
36 355
36 352
36 344
36 325
36 325
37 345
37 345
37 347
37 346
37 340
37 320
37 285
37 279
37 277
37 272
37 269
37 268
37 264
37 258
37 253
37 252
37 253
37 251
37 248
35 247
28 246
28 246
28 240
28 240
28 239
28 239
28 236
28 237
28 240
28 244
28 246
28 246
28 251
28 282
28 283
27 285
27 289
26 282
26 294
26 297
26 298
26 299
27 298
30 298
41 309
43 303
51 303
60 304
63 303
71 299
72 297
73 296
75 291
74 291
74 289
76 292
76 289
76 288
76 284
76 284
74 282
72 277
71 267
73 266
73 265
75 266
74 267
72 268
72 267
70 267
69 263
68 263
66 258
66 253
66 249
66 246
64 239
62 200
61 195
61 191
60 189
60 195
61 227
62 231
62 235
62 250
62 244
62 254
62 253
62 251
62 248
62 247
62 246
62 237
62 237
61 239
61 239
61 238
61 234
61 232
60 201
60 200
60 197
60 197
60 196
60 196
60 193
60 193
60 193
60 193
60 193
60 193
60 193
60 193
60 193
60 193
59 192
59 192
59 192
59 192
59 192
59 193
60 193
60 195
60 195
60 195
60 194
60 194
60 196
60 196
60 194
60 196
60 195
60 166
60 167
60 166
60 163
61 169
59 158
58 158
54 160
52 158
52 158
52 158
24 143
19 141
19 140
19 140
8 137
7 133
7 134
7 134
7 130
7 129
7 126
8 124
8 124
7 124
8 124
8 124
8 124
8 124
8 124
6 124
6 123
4 123
4 124
4 126
4 126
528 143
538 143
538 143
538 144
539 149
541 151
541 159
541 161
541 162
541 159
541 162
545 164
545 159
545 119
546 109
546 108
14 88
26 87
26 86
25 86
29 86
37 85
38 85
38 85
40 85
40 84
41 82
41 82
41 82
41 82
42 89
42 89
43 89
45 89
45 91
45 91
45 91
45 91
45 91
44 91
46 91
46 91
46 91
48 91
49 91
53 91
55 83
55 83
56 83
58 83
58 83
60 82
59 82
61 83
64 81
67 82
69 81
72 83
94 83
116 73
116 74
124 73
130 68
146 69
152 77
189 79
190 75
190 76
245 99
272 97
272 94
272 94
272 93
272 94
272 94
272 94
272 94
272 94
272 94
272 94
272 93
272 93
272 93
272 93
217 65
217 60
215 60
189 60
192 60
192 61
198 61
218 61
229 61
244 61
253 61
253 61
254 61
254 58
266 59
268 59
270 59
279 59
279 56
281 56
283 48
282 46
281 35
279 36
279 34
279 34
279 34
276 32
275 32
277 34
279 34
280 34
281 32
271 32
269 32
268 33
265 33
260 33
260 33
260 33
258 33
258 33
260 33
259 33
256 31
256 31
256 31
253 31
251 29
249 30
249 30
248 30
246 30
246 30
245 29
243 29
245 29
245 31
243 32
241 32
231 32
217 32
202 32
189 32
189 32
189 32
189 32
184 32
179 32
176 31
176 31
172 30
171 30
164 29
162 29
151 27
151 25
153 26
150 25
147 22
144 18
115 17
118 18
128 17
132 18
134 18
141 19
144 19
358 22
366 23
366 23
370 29
370 29
370 31
370 31
370 31
370 31
370 31
370 31
370 31
370 31
367 31
363 31
361 31
144 28
117 28
117 28
96 28
91 27
81 26
76 26
76 26
75 26
75 25
71 24
72 23
72 22
73 22
72 22
72 21
71 21
71 21
71 21
71 21
72 21
72 21
72 21
72 21
71 19
71 19
69 19
69 20
69 20
69 20
69 20
69 20
69 20
69 20
69 20
68 20
68 20
68 20
66 20
66 48
66 48
69 48
69 47
72 47
73 47
73 47
73 46
74 46
74 46
75 46
75 46
74 46
74 45
73 44
73 45
70 45
70 45
70 45
70 17
70 17
74 17
7868 49
7869 49
7906 48
7906 48
7906 48
7906 48
7906 48
7906 48
7908 47
7908 47
7907 47
7907 47
7902 45
7903 45
7900 45
164 15
107 15
73 18
56 19
57 22
54 22
49 23
48 23
45 23
45 22
43 22
36 16
32 16
32 14
32 14
32 14
32 14
32 14
32 14
32 14
32 12
32 12
32 12
32 12
31 12
31 12
26 12
26 12
26 12
26 12
26 12
26 12
25 12
25 12
25 13
24 13
24 13
23 13
23 13
23 15
23 15
23 15
23 15
23 15
22 15
22 15
23 15
23 15
23 15
23 15
23 15
23 15
23 17
24 18
24 18
24 18
24 18
24 18
24 18
24 18
24 18
24 18
24 18
24 18
24 18
18 18
17 18
15 18
15 18
15 18
14 19
14 21
14 21
14 21
14 21
15 21
15 21
15 20
15 20
16 21
16 21
17 21
17 21
17 21
17 21
11 20
10 20
10 20
10 20
10 20
9 20
9 21
10 22
10 22
10 22
10 23
10 24
9 28
9 28
9 28
9 26
9 26
9 24
9 26
5 24
5 24
6 24
6 24
29 40
37 40
37 40
37 40
37 42
37 43
37 43
37 50
37 50
41 51
42 51
42 51
42 51
42 51
42 50
42 50
11 35
11 35
11 35
11 35
11 35
11 35
11 35
11 35
11 36
8 36
8 34
8 34
8 34
8 34
8 34
8 32
8 32
8 32
8 32
8 32
8 32
8 32
7 32
7 32
6 32
6 32
6 32
6 32
6 31
5 31
5 31
5 31
5 31
5 31
5 31
5 30
5 29
5 29
5 28
5 28
5 28
5 28
5 28
5 28
5 28
5 28
5 28
5 28
5 28
5 28
5 30
5 35
5 35
5 35
5 35
4 35
3 35
3 35
3 36
4 37
4 40
5 54
5 56
5 65
5 68
5 68
5 70
5 70
4 70
4 70
4 70
4 68
4 77
4 88
4 106
4 108
4 111
4 114
3 117
3 122
3 125
3 128
3 128
3 131
3 134
3 137
3 144
3 144
3 143
4 142
4 141
4 137
4 136
4 140
3 140
3 143
3 143
3 145
3 149
3 152
3 155
3 155
3 155
3 155
2 155
2 156
2 156
2 157
2 156
2 156
2 156
2 156
2 156
2 156
2 154
2 154
2 155
2 154
2 154
2 154
2 154
3 154
3 157
3 158
3 160
3 175
3 180
3 183
3 185
3 194
1 202
1 207
1 211
1 211
1 211
1 211
1 213
1 213
1 211
1 210
1 210
1 212
1 212
1 212
1 212
1 211
1 212
1 212
1 212
1 214
1 212
1 211
1 212
1 213
1 212
1 212
1 211
1 212
1 211
1 215
1 211
1 196
1 194
1 189
1 191
1 180
1 180
1 180
1 179
1 179
1 176
1 174
1 160
1 156
1 148
1 147
1 143
2 137
2 132
2 128
2 128
2 128
2 127
2 124
2 118
2 117
2 114
2 115
2 117
2 119
2 122
2 122
2 121
2 116
2 117
2 109
2 108
2 108
2 103
2 103
2 102
2 102
2 102
2 102
2 102
2 101
2 101
2 101
2 101
2 102
2 103
2 104
2 104
2 103
2 104
2 104
2 104
2 104
2 104
1 104
1 106
1 105
1 103
1 100
1 91
1 72
1 61
1 59
1 58
1 57
1 57
1 56
1 56
1 57
1 76
1 79
1 77
1 77
1 77
1 76
1 76
1 77
1 77
1 84
1 92
1 92
1 90
1 90
1 92
1 89
1 87
1 84
1 84
1 85
1 85
1 85
1 85
1 85
1 84
1 82
1 82
1 83
1 82
1 82
1 80
1 80
1 80
1 80
1 80
1 80
1 80
0 78
0 78
0 76
0 76
0 75
0 76
0 76
0 76
0 76
16 91
16 92
16 92
16 92
16 92
16 91
16 90
16 86
16 83
16 82
16 79
16 79
16 79
16 78
16 94
16 97
0 85
0 87
0 89
0 91
0 92
0 93
0 93
0 95
0 95
0 94
0 94
0 93
0 93
0 93
0 93
0 93
0 93
0 93
0 91
96 98
97 98
99 98
99 97
99 97
99 97
99 97
99 97
99 96
99 94
99 94
99 92
99 93
99 93
99 93
4 86
4 86
3 86
0 86
0 66
0 62
0 62
3 68
3 68
3 67
3 66
3 65
3 65
3 52
4 52
4 51
4 51
4 51
4 50
4 50
4 50
4 50
1 44
1 42
1 42
1 42
1 42
1 41
1 41
1 41
1 41
1 40
1 40
1 40
1 40
1 40
1 40
1 42
1 42
1 45
1 47
1 47
1 47
1 47
1 48
1 48
1 47
1 49
1 49
1 49
1 49
1 49
1 49
1 50
1 49
1 47
1 49
1 49
1 49
1 49
1 49
1 47
1 46
2 46
2 27
2 26
2 21
2 20
2 18
2 16
2 15
2 15
25 24
25 22
25 23
25 23
25 23
25 26
25 28
25 28
25 28
25 28
25 28
25 28
25 28
25 28
25 28
27 33
23 35
22 35
5 27
4 27
4 27
4 26
4 27
4 28
4 28
4 28
4 28
4 37
4 39
5 39
5 41
5 41
5 41
5 47
5 49
5 49
5 49
5 50
5 52
5 52
5 53
4 55
4 53
4 53
3 53
3 53
3 53
3 53
3 53
3 53
3 53
3 54
3 54
317 61
317 61
317 61
317 61
317 60
317 61
317 63
317 63
317 63
317 63
317 63
317 64
317 63
317 63
317 64
6 55
6 55
6 55
6 56
5 57
5 56
3 56
3 57
3 57
3 57
5 60
5 63
5 64
6 64
6 67
14 412
14 412
15 415
15 415
15 415
15 416
14 416
14 416
14 416
14 416
14 416
14 416
14 416
13 416
13 416
13 414
13 414
13 413
4 64
4 63
4 63
4 62
4 58
4 58
4 58
4 58
4 58
4 58
4 58
4 57
4 57
4 56
2 53
2 50
2 50
2 50
2 49
2 48
2 48
2 47
8 47
8 47
8 48
8 49
8 38
8 37
8 38
8 38
8 37
8 37
8 31
8 28
8 28
8 28
8 28
8 28
2 28
2 29
2 34
2 34
2 35
2 35
2 35
2 35
2 35
2 34
2 34
2 34
2 34
2 34
2 34
2 34
2 35
2 37
2 35
2 34
2 33
2 33
2 34
2 34
2 33
2 35
2 35
2 40
2 40
2 42
2 46
2 46
2 46
2 46
2 48
2 49
2 49
2 47
2 54
0 48
0 48
0 48
0 50
0 50
0 51
0 51
0 51
0 51
0 51
0 50
0 50
0 51
0 51
0 51
0 51
0 52
0 52
0 53
0 54
0 55
0 55
0 55
0 55
0 55
0 55
0 55
0 55
0 55
0 55
0 55
0 56
0 56
0 58
0 58
0 60
0 60
0 60
0 60
0 60
0 60
0 60
0 60
0 62
0 62
0 62
0 63
0 62
0 61
0 60
0 60
0 60
0 60
0 60
0 60
0 60
0 60
0 60
0 60
0 60
0 60
0 60
0 59
0 54
0 53
0 54
0 55
0 55
0 55
0 55
1 57
1 57
1 57
1 57
1 57
1 57
1 56
1 56
1 53
3 53
3 50
3 50
3 49
3 50
3 50
3 54
3 56
3 54
3 51
3 52
3 49
3 50
3 48
3 49
1 47
1 48
1 46
1 46
1 44
1 37
1 36
1 36
1 36
1 36
1 36
1 35
1 34
1 34
1 35
1 35
1 36
1 36
1 36
1 36
1 36
4 38
4 37
4 37
4 37
4 37
4 37
4 37
4 37
4 37
4 37
4 39
4 39
4 40
4 41
4 42
1 40
1 39
1 40
1 35
1 37
2 36
2 36
2 36
2 37
2 42
2 41
3 43
3 42
3 42
3 42
3 42
3 41
3 41
3 41
3 41
2 41
2 41
2 41
2 41
2 41
2 41
2 41
2 41
4 42
4 42
4 42
4 42
4 42
4 42
4 43
4 42
4 41
4 41
4 41
4 42
3 40
3 40
3 40
3 40
3 39
3 40
3 42
3 45
3 78
3 84
3 91
3 93
3 101
3 119
3 133
3 130
3 130
5 139
5 140
5 154
5 159
5 186
5 191
5 204
5 210
5 212
5 217
5 218
5 218
5 218
5 218
5 218
5 220
5 220
5 220
5 220
5 221
5 221
6 221
6 221
6 224
6 241
6 247
6 247
6 251
6 253
6 252
6 253
6 253
6 253
6 253
6 253
6 254
6 254
6 255
6 254
6 256
25 253
25 256
25 254
24 255
24 255
24 255
24 255
24 253
24 255
24 255
24 256
24 257
24 255
24 253
23 253
4 253
4 252
4 252
4 252
4 251
4 252
4 252
4 253
4 253
4 254
4 255
4 256
4 257
3 256
3 256
2 257
2 256
2 256
2 256
2 256
2 256
2 256
2 256
2 256
2 255
2 255
2 255
2 255
2 255
2 256
2 260
2 261
2 259
2 261
2 248
2 248
2 202
2 194
2 189
2 188
2 183
2 183
2 181
2 184
2 183
1 174
1 172
2 160
2 183
2 152
2 155
2 139
2 139
2 140
2 151
2 157
2 157
2 157
2 158
2 158
2 160
2 161
2 169
2 178
2 184
1 193
1 194
1 192
1 179
1 171
1 170
1 170
1 167
1 167
1 167
1 167
1 167
1 167
1 167
1 167
1 167
1 169
1 168
1 167
1 166
1 165
1 181
1 191
1 194
1 197
1 199
1 200
1 205
3 207
3 212
3 214
3 216
3 218
3 222
3 224
3 229
4 230
4 232
4 232
4 232
4 231
4 229
4 228
4 228
4 226
4 226
4 226
4 225
2 226
2 250
2 250
1 250
1 250
1 250
1 251
1 251
1 252
1 252
1 252
1 252
1 252
1 251
1 251
1 250
1 249
1 242
1 240
1 240
1 234
1 233
1 226
1 226
1 224
1 219
1 219
1 214
1 213
1 204
1 204
1 204
1 204
0 202
0 195
0 160
1 236
1 232
1 232
1 226
1 224
1 218
1 217
1 217
1 217
1 219
1 220
1 215
1 217
1 220
1 220
0 148
0 147
0 147
0 149
0 153
0 152
0 152
0 152
0 152
0 151
0 151
0 151
0 151
0 151
0 151
0 151
0 148
0 147
0 147
0 147
0 147
0 145
0 118
1 118
1 120
1 132
1 128
1 130
1 120
1 117
1 125
1 124
1 118
1 114
1 111
2 115
2 112
2 112
2 110
2 111
2 115
2 120
2 120
2 123
2 122
2 122
2 124
2 127
2 126
2 130
2 106
2 106
2 106
2 106
2 106
2 106
2 106
2 106
2 108
2 108
2 119
2 125
2 127
2 127
2 127
2 128
2 129
2 130
2 130
2 130
2 130
2 130
2 130
2 129
2 132
2 135
3 137
3 136
3 136
3 135
3 136
3 136
3 142
3 146
3 147
3 149
3 151
4 443
5 459
5 462
5 472
5 472
5 475
5 479
5 478
6 477
6 467
6 457
6 451
6 451
6 448
6 447
5 149
5 148
5 145
5 145
5 144
5 144
6 144
6 144
5 148
5 148
5 148
5 150
5 150
5 151
5 152
5 151
5 150
5 150
5 150
5 151
5 149
4 146
4 136
4 127
4 122
4 122
3 122
3 122
3 122
3 123
3 123
3 123
3 125
2 124
2 140
2 140
2 142
2 143
2 139
2 134
2 132
2 132
2 133
2 133
2 133
2 132
2 132
4 141
4 139
4 141
4 143
4 145
4 145
4 146
4 146
4 147
4 144
4 145
4 131
4 127
4 127
4 127
3 127
3 124
3 124
3 124
3 124
3 124
3 124
3 124
3 124
3 122
2 121
2 117
2 116
2 116
2 117
2 117
2 118
2 126
2 124
2 123
2 127
2 124
2 123
2 122
1 103
1 101
1 90
1 90
1 90
1 87
1 87
1 86
1 85
1 85
1 89
1 93
1 95
1 96
1 97
1 99
1 102
1 102
1 102
1 102
1 102
1 102
1 101
1 105
1 105
1 103
1 105
1 104
1 107
1 153
1 154
1 168
1 174
1 175
1 176
1 180
1 181
1 181
1 180
1 181
1 182
1 183
1 183
1 183
2 182
7 183
7 182
7 171
7 162
7 161
7 159
7 158
7 159
7 159
7 159
7 159
7 160
7 160
7 162
7 161
2 161
7 287
7 286
7 284
7 281
7 280
7 281
7 280
7 280
7 280
7 280
7 280
7 280
8 280
8 280
8 281
2 146
2 148
2 148
2 149
2 150
2 150
2 151
3 151
3 151
3 151
3 151
3 151
2 152
2 151
2 151
2 150
2 150
2 142
2 142
2 142
2 138
2 139
1 138
1 139
1 139
1 139
1 139
2 137
2 138
2 137
2 139
2 138
2 138
2 138
2 132
2 127
2 127
3 126
3 125
3 124
3 121
3 121
2 121
2 121
2 120
2 119
2 120
2 120
2 118
2 117
2 113
2 110
1 109
1 60
1 55
1 41
2 37
2 37
2 37
2 35
2 36
2 39
2 38
3 40
3 86
4 100
4 102
4 106
3 107
3 108
3 112
3 112
2 111
2 111
2 111
2 112
3 113
4 113
4 114
4 120
3 112
3 114
3 113
3 113
3 113
3 112
3 112
3 112
3 111
3 111
3 111
3 113
3 113
3 116
3 113
3 114
3 114
4 114
4 115
4 116
4 113
4 110
4 110
4 110
4 110
4 110
4 110
4 110
4 110
4 111
4 112
4 112
4 112
4 111
4 111
4 111
4 112
4 112
4 114
4 113
4 113
4 113
4 112
4 112
4 112
5 112
5 112
5 113
5 112
5 110
5 111
5 111
5 113
5 113
5 113
5 113
5 113
6 113
6 115
6 115
5 116
5 116
5 115
5 114
5 117
5 118
5 117
5 116
5 116
5 116
5 116
5 118
5 117
5 117
5 119
5 119
5 120
5 121
5 121
5 119
5 116
6 115
6 151
6 137
6 95
6 91
6 91
6 90
6 91
6 91
7 93
7 93
7 93
7 95
7 96
7 98
5 94
5 94
6 96
6 96
6 96
6 97
6 98
7 98
7 98
7 98
7 98
7 99
7 99
7 99
7 96
7 94
7 94
7 88
7 87
7 87
7 89
6 89
6 89
6 86
6 85
6 85
6 85
18 88
18 87
18 87
18 87
18 87
18 87
18 86
18 86
18 86
18 86
18 86
18 86
18 87
18 86
18 87
6 83
6 83
6 83
6 84
6 84
6 84
6 84
6 85
6 85
6 82
5 81
5 81
5 80
5 81
5 82
5 82
5 82
5 86
5 86
4 84
4 84
4 86
4 87
4 87
4 86
4 86
4 83
4 83
4 82
4 82
4 82
4 82
4 81
4 79
4 78
4 78
4 76
4 75
4 79
4 78
4 78
3 78
3 78
2 78
2 40
2 40
2 40
2 40
2 57
2 58
2 57
2 54
2 53
2 54
2 53
2 53
2 54
2 56
2 56
12 55
12 54
12 54
12 54
12 53
12 53
12 54
12 54
12 55
12 55
12 53
12 53
12 53
12 53
12 53
0 53
0 53
0 53
0 53
0 51
0 51
0 50
0 50
0 51
0 50
0 49
0 49
0 49
0 49
0 49
0 49
0 49
0 49
0 48
2 48
2 48
2 47
2 47
2 51
2 53
2 54
2 54
2 54
2 55
2 56
2 56
2 56
2 56
2 56
0 56
0 56
0 56
0 57
0 57
0 56
0 58
2 68
3 76
3 74
3 78
3 81
3 80
3 84
3 122
3 127
5 148
5 159
5 160
5 167
6 188
6 194
6 195
6 208
6 209
6 209
6 208
6 211
6 210
6 211
6 207
6 211
6 213
6 213
6 214
6 215
6 215
6 218
6 218
6 215
6 198
6 198
6 197
6 199
6 210
6 222
6 226
6 230
6 233
6 236
6 237
6 238
6 238
6 238
5 238
5 238
5 238
5 238
5 239
5 238
5 238
5 238
5 238
5 238
5 240
5 240
5 241
5 242
5 242
6 242
6 242
6 242
6 243
6 245
6 244
7 254
7 256
7 257
7 256
7 257
7 258
7 258
7 259
7 260
6 262
6 261
6 273
6 274
6 276
6 279
6 277
6 280
7 281
7 281
7 282
7 281
7 281
7 281
8 291
8 292
8 295
8 299
8 300
9 300
9 300
9 299
9 298
6 282
6 281
6 280
6 277
6 276
6 276
6 267
4 210
4 192
4 174
4 166
4 166
4 164
4 158
4 158
4 157
4 146
4 148
4 151
4 150
4 151
4 151
4 151
4 150
4 147
4 146
4 146
4 146
4 144
4 144
4 142
4 142
4 141
10 325
10 332
11 339
11 333
11 323
11 313
11 311
11 308
11 309
11 306
11 308
11 308
11 308
11 308
11 309
11 309
11 311
5 129
5 128
5 130
5 128
5 128
5 135
5 135
5 133
5 135
5 136
5 135
5 137
5 137
5 137
4 137
4 138
4 141
4 142
4 131
4 129
4 131
4 132
4 133
4 135
4 140
4 136
4 134
4 134
4 134
4 122
4 123
4 123
3 118
3 117
3 118
3 120
4 141
4 146
4 151
4 152
4 155
3 146
3 144
3 142
3 139
3 142
2 141
2 138
2 138
2 136
2 136
2 136
2 137
2 137
2 138
2 138
2 137
2 137
2 138
2 138
2 139
2 139
2 140
2 140
2 140
2 138
2 138
2 135
2 138
2 139
5 138
6 139
6 142
6 173
6 177
7 184
7 185
7 194
8 210
8 210
8 211
8 213
8 213
9 212
10 208
9 200
9 199
9 201
9 202
9 202
9 203
9 200
9 200
9 201
9 201
9 198
9 198
9 198
9 198
9 198
9 198
9 198
9 196
9 196
9 197
9 189
10 190
10 190
10 186
10 186
10 186
10 184
10 183
10 181
10 180
10 180
10 177
10 174
10 174
10 174
10 172
10 171
11 169
11 163
11 163
11 163
12 166
12 166
12 165
14 162
14 162
14 160
15 158
16 158
17 157
17 155
16 133
16 125
16 122
16 119
16 120
16 119
16 118
16 117
16 117
16 114
62 172
62 172
62 172
62 172
62 172
62 172
62 171
62 171
62 170
62 170
62 170
62 169
62 169
62 171
62 171
16 114
16 116
16 120
19 129
20 129
24 132
23 130
22 126
19 125
19 131
19 131
19 127
19 87
19 86
19 79
19 77
18 112
17 96
17 95
17 97
17 94
17 94
17 95
17 95
17 95
17 96
17 93
17 93
18 94
18 109
18 109
18 108
18 68
18 68
18 68
18 68
18 68
18 68
18 68
18 68
17 68
17 68
17 68
17 67
17 52
19 51
19 51
19 51
19 51
19 50
21 51
25 51
25 51
25 51
25 51
25 51
27 53
28 53
28 54
28 61
25 72
25 72
25 72
25 73
25 73
23 69
23 69
23 69
22 69
22 69
22 69
21 67
20 68
22 111
22 110
22 114
22 118
22 118
22 119
22 119
22 119
22 120
22 120
23 119
23 120
23 123
23 125
23 127
23 128
23 129
23 129
23 129
23 129
23 130
23 130
23 130
23 130
24 129
24 126
24 126
24 126
22 122
21 118
21 111
18 110
16 107
16 105
16 105
16 104
15 98
15 98
15 98
14 96
14 96
14 96
14 96
14 97
14 97
14 95
14 96
14 96
14 96
14 94
14 94
14 93
14 95
14 95
14 96
13 96
13 96
13 97
13 97
13 97
14 108
14 108
14 108
14 108
14 108
14 108
14 108
14 108
14 108
14 108
14 108
13 109
13 110
13 112
13 113
12 103
12 103
11 102
7 105
7 106
7 105
7 108
7 109
5 107
4 107
4 104
4 98
4 89
4 90
4 89
4 89
4 89
4 88
4 88
4 88
4 88
4 89
4 89
4 87
4 86
1 42
1 42
1 36
1 35
1 35
1 43
1 43
1 43
1 44
1 45
0 43
0 38
0 38
0 39
0 38
0 39
0 42
0 46
0 46
0 46
0 45
0 48
0 49
0 49
0 49
0 50
0 52
0 53
0 53
0 54
0 54
0 54
0 54
1 55
1 58
2 59
2 59
2 60
3 61
3 61
3 61
3 61
3 61
3 61
3 61
3 61
3 60
3 62
3 62
3 62
3 62
3 61
3 59
2 59
2 57
2 57
2 57
2 58
2 58
2 58
2 58
2 58
2 58
2 58
8 128
8 138
8 139
8 139
8 139
8 139
8 140
8 139
8 138
8 136
8 136
10 142
10 141
10 143
10 140
4 70
4 69
4 68
4 67
4 67
4 67
4 67
4 70
4 69
4 69
4 69
4 69
4 72
4 75
4 78
4 79
4 79
4 78
5 78
5 78
6 85
6 85
6 85
6 85
6 82
6 79
6 76
6 77
6 78
6 78
6 78
6 78
6 77
6 77
6 74
6 72
6 69
6 65
6 65
6 65
6 65
6 65
6 64
6 63
6 63
6 64
6 65
6 64
6 63
6 63
6 62
6 62
6 63
5 65
4 64
4 61
4 60
4 60
4 60
4 59
4 60
4 61
4 61
4 62
4 62
4 63
4 66
4 71
4 70
4 71
4 72
4 75
4 75
4 80
4 80
4 80
4 80
4 81
4 82
4 88
4 87
4 87
4 87
4 88
6 94
7 99
7 90
7 93
7 97
7 102
7 105
8 113
8 116
8 115
8 115
8 109
6 102
6 102
6 100
6 100
4 95
4 95
4 95
4 95
4 95
4 107
5 107
5 106
6 114
6 113
6 115
6 115
6 113
6 112
6 112
5 111
5 112
5 112
5 112
5 117
5 112
5 114
5 114
5 114
5 114
5 112
5 112
5 112
5 111
5 114
5 115
5 116
5 115
5 116
5 117
5 120
5 128
5 132
5 132
5 133
5 132
6 135
6 136
17 432
17 434
17 433
17 436
17 436
17 437
17 437
17 438
17 438
17 438
17 437
17 437
17 436
17 436
17 436
6 139
6 140
6 140
6 139
6 139
6 137
6 134
6 131
6 131
6 122
6 120
6 119
6 119
6 119
6 119
6 116
6 117
6 117
6 127
6 136
6 135
6 135
6 133
6 133
6 132
6 132
5 118
4 109
4 102
4 102
4 102
4 102
4 102
7 102
7 120
7 120
7 120
9 120
9 121
617 244
617 245
617 247
617 247
617 247
619 251
620 262
620 267
619 249
618 247
618 256
618 241
619 242
619 242
619 243
12 121
10 124
10 126
10 127
10 131
10 131
10 132
9 127
9 126
9 124
9 124
9 123
9 123
9 123
9 123
9 123
9 123
9 118
9 118
9 118
9 118
9 118
9 117
9 113
9 106
9 105
9 105
10 103
10 103
11 101
11 97
11 96
11 97
11 96
11 96
11 96
11 96
11 96
11 96
11 97
11 98
11 101
10 101
10 101
10 102
11 102
11 102
11 101
11 101
11 101
11 101
11 101
11 105
11 111
11 111
11 110
11 111
11 111
11 110
11 111
10 113
10 113
10 112
10 111
10 98
10 89
10 88
11 95
12 97
12 97
12 97
12 97
12 96
12 96
11 96
11 97
11 96
11 96
11 97
7 99
6 98
6 98
6 97
5 97
5 96
5 96
5 96
5 95
5 95
5 95
5 89
4 80
5 79
5 79
5 79
5 70
5 69
5 69
5 70
5 69
5 67
5 63
5 59
5 58
5 54
5 54
5 54
13 55
13 57
13 57
13 57
12 58
12 58
12 63
12 67
12 69
12 71
12 71
12 71
12 71
12 71
12 73
4 77
4 75
4 75
4 75
4 76
4 76
4 76
4 75
4 74
4 75
4 74
4 73
4 74
4 76
4 76
4 76
4 75
4 71
4 71
4 69
4 71
4 71
3 75
3 75
3 75
3 75
3 75
3 75
3 75
3 75
3 70
3 67
3 67
3 67
3 65
3 65
3 64
3 63
3 64
3 64
3 64
3 63
3 64
3 62
2 62
1 52
1 52
1 52
1 52
1 52
1 53
1 55
1 56
1 55
1 56
1 56
1 55
1 54
1 54
1 54
1 54
1 54
1 54
1 57
1 57
1 59
1 59
1 59
1 59
1 58
0 56
0 55
0 54
0 49
0 49
0 50
0 51
0 51
0 51
0 51
0 51
0 52
0 52
0 58
0 58
0 59
0 57
0 59
0 58
0 57
0 51
0 49
0 48
0 49
0 49
0 49
0 50
0 50
0 51
0 51
0 47
0 60
0 59
0 62
0 63
0 74
1 81
1 90
1 91
1 91
1 91
1 90
1 89
1 90
1 90
1 91
1 91
1 91
1 92
1 94
1 92
3 91
3 88
3 88
3 89
3 89
3 89
3 92
3 92
3 92
3 92
3 93
3 94
3 96
3 96
3 98
3 100
3 110
3 118
3 121
3 132
4 132
4 135
4 135
4 135
4 135
4 135
4 137
4 138
4 140
4 143
4 155
4 157
4 158
4 163
4 169
3 168
3 170
3 170
3 170
3 171
3 171
3 170
3 167
3 167
3 166
3 166
3 166
3 166
3 175
3 178
3 183
3 185
3 185
3 186
3 189
3 188
3 188
3 189
3 189
3 188
4 187
4 186
4 179
4 187
4 185
4 186
11 186
10 186
9 186
9 185
9 185
9 182
9 180
9 178
9 178
8 178
8 174
8 173
9 172
9 174
9 159
2 150
2 149
2 150
2 147
1 143
1 142
1 142
1 142
1 143
1 142
1 144
1 145
1 145
0 145
0 146
0 148
0 147
0 146
0 147
0 147
0 155
0 155
0 159
0 163
0 183
0 213
0 219
0 222
0 222
0 225
0 224
0 220
0 218
0 217
0 217
0 200
0 195
190 198
190 195
190 191
190 193
190 193
191 194
192 195
192 193
192 191
192 189
192 187
192 180
192 171
192 165
192 161
192 160
2 154
2 154
2 154
2 154
3 154
4 154
4 154
4 155
4 156
5 163
5 173
5 178
5 185
6 192
6 184
6 186
6 178
6 181
6 181
6 180
6 178
6 178
6 177
6 176
6 176
6 176
6 176
6 179
6 178
6 174
6 175
6 174
6 175
6 179
6 180
6 192
6 194
6 195
6 196
6 197
13 198
13 199
13 201
13 203
13 208
13 209
13 209
13 209
14 212
14 208
14 209
14 210
14 213
14 213
14 213
7 210
7 209
7 208
7 207
7 207
7 208
8 211
9 213
8 212
8 214
8 213
8 211
8 200
8 197
7 194
6 192
6 156
6 129
6 128
6 126
6 125
7 125
7 125
7 125
7 126
7 127
7 128
7 133
7 133
7 133
7 133
7 133
13 135
13 137
14 137
14 138
14 138
14 138
14 138
14 137
14 137
14 136
14 131
14 130
14 130
14 132
14 132
14 132
14 133
13 134
12 135
12 135
12 132
12 130
11 119
11 99
10 93
11 92
11 91
11 91
11 91
11 90
11 89
11 89
11 88
11 88
11 88
11 87
12 86
12 87
12 86
12 85
12 84
12 82
12 81
12 80
12 81
12 81
12 75
12 75
12 59
12 57
12 55
12 54
12 54
12 54
12 51
12 49
12 47
14 43
14 40
14 40
16 40
16 40
19 40
20 40
20 39
22 39
22 39
22 39
22 39
22 39
22 38
22 38
27 38
28 37
27 32
29 27
29 23
30 22
31 22
33 22
33 22
33 23
33 23
33 23
33 23
33 23
37 43
38 46
37 46
36 47
37 51
37 51
37 52
37 52
37 52
37 52
38 52
39 53
40 53
40 58
34 57
35 54
35 54
35 53
35 54
36 54
36 54
36 54
36 54
40 54
42 60
42 66
42 67
43 65
43 65
43 67
43 66
43 65
43 67
43 68
43 67
43 67
45 67
45 67
45 68
44 68
44 68
44 68
44 68
44 68
44 68
44 68
44 68
44 68
44 68
45 68
45 68
45 67
45 68
46 68
46 68
46 70
46 70
46 70
46 68
46 68
46 68
46 68
46 68
46 70
49 80
49 82
49 87
48 101
47 114
47 119
47 123
46 124
46 124
46 124
44 125
42 125
39 125
38 127
38 127
37 128
37 130
37 130
37 130
37 132
36 132
36 133
32 134
32 134
32 134
28 134
28 133
26 132
26 132
25 133
25 130
25 129
25 131
25 132
28 132
29 129
24 121
25 121
25 121
25 123
25 123
25 124
31 124
51 126
51 125
50 126
49 126
49 125
49 125
48 121
49 121
52 121
55 123
56 126
60 127
60 129
60 132
62 133
63 132
57 132
56 123
56 119
56 117
56 118
56 118
56 114
56 114
56 114
56 115
56 115
56 115
55 115
54 115
54 115
54 115
54 115
54 115
54 115
54 115
53 117
53 117
53 119
53 121
53 124
54 144
54 146
54 155
54 172
54 173
53 179
53 178
53 176
53 175
53 175
53 175
52 176
52 175
52 191
52 192
52 189
50 162
51 154
51 162
51 162
51 164
51 166
51 166
51 166
51 166
51 165
51 165
51 165
51 165
51 164
51 144
51 143
51 142
51 143
51 142
51 140
51 140
51 140
51 140
51 140
51 140
51 139
51 139
51 139
51 138
51 138
51 141
51 141
50 139
50 140
47 139
45 140
45 127
42 124
42 123
42 124
32 124
23 126
20 127
11 123
9 123
9 131
10 134
10 137
10 138
10 139
10 139
6 409
4 403
4 401
4 399
4 399
3 398
3 398
3 398
4 398
4 397
4 397
4 396
4 396
4 396
4 396
4 396
4 128
4 127
4 127
4 127
4 127
4 127
4 127
3 129
3 139
3 142
4 146
4 148
4 152
4 152
4 150
4 140
4 131
3 116
3 110
3 99
3 93
3 91
3 90
3 90
3 91
3 91
3 92
3 93
3 97
3 101
3 101
3 101
3 107
3 106
3 119
2 106
2 106
2 106
2 106
2 106
2 106
2 106
2 109
2 109
2 109
2 109
2 110
2 110
2 110
2 110
2 113
2 112
2 112
2 113
2 113
2 113
2 113
2 113
2 112
2 116
2 116
2 116
2 117
2 113
2 115
2 115
2 111
2 111
2 111
2 111
2 111
2 112
2 112
2 111
2 111
2 111
2 110
2 108
1 98
1 97
1 93
1 93
1 93
1 93
1 91
1 91
1 91
1 92
1 92
1 91
1 91
1 91
1 91
1 91
2 92
2 98
2 98
2 98
2 98
2 98
2 98
2 98
2 98
2 98
2 99
2 98
2 98
2 94
2 83
0 81
0 82
0 78
0 68
0 69
0 69
0 69
0 68
0 70
1 71
1 72
2 74
2 73
2 71
2 71
2 71
2 73
2 69
2 67
2 67
2 65
2 64
2 66
2 58
2 57
2 43
2 43
2 43
2 43
2 43
2 44
2 44
2 44
2 41
2 41
2 40
2 40
2 42
2 42
2 42
2 42
2 35
2 35
2 35
2 35
2 35
2 35
2 33
2 33
2 33
2 33
2 31
2 31
2 32
2 34
3 33
3 33
3 33
3 33
3 34
3 34
3 34
3 33
3 35
3 40
4 40
5 38
5 38
5 39
5 39
5 39
5 39
5 40
5 40
5 41
5 41
5 41
5 41
5 42
5 43
5 44
5 44
5 46
5 47
5 47
5 49
5 49
5 50
5 50
6 50
6 51
6 51
6 51
6 51
6 51
6 51
6 55
6 54
6 54
6 57
7 58
7 55
7 52
7 52
6 52
6 52
6 52
7 50
7 50
6 49
6 47
5 48
5 49
5 49
5 49
5 50
5 48
5 48
5 48
6 59
7 60
7 59
6 60
6 60
6 60
6 60
6 60
6 60
6 60
6 60
6 59
6 59
7 59
7 59
7 59
7 59
7 59
6 59
6 59
6 59
6 59
6 59
6 60
6 61
6 60
6 60
6 60
6 60
6 60
5 60
5 60
5 57
5 57
5 57
5 57
6 58
7 59
9 58
9 58
9 61
9 64
12 65
12 66
17 69
17 66
17 66
17 66
17 66
18 65
18 65
18 65
18 64
18 63
18 63
18 63
18 63
18 63
18 63
18 61
18 58
18 54
18 54
18 56
18 57
18 56
18 56
18 56
18 56
18 57
18 57
18 58
18 64
18 75
21 76
21 78
21 79
21 74
21 74
21 73
20 71
20 71
20 70
20 68
20 68
20 68
20 67
20 67
20 67
21 65
21 67
24 82
24 84
24 85
24 86
24 85
24 83
23 84
23 84
23 84
24 72
24 72
24 72
24 72
24 73
24 73
24 73
24 72
24 72
24 72
24 72
24 72
24 72
23 72
23 72
23 72
23 72
23 72
23 72
23 74
23 74
23 74
23 74
23 72
23 72
23 72
23 72
23 72
23 71
23 72
23 72
23 72
23 73
22 73
22 73
21 72
19 71
18 69
18 68
18 69
17 65
17 63
14 61
13 61
8 58
8 58
8 58
9 58
9 58
9 58
9 58
9 58
9 58
9 59
9 59
9 59
9 59
9 59
9 59
9 59
9 59
9 58
9 58
9 55
9 53
9 53
9 53
9 53
9 53
9 51
9 50
9 49
9 45
7 32
6 32
6 30
6 29
6 29
6 29
6 29
6 29
6 29
6 29
6 29
6 29
7 37
7 37
6 38
6 40
6 40
5 35
5 19
7 22
7 23
9 24
9 24
10 24
10 24
10 23
10 23
9 23
9 23
9 23
9 23
9 23
10 23
10 23
10 23
12 23
12 23
12 23
12 23
12 23
12 22
12 22
12 22
12 22
12 22
12 22
12 20
12 20
12 20
12 22
11 23
11 23
11 22
11 22
11 22
11 21
11 21
11 25
11 26
11 31
11 35
11 42
11 45
11 48
11 47
11 47
11 47
11 47
11 47
11 47
11 47
11 47
11 48
10 49
10 49
10 50
10 51
10 52
10 52
11 51
11 51
11 51
11 51
11 53
11 54
11 54
11 54
11 54
11 54
11 54
11 54
11 55
11 55
11 54
10 54
10 54
11 54
12 54
12 54
12 54
12 54
12 54
12 54
12 54
12 54
12 55
12 56
12 56
12 56
13 60
13 60
13 61
12 53
13 54
13 52
13 51
11 51
11 51
11 51
8 47
8 47
7 47
7 48
6 48
6 48
6 48
6 48
6 48
6 47
5 50
5 50
5 50
5 50
11 52
11 52
10 52
10 52
10 52
10 52
10 52
10 52
10 52
10 52
10 53
10 53
10 54
10 54
10 54
10 55
4 54
4 53
4 53
4 54
4 55
5 54
6 54
10 55
10 49
10 50
10 44
10 43
10 31
10 31
10 28
10 28
10 28
10 28
14 26
14 26
14 26
14 26
14 26
14 26
14 26
14 26
14 26
14 28
14 30
14 30
14 33
14 33
15 33
15 32
11 31
11 30
11 30
11 30
11 30
11 30
11 31
11 31
11 32
11 32
11 32
12 33
11 33
11 33
10 33
13 69
13 70
13 70
13 72
13 72
13 72
13 72
21 70
21 70
21 70
21 70
20 65
20 65
20 64
20 63
19 63
19 62
16 27
16 27
16 25
16 25
16 25
8 25
8 25
8 23
8 23
8 23
8 23
8 24
8 28
9 27
10 38
10 38
10 38
10 38
10 38
10 39
10 39
10 39
10 39
10 40
11 41
11 41
11 41
11 41
11 40
9 27
8 26
8 27
8 27
8 25
8 25
8 25
8 23
9 23
9 23
8 23
7 23
5 22
5 22
5 21
5 22
5 22
5 22
5 24
5 24
5 24
5 24
7 28
7 28
7 28
7 28
7 30
8 30
8 30
8 31
8 30
8 30
8 27
8 22
8 22
8 22
8 21
7 21
6 21
6 21
6 21
6 21
6 21
6 21
6 21
6 21
6 20
6 19
6 19
5 19
5 19
5 19
5 19
5 19
5 20
5 22
5 23
5 23
5 23
6 23
6 23
6 23
6 23
6 23
6 26
6 26
6 26
6 26
6 27
6 29
6 31
6 32
6 33
6 33
6 33
6 33
6 33
6 34
6 34
6 34
6 34
6 34
6 33
6 29
5 29
4 29
4 29
4 30
4 32
4 32
4 35
4 39
4 38
4 38
4 37
3 37
3 37
3 37
3 37
3 38
3 39
3 39
3 38
3 38
3 41
3 39
3 32
3 32
3 32
3 32
3 37
3 38
3 39
3 39
3 39
3 66
3 66
3 66
3 64
3 64
3 64
3 64
2 59
2 59
2 59
2 61
2 62
1 62
1 62
1 65
1 78
1 51
1 53
1 60
1 62
1 64
2 67
2 68
2 68
2 70
2 72
2 73
2 74
2 74
2 74
2 74
2 72
2 72
2 72
2 72
2 71
2 71
2 71
2 71
2 71
2 68
2 69
2 69
2 69
1 70
1 71
1 72
1 71
1 71
1 69
1 70
1 70
1 69
1 67
1 64
1 64
1 64
1 64
1 64
1 64
1 64
1 64
1 64
1 64
1 65
1 65
1 65
1 65
1 69
1 77
1 83
1 83
1 83
1 85
1 85
1 86
1 89
1 89
1 93
1 94
1 96
1 96
1 96
1 97
1 97
1 96
1 99
1 99
2 212
2 209
2 213
2 214
2 215
2 215
2 218
2 212
2 210
1 206
1 206
1 206
1 206
1 204
1 207
0 95
0 95
0 90
0 91
0 90
0 89
0 89
0 89
0 89
0 88
0 88
0 85
0 72
0 69
0 69
0 67
0 64
0 63
0 62
0 62
0 62
0 63
0 62
0 62
0 62
0 75
0 76
0 76
0 76
0 76
0 77
0 77
0 77
0 78
0 78
0 79
0 77
1 81
1 84
1 85
1 91
1 89
1 88
1 87
1 89
2 89
2 89
2 88
2 88
2 88
2 88
2 88
1 89
1 89
1 89
1 89
1 89
1 90
1 99
1 103
0 105
0 106
0 112
0 113
0 131
0 126
0 122
0 121
0 121
0 121
1 124
1 128
1 129
1 130
1 133
1 132
1 131
1 130
1 130
1 130
1 129
1 129
1 129
1 129
1 130
1 130
1 130
1 130
1 129
2 127
2 127
2 125
2 125
2 125
2 125
2 125
2 125
2 124
2 124
2 121
2 120
2 120
2 120
2 120
2 120
2 120
2 120
2 119
2 124
2 124
2 124
2 125
2 141
2 157
3 163
3 166
3 166
3 167
3 166
3 167
3 167
3 166
3 164
3 163
3 163
3 146
3 147
3 149
3 149
3 149
3 150
3 150
3 151
3 151
3 151
3 150
3 148
3 143
3 140
2 138
2 140
2 145
2 142
2 148
2 153
2 154
2 155
3 155
3 156
3 157
3 158
3 168
3 173
3 174
3 172
3 172
3 172
3 172
3 154
3 148
3 141
3 139
3 139
3 137
3 126
3 121
3 120
3 120
3 120
3 120
3 117
3 107
3 107
3 104
3 103
3 103
3 104
3 104
3 107
3 107
3 107
3 108
3 108
3 108
3 107
3 107
3 106
3 106
3 106
2 107
2 108
2 108
2 109
2 109
2 116
2 116
2 116
2 118
2 118
2 120
2 127
2 133
3 133
10 137
10 138
9 140
9 141
9 143
9 136
9 136
9 134
9 129
9 107
9 103
9 97
9 96
9 96
9 96
8 96
1 94
1 94
1 94
1 95
1 103
1 103
1 103
1 107
1 115
1 117
1 117
1 121
1 127
1 135
1 137
2 144
2 150
2 151
2 151
2 151
2 152
2 151
1 149
1 157
2 147
2 150
4 159
4 161
4 170
4 172
4 171
4 171
4 170
4 162
4 163
4 163
4 166
4 166
4 166
4 166
4 166
4 166
4 166
4 166
4 166
4 166
4 167
4 168
4 168
4 168
4 170
4 169
4 169
4 169
4 169
4 171
4 175
4 179
4 181
4 177
4 178
4 177
4 177
4 179
4 179
4 178
4 183
4 183
4 181
4 185
5 183
5 181
5 181
5 173
5 163
5 154
15 154
15 154
15 154
15 151
15 150
15 150
15 149
15 149
15 149
16 150
16 149
16 151
16 152
16 153
16 152
11 152
7 151
7 151
10 150
10 145
10 143
10 143
10 142
10 143
10 143
8 144
8 143
8 138
8 130
8 128
8 128
7 122
7 113
4 111
4 111
4 111
4 111
4 110
4 106
3 97
3 94
3 93
3 92
3 92
3 92
3 93
3 88
3 80
2 77
2 74
0 63
0 60
0 52
0 50
0 50
0 50
0 40
0 40
0 40
0 38
0 37
0 37
0 37
0 37
0 37
0 37
0 37
0 37
0 37
0 37
0 36
0 35
0 35
0 35
0 35
0 35
0 37
0 36
0 39
0 37
0 39
0 35
0 37
0 42
0 42
0 42
0 41
0 41
0 42
0 42
0 39
0 40
0 40
0 40
0 40
0 40
0 40
0 40
0 40
0 40
0 41
0 41
0 40
0 40
0 41
0 46
0 47
0 48
0 48
0 48
0 49
0 48
0 47
0 46
0 47
0 47
0 47
0 47
0 48
0 50
0 51
0 52
0 53
0 52
0 52
0 52
0 54
0 54
0 55
0 55
0 54
0 54
0 53
0 53
0 53
0 53
0 52
0 51
0 51
0 51
0 51
0 51
0 51
0 51
0 51
0 49
0 49
0 49
0 49
1 49
2 49
2 50
2 51
2 51
2 51
2 51
2 51
2 54
2 54
2 54
2 54
2 54
2 54
2 54
2 54
2 54
2 55
2 56
2 56
2 57
2 60
2 63
2 65
2 66
2 67
2 67
2 65
2 65
3 62
3 60
3 52
3 51
3 50
3 46
3 46
3 45
3 45
3 46
3 46
3 46
3 45
3 44
3 44
2 43
2 43
2 43
2 44
2 49
2 49
2 50
2 49
2 49
2 49
2 48
2 48
2 39
2 39
3 39
3 39
3 39
3 40
3 48
4 49
4 48
4 51
4 52
4 54
4 54
130 55
130 51
130 51
130 51
130 50
130 50
130 52
130 51
130 49
130 50
130 50
130 50
130 50
130 49
130 49
129 50
4 48
4 49
4 49
4 49
4 50
4 50
4 51
4 51
4 52
2 52
2 53
3 54
3 54
4 54
4 54
4 55
4 54
4 53
4 53
4 53
4 53
4 53
4 53
4 50
4 50
4 50
4 51
4 51
4 51
4 51
4 51
4 51
4 48
4 48
4 48
4 47
4 43
4 42
4 41
4 40
4 39
4 39
4 39
4 39
4 40
4 40
4 39
4 40
4 47
4 47
4 47
4 47
4 47
4 45
4 44
4 44
4 44
4 44
4 43
4 42
4 42
4 41
4 41
4 38
4 38
4 38
4 42
4 43
4 45
4 45
4 45
4 45
3 45
2 45
2 45
2 42
2 42
2 34
2 32
2 32
2 32
2 32
2 32
2 32
2 32
2 32
2 32
2 32
2 32
2 30
2 29
2 30
2 30
1 30
0 30
0 30
0 30
0 30
0 30
0 29
0 28
0 28
0 28
0 28
0 27
0 27
0 26
0 26
0 23
0 23
0 23
0 23
0 24
0 26
0 32
0 34
0 36
0 36
0 38
0 38
0 38
0 38
0 38
0 38
0 37
0 37
0 37
0 37
0 37
0 38
0 36
0 36
0 35
0 35
0 35
0 35
0 34
0 34
0 34
0 33
0 31
0 30
0 30
0 29
0 27
0 27
0 27
0 24
0 23
0 23
0 23
0 23
0 23
0 23
0 22
0 25
0 25
0 33
0 36
0 39
0 39
0 39
0 39
0 39
0 36
0 36
0 36
0 36
0 36
0 36
0 36
0 36
0 36
0 36
0 36
0 36
0 35
0 35
0 35
0 35
0 34
0 34
0 34
0 34
0 35
0 35
0 36
0 36
0 36
0 36
0 36
0 35
0 40
0 40
0 40
0 40
0 40
0 40
0 42
0 43
0 44
0 43
0 44
0 44
0 44
0 47
0 47
0 50
0 100
0 100
0 110
0 113
1 110
1 104
1 104
1 102
1 100
1 100
1 104
1 104
1 104
1 107
1 108
1 110
1 109
1 47
1 48
0 48
0 49
0 53
0 55
0 57
0 58
0 57
0 57
0 57
0 57
0 57
0 57
0 60
2 60
2 62
2 67
4 164
4 167
4 172
5 176
5 184
5 195
5 205
5 232
8 483
14 670
19 855
21 984
25 1083
25 1176
26 1237
31 1292
32 1528
38 1563
38 1605
38 1624
38 1657
38 1662
38 1664
38 1672
38 1681
38 1693
38 1699
38 1709
38 1717
38 1720
38 1723
258 1750
258 1763
259 1778
262 1789
262 1793
263 1848
264 1849
264 1852
264 1854
264 1858
264 1859
264 1859
264 1860
265 1860
266 1862
46 1839
46 1845
46 1847
46 1847
46 1850
46 1850
46 1850
46 1853
46 1861
46 1867
46 1871
46 1871
46 1872
50 1880
50 1887
50 1892
50 1888
51 1894
51 1891
51 1890
52 1892
52 1897
53 1898
53 1903
53 1959
53 1961
53 1964
53 1976
49 2015
48 2071
47 2122
48 2139
48 2141
48 2140
49 2140
50 2141
52 2139
52 2139
52 2142
67 2184
67 2185
67 2187
67 2190
67 2192
67 2201
67 2200
67 2200
67 2201
67 2201
67 2199
67 2195
66 2195
66 2190
66 2175
63 2074
63 2057
62 2052
61 2034
60 2030
59 2002
60 1971
57 1797
47 1280
45 1084
43 1056
41 1089
42 1114
42 1114
41 1098
38 1077
37 780
32 744
32 755
32 745
32 748
32 754
32 764
32 755
32 746
32 739
32 736
32 724
32 717
32 723
32 723
32 726
32 714
32 706
30 720
30 881
28 861
28 864
28 871
28 880
28 883
29 890
29 895
28 898
27 899
27 899
27 900
27 894
27 895
27 896
27 896
27 896
27 893
27 888
27 887
27 880
27 883
29 888
29 903
28 907
28 902
28 900
28 906
28 913
28 947
27 964
27 985
27 978
27 980
27 985
27 931
27 931
26 916
26 883
26 864
26 810
25 754
24 742
24 741
23 741
23 741
23 740
20 739
20 738
19 736
4 682
4 678
4 671
4 670
4 670
4 664
4 665
4 662
5 691
5 691
5 689
5 689
5 689
5 689
5 689
5 692
5 692
5 696
5 698
5 699
5 697
5 704
5 696
5 689
5 679
5 672
5 633
4 623
5 610
6 603
6 606
6 611
6 612
6 581
6 580
6 579
6 574
6 568
6 569
6 571
6 585
7 595
7 595
8 594
8 583
8 583
8 587
7 594
7 600
7 589
7 425
8 470
10 464
10 479
10 492
10 498
10 499
10 507
10 504
10 504
10 501
10 499
10 490
10 486
10 484
10 483
10 485
10 484
10 491
10 488
10 489
10 482
8 477
8 445
8 441
8 431
8 424
8 428
8 392
9 379
9 372
9 362
9 359
9 355
9 350
9 349
8 308
8 308
8 308
8 309
8 309
8 310
8 311
8 316
8 320
7 324
7 326
7 327
7 329
7 334
7 338
7 340
7 344
7 345
7 349
7 351
7 352
7 352
7 352
7 352
7 352
7 353
7 353
7 352
9 351
9 346
9 344
9 340
9 336
9 335
9 334
9 328
8 326
8 352
8 350
8 344
8 339
8 325
8 325
8 327
6 326
6 326
6 327
6 327
6 327
6 325
6 325
6 330
7 331
6 326
5 309
3 299
3 300
3 299
5 337
5 329
5 334
5 335
5 323
5 291
6 249
6 231
6 222
6 216
6 208
6 203
7 201
7 198
7 198
6 159
6 159
6 147
6 147
6 147
6 147
5 143
5 143
5 143
5 143
5 143
4 142
3 142
3 135
3 132
3 119
3 119
3 119
3 111
3 111
3 111
2 111
2 110
2 110
2 110
2 109
2 109
2 109
3 109
3 109
3 108
3 107
3 107
3 106
3 99
3 94
3 91
3 90
3 90
3 88
3 83
3 80
3 80
3 80
2 77
2 76
2 75
2 74
3 74
3 74
3 74
3 73
3 73
3 73
3 73
3 73
3 72
3 72
3 70
3 70
3 69
3 69
3 66
3 60
3 36
3 36
3 36
3 38
3 38
3 36
3 38
3 38
3 38
3 37
3 36
3 37
3 34
3 35
3 34
2 33
2 33
2 30
2 30
2 28
1 28
1 28
1 30
1 35
1 35
1 37
1 39
1 44
1 56
1 60
1 61
0 62
0 67
0 69
0 68
0 73
0 73
0 77
0 78
0 83
0 86
0 87
0 90
0 90
0 90
0 90
0 91
0 91
0 91
0 91
0 91
0 93
0 90
0 92
0 89
0 89
0 89
0 89
0 90
0 90
0 91
0 92
0 96
0 96
0 96
0 97
0 97
0 99
0 99
0 103
0 110
0 130
0 133
0 142
0 147
0 166
0 170
0 173
1 175
1 177
1 180
1 180
1 184
1 185
1 186
1 186
1 186
1 186
1 186
1 186
1 186
1 186
1 185
1 185
0 185
0 185
0 185
0 185
0 184
0 184
0 184
0 184
0 184
0 182
0 180
0 179
0 179
1 178
1 178
1 178
1 178
1 178
1 173
1 170
1 170
1 170
1 170
1 171
1 173
1 172
1 174
1 175
1 169
1 159
1 156
1 156
0 155
0 146
0 140
0 138
0 138
0 137
0 133
0 133
0 131
0 127
0 127
0 127
0 125
0 125
0 120
0 120
0 120
0 120
0 120
0 120
0 119
0 119
0 119
12 129
12 125
12 125
12 122
12 119
12 119
12 118
12 118
12 118
12 116
12 115
12 114
12 114
12 111
12 111
12 110
0 97
0 96
0 93
0 92
0 87
0 80
0 60
0 57
0 52
0 42
0 25
0 20
0 20
0 20
0 19
0 19
0 18
0 10
0 9
0 9
0 10
2 10
2 11
2 11
2 10
2 9
2 9
2 9
2 9
2 9
2 9
2 9
2 9
2 9
2 9
2 9
2 9
2 9
2 9
2 9
2 9
2 9
2 9
2 9
2 9
2 9
2 9
2 9
2 9
2 9
2 7
2 6
2 6
2 5
2 6
2 6
2 6
2 7
2 7
2 9
2 14
5 20
10 126
10 129
11 132
11 136
11 136
11 137
11 139
11 139
11 139
11 139
11 139
11 139
11 138
11 137
11 137
11 137
11 137
11 138
11 138
11 138
11 138
11 138
11 143
12 154
12 155
13 175
13 176
13 176
13 180
13 180
13 180
13 180
13 182
13 183
13 183
13 189
13 189
13 191
13 200
13 200
13 203
13 203
13 203
13 203
13 203
13 203
13 203
13 204
13 206
13 207
13 220
13 222
13 231
13 231
13 232
13 231
13 232
13 232
13 232
11 232
11 231
11 231
11 230
11 230
11 230
11 230
11 231
11 222
11 222
11 222
11 223
11 223
12 224
12 224
12 226
12 227
12 227
12 227
12 227
12 227
12 231
12 237
13 239
13 241
13 258
14 260
14 260
13 260
13 262
13 262
13 262
13 268
13 303
13 304
13 306
13 306
10 307
10 304
10 295
9 295
4 182
4 181
4 181
4 180
4 181
4 183
4 183
4 142
4 142
4 142
5 142
5 142
5 142
5 141
5 141
5 141
5 140
5 140
5 139
5 139
5 136
5 134
5 132
4 121
3 118
3 101
3 101
3 102
3 100
3 100
3 99
3 99
3 99
3 98
3 94
3 91
3 91
3 90
3 81
3 81
3 78
3 79
3 79
3 81
3 81
3 81
3 82
3 81
3 78
3 78
3 65
3 65
3 65
3 65
3 64
3 64
3 64
3 64
3 63
4 65
6 69
10 101
13 106
14 113
14 116
14 117
14 117
14 119
14 119
14 119
14 120
14 120
14 121
15 120
15 120
15 125
15 125
15 125
15 125
15 123
14 118
14 110
14 107
14 106
13 88
13 88
13 88
13 88
13 88
14 93
14 94
15 98
19 99
25 107
36 105
36 107
36 106
36 106
37 105
37 107
37 106
38 106
38 107
38 107
38 107
38 106
39 107
40 108
39 109
39 109
39 109
39 109
39 109
39 109
39 109
39 109
39 109
39 110
39 111
39 111
39 111
39 112
39 112
39 112
39 113
40 114
40 115
40 113
40 116
40 116
40 118
40 118
40 122
40 124
40 130
40 131
40 133
40 133
40 135
40 137
40 137
40 136
40 136
40 135
40 134
40 134
40 133
40 134
40 134
40 134
40 135
40 137
40 137
40 138
40 138
40 137
40 140
39 142
39 141
38 138
35 131
31 93
29 92
29 89
29 89
29 89
29 90
29 92
29 92
29 91
37 650
37 649
37 648
36 647
36 647
36 646
36 646
37 647
37 647
37 647
37 647
37 647
37 647
37 647
37 647
29 86
29 85
30 85
30 86
29 78
28 73
25 73
15 73
13 63
4 62
4 60
4 60
4 60
4 60
4 59
3 59
4 58
5 57
5 57
5 57
5 57
5 56
5 55
5 55
5 55
5 55
5 55
5 55
5 55
5 55
5 55
5 55
5 54
5 55
5 53
5 53
5 51
6 50
7 49
7 49
6 47
6 45
6 44
6 44
6 43
6 40
6 39
6 36
6 31
6 29
6 27
7 26
7 29
6 30
6 31
6 34
6 36
6 38
6 38
6 40
6 40
6 42
6 41
6 40
6 40
6 41
6 39
6 47
6 98
8 172
10 190
11 219
11 228
11 229
14 240
14 242
14 243
16 242
16 242
16 242
16 241
16 240
16 246
16 247
16 253
16 257
16 260
16 267
18 279
18 281
18 281
18 284
15 297
15 306
15 316
15 327
15 370
15 377
15 380
15 383
15 385
15 384
14 381
14 382
14 383
14 384
14 383
14 384
14 384
14 386
14 387
14 386
14 386
14 386
14 386
13 387
13 387
12 387
12 388
12 390
12 390
12 391
13 390
13 390
13 390
13 390
13 390
13 390
13 389
13 389
14 389
14 390
16 389
16 389
16 389
16 397
16 409
16 411
15 413
15 415
16 417
16 420
16 429
16 529
15 535
15 539
15 539
15 542
15 542
15 542
17 552
17 555
17 552
17 553
17 552
17 542
16 548
16 552
16 558
16 566
16 576
16 578
16 587
16 594
15 602
15 605
13 591
11 541
11 505
10 461
10 450
10 443
9 440
15 560
14 556
14 556
14 554
14 553
14 553
14 553
14 553
14 552
14 543
14 541
14 534
14 528
15 527
15 524
7 390
11 394
12 391
12 382
12 373
12 368
12 354
12 338
12 304
12 303
12 309
12 309
13 311
13 311
15 311
15 311
15 310
15 310
15 311
15 313
15 312
17 314
17 314
17 315
17 318
17 336
17 357
17 357
17 358
16 361
16 365
16 365
16 366
16 368
16 368
18 368
17 368
17 373
18 374
17 377
17 378
17 384
16 401
16 403
14 404
14 405
14 404
14 382
14 364
14 360
14 360
14 357
14 353
14 351
14 343
14 248
14 248
14 258
14 260
14 261
14 258
14 258
14 256
14 256
14 266
14 269
14 271
14 271
14 259
14 256
14 255
15 273
15 266
15 266
15 255
15 249
15 237
15 236
15 235
15 235
14 235
14 238
14 239
14 238
14 238
14 238
14 238
14 239
14 239
14 239
14 239
14 239
14 239
14 239
14 240
14 240
13 240
12 240
12 242
10 241
9 238
9 234
8 234
8 234
8 235
8 235
8 235
8 235
6 235
7 234
7 228
7 227
7 226
7 230
7 233
9 266
11 301
12 337
12 336
12 338
16 344
16 339
17 336
17 330
15 329
15 302
15 301
15 300
15 301
15 297
15 290
15 290
15 290
15 293
15 295
13 297
13 301
12 299
13 300
13 302
13 304
13 297
13 288
13 286
13 285
13 283
13 283
16 286
16 286
16 286
16 286
16 286
16 285
16 285
16 285
16 285
16 284
16 273
16 272
16 271
16 271
16 269
13 269
13 258
13 247
13 244
13 238
13 235
13 234
13 226
13 223
12 200
12 199
12 192
14 194
14 194
14 194
15 194
15 194
15 195
15 194
15 191
15 190
15 201
15 201
15 202
15 203
15 203
15 203
15 204
15 206
15 206
14 205
14 205
14 204
14 204
14 203
14 207
14 197
14 197
14 198
13 197
13 197
13 197
13 197
13 193
13 193
13 200
13 202
13 202
13 200
13 200
13 193
11 187
9 184
9 113
7 98
8 82
8 115
8 117
4 113
4 115
4 117
3 120
3 125
3 141
3 190
3 197
3 200
3 202
3 208
3 209
3 210
3 207
3 206
3 203
3 201
2 195
2 189
2 189
2 186
2 183
2 174
2 174
2 175
2 176
2 176
2 176
2 176
2 176
2 176
2 176
2 176
2 178
2 178
2 179
2 179
2 179
2 179
2 179
2 179
2 179
2 180
2 180
2 181
2 181
2 183
2 184
2 187
2 188
2 188
2 188
2 189
2 192
0 194
0 198
0 198
0 200
0 200
0 200
0 199
0 200
0 200
0 201
0 208
0 207
0 207
0 206
0 205
0 204
0 204
1 204
1 204
1 204
1 204
1 204
1 204
1 205
1 204
1 204
1 203
1 203
1 203
1 203
1 201
1 201
1 200
0 190
0 191
0 192
0 192
0 190
0 191
0 189
0 188
0 187
0 195
0 196
0 158
0 162
0 150
0 153
0 149
0 143
0 128
0 115
0 85
0 83
0 79
0 83
0 83
0 84
0 84
7 85
7 85
7 85
7 84
7 84
7 84
7 84
7 86
7 86
7 86
7 86
7 85
7 84
7 83
7 82
0 84
0 87
0 100
0 106
0 112
0 112
0 112
0 113
0 114
0 114
0 115
0 115
0 117
0 122
1 135
1 135
1 133
1 137
1 133
1 134
1 148
1 149
1 148
1 149
1 150
1 144
1 147
1 143
1 143
1 141
2 141
2 141
2 141
2 140
2 140
2 139
2 136
2 138
2 144
3 151
3 154
8 441
8 441
8 442
8 442
8 442
8 442
8 443
8 443
8 442
8 442
8 442
8 442
8 442
8 443
9 443
9 440
6 158
6 158
6 157
6 156
6 154
6 154
6 153
6 154
6 155
6 155
6 153
6 145
6 143
6 138
6 134
6 133
6 133
6 133
6 131
6 130
6 128
6 127
6 124
6 124
6 119
6 119
7 121
7 121
7 120
7 121
7 122
7 122
7 122
7 122
7 123
7 124
7 125
7 128
7 134
7 134
7 133
6 134
6 133
6 130
6 126
6 105
5 91
4 87
4 86
5 86
5 86
5 86
5 87
5 87
5 86
5 86
5 85
5 75
5 74
5 73
5 73
5 73
5 74
5 60
5 60
5 60
5 58
5 58
5 56
5 51
5 53
5 52
5 52
5 52
5 52
5 51
5 49
5 50
5 49
5 49
5 48
5 38
4 40
4 38
3 37
3 37
4 37
4 37
4 37
4 36
4 36
4 36
5 37
5 37
5 37
5 37
5 38
5 33
4 34
4 34
3 35
4 35
4 35
4 35
4 36
4 39
4 41
4 41
4 40
4 42
4 42
4 42
4 43
4 43
4 43
4 43
4 43
4 44
4 44
4 48
4 48
4 50
4 51
4 51
4 51
4 51
4 49
4 48
4 47
4 46
4 46
4 47
4 46
4 48
4 60
4 59
54 57
54 56
54 50
53 50
54 49
54 48
54 48
54 49
54 49
54 51
54 51
54 52
54 52
53 41
53 41
3 41
3 40
3 40
3 41
2 41
2 41
2 41
2 41
2 41
2 42
2 42
2 41
2 40
2 40
2 40
2 42
2 43
2 43
2 42
2 43
2 43
2 43
2 42
2 43
2 43
2 43
2 41
2 42
2 42
2 42
2 43
2 43
2 45
2 46
2 49
2 49
2 51
2 55
2 58
2 60
2 63
1 70
1 71
1 73
0 75
0 75
0 77
0 77
0 75
0 74
0 74
0 73
0 72
0 69
0 65
0 66
0 66
0 66
0 67
0 67
0 67
0 67
0 67
0 67
0 70
0 69
0 68
1 89
1 86
1 86
1 83
1 82
1 82
1 82
1 82
1 82
1 82
1 83
1 83
1 83
1 82
1 82
0 60
0 59
0 64
0 68
0 69
0 73
0 75
0 79
0 85
0 100
0 126
2 294
2 323
2 339
2 365
2 377
2 383
2 389
2 389
2 389
2 390
2 390
2 393
2 393
2 393
2 393
2 393
2 395
2 395
2 396
2 396
2 398
2 398
2 397
2 398
2 398
2 397
2 397
2 401
2 407
2 412
2 435
2 437
2 439
2 441
3 442
3 447
3 474
3 520
3 595
3 606
3 631
3 631
3 635
4 647
8 647
8 654
8 662
8 660
8 656
8 661
8 670
8 673
8 676
8 677
8 683
8 686
8 691
8 694
8 698
10 699
10 701
10 699
10 699
10 701
1134 780
1134 777
1134 776
1134 776
1134 781
1134 784
1134 785
1134 783
1134 786
1134 784
1134 784
1134 784
1134 785
1134 795
1134 796
5 718
5 718
6 740
10 748
10 756
10 773
11 908
11 918
11 943
11 950
11 952
11 964
11 967
11 969
11 965
11 965
11 968
13 970
8 957
8 947
9 943
8 781
8 780
8 802
8 854
8 892
8 900
8 909
8 911
8 913
8 912
8 912
6 910
7 912
7 912
7 914
7 925
7 931
7 944
7 944
7 947
7 947
7 948
8 942
8 946
8 946
8 944
30 954
30 941
30 941
30 941
30 921
30 919
73 1355
74 1353
73 1347
73 1343
73 1306
73 1256
73 1211
73 1208
73 1228
53 1227
57 1288
56 1277
56 1282
57 1278
57 1287
14 859
14 876
18 910
18 900
19 912
19 913
22 919
23 937
22 943
22 948
21 955
22 961
22 961
22 961
22 964
22 971
22 969
22 970
23 974
23 978
23 977
23 978
23 967
23 968
23 970
23 968
23 970
23 971
23 971
23 972
23 954
23 953
23 950
23 945
23 924
23 926
23 916
23 893
22 774
22 769
22 757
22 751
22 749
22 734
22 721
22 715
22 707
23 798
23 814
23 832
22 842
22 869
20 818
20 838
20 819
20 810
20 758
20 725
20 729
20 726
20 725
20 728
20 728
20 737
20 785
20 798
20 805
20 804
20 788
20 775
20 776
20 774
19 774
19 772
19 772
17 771
17 772
17 773
17 772
17 770
17 763
17 760
17 755
17 749
17 758
17 766
16 785
17 952
17 1026
17 1060
18 1083
18 1077
18 1067
16 1040
13 1045
10 969
10 979
10 978
10 978
10 956
10 950
9 960
6 929
6 928
6 929
6 930
2 924
2 903
2 895
2 896
2 899
2 895
2 901
2 898
2 899
2 898
2 896
2 896
2 916
2 916
2 921
2 930
2 932
2 935
2 939
2 947
2 1013
2 1025
2 1032
2 1039
2 1055
2 1054
2 1057
2 1071
2 1067
2 1067
2 1069
2 1073
2 1071
2 1072
2 1076
2 1082
2 1083
2 1082
2 1082
2 1081
2 1056
2 955
2 949
2 927
2 919
2 894
2 863
2 858
2 861
2 874
2 874
2 868
2 868
2 868
2 877
2 875
2 875
2 858
2 791
2 791
2 794
2 803
4 824
4 821
4 828
5 828
5 838
5 844
5 857
5 870
5 892
5 940
5 959
5 977
6 1003
6 1002
6 1010
6 1019
4 1029
5 1034
5 1016
7 990
9 1093
10 1257
11 1329
12 1356
12 1368
12 1395
12 1391
13 1403
14 1396
14 1394
14 1400
14 1396
14 1398
15 1395
15 1391
15 1394
15 1394
16 1394
17 1393
17 1402
16 1403
17 1404
16 1427
16 1425
18 1456
20 1458
20 1455
20 1451
20 1450
20 1443
20 1407
22 1402
23 1426
23 1428
23 1427
23 1425
23 1425
24 1426
24 1337
24 1338
22 1333
22 1329
23 1304
23 1301
23 1293
23 1294
23 1294
23 1294
23 1294
23 1292
23 1291
23 1292
24 1314
24 1312
24 1311
24 1311
24 1309
24 1308
23 1308
23 1310
23 1308
23 1311
23 1314
23 1312
23 1309
23 1306
23 1264
23 1242
23 1238
23 1245
23 1244
23 1243
23 1241
23 1241
24 1275
24 1257
24 1257
24 1246
24 1238
24 1210
24 1189
24 1166
24 1167
24 1161
24 1160
24 1151
24 1144
24 1118
24 1085
24 1036
24 1006
21 987
18 955
13 765
11 761
11 620
11 531
12 435
12 421
11 366
10 271
10 255
10 254
10 253
10 254
10 255
11 263
11 266
11 268
11 263
11 253
11 254
12 260
27 258
26 207
25 193
24 189
23 188
23 186
23 178
23 177
23 173
23 173
23 173
23 171
24 172
24 170
24 169
24 160
24 159
8 158
8 157
8 156
8 156
8 156
8 158
8 158
8 154
8 154
8 154
8 153
8 153
8 157
8 158
8 158
8 159
9 159
9 159
9 155
9 153
9 154
10 159
9 158
9 157
9 154
9 154
9 152
9 152
9 152
9 152
9 150
9 147
9 148
9 147
9 147
9 146
8 140
8 140
8 140
7 116
7 115
7 114
7 114
7 113
7 112
7 111
7 111
7 113
7 113
7 113
5 93
5 93
5 89
5 88
5 89
5 91
5 93
5 92
5 93
5 92
5 90
5 90
5 89
4 89
4 90
4 93
4 93
4 93
4 91
4 91
4 88
8 88
8 85
8 82
8 81
8 81
7 68
7 67
7 66
7 66
8 66
8 67
8 60
8 59
8 59
8 59
4 59
4 61
4 61
4 61
4 61
4 61
4 62
4 62
4 63
3 63
3 63
3 63
3 63
3 72
3 71
3 71
3 69
3 70
3 71
4 68
5 68
5 67
5 66
5 65
5 64
5 63
5 59
5 59
5 59
5 59
4 57
4 57
4 55
4 55
4 56
4 56
4 56
5 51
5 52
5 52
5 53
5 63
5 67
5 67
5 68
5 69
5 77
6 78
6 81
6 88
6 88
6 89
6 89
7 89
7 89
7 90
7 90
7 91
7 91
7 91
7 91
7 89
7 89
7 88
7 89
7 89
7 89
7 89
7 86
7 85
7 84
7 100
7 99
7 99
7 100
7 100
7 100
7 101
7 97
7 95
7 95
7 95
7 95
7 96
7 97
7 101
7 102
7 102
7 101
7 102
7 102
7 103
7 101
6 101
6 100
5 95
5 95
5 95
5 95
5 95
5 97
97 102
97 101
97 102
97 102
97 101
97 101
97 101
97 101
97 100
97 100
97 100
97 98
97 90
97 89
97 90
5 81
5 81
4 81
4 81
3 81
3 81
3 81
3 81
3 81
3 81
3 80
3 80
3 87
3 87
3 86
3 90
3 91
3 93
3 94
3 95
3 93
3 94
3 92
3 93
3 92
3 79
3 78
3 77
3 77
3 78
3 66
2 64
2 67
2 70
2 70
2 72
1 72
0 72
0 72
0 71
45 71
45 71
45 71
45 72
45 72
45 72
45 69
45 69
45 65
45 65
45 65
45 68
45 66
45 67
45 66
45 50
2 50
0 46
0 45
0 45
0 45
0 44
0 43
0 43
0 43
0 43
0 43
0 41
0 42
0 40
0 40
0 40
0 40
0 40
0 40
0 40
0 40
0 40
0 40
0 41
0 41
0 41
0 40
0 42
0 42
0 47
0 47
0 46
0 48
0 48
0 46
0 46
0 59
0 60
0 61
0 62
0 63
0 64
0 68
0 68
1 68
1 68
1 68
1 69
2 70
2 71
2 75
2 75
2 77
2 79
2 80
2 80
3 74
3 73
3 70
3 70
2 69
13 68
13 67
13 66
13 66
13 66
13 66
13 65
13 69
13 70
13 71
13 70
13 70
13 69
13 67
13 65
2 63
2 64
2 65
2 63
3 63
3 64
3 64
3 64
3 64
3 64
3 64
3 64
3 64
3 64
3 64
6 65
6 65
6 65
6 65
6 61
5 61
5 62
5 62
5 62
5 64
5 65
5 65
5 65
5 65
5 65
5 64
2 64
2 64
2 64
2 64
2 62
2 62
4 62
4 62
4 62
4 62
4 62
4 62
4 62
4 62
4 62
4 62
4 62
4 62
4 62
4 62
4 57
2 56
2 55
2 55
2 54
2 51
3 60
3 61
3 48
3 44
3 44
3 43
3 46
3 48
3 47
3 51
4 52
4 53
4 56
4 58
4 58
3 57
3 57
3 54
3 57
3 55
2 54
2 54
2 57
2 57
2 60
2 61
2 61
2 61
2 62
2 61
3 61
3 62
3 62
3 62
3 62
3 60
3 59
3 58
3 58
3 59
3 59
3 59
3 61
3 61
3 60
3 59
3 58
3 58
3 60
3 60
3 72
3 74
3 77
4 78
4 78
4 80
4 80
4 80
4 79
4 80
4 79
4 79
4 80
4 80
4 78
4 78
4 78
4 78
4 78
3 78
3 79
3 81
3 81
3 81
3 81
3 82
3 85
3 88
4 90
4 90
4 90
4 90
4 92
4 93
4 93
4 93
4 93
4 93
4 93
4 93
4 93
4 93
4 94
4 93
4 94
4 94
4 94
4 94
4 94
4 94
4 82
4 81
4 80
5 80
5 78
5 76
6 74
6 71
6 71
6 70
5 71
5 69
5 66
5 66
11 67
11 65
11 65
11 64
11 62
10 63
10 62
10 61
10 59
10 58
9 55
9 55
9 56
9 55
9 55
3 55
3 57
3 58
4 58
4 57
4 57
4 57
4 57
4 57
4 57
5 57
6 62
6 63
6 61
6 67
6 67
7 67
7 67
7 65
7 63
7 59
10 49
10 50
10 49
10 50
10 50
10 48
10 47
10 47
10 47
10 47
10 47
10 48
10 48
10 47
10 47
7 47
7 47
7 46
7 45
7 45
7 45
7 44
7 45
7 46
7 45
7 45
7 42
6 40
6 38
6 38
6 37
6 37
6 37
6 37
6 38
6 39
6 39
6 39
6 39
6 39
6 39
6 38
6 38
6 39
6 39
6 39
6 40
6 40
6 41
6 41
5 41
5 40
5 40
4 55
4 62
4 61
18 70
18 71
18 77
18 79
18 80
18 79
18 79
18 79
18 78
18 78
18 78
18 77
18 76
18 75
18 75
4 69
4 69
4 69
4 69
4 69
2 69
1 71
0 71
0 72
0 69
0 68
0 68
0 68
0 68
0 69
0 70
0 68
0 68
0 67
0 62
0 61
0 60
0 57
0 57
0 57
0 57
0 57
0 57
0 57
0 55
0 54
0 53
0 52
0 52
0 52
0 52
0 52
0 52
0 52
0 52
0 54
0 54
0 53
0 54
0 54
0 55
0 55
0 55
0 55
0 54
0 54
0 53
0 53
0 53
0 53
0 53
0 53
0 53
0 53
0 53
0 53
0 53
0 53
0 53
0 52
0 55
0 57
0 62
0 63
0 63
0 64
0 65
0 64
0 64
0 65
0 64
0 65
0 64
0 63
0 61
0 61
0 60
0 39
0 37
0 37
0 37
0 37
0 28
0 29
0 27
0 28
0 29
0 30
0 30
0 30
0 30
0 30
0 30
0 30
0 30
0 30
0 30
0 30
0 30
0 33
0 33
0 32
0 32
0 32
0 32
0 32
0 32
0 34
0 34
0 34
0 34
0 34
0 34
0 35
0 36
0 47
0 52
0 56
0 56
0 56
0 56
0 56
0 57
0 58
0 59
0 59
0 59
0 61
0 61
0 61
0 63
0 63
0 62
0 62
0 62
0 61
0 61
0 60
0 60
0 59
0 59
0 59
0 59
0 61
0 61
0 58
0 58
1 58
1 59
1 59
1 60
1 61
1 61
1 61
1 65
1 65
1 65
1 66
1 67
1 65
1 62
1 62
1 57
1 58
1 58
1 57
1 57
1 57
1 56
1 56
1 56
1 55
1 55
1 54
1 54
1 54
1 55
1 55
1 55
1 55
1 55
1 56
1 56
1 57
1 55
1 54
1 55
1 56
1 56
1 56
2 58
2 59
2 59
3 59
3 59
3 60
3 60
3 59
3 57
3 53
3 52
3 52
3 52
3 52
3 51
3 51
3 50
3 49
4 49
5 46
5 46
5 44
5 44
5 42
5 42
5 34
5 31
5 31
6 30
6 29
6 29
6 29
6 30
6 30
6 29
6 28
6 28
6 28
7 28
7 28
7 27
7 27
7 27
6 27
6 28
6 29
6 29
6 29
7 32
7 32
7 34
7 37
7 42
6 40
6 41
6 42
6 43
5 43
5 42
5 42
4 39
4 39
4 38
4 36
3 40
3 41
4 41
4 43
4 44
4 44
4 44
4 43
4 44
4 45
4 45
4 47
5 48
5 52
5 53
5 53
5 55
5 57
5 59
5 59
5 60
5 62
5 61
5 61
5 61
5 61
5 61
5 62
5 64
4 63
4 62
4 62
4 61
4 60
4 60
4 60
4 60
4 59
4 59
3 59
3 59
3 59
3 59
3 59
3 59
3 59
3 59
3 60
3 60
3 60
3 60
3 62
3 63
1 63
0 63
0 62
0 62
0 62
0 64
0 64
0 63
0 63
0 62
0 62
0 62
0 62
0 62
0 62
0 61
0 59
0 59
0 59
0 59
0 59
0 60
0 62
0 69
0 96
0 120
1 145
2 148
2 148
2 157
2 162
2 162
3 164
3 162
6 289
6 287
6 286
6 287
6 287
6 288
6 292
6 293
6 294
6 298
6 298
6 299
6 301
6 299
6 298
6 299
4 170
4 173
4 172
4 173
4 173
4 177
4 176
4 175
4 173
4 173
4 167
4 165
4 166
4 165
4 168
4 166
4 166
4 169
4 168
4 171
4 171
4 172
4 176
4 176
4 175
4 175
4 175
4 175
4 175
4 179
4 183
4 179
4 180
5 184
5 188
5 187
5 187
5 187
5 187
5 187
5 188
5 188
5 189
5 193
5 193
5 193
6 194
6 193
6 192
6 194
7 198
19 339
20 341
20 341
20 344
20 341
20 343
20 343
20 343
20 343
20 342
20 340
19 340
19 340
19 340
19 341
8 226
8 226
8 226
8 225
8 224
8 219
8 206
7 195
7 170
7 161
6 141
6 139
6 138
6 124
6 122
5 119
5 117
5 119
5 116
5 117
5 118
7 121
7 119
7 118
7 117
7 117
7 114
7 114
7 114
7 115
7 113
7 117
7 119
7 119
6 112
6 112
4 109
4 109
4 109
4 110
4 110
4 110
4 109
4 110
4 117
4 130
4 130
4 132
4 133
4 134
4 135
4 132
4 131
4 129
4 130
4 134
4 132
4 132
4 133
4 139
4 151
4 191
4 200
4 199
5 202
5 206
5 209
5 200
5 199
5 200
5 200
5 200
5 200
5 200
5 198
5 199
5 204
5 202
5 203
5 204
5 206
5 208
4 223
3 227
3 225
3 194
3 191
3 190
4 192
4 192
4 189
4 189
4 189
4 189
4 189
4 189
4 188
4 188
4 188
4 188
4 188
4 188
4 187
4 187
3 187
3 187
3 187
3 187
3 187
3 187
4 187
4 188
4 188
4 191
4 193
4 194
5 195
6 195
6 194
6 195
6 196
7 197
8 197
9 198
9 202
9 203
9 201
9 202
9 204
9 205
9 211
9 208
9 204
9 207
9 211
9 210
9 213
9 212
10 212
12 216
12 217
12 216
12 218
13 218
14 234
14 231
14 230
14 224
14 225
14 231
14 233
15 232
16 232
17 233
18 232
18 232
18 232
18 224
19 223
18 211
18 206
18 180
18 180
18 179
18 179
18 177
18 178
18 178
18 178
18 178
20 180
20 179
20 179
20 178
22 174
22 174
22 171
22 171
22 169
22 170
22 164
22 161
21 150
21 147
21 147
21 147
22 147
22 147
22 145
22 147
22 147
25 148
25 149
25 149
25 149
26 150
26 150
26 160
26 162
26 164
26 165
26 168
25 170
25 170
25 168
25 168
22 168
21 169
21 172
24 173
23 173
23 172
23 172
23 168
22 165
22 167
21 164
21 166
20 167
20 166
20 169
20 173
19 174
18 174
18 171
18 173
18 175
18 176
18 183
18 182
18 175
18 180
28 203
29 204
29 198
29 192
30 194
30 208
29 207
27 208
27 208
27 208
27 205
26 189
26 149
26 143
26 143
26 144
26 144
26 144
26 143
24 142
23 142
22 141
21 139
21 138
21 136
21 137
22 138
21 138
21 137
21 137
21 137
21 137
29 164
31 166
33 178
33 180
33 184
33 184
30 183
30 183
29 182
29 181
29 180
29 179
29 180
29 181
33 280
33 283
33 284
33 287
33 286
34 290
34 293
34 293
35 293
36 296
36 297
36 296
36 299
36 299
36 302
36 316
32 216
32 220
32 220
32 207
32 206
31 202
33 201
36 199
38 200
38 202
38 202
38 202
38 202
38 204
36 190
35 191
35 195
35 195
35 198
35 198
35 197
35 194
35 194
35 190
35 186
35 183
35 183
35 185
34 190
34 193
34 191
34 193
34 193
34 193
34 190
34 190
32 187
32 184
23 153
23 152
23 151
23 150
23 150
23 150
23 155
23 155
23 154
22 152
22 151
22 151
22 151
22 150
22 150
22 152
22 151
22 152
22 153
22 154
22 156
22 156
22 155
22 155
22 154
22 154
20 154
20 154
20 157
19 161
19 177
18 176
11 149
9 149
9 141
9 140
9 143
9 144
8 144
8 144
8 144
8 146
8 145
8 144
8 144
8 145
8 146
8 151
8 151
8 148
8 148
8 149
8 147
7 147
7 148
7 147
7 146
7 145
7 142
7 140
8 137
8 138
8 137
8 137
8 148
8 153
8 153
8 156
5 155
3 157
1 156
1 154
1 155
1 155
1 156
1 153
1 149
1 146
1 145
1 145
1 142
1 141
1 141
1 140
1 140
1 140
1 139
1 140
1 133
1 126
1 124
1 124
1 123
1 123
1 120
1 120
1 117
1 117
1 126
1 131
1 133
1 134
1 134
1 134
1 134
1 128
1 124
1 124
1 124
1 126
1 126
1 134
1 148
1 192
1 219
1 237
1 252
1 280
1 291
1 299
1 311
1 313
1 314
1 317
1 318
1 327
1 340
1 345
1 342
1 353
1 344
1 344
1 344
2 343
2 341
2 339
2 339
2 349
2 356
2 359
3 383
3 389
3 390
3 394
3 394
3 402
3 418
4 429
4 435
4 438
4 436
4 435
4 434
4 437
4 445
4 445
4 444
4 445
3 444
3 454
3 454
3 457
3 453
3 459
3 459
3 462
74 493
74 497
74 498
74 501
74 501
74 503
74 501
75 500
75 501
75 501
75 502
75 502
75 502
75 494
76 495
76 496
5 491
5 492
5 489
5 492
5 493
5 491
5 490
5 490
5 491
4 492
4 498
5 504
5 547
5 554
5 564
5 572
5 562
5 563
5 566
5 573
5 618
5 633
6 675
6 694
7 803
7 829
7 866
8 866
8 872
9 861
9 839
9 818
9 800
9 780
9 773
9 746
9 743
9 735
9 732
9 732
9 732
9 723
9 718
9 711
9 692
9 692
9 691
9 692
9 691
9 690
8 687
8 687
8 692
8 691
8 692
8 689
8 679
7 677
7 658
7 660
7 659
7 661
7 705
7 709
7 692
7 684
7 686
8 687
8 685
8 688
12 729
12 729
12 730
13 741
13 912
13 925
13 930
13 922
13 926
13 945
13 952
13 951
14 953
14 946
14 912
14 909
14 909
14 909
14 910
14 911
14 911
14 914
14 915
14 917
14 921
14 921
14 926
14 932
14 933
14 934
14 938
14 939
14 939
13 943
13 952
16 983
16 988
16 992
16 995
16 992
16 987
15 986
15 911
15 914
15 908
15 897
15 881
15 883
15 871
15 864
18 796
20 852
19 816
23 805
22 678
22 663
22 659
22 670
22 674
22 681
22 681
22 682
24 682
24 687
24 695
24 711
24 723
24 727
24 734
26 736
26 736
26 737
26 737
26 737
26 747
25 751
25 760
25 763
25 768
25 768
25 770
27 775
26 772
26 778
26 763
25 760
25 758
25 757
25 751
28 748
28 749
28 749
29 686
28 685
27 684
27 692
27 698
28 706
28 707
26 706
23 661
23 659
23 638
23 627
23 444
24 443
23 439
23 436
21 433
21 421
21 417
21 414
21 411
22 412
22 414
22 424
22 424
22 431
22 433
22 432
22 431
21 428
21 427
21 427
21 425
21 424
21 420
24 413
24 414
24 411
24 409
24 408
24 402
23 395
23 388
21 361
21 362
21 366
21 369
22 368
22 363
22 371
22 384
23 393
21 398
21 397
20 397
20 395
19 394
19 399
18 398
13 317
13 317
10 313
10 308
10 306
10 305
10 294
10 286
11 285
11 281
15 280
15 280
15 275
15 268
15 246
15 249
15 250
15 250
16 252
16 252
16 252
16 250
16 248
16 240
16 234
12 218
12 210
12 209
12 208
11 214
10 211
10 215
11 219
11 221
11 225
10 222
10 219
10 220
10 222
10 222
10 226
10 229
10 228
9 226
9 221
9 216
8 207
8 205
8 212
8 213
8 213
8 214
8 214
8 215
8 215
8 211
8 210
8 210
8 194
8 194
8 194
8 192
8 190
8 189
8 173
8 168
8 167
8 168
8 168
8 168
9 167
9 167
9 165
9 165
9 164
9 165
7 165
7 163
7 162
7 163
8 205
9 219
10 228
10 240
10 244
10 238
8 238
8 232
8 230
8 227
8 219
8 200
8 193
8 192
8 193
7 191
7 193
7 192
7 188
7 184
7 183
7 184
7 184
7 185
7 191
7 193
7 195
8 199
7 194
7 195
7 196
7 197
7 196
7 195
8 193
8 185
20 185
21 185
20 185
20 183
20 184
20 184
20 184
20 185
20 184
20 186
20 186
20 186
21 184
20 180
20 174
8 168
7 162
7 163
7 158
7 159
7 165
7 173
7 169
7 173
7 173
7 178
7 179
7 188
7 190
7 194
8 195
8 195
9 193
8 209
8 210
8 212
8 212
8 213
8 213
8 213
8 213
9 213
9 212
9 212
9 212
9 212
8 213
10 212
10 212
10 215
10 215
10 215
10 216
10 216
9 217
9 216
9 218
9 217
9 231
9 230
9 234
9 232
8 231
8 224
7 171
7 164
7 163
7 161
7 158
7 159
8 160
8 160
8 160
8 160
12 161
12 163
12 169
13 176
14 246
14 249
14 260
15 262
15 267
15 265
15 267
13 266
13 261
13 257
13 253
13 252
13 252
13 247
13 247
13 246
13 247
13 248
16 254
18 255
18 255
18 256
17 258
17 260
17 261
17 268
17 274
17 275
17 274
17 274
17 278
16 278
16 280
16 278
16 278
16 278
16 283
16 283
16 277
16 277
16 270
16 269
16 270
16 256
17 268
17 273
17 284
17 293
17 309
17 305
17 312
17 311
17 309
17 308
16 298
16 284
16 284
16 283
16 284
16 284
16 284
16 284
16 284
15 283
15 283
15 285
15 285
15 285
15 284
13 285
13 285
13 281
13 280
13 279
13 280
13 280
13 280
13 280
13 278
13 277
12 264
12 264
13 253
13 249
13 249
13 251
13 251
13 251
13 247
13 246
13 247
14 247
14 248
14 250
14 268
14 270
10 268
10 266
10 256
9 244
8 173
8 167
8 164
8 163
8 159
8 160
8 159
8 159
8 159
8 162
8 162
8 162
8 163
8 163
8 163
8 163
8 162
8 160
4 154
4 153
4 152
4 148
4 148
4 144
4 142
4 135
4 135
4 134
6 133
6 134
6 131
6 132
6 131
6 131
6 133
6 133
6 127
6 126
6 126
6 126
6 125
6 124
6 121
4 113
3 94
3 92
3 87
3 75
3 64
3 62
3 57
3 55
3 55
2 54
2 53
2 53
2 53
2 53
2 53
2 53
2 54
2 55
2 57
2 59
2 59
2 60
2 62
2 63
2 63
2 63
2 67
2 70
2 70
2 78
2 92
2 93
2 96
2 144
2 147
2 165
2 169
2 173
2 185
2 190
2 191
2 202
2 209
2 211
2 216
2 214
1 215
1 216
1 213
1 212
0 189
0 190
0 194
0 194
0 194
0 193
0 192
0 192
0 192
0 192
0 191
0 191
0 191
0 191
0 191
0 188
0 188
0 187
0 187
0 188
0 188
0 188
0 189
0 190
0 193
0 193
0 194
0 194
0 194
0 197
0 206
0 207
0 208
0 211
0 211
0 213
0 212
0 210
0 209
0 208
0 207
0 206
0 206
0 206
0 208
0 212
0 215
0 216
0 220
0 220
0 220
0 223
0 246
0 246
0 255
0 256
0 256
0 255
0 255
0 255
0 273
0 274
0 284
0 290
0 289
0 287
0 290
0 290
0 290
0 289
0 291
0 290
0 291
0 291
1 292
1 290
1 284
1 288
1 285
1 278
1 266
1 262
1 254
1 210
1 198
1 196
1 195
1 190
1 187
1 189
1 188
1 172
1 169
1 167
1 167
1 165
1 165
2 167
2 167
2 168
2 168
2 168
2 168
2 172
2 174
2 174
2 174
2 174
2 176
2 176
2 176
2 176
2 176
2 177
2 177
2 177
2 177
2 176
2 176
2 175
2 176
2 177
2 174
2 172
2 175
2 175
2 176
2 178
2 178
2 169
2 162
2 158
2 158
2 157
2 156
2 149
2 149
2 149
2 149
2 149
2 149
2 151
2 149
2 147
2 143
2 146
3 151
4 157
4 155
4 159
4 158
4 154
4 130
4 131
4 123
4 126
4 127
4 132
38 136
39 136
39 118
39 119
39 108
39 107
39 106
39 110
39 109
39 111
39 111
39 110
39 110
39 112
39 111
39 112
37 110
36 110
3 110
3 103
3 105
3 106
3 110
3 111
3 113
3 113
3 115
3 118
3 117
3 119
3 119
3 118
3 118
5 137
5 138
5 140
5 143
5 148
5 150
4 150
4 151
4 150
4 149
4 148
4 142
4 140
4 139
4 140
4 141
2 125
2 125
2 126
2 126
2 126
2 127
2 137
2 138
2 141
2 152
2 160
2 161
2 168
2 165
3 166
3 166
3 172
3 168
3 166
3 167
3 166
3 166
3 166
3 166
3 167
3 165
3 164
3 164
3 165
3 165
3 164
3 164
3 177
3 183
3 183
3 184
3 186
3 186
3 183
1 183
1 180
1 178
1 174
2 207
2 208
2 210
2 209
2 211
2 207
2 200
2 196
2 196
2 196
2 197
2 198
2 204
2 205
2 206
2 212
2 213
2 214
2 215
2 215
2 214
2 212
2 212
2 212
2 213
2 212
2 211
2 212
2 210
2 209
2 217
2 216
2 214
2 211
2 206
2 206
2 205
2 203
2 204
2 204
2 206
2 201
2 201
2 199
2 194
2 182
2 181
2 180
2 181
2 183
2 183
2 183
2 183
2 178
2 177
2 177
2 178
2 180
2 183
6 184
6 184
6 186
6 177
6 166
6 165
6 164
5 157
5 157
5 159
5 160
5 160
5 160
5 162
5 153
40 174
39 174
39 174
39 174
39 174
36 174
36 171
36 171
36 172
36 172
36 172
36 173
36 175
36 175
36 174
1 140
1 136
1 136
1 135
1 131
1 129
0 127
0 123
0 123
0 123
0 131
0 91
0 102
0 105
0 109
0 111
0 112
0 112
0 112
0 112
0 111
0 112
0 111
0 104
0 104
0 102
1 91
1 91
1 90
1 88
1 88
2 89
2 89
2 89
2 89
2 87
2 87
2 87
2 86
2 86
2 86
2 86
2 86
3 86
3 86
3 85
2 85
2 85
2 85
2 84
2 85
2 84
2 83
2 83
2 83
3 82
3 81
3 80
2 79
2 79
2 79
3 79
3 79
3 78
3 77
3 75
3 76
3 78
3 78
3 78
3 77
3 77
3 73
3 73
3 71
3 72
2 75
2 69
2 70
2 74
2 74
2 79
2 79
2 79
2 78
2 76
2 76
2 76
2 78
2 78
2 79
2 79
2 78
2 76
2 76
2 76
2 73
2 73
2 74
2 74
2 71
2 71
2 71
2 71
2 70
2 70
2 70
2 68
2 65
2 58
2 46
2 40
2 39
2 39
2 38
2 40
2 40
2 42
2 42
2 41
2 42
2 41
2 42
2 45
2 46
2 48
1 49
1 49
1 51
1 51
1 51
1 48
1 48
1 48
1 47
1 47
1 47
1 48
1 48
1 48
1 48
1 48
1 48
1 48
1 50
1 50
1 50
1 49
1 49
1 49
1 49
1 49
1 50
1 50
0 50
0 50
0 50
0 50
0 51
0 51
0 51
0 50
0 50
0 51
0 51
0 51
0 50
0 48
0 49
0 50
0 50
0 50
0 49
0 49
0 49
0 46
0 43
0 41
0 41
2 38
3 37
3 29
3 31
3 70
3 70
3 70
3 73
3 74
3 72
4 72
4 72
4 72
4 72
4 84
4 98
4 103
5 107
5 107
5 107
5 110
5 113
5 116
5 120
5 121
4 127
4 136
4 143
4 145
4 145
4 146
4 145
4 146
4 146
4 146
4 146
4 146
4 145
4 143
4 143
4 142
4 142
4 140
4 137
4 134
4 134
4 133
4 133
4 133
4 131
4 131
4 131
4 132
4 132
4 132
4 132
4 133
4 166
4 165
4 167
4 167
4 168
4 169
4 172
4 172
4 173
4 174
4 175
4 178
4 178
4 180
4 186
4 187
4 155
4 156
4 157
4 157
4 157
4 157
4 156
4 156
4 156
4 156
4 156
5 155
5 155
5 156
5 156
5 154
5 154
5 158
5 160
5 174
5 175
5 176
5 183
4 191
3 194
3 201
2 201
1 202
1 200
1 200
1 196
1 145
1 145
1 140
1 123
1 123
1 123
1 123
0 123
0 122
0 122
0 121
0 111
0 109
0 107
0 106
0 106
0 106
0 105
0 101
0 96
0 89
0 85
0 84
0 85
0 91
0 96
0 95
0 95
0 95
0 97
0 98
0 98
0 98
0 98
0 98
0 98
0 98
0 98
0 98
0 98
0 98
0 98
0 98
0 98
0 98
1 98
1 98
1 98
1 98
1 98
1 98
1 100
1 100
1 99
1 100
1 99
1 103
1 102
1 102
1 99
1 99
1 96
1 94
1 91
1 88
1 87
1 85
1 83
1 83
1 83
1 81
1 80
1 80
1 80
1 82
1 82
1 82
1 82
1 83
1 84
1 82
1 82
1 81
1 81
1 83
1 83
1 92
1 88
1 77
1 77
1 76
1 68
1 60
1 60
1 65
1 65
1 64
1 64
1 64
1 61
1 61
1 60
1 60
1 60
1 60
1 60
1 60
1 60
1 63
1 63
1 63
1 63
1 63
1 63
1 63
1 63
1 62
1 62
1 62
1 74
1 79
1 87
2 109
2 102
2 101
2 99
2 102
3 101
3 153
3 153
3 154
3 154
3 154
3 156
4 158
4 158
4 159
5 183
5 185
5 190
5 176
5 176
5 166
5 114
5 114
4 114
4 114
4 115
4 116
6 118
6 119
6 120
6 118
6 121
6 122
6 127
6 129
6 129
6 131
6 131
6 132
6 132
6 132
6 131
6 135
6 135
6 133
6 133
7 132
7 132
7 130
7 130
10 145
10 147
10 148
10 149
10 149
10 152
11 152
11 152
11 152
11 153
11 152
11 151
11 144
11 143
11 143
11 143
12 143
12 146
12 146
12 147
12 147
12 147
13 147
13 147
13 146
14 146
14 146
14 146
14 146
14 146
14 147
15 149
17 150
17 149
17 149
17 149
17 149
17 149
17 149
17 149
17 148
17 148
17 148
17 148
17 148
18 158
18 167
20 190
20 188
20 184
19 160
19 157
37 578
37 574
37 575
37 575
37 582
37 582
37 582
37 587
37 588
37 584
36 584
36 583
36 579
35 552
35 551
17 132
17 141
17 144
17 144
18 150
18 149
18 149
18 150
18 150
18 149
16 154
16 153
16 160
16 157
16 155
16 151
16 151
16 151
16 151
17 152
17 152
17 153
17 156
17 171
17 174
17 171
17 171
16 171
16 171
16 170
16 171
14 171
14 172
13 157
13 159
13 160
13 164
11 164
11 165
10 165
10 165
10 168
10 169
10 169
10 169
10 169
12 170
17 233
16 236
16 240
17 233
17 236
17 236
17 236
17 236
17 236
17 236
17 236
17 237
17 238
17 241
17 245
17 249
16 247
16 245
14 245
14 247
15 266
15 268
15 268
15 268
15 269
15 271
15 269
15 269
15 270
15 270
15 270
14 260
13 256
11 235
11 235
10 209
10 209
10 214
11 229
11 248
11 249
11 249
11 241
11 243
11 242
11 240
11 239
11 236
11 237
11 237
11 237
11 237
16 237
16 230
51 221
51 221
51 220
50 211
50 212
50 214
50 214
50 211
50 210
50 205
50 204
50 197
50 196
50 196
45 196
10 196
10 195
10 195
9 192
9 192
9 191
9 190
10 173
10 172
10 169
10 169
10 169
10 169
10 167
11 177
13 179
13 182
13 182
13 180
13 177
13 175
14 174
14 174
15 174
15 174
15 171
15 169
15 170
13 168
13 168
13 167
7 101
7 100
8 99
9 100
9 100
9 100
10 99
12 98
12 101
13 101
17 104
21 104
42 102
42 99
42 97
42 98
42 101
42 103
42 107
45 111
45 112
45 114
45 115
45 115
45 115
45 114
45 114
45 114
45 111
45 110
45 112
45 110
45 113
45 113
45 114
46 115
46 121
46 117
46 95
46 80
46 84
48 84
73 589
73 589
74 590
79 590
102 595
106 595
107 595
107 595
107 595
107 594
107 594
107 594
107 593
107 593
107 593
82 88
83 87
84 84
84 84
84 83
84 83
84 83
84 83
84 84
84 84
84 84
84 86
84 87
84 88
84 90
85 90
86 93
86 93
86 94
85 94
85 95
85 95
85 97
85 97
85 97
85 97
84 85
82 83
82 81
82 81
82 81
82 82
82 80
81 81
80 88
80 89
80 89
81 91
81 92
81 90
80 90
80 90
80 90
80 89
80 88
79 88
79 88
79 87
80 87
79 98
77 100
75 99
74 97
67 94
65 95
47 94
49 93
49 92
49 92
49 87
50 84
50 83
47 78
47 77
47 73
47 74
47 74
47 74
47 74
47 74
47 74
47 78
47 81
47 79
47 80
47 78
47 78
47 78
46 75
46 71
46 69
45 69
45 70
44 68
37 68
33 67
26 68
22 68
21 68
8 63
7 63
7 63
7 63
8 63
10 64
10 64
11 64
11 64
11 64
11 63
11 64
11 64
11 63
11 72
13 72
13 75
13 76
13 76
13 78
13 77
13 77
13 78
13 80
13 79
12 75
12 73
11 68
11 68
11 68
11 68
11 67
11 67
11 67
11 68
11 68
11 69
11 69
11 70
11 70
11 70
11 70
11 71
11 70
11 66
11 62
11 63
11 63
10 63
10 64
10 66
10 66
10 66
10 66
10 66
10 67
10 67
10 67
10 68
9 69
9 58
9 57
9 54
9 54
9 55
9 55
7 56
6 56
6 56
6 57
6 56
6 55
6 55
6 54
6 54
6 54
6 54
6 54
6 54
6 55
6 53
6 52
6 48
6 47
6 47
6 46
6 45
6 45
4 45
4 51
4 51
4 52
4 53
4 53
4 52
4 52
4 52
3 52
5 52
5 52
5 53
5 53
5 53
5 53
4 55
4 54
4 54
4 54
4 54
4 54
4 53
3 48
3 47
4 48
4 38
3 46
3 44
3 46
4 46
4 45
4 45
4 42
4 41
4 41
4 40
4 40
4 40
4 40
4 39
4 39
4 39
4 39
4 39
4 42
4 42
4 42
4 41
4 40
4 40
4 40
4 40
4 40
4 39
4 39
4 38
4 38
4 38
4 38
4 35
4 33
4 33
4 33
4 33
4 33
4 33
4 33
4 32
4 32
4 30
4 29
4 29
4 29
4 29
4 29
5 31
5 31
5 30
5 29
5 29
5 29
6 30
6 32
6 33
6 33
6 33
6 33
6 33
6 33
6 33
6 36
6 39
6 44
6 48
6 50
6 51
7 51
7 50
7 50
7 54
7 54
7 55
7 53
7 55
7 55
7 55
7 55
6 55
6 55
5 55
5 55
5 54
5 54
5 54
5 54
5 52
5 52
5 52
5 52
5 53
5 53
5 53
5 55
4 55
4 54
4 54
4 45
4 45
4 44
4 44
4 43
4 42
4 41
4 42
4 42
4 42
4 42
4 42
4 42
4 43
4 43
4 50
4 50
4 49
3 47
3 47
3 47
5 49
5 52
5 56
7 59
7 60
7 60
7 61
7 61
7 61
7 61
7 61
7 61
7 62
7 62
7 62
7 62
7 62
7 67
7 71
6 74
6 74
6 76
6 77
6 78
6 77
6 77
6 77
6 77
6 73
6 73
6 73
6 73
6 74
6 72
5 71
5 69
5 69
5 69
5 69
5 69
5 69
5 68
5 68
4 64
4 58
4 57
4 54
4 53
4 53
4 53
4 53
4 52
4 48
4 48
5 47
5 47
5 49
5 49
5 49
5 48
5 48
5 48
5 48
5 48
5 48
5 48
7 84
7 85
7 85
6 85
6 85
6 81
72 95
72 94
72 94
72 93
72 92
72 92
72 93
72 93
72 93
72 92
70 57
70 57
70 57
70 57
70 56
70 56
64 56
64 56
64 56
64 56
65 55
65 54
5 33
5 33
5 33
5 32
5 32
5 32
3 32
3 28
3 19
1 19
1 19
1 19
1 19
0 19
0 19
0 19
0 19
0 19
0 18
0 18
0 17
0 17
0 17
0 10
0 10
0 8
0 8
0 5
0 4
0 2
0 2
0 2
0 2
0 1
0 1
0 1
0 1
0 1
0 1
0 1
0 2
0 3
0 5
0 5
0 5
0 5
0 5
0 5
0 5
0 13
0 13
0 13
1 15
1 16
1 17
1 17
1 17
1 17
1 19
1 22
1 24
1 24
1 24
1 24
1 24
1 24
1 25
1 25
1 26
1 26
4 26
4 27
4 27
4 26
4 28
4 29
4 30
4 30
4 30
4 31
4 32
4 32
4 34
4 35
4 35
4 35
2 35
2 35
2 35
2 35
2 36
2 36
2 36
2 36
2 36
2 36
2 36
2 36
2 36
2 36
2 36
2 36
2 36
2 36
2 36
2 36
2 36
2 36
2 36
2 36
2 37
2 39
2 41
5 79
5 96
5 110
5 115
5 118
5 123
5 130
5 145
5 150
5 157
5 166
5 183
7 192
7 193
7 197
7 197
7 198
6 198
6 198
6 198
8 199
9 205
23 239
23 241
24 247
24 248
24 260
24 259
24 258
24 257
24 258
24 266
24 266
25 269
25 269
25 270
26 262
25 265
25 266
24 267
24 266
27 265
27 265
27 265
27 265
27 264
27 262
27 263
27 264
27 264
29 262
29 262
29 263
29 262
29 262
29 260
27 258
27 268
27 273
28 276
28 277
32 275
34 274
39 272
42 272
43 273
44 272
46 272
47 272
47 273
47 273
47 273
47 274
46 273
46 273
46 272
47 272
47 271
47 271
47 271
47 271
47 271
47 271
47 269
47 269
47 269
47 274
47 275
47 276
47 276
47 279
48 280
48 280
48 280
48 280
49 282
48 280
48 273
48 270
48 235
47 210
47 207
47 202
48 197
48 200
48 197
48 191
48 168
48 156
48 152
47 140
47 135
45 132
45 130
45 128
46 129
46 130
46 148
46 250
48 286
48 288
48 291
39 265
44 283
56 302
69 306
86 314
88 323
90 325
91 327
91 327
92 319
93 318
95 318
96 318
94 318
121 321
121 316
121 315
120 315
120 315
120 313
120 313
120 312
121 320
121 317
121 322
121 324
121 324
121 324
121 325
121 327
93 328
93 328
93 330
94 359
94 362
94 354
93 348
91 345
91 345
86 345
84 342
81 342
78 345
75 345
75 346
75 346
75 346
75 343
73 314
73 314
73 315
73 316
73 316
73 316
72 316
72 320
72 323
72 325
72 334
72 334
72 334
72 341
82 481
87 502
87 546
88 569
88 709
88 907
89 1111
89 1365
90 1717
91 1833
91 1879
91 1974
91 2184
93 2287
97 2517
97 2538
93 2539
94 2543
94 2543
93 2546
93 2540
94 2546
94 2558
94 2561
94 2565
94 2566
94 2563
94 2559
94 2559
93 2566
93 2576
93 2580
92 2581
91 2546
88 2448
86 2431
84 2428
80 2428
64 2430
58 2428
49 2427
40 2442
32 2440
30 2435
30 2438
30 2441
30 2450
30 2458
28 2464
28 2471
27 2488
27 2493
27 2500
28 2502
28 2504
28 2504
28 2504
29 2523
29 2524
29 2525
28 2519
28 2519
28 2513
28 2513
28 2514
28 2512
28 2512
28 2513
28 2513
28 2516
29 2516
41 2944
41 2940
41 2940
41 2939
41 2937
41 2944
41 2944
41 3033
41 3046
41 3064
41 3099
41 3113
43 3122
43 3125
45 3130
33 2705
34 2707
34 2709
34 2708
34 2715
34 2716
34 2716
34 2708
34 2703
34 2699
34 2671
33 2657
34 2614
31 2589
19 1998
16 1922
16 1652
15 1019
15 1014
15 924
15 836
15 748
13 579
12 499
12 479
12 477
10 473
9 468
8 468
8 468
8 468
8 468
8 468
8 465
8 465
7 454
7 446
7 446
7 449
7 450
7 452
7 452
7 451
7 456
7 449
7 445
6 438
6 431
6 422
6 412
6 411
6 411
6 408
6 407
6 405
6 386
6 379
5 374
5 371
5 369
5 363
5 357
5 353
5 343
5 325
5 320
5 317
4 316
4 314
4 315
4 320
3 301
3 302
3 301
3 300
3 299
4 299
4 298
4 299
4 299
4 298
6 334
6 332
6 330
5 329
5 329
5 329
5 329
6 334
6 329
6 316
6 315
6 198
6 192
5 160
5 149
3 110
3 110
3 111
3 107
3 104
3 102
3 99
3 98
3 90
3 90
3 88
3 86
3 86
3 86
3 86
2 86
2 85
2 83
2 83
2 83
2 83
2 83
2 83
2 83
2 82
2 81
2 81
4 80
4 76
4 72
4 72
4 72
4 73
4 73
4 73
4 73
4 73
4 72
4 72
4 71
4 71
4 65
4 65
4 65
4 63
4 62
2 60
2 50
2 43
2 43
2 43
2 43
2 42
2 40
2 40
2 40
2 40
2 40
2 40
2 40
2 40
2 38
2 36
2 36
2 35
2 33
2 35
2 35
2 35
2 36
2 36
2 39
2 39
2 38
2 31
2 31
2 29
1 29
1 29
1 34
1 34
1 34
1 34
1 34
1 34
1 34
1 34
1 33
1 33
1 33
1 33
1 33
0 28
0 27
0 20
0 19
0 17
0 17
0 17
0 16
0 14
0 13
0 10
0 10
0 10
0 10
0 10
0 10
0 10
0 10
0 9
0 11
0 11
0 12
0 12
0 12
0 13
0 13
0 14
0 16
0 23
0 23
0 20
0 23
0 23
0 23
0 24
0 26
0 26
0 27
0 27
0 27
0 27
0 27
0 27
0 27
0 27
0 27
0 30
0 30
0 31
0 34
0 37
0 38
0 38
0 39
0 46
0 49
0 55
0 57
0 58
1 62
1 63
1 65
1 65
1 65
1 65
1 66
1 66
1 66
1 66
1 66
1 66
1 66
1 66
1 66
0 64
0 64
0 64
1 65
1 65
1 65
1 65
1 65
1 66
1 84
1 86
1 89
1 92
1 93
1 93
1 94
1 95
1 95
0 95
0 94
0 94
0 94
0 94
0 94
0 94
0 94
0 94
0 94
0 94
0 94
0 95
0 95
0 94
0 95
0 95
0 97
0 98
0 103
0 106
1 110
1 110
1 111
1 111
1 110
1 110
1 112
1 112
1 111
1 111
1 113
1 113
1 113
1 105
1 98
1 95
1 94
1 94
1 93
1 92
1 93
1 94
1 93
1 93
1 94
1 94
1 94
1 94
1 96
3 99
5 113
6 113
11 114
11 113
11 119
11 112
11 113
11 112
11 113
11 112
11 111
11 101
11 96
11 90
11 90
11 89
12 89
7 92
13 114
13 118
22 124
30 239
31 265
31 268
31 274
31 275
31 275
31 276
31 276
31 276
31 276
31 277
31 281
31 281
31 281
31 282
32 285
32 286
32 286
33 285
33 265
33 262
33 267
33 268
33 267
33 267
33 266
33 268
33 268
33 274
33 275
33 277
34 277
34 277
34 276
34 279
35 295
35 295
35 296
35 298
35 299
35 298
35 301
35 301
35 307
35 338
35 341
35 344
35 342
35 339
34 341
34 353
34 363
34 369
34 373
34 375
34 376
34 375
34 375
34 375
34 375
35 381
35 396
35 398
35 429
35 506
35 520
35 540
38 564
38 565
38 572
38 574
38 578
38 584
38 594
38 642
39 662
39 671
40 828
39 839
37 847
37 858
37 871
37 882
37 907
37 910
37 912
37 913
37 912
37 911
37 910
37 910
37 912
37 913
36 911
34 911
34 911
33 933
28 943
24 966
18 972
10 882
9 899
9 911
9 915
9 920
9 925
9 936
9 934
9 938
9 944
9 989
9 1026
9 1089
9 1095
9 1104
8 1107
8 1110
8 1112
8 1115
8 1133
8 1147
8 1138
8 1138
8 1148
8 1152
8 1157
8 1162
8 1165
8 1159
8 1159
9 1156
9 1158
13 1158
14 1156
14 1155
13 1141
14 1140
14 1140
15 1144
15 1144
17 1142
17 1139
17 1135
17 1131
17 1101
18 1101
18 1100
18 1100
19 1100
19 1097
19 1085
19 1079
19 1073
19 1072
19 1071
19 1067
19 1066
19 1061
19 1055
19 1059
19 1056
19 1041
19 1033
19 993
18 912
18 902
18 885
18 886
18 883
18 880
19 888
19 889
18 883
18 863
18 825
18 801
19 778
16 586
16 574
16 569
16 568
17 571
17 573
17 572
17 572
17 571
17 569
17 569
17 572
18 573
18 573
18 570
17 578
17 580
17 578
17 579
17 553
17 512
17 499
17 480
17 414
20 405
21 402
21 398
21 394
23 415
23 413
24 420
24 421
24 415
24 326
26 305
26 258
26 256
27 248
27 246
27 240
30 238
32 237
32 219
33 211
33 208
33 206
33 196
34 195
34 188
34 187
34 187
34 187
34 189
32 190
32 189
25 188
23 189
23 187
23 187
23 191
23 190
22 186
22 187
22 188
22 188
22 189
22 190
22 195
21 194
21 194
21 204
21 207
21 222
21 225
21 225
21 225
22 229
22 232
22 252
22 258
22 265
22 276
22 268
21 270
21 270
21 268
21 269
22 273
22 269
22 274
23 273
23 270
22 262
22 254
22 248
22 248
22 246
21 245
21 246
21 246
21 243
21 240
21 242
20 244
20 242
21 242
21 240
21 241
21 241
21 242
21 242
21 239
20 239
20 239
20 240
20 233
20 232
20 228
19 224
19 234
19 257
20 280
20 281
19 282
15 280
14 285
14 287
14 257
13 273
13 291
12 289
12 288
12 286
12 286
12 284
12 284
12 288
11 288
10 286
10 287
9 292
7 297
8 301
7 303
7 302
7 302
7 303
6 300
6 310
7 311
7 312
8 330
8 331
8 332
8 348
8 361
8 370
9 376
11 379
11 373
11 373
11 372
11 371
11 371
11 369
11 368
11 367
11 350
170 352
170 351
170 342
170 340
170 340
170 341
170 341
170 338
169 336
169 333
169 302
170 298
170 302
170 301
170 306
12 308
11 313
11 314
11 312
10 309
9 310
9 310
9 307
9 306
9 306
9 305
9 312
9 310
9 310
9 310
9 309
8 308
8 305
8 305
8 301
8 301
8 301
8 301
8 301
8 301
8 301
8 300
8 293
8 292
8 291
8 287
8 286
8 285
8 283
7 281
7 276
7 256
7 230
7 212
7 210
7 204
8 203
8 200
8 195
7 185
7 168
7 154
7 151
7 151
7 152
7 152
7 152
7 152
7 151
7 151
7 151
7 149
6 144
6 137
6 136
5 136
5 136
5 136
5 136
5 136
4 126
4 125
4 121
2 103
2 102
2 98
3 72
3 61
3 58
2 53
2 53
2 53
2 53
2 52
2 52
2 52
13 52
13 52
17 223
16 220
16 220
15 219
15 219
15 218
15 218
15 217
15 215
15 215
15 214
15 216
15 216
12 214
4 215
4 219
4 200
0 38
1 32
1 29
1 31
1 33
1 35
1 35
2 44
3 43
3 46
3 49
3 51
3 55
5 55
5 61
7 82
8 88
12 111
38 334
44 367
45 384
50 396
52 400
54 407
54 437
56 438
56 441
58 459
58 460
58 462
57 466
63 491
64 493
64 495
64 496
64 497
64 496
64 498
64 496
64 500
64 501
64 504
64 506
64 509
64 512
64 514
64 514
94 517
94 521
94 521
94 521
94 521
94 523
94 525
94 526
94 531
94 531
94 531
94 532
94 532
94 532
94 533
64 531
64 531
64 533
64 534
64 532
64 533
64 534
64 534
64 534
64 534
64 547
66 555
66 562
67 565
67 571
68 574
68 579
68 584
69 585
69 594
69 602
69 605
69 607
69 614
69 615
69 616
69 621
69 632
69 710
69 734
69 760
69 769
70 781
71 822
70 837
70 859
70 861
70 861
70 860
70 860
70 861
70 854
70 850
70 851
70 854
69 856
68 858
66 858
66 857
67 855
67 850
67 843
66 834
61 803
57 792
51 742
23 515
45 533
43 533
40 537
40 537
40 539
40 555
40 556
40 579
40 568
39 571
39 574
38 578
32 557
32 560
35 568
10 554
11 555
11 560
11 574
11 586
11 581
11 593
11 596
11 625
11 800
11 823
11 847
11 858
11 859
11 889
11 908
11 912
11 915
11 916
11 915
11 911
11 908
11 908
11 907
11 907
11 907
11 908
11 907
11 906
11 905
11 902
11 902
11 902
11 902
11 900
10 902
10 903
10 903
10 889
10 876
10 865
10 861
9 861
9 859
9 853
9 850
9 850
9 842
9 841
9 863
9 857
9 854
9 869
9 879
9 892
9 865
7 807
7 826
7 800
7 807
7 815
7 816
8 1085
8 1093
8 1208
8 1236
8 1255
8 1265
9 1266
9 1265
9 1267
9 1266
9 1263
9 1245
8 1242
8 1243
7 1242
7 1239
7 1239
7 1245
7 1245
7 1246
7 1247
7 1230
7 1217
7 1215
7 1212
6 1208
6 1205
6 1201
6 1190
6 1190
6 1159
7 1170
7 1165
7 1162
7 1158
6 1155
6 1151
4 1140
4 1137
3 1135
3 1122
3 1102
3 1092
3 1092
3 1090
3 1084
3 1023
3 819
3 810
3 801
3 792
3 793
3 789
3 782
3 779
4 788
4 792
4 795
4 798
4 798
4 801
4 806
5 824
6 844
6 844
6 847
6 848
6 848
6 848
7 856
7 860
7 867
7 871
7 874
7 873
7 880
10 913
13 924
13 919
13 923
13 921
13 920
13 919
13 915
14 953
14 956
14 959
14 933
14 932
14 931
14 907
14 898
14 855
14 828
14 785
14 767
14 737
14 731
14 721
14 709
13 422
13 413
13 266
13 264
13 255
13 252
12 253
12 252
12 251
12 251
12 254
12 256
13 258
19 314
21 333
21 334
21 335
21 329
21 328
21 329
21 329
21 331
22 333
22 333
22 332
22 333
22 339
23 342
23 343
23 341
23 338
22 322
22 321
22 321
22 324
22 326
22 329
22 330
22 334
22 335
22 336
23 336
23 337
23 335
23 335
23 334
24 335
24 338
27 344
27 354
27 377
27 381
26 380
26 382
26 377
26 368
25 362
25 363
25 368
25 377
25 377
25 375
24 365
22 377
22 379
22 382
22 385
22 388
22 397
29 731
29 823
30 893
33 976
48 2122
47 2295
51 2793
48 2973
55 3667
66 4293
78 5273
83 5632
107 7542
110 7841
116 8188
119 8314
122 8602
123 8722
129 9326
129 9354
130 9358
130 9362
130 9366
130 9367
132 9709
132 9732
132 9766
146 9954
147 10007
150 10599
151 10757
164 11228
168 11547
168 11684
188 12215
203 12451
213 12700
235 13109
249 13229
251 13302
272 13542
274 13551
273 13562
278 13725
271 13662
271 13700
274 13739
276 13756
276 13763
277 13891
278 13910
278 13945
280 13969
280 13977
280 14052
312 14131
347 14218
352 14271
355 14353
355 14364
356 14371
354 14390
356 14432
358 14460
360 14464
365 14472
365 14461
366 14458
409 14683
415 14693
416 14720
420 14744
422 14753
423 14771
424 14809
427 15024
427 15047
427 15043
429 15050
425 15043
423 15052
424 15048
425 15068
425 15081
425 15088
425 15105
425 15146
424 15191
423 15203
424 15206
423 15208
423 15649
424 15694
424 15698
422 15716
421 15743
422 15748
422 15756
421 15766
421 15706
413 15301
411 15245
410 15107
410 14745
396 13192
395 12863
388 12186
385 11829
381 11483
373 11105
363 10395
351 9629
321 7307
321 7126
321 7110
318 7141
317 7185
316 7179
316 7171
316 7183
317 7209
319 7220
326 7341
329 7350
346 7098
365 8154
363 8096
347 7961
345 7952
343 7289
339 6942
315 6341
309 6258
293 6001
278 5583
268 5313
254 5031
247 5444
245 5471
245 5513
231 5395
232 5558
231 5802
230 5803
231 6099
237 6281
239 6512
238 6651
238 6685
237 6587
237 6691
239 6741
240 6727
240 6733
237 6666
188 6537
163 6485
159 6470
157 6378
156 6369
155 6365
153 6324
152 6286
151 6263
150 6258
150 6248
143 6319
143 6328
103 6177
102 6209
101 6219
101 6235
101 6249
101 6244
99 6172
98 5965
98 5965
98 5960
98 5959
98 5961
100 5964
100 5951
100 5928
101 5931
101 5932
101 5933
100 5878
100 5841
100 5817
118 6368
121 6553
121 6151
134 6497
134 6852
136 7214
139 7333
142 7383
140 7405
140 7400
140 7380
140 7379
140 7378
140 7384
141 7395
142 7410
142 7387
142 7384
142 7383
142 7384
141 7396
141 7453
141 7484
147 7583
148 7591
147 7590
147 7512
145 7433
151 7528
150 7511
149 7522
148 7500
146 7467
141 7355
136 7268
116 7031
111 6084
112 6072
125 5951
125 5940
126 5938
138 5950
138 5961
145 5990
146 6010
159 6093
161 6115
160 6123
155 5444
155 5429
155 5413
157 5448
160 5391
161 5156
164 5026
161 4430
154 4254
153 4245
154 4203
153 4179
153 4133
151 4102
150 4032
150 4031
150 4033
152 4038
152 4033
152 4030
154 4030
159 4229
160 4258
163 4324
164 4358
165 4411
170 4566
170 4647
168 4662
164 4584
164 4547
168 4444
168 4441
169 4468
168 4437
169 4435
169 4449
169 4455
169 4457
169 4455
169 4473
167 4476
167 4473
167 4460
166 4464
166 4465
166 4457
165 4447
166 4439
167 4435
172 4443
173 4409
142 3523
155 3240
154 3169
153 3130
153 2623
152 2290
152 2262
153 2267
153 2259
153 2255
153 2245
153 2232
153 2229
153 2247
169 2298
171 2293
160 2316
161 2317
162 2318
162 2314
162 2273
162 2206
161 2175
154 2067
155 2078
155 2091
154 2118
157 2299
152 2187
152 2195
152 2172
152 2169
152 2206
167 2418
175 2531
255 3135
258 3208
262 3268
255 3256
258 3296
256 3302
252 3314
250 3282
245 3236
248 3207
239 3128
240 3134
240 3121
238 3103
236 3091
236 2998
235 2970
235 2952
235 2912
235 2910
237 2930
237 2954
237 2994
238 3089
239 3203
237 3303
241 3393
241 3468
241 3527
240 3534
242 3578
243 3630
248 3835
279 4336
284 4286
288 4341
287 4341
291 4664
292 4991
286 4911
289 4899
290 4907
290 4927
291 4935
289 4905
289 4905
288 4855
289 4864
291 4866
291 4861
291 4856
291 4855
291 4854
294 4835
295 4838
300 4840
328 4863
334 4925
496 5645
502 5694
509 5756
517 5989
515 6018
509 6013
513 6051
512 6060
513 6103
514 6125
515 6134
515 6134
517 6138
518 6122
521 6073
522 6070
533 6144
541 6174
539 6190
539 6202
538 6183
520 6138
520 6129
520 6154
521 6172
524 6222
526 6243
534 6308
535 6313
534 6320
534 6322
534 6301
532 6277
531 6818
528 6673
531 6769
528 6742
532 6799
531 6801
527 6777
504 6525
474 6353
419 5893
425 5987
427 6004
441 6033
439 6043
436 6045
432 6045
430 6065
430 6105
428 6118
428 6122
431 6109
430 6170
432 6164
438 6156
440 6157
438 6177
436 6173
433 6172
432 6160
436 6123
436 6008
436 5921
436 5770
436 5545
436 5438
435 5345
441 5268
442 5186
443 5175
442 5161
437 5085
423 4731
395 4140
384 3834
391 3794
390 3792
389 3769
389 3602
393 3593
395 3591
393 3622
391 3593
390 3725
388 3731
389 3766
387 3768
384 3759
385 3861
383 3881
382 4008
379 4050
380 4072
384 4081
368 4105
329 4058
293 4100
265 4047
174 3458
170 3517
163 3468
168 3264
180 3415
183 3391
181 3394
183 3393
357 3393
598 3445
679 3507
692 3513
750 3531
753 3554
799 3822
801 3884
794 3792
851 4063
854 4058
854 4039
860 4030
865 4041
885 4057
894 4044
891 4030
898 4075
934 4079
937 4172
967 5277
978 5418
984 5523
986 5544
991 5553
993 5145
997 5136
996 5042
996 5089
989 5089
989 5094
989 5112
990 5112
992 5105
994 5123
1003 5303
1008 5677
1001 6088
1015 6754
1034 8165
1037 8408
1038 8634
1035 8763
1039 9067
1044 9141
1041 9271
1042 9209
1043 9389
1041 9402
1041 9454
1041 9648
1042 9908
1044 10004
1047 10025
1042 10023
1043 10024
1044 9998
1043 9991
1041 9989
1037 9987
1035 9984
1029 9984
1028 9981
1028 9978
1027 9975
1027 9987
1026 10035
1025 10165
1024 10270
1020 10338
1020 10359
1022 10366
1019 10374
1018 10377
1018 10372
1019 10346
1019 10340
1018 10209
1017 10213
1017 10172
1016 10194
1016 10238
1013 10121
1016 10441
1016 10782
1021 12110
1019 12446
1017 12855
1016 13276
1016 13908
1014 14043
1016 14353
1017 14398
1020 14352
1023 14337
1007 14261
999 14203
986 14220
863 14222
850 14234
618 14246
385 14189
298 14116
296 14103
291 14105
289 14096
280 13821
261 13786
238 13837
165 13521
144 13524
143 13522
142 13437
136 13317
137 13304
138 13265
138 13255
134 13088
134 13047
134 12984
122 11966
119 11836
117 11749
118 11741
117 11718
115 11487
115 11476
113 11450
112 11357
112 11349
112 11338
112 11324
113 11300
113 11271
110 11016
106 10592
102 10257
97 9855
92 8890
78 7308
76 7189
73 7085
74 6945
74 6934
73 6923
72 6863
71 6848
67 6638
67 6614
66 6449
65 6288
63 6049
63 6005
62 6003
62 6002
62 6002
63 6002
63 6002
63 6000
63 5999
63 5998
63 5998
63 5993
62 5989
60 5970
60 5925
57 5800
57 5683
57 5571
53 5543
53 5542
52 5539
51 5527
51 5523
50 5518
50 5505
50 5502
49 5503
47 5494
44 5487
42 5431
42 5349
42 5256
42 4846
38 3887
30 2787
28 2490
26 2028
25 1501
25 965
25 903
22 502
22 478
15 459
12 455
12 440
12 398
12 382
12 370
12 360
12 314
12 278
12 273
12 267
11 262
11 258
10 196
10 195
7 120
7 121
7 115
7 115
6 112
13 131
13 132
13 132
13 132
11 131
11 132
11 131
11 131
11 130
11 130
13 129
20 129
18 120
18 119
18 121
18 122
18 120
18 120
18 120
11 99
11 99
11 98
11 98
11 97
11 97
11 102
2 101
2 101
1 100
1 99
1 98
2 98
2 96
2 96
2 95
2 95
2 95
2 93
1 91
1 91
1 91
1 91
1 91
1 91
1 91
1 92
1 92
1 92
1 92
1 92
1 92
1 92
1 92
1 92
1 92
6 115
7 120
8 124
8 129
8 134
8 137
8 132
8 131
8 136
8 135
10 176
10 183
10 188
10 177
10 174
10 177
10 174
10 175
10 170
10 170
10 170
10 169
10 168
10 168
10 168
8 142
8 140
8 141
9 140
9 140
9 140
9 140
9 140
9 140
9 140
9 140
9 140
9 140
9 140
9 143
9 144
9 143
9 143
8 142
8 142
8 142
8 141
8 141
8 141
8 141
8 137
8 137
9 137
9 137
9 137
9 138
24 180
25 180
25 182
25 179
25 181
25 181
25 184
25 185
25 186
25 186
25 187
25 187
25 189
25 189
25 185
9 143
9 144
9 147
9 146
9 146
9 146
9 144
9 148
9 151
9 153
9 156
9 171
9 174
9 177
13 195
13 203
13 204
13 208
18 213
18 214
18 213
18 220
18 218
18 220
18 221
20 224
20 220
20 219
19 214
14 197
15 248
15 247
15 246
15 242
15 243
15 245
17 243
17 230
17 215
17 188
17 186
17 183
17 183
17 182
17 181
17 182
17 183
17 184
17 187
18 186
18 186
20 185
20 186
20 190
21 192
28 195
28 197
28 198
28 198
28 199
28 203
31 203
31 203
33 205
33 205
33 205
33 205
33 205
33 201
34 201
32 198
27 198
29 198
32 198
49 196
50 196
52 197
54 197
55 197
66 197
67 197
67 197
69 197
73 197
74 196
77 195
78 196
81 198
85 199
87 197
88 195
95 194
98 194
112 395
132 395
146 392
147 392
149 391
149 391
149 391
148 389
149 387
152 386
153 386
154 386
156 385
156 384
176 376
170 177
170 178
172 190
173 178
172 174
172 173
169 152
170 146
180 145
209 147
211 144
212 146
219 146
222 140
240 140
243 137
243 133
241 134
241 135
241 133
241 131
242 128
242 69
239 68
238 68
239 67
240 68
240 68
241 68
241 70
242 69
242 73
243 74
243 73
243 73
245 73
252 73
256 72
472 88
489 90
499 100
531 108
549 117
547 116
551 114
560 112
702 136
737 138
752 147
768 153
772 153
772 154
774 153
771 152
800 151
799 151
805 152
809 153
1063 156
1075 156
1078 156
1079 159
1084 159
1083 159
1083 159
1082 159
1066 161
1066 161
1069 160
1074 160
1077 160
1067 160
1071 160
1090 160
1110 159
1370 165
1456 167
1462 166
1464 164
1469 162
1471 162
1478 162
1482 160
1468 160
1469 161
1474 161
1457 161
1447 161
1455 161
1466 161
1468 161
1470 163
1469 163
1469 163
1467 161
1469 161
1469 161
1471 162
1470 162
1453 161
1451 156
1455 155
1454 136
1454 134
1458 135
1461 139
1467 143
1475 144
1472 144
1488 1222
1481 1220
1480 1219
1482 1219
1480 1218
1465 1218
1471 1221
1476 1228
1483 1231
1487 1230
1496 1233
1567 1240
1570 1241
1570 1241
1571 1243
1569 1236
1550 162
1551 162
1561 162
1577 162
1576 162
1580 161
1586 157
1601 157
1605 155
1603 154
1604 155
1593 153
1604 154
1404 122
1387 108
1378 105
1348 106
1333 104
1326 103
1320 104
1299 100
1134 67
1091 65
1085 58
1075 57
1071 57
1070 56
1108 64
1108 68
1107 70
1105 70
1100 70
1095 71
873 68
868 69
867 69
865 69
864 69
866 71
867 71
867 71
867 71
868 71
862 72
793 70
756 70
748 70
728 69
697 68
647 67
448 61
412 63
410 62
408 63
410 67
411 69
401 69
401 70
401 70
402 70
402 71
403 72
403 72
403 72
399 72
397 72
397 70
396 70
397 70
406 70
476 70
486 71
487 70
491 70
493 71
494 71
495 70
497 70
501 70
498 70
491 67
488 66
474 67
472 70
472 70
472 70
476 69
479 69
477 69
474 87
465 83
448 73
431 71
426 71
411 71
376 72
372 73
369 73
370 77
369 77
351 77
349 79
340 79
333 80
332 81
330 81
334 62
327 64
336 66
356 66
352 65
353 65
324 64
312 68
317 66
316 64
312 62
306 62
302 62
302 62
303 62
302 62
305 62
304 62
304 62
304 62
301 62
276 51
275 51
270 50
269 50
269 50
269 50
270 50
270 51
269 51
268 52
265 52
266 51
266 51
266 51
266 52
264 53
264 53
263 54
263 54
270 61
271 62
272 79
277 84
280 85
280 86
275 87
276 88
272 86
267 84
280 115
281 119
281 119
280 119
281 121
283 124
287 128
288 130
284 130
280 132
264 133
268 134
258 133
275 136
218 137
216 136
215 135
215 135
212 135
198 106
195 106
193 106
191 106
191 107
191 106
189 104
189 103
186 101
186 101
185 101
181 101
178 101
179 101
182 101
186 103
193 103
193 104
193 104
193 102
177 95
179 95
181 95
178 90
178 92
178 91
177 91
178 91
172 88
169 88
163 88
158 87
157 85
140 85
125 85
132 87
131 86
129 89
128 89
123 90
123 90
140 94
140 94
142 96
144 96
144 97
144 97
144 97
145 97
146 97
139 95
139 95
139 94
139 94
139 94
139 94
124 91
124 91
124 89
233 98
242 99
264 109
301 120
346 125
349 127
349 128
349 127
349 126
349 126
348 125
348 127
340 118
338 116
331 93
326 88
325 88
322 79
320 79
316 78
316 78
316 78
316 77
315 73
315 73
315 73
312 68
310 66
306 61
304 59
304 60
306 60
303 69
297 68
296 67
268 65
267 63
266 63
266 63
266 64
266 64
266 64
265 64
265 65
265 67
265 67
265 68
263 81
262 80
262 81
262 81
262 81
262 81
262 81
259 81
256 81
252 80
247 79
247 79
250 80
250 81
249 82
246 86
244 86
242 86
241 85
241 85
240 86
238 87
238 91
238 91
238 91
238 91
238 91
238 90
235 90
235 90
235 91
236 113
236 118
236 122
236 123
233 123
233 137
232 151
229 161
229 162
229 166
229 169
229 170
229 170
229 171
229 171
230 171
230 171
230 172
230 173
229 172
223 173
215 173
109 163
101 162
50 155
27 145
3 140
2 140
2 140
2 140
2 140
2 140
2 139
2 138
2 138
3 175
3 175
3 175
3 175
3 175
3 175
3 175
3 175
3 174
3 174
3 174
3 174
3 173
3 173
3 173
3 173
2 132
3 131
3 132
3 125
3 124
3 123
3 123
3 123
3 123
3 124
3 125
3 125
3 127
3 129
3 128
3 126
3 128
3 133
3 121
3 131
3 131
3 137
3 141
4 147
4 154
4 155
4 156
4 156
5 156
5 156
5 156
6 162
6 169
6 168
7 181
7 182
7 180
7 180
7 180
7 180
7 178
7 183
7 189
7 193
7 194
7 193
9 204
9 203
9 214
9 185
9 185
9 187
9 192
10 199
10 191
10 182
10 182
10 195
10 198
10 199
10 205
10 205
10 205
10 205
9 205
9 205
9 205
9 205
9 206
9 206
9 206
9 206
9 207
9 208
9 230
9 231
9 232
9 237
9 238
9 238
11 238
12 239
12 239
12 239
12 239
12 239
12 239
12 239
12 239
13 240
13 240
13 241
13 242
13 242
13 242
13 242
10 242
10 243
10 243
9 243
9 244
9 245
9 247
10 251
11 251
11 249
11 245
13 245
13 245
13 245
13 245
13 249
13 245
13 244
13 244
13 242
13 238
13 231
13 227
13 218
11 214
10 211
9 210
9 203
9 201
9 203
9 202
10 203
9 203
9 200
11 192
11 180
10 170
10 169
10 172
10 188
10 193
11 194
11 194
11 194
11 193
11 191
11 183
11 183
11 181
11 178
8 159
8 159
8 144
8 144
8 134
8 129
8 128
7 110
7 99
7 97
8 95
8 95
10 101
12 106
12 115
12 115
12 117
12 117
11 117
11 118
11 118
11 117
11 118
11 119
11 120
11 119
11 117
11 117
11 96
11 95
11 93
11 87
11 87
12 87
12 87
12 87
12 87
12 87
12 87
12 88
14 87
14 87
14 85
13 85
13 86
14 84
14 84
14 84
14 85
14 85
14 85
14 86
14 103
14 105
14 102
14 102
14 104
14 104
14 104
14 104
14 103
13 106
12 106
12 106
12 105
12 103
12 103
12 103
12 103
12 103
12 103
12 104
12 104
12 104
12 104
12 104
11 102
11 102
11 102
11 97
10 98
10 99
10 99
10 97
9 100
9 100
8 98
8 95
8 90
8 72
8 71
8 70
8 70
8 70
8 70
8 69
7 69
7 68
7 69
7 69
7 71
7 72
8 72
8 73
8 73
8 73
8 69
8 64
8 69
9 69
8 71
8 69
12 86
11 77
11 78
11 79
11 77
11 79
11 79
11 79
11 79
39 80
40 80
144 88
144 88
144 89
144 90
144 90
144 90
144 90
144 90
144 90
143 90
143 90
143 91
143 91
143 91
142 91
11 80
10 80
10 79
11 79
11 79
11 80
11 80
12 82
12 82
12 83
12 82
12 83
12 82
12 81
12 65
12 65
12 65
12 66
12 65
12 65
12 65
14 66
14 66
14 63
13 63
13 63
13 63
14 63
14 63
14 63
15 64
15 64
16 64
16 64
16 64
17 67
17 66
17 66
17 66
17 66
17 66
17 66
17 64
17 64
17 63
17 62
17 59
17 58
16 58
16 58
16 59
15 59
15 60
15 60
15 60
16 60
16 60
16 60
16 59
16 61
16 65
16 65
16 70
16 70
16 77
20 100
23 127
24 126
25 128
25 132
25 129
24 128
23 126
23 125
20 104
20 107
20 105
21 106
21 106
21 113
29 132
30 133
41 134
41 134
41 134
41 134
42 135
43 140
43 143
43 147
43 149
44 150
44 152
45 152
46 152
49 151
52 151
55 151
61 151
61 151
67 152
97 153
130 157
210 159
227 160
236 159
241 160
240 160
243 161
250 161
278 159
341 159
376 161
396 161
413 161
420 159
428 157
431 158
434 159
441 160
445 163
462 163
462 163
463 163
465 163
472 164
478 164
477 165
477 165
479 164
486 163
490 164
507 165
516 165
527 165
531 162
533 163
536 163
536 163
538 164
540 164
545 164
577 163
585 163
594 162
600 162
611 163
617 163
628 162
655 163
658 164
671 175
673 175
679 178
680 178
683 175
702 176
737 176
744 174
748 163
748 140
747 126
746 108
743 104
741 100
739 90
738 88
738 89
739 84
741 84
741 84
741 84
738 84
739 86
738 86
738 84
738 84
738 83
737 82
737 81
730 73
729 73
719 73
722 74
727 74
728 73
730 73
730 68
730 65
727 64
727 66
726 69
724 70
720 73
715 73
712 73
697 73
689 73
657 73
643 73
617 72
609 71
578 67
515 64
502 63
494 63
490 60
489 60
483 60
477 60
466 60
424 61
384 60
368 60
361 60
358 60
351 60
348 59
342 57
339 57
339 53
320 53
320 53
317 53
315 53
309 53
305 54
305 54
303 54
303 54
298 55
288 62
268 60
260 61
257 60
260 59
253 59
253 59
252 59
243 58
243 58
242 58
202 58
193 58
180 58
165 58
155 57
155 57
151 57
128 56
119 52
115 44
110 42
108 42
101 40
101 42
79 41
48 35
48 35
48 35
55 35
66 36
71 39
113 46
139 46
139 47
139 47
148 63
148 63
148 66
150 68
151 69
151 70
156 69
159 70
166 76
169 75
169 76
169 76
170 76
170 76
170 76
175 76
182 76
230 76
253 76
323 77
325 77
332 79
336 79
365 79
365 74
375 74
376 72
377 72
377 72
384 72
389 72
411 72
418 72
435 72
438 72
438 75
435 75
553 74
556 76
557 76
558 77
558 78
557 78
556 78
556 78
556 78
556 78
556 78
1503 95
1503 95
1502 95
1502 95
1502 95
2117 166
2124 166
2124 166
2144 166
2153 166
2179 165
2217 165
2313 164
2332 164
2408 164
2434 162
2461 155
2464 156
2465 156
2467 156
2471 156
923 69
926 69
926 69
927 69
926 69
926 69
925 69
926 70
931 70
933 70
938 70
938 67
938 66
937 66
935 66
933 66
937 66
939 66
941 67
942 65
944 65
938 65
933 63
929 62
924 62
916 59
897 56
870 64
850 63
850 62
849 58
847 50
847 49
847 45
850 46
850 46
858 43
906 48
906 45
905 41
904 41
905 40
906 28
906 28
905 29
927 31
929 33
911 33
950 33
933 35
863 34
862 35
861 34
861 33
833 32
833 32
826 32
828 32
826 32
821 38
820 42
809 44
788 50
769 50
772 48
765 48
767 43
773 43
672 42
675 41
675 41
681 41
729 41
742 46
757 50
758 50
759 50
761 52
761 52
760 53
761 53
762 53
762 53
763 53
766 53
734 53
692 53
657 53
638 52
636 52
611 52
572 52
555 52
482 52
452 52
434 52
433 51
435 51
436 51
435 51
419 51
416 51
416 52
416 53
416 53
416 59
417 59
415 59
413 59
412 60
408 60
408 60
408 60
406 60
409 60
410 61
443 63
447 63
445 60
447 60
447 60
461 54
485 55
585 55
596 54
595 53
596 53
596 52
594 52
595 50
598 45
601 43
598 42
598 42
570 39
555 38
548 37
502 25
484 25
483 24
481 24
479 17
478 17
477 18
475 17
472 17
462 16
459 16
396 15
396 15
396 15
395 14
395 14
397 13
398 13
398 13
398 12
394 12
392 12
390 11
387 11
387 11
387 10
384 10
376 10
377 10
371 10
364 10
361 10
355 10
348 10
335 10
294 10
291 10
276 9
276 9
275 9
274 9
274 9
274 8
274 8
271 8
269 8
272 8
268 8
286 9
284 9
279 8
275 8
274 8
272 8
355 9
353 9
353 9
352 9
351 9
347 9
347 9
346 9
340 10
323 9
321 9
321 10
320 10
322 10
322 11
233 10
235 10
236 10
236 10
236 10
235 10
231 9
230 9
220 9
217 10
179 8
175 8
174 8
161 8
161 10
136 9
117 9
31 9
29 9
29 7
29 7
29 8
28 9
28 9
21 9
18 9
18 9
18 9
18 9
18 9
18 7
18 7
18 7
18 7
17 7
17 7
17 7
17 7
17 7
17 7
17 7
17 7
17 7
18 7
16 7
15 7
15 7
12 7
11 7
13 7
13 7
13 7
56 75
57 76
57 76
55 76
55 76
56 76
55 76
55 76
55 76
55 76
55 76
55 76
54 76
54 76
54 76
54 76
54 76
54 76
54 76
54 76
54 76
54 76
12 9
12 9
12 9
12 9
12 9
12 10
12 14
12 14
12 17
12 18
12 18
10 19
10 21
9 21
8 21
8 21
8 21
8 21
8 21
8 19
8 19
8 19
9 19
9 19
9 18
9 18
9 17
7 17
7 17
7 17
7 17
7 17
7 17
7 17
7 17
7 16
7 16
11 593
12 593
12 593
12 593
12 593
12 593
12 593
12 593
12 593
12 593
12 591
12 591
12 591
12 591
12 590
7 15
12 14
12 14
12 14
11 14
16 18
16 18
16 18
16 18
16 18
16 18
16 18
16 18
16 18
16 18
17 23
16 23
13 23
13 23
13 23
8 19
8 19
8 19
8 19
6 19
5 18
5 17
5 17
5 17
5 17
4 14
3 12
2 12
2 12
2 12
2 12
2 12
2 12
1 12
1 12
1 12
1 12
1 10
1 10
1 10
1 10
1 8
2 8
2 8
2 8
2 8
2 8
2 8
2 8
2 3
581 11
581 11
581 11
581 11
581 11
581 9
581 9
580 9
580 9
580 9
580 9
580 9
579 9
579 9
579 9
0 1
11 1
11 1
11 1
11 1
11 1
11 1
11 1
11 1
11 1
11 1
11 1
11 1
11 1
11 1
11 1
0 108
0 109
0 109
1 109
1 109
1 109
1 109
1 109
1 109
1 109
1 110
2 110
145 117
145 117
145 117
145 117
145 9
145 9
145 9
144 9
144 9
144 9
144 9
144 10
144 10
144 10
143 10
143 10
0 3
0 3
0 3
1 3
1 3
2 3
2 3
2 3
2 3
6 5
6 5
6 5
6 6
6 7
6 7
6 8
6 8
6 8
6 8
8 9
8 9
8 9
8 9
9 9
4 8
5 7
5 7
5 7
5 7
5 8
5 7
5 7
5 7
5 6
5 6
5 6
3 5
3 5
2 5
46 25
45 25
45 25
45 25
45 25
45 23
45 23
45 23
45 23
45 24
45 24
45 24
45 25
45 25
45 24
1 5
1 5
1 5
1 5
1 5
1 5
1 5
1 5
1 5
1 4
1 3
1 3
1 3
3 2
3 2
3 2
3 2
3 2
3 2
3 2
4 2
4 3
4 3
4 3
4 3
3 4
3 4
3 4
3 3
3 3
3 2
3 2
3 2
3 2
3 2
3 2
2 2
2 2
2 2
2 2
2 2
2 2
2 4
2 4
2 4
2 4
2 4
2 4
2 4
2 4
2 4
2 4
2 4
2 4
2 4
2 4
66 7
66 7
66 7
66 7
66 7
66 7
66 7
66 7
66 7
66 7
66 7
66 7
66 7
66 7
67 7
68 7
4 4
4 4
4 4
4 4
4 4
4 4
4 4
4 4
4 4
4 4
4 4
4 4
4 4
4 4
3 4
3 4
3 4
3 4
3 4
4 4
4 4
4 4
4 4
4 4
4 4
4 4
4 4
4 4
4 4
4 4
4 4
4 4
4 4
9 5
8 5
8 5
8 5
8 5
8 5
8 5
8 5
7 5
8 5
8 5
8 5
8 5
8 6
9 11
7 23
7 22
7 25
7 27
7 27
9 26
9 26
9 26
9 26
9 26
9 25
9 24
9 24
9 24
9 25
9 26
8 20
8 21
8 21
8 22
8 22
6 22
6 22
7 22
7 22
7 22
7 22
7 22
7 22
8 22
9 24
9 24
9 24
10 24
11 28
11 29
11 29
11 30
11 30
11 30
12 30
13 30
13 30
405 42
405 42
405 42
405 42
406 42
406 40
406 40
405 40
405 40
406 40
407 40
407 40
407 40
407 40
407 40
15 28
16 28
16 28
16 28
16 28
16 28
16 28
16 28
18 28
18 28
18 28
18 28
18 28
18 28
18 28
18 28
18 28
18 28
18 28
18 28
18 29
18 30
18 31
18 31
18 31
18 31
18 31
18 31
18 31
18 31
18 31
18 31
18 31
19 31
19 31
18 31
18 29
18 33
18 32
18 30
18 29
16 25
15 17
15 13
17 13
17 13
18 13
18 12
18 12
18 12
18 12
18 12
18 8
18 8
18 8
18 15
18 16
18 16
18 16
18 15
18 15
18 15
18 15
18 15
17 15
17 15
17 15
18 15
19 15
19 8
19 6
18 6
17 6
18 6
17 6
17 6
17 1
17 1
17 1
18 0
18 0
18 0
19 0
18 1
18 1
18 1
18 1
18 3
17 3
17 3
16 3
16 3
17 3
17 3
17 3
15 3
15 3
18 3
21 3
23 3
27 3
28 3
28 1
31 1
31 1
31 2
33 2
37 2
37 2
40 2
40 2
40 2
40 2
40 2
42 2
43 2
43 2
43 2
43 2
43 2
43 2
43 2
43 2
43 2
43 2
43 2
43 2
44 2
44 2
45 2
45 2
45 2
45 2
44 2
45 2
66 7
66 7
66 7
67 7
67 7
67 7
67 7
67 7
67 7
65 7
65 7
64 7
64 7
64 7
64 7
64 7
62 7
43 2
43 2
44 2
44 2
44 2
44 2
44 2
44 2
44 2
47 2
47 2
48 3
48 3
48 3
47 3
46 3
46 3
46 3
46 3
46 3
46 3
45 3
45 3
45 3
45 3
45 3
43 2
43 2
44 2
44 2
43 1
43 1
43 1
43 1
43 1
43 1
43 1
43 1
43 1
43 1
42 1
42 1
38 1
31 1
30 2
28 3
24 11
26 16
26 16
29 17
29 19
27 19
27 19
27 18
27 18
25 18
25 18
25 18
26 18
26 18
26 18
32 19
32 19
33 19
33 19
34 20
34 20
35 20
39 21
40 23
41 23
41 23
41 23
41 23
41 23
41 23
42 23
42 23
42 23
56 28
57 28
57 28
56 28
56 28
55 28
54 28
54 28
54 28
54 28
56 28
56 28
56 30
56 30
55 30
54 30
54 30
54 30
54 30
54 30
54 30
55 30
55 30
55 30
61 30
60 30
61 30
63 30
63 28
63 28
61 28
61 28
61 28
61 28
61 28
61 28
61 28
61 28
61 28
61 28
61 28
61 28
59 28
59 28
59 28
59 27
59 27
59 27
59 27
58 26
58 26
58 26
58 26
58 27
58 27
58 27
58 27
57 27
57 27
57 27
57 27
57 26
56 25
56 24
57 24
67 24
67 23
63 15
60 10
58 10
57 10
58 10
62 10
63 10
64 10
72 10
75 10
77 10
78 10
78 10
77 10
74 11
70 10
68 10
68 9
68 10
66 8
66 8
64 8
62 8
61 8
61 8
61 8
61 8
61 8
60 8
57 8
55 8
55 8
53 8
44 3
44 3
44 3
44 3
44 3
44 3
44 3
44 3
44 3
44 3
43 3
43 3
43 3
43 3
43 3
43 3
43 3
43 3
43 3
42 3
42 3
42 3
42 3
42 3
38 3
38 3
37 3
36 3
36 3
36 3
36 3
36 3
