# Supplementary material for: From Insect to Man: Photorhabdus Sheds Light on the Emergence of Human Pathogenicity
Source: PLoS One. 2015 Dec 17;10(12):e0144937. doi: 10.1371/journal.pone.0144937 (PMC4683029; doi:10.1371/journal.pone.0144937)
Supplement: S3 Data — (ZIP) [file pone.0144937.s003.zip › pPAU1_37C_Expo_rep1.plot]

7 1
7 1
7 1
7 1
7 1
7 1
7 1
7 1
7 1
7 1
7 1
7 1
7 1
7 1
7 1
7 1
7 1
7 1
7 0
7 0
7 0
5 0
5 0
2 0
1 0
2 0
2 0
4 0
5 0
5 1
6 1
10 1
10 1
10 1
12 1
12 1
14 1
14 1
14 1
14 1
14 1
14 1
14 1
14 1
16 1
23 0
38 0
38 0
39 0
39 0
40 0
40 0
40 0
40 0
40 0
40 0
40 0
40 0
42 0
49 0
52 0
52 0
52 0
51 0
50 0
49 0
56 0
54 0
54 0
55 0
54 0
54 0
52 0
52 0
52 0
52 0
52 0
53 0
52 0
50 0
47 0
41 0
27 0
29 0
29 0
29 0
31 0
31 0
31 0
31 0
41 0
42 0
42 0
42 0
41 1
35 1
31 1
30 1
30 1
27 1
27 1
26 1
20 1
19 1
19 1
19 1
19 1
19 1
19 1
19 1
19 1
21 1
21 1
20 1
21 1
22 1
22 2
22 2
22 2
20 2
21 2
22 2
96 2
96 3
94 3
98 3
102 3
109 3
111 3
108 3
108 2
109 1
110 1
110 1
113 1
113 1
113 1
114 1
114 1
114 1
113 3
113 3
113 3
113 3
113 3
117 3
117 3
116 3
116 3
115 3
115 3
115 3
115 3
115 2
115 2
115 2
107 2
105 2
30 2
29 2
28 2
24 2
18 2
15 2
13 2
20 2
22 2
35 2
36 2
37 2
35 3
36 3
38 3
38 3
40 3
40 3
42 1
42 1
42 1
41 1
42 1
43 1
43 1
43 1
43 1
43 0
43 0
43 0
43 0
43 0
92 0
92 0
92 0
93 0
95 0
93 0
93 0
94 0
93 0
93 0
93 0
81 0
86 0
82 0
81 0
81 0
82 0
83 0
84 0
84 0
88 0
89 0
102 0
101 0
101 0
101 0
100 0
99 0
99 0
106 0
127 6
144 6
144 6
143 6
143 6
143 6
94 6
94 6
94 6
92 6
90 6
90 6
89 6
90 6
91 6
86 1
85 1
86 1
83 1
80 1
84 1
85 1
85 1
81 1
79 1
79 1
77 1
76 1
62 1
62 1
62 1
62 1
62 1
60 1
60 1
54 1
37 1
22 1
22 1
22 1
26 1
29 1
37 1
44 1
110 1
122 1
133 1
186 1
195 1
210 1
215 1
218 0
216 0
216 0
213 0
214 0
210 0
209 0
209 0
209 0
208 0
216 0
217 0
216 0
218 0
219 0
220 0
226 0
226 0
227 0
228 0
228 0
228 0
228 0
228 0
229 0
224 0
237 0
420 0
484 0
427 0
426 0
418 0
365 7
355 7
345 7
347 7
346 7
350 7
349 7
350 7
348 7
348 7
347 7
347 7
347 7
347 7
339 7
339 10
340 10
338 3
334 3
332 3
329 3
329 3
328 3
327 3
327 3
327 3
324 3
321 3
309 3
300 3
259 0
65 0
41 0
41 0
28 0
29 0
26 0
26 0
24 0
17 0
17 0
13 0
16 0
16 0
16 0
17 0
17 0
17 0
17 0
17 0
19 0
19 0
18 0
18 0
18 0
18 0
18 0
18 0
18 1
18 2
18 2
16 5
16 5
20 5
19 5
17 5
17 5
17 5
17 5
17 5
17 5
15 5
16 5
16 5
15 5
15 5
13 5
11 2
11 2
12 3
18 7
25 7
38 9
38 9
39 9
39 9
37 9
37 9
37 9
37 9
37 9
39 9
39 9
39 9
39 7
39 6
37 6
38 6
37 6
33 6
33 6
33 6
33 6
33 6
33 6
36 6
36 6
36 6
35 6
36 6
36 6
37 8
37 8
36 8
35 8
29 8
30 4
25 4
13 2
13 2
12 2
12 2
12 2
12 2
12 2
12 2
18 2
26 3
34 3
36 3
36 3
36 3
36 3
35 3
35 3
36 3
36 3
38 3
86 3
88 3
97 3
605 11
670 13
671 13
671 13
670 13
670 13
676 11
707 11
712 11
713 11
713 11
709 11
709 11
710 11
710 11
206 3
206 3
205 3
204 3
202 3
198 3
189 3
187 2
182 2
183 2
183 2
183 2
178 2
178 2
179 2
180 2
177 2
175 4
132 4
122 4
102 4
101 4
57 2
56 2
55 2
52 2
52 2
49 2
19 3
15 3
14 3
14 3
16 3
15 1
14 1
14 1
15 1
14 1
15 1
17 1
20 1
36 1
36 1
32 1
31 0
31 0
31 0
60 10
67 10
67 10
67 10
66 10
65 10
65 10
65 10
68 12
68 13
66 14
66 14
66 14
66 14
66 14
87 14
97 14
99 14
100 14
99 14
97 14
97 14
97 14
96 14
109 14
109 14
105 14
104 14
103 14
103 14
87 14
87 14
87 14
87 14
87 14
86 14
60 4
53 4
53 4
51 4
51 4
51 5
51 5
50 5
48 3
48 2
51 1
49 1
48 1
48 2
46 2
24 2
25 5
24 5
26 5
28 5
28 5
28 5
28 5
27 5
15 5
15 5
15 5
15 5
15 5
15 5
15 5
15 5
15 5
15 5
16 6
16 6
15 6
15 6
15 6
15 6
15 6
15 5
15 5
15 5
15 5
15 6
12 7
11 7
10 7
9 6
9 6
10 6
5 3
5 3
3 3
3 3
6 3
12 3
22 3
22 3
22 3
23 3
24 3
40 3
40 3
40 3
40 3
40 3
40 3
41 3
40 2
40 2
40 2
40 2
40 2
40 2
40 2
40 2
40 2
40 2
40 2
40 1
40 0
40 0
40 0
45 0
62 1
91 2
113 2
115 2
115 3
114 3
111 3
104 3
102 3
103 3
103 3
103 3
103 3
87 3
87 3
87 3
89 3
89 3
89 3
88 3
91 3
91 3
92 3
92 3
92 3
92 3
92 4
93 4
93 4
93 5
93 5
93 5
93 8
93 8
90 9
84 11
61 11
28 12
15 12
14 12
14 12
13 12
11 12
11 13
8 13
9 13
10 14
10 16
9 16
8 16
8 16
7 16
7 17
12 18
12 18
12 18
9 18
9 18
9 18
10 18
11 18
11 18
11 16
10 16
10 16
11 16
12 16
14 17
94 20
133 18
136 18
136 17
195 19
195 17
202 18
206 18
248 18
250 18
250 18
250 17
250 17
249 16
249 18
249 16
251 16
252 16
254 16
263 16
263 16
258 15
258 15
258 15
258 15
258 15
257 15
257 15
259 15
265 15
268 15
266 15
264 15
260 15
210 15
197 14
146 6
151 6
151 6
152 5
95 4
96 3
107 6
107 6
68 6
68 6
68 6
71 6
73 7
107 7
108 4
108 4
106 4
105 4
103 4
94 4
93 4
93 4
93 4
93 4
92 4
92 4
92 4
89 4
86 4
83 4
83 4
83 4
85 4
91 4
96 4
97 4
99 4
93 4
94 4
94 4
92 4
92 4
81 0
81 0
109 0
108 0
120 0
137 0
138 0
107 0
119 0
120 0
119 0
171 0
172 0
173 0
173 0
176 0
176 0
178 0
179 41
180 41
195 41
206 41
205 41
205 41
205 41
208 41
206 41
198 41
192 41
201 41
198 41
193 41
195 41
195 0
193 0
189 0
185 0
182 0
150 0
137 0
122 0
116 0
111 0
108 0
106 0
115 0
116 0
68 0
74 0
82 0
86 0
85 0
84 0
85 1
82 2
80 2
67 2
55 2
55 2
55 2
55 2
52 2
52 2
52 2
52 2
40 2
40 2
40 2
40 2
40 2
40 2
40 2
40 2
40 2
41 2
40 2
40 2
43 2
80 2
84 2
85 2
79 2
77 2
71 2
69 1
61 1
58 1
56 1
56 1
54 0
60 0
63 0
63 0
63 0
65 0
66 0
82 0
109 0
134 0
143 0
153 0
153 0
153 0
159 0
163 0
170 0
173 0
178 0
178 0
178 0
177 0
175 0
174 0
177 0
140 0
137 0
136 0
132 0
131 0
131 0
131 0
131 0
131 0
130 0
128 0
128 0
122 0
122 0
122 0
121 0
121 0
115 0
97 0
86 0
81 0
79 0
72 0
80 0
88 0
88 0
122 0
123 0
134 0
155 0
155 0
155 0
155 0
155 0
155 0
150 0
151 0
151 0
153 18
153 18
153 18
153 18
153 18
153 18
153 18
157 20
182 20
183 20
183 20
184 20
184 20
185 20
183 20
182 20
183 2
156 2
148 3
147 3
147 3
139 3
141 3
179 5
139 5
135 5
130 5
106 5
107 5
107 5
107 5
101 5
101 5
101 5
101 5
101 5
101 5
101 5
97 5
95 5
89 3
85 3
88 3
88 3
76 3
74 3
77 3
77 3
76 3
75 3
76 4
77 4
80 4
80 4
77 3
74 3
73 3
61 2
52 2
19 1
18 1
17 1
15 1
14 1
14 1
14 1
14 1
14 1
14 1
15 1
15 1
15 1
15 1
15 1
15 1
15 1
15 1
15 1
13 1
16 1
22 1
24 1
20 1
19 1
19 1
18 1
17 0
25 0
22 0
21 0
21 0
21 0
21 0
21 0
21 0
21 0
21 0
21 0
21 0
21 0
21 0
21 0
21 0
21 0
21 0
20 0
20 0
20 0
20 0
20 0
20 0
20 0
20 0
19 0
18 0
12 0
13 3
13 3
14 3
14 3
14 3
14 3
13 3
6 3
6 3
6 3
6 3
6 3
6 3
6 3
7 3
7 3
7 3
9 3
9 3
9 3
9 3
9 3
9 3
9 3
9 3
9 3
9 3
9 3
9 3
9 3
9 3
9 3
9 10
11 10
11 10
10 10
6 7
6 7
5 7
5 7
6 7
6 7
6 7
6 7
5 7
5 7
5 7
5 0
5 0
5 0
5 0
5 0
5 0
4 0
4 0
4 0
4 0
4 0
4 0
5 0
5 0
7 0
7 0
7 0
7 0
7 0
7 0
7 0
7 0
5 0
5 1
5 1
5 1
5 1
5 1
5 1
4 2
4 2
4 2
4 2
4 2
4 2
4 2
4 2
4 2
4 2
4 2
6 1
6 1
5 1
5 1
4 1
4 0
4 0
5 1
5 1
5 1
4 1
5 2
5 3
5 3
5 3
5 3
5 3
5 3
5 3
5 3
5 3
5 3
5 3
5 3
5 3
5 3
5 3
5 3
5 3
5 3
5 3
5 3
5 3
5 3
5 3
5 3
3 3
3 3
3 3
3 3
3 3
3 3
3 3
3 2
3 2
3 2
3 1
2 1
2 0
2 0
2 0
2 0
2 0
2 0
2 0
2 4
2 4
2 4
1 4
1 4
1 4
1 4
1 4
1 4
1 4
1 4
1 4
1 4
1 4
1 4
1 0
1 0
1 0
0 0
0 0
0 0
0 0
0 0
0 1
0 1
0 1
1 1
1 1
1 1
1 1
1 1
1 1
2 1
2 1
2 1
2 1
2 1
2 1
2 1
2 1
2 1
1 1
1 1
1 1
2 1
2 1
209 10
208 10
209 10
209 10
210 10
212 10
213 10
213 10
213 10
213 10
213 10
213 10
213 10
213 10
213 10
6 1
7 1
7 1
8 1
10 2
10 2
12 2
24 2
26 2
26 2
26 2
26 2
26 1
26 1
29 1
43 1
43 1
42 1
43 1
43 1
43 1
43 1
43 1
42 1
42 1
41 1
38 1
38 1
38 1
38 1
38 1
38 1
38 1
38 1
38 1
37 1
39 1
40 1
39 1
37 1
36 0
36 0
32 0
19 0
23 0
23 0
20 0
20 0
20 0
20 0
20 0
10 0
10 0
11 0
23 0
23 0
23 0
23 0
23 0
23 0
23 0
23 0
23 0
23 0
31 3
31 3
31 3
31 3
31 3
31 3
31 3
30 3
29 3
31 3
34 3
34 3
34 3
33 3
35 3
35 3
25 0
24 0
24 0
24 0
22 0
18 0
17 0
19 0
20 0
19 0
13 0
13 0
13 0
13 0
13 0
13 0
13 0
13 0
14 0
14 0
16 0
16 0
17 0
19 0
32 3
32 3
32 3
37 3
36 3
33 3
30 3
30 3
30 3
30 3
28 3
28 3
28 3
28 3
28 3
28 3
28 3
28 3
27 3
26 3
25 3
24 3
24 3
24 3
24 3
24 3
24 3
24 3
24 3
26 3
25 3
24 3
23 3
23 3
21 3
20 3
7 0
7 0
7 0
2 0
2 0
2 0
2 0
2 0
0 0
0 1
0 1
0 1
0 1
0 1
1 1
1 1
1 1
1 1
1 1
1 1
1 1
1 1
1 1
1 1
1 1
1 1
1 1
1 1
1 1
1 1
0 1
0 1
0 1
0 1
0 1
0 1
0 1
0 1
0 0
0 0
1 1
1 1
1 1
1 1
1 1
1 1
1 1
2 1
2 1
2 1
2 1
2 1
2 1
2 1
2 1
2 1
1 0
1 0
1 0
1 0
1 0
1 0
1 0
5 0
9 0
9 0
8 0
8 6
9 202
10 211
10 211
10 211
10 211
10 211
10 221
10 221
10 221
10 221
10 221
10 221
10 221
10 221
32 223
32 223
32 223
30 12
31 12
31 12
31 12
31 12
31 2
31 2
32 2
32 2
32 2
32 2
32 2
32 2
28 2
28 2
24 2
24 2
24 2
24 2
24 2
24 2
24 2
24 3
24 3
24 3
24 3
24 3
24 3
24 3
24 3
23 3
23 3
21 3
2 1
3 1
3 1
3 1
2 1
2 0
2 0
2 0
2 0
2 0
1 0
1 0
1 0
1 0
1 0
1 0
0 0
0 0
0 0
0 0
0 0
0 0
0 0
0 0
0 0
0 0
0 0
0 0
0 0
0 0
0 0
0 0
0 0
0 0
0 0
0 0
0 0
0 0
0 0
0 0
0 0
0 0
0 0
0 0
0 0
0 0
0 0
0 0
0 0
2 0
2 0
2 0
2 0
2 0
2 0
2 0
2 0
2 0
2 0
2 0
2 0
2 0
2 0
2 0
2 0
2 0
3 0
3 0
3 0
3 1
3 1
3 1
3 1
3 1
3 1
4 1
4 1
4 1
4 1
4 1
4 1
4 1
4 1
4 1
4 0
2 0
2 0
2 0
2 0
2 0
1 0
1 0
1 0
1 0
4 0
7 0
7 0
7 0
7 0
7 0
7 0
7 0
6 0
6 0
6 0
6 0
6 0
6 0
6 0
6 0
6 0
6 0
6 0
6 0
6 0
6 0
6 0
6 0
6 0
6 0
6 0
6 0
6 0
6 0
5 0
5 0
5 0
5 0
5 0
5 0
2 0
0 0
0 0
0 0
1 0
1 0
1 0
1 0
1 0
1 0
2 0
2 0
2 0
2 0
2 0
2 0
2 0
2 0
2 0
2 0
2 0
2 0
2 0
2 1
2 1
2 1
2 1
2 1
2 1
2 1
2 1
2 1
2 1
2 1
2 1
2 1
2 1
2 1
2 1
1 1
1 1
1 1
1 1
1 1
1 1
0 0
0 0
0 0
0 0
0 0
1 0
1 0
1 0
1 0
1 0
1 0
1 0
1 0
1 0
1 0
1 0
1 0
1 0
1 0
1 0
1 0
1 0
2 0
2 0
2 0
2 0
2 0
2 0
2 0
2 0
2 0
2 0
2 0
2 0
2 0
2 0
2 0
2 0
2 0
2 0
2 0
1 0
1 0
1 0
1 0
1 0
1 0
1 0
1 0
1 0
1 0
1 0
1 0
1 0
1 0
1 0
1 0
1 0
0 0
0 0
0 0
0 0
0 0
0 0
0 0
0 0
0 0
0 0
0 1
0 1
0 1
0 1
0 2
0 3
0 13
0 14
0 15
0 52
0 60
0 68
0 69
0 70
0 71
0 71
0 71
0 72
0 72
0 72
0 72
0 72
0 72
0 72
0 72
0 74
0 77
0 77
0 78
0 78
0 78
0 78
0 78
0 78
0 79
0 81
0 81
0 81
0 81
0 81
0 80
0 78
0 65
0 63
0 63
1 23
1 17
1 13
1 13
1 12
1 12
1 12
1 13
1 12
1 16
1 19
2 28
2 29
2 31
2 32
2 32
1 28
1 44
1 48
2 49
2 52
3 88
3 90
3 90
3 95
3 94
3 95
3 100
3 100
3 100
3 100
3 100
3 101
3 101
3 101
3 101
3 101
3 101
3 101
3 101
3 101
3 101
3 100
3 99
3 94
3 91
3 84
2 88
2 93
2 94
2 95
2 98
2 226
2 211
2 217
0 214
0 218
0 180
0 194
0 259
0 256
0 257
0 257
0 257
0 257
0 257
0 257
0 257
0 256
0 256
0 256
0 256
0 256
0 256
0 258
0 258
0 258
0 258
0 258
0 260
0 266
0 291
1 351
1 344
1 434
1 439
2 446
2 445
2 313
2 314
2 309
2 309
2 308
2 308
2 301
2 235
2 235
2 235
2 236
2 237
2 239
2 239
2 242
2 250
2 251
2 253
2 253
2 253
2 258
2 258
2 260
2 269
2 280
2 283
2 286
2 283
2 268
2 237
1 188
1 184
1 85
1 86
0 80
0 77
0 67
0 63
0 60
0 60
0 60
0 60
0 60
0 60
0 66
0 71
0 70
0 69
0 68
0 67
0 65
0 57
0 57
0 55
0 54
0 54
0 51
0 51
0 50
0 40
0 37
1 39
1 74
1 75
1 74
1 72
1 69
1 69
1 69
1 69
1 69
2 69
2 69
2 69
2 69
2 69
2 69
2 69
2 68
2 67
2 60
2 57
2 57
2 57
2 58
2 58
1 56
1 56
1 56
1 56
1 58
1 58
1 57
1 57
1 53
1 48
1 45
0 42
0 5
0 4
1 8
2 86
2 87
2 87
2 88
10 88
10 89
10 96
10 98
10 103
10 104
11 104
11 115
11 114
11 114
11 114
11 116
11 116
11 116
11 117
3 117
3 117
3 117
3 117
3 117
3 115
4 115
4 115
4 115
4 115
4 115
4 115
3 115
3 115
3 115
3 114
3 110
2 32
2 32
2 31
2 31
2 30
2 28
1 19
1 17
1 16
1 16
1 16
1 5
1 5
1 5
1 5
1 3
1 4
1 3
1 3
0 3
0 3
0 3
0 3
0 3
207 6
207 6
207 6
207 6
207 6
207 6
207 7
207 8
207 11
207 12
207 12
207 13
207 12
207 12
207 12
0 10
0 10
0 10
0 12
0 12
0 12
0 12
0 12
0 12
0 12
0 12
0 12
0 11
0 11
0 11
0 11
0 11
0 11
0 11
0 11
0 10
0 10
0 10
0 10
0 10
0 8
0 1
0 1
0 0
0 0
0 0
0 0
0 0
0 0
0 0
0 0
0 0
0 0
0 0
0 0
0 0
0 0
0 0
0 0
0 0
0 0
0 0
0 0
0 0
0 0
0 0
0 0
0 0
0 0
0 0
0 0
0 0
0 0
0 0
1 0
1 0
1 0
1 0
1 0
1 0
1 0
1 0
1 0
1 0
1 0
1 0
1 0
1 0
1 0
0 0
0 0
0 0
0 0
0 0
0 0
0 0
0 0
0 0
0 0
0 0
0 0
0 0
0 1
0 1
0 1
0 1
0 1
0 1
0 1
0 1
0 2
0 2
0 2
0 2
0 2
0 2
0 3
0 2
0 2
0 2
0 2
0 2
0 2
0 2
0 2
0 2
0 2
0 2
0 2
0 1
0 1
0 1
0 0
0 0
0 0
0 0
0 0
0 0
1 0
1 0
1 0
1 0
1 0
1 0
1 0
1 0
1 0
1 0
1 0
1 0
1 0
1 0
1 0
0 0
0 0
0 0
0 0
0 0
0 0
0 0
0 0
0 0
0 0
0 0
0 0
0 0
0 0
0 0
0 0
0 0
0 0
0 0
0 0
0 0
0 0
0 0
0 0
0 0
0 0
0 0
0 0
0 0
0 0
0 0
0 0
0 0
0 0
0 0
0 0
0 0
0 0
0 0
0 0
0 0
0 0
0 0
0 0
4 0
4 0
4 0
5 0
5 0
6 0
6 0
6 0
6 0
6 0
6 0
6 0
6 0
6 0
6 0
6 0
2 0
2 0
2 0
2 0
2 0
1 0
1 0
1 0
2 0
2 0
2 0
3 0
3 0
3 0
3 0
3 0
3 0
3 0
3 0
3 0
3 0
3 0
2 0
2 0
2 0
2 0
2 0
2 0
2 0
3 0
3 0
3 0
3 0
6 0
6 0
6 0
6 0
6 0
6 0
6 0
6 0
6 0
6 0
6 0
5 0
5 0
5 0
11 0
11 0
12 0
13 0
13 0
13 0
13 0
13 0
13 0
13 0
15 0
18 0
83 0
141 2
147 3
153 3
153 3
152 3
152 3
152 3
152 3
152 3
152 3
152 3
152 3
152 3
152 3
152 3
152 3
152 3
155 3
160 3
160 3
161 3
165 3
166 3
159 3
159 3
160 3
159 3
159 3
159 3
160 3
160 3
160 2
158 2
155 2
133 2
84 2
29 0
22 0
20 0
20 0
21 0
22 0
31 0
32 0
32 0
32 0
32 0
33 0
33 0
33 0
51 0
69 0
77 0
150 0
155 0
157 0
157 0
152 0
151 0
151 0
148 0
152 0
152 0
152 0
152 0
151 0
151 0
154 0
154 0
154 0
153 0
152 0
152 0
149 0
147 0
148 0
148 0
165 1
163 1
163 1
163 1
163 1
160 1
158 1
157 1
156 1
130 1
114 1
109 1
30 1
28 1
32 1
33 1
33 1
32 1
32 1
32 1
28 1
28 1
28 9
28 9
28 9
28 9
28 9
28 9
28 9
28 9
32 9
37 9
37 10
37 10
35 10
35 10
18 9
17 1
18 1
18 1
18 1
23 1
23 1
23 1
25 1
33 1
34 1
34 1
34 1
32 1
30 1
29 1
29 1
30 1
32 1
35 1
35 1
35 1
35 1
36 1
39 1
39 1
39 0
40 0
42 0
70 0
105 0
116 0
116 0
119 0
119 0
118 0
131 0
140 0
142 0
149 0
148 0
144 0
145 0
145 0
144 0
135 0
142 0
143 0
144 0
144 0
145 0
144 0
142 0
142 0
141 0
140 0
140 0
140 0
140 0
139 0
137 0
137 0
137 0
134 0
121 0
92 0
62 0
56 0
56 0
55 0
55 0
65 0
62 0
61 0
58 0
65 2
70 2
77 3
100 3
117 3
119 3
118 3
115 3
115 3
114 3
114 3
113 3
113 3
115 3
139 3
261 3
267 3
268 3
268 3
268 4
266 4
266 4
265 4
265 4
264 4
264 4
264 4
264 4
264 4
264 4
262 4
262 4
251 4
239 4
236 3
233 3
222 1
217 1
206 0
183 0
168 0
166 0
166 0
163 0
169 0
172 0
170 0
172 0
171 0
148 0
127 0
39 0
69 0
120 0
141 0
149 0
149 0
148 0
148 0
148 0
154 0
154 0
155 0
154 0
154 0
154 0
154 0
154 0
154 0
170 1
171 1
171 1
171 1
170 1
170 1
178 1
177 1
176 1
175 1
179 1
175 1
168 1
167 1
166 1
158 1
153 1
148 1
115 1
90 1
53 1
46 1
41 1
41 1
41 1
41 1
41 1
35 1
35 1
34 1
32 1
30 1
30 1
30 1
28 1
27 1
13 0
13 0
13 0
12 0
11 1
11 1
5 1
4 1
4 1
5 2
1 2
1 2
1 2
1 2
1 2
1 2
1 2
1 2
1 2
2 2
2 2
3 2
5 2
5 2
5 2
5 2
5 2
5 2
5 2
5 2
5 2
5 2
5 2
5 2
5 1
5 1
5 1
5 1
5 1
5 1
5 1
5 2
5 2
5 2
5 2
3 1
4 1
4 1
4 1
3 2
3 7
3 7
3 7
3 7
2 7
2 7
2 7
2 7
1 7
1 7
2 7
1 7
1 7
1 7
2 7
2 7
3 7
3 7
5 7
8 7
8 7
8 7
10 7
12 7
12 7
11 7
12 7
13 6
13 6
13 6
13 6
13 6
13 6
10 6
10 6
10 5
10 0
10 0
10 0
10 0
10 0
10 0
10 0
10 0
10 0
10 0
10 0
10 0
10 0
10 0
10 0
10 0
9 0
9 0
9 0
7 0
7 1
7 1
4 1
3 1
3 1
2 1
1 1
1 1
1 1
1 1
1 1
1 1
1 1
1 1
2 1
6 1
6 1
6 1
6 1
6 1
6 2
6 3
6 3
6 6
6 6
6 6
6 6
6 6
6 6
6 6
6 6
2 6
2 6
2 6
1 6
1 5
1 5
1 5
1 5
1 5
1 5
1 5
1 5
1 5
1 5
1 5
1 5
1 5
1 5
1 5
0 5
0 5
0 5
0 3
0 3
0 3
0 8
0 8
0 8
0 5
0 5
0 5
0 5
0 5
0 5
0 5
0 5
0 5
0 5
0 5
0 5
0 1
0 1
0 1
0 1
0 1
0 1
0 1
0 1
0 1
0 1
0 1
0 1
0 1
0 2
0 2
0 2
0 2
0 2
0 2
0 2
0 2
0 2
0 2
0 2
0 2
0 2
0 2
0 2
0 2
0 2
0 2
0 2
0 2
0 2
0 2
0 2
0 2
0 2
0 3
0 3
0 3
0 3
0 3
0 4
0 6
0 30
0 32
0 37
0 40
0 41
0 44
0 51
0 52
0 52
0 52
0 52
0 52
0 53
0 53
0 53
0 54
0 54
0 54
0 58
0 59
0 59
0 59
0 59
0 59
0 59
0 59
0 59
0 58
0 58
0 56
0 57
0 57
0 57
0 57
0 56
0 52
0 17
0 10
0 11
0 11
0 11
0 11
0 11
0 12
0 14
0 22
0 23
0 23
0 24
0 24
0 23
0 24
0 24
0 24
0 20
0 20
0 20
0 20
0 20
0 20
0 21
0 21
0 26
0 33
0 35
0 34
0 35
0 35
0 35
0 35
0 35
0 34
0 34
0 32
0 32
0 32
0 38
0 37
0 37
0 32
0 26
0 27
0 26
0 25
0 25
1 25
3 41
3 40
3 40
3 40
3 39
3 39
3 39
3 39
3 39
3 39
3 38
3 37
3 36
3 28
3 26
3 26
3 26
3 26
3 26
3 26
3 27
3 27
3 27
4 31
4 31
4 31
4 25
4 25
4 25
4 25
4 25
4 25
4 26
4 26
4 26
3 26
1 10
1 10
1 10
1 10
1 10
1 10
1 10
1 10
1 10
1 11
1 11
1 12
1 11
1 11
1 11
1 16
1 16
1 16
1 16
1 16
1 15
1 16
1 15
0 12
0 16
0 16
0 17
2 20
2 20
8 21
8 20
8 22
8 27
8 27
8 27
8 28
8 28
8 28
10 43
10 43
10 43
10 43
10 43
10 43
9 43
2 42
2 42
2 41
2 39
2 39
2 39
2 34
2 34
1 32
1 32
1 32
1 32
1 31
1 31
1 30
1 26
1 25
1 25
2 22
2 23
2 22
2 21
2 20
2 15
2 15
2 15
2 14
2 14
2 14
1 1
1 1
1 1
1 1
1 1
1 1
1 1
1 1
1 1
1 1
1 1
1 1
1 1
1 1
1 1
1 2
1 2
1 2
1 2
1 2
1 2
1 3
2 3
2 3
3 3
2 2
2 2
2 2
2 2
2 2
2 3
2 3
2 3
2 3
2 3
2 3
2 3
2 3
2 3
2 3
2 3
2 3
2 3
2 3
2 3
2 3
2 3
2 3
2 3
2 3
2 3
2 2
2 2
2 2
2 2
2 2
2 1
2 2
0 13
0 14
0 14
0 14
0 14
0 13
0 13
0 13
0 13
0 13
0 14
0 14
0 14
0 14
0 14
0 3
1 4
1 4
1 5
1 5
1 5
1 5
1 6
1 6
1 10
1 31
1 45
1 50
1 59
1 65
1 70
1 80
1 82
1 85
1 85
1 85
1 85
1 84
1 84
1 84
1 85
1 85
1 85
1 85
1 85
1 85
1 84
1 84
1 84
1 84
0 84
0 84
1 84
1 84
1 82
1 82
1 82
1 82
1 82
1 82
1 76
1 51
1 26
1 14
1 6
1 5
1 2
1 3
0 4
0 5
0 6
0 6
1 29
1 32
1 39
1 39
1 40
1 44
1 45
1 46
1 47
1 51
1 51
1 51
2 52
2 52
3 52
3 52
3 52
3 52
3 52
3 53
3 54
3 55
3 55
3 56
3 56
3 59
3 61
2 64
2 64
1 64
1 64
1 61
1 61
1 61
1 60
2 54
1 35
1 38
1 31
1 33
1 31
1 28
1 28
1 28
1 28
1 24
1 24
1 24
1 24
1 24
1 24
1 24
1 24
1 25
1 25
1 24
1 23
1 23
1 24
1 23
1 23
1 20
1 18
1 15
1 15
1 15
1 19
1 19
1 21
1 20
1 21
0 19
0 17
0 13
0 12
0 11
0 11
0 11
0 11
0 11
0 11
0 11
1 11
1 12
1 12
1 14
1 15
1 16
1 16
1 16
2 16
2 14
3 15
3 15
3 15
3 15
3 15
3 16
3 16
3 17
4 24
4 24
4 21
4 21
4 19
4 19
4 18
4 18
4 18
4 19
4 19
4 28
4 31
5 33
5 34
5 34
5 34
4 35
4 36
4 35
4 35
2 32
2 32
2 32
2 33
2 33
2 34
2 86
2 86
2 86
2 90
2 90
2 90
2 88
2 87
2 87
1 81
1 81
1 82
1 83
1 83
1 84
1 84
1 85
1 85
1 82
3 81
3 71
3 70
2 69
2 69
2 69
2 69
2 68
3 68
3 68
3 68
3 67
3 67
3 66
3 66
3 67
3 66
3 13
3 12
3 12
3 7
3 7
3 7
3 7
3 7
3 7
3 5
3 5
3 4
3 4
3 4
3 3
3 3
3 3
3 4
3 4
1 4
1 4
1 4
1 4
1 4
1 3
1 3
0 4
0 4
0 4
0 4
0 4
0 4
0 4
0 4
0 3
0 3
0 3
0 3
0 3
0 3
0 3
1 3
1 3
1 3
1 3
1 3
2 3
2 3
2 3
2 3
2 3
2 3
2 3
2 2
2 2
2 2
2 4
2 53
2 53
2 53
2 53
2 53
2 51
2 51
2 51
2 51
2 51
2 51
2 57
2 58
2 58
2 58
2 8
2 8
2 8
2 8
2 9
5 9
5 9
5 9
5 9
5 9
4 9
4 9
4 10
4 10
4 10
4 10
4 10
4 11
4 12
4 11
1 11
1 12
1 12
1 12
1 12
1 12
1 12
1 12
1 12
1 12
1 12
1 12
1 6
1 5
1 5
1 5
1 5
0 5
0 5
0 5
0 4
0 4
0 4
0 4
0 4
1 4
1 4
1 4
1 3
1 2
1 2
1 2
1 2
1 1
1 0
1 0
1 0
1 0
1 0
1 0
1 0
1 0
1 0
1 0
1 0
1 0
1 0
1 0
1 0
1 0
1 0
1 0
1 0
1 0
1 0
1 0
1 0
1 1
1 2
1 2
1 4
0 4
0 4
0 4
0 4
0 4
0 4
0 4
0 4
0 5
0 5
0 5
0 5
0 5
0 5
0 5
0 5
0 5
0 5
0 5
0 5
0 5
0 6
0 6
0 6
0 6
0 6
0 6
0 6
0 6
0 6
0 6
0 6
0 5
0 4
0 4
0 2
0 2
0 2
0 2
0 2
0 2
0 1
0 1
0 1
0 1
0 1
0 1
0 2
0 3
0 3
0 3
0 3
0 3
0 3
0 3
0 4
0 4
0 3
0 3
0 3
0 3
0 3
0 3
0 3
0 3
0 3
0 3
0 3
1 3
1 3
1 3
1 3
1 3
1 3
1 3
1 3
1 5
1 5
1 5
1 5
1 5
1 5
1 5
1 4
1 4
1 4
1 4
1 4
1 4
1 5
1 5
1 2
1 3
1 3
1 3
1 3
1 3
1 2
3 2
3 2
3 2
3 2
3 3
3 4
2 4
2 4
2 4
2 4
2 4
2 4
2 5
2 6
2 6
2 6
2 7
0 16
0 16
0 16
0 16
2 16
2 16
2 16
2 16
2 16
2 16
2 14
3 14
3 14
3 14
3 14
3 14
3 14
3 14
3 14
3 14
1 13
1 13
1 13
2 14
2 13
2 14
1 14
1 14
1 14
1 13
1 13
1 13
1 12
1 12
1 12
1 10
1 2
1 2
1 2
1 2
1 2
1 2
1 2
1 2
1 2
1 2
1 2
1 2
1 2
1 2
1 2
1 2
1 2
1 2
1 2
1 2
1 2
1 2
1 2
0 0
0 0
0 0
0 0
0 0
0 0
0 0
0 0
0 0
0 0
0 0
0 0
0 0
0 0
1 0
1 0
1 0
1 0
1 0
1 0
1 0
1 0
1 0
1 0
1 0
1 0
1 0
1 0
1 0
0 0
0 0
0 0
0 0
0 0
0 0
0 0
0 0
0 0
0 0
0 0
0 0
0 0
0 0
0 0
0 0
0 0
0 0
0 0
0 0
0 0
0 0
0 0
0 0
0 0
0 0
0 0
0 0
0 0
0 0
0 0
0 0
0 0
0 0
0 0
0 0
0 0
0 0
0 0
0 0
0 0
0 0
0 0
0 1
0 1
0 1
0 1
0 1
4 1
4 1
4 1
4 1
4 1
4 1
4 1
4 1
4 1
4 1
4 1
4 1
4 1
4 1
4 1
4 2
4 2
4 2
0 2
0 2
0 2
1 2
3 2
3 2
3 2
3 2
3 2
3 2
3 2
3 2
3 1
4 1
4 1
4 1
4 1
4 1
4 1
4 1
4 1
4 1
4 1
4 1
4 1
4 1
4 1
4 1
4 1
4 1
4 1
4 1
4 1
4 0
4 0
3 0
3 0
3 1
3 1
3 1
1 1
1 1
1 1
1 1
0 1
0 2
0 2
0 3
0 3
0 3
0 3
0 3
0 3
0 2
0 2
0 2
0 2
1 2
1 2
1 2
1 2
1 2
1 2
1 2
1 2
1 2
1 2
1 2
2 2
2 2
2 2
2 2
2 4
2 4
2 5
2 5
2 5
2 5
3 5
3 7
3 7
3 6
3 6
3 6
3 6
3 7
3 7
3 7
3 7
3 7
3 7
3 7
3 7
2 7
2 7
2 7
2 7
2 7
2 7
2 7
2 7
2 7
4 10
4 10
3 10
3 10
3 10
3 10
3 7
3 7
3 7
3 8
3 8
3 7
2 7
2 6
2 6
2 5
2 5
2 5
2 5
2 4
2 4
2 4
2 4
2 4
2 4
2 4
2 4
2 4
2 4
2 4
2 4
2 4
2 4
1 4
1 4
1 4
0 1
0 1
0 1
0 1
0 1
0 1
0 1
0 1
0 1
0 0
0 1
0 1
0 1
0 2
0 2
0 3
0 3
0 3
1 3
1 3
1 3
1 3
1 3
1 3
1 3
1 3
1 3
1 3
1 3
1 3
1 3
1 3
1 3
1 3
1 3
1 3
1 3
1 3
1 3
1 3
1 3
1 3
2 3
2 3
2 3
2 3
2 2
2 2
1 1
1 1
1 1
1 0
1 0
1 0
1 0
1 0
1 0
1 0
1 0
1 0
1 0
1 0
1 0
1 0
1 0
1 0
1 0
1 0
1 0
1 0
2 0
2 0
2 0
2 0
2 0
2 0
2 0
2 0
1 0
1 0
1 0
1 0
1 0
1 0
1 0
1 0
0 0
0 0
0 0
0 0
0 0
0 0
0 0
0 0
0 0
0 0
0 0
0 0
0 0
0 0
0 0
0 0
0 0
0 0
0 0
0 0
0 0
0 2
0 2
0 3
0 3
0 3
0 3
0 3
0 3
0 3
0 4
0 4
0 4
0 4
0 4
0 4
0 4
0 4
0 4
0 4
1 4
1 5
1 5
1 5
1 5
1 5
1 5
1 5
1 5
1 61
1 61
1 61
1 61
1 61
1 61
1 61
1 61
1 59
1 58
1 58
1 58
1 58
1 58
1 59
1 3
1 3
1 2
12 2
12 2
12 2
12 1
12 1
12 1
12 1
12 1
11 1
11 1
11 1
11 1
11 1
11 1
11 1
0 1
1 0
1 1
1 1
1 1
1 1
1 1
1 1
1 1
1 1
1 1
1 1
1 1
1 1
1 1
1 1
1 1
1 1
1 1
1 1
1 1
3 1
3 1
3 1
3 1
3 1
3 1
3 1
3 1
3 1
3 1
3 1
3 1
3 1
3 1
3 1
2 1
1 1
1 0
1 0
1 0
1 0
1 0
1 0
1 0
1 0
1 0
1 0
1 0
1 0
1 0
1 0
1 0
1 1
1 1
1 1
1 1
1 1
1 1
1 1
1 1
1 1
1 1
1 1
1 1
1 1
1 1
1 1
1 1
1 0
1 0
2 0
1 0
100 1
100 1
100 1
100 1
100 1
100 1
100 1
100 1
100 1
100 1
100 1
100 1
100 1
100 1
100 1
2 0
2 0
2 0
2 0
2 0
1 0
1 0
1 1
1 1
1 1
1 1
1 1
1 1
1 1
1 1
1 1
1 1
1 1
1 1
1 1
1 1
1 1
1 0
1 0
1 0
1 0
1 0
1 0
1 0
3 0
3 0
3 0
2 0
2 0
2 0
2 0
2 0
2 0
2 0
2 0
2 0
5 0
5 0
5 0
3 0
3 0
3 0
3 0
3 0
3 0
3 0
3 0
3 0
3 0
3 0
3 0
3 0
0 0
0 1
0 1
1 2
1 2
1 2
1 2
1 2
1 2
1 2
1 2
1 2
1 3
1 3
15 3
15 3
15 3
15 3
15 3
15 3
15 3
15 3
15 3
15 3
15 3
15 3
15 3
15 2
15 2
13 3
15 5
15 5
15 5
3 5
3 5
3 4
3 4
3 4
4 7
3 6
3 6
3 6
3 6
3 6
3 7
3 7
3 8
3 8
3 8
3 8
3 8
3 8
3 8
3 8
2 5
2 5
2 5
5 6
9 6
9 6
9 6
9 6
9 6
9 6
10 6
10 4
8 3
8 3
8 3
8 3
8 3
8 3
8 3
8 3
8 3
8 3
8 3
8 3
8 3
8 3
8 2
7 2
7 1
7 1
7 1
7 1
7 1
7 1
7 1
7 1
7 1
7 1
7 1
4 0
0 0
0 0
0 0
0 0
0 0
0 0
0 0
0 0
0 0
0 0
0 0
0 0
0 0
0 0
0 0
0 0
0 0
0 0
0 0
0 0
0 0
0 0
0 0
0 0
0 0
0 0
0 0
0 0
0 0
0 0
0 0
0 0
0 0
5 0
5 1
5 2
5 2
13 2
13 2
13 2
13 2
13 2
13 2
13 2
13 2
13 2
13 2
13 2
13 2
8 2
8 2
8 1
8 1
7 1
0 1
0 1
0 1
0 1
0 1
0 1
0 1
0 1
0 1
0 1
0 1
0 1
0 1
0 1
0 1
0 1
0 0
0 0
0 0
0 0
0 0
0 0
0 0
0 0
0 0
0 0
0 0
0 0
0 0
0 0
0 0
0 0
0 0
0 0
0 0
0 0
0 0
0 0
0 0
0 0
0 0
0 0
0 0
0 0
0 0
0 2
0 2
0 2
0 2
0 2
0 2
0 2
0 2
0 2
0 2
0 2
0 2
0 2
0 2
0 2
0 2
0 2
0 2
0 2
0 2
0 2
0 3
0 3
0 3
0 3
0 3
0 3
0 3
0 3
0 3
0 3
0 3
0 3
0 3
0 3
1 3
1 0
1 0
1 0
1 0
1 0
1 0
1 0
1 0
1 0
1 0
1 0
1 0
1 0
1 0
1 0
0 0
0 0
0 0
0 0
0 0
0 0
0 0
0 0
0 0
0 0
0 0
0 0
0 0
0 0
0 0
0 0
0 0
0 0
0 0
0 0
0 0
0 0
0 0
0 0
0 0
0 0
0 0
0 0
0 0
0 0
0 0
1 0
1 0
1 0
1 0
1 0
1 0
1 0
1 0
1 0
1 0
1 0
1 0
1 0
1 0
1 0
1 0
1 0
0 0
0 0
0 0
0 0
0 0
0 0
0 0
1 0
1 4
1 4
1 4
1 4
1 4
1 4
1 4
1 4
1 4
1 4
1 4
1 4
1 4
1 4
1 4
1 4
1 4
1 4
1 4
1 4
1 4
1 4
1 4
1 4
1 4
1 4
1 4
1 5
1 6
1 6
1 6
1 6
1 6
1 6
0 6
0 3
0 2
0 2
0 2
0 2
0 2
1 2
1 2
1 2
1 2
1 2
1 2
1 2
1 2
1 2
1 2
1 2
1 2
1 2
1 2
1 2
1 2
1 2
1 2
1 3
1 4
1 6
2 146
2 156
2 156
2 156
2 156
2 229
2 232
2 234
3 234
3 234
3 234
3 234
3 234
2 234
2 234
2 234
2 234
2 234
2 234
2 234
2 234
1 4
1 4
0 3
0 3
0 3
0 3
0 3
0 3
0 3
0 3
0 3
0 2
0 2
0 4
0 4
0 3
0 3
1 3
1 3
1 3
1 3
1 3
1 3
1 3
1 3
1 3
1 3
1 3
1 0
1 0
1 0
1 0
0 0
0 0
0 0
0 0
0 0
0 0
0 0
0 0
0 0
0 0
0 0
0 0
0 0
0 0
0 0
0 0
0 0
0 0
0 0
0 0
0 0
0 0
0 0
0 0
0 0
0 0
0 0
0 0
0 0
0 0
0 0
0 0
0 0
0 0
0 2
0 2
0 2
0 2
0 2
0 2
0 2
0 2
0 2
0 2
0 2
0 3
0 3
0 3
0 3
0 3
0 3
0 3
0 3
0 3
0 3
0 3
0 3
0 3
0 3
0 3
0 3
0 3
0 4
0 4
0 4
0 4
0 4
0 4
0 2
0 4
0 4
0 4
0 4
0 5
0 8
0 59
0 62
2 75
2 81
2 82
2 84
3 84
3 86
3 87
3 85
3 85
3 85
3 85
3 85
3 85
3 82
3 82
2 82
2 81
2 81
2 81
1 81
1 81
1 80
1 80
1 80
1 80
1 80
1 80
1 80
1 80
1 80
1 80
1 80
1 79
1 66
1 14
1 14
0 4
0 3
0 3
0 3
0 3
0 1
0 0
0 0
0 2
0 3
0 4
0 4
25 4
25 4
25 5
25 5
25 5
25 5
25 25
26 32
27 33
27 33
28 33
28 33
28 35
29 36
29 37
4 37
4 37
4 37
4 37
4 37
4 37
4 17
4 17
6 30
6 30
5 30
5 30
5 28
5 28
2 19
2 19
2 18
2 16
2 16
4 15
4 15
4 15
4 15
4 14
2 14
2 14
2 14
2 14
2 70
4 71
4 73
4 74
4 75
4 76
4 77
4 104
4 111
4 131
4 141
4 161
4 163
4 163
4 163
4 164
4 151
4 151
4 151
4 151
4 151
4 151
2 151
2 151
2 151
2 151
2 151
2 151
2 152
2 152
2 152
2 153
2 153
2 153
2 153
2 152
0 95
0 95
0 129
0 136
0 139
0 141
0 142
0 105
0 98
0 77
1 83
1 67
1 69
1 71
1 71
1 71
1 72
1 72
1 72
1 72
1 72
1 72
1 71
1 71
1 71
1 71
1 71
1 71
1 70
1 70
1 69
1 71
1 71
1 71
1 71
1 72
1 72
1 68
1 31
1 25
1 23
0 20
0 20
0 21
0 21
0 21
0 10
0 7
0 5
0 12
0 12
0 17
0 18
0 18
0 18
0 22
0 22
0 22
0 22
0 22
0 22
0 22
0 23
0 23
0 23
0 23
0 23
0 21
0 21
0 21
0 21
0 21
0 21
0 21
0 21
0 21
0 21
0 21
0 21
0 20
0 20
0 20
0 20
2 70
2 68
2 61
2 59
2 56
2 56
2 58
2 58
2 63
2 68
2 68
2 70
2 70
2 70
2 71
2 68
2 20
2 20
2 20
2 20
2 20
2 20
2 20
2 20
2 19
2 19
2 19
3 19
3 19
3 19
2 19
2 19
2 19
2 19
2 19
2 19
1 19
1 19
1 19
1 19
1 19
1 19
1 17
0 17
0 2
0 1
0 1
0 0
0 0
0 0
0 0
0 1
0 1
0 2
0 5
0 5
0 5
0 5
0 7
0 7
0 7
0 7
0 7
0 8
0 8
0 8
0 9
0 10
0 11
0 11
0 18
0 18
0 18
0 18
0 18
0 18
0 18
0 20
0 20
0 20
0 20
0 20
0 21
0 21
0 21
0 14
0 14
0 13
0 13
0 12
0 9
0 11
0 23
0 25
0 23
0 22
0 63
0 65
0 72
0 77
0 78
0 78
0 78
0 77
0 76
0 76
0 76
0 76
0 76
0 76
0 76
0 76
0 76
0 74
0 74
0 74
0 74
0 73
0 73
0 73
0 73
0 73
0 73
0 73
0 73
0 73
0 73
0 77
0 66
0 66
0 66
0 64
0 23
0 15
0 12
0 11
0 11
0 11
0 11
0 11
0 11
0 11
0 11
0 11
0 11
0 11
0 11
0 11
0 11
0 11
0 11
0 11
0 11
0 11
0 11
0 11
0 11
0 11
0 11
0 11
0 12
0 12
0 13
0 6
0 13
0 13
0 14
0 14
0 17
0 18
0 21
0 21
0 21
0 27
0 29
0 33
0 34
0 34
0 35
0 37
1 38
1 38
1 38
1 39
1 39
1 39
1 39
1 39
1 39
1 39
1 39
1 37
1 37
1 37
1 37
1 37
1 36
1 36
1 35
1 32
2 25
2 25
2 25
2 25
3 67
3 76
3 84
3 91
3 94
3 87
3 94
3 95
3 98
3 99
3 98
3 98
1 98
1 98
1 98
1 97
1 97
1 97
1 97
1 97
1 97
1 97
1 97
1 97
2 100
2 102
2 102
2 102
2 102
2 101
3 101
3 101
3 101
3 98
3 97
3 85
2 16
2 10
2 8
2 8
2 8
2 7
2 7
2 6
2 6
1 6
1 6
1 6
1 6
1 6
1 6
1 7
1 7
1 8
1 11
1 11
1 12
1 12
1 14
1 13
0 10
0 10
0 10
0 41
0 44
0 44
0 49
0 51
0 62
0 63
0 70
0 70
263 10149
263 10149
263 10149
263 10149
263 10149
263 10148
263 10148
263 10153
263 10153
263 10153
263 10153
263 10153
263 10153
263 10151
263 10151
262 10097
255 9709
255 9709
255 9734
255 9736
0 84
0 97
1 99
1 110
1 117
1 125
1 124
1 94
1 89
1 89
1 86
1 89
1 87
1 91
1 94
1 99
1 107
1 111
1 111
1 113
1 114
1 114
1 114
1 110
1 110
1 110
1 111
1 111
1 111
1 111
1 111
1 111
1 111
2 114
2 84
2 85
2 86
1 71
29 86
29 70
29 66
29 57
29 57
29 56
29 56
29 56
29 57
29 48
29 44
29 43
29 41
29 34
29 29
1 14
1 15
1 15
1 16
1 16
1 16
1 16
1 16
1 16
1 16
1 16
1 16
1 16
1 16
1 16
1 16
0 11
0 11
0 7
0 7
0 6
0 6
0 6
0 6
0 6
0 21
0 22
0 24
0 25
0 25
0 26
0 27
1 30
1 30
1 28
1 27
1 26
1 25
1 25
1 25
1 25
1 28
1 28
2 28
2 31
2 31
3 30
3 31
3 32
2 30
2 30
2 30
2 30
2 30
2 30
2 31
2 40
2 41
3 49
4 50
4 51
4 36
4 39
4 39
4 41
4 42
4 42
4 42
4 41
4 41
4 41
4 41
4 46
4 46
4 47
4 47
3 50
3 62
6 582
4 607
4 635
4 643
4 652
4 735
4 770
4 795
4 859
4 876
4 886
4 931
4 973
4 985
4 979
4 980
4 980
0 428
0 427
4 423
4 419
4 419
4 418
4 417
4 417
4 417
4 417
4 417
4 416
4 416
4 412
4 409
4 409
22 413
18 407
18 403
18 393
18 384
18 355
18 348
18 328
18 220
18 154
18 117
18 31
18 7
18 6
18 6
0 3
0 3
0 2
0 59
0 61
0 67
0 77
0 116
0 116
0 116
0 131
0 170
0 180
0 181
0 182
8 187
8 187
8 191
8 192
8 194
8 196
8 196
8 197
8 197
8 197
8 198
8 198
8 198
8 198
8 199
0 194
0 194
0 195
0 195
0 195
0 195
0 194
0 194
0 195
0 136
0 134
0 120
0 117
0 83
0 83
0 82
0 61
0 34
0 26
0 27
0 27
0 27
0 27
0 21
0 23
0 21
0 22
0 23
0 22
0 22
0 25
0 37
0 46
0 53
0 82
0 91
0 103
0 123
0 134
10 157
10 159
10 159
10 160
10 160
10 246
10 249
10 254
10 266
10 267
10 284
10 284
10 285
10 284
10 278
0 282
0 281
0 281
0 281
0 286
0 287
0 287
0 287
0 286
0 286
0 286
0 286
0 283
0 261
0 251
0 246
0 221
0 208
12 202
13 178
13 161
13 148
13 148
13 148
13 148
13 149
13 61
13 57
13 49
13 37
13 37
13 21
13 20
13 20
0 20
0 18
0 12
0 13
0 13
0 13
0 7
0 5
0 4
0 4
0 4
0 4
0 4
0 4
1 4
1 6
1 6
1 5
1 5
30 6
31 7
31 7
31 7
38 9
38 9
38 9
39 9
39 8
39 8
39 8
39 8
38 8
38 8
38 8
38 8
9 8
8 8
8 8
1 6
1 5
1 5
1 5
0 4
0 4
0 4
0 4
0 4
0 4
0 4
0 4
0 4
1 7
1 8
1 8
1 10
1 8
1 8
1 8
1 8
1 8
1 8
1 8
1 8
27 9
27 9
27 9
27 9
27 9
27 9
27 10
27 10
29 10
29 10
29 11
29 12
29 12
29 12
29 12
3 12
3 17
3 18
3 19
3 21
3 21
3 21
3 22
3 21
0 14
0 15
0 15
0 15
0 15
0 14
0 14
0 14
0 14
0 14
0 14
0 14
0 14
0 15
0 15
0 15
0 15
0 16
0 15
1 18
1 18
3 18
3 16
3 15
3 15
3 15
3 16
3 15
3 10
3 9
3 8
3 7
3 7
3 7
3 7
3 7
3 7
3 7
3 8
3 8
3 8
3 8
3 8
3 14
3 15
3 17
3 20
3 65
3 70
3 70
3 77
3 77
3 78
3 85
3 155
0 154
0 182
0 193
0 194
1 196
1 202
1 288
1 321
1 332
1 360
1 365
1 380
1 403
1 404
1 404
1 404
1 404
1 404
1 404
1 403
1 403
1 403
1 403
1 406
1 400
2 400
2 398
2 392
2 340
3 352
3 352
3 352
3 352
3 349
3 338
3 245
2 237
2 233
2 230
2 230
2 229
2 215
2 84
2 68
1 31
1 8
1 7
1 7
4 7
4 6
4 6
4 6
4 7
4 7
4 7
4 7
4 7
4 7
4 7
4 3
4 3
3 5
3 7
3 8
3 10
3 12
3 13
3 14
3 14
3 15
3 17
3 17
3 21
3 29
3 46
3 61
3 94
3 140
3 205
3 220
3 226
3 428
3 427
3 428
0 428
0 428
0 429
0 429
0 428
0 428
0 428
0 428
0 428
0 428
0 428
0 427
0 427
0 424
0 422
0 420
0 418
0 418
0 418
0 418
0 418
0 420
0 418
1 420
1 417
1 404
1 372
1 344
1 317
1 284
1 223
1 211
1 210
1 8
1 8
1 8
1 8
1 8
1 8
1 8
1 8
1 9
1 9
1 9
1 10
1 9
1 9
1 9
1 10
1 10
1 10
1 20
1 20
9 20
9 20
9 20
9 20
9 18
8 18
9 18
10 26
10 41
10 41
10 41
10 42
10 42
10 42
10 42
10 43
2 44
2 44
2 44
2 44
2 44
2 44
2 44
2 44
2 42
2 42
2 42
2 42
2 43
2 44
2 43
2 43
2 44
2 42
2 35
2 34
2 34
2 34
2 34
2 34
2 35
1 35
1 33
0 19
0 11
0 11
0 12
0 13
0 13
0 13
0 13
0 11
0 11
0 11
0 11
0 11
0 11
0 11
0 12
0 12
0 12
0 12
0 12
0 10
0 10
0 9
0 9
0 9
0 8
0 8
0 9
0 9
0 9
0 8
0 8
0 9
0 10
0 10
0 10
0 10
1 27
2 27
2 27
2 26
2 45
2 45
2 46
2 46
2 46
2 47
2 47
2 47
2 47
2 47
2 47
2 47
1 47
1 47
1 47
1 28
2 28
2 28
2 28
2 28
2 28
2 28
2 25
2 25
2 52
2 57
2 64
2 69
2 69
2 69
2 70
2 70
2 49
1 49
1 48
1 48
1 48
1 48
1 49
1 49
1 49
1 48
1 49
1 49
1 49
1 49
1 51
1 51
2 51
2 54
2 54
2 54
1 54
1 54
4 54
4 54
4 54
4 54
4 54
4 53
4 24
4 19
4 12
3 8
3 8
3 8
3 7
3 7
3 7
0 7
0 7
0 7
0 7
0 7
0 5
1 3
1 3
1 3
1 3
1 3
1 3
1 3
1 3
1 3
1 3
1 0
1 0
1 0
1 0
1 0
1 0
1 0
1 1
1 1
1 1
1 1
1 1
1 1
1 1
1 1
1 1
1 1
1 1
1 1
1 1
1 1
1 1
2 1
2 1
2 1
2 1
1 1
1 1
1 1
1 5
1 5
1 5
1 5
1 5
1 4
1 4
1 4
1 4
1 4
1 4
1 4
1 4
1 4
1 4
1 0
1 0
1 0
1 0
1 0
1 0
1 0
1 0
1 0
1 0
1 0
1 0
1 0
1 0
0 0
0 0
0 0
0 0
0 0
0 0
0 0
0 0
0 0
0 0
0 0
0 0
0 0
0 0
0 0
0 0
0 0
0 0
0 0
0 0
0 0
0 0
0 0
0 0
0 0
0 0
0 0
0 0
0 0
0 0
0 0
0 0
0 0
0 1
0 1
0 1
0 1
0 1
0 1
0 1
0 1
0 1
0 1
0 1
0 1
0 1
0 1
0 1
0 0
0 0
0 0
0 0
0 0
0 0
0 0
0 0
0 0
0 0
0 0
0 0
0 0
0 0
0 0
0 0
0 0
0 0
0 0
0 0
0 0
0 0
0 0
0 0
0 0
0 0
0 0
0 0
0 0
0 0
0 0
0 0
0 0
0 0
0 0
0 0
0 0
0 0
0 0
0 0
0 0
0 0
0 0
0 0
0 0
0 0
0 0
0 0
0 0
0 0
0 0
0 0
0 0
0 0
0 0
0 0
0 0
0 0
0 0
0 0
0 0
0 0
0 0
0 0
0 0
0 0
0 0
0 0
0 0
0 0
0 0
0 0
1 0
1 0
1 0
1 0
1 0
1 0
1 0
1 0
1 0
1 0
1 0
1 0
1 0
1 0
1 0
1 0
1 0
1 0
1 0
1 0
1 0
1 0
1 0
1 0
1 0
1 0
1 0
1 0
1 0
1 0
1 0
1 0
1 0
1 0
1 0
0 0
0 0
0 0
0 0
0 0
0 0
0 0
0 0
0 0
0 25
0 25
0 25
0 25
0 25
0 25
0 25
0 25
0 25
0 25
0 25
0 25
0 25
1 25
1 25
1 25
1 0
1 0
1 0
1 0
1 0
1 0
1 0
1 0
1 0
1 0
1 0
1 0
0 0
0 0
0 0
0 0
0 0
0 0
0 0
0 2
0 2
0 2
0 2
0 2
0 2
0 2
0 2
0 2
0 2
0 2
0 2
0 2
0 2
0 2
0 2
0 0
0 0
0 0
0 0
0 0
0 0
0 3
0 3
0 3
0 3
0 3
0 3
0 3
0 3
0 3
0 3
0 3
0 3
0 3
0 3
0 3
0 3
0 3
0 3
0 3
0 3
0 3
0 3
0 3
0 3
0 3
0 3
0 3
0 3
0 3
0 3
0 3
0 3
0 3
0 3
0 3
0 3
0 0
0 0
0 0
0 0
0 0
0 0
0 1
0 1
0 1
0 1
1 10
1 10
1 10
1 10
1 10
1 12
1 12
2 12
2 12
2 12
2 12
2 12
2 12
2 12
2 12
2 12
2 12
2 12
2 12
2 12
2 12
2 12
2 12
2 12
2 12
2 12
2 12
2 14
2 14
2 14
2 14
2 14
2 14
2 14
2 14
2 13
1 3
0 3
0 3
0 3
0 3
0 3
0 3
0 4
0 4
0 4
0 4
0 4
0 3
0 3
0 3
0 3
0 3
0 3
0 3
0 3
0 3
0 3
0 3
0 3
0 3
0 13
0 14
0 14
0 17
0 19
0 20
0 24
0 24
1 28
1 28
2 31
2 33
20 203
23 208
23 209
23 209
23 209
23 209
23 212
23 212
23 213
23 213
23 213
23 213
23 213
23 213
23 213
23 213
23 213
23 213
23 213
23 213
24 216
24 222
24 238
26 241
30 254
30 250
30 250
30 251
30 251
30 254
30 258
30 258
29 256
28 254
27 250
26 245
8 72
7 71
7 70
7 70
7 70
7 71
7 72
7 72
7 71
7 73
9 69
9 69
11 70
13 73
13 75
13 76
14 121
14 122
14 123
14 127
13 123
13 119
11 100
10 98
7 69
7 69
7 68
7 67
7 67
7 67
7 67
5 67
5 67
5 67
5 67
5 67
5 67
5 67
5 68
6 72
6 74
6 117
6 116
6 116
6 112
6 112
5 112
5 112
3 110
3 106
3 103
3 101
2 54
2 53
2 55
2 54
2 55
2 64
2 64
2 66
2 66
2 66
2 67
2 67
2 67
2 67
11 83
12 83
12 84
12 90
12 91
12 91
12 91
12 91
12 88
11 87
10 84
10 41
10 41
10 42
10 44
10 44
10 45
10 45
10 44
10 44
10 44
10 44
10 44
10 44
10 42
10 45
10 44
11 35
11 36
12 35
12 35
12 35
12 35
12 35
12 35
12 36
2 20
2 20
2 17
2 14
2 14
2 15
1 15
1 16
1 16
1 13
1 13
1 13
1 13
1 12
1 10
1 11
1 13
1 22
1 56
1 63
1 68
1 70
1 75
2 90
2 94
2 93
2 96
2 99
2 102
1 104
1 105
1 105
1 103
1 104
1 103
1 108
1 178
1 224
1 252
1 256
1 257
1 256
1 255
1 255
1 255
1 256
1 256
1 256
1 256
1 255
1 255
1 255
1 254
1 237
1 192
1 181
1 180
1 179
1 179
0 174
0 167
0 160
0 160
0 159
0 161
0 163
0 164
0 166
0 174
0 173
0 172
0 158
0 84
0 35
0 26
0 26
0 26
0 26
0 26
0 26
0 26
0 26
0 26
0 26
0 26
0 27
0 28
0 30
0 41
0 42
0 43
0 43
0 43
0 43
0 43
0 43
0 43
0 43
0 49
0 49
0 47
0 45
0 43
0 39
0 36
0 36
0 29
0 29
0 29
0 29
0 30
0 30
0 30
0 30
0 30
0 30
0 30
0 34
0 36
0 37
0 38
0 37
0 35
0 33
0 24
0 24
0 23
0 23
0 23
0 23
0 23
0 23
0 23
0 24
0 18
0 18
0 16
0 20
0 112
0 115
0 114
0 117
1 121
1 121
1 133
1 141
1 153
1 156
1 222
1 248
1 272
1 289
1 294
1 290
1 288
1 287
1 286
1 285
1 285
1 283
1 283
1 283
1 283
1 284
1 284
1 284
1 284
1 284
1 284
1 284
1 284
1 284
1 283
1 276
1 176
0 170
0 169
5 266
5 278
8 293
8 295
8 294
8 286
9 292
9 215
9 166
9 158
9 157
9 157
9 157
9 157
9 157
8 156
8 156
8 156
8 157
8 157
8 158
8 158
8 159
9 160
9 408
9 410
9 414
9 414
10 425
10 431
10 442
10 469
10 500
10 529
10 532
10 526
3 401
3 396
3 386
3 385
2 136
2 136
2 136
1 136
1 136
1 138
1 138
1 138
1 138
1 138
1 138
1 138
1 138
1 139
2 138
2 137
2 138
3 138
3 140
2 137
2 136
2 133
2 126
2 126
2 119
2 117
2 101
2 84
2 55
2 39
2 39
2 38
2 42
2 44
2 44
2 44
2 42
2 42
2 42
2 42
2 41
2 40
2 40
2 40
2 40
2 40
2 40
2 39
2 39
2 42
1 41
1 38
1 54
0 54
0 52
0 63
0 64
0 64
0 70
0 70
0 65
0 66
0 65
0 58
0 57
0 58
0 57
7 68
7 67
7 67
7 66
9 65
10 66
11 66
11 66
11 66
11 66
11 66
12 66
13 66
13 67
13 66
13 66
13 66
13 65
13 65
13 65
13 65
13 65
13 67
13 67
13 54
13 54
13 55
13 51
13 51
13 53
13 50
13 50
13 51
12 46
12 45
12 45
5 13
4 12
4 10
3 10
3 10
2 10
1 10
1 10
1 10
1 10
1 10
1 10
0 9
0 9
0 9
0 9
0 9
0 9
0 9
0 9
0 9
0 10
0 10
0 35
0 35
0 35
0 32
0 30
0 30
0 30
0 30
0 31
0 29
0 29
1 30
1 30
1 30
1 35
1 35
1 39
1 40
1 40
1 40
1 41
1 41
1 41
1 42
1 42
1 42
1 42
1 42
1 42
1 43
1 43
1 43
4 46
4 52
4 54
4 53
4 28
4 28
4 28
4 28
4 28
4 28
4 28
4 29
4 29
4 29
4 29
3 31
3 31
3 31
3 27
3 25
3 22
3 21
3 21
3 20
3 20
3 20
3 20
3 21
3 24
3 26
3 27
3 27
3 27
3 26
3 26
3 26
0 23
0 14
0 13
0 13
0 13
0 13
0 14
0 22
0 22
0 26
0 26
0 27
0 27
0 26
0 26
1 24
1 24
1 24
1 25
1 25
1 25
1 26
1 28
1 33
2 40
2 44
2 47
2 44
2 42
2 40
2 40
2 40
2 40
2 40
2 40
2 40
2 40
2 43
2 50
2 51
2 53
2 53
2 52
2 43
2 42
2 40
2 40
2 39
2 40
2 40
2 38
1 38
1 38
1 38
1 38
1 38
1 38
1 37
1 34
0 29
0 20
0 19
0 16
0 16
0 16
0 16
0 16
0 16
0 16
0 16
0 16
0 16
0 16
0 13
0 5
0 6
0 3
0 3
0 3
0 2
0 2
0 2
0 2
0 4
0 4
0 4
0 4
0 4
0 5
0 5
0 5
0 5
0 5
0 5
0 6
0 8
0 11
0 13
0 13
0 13
0 14
0 14
0 18
0 21
0 21
0 21
0 21
0 22
0 22
1 22
1 22
1 21
1 21
1 21
1 21
1 21
1 21
1 21
1 19
1 18
1 18
1 18
1 19
1 19
1 20
1 28
1 34
1 34
1 34
1 34
1 35
1 35
1 37
1 35
1 35
1 35
1 34
1 34
1 28
1 27
1 27
0 27
0 26
0 26
0 26
0 26
0 26
0 26
0 26
0 26
0 26
0 27
0 43
0 43
0 43
0 43
0 43
0 47
0 48
0 46
0 48
0 40
0 34
0 34
0 34
0 34
0 33
0 32
0 27
0 27
0 27
0 27
0 27
0 27
0 27
0 27
0 27
0 27
0 27
0 27
0 27
0 27
0 27
0 27
0 27
0 27
0 27
0 26
1 8
1 9
1 9
1 8
1 8
1 5
1 5
1 5
1 1
1 1
1 1
1 1
1 5
1 5
1 7
2 9
1 9
1 9
1 10
1 10
1 10
1 10
1 10
1 10
1 10
1 10
1 10
1 10
1 10
1 9
1 9
0 8
0 8
0 8
0 8
0 9
0 8
0 8
0 8
0 8
0 8
0 8
0 8
0 8
0 8
0 9
0 9
0 11
0 11
0 13
0 12
0 11
0 15
0 16
0 16
0 16
0 16
0 16
0 17
0 17
0 17
0 17
0 17
0 17
0 17
0 17
0 17
0 17
0 17
0 19
0 18
0 20
0 22
0 24
0 29
0 29
0 29
0 30
0 30
0 30
0 30
0 28
0 28
0 25
0 23
0 23
0 26
0 27
0 22
0 21
0 21
0 21
0 21
0 20
0 20
0 20
0 20
0 20
1 20
1 20
1 21
1 21
1 25
1 26
1 26
1 23
1 26
1 23
1 47
1 46
1 42
1 41
1 41
1 41
1 41
1 41
1 41
1 42
1 43
1 43
1 42
1 38
1 38
1 11
1 11
1 11
2 12
2 12
2 12
2 12
2 13
2 15
2 15
2 15
1 16
1 15
10 14
10 14
10 10
10 9
10 9
10 9
10 7
10 7
10 7
10 7
10 7
10 7
10 5
10 5
10 5
9 5
2 4
2 4
2 3
1 3
1 3
1 3
1 6
1 7
1 15
1 17
0 17
0 17
0 17
0 17
0 17
0 17
0 17
0 17
0 21
0 24
0 26
0 27
0 28
0 28
0 24
0 42
0 42
0 43
0 43
0 43
0 43
0 43
0 43
0 43
0 43
0 43
0 44
0 44
0 46
0 46
0 46
0 49
0 44
0 42
0 40
0 39
0 39
0 38
0 39
0 39
0 42
0 42
0 42
0 41
0 37
0 35
0 33
0 31
0 30
0 31
0 32
0 14
0 15
0 14
0 14
0 14
0 14
0 14
0 14
0 14
0 14
0 14
0 13
0 13
0 10
0 9
0 9
0 9
0 9
0 11
0 11
0 11
0 11
0 11
0 9
0 9
0 7
0 7
0 7
0 7
0 6
0 7
0 7
1 7
1 7
1 6
1 4
1 4
1 4
1 4
1 4
1 4
1 4
1 4
1 4
1 4
1 4
1 4
1 4
1 4
0 4
0 4
0 4
0 4
0 4
0 2
0 2
0 2
0 2
0 2
0 2
0 2
0 2
0 2
0 2
0 2
0 2
0 0
0 0
0 0
0 0
0 1
0 1
0 1
0 1
0 1
0 1
0 1
0 1
0 1
0 1
0 1
0 1
0 1
0 1
0 1
0 1
0 1
0 1
0 1
0 1
0 1
0 1
0 1
0 1
0 1
0 1
0 1
0 1
0 1
39 75
39 75
39 75
39 75
39 75
39 75
39 75
39 74
39 74
39 74
40 93
40 93
40 93
40 93
40 93
36 91
3 19
3 19
3 21
3 21
1 21
1 21
1 21
1 21
1 21
0 2
0 2
0 2
0 2
0 2
0 2
0 2
0 2
0 2
0 2
0 2
0 2
0 0
0 0
0 0
0 0
0 0
0 0
0 0
0 0
0 0
0 0
0 0
0 0
0 0
1 13
1 13
1 13
1 13
1 13
1 13
1 13
1 13
1 14
1 14
1 14
1 14
1 37
1 37
1 37
0 24
0 24
0 24
0 24
0 24
0 24
0 25
0 25
0 25
0 25
0 25
0 25
0 2
0 2
0 2
0 2
0 2
0 2
0 2
0 2
0 2
0 2
0 2
0 1
0 1
0 1
0 1
0 0
0 0
0 0
0 0
0 0
0 0
0 0
0 0
0 0
0 0
0 0
0 0
0 0
0 0
0 0
0 0
0 0
0 0
0 0
0 0
0 0
0 0
0 0
0 0
0 0
0 0
0 0
0 0
0 0
0 0
0 0
0 0
0 0
0 0
0 0
0 0
0 0
0 0
1 0
2 0
3 0
3 0
11 0
14 0
20 0
30 0
33 0
39 0
40 0
41 0
44 0
50 0
53 0
63 0
64 0
64 0
65 0
65 0
66 2
66 2
66 2
66 2
66 2
66 2
66 2
66 2
65 2
65 2
65 2
65 2
65 2
65 2
65 2
64 2
63 2
61 2
61 2
60 2
51 2
51 2
46 2
40 2
41 2
36 2
45 2
45 2
51 2
54 2
55 0
50 0
50 0
50 0
50 0
61 0
62 0
63 0
64 0
65 0
69 0
70 0
71 0
71 0
71 0
71 0
71 0
71 0
71 0
71 0
71 0
71 0
71 0
71 0
71 0
71 0
80 0
122 0
122 0
120 0
115 0
112 0
107 0
106 0
99 0
92 0
86 0
84 0
83 0
83 0
88 0
85 0
85 0
83 0
81 0
80 0
79 0
78 0
78 0
78 0
78 0
78 0
76 0
76 0
78 0
79 0
81 0
84 0
84 0
85 1
85 1
78 1
71 1
26 1
26 1
23 1
23 1
21 1
20 10
20 10
21 10
25 10
27 10
27 10
27 10
25 10
21 10
18 10
18 10
19 10
20 10
21 10
22 10
24 1
24 1
23 1
24 1
29 1
29 1
30 1
27 1
26 0
23 0
20 0
20 0
170 4
171 4
171 4
171 4
171 4
170 4
170 4
170 4
170 4
170 4
169 4
168 4
166 4
165 4
167 4
167 4
15 0
19 0
19 0
22 0
19 0
19 0
19 0
17 0
15 0
18 0
18 0
17 0
12 0
12 0
10 0
45 0
45 0
45 0
45 0
45 0
45 0
45 0
46 0
46 0
46 0
46 0
46 0
46 0
46 0
46 0
12 0
12 0
12 0
12 0
13 0
13 0
13 0
8 0
8 0
6 0
6 0
6 0
6 0
6 0
6 0
3 0
3 0
3 0
16 0
16 0
14 0
14 0
14 0
14 0
14 0
14 0
14 0
14 0
26 5
28 6
28 6
28 6
28 6
28 6
28 6
29 6
29 6
29 6
29 6
29 6
29 6
29 6
29 6
33 7
21 1
21 1
21 1
21 1
21 2
21 2
30 2
32 2
32 2
32 2
19 2
19 2
20 2
31 6
32 6
34 6
34 6
35 6
36 7
36 7
35 7
33 7
33 7
34 7
34 7
34 7
34 7
33 7
34 7
33 7
35 7
43 7
48 7
48 7
48 7
45 5
45 5
45 5
45 5
45 5
45 5
45 5
37 5
35 4
41 4
42 4
42 4
42 4
41 4
30 1
29 1
28 1
39 2
42 3
43 3
44 3
44 3
43 3
43 3
42 3
43 3
51 3
56 3
60 3
69 3
67 3
66 3
62 3
91 7
95 7
95 7
95 7
95 7
95 7
95 7
95 7
95 7
94 7
92 7
90 8
87 8
88 8
86 8
86 8
86 8
86 8
86 8
85 9
75 7
73 6
71 7
70 7
70 7
71 7
79 6
79 6
76 6
67 6
68 6
68 6
62 6
65 6
65 6
61 6
30 2
26 2
26 2
26 2
26 2
27 2
27 2
27 3
27 3
27 3
27 3
30 6
30 6
30 7
30 7
30 7
30 7
30 7
31 7
31 5
29 5
29 5
29 5
27 5
26 5
27 5
20 2
16 2
16 1
29 1
32 1
31 1
31 1
31 1
31 1
32 1
32 1
33 1
34 1
34 1
36 1
37 1
37 1
42 0
50 0
50 0
50 0
50 0
50 0
50 0
50 0
49 0
49 0
49 0
49 0
49 0
57 0
57 0
52 0
51 0
53 0
53 0
53 0
52 0
50 0
36 0
27 0
27 0
23 0
23 0
23 0
23 0
23 0
23 0
23 0
23 0
21 0
19 0
19 0
19 0
10 0
11 0
11 0
14 1
14 1
14 1
14 1
14 1
14 1
14 1
14 1
14 1
6 1
6 1
5 1
5 1
4 1
4 1
4 1
4 1
4 1
4 2
4 2
4 2
5 2
5 2
5 2
5 2
5 2
5 2
5 2
5 2
5 2
5 2
4 2
4 2
4 2
4 2
4 2
1 1
1 1
1 1
1 1
1 1
1 1
1 1
1 1
1 1
6 1
8 1
9 1
9 1
9 1
9 1
10 1
10 1
10 1
10 0
10 0
23 0
22 0
26 0
37 0
43 0
43 0
43 0
44 0
47 0
48 0
54 0
77 0
78 0
78 0
78 0
78 0
78 0
78 0
78 0
78 0
78 0
76 0
79 0
79 0
87 0
83 0
86 0
85 0
84 0
85 0
85 0
85 0
86 0
86 0
86 0
86 0
72 0
72 0
71 0
60 0
54 0
54 0
54 2
53 2
50 30
46 30
42 30
19 30
19 30
19 30
19 30
19 30
19 30
19 30
18 30
18 30
17 30
19 30
16 30
14 2
32 2
31 2
29 2
29 2
28 2
27 2
26 2
26 2
26 3
26 3
26 3
26 3
26 3
26 1
26 1
3 1
2 1
2 1
2 1
2 1
2 1
2 1
2 1
3 0
15 0
33 0
33 0
34 0
35 0
35 0
35 0
36 0
52 0
58 0
171 5
174 5
174 6
174 6
174 6
174 6
175 6
175 6
175 6
175 6
175 6
175 6
175 6
175 6
175 6
176 6
176 6
176 5
177 5
184 5
189 5
203 5
216 5
216 5
216 5
214 5
205 5
187 5
187 5
186 6
186 6
186 6
188 6
191 6
191 8
181 7
70 3
69 3
69 3
69 3
69 3
69 3
69 3
69 3
71 3
108 3
123 3
131 3
131 3
132 3
132 0
130 0
129 0
126 0
124 0
111 0
96 0
95 0
94 0
93 0
94 0
108 0
110 0
111 1
111 1
112 1
111 1
110 1
110 1
106 1
92 1
92 1
92 1
97 1
99 1
105 1
112 1
117 1
113 1
113 1
119 1
132 2
195 3
247 4
280 4
314 4
316 4
317 4
317 4
316 4
349 4
353 4
353 4
349 4
349 4
347 4
348 4
336 4
338 6
338 5
338 5
338 5
336 5
335 5
335 5
335 5
335 5
335 5
336 5
330 5
325 5
315 5
307 5
289 3
275 1
257 1
241 1
192 1
132 0
70 0
58 0
43 0
60 0
60 0
59 0
57 0
25 1
25 3
25 3
25 3
25 3
25 3
24 3
24 3
24 3
23 3
22 3
22 3
22 3
22 3
22 3
22 3
22 3
22 3
22 3
22 3
22 3
22 3
22 3
22 3
22 3
28 12
28 13
27 15
26 15
24 15
23 15
23 15
6 13
6 13
6 12
6 12
6 12
6 12
6 12
6 12
6 12
6 12
6 12
6 12
6 12
6 12
6 12
6 12
6 12
6 12
6 12
6 12
6 12
6 12
6 12
6 12
6 12
6 12
6 12
6 12
6 10
0 0
0 0
0 0
0 0
0 0
0 0
0 0
0 0
2 0
2 0
2 1
3 1
3 1
3 1
3 1
4 1
4 1
4 1
4 1
4 1
4 1
4 1
4 1
4 1
4 1
4 1
4 1
4 1
4 1
5 1
4 1
4 1
4 1
7 1
7 1
7 1
8 1
11 1
13 2
13 2
13 2
14 3
14 3
14 3
12 3
16 9
16 8
15 8
15 8
15 8
15 8
15 8
15 8
15 8
15 8
15 8
15 8
15 8
15 8
15 8
15 8
15 8
15 8
15 8
16 8
16 8
16 8
16 8
23 8
20 8
31 8
32 8
32 8
29 8
30 7
30 7
30 7
30 6
30 6
29 6
29 5
26 0
26 0
31 4
31 4
31 4
31 4
31 4
31 4
31 4
31 4
31 4
31 4
31 4
31 4
31 4
31 4
31 4
31 4
30 4
27 4
26 4
26 4
25 4
20 4
20 4
9 4
9 4
7 4
7 4
6 4
5 4
5 4
5 4
5 4
5 4
5 4
5 4
4 4
0 0
0 0
0 0
0 0
0 0
0 0
0 0
0 0
0 0
0 0
0 3
0 3
0 3
0 3
0 3
0 3
0 3
0 3
0 3
0 3
0 3
0 4
0 4
0 4
0 4
0 3
0 4
1 4
3 16
4 17
4 17
4 20
4 20
4 20
4 20
4 20
4 20
4 20
4 20
4 20
4 20
4 20
4 20
4 20
4 21
4 21
4 21
6 22
6 22
6 22
6 22
6 22
6 22
6 22
6 23
6 24
7 29
7 31
7 32
7 32
7 32
6 30
5 32
5 32
4 17
3 16
3 16
4 16
4 16
4 16
4 16
4 16
4 16
4 16
4 16
4 16
4 16
4 16
4 16
4 16
4 16
4 16
4 16
2 15
2 15
2 15
2 16
2 16
2 16
4 16
4 15
7 13
7 5
8 3
8 3
8 5
9 6
22 8
22 7
22 7
22 7
22 6
22 6
21 6
21 6
21 6
21 6
21 6
21 6
21 6
21 6
21 6
21 6
21 6
21 6
21 6
21 6
21 6
21 6
21 6
21 6
21 6
21 7
21 7
21 7
19 7
19 8
14 8
13 8
12 9
11 10
11 8
11 7
0 5
0 5
0 5
0 5
0 5
0 6
1 6
1 6
1 6
1 6
1 6
1 6
1 6
1 6
1 6
1 6
1 6
1 7
1 7
1 7
1 6
1 7
1 9
1 11
1 13
1 13
1 15
1 16
1 18
2 34
2 38
2 40
2 42
2 42
2 44
2 46
2 48
2 48
2 49
2 49
2 49
2 50
1 50
1 55
1 57
1 60
1 61
1 61
1 61
1 61
1 61
1 61
1 61
1 60
1 60
1 60
1 60
1 59
1 56
1 54
1 51
1 50
1 49
1 49
2 66
1 43
1 44
1 45
1 45
1 44
2 43
2 41
2 42
2 55
4 55
4 55
4 56
4 56
4 57
4 51
4 56
4 54
5 74
5 82
5 83
5 84
5 87
5 90
5 90
5 90
5 91
5 91
5 91
5 119
5 119
5 121
5 125
6 142
6 143
6 142
5 117
6 119
6 118
6 118
6 118
6 117
5 117
5 117
5 114
5 100
3 100
3 100
3 100
3 100
3 99
3 96
3 93
3 93
4 74
4 65
4 63
4 63
4 62
4 59
4 61
4 61
4 61
4 65
4 64
4 37
4 37
5 34
5 32
4 16
4 15
2 14
2 14
1 13
1 15
1 15
1 15
1 15
1 15
1 14
1 14
1 14
0 14
0 14
0 14
0 15
0 16
0 16
0 16
0 15
0 15
0 15
0 15
0 15
0 14
0 14
0 12
0 11
0 10
0 6
0 6
0 6
0 6
0 5
0 5
0 5
0 5
0 5
0 5
0 2
0 2
0 3
0 3
0 3
0 3
0 4
0 8
0 8
0 9
0 8
0 7
0 7
0 7
0 7
0 7
0 7
0 7
0 7
0 7
0 7
0 7
0 7
0 7
0 3
0 3
1 4
1 4
1 4
1 4
1 4
1 4
1 4
1 4
1 3
1 4
1 6
1 7
1 8
1 9
1 9
0 10
0 9
0 9
0 9
0 8
1 8
1 8
1 8
1 8
1 8
1 8
1 10
1 10
1 10
1 10
1 10
1 10
1 10
1 10
1 10
0 10
0 10
0 11
0 16
0 16
0 16
0 17
0 18
0 18
0 17
0 14
0 14
2 13
2 12
2 13
2 13
2 12
2 13
2 13
2 13
2 13
2 13
2 13
2 13
2 13
2 13
2 13
2 11
2 11
2 11
2 11
2 11
2 11
2 11
2 11
2 10
2 10
2 10
2 9
2 3
2 3
2 3
2 3
2 3
2 3
2 3
2 3
2 3
0 3
0 7
0 12
0 15
0 13
0 14
0 15
0 15
0 15
0 18
0 20
0 29
0 30
0 31
0 31
0 31
0 31
0 31
0 31
0 31
0 31
0 31
0 31
0 31
0 31
0 31
0 31
0 31
0 31
0 40
0 41
0 42
0 43
0 45
0 45
0 46
0 38
0 38
0 34
0 34
0 35
0 35
0 34
0 34
0 34
0 32
0 30
0 28
0 27
0 27
0 27
0 27
0 27
0 27
0 28
0 28
0 28
0 28
0 28
0 28
0 28
0 28
0 31
0 30
0 30
0 22
0 22
1 148
1 149
1 148
1 148
1 147
1 147
1 144
1 144
1 144
2 192
2 193
2 202
2 206
2 208
2 208
1 85
1 76
1 76
1 76
1 76
1 76
1 77
1 77
1 76
1 76
1 84
1 85
1 86
1 89
1 89
1 89
1 85
1 85
1 85
1 85
1 85
1 85
1 84
1 84
1 84
1 84
1 84
1 84
1 84
1 79
0 23
0 18
0 15
0 15
0 19
0 22
0 24
0 24
0 24
0 30
0 48
0 58
0 58
0 62
0 66
0 71
0 64
0 64
0 65
0 66
0 67
0 68
0 68
0 69
0 69
0 69
0 69
0 69
0 69
0 69
0 70
0 72
0 81
0 89
0 93
0 98
0 99
0 103
1 103
1 100
1 96
1 96
1 94
1 94
1 96
1 92
1 69
1 66
1 66
1 60
1 55
1 54
1 55
1 56
1 54
1 52
1 51
1 51
1 51
1 51
1 51
1 51
2 51
2 51
2 51
2 51
2 51
2 68
2 60
1 53
2 51
2 47
2 42
2 41
2 41
2 41
2 42
2 42
2 42
2 41
2 36
2 36
2 36
2 36
2 35
2 33
2 33
2 33
2 29
2 27
2 27
3 27
3 27
3 27
3 27
3 27
3 27
3 27
2 27
2 28
2 28
2 38
1 35
1 18
1 16
1 16
1 16
1 16
1 16
1 16
1 16
1 16
1 15
1 15
1 15
1 14
1 14
1 14
1 14
1 14
1 14
1 14
0 14
0 14
0 14
0 14
0 14
0 14
1 15
1 15
1 15
1 15
1 16
1 18
1 18
1 18
1 18
1 8
1 6
1 5
1 5
1 5
1 5
1 6
1 6
1 7
1 7
1 7
1 7
1 7
1 14
1 15
1 16
1 18
1 22
1 25
1 25
1 26
1 28
1 30
1 30
1 30
1 30
1 30
0 30
0 30
0 30
0 30
0 29
0 27
0 27
0 27
0 27
0 27
0 27
0 27
0 27
0 27
0 27
0 26
0 26
0 25
0 25
0 25
0 25
0 25
0 18
0 16
0 16
0 14
0 11
0 8
0 8
0 6
0 8
0 7
0 7
0 7
0 7
0 6
0 6
0 6
0 7
0 7
0 8
0 7
0 7
0 7
0 7
0 7
0 7
0 7
0 7
0 7
0 7
0 7
0 7
0 7
0 7
0 7
0 7
0 7
0 7
0 8
0 11
0 11
0 11
0 12
0 12
0 12
0 8
0 8
0 8
0 8
0 8
0 8
0 8
0 8
0 7
0 7
0 6
0 6
0 7
0 10
0 10
0 11
0 12
0 12
0 12
0 12
0 12
0 12
0 12
0 12
0 12
0 12
0 12
0 12
0 14
0 11
0 10
0 12
0 11
0 11
0 11
0 11
0 11
0 11
0 11
0 12
0 12
0 12
0 12
0 13
0 13
0 13
0 12
0 11
0 11
0 9
0 9
0 8
0 7
0 7
0 7
0 8
0 8
0 8
0 8
0 9
0 9
0 9
0 10
0 10
0 9
0 9
0 8
0 7
0 7
0 7
0 7
0 8
0 7
0 9
0 9
0 8
0 8
0 8
0 8
0 7
0 7
0 7
0 7
0 7
0 6
0 6
0 6
0 6
0 6
0 6
0 6
0 6
0 6
0 6
0 6
0 5
0 5
0 5
0 4
0 3
0 3
0 3
0 4
0 6
0 7
0 7
0 7
0 6
0 6
0 4
0 4
0 4
0 4
0 4
0 5
0 5
0 5
0 6
0 7
0 7
0 7
0 7
0 7
0 7
0 8
0 8
0 8
0 8
0 8
0 8
0 8
0 8
0 9
0 9
1 12
1 13
1 25
1 27
1 30
1 33
1 33
1 34
1 36
1 37
2 39
2 47
2 51
2 54
2 55
2 55
2 55
2 55
2 55
2 54
2 53
2 53
2 54
2 54
2 54
2 54
2 53
2 53
2 53
2 53
2 53
2 53
2 55
2 63
1 79
1 89
1 93
1 96
1 83
1 77
1 76
0 76
0 91
0 91
0 91
0 91
0 88
0 80
0 75
0 74
0 73
0 73
0 73
0 74
0 74
0 74
0 74
0 73
0 73
0 72
0 72
0 72
0 72
0 72
0 72
0 72
0 71
0 71
0 67
0 56
0 38
0 31
0 25
0 23
0 23
0 23
0 22
0 17
0 5
0 4
0 7
0 7
0 7
0 9
0 19
0 20
0 36
0 36
0 38
0 38
0 38
0 39
1 39
1 40
1 41
1 41
1 41
1 41
1 41
1 41
1 41
1 41
1 41
1 41
1 41
1 43
1 44
1 44
0 60
0 62
0 63
0 64
0 64
0 68
0 69
0 69
0 68
0 70
0 77
0 81
0 81
0 88
0 72
0 72
0 72
0 72
0 72
0 71
0 71
0 69
0 69
0 69
0 69
0 68
0 68
0 69
0 69
0 69
0 71
0 73
0 73
0 70
0 68
0 67
0 51
0 52
0 51
0 50
0 51
0 47
1 58
1 59
1 60
1 55
1 41
1 35
1 29
1 26
1 25
1 26
1 29
1 29
1 31
1 31
1 34
1 34
1 34
1 35
1 35
1 35
1 35
1 34
1 34
1 34
1 32
1 31
1 31
1 31
1 31
2 31
2 30
2 29
2 29
2 28
2 25
1 18
1 11
1 11
1 11
1 11
1 11
1 11
1 11
1 11
0 11
0 10
0 7
0 7
0 5
0 4
0 1
0 1
0 1
0 1
0 1
0 1
0 1
0 1
0 1
0 1
0 1
0 0
0 0
0 2
0 2
0 2
0 2
0 2
0 2
0 3
0 3
0 3
0 3
0 3
0 3
0 3
0 3
0 4
0 4
0 4
0 4
0 8
0 12
0 15
0 15
0 15
0 15
0 17
0 18
0 18
0 18
0 18
0 18
0 18
0 18
0 18
0 19
0 20
0 20
0 17
0 17
0 20
0 24
0 55
0 108
0 131
0 149
0 155
0 160
1 165
1 170
1 177
1 177
1 179
1 179
1 179
1 179
1 175
1 170
1 167
1 167
1 169
1 169
1 175
0 183
0 187
0 191
0 236
0 236
0 237
0 237
1 291
1 292
1 291
1 291
1 291
1 297
1 294
1 287
1 237
1 185
1 174
1 152
1 149
1 149
1 149
1 144
1 138
1 139
1 138
1 138
1 138
1 152
2 295
2 320
2 334
2 341
2 340
2 342
2 356
2 351
2 354
2 352
2 312
2 314
2 314
2 313
1 259
1 260
1 260
1 260
1 260
1 254
1 254
1 254
1 255
1 255
1 255
1 255
1 255
1 253
1 253
1 253
1 253
1 253
1 253
1 252
1 252
1 228
0 23
0 18
0 18
0 18
0 18
0 18
0 17
0 15
0 10
0 9
0 5
0 3
0 3
0 3
0 3
0 3
0 3
0 3
0 3
0 5
0 31
0 46
0 58
0 118
0 124
0 130
0 130
0 131
0 133
0 133
0 133
0 134
0 134
0 134
0 134
0 134
0 134
0 134
0 134
0 135
0 135
0 135
0 135
0 135
0 135
0 135
0 134
0 133
0 133
0 133
0 133
0 134
0 144
0 145
0 147
0 143
0 110
0 88
0 82
0 29
0 33
0 25
0 32
0 34
0 42
0 46
0 55
0 55
0 63
0 71
0 72
0 74
0 75
0 75
0 74
0 74
0 78
0 84
0 96
0 104
0 118
0 118
0 119
0 119
0 119
0 131
0 169
0 199
0 237
0 243
0 255
0 258
0 262
0 267
0 277
0 276
1 266
1 267
1 268
1 268
1 251
1 243
1 241
1 244
1 248
1 250
1 252
1 254
1 254
1 254
1 254
1 254
1 249
1 240
1 225
1 219
1 210
1 210
1 210
1 210
1 209
1 195
1 141
2 115
2 76
2 80
2 76
2 74
2 69
2 60
1 49
1 47
1 51
1 52
1 54
1 72
1 77
1 77
1 67
1 62
1 56
1 54
1 53
1 52
1 52
1 52
1 53
1 53
1 53
1 53
1 53
1 53
1 52
1 52
0 52
0 52
0 53
0 53
0 50
0 40
0 35
0 33
0 33
0 33
0 34
0 34
0 35
0 35
0 30
0 29
0 27
0 8
0 5
0 5
0 4
0 5
0 8
0 8
0 9
0 9
0 14
0 14
0 13
0 13
0 13
0 13
0 13
0 13
0 15
0 16
0 21
0 19
0 18
0 19
0 19
0 20
0 20
0 20
0 20
0 20
0 20
0 20
0 19
0 19
0 19
0 19
1 19
1 19
1 19
1 19
1 19
1 17
1 17
1 19
1 18
1 18
1 13
1 13
1 13
1 13
1 13
1 13
1 13
1 12
1 11
1 10
1 4
1 4
1 4
1 4
1 4
1 2
1 2
1 2
1 3
1 4
1 6
1 6
1 6
1 6
1 6
1 7
0 7
0 7
0 7
0 7
0 7
1 10
1 10
1 8
1 10
1 10
1 14
1 16
1 17
1 17
1 20
1 49
1 51
1 51
1 51
1 51
1 51
1 51
1 51
1 51
1 52
1 52
2 53
2 53
2 56
2 57
2 56
2 57
2 74
2 73
2 74
2 140
2 144
2 147
2 154
2 155
2 158
1 156
1 157
1 159
1 173
1 178
1 176
1 180
1 181
1 181
1 176
1 94
1 94
1 100
1 102
1 104
1 104
1 121
1 121
1 121
1 121
1 121
0 120
0 120
0 117
0 117
0 117
0 119
0 99
0 97
0 97
0 88
0 84
0 80
0 77
0 76
0 75
0 73
0 73
0 68
0 55
0 47
0 44
0 40
0 40
0 40
0 40
0 39
0 39
0 34
0 31
0 31
0 31
0 13
0 14
0 14
0 14
0 14
0 13
0 13
0 11
0 9
0 10
0 7
0 6
0 6
0 5
0 4
0 4
0 4
0 5
0 5
0 7
0 7
0 7
0 7
0 7
0 7
0 7
0 6
0 6
0 6
0 6
0 7
0 7
0 7
0 7
0 9
0 9
0 9
0 10
0 18
0 18
0 57
0 59
0 59
0 65
0 66
1 88
1 91
2 92
2 95
2 97
2 99
2 103
2 103
2 103
2 103
4 101
4 100
4 100
4 101
4 101
4 102
4 102
4 102
4 103
4 103
4 103
4 102
4 102
4 102
4 102
4 100
4 100
2 100
2 98
2 90
2 90
2 52
3 51
3 49
3 42
3 40
1 22
1 18
1 17
1 15
1 14
1 12
1 12
2 12
2 10
2 10
2 33
2 33
2 33
2 33
2 32
2 32
2 32
2 32
2 32
2 32
2 32
2 32
2 32
2 34
1 38
1 22
1 33
1 34
1 36
1 36
1 35
1 46
0 47
0 53
0 55
0 57
0 53
0 53
0 53
0 51
0 52
0 52
0 52
0 53
0 54
0 54
0 54
0 53
0 54
0 54
0 54
0 54
0 54
0 54
0 54
0 55
0 56
0 56
0 56
0 52
0 46
0 39
0 30
0 32
0 34
0 34
1 34
1 22
1 18
1 15
1 24
1 24
1 24
1 24
1 24
1 25
1 24
1 24
1 23
1 23
1 22
1 22
1 22
1 22
1 22
1 22
1 22
1 22
1 22
1 22
1 22
1 21
1 20
1 20
1 20
1 21
1 21
1 21
1 20
2 19
2 19
2 19
1 19
1 19
1 18
1 18
1 8
1 8
1 10
1 10
1 11
1 11
1 11
1 11
1 11
1 13
1 13
1 13
1 14
1 14
1 14
1 14
1 14
1 14
1 17
1 17
1 17
1 18
1 20
1 20
1 21
1 20
1 25
1 23
1 23
0 20
0 20
0 20
0 20
0 20
0 20
0 20
0 20
0 19
0 18
0 16
0 16
0 16
0 16
0 16
0 16
0 14
0 14
0 14
0 13
0 13
0 13
0 13
0 13
0 13
0 9
0 9
0 9
0 8
0 6
0 5
0 6
0 6
0 1
0 1
0 1
0 1
0 2
0 4
0 9
0 10
0 11
0 11
0 13
0 13
0 13
0 14
0 19
0 19
0 19
1 46
1 48
1 54
1 54
1 54
1 54
1 54
1 55
1 55
1 56
1 56
1 56
1 50
1 51
1 51
1 51
1 51
1 50
1 58
1 60
1 60
1 60
1 60
1 59
1 57
1 52
1 51
1 50
1 50
1 49
1 49
1 49
1 49
1 50
1 49
1 48
0 20
0 21
0 22
0 46
0 50
0 52
0 54
0 53
0 53
0 53
0 55
0 55
0 66
0 67
0 70
0 70
0 69
0 70
0 64
0 62
0 62
0 62
0 62
0 62
0 62
0 62
0 62
0 62
0 62
0 62
0 61
0 62
0 74
1 171
1 199
1 222
1 234
1 240
1 251
4 254
4 253
4 252
4 251
4 252
4 252
4 250
4 251
4 254
4 240
4 240
4 239
4 239
4 239
4 243
2 245
2 247
2 247
2 247
2 247
2 247
2 248
2 248
2 250
2 251
2 250
2 249
2 249
2 248
2 204
1 84
1 51
1 42
1 39
1 38
1 34
0 19
0 19
0 19
0 20
0 20
0 20
0 20
0 19
0 14
0 14
0 16
0 16
0 16
0 16
0 12
0 10
0 8
0 7
0 7
0 7
0 7
0 6
0 6
0 5
0 4
0 4
0 4
0 5
0 6
0 6
1 6
2 7
2 7
2 8
2 8
2 8
2 8
2 8
2 7
2 6
2 23
2 23
2 49
2 68
2 88
2 96
1 106
1 108
1 110
1 111
1 111
1 115
1 118
1 124
1 129
1 129
1 129
1 129
1 129
1 130
1 135
1 135
2 136
2 135
2 134
1 132
1 133
1 134
1 134
1 134
1 134
1 134
1 137
1 137
1 136
1 136
1 119
1 118
1 88
2 74
2 58
2 65
2 54
2 53
2 54
2 54
2 55
2 53
2 49
2 43
2 40
3 41
3 51
2 51
2 49
2 45
2 47
3 56
3 66
3 85
3 87
3 98
3 102
3 104
3 104
3 104
3 104
3 107
3 115
3 120
3 144
3 158
3 165
3 166
3 166
2 161
2 161
2 144
2 159
2 160
2 161
2 163
2 162
2 166
2 167
3 174
3 174
2 173
2 163
2 164
2 164
2 164
2 161
1 149
1 138
1 119
1 112
1 107
1 108
1 110
1 122
1 133
1 135
1 137
1 129
1 167
1 138
1 137
1 140
1 174
1 179
1 187
1 190
1 194
2 192
2 196
2 199
2 205
2 208
2 204
2 203
1 199
1 201
1 205
1 205
1 217
1 225
1 233
1 247
1 253
1 286
1 289
1 291
1 289
1 286
1 283
1 270
1 259
1 255
1 250
2 250
2 197
2 186
2 172
2 167
2 142
2 133
2 153
3 153
3 149
2 139
2 135
2 131
2 127
2 123
2 121
3 168
3 171
3 218
3 230
3 238
3 230
3 222
3 207
3 190
3 189
3 160
3 157
3 157
3 157
3 157
3 158
3 158
3 158
3 159
3 159
2 155
2 153
2 153
2 153
2 153
2 153
2 153
2 132
1 132
1 132
1 132
1 133
1 133
2 138
2 138
2 137
1 90
1 79
1 18
1 13
1 11
1 10
1 11
1 11
1 11
1 11
1 11
1 11
1 11
1 11
1 20
1 17
1 18
1 19
1 19
1 19
1 19
1 19
1 19
1 20
1 21
1 21
1 21
1 21
1 21
1 21
1 21
1 21
1 21
0 15
0 15
0 15
0 15
0 15
0 15
0 15
0 15
0 15
0 14
0 14
0 14
0 17
0 17
0 18
0 18
0 18
0 8
0 8
0 8
1 12
1 13
1 13
1 13
1 13
1 13
1 11
1 10
1 10
1 10
1 17
1 17
1 17
1 17
1 17
1 17
1 17
1 17
1 17
1 17
1 17
1 17
1 17
1 17
1 17
1 17
1 18
1 19
1 17
3 17
3 16
3 15
3 14
3 14
3 14
3 14
2 11
2 11
2 11
2 11
2 11
2 11
2 11
2 11
2 11
2 11
2 4
2 4
2 4
2 4
2 4
3 4
3 4
3 4
3 4
3 4
3 5
3 14
6 78
10 108
11 130
11 145
11 162
11 164
11 170
9 170
8 170
8 169
8 169
8 169
8 169
8 169
8 170
8 170
5 170
5 170
5 170
5 171
5 171
5 171
5 171
5 171
5 173
5 173
5 177
5 177
5 179
6 185
6 221
6 221
6 221
7 221
7 218
7 162
5 90
4 78
3 79
3 82
3 85
3 86
3 86
3 86
3 95
3 96
3 98
3 98
3 98
3 98
3 98
3 99
3 99
3 99
3 99
3 99
3 99
3 100
3 101
3 124
3 124
3 127
4 124
4 125
4 124
3 118
3 81
2 81
2 81
2 80
2 81
2 77
1 54
1 53
1 52
1 48
1 49
1 49
1 50
1 51
1 46
1 45
1 43
1 45
1 46
1 46
1 46
1 46
1 46
1 46
1 47
1 47
1 47
1 43
1 42
1 19
1 17
1 13
0 11
0 11
0 11
0 11
0 11
0 11
0 11
0 11
1 11
1 11
1 11
1 10
1 12
1 12
1 10
1 8
1 8
1 6
1 10
1 12
1 12
1 11
1 11
1 11
1 11
1 11
1 10
3 69
3 69
6 84
7 84
7 88
7 89
7 90
7 90
8 90
8 90
7 90
7 90
7 90
7 90
7 90
6 30
6 52
5 52
5 56
5 57
5 57
5 56
5 57
5 57
5 57
5 57
5 57
5 53
5 51
5 51
5 51
5 29
4 29
4 30
4 31
4 31
4 31
4 31
1 16
1 10
1 10
1 10
1 10
1 10
0 10
0 10
0 11
0 10
0 45
0 40
0 40
0 40
17 48
19 49
19 52
19 53
19 54
19 56
19 55
19 55
19 55
19 55
19 55
19 55
19 52
19 20
19 20
2 19
2 19
2 18
2 17
0 16
0 16
0 16
0 16
0 17
0 17
0 17
0 17
0 17
0 17
0 19
0 18
0 18
0 18
0 19
0 19
0 19
0 12
0 9
0 7
0 7
0 7
0 4
0 4
0 4
1 11
1 11
1 11
1 11
1 11
1 11
1 11
1 11
1 11
1 11
1 11
1 11
1 11
1 11
1 11
0 3
0 3
0 3
1 4
1 4
1 4
1 1
1 1
1 1
1 2
2 2
2 6
2 7
2 9
2 10
2 10
2 10
2 10
1 9
1 9
1 9
1 9
1 9
1 9
1 9
1 9
1 9
1 9
1 9
1 9
1 9
1 9
1 9
1 9
1 9
1 9
1 9
1 9
1 11
1 11
1 13
1 13
1 13
1 16
1 16
1 15
0 15
0 10
0 8
0 9
0 11
0 13
0 15
0 15
0 15
0 15
0 15
0 15
0 15
0 15
0 15
0 15
0 15
0 15
0 15
0 15
0 15
0 15
0 15
0 15
0 15
0 15
0 15
0 15
0 13
0 13
0 11
0 11
0 11
1 8
3 23
3 24
3 28
3 29
3 29
3 28
3 24
3 23
3 21
3 21
3 21
3 21
3 21
3 21
2 21
2 21
2 21
2 21
2 21
2 21
2 22
2 24
2 25
2 25
2 25
2 25
2 25
2 25
2 25
19 26
19 26
19 26
19 26
21 26
21 27
20 27
19 10
19 8
19 7
19 7
19 7
19 7
19 7
19 9
19 9
19 9
19 9
19 9
3 8
3 9
3 9
3 9
3 9
3 9
3 10
6 12
6 9
6 9
6 8
5 8
4 8
4 8
4 8
4 8
4 8
3 8
3 8
3 8
3 8
3 8
3 6
3 6
3 6
3 6
3 6
3 7
3 9
3 10
3 16
3 19
3 21
3 21
3 21
3 24
3 27
3 31
3 34
3 36
3 36
3 36
3 36
0 34
0 34
0 34
0 34
0 34
0 34
0 34
0 34
0 34
0 36
0 36
0 36
0 36
0 39
0 39
0 40
0 44
0 45
0 45
0 45
0 43
0 40
0 43
0 34
0 31
0 31
0 31
0 31
0 28
0 25
0 18
0 16
0 16
0 15
0 15
0 15
0 15
0 15
0 15
0 15
0 15
0 15
0 15
0 15
0 15
0 13
0 13
0 13
0 13
0 10
0 10
0 9
0 4
0 4
0 4
0 11
0 11
0 12
0 9
0 9
0 9
0 8
0 8
0 8
0 8
0 8
0 8
0 9
0 9
0 9
0 9
0 9
0 11
0 11
0 11
0 12
10 12
10 12
10 12
10 12
10 12
10 12
10 12
10 12
10 12
10 12
10 12
10 12
10 12
10 12
10 12
0 6
0 6
0 5
0 5
0 6
0 16
0 18
0 19
0 19
0 19
1 19
1 19
1 19
1 19
1 19
28 59
28 59
28 57
28 57
28 57
28 51
28 51
28 51
28 51
28 51
28 51
27 51
27 51
27 51
27 51
0 11
0 11
0 11
0 11
0 11
0 13
0 12
0 13
0 13
0 13
1 22
1 17
1 20
1 20
1 24
1 24
1 24
1 23
1 23
1 23
1 23
1 24
1 24
1 24
1 24
1 24
1 24
1 24
1 24
1 24
1 24
1 24
1 24
1 24
1 24
1 24
1 24
1 24
1 25
1 25
1 25
1 24
1 24
1 24
1 24
1 24
0 9
0 6
0 6
0 6
1 4
1 5
1 5
1 12
1 12
1 12
1 12
1 11
1 11
1 11
1 11
2 11
2 11
7 12
8 12
8 12
7 12
7 12
7 12
7 12
7 12
7 12
7 12
7 12
7 11
7 11
6 11
6 11
1 10
1 9
1 9
1 9
1 9
1 9
1 9
2 10
2 11
2 10
2 10
2 3
2 3
2 3
2 3
2 3
2 3
2 3
2 3
2 3
2 3
2 3
1 3
1 3
1 2
1 2
1 2
1 2
1 2
1 2
1 3
1 3
1 3
1 3
1 3
1 3
1 3
1 3
0 3
0 3
1 4
1 4
1 4
1 6
1 8
1 10
1 14
1 14
1 14
1 14
1 14
1 14
1 14
1 14
1 15
1 15
1 15
1 15
1 15
1 15
1 15
1 15
1 16
1 16
1 18
1 18
1 17
1 17
1 17
1 17
1 17
1 17
1 17
1 17
1 18
1 20
0 19
0 19
0 19
0 15
0 12
0 11
0 7
0 7
0 7
0 7
0 7
0 7
0 7
0 7
0 6
0 6
0 6
1 12
1 12
1 37
1 38
1 39
1 38
1 38
1 36
1 36
1 36
1 36
1 36
1 36
1 36
1 37
0 37
0 37
0 36
0 34
0 34
0 34
0 34
0 34
0 34
0 34
0 34
0 34
0 34
0 34
0 34
0 34
0 34
0 34
0 34
0 34
0 34
0 28
0 28
0 1
0 1
0 8
0 24
0 26
0 26
0 26
0 27
1 28
1 28
1 29
1 30
1 29
1 29
1 29
1 30
1 30
1 30
1 30
1 30
1 30
1 30
1 30
0 29
0 29
0 29
0 29
0 29
0 29
0 29
0 29
0 29
0 29
0 29
0 29
0 29
0 29
0 29
0 21
0 5
0 4
0 4
0 4
0 3
0 3
0 2
0 1
0 0
0 0
0 0
0 0
0 0
0 0
0 1
0 1
0 1
0 1
0 1
0 1
0 1
0 1
0 1
2 1
6 1
6 1
6 1
6 1
7 2
7 3
7 5
7 5
7 5
7 9
7 9
7 10
7 11
7 11
7 22
7 24
7 25
7 26
7 26
7 26
7 26
7 26
7 26
7 26
7 26
7 26
7 27
7 27
7 27
7 27
7 27
7 27
7 28
5 28
5 28
5 28
1 28
1 28
1 27
1 27
0 25
0 25
0 24
0 24
0 24
0 20
0 20
0 19
0 18
0 16
0 3
0 3
0 2
0 2
0 8
0 8
0 8
0 7
0 7
0 7
0 7
0 8
0 8
0 9
0 9
0 10
0 18
0 18
0 17
0 17
0 18
0 18
0 20
0 20
0 22
0 23
0 23
0 23
0 23
0 23
0 23
0 23
0 23
0 23
0 23
0 23
0 23
0 24
0 24
0 24
0 18
0 18
0 18
0 18
0 18
0 18
0 18
0 17
0 17
0 16
0 16
0 15
0 14
0 33
0 36
0 41
0 44
1 93
5 99
5 107
5 108
5 110
5 115
5 116
5 118
6 125
6 140
6 144
6 141
6 142
6 142
6 145
6 144
6 145
6 145
6 147
6 149
6 149
6 151
6 152
6 153
6 153
6 155
6 157
6 157
7 157
7 155
7 154
7 141
7 134
7 130
7 126
7 115
6 64
2 56
3 54
3 52
3 48
3 47
3 47
2 42
2 37
2 21
2 19
2 18
2 17
2 17
2 13
2 12
2 12
2 12
2 10
2 7
2 7
2 6
2 4
2 3
2 1
2 2
2 3
2 3
1 3
1 4
1 3
1 3
1 3
1 3
1 3
1 3
1 3
0 3
0 3
0 3
0 4
0 4
0 33
0 33
0 33
0 33
0 33
0 33
0 33
0 33
0 33
0 33
0 33
0 34
0 34
1 34
1 34
1 34
1 34
1 34
1 34
1 33
1 44
1 44
1 44
1 46
1 46
1 46
1 46
1 47
1 48
1 49
4 52
5 52
5 52
5 52
7 50
7 50
7 22
7 22
7 22
7 22
7 22
7 22
7 22
7 22
7 22
7 22
8 22
10 24
10 26
10 27
10 27
10 27
10 26
10 26
10 26
10 26
10 15
10 15
10 15
10 12
10 12
10 12
10 11
10 10
9 13
9 14
7 13
6 13
6 16
6 16
4 16
4 16
4 16
4 16
4 16
4 16
4 16
4 16
4 17
4 17
4 17
4 17
3 17
1 14
1 11
1 11
1 12
1 12
2 14
2 15
2 15
2 15
2 16
2 16
3 16
3 15
2 16
2 16
2 19
2 19
2 16
2 18
2 16
2 16
2 13
2 13
2 13
2 13
2 14
2 14
2 14
2 13
2 14
2 17
2 19
2 19
2 20
2 20
2 20
2 20
2 20
3 19
4 19
4 19
5 17
15 35
16 35
16 34
16 33
15 33
15 33
15 32
15 32
15 33
15 30
15 32
15 36
15 34
14 34
14 34
14 34
14 34
14 34
14 35
14 35
14 35
15 35
15 35
15 35
15 30
15 28
15 28
15 29
15 29
15 29
15 29
15 30
14 30
14 32
12 34
11 36
0 19
1 19
1 20
1 21
1 21
1 22
1 22
1 22
1 21
1 20
1 18
1 15
1 15
1 15
1 15
1 15
1 15
0 14
0 14
0 14
0 14
0 14
0 14
0 14
0 14
0 14
0 14
0 16
0 16
0 16
0 16
0 14
0 22
0 19
0 18
0 16
0 15
1 21
1 23
1 22
1 21
1 21
1 21
1 21
1 21
1 21
1 21
1 21
1 21
4 23
4 26
4 26
4 21
5 204
5 205
5 205
5 205
5 205
5 205
5 205
5 205
5 205
5 205
5 203
5 212
2 213
2 43
2 46
1 41
1 54
1 57
1 79
1 79
1 79
1 80
1 80
1 94
1 94
1 95
2 95
2 113
2 117
2 117
2 118
2 118
2 118
2 92
2 92
2 92
2 93
2 93
2 94
3 94
3 95
3 95
3 95
3 95
3 95
2 93
2 79
2 53
2 51
2 50
2 51
2 51
2 50
2 50
2 50
2 49
2 49
2 45
2 44
2 30
2 29
1 27
1 27
1 9
1 7
1 7
1 7
2 7
3 6
3 6
3 6
3 5
3 5
3 3
3 2
2 2
2 2
2 2
2 2
2 2
2 2
2 2
2 2
2 2
2 2
2 1
2 0
2 0
2 0
2 0
2 0
5 0
5 0
5 0
5 0
5 0
5 0
5 2
5 2
5 2
5 2
4 2
4 2
4 2
3 2
3 2
3 2
1 2
0 2
0 2
0 2
0 2
0 2
0 2
0 2
0 3
0 4
0 4
0 4
0 4
0 4
0 4
0 4
0 4
0 4
0 4
0 4
0 4
0 4
0 4
0 6
0 6
0 6
0 5
0 5
0 5
0 5
0 5
0 5
0 5
0 5
0 5
0 5
0 5
0 7
0 6
0 9
0 9
0 9
0 9
0 10
0 10
0 10
0 10
0 11
0 12
0 12
0 12
0 12
0 12
0 12
0 12
0 12
0 13
0 13
0 16
0 16
0 16
0 16
0 15
0 15
0 16
0 17
0 17
0 19
0 19
0 19
0 19
0 19
0 18
0 16
0 15
0 18
0 21
0 29
0 29
0 28
0 24
0 24
0 25
0 25
0 28
0 29
0 29
0 29
0 29
0 29
0 29
0 29
0 28
0 27
2 23
2 23
2 23
3 23
3 23
3 23
3 23
3 23
3 23
3 21
3 21
3 21
3 21
3 21
3 21
3 21
3 21
3 16
2 13
2 5
2 5
2 5
2 5
2 5
2 4
2 5
2 3
2 2
2 2
2 2
2 2
2 3
2 3
2 3
2 3
2 3
0 3
0 3
0 3
0 3
0 3
0 3
0 3
0 3
0 3
0 3
0 3
0 4
0 8
0 12
0 12
0 23
0 24
0 25
0 33
0 33
0 33
0 34
0 34
0 35
0 34
0 34
0 35
0 34
0 35
0 35
0 35
0 34
0 37
0 38
0 46
0 59
0 61
0 65
0 65
0 67
1 69
1 71
1 91
3 233
3 266
3 283
3 323
3 334
3 344
4 350
4 353
4 342
4 341
4 337
4 334
4 334
4 336
4 335
4 335
4 334
4 334
4 333
4 332
4 332
4 331
4 331
4 329
4 326
4 330
4 329
4 320
4 307
4 303
4 300
4 301
4 305
3 305
3 299
3 239
0 59
0 63
0 104
0 137
0 167
0 180
0 179
0 185
0 185
0 188
0 188
0 189
0 191
0 192
0 193
0 194
0 199
0 200
0 205
0 206
0 207
0 209
0 209
0 209
1 227
1 225
1 227
1 230
1 232
1 234
1 235
1 240
1 254
1 282
1 304
2 340
2 341
2 303
2 243
2 231
2 210
2 213
2 210
2 203
2 203
2 199
2 199
2 199
2 199
2 197
2 195
2 194
2 187
2 187
2 186
2 186
2 185
2 182
2 182
2 181
1 162
1 161
1 159
1 156
1 160
1 157
1 157
1 145
1 115
1 109
1 97
0 55
0 50
0 50
0 47
0 53
0 61
1 68
1 71
1 73
1 75
1 76
1 77
1 77
1 79
1 82
1 84
1 87
1 96
1 118
1 125
1 132
1 132
1 138
1 143
1 145
3 146
3 147
3 147
3 147
3 144
3 145
4 157
4 153
4 153
5 159
5 158
5 157
5 167
5 181
5 222
5 327
4 347
4 367
4 388
5 399
5 404
5 415
5 415
6 429
6 429
7 430
7 434
7 438
8 429
8 400
10 405
10 404
10 418
10 420
10 437
9 445
7 454
8 456
8 455
8 457
8 457
8 453
7 460
7 456
7 454
7 467
7 522
7 533
7 536
7 505
7 402
7 274
7 266
7 264
7 270
7 276
8 278
8 270
8 266
7 245
7 250
9 322
15 490
17 519
23 678
23 708
21 697
22 687
22 674
22 664
22 662
22 657
22 651
20 649
20 648
20 641
20 638
20 654
20 635
20 635
20 638
20 627
20 558
20 544
20 542
20 540
20 540
20 539
20 539
20 534
20 525
20 515
19 518
19 518
19 519
19 519
18 498
17 350
9 215
8 188
1 47
1 45
1 45
1 44
1 53
1 53
1 53
1 68
1 88
2 117
3 125
3 131
3 159
3 172
4 234
4 263
6 292
6 377
6 383
6 387
6 392
6 393
6 396
6 403
6 404
7 422
7 425
7 425
7 423
7 423
7 423
7 420
7 421
6 422
6 422
6 425
6 424
6 425
11 434
11 434
11 425
11 425
12 423
12 410
12 398
10 391
12 392
47 478
49 449
49 400
48 316
48 299
46 284
46 198
46 196
46 194
46 190
46 188
45 188
45 183
45 180
44 161
44 161
44 162
44 165
44 174
44 176
44 179
44 179
44 178
44 181
44 186
46 189
46 191
41 187
41 185
41 188
41 193
41 195
41 200
38 194
38 189
33 183
4 97
3 100
3 98
3 103
3 105
4 135
6 181
7 191
7 195
7 194
7 191
7 191
7 192
7 182
7 202
7 238
7 239
7 239
7 239
7 239
7 237
7 236
8 237
7 236
7 224
5 220
5 218
4 222
4 221
4 217
4 220
4 219
4 205
4 182
4 181
4 181
4 180
4 181
4 180
4 177
4 175
2 169
1 124
1 117
1 115
1 121
1 131
1 144
1 174
1 185
1 172
1 136
1 136
1 137
1 138
1 142
1 142
0 143
0 139
1 140
1 142
1 146
1 150
1 145
2 145
2 148
2 148
2 150
2 153
2 153
2 154
2 155
2 154
2 154
2 167
2 168
3 167
3 142
3 141
3 137
3 139
4 134
4 121
4 105
4 70
4 68
4 59
4 58
4 57
4 56
4 55
4 55
4 56
3 55
3 53
3 51
2 50
2 52
2 51
2 44
2 44
2 40
2 38
2 38
2 38
2 37
2 32
2 32
2 32
3 48
10 77
11 119
12 141
12 144
12 146
12 146
12 144
11 143
11 143
11 139
11 139
11 139
11 139
12 144
12 144
12 144
12 144
12 160
12 162
12 163
12 165
12 166
12 166
12 163
12 163
13 163
13 165
13 178
13 180
13 181
13 191
13 211
13 212
13 212
13 212
12 183
3 105
3 94
2 82
2 84
2 84
2 85
2 85
7 88
7 88
7 89
7 89
7 89
8 89
10 145
10 146
10 147
10 145
10 127
10 125
10 125
10 128
10 130
10 143
11 149
11 162
10 182
10 192
10 232
10 232
10 233
10 226
10 205
10 204
10 204
10 204
11 204
22 283
22 282
22 280
22 279
19 279
19 279
19 279
16 276
16 277
15 276
15 276
15 276
15 275
13 215
30 215
30 214
30 213
30 217
30 217
30 213
30 213
30 209
30 195
29 192
29 181
29 155
29 144
29 99
29 97
29 96
26 93
12 93
11 93
11 93
9 93
9 93
0 13
0 14
0 14
0 16
0 16
0 17
0 17
0 17
0 17
0 16
0 17
0 14
0 10
0 10
0 10
0 9
0 9
0 9
0 9
0 9
0 8
0 8
0 8
0 8
0 8
0 8
0 7
0 7
0 10
0 10
0 10
0 10
0 11
0 11
0 11
0 11
0 11
0 10
0 9
0 9
0 9
0 9
2 21
2 25
2 27
2 27
2 27
2 30
2 30
2 31
2 31
2 31
2 31
2 31
2 31
2 31
2 31
2 31
2 31
2 31
2 32
2 32
2 33
2 33
2 30
2 30
2 30
2 31
2 31
2 32
2 37
2 40
2 39
2 39
2 39
2 39
2 39
2 37
1 22
0 19
0 20
0 20
0 20
0 17
0 15
0 15
0 15
0 15
0 15
0 14
0 14
0 15
0 15
0 15
0 15
0 15
0 15
0 16
0 16
0 16
0 19
0 19
0 19
0 25
0 24
0 26
0 20
0 17
0 16
0 16
0 16
0 16
0 17
0 17
0 18
0 21
0 20
0 21
0 22
0 25
0 25
0 25
0 25
0 25
0 25
0 24
0 24
0 25
0 25
0 28
1 40
1 42
1 43
1 43
1 44
1 45
1 42
1 42
1 42
1 35
1 35
1 32
1 33
1 33
1 34
1 34
1 34
2 34
2 37
7 289
9 346
9 349
9 365
9 366
9 366
9 364
9 364
9 364
9 372
10 381
10 381
10 382
10 382
10 382
10 382
9 376
9 364
9 364
9 364
9 365
9 369
9 369
10 369
10 369
10 370
10 371
10 371
10 371
10 373
10 372
10 377
10 377
10 378
9 379
8 374
2 85
2 43
2 44
2 52
2 53
2 52
2 53
2 53
2 53
2 43
1 33
1 34
1 34
1 35
2 36
2 60
2 63
2 62
2 62
2 62
1 62
1 58
1 59
1 60
3 61
3 63
4 65
4 66
4 69
4 66
4 67
4 62
4 64
4 62
4 61
4 62
4 62
4 150
4 145
4 149
4 168
4 208
4 217
6 234
10 252
10 254
10 256
10 256
10 255
10 256
9 256
9 230
9 234
9 234
9 240
13 286
13 291
14 319
15 322
14 322
13 324
13 325
12 324
12 324
12 341
12 341
14 500
14 511
16 534
16 553
16 566
16 574
16 576
16 486
16 485
16 464
16 454
16 412
13 398
10 382
10 376
10 376
10 375
8 374
8 373
9 371
9 371
9 371
11 370
11 367
11 357
7 312
7 297
6 274
5 268
5 267
5 269
5 269
5 269
5 270
5 255
5 245
3 77
3 68
3 38
3 27
3 20
3 20
3 20
3 19
2 19
2 18
2 18
2 18
2 24
4 31
7 41
7 45
7 46
7 47
7 48
10 49
10 48
10 49
8 44
9 43
35 102
36 103
36 104
36 103
36 102
36 101
37 100
37 101
37 100
37 100
37 100
37 100
37 100
37 100
38 100
38 100
38 100
40 111
40 111
40 111
40 111
43 115
43 117
43 118
42 110
40 102
39 91
39 88
39 86
39 85
38 84
33 79
33 80
29 79
36 104
36 104
15 49
15 50
15 50
15 53
15 53
15 53
14 53
14 52
14 52
14 52
14 54
14 54
14 54
15 54
15 55
15 55
15 56
13 45
14 45
15 46
15 46
12 42
12 40
11 39
17 139
17 141
26 149
26 153
26 154
26 155
26 155
28 161
29 161
29 163
23 151
23 152
23 152
23 153
23 151
23 151
23 152
23 152
23 152
23 153
23 153
23 153
23 153
23 153
23 159
22 159
21 158
21 158
22 157
22 158
22 160
34 222
36 225
36 226
36 227
36 229
30 128
30 126
22 122
22 118
22 116
22 116
22 115
19 110
19 109
18 105
18 92
18 92
18 93
18 92
18 93
18 94
18 94
19 94
19 94
20 93
20 94
20 97
22 110
22 109
22 107
22 107
22 110
23 118
22 119
22 136
19 137
8 76
6 71
6 71
8 93
8 93
8 93
8 93
8 92
8 92
8 91
8 96
8 97
8 102
8 103
9 161
9 164
9 170
9 172
9 174
9 173
9 172
9 173
8 182
8 185
8 194
8 192
7 191
6 178
6 177
14 170
29 189
30 192
30 192
30 193
30 176
29 172
29 197
29 197
29 199
27 188
27 194
27 194
26 194
26 194
26 194
26 194
26 190
26 188
26 182
26 179
25 112
25 111
25 111
25 109
25 109
25 110
25 110
25 108
25 92
24 88
26 103
25 103
25 108
22 104
19 106
16 105
5 80
4 79
4 76
4 77
4 81
4 79
4 56
5 63
5 60
5 55
5 48
5 49
5 49
6 49
6 49
6 50
6 67
6 70
7 77
7 81
7 83
7 85
7 85
7 85
7 85
7 90
7 114
7 131
6 144
6 162
4 147
4 149
3 150
3 193
3 191
3 190
3 191
3 187
3 187
4 187
4 184
4 183
4 177
4 173
4 179
4 179
4 180
4 183
4 183
4 184
4 184
4 183
4 165
4 162
3 154
3 151
3 152
3 148
4 220
4 222
4 238
4 234
4 205
4 186
4 170
4 160
4 160
4 158
3 158
2 117
2 117
2 119
1 117
3 117
3 117
3 118
3 118
3 118
3 118
3 118
14 115
14 115
14 125
15 125
15 127
15 126
15 129
15 133
15 133
15 134
15 132
15 132
15 131
15 129
14 41
14 41
14 37
14 37
14 38
14 38
14 41
14 51
14 66
14 90
14 93
14 96
15 98
15 97
13 97
15 97
15 96
15 96
15 96
15 96
13 96
13 95
3 90
3 90
3 80
3 77
3 75
3 74
3 75
3 72
3 72
3 69
3 69
3 68
3 68
3 68
3 69
3 75
3 77
3 92
3 91
3 91
3 84
2 72
2 39
2 34
1 36
1 37
0 35
0 35
0 35
0 34
0 34
0 33
0 33
0 33
0 33
0 33
0 33
0 33
0 33
0 33
0 33
0 33
0 31
0 31
0 32
0 32
0 70
0 76
0 112
0 130
0 133
0 127
0 125
0 110
0 113
0 114
0 115
0 114
0 114
0 113
0 111
0 110
0 110
0 110
0 111
0 112
0 112
0 112
0 112
0 113
0 113
0 119
0 120
1 129
1 134
1 138
1 147
1 148
1 150
1 151
1 152
1 152
1 113
1 106
1 67
1 58
1 61
1 73
1 78
1 79
1 74
1 76
1 76
1 86
1 87
1 90
1 91
1 91
1 90
1 88
1 88
2 88
2 88
1 88
1 88
1 88
1 84
1 80
1 81
1 71
1 69
1 70
1 67
1 75
1 76
1 77
0 77
0 76
1 77
1 80
1 76
1 62
1 59
1 58
1 57
1 57
1 58
1 58
1 58
1 48
1 48
1 45
1 47
1 47
1 43
1 43
1 43
1 43
1 43
1 45
2 46
2 53
4 212
5 217
6 214
6 209
6 203
6 201
6 195
6 186
6 185
6 183
5 181
5 181
5 181
5 183
5 200
5 204
3 42
3 44
3 46
3 46
3 47
5 47
5 47
5 47
5 47
5 46
5 44
5 44
5 44
5 44
6 45
6 45
8 45
8 42
7 39
6 33
5 33
5 33
5 33
5 33
5 34
5 34
5 34
5 34
5 34
5 34
5 33
5 33
5 33
5 42
5 23
5 18
5 26
5 50
5 54
5 55
5 55
3 55
3 56
3 56
3 56
3 56
3 56
3 56
2 56
2 45
2 43
2 43
0 41
0 41
0 41
0 53
0 57
0 61
0 63
0 64
0 64
0 64
0 64
0 64
0 64
0 65
0 65
0 65
0 65
0 64
6 65
6 63
6 56
6 33
7 34
7 38
8 38
8 39
8 38
8 38
8 38
8 38
8 38
8 38
8 38
8 49
8 50
8 51
8 51
8 51
8 51
8 38
8 36
8 32
8 30
8 29
8 29
8 29
8 29
9 29
9 30
9 29
9 29
10 45
10 48
10 49
3 51
2 51
2 50
2 50
2 49
2 45
2 45
2 45
2 45
2 47
2 47
2 47
2 48
2 47
2 47
2 34
2 34
2 33
2 32
2 32
2 32
2 32
2 32
16 41
17 41
17 42
17 42
17 42
17 42
16 42
16 42
16 42
16 40
15 20
15 17
15 17
15 14
15 14
15 14
15 15
15 27
15 31
15 32
15 32
15 32
15 32
15 32
15 34
15 33
15 35
15 35
15 35
15 35
15 34
14 34
14 34
13 34
13 34
12 34
0 24
0 24
0 24
0 24
0 24
0 24
1 25
1 25
1 23
1 23
1 8
1 1
1 1
1 1
1 1
1 1
1 1
1 1
1 1
1 1
1 1
1 1
0 0
0 0
0 0
0 0
0 0
0 0
0 0
0 0
0 0
0 0
0 0
0 0
0 0
0 0
2 1
2 1
2 1
2 2
2 2
2 2
2 2
2 2
2 2
2 2
5 2
6 2
6 2
7 2
7 2
7 2
7 2
7 3
7 3
7 2
7 3
7 6
7 6
7 7
7 7
7 7
7 7
7 7
7 7
7 7
7 7
7 7
7 7
7 7
7 7
7 7
5 6
5 6
5 6
6 6
6 6
6 6
9 6
9 6
9 6
10 6
11 6
14 6
30 6
31 7
32 7
37 7
41 7
45 6
93 9
93 9
93 8
93 5
93 5
95 10
95 10
95 10
95 11
95 11
95 11
95 11
95 11
95 11
95 11
95 9
95 9
95 9
95 9
94 9
94 9
92 10
92 10
92 10
89 10
89 10
85 10
86 10
80 10
81 10
66 10
66 9
68 10
63 10
62 12
63 13
20 12
20 12
20 12
20 12
20 12
19 6
19 6
22 5
27 5
61 6
61 6
61 6
67 7
69 7
79 8
79 8
80 8
80 8
81 8
80 8
80 8
81 7
81 7
81 7
81 7
88 7
90 7
82 6
82 6
82 6
80 6
80 6
75 4
75 4
75 4
70 3
68 3
68 3
68 3
70 3
70 3
66 3
65 3
52 3
64 3
40 2
43 3
47 3
49 3
59 3
50 1
56 1
58 1
60 1
74 1
92 1
115 3
130 3
132 3
132 3
140 6
141 6
140 6
140 6
140 6
140 6
140 6
140 6
140 6
140 6
140 6
139 6
139 6
139 6
139 6
137 6
137 5
138 5
139 5
138 5
126 5
123 5
119 5
110 5
104 5
97 5
96 5
91 5
76 5
73 5
58 4
50 4
28 3
22 3
21 3
21 3
15 0
9 0
8 0
8 0
8 0
8 0
8 0
8 0
10 0
10 0
10 0
10 0
10 0
10 0
10 0
9 0
9 0
6 0
6 0
6 0
6 0
6 0
6 0
6 0
6 0
6 0
6 0
6 0
6 0
3 0
2 5
2 5
2 5
2 5
5 5
7 5
8 5
10 6
11 6
11 6
11 6
11 6
13 7
13 7
11 7
11 6
11 6
11 6
11 7
11 3
11 3
12 3
792 4
792 4
822 4
822 4
822 4
822 4
822 4
822 4
823 4
823 4
823 4
823 4
823 4
823 4
823 4
44 3
42 3
12 3
8 3
7 3
7 3
5 2
5 2
5 2
5 2
4 2
3 1
3 1
3 1
3 1
3 1
3 1
3 0
3 0
3 0
3 0
3 0
3 0
3 0
3 0
4 0
4 0
4 0
4 0
5 0
7 1
8 1
8 1
8 1
8 2
8 2
8 3
8 4
8 4
8 5
7 5
7 5
7 5
6 5
5 5
5 5
5 5
5 5
5 5
9 6
9 6
9 6
9 6
9 6
9 6
9 6
9 6
9 6
9 6
9 6
11 6
10 7
10 7
10 7
10 7
9 8
7 7
6 7
6 7
7 7
7 6
8 6
8 5
8 5
8 5
8 4
8 4
8 4
8 4
8 4
8 4
8 4
7 4
7 4
7 4
3 3
3 3
2 3
2 3
2 4
2 4
2 4
2 12
2 14
2 15
2 15
2 14
2 25
2 28
2 29
2 36
2 36
2 37
2 41
1 41
1 41
1 40
0 40
1 43
1 43
1 43
1 45
1 49
1 65
1 68
1 142
1 144
2 149
2 157
3 158
3 160
3 162
3 162
3 163
2 160
2 159
2 159
2 159
2 150
2 150
2 149
2 149
2 149
2 126
2 124
2 122
2 121
2 121
2 121
2 121
2 121
2 121
2 121
2 121
2 121
2 123
2 123
2 121
2 114
2 102
2 94
2 18
2 18
1 15
1 9
0 9
0 14
0 21
0 24
0 27
0 27
0 28
0 28
0 27
0 27
0 33
0 50
0 59
0 69
0 73
0 76
0 78
0 78
0 78
0 79
0 80
0 80
0 80
0 80
0 80
0 79
0 78
0 78
0 80
0 86
0 98
0 98
0 104
0 116
0 116
0 115
0 114
0 109
0 99
0 96
0 98
0 105
0 117
0 136
0 138
0 143
0 135
0 107
0 103
0 101
0 100
0 97
0 96
0 96
0 96
0 95
0 94
0 94
0 95
0 98
0 112
0 130
0 137
0 143
0 149
0 154
0 147
0 148
0 144
0 141
0 142
0 142
0 143
0 142
0 142
0 142
0 137
0 119
0 100
0 97
0 96
0 91
0 91
0 91
0 87
0 86
0 85
0 85
0 85
0 87
0 88
0 88
0 90
0 98
1 111
1 120
1 106
1 107
1 112
1 112
1 109
1 96
1 92
1 97
1 97
1 97
1 98
1 99
1 99
1 99
1 105
1 106
1 110
1 112
1 115
1 115
1 116
1 118
1 119
1 120
1 120
1 119
1 119
1 119
1 119
1 117
2 125
2 128
2 126
2 113
1 86
1 76
1 71
1 67
1 60
1 60
1 60
1 57
1 56
1 53
1 53
1 53
1 53
1 52
2 53
2 53
2 48
2 45
2 43
2 41
2 37
2 37
2 36
2 37
2 37
2 38
2 38
2 38
2 38
1 40
1 40
1 40
0 28
0 25
0 24
0 24
0 23
0 14
0 14
0 10
0 10
0 9
0 9
0 9
0 9
0 9
0 10
0 12
0 14
0 17
0 17
0 17
0 16
0 18
0 18
0 17
0 17
0 17
0 17
0 16
0 15
0 14
0 14
0 14
0 14
0 12
0 13
0 13
0 13
0 12
0 12
0 12
0 12
0 12
0 12
0 12
0 12
0 12
0 12
0 11
0 11
0 11
0 10
0 7
0 7
1 6
1 6
1 6
1 5
1 4
1 4
1 4
1 7
1 7
1 7
1 7
1 8
1 8
1 9
1 9
1 9
0 9
0 9
0 9
0 9
0 9
0 9
0 9
0 9
0 9
0 9
0 9
0 9
0 9
0 9
0 9
0 9
0 10
0 8
11 7
11 8
11 9
11 9
11 9
11 9
11 9
11 9
11 9
11 6
11 6
11 6
11 5
11 5
11 5
11 4
0 5
0 5
0 13
0 14
0 14
0 14
0 14
0 14
0 14
0 14
0 14
0 24
0 27
0 27
0 29
0 29
0 30
0 32
0 32
23 32
23 33
23 35
23 34
23 34
23 35
23 36
23 36
23 36
23 36
23 37
23 37
23 37
23 37
23 37
0 37
0 36
0 36
0 36
0 28
0 27
0 27
0 30
0 32
0 32
0 35
0 37
0 37
0 27
0 24
0 24
0 22
0 23
0 23
0 21
0 20
0 20
0 19
0 15
0 15
0 15
0 12
0 12
0 20
0 20
0 22
0 25
0 26
0 30
0 33
0 33
0 35
0 36
0 36
0 37
0 38
0 38
0 38
0 35
0 33
0 33
0 30
0 28
0 28
0 28
0 28
0 28
0 27
0 27
0 26
0 26
0 26
0 27
0 27
0 27
0 27
0 28
0 28
0 28
0 22
0 22
0 19
0 18
0 16
0 13
0 10
0 9
4 10
4 10
5 10
5 9
5 8
5 8
5 9
5 9
5 9
5 10
5 10
5 10
5 10
5 10
5 10
5 16
4 17
4 19
0 18
0 18
0 19
0 18
0 20
0 20
0 21
0 23
0 23
0 35
0 36
0 37
0 40
0 41
0 47
0 60
0 64
0 65
0 69
0 75
0 83
0 85
0 86
0 87
0 87
1 87
1 92
1 96
1 97
1 98
1 100
1 100
1 100
1 93
1 92
47 90
47 90
47 90
47 85
47 85
47 87
46 87
46 86
46 84
46 80
46 62
46 62
46 62
46 62
46 62
0 53
0 30
0 27
0 24
0 22
0 21
0 22
0 22
0 21
0 21
0 20
0 20
0 12
0 9
0 9
3 1015
3 1016
11 1022
11 1022
11 1022
11 1023
11 1023
11 1023
11 1023
11 1023
11 1022
11 1021
11 1021
11 1021
11 1021
9 1015
9 1011
9 1005
0 9
0 9
0 9
0 9
0 6
0 6
0 6
0 6
0 6
0 5
0 6
0 6
0 7
0 8
0 8
0 8
0 7
0 5
0 4
0 4
0 5
0 5
15 6
15 5
15 5
15 5
15 5
15 5
15 5
15 7
15 7
15 7
15 7
15 7
15 8
15 15
15 20
13 25
0 26
0 30
0 35
0 59
0 63
0 67
0 67
0 67
0 66
0 66
0 64
0 64
0 64
0 64
0 64
0 64
0 65
0 65
0 72
0 72
0 72
0 72
0 73
0 73
0 73
0 73
0 72
0 77
1 79
1 79
1 83
1 83
1 80
1 76
2 71
2 69
2 69
2 62
3 59
3 36
3 35
3 32
3 33
3 34
3 34
3 34
3 34
3 34
3 34
3 34
3 34
3 35
3 32
3 32
3 24
3 24
3 24
3 24
3 23
3 23
3 23
3 23
3 22
3 16
2 12
2 15
2 20
2 20
2 19
2 17
1 16
1 16
1 15
1 15
0 11
0 10
0 10
0 10
0 10
0 10
0 10
0 15
0 15
0 15
0 15
0 15
0 15
0 14
0 16
0 16
0 16
0 17
0 17
0 17
0 17
0 17
0 18
0 18
0 17
0 17
0 15
0 15
0 9
0 9
0 9
0 9
0 9
0 9
0 9
0 10
0 10
0 11
0 11
0 11
0 13
0 13
0 13
0 7
43 8
55 8
55 9
55 9
55 9
55 8
55 9
55 9
55 9
55 9
55 9
55 9
55 9
55 8
55 8
12 7
12 7
0 7
0 7
0 7
0 7
0 7
0 7
0 7
0 7
0 8
0 8
0 6
0 6
0 6
0 4
0 5
0 5
0 6
0 6
0 6
0 6
0 6
0 5
0 6
0 6
0 6
0 5
0 5
0 4
0 4
0 4
0 5
0 5
0 5
0 5
0 5
0 5
0 5
0 5
0 4
0 4
0 4
0 4
1 5
2 8
2 8
2 8
2 8
2 8
2 8
2 8
2 7
2 6
2 6
2 6
2 6
2 6
2 6
2 6
2 5
2 5
2 5
2 5
2 5
2 5
2 5
2 8
2 7
2 7
2 7
2 7
2 7
2 7
2 8
2 8
2 8
2 8
2 8
1 8
1 7
0 4
0 4
0 4
1 63
1 74
1 77
1 82
1 94
2 110
3 118
3 120
3 124
3 143
3 143
8 164
8 165
8 165
8 169
9 184
9 194
9 196
9 200
9 197
8 198
8 198
8 199
8 199
8 202
8 203
8 202
9 209
9 210
9 227
9 228
10 230
10 251
11 300
11 314
11 315
10 245
10 226
10 215
10 218
10 218
23 217
22 215
22 215
22 211
22 191
22 190
17 167
17 166
21 166
21 159
20 145
20 139
20 138
20 138
20 139
20 143
20 147
20 156
20 158
20 155
20 154
20 158
19 152
15 153
15 137
15 135
14 133
14 85
13 41
13 40
13 39
13 37
13 38
13 38
11 36
11 36
0 70
0 70
0 70
0 70
0 70
0 70
0 70
0 70
0 70
0 70
0 70
0 71
0 71
0 68
1 68
1 62
1 60
1 52
1 55
1 59
1 59
1 51
1 52
1 53
1 53
1 55
1 55
1 55
1 55
1 55
1 55
1 54
1 54
1 54
1 54
1 54
1 20
1 20
1 20
1 20
1 23
1 35
1 41
1 48
1 54
1 55
1 58
1 78
1 82
1 96
1 127
1 152
1 173
1 182
1 181
1 175
1 175
1 180
3 181
3 185
2 185
2 184
2 184
2 185
2 185
2 185
2 185
2 186
2 186
2 186
2 186
2 187
2 188
0 248
0 263
0 262
0 259
0 256
0 251
0 256
0 250
0 254
0 250
0 212
0 164
0 143
0 146
0 144
0 140
0 143
0 141
0 149
0 152
0 203
0 227
0 245
0 253
0 263
0 269
0 470
0 477
0 483
0 483
0 483
0 483
0 484
0 484
0 483
0 480
0 406
0 403
0 403
0 402
0 392
0 392
0 379
0 379
0 375
0 375
0 374
0 372
0 370
0 363
0 355
0 357
0 359
0 359
0 348
0 336
0 285
0 243
0 237
0 235
0 217
0 213
0 20
0 182
0 177
0 177
0 177
0 178
0 198
0 198
0 198
0 205
0 208
0 207
0 210
0 222
0 231
0 231
0 63
0 63
0 63
0 64
0 64
0 64
0 64
0 64
0 64
0 61
0 59
0 60
0 61
0 62
0 84
0 84
0 84
0 83
0 84
0 84
0 84
0 87
0 87
0 87
0 87
0 100
0 81
0 82
0 86
0 79
0 84
0 85
0 85
0 67
0 64
0 64
0 64
0 64
0 64
0 63
0 63
0 63
0 63
0 63
0 63
0 63
0 62
0 62
0 58
0 56
0 32
0 33
0 34
0 34
0 30
0 30
0 30
0 30
0 30
0 29
0 29
0 21
0 15
0 15
0 15
0 15
0 18
0 18
0 18
0 18
0 18
0 18
0 18
0 18
0 18
0 18
0 19
0 19
0 19
0 19
0 19
0 18
0 21
0 26
0 38
0 42
0 50
0 508
0 523
0 524
0 551
0 561
0 563
0 568
0 572
1 572
1 571
1 560
1 560
1 561
1 561
1 561
1 77
1 77
1 81
1 81
1 81
1 82
1 82
1 82
0 82
0 82
0 81
0 82
0 82
0 82
0 82
0 82
0 81
0 81
0 73
0 72
0 71
0 71
0 57
0 45
0 23
0 22
0 22
0 19
0 15
0 15
0 15
0 16
0 17
1 19
1 35
1 36
1 36
1 36
1 32
1 32
1 32
1 32
1 32
1 32
1 32
1 32
1 32
3 31
3 31
3 31
3 31
3 31
3 31
3 31
3 31
3 31
3 31
3 30
3 23
3 23
3 23
3 23
1 23
1 23
1 23
1 23
1 23
1 22
1 20
0 10
0 0
0 0
0 0
0 0
0 0
0 1
0 1
0 1
0 1
0 7
0 8
0 10
0 10
0 10
0 11
0 11
0 11
0 11
0 11
0 13
0 13
1 13
1 13
1 13
1 13
1 19
1 23
1 24
1 24
1 26
1 26
1 28
1 29
1 30
1 32
1 32
1 32
1 32
1 32
1 32
1 32
1 48
1 50
1 49
1 53
1 79
1 79
1 79
1 80
1 80
1 79
1 83
1 84
1 84
1 86
1 85
0 85
0 87
0 87
0 86
0 87
0 81
0 91
1 88
1 88
1 88
1 89
1 87
1 86
1 85
1 84
1 84
1 84
1 84
1 86
1 86
1 86
2 93
2 77
2 75
2 68
2 38
2 37
2 37
2 38
2 38
2 38
2 35
2 34
2 37
2 43
2 66
1 49
1 50
1 51
1 53
1 53
1 53
1 53
0 53
0 53
0 53
0 52
0 52
0 54
0 54
0 56
0 56
0 56
0 92
0 91
0 94
0 97
0 98
0 98
0 99
0 99
0 103
0 103
0 105
0 107
0 107
0 107
0 107
0 108
0 104
0 100
0 73
0 70
0 68
0 67
0 67
0 65
0 65
0 65
0 66
0 68
0 68
0 70
0 70
0 68
0 68
0 66
0 66
0 66
0 29
0 29
0 25
0 24
0 24
0 24
0 25
0 27
0 25
0 25
0 25
3 118
3 128
3 154
3 158
4 160
4 157
4 165
4 164
4 163
4 163
4 163
4 163
4 165
4 166
4 167
4 167
4 165
4 165
4 163
4 164
4 165
4 165
4 165
4 165
4 165
4 165
4 165
4 164
4 165
4 170
4 169
4 169
4 166
4 164
4 164
3 142
0 32
0 23
0 16
0 15
0 15
0 15
0 15
0 19
0 19
0 19
0 19
0 23
0 20
0 22
0 23
0 23
0 35
0 36
0 37
0 40
0 43
0 47
0 49
1 57
1 58
1 59
1 59
1 59
1 58
1 53
1 53
1 52
1 53
1 53
1 53
1 53
1 53
1 53
1 58
1 59
1 60
1 60
1 60
1 56
1 56
1 57
1 57
1 52
0 51
0 49
0 48
0 50
0 33
0 34
0 34
0 31
0 31
0 27
0 24
0 18
0 18
0 27
0 28
0 28
0 28
0 29
0 35
0 36
0 34
0 33
0 33
0 33
0 33
0 31
0 27
0 27
0 27
1 29
1 31
1 31
1 35
1 36
1 36
1 36
1 36
1 36
1 36
1 34
1 40
1 39
1 37
1 38
1 40
1 39
1 41
1 40
1 40
1 31
1 33
2 33
2 33
2 31
2 25
2 25
2 26
2 26
2 26
1 26
1 26
1 26
1 26
1 26
1 24
1 22
0 20
0 20
0 17
0 17
0 17
0 17
0 17
0 17
0 17
0 18
0 14
0 15
2 85
3 84
3 83
3 83
3 80
3 80
3 80
3 79
3 80
3 81
3 82
3 82
3 81
3 82
3 82
3 83
3 83
3 83
3 83
3 83
3 83
3 83
3 83
3 83
3 83
3 83
3 83
3 83
3 83
3 84
3 85
3 85
3 84
3 81
2 79
3 76
1 8
1 8
1 16
1 23
1 24
1 24
1 24
1 24
1 22
1 19
1 19
1 19
1 19
1 18
1 19
2 19
2 19
2 19
2 19
2 19
2 19
2 19
2 19
2 19
2 19
2 19
2 19
2 19
2 19
2 18
0 17
0 17
0 17
0 17
0 17
0 18
1 18
1 18
1 10
1 2
1 2
1 3
1 3
1 4
1 4
1 4
1 4
1 4
1 4
1 3
1 3
1 3
0 3
0 4
0 12
0 13
0 13
0 13
0 13
0 13
0 13
0 13
0 13
0 13
0 15
0 16
0 16
0 16
0 19
0 19
0 20
0 44
0 52
0 55
0 56
0 59
0 61
0 64
0 115
0 119
0 134
0 144
0 149
0 152
0 163
0 168
0 170
0 177
0 177
0 176
0 168
0 167
0 168
0 174
0 174
0 174
0 174
0 174
0 173
0 175
0 174
0 174
0 174
0 175
0 169
0 167
0 168
0 140
0 142
0 153
0 156
1 155
1 154
1 152
1 88
1 74
1 60
1 54
1 55
1 56
1 56
1 56
1 55
1 50
1 51
1 53
0 55
0 55
0 57
0 51
0 51
0 54
0 53
0 53
0 54
0 51
0 51
0 51
0 51
0 50
0 50
0 51
0 42
0 35
0 27
0 23
0 19
0 18
0 18
0 18
0 27
0 28
0 29
0 34
0 34
0 43
0 51
0 75
0 91
0 89
0 94
0 96
0 99
0 97
0 100
0 101
0 101
0 97
0 97
0 97
0 98
0 98
0 98
0 98
0 98
0 107
0 108
0 108
0 108
0 108
0 108
0 107
0 107
0 107
0 107
0 105
0 95
0 95
0 93
0 88
0 84
1 73
1 72
1 44
1 31
1 28
1 23
1 21
1 16
1 16
1 14
1 14
1 14
1 18
2 25
2 26
1 25
1 25
1 26
1 26
1 27
1 21
1 21
1 20
1 20
1 20
1 20
1 21
1 21
1 21
1 21
0 14
0 14
0 14
0 14
0 15
0 15
0 15
0 14
0 14
0 14
0 14
0 15
0 17
0 17
0 17
0 17
0 17
0 17
0 13
0 12
0 12
0 12
0 13
0 11
0 11
0 11
0 8
0 8
0 8
0 9
0 9
0 9
0 9
0 9
0 9
0 9
0 10
0 9
0 9
0 11
0 11
0 11
0 11
0 11
0 11
0 11
0 11
0 12
0 16
0 18
0 22
0 24
0 25
0 25
0 25
0 25
0 25
0 25
0 24
0 24
0 24
0 24
0 22
0 22
0 23
0 20
0 20
0 20
0 23
0 23
0 22
0 22
0 25
0 25
0 24
0 24
0 26
0 35
0 53
0 58
0 63
0 72
0 72
0 72
0 62
0 58
0 58
0 60
0 61
0 62
0 62
0 62
0 65
0 65
0 68
0 78
0 82
0 84
0 84
0 86
0 112
0 116
0 118
0 121
1 123
1 123
1 123
1 123
1 119
1 120
1 122
1 122
1 120
1 112
1 89
1 84
1 80
1 77
1 77
1 76
1 76
2 75
2 75
2 73
2 72
2 72
3 72
3 72
3 69
3 69
3 67
3 57
3 55
3 52
4 52
4 49
4 22
4 32
4 27
4 26
3 24
3 24
3 24
3 24
3 24
3 21
3 23
3 23
3 21
3 20
3 19
3 19
3 19
3 19
3 19
3 19
3 19
2 19
2 19
2 19
2 19
2 16
1 16
1 19
2 27
2 28
2 28
2 27
2 25
2 25
2 28
2 29
2 29
2 17
2 17
2 17
2 17
2 25
2 25
2 25
2 26
2 26
2 26
2 26
2 26
2 26
2 26
2 26
2 26
2 26
2 48
2 48
2 48
2 40
2 40
2 40
2 40
2 39
2 38
1 33
1 26
1 26
1 26
1 26
1 26
2 5
1 2
1 2
1 2
1 2
1 2
1 2
1 2
1 2
1 2
1 2
1 1
1 1
1 2
1 2
2 6
2 6
2 6
2 6
2 6
2 7
2 8
2 8
2 8
2 8
3 8
3 8
3 8
3 8
3 8
3 8
3 8
3 8
3 8
3 8
3 8
2 7
2 8
2 8
2 8
2 9
2 9
2 9
2 9
2 9
2 9
2 9
2 9
2 9
2 8
2 8
1 4
1 4
1 4
1 3
1 3
1 2
1 2
1 2
1 2
1 2
0 2
0 2
0 2
0 2
0 2
0 2
0 2
0 2
0 3
0 3
0 5
0 9
0 9
0 9
0 9
1 10
1 10
1 10
1 10
1 31
1 32
1 32
1 32
1 32
1 32
1 32
1 32
1 32
1 33
1 33
1 33
1 33
2 43
2 43
2 43
2 43
2 43
2 43
2 43
2 43
2 45
2 46
2 47
2 47
2 47
2 45
2 45
2 42
1 42
1 42
1 42
1 41
1 41
1 41
1 42
1 21
1 20
1 20
1 20
1 20
1 20
1 20
1 20
1 20
1 20
1 20
0 20
0 20
0 10
0 10
0 10
0 10
1 11
1 14
1 14
1 12
1 9
1 8
1 8
1 6
1 6
1 6
1 5
1 5
1 5
1 5
1 6
1 6
1 6
1 8
1 8
1 10
1 10
1 10
1 14
1 14
1 14
1 14
1 14
1 14
1 14
1 14
1 14
1 14
1 15
1 16
1 17
1 16
0 15
0 13
0 13
0 13
0 13
0 13
0 13
0 14
0 14
0 14
0 14
0 14
0 14
1 14
1 11
1 9
1 9
1 8
1 8
1 8
1 8
1 9
1 8
1 8
4 25
5 34
5 34
5 37
5 37
5 37
5 37
5 40
5 38
5 38
5 38
5 38
5 38
5 43
5 43
2 33
2 37
2 38
2 39
2 39
2 39
2 40
2 40
2 40
2 40
1 38
1 39
1 39
1 39
1 40
1 40
1 40
1 40
1 39
1 38
1 45
1 41
0 31
0 31
0 28
0 28
0 28
0 28
0 31
0 34
0 33
0 34
0 35
0 36
0 31
0 30
0 23
0 21
0 19
0 19
0 19
0 19
0 18
0 18
0 17
0 17
0 17
0 17
0 17
0 17
0 16
0 16
0 16
0 16
0 16
0 16
0 10
0 10
0 11
0 11
1 18
1 18
1 18
1 18
1 17
1 21
1 22
1 25
1 25
1 30
1 30
1 32
1 34
1 38
1 38
1 38
1 60
1 61
1 62
1 62
1 62
1 65
1 65
1 66
1 69
1 84
1 87
1 89
1 94
1 105
2 111
2 119
2 121
2 121
1 120
1 120
1 109
1 109
1 108
1 107
1 101
1 95
1 94
1 90
1 103
2 140
2 145
2 148
2 164
2 163
3 165
3 169
3 148
3 147
3 146
3 146
4 147
4 146
4 146
4 145
4 142
4 106
4 99
4 107
4 108
3 107
3 107
3 113
3 113
3 113
3 113
3 113
3 113
3 113
3 113
3 113
3 114
4 115
4 115
4 116
4 93
2 45
2 44
6 124
6 126
6 123
6 126
6 126
6 126
6 126
6 125
6 121
5 120
5 120
5 120
5 120
5 120
5 120
1 32
1 24
1 23
1 24
1 24
1 17
1 17
1 17
1 17
1 16
1 16
1 18
1 18
1 18
1 17
0 15
0 15
0 14
0 13
0 8
0 8
0 7
0 5
0 5
0 5
0 5
0 5
0 5
0 5
0 6
0 6
0 6
0 7
0 8
0 16
0 15
1 15
1 15
2 16
3 15
4 15
4 25
4 25
4 25
4 32
5 42
5 49
6 48
6 55
6 56
6 50
8 50
8 52
8 53
7 53
7 54
7 56
7 56
7 56
7 56
7 56
7 56
7 56
7 56
7 56
7 55
5 55
5 55
5 54
5 53
5 53
5 53
4 52
4 52
2 51
2 51
2 52
2 45
2 48
3 48
3 40
1 30
1 27
1 25
1 22
1 22
1 21
1 21
1 19
1 17
1 19
1 19
1 17
1 17
1 17
1 19
1 19
6 22
6 22
6 22
6 22
6 22
6 22
6 22
6 22
6 23
6 29
7 36
7 36
7 37
7 38
7 39
7 35
7 37
7 36
6 36
6 40
6 41
6 67
6 83
6 95
6 99
6 107
6 107
6 107
6 106
6 105
6 105
6 105
6 105
6 105
5 103
4 105
1 101
1 101
1 101
1 101
1 102
1 102
1 101
1 100
1 100
1 93
0 89
0 90
0 89
0 88
0 88
0 88
0 86
0 85
1 85
1 81
1 77
1 46
1 25
1 21
1 17
1 10
1 10
1 10
1 10
4 11
5 11
5 11
5 11
5 11
5 11
5 9
5 10
5 10
5 10
5 10
5 9
5 9
5 9
5 9
5 9
4 9
4 13
4 12
4 12
4 12
4 11
5 13
5 22
5 24
4 23
4 23
4 23
4 23
4 23
4 23
4 23
4 22
3 22
3 22
3 22
2 21
2 21
2 21
2 21
2 21
2 20
2 20
2 20
2 20
2 21
2 21
2 21
2 21
2 21
2 21
2 21
2 22
2 19
2 20
2 20
2 21
2 20
1 19
1 5
1 5
1 5
1 5
1 5
1 6
1 7
1 7
1 8
1 8
1 9
1 9
1 9
0 9
0 9
0 9
0 9
0 10
1 12
1 16
1 16
1 16
1 15
1 15
1 14
1 14
1 14
1 14
1 14
1 13
1 12
1 12
1 12
1 11
1 11
1 11
1 11
1 11
1 10
1 10
1 10
1 9
1 8
1 8
1 8
1 8
1 7
1 7
1 11
1 11
1 11
1 13
1 14
1 13
0 11
0 11
0 19
0 19
0 24
0 25
0 34
0 36
0 36
0 36
0 36
0 36
0 36
0 36
0 36
0 36
0 36
0 36
0 36
0 36
0 37
0 38
0 38
0 41
1 41
1 41
1 41
1 41
1 41
1 41
1 37
1 37
1 35
1 34
1 40
1 41
1 40
1 41
1 34
1 39
1 41
1 52
1 47
1 47
1 48
1 49
1 49
1 49
1 53
1 54
1 55
1 63
1 85
2 90
2 91
2 96
2 99
2 99
2 100
2 97
1 97
1 97
1 97
1 97
1 97
1 97
1 98
1 98
1 98
1 98
1 95
1 97
1 102
1 99
1 92
1 84
1 82
1 75
1 79
1 80
1 79
1 77
1 77
1 82
1 78
1 75
1 73
1 65
5 43
5 33
5 32
5 31
5 31
5 30
5 31
5 31
5 37
5 39
5 39
5 39
6 39
7 46
7 46
2 47
2 46
2 46
2 43
2 41
2 35
2 35
2 33
2 36
2 36
2 38
2 33
2 34
1 34
1 33
1 36
1 33
1 34
1 36
1 37
1 43
1 43
1 43
1 44
1 44
1 44
1 43
1 42
1 38
1 37
1 36
2 54
2 57
2 70
1 63
1 65
1 66
181 68
181 66
181 67
183 68
183 67
183 66
183 66
183 65
183 66
183 75
183 75
183 73
183 73
183 71
183 66
183 67
3 65
3 65
3 65
3 59
3 59
3 58
3 59
3 59
3 65
3 81
3 99
3 106
3 108
3 118
2 101
2 105
2 99
2 100
2 99
2 98
2 100
2 105
2 106
0 105
0 104
0 104
0 103
0 102
0 102
1 93
1 98
1 102
1 103
3 110
3 112
3 119
3 145
3 147
3 148
3 149
3 149
3 150
3 149
3 147
3 137
3 118
3 98
3 81
3 77
3 74
3 73
3 74
3 73
3 73
3 73
3 72
3 71
3 67
3 63
3 63
3 66
3 71
3 72
3 75
3 76
2 74
2 68
2 64
2 64
0 56
0 51
0 42
0 17
0 17
0 17
0 16
0 16
0 16
0 18
0 18
0 19
0 17
0 17
0 17
0 17
0 18
0 18
0 17
0 18
0 19
0 19
0 19
0 19
0 19
0 20
0 19
1 18
1 10
1 10
1 16
1 16
1 15
1 15
1 15
1 15
1 15
1 17
1 17
1 19
1 19
1 19
1 19
1 19
1 19
1 18
1 18
1 17
1 17
1 17
1 17
1 17
1 17
1 17
1 16
1 15
1 16
0 17
0 17
0 18
0 18
0 17
0 30
0 32
0 32
0 45
0 39
0 39
0 40
0 40
0 40
0 40
0 40
0 37
0 37
0 36
0 36
0 36
0 36
0 36
0 36
0 36
0 37
0 37
0 37
0 37
0 37
0 37
0 37
0 37
0 37
0 37
0 35
0 35
0 37
0 39
0 39
1 40
1 25
1 19
1 18
1 11
1 13
1 15
1 54
1 55
1 56
1 58
1 66
1 71
1 79
1 79
1 79
1 78
1 78
1 78
1 79
1 81
1 82
1 82
1 82
1 82
1 82
1 82
1 82
1 82
1 82
1 82
1 83
1 85
1 82
1 80
1 80
0 83
0 84
0 82
0 81
0 80
0 78
0 72
0 24
0 22
0 22
0 19
0 15
0 14
0 14
0 14
0 14
0 14
0 14
0 14
0 12
0 11
1 11
1 11
1 11
1 11
1 11
1 13
1 13
1 13
1 12
1 12
1 11
1 9
1 9
1 11
1 21
1 25
1 33
1 56
1 75
1 87
1 96
1 97
1 96
1 96
1 96
1 96
1 96
1 96
2 101
2 101
1 101
1 102
1 102
1 115
1 116
1 117
1 117
1 117
1 119
1 120
1 120
1 118
1 118
1 118
1 119
1 119
1 129
1 128
1 128
1 119
4 157
5 137
5 128
5 127
5 129
5 131
5 131
5 134
5 134
5 134
5 136
5 136
5 136
4 137
4 132
4 132
4 132
4 131
4 133
4 118
4 118
4 118
4 118
4 118
4 116
4 115
4 115
4 115
4 115
4 114
4 111
4 110
4 101
4 99
4 99
4 98
0 14
0 10
0 10
0 12
0 12
0 11
0 11
0 9
0 9
0 9
0 6
0 6
0 6
0 6
0 7
0 9
0 9
0 9
0 7
0 7
0 7
0 7
0 7
0 8
0 9
1 9
1 10
1 10
1 10
1 10
1 17
1 19
1 21
1 21
1 21
5 25
5 24
5 24
5 25
5 23
5 23
5 23
4 23
4 23
4 26
4 27
4 28
4 29
4 29
4 29
4 28
4 27
4 26
4 27
4 27
4 28
4 28
4 28
4 29
4 30
4 29
4 30
4 29
4 29
4 30
4 30
4 24
4 22
2 24
2 30
2 38
1 43
1 47
1 54
1 76
1 92
1 212
1 221
1 238
1 251
1 253
1 251
1 249
1 250
1 256
1 256
1 256
1 255
1 255
1 256
1 257
1 257
1 258
1 258
2 256
2 256
2 257
2 257
2 257
2 258
2 258
2 264
2 269
2 293
2 299
2 298
2 292
1 293
1 283
1 282
1 263
1 242
1 121
1 113
1 99
1 93
1 92
1 92
1 92
1 91
1 85
1 88
2 92
2 96
2 97
2 97
2 97
2 96
2 95
2 95
1 94
1 94
1 94
1 94
1 98
1 97
1 98
1 112
1 103
1 80
1 71
1 65
1 57
1 50
1 49
1 50
1 50
1 50
1 50
1 49
1 49
1 51
1 52
1 54
1 58
1 59
1 58
0 54
0 49
0 48
0 47
0 47
0 48
0 48
0 48
0 50
0 49
0 49
0 51
0 51
0 47
0 48
0 45
0 22
0 22
0 19
0 18
0 18
0 18
0 16
0 17
0 16
0 21
0 34
0 36
0 36
0 36
0 33
0 37
0 35
0 37
0 120
0 122
0 149
0 150
0 150
0 151
0 151
0 150
0 150
0 150
0 146
0 146
0 147
0 147
0 147
0 147
0 147
0 147
0 147
0 147
0 147
0 148
0 150
0 156
0 161
0 160
0 163
0 157
0 147
1 146
1 149
1 149
1 149
1 144
1 139
1 138
1 56
1 55
1 27
1 26
1 26
1 25
1 25
1 25
1 25
1 25
1 23
1 24
1 24
1 24
1 24
1 24
1 24
1 24
1 24
1 24
1 23
1 21
1 19
1 15
1 10
1 10
1 7
1 7
0 3
0 2
0 2
0 2
0 3
0 3
0 3
0 3
0 3
0 3
0 6
0 6
0 6
1 9
1 10
1 12
1 12
1 12
1 11
1 11
1 12
1 12
1 14
1 14
1 14
1 14
1 14
1 14
1 16
1 20
1 21
1 23
1 23
1 24
1 24
1 24
1 24
1 24
1 24
1 24
1 23
1 23
1 23
1 23
1 23
1 23
0 20
0 20
0 20
0 16
0 15
0 14
0 14
0 13
0 13
0 13
0 12
0 11
0 9
0 9
0 10
0 10
0 10
0 10
0 9
0 4
1 5
1 5
1 9
1 9
1 10
1 10
1 10
1 10
1 10
1 10
1 10
1 13
1 14
1 15
1 16
1 16
1 16
1 16
1 16
1 16
1 16
1 15
1 15
1 15
1 15
1 15
1 18
1 18
1 20
1 20
1 18
1 19
1 20
0 21
0 21
0 20
0 20
0 20
0 15
0 15
0 16
0 18
0 20
0 31
0 34
0 35
0 36
0 31
0 35
0 35
0 34
0 34
0 34
0 34
0 34
0 34
0 34
0 34
0 34
0 34
0 36
0 36
0 36
0 35
0 35
0 35
0 35
0 34
0 34
0 37
0 37
0 44
1 53
1 54
1 59
1 58
2 58
2 55
2 50
2 43
2 40
2 40
2 38
2 38
2 38
2 38
2 38
2 38
13 38
13 38
13 38
13 38
14 39
16 45
16 47
16 47
16 43
16 43
16 37
16 37
16 36
16 37
16 37
6 39
5 37
5 36
5 33
5 20
4 17
3 17
8 22
9 22
9 22
9 22
9 22
9 21
9 21
9 20
9 20
9 20
9 20
9 27
9 27
9 27
9 28
9 28
9 31
9 31
8 31
6 43
6 45
6 45
6 45
6 44
6 44
6 44
6 44
6 42
6 42
6 53
6 53
6 53
6 53
6 53
8 53
8 53
2 47
2 47
2 47
2 47
2 48
2 48
2 48
2 48
2 49
2 49
2 48
2 39
2 38
3 38
3 38
3 38
3 38
3 37
3 35
3 17
3 15
3 15
3 16
3 16
3 17
3 17
3 17
3 17
3 15
3 4
3 4
3 4
3 4
3 4
1 3
1 4
1 4
1 4
1 6
1 6
1 6
1 6
1 6
1 6
1 6
1 6
1 6
1 6
1 6
0 6
0 7
0 7
0 7
0 7
0 7
0 7
0 6
0 6
0 5
0 5
0 4
0 4
0 4
0 4
0 4
0 4
0 4
0 4
0 4
0 4
0 4
0 8
0 8
0 8
0 8
0 8
0 8
0 8
0 9
0 9
0 9
0 9
0 9
0 9
0 9
0 9
0 8
0 9
0 12
0 12
0 12
0 12
0 12
0 11
0 11
0 11
0 11
0 11
0 11
0 11
0 11
0 11
0 11
0 11
0 12
0 14
0 15
0 10
0 10
0 9
0 10
0 10
0 12
0 14
0 14
0 14
0 14
0 14
0 14
0 14
0 14
0 14
0 14
0 13
0 10
0 10
0 10
2 10
2 10
2 10
2 10
2 10
2 10
2 10
2 11
2 11
2 11
2 11
2 13
2 13
3 13
3 11
3 10
3 9
3 9
3 9
3 8
3 8
3 6
3 5
3 9
3 9
3 10
3 10
4 19
4 19
4 19
4 19
7 19
7 19
7 19
7 19
7 19
5 19
5 19
5 19
5 19
5 19
5 19
5 19
5 18
5 18
5 18
5 18
5 15
5 15
4 15
4 16
4 18
4 18
4 18
4 19
4 19
4 19
4 18
4 19
4 15
4 16
4 15
4 15
3 7
3 7
2 7
1 7
0 7
0 7
0 7
0 7
0 11
0 11
0 11
0 11
0 11
0 11
0 11
0 12
0 12
0 12
0 12
0 12
0 12
0 12
0 12
0 7
0 5
0 4
0 4
0 4
0 4
0 4
0 4
0 3
0 3
0 2
0 2
0 1
0 1
5 2
5 3
5 3
5 4
5 4
5 4
6 4
6 4
6 4
6 4
6 4
6 4
6 4
6 4
6 3
6 3
6 3
1 2
1 2
2 1
2 1
2 2
2 2
2 2
2 2
2 2
2 2
2 2
2 2
2 2
2 2
2 3
2 3
2 3
2 3
2 3
2 3
2 5
2 5
2 4
2 4
2 5
1 5
1 5
1 5
1 5
1 4
1 4
1 4
1 4
1 4
1 4
1 4
1 4
1 4
0 4
0 3
0 3
0 3
0 4
0 4
0 4
0 4
0 4
0 5
0 5
0 6
0 7
0 13
0 13
0 15
0 19
0 23
0 23
0 29
0 29
0 29
0 28
0 28
0 28
0 28
0 28
0 28
0 28
0 28
0 29
0 29
0 29
0 29
0 28
0 28
0 29
0 29
0 29
1 29
1 29
1 29
1 29
1 29
1 29
2 27
2 34
2 33
2 35
2 25
2 27
3 14
3 13
3 13
3 13
3 13
3 13
3 13
3 14
3 18
3 20
3 20
3 20
3 20
3 20
3 20
3 19
3 20
3 20
3 21
3 21
3 21
3 21
3 21
3 21
2 21
2 21
2 21
2 21
2 21
2 21
1 20
1 11
1 10
1 10
1 10
1 8
0 8
0 8
0 8
0 8
0 8
0 8
0 8
0 7
0 2
0 1
0 1
0 1
0 1
0 1
0 1
0 1
0 1
0 1
0 0
1 29
1 29
1 29
1 29
1 29
1 29
1 29
1 29
1 29
1 29
1 33
1 33
1 33
1 35
1 38
0 47
0 21
0 22
0 28
0 31
0 34
0 40
0 41
0 42
0 43
0 43
0 43
0 43
0 43
0 43
0 43
0 43
0 43
0 43
0 43
0 45
0 47
0 47
0 47
0 48
0 48
0 48
0 48
0 49
0 49
0 49
0 46
0 44
0 44
0 44
0 41
0 21
0 21
0 25
0 22
0 18
0 16
0 15
0 13
0 12
0 12
0 13
0 15
0 16
0 16
0 16
0 16
0 16
0 17
0 19
0 19
0 21
0 23
0 30
0 31
0 32
0 32
0 32
0 34
0 33
0 33
0 33
0 33
0 33
0 33
0 32
0 32
0 32
0 50
0 46
0 44
0 44
0 44
0 44
0 44
0 44
0 44
0 43
0 41
0 40
0 40
0 41
0 42
0 25
0 23
0 19
0 17
0 15
0 9
0 18
0 26
0 27
0 27
0 27
0 25
0 25
0 25
0 25
0 25
0 25
0 25
0 25
0 25
0 25
0 25
0 25
0 25
0 25
0 25
0 25
0 25
0 25
0 25
0 25
0 26
0 26
0 26
0 25
0 25
0 24
0 25
0 27
0 28
0 28
0 24
0 15
0 7
0 6
0 6
0 5
0 5
0 5
0 5
0 5
0 5
0 5
0 6
0 6
0 6
0 6
0 6
0 6
0 6
0 6
0 6
0 7
0 7
1 18
1 28
1 29
1 32
1 32
1 32
1 32
1 32
1 32
1 32
1 32
1 31
1 31
1 31
1 31
1 31
1 31
1 33
1 37
1 40
1 40
1 45
1 47
1 47
1 47
1 49
1 49
1 49
1 49
1 49
1 49
1 49
1 49
1 50
1 53
1 53
0 41
0 32
0 32
0 30
0 30
0 29
0 29
0 29
0 29
0 27
0 26
0 29
0 34
0 47
0 48
0 49
0 49
0 46
0 41
0 39
0 39
0 35
0 38
0 40
0 40
0 38
0 39
0 39
0 40
0 41
0 44
0 44
0 45
0 44
0 41
0 40
0 40
0 40
0 41
0 41
0 43
0 43
0 43
0 46
0 46
0 47
0 49
0 46
0 41
0 27
0 27
0 26
0 26
0 26
0 26
0 26
0 26
0 25
0 20
0 19
0 19
0 18
0 17
0 17
0 17
0 17
0 13
0 13
0 13
0 12
0 10
0 10
0 11
0 11
0 11
0 11
0 11
0 11
0 15
0 11
0 12
1 16
1 17
1 19
1 20
1 20
1 20
1 21
1 21
1 21
1 21
1 23
1 23
1 24
1 28
1 29
1 29
1 30
1 30
1 30
1 29
1 29
1 30
1 30
1 31
1 45
1 49
1 51
1 49
1 50
1 50
1 54
1 59
1 59
1 57
1 62
1 64
0 62
0 62
0 59
0 59
0 59
0 59
0 69
0 72
0 78
0 80
0 101
0 106
0 110
0 112
0 118
0 124
0 124
0 150
0 157
0 159
0 160
0 162
0 161
0 161
0 148
0 152
0 152
0 155
0 154
0 149
0 131
0 125
0 124
0 120
0 114
0 110
0 111
0 111
0 112
0 114
0 114
0 133
0 124
0 124
0 123
0 117
0 90
0 86
0 86
0 86
0 86
0 86
0 82
0 53
0 45
0 45
0 45
0 45
0 45
0 44
0 40
0 34
0 34
0 32
0 33
0 33
0 33
0 30
0 36
0 36
0 34
0 34
0 33
0 34
0 34
0 32
0 32
0 14
1 17
1 15
1 16
1 17
1 17
1 17
1 17
1 17
1 17
1 17
1 17
1 17
1 17
1 17
1 37
1 37
3 39
3 39
3 40
3 40
3 42
3 42
3 41
3 41
3 41
3 42
3 34
3 34
3 34
3 35
3 36
0 36
0 35
0 35
0 33
0 30
0 29
0 29
0 28
0 28
0 28
0 28
0 28
0 28
0 28
0 28
0 28
0 28
0 28
0 28
0 10
0 9
0 8
0 8
0 7
0 7
0 5
0 5
0 5
0 5
0 2
0 2
0 2
0 2
0 2
0 2
0 2
0 2
0 2
0 2
0 2
0 3
0 4
0 4
0 5
0 5
0 8
0 8
0 8
0 8
0 17
0 20
0 21
0 22
0 22
0 23
0 21
0 21
0 21
0 21
0 22
0 22
0 23
0 25
0 25
0 26
0 26
0 26
0 26
0 26
0 26
0 26
0 27
0 27
0 27
0 28
0 27
0 30
0 29
0 29
0 28
0 28
0 25
0 26
0 25
0 25
0 17
0 15
0 16
0 18
0 24
0 25
0 25
0 29
0 27
0 31
0 30
0 30
0 31
0 31
0 30
0 30
0 30
0 30
0 30
0 30
0 30
0 30
0 29
0 29
0 29
0 25
0 35
0 34
0 36
0 40
0 43
0 44
0 44
0 44
0 44
0 44
0 41
0 40
0 38
0 32
0 28
0 28
0 28
0 27
0 27
0 23
0 25
0 25
0 25
0 25
0 25
0 25
0 25
0 26
0 27
0 33
0 34
0 39
0 39
0 39
0 39
0 38
0 28
0 26
0 24
0 22
0 19
0 18
0 18
0 18
0 18
0 18
0 18
0 19
0 19
0 19
0 19
0 19
0 19
0 18
0 17
0 27
0 26
0 26
0 26
0 26
0 26
0 26
0 26
0 27
0 25
0 19
0 16
0 14
0 14
0 27
0 30
0 29
0 30
0 31
0 33
0 34
6 34
6 34
6 34
6 34
6 34
6 37
6 43
6 45
6 45
6 45
6 45
6 45
6 46
6 45
6 45
6 35
0 62
0 62
0 62
0 62
0 62
0 62
0 62
0 59
0 59
0 61
0 61
0 61
0 62
0 46
0 46
0 45
0 45
0 44
0 44
0 47
0 53
0 57
0 59
0 60
0 59
0 55
0 49
0 50
0 51
0 51
0 51
0 51
0 50
0 50
0 52
0 53
1 26
1 35
1 35
1 37
1 37
1 43
1 43
1 45
1 46
1 44
1 44
1 44
1 42
1 41
1 41
1 42
1 42
1 42
1 42
1 38
1 31
1 30
1 28
1 27
1 27
1 27
1 32
1 33
1 36
1 37
1 37
1 37
1 40
1 41
1 39
1 38
1 39
0 31
0 32
0 30
0 30
0 24
0 24
0 22
0 27
0 28
0 28
0 31
0 34
0 34
0 34
0 33
0 34
0 34
0 34
0 35
0 35
0 36
0 37
0 37
0 37
0 37
0 34
0 32
0 30
0 30
0 31
0 33
0 37
0 60
0 62
0 64
0 63
0 61
0 60
0 60
0 61
0 64
0 64
0 62
0 59
0 58
0 60
0 56
0 57
0 57
0 57
0 57
0 56
0 58
0 59
0 58
0 58
0 56
0 55
0 55
0 55
0 55
0 53
0 53
0 51
0 51
0 50
0 47
0 41
0 15
0 14
0 12
0 12
0 12
0 12
0 12
0 11
0 10
0 10
1 10
1 10
1 9
1 7
1 7
1 9
1 8
1 9
1 8
1 8
1 6
1 5
1 5
1 5
1 5
1 5
0 4
0 4
0 4
0 4
0 4
0 4
0 4
0 4
0 4
0 5
0 5
0 5
0 5
0 5
0 5
0 5
0 5
0 5
0 5
0 5
0 5
0 5
0 5
0 5
0 4
0 2
0 2
0 1
0 1
0 1
0 1
0 1
0 1
0 2
0 2
0 2
0 2
0 2
0 3
0 3
0 3
0 5
0 5
0 5
0 7
0 7
0 7
0 7
0 7
0 7
0 7
0 10
0 11
0 12
0 14
0 14
0 14
0 14
0 12
0 12
0 13
0 13
0 13
0 15
0 16
1 16
1 16
1 16
1 17
1 16
1 16
1 16
1 16
1 16
1 16
1 16
1 23
1 22
1 22
1 22
1 21
1 20
1 19
1 21
4 146
6 188
6 227
6 239
6 250
6 263
6 273
6 275
6 274
6 277
6 279
6 281
6 282
6 283
6 282
6 280
5 280
5 281
5 281
5 282
5 284
5 284
5 284
7 286
7 292
7 294
7 296
7 298
7 301
7 302
7 303
7 303
7 303
7 304
7 305
7 293
4 79
2 51
0 51
0 50
0 49
0 50
0 50
0 47
0 42
0 38
0 38
0 38
0 38
0 38
0 38
0 38
0 38
0 37
0 37
0 34
0 31
0 31
0 31
0 31
0 26
0 24
0 21
0 16
0 8
0 7
1 7
1 8
1 9
1 9
1 9
2 9
4 48
4 49
4 50
4 54
4 54
4 53
4 53
4 53
4 55
4 57
4 57
4 59
4 60
4 60
4 61
4 61
4 61
4 61
4 64
4 64
4 64
4 64
4 64
4 64
4 62
4 62
4 60
4 60
4 59
4 59
3 60
4 61
5 66
5 66
5 65
4 63
2 23
2 20
2 18
2 18
2 18
2 17
2 25
2 28
2 29
2 31
2 31
2 28
2 27
2 27
2 27
2 29
2 34
2 44
2 107
2 121
2 133
2 151
2 156
2 170
2 171
2 171
2 171
3 172
3 172
3 172
3 171
2 169
1 162
5 205
5 205
5 206
6 206
6 207
6 212
6 212
6 213
6 213
6 205
6 199
6 198
6 197
6 198
6 197
6 201
6 203
6 204
7 202
7 197
7 187
7 113
7 105
7 91
7 84
7 81
7 67
7 66
7 66
7 66
6 65
6 65
6 65
4 71
4 71
4 70
0 27
0 27
0 27
0 26
0 26
0 21
0 28
0 27
0 28
0 30
0 32
0 31
0 30
0 39
0 52
0 50
0 49
0 47
0 49
0 49
0 49
0 43
0 42
0 42
0 44
0 52
0 59
0 68
0 70
0 70
0 71
0 71
0 71
0 65
0 65
0 65
0 65
0 65
0 66
0 67
0 71
0 87
0 89
0 89
0 91
0 91
0 92
0 94
0 98
0 103
0 116
0 175
0 175
0 192
0 209
0 214
0 218
0 228
0 230
0 231
0 228
0 218
0 209
0 204
0 204
1 205
1 205
1 205
1 205
1 205
1 205
1 205
1 204
1 204
1 202
1 201
1 196
1 177
1 175
2 173
2 173
2 173
2 170
2 169
2 160
2 129
2 54
1 37
1 26
1 19
1 15
1 13
1 9
1 6
1 12
0 12
0 12
0 12
0 13
0 13
0 13
0 12
0 14
0 16
0 29
0 31
0 38
0 38
0 38
0 40
0 40
0 40
0 41
0 40
0 44
0 44
0 44
0 46
0 47
0 47
0 47
0 47
0 47
0 74
0 78
0 80
0 82
0 82
0 83
0 79
0 75
0 75
0 76
0 77
1 84
1 84
1 87
1 87
1 85
1 83
1 72
1 75
1 68
1 67
1 67
1 67
1 79
1 79
1 78
1 84
1 82
1 83
1 83
1 84
1 89
1 90
1 90
1 100
1 92
1 64
1 65
1 56
1 56
1 66
2 66
2 66
2 68
2 68
2 66
2 64
1 58
1 59
1 56
1 56
1 55
1 55
1 55
1 51
1 51
1 52
1 52
1 49
1 48
1 47
1 48
1 41
1 40
1 42
1 40
1 37
1 34
1 33
1 34
1 25
1 22
1 22
0 33
0 65
0 72
0 72
0 78
0 97
0 104
0 112
0 111
0 112
0 112
0 112
0 112
0 112
0 112
0 115
0 116
0 118
0 137
0 138
0 142
0 145
0 148
0 152
0 194
1 217
1 237
1 244
1 248
1 248
1 248
1 248
1 247
1 247
1 248
1 248
1 221
1 180
1 175
1 169
1 169
1 152
1 146
1 145
1 145
1 145
1 145
1 145
1 145
1 145
1 143
1 139
1 137
1 138
1 124
1 145
1 147
1 148
1 148
1 132
1 90
0 66
0 58
0 55
0 54
0 57
0 58
0 90
0 97
0 103
1 126
1 137
2 151
2 192
2 196
2 199
2 201
2 204
2 205
2 205
2 205
2 205
2 205
2 205
2 229
2 229
2 229
2 230
2 229
2 229
2 214
2 202
2 198
2 197
2 198
2 197
2 200
2 198
2 217
2 216
2 221
2 223
2 230
2 193
2 191
2 189
1 168
1 157
0 143
0 105
0 104
0 102
0 101
0 113
0 119
0 124
0 125
0 125
0 125
0 125
0 101
0 101
0 100
0 100
0 100
0 99
0 107
0 105
0 105
0 104
0 99
0 97
0 94
0 89
0 69
0 72
0 66
0 63
0 51
0 50
0 49
0 49
0 87
0 93
0 122
0 153
0 179
0 189
0 211
0 203
0 196
0 195
0 197
0 197
0 197
0 197
0 197
0 197
0 197
0 197
0 197
0 197
0 186
0 188
0 202
0 214
0 220
0 227
0 227
0 226
0 226
0 223
0 223
0 223
0 223
0 222
3 228
3 219
3 136
3 104
3 61
3 61
3 60
3 60
3 58
3 52
3 52
3 54
3 52
3 52
3 52
2 52
0 49
0 50
0 52
0 55
0 63
0 65
0 66
0 62
0 48
0 38
0 30
0 26
0 26
0 28
0 29
0 30
0 30
0 31
0 31
0 32
0 33
0 33
0 34
0 34
0 35
0 35
0 35
0 34
0 34
0 34
0 34
0 32
0 32
0 31
0 31
0 30
0 26
0 22
0 19
0 14
0 14
0 13
0 12
0 12
0 12
0 14
0 15
0 15
0 16
0 13
0 13
0 12
0 12
0 12
0 13
0 30
0 42
0 52
0 57
0 58
0 57
0 58
0 58
0 58
0 58
0 58
0 58
0 58
0 58
0 58
0 58
0 58
0 58
0 58
0 56
0 56
0 55
0 55
0 55
0 55
0 55
0 53
0 52
0 51
0 53
1 81
1 81
4 116
4 116
4 113
4 109
4 94
4 81
4 74
4 74
4 75
4 75
4 75
4 76
4 76
4 76
4 76
4 76
4 76
4 77
4 77
4 78
4 79
4 79
4 79
4 79
4 79
5 87
5 90
5 90
5 90
5 90
5 90
5 90
5 90
5 84
4 56
4 56
1 21
1 21
2 26
5 171
5 170
5 171
5 172
5 172
5 172
5 171
5 171
5 171
5 172
5 175
5 175
5 175
5 176
5 177
5 177
5 176
5 175
5 176
5 176
5 176
5 176
4 166
4 165
4 165
4 166
4 166
4 167
4 170
4 173
4 174
4 175
4 175
5 174
5 171
4 169
1 20
1 20
1 21
1 21
1 21
1 22
1 22
1 18
1 18
1 17
1 20
1 20
1 23
1 24
1 26
1 26
1 28
1 32
1 31
1 31
1 31
1 31
1 31
1 31
1 31
1 30
1 30
1 30
1 30
1 27
1 29
1 34
1 35
0 37
0 37
0 38
0 38
0 38
0 37
0 37
0 37
0 36
0 38
0 41
0 43
0 51
0 46
0 48
1 55
1 54
1 51
1 51
1 49
1 45
1 45
1 45
1 45
1 45
1 46
1 49
1 49
3 70
3 72
3 75
3 76
3 76
3 66
3 63
3 63
3 62
3 62
3 62
3 62
3 62
3 63
3 64
3 64
3 62
3 62
3 60
3 56
3 48
3 47
3 46
2 37
2 37
2 38
2 38
2 39
2 43
2 43
2 47
2 49
5 50
5 49
5 45
5 44
3 23
3 23
3 19
3 19
3 19
3 18
3 18
3 18
3 18
3 18
3 18
3 18
3 18
3 17
3 16
3 16
3 15
3 15
3 15
3 15
3 15
3 15
3 15
3 15
3 15
3 14
3 14
3 13
3 8
3 7
3 4
3 4
0 2
0 4
0 7
0 11
0 20
0 28
0 28
0 30
0 32
0 34
0 35
0 35
0 35
0 36
0 36
0 36
0 36
0 36
0 36
0 36
0 36
0 36
0 38
0 38
0 39
0 41
0 41
1 41
1 42
4 44
6 44
7 44
7 44
7 46
7 45
7 45
7 45
7 41
7 31
7 30
7 23
7 17
7 16
7 15
7 15
7 17
7 17
7 16
7 16
7 16
7 17
7 17
6 17
6 17
6 17
6 17
6 17
6 17
6 16
6 15
6 15
6 13
5 13
4 13
4 12
2 8
0 8
0 8
0 8
0 8
0 8
0 7
0 6
0 5
0 5
0 5
0 5
0 5
0 2
0 2
0 2
0 1
0 1
0 1
0 1
0 1
0 3
0 3
0 3
0 3
0 3
0 3
0 4
0 4
0 6
0 7
0 8
0 9
0 9
0 9
0 9
0 9
0 10
0 10
0 10
0 10
0 10
0 10
0 10
0 12
0 13
0 13
0 13
0 14
0 14
0 15
0 15
0 16
0 16
0 15
0 15
0 16
1 19
1 32
1 66
1 129
1 135
1 142
1 147
1 148
2 152
3 153
3 152
3 151
3 151
3 151
3 151
3 153
3 152
3 154
3 158
3 158
3 157
3 181
3 181
3 179
3 179
3 178
3 180
3 182
3 185
3 187
3 203
3 204
3 206
2 205
2 204
2 197
2 173
2 140
2 97
2 48
1 46
1 43
1 42
1 39
0 39
0 39
0 42
0 44
0 44
0 46
0 56
0 59
0 75
0 79
0 77
0 77
0 127
0 127
0 128
0 127
0 126
0 126
0 124
0 121
0 117
0 115
0 98
0 98
0 98
0 98
0 98
0 98
0 98
0 98
0 98
0 99
0 97
0 156
0 159
0 159
0 159
0 159
0 157
0 157
0 157
0 153
0 149
0 146
0 133
0 125
0 125
0 123
0 75
0 75
0 74
0 75
0 75
0 75
0 75
0 76
0 77
0 77
0 77
0 77
0 77
0 77
0 77
0 90
0 90
0 90
0 90
0 89
0 88
0 26
0 26
0 26
0 26
0 26
0 26
0 25
0 25
0 25
0 7
0 6
0 5
0 4
0 4
0 4
0 4
0 7
0 8
0 11
0 14
0 17
0 17
0 16
0 16
0 17
0 17
0 19
0 20
0 21
0 21
0 21
0 21
0 21
1 21
1 22
1 25
1 30
1 30
1 31
1 32
1 32
1 34
1 34
1 35
1 35
1 34
1 36
1 60
1 66
0 71
0 71
0 74
0 70
0 69
0 67
0 65
0 62
0 63
0 62
0 62
0 61
0 61
0 58
0 57
0 57
0 57
0 57
0 57
0 57
0 57
0 56
0 50
0 47
0 47
0 46
1 46
1 46
1 45
1 48
1 47
2 55
2 55
2 52
2 29
2 22
2 19
2 17
2 14
2 15
2 15
2 18
2 21
2 24
2 26
2 42
3 46
3 53
3 60
3 71
3 71
3 71
3 71
3 71
3 72
3 72
3 72
3 72
3 72
2 72
2 72
2 73
2 75
2 75
2 72
2 70
2 71
1 63
1 64
1 64
1 64
1 64
1 64
1 64
1 64
1 63
1 67
1 64
1 61
1 61
1 59
1 42
0 31
0 26
0 26
0 15
0 15
0 16
0 16
0 17
0 19
0 20
0 22
0 27
0 28
0 28
0 28
0 28
0 27
0 27
0 27
0 27
0 26
0 25
0 25
0 25
0 25
0 25
0 25
0 25
0 25
0 24
0 18
0 17
0 17
0 17
0 17
0 19
0 21
0 23
0 22
0 22
0 21
0 21
0 20
0 18
0 14
0 14
0 12
0 10
0 10
0 10
0 10
0 9
0 10
0 10
0 10
0 10
0 10
0 20
0 20
0 20
0 20
0 24
0 24
0 24
0 24
0 24
0 24
0 25
0 25
0 27
0 27
0 32
0 31
0 33
0 35
0 39
0 37
0 37
0 37
0 38
0 38
0 38
0 46
0 43
0 43
0 44
0 45
0 44
0 43
0 43
0 43
0 44
0 44
0 34
0 34
0 34
0 34
0 34
0 34
0 34
0 33
0 32
0 33
0 33
1 78
1 77
1 82
1 75
1 79
1 80
1 85
1 81
1 81
1 81
1 82
1 80
1 82
1 82
1 76
1 74
1 74
1 74
1 76
1 76
1 76
1 76
1 75
1 75
1 75
1 75
1 75
1 75
1 75
1 77
1 77
1 77
1 77
1 77
1 75
1 72
0 18
0 13
0 8
0 8
0 8
0 8
0 11
0 10
0 8
0 15
0 15
0 15
0 13
0 13
0 12
0 12
0 13
0 14
0 13
0 14
0 27
0 27
0 32
0 32
0 32
0 32
0 36
0 40
0 41
0 41
0 41
0 41
1 41
1 41
1 41
1 41
1 41
1 41
1 42
1 42
1 42
1 40
1 39
1 39
1 39
2 32
2 32
2 32
2 32
2 32
2 32
2 32
2 31
2 31
2 29
2 28
2 16
2 25
2 25
2 26
2 27
2 27
2 21
2 18
2 18
2 18
2 18
2 19
1 19
1 19
1 19
1 19
1 18
1 18
1 17
1 17
1 17
2 22
2 23
2 23
2 25
1 25
1 25
1 25
1 25
1 25
1 25
1 25
1 25
1 24
1 24
1 23
1 19
1 11
1 11
1 12
1 13
1 13
1 14
1 14
1 20
1 21
1 21
1 22
1 22
1 22
4 44
4 45
4 45
4 45
5 49
5 49
5 49
4 44
4 43
4 43
4 42
4 42
4 46
5 49
5 54
5 56
5 60
5 61
5 61
5 63
5 64
6 83
6 82
7 87
7 90
7 89
7 89
7 89
7 88
7 88
7 80
7 80
7 80
7 80
7 80
7 80
4 59
4 47
4 46
4 46
4 42
3 43
3 45
3 45
3 47
3 64
3 90
3 93
3 90
2 87
2 81
2 81
2 77
2 76
2 76
2 73
2 72
1 62
4 63
3 55
3 55
3 54
3 54
3 54
3 54
3 54
3 54
3 54
3 55
3 55
3 56
3 57
3 61
3 63
3 67
3 86
3 89
3 88
3 90
3 91
3 90
3 77
3 48
3 48
3 47
4 47
4 47
4 47
4 47
4 48
4 48
4 48
3 48
3 48
1 47
1 47
1 47
1 48
1 50
1 51
0 52
0 54
0 57
0 57
0 58
0 60
0 59
0 57
0 53
0 52
0 50
0 31
0 43
0 43
0 40
0 36
0 36
0 37
0 37
0 37
0 37
0 37
0 38
0 38
0 38
0 37
0 37
0 37
0 37
0 38
0 38
0 38
0 38
0 37
0 35
0 34
0 34
0 28
0 25
0 25
0 26
0 42
0 48
0 48
0 49
0 50
1 48
1 53
1 36
1 34
1 34
1 34
1 34
1 35
1 35
1 36
1 36
1 36
1 35
1 36
1 36
1 36
1 36
1 36
1 36
1 35
1 35
1 36
1 35
1 35
1 35
1 35
1 35
1 35
1 35
1 35
1 32
1 17
1 12
2 8
2 6
2 6
1 7
1 7
1 7
2 7
2 7
2 7
2 7
2 6
2 6
2 5
2 7
2 7
1 6
1 6
1 6
1 6
1 6
1 6
0 8
0 8
0 9
0 9
0 9
0 9
0 9
0 9
0 9
0 9
0 9
0 10
0 14
0 16
0 21
0 30
0 32
0 35
0 39
0 39
0 40
0 40
0 41
5 42
5 42
5 43
5 41
5 41
5 41
5 54
5 54
5 54
5 54
5 54
5 54
5 53
5 53
5 53
0 51
0 50
0 50
0 50
0 50
0 50
0 50
0 50
0 50
0 48
0 39
0 33
0 32
0 25
0 25
0 22
0 16
0 17
0 17
0 16
0 16
0 16
0 17
0 17
0 18
0 20
0 22
0 8
0 8
0 8
0 9
0 9
0 9
0 9
0 9
0 9
0 9
0 9
0 8
0 8
0 8
0 10
0 21
0 75
0 86
0 96
0 100
0 106
0 115
0 118
0 122
0 125
0 127
0 127
0 127
0 127
0 127
0 126
0 126
0 126
0 126
0 124
0 122
0 122
0 122
0 122
0 122
0 122
0 122
0 122
0 122
0 122
0 120
0 124
0 124
0 124
0 124
0 111
0 97
0 70
0 74
0 88
0 89
0 89
0 90
0 91
0 90
0 86
0 87
0 87
0 88
0 88
0 90
0 91
0 92
0 92
0 92
0 95
0 101
0 101
0 104
0 104
0 104
0 103
0 109
0 109
0 110
37 116
37 116
37 112
37 112
37 112
37 111
37 107
37 107
37 82
37 65
37 39
37 36
37 36
37 36
37 36
0 31
0 30
2 39
20 40
20 40
20 47
20 79
20 86
20 92
21 94
21 94
21 93
21 86
21 86
21 86
21 86
22 86
22 86
2 80
2 80
2 79
2 78
2 78
2 78
2 78
2 78
2 78
2 78
2 78
2 78
2 78
2 78
4 78
4 78
4 79
4 82
4 83
4 81
4 72
4 72
4 73
4 65
3 28
3 25
3 22
3 23
3 24
3 29
2 46
1 49
1 47
1 46
1 46
1 50
1 51
1 51
1 51
1 52
1 52
1 55
1 55
1 55
1 50
1 50
1 50
1 50
1 50
1 50
1 47
2 64
2 77
2 74
2 83
2 85
2 84
2 96
2 94
2 98
2 102
3 104
3 105
2 103
2 103
2 99
2 136
2 143
2 151
2 154
2 163
2 168
2 167
2 167
2 166
2 166
2 166
2 163
2 163
2 166
2 166
2 167
2 167
2 168
2 168
2 171
2 172
1 155
1 134
1 131
1 130
1 130
1 131
0 113
0 113
0 112
0 110
0 140
0 143
0 143
0 143
0 139
0 89
0 82
0 70
0 68
0 77
0 83
0 90
1 138
1 138
1 139
1 139
1 140
1 138
1 136
1 136
1 136
1 136
1 135
1 134
1 127
1 129
1 130
1 130
1 129
1 130
1 130
1 129
1 129
1 126
1 125
1 121
1 89
1 88
1 86
1 86
1 138
1 138
1 152
1 152
1 152
1 137
1 126
1 122
0 78
0 78
0 78
0 78
0 78
0 78
0 79
0 79
0 79
0 79
0 79
0 78
0 78
0 77
0 76
0 76
0 76
0 76
0 76
0 76
0 78
0 83
0 83
0 84
0 84
0 84
0 84
0 83
0 11
0 10
0 10
0 19
0 24
0 33
0 34
0 38
0 39
0 39
0 39
0 40
0 43
0 43
0 43
0 43
0 43
0 44
0 44
0 45
0 45
0 46
0 46
0 46
0 48
0 51
0 51
0 51
0 49
0 48
0 48
0 47
0 48
0 50
0 55
0 59
0 62
0 63
0 63
0 52
0 43
0 37
0 39
0 38
0 41
0 58
0 58
1 71
1 73
1 78
1 82
1 86
1 95
1 122
1 172
1 189
1 201
1 222
1 225
1 231
1 235
1 241
1 247
1 252
1 261
1 486
1 600
1 655
1 677
1 680
1 685
2 685
2 694
2 697
2 697
2 698
2 700
2 702
2 697
2 690
1 685
1 667
1 663
1 663
1 666
1 664
1 654
1 651
1 635
1 597
1 547
1 536
1 525
1 512
1 510
1 518
1 519
1 520
1 521
1 516
1 433
1 125
2 97
2 72
2 82
2 81
2 79
3 81
5 96
5 96
5 107
5 111
5 111
5 110
5 110
5 111
5 111
5 110
5 109
5 109
5 110
5 113
7 306
6 310
6 337
6 339
7 345
7 345
7 349
7 357
7 362
7 352
7 355
7 357
7 355
7 355
7 355
6 363
5 360
5 359
5 354
5 357
5 360
5 464
3 438
3 432
3 423
3 422
3 425
3 424
3 424
3 425
3 426
3 426
3 427
3 426
3 415
3 409
1 212
1 207
1 186
1 188
0 182
0 181
0 176
0 160
0 145
0 139
0 140
0 141
0 141
1 160
1 162
1 154
1 158
2 157
2 157
2 158
4 155
4 47
4 48
5 45
5 48
5 49
5 47
5 47
5 47
5 46
5 45
5 45
5 44
5 44
5 44
5 43
5 42
3 43
3 43
3 44
4 52
4 53
4 57
4 57
4 58
4 58
4 57
4 56
4 57
3 29
3 30
3 129
3 137
3 145
3 145
3 143
3 143
3 143
13 218
12 229
12 241
12 257
12 260
12 259
12 259
12 259
12 259
12 259
12 259
12 259
12 260
12 261
12 261
3 186
3 186
2 183
1 176
1 175
1 171
1 171
1 171
0 171
0 171
1 176
1 174
1 173
1 171
1 67
1 63
1 55
1 54
1 54
1 55
1 56
1 56
1 35
1 24
1 12
1 12
1 12
1 12
1 12
1 12
1 12
1 12
1 12
1 12
1 11
1 11
1 10
1 10
1 10
1 10
1 11
2 12
2 12
2 12
4 12
4 12
3 7
3 7
3 8
3 8
3 8
4 9
5 9
5 11
5 11
5 10
5 9
5 9
5 9
5 7
5 9
5 10
5 11
5 28
5 29
5 30
5 31
5 33
5 34
5 34
5 34
5 34
5 34
5 34
5 34
5 34
5 33
4 33
2 35
2 35
2 35
2 35
2 35
2 35
2 34
2 34
2 37
1 36
0 36
0 37
0 37
0 39
0 39
0 40
0 40
0 39
0 63
0 65
0 63
0 47
0 51
0 50
0 49
0 49
0 50
0 50
0 51
0 51
0 51
0 51
0 51
0 50
0 50
0 50
0 48
0 48
0 48
1 51
1 51
1 51
1 52
1 52
1 49
1 49
1 49
1 46
1 46
1 44
1 42
1 42
1 42
1 42
1 11
1 12
4 16
4 24
4 22
4 22
4 23
4 23
4 22
4 22
4 22
4 22
4 22
4 22
4 22
4 22
4 22
4 22
4 25
4 25
4 31
3 30
3 33
3 39
3 39
3 39
3 41
3 41
3 41
3 41
3 42
3 43
3 43
3 43
4 43
2 42
2 42
2 41
1 36
1 27
1 27
1 27
1 27
1 27
1 27
1 27
1 26
1 26
1 26
1 26
1 26
1 27
1 27
1 26
1 24
1 24
1 18
1 17
1 15
1 8
1 8
1 8
1 6
1 6
1 7
1 7
1 7
1 6
0 6
0 6
0 6
0 6
0 6
0 6
0 6
0 5
0 5
0 5
0 5
0 5
0 5
0 5
0 5
0 5
0 5
1 7
1 7
1 7
1 7
1 8
1 8
1 8
1 7
1 7
1 7
1 7
1 7
1 8
1 8
1 8
1 7
1 7
1 6
1 6
1 6
1 6
1 6
1 9
1 12
1 16
1 30
1 34
1 34
1 41
1 42
1 42
1 42
1 45
1 46
1 48
1 48
1 46
1 47
2 47
2 47
2 46
2 52
2 52
2 57
2 57
3 61
3 62
3 63
3 62
3 62
3 62
3 62
3 66
2 69
2 69
2 71
2 71
2 72
2 72
2 68
3 64
3 48
3 47
3 46
3 39
3 39
3 39
3 39
3 36
3 35
3 33
3 33
2 32
2 31
3 30
2 30
2 30
2 19
2 19
1 14
1 14
1 13
1 13
1 13
1 13
1 13
1 13
1 12
1 8
0 6
0 6
0 3
0 2
0 0
0 0
0 0
0 0
0 0
0 0
0 0
0 1
1 2
1 3
1 3
1 3
1 3
1 3
1 3
1 3
1 3
1 4
1 4
1 4
1 4
1 5
1 6
1 7
0 9
0 10
0 10
0 10
0 10
0 10
0 10
0 10
0 10
0 10
0 10
0 10
0 10
0 10
0 11
0 11
0 11
0 11
0 11
0 10
0 11
0 15
0 15
0 15
0 20
0 22
0 22
0 24
0 26
0 25
0 26
0 27
0 28
2 28
2 28
2 27
2 25
2 24
2 24
2 24
2 24
2 26
2 27
2 29
2 29
2 29
2 30
2 30
0 30
0 30
0 29
0 30
0 30
0 30
0 30
0 29
0 27
0 23
0 23
0 23
0 17
0 16
0 15
0 13
0 11
0 11
0 10
0 9
0 8
0 7
0 7
0 7
0 7
0 7
0 7
0 6
0 6
0 5
0 4
0 2
0 2
0 2
0 1
0 1
0 1
0 7
0 7
0 6
0 6
0 7
0 7
0 7
0 8
0 8
0 8
0 10
0 11
0 11
1 17
1 19
1 19
1 19
1 19
1 19
1 19
1 19
1 19
1 20
1 20
1 22
1 22
1 22
1 22
1 22
1 22
1 22
1 22
1 22
1 22
1 22
1 22
1 16
1 16
1 17
1 17
1 16
1 15
1 19
1 18
1 18
1 18
1 23
1 26
1 29
0 24
0 31
0 31
0 31
0 33
0 34
0 34
0 34
0 35
0 36
0 36
0 34
0 35
0 35
0 35
0 35
0 35
1 36
1 35
1 35
1 35
1 35
1 36
1 36
1 38
1 38
1 38
1 40
1 39
1 36
1 43
1 44
1 41
1 38
1 35
1 33
1 32
9 22
9 22
9 20
9 20
9 20
9 20
9 20
9 20
9 19
9 19
9 19
9 19
9 19
9 19
9 19
1 19
0 19
0 19
0 19
0 19
0 19
0 16
0 16
0 15
0 17
0 17
0 15
0 15
0 15
0 10
0 9
0 8
0 8
0 6
0 7
0 7
0 7
0 7
0 7
0 7
0 7
0 7
0 7
0 7
0 7
0 7
0 7
0 7
0 7
0 7
0 8
0 8
0 8
0 59
0 73
0 82
0 88
0 91
0 91
0 91
0 88
0 88
0 87
0 87
0 87
0 87
0 87
0 88
0 88
0 87
0 87
0 87
0 87
0 87
0 87
0 88
0 88
0 88
0 88
0 88
0 88
0 87
0 88
0 99
0 108
0 113
0 111
0 111
0 109
0 41
0 32
0 32
0 31
0 31
0 31
0 31
0 31
0 31
0 31
0 31
0 31
0 31
0 31
0 30
0 30
0 30
0 31
0 31
0 31
0 30
0 30
0 30
0 32
0 32
0 33
0 33
0 34
0 32
0 28
0 19
0 8
0 6
0 9
0 9
0 10
0 10
0 10
0 10
0 10
0 10
0 10
0 10
0 10
0 10
0 10
0 10
0 10
0 10
0 10
0 10
0 10
0 10
0 9
0 9
0 9
0 9
0 9
0 9
0 7
0 8
0 7
0 6
0 6
0 6
0 6
0 6
0 6
0 6
0 4
0 4
0 7
0 13
0 14
0 14
0 14
0 13
0 14
0 14
0 14
0 14
0 14
0 15
0 17
0 18
0 18
0 19
0 19
0 19
0 19
0 19
0 19
0 21
0 21
0 21
0 21
0 22
0 22
0 22
0 30
0 30
0 38
0 65
0 78
0 98
0 100
0 104
0 98
0 93
0 99
0 109
0 133
0 138
0 157
0 163
0 165
0 165
0 162
0 161
0 163
0 164
0 164
0 164
0 164
0 164
0 164
0 164
0 163
0 162
0 162
0 162
0 162
0 161
0 161
0 162
0 155
0 153
0 146
0 118
0 105
0 81
0 83
0 82
0 82
0 79
0 77
0 71
0 49
0 50
0 42
0 73
0 74
0 74
0 74
0 74
0 74
0 72
0 74
0 75
0 76
0 76
0 76
0 78
0 78
0 78
0 78
0 78
0 90
0 91
0 92
0 91
0 90
0 88
0 88
0 88
0 87
0 87
0 82
1 82
1 83
1 86
1 87
1 84
1 78
1 69
1 67
1 35
1 33
1 33
1 33
1 33
1 31
1 29
1 29
1 28
1 27
1 27
1 27
1 25
1 25
1 24
1 24
1 23
1 12
1 11
1 13
1 13
1 14
1 14
1 14
1 13
1 13
1 11
1 9
0 9
0 8
0 4
0 4
0 4
0 4
0 4
0 4
0 4
1 4
1 4
3 4
3 4
3 4
3 4
3 8
3 8
3 9
3 9
3 11
3 11
3 11
3 13
3 13
2 13
2 12
0 12
0 10
0 10
0 9
0 9
0 9
0 9
0 9
0 9
0 9
0 9
0 9
0 9
0 9
0 15
0 18
0 18
0 18
0 18
0 18
0 18
0 18
0 18
0 18
0 18
0 12
0 12
0 14
0 14
0 13
0 13
0 14
0 13
0 13
0 13
0 13
0 13
0 15
0 16
0 16
0 16
0 16
0 16
0 18
0 22
0 29
0 40
0 46
0 48
0 53
0 52
0 53
0 68
0 70
0 72
0 72
0 72
0 72
0 72
0 73
0 73
0 73
0 72
0 71
0 71
0 71
0 71
0 72
0 72
0 73
0 73
0 74
0 80
0 84
0 98
0 107
0 115
1 134
1 178
1 206
3 255
3 253
3 237
3 238
3 240
3 240
3 235
3 243
3 267
3 266
3 267
3 267
3 267
3 270
3 283
3 288
3 297
3 297
3 298
3 298
3 302
3 302
3 301
3 295
3 299
3 297
3 299
3 304
3 296
3 291
3 272
3 263
4 251
3 223
3 189
3 167
2 125
2 125
2 129
2 128
2 126
2 123
2 121
2 122
2 123
2 123
2 122
2 123
2 123
2 120
2 106
2 100
2 91
2 91
2 91
2 83
2 78
2 77
2 76
2 73
2 27
2 26
1 26
1 25
1 24
1 25
1 27
1 43
1 46
1 45
1 42
1 39
0 27
0 26
0 26
0 51
0 51
0 50
0 49
0 49
0 48
0 48
0 48
0 47
0 47
0 47
0 47
0 47
0 47
0 47
0 22
0 22
0 22
0 22
0 22
0 22
0 22
0 22
0 22
0 22
0 22
0 21
0 19
0 4
0 2
0 4
0 6
0 8
0 8
0 10
0 12
0 14
0 14
0 14
0 14
0 14
0 14
0 14
0 15
0 15
0 16
0 19
0 20
0 21
0 21
0 23
0 21
0 21
0 21
0 21
0 22
0 22
0 22
0 22
0 24
0 26
0 28
0 34
0 43
1 176
1 174
1 173
1 173
1 173
1 173
1 179
1 178
1 178
1 185
1 185
1 189
1 272
2 285
2 289
2 306
3 309
3 318
3 316
3 315
3 315
3 315
3 314
3 314
3 314
3 314
3 315
3 328
3 328
3 328
3 330
3 334
3 333
3 333
3 332
3 329
2 197
2 199
2 198
2 200
2 193
2 200
2 195
2 199
2 201
2 200
2 200
2 181
2 75
0 66
0 66
0 67
0 67
0 68
0 68
0 67
0 67
0 67
0 74
0 79
0 87
1 88
1 90
1 79
4 80
4 79
4 78
4 78
4 72
4 50
4 49
4 48
4 48
4 48
5 68
5 71
7 206
7 199
7 199
7 196
7 195
7 198
7 198
7 198
7 198
7 199
7 197
8 196
8 196
8 199
8 202
8 203
8 203
8 204
8 193
9 212
8 214
8 215
8 212
8 212
5 212
8 215
8 214
8 214
9 215
9 216
9 217
9 216
9 217
9 218
8 194
8 191
6 55
6 54
6 54
6 54
6 54
6 52
6 51
6 51
6 51
6 50
6 46
5 45
5 45
5 44
5 44
5 44
5 44
6 42
6 38
5 14
5 11
5 13
5 15
5 15
5 15
2 15
2 15
2 14
1 15
1 15
1 14
1 13
1 13
1 13
1 14
1 14
1 14
1 14
1 16
1 16
1 16
1 16
1 16
1 15
1 15
1 15
1 15
1 16
1 16
1 15
1 16
1 16
1 16
0 13
0 13
0 11
0 11
0 8
0 5
0 5
0 5
0 5
0 5
0 5
0 5
0 5
0 5
0 5
0 5
0 5
0 5
2 11
2 12
2 12
2 10
2 13
2 17
2 17
2 17
2 17
2 17
2 17
2 16
2 16
2 16
2 15
2 14
2 14
2 15
2 15
2 15
2 15
2 15
2 15
2 15
2 15
2 15
2 15
2 15
2 16
2 17
2 17
2 18
2 18
2 18
2 18
2 18
0 10
0 7
0 6
0 5
0 5
0 5
0 5
0 6
1 6
1 8
1 19
1 19
1 22
1 22
1 22
2 24
2 26
2 29
2 30
2 33
2 33
2 35
2 34
2 34
2 50
2 53
2 42
2 44
2 44
2 43
1 42
1 41
1 41
1 41
1 41
1 41
1 41
1 41
1 41
1 41
1 41
1 42
1 42
1 41
0 41
0 39
0 39
0 39
0 35
0 34
0 35
0 33
0 31
0 28
0 26
0 26
0 26
0 26
0 26
0 24
2 9
2 9
2 9
2 8
2 8
2 8
2 8
2 8
2 8
2 8
2 8
2 8
2 8
2 8
2 10
2 10
2 10
2 9
2 9
2 9
2 8
2 8
2 8
3 8
3 8
4 8
4 8
4 8
4 8
4 8
4 8
4 9
4 8
3 8
3 14
3 14
2 14
2 13
2 19
2 19
2 21
2 21
2 21
2 21
2 22
2 25
2 26
2 26
2 26
2 26
2 24
2 26
2 26
2 26
2 26
1 26
1 32
1 34
1 35
0 35
0 35
0 35
0 35
0 35
0 35
0 41
0 41
0 45
0 55
0 57
0 51
0 51
0 49
0 45
0 46
0 46
0 46
0 46
0 47
0 48
0 48
0 45
0 45
0 45
0 48
1 50
1 51
1 54
1 54
1 54
1 54
1 56
1 53
1 56
1 56
1 57
1 63
1 63
1 64
1 66
1 66
0 57
0 57
0 48
0 48
0 48
0 48
0 48
0 47
0 46
0 44
0 45
0 45
0 45
0 44
0 54
0 87
0 133
0 168
0 187
0 194
0 222
0 229
0 230
0 242
0 242
0 245
0 248
0 250
0 247
0 249
0 249
0 240
0 243
0 244
0 243
0 242
0 241
0 238
0 238
0 236
0 251
0 252
0 254
1 266
1 265
1 268
1 267
1 267
1 265
1 260
1 241
1 203
1 167
1 150
1 126
1 114
1 82
1 84
1 84
1 84
1 84
1 80
1 77
1 79
1 85
1 102
1 125
1 139
1 155
2 158
2 158
2 159
2 161
2 161
2 161
2 163
2 147
2 149
1 147
1 136
1 136
1 133
1 132
1 130
1 127
0 117
0 108
0 106
0 106
0 106
0 107
0 105
0 105
0 103
0 103
0 104
0 106
1 110
1 113
1 108
1 99
1 78
1 44
1 41
1 37
2 94
2 100
2 127
2 128
6 213
6 228
6 242
6 250
6 257
6 264
6 268
6 268
6 269
6 269
6 270
6 271
6 272
6 272
6 272
6 279
6 281
7 307
7 306
7 306
7 306
7 308
7 307
7 306
6 309
6 311
6 309
6 304
7 302
7 302
7 299
7 295
6 228
5 219
5 198
5 187
2 78
2 63
2 60
2 62
2 63
2 66
2 74
3 76
4 79
3 85
7 94
6 93
6 94
6 98
6 99
6 91
6 154
6 131
6 130
6 129
6 128
6 127
6 126
6 125
6 117
6 117
6 117
6 117
6 117
6 117
6 117
7 117
7 116
7 116
7 117
7 117
7 117
7 116
7 116
7 113
7 107
6 107
6 99
5 99
4 95
8 123
5 117
6 118
6 119
6 118
7 122
7 127
7 61
8 63
8 65
8 67
8 68
8 71
8 74
8 79
8 91
8 100
8 108
8 111
8 114
8 116
7 118
7 128
7 129
8 133
8 134
8 134
8 135
8 141
13 177
13 216
13 240
13 248
13 379
14 380
13 383
11 354
11 354
10 393
10 392
11 392
10 381
10 392
10 391
9 389
9 388
9 390
10 392
10 392
10 390
10 387
10 368
10 356
10 356
10 354
10 353
10 365
10 361
10 350
10 354
9 351
9 352
9 354
9 354
9 348
4 299
4 245
4 224
5 219
5 93
4 93
3 93
3 91
4 91
4 52
4 54
4 52
4 53
4 42
4 42
11 159
14 159
24 164
23 164
23 162
23 163
23 162
23 163
23 163
23 164
23 166
23 168
23 158
23 158
23 158
23 148
23 147
23 146
21 145
21 145
21 145
21 145
21 145
21 152
21 152
21 153
21 152
21 151
21 151
20 151
20 151
20 149
20 149
18 149
18 157
17 158
10 38
9 39
0 30
0 30
0 30
0 31
0 30
0 29
0 27
0 23
0 23
0 23
0 22
0 21
0 21
0 30
0 33
0 34
0 35
0 35
0 36
0 36
0 35
0 34
0 34
0 34
0 38
0 57
0 71
0 83
0 86
0 87
0 87
0 87
0 77
0 76
0 76
0 77
0 81
0 80
0 80
0 81
0 81
0 81
0 81
0 81
0 80
0 80
0 80
0 80
0 83
0 72
1 73
1 73
1 74
1 75
2 74
2 75
2 71
2 71
2 71
2 70
2 67
2 48
2 29
2 19
2 21
2 21
2 21
2 21
2 21
2 20
3 21
3 21
3 16
3 16
3 16
3 17
3 17
3 19
3 71
3 78
3 93
3 98
3 99
3 99
3 96
2 94
2 93
2 93
2 93
2 92
2 92
2 90
2 89
2 89
2 89
2 90
2 102
2 100
2 100
2 100
2 99
2 99
2 101
1 101
2 104
2 104
1 102
1 102
1 101
1 101
1 102
1 102
1 100
1 99
6 38
6 28
6 19
6 19
6 20
6 19
6 19
6 19
6 19
6 19
6 19
6 19
6 19
5 19
5 19
0 19
0 19
0 19
0 7
0 7
0 7
0 28
0 29
0 30
0 32
0 35
0 38
0 45
0 45
0 53
0 54
0 57
0 62
0 72
0 76
0 77
0 79
0 81
0 82
0 83
0 83
0 84
0 84
0 84
0 84
0 84
0 86
1 105
1 109
1 119
1 131
1 136
1 138
1 138
1 138
1 140
2 139
2 107
2 105
2 104
2 104
2 105
2 105
2 100
2 100
2 93
2 94
2 89
2 87
2 78
2 75
2 73
2 71
2 69
4 68
4 68
4 68
4 75
4 101
4 103
4 112
4 117
4 119
3 92
3 85
3 79
3 72
3 69
3 68
3 69
3 68
2 65
2 66
2 65
2 64
2 67
2 69
2 69
2 68
2 72
2 73
2 75
2 74
2 79
2 81
2 81
2 83
2 84
2 84
2 85
0 85
0 85
0 86
0 74
0 55
0 52
0 46
0 44
0 42
0 46
0 53
0 62
1 131
1 152
1 166
1 174
1 178
1 179
1 178
1 178
1 178
1 174
1 172
1 171
1 170
1 163
1 162
1 160
1 156
1 153
1 152
1 152
2 173
2 172
2 172
2 172
2 172
2 171
2 168
2 167
2 162
2 161
2 160
2 160
2 160
2 157
2 150
2 134
1 48
1 37
1 37
1 35
1 38
1 39
1 40
1 43
1 43
1 44
1 44
1 44
1 44
1 45
1 47
1 47
1 47
1 47
1 47
0 47
0 26
0 26
0 26
0 26
0 27
0 27
0 29
0 29
0 33
0 35
0 37
0 43
0 55
0 58
0 60
0 59
0 59
0 59
0 50
0 49
0 47
0 46
0 47
0 44
0 45
0 44
0 45
0 45
0 45
0 43
0 41
0 41
0 40
0 40
0 40
0 40
0 40
0 40
0 45
0 44
0 45
0 45
0 41
0 41
0 39
0 37
0 32
0 29
0 19
0 15
0 15
0 15
0 15
0 15
0 16
0 15
0 16
0 14
0 17
0 17
0 18
1 20
2 30
2 30
2 30
2 31
4 31
4 33
4 34
4 34
4 35
4 37
4 39
4 48
5 66
5 69
5 75
5 150
5 156
5 190
5 203
4 208
3 221
3 228
3 229
3 237
3 243
3 243
3 245
3 246
3 244
3 244
3 244
3 245
3 246
3 247
3 246
3 245
2 237
2 238
2 237
2 237
2 237
2 235
2 235
2 235
2 234
2 232
2 230
1 220
1 196
1 193
2 184
2 84
2 56
2 38
2 34
2 34
2 34
2 32
2 28
2 17
2 16
2 17
5 30
5 30
5 35
5 37
5 38
5 36
4 36
4 36
4 31
4 30
4 30
4 35
4 35
4 37
4 41
4 48
4 48
4 48
4 62
4 62
4 64
4 75
4 79
4 85
3 90
3 90
3 91
3 91
3 91
3 91
3 91
3 91
3 94
3 95
3 93
3 93
0 79
0 77
0 74
0 73
0 70
0 70
0 70
0 70
0 72
0 72
0 72
0 68
0 68
0 65
0 61
0 57
0 57
0 58
0 42
0 42
0 52
0 38
0 34
0 33
0 31
0 31
0 30
2 82
2 89
2 91
2 94
2 102
2 101
2 99
2 99
2 100
2 100
2 101
2 102
2 101
2 102
2 101
2 101
2 102
2 100
2 103
2 106
2 107
2 107
2 107
2 111
2 109
2 111
2 113
2 128
2 140
2 130
2 139
2 160
2 169
2 192
2 196
2 192
0 143
0 138
0 135
0 131
0 127
0 127
0 127
0 126
0 125
0 125
0 127
0 129
0 130
1 132
1 133
1 133
1 133
1 131
1 132
1 131
1 133
1 133
1 133
1 130
1 132
1 131
1 128
1 114
1 102
5 104
5 100
5 78
5 67
5 40
5 37
5 37
5 57
5 58
5 62
5 68
5 75
5 77
5 78
4 78
4 78
4 78
4 76
0 74
0 72
0 72
0 72
0 73
0 74
0 75
0 75
0 82
0 83
0 92
0 108
1 116
1 114
1 113
1 113
1 106
1 103
1 102
1 102
1 102
1 103
1 103
1 103
2 98
2 78
2 75
2 68
2 62
2 60
2 59
2 59
2 60
2 68
3 100
3 106
3 109
3 127
3 131
2 139
2 172
2 201
2 212
2 215
2 206
2 203
1 191
1 190
1 185
1 189
1 189
1 188
1 192
1 192
1 193
1 194
1 195
1 195
1 197
1 198
1 198
1 204
1 204
2 228
2 236
2 241
2 252
2 257
2 262
3 254
2 269
2 274
2 279
2 268
2 264
2 256
2 218
2 214
2 216
2 228
2 228
2 228
2 224
2 210
2 208
2 208
2 208
2 209
2 210
2 210
2 213
2 211
2 211
2 211
2 211
2 211
2 211
2 205
2 203
1 176
1 199
1 198
1 194
1 194
1 208
0 195
0 133
0 128
0 119
0 113
0 105
0 101
1 98
1 97
1 96
1 83
1 83
1 83
1 83
1 63
1 63
1 63
1 62
1 60
1 59
1 59
1 56
1 60
1 62
1 64
1 64
1 69
1 70
8 66
8 65
8 53
8 21
8 20
8 38
8 39
8 43
8 45
8 46
8 46
8 47
8 47
8 47
8 47
13 51
7 53
7 53
7 54
7 55
6 60
6 62
6 63
6 63
6 63
6 62
6 62
6 62
6 62
6 62
0 52
0 49
1 51
1 53
1 55
1 57
1 57
1 57
1 57
1 57
1 69
1 48
2 54
2 52
2 48
2 49
2 49
2 49
2 49
2 51
2 49
2 51
2 50
2 50
2 50
2 51
2 45
2 44
2 43
2 43
2 43
3 43
3 43
3 42
3 42
3 40
3 40
3 40
2 35
2 34
2 30
2 27
2 27
2 27
2 27
2 25
0 9
0 14
0 18
0 24
0 27
0 29
0 30
0 30
0 29
0 27
0 28
0 28
0 28
0 28
0 29
0 29
0 30
0 30
0 31
0 32
0 32
0 32
0 33
0 33
0 35
0 35
0 35
0 35
0 36
0 36
1 38
1 39
1 46
1 50
1 50
1 52
1 43
1 38
1 31
1 29
1 29
1 27
1 27
1 29
1 29
1 29
1 30
1 29
1 29
1 29
1 28
1 28
1 28
1 28
1 27
1 27
1 27
1 26
1 25
1 25
1 23
1 23
1 22
1 22
1 22
1 23
0 21
0 13
1 12
1 10
1 10
1 8
1 8
1 9
1 9
1 9
1 9
1 9
1 9
1 7
1 7
1 7
1 5
1 6
1 6
1 6
1 6
1 6
1 6
1 7
1 8
1 8
1 8
1 8
1 8
1 8
1 8
1 8
1 8
1 8
1 8
1 6
1 6
1 4
0 4
0 5
0 5
0 6
0 6
0 5
0 5
0 5
0 5
0 5
0 5
0 5
0 5
0 5
0 5
0 4
0 5
0 5
0 7
0 7
0 7
0 5
0 5
0 5
0 5
0 5
0 5
0 5
0 5
0 5
0 6
0 6
0 7
0 9
0 9
0 17
0 18
0 18
0 19
0 21
0 21
0 21
0 23
0 25
0 53
0 56
0 61
0 62
0 62
0 64
0 66
0 67
0 78
0 79
0 80
0 85
0 90
0 94
0 95
0 95
0 97
0 97
0 97
0 97
0 97
0 97
0 96
0 97
0 96
0 94
0 94
0 86
0 83
0 83
0 82
0 80
0 80
0 80
0 76
0 71
0 40
0 37
0 36
0 36
0 36
0 35
0 35
0 35
0 14
0 16
0 22
0 22
0 24
0 24
0 25
0 26
0 25
0 60
0 60
0 70
0 73
0 74
0 75
0 75
0 85
0 85
1 86
1 87
1 91
1 92
1 92
1 92
1 92
1 92
1 92
1 92
1 92
1 92
1 93
1 102
1 105
1 118
1 118
1 121
1 130
1 129
1 132
1 138
1 138
1 140
1 139
1 138
1 138
1 105
1 105
1 93
1 90
1 92
0 91
0 91
0 81
0 79
0 79
0 79
0 74
0 74
0 74
0 76
0 76
0 78
0 80
0 83
0 89
0 93
0 95
0 85
0 124
0 110
0 115
0 118
0 104
0 83
0 80
0 80
0 80
0 80
0 80
0 96
0 97
0 96
0 98
0 98
0 98
0 96
0 96
0 96
0 97
0 97
0 97
0 97
0 97
0 97
0 96
0 95
0 94
0 94
0 92
0 89
0 84
0 83
0 80
0 77
0 36
0 31
0 27
0 26
0 26
0 26
0 26
0 26
0 26
0 26
0 26
0 10
0 9
0 9
0 8
0 8
0 8
0 8
0 8
0 8
0 7
0 7
0 7
0 7
0 7
0 7
0 7
0 6
1 7
1 8
1 20
1 26
1 22
1 25
1 26
1 26
1 26
1 26
1 26
1 26
1 26
1 26
1 26
1 26
0 26
0 35
0 36
2 36
2 36
2 40
2 40
2 40
2 40
2 40
2 41
2 41
2 41
2 41
2 41
2 42
2 45
2 46
0 49
0 68
0 67
0 67
0 52
0 47
0 45
0 49
0 49
0 49
0 49
0 49
0 49
0 55
0 54
0 56
1 82
1 83
1 89
1 82
1 81
1 78
1 73
1 73
1 73
1 76
1 76
1 79
1 80
1 81
1 81
1 83
1 85
1 84
1 83
1 82
1 78
1 59
1 59
1 59
1 59
1 59
1 59
1 59
1 59
1 59
1 59
1 59
1 59
1 52
1 47
1 46
0 17
0 15
0 15
0 15
0 17
0 18
0 18
0 18
0 18
0 14
0 12
0 9
0 9
0 9
0 8
0 7
1 8
1 9
1 9
1 10
1 10
1 10
1 10
1 10
1 10
1 10
1 10
1 16
1 16
1 17
1 22
1 25
1 25
1 26
1 26
1 27
1 27
1 27
1 33
1 34
1 33
1 33
1 34
1 35
2 45
2 49
3 62
3 65
3 67
3 67
3 67
3 111
3 108
3 106
3 106
3 107
4 108
4 108
4 109
4 111
4 112
4 112
4 112
5 109
5 109
5 106
4 55
5 66
6 69
6 73
9 81
9 81
9 83
9 85
9 81
9 78
11 82
11 83
11 93
11 97
10 88
10 84
9 70
9 70
9 70
9 70
9 70
9 69
9 69
9 69
9 69
9 68
8 67
8 65
7 65
7 64
7 64
7 64
7 64
8 60
8 61
8 61
6 61
5 47
4 43
4 42
3 34
3 33
3 31
3 29
3 27
3 28
1 21
1 18
1 5
1 5
1 4
1 4
1 4
1 6
1 6
1 6
1 7
1 7
1 7
1 7
1 7
1 7
1 7
1 7
1 7
1 7
0 6
0 6
0 7
0 8
0 7
0 7
0 7
0 7
0 7
0 8
0 9
0 9
0 11
0 11
0 11
0 10
0 10
0 12
1 19
1 40
2 53
2 59
2 62
2 59
2 61
2 62
2 62
2 62
2 62
2 62
2 62
2 62
3 62
3 62
3 65
3 65
3 65
3 65
3 63
3 63
3 63
3 65
4 68
4 68
5 68
14 169
14 168
14 168
14 167
14 166
16 166
25 166
25 166
25 162
24 156
23 127
23 118
23 113
23 115
23 121
24 121
24 122
23 129
23 129
23 130
23 131
12 131
12 131
12 131
12 131
12 128
12 129
12 129
12 129
12 130
12 130
12 130
12 128
10 125
9 124
9 124
1 23
1 24
1 23
1 23
1 23
1 24
1 24
3 24
4 24
4 24
4 24
4 22
5 22
5 20
5 12
4 12
4 10
4 7
4 6
4 6
4 5
4 5
4 5
4 10
4 10
4 10
4 9
4 9
4 9
4 8
4 8
5 8
5 8
5 9
5 9
5 14
5 16
5 16
5 18
5 21
5 22
5 21
4 31
3 31
2 31
2 31
2 32
2 46
1 45
1 45
1 45
1 45
1 45
1 45
1 45
1 45
1 45
1 35
1 36
1 31
1 31
1 31
1 31
1 32
3 32
3 32
3 32
3 31
3 30
3 29
3 27
3 25
3 24
3 23
3 22
3 21
3 21
3 21
3 24
3 24
3 28
3 28
2 27
2 22
2 22
2 23
2 23
2 23
2 26
2 26
2 26
2 29
2 29
3 29
4 31
4 31
4 31
3 31
3 32
3 31
2 31
2 31
2 31
2 31
2 31
2 31
2 31
2 31
2 30
5 29
10 32
11 32
11 30
11 29
11 29
11 29
11 25
11 25
11 25
11 15
11 15
11 13
11 12
11 11
11 11
11 11
11 11
9 10
9 12
9 12
9 10
9 10
9 10
9 10
9 9
9 11
9 11
9 11
9 12
9 13
9 13
9 13
7 14
4 13
4 13
3 13
1 9
1 9
1 9
1 9
1 9
1 9
1 9
1 10
1 10
1 10
1 10
1 10
1 9
1 8
1 8
1 8
1 7
1 6
1 6
1 9
1 9
1 10
1 10
1 10
1 12
1 9
1 9
1 9
1 8
1 8
1 8
0 8
0 9
0 9
0 10
0 10
0 10
0 10
0 10
0 11
0 11
0 11
0 11
0 11
0 11
0 11
0 12
0 12
0 12
0 12
0 13
0 13
0 15
0 15
0 14
0 11
0 11
0 10
0 10
0 10
0 8
0 8
0 8
0 8
0 8
0 9
0 9
0 9
0 8
0 8
0 7
0 7
0 7
0 7
0 7
0 6
0 8
0 8
0 22
0 22
0 22
0 22
0 22
0 22
0 24
0 23
0 22
0 22
0 22
0 32
0 32
0 32
0 33
0 33
0 33
0 33
0 33
0 33
0 33
0 33
0 30
0 29
0 29
0 30
0 30
0 30
0 30
0 30
0 30
0 31
0 31
0 21
0 20
0 20
0 5
0 4
0 3
0 3
0 3
0 4
0 4
0 4
0 5
0 5
0 5
0 5
0 5
0 5
0 4
0 4
0 4
0 4
0 4
0 4
0 4
0 5
0 4
0 5
0 5
0 5
0 5
0 5
0 5
0 8
0 8
0 7
0 8
0 8
0 8
0 8
0 8
0 8
0 8
0 8
0 8
0 6
0 6
0 6
0 6
0 6
0 6
0 6
0 7
0 7
0 7
0 7
0 7
0 8
0 7
0 7
0 7
0 7
0 9
0 8
0 8
0 9
0 9
0 9
0 9
0 18
0 21
0 21
0 23
0 26
0 26
0 26
0 26
0 26
0 26
0 26
0 26
0 26
0 26
0 26
0 26
0 26
0 26
0 26
0 25
0 25
0 25
0 25
0 24
0 24
0 24
0 24
0 24
0 22
0 22
0 22
0 22
0 21
0 21
0 21
0 21
0 7
0 2
0 1
0 0
0 0
0 0
0 0
0 0
0 0
0 0
0 0
0 0
0 1
0 1
0 1
0 4
0 5
0 5
0 5
0 8
0 8
0 9
0 9
0 9
0 9
0 9
0 9
0 9
0 9
0 9
0 9
0 10
0 10
0 12
0 15
0 16
0 16
0 22
0 22
0 26
0 27
0 27
0 29
0 30
0 30
2 30
2 30
2 30
2 29
2 29
2 29
2 26
2 25
2 25
2 25
2 23
2 22
2 22
2 22
2 22
2 23
2 23
2 23
2 23
2 23
2 23
2 23
2 22
2 23
2 22
2 19
2 18
2 18
2 12
2 10
2 7
2 7
2 12
2 10
2 9
2 9
0 9
0 9
0 10
0 11
0 11
0 13
1 47
1 66
1 70
1 71
1 70
1 65
3 71
3 71
3 71
3 70
3 70
3 70
3 70
3 70
3 70
3 70
2 40
2 38
2 38
2 38
2 38
2 37
2 36
2 36
2 38
2 38
2 38
2 38
1 37
1 38
1 58
1 58
1 58
1 57
1 57
1 56
0 51
0 30
0 31
0 28
0 28
0 28
0 28
0 28
0 28
0 29
1 29
1 30
1 30
1 31
1 34
1 34
1 35
1 35
1 35
1 38
1 38
1 37
1 37
1 37
1 35
1 37
1 37
1 37
1 40
1 39
1 18
1 18
1 18
1 18
1 18
1 17
1 17
1 18
1 15
1 15
1 15
1 30
1 35
1 35
0 37
0 37
0 38
0 37
0 35
0 33
0 33
0 33
0 32
0 32
0 32
0 29
0 29
0 29
0 29
0 30
0 30
0 29
0 30
0 30
0 29
0 29
0 30
0 31
0 35
0 35
0 35
0 37
0 39
0 38
2 42
2 49
2 56
7 43
7 38
7 39
7 39
7 39
7 38
7 38
7 38
7 38
7 38
7 38
7 38
7 38
7 38
7 39
7 40
6 40
3 44
1 44
0 49
0 48
0 51
0 50
0 46
0 46
0 47
0 52
0 51
2 128
2 143
2 161
2 160
2 162
2 165
2 163
2 179
2 182
2 193
2 208
2 218
2 219
2 219
2 220
2 225
2 225
2 227
2 229
2 230
2 230
2 231
13 259
13 258
15 265
16 276
18 284
18 282
18 282
18 281
18 281
18 280
18 279
18 278
18 278
18 271
16 185
16 180
16 169
16 166
16 163
16 157
16 147
16 110
16 101
16 89
16 88
16 86
16 84
16 84
16 84
16 83
16 83
16 83
16 81
16 81
16 81
16 79
3 46
1 42
1 33
0 16
0 9
0 6
0 4
0 4
1 4
5 3
12 3
12 3
12 2
12 2
12 2
12 1
12 1
12 1
12 3
12 3
13 3
13 3
13 4
13 4
13 4
13 4
13 4
14 4
14 4
14 5
14 6
15 6
15 7
15 6
15 6
15 7
16 9
16 17
16 18
16 18
16 20
16 20
15 20
13 20
9 20
8 22
7 31
7 33
7 33
7 33
7 33
7 34
7 35
7 34
7 34
7 34
6 34
6 35
6 39
7 52
9 164
12 191
12 196
11 214
11 221
11 234
11 247
10 262
32 281
34 287
34 293
34 294
33 294
33 284
35 283
39 292
39 292
39 291
40 291
38 291
36 291
36 286
36 279
36 278
36 278
36 278
36 278
36 276
36 278
37 280
37 281
39 283
39 341
41 339
41 332
42 303
40 181
37 147
37 142
37 131
37 126
37 120
37 118
36 108
13 87
11 82
11 82
11 82
10 82
9 82
9 82
7 73
7 73
7 73
7 73
7 73
7 73
7 75
7 75
7 76
7 77
7 78
7 78
7 78
7 72
6 73
6 74
4 74
4 19
16 19
31 20
40 27
51 105
56 119
63 220
63 226
63 244
63 269
64 297
64 314
65 373
66 377
66 377
66 379
66 379
66 379
66 379
66 394
68 398
68 399
72 437
72 439
72 446
72 444
72 443
72 442
72 451
72 451
73 453
73 462
74 476
75 499
75 502
73 499
57 498
43 498
32 495
24 474
18 394
15 360
12 173
12 151
12 141
12 138
11 138
11 139
10 139
9 145
9 145
9 145
9 146
9 146
9 146
9 131
6 127
6 127
3 91
3 91
3 85
3 85
14 315
14 342
14 351
14 352
13 348
12 380
12 370
13 751
14 756
15 848
15 849
15 850
15 849
15 850
15 855
15 856
15 859
15 862
15 865
15 868
15 866
15 864
13 458
13 454
13 454
13 454
13 453
13 453
14 453
14 453
14 453
14 453
14 449
13 449
13 447
13 447
3 215
3 186
3 167
3 165
3 165
3 127
3 127
3 127
2 122
1 32
1 32
1 30
1 29
1 31
1 28
1 29
1 25
1 23
1 22
1 26
1 27
1 37
1 38
1 38
1 39
1 41
1 41
1 42
0 44
0 46
0 46
0 46
0 45
0 48
0 48
0 48
0 48
0 47
0 45
0 48
0 51
0 48
0 90
0 91
0 91
0 94
0 94
0 95
0 95
0 91
0 91
0 90
0 90
0 90
0 90
0 81
0 81
0 71
0 71
0 70
0 71
0 71
0 71
0 68
0 68
0 66
0 66
0 69
0 69
0 67
0 68
0 68
0 74
0 76
0 81
0 84
0 84
0 84
0 42
0 42
0 36
0 37
0 56
0 64
0 81
0 81
0 87
0 88
1 91
1 91
1 91
1 91
1 91
1 93
1 93
1 94
1 94
1 95
1 95
1 95
1 95
1 95
1 95
1 95
1 95
1 94
1 93
1 92
1 85
3 89
3 88
3 85
3 83
3 83
3 84
3 83
3 86
3 107
3 95
3 93
3 85
3 86
3 87
3 86
2 84
2 87
2 88
2 90
0 81
0 81
0 81
0 81
0 81
0 81
0 82
0 86
0 90
0 97
1 124
1 132
1 148
1 154
1 155
1 157
1 159
1 156
1 152
1 150
4 176
4 176
4 177
5 177
5 173
5 142
5 135
6 132
6 122
6 122
6 122
6 122
6 123
6 125
6 124
6 122
6 128
6 165
6 167
6 168
7 202
8 211
7 212
7 211
7 215
7 211
6 189
6 179
6 156
6 155
6 155
6 156
6 183
6 184
6 186
6 185
2 159
2 159
2 157
2 158
2 158
2 161
8 219
8 226
8 229
9 250
9 252
9 270
9 275
9 267
9 262
9 261
9 253
9 219
9 225
9 222
8 187
8 186
8 183
8 179
9 174
9 170
9 170
9 170
9 168
9 168
9 169
9 169
9 140
9 138
9 141
9 141
9 142
9 147
9 147
9 145
10 145
8 139
4 68
4 50
4 45
3 31
3 33
3 38
3 39
3 39
3 39
3 40
3 38
3 31
3 26
3 26
2 25
2 24
2 24
2 24
1 24
1 24
1 24
2 24
2 24
2 24
2 24
3 23
3 21
3 20
3 19
3 18
3 17
3 13
3 13
3 12
2 12
2 11
1 11
1 14
1 15
1 16
1 13
0 8
0 7
0 7
0 7
0 6
0 6
0 7
0 7
0 7
0 7
0 7
0 7
0 7
0 7
0 7
0 7
0 7
0 8
0 15
0 30
0 47
0 55
0 63
0 65
0 70
0 82
0 84
0 93
0 93
0 97
0 97
0 98
0 95
0 89
0 89
0 89
0 91
0 91
0 91
0 91
0 91
0 91
0 90
0 90
0 90
0 90
0 90
0 90
0 90
1 90
4 93
4 93
4 94
5 93
7 97
8 77
9 57
9 55
9 46
9 47
9 40
9 29
9 29
9 21
9 22
10 22
10 23
10 22
13 26
13 26
13 26
14 25
14 25
14 25
14 25
14 25
14 25
14 25
14 25
14 26
14 26
14 26
14 32
14 32
14 32
13 33
12 31
12 31
10 30
10 30
9 20
9 20
8 17
8 17
8 17
8 15
8 14
8 14
8 14
8 14
8 14
7 18
7 20
7 35
3 42
4 68
11 91
11 94
11 93
11 95
11 98
11 98
11 99
11 101
11 101
16 135
16 137
16 138
16 132
18 132
18 134
18 153
16 164
16 172
16 175
15 177
16 180
16 180
16 180
16 181
16 180
16 188
16 203
20 220
42 294
64 476
65 493
65 509
65 551
65 541
65 529
64 502
61 486
61 486
65 496
65 528
65 548
65 555
66 750
66 764
66 774
61 768
61 780
61 797
61 842
61 846
61 850
61 843
61 832
61 824
60 824
58 823
57 837
57 838
57 841
57 843
57 842
57 834
51 816
41 798
16 715
4 488
3 478
3 459
3 459
3 460
3 463
3 463
2 459
2 456
2 441
2 414
2 394
2 379
0 107
0 70
0 61
0 61
0 62
0 59
0 54
1 55
1 48
1 46
1 46
1 44
1 43
1 42
1 25
1 21
1 20
1 21
1 23
1 26
1 30
1 32
1 29
1 30
1 27
1 30
1 37
2 38
2 57
2 75
2 76
2 81
2 82
2 83
2 80
2 80
2 80
2 80
2 79
2 78
2 79
2 79
2 78
1 76
1 76
1 79
1 83
1 101
1 126
4 154
4 169
4 186
4 244
4 260
4 271
4 290
5 295
5 325
5 330
5 355
5 379
5 498
4 579
4 649
4 642
4 644
4 645
4 646
4 645
4 645
4 646
4 646
4 646
4 647
4 663
4 669
5 678
5 692
5 712
5 721
5 722
5 712
5 715
7 685
7 667
4 637
4 626
4 612
4 545
4 532
4 529
4 501
4 520
4 502
4 500
4 473
4 459
4 228
4 194
4 176
4 171
4 156
4 157
4 154
4 155
4 155
4 154
4 156
4 156
4 156
4 141
3 136
3 112
3 89
3 87
3 80
3 110
3 110
3 105
1 107
1 107
1 106
1 105
1 105
1 103
1 103
1 101
1 99
0 54
0 51
0 51
0 56
0 50
1 49
1 60
1 67
2 77
2 81
2 80
2 79
2 84
2 84
2 100
2 110
2 120
2 132
2 136
2 152
2 154
2 156
2 159
2 161
3 146
3 152
3 153
3 153
3 153
3 153
3 158
3 158
4 160
4 160
3 161
3 160
3 159
3 159
3 160
3 162
4 166
4 164
5 152
5 147
4 142
4 141
5 142
7 142
7 140
7 140
7 111
7 95
7 93
7 94
7 88
7 79
8 78
10 89
10 83
10 74
9 62
9 60
9 61
9 62
9 61
9 61
9 55
9 55
8 53
8 53
8 53
8 53
8 54
8 53
8 52
8 51
7 56
7 64
8 63
8 61
8 61
8 60
7 58
4 58
3 55
3 55
3 54
3 55
4 55
4 54
15 55
15 51
14 49
14 36
14 35
14 35
14 35
14 33
14 33
14 32
14 32
14 32
14 32
15 33
147 33
136 32
135 32
135 32
135 31
135 31
135 31
135 22
135 8
135 14
134 14
134 14
134 15
134 23
134 32
2 49
2 60
2 74
2 81
2 83
1 85
1 89
1 91
1 93
1 96
1 97
1 98
1 98
1 100
0 100
0 101
0 101
0 101
0 101
0 100
0 100
0 100
0 101
0 101
0 101
0 102
0 103
0 101
0 130
0 182
0 184
0 204
1 332
1 349
1 348
1 387
1 390
1 390
3 399
3 405
4 425
4 426
4 423
4 421
4 419
4 416
4 415
4 415
4 415
4 414
4 414
4 414
4 415
4 415
4 415
4 415
4 414
4 416
4 416
4 417
6 533
7 540
7 543
7 560
7 533
7 473
7 462
7 449
6 323
10 331
10 321
10 245
10 231
10 228
8 211
8 203
7 196
7 196
7 195
7 195
7 195
7 195
7 195
7 205
3 203
3 203
3 202
3 205
3 207
2 208
2 210
2 210
2 211
2 216
2 215
2 206
0 94
0 91
1 90
1 71
2 58
2 50
2 47
2 48
2 46
2 39
2 40
2 43
2 43
2 43
2 43
3 44
3 45
3 45
3 45
3 46
4 46
5 59
45 290
45 300
48 318
55 327
55 327
56 325
58 333
64 335
67 336
69 355
69 353
69 345
69 343
70 344
70 344
70 346
69 346
68 345
68 344
68 344
68 343
68 346
68 341
68 341
68 341
68 339
68 339
68 340
68 340
71 338
71 338
71 338
71 341
71 340
69 340
64 305
22 61
21 59
21 58
16 56
15 58
13 56
14 62
10 62
3 63
2 43
3 43
3 43
3 41
3 44
3 43
3 43
3 43
3 45
3 41
3 41
3 38
3 34
3 33
4 31
4 32
4 51
4 55
12 56
46 100
46 101
46 101
46 102
46 103
47 104
47 108
47 124
47 256
46 280
46 301
45 312
45 319
57 438
57 439
56 465
56 464
56 465
56 466
56 466
56 466
56 466
56 466
56 469
56 470
56 475
56 476
56 476
56 476
56 477
57 482
56 483
56 482
49 458
49 454
45 450
14 405
16 406
16 404
16 404
16 404
15 403
15 391
15 336
15 170
15 148
15 118
14 113
14 111
3 30
3 30
3 27
1 26
1 26
1 42
1 67
1 71
1 81
1 92
1 93
1 114
1 273
1 285
1 293
0 299
0 316
0 342
0 383
0 389
0 390
0 391
0 391
0 391
0 392
0 393
0 393
0 395
0 395
0 393
0 394
0 396
0 396
0 395
0 396
0 398
0 399
0 403
0 466
0 479
0 550
0 593
0 641
0 673
0 665
0 661
0 651
0 603
0 391
0 388
0 394
0 397
0 410
0 411
0 398
0 393
0 392
0 393
0 393
0 397
0 396
0 396
0 395
0 393
0 395
0 396
2 401
2 401
3 402
3 402
3 401
3 399
3 398
3 394
3 334
3 317
3 226
3 171
3 101
3 74
3 75
3 74
3 80
3 82
3 80
3 78
3 54
3 52
3 41
3 43
3 43
3 43
3 42
3 41
3 41
3 39
4 52
4 52
4 50
5 51
5 50
5 50
2 42
2 43
2 43
2 43
2 43
2 43
2 43
2 44
2 43
2 41
2 41
2 42
2 38
2 34
2 35
2 35
2 29
2 28
2 33
2 34
2 34
2 35
2 42
2 40
2 43
3 61
3 85
3 522
3 527
2 565
2 557
2 559
2 561
1 559
1 559
1 559
1 559
1 560
1 563
1 580
1 583
1 582
1 584
1 583
1 580
1 578
1 578
1 575
1 575
1 575
1 575
1 574
1 574
1 574
1 569
1 569
1 569
1 568
1 560
1 559
1 558
0 535
0 508
0 69
0 66
0 26
0 24
0 23
0 23
0 23
0 23
0 23
0 23
0 23
1 22
1 6
1 3
1 2
1 1
1 1
1 1
1 1
1 1
1 1
1 1
1 1
1 1
1 1
1 1
1 2
1 2
1 2
1 2
1 2
1 2
1 2
1 2
1 4
1 5
1 5
1 5
1 5
1 4
1 4
1 4
1 5
1 5
1 5
1 5
1 6
0 6
2 27
4 33
5 41
5 41
5 41
5 41
5 41
5 41
5 41
5 41
5 45
6 53
6 53
6 53
6 55
7 65
7 67
7 69
9 69
9 69
9 70
13 163
13 181
13 191
13 207
16 529
16 562
17 661
18 707
21 956
23 1131
30 1343
30 1404
47 1879
48 1916
50 1957
46 1963
44 2013
43 2018
44 2100
44 2103
44 2103
44 2114
44 2128
44 2133
45 2136
44 2130
45 2124
46 2147
46 2152
46 2198
45 2294
45 2320
45 2362
45 2395
45 2521
49 2548
47 2495
51 2555
51 2568
52 2527
51 2180
51 2132
51 1983
50 1906
49 1668
48 1592
40 1451
38 1329
18 775
18 738
18 737
18 735
18 735
18 735
18 736
18 737
18 738
17 721
16 702
15 700
15 699
15 698
15 696
14 666
14 664
14 603
14 474
14 437
14 402
14 377
12 227
9 172
8 98
7 83
9 78
21 112
17 70
17 68
16 68
16 66
15 76
15 78
15 78
15 77
15 77
15 77
15 76
15 75
15 78
15 78
15 78
15 78
15 77
16 155
16 160
22 244
22 258
23 265
23 265
23 265
23 267
23 268
22 269
22 269
22 269
22 270
22 271
22 332
21 331
22 339
21 337
9 354
10 407
12 457
12 463
12 463
15 461
15 464
16 467
27 476
43 484
46 490
46 504
47 507
48 529
51 580
51 587
50 590
50 593
49 518
49 510
43 421
62 593
62 596
62 611
62 614
62 614
62 615
62 618
62 623
62 622
62 621
61 620
61 556
61 556
61 554
61 546
62 479
63 435
62 386
63 397
63 395
60 397
57 395
56 394
42 405
30 405
29 402
28 385
29 369
27 329
26 305
26 303
26 306
28 307
28 304
26 304
26 303
10 127
10 116
9 101
9 98
9 98
9 98
9 90
9 87
9 88
9 82
9 80
9 86
9 87
7 85
7 86
6 98
6 102
5 95
4 84
4 87
4 93
9 721
13 752
15 758
18 874
18 887
15 887
15 899
14 899
14 896
14 895
14 895
15 897
15 1081
15 1123
15 1223
15 1264
15 1277
15 1339
15 1357
15 1369
17 1404
17 1442
17 1456
17 1458
17 1458
17 1457
18 1466
18 1462
18 1463
18 1456
17 1446
17 1445
17 1441
18 1439
18 1436
19 1420
12 685
7 644
7 604
7 600
7 599
10 624
11 635
11 644
12 655
12 673
12 691
11 714
11 496
11 386
12 360
12 362
13 354
14 301
14 284
12 248
12 228
12 209
12 201
12 200
12 202
12 201
11 187
11 189
11 191
10 201
10 217
10 218
10 222
11 303
11 304
12 311
12 317
12 320
13 333
13 333
13 332
10 310
9 293
9 286
8 275
8 265
7 250
6 224
6 224
6 215
5 211
6 231
6 228
6 222
6 218
6 218
7 233
7 235
7 235
8 234
8 234
8 236
8 236
8 236
8 229
10 223
12 214
12 214
13 214
15 126
15 123
14 116
14 110
14 107
13 98
13 101
13 102
13 102
18 111
18 114
17 118
17 110
17 107
17 107
18 107
18 108
18 107
17 80
17 80
17 81
17 81
17 80
16 63
16 64
16 62
15 61
16 64
18 192
18 197
28 365
28 375
30 384
30 377
31 385
27 382
26 383
26 384
26 403
26 401
27 401
27 404
27 403
27 402
27 403
21 390
21 387
21 385
21 386
21 386
21 386
21 385
21 385
21 385
22 389
22 399
22 408
27 417
28 424
28 422
28 423
28 434
29 491
42 708
40 627
40 628
26 471
27 565
29 650
30 663
30 673
30 679
30 682
30 683
29 664
29 665
29 664
28 663
28 664
28 664
28 662
28 662
28 662
28 661
27 660
27 660
29 679
32 682
48 718
49 717
49 710
49 703
48 691
43 685
42 684
42 685
41 683
41 662
36 538
24 241
22 119
22 102
22 92
23 90
24 93
24 97
24 97
24 99
24 97
24 98
24 100
24 110
25 145
25 195
27 328
28 440
28 482
28 515
28 517
28 520
28 520
28 520
26 504
23 503
7 463
11 462
13 486
13 494
14 504
14 508
14 507
14 513
15 514
15 515
15 515
15 516
17 517
17 517
18 518
18 517
17 518
18 514
18 516
18 513
18 517
18 517
18 507
17 496
17 452
16 357
19 234
19 147
19 147
19 137
22 204
22 313
22 334
22 341
22 344
21 342
21 343
17 343
14 320
14 300
14 292
14 291
14 291
14 286
14 286
15 286
15 285
15 285
11 283
11 283
11 281
11 282
11 277
10 275
10 275
10 277
10 274
10 274
10 274
10 274
10 274
10 283
6 271
5 269
5 253
5 267
2 198
2 73
4 70
4 65
4 65
4 66
4 66
3 64
5 69
5 71
5 74
5 83
15 131
16 142
16 143
17 152
18 155
18 153
18 155
18 161
19 163
20 163
20 164
27 183
30 190
30 195
44 366
45 379
50 395
50 395
51 393
59 415
60 428
60 427
67 454
67 442
67 447
66 446
65 447
64 448
65 454
66 494
68 554
72 623
81 700
94 895
94 917
95 921
83 869
84 888
84 895
85 911
85 909
85 913
85 917
85 916
85 929
85 957
86 976
77 960
71 987
71 982
62 806
59 793
55 783
55 783
55 783
47 735
47 732
47 728
104 698
172 706
194 712
195 715
194 712
194 710
193 679
193 615
192 582
205 725
194 609
177 383
177 371
177 363
177 362
177 359
177 361
177 349
177 346
177 348
177 348
177 345
176 314
176 294
175 284
175 291
175 264
175 259
175 259
175 258
174 257
174 255
172 254
171 254
152 253
151 253
92 249
36 241
21 235
20 243
19 244
19 246
19 264
18 268
15 274
0 91
1 112
1 434
1 439
1 466
1 526
1 571
1 586
1 589
1 589
1 587
1 587
1 586
1 585
1 585
1 585
1 585
1 584
1 584
1 584
1 584
1 586
1 594
1 602
1 617
1 618
1 619
1 643
1 644
1 647
1 639
0 638
0 643
0 634
0 634
0 623
0 618
0 603
1 275
1 263
1 315
1 268
1 251
1 264
1 270
1 276
1 319
1 324
1 326
1 326
1 326
1 328
1 330
1 331
1 332
1 334
1 335
1 333
1 325
2 318
2 301
2 302
2 299
2 281
2 278
2 267
2 266
2 265
2 263
1 252
1 242
1 238
1 233
1 234
1 222
1 217
1 125
1 114
1 98
1 82
1 78
1 75
1 28
1 28
1 28
1 28
1 28
1 26
1 26
1 26
0 21
0 20
0 20
0 20
0 20
0 19
0 19
0 17
0 17
0 8
0 8
0 9
0 7
0 7
0 7
0 7
0 7
0 7
0 4
0 4
0 4
0 3
0 3
0 3
0 3
17 5
17 4
17 4
17 4
17 4
17 4
17 4
17 4
17 4
17 4
17 6
17 6
17 6
17 6
17 6
0 4
0 4
0 2
0 2
0 2
0 2
0 2
0 2
0 2
0 2
0 2
0 3
0 3
0 3
0 3
0 3
0 3
0 3
0 3
0 3
0 3
0 3
0 3
0 3
0 3
0 3
0 3
0 3
0 3
0 3
0 2
0 2
0 2
0 2
0 2
0 2
0 2
0 2
0 2
0 11
0 11
0 11
0 11
2 11
3 11
3 11
3 10
3 11
3 11
3 11
3 11
3 11
3 13
3 13
3 4
3 4
3 4
3 4
1 4
1 4
0 4
0 4
0 4
0 4
0 4
0 3
0 3
0 3
0 3
0 3
0 3
0 3
1 3
1 3
1 3
1 2
1 2
1 2
1 2
1 2
1 2
1 2
1 2
1 2
1 2
1 2
1 2
1 2
1 0
0 0
0 0
0 0
0 0
0 0
0 0
0 0
0 0
0 0
0 0
0 0
0 0
0 0
0 0
0 1
0 1
0 1
0 1
0 2
0 2
0 2
0 2
0 2
0 2
0 2
0 4
1 4
1 4
1 4
1 4
1 4
1 4
1 4
1 4
1 4
1 4
1 4
1 4
1 4
1 4
1 4
1 4
1 4
1 4
1 4
1 4
1 6
1 6
1 6
1 6
1 5
1 5
1 5
1 5
1 4
1 4
1 4
1 4
1 4
1 4
1 4
1 0
0 0
0 0
0 0
0 0
0 1
0 1
0 1
0 1
0 1
0 1
0 1
0 1
0 1
0 1
0 1
0 1
0 1
0 1
0 1
0 0
0 0
0 0
0 0
0 0
0 0
0 0
0 0
0 0
0 0
0 0
0 0
0 0
0 0
0 0
0 0
0 0
0 0
0 0
0 0
0 0
0 0
1 0
1 111
1 112
1 112
1 112
1 112
1 112
2 112
2 112
2 112
2 112
2 112
2 112
2 112
2 112
2 112
2 2
2 2
2 1
2 1
2 1
2 1
1 1
1 1
1 1
3 1
6 1
7 1
8 1
8 1
10 1
10 1
10 1
10 2
10 2
9 2
9 2
9 2
9 1
9 1
9 1
9 1
9 1
9 1
9 1
10 1
10 1
10 1
11 1
11 1
11 1
12 1
12 1
12 1
40 4
40 4
40 5
40 5
39 5
39 5
39 5
36 5
33 5
33 5
33 6
33 6
31 6
31 6
31 6
31 5
31 5
31 5
31 5
31 5
37 5
37 5
37 5
37 5
37 5
37 5
37 6
36 6
36 7
36 7
35 7
35 7
34 7
34 7
34 7
34 7
7 3
7 3
7 3
7 3
7 3
7 3
7 3
7 3
8 3
8 3
8 2
8 2
8 2
8 2
8 2
9 2
9 2
9 3
10 3
10 3
4 3
4 3
4 3
5 3
5 3
5 3
5 2
5 4
5 3
5 3
5 3
5 24
6 58
7 73
7 135
65 348514
79 348516
80 348518
81 348518
81 348518
81 348518
81 348518
81 348518
81 348518
80 348518
80 348518
80 348518
80 348518
80 348515
80 348514
77 348161
23 68
23 5
23 6
23 6
23 6
23 6
23 6
25 6
24 6
24 6
25 6
27 8
31 9
31 9
54 9
60 9
60 8
58 6
57 6
57 6
57 6
44 4
46 3
45 3
45 3
45 3
45 3
49 5
45 4
45 4
45 4
45 4
46 4
46 4
46 4
46 4
46 4
46 4
45 4
45 4
45 4
45 4
45 4
44 4
40 4
38 4
39 4
37 2
36 2
34 2
10 2
8 3
7 3
8 3
9 4
9 4
6 5
6 6
6 6
5 6
5 6
5 6
5 6
4 4
4 4
4 4
5 4
5 4
4 4
4 4
4 4
4 4
4 4
4 4
5 4
5 4
5 4
5 4
5 4
5 4
5 4
4 4
3 4
8 4
8 4
9 4
9 4
9 4
9 4
8 4
8 1
8 1
8 1
8 1
8 1
10 2
10 2
10 2
9 3
9 3
9 3
9 3
9 4
9 4
9 4
9 4
9 4
10 4
12 4
59 4
58 4
60 4
60 4
60 4
60 4
60 4
60 4
60 5
60 5
55 5
55 5
55 5
55 5
55 4
55 4
55 4
56 4
56 4
56 4
56 4
56 4
54 2
55 2
57 2
83 3
85 3
85 3
86 3
86 3
85 3
85 3
84 3
83 3
82 4
80 4
33 4
37 5
37 5
38 11
38 12
38 12
38 12
38 12
38 11
38 11
38 11
38 11
38 12
38 12
38 11
39 11
39 11
39 13
38 13
38 13
38 13
37 13
37 13
30 13
33 13
15 12
14 15
14 15
13 15
13 14
11 14
11 14
11 14
11 14
11 14
11 14
11 14
7 13
7 12
6 6
6 6
6 6
6 6
6 6
6 6
6 6
6 6
6 6
6 5
6 5
6 5
6 5
6 5
6 3
6 3
6 3
5 3
5 3
5 3
5 3
1 3
0 0
0 0
0 0
0 0
9 0
9 0
9 1
9 1
9 1
9 1
9 1
9 1
9 1
9 1
9 1
9 1
9 1
9 1
13 4
4 4
4 4
4 4
4 4
4 4
4 4
4 4
4 4
4 4
4 4
4 4
5 6
5 6
5 6
5 6
3 6
3 6
3 6
3 6
3 6
3 5
3 5
3 5
3 5
4 5
4 5
3 3
3 3
3 3
3 3
3 3
3 3
3 3
3 3
3 2
1 0
1 0
1 0
1 0
1 0
1 0
1 5
1 5
1 5
1 5
1 5
1 5
1 6
1 6
1 6
1 6
1 6
1 6
1 6
1 6
1 6
1 6
1 6
0 6
0 6
0 6
0 6
0 6
0 6
0 6
0 6
0 6
0 6
0 6
0 6
0 6
0 6
0 7
16 14
17 14
22 14
26 14
37 9
37 9
37 9
37 9
37 9
37 9
37 10
38 11
38 11
38 11
39 16
39 17
39 17
39 17
39 17
39 17
39 17
39 17
39 17
40 17
40 17
40 16
40 16
40 16
40 16
40 16
40 16
40 16
40 16
40 16
40 16
36 16
21 9
19 9
10 9
8 9
2 8
2 8
1 8
1 8
1 8
1 8
1 8
1 9
1 10
1 16
0 11
0 10
0 10
0 10
0 10
0 10
0 14
0 15
0 27
0 28
0 28
0 28
0 30
0 31
0 32
0 26
0 26
0 26
0 25
0 25
0 25
0 25
0 25
0 25
0 25
0 53
0 56
0 73
0 78
0 83
0 100
0 116
0 142
0 147
0 173
0 233
0 273
0 292
0 321
0 335
0 338
0 342
0 339
0 340
1 327
1 329
1 346
1 358
1 358
1 362
1 362
1 362
1 362
1 362
1 362
1 362
1 363
1 363
1 363
0 363
0 363
0 335
0 323
0 296
0 288
0 282
0 269
0 238
0 206
0 200
0 191
0 30
0 5
0 5
0 5
0 4
0 3
0 3
0 3
0 3
0 4
0 4
1 4
1 3
1 3
1 3
1 3
1 3
1 3
1 3
1 3
1 3
1 3
1 3
1 3
1 5
1 5
1 5
1 5
1 5
1 5
1 5
1 5
1 5
1 5
1 3
1 3
1 3
1 3
1 3
1 3
1 1
1 1
1 1
1 0
1 0
1 0
1 0
0 0
0 0
0 0
0 0
0 0
0 0
0 0
0 0
0 42
0 42
0 42
0 42
0 42
0 42
0 42
0 42
0 42
0 42
0 42
0 42
0 42
0 42
0 42
0 0
0 0
0 0
0 0
0 0
0 0
0 0
0 0
0 0
0 1
0 1
0 1
0 1
0 1
0 1
0 1
0 1
0 2
0 2
0 2
0 2
0 2
0 2
0 2
0 2
0 2
0 2
0 2
0 2
0 2
0 2
0 2
0 2
0 2
0 3
0 3
0 3
0 3
0 3
0 3
0 3
0 3
0 3
0 2
0 2
0 2
0 2
0 2
0 2
0 2
0 2
0 2
0 1
0 1
0 1
0 1
0 1
0 1
0 1
0 1
0 1
0 1
0 1
0 1
0 1
0 1
0 1
0 1
0 1
0 0
0 0
0 0
0 0
0 0
0 0
0 0
0 0
0 0
0 0
0 0
0 0
0 0
0 0
0 0
0 0
0 0
0 0
0 0
0 0
0 0
0 0
0 0
0 0
0 0
0 0
0 0
0 0
0 0
0 0
0 0
0 0
0 3
0 3
0 3
0 3
0 4
0 5
0 5
0 5
0 5
0 5
0 5
0 5
0 5
0 5
0 5
0 4
0 4
0 4
0 4
0 3
0 3
0 3
0 3
0 4
0 4
0 4
0 4
0 4
0 4
0 4
0 4
0 4
0 4
0 4
0 4
0 4
0 1
0 1
0 1
0 1
34 1
34 1
191 2
191 2
191 2
191 2
191 2
191 2
191 2
191 2
191 2
191 2
191 2
191 2
191 2
190 2
190 2
3 1
0 1
0 0
0 0
0 0
0 0
0 0
0 0
0 0
0 0
0 0
0 0
0 0
0 0
0 1
0 1
0 1
0 1
0 1
0 1
0 1
0 1
0 1
0 1
0 1
0 1
0 1
0 1
0 1
0 1
0 1
0 1
0 1
0 1
0 1
0 2
0 2
0 2
0 9
0 9
0 9
0 9
0 9
0 9
0 9
0 9
0 9
0 9
0 9
0 9
0 8
0 8
0 8
0 8
0 8
0 8
0 8
0 8
0 8
0 8
0 8
0 8
0 8
0 8
0 8
1 9
1 15
1 16
1 16
1 18
1 17
1 18
1 19
1 19
1 12
1 13
1 13
1 13
1 13
1 13
1 30
1 33
1 34
1 34
1 34
1 34
1 35
1 37
1 40
1 50
1 50
1 52
1 54
1 54
2 54
2 54
2 54
2 54
2 54
2 54
2 54
1 52
3 45
7 46
7 46
7 44
7 44
7 43
7 42
7 44
7 43
10 42
10 42
10 42
10 44
10 43
11 30
11 30
11 32
11 41
11 46
11 57
11 61
11 55
10 48
10 46
11 52
12 52
12 50
12 50
12 50
12 50
12 50
12 50
12 50
12 50
11 51
10 51
10 51
6 49
6 49
6 49
6 50
6 50
6 50
7 50
7 49
4 49
4 48
4 48
4 45
4 44
3 44
3 44
3 43
3 22
3 17
3 12
3 11
3 11
3 11
3 11
7 5
6 5
6 5
6 5
6 9
6 10
6 10
7 11
7 11
7 11
7 10
7 9
7 9
7 9
7 9
7 9
7 8
6 8
6 8
6 8
6 8
6 9
6 9
6 9
6 9
6 7
6 7
6 7
8 7
8 7
8 7
8 7
8 7
8 7
9 6
11 6
7 6
7 6
7 6
7 6
7 2
7 2
7 2
6 1
6 1
7 1
7 1
8 1
9 1
9 1
9 1
9 1
7 1
7 1
7 1
7 1
7 1
7 0
7 0
8 6
8 6
8 6
8 6
8 6
8 6
8 6
8 6
8 7
8 7
8 9
7 9
4 10
4 10
4 10
4 10
4 10
4 10
4 10
7 10
7 10
6 10
6 10
4 10
4 10
4 10
5 10
6 10
6 10
6 10
6 10
6 10
6 10
6 10
6 10
5 10
5 5
5 5
5 5
5 5
5 5
8 5
8 5
8 5
8 4
8 3
8 7
8 7
8 9
8 9
8 9
8 9
8 10
5 10
5 10
6 10
6 10
6 10
6 10
6 10
7 10
7 10
4 10
3 10
7 10
11 10
11 10
11 10
11 10
11 10
11 10
11 10
10 9
10 9
10 9
11 9
12 9
12 9
12 9
12 9
12 9
12 8
12 2
12 2
12 1
12 1
12 1
12 0
12 0
12 0
12 0
11 0
11 1
11 1
20 1
20 1
19 1
19 1
19 1
23 3
24 3
21 3
22 3
24 3
24 3
24 3
25 3
25 3
25 3
25 6
25 6
23 6
23 6
23 6
23 6
4 7
4 7
4 7
4 8
4 8
4 8
4 8
4 8
4 8
4 8
5 8
5 8
5 8
5 7
5 8
5 8
5 10
5 10
6 10
6 10
6 10
10 10
11 10
11 10
9 10
9 10
8 10
8 10
9 10
9 10
9 7
9 7
9 7
9 7
9 7
9 7
9 3
9 3
9 3
9 3
9 3
9 3
9 3
9 3
9 3
9 3
8 3
8 3
23 3
23 3
23 2
23 2
24 0
30 0
30 0
33 0
35 0
37 0
38 0
38 0
40 1
40 1
41 1
41 1
42 1
42 1
42 1
42 1
42 1
42 1
42 1
42 1
42 1
42 1
42 2
42 2
42 2
42 2
42 2
42 3
42 3
42 3
42 3
42 3
27 3
22 3
20 3
18 3
18 3
18 3
18 3
16 3
12 3
6 3
4 3
2 2
2 2
2 2
2 2
3 2
2 2
7 3
7 9
7 9
7 9
7 23
7 26
7 28
7 29
7 30
7 29
7 29
7 29
7 29
7 29
7 28
7 28
7 28
7 22
7 22
7 22
7 9
7 9
7 5
7 4
7 4
7 4
7 4
8 4
9 4
10 4
12 6
12 6
12 7
11 7
9 7
13 7
12 6
12 6
12 6
12 6
12 5
12 3
12 3
12 3
12 3
12 3
12 3
12 3
12 3
12 3
12 3
13 3
13 2
13 2
13 2
13 2
13 2
13 2
13 2
13 2
11 2
11 2
11 2
22 2
23 2
22 2
21 0
21 0
21 0
21 0
22 0
16 0
16 1
16 4
16 5
16 7
16 7
16 7
18 7
22 7
23 7
23 7
23 7
23 7
29 7
29 7
34 7
33 7
33 7
33 7
35 7
35 7
35 7
35 7
36 7
36 7
36 7
36 7
36 7
18 7
17 7
16 7
16 7
16 7
16 7
14 7
13 7
13 7
13 6
13 2
13 2
13 0
12 0
11 0
11 0
7 0
6 1
6 1
6 1
6 1
6 1
6 1
1 1
1 1
1 1
1 1
2 1
2 1
2 1
2 1
1 1
1 1
1 1
1 1
1 1
1 1
1 1
1 1
1 1
1 1
1 1
1 1
1 1
1 1
1 1
1 1
1 2
1 2
1 3
1 3
0 3
0 3
0 2
0 2
0 2
0 2
0 2
0 2
0 2
0 2
0 2
0 2
0 1
0 0
0 0
0 0
0 0
0 0
0 0
0 0
0 0
0 0
0 0
0 0
0 0
0 0
0 0
0 0
0 0
0 0
0 0
0 0
0 0
0 0
0 0
0 0
0 0
0 0
0 0
0 0
0 0
0 0
0 0
0 0
0 0
0 0
0 0
0 0
0 0
0 0
0 0
0 0
0 0
0 0
1 0
1 0
1 0
1 0
1 0
1 0
1 0
1 0
1 0
1 0
1 0
1 0
1 1
1 1
1 1
1 1
1 1
0 1
1 1
1 1
1 1
1 1
1 1
1 1
1 1
1 1
1 1
1 0
1 0
1 0
1 0
1 0
1 0
1 0
1 0
1 0
1 0
1 0
1 0
1 0
1 0
1 0
1 0
1 0
1 0
1 0
1 0
1 0
1 0
1 0
1 0
1 0
0 0
0 0
0 0
0 0
0 0
0 0
0 0
0 0
0 0
0 0
0 0
0 0
0 0
0 0
0 0
0 0
0 0
0 0
0 0
0 0
0 0
0 0
0 0
0 0
0 0
0 0
0 0
0 0
0 0
0 0
54 3
54 3
54 3
54 3
54 3
54 3
54 3
54 3
54 3
54 3
54 3
54 3
54 3
54 3
54 3
1 0
0 2
0 2
0 2
0 2
0 2
0 2
0 2
0 2
0 2
0 2
0 2
0 2
0 3
0 3
0 3
1 6
1 10
1 10
1 10
1 10
1 10
1 10
1 10
1 10
1 10
1 10
2 10
15 9
16 9
16 9
16 9
15 0
15 0
15 0
15 0
15 0
15 0
15 0
15 0
15 0
15 0
14 0
14 0
0 0
0 0
0 0
0 0
0 0
0 0
0 0
0 0
0 0
0 0
0 0
0 0
0 0
0 2
0 2
0 2
0 3
0 3
1 3
2 3
2 3
3 3
3 3
3 3
3 3
3 3
3 3
3 3
3 3
3 3
3 3
3 1
3 1
3 1
3 1
2 1
1 0
0 0
0 0
1 6
1 6
1 6
1 6
1 6
1 6
1 6
1 6
2 6
2 6
2 6
2 6
2 6
2 6
2 6
1 0
1 0
1 0
1 0
1 0
1 0
1 0
1 0
0 0
0 0
0 0
0 0
0 0
1 0
1 0
2 0
2 0
2 0
2 0
3 0
3 0
3 0
3 0
3 3
3 3
3 3
3 3
3 3
3 3
3 3
3 3
3 3
3 3
3 3
3 3
2 3
2 3
2 3
2 0
2 0
2 0
2 0
2 0
2 0
2 0
2 0
2 0
2 0
1 0
1 0
1 0
1 0
1 0
1 0
1 0
1 0
62 1
62 1
62 1
62 1
62 1
62 1
62 1
62 1
61 1
61 1
61 1
61 1
61 1
61 1
61 1
61 1
0 0
0 0
0 0
0 0
0 0
0 0
0 0
0 0
0 0
0 0
0 0
0 0
0 0
0 0
0 0
0 1
0 1
0 1
0 1
0 1
0 1
0 1
0 1
0 1
0 1
0 1
0 1
0 1
0 1
0 1
0 0
0 0
0 0
0 0
0 0
0 0
0 0
0 0
0 0
0 0
0 0
0 0
0 0
0 0
0 0
0 0
0 0
0 0
1 0
1 0
1 1
1 1
1 1
1 1
1 1
1 1
1 1
1 1
1 1
1 1
1 1
1 1
1 1
2 1
2 1
4 4
4 4
4 4
4 5
4 5
4 5
4 5
4 5
4 5
4 5
4 5
4 5
4 5
4 5
4 5
4 6
4 6
4 6
3 6
3 6
3 6
1 5
1 5
1 5
1 5
1 5
16 5
16 5
16 5
16 5
16 5
16 5
16 5
16 5
16 5
16 5
15 2
15 2
15 2
15 1
15 1
0 1
0 1
0 1
0 1
0 1
0 1
2 2
2 2
2 2
2 2
2 1
2 1
2 1
2 1
2 1
2 1
2 1
2 1
2 1
2 1
2 1
2 2
2 2
2 2
2 2
2 2
2 2
2 2
2 2
2 2
2 2
2 2
2 2
2 2
2 2
3 2
3 1
3 1
3 1
3 1
3 1
3 1
1 0
1 0
1 0
1 0
1 0
1 0
1 0
1 0
1 0
1 0
1 0
1 0
1 0
1 0
1 0
1 0
1 0
1 0
1 0
1 1
1 1
1 1
1 1
1 1
1 1
1 1
1 1
1 1
1 1
0 1
0 1
0 1
0 1
0 1
0 1
0 1
0 1
0 1
0 1
0 1
0 1
0 1
0 1
0 1
0 1
0 1
0 1
0 1
0 1
0 1
0 1
0 1
0 0
0 0
0 0
0 0
0 0
0 0
0 0
0 0
1 1
9 1
9 1
9 1
10 1
11 1
11 1
11 1
11 1
11 1
12 1
12 1
13 1
13 1
14 1
14 1
14 1
14 1
14 1
14 1
14 1
14 1
14 1
14 1
14 1
14 1
14 1
14 1
14 1
14 1
14 1
14 1
15 1
21 1
20 1
19 0
19 0
14 0
14 0
14 0
11 0
11 0
10 0
10 0
10 0
10 0
10 0
10 0
10 0
10 0
3 0
3 0
1 0
1 0
1 0
1 0
1 0
3 0
6 0
8 0
10 1
10 1
11 1
11 1
11 1
11 1
11 1
12 1
11 1
11 1
11 1
11 1
11 1
11 1
11 1
11 1
11 1
11 1
11 1
11 1
11 1
12 1
12 1
12 1
12 1
12 1
12 1
12 1
12 1
12 1
12 1
12 1
10 1
5 1
3 1
3 0
2 2
2 2
1 2
1 2
1 2
1 2
1 2
0 2
0 2
0 2
0 2
0 2
0 2
0 2
0 2
0 2
0 2
0 2
0 2
0 2
0 2
0 2
0 2
0 2
0 2
0 2
0 2
0 2
0 2
0 2
0 2
0 2
0 2
0 2
0 2
0 2
0 0
0 0
0 0
0 0
0 0
0 0
0 0
28 4
28 4
28 4
28 4
28 4
28 4
28 4
28 4
28 4
28 4
28 4
28 4
28 4
28 4
29 4
1 0
1 0
1 0
1 0
1 0
1 0
1 0
2 0
2 0
2 0
2 0
2 0
2 0
2 0
2 0
2 0
2 0
2 0
2 0
2 0
2 0
3 0
3 0
3 0
3 0
3 0
3 0
3 0
3 0
3 0
3 0
3 0
3 0
3 0
3 0
2 0
2 0
2 0
2 0
4 2
4 2
4 2
4 2
3 2
3 2
3 2
3 2
3 2
3 2
4 2
6 2
5 2
8 2
10 2
10 2
11 2
11 2
11 2
11 2
11 2
11 2
11 2
11 3
13 3
14 3
15 3
15 3
15 3
15 3
15 3
14 3
14 3
14 3
16 3
16 3
12 1
12 1
12 1
12 0
12 0
12 0
10 0
10 0
10 0
9 0
9 0
7 0
7 0
7 0
6 0
6 0
6 0
6 0
6 0
6 0
6 0
6 0
6 0
5 0
3 0
3 0
0 0
0 0
0 0
0 0
0 0
0 0
