# Supplementary material for: From Insect to Man: Photorhabdus Sheds Light on the Emergence of Human Pathogenicity
Source: PLoS One. 2015 Dec 17;10(12):e0144937. doi: 10.1371/journal.pone.0144937 (PMC4683029; doi:10.1371/journal.pone.0144937)
Supplement: S3 Data — (ZIP) [file pone.0144937.s003.zip › pPAU1_37C_Expo_rep2.plot]

12 0
12 0
14 0
14 0
14 0
15 0
15 0
15 0
16 2
16 2
16 2
18 2
20 2
20 2
20 2
20 8
20 8
19 8
18 8
18 8
18 8
17 8
17 8
16 6
16 6
16 6
16 6
15 6
15 6
15 6
15 6
15 0
14 0
14 0
14 0
14 0
14 0
14 0
13 0
13 0
13 0
12 0
12 0
12 0
14 0
29 0
61 0
61 0
63 0
62 0
62 0
62 0
62 0
69 0
70 0
70 0
70 0
70 0
78 0
109 0
125 0
123 0
123 0
121 0
127 1
127 1
157 1
157 1
157 1
159 1
159 1
159 1
159 1
159 1
159 1
159 1
159 1
159 2
159 2
159 2
159 1
159 1
159 1
159 1
159 1
159 1
161 1
161 1
164 1
185 1
194 1
196 1
198 1
199 1
200 3
201 3
202 3
203 2
204 2
206 2
203 2
203 2
204 2
205 2
205 2
206 2
206 2
206 2
210 2
211 2
211 2
212 2
212 2
209 2
207 2
202 2
203 2
200 2
185 2
186 2
187 2
187 2
484 2
486 2
484 2
485 2
473 2
472 2
485 2
490 2
512 2
515 2
505 3
492 3
491 3
494 3
491 3
491 3
490 3
465 3
465 3
467 3
465 4
469 4
469 4
469 4
469 4
468 3
468 3
468 3
468 3
468 3
468 3
467 3
467 3
467 3
460 3
460 2
457 2
458 2
463 2
457 2
431 2
407 2
401 2
400 2
415 1
413 0
413 0
412 0
408 0
407 0
404 0
406 0
408 0
407 0
406 0
406 0
403 0
399 0
397 0
389 0
389 0
389 0
389 0
384 0
384 0
384 0
385 0
385 0
490 0
491 0
488 0
488 0
487 0
228 0
224 0
225 0
224 1
223 1
222 1
213 1
218 1
186 1
177 1
177 1
177 1
177 1
174 2
174 2
176 2
176 2
208 2
208 2
206 2
206 2
202 2
202 2
199 2
201 2
232 33
274 33
277 33
277 33
278 32
278 32
277 32
277 32
285 32
290 32
296 32
300 32
302 32
295 32
293 32
293 1
293 1
292 1
296 1
283 1
282 1
281 1
281 1
278 1
279 1
277 1
276 1
276 1
277 1
277 1
278 1
278 1
278 1
279 1
279 1
279 1
279 1
279 1
280 1
282 1
300 1
560 1
709 1
627 1
716 1
727 1
792 1
873 1
928 1
994 2
999 2
1004 1
1004 1
1004 1
1001 1
1003 1
1003 1
1002 1
1002 1
1003 2
1004 2
1011 2
1009 3
1008 3
1007 3
979 3
979 3
980 3
980 3
980 3
978 3
974 3
973 3
947 3
906 3
904 2
903 2
905 2
916 2
919 2
923 2
947 1
937 3
934 44
931 46
941 46
948 46
949 46
947 46
944 46
944 46
940 46
939 46
939 46
938 46
938 47
938 47
937 46
936 50
937 50
931 8
929 8
926 8
925 8
925 8
926 8
925 8
923 8
913 8
914 8
908 8
886 8
856 8
787 3
374 3
300 2
161 1
125 1
119 1
113 1
93 1
88 1
79 1
79 1
75 1
79 1
79 1
83 1
84 1
83 1
83 1
83 1
83 1
83 1
81 1
81 1
81 1
81 1
81 1
81 1
81 1
81 2
81 2
81 2
81 8
81 8
81 8
81 8
81 9
81 9
81 9
74 10
73 10
71 10
46 10
47 10
48 10
48 10
34 10
27 10
26 7
26 7
26 11
37 13
38 13
53 13
54 13
56 13
56 12
57 12
57 12
57 12
56 12
56 12
56 12
56 12
54 12
54 8
54 8
55 7
54 7
55 7
49 7
49 8
65 8
65 8
65 8
65 8
151 12
156 13
157 13
157 13
157 13
158 13
178 13
178 13
182 13
183 13
182 13
193 13
189 13
190 13
191 13
191 13
191 13
190 13
191 13
190 13
191 13
195 14
199 14
202 15
206 16
206 16
206 15
205 15
205 15
205 16
217 16
218 14
220 14
265 14
268 14
296 14
1230 18
1231 19
1232 19
1233 19
1231 18
1231 18
1231 18
1231 18
1231 18
1231 18
1231 18
1231 18
1220 17
1219 17
1204 17
273 13
271 13
271 12
272 12
285 12
285 13
285 13
285 13
286 13
286 13
287 13
289 13
289 13
286 12
293 12
293 12
292 12
301 18
279 18
270 18
238 18
237 18
172 13
168 13
171 13
183 13
192 13
189 13
168 13
168 13
165 13
164 13
163 13
154 7
154 7
153 7
154 7
153 7
153 8
153 8
153 8
153 8
153 8
150 7
150 7
151 6
149 6
276 29
284 29
284 29
285 30
286 26
284 26
283 28
283 28
251 29
252 29
225 29
222 29
221 29
221 32
221 33
222 34
223 34
224 35
224 36
224 36
224 36
224 36
226 36
226 37
243 37
242 37
241 37
240 37
242 37
241 37
230 37
230 36
230 36
232 36
231 36
231 36
230 36
230 36
230 36
229 36
222 36
222 36
222 36
225 36
225 36
224 36
226 36
226 36
224 36
221 36
215 37
186 37
187 38
188 38
188 38
196 39
204 39
212 39
214 39
211 39
211 39
211 39
209 39
209 38
212 38
213 38
213 38
213 38
213 38
213 38
213 38
212 38
211 38
85 12
79 12
79 12
79 12
79 12
79 12
77 12
77 12
71 11
70 11
70 11
71 11
71 12
72 7
74 6
74 6
73 6
72 5
74 5
75 5
76 7
76 7
73 7
73 6
57 6
58 6
109 6
109 6
107 6
108 6
108 6
108 6
108 6
107 6
106 6
106 6
106 6
106 6
106 6
106 6
106 9
107 9
108 9
105 9
105 12
105 12
103 13
103 12
107 12
177 15
363 15
381 15
384 14
448 14
447 14
436 15
426 19
421 19
420 21
419 21
420 21
420 21
420 21
424 21
424 21
425 21
424 21
424 21
361 21
364 21
364 21
364 21
364 22
364 22
363 22
363 22
363 22
364 22
362 22
367 22
700 39
793 39
808 39
809 39
808 39
809 38
808 38
806 38
806 38
807 38
807 38
805 38
804 38
803 36
803 36
803 36
803 36
801 36
801 36
758 36
761 36
762 40
768 40
768 41
768 41
769 43
770 45
770 45
774 45
785 45
785 45
785 45
784 44
814 42
818 42
818 42
818 45
827 43
828 42
828 42
828 43
1082 54
1016 51
840 52
834 53
1014 56
1019 59
1019 59
1026 54
1098 61
1102 60
1103 55
1103 56
1109 57
1116 59
1117 59
1118 58
1119 58
1119 58
1119 58
1120 58
1120 58
1118 58
1122 58
1122 58
1122 57
1123 57
1121 57
1120 57
1119 57
1104 57
955 55
934 55
673 39
652 39
650 39
650 39
652 39
633 38
720 42
721 42
719 42
723 43
721 43
721 44
721 44
721 44
721 44
720 44
719 44
719 44
719 44
701 43
701 43
701 43
687 42
688 42
687 42
682 41
676 39
674 39
673 39
662 39
663 39
663 39
663 39
679 39
690 39
695 39
700 36
702 36
704 36
698 36
698 36
465 24
457 22
448 22
463 22
299 21
310 18
331 17
330 17
262 10
277 13
275 13
275 11
358 11
356 9
357 9
361 9
367 9
370 9
372 9
373 436
373 436
377 436
388 436
388 436
388 436
385 436
387 436
388 436
388 436
388 436
402 436
402 436
403 436
403 436
403 9
403 9
401 9
400 9
312 3
314 3
313 3
309 3
308 3
309 3
309 3
313 5
313 5
313 5
313 5
319 5
331 5
331 5
331 5
330 5
330 5
332 5
332 5
333 5
334 6
335 6
346 7
392 9
425 9
433 9
440 9
426 9
409 9
408 9
413 10
415 11
417 11
419 11
419 11
419 11
414 10
413 10
393 10
385 10
388 10
416 10
422 10
423 10
413 7
418 7
421 7
331 7
329 7
325 7
323 7
316 7
314 7
312 7
310 7
308 7
303 7
292 7
307 7
376 8
412 8
423 8
436 8
456 8
478 8
510 9
663 10
686 10
703 11
777 11
779 11
779 11
779 11
777 11
777 11
778 11
778 11
779 11
780 11
780 11
777 9
777 9
776 9
774 9
769 9
760 9
793 9
795 9
798 9
801 9
801 10
804 10
804 10
802 10
798 9
774 10
732 8
695 8
687 8
680 8
678 8
761 8
755 7
742 6
731 6
730 6
723 6
725 6
725 6
725 6
726 6
726 5
718 5
713 5
672 5
674 20
671 20
670 20
666 20
665 20
663 20
663 20
663 20
663 20
664 20
666 20
666 20
656 21
657 21
650 21
641 21
642 6
562 5
543 5
541 5
534 5
503 5
486 4
425 3
282 2
260 2
246 2
181 1
180 1
181 1
181 1
161 1
157 1
155 1
155 1
155 1
157 1
157 1
155 1
155 1
148 1
143 1
155 1
167 1
144 1
144 1
143 1
142 1
141 1
141 1
152 1
154 1
152 1
152 1
152 1
152 1
152 1
141 1
140 1
64 1
64 1
63 1
61 1
61 1
61 1
60 1
60 1
60 1
60 1
60 1
60 1
60 1
60 1
60 1
59 1
58 1
58 1
58 1
57 1
57 1
57 1
59 1
57 1
56 1
56 1
56 0
55 0
55 0
55 0
55 0
53 0
53 0
50 0
50 0
48 1
48 1
48 1
50 1
51 1
51 1
51 1
51 1
51 1
51 1
51 1
51 1
51 1
51 1
51 1
51 0
51 0
51 0
51 0
47 0
47 0
23 0
28 0
26 0
26 0
25 0
25 0
25 0
25 0
14 0
13 0
13 0
13 0
13 0
13 0
13 0
13 0
10 0
10 0
11 0
11 0
11 0
11 0
11 0
13 0
12 0
12 0
12 0
12 0
13 0
13 0
13 0
13 0
13 0
13 45
13 45
13 45
13 45
13 45
11 45
11 45
11 45
11 45
11 45
12 45
12 45
12 45
12 45
12 45
12 0
12 0
12 0
12 0
12 0
12 0
12 0
12 0
12 0
12 0
12 0
12 0
12 0
12 0
12 0
12 0
12 0
12 0
12 0
12 0
12 0
12 0
12 0
12 1
12 1
12 1
5 1
5 2
5 2
5 25
5 25
5 25
5 25
5 25
5 25
5 25
5 25
5 25
5 25
5 25
7 24
7 24
7 24
6 24
6 23
7 0
7 0
8 0
6 0
6 0
6 0
6 1
6 1
5 1
5 1
5 2
5 2
5 2
5 2
5 2
5 2
5 2
4 2
4 2
4 2
4 2
4 2
4 2
3 2
3 2
3 1
3 1
3 1
4 1
4 1
4 1
4 1
4 1
4 1
4 1
4 1
5 1
5 1
5 1
5 1
5 1
5 1
6 1
5 1
5 1
5 1
5 1
5 1
5 1
6 1
6 2
5 2
6 2
6 2
6 2
6 2
6 2
8 2
7 2
7 2
7 2
7 2
7 2
7 2
7 2
7 1
7 1
7 1
5 1
5 1
5 1
5 1
5 1
4 1
4 1
4 2
4 1
4 1
6 1
6 1
6 1
17 2
21 2
21 2
21 2
21 2
22 2
22 2
22 2
22 2
22 2
22 2
22 1
21 1
21 1
22 1
835 23
831 23
831 23
831 23
833 23
835 23
835 23
836 23
836 23
836 23
836 23
836 23
836 23
836 23
836 23
26 1
26 1
27 1
25 1
25 1
25 1
25 1
25 1
24 1
24 1
22 1
22 1
22 1
22 1
25 1
33 1
33 1
45 1
46 1
48 1
50 1
50 1
50 1
50 1
50 1
50 1
50 1
50 1
50 1
50 1
50 1
50 1
50 1
50 1
50 1
50 1
50 1
50 1
50 1
50 1
49 1
49 1
46 1
38 0
37 0
36 0
33 0
33 0
33 0
34 0
34 0
34 0
34 0
34 0
34 0
34 0
34 0
34 0
33 0
34 0
34 0
34 0
32 0
31 0
76 7
75 7
75 7
75 7
75 7
75 7
75 7
75 7
75 7
80 7
81 7
79 8
79 8
79 8
83 8
83 8
38 1
37 1
37 1
36 1
34 1
34 1
34 1
34 1
28 1
27 1
15 0
14 0
12 0
11 1
11 1
11 1
11 1
11 1
11 1
11 1
11 1
12 1
11 1
11 1
14 1
14 1
14 1
14 1
14 0
14 0
14 0
14 0
14 0
14 0
14 0
14 0
14 0
14 0
14 0
14 0
14 0
14 0
14 0
14 0
14 0
14 0
14 0
14 0
14 0
14 0
19 0
19 0
19 0
26 0
26 0
26 0
26 0
26 0
26 0
26 0
26 0
26 0
26 0
26 1
26 1
26 1
15 1
15 1
8 1
8 1
8 1
4 1
4 1
4 1
4 2
4 2
4 2
4 2
4 2
9 2
9 1
9 1
9 1
9 1
9 1
9 1
9 1
17 1
17 1
19 1
19 0
19 12
19 12
19 12
13 12
14 12
14 13
12 13
12 13
12 14
14 15
16 18
16 18
16 18
16 18
22 18
22 20
25 21
25 9
25 9
25 9
25 9
25 9
23 8
23 8
23 8
22 6
22 6
20 4
20 4
20 3
22 3
21 3
21 3
21 2
21 2
19 0
19 8
20 464
20 477
20 477
20 477
20 477
20 477
20 485
20 485
19 485
18 485
18 485
18 485
18 485
18 485
18 485
18 485
18 485
17 8
17 8
17 8
17 8
17 8
17 0
17 0
17 0
17 0
17 0
17 0
17 0
17 0
17 0
16 0
7 0
7 0
7 0
7 0
7 0
7 0
7 0
8 0
7 0
7 0
7 0
7 0
7 0
6 0
6 0
6 0
6 0
6 0
1 0
1 0
1 0
3 1
2 1
2 1
2 1
2 2
2 2
2 3
2 3
2 3
2 3
2 3
2 3
2 3
2 3
2 3
2 3
2 3
4 3
4 4
4 7
2 6
2 6
2 7
3 8
3 8
3 8
3 8
3 8
3 8
3 8
4 8
4 8
4 8
2 7
2 7
2 4
2 4
2 4
2 4
1 1
2 1
2 1
2 1
2 1
2 1
2 1
5 1
5 1
5 1
5 1
5 1
5 1
5 1
5 1
5 1
7 0
7 0
7 0
7 0
7 0
7 0
5 0
5 0
5 0
5 0
5 0
8 0
8 0
8 0
8 0
8 0
8 0
8 0
8 0
8 0
8 0
8 0
8 0
8 0
8 0
8 0
6 0
5 0
5 0
5 0
5 0
5 0
5 0
5 0
5 0
5 0
5 0
5 0
5 0
5 0
5 0
5 0
5 0
5 0
5 0
5 1
5 1
5 1
5 1
5 1
5 1
5 1
5 1
5 1
5 1
5 1
5 1
5 1
4 1
4 1
4 0
4 0
4 0
4 0
2 0
2 0
3 0
19 0
19 0
19 0
18 0
18 0
17 0
17 0
17 0
17 0
17 0
17 0
17 0
17 0
17 0
17 0
1 0
0 0
0 0
0 0
0 0
0 1
0 1
1 1
1 1
1 1
1 1
1 2
1 2
1 5
1 5
1 5
1 5
1 5
1 5
1 5
1 4
1 4
1 4
0 4
0 4
0 4
0 3
0 3
0 3
0 3
0 3
0 3
0 3
0 4
0 4
0 1
0 1
0 1
1 1
2 1
2 1
2 1
2 1
2 1
2 1
2 1
2 1
4 1
4 1
4 1
4 1
4 1
4 1
4 1
4 1
4 1
4 1
11 1
11 1
11 1
11 1
11 1
9 1
9 1
9 1
9 1
9 1
9 1
9 1
9 1
9 1
9 1
9 1
2 1
2 1
2 1
2 1
2 1
2 1
2 1
2 1
3 1
3 1
3 1
3 1
3 1
3 1
3 1
3 1
3 1
3 1
4 1
4 1
4 1
4 1
4 1
3 1
3 1
3 1
3 1
3 1
3 1
3 1
3 6
3 8
3 8
3 10
3 12
3 12
3 48
3 49
2 50
1 149
1 174
1 189
1 192
1 192
1 192
1 192
1 193
1 193
1 193
1 193
1 194
1 196
1 196
2 196
2 196
2 196
2 196
2 196
2 196
3 196
4 196
4 196
4 196
4 196
4 196
4 197
4 197
4 197
4 198
3 197
3 197
3 197
3 197
3 197
3 197
3 201
3 201
2 201
2 201
2 201
2 201
2 203
2 223
2 222
2 222
2 230
2 239
2 243
2 244
2 244
2 245
1 240
1 257
1 258
1 269
1 273
1 324
1 444
1 444
1 453
1 450
1 446
1 450
1 442
1 441
1 441
1 441
1 441
1 439
1 411
1 407
1 406
1 294
1 288
1 281
1 281
1 281
1 280
1 287
1 290
1 305
1 308
1 338
1 406
1 406
1 406
1 409
1 561
1 563
1 569
1 570
1 577
0 577
0 587
0 587
0 587
0 587
0 587
0 586
0 588
0 597
0 598
0 600
0 600
0 600
0 599
0 604
0 604
0 604
0 654
0 654
0 656
0 657
0 657
0 656
0 656
0 670
1 705
1 688
1 686
1 684
1 695
1 693
1 694
1 697
1 623
1 619
3 607
5 601
5 546
5 372
5 369
5 363
5 331
5 332
5 340
5 340
5 341
7 346
7 346
7 346
7 346
7 345
3 344
3 365
3 375
3 405
3 439
3 632
3 635
3 635
3 623
3 601
1 579
1 576
1 533
1 531
1 515
1 515
1 513
1 417
1 414
1 411
1 411
1 410
1 410
1 411
1 412
1 411
1 412
1 412
1 412
1 409
2 400
2 398
2 397
2 397
2 397
2 397
2 390
2 390
2 390
2 390
2 389
2 389
2 386
2 388
3 411
3 411
2 398
1 360
1 358
1 358
1 358
3 349
3 349
3 348
3 346
3 353
3 353
3 353
3 353
3 353
3 353
3 353
3 353
3 353
3 349
3 344
1 343
1 342
1 337
1 337
1 337
1 337
1 336
1 336
1 309
1 287
1 255
1 229
1 44
1 42
1 41
1 41
1 39
1 39
1 39
104 39
104 39
104 39
104 39
104 39
104 39
104 39
104 38
104 38
104 38
104 38
104 38
104 38
104 38
104 37
1 37
1 37
1 37
1 36
1 36
1 36
1 36
1 36
1 36
1 36
1 36
1 36
1 36
1 36
1 36
1 36
1 34
0 9
0 9
0 9
0 9
0 10
1 9
1 8
2 8
2 8
2 8
2 8
2 1
2 1
2 1
2 1
2 1
2 1
2 1
2 1
2 2
6 2
6 2
6 2
6 2
466 2
466 2
466 2
466 2
466 2
466 2
466 2
466 2
466 2
466 2
466 2
462 2
462 2
462 2
462 2
2 2
2 2
2 2
2 2
2 2
2 2
2 2
2 2
2 2
2 2
2 2
2 2
2 2
2 2
2 2
2 2
2 2
2 2
2 2
2 2
2 2
2 2
2 2
2 2
2 2
2 2
0 0
1 0
1 0
1 0
1 0
1 0
1 0
1 0
1 0
1 0
1 0
1 0
1 0
1 0
1 0
1 1
1 1
0 1
0 1
0 1
0 1
0 1
0 1
0 1
0 1
0 1
0 1
0 1
0 1
0 1
0 1
0 0
0 0
1 0
1 0
1 0
1 0
1 0
1 0
1 0
1 0
1 0
1 0
2 0
2 0
3 0
3 0
3 0
2 0
2 0
2 0
2 0
2 0
2 0
2 0
2 0
2 0
2 0
1 0
1 0
1 0
0 1
0 1
1 1
1 1
1 1
1 1
2 1
2 1
2 1
2 1
2 1
2 1
2 1
2 1
2 1
2 0
2 0
1 0
2 0
2 0
2 0
1 0
1 0
1 0
1 0
1 0
1 0
1 0
1 0
1 0
1 0
1 0
1 0
1 1
1 1
1 1
2 1
1 1
1 1
1 1
1 1
1 1
1 1
1 1
1 1
1 1
1 1
1 1
1 1
1 0
1 0
1 0
1 0
0 0
0 0
0 0
0 0
0 0
0 0
0 0
0 0
0 0
0 0
0 0
0 0
0 1
0 2
0 2
0 2
0 2
0 2
0 2
0 2
0 2
0 2
0 2
0 2
0 2
0 2
0 2
0 2
0 0
2 0
2 0
2 0
2 0
2 0
2 0
2 1
2 1
4 2
5 2
5 2
5 2
6 2
14 2
14 4
14 4
12 4
12 6
15 6
20 6
20 6
20 5
20 5
20 5
18 6
17 6
17 6
17 6
17 6
9 6
9 5
9 5
9 5
7 4
4 3
0 3
0 3
0 3
0 3
0 3
0 89
0 89
0 89
0 89
0 90
0 90
0 89
1 89
1 89
1 89
1 89
1 89
1 89
1 89
1 89
1 3
1 3
1 3
1 3
3 2
7 2
7 2
16 2
16 2
16 2
16 2
16 2
16 1
16 0
16 0
16 0
16 0
16 0
16 0
16 0
14 0
22 0
12 0
13 0
13 0
13 0
13 0
13 0
13 0
13 0
16 0
16 0
18 0
41 0
75 1
82 1
87 1
88 1
88 1
88 1
88 1
88 1
88 1
88 1
88 1
88 1
85 1
85 1
85 1
86 1
86 1
87 1
90 1
90 1
90 1
91 1
91 1
91 1
93 1
93 1
92 1
92 1
92 1
93 1
93 1
93 1
93 1
93 1
94 1
94 1
94 1
96 1
96 1
96 1
100 1
108 1
124 1
124 1
124 1
124 1
125 1
125 1
127 1
127 1
144 1
157 1
162 1
244 1
252 1
249 1
249 1
242 1
243 1
243 1
236 1
236 2
236 2
236 3
236 3
236 3
237 3
436 5
436 5
436 5
436 5
433 5
415 5
381 4
379 4
375 4
374 3
374 3
374 3
375 2
375 2
375 2
375 1
181 0
181 0
180 0
180 0
179 0
178 0
178 0
177 0
181 0
182 0
183 0
182 0
182 0
182 0
180 0
180 0
192 15
193 15
193 15
191 15
191 15
191 15
192 15
192 15
199 16
200 16
202 16
198 16
196 16
194 16
188 16
169 1
162 2
162 2
160 2
160 2
159 2
161 2
160 2
165 5
147 7
133 7
126 7
46 8
43 9
43 9
44 9
44 9
44 9
45 9
45 9
48 9
48 9
48 9
48 9
47 5
47 5
47 5
50 5
85 5
189 5
193 4
194 4
194 4
202 4
209 4
213 4
230 5
249 5
285 5
290 5
308 5
311 5
311 5
312 5
308 5
309 5
309 5
309 5
310 5
309 5
303 5
309 5
439 5
442 5
443 5
443 5
443 5
443 5
446 5
445 5
444 5
445 5
446 5
446 5
446 5
445 5
440 4
439 3
439 3
439 3
439 3
437 3
436 3
438 3
439 3
439 3
439 3
439 3
441 3
437 3
435 3
433 2
430 1
431 1
432 1
440 1
440 1
440 1
449 1
501 2
623 2
651 2
659 2
658 2
658 2
658 2
657 2
658 2
658 2
655 2
641 2
611 2
517 2
512 2
512 2
512 1
511 1
507 1
506 1
488 0
458 0
438 0
436 0
417 0
416 0
416 1
419 1
421 1
422 1
422 1
421 1
421 1
415 1
401 1
390 1
281 1
280 1
279 1
280 1
280 0
279 0
276 0
277 0
277 0
276 0
276 0
276 0
275 0
274 0
274 0
274 0
273 0
273 0
273 0
273 0
273 0
271 0
270 0
270 0
269 0
269 0
269 0
269 0
269 0
268 0
266 0
266 0
265 0
258 0
260 0
257 0
202 0
154 0
62 0
44 0
40 0
40 0
40 0
40 0
40 0
39 0
39 1
38 1
31 1
25 1
25 1
25 1
23 1
17 1
13 1
12 1
11 1
10 1
10 3
9 3
7 3
7 3
6 2
6 2
3 2
2 2
2 2
2 2
2 2
2 2
2 2
2 2
2 2
2 2
2 2
2 2
2 2
2 2
2 2
4 2
3 2
3 2
3 2
3 2
3 2
3 2
4 2
4 2
4 2
5 2
6 2
6 2
6 2
6 2
8 2
6 4
6 4
6 4
6 4
5 3
5 174
5 174
5 174
5 173
5 174
5 175
5 175
5 175
15 183
13 183
13 183
13 184
13 183
13 183
13 183
15 12
15 13
15 13
15 13
15 13
15 13
15 13
16 13
16 13
16 13
16 13
16 13
16 13
17 13
17 14
17 14
17 14
15 14
15 13
15 13
15 13
15 13
5 5
4 5
4 5
4 5
4 5
4 5
4 5
3 5
3 5
3 4
3 4
3 5
3 5
3 5
3 5
3 5
3 5
3 5
3 5
3 5
3 5
3 5
2 5
2 5
2 5
1 5
0 5
0 5
0 5
1 5
1 5
1 4
1 4
1 4
1 4
1 4
1 4
1 4
2 5
2 5
2 4
2 2
2 2
2 2
2 4
1 4
1 15
1 15
1 16
1 16
1 16
1 16
1 16
1 16
0 15
0 15
0 16
0 16
0 16
0 16
0 16
0 16
0 16
0 16
0 16
0 16
0 16
0 16
0 16
0 16
0 16
0 16
0 16
0 16
0 16
0 16
0 16
0 16
0 16
1 19
1 19
1 19
1 19
1 19
1 18
1 32
1 32
1 32
1 32
1 32
1 32
1 32
1 32
1 32
0 29
0 29
0 30
0 30
0 30
0 30
0 16
0 16
0 16
0 16
0 16
0 16
0 16
0 16
0 16
0 16
0 16
0 16
0 16
0 16
0 16
0 18
0 18
0 16
0 16
0 4
0 4
0 4
0 4
0 4
0 4
0 5
0 8
0 10
0 12
0 11
0 13
0 13
0 15
0 15
1 15
1 20
1 21
1 24
1 45
8 368
8 399
8 442
9 468
9 482
9 497
9 533
9 537
9 538
9 539
9 539
9 540
9 542
9 546
9 547
9 548
9 551
9 553
10 554
10 554
10 554
10 554
10 554
10 554
10 557
10 583
10 606
10 609
10 612
10 614
10 615
10 615
10 615
10 615
10 615
10 617
10 619
10 619
10 622
10 638
10 639
10 641
11 642
11 645
11 645
11 664
11 665
11 665
11 666
21 910
21 911
21 908
21 907
21 908
21 909
21 909
21 909
20 917
20 917
20 915
20 913
20 930
20 929
20 929
20 928
20 928
19 925
19 924
19 923
19 918
19 909
19 906
19 823
12 449
11 415
11 410
11 408
11 407
11 409
11 410
11 410
11 409
11 409
11 409
11 409
11 405
11 404
11 403
11 402
11 401
11 399
10 398
10 398
10 398
10 398
10 401
10 402
10 403
10 379
10 354
10 370
10 367
10 365
10 365
10 369
10 369
10 371
10 372
10 370
10 394
10 393
10 392
10 377
10 378
10 375
10 375
10 364
9 369
9 366
9 369
8 368
8 366
0 121
0 236
0 236
0 238
0 238
0 238
0 238
0 238
0 230
0 232
0 232
0 232
0 215
0 215
0 215
0 214
0 214
0 214
0 214
0 214
0 214
0 214
0 214
0 214
0 214
0 214
1 214
1 214
1 214
3 214
3 213
3 213
3 214
3 214
4 213
4 213
4 213
4 213
6 236
6 236
6 234
5 234
5 235
5 235
5 235
3 233
3 232
3 232
3 224
3 222
3 222
2 204
2 204
0 180
0 180
0 176
0 174
0 173
0 172
0 171
0 144
0 143
0 143
0 143
0 143
0 143
0 143
0 142
0 128
0 128
0 128
0 128
1 127
1 124
1 10
1 10
1 8
1 8
1 8
1 8
1 8
1 7
1 7
1 7
1 7
1 9
1 9
0 9
0 9
0 9
0 9
0 9
0 9
0 9
0 9
0 9
0 9
0 9
0 9
0 9
1 9
1 7
1 6
1 6
1 9
1 10
1 10
1 10
2 10
2 10
2 10
2 10
2 10
2 10
2 10
2 10
2 10
2 10
2 10
2 9
2 6
3 6
3 6
3 6
3 6
3 6
3 6
2 6
2 7
2 7
2 7
2 11
3 44
3 45
3 45
3 45
3 43
3 43
3 43
3 43
3 44
3 46
3 48
3 48
3 49
3 49
3 49
2 17
2 18
2 19
2 29
2 29
2 29
2 29
2 29
2 32
2 46
2 144
2 211
2 238
2 265
2 289
2 305
2 350
2 355
2 361
2 362
2 363
2 364
2 376
2 376
2 381
2 395
2 397
2 397
2 397
2 400
2 400
2 399
3 399
2 399
2 399
2 399
2 399
8 399
8 399
8 399
8 399
8 399
8 399
8 399
8 399
8 397
8 397
7 397
6 397
6 397
6 397
6 397
6 402
0 402
0 402
0 402
0 406
1 583
1 606
1 613
1 616
1 618
1 620
1 622
1 623
1 623
1 621
1 622
1 619
1 619
1 620
1 621
1 623
1 625
1 626
1 628
1 622
1 626
1 628
1 630
1 630
1 631
1 626
1 499
1 410
1 375
1 365
1 366
1 343
1 342
1 342
1 341
1 343
1 346
1 352
1 345
1 348
1 341
2 329
2 329
2 329
2 329
2 325
2 325
2 325
2 331
2 333
2 338
2 340
2 342
2 343
2 343
2 343
2 344
2 344
1 344
1 345
1 348
1 349
1 349
1 372
1 373
1 373
1 372
1 372
1 372
1 372
1 375
1 373
1 370
0 167
0 174
0 181
0 181
0 181
0 182
0 182
0 182
0 182
0 183
0 183
0 183
0 181
0 179
0 179
0 176
0 175
0 709
0 714
0 717
0 739
0 737
0 734
0 731
0 724
0 708
0 708
0 701
0 701
0 691
0 692
0 692
0 693
0 692
0 692
0 690
0 687
0 673
0 671
0 669
0 669
0 671
0 671
0 674
0 676
0 678
0 678
0 678
0 671
0 669
0 664
0 664
0 661
0 661
0 662
0 662
0 662
0 662
0 662
0 659
0 658
0 660
0 662
8 639
8 638
8 637
8 637
8 637
8 637
8 637
8 637
8 636
8 632
8 628
8 616
8 610
8 610
8 611
8 610
0 611
0 611
0 611
0 608
0 605
0 605
0 605
0 605
0 605
0 604
0 599
0 52
0 46
0 41
0 19
0 19
0 19
0 19
0 19
0 19
0 18
0 17
0 16
0 15
0 16
0 16
0 16
0 16
0 16
0 16
0 15
0 15
0 15
0 15
0 16
0 14
0 14
0 14
0 14
0 12
0 12
0 11
0 11
0 11
0 11
0 9
0 9
0 9
0 9
0 8
0 14
0 14
2 14
2 14
2 15
2 10
2 10
2 10
2 10
2 10
2 10
2 10
2 12
2 12
2 13
2 13
2 15
2 15
7 200
7 199
7 199
7 198
7 198
7 197
7 197
7 197
7 197
7 197
7 195
7 196
7 196
7 196
7 196
2 10
2 10
2 10
4 10
4 10
8 10
8 10
8 10
8 10
8 10
8 10
8 10
8 10
8 10
8 10
8 10
8 10
8 10
8 10
7 10
4 10
4 11
3 11
3 12
3 12
3 12
3 12
3 12
3 12
3 12
3 12
3 12
3 12
3 12
3 12
3 12
3 13
3 12
3 12
3 12
3 6
3 7
1 7
1 7
1 7
1 7
1 7
1 7
1 7
1 7
1 7
1 7
1 7
1 7
1 7
1 7
1 5
1 5
1 5
1 5
1 5
1 5
1 5
1 5
1 5
1 5
1 5
1 5
1 5
1 4
1 6
1 6
1 6
1 6
1 6
1 6
0 6
0 6
0 6
0 6
0 6
0 6
0 6
0 6
0 6
0 6
0 6
0 6
0 6
0 6
0 5
0 5
0 7
0 7
0 7
0 7
0 7
0 7
0 7
0 9
0 9
0 10
0 10
0 10
0 10
0 10
0 10
0 11
0 10
1 9
1 9
1 9
2 9
2 9
2 8
2 6
2 6
2 5
2 5
2 5
2 5
2 5
2 5
2 5
2 5
2 5
2 5
2 5
2 5
2 5
2 5
2 5
2 5
2 5
2 5
2 5
2 6
2 6
2 6
2 6
2 7
2 7
2 7
2 4
2 4
2 4
2 4
2 4
2 4
2 4
2 4
2 5
2 5
2 5
2 5
2 5
2 6
2 42
2 42
3 44
3 44
3 44
3 45
3 48
3 48
3 48
3 47
3 47
3 47
4 48
4 48
4 48
4 13
4 12
4 12
4 12
4 12
5 12
5 9
11 8
11 7
10 7
10 6
10 6
9 5
8 5
8 5
8 5
8 5
8 5
8 5
8 5
8 5
8 5
8 5
8 5
5 5
5 5
5 5
5 5
5 5
5 5
5 5
12 5
12 5
13 5
13 5
15 5
15 4
15 4
15 4
15 4
15 3
15 3
15 3
16 3
16 3
16 3
9 3
10 4
12 4
12 4
10 4
10 4
10 4
6 4
6 4
6 4
6 3
6 3
6 3
6 3
4 1
4 1
4 1
4 1
1 1
1 1
1 1
1 1
1 1
1 1
1 1
1 1
1 1
1 1
1 1
1 1
1 1
1 1
1 1
2 1
2 1
4 1
4 1
4 1
4 1
4 1
4 1
4 1
4 1
4 1
4 1
5 5
5 5
5 5
5 5
5 5
3 5
2 5
2 5
2 6
2 6
2 6
2 6
2 6
2 6
2 6
1 2
1 2
1 2
1 2
1 2
1 2
1 2
1 2
1 1
1 1
1 1
1 3
1 3
1 5
0 5
2 5
2 5
2 5
2 5
2 5
2 5
2 5
2 5
2 5
2 5
2 5
2 4
2 4
2 4
2 4
0 4
0 4
0 4
0 4
0 4
0 4
0 4
0 4
0 4
0 4
0 4
0 4
0 4
0 4
0 4
0 4
0 4
0 4
0 4
0 4
0 4
0 4
0 4
0 4
41 4
41 4
41 4
41 4
41 4
41 4
41 4
41 4
41 4
41 4
41 4
41 4
41 4
41 4
41 4
41 4
40 4
40 4
0 4
0 4
0 4
0 4
0 4
0 4
0 4
0 4
0 4
0 4
0 4
0 4
0 3
0 3
0 0
0 0
0 0
0 0
0 0
0 0
0 0
0 0
0 0
0 0
0 0
0 0
9 0
9 0
9 0
9 0
9 0
9 0
9 0
9 0
9 0
9 0
9 0
9 0
9 0
9 0
9 0
9 0
0 0
0 0
0 0
0 0
0 0
0 0
0 0
0 0
0 0
0 0
0 0
0 0
0 0
0 0
0 0
0 0
0 0
0 0
0 0
0 1
0 1
0 1
0 1
1 1
1 1
1 1
1 1
1 1
1 1
1 1
1 1
1 1
1 1
1 1
1 0
1 0
1 1
1 2
1 3
1 4
1 4
1 4
1 4
1 5
2 5
2 5
2 5
2 5
2 5
2 5
2 5
2 5
2 5
2 6
2 6
2 6
2 6
2 6
2 6
2 6
1 6
1 6
1 6
1 6
1 6
1 6
1 6
1 6
1 5
1 6
1 6
1 6
1 6
1 6
1 6
1 6
1 6
1 6
1 6
1 6
1 6
1 6
1 6
1 6
1 5
1 5
1 5
1 5
1 5
1 5
1 5
1 5
1 5
1 5
1 5
1 5
0 3
0 3
0 3
0 2
0 2
0 2
0 2
0 2
0 2
0 2
0 2
0 2
0 2
0 2
0 2
0 1
0 1
0 1
0 1
0 2
0 1
1 1
1 1
2 1
3 1
3 1
3 1
3 1
3 1
3 1
3 1
3 1
3 1
3 1
3 0
3 0
2 0
2 0
1 0
1 0
1 0
1 0
1 0
1 0
0 0
0 0
0 0
0 0
0 0
0 0
0 0
0 0
0 0
0 0
0 0
0 0
1 1
1 1
1 1
1 1
1 1
1 1
1 1
1 2
1 2
1 2
1 2
4 11
4 11
4 13
4 16
5 17
4 16
4 16
4 16
4 16
4 16
4 16
4 15
5 15
5 15
5 15
3 14
2 6
2 5
2 4
1 2
1 2
1 2
1 2
1 2
1 2
1 2
1 2
0 2
0 2
0 2
0 2
0 2
0 2
0 2
0 2
0 2
0 2
0 2
0 2
0 3
0 3
0 3
0 3
0 3
0 3
0 3
0 3
0 3
0 3
0 3
0 3
0 3
0 3
0 3
0 3
0 2
0 2
0 2
0 2
0 2
0 2
0 2
0 2
0 2
0 2
0 2
0 2
0 2
0 228
0 228
0 228
0 228
0 228
0 228
0 228
0 228
0 227
0 226
0 226
0 226
0 226
0 226
0 227
0 2
0 1
0 1
8 2
8 2
8 2
8 2
8 2
8 2
8 2
8 2
8 2
8 2
8 3
8 2
8 2
8 2
8 2
0 1
0 1
0 1
0 1
1 1
1 1
1 1
3 2
3 2
3 2
3 1
3 1
3 1
3 1
3 1
3 1
3 1
3 1
3 1
3 1
3 1
17 1
16 1
16 1
14 1
14 1
14 0
14 0
14 0
14 0
14 0
14 0
14 0
14 0
14 0
14 0
1 0
2 0
2 0
2 0
2 0
2 0
2 0
2 0
2 0
2 0
2 0
2 0
2 0
2 0
2 0
2 0
2 0
2 0
2 0
2 0
3 0
3 0
3 0
3 0
3 0
3 0
3 0
3 0
3 0
3 0
3 0
3 0
3 0
3 0
3 0
6 0
5 0
271 0
271 1
271 1
271 1
271 1
271 1
271 1
271 1
272 1
272 1
272 1
272 1
272 1
272 1
272 5
8 5
8 5
8 4
8 4
8 4
5 4
5 4
7 4
7 4
6 4
6 4
6 4
5 4
6 4
6 1
6 0
5 0
5 0
5 0
4 0
5 2
5 3
5 3
3 4
3 4
3 4
3 4
3 4
2 4
3 4
3 4
3 4
2 4
2 4
2 5
2 9
1 6
1 6
1 5
1 5
1 5
29 6
29 6
29 6
28 6
28 6
28 6
28 6
28 6
28 6
28 6
28 1
28 1
28 1
28 1
28 1
28 1
0 0
0 0
0 0
0 0
0 0
0 0
0 0
0 0
0 0
0 0
1 0
1 0
1 0
1 0
28 1
28 1
28 1
28 1
28 1
28 1
32 1
32 1
32 1
32 1
32 1
32 1
32 1
32 1
32 1
32 1
32 1
32 1
32 1
5 0
5 1
2 1
2 1
2 1
7 107
7 107
7 107
7 107
7 107
7 107
7 107
7 107
7 107
7 107
7 107
7 106
7 106
7 106
7 106
4 105
2 0
2 0
2 0
2 0
2 0
2 1
2 1
2 1
3 2
3 2
11 4
11 4
13 4
13 4
13 4
13 4
13 4
13 4
13 4
13 4
13 4
13 4
13 3
13 3
12 3
11 3
4 1
2 1
2 0
1 0
1 0
1 0
1 0
0 0
0 5
0 5
0 5
0 5
0 5
0 5
0 5
0 5
0 5
0 5
0 5
0 5
0 5
0 5
0 5
0 5
0 5
0 5
0 7
0 2
0 2
0 2
0 2
0 2
0 3
1 3
1 4
1 4
1 5
1 5
1 5
1 5
1 5
1 5
2 6
2 6
2 6
2 6
2 6
6 5
6 6
5 27
5 28
136 28
139 33
139 34
139 34
139 34
139 34
139 32
139 33
139 33
139 33
139 33
139 32
134 32
134 32
134 8
134 9
130 9
0 3
0 2
0 2
0 2
0 2
0 1
0 1
0 1
0 1
0 1
0 1
0 1
0 1
0 1
0 1
0 0
0 0
0 0
0 0
0 0
2 1
2 1
2 1
2 1
2 1
2 1
2 1
2 2
2 2
2 2
2 2
2 2
2 3
2 3
2 4
2 4
2 4
1 4
1 4
0 4
0 4
0 4
0 4
0 3
1 2
1 2
4 3
4 2
5 2
5 1
5 1
5 1
5 1
5 1
5 1
5 1
5 2
5 2
5 2
4 2
4 2
2 1
1 1
0 1
0 1
0 1
1 17
1 17
1 17
1 17
1 17
1 16
1 16
1 16
1 16
1 16
1 16
1 16
1 16
1 16
5 17
4 1
4 2
4 2
4 2
4 2
4 2
5 2
5 2
5 2
5 3
5 3
5 3
5 3
5 3
2 2
1 2
1 1
1 1
1 1
1 1
1 1
1 1
0 1
0 1
0 0
0 0
0 0
0 0
0 0
0 0
0 0
0 1
0 1
0 1
0 1
0 1
0 1
0 1
0 1
0 1
0 1
0 1
0 1
0 1
0 1
0 1
0 1
0 0
0 0
0 0
0 0
0 0
0 0
0 0
0 0
1 0
1 0
1 0
1 0
2 0
2 0
2 0
2 0
2 0
2 0
2 0
2 0
2 0
2 0
2 0
1 0
1 0
1 0
1 0
1 0
2 0
2 0
2 0
2 0
2 0
2 0
2 0
2 0
2 0
2 0
2 0
2 0
2 0
2 0
2 0
2 0
2 0
2 0
2 0
2 0
2 0
2 0
2 1
2 4
2 5
2 5
2 5
2 5
5 5
5 5
5 5
5 5
5 5
7 5
7 5
7 5
7 6
7 6
7 7
7 7
7 7
7 7
7 7
4 7
4 7
4 7
4 7
4 7
5 7
3 7
3 7
3 6
3 6
3 5
3 5
3 5
3 5
2 7
11 633
11 639
11 639
11 639
11 639
12 703
12 709
56 714
56 714
56 714
56 714
56 714
56 714
56 714
56 714
55 714
55 714
55 714
55 714
55 714
55 714
44 11
44 11
0 6
0 6
0 5
0 5
0 5
0 7
1 7
2 7
2 7
2 8
2 9
2 10
2 10
2 10
3 10
3 8
3 7
3 7
3 7
3 7
3 6
3 6
2 6
2 6
1 6
1 6
1 3
1 3
1 2
2 2
1 2
1 2
1 2
1 3
1 3
1 3
1 3
1 3
1 3
1 3
1 3
1 3
1 3
1 3
0 3
0 3
0 3
0 3
0 3
0 3
0 3
0 3
0 3
0 0
0 0
0 1
0 1
0 2
0 2
0 2
0 2
0 2
0 3
0 3
0 3
0 3
0 3
0 3
0 3
0 3
0 3
0 3
0 3
0 3
0 3
0 3
0 3
0 3
0 3
0 3
0 3
0 3
0 3
0 3
0 3
0 3
0 3
0 3
0 3
0 3
0 3
0 3
0 3
0 3
0 3
0 3
0 3
0 3
0 3
0 4
0 4
0 4
0 4
0 5
1 10
1 73
1 80
1 92
1 93
1 94
1 95
1 96
1 97
1 97
1 96
1 96
1 96
1 96
1 96
1 96
0 95
0 95
0 95
0 95
0 95
0 95
0 95
0 95
0 93
0 93
0 93
0 93
0 93
0 93
0 92
0 92
0 92
0 93
0 93
0 93
0 93
0 130
0 130
0 130
0 130
0 130
0 130
0 130
0 130
0 130
0 131
0 131
0 131
1 130
1 130
27 130
27 128
27 128
27 128
27 128
27 128
27 141
114 179
114 179
114 179
114 179
114 181
114 183
114 187
114 195
88 211
88 212
88 217
88 217
88 216
88 216
88 203
88 193
107 131
107 132
107 120
108 120
108 118
108 118
21 79
21 78
21 78
21 78
21 78
21 78
21 78
21 78
21 78
21 78
2 90
2 90
2 91
2 97
2 140
2 142
2 142
3 148
3 148
3 148
4 149
4 149
4 149
4 159
4 159
4 160
4 159
4 159
3 153
3 153
3 116
4 116
3 116
3 116
3 116
3 116
2 116
2 116
2 116
2 115
2 115
2 115
1 116
1 116
1 116
1 115
0 115
0 115
0 115
0 119
0 121
0 129
0 150
0 153
0 154
0 156
0 157
0 145
0 133
0 115
0 111
0 105
0 107
0 107
1 117
1 117
1 110
1 110
1 115
1 115
1 114
1 115
1 113
1 113
1 114
1 115
1 115
1 115
1 113
2 113
1 113
1 113
1 111
1 111
1 113
1 112
1 110
1 78
1 75
1 73
1 72
1 72
1 72
1 72
1 74
1 74
2 64
2 64
2 63
2 63
2 63
2 64
2 63
2 63
2 63
2 64
2 65
2 66
2 66
2 66
2 66
2 66
2 66
2 66
2 66
2 66
2 66
2 66
2 66
2 67
2 66
2 66
2 61
2 61
2 59
2 38
2 37
2 35
2 33
2 33
2 33
2 34
2 34
2 649
2 649
2 644
2 644
2 636
2 636
2 636
2 637
2 644
2 649
3 649
3 648
3 649
3 649
3 647
3 630
3 29
3 29
3 29
2 29
2 29
2 30
2 30
2 30
2 28
1 28
1 30
1 30
1 30
1 30
1 28
1 28
1 28
1 27
1 28
1 28
0 28
0 28
0 28
0 28
0 30
0 30
0 29
0 29
0 29
0 29
0 29
0 28
0 28
0 26
0 27
0 27
0 27
0 28
0 29
0 37
0 41
0 42
0 44
0 80
0 81
0 82
0 82
0 82
0 82
0 83
0 83
0 84
0 84
0 85
0 103
0 103
0 103
0 102
0 102
0 102
0 102
0 102
0 102
0 102
0 99
1 82
1 82
1 82
1 82
1 65
1 65
1 65
1 65
1 65
1 65
1 65
1 65
1 65
1 65
1 65
1 65
1 65
1 65
1 64
1 64
1 64
1 64
1 64
1 64
1 64
1 64
1 64
1 64
1 64
1 64
1 64
1 64
1 62
1 61
1 61
1 61
1 61
1 61
1 61
1 61
1 61
1 61
1 60
1 60
1 64
1 62
1 65
1 55
1 55
1 56
1 56
1 16
1 16
1 16
1 16
1 19
1 18
1 18
1 18
1 20
1 16
1 15
1 15
1 15
1 15
1 15
1 15
1 15
1 15
1 15
1 15
1 15
1 15
0 15
0 15
0 15
0 15
0 15
0 15
0 15
0 15
0 15
0 15
0 15
0 16
0 15
0 15
0 19
0 20
0 21
0 22
1 23
1 24
1 24
1 24
1 24
1 24
1 24
1 24
1 25
1 25
1 24
1 24
1 24
1 24
1 24
0 24
0 23
0 23
0 24
0 25
0 25
0 25
0 26
0 27
0 27
0 28
0 27
0 27
0 22
0 22
0 23
0 37
0 235
0 250
1 272
1 286
2 287
2 288
2 312
2 314
2 320
2 317
2 318
2 318
2 318
2 318
2 318
2 318
2 318
1 318
1 318
1 318
1 318
0 318
0 319
0 321
0 322
0 325
1 422
1 423
1 426
1 436
3 442
3 445
3 445
3 437
3 437
3 437
3 436
3 431
3 433
3 433
3 433
2 432
2 431
2 430
2 430
0 430
0 430
0 430
0 430
0 429
0 429
0 430
0 430
0 431
0 431
0 431
0 431
0 432
0 441
0 439
0 443
0 444
0 446
0 445
0 442
0 442
0 444
0 445
0 451
0 451
1 468
1 464
92 29629
92 29392
92 29375
92 29372
93 29371
93 29370
93 29388
93 29397
93 29398
93 29399
93 29399
93 29399
93 29399
92 29390
92 29390
92 29100
90 28687
88 28688
89 28737
88 28737
1 296
2 310
3 312
4 314
4 313
4 314
4 314
4 221
4 222
4 221
4 215
4 218
4 217
4 219
4 232
4 233
4 244
3 245
3 245
3 244
3 244
3 243
3 243
3 243
3 243
3 241
3 243
3 243
3 243
3 243
3 242
3 243
3 242
3 243
4 242
4 241
4 241
4 241
35 317
35 306
35 301
35 335
35 335
35 336
35 337
35 337
36 337
36 337
36 336
35 336
35 336
35 331
35 331
4 254
5 256
5 256
5 256
5 257
5 255
5 255
5 245
5 246
5 247
5 248
5 249
5 249
5 248
5 248
5 247
5 206
4 205
2 152
2 148
2 147
1 105
1 102
1 100
1 97
1 94
1 94
1 93
1 93
1 93
1 93
1 82
1 74
1 73
1 63
2 61
2 60
2 60
2 60
2 60
2 60
2 60
2 60
9 61
9 61
9 61
9 61
9 60
9 60
9 60
8 60
8 60
8 60
8 61
8 60
8 60
8 92
8 95
20 196
20 198
20 199
19 161
19 175
21 204
21 210
21 212
21 216
21 218
21 219
21 219
21 221
21 225
21 229
22 229
22 228
22 234
22 236
22 266
24 2083
3 1998
3 2063
3 2079
3 2117
3 2424
3 2557
4 2649
4 2837
4 2896
3 2934
3 3028
3 3144
3 3171
3 3318
3 3324
3 3338
1 1526
1 1572
1 1572
1 1579
1 1610
0 1656
0 1677
0 1680
0 1681
0 1681
1 1679
1 1684
2 1685
2 1688
2 1689
2 1690
17 1693
17 1694
17 1696
17 1700
17 1700
17 1701
17 1701
17 1704
17 1705
16 1705
16 1705
15 1706
15 1706
15 1705
15 1707
0 1703
0 1703
0 1702
0 1667
0 1663
0 1663
0 1664
0 1662
0 1654
0 1639
0 1636
0 1633
0 1631
0 1628
0 1627
14 2478
14 2477
14 2472
14 2474
14 2468
14 2468
14 2468
15 2462
15 2456
17 2467
17 2442
17 2452
17 2485
17 2480
17 2434
3 1253
3 1047
3 944
3 720
3 654
3 651
3 653
3 1282
3 1286
2 1179
2 1220
2 1223
2 1272
3 1225
5 1227
5 1235
5 1207
5 1179
5 1164
5 1159
5 1160
5 1164
5 1172
5 1168
5 1169
5 1169
5 1168
5 1167
4 1167
4 1166
4 1167
4 1163
4 1163
4 1163
4 1162
5 1159
5 1159
5 1160
5 1161
38 1162
38 1179
38 1180
38 1178
38 1179
38 1178
38 1179
38 1179
39 1180
39 1180
39 1180
39 1180
38 1180
38 1180
38 1179
5 1184
5 1184
5 1184
6 1184
6 1184
6 1184
6 1188
6 1183
6 1182
5 1183
5 1182
5 1182
5 1182
3 1152
3 1116
3 1102
3 999
4 991
236 978
236 921
235 905
235 891
235 890
235 887
235 886
235 882
235 237
235 230
234 182
234 126
234 114
234 65
234 64
234 64
0 62
0 53
0 49
0 48
0 48
0 49
0 45
0 38
0 38
0 35
0 33
0 33
0 32
0 32
0 32
0 32
0 32
1 32
1 32
103 32
103 32
106 32
106 43
110 43
110 43
110 25
110 25
110 23
110 22
110 22
110 22
110 22
109 22
109 22
108 22
7 22
5 22
4 22
0 11
0 6
0 6
0 6
0 6
0 6
0 6
0 8
0 7
0 7
0 7
0 7
0 8
0 14
0 16
0 16
0 21
0 19
0 19
0 18
0 18
0 18
0 18
3 18
3 18
77 18
77 18
77 18
77 18
77 18
77 18
77 18
77 18
82 19
82 19
82 19
82 19
82 19
82 19
79 19
6 18
5 18
5 20
5 20
5 20
6 20
6 20
6 20
4 20
1 20
1 54
1 54
1 54
1 54
1 54
1 54
1 54
1 54
1 54
1 54
1 54
0 54
0 54
0 55
0 55
0 55
0 55
0 55
2 66
2 66
2 68
2 34
2 34
2 34
2 34
2 34
2 34
2 34
2 33
2 32
2 30
2 30
2 30
2 30
2 30
2 29
2 19
2 18
2 17
2 16
2 16
2 16
2 17
2 27
2 36
2 37
2 231
2 240
2 248
2 273
2 274
2 282
2 287
2 498
2 511
2 564
3 585
3 587
3 594
3 602
3 785
3 841
3 858
3 894
3 909
6 915
6 948
6 948
6 949
6 949
6 949
6 949
6 949
7 949
7 949
7 950
7 951
7 957
7 957
7 966
7 968
7 968
7 968
8 979
8 979
8 981
9 981
9 981
8 981
8 982
8 983
6 993
6 1029
6 1105
6 1190
6 1370
6 1411
6 1424
5 1920
5 1920
5 1921
5 1922
5 1922
4 1922
4 1924
4 1924
4 1929
4 1931
4 1932
4 1935
4 1936
4 1936
4 1937
4 1938
4 1936
4 1933
4 1922
5 1917
5 1916
5 1698
5 1678
5 1692
5 1691
5 1693
5 1687
5 1675
4 1411
4 1384
4 1383
5 1379
5 1379
6 1376
5 1360
5 1114
5 1087
5 1051
5 1013
5 1015
3 1015
4 1016
4 1016
6 1016
6 1016
6 1016
5 1016
5 1015
5 1015
5 1015
5 1015
5 1014
5 1008
5 1008
4 999
4 998
3 998
3 998
3 998
3 998
1 999
1 999
1 1001
1 1001
0 1001
0 1001
0 959
0 880
0 807
0 728
0 588
0 554
0 537
0 30
0 31
0 31
0 31
0 29
0 29
0 29
0 29
0 33
0 33
0 33
0 33
0 33
0 33
0 31
0 31
0 31
0 31
0 37
1 40
1895 40
1895 41
1895 41
1895 41
1895 41
1895 41
1896 42
1896 55
1896 69
1896 70
1896 70
1896 70
1896 70
1896 70
1896 70
1891 70
2 68
2 68
2 68
2 68
1 68
1 68
1 68
1 68
3 68
3 68
3 68
3 68
3 69
4 69
4 69
4 69
5 69
5 69
8 70
8 70
8 70
8 70
8 70
6 70
6 69
6 69
6 67
6 85
6 86
6 86
6 86
6 86
6 87
2 87
2 75
2 72
2 72
2 72
2 71
3 71
3 71
3 72
10 89
10 90
10 91
10 86
10 86
10 85
10 85
10 85
10 85
10 85
10 85
10 85
10 88
9 123
9 126
2 121
2 124
2 125
2 126
2 126
2 126
1 124
1 109
1 98
1 98
1 98
2 298
2 298
2 299
2 299
2 299
2 299
2 299
2 299
2 299
2 299
2 299
2 299
2 300
2 299
2 299
1 98
1 98
1 97
0 97
0 97
0 97
0 97
0 97
0 96
0 96
0 96
0 96
0 96
0 96
0 96
0 96
0 96
0 76
0 74
0 73
0 73
0 73
0 73
0 72
0 72
0 72
0 72
0 72
0 72
0 72
0 72
0 72
0 72
0 72
0 72
0 72
0 72
0 72
0 72
60 72
60 72
60 72
60 72
60 72
60 68
60 23
60 17
60 3
60 1
60 1
61 1
61 1
61 1
61 1
1 1
1 1
1 1
1 1
1 1
1 1
1 1
1 1
1 1
1 1
1 1
1 1
0 1
0 1
0 1
0 1
0 0
0 0
0 3
0 3
0 3
0 3
0 3
0 3
0 3
0 3
0 3
0 3
0 3
0 3
0 3
0 3
0 3
0 3
0 0
0 0
0 0
0 0
2 0
2 0
2 0
2 0
2 0
2 0
2 0
2 3
2 3
2 3
2 3
2 3
2 3
2 3
2 3
4 3
4 3
4 3
4 3
4 4
5 4
5 4
5 1
5 2
5 2
5 2
5 2
5 2
5 2
5 2
3 2
3 2
3 2
3 2
3 1
3 1
2 1
2 1
2 1
2 1
2 1
2 1
2 1
2 1
2 1
2 1
2 1
2 1
2 1
3 1
3 1
3 1
3 1
3 1
3 1
3 1
3 1
3 1
3 1
3 1
3 1
4 1
4 1
4 1
3 1
3 1
3 1
3 1
3 2
3 3
3 3
3 3
3 3
1 3
1 3
1 3
0 3
0 3
0 3
0 3
0 3
0 3
1 3
2 3
2 2
3 1
3 1
3 1
3 1
3 1
3 1
3 1
3 1
3 1
3 1
3 1
3 0
3 0
3 0
2 0
0 0
0 0
0 0
0 0
0 0
0 0
0 0
0 0
0 0
0 0
1 0
1 0
1 0
1 0
1 0
1 0
1 0
1 0
1 0
3 0
3 0
3 0
3 0
3 0
3 0
3 0
3 0
2 1
2 1
2 1
2 1
2 1
2 1
2 1
2 1
2 1
2 1
2 1
2 1
2 1
2 1
2 1
2 0
2 0
2 0
2 0
2 0
2 0
2 0
2 0
2 0
2 0
2 0
2 0
3 2
3 2
3 2
3 2
3 2
3 2
3 2
3 2
3 2
3 2
3 2
3 2
3 2
3 2
3 2
3 2
2 0
2 1
2 1
2 1
2 1
2 1
2 1
2 18
3 18
3 18
4 18
4 18
4 18
4 18
4 18
4 18
4 17
4 17
4 17
5 17
5 17
5 17
3 0
3 0
3 0
2 0
1 0
1 0
1 0
1 0
3 137
3 137
3 137
3 137
2 137
3 137
3 137
3 137
3 138
5 138
5 138
5 138
5 139
5 139
5 140
5 140
3 3
3 3
3 3
3 3
3 3
3 3
2 3
2 3
0 2
0 2
0 2
0 2
0 2
0 1
0 0
0 0
0 0
0 0
0 0
0 1
0 1
0 1
0 1
0 1
0 1
0 1
0 1
0 1
0 1
0 1
0 1
0 1
0 1
0 1
0 1
0 0
0 0
0 0
0 0
0 0
0 0
0 1
0 1
0 1
0 1
0 1
0 1
0 1
0 1
0 1
0 1
0 1
0 1
0 1
0 1
0 1
0 1
0 1
0 1
0 1
0 1
0 1
0 1
1 5
1 5
1 5
1 5
1 5
1 5
1 5
1 5
1 5
1 5
1 5
1 5
1 5
1 5
1 5
0 5
0 5
0 5
0 5
0 5
2 1
2 1
2 1
2 2
2 8
2 8
3 9
3 10
5 11
6 11
7 12
7 12
7 12
7 12
7 12
5 12
5 12
5 12
5 12
5 12
5 12
4 11
4 11
4 11
4 11
0 11
0 11
0 10
0 10
0 10
0 11
0 10
0 10
0 10
0 10
0 10
0 10
0 10
0 10
0 10
0 10
0 10
0 38
0 38
0 38
0 37
0 37
0 38
0 41
0 41
0 41
0 41
0 43
0 43
0 43
0 43
0 43
0 43
0 43
0 43
0 43
0 44
0 46
0 45
0 49
1 50
2 50
2 49
2 55
2 59
2 59
2 61
2 62
2 67
4 97
5 98
5 100
15 262
17 268
17 269
17 269
17 270
17 271
17 273
18 274
18 274
18 274
18 274
18 278
18 277
18 277
18 277
18 277
18 277
18 277
18 277
18 277
18 277
18 277
18 277
18 277
18 284
18 287
18 288
18 289
18 289
18 289
18 292
18 292
19 294
19 292
19 292
19 306
19 306
19 307
19 309
19 320
20 368
20 368
20 371
20 369
21 369
22 369
22 367
23 368
23 369
23 409
22 417
22 424
27 533
28 539
28 539
28 548
30 561
30 554
29 552
27 544
25 514
25 491
23 488
23 489
22 464
30 529
30 529
31 529
32 528
32 524
31 526
31 525
31 519
23 377
23 375
23 376
23 376
23 375
23 375
23 374
22 375
22 375
22 375
22 374
22 371
22 371
22 372
22 372
22 372
22 373
22 381
23 381
23 381
23 381
24 381
24 381
24 381
24 372
24 371
24 371
24 376
24 376
24 378
24 379
24 379
24 382
23 383
23 382
23 382
23 382
23 378
22 373
22 357
21 283
21 283
21 251
21 250
21 249
21 249
21 249
21 249
21 247
22 237
22 228
19 224
15 127
15 123
15 123
15 122
14 108
14 108
14 108
14 108
14 108
13 100
12 101
12 101
12 146
2 129
2 144
2 147
2 149
2 150
2 148
1 148
1 148
1 148
1 148
1 147
1 147
1 147
1 148
1 164
1 163
1 164
1 172
1 211
1 216
1 221
1 224
1 230
1 235
1 235
1 231
1 235
1 236
1 246
0 250
0 251
0 251
0 252
0 252
0 251
0 249
0 251
0 249
0 248
0 247
0 246
0 245
0 245
0 245
0 245
0 245
0 245
0 245
0 245
0 245
0 245
0 245
0 245
0 245
0 245
0 245
0 245
0 245
0 245
0 242
0 241
0 242
0 242
0 242
0 242
0 242
0 242
0 247
0 249
0 249
0 247
0 239
0 178
1 96
1 85
1 81
1 80
1 79
1 79
1 79
1 79
1 81
1 81
1 84
1 84
1 85
1 84
1 90
0 92
0 92
0 87
0 55
0 52
0 51
0 51
0 51
0 51
0 49
0 47
0 41
0 41
0 35
0 29
0 29
0 32
1 32
1 27
1 26
2 28
2 34
2 43
3 66
3 81
4 91
4 100
4 101
5 104
5 107
5 108
5 109
5 113
4 112
4 112
4 112
4 112
4 112
3 112
3 112
2 113
2 114
2 114
2 114
1 142
1 142
1 141
1 141
1 141
1 145
4 252
4 255
4 252
3 254
3 257
3 257
3 263
3 263
3 263
3 263
3 263
3 262
3 262
4 262
4 261
4 261
4 260
4 259
4 258
4 259
4 258
4 257
4 257
4 255
4 255
4 254
4 253
4 257
4 258
4 258
4 264
4 264
4 272
5 282
5 296
5 350
5 351
5 355
7 360
21 776
21 814
21 854
21 863
24 872
24 868
24 876
24 832
24 781
23 770
23 769
23 769
23 769
23 769
23 769
23 770
23 764
23 765
23 773
23 786
23 803
23 816
23 824
23 834
24 1889
24 1890
24 1898
24 1904
25 1907
25 1909
25 1925
25 1925
25 1929
25 1958
21 1872
21 1878
22 1880
22 1880
22 1880
22 1875
21 842
21 841
21 842
20 841
20 842
20 841
20 840
20 840
20 839
20 839
20 839
19 839
19 835
20 835
20 834
20 794
20 794
20 795
20 794
20 795
20 794
20 786
20 784
20 783
21 774
21 769
23 748
23 695
23 641
24 633
38 818
38 808
36 793
22 383
21 366
20 349
21 349
21 346
21 344
20 344
20 344
20 344
20 344
20 344
20 344
20 344
20 345
20 344
20 344
20 344
20 344
20 337
20 350
20 334
20 320
20 322
20 313
20 313
20 317
20 309
20 304
20 305
20 305
20 288
21 287
21 288
21 273
21 246
21 239
21 235
21 235
20 235
20 235
20 236
20 233
20 232
20 232
20 232
20 233
19 233
19 233
19 233
20 233
20 232
20 232
20 232
20 232
20 235
20 265
21 416
21 416
21 419
21 419
21 420
21 424
21 425
21 424
20 423
17 422
14 422
16 420
15 419
14 418
4 242
5 243
5 240
5 241
5 240
5 239
4 238
4 238
4 238
4 238
4 238
4 238
2 238
2 238
2 238
2 238
2 238
1 238
1 237
1 244
1 255
9 255
9 253
9 252
9 251
9 246
9 245
9 245
9 239
9 239
9 239
9 237
9 236
9 240
9 242
9 241
9 241
1 242
1 243
1 243
1 243
1 243
1 243
1 243
1 243
1 252
1 257
2 261
2 260
2 260
3 260
3 260
3 257
3 258
3 258
4 262
4 262
4 260
4 219
3 76
3 75
3 88
2 88
2 84
2 87
3 87
2 87
2 87
2 87
2 87
2 87
2 87
2 87
2 75
2 73
2 73
2 72
2 72
2 72
2 74
2 74
2 74
2 74
2 74
1 74
1 74
1 74
1 74
2 74
2 75
2 75
2 78
2 69
2 61
2 61
2 61
2 61
2 60
2 61
2 62
2 63
2 63
2 63
2 63
1 63
1 63
1 59
1 59
1 58
1 58
1 58
1 58
1 58
1 59
1 65
1 70
1 70
1 70
1 60
1 54
1 52
1 52
1 51
1 52
1 52
1 52
1 52
1 52
0 49
0 51
0 52
0 52
0 51
0 51
0 36
0 33
0 33
0 33
0 33
0 33
0 33
0 33
0 33
0 33
0 33
0 33
0 33
0 33
0 33
0 37
0 37
0 37
0 35
0 35
0 36
0 36
0 45
0 48
0 48
0 48
0 49
0 49
0 49
0 49
0 46
0 46
0 43
0 43
0 43
0 43
0 42
0 40
0 40
0 41
0 41
0 41
0 41
0 41
0 38
0 38
0 38
0 38
0 38
0 38
0 39
0 39
0 37
0 32
0 29
0 29
0 28
1 28
1 28
1 28
1 28
1 28
1 27
1 27
1 27
1 27
1 27
1 27
1 24
1 23
1 22
1 22
1 29
0 29
0 29
0 29
0 29
0 29
0 29
0 29
0 36
0 35
0 42
0 51
0 51
0 54
0 54
0 55
0 52
0 54
0 56
0 56
0 57
0 56
0 57
0 49
0 46
0 46
0 46
0 45
0 45
0 46
0 46
0 46
0 46
0 46
0 46
0 46
0 46
0 48
0 47
0 46
0 45
0 45
0 47
0 48
0 49
0 50
0 50
3 50
3 53
3 53
3 53
3 52
3 52
3 52
3 52
3 52
3 52
3 52
3 51
14 51
14 49
14 49
14 49
11 49
11 49
11 49
11 49
11 50
11 50
11 50
11 50
11 50
11 50
11 38
11 39
0 34
0 34
1 36
1 36
1 35
1 35
1 30
1 28
1 24
1 18
1 18
1 15
1 28
1 74
1 74
1 71
1 71
1 73
1 73
1 73
1 73
1 73
1 73
1 73
2 73
2 73
2 73
2 59
2 60
2 30
2 30
2 30
2 31
2 34
2 35
2 34
2 34
2 34
3 34
4 34
3 32
3 32
3 32
3 33
3 33
3 33
5 31
5 34
6 34
6 34
7 34
7 34
7 34
7 34
7 34
6 34
6 33
6 33
6 33
6 33
6 33
6 33
6 33
6 34
6 34
5 34
5 34
5 34
5 34
5 36
5 41
5 41
5 41
5 46
5 46
4 44
4 44
4 44
4 44
4 45
4 45
4 45
4 46
4 47
4 49
4 50
4 34
4 36
4 36
4 35
4 33
4 32
4 32
4 32
4 32
4 32
4 35
4 36
4 36
4 37
4 47
4 47
4 48
4 46
4 47
4 46
4 146
4 145
4 143
4 142
4 142
3 142
3 142
1 141
1 142
1 142
1 143
1 143
1 142
1 143
1 148
0 54
0 55
0 59
0 60
0 61
0 61
0 62
0 63
0 65
0 67
0 70
0 72
0 77
39 77
39 82
39 81
39 81
40 96
40 96
40 97
40 97
40 97
40 93
40 93
40 93
40 85
40 85
40 85
39 85
2 85
1 85
1 84
1 84
0 84
0 83
0 81
0 77
1 98
1 98
1 96
1 96
1 96
1 96
1 96
1 96
1 96
1 96
1 96
1 95
1 94
1 94
1 93
1 83
0 62
0 62
0 62
0 61
0 61
0 61
0 61
0 61
0 61
0 61
0 60
0 61
0 60
0 60
0 62
0 61
0 60
0 60
0 56
0 51
0 43
0 43
0 39
0 39
0 38
0 38
0 37
0 37
0 37
0 36
0 34
0 32
0 27
0 26
0 22
0 22
0 22
0 7
0 7
0 6
0 6
0 6
0 6
0 6
0 6
0 6
0 6
0 6
0 6
0 6
0 6
0 8
0 8
0 8
0 9
0 9
0 9
0 9
0 9
0 9
0 9
0 9
0 9
0 10
0 10
0 11
0 11
0 9
0 9
0 9
0 9
0 9
0 8
0 7
0 8
0 8
0 8
0 8
0 8
0 8
0 8
0 8
0 8
0 8
0 7
0 5
0 5
0 5
0 5
0 4
0 4
0 4
0 3
0 3
0 3
0 3
0 3
0 4
0 4
0 4
0 4
0 6
0 7
0 6
0 6
0 6
0 8
0 8
0 8
1 9
1 9
1 9
1 9
1 9
1 9
1 10
1 10
1 7
1 7
1 7
1 7
1 5
1 5
1 5
1 5
0 4
0 4
0 3
0 3
0 3
1 3
1 2
1 2
1 2
1 2
1 2
65 46
67 46
67 45
67 45
67 46
67 46
70 46
70 46
70 46
69 46
70 83
70 83
71 83
71 83
75 83
73 83
18 39
16 39
14 263
14 262
10 262
7 262
7 277
7 277
8 277
8 240
9 240
9 240
8 241
10 242
6 242
6 242
6 242
6 241
7 241
7 242
7 243
7 22
6 14
6 14
6 14
4 14
4 15
4 5
4 4
3 4
3 4
3 4
3 4
2 5
2 325
2 324
1 322
1 322
1 322
1 322
4 322
4 322
3 322
4 321
4 321
4 321
4 486
4 486
5 486
5 165
5 165
5 165
10 166
10 167
10 167
7 170
9 170
9 171
9 172
8 172
8 172
8 7
8 7
8 7
8 9
8 10
8 10
8 9
2 9
2 9
2 9
0 6
0 6
0 6
0 6
0 6
0 6
0 6
0 6
0 4
0 4
0 3
0 3
0 3
0 3
0 3
0 3
0 2
0 2
0 2
0 2
0 2
0 2
0 2
0 2
0 2
0 2
0 2
0 2
0 2
0 2
0 2
0 2
0 2
0 2
0 2
0 2
0 2
0 2
0 2
0 2
0 2
0 2
0 2
0 2
0 2
2 2
7 2
53 2
58 2
64 2
89 2
93 2
107 2
111 2
124 2
141 1
147 1
157 1
157 1
158 1
158 0
168 0
168 0
170 0
172 0
176 0
177 0
180 0
180 0
180 0
179 0
179 0
179 0
179 0
180 0
179 0
179 0
180 0
179 0
179 0
179 0
179 0
179 0
179 0
179 0
182 0
189 0
193 0
193 0
193 0
193 0
194 0
194 0
194 0
192 0
193 0
193 0
192 0
196 0
200 0
200 0
200 0
200 0
200 0
200 0
200 0
200 1
200 1
200 1
201 2
201 2
201 2
201 2
202 2
202 2
199 2
199 2
194 2
187 2
180 2
172 2
167 2
156 1
146 1
139 0
118 0
116 0
103 0
83 0
77 0
74 0
67 0
68 0
68 0
59 0
58 0
54 0
48 1
44 1
43 1
43 1
43 1
43 1
43 1
43 1
43 1
43 1
43 2
43 2
46 2
47 2
47 5
48 5
48 5
48 5
49 5
49 5
49 5
48 5
48 5
49 5
49 33
49 32
49 32
48 32
48 32
47 29
47 28
45 28
44 28
43 28
43 28
43 28
43 28
43 28
43 28
43 0
43 0
43 0
43 0
43 0
43 0
43 0
43 0
43 0
43 0
42 0
42 0
1119 6
1119 6
1119 6
1118 6
1116 6
1086 6
1086 6
1085 6
1087 6
1088 6
1088 6
1088 6
1088 6
1089 6
1222 7
1222 7
146 1
145 1
145 1
147 1
147 1
147 1
147 1
147 1
144 1
145 1
145 1
145 1
145 1
145 1
11 0
101 0
102 0
102 0
99 0
99 0
99 0
99 1
99 1
99 1
99 1
99 1
100 1
100 2
100 2
99 2
10 2
10 2
9 2
9 2
8 2
8 2
8 1
8 2
8 2
8 2
7 2
7 2
7 2
7 1
7 1
7 1
7 1
8 1
20 1
20 1
23 1
24 1
24 1
24 0
24 0
23 0
23 0
23 0
39 22
40 24
40 24
40 24
39 24
39 24
39 24
39 24
40 24
40 24
47 24
49 24
50 24
51 24
51 24
55 24
38 0
36 0
36 0
36 0
36 0
36 0
40 0
40 0
39 0
39 0
40 0
40 0
40 0
42 1
42 1
48 1
50 1
50 1
50 1
50 2
50 2
50 3
50 3
50 3
50 3
49 3
49 3
55 3
55 3
57 4
57 4
72 6
80 6
81 6
81 6
81 6
81 6
83 6
83 6
83 6
83 6
86 6
86 6
86 6
88 5
88 5
88 5
76 5
74 5
72 5
71 5
71 5
71 5
71 5
72 5
72 5
72 5
75 5
75 5
75 5
75 5
80 5
86 5
89 5
88 5
88 5
88 4
82 4
80 4
79 4
78 4
78 4
73 4
73 4
73 4
73 5
73 5
72 5
72 5
68 5
68 5
68 5
69 5
69 5
69 5
69 5
67 4
67 4
77 4
75 4
76 3
77 3
77 2
77 2
76 2
76 2
82 2
82 2
83 2
83 2
77 2
76 2
76 2
74 2
58 0
52 0
52 0
54 0
54 0
58 1
58 1
66 1
66 1
66 1
64 2
823 75
823 75
819 75
819 75
819 75
819 75
819 75
819 75
819 75
819 75
819 75
817 74
816 74
816 74
818 74
815 32
57 0
56 0
56 0
52 0
46 0
45 0
49 0
52 0
53 0
53 0
53 0
53 0
53 0
53 0
56 0
56 0
68 1
68 1
67 1
70 1
70 1
70 1
71 1
71 1
70 1
70 1
70 1
70 1
70 1
73 1
58 1
46 0
47 0
46 0
46 0
46 0
46 0
46 0
39 2
39 2
39 2
39 2
39 2
39 2
39 2
40 3
40 3
40 3
40 3
37 3
35 3
32 3
32 3
26 2
27 1
27 1
26 1
26 2
26 2
27 2
27 2
27 1
27 1
27 1
32 1
32 1
32 1
32 1
32 1
31 1
31 1
28 1
28 1
28 0
27 0
27 0
27 1
27 1
24 1
21 1
18 1
18 1
19 3
19 3
19 3
19 3
19 3
16 3
16 3
16 3
16 3
16 3
13 3
13 3
13 3
12 3
12 3
11 0
11 0
11 0
11 0
13 0
11 0
11 0
11 0
10 0
10 0
10 0
10 0
10 0
11 0
10 0
54 0
54 0
56 1
75 1
80 1
80 1
80 1
80 1
104 1
109 1
111 1
159 1
159 1
159 1
159 1
159 1
159 1
159 1
159 0
158 0
158 0
158 0
158 0
155 0
163 0
161 0
161 0
161 0
161 0
162 0
162 0
162 0
162 0
162 0
162 0
162 0
162 0
160 0
160 0
160 0
160 0
160 0
160 0
160 1
160 47
160 47
161 47
162 47
164 47
164 47
164 47
164 47
164 47
164 47
164 47
164 47
164 47
164 47
164 47
162 0
220 0
220 0
220 0
219 0
219 0
220 0
220 1
220 1
220 1
220 1
220 1
224 1
224 1
180 1
180 1
120 1
101 1
96 1
96 1
96 1
95 1
71 0
65 0
65 0
47 0
83 0
88 0
89 0
91 0
92 0
96 0
98 1
200 4
219 4
1026 10
1039 10
1041 10
1036 10
1036 10
1035 10
1038 11
1038 11
1125 11
1141 11
1155 11
1158 11
1160 12
1163 12
1164 9
1170 9
1169 9
1171 9
1172 9
1193 9
1208 9
1226 8
1245 10
1246 10
1267 11
1268 11
1272 11
1273 10
1273 10
1276 10
1276 10
1279 10
1291 10
1317 10
1339 11
1342 11
1342 11
1342 10
1342 10
1340 10
1340 10
1342 10
1348 10
1382 10
1515 11
1793 11
2071 13
2202 13
2371 12
2379 12
2376 12
2379 12
2381 12
2474 13
2480 13
2480 12
2479 12
2480 12
2486 12
2486 12
2487 12
2494 12
2496 12
2472 12
2435 12
2430 12
2430 12
2429 12
2426 12
2424 12
2414 12
2337 12
2315 12
1521 7
1521 7
1536 7
1546 7
1560 7
1557 7
1548 7
1540 7
1463 7
1456 7
1441 7
1439 8
1434 8
1432 8
1433 8
1433 8
1433 8
1437 8
1432 8
1404 8
1386 7
1373 7
1367 7
1368 7
1352 6
1359 14
1356 14
1353 13
1352 13
1349 13
1348 13
1337 13
1327 13
1310 13
1289 12
1286 12
1285 12
1281 12
1272 12
1271 12
1253 4
1201 4
1167 4
1118 5
934 4
652 4
341 2
266 2
145 2
197 5
198 5
195 5
195 5
98 4
95 4
94 4
79 4
69 4
69 4
69 3
69 3
69 3
67 3
67 3
66 3
66 3
66 3
66 3
66 3
66 3
66 3
66 3
66 3
64 4
68 4
66 4
67 4
67 4
76 12
75 12
75 12
75 13
75 13
73 13
73 13
73 13
73 13
74 13
76 12
79 12
74 12
74 12
74 12
74 12
74 12
74 12
72 11
72 11
72 11
72 11
72 11
72 11
71 11
71 11
71 11
71 11
71 11
71 11
71 11
71 11
72 11
74 11
74 11
74 11
81 11
83 13
83 13
83 13
83 13
83 13
83 14
83 14
44 11
43 11
44 11
44 11
44 11
45 11
45 11
46 11
47 11
47 11
47 11
47 11
47 11
47 11
47 11
47 11
47 11
47 11
48 11
48 11
47 11
47 11
46 11
47 11
48 11
48 11
49 11
55 11
56 10
48 4
49 4
49 4
49 4
49 4
49 4
49 4
49 4
48 4
51 9
53 9
51 9
51 9
52 9
52 9
51 8
51 8
51 8
51 8
51 8
51 8
51 8
51 8
51 8
51 8
51 8
51 8
51 8
51 8
51 8
51 8
51 8
51 8
73 8
73 8
73 8
65 8
64 6
64 6
64 6
64 6
64 6
64 5
62 5
48 5
48 5
48 5
48 5
48 5
48 5
48 4
47 4
47 4
47 4
47 4
47 4
47 4
47 4
47 4
47 4
47 4
47 4
46 4
46 4
46 4
46 4
46 4
43 4
43 4
42 4
41 4
35 4
34 4
34 4
34 5
34 5
34 5
34 5
34 5
34 5
34 4
34 4
29 1
26 1
26 1
26 1
25 1
25 1
25 1
25 0
25 0
25 0
25 0
25 0
26 0
26 0
26 1
26 1
26 1
26 1
26 1
26 1
26 1
26 1
26 1
25 1
1 1
1 5
1 5
0 7
3 26
3 27
3 28
3 29
3 29
3 29
3 29
3 30
3 30
3 30
8 30
8 30
8 30
8 30
8 30
8 30
8 40
8 40
8 40
13 40
13 41
13 41
13 41
13 41
14 41
16 41
20 40
21 40
30 43
30 45
30 47
31 39
89 49
90 50
90 53
90 53
90 53
94 53
100 53
102 53
102 53
102 53
102 53
102 53
102 53
102 53
103 53
102 53
102 53
102 55
103 55
103 55
103 55
103 55
103 53
103 53
103 53
103 54
103 54
103 54
106 54
105 54
108 56
108 56
108 56
108 56
108 56
108 56
108 56
108 55
108 52
108 52
108 51
105 31
106 31
106 31
106 31
106 32
106 32
106 32
106 32
106 32
106 32
101 32
101 32
101 32
101 32
101 32
101 32
100 32
100 32
100 32
95 32
95 31
95 31
95 31
95 30
94 30
92 30
86 29
84 29
76 20
74 22
71 21
67 23
9 10
9 11
8 11
0 11
0 12
0 15
0 16
1 17
1 17
1 17
1 17
1 17
1 15
1 15
1 15
1 11
1 10
1 10
1 10
1 10
1 8
1 8
0 9
0 10
0 12
1 11
1 12
1 12
1 14
1 32
1 30
1 32
1 33
1 34
1 34
1 36
1 36
1 36
1 36
2 36
1 36
1 37
1 37
1 42
1 42
1 47
1 51
1 51
1 51
1 51
1 51
1 51
1 51
1 51
0 51
0 51
0 59
0 59
0 76
0 78
1 146
1 146
1 146
1 147
3 214
3 223
3 224
3 224
3 226
3 231
3 236
3 236
3 237
3 242
3 239
3 240
3 240
3 240
3 239
3 238
3 238
3 238
3 238
3 238
3 238
3 238
3 239
3 240
3 240
3 242
3 248
3 248
3 248
3 251
3 251
3 250
3 247
3 245
3 244
3 244
3 244
3 241
3 224
3 222
3 222
3 222
3 223
3 223
3 219
3 219
3 219
3 219
3 219
3 219
3 218
3 217
3 212
3 210
5 199
6 193
6 193
6 193
6 193
6 193
6 193
6 193
6 195
6 195
6 195
6 178
6 178
7 167
7 164
6 93
5 92
2 44
2 39
1 21
1 20
1 20
1 20
1 20
1 20
1 20
1 20
1 18
0 15
0 15
0 15
3 15
3 15
3 15
3 15
4 14
4 16
4 16
4 18
4 18
4 18
4 18
4 17
4 17
4 15
4 8
1 7
1 7
1 7
1 13
0 13
0 13
0 13
0 11
0 9
0 7
0 7
0 7
0 8
0 11
0 11
0 10
0 15
0 15
0 15
0 9
0 9
0 9
0 9
0 9
0 11
0 11
0 11
0 11
0 11
0 11
0 11
0 11
0 11
0 6
0 6
3 6
3 8
3 8
3 8
3 8
3 8
3 8
3 8
3 8
3 8
3 8
3 13
3 14
3 15
3 16
0 16
0 16
0 16
0 16
0 16
0 17
0 17
0 17
0 17
0 17
0 17
0 17
0 17
0 17
0 17
0 17
0 17
0 17
0 17
0 17
0 16
0 16
0 20
0 24
0 25
0 25
0 25
0 25
0 26
0 26
0 26
0 29
0 31
0 35
0 39
0 38
0 35
0 38
0 38
0 38
0 55
0 61
0 73
0 72
0 72
0 72
0 72
0 71
0 71
0 71
0 71
0 71
0 71
0 74
0 74
0 74
0 74
0 72
0 72
0 73
0 73
0 73
0 73
0 74
0 74
0 74
0 74
0 73
1 71
1 68
1 67
1 66
1 65
1 69
1 67
1 67
1 67
1 67
1 70
1 70
1 70
1 70
1 70
1 70
0 70
0 70
0 70
0 70
0 70
0 71
0 71
0 71
0 73
0 76
0 76
0 70
0 67
0 95
0 96
0 101
0 101
0 101
0 103
0 105
0 101
0 101
0 97
0 99
0 100
0 101
0 99
0 100
0 100
0 82
0 76
2 62
2 61
2 61
2 61
2 61
2 61
2 61
2 61
2 74
2 72
2 76
2 77
2 77
2 77
2 78
2 79
0 84
0 84
0 84
0 89
5 2658
5 2657
5 2657
5 2657
5 2657
6 2666
6 2667
6 2667
6 2672
8 2895
8 2903
8 2924
8 2939
8 2951
8 2958
3 388
3 379
3 378
3 379
3 381
3 384
3 410
2 420
2 422
2 429
2 435
2 442
2 451
2 455
2 455
2 454
2 454
2 454
2 453
2 453
2 428
2 426
2 425
2 430
2 430
2 441
2 453
2 468
2 464
2 463
2 463
2 463
2 463
2 463
2 462
2 462
3 463
3 487
3 487
3 488
6 586
6 608
6 613
6 618
6 620
6 620
6 605
6 597
6 591
6 588
6 588
6 588
6 587
7 586
7 586
7 586
7 586
7 586
7 588
7 590
8 654
9 656
9 656
9 657
9 660
9 660
9 643
8 406
7 391
7 393
7 392
7 383
7 378
7 379
7 382
7 387
7 386
7 388
7 385
7 361
7 354
7 356
7 356
7 352
7 342
7 336
7 332
7 332
7 333
7 333
7 333
7 331
8 335
8 341
8 416
8 438
9 437
9 460
9 432
9 420
9 389
7 382
7 382
7 382
7 382
7 378
7 377
7 377
7 377
6 376
6 376
6 374
6 368
4 291
4 274
4 275
4 273
4 273
4 273
4 270
5 283
7 288
7 291
7 293
7 294
7 295
7 295
7 295
7 295
7 296
7 296
7 295
7 293
5 217
5 219
5 212
5 212
5 214
5 215
5 213
5 210
5 209
5 206
5 240
5 245
5 252
5 253
5 263
5 256
5 255
5 255
5 256
5 250
5 247
5 243
5 238
5 236
5 236
5 222
5 223
5 224
5 223
5 223
5 227
5 227
4 222
4 215
4 141
4 118
3 114
3 98
3 98
3 97
3 97
3 97
3 97
3 97
3 97
3 97
3 97
3 97
3 97
3 97
3 97
3 97
3 99
3 99
4 108
4 109
4 109
4 108
4 108
4 107
3 96
1 87
1 85
1 84
1 87
1 86
1 86
1 86
1 86
1 85
1 85
1 85
1 85
1 85
1 83
1 82
1 80
1 77
1 76
1 76
1 76
1 77
1 80
1 58
1 46
2 52
2 51
4 42
4 44
4 47
4 46
4 45
4 45
4 45
4 45
4 45
4 45
4 46
4 48
4 48
4 51
4 53
5 53
3 49
3 50
3 52
4 52
4 52
4 52
4 52
4 52
4 53
4 53
4 52
4 54
4 54
4 55
3 56
3 56
3 56
3 60
3 62
2 62
2 62
2 62
2 61
2 61
1 49
1 48
1 50
1 50
1 49
1 49
1 47
1 47
1 47
1 48
1 45
1 45
1 46
1 46
1 46
1 46
1 46
1 46
1 46
1 46
1 46
1 46
1 46
1 47
1 47
1 47
1 48
1 47
1 44
1 43
0 38
0 30
0 30
1 27
1 22
2 22
2 22
2 22
2 22
2 22
2 22
2 26
2 26
2 25
3 26
3 26
3 26
3 25
3 25
3 24
3 23
3 22
3 22
3 22
3 22
3 22
3 22
3 22
3 22
3 22
3 19
3 20
3 20
3 21
4 21
4 21
4 17
4 15
4 15
4 15
4 15
4 17
4 17
4 17
4 17
4 16
4 16
4 16
4 16
4 16
4 16
4 16
4 15
4 15
4 14
4 14
4 14
4 14
4 14
4 14
4 14
4 13
4 13
2 13
2 13
2 13
2 11
2 11
2 11
2 12
2 13
2 14
2 16
2 19
2 19
2 19
2 19
2 21
2 37
2 42
2 46
2 48
2 48
2 48
2 44
2 44
1 44
1 42
1 42
1 41
1 41
1 47
1 47
1 47
1 50
1 50
1 50
1 50
1 50
1 50
1 50
2 50
2 51
2 52
2 57
2 57
2 72
1 82
1 83
1 83
1 80
1 81
1 81
1 81
1 79
1 79
0 79
0 79
0 79
0 79
0 79
0 79
0 79
0 79
0 79
0 80
0 80
0 80
0 82
0 82
0 82
0 82
0 82
0 82
0 82
4 82
4 83
4 89
4 105
4 166
4 210
4 219
4 222
4 232
4 233
4 237
5 278
8 286
8 286
9 288
9 290
5 276
5 263
5 257
5 255
5 255
5 257
5 257
5 257
5 257
5 257
5 257
1 257
1 256
0 256
0 256
1 256
1 256
1 256
1 256
1 255
1 253
1 258
1 260
1 266
1 288
1 292
1 288
1 287
1 277
1 274
1 273
1 274
0 277
0 287
0 302
0 332
0 382
0 397
0 402
1 420
1 422
1 422
1 426
1 425
1 425
10 429
10 431
10 433
10 432
10 433
10 433
10 433
10 433
10 432
10 432
10 433
10 432
10 432
10 431
10 422
10 395
1 333
1 299
1 296
1 291
1 282
1 280
1 274
1 233
1 228
1 228
1 226
1 223
1 217
1 217
1 217
5 222
5 222
5 223
5 223
5 223
5 223
5 223
5 222
5 222
5 222
5 222
5 222
5 223
5 224
5 224
5 225
5 226
1 226
1 217
1 213
1 206
1 177
1 177
1 172
1 174
1 175
1 178
2 192
2 193
2 192
2 181
2 159
2 107
2 68
2 61
2 57
1 48
1 48
1 49
1 49
1 49
1 49
1 50
1 50
1 50
1 49
1 49
1 49
1 49
1 49
1 49
1 49
5 48
5 48
8 48
10 48
10 48
12 48
12 47
12 46
12 46
12 43
12 44
12 44
12 45
12 46
12 46
12 46
12 46
12 46
13 46
13 51
13 61
9 58
9 57
9 56
9 56
9 56
9 57
9 57
9 57
9 57
9 57
9 58
9 58
9 57
9 57
9 56
9 55
9 55
13 55
13 55
13 56
13 53
13 53
16 50
16 48
16 57
16 54
16 45
16 40
19 38
19 38
19 38
19 38
15 38
15 38
15 38
15 38
15 38
15 44
15 43
15 46
15 46
15 33
15 33
15 33
15 62
15 62
15 62
15 63
18 113
18 115
18 115
18 116
14 118
14 128
12 128
11 149
11 248
12 447
13 640
13 729
13 803
14 838
14 865
15 876
16 906
16 913
16 914
16 919
16 920
15 919
15 919
15 914
15 903
15 900
15 900
15 900
15 900
15 900
14 900
14 902
14 902
14 905
14 905
14 904
14 904
14 904
14 903
14 903
14 903
14 903
14 904
13 904
13 904
13 905
13 905
10 909
10 909
10 911
10 911
10 911
10 911
7 910
7 923
7 923
7 923
7 928
7 984
9 2041
9 2214
9 2295
9 2358
9 2369
9 2380
9 2470
9 2474
9 2473
9 2477
9 2361
9 2356
9 2261
9 2251
4 2056
4 2057
2 1917
2 1918
2 1920
2 2035
2 2063
3 2098
3 3365
5 3304
5 3236
5 3208
5 3176
5 3166
5 3162
5 3162
5 3151
5 3147
5 3148
5 3151
5 3151
5 3151
5 3151
5 3149
5 3151
4 3151
4 3151
4 3151
4 3150
4 3150
4 3151
4 3149
4 3149
4 3150
4 3150
4 3150
4 3151
4 3151
4 3151
4 3150
4 3151
4 3151
4 3148
4 3149
4 3149
4 3149
4 3150
4 3147
4 3147
4 3146
4 3146
4 3147
4 3146
4 3146
4 3142
4 3136
4 3132
4 3127
4 3026
2 1630
2 1577
2 1577
2 1581
2 1589
2 1602
2 1609
2 1599
2 1594
2 1587
2 1578
2 1591
2 1711
2 1749
2 1849
2 1878
2 1884
2 1884
2 1882
2 1761
2 1717
1 1699
1 427
0 438
0 415
0 427
0 429
0 457
0 461
0 474
0 492
0 499
0 508
0 508
0 508
0 508
0 509
0 509
0 508
0 510
0 513
0 515
0 522
0 523
0 523
0 521
0 521
0 521
0 521
0 521
0 521
0 521
0 524
0 524
0 524
0 524
0 524
0 535
0 535
0 535
0 540
0 546
0 550
0 550
0 551
0 553
0 553
0 553
0 553
0 554
0 555
0 556
0 556
0 558
0 558
0 556
0 557
0 546
0 533
0 529
0 529
0 529
0 529
0 528
0 499
0 371
0 330
0 234
0 205
0 202
0 202
0 199
0 185
0 179
0 177
0 169
0 156
0 159
0 183
0 185
0 168
0 166
0 155
0 148
0 151
0 150
0 154
0 154
0 154
0 154
0 154
0 155
0 154
0 147
0 147
0 158
0 167
0 169
0 169
0 169
0 169
0 177
0 179
0 181
0 181
0 178
0 177
0 179
0 180
0 184
0 170
0 170
0 167
0 157
0 151
1 148
1 148
1 147
1 146
1 149
1 149
1 149
1 147
1 146
1 146
1 146
1 144
1 144
1 144
1 144
0 144
0 136
0 135
0 135
0 131
0 128
0 127
0 126
0 119
0 112
0 96
0 94
0 94
0 94
0 94
0 94
0 94
0 95
0 94
1 90
1 87
1 63
1 61
1 61
1 57
1 55
1 51
1 47
1 48
1 44
1 44
1 44
1 52
1 86
2 90
2 92
2 93
2 92
2 82
2 73
3 71
5 72
5 72
5 72
7 64
7 62
7 60
7 60
7 60
7 59
7 57
6 56
6 55
6 55
8 55
8 55
6 64
6 64
6 64
6 64
11 64
11 64
11 62
11 62
11 62
11 62
11 62
11 62
11 62
11 62
11 62
11 62
11 63
11 63
11 65
11 72
11 73
11 78
11 78
11 80
11 81
11 82
11 83
12 85
12 99
12 99
12 100
12 123
12 124
12 125
13 230
13 238
12 236
12 241
12 244
12 249
12 258
12 263
11 273
11 329
11 365
11 372
12 396
12 396
12 396
12 385
11 265
11 262
11 261
11 261
11 263
11 263
19 267
19 266
18 267
16 267
16 267
14 267
12 267
12 267
12 267
12 267
12 267
12 267
12 267
12 267
13 267
13 267
13 267
13 258
13 258
13 258
13 258
10 258
10 258
10 258
10 258
10 258
10 260
10 260
10 260
11 260
11 261
11 261
11 259
11 257
11 257
11 253
11 243
11 242
11 239
12 376
12 378
12 379
12 403
12 402
11 405
14 402
14 404
14 413
14 395
21 396
21 395
21 380
21 371
28 369
28 368
30 368
30 362
30 348
30 347
30 336
29 278
34 234
33 228
33 220
32 219
32 220
32 221
32 221
31 221
27 221
27 221
27 220
27 222
19 218
19 223
19 222
14 232
14 232
14 232
14 235
14 242
15 270
15 270
15 276
15 276
15 276
15 279
14 283
14 284
14 285
14 286
17 287
17 283
17 283
17 282
17 282
17 282
17 283
17 283
17 281
17 281
17 281
17 281
17 283
17 286
17 296
17 309
17 316
14 316
14 316
14 316
14 327
14 183
12 183
12 180
12 151
12 150
9 143
8 132
8 127
8 121
8 119
2 114
6 115
5 118
5 117
5 118
5 181
5 180
5 180
5 179
5 180
5 180
5 179
5 180
5 181
5 181
5 182
1 182
1 182
1 182
1 182
1 119
1 119
1 119
1 118
1 117
1 116
2 119
2 119
2 119
2 119
2 119
2 107
1 79
1 77
1 75
1 75
1 75
1 75
1 75
1 75
1 75
1 75
1 74
1 74
1 74
1 74
1 74
1 74
1 74
1 74
1 74
1 74
1 74
1 75
1 71
1 66
1 58
3 44
3 42
3 43
3 43
3 43
3 28
3 28
3 30
3 34
3 36
3 38
3 37
3 37
3 38
3 36
3 35
3 36
3 35
3 33
3 33
3 32
3 32
3 32
3 32
3 32
3 39
3 39
3 39
3 39
3 38
3 37
3 37
3 38
3 39
3 39
3 39
3 41
3 41
3 41
3 41
3 40
3 36
2 35
2 35
2 35
2 35
2 35
2 36
2 40
2 41
2 41
2 41
4 41
4 41
4 41
4 41
4 41
4 41
4 41
4 41
4 41
4 41
4 41
4 37
4 36
4 35
4 36
2 36
2 36
2 36
2 39
2 39
2 38
0 36
0 37
0 38
0 40
0 40
0 40
0 40
0 37
0 33
0 29
0 27
1 29
1 29
1 29
1 29
1 29
1 28
1 27
1 27
1 26
1 26
1 27
1 27
1 27
1 28
1 21
0 19
0 20
0 19
0 19
0 19
0 20
0 19
0 18
0 18
0 18
0 18
0 18
0 19
0 20
0 21
0 21
0 20
0 20
0 20
0 20
0 22
0 51
0 51
0 51
1 85
1 86
1 88
1 89
1 90
1 90
1 91
1 91
1 92
1 92
1 92
1 92
1 63
1 63
1 63
1 63
1 62
1 61
2 62
2 62
2 59
2 59
2 58
2 58
2 57
2 55
2 54
2 54
2 55
2 55
2 55
2 56
2 56
2 56
2 56
2 57
2 58
2 59
2 65
3 169
3 180
3 191
3 196
3 199
3 199
3 202
3 203
3 205
3 234
3 235
3 235
3 237
3 237
3 239
3 238
3 237
3 237
3 237
3 237
3 237
3 237
3 235
3 235
3 238
3 240
36 249
36 249
36 249
36 284
37 617
38 705
38 759
38 802
37 782
37 793
38 823
38 830
38 833
38 834
38 832
5 831
5 831
5 833
5 835
5 844
5 845
4 845
4 846
4 847
4 847
3 847
2 847
2 851
2 851
2 852
2 852
2 852
2 852
2 852
2 852
2 852
2 851
2 851
2 851
2 852
2 850
2 850
2 849
2 849
2 848
1 842
1 831
0 714
0 711
0 773
0 779
0 818
0 853
0 891
2 914
2 940
2 913
2 909
2 911
2 910
2 912
2 917
2 923
2 930
2 939
2 939
2 939
2 939
2 939
0 939
2 939
2 939
2 938
2 931
2 930
2 925
2 820
2 432
2 367
2 353
2 349
2 348
2 344
2 321
2 316
0 316
0 316
0 315
0 320
0 321
0 343
0 341
0 333
0 334
0 334
0 334
0 333
0 334
0 334
0 335
0 332
0 345
0 345
0 345
0 345
0 345
0 345
0 345
0 389
0 396
0 401
0 404
0 404
0 405
0 406
0 408
0 409
0 411
0 432
0 499
0 522
0 533
0 472
0 466
0 412
0 386
0 350
0 377
0 343
0 339
0 340
0 339
0 339
0 338
0 361
0 352
1 347
1 339
1 339
1 340
1 340
1 343
1 344
1 353
1 363
1 364
1 360
1 360
1 360
1 360
1 360
1 358
0 358
0 359
0 359
0 361
0 362
0 362
0 363
0 364
0 365
0 360
0 364
0 379
0 380
0 380
0 380
0 381
0 381
0 382
0 385
0 387
0 385
0 384
0 374
0 374
0 374
0 397
0 407
0 448
0 450
0 405
1 398
2 394
2 406
2 412
3 447
3 479
3 487
3 523
3 538
3 583
7 516
7 519
7 516
7 553
8 588
8 597
9 599
9 601
9 550
9 562
9 564
9 568
9 570
9 667
9 676
9 796
9 808
5 815
5 818
5 825
5 830
4 832
4 832
4 833
4 825
4 816
4 816
4 816
4 816
5 822
5 822
5 822
5 822
5 869
5 870
5 869
5 866
5 863
5 863
5 862
5 862
5 861
5 863
5 854
4 811
3 810
2 800
2 799
2 799
2 750
2 747
2 739
2 736
2 733
2 732
2 729
2 729
2 727
2 692
2 649
2 587
2 562
2 560
2 568
2 564
2 568
2 561
1 533
1 512
1 505
1 494
1 487
1 431
1 421
1 411
1 409
1 378
0 343
0 342
0 342
0 342
0 339
0 338
6 347
6 342
6 338
6 235
6 221
6 50
6 34
6 34
6 28
6 28
6 28
6 30
6 30
6 30
6 30
6 30
7 30
7 30
7 30
7 30
7 32
7 32
7 32
7 32
7 32
9 32
9 32
9 35
9 35
9 34
9 34
9 35
8 35
8 35
8 34
8 35
8 35
8 35
8 35
8 35
8 33
8 33
9 33
9 35
9 35
9 35
9 34
9 34
10 40
10 40
10 40
10 40
10 39
10 32
10 31
10 29
10 30
10 30
10 30
10 28
10 28
11 28
11 29
11 29
11 29
11 29
11 30
11 30
11 30
13 30
13 28
13 28
13 28
7 21
7 21
7 21
7 21
7 21
7 21
7 21
7 21
7 21
6 21
6 21
6 20
4 19
4 19
4 19
4 19
4 19
4 19
4 19
4 19
4 19
4 20
4 20
4 20
4 20
2 19
2 19
2 17
2 17
2 17
2 17
2 16
3 16
13 21
13 28
13 28
13 29
13 28
13 28
14 46
15 62
19 211
25 284
31 324
32 338
32 357
32 359
32 367
31 373
27 375
27 378
27 377
27 377
27 377
27 377
27 376
27 375
22 375
22 375
22 376
22 376
22 376
22 377
22 482
23 492
23 501
24 506
24 509
24 511
24 511
24 511
24 512
24 511
24 510
24 510
24 510
24 510
24 510
24 510
24 510
24 514
24 516
24 516
24 515
24 515
24 515
24 515
24 515
24 515
24 515
24 515
24 515
25 517
25 517
25 517
25 517
26 519
26 521
26 523
26 524
26 524
26 524
26 524
26 521
25 519
20 519
19 509
18 472
18 471
17 447
17 445
16 444
15 438
12 364
6 212
4 178
3 174
3 174
3 173
3 173
3 173
3 161
3 161
3 159
3 159
3 159
3 159
3 159
3 159
3 158
3 159
5 170
6 173
6 173
6 174
6 170
5 62
5 51
5 43
4 40
4 37
4 37
4 37
4 37
4 37
4 169
4 169
4 169
4 169
4 169
4 174
4 180
4 181
4 177
4 175
4 175
4 175
4 176
4 176
4 176
4 176
4 44
4 44
4 44
4 43
3 45
24 18088
24 18086
25 18086
25 18084
26 18082
26 18082
26 18082
26 18082
26 18082
26 18086
26 18086
26 18086
26 18088
26 18088
26 18090
5 90
6 121
5 130
5 130
5 127
4 129
4 128
4 128
4 127
4 127
4 127
4 127
4 125
4 125
4 124
4 123
3 68
4 68
4 69
4 70
4 70
4 70
4 69
2 60
1 56
1 56
1 55
1 55
1 55
1 55
1 55
1 55
1 55
0 124
0 125
0 127
0 127
200 130
200 130
200 130
200 130
200 130
201 125
201 118
201 118
201 118
201 118
201 118
201 118
201 117
201 46
201 46
1 43
1 43
1 43
1 43
1 43
1 43
0 43
0 43
0 43
0 43
0 43
0 43
0 43
0 43
0 43
0 39
0 42
0 42
0 44
0 46
0 47
0 28
0 22
0 16
0 16
0 16
0 13
0 13
0 13
0 41
0 41
0 41
0 41
0 41
0 41
0 41
0 41
0 41
0 40
0 39
0 39
0 39
0 39
0 39
0 11
0 11
0 11
2 11
2 11
2 13
2 13
2 13
2 13
3 13
3 13
3 13
3 12
3 14
3 16
3 16
3 16
3 16
1 16
1 16
1 16
1 14
1 14
1 14
1 14
0 14
0 14
0 14
0 14
0 14
0 14
0 15
0 15
0 16
0 16
0 16
0 16
0 16
0 17
0 17
0 20
0 20
0 21
0 24
0 24
0 23
0 23
0 22
0 20
0 18
0 17
0 19
0 23
0 24
0 24
0 24
0 24
0 24
0 23
0 24
0 24
0 24
0 24
0 24
0 24
0 24
0 24
0 24
0 24
0 24
0 24
0 24
0 24
0 24
0 24
0 24
0 24
0 24
0 24
1 25
3 71
3 71
3 75
3 75
3 75
3 75
3 74
3 72
3 72
3 73
3 74
3 74
3 74
3 74
2 75
2 75
2 75
2 75
4 87
4 88
4 92
4 96
4 97
4 97
4 97
4 97
4 97
5 97
8 97
101 97
101 99
101 99
101 99
440 95
440 96
440 96
440 91
440 92
440 92
440 91
440 102
440 114
439 124
440 130
439 129
439 125
439 124
439 126
7 134
7 145
7 146
7 146
7 147
8 148
9 152
9 153
9 153
9 153
8 153
8 153
8 153
8 153
8 153
8 157
8 157
8 158
8 159
8 169
8 169
8 170
8 169
8 169
8 166
6 117
6 117
6 117
6 117
6 117
6 117
6 117
6 117
6 117
6 116
6 115
6 115
6 115
6 115
7 114
7 114
7 114
7 114
5 101
5 99
5 93
5 91
5 91
5 91
5 91
5 91
5 91
5 91
3 91
2 91
2 90
2 90
2 95
3 98
3 114
3 121
5 156
6 157
6 162
6 162
7 159
7 143
7 138
7 141
7 143
7 143
7 145
7 140
7 127
7 120
6 121
6 121
6 120
5 120
5 120
5 120
5 120
5 120
5 120
5 120
5 120
5 120
5 120
5 116
5 116
5 115
5 114
5 97
5 97
5 99
5 91
5 91
4 91
4 91
4 91
5 91
5 91
5 91
5 91
5 91
5 91
5 91
5 91
5 91
5 91
5 89
8 89
8 89
8 88
8 88
8 88
7 88
8 88
8 86
27 86
27 86
27 86
27 86
27 86
27 86
27 86
25 86
25 86
24 86
24 87
24 87
23 81
22 63
22 60
1 18
0 19
0 19
0 19
0 9
0 37
0 37
0 42
0 42
0 42
0 40
0 40
0 40
0 40
0 40
8 43
8 43
8 43
8 43
8 43
8 35
8 35
8 34
8 34
8 34
8 34
8 34
8 34
8 34
8 34
0 32
2 33
2 33
2 33
2 33
2 33
2 33
2 33
2 33
2 33
2 66
2 66
3 79
3 80
3 83
3 85
3 85
3 85
3 85
3 85
3 85
3 87
3 87
3 87
3 87
3 87
3 87
3 87
3 87
3 87
3 87
3 87
3 87
3 87
3 87
3 87
3 86
3 85
3 88
3 88
3 89
3 91
3 91
3 91
3 90
4 90
4 90
4 85
4 65
4 61
4 61
4 61
4 60
4 63
4 66
4 66
4 66
4 66
4 66
4 66
3 66
3 66
4 66
256 86
256 86
256 86
256 86
256 86
256 86
256 86
256 86
256 85
256 85
256 84
254 84
254 84
254 84
254 84
1 64
1 64
1 64
1 64
1 63
0 17
0 21
0 22
0 22
0 19
0 17
0 17
0 17
0 17
0 17
0 17
0 18
0 18
0 18
0 18
0 18
0 18
0 18
0 18
0 18
0 18
0 18
0 21
0 21
0 21
0 21
0 22
0 22
0 19
0 19
0 17
0 16
0 16
0 17
0 18
0 20
0 20
0 20
0 21
0 21
0 21
0 21
0 18
0 15
0 15
0 15
1 15
1 15
1 19
1 18
1 18
1 17
1 17
1 17
1 17
1 17
1 17
1 17
1 17
1 17
1 17
0 17
0 17
0 13
0 13
0 13
0 13
0 13
0 13
0 13
0 13
0 14
0 14
0 14
0 10
0 7
0 7
0 7
0 7
0 7
0 7
0 7
0 7
0 7
0 6
0 6
0 6
0 8
0 17
0 18
0 65
0 87
0 138
0 147
0 151
0 150
0 155
0 155
0 155
0 155
0 155
0 158
0 159
0 159
0 159
0 159
0 159
0 159
0 158
0 158
0 158
0 158
0 158
2 158
2 158
2 158
2 158
2 158
2 158
2 158
2 158
2 160
2 160
2 161
2 161
2 161
2 162
2 162
2 162
0 165
0 165
0 165
0 165
0 165
0 165
0 165
0 165
0 165
0 165
0 165
0 165
0 165
0 165
0 165
0 165
0 165
0 165
0 165
0 165
0 165
0 165
0 168
0 168
0 168
0 168
0 168
0 168
0 168
0 169
0 169
0 169
0 160
0 158
0 116
0 93
0 37
0 27
0 26
0 27
0 30
0 30
0 29
0 29
0 29
0 29
0 28
0 28
0 28
0 28
0 28
0 28
0 28
0 28
0 28
0 28
0 28
0 30
0 30
0 31
1 31
1 31
1 31
1 31
1 34
1 33
1 33
1 32
1 32
1 39
1 38
1 39
1 39
1 39
1 68
1 71
1 73
1 75
1 75
1 75
1 75
1 75
1 75
1 75
1 76
1 76
1 78
1 77
1 79
1 91
1 91
1 91
1 91
1 92
1 90
1 90
1 91
1 97
1 97
1 97
1 97
1 97
1 96
1 97
1 95
1 94
1 91
1 85
1 85
1 85
1 85
1 85
1 82
1 79
1 79
1 79
1 79
1 79
2 77
2 77
2 77
2 78
2 78
5 80
5 80
5 80
5 80
5 80
5 80
5 82
5 82
6 90
6 90
5 91
5 91
5 91
4 90
4 94
1 104
1 125
1 125
1 125
1 118
1 118
1 117
1 118
1 110
2 82
2 82
2 82
2 80
2 80
2 80
3 80
3 80
3 80
3 80
3 79
3 79
3 77
3 83
3 88
2 106
2 163
2 174
2 210
2 236
2 375
1 394
1 408
1 417
1 438
1 451
1 455
1 455
1 457
1 458
1 468
1 461
1 463
1 463
1 464
1 462
3 464
3 464
3 467
3 471
3 478
3 482
3 496
3 503
3 504
3 504
3 505
3 504
3 505
3 503
3 503
1 502
1 502
1 502
1 502
1 496
1 494
1 480
1 484
1 490
1 492
1 684
1 684
1 670
1 662
1 630
1 623
1 622
1 622
1 622
1 621
1 618
0 623
0 622
0 622
0 621
1 621
1 622
1 622
1 622
1 625
1 761
1 763
1 765
1 758
1 758
1 743
1 736
1 688
1 659
1 651
1 631
0 598
0 468
0 467
0 458
0 457
0 434
0 431
0 427
0 426
0 425
0 425
2 417
2 416
2 415
2 415
2 414
2 414
2 413
3 413
4 410
5 425
5 416
5 411
5 393
5 392
5 392
5 392
3 392
3 392
3 392
4 392
4 392
4 392
3 392
5 397
4 383
6 384
6 386
8 386
8 380
13 367
13 363
13 172
13 172
13 171
13 170
12 171
12 171
12 171
12 171
12 171
12 171
12 171
15 176
15 180
15 180
15 181
15 181
15 180
15 180
15 178
15 178
15 36
15 36
15 35
15 31
15 30
15 30
15 30
15 30
15 30
15 30
15 30
15 30
15 30
15 30
15 30
15 30
15 30
15 31
15 31
15 31
15 33
15 33
15 34
15 34
15 34
15 34
15 34
15 34
15 34
15 34
15 34
17 34
32 71
32 71
32 71
32 72
34 72
37 74
38 74
40 81
41 84
41 84
42 84
42 84
42 86
40 83
39 80
37 77
37 76
37 76
37 75
32 75
32 75
32 75
32 75
32 72
32 73
32 72
32 72
32 72
32 72
32 72
36 72
36 72
31 57
31 57
32 58
32 64
32 67
32 67
33 67
33 66
33 66
33 66
33 66
33 66
33 66
29 66
29 66
29 66
29 66
29 66
29 66
29 66
29 67
28 67
28 67
28 68
29 68
29 68
32 68
32 68
32 69
32 67
32 66
32 66
32 66
32 66
32 66
31 65
31 65
31 65
27 65
22 64
21 65
7 24
6 26
8 26
8 27
8 26
6 35
4 35
3 34
3 35
3 35
3 35
3 36
3 43
4 43
4 45
4 48
4 48
4 48
4 48
3 48
2 48
2 48
2 48
2 48
2 48
2 51
2 51
3 55
2 56
2 56
2 61
2 64
2 70
2 79
1 80
1 78
1 76
1 357
1 357
1 363
1 364
1 366
1 366
2 388
2 388
2 388
2 388
2 388
2 388
5 490
5 490
5 490
5 215
8 1818
8 1817
8 1817
8 1816
8 1816
8 1816
8 1816
9 1831
9 1833
9 1837
9 1849
7 1911
6 1946
3 389
4 430
4 456
4 488
4 494
4 520
4 520
4 520
4 517
4 516
4 518
4 518
4 510
4 509
4 509
4 508
4 507
4 505
4 504
4 487
4 460
4 454
4 452
4 452
4 452
4 450
4 450
4 450
4 450
4 450
4 450
4 450
4 450
4 450
3 449
3 449
3 447
3 445
3 443
3 433
3 427
3 426
3 424
3 425
3 420
3 416
3 396
3 391
2 373
2 375
2 226
1 221
1 221
1 221
1 221
2 221
2 221
1 94
1 93
1 85
1 81
1 81
1 81
1 81
1 81
1 81
1 90
1 90
1 89
1 86
1 65
1 29
1 22
1 20
1 19
1 19
1 19
1 19
5 19
5 19
5 19
5 19
5 19
5 19
5 18
5 18
5 18
5 18
5 18
5 18
5 18
5 18
5 18
5 18
2 25
1 25
1 26
1 28
1 28
1 30
1 35
1 38
1 40
1 42
1 45
1 45
1 45
1 45
1 45
1 45
1 43
1 44
1 44
1 44
1 44
1 43
1 43
1 49
1 49
1 49
1 48
2 49
2 45
2 45
2 46
2 46
2 46
2 46
1 46
1 46
1 46
1 46
1 40
1 40
1 40
1 40
1 40
1 40
0 39
0 31
0 30
0 30
0 30
0 32
0 32
0 32
0 32
0 32
0 32
0 32
0 32
1 38
3 40
3 41
3 41
3 42
3 43
3 43
3 43
3 43
3 43
3 41
3 41
3 41
3 41
3 41
3 41
3 33
1 32
1 34
1 35
1 42
1 39
1 34
1 32
1 31
1 29
1 27
3 32
3 32
3 32
3 32
3 37
3 37
3 36
3 36
3 36
3 36
3 36
3 36
3 36
4 40
4 40
5 39
5 39
5 39
5 38
5 38
5 38
5 44
5 51
5 51
5 55
5 55
5 55
5 55
4 51
4 51
3 51
3 51
3 51
3 51
3 51
3 51
3 51
3 51
3 51
3 51
3 53
3 53
3 55
3 57
3 57
3 57
1 51
2 49
2 49
2 50
1 50
1 50
1 50
1 50
1 51
1 52
1 52
1 54
1 58
1 59
1 59
1 85
0 95
0 103
0 116
0 115
0 108
0 107
0 107
0 105
0 105
0 106
0 107
0 102
0 108
0 108
0 109
0 104
0 106
1 111
1 139
1 170
1 175
1 181
1 181
1 197
1 203
1 212
1 269
2 827
2 1046
2 1203
2 1439
2 1483
1 1538
2 1573
2 1579
2 1574
2 1573
2 1574
2 1574
2 1576
2 1577
2 1577
2 1577
9 1577
9 1578
9 1578
9 1578
9 1579
9 1579
9 1579
9 1681
9 1688
9 1701
9 1696
9 1690
9 1696
9 1697
9 1697
2 1697
2 1698
2 1701
3 1910
3 1917
3 1936
3 1950
3 1947
3 1960
3 1980
3 1986
3 1985
3 2005
3 2010
3 1994
3 1987
3 1979
3 1973
3 1970
3 1970
3 1972
3 1989
3 2007
3 2009
3 2011
3 2006
3 2008
3 2005
3 2007
3 2006
3 2010
3 2012
3 2008
3 1985
3 1961
3 1966
3 1986
3 2036
3 2096
3 2129
3 2168
3 1965
1 1256
1 1047
1 981
1 933
1 940
1 941
1 941
1 944
1 945
1 947
1 946
1 950
1 954
1 962
1 1001
1 1039
2 1070
2 1089
2 1095
2 1146
2 1160
2 1160
2 1159
2 1035
2 1026
2 985
2 982
2 981
2 984
2 984
2 984
2 986
2 976
1 980
0 737
0 736
0 726
0 705
0 682
0 679
0 680
0 683
0 683
0 674
0 670
0 666
0 669
0 671
0 671
0 670
0 670
0 664
0 641
0 642
0 642
0 644
0 646
0 653
0 652
0 656
0 655
0 654
0 650
0 647
0 646
0 677
0 672
0 706
0 742
0 753
1 739
2 713
2 821
3 1110
4 1598
4 1705
6 1869
6 1983
6 2015
6 2041
6 2061
7 2069
8 2120
8 2122
8 2148
8 2161
7 2179
7 2144
7 2082
7 2090
7 2088
7 2095
8 2055
9 2073
9 2088
9 2102
9 2104
9 2104
9 2110
9 2124
9 2127
9 2151
9 2156
9 2179
9 2194
12 2195
12 2191
12 2193
12 2194
12 2195
12 2195
12 2196
12 2195
12 2194
12 2193
12 2201
12 2190
12 2191
12 2193
12 2203
14 2487
27 2954
29 3055
44 3470
44 3540
44 3556
45 3593
45 3595
45 3598
45 3625
45 3628
45 3654
45 3662
45 3676
45 3756
45 3780
45 3968
45 4077
45 4085
45 4704
45 4536
44 4264
44 4165
44 4132
44 4111
44 4045
41 3713
40 3259
40 3209
40 3148
40 3125
40 3125
40 3126
40 3119
39 3109
38 3040
38 3039
38 3014
38 2996
38 2970
38 2970
38 2968
37 2939
37 2933
37 2909
36 2885
36 2874
36 2865
36 2874
77 3381
78 3381
78 3376
78 3362
83 3351
85 3296
92 3292
92 3261
92 3253
92 3251
92 3251
92 3248
92 3248
92 3247
93 3248
94 3249
96 3254
96 3253
96 3241
96 3229
96 3224
96 3219
96 3213
96 3182
85 2678
79 2342
78 2260
65 1943
72 1950
72 1946
73 1927
73 1926
73 1918
73 1894
73 1965
76 1953
76 1940
76 1929
76 1849
76 1821
76 1538
76 1528
76 1640
76 1003
76 1008
76 1003
76 996
76 994
76 995
76 992
76 1001
76 1013
76 1011
76 1011
76 1012
76 1012
76 1012
76 1013
76 1013
76 1014
76 1017
77 1033
77 1046
77 1055
77 1066
77 1069
77 1070
77 1074
76 1076
76 1082
79 1103
79 1100
74 1086
26 566
26 570
26 568
26 571
25 684
10 676
10 681
10 694
10 719
11 743
11 770
10 937
7 985
7 1019
7 1019
7 1021
7 1024
7 1025
7 1025
7 1025
7 1027
7 1027
7 1027
7 1026
6 1026
6 1019
6 1019
6 1019
3 1010
3 1012
3 1014
3 1013
3 1018
3 1027
3 928
3 918
3 920
3 948
3 947
3 943
3 940
3 895
3 762
3 755
3 749
3 749
3 749
4 749
4 746
4 743
4 715
4 667
4 670
4 672
4 672
6 682
6 681
6 683
7 685
7 688
7 687
7 672
6 659
6 655
6 655
6 652
6 651
7 657
7 657
7 650
2 613
2 613
2 613
5 613
5 612
6 652
6 648
6 530
6 531
6 515
6 502
6 481
6 452
7 418
7 208
7 199
7 173
7 173
7 172
7 172
7 172
7 170
7 170
7 168
7 165
7 166
8 167
8 167
8 170
8 173
8 194
8 183
8 181
8 186
8 222
8 217
9 209
9 209
11 211
17 229
28 336
31 466
31 471
31 483
31 486
31 484
37 490
37 486
37 485
37 485
37 485
37 485
39 535
40 537
40 537
42 538
42 538
43 552
43 552
43 551
44 551
43 572
43 574
43 573
43 588
43 596
44 658
44 657
44 660
44 664
44 664
44 666
44 667
44 667
44 667
72 1005
69 1006
69 1013
69 973
69 974
69 974
69 976
68 976
68 987
68 988
68 990
67 990
67 990
67 989
67 989
67 989
67 990
67 994
67 996
67 996
67 997
67 996
67 997
69 996
68 997
68 996
68 995
64 992
64 969
64 968
64 967
64 959
64 916
64 915
64 903
64 902
62 899
60 852
44 638
44 608
44 609
41 608
41 611
41 612
39 603
39 603
39 603
39 603
39 602
39 601
37 545
300 547
300 547
300 545
300 545
299 531
299 530
299 529
298 527
298 509
298 507
298 503
298 485
298 477
298 404
298 398
297 397
294 396
29 391
29 391
29 388
22 387
22 382
1 40
1 41
1 35
1 35
0 32
0 32
0 32
0 32
0 21
0 21
0 21
0 17
0 18
0 18
0 18
0 17
0 15
0 12
0 11
0 11
0 11
0 11
0 10
0 10
0 10
0 12
0 12
0 14
0 14
0 14
0 14
0 14
0 14
0 16
0 17
0 17
0 17
0 20
0 20
0 20
0 20
0 22
1 28
1 28
1 30
2 30
2 30
2 30
2 30
2 30
2 30
2 32
2 32
2 33
2 33
2 33
2 31
2 31
3 31
3 31
3 34
3 34
3 33
3 33
3 33
7 33
8 35
8 34
8 35
8 35
8 35
8 35
8 35
8 34
7 33
7 34
7 34
7 37
7 38
7 38
3 41
3 41
3 41
3 40
3 40
3 40
3 40
3 40
3 40
3 40
3 45
3 45
3 45
3 45
3 45
3 46
3 46
3 46
3 46
3 46
3 45
3 45
3 47
3 47
3 47
3 47
3 43
3 42
3 42
3 42
3 40
3 40
3 40
3 40
3 40
1 32
1 31
1 31
1 31
1 31
1 31
1 31
1 31
1 31
1 31
1 31
1 31
1 32
1 35
3 35
3 53
3 54
3 54
3 52
3 52
3 53
2 54
2 54
2 54
2 49
2 48
2 47
3 46
3 50
3 50
3 50
3 50
3 64
4 64
15 453
15 495
15 505
15 524
15 525
15 525
15 524
15 525
15 525
15 530
15 537
15 539
15 544
15 544
15 577
15 577
15 577
15 577
15 577
15 577
15 578
15 579
15 578
15 580
15 576
15 577
15 579
15 579
15 579
15 578
15 578
15 578
15 578
15 578
15 578
15 578
15 656
15 658
15 680
15 701
15 719
15 720
15 723
15 728
15 730
15 731
15 732
15 732
15 732
15 733
15 735
15 733
15 731
13 730
13 713
13 715
13 730
13 721
13 719
13 711
13 710
13 710
13 710
13 710
13 711
13 908
12 905
12 918
12 925
12 926
12 924
12 925
11 920
0 521
0 481
0 477
0 477
2 481
2 489
2 501
2 507
2 509
2 505
2 496
2 496
2 500
2 500
2 462
2 471
2 479
2 500
5 523
6 526
8 543
8 543
8 543
8 540
9 549
9 554
9 566
9 583
9 583
10 600
10 606
10 612
10 620
10 628
10 633
10 633
10 553
10 550
10 510
10 508
10 493
10 493
10 488
10 485
10 482
10 481
10 481
10 480
10 474
10 474
10 474
12 477
35 572
35 573
36 572
36 570
36 555
36 554
36 555
36 555
36 556
36 555
36 556
36 556
36 553
36 299
36 298
36 274
36 264
36 210
36 210
37 210
37 210
37 210
37 209
37 209
37 210
40 207
46 207
54 217
55 222
55 222
56 223
56 223
58 220
58 212
58 210
58 209
58 204
59 201
59 194
55 185
55 181
53 167
52 166
52 164
52 162
52 161
52 158
52 159
52 153
51 151
51 149
51 148
51 146
51 144
51 147
51 146
51 146
51 146
51 145
51 145
53 163
53 162
57 167
57 168
57 168
57 167
57 167
59 176
59 176
59 176
49 176
53 189
52 188
29 90
30 92
30 92
31 93
31 93
31 93
31 94
24 99
24 98
24 99
25 98
25 110
25 110
25 110
25 111
25 111
25 111
25 111
25 111
25 111
25 111
25 111
25 111
25 111
25 110
25 98
22 96
19 81
19 74
19 74
19 73
24 80
23 80
26 85
25 85
25 85
25 85
26 85
26 85
26 86
26 86
26 86
26 86
26 86
25 86
25 86
25 86
25 86
25 86
25 86
25 88
25 89
25 89
26 93
26 96
60 241
62 254
62 258
62 260
62 261
60 235
59 233
55 228
55 221
52 220
53 220
53 220
53 220
53 220
53 220
53 219
50 211
50 211
50 212
50 212
50 212
50 213
50 213
50 213
50 215
50 215
52 217
54 246
57 250
110 279
115 292
115 299
115 311
117 317
119 358
119 393
122 400
122 403
122 407
126 446
126 446
126 449
123 450
123 451
123 451
122 453
122 456
124 464
124 465
119 461
121 534
117 531
117 535
117 540
117 541
118 542
118 544
120 545
122 558
122 558
130 578
130 578
130 580
132 590
132 591
132 592
132 590
132 590
131 585
130 585
130 586
130 589
130 589
96 441
95 432
95 431
95 431
95 427
95 427
95 427
94 427
94 429
94 429
93 438
93 439
93 439
93 439
93 439
93 440
93 440
93 454
93 469
93 524
93 562
93 599
94 603
96 631
96 632
96 806
92 803
85 770
79 767
24 707
18 706
18 694
18 691
18 689
9 641
10 608
10 611
9 608
9 603
8 569
8 573
7 571
7 571
7 571
7 571
7 570
7 568
7 563
7 560
7 554
6 470
6 469
6 469
6 469
5 469
5 466
5 466
5 462
5 444
5 444
5 442
5 443
5 442
6 434
6 435
7 438
7 438
7 438
7 439
7 436
7 435
7 434
11 435
11 436
11 448
11 448
12 449
12 449
12 448
11 448
11 448
11 440
11 440
16 438
16 440
16 440
16 438
21 536
21 537
21 542
21 526
21 508
21 439
21 404
21 385
20 383
18 363
18 361
18 187
18 187
17 187
17 187
17 184
17 181
18 181
18 181
19 181
18 180
17 178
17 175
17 175
17 175
17 179
18 179
18 182
18 187
18 189
18 191
18 191
17 191
17 191
17 191
17 191
17 191
17 191
17 191
17 191
17 191
17 191
17 193
17 207
18 226
18 251
18 250
17 251
17 251
17 251
17 251
16 249
16 249
16 248
16 248
17 249
17 249
17 249
9 236
9 236
9 218
5 215
3 216
3 212
3 212
2 214
2 214
2 236
2 238
2 277
1 285
1 288
1 288
2 196
2 200
2 219
2 222
2 226
2 223
2 223
2 220
2 216
2 217
2 218
2 217
2 217
2 218
2 218
2 218
2 218
2 218
2 218
2 219
2 222
2 238
2 246
2 251
2 256
2 250
2 249
2 247
2 244
5 243
5 242
6 242
6 242
6 249
6 249
6 251
6 252
6 252
6 252
6 252
6 252
6 275
6 271
6 250
5 204
5 205
2 206
2 206
1 206
1 206
1 206
1 206
1 206
1 205
1 205
1 206
1 209
1 218
1 227
1 236
1 244
1 277
1 279
1 278
1 277
1 277
1 278
1 250
1 244
1 201
1 200
1 213
2 227
1 221
1 217
1 204
1 205
1 205
1 205
1 203
1 203
1 203
1 202
1 200
1 200
1 200
1 200
0 200
0 200
0 201
0 201
0 201
0 200
0 193
0 173
0 167
0 165
1 160
1 159
1 159
1 159
1 160
1 160
1 160
1 161
1 161
1 153
1 153
1 149
1 149
1 149
1 150
1 150
0 150
0 127
0 127
0 125
0 125
0 125
0 124
0 124
0 124
1 124
1 124
1 124
1 125
4 135
6 2374
6 2381
6 2379
6 2366
6 2357
6 2343
6 2336
6 2300
6 2292
6 2292
6 2290
6 2290
6 2291
6 2291
6 2314
6 2312
4 83
4 82
4 84
4 94
4 96
4 96
4 95
4 95
4 95
4 95
4 95
4 95
4 95
4 95
4 95
4 95
4 95
4 95
4 105
4 106
4 115
4 117
4 117
4 117
4 117
4 117
4 117
4 117
4 117
4 117
4 117
4 116
4 116
4 139
4 139
4 140
4 140
4 141
4 141
4 141
4 140
3 140
3 140
3 140
3 140
3 140
3 140
3 140
3 188
2 165
2 166
2 166
2 167
2 168
2 168
2 166
0 164
0 164
0 163
0 163
0 163
0 163
0 163
0 163
0 163
0 163
0 163
0 163
0 163
0 162
1 162
2 123
2 113
2 85
2 83
2 82
2 82
2 82
2 81
2 81
2 81
2 81
2 81
2 81
2 81
2 81
1 81
1 82
1 78
1 78
1 78
1 68
3 67
3 60
3 60
3 60
3 60
3 61
3 61
3 63
5 65
5 65
5 65
7 71
7 74
7 75
7 76
7 76
9 78
9 78
9 76
10 76
10 76
10 75
10 75
10 75
10 75
10 75
10 75
10 76
10 76
10 27
10 27
10 26
10 26
10 25
10 25
10 25
10 25
10 25
10 25
10 25
10 25
10 25
10 25
10 25
10 25
10 25
10 25
10 25
10 25
10 25
10 25
9 25
9 25
9 25
9 25
9 25
9 25
9 25
9 24
9 25
9 25
10 25
11 25
11 25
9 25
9 25
9 25
9 25
9 24
10 24
10 24
11 24
11 24
7 17
7 17
6 16
6 16
4 13
3 13
3 13
3 11
3 11
3 11
3 7
2 0
2 1
1 1
1 1
1 1
1 1
1 2
1 2
1 4
1 9
1 9
1 10
1 10
1 11
2 11
2 11
2 10
2 10
2 10
2 10
2 10
2 11
2 11
2 11
2 11
4 12
4 12
4 12
4 12
4 12
3 12
3 12
3 12
3 12
3 12
3 12
3 12
3 12
3 12
3 12
3 12
4 12
4 12
4 12
4 12
4 12
4 12
4 12
4 12
4 12
3 12
3 12
3 12
3 12
3 12
3 12
2 12
2 12
2 12
3 12
3 12
3 13
3 13
3 13
3 13
3 13
3 13
3 13
3 13
3 13
3 13
8 13
9 13
28 13
30 13
30 13
31 13
34 13
36 15
48 16
48 15
48 14
49 13
49 11
49 11
51 10
54 10
66 10
67 11
67 11
67 11
67 11
75 10
75 10
75 6
75 6
77 6
77 6
74 2
74 2
74 2
74 4
74 4
75 4
75 3
75 3
77 3
81 4
89 5
90 7
90 7
98 9
101 9
103 9
108 9
108 9
109 7
109 6
109 6
109 6
109 6
109 7
110 7
111 7
111 7
111 7
111 7
147 12
147 12
149 12
150 12
150 12
154 12
154 12
171 14
177 14
177 14
177 14
177 14
178 14
189 14
192 14
155 9
155 10
151 10
150 10
131 10
130 10
130 10
129 10
124 10
124 10
111 10
114 10
119 10
119 10
119 10
119 10
117 8
126 8
119 8
119 8
120 8
118 7
121 7
110 7
111 7
107 7
107 7
106 7
106 7
108 7
108 7
108 7
108 7
117 8
117 8
117 8
117 8
117 8
117 7
111 6
114 6
114 6
107 4
107 4
107 4
105 4
105 4
105 4
105 4
105 4
105 4
105 4
104 3
104 3
104 3
105 3
104 3
104 3
99 3
99 3
99 3
92 3
93 3
83 3
80 3
59 1
51 1
54 1
57 1
61 1
59 1
57 1
57 1
50 1
50 2
50 2
50 2
50 2
50 2
50 2
50 2
52 2
52 2
52 2
52 2
52 2
50 2
48 2
48 2
48 2
42 2
40 2
40 2
40 2
39 2
37 2
35 2
35 2
35 2
35 12
35 12
35 12
35 12
34 12
34 12
34 12
27 11
27 11
27 11
27 11
26 11
26 11
26 11
24 12
24 11
24 11
24 11
24 11
24 2
24 2
24 2
2466 5
2466 5
2572 6
2572 6
2572 6
2573 6
2573 6
2573 5
2577 5
2577 5
2578 5
2578 5
2578 5
2578 5
2573 5
137 2
131 2
24 1
18 1
17 2
17 2
13 3
10 3
6 4
6 4
4 4
3 3
10 4
10 4
10 4
10 4
10 4
10 4
10 4
10 4
10 4
10 4
10 4
10 4
10 4
10 4
10 4
10 4
10 4
10 6
10 6
10 7
10 7
11 7
11 7
11 7
11 8
11 8
11 8
11 8
11 8
11 8
11 8
11 8
11 8
11 9
11 9
11 9
10 9
10 9
10 9
10 9
10 9
10 9
10 9
10 9
10 9
10 9
10 9
10 9
10 9
10 9
10 9
9 9
9 9
9 9
9 10
9 10
8 10
8 10
8 10
8 10
8 10
8 10
8 10
8 10
8 10
8 8
8 8
8 8
10 9
10 9
11 9
10 9
10 9
4 8
4 8
3 8
3 8
3 8
3 9
3 9
3 17
3 19
3 19
3 23
3 23
3 43
3 43
3 45
3 55
3 58
3 59
3 63
3 62
3 62
3 62
5 62
8 87
8 86
8 86
8 86
8 95
8 117
8 118
8 179
8 180
8 181
8 183
8 188
8 191
8 193
7 194
6 193
3 168
3 168
3 168
3 168
3 170
3 184
3 203
3 214
3 217
3 223
3 223
3 223
3 223
3 223
3 222
3 221
3 221
3 221
3 221
3 221
3 221
3 221
3 221
3 221
3 221
3 221
3 221
3 221
3 221
1 213
1 206
0 200
0 200
0 200
0 200
0 201
0 201
0 201
0 201
0 201
0 200
0 194
0 193
0 193
0 192
0 192
0 171
0 170
0 166
0 162
0 160
0 160
0 160
0 160
0 167
0 178
0 184
0 188
0 198
0 223
0 229
0 244
0 234
0 240
0 187
0 187
0 188
0 188
0 181
0 178
0 179
0 179
0 200
0 231
0 262
0 268
0 272
0 275
0 260
0 240
0 230
0 230
0 224
0 228
0 228
0 229
0 229
0 232
0 233
0 234
0 235
0 237
0 242
0 243
0 244
0 249
0 249
0 251
0 247
0 247
0 246
0 246
0 246
0 247
0 254
0 256
0 259
0 260
0 259
0 259
0 259
0 259
0 259
0 259
0 259
0 259
0 259
0 264
0 264
0 264
0 276
0 275
0 274
0 285
0 309
0 369
0 404
0 417
0 425
0 424
0 425
0 401
0 364
0 354
0 338
0 336
0 336
0 334
0 333
0 333
0 334
0 334
0 334
0 333
0 333
0 321
0 308
0 305
0 304
0 305
0 304
0 304
0 304
0 305
0 307
0 307
0 308
0 310
0 318
0 318
0 317
0 316
0 315
0 314
0 310
1 304
1 304
1 303
1 297
1 297
1 294
1 298
1 299
1 304
1 307
1 307
1 306
1 296
1 289
1 281
1 280
0 279
0 276
0 276
0 277
0 276
0 276
0 276
0 279
0 280
0 283
0 284
0 283
0 257
0 256
0 238
0 227
0 191
0 114
0 64
0 58
0 58
0 58
0 58
0 58
0 58
0 57
0 59
0 60
0 60
0 61
0 62
0 62
0 62
0 62
0 62
0 63
0 63
0 62
0 62
0 62
0 62
0 61
0 61
0 61
0 61
0 60
0 58
0 57
0 57
0 57
0 50
0 51
0 51
0 51
0 51
0 49
0 43
0 43
0 43
0 42
0 42
0 40
0 41
0 35
0 34
2 29
2 27
2 26
2 25
2 24
2 23
2 23
2 23
2 22
2 22
2 22
2 22
2 22
2 22
2 22
2 61
0 61
0 58
0 56
0 56
0 56
0 54
0 54
0 54
0 67
0 67
0 68
0 70
0 74
0 74
0 78
0 80
0 81
0 82
8 90
8 89
8 89
8 88
8 88
8 88
8 88
8 88
8 88
8 87
8 87
8 87
8 87
8 87
8 87
8 87
1 77
0 77
0 77
0 77
0 78
0 78
0 78
0 79
0 82
0 81
0 81
0 81
0 81
0 81
0 82
0 85
0 85
0 85
0 85
209 87
209 86
209 85
209 86
209 86
209 86
209 95
209 95
209 95
209 95
209 102
209 108
209 113
209 116
209 122
1 120
0 120
0 120
1 119
1 77
1 77
1 77
10 78
10 78
10 78
10 78
10 77
10 76
10 64
10 66
10 65
10 60
10 59
10 59
10 56
10 57
10 58
0 56
0 56
0 56
0 56
0 56
0 56
0 58
0 58
0 59
0 59
0 59
0 59
0 59
0 59
0 59
0 59
0 59
0 59
0 59
0 59
0 59
0 58
0 58
1 58
1 55
1 53
1 53
1 53
1 53
1 53
1 53
1 56
1 54
1 54
1 54
1 54
1 54
1 53
1 53
0 53
0 53
0 54
0 45
1 45
1 45
1 45
1 34
1 29
1 23
1 18
70 22
70 22
70 22
70 22
70 22
70 22
70 21
70 22
69 23
69 24
69 24
69 25
69 26
69 26
69 26
69 33
58 33
51 33
0 25
0 25
0 32
0 27
0 27
0 27
0 31
0 34
0 35
0 71
0 74
0 75
0 77
0 79
0 87
0 135
0 141
0 148
0 166
1 193
2 209
2 211
2 212
2 212
2 212
2 212
2 211
2 211
2 211
2 210
2 209
2 209
2 209
2 209
2 209
103 209
103 209
103 209
103 209
103 210
103 210
103 210
103 210
103 210
103 210
103 210
103 210
103 210
103 210
103 210
3 209
3 209
3 208
3 208
3 208
3 208
2 209
2 210
2 211
2 212
1 212
2 210
2 205
3 207
3 208
4 1492
4 1491
72 1499
72 1501
72 1502
72 1496
72 1495
72 1496
72 1496
72 1496
73 1489
72 1487
72 1487
71 1487
71 1488
70 1479
70 1476
70 1440
2 174
2 177
2 182
2 182
3 300
3 236
2 230
2 226
2 221
2 219
2 226
2 226
2 227
2 227
2 227
2 227
2 227
2 227
2 227
2 239
2 239
2 240
37 242
37 242
37 242
37 242
37 242
37 242
37 241
37 240
37 240
37 240
37 240
37 240
37 240
37 240
37 240
37 240
3 239
3 239
3 239
3 239
3 239
3 239
3 239
3 239
3 238
3 237
3 236
3 235
3 236
3 237
3 237
2 233
2 232
2 230
2 230
2 230
2 229
2 230
2 229
2 229
2 228
2 229
2 229
1 239
2 243
2 249
2 249
2 248
2 247
2 236
2 229
2 224
2 224
2 219
4 219
3 81
3 69
3 65
3 65
3 59
3 70
3 67
3 67
3 67
3 67
3 67
3 68
3 67
3 68
3 68
3 55
3 55
3 55
3 55
3 55
3 55
3 55
3 55
3 56
3 56
3 56
3 56
3 56
3 56
3 56
3 56
3 56
3 56
3 56
3 56
3 56
3 56
3 56
3 55
3 55
3 55
3 55
3 55
3 55
3 56
3 55
3 55
3 54
3 53
3 53
3 52
3 52
3 52
3 53
3 52
3 50
3 50
3 50
3 50
3 50
3 50
3 41
2 37
2 28
3 28
3 27
3 27
3 26
3 23
3 23
3 24
3 24
1 21
1 20
1 18
1 18
1 18
1 18
1 7
4 7
4 7
5 7
5 7
5 7
5 6
5 9
6 8
6 8
7 13
8 13
8 13
8 14
8 14
8 14
5 14
5 14
3 15
3 16
3 16
3 16
3 16
3 17
3 17
3 18
2 18
2 18
2 18
2 17
2 17
2 17
2 17
2 17
2 17
2 17
2 17
11 18
12 19
13 18
13 19
13 21
13 21
13 21
13 21
13 21
14 21
14 22
14 21
14 21
14 21
14 21
5 20
5 20
3 19
3 19
3 19
3 19
1 20
1 20
3 20
6 27
6 27
7 28
7 28
7 26
7 26
7 25
7 25
7 25
7 25
7 25
7 25
7 25
7 25
7 25
7 25
7 25
7 26
7 25
7 25
7 25
7 25
7 22
7 22
7 22
7 22
7 22
7 22
7 22
7 28
7 30
7 42
7 43
7 44
7 63
7 61
7 63
7 64
8 72
12 268
14 285
15 299
15 315
23 346
27 387
31 408
32 411
42 417
48 454
48 454
54 501
54 504
54 505
56 509
58 571
61 593
61 601
62 610
62 620
62 622
62 635
61 637
61 637
61 642
61 647
61 647
57 650
57 650
57 654
56 654
60 663
65 699
78 884
75 926
75 946
75 964
75 966
75 970
76 979
76 1026
76 1026
76 1024
76 1024
76 1026
76 1026
76 1026
76 1026
76 1026
83 1026
83 1026
83 1025
83 1025
83 1024
82 1024
82 1024
82 1022
82 1022
82 1022
82 1021
82 1019
82 1019
83 1019
83 1007
76 1005
76 978
76 972
76 970
76 962
76 947
75 944
74 941
74 918
70 680
69 655
66 632
65 629
30 622
30 618
27 610
12 609
12 602
12 572
12 573
12 534
12 530
12 530
12 521
12 460
2 444
2 439
2 431
2 416
2 405
2 398
2 400
2 406
2 415
2 416
2 419
2 414
2 416
2 413
2 410
2 401
2 275
1 152
1 141
1 141
1 135
1 133
1 133
1 126
1 79
1 79
1 80
1 81
1 84
1 148
1 162
1 180
1 189
1 192
1 196
1 244
1 267
1 351
1 488
1 593
1 672
1 696
1 714
1 730
1 792
1 846
0 877
0 888
0 899
0 909
0 1835
0 1845
0 1850
0 1854
0 1854
0 1857
0 1860
0 1982
0 1984
0 1986
0 1988
0 2135
0 2173
0 2196
0 2213
0 2234
0 2232
0 2250
0 2241
0 2248
0 2247
0 2249
0 2249
0 2249
0 2255
0 2256
0 2255
0 2256
0 2249
0 2245
0 2239
0 2220
0 2214
0 2215
0 2214
0 2213
0 2213
0 2213
0 2213
0 2213
0 2196
0 2197
0 2239
0 2243
0 2242
0 2252
0 2253
0 2254
0 2255
0 2285
0 2291
0 2280
0 2206
0 2194
0 2187
0 2178
0 2175
0 2161
0 2006
0 1825
0 1744
0 1704
0 1692
0 1667
0 1668
0 1656
0 1759
0 1660
0 1579
0 1562
0 1551
0 1528
0 1494
0 448
0 820
0 819
0 819
0 692
0 691
1 691
1 690
1 690
1 691
1 691
1 637
1 634
1 632
1 632
1 627
1 254
1 244
1 245
1 245
1 245
1 243
0 241
0 239
0 237
0 242
0 246
0 246
0 246
0 246
0 247
0 246
0 246
0 245
0 245
2 245
2 244
2 249
2 249
2 252
2 260
2 297
2 261
2 268
2 268
2 261
2 271
2 269
2 270
2 232
0 230
0 229
0 229
0 229
0 228
0 229
0 229
0 229
0 230
0 230
0 230
0 230
0 230
0 240
0 235
0 231
0 112
0 113
0 113
0 113
0 109
0 109
0 109
0 109
0 109
0 109
0 109
0 109
0 111
0 111
0 110
0 110
0 113
0 116
0 117
0 117
0 117
0 118
0 118
0 113
0 113
0 113
0 114
0 114
0 114
0 116
0 115
0 113
0 108
0 137
0 162
0 194
0 238
0 2730
0 2758
0 2766
0 2807
0 2814
0 2818
0 2824
0 2826
4 2825
4 2822
4 2817
4 2767
4 2765
4 2764
4 2764
4 160
4 160
4 154
4 154
4 154
4 154
4 154
4 154
0 154
0 155
0 155
0 156
0 156
0 155
0 155
0 155
0 157
0 157
0 146
0 145
0 145
0 145
0 144
0 144
0 144
0 144
0 144
0 144
0 144
0 145
0 145
0 145
0 146
0 147
0 162
0 164
0 164
0 162
0 160
0 159
0 160
0 160
0 159
0 159
0 159
0 159
0 159
3 158
3 158
3 158
3 158
4 158
4 157
4 155
4 155
4 155
4 149
4 148
4 135
4 104
4 84
4 50
1 49
1 48
1 50
1 51
0 50
0 50
0 43
0 43
0 42
0 42
0 41
0 41
0 75
0 79
0 82
0 85
0 85
0 92
0 92
0 92
0 93
0 93
0 92
0 92
0 92
0 92
0 92
0 94
0 96
0 96
0 95
0 95
0 95
0 95
0 97
0 102
0 103
0 103
0 103
0 103
0 103
0 103
0 103
1 101
1 95
1 82
1 80
1 86
1 86
1 87
1 87
1 86
1 87
1 134
1 137
1 139
1 143
1 144
0 145
0 149
0 149
0 152
0 198
0 204
0 205
0 206
0 207
0 208
0 205
4 202
4 209
4 210
4 210
5 211
5 211
5 206
5 207
5 211
5 211
5 211
5 290
5 292
6 294
6 294
2 292
5 369
5 358
5 355
5 353
5 352
4 345
4 347
4 347
4 347
4 347
4 347
4 360
4 362
3 363
3 364
0 249
0 247
0 248
0 248
0 248
0 248
0 247
0 243
0 240
0 241
0 241
0 241
0 242
0 242
0 242
0 242
0 242
0 242
0 241
0 239
0 239
0 239
0 237
0 238
0 237
0 235
0 191
0 190
0 188
0 188
0 188
0 187
0 184
0 183
0 179
1 127
1 125
1 124
1 123
1 123
1 123
2 123
2 123
2 124
2 124
2 124
2 124
2 123
2 123
8 123
8 119
7 118
7 118
7 37
7 37
7 35
7 35
6 35
6 35
6 35
7 35
7 41
7 41
7 50
2 478
2 491
2 536
2 550
2 553
2 543
2 560
2 562
2 564
2 565
2 574
3 576
3 593
3 606
3 611
3 631
3 630
3 630
3 630
3 630
3 633
3 634
3 639
3 642
3 645
3 645
2 647
2 646
2 646
2 656
2 656
2 656
2 655
2 656
2 657
2 653
2 658
2 666
2 664
2 663
2 663
2 663
2 663
2 663
2 663
2 663
2 664
2 664
2 664
1 664
1 664
1 664
1 663
1 662
1 662
1 662
1 662
1 662
1 666
1 666
1 677
1 677
1 677
1 677
1 680
1 688
1 688
1 687
1 687
0 685
0 678
0 677
0 640
0 167
0 159
0 158
0 158
0 166
0 174
0 196
0 197
0 194
0 194
0 185
0 181
0 166
0 148
0 160
0 141
0 141
0 141
0 139
0 139
0 138
0 137
0 130
0 126
0 127
0 127
0 125
0 127
0 131
0 121
0 121
0 125
0 126
0 126
0 124
0 122
0 119
0 109
1 115
1 115
1 115
1 115
1 116
1 116
1 118
1 118
1 116
1 117
1 117
1 117
1 118
1 124
1 477
0 469
0 471
0 474
0 473
0 474
0 471
0 473
0 472
0 474
0 474
0 476
0 473
0 465
0 465
0 463
0 462
0 462
0 462
1 462
1 462
1 463
1 463
1 463
1 463
1 450
1 445
1 417
1 418
1 418
1 418
1 418
1 418
1 418
1 417
1 404
1 403
1 405
1 418
1 426
1 427
1 425
1 425
1 424
1 424
1 424
1 428
1 428
1 428
1 425
1 425
1 424
1 418
1 418
1 418
1 418
1 418
1 418
1 418
1 418
1 418
1 418
1 418
1 417
1 416
1 414
1 415
1 415
1 415
1 418
1 418
1 417
17 411
17 50
17 50
17 50
17 50
17 50
17 50
17 48
17 48
17 39
17 39
17 39
17 38
17 38
17 38
17 38
1 38
1 38
1 38
1 38
0 37
0 37
0 36
0 36
0 36
0 36
0 36
0 37
0 37
0 37
0 37
0 37
0 56
0 56
0 57
0 57
0 59
0 68
0 66
0 53
0 43
0 43
0 43
0 43
0 43
0 44
0 44
0 40
0 40
0 40
0 39
0 40
0 40
0 31
0 34
0 40
0 41
0 41
0 42
0 42
0 43
0 44
0 44
0 44
0 45
0 45
0 45
0 44
0 44
1 53
1 51
1 51
2 104
3 127
3 131
3 136
5 149
5 152
5 155
5 248
6 268
6 295
6 309
6 315
6 321
6 330
6 337
6 337
6 344
6 344
6 345
5 347
4 348
4 350
4 353
3 358
3 362
3 367
3 367
3 367
3 369
3 369
3 369
3 369
3 368
3 335
3 335
3 336
3 340
3 354
3 364
3 367
4 352
3 353
2 353
2 353
2 354
2 354
2 351
2 359
2 366
2 397
2 416
2 421
2 434
2 431
2 431
1 429
1 424
1 423
1 424
1 424
1 424
2 416
2 414
2 413
3 414
3 412
3 413
3 433
3 432
3 433
3 435
3 435
3 434
2 366
2 359
2 359
2 355
1 353
1 353
1 344
1 224
1 206
1 194
0 191
0 192
0 193
0 193
0 193
0 188
0 182
0 182
0 184
0 183
0 180
0 179
0 183
0 177
0 177
0 173
0 173
0 173
0 171
0 173
0 179
0 179
0 179
0 180
0 181
0 177
0 168
0 152
0 147
0 146
0 146
0 146
0 146
0 146
0 145
0 148
0 148
0 140
0 130
1 96
2 77
2 76
2 61
2 61
2 61
2 64
2 64
2 64
2 63
2 63
4 121
4 123
4 123
4 123
4 123
4 123
3 120
4 100
4 100
4 100
4 100
4 99
4 99
4 99
4 99
4 99
4 98
2 40
2 40
2 40
2 41
2 40
1 38
1 38
1 37
1 38
1 38
1 38
1 40
1 45
1 45
1 43
1 43
1 43
1 43
1 33
1 32
1 32
1 32
1 32
1 31
1 31
1 28
1 22
1 21
1 21
1 20
1 20
1 20
1 22
1 22
1 23
1 23
1 23
1 24
1 24
1 24
1 28
1 33
1 44
0 52
0 58
0 60
0 57
0 58
0 58
0 57
0 57
0 55
0 55
0 55
0 55
0 57
0 58
0 60
0 70
0 72
0 73
0 76
0 76
1 132
1 135
1 134
1 137
1 138
1 138
1 138
1 138
1 138
1 138
1 137
1 137
1 140
1 139
1 139
1 150
0 150
0 155
0 158
0 158
0 159
0 157
0 152
0 153
0 153
0 153
0 153
0 153
0 153
0 153
0 153
0 153
0 153
0 156
0 156
0 156
0 156
0 164
0 164
0 164
0 164
0 164
0 163
0 163
0 163
0 163
0 163
0 162
0 162
0 161
0 154
0 148
0 132
0 125
0 123
0 121
0 122
0 122
0 122
0 122
0 122
0 122
0 122
0 123
0 123
0 121
0 121
0 118
0 104
0 102
0 102
0 99
0 96
0 38
0 35
0 32
0 31
0 31
0 31
0 32
0 32
0 32
0 31
0 83
0 83
0 82
0 82
0 85
0 74
0 74
0 73
0 73
0 73
0 73
0 73
0 73
0 72
0 73
0 20
0 21
0 24
1 37
1 36
3 37
3 35
3 38
3 36
3 38
3 38
3 38
3 30
3 31
3 31
3 33
3 66
3 66
3 66
3 66
3 66
1 66
1 66
1 66
1 66
1 66
1 66
1 66
1 66
1 157
1 155
1 154
1 121
1 121
1 121
1 121
1 121
1 121
1 119
1 119
1 119
1 119
1 119
1 119
1 27
3 27
3 27
3 27
3 27
3 27
3 27
3 27
3 27
3 27
3 26
3 26
3 26
3 26
3 26
3 31
1 31
1 33
1 33
1 33
1 33
1 33
1 33
1 33
1 33
1 33
1 33
1 33
1 32
1 33
1 31
1 23
0 13
0 12
0 19
0 20
0 19
0 20
0 17
0 17
0 18
0 19
0 19
0 59
0 60
0 62
0 62
0 63
0 63
1 63
1 64
1 64
1 64
1 64
1 65
1 65
2 77
2 78
2 78
2 78
2 78
2 79
2 79
2 79
2 79
2 79
1 79
1 79
1 79
1 80
1 80
1 80
1 80
1 80
1 80
1 80
1 79
1 79
1 79
1 79
1 79
1 79
1 78
1 78
1 78
1 78
1 78
1 75
1 74
4 75
4 75
4 75
4 75
4 75
4 75
4 75
4 75
4 75
4 75
5 75
5 76
5 75
5 76
5 78
2 77
2 77
2 76
2 70
2 67
2 67
2 67
2 67
2 67
2 66
1 66
1 66
1 24
2 24
2 23
2 22
2 22
2 22
2 22
2 21
2 21
3 21
3 20
3 20
3 20
2 8
2 8
2 8
1 8
1 8
1 10
1 10
1 10
1 10
1 10
1 10
0 10
0 9
0 9
0 9
0 9
0 10
0 10
0 10
0 10
0 10
0 10
0 13
0 14
0 16
0 18
0 21
0 21
1 21
1 21
1 21
1 21
1 21
1 21
1 21
1 24
1 24
1 24
1 24
1 24
1 28
2 29
2 35
2 39
2 41
2 41
2 40
2 38
2 39
2 39
1 39
1 37
1 37
1 37
1 36
1 36
1 34
1 31
0 31
0 33
0 33
0 33
0 33
0 33
2 99
2 108
2 108
2 108
2 107
2 106
2 107
2 107
2 107
2 107
2 107
2 107
2 107
2 107
2 107
0 42
0 42
0 42
0 42
0 42
0 42
0 42
0 42
0 42
0 42
0 41
0 41
0 41
0 41
0 41
0 39
0 34
1 34
1 34
1 33
1 38
1 38
1 41
1 43
1 43
1 44
1 44
1 48
1 50
1 47
1 47
1 52
0 52
0 52
0 53
0 54
0 50
0 43
0 41
0 51
0 50
0 52
0 53
0 52
0 52
0 52
0 52
0 52
0 52
0 52
0 52
0 52
0 52
0 52
0 53
0 53
0 52
0 52
0 51
0 44
0 44
0 44
0 44
0 50
0 58
0 62
0 63
0 76
0 77
0 77
0 77
0 81
0 84
0 88
0 97
0 98
0 99
0 101
0 101
2 105
2 106
2 112
2 112
2 116
2 118
2 167
2 187
2 194
2 207
2 228
2 240
2 251
2 254
2 243
2 243
0 238
0 228
0 228
0 226
0 222
0 221
0 220
1 232
1 234
1 231
3 275
3 276
3 275
3 283
6 283
6 282
6 282
7 270
7 270
7 268
7 265
7 265
7 265
7 265
7 265
7 266
7 266
7 266
7 266
4 268
4 267
4 267
4 266
3 267
3 268
3 268
3 268
3 272
3 272
3 272
3 272
3 273
3 264
3 263
3 263
3 242
3 241
3 232
5 478
5 470
5 465
5 459
5 461
5 461
5 460
5 458
5 454
5 447
5 443
5 443
5 442
5 441
5 438
3 118
3 85
3 81
3 81
2 94
2 86
2 87
2 88
2 88
1 88
1 92
1 96
1 100
1 101
1 101
1 100
1 100
1 98
1 94
1 94
0 55
0 55
0 54
0 54
0 54
0 54
0 54
0 54
0 54
0 54
0 54
0 54
0 55
0 55
1 101
2 103
2 104
4 101
6 102
328 106
328 107
328 110
328 110
328 111
329 123
330 128
330 134
330 133
330 138
330 137
330 88
339 85
339 87
339 88
13 87
13 88
13 87
13 86
13 86
13 84
18 87
18 87
18 87
18 86
18 86
18 86
9 86
9 86
9 85
9 84
9 85
9 85
9 85
9 85
9 82
9 82
9 82
9 68
9 68
9 69
9 70
9 104
9 131
9 134
9 132
9 146
9 147
9 147
9 147
9 147
9 147
9 147
9 147
9 147
9 148
10 151
10 151
10 151
10 151
10 151
10 150
10 149
10 149
10 150
10 150
10 154
10 165
9 176
9 176
9 175
8 175
7 175
7 175
7 174
6 172
6 172
6 171
6 159
5 149
5 145
5 145
5 145
5 145
5 145
5 143
5 143
5 140
4 140
4 140
4 140
3 140
3 140
2 140
0 137
0 137
0 137
0 137
0 137
0 136
0 136
0 136
0 136
0 136
0 136
0 136
0 136
0 137
0 137
0 159
0 159
0 159
0 162
0 161
0 159
0 123
0 84
0 79
0 75
0 59
0 59
0 59
0 60
0 60
0 60
0 58
0 58
0 57
0 56
0 53
0 53
0 55
0 55
0 56
0 57
0 57
0 57
0 57
0 57
0 55
0 47
0 42
0 42
0 42
0 41
0 40
0 36
0 35
0 33
0 33
0 30
0 30
0 31
0 30
0 30
0 29
0 29
0 29
0 29
0 29
0 29
0 29
0 29
0 29
0 29
0 29
0 29
0 29
0 29
0 29
0 29
0 29
0 29
0 29
0 29
0 29
0 29
0 29
1 29
1 29
1 28
1 28
1 6
1 6
1 6
1 6
1 6
1 6
1 7
1 8
1 10
1 10
1 10
0 10
0 11
0 10
0 10
0 11
1 11
1 11
1 15
1 21
1 21
1 22
1 20
1 20
1 20
1 20
1 21
1 21
1 21
1 21
1 21
0 19
0 20
0 20
0 20
0 20
0 20
0 20
0 22
0 23
0 24
0 24
0 24
0 23
0 23
0 24
0 24
0 23
0 25
0 25
0 25
0 27
0 27
0 27
0 27
0 27
0 38
0 39
0 41
0 43
0 49
0 55
0 59
0 60
0 61
0 63
0 64
0 64
0 64
0 64
0 64
0 64
0 64
0 64
0 64
0 64
0 64
0 64
0 63
0 63
0 62
0 60
0 60
0 60
0 60
0 59
16 60
16 61
16 70
16 74
16 76
16 78
16 88
16 102
16 111
17 135
17 137
17 141
17 143
17 145
17 150
17 150
1 161
1 161
1 165
1 170
1 248
1 259
1 262
1 273
1 275
0 273
0 274
0 276
0 275
0 275
0 275
0 274
0 274
0 274
0 279
0 278
0 278
0 281
0 280
0 280
0 280
0 280
0 278
1 262
1 260
1 259
1 262
1 258
1 260
1 257
1 256
1 256
1 253
1 252
1 251
1 251
62 251
62 251
62 251
61 251
61 251
61 249
61 249
61 249
61 250
61 310
61 321
61 343
62 347
62 352
62 352
1 352
1 350
1 354
1 340
1 323
1 309
1 307
1 301
1 283
1 290
1 285
1 266
1 265
0 264
0 264
0 261
0 258
0 258
0 258
0 258
0 260
0 244
0 178
0 167
0 167
0 167
1 167
1 167
1 164
2 165
2 166
2 167
3 167
3 167
3 168
3 168
3 168
1750 175
1750 178
1750 175
1750 182
1750 181
1750 183
1750 184
1750 184
1750 183
1750 187
1750 191
1749 192
1749 206
1749 205
1749 210
1746 218
3 215
3 215
2 216
2 216
2 216
2 216
2 217
2 218
2 222
3 256
3 326
3 350
3 360
3 365
2 305
2 304
2 281
1 282
1 278
1 278
1 278
1 278
1 271
1 271
1 271
1 271
1 271
1 271
1 269
1 252
1 251
1 249
1 249
1 249
2 250
2 247
2 245
2 244
2 244
2 244
2 237
2 237
2 237
2 236
2 236
3 240
3 240
3 240
3 264
2 261
2 261
2 260
2 260
2 260
2 258
2 259
2 258
2 255
2 254
2 256
2 250
2 268
2 305
2 281
2 282
2 282
2 272
2 261
2 254
2 237
2 227
3 227
3 213
3 213
3 213
3 208
4 208
4 208
4 208
4 210
4 211
4 201
4 173
4 131
4 111
4 112
4 112
4 115
4 115
4 116
4 115
4 117
4 118
4 119
4 143
4 145
4 153
4 168
4 168
4 168
4 168
5 161
5 161
6 161
6 161
6 164
6 164
6 164
6 164
6 164
6 164
6 164
6 164
6 166
6 167
6 167
6 165
5 165
4 162
3 162
3 162
3 162
3 162
3 162
3 162
3 162
3 161
3 161
3 161
3 161
3 160
3 158
3 159
3 153
3 138
3 106
3 101
3 102
3 101
3 105
3 108
3 109
2 101
2 97
1 90
1 90
1 90
1 89
1 89
1 89
1 89
0 89
0 84
0 83
0 83
0 83
0 83
0 83
0 82
0 81
0 78
2 77
2 77
2 77
3 77
3 76
3 77
3 53
3 53
3 47
3 34
3 35
3 36
3 74
3 77
3 78
3 79
1 83
1 82
1 92
1 94
1 94
1 94
1 92
0 92
0 92
0 93
0 94
0 95
0 95
0 95
0 98
0 98
0 98
0 98
0 98
0 97
0 97
0 97
0 97
1 97
1 97
1 106
1 107
1 107
1 105
1 107
1 105
1 107
1 107
1 107
1 107
1 103
1 100
1 98
0 98
0 98
0 98
0 99
0 100
0 100
0 101
0 101
0 101
0 102
0 102
0 102
0 102
0 102
0 102
0 102
0 104
0 104
0 103
0 103
0 101
0 104
2 226
2 256
2 281
2 357
2 428
3 461
3 475
3 475
3 469
3 421
3 414
3 414
3 414
3 415
4 423
4 422
4 422
4 423
4 423
6 450
5 450
5 450
5 450
5 449
5 449
5 449
5 449
5 446
5 447
5 447
5 448
5 448
5 455
5 458
5 460
5 462
8 594
8 600
8 595
8 595
8 600
8 604
8 608
8 609
8 609
8 609
8 609
8 609
8 608
8 611
8 611
8 611
8 611
8 611
10 612
10 616
11 618
12 618
12 618
12 621
12 621
12 624
12 624
12 624
12 624
12 624
12 624
12 622
12 622
12 623
20 627
20 627
20 602
18 325
18 258
18 261
18 262
18 263
19 264
19 272
19 272
19 273
19 272
19 273
19 275
19 274
19 272
18 265
18 265
18 262
18 261
18 261
16 234
16 234
16 234
16 234
16 233
16 235
16 237
16 237
16 238
16 238
16 256
17 256
17 273
17 275
17 284
17 290
17 297
14 215
14 308
14 664
14 686
14 704
14 731
14 732
14 732
14 732
14 732
14 733
14 733
14 733
13 730
13 730
13 730
13 730
13 728
13 727
13 736
14 738
13 746
13 746
13 743
13 743
13 742
13 743
13 744
13 744
13 744
13 745
13 740
13 740
12 739
3 735
3 735
3 735
3 737
3 740
3 726
3 726
3 725
2 724
2 719
2 720
2 720
2 719
2 737
2 741
2 742
2 745
2 751
2 751
2 752
2 752
2 752
2 752
2 752
6 752
6 752
6 756
6 754
6 756
6 775
7 784
7 797
7 882
7 903
7 910
7 928
7 923
7 911
7 901
6 830
3 725
3 373
3 360
3 326
3 313
2 310
2 311
2 311
2 311
2 311
2 317
2 331
2 338
2 338
2 337
2 337
2 337
2 332
2 331
0 326
0 321
0 320
0 319
0 319
0 318
0 318
0 318
0 318
0 318
0 318
0 318
0 319
0 324
0 324
0 335
0 352
0 354
0 353
0 353
0 355
0 368
0 370
0 375
0 683
0 686
0 724
0 708
0 701
0 708
0 708
0 709
0 709
0 715
0 723
0 730
0 730
0 730
0 730
0 730
0 724
0 723
0 722
0 693
0 682
0 670
0 553
1 533
1 520
1 494
1 479
1 473
1 477
1 477
1 478
1 478
1 477
1 477
1 477
1 477
1 477
1 477
0 477
0 477
0 466
0 451
0 450
0 450
0 450
0 450
0 450
0 450
0 451
0 450
0 450
0 451
0 451
0 451
0 451
0 451
0 451
0 452
0 455
0 463
0 469
0 471
0 466
1 464
1 453
1 434
1 433
1 434
1 434
1 431
1 415
1 409
1 398
1 92
1 86
1 46
1 37
1 37
0 39
0 40
0 40
1 40
1 41
1 33
1 32
1 32
1 33
1 33
1 33
1 33
1 32
1 29
1 28
1 29
1 29
1 29
0 31
0 31
0 31
0 31
0 31
0 25
0 24
0 24
0 25
0 26
0 26
0 26
0 26
0 26
0 26
0 28
0 28
0 31
0 31
0 31
0 31
0 31
0 31
0 31
0 31
0 31
0 31
0 31
0 31
0 31
0 31
0 31
0 32
0 34
0 42
0 51
0 48
0 41
0 39
0 40
0 40
0 39
0 39
0 39
0 39
0 45
0 45
0 45
0 45
0 45
1 45
1 45
1 46
1 46
1 46
1 44
1 44
1 44
1 44
1 43
1 47
1 49
1 49
1 48
1 48
1 53
1 54
1 55
1 55
1 55
1 54
1 59
1 60
1 65
1 65
1 66
1 65
1 73
1 72
1 71
1 71
1 70
1 69
2 69
2 69
2 69
2 69
2 69
2 69
2 69
2 66
2 66
2 66
2 66
2 67
2 67
2 75
2 75
1 75
1 75
1 75
1 75
1 75
1 75
1 75
1 70
1 69
1 55
1 52
1 52
1 54
1 54
1 54
1 59
1 67
3 68
3 68
3 72
3 65
3 66
3 66
3 66
3 67
2 67
2 67
2 69
2 69
2 69
2 69
2 68
2 68
2 68
2 68
2 65
2 64
2 64
2 64
3 64
3 57
3 56
3 55
3 53
3 55
3 64
6 73
6 75
6 72
6 72
6 71
6 71
6 63
6 63
5 65
5 65
5 65
5 66
5 66
5 66
5 66
44 66
44 66
49 67
49 71
49 90
53 99
54 99
56 99
56 99
56 99
56 90
57 92
57 94
57 101
57 107
20 108
18 108
17 108
17 108
17 108
17 108
17 109
17 109
17 109
17 108
17 108
17 108
17 105
17 95
15 93
15 92
15 89
15 89
15 90
15 90
15 91
15 90
15 90
15 90
15 91
15 92
15 93
15 93
15 93
15 93
15 95
15 95
15 93
15 93
15 92
15 92
15 92
15 92
15 90
15 88
15 86
15 82
14 75
7 69
7 69
7 69
2 69
2 69
2 69
2 69
2 68
2 67
2 67
2 67
2 66
3 66
3 67
3 67
3 67
3 67
3 66
3 61
3 40
1 27
1 25
1 25
1 24
1 24
1 24
1 24
0 21
0 18
0 11
0 10
0 9
0 9
0 9
0 11
0 11
0 13
0 13
0 13
0 13
0 13
0 13
0 13
0 13
0 13
0 14
0 14
0 14
0 14
0 14
0 13
0 12
0 12
0 12
0 11
0 9
0 9
0 9
0 9
0 8
0 7
0 7
0 7
0 7
0 7
0 7
0 7
0 7
0 7
0 7
0 7
0 5
0 5
0 5
0 5
1 8
1 8
1 8
1 9
1 9
1 8
1 8
1 8
1 8
1 8
1 8
1 8
1 8
2 11
2 11
2 11
2 11
2 11
2 10
2 10
2 10
2 10
2 10
2 10
2 10
2 10
2 10
2 12
2 12
2 13
2 14
2 14
2 13
7 14
7 13
7 13
7 15
7 17
7 23
7 24
7 26
7 27
7 45
7 44
7 44
7 44
7 44
7 44
2 44
2 43
2 43
6 43
6 45
6 45
6 45
6 45
6 45
6 45
6 45
6 46
6 46
6 47
6 47
6 47
6 48
6 49
6 49
2 53
2 53
2 53
2 53
2 53
2 53
1 48
1 49
1 49
1 47
1 49
1 49
1 49
1 49
1 49
1 48
1 48
1 48
1 48
0 45
0 45
0 45
0 45
0 45
0 45
0 44
0 44
0 44
0 44
0 44
0 44
0 44
0 44
0 42
0 42
0 44
0 45
0 45
0 44
0 44
0 43
0 42
0 40
0 36
0 33
0 33
0 33
0 33
0 12
0 12
0 12
0 12
0 13
0 13
0 12
0 12
0 21
0 21
0 21
0 20
0 20
0 20
0 20
0 20
0 20
0 19
0 18
0 18
0 18
0 18
0 18
0 9
0 9
0 8
0 6
0 6
0 6
0 6
0 6
0 6
0 7
0 7
0 7
0 6
0 7
9 142
10 152
10 154
10 155
10 155
10 157
10 159
11 159
11 160
11 160
11 160
11 160
11 161
11 161
11 160
11 160
11 160
1 22
1 22
1 17
1 17
1 17
0 16
0 15
0 14
0 14
0 14
0 14
0 14
0 14
0 14
0 17
0 17
0 18
0 18
0 19
0 20
0 20
0 20
0 20
0 19
0 19
0 19
0 19
0 19
0 19
0 16
0 16
0 16
0 16
0 16
0 16
0 16
0 16
0 16
0 16
0 16
0 16
0 17
0 17
0 17
0 17
0 17
0 18
0 22
0 24
0 24
0 26
0 28
1 28
1 28
2 29
2 30
2 25
2 27
2 27
2 27
2 27
2 25
2 23
2 23
2 23
2 22
2 22
1 22
1 22
1 22
0 22
0 22
0 22
0 22
0 23
0 23
0 24
0 24
0 24
0 23
0 23
0 23
0 24
1 26
2 36
2 37
2 38
2 39
2 39
2 34
2 35
2 34
2 33
2 33
2 33
2 33
2 33
2 36
3 38
3 39
3 39
3 40
3 40
3 40
3 40
3 43
3 44
3 44
3 44
3 44
3 44
3 44
3 44
3 41
3 41
3 40
3 40
3 40
3 40
3 39
3 37
3 32
3 32
3 29
2 27
2 26
2 25
2 24
2 24
2 24
2 24
2 24
2 24
1 24
1 24
1 24
1 24
1 24
1 24
1 24
1 24
1 24
1 24
1 24
2 106
2 106
2 106
2 106
2 106
2 106
2 106
2 106
2 106
2 106
2 111
2 110
2 107
2 98
2 103
1 137
1 56
1 58
1 62
1 63
1 66
2 73
2 74
2 74
2 77
2 78
2 74
1 73
1 73
1 73
1 73
1 73
1 73
1 74
1 79
1 82
1 82
0 82
0 82
0 83
0 83
2 83
2 83
2 83
2 82
2 82
2 82
2 82
2 82
2 82
2 82
2 82
2 82
2 82
2 82
2 82
2 82
2 82
2 82
2 82
2 82
2 82
2 82
2 82
2 82
2 82
2 82
2 82
2 83
2 89
3 90
3 91
3 103
4 146
4 147
4 148
4 149
4 149
4 151
4 151
4 151
4 150
4 150
4 147
4 146
5 146
4 147
4 144
7 190
7 189
7 190
7 189
7 188
7 188
7 180
7 179
7 178
7 180
7 178
7 176
7 178
7 177
7 179
4 98
4 99
4 98
4 97
4 91
3 89
3 89
3 89
3 90
3 91
3 88
1 88
1 88
1 88
1 88
1 88
1 88
1 88
1 88
1 88
1 88
1 88
1 88
1 88
1 88
1 88
1 88
1 88
1 88
1 88
1 88
1 88
1 88
1 88
1 88
1 88
1 89
1 93
1 90
1 80
1 79
1 74
1 68
0 23
0 22
0 19
0 20
0 20
0 19
0 19
0 20
0 20
0 26
0 26
0 26
0 26
0 26
0 26
0 26
0 26
0 26
0 27
0 34
0 34
0 72
0 98
0 99
1 102
1 102
1 102
1 102
1 103
1 106
1 104
2 112
2 112
2 112
2 113
2 114
2 114
2 114
2 113
2 113
2 113
2 113
3 127
6 137
6 137
6 138
6 138
6 138
6 138
6 137
6 137
6 137
7 137
7 137
7 137
7 136
7 136
7 136
7 136
7 136
7 137
7 137
7 137
7 137
7 138
7 138
7 135
6 134
6 138
6 151
6 176
6 182
6 182
6 182
6 182
6 181
6 177
6 176
6 174
6 173
6 174
6 174
6 165
6 167
6 168
6 165
6 169
6 182
7 184
7 184
7 184
7 182
7 178
7 178
7 147
7 126
7 126
6 124
6 124
6 123
6 130
6 132
5 130
4 142
4 137
4 137
4 138
4 139
4 139
4 139
4 140
4 142
4 143
4 143
4 143
3 129
0 117
0 116
0 115
0 115
0 115
0 115
0 115
0 118
0 121
0 186
0 193
0 200
0 204
0 211
0 212
0 224
0 229
0 244
0 249
0 260
0 264
0 264
0 267
0 268
0 268
0 265
0 346
0 324
0 321
0 321
0 321
0 322
0 322
0 322
0 322
0 324
0 324
0 323
0 326
0 324
0 323
0 224
0 224
0 220
0 207
0 208
0 208
0 211
0 204
0 203
0 203
0 203
0 203
0 203
0 203
0 203
0 203
0 193
0 190
0 191
0 175
0 175
0 177
0 179
0 207
0 210
0 238
0 251
0 293
0 306
0 306
0 322
0 365
0 378
0 379
0 409
0 417
0 419
0 420
0 419
0 415
0 407
0 342
0 347
0 336
0 331
0 327
0 307
0 285
0 273
0 262
0 258
0 249
0 246
0 245
0 245
0 245
0 247
0 252
1 252
1 255
1 257
1 257
1 257
1 258
1 258
1 258
1 259
1 255
1 259
1 259
1 259
1 259
1 276
1 277
0 279
0 280
0 282
0 284
0 285
0 285
0 284
0 287
0 287
0 289
0 285
0 291
0 291
0 288
0 290
0 288
0 287
0 287
0 285
0 286
0 234
2 228
2 201
2 200
2 156
2 146
2 114
2 106
2 103
2 104
2 105
2 105
2 107
2 83
2 78
3 78
2 78
2 78
2 78
4 78
4 70
4 66
4 65
4 65
4 64
4 65
4 65
4 65
4 61
4 61
3 61
3 61
2 61
2 61
2 61
1 58
0 53
0 53
0 52
0 49
0 50
0 49
1 48
2 48
2 51
2 53
2 53
2 53
2 53
2 53
2 53
2 33
2 32
2 25
2 24
2 23
2 23
3 22
2 22
2 21
2 21
2 21
1 20
1 20
1 14
1 14
1 14
1 14
1 14
1 14
1 14
1 15
1 15
0 15
0 15
0 15
0 15
0 16
0 16
0 16
0 16
0 21
0 21
0 20
0 20
0 20
0 24
0 24
0 24
0 24
0 24
0 26
0 27
0 27
0 27
0 27
0 27
0 27
0 26
0 26
0 26
0 26
0 26
0 26
0 26
0 27
0 50
0 55
0 59
0 63
0 63
0 65
0 66
0 65
0 65
0 65
0 65
1 63
1 61
1 65
1 71
1 80
1 82
2 84
2 91
2 92
2 104
2 104
2 107
2 109
2 109
2 107
2 108
1 108
1 108
1 108
1 108
1 107
1 107
0 107
0 107
0 107
0 107
0 107
0 106
0 105
0 105
0 105
0 105
0 105
0 105
0 105
0 106
0 106
0 101
0 101
0 101
0 99
0 99
0 96
0 96
0 96
0 96
0 97
0 96
0 95
0 95
0 95
0 95
0 95
0 95
0 96
0 97
0 97
0 100
0 101
0 102
0 103
0 100
1 84
1 79
1 75
1 71
1 71
1 70
1 70
1 70
1 70
1 72
1 72
1 70
1 68
1 64
1 57
0 42
0 40
0 39
0 32
0 82
0 68
0 68
0 67
0 67
0 67
0 67
0 67
0 69
0 69
0 69
0 72
0 75
0 74
0 82
0 84
0 86
0 88
0 88
0 95
0 95
21 95
21 97
21 97
21 97
21 97
21 93
21 93
21 93
21 93
21 93
21 94
21 94
21 94
21 89
21 89
21 91
0 111
0 113
0 114
0 114
0 125
0 125
0 125
0 126
0 127
0 130
0 129
0 129
0 126
0 126
0 130
0 130
0 130
0 130
0 130
0 134
0 138
0 138
0 143
0 143
0 143
0 150
0 151
0 154
0 157
0 157
0 159
0 159
0 159
0 161
2 160
2 159
2 107
2 107
3 107
3 107
3 107
3 107
4 107
4 107
4 106
4 106
4 106
4 109
4 107
2 107
2 95
2 94
2 94
1 95
1 95
1 95
1 95
0 95
0 93
0 92
0 92
0 92
0 92
0 95
0 96
0 96
0 99
0 112
0 171
0 182
0 184
0 184
1 182
1 156
1 158
1 156
1 156
1 146
1 147
1 147
1 150
1 167
1 164
1 166
1 169
1 168
1 168
0 165
0 165
0 165
0 165
0 168
0 161
0 160
0 163
0 158
0 158
0 158
0 150
0 150
0 145
0 144
0 144
0 144
0 144
0 144
0 144
0 144
0 144
0 144
0 145
0 145
0 145
0 146
0 151
0 151
0 151
0 151
0 153
0 149
0 148
0 146
0 145
0 145
0 145
0 144
0 145
0 145
0 145
1 144
1 144
1 144
1 141
1 139
1 139
1 139
1 134
1 132
1 129
1 128
1 114
1 45
1 43
1 41
1 34
0 34
0 34
0 34
1 34
1 34
1 34
2 34
2 33
2 31
2 14
2 13
2 10
2 6
2 6
2 7
2 6
2 6
3 6
3 6
2 5
2 5
2 5
2 4
2 4
2 4
2 4
2 4
2 4
2 4
1 4
1 4
1 4
0 3
0 3
0 3
0 3
0 3
0 3
0 3
0 3
0 3
0 4
0 4
0 4
0 4
0 4
0 4
0 5
0 5
0 5
0 5
0 5
0 6
0 11
0 10
0 10
0 9
0 9
0 9
0 12
0 12
0 12
0 12
0 12
0 12
0 13
0 13
0 12
0 6
0 6
0 6
0 6
0 6
0 6
0 6
0 5
0 6
0 6
0 6
0 6
0 4
0 4
0 5
0 6
1 13
1 12
1 13
1 13
1 13
1 13
1 12
1 12
1 12
1 13
1 14
1 14
1 14
1 14
1 28
1 28
1 28
1 29
1 38
1 37
1 41
1 49
10 1102
15 1241
18 1462
18 1503
18 1535
18 1559
18 1577
18 1584
18 1585
19 1587
19 1588
19 1589
19 1592
19 1592
19 1593
19 1593
19 1592
19 1594
20 1596
20 1597
20 1597
20 1598
20 1598
38 1601
38 1604
37 1607
37 1622
38 1623
38 1634
38 1637
38 1638
38 1637
38 1637
39 1639
42 1647
49 2120
50 2127
51 2139
33 2141
33 2143
33 2143
33 2143
32 2145
32 2146
32 2146
32 2146
32 2147
32 2147
31 2147
31 2151
31 2149
30 2142
30 2142
30 2142
30 2141
30 2138
29 2137
29 2137
29 2137
28 2135
28 2131
28 2130
28 2128
28 2127
28 2122
28 2108
29 2105
29 2105
29 2101
29 2098
29 2091
29 2077
29 2017
16 785
14 599
14 584
14 583
14 592
14 600
14 600
14 596
14 594
14 594
16 593
16 592
17 592
17 597
17 618
17 690
18 1113
18 1129
18 1164
18 1213
18 1218
18 1234
18 1235
18 1236
18 1235
16 1230
16 1219
15 1219
15 1212
15 1209
15 1221
18 1523
17 1526
17 1526
14 1518
6 1042
6 1043
5 1033
5 1034
5 1034
5 1034
5 1035
5 1033
5 1032
5 1032
5 1032
5 1031
5 1031
5 1031
5 1027
5 1028
5 1027
5 1027
5 1027
5 1027
5 1028
5 1028
5 1029
5 1029
5 1029
5 1029
5 1029
5 1030
5 1030
5 1035
5 1035
4 1035
4 1035
4 1034
4 1034
4 1035
4 1035
4 1036
4 1036
4 1036
4 1041
4 1041
4 1028
4 1021
4 1021
4 1023
4 1041
4 1042
4 1046
4 1048
4 1052
4 1044
4 1021
4 938
3 510
3 497
3 430
3 413
3 409
3 395
3 392
3 392
3 391
3 391
3 390
3 389
3 387
3 384
3 373
0 68
0 64
0 59
0 59
0 59
0 52
0 82
0 82
0 82
0 81
1 81
1 82
1 82
1 82
1 82
1 86
1 86
1 87
1 89
1 89
1 89
1 60
1 60
1 60
2 61
1 68
2 71
2 89
2 90
2 90
2 92
2 93
2 94
2 89
2 89
2 89
2 89
2 91
2 93
1 96
1 101
2 145
2 145
3 147
3 147
3 147
3 154
3 156
3 165
3 183
3 268
3 434
5 445
5 490
5 514
5 528
5 539
5 555
5 555
5 556
5 556
5 556
5 557
5 557
5 557
5 557
5 558
3 577
3 578
3 578
3 578
3 578
3 578
3 578
3 578
3 578
3 579
3 584
3 584
3 585
3 588
3 589
3 589
3 590
3 590
3 590
3 590
3 590
3 586
3 585
3 583
3 581
3 581
3 584
3 582
3 586
3 585
4 614
4 640
3 632
3 624
3 625
3 625
4 624
4 638
4 639
4 642
4 643
4 645
4 646
4 646
4 643
4 641
4 598
3 555
2 554
2 547
2 547
2 546
2 541
2 552
2 530
2 457
2 367
2 308
2 299
2 298
2 283
2 281
2 276
2 277
2 277
2 277
2 277
2 277
2 277
2 277
2 277
2 277
2 275
2 258
2 257
2 257
2 257
3 390
3 388
6 411
6 416
6 418
6 424
6 425
6 426
6 426
6 426
6 434
6 436
6 435
6 440
6 445
5 313
5 312
2 296
2 315
2 317
3 350
3 352
3 355
3 354
3 349
3 349
2 317
2 315
2 312
2 312
2 329
2 330
1 351
1 473
1 481
1 483
1 483
1 484
1 484
1 499
1 512
1 525
1 530
1 651
1 652
1 655
1 655
1 655
1 654
1 641
3 644
3 616
3 524
3 595
3 597
3 598
3 622
3 622
3 625
3 633
4 635
4 635
4 635
4 635
4 635
2 635
2 635
2 635
2 635
2 635
2 635
2 635
2 635
2 635
4 626
3 620
3 617
3 616
3 605
3 600
3 600
3 599
3 652
3 654
3 678
3 720
3 736
3 752
3 841
1 846
1 846
1 823
1 823
0 789
0 785
0 776
0 776
0 775
0 775
2 842
2 843
2 844
2 834
2 809
2 797
2 785
2 657
2 688
2 681
2 684
3 677
3 675
3 587
3 508
3 459
3 453
3 449
3 453
3 454
3 464
3 466
3 473
3 470
3 471
3 486
3 487
3 491
3 496
3 512
3 522
3 524
3 527
3 527
3 527
3 527
3 527
3 527
3 529
3 529
3 529
3 529
3 549
3 553
3 556
3 562
3 563
3 566
3 566
3 572
3 582
3 610
3 612
3 621
3 621
4 633
4 571
4 550
4 530
4 486
4 471
4 449
5 359
5 349
5 349
5 355
5 353
5 353
6 351
6 351
6 350
5 350
5 350
4 261
4 261
4 257
4 257
4 255
3 233
3 233
3 238
3 224
3 228
3 225
1 216
1 214
1 215
1 251
2 263
2 261
2 261
2 260
2 257
2 244
2 248
3 489
3 522
3 644
4 802
5 907
5 942
5 988
5 977
5 967
5 966
5 966
5 968
6 968
6 968
6 968
6 968
6 968
6 969
6 976
6 976
6 951
6 947
6 946
6 944
6 937
6 936
6 938
6 934
6 925
6 907
6 906
6 899
7 899
6 886
12 936
12 936
12 936
12 936
12 936
12 938
12 938
12 937
12 931
12 921
12 920
12 920
12 918
11 917
11 917
11 917
5 868
5 872
5 874
5 875
5 877
5 877
5 877
5 877
5 834
5 778
5 757
5 752
5 752
5 748
5 749
4 749
4 741
4 746
4 773
4 884
4 902
4 914
4 898
3 511
3 349
2 233
1 223
1 221
1 222
1 221
1 221
1 219
1 219
1 219
1 218
0 218
0 218
0 217
0 217
0 217
0 219
0 213
0 213
0 213
0 215
0 215
0 215
0 215
0 217
0 215
0 215
0 213
0 210
1 210
1 209
1 207
1 207
1 204
1 204
1 204
1 204
1 204
1 202
1 203
1 203
1 202
1 202
1 202
1 202
0 202
0 202
0 202
0 202
0 202
0 198
0 195
0 194
0 194
0 194
0 194
0 194
0 193
0 193
0 195
0 201
6 309
6 316
15 453
18 464
34 1095
34 1090
35 1076
35 972
36 943
36 944
36 949
36 950
36 953
36 954
36 958
36 972
37 972
37 976
37 978
37 978
37 978
37 979
37 986
37 987
38 987
38 992
38 992
41 1019
41 1022
41 1022
41 1022
41 1022
41 1020
41 1024
41 1027
41 1027
41 1028
41 1030
41 1031
41 1032
41 1032
41 1032
41 1042
40 1043
40 1044
40 1044
40 1044
40 1044
40 1044
40 1044
40 1049
40 1050
40 1054
40 1055
40 1058
40 1058
40 1058
40 1063
40 1064
40 1065
40 1067
40 1067
40 1067
40 1067
40 1067
40 1067
40 1068
40 1070
45 1093
47 1303
47 1307
47 1307
46 1306
36 1198
36 1190
28 1052
25 1035
11 383
11 383
11 381
11 382
11 385
12 387
12 390
4 170
4 191
4 193
4 195
5 299
5 309
5 308
5 307
5 307
5 306
5 303
5 299
5 298
5 297
5 296
5 300
4 273
4 272
4 272
4 272
4 272
4 271
4 268
4 265
4 265
4 264
4 263
4 262
4 261
4 262
4 262
4 251
4 251
4 251
4 250
4 250
4 250
4 249
4 249
4 245
4 244
4 239
4 239
4 237
4 236
4 236
4 230
4 229
4 228
4 226
4 226
4 227
4 228
4 230
5 247
5 249
5 247
5 251
5 249
5 243
6 235
6 232
6 232
5 232
5 232
5 231
5 231
5 231
6 232
6 230
6 227
5 226
5 217
4 198
4 176
4 172
4 166
3 37
3 38
3 37
3 38
3 39
3 45
3 46
3 47
3 47
3 51
3 50
3 46
3 47
3 48
3 47
3 48
3 48
3 48
3 48
3 50
4 51
4 50
4 50
4 50
4 50
5 50
5 50
5 50
5 50
5 50
5 54
5 54
5 54
5 55
6 55
5 54
5 55
9 57
9 57
9 57
9 57
9 57
9 57
9 54
9 56
9 57
9 64
9 69
9 84
9 103
7 102
7 102
7 102
7 104
7 111
7 112
7 113
7 113
7 113
7 113
7 113
7 114
7 114
7 114
6 115
6 115
6 116
6 116
6 116
6 116
6 115
6 115
6 115
6 117
6 117
6 117
7 117
7 115
7 108
9 108
9 107
9 106
9 100
9 98
9 97
9 97
9 111
9 111
9 111
9 111
9 111
8 110
7 108
7 108
7 108
7 108
7 108
7 108
7 108
7 108
7 108
7 94
7 96
7 90
7 90
6 90
6 87
6 86
4 76
4 75
0 72
0 69
0 69
0 69
0 69
0 69
0 70
0 71
0 70
0 67
0 52
0 45
0 37
0 32
0 32
0 32
0 28
0 21
0 20
0 26
0 27
0 27
0 27
0 27
0 26
0 26
0 25
0 24
0 24
0 32
0 33
0 33
0 34
0 34
0 34
0 34
0 30
0 29
0 29
0 29
0 29
0 29
0 29
0 29
0 29
0 29
0 29
0 29
0 29
0 29
0 33
0 34
0 38
0 38
0 38
0 38
0 38
0 41
0 71
0 161
1 238
1 260
1 284
1 291
1 294
1 298
1 301
1 307
4 305
4 308
4 322
4 329
4 352
4 366
4 369
4 371
4 468
4 474
4 548
4 547
4 543
4 543
4 543
1 545
1 550
1 556
1 558
1 566
1 571
1 572
1 574
1 573
1 566
1 491
1 491
1 491
2 492
2 491
2 491
2 491
2 491
2 491
2 482
2 483
2 483
2 483
2 495
2 495
2 495
2 495
2 495
1 495
1 496
1 496
1 496
1 496
1 495
1 494
1 494
1 496
1 498
1 498
1 497
1 492
1 492
1 487
1 487
1 487
1 485
1 483
1 481
1 410
1 323
0 258
0 297
0 292
0 292
0 291
0 286
0 283
0 277
0 276
0 273
0 258
0 251
0 226
0 211
0 206
0 204
0 110
1 114
1 116
2 111
2 111
2 111
2 110
2 105
2 102
2 102
2 103
2 100
2 94
2 94
2 94
2 101
2 101
2 106
2 106
2 109
2 120
2 124
2 126
2 126
2 126
2 129
2 129
2 127
2 128
2 128
2 112
2 140
2 144
2 151
2 154
2 155
2 156
2 158
2 158
2 159
2 161
2 161
2 161
2 159
2 157
2 157
2 157
3 157
3 157
3 159
3 159
3 159
3 159
3 159
3 157
3 157
3 156
3 155
3 107
3 107
3 107
3 107
3 107
2 107
2 107
2 107
2 107
2 107
2 108
2 108
2 108
2 107
2 109
2 95
2 94
2 100
1 101
1 104
1 119
1 121
1 129
1 131
1 132
1 130
1 130
1 130
1 130
1 130
1 129
1 129
0 124
0 124
0 121
0 105
0 102
0 100
0 100
1 99
1 100
2 101
2 100
3 103
3 103
3 99
3 65
3 56
3 50
3 49
3 48
3 48
3 48
3 48
2 48
2 48
2 52
2 52
2 52
2 52
2 52
2 52
2 52
2 53
2 53
2 53
2 56
2 56
2 56
2 57
2 57
2 57
2 57
2 57
2 57
2 57
2 57
2 57
2 57
2 58
2 59
2 59
2 59
2 58
2 58
2 59
2 59
2 60
2 64
2 63
2 57
2 56
2 54
2 41
2 32
2 30
2 29
2 28
2 28
2 28
2 28
2 28
2 29
2 29
2 29
0 29
0 29
0 29
0 29
0 28
0 28
0 28
0 28
0 25
0 28
0 28
1 25
1 25
1 25
2 25
2 25
2 25
2 25
2 25
2 25
2 25
2 25
2 25
2 27
2 23
2 24
2 26
1 27
1 28
1 28
1 28
1 27
1 27
1 25
1 29
1 30
3 33
3 32
3 32
3 32
3 32
3 32
3 32
3 32
3 32
3 32
3 32
3 32
3 31
3 31
4 43
2 42
2 42
2 41
2 41
3 39
3 35
3 35
3 37
3 37
3 38
3 34
3 34
3 34
3 35
2 29
2 29
2 29
2 31
2 31
2 30
2 30
1 23
1 23
1 23
1 21
1 21
1 22
1 22
1 21
1 21
1 21
1 16
1 16
2 18
1 18
1 18
1 18
4 18
4 18
4 17
4 19
4 20
4 90
4 93
4 95
4 94
4 95
4 101
4 103
4 103
4 105
4 106
0 106
0 106
0 106
0 105
0 99
0 97
0 101
0 102
0 102
0 124
0 124
0 124
0 124
0 124
0 124
0 129
0 132
0 132
0 132
0 137
0 137
0 137
0 137
0 137
0 138
0 138
0 139
0 140
13 140
13 140
13 140
13 143
13 143
13 144
13 140
13 140
13 140
13 141
13 138
13 138
13 137
13 138
13 138
13 138
0 138
0 138
0 138
0 139
0 142
0 142
0 142
0 143
0 143
0 143
0 143
0 143
0 143
0 143
0 142
0 142
0 141
0 140
0 135
0 60
0 59
0 55
0 61
0 61
0 61
0 62
0 63
0 62
0 62
0 62
0 62
0 64
0 64
0 63
0 64
0 60
0 59
0 60
0 47
0 62
0 66
0 68
0 68
0 68
0 63
0 68
0 68
0 71
0 71
0 71
0 71
0 71
0 71
0 71
0 71
0 85
0 84
0 84
0 84
0 84
0 80
0 80
0 69
0 75
0 79
0 86
0 86
0 87
0 87
0 86
0 85
0 85
0 88
0 90
0 94
0 95
0 94
0 91
0 94
0 94
0 94
0 94
0 102
0 102
0 113
2 113
2 113
2 113
7 135
7 137
7 137
7 136
7 136
7 138
7 139
7 145
7 155
7 195
7 197
7 196
5 196
5 196
5 197
5 198
5 197
5 198
5 198
5 216
5 218
7 250
7 244
7 238
7 227
7 224
7 224
7 221
7 221
8 221
8 220
8 220
8 219
8 219
8 218
8 218
8 217
7 193
7 193
7 191
6 175
6 175
6 176
6 176
4 174
4 174
4 174
4 174
2 161
2 153
2 148
2 146
2 145
2 146
2 146
2 140
2 140
2 137
2 134
2 128
2 127
2 126
2 126
2 125
2 125
2 126
2 126
2 119
2 119
2 120
2 120
3 122
3 124
2 112
2 117
2 143
2 147
2 149
2 146
2 144
2 133
2 118
2 68
2 58
2 56
2 56
1 56
1 56
1 57
1 58
1 58
1 58
1 58
1 55
0 52
0 52
0 51
0 51
0 51
0 51
0 51
0 51
0 51
0 51
0 51
0 51
0 51
0 51
0 51
0 51
0 52
0 52
0 52
0 52
0 52
0 51
0 51
0 51
0 51
0 51
0 51
0 51
0 51
0 51
0 53
0 53
0 52
0 52
0 52
0 52
0 54
0 54
0 54
0 56
0 57
0 56
0 56
0 56
0 52
0 50
0 48
0 64
0 64
0 67
0 65
0 61
0 62
0 58
0 34
0 34
0 34
0 33
0 33
0 33
0 33
0 33
0 33
0 33
0 33
0 33
0 33
0 31
0 31
0 31
0 31
0 31
0 31
0 33
0 33
0 33
0 33
0 33
0 33
10 33
10 33
10 42
10 49
10 60
10 64
10 65
10 65
10 68
10 70
10 69
10 71
10 71
10 71
10 71
0 71
0 71
0 71
0 71
0 71
0 71
0 71
0 72
0 72
0 72
0 70
0 70
0 70
0 70
0 69
0 68
0 68
0 68
0 66
0 65
0 65
0 66
0 64
0 63
0 63
0 63
0 44
0 44
0 44
0 45
0 45
0 46
0 46
0 46
0 46
0 50
0 50
0 50
0 52
0 53
0 53
0 58
0 59
0 59
0 57
0 57
0 56
0 56
0 56
0 56
0 54
0 54
0 51
0 51
0 50
0 49
0 56
0 57
0 57
0 57
0 36
0 28
0 26
0 23
0 23
0 23
0 20
0 19
0 19
0 19
0 19
0 19
0 19
0 19
0 18
0 18
0 18
0 18
0 18
0 18
0 18
0 18
0 18
0 18
0 18
0 18
0 18
0 18
0 18
0 19
0 21
1 39
1 50
1 99
1 100
1 105
1 112
1 115
1 116
1 116
1 116
1 116
1 116
1 116
1 116
1 116
1 116
1 117
1 116
1 116
0 116
0 119
0 120
0 120
0 117
0 116
0 116
0 120
0 121
0 121
0 121
0 122
0 121
0 125
0 125
0 125
0 125
0 124
0 103
3 124
3 146
4 201
4 206
4 208
4 209
4 209
4 209
4 204
4 201
4 204
4 202
4 206
4 214
4 215
4 215
4 215
4 215
4 219
4 219
4 219
4 219
4 219
4 219
5 219
7 219
7 219
7 219
105 223
105 223
105 223
105 223
105 223
105 222
105 220
105 220
105 208
105 174
105 173
105 173
105 173
105 173
104 173
4 170
4 170
4 172
14 178
14 179
14 182
14 259
14 262
14 267
14 268
14 266
14 283
14 276
14 277
14 278
14 276
14 279
14 282
0 269
0 269
0 258
0 254
0 254
0 255
0 255
0 256
0 256
0 254
0 251
0 248
0 223
0 202
3 159
3 157
3 159
3 164
3 165
3 162
3 164
3 164
3 161
3 159
3 154
3 150
3 154
3 155
3 155
7 272
4 273
4 277
4 281
4 284
4 285
6 300
6 300
6 302
6 303
6 304
6 304
6 307
6 308
6 309
2 286
3 286
3 287
3 287
3 287
3 295
1 280
1 281
1 300
1 301
1 307
1 315
1 313
1 330
1 330
1 332
1 332
1 259
0 259
0 259
0 260
0 260
0 241
0 242
0 247
0 251
0 267
0 274
0 329
0 326
0 326
0 327
0 328
0 328
0 328
0 328
0 327
0 327
0 327
0 328
0 328
0 330
0 330
0 327
0 329
0 324
0 318
0 316
0 312
0 312
0 318
0 319
0 320
0 362
0 361
0 364
0 363
0 366
0 255
0 253
0 230
0 228
0 226
0 225
0 227
0 228
0 228
0 228
0 228
0 228
0 219
0 217
0 215
0 213
0 212
0 212
0 212
0 212
0 212
0 211
0 209
0 187
0 187
0 187
0 188
0 196
0 179
0 178
0 178
0 178
0 176
0 188
0 192
0 443
0 455
0 469
0 479
0 479
0 475
0 456
0 451
0 389
0 390
0 390
0 390
0 382
0 382
0 382
0 382
0 382
0 382
0 382
0 382
0 382
0 381
0 381
0 381
0 380
0 380
0 380
0 380
0 387
0 387
0 387
0 386
0 385
0 349
0 365
0 370
0 377
0 377
1 377
1 390
1 389
1 390
1 390
1 399
1 399
1 399
1 399
1 399
1 400
1 406
1 406
1 409
1 428
0 454
0 465
0 468
0 473
0 477
0 489
0 490
0 491
0 493
0 493
0 493
0 490
0 465
0 510
0 501
0 502
0 502
0 501
0 504
0 500
0 240
0 236
0 236
0 233
0 229
0 228
0 239
0 256
0 304
0 307
1 336
1 338
1 351
1 359
1 381
1 428
1 572
1 812
1 887
1 936
1 1053
1 1099
1 1109
1 1134
1 1206
1 1225
1 1245
1 1325
5 2619
6 3119
6 3192
6 3351
6 3376
6 3392
6 3511
6 3541
6 3576
6 3584
6 3589
6 3579
6 3578
6 3577
6 3576
6 3566
6 3568
6 3568
6 3570
6 3579
8 4459
8 4467
9 4610
9 4608
11 4577
11 4542
11 4543
11 4590
11 4645
11 4663
11 4671
11 4675
11 4674
11 4675
11 4680
11 4692
11 4694
11 4695
11 4620
11 4630
11 4599
11 5488
11 5509
11 5539
11 5534
11 5531
11 5529
11 5532
11 5532
11 5532
11 5534
11 5519
11 5487
12 5429
11 5423
11 5414
11 5408
11 5403
11 5385
11 5368
11 5329
11 5154
11 4953
11 4913
11 4857
11 4717
11 4635
11 4597
10 4586
10 4584
9 4578
9 4549
9 4256
5 2601
5 2509
5 2498
5 2500
5 2502
5 2499
5 2382
5 2361
5 2324
5 2322
5 2323
5 2323
5 2323
5 2323
5 2327
5 2327
5 2325
5 2324
4 2320
4 2307
1 1370
0 1347
0 1250
1 1291
1 1289
1 1293
1 1278
1 1196
1 1150
1 1136
1 1133
1 1136
1 1139
2 1179
2 1496
2 1504
2 1518
3 1522
3 1523
3 1518
14 1511
14 593
16 594
17 587
17 617
17 617
18 616
18 616
18 616
18 616
18 617
18 617
18 615
18 615
18 616
18 614
18 631
5 630
5 630
4 628
4 632
5 623
5 628
5 628
5 628
5 628
10 642
10 642
10 642
10 642
10 642
10 641
10 641
10 639
10 639
10 636
10 636
8 635
37 809
37 803
37 780
37 780
37 780
37 778
37 778
37 778
37 778
37 773
37 773
37 773
37 780
37 780
37 778
8 603
8 603
8 603
7 544
7 543
7 541
7 540
7 540
7 541
7 536
7 534
7 525
7 513
6 468
5 153
5 133
5 119
6 117
6 117
6 117
6 116
6 115
6 98
6 85
6 59
6 58
6 57
6 57
6 57
6 57
6 57
6 57
6 57
6 56
5 52
5 52
5 35
5 35
5 35
5 34
5 32
5 32
5 30
5 30
5 30
5 30
0 16
0 16
0 16
0 18
0 19
0 20
0 21
0 27
0 28
0 31
0 32
0 32
0 30
0 29
0 27
0 26
0 27
2 50
2 53
2 54
2 57
2 59
2 62
2 63
2 64
2 64
2 64
2 64
2 64
2 64
2 64
2 64
2 64
2 64
2 64
2 63
2 63
2 64
2 64
2 63
2 63
2 60
2 60
2 61
2 61
2 61
2 66
2 66
2 66
2 66
2 103
2 155
2 165
2 178
2 179
2 178
2 177
2 177
2 177
2 179
2 179
2 179
2 180
2 180
2 180
2 180
2 180
2 180
2 186
2 214
2 218
2 222
2 235
2 237
2 237
2 237
2 234
2 232
2 231
2 229
2 224
2 224
2 222
2 221
3 220
3 220
3 221
3 226
3 227
4 237
2 213
2 215
2 214
2 217
2 217
2 216
2 216
2 215
2 215
2 215
2 215
3 215
4 219
4 219
4 220
3 220
3 219
3 219
3 215
3 214
3 214
3 214
3 214
3 214
3 214
3 214
2 213
2 212
2 211
2 208
2 208
2 208
2 207
2 154
2 96
2 93
2 90
2 89
2 89
2 89
2 89
2 88
2 87
2 87
2 87
2 87
2 87
2 89
2 88
2 89
2 90
2 82
2 53
2 44
2 42
2 26
2 26
2 25
3 25
3 25
3 24
3 22
3 22
3 21
3 20
3 21
3 24
2 24
2 26
2 68
2 74
2 83
2 98
3 98
2 98
2 98
2 98
2 98
2 98
3 98
3 104
4 107
4 108
4 109
4 108
3 106
3 107
3 109
2 113
2 113
2 113
2 113
2 113
2 113
2 113
2 113
2 113
2 113
2 113
2 113
2 113
2 113
2 113
2 113
2 113
2 113
2 113
2 113
2 113
2 113
2 113
2 113
2 115
2 120
2 120
2 120
2 120
2 120
2 120
2 120
2 118
2 118
2 138
2 137
2 137
2 138
2 138
2 139
2 142
2 142
6 142
6 142
6 142
6 145
6 146
6 150
6 153
6 152
6 153
6 152
6 152
6 149
6 105
6 101
6 95
6 77
2 77
4 77
3 76
3 76
3 76
3 76
3 76
3 70
3 68
3 67
3 65
3 67
3 71
3 69
2 66
2 62
0 63
0 63
0 63
0 63
0 63
0 63
0 63
0 63
0 64
0 64
0 64
0 64
0 64
0 64
0 64
0 64
0 64
1 65
1 66
1 71
1 77
1 77
1 77
1 80
1 75
1 77
1 77
1 81
1 83
1 82
1 83
1 83
0 82
0 58
0 58
0 58
0 58
0 58
0 58
1 59
1 58
1 58
1 62
1 62
1 60
1 59
1 55
1 51
1 50
1 50
1 48
1 48
1 48
1 48
0 47
0 44
0 40
0 40
0 40
0 40
0 41
0 43
0 43
0 43
0 47
0 48
0 48
0 48
0 49
2 47
2 50
2 50
2 50
2 50
2 51
2 51
2 52
2 55
2 55
2 55
2 57
2 57
2 57
2 57
0 63
0 63
0 63
0 63
0 62
0 61
0 61
0 59
0 53
0 49
0 49
0 49
0 44
0 43
0 43
0 43
0 40
0 38
0 38
0 37
0 37
0 37
0 37
0 37
0 37
0 37
0 37
0 37
0 36
0 36
0 36
0 28
0 28
0 25
0 25
0 25
0 25
0 25
0 25
0 25
0 25
0 25
0 26
0 26
0 27
0 27
0 28
0 29
0 30
0 31
0 61
0 67
0 68
0 65
0 65
0 64
0 63
0 61
0 59
0 59
0 59
0 59
0 59
0 57
0 55
0 54
0 55
0 55
0 55
0 52
0 52
0 52
0 51
0 45
0 45
0 45
0 45
0 45
0 45
0 46
3 46
3 46
3 46
3 46
3 47
3 47
3 47
4 47
4 47
4 47
4 47
4 48
4 48
4 48
4 48
4 48
1 48
1 48
1 48
1 48
1 48
1 48
0 48
0 48
0 48
0 49
0 49
0 49
0 51
0 52
0 53
0 56
0 56
0 59
0 59
0 58
0 60
0 59
0 60
0 59
0 56
0 53
0 51
12 21
12 21
12 21
12 20
12 20
12 20
12 20
12 20
12 20
12 20
12 20
12 20
12 20
12 20
12 20
0 20
0 19
0 19
0 19
0 19
0 19
0 19
0 19
0 19
1 19
1 19
1 19
1 19
1 19
1 18
1 18
1 18
1 18
1 18
1 17
1 19
1 19
1 19
1 19
0 20
0 20
0 19
0 19
0 19
0 19
0 19
0 21
0 23
0 23
0 49
0 49
0 51
0 52
0 134
0 169
0 183
4 192
4 197
4 196
4 196
4 195
4 192
4 192
4 189
4 189
4 189
4 187
4 187
4 186
4 188
4 188
0 185
0 185
0 185
0 185
0 191
0 192
0 189
0 189
0 188
0 188
0 188
1 188
2 188
2 188
2 194
2 194
2 202
2 202
2 202
2 202
2 202
2 202
2 202
2 202
2 202
2 202
1 202
1 202
0 202
0 202
0 202
0 203
0 203
0 203
0 203
0 202
0 200
0 199
0 199
0 199
0 198
0 200
0 200
0 200
0 200
0 201
0 204
0 199
0 182
0 155
0 146
0 143
0 147
0 146
0 143
0 53
0 39
0 39
0 39
0 39
0 39
0 40
0 42
0 39
0 42
0 45
0 45
0 45
0 45
0 45
0 45
0 42
0 42
0 42
0 42
0 42
0 42
0 37
0 36
0 36
0 36
0 36
0 36
0 36
0 36
0 36
0 36
0 30
0 30
0 23
0 25
0 25
0 50
0 55
0 61
0 63
0 63
0 64
0 66
0 68
0 69
0 72
0 72
0 72
0 72
0 72
0 72
0 73
0 75
0 75
0 77
0 78
0 78
0 78
0 79
0 78
0 78
0 92
0 98
0 123
0 205
0 255
0 320
0 323
0 335
0 334
0 335
0 346
0 367
0 383
0 402
0 503
0 507
0 513
0 519
0 517
0 517
0 520
0 523
0 537
0 538
0 538
0 538
0 540
0 542
0 543
0 554
0 559
0 617
0 621
0 622
0 623
0 623
0 623
1 622
3 622
3 623
3 625
3 628
3 640
3 643
3 646
3 647
3 645
3 645
3 599
3 593
3 584
3 581
3 581
0 585
0 584
0 582
0 582
0 579
0 580
0 580
0 581
0 581
0 582
0 581
0 578
0 577
0 576
0 576
0 576
0 575
0 574
0 572
0 570
0 556
0 550
0 529
0 445
0 393
0 338
0 334
0 328
0 329
0 330
0 327
0 309
0 285
0 258
0 158
0 158
0 149
0 148
0 146
0 145
0 140
0 135
0 123
0 122
0 122
0 123
0 121
0 121
0 117
0 105
0 97
0 38
0 34
0 33
0 33
0 33
0 33
0 34
0 34
0 34
0 34
0 32
0 23
1 19
1 15
1 15
1 21
2 20
3 20
3 20
4 20
4 20
4 20
7 19
7 19
7 19
7 19
8 29
7 29
7 29
8 29
8 32
8 31
8 31
8 31
8 31
7 31
7 31
5 31
6 31
6 31
6 31
6 32
6 32
6 32
6 32
6 32
6 32
6 25
6 28
6 37
7 36
7 56
7 62
7 65
6 65
6 67
6 68
6 68
6 68
6 68
6 68
6 68
6 68
6 69
6 68
6 70
6 71
5 74
5 77
5 78
5 78
5 79
5 96
5 104
5 131
5 140
5 143
5 147
5 147
5 146
5 147
5 151
5 174
5 185
5 190
5 196
5 198
7 203
7 198
7 199
5 199
5 199
3 198
3 201
3 208
3 208
3 208
3 210
2 210
2 200
2 198
2 198
2 199
0 196
0 196
0 196
0 196
0 196
0 196
0 196
0 196
0 196
0 198
0 203
1 238
3 303
3 370
3 542
3 573
3 576
3 601
3 608
3 617
3 632
3 622
3 818
3 815
3 817
4 817
4 818
4 819
4 828
4 828
4 851
4 859
4 860
4 861
2 871
4 868
4 870
4 872
4 831
4 848
4 855
3 868
3 849
3 863
3 880
3 867
3 867
3 864
5 866
5 866
3 865
3 863
3 964
3 953
3 953
3 951
3 951
3 963
3 969
3 969
3 969
3 969
3 969
3 958
3 944
1 936
1 933
1 932
1 932
1 822
1 822
1 822
1 813
1 813
1 808
1 808
1 808
1 807
1 807
1 806
1 807
1 808
1 807
1 796
1 760
0 693
0 615
0 452
0 444
1 487
1 477
1 459
1 437
1 433
1 431
1 430
1 430
1 427
1 425
1 425
1 424
1 411
1 408
1 384
0 336
0 335
0 336
0 322
0 320
0 318
0 304
0 112
0 106
0 111
0 118
0 128
0 656
0 594
0 597
0 597
0 598
0 595
0 598
0 601
0 602
0 604
0 605
0 605
0 601
0 602
0 600
0 599
0 600
0 600
0 601
0 601
0 601
0 601
0 601
0 601
0 599
0 599
0 599
0 599
0 599
0 600
0 600
0 600
0 600
0 600
0 601
0 601
0 601
0 597
0 597
0 598
0 598
0 598
0 599
0 637
0 638
0 640
0 647
0 648
0 664
0 968
0 1004
0 1011
0 1060
0 1064
0 1073
0 1082
0 1082
0 1082
0 1087
0 1095
0 1102
0 1108
0 1111
0 1113
0 1137
0 1141
0 1139
0 1143
1 1172
1 1177
1 1204
1 1201
1 1194
2 645
2 738
2 744
3 1179
3 1176
3 1176
3 1176
3 1176
3 1176
3 1176
3 1176
2 1148
2 1148
2 1148
2 1148
1 1148
1 1147
1 1146
1 1144
1 1144
1 1144
1 1144
1 1144
1 1144
1 1144
3 1148
4 1148
4 1148
6 1158
6 1161
6 1162
6 1162
6 1162
6 1162
6 1162
6 1163
6 1164
6 1167
6 1167
6 1169
6 1168
6 1163
6 1157
6 1119
6 1119
6 1115
6 1116
6 1114
6 1080
6 731
6 708
7 708
7 709
8 709
8 709
8 711
8 711
8 716
9 711
10 743
11 749
11 748
11 749
11 745
12 726
12 728
12 728
12 725
12 721
14 707
14 667
14 664
13 664
13 661
13 561
11 554
10 123
9 123
9 123
8 123
8 122
8 122
8 122
8 122
8 122
8 124
8 124
8 124
8 124
8 124
8 124
8 124
8 124
8 124
7 124
6 124
6 124
6 124
6 120
6 120
6 120
5 109
5 106
5 106
5 106
5 106
5 106
5 105
6 105
6 104
6 103
6 103
6 101
6 101
6 101
6 101
6 101
6 101
6 99
6 99
6 99
6 99
6 93
5 90
4 89
3 89
3 89
3 89
3 85
3 81
3 77
2 64
1 8
0 5
0 3
0 3
0 3
0 3
0 3
0 7
0 7
0 7
0 7
0 7
0 7
0 7
0 7
4 56
4 59
4 59
5 65
6 71
7 86
7 86
7 86
7 86
7 86
7 87
7 85
7 85
7 85
7 85
7 86
7 86
7 88
7 89
7 91
7 93
10 93
10 93
10 108
10 110
10 111
10 111
10 111
10 111
10 111
10 111
10 111
10 111
10 111
10 111
10 111
7 111
7 111
7 111
7 111
7 111
7 112
7 112
7 112
7 113
7 113
8 546
8 554
8 556
8 556
8 557
10 557
10 558
10 559
10 559
10 559
10 559
10 559
10 560
11 574
12 575
12 580
11 140
11 141
11 141
13 138
13 139
11 139
11 139
11 139
10 139
10 139
10 139
7 72
7 64
8 62
6 57
5 56
5 59
5 60
4 60
4 61
5 62
5 61
5 63
5 64
5 64
5 64
5 63
5 65
5 62
5 61
5 61
5 59
5 60
5 79
5 67
5 76
5 81
5 81
5 81
5 81
5 81
5 81
5 81
5 81
5 81
5 83
5 83
5 83
5 85
5 85
5 85
5 86
5 85
5 118
5 123
5 125
5 127
5 128
5 130
5 126
5 126
5 126
5 126
5 126
5 130
5 130
5 130
5 130
6 148
6 150
3 136
3 141
3 139
3 139
3 137
3 137
2 137
2 137
2 137
2 138
2 138
2 138
2 139
2 140
2 147
2 153
2 153
2 153
2 155
2 153
2 152
1 153
1 152
1 154
1 154
1 153
1 152
1 152
1 152
1 163
1 165
1 169
1 179
1 181
1 183
1 184
1 164
2 153
2 146
2 145
2 147
2 147
2 147
2 147
2 148
2 148
2 147
2 147
2 146
2 146
2 147
2 146
2 146
1 146
1 151
2 161
2 130
2 127
2 123
2 122
2 121
2 120
2 120
2 120
2 120
2 120
2 125
2 123
2 125
2 125
2 123
1 110
3 109
3 109
3 104
3 104
3 106
3 110
3 121
4 167
4 306
4 492
4 576
4 654
4 679
4 751
4 758
4 759
4 770
4 771
4 772
4 775
4 779
4 841
4 893
4 924
4 935
4 940
4 938
4 936
4 938
4 937
4 926
4 923
4 924
4 964
4 975
4 974
5 992
5 998
5 1002
4 1002
4 999
4 1005
4 1032
4 1042
4 1058
4 1062
4 1069
4 1071
4 1070
4 1073
4 1076
4 1076
4 1074
4 1096
3 1093
3 1079
2 1062
2 1058
2 1051
4 1071
4 1072
4 1145
7 1150
7 1153
7 1153
7 1153
7 1153
7 1146
7 1145
8 1145
8 1145
8 1144
8 1145
8 1144
8 1127
6 1109
6 1108
6 1093
3 1085
3 1068
2 975
2 771
1 700
1 657
1 607
1 585
1 517
1 515
1 515
1 531
1 539
1 544
1 540
1 541
1 484
1 414
1 394
1 394
7 488
7 510
7 562
7 578
9 864
9 892
10 943
10 951
10 927
10 986
10 1003
10 1008
10 1015
10 1015
10 1015
10 1015
10 1008
11 986
11 973
11 1090
11 1090
11 1086
11 1084
11 1084
11 1081
11 1079
10 1080
10 1080
10 1053
10 1053
10 1051
10 1049
10 1049
10 1048
10 1048
10 1046
10 973
10 973
10 970
10 969
10 969
11 970
11 971
11 972
11 973
12 974
12 974
12 972
14 973
14 973
16 978
16 978
16 978
17 978
17 977
17 963
17 952
16 934
16 934
16 933
15 929
15 931
15 935
15 939
15 925
15 923
15 917
15 917
15 911
15 917
15 915
15 907
15 905
9 783
9 768
9 721
9 705
6 443
6 428
6 426
6 420
6 743
6 684
6 695
7 672
9 727
9 781
9 784
9 789
9 785
8 799
9 803
9 681
9 685
9 686
10 688
10 692
10 701
10 701
10 699
10 703
11 707
11 706
11 707
11 729
11 731
11 734
12 764
12 764
12 766
12 774
12 779
14 786
14 796
14 804
16 858
17 928
17 942
16 963
16 975
17 978
15 988
15 993
13 988
13 988
14 988
13 988
13 988
19 1349
21 1359
36 1374
36 1378
36 1378
38 1383
38 1382
38 1380
38 1377
38 1362
38 1363
38 1365
38 1365
38 1365
38 1356
38 1358
38 1360
38 1361
38 1362
38 1364
38 1365
38 1363
38 1277
38 1273
38 1256
38 1250
38 877
38 876
38 832
37 827
35 773
35 720
35 719
35 711
35 711
35 691
34 689
33 685
33 684
33 683
33 683
33 683
33 679
33 679
33 679
33 676
33 674
33 675
33 675
33 651
34 649
34 645
33 613
33 610
33 605
33 605
33 602
34 599
34 603
33 568
31 489
30 471
30 468
30 521
30 554
30 554
29 553
29 555
28 556
28 558
25 561
25 569
21 570
14 198
13 188
1 176
0 170
0 168
0 165
0 165
0 164
0 157
0 152
0 147
0 147
0 148
0 142
0 142
1 154
1 154
1 156
1 153
1 151
1 151
1 151
1 152
1 152
1 152
1 151
1 153
1 153
1 157
1 160
1 160
1 160
1 160
1 160
1 157
2 160
2 160
2 160
2 165
2 166
2 166
2 166
2 165
2 165
3 165
3 164
3 162
3 160
3 160
3 160
3 160
4 160
4 160
4 160
4 160
4 160
4 161
5 159
5 139
4 137
4 137
4 143
4 148
4 93
4 59
4 59
4 59
4 59
4 59
4 59
4 58
4 52
4 52
4 52
5 52
5 52
5 52
5 53
5 53
5 46
5 143
5 159
5 171
5 175
5 177
5 178
5 177
5 179
4 165
3 164
3 164
3 164
3 164
3 165
3 165
3 165
3 165
3 166
3 165
3 163
3 162
3 160
3 157
3 157
3 157
3 157
3 157
3 158
2 156
2 156
2 156
2 151
2 150
3 154
4 154
4 154
17 154
18 154
20 154
20 154
20 154
20 154
20 154
20 154
19 154
19 155
19 159
19 162
18 172
16 178
16 181
3 181
3 183
1 183
0 246
0 271
0 273
0 305
0 311
0 314
0 322
0 336
0 348
0 358
0 364
0 376
1 377
1 377
1 386
1 401
2 403
3 418
3 417
3 310
3 299
3 297
3 297
3 292
3 292
3 293
3 293
3 293
2 293
2 293
2 293
2 295
1 295
1 296
1 296
1 296
1 295
1 295
1 295
1 295
1 295
1 295
1 295
1 295
1 295
1 295
1 295
1 294
1 299
1 299
1 299
1 299
1 294
1 295
1 295
1 297
2 298
2 299
2 302
2 317
2 367
2 373
2 381
2 386
2 383
2 368
2 359
2 422
2 425
2 438
2 448
2 448
2 447
2 335
2 335
2 331
2 304
2 300
3 299
3 293
3 294
3 294
3 287
3 285
3 282
3 287
3 289
3 293
3 284
3 286
2 278
2 277
2 274
2 274
2 276
2 278
2 280
3 280
3 281
3 285
3 286
3 284
3 284
3 284
3 330
3 345
3 348
3 348
3 351
3 351
3 353
3 353
3 353
3 355
3 355
3 354
3 354
3 353
3 353
3 354
3 354
3 347
3 347
3 349
3 349
3 349
3 349
3 349
3 347
2 346
3 345
3 347
3 338
3 297
3 308
3 343
3 342
3 342
3 338
3 329
3 242
3 229
3 206
3 203
3 203
3 202
3 202
3 202
3 202
3 202
3 201
2 201
2 199
2 197
2 197
2 195
2 194
2 194
2 192
2 190
1 173
1 173
1 168
1 167
12 167
12 167
12 172
12 171
12 169
12 167
12 167
12 165
12 165
12 165
12 165
12 165
12 163
12 120
13 104
13 103
2 102
2 103
2 103
2 103
2 103
2 101
2 102
2 102
2 103
2 103
2 103
2 103
2 102
2 101
1 101
1 101
1 101
1 101
1 105
1 106
1 106
1 106
1 107
0 104
0 101
0 93
0 85
0 67
0 29
0 26
0 25
0 25
0 25
0 25
0 26
0 28
0 28
0 28
0 30
0 31
0 43
0 60
0 118
0 118
0 123
4 129
12 131
13 132
13 133
13 131
13 136
13 140
14 140
14 147
14 194
14 201
14 209
14 436
14 450
15 552
16 575
16 611
6 643
5 648
5 650
5 663
5 666
4 668
4 671
4 671
4 671
4 674
4 673
4 673
4 666
3 666
3 665
3 667
3 702
3 706
3 707
3 706
3 710
3 714
3 715
3 716
3 716
3 718
4 750
4 753
4 771
4 766
4 766
4 767
4 767
4 767
4 767
4 765
4 768
4 768
4 768
4 768
5 770
5 773
5 822
5 825
5 839
5 840
5 837
5 836
6 835
6 829
6 821
6 805
6 785
6 731
6 730
6 735
5 737
5 737
5 737
3 737
4 768
4 772
4 772
4 773
3 766
3 722
3 712
3 708
3 634
3 566
2 533
2 536
2 542
2 542
2 546
2 544
2 529
2 527
2 531
2 532
2 532
2 536
2 538
2 538
2 540
2 540
2 546
3 544
3 544
3 508
3 507
3 509
3 506
3 500
3 511
4 570
4 579
4 588
3 592
3 612
3 620
3 688
3 700
3 703
3 703
3 705
3 704
3 704
3 704
3 705
3 703
3 703
2 703
2 701
2 699
2 645
2 644
2 638
2 637
2 637
2 637
2 637
2 637
2 637
2 637
2 637
2 636
2 636
2 634
2 631
2 631
2 632
2 630
1 598
1 589
1 584
1 584
1 584
1 583
1 583
1 580
1 347
1 337
1 330
1 315
1 312
1 312
1 311
1 310
1 309
1 309
1 309
1 310
1 314
1 313
1 313
1 313
1 314
2 312
1 312
1 316
1 322
1 328
2 346
2 350
2 352
2 357
2 341
3 282
3 272
46 270
47 265
47 207
46 192
46 101
46 96
46 96
47 120
47 121
47 123
47 123
47 124
47 127
47 129
46 140
47 173
47 182
47 185
3 185
3 185
3 186
3 187
3 191
3 194
4 196
4 204
4 217
4 220
4 225
4 229
5 229
5 229
5 229
5 241
5 243
5 243
5 243
5 243
5 243
4 244
4 244
4 244
4 244
4 243
4 242
3 233
3 221
3 226
3 226
3 215
3 221
3 247
3 260
3 268
3 274
3 311
3 308
3 314
3 358
3 385
3 409
5 423
5 423
5 425
5 415
5 419
4 401
4 396
4 399
4 392
4 395
4 393
4 394
4 395
4 395
4 395
4 395
4 396
4 412
4 419
3 400
3 476
3 496
3 497
3 507
3 517
3 523
3 508
1 463
1 476
1 474
0 483
1 485
2 487
2 487
2 484
2 485
2 483
2 479
2 476
2 479
2 475
2 472
2 471
2 471
2 472
2 472
2 471
2 471
2 470
2 470
2 470
2 469
2 470
2 472
2 468
2 468
2 466
2 467
2 497
2 495
2 495
2 553
2 540
2 479
2 434
2 422
2 416
2 378
2 365
2 355
2 330
2 327
2 305
2 330
2 323
2 323
3 258
3 248
3 245
3 244
3 244
3 244
3 245
3 239
3 240
3 253
3 262
4 272
4 280
4 278
31 279
31 274
30 263
30 184
30 163
30 161
30 161
30 159
30 156
30 153
30 143
30 141
29 140
28 139
28 139
98 147
74 145
74 143
74 143
76 143
73 143
73 142
73 142
73 142
73 142
73 144
73 144
73 145
73 147
73 147
2 135
2 136
2 137
2 140
0 143
0 144
0 142
0 142
0 143
0 144
0 166
0 158
0 219
0 219
0 222
0 229
0 228
0 226
0 226
0 226
0 229
0 230
0 229
0 228
0 228
0 228
0 201
0 200
0 196
0 196
0 196
3 196
3 196
3 196
3 195
3 194
3 194
3 192
3 176
3 171
3 164
3 159
3 158
3 159
3 159
3 159
0 159
0 160
0 160
0 159
0 158
0 157
0 164
0 166
0 166
0 166
0 166
0 166
0 165
1 165
1 165
2 166
2 166
2 166
2 166
2 166
2 166
2 167
2 168
2 168
2 168
2 166
2 167
2 171
1 178
1 178
0 180
0 177
0 179
0 183
0 183
0 187
0 179
0 134
0 101
0 66
0 64
0 58
0 58
0 57
0 56
0 56
0 54
0 51
0 51
0 52
0 52
0 52
0 52
0 52
0 53
0 53
0 55
0 55
0 55
0 55
0 56
0 57
0 57
0 57
0 57
0 58
0 57
0 55
0 55
0 56
0 58
0 58
0 58
0 58
0 57
0 57
0 56
0 56
0 56
1 48
1 47
1 47
1 47
1 49
1 49
1 49
1 49
1 48
1 47
1 50
1 50
1 50
1 51
1 51
0 50
0 49
0 49
0 48
0 46
0 45
0 43
0 36
0 39
1 30
1 26
1 26
1 25
1 25
1 21
1 21
1 21
1 21
1 21
1 21
1 21
1 21
1 21
1 21
0 21
0 21
0 21
0 23
0 31
0 31
0 31
0 32
0 32
0 31
0 32
0 30
0 30
0 29
0 29
0 28
0 28
0 28
0 28
0 28
0 28
0 32
0 37
0 38
0 38
0 37
0 37
0 37
0 40
0 45
0 91
0 99
0 119
0 120
0 122
0 133
0 135
0 136
0 159
0 174
0 188
0 202
0 219
0 224
0 227
0 227
0 335
0 334
0 334
0 334
0 334
0 334
0 335
0 349
0 351
0 358
0 360
0 358
0 354
0 354
0 354
0 354
0 354
0 354
0 355
0 356
0 356
0 358
0 358
0 356
0 356
0 356
0 356
0 356
0 356
0 358
0 360
0 350
0 349
0 350
0 350
0 349
0 349
1 349
1 350
1 355
1 360
1 364
1 368
1 368
1 369
1 369
2 369
2 369
2 367
3 364
3 364
3 365
2 365
3 370
3 371
3 369
3 359
3 295
3 289
3 366
3 387
3 410
3 412
2 415
1 437
1 426
1 419
1 428
0 427
0 428
0 531
0 532
0 536
0 430
0 435
0 435
0 437
0 437
0 436
0 436
0 419
0 417
0 413
0 411
0 411
0 411
0 413
0 415
0 415
0 415
0 415
0 414
0 411
0 411
0 409
0 408
0 408
0 408
0 408
0 408
0 408
0 407
0 407
0 404
0 405
0 405
0 405
0 406
0 406
0 406
3 406
3 406
3 397
3 391
3 391
3 390
3 388
3 388
3 389
3 389
3 389
3 386
3 386
3 386
3 386
3 433
0 450
0 471
0 477
0 479
0 478
0 471
0 375
0 347
0 334
0 330
0 330
0 284
0 250
0 247
0 266
0 265
0 267
0 161
0 162
0 156
0 153
0 149
0 149
0 146
0 147
0 147
0 148
0 148
0 148
0 148
0 148
0 149
0 149
0 149
0 149
0 149
1 151
1 151
1 151
1 152
1 152
1 152
1 152
1 152
1 157
1 157
1 156
1 157
1 157
1 157
1 157
1 156
0 156
7 156
7 155
7 155
7 158
7 157
7 157
7 158
7 158
7 158
7 158
7 157
7 156
7 157
7 161
7 162
0 162
0 186
0 186
0 184
0 137
0 107
0 77
5 84
5 84
5 84
5 84
5 84
5 84
6 86
6 86
7 86
8 154
8 154
8 164
8 145
8 146
8 144
3 136
3 135
3 135
3 131
3 131
3 131
3 130
2 130
1 130
1 134
1 138
1 139
1 139
1 139
1 139
1 139
1 139
1 139
1 139
1 139
1 145
1 148
1 151
1 151
1 152
1 152
1 152
1 147
1 147
1 148
1 150
1 159
1 162
1 166
1 170
1 173
1 173
1 173
1 173
1 170
1 170
1 167
1 167
1 167
1 168
1 169
1 173
1 171
1 170
1 167
1 167
2 165
2 137
2 137
2 137
2 137
3 158
3 158
3 159
3 159
3 161
3 161
3 162
3 163
3 162
3 169
2 170
1 90
1 90
1 90
1 89
1 90
1 90
1 95
1 100
1 102
2 117
2 117
2 118
2 118
2 124
70 5650
70 5646
70 5642
70 5641
70 5641
70 5640
70 5640
70 5642
70 5643
70 5646
70 5646
70 5646
70 5639
70 5636
70 5634
2 104
3 145
3 151
3 154
12 172
12 173
12 172
12 175
12 165
12 168
12 179
12 177
13 185
14 192
14 193
14 194
14 196
14 198
14 199
14 200
14 200
14 198
14 198
14 194
14 194
14 195
14 195
14 195
14 195
14 195
14 195
13 195
13 196
13 174
13 175
14 174
14 174
14 172
14 171
14 171
14 171
14 171
14 164
14 163
14 163
14 163
14 164
14 164
14 164
14 164
14 172
14 166
14 165
13 152
13 151
13 151
13 151
13 151
13 151
13 151
13 151
13 151
13 151
13 151
13 151
13 148
13 146
13 143
13 145
13 145
13 145
13 150
13 150
13 151
23 298
23 290
22 291
15 268
18 291
18 291
18 289
18 290
18 287
18 272
18 284
20 315
20 337
21 341
22 347
22 346
22 345
22 351
22 357
22 361
22 362
22 362
22 361
22 362
22 361
22 361
22 361
22 361
22 361
22 361
22 361
22 360
22 360
22 359
21 359
21 359
21 360
21 361
21 360
21 360
21 360
21 361
21 360
22 359
22 359
22 359
22 359
22 359
22 358
22 345
22 345
22 343
22 343
22 343
22 343
22 343
22 343
22 343
21 343
21 349
21 349
21 349
21 349
21 350
21 350
21 350
21 350
21 348
21 348
21 348
21 341
19 338
18 336
6 101
6 101
6 101
6 102
6 102
6 102
2 63
2 63
3 63
3 61
3 68
2 53
5 42
5 41
5 38
5 38
6 37
6 31
6 25
6 21
6 20
6 20
6 21
6 21
6 21
6 21
6 26
6 26
6 26
6 26
6 26
5 26
5 26
5 26
5 26
5 26
5 29
5 37
6 40
6 41
6 41
6 39
7 216
7 220
7 220
7 220
7 230
7 230
7 230
7 230
7 230
7 230
7 230
7 230
7 230
7 229
7 229
6 52
6 52
5 47
5 47
5 49
6 49
6 49
6 49
6 49
6 51
6 51
6 52
6 54
6 54
6 55
8 55
13 57
13 57
13 57
13 57
12 57
12 57
12 57
12 57
11 57
11 58
11 46
11 46
8 45
8 45
8 57
8 57
8 57
8 57
8 66
8 68
9 68
9 69
9 68
9 68
9 68
9 68
9 62
9 62
9 60
9 60
9 51
9 50
9 50
9 50
9 50
9 49
10 44
9 41
8 39
8 40
8 40
8 40
8 40
9 36
9 37
9 37
9 26
9 27
9 26
9 26
9 26
9 26
9 26
9 27
10 28
11 29
11 29
11 29
10 29
10 27
10 29
10 27
10 28
10 28
10 28
10 29
10 46
10 47
10 47
9 44
6 44
6 45
6 44
3 43
3 43
3 43
3 43
3 43
3 43
3 43
3 44
3 44
3 43
3 43
3 43
3 38
3 24
3 24
3 24
3 24
3 24
3 16
3 16
3 16
3 15
3 15
3 15
3 15
3 15
3 15
3 15
3 15
3 15
3 15
3 15
3 15
3 15
3 15
3 15
2 14
2 14
2 15
2 16
2 16
2 20
2 24
2 24
2 23
2 24
2 25
2 24
2 25
2 29
2 30
2 30
2 30
2 29
0 28
0 27
0 27
0 24
0 25
0 25
0 22
0 22
0 21
0 21
0 22
0 22
0 22
0 22
0 21
0 21
0 21
0 20
0 20
0 20
0 20
0 20
0 20
0 20
0 20
0 20
0 19
0 20
0 20
2 21
2 48
2 48
2 49
2 51
2 51
2 92
2 92
2 92
2 90
2 90
2 90
2 90
2 91
2 91
2 91
2 91
2 65
2 64
2 64
2 62
2 62
2 62
2 62
2 62
2 62
2 62
2 62
2 19
2 17
2 17
2 12
2 11
2 12
2 12
3 11
3 11
3 13
3 12
3 10
3 9
3 9
3 11
3 11
3 11
3 11
3 12
3 12
3 11
4 11
3 15
3 15
3 12
3 12
3 13
3 13
3 13
3 15
3 15
3 25
3 25
3 25
3 25
3 25
2 25
2 25
2 25
2 25
2 25
2 25
2 25
2 24
2 24
0 23
0 23
0 23
0 23
0 23
0 23
0 24
0 24
0 24
0 24
0 24
0 25
0 25
0 25
0 25
0 25
0 25
0 26
0 27
0 27
0 27
0 27
0 27
0 30
0 32
0 34
0 38
0 42
0 43
0 42
0 42
0 42
0 42
0 44
0 44
0 51
0 51
0 51
0 51
0 51
0 51
0 51
0 49
0 48
0 48
0 48
0 47
0 47
0 47
0 47
0 43
0 43
0 43
0 43
0 41
0 41
0 42
0 40
0 40
0 35
0 35
0 35
0 33
0 33
0 33
0 33
0 33
0 33
0 33
0 33
0 33
0 35
0 35
0 35
0 45
0 48
0 48
0 48
0 49
0 48
0 48
0 48
0 48
0 47
0 47
0 47
0 47
0 47
0 46
0 46
0 46
0 46
0 47
0 47
0 47
0 47
0 43
0 36
0 35
0 37
0 36
0 38
0 38
0 39
1 40
1 40
1 38
1 38
1 31
1 34
1 36
1 37
1 38
1 38
1 38
1 39
1 39
1 39
1 39
1 39
1 39
1 39
1 39
1 39
1 39
1 39
1 39
1 39
1 39
1 38
1 38
1 38
1 30
1 29
1 31
1 30
1 36
1 36
1 36
1 36
1 36
1 37
1 38
1 39
1 39
1 40
4 184
4 177
4 176
4 181
4 181
4 174
9 175
9 175
10 175
11 175
11 175
11 175
11 175
11 175
11 175
11 175
8 34
8 33
8 34
8 33
8 33
8 33
8 33
7 33
7 34
7 35
7 35
7 35
2 34
2 34
2 66
1 70
1 72
1 76
1 77
1 76
1 72
1 69
1 68
1 69
1 70
1 71
1 71
1 69
1 69
1 70
1 70
1 71
1 71
1 71
1 74
1 74
1 74
1 74
1 75
1 75
1 75
1 75
1 75
1 75
1 75
1 75
1 75
1 75
1 75
1 75
1 75
1 74
1 72
1 72
1 72
1 72
1 73
1 76
1 84
1 90
1 85
1 104
1 105
1 107
1 108
1 108
0 107
0 108
0 107
0 107
0 107
0 107
0 107
0 107
0 107
0 104
0 104
0 109
0 109
0 122
0 123
0 131
0 132
0 130
0 131
0 130
0 125
0 91
0 90
0 89
0 89
0 89
0 90
0 90
0 91
0 94
0 96
8 110
8 110
8 111
8 111
8 111
8 110
8 110
8 108
8 108
8 108
8 106
8 106
8 106
8 106
8 105
8 106
8 113
0 115
0 117
0 117
0 118
0 118
0 118
0 118
0 118
0 119
0 180
0 184
4 537
4 577
5 613
5 633
5 643
5 643
5 642
9 670
9 683
9 666
10 687
10 706
10 707
13 707
13 709
13 709
14 708
15 713
15 713
15 713
19 713
20 713
77 827
75 827
75 841
75 839
76 845
76 823
76 821
75 818
75 812
75 812
75 812
75 812
75 812
75 812
75 811
75 812
75 812
75 816
75 815
75 815
75 814
75 812
76 805
77 778
77 769
77 770
77 770
78 771
78 771
79 773
79 773
79 773
79 774
79 773
79 776
79 777
79 807
80 805
79 795
79 744
79 724
79 714
79 667
82 665
94 663
105 664
116 664
116 664
116 661
116 661
115 654
112 316
111 300
110 293
110 291
110 285
110 281
110 274
109 212
109 192
109 191
109 190
109 207
109 208
106 223
106 244
106 268
105 268
105 282
105 282
105 282
102 281
100 280
44 151
45 169
45 164
45 166
44 167
44 167
44 168
44 168
45 174
49 179
52 187
52 188
52 188
52 188
52 189
52 195
52 196
52 194
52 251
52 250
52 250
52 258
52 307
57 500
68 568
72 588
72 602
72 620
71 640
71 665
71 667
264 679
268 679
270 681
270 681
270 679
270 652
270 654
270 654
270 654
270 654
269 654
267 654
260 653
249 653
239 653
232 653
233 653
233 654
233 654
233 654
233 654
233 655
233 655
244 657
313 659
389 661
494 661
522 662
538 663
538 664
538 662
538 646
539 638
551 620
552 598
560 567
560 567
559 553
558 552
556 551
556 551
556 550
556 550
554 523
554 521
554 627
553 620
552 623
552 623
551 623
551 617
548 610
547 610
547 611
548 610
555 612
555 609
555 610
555 612
555 612
555 550
555 560
555 563
569 577
569 912
565 773
593 1270
593 1302
591 1344
591 1406
591 1548
590 1626
589 1800
398 1808
398 1805
399 1806
399 1804
399 1804
398 1804
398 1822
400 1829
400 1832
400 1832
400 1834
400 1849
436 3138
436 3253
435 3306
436 3327
436 3332
437 3380
433 3391
430 3411
426 3452
424 3791
414 3791
309 3790
251 3788
170 3788
128 3792
117 3793
107 3792
107 3793
108 3793
108 3794
106 3795
93 3796
92 3795
80 3791
79 3791
79 3791
76 3790
76 3790
76 3790
76 3790
76 3790
76 3787
76 3787
75 3642
74 3642
74 3631
74 3595
73 3591
72 3595
72 3597
71 3594
71 3594
71 3594
71 3594
79 4315
79 4306
79 4306
79 4305
79 4303
79 4291
79 4286
79 4232
77 3828
77 3737
59 2892
59 2805
61 2777
61 2786
61 2774
53 2056
52 2040
51 2033
51 2033
51 2034
51 2038
50 2040
50 2040
50 2023
50 2016
50 2013
48 2007
48 2004
46 1981
10 642
9 551
8 498
7 460
6 454
6 464
6 459
6 452
4 425
3 85
3 85
3 84
2 84
2 87
2 86
2 86
0 84
0 84
0 84
0 89
0 89
0 88
0 88
0 88
0 88
0 88
0 88
0 88
0 88
0 88
0 88
0 88
0 88
0 87
0 87
0 87
0 87
0 87
0 83
0 84
0 84
0 84
0 84
0 83
0 82
0 81
0 78
0 77
0 77
0 76
0 76
0 76
0 76
0 76
0 75
0 74
0 73
0 62
0 68
0 68
0 71
0 72
0 72
0 67
0 71
0 70
0 70
0 74
0 74
0 73
0 74
0 74
0 81
0 90
0 92
0 103
0 103
0 105
0 69
0 74
0 134
0 146
0 186
0 222
0 245
0 250
0 254
0 256
0 258
0 260
0 260
0 260
0 255
0 255
0 255
0 256
0 256
0 263
0 265
0 269
0 287
0 360
0 374
0 399
0 402
0 403
0 403
0 403
0 403
0 447
0 446
0 446
0 445
0 445
0 445
0 445
0 445
0 445
0 445
0 445
0 444
0 444
0 444
0 444
0 443
0 443
0 442
0 443
0 416
0 416
0 414
0 414
0 409
0 409
0 409
0 431
0 436
0 436
0 435
0 435
0 435
0 437
0 437
0 437
0 448
0 439
0 432
0 430
2 468
2 466
2 459
2 463
2 458
3 398
3 374
5 346
5 309
5 291
5 289
5 289
5 289
5 290
5 290
5 291
5 291
5 292
7 297
7 298
12 341
12 345
12 342
12 341
12 337
13 318
13 243
13 229
13 210
14 212
14 213
14 216
16 237
16 238
16 241
16 242
16 244
16 245
16 260
16 260
16 262
16 262
17 338
17 348
17 356
18 370
18 372
18 384
18 388
18 388
18 387
18 387
18 386
18 332
18 342
19 336
19 327
19 331
19 331
19 328
19 323
19 318
19 314
19 314
19 305
19 302
19 302
19 302
19 302
19 302
19 302
19 302
19 302
17 280
17 279
16 279
16 276
16 272
11 260
11 246
9 244
9 244
9 244
9 244
9 244
9 243
9 235
9 235
9 234
9 233
9 233
9 232
9 231
5 186
5 186
5 184
5 184
4 183
4 183
4 182
4 183
4 205
4 229
5 247
5 250
3 229
3 225
3 236
3 232
3 234
3 233
3 233
3 234
3 231
3 226
2 146
2 135
2 131
1 121
0 117
0 115
0 115
0 115
0 115
0 115
0 114
0 108
0 106
0 106
0 107
0 106
0 106
0 106
0 106
0 106
0 107
0 125
0 161
1 164
1 165
1 165
1 165
1 165
1 165
1 166
1 168
1 170
1 170
1 170
1 170
1 169
1 169
1 134
1 133
1 134
1 134
1 134
1 134
1 133
1 133
1 133
1 134
1 134
1 135
1 137
1 139
1 139
2 139
2 139
4 142
4 142
4 145
5 145
6 144
6 113
6 78
6 73
6 69
6 63
6 61
6 50
6 51
5 45
5 48
5 47
5 56
5 60
17 103
18 111
18 112
20 116
20 115
20 115
20 115
20 115
20 115
20 115
20 115
20 115
20 117
20 117
21 123
21 121
21 121
21 121
21 125
21 125
21 125
21 125
21 108
21 108
20 105
20 105
20 104
20 104
21 105
33 106
48 153
49 151
49 151
49 151
49 151
49 152
61 158
61 158
72 181
72 181
72 181
73 183
73 184
73 184
96 202
96 204
99 207
119 251
119 254
119 257
119 253
120 257
120 266
124 293
127 314
126 327
126 328
126 329
125 334
124 334
124 333
124 333
124 334
124 344
126 363
133 382
135 498
141 833
142 873
142 896
143 984
143 979
145 978
132 924
135 922
137 922
137 947
137 1038
137 1102
137 1117
137 1453
137 1474
137 1502
137 1588
137 1606
137 1627
136 1686
135 1690
135 1692
134 1700
134 1700
132 1696
132 1696
132 1696
129 1713
129 1719
129 1722
129 1725
129 1728
130 1749
114 1748
108 1747
88 1746
50 1652
48 1653
48 1661
48 1665
48 1703
48 1744
48 1748
8 1705
8 1686
8 1686
8 1684
8 1683
8 1681
8 1683
8 1682
8 1681
8 1683
8 1648
8 1645
8 1643
8 1646
8 1642
8 1638
8 1646
8 1660
8 1680
8 1702
8 1731
8 1840
8 1853
8 1863
8 1900
8 1904
7 1899
6 1891
6 1888
4 1782
3 1583
2 1707
2 1745
2 1751
2 1804
2 1808
2 1806
2 1805
2 1803
3 1766
3 1675
3 1615
3 1593
3 1206
3 1165
3 1198
3 1225
3 1248
3 1248
3 1243
3 1242
3 1230
4 1236
4 1239
4 1241
3 1245
3 1248
3 1229
3 1230
3 1230
3 1228
3 1223
2 1207
2 1224
2 1225
2 1227
2 1229
2 1227
2 1205
2 1201
2 1172
2 1128
2 1127
2 1128
2 1127
2 1128
2 1130
2 1131
2 1132
2 1133
2 1133
2 1135
2 1131
2 1131
2 1134
3 1156
3 1152
3 1149
3 1154
3 1133
3 1111
3 1078
3 1063
3 1027
3 905
3 895
4 891
4 851
4 882
4 888
4 884
4 869
5 850
6 530
6 465
6 422
6 412
6 370
6 365
7 365
7 365
7 365
8 364
8 364
8 364
8 366
8 271
8 266
8 214
8 182
8 171
11 199
11 199
11 198
11 199
10 199
10 199
10 201
10 198
10 197
9 196
9 196
9 196
9 194
9 193
9 184
9 176
9 189
12 189
12 188
13 220
14 235
14 246
14 248
14 248
14 249
14 251
14 248
14 260
14 265
14 274
14 301
14 300
14 322
14 323
13 323
13 341
13 345
12 318
12 326
12 331
12 324
12 326
12 327
12 329
12 326
12 325
10 325
11 323
10 322
10 304
10 274
10 274
10 281
9 279
8 276
8 276
8 276
8 276
8 276
8 276
8 279
8 285
7 285
7 287
8 286
8 287
8 289
8 289
8 301
10 303
12 328
12 331
12 332
8 299
8 299
8 297
8 293
8 292
8 292
8 288
8 288
8 288
8 287
8 287
8 287
8 286
8 284
7 284
7 314
8 343
6 360
6 361
6 329
6 316
6 319
6 339
6 362
6 392
6 393
6 391
6 356
7 348
7 352
46 364
45 374
45 356
45 356
45 356
45 334
45 320
45 313
45 308
45 304
45 304
45 304
45 304
45 305
138 306
99 301
99 301
99 301
99 299
99 299
101 301
101 409
101 411
101 437
101 739
101 749
101 751
101 777
101 782
8 803
8 818
8 817
8 825
6 830
4 831
1 831
1 829
1 827
1 813
1 811
1 788
1 786
1 786
1 787
1 787
1 787
1 787
1 785
1 785
1 784
1 784
1 784
1 784
1 784
1 784
1 826
1 830
1 849
1 811
1 780
1 790
1 790
1 802
1 800
1 820
1 801
1 770
1 760
1 763
1 769
2 776
1 771
1 767
1 757
1 743
1 742
1 742
1 743
1 743
1 743
1 745
1 750
1 750
1 752
1 755
1 755
1 759
1 761
4 764
8 852
8 857
8 856
8 860
8 860
8 745
8 762
8 728
9 417
15 442
15 434
15 402
15 397
15 376
12 352
13 351
13 342
13 333
13 330
13 334
13 333
13 333
13 334
13 432
8 436
8 441
8 440
8 440
9 440
9 441
9 441
8 443
8 445
8 454
8 454
8 455
8 457
8 458
8 452
9 392
9 296
13 284
13 280
13 279
13 267
13 263
13 262
13 259
13 229
13 225
14 225
14 224
15 218
122 220
120 220
120 221
118 221
119 236
167 751
167 769
170 793
176 802
176 804
176 810
177 827
177 827
176 828
176 847
72 847
72 848
71 851
70 853
70 844
69 759
69 762
69 761
69 760
69 757
69 745
69 712
68 714
67 701
68 723
68 726
75 731
107 899
107 900
162 899
162 901
162 901
161 901
161 902
161 904
161 904
161 904
161 904
161 904
161 905
172 1063
172 1065
172 1066
170 1065
114 1064
114 1064
114 1064
114 1060
114 1048
114 1044
114 1044
114 1044
114 1044
114 1044
113 1036
113 1036
112 1036
111 1032
110 1032
110 1032
110 1032
110 1032
110 1032
110 1033
110 1033
110 1033
110 1032
110 1032
110 1052
110 1052
109 1060
107 1081
104 1396
61 902
60 928
59 944
56 951
57 1027
57 1038
57 1072
57 1074
57 1082
57 1067
57 1067
57 1068
57 1068
57 1065
57 1065
55 1069
56 1070
56 1070
56 1069
56 1069
56 1070
55 1070
55 1067
54 1067
48 1030
47 1026
45 1018
15 849
39 860
39 858
39 858
39 856
39 856
39 856
39 855
39 855
39 855
38 855
37 856
37 856
28 681
28 797
28 809
5 912
4 1016
4 1269
4 1340
4 1350
4 1352
4 1372
4 1443
4 1477
4 1689
4 1734
4 1750
4 1757
6 1770
6 1791
6 1829
6 1841
6 1841
6 1847
6 1849
6 1848
6 1848
6 1850
6 1854
6 1855
6 1854
10 1911
10 1899
10 1822
9 1420
8 1381
8 1330
6 1317
6 1316
6 1317
6 1317
6 1318
6 1318
6 1312
6 1313
6 1313
6 1310
6 1308
6 1308
6 1308
7 1304
6 1298
6 1297
6 1297
6 1297
6 1296
6 1294
6 1294
6 1294
6 1294
6 1294
6 1295
6 1295
6 1295
6 1295
5 1295
5 1294
5 1294
5 1294
5 1294
5 1294
5 1294
5 1294
5 1291
5 1290
5 1286
5 1151
5 1114
4 918
4 804
4 473
4 368
4 355
4 356
4 353
4 348
4 310
4 151
4 126
4 120
4 123
4 127
4 129
4 115
4 489
4 493
4 531
4 533
4 546
4 547
4 542
4 540
6 542
6 542
2 485
2 485
2 483
3 483
5 483
5 483
5 483
5 483
5 482
5 481
5 481
5 481
5 477
5 471
5 471
5 471
5 471
5 471
5 471
3 472
3 472
3 472
3 472
3 472
3 473
3 481
3 484
3 485
4 681
4 682
4 682
4 683
4 683
4 685
5 685
5 685
5 685
5 686
5 688
5 700
4 704
4 701
4 704
3 510
3 504
3 503
3 501
3 501
3 501
2 501
2 500
1 500
1 501
1 500
0 499
0 499
0 498
0 496
0 491
0 486
0 483
0 479
0 477
0 91
0 90
0 49
0 47
0 43
0 41
0 39
0 36
0 36
0 36
0 36
0 111
0 111
0 111
0 111
0 111
0 111
0 111
0 110
0 110
0 110
0 110
0 110
0 110
0 110
0 110
0 110
0 110
0 109
0 109
0 109
0 109
0 109
0 109
0 108
0 105
0 102
0 102
0 103
0 108
0 152
4 152
4 152
4 152
4 152
4 153
4 154
4 154
4 154
4 149
4 152
4 152
4 149
4 150
4 150
4 152
0 152
0 152
0 154
0 155
0 155
0 160
0 171
0 193
0 200
0 203
0 232
0 233
1 235
4 464
5 505
5 525
5 578
9 1219
10 1300
10 1533
11 1603
13 1908
18 2284
19 2682
22 2805
34 3680
34 3765
35 3877
36 3841
36 3960
36 3993
40 4163
40 4166
40 4166
40 4167
40 4167
40 4169
40 4181
39 4182
39 4182
42 4236
42 4238
42 4240
42 4244
42 4246
42 4250
42 4252
42 4384
42 4414
42 4477
42 4553
42 4574
42 4585
42 4628
42 4629
42 4617
42 4601
42 4419
42 4419
40 4468
40 4468
40 4330
40 4327
40 4327
40 4327
40 4323
40 4317
40 4319
40 4321
40 4595
40 4610
42 4893
42 4936
42 4948
42 4900
42 4897
42 4897
43 4896
42 4874
41 4783
41 4693
41 4584
41 4554
41 4614
44 4615
44 4605
41 4456
42 4623
51 4768
50 4821
46 4071
46 3983
39 3702
37 3627
36 3479
37 3282
46 3030
43 2830
35 1813
35 1753
35 1748
35 1740
35 1741
35 1741
35 1744
35 1745
35 1747
36 1746
41 2393
41 2403
42 2427
42 2439
43 2437
40 2383
40 2385
40 2396
40 2397
40 2395
40 2396
40 2391
40 2232
40 2187
40 2093
40 2077
41 2075
41 2075
41 2044
41 2046
41 2047
41 2049
41 2048
41 2124
41 2124
41 2126
41 2132
43 2143
43 2147
44 2164
46 2207
46 2215
46 2215
46 2213
46 1938
43 1891
39 1583
39 1563
38 1555
38 1555
38 1553
38 1553
38 1553
38 1553
38 1553
38 1553
38 1553
38 1558
38 1494
38 1492
38 1489
38 1477
36 1285
32 1133
32 996
32 1005
32 1005
33 1654
33 1659
33 1675
22 1667
14 1657
13 1646
13 1637
13 1637
13 1636
13 1633
13 1632
13 1633
14 1788
14 1840
12 1932
11 1941
7 1304
7 1336
7 1329
7 1345
8 1426
8 1432
8 1434
8 1423
8 1424
8 1425
8 1434
8 1433
8 1435
8 1434
8 1434
8 1442
8 1445
8 1447
8 1487
8 1485
8 1486
15 1704
17 1733
17 1676
25 1779
27 1830
27 1825
25 1837
25 1838
23 1824
23 1822
23 1904
23 1904
23 1904
23 1903
23 1903
23 1904
23 1904
24 1906
24 1910
24 1910
24 1910
24 1927
24 1927
24 1930
24 1932
24 1932
24 1928
24 1934
24 1944
24 2005
23 2010
23 2014
21 2151
21 2140
21 2133
21 2126
20 1472
20 1470
20 1449
25 1448
25 1438
25 1438
25 1440
25 1440
25 1440
25 1446
25 1446
25 1445
24 1275
24 1179
25 1157
25 1159
25 1152
25 1114
19 1083
19 1067
17 990
17 990
17 983
16 961
16 961
17 961
17 949
17 949
17 947
17 989
17 989
17 989
19 992
19 994
19 990
19 989
18 982
6 699
6 666
6 660
6 660
4 616
4 609
4 600
3 595
3 587
3 570
3 477
3 478
3 478
3 479
3 475
3 473
3 473
3 473
3 473
3 473
3 473
4 459
4 459
4 604
4 609
4 617
5 617
5 612
7 603
7 540
7 533
7 525
7 380
7 388
7 387
7 386
7 390
7 390
7 390
7 394
7 394
7 396
7 394
5 397
5 397
5 393
5 392
5 389
5 385
5 377
4 325
4 325
4 339
4 342
4 343
4 305
4 305
4 303
4 303
4 312
4 354
5 363
21 517
21 519
21 531
21 494
21 497
23 502
21 499
21 497
21 496
21 495
21 495
21 491
21 485
21 485
21 485
21 482
21 484
21 484
21 484
21 484
21 485
21 485
21 486
21 488
21 504
21 524
21 545
21 551
21 554
21 553
21 554
20 558
23 605
37 866
38 756
38 765
39 775
41 863
44 902
44 909
44 924
44 925
44 928
44 931
44 919
44 939
44 1009
44 1134
44 1220
44 1235
46 1247
46 1251
46 1250
46 1249
47 1250
47 1256
48 1256
50 1254
61 1271
61 1311
61 1315
61 1327
61 1317
61 1293
61 1284
61 1284
59 1285
59 1287
59 1288
58 1303
58 1300
58 1256
57 1246
41 1082
41 1087
41 1086
41 1085
41 1082
41 1076
41 1072
41 1073
41 1073
41 1084
41 1097
41 1107
41 1121
41 1122
43 1213
43 1353
43 1379
43 1399
43 1405
43 1400
44 1400
44 1394
45 1402
47 1404
47 1401
47 1379
47 1356
47 1354
47 1355
47 1357
47 1356
47 1348
41 1264
25 932
24 847
22 837
22 836
22 836
22 834
22 834
22 833
22 832
22 832
22 830
20 823
20 816
20 716
21 583
21 519
21 523
21 515
21 512
21 517
21 516
20 515
20 513
19 513
18 513
8 497
8 454
8 445
8 441
8 460
8 465
8 467
9 468
10 468
11 466
11 464
10 446
10 446
10 444
10 444
10 437
10 430
10 430
10 430
10 430
10 431
10 432
10 431
10 430
10 417
10 404
10 392
10 380
10 377
8 285
8 127
9 116
9 104
9 100
9 97
8 98
7 95
9 89
7 85
7 85
7 85
20 107
20 108
21 108
26 114
27 115
27 115
28 115
28 119
28 127
28 133
28 133
40 158
41 176
41 186
77 438
77 461
85 485
86 488
87 491
92 536
94 553
142 556
213 724
238 710
241 730
243 737
243 737
244 739
246 750
266 856
295 1198
300 1271
317 1425
338 1725
340 1772
340 1815
340 1807
342 1847
342 1857
342 1878
342 1880
341 1879
341 1883
342 1885
342 1887
342 1887
342 1888
342 1888
342 1886
342 1885
342 1885
342 1885
342 1885
342 1884
342 1884
342 1885
342 1884
342 1885
342 1885
342 1883
342 1890
342 1892
342 1895
341 1894
341 1896
341 1897
342 1902
342 1902
343 2142
341 2139
341 2153
341 2199
341 2230
323 2212
322 2238
322 2238
322 2237
321 2237
321 2236
321 2234
321 2214
321 2204
320 2190
320 2183
308 2144
306 2128
305 2113
270 1875
266 1854
259 1813
257 1819
253 1820
228 1747
225 1772
163 1759
83 1487
66 1492
64 1491
64 1490
64 1490
63 1486
59 1460
33 1336
19 942
19 894
19 756
2 603
2 591
2 590
2 618
2 630
2 633
2 706
2 710
3 712
3 710
3 709
3 708
3 709
3 709
3 709
3 709
3 709
3 709
3 710
3 711
3 711
4 727
4 727
4 755
3 754
3 754
3 754
3 745
3 747
2 747
2 750
2 751
1 746
1 745
1 743
1 506
1 506
1 495
2 444
2 418
2 415
2 413
2 413
2 413
2 414
2 414
2 414
2 414
2 414
2 414
2 414
2 413
2 411
2 409
2 407
2 399
2 394
2 389
2 389
2 389
2 362
2 361
4 353
4 350
4 350
4 348
4 346
4 346
3 346
3 347
3 348
3 345
3 340
3 219
3 207
3 194
3 167
3 154
3 150
3 69
3 68
3 66
3 66
3 66
3 66
1 66
1 66
1 66
1 65
1 64
1 64
1 63
1 63
1 62
1 48
1 48
0 15
0 14
0 13
0 8
0 8
0 8
0 9
0 9
0 10
0 9
0 9
0 9
0 10
0 8
0 8
0 8
34 11
34 10
34 10
34 10
34 10
34 10
34 10
34 10
34 9
34 9
34 9
34 9
34 9
34 9
34 9
1 6
0 6
0 6
0 6
0 6
0 6
0 6
0 6
0 6
0 6
0 6
0 6
0 6
0 6
0 6
0 5
0 4
0 4
0 4
0 4
0 4
0 4
0 4
0 4
0 4
0 4
0 4
0 4
0 4
0 5
0 5
0 5
0 5
0 5
0 5
0 5
0 5
0 4
0 2
9 10
9 10
9 10
9 10
10 10
10 10
10 10
10 10
10 10
10 10
10 10
10 10
10 10
10 10
10 10
1 2
2 2
2 2
2 2
1 2
1 2
1 2
1 2
1 2
2 2
2 2
2 2
2 2
2 2
2 2
2 2
1 2
1 2
1 2
1 2
1 2
1 2
1 2
1 2
1 2
0 2
0 2
0 2
0 2
0 2
0 2
0 2
0 2
0 2
0 2
0 2
0 2
0 2
0 2
0 2
0 2
0 2
0 2
0 2
0 2
0 2
0 2
0 2
0 1
0 1
0 1
0 4
0 4
0 9
0 9
0 9
0 8
0 8
0 8
0 8
0 8
0 8
0 8
0 8
0 8
0 8
0 5
0 5
0 2
0 1
0 1
0 1
0 1
0 1
0 1
0 1
0 1
0 1
0 1
0 2
1 2
1 2
1 2
1 2
1 2
1 2
1 2
2 3
2 3
3 3
3 3
3 4
3 4
3 4
3 4
3 4
2 4
2 3
2 3
2 3
2 3
2 4
2 3
2 6
1 6
1 6
1 6
0 5
0 5
1 5
2 5
2 5
2 5
2 5
2 5
2 5
2 4
2 4
2 4
2 4
2 4
2 4
2 4
2 4
1 4
1 4
1 3
1 3
1 3
1 3
1 3
1 3
1 3
1 3
2 3
2 3
2 3
2 3
2 3
8 270
8 270
9 270
9 270
10 270
10 270
10 270
10 270
10 270
10 270
10 270
10 270
10 270
10 270
10 270
4 4
4 4
4 4
4 4
4 3
4 3
4 3
4 3
4 3
5 3
5 3
5 3
5 3
5 3
7 3
7 3
7 3
7 3
7 3
7 3
7 3
7 3
7 0
7 0
7 0
7 0
7 0
7 0
7 0
6 0
6 0
6 0
6 0
6 0
6 0
6 0
6 0
6 0
29 0
29 0
29 0
29 0
29 0
29 0
29 0
29 0
29 0
29 0
29 0
29 1
29 1
29 1
29 1
28 1
28 1
28 1
28 1
28 1
30 1
31 1
30 1
30 7
30 7
30 7
30 6
30 6
30 8
30 8
30 8
30 8
30 8
30 8
30 8
35 8
36 8
36 8
36 8
36 2
36 2
36 3
36 3
36 3
35 1
35 1
35 1
35 1
35 1
33 1
33 1
33 1
34 1
34 1
34 1
35 1
35 0
35 0
35 0
42 0
43 0
43 0
44 0
46 1
70 1
72 1
73 1
74 5
75 5
75 5
75 12
75 9465
74 9465
52 9465
52 9465
52 9465
53 9465
53 9465
54 9465
54 9465
54 9465
54 9467
54 9467
54 9467
55 9467
55 9467
55 9360
55 5
55 2
55 2
55 2
55 2
55 2
52 2
57 2
57 2
57 0
57 0
57 0
62 0
62 0
62 0
62 0
62 0
62 0
61 0
60 0
61 0
56 0
58 0
58 0
58 0
58 0
57 0
87 1
82 1
82 2
82 2
82 2
82 2
82 2
83 2
83 2
83 2
83 2
81 2
82 2
82 2
82 2
82 2
81 2
77 2
74 2
73 2
71 2
71 2
69 2
41 2
41 2
40 2
39 2
39 2
39 2
37 2
37 2
37 2
37 2
37 2
37 2
37 2
37 2
37 2
37 2
37 2
37 2
37 2
37 2
36 3
36 3
36 3
36 3
36 3
36 3
36 3
36 3
37 3
37 3
35 4
35 4
35 4
36 4
36 4
36 4
36 3
36 3
36 3
36 3
36 3
36 3
35 3
34 3
34 3
45 3
45 3
66 3
68 3
68 3
39 1
39 1
39 1
39 1
39 1
39 1
39 1
54 1
55 1
91 1
91 1
91 1
90 1
90 1
90 1
90 1
90 1
90 1
90 1
90 1
90 1
90 1
90 1
90 1
89 1
90 1
90 1
90 1
90 1
90 1
90 2
90 2
90 2
91 2
91 2
91 2
91 2
91 2
92 2
92 2
92 2
92 2
92 2
94 2
94 2
95 2
109 4
109 5
116 6
116 6
116 6
116 6
115 6
114 5
114 5
114 6
113 7
113 7
113 8
112 8
112 8
112 8
112 9
112 9
112 9
109 9
102 9
99 9
88 9
88 9
61 9
61 9
50 9
49 9
50 8
50 7
50 7
50 7
48 7
48 7
48 7
48 7
27 7
27 7
27 7
28 7
28 7
29 7
29 7
29 7
29 7
30 7
30 8
30 8
30 8
30 8
30 8
28 8
25 8
25 8
23 8
23 7
23 7
23 7
24 7
24 7
23 7
23 7
23 7
23 7
29 7
29 7
29 7
29 7
29 7
29 7
33 7
33 7
33 7
20 5
20 4
14 3
14 3
16 3
20 4
14 4
14 4
14 4
14 3
14 3
14 3
10 3
10 3
10 3
10 2
10 3
10 6
10 6
10 6
8 6
4 5
4 5
4 5
4 5
4 5
4 5
5 5
4 5
4 5
4 5
4 5
4 2
4 2
4 2
4 2
4 2
3 2
3 2
3 2
4 2
3 2
15 3
15 3
20 3
36 6
57 6
61 7
61 7
61 8
61 8
61 8
61 8
63 10
63 10
63 11
64 11
64 11
64 10
64 10
64 10
63 10
64 10
64 10
64 9
64 9
64 9
64 9
64 9
64 9
65 9
65 9
65 9
65 9
65 9
65 9
65 9
65 12
65 12
65 12
65 12
65 12
65 12
65 12
65 12
65 12
64 11
64 11
64 11
64 12
64 12
64 13
64 12
64 15
64 15
64 19
64 19
64 19
64 19
64 19
64 19
64 19
65 19
65 19
65 19
65 19
65 19
65 19
65 19
65 19
65 18
65 15
65 15
63 15
59 15
44 15
42 15
24 15
11 12
3 13
3 12
4 12
4 13
4 13
4 13
4 13
2 11
2 12
1 68
1 68
1 68
2 68
2 68
2 68
2 70
2 72
1 72
1 73
1 73
1 74
1 74
1 74
1 74
1 74
1 19
1 19
0 19
0 19
0 19
0 19
0 19
0 28
0 28
0 28
0 36
0 37
0 37
0 37
0 45
0 49
0 62
0 68
0 72
0 81
0 80
0 83
0 79
0 81
0 83
0 83
0 85
0 86
0 86
0 87
0 89
0 96
0 99
0 99
0 97
0 97
0 97
0 97
0 97
0 97
0 97
0 98
0 98
0 98
0 98
0 98
0 98
0 94
0 88
0 78
0 78
0 75
0 74
0 75
0 75
0 75
0 34
0 9
0 9
0 8
0 5
0 2
0 2
0 2
0 2
0 2
0 2
0 2
0 2
0 2
0 2
0 2
0 2
0 2
0 2
0 2
0 2
0 2
0 2
0 2
0 3
0 3
0 3
0 3
0 3
0 4
0 4
0 4
0 4
0 4
0 4
0 4
0 4
0 6
0 6
0 6
0 5
0 5
0 5
0 3
0 3
1 2
1 2
1 2
1 2
1 2
1 2
4 2
4 0
4 0
4 0
4 85
4 85
4 85
4 85
4 85
4 85
4 85
3 85
3 85
3 85
3 85
0 85
0 85
0 85
0 85
0 1
0 0
0 0
0 0
0 0
0 0
0 0
0 0
0 0
0 0
0 0
0 0
0 0
0 0
0 0
0 0
0 0
0 0
0 0
0 0
0 0
0 0
0 0
2 0
2 0
2 0
2 0
2 0
2 0
2 0
2 0
2 0
2 0
2 0
2 0
2 0
2 0
2 0
0 0
0 0
0 0
0 0
0 0
0 0
0 0
0 1
0 1
0 1
0 1
0 1
0 1
0 1
0 1
0 1
0 1
0 1
0 1
0 1
0 1
0 1
0 0
0 0
0 0
0 0
0 0
0 1
0 1
1 2
1 2
1 2
1 2
2 2
2 2
2 2
2 2
2 2
2 2
2 3
2 3
2 3
2 3
2 2
1 2
1 3
1 3
1 3
0 3
0 3
0 2
0 2
0 2
1 2
1 1
1 1
1 1
1 1
1 1
1 1
1 1
1 0
1 0
1 0
1 0
1 0
1 0
1 0
0 0
0 0
0 0
0 1
0 1
0 1
0 1
0 1
0 1
2 2
2 2
2 2
2 2
2 2
2 2
2 3
2 3
2 3
2 3
2 3
2 3
2 3
2 3
2 3
2 2
2 2
0 2
0 2
0 2
0 2
0 1
0 1
0 1
1 1
1 1
44 1
44 1
368 4
368 4
369 4
369 4
369 4
369 4
369 4
369 4
369 4
369 4
369 4
369 4
369 4
368 4
368 4
9 2
1 3
0 3
0 2
0 2
0 2
0 2
0 2
0 2
0 2
0 2
0 2
0 2
0 2
0 2
0 2
0 2
0 2
0 2
0 2
0 2
0 2
0 2
0 2
0 2
0 2
0 2
0 2
0 2
0 2
0 2
0 2
0 2
0 2
0 2
0 2
0 2
0 2
0 2
0 2
0 2
0 2
0 2
0 2
0 2
0 2
0 2
0 2
0 2
0 2
0 2
0 2
0 2
0 2
0 1
0 1
0 1
0 1
0 1
0 1
0 1
1 1
1 1
1 1
1 1
3 4
5 10
5 10
5 10
5 10
5 10
6 10
6 10
7 11
7 10
7 10
6 10
6 11
6 12
6 12
6 32
6 35
8 44
8 44
8 59
8 63
8 68
8 74
7 80
7 92
7 92
7 94
7 96
7 96
7 96
7 96
7 96
7 96
7 96
7 96
7 96
7 99
7 99
26 102
26 102
26 103
26 103
26 102
27 101
27 101
27 101
31 101
31 101
33 101
37 101
37 101
39 101
39 101
40 101
40 101
40 101
39 101
39 103
39 103
39 103
45 103
45 103
45 104
45 104
50 106
51 106
52 107
52 107
52 107
52 107
52 107
52 107
52 107
52 104
55 100
55 100
55 100
55 100
54 100
57 100
57 100
57 100
57 100
57 100
57 100
57 100
58 113
58 111
58 90
58 90
56 75
56 62
56 44
58 38
58 35
58 30
58 27
59 25
59 25
59 25
59 25
59 25
59 25
59 25
61 25
61 25
61 25
62 25
64 25
64 25
64 25
45 26
45 26
45 25
45 25
45 25
44 25
45 25
47 25
51 44
51 45
49 45
45 46
44 46
43 46
43 46
42 46
41 46
41 46
40 46
40 44
39 44
39 44
31 44
31 44
29 43
29 43
25 41
23 41
23 40
23 40
23 40
23 40
23 40
23 40
23 40
24 40
21 38
20 38
21 38
22 38
22 38
22 39
22 39
22 39
22 42
22 44
22 43
22 41
21 30
21 30
21 29
21 29
21 29
21 29
22 30
20 30
20 30
20 30
20 30
19 30
19 32
19 32
19 32
19 32
19 32
19 32
18 32
24 32
24 32
23 32
21 32
21 32
21 32
21 31
21 31
21 31
21 31
22 31
21 30
21 29
19 28
11 9
5 10
4 10
4 10
4 10
3 10
3 13
3 13
3 14
3 14
3 15
3 16
3 17
3 18
3 18
3 18
3 18
3 18
3 18
3 18
3 18
3 18
3 18
3 18
3 18
3 18
4 18
3 18
4 18
4 19
4 19
4 20
4 20
4 20
4 20
4 18
4 15
4 12
4 12
6 13
6 13
5 13
5 14
5 14
5 15
4 15
4 14
4 14
4 14
4 14
4 14
4 14
4 14
4 14
4 14
4 14
4 17
4 17
82 21
82 21
82 21
82 21
82 21
86 24
86 24
86 25
86 25
86 25
86 25
85 25
85 25
85 25
85 25
85 25
85 25
85 25
84 25
84 25
84 24
3 14
3 14
3 13
3 12
3 9
3 9
3 9
3 9
3 9
3 9
6 9
6 9
6 9
6 9
6 9
6 9
7 9
9 9
10 9
12 10
16 10
19 10
20 9
21 9
21 8
21 8
21 8
21 7
21 7
21 7
21 7
21 7
21 7
19 6
19 5
19 5
19 3
19 3
19 3
19 3
19 3
19 3
19 3
19 3
19 3
21 3
21 3
21 3
35 3
36 3
37 0
37 0
37 0
37 0
37 0
37 0
37 0
37 0
37 2
37 6
37 6
37 6
37 6
37 7
38 7
38 7
38 7
38 7
38 7
38 7
38 7
38 7
38 7
38 7
38 4
38 4
38 4
38 4
38 4
38 5
38 5
38 5
38 5
35 5
35 5
34 5
34 5
31 5
33 5
34 5
34 5
35 5
34 5
30 5
29 5
24 5
23 5
24 5
25 5
37 5
37 5
39 5
39 6
39 8
39 8
39 37
39 41
39 44
39 46
40 46
42 46
42 46
42 46
42 46
42 46
42 46
42 46
42 46
42 45
42 45
42 45
29 14
29 12
28 8
28 8
27 8
27 8
27 8
29 9
29 10
29 10
31 14
31 14
31 15
30 17
30 17
30 17
30 24
30 24
30 28
30 29
30 29
31 29
32 29
32 29
32 29
32 29
32 28
35 30
35 30
36 30
36 30
40 31
40 31
40 31
40 31
40 31
40 31
40 31
40 31
40 31
52 31
52 31
52 31
67 31
67 31
65 31
65 32
65 32
65 32
64 32
62 32
51 32
51 32
49 32
48 32
48 32
47 32
47 30
47 29
47 29
46 29
46 29
49 29
48 29
51 29
51 29
50 29
50 29
50 29
50 29
50 29
50 29
50 29
49 29
50 29
50 29
50 29
49 29
46 29
43 29
43 28
43 27
43 27
43 21
43 20
43 18
43 17
43 16
43 16
40 9
40 9
40 3
39 1
37 0
37 0
27 0
27 0
15 0
15 0
15 0
15 0
14 0
7 0
7 0
0 0
0 0
0 0
0 0
0 0
0 0
0 0
0 0
0 0
0 0
0 0
0 0
0 0
0 0
0 0
0 0
0 0
0 0
0 0
0 0
0 0
0 0
0 1
0 1
0 2
0 2
0 2
0 2
0 2
2 2
3 2
4 2
4 2
5 7
5 7
5 7
5 7
5 7
6 6
6 5
6 5
6 5
6 5
6 5
6 5
4 5
3 5
2 5
2 5
2 5
2 5
2 5
2 5
2 5
2 5
1 0
1 0
0 0
0 0
0 0
0 0
0 0
0 0
0 0
0 0
0 0
0 1
0 1
1 1
1 1
1 1
1 1
1 1
1 1
1 1
1 1
1 1
1 1
1 1
1 1
1 1
1 0
1 0
1 0
1 0
1 0
1 0
1 0
1 0
1 0
1 0
1 0
1 6
1 6
1 6
1 6
1 6
1 6
1 6
1 6
1 6
1 6
1 6
1 6
1 6
1 6
1 6
1 0
1 0
1 0
1 0
1 0
1 2
1 2
1 2
1 2
1 2
1 2
1 2
1 2
1 2
1 2
1 2
1 2
2 2
2 2
2 2
2 1
2 1
2 1
2 0
2 0
2 0
2 0
2 0
2 0
2 0
2 0
2 0
3 0
2 0
1 0
1 0
1 0
1 0
1 0
1 0
1 0
1 0
1 0
1 0
1 0
1 0
1 0
2 0
2 0
1 0
1 0
1 0
3 1
5 1
5 1
144 2
144 2
144 2
144 2
144 2
144 2
144 2
143 2
143 2
143 2
143 2
143 2
143 2
140 2
139 1
0 0
0 2
0 2
0 2
0 2
0 2
0 2
0 2
0 2
0 2
0 2
0 2
0 2
0 2
0 2
0 2
3 99
3 110
3 110
3 110
3 110
3 110
3 110
3 110
3 110
4 110
4 110
6 110
387 130
389 130
389 130
389 130
386 20
386 20
386 20
386 20
386 20
386 20
386 20
386 20
386 20
386 20
384 20
384 20
1 0
1 0
1 0
0 0
0 0
1 0
1 0
1 0
1 0
2 0
4 1
4 2
5 2
6 3
6 4
6 7
7 7
17 16
19 25
22 55
22 55
22 55
22 55
22 55
21 55
21 55
20 54
20 54
19 54
17 56
16 54
16 53
16 53
16 51
15 51
11 46
0 8
0 6
0 6
40 28
40 25
40 25
40 24
40 24
40 24
40 24
40 24
41 24
41 24
41 24
42 22
46 22
46 22
46 22
6 0
6 0
6 0
6 0
6 0
6 0
8 0
8 0
7 0
7 0
7 0
7 0
8 0
4 0
4 0
3 0
3 0
3 0
3 0
3 0
3 0
3 0
3 0
3 1
3 1
3 1
4 1
4 1
4 1
4 1
4 1
4 1
4 1
4 1
4 1
4 1
4 1
4 1
4 0
4 0
4 0
4 1
3 1
3 1
3 1
3 1
3 1
3 1
3 1
6 1
6 1
6 1
7 1
8 1
8 1
8 1
510 0
511 0
511 0
511 0
511 0
511 0
511 0
511 0
509 0
509 0
509 0
509 0
509 0
509 0
509 0
509 0
4 0
4 0
4 0
4 0
4 0
4 0
3 0
2 0
1 0
1 0
1 0
1 0
1 0
0 0
0 0
0 0
0 0
0 0
0 0
0 0
0 0
0 0
0 0
0 0
0 0
0 0
0 0
0 0
0 0
0 0
0 0
1 0
1 0
1 0
1 0
1 0
1 0
1 0
1 0
1 0
1 0
1 0
1 0
1 0
1 0
1 0
1 0
1 0
1 0
1 2
1 2
1 2
1 2
1 2
1 2
1 2
1 2
1 2
1 2
1 2
1 2
1 2
1 2
1 2
1 2
2 2
2 2
2 2
2 2
2 3
2 3
2 3
2 3
2 3
2 3
3 5
3 5
3 5
3 8
3 8
2 8
2 8
2 8
2 8
2 7
3 7
3 8
3 8
3 8
3 8
3 8
69 8
69 8
69 8
69 8
69 8
69 5
69 5
69 5
69 5
69 5
69 5
69 4
69 4
68 4
68 4
2 4
2 4
2 4
2 4
2 4
2 4
2 4
2 4
2 4
2 4
2 4
2 4
2 4
2 4
2 4
2 4
2 2
2 2
2 2
2 2
2 19
2 20
2 20
2 21
2 21
2 21
2 21
2 22
4 22
4 22
4 22
4 22
4 22
4 22
4 22
4 22
4 4
4 4
4 3
5 3
5 3
5 3
4 0
4 0
2 0
2 0
2 0
2 0
2 0
2 0
2 0
2 0
1 0
1 0
0 0
1 0
1 0
1 0
1 0
1 0
1 0
1 0
1 0
1 0
1 0
1 0
1 0
1 0
1 0
0 0
0 0
0 0
0 0
0 0
0 0
0 0
0 0
0 0
0 0
0 0
0 0
0 2
0 2
0 2
0 2
0 2
0 2
0 2
0 2
0 2
0 2
0 2
0 2
0 3
0 3
0 3
0 1
0 1
0 1
0 1
0 1
7 1
7 1
56 1
56 1
56 1
56 1
57 1
57 0
58 0
58 0
58 0
58 0
58 0
59 0
59 0
59 0
61 0
63 0
63 0
63 0
64 0
68 0
70 0
77 0
83 0
93 0
100 0
100 0
100 0
100 0
100 0
107 0
107 0
108 0
113 0
113 0
119 0
119 0
119 0
119 0
119 0
119 0
119 0
119 0
119 0
119 0
119 0
119 0
119 0
118 0
116 0
114 0
110 0
110 0
110 0
110 0
110 0
110 0
110 0
110 0
112 0
112 0
112 0
112 0
112 0
112 0
113 0
113 0
113 0
113 0
113 0
112 0
109 0
103 1
103 1
55 1
55 1
55 1
54 1
54 1
54 1
53 1
53 1
53 1
53 1
53 1
52 1
52 1
52 1
50 0
48 0
48 0
47 0
44 0
36 0
34 0
28 0
21 1
18 2
13 3
13 3
13 3
15 3
15 3
9 3
9 3
8 3
8 3
8 3
8 3
8 3
8 3
8 3
8 3
8 3
8 3
8 3
8 3
8 3
7 3
7 3
7 3
7 3
7 3
7 3
8 3
8 3
8 3
9 3
9 3
9 3
9 3
9 3
6 4
6 4
6 4
6 4
6 4
6 4
9 4
114 20
115 20
115 20
117 20
118 20
118 20
118 20
118 21
118 21
118 21
120 20
120 20
120 21
120 21
122 21
18 5
21 6
28 8
30 8
29 9
29 9
29 9
29 9
28 9
28 8
26 8
26 8
26 8
26 7
26 7
26 6
23 4
22 4
22 4
22 4
19 4
19 3
19 3
19 3
19 3
19 3
25 3
25 3
25 3
25 3
25 3
25 3
25 3
25 3
25 3
25 3
26 4
26 4
26 4
26 4
27 5
28 5
28 5
27 5
27 5
27 5
26 5
26 5
27 5
27 5
27 5
27 5
28 5
29 4
29 4
29 4
29 3
26 3
26 3
25 3
26 3
25 3
28 3
28 3
28 3
28 3
28 3
29 3
29 3
29 3
27 3
26 2
24 2
23 2
20 2
17 0
17 0
17 0
14 0
14 0
14 0
14 0
14 0
14 0
15 0
15 0
15 0
14 0
14 0
14 0
14 0
14 0
14 0
14 0
14 0
14 0
13 0
13 0
13 0
6 0
6 0
4 0
4 0
4 0
4 0
4 0
4 0
