# Supplementary material for: From Insect to Man: Photorhabdus Sheds Light on the Emergence of Human Pathogenicity
Source: PLoS One. 2015 Dec 17;10(12):e0144937. doi: 10.1371/journal.pone.0144937 (PMC4683029; doi:10.1371/journal.pone.0144937)
Supplement: S3 Data — (ZIP) [file pone.0144937.s003.zip › pPAU1_37C_Expo_rep3.plot]

279 5
282 5
283 5
284 5
286 5
288 5
288 5
288 5
302 5
303 5
303 5
303 5
304 5
321 5
322 5
327 100
329 100
330 100
331 100
331 100
331 100
337 100
339 100
334 100
350 100
413 100
494 102
555 102
560 102
571 103
573 104
570 9
571 9
574 9
576 9
578 9
583 9
579 9
579 9
580 9
579 9
579 9
579 9
579 9
579 9
589 7
593 7
594 7
595 7
595 7
593 7
587 7
586 7
592 7
595 7
594 7
593 7
594 7
595 7
601 7
602 7
601 7
623 7
638 6
648 6
619 6
607 5
610 5
608 5
606 5
601 4
598 4
574 3
566 2
561 2
551 2
555 2
557 2
562 2
548 2
545 2
552 2
542 2
533 3
536 4
534 4
534 4
535 4
517 5
523 5
529 5
535 5
544 5
572 8
608 9
620 10
630 10
632 13
632 13
632 12
635 12
642 12
655 12
681 12
690 12
688 12
695 12
699 12
713 12
719 12
733 12
734 13
732 13
712 13
709 13
703 13
702 13
702 13
701 13
707 14
714 14
697 14
883 15
872 14
842 14
806 14
758 13
710 13
705 13
702 13
699 13
703 13
707 13
716 13
723 13
723 13
721 13
724 13
726 13
750 13
755 13
759 14
764 14
779 15
779 15
795 16
801 16
814 17
818 17
815 18
817 18
817 18
818 18
814 18
812 19
813 19
811 19
819 19
807 19
887 19
885 19
864 19
835 19
815 20
810 20
811 20
806 20
800 20
799 20
800 20
810 20
812 20
815 20
820 20
828 20
828 20
823 19
820 19
817 19
810 19
811 19
807 19
806 19
803 18
800 18
801 18
798 18
795 18
790 18
786 18
788 18
780 18
757 18
743 14
721 11
705 11
701 10
699 10
698 10
693 10
683 10
664 10
678 10
679 11
698 12
708 12
703 13
701 13
692 14
689 14
698 15
702 15
731 15
733 14
735 14
736 14
739 15
734 15
728 15
732 15
773 68
783 68
617 66
614 66
615 66
613 66
609 66
607 66
606 66
603 66
602 66
599 65
587 65
592 66
844 71
921 20
950 20
944 20
998 20
1023 20
1038 19
1040 20
1039 20
1025 18
1026 18
1011 17
1009 17
995 16
996 16
996 16
993 17
992 17
991 17
989 17
988 16
986 16
983 16
976 16
978 16
899 16
904 16
905 16
908 16
910 15
914 16
918 15
919 15
930 15
932 15
947 15
934 15
931 15
923 15
918 15
914 15
913 15
912 15
911 15
914 15
915 15
914 15
923 15
923 15
924 15
923 15
921 15
921 15
925 15
923 15
923 15
916 15
917 15
918 15
927 15
926 15
928 15
928 15
932 14
931 14
936 14
934 14
924 15
905 15
891 125
867 124
866 124
869 124
867 124
865 124
862 124
855 124
856 124
830 124
828 124
829 124
831 124
829 124
829 124
821 131
813 132
777 19
767 19
769 20
769 20
772 20
777 20
786 20
804 20
810 20
807 20
798 20
778 19
766 19
714 11
417 5
383 5
346 5
338 5
340 5
334 5
335 5
338 4
337 4
335 4
328 5
346 5
350 5
352 5
358 6
359 6
359 6
360 6
361 6
361 6
361 6
361 6
361 6
358 6
354 6
355 6
348 6
354 8
351 8
351 8
343 10
341 10
342 11
329 13
324 13
317 13
315 13
315 13
315 13
316 14
338 14
338 14
338 14
388 15
390 15
390 15
391 13
560 16
574 22
585 23
587 23
593 23
609 23
646 24
651 24
653 24
662 24
668 24
671 24
668 24
669 24
665 24
657 24
656 17
655 16
644 16
642 16
637 16
638 16
639 16
632 16
629 16
624 16
623 16
621 16
621 16
621 17
620 18
620 18
618 18
616 19
613 18
610 18
612 18
612 18
609 17
603 16
601 16
598 16
591 16
588 16
582 16
568 16
549 16
535 16
536 16
534 17
532 17
522 17
517 17
516 17
520 18
550 18
547 18
531 18
538 18
538 18
550 18
550 18
546 18
1803 52
1803 52
1801 52
1802 52
1795 51
1796 51
1795 51
1795 51
1800 51
1804 51
1805 51
1805 51
1808 51
1835 51
1860 51
601 17
600 16
599 15
598 14
600 14
600 14
607 19
607 18
608 18
608 18
609 18
610 18
609 18
608 18
609 17
589 19
586 19
622 26
572 26
558 26
498 25
498 25
371 22
360 22
350 22
343 22
338 22
329 22
288 21
284 21
282 21
281 21
279 21
235 14
232 14
230 14
231 14
234 14
235 15
234 15
234 16
233 16
232 16
223 16
220 16
223 16
223 17
268 31
277 33
277 34
280 35
280 34
279 33
279 34
278 33
282 33
282 34
282 34
281 34
281 34
317 37
322 38
323 38
323 38
352 38
354 41
354 41
354 41
354 41
364 42
369 42
446 44
447 44
440 44
445 44
453 45
471 44
454 44
454 44
455 44
450 44
448 44
436 44
435 44
426 44
422 44
423 44
424 44
424 44
425 44
441 44
440 44
436 44
440 44
441 44
437 44
433 43
427 42
392 42
437 48
439 48
439 50
444 50
444 50
466 50
472 51
475 44
488 44
487 43
486 42
487 41
494 43
493 43
509 47
510 47
510 47
510 47
509 47
511 47
514 47
513 47
512 47
512 47
513 47
513 47
520 48
518 48
518 48
517 48
517 48
518 48
520 48
522 48
524 50
527 53
528 54
526 54
531 54
532 53
532 54
534 55
535 55
534 55
535 55
543 55
540 55
602 54
562 40
562 40
562 42
566 42
567 42
572 42
571 41
569 43
568 43
567 42
566 42
566 42
564 40
528 37
532 35
538 35
537 35
508 35
507 35
507 34
512 34
518 34
574 33
639 35
579 34
591 34
754 39
856 44
861 44
859 43
865 43
869 43
870 43
870 43
874 43
875 43
874 43
874 43
878 43
879 43
880 43
879 43
880 43
864 43
863 43
881 43
876 43
876 43
870 42
869 42
873 42
851 39
836 36
842 36
849 36
871 37
871 37
847 37
856 36
856 36
846 36
845 36
845 36
852 36
845 35
844 35
825 31
828 32
829 33
833 34
840 34
842 34
845 37
849 37
849 37
897 37
905 37
906 37
905 39
905 39
906 39
906 39
906 39
906 39
903 38
903 38
899 33
900 34
901 34
903 34
894 33
893 33
896 33
891 36
980 41
988 45
997 47
993 49
1006 50
957 50
958 50
957 48
957 47
951 47
950 47
948 46
947 46
946 45
951 45
948 45
945 45
945 45
945 45
942 45
934 45
928 46
925 46
924 46
923 46
922 46
894 46
847 45
808 46
738 43
578 41
550 40
419 33
411 33
409 33
409 33
409 35
407 36
468 46
468 47
462 48
464 51
466 51
471 51
471 51
471 51
474 51
469 51
469 51
466 51
465 52
444 52
441 52
441 52
442 52
453 56
450 57
447 57
436 57
430 57
423 57
417 56
424 55
427 55
419 55
421 55
426 54
437 53
455 53
469 53
474 53
474 52
476 52
475 51
476 51
471 50
464 48
461 48
467 46
476 46
474 46
437 47
447 47
450 47
447 46
468 46
481 46
503 46
509 46
516 44
519 44
529 45
536 221
536 220
577 220
609 220
610 220
612 220
604 219
613 217
526 209
531 211
531 211
553 212
532 211
530 211
559 212
601 39
641 41
651 42
661 43
666 44
669 44
672 44
673 45
690 45
691 45
700 45
700 45
703 45
703 45
705 45
714 45
727 45
726 45
728 45
728 45
729 45
729 43
728 43
727 40
726 40
725 40
722 40
721 40
720 38
719 38
714 36
663 30
662 31
662 32
664 33
668 33
694 33
712 33
726 33
736 36
762 36
789 36
849 35
944 38
977 39
1020 40
1069 42
1076 42
1068 38
1063 37
1066 37
1065 37
1071 37
1066 37
1065 37
1060 37
1048 37
1046 39
1039 39
1029 39
1020 39
1003 39
999 39
1061 41
1068 41
1071 41
1069 41
1072 41
1068 41
1063 41
1050 41
1040 41
1035 41
1031 41
1029 40
1026 40
1026 40
1028 41
1087 47
1082 48
1070 48
1067 49
1059 49
1055 49
1041 48
1035 48
1017 48
988 48
958 47
958 47
953 47
951 47
942 48
939 47
929 44
926 44
911 43
912 43
902 43
863 39
821 36
791 36
789 36
780 35
779 35
781 34
773 34
764 34
751 33
749 33
743 33
743 34
740 34
738 35
736 35
732 35
718 35
717 35
713 35
726 46
726 46
726 52
726 52
726 52
725 52
725 52
725 51
725 51
725 52
728 52
729 52
728 47
728 47
718 47
706 47
706 35
661 28
653 30
646 30
636 29
610 30
581 30
540 30
439 28
421 27
391 23
338 21
339 21
336 21
334 21
322 21
321 21
321 21
321 21
321 21
321 22
320 22
312 22
308 22
292 22
287 22
287 22
277 22
239 20
238 20
235 20
231 20
230 19
230 20
230 20
231 20
231 22
231 22
231 25
227 25
223 25
194 24
185 23
118 16
115 15
115 15
114 14
115 14
115 14
115 14
115 14
115 14
114 14
117 13
117 13
116 13
115 13
115 13
112 13
112 13
111 13
111 13
106 13
104 13
104 13
104 13
96 12
94 12
91 12
92 12
91 12
91 12
91 12
90 12
90 12
90 12
90 12
90 12
90 11
90 11
90 11
90 11
90 11
90 11
90 11
88 11
88 11
88 10
88 10
88 10
89 10
90 10
91 10
93 10
90 10
100 11
98 11
95 11
94 11
81 11
90 15
91 15
87 13
84 13
82 12
82 12
80 12
62 11
62 11
63 11
63 11
63 11
64 11
64 11
64 11
64 11
64 11
69 11
69 11
69 11
70 11
70 11
70 11
70 11
70 11
69 11
70 11
70 11
72 11
72 11
72 10
72 10
72 11
72 10
73 10
72 10
72 8
73 8
73 7
73 7
74 7
75 7
75 7
76 7
76 7
76 8
77 8
76 6
76 6
76 6
76 6
76 6
79 6
77 6
76 6
77 6
77 6
77 6
77 6
77 6
77 6
77 6
76 6
76 6
76 6
76 6
76 7
76 7
75 7
75 7
76 7
77 7
78 7
79 7
80 7
80 7
81 33
81 33
81 33
81 33
81 33
81 32
81 32
81 32
81 32
84 32
84 32
86 32
87 32
85 32
89 32
90 32
88 6
90 6
90 6
90 5
87 5
85 5
86 7
83 6
68 3
68 3
67 3
67 3
67 3
68 3
69 3
69 3
69 3
72 3
72 3
71 3
69 3
70 3
72 3
71 3
71 3
66 3
66 3
66 3
66 3
66 3
67 3
67 3
67 4
68 4
68 4
71 4
73 4
73 4
73 4
73 4
73 4
72 4
71 4
72 4
72 4
71 4
72 4
72 3
72 3
74 3
72 4
86 5
87 5
90 5
123 7
128 7
129 7
131 7
131 7
132 7
128 7
128 7
128 7
127 7
127 7
127 5
126 5
126 5
126 5
126 5
126 5
126 5
126 5
126 5
126 5
125 5
125 5
125 5
125 5
124 5
122 5
121 5
122 5
122 5
122 5
122 5
122 5
122 5
122 5
124 5
124 5
128 5
131 5
129 5
131 5
131 5
1351 45
1347 45
1346 45
1345 45
1345 45
1372 45
1381 45
1375 46
1377 46
1377 46
1376 44
1372 45
1369 45
1368 45
1368 45
150 5
150 5
150 5
151 5
151 5
151 5
148 6
149 6
149 6
152 6
150 6
148 7
150 6
154 6
155 7
160 8
160 8
160 8
161 8
161 8
161 8
161 9
159 9
162 10
160 10
159 10
159 10
160 10
160 10
160 10
160 10
160 10
160 10
160 10
161 10
160 10
162 9
164 8
161 7
160 7
145 7
144 6
133 6
104 6
104 6
103 6
103 6
103 6
102 6
102 6
102 6
102 6
102 6
103 6
103 6
103 6
103 6
103 6
103 6
103 6
103 6
103 6
103 6
103 6
173 26
173 26
173 26
173 26
173 26
173 26
173 26
174 26
185 26
195 26
199 27
201 27
204 27
205 27
209 27
209 27
128 7
124 7
123 7
120 7
116 7
107 7
102 7
103 6
102 6
99 6
78 6
78 6
75 6
75 6
75 6
75 6
75 6
75 6
76 6
77 6
80 6
80 6
80 7
77 7
79 8
79 8
79 8
102 8
103 8
100 8
96 8
95 7
94 7
94 7
95 6
92 5
94 5
95 5
98 5
98 5
98 5
98 5
94 5
91 3
90 3
89 3
89 3
89 3
89 3
89 3
91 3
91 3
91 3
136 3
136 3
136 3
136 3
135 3
136 3
137 3
152 5
152 5
152 5
151 5
151 5
153 5
151 5
151 5
106 5
106 5
106 5
107 5
107 5
106 5
109 7
109 7
110 7
110 7
161 9
162 9
162 10
162 10
163 10
163 10
163 10
163 10
163 10
163 10
163 10
164 10
158 8
161 15
152 15
141 15
138 14
137 14
135 14
134 13
128 13
128 13
128 14
128 14
128 14
128 14
128 14
128 14
128 16
162 17
158 10
159 10
159 10
159 10
159 10
159 10
159 10
159 10
159 8
157 8
157 8
155 8
154 8
154 8
154 8
154 8
152 7
152 7
115 4
87 7
89 168
89 169
89 169
90 170
91 170
91 170
92 216
92 216
90 216
89 216
87 216
88 216
88 216
88 216
88 216
88 216
88 216
85 51
84 50
84 50
85 50
86 50
84 4
84 4
85 4
89 4
90 4
92 4
91 4
88 3
86 3
85 3
71 2
71 2
71 2
71 2
71 2
69 2
69 2
69 2
69 2
69 2
70 2
69 2
69 2
68 2
67 2
65 2
65 2
63 2
18 0
18 0
19 0
17 0
17 1
22 1
22 2
22 4
22 4
22 5
22 5
21 5
21 5
22 14
22 14
22 14
22 14
22 14
22 14
23 14
23 13
19 13
19 12
20 12
22 12
22 12
23 12
24 11
24 11
26 11
37 2
52 3
58 3
59 3
62 3
63 3
63 3
63 3
63 3
63 3
63 1
63 1
63 1
63 1
63 1
63 1
62 1
62 0
62 0
62 0
62 0
62 0
61 0
60 0
59 0
59 0
59 0
60 0
61 0
61 0
61 0
61 0
61 0
61 0
61 0
61 0
61 1
61 1
61 2
61 2
60 2
60 2
60 2
60 2
59 2
61 4
60 5
58 5
60 5
60 5
60 5
60 5
60 5
60 5
60 5
61 5
61 5
61 5
61 5
64 5
58 4
58 4
61 4
63 4
63 4
63 4
63 4
63 4
63 4
63 4
63 4
63 4
62 4
62 4
62 4
62 4
62 4
62 4
60 4
60 4
60 4
60 4
60 4
60 4
60 4
60 4
60 4
60 4
60 4
59 4
59 4
59 4
58 4
58 4
56 4
56 4
54 4
54 4
52 4
48 4
32 4
17 4
15 4
15 4
15 4
15 4
15 4
16 4
16 4
16 4
16 4
16 5
16 5
16 5
16 5
16 5
16 5
16 5
16 5
16 5
16 5
16 5
16 5
16 5
16 5
16 5
16 4
15 4
14 4
14 4
14 4
14 4
15 4
15 4
15 3
16 3
16 1
16 1
16 1
16 1
16 1
16 1
16 1
16 1
16 1
16 0
15 0
13 0
11 0
11 0
11 2
11 2
11 2
11 2
9 2
8 2
6 2
7 2
7 2
7 2
7 2
7 2
6 2
6 3
6 3
6 3
6 3
6 3
6 3
6 3
6 3
6 3
6 3
6 4
8 5
10 5
10 5
10 5
10 4
10 4
10 4
10 4
11 4
11 4
11 4
11 4
11 4
11 4
11 4
11 4
11 3
13 3
13 3
13 3
13 3
13 3
13 3
12 3
12 3
12 3
12 3
11 3
11 3
11 3
11 3
11 3
9 3
8 3
8 3
8 3
8 3
8 3
8 3
8 5
8 6
9 6
9 6
9 6
9 7
10 22
11 31
12 36
15 87
15 104
15 120
15 120
15 120
15 120
17 121
18 121
18 121
18 121
17 121
17 121
17 122
16 122
17 122
17 122
17 122
17 122
17 122
17 123
18 123
19 124
17 124
17 124
17 124
17 124
17 124
17 123
17 122
17 122
16 123
16 135
15 136
15 138
15 138
14 139
14 141
14 143
13 143
13 143
13 143
13 146
13 149
13 154
13 155
13 156
13 163
13 172
13 176
13 178
13 179
13 179
10 177
9 207
9 210
9 220
9 229
10 326
10 335
10 339
10 354
10 355
11 370
11 385
11 385
11 393
11 396
11 396
11 397
11 398
11 398
11 398
11 398
11 398
11 398
11 398
11 398
11 399
11 401
11 400
11 449
11 471
11 473
11 475
11 489
11 494
11 496
11 586
11 833
12 864
13 892
13 894
13 927
12 933
13 956
13 957
13 954
12 932
10 923
9 918
7 864
7 857
7 853
7 855
7 855
6 856
6 856
7 856
7 857
7 857
7 905
7 903
7 903
7 904
7 904
7 906
7 908
7 929
12 1014
13 1030
14 1060
15 1090
15 1277
15 1289
15 1301
15 1322
15 1279
15 1280
15 1280
15 1283
15 1292
15 1289
15 1291
15 1290
15 1287
15 1288
15 1293
15 1295
15 1303
15 1320
15 1320
15 1314
15 1310
15 1318
15 1316
16 1311
17 1312
18 1326
18 1347
19 1351
20 1355
20 1358
20 1356
20 1324
20 1318
20 1322
20 1305
19 1226
19 1226
19 1220
19 1203
22 1250
21 1238
22 1240
22 1241
22 1237
22 1236
22 1240
26 1255
27 1274
31 1288
32 1289
39 1326
40 1329
42 1330
42 1326
43 1340
43 1338
43 1338
43 1342
43 1190
43 1185
43 1185
43 1179
43 1177
43 1173
44 1064
44 1047
41 866
41 857
40 840
40 843
40 844
41 845
41 845
43 848
43 846
43 842
43 842
43 841
43 844
42 843
42 842
42 840
42 839
42 837
42 838
42 838
42 838
42 838
40 835
40 835
40 834
40 832
40 831
40 826
39 819
39 790
32 703
32 665
31 630
31 617
31 431
31 428
31 415
31 402
32 407
31 414
33 418
106 416
106 409
106 399
107 399
107 398
107 397
107 395
107 393
107 390
106 378
106 361
106 361
106 359
106 359
106 349
34 346
34 345
32 329
31 315
31 300
31 293
30 291
31 291
31 291
31 289
31 287
31 276
31 270
30 263
29 259
29 254
28 246
26 184
25 181
24 167
22 163
22 160
22 157
21 151
18 136
18 129
18 128
15 127
7 90
7 90
6 85
6 85
5 70
5 70
5 69
5 63
5 43
22 43
22 42
22 41
22 35
253 49
253 49
253 49
253 49
253 49
253 48
253 44
253 42
253 42
253 42
253 42
238 42
238 42
238 42
238 42
8 25
8 25
8 25
8 25
8 24
8 24
8 24
9 24
9 24
11 24
11 23
11 23
11 23
11 23
11 22
11 22
11 22
11 22
11 22
11 22
11 22
11 22
11 22
9 21
6 21
6 21
1 1
1 1
1 0
1 0
1 0
1 0
1 0
1 0
1 0
1 0
1 0
1 0
1 0
1 0
1 0
1 0
1 0
1 0
1 0
1 0
1 0
1 0
1 0
1 0
1 0
1 0
1 0
1 0
1 0
1 0
1 0
1 0
1 0
1 1
1 1
1 1
1 1
1 1
1 1
1 1
1 1
1 1
1 1
1 1
1 1
1 1
1 1
1 1
1 0
1 0
1 1
1 1
1 1
1 1
1 1
1 1
1 1
1 1
1 1
1 1
1 1
1 1
1 1
1 1
1 1
1 1
1 0
1 2
1 2
1 2
1 2
1 2
1 2
1 2
1 2
1 2
1 2
1 2
1 2
1 2
1 2
1 2
1 0
1 0
1 0
1 0
1 0
1 0
1 0
1 0
1 0
1 0
1 0
1 0
1 0
1 0
1 0
5 1
5 1
5 1
4 1
4 1
4 1
4 1
4 1
4 1
4 1
5 1
5 1
5 1
5 1
5 1
4 1
1 0
1 0
1 0
1 0
1 0
1 0
1 0
1 0
1 0
1 0
1 0
1 0
1 0
1 0
1 0
1 0
1 0
1 0
1 0
1 0
1 0
1 0
1 0
1 0
1 0
1 0
1 0
2 0
2 0
3 0
3 0
3 0
3 0
3 0
3 0
3 0
3 0
3 0
3 0
3 0
3 0
3 0
3 0
5 0
5 0
5 0
5 0
6 0
6 0
7 0
7 0
7 0
7 0
7 0
8 0
8 0
8 0
8 0
8 0
7 0
7 0
7 0
7 0
7 1
8 1
8 1
8 1
15 1
26 1
27 1
136 64
139 64
145 64
150 64
150 64
153 64
172 64
188 64
195 64
200 64
201 64
201 64
205 64
209 64
218 64
223 2
235 2
241 2
249 2
250 2
253 5
253 5
285 5
285 5
285 6
285 6
285 6
285 6
286 6
286 6
288 6
288 6
288 6
290 6
298 6
310 6
334 6
311 6
316 6
326 6
326 6
403 6
404 6
408 6
414 6
418 6
441 6
459 6
504 9
514 11
522 11
523 13
524 13
527 13
527 13
528 13
528 13
527 13
529 13
528 13
535 13
536 13
568 13
570 13
572 12
576 11
580 12
584 12
585 12
590 12
603 12
603 12
604 12
607 12
615 12
618 12
620 12
622 12
623 12
626 12
626 12
627 12
627 12
627 12
628 12
629 12
629 12
631 12
632 12
632 12
644 12
670 13
671 13
671 12
677 12
677 12
676 12
670 12
669 12
694 12
606 11
640 11
720 11
717 11
718 11
712 11
687 9
694 9
691 10
685 10
684 10
682 10
680 10
682 10
681 10
677 10
801 10
799 10
794 9
792 9
791 9
791 9
793 9
794 9
794 9
794 8
818 9
823 9
823 9
823 9
825 9
830 10
707 10
708 10
704 10
701 10
681 10
669 10
662 11
661 12
686 14
627 14
630 12
630 12
631 10
632 10
607 9
591 9
585 42
577 41
574 41
574 41
573 41
574 41
577 41
581 41
602 41
660 41
660 41
664 41
663 41
662 41
638 41
605 8
608 8
609 8
612 9
611 9
611 9
626 9
635 9
648 9
672 9
729 10
744 10
770 12
825 13
868 14
874 15
875 15
880 18
881 18
883 18
883 18
900 18
906 17
911 16
952 16
1167 18
1197 19
1238 19
1351 19
1460 19
1471 19
1482 19
1487 19
1484 19
1492 19
1498 19
1455 19
1450 20
1434 20
1358 20
1354 20
1352 20
1351 20
1351 20
1328 20
1332 20
1332 20
1330 22
1331 22
1330 22
1329 22
1327 22
1329 22
1329 22
1329 22
1329 22
1332 22
1331 22
1348 22
1350 22
1347 22
1357 22
1416 20
1520 19
1576 19
1621 19
1623 19
1621 19
1618 18
1615 17
1613 17
1616 16
1626 16
1644 16
1675 15
1678 15
1686 15
1670 15
1673 15
1710 17
1706 17
1699 16
1696 16
1691 16
1692 16
1753 16
1754 16
1755 18
1755 18
1799 18
1806 18
1802 19
1801 19
1782 19
1733 19
1731 20
1725 20
1722 20
1723 20
1713 20
1714 20
1711 20
1707 18
1703 17
1710 17
1717 17
1700 16
1664 16
1651 15
1629 15
1570 13
1547 13
1500 10
1441 9
1406 9
1398 8
1396 8
1402 7
1406 6
1412 7
1400 7
1389 8
1359 8
1275 7
1199 9
986 7
963 7
926 7
870 7
777 8
772 8
764 8
764 8
763 8
749 8
738 8
737 8
728 7
727 7
727 7
727 7
726 7
726 7
726 7
728 7
728 7
729 7
729 7
729 7
726 7
735 7
738 7
736 7
737 7
737 7
733 7
727 7
717 7
685 7
670 7
657 7
541 7
463 7
371 7
338 7
321 7
320 7
320 7
319 7
319 7
317 7
314 7
306 7
299 7
291 7
289 7
280 7
277 7
267 7
242 5
238 5
235 5
219 5
223 5
254 6
224 6
225 6
240 9
254 9
207 9
204 9
217 9
209 9
209 10
210 10
212 10
213 10
213 10
215 10
216 10
216 10
214 10
214 10
206 10
188 8
183 8
181 8
181 8
181 8
184 8
184 8
184 8
185 9
184 9
183 9
183 8
181 8
178 8
174 8
166 8
163 12
162 12
161 13
161 13
158 13
159 79
159 79
158 81
159 81
160 88
160 89
160 93
159 93
159 95
159 94
160 94
162 94
162 95
163 95
164 95
163 29
163 29
162 29
161 31
160 32
163 32
162 34
162 35
164 36
162 36
154 36
152 37
152 37
151 37
150 37
150 37
150 37
150 37
150 37
150 37
150 37
150 38
150 35
150 35
153 35
153 35
153 35
153 35
152 37
152 37
151 37
151 38
152 38
152 38
151 38
149 38
149 38
146 37
145 37
145 37
144 37
141 37
135 37
133 37
102 36
94 36
90 34
60 32
50 32
47 32
43 32
30 32
29 32
29 32
28 32
27 33
27 33
27 33
27 33
26 33
32 33
33 33
33 33
33 35
33 35
33 35
33 37
34 45
34 51
31 50
31 49
31 50
31 50
31 51
31 51
31 51
24 51
24 51
24 49
24 48
23 43
23 43
22 35
22 35
22 34
22 34
23 33
23 33
23 31
22 23
22 22
22 21
22 21
21 21
21 21
20 21
18 21
18 21
17 22
17 22
16 22
16 24
16 24
16 21
16 20
14 19
14 19
14 24
13 26
13 26
13 27
13 27
14 29
14 29
14 29
14 29
14 27
14 28
14 28
14 28
14 28
14 28
13 22
17 22
14 22
14 22
14 22
15 21
15 19
14 19
13 19
14 19
14 19
13 19
13 19
13 19
13 19
13 19
12 19
8 19
8 19
8 19
7 19
6 19
5 19
5 19
5 19
5 20
5 22
5 23
5 24
5 24
5 24
4 24
4 26
4 26
4 26
4 27
4 28
4 29
4 41
4 74
4 83
5 91
6 102
6 108
6 113
6 129
6 127
6 127
6 128
6 128
6 131
6 133
6 134
6 135
6 135
6 135
6 135
6 140
6 141
6 141
7 141
13 169
14 170
14 172
13 173
13 175
12 176
12 176
12 176
12 178
12 179
12 178
12 178
12 182
12 182
12 182
12 183
12 183
12 183
12 182
12 182
12 182
12 185
12 190
12 198
12 198
12 199
12 201
12 200
12 200
11 198
11 198
11 199
11 200
11 200
11 199
11 199
11 199
11 199
11 199
11 199
11 199
11 199
11 199
11 199
11 199
11 199
11 199
11 199
10 198
10 198
10 198
10 198
10 198
10 198
10 198
10 198
10 198
10 198
10 198
10 198
10 198
10 199
10 200
10 202
10 203
10 204
10 203
10 203
10 207
10 209
10 207
10 207
10 208
10 207
10 221
10 221
10 218
9 186
8 138
8 131
8 125
8 121
8 120
8 120
8 120
8 121
8 121
8 121
8 120
8 117
8 114
8 113
8 112
8 112
8 112
8 112
8 107
9 105
9 105
7 104
2 72
1 72
1 74
1 73
1 73
1 73
1 73
1 73
1 72
1 71
1 70
1 70
1 67
0 67
0 65
0 64
0 64
0 64
0 64
0 65
0 66
0 59
0 52
0 50
0 54
0 55
0 56
6 56
6 58
10 58
10 57
10 56
10 56
10 56
10 56
10 56
10 58
10 58
13 66
13 66
13 66
13 66
13 67
13 67
13 67
3 67
3 67
3 68
3 68
3 68
3 68
3 68
3 68
0 61
0 61
0 61
0 61
0 61
0 62
0 62
1 59
1 58
1 57
2 58
2 57
2 56
2 56
2 55
2 50
2 49
2 48
4 48
4 47
4 45
4 31
3 30
3 29
3 27
3 27
3 26
3 26
3 26
3 26
3 26
3 26
3 26
3 26
3 25
1 25
1 25
1 25
1 25
1 25
1 25
1 25
1 25
1 24
1 24
1 24
1 25
1 25
1 24
1 24
1 24
1 24
2 24
2 24
2 24
2 24
2 24
2 24
2 24
2 24
2 24
2 24
2 24
2 25
2 25
2 25
2 24
2 23
1 23
1 23
1 23
1 19
1 16
1 16
1 15
1 14
1 14
1 14
1 17
1 28
1 28
1 28
1 28
1 26
1 25
1 29
1 29
1 30
1 32
1 31
1 32
1 33
1 33
1 33
1 23
2 24
2 25
2 26
2 27
2 28
2 26
2 25
2 26
2 32
2 62
2 80
2 89
2 102
3 107
3 117
3 125
3 128
3 133
3 133
3 135
3 135
3 135
3 135
3 135
3 138
4 140
4 141
4 141
4 141
4 141
4 141
4 141
4 141
4 141
4 141
4 140
14 140
14 140
14 140
14 140
14 140
14 140
14 141
14 141
14 140
14 140
14 142
14 142
14 142
14 142
14 141
14 141
4 141
4 143
4 143
4 143
4 153
4 162
4 173
4 176
4 179
4 180
4 182
4 182
4 184
4 185
4 186
4 186
4 186
4 187
5 187
5 187
5 188
5 188
5 188
5 188
5 191
5 196
5 196
5 196
5 196
5 202
5 201
5 200
5 200
4 200
4 203
4 204
4 204
5 206
5 205
5 205
6 208
6 211
6 211
6 212
7 210
7 210
7 210
7 206
7 205
6 203
5 200
5 198
5 198
5 199
5 198
5 196
5 183
5 167
6 147
5 136
5 130
5 127
5 121
4 122
4 123
4 123
4 125
5 154
5 154
5 157
5 165
5 168
4 166
4 168
4 167
4 167
4 167
4 167
4 167
4 167
4 169
4 169
4 169
4 169
4 169
4 169
4 168
4 165
4 165
4 167
4 166
4 166
4 166
4 165
4 164
4 165
5 165
5 165
5 165
5 165
5 164
5 162
5 160
5 155
5 144
6 143
6 132
6 131
6 128
6 128
6 127
6 127
6 128
6 129
6 129
6 127
6 127
7 127
7 127
7 128
7 129
7 134
7 136
7 137
7 134
7 128
7 128
7 128
7 129
7 124
7 124
7 123
7 123
7 122
7 122
7 121
7 119
6 117
6 116
6 116
21 108
21 105
21 105
21 105
21 105
21 106
21 106
21 106
21 106
21 107
21 107
21 107
21 107
21 106
21 105
21 104
5 104
7 82
6 82
6 81
7 81
7 81
7 79
7 76
7 76
7 75
7 74
6 46
6 46
6 39
6 31
6 32
6 32
6 33
6 33
6 33
6 33
6 33
6 33
6 34
7 36
8 40
8 41
8 41
8 44
8 44
8 44
8 44
8 43
8 42
8 42
8 42
8 42
8 42
8 42
9 44
8 44
7 39
7 39
7 38
7 38
7 37
7 36
7 36
6 36
6 38
6 38
8 38
8 38
8 38
8 38
8 36
8 37
8 37
8 42
8 42
9 42
8 41
8 40
8 39
8 37
8 34
8 32
8 31
15 156
15 158
15 159
15 159
16 158
16 158
16 158
15 158
15 158
15 158
15 158
15 170
15 171
15 171
15 172
8 46
8 46
8 48
15 50
14 50
20 50
20 50
20 50
20 50
20 50
20 49
20 49
20 49
20 49
20 52
20 54
20 57
20 57
18 57
11 58
5 58
4 59
4 59
4 58
4 58
4 58
4 58
4 58
4 58
4 58
4 58
4 58
4 56
4 56
4 56
4 56
4 56
4 56
4 58
2 58
1 56
1 56
1 55
2 67
2 70
2 70
2 72
2 72
2 72
2 72
2 72
2 72
2 74
2 74
2 74
2 74
1 71
1 71
1 71
1 70
1 70
1 70
1 71
1 71
1 71
1 71
2 69
2 68
2 68
2 67
2 67
2 67
2 67
2 64
2 61
2 61
2 61
2 61
2 62
2 63
2 65
2 65
2 65
2 64
2 64
2 69
2 68
2 68
2 70
2 70
2 70
2 70
2 70
2 70
2 70
2 70
2 55
2 55
2 55
2 54
2 54
2 55
2 55
2 53
2 53
2 53
2 53
2 53
3 53
3 54
3 54
3 54
3 54
3 55
3 53
3 50
3 50
3 51
3 51
3 49
3 49
3 48
3 48
3 48
3 48
5 48
5 48
5 48
5 48
5 48
5 47
5 48
7 54
7 54
7 54
7 54
7 57
9 56
9 59
9 59
9 58
9 58
9 58
8 41
8 41
8 37
8 37
8 37
8 37
8 37
8 37
8 37
8 35
8 35
8 35
8 35
8 35
8 48
8 48
8 48
9 48
9 47
9 47
9 47
9 47
9 48
8 48
8 48
8 48
8 48
8 48
8 48
8 35
8 35
8 35
8 34
7 34
7 33
7 33
7 33
7 31
7 31
7 30
7 30
7 29
7 23
7 23
7 23
7 23
7 23
7 23
7 23
7 23
7 23
7 23
7 23
7 23
8 23
8 23
8 23
9 23
9 22
9 22
12 22
12 22
13 22
13 22
16 22
15 22
15 21
15 21
15 21
14 21
14 19
14 19
14 19
13 19
13 18
10 18
13 40
12 41
12 47
9 49
9 49
9 48
7 50
7 52
7 51
7 51
7 50
7 49
5 49
4 43
4 43
3 41
3 41
3 38
3 37
3 37
3 37
3 37
3 37
3 35
3 35
3 35
3 35
3 35
4 35
4 35
4 35
4 35
4 35
4 35
4 35
4 36
4 36
4 36
4 36
4 36
4 36
4 36
4 36
4 40
3 42
3 45
3 46
3 46
3 46
3 46
3 46
3 46
3 46
3 46
3 46
3 46
3 46
3 46
4 45
4 45
4 48
4 47
4 48
4 51
4 51
4 52
4 52
4 52
4 52
4 52
4 52
4 52
4 52
4 52
9 52
9 52
9 52
9 51
9 52
9 52
9 52
9 52
9 53
9 53
9 53
9 54
9 55
9 56
10 57
7 57
5 57
5 57
5 57
5 57
5 57
5 59
5 59
4 57
4 57
4 56
2 33
2 29
2 29
2 29
2 29
2 29
2 27
2 27
2 28
2 30
3 31
3 31
3 38
225 44
225 47
225 47
225 49
225 62
225 62
225 62
225 62
225 63
225 63
225 63
225 62
225 63
225 63
225 63
225 63
224 63
223 63
4 59
3 59
3 59
3 47
3 46
3 46
3 46
3 46
3 46
3 46
3 46
3 46
3 42
3 40
3 38
3 38
3 38
3 38
3 38
3 38
3 38
3 40
3 40
3 40
3 40
2 40
5 40
5 40
5 36
5 36
5 35
5 35
5 31
5 31
5 31
5 31
5 29
5 30
5 30
5 31
5 31
5 31
2 31
2 31
2 31
2 31
2 31
2 30
2 30
2 30
2 30
2 29
2 28
2 28
2 26
2 26
2 25
1 24
1 24
1 24
1 24
1 24
1 24
1 23
1 22
1 22
1 22
1 22
1 22
1 22
1 22
1 22
1 22
1 22
1 22
1 22
1 22
1 21
1 16
0 16
0 16
0 7
0 6
0 5
0 5
0 4
0 4
0 3
0 3
0 3
0 3
0 3
0 2
0 7
0 7
0 7
0 7
0 7
0 7
0 6
0 6
0 6
0 6
0 6
0 6
0 6
0 6
0 6
0 6
0 1
0 1
0 1
0 1
0 1
0 1
0 1
0 1
0 1
0 1
0 1
0 1
0 1
0 1
0 1
0 1
0 1
0 1
0 1
0 1
0 1
0 1
0 1
0 1
0 1
0 1
0 0
0 0
0 0
0 0
0 0
0 0
0 0
0 0
0 0
0 0
0 0
0 0
0 0
0 0
0 0
0 0
0 0
0 0
0 0
0 0
0 0
0 1
0 1
0 1
0 1
0 1
0 3
0 3
0 3
0 3
0 3
0 3
0 3
0 3
0 3
0 3
0 3
0 3
0 3
0 5
0 5
0 3
0 3
0 3
0 3
0 4
0 4
0 5
0 5
0 5
0 5
0 6
0 7
0 7
0 7
0 7
0 7
0 7
0 7
3 8
3 8
3 8
3 8
3 8
3 8
3 8
3 8
3 8
3 8
3 8
3 8
3 8
3 8
3 8
3 8
0 7
0 7
0 7
0 7
0 7
0 7
0 7
0 7
0 7
0 7
0 8
0 8
0 8
0 8
0 8
0 8
0 8
0 8
0 8
1 8
1 8
1 8
1 8
1 8
1 8
1 8
1 8
1 8
1 8
1 8
1 8
1 8
1 8
1 8
0 8
0 8
0 8
0 8
0 9
0 9
0 10
0 11
0 11
1 10
1 10
1 10
1 10
1 10
1 10
1 10
1 10
1 10
1 10
1 10
1 10
1 10
1 10
1 9
0 10
0 10
2 10
2 10
2 10
10 427
10 425
10 425
10 426
10 426
10 426
10 426
10 425
10 425
10 424
10 424
10 424
10 423
10 423
11 422
3 5
3 5
3 5
8 5
8 5
8 5
8 5
8 5
8 5
8 7
8 7
8 7
8 7
8 7
7 7
7 7
7 7
7 7
3 8
3 9
3 12
3 12
3 22
3 22
3 24
3 24
3 24
3 24
3 24
3 24
3 24
3 24
3 21
3 21
3 21
3 21
3 21
3 21
3 21
11 22
11 22
11 22
11 22
11 22
11 22
11 22
11 22
11 22
11 22
11 22
11 22
11 22
11 22
11 21
3 21
4 21
4 21
4 21
4 21
4 21
5 20
5 19
5 19
5 19
5 19
5 19
5 19
5 19
5 19
5 19
5 20
6 20
6 20
6 22
6 22
6 22
6 22
6 22
5 23
5 23
5 22
5 22
4 22
4 22
4 22
4 22
4 22
4 21
4 21
6 21
6 21
197 29
197 29
197 29
197 29
197 29
197 29
197 29
197 29
198 32
198 34
198 34
198 34
198 34
198 34
198 34
8 28
8 28
8 28
8 28
8 28
6 28
6 28
6 28
6 28
6 28
6 28
5 28
5 26
5 24
5 20
5 16
5 13
9 12
9 10
9 10
10 16
10 18
10 18
12 20
12 20
14 20
14 20
14 20
14 20
27 20
27 20
27 19
22 19
22 19
22 19
22 19
21 12
21 12
19 10
19 10
19 10
267 22
267 22
267 22
254 22
254 22
254 22
254 23
254 23
254 24
256 25
258 27
258 27
258 28
257 28
257 28
256 28
9 16
9 16
9 16
9 16
9 16
9 16
9 16
9 16
8 16
8 17
8 15
8 15
8 15
8 15
53 16
53 15
53 15
53 15
53 15
53 15
53 15
53 16
53 16
53 16
53 16
53 16
53 15
53 16
53 15
53 17
53 22
53 23
53 23
8 22
8 21
8 19
7 19
7 18
23 337
23 337
23 337
23 339
23 339
23 339
23 339
23 339
23 339
23 339
23 339
23 339
23 339
23 339
23 339
22 338
7 21
7 20
7 20
7 20
7 20
7 20
7 20
7 20
7 20
7 20
66 23
66 23
66 23
66 23
65 23
64 23
64 23
64 23
64 23
64 23
64 23
64 23
64 23
64 27
64 27
62 27
5 23
5 23
5 23
5 23
5 23
5 23
5 23
5 23
5 23
5 23
5 22
4 22
2 18
1 17
0 17
0 17
0 17
0 17
0 17
0 17
1 17
1 17
1 17
1 17
1 17
1 17
1 17
1 18
2 19
2 19
2 19
2 19
2 19
2 19
2 19
1 19
1 21
1 21
1 21
1 21
1 21
1 20
1 20
1 20
1 20
0 20
0 19
3 18
3 17
3 18
3 15
246 16
246 16
246 15
246 15
246 15
246 15
246 15
246 15
246 15
246 15
246 13
246 13
243 13
243 13
243 10
243 10
241 10
0 8
0 8
0 8
0 8
0 8
0 8
0 8
0 8
0 8
0 8
0 8
0 8
0 9
0 11
0 13
0 13
0 13
0 13
0 13
0 13
0 15
0 15
0 15
0 15
0 15
0 15
0 15
0 15
0 15
0 11
0 11
0 11
0 12
0 12
0 12
0 12
0 12
0 10
0 10
0 10
0 10
0 10
0 10
0 10
0 11
0 11
4 14
4 14
4 14
4 14
6 14
6 14
6 14
6 14
6 14
6 14
6 15
6 15
6 15
6 14
6 13
2 10
2 10
2 10
2 10
0 10
2 137
2 137
2 135
2 135
2 136
2 135
2 135
2 135
2 135
2 135
2 135
3 135
3 135
3 135
5 135
3 8
3 8
3 10
3 11
3 11
5 11
5 11
5 11
5 11
5 11
5 11
5 11
5 11
4 11
4 11
2 11
2 11
2 11
2 11
2 11
0 11
0 11
0 11
0 11
0 11
0 11
1 11
1 11
1 11
1 11
1 11
1 11
1 8
1 7
1 7
1 7
1 7
1 7
1 7
1 7
1 7
1 7
1 7
1 7
1 7
1 7
1 6
1 6
1 8
1 8
1 8
1 8
1 8
1 8
1 8
1 8
1 8
1 9
1 9
2 12
2 12
2 11
2 11
2 10
2 10
2 10
2 10
2 10
2 10
2 11
2 14
2 24
2 25
2 27
2 27
2 27
2 27
2 27
2 27
2 27
2 27
2 27
2 27
2 27
2 27
2 27
2 27
2 27
2 27
2 26
2 27
2 27
2 27
2 28
2 28
2 28
2 28
2 28
2 39
2 42
2 43
2 42
2 40
2 40
2 40
2 40
2 40
2 40
2 40
2 40
2 40
2 40
2 40
2 40
2 40
2 40
2 40
2 41
2 41
2 41
2 41
2 41
2 41
4 41
4 41
4 41
3 41
3 41
3 41
3 43
3 44
3 46
3 47
64 1426
65 1440
65 1440
65 1441
65 1441
71 1585
74 1591
96 1593
96 1593
96 1593
96 1593
96 1593
96 1594
96 1594
96 1593
96 1592
96 1592
96 1592
96 1592
96 1592
96 1592
23 54
23 54
1 52
1 50
1 48
0 44
0 44
0 44
0 45
0 45
0 45
0 43
0 43
2 52
2 47
2 44
2 43
5 40
5 39
5 39
5 39
5 41
5 41
5 41
5 41
5 41
5 41
5 41
3 32
3 32
3 32
3 32
1 32
0 32
0 32
2 33
2 31
2 31
2 31
2 31
2 30
2 30
2 30
2 29
2 18
2 16
2 16
2 16
2 16
2 16
1 15
1 15
1 15
1 15
1 14
0 14
0 14
0 14
0 14
0 14
0 14
0 14
0 14
0 13
0 13
0 13
0 13
0 13
0 13
0 13
0 13
0 13
0 13
0 13
0 13
0 12
0 11
0 8
0 8
0 6
0 5
0 5
0 4
0 4
0 4
0 4
0 4
0 4
0 4
0 4
0 4
0 3
0 3
0 3
0 3
0 3
0 3
0 3
0 3
0 3
0 3
0 3
0 3
0 2
0 1
0 0
0 1
0 4
0 4
0 4
0 4
0 4
0 4
5 4
5 4
5 4
5 4
5 4
5 4
5 4
5 4
5 4
5 0
5 0
5 0
5 0
5 0
5 0
0 0
0 0
0 0
0 0
0 0
0 0
0 0
0 0
0 0
0 0
0 0
0 0
0 0
0 0
0 0
0 0
0 0
0 0
0 0
0 0
0 1
0 1
0 3
0 3
0 8
0 23
0 25
0 28
2 29
663 51
663 52
663 52
663 52
663 55
663 55
675 321
679 341
679 342
679 342
679 342
679 342
679 344
679 349
679 350
16 328
16 328
16 328
16 329
16 329
16 331
4 64
4 63
104 67
105 67
105 77
105 79
105 78
105 79
101 54
101 54
101 54
101 54
101 54
106 54
106 52
106 52
106 52
106 52
6 50
6 50
6 50
6 56
7 243
7 256
7 266
7 267
7 267
7 269
2 273
2 273
2 274
2 276
2 277
2 279
2 280
2 283
2 305
3 314
3 319
3 319
3 326
3 327
3 325
3 328
3 328
3 328
3 328
3 328
3 329
3 331
3 332
3 332
3 333
2 333
2 333
2 333
2 334
2 338
2 340
2 497
3 684
4 715
5 740
6 753
7 753
7 788
7 789
8 793
8 795
8 799
8 812
8 840
9 844
9 847
9 706
9 693
9 691
9 687
9 687
9 689
8 689
8 689
8 689
7 690
7 697
7 697
7 698
7 705
6 710
6 712
6 712
6 712
6 712
6 711
6 711
6 712
6 713
6 713
6 713
6 713
6 713
6 715
6 716
6 715
6 704
6 702
6 702
6 707
5 709
5 709
5 710
5 704
5 704
5 704
5 705
5 705
5 705
5 703
5 704
5 703
5 696
5 674
5 498
5 495
4 494
4 494
4 493
4 492
4 492
4 493
4 491
4 492
4 489
4 489
4 486
4 479
3 453
3 446
3 445
3 451
3 451
4 567
4 569
4 571
4 574
4 573
4 574
5 578
5 580
5 609
5 649
4 649
4 657
4 660
4 661
4 668
4 667
3 547
3 537
3 515
1 324
1 305
1 298
1 291
1 288
1 254
1 252
1 247
1 251
1 365
1 370
1 365
1 364
1 408
1 418
1 427
1 443
1 447
1 448
1 447
1 448
1 450
1 472
1 472
1 464
1 464
1 464
1 458
1 456
1 454
1 456
1 457
1 461
1 462
1 466
1 478
2 479
2 483
2 485
2 491
2 490
2 490
2 491
2 495
2 495
2 501
2 505
2 506
2 506
2 509
2 510
5 524
5 524
5 526
5 526
5 526
5 526
5 526
5 526
5 526
5 527
5 528
5 529
5 527
5 529
5 531
2 527
2 527
2 528
2 528
2 528
3 527
3 534
3 535
3 535
3 533
3 533
3 534
3 532
3 524
3 518
3 523
3 523
3 521
2 519
2 519
1 520
1 516
1 510
1 452
1 446
1 449
1 449
1 452
1 452
1 450
1 448
1 449
1 449
1 450
1 451
1 451
1 451
1 451
1 452
1 451
1 451
1 449
1 451
1 319
1 295
1 294
1 291
1 244
1 228
1 214
1 205
1 204
1 203
1 203
1 204
1 202
1 176
1 177
1 177
1 178
1 177
1 176
1 176
2 176
2 175
2 175
2 171
2 171
2 168
2 152
1 152
1 150
1 150
2 143
2 142
2 141
2 140
2 138
1 148
1 156
1 154
1 160
1 162
1 195
1 202
1 207
1 216
1 218
1 223
1 228
1 230
1 231
1 232
1 233
1 232
1 233
1 232
1 232
1 236
1 235
1 227
1 227
1 227
1 225
2 224
2 224
2 215
2 217
2 217
2 217
2 223
2 223
2 222
2 219
2 218
3 213
4 210
4 212
4 236
8 349
9 407
10 477
11 510
12 529
14 542
14 585
14 597
14 598
14 597
14 601
13 605
13 611
13 617
13 619
13 621
13 621
13 621
13 621
13 621
13 622
12 621
12 619
13 607
13 607
13 607
13 605
13 605
13 605
13 605
53 608
57 614
57 615
57 622
58 631
58 639
58 640
58 643
59 645
59 647
59 653
59 655
61 663
61 663
61 663
21 660
21 662
21 662
23 662
22 664
22 666
22 675
22 679
21 680
24 695
24 696
24 698
24 698
22 685
23 662
23 644
25 650
26 639
26 626
26 601
26 594
26 591
26 586
26 602
23 594
23 633
23 634
1425 63034
1425 63031
1425 63031
1425 63029
1427 63028
1427 63032
1427 63034
1431 63072
1431 63074
1431 63076
1431 63088
1431 63091
1431 63092
1430 63095
1430 63096
1425 62924
1372 62264
1372 62282
1373 62351
1371 62357
28 755
29 774
29 777
27 780
28 782
28 777
27 768
28 699
24 510
22 459
22 429
25 437
25 437
28 442
38 547
41 544
42 574
42 578
42 579
42 571
42 571
42 565
43 565
43 567
43 567
43 566
43 568
43 564
43 563
43 564
43 567
42 575
42 587
42 590
43 596
43 598
44 600
44 600
312 1796
308 1790
308 1786
308 1773
308 1773
308 1766
308 1766
308 1764
308 1758
308 1757
308 1745
309 1744
309 1743
307 1743
307 1742
39 546
40 547
40 547
39 544
39 543
39 537
39 533
39 530
39 530
38 529
38 527
38 524
37 522
37 522
37 521
37 521
34 514
33 513
33 511
33 510
33 509
33 509
33 508
33 507
33 503
33 501
33 501
33 501
33 501
33 501
33 501
33 502
43 570
42 568
39 517
39 508
39 499
39 474
39 473
41 470
40 470
40 467
40 466
43 465
43 447
42 379
42 377
41 377
40 348
30 271
30 267
29 261
29 260
29 260
28 259
28 260
29 267
29 266
72 682
63 671
63 670
55 554
56 560
56 568
56 567
56 570
56 576
56 577
55 577
55 578
55 584
55 585
55 596
55 604
55 611
55 617
55 619
55 643
80 3861
34 3479
34 3516
34 3521
34 3546
34 3666
34 3741
34 3773
37 3863
37 3919
37 3932
39 3994
38 4034
37 4055
37 4063
37 4064
37 4050
12 765
12 763
12 763
12 767
12 769
12 768
12 768
12 768
12 769
12 769
12 769
12 769
12 769
12 769
12 769
12 769
226 797
226 797
226 797
226 797
226 797
226 797
226 807
226 833
226 840
226 843
226 844
227 845
235 846
236 849
236 851
26 839
26 846
26 869
26 923
26 951
25 964
25 964
25 966
25 962
25 963
25 1036
25 1042
25 1060
24 1079
24 1090
36 1599
36 1611
36 1615
37 1625
37 1640
36 1656
37 1664
37 1666
37 1672
37 1681
37 1719
37 1721
37 1731
37 1732
38 1735
24 1252
24 1249
26 1251
26 1262
24 1263
24 1259
23 1249
23 1245
23 1247
23 1241
23 1238
23 1234
23 1234
23 1230
23 1229
24 1217
25 1190
25 1176
26 1159
26 1141
26 1141
26 1131
26 1122
26 1113
26 1079
26 1066
25 1046
26 901
26 792
25 737
23 640
23 611
23 609
23 609
23 610
23 612
23 610
23 610
23 609
33 635
33 636
33 635
32 634
32 636
32 639
32 646
32 650
33 650
33 650
33 651
33 651
33 652
33 651
33 651
23 651
23 651
23 651
23 651
23 651
23 649
23 648
23 635
22 608
22 602
22 601
22 601
20 601
10 600
10 597
10 598
9 579
11 566
497 540
503 479
503 474
502 466
502 464
502 465
501 467
501 464
501 389
501 385
501 349
501 343
502 339
502 295
501 292
501 282
9 267
9 252
9 236
9 228
9 227
9 225
9 218
9 178
8 162
8 158
8 158
7 157
7 155
7 154
5 153
5 145
5 147
5 151
5 158
63 162
63 163
65 160
65 160
87 160
87 156
86 149
86 149
85 146
83 141
83 132
83 130
83 128
83 128
83 128
82 126
25 126
23 126
23 126
1 125
1 124
1 125
1 125
1 128
1 129
1 129
1 129
1 129
1 129
1 134
1 135
1 138
2 119
2 122
2 139
3 146
3 147
3 145
3 137
3 140
3 140
3 141
3 140
3 140
14 137
14 137
14 137
14 137
14 137
14 137
14 137
14 137
17 137
17 137
17 137
17 137
17 136
17 137
17 137
6 136
6 135
6 133
6 130
6 129
6 124
6 120
6 120
6 120
3 120
12 322
12 322
12 321
12 321
12 320
12 323
12 323
11 321
11 321
11 321
11 321
11 321
11 320
11 320
11 319
11 318
11 318
11 318
12 320
12 320
12 318
3 115
3 115
3 115
3 115
3 115
3 115
3 110
3 105
3 97
3 94
3 88
3 86
3 84
3 81
3 81
3 81
4 82
9 86
9 86
11 86
11 86
11 90
11 95
11 99
11 101
11 152
11 158
11 159
11 180
12 179
12 191
12 197
14 271
14 279
14 321
14 339
14 343
15 343
15 346
15 438
15 480
15 496
13 519
13 538
13 537
13 567
13 568
13 579
13 582
13 589
13 991
13 1022
13 1031
11 1038
11 1042
11 1082
11 1091
12 1211
12 1220
12 1223
12 1225
12 1226
58 4034
58 4035
58 4035
58 4035
58 4036
58 4036
58 4036
59 4037
59 4037
59 4037
59 4037
59 4040
59 4039
59 4039
59 4039
12 1074
12 1074
12 1073
12 1073
12 1076
12 1076
12 1076
12 1078
12 1079
12 1085
12 1085
12 1086
12 1090
12 1091
12 1091
12 1102
12 1103
12 1103
12 1103
12 1103
11 1101
11 1101
11 1101
11 1111
11 1111
11 1111
11 1111
11 1111
11 1112
11 1112
11 1103
11 1103
11 1103
11 1102
11 1102
11 1102
9 1102
9 1101
9 1088
8 1087
4 1075
3 1075
1 1072
1 1074
1 1082
1 1077
1 1073
1 1067
1 1006
1 995
1 993
1 993
1 992
1 982
1 969
1 851
1 838
1 832
1 832
1 830
1 823
1 802
1 653
1 628
1 602
1 587
1 584
1 586
1 579
1 568
1 553
1 545
1 525
1 118
1 115
1 108
1 108
1 99
1 98
1 98
1 98
1 100
1 99
1 100
1 100
1 100
1 100
1 105
1 106
1 106
1 108
1 121
0 122
98 126
98 126
98 126
98 122
99 123
99 123
99 125
99 133
101 159
101 164
101 164
101 161
101 161
101 159
101 159
101 158
3 163
3 164
3 165
2 162
2 161
3 162
3 162
3 162
3 162
3 161
3 162
3 163
3 165
3 166
3 167
3 169
3 169
3 170
4 172
4 171
4 175
4 175
3 175
3 177
3 178
3 178
3 178
3 178
3 182
4 186
4 187
4 190
4 196
3 196
3 190
3 182
3 181
3 181
4 182
5 181
5 182
6 182
7 283
7 286
9 287
9 289
9 289
9 287
9 288
9 287
9 288
9 288
10 286
9 284
9 288
8 282
8 272
7 174
7 170
7 172
7 174
6 174
6 180
6 182
6 171
6 174
6 175
6 177
121 7348
122 7348
122 7347
122 7348
122 7341
122 7341
122 7341
122 7341
122 7341
122 7341
122 7332
126 7333
126 7333
126 7326
126 7313
11 137
11 135
11 135
11 135
11 135
11 135
11 135
11 133
11 121
9 104
9 102
9 102
9 102
9 102
9 102
9 102
9 102
9 86
9 85
9 81
9 81
9 81
9 81
9 81
9 81
9 80
9 80
9 80
9 77
9 75
9 74
9 73
9 73
9 73
9 72
9 71
10 71
10 66
10 66
86 65
86 64
86 64
86 64
85 64
85 63
85 57
85 56
85 51
85 53
85 52
85 52
85 51
85 47
85 47
9 45
9 44
9 44
9 43
9 43
9 41
9 40
7 40
7 39
7 40
7 45
7 46
7 45
7 47
6 47
6 47
6 45
6 34
6 34
6 35
6 35
6 35
6 35
6 32
6 37
6 31
6 28
6 28
6 38
6 55
6 57
6 58
5 58
5 58
5 64
5 64
5 64
5 66
6 68
6 69
6 69
6 69
2 68
2 68
2 68
2 106
2 106
2 108
2 108
3 108
3 108
3 108
3 108
3 107
3 107
3 107
3 107
3 107
3 107
3 107
3 69
3 69
3 68
3 68
2 68
2 68
2 68
2 68
2 68
2 68
2 68
2 68
2 68
2 68
2 68
2 68
2 68
2 68
2 67
2 67
2 67
2 67
1 67
1 67
1 67
1 67
1 67
1 68
1 68
1 68
1 67
1 67
1 64
1 64
1 63
1 63
1 63
1 63
1 63
1 63
1 63
7 63
7 63
7 63
7 63
7 62
7 62
8 64
8 62
8 60
8 57
8 56
8 56
8 53
8 53
8 55
8 55
8 55
2 55
2 55
2 55
2 55
1 53
1 52
1 47
1 46
1 46
1 43
1 31
1 14
3 11
4 11
4 11
4 11
4 3
4 3
4 3
4 2
3 1
3 1
3 1
3 1
3 1
3 1
3 1
3 1
3 1
3 1
3 1
3 1
3 1
3 1
3 1
3 2
3 2
3 2
3 2
3 2
3 2
3 2
3 2
3 2
3 2
3 2
3 2
3 2
3 2
3 2
3 1
3 1
3 1
3 1
3 1
3 1
3 1
3 1
3 1
3 1
3 1
3 1
3 1
3 1
3 1
3 1
3 1
3 1
3 0
3 0
3 0
3 0
3 0
3 0
3 0
3 0
3 0
3 0
3 0
3 0
3 0
3 0
3 0
3 0
3 0
3 0
3 0
3 0
3 0
3 0
3 0
3 0
3 0
3 0
3 0
3 0
3 0
3 11
3 11
3 11
3 11
3 11
3 11
3 11
3 11
3 11
1 11
1 11
1 11
1 11
1 11
1 11
0 1
0 0
0 0
0 0
0 0
0 0
0 0
0 0
3 62
3 62
3 62
3 62
3 62
3 62
3 62
3 62
3 62
3 62
3 62
3 62
22 70
22 70
22 70
22 70
19 8
19 8
19 8
20 8
20 8
20 9
20 9
20 9
20 9
20 9
20 9
20 9
20 9
1 2
1 2
1 2
1 2
1 2
0 2
0 5
0 4
0 4
0 4
0 4
0 4
0 4
0 4
0 4
0 3
0 3
0 3
0 3
0 3
0 3
0 3
0 0
0 0
0 0
0 0
0 0
0 0
0 0
0 0
0 1
0 1
0 1
0 1
0 1
0 1
0 1
0 1
0 1
0 1
0 1
0 1
0 1
0 1
0 1
0 1
0 1
0 1
0 2
0 2
0 4
0 4
1 7
1 7
1 7
1 7
1 7
1 7
1 7
1 7
1 7
1 7
1 7
1 7
1 7
1 7
1 7
1 7
1 6
1 6
1 5
1 4
1 6
1 6
2 33
2 36
2 37
3 38
3 38
3 40
3 40
3 40
3 40
3 40
3 40
3 40
3 40
3 40
3 40
3 40
3 40
3 39
3 39
3 39
3 39
3 39
3 39
3 39
3 39
3 39
3 40
3 41
4 41
4 41
4 44
4 47
4 48
4 60
4 61
4 64
4 64
4 64
4 76
4 76
4 76
4 76
4 79
5 83
5 84
5 84
5 84
5 84
5 84
5 84
5 84
5 84
5 83
5 83
5 83
5 84
5 86
5 88
6 88
6 89
6 94
12 129
12 137
12 141
13 150
14 157
14 160
15 169
15 170
15 171
17 172
18 177
19 185
40 486
41 502
42 506
42 508
43 511
42 511
42 514
42 514
42 516
43 516
43 517
43 517
45 519
49 533
49 534
49 538
49 540
49 540
49 540
49 540
49 541
49 542
48 542
48 542
49 551
49 552
49 557
48 530
48 531
48 552
47 559
48 565
48 576
48 585
48 615
50 683
50 688
50 691
71 755
72 757
72 758
72 760
72 767
72 769
72 769
72 769
72 768
72 771
72 770
77 775
77 786
77 802
81 823
81 827
81 830
80 836
80 835
81 835
81 834
81 830
81 812
81 812
82 812
85 816
85 813
85 815
85 816
85 815
85 813
86 813
85 813
85 813
86 817
87 832
87 835
88 840
88 841
88 842
88 842
87 843
86 842
86 840
86 838
86 839
86 836
85 835
85 831
85 826
77 766
76 760
76 758
75 758
75 757
75 756
75 757
75 756
75 755
74 786
74 782
69 766
51 474
51 472
51 472
51 473
51 471
52 483
52 483
52 485
52 487
51 491
51 517
50 537
48 546
44 539
44 542
44 545
44 545
44 546
45 553
45 554
46 554
46 552
47 551
47 551
46 541
46 541
46 530
46 530
46 529
45 505
45 504
45 501
45 484
45 481
45 457
45 433
44 427
40 427
17 359
14 377
14 384
14 386
14 381
14 376
14 377
14 378
14 374
14 371
14 371
14 365
14 348
14 333
12 271
12 271
12 272
12 285
13 320
13 327
13 333
13 338
14 344
14 352
13 356
10 358
10 360
10 363
10 364
10 370
10 371
8 373
9 372
9 372
9 385
8 375
8 381
7 382
7 381
7 380
7 380
7 378
7 377
7 383
7 384
7 383
7 383
7 385
7 385
7 384
7 384
7 384
6 384
6 383
7 383
7 381
8 380
8 379
8 380
8 341
8 341
8 340
8 338
8 338
8 341
8 341
8 335
7 332
7 333
7 330
7 324
7 318
8 273
7 265
7 260
7 261
7 254
7 255
7 256
7 258
7 253
7 253
7 253
7 255
7 257
7 267
8 274
9 283
9 298
9 301
11 303
11 303
11 306
11 305
11 304
11 305
11 305
11 305
11 304
11 303
11 306
10 277
9 274
9 269
9 272
9 273
8 273
8 265
8 266
8 266
8 264
8 263
8 263
8 262
8 259
8 259
8 259
7 241
6 199
6 196
7 202
7 201
7 201
7 205
7 198
7 194
7 190
6 189
6 189
6 186
6 189
6 188
7 185
7 181
7 157
7 161
7 158
6 178
11 261
11 274
11 277
11 282
11 293
11 295
12 315
12 315
12 319
12 321
11 331
11 332
11 335
11 337
11 337
11 341
11 344
11 347
11 347
11 346
11 347
11 348
11 351
11 351
11 351
11 351
12 348
12 348
12 345
13 342
13 339
13 339
13 338
13 336
13 332
14 329
14 331
18 333
18 351
40 596
46 646
53 697
55 727
61 779
63 806
66 864
66 862
66 864
66 863
66 861
67 858
67 860
66 862
66 859
62 860
62 860
62 860
62 860
62 863
64 889
64 889
64 892
72 910
76 1382
76 1386
81 1418
81 1436
82 1445
86 1461
86 1473
87 1483
87 1487
87 1491
87 1492
88 1505
88 1506
88 1508
88 1507
88 1505
86 1048
86 1046
85 1052
129 1198
135 1218
136 1250
140 1257
147 1275
150 1282
156 1282
159 1285
159 1278
159 1256
159 1252
159 1258
159 1261
159 1262
159 1261
159 1253
159 1249
158 1224
153 1156
153 1145
152 1139
151 1139
151 1145
150 1138
150 1138
150 1138
150 1136
150 1133
150 1121
150 1121
150 1120
150 1120
150 1120
150 1118
150 1113
150 1110
150 1110
150 1110
150 1111
150 1110
150 1108
150 1108
150 1107
150 1107
147 1103
146 1102
146 1096
146 1093
146 1094
146 1100
146 1098
146 1101
146 1123
146 1119
144 1115
144 1119
143 1089
103 758
102 760
99 919
99 920
99 907
99 914
99 905
99 895
100 881
99 875
99 872
99 867
99 866
99 864
99 866
99 869
100 887
99 889
99 901
98 918
96 904
96 906
96 906
87 876
87 875
86 865
82 817
81 802
80 797
80 792
80 785
79 781
79 780
79 782
78 802
78 794
78 801
78 802
69 802
67 812
65 804
61 799
60 792
23 581
21 580
15 555
12 549
10 540
9 539
3 538
3 538
3 535
3 536
3 538
3 540
3 537
3 536
3 537
3 536
3 536
3 534
4 534
4 537
4 537
4 534
4 531
4 531
4 528
4 528
4 527
4 525
4 526
4 531
4 531
4 530
4 530
4 531
4 549
4 551
4 553
4 553
4 552
4 552
4 552
4 573
4 584
4 586
4 585
4 583
4 583
4 582
4 581
4 579
4 582
4 579
5 563
5 562
5 561
5 552
5 532
5 517
5 496
4 298
4 285
4 260
4 251
4 250
4 249
3 248
13 249
13 252
13 254
13 254
13 253
14 252
14 246
13 223
13 218
13 203
13 194
13 193
13 190
13 188
13 186
14 186
14 186
5 186
5 186
5 188
4 185
4 185
4 184
4 181
4 170
4 155
4 151
4 147
4 147
4 145
4 136
4 136
4 135
4 135
4 139
4 140
4 139
4 139
4 141
4 140
4 134
5 134
5 135
5 134
5 133
6 128
7 128
7 131
7 139
8 154
8 161
8 162
7 161
7 156
7 154
6 155
6 155
6 156
6 156
6 158
6 161
5 168
5 170
5 209
5 229
5 235
5 236
5 238
5 223
5 224
5 224
5 228
5 229
5 229
5 227
5 205
5 195
5 193
5 194
5 194
5 194
5 194
5 194
5 194
5 190
5 190
4 185
4 184
4 184
4 174
4 174
4 175
4 174
4 175
5 175
5 176
5 175
5 175
5 172
5 173
5 175
5 171
5 170
5 169
5 168
5 170
6 172
6 175
7 179
7 179
7 179
7 179
7 179
7 195
7 198
6 199
6 200
6 201
6 201
6 202
6 200
6 204
6 207
6 207
6 207
6 207
6 206
6 206
6 206
6 206
6 207
6 206
7 206
7 205
7 204
7 204
7 204
7 204
7 201
7 200
7 199
6 199
6 200
6 200
6 200
6 200
6 198
7 196
8 186
7 175
8 184
8 194
8 196
8 197
8 195
8 194
8 194
8 196
9 196
9 194
9 186
9 188
9 178
8 126
8 124
8 123
8 124
8 123
8 125
8 124
8 123
8 126
8 126
8 126
8 127
8 127
8 128
8 130
8 131
8 131
8 131
8 131
8 131
8 131
8 131
8 131
8 130
12 130
13 130
13 129
13 129
13 129
13 129
13 129
12 128
12 129
12 129
12 129
12 129
15 128
15 127
15 132
15 132
11 135
10 133
10 133
10 132
10 136
9 133
9 132
9 132
9 132
9 132
9 116
9 116
6 116
6 114
6 116
6 117
6 115
6 113
6 111
7 112
7 113
7 113
7 113
7 114
10 129
10 136
10 137
10 135
10 135
9 135
9 135
9 135
10 135
14 137
14 137
14 137
14 137
14 137
14 137
14 132
16 131
16 124
16 124
15 123
15 118
13 117
13 113
13 104
13 96
13 96
13 95
13 95
12 93
12 93
13 90
13 95
13 101
13 104
13 94
14 107
14 104
14 102
14 99
14 98
14 97
14 95
14 95
14 95
14 94
13 95
13 95
14 95
15 96
15 95
15 93
15 94
15 95
15 96
15 96
15 96
15 96
15 98
16 109
16 112
16 116
15 121
15 123
15 122
15 121
15 121
15 121
15 122
15 121
15 121
15 122
15 123
15 125
15 126
15 124
15 125
15 121
15 122
15 123
15 123
15 118
15 120
15 122
15 123
15 125
15 126
15 124
15 127
15 139
15 141
15 146
15 147
15 155
15 152
15 309
15 305
15 305
14 306
14 308
14 317
12 306
12 310
12 313
12 315
11 317
11 321
11 320
10 321
10 321
6 165
6 184
5 184
5 184
4 184
4 184
4 184
4 185
4 185
4 185
4 185
4 185
5 185
399 190
399 188
399 191
399 192
399 192
399 196
399 202
399 205
399 201
399 200
399 199
399 194
399 186
399 183
399 183
398 183
4 179
4 180
4 181
4 182
4 186
4 184
4 185
4 186
13 196
13 196
12 196
12 197
12 198
12 198
13 198
13 197
13 198
13 197
13 193
13 191
12 181
12 179
12 179
10 174
3 163
3 163
3 163
3 168
3 168
2 167
2 166
2 167
2 167
2 165
2 163
2 163
2 161
2 166
2 166
2 165
2 173
2 174
1 171
1 170
1 169
1 170
1 168
1 166
1 164
1 161
1 149
2 149
2 145
2 145
2 137
2 136
1 134
1 134
1 132
1 132
1 132
1 121
1 120
1 114
1 112
1 110
1 108
1 105
1 105
1 104
1 103
1 102
1 84
1 84
1 83
4 86
4 85
4 85
4 85
4 85
4 85
4 85
4 85
4 85
4 84
4 84
4 79
6 77
7 76
8 72
8 64
5 60
5 57
5 56
5 55
5 55
6 54
6 53
6 53
6 53
6 51
6 50
6 49
6 46
6 43
6 41
6 38
6 37
6 36
3 35
3 35
2 34
2 33
2 33
2 33
2 33
2 33
2 33
2 33
2 32
2 32
2 32
2 32
2 31
2 31
2 30
2 32
2 20
2 17
2 15
2 15
2 16
2 16
26 417
26 418
26 418
26 417
26 417
26 417
26 417
26 414
26 410
26 410
26 409
26 409
26 409
26 409
26 409
26 408
2 6
2 6
1 6
1 7
1 7
1 7
1 8
2 11
2 11
2 11
2 11
425 119
425 119
425 120
425 120
425 120
425 120
425 125
425 125
569 129
569 131
572 179
571 180
571 180
571 180
571 180
558 180
165 71
164 70
160 70
160 70
149 71
149 71
148 71
4 67
4 67
1 19
1 14
1 14
1 14
0 13
0 13
0 13
0 13
0 13
0 13
0 12
0 12
0 12
0 12
0 12
0 12
0 12
0 12
0 12
0 12
1 12
2 12
2 12
2 12
2 15
20 552
20 552
20 552
20 552
20 552
20 552
22 552
22 552
22 552
22 552
22 552
22 552
23 629
23 629
23 629
5 89
5 89
5 89
5 89
5 89
5 89
4 86
3 86
3 86
3 86
3 86
3 86
2 8
2 8
3 8
3 8
3 8
3 8
3 8
3 8
3 8
3 8
3 8
3 8
3 9
3 9
4 7
4 7
4 7
5 7
6 6
6 4
6 4
6 4
6 4
6 4
6 4
6 4
6 4
6 4
6 4
6 4
6 4
6 4
6 1
6 1
6 1
7 1
7 1
7 1
7 1
7 1
7 1
7 2
7 2
7 2
7 2
7 3
7 3
7 3
7 3
7 3
7 3
8 3
9 3
11 4
33 4
156 4
210 3
301 3
312 3
361 3
434 3
469 3
491 3
491 3
491 2
492 2
493 2
494 2
496 2
496 2
496 2
496 2
497 2
503 2
511 2
514 2
515 2
517 2
528 2
562 2
588 2
596 2
598 2
601 2
603 2
605 2
605 2
607 2
606 2
607 2
607 2
607 2
611 2
623 4
623 4
627 4
627 4
629 4
629 4
630 4
630 4
629 4
629 4
633 4
633 4
633 4
633 4
633 4
633 4
633 4
633 4
633 4
632 3
632 3
630 3
630 3
631 3
632 3
633 3
633 6
633 6
634 6
642 6
644 6
648 6
646 6
646 5
644 5
646 5
684 5
727 5
727 5
728 5
723 5
718 2
700 2
691 2
674 2
648 2
631 2
623 2
609 2
605 2
602 2
585 2
557 2
538 2
484 2
466 2
459 2
446 2
428 2
426 2
423 2
402 2
381 2
375 2
326 2
311 2
291 2
267 3
263 8
263 8
266 8
266 7
262 7
261 7
261 7
259 7
259 7
259 7
260 49
259 49
261 50
255 50
252 50
248 45
244 45
226 45
196 45
163 45
157 45
157 45
155 45
154 45
153 45
149 3
148 2
142 2
140 2
140 2
139 2
138 2
136 2
136 2
136 2
135 2
137 2
1641 55
1646 55
1646 55
1646 55
1648 55
1645 55
1647 55
1649 55
1651 55
1654 55
1654 55
1654 55
1654 55
1655 55
1817 59
1818 59
310 6
313 6
306 6
310 6
309 6
306 6
295 6
295 6
284 6
301 6
299 6
297 6
297 6
292 6
124 3
503 5
475 5
475 5
475 5
475 5
475 5
474 5
475 5
483 5
488 5
488 5
488 5
488 5
488 5
488 5
90 3
91 3
91 3
92 3
95 3
98 3
98 3
100 3
101 3
103 3
103 3
125 4
132 4
133 4
132 4
134 3
133 3
130 3
183 6
181 6
179 6
183 6
182 6
182 5
182 5
181 5
180 5
179 5
179 35
183 37
183 37
185 37
199 39
203 40
203 40
204 40
205 40
204 40
204 41
209 41
208 41
207 41
207 42
244 43
280 13
289 16
290 16
296 16
356 18
369 18
399 19
409 19
414 19
415 19
417 19
422 19
423 22
428 25
425 25
423 25
423 25
434 25
453 26
473 26
474 26
474 26
474 26
472 26
472 25
471 25
470 25
469 25
467 25
465 26
495 26
499 26
499 26
499 26
511 26
505 26
514 26
520 26
520 26
521 26
522 26
525 26
527 26
527 26
531 25
531 25
529 25
527 25
525 25
517 25
513 25
513 25
525 25
525 25
536 25
539 25
541 25
548 25
549 25
551 25
554 25
556 25
558 25
555 25
559 25
561 25
559 24
540 24
537 24
568 24
592 24
602 27
603 27
600 27
549 24
549 24
549 24
549 24
548 24
547 24
551 24
554 24
553 25
562 25
572 25
577 24
583 22
582 26
588 27
581 25
583 25
583 25
582 25
583 27
582 26
570 26
569 26
571 26
566 26
548 25
511 24
505 22
496 22
483 21
395 18
383 18
369 18
372 18
367 18
398 19
396 19
396 17
402 19
401 19
400 19
1441 170
1443 170
1444 170
1441 169
1437 169
1437 169
1437 169
1438 169
1446 169
1446 169
1447 169
1448 169
1444 169
1450 169
1459 169
1437 160
393 17
388 17
387 17
370 17
363 17
360 17
359 17
361 17
363 17
365 18
363 18
363 18
363 18
362 18
368 18
369 18
378 18
378 18
379 18
379 18
381 18
371 19
372 21
363 21
356 21
354 22
350 22
348 22
347 22
349 23
350 23
341 23
342 23
335 23
332 22
332 22
336 22
382 24
338 24
325 24
327 24
329 24
328 24
335 24
341 24
345 24
345 24
358 24
360 24
342 24
337 24
337 23
334 23
318 20
316 20
316 20
315 14
304 11
303 11
303 11
303 11
304 12
303 12
301 12
301 13
298 13
291 14
285 14
282 15
282 14
283 14
282 14
282 14
282 14
280 16
278 16
266 16
266 15
243 15
242 15
241 15
238 14
237 14
236 13
235 13
236 13
234 13
231 13
230 13
229 13
228 14
227 14
216 14
215 14
214 15
211 15
205 15
195 15
193 15
188 15
188 15
186 15
186 15
184 15
182 15
175 15
172 15
171 15
171 15
172 13
172 13
171 13
184 14
184 14
181 14
206 14
220 14
219 14
219 14
218 14
235 14
251 12
250 10
274 12
274 12
274 12
270 12
286 12
286 11
283 11
282 11
286 11
288 11
268 11
269 11
258 11
274 11
242 8
239 8
236 8
235 8
233 8
243 8
243 8
242 8
240 8
235 8
229 8
226 8
229 8
226 8
223 8
223 8
223 8
223 8
222 7
221 13
222 13
222 13
222 13
222 13
221 13
221 12
220 12
220 11
220 11
220 11
221 11
221 11
221 11
220 11
218 5
352 8
352 7
352 6
351 6
349 6
347 6
347 6
347 6
348 6
348 6
350 8
355 9
358 9
358 9
358 8
266 6
282 6
297 6
301 7
303 7
304 7
305 7
309 7
347 7
414 7
442 5
443 5
455 5
456 5
456 5
465 5
504 8
526 8
532 9
574 11
576 11
575 12
577 13
582 13
579 13
583 14
582 14
582 14
558 14
541 14
541 14
537 14
535 14
518 14
513 14
532 14
578 11
654 12
738 13
784 13
801 13
812 13
810 14
808 14
808 14
842 14
841 14
836 14
834 14
822 15
822 15
821 15
827 15
828 15
824 16
817 16
816 16
816 16
816 16
816 16
817 16
817 16
814 16
814 16
814 16
814 16
814 16
814 16
815 16
815 16
814 15
814 15
814 15
816 15
817 15
816 15
818 15
820 15
820 15
820 15
822 15
823 15
823 15
823 15
823 15
823 15
822 15
822 15
821 15
821 16
821 16
820 16
824 16
823 16
821 16
818 16
814 15
804 15
787 15
778 15
727 14
704 14
692 14
688 13
686 12
683 12
683 12
678 12
656 12
610 12
587 12
581 12
562 12
558 12
555 11
549 11
516 9
506 18
496 16
460 14
460 14
455 14
454 14
450 13
449 13
448 13
448 13
448 13
448 13
445 13
432 13
429 13
414 4
387 3
366 3
337 3
261 3
163 3
88 2
77 2
61 2
128 2
127 1
121 1
118 2
92 1
90 1
91 1
90 1
90 1
98 2
98 2
99 2
99 2
102 2
102 2
102 2
102 2
101 2
101 2
101 2
101 2
101 2
101 2
101 2
101 2
101 2
95 1
95 1
96 1
99 3
101 3
101 3
99 3
98 3
101 3
100 3
100 3
102 3
103 3
105 4
105 4
105 4
107 4
107 4
107 4
108 4
118 5
132 5
133 5
134 5
134 6
130 6
128 6
128 6
127 6
126 6
126 6
126 6
126 6
126 6
126 6
126 6
126 6
125 6
125 6
125 6
125 6
125 6
125 6
139 6
140 6
140 6
141 6
149 6
149 6
151 6
152 6
152 6
152 6
153 6
154 6
154 6
154 6
154 6
160 6
160 6
162 6
163 6
163 6
163 6
163 6
163 6
163 6
163 6
163 6
163 6
162 6
161 6
161 6
160 6
94 5
94 5
94 5
94 5
94 5
94 5
93 5
93 5
93 5
91 5
91 6
89 6
87 6
86 6
86 7
86 7
86 7
86 7
86 7
86 7
86 7
86 8
85 8
85 8
85 8
84 8
84 8
84 8
82 8
80 6
79 6
80 6
79 6
79 6
75 6
81 6
81 6
81 6
79 6
75 5
75 5
75 5
73 5
73 5
72 5
70 5
47 3
47 3
47 3
47 3
47 3
47 3
47 3
47 3
47 3
47 3
47 3
47 3
47 3
47 3
47 3
48 3
48 3
48 3
46 3
46 3
45 3
43 3
41 3
33 3
33 3
30 3
29 3
22 3
22 3
22 3
21 3
20 3
20 3
20 3
19 3
19 3
17 3
16 3
12 3
12 3
10 3
9 3
9 3
9 3
9 3
9 3
9 3
9 3
9 3
9 3
9 3
9 3
9 3
9 3
9 3
9 3
9 3
9 3
9 3
9 3
9 3
9 3
9 3
12 18
12 18
15 19
17 58
18 68
18 68
18 69
19 71
28 80
28 81
30 83
30 83
30 84
31 84
32 87
32 87
32 87
32 87
32 88
32 89
32 89
32 89
31 94
30 96
30 96
29 96
24 97
25 97
24 99
24 101
24 102
26 126
26 130
26 138
26 144
26 151
26 153
26 160
26 160
26 160
26 162
26 162
26 162
26 162
26 162
26 163
26 163
26 163
26 163
26 163
26 166
26 167
26 168
26 168
26 169
26 169
26 169
26 169
26 169
26 170
26 170
26 171
26 171
26 172
26 172
26 181
26 181
26 181
26 181
26 181
26 181
26 181
26 183
26 183
26 185
26 185
26 186
26 186
26 186
26 187
26 188
26 188
26 188
26 187
26 188
26 188
26 192
26 192
26 192
26 193
25 194
25 196
25 196
25 194
25 194
25 194
25 193
25 192
26 191
26 190
24 175
21 173
20 169
19 141
17 134
16 134
14 132
13 131
4 121
4 119
3 119
3 119
3 118
2 119
2 117
2 118
2 118
2 118
2 118
2 117
2 117
2 116
2 112
2 113
2 115
1 117
1 119
1 122
1 119
1 120
1 129
1 105
2 114
2 119
3 129
3 131
3 138
4 279
4 287
4 314
4 343
5 375
5 385
5 401
5 404
7 425
7 428
9 429
9 431
10 432
9 436
10 442
10 446
10 446
10 448
10 448
11 448
11 448
11 448
11 448
11 447
11 446
9 446
9 446
9 446
9 436
9 437
9 437
9 440
9 443
9 445
9 453
9 466
9 467
9 468
9 470
9 474
9 479
9 480
9 478
9 480
9 489
9 490
9 491
9 493
9 494
9 493
9 494
9 495
9 494
9 493
9 493
9 493
9 494
9 494
9 494
9 494
10 494
10 494
10 494
10 493
10 490
10 489
10 489
10 489
10 489
11 489
11 489
11 487
11 487
11 488
11 488
11 488
10 488
11 490
11 489
11 490
11 490
11 488
11 488
11 488
11 488
11 485
11 480
11 479
11 478
11 469
11 452
11 448
11 443
11 431
9 413
7 403
7 396
7 388
7 385
7 371
7 206
7 198
6 174
6 148
5 120
3 115
2 106
2 103
2 82
2 82
2 82
2 82
2 82
2 79
2 76
2 76
2 75
2 75
2 75
2 75
8 75
8 75
8 77
8 77
8 77
8 77
8 77
8 78
8 78
8 78
8 77
8 75
8 74
8 71
8 67
2 52
2 50
2 50
2 43
2 42
2 42
2 42
3 41
3 37
3 29
3 25
3 26
3 27
3 27
3 25
3 24
3 27
3 28
3 28
3 27
3 27
3 27
2 27
2 27
2 27
2 27
2 27
2 27
1 27
1 27
1 27
1 27
1 28
2 24
2 26
774 40
774 40
774 40
774 39
774 41
774 41
774 41
774 40
774 40
774 40
774 45
774 47
774 49
774 50
773 51
0 37
0 37
0 37
0 38
0 36
0 36
0 39
0 39
0 39
0 38
0 43
0 43
0 46
0 48
0 50
0 53
0 54
0 56
0 58
0 60
0 60
0 60
0 65
0 68
0 69
0 70
0 70
0 70
0 71
0 71
0 71
0 71
0 72
0 74
0 75
0 75
0 72
0 73
0 73
0 73
0 74
0 74
0 73
0 74
0 73
0 74
0 73
0 69
0 69
0 70
0 70
0 79
0 81
0 81
0 82
2 82
2 82
2 82
2 82
2 82
2 81
2 80
2 79
2 79
2 79
2 78
2 78
2 78
2 78
2 78
0 78
0 78
0 78
0 79
0 79
0 79
0 79
0 79
0 79
0 78
0 77
0 77
0 77
0 77
0 74
0 74
0 73
0 73
0 73
0 73
0 73
0 74
0 74
0 74
0 71
0 66
0 67
0 84
0 91
0 94
0 96
0 99
0 99
0 99
0 99
0 101
0 98
0 100
0 103
0 103
0 96
0 96
0 92
0 90
0 89
0 85
0 82
0 79
0 79
0 77
0 76
0 73
0 69
0 68
0 68
0 69
0 69
0 69
0 69
0 70
0 71
0 72
0 72
0 72
0 74
4 1164
4 1166
4 1166
4 1168
4 1169
4 1172
4 1171
4 1172
4 1178
6 1220
6 1233
6 1241
6 1254
6 1264
6 1272
2 197
2 192
2 192
3 192
3 192
3 192
3 195
3 195
3 195
3 195
3 195
3 195
3 195
3 195
3 195
3 195
3 195
3 195
3 195
3 195
3 195
3 195
3 195
3 194
3 194
3 194
3 194
3 194
3 194
3 194
3 194
3 194
3 194
3 195
3 195
3 195
3 196
3 196
3 196
3 197
3 204
3 206
5 207
5 206
5 206
5 205
5 198
5 179
5 174
5 173
5 173
5 173
5 173
5 171
5 169
5 165
5 164
5 163
5 163
5 163
5 163
5 163
5 163
5 163
5 163
5 163
5 165
5 168
5 170
5 171
5 172
5 173
5 174
5 179
5 180
6 181
6 181
6 185
6 185
6 186
6 187
6 188
6 190
7 188
7 189
7 186
7 184
7 182
7 172
7 169
7 167
7 165
8 162
11 159
12 113
12 112
12 113
12 122
12 119
11 114
11 111
11 108
11 106
10 104
10 104
10 104
10 104
10 104
10 105
10 105
10 105
10 105
10 105
10 105
10 106
10 106
10 110
10 113
10 118
10 120
10 124
10 125
10 125
10 133
10 136
10 139
10 139
10 140
10 140
10 140
10 139
10 139
10 139
9 141
8 148
8 151
8 151
8 151
8 150
8 148
8 144
8 140
8 138
8 139
8 139
8 139
8 139
8 139
8 139
8 141
8 133
8 133
8 133
8 134
8 134
8 133
8 133
8 133
8 133
8 133
8 136
8 136
8 136
8 144
8 144
8 144
8 138
8 138
8 137
8 134
8 135
8 134
8 135
8 129
8 127
7 126
7 123
7 124
7 122
8 114
8 107
8 103
8 99
8 97
8 97
9 99
9 99
10 104
10 105
8 105
8 106
9 111
6 109
5 104
3 104
3 102
3 100
3 93
3 91
3 92
3 91
3 91
3 90
3 91
3 91
3 91
3 92
3 92
3 91
3 91
3 91
4 92
4 92
4 94
4 94
4 102
4 92
4 91
4 89
4 88
4 85
4 85
4 83
4 76
4 73
4 72
4 73
4 72
4 70
4 70
4 70
4 70
4 70
4 69
4 69
4 71
4 70
4 70
4 70
4 70
4 74
4 78
4 82
4 82
4 82
4 82
4 83
4 83
4 83
4 82
4 82
4 82
4 82
4 80
4 80
4 80
5 80
6 83
6 83
6 83
6 81
6 81
6 80
6 73
6 72
6 72
6 72
6 71
6 71
6 71
6 70
6 69
6 68
6 68
6 69
6 69
6 68
6 66
6 67
6 67
6 67
6 67
6 67
6 67
6 67
5 66
5 68
4 62
4 69
4 69
4 68
3 64
3 64
3 58
3 56
3 54
3 53
3 53
3 53
3 53
3 53
3 53
3 54
3 54
3 58
3 58
3 59
3 59
3 59
3 59
3 60
2 60
2 61
2 58
2 57
2 50
2 50
2 49
2 49
2 48
2 49
2 49
2 49
2 49
2 48
2 48
2 47
2 47
2 48
2 48
2 48
2 48
2 47
2 46
2 48
2 47
2 47
3 49
3 49
3 49
3 39
4 39
4 36
4 36
4 37
4 37
4 35
4 35
4 35
4 36
4 36
4 37
4 37
2 37
2 37
2 37
2 37
1 34
1 34
1 34
1 33
1 33
1 33
1 33
1 33
1 33
1 33
1 33
1 33
1 33
1 33
1 33
1 33
1 33
1 33
1 33
1 34
1 35
1 34
1 34
1 34
1 35
1 35
1 35
1 35
1 34
1 34
1 34
1 27
1 27
1 27
1 27
1 28
1 29
1 30
1 31
1 34
1 38
1 39
1 39
1 36
1 36
1 36
1 34
1 32
1 32
1 32
1 32
1 31
1 31
1 30
1 30
1 30
1 30
1 32
1 33
1 34
1 34
1 34
1 34
1 34
1 34
1 34
1 34
1 34
1 34
1 36
1 45
1 56
1 71
1 86
1 87
1 90
1 93
1 97
1 97
1 123
1 132
1 141
1 146
1 147
1 147
1 147
1 147
1 147
1 149
1 150
1 150
1 150
1 150
1 152
0 155
0 160
0 161
0 161
0 162
0 162
0 162
0 163
0 165
0 166
0 166
0 166
0 166
0 166
0 166
0 167
0 167
0 167
0 167
0 167
0 168
0 168
0 168
0 168
0 168
0 167
0 171
0 182
0 190
0 205
0 211
0 213
0 214
0 214
0 214
4 214
4 214
4 215
4 215
4 218
4 218
4 217
4 216
4 211
4 210
4 206
4 202
4 202
4 202
4 202
4 202
0 202
0 202
0 202
0 202
0 203
0 203
0 203
0 203
0 202
0 200
0 199
0 198
0 194
0 193
0 191
0 191
0 190
0 190
0 190
0 189
0 189
0 189
0 189
0 188
0 181
0 172
0 161
0 149
0 139
0 134
0 134
0 130
0 127
0 118
0 90
0 83
0 83
0 85
0 85
1 85
1 88
1 101
1 130
1 138
1 142
1 143
1 141
1 140
1 138
1 136
1 134
1 133
1 134
1 135
1 136
1 136
1 137
1 138
1 140
2 144
2 152
3 158
3 159
3 159
3 158
3 158
3 159
3 159
3 159
3 159
3 160
3 160
3 160
3 160
3 159
3 152
3 140
3 133
3 117
3 115
3 115
3 115
3 115
3 116
3 117
3 116
3 116
3 116
3 113
3 113
3 115
3 115
3 115
3 116
3 117
3 117
3 117
3 117
3 117
3 117
3 118
3 118
3 120
3 124
3 123
19 162
19 163
19 170
19 176
19 219
19 222
19 227
19 239
19 248
19 251
19 254
19 253
19 257
19 260
20 261
4 262
4 263
4 264
4 265
4 267
4 270
4 271
4 270
4 270
4 264
4 258
4 258
4 258
5 259
4 259
3 259
3 258
3 255
3 254
3 249
3 244
3 220
3 205
3 203
3 204
3 220
3 241
3 248
2 264
2 266
2 271
9 273
9 284
9 287
9 287
8 289
8 283
8 283
8 280
8 276
8 268
7 260
7 260
7 260
7 260
7 261
0 261
0 262
0 261
0 261
0 262
0 262
0 262
0 261
0 262
0 262
0 262
0 262
0 262
0 263
0 262
0 262
0 262
0 261
0 261
0 259
0 259
0 261
0 264
0 261
2 316
3 317
3 317
3 318
3 329
3 426
4 467
6 486
7 498
7 501
7 504
7 526
7 526
7 527
7 526
7 489
7 486
7 477
7 474
7 425
7 424
7 413
7 409
7 405
7 400
7 397
7 397
7 396
7 394
7 394
7 394
7 393
7 392
7 395
7 394
7 391
7 391
7 391
7 393
7 399
7 402
7 406
7 408
7 410
7 411
7 412
7 411
7 412
7 409
7 407
7 404
7 404
7 405
7 405
7 401
8 374
8 367
8 377
8 367
8 368
8 366
8 370
8 367
8 373
8 377
8 397
8 412
8 435
8 440
8 442
9 442
9 446
9 448
9 451
9 453
9 453
9 457
9 456
9 456
9 456
9 456
9 459
9 459
9 461
9 462
9 462
9 470
9 472
9 472
9 471
9 470
9 473
9 472
9 475
9 476
9 477
9 475
9 469
7 449
7 442
5 389
5 387
5 385
5 382
5 357
2 232
2 228
2 234
2 237
2 239
2 244
2 248
2 249
2 244
2 244
2 251
2 251
2 254
2 259
2 263
2 266
2 267
2 268
2 269
2 269
2 269
2 269
2 269
2 269
2 270
2 274
2 275
2 274
2 276
2 277
3 289
3 286
3 285
3 287
3 284
3 282
3 277
3 276
3 275
3 273
3 273
3 273
3 273
3 272
3 274
3 274
3 273
3 273
3 271
3 269
2 267
2 257
3 244
3 244
3 244
3 242
3 237
2 228
2 225
3 234
3 221
3 218
3 232
3 242
3 241
3 242
3 242
3 245
4 245
4 253
4 259
5 281
5 284
5 286
5 284
5 283
5 281
5 279
7 281
7 280
7 279
7 273
7 273
7 272
12 283
12 287
12 287
12 287
12 286
12 287
12 286
12 286
12 286
10 286
10 285
10 281
10 276
10 277
10 278
5 266
5 254
5 249
5 249
5 246
5 245
5 242
5 242
5 242
5 241
5 241
5 231
5 228
5 227
5 224
5 222
5 221
5 225
5 225
5 226
6 226
6 226
6 229
6 229
6 230
6 226
6 222
6 223
6 223
6 223
6 233
5 220
5 223
5 225
5 226
5 226
7 226
7 228
7 229
7 230
7 234
8 239
8 244
8 242
8 244
8 243
8 243
8 243
8 243
8 243
8 243
8 243
8 243
7 254
7 254
7 254
7 255
7 254
7 253
6 241
6 215
6 201
6 193
6 165
6 157
6 156
6 156
6 153
6 150
5 142
5 138
5 133
4 114
4 114
4 114
4 114
4 114
4 114
4 113
4 112
4 112
4 112
4 113
4 113
7 114
7 116
7 109
7 108
7 107
7 106
7 106
7 106
7 107
7 106
7 106
7 108
7 109
7 110
7 108
7 107
7 107
7 108
7 108
7 109
7 110
7 109
7 108
7 110
7 111
7 110
7 110
7 130
9 133
8 133
14 327
14 334
14 329
14 336
14 342
14 341
14 340
14 341
14 341
14 355
14 370
14 374
14 379
14 378
14 377
14 375
8 162
8 160
8 159
8 160
8 159
8 160
8 163
8 162
8 161
8 164
8 165
7 154
7 155
12 155
12 155
12 159
12 160
12 160
12 173
12 173
12 177
13 183
14 182
16 171
16 182
16 179
16 185
16 188
16 189
16 189
16 189
17 190
12 189
12 190
12 190
12 190
12 190
14 190
14 190
14 189
14 189
14 190
14 188
14 188
14 188
14 189
14 189
14 189
14 189
14 188
14 187
14 186
14 184
14 183
11 182
11 181
11 180
12 181
12 180
12 184
12 187
12 188
12 188
12 190
12 191
12 188
12 186
15 185
15 190
15 190
15 190
15 190
15 190
15 190
15 190
15 189
15 192
15 189
16 187
16 188
16 199
14 176
11 177
11 176
12 174
12 170
12 173
13 207
13 204
13 214
13 215
13 217
13 212
13 215
12 204
12 205
12 200
13 201
13 208
11 214
11 217
11 221
11 223
11 223
11 223
10 225
10 221
10 221
10 222
10 218
10 214
10 214
10 215
10 217
9 217
9 212
9 211
9 210
8 202
8 203
8 198
7 193
7 193
5 193
5 181
5 176
5 176
5 174
4 172
4 172
5 172
5 171
5 172
5 207
6 211
6 211
6 212
6 213
6 213
6 213
6 213
6 215
6 215
6 215
5 215
5 215
5 215
4 216
4 182
4 182
4 182
5 182
5 182
5 182
5 182
5 182
5 182
5 184
5 188
5 182
5 182
5 180
5 180
5 180
5 179
5 179
5 178
4 177
4 173
4 173
4 172
4 172
4 172
4 171
4 171
4 171
4 168
3 167
3 166
3 163
3 150
3 149
3 140
4 142
3 142
4 148
4 141
3 111
3 107
3 104
3 105
3 107
3 103
3 108
3 112
3 114
3 113
3 113
3 113
3 106
3 107
3 104
3 101
3 99
3 100
3 98
3 98
3 98
3 98
3 98
3 98
3 98
3 97
3 98
3 99
3 98
3 99
4 100
4 100
4 99
4 98
4 100
4 101
4 100
4 99
4 99
4 98
4 98
4 98
4 99
4 99
5 101
5 104
6 104
5 104
5 106
5 105
7 105
7 104
7 106
7 106
7 106
7 108
7 108
7 109
7 110
6 110
6 108
6 107
6 107
6 107
6 107
4 107
5 108
5 109
5 118
5 118
5 116
5 116
5 119
5 118
5 118
6 120
6 122
6 124
6 124
6 123
6 122
6 123
9 154
9 156
9 157
9 157
9 157
9 159
9 158
9 158
9 158
9 158
9 159
9 158
9 158
9 157
8 144
5 117
4 113
4 112
4 111
4 111
5 111
5 110
5 106
5 104
5 85
5 88
5 86
5 84
5 84
5 84
5 87
5 87
5 87
5 87
5 86
4 90
5 201
5 201
5 210
6 273
6 279
7 300
6 303
6 305
6 306
6 303
6 302
6 303
6 304
6 304
6 304
5 191
5 191
5 190
5 190
5 190
5 189
5 189
5 189
5 189
5 190
5 190
5 193
5 187
4 185
4 181
4 182
4 182
4 184
4 184
4 182
4 183
4 179
4 181
4 182
4 182
4 186
4 189
4 224
4 236
4 240
4 242
4 244
4 246
3 245
3 245
3 240
4 266
4 271
4 269
4 270
4 269
4 269
3 267
3 267
3 267
3 273
3 273
3 270
3 271
3 268
3 269
3 272
3 272
71 277
71 278
71 280
71 300
73 474
73 532
74 575
74 612
74 651
74 680
114 712
115 720
115 747
115 748
115 746
48 745
49 746
49 746
49 754
49 754
49 755
49 753
49 754
49 753
49 751
10 757
10 756
10 770
10 775
10 775
10 776
10 776
10 776
10 775
10 757
9 700
8 695
8 696
8 698
8 698
8 696
8 694
9 694
9 693
9 692
9 692
9 692
9 691
10 694
11 694
11 694
11 695
11 695
11 695
11 693
11 693
11 692
10 691
10 691
10 692
10 691
10 713
10 712
10 761
10 765
10 775
10 777
10 777
10 779
10 779
10 779
10 778
10 776
11 776
11 757
12 754
12 758
12 758
12 763
12 763
12 763
12 771
12 772
11 751
11 750
11 752
11 753
11 751
11 754
11 755
11 758
11 766
11 767
10 779
10 777
10 778
10 781
10 793
10 794
10 798
11 909
11 915
11 919
11 866
9 657
9 597
8 585
8 607
8 601
8 600
7 578
6 570
9 543
9 544
9 544
9 545
9 546
9 546
9 540
9 541
9 539
9 538
9 535
9 532
9 524
8 518
8 512
8 499
8 499
8 499
8 499
8 502
8 504
8 504
8 507
8 510
9 524
9 524
9 525
9 529
10 530
10 536
10 541
11 565
13 596
13 600
13 604
13 617
12 615
11 617
13 620
13 622
14 628
14 636
14 638
14 641
14 641
14 641
14 639
14 639
16 636
16 605
17 603
16 548
16 543
16 540
16 541
16 540
16 538
18 617
17 619
17 624
17 624
16 619
16 592
16 592
16 592
16 585
16 591
16 591
15 608
15 612
15 617
15 607
15 615
15 631
16 651
16 666
17 673
17 680
17 695
17 706
19 692
19 703
19 703
19 717
20 735
20 735
20 731
20 726
20 585
20 591
20 579
20 581
20 580
20 581
20 582
20 558
19 564
18 561
18 561
18 561
14 560
14 561
14 560
14 560
14 560
15 559
15 556
15 557
15 556
15 556
15 557
15 555
15 556
15 555
16 555
16 554
16 555
16 555
16 553
16 548
16 547
15 547
15 541
15 539
15 524
15 526
15 516
14 513
13 511
13 505
13 497
12 471
11 451
11 451
11 451
11 440
11 439
11 435
9 432
9 430
8 421
8 409
8 409
8 410
8 409
8 424
8 424
8 425
6 422
6 426
5 426
5 425
5 425
5 425
5 423
5 422
4 421
3 329
3 328
3 327
3 326
3 326
3 314
3 333
3 330
3 334
3 316
4 306
5 257
7 224
7 212
7 201
8 207
8 200
6 193
6 181
6 178
6 178
7 172
7 157
7 153
7 146
7 146
7 168
8 195
8 194
8 197
8 193
8 193
8 191
8 197
8 193
8 193
8 193
8 192
8 190
8 187
8 187
8 187
8 187
8 184
8 183
8 183
8 148
8 148
8 148
8 148
8 147
8 147
8 148
8 149
8 148
8 147
8 147
7 146
7 143
7 137
7 136
7 136
8 141
8 143
8 143
8 142
9 142
9 139
9 139
9 140
9 140
9 139
9 138
9 138
9 138
9 138
9 135
9 134
9 134
9 134
9 134
9 134
9 134
9 134
9 134
9 135
9 137
9 137
10 122
10 123
10 122
12 123
13 122
14 121
14 122
14 123
14 125
14 125
14 125
14 125
14 129
14 133
14 139
14 139
13 140
13 138
11 117
10 115
9 110
7 111
7 110
7 110
7 112
7 113
7 114
8 107
10 108
10 109
10 117
10 121
11 178
14 236
15 275
15 301
16 330
17 342
17 357
16 324
16 324
16 322
16 321
16 317
16 313
16 312
16 315
16 316
14 317
14 317
14 318
14 322
14 327
14 328
14 328
14 328
14 332
14 336
14 338
14 342
14 343
14 344
14 345
14 345
14 342
14 341
14 341
14 344
14 344
14 344
14 345
14 345
14 346
14 344
12 338
12 339
12 341
12 341
12 341
12 341
12 341
12 341
12 341
12 342
12 342
12 343
12 343
12 348
12 352
12 353
12 355
12 362
12 363
12 363
12 367
20 377
20 380
21 380
21 378
21 378
21 377
21 381
21 382
19 381
18 377
18 377
18 377
19 376
19 375
19 377
19 378
19 379
19 373
19 370
19 363
19 360
19 359
19 359
19 359
18 359
18 358
18 358
19 356
19 356
19 356
19 355
19 352
18 346
17 338
17 327
17 318
16 251
13 152
12 126
11 119
11 121
11 147
11 147
9 146
10 177
10 181
10 180
10 199
10 201
10 201
10 204
10 206
10 211
10 224
10 229
10 271
10 271
10 237
10 237
10 238
10 238
10 230
46 4577
46 4578
46 4577
46 4576
46 4576
46 4577
46 4577
46 4578
46 4579
46 4579
46 4576
46 4585
46 4588
46 4587
47 4587
11 235
18 340
18 340
18 338
18 335
18 335
18 335
18 334
18 334
18 334
18 334
18 334
18 331
18 330
18 332
17 328
10 221
10 220
10 221
10 224
10 222
10 222
10 216
3 207
2 204
2 204
2 205
2 205
2 205
2 200
2 198
2 197
2 197
2 264
2 263
2 264
2 263
346 274
345 275
349 278
349 278
349 282
350 284
350 300
350 301
350 311
350 312
350 313
350 310
350 307
350 244
350 246
6 235
6 236
2 235
2 235
2 234
2 239
2 239
2 239
2 239
2 241
2 241
2 240
2 239
2 247
2 248
1 211
1 216
1 214
1 191
1 192
1 192
1 187
1 184
1 180
1 168
1 162
1 120
1 121
1 121
4 316
4 320
4 323
4 324
4 324
4 324
4 324
4 324
4 325
4 322
4 322
4 321
4 321
4 321
4 321
1 121
1 120
1 120
13 120
13 120
13 121
13 121
13 121
13 121
13 121
13 121
13 121
13 122
13 122
13 123
13 123
13 123
13 123
1 121
1 120
1 116
1 113
1 105
1 102
1 102
1 102
1 107
1 107
1 107
1 107
1 106
1 106
1 106
1 106
1 105
1 104
1 105
1 105
2 112
2 114
2 119
2 119
2 120
2 137
2 138
2 136
1 129
1 113
2 110
2 102
3 103
3 105
3 112
3 112
3 112
3 112
3 111
3 110
3 107
3 109
3 109
3 104
3 103
3 104
3 102
2 100
2 100
2 99
2 99
2 92
2 89
2 97
2 94
2 96
2 96
3 96
3 96
3 96
3 96
3 97
3 137
3 139
5 146
5 148
5 150
5 145
5 142
5 140
5 140
5 140
5 140
4 142
4 142
4 142
4 143
4 146
4 154
4 156
4 157
6 160
6 165
6 175
6 189
6 194
6 200
6 212
6 232
7 243
11 252
74 257
74 258
75 263
75 265
77 268
77 280
77 284
77 290
77 294
77 294
77 292
77 294
77 296
76 303
76 305
72 306
72 306
72 303
72 303
8 301
8 300
8 300
8 300
8 300
8 299
8 306
8 306
8 305
8 313
7 305
7 301
7 298
7 297
7 296
7 280
7 280
7 280
7 280
7 281
7 280
6 278
6 278
6 276
6 272
6 274
6 279
6 279
6 278
6 278
6 277
6 277
6 277
6 277
9 294
9 293
10 295
10 295
10 295
10 295
10 295
10 294
10 295
9 285
8 284
8 283
8 280
8 280
8 280
8 280
8 280
8 278
6 235
6 233
6 228
6 228
6 228
6 228
7 230
7 240
7 245
7 248
7 248
7 248
7 248
8 261
8 260
8 257
8 259
8 260
8 264
8 258
8 248
8 234
8 216
8 220
8 217
8 204
7 180
7 173
7 166
6 160
6 163
5 161
5 160
5 158
5 153
5 152
5 151
5 148
5 147
5 147
5 143
5 142
5 134
5 133
5 133
5 133
5 133
5 133
5 133
5 134
5 134
5 136
5 135
5 133
5 132
5 133
5 147
5 141
5 140
5 143
5 143
5 143
5 143
5 143
5 144
5 145
5 150
121 153
121 157
121 157
121 156
121 158
121 154
121 152
121 147
121 147
121 147
121 151
121 152
121 154
121 154
121 154
1 132
1 132
2 131
2 136
2 145
3 196
3 214
3 220
3 223
3 230
3 230
3 230
3 231
4 231
4 231
10 232
10 232
10 231
9 230
9 231
8 228
8 228
8 229
8 229
8 225
8 206
8 204
8 206
8 206
8 206
2 205
2 193
2 190
2 187
2 183
2 181
2 182
2 183
2 184
2 184
3 264
3 257
4 296
5 302
5 327
6 332
6 332
7 332
7 331
9 332
8 333
8 334
8 334
8 334
8 333
8 333
8 333
8 333
8 334
8 334
8 336
8 337
8 337
7 338
5 338
5 339
5 340
5 341
6 341
6 340
6 339
6 337
7 336
7 337
7 317
7 315
7 313
7 312
7 312
7 312
7 311
7 312
7 313
7 336
8 334
8 331
8 332
8 338
8 337
8 344
8 384
10 388
10 393
103 401
103 401
103 402
104 402
104 401
105 401
105 401
106 400
105 397
105 397
105 391
105 374
105 343
103 340
103 353
12 417
12 426
12 436
12 440
13 440
13 442
13 444
13 444
12 444
12 444
12 443
12 444
12 445
12 445
12 446
12 447
12 449
12 448
12 447
12 446
12 443
12 443
12 442
12 442
12 442
12 442
11 442
11 442
11 440
11 437
11 436
10 429
7 311
7 299
7 298
7 300
7 276
7 276
8 276
8 277
9 276
9 277
9 277
9 278
9 277
9 277
9 277
9 277
9 277
9 278
9 277
8 277
8 274
9 274
8 273
8 271
8 270
8 270
8 269
8 268
8 266
8 266
8 266
8 266
8 265
8 264
8 262
8 262
7 262
9 264
9 289
9 298
9 297
9 302
9 297
9 279
9 279
9 279
9 279
9 278
9 277
9 272
9 228
8 226
7 224
7 222
7 221
7 218
7 218
7 218
7 218
7 218
7 220
7 232
7 236
7 293
7 286
6 275
6 268
5 258
4 170
4 169
4 168
4 165
4 165
4 166
4 166
4 167
4 167
4 167
4 168
4 167
4 167
4 170
4 173
4 176
4 176
4 177
4 178
4 178
4 178
4 178
4 178
4 178
4 177
4 177
4 177
4 176
4 176
4 176
4 177
4 176
4 176
4 176
4 178
4 177
4 181
4 181
3 182
3 184
2 185
2 187
2 188
2 186
2 186
2 186
2 186
2 187
2 187
2 187
2 187
2 187
2 187
2 187
2 187
2 187
2 187
2 187
2 187
2 187
2 187
2 187
2 187
2 187
2 187
2 187
2 186
2 185
2 185
0 181
0 149
0 141
0 141
0 138
0 138
0 133
0 133
0 132
0 132
0 130
0 128
0 125
0 125
0 124
0 125
0 125
0 125
0 124
0 124
0 125
0 123
0 122
0 118
0 107
0 100
0 44
0 42
0 42
0 42
0 40
0 40
0 39
0 39
0 39
0 38
0 37
0 37
0 36
0 37
0 36
0 35
0 33
0 32
0 30
0 27
0 24
0 24
0 22
0 22
0 22
0 22
0 22
0 22
0 22
0 22
0 22
0 22
0 22
0 21
0 20
0 19
0 19
0 17
0 17
0 16
1 15
1 14
2 11
4 10
5 9
5 8
5 5
5 5
5 5
5 7
5 12
5 24
6 33
6 39
6 40
5 42
5 43
6 43
6 44
7 46
7 47
7 47
8 50
8 51
8 54
8 54
8 54
8 54
8 54
8 53
9 53
9 53
9 54
9 54
9 54
9 54
9 54
9 57
9 58
9 58
9 58
9 58
9 58
9 58
9 58
9 58
9 58
9 58
9 58
9 57
9 57
9 57
9 57
9 61
9 61
9 61
9 61
9 61
9 61
10 65
10 78
10 98
10 136
10 147
10 163
10 170
13 216
14 227
17 239
17 246
17 254
18 260
18 264
18 267
18 272
18 273
18 284
18 276
18 278
18 277
20 323
20 330
21 334
23 336
23 341
24 346
24 353
24 354
24 370
24 371
24 372
24 380
24 384
24 384
24 384
24 384
25 385
24 385
24 385
24 388
26 394
26 394
25 395
22 401
22 406
22 408
22 408
22 409
22 410
21 400
21 396
21 381
21 377
21 378
21 379
21 378
21 377
20 376
19 375
19 375
19 374
19 374
19 371
19 371
19 368
19 369
19 369
19 369
19 369
19 370
18 370
18 370
18 370
17 370
17 370
17 369
17 368
17 364
17 364
17 364
17 364
17 367
17 368
17 373
17 374
17 375
17 375
17 386
18 398
18 399
18 405
18 402
19 402
19 395
19 395
19 394
19 393
19 390
19 389
18 384
17 373
17 335
17 317
17 311
16 301
16 282
11 235
10 235
9 222
9 225
9 213
10 213
21 220
22 222
28 226
29 232
29 226
29 228
30 230
30 222
30 168
30 172
30 168
29 166
29 156
29 154
29 149
33 148
33 139
35 139
36 140
47 191
47 212
48 214
49 218
47 217
46 216
46 217
46 215
46 215
45 209
45 252
45 250
45 250
50 246
90 373
93 379
94 390
94 390
95 395
95 398
95 398
95 394
95 394
95 395
96 395
97 395
97 402
97 409
97 409
97 414
97 414
97 414
98 414
98 415
98 414
98 416
98 417
98 417
98 417
98 421
98 421
98 433
98 434
98 438
98 438
98 438
98 440
98 441
98 446
98 449
98 455
98 458
98 459
98 463
99 467
99 465
99 458
98 444
98 445
98 441
98 441
98 441
98 440
98 440
98 440
98 443
98 441
98 439
98 440
99 440
99 440
100 440
100 439
100 439
100 440
100 439
100 439
100 439
100 434
99 435
97 426
87 424
86 422
81 413
80 405
80 405
79 404
78 399
78 400
77 399
76 398
76 397
76 397
76 397
76 395
76 394
71 393
69 393
69 389
68 383
57 320
57 315
56 317
56 317
56 317
56 320
56 321
56 322
56 319
56 316
56 270
53 265
41 262
37 255
5 106
6 107
5 106
5 106
5 106
6 109
6 104
6 105
6 105
6 107
6 107
6 107
6 103
6 100
6 100
6 98
6 123
4 127
4 126
4 127
4 127
4 124
4 124
4 124
4 118
4 116
4 119
4 116
4 113
4 111
5 113
5 114
6 117
6 120
6 115
6 113
6 101
8 370
8 370
8 367
7 365
7 365
7 364
7 364
7 364
7 364
7 364
7 364
7 364
7 364
7 364
7 363
5 84
23 337
23 336
24 336
24 336
24 336
24 336
24 336
24 336
24 335
24 336
24 341
25 355
25 360
7 112
7 120
6 130
6 142
5 146
6 195
6 195
6 194
6 193
6 193
6 193
6 193
6 193
6 193
6 193
6 193
6 193
6 193
6 192
6 191
5 142
5 140
5 136
5 135
5 135
5 135
5 135
5 135
5 135
5 135
5 135
5 135
5 135
5 135
5 135
5 135
5 135
5 135
4 134
4 132
4 131
4 130
4 130
4 129
4 129
4 129
4 126
4 123
4 122
4 119
4 89
3 84
3 84
3 84
3 84
3 84
3 83
3 73
3 71
3 70
3 68
3 68
3 68
3 68
2 68
2 68
1 68
1 68
1 68
1 68
1 68
1 68
1 68
1 68
1 68
1 68
1 68
1 68
4 68
4 68
4 68
4 68
4 68
4 68
4 68
4 70
4 70
4 70
4 70
4 69
4 68
4 69
4 69
4 69
3 73
1 72
1 68
1 52
0 12
0 13
0 13
0 14
0 14
0 14
0 14
0 14
0 14
0 14
0 14
0 14
0 14
0 14
0 13
0 13
0 13
0 17
0 17
0 19
0 20
0 20
0 20
1 25
1 24
1 24
1 34
1 36
1 38
1 38
1 38
1 38
1 38
1 39
1 40
1 40
1 40
1 40
1 40
1 40
0 40
2 41
2 39
2 39
2 39
2 39
2 39
2 39
2 39
2 39
2 39
2 39
2 39
2 40
2 44
2 44
2 43
0 43
0 44
0 44
0 44
0 44
0 44
0 45
0 47
0 47
0 48
0 48
0 49
0 49
0 52
0 69
0 78
0 98
0 101
0 103
0 107
0 110
0 114
0 123
0 129
0 134
0 134
0 136
0 136
0 141
0 141
0 145
0 145
0 145
0 145
1 145
1 146
2 144
2 144
2 144
2 140
2 140
2 140
2 140
2 138
2 143
2 151
2 152
2 153
2 153
1 153
1 153
0 154
0 154
0 154
1 154
1 154
1 154
1 154
1 154
1 154
1 150
1 149
1 145
1 146
1 144
1 144
1 142
1 142
1 146
1 136
1 137
1 137
1 137
1 137
1 138
1 139
1 138
1 137
1 137
1 137
1 141
1 142
1 142
1 142
1 151
1 152
2 157
2 170
2 170
2 175
2 182
2 183
2 186
2 188
2 187
2 191
2 191
2 189
2 192
2 194
2 192
2 194
2 197
2 209
2 227
2 230
2 233
2 232
3 240
3 240
3 244
3 258
4 353
5 380
5 390
5 419
5 416
5 429
6 435
6 498
6 497
6 495
6 489
6 485
6 485
6 486
6 485
6 485
6 480
6 480
6 477
6 476
6 476
6 476
6 476
6 476
6 476
6 481
6 481
6 482
6 481
6 483
6 483
6 483
7 480
7 473
7 474
7 477
7 482
8 491
8 496
8 507
8 520
7 528
7 530
7 539
7 542
7 546
7 547
7 552
7 561
7 570
7 574
7 575
8 578
8 583
8 584
8 587
8 585
9 590
10 593
10 593
10 596
10 608
10 619
10 620
10 619
12 621
14 626
13 633
15 662
19 728
19 757
23 818
26 846
26 851
26 864
26 862
26 876
26 895
26 899
26 905
26 912
26 913
26 917
26 919
26 929
26 932
26 924
27 922
27 929
27 935
27 935
27 925
27 912
29 913
29 910
29 906
28 894
27 889
26 867
26 822
25 688
25 672
25 670
26 674
26 683
26 687
26 698
26 636
26 637
26 638
26 641
26 643
26 645
26 652
28 690
28 703
28 712
28 714
28 714
28 714
28 714
28 718
28 718
28 732
28 737
28 733
28 733
28 733
28 732
28 731
28 732
28 733
29 736
29 735
29 735
29 730
29 722
29 709
29 721
29 708
29 714
32 724
32 735
32 723
33 737
33 764
34 822
34 956
34 1021
37 1081
37 1137
37 1160
36 1182
36 1193
36 1191
37 1207
36 1205
36 1200
36 1196
37 1200
37 1241
37 1238
40 1273
42 1292
42 1312
42 1332
40 1360
42 1351
39 1331
38 1327
38 1301
33 1257
32 1259
31 1264
33 1287
33 1287
33 1287
34 1294
41 1290
41 1297
42 1313
42 1320
42 1337
42 1341
42 1337
42 1369
42 1390
39 1395
40 1409
40 1399
40 1399
40 1402
40 1420
39 1573
52 1881
57 2005
83 2345
87 2453
88 2486
88 2515
89 2522
90 2521
91 2520
90 2516
90 2502
90 2495
90 2492
90 2497
90 2499
90 2500
90 2501
90 2499
90 2495
90 2488
90 2443
154 2683
160 2692
160 2702
165 2705
167 2712
167 2715
168 2719
169 2719
169 2702
169 2700
171 2704
172 2717
175 2722
176 2727
178 2729
177 2728
176 2722
176 2710
175 2710
175 2709
175 2710
176 2723
174 2722
174 2686
173 2673
172 2664
172 2655
171 2652
171 2650
170 2623
170 2569
169 2431
169 2261
167 2276
167 2260
167 2256
167 2260
167 2260
166 2249
166 2252
168 2238
168 2243
172 2280
172 2293
171 2294
170 2248
169 2225
167 2185
165 2157
165 2125
163 2103
163 2137
161 2142
161 2143
160 2140
168 2152
167 2129
168 2119
167 2117
166 2085
165 2077
168 2109
168 2101
167 2101
167 2099
166 2067
166 2058
166 2014
164 1984
164 1980
163 1895
162 1896
161 1847
161 1826
161 1823
161 1818
161 1799
162 1750
149 1436
134 1178
132 1106
113 912
113 911
112 930
113 1015
113 1066
115 1115
115 1127
116 1149
119 1161
119 1167
119 1157
120 1165
121 1171
121 1174
120 1186
120 1204
113 1250
109 1249
100 1245
40 967
37 977
37 979
37 997
36 1001
37 999
37 999
38 1004
38 1005
38 1000
38 1017
38 1004
38 1001
38 1004
38 1005
37 1011
37 1012
37 1012
37 1005
37 1008
36 1006
36 993
36 997
35 996
35 998
35 1000
35 1002
35 993
35 986
36 979
36 968
36 956
36 949
36 921
36 921
36 921
36 924
36 919
36 917
36 918
34 909
34 897
30 845
30 831
30 815
30 808
30 805
30 802
30 842
31 840
31 830
31 773
31 767
30 761
29 760
23 758
23 757
23 757
25 755
27 758
27 762
24 708
23 699
23 700
23 701
23 704
25 700
25 702
25 703
25 703
25 674
25 664
25 664
28 671
30 674
29 678
30 686
29 709
28 714
28 713
27 711
28 712
27 707
27 671
26 519
26 503
26 476
25 473
25 460
36 449
36 441
36 434
36 429
36 422
36 419
40 606
41 625
39 581
39 588
39 595
39 592
39 593
39 591
39 586
39 592
39 593
39 593
40 590
40 594
41 624
43 677
44 770
44 781
44 797
45 804
46 808
46 811
47 815
61 1021
61 1030
65 1035
65 1044
66 1044
67 1060
67 1038
71 1040
71 1140
76 1190
76 1222
75 1228
75 1237
75 1248
75 1254
76 1251
76 1252
76 1250
76 1259
76 1263
76 1288
76 1291
76 1293
76 1297
76 1302
76 1305
76 1309
76 1311
76 1309
76 1307
74 1257
73 1267
73 1267
73 1266
74 1266
74 1267
74 1265
73 1262
72 1259
72 1258
69 1254
69 1252
69 1246
69 1240
69 1240
69 1232
69 1233
69 1230
67 1230
68 1229
68 1241
68 1242
68 1250
67 1248
67 1246
61 1241
61 1236
60 1231
59 1222
59 1187
59 1182
59 1177
59 1174
59 1169
59 1166
60 1162
60 1160
60 1160
57 1158
56 1159
55 1160
46 1157
46 1157
45 1156
43 1157
43 1156
42 1154
38 873
116 886
116 872
115 868
115 867
115 844
116 854
116 859
116 859
116 851
116 846
116 846
116 840
116 832
115 785
112 686
112 660
112 660
33 643
31 641
30 635
26 632
26 626
7 402
4 404
4 397
4 394
3 390
3 380
3 381
3 376
3 213
3 195
3 190
3 193
3 194
4 192
4 194
4 196
4 195
4 191
4 180
4 178
4 147
4 144
4 145
4 144
4 140
4 140
4 141
4 143
4 154
5 163
5 160
5 155
4 154
4 156
4 155
4 162
4 169
4 178
5 176
6 238
6 260
6 279
11 334
13 349
13 358
13 363
13 363
13 362
13 366
12 363
12 359
12 363
12 354
12 355
12 358
12 357
13 357
13 357
12 359
12 359
12 359
12 359
12 359
11 368
11 369
13 372
13 374
13 375
13 377
13 378
13 380
13 388
13 390
13 391
13 390
13 387
13 386
13 386
13 386
13 386
11 385
11 384
10 384
10 374
10 368
10 365
10 364
10 363
10 363
10 364
13 365
13 366
13 366
13 367
14 364
14 361
14 360
14 359
14 360
14 357
14 355
14 349
14 345
14 344
14 344
14 345
14 341
14 341
14 340
14 339
14 334
14 332
14 331
14 332
15 357
15 363
16 404
17 409
17 412
17 412
17 414
17 416
17 417
17 417
17 419
17 416
17 413
17 413
16 407
15 416
16 495
16 499
16 504
16 504
16 504
16 495
16 504
16 490
14 485
14 409
13 409
13 386
9 326
9 311
9 311
9 312
9 311
9 316
9 334
13 470
13 515
13 519
13 547
13 548
13 549
13 551
13 552
13 553
13 573
13 579
13 582
13 595
13 602
13 590
13 593
13 594
13 595
13 595
13 591
13 589
13 589
13 586
13 588
13 590
13 593
13 594
13 594
13 594
13 595
13 595
13 594
14 595
14 595
14 596
14 592
14 592
14 591
14 714
14 722
14 726
11 726
11 737
11 744
11 748
10 750
10 751
10 767
10 769
10 769
10 769
11 769
11 770
11 770
11 770
12 770
13 771
15 772
15 775
15 777
15 778
15 779
16 781
16 781
15 776
15 752
14 758
13 723
13 730
14 728
14 730
14 734
14 737
14 737
14 735
14 734
14 735
16 736
22 743
24 765
35 782
36 709
38 709
38 709
38 708
38 708
39 705
39 671
39 674
39 657
39 660
46 679
46 685
47 706
47 707
47 708
47 707
47 707
90 724
96 715
96 587
96 561
96 563
97 564
101 569
101 569
101 574
102 577
102 577
103 561
105 555
105 541
105 538
105 537
105 536
105 535
105 537
105 538
105 540
101 540
101 541
101 527
101 522
101 526
102 543
101 542
101 542
102 542
102 542
102 542
102 542
102 542
102 542
102 542
103 544
103 543
103 545
103 541
102 409
101 406
101 399
101 394
101 381
100 381
100 385
100 383
100 382
100 365
100 366
101 367
103 368
107 387
110 433
113 461
113 465
111 471
111 479
114 491
120 580
121 586
135 635
135 648
135 653
135 653
135 653
135 655
135 638
135 622
135 623
135 624
135 623
135 620
135 620
133 621
132 618
132 616
132 616
123 610
117 583
114 560
112 554
112 553
112 559
112 560
112 562
112 558
111 560
111 560
110 555
109 550
109 546
105 529
105 518
100 503
101 500
83 499
89 507
89 507
64 473
65 477
62 471
62 472
62 469
61 466
61 464
62 464
61 457
61 461
61 461
61 464
61 468
61 468
61 485
61 486
61 487
61 486
62 482
62 478
62 476
62 475
62 473
62 475
62 474
61 466
61 448
61 450
61 450
63 450
62 450
70 460
72 460
73 460
73 460
73 463
74 461
75 458
75 458
75 464
75 464
75 465
75 463
76 462
76 462
76 462
76 454
76 457
76 452
76 453
76 454
75 450
73 446
70 423
69 383
85 500
95 509
113 519
127 513
128 497
122 393
124 389
114 356
113 362
113 362
113 364
113 368
114 367
114 366
114 363
113 352
114 351
114 351
113 352
113 352
113 352
113 351
113 353
113 352
113 351
113 351
113 350
113 379
114 383
114 385
114 394
114 397
114 404
115 409
115 434
115 443
115 450
115 458
115 466
117 524
116 527
116 528
115 532
107 531
106 537
107 561
107 564
107 571
108 576
108 579
112 677
112 687
112 698
113 697
118 703
118 701
118 708
119 716
119 737
119 732
119 753
119 756
119 757
119 771
118 778
118 781
118 785
118 795
118 797
118 797
118 797
119 847
118 856
119 856
116 858
115 859
105 861
105 866
102 871
102 871
102 867
103 867
103 869
103 869
103 861
103 861
103 860
103 861
100 860
100 865
100 868
101 869
101 867
100 867
98 865
97 866
96 896
92 902
87 920
74 910
57 787
51 782
28 774
21 783
22 781
22 774
23 773
23 772
23 757
23 756
23 753
23 749
22 748
22 748
22 748
22 747
22 747
22 748
25 763
25 766
27 788
32 795
32 802
32 801
32 800
32 796
32 786
33 752
32 745
31 738
31 734
31 727
31 723
31 719
31 697
31 680
31 672
31 668
31 663
28 617
28 613
28 611
28 608
28 606
29 596
29 573
29 566
29 556
28 555
28 553
25 467
25 471
25 471
24 469
22 463
22 461
23 446
24 434
24 403
24 400
28 511
29 514
29 532
29 533
29 531
29 528
29 526
29 519
29 517
29 517
29 516
29 453
29 453
29 450
29 450
29 448
29 436
29 430
29 429
29 429
29 424
28 424
28 422
28 422
28 422
28 421
28 421
28 418
28 417
28 413
28 409
27 407
27 405
27 405
27 404
27 395
27 364
27 360
27 331
27 328
27 320
26 318
25 317
24 308
23 302
23 302
23 302
23 302
23 302
23 302
23 300
23 297
23 297
23 296
23 296
23 295
21 292
20 288
8 267
8 259
7 232
7 232
7 223
7 222
7 220
7 219
6 219
6 218
6 217
6 217
6 217
6 217
6 216
6 215
6 214
6 214
6 213
6 213
6 211
6 211
6 211
6 211
6 211
6 211
6 211
6 209
6 208
6 207
6 197
6 190
6 177
6 172
6 171
6 171
6 170
6 168
5 161
4 159
4 153
4 137
0 5
0 1
0 1
1 1
1 3
1 3
1 4
1 26
1 36
1 41
1 44
1 45
1 47
1 47
1 47
1 47
1 47
1 47
2 48
1 49
1 50
1 56
1 92
1 94
1 96
1 97
1 102
1 102
1 103
1 104
2 105
2 117
2 118
2 127
3 150
3 199
3 205
4 219
4 227
4 228
4 230
4 235
4 241
7 275
8 320
8 389
8 395
8 398
8 401
8 407
7 408
7 413
7 414
10 418
10 422
10 423
11 426
17 429
19 433
19 435
19 439
19 440
19 440
19 442
19 442
19 442
19 443
19 443
18 443
17 444
17 445
18 445
18 447
19 448
22 463
22 465
22 467
22 469
22 469
20 469
20 469
20 469
20 472
20 475
20 476
20 477
20 478
20 480
20 482
21 497
21 501
21 502
21 502
21 506
21 509
21 518
21 519
21 522
22 529
24 547
30 1251
30 1256
30 1256
30 1256
30 1256
30 1255
33 1248
33 1230
33 1222
35 1226
36 1235
36 1245
36 1248
36 1253
47 1304
48 1312
42 615
42 627
41 631
41 645
41 645
41 638
41 602
41 609
41 610
41 612
41 610
41 609
41 612
42 612
42 622
42 613
43 612
43 602
42 578
42 514
42 511
44 540
44 542
44 549
44 555
44 545
43 508
41 432
40 418
40 413
40 415
40 415
40 414
41 431
41 427
41 423
39 423
41 422
41 422
40 422
38 418
34 414
33 411
33 409
33 407
33 406
33 406
33 404
33 404
32 386
32 393
32 409
32 422
32 432
32 496
32 502
31 502
31 506
28 490
28 528
29 539
29 550
29 553
29 553
32 552
48 593
49 590
53 596
63 607
63 612
77 617
79 620
79 616
77 608
79 605
79 603
80 600
80 596
80 592
80 585
79 585
78 583
77 571
76 559
77 558
77 558
76 559
75 559
75 559
75 554
73 553
73 550
73 549
72 539
72 526
72 515
72 515
72 509
63 455
62 453
62 448
62 446
62 449
65 481
65 495
67 499
67 505
67 498
67 502
67 503
67 501
69 500
69 496
69 495
69 485
68 484
67 482
67 477
67 476
67 474
67 472
65 419
65 417
65 411
65 408
65 405
65 402
65 401
65 401
65 401
65 400
65 400
65 400
65 400
65 400
65 400
65 400
64 400
64 399
64 399
64 399
64 399
64 399
64 399
64 400
64 400
64 400
64 400
64 399
64 397
64 391
64 372
64 357
64 356
64 284
64 286
64 281
64 279
62 282
60 242
58 234
53 229
49 231
48 231
47 229
23 151
22 151
22 149
22 149
10 130
9 128
10 126
10 126
10 116
10 115
8 113
8 113
8 114
8 114
8 114
8 113
8 113
8 113
8 112
7 112
7 110
7 110
6 110
6 110
6 110
15 110
15 110
15 109
15 108
15 108
19 109
19 110
19 113
20 112
21 113
21 115
46 133
49 130
48 91
53 82
60 80
54 76
138 76
143 77
150 78
162 80
170 79
171 78
172 78
175 78
181 78
185 79
186 78
187 78
189 78
189 78
189 78
199 78
199 78
200 78
202 78
202 78
202 78
203 79
204 79
205 80
206 80
206 80
210 80
215 80
235 80
247 81
250 81
260 83
266 83
278 83
287 83
290 83
325 83
341 82
343 83
347 83
363 84
401 84
471 76
484 82
501 79
509 82
529 84
539 96
613 116
620 117
620 117
628 116
629 116
629 110
629 109
630 109
631 113
633 113
634 114
634 114
634 114
635 114
635 114
635 112
635 112
635 111
636 111
631 110
631 101
630 101
629 101
630 101
650 106
671 106
745 108
820 109
919 110
961 115
973 115
978 115
991 118
1018 126
1025 128
1033 129
1038 131
1038 133
1044 132
1049 124
1054 120
1054 115
1049 114
1049 112
1048 110
1046 109
1023 97
1020 94
1051 103
1051 104
1047 104
1045 102
963 104
959 102
945 102
937 102
933 102
933 101
931 102
927 100
926 100
922 100
922 103
890 94
889 94
889 94
887 94
881 94
878 94
878 94
873 97
871 96
870 96
868 95
867 93
867 94
869 96
861 94
846 91
829 91
803 91
765 91
746 91
744 91
738 91
725 91
701 91
687 93
662 93
655 93
650 87
642 87
627 86
621 86
572 85
568 82
572 89
568 83
559 79
555 74
487 59
487 55
493 56
505 60
511 62
518 62
524 63
529 63
537 64
536 65
543 86
544 88
543 88
542 89
541 90
541 90
542 90
541 91
540 91
539 91
534 91
496 91
500 91
495 91
403 90
397 90
324 87
286 87
206 85
174 83
167 83
164 81
159 78
147 68
147 68
145 68
148 68
156 66
156 66
156 65
155 65
155 65
155 66
155 67
156 68
156 68
156 67
154 64
154 64
151 64
150 64
150 63
150 62
150 62
150 62
150 62
149 62
148 62
146 61
146 61
146 61
145 60
145 87
145 87
147 88
151 89
156 90
158 90
158 90
158 90
157 88
157 88
156 88
156 88
157 88
156 87
153 86
153 88
153 88
153 88
153 89
152 61
152 61
152 61
1200 66
1201 66
1942 66
1943 64
1943 64
1943 64
1943 64
1942 64
1942 64
1943 64
1943 64
1941 64
1933 56
1935 56
1935 56
937 56
928 57
185 59
171 59
163 58
161 58
156 58
148 58
147 57
144 56
138 54
133 31
131 33
131 31
131 31
131 31
131 31
132 31
132 31
131 31
131 31
132 31
131 31
129 31
124 31
121 32
93 32
93 32
93 31
94 30
94 29
94 28
94 28
94 29
93 31
92 31
89 32
86 32
79 34
79 35
79 36
79 36
78 36
78 36
77 35
77 35
77 35
77 35
77 35
77 35
77 35
77 35
77 37
77 38
77 42
77 43
77 44
78 45
78 45
78 45
78 45
77 45
77 45
77 44
77 44
73 42
67 43
64 43
64 43
64 43
64 43
64 43
64 43
64 43
64 43
64 43
63 43
63 42
62 40
62 40
61 40
61 39
60 39
55 39
53 39
5 39
3 40
3 39
3 40
3 40
2 42
2 43
1 51
1 52
1 55
1 60
1 70
1 87
1 91
1 96
1 102
1 105
1 107
1 114
1 109
1 109
1 109
1 110
47 126
55 127
55 129
55 132
55 139
55 149
55 151
56 187
57 190
57 194
57 196
58 199
58 200
58 200
58 200
58 200
4 184
4 184
4 185
4 185
4 185
4 185
4 184
4 184
4 188
4 188
4 186
4 186
4 185
3 185
3 183
3 182
3 180
3 180
3 180
3 180
3 180
3 180
3 180
3 180
3 180
3 180
3 180
3 185
3 182
3 181
3 176
3 173
3 174
3 174
3 174
3 174
3 174
3 175
3 177
3 177
3 178
3 178
3 179
3 179
3 179
3 179
3 179
3 179
3 179
3 180
3 181
3 186
3 186
3 187
3 187
3 189
3 188
3 187
3 187
3 187
3 185
3 191
3 180
3 181
3 188
3 192
3 190
3 189
3 182
3 178
3 176
3 172
3 183
3 179
5 198
5 196
5 198
5 201
5 200
5 206
5 207
5 209
5 208
5 202
5 204
5 205
5 209
5 208
5 201
5 194
5 187
3 159
3 159
4 163
4 163
4 163
4 163
4 164
4 165
4 168
4 169
4 169
4 170
4 170
4 170
4 174
4 175
4 176
4 172
4 172
4 172
4 172
4 172
4 172
4 172
4 172
4 172
4 172
4 172
4 172
4 172
4 172
4 172
4 176
5 196
5 220
5 244
5 268
6 289
6 305
6 321
6 339
6 344
6 346
6 347
7 347
7 350
7 351
7 351
8 352
8 354
8 354
8 354
8 354
8 355
8 355
8 358
9 359
9 359
9 361
9 367
10 372
10 372
10 374
9 375
9 373
9 374
9 375
9 381
9 382
9 381
9 365
9 360
9 359
9 358
9 354
11 356
11 356
11 354
10 354
9 350
9 350
9 327
9 322
8 314
8 315
8 312
8 308
8 306
8 300
8 298
8 296
8 295
8 294
8 289
8 282
8 282
8 290
8 292
8 296
8 305
8 304
8 304
7 302
8 304
8 302
8 299
8 299
8 292
8 291
8 287
8 283
8 282
8 282
7 281
7 280
7 281
7 280
7 280
7 280
7 280
7 281
7 281
7 282
7 279
7 280
7 282
7 286
7 287
7 287
7 287
7 285
7 285
7 278
5 239
4 177
4 154
4 149
4 147
4 147
4 147
4 145
4 142
4 141
5 196
5 200
5 199
5 200
5 199
5 197
5 196
5 197
5 196
5 216
5 220
5 224
5 225
4 227
4 229
4 230
2 217
3 211
3 211
3 215
3 215
3 215
3 214
3 216
3 210
3 209
3 209
3 215
3 214
3 214
3 206
3 205
3 206
3 207
3 206
3 206
3 206
3 201
3 200
3 197
3 196
3 195
3 195
3 199
3 201
3 200
45 212
45 212
45 212
45 212
45 213
45 213
45 209
45 203
45 197
45 193
45 186
45 185
45 185
44 182
45 194
45 195
3 185
3 187
3 190
3 192
3 196
3 203
3 209
3 212
3 214
3 213
3 213
3 214
3 216
3 216
3 217
3 218
3 218
3 219
3 218
46 216
49 214
51 211
51 211
51 210
51 210
51 206
51 205
51 207
51 207
51 205
51 204
51 205
51 205
51 205
8 204
8 204
8 204
3 204
2 143
2 141
2 141
10 142
10 140
10 140
10 141
11 138
11 137
11 112
11 116
11 116
11 116
10 116
10 115
10 110
10 109
10 107
2 104
2 99
2 99
2 100
1 99
1 97
1 96
1 96
1 96
1 91
1 93
1 93
1 93
1 93
1 92
1 93
1 93
1 95
1 98
1 98
1 99
1 99
1 98
2 98
2 98
2 94
2 96
2 96
2 96
2 96
2 94
2 94
2 91
2 91
2 91
2 92
2 92
2 92
2 93
1 93
1 93
1 93
0 75
0 76
0 72
0 70
0 66
0 63
0 57
0 53
38 48
38 45
38 44
39 43
39 43
39 43
39 43
39 43
39 43
39 42
39 42
39 40
39 40
39 41
39 41
41 54
37 54
38 55
4 55
4 55
3 58
3 54
3 56
3 60
3 60
3 60
3 60
4 78
4 81
4 81
4 82
4 81
4 81
4 95
4 98
4 99
4 103
4 109
4 118
4 119
4 120
4 119
4 114
5 113
5 111
5 111
5 111
5 111
5 111
5 113
5 113
5 113
5 113
176 114
176 114
176 113
176 114
176 117
175 122
175 122
175 123
175 123
175 123
175 123
175 121
175 121
175 121
175 121
4 119
4 121
4 120
4 120
4 124
4 126
4 128
4 130
5 131
5 135
6 144
7 154
7 156
7 159
7 162
41 2304
41 2307
51 2312
51 2312
51 2311
51 2311
51 2312
51 2312
51 2312
51 2312
51 2313
50 2313
49 2314
49 2315
49 2316
48 2312
48 2303
48 2300
5 169
5 168
5 168
5 168
5 165
5 165
5 166
5 166
5 166
5 165
5 173
5 173
5 174
5 175
3 162
3 163
3 163
3 162
3 162
3 158
3 156
3 154
56 151
55 151
55 150
55 149
55 128
55 126
55 126
55 125
55 125
55 123
55 103
55 102
55 100
55 99
55 97
53 96
2 96
2 96
2 125
2 128
2 130
2 130
2 130
2 130
2 130
2 130
2 126
2 129
2 129
2 129
2 130
2 129
2 129
2 129
2 126
2 122
2 123
2 122
2 122
2 123
2 123
2 125
2 130
4 166
5 174
5 178
5 182
5 190
5 196
5 196
6 200
6 205
6 210
4 209
4 218
4 198
4 198
4 196
4 197
4 200
4 202
4 204
5 204
5 205
5 205
5 205
5 205
5 205
5 205
5 206
5 203
5 203
5 203
5 204
5 204
5 205
5 207
4 207
4 207
4 207
4 207
4 207
4 207
4 206
4 206
4 206
4 207
4 207
4 205
4 204
4 204
4 204
4 204
4 205
4 205
4 206
4 209
4 210
4 212
4 215
4 218
4 220
4 223
4 223
5 223
5 223
5 222
5 222
5 222
5 217
5 215
5 218
5 218
5 218
5 217
5 216
5 215
5 215
5 176
5 176
6 174
6 172
6 171
6 171
6 171
6 180
6 180
6 181
6 182
6 188
6 194
6 196
6 196
6 193
6 192
6 188
6 188
7 188
7 188
7 181
7 183
7 179
7 175
5 152
4 144
4 139
4 140
4 134
4 130
4 130
3 128
3 115
3 113
3 111
3 98
3 96
3 96
3 96
3 96
3 96
3 96
3 96
3 96
3 97
3 97
3 101
3 104
3 105
3 107
3 107
7 108
7 107
7 104
7 104
7 106
7 105
8 105
8 105
8 108
8 109
8 110
8 111
8 111
8 114
8 118
4 119
4 120
4 118
4 112
4 114
4 114
4 115
4 114
4 115
4 120
4 119
5 122
5 124
4 128
4 124
4 124
4 123
4 120
4 120
4 119
4 119
4 119
4 119
4 118
4 119
8 121
9 122
9 124
9 129
8 130
8 130
8 135
8 136
8 136
8 136
8 136
8 136
8 134
8 135
8 134
8 125
8 125
8 123
8 128
8 119
8 123
8 133
7 150
7 328
7 370
7 394
7 400
7 444
7 501
7 541
7 548
8 555
8 587
8 594
8 630
8 633
8 713
8 724
10 782
10 814
10 820
10 829
10 832
11 835
11 839
11 842
11 842
11 846
12 847
12 847
12 847
12 847
12 853
12 853
12 857
12 870
13 968
13 1001
13 1018
13 1047
13 1050
13 1052
13 1057
12 1059
12 1058
12 1058
11 1057
11 1058
11 1057
11 1062
11 1064
11 1062
100 1063
100 1064
100 1058
100 1059
100 1058
100 1059
100 1060
100 1059
100 1065
100 1068
100 1067
100 1069
99 1067
99 1064
99 1069
10 1068
10 1055
10 1056
10 1053
10 1053
10 1049
10 1054
10 1063
10 1067
10 1071
9 1072
7 1071
6 1070
3 1068
3 1067
3 1077
3 1078
3 1081
3 1080
3 1077
3 1076
3 1075
3 1075
3 1078
3 1078
3 1079
3 1080
3 1080
3 1080
3 1085
3 1095
3 1090
3 1086
3 1086
3 1042
3 1008
3 800
3 766
3 740
3 729
3 726
3 719
3 717
3 712
3 713
3 679
3 669
4 637
5 864
5 777
5 791
5 739
5 733
4 744
4 773
4 782
4 787
4 788
4 790
4 798
5 810
5 820
6 847
6 891
6 945
6 962
6 969
6 960
6 889
5 795
5 786
5 784
5 782
5 781
5 783
5 783
5 780
5 779
5 777
5 777
5 780
5 785
5 780
5 780
5 778
5 779
5 863
5 885
5 885
5 888
5 896
5 900
5 924
5 917
5 925
5 927
5 938
5 955
5 962
5 959
6 957
6 961
6 965
6 969
6 970
6 967
6 962
6 949
6 944
6 946
6 946
6 949
6 952
6 952
6 1056
7 1039
7 1041
7 1041
7 1050
7 1050
7 1052
7 1050
7 1049
7 1048
7 1049
7 1049
7 1047
7 1047
7 1044
9 1038
9 1029
9 1026
9 1021
9 1008
9 1006
9 1004
9 1002
9 995
9 989
9 988
9 979
9 979
9 969
9 967
9 966
9 962
8 957
7 945
6 635
14 830
14 805
14 801
14 732
14 730
14 715
14 707
14 698
14 698
14 695
14 697
13 686
12 690
12 681
12 686
4 494
4 498
4 503
4 506
4 506
4 510
4 514
4 516
4 515
4 514
4 513
4 513
4 514
4 514
4 514
4 513
4 509
4 504
4 503
4 499
4 499
4 487
4 396
4 398
4 397
5 431
5 422
5 424
5 409
5 407
5 411
5 411
5 396
4 371
4 368
5 381
5 381
5 380
5 375
5 375
5 386
5 406
5 405
5 415
5 417
5 417
5 419
5 415
5 413
5 423
4 312
4 311
4 310
4 309
4 301
4 301
4 300
4 298
4 300
4 300
4 312
4 321
4 325
4 325
4 327
2 326
2 325
2 326
2 327
2 327
2 328
2 328
2 329
2 329
2 329
2 333
2 329
2 331
2 331
2 332
2 332
2 333
2 341
2 352
2 358
2 368
2 378
8 1339
9 1368
9 1373
9 1413
9 1424
9 1433
9 1444
9 1445
12 1443
12 1423
12 1385
12 1372
12 1368
12 1362
12 1352
6 368
6 368
6 365
6 364
6 364
6 363
6 363
6 363
3 365
3 365
3 369
3 371
3 370
3 372
3 372
3 372
3 372
3 373
3 369
3 364
3 362
3 359
2 336
2 308
2 306
2 306
2 306
2 306
2 305
2 306
2 304
1 305
1 306
2 302
2 339
2 347
2 349
2 351
3 339
3 314
3 315
3 317
3 319
3 319
3 319
3 319
3 319
12 356
12 358
12 367
12 375
12 380
12 381
12 385
11 385
11 387
11 384
11 387
11 365
11 363
11 357
11 355
3 355
3 355
3 355
3 354
3 354
3 353
3 349
3 349
3 348
3 348
3 346
3 341
3 341
3 341
3 341
3 340
3 342
3 346
3 339
3 338
3 339
3 333
3 333
3 323
2 284
2 268
2 232
2 242
2 243
2 241
2 240
2 237
2 236
2 239
3 244
4 251
4 252
4 255
4 257
4 259
4 265
4 269
4 271
4 271
4 273
5 276
5 274
7 275
7 275
7 275
7 276
7 278
7 283
7 378
7 385
7 399
7 403
7 404
7 403
7 405
7 407
7 407
7 408
5 412
5 415
5 415
5 414
5 415
5 416
10 420
10 429
9 404
9 379
9 375
9 375
9 367
9 366
9 366
9 368
9 368
9 367
9 370
9 379
9 381
4 380
17 728
17 715
17 703
17 699
17 695
17 692
17 687
17 687
17 687
17 687
17 687
17 686
18 686
18 686
18 686
4 295
4 293
4 296
4 298
4 298
4 298
4 298
4 298
4 299
4 299
4 299
4 301
4 300
4 304
4 305
4 303
4 302
4 297
4 294
4 295
4 291
4 291
4 289
4 292
4 292
4 291
4 290
4 279
4 280
4 281
4 283
4 284
4 281
4 278
4 275
3 265
3 265
3 264
3 257
3 257
3 243
3 238
3 234
3 236
3 234
2 231
2 234
2 234
2 230
2 225
2 224
2 222
2 216
2 115
2 113
2 105
2 105
2 104
2 104
2 101
2 109
3 110
3 110
5 109
7 285
8 302
8 315
8 328
8 334
7 334
7 344
7 347
7 345
7 345
7 346
7 347
7 356
6 357
5 354
4 360
3 358
3 359
3 353
3 352
3 353
3 352
3 352
3 350
3 348
3 348
3 348
3 349
3 351
3 357
3 357
3 360
3 361
3 362
3 364
3 367
3 368
3 370
3 369
3 371
3 371
3 373
3 372
3 377
3 378
3 380
3 381
3 380
3 382
3 378
3 380
3 382
3 388
3 388
3 387
3 387
3 387
3 388
3 387
3 384
3 389
3 388
4 388
4 390
4 387
4 386
4 391
4 391
4 395
4 393
3 393
3 393
3 392
3 392
3 392
3 391
3 390
3 390
3 390
3 388
3 391
3 394
3 393
3 391
3 391
3 393
3 391
3 390
3 392
3 396
3 394
3 392
3 390
3 392
3 390
3 391
3 384
3 382
2 574
3 549
2 364
2 360
2 364
2 370
2 380
2 387
2 395
2 398
2 401
2 402
4 399
4 400
4 388
4 394
4 402
4 400
4 403
4 402
4 403
4 402
4 405
4 405
4 406
4 407
4 406
4 410
2 407
2 408
2 407
2 400
2 397
2 397
2 395
2 392
2 393
2 391
2 391
2 391
2 388
2 389
2 389
2 389
2 389
2 389
2 392
2 387
2 387
2 386
2 384
2 382
2 379
2 380
2 375
2 375
2 373
2 370
2 370
2 371
2 369
2 369
2 365
2 366
1 365
1 364
1 363
1 363
1 354
1 354
1 352
1 352
1 353
1 362
1 363
1 367
1 367
1 375
1 377
1 379
1 377
1 376
1 373
1 371
1 369
1 370
1 370
1 367
1 367
1 366
1 363
1 360
1 360
1 362
1 366
1 365
1 362
1 355
1 352
2 347
1 135
1 133
1 133
2 129
2 198
2 202
2 188
2 183
2 177
2 178
2 177
2 181
2 181
2 183
2 189
30 183
30 178
30 183
30 182
30 182
30 182
30 183
30 183
30 183
30 183
30 182
30 181
30 179
30 178
30 176
2 177
1 177
1 176
1 176
1 176
1 175
1 184
1 184
1 184
1 181
1 179
1 179
1 179
1 179
1 176
1 174
1 173
1 172
1 171
1 171
1 171
1 171
1 161
1 157
3 167
3 169
3 169
3 169
3 171
3 171
3 172
3 171
3 172
3 172
3 172
3 172
3 171
3 171
3 172
3 177
3 177
3 209
3 221
3 215
3 218
3 223
3 229
3 229
3 311
4 329
5 373
5 420
5 442
5 461
5 489
5 511
5 516
5 533
5 536
5 538
5 535
5 535
5 534
5 540
4 537
5 542
5 544
5 546
5 547
5 554
5 555
5 556
5 560
5 561
5 482
5 484
5 484
5 494
5 519
6 553
7 563
7 567
8 571
8 581
8 584
8 587
8 587
8 582
8 582
8 582
8 582
8 583
8 583
8 583
8 583
8 584
8 583
8 584
8 590
8 589
7 591
7 591
7 592
7 593
7 593
7 596
7 595
7 595
7 594
7 608
7 609
7 614
7 616
7 616
7 618
7 623
7 623
7 627
7 629
7 630
7 646
7 648
7 648
7 656
5 646
5 651
5 651
5 650
5 649
5 647
5 650
5 651
5 663
5 667
5 675
5 677
6 677
9 678
9 680
9 671
9 666
9 621
9 612
9 610
9 605
12 602
12 600
12 581
12 455
10 407
10 359
10 333
10 328
10 326
10 322
10 322
10 323
11 311
11 318
12 321
12 321
12 324
12 325
11 315
11 314
11 307
11 306
11 303
11 302
11 297
11 290
11 286
11 283
11 282
14 359
14 370
14 371
13 359
13 329
13 314
12 304
12 298
12 297
12 289
12 289
12 289
12 288
12 289
12 290
12 290
12 290
9 212
9 212
9 214
9 213
9 215
9 228
9 228
9 227
9 231
9 231
9 232
9 238
9 246
9 251
9 261
9 264
9 266
9 268
9 255
9 246
9 248
9 248
9 252
9 254
9 261
9 262
10 258
10 259
10 267
10 252
10 248
10 251
10 247
10 249
10 248
10 254
10 311
11 322
11 331
11 335
11 332
11 317
11 314
11 313
11 312
10 313
6 314
5 315
5 317
5 318
5 319
5 320
5 320
5 320
4 321
4 322
4 323
4 323
4 326
4 326
4 327
4 328
4 328
4 329
4 329
4 322
4 318
3 313
3 318
4 323
5 322
5 320
6 320
7 366
7 370
8 382
8 386
8 394
9 479
11 492
11 502
10 503
10 505
10 508
10 497
10 487
10 487
10 489
10 492
10 493
10 492
10 488
10 488
10 486
10 486
10 486
10 485
10 485
10 485
10 485
10 485
10 484
10 480
10 478
10 479
10 464
11 464
11 462
11 457
11 454
11 455
11 444
11 442
11 438
12 433
12 432
12 428
12 427
12 427
12 427
12 426
12 424
13 417
13 409
13 407
14 405
14 410
14 408
14 404
14 402
14 409
14 399
14 398
14 401
14 399
15 392
14 330
14 318
15 309
15 305
16 305
18 305
18 304
18 304
18 304
18 300
18 384
18 384
18 384
18 382
18 384
18 384
18 384
18 385
18 384
18 384
18 385
18 384
18 380
20 379
20 380
19 288
19 291
19 303
20 333
20 338
20 340
20 338
19 334
17 331
17 350
16 351
16 345
16 285
16 282
16 264
16 256
17 418
16 338
14 331
14 334
13 332
13 332
13 332
13 331
13 332
13 331
13 329
13 328
13 329
13 415
13 414
13 414
12 240
12 240
12 242
12 242
12 243
12 244
12 244
12 244
12 244
12 244
11 244
11 243
11 160
13 159
13 158
13 158
13 158
13 155
13 155
13 153
13 153
12 147
12 147
12 147
14 148
14 148
14 150
14 170
11 191
10 192
10 201
10 199
10 200
9 192
9 192
9 192
9 192
9 188
9 188
9 180
9 179
11 394
10 395
10 409
10 419
10 425
9 426
9 429
7 431
7 432
7 431
7 430
7 430
7 436
7 439
7 452
7 452
7 457
7 459
7 458
7 458
7 459
7 461
7 461
6 460
6 459
5 460
5 460
5 456
5 450
4 432
4 405
4 403
4 398
4 396
4 395
4 394
4 372
4 372
4 371
4 371
4 373
4 373
4 373
4 373
4 375
4 371
4 370
4 371
4 370
4 369
4 368
4 366
4 371
4 371
4 372
4 369
4 367
4 367
4 367
4 367
6 370
6 369
6 369
6 368
6 368
6 368
6 368
6 368
6 373
6 373
6 374
6 375
6 378
7 389
7 389
5 386
5 386
5 386
5 388
5 388
6 389
6 389
6 388
4 387
4 386
4 378
4 364
4 341
4 340
4 329
4 328
4 326
4 326
4 326
4 326
4 325
4 328
4 325
4 322
3 315
2 99
2 99
2 84
2 78
2 77
2 88
2 91
2 91
2 91
2 95
2 96
2 93
2 89
2 89
2 81
2 79
2 83
2 87
2 88
2 89
2 91
2 91
2 105
2 105
2 105
2 105
2 107
2 110
2 111
2 112
2 112
2 112
2 112
2 112
2 115
2 119
2 120
2 123
2 128
2 127
2 127
2 128
2 128
2 128
2 127
2 127
2 130
2 130
2 130
2 131
2 131
2 131
2 126
2 126
2 125
2 125
2 125
2 125
2 125
2 125
2 124
2 124
3 124
3 125
9 260
9 270
9 274
9 274
9 272
9 271
9 271
9 270
9 269
8 260
8 260
9 265
10 265
10 266
9 263
4 129
3 129
4 129
4 128
4 129
4 130
4 130
4 131
4 131
4 132
4 132
4 132
4 139
4 141
4 146
4 147
4 149
5 145
5 144
5 146
5 161
5 162
5 162
5 160
5 154
5 152
5 146
5 148
5 154
5 157
5 156
5 158
4 157
4 157
4 151
4 144
4 140
4 133
4 130
4 130
4 130
4 130
4 128
4 125
4 125
4 125
4 125
4 121
4 120
4 123
4 121
4 124
4 124
4 125
4 125
4 120
4 119
4 119
4 120
4 121
4 122
4 121
4 122
4 126
4 128
4 136
4 138
4 140
4 145
4 150
4 154
4 162
4 166
4 169
4 169
4 168
4 171
4 173
4 174
9 184
9 184
8 198
8 200
8 202
8 209
10 241
10 235
10 244
10 255
10 274
10 291
11 303
11 308
11 308
11 308
6 297
4 275
4 275
4 275
4 275
4 270
4 269
3 273
4 274
4 274
10 313
10 316
10 315
12 322
13 322
13 324
13 325
13 316
13 315
13 311
13 306
13 308
13 309
13 311
13 323
13 312
13 318
13 318
13 318
12 318
12 315
12 313
13 313
13 307
13 311
13 308
13 307
13 307
13 311
13 312
13 322
15 332
15 338
15 341
15 342
15 345
15 353
14 361
42 1177
45 1189
45 1193
45 1194
45 1193
45 1191
45 1190
46 1187
46 1185
46 1184
46 1184
46 1184
46 1184
46 1187
46 1187
18 373
18 368
18 369
18 367
18 367
18 353
18 347
18 340
18 335
18 321
18 313
18 311
18 310
19 311
19 308
19 305
19 303
19 305
19 316
19 333
19 337
19 336
19 334
19 334
19 333
18 332
17 287
16 259
16 242
16 244
16 244
16 246
17 248
26 249
27 279
28 279
29 279
30 283
30 285
1875 442
1875 442
1873 440
1873 441
1873 441
1874 446
1874 464
1874 476
1867 435
1867 435
1867 446
1865 420
1866 423
1866 426
1867 426
25 273
22 273
22 286
22 286
22 299
23 302
23 309
23 297
23 297
23 289
23 289
23 289
22 288
22 287
22 285
22 285
22 284
22 279
22 279
22 277
22 275
22 273
22 274
21 264
20 261
20 258
20 257
20 254
20 248
21 241
20 231
20 229
17 221
17 219
17 220
17 221
17 224
17 224
17 226
17 228
17 230
17 233
17 233
17 232
17 233
17 232
17 230
17 229
17 229
17 229
17 229
17 231
17 238
17 257
17 257
17 259
17 263
17 263
16 263
16 266
16 268
16 268
16 267
16 263
16 250
16 231
16 227
19 251
21 253
21 258
21 259
21 261
21 265
21 263
21 264
21 259
21 259
20 259
19 258
11 257
11 256
11 256
11 256
11 255
11 254
10 254
10 253
10 252
10 252
10 250
10 232
10 211
10 205
10 205
10 204
10 193
10 204
10 206
10 205
9 201
6 199
6 196
6 184
6 184
6 163
6 166
6 158
6 158
6 159
6 159
6 159
6 160
6 174
6 180
6 181
6 181
6 183
6 182
6 182
6 182
6 182
6 181
6 184
7 184
7 181
7 180
7 179
7 179
7 180
7 180
7 180
7 182
7 182
7 179
7 178
7 181
7 178
7 178
7 177
7 177
7 175
7 171
7 171
7 171
6 169
6 170
6 170
6 170
6 169
6 169
6 167
6 162
6 153
6 140
6 139
6 141
6 140
6 140
6 140
6 136
6 134
7 135
7 135
7 136
5 135
4 132
4 128
2 96
2 94
3 93
3 93
3 91
3 91
3 95
3 97
3 97
3 97
3 100
3 105
3 106
3 113
3 114
3 114
3 116
3 122
3 137
3 138
3 140
3 141
3 143
3 143
3 140
3 140
3 138
3 133
3 129
3 125
3 124
3 123
3 123
3 124
3 126
3 127
3 127
3 127
3 143
3 148
3 152
3 154
3 155
3 157
3 156
3 138
3 134
3 135
3 145
3 146
3 146
3 148
4 148
4 148
4 148
4 145
3 172
3 175
3 180
3 191
3 219
3 244
3 247
3 248
3 250
3 249
3 247
2 247
2 244
2 241
2 240
2 240
2 241
2 244
2 246
2 244
2 245
2 244
2 246
2 247
2 247
2 248
2 248
2 249
2 250
2 253
2 253
2 257
2 259
2 260
2 263
2 264
2 290
2 307
1 324
2 359
1 366
1 378
1 381
1 387
1 389
1 389
1 394
1 395
1 398
1 401
1 464
1 479
1 489
1 527
1 547
0 547
0 548
0 538
0 538
0 538
0 537
0 527
0 520
0 519
0 520
0 520
0 519
0 522
1 545
1 553
1 573
1 580
1 585
1 591
1 595
1 597
1 598
1 596
1 591
1 591
1 589
1 586
1 564
1 582
1 585
1 582
50 583
50 583
50 583
50 582
50 582
50 581
50 575
50 574
50 574
50 573
50 572
51 571
52 570
53 565
53 525
4 513
4 508
4 510
4 491
4 486
4 488
4 489
4 488
4 489
4 492
4 495
4 498
4 499
3 500
3 501
3 503
3 501
3 498
3 504
4 504
5 530
5 535
6 550
6 554
6 599
6 746
7 752
8 754
8 758
9 759
9 755
9 757
9 759
9 752
9 748
9 705
9 682
449 669
449 652
449 646
449 652
449 652
449 644
449 644
449 644
449 640
449 637
449 629
449 587
449 537
449 512
449 497
449 493
9 484
9 484
9 485
9 485
9 485
9 485
9 485
9 484
9 491
9 512
10 561
10 576
10 583
10 592
9 565
9 569
9 544
9 552
9 550
9 549
9 548
9 547
9 547
9 547
9 546
9 546
9 545
9 545
9 546
9 526
9 529
9 525
9 529
9 544
9 545
9 561
9 564
9 563
9 564
9 563
11 564
11 565
10 571
10 583
11 586
10 584
10 587
10 588
17 607
17 596
17 598
18 597
18 596
19 593
19 595
17 593
17 589
17 586
17 582
17 581
17 581
17 595
19 600
12 581
12 579
12 581
12 581
11 555
11 545
9 524
8 519
8 455
8 311
8 311
8 309
8 297
7 300
7 300
7 305
7 306
7 307
7 308
7 308
7 306
7 307
7 307
7 307
7 303
7 304
7 305
8 309
8 309
8 309
8 311
8 310
8 306
8 305
8 303
8 302
8 302
8 301
8 299
8 300
8 300
8 301
8 303
8 302
8 309
8 299
8 266
8 224
8 200
9 198
9 196
9 196
9 196
9 197
9 194
9 194
9 195
9 194
9 194
9 193
9 193
9 194
9 194
9 194
9 191
9 190
9 191
9 187
9 186
9 183
9 167
9 166
9 150
9 146
9 145
9 145
9 144
10 142
10 135
10 129
10 118
9 114
9 112
9 110
10 111
10 111
10 112
9 110
11 110
11 110
11 109
11 109
11 109
11 109
11 106
11 107
11 106
10 104
10 86
11 77
11 76
15 81
15 80
15 80
15 78
15 79
15 81
16 78
16 81
16 83
16 113
16 115
16 117
16 114
16 119
16 114
17 121
17 121
17 121
17 122
17 123
17 131
17 131
19 134
17 135
17 134
17 134
17 136
17 136
17 136
17 135
17 136
17 136
17 138
17 145
17 149
17 149
17 149
17 150
19 155
20 158
20 159
20 157
20 156
20 145
20 145
21 145
21 144
21 144
20 144
20 144
20 143
21 144
21 144
21 144
21 144
21 144
21 144
22 144
22 144
22 144
22 144
22 145
22 145
22 146
22 145
22 141
22 141
22 141
22 142
22 142
22 143
22 143
22 145
23 159
22 169
22 176
22 183
22 202
22 221
22 228
23 228
23 228
23 227
23 228
23 227
23 226
23 227
20 231
19 232
19 236
19 237
19 236
19 254
19 254
19 255
18 255
18 255
18 254
15 253
15 250
10 239
9 238
9 238
9 237
10 233
11 231
11 228
11 232
11 228
10 233
10 233
10 235
10 237
10 240
10 240
11 239
16 246
16 246
16 246
17 244
18 236
18 234
16 229
17 228
18 228
18 234
18 233
18 236
18 247
18 253
18 252
18 252
17 251
18 245
19 244
19 243
18 242
18 240
18 233
18 233
18 231
18 231
18 232
17 232
17 233
17 233
17 234
17 235
17 239
17 236
17 236
17 238
17 237
17 236
17 239
17 240
17 244
16 278
16 279
16 290
16 303
16 311
16 315
16 313
16 316
16 317
16 316
16 320
16 318
16 316
16 332
16 330
16 319
15 284
15 270
17 277
17 279
17 281
17 280
17 280
17 281
16 281
16 280
16 281
16 281
16 281
16 279
16 259
16 257
16 254
16 253
16 252
16 239
16 239
16 238
16 238
16 239
16 237
16 237
16 238
16 238
16 237
15 237
15 243
14 244
14 244
14 249
14 238
14 231
14 202
14 201
14 204
13 204
12 204
9 204
8 209
4 201
4 202
5 210
5 212
5 226
5 230
5 230
5 230
4 231
4 222
4 211
4 208
4 208
4 210
4 210
4 209
4 208
3 207
3 205
2 204
2 204
2 204
2 205
2 205
2 205
2 205
2 205
2 205
2 206
2 204
2 206
2 209
2 234
2 249
2 255
2 256
2 262
2 266
2 267
2 267
2 263
2 232
2 230
2 211
2 199
2 192
2 189
2 189
2 192
2 191
2 195
2 203
2 208
2 207
2 209
2 212
2 232
1 234
0 285
0 269
0 271
0 273
0 274
0 274
0 275
0 275
0 284
0 285
0 286
0 286
0 287
0 289
0 290
0 290
0 293
0 292
0 292
0 292
0 292
0 292
0 292
0 294
0 294
0 298
0 299
0 299
0 299
0 291
0 291
0 290
0 285
0 285
0 285
0 285
0 283
0 280
0 279
0 279
0 280
0 275
0 275
0 273
0 258
0 257
0 245
0 241
0 241
0 241
0 240
0 238
0 238
0 238
0 239
0 235
0 235
0 235
0 235
0 235
0 235
0 235
0 236
0 236
0 236
0 235
0 234
0 234
0 234
0 234
0 231
0 231
0 223
0 214
0 186
0 175
0 172
0 171
0 170
0 170
0 171
0 172
0 173
0 174
0 178
0 181
0 185
0 182
1 182
1 183
1 181
1 180
1 179
1 170
1 171
1 168
1 163
1 160
1 137
1 131
1 77
1 75
1 73
0 74
0 74
0 75
0 75
0 75
0 65
0 65
0 65
0 63
0 62
0 62
0 62
0 59
0 55
0 55
0 55
0 56
0 56
0 58
0 55
0 56
0 60
0 59
0 56
0 57
0 57
0 57
0 57
0 57
1 58
1 59
1 59
1 60
1 60
2 60
2 66
2 66
2 71
2 71
2 74
2 77
2 80
2 81
2 82
2 83
2 83
2 83
2 83
2 83
2 84
2 86
2 86
2 90
2 95
2 97
2 100
2 102
2 103
2 102
2 102
2 102
2 102
2 102
2 103
2 103
2 104
2 105
2 105
2 112
2 113
3 114
4 114
4 114
5 111
5 106
5 104
5 103
5 103
5 105
5 103
5 101
5 100
5 96
5 93
5 92
5 93
5 92
5 92
5 91
5 94
7 95
7 112
7 112
7 112
7 115
7 113
7 113
7 114
7 114
7 114
7 114
7 113
7 113
7 113
7 113
7 113
7 113
7 113
7 113
7 113
7 113
7 113
7 113
7 113
7 114
8 115
8 115
8 116
8 114
8 112
8 112
8 107
8 107
8 107
8 107
8 108
8 107
8 108
8 111
9 110
9 112
9 114
8 123
10 125
10 125
15 121
15 115
15 111
15 111
15 108
15 107
15 107
15 106
15 104
15 103
15 102
15 103
15 103
15 103
15 101
15 99
15 95
15 87
15 82
15 85
16 86
16 86
16 87
16 87
16 88
16 90
16 96
16 107
17 114
19 130
19 134
19 136
19 137
19 132
18 135
16 134
16 132
16 132
15 132
15 131
15 130
15 130
16 130
16 128
16 128
16 129
15 131
17 150
17 151
17 153
17 151
17 149
17 147
18 148
16 143
16 149
16 138
16 142
16 142
16 142
16 145
16 147
16 148
16 149
16 149
16 150
16 151
16 151
16 151
16 151
17 151
17 152
17 152
17 152
17 153
20 162
20 163
20 162
20 161
20 162
19 163
19 166
19 167
19 169
19 169
18 171
18 171
18 171
18 171
18 170
18 167
18 167
17 163
18 162
18 162
18 161
18 156
18 150
16 150
16 150
11 147
11 147
11 147
11 147
11 146
11 146
11 146
13 146
13 146
13 146
13 147
13 146
13 146
13 146
13 147
13 147
13 147
13 148
13 148
13 146
13 145
13 145
13 143
13 143
13 142
13 136
13 125
13 119
13 109
11 89
11 88
11 87
11 85
11 83
11 81
11 81
11 81
11 81
11 81
11 81
11 81
11 83
11 83
11 85
11 84
11 84
11 82
8 58
10 62
11 63
11 63
11 62
11 63
9 60
9 57
9 52
8 50
8 50
8 50
8 49
9 45
10 45
10 43
10 45
11 44
11 44
11 44
11 44
11 43
11 43
11 43
11 42
11 42
11 42
11 41
8 32
8 30
8 30
8 34
7 34
7 34
7 34
7 33
7 32
7 32
7 30
8 35
8 37
8 43
8 48
8 72
8 85
8 89
8 88
8 92
8 94
8 94
8 94
8 94
8 94
8 94
8 94
8 95
8 95
6 95
6 96
6 97
6 97
6 100
6 99
6 100
6 100
6 102
6 103
6 102
6 102
6 102
6 101
6 100
6 101
6 100
6 100
6 100
6 99
6 99
6 99
6 99
6 99
6 99
6 99
6 100
6 100
6 99
6 99
6 102
6 102
6 105
6 106
6 117
6 117
6 116
6 114
6 120
6 119
6 118
6 118
4 117
4 117
3 113
3 113
3 113
3 113
3 114
3 114
3 114
3 114
3 114
3 118
4 121
4 122
4 124
3 123
7 123
7 121
7 123
7 123
7 123
7 122
8 122
8 123
8 123
8 123
8 123
8 123
8 122
8 122
8 123
8 123
4 129
4 132
4 132
4 133
4 133
4 133
4 132
4 130
3 124
4 129
4 122
4 118
4 79
4 77
4 75
4 74
4 72
4 72
4 70
4 71
4 92
4 93
4 93
4 93
4 93
4 93
4 93
4 99
4 104
4 105
4 106
4 106
4 105
4 105
4 105
4 82
4 83
4 82
4 82
4 82
4 82
4 81
5 82
5 82
5 81
5 81
5 81
5 81
5 81
173 276
174 277
174 277
174 279
174 279
174 280
174 279
184 277
184 276
184 274
184 273
184 263
184 263
190 261
190 258
190 256
190 253
21 60
21 59
21 58
21 58
21 58
11 58
11 58
11 58
10 57
10 57
10 57
4 59
3 61
4 57
4 62
4 62
4 62
4 62
4 62
4 62
5 60
5 60
5 58
4 62
8 69
8 71
8 74
9 74
9 75
9 69
9 67
9 68
9 68
9 67
9 61
9 61
9 60
9 60
9 58
8 57
8 56
8 55
8 54
8 51
8 51
8 51
9 55
9 62
9 63
10 65
10 66
14 70
14 70
14 73
14 75
15 78
15 79
17 81
17 81
17 81
17 80
17 74
17 70
17 70
17 68
17 68
17 68
16 68
16 67
16 67
16 67
16 66
15 66
15 66
15 67
15 67
14 68
14 67
14 67
14 67
14 67
14 68
14 68
14 71
14 81
14 82
15 84
15 84
16 83
16 83
16 84
16 83
16 83
17 83
17 83
17 83
17 85
17 87
17 98
17 99
17 100
16 100
16 100
16 99
16 99
16 99
16 99
16 100
16 100
16 100
15 100
15 96
15 93
15 92
15 92
15 92
15 92
15 93
15 93
15 93
14 93
14 93
11 92
11 85
7 80
7 76
7 76
7 77
7 77
7 79
7 81
7 81
7 81
7 82
7 82
7 82
7 82
7 82
7 82
7 90
7 95
7 98
7 103
7 108
10 215
10 214
10 210
10 202
10 202
9 201
9 205
6 197
6 196
6 193
7 197
6 196
6 196
6 197
6 202
3 217
3 111
3 111
4 119
4 121
4 121
4 127
4 127
4 127
4 127
4 127
4 128
4 129
4 129
4 129
4 128
4 128
4 127
4 127
4 127
4 126
4 126
4 127
4 126
4 121
4 110
4 110
4 110
4 112
3 115
4 118
4 125
4 125
3 125
3 125
3 126
3 127
3 125
3 120
3 112
3 113
3 115
3 117
3 117
3 117
3 117
3 117
3 116
3 116
3 117
3 117
3 117
3 117
3 129
3 134
3 134
3 134
3 137
3 140
3 140
3 141
3 142
3 142
3 144
3 144
3 145
3 145
3 146
3 147
3 148
3 146
3 145
3 145
5 266
5 265
5 264
5 264
5 267
5 269
5 271
5 263
5 254
5 250
5 247
5 243
5 241
5 242
5 243
3 122
3 122
3 120
4 118
4 118
4 117
4 116
3 117
3 117
4 120
4 116
4 108
3 95
3 94
3 94
3 92
3 89
3 87
2 83
2 83
2 83
2 84
2 86
2 87
2 88
2 106
2 107
2 108
2 109
2 109
2 110
2 111
2 112
2 112
2 111
2 110
2 111
3 112
3 115
3 117
3 113
3 112
2 109
2 101
2 101
3 101
4 101
4 99
4 98
4 99
4 99
4 99
4 102
4 102
4 101
4 101
4 102
4 102
7 117
7 124
6 126
6 126
5 129
5 131
6 157
6 151
6 152
6 153
6 153
6 153
6 160
6 165
6 167
6 168
6 172
6 169
6 171
6 171
6 171
6 170
6 168
6 167
6 167
6 165
6 165
6 165
6 165
6 165
6 162
6 159
6 156
6 157
6 157
6 157
6 156
6 156
6 158
6 158
6 157
6 156
6 157
6 157
6 157
6 157
6 156
6 156
5 156
5 152
5 154
5 159
5 161
5 163
5 176
5 212
5 220
5 227
5 229
7 233
7 235
7 240
8 242
8 244
8 238
8 239
8 239
8 221
8 225
8 225
8 224
8 225
8 229
8 230
8 231
8 231
8 232
8 232
8 231
7 230
7 226
7 225
7 226
7 232
7 232
8 241
8 243
8 244
8 244
8 244
8 242
8 242
8 242
8 245
8 250
8 256
8 267
7 267
6 267
6 267
5 245
5 235
5 228
5 227
5 226
5 223
4 196
4 191
4 189
4 187
4 187
4 187
4 182
4 178
4 176
4 174
4 173
4 173
4 173
5 173
5 174
5 174
5 173
5 174
5 174
5 175
5 175
5 176
5 176
5 176
5 176
5 176
5 176
5 176
4 177
4 176
4 187
4 188
4 188
4 191
4 191
4 191
4 192
4 194
4 194
5 194
5 193
6 193
6 194
6 194
6 176
6 172
4 165
4 159
4 144
4 130
3 124
3 122
3 121
3 113
3 113
2 105
1 104
1 104
1 103
1 115
1 117
1 120
1 124
2 143
2 151
2 159
2 167
2 176
2 195
2 198
6 223
6 244
6 253
6 255
6 262
6 267
6 275
5 271
5 283
6 277
6 288
13 303
13 307
13 317
13 323
13 328
13 330
13 338
13 330
13 330
13 320
13 323
13 324
13 326
13 326
13 327
13 327
13 330
13 330
13 332
13 333
13 335
13 337
13 337
13 339
13 340
13 340
13 340
13 340
13 342
13 344
13 359
13 366
13 367
13 366
13 370
13 369
13 369
13 370
13 369
13 370
13 383
13 385
13 385
13 388
13 388
13 387
13 389
13 386
13 387
18 370
23 370
23 372
23 372
23 369
23 370
23 370
23 370
23 370
23 372
23 372
23 372
23 376
23 377
23 381
23 381
16 379
15 380
15 381
16 380
16 381
16 381
16 381
16 381
16 381
16 381
16 381
16 381
16 371
16 352
17 349
17 344
15 333
14 303
13 295
13 287
13 285
13 283
13 279
12 272
9 235
9 215
9 211
9 210
9 208
10 208
9 205
9 201
8 185
8 178
8 172
2 148
2 149
2 140
2 136
2 134
2 132
5 116
5 115
5 105
5 105
5 102
5 101
5 100
5 100
5 100
5 100
5 98
5 98
5 96
5 92
5 92
4 91
2 91
2 93
2 94
2 96
2 96
2 97
3 107
3 109
4 109
5 110
5 118
5 123
5 119
5 121
5 121
5 120
5 120
5 121
5 107
5 107
5 108
5 111
5 110
5 109
5 107
5 105
5 104
5 103
5 108
5 107
5 107
5 107
5 107
5 115
5 115
5 114
5 114
5 114
5 116
5 115
5 115
5 111
5 111
5 111
5 111
5 110
5 110
5 111
5 115
5 116
5 116
5 118
5 118
5 127
5 128
5 129
5 129
4 129
4 129
4 129
4 128
4 128
4 128
4 128
4 128
4 127
4 126
4 126
4 126
4 126
4 126
4 126
3 126
3 125
3 125
3 125
3 125
3 125
3 125
3 124
3 123
3 124
3 124
3 124
3 124
3 124
3 124
3 124
3 125
3 125
3 127
3 128
3 128
3 128
3 129
3 129
3 129
3 131
3 169
3 175
3 174
3 183
3 184
3 183
3 183
3 184
2 168
1 157
0 131
0 127
0 122
0 117
0 117
0 117
0 117
0 117
0 116
0 116
0 112
0 110
0 110
0 110
0 110
0 110
0 111
0 120
0 120
0 121
0 116
0 116
0 116
0 115
0 115
0 107
0 106
0 107
0 110
0 112
0 113
0 120
0 118
0 118
0 120
0 121
1 126
1 126
52 125
52 123
52 120
53 120
53 120
53 113
53 112
53 104
53 106
53 107
53 108
53 109
53 109
53 105
53 108
53 109
2 109
2 112
2 115
2 116
2 117
2 117
2 117
2 118
2 123
2 124
2 126
2 126
2 126
2 126
2 127
2 128
2 128
2 128
2 128
2 128
2 130
2 130
2 132
2 132
2 132
1 132
2 130
2 130
2 130
2 129
2 130
2 130
2 128
2 127
2 129
2 128
2 79
2 76
2 76
2 69
2 69
2 75
2 74
2 79
2 79
2 79
2 79
2 79
2 81
2 82
2 82
2 82
2 82
2 82
2 82
2 84
2 84
3 85
3 85
3 86
3 86
3 87
3 86
3 78
3 78
3 79
3 84
3 85
3 89
3 90
3 90
3 89
3 89
3 85
3 86
3 83
3 82
3 77
3 77
3 76
3 75
3 74
3 75
3 75
3 75
2 75
2 74
2 73
2 75
2 74
2 72
2 72
2 72
2 70
2 71
2 68
2 67
2 67
2 65
2 63
2 60
2 59
2 60
2 61
2 60
2 60
2 58
2 57
2 49
2 48
2 48
2 48
2 51
2 56
2 66
2 67
2 67
2 68
2 68
2 68
2 68
2 67
1 66
1 66
1 66
1 65
1 65
1 65
1 65
1 66
1 66
1 65
1 62
1 62
1 62
1 62
1 61
1 60
1 60
1 60
1 60
1 48
1 48
1 45
1 44
1 44
1 44
1 43
1 43
1 44
1 44
0 42
0 42
0 41
0 36
0 37
0 39
0 47
0 50
0 52
0 52
0 52
0 52
0 52
0 50
0 49
0 49
0 49
0 48
0 48
0 48
0 48
0 48
0 48
0 48
0 48
0 47
0 46
0 46
0 46
0 45
0 45
0 45
0 46
0 46
0 46
0 46
0 46
0 46
0 45
0 45
0 45
0 45
0 45
0 44
0 44
0 44
0 44
0 44
0 45
0 45
0 44
0 43
0 43
0 43
0 44
0 45
0 47
1 51
1 51
1 49
1 51
1 46
1 43
1 40
1 39
1 38
1 38
1 38
1 40
1 40
1 43
1 43
1 43
1 43
1 40
1 40
1 40
1 41
1 46
1 47
1 47
1 48
1 48
1 48
1 48
1 48
1 48
1 48
1 48
1 48
1 48
1 48
2 59
2 60
3 62
3 64
3 64
3 64
3 66
3 74
6 184
8 245
9 303
12 327
12 347
13 364
13 374
13 392
16 460
17 468
18 474
18 478
18 486
18 487
18 488
18 496
18 500
18 505
18 510
19 512
19 520
19 521
19 523
52 531
53 538
52 546
52 550
52 555
54 572
54 575
55 575
56 575
56 574
56 574
55 574
55 574
55 574
55 574
23 577
23 580
23 579
23 579
23 579
23 578
23 579
23 579
22 580
22 580
22 579
22 579
22 582
22 583
22 583
22 585
22 583
22 582
22 581
21 582
21 581
21 581
21 581
21 582
21 592
21 593
21 595
21 598
21 607
22 624
22 640
22 645
22 644
22 646
22 647
22 649
22 649
22 650
22 649
32 681
33 680
33 677
34 678
34 678
34 684
34 685
34 685
34 685
34 686
34 684
34 685
34 684
34 675
33 672
32 661
32 658
32 657
32 652
31 650
31 644
31 634
30 613
23 435
21 363
21 360
21 369
21 384
21 381
21 379
20 369
16 285
16 279
16 301
16 300
16 301
16 308
16 304
17 299
17 296
17 290
17 287
17 286
17 283
17 282
17 275
17 272
17 269
17 263
17 269
16 322
14 317
14 322
13 325
13 331
13 333
13 336
13 341
13 340
13 341
12 341
12 340
12 341
12 343
12 344
12 344
12 344
12 343
12 343
12 342
12 342
12 343
12 341
14 341
14 338
14 338
14 339
14 340
14 343
14 350
14 358
14 372
18 377
18 379
18 380
18 372
18 375
18 369
18 363
18 362
17 342
17 324
17 317
17 317
17 314
17 313
17 311
13 309
13 309
13 309
2 271
2 267
2 265
2 265
2 265
2 261
4 281
4 281
4 282
4 282
4 282
4 281
4 280
4 281
4 283
4 292
4 293
4 298
5 299
5 299
5 299
5 289
5 289
5 289
5 295
6 306
7 304
9 335
9 341
9 344
9 348
9 355
9 358
9 330
9 330
9 329
9 325
9 328
9 331
9 337
12 370
13 426
13 431
14 433
14 435
15 436
15 441
15 448
15 463
16 487
17 511
20 652
20 661
20 713
21 742
22 757
22 776
22 792
22 796
22 797
21 795
22 793
22 795
22 795
22 793
24 793
24 793
24 793
24 794
25 794
28 801
29 800
29 821
29 823
29 831
29 829
29 834
29 858
29 854
29 851
29 846
29 835
29 832
29 831
29 830
29 832
29 833
27 833
27 834
27 834
27 835
27 836
27 836
28 847
27 855
27 856
27 856
27 859
28 865
28 887
28 890
29 893
29 912
29 918
30 934
30 937
30 942
30 942
30 943
31 944
31 946
31 946
31 947
30 942
30 939
29 931
29 930
29 919
29 917
29 917
29 915
28 903
30 901
31 962
31 960
30 940
27 922
27 896
26 896
27 893
27 889
27 889
27 890
27 888
28 889
28 881
28 874
28 873
28 872
26 862
24 810
23 770
23 764
22 758
34 879
33 856
36 925
37 922
37 893
35 819
32 689
32 638
31 620
31 604
31 584
31 573
30 563
30 556
30 555
18 431
18 431
15 362
15 362
15 362
15 362
15 361
15 361
15 361
13 360
13 358
10 352
10 352
10 327
10 324
10 310
10 309
10 305
10 273
10 270
10 266
10 266
11 266
11 266
11 264
11 264
11 261
11 261
11 261
11 261
11 261
11 258
11 253
11 253
10 240
10 235
10 233
10 233
10 232
9 228
9 209
9 203
9 199
9 178
9 174
12 162
12 158
12 156
12 150
12 149
11 148
11 148
11 148
11 147
11 147
11 146
11 144
11 148
11 147
11 148
8 146
7 142
7 136
7 118
5 59
5 60
5 62
5 77
5 82
5 90
5 93
4 97
4 97
4 97
4 96
4 94
4 92
4 92
2 92
2 94
2 92
2 85
2 85
2 86
2 85
3 86
3 95
2 102
2 103
2 109
2 121
2 129
3 168
4 173
5 179
5 183
5 189
5 188
5 195
5 220
5 226
5 227
5 230
6 230
6 236
7 238
8 240
8 240
8 240
8 245
8 245
8 245
8 246
8 249
8 250
8 252
8 252
8 258
8 258
8 259
8 260
8 266
8 273
8 273
8 273
8 275
8 280
8 287
8 288
8 292
8 294
8 299
8 303
8 311
8 327
8 381
8 385
8 406
8 416
8 446
8 455
8 469
7 474
7 479
7 482
7 487
7 505
7 507
7 509
7 511
7 511
7 512
7 512
7 513
7 512
7 512
7 513
7 498
7 497
7 496
7 496
7 496
7 495
7 495
7 495
7 494
7 493
7 478
7 468
7 464
7 463
7 464
7 464
7 465
7 465
7 465
7 462
7 458
7 458
7 457
7 457
7 456
7 461
7 464
7 468
6 467
6 456
5 431
5 422
5 418
5 416
5 400
4 374
4 370
3 370
3 363
3 358
3 357
3 350
2 322
2 320
1 319
1 319
1 314
0 301
0 301
0 301
0 301
0 300
0 299
0 299
0 298
0 298
9 321
9 320
9 319
9 319
9 313
9 311
9 309
9 308
9 300
9 290
9 284
9 284
9 283
9 275
9 270
9 269
0 236
0 233
0 225
0 225
0 215
0 191
0 152
0 146
0 127
0 110
0 78
0 67
0 67
0 67
0 63
0 62
0 58
1 32
1 31
1 27
2 28
2 26
2 25
2 25
2 24
2 25
2 25
2 24
2 24
2 24
2 24
2 23
2 23
2 23
2 23
2 23
3 23
3 21
3 21
3 21
3 21
3 21
3 21
3 21
3 21
3 21
3 21
3 22
3 22
3 22
4 15
4 15
4 15
4 15
4 15
4 15
4 15
5 15
5 16
5 19
5 23
8 30
20 469
23 482
24 509
24 515
25 516
25 521
25 522
25 522
25 523
25 522
25 523
25 525
25 526
25 527
25 527
25 532
25 534
25 534
25 536
25 536
25 536
25 541
25 551
26 571
26 580
26 623
26 629
26 636
26 638
27 641
27 644
28 646
28 646
28 650
28 651
28 657
28 658
29 659
29 688
29 689
29 689
29 690
29 690
29 691
29 692
29 692
29 693
29 695
29 697
29 701
31 730
31 731
31 735
31 736
31 738
30 736
33 737
33 742
32 744
32 744
32 744
32 744
32 742
32 742
32 742
30 742
30 743
30 740
30 742
30 745
30 746
27 747
27 747
27 747
26 748
26 748
26 749
26 749
26 750
26 752
26 753
26 762
26 763
26 763
27 825
27 826
26 829
26 833
26 837
26 840
26 843
26 851
26 893
26 897
26 898
25 905
21 904
20 901
19 888
14 866
7 403
6 402
6 397
6 399
6 399
6 402
7 405
7 353
7 353
7 353
7 353
7 351
7 347
7 347
7 347
7 347
7 347
7 344
8 343
8 342
8 340
8 336
8 320
7 304
7 294
7 259
7 257
7 259
7 258
6 253
6 251
5 249
5 249
5 248
5 246
5 239
5 239
4 234
4 203
4 203
4 202
4 201
4 200
4 202
4 203
4 202
4 201
4 201
5 211
5 210
5 184
5 183
5 183
5 183
5 181
5 180
5 177
5 171
5 169
5 169
6 171
15 218
15 229
16 224
16 226
16 227
16 229
16 229
16 229
16 229
16 228
16 227
16 229
17 230
17 230
17 235
17 233
17 233
18 231
18 231
18 228
18 219
18 218
18 217
17 148
17 148
17 145
17 145
17 144
17 152
17 157
20 160
23 163
33 177
53 175
55 173
57 176
58 172
59 169
59 168
60 169
60 168
60 169
60 170
60 168
60 165
59 161
59 164
62 169
62 169
62 170
62 170
62 169
62 169
62 169
61 169
61 169
61 170
60 169
60 169
60 169
60 171
60 171
60 169
60 170
58 168
58 168
58 166
58 168
58 168
58 172
58 182
58 191
58 204
58 217
58 221
58 226
58 227
58 229
58 230
58 232
58 230
58 230
58 227
58 228
58 228
58 227
58 225
57 225
57 225
57 225
57 226
57 226
57 227
57 227
57 228
56 229
56 231
56 233
56 238
54 244
47 186
47 193
47 189
47 190
47 191
47 191
47 195
48 195
48 195
48 218
48 218
47 217
47 215
47 214
47 212
47 214
47 214
46 214
46 214
46 214
46 212
46 212
45 211
45 211
45 186
45 186
45 187
44 187
43 176
39 171
25 166
17 161
13 144
4 145
2 143
2 143
2 142
2 142
2 141
2 141
2 141
2 138
2 137
2 138
2 138
2 137
2 136
2 136
2 136
2 135
2 135
2 135
2 135
2 135
2 135
2 135
2 134
2 134
2 130
2 130
2 125
2 125
2 123
2 123
2 118
2 117
2 115
2 113
2 112
2 108
2 90
2 83
2 75
2 63
2 63
2 63
2 63
2 63
2 63
2 66
2 68
2 69
2 77
2 84
3 86
3 87
3 88
3 88
3 90
3 94
3 96
3 123
3 211
3 309
4 328
4 350
4 360
4 358
4 356
4 359
4 357
6 353
6 353
6 351
6 350
6 350
6 346
6 350
6 365
6 366
6 370
9 378
8 388
9 388
9 388
9 389
6 399
6 417
6 427
6 437
8 487
8 492
8 495
8 496
9 498
9 498
7 492
7 492
7 492
7 494
7 494
7 495
7 495
7 493
7 493
7 493
7 493
7 493
7 493
7 494
7 495
7 494
7 497
7 496
7 496
7 497
7 497
7 497
7 497
7 497
7 497
7 497
7 497
7 497
8 497
8 499
8 499
8 499
8 502
8 521
8 532
8 537
8 538
8 542
8 547
8 554
7 560
11 715
12 727
12 728
12 729
13 731
13 733
13 734
14 735
14 740
14 741
15 741
15 736
15 729
15 738
15 737
15 722
15 736
15 746
15 741
15 742
15 750
15 753
15 749
14 743
13 667
13 603
13 553
13 545
13 541
13 541
17 553
17 547
17 546
17 544
17 545
17 547
17 546
17 545
17 543
17 541
17 536
17 519
17 519
17 518
17 518
13 497
18 507
18 501
17 485
17 479
17 470
17 463
17 445
14 404
14 404
14 405
14 404
14 405
14 407
14 408
14 412
14 414
14 417
14 423
14 423
14 423
14 425
14 425
14 426
14 435
14 475
14 496
14 499
14 500
14 518
14 532
14 538
14 540
14 540
14 541
14 541
14 540
14 549
15 550
15 554
15 554
15 559
14 580
14 582
14 580
14 586
14 580
14 567
14 551
14 544
14 545
14 543
14 538
14 533
14 528
9 378
9 380
9 395
9 396
8 396
8 392
8 393
8 390
8 390
7 393
7 395
7 400
8 400
8 390
8 396
8 398
10 410
10 407
10 413
10 399
10 398
10 386
10 382
10 377
10 377
10 377
10 379
10 382
10 383
10 383
10 383
10 384
10 385
10 385
10 385
10 383
10 383
10 383
10 383
10 384
10 384
10 384
10 385
10 388
8 389
7 385
4 375
4 375
4 375
4 375
4 375
4 375
4 374
4 373
4 371
4 369
4 369
4 368
5 367
5 366
7 400
8 423
10 439
10 436
10 439
12 446
13 446
13 445
13 438
13 429
13 373
13 370
13 368
13 368
13 349
13 333
13 327
13 329
13 332
13 333
13 335
14 339
14 331
13 333
13 338
13 346
13 342
13 322
13 323
13 319
13 317
13 316
14 311
14 308
14 307
14 307
14 307
14 307
14 307
14 305
14 302
14 301
14 285
14 284
14 284
14 284
14 283
13 284
13 274
13 272
13 268
12 264
12 262
12 256
12 245
12 236
10 203
10 204
10 191
11 191
11 191
11 191
11 190
11 189
11 186
11 185
11 179
11 178
14 196
14 196
14 197
14 195
14 196
14 197
14 198
14 199
14 199
14 199
14 199
14 197
14 197
14 196
14 194
11 174
11 174
11 174
11 174
11 174
11 174
11 173
11 168
11 167
11 173
11 173
11 173
11 173
11 171
11 170
10 167
10 167
5 114
5 94
6 89
6 101
6 105
3 97
3 102
3 102
3 104
3 118
3 138
5 219
5 230
5 236
5 239
5 244
5 253
5 266
5 263
4 263
4 260
3 258
3 255
3 252
3 247
3 242
3 237
3 232
3 230
3 231
3 234
3 235
3 236
3 236
3 238
3 237
3 238
3 238
3 239
3 239
3 243
3 243
3 245
3 246
3 246
3 246
3 246
3 245
3 245
3 245
3 245
3 247
3 251
3 256
3 258
3 257
3 262
3 266
3 271
2 272
5 284
5 288
5 289
5 289
5 292
5 291
5 292
5 293
5 297
5 307
5 307
5 303
5 302
5 302
5 302
5 301
5 301
5 301
5 302
5 302
5 302
6 302
6 304
6 304
6 304
6 304
6 304
6 304
6 303
6 303
6 303
6 304
6 296
6 302
6 301
7 302
8 303
8 303
8 305
8 303
8 300
8 304
9 308
9 301
9 316
9 309
9 311
9 308
9 305
8 278
7 253
7 188
7 196
7 187
7 188
7 186
7 186
7 187
7 187
7 189
7 193
7 193
7 195
7 196
7 197
7 193
7 193
7 196
7 196
7 196
7 195
7 194
7 194
7 194
7 196
7 214
7 224
7 231
7 235
7 237
7 238
7 237
7 237
7 236
7 238
7 240
7 246
11 282
11 282
11 283
12 282
12 279
12 277
13 315
13 320
13 318
13 312
12 309
12 305
13 310
11 299
11 299
11 291
11 291
11 291
11 288
11 288
11 288
11 288
11 285
11 293
11 299
11 307
11 315
14 347
14 348
14 352
14 353
14 353
14 357
14 358
13 358
13 356
13 355
13 355
13 355
13 356
13 353
13 353
11 348
10 333
10 332
10 331
10 324
10 325
8 323
8 322
8 320
8 321
8 333
8 330
8 349
7 348
7 334
7 328
7 326
7 329
7 331
7 330
7 330
7 325
7 323
7 314
7 314
7 313
7 313
7 314
7 318
7 319
7 313
7 314
7 312
7 312
7 312
8 312
8 323
8 337
9 345
10 357
10 358
10 357
10 363
10 362
10 364
11 360
11 333
12 310
12 304
13 303
12 300
12 300
12 299
12 300
12 302
12 305
12 305
12 301
9 272
9 269
10 266
10 266
11 265
11 263
10 230
10 229
10 231
10 229
10 228
10 227
9 217
9 218
9 216
9 217
9 219
9 219
9 219
9 220
8 220
8 220
8 215
8 208
8 203
8 193
8 183
8 170
8 168
8 169
9 170
9 170
9 170
9 170
9 170
10 173
10 175
10 175
10 177
10 178
10 177
10 177
10 176
10 175
10 174
10 176
10 178
10 187
10 195
10 198
10 199
10 192
10 181
10 189
10 157
10 158
10 150
10 151
10 152
10 150
10 148
10 148
10 150
10 153
10 157
10 159
10 158
11 160
11 160
11 160
11 153
11 151
11 151
11 142
11 144
10 146
10 157
12 160
12 150
12 132
12 130
11 120
11 120
11 120
11 113
11 113
11 113
10 113
11 116
9 116
9 116
8 117
8 117
8 118
8 118
8 116
8 114
6 112
6 114
6 113
6 113
6 114
6 114
6 111
5 109
7 113
7 113
7 113
7 113
7 114
7 124
7 124
7 126
7 125
7 124
7 125
7 123
7 123
7 124
7 123
7 121
7 122
7 122
7 124
7 126
7 126
7 128
7 130
7 132
8 132
8 134
8 147
8 159
8 162
8 164
7 190
7 194
7 197
7 198
7 200
7 198
7 202
7 202
7 200
5 198
5 198
4 193
4 180
4 174
4 169
4 170
4 171
4 172
4 174
4 172
4 172
4 171
4 169
4 169
4 169
4 169
4 170
4 169
4 166
4 162
4 162
4 162
3 160
3 160
3 161
3 161
3 161
3 161
4 159
4 158
4 154
4 141
4 138
4 143
4 147
4 154
4 163
4 166
4 167
4 170
4 190
4 202
4 288
4 298
4 306
6 320
6 327
6 331
5 327
5 326
5 327
5 327
5 325
5 327
5 326
5 326
5 326
5 326
5 325
5 323
3 320
3 320
3 319
4 319
4 319
4 308
4 308
4 307
4 307
4 308
4 312
4 312
4 325
4 329
4 335
4 336
4 335
4 338
4 360
4 399
5 473
5 483
5 499
5 496
5 498
5 504
12 497
12 487
12 486
12 483
12 460
13 464
13 464
13 467
13 467
13 468
13 467
13 469
13 472
13 475
13 474
13 474
7 476
7 475
7 476
7 476
502 524
502 522
502 522
502 523
502 523
502 524
502 526
502 526
502 526
502 524
502 523
502 523
502 524
502 527
502 527
6 481
6 482
6 491
6 495
6 498
6 505
5 574
5 579
6 584
6 585
6 586
5 588
5 582
5 584
5 586
5 586
5 585
6 589
6 572
6 560
6 547
6 466
6 468
6 481
6 514
6 539
6 540
6 546
6 550
6 552
6 553
7 555
11 554
11 555
11 556
11 560
11 570
11 573
11 581
11 583
11 583
11 584
10 584
10 584
10 585
11 584
11 579
23 589
18 575
18 578
18 571
18 551
18 543
24 591
24 589
25 585
25 588
25 557
25 508
25 471
25 470
25 475
12 468
12 528
13 534
13 531
13 533
13 544
7 499
7 516
8 551
8 549
9 580
11 589
13 601
15 635
15 634
17 643
17 649
17 654
17 656
17 658
17 658
17 666
17 663
17 667
17 670
17 678
17 677
17 682
17 676
17 677
17 678
17 677
17 678
17 678
17 679
17 679
17 672
17 671
17 672
17 673
17 667
17 669
17 662
17 655
17 592
17 591
17 584
17 584
17 584
17 578
17 575
17 564
17 565
19 658
19 663
19 680
19 683
19 696
18 689
19 705
19 694
19 688
18 656
18 633
18 640
18 638
18 637
18 636
18 640
19 651
20 683
20 687
20 692
20 691
20 678
20 671
20 672
20 673
20 673
20 680
21 679
21 680
20 680
20 680
20 679
19 680
19 675
19 670
19 667
19 668
19 672
19 676
19 696
19 918
20 992
19 1026
19 1038
19 1038
16 1037
16 1025
15 1031
13 928
13 936
13 943
13 946
13 906
12 897
12 903
10 877
10 877
10 878
10 878
7 867
7 844
7 840
6 841
7 839
7 842
7 846
7 843
7 842
7 834
7 837
7 833
7 846
7 848
7 852
8 866
8 863
8 864
8 866
8 869
9 951
9 964
9 975
9 982
9 997
9 1003
9 1006
9 1024
9 1027
9 1026
9 1028
9 1033
9 1033
9 1033
9 1041
8 1048
8 1050
8 1050
8 1047
8 1045
7 1025
6 921
6 920
6 913
6 911
6 891
6 865
6 864
6 868
6 871
6 870
6 867
6 863
6 864
6 871
6 872
6 870
6 848
5 812
5 813
5 817
4 824
4 840
5 842
5 854
5 857
5 864
5 863
5 874
5 882
6 906
6 939
6 963
6 977
6 1007
6 1015
5 1031
5 1037
7 1044
7 1046
7 1031
8 908
14 1029
17 1173
18 1238
19 1284
19 1293
19 1325
19 1333
20 1339
20 1330
20 1329
20 1329
20 1320
20 1321
20 1317
20 1311
20 1317
17 1315
17 1315
17 1315
18 1329
18 1329
18 1329
19 1345
19 1338
21 1372
22 1374
22 1374
21 1377
21 1374
21 1371
20 1338
20 1336
20 1358
20 1360
20 1357
20 1357
20 1356
20 1355
19 1240
19 1241
18 1231
18 1222
18 1217
18 1210
18 1186
18 1187
18 1186
18 1187
18 1185
18 1184
18 1183
18 1181
18 1200
18 1198
18 1197
18 1197
18 1198
18 1197
18 1198
18 1200
18 1200
18 1210
18 1212
18 1213
18 1202
18 1193
18 1169
18 1148
18 1145
18 1149
18 1147
18 1145
18 1143
18 1142
18 1203
18 1187
18 1185
18 1177
19 1170
18 1150
19 1145
19 1124
19 1122
19 1119
19 1118
19 1106
19 1100
19 1086
20 1058
19 1023
18 1020
16 1000
16 977
13 816
10 813
10 708
10 628
10 568
10 549
8 481
7 329
7 309
7 305
7 305
7 304
7 307
7 333
7 338
7 337
8 352
8 353
10 354
14 380
46 384
46 332
46 326
46 323
46 323
45 315
45 306
45 305
45 302
44 299
44 296
44 294
44 292
43 287
43 283
43 271
43 271
11 270
12 271
13 271
13 270
13 267
13 270
13 270
13 266
13 270
13 271
13 284
13 284
13 295
13 299
13 299
13 303
13 305
12 306
12 304
12 303
12 304
21 424
21 423
21 427
21 425
21 426
21 422
21 422
21 421
21 420
21 418
21 408
21 408
21 416
21 416
21 416
12 292
12 292
12 292
12 268
12 268
12 265
11 263
11 263
11 264
11 262
11 264
11 270
12 264
12 264
9 240
8 239
8 235
8 233
9 233
9 230
9 232
9 231
9 240
9 238
9 227
9 227
9 224
9 219
9 217
9 218
9 221
9 221
9 221
9 219
9 218
18 218
18 217
18 215
19 213
18 210
17 171
17 167
17 163
16 162
16 164
16 161
13 135
13 134
13 134
13 135
4 135
4 140
4 140
4 147
4 147
4 146
4 146
4 146
4 145
4 146
4 145
4 146
4 147
4 164
4 166
4 167
3 166
3 168
3 167
3 166
3 167
3 167
3 162
4 164
4 143
4 142
4 131
4 129
4 130
4 131
4 126
4 128
4 126
4 126
4 126
4 126
4 126
4 119
4 118
4 119
4 120
4 136
4 141
4 141
4 148
4 152
4 170
4 190
4 195
4 208
4 211
4 215
4 214
4 214
4 215
4 216
4 216
4 216
4 215
3 215
5 211
5 204
5 204
5 202
5 201
5 202
4 203
4 203
4 202
4 203
4 200
4 211
4 203
4 205
4 203
4 203
4 203
4 204
4 202
4 195
4 192
4 193
4 194
4 195
4 196
4 197
4 198
4 199
3 198
3 199
3 200
3 200
3 200
3 200
3 199
3 200
3 200
3 200
3 200
3 198
3 196
6 192
6 192
6 185
6 185
6 186
6 188
6 187
6 186
6 186
6 184
6 183
6 181
6 162
6 157
7 158
4 158
4 157
4 157
4 158
4 157
4 157
4 157
3 157
3 157
3 157
3 156
3 154
5 155
5 155
5 155
6 161
6 162
6 166
6 167
6 167
6 171
6 171
6 166
6 165
4 159
4 144
4 142
4 139
6 135
6 132
6 107
6 84
6 82
6 79
6 78
6 75
6 75
6 75
6 74
6 74
6 74
6 74
6 74
6 74
4 73
4 73
4 74
4 74
4 70
4 70
4 70
4 72
4 74
4 74
4 74
4 60
4 57
4 56
4 56
4 57
4 57
4 56
4 56
4 56
4 56
4 57
4 54
4 53
4 50
4 50
4 50
4 48
4 48
4 49
4 48
4 47
4 47
4 47
4 47
4 47
4 47
4 49
4 49
4 57
4 60
4 65
4 68
4 70
4 74
4 72
4 71
4 70
5 98
5 100
5 102
5 104
5 108
5 109
5 117
4 116
4 116
4 116
4 116
4 118
4 119
4 124
4 131
4 131
4 133
3 136
3 137
3 137
2 133
3 133
3 132
2 129
2 128
14 126
14 127
14 126
14 126
14 126
14 125
14 122
14 122
14 124
14 124
14 125
13 126
13 126
13 126
13 124
1 121
1 123
1 123
1 124
2 126
2 126
2 126
2 128
2 129
2 129
2 130
2 130
3 130
3 131
3 131
3 133
3 132
3 133
3 135
3 131
2 130
2 130
2 129
2 129
2 133
2 134
2 134
2 134
2 134
2 133
2 133
2 132
2 132
2 132
2 132
2 132
2 131
2 131
2 131
2 131
2 129
2 129
2 128
2 128
2 127
2 127
2 124
2 124
2 122
2 120
2 119
2 111
2 110
2 108
2 108
2 106
2 100
3 128
4 126
3 101
3 96
3 96
3 99
3 98
3 102
3 103
3 105
3 108
3 107
4 107
4 109
4 108
3 110
4 106
4 100
4 102
4 100
4 100
4 99
4 100
4 100
4 100
4 101
4 101
3 103
3 103
3 102
3 101
3 101
2 102
2 102
2 102
2 100
2 99
2 99
2 99
2 96
3 95
3 93
3 93
2 93
2 90
2 83
2 84
2 86
2 88
2 88
2 114
2 117
2 119
2 120
2 123
1 123
1 123
1 123
1 123
1 123
1 123
1 122
1 123
1 123
1 123
1 123
1 124
2 126
2 126
2 126
2 126
2 126
2 126
2 126
2 129
2 129
2 129
2 134
2 135
2 135
2 136
2 136
2 136
2 136
2 136
2 136
2 135
2 135
2 134
2 133
2 132
2 133
2 133
2 133
2 134
2 134
2 133
2 132
2 132
2 132
1 97
1 96
1 93
1 93
1 94
3 94
3 92
3 88
3 86
3 86
3 85
3 86
3 85
3 85
6 86
6 82
6 82
6 80
6 78
6 77
6 76
6 76
6 74
6 74
6 71
6 71
6 71
6 70
6 71
3 71
3 71
3 70
3 70
3 70
3 70
3 72
3 73
3 76
3 76
3 76
3 79
3 78
3 78
3 84
3 84
3 84
3 83
3 80
3 78
3 74
5 43
5 42
5 41
5 41
5 40
5 39
5 38
5 38
5 38
5 38
5 39
5 38
5 38
5 38
5 38
3 38
2 36
2 36
2 36
2 36
2 37
2 37
2 37
2 37
2 34
2 34
2 34
2 31
2 31
2 31
2 31
2 31
2 31
2 31
2 31
2 32
2 36
2 37
2 37
2 36
2 36
2 35
2 35
2 35
2 34
2 34
2 34
2 34
2 35
3 37
3 37
4 38
4 39
4 60
4 66
2 70
30 79
30 80
30 90
30 90
31 95
31 95
31 95
31 96
31 93
31 93
31 93
30 93
30 93
30 92
30 93
2 87
2 87
2 87
2 87
2 87
2 87
2 87
2 86
2 86
2 86
2 86
2 84
2 84
2 84
2 82
2 80
2 78
2 78
2 78
2 75
2 73
2 73
2 71
2 71
2 71
2 73
2 73
2 73
2 73
2 73
2 73
2 73
2 72
2 72
2 72
2 72
2 72
2 72
2 73
2 72
2 72
2 73
2 73
2 75
2 76
2 76
2 76
2 76
2 76
2 75
2 77
2 77
2 77
2 77
2 77
2 76
2 76
2 76
2 78
2 78
2 78
2 78
2 78
2 78
2 80
2 77
2 77
2 82
2 82
2 83
2 83
2 83
2 85
2 90
2 92
2 92
2 91
2 90
1 88
1 87
1 86
1 79
1 53
1 53
1 53
1 53
1 53
1 42
0 42
0 35
0 36
0 36
0 35
0 36
0 37
0 37
0 37
0 37
0 37
0 38
0 38
0 39
0 39
0 39
0 40
0 40
0 40
0 40
0 41
0 41
0 41
0 43
0 45
0 46
0 46
0 46
0 46
0 46
0 48
0 50
0 62
0 75
0 84
0 87
0 91
0 91
0 91
0 96
0 98
0 99
0 99
0 104
0 104
0 105
0 106
0 106
0 107
0 107
0 106
0 106
0 106
0 105
0 105
0 102
0 102
0 102
0 103
0 103
0 103
0 103
0 100
0 100
0 101
0 101
0 101
0 102
0 100
0 100
0 100
1 106
1 106
1 106
1 106
1 105
2 105
2 104
3 104
3 100
3 99
3 99
3 99
3 98
3 97
3 91
3 91
3 91
3 90
3 90
3 90
3 91
3 91
3 93
3 94
3 94
3 94
3 97
3 97
3 97
3 96
3 97
3 97
3 97
3 96
3 95
3 96
4 103
4 106
4 107
6 107
6 105
6 105
6 105
6 105
6 100
6 99
6 98
6 96
6 95
6 93
6 94
6 93
9 93
10 94
10 94
10 94
10 93
10 92
10 89
10 86
10 81
10 72
10 63
10 53
10 49
10 48
10 48
10 49
10 49
10 50
10 49
10 46
10 45
10 45
10 45
10 44
10 44
10 43
10 43
11 43
11 43
11 44
11 44
12 45
13 47
13 52
13 57
15 64
16 71
16 74
16 79
16 79
16 84
16 83
16 83
16 83
14 82
14 82
14 82
14 83
13 80
13 80
13 81
11 83
11 83
11 83
11 81
11 81
11 83
11 84
11 85
11 92
11 93
11 115
11 116
11 116
11 119
11 123
11 126
11 129
11 132
11 130
11 129
11 127
13 127
13 127
13 125
13 127
13 128
13 128
13 127
13 127
13 128
13 124
13 124
13 123
12 118
12 118
12 117
8 117
8 117
8 117
8 117
8 117
8 119
8 121
8 122
8 124
8 124
8 124
7 122
7 125
5 125
4 124
1 124
1 124
1 124
1 124
1 124
1 124
1 125
1 127
1 128
1 128
1 128
1 128
1 128
1 127
1 127
1 126
1 126
1 126
2 126
2 126
2 126
2 127
1 141
1 208
2 258
4 330
5 340
5 350
6 373
6 380
6 387
6 374
6 378
9 461
9 457
9 459
9 461
9 460
9 457
9 464
9 465
9 476
9 477
9 478
9 478
9 476
10 473
11 474
11 475
8 400
8 407
8 406
8 407
8 407
8 409
8 410
10 406
10 400
10 399
10 381
10 381
9 379
9 385
9 392
9 391
9 391
9 403
9 403
9 405
9 413
9 414
9 418
9 421
8 420
8 420
8 420
8 418
8 417
8 420
8 423
8 412
8 412
8 412
8 413
9 413
9 408
9 407
9 407
9 409
9 416
9 413
9 412
9 413
9 415
9 416
9 418
9 419
9 418
9 420
9 422
26 694
26 701
27 710
27 713
27 714
27 722
26 717
26 717
26 716
26 716
26 716
26 716
26 715
26 715
26 715
9 519
9 519
8 518
7 516
7 514
7 507
6 487
6 442
5 405
4 365
3 303
3 293
3 289
2 270
2 261
2 250
2 250
2 249
2 248
4 250
4 249
4 252
4 253
4 251
4 244
4 244
4 237
4 238
4 239
4 239
4 235
4 238
4 239
4 236
2 223
2 219
2 214
2 215
2 216
2 216
2 216
2 217
2 218
2 221
2 218
2 233
2 245
2 246
2 250
2 250
2 250
2 234
2 233
2 235
2 235
2 246
2 244
2 244
2 247
3 260
3 277
4 452
6 482
6 506
5 546
5 550
6 557
6 560
6 562
6 563
6 564
6 564
6 564
6 564
7 559
7 561
9 578
9 577
9 579
9 583
12 599
11 600
11 621
11 627
11 623
11 542
11 544
11 538
11 547
11 545
11 537
11 537
11 537
11 537
11 537
11 538
8 523
8 524
8 525
9 524
9 524
9 524
10 524
10 524
10 524
10 524
10 525
10 525
10 524
10 524
11 524
12 525
12 525
14 534
14 536
14 536
16 537
16 544
16 544
15 548
15 548
15 550
15 555
15 561
15 566
15 567
15 564
15 563
15 563
15 562
15 565
15 560
15 556
15 558
15 563
15 565
15 575
16 575
16 578
16 586
16 587
16 591
16 591
16 591
17 637
17 625
17 632
19 629
19 634
19 643
19 646
19 648
19 648
19 647
20 640
20 645
20 641
20 609
18 600
14 550
14 530
14 381
13 378
13 377
13 377
13 370
13 365
13 364
13 364
12 363
12 364
12 363
11 363
11 363
11 359
11 358
11 349
11 347
10 341
10 337
10 333
10 330
10 309
10 307
10 306
10 310
10 308
10 306
10 301
10 303
10 303
10 308
10 308
10 308
11 308
12 307
12 306
12 323
12 323
11 324
11 329
11 334
11 335
11 337
11 337
11 337
11 337
12 338
13 341
13 343
14 343
14 339
14 339
13 330
12 328
12 328
11 327
11 321
11 323
11 322
11 332
11 339
12 336
12 336
12 334
12 334
12 333
12 335
12 353
12 352
12 349
12 357
25 391
26 392
25 380
25 379
25 381
26 406
26 409
26 411
26 407
29 406
29 406
29 378
27 291
27 269
27 264
26 264
26 264
26 262
26 260
26 263
26 262
26 258
25 254
25 251
25 251
25 250
25 250
25 250
25 250
25 251
24 251
24 251
34 293
38 296
38 322
38 327
38 334
38 334
38 335
38 335
38 334
38 333
38 334
39 335
39 337
39 339
40 771
40 774
40 783
40 786
40 786
44 795
44 796
44 794
44 792
46 791
46 790
46 790
46 790
46 790
46 793
46 843
44 411
44 416
44 417
46 400
46 402
42 392
42 389
43 388
44 391
45 396
45 399
45 401
44 401
44 403
42 356
42 361
42 371
42 376
40 383
39 388
39 391
39 390
38 388
38 384
37 383
37 374
38 370
38 367
38 365
38 365
38 368
38 375
38 374
38 374
38 354
38 358
36 354
36 352
23 310
23 303
23 298
23 297
23 297
23 289
23 299
23 299
21 296
20 293
20 292
20 292
20 297
20 298
20 300
20 301
20 302
20 300
20 301
20 299
20 300
20 300
20 298
20 300
20 302
20 304
20 306
19 307
19 315
18 318
19 348
17 351
8 309
6 310
6 280
6 276
6 276
6 276
6 275
6 276
6 276
6 280
6 278
6 277
6 277
6 275
6 275
6 276
6 267
6 267
6 266
6 266
6 267
6 267
6 269
4 271
4 273
4 273
4 276
4 276
4 275
4 284
4 286
4 293
4 325
4 334
4 341
4 347
4 343
3 338
2 336
2 336
2 335
2 333
2 333
2 327
2 323
2 313
2 304
2 299
3 287
3 281
3 279
3 279
3 281
3 280
3 279
3 279
2 275
2 276
2 274
2 273
2 266
2 263
2 261
2 260
2 261
2 262
3 276
3 277
3 281
3 283
3 286
3 286
3 283
3 269
3 262
3 263
3 263
3 269
3 271
3 295
3 401
4 575
4 671
4 733
4 788
4 869
4 902
4 943
4 993
4 1002
4 1003
4 1026
4 1031
11 1050
11 1068
11 1082
11 1081
11 1082
10 1070
10 1075
11 1076
11 1072
11 1072
11 1071
11 1078
12 1113
12 1185
12 1196
5 1295
5 1311
5 1314
5 1324
5 1334
5 1350
5 1381
5 1421
5 1449
5 1451
5 1458
5 1461
5 1458
5 1457
5 1465
5 1470
5 1469
5 1471
5 1466
5 1472
5 1472
5 1462
5 1453
5 1449
5 1441
5 1450
74 1506
74 1512
74 1514
74 1522
74 1523
74 1525
74 1526
76 1527
75 1529
76 1534
76 1533
76 1535
76 1536
76 1531
76 1540
76 1539
7 1533
7 1533
7 1533
7 1533
7 1532
7 1530
7 1525
7 1522
7 1522
4 1521
4 1539
4 1544
6 1696
6 1707
6 1727
6 1771
5 1762
5 1755
5 1769
6 1802
8 1913
8 1936
10 2001
10 2048
13 2217
14 2257
14 2298
15 2296
14 2294
14 2225
14 2119
14 2011
14 1951
14 1895
14 1862
14 1767
14 1758
14 1730
14 1729
14 1727
14 1726
14 1705
14 1701
14 1686
14 1658
14 1653
14 1651
14 1651
14 1642
14 1641
13 1640
13 1641
13 1643
13 1640
13 1624
12 1601
12 1451
14 1440
14 1382
14 1375
14 1374
14 1383
14 1503
14 1518
14 1493
14 1456
14 1449
16 1459
18 1459
18 1467
23 1517
23 1519
21 1523
21 1522
21 1807
21 1814
21 1824
21 1818
21 1822
21 1892
21 1896
21 1904
22 1911
22 1919
22 1821
22 1820
22 1821
22 1817
22 1819
22 1817
22 1819
22 1826
22 1823
22 1821
22 1820
22 1822
22 1824
22 1828
22 1828
22 1832
22 1837
22 1840
24 1840
26 1850
30 1867
37 1917
38 1922
38 1925
39 1926
39 1919
40 1914
39 1907
38 1616
38 1618
38 1604
38 1583
38 1492
39 1492
39 1480
38 1465
36 1352
49 1500
46 1467
59 1446
61 1249
60 1216
61 1213
62 1235
62 1239
63 1251
63 1273
63 1282
63 1292
63 1299
63 1307
63 1336
65 1360
65 1370
66 1385
66 1396
66 1397
65 1399
65 1403
65 1403
65 1406
65 1404
65 1428
65 1443
65 1450
65 1451
65 1451
65 1454
66 1452
66 1463
66 1452
66 1456
67 1462
67 1458
67 1455
67 1444
67 1445
67 1439
67 1284
67 1274
67 1263
67 1263
67 1272
71 1286
70 1287
70 1288
64 1231
64 1219
64 1213
64 1200
64 899
64 899
64 891
64 883
64 881
64 818
64 819
64 811
64 803
64 787
64 794
64 810
64 809
64 819
64 823
64 821
64 823
64 816
64 816
64 816
64 816
64 813
64 811
65 804
65 806
65 803
65 798
64 793
59 787
58 766
57 755
48 708
49 710
49 713
49 714
49 714
48 703
48 710
48 725
48 735
47 735
46 735
45 733
45 728
36 726
34 745
32 742
24 546
20 538
11 533
9 528
9 527
9 523
9 499
10 489
11 489
11 469
11 450
11 446
11 440
11 420
11 381
10 387
10 391
10 392
10 393
10 393
10 392
10 392
10 391
10 382
10 380
10 354
10 338
10 334
10 334
10 336
10 328
9 329
9 330
9 333
9 326
8 319
8 319
8 317
8 319
8 318
8 319
8 317
8 320
8 317
10 314
10 305
5 284
5 281
5 284
5 284
5 286
5 288
5 285
5 288
5 288
5 288
5 288
5 285
5 271
3 263
3 262
3 262
3 264
3 254
3 229
3 223
3 223
3 223
3 223
3 221
3 223
3 222
3 222
3 221
3 221
3 220
3 216
3 210
3 210
3 209
5 263
5 272
6 292
6 304
6 305
5 307
5 307
5 305
5 306
5 304
5 293
5 278
5 268
5 269
5 270
5 269
4 270
4 270
4 253
4 246
4 240
4 240
4 245
4 248
4 262
3 265
3 270
3 288
2 272
2 278
3 282
3 282
4 282
4 284
5 277
6 264
389 276
389 276
389 273
389 273
389 273
389 274
389 274
389 274
389 275
389 273
388 274
387 274
387 274
386 269
386 264
3 239
3 239
3 237
3 227
3 235
3 243
3 262
3 270
3 276
3 272
3 285
3 294
3 308
3 316
3 324
3 326
3 328
3 332
3 365
3 367
3 375
3 379
3 381
3 381
3 381
3 382
3 382
3 380
3 380
3 380
3 378
3 379
3 380
3 379
3 380
3 382
3 383
3 383
3 383
3 381
3 382
3 382
3 383
4 396
4 402
4 405
4 401
4 400
4 393
2 333
2 321
2 324
2 323
2 324
2 325
4 328
4 329
4 330
4 333
8 338
8 341
9 346
11 363
14 444
14 455
15 463
15 467
15 472
15 475
15 476
14 476
14 467
14 462
14 440
14 435
14 432
14 410
14 409
14 408
14 407
14 406
15 424
15 428
15 429
16 433
15 433
15 437
15 441
15 448
15 453
15 452
15 453
15 453
15 455
15 456
15 454
15 453
15 458
15 463
15 473
15 472
15 459
15 460
15 455
15 454
15 450
15 419
15 449
15 461
15 467
15 478
15 489
15 483
15 489
15 487
15 487
15 487
15 474
15 441
15 450
15 451
15 451
15 450
15 448
15 447
15 448
15 452
15 452
15 453
15 453
15 453
15 451
15 449
15 449
15 448
15 447
15 446
15 446
15 448
15 449
14 448
14 446
14 446
12 424
12 422
12 415
12 413
12 413
12 413
12 411
12 409
12 398
12 398
12 398
13 398
13 402
13 400
13 419
12 418
7 409
7 404
6 398
5 377
3 292
3 287
3 284
3 278
4 277
4 283
4 285
4 284
4 286
4 292
4 293
4 294
4 294
4 295
4 296
3 292
3 291
3 288
2 271
1 270
1 267
1 256
1 253
1 245
1 243
2 236
2 234
2 234
2 231
2 232
2 228
3 230
3 230
3 233
3 233
3 232
3 224
3 226
3 226
3 225
3 221
3 220
3 219
3 209
3 168
3 162
3 160
3 151
4 141
4 137
4 131
4 128
4 127
4 125
4 124
4 121
4 109
4 107
4 106
4 109
4 110
4 113
4 119
4 119
4 121
4 123
4 123
4 124
4 124
4 124
4 127
4 129
4 133
4 141
4 173
4 185
4 190
4 271
4 282
4 352
5 371
5 400
5 433
5 452
5 454
5 468
5 475
5 485
5 488
5 491
4 489
4 488
4 485
4 485
4 462
3 464
3 465
3 465
3 465
3 460
3 460
3 461
3 461
3 463
3 464
3 464
3 465
3 468
3 465
3 457
3 455
3 455
3 455
3 455
3 455
3 455
3 457
3 457
3 459
3 459
3 458
3 457
3 457
3 465
4 480
3 482
4 495
4 501
4 501
3 499
4 499
4 494
4 487
4 483
4 481
4 477
4 475
4 477
4 475
4 476
4 477
4 478
4 497
4 496
4 502
4 511
3 537
3 540
2 549
2 560
2 567
2 567
2 568
2 572
2 606
2 613
2 641
2 652
2 652
2 652
2 651
2 649
2 642
2 641
2 642
2 642
2 641
2 640
2 645
2 642
2 634
2 638
2 634
2 622
2 595
2 582
2 545
2 470
2 431
2 406
2 397
2 361
2 346
2 344
2 341
2 332
2 329
2 323
2 324
2 323
2 323
2 325
2 323
2 329
2 329
2 332
2 332
3 338
3 341
3 343
3 342
3 341
3 349
3 349
3 349
3 349
3 349
3 347
3 347
3 347
3 348
3 348
3 348
3 347
3 347
3 348
3 343
3 334
3 337
3 340
3 341
3 343
3 343
3 329
2 314
1 311
1 305
1 305
1 306
1 306
1 307
1 309
1 309
1 309
2 311
2 314
2 319
2 316
2 313
2 313
2 311
3 316
3 305
3 306
3 305
3 298
3 273
3 276
3 269
3 269
3 269
3 265
51 267
51 264
51 225
51 217
51 186
49 183
49 180
49 191
49 189
49 188
49 188
49 192
49 197
49 196
49 195
48 197
48 191
48 192
1 192
1 182
1 184
1 184
1 189
2 187
2 190
2 190
2 195
2 196
2 198
2 200
2 201
2 201
2 200
2 215
2 218
2 218
2 221
2 223
2 227
2 228
2 228
2 221
2 216
3 213
3 209
3 206
3 201
4 200
4 200
4 193
4 193
4 195
4 196
4 198
4 201
4 210
4 212
4 216
4 229
4 254
4 261
5 280
5 280
5 282
5 282
5 287
5 284
5 280
5 281
5 276
5 277
6 277
7 279
7 277
7 277
7 273
7 269
7 269
7 269
7 271
7 272
11 293
13 309
13 305
13 311
14 309
14 312
14 311
13 313
13 314
13 315
13 320
13 409
13 412
14 420
14 418
14 420
14 414
14 411
14 410
14 408
14 411
14 413
14 418
14 422
14 422
14 424
14 411
16 410
16 410
16 410
16 408
16 407
16 407
16 408
16 408
16 412
16 411
16 410
17 417
19 417
19 422
21 491
20 489
20 492
20 492
20 488
20 488
20 487
20 485
20 484
20 483
21 486
20 474
20 470
20 467
20 469
18 389
18 389
18 386
18 385
17 385
17 388
16 388
16 386
16 389
16 394
16 395
16 398
16 402
16 400
66 404
67 404
67 399
67 390
67 370
67 359
66 353
66 335
66 331
66 334
66 331
66 333
66 332
64 331
64 328
209 395
158 395
160 396
159 395
159 395
159 394
159 392
159 396
159 395
159 396
159 395
159 395
159 395
159 394
159 392
10 302
10 291
8 289
8 290
8 289
8 285
8 274
8 267
8 265
8 262
8 273
7 175
7 180
7 179
7 180
9 189
9 190
9 190
9 190
9 195
9 195
9 194
9 191
9 187
9 185
9 180
7 180
7 180
7 179
7 177
7 177
7 176
7 175
7 176
7 175
7 172
7 172
7 170
4 160
4 159
4 157
4 155
4 154
4 154
4 154
4 153
4 152
4 152
4 152
4 151
4 151
3 150
3 150
3 150
3 148
3 144
3 144
3 144
3 142
3 141
3 141
3 141
4 140
4 140
4 135
4 133
5 132
5 130
5 124
5 123
5 126
5 123
5 123
5 123
5 123
5 126
5 133
5 132
4 138
4 146
4 152
4 163
4 163
4 159
4 157
4 153
4 152
4 150
4 150
4 151
4 151
4 150
4 148
4 147
4 146
4 146
4 143
4 143
4 141
4 141
3 136
3 137
3 137
3 134
3 132
3 132
3 132
4 132
4 132
4 127
4 100
4 91
4 90
3 90
2 92
2 93
2 93
2 93
2 92
2 89
2 87
2 86
2 87
2 90
3 93
3 96
3 94
2 94
2 96
2 97
2 100
2 99
2 99
2 98
2 96
2 96
2 96
2 96
2 98
2 98
2 99
2 100
2 100
2 100
2 100
2 101
2 101
2 101
2 100
2 100
2 101
2 102
2 103
2 104
2 103
2 105
2 105
2 105
2 107
2 105
2 105
2 105
2 105
1 105
1 105
1 105
1 106
1 104
1 110
1 110
1 108
1 107
1 107
1 107
1 107
1 103
1 89
2 81
2 78
3 73
3 70
3 60
3 59
3 169
3 173
3 178
3 180
3 180
3 180
3 183
3 184
3 186
3 189
3 221
3 260
3 278
3 289
3 294
3 294
3 305
3 313
3 313
3 319
3 319
3 334
3 341
3 346
3 354
3 357
3 357
3 359
3 358
3 357
3 355
3 355
3 355
3 354
3 353
2 353
2 352
2 352
2 351
2 346
2 347
2 345
2 345
2 347
2 348
2 345
2 344
2 341
2 342
2 342
2 342
2 342
2 343
2 344
2 342
2 342
2 346
2 345
2 347
2 352
2 354
2 355
2 356
2 358
2 358
2 362
2 371
2 373
3 372
3 373
3 376
3 377
3 376
3 376
3 375
3 373
3 373
3 372
3 372
3 372
3 373
3 374
3 374
3 375
3 374
3 368
3 375
3 387
3 405
3 409
3 412
3 424
3 449
2 461
1 470
1 473
1 476
1 473
1 472
1 469
1 314
1 317
1 311
1 266
1 266
1 265
1 264
1 262
1 261
1 254
1 250
1 228
1 226
1 223
1 223
1 222
1 222
1 219
1 217
1 199
1 193
1 185
1 184
1 185
1 188
1 198
1 202
1 203
1 203
1 206
1 208
1 208
1 208
1 209
1 211
1 211
1 211
1 214
1 214
1 214
1 212
1 211
1 209
1 207
1 207
1 206
1 206
1 206
1 206
1 206
1 206
1 207
1 206
1 206
1 209
1 208
1 208
1 207
1 206
1 198
1 198
1 195
1 194
1 193
1 191
1 186
1 179
1 177
0 177
0 176
0 171
0 169
0 168
0 168
0 169
0 168
0 167
0 165
0 165
0 165
0 163
0 157
0 157
0 156
0 155
0 152
0 164
0 154
0 136
0 136
0 131
0 108
0 84
0 84
0 91
0 89
0 86
0 86
0 86
0 83
0 80
0 80
0 82
0 82
0 82
0 82
4 82
4 82
4 83
4 84
4 83
4 83
4 84
4 85
4 85
4 85
4 84
4 84
4 84
4 119
4 134
0 148
0 198
0 195
0 195
0 189
0 184
0 187
1 206
1 206
1 206
1 206
1 207
1 207
1 207
1 212
1 214
2 294
2 299
3 312
3 305
3 310
3 310
3 288
3 286
3 287
3 288
3 295
3 297
3 297
3 298
3 299
3 302
3 316
3 320
3 321
3 325
3 325
3 328
3 332
3 335
3 337
3 340
3 341
3 356
3 356
3 353
3 354
3 362
3 360
3 359
3 360
4 393
4 389
4 390
5 391
5 391
5 392
5 394
5 395
5 397
5 394
5 389
5 389
5 387
5 388
5 388
5 391
5 393
5 406
5 408
5 409
5 411
5 411
5 411
5 413
5 416
5 417
5 416
5 418
5 418
5 418
5 421
5 423
5 425
5 426
5 431
5 429
5 430
5 427
5 426
5 426
5 402
5 402
5 402
5 402
5 397
7 426
7 429
17 501
17 500
18 494
17 442
17 440
41 1101
41 1104
41 1103
41 1104
41 1121
41 1123
41 1125
41 1129
41 1129
41 1132
41 1128
41 1126
40 1122
39 1031
39 1027
15 367
19 391
20 392
20 395
22 419
22 423
22 420
22 421
22 414
22 414
22 427
22 429
24 444
25 438
26 429
26 428
26 426
27 429
27 429
27 428
27 422
27 421
27 419
27 445
27 443
27 429
27 429
27 427
27 427
27 418
27 418
27 419
26 419
25 381
25 383
25 384
25 410
25 414
25 415
25 415
25 414
25 420
25 419
25 420
25 421
25 421
27 421
42 624
43 630
45 631
45 624
45 624
45 622
45 623
45 623
45 623
45 620
45 621
45 620
45 622
45 623
45 630
45 633
45 629
45 626
45 622
45 621
45 622
45 624
45 625
45 623
45 621
45 623
45 623
45 623
45 627
45 627
44 625
43 594
42 589
32 517
32 516
32 516
32 517
32 529
34 563
35 596
35 597
35 600
35 582
35 583
35 573
35 572
35 570
36 565
36 565
36 561
36 558
36 557
36 557
34 554
31 531
31 526
31 524
29 505
29 502
30 505
30 505
30 503
30 496
29 484
28 476
26 463
26 463
26 462
26 461
26 462
26 461
26 462
26 461
26 462
26 461
26 461
26 431
27 434
27 432
27 432
27 433
27 432
28 432
29 457
29 455
29 459
29 457
29 456
29 457
29 428
29 428
29 428
29 428
29 426
28 421
28 422
28 420
27 418
25 418
24 418
9 193
9 193
9 193
9 193
9 193
9 194
9 192
9 194
9 196
10 198
13 199
13 198
15 195
15 191
15 185
16 185
16 185
16 185
16 186
16 190
16 189
16 188
16 187
16 187
16 187
15 184
15 184
15 184
15 181
15 180
15 177
15 155
15 155
15 156
15 159
15 159
15 170
15 165
13 144
12 120
12 122
12 121
21 271
21 271
22 275
26 278
32 280
34 282
35 282
35 282
35 283
35 283
35 283
35 283
35 283
35 285
35 285
26 136
26 135
24 132
24 132
24 132
24 132
23 132
24 132
24 132
24 132
25 131
25 130
25 131
25 130
25 132
25 132
25 149
25 150
25 151
24 152
24 150
24 150
23 149
23 149
23 147
22 146
21 121
21 121
21 117
21 117
21 117
21 117
21 117
21 120
21 128
21 131
21 132
21 131
21 129
21 129
21 129
21 128
22 125
22 124
22 124
22 125
22 125
22 127
22 127
22 166
22 165
22 171
21 169
19 173
19 174
17 172
18 172
18 172
16 172
16 171
16 174
16 173
16 169
16 167
16 167
16 169
16 169
16 172
16 172
16 173
17 174
17 180
17 181
18 179
18 183
19 184
19 181
19 179
19 172
19 165
19 155
19 148
19 150
19 149
18 147
13 147
9 144
9 141
7 139
4 136
3 136
3 136
3 136
3 136
3 136
3 135
3 135
3 135
3 133
3 134
3 134
3 134
4 133
6 142
6 143
7 143
7 144
7 145
7 146
7 146
7 146
7 146
7 147
7 153
7 149
7 148
7 129
7 130
7 129
7 129
7 127
7 129
7 129
7 129
7 129
7 129
7 130
7 130
7 131
7 133
7 132
7 133
7 133
7 130
7 121
7 121
7 121
7 120
8 122
8 122
8 122
8 122
8 122
8 122
8 120
9 120
9 119
9 119
9 116
9 76
9 75
9 68
9 66
9 66
9 66
9 67
8 66
8 65
8 65
8 65
8 60
8 59
8 59
8 59
8 59
8 60
8 58
8 56
8 55
6 51
6 51
6 47
6 47
6 46
6 44
6 43
6 44
6 44
6 64
6 64
6 64
6 63
6 63
6 63
6 63
6 63
6 63
8 65
8 65
8 65
8 65
8 65
8 68
8 69
8 69
9 69
9 69
9 69
9 69
9 68
7 49
7 45
7 45
6 37
7 53
6 53
6 55
6 57
6 55
6 56
5 55
5 54
5 52
5 48
5 48
5 48
5 48
5 46
5 46
5 45
5 45
7 50
7 53
7 53
7 54
7 56
7 56
7 56
7 55
7 54
7 54
7 53
7 54
7 55
7 54
7 54
5 51
5 51
4 50
4 51
4 51
4 51
4 51
4 51
4 51
3 51
3 51
3 51
3 50
3 49
3 51
3 52
3 52
3 53
3 52
3 54
3 54
3 54
3 55
3 55
3 57
3 59
3 60
3 62
3 62
3 62
3 63
3 63
3 65
4 67
4 79
4 83
4 85
4 85
4 90
4 92
4 93
5 101
5 101
5 106
5 107
5 108
5 109
5 109
5 109
5 109
5 108
3 107
3 106
3 105
3 105
3 105
3 103
3 103
3 103
3 104
3 105
3 105
3 105
3 105
3 105
3 106
3 105
2 105
2 88
2 88
2 86
2 86
2 87
2 86
2 84
2 84
2 84
2 84
2 84
2 84
2 84
2 84
2 84
2 90
2 90
2 90
2 86
2 86
2 85
2 83
2 85
2 86
2 88
2 89
2 90
2 91
2 90
2 90
2 90
2 90
2 89
2 89
2 89
2 89
2 90
3 90
4 99
4 99
4 107
4 108
4 113
4 113
4 113
4 114
4 109
4 108
4 108
4 107
4 107
4 106
4 106
4 107
4 105
4 104
4 101
4 100
4 99
4 100
4 100
4 100
4 96
4 92
4 85
3 79
3 78
3 75
3 75
4 74
4 69
4 69
4 69
3 60
3 60
3 55
3 55
3 86
3 86
3 93
3 93
3 93
3 94
3 94
3 94
3 95
3 95
61 866
61 866
61 866
61 866
61 866
61 834
63 833
63 828
63 824
63 824
63 822
63 821
63 821
63 821
63 821
63 814
5 49
5 48
5 48
5 48
5 48
5 47
5 48
5 48
5 48
5 48
5 48
5 47
3 42
3 42
3 43
3 43
3 43
3 44
3 43
3 37
3 36
3 36
3 34
3 34
3 34
3 34
3 33
3 33
3 33
3 33
2 32
2 32
2 31
2 30
1 30
1 25
1 24
1 18
1 15
1 9
1 9
1 9
1 7
1 7
1 7
1 7
1 6
1 5
1 4
1 4
1 4
1 4
1 4
1 4
1 6
1 6
1 6
1 7
1 7
1 7
1 8
2 19
2 21
2 22
2 25
2 27
1 27
1 27
1 28
1 28
1 30
1 32
1 32
1 32
1 32
1 33
1 33
1 33
1 33
1 32
1 32
1 32
1 33
1 33
1 34
1 37
2 38
2 39
2 42
2 43
2 43
2 43
2 45
2 46
2 46
2 46
4 47
14 47
14 47
14 47
14 47
14 47
14 47
14 47
14 45
14 45
14 45
14 45
14 45
14 44
14 44
14 44
12 43
12 43
2 43
2 43
2 43
2 43
2 43
2 43
2 43
2 43
2 44
2 45
2 49
5 128
6 162
7 183
8 190
9 197
9 209
9 218
9 257
9 275
9 286
9 325
10 361
11 372
11 375
11 382
11 389
12 389
12 389
12 391
12 392
13 398
13 406
41 465
42 473
42 483
43 486
43 499
43 502
43 508
43 506
43 508
43 513
43 513
43 514
43 515
44 517
43 509
43 507
43 507
43 507
43 506
44 507
44 507
44 509
44 509
44 513
44 513
44 513
44 513
45 513
45 510
45 511
45 511
45 511
46 511
47 511
47 511
47 516
47 523
49 524
51 527
51 531
51 530
51 531
51 530
50 530
51 529
51 527
52 526
53 536
53 536
53 534
53 534
53 535
53 535
53 535
53 535
53 536
52 537
52 537
52 536
52 535
52 535
52 536
52 535
52 535
52 535
52 535
52 536
52 536
52 535
53 533
54 533
54 533
54 533
54 534
54 532
53 522
53 511
53 450
51 401
50 392
49 384
48 384
48 378
49 370
49 350
48 301
49 263
49 259
49 242
49 228
48 223
49 218
49 217
49 215
48 221
47 252
48 424
52 528
50 526
48 533
31 475
47 498
68 522
88 530
142 546
151 574
156 584
158 588
159 587
159 585
163 586
163 587
164 587
163 587
187 586
189 584
189 583
189 583
189 582
188 583
188 583
188 580
188 586
188 577
188 582
188 585
188 586
188 586
188 586
188 588
165 591
165 594
167 599
166 599
166 604
165 595
165 589
165 583
164 583
163 581
163 578
163 579
163 582
162 583
162 583
161 583
162 582
161 573
161 574
161 579
161 579
161 579
161 580
161 581
161 581
161 586
161 586
161 587
161 607
161 608
161 610
162 617
173 792
174 823
174 876
174 896
176 964
176 1089
178 1238
177 1342
177 1579
177 1754
177 1820
179 1896
179 2049
180 2115
180 2285
179 2300
179 2299
180 2300
181 2297
181 2295
181 2291
179 2309
180 2321
178 2323
179 2324
179 2325
179 2320
179 2317
178 2317
178 2318
178 2331
178 2326
177 2318
175 2265
169 2092
162 2024
157 2018
148 2015
98 2011
85 2009
71 2004
51 2007
39 1990
36 1966
36 1969
36 1972
36 1981
36 1982
32 1989
32 1996
31 2003
31 2007
31 2012
31 2020
31 2020
31 2026
31 2027
31 2038
31 2040
31 2041
31 2032
31 2033
31 2028
31 2031
32 2031
32 2034
32 2037
32 2033
31 2030
31 2028
30 2027
83 4291
83 4284
83 4284
82 4284
82 4287
82 4299
82 4303
82 4345
82 4352
82 4360
82 4368
82 4371
85 4375
84 4379
84 4377
31 2117
31 2113
31 2114
31 2122
31 2132
31 2135
31 2135
31 2126
31 2124
31 2116
31 2081
28 2072
27 2040
26 2013
14 1667
14 1607
15 1464
13 1200
13 1194
13 1111
13 1019
13 944
11 694
11 426
11 408
10 396
10 399
10 391
10 390
10 386
10 385
9 382
7 380
7 381
7 380
7 365
7 357
7 355
6 354
6 355
6 362
6 363
6 362
6 369
5 358
5 366
5 363
4 359
4 353
3 339
3 339
3 339
3 337
3 339
3 339
3 328
3 325
3 315
3 309
3 309
3 303
3 296
3 289
3 279
3 269
3 266
3 266
3 261
3 259
3 258
3 269
3 258
3 259
3 261
3 261
3 265
4 267
4 270
3 281
3 281
3 278
4 306
4 306
4 304
4 304
4 304
4 310
4 309
5 317
5 313
5 310
5 312
6 267
6 268
6 254
6 247
5 229
5 231
5 234
5 232
5 230
5 223
5 221
6 215
6 199
6 198
6 195
6 192
6 193
6 193
6 193
5 193
4 193
4 193
4 193
4 193
4 193
4 193
4 193
4 192
4 190
4 186
4 186
8 191
8 189
8 188
8 187
8 186
8 186
8 186
8 186
8 186
8 184
8 183
8 183
8 183
8 183
8 182
8 182
8 179
8 169
8 167
4 149
4 145
4 142
4 132
4 132
4 133
4 130
4 135
4 135
4 134
4 134
4 133
4 132
4 132
4 132
4 129
4 127
4 125
4 125
4 125
4 128
4 128
4 122
4 125
4 123
4 122
4 122
5 125
5 111
5 110
5 109
5 107
5 104
5 100
4 95
4 87
4 86
4 86
4 86
4 86
4 86
5 86
4 84
4 84
4 79
4 76
2 66
2 64
2 46
2 40
2 33
2 28
2 27
2 26
2 19
2 19
2 16
2 17
1 17
1 17
1 16
1 16
1 17
1 17
1 17
1 17
1 17
1 18
1 18
1 18
1 19
1 19
1 19
3 22
4 33
4 33
4 33
6 37
6 38
6 39
6 40
6 62
6 67
6 68
6 69
6 70
6 71
6 72
6 72
6 72
6 72
6 72
6 74
6 75
6 82
6 87
6 94
6 94
6 97
6 99
6 107
6 113
6 145
6 153
6 156
9 158
9 159
9 160
9 160
9 160
9 160
9 160
9 160
9 160
9 161
9 161
9 161
9 161
9 161
9 161
6 160
6 161
6 161
6 162
6 163
6 165
6 165
6 165
6 168
6 187
6 196
6 198
6 203
6 204
6 205
6 207
6 208
6 208
6 208
6 205
6 204
6 205
6 205
6 205
6 205
6 205
7 204
7 203
7 204
7 204
7 204
7 205
7 205
7 205
7 206
7 206
7 206
7 220
7 229
9 231
10 234
10 233
10 233
11 233
11 233
11 237
11 240
13 241
13 242
14 244
14 248
14 248
14 234
11 217
11 217
10 216
9 216
9 215
9 214
9 215
9 212
9 187
9 189
9 191
9 192
9 191
9 192
9 197
13 212
16 260
16 268
17 279
19 281
24 290
24 285
24 284
24 283
24 281
25 280
25 278
25 267
25 254
25 226
25 224
25 224
26 225
26 226
37 257
41 263
70 284
96 549
101 607
104 615
108 618
108 620
108 620
108 623
108 626
109 627
110 633
110 638
111 650
111 650
111 652
112 655
112 664
112 667
112 663
112 664
112 640
112 638
112 646
112 645
112 643
112 648
112 650
112 657
112 660
112 670
111 677
111 678
111 680
111 680
111 681
111 686
110 734
108 738
108 736
108 740
108 744
108 744
108 746
108 749
108 755
108 830
108 837
108 845
108 843
106 835
106 835
106 882
106 914
106 934
106 938
105 942
104 947
104 948
103 949
103 951
103 952
104 976
105 1018
105 1056
106 1238
110 1602
109 1672
112 1715
113 1851
113 1873
118 1892
118 1892
122 1898
123 1905
123 1930
123 2046
123 2121
126 2163
128 2781
128 2829
123 2824
123 2902
123 2925
119 2959
116 3053
116 3057
116 3067
116 3073
116 3072
115 3073
115 3075
115 3074
108 3080
107 3080
106 3084
107 3096
106 3113
104 3222
82 3378
63 3471
40 3534
23 3394
23 3491
23 3537
24 3549
24 3572
24 3602
24 3632
24 3654
24 3667
25 3688
25 3869
25 4014
25 4194
25 4221
25 4268
25 4271
25 4292
25 4303
25 4315
25 4382
26 4428
26 4428
26 4434
26 4441
26 4441
26 4448
26 4451
26 4451
26 4447
27 4444
27 4441
27 4445
28 4445
28 4447
28 4442
28 4404
28 4410
28 4412
29 4424
31 4424
31 4424
32 4426
32 4413
32 4403
32 4323
32 4317
32 4312
32 4312
32 4308
31 4299
31 4255
31 4233
31 4216
31 4211
31 4198
31 4191
31 4186
31 4178
31 4163
30 4154
30 4143
29 4090
29 4036
28 3798
24 3410
24 3408
23 3349
24 3345
24 3340
24 3330
26 3345
27 3324
29 3304
29 3265
29 3155
29 3088
26 2988
24 2252
24 2202
24 2198
24 2195
24 2193
24 2192
24 2184
24 2179
24 2175
24 2175
24 2175
26 2183
26 2185
26 2188
24 2181
23 2215
24 2212
22 2185
23 2186
23 2021
24 1824
24 1748
30 1679
30 1449
36 1350
36 1328
38 1322
38 1305
43 1343
45 1343
46 1343
46 1335
46 1315
47 985
49 894
49 787
49 766
49 710
49 705
50 685
54 680
60 679
63 603
62 578
63 566
64 564
65 554
67 548
67 533
67 526
68 525
68 517
67 522
66 512
66 512
65 517
65 514
65 512
65 513
65 549
65 550
61 543
61 544
61 543
60 544
60 546
60 546
60 548
60 547
60 547
60 564
61 575
61 588
61 591
61 591
61 597
62 604
62 610
62 633
62 658
62 682
62 705
62 684
62 695
62 698
62 682
62 687
62 700
65 663
64 667
63 668
63 663
63 650
59 629
59 618
59 615
59 604
59 602
59 601
59 603
59 598
59 595
59 595
60 603
60 608
60 609
60 608
59 609
59 607
59 604
59 604
57 595
57 596
57 593
58 591
58 564
57 556
56 548
55 521
55 538
53 568
56 632
54 643
54 646
43 638
43 645
39 644
36 602
36 653
36 754
35 760
35 779
35 788
35 794
35 794
35 798
35 801
35 807
35 816
29 842
27 853
23 879
21 890
21 890
20 890
18 890
17 892
16 892
16 898
18 901
18 901
19 936
19 935
19 939
31 959
31 972
31 1001
31 1007
31 1009
31 967
31 966
31 963
31 962
31 961
31 961
31 959
31 957
31 945
338 945
326 936
326 926
326 924
326 924
326 925
326 926
326 921
325 909
325 901
325 852
326 818
326 816
326 817
326 835
19 827
19 830
19 831
18 821
17 807
13 808
12 806
12 806
12 806
12 806
12 804
12 804
12 796
12 795
14 794
14 794
14 788
14 782
13 780
13 773
12 769
12 769
12 766
12 766
13 764
13 765
13 764
13 764
12 763
12 762
12 757
12 756
12 753
12 752
12 748
10 733
10 712
10 656
6 615
6 609
6 600
7 599
7 588
7 573
7 543
7 474
7 335
7 294
7 284
7 279
7 277
7 275
7 275
7 270
7 268
7 266
7 251
7 240
7 230
7 231
8 231
8 232
8 232
8 235
8 234
7 223
7 220
7 209
6 176
7 175
7 165
6 127
6 110
6 92
6 83
6 82
6 82
6 82
6 80
6 79
6 79
6 79
6 79
6 176
5 172
5 172
5 172
5 173
5 172
5 172
5 171
5 170
5 170
5 169
6 168
5 168
5 166
5 169
5 166
6 138
4 41
4 35
6 33
6 32
6 33
6 35
6 35
6 41
6 41
6 42
6 42
7 45
7 45
10 50
10 51
10 69
14 77
19 101
67 655
74 711
81 748
93 773
94 780
97 790
105 821
106 827
105 835
106 863
105 865
105 869
106 875
128 930
128 933
129 938
129 944
129 945
129 944
129 944
129 945
130 947
130 948
130 952
130 954
130 955
130 957
130 959
130 961
146 963
146 964
146 965
146 965
146 966
146 966
146 968
146 968
146 973
146 973
146 974
146 973
146 974
146 971
146 976
130 974
130 976
130 978
130 979
130 979
130 979
130 981
130 982
130 981
130 980
130 991
130 1001
130 1008
130 1009
130 1011
130 1012
130 1013
131 1023
131 1025
131 1035
131 1040
131 1044
131 1050
131 1057
131 1059
131 1058
131 1061
131 1076
132 1216
132 1233
133 1265
132 1282
131 1304
131 1363
131 1370
131 1387
131 1391
131 1391
131 1394
131 1392
129 1394
129 1397
129 1397
129 1399
127 1398
127 1403
125 1410
125 1404
125 1401
124 1393
123 1391
120 1378
117 1368
111 1329
105 1306
94 1218
38 699
83 707
83 701
81 701
79 703
79 712
79 722
79 724
81 769
81 749
81 753
76 757
76 775
55 718
55 732
55 758
6 757
7 764
7 777
8 804
8 819
8 819
8 836
8 861
8 911
9 1185
9 1218
9 1244
9 1257
9 1275
9 1303
9 1342
9 1347
9 1345
9 1348
9 1347
9 1346
9 1345
9 1347
9 1347
9 1347
10 1347
9 1345
9 1341
9 1339
9 1338
9 1338
9 1337
9 1337
9 1337
9 1333
9 1332
9 1332
9 1333
9 1323
9 1306
9 1302
9 1305
9 1305
9 1303
8 1296
7 1290
7 1291
7 1281
7 1273
9 1286
9 1282
9 1274
9 1280
9 1277
9 1273
8 1199
8 1085
8 1089
7 1059
7 1058
8 1062
8 1072
10 1790
11 1819
11 1989
11 2028
11 2044
11 2053
13 2048
13 2052
13 2051
13 2048
13 2044
13 2025
13 2022
13 2020
13 2018
13 2020
13 2018
13 2025
13 2026
13 2027
13 2032
13 2011
13 2005
13 2003
13 2003
13 1998
13 1987
13 1976
12 1964
11 1965
11 1911
12 1923
12 1914
12 1898
12 1874
12 1871
12 1856
12 1825
12 1824
10 1819
10 1805
10 1765
10 1752
10 1753
10 1747
10 1707
9 1624
9 1316
9 1305
9 1292
9 1286
9 1283
9 1281
9 1264
9 1260
10 1269
10 1272
10 1272
10 1286
10 1289
10 1295
10 1301
10 1320
10 1346
10 1348
10 1349
10 1351
10 1351
10 1358
10 1368
10 1371
10 1372
10 1375
10 1375
10 1376
10 1384
13 1430
14 1437
14 1435
16 1438
16 1439
16 1440
16 1441
16 1441
21 1513
22 1518
21 1526
20 1513
20 1513
20 1511
20 1503
20 1501
20 1486
20 1477
20 1432
19 1412
19 1395
19 1383
18 1371
18 1340
15 591
15 572
15 374
15 369
15 364
15 364
16 364
16 362
16 362
16 362
16 366
17 371
17 374
20 477
20 500
20 504
20 508
20 499
20 498
20 497
20 496
20 497
20 498
20 498
20 494
20 494
20 497
20 496
20 498
20 498
20 493
19 483
19 482
19 481
19 484
19 495
19 497
19 504
19 509
19 510
19 510
19 510
19 509
19 502
19 502
19 502
20 501
20 502
21 508
22 508
23 522
23 522
23 522
23 522
22 518
22 505
22 500
22 499
22 487
22 496
22 492
22 489
22 464
23 470
23 471
23 474
24 471
24 471
24 478
30 753
31 820
32 889
33 956
41 1770
42 1886
47 2230
48 2305
57 2778
61 3228
69 3916
74 4172
108 5712
111 5958
114 6185
114 6222
114 6459
114 6519
121 6933
122 6945
122 6949
123 6950
123 6952
123 6952
123 7117
124 7127
124 7140
137 7242
139 7270
141 7778
141 7951
146 8375
149 8655
151 8754
163 9163
171 9344
181 9499
191 9781
199 9886
204 9950
218 10133
218 10128
218 10126
219 10198
216 10082
216 10085
220 10178
220 10186
221 10187
224 10231
224 10238
224 10249
226 10260
226 10264
233 10281
264 10310
294 10343
302 10377
301 10453
302 10458
302 10461
303 10448
304 10532
305 10579
308 10592
308 10606
308 10593
309 10597
351 10815
352 10844
355 10874
360 10900
361 10913
363 10927
363 10961
367 11192
369 11206
370 11210
370 11207
370 11210
369 11214
369 11214
369 11222
369 11226
370 11228
371 11238
369 11258
370 11264
370 11267
370 11261
370 11263
369 11740
370 11782
370 11799
369 11837
369 11919
368 11955
367 12011
367 12113
368 12235
364 11917
364 11867
363 11732
360 11474
352 10436
346 10242
336 9792
330 9571
326 9309
324 9045
320 8540
313 8037
276 6173
275 6024
275 6011
271 6026
270 6038
270 6040
270 6033
269 6043
270 6061
269 6075
269 6148
271 6168
277 6086
292 6719
291 6697
279 6636
278 6619
276 6018
273 5666
260 5127
258 5058
252 4887
243 4589
232 4384
219 4176
216 4233
216 4239
214 4256
203 4144
204 4211
205 4297
205 4300
204 4421
208 4519
208 4607
208 4702
209 4725
208 4711
212 4760
213 5004
210 5028
206 5079
200 5068
148 5033
126 5037
122 5038
122 4958
122 4954
122 4949
122 4865
120 4789
118 4736
116 4721
117 4708
113 4728
114 4724
76 4514
73 4498
73 4479
73 4482
73 4496
73 4486
72 4432
69 4217
69 4217
70 4214
70 4209
70 4206
70 4218
69 4209
69 4197
69 4200
68 4207
68 4208
69 4192
70 4183
70 4185
78 4603
82 4720
84 4240
91 4512
93 4664
91 4884
91 4923
92 4941
92 4902
92 4782
91 4625
91 4618
90 4610
90 4618
91 4633
92 4648
92 4637
92 4633
92 4641
91 4640
92 4653
92 4716
93 4752
99 4980
99 4999
101 5000
101 4959
100 4927
101 5035
101 5032
100 5025
99 5018
98 4998
94 4906
89 4839
82 4688
77 4109
77 4115
83 4061
86 4055
87 4050
91 4052
93 4057
100 4066
100 4083
103 4147
104 4152
103 4155
98 3972
100 3964
102 3966
107 4009
108 3989
109 3913
109 3881
108 3656
105 3574
106 3563
106 3504
107 3483
103 3448
100 3417
99 3091
99 3088
99 3075
99 3073
100 3059
100 3019
101 3017
105 3164
105 3177
105 3221
106 3229
107 3264
113 3374
115 3401
114 3415
103 3381
102 3364
104 3341
105 3344
108 3357
106 3330
107 3310
108 3321
108 3324
108 3327
108 3326
108 3349
108 3350
108 3353
108 3339
108 3340
108 3337
108 3326
108 3315
108 3309
108 3301
111 3296
110 3245
99 2594
104 2377
100 2318
100 2289
102 2096
102 1770
102 1762
102 1739
102 1723
102 1717
102 1689
102 1677
103 1676
103 1689
119 1709
121 1694
115 1723
115 1725
115 1718
115 1721
115 1698
111 1645
111 1587
106 1363
107 1370
109 1379
109 1390
110 1513
108 1391
108 1394
108 1376
108 1376
111 1405
121 1567
132 1667
201 2194
202 2243
204 2286
194 2296
201 2336
196 2336
194 2354
192 2343
192 2330
192 2305
190 2240
191 2246
190 2246
190 2238
190 2235
190 2169
189 2152
187 2133
187 2112
188 2113
188 2122
187 2134
187 2156
187 2205
186 2244
185 2301
187 2361
187 2420
187 2462
187 2468
186 2503
188 2560
194 2712
217 3137
217 3094
220 3151
221 3158
230 3381
237 3565
233 3512
233 3511
232 3519
235 3524
236 3531
236 3511
236 3509
232 3483
232 3495
232 3499
232 3498
234 3494
234 3493
234 3488
235 3459
235 3461
237 3470
252 3496
258 3518
336 3746
340 3764
346 3813
350 3995
347 4033
342 4048
343 4066
343 4077
343 4087
345 4096
347 4102
349 4106
351 4106
351 4093
351 4061
351 4065
356 4122
359 4143
357 4163
357 4190
355 4207
341 4194
339 4207
341 4232
342 4244
346 4282
349 4278
352 4311
352 4311
352 4315
351 4314
351 4300
351 4273
350 4503
349 4387
351 4439
347 4408
351 4457
348 4462
347 4430
334 4227
302 4068
256 3643
258 3667
257 3673
271 3688
272 3691
272 3695
271 3692
272 3699
273 3727
272 3744
271 3747
271 3728
272 3745
272 3749
269 3745
270 3761
274 3776
274 3777
273 3772
272 3767
278 3748
279 3698
279 3669
279 3576
279 3495
278 3413
279 3349
281 3268
285 3184
286 3161
283 3138
281 3069
266 2785
238 2349
231 2082
237 2063
237 2058
237 2042
241 1996
245 1998
244 1998
244 2023
239 2015
239 2092
237 2101
237 2113
238 2113
240 2104
241 2145
241 2151
241 2186
241 2200
240 2200
240 2199
234 2196
214 2169
197 2179
184 2167
134 1990
134 2041
131 2004
128 1859
131 1930
132 1914
133 1911
135 1910
246 1919
432 1960
488 1977
505 1981
532 1988
534 1993
560 2198
566 2213
564 2140
608 2292
611 2292
614 2254
619 2221
624 2213
636 2210
636 2198
633 2196
637 2230
649 2242
654 2282
670 3102
674 3204
676 3300
678 3317
678 3326
679 3246
682 3260
681 3206
680 3232
677 3218
678 3230
677 3235
677 3235
679 3228
678 3286
685 3485
686 3790
686 4197
685 4695
691 5794
690 6001
690 6192
690 6252
693 6446
693 6486
693 6573
693 6554
696 6596
695 6601
694 6605
691 6649
691 6708
691 6738
692 6755
686 6751
686 6750
686 6735
686 6731
686 6730
685 6727
683 6722
676 6721
673 6719
674 6717
672 6714
671 6717
670 6734
671 6774
670 6825
669 6865
669 6874
669 6868
664 6867
663 6872
662 6867
661 6840
661 6832
661 6755
661 6753
661 6739
660 6737
660 6752
660 6726
660 6878
661 6988
659 8418
660 8665
660 8967
660 9495
660 10142
657 10284
656 10897
657 10969
659 10964
660 10970
659 10936
654 10905
642 10905
569 10927
564 10934
407 10986
220 10949
164 10932
160 10938
156 10945
156 10947
151 10753
138 10744
123 10799
78 10615
67 10620
66 10616
67 10582
66 10523
66 10510
66 10492
66 10485
64 10378
64 10357
64 10314
62 9524
62 9425
61 9349
60 9344
60 9317
59 9120
59 9115
58 9099
58 9036
58 9031
58 9027
59 9022
59 9000
59 8977
52 8777
50 8395
48 8113
46 7794
45 7050
42 5847
39 5762
39 5687
39 5622
39 5617
38 5614
38 5575
38 5569
35 5517
35 5503
35 5453
35 5406
35 5332
35 5315
34 5314
33 5312
33 5314
34 5315
34 5316
34 5316
34 5315
34 5315
34 5315
34 5314
33 5314
33 5311
33 5300
33 5262
31 5213
30 5150
27 5134
27 5134
27 5129
26 5121
26 5119
26 5116
26 5111
26 5110
26 5111
27 5104
26 5101
25 5077
25 5054
25 4986
25 4810
24 4510
23 3000
22 2779
22 2459
22 1783
22 1290
22 1225
19 503
19 470
17 447
14 442
14 428
14 406
15 396
13 367
12 352
12 272
12 225
12 216
12 211
10 202
10 196
7 159
7 157
4 100
4 97
4 87
4 83
4 80
4 79
4 79
4 79
4 78
2 71
2 64
2 65
2 64
2 61
3 61
3 61
183 68
183 66
183 66
183 71
183 71
183 71
183 71
183 71
183 71
183 71
183 70
183 70
183 70
183 70
183 71
3 63
3 63
3 63
3 63
3 63
3 63
3 63
3 63
3 63
3 63
3 63
3 63
3 59
3 59
3 59
3 58
3 59
3 59
3 59
3 59
3 59
3 59
3 59
3 58
3 58
3 58
3 57
3 57
3 57
4 69
4 71
4 70
4 70
5 74
5 77
5 77
5 76
5 81
5 78
20 94
20 101
20 103
20 91
21 90
24 89
24 89
24 86
24 83
24 82
24 82
25 78
25 77
25 76
25 76
9 62
9 63
8 63
8 63
7 63
7 63
4 63
4 63
4 63
4 62
4 62
4 62
5 62
5 62
5 64
5 64
5 64
5 64
6 64
6 64
6 64
6 64
6 64
7 64
7 64
7 63
7 63
7 63
7 64
6 64
6 64
7 67
7 67
7 67
7 62
7 62
7 62
8 62
8 62
8 62
7 62
7 62
7 62
7 63
7 63
7 61
8 61
8 61
8 61
8 62
8 62
8 62
8 62
8 63
8 63
9 64
9 65
10 73
10 75
10 77
11 89
11 92
11 91
12 91
12 94
12 95
12 95
12 96
12 96
12 99
11 101
11 102
11 102
11 103
11 103
10 90
14 125
14 129
13 130
13 127
13 128
13 127
17 128
17 122
17 115
17 109
17 104
17 101
17 101
17 101
17 101
17 101
17 101
17 101
17 101
17 101
16 99
16 99
16 99
16 99
16 99
16 100
16 100
16 100
16 100
16 100
16 103
17 104
17 104
17 105
17 105
17 105
17 105
17 105
17 103
17 103
17 103
17 103
17 103
18 103
29 103
29 103
31 103
31 103
31 103
35 102
35 102
37 102
39 101
41 101
40 101
41 100
42 100
44 100
44 100
44 100
44 100
46 100
46 100
62 561
68 561
70 561
70 561
70 560
70 560
70 560
69 558
71 557
72 558
72 558
73 558
73 558
73 557
80 556
67 95
68 94
68 94
67 84
68 84
68 84
66 73
66 70
67 70
77 70
81 68
82 68
84 68
84 65
91 65
91 62
90 62
90 62
90 62
89 60
90 60
90 59
88 18
88 17
87 17
89 17
88 17
88 16
86 16
86 16
86 16
86 22
86 24
86 24
86 25
86 25
89 25
91 25
249 31
257 31
259 33
273 41
276 45
276 45
279 47
282 47
336 70
351 72
357 76
361 82
362 80
362 82
365 79
363 76
367 76
368 77
370 77
370 77
421 77
422 77
423 77
423 80
423 80
424 80
424 80
422 80
413 80
413 80
412 80
413 80
413 80
410 80
411 81
415 81
417 81
548 86
581 86
586 83
586 83
584 83
584 83
586 83
589 83
585 83
586 83
585 83
580 83
580 83
581 83
585 83
590 83
590 83
590 83
587 83
587 82
587 83
589 83
592 83
592 83
585 83
585 83
585 83
586 81
586 80
586 80
587 79
588 82
594 83
593 83
592 385
591 384
591 384
589 384
590 384
585 384
588 386
589 388
589 391
590 391
594 391
614 392
616 392
616 392
614 392
614 390
615 91
617 91
620 91
625 93
625 92
625 93
627 89
630 87
631 87
630 87
629 87
624 87
618 87
468 76
464 69
463 67
454 67
447 70
444 70
440 71
435 69
375 40
366 36
363 32
359 30
358 30
356 31
363 35
358 36
357 40
358 40
359 40
358 40
315 40
315 40
315 40
315 40
313 40
313 41
314 41
314 41
315 41
317 41
315 41
288 41
281 41
280 41
275 40
268 41
243 41
133 39
125 45
125 46
127 49
127 51
127 53
126 53
122 53
122 53
123 53
125 53
125 53
124 53
124 53
120 53
118 53
118 53
118 53
119 53
121 53
145 53
149 53
148 53
148 53
150 55
153 55
153 57
157 58
160 58
160 58
159 58
158 55
151 54
151 54
150 54
150 54
150 54
153 55
151 56
149 56
146 55
138 50
135 48
134 48
131 48
126 51
124 51
125 51
125 55
125 55
117 56
118 57
118 57
115 57
114 57
111 57
112 60
111 60
119 62
128 63
128 63
129 63
130 63
129 63
130 63
130 63
130 62
129 58
129 55
129 54
130 54
130 54
130 54
130 54
127 54
126 54
127 53
119 46
117 46
117 46
116 46
116 46
114 46
114 46
114 47
114 47
114 47
114 47
116 46
115 46
115 46
114 46
112 45
112 45
111 45
111 45
116 50
116 51
121 68
120 72
120 70
120 66
119 64
118 60
118 62
118 61
124 86
123 86
123 86
123 87
123 92
123 92
123 95
123 101
122 101
119 104
114 104
115 105
107 105
122 106
105 105
105 103
102 103
103 103
101 102
95 79
97 78
95 77
93 77
93 77
93 77
93 77
93 76
92 76
92 76
92 76
92 76
90 74
92 74
93 74
96 74
100 75
100 75
98 75
98 73
86 67
89 67
89 67
91 64
92 64
92 64
90 64
88 64
85 62
85 62
84 62
83 59
81 59
78 62
69 61
83 64
82 64
82 65
82 65
81 65
81 65
148 67
149 67
149 69
149 69
149 70
149 70
149 71
149 71
149 71
135 69
133 69
133 69
133 69
133 69
133 69
68 67
68 67
69 65
117 71
121 71
138 81
157 91
181 94
182 95
184 95
184 96
184 96
184 96
184 96
184 95
178 88
179 85
175 67
175 64
175 64
175 54
174 54
174 53
174 51
174 51
174 50
174 50
174 50
174 50
172 44
172 44
171 39
170 33
170 33
173 34
172 43
169 43
167 44
152 43
152 45
152 46
152 49
151 49
151 49
150 49
148 50
148 50
148 51
148 51
148 52
145 56
145 57
143 57
143 57
143 56
142 55
142 55
140 55
140 55
139 54
135 54
135 54
135 56
135 57
134 59
129 60
128 60
126 60
126 60
126 60
126 60
126 61
126 65
126 65
125 67
125 67
124 67
124 64
124 65
124 65
124 67
124 79
125 80
125 89
123 91
122 94
121 96
121 102
121 116
121 122
126 126
126 127
126 127
126 127
126 128
126 128
126 129
126 130
123 132
122 133
122 132
118 131
114 131
61 123
58 122
31 117
17 111
3 110
3 110
3 110
3 110
3 110
3 110
3 109
3 108
3 108
3 186
3 186
3 186
3 186
3 186
3 186
3 186
3 186
3 186
3 186
3 185
3 185
3 185
3 184
3 186
3 186
2 108
2 108
2 107
2 98
2 95
2 94
2 94
2 94
2 94
2 94
2 93
2 93
2 94
2 92
2 89
2 88
2 91
2 91
2 88
2 93
2 93
2 98
2 99
2 100
2 101
2 102
2 105
2 105
2 105
2 102
2 101
0 105
0 109
0 109
0 114
1 114
1 114
1 113
1 114
1 115
2 112
2 112
2 116
3 118
3 120
3 118
4 132
4 131
4 134
4 118
4 118
4 118
4 120
4 119
4 115
4 113
4 90
4 87
4 86
4 86
4 86
4 86
4 86
4 86
4 86
4 86
4 86
4 86
4 86
4 86
4 86
4 86
4 86
4 86
4 90
4 90
4 90
4 94
4 94
4 94
6 94
6 96
6 96
6 96
6 96
6 96
6 96
6 96
6 96
6 96
6 96
6 96
6 97
6 97
6 97
6 97
4 97
4 97
4 97
4 97
4 97
4 97
4 97
6 97
6 97
6 96
6 95
10 95
10 95
10 95
10 95
10 167
10 166
10 166
10 166
10 166
10 161
10 159
10 156
10 155
8 154
8 151
5 153
5 151
5 150
5 149
5 77
6 77
6 75
7 74
7 73
7 67
6 60
6 60
6 58
6 58
6 58
6 57
6 56
6 56
5 56
5 55
5 46
5 46
5 44
5 43
4 30
4 30
4 27
4 27
4 26
4 25
4 26
4 26
4 24
4 24
4 24
4 24
3 24
4 26
7 28
7 28
8 27
8 27
8 27
8 27
8 27
8 27
8 27
8 27
8 27
8 27
8 27
8 27
8 23
8 23
8 22
8 19
8 20
8 20
8 20
8 18
8 18
8 18
8 18
9 19
9 19
9 19
9 19
9 20
9 20
9 20
9 19
9 19
9 19
9 19
9 19
9 19
9 20
9 20
8 21
9 21
9 22
9 22
9 21
9 21
9 21
9 21
9 22
9 22
9 22
9 23
9 23
9 23
9 23
9 23
9 24
9 27
9 27
9 26
9 26
9 26
8 24
8 23
8 23
9 23
9 22
9 24
9 24
9 25
9 26
9 26
9 23
9 21
9 21
9 21
9 20
9 21
9 21
9 21
9 21
9 21
8 20
9 21
9 21
8 21
8 24
8 24
8 24
8 24
8 25
8 25
8 23
8 21
8 21
7 22
7 21
7 21
8 23
8 23
7 23
7 25
7 27
7 27
7 27
7 27
7 27
81 30
85 30
309 37
309 37
309 37
309 38
309 38
309 38
309 38
309 38
309 38
309 38
309 38
309 39
309 39
307 39
304 39
17 27
7 26
7 26
7 26
7 26
7 26
7 27
7 28
7 28
7 28
7 28
7 28
7 28
6 28
6 27
6 26
6 25
6 25
6 25
6 25
6 25
6 25
6 25
7 25
7 24
7 24
7 24
7 24
7 24
7 24
7 24
7 24
7 23
7 23
7 23
7 24
7 24
7 24
7 24
7 24
6 24
5 24
5 24
5 21
5 21
5 21
5 20
5 20
5 20
5 20
5 20
5 20
5 20
5 20
5 20
5 21
5 21
7 21
7 21
7 21
7 22
7 22
7 23
7 23
7 24
9 30
9 39
10 39
10 39
10 39
8 40
7 39
7 38
8 38
7 34
7 33
7 33
7 34
7 36
7 41
13 50
13 53
14 55
14 55
14 55
14 55
14 56
14 58
14 58
14 62
14 63
14 63
14 66
14 66
16 66
17 67
17 66
17 66
21 66
21 66
22 66
24 66
30 70
45 72
48 72
50 72
50 74
50 73
50 74
51 76
58 76
68 76
74 76
76 76
78 76
78 76
78 76
78 76
78 77
79 77
83 78
85 78
85 78
84 78
84 79
84 79
84 79
84 79
84 80
84 80
84 80
85 78
90 78
92 79
92 79
94 79
94 79
94 79
94 79
95 79
97 80
97 81
99 81
102 81
104 81
104 81
105 81
105 81
110 82
112 83
112 83
112 88
112 89
112 91
112 91
112 91
114 91
118 95
120 94
120 93
120 91
120 90
120 80
120 80
119 77
117 71
117 69
117 69
117 68
117 67
117 65
117 65
117 66
116 64
116 65
116 65
116 64
115 58
115 55
115 54
109 51
109 51
109 51
109 51
110 53
110 53
110 52
110 50
114 46
115 45
114 45
115 46
114 45
114 46
114 46
113 46
111 47
111 47
105 46
103 46
99 46
99 46
87 42
76 39
72 39
72 39
72 36
71 36
71 36
70 36
67 36
59 36
52 37
48 37
48 39
48 39
48 38
48 37
47 35
45 35
46 35
45 35
45 35
45 35
45 34
45 34
47 34
48 35
49 33
49 33
49 33
47 33
44 33
42 33
41 33
39 33
39 33
38 33
38 33
38 32
36 31
35 31
32 31
29 31
27 30
26 30
23 30
23 30
22 29
21 28
21 28
21 22
20 22
21 22
23 21
24 20
23 19
16 16
16 16
16 15
16 15
21 15
26 16
40 17
53 18
55 18
55 21
64 27
67 28
68 28
69 27
70 27
70 29
73 29
73 28
73 31
73 31
73 31
73 31
73 31
73 32
73 32
73 31
73 32
84 32
88 33
96 33
97 33
98 33
99 32
103 32
104 31
104 30
104 29
103 29
104 29
105 28
109 28
112 29
112 29
113 29
113 29
113 31
113 33
120 35
120 35
120 35
121 35
121 35
121 35
121 35
121 35
121 34
121 34
121 32
304 33
304 33
305 33
305 33
305 33
414 44
417 44
417 44
421 44
422 44
429 44
436 44
455 43
460 43
483 43
490 43
495 43
497 43
497 43
497 43
497 43
202 31
202 31
202 31
202 31
202 31
203 31
203 31
204 31
206 31
206 31
208 31
208 31
209 31
210 31
211 30
211 30
211 30
208 30
206 30
206 30
203 30
201 30
201 30
199 30
198 30
196 30
189 29
176 27
168 27
166 27
165 24
159 18
156 18
155 18
155 18
155 17
157 15
160 16
160 16
161 13
160 13
159 14
158 15
158 15
157 14
158 14
158 14
156 13
168 13
168 12
160 12
159 12
159 14
158 14
154 14
154 14
154 14
154 14
152 14
149 17
147 18
146 18
145 17
143 17
144 17
147 16
148 11
149 10
142 10
142 8
144 8
145 8
156 8
162 9
164 11
164 11
164 11
165 11
165 11
166 11
166 11
166 11
170 11
169 11
171 11
157 11
146 11
136 11
135 11
134 11
124 11
118 11
114 11
95 11
87 11
85 11
84 11
84 11
84 11
84 11
82 12
81 12
81 15
81 15
81 16
81 34
81 34
80 34
79 34
78 34
76 34
77 34
77 35
78 36
77 38
77 38
85 38
85 38
85 35
85 35
85 35
87 16
87 16
105 16
108 16
111 17
110 17
110 17
110 17
110 16
111 14
111 14
111 14
109 14
106 14
106 14
106 14
98 11
95 11
95 11
95 11
95 9
95 9
95 9
95 9
95 9
95 9
93 10
76 10
75 10
75 10
76 10
76 10
76 10
76 10
76 10
76 10
76 10
76 10
76 6
76 6
76 6
75 5
72 5
70 5
70 5
69 5
68 5
68 5
68 5
64 5
62 5
47 5
45 5
43 4
43 4
43 4
42 4
42 4
42 4
42 4
44 4
44 4
45 4
43 4
47 4
47 4
47 4
47 4
47 4
47 4
54 4
54 4
54 4
54 4
54 4
54 4
52 4
52 4
51 4
47 4
47 4
47 4
47 4
47 4
47 4
40 4
40 4
41 4
41 4
41 4
41 4
41 2
40 2
39 2
38 2
30 2
29 3
29 3
28 3
27 3
25 3
25 3
5 3
5 3
5 2
5 2
5 2
5 2
5 2
4 2
4 2
4 2
4 2
4 2
4 5
4 5
4 5
4 5
4 5
4 5
4 5
4 5
4 5
4 5
4 5
4 5
4 5
3 5
3 6
3 6
3 3
3 3
3 3
3 3
3 3
3 3
3 3
27 51
27 51
27 51
27 51
27 51
26 51
26 50
26 50
25 50
25 50
25 50
25 50
25 50
25 50
25 50
25 50
25 50
25 50
25 50
25 50
25 50
25 50
1 2
1 2
1 2
1 2
1 2
1 2
1 2
1 2
1 2
1 2
1 2
1 2
1 2
0 2
0 2
0 2
0 2
0 2
0 2
0 1
0 1
0 1
0 1
0 1
0 1
0 1
0 1
0 1
0 1
0 1
0 1
0 1
0 1
0 1
0 1
0 1
0 0
2 61
2 61
2 61
2 61
2 61
2 61
2 61
2 61
2 61
2 61
2 61
2 61
2 61
2 61
2 61
0 0
0 0
0 0
0 0
1 0
43 2
43 2
43 2
43 2
43 2
43 2
43 2
43 2
43 2
44 2
44 2
44 2
44 2
44 2
44 2
1 0
1 0
1 0
1 0
1 0
1 0
1 0
1 0
1 0
1 0
0 0
0 0
0 0
0 0
0 0
0 0
0 0
0 0
0 0
0 0
0 0
0 0
0 0
0 0
0 0
0 0
0 0
1 0
1 0
1 0
1 0
1 0
1 0
5 0
5 0
990 6
990 6
990 6
990 6
990 6
990 6
990 6
989 6
989 6
989 6
989 6
989 6
989 6
986 6
986 6
2 0
11 7
10 7
10 7
10 7
9 7
9 7
9 7
9 7
9 7
9 7
9 7
9 7
9 8
9 8
9 8
2 355
2 358
2 358
3 358
3 358
3 358
3 358
3 358
3 358
3 358
3 358
21 358
879 399
883 399
883 399
883 399
882 42
882 42
881 42
881 42
881 42
881 42
881 42
881 42
881 42
881 42
863 42
863 42
1 0
1 0
1 0
1 0
1 0
5 0
5 0
5 1
5 1
6 1
6 1
6 1
6 1
6 1
6 1
7 1
7 1
7 1
7 2
7 2
7 2
7 2
5 2
5 1
3 1
4 1
3 1
4 1
4 1
4 1
4 1
4 1
4 1
4 1
4 1
4 0
4 0
5 0
5 0
32 57
33 57
32 57
31 57
33 57
33 57
33 57
33 57
33 57
33 57
33 57
33 57
37 57
37 57
37 57
10 0
10 0
10 0
10 0
10 0
8 0
9 0
9 0
9 0
9 0
9 0
9 0
10 0
6 0
7 0
7 0
7 0
7 0
7 0
7 0
7 0
7 0
7 0
7 0
7 0
7 0
7 0
7 0
8 0
8 0
8 0
8 0
8 0
8 0
7 0
7 0
7 0
7 0
7 0
7 0
7 0
7 0
7 1
9 2
10 2
10 2
10 2
10 2
10 2
10 2
10 2
10 2
11 2
11 2
11 2
11 2
327 4
329 4
329 4
329 4
329 4
328 4
328 4
328 4
328 4
328 4
328 4
328 4
328 4
328 4
329 4
329 4
10 2
10 2
13 2
13 2
13 2
13 2
13 2
13 2
13 2
13 2
13 2
12 2
12 2
15 2
14 2
14 2
14 2
14 2
14 2
14 2
14 2
14 2
14 2
14 2
14 2
14 2
14 2
14 2
14 2
14 2
14 2
14 2
14 2
15 2
14 2
14 2
14 2
14 2
14 2
14 2
12 2
14 2
14 2
14 2
14 2
14 2
14 2
15 2
20 2
22 2
23 2
23 2
23 2
26 2
25 2
25 2
26 2
26 2
26 2
26 2
26 2
26 2
26 2
27 2
27 2
28 2
28 2
28 2
26 2
25 1
26 0
25 0
24 0
24 0
24 0
24 0
24 0
24 0
24 1
24 1
24 1
24 1
26 2
26 2
26 2
29 2
29 2
30 2
31 2
31 2
32 3
361 15
361 15
361 15
361 15
361 15
361 14
361 14
360 14
361 14
361 14
360 14
358 14
358 14
358 14
358 14
29 2
29 2
29 2
29 2
29 2
29 6
29 6
27 6
26 6
26 6
26 6
26 6
26 6
26 6
26 6
26 6
26 6
26 6
26 6
26 6
26 8
26 8
26 8
26 8
28 8
28 8
28 8
28 8
28 8
29 8
29 8
29 8
29 8
30 8
30 8
28 8
28 2
28 2
28 2
25 2
24 2
22 2
20 2
19 2
18 2
19 2
20 2
20 2
21 2
20 2
20 2
20 2
20 2
20 2
20 2
20 2
20 3
20 3
20 3
20 3
20 3
19 3
19 3
19 3
19 3
18 3
18 3
20 3
20 3
23 3
23 2
26 2
26 2
27 2
27 2
27 2
27 1
28 1
27 1
24 1
25 1
24 1
28 1
29 1
29 0
29 0
29 0
29 0
29 0
29 0
29 0
29 0
29 0
29 0
29 0
32 0
32 0
37 0
42 1
46 1
56 3
61 5
61 5
70 5
71 5
71 6
73 6
74 6
78 6
82 6
83 6
83 6
84 6
84 6
84 6
85 6
85 6
85 6
87 6
87 6
87 6
87 6
85 6
84 6
83 6
83 6
83 6
83 6
83 6
82 6
82 6
82 6
82 6
81 6
81 6
83 7
83 7
83 7
83 7
83 7
83 7
83 7
80 7
80 7
79 7
80 7
80 7
80 7
80 7
80 7
80 7
80 7
78 6
78 6
78 6
78 6
78 6
79 6
79 6
79 6
79 6
87 7
87 7
87 7
87 7
86 7
86 7
85 7
84 8
82 8
82 8
79 8
79 8
78 8
77 8
77 8
76 8
75 8
74 8
74 8
73 9
73 9
68 9
69 9
70 9
70 9
70 9
70 9
71 9
71 9
73 9
73 9
72 9
72 9
68 9
58 9
58 9
45 7
44 21
51 25
47 29
45 29
43 31
38 32
38 32
37 31
36 32
34 32
34 32
32 32
32 32
32 32
33 32
37 32
38 32
39 34
39 34
42 41
41 42
41 42
42 43
46 43
47 43
47 43
47 43
48 44
48 44
49 44
49 44
49 45
51 46
65 56
67 57
67 57
67 57
68 58
68 59
68 59
67 59
68 60
69 60
141 66
141 66
141 66
141 66
141 66
141 67
141 67
141 67
141 67
141 67
141 67
141 67
141 67
141 66
152 68
83 62
82 62
83 62
85 61
85 62
77 62
77 62
77 62
77 62
77 62
77 62
76 62
76 62
77 62
77 62
77 62
77 62
76 62
76 61
76 61
76 62
76 60
77 60
77 60
77 59
79 59
79 59
80 59
80 59
79 59
79 59
78 59
76 59
76 59
74 59
74 59
73 59
73 58
72 57
74 56
84 56
84 56
82 36
75 30
78 30
79 30
81 30
91 30
102 30
103 30
126 30
131 30
136 30
138 30
138 30
139 29
136 29
133 29
131 29
128 28
128 28
127 19
130 19
129 19
128 19
124 18
123 18
123 18
123 19
123 19
119 18
117 15
117 15
117 14
115 13
106 3
104 3
104 3
100 3
100 3
100 3
100 4
100 4
99 4
98 4
98 4
98 4
98 4
98 6
98 6
98 6
98 6
98 6
98 6
98 6
98 6
98 5
98 5
98 5
86 3
86 1
84 1
84 1
83 1
83 1
83 1
83 1
