# Supplementary material for: From Insect to Man: Photorhabdus Sheds Light on the Emergence of Human Pathogenicity
Source: PLoS One. 2015 Dec 17;10(12):e0144937. doi: 10.1371/journal.pone.0144937 (PMC4683029; doi:10.1371/journal.pone.0144937)
Supplement: S3 Data — (ZIP) [file pone.0144937.s003.zip › pPAU1_37C_Stat_rep1.plot]

6 0
6 0
6 0
6 0
6 0
6 0
6 0
6 0
6 0
6 0
6 0
6 0
6 0
6 0
6 0
6 2
6 2
6 2
6 2
6 2
6 2
6 2
6 2
6 2
6 2
6 2
5 2
5 2
5 2
5 2
5 2
5 0
5 0
5 0
5 0
5 0
5 0
5 0
5 0
5 0
5 0
5 0
5 0
5 0
5 0
6 0
8 0
8 0
8 0
6 0
5 0
5 0
5 0
7 0
7 0
7 0
7 0
7 0
7 0
6 0
6 0
6 0
5 0
5 0
5 0
5 0
5 0
5 0
5 0
5 0
5 0
5 0
5 0
5 0
5 0
5 1
5 1
5 1
5 1
5 1
5 1
5 1
5 1
5 1
5 1
5 1
5 1
5 1
5 1
6 1
6 1
6 0
6 0
6 0
6 1
6 1
6 1
6 1
6 1
6 1
6 1
6 1
6 1
6 1
6 1
6 1
6 2
6 2
6 2
6 2
6 2
6 2
6 2
6 2
6 2
6 1
6 1
6 1
5 1
4 1
4 1
4 0
11 0
10 0
10 0
9 0
9 0
9 0
9 0
9 0
10 0
10 0
10 0
10 0
10 0
10 0
10 0
10 0
10 0
10 0
10 0
10 0
10 0
10 1
10 1
10 1
10 3
10 3
10 3
10 3
10 3
10 3
10 3
10 3
10 3
10 3
10 3
10 3
10 3
10 2
10 2
10 0
9 0
9 0
9 0
9 0
9 0
9 0
9 0
9 0
9 0
10 0
10 0
10 0
10 0
10 0
10 0
10 0
10 0
9 0
9 0
9 0
9 0
9 0
9 0
8 0
8 0
8 0
9 0
9 0
13 0
13 0
13 0
13 0
13 0
7 0
7 0
7 0
7 0
7 0
7 0
7 0
7 0
7 0
7 0
7 0
6 0
6 0
6 0
6 0
6 0
6 0
8 0
8 0
8 0
8 0
8 0
8 0
8 0
8 0
11 0
18 0
18 0
18 0
18 0
18 0
18 0
18 0
18 0
19 0
20 0
20 0
20 0
19 0
18 0
18 0
18 0
18 0
18 0
21 0
26 0
26 0
26 0
26 0
25 0
25 0
25 0
26 0
26 0
26 0
26 0
26 0
26 0
26 0
26 0
26 0
26 0
26 0
26 0
27 0
29 0
42 0
76 0
75 0
98 0
98 0
138 0
181 0
189 0
215 0
218 0
222 0
222 0
223 0
223 0
227 0
227 0
227 0
228 0
228 0
228 0
232 0
232 0
232 0
232 0
230 0
230 0
230 0
230 0
230 0
229 0
229 0
229 0
226 0
219 0
219 0
221 0
223 0
224 0
224 0
222 0
224 0
223 0
223 0
220 0
221 0
221 0
221 0
221 0
220 0
220 0
219 0
217 0
213 0
213 0
213 0
213 0
213 0
213 0
213 0
212 0
212 0
210 0
210 0
210 0
210 0
211 0
211 0
211 0
208 0
204 0
201 0
194 0
184 0
104 0
70 0
12 0
7 0
7 0
7 0
4 0
4 0
4 0
3 0
3 0
3 0
3 0
3 0
3 0
3 0
3 0
3 0
3 0
3 0
2 0
2 0
2 0
2 0
2 0
2 0
2 0
2 0
2 0
2 0
2 0
2 0
2 0
2 0
2 1
2 1
2 1
3 1
4 1
4 1
3 1
3 1
3 1
3 1
3 1
3 1
3 1
3 1
3 1
6 1
6 0
8 0
8 0
8 0
8 0
8 0
8 0
8 0
8 0
8 0
8 0
8 0
7 0
7 0
7 0
7 0
7 0
7 0
7 0
7 0
8 0
8 0
8 0
8 0
14 1
14 1
14 1
15 1
15 1
15 1
18 1
18 1
18 1
18 1
18 1
18 1
18 1
18 1
18 1
18 0
18 0
18 0
18 0
18 0
18 0
19 0
23 0
32 0
33 0
33 0
33 0
33 0
33 0
33 0
38 0
38 0
39 0
50 0
50 0
54 0
52 0
52 0
52 0
52 0
52 0
52 0
52 0
52 0
52 0
52 0
52 0
52 0
49 0
49 0
47 0
47 0
47 0
47 0
47 0
48 0
48 0
48 0
48 0
48 0
48 0
48 0
48 0
48 0
48 0
48 0
49 0
49 0
49 8
47 8
47 8
44 8
44 8
33 8
32 8
32 8
24 8
24 8
25 8
21 8
21 8
20 8
20 8
20 8
20 0
20 0
20 0
20 0
20 0
20 0
20 0
20 0
20 0
20 0
21 0
18 0
16 0
15 0
26 2
27 2
27 2
27 2
27 2
27 2
27 2
27 2
21 2
22 2
19 2
19 2
19 2
19 2
19 2
19 2
19 2
19 2
19 2
19 2
19 2
19 2
19 2
19 2
22 2
22 2
22 2
22 2
22 2
22 2
21 2
21 2
21 2
21 2
21 2
21 2
21 2
21 2
20 2
20 2
20 2
20 2
20 2
20 2
20 2
20 2
20 2
20 2
20 2
20 2
19 2
17 2
16 2
16 2
16 2
16 2
17 2
17 3
17 3
17 3
17 3
17 3
15 3
15 3
15 3
15 3
15 3
15 3
15 3
15 3
15 3
15 3
15 3
6 1
5 1
5 1
5 1
5 1
5 1
5 1
5 1
4 1
4 1
4 1
4 1
6 1
6 1
7 1
7 1
7 1
7 1
7 1
7 1
7 1
7 1
7 1
7 1
6 1
6 1
8 1
8 1
8 1
8 1
8 1
8 1
8 1
9 1
9 1
9 1
9 1
9 1
9 1
9 1
9 1
9 1
9 1
9 1
9 2
9 2
9 2
9 2
10 2
14 2
26 2
28 2
28 2
34 2
34 2
32 3
30 3
29 2
29 2
29 2
29 2
29 2
29 2
29 2
29 2
29 2
29 2
27 2
21 2
21 2
22 2
22 2
22 2
22 2
22 2
22 2
22 2
22 2
22 2
22 2
39 2
44 3
45 3
45 3
45 3
43 3
43 3
41 3
41 3
41 3
41 3
41 3
41 3
41 3
41 3
41 3
41 3
41 3
41 3
41 3
42 3
42 3
43 3
43 4
43 4
43 4
42 4
42 4
42 5
45 5
45 5
45 5
45 5
65 9
65 9
65 9
65 9
68 8
68 8
69 8
69 8
111 11
110 11
110 15
111 17
133 17
133 18
133 19
134 19
150 20
152 20
153 21
153 21
155 21
155 22
157 22
157 22
157 22
157 22
157 24
157 24
157 24
157 24
156 24
156 24
156 24
156 24
156 24
155 24
155 24
152 24
140 24
142 23
122 18
122 16
122 15
122 15
123 15
107 11
123 12
123 12
123 12
124 12
124 12
124 12
124 12
122 12
122 12
122 12
122 12
122 12
122 12
121 12
121 12
121 12
120 12
121 13
117 13
116 13
112 13
111 13
109 13
104 11
104 11
104 11
104 11
105 11
104 11
104 11
104 11
102 11
102 11
87 9
87 9
65 6
63 6
56 6
57 6
42 6
44 4
44 4
44 4
29 4
30 4
29 3
29 3
35 3
36 2
37 2
37 2
37 2
37 2
37 2
37 3
37 3
39 3
43 3
43 3
43 3
41 3
41 3
41 3
41 3
41 3
45 3
43 3
43 3
43 3
43 2
43 2
42 2
43 2
29 1
29 1
29 1
28 1
28 1
28 1
28 1
28 1
28 1
28 1
28 1
29 1
30 1
30 1
31 1
31 1
31 1
33 0
33 0
33 0
33 0
33 0
34 0
43 0
52 0
52 0
53 0
52 0
52 0
55 0
58 0
59 0
59 0
59 0
59 0
58 0
58 0
58 0
57 0
55 0
56 0
61 0
61 0
63 0
62 0
62 0
63 0
56 0
55 0
54 0
54 0
54 0
54 0
55 0
54 0
53 0
53 0
49 0
51 0
53 0
57 0
57 0
57 0
58 0
61 0
60 0
70 0
77 0
79 0
84 0
84 0
84 0
83 0
83 0
83 0
83 0
83 0
83 0
83 0
83 0
83 0
83 0
83 0
83 0
82 0
81 0
89 0
88 0
89 0
89 0
86 0
87 0
87 0
87 0
86 0
84 0
76 0
66 0
65 0
65 0
66 0
72 0
69 0
66 0
65 0
65 0
64 0
65 0
65 0
65 0
65 0
65 0
65 0
65 0
60 0
60 0
58 0
57 0
57 0
57 0
57 0
57 0
57 0
57 0
57 0
57 0
56 0
56 0
56 0
54 0
53 0
52 0
50 0
49 0
50 0
49 0
48 0
46 0
37 0
28 0
23 0
23 0
17 0
17 0
17 0
17 0
17 0
17 0
17 0
17 0
17 0
17 0
17 0
17 0
17 0
15 0
13 0
13 0
13 0
9 0
9 0
9 0
9 0
9 0
9 0
9 0
9 0
9 0
9 0
9 0
9 0
9 0
8 0
8 0
1 0
1 0
1 0
0 0
0 0
0 0
0 0
0 0
0 0
0 0
0 0
0 0
0 0
0 0
0 0
0 0
0 0
0 0
0 0
0 0
0 0
0 0
0 0
0 0
0 0
0 0
0 0
0 0
0 0
0 0
0 0
0 0
0 0
0 0
0 0
0 0
0 0
0 0
0 0
0 0
0 0
0 0
0 0
0 0
0 0
0 0
0 0
0 0
0 0
0 0
0 0
0 0
0 0
0 0
0 0
0 0
0 0
0 0
0 0
0 0
0 0
0 0
0 0
0 0
0 0
0 0
0 0
0 1
0 1
0 1
0 1
0 1
0 1
0 1
0 1
0 1
0 1
0 1
0 1
0 1
0 1
0 1
0 0
0 0
0 0
0 0
0 0
0 0
0 0
0 1
0 1
0 1
0 1
0 1
0 1
0 1
0 1
0 1
0 1
0 1
0 1
0 1
0 1
0 1
0 0
0 0
0 0
0 0
0 0
0 0
0 0
0 0
0 0
0 0
0 0
0 0
0 0
0 0
0 0
0 0
0 0
0 0
0 0
0 0
0 0
0 0
0 0
0 0
0 0
0 0
0 0
0 0
0 0
0 0
0 0
0 0
0 0
0 0
0 0
0 0
0 0
0 0
0 0
0 0
0 0
0 0
0 0
0 0
0 0
0 0
0 0
0 0
0 0
0 0
0 0
0 0
0 0
0 0
0 0
0 0
0 0
0 0
0 0
0 0
0 0
0 0
0 0
0 0
0 0
0 0
0 0
0 0
0 0
0 0
0 0
0 0
0 0
0 0
0 0
0 0
0 0
0 0
0 0
0 0
0 0
0 0
0 0
0 0
0 0
0 0
0 0
0 0
0 0
0 0
0 0
1 0
1 0
1 0
1 0
1 0
1 0
1 0
1 0
1 0
1 0
1 0
2 0
2 0
2 0
2 0
2 0
2 0
2 0
2 0
2 0
2 0
2 0
2 0
2 0
2 0
2 0
2 0
2 0
2 0
2 0
2 0
2 0
2 0
2 0
2 0
3 0
3 0
3 0
3 0
3 0
3 0
3 0
3 0
3 0
3 0
3 0
3 0
3 0
3 0
3 0
12 2
12 2
12 2
12 2
12 2
12 2
12 2
12 2
12 2
12 2
12 2
12 2
12 2
12 2
12 2
4 0
4 0
4 0
3 0
3 0
3 0
3 0
3 0
2 0
2 0
2 0
2 0
2 0
2 0
2 0
3 0
3 0
4 0
4 0
5 0
5 0
5 0
5 0
5 0
5 0
5 0
5 0
5 0
5 0
5 0
5 0
5 0
5 0
5 0
5 0
5 0
5 0
5 0
5 0
5 0
5 0
7 0
7 0
6 0
6 0
6 0
6 0
6 0
6 0
6 0
7 0
7 0
7 0
7 0
7 0
7 0
7 0
5 0
5 0
5 0
5 0
5 0
5 0
5 0
6 0
6 0
6 0
6 0
6 0
6 0
6 0
6 0
6 0
6 0
7 0
7 0
7 0
7 0
7 0
7 0
6 0
6 0
6 0
6 0
6 0
6 0
6 0
6 0
5 0
5 0
3 0
3 0
2 0
2 0
2 0
2 0
2 0
2 0
2 0
2 0
2 0
2 0
2 0
2 0
2 0
2 0
2 0
2 0
2 0
2 0
2 0
2 0
2 0
2 0
2 0
2 0
2 0
2 0
2 0
2 0
2 0
2 0
2 0
1 0
1 0
1 0
1 0
1 0
1 0
1 0
1 0
1 0
1 0
1 0
1 0
1 0
1 0
1 0
1 0
1 0
1 0
1 0
1 0
1 0
1 0
1 0
1 0
0 0
0 0
0 0
0 0
0 0
0 0
0 0
0 0
0 0
0 0
0 0
0 0
0 0
0 0
0 0
0 0
0 0
0 0
0 0
0 0
0 0
0 0
0 0
0 0
2 0
2 0
2 0
2 0
2 0
2 0
2 0
2 0
2 0
2 0
2 0
2 0
2 0
2 0
2 0
0 0
0 0
0 0
0 0
0 0
0 0
0 0
0 0
0 0
0 0
0 0
0 0
0 0
0 0
0 0
0 0
0 0
0 0
0 0
0 0
0 0
0 0
0 4
0 4
0 4
0 4
0 4
0 4
1 5
1 5
1 5
1 5
1 5
1 5
1 5
1 5
1 5
1 5
1 5
1 1
1 1
1 1
1 1
1 1
0 0
0 0
0 0
0 0
0 0
0 0
0 0
0 0
0 0
0 0
0 0
0 0
0 0
0 0
0 0
0 0
0 0
0 0
0 0
0 0
0 0
0 0
0 0
0 0
0 0
0 0
0 0
0 0
0 0
0 0
0 0
0 1
0 1
0 1
0 1
1 1
1 3
2 3
2 3
2 3
2 3
2 3
2 3
2 3
2 3
2 3
2 3
2 3
2 3
2 3
2 3
1 3
1 2
0 2
0 2
0 2
0 2
0 2
0 2
0 2
0 2
1 2
1 2
1 2
1 2
1 2
1 2
1 2
1 2
1 2
1 0
1 0
1 0
1 0
1 0
1 0
1 0
1 0
1 0
1 0
1 0
1 0
1 0
1 0
1 0
3 0
3 0
3 0
3 0
4 0
4 0
4 0
4 0
4 0
4 0
4 0
4 0
4 0
4 0
4 0
4 0
4 0
4 0
4 0
3 0
3 0
3 0
3 0
3 0
3 0
3 0
3 0
3 0
3 0
3 0
3 0
3 0
3 0
3 0
3 0
3 0
3 0
3 0
3 0
3 0
3 0
3 0
3 0
3 0
2 0
2 0
2 0
2 0
2 0
2 0
2 0
2 0
2 0
2 0
2 0
2 0
2 0
2 0
2 0
2 0
2 0
2 0
2 0
2 0
2 0
2 0
2 0
2 0
2 0
2 0
1 0
1 0
1 0
0 0
0 0
0 0
0 0
0 0
0 0
0 0
0 0
0 0
0 0
0 0
0 0
0 0
0 0
0 0
0 0
0 0
0 0
0 0
0 0
0 0
0 0
0 0
0 0
0 0
0 0
0 0
0 0
0 0
0 0
0 0
0 0
0 0
0 0
0 0
0 0
0 0
0 0
0 0
0 0
0 0
0 0
0 0
0 0
0 0
0 0
0 0
0 0
0 1
0 2
0 2
0 2
0 2
0 2
0 2
0 2
0 2
0 2
0 2
0 2
0 2
0 2
0 2
0 2
0 2
0 2
0 2
1 2
1 2
1 2
1 2
1 2
1 2
1 2
1 2
1 2
1 2
1 2
1 2
2 2
2 2
3 2
3 2
2 4
2 4
2 4
2 4
2 4
2 4
2 4
2 4
2 4
2 4
2 4
1 4
1 4
1 4
0 4
0 4
0 4
0 4
0 2
0 2
0 2
0 2
0 2
0 2
0 1
0 1
0 1
0 0
0 1
0 1
0 2
0 2
0 2
0 2
0 2
0 2
0 4
0 4
0 4
1 7
1 9
1 9
1 9
1 9
1 9
1 9
1 9
1 9
1 9
1 9
1 9
1 9
1 9
1 9
1 9
1 9
1 9
1 9
1 9
1 9
1 9
1 9
1 9
1 10
1 10
1 10
1 10
1 10
1 10
1 10
1 10
1 10
1 10
1 10
1 10
1 11
1 11
1 11
1 11
1 10
1 10
1 10
1 13
1 13
1 13
1 13
1 13
1 13
1 13
1 13
1 13
1 10
1 12
1 13
1 13
1 13
1 14
2 15
2 16
2 16
2 16
2 15
2 14
2 14
2 14
2 14
2 14
2 14
2 14
2 13
2 13
2 13
1 9
1 9
1 9
1 9
1 9
1 9
1 9
1 9
1 9
1 9
1 9
1 16
1 16
1 16
1 17
1 29
1 29
1 30
1 30
1 30
1 30
1 31
1 31
1 31
1 31
1 31
1 31
1 31
1 31
1 31
1 31
1 31
1 31
1 31
1 31
1 31
1 31
1 32
1 32
1 33
1 33
1 33
1 33
1 32
1 32
1 35
1 35
1 35
1 35
1 37
1 37
1 37
1 37
1 34
1 33
1 33
1 33
1 32
0 22
0 21
0 21
0 14
0 14
0 14
0 14
0 14
2 14
2 14
2 14
2 14
2 14
2 14
2 14
2 15
2 16
2 19
2 38
2 39
2 39
2 39
2 41
0 41
0 41
0 40
0 40
0 39
0 39
0 39
0 33
0 33
0 33
0 33
0 33
0 33
0 33
0 33
0 34
0 34
0 34
0 34
0 34
0 34
0 34
0 34
0 34
0 34
0 34
0 34
0 34
0 33
0 33
0 33
0 33
0 33
0 33
0 34
0 34
0 34
0 32
0 32
0 32
0 32
0 30
0 31
0 31
0 31
0 32
0 32
0 32
0 32
0 32
0 32
0 32
0 32
0 32
0 32
0 32
0 32
0 32
0 32
0 32
0 32
0 32
0 32
0 32
0 29
0 26
0 24
0 22
0 5
0 5
0 5
0 5
0 5
0 5
0 5
0 5
0 5
0 5
0 5
0 5
0 5
0 5
0 5
0 5
0 5
0 5
0 5
0 5
0 4
0 4
0 4
0 4
0 4
0 4
0 4
0 4
0 4
0 4
0 4
0 4
0 3
0 3
0 3
0 3
0 3
0 3
0 3
0 2
0 2
0 2
0 2
0 2
0 2
0 2
0 2
0 1
0 1
0 1
0 0
0 0
0 0
0 0
0 0
0 0
0 0
0 0
0 2
0 2
0 2
0 2
0 2
0 2
0 2
0 2
0 2
0 2
0 2
0 2
0 2
0 2
0 2
0 2
0 2
0 2
0 2
0 2
0 2
0 2
0 2
0 2
0 2
0 2
0 2
0 2
0 2
0 2
0 2
0 2
0 2
0 2
0 2
0 2
0 2
0 2
0 2
0 2
0 2
0 2
0 2
0 2
0 2
0 2
0 1
0 1
0 0
0 0
0 0
0 0
0 0
0 0
0 0
0 0
0 0
0 0
0 0
0 0
0 0
0 0
0 0
0 0
0 0
0 0
0 0
0 0
0 0
0 0
0 0
0 0
0 0
0 0
0 0
0 0
0 0
0 0
0 0
0 0
0 0
0 0
0 0
0 0
0 0
0 0
0 0
0 0
0 0
0 0
0 0
0 0
0 0
0 0
0 0
0 0
0 0
0 0
0 0
0 0
0 0
0 0
0 0
0 0
0 0
0 0
0 0
0 0
0 0
0 0
0 0
0 0
0 0
0 0
0 0
0 0
0 0
0 0
0 0
0 0
0 0
0 0
0 0
0 0
0 0
0 0
0 0
0 0
0 0
0 0
0 0
0 0
0 0
0 0
0 0
0 0
0 0
0 0
0 0
0 0
0 0
0 0
0 0
0 0
0 0
0 0
0 0
0 0
0 0
0 0
0 0
0 0
0 0
0 0
0 0
0 0
0 0
0 0
0 0
0 0
0 0
0 1
0 1
0 1
0 1
0 1
0 1
0 1
0 1
0 1
0 1
0 1
0 1
0 1
0 0
0 0
0 0
0 0
0 0
0 0
0 0
0 0
0 0
0 0
0 0
0 0
0 0
0 0
0 0
0 0
0 0
0 0
0 0
0 0
0 0
0 0
0 0
0 1
0 6
0 6
0 14
0 16
0 16
0 16
0 16
0 16
0 16
1 17
1 17
1 17
1 17
1 17
1 17
1 16
1 16
1 16
1 10
1 10
1 2
1 1
1 1
1 1
1 0
0 0
0 0
0 1
0 1
0 1
0 1
2 316
2 316
2 316
2 316
2 316
2 316
2 316
2 316
2 316
2 316
2 316
2 315
2 315
2 315
2 315
2 0
2 0
2 0
2 0
2 0
3 0
3 0
3 0
3 0
3 0
3 0
3 0
3 0
3 0
3 0
3 0
3 0
3 0
3 0
3 0
5 0
7 0
7 0
7 0
7 0
7 0
7 0
7 0
7 0
7 0
7 0
7 0
7 0
9 0
10 0
10 0
12 0
13 0
13 0
13 0
13 0
13 0
13 0
13 0
13 0
13 0
13 0
13 0
13 0
13 0
13 0
13 0
13 0
13 0
12 0
12 0
12 0
12 0
10 0
10 0
10 0
10 0
10 0
10 0
10 0
10 0
10 0
10 0
10 0
10 0
10 0
10 0
10 0
10 0
11 0
11 0
11 0
11 0
11 0
11 0
11 0
11 0
11 0
11 0
12 0
12 0
12 0
18 0
18 0
18 0
18 0
14 0
14 0
14 0
13 0
13 0
13 0
13 0
13 0
13 0
13 0
16 0
16 0
15 0
15 0
15 0
13 0
12 0
12 0
11 0
11 0
12 0
12 0
12 0
12 0
12 0
12 0
9 0
9 0
9 0
9 0
9 0
9 0
9 0
9 0
9 0
9 0
9 0
9 0
9 0
9 0
9 0
9 0
9 0
9 0
9 0
9 0
9 0
9 0
9 0
9 0
9 0
10 0
10 0
10 0
10 0
9 0
9 0
9 0
9 0
9 0
9 0
9 0
9 0
9 0
9 0
9 0
8 0
8 0
9 0
3 0
3 0
3 0
3 0
3 0
3 0
3 0
3 0
3 0
3 0
3 0
3 0
3 0
3 0
3 0
3 0
4 0
11 0
11 0
11 0
12 0
13 0
13 0
14 0
15 0
17 0
18 0
19 0
20 0
20 0
20 0
20 0
20 0
20 0
20 0
20 0
20 0
20 0
20 0
20 0
32 0
32 0
33 0
33 0
33 0
33 0
33 0
33 0
33 0
33 0
33 0
33 0
33 0
33 0
33 0
32 0
32 0
32 0
32 0
32 0
32 0
32 0
32 0
32 0
32 0
32 0
32 0
32 0
31 0
31 0
31 0
31 0
31 0
31 0
31 0
31 0
31 0
32 0
36 0
36 0
36 0
36 0
36 0
36 0
36 0
36 0
36 0
35 0
35 0
35 0
28 0
28 0
27 0
27 0
25 0
25 0
24 0
23 0
21 0
20 0
19 0
18 0
18 0
18 0
18 0
18 0
18 0
18 0
18 0
18 0
18 0
17 0
16 0
6 0
6 0
5 0
5 0
5 0
5 0
5 0
5 0
5 0
5 0
5 0
5 0
5 0
5 0
5 0
5 0
5 0
5 0
5 0
5 0
5 0
5 0
5 0
5 0
5 0
5 0
5 0
5 0
5 0
5 0
5 0
5 0
6 0
6 0
5 2
4 2
3 2
3 2
1 2
1 2
1 2
1 2
1 2
1 2
1 2
1 2
1 2
1 2
0 2
0 0
0 0
0 0
0 0
0 0
0 0
0 0
0 0
0 0
0 0
0 0
0 0
0 0
0 0
0 0
0 0
0 0
0 0
0 0
0 0
0 0
0 0
0 0
0 0
0 0
0 0
0 0
0 0
0 0
0 0
0 0
0 0
0 0
0 0
0 0
0 0
0 0
0 0
0 0
0 0
0 0
0 0
0 0
0 0
0 0
0 0
0 0
0 0
0 0
0 0
0 0
6 286
6 286
6 286
6 286
6 286
6 286
6 286
6 286
10 286
10 286
10 286
10 286
10 286
10 286
10 286
4 0
4 0
4 0
4 0
4 0
4 0
4 0
4 0
4 0
4 0
4 0
4 0
4 0
4 0
4 0
4 0
4 0
4 0
4 0
4 0
4 0
4 0
0 0
0 0
0 0
0 0
0 0
0 0
0 0
0 0
0 0
0 0
0 0
0 0
0 0
0 0
0 0
0 0
0 0
0 0
0 0
0 0
0 0
0 0
0 0
0 0
0 0
0 0
0 0
0 0
0 0
0 0
0 0
0 0
0 0
0 0
0 0
0 0
0 0
0 0
0 0
0 0
0 0
0 0
0 0
0 0
0 0
0 0
0 1
0 1
0 1
0 1
0 1
0 1
0 1
0 1
0 1
0 1
0 1
0 1
0 1
0 1
0 1
0 1
0 1
0 1
0 1
0 1
0 1
0 1
0 1
0 1
0 1
0 1
0 1
0 1
0 1
0 1
0 1
0 1
0 1
0 1
0 1
0 1
0 1
0 1
0 1
0 1
0 1
0 1
0 1
0 1
0 1
0 1
0 1
0 1
0 1
0 1
0 1
0 1
0 1
0 1
0 1
0 1
0 1
0 1
0 1
0 1
0 1
0 1
0 1
0 1
0 1
0 1
0 1
0 1
0 1
0 1
0 1
0 1
0 1
0 0
0 0
0 0
0 0
0 0
0 0
0 0
0 0
0 0
0 0
0 0
0 2
0 2
0 2
0 2
0 2
0 3
0 4
0 4
0 5
1 22
1 22
1 22
1 24
1 25
1 27
1 29
1 27
1 27
1 27
1 27
1 27
1 27
1 27
1 27
1 27
1 27
1 27
1 28
1 28
1 28
1 28
1 28
1 28
1 29
1 30
1 32
1 32
1 32
1 32
1 32
1 32
1 32
1 32
1 32
1 32
1 32
1 32
1 32
1 32
1 32
2 32
2 32
2 32
2 32
2 32
2 33
2 33
3 33
4 41
4 41
4 41
4 39
4 39
4 39
4 39
4 39
4 39
4 39
4 39
4 40
4 42
4 42
4 42
4 42
4 42
4 42
4 42
4 42
4 42
4 41
4 41
3 40
3 21
3 17
3 17
3 17
3 14
3 14
3 14
3 15
3 15
3 15
3 15
3 15
3 15
3 15
3 15
3 15
3 15
3 15
3 14
3 14
3 14
3 14
3 14
3 14
3 13
3 12
3 10
3 12
3 12
3 12
3 12
3 12
3 12
3 12
3 12
3 12
3 13
3 13
3 13
3 13
3 13
2 13
2 13
2 13
1 14
1 14
1 14
0 13
0 13
0 5
0 13
0 13
0 13
0 13
0 13
0 12
0 12
0 12
0 12
0 12
0 12
0 11
0 11
0 11
0 11
0 12
0 12
0 12
0 12
0 12
0 12
0 12
0 12
0 12
0 12
0 12
0 11
0 11
0 11
0 11
0 10
0 10
0 10
0 10
0 10
0 10
0 10
0 10
0 10
0 10
0 10
1 10
2 10
2 10
2 10
2 10
2 10
2 10
2 10
2 10
2 10
2 10
2 10
2 10
2 10
2 10
2 10
2 10
2 10
2 9
2 9
2 9
2 9
2 9
2 9
2 9
2 9
1 8
1 8
0 8
0 8
0 8
0 8
0 0
0 0
0 0
0 0
0 0
0 0
0 0
0 0
0 0
0 0
0 0
0 0
0 0
0 0
0 0
0 0
0 0
0 0
0 0
1 0
1 0
1 0
1 0
1 0
1 0
1 0
1 0
1 1
1 1
1 1
1 1
1 1
1 1
1 1
1 1
1 1
0 1
0 1
0 1
0 1
0 1
0 1
0 1
0 1
0 1
0 1
0 1
0 1
0 1
0 1
0 1
0 1
0 1
0 1
0 1
0 1
0 1
0 1
0 3
0 3
0 3
0 3
0 3
0 3
0 3
0 3
0 3
0 3
0 3
0 3
0 3
0 3
0 3
0 2
0 2
0 2
0 2
0 2
0 2
0 2
0 2
0 2
0 3
0 8
0 11
0 13
0 13
0 13
0 13
0 15
0 15
0 15
0 15
0 15
0 15
0 15
0 15
0 15
0 15
0 16
0 15
0 15
0 15
0 15
0 15
0 15
0 15
0 15
0 15
0 15
0 15
0 15
0 15
0 15
0 15
0 15
0 15
0 15
0 14
0 14
0 14
0 13
0 13
0 13
0 13
0 13
0 13
0 13
0 13
0 13
0 20
0 22
0 22
0 22
0 22
0 22
0 22
0 22
0 22
0 22
0 22
0 22
0 22
0 22
0 22
0 22
0 22
0 22
0 22
0 22
0 23
0 23
0 23
0 23
0 23
0 21
0 15
0 12
0 12
0 12
0 12
0 12
0 12
0 12
0 12
0 12
0 12
0 12
0 12
0 12
0 12
0 12
0 11
0 11
0 11
0 11
0 11
0 11
0 11
0 11
0 11
0 11
0 11
0 11
0 11
0 11
0 11
0 11
0 11
0 11
0 11
0 11
0 11
0 14
0 14
0 14
0 14
0 14
0 14
0 14
0 14
0 14
0 14
0 5
0 5
0 5
0 5
0 5
0 5
0 5
0 5
0 5
0 5
0 5
0 5
0 5
0 5
0 5
0 5
0 5
0 21
0 21
0 22
0 22
0 22
0 22
0 22
0 22
0 21
0 21
0 21
0 21
0 21
0 21
0 21
0 21
0 21
0 21
0 21
0 21
0 21
0 21
0 21
0 21
0 21
0 21
0 21
0 21
0 21
0 21
0 21
0 21
0 21
0 21
0 21
0 21
0 21
0 21
0 21
0 21
0 21
0 21
0 21
0 22
0 23
0 25
0 22
0 22
0 22
0 23
0 23
0 24
0 24
0 24
0 24
0 24
0 24
0 24
0 24
0 23
0 23
0 23
0 23
0 23
0 23
0 23
0 23
0 23
0 23
0 23
0 23
0 23
0 23
0 5
0 5
0 4
0 3
0 3
0 3
0 3
0 3
0 3
0 3
0 3
0 3
0 3
0 3
0 3
0 3
0 3
0 3
0 3
0 3
0 3
0 3
0 3
0 3
0 3
0 3
0 3
0 3
0 3
0 3
0 3
0 3
0 3
0 3
0 3
0 3
0 3
0 3
0 3
0 3
0 3
0 3
0 3
0 3
0 0
0 0
0 0
0 0
0 0
0 0
0 0
0 0
0 0
0 0
0 0
0 0
0 0
0 7
0 7
0 7
0 7
0 7
0 7
0 7
0 8
0 8
0 8
0 8
0 8
0 8
0 8
0 9
0 2
0 2
0 2
0 2
0 2
0 2
0 2
0 2
0 2
0 2
0 2
0 2
0 2
0 2
0 2
0 2
0 2
0 2
0 2
0 2
0 2
0 2
0 2
0 2
0 2
0 2
0 2
0 2
0 2
0 2
0 2
0 2
0 2
0 2
0 2
0 2
0 2
0 2
0 2
0 2
0 1
0 1
0 1
0 1
0 0
0 0
0 0
0 0
0 0
0 0
0 0
0 0
0 0
0 0
0 0
0 0
0 0
0 0
0 0
0 0
0 0
0 0
0 0
0 0
0 0
0 0
0 0
0 0
0 0
0 0
0 0
0 0
0 0
0 0
0 0
0 0
0 0
0 0
0 0
0 0
0 0
0 0
0 0
0 0
0 0
0 0
0 0
0 0
0 0
0 0
0 0
0 0
0 0
0 0
0 0
0 0
0 0
0 0
0 0
0 0
0 0
0 0
0 0
0 0
0 0
0 0
0 0
0 0
0 0
0 0
0 0
0 0
0 0
0 0
0 0
0 0
0 0
0 0
0 0
0 0
0 0
0 0
0 0
0 0
0 0
0 0
0 0
0 0
0 0
0 0
0 0
0 0
0 0
0 0
0 0
0 0
0 0
0 0
0 0
0 0
0 0
0 0
0 0
0 0
0 0
0 0
0 0
0 0
0 0
0 0
0 0
0 0
0 0
0 0
0 0
0 0
0 0
0 0
0 0
0 0
0 0
0 0
0 0
0 0
0 0
0 0
0 0
0 0
0 0
0 0
0 0
0 0
0 0
0 0
0 0
0 0
0 0
0 0
0 0
0 0
0 0
0 0
0 0
0 0
0 0
0 0
0 0
0 0
0 0
0 0
0 0
0 0
0 0
0 0
0 0
0 0
0 0
0 0
0 0
0 0
0 0
0 0
0 0
0 0
0 0
0 0
0 0
0 0
0 0
0 0
0 0
0 0
0 0
0 0
0 0
0 1
0 1
0 1
1 1
2 3
2 3
2 3
2 3
2 3
2 3
2 3
2 3
2 3
2 3
2 3
2 3
2 3
2 2
2 2
2 1
0 1
0 1
0 1
0 1
0 1
0 1
0 1
0 1
0 1
0 1
0 1
0 1
0 1
0 1
0 1
0 1
0 1
0 1
0 1
0 1
0 1
0 1
0 1
0 1
0 1
0 1
0 1
0 1
0 1
0 1
0 1
0 1
0 1
0 1
0 1
0 1
0 1
0 1
0 1
0 1
0 1
0 1
0 1
0 1
0 1
0 1
0 1
0 1
0 1
0 1
0 1
0 1
0 1
0 1
0 2
0 2
0 2
0 1
0 1
0 1
0 1
0 1
0 1
0 1
0 1
0 1
0 1
0 1
0 1
0 1
0 1
0 1
0 1
0 1
0 1
0 1
0 1
0 1
0 1
0 1
0 1
0 1
0 1
0 1
0 1
0 1
0 1
0 1
0 1
0 1
0 1
0 1
0 1
0 1
0 1
0 1
0 1
0 1
0 1
0 1
0 1
0 1
0 1
0 1
0 1
0 1
0 1
0 1
0 1
0 1
0 1
0 1
0 1
0 1
0 1
0 1
0 1
0 1
0 1
0 1
0 1
0 1
0 1
0 1
0 1
0 1
0 1
0 0
0 0
0 0
0 0
0 0
0 0
0 0
0 0
0 0
0 0
0 0
0 0
0 0
0 0
0 0
0 0
0 0
0 0
0 0
0 0
0 0
0 0
0 0
0 0
0 0
0 0
0 0
0 0
0 0
0 1
0 1
0 1
0 1
0 1
0 1
0 1
0 1
0 1
0 1
0 1
0 1
0 1
0 1
0 1
0 0
0 0
0 0
0 0
0 0
0 0
0 0
0 0
0 0
0 0
0 0
0 0
0 0
0 0
0 0
0 0
0 0
0 0
0 0
0 0
0 0
0 0
0 0
0 0
0 0
0 0
0 0
0 0
0 0
0 0
0 0
0 0
0 0
0 0
0 0
0 0
0 0
0 0
0 0
0 0
0 0
0 0
0 0
0 0
0 0
0 0
0 0
0 0
0 0
0 0
0 0
0 0
0 0
0 0
0 0
0 0
0 0
0 0
0 0
0 0
0 0
0 0
0 0
0 0
0 0
0 0
0 0
0 0
0 0
0 0
0 0
0 0
0 0
0 0
0 0
0 0
0 0
0 0
0 0
0 0
0 0
0 0
0 0
0 0
0 0
0 0
0 0
0 0
0 0
0 0
0 0
0 0
0 0
0 0
0 0
0 0
0 0
0 0
0 0
0 0
0 0
0 0
0 0
1 0
1 0
1 0
1 0
1 0
1 0
1 0
1 0
1 0
1 0
1 0
1 0
1 0
1 0
1 0
0 0
0 0
0 0
0 0
0 0
0 0
0 0
0 0
0 0
0 0
0 0
0 0
0 0
0 0
0 0
0 0
0 0
0 0
0 0
0 0
0 0
0 0
0 0
0 0
0 0
0 0
0 0
0 0
0 0
0 0
1 0
1 0
1 0
1 0
1 0
3 0
3 0
3 0
3 0
3 0
3 0
3 0
3 0
3 0
3 0
3 0
3 0
3 0
3 0
3 0
0 0
0 0
0 0
0 0
0 0
0 0
0 0
0 0
0 0
0 0
0 0
0 0
0 0
0 0
0 0
0 0
0 0
0 0
0 0
0 0
0 0
0 0
0 0
0 0
0 0
0 0
0 0
0 0
0 0
0 0
0 0
0 0
0 0
0 0
0 0
0 0
0 0
0 0
0 0
0 0
0 0
0 0
0 0
0 0
0 0
0 0
0 0
0 0
0 0
0 9
0 9
0 9
0 9
0 9
0 9
0 9
0 9
0 9
0 9
0 9
0 9
0 9
0 9
0 9
0 0
0 0
0 0
0 0
0 0
0 0
0 0
0 0
0 0
0 0
0 0
0 0
0 0
0 0
0 0
0 0
0 0
0 0
0 0
0 0
0 0
0 0
0 0
0 0
0 0
0 0
0 0
0 0
0 0
0 0
0 0
0 0
0 0
0 0
0 0
0 0
0 0
0 0
0 0
3 0
3 0
3 0
3 0
3 0
3 0
3 0
3 0
3 0
3 0
3 0
3 0
3 0
3 0
3 0
0 0
1 0
1 0
1 0
1 0
1 0
1 0
1 0
1 0
1 0
1 0
1 0
1 0
1 0
1 0
1 0
1 0
1 0
1 0
1 0
1 0
1 0
1 0
1 0
1 0
1 0
1 0
1 0
1 0
1 0
1 0
1 0
1 0
1 0
1 0
1 0
1 0
2 1
2 1
2 2
2 2
2 2
2 2
2 2
2 2
2 2
3 2
3 2
3 2
3 2
3 2
3 2
2 1
2 1
2 1
2 1
2 1
2 1
2 1
2 1
2 0
2 0
3 0
3 0
3 0
3 0
3 0
3 0
3 0
3 0
3 0
3 0
3 0
3 0
2 0
2 0
2 0
2 0
1 0
1 0
1 0
1 0
1 0
1 0
1 0
1 0
1 0
1 0
1 0
1 0
1 0
1 0
1 0
1 0
1 0
1 0
1 0
1 0
1 0
1 0
1 0
1 0
1 0
1 0
1 0
1 0
1 0
1 0
1 0
1 0
1 0
1 0
1 0
1 0
1 0
1 0
1 0
1 0
1 0
0 0
0 0
0 0
0 0
0 0
0 0
0 0
0 0
0 0
0 0
0 0
2 0
2 0
2 0
2 0
2 0
2 0
2 0
2 0
3 0
4 0
4 0
4 0
4 0
4 0
4 0
4 0
4 0
5 10
5 10
5 10
5 10
5 10
5 10
5 10
5 10
5 10
5 10
5 10
5 10
5 10
5 10
5 10
5 10
4 0
4 0
4 0
4 0
4 0
4 0
4 0
4 0
5 1
5 1
5 1
5 1
5 1
5 1
5 1
5 1
5 1
5 1
5 1
5 1
5 1
5 1
5 1
5 1
5 0
5 0
5 0
4 0
4 0
4 0
4 0
4 0
4 0
4 0
4 0
4 0
4 0
4 0
2 0
1 0
0 0
0 0
0 0
0 0
0 0
1 0
1 0
1 0
1 0
1 0
1 0
1 0
1 0
1 0
1 0
1 0
1 0
1 0
1 0
1 0
1 0
0 0
0 0
0 0
0 0
0 0
0 0
0 0
0 0
0 0
0 0
0 0
0 0
1 0
1 0
1 0
1 0
2 0
2 0
2 0
2 0
2 0
2 0
2 0
2 0
2 0
2 0
2 0
2 0
1 0
1 0
1 0
1 0
1 0
0 0
0 0
0 0
0 0
0 0
0 0
0 0
0 0
0 0
0 0
0 0
0 0
0 0
0 0
1 0
1 0
1 0
1 0
1 0
1 0
1 0
1 0
1 0
1 0
1 0
1 0
1 0
1 0
1 0
0 0
0 0
0 0
0 0
0 0
0 0
0 0
0 0
0 0
0 0
0 0
0 0
0 0
0 0
0 0
0 0
0 0
0 0
0 0
0 0
0 0
0 0
0 0
0 0
0 0
0 0
0 0
0 0
0 0
0 0
0 0
0 0
0 0
0 0
0 0
0 0
0 0
0 0
0 0
0 0
0 0
0 0
0 0
0 0
0 0
0 0
0 0
0 0
0 0
0 0
0 0
0 0
0 0
0 0
0 0
0 0
0 0
0 0
0 0
0 0
0 0
0 0
0 0
0 0
0 0
0 0
0 0
0 0
0 0
0 0
0 0
0 0
0 0
0 0
0 0
0 0
0 0
0 0
0 0
0 0
0 0
0 0
0 0
0 0
0 0
0 0
0 0
0 0
0 0
0 0
0 0
0 0
0 0
0 0
0 0
0 0
0 0
0 0
0 0
0 0
0 0
0 0
0 0
0 0
0 0
0 0
0 0
0 0
0 0
0 0
0 0
0 0
0 0
0 0
0 0
0 0
0 0
0 0
0 0
0 0
0 0
0 0
0 0
0 0
0 0
0 0
0 0
0 0
0 0
0 0
0 0
0 0
0 0
0 0
0 0
0 0
0 0
0 0
0 0
0 0
0 0
0 0
0 0
0 0
0 0
0 0
0 0
0 0
0 0
0 0
0 0
0 0
0 0
0 0
0 0
0 0
0 0
0 0
0 0
0 0
0 0
0 0
0 0
0 0
0 0
0 0
0 0
0 0
0 0
0 0
0 0
0 0
0 0
0 0
0 0
0 0
0 0
0 0
0 0
0 0
0 0
0 0
0 0
0 0
0 0
2 14
2 14
2 14
2 14
2 14
2 15
2 15
2 15
2 15
2 15
2 15
2 15
2 15
2 15
2 15
2 15
2 15
2 15
2 15
2 15
2 15
0 0
0 1
0 3
0 4
0 4
0 4
0 4
0 4
0 4
0 4
0 4
0 4
1 5
1 6
1 6
1 6
1 5
1 5
1 2
1 2
1 2
1 2
2 2
2 2
2 2
2 2
2 2
2 2
2 2
1 0
1 0
1 0
1 0
1 0
1 0
1 0
1 0
1 0
1 0
1 0
0 0
0 0
0 0
0 0
0 0
0 0
0 0
0 0
0 0
0 0
0 0
0 0
0 0
0 0
0 0
0 0
0 0
0 0
0 0
0 0
0 0
0 0
0 0
0 0
0 0
0 0
0 2
0 2
0 2
0 2
0 2
2 2
2 2
2 2
2 2
2 2
2 2
2 2
2 2
2 2
2 2
2 2
2 0
2 0
2 0
2 0
0 0
0 0
0 0
0 0
0 0
0 0
0 0
0 0
0 0
0 0
0 0
0 0
0 0
0 0
1 0
1 0
1 0
1 0
1 0
2 0
2 0
2 9
2 10
2 17
2 17
2 17
2 17
2 17
2 17
2 17
2 17
2 17
2 17
2 17
0 17
0 17
0 17
0 17
0 17
0 17
0 17
0 17
0 17
0 17
0 17
0 17
0 17
0 17
0 17
0 17
0 17
0 17
0 17
0 17
0 17
0 17
0 17
0 28
0 28
0 28
0 28
0 28
0 28
0 28
0 28
0 28
0 28
0 28
0 28
0 28
0 28
0 28
0 28
0 28
0 28
0 28
0 28
0 31
4 35
4 35
4 35
4 35
4 35
4 35
4 35
4 36
4 38
4 38
4 40
4 40
4 40
4 40
4 38
4 38
4 28
4 27
4 21
4 21
4 21
4 21
0 17
0 17
0 17
0 17
0 17
0 19
0 19
0 19
0 19
0 19
0 22
0 22
0 22
0 28
0 31
0 31
0 31
0 31
0 31
0 31
0 35
0 34
0 34
0 33
0 33
0 33
0 33
0 33
0 29
0 29
0 16
0 16
0 15
0 14
0 12
0 12
0 12
0 12
0 12
0 12
0 12
0 12
0 12
0 12
0 12
0 12
0 12
0 12
0 12
0 11
0 11
0 12
0 15
0 15
0 15
0 16
0 16
0 16
0 15
0 11
0 11
0 9
0 9
0 9
0 9
0 9
0 9
0 9
0 9
0 9
0 9
0 9
0 9
0 9
0 9
0 9
0 9
0 9
0 9
0 9
0 9
0 7
0 7
0 7
0 7
0 7
0 7
0 5
0 5
0 5
0 5
0 3
0 3
0 3
0 3
0 3
0 3
0 3
0 3
0 3
0 3
0 3
0 3
0 3
0 3
0 3
0 3
0 3
0 3
0 3
0 3
0 3
0 3
0 3
0 3
0 3
0 3
0 3
0 3
0 3
0 3
0 3
0 3
0 3
0 3
0 1
0 1
0 1
0 0
0 0
0 0
0 0
0 0
0 4
0 4
0 4
0 4
0 4
0 4
0 4
0 4
0 4
0 5
0 5
0 5
0 5
0 5
0 5
0 5
0 1
0 1
0 1
0 1
0 1
0 1
0 1
0 1
0 1
0 1
0 0
0 0
0 0
0 0
0 0
0 0
0 0
0 0
0 0
0 0
0 0
0 0
0 0
0 0
0 0
0 0
0 0
0 0
0 0
0 0
0 0
0 0
0 0
0 0
0 0
0 0
0 0
0 0
0 0
0 0
0 0
0 0
0 0
0 0
0 0
0 0
0 0
0 0
0 0
0 0
0 1
0 1
0 1
0 1
0 1
0 1
0 1
0 1
0 1
0 1
0 1
0 1
0 1
0 1
0 1
0 0
0 0
0 0
0 0
0 0
0 0
0 0
0 0
0 0
0 0
0 0
0 0
0 0
0 0
0 0
0 0
0 0
0 0
0 0
0 0
0 0
0 0
0 0
0 0
0 0
0 0
0 0
0 0
0 0
0 0
0 0
0 0
0 0
0 0
0 0
0 0
0 0
0 0
0 0
0 0
0 0
0 0
0 0
0 0
0 0
0 0
0 2
0 2
0 3
0 3
0 3
0 3
0 3
0 3
0 3
0 3
0 3
0 3
0 3
0 3
0 3
0 3
0 3
0 3
0 3
0 3
0 3
0 3
0 3
0 3
0 3
0 3
0 3
0 3
0 3
0 3
1 3
1 3
1 3
1 3
1 3
1 3
1 3
1 3
1 3
1 3
1 3
1 3
1 3
1 3
1 3
1 3
1 3
1 3
1 3
1 3
1 3
1 3
1 3
1 3
1 3
1 3
1 3
1 3
1 3
1 3
1 3
1 3
1 3
1 3
1 3
1 3
0 3
0 3
0 3
0 3
0 3
0 3
0 3
0 5
0 5
0 4
0 4
0 15
0 15
0 15
0 17
0 17
4 19
4 21
4 21
4 21
4 21
4 22
4 22
4 22
4 22
4 22
4 22
4 22
4 21
4 21
4 21
4 21
0 19
0 18
0 18
0 18
0 18
0 17
0 18
0 18
0 18
0 18
0 18
0 18
0 18
0 18
0 18
0 18
0 18
0 18
0 18
0 18
0 18
0 18
0 18
0 18
0 18
0 19
0 19
0 19
0 19
0 19
0 20
0 20
0 20
0 20
0 20
0 20
0 20
0 20
0 18
0 15
0 12
1 12
1 12
1 11
1 13
1 13
1 13
1 13
1 13
1 16
1 16
6 277
6 271
6 269
6 269
6 269
5 269
5 269
5 271
5 271
5 269
5 269
5 269
5 269
5 269
5 269
5 268
5 270
5 270
5 272
5 272
0 13
0 14
0 14
0 14
0 14
0 14
0 14
0 15
0 14
0 14
0 14
0 14
0 14
0 14
0 15
0 15
0 15
0 16
0 16
0 16
0 16
0 16
0 16
0 16
0 16
0 16
0 16
0 16
0 16
0 16
0 16
0 16
0 15
0 15
0 15
0 15
0 15
0 15
4 17
4 17
4 17
4 20
4 20
4 20
4 20
4 20
4 20
4 20
4 20
4 20
4 20
4 16
4 17
0 15
0 15
0 15
0 15
0 15
0 15
0 15
0 13
0 13
0 13
0 13
0 13
0 13
0 13
0 13
0 13
0 10
0 10
0 8
0 7
0 7
0 6
0 6
0 6
0 6
0 6
0 6
0 6
0 6
0 6
0 6
0 5
0 5
0 5
0 5
0 5
0 5
0 5
0 5
0 5
0 5
0 5
0 5
0 5
0 5
0 5
0 5
0 5
0 5
0 5
0 5
0 5
0 5
0 5
0 5
0 5
0 5
0 5
2 5
2 5
2 5
2 1
2 1
2 2
2 2
2 1
2 1
2 1
2 1
2 1
2 1
2 1
2 1
2 1
2 1
2 1
2 2
2 3
2 9
0 9
0 10
0 11
0 11
0 16
0 17
0 17
0 19
0 20
0 22
0 23
0 25
0 26
0 29
0 29
0 29
0 22
0 22
0 22
0 22
0 22
0 22
0 22
0 22
0 22
0 22
0 22
0 22
0 22
0 22
0 22
0 22
0 22
0 22
0 22
0 22
0 22
0 22
0 24
0 24
0 24
0 24
0 24
0 24
0 24
0 24
0 24
0 24
0 24
0 24
0 24
0 24
0 24
0 24
0 22
0 22
0 22
0 22
0 22
0 22
0 22
0 22
0 24
0 24
0 24
0 24
0 24
0 24
0 24
0 24
0 23
0 23
0 23
0 22
0 21
0 22
0 22
0 14
0 13
0 12
0 6
0 5
0 5
0 5
0 15
0 15
0 14
0 14
0 14
0 15
0 15
0 16
0 16
0 18
0 18
0 18
0 18
0 18
0 18
0 18
0 18
0 18
0 18
0 18
0 18
0 18
0 18
0 18
0 18
0 18
0 18
0 18
0 18
0 19
0 19
0 19
0 19
0 19
0 19
0 19
0 19
0 19
0 19
0 19
0 19
0 19
0 19
0 19
0 19
0 19
0 19
0 19
0 19
0 19
0 19
0 19
0 19
0 19
0 19
0 19
0 19
0 19
0 19
0 19
0 19
0 19
0 19
0 19
0 18
2 18
2 18
2 18
2 18
2 18
2 18
2 18
2 18
2 7
2 7
2 4
2 3
2 3
2 1
2 1
2 1
0 1
0 1
0 1
0 1
0 1
0 1
0 1
1 1
1 1
1 1
1 1
1 1
1 1
1 1
1 1
1 1
1 1
1 1
1 0
2 0
2 0
2 0
1 0
2 0
2 0
2 0
2 0
2 0
2 0
2 1
2 1
2 1
2 1
2 1
2 1
1 1
1 1
1 1
0 1
0 1
0 1
0 1
0 1
0 1
0 0
0 0
0 0
0 0
0 0
0 0
0 0
0 0
0 0
0 0
0 0
0 0
0 0
0 0
0 0
0 0
0 0
0 0
0 0
0 0
0 0
0 0
0 0
0 0
0 0
0 0
0 0
0 0
0 0
0 0
0 0
0 0
0 0
0 0
0 0
0 0
0 0
0 0
0 0
0 0
0 0
0 0
0 0
0 0
0 0
0 0
0 0
0 0
0 0
0 0
0 0
0 0
0 0
0 0
0 0
0 0
0 0
0 0
0 0
0 0
0 0
0 0
0 0
0 0
0 0
0 0
0 0
0 0
0 0
0 0
0 0
0 0
0 0
0 0
0 0
0 0
0 0
0 0
0 0
1 0
1 0
1 0
1 0
1 0
1 0
1 0
1 0
1 0
1 0
1 0
1 1
1 1
1 1
1 3
1 3
1 3
0 3
0 11
0 11
0 11
0 12
0 12
0 12
0 12
0 16
0 16
0 16
0 18
0 18
0 18
0 18
0 18
0 18
0 18
0 18
0 18
0 18
0 18
0 18
0 18
0 18
0 18
1 18
1 18
1 18
1 18
1 18
1 19
1 19
1 19
1 19
1 19
1 19
1 19
1 19
1 21
1 22
1 24
1 27
1 28
0 28
0 28
0 36
0 36
0 36
0 36
0 36
0 36
0 36
0 36
0 36
0 36
0 36
0 36
0 36
0 36
0 36
1 36
1 36
1 36
1 36
1 36
1 36
1 34
1 33
1 33
1 33
1 33
1 33
1 33
1 24
1 24
0 24
0 24
0 24
0 24
0 24
0 20
0 20
0 20
0 18
0 18
0 18
0 18
0 18
0 18
0 18
0 18
0 18
0 18
0 18
0 18
0 18
0 18
0 18
0 18
0 18
0 18
0 18
0 18
0 18
0 18
0 18
0 18
0 18
0 18
0 18
0 18
0 15
0 14
0 13
0 10
0 9
0 9
0 9
0 0
0 0
0 0
0 1
0 1
0 1
0 1
0 1
0 1
0 1
0 1
0 1
0 1
0 1
0 1
0 1
0 1
0 1
0 1
0 1
3 0
3 0
3 0
3 0
3 0
3 0
3 0
3 0
3 0
3 0
3 0
3 0
3 0
3 0
3 0
3 0
0 0
0 0
0 0
0 0
0 0
0 0
0 0
0 0
0 0
0 0
0 0
0 0
0 0
0 0
0 0
0 0
1 0
1 0
1 0
1 0
1 0
1 0
1 0
1 0
1 0
1 0
1 0
1 0
1 0
1 0
1 0
1 0
1 0
0 0
0 0
0 0
0 0
0 0
0 0
0 0
0 0
0 0
0 0
0 0
0 0
0 0
0 0
0 0
0 0
0 0
0 0
0 0
0 0
0 0
0 0
0 0
0 0
0 0
0 0
0 0
0 0
0 0
0 0
0 0
0 0
0 0
0 0
0 0
0 2
0 2
0 2
0 2
0 2
0 2
0 2
0 2
0 2
0 2
0 2
0 2
0 2
0 2
0 2
0 0
0 0
0 0
0 0
0 0
0 0
0 0
0 0
0 0
0 0
0 0
0 0
0 0
0 0
0 0
0 0
0 0
0 0
0 0
0 0
0 0
0 0
0 0
0 0
0 0
0 0
0 0
0 0
0 0
0 0
0 0
0 0
0 0
0 0
0 0
0 0
0 0
0 0
0 0
0 0
0 0
0 0
0 0
0 0
0 0
0 0
0 0
0 0
0 0
0 0
0 0
0 0
0 0
0 0
0 0
0 0
0 0
0 0
0 0
0 0
0 0
0 0
0 0
0 0
0 0
0 0
0 0
0 0
0 0
0 0
0 0
0 0
0 0
0 0
0 0
0 0
0 0
0 0
0 0
0 0
0 0
0 0
0 0
0 0
0 0
0 0
0 0
0 0
0 0
0 0
0 0
0 0
0 0
0 0
0 0
0 0
0 0
0 0
0 0
0 0
0 0
0 0
0 0
0 0
0 0
0 0
0 0
0 0
0 0
0 0
0 0
0 0
0 0
0 0
0 0
0 0
0 0
0 0
0 0
0 0
0 0
0 0
0 0
0 0
0 0
0 0
0 0
0 0
0 0
0 0
0 0
1 0
1 0
1 0
1 0
1 0
1 0
1 0
1 0
1 0
1 0
1 0
1 0
1 0
1 0
1 0
1 0
0 0
0 0
0 0
0 0
0 0
0 0
0 0
0 0
0 0
0 0
0 0
0 0
0 0
0 0
0 0
0 0
0 0
0 0
0 0
0 0
0 0
0 0
0 0
0 0
0 0
0 0
0 0
0 0
0 0
0 0
0 0
0 0
0 0
0 0
0 0
0 0
0 0
0 0
0 0
0 0
0 0
0 0
0 0
0 0
0 0
0 0
0 0
0 0
0 0
0 0
0 0
0 0
0 0
0 0
0 0
0 0
0 1
0 1
0 1
0 1
0 1
0 1
0 1
0 1
0 1
0 1
0 1
0 1
0 1
0 1
0 1
0 0
0 0
0 0
0 0
0 0
0 0
0 0
0 0
0 0
0 0
0 0
0 0
0 0
0 0
0 0
0 0
0 0
0 0
0 0
0 0
0 0
0 0
0 0
0 0
0 0
0 0
0 0
0 0
0 0
0 0
0 0
0 0
0 0
0 0
0 0
0 0
0 0
0 0
0 0
0 0
0 0
0 0
0 0
0 0
0 0
0 0
0 0
0 0
0 0
0 0
0 0
0 1
0 1
0 1
0 1
0 1
0 2
0 2
0 2
0 2
0 2
0 2
0 2
0 2
0 2
2 2
2 1
2 1
2 1
4 1
4 1
4 1
4 1
4 1
4 61
4 61
4 61
4 60
4 60
4 60
2 60
2 60
2 60
2 60
0 60
0 60
0 62
0 62
0 62
0 62
0 2
0 2
0 2
0 2
0 2
0 2
0 2
0 2
0 2
0 2
0 2
0 2
0 2
0 0
0 0
0 0
0 0
0 0
0 0
0 0
0 0
0 0
0 0
0 0
0 0
0 0
0 0
0 0
0 1
0 1
0 1
0 1
0 1
0 1
0 1
0 1
0 1
0 1
0 1
0 1
0 1
0 1
0 1
0 1
0 0
0 0
0 0
0 0
0 0
0 0
0 0
0 0
0 0
0 0
0 0
0 0
0 0
0 0
0 0
1 0
1 0
1 0
1 0
1 0
1 0
1 0
1 0
1 0
1 0
1 0
1 0
1 0
1 0
1 0
0 0
0 0
0 0
0 0
0 0
0 0
0 0
0 0
0 0
0 0
0 0
0 0
0 0
0 0
0 0
1 1
1 1
4 1
4 1
4 1
4 1
4 1
4 1
4 1
4 1
4 1
4 1
4 1
4 1
4 1
3 0
3 0
0 0
0 0
0 0
0 0
0 0
0 0
0 0
0 0
0 0
0 0
0 0
0 0
0 0
0 0
0 0
2 1
2 1
2 1
2 1
2 6
2 6
2 6
2 6
2 6
2 6
2 7
2 7
2 7
2 7
2 7
2 6
2 6
0 6
0 6
0 6
0 6
0 6
0 6
0 6
0 6
0 5
0 5
0 1
0 1
0 1
0 1
0 1
0 1
0 1
0 1
0 1
1 3
1 3
1 3
4 6
4 6
4 6
4 6
4 6
4 6
4 6
4 6
4 6
4 6
4 6
4 6
4 6
4 6
4 6
4 6
4 6
4 6
4 6
4 6
4 6
4 6
4 6
4 6
4 6
4 6
4 6
4 6
4 6
4 6
4 6
4 6
4 6
4 6
4 6
4 6
4 6
4 6
5 6
5 6
5 7
5 7
5 7
5 7
5 7
5 7
5 7
5 7
5 7
6 7
6 7
6 7
7 7
7 7
7 7
7 7
7 7
7 7
6 7
6 5
6 4
6 4
6 4
6 4
5 3
6 3
6 3
6 3
6 3
6 3
6 3
6 3
6 3
4 2
4 2
4 2
4 3
4 3
4 3
4 3
4 3
4 3
4 3
4 3
4 3
4 3
4 3
4 3
4 3
4 3
4 3
4 3
4 3
4 3
4 3
4 3
4 3
4 3
4 3
4 3
4 3
4 3
4 3
4 3
4 3
4 4
4 4
4 4
4 4
4 4
4 4
3 4
3 3
2 2
2 2
1 2
1 2
1 2
1 2
1 2
1 2
1 2
1 2
1 2
1 2
1 2
1 2
1 2
1 2
2 2
2 2
2 2
2 2
2 2
2 1
2 1
2 1
2 2
1 2
1 2
1 2
1 2
1 2
1 2
0 2
0 2
0 2
0 2
0 2
0 2
0 2
0 2
0 2
0 2
0 2
0 2
0 2
0 2
0 2
0 2
0 2
0 2
0 2
0 2
0 2
0 2
0 2
0 2
0 2
0 2
0 2
0 2
0 2
0 2
0 2
0 2
0 2
0 1
0 1
0 1
0 1
0 1
0 1
0 1
0 1
0 1
0 1
0 1
0 1
0 1
0 1
0 1
0 1
0 1
0 1
0 1
0 1
0 1
0 1
0 1
0 1
0 1
0 1
0 1
0 1
0 1
0 1
0 1
0 1
0 0
0 0
0 0
0 0
0 0
0 0
0 0
0 0
0 0
0 0
0 0
0 0
0 0
0 0
0 0
0 0
0 0
0 0
0 0
0 0
0 0
0 0
0 0
0 0
0 0
0 0
0 0
0 0
0 0
0 0
0 0
0 0
0 0
0 0
0 0
0 0
0 0
0 0
0 0
0 0
0 0
0 0
0 0
0 0
0 0
0 0
0 0
0 0
0 0
0 0
0 0
0 0
0 0
0 0
0 0
0 0
0 0
0 0
0 0
0 0
0 0
0 7
0 7
0 7
0 7
0 7
0 7
0 15
0 15
0 15
0 15
0 15
0 16
0 16
0 16
0 16
0 16
0 16
0 13
0 13
0 13
0 13
0 13
0 13
0 13
0 13
0 13
0 13
0 13
0 13
0 13
0 13
0 13
0 13
0 14
0 14
0 14
0 15
1 15
1 15
1 15
1 15
1 24
1 24
1 24
1 24
1 57
1 61
1 61
1 61
1 61
1 62
1 63
0 60
0 56
0 56
0 56
0 56
0 55
0 55
0 55
0 55
0 55
0 55
0 55
0 55
0 55
0 55
0 56
0 56
0 67
0 67
0 67
0 67
0 68
1 69
1 69
1 69
1 69
1 76
1 72
1 72
1 72
1 73
1 73
1 73
1 65
1 65
1 66
1 65
1 65
1 65
1 64
1 64
1 64
1 62
1 62
1 62
1 62
1 62
1 62
0 59
0 59
0 58
0 58
0 58
0 58
0 57
0 57
0 57
0 56
0 56
0 56
0 54
0 48
0 44
0 58
0 59
0 59
0 26
0 26
0 26
0 26
0 26
0 25
0 25
0 25
0 25
0 25
0 24
0 24
0 24
0 24
0 24
0 24
0 24
0 24
0 24
0 24
0 24
0 24
0 23
0 23
0 22
0 22
0 22
0 22
0 22
0 22
0 22
0 22
0 22
0 16
0 15
0 15
0 15
0 14
0 14
0 14
0 14
0 14
0 14
0 14
0 14
0 14
0 14
0 14
0 14
0 14
0 14
0 14
0 14
0 14
0 15
0 15
0 18
0 18
0 18
0 18
0 18
0 18
0 18
0 18
0 18
0 18
0 18
0 18
0 18
0 18
0 4
0 4
0 4
0 4
0 4
0 4
0 4
0 4
0 4
0 4
0 4
0 4
0 4
0 4
0 4
0 4
0 4
1 4
1 4
1 4
1 4
1 4
1 4
1 4
1 4
1 4
1 4
1 4
1 4
1 4
1 4
1 4
0 4
0 4
0 4
0 4
0 4
0 4
0 4
0 4
0 4
0 6
0 6
0 6
0 6
0 8
0 10
0 10
0 10
0 10
0 10
0 10
0 12
0 12
0 12
0 12
0 10
0 9
0 9
0 6
0 7
0 7
0 7
0 7
0 7
0 7
0 7
0 7
0 7
0 7
0 7
0 7
0 7
0 7
0 7
0 7
0 7
0 7
0 7
0 7
0 7
0 7
0 7
0 7
0 7
0 7
0 7
0 7
0 7
0 7
0 7
0 7
0 7
0 7
0 7
0 7
0 7
0 7
0 7
0 7
0 7
0 7
0 7
0 8
0 8
0 8
0 8
0 8
0 8
0 8
0 8
0 8
0 8
0 8
0 8
0 8
0 8
0 8
0 2
0 2
0 2
0 2
0 2
0 2
0 2
0 2
0 2
0 2
0 1
0 1
0 1
0 1
0 1
0 1
0 1
0 1
0 1
0 1
0 1
0 1
0 1
0 1
0 1
0 1
0 1
0 1
0 1
0 1
0 1
0 1
0 1
0 1
0 1
0 1
0 1
0 1
0 1
0 1
0 1
0 1
0 1
0 1
0 1
0 1
0 0
0 0
0 0
0 0
0 0
0 0
0 1
0 1
0 1
0 1
0 1
0 1
0 1
0 1
0 1
0 2
0 2
0 2
0 2
0 2
0 2
0 2
0 2
0 2
0 2
0 2
0 2
0 2
0 2
0 2
0 1
0 1
0 1
0 1
0 1
0 1
0 1
0 1
0 1
0 1
0 1
0 1
0 2
0 2
0 2
0 2
0 2
0 2
0 2
0 2
0 2
0 2
0 2
0 2
0 2
0 2
0 3
0 3
0 3
0 4
0 4
0 4
0 4
0 4
0 4
0 4
0 4
0 4
0 4
0 4
0 4
0 4
0 4
0 4
0 4
0 4
0 5
0 5
0 5
0 4
0 4
0 4
0 4
0 4
0 4
0 4
0 4
0 4
0 4
0 4
0 4
0 4
0 4
0 4
0 4
0 4
0 4
0 4
0 4
0 4
0 4
0 4
0 4
0 4
0 4
0 4
0 4
0 4
0 4
0 4
0 4
0 4
0 4
0 4
0 4
0 3
0 3
0 3
0 3
0 3
0 3
0 3
0 3
0 2
0 1
0 1
0 1
0 1
0 1
0 1
0 1
0 1
0 1
0 1
0 1
0 1
0 1
0 1
0 1
0 1
0 1
0 1
0 1
1 1
1 1
1 4
1 4
1 4
1 4
1 3
1 3
1 3
1 3
1 3
1 3
1 3
1 3
1 3
0 3
0 4
0 4
0 2
0 1
0 1
2 2
2 2
2 2
2 2
2 2
2 2
2 2
2 2
2 2
2 2
2 1
2 1
2 1
2 1
2 1
2 1
2 1
2 1
2 1
2 1
2 1
2 1
2 1
2 2
2 2
2 2
2 2
2 2
2 2
2 2
2 2
2 2
2 2
2 2
2 2
2 2
2 2
2 4
2 4
2 4
2 5
2 5
2 5
2 5
2 5
2 5
2 5
2 5
2 5
2 5
2 5
2 5
2 6
2 7
2 7
2 7
2 7
2 8
2 8
2 9
2 9
2 9
2 9
2 9
2 9
1 9
1 9
1 9
1 9
1 9
1 9
0 9
0 9
0 8
0 7
0 7
0 7
0 8
0 8
0 8
0 8
0 8
0 8
0 8
0 9
0 9
0 9
3 9
3 9
3 9
3 9
3 14
3 14
3 14
3 14
3 13
3 12
3 12
3 11
3 11
3 11
3 11
2 11
0 11
0 11
0 11
0 11
0 11
0 11
0 11
0 10
0 10
0 10
0 10
0 10
0 10
0 10
0 10
0 10
0 10
0 10
0 10
0 10
0 10
0 10
0 9
0 8
0 8
0 8
0 8
0 7
0 7
0 7
0 7
0 7
0 7
0 7
0 7
0 7
0 7
0 7
0 8
0 8
0 10
0 10
0 11
0 11
0 11
0 11
0 11
0 10
0 10
0 10
0 10
0 10
0 10
0 9
0 9
0 9
0 9
0 9
0 9
0 9
0 9
0 3
0 3
0 3
0 2
0 2
0 2
0 2
0 2
0 2
0 2
0 2
0 2
0 2
0 2
0 2
0 2
0 2
0 2
0 2
0 2
0 2
0 2
0 2
0 2
0 2
0 2
0 2
0 2
0 2
0 2
0 2
0 2
0 2
0 2
0 2
0 2
0 2
0 4
0 4
0 4
0 4
0 4
0 4
0 4
0 4
0 4
0 4
0 4
0 4
0 4
0 3
0 3
0 1
0 1
0 0
0 0
0 0
0 0
0 0
0 0
0 0
0 0
0 0
0 0
0 0
0 0
0 0
0 0
0 0
0 0
0 0
0 0
0 0
0 0
0 0
0 0
0 0
0 0
0 0
0 0
0 0
0 0
0 0
0 0
0 0
0 0
0 0
0 0
0 0
0 1
0 1
0 1
0 1
0 1
0 1
0 1
0 1
0 1
0 1
0 1
0 1
0 1
0 1
0 1
1 1
1 1
1 1
1 1
1 1
1 9
1 9
1 9
1 9
1 9
1 9
1 9
1 9
1 9
1 9
1 9
0 9
0 9
0 9
0 9
0 1
0 1
0 1
0 1
0 0
0 0
0 0
0 0
0 0
0 0
0 0
0 0
1 1
1 1
1 1
1 1
1 1
1 1
1 1
1 1
1 1
1 1
1 1
1 1
1 1
1 7
1 7
1 7
0 6
0 6
0 6
0 6
0 6
0 6
0 6
0 6
0 6
0 10
0 10
0 10
0 4
1 4
1 4
3 4
3 4
3 4
3 4
4 4
4 4
4 4
4 4
4 4
4 0
4 0
4 0
4 0
3 0
3 0
3 0
1 0
1 0
1 0
0 0
0 0
1 0
1 0
1 0
3 0
3 0
3 0
3 0
3 0
3 0
3 0
3 0
3 0
3 0
3 0
3 0
3 0
3 0
3 0
0 0
0 0
0 0
0 0
0 0
0 0
0 0
0 0
0 0
0 0
0 0
0 0
0 0
0 0
0 0
0 0
0 0
0 0
0 0
0 0
0 0
0 0
0 0
0 0
2 0
3 0
8 0
30 0
30 0
32 0
32 0
34 0
41 0
42 0
49 0
52 0
53 0
53 0
53 0
53 0
54 0
54 0
54 0
54 0
54 0
54 0
55 0
56 0
56 0
56 0
56 0
56 0
56 0
56 0
56 0
56 0
56 0
56 0
56 0
56 0
55 0
54 0
54 0
57 0
60 0
60 0
62 0
65 0
65 0
65 0
65 0
65 0
64 0
64 0
61 0
61 0
61 0
58 0
61 0
64 0
64 0
64 0
63 0
63 0
62 0
62 0
62 0
62 0
62 0
62 0
62 0
62 0
62 0
61 0
61 0
61 0
61 0
60 0
59 0
57 0
44 0
44 0
42 0
41 0
41 0
33 0
32 0
26 0
21 0
20 0
20 0
20 0
18 0
17 0
14 0
14 0
14 0
10 0
8 0
8 0
8 0
8 0
8 0
8 0
8 0
8 0
8 0
8 0
8 0
8 0
8 0
8 1
8 1
8 1
8 1
10 1
10 1
11 1
11 1
11 1
10 1
10 30
10 30
10 30
9 30
9 30
8 29
8 29
8 29
7 29
4 29
2 29
0 29
0 29
0 29
0 29
0 1
0 0
0 0
0 0
0 0
0 0
0 0
0 0
0 0
0 0
0 0
0 0
52 3
52 3
52 3
52 3
52 3
52 3
52 3
52 3
52 3
52 3
52 3
52 3
52 3
52 3
53 4
53 4
1 1
1 1
1 1
1 1
1 1
1 1
1 1
1 1
1 1
1 1
1 1
1 1
1 1
1 1
1 0
1 2
1 2
1 2
1 2
1 2
1 2
1 2
1 2
1 2
1 2
1 2
1 2
1 2
1 2
1 2
0 0
0 0
0 0
0 0
0 0
0 0
0 0
0 0
0 0
0 0
0 0
0 0
0 0
0 0
0 0
0 0
0 0
0 0
0 0
0 0
0 0
0 0
0 0
0 0
0 0
0 0
0 0
0 0
0 0
0 0
0 0
0 0
0 0
0 0
0 0
0 0
0 0
0 0
0 0
0 0
0 0
0 0
0 0
0 0
0 0
0 0
0 0
0 0
0 0
0 0
0 0
0 0
0 0
0 0
0 0
0 0
0 0
0 0
0 0
0 0
0 0
0 0
0 0
0 0
0 0
0 0
0 0
0 0
0 0
0 0
0 0
0 0
0 0
0 0
0 0
0 0
0 0
0 0
0 0
0 0
0 0
0 0
0 0
0 0
0 0
0 0
0 0
0 0
2 0
2 0
2 0
2 0
2 0
2 0
2 0
2 0
2 0
2 0
2 0
2 0
2 0
2 0
2 0
2 0
2 0
4 0
4 0
4 0
4 0
6 0
6 0
6 0
6 0
6 0
6 0
6 0
6 0
6 0
6 0
6 0
6 0
6 0
6 0
6 0
6 0
6 0
6 0
6 0
6 0
6 0
6 0
6 0
7 0
7 0
7 0
7 0
7 0
7 0
7 0
7 0
7 0
7 0
8 0
8 0
8 0
8 0
8 0
8 0
6 0
6 0
6 0
6 0
6 0
6 0
6 0
6 0
6 0
6 0
6 0
250 2
250 2
250 2
250 2
250 2
250 2
250 2
250 2
250 2
250 2
250 2
250 2
249 2
249 2
249 2
249 2
5 0
4 0
4 0
4 0
4 0
4 0
4 0
2 0
2 0
2 0
2 0
2 0
2 0
2 0
2 0
2 0
2 0
2 0
3 0
3 0
3 0
3 0
3 0
3 0
3 0
3 0
3 0
3 0
3 0
3 0
2 0
2 0
2 0
2 0
2 0
2 0
2 0
2 0
1 0
1 0
1 0
1 0
1 0
1 0
1 0
1 0
1 0
1 0
1 0
1 0
1 0
1 0
1 0
1 0
1 0
1 0
1 0
1 0
1 0
1 0
1 0
1 0
1 0
1 0
1 0
1 0
1 0
1 0
1 0
1 0
1 0
1 0
1 0
1 0
1 0
1 0
1 0
1 0
1 0
1 0
1 0
1 0
1 0
1 0
1 0
1 0
1 0
1 0
1 0
1 0
1 0
0 0
0 0
0 0
0 0
0 0
0 0
0 0
0 0
0 0
0 0
0 0
0 0
0 0
0 0
0 0
0 0
0 0
0 0
0 0
0 0
0 0
0 0
0 0
0 0
1 0
1 0
1 0
1 0
1 0
4 0
5 0
5 0
12 0
12 0
12 0
12 0
12 0
12 0
12 0
12 0
12 0
12 0
12 0
12 0
12 0
13 0
13 0
13 0
13 0
13 0
13 0
13 0
13 0
13 0
13 0
13 0
13 0
13 0
13 0
13 0
13 0
13 0
13 0
13 0
13 0
13 0
13 0
13 0
13 0
13 0
13 0
11 0
11 0
11 0
11 0
11 0
11 0
11 0
11 0
11 0
11 0
11 0
11 0
11 0
11 0
11 0
11 0
11 0
11 0
11 0
11 0
11 0
11 0
11 0
11 0
11 0
11 0
10 0
10 0
10 0
10 0
10 0
7 0
7 0
7 0
1 0
2 0
2 0
2 0
2 0
2 0
2 0
2 0
2 0
4 0
30 0
30 0
30 0
29 0
29 0
29 0
29 0
29 0
31 0
32 0
32 0
32 0
32 0
32 0
32 0
32 0
32 0
32 0
32 0
32 0
32 0
32 0
32 0
32 0
32 0
32 0
32 0
32 0
32 0
32 0
32 0
33 0
35 0
37 0
39 0
39 0
39 0
39 0
40 0
40 0
40 0
40 0
41 0
44 0
49 0
61 0
71 0
76 0
82 0
84 0
85 0
85 0
85 0
87 0
88 0
88 0
88 0
89 0
89 0
89 1
89 1
89 1
89 1
90 1
89 1
89 1
89 1
89 1
89 1
89 1
89 1
95 1
93 1
73 1
75 1
78 1
80 1
84 1
86 0
85 0
84 0
84 0
84 0
84 0
84 0
87 0
91 0
92 0
92 0
92 0
92 0
92 0
92 0
92 0
92 0
92 0
92 0
92 0
94 0
94 0
94 0
94 0
94 0
93 0
92 0
90 0
88 0
86 0
86 0
86 0
86 0
85 0
85 0
81 0
74 0
70 0
68 1
56 1
46 1
28 1
23 1
17 1
18 1
18 1
18 1
18 1
12 1
12 1
12 1
9 1
6 1
6 0
6 0
5 0
5 0
5 0
5 0
5 0
5 0
5 0
5 0
5 0
5 0
5 0
5 0
5 0
5 0
5 0
3 0
3 0
3 0
3 0
3 0
3 0
3 0
3 0
3 0
3 0
3 0
3 0
3 0
3 0
3 0
3 0
3 0
3 0
3 0
3 0
3 0
3 0
3 0
3 0
3 0
3 0
3 0
3 0
3 0
3 0
3 0
3 0
3 0
3 0
3 0
3 0
3 0
3 0
3 0
3 0
3 0
3 0
3 0
3 0
3 0
3 0
3 0
0 0
0 0
0 0
0 0
0 0
0 0
0 0
0 0
0 0
0 0
0 0
0 0
0 0
0 0
0 0
0 0
0 0
0 0
0 0
0 0
0 0
0 0
0 0
0 0
0 0
0 0
0 0
0 0
0 0
0 1
0 1
0 1
0 1
0 1
0 1
0 1
0 1
0 1
1 1
1 1
1 1
1 1
1 1
1 1
1 0
1 0
1 0
1 0
1 0
1 0
1 0
1 0
1 0
1 0
1 0
1 0
1 0
2 0
2 0
2 0
2 0
2 0
2 0
2 0
2 0
2 0
2 0
2 0
2 0
2 0
2 0
2 0
2 0
1 0
1 0
1 0
1 0
1 0
1 0
1 0
1 0
1 0
1 0
1 0
1 0
1 0
1 0
1 0
1 0
1 0
1 0
1 0
1 0
1 0
1 0
1 0
1 0
1 0
1 0
1 0
1 0
1 0
1 0
1 0
1 0
1 0
1 0
1 0
1 0
1 0
1 0
0 0
0 0
0 0
0 0
0 0
0 0
0 0
0 0
0 0
0 0
0 0
0 0
0 0
0 0
0 0
0 0
0 0
0 0
0 0
0 0
0 0
0 0
0 0
0 0
0 0
0 0
0 0
0 0
0 0
0 0
0 0
0 0
0 0
0 0
0 0
0 0
0 0
0 0
0 0
0 0
0 0
0 0
1 0
1 0
1 0
3 0
3 0
5 0
5 0
5 0
5 0
5 0
5 0
5 0
5 0
5 0
5 0
5 0
5 0
4 0
6 0
6 0
6 0
6 0
6 0
6 0
6 0
6 0
6 0
6 0
6 0
6 0
4 0
2 0
2 0
2 0
2 0
2 0
2 0
2 0
2 0
2 0
2 0
2 0
2 0
2 0
2 0
2 0
2 0
2 0
2 0
2 0
2 0
2 0
2 0
2 0
2 0
2 0
2 0
2 0
2 0
2 0
2 0
2 0
2 0
2 0
2 0
2 0
2 0
2 0
2 0
2 0
2 0
2 0
2 0
2 0
2 0
2 0
2 0
2 0
2 0
2 0
2 0
2 0
2 1
2 3
2 3
2 3
2 3
2 3
2 3
2 3
2 3
0 3
0 3
0 3
0 3
0 3
0 3
0 2
0 2
0 2
0 2
0 2
0 2
0 2
0 2
0 2
0 2
0 2
0 2
0 2
0 2
0 2
0 2
0 2
0 2
0 2
0 1
0 0
0 0
0 0
0 0
0 0
0 0
0 1
0 1
0 1
0 1
0 1
0 1
0 1
0 1
0 1
0 1
0 1
0 2
0 2
0 2
0 2
0 2
0 2
0 2
0 2
0 2
0 2
0 2
0 2
0 2
0 3
0 3
0 4
0 4
0 9
0 9
0 9
0 11
0 16
0 17
0 17
0 17
0 17
0 17
0 17
0 17
0 17
0 17
0 17
0 17
0 17
0 17
0 17
0 17
0 17
0 17
0 17
0 17
0 17
0 19
0 19
0 19
0 19
0 19
0 19
0 19
0 19
0 19
0 19
0 19
0 19
0 19
0 19
0 19
0 19
0 19
0 18
0 18
0 18
0 18
0 18
0 18
0 18
0 18
0 18
0 18
0 18
0 18
0 18
0 18
0 17
0 17
0 17
0 17
0 17
0 17
0 17
0 17
0 17
0 17
0 17
0 17
0 17
0 14
0 14
0 12
0 10
0 5
0 5
0 0
0 0
0 0
0 0
1 0
1 0
1 0
1 0
1 0
1 0
1 0
1 0
1 0
1 0
1 0
1 0
1 0
1 0
1 0
1 0
0 0
0 0
0 0
0 0
0 0
0 0
0 0
0 0
0 0
0 0
0 0
0 0
0 1
0 1
0 1
0 1
0 1
0 1
0 1
0 1
0 1
0 1
0 1
0 1
0 1
0 1
0 1
0 1
0 0
0 0
0 0
0 0
0 0
0 0
0 0
0 0
0 0
0 0
0 0
0 0
0 0
0 0
0 0
0 0
3 0
3 0
3 0
3 0
3 0
3 0
3 0
3 0
3 0
3 0
3 0
3 0
3 0
3 0
3 0
0 0
0 0
0 0
0 0
0 0
0 0
0 0
0 0
0 0
0 0
0 0
0 0
0 0
0 0
0 0
0 0
0 0
0 0
0 0
0 0
0 0
0 0
0 0
0 0
0 0
0 0
0 0
0 0
0 0
0 0
0 0
0 0
0 0
0 0
0 0
0 0
0 0
0 0
0 0
0 0
0 0
0 0
0 1
0 1
0 1
0 1
0 1
0 1
0 1
0 1
0 1
0 1
0 1
0 1
0 1
0 1
0 1
0 1
0 1
0 1
0 1
0 1
0 1
0 1
0 1
0 1
0 1
0 1
0 1
0 1
0 1
0 1
0 1
0 1
0 1
0 1
0 1
0 1
0 1
0 1
0 1
0 1
0 1
0 1
0 1
0 1
0 1
0 1
0 1
0 1
0 1
0 1
0 1
0 1
0 1
0 1
0 1
0 1
0 1
0 1
0 1
0 1
0 1
0 1
0 1
0 1
0 1
0 1
0 1
0 1
0 1
0 1
0 1
0 1
0 1
0 0
0 0
0 0
0 0
0 0
0 0
0 0
0 0
0 0
0 0
0 0
0 0
0 0
0 0
0 0
0 0
0 0
0 0
0 0
0 0
0 26
0 26
0 26
0 26
0 26
0 27
0 27
0 27
0 27
0 31
0 31
0 31
0 31
0 31
0 31
0 5
0 5
0 5
0 5
0 5
0 5
0 6
0 6
0 6
0 6
0 6
0 6
0 6
0 6
0 6
0 6
0 6
0 6
0 6
0 6
0 6
0 6
0 6
0 6
0 6
0 6
0 6
0 6
0 7
0 7
0 7
0 7
0 7
0 7
0 7
0 7
0 7
0 7
0 7
0 7
0 10
0 11
0 11
0 11
0 11
0 11
0 11
1 11
1 10
1 9
1 9
1 9
1 9
1 9
1 9
1 9
1 9
1 9
1 9
1 9
1 9
1 9
0 9
0 9
0 9
0 9
0 9
0 6
0 6
0 6
0 6
0 6
0 6
0 6
0 6
0 6
0 6
0 6
0 6
0 6
0 6
0 6
0 6
0 6
0 6
0 6
0 6
0 6
0 6
0 6
0 6
0 6
0 6
0 6
0 6
0 7
0 7
0 8
0 8
0 8
0 9
0 8
0 8
0 8
0 8
0 8
0 8
0 8
0 8
0 8
0 8
0 8
0 8
0 5
0 4
0 4
0 4
0 4
0 4
0 4
0 4
0 4
0 4
0 4
0 4
0 4
0 4
0 4
0 4
0 4
0 4
0 4
0 4
0 3
0 3
0 2
0 3
0 3
0 3
0 3
0 3
0 3
0 3
0 5
0 5
0 5
0 5
0 5
0 5
0 5
0 6
0 7
0 6
0 6
0 6
0 6
0 6
0 6
0 5
0 5
0 5
0 5
0 5
0 5
0 5
0 5
0 5
0 4
0 4
0 4
0 4
0 4
0 4
0 3
0 3
0 3
0 3
0 3
0 3
0 3
0 3
0 3
0 3
0 3
0 3
0 3
0 3
0 4
0 4
0 4
0 4
0 4
0 4
0 4
0 4
0 4
0 4
0 4
0 4
0 4
0 4
0 4
0 4
0 4
0 4
0 4
0 4
0 4
0 4
0 3
0 3
0 3
0 3
0 3
0 3
0 3
0 2
0 2
0 2
0 2
0 2
0 2
0 2
0 1
0 1
0 1
0 2
0 2
0 2
0 2
0 2
0 2
0 2
0 2
0 2
0 2
0 2
0 2
0 2
0 2
0 2
0 2
0 2
0 2
0 2
0 2
0 2
0 2
0 2
0 2
0 2
0 2
0 2
0 2
0 2
0 2
0 2
0 2
0 2
0 2
0 1
0 1
0 1
0 1
0 1
0 1
0 1
0 1
0 1
0 1
0 1
0 1
0 1
0 1
0 1
0 1
0 1
0 1
0 1
0 1
0 1
0 1
0 1
0 1
0 1
0 1
0 1
0 1
0 1
0 1
0 1
0 1
0 1
0 1
0 1
0 1
0 1
0 1
0 1
0 0
0 0
0 0
0 0
0 0
0 0
0 0
0 0
0 0
0 0
0 0
0 0
0 0
0 0
0 0
0 0
0 0
0 0
0 0
0 0
0 0
0 0
0 0
0 0
0 0
0 0
0 0
0 0
0 0
0 0
0 0
0 0
0 0
0 0
0 0
0 0
0 0
0 0
0 0
0 0
0 0
0 0
0 0
0 0
0 0
0 0
0 0
0 0
0 0
0 0
0 0
0 0
0 0
0 0
0 0
0 0
0 0
0 0
0 0
0 0
0 0
0 0
0 0
0 2
0 2
0 2
0 2
0 2
0 2
0 2
0 2
0 2
0 2
0 2
0 2
0 2
0 2
0 2
0 2
0 2
0 2
0 2
0 3
0 3
0 3
0 3
0 3
0 3
0 3
0 3
0 3
0 3
0 3
0 3
0 3
0 3
0 3
0 3
0 3
0 2
0 2
0 2
0 2
0 2
0 2
0 2
0 2
0 2
0 2
0 2
0 2
0 2
0 2
0 2
0 2
0 2
0 2
0 2
0 2
0 2
0 2
0 2
0 2
0 2
0 2
0 2
0 2
0 2
0 2
0 3
0 4
0 4
0 4
0 6
0 6
0 6
0 4
0 5
2 5
2 5
2 5
2 5
2 5
2 5
2 5
2 5
2 5
2 5
2 5
2 5
2 5
2 5
2 5
0 5
0 5
0 5
0 5
0 5
0 5
0 5
0 5
0 5
0 5
0 5
0 5
0 5
0 8
0 8
0 8
0 8
0 8
0 8
0 8
0 8
0 8
0 8
0 8
0 9
0 10
0 10
0 10
0 11
0 11
0 11
0 11
0 11
0 11
2 11
2 11
2 11
2 11
2 11
2 11
2 11
2 11
2 11
2 11
2 11
2 11
2 11
2 11
2 11
2 9
0 8
0 8
0 8
0 7
0 7
0 7
0 6
0 6
0 7
0 7
0 7
0 7
0 7
0 7
0 7
0 7
0 7
0 7
0 7
0 7
0 7
0 7
0 7
0 7
0 7
0 7
0 7
0 7
0 7
0 7
0 8
0 8
0 8
0 8
0 8
0 5
0 2
0 2
0 2
0 2
0 2
0 2
0 2
0 2
0 2
0 2
0 2
0 2
0 1
0 1
0 1
0 1
0 1
0 1
0 1
0 2
0 2
0 2
0 2
0 2
0 2
0 2
0 2
0 2
0 2
0 2
0 2
0 2
0 2
0 2
0 2
0 2
0 2
0 2
0 2
0 2
0 2
0 2
0 2
0 2
0 2
0 2
0 2
0 2
0 2
0 2
0 2
0 2
0 2
0 2
0 2
0 2
0 2
0 2
0 2
0 2
0 2
0 2
0 2
0 2
0 2
0 2
0 2
0 1
0 1
0 1
0 1
0 1
0 1
0 1
0 1
0 1
0 1
0 1
0 1
0 1
0 1
0 1
0 1
0 1
0 1
0 1
0 1
0 1
0 1
0 1
0 1
0 1
0 0
0 0
0 0
0 0
0 1
0 1
0 1
0 2
0 4
0 4
0 4
0 4
0 4
0 4
0 4
0 4
0 13
0 26
0 28
0 29
0 31
0 33
0 32
0 32
0 33
0 33
0 33
0 33
0 33
0 33
0 33
0 33
0 33
0 33
0 33
0 33
0 33
0 33
0 33
0 33
0 33
0 33
0 33
0 33
0 33
0 33
0 33
0 33
0 33
0 33
0 33
0 33
0 34
0 34
0 34
0 34
0 34
0 34
0 34
0 34
0 34
0 34
0 35
0 35
0 35
0 35
0 36
1 78
1 86
2 91
2 92
2 92
2 92
2 94
2 93
2 92
2 92
2 91
2 91
2 91
2 88
2 77
2 77
2 66
2 66
2 66
3 75
3 78
3 79
3 89
4 88
4 88
4 87
4 87
4 87
4 87
4 87
4 87
4 87
4 87
4 87
4 87
4 87
4 87
4 87
4 87
4 87
4 87
4 87
4 87
4 87
4 87
4 87
4 87
4 87
4 87
4 87
4 87
4 87
4 87
4 87
4 87
4 87
4 87
4 87
4 86
4 86
4 86
4 85
4 85
4 84
4 84
5 84
5 84
5 84
5 84
6 84
6 84
8 84
8 84
6 30
6 27
6 27
8 27
8 28
8 31
8 32
8 32
8 32
8 32
8 33
8 36
8 46
8 50
8 57
8 58
8 60
8 60
8 60
7 53
7 61
7 60
4 52
3 55
3 54
3 60
3 62
3 68
0 68
0 79
0 82
0 88
0 93
0 93
0 93
0 93
0 93
0 93
0 93
0 93
0 93
0 93
0 93
0 93
0 93
0 93
0 93
0 93
0 93
0 93
0 93
0 93
0 93
0 93
0 93
0 94
0 94
0 95
0 96
0 96
0 96
0 97
0 97
0 97
0 97
0 97
0 97
0 97
0 97
0 97
0 97
0 97
0 97
0 97
0 97
0 97
0 97
0 96
0 91
0 90
0 90
0 90
0 90
0 89
0 75
0 58
0 51
0 27
0 8
0 8
0 8
0 6
0 6
0 6
0 6
0 6
0 6
0 6
0 8
0 8
0 7
0 5
0 4
0 2
0 2
0 2
0 2
0 2
0 2
0 2
0 2
0 2
0 2
0 2
0 2
0 4
0 4
0 4
0 4
0 4
0 4
0 4
0 4
0 4
0 4
0 4
0 4
0 4
0 4
0 4
0 4
0 4
0 4
0 4
0 4
0 4
0 4
0 4
0 4
0 4
0 4
0 4
0 4
0 4
0 4
0 4
0 4
0 4
0 4
0 4
0 4
0 4
0 4
0 4
0 4
0 4
0 4
0 4
0 4
0 4
0 4
0 4
0 4
0 4
0 4
0 4
0 4
0 4
0 4
0 4
0 4
0 2
0 2
0 2
0 2
0 2
0 2
0 2
0 2
0 2
0 2
0 2
0 2
0 2
0 2
0 2
0 2
0 2
0 0
0 0
0 0
0 0
0 0
0 0
0 0
0 0
0 0
0 0
0 0
0 0
0 0
0 0
0 0
0 0
0 0
0 0
0 0
0 0
0 0
0 0
0 0
0 0
0 0
0 0
0 0
0 0
0 0
0 0
0 0
0 0
0 0
0 0
0 0
0 0
0 0
0 0
0 0
0 0
0 0
0 0
0 0
0 0
0 0
0 1
0 1
0 1
0 1
0 1
0 1
0 1
0 3
0 3
0 3
0 3
0 3
0 3
0 3
0 3
0 3
0 4
0 4
0 4
0 4
0 4
0 4
0 4
0 2
0 2
0 2
0 2
0 2
0 2
0 2
0 2
0 2
0 2
0 2
0 2
0 2
0 2
0 2
0 2
0 2
0 2
0 2
0 2
0 2
0 2
0 2
0 2
0 2
0 2
0 2
0 2
0 2
0 2
0 2
0 2
0 2
0 2
0 2
0 2
0 2
0 2
0 2
0 2
0 2
0 2
0 2
0 2
0 2
0 3
0 3
0 3
0 3
0 2
0 2
0 2
0 2
0 2
0 2
0 2
0 2
0 4
2 4
4 4
4 4
6 4
6 4
6 4
6 4
6 4
6 3
6 3
6 3
6 3
6 3
6 3
6 1
6 1
6 1
6 1
6 1
5 1
4 1
4 1
4 1
2 1
2 1
2 1
2 1
2 1
0 2
0 3
0 3
0 3
0 3
0 3
0 3
0 4
0 4
0 4
0 4
0 4
0 4
0 4
0 4
0 4
0 4
0 4
0 4
0 4
0 4
0 4
0 4
0 4
0 4
0 5
0 5
0 5
0 5
0 5
0 5
0 5
0 4
1 5
1 5
1 5
1 5
1 5
1 5
1 5
1 5
1 5
1 5
1 5
1 5
1 5
1 5
1 5
1 4
0 4
0 4
0 4
0 4
0 4
0 4
0 4
0 4
0 4
0 4
0 4
0 4
0 4
0 4
0 4
0 4
0 4
0 4
0 4
0 4
0 4
0 4
0 4
0 4
0 3
0 2
0 2
0 1
0 1
0 1
0 1
0 1
0 1
0 1
0 1
0 1
0 1
0 1
0 2
0 2
0 2
0 2
0 2
0 2
0 2
0 2
1 2
1 2
1 2
1 1
1 1
1 1
1 1
1 1
1 1
1 0
1 0
1 0
1 0
1 0
1 0
1 0
0 0
0 0
0 0
0 0
0 0
0 0
0 0
0 0
0 0
0 0
0 0
0 0
0 0
0 1
0 1
0 1
0 1
0 1
0 1
0 1
0 1
0 1
1 1
1 1
1 1
1 1
1 1
1 1
1 1
1 1
1 1
1 1
1 1
1 1
1 1
1 1
1 1
0 1
0 1
0 1
0 1
0 1
0 1
0 1
0 1
0 1
0 1
0 1
0 1
0 1
0 1
0 1
0 1
0 1
0 1
0 1
0 1
0 1
0 1
0 1
0 1
0 1
0 1
0 1
0 1
0 1
0 1
0 1
0 1
0 1
0 1
0 1
0 3
0 3
0 3
0 3
0 3
0 3
0 3
0 3
0 3
0 3
0 3
0 3
0 3
0 3
0 2
0 0
0 0
0 0
0 0
0 0
0 0
0 0
0 0
0 0
0 0
0 0
0 0
0 0
0 0
0 0
0 0
0 0
0 0
0 0
0 0
0 1
0 1
0 1
0 1
1 2
1 2
1 2
1 2
1 2
1 2
1 2
1 2
1 2
1 2
1 2
1 2
1 2
1 2
1 2
1 2
1 2
1 2
1 2
1 2
1 2
1 2
1 2
1 2
1 2
1 2
1 2
1 0
1 0
1 0
1 0
1 0
1 0
1 0
1 0
1 0
1 0
1 0
1 0
1 1
1 1
1 1
1 1
1 1
1 1
0 1
0 1
0 1
0 2
0 2
0 2
0 2
0 2
0 3
0 3
0 3
0 3
0 3
0 3
0 3
0 3
0 3
0 3
0 3
0 3
3 4
3 4
3 4
3 5
3 24
3 26
3 30
3 32
3 33
3 33
3 33
3 33
3 33
3 33
3 33
0 33
0 33
0 33
0 33
0 34
0 34
0 34
0 34
0 34
0 34
0 34
0 34
0 34
0 34
0 34
0 34
0 34
0 34
0 34
0 34
0 34
0 34
0 34
0 34
0 34
0 34
0 34
0 34
0 34
0 34
0 34
0 33
0 32
0 32
0 34
0 35
0 36
0 38
0 38
0 38
0 38
0 37
0 37
0 37
0 37
0 36
0 36
0 36
0 36
0 36
0 36
0 36
0 36
0 36
0 36
0 36
0 36
0 36
0 36
0 36
0 36
0 34
1 14
1 13
1 8
1 8
1 8
1 8
1 8
1 8
1 8
1 8
1 8
1 9
1 9
1 10
1 9
1 9
0 9
0 10
0 10
0 10
0 10
0 10
0 10
0 10
0 11
0 11
0 11
0 12
0 12
0 13
0 13
0 13
0 13
0 13
0 13
0 13
0 13
0 13
0 13
0 13
0 14
0 14
0 15
0 14
0 14
0 12
0 12
0 10
0 9
0 9
0 9
0 9
0 9
0 9
0 9
0 9
0 9
0 10
0 10
0 10
0 10
0 10
0 10
0 10
0 10
0 11
0 13
0 13
0 13
0 13
0 13
0 13
0 13
0 13
0 13
0 13
0 13
0 13
0 16
0 17
0 17
0 17
0 17
0 17
0 16
0 16
0 17
0 17
0 17
0 17
0 17
0 17
0 18
0 19
0 19
0 19
0 19
0 18
0 18
0 18
0 18
0 18
0 20
0 20
0 21
0 21
0 21
0 22
0 23
0 31
0 40
0 42
0 52
0 56
0 76
0 81
0 80
0 80
0 86
0 97
0 101
0 101
0 101
0 103
0 103
0 104
0 106
0 106
0 110
0 110
0 119
0 121
0 121
0 121
0 123
0 125
0 127
0 127
0 127
0 128
0 128
0 128
0 128
0 128
0 128
0 128
0 128
0 128
0 131
0 131
0 131
0 128
0 127
0 125
0 124
0 124
0 124
0 124
0 124
0 121
0 121
0 120
0 120
0 120
0 117
0 116
0 115
0 115
0 115
0 115
0 115
0 115
0 115
0 112
0 110
0 89
0 73
0 73
0 73
0 73
0 73
0 73
0 69
0 69
0 69
0 65
0 60
0 50
0 50
0 49
0 49
0 45
0 26
0 26
0 26
0 26
0 25
0 22
0 22
0 22
0 22
0 18
0 18
0 3
0 0
0 0
0 0
0 0
0 0
0 0
0 0
0 0
0 0
0 0
0 0
0 0
0 0
0 0
0 0
0 0
0 0
0 0
0 0
0 0
0 0
0 0
0 0
0 0
0 0
0 0
0 0
0 0
0 0
0 0
0 0
0 0
0 0
0 0
0 0
0 0
0 0
0 0
0 0
0 0
0 0
0 0
0 0
0 0
0 0
0 0
0 0
0 0
0 0
0 0
0 0
0 0
0 0
0 0
0 0
0 0
0 0
1 0
1 0
1 0
1 0
1 0
1 0
1 0
1 0
1 0
1 0
1 0
1 0
1 0
1 0
1 0
1 0
0 0
0 0
0 0
0 0
0 0
0 0
0 0
0 0
0 0
0 0
0 0
0 0
0 0
0 0
0 0
0 0
0 0
0 0
0 0
0 0
0 0
0 0
0 0
0 0
0 0
0 0
0 0
1 0
1 0
1 0
1 0
1 0
1 0
1 0
1 0
1 3
6 3
6 4
6 4
6 4
6 4
6 4
6 4
6 4
6 4
6 4
6 4
6 4
6 4
6 4
6 4
0 4
0 4
0 4
0 4
0 4
0 4
0 4
0 5
0 5
0 5
0 5
0 5
0 5
0 5
0 5
0 5
0 5
0 5
0 5
0 5
0 5
0 5
0 5
0 5
0 5
0 5
0 5
0 5
0 5
0 5
0 5
0 5
0 5
0 5
0 5
0 5
0 5
0 5
0 5
0 5
0 5
0 5
0 5
0 5
0 5
0 5
0 5
0 5
0 5
0 5
0 5
0 5
0 5
0 5
0 5
0 5
0 3
0 1
0 1
0 1
0 1
0 1
0 1
0 1
0 1
0 1
0 1
0 1
0 1
0 1
0 1
0 1
0 1
0 1
0 3
0 3
0 3
0 3
0 3
0 2
0 2
0 2
0 2
0 2
0 2
0 2
0 2
0 2
0 3
0 3
0 3
0 3
0 3
0 3
0 3
0 3
0 3
0 3
0 3
0 3
0 3
0 3
0 3
0 3
0 2
0 2
0 2
0 2
0 2
0 9
0 9
1 9
1 9
1 9
1 9
1 9
1 9
1 9
1 9
1 9
1 9
1 9
1 9
1 9
1 2
1 16
0 17
0 17
0 17
0 17
0 17
0 17
0 17
0 17
0 17
0 17
0 17
0 17
0 17
0 17
0 3
0 3
0 3
0 3
0 3
0 3
0 3
0 1
0 1
0 1
0 1
0 1
0 1
0 1
0 1
0 1
0 1
0 3
0 3
0 3
0 3
0 3
0 3
0 3
0 3
0 3
1 3
1 3
1 3
1 3
1 3
1 3
1 3
1 3
1 1
1 1
1 1
1 1
1 1
1 1
1 1
1 1
1 1
0 1
0 1
0 1
0 1
0 1
0 1
0 1
0 1
0 1
0 1
0 1
0 1
0 1
0 1
0 1
0 1
0 0
0 0
0 0
0 0
0 0
0 0
0 0
0 0
0 0
0 0
0 0
0 0
0 0
0 0
0 0
0 0
0 0
0 0
0 0
0 0
0 0
0 0
0 0
0 0
0 0
0 0
0 0
0 0
0 0
0 0
0 0
0 0
0 0
0 0
0 0
0 0
0 0
0 0
0 0
0 0
0 0
0 0
0 0
0 0
0 0
0 0
0 1
0 1
0 1
0 1
0 1
0 1
0 1
0 1
0 1
0 1
0 1
0 1
0 1
0 1
0 1
1 0
1 0
1 0
1 0
1 0
1 0
1 0
1 0
1 0
1 0
1 0
1 0
2 0
2 0
2 0
2 0
2 0
2 0
2 0
2 0
2 0
2 0
2 0
2 0
2 0
2 0
2 0
2 0
2 0
2 0
2 0
2 0
2 0
2 0
2 0
2 0
2 0
3 0
3 0
3 0
3 1
3 1
3 1
3 1
3 1
3 1
3 1
3 1
3 1
3 1
3 1
3 1
2 1
2 1
2 1
2 1
2 1
2 1
2 1
2 1
2 1
2 1
2 1
2 1
2 1
2 1
2 1
2 1
2 1
8 1
8 1
8 1
8 1
19 1
19 1
19 1
19 1
19 1
19 1
19 1
19 1
19 1
19 1
19 1
19 1
18 1
18 1
18 1
0 1
0 1
0 1
0 1
0 1
0 1
0 1
0 1
0 1
0 1
0 1
0 1
0 1
0 1
0 1
0 1
0 1
0 1
0 1
0 2
0 2
0 2
0 2
0 2
0 2
0 1
0 1
0 1
0 1
0 1
0 1
0 1
0 1
0 1
0 1
0 1
0 1
0 1
0 1
0 1
0 1
0 1
0 1
0 1
0 1
0 1
0 1
0 1
0 1
0 1
0 1
0 1
0 1
0 1
0 1
0 1
0 1
0 7
0 7
0 14
0 14
1 16
1 17
1 17
1 17
1 17
1 17
1 17
1 17
2 17
2 17
2 17
2 17
2 18
2 18
2 18
2 18
2 18
2 18
2 18
2 18
2 18
2 18
2 18
1 18
1 18
1 18
1 18
1 18
1 18
1 18
1 18
1 11
1 11
1 11
1 5
1 5
1 5
1 5
1 5
1 5
1 5
1 5
1 5
1 5
1 5
1 5
1 5
1 5
1 5
1 5
1 5
1 5
1 5
1 5
1 5
1 5
1 5
1 5
5 5
5 5
5 5
5 5
5 5
5 5
5 5
5 5
5 5
5 5
5 5
5 5
5 5
5 2
5 2
0 1
0 1
0 1
0 1
0 1
0 3
0 3
0 3
0 3
0 3
0 3
0 3
0 2
0 2
0 2
0 2
0 2
0 2
0 2
0 2
0 2
0 2
0 2
0 2
0 2
0 2
0 2
0 2
0 3
0 3
0 3
0 3
0 3
0 3
0 3
0 3
0 3
0 3
0 3
0 3
0 3
0 3
0 3
0 3
0 3
0 3
0 4
0 4
0 4
0 4
0 4
0 4
0 4
0 4
0 4
0 4
0 4
0 4
0 4
0 4
0 4
0 4
0 4
0 4
0 4
0 4
0 5
0 5
0 5
0 5
0 5
0 5
0 5
0 5
0 5
0 5
0 5
0 5
0 3
0 3
0 3
0 3
0 3
0 3
0 3
0 3
0 3
0 3
0 3
0 3
0 3
0 3
0 3
2 3
2 3
2 3
2 3
2 3
2 3
2 3
2 3
2 2
2 2
2 2
2 2
2 2
2 2
2 2
0 2
0 2
0 2
0 2
0 2
0 2
0 2
0 2
0 2
0 2
0 2
0 1
0 1
0 1
0 1
0 1
0 1
0 1
0 1
0 1
0 1
0 1
0 1
0 1
0 1
0 1
0 1
0 2
0 2
0 2
0 2
0 1
0 1
0 1
0 1
0 1
0 1
0 1
0 1
0 1
0 1
0 1
0 1
0 1
0 1
0 1
0 1
0 1
0 1
0 1
0 1
0 1
0 1
0 1
0 1
0 1
0 1
0 1
0 1
0 1
0 1
0 1
0 1
0 1
0 1
0 1
0 1
0 1
0 1
0 1
0 1
0 1
0 1
0 1
0 1
0 1
0 1
0 1
0 1
0 1
0 1
0 1
0 1
0 1
0 1
0 1
0 1
0 1
0 1
0 1
0 1
0 1
0 1
0 1
0 1
1 3
1 3
1 4
1 4
1 4
1 3
1 3
1 3
1 3
1 3
1 3
1 3
1 3
1 3
1 3
0 3
0 3
0 3
0 3
0 3
0 3
0 3
0 3
0 3
0 3
0 3
0 3
0 3
0 3
0 3
0 3
0 3
0 3
0 3
0 3
0 3
0 3
0 3
0 3
0 3
0 3
0 3
0 3
0 3
0 3
0 3
0 3
0 3
0 3
0 3
0 3
0 3
0 3
0 3
0 3
0 3
0 3
0 3
0 3
0 3
0 3
0 3
0 3
0 3
0 3
0 3
0 3
0 3
0 3
0 3
0 3
0 3
0 2
0 1
0 1
0 0
0 0
0 0
0 0
0 0
0 0
0 0
0 0
0 0
0 0
0 0
0 0
0 0
0 0
0 0
0 0
0 0
0 0
0 0
0 1
0 1
0 1
0 1
0 1
1 1
1 1
1 1
1 1
1 1
1 1
1 1
1 1
1 1
1 2
1 2
1 2
1 2
1 2
1 3
1 3
1 4
1 4
1 4
1 4
1 4
1 4
1 4
1 4
1 4
1 4
1 4
1 4
1 4
1 4
1 4
1 4
1 4
1 4
1 4
1 4
1 4
1 4
1 4
1 4
1 4
1 4
1 4
1 4
1 4
1 4
1 4
1 4
1 4
1 4
1 4
1 4
1 4
1 4
1 4
1 4
1 4
1 4
1 4
1 4
1 4
1 4
1 4
1 4
2 4
2 4
2 4
2 4
2 3
2 3
2 3
3 3
3 3
2 3
2 3
2 3
2 3
2 3
2 4
2 4
2 4
2 4
2 3
2 3
2 3
2 3
2 3
2 1
2 1
2 1
2 1
2 1
2 1
2 1
2 1
2 1
2 1
2 1
2 1
2 1
4 2
4 2
6 13
6 26
6 27
6 45
6 57
6 91
6 97
6 104
6 109
6 113
6 117
6 117
6 117
6 118
6 118
6 124
6 123
6 126
6 126
6 127
6 127
6 127
6 127
6 127
6 129
6 130
6 132
6 141
7 142
7 143
7 143
7 143
7 143
8 143
8 143
7 145
7 145
7 145
7 145
7 145
5 139
5 138
3 136
3 136
1 135
1 135
1 225
1 226
1 227
1 221
1 214
1 212
1 212
1 212
1 212
1 211
1 210
1 211
1 211
1 211
1 211
1 211
1 211
1 211
1 211
1 211
1 226
1 226
1 226
1 225
1 226
1 225
1 225
1 213
1 205
1 205
1 194
1 177
1 143
1 143
1 139
1 138
1 134
1 132
1 132
1 132
1 132
1 132
1 125
1 125
1 122
1 122
1 121
1 121
1 121
1 121
1 122
1 121
1 121
1 123
1 113
1 112
1 112
1 112
1 112
1 112
0 112
0 112
0 112
0 112
0 112
0 112
0 111
0 111
0 110
0 110
0 109
0 109
0 108
0 18
0 18
0 18
0 18
0 17
0 17
0 17
0 17
0 17
0 17
0 17
1 17
1 18
1 18
1 18
1 18
1 18
1 18
1 18
1 18
1 3
1 3
1 3
1 3
1 2
1 2
1 2
1 2
1 2
1 2
1 2
1 2
1 2
1 2
1 2
1 2
1 2
1 3
1 3
1 3
1 3
1 3
1 3
1 3
1 3
1 3
1 3
1 3
1 3
1 3
1 3
1 3
2 18
2 18
2 18
2 18
2 18
2 18
2 18
2 18
2 19
2 19
2 20
2 20
2 20
2 20
2 20
2 20
2 20
2 20
2 20
2 20
2 20
2 20
2 20
2 20
2 20
2 20
2 20
2 20
2 20
2 20
2 20
2 20
1 18
1 18
1 18
1 18
1 18
1 19
1 19
1 19
1 19
1 19
1 19
1 19
1 19
1 19
1 19
1 19
1 19
1 19
1 19
1 19
1 19
1 19
1 19
1 19
1 19
1 19
1 19
1 19
1 19
1 19
1 19
1 19
1 19
1 20
1 20
1 20
1 20
1 20
1 20
1 20
1 20
0 4
0 4
0 4
2 4
2 4
2 5
2 4
2 4
2 4
2 4
2 4
2 4
2 4
2 4
2 6
2 6
2 6
2 6
1 6
1 6
0 6
0 6
0 6
0 6
0 6
0 8
0 8
0 18
0 20
1 28
1 38
1 42
1 66
1 69
1 69
1 73
1 73
1 79
1 79
1 85
1 85
1 85
1 85
1 139
0 139
0 139
0 139
0 139
0 139
0 377
0 377
0 377
0 374
0 406
0 406
0 406
0 406
0 406
0 405
0 405
0 414
0 423
0 427
0 454
0 594
0 633
0 664
0 700
0 729
0 756
0 759
0 761
0 761
0 763
0 761
0 759
0 761
0 761
0 760
0 760
0 760
0 760
0 760
0 760
0 760
0 760
0 760
0 758
0 756
0 756
0 756
0 756
0 756
0 756
0 756
0 756
0 756
0 756
0 756
0 756
0 746
0 743
0 740
0 731
0 723
0 694
0 692
0 692
0 692
0 692
0 691
0 690
0 666
0 667
0 650
0 648
0 307
0 303
0 303
0 303
0 303
0 303
0 303
0 16
0 14
0 14
0 10
0 10
0 10
0 10
0 9
0 10
0 10
0 10
0 10
0 10
0 8
0 5
0 4
0 4
0 4
0 4
0 4
0 4
0 4
0 4
0 4
0 4
0 4
0 4
0 4
0 4
0 4
0 4
0 4
0 4
0 4
0 4
0 4
0 4
0 5
0 5
0 5
0 5
0 5
0 5
0 5
0 5
0 5
0 5
0 5
0 5
0 5
0 5
0 5
0 5
0 5
0 5
0 5
0 5
0 5
0 5
0 5
0 5
0 5
0 5
0 4
1 5
1 4
1 4
1 4
1 6
1 6
1 6
1 6
1 6
1 6
1 6
1 6
1 6
1 6
1 6
1 6
0 6
0 5
0 4
0 3
0 3
0 3
0 3
0 3
0 3
0 3
0 3
0 3
0 3
0 4
0 6
0 7
0 7
0 7
0 7
0 7
0 7
0 7
0 7
0 7
0 7
0 7
0 7
0 7
0 7
0 7
0 6
0 6
0 7
0 7
0 8
0 8
0 7
0 8
0 8
0 8
0 7
0 7
0 7
0 7
0 7
0 7
0 7
0 7
0 7
0 7
0 7
0 7
0 9
0 8
0 8
0 8
0 8
0 8
0 8
0 8
0 8
0 8
0 8
0 9
0 9
0 9
0 9
0 7
0 7
0 7
0 7
0 7
0 7
0 7
0 7
0 7
0 6
0 6
0 6
0 6
0 6
0 6
0 6
0 6
0 6
0 6
0 6
0 4
0 4
0 4
0 4
0 4
0 4
0 4
0 4
0 4
0 4
0 4
0 4
0 4
0 4
0 4
0 7
0 7
0 7
0 6
0 6
0 5
0 5
0 5
0 4
0 4
0 4
0 4
0 4
0 4
0 4
0 4
0 4
0 6
0 6
0 6
0 8
0 8
0 10
0 10
0 16
0 16
0 16
0 22
0 69
0 87
0 91
0 99
0 100
0 100
0 99
0 99
0 99
0 99
0 99
0 99
0 99
0 100
0 100
0 100
0 100
0 100
0 100
0 100
0 100
0 100
0 100
0 105
0 105
0 107
0 107
0 107
0 107
0 105
0 105
0 105
0 105
0 107
0 141
0 141
0 144
0 144
0 145
0 145
0 150
0 152
0 153
0 158
0 159
0 156
0 156
0 158
0 159
0 160
0 162
0 162
0 162
0 162
0 162
0 162
0 157
0 158
0 158
0 158
0 153
0 153
0 153
0 153
0 153
0 153
0 155
0 155
0 155
0 159
0 162
0 167
0 156
0 107
0 94
0 93
0 95
0 99
0 100
0 100
0 100
0 100
0 100
0 100
0 100
0 100
0 99
0 99
0 102
0 105
0 106
0 106
0 108
0 107
0 107
0 107
0 97
0 97
0 92
0 92
0 92
0 92
0 92
0 92
0 92
0 92
0 92
0 48
0 48
0 47
0 48
0 37
0 38
0 38
0 39
0 39
0 39
0 39
0 38
0 38
0 38
0 38
0 38
0 38
0 38
0 38
0 38
0 38
0 38
0 37
0 37
0 37
0 38
0 38
0 38
0 38
0 37
0 37
0 41
0 39
0 46
0 49
0 50
0 51
1 52
1 108
2 163
2 226
2 228
2 247
2 256
2 256
2 263
2 265
2 266
2 271
2 271
2 272
2 276
1 280
1 283
1 280
1 282
1 282
1 282
1 282
1 283
1 283
1 283
1 283
1 283
1 282
1 282
1 282
1 284
1 286
1 290
1 290
1 290
1 289
1 289
1 289
1 289
1 289
1 289
1 288
1 288
1 289
1 294
1 293
1 292
1 291
1 296
3 323
5 351
5 362
6 394
6 396
6 398
6 399
6 398
6 394
6 394
6 397
6 398
6 397
6 397
6 398
6 401
6 411
6 416
6 409
6 418
6 354
6 269
6 241
6 233
6 232
6 232
5 210
5 195
5 190
5 184
5 182
5 180
5 180
5 180
5 177
5 172
5 172
5 171
5 169
5 165
5 165
5 165
5 163
5 162
5 162
5 159
5 159
5 159
5 159
10 211
10 212
10 212
10 212
11 212
11 208
12 205
12 196
12 194
12 194
12 194
13 194
13 194
13 195
13 195
13 195
13 195
13 195
13 193
13 192
13 189
13 190
13 190
13 185
11 153
13 133
13 124
12 104
15 104
15 104
17 102
15 102
15 102
15 102
15 102
15 102
15 101
15 101
15 100
15 96
15 86
15 85
15 90
15 81
15 82
15 82
15 81
15 82
15 82
15 81
15 84
15 86
15 86
15 86
15 86
15 86
15 86
15 86
15 86
15 86
15 86
15 86
15 86
15 86
15 87
15 87
15 86
15 85
15 85
15 84
15 84
15 84
13 83
4 31
4 31
4 30
4 30
4 38
0 37
0 38
0 38
0 38
0 38
0 40
0 44
0 46
0 45
0 45
0 45
0 45
0 45
0 45
0 45
0 45
0 44
0 46
0 46
0 46
0 46
0 46
0 46
0 47
0 47
0 47
0 47
0 47
0 47
0 43
0 42
0 42
0 44
0 44
0 44
0 44
0 42
0 37
0 36
0 35
0 35
0 35
0 35
0 35
0 35
0 32
0 25
0 25
0 25
0 25
2 25
2 25
2 25
2 25
2 25
2 26
2 27
2 27
2 27
2 27
2 28
2 28
2 28
2 28
2 28
0 27
0 27
0 27
0 27
0 27
0 29
0 29
0 21
0 20
0 20
0 20
0 20
1 20
1 18
1 11
1 10
1 8
1 8
1 8
1 8
1 8
1 8
1 8
1 8
1 8
1 8
1 8
1 8
1 8
1 8
1 9
1 8
1 8
1 11
1 16
1 16
1 17
1 17
1 17
1 19
2 26
2 28
2 28
2 28
2 27
3 27
3 29
3 29
3 29
3 29
3 29
3 29
3 42
3 43
3 43
3 44
3 44
3 44
3 44
3 44
3 44
3 46
3 47
3 46
3 45
3 45
3 46
3 46
3 46
3 46
3 46
3 46
3 46
3 46
3 46
4 52
4 52
4 52
4 49
4 49
4 49
4 49
4 48
4 48
4 48
3 48
3 48
3 48
3 48
3 48
3 48
3 48
3 48
3 49
3 49
3 49
3 49
3 49
3 49
3 49
3 49
3 49
3 49
3 48
3 48
3 48
3 45
3 39
3 39
3 38
3 38
3 38
3 37
2 29
2 28
2 28
1 28
1 28
1 28
1 26
1 26
1 26
1 26
1 26
1 26
1 12
15 11
15 11
15 11
15 11
15 11
15 11
15 11
15 11
15 9
15 8
15 8
15 8
15 8
15 7
15 7
15 7
15 7
1 7
1 7
1 7
1 7
1 7
0 1
0 1
0 1
0 1
0 1
0 1
0 1
0 1
0 1
0 1
0 1
0 1
0 1
0 1
0 1
0 1
0 1
0 1
0 0
0 0
0 0
0 0
0 0
0 0
0 0
0 0
0 0
0 0
0 0
0 0
0 0
0 0
0 0
0 0
0 0
0 0
0 0
0 0
0 0
0 0
0 0
0 0
0 2
0 2
0 2
0 2
0 2
0 2
0 2
0 2
0 2
0 2
0 2
0 2
0 2
0 2
0 2
0 2
0 2
0 2
0 2
0 2
0 2
0 2
0 2
0 2
0 3
0 4
0 4
0 4
0 4
0 4
0 4
0 4
0 4
0 4
0 4
0 5
0 5
0 5
0 5
0 5
0 4
0 4
0 4
0 4
0 4
0 4
0 4
1 4
1 4
1 4
1 4
1 4
1 4
1 4
1 4
1 4
1 4
1 4
1 5
1 5
1 5
1 5
0 5
0 5
0 5
0 5
0 5
0 5
0 5
0 5
0 5
0 5
0 5
0 3
0 3
0 3
0 3
0 3
0 3
0 3
0 3
0 3
0 3
0 3
0 3
0 3
0 3
0 3
0 7
0 7
0 8
0 8
0 10
0 10
0 10
0 10
0 10
0 9
0 10
0 11
0 12
0 12
0 12
0 12
0 12
0 13
0 13
0 33
0 36
0 36
0 36
0 36
0 36
0 36
0 36
0 36
0 37
0 37
0 37
0 37
0 37
0 37
0 37
0 37
0 37
0 37
0 37
0 37
0 37
0 37
0 37
0 36
0 36
0 36
0 36
0 36
0 36
0 36
0 36
0 36
0 36
0 36
0 37
0 39
0 39
0 39
0 40
0 41
0 41
0 41
0 41
0 42
0 41
0 41
0 41
0 41
0 41
0 41
0 41
0 41
0 41
0 37
0 37
0 37
0 36
0 36
0 33
0 33
0 33
0 33
0 33
0 33
1 65
1 66
1 68
1 72
1 72
1 72
1 72
1 72
1 50
1 49
1 49
1 50
1 52
1 57
1 62
1 66
0 66
0 65
0 65
0 67
0 69
0 69
0 69
0 69
0 74
0 103
0 130
0 132
0 136
0 137
0 140
0 150
0 189
0 199
0 213
1 235
1 235
1 256
1 265
1 267
1 288
1 290
1 294
1 296
1 294
1 294
1 292
1 291
1 291
1 291
0 291
0 291
0 291
0 291
0 291
0 291
0 291
0 291
0 291
1 292
2 299
2 300
2 300
2 300
2 299
2 298
2 298
2 298
2 299
2 299
2 299
2 299
2 299
2 140
2 140
2 136
2 133
2 13
2 13
2 13
2 13
2 13
2 13
2 13
2 13
3 12
4 12
4 13
4 13
4 13
5 13
6 13
7 13
7 13
7 13
7 14
7 14
7 14
7 13
7 13
7 13
7 13
7 12
7 12
7 11
7 11
7 11
7 11
7 11
7 11
6 11
7 11
7 11
7 11
7 11
7 11
7 11
7 11
7 12
7 12
7 16
7 16
7 16
7 16
7 15
7 15
6 15
6 15
6 15
6 15
4 15
4 15
3 14
2 8
2 8
2 8
2 8
2 8
3 8
3 8
1 8
1 7
1 7
1 7
1 7
1 7
1 7
1 7
1 7
1 7
1 7
1 7
1 7
1 7
1 7
1 7
1 7
1 7
1 7
1 7
1 6
1 6
1 6
1 6
1 6
1 6
1 6
1 6
1 5
1 5
1 5
1 5
1 5
1 5
1 5
1 5
1 5
1 5
1 5
1 5
1 5
1 6
1 6
1 6
1 6
1 6
1 6
1 6
5 11
5 12
5 12
5 11
5 11
5 7
5 7
5 7
5 7
5 7
5 7
5 7
5 7
5 7
5 7
5 7
5 7
5 7
5 7
5 7
5 7
5 7
4 7
4 7
4 7
4 7
4 8
5 12
6 12
9 12
11 12
11 12
11 13
12 13
12 14
13 15
13 15
13 15
13 15
13 15
13 15
13 15
13 15
13 15
13 15
13 15
13 15
13 15
13 14
13 14
13 20
13 20
13 20
13 20
13 20
13 20
13 20
13 20
13 20
13 20
13 21
13 21
13 21
13 21
13 21
13 21
13 20
13 21
13 21
13 21
13 21
13 21
13 21
9 16
9 15
9 15
9 15
9 15
9 15
9 15
9 15
9 16
9 15
9 15
9 15
9 15
9 15
9 15
9 15
9 15
9 15
9 15
9 17
9 17
9 20
9 20
9 20
9 20
9 30
9 29
7 25
6 28
3 28
1 30
1 30
1 31
1 31
0 29
0 29
0 29
0 29
0 29
0 29
0 29
0 29
0 28
0 28
0 28
0 28
0 28
0 28
0 26
0 26
0 23
0 23
0 24
0 24
0 24
0 24
0 24
0 24
0 24
0 24
0 23
0 23
0 23
0 20
0 17
0 17
0 17
0 17
0 17
0 17
0 17
0 17
0 17
0 17
0 17
0 17
0 18
0 18
0 18
0 18
0 18
1 17
1 18
2 25
2 25
2 25
2 25
3 35
3 35
3 37
3 37
3 36
3 36
3 35
3 33
3 34
3 34
2 32
2 23
2 23
2 23
2 22
2 22
2 22
2 22
2 22
2 22
2 22
2 24
2 22
2 21
2 21
2 21
2 21
2 21
2 21
2 21
2 21
2 21
2 21
2 21
2 21
2 21
2 21
2 21
2 20
2 20
2 20
2 21
2 22
2 23
2 25
2 29
2 28
2 28
2 28
2 28
2 28
2 28
2 28
2 28
2 28
2 28
1 28
1 28
1 25
1 25
1 24
0 21
0 20
0 19
0 19
0 19
0 19
0 24
0 24
0 28
0 29
0 29
0 29
0 23
0 23
0 24
0 24
0 24
0 24
0 23
0 23
0 23
0 23
0 23
0 23
0 23
0 23
0 21
0 21
0 21
0 21
0 21
0 21
0 21
0 25
0 25
0 25
0 25
0 25
0 25
0 25
0 25
0 25
0 25
0 25
0 25
0 25
0 25
0 24
0 24
0 24
0 24
0 24
0 24
0 24
0 23
0 22
0 17
0 17
0 17
0 17
0 17
0 17
0 17
0 17
0 17
0 17
0 17
0 17
0 17
0 17
0 17
0 17
0 17
0 18
0 19
0 19
0 19
0 19
0 19
0 14
0 18
0 15
0 15
0 16
0 19
0 18
0 18
0 17
0 17
0 17
0 17
0 17
0 17
0 17
0 17
0 17
0 17
0 17
0 17
0 17
0 17
0 18
0 18
0 18
0 18
0 18
0 14
0 14
0 13
0 13
0 13
0 13
0 13
0 14
0 14
0 14
0 14
0 14
0 14
0 14
0 14
0 14
0 15
0 15
0 15
0 15
0 13
0 13
0 13
0 11
0 11
0 11
0 11
0 11
0 11
0 11
0 10
0 10
0 10
0 57
0 57
0 56
0 56
0 58
0 58
0 58
0 56
0 56
0 56
0 56
0 56
0 56
0 57
0 63
0 63
0 14
0 14
0 14
0 17
0 17
0 17
0 17
0 17
0 17
0 17
0 16
0 16
0 17
0 17
0 17
0 17
0 17
0 17
0 19
0 18
0 27
0 30
0 30
0 30
0 30
0 30
0 30
0 30
0 30
0 30
0 30
0 29
0 29
0 30
0 30
0 30
0 30
0 31
0 31
0 30
0 30
0 30
0 30
0 30
0 30
0 30
0 30
0 30
0 31
0 31
0 31
0 31
0 31
0 31
0 31
0 31
0 31
0 31
0 31
0 31
0 31
0 32
0 32
0 32
0 32
0 32
0 32
0 32
0 32
0 32
0 31
0 24
0 22
0 19
0 19
0 19
0 19
0 19
0 18
0 18
0 18
0 18
0 18
0 18
0 18
0 18
0 18
0 18
0 18
0 18
0 18
0 16
0 14
0 1
0 1
0 1
0 1
0 2
0 2
0 3
1 10
1 10
1 10
1 15
1 15
1 16
2 16
2 16
2 17
2 18
2 18
2 18
2 18
2 18
2 18
2 18
2 18
2 18
2 18
2 18
2 18
2 17
2 17
2 17
2 17
2 17
2 17
2 17
2 17
2 17
2 17
2 17
2 17
2 17
2 17
2 17
2 17
2 17
2 17
2 17
2 17
2 17
2 17
2 17
2 17
2 17
2 17
2 17
2 15
2 15
2 13
2 11
2 11
2 11
2 11
2 11
2 11
2 11
2 11
2 11
2 11
2 11
2 11
2 11
2 11
1 6
1 6
1 6
1 6
0 1
0 1
0 1
0 1
0 1
0 1
0 1
0 1
0 0
0 0
0 0
0 0
0 0
0 0
0 0
0 0
0 1
0 1
1 1
1 1
1 1
298 1
299 1
299 1
299 1
299 1
299 1
299 1
299 1
299 1
299 1
299 1
304 2
304 3
303 4
303 4
303 4
5 4
6 4
6 4
6 4
6 4
6 4
6 4
6 4
6 4
6 4
6 3
6 3
6 3
6 3
6 3
6 3
6 3
6 3
6 3
6 3
6 3
6 3
6 3
6 3
6 3
6 3
6 3
6 3
6 3
7 3
7 3
7 3
7 3
7 3
7 3
7 3
7 3
7 3
7 3
7 3
7 3
14 3
15 3
22 3
23 3
24 3
27 3
28 3
28 3
38 3
38 3
38 3
39 3
39 3
39 2
40 1
41 1
72 1
72 1
72 1
72 1
72 1
75 1
75 1
75 1
75 1
75 1
75 1
69 0
69 0
69 0
69 0
69 0
69 0
68 0
68 0
68 0
74 0
79 0
84 0
84 0
88 0
92 0
92 0
96 0
96 0
96 0
96 0
98 0
98 0
98 0
98 0
98 0
98 0
98 0
98 0
98 0
98 0
98 0
98 0
98 0
98 0
98 0
99 0
99 0
100 0
100 0
100 0
100 0
102 0
105 0
106 0
106 0
106 0
98 0
98 0
90 0
87 0
85 0
84 0
83 0
83 0
73 0
73 0
73 0
73 0
73 0
71 0
65 0
64 0
29 0
29 0
29 0
18 0
18 0
12 0
12 0
9 0
9 0
9 0
9 0
9 0
9 0
9 0
9 0
9 0
9 0
9 0
9 0
9 0
9 0
8 0
8 0
8 0
7 0
7 0
7 0
7 0
7 0
7 0
7 0
7 0
7 0
7 0
7 0
7 0
7 0
7 0
7 0
7 0
7 0
7 0
7 0
7 0
9 0
8 0
7 0
4 0
3 0
4 0
4 0
5 0
5 0
5 0
5 0
5 0
5 0
5 0
5 0
5 0
5 0
5 0
5 0
5 0
5 0
5 0
5 0
5 0
5 0
5 0
5 0
5 0
5 0
5 0
5 0
5 0
5 0
5 0
5 0
5 0
5 0
5 0
5 0
5 0
5 0
5 0
5 0
5 0
5 0
5 0
5 0
5 0
5 0
5 0
5 0
5 0
5 0
5 0
5 0
5 0
5 0
5 0
5 0
49 0
49 0
50 0
50 0
50 0
50 0
50 0
50 0
50 0
50 0
50 0
50 0
50 0
50 0
48 0
4 0
4 0
3 0
0 0
1 0
1 0
1 0
1 0
1 0
1 0
1 0
1 0
1 0
1 0
1 0
2 0
2 0
2 0
2 0
2 0
2 0
2 0
2 0
2 0
2 0
2 0
2 0
2 0
2 0
2 0
2 0
2 0
2 0
2 0
2 0
2 0
2 0
2 0
2 0
2 0
2 0
2 0
2 0
2 0
2 0
2 0
2 0
2 0
2 0
2 0
2 0
2 0
2 0
2 0
2 0
2 0
2 0
2 0
2 0
2 0
2 0
2 0
2 0
2 0
2 0
2 0
2 0
2 0
2 0
2 0
2 0
2 0
2 0
2 0
2 0
2 0
2 0
1 0
1 0
1 0
1 0
1 0
1 0
1 0
1 0
0 0
0 0
0 0
0 0
0 0
0 1
0 1
0 3
0 3
0 4
0 7
0 8
0 13
0 16
0 16
0 17
0 17
0 17
0 23
0 23
0 23
0 23
8 25
8 25
8 25
8 25
8 25
8 29
8 31
8 31
8 39
8 39
8 39
8 41
8 41
8 42
8 42
0 41
0 41
0 41
0 41
0 41
0 42
0 42
0 47
0 49
0 53
0 53
0 53
0 53
0 53
0 53
0 53
0 53
0 53
0 53
0 53
0 53
0 53
0 53
0 53
0 53
0 53
0 53
0 53
0 53
0 53
0 53
0 49
0 46
0 42
0 42
0 41
0 41
0 41
0 41
0 41
0 41
0 41
0 41
0 40
0 40
0 39
0 39
0 37
0 30
0 28
0 28
0 28
0 28
0 28
0 28
0 28
0 29
0 30
0 30
0 29
0 28
0 30
0 30
0 30
0 32
0 35
0 27
0 27
0 27
0 27
0 25
0 24
0 24
0 23
0 25
0 33
0 36
0 37
0 36
0 35
0 29
0 27
0 25
0 25
0 25
0 25
0 25
0 25
0 25
0 25
0 26
0 27
0 27
0 29
0 29
0 27
0 27
0 27
0 27
0 27
0 27
0 27
0 27
0 27
0 27
0 27
0 28
0 28
0 29
0 29
0 28
0 28
0 28
0 28
0 26
0 26
0 26
0 26
0 26
0 28
0 28
0 28
0 29
0 29
0 29
0 31
0 35
0 59
0 66
0 78
0 84
0 83
0 85
0 83
0 80
0 80
0 79
0 78
0 76
0 76
0 76
0 77
0 77
0 77
0 77
0 77
0 78
0 79
0 79
0 79
0 79
0 79
0 79
0 79
0 79
0 79
0 79
0 79
0 79
0 79
0 79
0 79
0 78
0 76
0 77
0 77
0 73
0 73
0 73
0 73
0 73
0 73
0 73
0 77
0 77
0 77
0 77
0 77
0 77
0 73
0 68
0 65
0 65
0 62
0 62
0 62
0 62
0 62
0 62
0 62
0 62
0 62
0 62
0 62
0 62
0 58
0 58
0 54
0 54
0 47
0 19
0 13
0 9
0 5
0 5
0 5
0 5
0 5
0 5
0 7
0 7
0 7
0 7
0 7
0 6
0 6
0 6
0 6
0 7
0 7
0 7
0 7
0 7
0 7
0 7
0 7
0 7
0 7
0 7
0 7
0 7
0 7
0 7
0 9
0 9
0 9
0 9
0 9
0 9
0 9
0 9
0 9
0 9
0 9
0 9
0 9
0 5
0 5
0 5
0 5
0 5
0 5
0 5
0 5
0 5
0 5
0 5
0 5
0 5
0 5
0 5
0 5
0 5
0 8
0 8
0 8
0 8
0 8
0 8
0 8
0 8
0 8
0 13
0 13
0 13
0 13
0 13
0 13
0 13
0 13
0 13
0 13
0 11
0 11
0 11
0 11
0 11
0 11
0 11
0 11
0 11
0 10
0 10
0 10
0 10
0 10
0 10
0 10
0 10
0 10
0 9
0 9
0 9
0 9
0 9
0 9
0 8
0 8
0 8
0 8
0 8
0 8
0 8
0 9
0 9
0 9
0 9
5 9
5 9
5 9
5 9
5 9
5 9
5 9
5 9
5 9
5 10
5 11
5 11
5 11
5 11
5 11
0 11
0 11
0 11
0 11
0 8
0 8
0 8
1 8
1 8
1 8
1 8
1 8
1 8
1 3
1 3
1 3
1 3
1 3
1 3
1 3
1 3
1 3
0 3
0 3
0 3
0 3
0 3
0 3
0 3
1 3
1 3
1 3
1 3
1 3
1 3
1 3
1 3
1 3
1 3
1 3
1 3
1 4
1 4
1 4
1 4
1 4
1 4
1 4
1 4
1 4
1 4
1 4
1 3
1 3
1 3
1 3
1 3
1 3
1 3
1 3
1 3
1 3
1 3
1 3
1 3
1 3
1 3
1 2
1 1
1 1
1 1
1 1
21 1
21 1
21 1
21 1
21 1
21 1
21 1
21 1
21 2
21 2
21 2
21 2
21 2
21 2
21 2
21 2
14 2
14 2
1 2
1 2
1 2
1 2
1 2
1 2
1 2
1 2
1 3
1 6
1 6
1 6
0 6
0 7
0 8
0 9
0 10
0 10
0 11
0 11
0 11
0 11
0 11
0 11
0 10
0 10
0 10
0 10
0 10
0 10
0 10
0 10
0 10
0 10
0 10
0 10
0 10
0 10
0 10
0 10
0 10
0 10
0 10
0 10
0 10
0 10
0 10
0 10
0 11
0 11
0 11
0 11
0 11
0 11
0 11
0 11
0 11
0 11
0 11
0 11
0 11
0 11
0 11
0 10
0 10
0 17
0 17
0 16
0 16
0 16
0 16
0 16
0 16
0 16
0 16
0 16
0 16
0 16
0 16
0 16
0 15
0 15
0 12
0 6
0 6
0 7
0 7
1 6
1 5
1 5
1 5
1 4
1 4
1 4
1 4
1 4
1 4
1 4
1 4
1 4
1 4
1 4
1 6
1 6
1 6
2 6
2 6
2 6
2 6
2 6
2 6
2 6
2 6
2 6
2 6
2 6
2 6
2 6
2 6
2 6
2 6
1 6
1 6
1 6
1 6
1 6
1 6
1 6
1 6
1 6
1 6
1 6
1 6
1 6
1 6
1 6
1 5
1 5
1 5
1 5
1 5
1 6
1 6
1 6
1 6
1 6
1 6
1 6
1 9
1 10
1 17
1 17
1 17
1 17
1 16
1 15
1 15
1 15
1 14
0 15
0 15
0 15
0 15
0 15
0 15
0 17
0 17
0 19
0 19
0 19
0 19
0 19
0 19
0 19
0 19
0 17
0 17
0 17
0 17
0 17
0 17
0 17
0 17
0 17
0 17
0 16
0 16
0 16
0 16
0 16
0 15
0 15
0 15
0 15
0 15
0 15
0 15
0 15
0 15
0 15
0 15
0 15
0 15
0 15
0 15
0 15
0 15
0 15
0 15
0 15
0 15
0 15
0 15
0 15
0 14
0 14
0 14
0 14
0 14
0 14
0 14
0 10
0 10
0 1
0 1
0 1
0 1
0 0
0 0
0 0
0 1
0 1
0 1
0 1
0 1
0 1
0 1
0 1
0 1
7 1
21 2
21 2
21 2
21 2
21 2
21 2
21 2
21 2
21 2
21 2
21 2
21 2
21 2
21 2
14 2
14 2
0 1
0 1
0 1
0 1
0 1
0 1
0 1
0 1
0 1
0 1
0 1
0 1
0 1
0 1
0 1
0 1
0 1
0 1
0 1
0 1
0 1
0 1
0 1
0 1
0 1
0 1
0 1
0 1
0 1
0 1
0 1
0 1
0 1
0 1
0 1
0 1
0 1
0 1
0 1
0 1
0 1
0 1
0 1
0 1
0 1
0 1
0 1
0 0
0 0
0 0
0 1
0 1
0 1
0 1
0 1
0 1
0 1
0 1
0 1
0 1
0 1
0 1
0 1
0 1
0 1
0 1
0 1
0 1
0 1
0 1
0 1
0 1
0 1
0 1
0 1
0 1
0 1
0 3
0 3
0 3
0 3
0 4
0 12
0 12
0 13
0 15
0 15
0 17
0 19
0 20
1 20
1 22
1 22
2 22
2 23
2 25
2 25
2 28
2 29
2 29
2 30
2 30
2 31
2 32
2 32
2 32
2 33
2 35
2 35
2 35
2 35
2 35
2 35
2 35
2 36
2 39
2 43
2 44
2 47
2 47
2 47
2 47
2 53
2 52
2 53
2 53
2 53
2 53
2 53
2 53
2 53
2 53
2 53
2 53
2 53
2 53
2 53
2 53
2 53
2 53
2 53
2 53
2 53
2 53
2 53
2 50
2 50
2 47
2 44
2 44
2 44
2 41
2 41
2 41
2 40
2 31
2 29
1 28
1 28
1 28
1 28
1 27
0 27
0 27
0 26
0 26
0 26
0 25
0 24
0 24
0 23
0 23
0 22
0 22
0 21
0 20
0 19
0 19
0 19
0 19
0 15
0 15
0 13
0 13
0 13
0 13
0 13
0 9
0 12
0 12
0 12
0 11
0 11
0 11
0 11
0 5
0 5
0 4
0 4
0 4
0 4
0 4
0 4
0 4
0 4
0 4
0 4
0 4
0 7
0 9
0 11
0 12
0 12
0 12
0 12
0 12
0 13
0 13
0 13
0 13
0 13
0 28
0 28
0 28
0 28
0 28
0 28
0 28
0 29
0 29
0 29
0 29
0 33
0 33
0 33
0 33
0 33
0 33
0 33
0 33
0 33
0 33
0 33
0 33
0 33
0 33
0 33
0 33
0 33
0 33
0 33
0 33
0 33
0 33
0 33
0 33
0 33
0 33
0 33
0 33
0 33
0 28
0 28
0 28
0 28
0 28
0 28
0 28
0 28
0 28
0 30
0 30
0 30
0 30
0 30
0 30
0 30
0 30
0 30
0 28
0 26
0 23
0 23
0 26
0 26
0 26
0 26
0 31
0 31
0 28
0 28
0 28
0 28
0 28
0 13
0 13
0 13
0 13
0 13
0 13
0 13
0 13
0 13
0 13
0 13
0 10
0 10
0 10
0 10
0 10
0 10
0 10
0 10
0 10
0 10
0 10
0 10
0 10
0 10
0 10
0 10
0 10
0 10
0 10
0 10
0 10
0 10
0 10
0 10
0 10
0 10
0 10
0 10
0 10
0 10
0 10
0 10
0 10
0 10
0 10
0 10
0 10
0 10
0 8
0 8
0 8
0 8
0 8
0 9
0 9
0 9
0 9
0 9
0 9
0 9
0 9
0 6
0 6
0 6
0 6
0 1
0 1
0 1
0 1
0 0
0 0
0 0
0 0
0 0
0 0
0 0
0 0
0 0
0 1
0 1
0 1
0 1
0 1
0 1
0 1
0 1
0 1
0 1
0 1
0 1
0 1
0 1
0 1
0 1
0 1
0 1
0 1
0 0
0 0
0 0
0 0
0 0
0 26
0 26
0 26
0 26
0 26
0 26
0 26
0 26
0 26
0 26
0 26
0 26
0 26
0 26
0 26
0 0
0 0
0 0
0 0
0 0
0 0
0 0
0 0
0 0
0 0
0 0
0 0
0 0
0 0
0 0
0 0
0 0
0 0
0 0
0 0
0 0
0 0
0 0
0 0
0 0
0 0
0 0
0 0
0 0
0 0
0 0
0 0
0 0
0 0
0 0
0 0
0 0
0 0
0 0
0 0
0 0
0 0
0 0
0 0
0 0
0 0
0 0
0 0
0 0
0 0
0 0
0 0
0 0
0 0
0 0
0 0
0 0
0 0
0 0
0 0
0 0
0 0
0 0
0 0
0 0
0 0
0 0
0 0
0 0
0 0
0 0
0 0
0 0
0 0
0 0
0 0
0 0
0 0
0 0
0 0
0 0
0 0
0 0
0 0
0 0
0 0
0 0
0 0
0 0
0 0
0 0
0 0
0 0
0 0
0 0
0 1
0 2
0 2
0 2
0 2
0 2
0 2
0 2
0 2
0 2
0 2
0 2
0 2
0 2
0 2
0 2
0 2
0 2
0 2
0 2
0 3
0 3
0 3
0 3
0 4
0 4
0 4
0 4
0 4
0 5
0 5
0 5
0 5
0 5
0 5
0 5
0 5
0 5
0 5
0 5
0 5
0 5
0 5
0 5
0 5
0 5
0 5
0 5
0 5
0 5
1 5
1 5
1 7
1 7
1 6
1 6
1 6
1 6
1 6
1 6
1 6
1 6
1 6
1 6
1 6
0 6
0 6
0 3
0 3
0 3
0 3
0 3
0 3
0 3
0 3
0 3
0 3
0 3
0 3
0 3
0 3
0 3
0 3
0 3
0 3
0 3
0 3
0 3
1 3
1 3
2 3
2 3
2 3
2 2
2 2
2 3
2 3
2 2
2 2
2 2
2 2
2 2
2 1
2 1
2 1
2 1
2 1
2 1
2 1
2 1
2 1
2 1
2 1
2 1
2 1
2 1
2 1
2 1
2 1
2 1
1 1
1 1
1 1
0 1
0 1
0 1
0 1
0 1
0 3
0 3
0 3
0 7
0 7
0 8
0 8
0 8
0 8
0 8
0 8
0 8
0 8
0 8
0 8
0 8
0 9
0 9
0 9
0 8
0 7
0 7
0 7
0 7
0 7
0 7
0 7
0 7
0 7
0 7
0 7
0 7
0 7
0 7
0 7
0 7
0 7
0 7
0 7
0 7
0 6
0 6
0 6
0 6
0 6
0 6
0 6
0 6
0 6
0 6
0 6
0 6
0 6
0 6
0 6
0 6
0 6
0 6
0 6
0 6
0 6
0 6
0 6
0 6
0 6
0 6
0 6
0 5
0 5
0 5
0 4
0 5
0 5
0 5
0 5
0 5
0 2
0 2
0 2
0 2
0 2
0 2
0 2
0 2
0 2
0 2
0 2
0 2
0 2
0 1
0 1
0 1
0 1
0 1
0 1
0 1
0 1
0 1
0 1
0 1
0 1
0 1
0 1
0 1
0 1
0 1
0 1
0 1
0 1
0 1
0 1
0 1
0 1
0 1
0 1
0 1
0 1
0 1
0 3
0 3
0 3
0 3
0 3
0 3
0 3
0 3
0 3
0 3
0 4
0 4
0 4
1 4
1 4
2 2
2 2
2 2
2 2
2 2
2 2
2 2
2 2
2 2
2 2
2 1
2 1
2 1
2 1
2 1
2 1
2 1
2 1
2 1
2 1
2 1
2 1
2 1
2 1
2 1
2 1
2 1
2 1
2 1
2 1
1 1
1 1
0 1
0 1
0 1
0 1
0 1
0 1
0 1
0 1
0 1
0 1
0 1
0 1
0 1
0 1
0 1
0 1
0 1
0 1
0 1
0 1
0 1
0 1
0 1
0 1
0 1
0 1
0 1
0 1
0 1
0 1
0 1
0 1
0 1
0 1
0 1
0 1
0 0
0 0
0 0
0 0
0 0
0 0
0 0
0 0
0 0
0 0
0 0
0 0
0 0
0 0
0 0
1 0
1 0
1 0
1 0
1 0
1 0
1 0
1 0
1 0
1 0
1 0
1 0
1 0
1 0
1 0
0 0
0 0
0 0
0 0
0 0
0 0
0 0
0 0
0 0
0 0
0 0
0 0
0 0
0 0
0 0
0 0
0 0
0 0
0 0
0 0
0 0
0 0
0 0
0 0
0 2
0 2
0 2
0 2
0 2
0 2
0 2
0 2
0 2
0 2
0 2
0 2
0 2
0 2
1 2
1 2
1 2
2 2
2 2
2 2
2 2
2 5
2 5
2 5
2 7
2 8
2 8
2 8
2 8
2 8
2 8
2 8
2 8
2 8
2 8
2 8
2 8
2 8
2 8
2 8
2 8
2 8
2 8
2 8
2 8
2 8
2 8
2 8
2 8
2 8
2 8
2 8
2 8
2 8
2 8
2 8
2 8
0 8
0 7
0 5
0 4
0 4
0 4
0 4
0 4
0 4
0 4
0 3
0 3
0 3
0 2
0 2
0 2
0 0
0 0
0 0
0 0
0 0
0 0
0 0
0 0
0 0
0 0
0 0
0 0
0 0
0 0
0 0
0 0
0 0
0 0
0 0
0 0
0 0
0 0
0 0
0 0
0 0
0 0
0 0
0 0
0 0
0 0
0 0
0 0
0 0
0 0
0 0
0 0
0 0
0 0
0 0
0 0
0 0
0 0
0 0
0 0
0 0
0 0
0 0
0 0
0 0
0 0
0 0
0 0
0 0
0 0
0 0
0 0
0 0
0 0
0 0
0 0
0 0
0 0
0 0
0 0
0 0
0 0
0 0
0 2
0 2
0 2
0 2
0 2
0 2
0 2
0 2
0 2
0 2
0 6
0 6
0 6
0 6
0 6
0 6
0 6
0 6
0 6
0 6
0 6
0 6
0 6
0 6
0 6
0 6
0 6
0 2
0 2
0 2
0 2
0 2
0 2
0 2
0 2
0 2
0 2
0 2
0 2
0 2
0 2
0 2
0 2
0 2
0 2
0 2
0 2
0 2
0 2
0 2
0 2
0 2
0 2
0 2
0 2
0 2
0 2
0 2
0 2
0 2
0 2
0 2
0 2
0 2
0 2
0 2
0 2
0 2
0 2
0 4
0 4
0 4
0 4
0 2
0 2
0 2
0 2
0 2
0 2
0 2
0 2
0 2
0 2
0 2
0 2
0 2
0 2
0 2
0 2
0 2
0 2
0 2
0 2
0 2
0 2
0 2
0 2
0 2
0 2
0 2
0 2
0 2
0 2
0 2
0 2
0 3
0 3
0 3
0 3
0 3
0 3
0 3
0 2
0 1
0 1
0 1
0 1
0 1
0 1
0 1
0 1
0 1
0 1
0 1
0 1
0 1
0 1
0 2
0 2
0 2
0 2
0 2
0 2
0 2
0 2
0 2
0 2
0 2
0 2
0 2
0 2
0 2
0 2
0 2
0 2
0 2
0 2
0 2
0 2
0 2
0 2
0 2
0 2
0 2
0 2
0 2
0 2
0 2
0 2
0 2
0 2
0 2
0 2
0 2
0 2
0 2
0 2
0 2
0 2
0 2
0 2
0 2
0 2
0 2
0 2
0 2
0 2
0 2
0 1
0 1
0 1
0 1
0 1
0 1
0 1
0 1
0 1
0 1
0 1
0 1
0 1
0 1
0 1
0 1
0 1
0 1
0 1
0 1
0 1
0 1
0 0
0 0
0 0
0 0
0 0
0 0
0 0
0 0
0 0
0 0
0 0
0 0
0 0
0 0
0 0
0 0
0 0
0 7
0 7
0 7
0 7
0 7
0 7
0 7
0 7
0 7
0 7
0 7
0 7
0 7
0 7
0 7
0 0
0 0
0 0
0 0
0 0
0 0
0 0
0 0
0 0
0 0
0 0
0 0
0 0
0 0
0 0
0 0
0 0
0 0
0 0
0 0
0 0
0 0
0 0
0 0
0 0
0 0
0 0
0 0
0 0
0 0
0 0
0 0
0 0
0 0
0 0
0 0
0 0
0 0
0 0
0 0
0 0
0 0
0 0
0 0
0 0
0 0
0 0
0 0
0 0
0 0
0 0
0 0
0 0
0 0
0 0
0 0
0 0
0 0
0 0
0 0
0 0
0 0
0 0
0 0
0 0
0 0
0 0
0 0
0 0
0 0
0 0
0 0
0 0
0 0
0 0
0 0
0 0
0 0
0 0
0 0
0 0
0 0
0 0
0 0
0 0
0 0
0 0
0 0
0 0
0 0
0 0
0 0
0 0
0 0
0 0
0 0
0 0
0 0
0 0
0 0
0 0
0 3
0 4
0 4
0 4
0 4
0 4
0 4
0 4
0 4
0 4
0 4
0 4
0 4
0 4
0 4
0 3
0 1
0 1
0 0
0 0
0 0
0 0
0 0
0 0
0 0
0 0
0 0
0 0
0 0
0 0
0 0
0 0
0 0
0 0
0 0
0 0
0 0
0 0
0 0
0 0
0 0
0 0
0 0
0 0
0 0
0 0
0 0
0 0
0 0
0 0
0 0
0 0
0 0
0 0
0 0
0 0
0 0
0 0
0 0
0 0
0 0
0 0
0 0
0 0
0 0
0 0
0 0
0 0
0 0
0 0
0 0
0 0
0 0
0 0
0 0
0 0
0 0
0 0
0 0
0 0
0 0
0 0
0 0
0 0
0 0
0 0
0 0
0 0
0 0
0 0
0 0
0 0
0 2
0 2
0 2
0 2
0 2
0 2
0 2
0 2
0 2
0 2
0 2
0 2
0 2
0 2
0 2
0 0
0 0
0 0
0 0
0 0
0 0
0 0
0 0
0 0
0 0
0 0
0 0
0 0
0 0
0 0
0 0
0 0
0 0
0 0
0 0
0 0
0 0
0 0
0 0
0 0
0 2
0 2
0 2
0 2
0 2
0 2
0 2
0 2
0 2
0 2
0 2
0 2
0 2
0 2
0 2
0 2
0 2
0 2
0 2
0 2
0 2
0 2
0 2
0 2
0 2
0 2
0 2
0 2
0 2
0 2
0 2
0 2
0 2
0 2
0 2
0 2
0 2
0 2
0 2
0 3
0 3
0 3
0 3
0 3
0 3
0 3
0 3
0 4
0 4
0 5
0 7
0 7
0 7
0 7
0 7
0 7
0 7
0 7
0 7
0 7
0 8
0 8
0 8
0 8
0 8
0 6
0 6
0 6
0 5
0 5
0 5
0 4
0 4
0 4
0 4
0 4
0 4
0 4
0 4
0 4
0 5
0 5
0 5
0 5
0 5
0 5
0 5
0 4
0 4
0 4
0 3
0 3
0 3
0 3
0 3
0 3
0 3
0 3
0 3
0 3
0 3
0 3
0 3
0 3
0 3
0 3
0 3
0 6
0 6
0 7
0 7
1 7
1 6
1 6
1 6
1 6
1 6
1 6
1 13
1 14
1 14
1 14
1 17
1 17
1 17
1 17
1 17
1 17
1 17
1 17
1 17
1 17
2 17
2 9
2 6
2 6
2 6
2 3
2 2
2 2
2 2
2 2
2 2
2 2
2 2
2 2
2 2
2 2
2 2
2 2
2 2
2 2
2 2
2 1
2 1
2 1
2 1
2 1
2 1
2 1
2 1
2 1
2 1
2 1
2 1
2 1
2 1
2 1
2 1
2 1
2 1
2 1
10 1
10 1
10 1
10 1
10 1
10 1
10 1
10 1
10 0
10 0
10 0
10 0
9 0
9 0
9 0
1 0
1 0
1 0
1 0
1 0
1 0
1 0
1 0
1 0
1 0
1 0
1 0
1 0
1 0
1 0
0 0
0 0
0 0
0 0
0 0
0 0
0 0
0 0
0 0
0 0
0 0
0 0
0 0
0 0
0 0
0 0
0 0
0 0
0 0
0 0
0 0
0 0
0 0
0 0
0 0
0 0
0 0
0 0
0 0
0 0
0 0
0 0
0 0
0 0
0 1
0 1
0 2
0 3
0 3
0 3
0 3
0 3
0 3
0 3
0 3
0 3
0 3
0 3
0 3
0 3
0 2
0 2
0 3
0 3
0 3
0 3
0 3
0 3
0 3
0 3
0 3
0 3
0 3
0 3
0 3
0 3
0 3
0 3
0 3
0 3
0 3
0 3
0 3
0 3
0 3
0 3
0 3
0 3
0 3
0 4
0 4
0 4
0 4
0 4
0 4
0 3
0 2
0 2
0 2
0 2
0 2
0 2
0 2
0 2
0 2
0 2
0 2
0 2
0 2
0 2
0 3
0 4
0 4
0 4
0 4
0 4
0 4
0 4
0 4
0 4
0 4
0 4
0 4
0 4
0 4
0 4
0 3
0 3
0 2
0 2
0 2
0 2
0 2
0 2
0 2
0 1
0 1
0 1
0 1
0 1
0 1
0 1
0 1
0 1
0 1
0 1
0 1
0 1
0 1
0 1
0 1
0 1
0 1
0 1
0 1
0 1
0 1
0 1
0 1
0 1
0 1
0 1
0 0
0 0
0 0
0 0
0 0
0 0
0 0
0 0
0 0
0 0
0 0
0 0
0 0
0 0
0 0
0 0
0 0
0 0
0 0
0 0
0 0
0 0
0 0
0 0
0 0
0 0
0 0
0 0
0 0
0 0
0 0
0 0
0 0
0 0
0 0
0 0
0 0
2 0
2 0
2 0
2 0
2 0
2 0
2 0
2 0
2 0
2 0
2 0
2 0
2 0
2 0
2 0
2 0
2 0
2 0
1 0
1 0
1 0
1 0
1 0
1 0
1 0
0 0
0 0
0 0
0 0
0 0
0 0
0 0
0 0
0 0
0 0
0 0
0 0
0 0
0 0
0 0
0 0
0 0
0 0
0 0
0 0
0 0
0 0
0 0
0 0
0 0
0 0
0 0
0 0
0 0
0 0
0 5
0 5
0 6
1 7
1 7
1 7
1 7
1 7
1 8
1 8
1 9
1 9
1 9
1 9
1 14
1 15
1 16
1 18
1 18
0 18
0 18
0 18
0 18
0 18
0 18
0 18
0 18
0 18
0 18
0 18
0 18
0 18
0 18
0 18
0 18
0 19
0 19
0 19
0 19
0 19
0 19
0 19
0 19
0 19
0 19
0 19
0 18
0 18
0 17
0 17
0 17
0 17
0 17
0 17
0 17
0 17
0 17
0 17
0 17
0 27
0 27
0 28
0 28
0 28
0 28
0 28
0 28
0 28
0 28
0 28
0 26
0 26
0 26
0 24
0 26
0 25
0 23
0 23
0 23
0 23
0 24
0 24
0 24
0 24
0 24
0 24
0 23
0 18
0 16
0 16
0 16
0 16
0 16
0 16
0 16
0 15
0 15
0 15
0 15
0 15
0 15
0 15
12 16
12 16
12 16
13 16
13 16
13 15
13 15
13 15
13 15
13 15
13 15
13 15
13 16
14 16
14 16
14 16
2 15
2 15
2 15
2 15
2 15
2 15
2 15
2 15
2 15
2 15
2 15
2 17
2 16
2 18
2 8
2 8
2 7
2 7
2 7
2 7
2 7
2 7
2 7
2 7
2 7
2 7
2 7
2 7
2 7
2 6
2 6
2 6
2 6
2 6
2 6
2 6
2 6
2 6
2 6
2 6
2 6
2 6
2 6
2 6
2 6
2 6
2 6
2 6
2 6
2 6
2 6
2 6
2 6
2 6
2 6
2 6
2 6
2 6
2 6
2 6
1 6
1 6
1 6
1 6
1 6
1 6
1 6
1 6
1 6
1 5
0 5
0 3
0 1
0 1
0 1
0 1
0 1
0 1
0 1
0 1
0 1
1 1
1 1
1 1
1 1
1 1
1 1
1 0
1 0
1 0
1 0
1 0
1 0
1 0
1 0
1 0
1 0
0 0
0 0
0 0
0 0
0 0
0 0
0 0
0 0
0 0
0 0
0 0
0 0
0 0
0 0
0 0
0 0
0 0
0 0
0 0
0 0
0 0
0 0
0 0
0 0
0 0
0 0
0 0
0 0
0 0
0 0
0 0
0 0
0 0
0 0
0 0
0 0
0 0
0 0
0 0
0 0
0 0
0 0
0 0
0 1
0 1
0 1
0 1
0 1
0 1
0 1
0 1
0 1
0 1
0 1
0 1
0 1
0 1
0 1
0 1
0 1
0 1
0 1
0 1
0 1
0 1
0 1
0 1
0 1
0 1
0 1
0 1
0 1
0 1
0 1
0 1
0 1
0 1
0 1
0 1
0 1
0 1
0 1
0 1
0 1
0 1
0 1
0 1
0 1
0 1
0 1
0 1
0 1
0 1
0 1
0 1
0 1
0 1
0 1
0 1
0 1
0 1
0 1
0 1
0 1
0 1
0 2
0 2
0 2
0 2
0 2
0 2
0 2
0 2
0 2
0 2
0 2
0 1
0 1
0 1
0 1
0 1
0 1
0 1
0 1
0 1
0 1
0 1
0 1
0 1
0 1
0 1
0 1
0 1
0 1
0 3
0 3
0 3
0 3
0 3
0 3
2 4
2 5
2 5
2 6
2 6
2 6
2 6
2 6
2 6
2 6
2 4
2 4
2 4
2 4
2 4
2 4
2 4
2 4
2 4
2 4
2 4
2 4
2 4
2 4
2 4
2 4
2 4
2 4
2 4
2 4
2 4
2 4
2 4
2 4
2 4
2 4
2 8
2 8
2 7
2 7
2 7
2 7
2 7
2 7
2 7
2 7
2 7
2 7
2 7
2 7
2 7
2 7
2 7
2 7
2 7
2 7
3 7
3 7
3 7
3 7
3 7
3 7
3 7
3 7
3 7
3 7
3 7
3 7
3 7
3 7
6 7
6 7
6 7
4 5
4 4
4 4
4 4
4 4
4 4
4 4
4 4
4 4
4 4
4 4
4 4
4 4
4 4
4 4
4 4
4 4
4 4
4 4
4 4
4 4
4 4
4 4
4 4
4 4
4 4
4 4
4 4
4 4
4 6
4 7
4 7
4 7
4 7
4 7
4 7
4 7
4 7
4 9
4 10
4 12
4 13
4 13
4 13
4 13
4 13
4 13
4 13
4 13
4 14
4 14
4 14
4 14
4 14
4 14
3 16
3 18
3 20
3 20
3 20
3 20
3 20
3 21
3 21
3 21
3 21
3 21
3 21
2 21
2 21
0 21
0 21
0 21
0 21
0 21
0 21
0 21
0 21
0 23
0 23
0 23
0 23
0 23
0 23
0 23
0 23
0 24
0 24
0 24
0 24
0 24
0 24
0 24
0 24
1 22
1 22
1 22
1 23
1 24
1 24
2 25
2 24
2 28
4 33
4 33
4 34
4 35
4 36
4 36
3 28
3 27
3 21
3 20
3 17
3 17
4 17
4 17
3 17
3 17
3 17
3 17
3 17
3 17
3 17
3 17
3 17
2 17
2 17
3 17
3 17
3 16
2 16
1 16
1 16
1 16
1 16
1 16
1 16
1 16
1 16
1 18
1 18
1 18
0 18
0 18
0 19
0 19
0 19
0 19
0 19
0 19
0 20
0 20
0 30
0 30
0 33
0 34
0 35
0 35
0 35
0 35
0 35
0 35
0 35
0 35
0 35
0 37
0 38
0 38
0 37
0 35
0 35
0 34
0 34
0 33
0 28
0 23
0 22
0 22
0 21
0 20
0 20
0 20
0 20
0 20
0 20
0 20
0 20
0 20
0 20
0 20
0 20
0 20
0 20
0 20
0 20
0 20
0 20
1 20
1 20
1 20
1 20
1 20
1 20
1 20
1 20
1 20
1 20
1 22
1 22
1 22
1 24
1 27
0 29
0 32
0 32
0 32
0 32
0 31
0 31
0 31
0 31
0 31
0 29
0 27
0 27
0 15
0 15
0 12
0 5
0 4
0 0
0 0
0 0
0 0
0 0
0 0
0 0
0 0
0 0
0 0
0 0
0 0
0 0
0 0
0 0
0 1
0 1
0 1
0 1
0 1
0 1
0 1
0 1
0 1
0 1
0 1
0 1
0 1
0 1
0 1
0 0
0 0
0 0
0 0
0 0
0 0
0 0
0 0
0 0
0 0
0 0
1 0
1 0
1 0
1 0
1 0
1 0
1 0
1 0
1 0
1 0
1 0
1 0
1 0
1 0
1 0
0 0
0 0
0 0
0 0
0 0
0 0
0 0
0 0
0 0
0 0
0 0
0 0
0 0
0 0
0 0
0 0
0 0
0 0
0 0
0 0
0 0
0 0
0 0
0 0
0 0
0 0
0 0
0 0
0 0
0 0
0 0
0 0
0 0
0 0
0 0
0 0
0 0
0 0
0 0
0 0
0 0
0 0
0 0
0 0
0 0
0 0
0 0
0 0
0 0
0 0
0 0
0 0
0 0
0 0
0 0
0 0
0 0
0 0
0 0
0 0
0 0
0 0
0 0
0 0
0 0
0 0
0 0
0 0
0 0
0 0
0 0
0 0
0 0
0 0
0 0
0 0
0 0
0 0
0 0
1 0
1 0
1 0
1 0
1 0
1 0
1 0
1 0
1 0
1 0
1 0
1 0
1 0
1 0
1 0
1 0
1 0
1 0
1 0
1 0
1 0
1 0
1 0
1 0
1 0
1 1
1 2
2 2
2 2
2 2
2 2
2 2
2 2
2 2
2 2
2 2
2 2
2 2
2 2
2 2
2 2
2 2
5 2
5 2
5 2
5 3
5 3
5 3
5 3
5 3
5 3
5 3
5 3
5 3
5 3
5 3
5 3
3 3
2 3
2 3
2 3
2 3
2 3
2 3
2 3
2 3
2 3
2 3
2 3
2 3
2 3
2 3
2 3
1 3
1 3
1 3
1 3
1 3
1 3
1 3
1 3
1 3
1 3
1 3
1 3
1 3
1 3
1 3
1 3
1 3
1 3
1 3
1 3
1 3
1 3
1 3
1 3
1 3
1 1
1 1
0 1
0 1
0 1
0 1
0 1
0 1
0 1
0 1
0 1
0 1
0 1
0 1
0 1
0 1
0 1
0 1
0 1
0 1
0 0
0 0
0 0
0 0
0 0
0 0
0 0
0 0
0 0
0 0
0 0
0 0
0 0
0 0
0 0
0 0
0 0
0 0
0 0
0 0
0 0
0 0
0 0
0 0
0 0
0 0
0 0
0 0
0 0
0 0
0 0
0 0
0 0
0 0
0 0
0 0
0 0
0 0
0 0
0 0
0 0
0 0
0 0
0 0
0 0
0 0
0 0
0 0
0 0
0 0
0 1
0 1
0 1
0 1
0 1
0 1
0 1
0 1
0 1
0 1
0 1
0 1
0 1
0 1
0 1
0 1
0 1
0 1
0 1
0 1
0 1
0 1
0 1
0 1
0 1
0 1
0 1
0 1
0 1
0 1
0 1
0 1
0 1
0 1
0 1
0 1
0 1
0 1
0 1
0 1
0 1
0 1
0 1
0 1
0 1
0 1
0 1
0 1
0 1
0 1
0 1
0 1
0 1
0 1
0 1
0 1
0 1
0 1
0 1
0 1
0 1
0 1
0 1
0 1
0 1
0 1
0 2
0 2
0 2
0 2
0 2
0 3
0 3
0 2
0 6
0 6
0 6
0 6
0 6
0 6
0 6
0 6
0 6
0 6
0 6
0 6
0 6
0 6
0 6
0 6
0 6
0 6
0 6
0 6
0 6
0 6
0 6
0 6
0 6
0 6
0 6
0 6
0 6
0 6
0 6
0 6
0 6
0 6
0 6
1 6
1 6
1 6
1 6
1 6
1 6
1 6
1 6
1 6
1 6
1 6
1 6
1 6
1 4
1 4
1 4
0 4
0 4
0 4
0 2
0 2
0 2
0 2
0 2
0 2
0 2
0 2
0 2
0 2
0 2
0 1
0 1
0 1
0 0
0 0
0 0
0 0
0 0
0 0
0 0
0 0
0 0
0 0
0 0
0 0
0 0
0 0
0 0
0 0
0 0
1 3
1 6
1 6
1 6
1 6
1 6
1 6
1 6
1 6
1 6
1 6
1 6
1 6
1 6
1 6
1 6
1 6
0 0
0 0
0 0
0 0
0 0
0 0
0 0
0 0
0 0
0 0
0 0
0 0
0 0
0 0
0 2
0 2
0 2
0 2
0 2
0 2
0 2
0 2
0 2
0 2
0 2
0 2
0 2
0 2
0 2
0 0
0 0
0 0
0 0
0 0
0 0
0 0
0 0
0 0
0 0
0 0
0 0
0 0
0 0
0 0
0 1
0 1
0 1
0 1
0 2
0 2
0 2
0 2
0 2
0 2
0 2
0 2
0 2
0 2
0 2
0 2
0 2
0 2
0 2
0 2
0 2
0 2
0 2
0 2
0 2
0 2
0 2
0 2
0 2
0 2
0 2
0 2
0 2
0 2
0 2
0 2
0 2
0 2
0 2
0 2
0 2
0 2
0 0
0 0
0 0
0 0
0 0
0 0
0 0
0 0
0 0
0 0
0 0
0 0
0 0
0 0
0 0
0 0
0 0
0 0
0 0
0 0
0 0
0 0
0 0
0 0
0 0
0 0
0 0
0 0
0 0
0 0
0 0
0 0
0 0
0 0
0 0
0 0
0 0
0 0
0 0
0 0
0 0
0 0
0 0
0 0
0 0
0 0
0 0
0 0
0 0
0 0
0 0
0 0
0 0
0 0
0 0
0 0
0 0
0 0
0 1
0 1
0 1
0 1
0 1
0 2
0 2
0 2
0 2
0 2
0 2
0 2
0 2
0 2
0 2
0 4
0 3
0 3
0 3
0 3
0 3
0 3
0 3
0 3
0 3
0 3
0 3
0 3
0 3
0 3
0 3
0 3
0 3
0 3
0 4
0 4
0 4
0 4
0 4
0 4
0 4
0 4
0 4
0 4
0 4
0 4
0 4
0 4
0 4
0 4
0 4
0 4
0 4
0 4
0 4
0 4
0 4
0 4
0 4
0 4
0 4
0 4
0 4
0 4
0 4
0 4
0 4
0 4
0 4
0 4
0 4
0 4
0 4
0 5
0 5
0 5
0 5
0 5
0 5
0 5
0 5
0 5
0 5
0 5
0 5
0 5
0 5
0 5
1 3
1 3
1 3
1 3
1 3
1 3
1 2
1 2
1 2
1 2
1 2
1 2
1 2
1 2
1 2
0 2
0 2
0 2
0 2
0 1
0 1
0 1
0 1
0 1
0 1
0 1
0 1
0 1
0 1
0 1
0 1
0 1
0 1
0 1
0 1
0 1
0 1
0 1
0 1
0 1
0 1
0 1
0 1
0 1
0 1
0 1
0 1
0 1
0 1
0 1
0 1
0 1
0 1
0 1
0 1
0 1
0 1
0 1
0 0
0 0
0 0
0 0
0 0
0 0
0 0
0 0
0 0
0 0
0 0
0 0
0 0
0 0
0 0
0 0
0 0
0 0
0 0
0 0
0 0
0 0
0 0
0 0
0 0
0 0
0 0
0 0
0 0
0 0
0 0
0 4
0 4
0 4
0 4
0 4
0 4
0 4
0 4
0 4
0 4
0 4
0 4
0 4
0 4
0 4
0 4
0 4
0 4
0 4
0 4
0 4
0 4
0 4
0 4
0 4
0 4
0 4
0 4
0 4
0 4
0 4
0 4
0 4
0 4
0 4
0 4
0 4
0 4
0 4
0 5
0 5
0 5
0 5
0 5
0 5
0 5
0 5
0 5
0 5
0 5
0 5
0 3
0 3
0 3
0 1
0 1
0 1
0 1
0 1
0 1
0 1
0 1
0 1
0 1
0 1
0 1
0 1
0 1
0 1
0 1
0 1
0 1
0 1
0 1
0 1
0 1
0 1
0 1
0 1
0 1
0 1
0 3
0 3
0 3
0 3
0 3
0 3
0 3
0 3
0 3
0 3
0 3
0 4
0 4
0 6
0 6
0 6
0 6
0 6
0 6
0 6
0 6
0 6
0 6
0 7
0 7
0 7
0 7
0 7
0 7
0 7
0 7
0 6
0 6
0 6
0 6
0 6
0 6
0 6
0 6
0 8
0 8
0 8
0 9
0 9
0 9
0 9
2 9
2 10
2 12
2 12
2 13
2 14
2 14
2 14
2 16
2 18
2 20
2 20
2 20
2 20
2 20
2 20
2 20
2 21
2 20
2 19
2 31
2 41
2 100
2 108
2 315
2 342
2 492
2 531
2 549
2 607
2 712
2 752
2 752
2 813
2 816
2 818
2 818
2 818
2 818
2 820
1 822
1 843
0 843
0 847
0 849
0 848
0 846
0 846
0 846
0 846
0 844
0 843
0 842
0 841
0 841
0 842
0 849
0 850
1 850
1 850
1 850
1 850
1 850
1 850
1 849
1 849
1 846
1 846
1 846
1 846
1 846
1 847
1 847
1 844
0 844
0 844
0 844
0 845
0 844
0 844
0 843
0 841
0 842
0 842
0 842
0 842
0 841
0 841
0 841
0 841
0 841
0 839
0 839
0 426
0 416
0 385
0 383
0 26
0 25
0 17
0 17
0 17
0 16
0 16
0 16
0 16
0 14
0 14
0 15
0 17
0 17
0 17
0 17
0 17
0 16
0 16
0 16
0 16
0 16
0 16
0 16
0 16
0 16
0 15
0 15
0 15
0 15
0 15
0 14
0 7
0 6
0 6
0 6
0 6
0 6
0 6
0 6
0 6
0 6
0 6
0 6
0 6
0 6
0 6
0 5
0 5
0 5
0 5
0 5
0 5
0 2
0 2
0 1
0 0
0 0
0 0
0 0
0 0
0 0
0 0
0 0
0 0
0 0
0 0
0 0
0 0
0 0
0 0
0 0
0 0
0 0
0 0
0 0
0 0
0 0
0 0
0 0
0 0
0 0
0 0
0 0
0 0
0 0
0 0
0 0
0 0
0 0
0 0
0 0
0 0
0 0
0 0
0 0
0 0
0 0
0 0
0 0
0 0
0 0
0 1
0 1
0 1
0 1
0 1
0 1
0 1
0 1
0 1
0 1
0 1
0 1
0 1
0 1
0 1
0 3
0 3
0 3
0 3
0 3
0 3
0 3
0 3
0 3
0 3
0 3
0 3
0 3
0 3
0 3
0 3
0 3
0 3
0 3
0 3
0 3
0 3
0 3
0 3
0 3
0 3
0 3
0 3
0 3
0 3
0 3
0 3
0 3
0 3
0 3
0 3
0 3
0 3
0 3
0 3
0 3
0 3
0 3
0 3
0 3
0 3
0 3
0 3
0 3
0 3
0 3
0 3
0 3
0 3
0 3
0 3
0 3
0 3
0 4
0 4
0 4
0 4
0 3
0 2
0 2
0 2
0 2
0 2
0 2
0 2
0 2
0 2
0 2
0 0
0 0
0 0
0 0
0 1
0 1
0 1
0 1
0 1
0 1
0 1
0 1
0 1
0 1
0 1
0 1
0 1
0 1
0 1
0 1
0 1
0 1
0 1
0 1
0 1
0 1
0 1
0 1
0 1
0 2
0 3
0 3
0 3
0 3
0 3
0 3
0 3
0 3
0 3
0 3
0 3
0 3
0 3
0 3
0 3
0 3
0 3
0 3
0 3
0 3
0 3
0 3
0 3
0 3
0 3
0 3
0 3
0 3
0 3
0 3
0 3
0 3
0 5
0 5
0 5
0 5
0 5
0 5
0 5
0 5
0 6
0 6
0 6
0 6
0 6
0 6
0 7
0 5
0 5
0 5
0 4
0 4
0 4
0 4
0 4
0 4
0 4
0 4
0 4
0 4
0 4
0 4
0 4
0 4
0 4
0 4
0 4
0 4
0 4
0 4
0 4
0 4
0 4
0 4
0 4
0 4
0 4
0 4
0 4
0 5
0 5
0 5
0 5
0 5
0 5
0 5
0 5
0 5
0 5
0 6
0 6
0 7
0 7
0 7
0 7
0 7
0 7
0 7
0 7
0 7
0 7
0 7
0 7
0 8
0 8
0 7
0 7
0 7
0 7
0 7
0 7
0 7
0 7
0 6
0 6
0 6
0 7
0 7
0 7
0 6
0 6
0 6
0 6
0 6
0 6
0 7
0 7
0 7
0 7
0 7
0 6
0 5
0 5
0 5
0 5
0 5
0 5
0 5
0 5
0 5
0 5
0 5
0 5
0 5
0 5
0 5
0 5
0 5
0 5
0 5
0 6
0 6
0 4
0 4
0 4
0 3
0 3
0 3
0 3
0 3
0 5
0 5
0 5
0 6
0 6
0 6
0 6
0 6
0 6
0 6
0 6
0 6
0 6
0 6
0 6
0 6
0 6
0 6
0 6
0 6
0 6
0 6
0 6
0 7
0 7
0 8
0 8
0 8
0 8
0 7
0 7
0 7
0 7
0 7
0 7
0 7
0 7
0 6
0 6
0 6
0 6
0 6
0 6
0 6
0 6
0 6
0 6
0 6
0 5
0 5
0 5
0 5
0 5
0 5
0 5
0 5
0 5
0 5
0 5
0 5
0 5
0 5
0 5
0 3
0 3
0 3
0 3
0 2
0 2
0 2
0 2
0 3
0 3
0 3
0 3
0 3
0 2
0 2
0 2
0 2
0 2
0 2
0 2
0 2
0 2
0 2
0 1
0 1
0 1
0 1
0 1
0 1
0 1
0 1
0 3
0 3
0 3
0 3
0 2
0 3
0 3
0 4
1 53
2 62
4 70
5 71
5 73
5 76
5 77
5 77
5 77
5 77
5 78
5 78
5 78
6 79
6 79
6 79
6 79
6 79
6 79
6 79
6 79
6 79
6 79
6 81
6 81
6 81
6 82
7 82
6 82
6 82
6 83
6 84
6 84
6 84
6 85
9 90
10 90
10 90
10 88
10 88
10 88
10 88
9 88
9 88
9 88
9 88
9 90
9 90
9 90
9 90
9 90
9 90
9 90
9 90
9 90
9 90
9 90
9 90
9 90
9 90
9 90
9 90
9 90
9 90
9 90
9 88
9 87
9 87
9 87
9 87
9 87
9 87
8 84
4 24
4 14
4 13
4 13
4 13
4 13
4 13
4 13
4 12
4 11
4 11
4 11
4 11
4 11
4 11
4 13
4 28
4 28
4 28
4 29
4 29
4 29
4 30
4 30
4 30
4 30
5 29
5 29
5 30
5 30
5 31
5 79
4 79
4 79
3 78
2 73
1 73
1 72
1 72
1 72
1 72
1 72
1 72
1 72
1 72
1 72
1 70
1 70
1 70
1 70
1 70
1 70
1 70
1 70
1 70
1 70
1 70
1 70
1 70
1 70
1 70
1 70
1 70
1 70
1 71
1 71
1 71
1 71
1 71
1 71
1 71
1 71
1 71
1 71
1 71
1 71
1 71
1 71
1 71
1 71
1 71
1 72
1 72
1 72
1 72
1 74
1 74
1 74
1 72
1 57
1 57
1 56
1 56
1 56
1 56
1 56
1 56
1 56
1 56
0 56
0 56
0 55
0 55
0 53
0 4
0 4
0 4
0 4
0 4
0 4
0 4
0 4
0 5
0 5
0 5
0 5
0 5
0 5
0 5
0 5
0 5
0 5
0 6
0 6
0 6
0 6
0 6
0 6
0 6
0 6
0 8
0 9
0 9
0 9
0 9
0 9
0 9
0 7
0 7
0 7
0 6
0 6
0 6
0 6
0 6
0 6
0 6
0 6
0 6
0 6
0 6
0 6
0 6
0 6
0 6
0 10
0 11
0 11
0 12
0 12
0 12
0 13
0 13
0 13
0 13
0 13
0 13
0 13
0 13
0 13
0 13
0 14
0 14
0 14
0 14
0 14
0 14
0 12
0 12
0 12
0 12
0 12
0 11
0 11
0 11
0 11
0 11
0 11
0 11
0 11
0 10
0 10
0 10
0 10
0 10
0 9
0 9
0 9
0 9
0 9
0 9
0 9
0 10
0 10
0 10
0 10
0 10
0 10
0 10
0 10
0 11
0 11
0 11
0 11
0 11
0 11
0 11
0 10
0 10
0 10
0 10
0 10
0 10
0 10
0 10
0 10
0 8
0 6
0 6
0 6
0 6
0 6
0 6
0 6
0 5
0 5
0 5
0 5
0 5
0 5
0 5
0 5
0 5
0 5
0 4
0 4
0 4
0 4
0 13
0 13
0 13
0 13
0 13
0 14
0 16
0 16
0 16
0 16
0 16
0 16
0 16
0 16
0 16
0 7
0 7
0 7
0 7
0 7
0 7
0 5
0 5
0 5
0 5
0 6
0 6
0 6
0 6
0 6
0 6
0 6
0 6
0 6
0 6
0 5
0 5
0 5
0 5
0 5
0 6
0 8
0 8
0 14
0 14
0 14
0 14
0 14
0 14
0 15
5 15
5 14
5 12
5 16
5 16
5 16
5 17
5 17
5 17
5 18
5 18
5 19
5 19
5 19
5 19
0 19
0 20
0 20
0 20
0 20
0 21
0 21
0 21
0 21
0 21
0 21
0 21
0 21
0 21
0 20
0 20
0 20
0 20
0 20
0 21
0 21
0 21
0 21
0 22
0 22
0 22
0 21
0 20
0 21
0 19
0 19
0 19
0 19
0 18
0 21
0 21
0 21
0 21
0 21
0 22
0 22
0 22
0 26
0 26
0 27
0 27
0 29
0 25
0 19
0 15
0 16
0 16
0 18
0 18
0 20
0 20
0 20
0 20
0 20
0 22
0 22
0 22
0 22
0 22
0 22
0 24
0 24
0 24
0 24
0 24
0 24
0 24
0 24
0 24
0 25
0 25
0 28
0 28
0 28
0 28
0 31
0 31
0 31
0 35
0 58
0 77
0 77
0 80
0 84
0 84
0 83
0 87
0 86
0 86
0 86
0 86
0 85
0 85
0 85
0 86
0 85
0 85
0 85
0 85
0 85
0 85
0 85
0 74
0 74
0 73
0 73
0 73
0 66
0 66
0 66
0 68
0 68
0 67
0 67
0 67
0 67
0 67
0 67
0 67
0 67
0 65
0 65
0 64
0 64
3 75
3 75
3 81
3 87
3 92
3 93
3 94
3 94
3 93
3 92
3 92
3 92
3 92
3 92
3 92
3 92
3 93
3 93
3 95
3 95
3 65
3 65
3 65
3 64
3 37
3 37
3 38
3 38
3 38
3 37
3 37
3 37
3 37
3 37
3 38
3 38
3 38
3 38
3 38
3 38
3 38
3 38
3 38
3 37
3 38
3 38
3 38
3 38
3 38
3 38
3 37
3 37
3 37
3 37
3 37
3 37
3 37
3 37
3 37
3 34
3 34
3 34
3 34
3 34
3 34
3 34
3 34
3 33
3 33
3 38
3 38
3 39
3 37
0 22
0 14
0 11
0 11
0 11
0 11
0 11
0 12
0 13
0 13
0 13
0 13
0 13
0 13
0 13
0 13
0 12
0 11
0 10
0 10
0 10
0 11
0 11
0 11
0 11
0 11
0 10
0 10
0 10
0 10
0 10
0 10
0 10
0 10
0 10
0 10
0 10
0 10
0 10
0 10
0 10
0 10
0 10
0 10
0 10
0 10
0 10
0 10
0 10
0 10
0 10
0 10
0 10
0 10
0 10
0 10
0 10
0 10
0 10
0 10
0 10
0 10
1 12
1 12
1 14
3 15
7 34
7 34
7 35
7 30
7 27
7 27
7 27
7 27
7 27
7 27
7 27
7 27
7 27
7 27
7 27
7 27
7 27
7 27
7 27
7 27
7 27
7 27
7 27
7 27
7 27
9 27
9 27
9 27
9 26
9 26
9 26
9 26
9 26
9 27
9 27
9 27
9 27
9 27
9 27
9 27
9 27
9 27
9 27
9 27
9 27
9 27
9 27
9 27
9 27
9 27
9 27
9 27
9 27
9 27
9 27
9 27
9 27
9 27
9 27
9 27
9 27
9 27
9 27
9 47
13 52
15 62
15 62
15 63
15 62
14 61
14 61
13 58
11 56
7 37
7 37
7 37
7 37
7 37
7 26
7 20
0 3
0 3
0 2
0 3
0 4
0 4
0 4
0 4
0 4
0 4
0 4
0 4
0 4
0 4
0 4
0 4
0 4
0 4
0 4
0 4
0 4
0 4
0 4
0 4
0 4
0 3
0 3
0 3
0 3
0 3
0 3
0 3
0 3
0 3
0 3
0 3
0 3
0 3
0 3
0 3
0 3
0 3
0 3
0 3
0 3
0 3
0 3
0 3
0 3
0 3
0 3
0 3
0 5
0 5
0 7
0 7
0 7
0 7
0 7
0 7
0 7
0 7
0 7
0 7
0 7
0 7
0 7
0 7
0 7
0 7
0 7
0 6
0 6
0 5
0 5
0 5
0 5
0 4
0 4
0 4
0 4
0 4
0 5
0 5
0 5
0 5
0 5
0 5
0 5
0 5
0 5
0 5
0 5
0 5
0 5
0 5
0 5
0 5
0 5
0 4
0 4
0 4
0 3
0 3
0 3
0 3
0 3
0 3
0 3
0 3
0 3
0 3
0 3
0 3
0 3
0 3
0 3
0 3
0 3
0 3
0 2
0 2
0 2
0 1
0 1
0 2
0 2
0 2
0 2
0 2
0 3
0 3
0 3
0 3
0 3
0 3
0 3
0 3
0 3
0 3
0 3
0 3
0 3
0 3
0 3
0 3
0 3
0 3
0 3
0 3
0 3
0 3
0 3
0 3
0 3
0 2
0 2
0 2
0 2
0 2
0 2
0 2
0 2
2 4
2 4
2 4
2 4
2 4
2 4
2 4
2 4
2 4
2 4
2 5
2 5
2 5
2 5
2 5
0 3
0 3
0 3
0 3
0 3
0 3
0 3
0 3
0 3
0 3
0 2
0 2
0 2
0 2
0 2
0 2
0 2
0 2
0 2
0 2
0 1
0 1
0 1
0 1
0 1
0 0
0 0
0 0
0 0
0 0
0 0
0 0
0 0
0 0
0 0
0 0
0 0
0 0
0 0
0 0
0 0
0 0
0 0
0 0
0 0
0 0
0 0
0 0
0 0
0 0
0 0
0 0
0 0
0 0
0 0
0 0
0 0
0 0
0 0
0 0
0 0
0 0
0 0
0 0
0 0
0 0
0 0
0 3
0 4
0 7
0 7
0 7
0 7
0 7
0 7
0 7
0 7
1 7
1 7
1 8
1 8
1 9
1 11
1 11
1 11
1 12
1 12
1 12
1 12
1 12
1 12
1 12
0 12
0 12
0 13
0 13
0 13
0 13
0 13
0 13
0 13
0 13
0 13
0 13
0 13
0 13
0 13
0 13
0 13
0 13
0 13
0 12
0 11
0 11
0 11
0 11
0 11
0 11
0 11
0 11
0 11
0 11
0 11
0 11
0 11
0 11
0 11
0 11
0 11
0 11
0 11
0 11
0 11
0 11
0 11
0 11
0 11
0 11
0 11
0 11
0 12
0 9
0 8
1 11
1 11
1 11
1 11
1 11
1 11
1 11
1 11
1 11
1 10
1 10
1 9
1 7
1 7
1 8
1 7
1 7
1 7
1 7
1 7
1 7
1 7
1 7
1 7
1 6
1 6
1 6
1 6
1 6
1 6
1 6
1 6
1 6
1 6
1 6
1 6
1 6
1 6
1 6
1 6
1 6
1 6
1 6
1 6
1 6
1 4
1 4
1 2
1 2
1 2
1 2
1 2
1 2
1 2
1 2
1 2
1 2
1 2
1 2
1 2
1 2
1 2
1 2
1 2
1 2
1 2
1 2
1 2
1 2
1 2
1 2
1 2
1 2
1 1
1 1
1 1
1 1
1 1
1 1
1 1
1 1
1 1
7 1
7 1
7 1
7 1
7 1
7 0
7 0
7 0
7 0
7 0
7 0
7 0
7 0
7 0
7 0
1 0
1 0
1 0
1 0
1 0
1 0
1 0
1 0
1 0
1 0
1 0
1 0
1 0
1 0
1 0
1 0
1 0
1 0
1 0
1 0
1 0
1 0
1 0
1 0
1 0
1 0
1 0
1 0
1 0
1 0
1 0
1 0
1 0
1 0
1 0
1 0
1 0
1 0
1 0
1 0
1 0
1 0
1 0
0 0
0 0
0 0
0 0
0 0
0 0
0 0
0 0
0 0
0 0
0 0
0 0
0 0
0 0
0 0
0 0
0 0
0 0
0 0
0 0
0 0
0 0
0 0
0 0
0 0
0 0
0 0
0 0
0 0
0 0
0 0
0 0
0 0
0 0
0 0
0 0
0 0
0 0
0 0
0 0
0 0
0 0
0 0
0 0
0 0
0 0
0 0
0 0
0 0
0 0
0 0
0 0
0 0
0 0
0 0
0 0
0 0
0 0
0 0
0 0
0 0
0 0
0 0
0 0
0 0
0 0
0 0
0 0
0 0
0 0
0 0
0 0
0 0
0 0
0 0
0 0
0 0
0 0
0 0
0 0
0 0
0 0
0 0
0 0
0 0
0 0
0 0
0 0
0 0
0 0
0 0
0 0
0 0
0 0
0 0
0 0
0 0
0 0
0 1
0 1
0 1
0 1
0 1
0 1
0 1
0 1
0 1
0 1
0 1
0 1
0 1
0 1
0 1
0 1
0 1
0 1
0 1
0 1
0 1
0 1
0 1
0 1
0 1
0 1
0 1
0 1
0 1
0 1
0 1
0 1
0 2
0 4
0 4
0 4
0 4
0 4
0 4
0 4
0 4
0 4
0 4
0 4
0 4
0 4
0 4
0 4
0 4
0 4
0 4
0 4
0 5
0 5
0 5
0 5
0 5
0 5
0 6
0 6
0 6
0 6
0 6
0 6
0 6
0 6
0 6
0 6
0 6
0 6
0 5
0 5
0 5
0 5
0 5
0 5
0 5
0 5
0 5
0 5
0 5
0 5
0 5
0 5
0 5
0 5
0 5
0 5
0 5
0 5
0 5
0 5
0 5
0 5
0 5
0 5
0 5
0 5
0 5
0 5
0 5
0 5
0 5
0 5
0 5
0 4
0 2
0 2
0 2
0 3
0 3
0 3
0 3
0 3
0 3
0 3
0 3
0 3
0 3
0 3
0 3
0 3
0 3
0 3
0 3
0 2
0 2
0 2
0 2
0 2
0 2
0 1
0 1
0 1
0 1
0 1
0 1
0 1
0 1
0 1
0 1
0 1
0 2
0 2
0 2
0 2
0 2
0 2
0 2
0 2
0 2
0 2
0 2
0 2
0 2
0 2
0 2
0 2
0 2
0 2
0 2
0 2
0 2
0 2
0 2
0 2
0 2
0 2
0 2
0 3
0 3
0 4
0 4
0 4
0 4
0 7
0 7
0 7
0 7
0 7
0 7
0 7
0 6
0 7
0 7
0 7
0 7
0 7
0 7
0 7
0 7
1 7
2 7
2 7
2 10
2 10
2 16
2 16
2 14
2 14
2 14
2 14
2 14
2 14
2 14
2 14
2 14
2 14
2 14
2 14
2 14
2 14
2 9
2 9
2 9
1 8
1 8
1 8
1 8
0 8
0 8
0 8
0 8
0 8
0 8
0 8
0 8
0 8
0 8
0 8
0 8
0 8
0 8
0 8
0 8
0 8
0 8
0 8
0 8
0 8
0 8
0 8
2 7
2 7
2 7
2 7
2 7
2 6
2 5
2 5
2 6
2 6
2 6
2 6
2 6
2 6
2 5
0 3
0 1
0 1
0 1
0 1
0 1
0 1
0 1
0 2
0 2
0 2
0 2
0 2
0 2
0 2
0 2
0 2
0 2
0 2
0 2
0 2
0 2
0 2
0 2
0 2
0 2
0 2
1 2
1 2
1 2
1 2
1 2
1 2
1 2
1 2
1 2
1 2
1 2
1 2
1 2
1 2
1 2
0 2
0 2
0 2
0 2
0 2
0 2
0 2
0 2
0 2
0 2
0 2
0 2
0 2
0 2
0 2
0 2
0 2
0 2
0 2
0 2
0 2
0 2
0 2
0 1
0 1
0 1
0 1
0 1
0 1
0 1
0 1
0 1
0 1
0 1
0 1
0 1
0 1
0 1
0 1
0 0
0 0
0 0
0 0
0 0
0 0
0 0
0 0
0 0
0 0
0 0
0 0
0 0
0 0
0 0
0 0
0 0
0 0
0 0
0 0
0 0
0 0
0 0
0 0
0 0
0 0
0 0
0 0
0 0
0 0
0 2
0 2
0 2
0 2
0 2
0 2
0 2
0 2
0 2
0 2
0 2
0 2
0 2
0 2
0 2
0 2
0 2
0 2
0 2
0 2
0 2
0 2
0 2
0 2
0 2
0 2
0 2
0 2
0 2
0 2
0 2
0 2
0 2
0 2
0 2
0 2
0 3
0 3
0 3
0 3
0 3
0 3
0 3
0 3
0 3
0 3
0 3
0 3
0 3
0 3
5 3
5 3
5 3
5 3
5 3
5 3
5 1
5 1
5 1
5 1
5 1
5 1
5 1
5 1
5 1
0 1
0 1
0 1
0 1
0 1
0 1
0 1
0 1
0 1
0 1
0 1
0 1
0 1
0 1
0 1
0 1
0 1
0 1
0 1
0 1
0 1
0 24
0 24
0 52
0 53
0 55
0 55
0 55
0 55
0 55
0 55
0 55
0 55
0 55
0 55
0 55
0 55
0 55
0 55
0 55
0 55
0 55
0 55
0 55
0 54
0 54
0 54
0 54
0 54
0 54
0 54
0 54
0 54
0 54
0 54
0 54
0 54
0 54
0 53
0 53
0 49
0 50
0 50
0 50
0 48
0 48
0 48
0 27
0 10
0 10
0 10
0 11
0 12
0 12
0 12
0 12
0 12
0 13
0 13
0 13
0 13
0 13
0 13
0 13
0 13
0 13
0 13
0 13
0 13
0 13
0 13
0 13
0 13
0 13
0 13
0 12
0 11
0 11
0 11
0 11
0 12
0 12
0 12
0 12
0 12
2 12
2 12
2 12
2 16
2 16
2 17
2 17
2 17
2 18
2 18
2 18
2 19
2 19
2 17
2 17
0 16
0 16
0 15
0 15
0 15
0 15
0 15
0 15
0 15
0 15
0 15
0 15
0 14
0 12
0 12
0 12
0 12
0 12
0 12
0 12
0 12
0 12
0 12
0 12
0 12
0 11
0 11
0 11
0 11
1 12
1 11
1 11
1 11
1 13
1 13
1 13
1 13
1 14
1 14
1 14
1 14
1 15
1 15
1 15
0 15
0 15
0 15
0 15
0 15
0 15
0 15
0 15
0 15
0 14
0 14
0 14
0 14
0 15
0 14
0 15
0 15
0 10
0 10
0 10
0 10
0 10
0 11
0 11
0 11
0 10
0 13
0 14
0 17
0 17
0 17
0 17
0 17
0 17
0 17
0 17
0 17
0 17
0 17
0 17
0 17
0 16
0 16
0 15
0 15
0 17
0 17
0 17
0 17
0 17
0 18
0 20
0 20
1 22
1 22
1 22
1 22
1 22
1 21
1 21
1 20
1 19
1 17
1 17
1 17
1 17
1 17
1 17
0 17
0 15
0 14
0 14
0 14
0 14
0 14
0 14
0 14
0 14
0 14
0 14
0 14
0 14
0 14
0 14
0 14
0 15
0 14
0 13
0 13
0 13
0 13
0 14
0 14
0 18
0 20
0 18
0 18
0 18
0 18
0 15
0 14
0 10
0 10
0 10
0 10
0 9
0 9
0 9
0 9
0 9
0 9
0 9
0 9
2 9
2 9
2 9
2 9
2 9
2 9
2 9
2 9
2 9
2 9
2 9
2 9
2 9
2 8
2 8
0 8
0 8
0 8
0 8
0 8
0 8
0 8
0 8
0 8
0 8
0 8
0 8
0 8
0 8
0 8
0 8
0 8
0 8
0 8
0 8
0 8
0 8
0 8
0 8
0 8
0 8
0 8
0 8
0 8
0 8
0 5
0 6
0 4
0 5
0 5
0 5
0 5
0 5
0 2
0 5
0 5
0 8
0 8
0 8
0 14
0 25
0 51
0 53
0 76
0 75
0 80
0 88
0 94
0 121
0 180
0 290
0 300
0 314
0 337
0 356
0 360
0 364
0 394
0 395
0 399
0 414
1 725
1 820
1 830
1 853
1 855
1 854
1 840
1 822
1 816
1 817
1 818
1 818
1 819
1 819
1 819
1 819
1 820
1 820
1 820
1 821
1 999
1 997
1 1028
1 1026
1 1029
1 1022
1 1025
1 1035
1 1047
1 1053
1 1071
1 1071
1 1071
1 1071
1 1071
1 1072
1 1073
1 1074
1 1054
1 1054
1 1036
1 1228
1 1230
1 1229
1 1221
1 1217
1 1219
1 1222
1 1220
1 1219
1 1215
1 1213
1 1207
1 1191
1 1187
1 1189
1 1189
1 1188
1 1179
1 1173
1 1159
1 1115
1 1041
1 1037
1 1029
1 1002
1 958
1 935
1 934
1 934
1 934
1 929
1 885
0 552
0 539
0 530
0 530
0 530
0 531
0 514
0 546
0 541
0 542
0 541
0 541
0 542
0 542
0 542
0 542
0 541
0 541
0 540
0 538
0 346
0 341
0 310
0 302
0 299
0 299
0 296
0 283
0 259
0 253
0 253
0 253
0 253
0 254
1 293
1 293
1 294
1 292
1 292
1 291
3 288
3 88
3 87
3 87
3 87
3 87
3 85
3 85
3 85
3 85
3 85
3 85
3 84
3 84
3 84
3 82
3 82
1 82
1 82
1 82
1 80
1 80
1 78
1 78
1 78
1 78
1 82
1 82
1 82
1 82
1 82
1 82
1 82
1 82
1 82
1 82
1 82
1 82
1 81
1 83
1 48
1 47
1 47
1 47
1 47
1 47
1 47
1 47
1 47
1 47
1 47
1 47
1 47
1 47
1 47
1 47
1 47
1 47
1 47
1 47
1 47
1 47
1 47
1 47
1 47
1 47
1 46
0 7
0 7
0 6
0 6
0 6
0 6
0 6
0 6
0 6
0 6
0 6
0 6
0 6
0 6
0 6
0 6
0 6
0 6
0 6
0 6
0 6
0 6
0 6
0 6
0 6
0 6
0 6
0 6
0 6
2 6
2 6
2 6
2 2
2 2
2 2
2 3
2 3
2 3
3 3
4 3
4 3
4 3
4 3
4 3
4 3
3 1
2 1
2 1
2 1
2 1
2 1
2 1
2 1
2 1
2 1
2 1
2 1
2 1
2 1
2 1
2 1
2 1
2 1
2 1
2 1
2 1
2 2
2 2
2 2
2 2
2 2
2 2
2 2
1 2
1 2
1 2
1 2
1 2
1 2
0 2
0 2
0 2
0 3
0 3
0 3
0 3
0 3
0 3
0 3
0 3
0 3
0 3
0 3
0 3
0 3
0 3
0 3
0 3
0 3
0 3
0 3
0 3
0 3
0 3
0 3
0 3
0 3
0 3
0 2
0 2
0 2
0 2
0 2
0 2
0 2
0 2
0 2
0 2
0 2
0 3
0 3
0 4
0 4
0 4
0 4
0 4
0 4
0 4
0 4
0 4
0 4
0 4
0 4
0 4
0 4
0 4
0 5
0 5
0 5
0 4
0 4
0 4
0 4
0 4
0 4
0 4
0 4
0 4
0 4
0 4
0 4
0 4
0 4
0 4
0 4
0 3
0 3
0 3
0 3
0 3
0 3
0 3
0 3
0 3
0 3
0 3
0 3
0 3
0 3
0 3
0 3
0 3
0 3
0 3
0 2
0 1
0 1
0 1
0 1
0 1
0 1
0 1
0 1
0 1
0 1
0 1
0 1
0 1
0 1
0 1
0 1
0 2
0 2
0 2
0 2
0 2
0 2
0 2
0 2
0 2
0 2
0 2
0 2
0 2
0 2
0 2
0 2
0 2
0 2
0 1
0 1
0 1
0 1
0 1
0 1
0 1
0 1
0 1
0 1
0 1
0 1
0 1
0 1
0 1
0 1
0 1
0 1
0 1
0 1
0 1
0 1
0 1
0 1
0 1
0 1
0 1
0 1
0 1
0 1
0 1
0 1
0 3
0 3
0 3
0 4
0 4
0 4
0 4
0 4
0 4
0 4
0 4
0 4
0 4
0 4
0 4
0 4
0 12
0 13
0 13
0 13
0 13
0 13
0 12
0 11
0 11
0 12
0 11
0 13
0 14
0 14
0 14
0 14
0 14
0 14
0 11
0 11
0 8
0 8
0 8
0 8
0 8
0 8
0 8
0 8
0 8
0 8
0 8
0 8
0 8
0 8
0 8
0 8
0 8
0 8
0 8
0 8
0 8
0 8
0 8
0 8
0 8
0 8
0 8
0 8
0 8
0 8
0 8
0 8
0 8
0 8
0 8
0 8
0 8
0 8
0 8
0 8
0 7
0 7
0 7
0 7
0 7
0 7
0 7
0 7
0 7
0 7
0 7
0 7
0 7
0 5
0 4
0 4
0 4
0 4
0 4
0 3
0 3
0 3
0 2
0 0
0 0
0 0
0 0
0 1
0 3
0 3
0 3
0 5
0 5
0 5
0 5
0 5
0 7
0 7
0 7
0 7
0 8
0 8
0 8
0 8
0 8
0 8
0 8
0 8
0 8
0 8
0 8
0 11
0 11
0 11
0 11
0 11
0 11
0 11
0 11
0 9
0 9
0 9
0 9
0 9
0 9
0 9
0 9
0 9
0 9
0 9
0 9
0 9
0 9
0 9
0 9
0 9
0 9
0 9
0 9
0 9
0 8
0 7
0 6
0 6
0 5
0 5
0 5
0 5
0 5
0 5
0 5
0 5
0 5
0 5
0 5
0 6
0 6
0 8
0 8
0 8
0 8
0 9
0 9
0 9
0 8
0 8
0 8
0 8
0 8
0 8
0 8
0 8
0 8
0 7
0 7
0 7
1 7
1 7
1 7
1 7
2 7
2 7
2 7
2 7
2 4
2 4
2 4
2 4
2 4
2 4
2 4
2 4
2 4
2 4
2 4
2 4
2 4
2 4
2 4
2 4
2 4
2 4
2 4
2 4
2 4
2 4
2 4
0 4
0 4
0 4
0 4
0 4
0 4
0 4
0 4
0 4
0 4
0 4
0 4
0 4
0 4
0 4
0 4
0 4
0 4
0 4
0 4
0 4
0 3
0 2
0 1
0 1
0 1
0 1
0 0
0 0
0 0
0 0
0 0
0 0
0 0
0 0
0 0
0 0
0 0
0 0
0 0
0 0
0 0
0 0
0 0
0 0
0 0
0 0
0 0
0 0
0 0
0 0
0 0
0 0
0 0
0 0
0 0
0 0
0 0
0 0
0 0
0 0
0 0
0 0
0 0
0 0
0 0
0 0
0 0
0 0
0 0
0 0
0 0
0 0
0 0
0 0
0 0
0 3
0 3
0 3
0 3
0 7
0 9
0 11
0 11
0 11
0 11
0 11
0 11
0 11
0 11
0 11
0 11
0 11
0 11
0 11
0 11
0 11
0 11
0 11
0 11
0 11
0 11
0 11
0 11
0 11
0 11
0 11
0 11
0 11
0 11
0 11
0 11
0 12
0 12
0 13
0 13
0 13
0 13
0 13
0 13
0 13
0 13
0 13
0 13
0 13
0 13
0 13
0 13
0 13
0 13
0 13
0 13
0 13
0 13
0 13
0 13
0 13
0 13
0 13
0 13
0 13
0 13
0 13
0 13
0 13
0 13
0 8
0 7
0 7
0 7
0 7
0 7
0 7
0 2
0 2
0 2
0 2
0 2
0 2
0 2
0 2
0 2
0 2
0 3
0 3
0 4
0 4
0 6
0 6
0 6
0 6
0 6
0 6
0 6
0 6
0 6
0 6
0 6
0 6
0 6
0 6
0 6
0 6
0 6
0 6
0 5
0 5
0 3
0 3
0 3
0 2
0 2
0 3
0 3
0 3
0 3
0 3
0 3
0 3
0 3
0 3
0 3
0 3
0 3
0 3
0 3
0 3
0 3
0 3
0 4
0 4
0 4
0 4
0 4
0 4
0 11
0 12
0 14
0 16
0 19
0 19
0 19
0 19
0 19
0 18
0 18
0 20
0 21
0 22
0 26
0 28
0 28
0 28
0 28
0 28
0 27
0 27
0 27
0 27
0 27
0 26
0 26
0 26
0 26
0 26
0 26
0 26
0 26
0 27
0 27
0 27
0 27
0 27
0 27
0 27
0 27
0 28
0 28
0 28
0 28
0 28
0 28
0 28
0 24
0 22
0 20
0 19
0 19
0 19
0 19
0 19
0 19
0 18
0 18
0 18
0 18
0 17
0 17
0 17
0 18
0 18
0 19
0 19
0 19
0 19
0 19
0 19
0 19
0 18
0 17
0 16
0 14
0 13
0 13
0 13
0 13
0 13
0 13
0 12
0 9
0 9
0 8
0 5
0 5
0 5
0 6
0 6
0 6
0 6
0 6
0 6
0 6
0 6
0 6
0 6
0 6
0 6
0 6
0 6
0 5
0 5
0 4
0 4
0 3
0 3
0 3
0 3
0 3
0 3
0 2
0 2
0 2
0 2
0 2
0 5
0 5
0 5
0 5
0 5
0 5
0 5
1 5
1 5
1 5
1 5
1 6
1 6
1 6
1 6
1 6
1 6
1 6
1 6
1 6
1 6
1 6
1 6
0 6
0 6
0 6
0 6
0 6
0 6
0 5
0 5
0 5
0 5
0 5
0 7
0 7
0 8
0 8
0 8
0 8
0 8
0 7
0 7
0 7
0 7
0 7
0 7
0 7
0 7
0 7
0 7
0 7
0 8
0 8
0 8
0 8
0 8
0 9
0 9
0 11
0 12
0 12
0 12
0 12
0 12
0 12
0 12
0 15
0 17
0 17
0 18
0 18
0 18
0 14
0 15
0 15
0 15
0 14
0 14
0 14
0 14
0 14
0 14
0 14
0 13
0 13
0 13
0 13
0 13
0 13
0 13
0 13
0 13
0 13
0 13
0 13
0 13
0 13
0 13
0 14
0 18
0 25
0 39
0 39
0 39
2 40
2 41
2 40
2 39
2 41
2 42
2 42
2 42
2 42
2 42
2 42
2 43
2 43
2 44
2 44
2 44
0 44
0 44
0 44
0 47
0 45
0 58
0 60
0 60
0 60
0 57
0 57
0 50
0 45
0 45
0 43
0 43
0 43
0 43
0 43
0 61
0 62
0 60
0 60
0 60
0 61
0 62
0 62
0 62
0 62
0 62
0 61
0 59
0 58
0 58
0 58
0 58
0 39
0 39
0 39
0 39
0 39
0 39
0 39
0 39
0 38
0 38
0 37
0 37
0 37
0 37
0 37
0 36
0 34
0 28
0 21
0 21
0 20
0 19
0 19
0 18
0 18
0 18
0 18
0 18
0 18
0 18
0 18
0 18
0 17
0 17
0 16
0 16
0 16
0 16
0 16
0 16
0 16
0 15
0 3
0 3
0 4
0 4
0 5
0 21
0 21
0 21
0 21
0 21
0 22
0 22
0 22
0 22
0 22
0 22
0 22
0 21
0 20
0 19
0 19
0 19
0 19
0 19
0 19
0 18
0 18
0 18
0 18
0 18
0 18
0 18
0 18
0 18
0 18
0 18
0 18
0 18
0 18
0 18
0 18
0 18
0 18
0 18
0 19
0 19
0 19
0 19
0 48
0 49
0 50
0 56
0 60
0 63
0 150
0 170
0 174
0 206
0 212
0 219
0 220
0 220
0 223
0 224
0 228
0 228
0 229
0 231
0 231
0 237
0 238
0 238
0 239
0 240
0 240
0 254
0 259
0 258
0 234
0 251
0 252
0 457
0 449
0 449
0 449
0 449
0 449
0 449
0 449
0 449
0 449
0 449
0 449
0 449
0 449
0 449
0 449
0 449
0 449
0 449
0 449
0 449
0 449
3 450
5 450
5 452
8 452
8 454
8 453
8 453
8 453
8 453
8 455
8 456
8 458
8 459
8 459
8 461
8 461
8 463
8 463
8 434
8 434
8 433
8 432
8 428
8 420
8 298
8 283
8 282
8 281
8 281
8 281
8 281
8 281
8 276
8 276
8 275
8 274
8 271
8 270
8 269
8 264
8 264
8 264
8 263
8 262
8 259
8 238
8 237
8 237
8 237
7 220
7 218
5 7
4 7
4 7
4 7
2 1
2 1
2 1
2 1
2 1
2 1
2 1
2 1
2 1
2 1
2 1
2 1
1 1
0 1
0 1
0 1
0 1
0 1
0 1
0 1
0 1
0 1
0 0
0 0
0 0
0 0
0 0
0 0
0 0
0 0
0 0
0 0
0 0
0 0
0 0
0 0
0 0
0 0
0 0
0 0
0 0
0 0
0 0
0 0
0 0
0 0
0 0
0 0
0 0
0 0
0 0
0 0
0 0
0 0
0 0
0 0
0 0
0 0
0 0
0 0
0 0
0 0
0 0
0 0
0 0
0 0
0 0
0 1
0 1
0 1
0 1
0 1
0 1
0 1
0 1
0 1
0 1
0 1
0 2
0 2
0 2
0 2
0 2
0 2
0 2
0 2
0 2
0 2
4 2
4 2
4 2
4 2
4 2
4 2
4 2
4 2
4 2
4 2
4 2
4 2
4 2
4 2
4 2
0 2
0 2
0 2
0 2
0 2
0 2
0 2
0 2
0 2
0 2
0 2
0 2
0 2
0 2
0 2
0 4
0 4
0 4
0 4
0 4
0 4
0 4
0 4
0 4
0 4
0 4
0 4
0 4
0 4
0 4
0 4
0 2
0 2
0 2
0 2
0 2
0 2
0 1
0 1
0 1
0 1
0 1
0 1
0 1
0 1
0 1
0 1
0 1
0 0
0 0
0 0
0 0
0 0
0 0
0 0
0 0
0 0
0 1
0 1
0 1
0 2
0 2
0 2
0 2
0 2
0 2
0 2
0 2
0 2
0 2
0 2
0 2
0 2
0 2
0 2
0 2
0 2
0 2
0 2
0 2
0 2
0 3
0 3
0 3
0 3
0 3
0 3
0 3
0 3
0 3
0 3
0 3
0 3
0 3
0 3
0 3
0 3
0 3
0 3
0 3
0 3
0 3
0 3
0 3
0 3
0 3
0 3
0 3
0 3
0 3
0 3
0 3
0 3
0 3
0 3
0 3
0 3
0 3
0 3
0 3
0 3
0 3
0 3
0 3
0 3
0 3
0 3
0 4
0 4
0 4
0 3
0 3
0 3
0 2
0 2
0 2
0 2
0 2
0 2
0 2
0 2
0 2
0 2
0 2
0 2
0 2
0 2
0 2
0 2
0 2
0 2
0 2
0 2
0 1
0 1
0 1
0 1
0 1
0 1
0 1
0 1
0 1
0 1
0 1
0 1
0 1
0 1
0 1
0 1
0 2
0 2
0 2
0 2
0 2
0 2
0 5
0 20
1 37
2 40
2 42
2 42
2 44
2 44
2 44
2 44
2 44
2 44
2 44
2 44
2 46
2 49
2 51
2 51
2 51
2 52
2 52
2 52
2 52
2 52
2 51
2 51
2 52
2 52
2 52
2 53
2 55
2 55
2 55
2 55
2 55
2 58
2 58
2 58
2 59
2 59
2 59
2 59
2 60
2 60
2 60
2 60
2 60
2 58
2 58
2 53
2 53
2 50
2 51
2 50
2 59
2 59
2 59
2 59
2 59
2 59
2 59
2 59
2 59
2 59
2 59
2 59
2 59
2 56
2 55
2 55
2 53
2 53
2 52
1 45
1 33
1 30
0 28
0 28
0 28
0 26
0 27
0 27
0 27
0 28
0 29
1 29
1 32
1 30
1 27
1 26
1 26
1 33
1 34
1 37
1 38
1 63
1 63
1 66
2 67
2 65
2 68
2 69
2 69
2 67
2 67
2 67
2 67
2 67
2 66
2 66
2 79
2 79
2 79
2 79
2 78
2 78
2 78
2 78
2 78
2 77
2 77
2 76
2 76
2 76
2 76
2 76
2 76
2 67
2 67
2 67
2 67
2 67
3 67
3 67
3 68
3 68
3 68
3 68
3 68
3 68
3 68
4 68
4 68
4 68
4 69
4 69
4 69
3 69
3 67
3 67
3 66
3 66
3 67
3 67
3 68
3 69
3 69
2 69
2 69
2 68
2 67
2 67
2 67
2 66
2 57
1 57
1 55
1 54
2 31
2 30
2 29
2 29
2 58
2 54
2 61
2 60
3 64
3 68
3 70
3 70
3 71
3 69
3 69
3 56
3 56
3 56
3 56
3 56
3 57
3 57
3 57
3 58
3 58
3 58
3 58
3 58
3 58
3 59
3 60
3 60
3 60
3 65
3 65
3 66
3 66
3 66
4 71
4 70
4 70
4 70
4 70
4 70
4 71
4 71
3 71
3 71
3 71
3 70
3 70
5 74
5 74
5 74
6 74
6 74
6 75
6 74
6 73
6 73
6 72
6 71
6 71
6 71
6 71
6 71
6 71
6 71
6 71
6 71
6 71
6 71
6 71
4 66
4 66
2 64
2 64
2 25
2 25
2 16
2 16
2 14
2 10
2 10
2 8
2 7
2 7
2 7
2 7
2 7
2 7
2 7
2 7
2 7
2 7
2 7
2 7
2 7
3 7
3 7
4 7
4 7
4 7
4 6
4 6
4 6
4 6
4 6
4 6
4 7
4 7
4 6
4 6
4 6
4 7
4 7
4 7
4 7
4 7
4 7
4 8
4 9
4 9
4 9
2 5
2 5
1 5
1 5
0 4
0 4
0 4
0 4
0 4
0 4
0 4
0 4
0 3
0 2
0 2
0 2
0 2
0 2
0 2
0 2
0 2
0 2
0 2
0 2
0 2
0 2
0 2
0 2
0 2
0 2
0 2
0 2
1 2
1 2
1 2
1 2
1 2
1 2
1 2
1 2
1 2
1 2
1 2
1 2
1 2
1 2
1 2
0 2
0 2
0 2
0 2
0 2
0 2
0 2
0 2
0 2
0 2
0 2
0 1
0 1
0 1
0 1
0 1
0 0
0 0
0 0
0 0
0 0
0 0
0 0
0 0
0 0
0 0
0 0
0 1
0 1
0 1
0 2
0 3
0 3
1 4
1 4
1 4
1 5
1 5
1 5
1 5
1 5
1 5
1 5
1 4
1 4
1 4
1 3
1 3
1 3
1 3
1 3
1 3
1 3
1 3
1 3
1 3
1 3
1 3
1 3
1 3
0 3
0 3
0 3
0 3
0 3
0 3
0 3
0 3
0 3
0 2
0 2
0 2
0 2
0 1
0 1
0 1
0 1
0 1
0 1
0 1
0 1
0 1
0 1
0 1
0 1
0 1
0 1
0 1
0 3
0 3
0 5
0 5
0 5
0 6
0 7
0 8
0 9
0 9
0 11
0 11
0 11
0 12
0 13
1 13
1 13
1 13
1 12
1 12
1 12
1 12
1 12
1 12
1 12
1 12
1 12
1 12
1 12
1 12
1 12
0 12
0 12
0 12
0 12
0 12
0 12
0 12
0 12
0 12
0 12
0 12
0 12
0 12
0 12
0 14
0 14
0 16
0 16
0 16
0 16
0 16
0 16
0 16
0 16
0 16
0 16
1 16
1 17
1 18
1 18
1 18
1 18
1 18
1 12
1 9
1 8
1 6
1 6
1 6
1 6
1 6
0 6
0 6
0 6
0 5
0 5
0 5
0 5
0 5
0 5
0 5
0 6
0 6
0 6
0 6
0 6
0 5
0 5
0 7
0 7
0 7
0 7
0 7
0 7
0 7
0 7
0 7
0 7
0 7
0 7
0 7
0 7
0 10
0 10
0 10
0 10
0 10
0 10
0 10
0 10
0 10
0 10
0 10
0 10
0 10
0 10
0 10
0 10
0 10
0 10
0 10
0 10
0 10
0 10
0 10
0 10
0 10
0 10
0 10
0 11
0 9
0 9
0 9
0 11
0 11
0 11
0 11
0 10
0 9
0 9
0 9
0 9
0 9
0 9
0 9
0 9
0 9
0 9
0 9
0 9
0 9
0 9
0 9
0 8
0 8
0 8
0 8
0 8
0 7
0 7
0 6
0 6
0 6
0 6
0 7
0 7
0 7
0 7
0 7
0 7
0 7
0 7
0 7
0 7
0 6
0 4
0 4
0 4
0 4
0 4
0 4
0 4
0 4
0 4
0 4
0 4
0 4
0 4
0 4
0 4
0 4
0 4
0 4
0 4
0 4
0 4
0 4
0 4
0 4
0 4
0 4
0 4
0 3
0 3
0 3
0 3
0 1
0 1
0 1
0 1
0 1
0 1
0 1
0 1
0 1
0 1
0 1
0 1
0 1
0 1
0 2
0 2
0 2
0 2
0 2
0 2
0 2
0 2
0 3
0 3
0 3
0 4
0 7
0 7
0 7
0 16
0 16
0 20
0 21
0 22
0 22
0 22
0 22
0 22
0 22
0 22
0 22
0 22
0 22
0 22
0 22
0 22
0 21
0 21
0 21
0 21
0 22
0 22
0 22
0 22
0 22
0 22
0 22
0 22
0 22
0 23
0 27
0 28
0 29
0 29
0 29
0 29
0 29
0 29
0 29
0 29
0 29
0 29
0 29
0 29
0 29
0 29
0 30
0 30
0 30
0 30
0 30
0 30
0 30
0 30
0 30
0 28
0 26
0 25
0 25
0 25
0 25
0 25
0 25
0 25
0 25
0 25
0 25
0 25
0 24
0 23
0 23
0 22
0 15
0 13
0 10
0 10
0 10
0 10
0 11
0 11
0 11
0 11
0 11
0 11
0 11
0 11
0 12
0 12
0 12
0 13
0 14
0 14
0 14
0 13
0 13
0 13
0 13
0 13
0 13
0 14
0 14
0 14
0 14
0 10
0 9
0 13
0 13
0 13
0 15
0 15
0 19
0 19
0 19
0 19
0 19
0 19
0 19
0 19
0 19
0 18
0 18
0 18
0 18
0 18
0 18
0 18
0 18
0 18
0 18
0 18
0 18
0 18
0 18
0 18
0 18
0 18
0 17
0 17
0 17
0 17
0 16
0 16
0 16
0 16
0 16
0 15
0 16
0 16
0 16
0 16
0 16
0 15
0 15
0 15
0 15
0 15
0 15
0 15
0 15
0 15
0 16
0 16
0 15
0 15
0 16
0 16
0 16
0 17
0 17
0 17
0 17
0 17
0 14
0 15
1 15
1 15
1 13
1 13
1 7
1 5
1 5
1 6
1 6
1 6
1 6
1 6
1 6
1 6
1 7
1 11
1 12
1 12
0 12
0 12
0 12
0 12
0 12
0 12
0 12
0 12
0 12
0 12
0 13
0 15
0 15
0 15
0 15
0 15
0 15
0 15
0 15
0 15
0 15
0 15
0 15
0 15
0 15
0 15
0 15
0 14
0 14
0 14
0 15
0 16
0 16
0 16
0 16
0 16
0 16
0 16
0 16
0 16
0 17
0 18
0 18
0 18
0 20
0 21
0 19
0 19
0 19
0 20
0 20
0 20
0 20
0 21
0 21
0 21
0 21
0 21
0 21
0 21
0 23
0 23
0 22
0 24
0 26
0 26
0 27
0 27
0 27
0 26
0 18
0 16
0 16
0 15
0 15
0 15
0 15
0 15
0 15
0 15
0 15
0 15
0 15
0 15
0 14
0 14
0 14
0 14
1 14
1 14
1 14
1 14
1 14
1 13
1 13
1 13
1 13
1 13
1 13
1 13
1 13
1 15
1 15
0 16
0 13
0 13
0 11
0 9
0 9
0 9
0 9
0 9
0 9
0 8
0 8
0 7
0 7
0 6
0 6
0 6
0 6
0 6
0 6
0 6
0 6
0 6
0 5
0 4
0 7
0 7
0 7
0 8
0 8
1 8
1 8
1 8
1 7
1 7
1 7
1 7
1 7
1 8
1 8
1 8
1 8
1 8
1 8
1 8
1 11
1 11
1 11
1 11
1 11
0 11
0 11
0 11
0 11
0 11
0 11
0 11
0 11
0 11
0 11
0 8
0 8
0 8
0 8
0 8
0 8
0 8
0 8
0 8
0 8
0 8
0 8
0 9
0 9
0 9
0 9
0 9
0 9
0 9
0 9
0 10
0 10
0 10
0 10
0 10
0 10
0 10
0 10
0 10
0 10
0 10
0 10
0 10
0 10
0 10
0 10
0 10
0 10
0 7
0 7
0 7
0 6
0 6
0 6
0 6
0 6
0 6
0 6
0 6
0 5
0 5
0 5
0 5
0 5
0 5
0 5
0 5
0 5
0 5
0 5
0 5
0 5
0 5
0 5
0 5
0 5
0 5
0 5
0 5
0 5
0 6
0 6
0 6
0 6
0 6
0 6
0 6
0 6
0 6
0 6
0 6
0 6
0 6
0 5
0 3
0 2
0 2
0 2
0 2
0 2
0 2
0 3
0 3
0 2
0 2
0 2
0 2
0 2
0 2
0 2
0 2
0 2
0 2
0 2
0 2
0 2
0 1
0 1
0 1
0 1
0 1
0 2
0 2
0 2
0 2
0 2
0 2
0 2
0 2
0 2
0 2
0 2
0 2
0 2
0 2
0 2
0 2
0 2
0 2
0 2
0 2
0 2
0 2
0 2
0 2
0 2
0 2
0 2
0 2
0 2
0 2
0 2
0 2
0 1
0 1
0 1
0 1
0 1
0 1
0 1
0 1
0 1
0 1
0 1
0 1
0 1
0 1
0 1
0 1
0 1
0 1
0 1
0 1
0 1
0 1
0 1
0 1
0 1
0 1
0 1
0 1
0 1
0 1
0 1
0 1
0 1
0 1
0 1
0 1
0 1
0 1
0 1
0 1
0 1
0 0
0 0
0 0
0 1
0 1
0 1
0 1
0 1
0 1
0 1
0 3
0 3
0 3
0 3
0 3
0 4
0 4
0 4
0 4
0 4
0 5
0 10
0 10
0 10
0 10
0 10
0 13
0 13
0 13
0 13
0 13
0 13
0 13
0 14
0 12
0 12
0 12
0 12
0 12
0 12
0 12
0 12
0 12
0 12
0 12
0 12
0 12
0 12
0 12
0 12
0 12
0 12
0 12
0 12
0 12
0 13
0 14
0 14
0 14
0 14
0 14
0 14
0 14
0 14
0 14
0 14
0 15
0 17
0 17
0 17
0 17
0 17
0 17
0 17
0 17
0 17
0 17
0 17
0 17
0 17
0 17
0 17
0 17
0 16
0 15
0 15
0 15
0 16
0 16
0 16
0 16
0 18
0 16
0 14
0 14
0 14
0 18
0 18
0 18
0 14
0 14
0 14
0 13
0 13
0 13
0 11
0 9
0 9
0 8
0 8
0 8
0 8
0 8
0 10
0 10
0 10
0 10
0 10
0 10
0 10
0 10
0 10
0 10
0 10
0 10
0 10
0 10
0 10
0 10
0 10
0 10
0 10
0 10
0 10
0 10
0 10
0 10
0 10
0 10
0 9
0 9
0 9
0 9
0 9
0 9
0 9
0 9
0 9
0 9
0 9
0 9
0 9
0 9
0 9
0 8
0 7
0 7
0 7
0 6
0 6
0 6
0 6
0 6
0 4
0 4
0 4
0 4
0 4
0 4
0 0
0 1
0 1
0 1
0 1
0 1
0 1
0 1
0 1
0 1
0 1
0 1
0 1
0 1
0 1
0 1
0 1
0 1
0 1
0 1
0 1
0 1
0 1
0 1
0 1
0 1
0 1
0 1
0 1
0 1
0 1
0 1
0 1
0 1
0 1
0 1
0 1
0 1
0 1
0 1
0 1
0 1
0 1
0 1
0 1
0 1
0 1
0 1
0 1
0 1
0 1
0 1
0 1
0 1
0 1
0 1
0 1
0 1
0 1
0 1
0 1
0 1
0 1
0 1
0 2
0 2
0 2
1 4
1 4
1 4
1 4
1 4
2 4
2 4
2 3
2 3
2 3
2 3
2 3
2 3
2 4
2 4
2 4
2 4
2 4
2 4
2 4
2 4
1 4
1 4
1 4
1 4
1 4
1 4
1 4
1 4
1 4
1 4
1 4
1 4
1 4
1 4
1 4
1 4
1 5
1 5
1 5
1 5
1 5
1 5
1 5
1 5
1 5
1 5
1 4
1 4
1 4
1 4
1 4
1 4
1 3
1 3
1 3
1 3
1 3
1 3
1 3
1 3
1 3
2 3
2 3
2 3
2 3
2 3
2 3
2 3
2 3
2 3
2 3
1 3
1 2
1 2
1 2
1 2
1 2
1 2
1 2
1 2
1 2
1 2
1 2
1 2
1 2
1 1
5 49
5 49
5 49
5 49
5 49
5 49
5 49
5 49
5 49
5 49
5 49
5 49
5 49
5 49
5 49
1 1
1 1
1 1
1 1
1 1
1 1
1 1
1 1
1 0
1 0
1 0
1 0
1 0
1 0
1 0
1 0
1 0
1 0
1 0
1 0
1 0
1 0
1 0
1 0
1 0
1 0
1 0
1 0
1 0
1 0
1 0
1 0
1 0
0 0
0 0
0 0
0 0
0 0
0 0
0 0
0 0
0 0
0 0
0 0
0 0
0 0
0 0
0 0
0 0
0 0
0 0
0 0
0 0
0 0
0 0
0 0
0 0
0 0
0 0
0 0
0 0
0 0
0 0
0 0
0 0
0 0
0 0
0 0
0 0
0 0
0 0
0 0
0 0
0 0
0 0
0 0
0 0
0 0
0 0
0 0
0 0
0 0
0 0
0 0
0 0
0 0
0 0
0 0
0 0
0 0
0 0
0 0
0 0
0 0
0 0
0 0
0 0
0 0
0 0
0 0
0 0
0 0
0 0
0 0
0 0
0 0
0 0
0 1
0 1
0 1
0 1
0 1
0 1
0 1
0 1
0 1
0 1
0 1
0 1
0 1
0 1
0 1
0 1
0 1
0 1
0 1
0 1
0 1
0 1
0 1
0 1
0 1
0 1
0 1
1 1
1 1
1 1
1 1
1 1
1 1
1 1
1 1
1 1
1 1
1 1
1 1
1 1
1 1
1 1
1 1
1 1
1 1
1 1
0 1
0 1
0 1
0 1
0 2
0 2
0 2
0 2
0 2
0 2
0 2
0 2
0 2
0 2
0 2
0 2
0 2
0 2
0 2
0 2
0 2
0 2
0 1
0 1
0 1
0 1
0 1
0 1
0 1
0 1
0 3
0 3
0 3
0 3
0 5
0 5
0 7
0 7
0 7
0 7
0 7
1 7
1 7
1 7
1 7
1 7
1 7
1 7
1 7
1 7
1 7
1 5
1 5
1 5
1 5
1 5
1 5
0 5
0 5
0 5
0 5
0 5
0 5
0 5
0 5
0 5
0 5
0 5
0 5
0 5
0 5
0 5
0 5
0 5
0 5
0 5
0 5
0 2
0 2
0 2
0 2
1 2
1 2
1 2
1 2
2 4
2 4
2 4
2 4
2 4
2 4
2 4
2 4
2 4
2 4
2 4
2 4
2 3
2 3
2 3
2 3
2 3
2 4
2 4
2 4
2 4
2 4
3 4
3 4
3 4
3 4
3 4
3 4
3 4
3 4
3 4
3 4
3 3
3 3
3 3
3 3
3 3
3 3
2 3
2 3
2 3
2 3
2 3
2 3
2 3
2 3
2 3
2 3
2 3
2 3
2 3
2 3
1 3
1 3
1 3
1 2
1 2
1 2
1 2
1 2
1 2
1 2
1 2
1 2
1 2
1 2
1 2
0 1
0 1
0 1
0 1
0 1
0 1
0 0
0 0
0 0
0 0
0 0
0 0
0 0
0 0
0 0
0 0
0 0
0 0
0 0
0 0
0 0
0 0
0 0
0 0
0 0
0 0
0 0
0 1
0 1
0 1
0 1
0 1
0 1
0 1
0 1
0 1
0 1
0 1
0 1
0 1
0 1
0 1
0 1
0 0
0 0
0 0
0 0
0 0
0 0
0 0
0 0
0 0
0 0
0 0
0 0
0 0
0 0
0 0
0 0
0 0
0 0
0 0
0 0
0 0
0 0
0 0
0 0
0 0
0 0
0 0
0 0
0 0
0 2
0 2
0 2
0 2
0 2
0 2
0 2
0 2
0 2
0 2
0 2
0 2
0 2
0 2
0 2
0 2
0 0
0 0
0 0
0 0
0 0
0 0
0 0
0 0
0 0
0 0
0 0
0 0
0 0
0 0
0 0
0 0
0 0
0 0
0 0
0 1
0 1
0 1
0 1
0 1
0 1
0 2
0 2
0 2
0 2
0 2
0 2
0 2
0 2
0 2
0 2
0 1
0 1
0 1
0 1
0 1
0 1
0 1
0 1
0 1
0 1
0 1
0 1
0 1
0 1
0 1
0 1
0 1
0 1
0 1
0 1
0 1
0 1
0 1
0 1
0 1
0 1
0 1
0 1
0 1
0 1
0 1
0 1
0 1
0 1
0 1
0 1
0 1
0 1
0 1
0 1
0 1
0 1
0 1
0 1
0 1
0 1
0 1
0 1
0 1
0 1
0 1
0 1
0 1
0 1
0 1
0 1
0 1
0 1
0 1
0 1
0 1
0 1
0 1
0 0
0 0
0 0
0 0
0 0
0 0
0 0
0 0
0 0
0 0
0 0
0 0
0 0
0 0
0 0
0 0
0 0
0 0
0 0
0 0
0 0
0 0
0 0
0 0
0 0
0 0
0 0
0 0
0 0
0 1
0 1
0 1
0 2
0 2
0 2
0 2
0 2
0 2
0 2
0 2
0 2
0 2
0 2
0 2
0 2
0 2
0 2
0 2
0 2
0 2
0 2
0 2
0 2
0 2
0 2
0 3
0 3
0 3
1 3
2 4
2 4
2 4
3 4
3 4
3 4
3 4
3 4
3 4
3 5
3 6
3 6
3 6
3 6
3 6
3 6
3 6
3 6
3 6
3 6
3 6
3 6
3 6
3 6
3 6
3 6
3 6
3 6
3 6
3 6
3 6
2 5
2 5
2 5
1 4
1 4
1 4
1 4
1 4
1 4
1 4
1 4
1 4
1 4
1 4
1 4
2 4
2 4
2 4
2 4
2 4
2 4
2 4
2 4
3 4
3 4
3 4
3 4
3 4
3 4
3 4
3 4
2 4
2 4
2 4
2 4
2 4
2 4
2 4
2 3
2 3
2 4
2 5
2 4
2 4
2 4
1 4
1 4
1 4
1 4
1 4
1 4
1 2
1 2
1 2
1 2
1 2
1 2
1 1
1 0
1 0
1 0
1 0
1 0
1 0
1 0
1 0
1 0
1 0
1 0
1 0
1 0
1 0
1 0
1 0
1 0
1 0
1 0
1 0
1 0
1 0
1 0
1 0
1 0
1 0
1 0
1 0
1 0
1 0
1 0
1 0
1 0
1 2
1 2
1 2
1 2
1 2
0 2
0 2
0 2
0 2
0 2
0 2
0 2
0 2
0 2
0 2
0 2
0 2
0 2
0 2
0 3
0 3
0 3
0 3
0 5
0 5
0 5
0 5
0 5
0 5
0 5
0 5
0 5
0 5
0 5
0 5
0 5
0 5
0 5
0 5
0 5
0 5
0 5
0 5
0 5
0 5
0 5
0 5
0 5
0 5
0 5
0 5
0 5
0 5
0 5
0 5
0 5
0 5
0 5
0 5
0 5
0 5
0 5
0 20
0 20
0 40
0 42
0 42
0 42
0 42
0 46
0 47
0 53
0 53
0 52
0 53
0 53
0 53
0 53
0 53
0 53
0 53
2 61
2 61
2 61
3 61
3 61
9 69
9 69
9 69
9 69
9 66
9 62
9 59
9 59
9 59
9 58
9 54
9 54
9 54
9 54
9 54
9 55
9 55
9 55
9 55
9 55
9 55
9 55
9 53
9 51
9 49
9 49
9 49
9 49
9 49
9 49
9 49
9 49
9 49
9 49
9 49
9 49
10 49
10 49
10 49
8 33
8 31
8 29
6 13
6 11
6 11
6 11
7 11
7 11
7 11
7 11
7 11
7 5
7 5
7 5
7 5
7 5
7 5
7 5
7 3
7 3
7 3
7 3
7 3
7 3
7 3
7 4
7 6
7 6
7 8
7 8
7 8
6 8
6 8
2 6
2 6
2 6
2 6
2 6
2 6
2 6
2 6
2 6
2 6
3 6
3 6
3 6
3 6
3 6
3 5
3 5
3 5
3 8
3 8
3 8
3 9
3 12
3 21
4 25
4 26
4 26
4 26
4 26
4 27
4 28
14 31
14 32
14 32
14 32
14 32
13 32
13 32
13 32
13 32
13 32
15 32
15 32
15 32
15 32
15 32
14 32
14 32
14 32
14 32
14 32
14 32
14 32
14 32
15 32
17 32
20 33
28 34
30 34
32 34
32 34
32 34
32 34
32 34
32 33
32 33
32 30
33 30
33 28
33 28
33 28
33 28
33 28
33 28
33 27
33 27
33 33
33 32
33 31
33 31
33 31
33 31
33 31
32 32
32 32
32 31
32 31
32 31
32 32
32 33
32 33
32 31
33 33
34 33
40 39
42 59
42 52
49 83
49 83
49 84
49 89
49 92
49 96
49 107
39 106
39 106
39 106
39 106
39 106
39 106
39 107
39 108
39 108
39 109
39 109
39 109
41 157
41 163
41 165
41 170
41 171
41 176
41 179
42 179
42 183
42 222
41 222
32 221
31 223
28 222
16 223
14 223
11 223
11 222
11 222
11 222
11 222
10 222
10 222
10 222
9 222
8 222
8 222
8 222
8 222
8 222
8 222
7 222
7 222
7 214
7 214
7 211
6 210
6 207
6 207
6 207
6 206
6 204
6 204
6 204
6 204
6 203
6 202
6 202
6 202
6 200
7 199
7 198
6 172
6 169
4 123
4 122
4 121
4 122
4 122
4 122
4 121
4 121
4 119
4 119
4 119
4 120
4 120
3 119
3 119
3 119
3 117
3 117
3 117
1 68
1 63
1 62
1 58
1 57
1 53
1 53
1 53
1 48
0 6
0 6
0 6
0 6
0 6
0 6
0 6
0 6
0 6
0 6
0 6
0 6
0 6
0 6
0 6
0 6
0 6
0 6
0 6
0 6
0 6
0 6
0 6
0 6
0 6
0 6
0 6
0 6
0 6
0 6
0 7
0 7
0 7
0 7
0 7
0 7
0 7
0 7
0 7
0 7
0 7
0 7
0 7
0 7
0 7
0 7
0 7
0 7
0 5
0 5
0 5
0 5
0 5
0 5
0 4
0 4
0 4
0 4
0 4
0 4
0 4
0 4
0 4
0 4
0 4
0 5
0 5
0 5
0 5
0 2
0 2
0 3
0 3
1 6
2 7
2 9
2 9
2 9
2 10
2 11
2 11
2 11
2 11
2 11
2 11
2 11
2 11
2 11
2 11
0 12
0 12
0 13
0 14
0 14
0 18
0 18
0 19
0 19
0 19
0 19
0 19
0 19
0 19
0 18
0 18
0 18
0 18
0 18
0 18
0 18
0 18
0 17
0 17
0 17
0 17
0 17
0 17
0 17
0 17
0 17
0 17
0 17
0 17
0 17
0 17
0 17
0 19
0 19
0 19
0 19
0 19
0 19
0 19
0 19
0 19
0 19
0 19
0 19
0 18
0 18
0 18
0 17
0 18
0 18
0 17
0 17
0 13
0 12
0 10
0 10
0 10
0 10
0 10
0 10
0 10
0 10
0 10
0 9
0 9
0 9
0 9
0 9
0 8
0 8
0 8
0 7
0 7
0 3
0 3
0 3
0 3
0 3
0 3
0 3
0 3
0 3
0 3
0 3
0 3
0 3
0 3
0 7
0 7
0 7
0 7
0 7
0 8
0 8
0 8
0 8
0 8
0 8
0 5
0 5
0 5
0 5
0 5
0 5
0 5
0 5
0 5
0 5
0 5
0 5
0 5
0 5
0 5
0 5
0 5
0 5
0 5
0 5
0 5
0 5
0 5
0 5
0 5
0 5
0 5
0 5
0 5
0 5
0 5
0 5
0 5
0 5
0 5
0 5
0 5
0 5
0 5
0 5
0 5
0 5
0 5
0 5
0 5
0 5
0 5
0 5
0 5
0 7
0 8
0 8
0 8
0 8
0 8
0 8
0 8
0 8
0 8
0 8
0 8
0 8
0 4
0 3
0 3
0 3
0 3
0 3
0 3
0 3
0 3
0 3
0 3
0 3
0 3
0 3
0 3
0 3
0 3
0 3
0 3
0 3
0 3
0 3
0 5
0 5
0 5
0 5
0 5
0 5
0 5
0 5
0 5
0 5
0 5
0 5
0 5
0 5
0 5
0 3
0 3
0 3
0 3
0 3
0 3
0 3
0 3
0 3
0 3
0 3
0 3
0 3
0 3
0 3
0 3
0 3
1 3
1 3
1 3
1 3
1 3
1 3
1 0
1 0
1 0
1 0
1 0
1 0
1 0
1 0
1 0
1 0
1 0
1 0
2 1
2 1
2 1
2 1
2 1
2 1
2 1
2 1
2 1
2 1
2 1
2 1
2 1
2 1
3 1
3 1
3 1
3 1
3 1
3 1
3 1
3 1
3 1
3 1
3 1
3 1
3 1
3 1
3 1
5 1
6 2
6 2
6 2
6 2
6 2
6 2
6 3
6 3
7 4
7 4
7 4
7 4
7 4
7 4
9 5
9 5
9 5
10 6
10 6
10 6
10 6
10 6
10 6
11 8
12 10
11 11
11 11
11 11
11 11
11 11
11 11
11 11
11 11
11 12
11 12
14 13
14 15
17 19
17 20
17 22
17 24
17 24
17 24
16 23
16 23
16 23
16 26
16 29
16 30
16 31
16 44
16 44
16 44
16 44
16 44
16 44
16 44
15 44
15 44
15 44
15 44
15 44
15 44
15 44
15 44
15 44
15 44
15 44
15 44
15 45
14 44
12 42
7 42
6 38
6 38
6 38
6 38
6 39
6 39
6 39
0 35
0 35
0 35
0 35
0 35
0 35
0 35
0 35
0 35
0 35
0 35
0 35
0 35
0 35
0 34
0 34
0 35
0 36
0 37
0 38
0 38
0 37
0 36
0 36
0 36
0 36
0 36
0 36
0 37
0 37
0 35
0 37
0 37
0 38
0 39
0 39
0 39
0 38
0 38
0 36
0 34
0 33
0 32
0 21
0 21
0 21
0 21
0 24
0 24
0 24
0 24
0 24
0 28
0 28
0 28
0 28
0 28
0 29
0 29
0 29
0 29
0 29
0 28
0 30
0 30
0 30
0 30
0 30
0 27
0 27
0 26
0 26
0 26
0 26
0 26
0 26
0 26
0 26
0 26
0 26
0 26
0 26
0 26
0 26
0 26
0 26
0 26
0 26
0 26
0 24
0 24
0 23
1 20
1 20
1 22
1 22
1 22
1 22
1 23
1 23
1 23
1 23
1 21
1 15
1 15
1 13
1 13
0 12
0 13
0 12
0 12
0 12
0 11
0 11
0 11
0 11
0 11
0 11
0 11
0 9
0 6
0 6
0 6
0 5
0 5
0 5
0 5
0 5
0 5
0 5
0 5
0 5
0 5
0 5
0 5
0 5
0 5
0 5
0 5
0 5
0 5
0 5
0 5
0 5
0 5
0 5
0 5
0 5
0 5
0 5
0 5
0 5
0 5
0 5
0 5
0 5
0 6
0 6
0 3
0 2
0 2
0 2
0 2
0 2
0 2
0 2
0 2
0 2
0 2
0 2
0 2
0 2
0 1
0 1
0 1
0 1
0 1
0 0
0 0
0 0
0 0
0 0
0 0
0 0
0 0
0 0
1 0
2 0
2 1
2 1
3 1
4 1
4 1
4 1
4 1
4 1
4 1
4 1
4 1
4 1
4 1
4 1
4 1
4 0
4 0
4 0
4 0
4 0
4 0
4 0
4 0
4 0
4 0
4 0
4 0
4 0
4 0
4 1
4 1
4 1
4 1
4 1
4 1
4 1
5 1
5 1
5 1
5 1
5 1
5 1
5 1
5 1
5 1
5 1
5 1
5 1
5 1
5 1
5 1
4 1
4 1
4 1
4 1
4 1
4 1
4 1
4 1
4 1
4 2
4 2
4 2
4 2
4 2
4 2
4 2
4 2
4 2
4 2
2 2
2 2
0 2
0 2
0 2
0 2
0 2
0 2
0 2
0 2
0 2
0 2
0 2
0 2
0 2
0 2
0 2
0 2
0 2
0 2
0 2
0 5
0 5
0 7
0 7
0 7
0 7
0 7
0 16
0 16
0 27
0 31
0 31
0 36
0 37
0 37
0 37
0 37
0 37
0 37
0 37
0 37
0 37
0 37
0 37
0 37
0 37
0 36
0 36
0 38
0 38
0 38
0 43
0 43
0 44
0 52
0 52
0 52
0 53
0 53
0 56
0 56
0 58
2 57
2 57
2 57
2 57
2 57
2 57
2 56
2 54
2 54
2 54
2 54
2 54
2 55
2 55
2 55
2 57
2 57
2 57
2 57
2 57
2 57
2 57
2 57
2 57
2 57
2 58
2 58
2 58
2 56
2 56
2 56
1 43
0 25
0 22
0 20
0 20
0 19
0 17
0 16
0 16
0 14
0 12
0 12
0 12
0 12
34 13
34 13
34 13
34 13
34 13
35 20
35 20
35 21
35 21
35 21
35 21
35 21
35 21
35 21
35 21
1 21
1 21
1 21
1 21
1 21
1 16
1 16
1 16
1 16
1 16
1 13
1 13
1 12
1 12
1 13
1 13
1 13
2 16
2 16
4 16
4 16
4 16
4 16
4 16
4 16
4 16
4 16
4 16
4 16
4 16
4 23
4 23
4 24
4 24
2 24
2 24
2 24
2 24
2 23
2 23
2 23
2 23
2 23
2 23
2 21
2 21
2 21
2 20
2 20
2 20
2 20
2 20
2 20
2 20
2 20
2 20
2 20
2 20
2 22
2 22
2 22
2 22
2 27
1 22
1 22
1 22
1 23
1 23
1 23
1 25
1 25
1 25
1 25
1 25
1 25
1 24
1 24
1 24
1 24
1 24
1 24
1 24
1 24
1 24
1 24
1 24
1 24
1 23
1 23
1 23
0 20
0 20
0 20
0 20
0 20
0 20
0 20
0 20
0 20
0 20
0 20
0 20
0 20
0 11
0 12
0 11
0 11
0 12
0 10
0 13
0 13
0 13
0 14
0 16
0 19
0 33
0 33
0 33
0 33
0 34
0 37
0 39
0 39
0 39
0 39
0 39
0 39
0 39
0 39
0 39
0 40
0 40
0 41
0 41
0 38
0 35
0 35
0 33
0 33
0 33
0 33
0 33
0 33
0 34
0 34
0 35
0 35
0 35
0 35
0 35
0 35
0 35
0 35
0 35
0 35
0 35
0 35
0 35
0 35
0 35
0 35
0 35
0 35
0 35
0 35
0 35
1 35
1 35
1 35
1 35
1 35
1 35
1 35
1 35
1 35
1 35
1 35
1 33
1 32
1 32
1 31
1 29
0 23
0 23
0 23
0 23
0 23
0 21
0 9
0 9
0 6
0 6
0 6
0 6
0 4
0 33
0 33
0 32
0 32
0 32
0 32
0 32
0 32
0 32
0 32
0 31
0 31
0 31
0 31
0 31
0 31
0 31
0 31
0 31
0 31
0 31
0 30
0 30
0 29
0 29
0 29
0 29
0 29
0 29
0 29
0 29
0 29
0 29
0 29
0 30
0 31
0 31
0 31
0 370
0 370
0 370
0 370
0 370
1 370
1 370
1 370
1 370
1 370
1 370
1 370
1 370
1 370
1 371
1 33
1 32
1 32
1 32
1 32
1 32
1 32
0 32
0 32
0 32
0 32
0 32
0 32
0 32
0 32
0 32
0 32
0 32
0 32
0 32
0 2
0 2
0 2
0 1
0 1
0 1
0 1
0 1
0 1
0 1
0 1
0 2
0 2
0 2
0 2
0 2
0 2
0 2
0 2
0 2
0 2
0 2
0 2
0 2
0 2
0 2
0 2
0 2
0 2
0 2
0 2
0 2
0 2
0 2
0 2
0 2
0 2
0 2
0 2
0 2
0 3
0 3
0 3
0 3
0 3
0 3
0 3
0 3
0 3
0 3
0 3
0 3
0 2
0 2
0 2
0 2
0 2
0 2
0 2
0 2
0 2
0 2
0 2
0 2
0 2
0 2
0 7
0 7
0 7
0 38
0 39
0 40
0 43
0 84
0 86
0 97
0 98
0 119
0 153
1 166
1 175
1 210
1 218
1 224
1 224
1 226
1 228
1 234
1 234
1 234
1 234
1 234
1 235
1 235
1 235
1 235
1 238
1 238
1 238
1 238
1 238
1 238
1 238
1 241
1 241
1 245
1 247
1 247
1 247
1 249
1 249
1 243
1 238
1 183
1 184
3 183
3 183
3 128
3 128
3 128
3 128
3 128
3 128
3 128
3 129
3 141
3 142
3 169
3 172
3 171
1 170
1 171
1 171
1 171
1 167
1 159
1 155
1 151
1 151
1 154
2 154
2 154
2 152
2 151
3 152
3 154
3 130
3 130
3 121
3 119
3 117
3 113
3 106
3 101
3 70
3 69
3 69
3 69
3 69
3 69
3 69
3 69
3 69
3 69
4 82
4 82
4 83
4 86
4 86
4 84
4 85
4 85
4 85
4 84
4 84
4 84
4 82
4 81
4 76
4 76
4 76
4 76
4 73
4 73
4 73
4 73
4 73
4 74
4 74
4 74
4 74
4 74
4 74
4 74
4 74
4 74
4 74
4 72
4 60
4 56
4 27
4 27
4 27
4 27
4 26
4 26
4 26
4 26
4 26
4 26
4 26
4 29
4 26
3 26
3 26
3 26
3 26
2 25
3 22
3 22
3 22
3 35
3 35
3 35
3 35
2 34
2 31
2 31
2 31
2 31
2 31
2 31
2 31
2 33
2 34
1 34
1 34
1 21
1 21
1 20
1 18
1 21
1 21
1 20
1 20
1 20
1 20
1 20
1 20
1 20
1 20
1 20
1 20
1 20
1 20
1 22
1 22
1 22
1 28
1 28
1 27
1 30
1 32
1 32
1 32
1 32
1 32
1 34
1 35
1 35
1 35
1 35
1 35
1 35
1 35
1 35
1 35
1 35
1 35
1 36
1 36
1 36
1 36
1 36
1 36
1 36
1 38
1 39
1 39
1 39
1 41
0 41
0 41
0 41
0 28
0 28
0 28
0 28
0 28
0 28
0 28
0 28
0 28
0 29
0 29
0 29
0 26
1 25
1 25
1 25
1 25
1 25
1 25
1 26
1 23
1 23
1 23
1 21
1 21
1 21
1 21
1 21
1 21
1 22
1 22
1 22
2 23
2 23
2 23
2 23
2 23
2 17
2 16
2 16
2 16
2 14
2 14
2 14
2 14
2 14
2 12
2 11
2 11
2 11
2 11
2 11
2 11
2 11
2 11
2 11
2 11
2 11
2 10
2 10
2 12
2 12
2 14
2 14
2 14
2 12
2 11
2 11
2 11
2 9
2 9
2 9
2 9
2 9
2 9
2 9
2 9
2 9
2 9
2 9
2 9
2 9
2 8
2 8
2 8
2 8
1 8
1 8
1 9
1 10
1 10
1 10
1 8
1 8
1 8
1 8
1 8
1 8
1 8
1 9
1 9
1 9
1 8
1 8
1 8
0 7
0 7
0 7
0 7
0 7
0 7
0 7
0 7
0 7
0 7
0 7
0 7
0 7
0 7
0 7
0 7
0 7
0 7
0 7
0 7
0 7
0 7
0 7
0 7
0 7
0 7
1 9
1 15
1 14
1 14
1 12
1 18
1 18
1 19
1 19
1 19
1 19
1 19
1 19
1 19
1 19
1 19
1 20
1 20
1 20
1 20
1 20
1 20
1 20
1 20
1 20
1 20
5 21
5 21
5 21
5 21
5 21
5 20
5 20
5 20
5 20
5 20
5 20
5 20
5 20
5 20
5 20
5 19
5 19
5 19
5 19
5 19
5 19
5 19
5 19
5 19
5 19
5 19
5 20
5 20
5 20
5 22
5 24
5 25
5 25
5 25
5 25
5 25
5 25
5 25
5 25
5 26
5 26
5 26
5 26
5 27
5 27
5 27
5 27
4 25
4 17
4 11
4 11
4 11
4 11
4 11
4 11
4 11
4 11
4 11
4 11
4 11
4 11
4 11
4 11
4 10
4 11
4 11
4 11
4 11
4 11
4 11
4 11
4 11
4 11
0 10
0 10
0 9
0 9
0 9
0 9
0 9
0 9
0 9
0 9
0 9
0 9
0 9
0 9
0 9
0 9
0 9
0 8
0 8
0 8
0 8
0 8
0 8
0 8
0 8
0 8
0 7
0 7
0 7
0 5
0 2
0 2
0 2
0 2
0 2
0 2
0 2
0 2
0 2
0 2
0 2
1 2
1 2
1 1
1 1
1 1
1 1
1 1
1 1
1 2
2 2
2 2
3 2
3 2
3 2
8 19
8 20
8 20
8 21
8 21
8 25
8 25
16 25
20 38
21 38
21 39
21 40
21 40
21 42
21 43
24 57
24 88
26 92
26 114
34 186
34 188
34 190
34 190
36 196
36 197
36 199
36 199
36 199
36 199
36 199
36 199
36 199
36 199
36 199
36 199
36 199
36 199
36 199
36 199
36 199
36 199
36 199
36 199
36 199
36 199
36 199
36 199
36 199
36 199
36 199
36 199
36 199
36 199
36 199
36 207
36 207
36 206
36 207
36 207
35 207
35 207
35 207
35 207
35 207
35 207
35 207
34 207
34 204
34 201
34 198
33 197
32 196
32 196
28 179
28 178
28 179
28 178
28 178
26 173
26 173
16 170
10 140
10 138
10 138
10 138
10 138
10 136
10 131
7 123
6 70
6 70
6 60
0 14
0 15
0 15
0 17
0 17
0 17
0 20
0 20
0 20
0 20
0 20
0 20
0 20
0 20
0 20
0 22
0 23
0 23
0 23
0 23
0 23
0 26
0 27
0 32
0 32
0 32
0 32
0 32
0 34
0 34
0 35
1 35
1 37
2 37
2 37
2 29
2 31
2 41
2 42
2 51
2 51
2 51
2 54
2 55
2 55
2 57
2 57
2 57
2 57
2 57
2 57
2 57
0 57
0 57
0 56
0 56
0 56
0 56
0 56
0 56
0 56
0 56
0 56
0 56
0 56
0 56
0 56
0 56
0 56
0 56
0 56
0 55
0 55
0 52
0 49
0 48
0 47
0 47
0 47
0 41
0 40
0 40
0 40
0 40
0 40
0 40
0 40
0 40
0 38
0 37
0 37
0 37
0 37
0 37
0 33
0 32
0 16
0 16
0 16
0 6
0 6
0 6
0 6
0 6
0 6
0 5
0 4
0 4
0 3
0 1
0 1
0 1
0 1
0 1
0 1
0 1
0 1
0 1
0 1
0 1
0 1
0 1
0 1
0 1
0 1
0 1
0 1
0 1
0 1
0 1
0 1
0 1
0 1
0 1
0 1
0 1
0 1
0 1
0 1
0 1
0 1
0 1
0 2
0 2
0 2
0 2
0 2
0 2
0 2
0 2
0 2
0 2
0 2
0 3
0 3
0 3
0 3
0 3
0 3
0 3
0 3
0 3
0 3
0 3
0 3
0 3
0 3
0 3
0 3
0 2
0 2
0 2
0 2
0 2
0 2
0 2
0 2
0 2
0 2
0 1
0 1
0 1
0 1
0 1
0 1
0 1
0 1
0 1
0 1
0 1
0 1
0 1
0 1
0 1
0 1
0 1
0 1
0 1
0 1
0 1
0 1
0 1
0 1
0 1
0 1
0 1
0 1
0 1
0 1
0 1
0 1
0 1
0 1
0 1
0 1
0 0
0 0
0 0
0 0
0 0
0 0
0 0
0 0
0 0
0 0
0 0
0 0
0 0
0 0
0 0
0 0
0 0
0 0
0 0
0 0
0 0
0 0
0 0
0 0
0 0
0 0
0 0
0 0
0 0
0 0
0 0
0 0
0 0
0 0
0 0
0 0
0 0
0 0
0 0
0 0
0 0
1 0
1 0
1 0
1 0
1 0
1 0
1 0
1 0
2 0
2 0
2 0
2 0
2 0
2 0
2 0
2 0
2 0
2 0
2 0
2 0
1 0
1 0
1 0
1 0
0 0
0 0
0 0
0 0
0 0
0 0
0 0
0 0
0 0
0 0
0 0
0 0
0 0
0 0
0 0
0 0
0 0
0 0
0 0
0 0
0 0
0 0
0 0
0 0
0 0
0 0
0 0
0 0
0 0
0 0
0 0
0 0
0 0
0 0
0 0
0 0
0 0
0 0
0 0
0 0
0 0
0 0
0 0
0 0
0 0
0 0
0 0
0 0
0 0
0 0
0 0
0 0
0 0
0 0
0 0
0 0
0 0
0 0
0 0
0 0
0 0
0 0
0 0
0 0
0 0
0 0
0 0
0 0
0 0
0 0
0 0
0 0
0 0
0 0
0 0
0 0
0 0
0 0
0 0
0 0
0 0
0 0
0 0
0 0
0 0
0 0
0 0
0 0
0 0
0 0
0 0
0 0
0 0
0 0
0 0
0 0
0 0
0 0
0 0
0 0
0 0
0 0
0 0
0 0
0 0
0 0
0 0
0 0
0 0
0 0
0 0
0 0
0 0
0 0
0 0
0 0
0 0
0 0
0 0
0 0
0 0
0 0
0 0
0 0
0 0
0 0
0 0
0 0
0 0
0 0
0 0
0 0
0 0
0 0
0 0
0 0
0 0
0 0
0 0
0 0
0 0
0 0
0 0
0 0
0 0
0 0
0 0
0 0
0 0
0 0
0 0
0 0
1 0
1 0
1 0
1 0
1 40
1 40
2 40
2 42
2 54
2 87
2 89
2 185
24 268067
24 268068
24 268068
24 268068
24 268069
24 268069
24 268069
24 268069
24 268069
24 268069
24 268069
24 268069
24 268069
24 268069
24 268069
24 266481
2 37
2 1
2 1
2 0
2 0
2 0
2 0
2 0
2 0
2 0
2 0
2 0
2 0
2 0
2 0
2 0
2 0
2 0
2 0
2 0
2 0
2 0
4 0
4 0
5 0
5 0
5 0
7 0
7 0
7 0
7 0
7 0
7 0
7 0
7 0
7 0
7 0
7 0
7 0
6 0
6 0
6 0
6 0
6 0
6 0
5 0
5 0
5 0
5 0
4 0
3 0
3 1
3 1
3 1
3 1
3 1
2 1
2 1
2 1
2 1
2 1
2 1
2 1
2 1
2 1
2 1
2 1
2 1
2 1
2 1
2 1
2 1
2 1
2 1
2 1
2 1
2 1
2 1
2 1
2 1
2 1
2 1
2 1
2 1
2 1
2 1
2 1
3 1
3 1
3 1
3 1
3 1
3 1
3 1
2 1
2 2
2 2
2 2
2 2
1 2
1 3
1 3
1 3
1 3
2 3
2 3
2 3
3 3
3 3
5 3
5 3
5 3
5 3
5 3
5 3
5 3
5 3
5 3
5 3
5 3
5 3
5 3
5 3
5 3
5 2
5 3
5 3
5 3
5 3
5 3
5 3
5 3
5 3
5 3
5 3
5 3
5 3
5 3
5 3
5 3
5 3
5 3
5 3
5 3
5 3
5 3
5 3
5 3
5 3
5 3
5 3
5 3
5 3
5 3
5 3
5 3
4 6
4 6
4 6
4 6
4 6
4 6
4 6
4 6
4 6
4 6
4 5
4 5
4 5
4 5
3 4
3 4
2 4
2 4
2 4
2 1
2 1
1 1
1 1
1 1
1 1
1 1
0 1
0 1
0 1
0 1
0 1
0 1
0 1
0 1
0 1
0 1
0 1
0 1
0 1
0 1
0 1
0 1
0 0
0 0
0 0
0 0
0 0
0 0
0 0
0 0
0 0
0 0
0 0
0 0
0 0
0 0
0 0
0 0
0 0
0 0
1 0
1 0
1 0
1 0
1 0
1 0
1 0
1 0
2 0
2 0
2 0
2 0
2 0
2 0
2 0
1 0
1 0
1 0
1 0
1 0
1 0
1 0
1 0
1 0
0 0
0 0
0 0
0 0
0 0
0 0
0 0
0 0
0 0
0 0
0 0
0 0
0 0
0 0
0 0
0 0
0 0
0 0
0 0
0 0
0 0
0 0
1 0
1 0
1 0
2 0
3 0
3 0
3 0
3 0
3 0
3 0
3 0
3 0
3 0
3 0
3 0
3 0
3 0
3 0
3 0
3 0
3 0
3 0
3 0
3 0
3 0
3 0
3 0
3 0
3 0
3 0
3 0
3 0
3 0
3 0
3 0
3 0
3 0
3 0
3 0
3 0
3 0
3 0
3 0
3 0
3 0
3 0
3 0
3 0
3 0
3 0
3 0
3 0
3 0
3 0
3 0
3 0
3 0
3 0
3 0
3 0
3 0
3 0
3 0
3 0
3 0
3 0
3 0
3 0
3 0
3 0
3 0
3 0
3 0
2 0
2 0
2 0
2 0
1 0
1 0
1 0
1 0
1 0
1 0
1 0
1 0
1 1
1 2
1 2
1 2
1 2
1 2
0 4
0 10
0 10
0 12
0 12
0 12
0 12
0 12
0 12
0 14
0 12
0 12
0 12
0 12
0 12
0 12
0 12
0 43
0 43
0 44
0 74
0 74
0 76
0 78
0 94
0 97
0 125
0 141
0 145
0 160
0 161
0 168
0 168
0 178
0 187
0 187
0 190
0 190
0 190
0 192
0 193
0 226
0 242
0 244
0 248
0 248
0 247
0 247
0 247
0 249
0 251
0 251
0 251
0 251
0 253
0 253
0 254
0 254
0 229
0 223
0 221
0 219
0 219
0 221
0 220
0 216
0 98
0 22
0 20
0 19
0 18
0 17
0 17
0 17
0 17
0 17
0 17
0 17
0 17
0 17
0 17
0 17
0 18
0 19
0 19
0 19
0 19
0 20
0 20
0 20
0 20
0 20
0 20
0 20
0 20
0 20
0 20
0 20
0 20
0 20
0 19
0 19
0 19
0 19
0 20
0 20
0 20
0 20
0 20
0 9
0 7
0 7
0 6
0 6
0 6
0 5
0 5
0 5
0 5
0 5
0 5
0 5
0 5
0 5
0 5
0 5
0 5
0 5
0 5
0 5
0 5
0 5
0 5
0 4
0 4
0 4
0 3
0 3
0 3
0 3
0 3
0 3
0 3
0 3
0 3
0 3
0 3
0 3
0 3
0 3
1 3
1 3
1 3
1 3
1 3
1 3
1 2
1 2
1 2
1 2
1 2
1 2
1 2
1 2
1 2
1 2
0 2
0 2
0 2
0 2
0 2
0 2
0 2
0 2
0 2
0 2
0 2
0 1
0 1
0 1
0 1
0 1
0 1
0 1
0 0
0 0
0 0
0 0
0 0
0 0
0 0
0 0
0 0
0 0
0 0
0 0
0 0
0 0
0 0
0 0
0 0
0 0
0 0
0 0
0 0
0 0
0 0
0 0
0 0
0 0
0 0
0 0
0 0
0 0
0 0
0 0
0 0
0 0
0 0
0 0
0 0
0 0
0 0
0 0
0 0
0 0
0 0
0 0
0 0
0 0
0 0
0 0
0 0
0 0
0 0
0 0
0 0
0 0
0 0
0 0
0 0
0 0
0 0
0 0
0 0
0 0
0 0
0 0
0 0
0 0
0 0
0 0
0 0
0 0
0 0
0 0
0 0
0 0
0 0
0 0
0 0
0 0
0 0
1 0
1 0
1 0
1 0
1 0
1 0
1 0
1 0
1 0
1 0
1 0
1 0
1 0
1 0
4 0
3 0
7 0
7 0
8 1
8 1
8 1
8 1
8 1
8 1
8 1
8 1
8 1
8 1
8 1
8 1
8 1
1 1
1 2
1 2
0 1
0 1
0 1
0 1
0 1
0 1
0 1
0 1
0 1
0 1
0 1
0 1
0 1
0 0
0 0
0 0
0 0
0 0
0 0
0 0
0 0
0 0
0 0
0 0
0 0
0 0
0 0
0 0
0 0
0 0
0 0
0 0
0 0
0 0
0 0
0 0
0 0
0 0
0 0
0 0
0 0
0 0
0 0
0 0
0 0
0 0
1 0
1 0
1 0
1 0
1 0
1 0
1 0
1 0
1 0
1 0
1 0
1 0
1 0
1 0
1 0
0 0
0 0
0 0
0 0
0 0
0 0
0 0
0 0
0 0
0 0
0 0
0 0
0 0
0 1
0 2
0 2
0 7
0 7
0 11
0 11
0 11
0 11
0 13
0 15
0 17
0 18
0 21
0 22
0 22
0 22
0 22
0 22
0 22
0 22
0 22
0 22
0 22
2 22
2 22
4 22
4 22
4 24
4 24
4 24
4 24
4 24
4 24
4 24
4 24
4 24
4 24
4 24
4 24
4 24
4 24
4 24
4 24
4 24
4 24
4 24
4 24
4 24
4 24
4 24
4 24
4 25
4 25
4 25
4 25
4 25
4 25
2 25
2 25
2 25
2 25
2 25
2 25
2 25
2 24
2 24
2 23
2 23
2 23
2 23
2 23
2 24
2 24
2 29
2 29
2 25
2 25
3 18
3 18
2 18
1 16
1 13
1 13
1 11
1 10
1 10
1 10
1 9
1 9
1 9
1 9
1 9
0 9
0 9
0 9
0 9
0 9
0 9
0 9
0 8
0 7
0 7
0 7
0 7
0 7
0 7
0 12
0 12
0 12
0 12
0 12
0 12
0 12
0 12
0 12
0 12
0 12
0 12
0 12
0 12
0 12
0 12
0 12
0 12
0 11
0 11
0 11
0 11
0 11
0 11
0 11
0 11
0 11
0 11
0 11
0 11
0 11
0 11
0 11
0 11
0 11
0 12
0 12
0 13
0 13
0 13
0 7
0 8
0 8
2 8
2 8
4 8
4 8
4 10
4 10
4 10
4 10
4 10
4 10
4 10
4 10
4 10
4 10
4 10
4 10
4 10
4 10
4 10
4 10
4 10
4 10
4 10
4 10
4 10
4 10
4 10
4 10
4 10
4 9
2 3
2 3
2 3
2 3
2 3
0 2
0 2
0 2
0 2
0 2
0 2
0 2
0 2
0 2
0 2
0 2
0 2
0 2
0 2
0 2
0 2
0 2
1 2
1 2
1 2
1 2
1 2
1 2
1 2
1 2
1 2
1 2
1 2
1 2
1 2
1 1
1 1
1 0
0 0
0 0
0 0
0 0
0 0
0 0
0 0
0 0
0 0
0 0
0 0
0 0
0 0
0 0
0 0
0 0
0 0
0 0
0 0
0 0
0 0
0 0
0 0
0 0
0 0
0 0
0 0
0 0
0 0
0 0
0 0
0 0
0 0
0 0
0 0
0 0
0 0
0 0
0 0
0 0
0 0
0 0
0 0
0 0
0 0
0 0
0 0
0 0
0 0
0 0
0 0
0 0
0 0
0 0
0 0
0 0
0 0
0 0
0 0
0 0
0 0
0 0
0 0
0 0
0 0
0 0
0 0
0 0
0 0
0 0
0 0
0 0
0 2
0 2
0 2
0 2
0 2
0 2
0 2
0 2
0 2
0 2
0 2
0 2
0 2
0 2
1 2
1 2
1 2
3 2
3 2
3 2
4 2
4 2
4 2
4 2
4 2
4 2
4 2
4 2
4 2
4 3
4 3
4 5
4 5
5 5
5 5
5 5
5 5
5 5
5 5
5 5
5 5
5 5
5 5
5 5
5 5
5 5
5 5
5 5
5 5
5 5
5 5
5 5
5 5
5 5
5 5
5 5
5 5
5 5
5 5
4 5
4 5
4 5
4 5
3 5
3 5
3 5
3 5
3 5
4 5
4 5
4 6
4 6
5 4
6 5
6 25
6 25
6 25
6 25
8 25
8 25
8 25
8 25
8 25
8 25
8 25
8 24
8 24
8 24
8 24
8 24
6 3
6 3
6 3
6 3
4 3
4 3
4 3
4 3
4 3
4 3
4 3
4 5
4 4
4 2
4 2
4 2
2 2
2 2
2 2
2 2
1 2
1 2
1 2
1 2
1 2
1 2
1 2
135 2
136 2
183 2
183 2
365 2
365 2
365 2
365 2
365 2
366 2
366 2
366 2
366 2
378 2
378 2
378 2
390 2
390 2
391 2
392 2
392 2
392 2
392 2
392 2
389 2
387 2
387 2
387 2
387 2
387 2
387 2
387 2
387 2
387 2
387 2
387 2
384 2
384 2
384 2
381 2
381 2
381 2
379 2
378 2
377 2
378 2
378 2
378 2
378 2
378 3
378 3
378 4
378 4
378 4
378 4
378 4
378 4
378 2
378 2
376 2
376 2
376 2
376 2
376 2
374 2
362 1
323 0
318 0
228 0
220 0
121 0
117 0
117 0
112 0
103 0
56 0
56 0
6 0
6 0
6 0
6 0
5 0
2 0
2 0
1 0
1 0
1 0
1 0
1 0
1 0
1 0
1 0
1 0
1 0
1 0
1 0
1 0
1 0
1 0
1 0
1 0
1 0
1 0
1 0
1 0
1 0
1 0
1 0
1 0
1 0
1 1
1 1
1 1
1 1
1 1
1 1
1 1
1 1
0 1
0 1
0 1
0 1
0 1
0 1
0 1
0 1
0 1
0 1
0 1
0 1
0 1
0 1
0 0
0 0
0 0
0 0
0 0
0 1
0 2
0 2
0 2
0 2
0 2
0 2
0 2
0 2
0 2
0 2
0 2
0 2
0 2
0 2
0 2
0 2
0 2
0 2
0 2
0 2
0 2
0 2
0 2
0 2
0 2
0 2
0 2
0 2
0 2
0 2
0 2
0 32
0 32
0 32
0 32
0 32
0 32
0 32
0 32
0 32
0 32
0 32
0 32
0 32
0 32
1 32
1 2
1 2
1 2
1 2
1 2
1 2
1 2
1 2
1 2
1 2
1 2
1 2
1 2
1 2
1 2
0 2
0 2
0 2
0 2
0 2
0 2
0 2
1 2
1 2
1 2
1 2
1 1
1 0
1 0
2 0
2 0
2 0
2 0
2 0
2 0
2 0
2 0
2 0
2 0
2 0
1 0
1 0
1 0
1 0
0 0
0 0
0 0
0 0
0 0
0 0
0 0
0 0
0 0
0 0
0 0
0 0
0 0
0 0
0 0
0 0
0 0
0 0
0 0
0 0
0 0
0 0
0 0
0 0
0 0
0 0
0 0
0 0
0 0
0 0
0 0
0 0
0 0
0 0
0 0
0 0
0 0
0 0
0 0
0 0
0 0
0 0
0 0
0 0
0 0
0 0
0 0
0 0
0 0
0 0
0 0
0 0
0 0
0 0
2 0
2 0
2 0
2 0
2 0
2 0
2 0
2 0
2 0
2 0
2 0
2 0
2 0
2 0
2 0
2 0
0 0
0 4
0 4
0 4
0 4
0 4
0 4
0 4
0 4
2 4
2 4
2 4
2 4
2 4
2 5
2 5
3 1
3 3
3 3
3 3
3 3
3 3
3 3
3 3
2 3
1 3
1 3
1 4
1 4
1 4
1 4
1 4
1 3
1 3
0 3
0 2
0 2
0 2
0 2
4 2
4 1
4 1
4 0
4 0
4 0
4 0
4 0
4 0
4 0
4 0
4 0
4 0
4 0
4 0
0 0
0 0
0 0
0 0
0 0
0 0
0 0
0 0
0 0
0 0
0 0
0 0
0 0
0 0
0 0
0 0
0 0
0 0
0 0
0 0
0 0
0 0
0 0
0 0
0 0
0 0
0 0
0 0
0 0
0 0
0 0
0 0
0 0
0 0
0 0
0 0
0 0
0 0
0 0
0 0
0 0
0 0
0 0
0 0
0 0
0 0
0 0
0 0
0 0
1 0
1 0
1 0
1 0
1 0
1 0
1 0
1 0
1 0
1 0
1 0
1 0
1 0
1 0
1 0
0 0
0 0
0 0
0 0
0 0
0 0
0 0
0 0
0 0
0 0
0 0
0 0
0 0
0 0
0 0
0 0
0 0
0 0
0 0
0 0
0 0
0 0
0 0
0 0
0 0
0 0
0 0
0 0
0 0
0 0
0 0
0 0
0 0
0 0
0 0
0 0
0 0
0 0
0 0
0 0
0 0
0 0
0 0
0 0
0 0
0 0
0 0
0 0
0 0
0 0
0 0
0 0
0 0
0 0
0 0
0 0
0 0
0 0
0 0
0 0
0 0
0 0
0 0
0 0
0 0
0 0
0 0
0 0
0 0
0 0
0 0
0 0
0 0
0 0
0 0
0 0
0 0
0 0
0 0
0 0
0 0
0 0
0 0
1 0
1 0
1 0
1 0
1 0
1 0
1 0
1 0
1 0
1 0
1 0
1 0
1 0
1 0
1 0
1 0
1 0
0 0
0 0
0 0
0 0
0 0
0 0
0 0
0 0
0 0
0 0
0 0
0 0
0 0
0 0
0 0
0 0
0 0
0 0
0 0
0 0
0 0
0 0
0 0
0 0
0 0
0 0
0 0
0 0
0 0
0 0
0 0
0 0
0 0
0 0
0 0
0 0
0 0
0 0
0 0
0 0
0 0
0 0
0 0
0 0
0 0
0 0
0 0
0 0
0 0
0 0
0 0
0 0
0 0
0 0
0 0
0 0
0 0
0 0
0 0
0 0
0 0
0 0
0 0
0 0
0 0
0 0
0 0
0 0
0 0
0 0
0 0
0 0
0 0
0 0
0 0
0 0
0 0
0 0
0 0
0 0
0 0
0 0
0 0
0 0
0 0
0 0
0 0
0 0
0 0
0 0
0 0
0 0
0 0
0 3
0 3
0 3
0 3
0 3
0 3
1 3
1 3
1 3
1 3
1 3
1 3
1 3
1 3
1 3
1 0
1 0
1 0
1 0
1 0
1 0
1 0
1 0
0 0
4 0
4 0
4 0
4 0
4 0
4 0
4 0
4 0
4 0
4 0
4 0
4 0
4 0
4 0
4 0
4 0
4 0
4 0
4 0
4 0
4 0
5 0
6 0
7 0
7 0
7 0
7 0
7 0
7 0
7 0
7 0
7 0
11 0
12 0
12 0
12 0
12 0
12 0
12 0
12 0
12 0
12 0
12 0
12 0
12 0
12 0
12 0
12 0
10 0
8 0
8 0
8 0
8 0
8 0
8 0
8 0
8 0
8 0
8 0
8 0
8 0
8 0
8 0
8 0
8 0
8 0
8 0
8 0
8 0
8 0
8 0
8 0
8 0
4 0
4 0
4 0
4 0
4 0
4 0
4 0
4 0
4 0
4 0
4 0
4 0
4 0
4 0
4 0
4 0
4 0
4 0
4 0
3 0
3 0
2 0
2 0
1 0
1 0
1 0
1 0
1 0
1 0
1 0
1 0
0 0
0 0
0 0
0 0
0 0
0 0
0 0
0 0
0 0
0 0
0 0
0 0
0 0
0 0
0 0
0 0
0 0
0 0
0 0
0 0
0 0
0 0
0 0
0 0
0 0
0 0
0 0
0 0
0 0
0 0
0 0
0 0
0 0
0 0
0 0
0 0
0 0
0 0
0 0
0 0
0 0
0 4
0 4
0 4
0 4
0 4
0 4
0 4
0 4
0 4
0 4
0 4
0 4
0 4
0 4
0 4
0 4
0 4
0 0
0 0
0 0
0 0
0 0
0 0
0 0
0 0
0 0
0 0
0 0
0 0
0 0
0 0
0 0
0 0
0 0
0 0
0 0
0 0
0 0
0 0
0 0
0 0
0 0
0 0
0 0
2 0
2 0
2 0
2 0
4 0
4 0
4 0
4 0
4 0
4 0
4 0
4 0
4 0
4 0
4 0
4 0
4 0
4 0
4 0
4 0
4 0
4 0
4 0
4 0
6 0
6 0
6 0
6 0
6 0
6 0
6 0
6 0
6 0
6 0
6 0
6 0
6 0
6 0
6 0
5 0
5 0
4 0
4 0
4 0
4 0
3 0
3 0
3 0
3 0
3 0
3 0
3 0
3 0
3 0
3 0
3 0
3 0
3 0
3 0
3 0
3 0
3 0
3 0
2 0
2 0
0 0
0 0
0 0
0 0
0 0
0 0
