# Supplementary material for: From Insect to Man: Photorhabdus Sheds Light on the Emergence of Human Pathogenicity
Source: PLoS One. 2015 Dec 17;10(12):e0144937. doi: 10.1371/journal.pone.0144937 (PMC4683029; doi:10.1371/journal.pone.0144937)
Supplement: S3 Data — (ZIP) [file pone.0144937.s003.zip › pPAU1_37C_Stat_rep2.plot]

191 5
192 5
193 5
194 5
195 6
195 6
196 6
196 6
197 7
197 7
197 7
197 7
197 7
205 7
206 7
219 115
220 115
224 116
224 116
223 116
223 116
225 116
226 116
226 115
232 115
278 115
375 115
464 115
473 115
476 115
477 115
466 7
471 7
477 7
481 7
483 7
488 7
489 7
490 7
491 7
491 7
491 7
491 7
494 7
496 7
498 7
503 7
503 7
504 7
505 7
503 7
502 7
503 7
510 7
513 7
512 7
516 7
514 7
517 7
531 7
534 7
534 7
548 7
566 7
571 7
551 6
559 6
556 6
550 6
550 6
548 5
545 6
529 6
522 5
523 4
520 4
523 4
523 4
524 4
518 4
515 4
517 4
510 4
506 3
504 3
507 3
504 3
504 4
496 4
508 4
523 4
564 4
596 4
665 5
735 7
771 10
786 12
794 13
797 13
793 13
792 13
804 13
818 13
860 13
869 12
871 12
881 12
883 12
906 12
911 12
919 12
920 12
919 12
913 12
913 13
910 12
912 12
917 12
917 11
929 12
951 12
954 12
1251 12
1246 12
1223 12
1189 12
1108 12
1048 12
1044 12
1045 14
1045 14
1046 14
1058 14
1064 14
1061 14
1061 15
1055 15
1053 15
1055 15
1091 15
1099 15
1105 15
1115 15
1137 16
1138 16
1165 16
1174 17
1192 21
1196 21
1196 21
1195 21
1197 21
1196 21
1191 21
1188 21
1182 21
1179 21
1177 21
1168 21
1227 21
1225 21
1204 21
1181 21
1172 21
1167 21
1167 21
1160 21
1159 21
1159 21
1160 21
1179 22
1178 22
1181 22
1197 22
1205 22
1208 22
1205 22
1206 22
1200 22
1197 21
1197 21
1188 21
1187 20
1181 20
1175 20
1171 20
1167 20
1162 20
1152 20
1142 21
1131 21
1082 21
1031 20
987 18
941 16
907 16
907 13
900 15
892 15
890 15
884 13
864 13
908 13
901 14
932 14
954 15
961 15
967 15
943 15
938 15
942 15
948 15
980 16
992 16
998 15
1000 15
1002 15
993 15
985 15
982 15
1021 18
1024 18
756 18
763 18
762 18
752 18
748 18
747 18
748 18
745 18
744 18
748 18
745 18
763 18
1122 20
1215 19
1239 21
1239 20
1320 20
1393 20
1416 20
1419 20
1414 20
1378 19
1381 19
1367 19
1365 19
1347 15
1348 15
1348 15
1348 15
1346 15
1346 15
1346 15
1346 15
1346 15
1344 15
1341 15
1339 15
1277 15
1282 15
1286 15
1297 15
1316 15
1340 16
1347 17
1341 17
1349 17
1361 17
1384 17
1382 16
1378 16
1368 16
1361 16
1349 16
1347 16
1347 16
1346 16
1354 16
1356 16
1357 16
1389 16
1394 16
1393 16
1393 16
1395 16
1400 16
1427 15
1428 15
1430 15
1430 15
1429 15
1429 13
1445 13
1450 12
1455 12
1461 12
1464 12
1497 12
1543 12
1536 12
1538 12
1541 13
1520 29
1474 29
1483 29
1482 29
1478 29
1479 29
1476 29
1474 29
1467 29
1442 28
1431 28
1427 28
1422 29
1422 29
1422 29
1418 29
1412 29
1395 13
1383 13
1382 13
1377 14
1379 14
1382 14
1384 14
1388 14
1385 14
1374 15
1370 15
1332 14
1304 14
1171 13
778 9
736 10
670 10
652 10
641 10
631 10
625 10
624 11
624 11
624 11
618 11
630 11
634 11
634 11
642 11
644 11
647 11
654 11
655 11
657 11
656 11
656 11
655 11
652 11
651 11
650 11
643 11
643 11
640 11
633 10
609 9
604 10
600 10
592 10
576 10
561 10
554 11
553 11
553 14
554 14
557 14
556 14
553 14
612 15
620 15
615 15
621 15
731 17
746 17
762 18
766 21
778 20
770 20
798 20
802 20
788 22
791 22
792 22
792 22
780 22
775 22
764 22
740 22
733 22
687 22
665 22
660 22
645 22
602 21
593 21
581 21
567 20
564 20
562 20
562 20
562 19
559 19
563 20
560 20
560 20
559 20
555 20
548 20
547 20
536 20
529 18
513 18
512 18
510 18
509 17
505 17
501 17
493 17
488 17
484 17
485 17
484 15
486 17
478 17
477 17
476 17
480 17
507 17
504 17
500 17
504 17
503 17
524 17
526 17
527 19
528 20
526 22
522 22
520 22
512 22
510 22
507 22
502 22
506 22
506 23
507 25
509 25
509 25
544 25
552 26
550 25
553 25
548 25
545 25
545 25
546 25
547 28
546 25
549 25
549 25
550 25
550 25
546 25
549 25
548 25
547 25
538 26
531 32
464 30
451 30
392 29
389 29
300 27
297 27
288 24
278 24
267 24
255 24
209 24
207 24
206 24
206 24
204 24
197 18
196 18
195 18
196 18
196 19
196 21
197 21
195 21
195 21
195 22
191 22
192 22
194 22
194 22
222 40
228 43
226 44
231 45
233 44
232 44
232 44
231 44
231 44
230 47
230 47
230 48
231 48
254 48
258 47
260 47
262 48
290 50
288 50
290 50
294 50
295 50
296 50
299 50
372 57
369 56
364 55
360 56
374 56
380 57
362 57
361 58
359 58
354 60
354 60
338 60
337 60
332 58
332 56
332 56
332 56
332 56
332 56
332 56
330 56
329 56
334 55
333 53
326 52
320 52
321 52
289 52
355 55
358 55
358 56
365 57
366 59
391 60
397 63
399 60
412 61
414 62
414 62
413 62
422 65
422 65
432 65
433 65
429 64
430 64
430 64
430 63
430 63
430 63
429 63
429 63
429 63
429 62
436 69
437 69
437 69
438 70
440 70
440 70
445 70
451 70
460 71
469 79
469 79
470 80
473 80
473 79
474 81
478 82
478 82
479 81
479 81
484 81
484 84
536 85
527 63
526 64
528 65
532 66
531 68
534 67
535 67
535 67
535 67
535 63
535 63
535 63
529 63
508 63
509 64
510 64
506 64
479 63
477 63
474 63
472 63
473 63
506 63
569 65
504 59
508 59
637 60
729 60
739 57
735 57
737 56
737 56
737 56
738 56
737 56
737 56
738 56
738 56
738 57
737 57
737 57
734 57
735 58
731 58
731 58
742 58
739 58
739 58
740 58
740 58
732 57
713 55
671 50
669 50
675 50
682 51
681 50
657 48
674 46
674 46
663 45
660 44
664 44
668 44
663 42
665 42
656 42
656 44
661 45
663 45
667 45
670 45
672 45
671 45
672 45
711 46
714 46
712 45
711 38
711 39
710 39
711 39
712 40
713 40
704 40
702 40
687 30
692 25
692 25
693 27
692 27
692 26
697 25
694 27
739 37
741 36
745 39
737 39
744 41
693 41
684 41
680 39
681 36
674 36
673 35
669 35
675 35
675 35
684 35
684 35
684 35
685 35
686 34
683 34
678 34
676 34
675 34
675 34
674 34
672 34
658 34
639 34
611 33
546 30
435 29
417 29
311 29
297 29
295 29
293 29
293 29
294 29
328 40
328 43
326 45
328 51
327 51
328 52
329 51
331 51
331 51
331 50
331 50
330 50
333 50
321 50
322 50
322 50
320 50
328 57
323 59
321 59
319 59
319 59
315 59
307 58
308 59
311 62
292 62
294 62
295 63
306 63
325 63
353 63
362 63
362 63
365 63
362 61
359 61
352 61
351 61
349 61
351 61
361 61
371 61
340 60
340 60
346 60
343 60
377 57
389 57
418 57
446 56
448 56
448 56
453 56
452 73
454 73
499 73
513 71
515 70
514 70
509 67
514 66
473 57
476 60
474 60
497 61
483 60
484 60
511 62
558 48
587 48
599 48
607 48
611 50
607 50
614 51
610 51
626 53
632 54
637 54
638 53
639 53
639 53
640 53
644 53
654 53
654 53
655 53
655 54
655 54
655 53
655 54
654 53
650 53
650 53
650 53
649 53
648 53
648 53
648 54
613 38
613 37
616 37
614 37
615 37
631 37
646 37
647 37
653 37
667 37
691 38
724 38
784 38
811 39
841 39
867 40
874 39
863 31
861 30
861 30
864 30
868 30
866 29
867 29
862 29
856 26
867 26
864 26
859 26
849 26
829 26
822 26
881 27
887 27
884 28
887 28
887 28
886 28
879 28
878 28
870 28
859 28
852 28
851 28
850 28
850 29
859 29
903 38
894 40
860 40
840 40
837 40
836 40
831 40
824 40
802 40
776 40
766 40
764 40
772 40
770 41
761 41
764 41
758 37
757 37
738 34
733 34
725 34
687 31
643 29
620 29
616 29
609 28
609 27
608 27
598 25
585 25
576 24
576 23
569 23
572 23
571 23
571 25
568 25
565 24
554 23
554 23
552 23
552 24
552 24
552 24
552 24
550 24
550 24
550 24
549 24
549 24
550 24
550 24
551 22
550 21
554 22
551 22
542 21
553 21
524 21
524 23
527 24
529 24
506 24
488 25
470 25
400 25
389 25
366 24
340 24
338 24
335 24
332 24
331 24
331 24
325 24
325 24
325 24
325 24
325 24
301 23
297 23
287 23
275 24
274 24
264 24
235 24
229 24
229 23
228 23
227 23
227 23
227 23
227 23
230 23
229 24
229 24
227 24
225 25
191 22
185 21
132 13
129 13
129 13
129 13
129 13
129 13
128 13
129 13
129 13
127 13
126 13
125 13
121 12
122 12
121 12
117 12
119 12
119 12
119 12
118 12
115 12
113 12
112 12
109 12
108 12
108 12
108 12
107 12
106 12
105 12
105 12
105 12
105 12
105 12
105 10
105 10
105 10
105 10
105 10
105 10
105 10
105 10
105 10
105 10
105 11
105 11
104 11
104 11
107 11
108 11
110 11
114 11
126 11
122 9
116 9
114 9
90 9
138 12
133 12
123 9
119 9
118 9
117 9
112 7
99 7
98 7
98 7
102 7
103 7
104 7
104 7
104 7
104 7
104 7
110 7
110 7
110 6
110 6
110 6
110 6
110 6
110 6
109 6
108 6
109 6
112 6
112 6
112 7
112 7
114 10
115 10
117 9
118 9
115 8
115 8
114 8
114 8
114 8
115 8
114 8
115 8
115 8
115 8
115 8
115 5
115 5
118 5
121 5
121 5
124 5
127 5
127 5
128 5
127 5
127 5
128 5
126 5
126 5
125 5
125 5
125 5
124 5
125 5
125 5
125 5
126 5
126 5
127 5
127 5
127 5
128 5
128 5
128 5
128 5
128 5
128 6
128 6
128 5
130 5
130 5
130 5
130 5
131 5
133 5
138 5
139 5
142 5
147 5
156 5
156 5
167 6
166 7
189 11
189 15
187 17
192 18
171 20
160 18
164 19
162 19
162 19
161 19
161 20
162 20
162 20
162 20
159 20
158 20
157 20
157 20
157 20
160 20
160 20
158 20
155 20
155 20
155 20
155 20
155 20
160 21
160 21
158 21
161 21
162 21
163 21
162 21
161 21
162 20
162 20
162 20
160 20
157 20
156 20
156 20
156 20
156 20
155 20
155 20
159 20
158 20
182 21
185 21
195 21
262 25
281 27
282 27
280 27
278 27
283 27
281 27
278 27
278 27
277 27
277 27
277 27
277 27
277 27
278 27
278 27
278 27
278 27
278 27
274 27
275 27
275 27
275 27
275 27
274 27
274 27
274 27
273 27
276 29
276 29
276 29
276 29
276 29
276 29
276 29
275 29
275 29
279 30
284 30
284 31
278 31
276 31
841 38
834 36
832 36
824 36
820 36
880 37
888 33
859 29
861 26
861 24
857 23
852 21
845 20
843 20
843 20
278 12
282 12
286 11
286 11
286 11
286 11
285 12
287 15
289 15
295 16
298 16
300 16
305 16
312 16
320 16
334 16
334 16
333 16
339 16
339 15
339 15
339 20
336 19
341 22
342 22
340 23
340 23
347 23
347 23
347 23
347 23
348 23
348 23
347 23
344 23
344 23
344 18
343 18
336 18
335 18
307 16
294 16
264 15
216 11
215 11
213 11
211 11
210 11
209 13
209 28
209 28
209 28
209 28
209 29
209 29
208 29
208 29
208 29
208 29
208 29
208 29
208 29
208 29
207 29
229 23
230 23
230 23
230 23
230 23
230 23
231 23
235 23
246 23
286 23
304 23
314 23
328 23
329 23
406 23
406 22
374 10
372 10
370 10
367 10
361 10
350 10
339 10
329 9
326 9
311 9
274 9
270 9
269 9
269 9
267 10
264 10
263 10
267 10
266 10
266 10
268 10
278 10
281 10
281 10
299 12
304 12
305 12
328 10
327 10
324 9
315 9
312 9
308 9
302 9
294 9
287 9
287 9
291 9
289 9
287 9
289 9
288 8
288 8
283 6
283 6
283 5
283 5
283 5
283 5
283 5
283 5
282 5
282 5
284 5
284 5
284 5
281 5
282 5
281 5
285 5
330 8
330 8
333 8
330 8
330 8
329 8
329 8
329 7
327 7
327 7
327 7
327 7
327 7
326 7
328 7
328 7
328 7
329 7
432 9
439 9
441 9
446 9
449 9
448 9
448 9
447 9
447 9
446 9
446 9
445 9
438 9
434 10
424 10
389 10
371 10
359 10
347 10
345 10
268 10
268 10
270 10
272 10
274 10
274 10
274 10
274 10
274 10
318 27
314 25
313 25
313 25
313 25
313 25
313 25
313 25
313 25
312 25
309 25
307 25
306 25
303 25
294 25
295 26
294 26
274 25
271 25
221 8
197 8
197 48
197 49
197 49
195 49
198 49
200 49
200 94
198 94
198 94
194 94
191 94
191 96
190 96
190 96
190 96
190 96
191 96
191 56
191 56
193 56
197 56
201 56
203 11
203 11
215 11
248 12
249 12
249 13
249 14
245 13
246 13
238 13
204 11
201 11
205 11
205 11
205 11
205 11
205 11
205 11
205 11
205 11
205 11
206 11
214 14
212 14
215 16
214 16
212 16
208 16
113 14
109 14
105 14
100 14
100 15
105 16
105 17
105 17
104 17
104 17
104 17
104 17
104 17
104 17
105 17
106 17
106 17
106 17
106 17
106 17
106 17
99 17
99 18
100 18
100 18
100 19
100 19
100 19
105 19
113 19
162 19
228 19
251 19
253 19
257 19
265 20
265 20
266 20
266 19
266 18
267 16
268 16
268 16
269 16
269 14
271 15
271 15
271 15
271 15
274 24
274 25
274 25
274 25
273 25
268 25
268 27
269 28
279 28
285 28
286 28
286 28
286 26
286 26
286 26
286 26
286 27
285 28
286 30
285 30
280 30
279 31
276 31
270 30
267 30
261 30
238 43
245 43
249 42
257 42
259 42
261 42
262 43
264 46
264 46
264 46
278 47
280 46
280 47
279 47
283 48
284 46
284 46
290 46
294 47
287 44
286 42
282 42
282 42
282 41
282 41
282 41
281 41
281 41
281 41
281 41
280 39
280 40
280 40
274 39
274 39
274 39
273 39
274 39
274 39
273 39
273 39
273 39
273 39
273 39
273 39
273 39
272 39
272 39
271 39
270 39
267 39
257 39
245 39
239 39
229 39
175 39
128 39
115 39
112 39
114 39
111 38
111 38
114 38
114 38
115 38
111 38
110 38
109 38
107 38
105 38
105 37
105 37
105 37
105 36
104 24
104 24
104 24
103 24
103 24
103 24
103 24
102 24
93 24
87 24
87 24
87 24
87 24
87 24
87 24
87 24
87 23
87 22
86 21
86 21
85 21
85 20
85 20
84 20
81 20
80 20
72 8
68 8
59 8
52 8
50 8
50 9
48 6
44 5
43 5
25 4
19 4
18 4
18 2
18 2
18 2
18 2
18 2
17 2
17 2
17 2
17 2
17 2
19 2
19 2
19 2
19 2
19 2
19 2
19 2
21 2
26 2
29 1
29 1
29 1
29 1
29 1
29 1
29 1
28 1
27 1
27 1
27 1
27 1
27 1
27 1
27 1
28 1
28 1
27 1
25 1
25 1
25 1
25 1
25 1
25 1
25 1
24 1
24 1
24 1
21 1
23 1
21 1
19 1
19 1
18 1
18 1
18 1
18 1
18 19
18 22
20 23
21 32
21 40
23 44
23 147
23 164
23 191
23 267
25 333
25 379
25 390
25 393
25 393
25 394
25 394
25 394
25 394
25 394
25 394
25 394
26 394
26 394
26 394
26 394
26 394
26 394
26 400
25 409
25 414
25 417
24 418
24 420
25 421
25 421
23 421
21 422
21 423
21 423
21 442
21 444
21 444
21 444
21 444
21 476
21 489
21 490
21 490
21 491
21 491
21 493
21 498
21 501
21 504
21 522
21 543
21 548
21 554
21 556
21 558
18 514
13 546
11 559
11 580
11 639
13 747
13 769
13 779
14 806
14 813
14 835
16 849
16 852
16 855
16 858
16 858
16 861
16 861
16 861
16 861
16 862
16 862
16 866
16 869
16 871
16 869
16 869
16 869
16 917
16 941
16 944
14 946
14 953
14 955
14 958
14 1008
16 1211
16 1230
16 1256
16 1224
16 1238
12 1238
13 1262
13 1251
13 1222
13 1101
13 1076
13 1059
12 977
11 966
11 945
11 945
11 946
11 946
11 946
12 946
12 946
12 946
12 955
12 955
12 955
11 960
11 960
11 964
11 968
12 991
16 1075
15 1085
16 1108
18 1137
18 1381
18 1395
18 1411
22 1448
22 1457
22 1461
22 1464
22 1466
22 1467
24 1449
24 1450
24 1450
25 1449
25 1450
26 1455
26 1456
26 1464
29 1475
29 1476
29 1476
29 1471
29 1472
29 1463
29 1457
30 1439
36 1453
42 1470
45 1465
47 1480
47 1479
47 1472
46 1433
46 1417
46 1420
45 1346
42 1254
42 1237
42 1231
42 1217
49 1267
49 1248
49 1253
49 1260
49 1261
50 1263
53 1274
56 1296
62 1318
65 1325
67 1325
75 1355
77 1358
77 1358
77 1350
77 1357
77 1356
77 1357
78 1360
78 1242
79 1240
79 1239
79 1238
79 1231
79 1227
78 1180
77 1158
75 977
75 963
75 949
75 952
76 957
76 960
76 960
76 960
76 960
76 953
76 952
76 952
76 952
76 952
76 952
76 949
76 949
76 950
76 950
75 950
75 950
75 951
75 951
75 951
75 951
78 945
80 946
80 942
79 939
79 904
73 803
74 772
74 735
73 710
74 467
75 463
74 440
72 401
74 402
76 404
86 409
155 414
158 412
157 410
165 411
166 414
166 415
165 411
165 408
165 405
164 399
162 388
162 387
161 386
161 385
161 378
105 377
106 375
103 364
99 344
94 331
90 330
89 321
89 320
89 319
89 317
89 310
89 289
89 289
89 279
87 269
87 260
87 242
82 178
82 177
82 159
82 151
77 150
73 142
64 126
60 110
57 107
55 107
53 106
52 73
52 71
52 68
51 68
51 57
51 57
51 55
51 52
51 52
54 52
54 52
54 51
54 50
60 50
59 50
59 50
59 50
59 50
59 50
59 46
59 40
59 38
60 38
60 38
57 38
57 38
57 38
57 38
51 38
51 38
51 38
51 38
51 38
53 37
53 37
53 37
53 37
53 37
53 36
52 36
52 36
49 36
48 35
47 34
47 33
47 33
47 33
47 32
46 32
45 32
45 32
43 32
42 32
42 31
3 3
3 2
3 2
3 0
3 0
3 0
3 0
3 0
3 0
3 0
3 0
3 0
3 0
3 0
3 0
3 0
3 0
3 0
3 0
3 0
3 0
3 0
3 0
3 0
3 0
3 0
3 0
3 0
3 0
3 0
3 0
3 0
3 0
3 0
3 0
3 0
3 0
3 0
3 0
3 0
3 0
4 0
4 0
7 0
7 0
7 0
7 1
7 1
7 1
7 1
7 1
7 1
7 1
15 1
15 1
15 1
15 1
15 1
11 1
11 1
11 1
11 2
11 1
11 1
12 1
12 1
12 1
13 1
12 1
4 1
4 1
4 3
4 3
4 3
4 3
4 3
4 2
4 2
4 2
3 2
2 2
2 2
1 2
1 2
1 2
1 2
1 0
1 0
1 0
1 0
1 0
1 0
1 0
1 0
1 0
1 0
0 0
1 0
1 0
1 0
1 0
1 0
1 0
1 0
1 0
1 0
1 0
1 0
1 0
1 0
1 0
1 0
1 0
0 0
0 0
0 0
0 0
0 0
0 0
0 0
0 0
0 0
0 0
0 0
0 0
0 0
0 0
0 0
0 0
0 0
0 0
0 0
0 0
0 0
0 0
0 0
0 0
0 0
0 0
1 0
4 0
10 0
15 0
15 8
15 8
15 8
15 8
15 8
15 8
16 8
16 8
16 8
18 8
18 8
18 8
18 8
18 8
18 8
18 0
19 0
19 1
19 1
19 1
19 1
18 1
18 1
19 1
19 1
19 1
19 1
19 1
19 1
19 1
19 1
19 1
20 1
19 1
19 1
19 1
19 1
21 1
24 1
25 1
44 219
46 219
49 219
49 219
51 219
53 219
59 219
66 219
67 219
71 219
71 219
71 219
73 219
73 219
75 219
69 1
70 1
79 1
86 1
89 1
88 0
89 0
90 0
91 0
95 0
95 0
95 0
95 0
95 0
95 0
95 0
95 0
95 0
95 0
95 0
97 0
109 2
110 4
110 4
110 4
110 4
119 4
120 4
120 4
121 4
121 4
131 4
149 4
195 5
208 9
211 9
215 10
215 10
216 10
216 10
213 10
211 11
213 11
213 11
209 11
212 11
213 11
236 11
239 11
240 11
242 11
243 11
244 11
245 11
244 11
251 11
251 11
253 11
257 11
262 11
264 10
264 10
267 10
272 10
274 10
275 10
274 10
274 10
274 10
274 10
274 10
274 10
274 10
274 10
274 10
284 10
299 11
299 11
298 11
307 11
309 11
318 11
318 11
326 11
342 11
342 12
381 12
438 14
451 14
453 14
456 14
443 12
471 12
470 12
467 12
468 12
468 14
468 14
467 14
473 14
471 14
747 16
742 16
739 16
739 16
739 16
739 16
739 16
737 16
737 16
737 16
740 16
741 16
746 14
746 14
748 14
754 14
479 14
483 14
484 14
489 14
484 10
484 10
486 10
495 10
509 11
507 11
508 11
510 11
521 11
524 11
515 11
495 11
477 52
465 50
460 50
459 49
459 49
460 52
460 52
462 52
481 52
537 54
540 54
543 54
543 54
542 54
523 54
507 11
508 11
508 11
511 11
512 11
513 11
530 11
546 13
553 13
557 13
573 16
578 18
601 21
634 21
644 22
645 22
649 22
655 25
656 27
656 31
657 31
671 32
677 32
685 31
710 32
823 33
840 34
851 34
909 35
974 35
971 35
968 35
963 35
965 33
967 33
968 33
949 33
938 32
922 32
866 32
858 32
853 32
849 32
848 32
819 32
819 32
819 32
818 32
818 32
817 32
818 32
815 32
815 32
815 32
816 32
816 32
817 32
818 32
825 32
826 32
827 32
842 32
883 35
945 36
961 36
964 34
965 34
965 34
958 34
957 34
957 34
959 33
970 33
980 33
1003 33
995 33
1012 33
1006 33
1000 33
1025 33
1026 33
1021 32
1020 32
1020 32
1023 32
1074 32
1076 33
1078 33
1079 33
1097 34
1111 31
1110 30
1105 30
1085 30
1031 30
1025 30
1021 30
1020 30
1019 30
1016 30
1016 30
1013 30
1015 30
1010 30
1010 30
1018 31
998 33
976 31
971 31
967 31
948 28
941 21
899 15
872 13
852 13
848 13
846 13
851 13
862 14
858 14
848 14
837 16
812 16
755 18
703 16
618 15
601 15
587 15
554 14
505 14
504 14
503 14
499 14
498 14
494 14
489 14
486 14
482 14
481 14
480 14
480 14
478 14
477 14
477 14
482 14
482 14
482 14
482 14
482 14
480 14
485 14
486 14
486 14
487 14
483 14
482 14
478 14
472 14
461 14
447 14
439 14
378 14
337 11
282 10
265 10
257 10
256 10
256 10
255 10
255 10
253 10
249 10
243 10
241 10
235 10
234 10
218 9
214 9
208 9
182 9
181 9
178 9
158 8
160 8
184 9
165 9
167 9
180 9
198 10
171 10
167 11
171 12
170 12
170 12
170 12
171 12
172 12
174 12
176 12
176 12
179 13
182 13
181 13
177 13
168 10
164 9
163 9
163 9
163 9
165 9
165 9
165 9
165 8
165 8
165 8
161 7
161 7
156 7
147 6
145 6
144 6
144 6
145 6
145 6
145 7
201 1344
200 1344
200 1344
202 1344
202 1346
203 1346
201 1347
201 1347
202 1347
202 1347
202 1347
204 1347
205 1347
205 1347
204 1348
148 10
148 10
148 10
147 10
143 10
143 10
141 10
142 10
142 10
141 10
137 10
134 10
134 10
132 11
132 11
132 11
132 11
132 11
132 11
132 11
132 11
132 11
131 12
131 12
132 12
134 12
134 12
135 12
135 11
135 11
134 12
134 12
135 12
135 12
135 12
135 12
134 12
129 12
127 12
125 12
122 11
118 11
111 11
103 11
85 9
78 10
73 10
37 10
31 10
31 9
30 9
25 8
22 8
22 8
22 8
22 8
21 8
21 8
20 8
19 8
23 7
22 7
22 7
22 8
22 9
22 9
22 9
23 15
24 17
22 17
22 18
22 18
22 18
22 20
22 20
22 20
17 20
17 20
17 19
17 19
17 19
17 19
17 13
17 14
17 14
17 14
17 14
17 14
15 13
14 11
14 11
14 11
14 11
14 11
14 11
14 12
12 12
12 12
12 13
12 13
12 13
12 14
12 14
12 16
11 16
10 17
10 17
12 19
11 19
11 19
13 20
13 21
13 21
13 20
13 20
13 20
13 19
13 20
13 19
13 19
13 19
13 19
11 16
11 16
9 15
8 15
8 15
11 17
11 17
11 17
11 17
13 17
12 17
12 17
13 17
13 17
13 17
13 17
13 17
13 17
13 17
13 17
9 15
9 15
9 15
9 15
9 15
10 15
10 15
10 15
10 15
9 15
9 15
9 15
10 15
10 15
10 15
10 15
10 16
11 16
11 21
12 28
12 28
12 33
12 40
12 45
12 49
10 51
10 49
10 49
10 47
10 47
10 47
10 48
11 49
11 49
11 49
11 49
11 49
11 51
11 51
11 51
12 51
16 58
16 58
16 58
16 58
16 58
16 58
16 58
16 58
16 58
16 58
16 57
16 57
16 56
16 58
16 58
16 57
18 57
19 57
19 57
20 56
20 56
20 58
20 58
20 62
20 62
20 62
20 62
18 61
18 61
18 61
18 63
18 63
18 63
18 63
18 62
18 62
18 62
18 62
18 64
18 64
18 64
18 64
18 64
18 64
18 64
18 64
18 64
18 64
16 65
15 65
15 65
14 66
14 66
14 66
14 66
14 64
14 65
14 65
14 66
14 66
14 66
14 66
15 66
14 67
16 67
15 69
15 69
15 69
15 72
15 73
15 73
14 73
14 71
14 71
14 76
14 78
14 79
14 68
13 54
13 53
13 51
13 49
13 49
13 49
13 49
13 49
13 49
13 50
13 50
13 49
12 47
12 47
12 47
12 48
12 48
10 48
10 46
10 46
10 46
9 45
6 37
5 37
5 37
5 37
5 37
5 37
5 36
5 36
5 36
5 36
5 36
5 36
4 36
3 36
3 34
3 34
3 34
3 34
3 34
3 34
3 34
3 32
3 29
3 27
3 27
3 27
3 27
10 28
10 28
15 29
15 29
15 29
15 29
15 29
15 29
15 29
15 29
15 29
15 30
15 30
15 30
15 30
15 30
15 30
15 30
3 29
3 29
3 29
3 27
3 27
3 27
3 26
3 26
3 25
1 25
1 25
1 25
1 24
1 24
1 24
1 24
1 24
0 24
0 23
0 20
0 20
0 20
0 20
0 17
0 18
0 18
0 17
0 17
0 15
0 9
0 9
0 5
0 5
0 5
0 5
0 5
0 5
0 5
0 5
0 5
0 4
0 4
0 3
0 3
0 3
0 3
0 3
0 3
0 3
0 3
0 3
0 3
0 3
0 3
0 3
0 3
0 3
0 3
0 3
0 3
0 3
0 3
0 3
0 3
0 3
0 3
0 3
0 3
0 3
0 3
0 3
0 3
0 3
0 3
0 3
0 3
0 3
0 3
0 3
0 3
0 3
0 3
0 3
0 3
0 3
0 3
0 3
0 4
0 4
0 4
0 4
0 4
0 4
0 4
0 4
0 4
0 4
0 4
0 4
0 4
0 4
0 4
0 3
0 3
0 3
0 6
0 6
0 6
0 6
0 6
0 9
0 12
0 19
1 29
1 33
1 38
1 42
1 45
1 50
1 50
1 51
1 51
1 51
1 51
1 51
1 51
1 51
1 51
1 51
1 50
1 50
1 50
1 50
1 50
1 52
1 52
1 52
1 52
1 52
12 53
12 53
12 53
12 53
12 53
12 53
12 54
12 54
12 56
12 57
12 57
12 57
12 57
12 57
12 57
12 57
1 56
1 56
1 57
1 57
1 62
2 69
2 73
2 74
2 78
2 79
3 79
3 80
3 81
3 82
3 83
3 83
3 83
3 83
3 83
3 83
3 83
3 83
3 85
3 86
3 85
3 87
3 90
3 91
3 93
3 100
3 101
3 103
3 103
3 103
3 104
3 104
3 104
3 104
3 104
4 105
4 109
5 110
5 109
5 108
5 112
5 112
5 112
5 111
5 111
5 111
5 108
5 111
5 111
5 111
4 111
4 107
4 104
4 89
4 87
4 77
4 73
4 73
4 73
6 73
6 73
6 73
6 74
6 87
6 89
6 91
6 93
6 97
6 97
6 97
6 97
6 97
6 97
6 97
6 97
6 97
6 97
6 97
6 97
6 96
6 96
6 96
6 96
6 92
6 92
6 92
6 90
6 89
6 88
6 87
6 87
7 87
8 87
8 87
8 87
8 85
9 83
9 83
8 82
7 80
7 75
7 74
7 71
7 71
7 65
7 65
7 65
7 65
7 65
7 64
7 64
7 64
7 64
10 65
10 65
10 65
10 65
10 64
10 65
10 64
10 64
10 60
10 53
10 52
10 51
10 45
10 45
11 44
11 44
11 44
11 44
11 43
11 43
11 43
10 43
9 37
18 34
18 34
18 34
18 34
18 34
18 34
19 35
19 35
20 35
21 35
21 35
21 32
21 32
21 32
21 32
21 31
12 30
12 28
12 28
12 28
12 28
11 28
11 27
10 27
10 27
10 27
10 27
10 13
10 11
12 8
12 5
12 5
12 5
12 5
12 5
12 5
12 5
12 5
13 5
17 5
17 7
17 7
17 9
17 9
17 9
17 9
17 9
17 9
17 9
17 9
17 9
17 9
17 9
17 9
17 9
16 9
15 9
15 7
14 8
14 8
14 8
14 8
14 8
14 8
14 8
14 8
14 8
14 8
15 9
15 8
15 9
15 9
15 10
15 10
15 11
15 11
15 11
12 11
12 11
12 11
12 10
12 10
12 9
12 10
17 95
17 95
17 95
17 95
17 95
17 95
17 95
16 94
16 94
16 94
16 94
16 100
16 102
16 103
16 103
12 18
12 18
11 18
12 18
12 18
16 18
15 18
15 17
15 17
15 17
14 17
14 17
14 17
14 17
14 21
14 21
15 22
15 23
15 23
14 23
9 24
9 25
9 25
9 25
9 25
9 25
9 26
9 26
9 26
9 26
7 26
7 26
7 26
7 26
7 26
7 28
7 28
6 28
5 28
5 28
2 28
2 28
2 28
2 27
2 27
2 27
2 27
2 27
2 27
2 27
2 27
2 27
2 27
2 27
3 26
3 26
3 26
3 26
3 25
3 24
3 24
3 24
3 24
3 24
3 24
3 24
3 24
3 24
3 24
2 24
2 24
2 24
2 24
2 23
3 22
3 22
3 22
3 22
3 22
3 22
3 22
3 22
3 22
3 22
3 21
5 24
5 24
5 25
5 25
5 25
5 25
5 25
5 25
5 25
5 25
5 24
5 16
5 16
5 16
5 16
5 16
5 16
5 16
5 16
5 16
5 16
5 16
5 16
6 16
6 16
6 16
6 16
6 16
6 16
6 11
6 10
5 9
5 9
5 9
5 9
5 11
5 10
5 10
5 10
5 10
5 8
5 7
5 7
5 7
5 7
6 7
7 7
9 8
11 8
11 8
11 8
11 8
12 8
12 10
12 10
12 10
12 10
12 10
12 9
12 9
12 10
12 10
12 10
12 10
12 10
12 10
12 10
12 10
12 10
11 10
11 10
11 10
11 10
11 10
11 10
11 10
11 9
11 10
11 10
11 10
11 10
11 10
11 10
11 10
11 10
11 10
11 10
11 10
11 10
10 10
10 10
10 10
10 10
10 9
10 9
10 9
10 9
10 9
10 8
10 8
8 5
8 5
8 5
8 5
8 5
8 5
8 5
8 5
8 5
8 5
8 5
8 5
8 5
8 5
8 5
8 5
8 5
8 5
8 6
8 6
8 6
8 6
8 6
7 6
7 6
7 6
7 6
7 6
7 6
7 6
7 7
7 7
7 7
7 6
11 16
11 14
11 16
11 17
11 17
11 17
11 19
11 21
8 21
7 21
7 21
7 21
6 21
4 20
4 20
4 19
4 19
4 19
4 19
4 19
4 19
4 19
4 19
4 18
4 18
4 18
4 18
4 18
4 18
4 18
4 18
4 18
4 18
4 18
4 18
4 18
4 18
4 18
4 18
4 18
4 19
4 19
4 19
4 19
4 21
4 21
4 21
4 21
4 21
4 21
4 21
4 22
4 22
4 22
4 22
4 22
4 22
4 22
6 22
6 21
6 23
6 24
6 24
6 25
6 25
6 25
6 25
7 25
7 25
7 25
7 25
7 25
7 25
7 25
8 25
8 25
8 25
8 25
8 25
8 25
8 26
8 27
8 31
7 31
7 31
7 31
7 32
7 32
7 32
8 32
8 34
8 35
8 35
8 35
8 37
8 37
8 36
8 36
8 36
8 36
4 23
4 23
4 23
4 23
4 22
4 21
4 19
4 19
4 22
4 23
4 24
4 27
4 28
36 29
36 30
36 30
36 30
36 30
36 30
36 30
36 30
36 32
36 32
36 32
36 32
36 32
36 32
36 32
36 32
36 32
36 32
4 31
4 31
4 31
4 31
4 31
4 31
4 31
4 31
4 31
4 30
4 30
4 30
4 30
4 30
4 29
4 29
4 29
4 29
4 29
4 29
4 29
4 32
4 33
4 33
4 34
4 34
3 34
2 34
2 32
2 30
2 30
2 30
2 29
2 29
2 29
2 29
2 26
2 26
2 26
2 26
2 26
2 26
2 26
2 26
2 26
2 26
2 26
2 26
2 25
2 24
2 24
2 20
2 20
2 20
2 20
2 19
2 19
2 19
0 19
0 16
0 16
0 16
0 16
0 14
0 14
0 14
0 14
0 14
0 14
0 14
0 14
0 14
0 14
0 14
0 14
0 14
0 14
0 11
0 10
0 8
0 4
0 2
0 2
0 2
0 2
0 2
0 2
0 2
0 2
0 2
0 0
0 0
0 0
0 0
0 0
0 0
0 0
0 0
0 0
0 0
0 0
0 0
0 0
0 0
0 0
0 0
0 0
0 0
0 0
0 0
0 0
0 0
0 0
0 0
0 0
0 0
0 0
0 0
0 0
0 0
0 0
0 0
0 0
0 0
0 0
0 0
0 0
0 0
0 0
0 0
0 0
0 0
0 0
0 0
0 0
0 0
0 0
0 0
0 0
0 0
0 0
0 0
0 0
0 0
0 0
0 0
0 0
0 0
0 0
0 0
0 0
0 0
0 0
0 0
0 0
1 0
1 1
1 1
1 1
1 4
1 4
1 4
1 4
1 4
1 4
1 4
1 4
1 4
1 4
1 4
1 4
1 4
1 4
1 4
1 4
0 1
0 1
0 1
0 1
0 1
0 2
0 3
0 6
0 6
0 6
0 6
0 6
0 6
0 6
0 7
0 7
0 7
0 7
0 7
2 7
2 7
2 7
2 7
2 7
2 7
2 7
2 7
2 7
2 7
2 7
2 7
2 7
2 7
2 7
2 7
0 7
0 7
0 7
0 7
0 7
0 7
0 7
0 7
0 7
0 7
0 7
0 7
0 7
0 7
0 7
0 7
0 7
0 7
0 7
0 7
0 7
1 9
1 9
1 9
1 10
1 10
1 10
1 10
1 10
1 10
1 10
1 10
1 10
1 10
1 10
1 10
1 10
1 10
1 11
1 11
1 11
1 11
1 11
1 10
1 10
1 10
1 10
1 10
1 10
1 10
1 10
1 10
1 10
1 10
1 10
1 11
1 11
1 11
1 11
1 11
1 14
1 16
1 16
3 87
3 87
3 87
3 87
3 88
3 89
3 89
3 88
3 87
3 84
3 84
3 84
3 84
3 84
6 84
4 14
4 13
4 13
5 13
5 13
5 13
5 13
5 13
5 13
5 13
5 13
5 14
5 14
5 14
5 14
5 14
5 14
5 15
4 17
4 17
5 26
5 32
5 47
5 49
5 51
5 52
5 52
5 52
5 52
5 53
5 53
6 53
6 53
6 53
6 53
6 53
6 53
6 54
6 54
7 55
7 54
7 54
7 52
6 51
6 51
6 51
6 51
6 51
6 51
6 51
6 51
6 51
6 52
6 52
9 53
10 53
10 53
10 53
11 53
11 53
11 52
11 52
11 52
11 52
11 52
11 52
11 52
11 52
11 53
11 54
11 56
11 56
14 56
14 64
14 65
14 65
14 65
14 65
14 65
14 66
14 66
16 66
16 62
16 61
16 61
16 62
16 63
16 63
16 61
16 63
16 63
40 66
40 66
40 66
40 66
40 68
41 72
41 75
44 79
41 81
41 82
41 83
41 84
41 84
41 85
41 83
17 83
17 83
17 83
17 83
17 83
17 83
17 83
18 82
21 82
21 81
23 82
23 80
23 76
22 68
22 62
22 53
22 50
23 49
23 47
23 47
25 57
27 57
30 56
31 56
32 56
32 56
33 58
33 58
33 58
35 58
35 58
35 58
34 58
34 58
34 58
34 58
34 48
34 48
34 48
34 49
35 50
83 52
83 53
83 55
82 55
82 56
82 55
81 56
80 55
82 55
89 57
95 57
94 57
94 57
94 57
94 57
93 57
46 55
47 55
47 55
48 55
48 55
48 54
48 51
48 50
48 48
47 50
48 42
48 41
48 41
48 41
49 41
49 42
49 42
49 42
48 42
49 42
49 42
49 43
49 44
49 43
49 44
49 44
51 44
54 43
54 43
54 43
54 50
54 47
54 47
52 42
51 40
50 34
50 33
50 33
58 194
58 193
61 197
61 197
61 196
61 196
62 196
62 196
63 196
63 196
63 195
63 195
61 195
59 195
59 195
57 194
49 32
46 29
46 28
48 28
48 30
48 30
48 30
48 30
48 30
44 34
51 36
48 36
48 36
47 36
46 34
46 34
46 34
46 34
46 34
46 34
46 34
50 34
50 35
54 38
54 39
54 41
46 39
46 40
46 39
45 38
45 38
45 39
45 37
42 37
44 36
42 36
39 35
33 35
30 35
29 33
27 33
27 33
27 33
27 33
27 33
27 33
27 33
26 33
27 33
26 33
26 33
26 33
24 33
24 34
24 34
24 34
23 34
23 34
23 34
23 36
23 38
23 37
23 38
23 38
22 38
21 38
21 38
21 37
21 36
21 36
21 36
20 36
19 36
18 35
18 31
17 30
17 27
48 27
48 30
48 29
48 30
48 30
49 30
49 30
49 30
49 30
49 30
49 29
49 29
49 28
48 27
48 26
47 26
46 23
16 23
16 23
16 22
16 22
16 22
19 22
19 23
19 23
19 23
16 24
18 22
18 22
21 23
21 25
22 26
22 24
21 24
20 24
20 24
20 24
20 24
20 24
20 24
20 24
20 25
18 25
18 25
15 25
15 25
12 21
12 21
12 21
12 21
12 20
12 20
12 22
12 21
12 19
12 19
11 18
9 18
9 18
10 18
10 18
11 22
11 22
11 24
11 23
12 23
12 23
12 24
12 25
12 25
12 25
11 25
15 25
15 25
15 25
17 26
17 25
17 27
17 27
17 28
17 28
17 28
17 26
20 70
20 69
20 69
20 69
20 69
20 69
20 69
20 69
20 69
20 69
20 69
20 69
20 69
20 69
20 69
17 23
17 23
17 23
17 23
17 23
17 23
16 23
16 23
16 23
16 23
16 23
16 23
16 23
16 23
16 23
16 23
16 23
16 23
16 23
16 23
18 23
15 24
15 24
15 24
15 24
15 23
16 24
16 26
16 25
16 27
16 26
13 26
13 22
12 22
12 22
12 22
12 22
12 22
12 22
12 22
12 22
12 22
12 22
12 22
12 22
12 22
12 21
13 21
14 21
14 21
14 21
14 21
14 21
15 21
15 20
15 20
15 20
15 22
17 22
22 27
24 29
22 29
21 30
20 24
20 24
20 24
20 24
20 23
21 25
22 25
21 28
23 33
23 33
23 33
19 33
17 33
17 32
17 30
17 30
17 30
17 29
17 29
17 29
17 29
17 29
17 29
17 31
17 31
17 31
17 31
17 31
17 31
18 31
18 31
18 31
18 31
18 31
18 33
19 35
19 41
20 41
20 41
20 42
20 42
20 42
20 42
20 42
20 43
20 43
20 43
20 43
20 43
20 43
20 43
20 43
19 43
19 43
18 43
18 43
17 43
16 43
16 42
16 42
16 42
15 42
15 41
15 38
15 38
15 37
15 39
15 41
15 41
15 43
24 195
24 196
24 196
24 196
24 196
24 201
24 201
29 207
29 207
29 207
29 207
29 207
29 207
29 207
30 207
29 206
29 206
29 206
29 205
29 206
29 206
20 49
20 47
15 41
15 38
11 36
9 32
9 30
9 31
9 30
9 30
9 30
8 30
8 30
8 36
8 34
7 34
5 33
7 32
7 32
7 32
4 32
4 32
4 32
4 32
4 32
4 32
4 32
4 32
4 27
4 27
4 27
4 29
3 27
3 27
3 27
3 27
3 27
2 27
2 27
2 27
2 27
2 27
2 27
2 25
2 22
2 17
2 17
2 17
2 16
2 16
2 16
2 16
2 16
2 15
2 15
2 15
2 15
2 15
2 15
2 15
2 15
2 15
2 15
2 15
2 15
2 15
2 15
2 15
2 15
2 15
2 15
4 17
4 17
4 17
4 17
4 13
4 13
4 10
4 10
4 10
4 9
4 9
4 9
4 9
4 9
4 9
2 7
1 7
1 7
1 7
1 7
1 7
1 7
1 7
1 7
1 7
1 7
1 6
1 6
1 6
1 6
1 6
1 6
1 6
1 5
1 4
1 4
1 3
1 3
1 3
1 3
1 3
1 3
2 2
2 2
2 2
2 2
2 2
2 2
2 2
2 2
2 2
2 2
2 2
2 2
2 2
2 2
2 2
1 2
1 2
1 0
1 0
0 0
0 0
0 0
0 0
0 0
0 0
0 0
0 0
0 0
0 0
0 0
0 0
0 0
0 0
0 0
0 0
0 0
0 0
0 0
0 0
0 5
0 6
0 6
0 6
1 6
555 19
555 20
555 21
555 21
555 21
555 22
557 170
560 170
560 170
560 170
562 170
562 170
562 170
562 170
562 170
7 157
7 157
7 157
7 161
7 161
7 162
5 13
5 13
8 13
11 14
9 19
9 19
9 19
9 19
6 19
6 19
6 19
6 19
6 19
6 55
6 55
6 57
6 57
6 57
0 56
0 56
0 56
0 58
0 147
0 161
0 169
0 173
0 174
0 175
0 180
0 181
0 180
0 139
0 139
0 139
0 139
0 140
0 145
0 148
0 149
0 149
0 150
0 150
0 152
0 152
0 152
0 152
0 153
0 153
0 153
0 153
0 154
0 155
0 155
0 156
0 156
0 156
0 156
0 159
0 159
2 449
5 508
5 526
5 544
5 546
5 551
5 561
5 564
5 564
5 564
5 566
5 573
5 579
5 580
5 580
3 298
3 299
3 299
4 299
4 299
4 298
4 297
4 297
4 299
4 300
4 302
4 302
4 301
4 302
4 307
4 309
4 311
4 311
4 311
4 311
4 311
4 311
4 311
4 311
4 311
4 310
5 310
5 309
5 309
5 310
5 304
5 304
5 304
5 306
5 306
5 306
5 306
5 306
5 305
5 305
5 306
5 306
5 306
5 303
5 303
5 301
5 298
5 290
5 196
5 190
5 190
5 189
5 189
5 189
5 189
5 189
5 189
5 189
5 188
5 185
5 185
5 185
5 177
5 177
5 178
5 181
6 181
6 237
6 237
6 239
6 239
6 240
6 240
6 241
6 240
6 263
6 283
6 282
6 289
6 291
6 291
6 294
6 293
6 238
6 238
6 221
3 160
3 153
3 149
3 150
3 146
3 131
3 131
3 131
3 134
3 194
3 197
3 200
3 199
3 261
3 278
3 287
3 301
2 313
2 313
2 314
2 314
2 314
2 316
2 315
2 313
2 313
2 314
2 313
2 310
2 308
2 306
2 307
2 307
2 309
2 311
2 314
2 314
2 314
2 314
2 314
0 314
0 314
0 315
0 316
0 316
0 320
0 323
0 323
0 323
0 324
0 324
4 330
4 328
4 328
4 329
4 329
4 329
4 330
4 331
4 332
4 332
4 331
4 331
4 329
4 331
4 338
0 340
0 340
0 341
0 341
0 341
0 341
0 341
0 342
0 342
0 342
0 341
0 339
1 338
1 331
1 330
1 333
1 334
1 332
1 333
1 332
1 332
1 331
1 329
1 289
1 286
1 286
1 281
1 280
1 279
1 278
1 278
1 278
1 277
1 277
2 277
2 272
2 271
2 271
2 271
2 271
2 271
4 272
6 267
6 197
6 185
6 184
6 185
6 121
6 97
6 84
6 76
5 73
5 73
5 73
5 73
5 72
3 66
3 66
3 66
3 66
3 66
3 67
3 67
3 67
3 67
3 66
3 66
3 65
3 64
3 61
3 61
3 61
3 61
3 60
3 59
3 59
3 60
3 59
5 61
6 60
6 58
6 58
6 58
6 69
6 70
6 71
6 73
6 73
6 73
6 74
7 73
7 76
7 75
7 74
7 75
7 79
7 78
7 79
7 79
7 70
7 63
7 64
7 64
7 64
7 64
7 64
7 61
7 62
7 62
6 61
6 63
6 63
6 63
6 65
6 64
6 62
6 63
6 65
6 73
7 96
8 113
9 148
9 160
9 173
9 179
10 204
10 206
10 206
10 206
10 210
10 211
10 213
10 215
10 215
10 216
10 216
10 216
9 214
9 214
9 214
9 214
9 214
8 209
6 209
6 209
6 208
6 207
6 206
6 206
11 206
11 207
11 206
11 209
11 211
11 213
11 215
11 216
11 216
11 216
11 220
11 222
12 226
12 226
12 227
7 227
7 227
7 227
7 227
7 227
7 227
7 228
7 230
7 232
7 233
7 232
7 232
7 231
6 226
4 220
3 216
3 216
3 215
3 213
3 203
3 204
3 203
3 201
3 201
3 201
3 203
2 203
38 2339
38 2339
38 2339
38 2338
39 2333
39 2334
39 2335
40 2342
40 2343
40 2352
40 2356
40 2356
41 2357
41 2357
41 2358
41 2356
38 2332
38 2336
38 2344
37 2348
4 240
4 247
4 249
4 249
3 248
3 244
3 242
3 220
2 170
2 136
2 110
2 108
2 110
2 112
3 135
3 131
5 138
5 143
6 142
6 139
6 138
6 136
6 136
6 136
6 139
6 139
6 140
6 140
6 140
6 140
6 140
6 145
7 145
7 146
7 146
7 146
7 148
7 149
103 707
103 706
103 706
103 701
103 699
103 698
103 697
103 697
103 697
103 697
103 693
103 691
103 690
103 690
103 690
7 130
7 130
7 130
7 132
7 132
7 132
7 131
7 131
7 129
7 128
7 128
7 128
7 128
7 128
7 128
7 128
7 128
7 128
7 126
7 125
7 125
7 125
7 124
7 124
7 124
7 124
7 124
7 124
7 124
7 124
7 124
7 124
7 125
7 124
6 110
6 107
6 106
6 102
6 102
5 101
5 101
5 100
5 99
5 98
5 96
5 78
5 76
5 75
5 67
5 64
5 64
5 63
5 63
5 63
5 63
5 62
5 62
5 60
6 79
5 76
5 75
3 50
3 53
3 49
3 49
4 53
4 54
4 54
4 58
4 60
4 60
4 57
5 59
5 66
5 69
5 71
5 71
5 73
6 387
3 371
3 380
3 381
3 382
4 401
4 420
4 426
5 448
5 462
5 470
5 486
5 498
6 499
6 500
6 502
6 500
5 177
5 177
6 177
6 177
6 177
6 177
6 177
6 177
6 178
6 178
6 178
6 178
6 178
6 178
6 178
6 178
21 181
20 181
20 181
20 181
20 181
20 181
20 181
20 187
20 191
20 192
20 192
20 192
23 194
23 198
23 199
8 199
8 201
9 205
9 214
9 218
10 217
10 214
10 214
10 214
10 216
10 237
10 242
10 247
10 252
10 254
15 367
15 368
15 368
15 369
15 373
15 378
15 380
15 380
15 381
15 381
15 382
15 383
15 383
15 383
15 383
10 273
10 274
10 273
10 273
10 272
10 271
11 267
11 267
11 267
10 264
10 263
10 261
10 259
10 257
10 258
10 256
9 249
9 246
9 244
9 237
9 236
9 235
9 235
9 235
9 229
9 226
8 215
8 186
8 164
8 159
6 131
6 124
6 123
6 121
6 122
6 124
6 124
6 124
6 122
10 130
10 131
10 132
10 132
10 133
10 133
10 135
10 137
10 139
10 140
10 140
10 140
10 140
10 139
10 139
6 139
6 139
6 139
6 139
6 139
6 139
6 139
6 137
6 128
7 128
7 129
7 129
7 129
4 128
4 124
4 123
4 120
4 119
72 111
73 105
73 103
72 104
72 104
72 106
72 106
72 105
72 82
72 77
72 67
72 66
72 66
72 57
72 57
72 57
2 56
3 53
3 46
3 45
3 44
3 44
3 44
3 43
3 42
3 42
3 42
3 42
3 42
3 41
3 41
3 42
3 42
3 44
2 44
27 45
27 45
27 46
27 46
37 51
37 51
37 51
37 49
37 49
37 49
37 52
37 52
37 52
37 52
37 52
37 52
12 52
12 52
12 52
2 45
2 45
2 45
2 42
2 42
2 42
2 36
2 36
2 35
2 34
3 36
3 34
3 36
3 29
3 29
3 33
3 32
3 33
3 34
3 32
3 31
3 30
3 29
3 29
3 29
3 29
3 29
3 29
3 29
3 29
3 29
3 29
3 29
3 29
3 29
3 28
3 28
2 28
2 28
2 28
2 28
2 28
2 28
2 27
2 27
2 25
2 24
2 24
2 24
2 24
2 30
2 29
2 29
2 29
2 29
2 29
2 29
2 29
2 29
2 29
2 29
2 29
2 29
1 29
1 29
1 29
1 30
1 30
3 35
3 37
3 36
3 30
3 30
3 30
3 31
3 31
3 31
3 30
3 30
3 27
3 27
3 25
3 25
3 26
3 26
3 26
3 26
3 26
4 26
4 27
4 27
4 27
4 27
4 28
4 28
4 28
4 38
4 38
4 38
4 41
4 43
4 48
4 48
4 57
4 57
4 66
4 68
4 66
4 68
4 69
3 98
3 113
3 117
3 124
3 127
3 128
3 143
5 144
5 151
5 151
5 157
5 235
6 241
6 245
6 245
8 245
8 262
8 271
9 304
9 305
9 305
9 305
9 307
24 1179
24 1179
24 1181
24 1181
24 1181
24 1181
24 1182
22 1182
22 1182
22 1182
22 1182
22 1182
22 1182
22 1182
22 1182
6 259
6 259
6 259
6 259
6 259
6 259
6 259
6 259
6 259
6 262
6 262
6 262
6 262
6 263
6 264
6 265
6 266
8 266
8 265
8 270
6 264
6 263
6 263
6 263
6 263
6 263
6 263
6 263
6 263
6 262
6 260
6 260
4 260
4 260
4 255
4 254
4 254
4 254
4 254
4 254
3 253
3 253
3 253
3 256
3 259
3 258
3 258
3 259
3 242
3 242
3 241
3 241
3 241
3 239
3 238
3 216
3 216
3 215
3 213
3 212
3 209
3 212
3 170
3 166
4 165
6 170
5 170
5 168
5 166
4 165
4 160
4 158
4 150
4 70
4 66
4 65
4 65
4 62
4 61
4 61
4 60
4 63
4 63
4 63
4 62
4 63
4 64
4 67
4 65
4 67
4 67
4 73
4 73
69 75
69 75
69 75
69 75
69 76
69 76
70 76
70 81
72 89
72 92
72 93
72 93
72 93
72 93
72 93
72 94
8 102
10 103
10 103
10 103
10 103
10 102
10 102
10 102
10 102
10 102
10 102
10 102
10 102
10 103
10 103
10 104
10 104
10 105
10 106
10 106
10 109
10 109
10 109
10 108
10 108
10 108
10 108
10 108
11 114
11 118
11 120
11 122
11 123
11 123
12 121
12 120
12 119
12 119
12 119
12 119
12 119
12 119
14 134
14 134
14 134
14 134
14 134
14 134
14 136
14 134
14 132
14 132
14 129
14 125
15 128
15 123
12 112
10 99
10 98
10 98
10 97
10 98
10 98
10 99
10 98
10 98
10 98
10 98
32 1147
32 1147
32 1147
32 1147
36 1144
36 1144
36 1144
36 1144
36 1143
36 1141
36 1135
36 1135
36 1135
36 1134
36 1127
14 79
14 78
14 78
14 78
10 78
10 78
10 78
9 78
9 69
7 62
7 61
7 61
7 61
7 61
7 61
7 61
7 59
6 47
4 47
4 46
4 46
4 46
4 48
5 48
5 48
5 48
5 48
5 48
5 47
5 47
5 47
5 47
5 46
5 46
5 46
5 45
5 45
5 43
5 43
16 43
16 43
16 43
16 43
16 43
16 43
15 37
15 31
14 27
14 27
14 27
14 27
14 25
14 22
14 22
3 22
4 22
4 22
4 22
4 21
4 21
4 21
4 21
7 20
8 20
8 22
8 22
8 22
9 22
9 22
9 22
9 20
7 12
7 12
7 12
7 12
7 12
7 12
7 12
8 15
8 17
9 17
9 19
9 27
9 35
9 37
9 38
11 38
11 38
11 38
13 39
16 41
16 41
17 41
17 41
17 41
17 41
17 40
17 40
20 40
21 49
21 49
21 49
21 49
22 49
22 49
22 49
22 49
22 49
22 49
22 49
22 49
22 49
22 49
22 49
22 40
22 40
22 40
22 40
21 40
21 40
21 40
21 40
21 38
20 38
20 38
20 40
24 40
26 40
26 40
26 41
26 41
26 41
26 39
26 39
26 39
26 39
26 39
26 39
26 39
26 39
26 39
26 39
26 39
26 39
26 39
26 39
26 39
26 39
26 41
26 41
26 41
26 41
26 41
26 41
26 41
50 41
50 41
50 41
50 41
50 41
50 41
50 40
47 40
46 40
46 37
46 37
46 37
45 35
45 35
45 35
45 35
45 35
20 35
20 35
20 35
20 35
21 35
21 35
20 30
19 28
19 26
20 22
20 16
24 7
41 6
43 6
42 6
42 6
44 5
42 5
39 3
39 3
39 3
39 3
39 3
39 3
39 3
39 3
35 3
35 3
35 3
36 3
36 3
36 3
36 3
36 3
36 3
36 3
36 3
36 3
36 3
36 3
36 3
36 3
36 3
36 3
35 3
35 3
35 3
35 3
35 3
35 3
35 3
34 3
34 3
33 0
30 0
29 0
29 0
29 0
29 0
29 0
29 0
29 0
29 0
29 0
29 0
29 0
29 0
29 0
29 0
29 0
29 0
29 0
29 0
29 0
29 0
29 0
29 0
29 0
29 0
29 0
29 0
29 0
29 0
29 0
29 0
29 0
29 0
29 1
29 1
29 1
29 1
29 1
29 1
29 1
29 1
29 1
29 1
29 5
29 5
29 5
29 5
29 5
29 4
28 4
28 4
29 4
26 4
26 4
24 4
22 4
21 4
18 4
5 0
4 0
3 0
3 0
2 0
2 0
1 0
1 1
25 1531
26 1533
26 1533
26 1533
26 1533
26 1533
26 1533
26 1533
26 1533
26 1533
26 1533
26 1533
27 1533
27 1533
27 1533
27 1533
2 2
2 2
2 2
2 2
2 2
2 5
2 5
2 5
2 5
2 5
2 5
2 5
2 5
1 5
1 5
1 5
1 5
1 5
1 5
1 5
1 0
1 0
1 0
1 0
1 0
1 0
1 0
1 0
1 0
1 0
1 0
1 0
1 0
1 0
1 0
1 0
1 0
1 0
1 0
1 0
1 0
1 0
1 0
1 0
1 0
1 0
1 0
1 0
1 0
1 0
1 0
1 0
1 0
1 0
1 0
1 0
1 0
1 0
1 0
1 0
1 1
1 1
1 1
1 1
1 1
3 1
3 3
3 3
3 3
2 3
2 3
2 3
2 3
2 3
2 3
2 3
2 3
2 2
2 2
2 2
2 2
2 2
2 2
2 2
2 2
2 2
2 3
3 6
3 7
3 7
3 7
3 7
3 8
3 8
3 8
3 8
3 8
3 8
3 8
3 8
3 8
3 8
3 8
3 8
3 8
3 8
3 8
3 8
3 8
3 8
3 8
3 8
3 8
3 9
3 9
3 9
4 9
4 10
4 12
4 12
4 12
4 12
4 12
4 12
4 12
4 17
4 17
4 17
4 17
4 17
4 17
4 17
4 17
4 17
4 17
4 17
4 17
4 17
4 17
4 17
4 17
4 17
4 17
4 18
4 17
4 17
4 17
4 18
4 19
4 23
4 23
4 23
5 24
5 24
5 24
5 24
6 25
6 25
6 25
6 28
15 74
15 74
15 74
15 74
15 75
13 73
13 75
13 74
13 75
13 76
13 76
13 76
13 76
14 82
14 82
14 84
14 85
14 85
14 85
14 85
14 85
14 85
14 85
14 85
14 87
15 88
15 88
14 87
14 87
14 93
14 96
14 97
14 110
14 110
14 113
14 115
14 115
14 115
19 116
19 116
19 116
19 116
19 117
19 117
19 117
19 117
19 117
19 117
19 106
19 106
19 112
21 118
25 128
26 129
26 130
26 131
25 133
25 129
25 129
25 129
26 127
26 127
27 127
29 127
29 125
29 125
29 124
29 124
29 124
29 124
29 124
29 124
29 124
36 127
36 128
36 130
36 130
36 130
36 130
36 130
36 130
36 130
36 131
36 130
36 130
36 130
36 130
36 129
35 122
35 120
35 120
35 120
35 120
35 120
35 120
35 119
34 118
34 119
34 119
34 116
25 74
25 74
25 74
25 74
25 73
25 74
25 75
26 75
26 77
26 76
27 83
30 91
30 94
30 90
30 90
30 89
30 88
30 88
30 88
30 89
30 89
30 89
29 89
29 89
29 88
29 87
29 83
29 83
29 84
29 77
29 77
29 74
29 72
29 72
29 70
29 68
29 68
29 68
24 67
24 68
24 69
24 70
24 68
23 67
23 67
23 67
22 67
22 67
22 67
22 66
22 60
20 58
17 49
17 48
17 48
17 49
17 57
17 59
17 60
17 60
16 63
16 65
15 65
13 67
13 67
13 68
13 68
13 68
13 68
13 70
13 70
13 71
13 71
6 68
6 67
6 65
6 65
6 65
6 64
6 64
6 64
6 65
6 65
6 65
6 65
6 65
6 65
6 65
6 65
6 65
6 65
6 65
6 65
6 65
6 65
6 65
6 65
6 62
6 62
6 62
6 61
6 61
6 61
6 61
6 59
6 59
6 62
5 61
5 59
4 56
4 43
2 41
2 41
1 41
1 41
1 42
1 42
1 42
1 42
1 43
1 43
1 43
1 45
1 46
1 50
1 51
0 56
0 56
0 56
0 56
0 56
0 56
0 56
0 56
0 56
0 56
0 55
0 56
0 55
0 52
0 52
0 51
0 51
0 51
0 51
0 51
1 53
1 53
1 53
1 53
1 53
1 53
1 53
1 53
1 53
1 51
1 38
2 38
2 40
2 41
2 41
2 43
1 44
1 44
1 44
1 44
1 44
1 44
1 47
1 45
1 45
1 45
1 45
1 45
1 45
1 52
1 64
1 66
1 66
1 69
1 77
1 78
1 82
1 84
1 84
1 84
1 87
1 88
1 88
1 89
1 89
1 89
1 89
1 89
1 90
1 90
1 90
1 91
1 92
1 91
1 91
1 91
1 91
1 90
1 90
1 89
1 86
1 86
1 86
1 86
1 87
2 84
2 84
2 84
2 86
7 115
8 123
8 129
10 133
10 140
10 144
12 149
12 148
12 147
12 144
12 141
12 140
12 140
12 139
12 140
12 140
12 140
12 142
12 142
12 142
13 145
13 145
13 145
13 149
13 247
13 247
14 249
14 252
15 257
15 260
15 260
15 260
15 261
15 262
15 261
16 264
16 265
16 267
16 267
16 267
17 166
17 166
16 166
24 180
24 183
23 185
25 187
25 188
25 188
28 188
28 188
28 181
28 171
28 169
29 167
29 166
29 166
29 165
29 164
29 158
29 156
29 144
29 144
29 144
29 141
29 143
29 142
29 142
29 142
29 142
29 140
29 132
29 131
29 131
29 131
29 131
29 131
29 131
29 130
29 130
29 130
29 130
29 130
29 129
29 129
29 129
29 129
28 129
27 129
27 129
27 129
27 129
27 140
27 141
27 141
27 145
27 144
27 143
26 152
25 147
18 112
18 106
18 118
18 118
18 118
18 118
18 113
18 100
18 98
18 98
18 98
18 98
18 98
18 98
18 99
18 99
18 103
18 105
18 115
18 117
17 115
17 115
17 115
16 111
16 110
16 110
16 104
16 104
16 104
16 103
16 103
16 102
16 102
16 102
15 102
15 101
15 103
15 104
15 104
15 105
14 105
14 107
12 107
5 82
5 82
5 78
5 76
5 76
5 76
1 76
1 76
1 76
1 76
1 76
1 77
1 77
1 77
1 77
1 77
1 77
1 77
2 77
2 78
2 78
2 77
2 77
2 77
2 77
2 77
2 77
2 77
2 77
2 78
2 78
2 78
2 78
2 78
2 79
2 79
2 79
2 79
2 79
2 79
2 79
2 80
2 80
2 81
2 81
2 81
2 81
2 81
2 81
2 81
2 81
2 81
2 78
2 76
2 77
5 78
5 80
5 81
5 80
5 64
5 58
5 55
5 54
5 54
5 53
6 53
9 57
9 58
9 60
9 63
9 63
9 62
9 61
9 55
9 49
9 44
9 44
9 44
9 44
9 44
9 44
9 43
9 43
6 43
6 43
6 43
6 42
6 42
6 42
6 41
6 41
6 41
6 40
6 39
6 37
5 37
5 34
5 34
5 33
5 33
5 37
5 37
5 40
5 40
5 40
5 42
5 41
5 41
5 41
5 41
5 41
5 40
5 42
5 45
5 55
5 74
5 75
5 76
4 76
4 75
4 75
4 75
4 76
4 77
4 77
4 77
4 77
4 81
4 85
8 101
8 105
8 107
8 108
8 109
8 109
8 109
8 111
8 114
8 114
8 114
8 114
8 112
8 112
8 112
8 112
8 112
8 114
8 115
8 115
8 115
8 113
8 113
8 112
8 111
7 110
5 101
5 100
5 100
5 100
4 100
4 100
4 103
4 103
4 103
4 104
4 104
4 101
4 98
4 100
4 98
4 98
4 101
4 105
4 115
4 118
4 121
4 121
4 123
4 123
4 156
4 158
4 163
6 163
6 163
6 165
6 167
6 167
6 175
6 176
6 176
7 177
7 177
7 177
7 177
7 178
7 178
7 178
7 178
7 179
7 178
7 176
7 176
7 173
7 173
7 173
7 170
7 170
7 170
7 172
7 171
7 171
7 169
7 167
7 168
7 156
7 144
7 148
7 153
7 154
7 154
7 154
8 156
8 153
10 153
10 152
10 152
9 149
9 152
8 150
6 129
6 129
6 135
6 136
6 137
6 139
6 140
6 140
6 140
6 140
7 141
7 142
7 142
7 142
7 144
7 143
7 143
7 140
7 140
7 141
8 141
8 141
8 141
8 141
8 141
8 141
8 141
7 141
7 140
7 140
7 141
7 141
7 140
7 140
7 140
7 137
6 135
6 135
9 137
9 137
9 137
9 134
9 135
9 134
9 122
9 121
9 119
9 118
9 118
10 117
9 84
10 83
10 78
9 80
9 82
9 81
9 79
9 80
9 75
9 74
9 74
9 73
9 73
9 74
13 75
13 75
13 75
12 75
12 75
12 73
12 73
12 73
12 73
19 74
19 74
19 74
19 74
19 74
19 73
19 71
19 71
19 71
19 70
19 67
19 65
19 64
19 64
19 59
19 54
19 54
19 54
19 54
19 52
18 52
17 54
17 57
17 57
17 58
17 50
17 55
17 50
17 49
17 48
17 48
17 47
17 44
17 44
17 43
16 40
16 39
15 39
15 39
16 39
16 39
16 38
16 38
16 38
16 38
16 38
16 38
16 39
16 40
16 41
16 41
16 41
16 41
16 41
16 41
16 41
16 42
16 42
16 43
16 43
16 43
16 43
16 43
16 45
16 46
13 47
13 48
13 46
13 46
13 43
13 38
13 43
13 46
13 47
13 49
13 49
13 49
13 49
13 50
13 52
13 52
13 52
13 51
13 51
13 52
15 129
15 129
15 130
12 129
12 129
12 133
10 131
10 131
10 135
10 137
10 137
10 139
10 139
10 139
10 139
1 60
1 60
1 60
1 60
1 60
1 60
1 60
1 60
1 60
1 60
1 61
1 61
3 61
238 66
238 65
238 66
238 66
238 66
238 67
238 72
238 73
238 72
238 73
238 73
238 73
238 69
238 67
238 67
234 67
1 62
1 62
1 62
1 62
1 62
1 62
1 62
1 62
4 69
3 69
3 69
3 69
3 69
3 69
3 69
3 69
3 69
3 69
3 68
3 67
3 66
3 66
3 66
3 66
0 59
0 58
0 58
0 57
0 57
0 56
0 56
0 56
0 56
0 53
0 52
0 52
0 49
0 49
0 50
0 50
0 50
0 50
0 44
0 39
0 39
0 39
0 38
0 38
0 38
0 38
0 36
0 36
0 36
0 37
0 34
0 33
0 32
0 32
0 31
0 31
0 30
0 25
0 25
0 22
0 21
0 20
0 20
0 18
0 18
0 18
0 18
0 18
0 18
0 18
0 18
0 19
0 19
0 19
0 19
0 19
0 19
0 19
0 19
0 19
0 19
0 19
0 18
0 17
0 17
0 15
0 9
0 8
0 4
0 4
0 3
0 3
0 3
0 3
0 4
0 4
0 4
0 4
0 4
0 4
0 4
0 4
0 4
0 4
0 4
0 4
0 4
0 4
0 4
0 3
0 3
0 3
0 3
0 3
0 3
0 3
0 3
0 3
0 4
0 4
0 4
0 4
0 4
0 4
0 4
0 4
0 4
0 4
0 6
12 82
12 82
12 82
12 82
12 82
12 81
12 81
12 81
12 81
12 81
12 81
12 81
12 81
12 81
12 81
12 81
0 3
0 3
0 3
0 2
0 2
0 2
0 2
0 2
0 3
0 3
1 3
23 5
58 5
58 5
58 5
58 5
58 5
58 5
58 5
66 7
66 7
66 10
66 10
66 10
66 10
66 10
66 10
44 8
9 8
9 8
9 8
9 8
9 8
9 8
0 6
0 6
0 3
0 3
0 3
0 3
0 3
0 2
0 2
0 2
0 2
0 2
0 2
0 2
0 2
0 2
0 2
0 2
0 2
0 2
0 2
0 2
0 2
0 2
0 2
0 2
0 2
0 10
0 10
0 11
0 11
0 11
0 11
0 11
0 11
0 11
0 11
0 11
0 11
0 23
0 23
0 24
0 16
0 16
0 15
1 15
1 15
1 15
1 15
1 15
1 15
1 15
1 15
1 15
1 2
1 2
1 1
1 1
1 1
1 1
1 1
0 1
0 1
0 1
0 1
0 1
0 1
0 1
0 1
0 1
1 1
1 1
1 1
1 0
1 0
1 0
1 0
1 0
1 0
1 0
1 0
1 0
1 0
1 0
1 0
1 0
1 0
1 0
1 0
1 0
1 0
1 0
1 0
1 0
1 0
1 0
1 0
1 0
1 0
1 0
1 0
1 0
1 0
1 0
1 0
1 0
2 0
2 0
3 0
11 0
24 0
58 0
67 0
106 0
211 0
265 0
289 0
301 0
302 0
307 0
310 0
310 0
310 0
310 0
310 0
310 0
310 0
314 0
321 0
321 0
322 0
322 0
334 0
358 0
380 0
388 0
389 0
391 0
394 0
395 0
399 0
400 0
401 0
401 0
401 0
401 0
408 0
417 2
418 4
420 4
421 4
422 4
422 4
423 4
424 4
424 4
424 4
424 4
424 4
424 4
424 4
424 4
424 4
424 4
424 4
424 4
424 4
424 4
424 4
424 4
425 4
426 4
426 4
426 5
428 5
431 5
436 5
438 5
440 5
441 5
441 5
443 5
449 5
497 5
548 5
555 5
553 5
551 5
548 4
544 4
540 4
536 4
531 4
525 4
521 4
512 4
514 4
510 4
507 4
499 4
486 4
446 4
438 4
430 4
423 4
418 4
416 4
415 4
410 4
402 4
400 4
370 4
359 4
342 4
311 4
290 10
287 10
281 10
282 10
281 10
280 10
280 10
280 10
280 10
279 10
281 54
280 54
278 54
272 54
271 54
270 48
265 48
236 48
215 46
196 44
189 44
191 44
193 44
190 44
191 44
188 0
187 0
184 0
182 0
184 0
184 0
184 0
183 0
184 0
184 0
184 0
184 0
1254 16
1253 16
1253 16
1253 16
1254 16
1256 16
1257 16
1259 16
1259 16
1260 16
1260 16
1260 16
1261 16
1262 16
1333 18
1334 18
272 2
270 2
266 2
272 2
266 2
265 2
253 2
251 2
231 2
271 2
269 2
268 2
266 2
260 2
184 0
261 0
227 0
223 0
223 0
225 0
225 0
224 0
232 0
257 0
270 0
274 0
274 0
273 0
272 0
276 0
182 0
183 0
184 0
184 0
186 0
187 0
187 0
190 1
189 1
192 1
195 1
209 1
213 1
214 1
214 1
211 1
202 1
197 1
232 2
230 2
231 2
230 2
229 1
229 1
229 1
229 3
229 3
229 3
231 12
231 12
231 12
231 12
253 12
256 13
258 13
258 13
259 17
259 17
256 18
255 21
255 21
267 21
266 24
273 27
291 18
300 18
300 18
301 18
324 22
331 22
345 24
349 24
349 24
354 24
355 26
356 26
355 26
348 26
346 26
348 26
348 26
351 26
366 26
375 27
375 27
375 27
375 27
374 27
370 27
369 27
365 27
360 27
358 27
356 28
387 28
392 28
391 28
390 28
400 28
365 28
369 28
369 28
369 28
369 28
370 28
371 28
372 28
371 28
376 27
381 27
381 27
381 27
373 27
343 27
332 27
330 27
336 27
334 27
335 27
335 27
334 27
336 27
342 27
345 27
346 27
352 27
356 27
354 29
356 29
361 29
353 29
332 29
330 29
347 31
359 31
368 34
367 35
367 35
337 34
337 34
335 34
335 34
335 34
335 34
340 34
344 32
344 34
348 34
364 35
368 35
370 32
372 32
403 33
400 30
399 31
401 31
400 27
402 27
399 26
394 24
392 24
395 24
396 24
393 24
373 24
366 23
364 23
360 23
320 20
322 20
310 18
317 18
317 18
330 18
329 16
330 16
331 17
328 17
328 17
538 70
539 70
539 70
536 70
535 69
534 69
534 69
534 69
541 69
540 69
542 69
536 69
522 69
525 69
534 69
521 68
309 16
307 16
306 16
295 16
289 16
289 16
291 16
291 16
292 16
289 16
289 16
289 16
290 16
286 16
292 17
290 17
293 17
293 17
293 17
292 17
293 18
288 18
288 19
287 20
284 23
280 25
279 25
272 27
272 27
281 26
280 26
275 26
273 24
268 24
263 23
262 23
275 23
308 25
291 23
284 24
283 24
284 24
286 24
291 24
301 24
306 25
321 25
336 25
335 25
327 25
322 25
319 25
307 25
280 24
279 24
278 24
266 23
251 18
249 17
249 17
249 17
249 16
248 16
248 16
250 16
250 16
247 16
243 16
243 16
243 16
243 16
243 18
243 18
239 19
233 19
227 21
223 21
221 22
209 22
207 22
207 22
206 21
206 21
206 21
206 21
205 21
204 21
203 21
203 21
202 21
202 21
202 21
194 21
194 21
193 21
191 21
184 21
177 21
173 21
172 21
172 21
172 21
173 21
171 21
170 21
162 21
162 23
161 23
160 23
161 23
161 23
161 23
160 23
160 23
163 22
184 22
194 22
196 22
196 22
196 22
201 21
205 21
208 18
216 22
217 21
217 19
216 18
226 17
225 17
216 17
215 17
215 17
206 17
190 17
194 17
188 16
189 16
169 15
160 15
149 14
148 13
149 13
154 13
148 13
143 13
140 13
130 13
128 13
127 13
129 13
129 13
129 13
129 13
129 13
129 13
129 13
129 13
130 13
130 13
130 13
130 13
130 13
130 13
131 13
129 13
130 13
131 13
132 13
134 14
134 14
134 14
134 12
139 12
139 10
139 10
138 9
138 9
137 8
135 8
135 8
138 8
137 8
137 8
137 10
136 10
134 10
135 10
154 12
167 12
173 12
173 12
175 12
175 13
175 13
176 13
180 13
202 13
215 14
222 14
229 14
230 14
236 14
240 14
260 14
277 16
284 16
337 19
337 20
337 20
338 20
341 21
339 21
341 24
339 24
333 24
317 24
307 24
306 24
305 24
305 24
299 21
299 21
310 22
352 19
396 19
450 19
501 19
549 18
556 18
554 18
556 18
555 18
582 19
586 19
582 19
580 19
574 19
572 19
576 19
582 19
583 20
579 20
573 20
574 20
574 20
573 20
573 20
574 20
574 20
574 20
574 20
574 20
574 20
574 20
574 20
574 20
574 19
573 19
572 19
573 19
573 19
573 19
574 21
574 21
574 21
574 21
573 21
572 21
569 20
569 20
569 20
569 20
569 20
569 20
569 20
569 20
570 21
569 21
569 21
574 21
571 21
570 21
574 21
575 18
571 18
567 18
559 18
533 17
529 17
521 17
520 17
519 16
520 16
520 17
518 17
512 17
492 17
478 16
473 16
463 15
460 15
453 14
451 14
435 13
424 13
412 13
370 10
370 9
366 9
365 9
361 9
361 9
361 9
361 9
361 9
361 9
360 9
352 9
349 9
340 9
311 9
295 9
268 7
208 5
140 5
86 5
68 5
57 5
86 8
84 8
81 7
78 7
54 8
51 8
51 10
50 10
50 10
50 10
50 10
49 10
49 10
49 10
49 10
49 10
49 10
49 10
49 10
49 10
49 10
49 10
49 10
49 10
49 10
49 10
48 10
48 10
48 10
48 11
48 12
47 13
47 13
47 13
49 11
49 11
49 11
49 11
52 12
54 13
54 13
54 14
54 14
54 14
55 14
57 14
62 17
63 17
63 18
63 18
63 18
60 18
59 18
59 18
54 18
54 18
54 18
54 18
54 18
54 18
54 22
54 22
54 23
54 23
53 22
53 21
52 21
52 21
50 21
53 23
53 23
53 24
53 24
64 25
64 25
66 30
66 30
66 30
66 30
66 30
66 30
66 30
66 30
66 30
74 30
74 30
74 30
75 30
76 30
78 30
78 31
78 36
77 31
77 31
77 31
77 31
76 31
76 31
76 31
76 31
48 26
49 25
49 25
49 25
48 25
48 25
48 25
48 26
48 26
48 26
48 26
48 26
48 26
47 26
47 27
47 27
47 27
47 27
47 27
47 27
47 27
47 27
47 27
47 27
47 27
47 27
47 26
47 26
47 26
47 25
47 24
47 24
47 24
47 24
44 24
45 25
45 25
45 25
39 24
39 23
39 22
39 22
39 22
39 22
36 22
35 22
30 18
30 18
30 18
30 18
30 18
30 19
30 19
30 19
30 19
30 20
30 20
30 20
30 17
30 17
30 16
30 16
30 15
30 15
30 15
29 15
29 15
28 15
28 15
26 13
26 13
24 12
24 12
15 11
15 11
15 11
15 11
15 11
15 11
15 11
15 11
15 11
15 11
18 13
9 13
9 13
9 13
7 12
6 12
6 11
6 10
6 7
5 7
5 7
6 7
6 7
6 7
6 7
6 7
6 7
6 7
6 7
6 7
6 7
6 6
6 6
6 6
6 6
6 6
7 9
7 9
7 9
7 21
8 29
8 30
8 33
8 35
8 37
8 38
8 38
8 38
8 38
8 38
8 38
8 38
8 38
8 38
8 38
8 38
8 38
8 40
8 44
8 46
8 46
6 46
5 45
5 46
5 47
5 51
5 53
5 69
5 69
5 77
5 79
5 79
5 86
5 91
5 91
5 91
5 92
5 91
5 91
5 91
5 91
3 92
3 93
3 93
3 93
3 93
3 94
3 102
3 102
3 102
3 102
3 102
3 102
3 103
3 104
3 104
3 104
3 104
3 104
3 104
3 104
3 113
3 115
3 115
3 117
3 116
3 117
3 118
3 120
3 120
3 120
3 121
3 122
3 123
3 124
3 127
3 127
3 128
2 128
2 128
2 128
2 128
2 128
2 128
2 128
2 128
2 128
2 128
2 128
2 128
2 130
2 131
1 131
1 131
1 130
1 130
1 131
1 139
1 137
1 120
0 119
0 119
0 119
0 117
0 115
0 115
0 116
0 116
0 117
1 118
1 118
1 118
1 118
1 118
1 118
1 118
1 118
1 118
1 111
1 111
1 111
1 114
1 120
1 125
1 126
0 127
0 133
0 119
0 123
0 132
1 141
1 150
1 159
2 252
2 262
2 288
3 304
3 349
3 357
4 369
4 372
4 375
4 376
4 379
4 379
4 381
4 381
5 389
5 390
5 391
5 391
5 391
5 390
5 389
5 389
5 389
5 389
5 389
5 389
5 389
5 387
5 379
5 379
5 378
5 378
5 378
5 378
5 378
5 384
5 386
5 385
5 386
5 385
5 384
5 384
5 382
6 382
7 389
8 394
8 394
8 398
8 398
8 400
8 400
8 400
8 400
8 401
8 401
8 401
8 401
8 397
8 397
8 397
9 397
9 397
9 397
9 390
9 384
9 381
9 381
9 381
9 380
9 380
9 380
9 380
9 380
9 379
9 381
9 381
8 380
8 382
8 382
8 382
8 383
8 383
8 383
8 385
8 384
8 383
8 381
8 380
8 375
15 360
16 344
16 318
16 318
16 307
17 301
17 293
17 275
15 271
15 266
15 260
15 144
14 136
14 116
14 101
13 63
13 62
5 55
5 53
5 46
5 46
5 46
5 46
5 46
5 45
4 43
4 43
4 43
4 43
4 43
4 43
4 43
4 44
4 44
4 44
4 44
3 44
3 44
3 42
3 42
3 42
3 42
3 42
4 41
4 40
4 37
4 31
4 30
4 30
4 30
4 30
4 28
4 28
4 28
4 26
3 21
2 17
2 16
2 13
2 14
2 12
2 12
2 12
2 12
2 11
2 12
2 12
2 12
2 12
5 12
5 12
5 12
5 12
5 12
5 12
5 12
5 14
5 14
5 14
5 14
5 14
862 36
862 35
862 35
862 35
862 35
862 35
862 33
862 31
862 31
862 31
862 38
862 39
862 39
862 39
862 39
2 15
3 15
3 15
3 15
3 15
3 15
3 16
3 16
3 16
2 15
2 16
2 16
2 20
2 20
2 21
2 23
2 25
1 25
1 25
1 25
1 25
1 27
1 28
1 29
1 31
1 32
1 32
1 32
1 32
1 32
1 32
1 32
1 32
1 33
1 33
1 34
1 33
1 33
1 33
1 33
1 33
1 33
1 33
1 33
1 33
1 33
1 33
0 33
0 33
0 33
0 33
1 38
1 39
1 40
1 41
2 41
2 41
2 41
2 41
2 41
2 41
2 41
2 41
2 40
2 40
2 40
1 40
1 40
1 40
1 39
0 39
0 39
0 39
0 39
0 39
0 39
0 39
0 39
0 39
0 38
0 38
0 38
0 38
0 38
0 38
0 38
0 38
0 38
0 38
0 38
0 38
0 38
0 38
0 38
0 36
0 31
0 30
1 33
1 33
1 34
1 34
1 35
1 35
1 35
1 35
1 36
1 34
1 33
1 33
1 33
1 32
1 34
1 28
1 28
1 26
1 24
1 22
1 22
1 22
1 22
1 19
1 19
1 19
1 18
1 18
1 18
1 18
1 18
1 18
1 18
1 19
1 20
1 20
1 18
1 19
1 128
1 128
1 128
1 129
1 129
1 129
1 129
1 129
1 131
1 143
1 146
1 150
1 151
1 152
1 156
1 51
2 53
2 51
2 54
2 56
2 56
2 56
2 56
2 56
3 56
3 56
3 56
3 56
3 56
3 56
3 56
3 56
3 56
3 56
3 56
3 56
3 56
3 56
3 56
3 56
2 56
2 56
2 56
2 56
2 56
2 56
2 56
2 56
2 57
2 57
2 57
2 57
2 57
1 57
1 59
1 60
1 64
1 65
1 65
1 64
1 64
1 62
1 61
1 60
1 60
1 59
1 59
1 59
1 59
1 59
1 58
1 58
1 58
1 58
1 57
1 57
1 57
1 57
1 57
1 57
1 57
1 58
1 60
1 63
1 63
1 63
1 63
1 66
1 66
1 67
2 67
2 67
2 67
2 67
2 68
2 68
2 68
2 71
2 73
2 74
2 73
2 73
2 73
2 75
2 75
1 75
1 75
4 76
6 73
6 61
6 62
6 64
6 80
6 80
5 75
5 75
5 71
5 70
5 66
5 65
5 65
5 65
5 65
5 65
5 65
5 65
5 65
5 65
5 65
5 65
5 65
5 68
5 69
5 69
5 70
5 70
5 70
5 70
5 76
5 80
5 82
5 82
5 82
5 82
5 81
5 81
5 81
5 81
5 80
5 86
5 86
5 86
5 85
5 85
5 84
5 82
5 81
5 81
5 81
5 81
5 81
5 83
5 83
5 84
5 84
5 79
5 79
5 79
5 81
5 84
5 84
5 84
5 85
5 85
5 85
5 90
6 90
6 90
6 90
6 90
6 90
6 88
6 85
6 85
6 85
6 89
6 89
6 86
6 86
6 86
6 87
6 87
6 88
6 87
6 85
6 82
6 76
6 74
6 73
6 74
6 75
6 76
6 82
6 81
6 81
6 81
6 83
1 83
1 82
1 85
1 85
1 84
1 70
1 70
1 70
1 69
1 69
1 69
1 69
1 69
1 69
1 69
1 69
1 69
1 69
1 69
1 69
1 69
1 70
1 71
1 71
1 68
1 67
1 68
1 68
1 68
1 68
1 67
1 58
1 56
1 55
1 55
1 55
1 56
1 56
1 56
1 56
1 56
1 57
1 57
1 57
1 57
1 56
1 56
1 56
1 57
1 60
1 63
1 63
1 63
2 64
2 63
2 63
2 63
2 62
2 62
2 62
2 59
2 56
2 56
2 56
2 56
2 56
2 56
1 56
1 51
0 51
0 51
0 51
0 51
0 51
0 51
0 51
0 50
0 50
0 45
0 44
0 44
0 45
0 44
0 42
0 42
0 42
0 42
0 41
0 39
0 39
1 39
1 39
1 39
1 39
1 40
1 35
1 37
1 37
1 37
1 35
1 33
1 30
1 26
1 22
1 22
1 20
1 20
1 20
1 20
1 21
1 23
1 23
2 25
2 26
2 26
2 26
2 27
2 27
2 27
3 27
3 26
3 25
4 25
4 23
4 24
4 24
4 23
4 23
4 23
4 23
4 23
4 23
4 22
4 21
4 21
4 21
4 21
4 21
4 22
4 22
4 21
4 19
4 21
4 21
4 21
4 21
4 21
4 21
4 19
4 17
4 15
4 16
4 16
4 16
4 16
4 16
4 16
4 16
4 16
4 16
4 16
4 16
4 16
4 16
4 16
4 16
4 16
4 16
4 16
4 16
4 16
4 16
4 16
4 16
4 16
4 16
4 16
4 16
4 16
4 16
4 15
4 14
4 15
4 15
4 15
4 15
4 15
4 15
4 16
4 17
3 17
3 19
3 19
3 19
3 19
3 18
3 17
3 17
3 17
3 17
2 18
2 20
2 21
2 22
2 25
2 26
2 26
1 26
0 25
0 25
0 25
0 25
0 23
0 23
0 23
0 24
0 24
0 24
0 26
0 26
0 26
0 26
0 26
0 26
0 26
0 26
0 26
0 26
0 26
0 26
0 26
0 26
1 26
1 26
1 32
1 41
1 45
1 58
1 67
1 69
1 69
1 78
1 80
1 82
1 104
1 109
1 110
1 112
1 116
1 117
1 117
1 118
1 119
1 121
1 123
1 123
1 123
1 123
1 123
1 123
1 125
1 127
1 127
1 127
1 127
1 127
1 128
1 128
1 128
1 128
1 128
1 128
1 128
1 128
1 129
1 129
1 129
1 129
1 129
1 130
1 131
1 131
1 130
1 130
1 131
2 134
2 136
2 136
2 136
2 141
2 141
2 138
2 138
2 139
9 144
9 144
9 144
9 145
9 150
9 151
9 152
9 150
9 150
9 150
9 144
9 143
9 142
9 142
9 142
9 141
2 136
2 136
2 136
2 136
1 138
1 136
1 136
1 135
1 133
1 133
1 133
1 133
1 133
1 133
1 133
1 133
1 133
1 133
1 133
1 133
1 133
1 133
1 130
1 127
1 121
1 112
1 104
1 95
1 92
1 92
1 93
1 84
1 78
1 76
1 53
1 52
1 54
1 55
1 54
1 58
1 59
1 68
1 96
1 99
1 101
1 102
1 102
1 100
1 100
1 99
1 98
1 97
1 97
1 97
1 97
1 97
1 101
1 101
1 102
1 102
1 105
1 105
1 106
1 105
1 105
1 105
1 105
1 105
2 105
2 102
2 102
2 102
2 102
2 102
2 101
1 98
1 96
1 94
1 90
1 90
1 90
1 90
1 90
1 90
1 90
1 90
1 89
1 90
2 85
2 84
2 80
2 80
2 80
2 80
2 81
2 81
2 81
2 81
2 81
2 81
2 84
2 85
2 84
2 85
2 84
15 141
15 147
15 156
15 159
15 203
15 208
15 210
15 214
15 220
15 220
15 222
15 224
15 225
15 226
15 226
2 227
2 229
2 229
2 229
2 229
2 229
2 229
2 229
2 225
2 223
2 220
2 220
2 218
2 218
2 217
2 217
2 216
2 211
2 211
2 207
2 199
2 173
2 166
2 164
2 164
2 165
2 178
2 182
2 189
2 191
2 192
2 193
2 200
2 200
2 200
4 199
4 196
4 196
4 195
4 195
4 192
4 192
4 192
4 192
4 192
4 192
4 192
4 192
3 192
3 192
3 192
3 192
3 192
3 192
3 192
3 192
3 192
3 192
3 192
3 192
3 192
3 192
3 192
3 192
3 192
3 192
3 192
3 196
2 197
2 197
4 235
4 236
4 238
5 241
5 250
7 285
7 296
8 312
8 320
8 323
8 319
9 330
9 327
9 326
9 324
9 269
9 263
9 249
9 248
9 199
8 198
8 190
8 190
8 186
8 186
8 184
8 183
8 183
8 183
8 183
8 183
8 183
8 183
8 183
8 183
8 183
8 184
8 185
8 186
8 186
8 187
8 187
8 188
8 188
8 188
8 187
8 187
8 188
8 188
8 189
8 190
8 190
8 189
8 190
8 190
11 180
11 174
11 177
11 169
11 169
11 169
11 170
10 163
11 169
10 169
10 176
10 178
10 183
10 183
10 185
10 185
10 186
10 188
10 190
10 191
10 191
10 192
10 192
10 192
10 192
10 192
10 192
10 192
10 192
10 192
10 192
10 193
10 193
10 193
10 193
10 193
10 193
10 193
10 197
10 197
10 197
10 197
10 187
10 178
10 169
8 126
8 129
8 129
8 128
6 122
4 69
4 68
4 70
4 72
4 72
4 78
4 78
4 80
4 82
4 82
4 87
4 88
4 90
4 92
4 94
4 95
4 97
4 97
4 97
4 98
4 98
4 96
4 96
4 96
4 97
6 99
6 99
6 99
6 100
6 100
6 100
6 99
6 97
6 97
6 96
6 96
6 97
6 96
6 96
6 96
6 96
6 96
6 96
6 96
6 96
6 96
6 96
5 96
5 95
5 95
3 94
3 92
3 89
3 90
3 90
3 92
3 92
3 89
2 85
2 88
2 88
2 92
2 94
2 96
2 94
2 92
2 92
2 92
2 91
2 91
2 91
3 116
3 118
3 119
3 120
3 121
3 121
3 123
3 123
3 123
3 124
3 123
3 122
3 122
3 122
3 123
3 122
3 121
3 114
3 114
3 115
3 115
3 116
3 116
3 116
4 115
4 110
4 110
5 110
5 109
5 107
5 103
5 101
5 102
5 101
5 102
5 101
5 104
5 105
5 108
5 102
5 101
5 101
5 102
5 102
5 105
5 105
5 105
5 105
5 105
5 104
5 104
5 104
5 104
5 103
3 100
3 102
3 106
3 107
3 125
3 126
3 129
3 132
3 133
3 135
4 135
4 136
4 137
4 137
4 138
4 139
4 141
5 139
5 140
5 141
5 141
5 141
5 140
5 139
5 139
5 139
5 139
5 140
5 140
5 139
5 139
5 139
5 137
5 132
5 128
5 119
5 118
5 116
5 114
5 113
5 113
5 113
5 114
5 114
5 114
5 110
4 84
4 84
4 84
4 84
4 84
4 84
5 84
5 84
5 84
5 83
6 85
6 85
9 85
9 86
9 84
9 84
9 84
9 85
9 85
9 84
9 84
9 83
9 83
10 83
10 84
10 83
10 84
10 84
10 82
10 82
10 81
10 81
10 81
10 80
10 80
10 80
10 77
10 73
10 73
11 83
11 85
11 84
18 124
18 126
18 124
18 127
18 128
18 129
18 131
18 132
18 131
18 135
19 141
19 142
19 151
19 147
19 144
19 144
12 79
12 76
12 75
12 75
12 75
12 75
12 79
12 77
12 79
12 78
12 78
11 75
11 75
11 75
11 75
12 75
12 75
12 76
14 85
14 86
14 89
14 93
14 95
14 92
14 101
14 101
14 104
15 106
16 108
16 108
16 109
16 109
16 109
16 109
16 109
16 109
16 109
16 109
16 108
16 108
16 108
15 108
15 106
14 106
14 106
14 106
14 106
14 106
14 106
14 106
14 106
14 106
13 104
13 104
11 104
11 103
11 103
11 102
11 102
13 103
13 104
17 105
16 105
16 105
16 105
15 105
15 105
15 106
15 106
15 106
15 106
15 108
15 108
15 108
15 108
15 108
15 111
15 109
15 107
15 106
14 112
13 100
13 100
13 99
16 95
16 101
16 101
16 119
16 121
16 125
15 129
15 129
16 137
16 133
16 126
16 128
16 122
16 122
16 122
16 123
16 125
16 128
16 128
16 131
16 131
15 132
15 126
15 126
15 126
15 126
15 126
15 126
15 126
15 127
15 128
14 128
14 128
14 127
14 118
14 118
16 114
16 110
16 108
16 108
16 101
16 101
15 101
14 100
14 97
14 97
14 97
14 97
14 97
14 118
14 119
14 119
14 119
14 118
14 118
14 120
14 120
14 120
14 121
14 121
14 121
14 121
14 121
14 122
14 101
14 101
14 100
14 100
14 100
14 100
14 98
14 98
14 98
14 98
14 101
11 99
11 99
8 98
8 97
8 97
8 98
8 98
8 97
8 96
8 96
8 96
8 96
8 94
8 94
8 93
8 93
10 93
10 90
10 90
10 88
11 86
11 78
11 79
10 78
12 84
10 84
10 79
10 72
10 56
10 54
10 53
10 49
10 50
10 50
10 53
10 53
10 51
10 52
10 53
10 53
10 50
10 49
10 47
10 47
10 45
10 45
10 44
10 44
10 45
11 46
11 46
11 46
11 47
11 47
11 45
11 46
11 46
11 46
10 46
13 46
13 45
13 45
13 45
13 45
13 44
13 42
13 43
13 42
13 42
13 42
13 42
13 42
13 43
13 45
13 49
12 49
12 52
12 52
12 53
12 53
12 52
12 52
12 53
12 53
12 53
12 53
12 53
12 53
12 54
12 54
12 54
12 54
12 54
12 55
12 55
12 55
12 55
13 59
13 61
13 60
15 60
15 63
15 65
15 70
15 71
15 70
15 70
15 70
15 70
15 70
21 104
21 104
21 104
21 104
21 104
21 105
21 105
20 105
20 105
20 105
20 104
18 103
18 100
18 99
17 90
9 55
9 52
9 50
9 47
9 48
9 49
9 50
9 49
9 50
9 45
9 45
9 45
9 45
9 45
9 45
9 47
9 47
9 47
9 47
9 48
9 48
10 62
10 62
10 63
10 86
10 88
10 89
10 88
10 88
10 92
10 92
10 94
10 95
10 95
6 94
5 94
4 80
5 80
5 80
5 82
5 82
5 81
5 81
5 81
5 82
5 83
5 83
5 82
5 81
5 78
5 77
5 76
5 76
5 76
5 77
5 77
5 77
5 78
5 78
5 78
5 78
5 80
5 82
5 90
7 93
7 95
7 100
7 100
7 99
7 101
7 99
6 99
7 110
5 106
5 107
5 105
5 102
5 102
5 100
5 100
5 100
6 99
6 99
6 99
6 99
6 99
6 99
6 103
6 103
33 106
33 107
33 107
33 117
33 151
34 179
34 189
34 206
34 210
34 211
53 225
53 225
53 230
53 229
53 226
26 226
26 226
26 227
26 230
26 231
26 231
26 231
26 235
26 239
28 243
9 254
9 255
9 262
9 267
9 273
7 275
7 270
7 270
7 268
7 265
6 249
6 243
6 243
6 243
6 243
6 239
6 239
6 239
6 238
6 238
6 238
6 238
6 238
5 239
6 239
6 237
6 237
6 237
6 237
6 236
6 236
6 235
6 237
6 238
6 238
6 236
6 240
6 240
6 251
6 252
6 254
6 253
6 256
6 256
6 256
6 256
6 256
6 254
7 254
7 240
7 241
7 238
8 240
8 240
8 240
8 240
8 241
8 240
7 231
7 232
7 231
7 231
7 230
7 231
7 232
7 231
7 233
6 234
6 238
6 243
6 244
6 242
6 248
6 249
6 248
6 281
6 286
6 284
6 269
6 216
5 205
5 207
5 211
5 210
4 201
4 194
4 194
4 189
4 189
4 189
4 189
4 189
4 185
4 185
4 185
4 185
4 186
4 184
4 182
2 175
2 165
2 159
2 155
2 151
2 145
2 144
2 144
2 146
2 147
2 147
2 148
2 154
2 154
2 155
2 158
2 158
2 158
2 158
2 158
3 170
3 173
3 173
3 176
3 175
2 177
2 177
2 177
2 181
2 183
2 184
2 183
2 183
2 181
2 178
2 178
2 178
2 174
2 174
2 159
2 159
2 158
2 159
2 158
2 160
2 175
2 175
2 176
2 176
1 173
1 168
1 168
1 170
1 170
1 172
1 176
2 191
3 197
3 197
3 196
3 199
3 199
3 206
3 215
3 224
3 224
3 232
3 242
3 238
3 245
3 247
3 249
3 255
3 252
3 252
3 251
3 208
3 207
3 200
3 200
3 200
3 198
3 197
3 191
3 192
3 192
3 192
3 193
3 193
3 194
3 193
3 193
3 193
3 193
3 189
3 187
3 187
4 186
4 186
4 186
4 186
4 186
4 187
4 187
4 187
4 187
4 187
4 185
4 183
4 183
4 183
4 179
4 176
3 176
3 174
3 174
3 174
3 172
3 170
2 166
2 159
2 159
2 159
2 159
2 159
2 158
2 158
2 159
2 153
2 148
2 146
2 146
2 146
2 151
2 151
2 152
2 152
2 151
2 152
2 152
2 151
2 151
2 150
2 149
2 149
2 134
2 134
2 132
2 132
2 132
2 130
8 134
8 133
8 131
8 123
8 115
7 79
6 55
6 55
6 50
6 49
6 45
6 42
6 41
6 39
6 39
7 37
7 35
7 31
7 28
7 30
7 46
7 50
7 52
7 53
7 53
7 55
7 57
7 60
7 60
7 61
7 60
7 60
7 60
7 58
7 58
7 58
7 58
7 58
7 58
7 58
7 44
7 44
7 44
7 44
7 44
7 44
7 44
7 44
7 42
7 42
7 42
7 41
7 41
7 41
7 41
7 41
9 42
10 42
13 41
13 41
13 42
13 41
13 40
13 40
13 40
13 40
13 40
13 40
13 40
13 40
13 39
13 38
13 38
13 38
13 38
13 38
13 38
13 38
17 40
20 40
21 46
21 47
23 54
23 56
23 55
24 57
27 58
27 57
27 57
28 58
28 58
29 58
29 58
29 58
29 58
29 58
29 60
29 61
27 47
27 46
21 41
21 41
21 41
21 41
21 41
21 41
21 41
21 41
22 42
23 42
23 43
23 43
23 43
23 43
23 60
25 77
25 87
25 91
25 94
25 98
25 94
25 92
25 92
25 92
25 92
25 90
25 88
25 84
25 83
25 83
22 83
22 83
22 83
22 83
22 86
22 86
22 86
22 86
22 88
22 89
22 89
23 90
24 92
24 92
24 92
24 92
24 92
24 92
24 92
24 93
24 94
24 94
24 94
24 94
24 94
24 94
21 93
21 93
18 94
18 94
18 94
18 94
18 94
18 94
18 94
18 94
18 94
18 94
18 94
18 95
18 96
18 97
18 97
18 98
18 98
18 98
18 100
19 105
14 106
14 107
13 101
13 101
12 101
11 101
11 100
9 99
7 100
7 99
7 99
8 99
8 99
8 99
8 99
8 102
8 102
8 102
8 99
8 99
8 99
8 99
8 99
8 99
8 99
8 100
7 101
7 102
7 103
5 102
5 102
5 94
5 93
5 90
5 87
5 68
5 44
5 37
5 36
5 36
5 38
5 38
5 38
5 48
5 49
5 51
5 63
5 65
5 65
5 68
5 69
5 70
5 77
5 77
5 82
5 83
5 77
5 77
5 79
5 78
5 77
5 234
4 234
3 232
3 231
3 234
3 234
3 233
3 233
3 233
3 234
3 233
3 240
3 241
3 241
3 241
3 85
22 429
22 429
22 429
22 428
22 428
22 428
22 428
22 428
22 428
22 428
22 428
22 428
22 428
22 428
22 427
3 82
3 80
3 80
3 80
3 80
3 80
3 78
1 71
0 69
0 69
0 68
0 68
0 68
0 68
0 67
0 67
0 65
0 84
0 84
0 84
0 84
33 84
33 84
34 87
34 87
34 88
34 89
34 92
34 94
34 96
34 99
34 99
34 99
34 98
34 78
34 78
1 77
1 77
0 74
0 74
0 74
0 75
0 75
0 75
0 75
0 75
0 75
0 75
0 75
0 80
1 80
2 67
2 67
2 66
2 50
2 50
2 50
2 50
2 48
2 47
2 40
2 40
2 35
2 35
2 35
2 78
2 77
2 79
2 78
2 78
2 78
2 78
2 78
2 75
2 75
2 75
2 75
2 74
2 74
2 72
2 23
5 23
5 23
6 23
6 23
6 23
6 23
6 23
6 23
6 23
6 23
6 23
6 23
6 24
6 24
6 24
3 24
3 25
2 25
2 26
2 26
2 26
2 26
2 26
2 26
2 26
2 26
2 26
2 27
2 27
2 27
2 27
2 27
2 27
2 27
2 27
2 27
2 27
2 27
3 33
3 42
3 42
3 43
3 54
3 53
3 53
3 52
3 49
3 46
3 44
3 41
3 44
3 49
3 49
3 49
3 50
3 52
3 52
3 52
3 52
3 52
3 51
3 51
3 51
3 51
3 52
3 52
3 52
3 52
3 47
2 48
1 50
1 50
1 50
1 50
1 50
2 50
5 50
5 50
5 51
5 70
5 70
5 74
5 75
5 76
5 77
5 77
5 75
5 75
5 75
5 76
5 76
2 76
2 76
2 78
2 81
2 85
2 86
2 86
2 88
2 89
2 92
2 100
2 110
2 112
2 119
2 139
2 141
2 141
37 143
37 144
37 147
37 147
37 148
37 149
37 149
37 151
37 150
37 150
37 149
37 153
37 153
37 152
37 154
37 156
37 156
37 156
37 156
2 156
2 156
2 156
2 158
2 159
2 159
2 160
2 160
2 160
2 163
2 159
1 156
1 147
1 147
1 146
1 138
1 138
1 138
1 136
1 137
1 137
1 138
1 138
1 135
1 131
1 131
1 132
1 133
1 130
1 130
1 129
1 130
1 130
1 130
1 139
1 140
1 140
1 139
1 139
1 139
0 139
0 137
0 136
0 133
0 133
0 133
0 132
0 132
0 132
0 132
0 132
0 131
0 110
0 108
0 108
0 108
0 108
0 108
0 108
0 108
0 110
0 111
0 113
0 113
0 112
0 114
0 113
0 110
0 104
0 106
1 107
1 104
1 100
1 90
1 82
1 81
1 78
1 67
1 52
1 51
1 52
1 52
1 53
1 53
1 53
1 53
1 53
1 53
1 51
1 51
1 51
1 51
1 47
1 47
1 46
1 44
1 43
1 43
1 43
1 43
1 43
1 44
1 44
1 44
1 41
1 42
1 42
1 43
1 47
1 45
1 45
1 47
1 47
1 48
1 48
1 48
1 49
1 49
1 49
62 48
62 51
62 50
62 50
62 50
62 50
62 50
62 50
62 50
62 51
62 53
62 53
62 54
62 54
62 54
1 44
1 43
1 43
1 43
1 47
1 56
1 59
1 60
1 62
1 62
1 62
1 63
1 63
1 63
1 64
4 64
4 64
4 64
4 64
4 64
4 64
4 64
4 64
4 64
4 63
4 61
4 59
4 59
4 58
4 58
1 57
1 54
2 53
2 52
1 50
1 49
1 50
1 53
1 53
1 53
1 63
1 59
1 64
1 66
1 69
1 70
1 69
1 69
1 69
0 68
0 68
0 68
0 64
0 64
0 64
0 64
0 64
0 63
0 63
0 63
0 63
0 63
0 63
0 65
0 65
0 65
0 65
0 63
0 63
0 64
0 64
0 63
0 63
0 59
0 57
0 57
0 56
0 56
0 57
0 56
0 56
1 56
1 55
1 66
1 66
1 67
1 67
2 68
2 68
2 70
2 74
2 74
2 75
8 86
8 85
9 83
9 83
9 82
9 82
9 82
10 82
10 82
10 82
10 81
10 74
10 74
10 76
10 77
5 75
6 75
5 76
5 78
5 79
5 79
5 79
5 79
5 79
5 79
5 79
5 79
5 79
5 79
5 79
5 79
5 79
5 79
5 79
5 79
5 78
5 78
5 77
5 78
5 78
5 78
5 78
5 78
5 78
5 78
5 78
5 78
5 61
5 60
5 60
5 61
5 60
5 60
5 61
5 61
5 60
6 61
6 63
6 63
6 62
6 62
6 63
6 63
6 63
6 63
6 63
6 63
6 63
6 63
6 63
6 61
5 61
5 61
5 61
5 61
5 59
6 59
6 59
6 59
6 57
6 57
6 57
6 57
6 57
7 59
7 65
7 69
7 70
7 70
7 67
8 58
8 59
8 59
7 59
7 59
7 59
7 59
7 54
7 53
7 53
7 53
7 53
7 53
6 53
6 53
6 53
6 53
6 54
6 57
6 61
29 87
29 80
29 77
28 76
28 77
27 64
27 67
27 67
27 67
27 68
27 68
27 68
27 69
27 69
27 69
26 69
4 65
4 65
4 65
4 65
4 65
4 65
4 65
4 65
4 65
4 65
4 65
4 65
4 64
4 64
4 65
4 65
4 65
4 65
4 66
4 66
4 67
4 67
4 67
4 68
4 67
4 67
4 66
4 66
7 67
7 66
7 65
7 64
7 64
7 64
7 64
7 64
7 64
7 64
7 64
7 64
7 64
7 64
7 64
5 64
5 64
5 64
5 64
5 64
5 64
5 64
4 64
4 64
4 64
4 64
4 64
4 64
4 64
4 64
3 62
2 55
1 51
1 51
1 51
1 49
1 48
1 48
1 48
1 48
1 48
1 40
1 40
1 39
1 39
1 39
1 39
1 39
1 39
1 39
1 39
1 39
1 39
1 37
1 33
1 33
1 12
1 12
1 12
1 13
1 13
1 13
1 11
1 12
1 13
1 12
1 12
1 12
1 11
1 11
1 11
1 11
1 10
1 10
1 10
1 10
1 10
1 10
1 10
1 10
1 10
1 10
1 10
1 10
1 10
1 10
1 9
1 9
1 8
1 8
1 8
1 8
1 7
1 6
1 6
1 5
1 5
1 5
2 4
6 6
5 6
5 6
5 8
5 8
5 8
5 14
5 14
5 19
5 25
5 25
6 25
6 25
6 25
7 26
7 26
7 26
7 26
7 26
7 26
7 26
7 27
7 27
7 27
7 28
7 28
7 28
7 28
7 28
7 28
7 28
7 28
7 29
7 31
7 29
7 30
7 30
7 30
7 30
7 30
7 30
7 30
7 30
7 30
7 30
7 30
7 30
7 30
7 31
7 31
7 33
7 33
7 34
8 34
8 34
8 34
8 38
8 46
8 52
8 66
8 72
8 82
8 88
8 109
8 112
8 115
8 118
8 126
8 129
8 134
8 135
8 135
8 135
8 136
8 136
8 138
8 138
8 174
8 177
8 181
8 181
8 183
9 186
11 190
11 192
11 196
11 197
11 197
11 208
11 210
11 211
11 211
11 211
11 212
11 212
11 212
11 212
11 218
11 218
9 219
5 218
5 220
5 219
5 217
4 217
4 214
3 210
3 209
3 208
3 203
3 204
3 204
3 204
2 203
2 203
2 203
2 201
2 201
2 201
2 201
2 200
2 200
2 200
2 200
2 199
2 199
2 199
2 199
2 199
2 199
2 199
2 199
2 198
2 196
2 195
2 195
2 195
2 196
2 197
2 201
2 206
2 207
2 208
2 209
2 213
2 214
2 214
1 216
1 213
1 212
1 209
1 208
1 208
1 208
1 206
1 205
1 201
1 191
1 181
1 174
1 168
1 161
1 152
1 130
1 130
4 127
6 127
10 119
20 120
63 127
70 127
73 128
77 127
77 129
77 129
83 125
83 124
83 78
83 78
83 76
83 76
83 68
83 67
82 65
83 63
83 62
85 66
86 67
98 88
98 99
102 100
102 100
102 101
102 101
102 102
104 102
104 102
104 95
107 96
107 94
108 93
120 93
184 155
187 156
189 158
190 158
191 158
191 159
191 159
192 158
192 158
192 158
192 159
192 159
193 160
193 162
193 162
193 163
193 166
193 166
193 166
194 166
195 166
195 167
195 167
195 167
195 169
195 170
195 171
195 180
195 184
195 185
195 185
195 185
195 188
195 194
195 202
197 212
201 222
202 220
202 218
202 222
202 223
202 221
202 216
202 215
202 214
202 213
202 213
202 213
202 213
203 213
203 213
203 213
203 213
202 212
202 212
202 211
201 210
201 210
200 212
200 212
199 212
198 212
196 212
193 212
189 214
178 214
157 209
141 203
135 203
132 202
130 202
130 202
129 202
123 202
123 202
123 202
123 202
123 202
123 202
123 202
121 201
121 201
120 201
119 200
117 195
117 192
106 160
105 158
101 158
101 158
101 156
101 158
100 157
100 157
100 157
100 156
93 155
88 154
72 153
64 151
14 90
10 90
10 88
10 88
10 88
10 88
10 85
10 85
9 85
9 85
9 87
9 86
9 85
9 85
9 86
9 85
9 91
9 94
9 97
9 97
9 97
9 96
10 95
10 95
11 92
11 91
11 92
11 88
11 84
12 92
13 95
13 96
13 97
13 90
12 83
10 69
6 55
6 153
6 153
6 155
6 155
6 155
7 155
8 154
7 155
7 155
7 155
7 155
7 155
7 155
7 155
7 155
7 58
14 144
14 144
14 144
14 144
14 144
14 144
14 144
14 144
14 147
14 149
14 153
14 158
14 162
7 88
7 91
7 98
7 103
7 104
7 122
6 120
6 119
6 119
6 119
6 119
6 119
6 119
6 119
6 118
6 118
6 118
6 118
5 117
5 117
5 99
5 99
5 99
5 100
5 100
5 100
5 101
5 101
5 101
5 101
5 101
5 101
5 101
5 101
5 101
5 101
5 101
5 101
5 101
5 101
5 99
5 99
5 99
5 99
5 97
5 96
5 94
5 94
3 91
3 91
3 76
3 71
3 71
3 71
3 71
3 69
3 69
3 63
3 62
3 61
3 57
3 57
1 56
1 55
0 52
0 50
0 51
0 51
0 51
0 50
0 50
0 50
0 50
0 50
0 50
0 50
0 50
0 49
1 49
1 49
1 49
1 49
1 49
1 48
1 48
1 47
1 47
1 47
1 47
1 47
1 47
1 47
1 47
1 46
1 46
0 42
0 34
0 20
0 4
0 4
0 4
0 4
0 4
0 4
0 4
0 4
0 4
0 4
0 4
0 4
0 4
0 5
0 5
0 5
1 6
1 10
1 10
1 15
1 17
1 17
1 17
3 17
3 16
3 17
4 19
4 18
4 19
4 19
4 19
4 19
4 19
4 19
4 19
4 19
4 19
4 19
4 19
4 19
2 19
2 19
2 19
2 19
2 19
2 19
2 19
2 19
2 19
2 20
2 20
2 20
2 20
2 20
2 24
2 25
2 25
2 25
2 25
2 25
2 25
2 25
2 25
2 25
2 25
2 26
2 26
2 26
2 25
2 25
2 26
2 33
2 35
2 41
2 41
2 46
2 49
2 51
2 52
2 53
2 60
2 62
2 64
2 64
2 65
2 71
2 71
2 77
2 78
2 83
2 83
2 84
2 84
2 84
2 85
2 86
4 86
4 86
4 86
4 86
4 87
4 88
4 89
4 93
4 92
4 92
5 92
5 91
5 92
5 92
5 90
5 90
3 88
3 87
3 87
3 87
2 87
2 85
2 85
2 80
2 80
2 81
2 81
2 81
2 80
2 79
1 79
1 79
1 79
1 79
1 79
1 80
1 81
1 81
1 81
1 81
1 81
1 81
1 81
1 81
1 81
1 87
1 87
1 91
1 92
1 93
1 93
1 95
1 97
1 96
1 98
1 98
1 98
1 96
1 97
1 97
1 98
1 99
1 100
1 100
1 101
1 106
1 109
1 110
1 109
1 112
1 114
1 114
1 116
1 140
1 153
1 155
1 156
2 161
2 165
2 164
3 175
3 173
3 174
3 175
3 170
3 169
3 167
3 167
3 166
3 160
3 160
3 154
3 154
3 149
3 149
3 149
3 149
3 149
3 147
3 147
3 147
3 147
3 147
3 147
3 145
3 144
3 145
3 141
3 141
3 143
2 150
2 150
4 151
4 152
4 154
4 154
4 157
4 158
4 161
4 162
4 164
4 174
4 177
4 178
4 179
4 182
4 184
4 188
4 190
4 189
4 192
4 194
4 195
4 196
4 202
4 205
4 207
4 212
4 213
4 217
4 219
4 232
4 275
4 292
4 315
4 319
4 320
4 326
4 339
4 344
4 355
4 356
4 358
4 359
4 358
4 359
4 360
4 361
4 360
4 359
4 360
4 360
4 359
4 359
4 356
4 351
4 351
4 350
4 350
4 344
4 342
4 330
3 327
3 281
3 276
3 274
3 275
3 279
3 279
3 279
2 263
2 264
2 263
2 264
2 265
2 265
2 265
2 293
2 301
2 308
2 311
3 312
3 312
3 313
3 313
3 315
3 316
3 317
3 317
3 317
3 317
3 317
3 317
3 317
3 318
4 320
4 321
4 320
4 318
4 318
2 314
2 317
2 315
2 316
3 315
3 316
3 311
3 309
3 311
3 326
3 348
3 362
3 372
4 389
4 401
4 399
4 399
4 395
4 401
4 401
4 396
4 389
4 389
4 381
4 380
6 379
6 378
9 372
8 371
10 375
11 365
12 353
12 347
12 328
14 302
14 303
14 306
14 316
14 314
14 316
14 315
15 318
13 323
13 336
13 339
13 353
13 356
13 364
13 376
13 382
13 383
13 389
13 389
13 390
13 391
13 393
15 432
17 523
17 572
21 725
24 752
24 759
26 772
26 775
26 783
26 784
26 781
26 779
26 778
26 792
26 801
26 806
26 809
26 810
26 810
26 809
26 806
26 777
44 799
44 801
44 799
44 802
45 803
46 803
46 802
46 800
46 797
46 802
46 806
46 811
46 811
46 811
46 811
46 810
46 804
45 799
45 799
45 800
45 799
45 805
45 799
45 792
45 792
45 791
45 782
45 778
45 783
45 779
45 760
45 731
45 698
45 701
45 702
45 702
45 700
45 702
45 699
45 700
45 700
47 710
49 735
49 752
49 761
49 756
49 752
47 747
44 744
43 740
42 738
41 747
41 744
43 748
43 744
47 750
45 745
45 733
46 737
46 723
46 717
47 745
47 749
48 737
48 741
48 724
45 722
45 701
45 694
45 689
45 661
45 663
45 642
45 636
45 630
45 629
45 624
44 614
37 544
37 454
36 413
34 331
34 332
34 349
34 403
34 431
35 449
35 454
38 468
39 473
39 475
39 445
39 446
39 449
39 456
39 458
41 470
39 487
38 490
37 494
21 461
21 466
21 467
21 474
19 475
19 477
19 478
21 479
21 481
21 476
21 487
21 487
21 492
21 495
21 499
21 504
21 504
21 503
21 503
21 503
21 503
21 495
19 497
19 497
19 499
19 500
19 501
19 498
19 499
19 499
19 497
19 494
19 492
19 488
19 488
19 490
19 490
19 488
17 488
17 485
17 481
14 472
15 440
15 421
15 416
15 416
15 417
15 417
15 417
15 417
15 415
14 403
14 403
13 399
13 400
47 1351
47 1351
47 1351
48 1352
48 1354
48 1349
48 1316
48 1313
49 1312
49 1309
50 1307
50 1305
50 1308
50 1308
50 1310
14 343
14 342
15 342
16 343
16 343
16 344
17 354
17 351
17 356
17 350
16 350
16 348
16 341
16 319
16 235
16 218
15 219
15 218
15 206
17 205
18 198
18 190
18 189
18 185
19 182
17 231
18 231
18 214
18 213
18 213
18 211
18 210
18 211
18 211
18 214
18 212
18 210
18 212
18 212
18 219
20 243
22 270
22 273
22 272
22 276
22 278
22 279
24 280
36 347
37 354
38 358
38 361
38 363
39 364
39 359
39 362
39 382
40 394
41 397
41 400
41 401
41 407
41 404
41 401
41 401
41 399
41 402
42 405
42 413
42 414
42 414
41 415
40 416
40 416
40 416
40 416
40 415
39 415
39 408
39 407
39 406
39 405
39 402
39 401
39 403
38 402
37 402
37 403
37 400
37 399
35 396
35 397
35 396
34 392
33 393
33 392
33 392
33 392
33 400
33 405
33 408
34 408
33 408
32 402
31 401
31 399
31 390
31 377
31 375
31 375
31 375
31 371
31 369
30 369
30 369
30 369
29 369
29 369
29 369
27 368
27 368
26 368
26 367
26 366
25 365
25 291
77 291
77 285
77 286
77 287
77 281
77 288
77 293
77 297
77 298
77 297
77 296
77 291
77 288
75 269
73 222
73 213
73 214
21 216
21 215
19 215
14 215
12 215
3 145
2 150
1 145
1 149
1 149
1 148
1 148
1 149
1 121
1 118
1 114
1 117
1 117
2 120
2 121
2 121
3 121
3 117
3 115
3 114
3 109
3 108
3 107
3 105
3 105
3 107
3 107
4 109
4 138
4 146
4 149
4 150
4 153
4 155
4 153
4 152
4 158
4 171
4 172
5 200
5 209
6 223
10 260
21 270
21 276
21 277
21 279
21 278
21 282
21 282
21 279
20 278
20 276
20 280
20 280
20 282
20 283
20 284
18 284
12 284
12 285
12 286
12 286
12 287
12 287
13 287
13 287
13 288
13 288
13 291
13 291
13 291
13 291
13 291
13 291
13 291
13 292
13 293
13 293
13 293
13 291
13 290
13 290
13 281
13 273
13 273
13 270
13 269
13 269
13 269
13 279
13 281
13 279
13 280
13 274
13 275
13 276
13 276
13 276
13 273
13 270
13 257
13 255
13 254
13 256
13 253
13 254
13 249
13 248
13 247
13 247
13 243
12 244
12 244
12 254
12 255
12 281
12 284
12 287
12 288
12 291
12 291
12 291
12 294
12 294
12 292
12 290
11 294
11 264
11 264
11 303
11 303
11 307
11 310
10 308
10 306
10 317
10 307
10 308
10 277
10 276
9 256
2 213
2 210
2 210
2 209
2 209
3 210
3 222
4 282
5 318
8 321
9 323
9 326
9 326
9 324
9 324
9 324
9 340
9 347
9 355
9 362
9 370
9 367
9 368
9 376
9 383
9 382
10 382
10 378
10 378
10 384
11 385
11 386
11 386
11 390
11 390
11 391
11 391
12 391
11 391
11 391
11 391
11 391
11 391
11 391
11 390
12 411
12 415
12 420
12 408
12 413
12 415
12 416
12 416
12 416
12 445
13 449
15 451
15 456
15 459
16 459
16 459
16 459
16 457
16 457
16 459
16 460
16 460
17 460
17 467
17 464
17 464
17 463
17 446
16 449
16 423
16 425
16 426
16 422
17 421
17 426
17 426
17 424
17 423
17 423
17 423
24 427
26 433
30 444
30 405
30 408
30 408
30 407
30 405
30 405
31 373
31 375
31 372
31 384
33 411
33 415
34 423
34 423
34 422
34 422
34 421
61 462
61 454
59 378
58 357
59 361
59 362
60 362
60 364
60 369
60 371
60 369
60 359
60 353
60 334
60 332
60 330
60 331
60 329
60 318
60 315
59 315
57 315
57 315
57 310
57 305
57 303
57 308
57 311
57 309
57 309
57 309
57 308
56 308
56 308
56 308
56 310
56 309
56 311
56 311
56 310
55 285
55 286
55 283
55 282
55 276
55 276
55 276
55 276
55 276
53 240
53 240
51 242
51 243
51 249
50 264
51 274
51 275
52 274
52 272
54 275
55 320
55 329
59 344
59 346
60 350
60 351
60 351
59 351
59 345
59 334
59 333
59 334
59 333
59 330
59 328
59 327
58 327
58 327
58 324
53 318
48 311
47 304
46 295
46 295
48 293
48 293
48 294
48 293
48 289
46 287
46 287
46 276
46 266
45 241
44 236
36 233
36 231
26 228
32 232
34 229
23 177
23 177
21 172
21 171
21 171
21 170
21 169
22 174
22 172
22 171
22 175
22 175
22 174
23 174
23 182
23 183
23 183
24 183
25 183
25 183
25 183
25 183
25 183
25 183
25 183
24 179
24 173
25 173
25 173
28 173
28 173
32 181
32 183
33 184
33 183
33 179
33 178
33 177
33 177
33 179
33 179
33 180
33 180
33 180
33 180
33 180
33 179
33 180
32 180
32 180
32 182
32 180
32 177
32 172
33 156
55 217
65 235
88 241
95 241
95 249
97 197
99 190
95 176
95 187
95 187
95 191
95 191
95 192
95 192
95 191
95 188
95 188
95 188
95 188
95 188
95 188
95 188
94 188
94 190
94 192
96 195
96 195
96 210
96 212
97 220
99 227
99 227
99 232
99 232
99 239
100 252
101 258
102 263
102 264
103 288
103 288
103 288
102 291
96 287
96 289
96 293
96 292
100 296
100 301
100 302
104 338
104 338
104 339
104 343
104 349
103 345
103 351
103 355
104 371
103 364
104 387
104 391
101 393
101 401
101 405
101 418
101 424
101 433
101 436
101 441
101 444
101 468
100 468
97 470
97 468
97 468
93 461
93 460
92 458
92 458
92 459
92 459
92 459
92 459
92 457
92 455
92 455
92 461
92 461
92 461
92 461
92 463
92 463
92 464
92 465
92 466
91 477
89 476
83 476
75 471
46 397
39 393
17 389
14 392
13 379
13 377
13 377
13 377
13 363
13 361
13 358
13 358
13 357
13 357
13 356
13 356
13 356
13 356
16 359
16 359
16 364
16 368
16 370
16 369
16 363
16 361
16 353
15 337
15 329
13 324
13 324
13 324
13 324
13 324
13 312
12 297
12 293
12 291
12 288
12 268
13 267
14 268
14 266
14 266
16 266
16 261
15 260
15 254
14 251
14 257
12 222
13 224
13 224
13 221
13 214
13 211
13 204
12 196
11 183
10 178
14 239
15 241
17 253
18 245
18 243
18 226
18 223
18 221
18 218
18 213
18 211
18 187
18 187
18 186
18 186
18 186
18 186
18 186
18 187
18 187
18 186
18 187
18 187
18 187
18 187
18 187
18 187
18 181
18 181
18 181
18 181
18 179
18 178
18 177
18 176
18 169
18 156
18 154
18 152
18 151
18 149
18 149
18 147
17 145
17 146
17 147
17 146
17 146
17 146
17 146
16 144
16 144
16 144
16 144
16 143
15 143
15 141
15 141
10 135
10 133
10 128
10 128
10 126
10 126
10 126
10 126
10 126
10 126
10 126
10 126
10 126
10 126
10 126
10 126
10 124
10 123
10 123
10 122
10 122
8 122
8 122
8 122
8 121
8 121
8 120
8 120
8 120
8 120
8 118
8 113
8 110
8 109
8 108
8 108
8 106
7 104
7 103
5 100
5 97
3 85
1 6
0 1
0 1
0 3
0 7
0 10
0 14
0 27
0 36
0 41
0 42
0 43
0 43
0 43
0 43
0 43
0 43
0 44
0 46
0 48
0 49
0 55
0 64
0 64
0 65
0 69
0 69
0 69
0 70
0 74
0 74
0 74
0 78
1 82
1 103
1 126
1 131
1 135
1 139
1 141
1 141
1 147
1 151
2 175
3 210
5 244
5 245
5 249
5 250
6 256
6 258
6 259
6 260
6 261
6 261
6 262
7 262
15 263
15 269
15 274
15 274
15 275
15 275
15 277
15 277
15 277
16 277
16 277
16 278
16 278
16 280
16 280
16 281
16 282
21 292
21 294
21 299
21 302
21 303
21 303
21 303
21 303
21 317
21 321
21 330
21 333
21 340
21 343
21 346
21 362
21 369
21 373
21 375
21 379
21 380
21 380
21 382
22 386
24 392
31 417
46 909
46 913
46 910
46 910
46 909
46 904
49 899
50 892
50 880
50 887
50 901
51 904
51 906
51 912
59 962
59 977
46 495
46 500
46 502
46 517
45 523
45 517
45 510
45 521
45 521
45 521
44 523
44 536
44 538
44 539
44 544
43 546
43 541
43 537
43 521
43 491
43 491
43 521
43 522
43 526
43 532
43 521
43 484
41 439
41 433
41 429
41 427
41 427
41 426
41 419
41 417
41 417
40 417
39 418
39 418
39 417
37 416
32 413
32 407
32 402
32 402
32 401
32 401
32 401
32 401
32 407
31 410
31 422
31 434
31 438
31 474
31 475
31 478
31 480
26 473
26 507
26 510
26 510
26 510
26 510
29 510
53 520
53 496
58 495
72 493
72 493
82 489
85 491
85 489
85 466
87 465
88 461
89 459
89 458
89 459
88 459
88 458
87 453
83 444
78 423
78 423
77 422
76 424
76 424
76 422
76 422
76 421
75 413
75 408
75 398
74 384
74 369
74 368
72 357
66 294
66 294
66 290
66 291
66 296
67 318
68 323
68 323
68 324
68 318
68 322
68 321
68 313
68 307
68 302
68 301
68 296
68 296
68 295
68 294
68 291
68 291
68 288
68 250
68 246
68 240
68 237
68 237
68 237
67 237
67 237
67 237
67 237
67 237
67 237
67 237
67 237
67 237
67 237
67 236
67 236
67 236
67 236
67 236
67 236
67 236
69 236
69 236
69 236
69 236
69 236
69 236
69 236
69 223
69 209
69 207
69 167
69 169
69 167
69 167
69 168
69 127
68 124
63 123
57 130
56 130
53 131
18 113
17 113
16 113
15 113
4 111
4 109
4 106
4 106
2 96
2 95
2 89
2 89
2 89
2 89
2 89
2 89
2 89
2 89
2 89
2 89
2 89
2 88
2 88
2 88
2 88
424 94
438 94
438 94
439 94
439 96
439 97
439 98
439 98
439 99
439 92
439 91
444 96
445 94
446 60
447 55
447 55
12 52
40 53
39 53
44 53
54 53
84 53
85 53
85 54
87 54
91 54
91 54
91 54
91 54
93 54
93 54
93 54
94 54
94 54
94 54
94 54
94 55
94 55
94 55
94 55
94 55
94 55
94 55
94 55
96 55
98 55
100 55
100 55
101 55
101 55
102 55
105 56
105 56
108 56
115 56
113 56
115 56
122 56
155 56
186 46
195 47
212 50
218 49
232 52
237 55
295 55
296 51
297 48
307 58
317 57
317 49
317 48
317 46
317 46
317 46
317 46
317 46
317 46
317 46
317 46
317 48
317 48
317 48
317 48
306 38
307 37
307 37
297 37
297 37
308 37
315 37
365 37
400 37
453 37
469 38
480 38
480 40
489 39
502 41
505 42
510 42
512 42
510 42
513 42
514 38
516 39
516 35
516 35
516 35
516 35
516 35
510 31
511 31
512 35
512 34
513 34
512 29
484 29
479 29
472 29
459 29
439 29
441 28
441 28
436 28
437 28
437 28
437 31
436 28
433 28
433 29
433 29
432 29
432 29
432 29
432 29
432 28
432 28
432 28
433 28
435 28
437 28
438 28
434 28
417 28
411 28
399 28
391 28
390 28
390 28
389 28
371 27
356 27
349 27
348 27
344 27
339 27
335 27
330 26
305 24
304 23
308 28
303 27
299 25
294 21
246 20
246 20
249 20
255 23
257 23
260 23
267 23
272 23
279 24
279 24
289 37
289 39
289 43
289 43
289 43
289 43
289 43
289 43
289 44
288 44
281 45
259 45
258 45
242 44
201 44
190 44
140 44
127 44
102 43
93 43
87 43
85 43
83 40
79 39
78 39
76 39
76 39
77 39
78 38
76 38
77 38
77 38
78 38
79 38
79 39
79 39
79 39
79 38
79 37
78 37
78 37
78 37
78 37
78 37
78 37
78 37
78 37
76 37
76 37
76 37
75 37
74 37
74 49
74 49
75 49
77 48
79 49
79 49
80 49
80 49
80 49
80 49
80 49
78 49
78 49
76 49
75 49
74 47
74 47
74 47
74 47
74 34
74 34
74 34
1221 38
1221 38
1275 39
1276 39
1276 39
1276 39
1276 39
1276 39
1274 39
1274 39
1274 39
1274 39
1264 33
1263 33
1263 33
144 30
134 30
80 30
71 30
67 31
66 31
63 31
57 31
57 30
57 30
52 30
45 14
45 14
45 12
45 12
45 12
45 12
45 12
45 12
45 11
45 9
45 8
45 8
44 8
44 8
43 8
32 8
32 8
31 8
31 8
32 8
32 6
32 6
32 7
34 8
34 8
33 8
33 8
31 8
31 8
31 8
30 8
29 9
28 9
28 9
28 8
28 8
28 8
28 8
28 8
28 8
28 8
28 8
28 9
28 10
28 10
28 10
28 10
30 10
30 10
30 10
30 10
30 10
30 10
30 10
25 10
25 9
24 9
24 9
24 9
24 9
24 9
24 9
24 9
24 9
24 9
24 9
24 9
24 9
23 9
23 9
25 9
25 9
24 9
23 9
8 9
8 9
8 9
7 9
7 9
7 9
7 10
9 13
9 13
9 13
9 17
9 17
9 18
10 20
10 20
10 23
10 23
11 23
11 25
11 26
11 26
11 28
11 28
19 36
19 36
19 36
19 36
19 37
19 39
19 39
19 43
19 43
19 44
19 44
20 44
20 44
20 44
20 42
20 42
12 34
12 34
12 34
12 36
12 36
12 37
11 38
11 38
11 38
11 38
9 38
9 38
9 38
9 38
9 38
9 37
9 37
9 37
9 37
9 37
9 37
9 37
8 37
7 37
7 37
7 37
7 37
7 38
7 38
7 37
7 36
7 36
7 37
7 38
7 38
7 38
7 38
7 38
7 38
7 38
7 38
7 38
7 38
7 38
7 38
7 38
7 38
7 38
7 38
7 37
7 37
7 39
7 39
7 39
7 38
5 38
5 39
5 39
5 40
5 40
5 42
5 48
5 53
5 50
5 52
5 56
5 57
5 57
2 56
2 54
2 52
3 53
3 58
3 63
4 72
4 74
4 75
3 76
3 74
3 78
3 78
3 78
3 77
3 77
3 80
3 81
3 81
3 81
3 81
2 79
2 80
2 78
2 76
3 78
3 79
3 80
3 81
3 81
3 83
3 84
3 83
3 83
3 83
3 81
3 80
3 80
3 81
3 81
3 81
3 81
3 81
3 81
3 81
3 81
3 81
3 81
3 81
3 81
3 81
3 81
3 82
3 83
3 83
3 83
3 90
3 103
3 117
3 134
3 149
3 154
3 164
3 171
3 173
3 173
3 173
3 173
3 174
3 174
3 175
3 175
3 177
3 177
3 178
3 178
3 179
3 180
3 180
3 180
3 183
3 184
3 187
3 190
3 191
3 190
3 190
3 191
3 188
3 189
3 193
3 193
3 189
3 177
3 176
3 178
3 180
3 184
3 189
3 189
3 189
3 189
2 189
2 189
2 182
1 178
1 170
1 169
1 169
1 168
1 170
1 166
1 166
1 167
1 168
1 166
1 165
1 165
1 168
1 174
1 180
1 182
1 195
1 196
1 197
0 194
0 194
0 193
0 193
0 194
0 191
0 189
0 185
0 185
0 184
0 184
0 182
0 182
0 182
0 182
0 182
0 183
0 183
0 183
0 183
0 183
0 184
0 184
0 185
0 186
0 186
0 186
0 185
0 182
0 184
0 180
0 165
0 132
0 114
0 108
0 108
0 108
0 108
0 108
0 106
0 106
0 138
0 141
0 142
0 139
0 139
0 139
0 139
0 145
0 144
0 171
0 187
0 193
0 196
1 201
1 199
1 199
1 193
1 195
1 195
1 196
1 197
1 194
1 193
1 192
1 188
1 185
1 186
1 186
1 186
1 185
1 175
1 174
1 174
1 174
1 174
1 174
1 175
1 175
1 177
1 174
1 174
1 173
1 174
1 172
1 174
1 174
2 176
2 175
2 175
2 175
2 174
2 172
2 166
2 160
2 157
2 155
2 142
2 141
2 141
2 140
2 157
2 159
1 160
1 162
1 163
1 166
1 170
1 169
1 173
1 173
1 173
1 174
1 174
1 174
1 175
1 176
1 178
1 179
1 179
1 178
1 178
16 178
16 178
16 177
16 177
16 176
16 175
16 174
16 174
16 175
16 174
16 174
16 174
16 174
16 174
16 174
1 174
1 172
1 172
1 172
1 136
1 132
1 132
1 132
1 132
1 132
1 127
1 127
1 126
1 80
1 84
1 77
0 74
0 72
0 72
0 71
0 71
0 69
0 69
0 68
0 68
0 70
0 70
0 69
0 69
0 69
0 69
0 69
0 68
0 68
0 67
0 68
0 68
0 69
0 71
0 73
0 73
0 73
0 71
0 71
0 72
0 73
0 72
0 71
0 72
0 72
0 72
0 72
0 72
0 72
0 71
0 71
0 74
0 75
0 75
0 75
0 75
0 75
0 75
0 75
0 54
0 54
0 47
0 46
0 47
0 42
0 40
0 40
1 37
1 37
1 37
1 39
1 41
1 43
1 44
1 43
1 40
1 40
1 40
1 40
1 40
1 41
1 40
1 47
1 50
1 50
0 50
0 50
0 53
0 52
0 54
0 54
0 55
0 59
0 61
0 72
0 72
0 73
0 73
0 71
0 71
0 74
0 74
0 76
0 76
0 77
0 79
0 78
0 78
0 80
0 80
0 80
0 80
0 80
0 80
0 80
0 80
0 81
0 81
0 81
0 81
88 79
88 79
88 79
88 79
89 80
89 81
89 81
89 81
89 81
89 79
89 79
89 79
89 76
89 76
89 75
1 74
1 74
1 75
1 74
1 78
1 78
1 76
1 77
1 77
1 77
1 77
2 84
2 86
3 88
3 89
25 1037
25 1034
28 1036
28 1036
28 1036
28 1036
28 1036
28 1036
28 1036
28 1036
28 1036
27 1036
27 1036
27 1039
27 1039
27 1038
27 1032
27 1032
3 88
3 88
3 84
3 83
3 80
3 80
3 80
3 80
3 80
3 80
3 82
3 83
3 82
3 84
3 73
3 72
3 72
3 72
3 72
3 68
3 69
3 69
6 69
6 68
6 65
6 64
6 54
6 54
6 53
6 53
6 53
6 53
6 48
6 47
6 47
6 46
6 45
6 46
3 45
3 45
3 52
3 49
3 49
3 49
3 49
3 49
2 49
2 50
2 49
2 49
2 50
2 50
2 50
2 50
2 50
2 50
2 48
2 48
2 48
2 48
2 48
2 48
2 48
2 48
2 49
4 63
4 72
6 73
6 81
6 82
6 81
6 80
6 82
6 86
6 88
6 93
6 100
6 95
6 88
6 89
6 89
6 91
6 91
6 91
6 91
6 91
6 91
6 91
6 91
6 91
6 91
6 91
6 90
6 91
6 91
6 88
6 88
6 89
5 89
5 90
5 88
5 88
5 88
5 88
5 88
5 87
5 87
5 87
5 87
5 87
5 88
5 86
5 90
5 92
5 93
5 93
5 93
5 96
5 97
5 96
5 98
5 102
5 110
5 110
5 110
5 110
5 110
5 110
5 110
5 111
5 111
5 111
5 111
5 111
5 111
5 111
5 111
5 109
5 108
5 107
5 97
5 97
5 97
5 99
5 100
5 102
5 102
6 115
6 117
6 116
6 117
6 117
6 117
6 117
6 117
6 115
46 119
57 118
57 118
57 118
58 118
58 120
58 121
58 121
58 126
57 115
56 108
55 106
55 105
55 105
55 108
15 104
15 101
4 101
4 100
4 93
4 87
4 87
3 85
3 84
3 84
3 84
3 84
3 84
3 84
3 85
3 86
3 91
3 96
3 99
3 99
3 100
7 100
7 99
7 100
7 99
7 102
7 102
7 102
7 102
7 104
7 104
8 104
8 104
8 105
8 105
8 111
4 112
4 112
4 112
4 108
4 107
4 105
4 105
4 106
4 104
4 106
3 102
4 104
4 105
4 111
4 102
5 99
5 99
5 100
5 102
5 102
5 102
5 102
5 102
7 102
7 102
8 102
10 102
10 102
10 103
10 103
10 104
10 104
10 104
10 105
10 105
10 105
10 103
10 102
10 98
10 96
9 84
9 84
9 85
9 88
9 87
9 88
9 91
9 103
9 142
10 152
10 164
10 166
10 185
9 195
9 208
10 208
10 211
11 227
10 220
10 236
10 235
11 264
11 273
11 292
11 295
11 298
11 302
11 302
11 303
11 303
11 304
11 306
11 308
11 308
11 308
11 309
11 308
11 306
11 305
11 304
11 302
12 322
12 327
12 328
13 335
13 335
13 335
13 334
13 334
13 331
13 331
13 331
13 331
13 331
13 331
13 333
13 333
45 335
45 337
45 331
45 330
45 330
45 331
45 332
45 329
45 332
45 330
45 328
45 328
44 329
44 330
44 328
12 326
11 315
11 314
11 314
11 314
11 314
11 313
11 320
11 321
10 322
10 322
7 322
7 323
6 323
6 323
6 323
7 322
7 322
7 322
7 322
7 323
7 323
7 323
6 323
6 323
6 323
6 323
7 322
7 322
7 323
7 326
7 328
7 330
7 332
7 309
7 295
6 244
6 219
6 218
6 217
6 219
6 216
6 221
5 220
5 218
4 200
4 197
4 184
4 219
3 178
3 177
3 168
3 168
3 160
3 166
3 167
3 166
3 167
3 166
3 167
3 172
3 170
3 178
3 185
3 188
3 194
3 197
3 195
2 184
2 173
2 172
2 172
1 172
1 172
1 172
1 172
1 172
1 172
1 170
1 170
1 170
1 170
2 171
2 169
2 168
2 170
2 189
2 194
2 196
2 196
2 202
2 205
2 214
2 212
2 215
2 215
2 221
2 232
2 233
2 232
2 236
2 239
2 240
2 241
2 241
2 242
2 242
2 234
2 233
2 233
2 233
2 235
2 234
2 234
2 258
1 258
1 260
1 260
1 261
1 260
2 260
2 260
2 263
2 263
2 264
2 264
2 264
2 264
2 265
2 264
4 261
4 259
4 254
4 251
5 251
5 250
5 246
5 245
5 243
5 243
5 239
5 239
5 228
5 228
5 227
5 227
5 226
5 223
5 177
5 209
5 202
5 201
5 195
5 193
5 190
5 190
5 190
5 190
5 190
5 192
5 184
5 188
5 189
5 190
5 160
5 159
5 162
5 163
5 161
5 161
5 161
5 161
5 160
5 161
5 161
5 161
5 161
5 161
5 161
5 161
5 161
5 161
4 160
4 160
4 162
4 159
4 137
4 138
4 138
4 146
4 140
4 142
4 136
4 140
4 147
4 145
4 138
4 124
4 123
4 128
4 125
4 126
4 127
4 126
4 133
4 140
4 142
4 146
4 147
4 147
4 147
4 146
3 146
3 150
2 125
1 125
1 122
1 122
1 121
1 121
1 121
1 121
1 119
1 119
1 130
1 132
1 134
1 134
1 134
1 135
1 138
1 138
1 138
1 139
0 140
0 140
0 140
0 141
0 143
0 145
0 147
0 148
0 148
0 147
0 148
0 147
0 146
0 148
0 151
0 153
0 156
0 339
0 358
0 363
0 381
0 395
0 401
0 409
0 411
0 411
0 405
0 396
0 392
0 390
0 387
0 386
0 199
0 199
0 199
0 200
0 200
0 200
0 200
0 199
0 205
0 206
0 208
0 208
0 208
0 211
0 211
0 211
0 211
0 211
0 206
0 199
0 198
0 195
0 182
0 172
0 170
0 169
0 168
0 168
0 168
0 167
0 166
0 170
0 170
0 164
0 188
0 195
0 195
0 196
0 188
0 185
0 186
0 186
0 186
0 186
0 186
0 186
0 184
0 203
0 204
0 207
0 210
0 211
0 214
0 214
0 214
0 214
0 213
0 212
0 198
0 198
0 196
0 196
0 196
0 196
0 193
1 192
3 192
3 192
3 191
3 191
3 191
3 190
3 188
3 185
3 184
3 183
3 183
3 185
3 185
3 189
3 187
3 188
1 188
1 184
1 183
1 181
1 159
1 139
1 121
1 124
1 127
1 128
1 127
1 126
1 124
1 125
1 131
1 134
1 135
1 135
1 135
1 140
1 143
1 144
1 144
1 144
1 144
1 145
1 137
1 137
1 138
1 141
1 140
1 141
1 142
1 197
1 200
1 215
1 218
1 218
1 219
1 219
1 220
1 221
1 221
1 223
1 223
1 223
1 226
1 227
1 228
2 228
2 230
2 224
2 202
2 200
2 197
2 191
2 189
2 187
2 192
2 192
2 193
2 193
2 197
2 199
1 199
3 221
3 219
3 214
3 213
3 214
3 211
3 211
3 211
3 211
3 212
3 213
3 212
3 212
3 212
3 212
2 169
2 171
2 175
1 175
1 176
1 177
1 179
1 179
1 179
1 179
1 179
1 179
1 178
1 180
1 181
1 180
1 181
1 178
1 178
1 179
1 178
1 178
1 178
1 178
1 176
1 174
1 173
1 166
1 167
1 165
1 165
1 165
1 163
1 162
1 157
1 153
1 153
2 152
2 149
2 144
2 140
2 140
2 140
2 139
2 140
2 141
2 143
2 143
2 141
2 140
2 140
2 136
1 134
1 69
1 67
1 61
1 62
1 62
1 65
1 67
1 70
1 69
1 71
1 72
1 111
1 124
1 124
1 129
1 128
1 126
1 133
1 131
1 130
1 133
1 133
1 133
2 141
2 142
2 137
2 137
2 138
2 139
2 135
2 134
2 134
2 134
2 135
2 135
2 134
2 133
2 133
2 134
2 134
2 142
2 145
2 145
2 145
3 150
3 152
3 153
2 149
2 150
2 147
2 148
2 147
2 148
2 148
2 149
2 151
2 154
2 154
2 154
2 154
2 151
2 148
2 148
2 149
2 148
2 149
2 151
2 151
2 152
2 152
2 151
2 153
2 154
2 154
2 154
2 152
2 152
2 154
2 154
2 154
2 155
2 155
2 154
2 155
2 155
2 155
2 155
2 156
2 156
2 156
2 155
2 154
2 155
2 153
2 153
2 153
2 154
2 155
2 155
2 154
2 154
2 155
2 151
2 152
2 151
2 149
2 147
2 143
2 143
2 200
2 186
2 147
2 145
2 149
2 149
2 154
2 158
2 160
2 160
2 161
2 162
2 164
2 161
1 155
1 164
1 163
1 164
1 164
1 164
1 164
1 164
1 164
1 165
1 165
1 165
1 167
1 168
1 168
1 169
1 167
1 161
1 161
1 163
1 166
0 162
0 167
0 167
0 168
0 169
0 168
0 168
0 168
0 169
0 168
0 168
0 171
0 170
0 171
0 171
0 171
0 171
0 171
1 173
1 171
1 171
1 168
1 166
1 165
1 165
1 166
1 167
1 165
1 165
1 165
1 165
1 165
1 164
1 162
1 163
1 163
1 163
1 163
1 163
1 163
1 165
1 166
1 173
1 173
1 174
1 174
1 175
1 173
1 172
1 171
1 171
1 169
1 169
1 167
1 168
1 168
1 168
1 165
1 170
1 180
1 180
1 183
1 182
1 183
4 181
4 114
4 115
4 112
4 112
5 154
5 157
5 154
5 154
5 151
5 157
5 157
5 159
5 160
5 164
4 164
24 159
24 157
24 157
24 157
24 157
24 157
24 157
24 157
24 157
24 157
24 155
24 150
24 150
24 150
24 145
2 143
2 143
2 141
2 140
2 138
2 134
2 132
4 132
4 132
4 127
4 124
4 123
4 124
4 124
4 124
4 124
4 121
4 120
4 120
4 120
4 120
4 121
4 121
3 119
3 123
3 123
3 124
3 127
3 127
3 127
3 125
3 125
3 125
3 125
3 127
3 127
3 127
3 127
3 127
3 128
3 131
5 162
7 194
7 200
7 203
7 203
8 204
8 209
10 329
12 344
12 401
12 434
13 452
15 485
15 547
17 569
17 571
17 595
17 598
17 598
17 598
17 596
17 598
17 601
17 594
17 608
17 609
17 614
17 615
17 622
17 623
17 626
18 628
18 627
17 571
17 570
17 571
17 579
17 604
17 632
17 638
17 654
17 655
17 656
17 658
17 664
17 664
17 665
17 665
17 665
17 665
17 665
17 665
17 665
17 666
17 667
17 667
17 669
17 674
17 674
17 674
17 676
17 676
17 676
17 678
17 678
17 678
17 678
17 679
17 686
17 690
17 700
17 701
17 704
17 706
17 706
17 709
17 716
17 719
17 721
17 752
17 754
17 756
17 762
15 753
15 753
15 757
15 758
15 760
15 761
15 760
15 761
15 789
15 790
15 794
15 793
15 795
23 793
23 793
23 783
22 771
20 728
18 726
18 724
18 720
18 717
18 712
18 690
13 487
9 444
9 384
9 363
9 358
9 358
9 355
9 355
9 354
9 334
9 336
9 341
9 342
9 338
9 336
9 321
9 321
9 314
9 313
9 306
9 304
9 301
9 301
9 295
8 292
8 292
12 329
12 341
12 356
12 344
12 314
12 301
12 298
12 278
12 277
12 275
12 276
12 275
12 275
12 278
12 278
12 278
12 278
8 245
8 245
9 245
10 242
10 243
10 249
10 246
10 243
10 245
10 245
10 251
10 254
10 258
10 257
10 264
10 271
10 276
10 277
10 265
10 258
10 255
10 257
10 260
10 258
10 274
10 269
10 262
10 263
10 261
10 228
10 234
10 237
10 232
10 233
10 238
10 254
10 341
10 362
10 373
10 378
10 379
10 354
10 352
7 347
7 349
5 350
2 353
2 355
2 352
2 350
2 350
2 351
2 351
2 350
2 350
2 350
2 352
2 353
2 358
2 360
2 361
2 365
2 373
3 374
3 373
3 369
3 367
3 366
3 374
5 381
5 387
6 390
6 395
6 584
6 596
7 629
7 641
7 651
7 692
6 694
6 701
7 702
7 698
7 700
6 688
6 668
6 669
6 668
6 668
6 668
6 668
6 664
6 666
6 666
6 667
6 666
6 665
6 665
6 666
6 665
6 661
6 661
5 661
5 661
5 661
5 655
5 655
5 655
5 653
5 651
5 647
5 640
5 640
5 638
5 630
5 626
5 621
5 619
5 618
5 618
5 615
5 612
5 602
5 594
5 593
5 593
6 593
6 591
6 589
6 589
6 589
6 583
6 580
6 579
6 563
6 549
6 452
6 426
6 419
6 415
6 413
6 413
6 413
6 413
6 413
6 409
6 409
6 407
6 408
6 408
6 408
6 408
6 408
6 408
6 408
6 408
6 406
6 407
6 402
6 403
6 399
6 394
6 390
6 397
7 418
7 418
7 418
7 415
7 401
5 392
7 395
6 390
6 383
6 151
6 151
5 118
5 104
7 103
7 87
7 87
7 85
6 83
10 86
10 85
10 85
10 85
10 85
10 85
10 85
10 86
10 94
10 94
10 94
8 85
8 85
8 85
8 85
8 86
8 86
8 86
8 86
8 86
8 86
8 86
8 86
8 78
9 78
9 78
9 78
9 78
9 75
9 74
9 74
12 74
12 70
12 70
12 71
14 74
14 74
14 73
15 83
14 93
14 94
14 97
14 97
14 97
13 94
13 93
13 93
13 93
13 91
13 91
13 90
13 90
13 161
13 161
13 166
13 172
13 172
13 172
13 173
13 173
13 173
13 174
15 174
15 178
15 181
15 181
15 183
15 183
15 183
15 183
15 185
15 186
15 186
15 186
15 186
15 185
15 183
15 182
15 182
15 179
15 174
15 166
13 150
13 150
13 146
13 144
13 144
13 143
11 136
11 134
11 134
11 135
11 135
11 135
11 135
11 135
11 134
11 131
9 132
9 132
8 130
8 130
8 130
8 130
8 129
8 129
8 129
8 130
8 130
8 130
8 130
8 130
9 134
9 134
9 134
9 134
9 134
9 134
9 134
9 134
9 134
9 134
9 135
9 143
9 152
7 162
7 164
6 165
6 166
6 166
5 167
5 168
5 168
4 170
4 170
3 168
3 167
3 167
3 157
3 147
3 147
3 144
3 144
3 144
3 144
3 144
3 143
3 143
3 144
3 143
3 142
3 137
3 74
3 71
3 68
3 66
3 69
3 79
3 84
3 84
3 84
3 84
1 83
1 78
1 78
1 85
1 85
2 88
2 92
2 100
2 101
3 102
3 103
3 105
3 109
3 109
3 109
3 109
3 111
3 111
3 111
3 113
3 114
3 116
3 116
3 116
3 118
3 118
3 118
3 119
3 120
3 120
3 119
4 119
4 119
4 119
4 118
4 117
4 120
4 120
4 121
4 121
4 121
4 121
4 121
4 121
4 121
4 119
4 119
4 119
4 119
4 119
4 119
4 119
4 119
4 118
6 163
6 173
6 176
6 177
6 177
6 177
6 176
5 158
5 157
5 150
5 150
5 148
5 148
6 151
6 149
4 106
4 105
4 104
4 104
4 103
4 103
4 103
4 106
4 106
4 106
4 107
4 110
4 124
4 127
4 131
5 136
5 138
6 134
8 133
8 137
9 147
9 147
9 150
9 147
9 140
9 136
9 134
9 134
9 136
9 139
9 138
9 138
8 138
8 135
7 124
7 119
7 110
7 104
7 104
7 104
6 106
6 106
6 108
6 106
6 106
6 108
6 109
6 108
6 110
6 110
6 109
6 109
6 109
6 109
6 110
6 109
6 109
6 110
6 109
6 111
5 113
5 113
5 113
5 116
5 116
5 120
5 122
5 122
5 124
5 124
5 127
5 133
5 133
5 133
6 133
6 133
6 133
6 133
6 133
10 136
10 136
10 168
10 169
10 169
10 170
10 170
10 161
10 162
10 166
10 178
10 180
10 187
10 188
10 188
10 188
6 185
6 148
6 148
5 146
5 145
5 145
5 145
5 145
5 145
5 145
6 162
6 165
6 162
7 170
8 171
8 166
8 164
6 148
4 144
4 141
4 135
4 133
4 133
4 133
4 132
4 123
4 123
4 123
4 123
3 123
3 123
3 123
3 123
4 122
4 128
4 128
4 128
4 128
4 127
4 127
4 131
4 141
4 145
4 147
4 153
4 152
4 159
4 167
34 613
34 619
34 617
34 613
34 612
34 615
34 616
34 615
34 613
34 611
35 610
35 609
35 609
35 611
35 610
5 169
5 165
5 166
5 166
5 166
5 159
5 156
5 152
5 151
5 150
4 147
4 149
4 149
4 151
4 151
4 151
3 151
3 153
3 160
3 170
3 172
3 174
3 172
3 171
3 171
3 168
3 155
3 142
3 140
3 141
3 141
3 140
3 142
4 142
7 157
7 158
8 161
8 161
8 162
88 172
88 172
89 172
89 172
89 172
89 173
89 176
89 185
87 164
88 165
88 174
86 159
86 160
86 163
86 163
9 153
7 154
9 155
9 154
8 158
8 159
8 160
8 159
8 159
8 159
8 158
8 158
8 158
8 158
8 158
7 158
7 158
7 150
7 150
7 150
7 149
7 149
7 149
7 143
7 136
7 123
7 122
9 120
9 117
9 103
9 98
9 97
9 98
9 102
9 102
9 102
9 102
9 103
9 103
9 104
9 106
9 112
7 113
7 113
9 112
9 112
9 111
9 110
9 109
9 109
9 109
9 109
9 112
11 123
11 126
11 131
11 128
11 129
11 130
11 131
11 131
11 132
11 132
11 129
11 123
11 110
12 115
13 121
13 124
13 125
13 125
13 124
13 125
13 125
13 123
13 123
13 125
13 125
12 126
11 126
11 126
10 125
10 123
10 123
10 122
10 122
10 122
10 122
10 122
10 121
10 117
9 110
9 102
9 102
9 101
9 90
10 89
10 92
10 90
10 91
9 91
9 89
7 89
7 89
7 86
7 87
7 88
7 92
7 95
7 95
7 96
7 98
7 101
7 102
7 101
7 102
7 102
7 101
7 101
7 101
7 101
7 101
7 105
8 105
8 106
8 106
8 106
8 105
8 106
8 106
8 106
8 105
8 102
8 99
8 99
8 101
8 100
8 100
8 99
8 97
8 95
8 90
8 91
8 91
6 93
6 95
6 96
6 96
6 96
6 97
6 96
5 96
5 86
4 78
4 77
4 75
4 75
4 74
4 74
4 72
4 71
4 71
4 70
4 70
4 69
4 65
3 64
2 55
2 55
2 55
2 55
2 55
2 54
2 55
2 55
2 55
2 53
2 53
2 56
2 56
2 56
2 56
2 56
2 57
2 58
3 60
3 60
3 60
3 62
3 62
3 64
3 67
3 67
3 67
2 66
2 63
2 61
2 60
4 62
4 61
4 61
4 63
4 64
4 63
4 65
4 72
4 73
4 69
4 66
4 69
4 70
4 68
4 65
4 64
4 65
4 70
4 72
4 72
4 76
4 77
3 77
3 77
3 73
3 93
3 95
3 102
3 107
3 126
4 136
4 147
4 148
4 147
4 147
4 147
4 147
4 146
4 146
4 146
4 146
4 148
4 154
4 155
4 151
4 149
4 148
4 149
4 150
4 150
4 150
4 153
4 152
4 152
4 152
4 152
4 153
4 158
4 159
4 161
4 164
4 175
4 182
4 187
4 201
4 213
4 216
4 218
4 220
4 220
4 220
4 224
4 225
4 226
5 230
5 262
5 273
5 282
5 298
5 301
5 307
5 310
5 311
5 311
5 311
5 308
5 307
4 303
4 303
4 303
4 303
4 304
4 304
4 312
4 314
4 323
4 327
4 328
3 328
3 333
2 332
2 334
2 334
2 331
2 330
2 330
2 323
2 315
2 323
2 324
2 322
4 322
4 322
4 322
4 321
4 321
4 319
4 312
4 312
4 312
4 308
4 308
4 305
6 306
6 309
5 271
3 266
3 262
3 270
3 260
3 260
3 261
3 264
3 264
3 265
3 265
4 273
4 275
3 277
2 277
2 279
4 285
6 277
6 279
6 284
6 292
6 321
8 329
9 355
9 367
9 427
9 487
9 492
9 499
9 499
9 502
9 508
9 501
9 500
9 500
9 496
9 479
9 473
249 467
250 460
250 452
251 452
251 450
251 451
251 454
251 451
251 447
251 446
251 438
251 415
251 388
251 375
251 367
251 367
11 364
11 364
11 364
11 364
11 364
11 364
11 364
11 366
11 375
12 400
12 414
12 428
12 430
12 450
12 444
12 446
12 437
13 445
13 445
13 447
13 445
13 444
13 445
13 445
13 445
13 446
13 447
13 447
13 449
13 443
13 448
13 449
13 449
13 461
13 466
13 485
13 487
13 489
13 490
13 490
27 491
27 493
27 495
27 500
27 503
28 494
28 493
28 493
28 495
28 483
28 483
28 483
29 484
29 480
29 480
15 476
15 475
14 469
13 460
13 460
13 459
14 460
13 456
11 449
11 452
11 451
11 443
8 413
8 407
6 383
5 376
5 287
5 237
5 237
5 236
5 234
5 231
5 230
5 229
5 230
5 230
5 230
5 230
5 230
5 230
5 230
5 228
9 227
10 226
10 226
10 225
11 225
11 225
11 225
11 224
11 224
11 224
11 224
11 224
11 224
11 223
11 224
11 224
11 223
11 224
11 224
11 224
11 224
11 213
10 180
10 167
9 145
9 143
9 138
9 138
9 138
9 139
9 139
9 139
9 135
9 135
9 135
9 134
9 134
9 134
9 133
9 131
9 128
9 127
9 123
9 118
10 118
10 117
10 104
10 101
10 81
10 79
10 78
10 78
10 78
10 78
10 74
10 72
10 68
9 60
9 58
9 58
9 58
10 58
10 58
10 58
10 58
10 56
10 56
10 56
10 56
10 57
11 57
11 57
11 57
11 56
10 52
11 45
12 42
13 42
14 42
14 43
14 37
14 37
14 36
14 30
14 30
14 30
14 41
14 44
14 44
14 43
14 46
14 47
14 49
14 51
14 53
14 54
15 54
17 56
17 56
17 61
14 61
13 63
13 64
13 65
13 65
13 65
13 65
13 65
13 65
13 65
13 71
13 80
13 80
13 81
13 81
14 88
14 91
15 92
15 92
15 94
15 87
15 87
15 87
15 87
15 87
15 86
15 84
15 83
15 82
15 84
15 84
15 84
15 85
15 85
15 85
15 85
15 85
15 85
15 85
15 85
15 84
13 84
13 84
13 85
12 85
12 85
12 85
12 85
12 84
12 84
12 88
12 88
12 94
13 103
13 120
13 130
13 134
13 134
13 134
13 135
13 135
13 135
13 136
13 138
13 144
13 144
13 145
13 145
13 144
14 149
14 149
14 149
14 149
14 150
14 149
12 149
11 148
9 148
9 148
9 148
9 144
9 144
9 146
9 146
10 151
10 147
14 153
14 154
14 157
14 158
14 158
14 158
14 159
26 162
26 162
26 162
25 162
23 160
23 158
22 153
22 153
22 151
22 153
22 158
23 161
23 169
23 172
23 173
23 174
23 173
23 166
23 156
23 156
23 156
23 155
22 146
22 144
21 143
21 142
21 142
21 142
21 142
21 142
21 142
21 142
21 144
21 143
21 144
22 143
22 143
22 144
22 144
22 146
22 153
22 184
22 187
22 194
22 204
22 215
22 217
22 218
22 219
22 218
22 219
22 219
22 219
22 220
23 237
23 237
23 230
23 216
22 210
22 220
22 224
22 227
22 227
22 227
22 228
22 227
22 226
22 226
22 226
22 224
22 225
21 200
21 200
21 200
21 205
21 206
20 201
20 201
20 201
20 201
20 202
20 202
20 202
20 202
20 199
20 199
20 199
20 202
20 202
20 202
20 201
19 197
19 196
15 175
15 172
15 169
15 169
14 168
14 168
11 170
2 165
1 166
1 174
1 177
1 185
1 185
1 185
1 185
1 200
1 195
1 189
1 184
1 182
1 184
1 188
1 187
1 186
1 186
1 186
1 186
1 186
1 186
1 186
1 186
1 174
1 174
1 174
1 174
1 174
1 176
1 186
1 193
1 207
1 220
1 221
0 230
0 230
0 239
0 239
0 232
0 230
0 198
0 191
0 179
0 168
0 165
0 165
0 165
0 166
0 170
0 184
1 202
1 212
1 217
1 218
1 223
1 230
1 224
1 246
1 232
1 232
1 229
1 231
1 233
1 234
1 235
1 256
1 257
3 257
5 258
5 258
5 259
5 257
5 255
5 259
5 259
5 260
5 260
5 260
5 260
5 259
5 260
5 261
5 268
5 272
5 271
5 272
5 270
5 270
5 269
5 267
5 267
5 267
5 267
5 267
5 267
5 267
5 267
5 267
5 263
7 263
7 261
7 246
7 244
7 238
7 236
7 235
7 235
7 234
7 234
7 234
7 235
7 233
7 230
8 230
6 230
6 230
6 230
6 230
6 230
6 230
6 230
6 230
6 230
6 230
6 230
6 229
6 229
6 227
6 223
6 210
6 208
6 188
6 179
6 180
6 176
6 172
6 167
6 167
6 167
6 168
6 177
6 182
6 186
7 191
7 187
7 188
7 188
7 186
7 187
7 173
6 153
6 154
6 147
6 145
6 140
6 132
6 132
6 105
6 108
6 107
6 105
6 105
2 105
2 105
2 105
2 84
2 84
2 84
2 84
2 84
2 84
2 84
2 83
2 74
2 74
2 74
2 74
2 74
2 75
2 75
2 75
2 75
2 75
2 69
2 69
2 69
2 73
2 73
2 73
2 73
2 73
2 74
2 74
2 74
2 74
2 75
2 88
2 91
2 94
2 96
2 98
2 98
2 101
2 99
2 100
2 101
2 101
2 101
2 103
2 103
2 102
2 105
1 109
1 114
1 114
1 114
1 115
1 121
1 121
1 121
1 121
1 121
1 121
1 121
1 123
1 123
1 122
1 123
1 138
1 142
2 147
2 148
2 148
2 143
2 135
2 132
2 132
2 133
2 132
2 132
2 129
1 120
1 117
1 117
1 116
1 118
1 118
1 117
1 120
1 122
1 122
1 136
1 137
1 137
1 134
1 136
1 138
1 140
1 140
1 140
1 140
1 138
1 137
1 138
1 138
1 140
1 140
1 140
1 140
1 139
1 139
1 140
1 140
1 140
1 141
1 143
1 143
1 142
1 141
1 140
1 140
1 134
1 134
2 134
3 137
3 137
4 136
4 138
6 139
10 138
10 138
10 140
10 146
13 154
15 153
21 157
21 148
21 148
21 146
21 142
21 141
21 141
22 141
22 139
22 138
22 137
22 140
22 140
22 140
22 140
22 139
22 135
22 129
22 128
22 131
22 135
22 133
22 130
23 131
23 131
23 131
23 143
23 144
22 150
23 169
24 172
24 173
24 170
24 154
24 150
24 145
24 145
24 144
24 143
25 141
25 140
25 141
26 141
26 141
27 142
29 141
29 149
29 186
29 190
29 192
29 190
29 191
29 186
29 187
29 191
29 204
29 192
28 195
28 196
28 196
28 202
28 203
28 203
28 203
28 202
28 202
28 203
28 203
28 203
28 202
28 202
28 202
28 202
28 202
28 202
28 208
28 208
28 208
28 207
28 207
28 206
28 207
28 207
28 207
28 207
29 207
29 208
30 211
29 211
27 204
27 201
26 200
22 199
22 199
19 199
19 197
18 193
18 191
16 184
15 183
10 173
10 174
10 174
10 174
11 174
11 174
11 172
10 178
10 178
10 178
10 178
10 178
11 178
11 179
11 179
11 179
11 179
11 176
11 176
11 173
11 170
12 168
12 166
11 167
11 167
11 166
10 158
10 157
9 147
8 122
7 122
7 116
7 115
7 115
7 115
7 115
7 115
7 115
7 115
6 115
6 115
6 124
8 126
8 130
8 134
7 130
7 116
8 90
10 95
15 96
16 96
16 94
16 94
16 92
16 81
16 71
16 69
17 69
17 69
17 69
17 62
17 62
17 62
18 62
18 62
18 60
18 61
18 61
18 61
18 61
18 61
18 61
17 61
17 61
17 61
17 53
17 53
17 53
17 56
17 56
17 54
17 56
17 57
17 58
17 57
16 57
16 71
16 76
16 80
16 83
16 110
16 120
16 131
16 131
16 131
16 133
16 133
16 132
16 132
16 132
16 132
16 132
16 132
16 132
15 136
15 137
15 139
15 133
15 135
15 135
15 135
15 133
14 138
14 137
14 137
14 137
14 137
14 135
14 135
14 137
14 136
13 136
13 137
13 137
13 136
14 138
14 138
14 142
14 141
14 144
14 145
14 147
14 147
14 147
14 151
14 151
14 151
14 150
14 156
14 156
14 159
11 146
11 160
11 157
10 155
9 155
4 154
4 152
4 146
4 146
4 146
4 146
4 146
4 146
4 146
4 146
4 146
3 148
3 149
3 149
3 149
3 149
2 149
2 149
2 148
2 149
2 149
2 149
2 149
2 149
2 149
2 149
2 149
2 150
2 150
2 150
2 150
2 151
2 152
2 152
2 152
2 148
2 147
2 148
2 147
2 148
2 130
3 128
3 125
3 120
3 72
3 71
3 67
3 67
3 67
3 67
3 64
3 64
3 64
3 64
3 64
3 64
3 64
3 64
3 67
3 70
4 74
4 77
4 75
4 76
4 76
4 76
4 71
4 72
4 72
4 72
4 72
4 72
4 72
4 71
4 71
4 72
4 72
4 72
4 72
3 73
3 71
53 160
53 160
53 157
53 157
53 157
53 157
53 157
54 152
54 153
54 153
54 155
54 149
54 148
54 144
54 142
54 134
52 134
3 41
3 41
3 41
4 40
4 42
3 43
3 44
3 44
3 44
3 44
3 44
3 45
3 45
3 42
4 43
4 43
4 43
4 43
4 43
4 43
4 43
4 42
4 42
5 45
5 48
5 48
5 49
5 49
5 49
4 47
4 47
4 47
4 47
4 46
4 44
4 44
4 44
4 43
4 43
4 44
4 44
4 42
3 42
3 42
3 40
3 40
4 40
4 40
4 44
6 50
6 52
6 55
6 56
7 58
7 58
7 58
7 58
7 59
7 60
7 60
7 54
6 51
6 46
6 46
6 46
6 45
6 45
6 45
6 45
6 44
6 44
6 44
5 44
5 43
5 43
5 44
5 47
5 46
5 46
5 45
5 45
5 44
5 45
5 47
6 56
6 59
6 65
6 68
7 68
7 67
7 67
7 67
7 67
7 64
7 64
7 64
7 65
7 69
7 74
7 75
7 76
6 77
6 76
6 73
6 73
6 73
6 74
6 79
6 79
6 79
6 78
6 78
6 78
6 78
6 78
6 78
6 79
6 80
6 81
6 81
6 81
6 81
6 82
5 79
5 74
5 74
5 74
5 75
5 76
5 76
5 77
5 79
5 79
5 79
5 80
5 80
5 80
5 80
5 80
5 92
5 96
5 102
5 102
5 105
5 139
5 139
5 139
5 135
5 130
3 130
3 129
3 127
3 125
2 125
2 126
2 126
2 129
2 128
2 131
2 140
2 110
2 110
2 116
2 121
2 122
2 126
2 126
2 127
2 128
2 129
2 130
2 131
2 131
2 131
2 131
2 130
2 127
2 127
2 127
2 127
2 127
2 128
2 127
1 123
1 108
1 107
1 112
1 111
0 113
0 116
3 120
3 124
3 126
3 126
3 126
3 127
3 126
3 121
3 117
3 117
3 116
3 116
3 116
3 119
3 117
3 117
3 116
3 113
3 113
3 113
3 113
3 114
3 117
3 124
3 125
3 125
3 125
3 125
3 125
3 129
3 131
3 131
3 130
3 130
3 132
3 132
3 133
3 134
3 133
3 133
3 132
3 133
4 191
4 191
4 191
4 191
4 191
4 190
4 190
4 176
4 170
4 167
4 167
4 164
4 162
4 163
4 165
3 108
3 107
3 106
3 105
3 105
3 105
3 105
3 102
3 102
3 102
3 101
3 94
3 84
3 84
3 85
3 82
3 78
3 78
3 74
3 74
3 74
3 75
3 77
3 76
3 77
3 108
3 109
3 109
3 109
3 108
3 108
3 109
3 110
3 111
3 111
3 111
3 110
3 119
3 120
3 116
3 114
3 113
3 111
0 107
0 104
3 102
3 102
3 100
3 99
3 99
3 98
3 97
3 98
3 98
3 98
3 98
3 96
3 96
3 110
3 119
0 122
0 123
0 126
0 126
2 152
2 170
2 164
3 168
4 169
4 171
4 172
4 173
4 173
4 171
4 176
4 176
4 176
4 174
4 174
4 170
4 169
4 169
4 169
4 169
4 169
4 169
4 169
4 169
4 169
4 168
4 167
4 167
4 166
4 166
4 165
4 165
4 165
4 165
4 164
4 161
4 161
4 162
4 162
4 162
4 162
4 162
4 162
4 161
4 162
4 164
4 165
4 165
4 175
4 190
4 197
4 199
4 202
4 207
4 207
4 207
4 207
4 206
4 203
4 203
4 201
4 165
4 166
4 166
4 166
4 166
5 166
5 165
5 166
5 164
5 164
5 164
5 163
5 160
5 159
5 159
5 162
6 163
6 163
6 170
6 173
6 174
6 174
6 174
6 177
6 180
6 180
6 183
6 188
6 190
6 189
6 189
6 188
6 187
6 170
6 152
6 146
2 146
2 146
2 143
2 120
2 105
2 105
2 101
2 101
2 101
2 101
2 99
2 97
2 97
2 94
2 94
2 94
2 94
2 99
2 99
2 99
2 101
2 102
2 103
2 103
2 105
2 105
2 105
2 105
2 106
2 107
2 107
2 111
2 111
2 122
2 123
2 123
2 122
2 122
2 123
2 124
2 127
2 127
2 129
2 129
2 129
2 127
2 127
2 122
2 121
2 120
2 113
2 95
2 89
2 86
2 85
2 83
2 80
2 82
2 82
2 83
2 83
2 84
2 88
2 93
2 95
2 96
2 108
2 111
2 117
1 122
1 131
1 147
1 153
4 167
4 175
4 180
4 183
4 185
4 184
4 185
5 185
7 198
7 193
9 195
15 225
15 227
19 229
20 233
20 235
20 237
20 236
20 228
20 229
20 227
20 229
20 229
20 230
20 230
20 230
20 230
20 232
20 232
20 232
20 232
20 232
20 239
20 239
20 239
20 239
20 239
20 239
20 239
20 242
20 244
20 262
20 271
20 275
20 272
20 271
20 270
20 269
20 269
20 269
20 269
20 270
20 270
20 271
20 272
20 270
20 272
20 278
20 272
21 265
21 253
24 251
24 251
24 252
24 249
24 249
24 249
24 247
24 247
24 248
24 248
24 249
24 249
24 249
24 252
24 252
24 252
22 251
22 252
22 252
22 252
22 252
22 252
23 252
23 250
23 253
23 253
23 253
23 248
23 243
23 238
23 237
22 231
22 206
21 199
21 193
21 192
21 192
20 191
19 183
18 167
18 159
18 157
18 155
18 154
16 153
16 151
14 146
11 138
11 139
10 138
1 107
1 108
1 96
1 93
1 93
1 93
2 88
2 88
2 88
2 88
2 85
2 85
2 85
2 85
2 85
2 84
2 83
2 83
2 83
2 83
2 81
2 76
2 76
2 76
2 76
2 77
2 79
2 80
2 87
2 85
2 64
2 61
2 65
2 68
2 68
2 69
2 68
2 67
2 67
2 67
2 61
2 66
2 66
2 66
2 66
2 66
1 63
1 62
1 61
1 61
1 63
1 63
1 63
1 63
1 63
1 76
1 78
1 79
1 78
1 78
2 78
2 78
2 78
2 75
2 75
2 75
2 75
2 73
4 74
4 74
5 76
5 77
5 77
5 78
5 73
5 77
5 79
5 79
5 79
5 80
5 79
5 79
5 79
5 79
5 78
5 78
5 78
5 76
5 76
5 76
5 76
5 76
5 75
5 75
5 75
5 73
5 72
5 72
5 71
5 71
5 70
5 73
5 73
5 73
5 73
5 73
4 73
4 74
4 74
4 74
4 76
4 76
4 76
4 76
4 77
4 77
4 77
4 78
4 78
4 78
4 81
4 81
4 82
4 84
4 84
4 84
4 80
4 79
4 69
4 66
4 61
4 59
4 52
4 50
4 50
4 50
4 50
4 50
4 50
4 50
4 50
4 46
4 46
4 46
4 46
4 46
4 46
4 52
4 52
4 52
4 50
4 50
4 50
4 50
4 50
3 37
3 36
3 41
3 43
3 43
4 44
4 52
4 54
4 55
4 60
4 61
4 64
2 65
33 66
33 67
32 67
32 67
32 68
32 65
32 67
32 63
32 62
32 63
32 63
32 63
32 63
32 62
32 62
32 63
1 62
1 62
1 65
2 67
2 68
2 69
2 69
2 70
2 73
2 73
2 73
2 74
2 75
2 75
2 75
2 75
2 75
2 72
2 73
2 74
2 78
3 80
3 81
3 81
3 81
3 80
4 79
4 79
6 80
6 80
6 82
6 82
6 82
6 82
6 82
6 80
6 79
6 79
6 78
6 76
6 76
5 79
5 81
5 87
5 87
5 87
5 88
5 88
5 91
5 91
5 91
5 91
5 91
5 91
5 91
5 94
5 94
6 97
6 98
6 99
6 100
6 100
6 98
6 95
6 95
6 96
8 100
8 100
9 104
9 106
9 106
9 104
9 103
8 96
8 94
8 90
8 88
8 77
8 75
8 75
8 73
8 72
8 72
8 72
8 72
8 72
8 72
8 72
8 71
8 71
8 71
8 71
8 71
8 70
8 71
8 71
8 71
8 71
8 70
8 70
7 69
7 66
7 65
7 64
7 63
7 62
7 62
7 60
7 54
7 54
7 54
7 54
8 57
8 64
8 74
8 76
8 82
8 82
8 81
8 78
8 74
7 74
7 72
7 72
7 72
7 71
5 71
5 70
5 69
5 72
5 71
6 68
6 69
6 69
6 69
6 68
6 67
6 66
6 66
6 66
6 63
5 51
5 51
5 46
5 46
5 46
5 46
5 46
5 46
5 45
5 45
5 45
5 44
5 44
3 44
3 42
3 46
3 52
3 52
3 52
3 54
3 53
3 53
3 53
3 53
3 52
3 52
2 52
2 52
2 52
2 52
2 52
2 52
2 52
2 52
2 52
2 52
2 52
2 52
2 52
2 52
2 51
2 53
2 53
2 53
2 53
2 53
2 53
2 53
2 53
2 53
2 53
2 52
2 51
2 51
2 51
2 51
2 52
2 52
2 52
2 52
2 52
2 52
2 52
2 53
2 61
2 61
2 64
2 68
2 70
2 71
2 70
1 64
1 55
1 52
1 53
1 50
1 50
1 50
1 52
1 51
1 54
1 54
1 56
1 56
1 51
1 51
1 50
1 51
1 51
1 51
1 51
1 51
1 51
1 52
1 53
1 53
1 53
1 53
1 53
1 53
1 53
1 54
1 72
1 74
1 78
1 82
1 85
1 88
1 95
1 106
1 202
4 276
4 349
5 386
5 419
5 436
6 470
7 491
9 624
10 640
10 650
10 655
11 670
11 670
11 670
11 674
11 679
11 684
11 687
11 688
11 694
11 696
10 702
18 709
18 713
18 715
19 722
20 722
23 738
23 739
23 739
23 738
23 738
23 738
23 738
23 738
23 740
23 741
15 736
15 737
15 737
15 737
15 737
15 737
15 736
15 737
15 738
15 739
15 740
16 741
17 744
17 744
17 745
17 744
17 739
17 736
17 735
17 733
18 734
18 735
18 737
18 736
19 745
19 745
19 747
19 749
19 772
19 799
19 808
19 822
19 823
19 822
19 822
19 820
19 823
19 824
20 824
27 845
27 845
26 843
26 843
27 844
27 853
27 855
27 856
27 854
27 857
27 856
27 859
27 859
27 858
27 855
27 829
27 827
27 827
27 819
27 815
27 809
27 799
26 752
25 541
22 460
22 451
22 461
23 467
23 470
23 448
23 438
19 286
19 279
19 278
19 277
19 275
20 278
20 278
20 272
20 270
20 264
20 262
20 259
20 254
20 251
20 251
20 251
20 250
20 248
19 250
18 312
16 306
15 312
15 313
15 314
15 315
15 315
15 319
15 320
14 320
14 320
14 319
14 319
14 319
14 319
14 321
14 321
14 320
14 318
14 317
14 317
14 318
13 316
13 316
13 316
13 316
13 316
13 319
13 324
13 333
13 337
12 346
12 347
12 346
12 352
11 342
11 339
11 328
11 314
11 300
11 274
11 261
11 249
11 247
11 246
10 246
10 245
9 245
8 244
8 243
2 217
2 217
2 216
2 216
2 216
2 208
2 210
2 209
2 241
2 237
2 237
2 235
2 235
2 235
2 235
2 238
2 239
2 242
2 246
2 248
2 248
2 252
2 252
2 251
2 253
2 255
1 249
1 262
1 260
1 259
0 260
0 261
1 262
1 255
1 257
1 258
1 255
1 256
1 256
1 258
1 267
5 289
5 290
5 294
9 300
9 300
9 301
9 308
9 305
9 298
9 247
9 296
10 295
10 318
10 327
10 337
10 346
10 356
10 354
6 354
6 352
6 351
6 351
6 351
6 351
6 351
6 351
5 353
5 356
5 357
6 357
6 355
6 361
6 355
6 355
6 352
6 347
6 354
6 350
6 342
6 340
6 335
6 332
6 330
6 332
6 331
6 302
6 302
6 302
6 302
6 304
6 307
6 308
6 314
7 319
7 319
7 318
8 318
8 319
8 329
8 332
8 333
8 338
8 337
8 342
8 345
8 347
8 347
8 347
8 348
8 351
8 351
8 352
8 352
8 352
8 351
8 349
8 344
8 343
8 341
8 341
8 334
8 340
8 383
8 380
8 375
8 374
8 364
8 362
7 368
7 368
7 367
7 367
7 367
7 365
7 362
7 364
10 364
10 365
10 366
10 352
6 331
6 328
6 326
7 350
8 346
8 361
8 359
8 350
8 326
8 274
8 255
8 249
8 245
8 236
8 231
8 223
8 218
8 218
7 193
7 195
7 176
7 176
7 176
7 176
7 176
7 176
7 176
6 174
6 174
6 174
6 174
6 167
6 166
6 163
6 163
6 160
6 151
6 150
6 149
6 149
6 149
6 149
6 149
6 147
6 146
6 146
6 146
6 146
6 146
6 142
6 138
5 136
4 128
4 127
4 127
4 127
4 127
4 126
5 116
5 114
5 114
5 107
5 104
7 100
7 101
7 98
7 95
7 95
7 95
7 95
7 95
7 94
7 94
7 94
7 92
6 93
6 93
6 93
4 92
4 92
4 89
4 75
4 31
4 30
4 30
4 31
4 28
4 24
4 25
4 25
4 25
4 25
4 25
4 26
4 28
4 26
1 25
1 23
1 22
1 19
1 19
1 19
1 20
1 19
0 21
0 27
0 28
0 30
0 33
0 36
0 42
0 42
0 43
0 42
0 44
0 46
0 45
1 55
1 56
1 55
1 56
1 56
1 56
1 56
1 57
1 57
1 57
1 57
1 57
1 57
1 59
1 62
1 63
1 63
1 64
1 67
1 67
1 67
1 67
1 68
1 69
1 71
1 71
1 71
1 78
1 81
1 85
1 88
1 90
1 95
1 95
1 101
2 115
2 151
2 153
2 166
2 177
3 212
3 225
3 232
3 239
3 239
3 240
3 241
3 244
3 246
3 246
3 247
3 248
3 248
3 249
3 249
3 249
3 249
3 249
3 248
3 248
3 248
3 248
3 248
3 248
3 248
3 248
3 248
3 248
3 245
3 245
3 245
3 245
3 244
3 244
3 244
3 244
3 243
3 243
3 242
3 241
3 242
3 242
3 244
3 245
3 245
3 245
3 245
3 241
3 231
3 227
3 226
3 224
3 222
3 220
3 220
3 220
3 217
3 217
3 216
3 216
2 206
2 206
2 206
2 205
2 205
2 204
2 204
2 204
2 204
2 204
2 203
2 203
2 203
2 200
17 217
17 216
17 215
17 215
17 211
17 211
17 209
17 210
17 209
17 205
17 201
17 201
17 201
17 192
17 183
17 180
2 161
2 160
2 152
2 151
2 139
1 120
1 95
1 94
1 78
1 60
0 21
0 14
0 13
0 13
0 13
0 12
0 11
0 8
0 7
0 7
0 5
0 6
1 7
1 7
1 7
1 7
1 7
1 7
1 7
1 7
1 7
1 7
1 7
1 6
1 6
1 6
1 6
1 6
1 6
1 5
1 5
1 5
1 5
1 5
1 5
1 5
1 5
1 5
1 7
1 8
1 8
1 8
1 8
1 8
1 9
1 9
1 9
1 9
1 9
1 11
1 13
3 15
12 106
12 109
12 118
12 119
12 120
12 120
12 120
12 120
12 120
12 120
12 120
12 120
12 120
12 121
12 122
12 122
12 122
12 122
12 122
12 124
12 124
12 125
13 126
13 139
13 143
16 164
16 165
16 167
17 167
17 166
17 169
17 170
17 171
17 171
20 173
20 175
20 175
20 175
20 181
20 182
20 183
20 183
20 183
20 183
20 183
20 183
20 183
20 183
20 186
20 188
26 202
26 204
26 206
26 209
26 210
26 210
26 210
26 210
26 209
26 208
25 209
25 209
25 212
25 212
25 212
25 212
19 212
19 212
19 211
19 215
19 218
19 220
19 221
19 221
19 222
19 224
19 224
19 225
19 225
19 226
19 232
19 235
19 242
19 243
20 267
20 268
20 266
20 269
20 269
20 270
20 270
20 277
20 295
20 297
20 298
20 298
18 304
18 306
18 302
16 299
8 199
8 201
8 201
8 201
9 201
9 205
9 206
9 180
9 180
9 183
9 185
9 186
9 186
9 186
9 187
9 186
9 186
9 186
9 187
9 185
9 185
9 180
9 179
9 169
8 166
7 149
7 150
7 153
6 153
4 153
4 151
4 151
4 150
3 150
3 148
3 145
3 143
3 143
3 136
3 136
3 135
3 136
3 135
3 134
3 135
3 135
3 135
3 135
3 132
3 131
3 116
3 116
3 116
3 115
3 114
3 114
3 116
3 113
3 113
5 116
5 117
17 179
18 182
20 187
24 188
24 188
24 187
24 190
25 188
25 185
25 184
25 181
25 182
25 183
25 182
25 188
25 188
25 188
25 188
25 187
25 182
25 178
25 171
25 171
24 139
25 139
25 138
25 138
26 139
27 144
27 146
29 150
32 151
42 162
67 161
68 164
70 165
73 161
73 162
73 159
73 159
73 156
73 156
73 158
72 158
73 155
73 151
74 153
74 154
74 153
74 153
74 153
74 155
74 155
74 154
74 154
74 154
74 154
74 155
74 155
74 156
73 158
73 158
73 156
73 156
75 155
75 155
75 152
75 153
75 155
75 156
75 159
75 170
75 180
75 189
75 196
75 198
75 198
75 199
75 199
75 198
75 197
75 197
75 197
75 197
75 197
74 197
74 197
74 198
74 199
74 201
74 201
74 201
74 201
74 201
74 201
74 202
74 205
73 204
72 201
72 193
56 131
57 134
57 134
56 139
56 139
56 139
56 140
56 142
56 142
58 193
58 193
58 192
58 191
58 193
58 186
58 186
58 185
58 185
58 185
58 186
58 186
58 186
58 186
58 186
55 137
55 139
55 138
54 139
50 129
49 127
44 125
37 123
32 111
5 105
5 105
5 103
5 103
5 102
5 102
5 102
5 102
5 101
5 101
5 101
5 102
5 102
5 102
5 100
5 100
5 100
5 100
6 98
6 98
6 100
6 103
6 105
6 105
6 105
6 105
6 105
6 100
6 99
4 100
4 99
4 96
4 95
4 95
4 95
4 94
4 90
4 75
4 62
4 58
4 54
4 54
4 54
4 57
4 59
5 64
5 69
5 69
5 69
5 73
5 80
5 80
8 82
8 84
8 83
8 82
8 82
8 83
9 100
9 146
9 208
9 221
11 243
13 253
13 254
14 258
14 257
14 257
12 253
12 252
12 247
12 247
12 247
12 246
12 249
12 256
12 258
12 259
12 261
15 268
15 267
16 268
16 273
15 283
16 292
17 298
17 310
23 355
24 360
25 363
25 365
25 363
25 362
25 363
25 364
25 365
25 366
25 366
25 366
25 366
25 366
25 366
26 366
26 367
26 367
26 367
26 367
26 366
26 369
26 369
26 370
26 370
26 370
26 370
26 370
26 370
25 369
25 369
25 367
25 364
26 364
26 363
27 364
27 365
27 363
27 363
27 371
27 376
27 381
27 382
27 382
27 383
27 390
27 401
42 581
43 591
44 601
43 607
43 608
42 611
42 612
43 614
43 619
43 618
43 618
43 615
42 610
42 634
42 635
42 631
42 644
42 653
39 652
39 664
39 674
39 684
38 687
38 685
36 636
35 588
35 557
35 545
35 540
35 536
38 582
37 581
37 581
37 581
37 581
37 581
37 581
37 584
39 584
39 582
40 581
40 572
40 571
40 571
39 575
36 530
57 537
67 533
67 521
66 519
64 511
63 504
62 480
58 445
58 444
59 448
59 450
59 451
60 452
61 452
61 451
61 451
61 453
61 458
61 460
61 460
63 463
63 463
62 463
62 467
62 506
62 539
62 539
62 539
62 550
62 558
62 558
62 562
62 564
62 564
62 565
62 564
62 580
62 587
62 589
62 590
62 595
62 628
62 638
62 637
62 639
62 638
62 622
62 606
62 604
62 603
62 602
62 600
62 591
61 579
46 394
45 394
45 416
45 417
45 416
45 413
45 415
44 413
45 414
45 419
45 421
45 426
45 432
45 410
45 407
45 409
45 421
45 416
45 404
45 390
45 380
45 370
45 369
45 364
45 369
45 368
45 373
44 374
44 375
44 375
44 376
44 376
44 377
44 377
44 377
44 377
44 372
44 372
42 372
42 378
39 377
37 376
35 377
33 377
26 372
25 362
13 361
4 361
4 361
4 363
4 364
4 365
4 365
3 365
3 364
3 362
3 358
3 354
3 356
3 358
4 412
4 476
5 512
5 508
5 509
6 516
5 513
5 517
5 509
5 499
5 445
5 435
5 435
5 434
5 424
5 416
5 414
5 416
5 422
5 425
5 426
5 428
5 416
5 416
5 418
5 431
5 428
5 400
5 401
5 402
5 402
5 403
5 403
5 401
5 401
5 401
5 401
5 401
5 401
5 401
5 400
5 399
5 376
5 376
5 377
5 376
5 373
5 372
4 362
4 355
4 354
4 346
4 338
4 339
4 333
4 322
4 297
4 296
4 293
4 294
4 294
5 294
5 295
5 294
5 290
5 292
5 285
5 285
12 285
12 282
12 282
12 282
13 282
13 284
13 284
13 285
13 285
13 289
13 289
13 283
13 283
13 283
13 282
6 279
6 280
6 283
6 281
6 279
6 279
6 275
6 274
6 274
6 290
6 290
6 291
6 291
7 292
6 291
6 289
6 286
5 169
5 136
5 122
5 133
5 136
3 126
3 127
3 128
3 135
3 139
3 157
2 221
2 231
2 236
2 235
2 237
2 244
2 254
2 249
2 248
2 247
2 239
2 230
2 228
2 224
2 212
2 208
2 196
2 196
2 196
2 195
2 194
2 194
2 194
2 197
2 197
2 198
2 199
2 199
2 199
2 199
2 199
2 199
2 201
2 201
2 201
2 201
2 201
2 201
2 204
2 204
2 207
2 211
2 219
2 221
2 221
2 223
2 226
2 230
1 236
0 249
0 254
0 257
0 258
0 259
0 256
0 259
0 259
2 259
2 263
2 262
2 260
2 260
2 256
2 256
2 256
3 255
3 255
3 255
3 255
3 255
3 255
3 255
3 255
3 254
3 251
3 251
3 250
3 250
3 250
3 250
3 249
2 231
3 236
3 238
3 242
3 240
3 240
3 240
3 238
3 239
3 251
3 256
3 242
5 258
5 256
5 257
5 254
5 247
5 236
5 213
5 162
5 160
5 157
5 161
5 162
5 163
5 166
5 166
5 168
5 170
5 170
5 170
5 170
5 170
5 168
5 168
5 170
5 170
5 170
5 171
5 171
5 172
5 172
5 178
5 202
6 213
6 221
6 228
6 229
7 232
7 233
7 233
7 231
7 232
7 233
7 243
7 270
7 271
7 269
7 267
7 264
7 260
7 276
7 278
7 277
7 275
7 272
7 264
7 264
7 255
7 255
7 252
7 252
7 252
7 252
7 251
7 252
5 253
5 251
5 252
5 259
5 273
5 274
10 290
10 290
11 292
11 292
11 291
11 291
11 291
11 290
11 289
11 289
11 289
11 289
11 289
11 289
10 289
10 287
5 278
5 278
5 275
4 271
3 269
3 266
3 265
5 265
5 267
5 270
5 268
5 255
5 251
5 236
5 229
5 226
5 227
5 226
5 225
5 225
5 221
5 220
5 217
5 216
5 213
5 213
5 212
5 209
5 207
5 206
5 204
5 204
5 204
5 204
5 204
5 205
5 213
5 214
5 223
5 225
3 225
3 223
3 223
3 223
3 216
3 175
4 150
4 144
4 144
4 144
4 143
4 143
4 146
4 146
4 146
4 146
4 143
4 123
4 122
4 121
6 122
6 121
6 120
6 105
6 105
6 105
6 105
6 105
6 102
6 90
6 90
6 91
6 90
6 90
6 90
6 90
6 89
6 88
6 87
6 85
6 80
5 66
5 61
5 59
5 56
5 56
5 56
5 56
5 56
5 56
5 56
5 56
5 56
5 59
5 59
5 60
5 60
5 61
5 61
5 61
5 60
5 59
5 61
5 61
6 71
6 76
6 77
4 77
4 75
4 74
4 75
4 70
4 70
4 70
4 70
4 70
4 68
4 69
4 69
4 71
4 71
4 76
4 76
4 76
4 76
4 76
4 75
4 73
4 73
4 73
4 73
4 73
4 74
4 79
4 77
4 77
9 67
9 66
9 61
9 59
9 59
9 57
9 57
9 57
9 57
9 58
8 57
8 57
8 57
8 57
8 58
3 59
3 56
3 56
3 55
3 56
3 55
3 56
3 57
1 57
1 56
1 56
2 58
2 56
2 56
2 57
2 57
2 60
2 61
2 62
2 61
2 60
2 60
2 60
2 60
2 60
2 60
2 60
2 61
2 61
2 62
2 65
2 65
2 71
2 71
2 74
3 76
3 76
3 79
3 80
3 80
3 79
3 84
3 82
3 82
3 86
3 89
3 87
3 87
3 87
3 88
2 87
2 87
2 83
1 74
1 69
1 68
1 68
1 68
1 69
1 70
1 70
1 71
1 71
1 70
1 69
1 69
1 68
1 70
1 68
1 69
1 65
1 64
1 64
1 64
1 64
1 64
1 64
1 64
1 64
1 64
1 64
1 62
1 57
1 58
1 64
1 65
1 66
1 69
1 69
1 69
1 71
1 81
1 91
2 173
2 187
2 191
3 202
3 207
3 208
3 209
3 208
3 208
3 209
3 209
3 209
3 209
3 207
3 205
3 205
3 205
3 205
2 203
2 203
2 203
2 203
2 203
2 202
2 201
2 200
2 200
2 202
2 202
2 204
2 217
2 219
2 219
2 220
2 223
2 224
2 238
2 259
2 299
2 310
2 320
2 319
2 325
2 335
2 335
2 333
2 339
2 342
3 336
5 343
6 343
6 343
6 345
6 345
6 348
6 356
6 356
6 356
6 356
9 356
9 356
9 357
9 360
8 361
85 369
84 368
84 367
84 367
84 368
84 372
84 377
84 377
84 380
84 380
84 380
84 380
84 384
84 389
84 389
7 385
7 385
7 394
20 399
20 402
20 407
20 478
20 488
20 504
20 506
20 507
20 515
20 506
20 507
20 516
20 518
20 522
20 533
5 526
5 514
8 532
6 437
6 441
6 457
6 503
6 519
6 520
6 522
6 522
6 522
6 520
6 523
6 516
6 519
6 519
6 520
6 527
6 529
6 541
6 544
6 544
6 545
6 545
6 542
6 537
6 539
6 537
45 541
45 544
45 545
45 543
45 530
45 530
46 543
46 542
46 539
46 539
46 524
46 500
46 476
46 471
46 491
7 499
7 540
7 537
7 537
7 538
7 536
6 525
6 533
7 550
7 547
7 558
7 559
8 563
12 581
12 574
12 584
13 587
14 592
12 592
13 595
13 596
13 596
13 596
13 594
13 596
13 599
13 604
13 603
13 595
13 595
13 595
13 595
13 595
13 596
12 598
12 597
12 589
12 588
12 587
12 582
12 572
12 574
12 570
12 560
12 490
12 484
12 475
12 474
12 472
12 468
12 459
12 455
12 445
12 487
12 492
12 497
12 498
12 506
9 476
9 483
9 466
9 452
9 414
9 399
9 405
9 405
9 405
9 407
9 408
9 409
9 442
9 447
9 454
9 454
9 441
10 430
10 432
10 435
10 438
10 439
10 439
12 437
12 437
12 436
12 434
12 434
12 433
12 432
12 432
12 431
12 430
13 434
13 441
15 516
15 563
15 581
13 585
13 580
14 575
14 550
14 539
14 491
14 491
14 490
14 490
14 477
14 473
14 474
13 446
13 442
13 442
13 440
9 438
8 418
8 416
8 415
6 412
7 415
6 417
6 416
6 415
6 414
6 411
6 411
6 425
6 431
6 427
6 429
6 430
6 430
6 431
6 434
6 470
6 475
6 478
6 483
6 495
6 500
6 501
6 507
6 504
6 503
6 505
6 507
6 507
6 506
6 510
6 517
6 519
6 518
6 517
6 517
6 508
6 465
6 462
6 456
6 453
6 446
6 432
6 429
6 431
6 436
6 438
6 437
6 434
6 434
6 435
6 433
6 434
6 427
6 380
6 381
6 383
4 388
4 397
3 399
3 403
3 405
3 405
3 407
3 416
3 424
4 429
4 459
4 466
4 478
4 488
4 492
2 500
2 504
2 512
2 510
2 494
2 474
3 493
4 603
4 652
9 673
8 675
8 670
8 676
8 679
8 680
8 679
8 682
8 683
8 684
8 687
8 688
8 690
8 691
8 691
8 691
8 694
8 694
10 699
10 714
10 712
10 724
10 724
10 724
10 728
10 730
10 728
11 705
11 703
12 719
12 721
12 720
12 720
12 719
12 723
12 663
12 667
12 662
12 659
12 648
12 647
12 643
10 645
10 645
10 645
10 643
10 643
10 643
10 644
10 651
10 652
10 653
10 653
10 653
10 653
10 654
10 657
10 657
10 668
10 672
10 672
10 675
10 671
10 653
9 645
9 646
9 647
9 647
9 647
9 647
9 649
11 691
11 687
11 687
11 682
11 680
11 662
13 652
13 643
13 643
14 642
14 640
15 637
14 635
15 629
15 617
15 589
15 587
16 570
16 560
15 478
14 475
14 419
14 389
14 344
14 338
11 299
11 228
11 220
11 219
11 219
11 218
11 219
17 234
17 237
18 235
18 236
18 233
18 234
21 240
26 244
26 219
26 212
26 208
26 207
26 207
25 205
25 205
24 194
24 191
24 189
24 189
28 188
28 188
28 189
28 186
28 185
22 191
22 192
22 192
22 192
22 193
22 193
22 192
22 184
22 184
22 185
22 186
22 188
22 193
22 194
22 194
22 197
22 197
22 200
22 189
22 188
22 186
24 210
23 207
24 210
24 203
24 204
24 198
24 199
24 194
24 192
24 190
24 181
24 180
24 180
24 180
24 180
22 158
22 158
22 157
22 135
22 133
22 132
22 132
21 131
21 132
21 132
21 132
21 133
21 136
21 134
16 127
16 125
16 122
16 120
16 123
16 122
15 123
15 122
15 135
15 142
15 141
15 143
15 142
15 141
15 140
16 141
16 144
16 144
16 139
16 139
16 138
16 140
16 140
16 140
16 141
16 139
10 117
11 119
10 120
10 123
10 122
9 128
6 117
6 117
6 117
6 117
6 116
6 124
6 124
7 133
7 136
7 140
7 139
7 139
7 139
3 141
3 142
3 139
3 139
3 177
3 177
3 179
3 182
3 190
3 195
4 198
5 199
5 199
5 200
5 200
5 198
5 198
5 192
5 196
5 195
5 193
5 192
5 188
5 187
5 187
5 187
5 187
5 188
4 183
4 186
4 187
4 187
4 218
4 227
4 229
4 234
5 236
6 266
6 277
6 285
6 296
6 300
6 300
6 298
6 301
6 301
6 301
6 301
6 301
6 301
6 301
6 301
6 298
6 298
6 298
6 297
6 297
6 296
6 296
6 291
6 291
6 290
6 343
6 324
6 324
6 327
6 327
6 328
6 328
6 326
6 323
6 323
6 323
6 323
6 325
6 326
6 328
6 330
6 330
6 330
6 331
6 331
5 331
5 328
5 328
5 327
5 321
5 321
5 321
5 322
5 324
5 325
9 319
9 318
8 307
8 307
8 308
8 308
8 308
8 308
8 307
8 305
8 305
8 301
8 248
8 245
7 242
3 242
3 242
3 242
3 242
2 241
2 240
2 240
2 239
2 239
2 239
2 238
2 235
3 257
4 260
4 262
4 274
4 276
4 280
4 279
4 280
4 279
4 279
4 274
4 273
4 267
4 231
4 224
4 220
4 219
4 218
4 185
4 176
4 181
4 180
4 180
4 180
4 182
4 179
4 179
4 179
6 180
6 179
6 179
6 183
5 183
5 183
5 183
5 183
5 183
5 184
5 184
5 191
5 191
5 190
7 191
7 132
6 128
5 122
5 120
4 121
4 121
4 121
4 121
4 121
4 121
4 120
4 119
4 119
4 118
4 112
4 110
4 110
4 110
4 110
4 109
4 112
4 112
4 112
4 112
6 112
6 111
6 111
6 113
6 147
6 156
6 173
6 175
6 178
6 190
6 187
6 187
6 186
6 254
6 260
6 262
6 259
6 266
6 272
6 294
6 295
6 295
6 296
6 297
8 311
8 315
8 330
8 348
8 353
8 357
7 361
7 365
7 366
6 341
6 341
6 334
6 325
6 324
8 323
8 323
8 322
8 324
8 324
8 324
9 323
9 329
9 330
9 329
10 331
11 342
11 338
11 334
11 332
9 331
9 336
9 338
9 340
9 340
9 342
9 342
9 350
9 350
9 351
9 352
9 350
9 351
9 352
9 352
9 352
9 355
9 356
9 362
9 352
8 352
8 354
7 354
7 354
7 357
7 358
7 358
7 359
7 359
7 357
7 358
7 358
7 357
7 357
7 356
7 353
7 355
7 354
7 353
7 355
7 355
7 355
5 354
5 352
5 351
5 350
6 349
6 348
6 349
6 346
6 335
6 307
6 298
6 288
6 288
6 285
6 274
6 331
6 333
6 257
6 250
6 251
6 253
6 259
11 283
12 291
12 300
12 306
12 311
12 320
12 328
10 318
10 318
12 304
12 290
12 289
12 287
12 294
12 291
12 305
12 308
13 325
13 330
13 337
13 342
13 342
12 346
12 349
12 350
12 351
12 353
11 351
11 345
11 346
11 347
10 345
10 332
10 331
10 328
11 331
11 331
11 316
11 317
11 326
11 333
11 345
11 370
11 419
11 422
11 426
11 432
12 436
12 440
12 442
12 442
12 441
12 437
12 439
12 439
14 442
14 439
14 439
14 439
14 439
14 439
15 442
15 444
15 445
16 456
16 456
16 457
16 462
16 464
16 476
16 494
16 506
16 515
16 517
15 520
15 520
15 523
15 523
15 523
15 524
15 524
13 524
13 523
13 523
13 523
13 524
13 525
13 528
13 528
13 526
13 525
13 524
15 523
15 452
15 453
15 445
21 453
24 447
24 448
24 445
19 430
19 423
21 419
21 426
21 416
22 402
22 404
22 405
22 402
22 399
22 395
22 391
22 389
22 382
22 379
22 372
21 363
21 344
21 346
21 340
21 336
21 334
21 333
21 336
21 340
21 342
21 338
21 338
21 349
21 352
21 356
21 358
21 358
21 371
22 371
21 363
21 370
21 368
22 365
22 352
22 339
22 300
22 273
22 234
22 234
22 233
21 242
21 243
21 236
21 234
19 237
19 237
19 238
19 238
19 239
19 239
19 238
19 238
19 240
19 238
19 240
18 236
18 235
18 233
17 226
17 228
17 227
17 223
17 219
17 207
17 196
17 181
17 178
17 175
17 175
17 173
17 170
17 171
17 175
17 176
17 177
17 177
17 177
17 176
17 178
17 177
17 175
17 174
17 174
17 174
15 174
15 177
15 182
14 187
14 187
12 185
8 231
6 255
6 275
21 287
21 284
19 326
18 328
18 333
18 332
18 334
18 332
18 331
18 331
18 331
18 329
18 328
18 327
18 329
3 323
3 323
3 323
3 323
3 320
3 322
3 321
3 321
3 322
3 318
3 315
2 312
1 312
1 312
1 302
1 300
1 292
1 292
2 292
2 282
2 285
2 287
2 280
2 279
2 280
2 281
2 281
2 281
2 282
2 276
2 276
2 275
2 266
2 264
1 264
1 263
1 260
1 260
1 259
1 258
1 259
1 262
1 262
1 262
1 260
2 258
2 257
2 257
2 257
2 256
2 271
2 270
2 269
2 269
2 269
2 269
2 270
2 269
2 269
2 270
2 271
2 271
2 273
2 275
2 275
2 293
2 292
2 303
2 306
3 311
3 310
3 310
3 309
3 318
3 320
3 318
3 320
3 314
3 299
3 298
3 296
3 287
2 188
2 181
2 181
2 182
2 181
2 137
2 138
2 124
2 125
2 124
2 133
2 135
2 137
2 137
2 137
2 137
2 137
2 137
3 137
3 137
3 137
3 137
3 141
3 142
3 146
3 147
3 150
3 158
3 164
3 162
3 163
3 164
3 167
3 164
3 162
3 168
3 172
4 182
4 205
5 225
6 246
6 255
6 260
6 263
6 266
6 275
6 279
6 281
6 288
6 299
6 303
6 306
6 307
6 308
6 308
6 308
6 308
5 306
5 306
5 304
5 303
5 303
5 303
5 304
5 308
5 308
5 310
5 311
5 293
5 293
5 293
7 294
7 295
7 295
7 295
7 295
7 296
8 315
8 317
8 316
8 315
8 315
8 313
8 296
8 302
8 285
8 282
7 282
7 285
8 283
8 279
8 270
8 268
8 268
8 268
8 270
8 272
8 274
8 275
8 274
8 275
8 273
8 275
13 276
13 277
13 279
13 278
13 275
13 278
13 277
13 271
13 271
13 272
16 287
16 290
16 291
16 293
16 294
15 293
15 292
15 292
15 291
15 282
15 284
15 275
15 267
15 262
16 254
18 250
20 250
23 251
24 251
25 251
25 247
25 243
25 237
25 228
24 211
23 198
23 184
22 167
22 161
22 156
22 155
22 155
22 155
22 154
22 150
22 140
22 136
22 134
22 134
22 134
22 133
22 133
22 133
22 132
22 139
22 141
22 145
22 148
24 161
27 166
27 174
28 187
29 220
29 221
29 228
29 235
29 253
28 258
27 257
27 257
27 257
27 257
27 257
25 252
23 238
23 245
23 246
22 250
22 252
22 252
22 249
22 250
22 255
22 271
22 278
24 315
24 324
24 392
24 399
25 402
25 404
25 412
25 416
25 417
25 420
25 425
25 424
25 423
25 423
25 423
20 424
20 432
20 445
20 446
20 452
20 451
20 451
20 440
20 440
19 438
17 430
17 429
17 429
17 428
17 427
17 427
17 427
17 428
17 433
17 436
17 435
17 437
17 439
15 440
12 437
13 442
13 443
9 443
8 444
8 444
8 444
8 445
8 444
8 444
8 444
9 445
9 442
9 444
9 444
9 444
9 444
9 443
9 441
9 440
9 441
9 441
9 442
9 441
9 445
10 452
13 485
19 623
20 693
21 812
22 835
22 844
22 867
23 880
20 881
19 886
19 890
19 895
18 867
18 865
18 863
19 860
19 847
20 860
20 864
22 871
23 884
23 884
23 884
24 888
24 874
24 859
24 857
24 852
24 856
23 856
23 857
23 853
23 851
23 840
22 807
22 780
22 774
22 727
22 727
22 722
22 720
22 712
22 709
22 708
22 718
22 714
23 719
23 731
23 732
23 736
23 731
23 725
23 720
23 721
23 720
23 723
23 732
23 743
23 747
23 750
23 748
23 750
23 749
24 749
24 749
24 751
24 752
24 761
24 766
24 766
24 769
24 769
24 772
24 773
24 773
21 770
20 780
21 790
30 1069
30 1085
31 1109
32 1115
32 1118
32 1130
32 1127
32 1126
32 1126
32 1128
32 1128
32 1129
32 1129
31 1129
31 1125
29 1019
29 1017
29 1016
29 1010
29 1006
29 993
29 963
23 877
21 792
21 739
19 613
19 595
19 594
19 555
18 544
18 525
18 520
18 518
18 518
18 517
17 518
17 524
16 524
16 519
15 505
13 500
13 491
13 492
13 493
13 492
14 484
14 502
14 506
14 512
14 488
14 484
14 473
14 472
14 474
14 474
14 474
14 475
14 476
14 487
14 507
14 553
14 583
14 590
14 595
14 596
14 598
14 581
14 582
13 575
13 577
13 596
13 597
13 598
13 598
16 605
16 632
25 790
26 833
26 822
26 863
27 866
28 877
28 881
28 881
28 883
27 882
27 882
27 881
27 880
27 874
27 864
27 871
27 882
28 885
28 892
29 897
28 901
28 901
28 909
28 905
23 727
23 719
23 706
23 717
23 717
23 706
23 706
23 704
23 704
23 704
23 705
22 703
22 703
22 703
22 703
22 704
22 704
23 704
23 704
23 704
23 704
23 703
23 704
23 704
23 703
23 703
23 703
23 704
23 713
23 719
23 720
23 720
23 727
25 731
24 734
25 734
26 736
26 743
26 746
27 758
25 759
25 764
25 767
25 769
25 768
26 778
26 758
26 743
26 741
26 750
26 749
26 762
26 765
26 766
26 772
26 772
26 770
27 761
25 754
26 743
27 707
27 692
27 683
27 687
27 699
28 707
28 706
28 705
28 708
31 712
33 710
33 710
33 667
33 659
30 627
29 621
19 486
19 486
19 484
19 483
19 480
19 477
19 476
19 476
19 476
20 477
20 477
20 476
20 474
20 463
20 460
20 450
20 444
20 438
20 431
20 417
19 410
17 394
17 390
17 393
17 397
17 398
17 394
17 386
17 383
17 383
17 394
17 395
17 395
17 397
21 397
21 397
24 445
24 449
24 448
24 448
24 453
24 452
24 455
24 456
24 457
24 455
26 455
28 467
28 468
24 469
23 470
23 468
23 457
23 456
23 457
23 458
23 450
21 446
20 449
20 453
21 459
21 457
21 451
20 444
20 444
21 435
21 436
21 454
21 455
20 448
20 456
41 511
41 519
41 503
40 507
41 503
41 523
41 525
42 528
42 526
42 522
42 515
41 485
40 387
40 368
40 361
40 360
40 355
40 353
40 354
39 354
40 353
40 343
39 338
37 334
37 330
37 329
37 329
37 329
37 329
36 329
36 329
36 329
49 462
54 474
58 508
58 519
58 531
59 532
58 531
58 530
58 531
59 531
59 534
59 541
59 545
59 546
64 611
64 613
64 616
64 616
64 617
64 615
64 617
64 615
64 617
66 623
66 623
66 626
66 624
66 617
66 620
66 628
61 565
61 573
61 573
58 522
58 524
58 521
59 522
61 519
62 519
62 523
62 526
61 527
61 529
60 530
58 516
57 523
57 528
57 528
57 534
57 539
57 537
54 536
54 534
54 532
54 527
54 514
54 516
54 521
54 523
54 526
54 532
54 537
54 537
54 536
54 516
53 516
51 503
51 498
33 423
33 411
33 408
33 408
34 411
34 406
34 414
33 424
33 427
33 422
33 423
33 424
33 426
33 424
33 427
33 427
33 427
33 425
33 428
34 428
34 430
34 429
34 430
34 432
34 434
34 436
34 441
34 442
34 451
32 452
31 470
31 466
17 326
14 319
10 287
10 276
10 278
10 283
10 283
10 282
10 283
10 289
10 288
10 285
10 281
10 280
10 279
10 284
10 280
10 280
10 280
10 279
10 278
10 276
12 273
10 268
10 267
11 265
11 266
11 266
11 265
11 279
11 279
11 277
11 300
10 305
10 304
9 304
8 299
6 297
6 296
6 295
6 294
6 292
6 288
6 286
6 281
6 271
6 268
6 267
6 256
6 253
6 252
6 252
6 254
6 254
6 254
6 253
6 245
6 241
6 241
6 236
6 234
6 231
6 231
6 231
6 229
6 226
6 237
6 242
6 245
8 249
9 254
9 254
8 250
8 249
8 229
8 229
8 227
8 231
8 235
10 260
10 320
10 424
10 487
10 535
10 571
12 643
12 662
12 699
12 739
12 749
11 754
11 773
11 783
11 784
11 806
11 814
11 821
11 824
11 823
11 827
11 832
12 828
12 826
12 825
12 829
13 857
13 884
13 899
15 958
15 964
15 970
15 973
15 979
15 991
15 1035
16 1067
16 1083
16 1085
16 1093
16 1095
16 1096
16 1098
14 1108
14 1113
14 1114
13 1120
13 1129
13 1148
14 1151
14 1148
14 1142
14 1145
14 1140
16 1155
18 1222
18 1234
18 1239
18 1245
18 1248
18 1252
18 1252
20 1255
20 1257
21 1257
21 1257
21 1258
21 1257
21 1253
21 1257
21 1259
18 1258
18 1258
18 1255
18 1255
18 1254
18 1255
17 1250
17 1250
17 1250
15 1252
15 1272
15 1274
15 1338
15 1352
15 1365
15 1376
13 1356
13 1342
13 1339
13 1351
18 1425
18 1442
22 1519
23 1547
24 1681
24 1727
24 1789
27 1793
28 1817
26 1776
26 1688
26 1632
26 1575
26 1517
25 1480
25 1423
25 1420
24 1398
24 1397
24 1396
24 1390
24 1370
24 1364
24 1353
24 1312
25 1303
26 1305
26 1305
26 1298
26 1297
25 1294
25 1292
25 1294
25 1292
25 1274
24 1261
22 1229
25 1215
25 1179
25 1182
25 1179
25 1179
25 1242
28 1270
28 1232
27 1209
28 1206
30 1218
31 1222
31 1226
41 1323
41 1334
38 1334
39 1348
44 1675
44 1687
44 1692
43 1681
43 1686
44 1739
44 1748
44 1751
44 1751
42 1736
42 1632
42 1629
42 1623
42 1621
42 1622
42 1624
42 1624
42 1627
42 1626
42 1626
42 1628
42 1633
42 1636
42 1645
42 1648
42 1651
42 1658
42 1658
42 1654
43 1667
43 1680
52 1725
52 1734
53 1743
53 1747
54 1749
57 1749
57 1746
59 1653
59 1660
59 1650
59 1645
59 1630
60 1628
61 1615
61 1598
53 1505
70 1632
68 1575
82 1563
81 1364
82 1340
85 1332
86 1351
85 1356
88 1373
88 1382
88 1390
88 1405
88 1415
88 1421
89 1435
95 1450
95 1455
95 1472
95 1476
95 1479
95 1478
95 1481
95 1481
95 1486
94 1484
93 1504
93 1505
93 1514
93 1515
93 1515
93 1527
93 1531
99 1548
100 1533
100 1519
101 1513
101 1508
102 1499
103 1492
103 1493
103 1489
102 1386
100 1374
100 1367
100 1379
99 1392
98 1417
100 1418
101 1424
93 1323
92 1312
91 1285
89 1257
85 905
85 904
85 894
85 886
85 878
84 844
84 854
84 850
84 852
84 849
84 857
84 877
84 885
84 900
84 904
84 901
84 907
84 905
84 907
84 910
84 907
84 898
84 898
85 887
85 888
84 887
84 880
84 880
84 880
83 857
83 844
75 798
74 804
73 818
73 831
72 832
70 819
70 840
69 850
69 867
69 870
69 870
68 865
63 871
50 868
49 884
48 876
39 682
35 674
21 667
18 665
17 661
19 657
19 635
20 618
32 608
32 599
48 583
48 579
48 572
49 556
45 531
46 550
47 555
47 558
47 563
48 561
48 565
48 563
48 564
48 556
48 555
32 534
32 527
32 526
32 526
32 535
30 515
29 509
29 523
28 527
28 538
27 539
27 540
27 541
27 541
27 544
27 544
27 545
27 542
27 537
29 522
29 505
24 471
23 466
23 474
23 477
23 479
23 483
23 483
24 484
24 485
24 484
24 483
24 481
24 446
23 434
23 432
23 430
23 427
23 418
25 384
25 368
25 367
25 368
25 368
25 365
25 365
25 361
25 359
25 357
22 355
22 354
21 352
21 352
21 351
21 352
21 413
23 438
23 467
23 489
23 493
23 476
23 458
23 455
23 447
23 442
23 416
23 401
23 382
23 380
23 381
23 381
23 378
23 385
23 371
23 369
23 365
23 365
23 368
22 377
20 393
19 395
18 396
18 411
6 406
5 412
6 413
6 414
6 415
6 413
5 410
5 382
87 377
87 375
87 372
87 367
87 370
87 370
87 371
87 374
87 375
86 374
86 374
86 374
86 373
86 361
86 356
5 343
5 333
5 333
5 317
5 323
5 330
6 361
7 365
7 364
7 372
7 389
7 403
7 409
7 413
7 431
8 434
8 435
11 440
12 488
12 494
12 501
12 508
12 516
12 518
12 520
12 523
14 526
14 528
14 528
14 528
14 528
11 530
11 528
11 530
11 535
11 534
11 535
11 535
11 535
11 537
11 537
11 540
11 538
13 559
14 566
13 570
13 571
13 572
12 563
12 478
12 468
12 465
12 461
12 452
12 453
13 454
13 457
13 458
13 458
17 460
17 463
17 472
20 493
27 599
27 627
29 647
30 657
30 662
30 664
30 666
30 663
30 660
30 642
30 623
30 618
30 613
30 596
30 596
30 593
30 592
30 592
32 602
34 611
34 613
33 617
33 619
33 625
33 635
33 643
33 645
33 642
33 641
33 636
33 645
34 648
35 646
35 653
35 654
35 656
35 666
35 668
35 652
35 652
35 641
35 637
35 630
33 587
34 624
35 630
35 640
36 665
37 692
37 695
37 718
37 706
36 704
36 705
33 677
33 626
33 620
33 617
33 613
33 611
33 612
33 611
32 607
31 606
31 607
31 608
31 608
31 609
31 605
31 605
31 602
31 597
31 598
31 597
31 598
31 598
30 600
30 601
30 592
30 590
27 560
27 558
27 537
27 532
27 532
27 534
26 535
26 532
26 527
26 526
26 526
26 526
26 528
26 527
26 555
26 561
26 560
26 551
26 538
23 509
13 392
14 383
14 372
14 368
14 365
14 365
14 366
14 366
14 369
14 374
14 376
14 375
14 376
14 376
14 376
14 370
14 370
14 368
10 357
9 351
9 346
9 341
9 340
12 334
12 322
12 317
12 317
11 316
12 314
12 319
12 311
11 316
11 320
11 320
11 320
11 324
11 313
11 313
11 319
11 319
11 318
10 316
10 312
10 298
9 239
9 234
9 233
9 196
8 184
8 178
8 170
8 168
8 163
8 162
8 163
8 162
8 160
8 160
8 158
8 157
8 156
8 159
8 162
8 163
8 166
8 165
8 165
8 165
8 165
8 166
8 170
8 176
8 182
8 197
10 235
10 253
10 263
12 374
12 385
13 462
13 473
14 500
14 522
14 539
14 544
14 559
14 563
15 571
15 579
16 582
16 583
16 585
15 583
14 579
14 542
13 543
12 556
12 555
12 556
12 549
12 550
10 552
10 552
10 552
10 552
10 553
10 552
10 553
10 548
10 543
10 541
10 541
10 540
10 540
10 540
10 541
10 547
10 548
10 554
10 557
10 555
9 556
8 559
9 587
10 606
10 610
10 632
10 650
10 651
10 644
10 645
10 640
10 635
10 634
10 635
10 627
10 631
10 636
10 638
12 637
12 642
12 646
12 664
12 668
12 669
16 676
16 720
16 726
16 742
16 756
18 758
18 762
18 769
18 782
19 825
19 831
19 876
19 891
19 899
19 900
19 902
19 900
20 901
20 904
20 907
20 913
20 919
20 917
23 924
23 909
23 903
23 898
21 887
21 864
20 833
20 815
20 793
18 678
18 636
18 600
17 599
17 582
17 581
17 581
17 574
17 557
17 551
16 548
16 549
16 547
16 547
16 551
16 551
16 556
16 559
16 564
16 558
16 564
16 566
16 567
16 567
16 563
16 569
16 570
16 570
16 570
16 571
16 571
16 572
17 572
17 571
17 571
17 571
17 573
17 573
17 572
17 559
17 555
22 553
24 555
24 564
25 569
25 565
24 529
23 510
23 500
23 487
23 474
23 470
23 470
24 464
24 463
24 464
24 462
24 466
24 464
24 471
24 467
23 460
22 463
25 467
25 477
22 466
22 470
20 472
19 471
19 421
19 433
19 413
19 424
19 428
21 428
37 434
37 426
37 375
36 369
36 309
36 300
36 299
39 321
39 322
39 322
39 320
39 315
39 320
39 326
40 324
39 326
37 318
37 317
20 316
19 303
19 302
19 306
19 312
19 319
19 327
19 334
19 347
19 351
19 366
19 364
19 365
19 361
19 362
19 382
19 388
19 391
19 401
19 401
19 404
19 400
19 400
19 393
19 389
19 383
19 375
19 372
19 373
19 375
19 376
19 378
20 381
19 381
19 381
19 383
19 388
20 405
20 416
20 429
22 441
22 480
22 497
23 512
23 515
23 512
23 511
23 511
17 502
17 502
17 495
17 487
17 490
17 492
18 494
18 494
18 494
18 492
18 492
19 493
18 493
19 499
21 499
22 546
26 567
26 570
26 576
28 581
29 582
30 581
26 579
25 583
25 581
27 592
29 709
29 716
29 718
29 707
29 708
29 697
30 685
30 682
30 684
30 690
30 696
30 700
30 710
30 712
30 711
30 689
30 692
30 692
30 700
30 704
30 708
30 708
30 708
30 705
30 709
30 707
30 707
30 710
30 709
31 713
31 710
31 708
31 700
31 690
31 673
31 674
31 669
31 666
31 661
31 662
39 674
39 656
39 653
39 649
40 639
40 632
40 630
40 627
40 627
40 628
40 626
40 627
40 626
40 629
40 634
40 638
40 645
40 653
39 650
71 651
71 648
71 644
70 627
70 595
71 572
71 565
68 551
69 550
69 561
69 561
69 562
68 562
68 561
68 560
91 638
69 638
69 638
69 638
69 642
59 641
57 637
57 637
57 636
57 635
57 635
57 635
57 636
56 630
54 626
30 511
26 496
25 492
24 502
24 496
23 484
21 470
21 458
21 462
21 464
22 481
20 349
22 383
22 389
22 394
22 404
22 410
22 410
22 411
22 410
22 408
22 410
22 407
22 398
21 396
21 398
18 390
18 388
18 383
18 375
18 372
18 371
18 375
18 385
19 386
19 385
19 387
19 387
18 377
18 378
18 375
18 369
18 369
18 370
18 369
18 369
18 368
18 371
18 371
17 370
17 367
11 354
11 352
11 350
11 348
10 347
10 346
10 347
10 348
10 346
10 345
10 345
11 341
11 336
11 329
11 325
11 317
11 309
11 297
10 298
10 301
10 302
10 302
10 302
10 303
9 306
9 328
9 330
9 339
9 361
9 369
9 381
9 381
9 380
8 377
8 368
8 371
8 372
8 372
7 374
7 374
7 375
7 374
7 373
7 373
7 373
7 371
7 369
7 367
7 368
5 355
5 353
5 349
5 341
5 337
5 334
5 331
4 324
4 316
4 303
4 244
3 232
3 226
3 225
3 220
3 219
3 220
3 216
3 217
3 216
3 213
3 225
3 236
3 255
3 266
3 267
3 264
3 265
3 274
3 275
3 277
3 277
3 271
3 259
2 259
2 257
2 256
2 256
2 256
2 256
2 256
2 257
4 257
4 255
4 256
4 255
4 256
4 256
4 257
4 258
3 258
3 258
3 258
3 258
3 258
3 259
3 258
3 258
2 269
2 270
2 269
2 269
2 269
2 274
2 274
2 274
2 274
2 272
2 298
2 300
2 296
2 295
2 292
2 288
2 286
2 275
2 244
2 229
2 218
2 210
2 205
2 192
2 188
2 346
2 349
2 358
2 369
2 368
2 368
4 369
4 369
4 376
4 381
4 406
4 465
4 489
4 512
4 519
4 527
4 555
4 570
4 572
4 585
4 590
3 608
3 618
3 630
3 644
3 650
3 654
3 650
3 649
2 650
2 650
2 650
2 649
2 644
2 643
2 639
2 638
2 638
1 622
1 595
1 585
1 579
1 579
1 580
1 580
1 571
1 571
1 574
1 577
1 577
1 577
1 578
1 579
1 582
1 584
1 587
1 591
1 596
1 599
1 614
1 624
1 633
1 634
1 639
1 640
1 658
1 672
1 681
1 690
1 704
1 716
3 725
3 725
3 730
3 730
3 717
3 722
3 721
3 721
3 720
3 714
3 715
3 715
3 716
3 716
3 692
5 706
5 729
6 783
6 793
6 799
6 826
6 861
6 887
6 912
6 913
6 912
6 911
6 912
6 901
6 690
6 690
6 668
6 617
6 607
6 608
6 607
6 609
6 608
6 606
6 595
6 532
6 524
6 524
6 523
6 521
6 518
6 515
6 509
6 480
6 467
5 450
5 449
5 457
5 490
5 522
5 527
5 530
5 531
5 533
5 537
5 537
5 540
5 538
6 539
6 540
6 544
6 547
6 547
6 547
6 543
6 540
6 538
6 537
6 539
6 539
6 536
6 534
6 533
6 534
6 533
6 543
6 543
6 540
6 538
6 541
6 544
6 534
6 533
6 515
6 510
6 497
6 488
6 486
6 480
6 459
6 444
6 440
6 434
6 428
6 415
4 406
4 406
4 405
4 413
4 412
4 406
4 410
4 410
4 414
4 413
4 411
4 411
4 408
4 407
4 402
2 476
2 450
1 404
1 402
1 398
1 343
1 320
1 315
1 330
1 335
1 334
1 334
1 333
1 330
1 325
1 324
1 324
1 324
1 324
1 324
2 324
2 321
2 327
2 327
2 327
2 327
2 327
2 328
2 328
2 328
2 328
2 328
2 329
4 376
4 397
4 409
5 481
5 441
5 430
5 411
5 406
5 405
5 409
5 409
5 411
5 412
5 412
5 413
4 418
6 419
6 418
12 569
12 576
12 602
12 527
12 529
12 483
14 473
14 470
14 472
14 473
14 490
14 494
14 499
14 504
14 506
14 511
15 538
15 554
15 559
15 567
15 569
15 570
15 576
15 584
15 587
15 588
15 589
15 601
15 601
15 599
15 597
15 595
15 595
15 589
16 588
24 672
24 674
24 677
25 677
25 680
26 691
26 693
26 696
26 696
26 703
26 697
26 697
26 685
26 682
26 679
26 678
27 683
27 684
27 686
27 690
27 694
27 695
27 695
27 694
27 696
27 696
27 696
27 696
27 696
27 697
27 702
27 715
27 720
27 713
29 713
29 713
31 709
31 713
31 711
31 711
29 700
28 700
28 700
28 700
28 699
30 734
30 736
42 852
42 852
46 855
46 780
46 779
57 866
57 865
57 864
57 865
57 896
57 903
57 908
57 914
58 923
58 926
58 920
58 911
58 900
50 740
50 728
39 644
39 666
39 667
40 670
44 700
44 699
44 688
44 688
44 670
45 664
47 666
48 672
54 682
55 670
54 660
54 634
55 634
55 632
55 632
56 626
56 624
56 617
57 619
57 718
57 720
57 713
57 718
54 717
55 719
55 709
55 711
54 708
54 707
50 608
50 619
50 622
49 640
49 640
48 636
48 640
48 643
48 647
48 647
48 647
48 648
48 648
54 649
87 879
87 881
87 885
87 882
88 880
88 876
88 878
88 880
88 880
87 878
87 878
87 878
87 884
87 891
87 902
86 907
86 902
86 887
85 882
85 882
82 882
82 880
82 893
82 895
82 897
82 899
82 900
82 902
82 908
81 910
81 908
80 879
78 867
66 741
64 740
64 739
64 744
66 756
69 819
71 894
71 900
74 918
74 875
75 878
75 863
75 851
74 842
74 839
73 839
73 838
73 837
73 837
76 837
75 829
78 809
78 803
79 801
75 777
76 777
78 785
78 786
77 786
75 784
75 773
75 763
68 743
67 742
67 742
64 741
61 739
62 733
62 737
62 736
62 735
62 733
61 730
61 637
60 637
60 628
61 625
62 625
62 630
62 630
63 664
63 666
62 674
62 673
62 662
62 657
62 630
62 631
62 633
62 628
62 627
62 623
62 620
60 615
47 616
39 614
38 614
21 375
21 375
21 375
21 376
21 376
21 379
23 377
26 375
26 376
26 379
28 380
28 379
37 372
37 363
37 348
38 350
38 364
38 368
38 366
40 387
40 386
40 388
40 391
40 389
40 388
40 391
40 391
40 390
39 379
39 376
39 374
39 370
39 368
39 368
38 373
38 383
37 393
36 381
33 301
31 253
31 258
29 263
30 305
30 308
30 309
40 312
52 319
56 321
56 322
57 328
58 328
58 329
58 329
58 328
57 326
57 328
57 326
55 282
56 282
53 273
53 273
53 274
53 275
53 278
53 277
53 279
53 280
53 281
53 284
53 290
53 298
53 295
53 298
53 312
53 319
52 320
54 320
54 321
53 322
53 322
52 318
52 312
52 312
52 277
52 276
51 267
52 267
52 267
52 267
52 267
52 280
53 304
53 306
53 308
54 311
54 310
54 308
54 307
54 307
53 303
53 303
53 303
53 304
53 307
53 308
53 305
51 366
49 374
49 383
49 384
47 388
47 390
39 388
39 389
39 389
39 386
39 370
39 370
39 375
37 356
37 354
37 342
37 341
37 340
38 340
38 339
38 340
40 344
41 354
41 355
41 356
41 360
41 362
41 358
41 349
41 334
41 324
41 308
40 297
40 287
39 284
33 283
30 282
19 282
16 282
15 276
7 268
7 268
7 265
7 263
7 263
7 263
7 262
7 261
7 261
7 260
7 261
7 261
7 260
7 260
7 277
7 281
7 282
7 282
8 284
9 283
9 283
10 283
11 285
11 286
11 283
11 279
11 277
11 254
11 252
11 252
11 252
11 251
11 252
11 254
11 255
11 256
11 258
11 260
11 260
11 262
11 262
11 263
11 266
11 265
11 243
10 225
10 223
10 224
9 226
9 226
9 227
9 228
9 230
9 231
9 231
9 235
12 234
13 232
13 232
13 233
13 161
13 161
13 143
13 142
13 142
12 145
12 146
12 145
12 145
12 142
12 142
13 138
13 140
13 140
13 141
13 141
13 142
13 142
12 142
9 142
9 140
9 135
9 131
9 129
9 129
9 124
9 120
9 117
9 118
9 120
9 120
9 120
9 118
9 118
9 117
9 116
9 116
9 117
10 120
10 120
10 125
10 124
10 125
10 128
10 128
10 130
10 131
10 130
10 130
10 131
10 129
10 126
10 121
11 133
11 116
10 152
10 155
10 157
9 159
9 159
9 159
8 156
8 156
8 150
8 141
8 140
8 141
8 141
9 141
9 140
9 140
9 140
9 140
8 143
8 143
8 143
8 140
8 137
8 135
8 135
8 135
8 136
8 130
9 135
9 135
9 135
9 136
9 136
9 134
9 129
9 130
9 130
9 129
9 128
9 127
8 124
5 121
5 119
5 119
5 116
5 114
5 114
5 115
5 116
5 118
5 117
5 116
7 118
7 118
7 117
7 117
6 117
6 115
6 115
6 115
6 115
6 114
7 114
7 114
7 119
7 121
7 123
8 126
8 128
8 130
8 130
8 130
8 129
10 140
10 141
10 146
10 147
10 147
10 147
10 147
10 147
10 147
10 146
9 143
9 142
9 138
9 138
9 135
9 134
9 131
9 131
9 131
9 131
9 132
9 132
9 132
9 134
9 132
8 119
8 118
8 75
8 75
8 74
8 73
8 73
8 72
8 73
8 72
8 72
8 72
7 71
7 71
7 71
7 72
7 72
7 73
7 77
7 78
7 73
7 73
7 73
7 73
7 71
7 76
7 84
7 85
7 84
7 84
6 78
6 79
6 79
6 79
6 77
6 77
6 77
6 77
6 78
6 78
7 86
7 89
7 103
7 106
7 108
7 112
7 112
7 110
7 108
7 106
7 106
7 103
7 103
5 102
5 102
5 101
5 100
5 100
5 100
5 99
5 99
5 99
5 99
5 99
4 99
4 99
4 93
4 90
4 89
3 85
3 84
3 84
3 84
3 84
3 84
1 73
1 71
1 67
1 67
1 68
1 68
1 68
1 68
1 68
1 68
1 68
1 68
1 68
1 68
3 100
3 100
3 100
3 100
3 100
3 98
14 100
14 99
14 99
14 98
14 97
14 97
14 99
14 99
14 99
14 99
12 66
12 65
12 63
12 63
12 63
12 63
11 63
11 63
11 63
11 62
11 62
11 61
1 58
1 56
1 59
1 59
1 59
1 58
1 58
1 58
1 41
1 34
1 30
1 29
1 29
1 29
1 28
1 28
1 28
1 28
1 28
1 28
1 28
1 27
1 28
0 22
0 16
0 12
0 11
0 11
0 10
0 10
0 9
0 9
0 9
0 9
0 9
0 9
0 8
0 8
0 8
0 8
0 10
0 11
0 13
0 13
0 13
0 13
0 13
0 13
0 14
0 37
0 39
0 42
0 44
0 45
0 49
0 49
0 49
0 49
0 50
0 52
0 53
0 53
0 53
1 53
1 53
1 53
1 53
1 53
1 53
1 53
1 53
1 57
1 57
1 58
1 62
2 63
4 65
4 65
4 65
4 65
4 65
4 65
4 67
4 67
5 67
7 67
7 67
7 66
7 66
7 66
7 66
6 65
6 65
6 65
6 65
5 65
5 66
5 66
5 66
5 66
5 66
5 66
3 66
3 66
3 66
3 66
3 66
3 66
3 66
3 66
3 69
3 67
4 74
7 150
7 186
8 213
11 223
11 236
11 244
11 254
13 287
13 307
13 318
13 350
14 390
14 399
14 405
14 411
14 413
14 414
14 418
14 418
14 418
15 421
15 427
24 502
24 507
24 523
24 531
27 550
27 550
27 553
27 551
27 552
27 561
27 563
27 564
27 567
27 566
27 544
27 545
27 551
27 553
27 552
27 555
27 557
27 560
27 560
26 560
26 559
26 559
26 560
26 560
26 560
26 560
26 560
26 561
26 560
26 560
26 560
26 575
26 588
28 600
28 607
29 610
29 611
29 611
30 611
30 612
32 612
33 612
33 614
34 620
34 620
34 622
34 620
34 619
34 617
34 617
34 617
34 617
34 616
34 614
34 613
34 612
34 612
34 612
34 613
34 615
34 619
33 620
33 623
34 625
34 627
36 627
36 627
36 625
36 627
37 628
36 629
35 624
35 619
32 559
31 511
31 494
32 479
30 480
31 475
32 485
31 458
31 391
31 371
31 361
31 353
31 351
31 350
30 346
30 347
30 346
30 356
30 426
38 784
38 935
38 939
35 973
33 904
34 970
42 1046
51 1062
74 1102
79 1133
80 1143
80 1147
80 1149
80 1138
80 1136
80 1135
82 1135
82 1134
97 1135
98 1125
98 1121
98 1119
98 1119
98 1118
98 1117
98 1115
103 1138
104 1134
104 1147
104 1147
104 1147
104 1149
104 1154
104 1155
88 1166
88 1170
88 1171
88 1171
88 1178
88 1159
88 1137
86 1125
88 1124
85 1121
85 1121
83 1123
83 1134
81 1133
81 1133
81 1135
81 1134
81 1125
81 1124
81 1132
81 1138
81 1139
81 1139
81 1141
81 1142
81 1145
81 1144
81 1148
81 1165
81 1168
81 1173
80 1195
85 1671
85 1736
85 1870
85 1941
85 1994
85 2333
84 2580
83 2994
83 3460
82 3574
83 3679
83 3830
83 4127
83 4250
85 4516
84 4537
83 4539
83 4542
83 4542
82 4522
82 4524
84 4536
84 4557
84 4560
84 4564
84 4563
84 4544
84 4540
84 4542
84 4547
84 4576
84 4571
84 4553
83 4453
77 4019
77 3906
76 3888
75 3885
63 3888
56 3881
42 3866
34 3866
23 3843
21 3807
21 3815
21 3816
21 3819
21 3823
21 3824
21 3826
19 3835
19 3837
19 3842
19 3844
19 3846
19 3850
19 3851
18 3868
18 3868
18 3877
13 3855
13 3858
13 3843
13 3843
13 3843
13 3843
13 3840
13 3833
13 3827
13 3827
13 3827
13 3977
13 3968
13 3968
13 3968
13 3967
13 3975
13 3976
14 4075
14 4083
14 4084
15 4109
16 4115
17 4120
17 4123
18 4123
18 3983
18 3976
18 3978
18 3978
18 3981
18 3980
19 3978
19 3962
19 3959
19 3949
19 3916
19 3901
20 3863
19 3811
14 2721
13 2595
13 2139
13 1299
13 1284
13 1101
12 994
12 863
10 653
9 537
9 520
9 513
9 513
9 507
9 502
9 499
9 499
10 498
10 497
12 500
12 500
10 477
10 465
10 460
10 461
10 457
11 458
11 457
11 456
11 454
11 420
11 418
11 410
10 403
10 396
8 374
8 375
8 375
8 366
8 367
8 366
8 347
8 342
8 347
8 348
8 354
8 353
8 349
8 351
8 352
8 339
8 336
8 332
7 334
7 332
7 338
7 369
7 357
7 356
8 350
8 353
8 359
8 362
8 365
8 367
8 366
8 368
9 386
9 386
9 383
9 385
9 384
9 387
9 389
9 396
9 402
9 398
9 397
7 293
7 299
7 268
7 264
6 255
6 258
6 262
6 257
6 252
6 249
6 246
6 246
6 243
6 245
5 245
5 245
5 246
5 246
5 246
4 246
4 245
4 244
4 244
4 244
4 244
4 244
4 245
4 245
4 242
4 242
4 239
7 244
7 240
7 242
7 241
7 241
7 242
7 242
7 243
7 243
7 243
5 240
5 240
5 240
5 240
4 240
4 241
4 241
3 240
3 240
1 232
1 228
1 226
1 214
1 214
1 214
1 213
1 211
1 211
1 211
1 211
1 211
1 208
1 207
1 207
1 190
1 184
1 176
1 176
1 175
1 188
1 187
1 186
1 189
1 187
1 186
1 184
1 176
1 135
1 134
1 131
0 131
0 129
0 125
0 122
0 117
0 116
0 116
0 116
0 114
0 114
0 117
0 117
0 113
0 111
0 109
0 94
0 86
0 76
0 70
0 52
0 49
0 48
0 44
0 42
0 40
0 36
0 35
0 35
0 35
0 35
0 34
0 33
0 33
0 33
0 33
0 33
0 33
0 35
0 36
0 36
0 33
0 32
0 27
0 52
0 54
0 51
0 63
0 67
0 67
0 68
0 79
0 79
0 83
0 84
0 84
0 84
0 84
0 84
0 84
0 84
0 84
0 90
0 92
0 106
0 116
0 123
0 127
0 128
0 127
0 136
0 143
0 167
1 185
1 186
1 188
1 189
1 190
1 193
1 193
1 193
1 194
1 194
1 194
1 194
1 195
1 198
1 198
1 198
1 198
1 196
1 196
1 196
1 196
1 196
1 197
1 197
1 198
1 198
1 225
1 239
1 241
1 242
1 242
1 244
1 245
1 245
1 245
1 245
1 246
1 243
1 243
1 243
1 243
1 243
1 243
1 243
1 243
1 242
1 242
1 242
1 242
1 242
1 242
1 244
1 247
1 250
1 252
2 265
2 267
2 268
2 268
3 266
3 268
3 270
3 277
3 280
3 287
3 287
3 285
3 285
3 284
3 277
4 253
4 253
4 252
4 252
4 245
6 245
7 248
7 254
7 247
8 247
8 246
8 247
8 247
8 248
8 260
11 309
19 411
19 416
22 442
25 448
33 479
34 459
36 469
36 465
36 466
36 474
35 460
35 448
35 442
35 422
35 424
35 425
37 432
37 436
67 507
79 521
124 549
162 932
171 1029
172 1043
174 1053
174 1055
174 1056
174 1065
178 1069
179 1069
185 1073
186 1077
190 1104
190 1108
190 1108
192 1111
192 1122
192 1123
192 1125
192 1124
192 1084
192 1084
192 1109
192 1111
192 1112
192 1114
192 1118
192 1122
192 1123
193 1142
193 1150
193 1151
193 1153
193 1155
193 1163
193 1168
193 1245
194 1248
194 1253
194 1266
194 1270
194 1272
194 1281
196 1292
195 1311
197 1397
197 1401
197 1416
197 1414
197 1420
197 1435
199 1500
200 1543
200 1571
200 1594
200 1602
200 1614
200 1614
200 1610
200 1613
200 1613
201 1630
200 1702
204 1743
204 1919
212 2355
214 2443
215 2513
215 2697
214 2720
214 2735
214 2734
214 2730
215 2743
216 2784
219 2959
219 3078
221 3123
228 3860
227 3947
221 3947
222 4114
219 4171
214 4242
211 4432
210 4457
210 4465
210 4477
210 4478
210 4472
210 4478
210 4480
210 4492
209 4493
208 4496
203 4506
201 4531
193 4635
136 4745
103 4824
77 4879
57 4607
56 4730
56 4759
56 4777
57 4803
57 4822
57 4855
57 4883
57 4906
57 4926
57 5201
57 5555
58 5834
58 5874
58 5922
58 5928
58 5970
58 5973
58 6001
58 6101
65 6467
68 6705
68 6723
69 6756
70 6777
70 6793
70 6804
70 6812
70 6792
70 6785
70 6788
70 6792
70 6788
78 6809
78 6808
79 6741
81 6796
81 6801
88 6877
89 6883
89 6886
88 6876
87 6867
87 6854
83 6734
84 6738
83 6736
83 6737
83 6739
83 6710
83 6647
82 6620
84 6586
84 6576
88 6568
90 6553
90 6544
90 6536
90 6524
90 6538
90 6525
89 6459
99 6411
95 6152
90 5629
91 5636
89 5581
92 5576
93 5582
98 5605
101 5747
103 5745
102 5766
102 5725
102 5525
101 5395
99 5261
92 4154
90 4035
90 4021
90 4014
89 4016
89 4009
90 4013
93 4012
93 4005
93 4001
95 4003
107 4036
108 4040
110 4047
110 4030
118 4094
118 4087
118 4081
120 4137
119 4013
122 3802
121 3744
127 3680
126 3376
147 3321
160 3319
165 3318
166 3298
170 3455
171 3441
182 3462
183 3461
185 3445
184 2879
184 2607
186 2430
187 2415
187 2351
187 2337
187 2292
196 2293
229 2271
232 2183
226 1822
222 1649
225 1646
226 1609
233 1601
236 1582
238 1573
238 1572
237 1563
237 1570
237 1557
237 1552
237 1564
229 1533
229 1523
227 1509
225 1497
225 1489
218 1411
218 1407
220 1422
219 1424
220 1426
220 1426
220 1427
219 1417
220 1416
220 1436
221 1447
219 1482
218 1494
217 1490
220 1495
218 1498
217 1511
219 1560
218 1590
218 1616
219 1642
219 1593
218 1606
217 1613
205 1592
205 1591
204 1618
216 1577
223 1572
218 1566
216 1551
210 1462
211 1371
211 1345
211 1328
211 1303
208 1293
209 1295
207 1303
205 1280
205 1273
205 1276
205 1277
203 1275
204 1281
202 1276
201 1282
201 1287
199 1288
195 1286
185 1256
185 1263
181 1287
180 1286
175 1230
175 1238
177 1230
177 1127
176 1260
173 1429
179 1706
175 1742
174 1762
139 1750
137 1810
137 1887
135 1772
131 1940
132 2260
122 2307
122 2332
121 2346
121 2351
121 2353
121 2356
120 2370
121 2372
112 2379
99 2403
90 2418
78 2477
76 2495
74 2496
73 2492
70 2494
68 2496
64 2491
68 2551
69 2568
71 2583
74 2696
74 2696
75 2719
77 2783
78 2829
78 2900
78 2911
79 2918
79 2911
79 2918
79 2916
81 2917
79 2910
79 2904
79 2898
78 2892
78 2863
122 2864
121 2860
122 2834
121 2819
121 2815
121 2814
121 2813
118 2811
118 2807
113 2793
110 2710
110 2672
109 2667
109 2664
109 2705
65 2694
64 2709
63 2720
61 2702
59 2675
45 2667
44 2664
44 2664
44 2664
44 2664
43 2661
42 2662
42 2650
42 2650
42 2647
42 2642
41 2639
41 2627
41 2625
41 2607
41 2599
41 2599
41 2592
41 2588
41 2581
41 2576
41 2571
41 2567
40 2565
40 2559
40 2525
39 2524
39 2517
38 2503
31 2480
31 2431
31 2218
29 1930
25 1783
22 1769
22 1727
22 1706
22 1612
22 1507
15 1352
14 1209
12 840
12 743
12 732
12 727
12 725
12 724
12 721
12 716
12 715
12 712
12 706
12 673
12 650
10 649
11 645
11 647
11 646
11 648
11 648
5 584
5 566
5 540
4 427
4 423
4 389
3 297
3 220
3 178
3 170
2 167
2 161
2 157
2 155
2 154
2 154
2 153
2 153
2 170
2 167
2 164
2 163
2 163
2 163
2 163
2 163
2 162
2 162
2 163
2 166
2 164
2 158
2 166
2 170
2 118
2 75
2 60
2 49
2 54
2 58
2 59
2 59
2 90
2 95
2 99
2 102
2 104
2 107
3 114
3 122
3 190
5 202
19 235
54 511
61 547
69 578
76 584
78 590
78 593
79 610
81 613
81 614
88 626
87 626
87 627
87 628
102 670
103 673
103 679
103 681
104 683
104 685
104 685
104 683
104 684
104 683
104 685
104 686
104 685
104 686
104 688
104 691
113 693
113 695
113 696
113 699
113 699
113 699
113 702
113 704
113 704
113 706
113 706
113 707
113 707
111 706
111 707
102 707
102 708
102 708
102 708
103 707
103 707
103 709
103 709
103 709
103 709
103 727
103 739
103 746
104 752
105 752
105 752
105 756
105 760
105 763
105 771
105 777
105 781
105 787
105 791
105 792
105 793
103 794
104 797
105 841
105 856
105 873
106 875
106 886
106 915
106 915
106 918
106 914
106 912
105 911
105 912
105 911
105 903
105 898
105 905
105 901
105 873
105 874
105 875
105 876
105 878
104 870
97 866
92 849
78 770
75 756
64 702
33 415
52 416
52 410
49 416
49 416
49 419
49 421
49 424
49 449
46 441
46 443
43 444
43 454
29 407
29 409
33 414
12 415
13 419
13 425
13 443
13 452
13 448
13 459
13 464
14 491
14 623
15 648
15 666
15 681
15 692
15 713
15 724
15 730
15 733
15 734
15 734
15 734
15 734
15 733
15 734
15 735
15 735
15 735
15 732
15 732
15 731
15 731
14 731
14 731
14 731
14 729
14 728
14 727
14 725
14 709
14 694
14 686
12 684
12 683
12 682
12 676
12 669
12 666
11 652
11 648
10 669
10 663
10 660
10 668
10 668
10 678
10 679
9 648
9 670
9 669
9 681
9 681
9 682
10 932
10 939
10 1014
11 1033
11 1042
12 1043
12 1043
12 1043
12 1048
12 1045
12 1042
12 1025
12 1026
12 1026
12 1023
12 1021
12 1018
13 1018
13 1016
13 1016
13 1018
13 1005
13 1002
12 1002
12 1002
12 994
13 989
13 987
13 980
13 981
13 959
13 961
13 957
13 952
13 935
13 935
12 931
6 923
6 921
6 915
6 906
6 881
6 874
6 872
6 868
6 857
5 783
5 622
5 615
5 606
5 603
5 602
5 601
5 598
5 595
5 596
5 596
5 595
5 598
5 597
5 597
5 598
5 603
5 606
5 609
5 609
6 609
6 609
6 609
6 610
7 610
7 609
7 609
7 609
7 609
7 612
8 635
8 649
9 654
9 661
9 659
9 659
9 660
9 660
9 670
9 670
8 673
8 647
8 647
8 647
8 637
8 631
8 609
8 592
7 540
6 524
6 505
6 498
6 484
5 469
5 195
5 187
5 103
5 104
5 99
5 98
5 97
5 97
5 97
5 97
5 100
6 101
6 106
12 129
12 131
12 132
12 132
11 131
11 131
11 131
11 133
11 134
11 135
11 135
11 135
11 134
9 133
9 133
9 133
9 132
9 129
9 127
10 127
10 128
10 130
10 132
10 136
10 136
10 137
10 137
10 137
10 137
10 139
10 139
10 140
10 140
10 140
10 140
11 142
11 143
11 145
11 144
11 141
11 141
11 140
11 138
11 137
13 139
13 136
13 137
13 135
15 135
14 134
14 138
14 136
14 137
14 137
14 137
14 138
16 194
16 214
16 223
16 242
17 448
17 478
18 574
16 597
17 737
17 863
17 1051
20 1101
33 1411
33 1473
33 1536
33 1569
35 1624
35 1646
36 1753
36 1759
36 1760
36 1760
36 1761
36 1761
36 1805
36 1810
36 1812
40 1839
42 1848
43 1982
43 2023
43 2086
50 2134
52 2153
55 2223
54 2257
49 2298
58 2363
58 2386
58 2399
63 2450
63 2448
62 2448
62 2479
57 2457
57 2465
61 2479
62 2480
62 2481
62 2505
63 2511
63 2513
64 2517
64 2520
66 2544
73 2555
80 2577
82 2593
81 2606
81 2606
81 2608
77 2600
77 2609
77 2613
79 2612
79 2612
82 2609
82 2607
93 2662
95 2667
95 2677
95 2686
96 2691
96 2689
96 2694
96 2751
96 2755
96 2755
96 2753
94 2748
93 2751
94 2751
94 2752
94 2756
94 2758
94 2760
94 2764
94 2772
94 2773
94 2778
94 2778
95 2854
95 2869
95 2866
95 2865
96 2873
96 2870
96 2873
96 2873
96 2870
95 2792
96 2775
97 2751
97 2685
95 2379
95 2312
94 2168
94 2101
94 2025
94 1982
92 1848
90 1713
78 1322
77 1283
77 1282
77 1282
78 1292
78 1289
78 1289
78 1295
80 1297
80 1302
80 1339
84 1347
87 1363
93 1632
92 1642
88 1632
84 1624
82 1480
81 1406
79 1317
79 1303
78 1268
76 1196
74 1168
69 1108
69 1229
70 1234
70 1253
67 1226
67 1270
67 1353
67 1358
67 1476
67 1538
67 1616
66 1646
66 1665
64 1669
66 1744
66 1761
66 1767
66 1772
64 1750
52 1728
46 1711
46 1713
46 1703
46 1703
46 1703
45 1695
45 1689
44 1685
44 1683
44 1683
40 1703
40 1712
32 1689
31 1707
31 1706
31 1705
31 1710
31 1711
31 1703
31 1648
31 1649
31 1649
31 1650
31 1648
31 1654
31 1653
31 1650
31 1657
31 1658
31 1661
31 1655
32 1651
32 1645
35 1869
36 1969
35 1908
36 2053
36 2193
37 2316
39 2364
40 2378
40 2380
40 2376
40 2373
40 2375
39 2374
39 2374
39 2377
40 2375
40 2371
40 2370
40 2368
40 2364
40 2370
39 2414
40 2420
41 2452
42 2451
42 2449
42 2440
42 2428
44 2473
44 2480
44 2472
42 2474
41 2462
40 2430
37 2397
34 2294
27 2094
27 2094
29 2070
28 2071
29 2070
34 2070
36 2079
38 2093
38 2105
40 2136
40 2155
41 2159
41 1961
40 1963
40 1963
42 1989
42 1963
42 1881
42 1839
42 1629
42 1580
42 1580
42 1572
40 1561
40 1520
38 1492
38 1477
38 1476
38 1477
38 1479
38 1479
38 1477
38 1480
41 1528
41 1541
41 1573
43 1605
45 1625
49 1714
49 1739
49 1749
47 1728
49 1715
51 1668
51 1671
51 1690
51 1680
51 1679
51 1682
51 1687
51 1689
51 1688
51 1694
51 1694
51 1692
51 1682
51 1680
51 1691
51 1691
51 1685
51 1681
51 1678
52 1679
52 1672
46 1296
52 1191
50 1145
50 1135
50 960
50 851
50 848
51 859
51 857
51 858
51 857
51 854
52 854
52 856
60 864
68 868
68 880
68 879
68 880
68 880
70 867
70 830
69 827
68 793
68 796
66 797
66 807
67 894
66 836
66 839
66 840
68 840
71 878
87 1066
92 1151
147 1652
150 1700
152 1751
150 1773
156 1837
157 1847
156 1872
155 1857
154 1846
154 1837
153 1816
153 1828
151 1831
151 1825
151 1818
151 1781
151 1767
151 1757
151 1751
151 1755
151 1763
152 1784
153 1817
154 1893
154 1967
156 2025
157 2067
157 2099
157 2134
156 2136
156 2158
157 2193
157 2285
163 2479
165 2516
166 2541
170 2552
169 2720
168 2848
165 2802
165 2799
165 2798
168 2797
167 2801
165 2796
165 2796
165 2784
165 2793
169 2790
169 2791
172 2787
172 2788
172 2786
172 2784
172 2788
176 2796
201 2818
210 2851
312 3231
314 3260
317 3303
323 3419
325 3441
324 3438
326 3462
327 3471
326 3498
329 3520
332 3528
335 3532
337 3534
337 3532
340 3518
342 3518
351 3564
352 3573
348 3572
348 3583
346 3582
334 3573
331 3571
337 3577
337 3584
340 3617
346 3638
349 3685
349 3687
349 3688
349 3691
349 3687
349 3678
349 3998
345 3910
347 3981
349 3958
350 3993
352 3995
347 3965
325 3764
301 3619
270 3203
269 3197
271 3194
290 3197
291 3194
291 3193
288 3181
289 3189
289 3212
289 3214
288 3215
288 3195
288 3219
288 3216
289 3225
291 3229
293 3239
291 3230
291 3223
291 3207
293 3186
293 3128
293 3072
289 2952
289 2847
288 2797
288 2753
289 2717
290 2660
290 2650
289 2638
288 2610
286 2462
272 2198
273 2049
273 2037
275 2032
275 2020
278 1954
281 1956
282 1958
283 1968
280 1969
279 2033
279 2040
279 2047
278 2042
279 2032
279 2093
279 2105
277 2198
277 2227
275 2242
276 2247
269 2257
249 2231
228 2258
208 2232
130 1886
130 1930
127 1895
130 1788
131 1861
131 1846
131 1837
132 1834
244 1821
410 1849
469 1875
476 1873
501 1877
507 1883
527 2042
532 2079
527 2031
556 2163
559 2171
559 2163
560 2168
561 2174
566 2182
562 2182
560 2171
568 2164
572 2174
576 2197
593 3062
595 3210
598 3281
601 3291
602 3296
604 3074
605 3066
602 3013
601 3033
594 3026
592 3034
592 3040
591 3039
594 3039
593 3070
613 3264
613 3538
607 3910
612 4337
628 5281
630 5435
634 5592
641 5685
647 5896
646 5942
646 5996
646 5971
646 6055
647 6065
646 6092
646 6215
647 6410
648 6472
652 6484
650 6482
650 6482
650 6477
650 6473
650 6473
649 6471
648 6466
645 6462
645 6458
645 6456
645 6456
644 6464
644 6503
644 6546
641 6620
648 6654
647 6667
647 6668
640 6674
614 6660
614 6656
614 6645
613 6633
613 6574
617 6579
617 6570
616 6584
616 6607
617 6546
618 6769
619 7029
625 8271
628 8523
630 8847
630 9195
630 9669
630 9772
635 9981
634 10014
640 9985
640 9985
633 9944
631 9918
630 9931
541 9934
531 9939
394 9948
222 9913
175 9888
175 9897
175 9903
173 9906
173 9729
173 9718
155 9747
132 9634
124 9634
124 9635
118 9606
119 9571
120 9559
120 9545
120 9541
113 9451
112 9436
110 9394
104 8449
104 8356
103 8308
103 8304
102 8294
101 8124
101 8123
101 8115
99 8047
99 8046
99 8043
99 8033
99 8016
99 8001
99 7842
95 7506
90 7273
84 6971
78 6356
69 5284
70 5188
68 5117
69 5034
69 5024
69 5019
69 4996
68 4990
65 4882
65 4875
64 4812
64 4698
64 4499
64 4463
60 4462
60 4465
60 4467
60 4467
60 4466
60 4466
60 4467
60 4467
60 4467
60 4467
60 4464
60 4455
60 4427
60 4352
58 4305
58 4241
50 4224
50 4224
50 4223
49 4220
46 4218
46 4218
45 4217
45 4214
45 4215
42 4210
41 4212
41 4187
40 4147
40 4090
38 3808
37 3114
31 1995
29 1773
26 1411
25 1035
25 625
25 589
21 319
21 309
15 293
15 292
15 289
14 277
14 264
14 260
14 254
14 224
14 186
14 182
14 179
11 175
11 172
5 127
3 124
0 84
1 82
1 77
1 76
1 74
1 78
1 78
1 78
1 78
1 75
1 72
1 72
1 72
1 71
1 71
1 71
11 73
10 66
10 66
10 65
10 66
10 68
10 69
10 69
10 65
10 65
10 65
10 64
10 64
10 64
10 64
2 64
2 64
0 64
0 64
0 65
0 65
0 66
0 66
0 68
0 68
0 68
0 67
0 64
0 61
0 61
0 61
0 61
0 61
0 59
0 59
0 59
0 59
0 59
0 59
0 57
0 57
0 57
0 57
0 57
3 70
3 78
6 81
6 81
6 82
6 83
6 82
6 82
6 87
6 85
7 107
7 112
9 122
9 115
9 112
9 111
9 111
9 110
9 106
9 106
9 106
10 106
10 101
10 101
10 101
9 93
9 93
9 94
9 94
9 94
9 94
9 94
9 94
9 94
9 94
9 94
9 95
9 95
9 95
9 95
9 96
9 96
9 96
9 96
9 96
9 100
9 100
9 100
9 100
9 100
9 100
9 99
9 99
9 99
10 99
11 98
17 103
17 103
16 103
16 101
16 101
16 99
16 99
16 99
16 99
19 99
19 100
19 100
19 101
19 101
19 102
13 98
13 98
14 100
15 99
15 99
15 99
15 99
16 102
17 98
17 98
18 99
19 111
20 112
20 113
26 137
26 141
26 142
26 144
28 145
28 145
28 147
28 151
28 153
28 156
28 155
28 155
28 154
27 154
27 153
24 137
26 163
25 167
25 166
25 165
26 166
26 167
30 171
30 165
29 153
29 132
29 129
28 122
28 122
28 122
28 122
28 122
28 122
28 123
28 124
28 126
27 126
26 128
26 128
26 129
26 129
27 128
28 131
28 131
28 131
28 131
30 133
30 135
30 138
30 138
31 138
31 137
33 137
33 138
33 138
33 139
32 139
32 140
33 142
33 142
42 142
43 142
43 142
43 142
43 142
46 142
46 142
46 143
48 143
48 143
47 143
47 146
47 146
52 147
53 147
53 146
53 146
57 146
59 146
69 209
78 209
82 207
82 207
82 205
82 205
82 204
82 201
81 199
81 199
81 199
81 199
81 198
80 197
87 196
77 134
77 135
77 152
76 146
75 146
75 142
69 119
69 117
71 117
80 117
78 116
78 114
80 114
80 111
88 112
88 110
88 109
88 108
88 108
88 108
88 108
88 107
85 66
85 66
85 65
85 65
86 65
83 65
83 62
83 62
83 62
83 64
83 66
83 66
83 66
84 66
86 66
86 66
183 76
189 76
190 78
199 75
206 77
206 75
210 75
212 73
257 83
266 86
275 88
278 92
278 91
278 91
278 89
280 84
292 81
292 81
295 81
295 89
367 89
370 88
373 88
373 88
373 89
374 89
373 89
371 89
366 89
365 89
365 89
366 89
368 89
367 89
371 89
376 89
386 90
463 95
496 95
500 92
501 90
500 90
500 92
507 92
510 84
503 85
503 85
500 85
492 85
490 85
491 85
492 85
492 85
492 85
492 85
492 85
492 85
492 85
492 86
494 86
494 86
486 85
486 84
486 80
485 59
485 54
486 54
487 55
494 56
502 57
502 59
608 7568
609 7568
609 7568
607 7568
607 7568
603 7567
609 7568
611 7576
615 7577
615 7577
620 7577
646 7580
646 7581
646 7581
646 7581
637 7543
541 74
543 71
547 71
551 71
551 71
552 71
552 69
557 68
558 68
557 68
558 68
553 68
550 69
455 57
455 53
456 51
449 51
444 51
442 51
437 51
427 50
368 39
351 37
344 33
341 31
341 31
340 31
361 34
362 37
365 39
369 39
367 39
363 39
311 38
311 38
309 37
309 37
308 37
308 40
306 40
306 40
307 40
307 40
302 40
270 40
260 39
259 39
253 39
249 39
239 37
176 34
166 36
164 36
160 37
161 37
159 35
152 35
152 34
152 34
151 34
151 34
151 34
151 34
150 34
149 34
149 34
149 34
149 34
150 35
153 35
192 35
207 34
206 34
211 34
214 35
216 35
218 35
221 35
222 36
222 36
221 34
214 32
209 32
210 34
211 34
209 37
210 38
212 39
212 39
206 43
198 42
193 34
190 33
186 33
181 33
167 39
167 40
166 40
169 47
168 48
163 48
163 49
159 49
180 52
187 52
189 52
193 49
191 49
199 50
210 50
210 52
210 52
206 51
201 51
201 51
201 51
199 51
196 50
196 49
196 49
196 49
196 49
196 50
196 50
195 50
195 49
196 48
176 44
176 44
174 43
170 43
170 43
170 43
170 43
170 43
170 44
170 44
170 44
171 43
171 43
171 43
170 44
170 44
170 44
170 44
170 44
171 50
170 53
170 56
169 62
172 66
171 66
171 67
171 69
171 69
172 69
172 77
172 79
172 80
171 80
175 84
175 84
176 87
175 88
173 88
167 88
161 88
158 88
148 88
150 88
128 88
127 88
123 88
120 88
116 87
115 81
114 81
111 81
111 81
111 81
110 81
109 81
108 81
107 76
107 76
107 76
107 76
106 75
106 75
106 75
107 75
109 75
110 75
110 74
110 74
105 63
101 63
102 62
96 55
95 55
95 55
85 55
85 55
63 52
62 52
58 52
53 51
52 51
47 53
38 53
39 53
39 53
39 53
39 53
39 53
39 53
256 70
256 71
256 78
256 78
256 79
256 79
256 80
256 80
258 80
257 80
255 80
255 80
255 80
255 80
256 80
39 67
39 67
39 60
63 65
63 66
73 72
87 76
98 79
98 80
96 81
96 80
97 80
99 80
99 80
100 79
99 69
97 66
93 56
92 53
90 53
90 47
89 47
89 44
89 43
88 43
88 42
88 40
88 40
88 40
84 35
84 35
83 33
83 32
83 32
83 32
83 41
83 41
83 41
72 41
72 42
72 46
72 46
72 47
71 47
71 47
71 47
71 47
71 46
71 49
71 50
71 54
71 54
70 55
70 55
70 54
70 54
70 54
70 54
69 54
68 54
66 54
66 54
66 56
66 56
66 56
66 57
65 57
65 57
65 58
65 58
65 58
65 58
65 59
65 59
65 59
65 59
65 57
65 54
65 56
65 56
65 59
66 71
66 75
66 82
66 88
66 86
66 95
66 109
66 116
66 116
66 116
66 115
66 115
65 115
65 115
65 116
65 116
65 115
65 115
66 115
65 115
63 114
61 114
37 108
35 107
18 103
14 102
5 100
6 100
6 100
6 100
4 100
4 100
4 100
3 100
3 100
3 129
3 129
3 129
3 129
3 129
3 129
3 131
3 131
3 131
3 131
3 132
3 132
3 132
3 132
3 132
3 132
3 103
3 102
3 102
3 90
3 89
3 89
3 89
3 90
3 90
3 90
3 89
3 89
3 89
3 89
3 88
3 88
3 90
3 99
3 95
3 99
3 98
3 104
3 106
3 111
3 113
3 113
3 116
3 116
3 116
3 116
3 114
4 123
4 133
5 135
7 140
7 140
7 140
7 140
7 140
7 140
7 139
7 139
7 139
7 141
7 141
7 139
9 150
9 149
9 149
8 128
9 128
9 128
9 133
9 141
9 131
9 123
9 123
9 131
9 131
9 131
9 131
9 131
9 131
9 131
9 131
10 131
10 131
9 131
9 131
9 131
9 131
9 131
9 131
9 130
9 144
9 147
8 147
8 149
8 150
8 151
8 151
8 151
8 151
8 151
8 151
8 151
8 151
8 151
8 151
8 152
8 152
8 152
8 154
8 152
8 152
8 152
8 152
8 152
8 152
10 152
10 154
11 154
11 154
11 161
11 161
11 156
11 151
12 151
12 152
13 153
13 154
13 155
13 156
13 156
13 155
13 155
13 154
13 146
13 145
12 143
12 136
12 132
9 135
9 133
9 133
8 133
8 132
8 135
8 134
8 134
7 130
6 117
6 112
4 114
4 116
4 123
4 125
4 127
4 127
4 127
4 127
7 128
7 129
7 132
7 133
7 133
5 118
5 117
5 108
5 107
4 103
4 99
4 94
4 88
4 81
5 80
5 81
5 81
7 82
7 82
7 88
8 90
8 90
8 90
8 91
7 91
7 92
7 92
7 92
7 92
7 92
7 91
7 90
7 88
7 73
7 73
7 73
7 69
7 69
7 68
7 68
7 68
7 68
7 68
7 68
7 68
7 68
7 68
7 68
7 70
7 70
7 70
7 69
7 69
7 69
7 69
7 69
7 70
7 76
7 86
7 86
7 86
7 86
7 86
7 86
7 86
7 86
7 86
7 85
7 85
7 85
7 86
7 85
7 85
7 85
7 85
7 84
7 84
7 83
7 83
7 83
7 83
7 78
7 78
7 76
7 73
7 74
7 77
7 78
8 79
8 79
8 79
8 75
8 71
8 70
8 59
8 54
8 54
8 54
8 54
8 53
5 53
5 52
7 52
7 51
7 51
8 51
8 51
8 51
8 51
8 51
8 50
8 49
8 47
9 46
9 44
11 43
8 45
9 57
9 56
9 53
9 51
9 51
9 51
9 50
9 50
9 49
14 49
14 49
29 49
29 49
29 49
29 50
29 50
30 50
30 50
30 50
30 50
30 50
30 50
30 50
30 52
31 53
31 53
11 53
11 53
11 52
11 53
11 53
11 53
11 53
13 54
14 54
14 54
14 54
14 54
14 53
14 51
14 44
14 34
14 31
14 31
14 31
14 31
14 30
14 30
14 30
14 30
14 29
14 29
14 29
14 28
14 28
16 28
16 28
16 28
16 28
16 28
16 28
16 30
16 30
16 31
16 33
16 33
16 33
16 33
16 31
16 29
16 29
15 28
15 28
15 28
15 28
15 28
15 28
15 28
15 28
15 28
15 28
15 28
15 28
15 28
15 28
15 28
15 29
14 31
14 31
14 31
15 31
16 35
16 40
15 41
15 41
15 41
13 41
13 43
11 42
11 40
8 26
9 27
9 27
9 27
9 27
9 28
12 33
12 34
18 38
18 38
18 38
18 40
18 40
18 42
18 41
19 44
19 44
19 44
18 47
18 47
18 47
18 46
18 46
18 45
18 44
18 44
19 44
29 44
43 46
61 45
61 45
62 45
62 46
60 45
59 45
59 47
62 47
77 47
83 47
89 47
91 47
91 47
91 49
91 49
91 50
91 51
92 53
93 53
93 53
93 53
94 53
92 53
93 53
93 53
93 52
93 52
95 52
95 52
99 52
99 52
100 52
100 49
103 49
103 49
103 47
104 47
106 45
107 45
109 45
109 45
109 45
113 45
115 45
115 45
115 45
118 46
118 46
122 51
122 55
124 57
124 57
124 57
126 56
147 64
148 62
148 62
148 59
148 58
147 54
147 54
147 54
146 50
146 50
146 48
146 47
146 47
146 47
146 47
146 47
146 47
146 45
145 45
144 45
144 46
144 47
144 46
143 40
143 40
137 38
137 38
143 38
143 37
143 37
144 36
144 36
144 35
144 35
143 36
143 36
141 37
140 37
141 38
140 38
142 38
137 38
136 38
131 38
125 38
117 35
101 33
100 33
100 33
98 33
99 33
98 33
102 33
100 33
88 33
81 36
79 37
78 37
78 37
79 35
79 35
79 33
79 33
79 31
79 31
79 31
78 31
78 31
78 31
77 31
77 31
79 31
81 32
79 32
79 32
76 32
74 32
73 32
71 32
72 32
73 32
73 32
71 32
70 32
70 32
69 31
71 31
71 29
67 29
66 29
68 29
66 29
65 28
65 27
61 21
60 21
60 21
58 20
58 20
54 20
39 12
40 12
42 12
42 12
42 13
45 13
50 13
51 14
51 14
51 14
53 16
53 16
53 16
53 16
53 17
53 17
53 18
53 21
53 22
54 22
54 21
54 20
53 20
52 20
51 20
51 20
48 20
48 20
49 20
50 20
49 20
48 20
47 20
50 19
50 18
49 18
49 17
49 17
48 17
48 17
47 17
47 17
48 17
48 18
48 18
47 19
46 19
52 19
52 19
52 19
52 19
53 19
50 19
50 19
50 19
50 15
50 15
50 15
66 17
66 17
66 17
66 17
66 17
80 21
80 21
80 21
80 21
82 21
87 21
91 21
98 21
98 20
99 20
103 20
108 20
106 20
106 20
106 20
106 20
78 15
78 15
78 15
77 15
77 15
78 15
78 15
77 15
78 15
77 15
76 15
76 15
76 15
76 15
75 15
74 15
74 15
72 14
72 14
72 14
72 14
70 14
67 14
64 14
63 14
64 13
59 13
55 13
55 13
55 13
55 13
54 11
55 11
55 10
56 10
56 10
56 9
60 8
60 7
59 6
58 6
58 6
58 6
58 6
58 6
60 6
60 6
60 6
64 6
63 6
64 6
64 6
64 5
63 6
61 6
61 6
61 6
61 6
61 6
61 9
60 14
60 16
60 15
59 15
60 15
60 15
59 14
57 14
55 14
55 14
55 14
56 14
60 14
62 14
63 15
63 15
63 15
65 15
65 15
66 15
66 15
66 15
66 15
66 15
66 15
62 15
58 15
55 15
52 15
52 15
52 15
49 15
49 15
46 15
43 15
39 15
39 15
39 16
39 16
39 16
37 15
37 15
37 15
37 15
37 15
37 20
37 21
36 21
36 21
36 21
36 22
36 22
36 22
36 21
36 21
38 21
40 21
40 21
40 21
40 21
40 21
40 17
40 17
43 15
43 15
43 11
42 11
42 10
42 10
42 10
42 8
41 8
41 7
41 7
40 7
39 7
39 7
35 6
32 6
32 6
32 6
32 5
33 5
33 5
33 4
32 4
32 4
32 4
28 3
27 3
27 3
27 3
27 3
27 2
27 2
27 2
27 2
27 2
27 2
27 2
27 2
27 2
27 2
26 2
29 2
30 2
29 2
34 2
37 2
37 2
37 2
36 2
31 2
31 2
29 1
29 1
29 1
27 1
27 1
27 1
27 1
27 1
27 1
27 1
27 1
27 2
27 2
27 2
27 2
25 2
24 2
26 2
26 2
26 2
25 2
24 2
24 2
24 2
24 2
24 2
24 1
24 1
24 1
24 1
24 1
24 1
23 1
23 1
23 1
23 1
22 0
22 0
23 0
23 0
23 0
21 0
15 0
13 0
13 0
13 0
13 0
13 0
13 0
9 0
8 0
8 0
8 0
8 0
8 0
7 0
7 0
7 0
7 0
7 0
7 0
7 0
7 0
7 0
7 0
7 0
7 0
7 0
6 0
6 0
6 0
6 0
6 0
6 1
6 1
6 1
6 1
6 1
6 1
6 1
6 1
6 1
6 1
6 1
18 34
18 37
18 37
18 37
18 37
16 37
14 37
14 37
13 37
13 37
13 37
13 37
13 37
13 37
13 37
13 37
13 37
13 37
13 37
13 37
13 37
13 37
3 1
3 1
3 1
3 1
3 1
3 1
3 1
3 1
3 1
3 1
3 1
2 2
2 2
2 2
2 2
2 2
2 2
2 2
2 2
2 2
2 2
2 2
2 2
2 2
2 2
2 2
2 1
2 1
2 1
2 1
2 1
2 1
2 1
2 1
2 1
2 1
2 1
10 578
11 578
11 578
11 578
11 578
11 578
11 578
11 578
11 578
11 578
11 578
11 578
11 578
11 578
11 578
3 1
4 1
4 1
4 1
3 1
12 1
12 1
12 1
12 1
12 1
12 1
12 1
12 1
12 1
12 1
12 0
12 0
11 0
11 0
11 0
2 0
2 0
2 0
2 0
2 0
2 0
0 0
0 0
0 0
0 0
0 0
0 0
0 0
0 0
0 0
0 0
0 0
0 0
0 0
0 0
0 0
0 0
0 0
0 0
0 0
0 0
0 0
0 0
0 0
0 0
0 0
0 0
0 0
0 0
0 0
186 0
186 0
186 0
186 0
186 0
186 0
186 0
186 0
186 0
186 0
186 0
186 0
186 0
186 0
186 0
0 0
1 0
1 0
1 0
1 0
1 0
1 0
1 0
1 0
1 0
1 0
1 0
1 0
1 0
1 0
1 0
2 180
2 180
2 180
2 180
2 180
2 180
2 180
2 180
2 180
2 180
2 180
12 180
103 185
107 185
107 185
107 185
109 5
109 5
109 5
109 5
109 5
109 5
109 5
109 5
109 5
109 5
99 5
99 8
4 3
5 3
5 3
5 3
5 4
5 4
5 4
5 4
5 4
5 4
5 4
6 4
6 5
6 5
6 4
6 4
6 4
6 5
6 5
6 5
6 5
6 5
6 5
6 5
6 5
6 5
5 5
5 5
5 5
5 5
5 2
5 2
5 2
5 2
7 2
7 1
7 1
7 1
7 1
25 62
25 62
25 62
25 62
25 62
25 62
25 62
25 62
25 62
25 62
25 62
25 62
25 62
25 62
26 62
10 1
10 1
10 1
10 1
10 1
10 1
10 1
13 1
13 1
13 1
13 1
13 1
13 1
15 1
16 1
17 1
17 1
17 1
17 1
17 1
17 1
17 1
17 1
17 4
17 4
18 4
18 4
18 4
18 4
18 4
18 4
18 4
18 4
18 4
14 4
14 4
14 4
14 4
14 4
14 4
14 4
14 4
14 7
14 7
14 7
14 7
14 7
13 7
13 7
13 7
13 6
13 6
13 6
13 6
13 6
13 6
33 6
34 6
34 6
34 6
34 6
34 6
34 6
34 6
34 6
34 6
34 6
34 6
35 6
35 6
35 6
36 6
15 6
15 6
18 6
18 6
20 6
20 6
20 6
20 6
18 6
18 6
18 6
18 6
18 6
16 6
16 6
16 6
16 6
16 6
16 6
16 6
16 6
16 6
16 6
16 6
16 6
16 6
16 6
15 6
15 6
15 6
13 6
13 6
13 6
14 6
14 6
13 6
13 6
13 6
12 6
12 6
11 6
10 6
10 6
11 6
11 6
13 6
13 6
13 6
13 6
15 7
16 8
16 5
16 5
16 5
16 5
16 5
16 5
16 5
16 5
16 5
16 5
16 5
16 5
16 5
16 5
17 5
17 5
17 5
17 5
17 5
17 2
19 2
19 2
19 2
19 2
19 2
19 2
19 2
19 2
19 2
19 2
19 2
19 2
19 2
19 2
22 2
22 2
22 2
22 2
22 2
22 2
168 7
168 7
168 7
168 7
168 7
168 7
168 7
168 7
165 7
165 7
165 7
164 7
164 7
162 7
162 7
16 2
16 2
16 2
16 2
16 2
16 2
16 2
16 2
16 2
16 2
16 2
16 2
16 2
16 2
16 2
16 2
16 2
16 2
16 2
16 2
16 3
16 3
16 3
16 3
16 3
16 3
16 3
16 3
16 3
16 3
16 3
16 3
17 3
17 3
17 3
18 3
16 2
16 2
16 2
14 2
12 2
12 2
11 1
11 1
10 0
11 0
14 0
14 0
14 0
14 0
14 0
14 0
14 0
14 0
14 0
14 0
14 0
14 0
14 0
13 0
13 0
13 0
13 0
13 0
13 0
11 0
11 0
11 0
11 0
11 0
11 0
11 0
11 0
13 0
13 0
13 0
13 0
13 0
13 0
13 0
14 0
14 0
16 0
16 0
16 0
17 0
17 0
17 1
17 1
17 1
16 1
16 1
17 1
17 1
17 1
20 1
20 1
23 1
25 1
32 1
38 1
47 1
47 0
52 0
53 0
53 0
53 0
54 0
56 0
56 0
58 0
58 0
58 0
58 0
58 0
58 0
59 0
59 0
59 0
60 0
60 0
60 0
60 0
60 0
60 0
60 0
60 0
60 0
60 0
60 0
59 0
59 0
58 0
59 0
59 0
80 5
81 5
81 5
81 5
81 5
81 5
81 5
80 5
79 5
79 5
79 5
76 5
76 5
76 5
76 5
76 5
74 5
54 0
54 0
54 0
54 0
54 0
54 0
54 0
56 0
56 0
63 0
63 0
63 0
64 0
64 0
64 0
63 0
63 0
63 0
64 0
64 0
64 0
62 0
62 0
62 0
62 0
62 0
60 0
60 0
59 0
59 0
57 0
57 0
57 0
56 0
55 0
55 0
54 0
55 0
55 0
57 1
59 1
59 1
54 1
52 1
47 1
42 1
35 14
30 18
26 19
26 23
26 24
24 24
24 24
25 24
25 24
24 24
24 24
24 24
24 24
25 24
25 24
28 25
29 25
30 25
29 26
30 30
30 30
30 30
33 30
35 30
35 30
35 30
35 30
35 30
35 30
35 30
35 30
35 30
40 32
49 42
48 43
48 43
48 43
49 43
49 43
49 43
49 43
49 43
49 43
51 43
51 43
51 43
51 43
51 43
51 43
51 43
51 43
51 43
51 43
51 43
51 43
51 43
51 43
56 45
55 45
56 45
56 45
54 45
54 45
47 45
45 45
45 45
45 45
45 45
46 45
46 45
46 45
45 45
45 45
45 45
45 45
43 44
43 44
43 44
43 44
43 44
43 44
43 44
43 44
44 44
43 44
43 44
43 44
43 44
43 43
43 43
41 43
41 43
41 43
39 43
39 43
39 43
40 43
40 42
49 43
49 43
46 25
44 22
43 22
43 22
43 22
43 22
49 22
49 22
66 22
75 22
78 22
79 22
79 22
77 22
77 21
75 18
73 18
72 18
72 19
70 15
70 15
70 15
69 15
68 15
68 15
68 15
68 15
68 15
68 14
63 11
63 11
62 8
61 8
54 2
54 2
54 2
54 2
53 2
53 2
53 2
53 2
53 1
53 1
53 1
53 1
53 1
53 1
53 1
53 1
53 1
53 1
52 1
52 1
52 1
52 1
52 1
52 1
50 0
49 0
48 0
48 0
48 0
48 0
48 0
48 0
