# Supplementary material for: From Insect to Man: Photorhabdus Sheds Light on the Emergence of Human Pathogenicity
Source: PLoS One. 2015 Dec 17;10(12):e0144937. doi: 10.1371/journal.pone.0144937 (PMC4683029; doi:10.1371/journal.pone.0144937)
Supplement: S4 Data — (XLSX) [file pone.0144937.s004.xlsx]

## Sheet: Sheet1
Table S11. Homologues of IsnA (PvcA) and isnB (PvcB) proteins in other species (protein size and accession numbers are indicated).
Species	IsnA amino acids (NCBI accession number)	IsnB amino acids (NCBI accession number)
Aeromonas_dhakensis	324 (WP_010633130.1)	286 (WP_010633131.1)
Aeromonas_hydrophila	324 (KER61740.1), 324 (WP_017409272.1)	252 (WP_026141462.1), 286 (WP_017784593.1), 286 (WP_017765143.1), 286 (KER61741.1)
Aeromonas_hydrophila_pc104A	324 (AHX70707.1)
Aeromonas_hydrophila_SSU		286 (EKB29890.1)
Aeromonas_hydrophila_subsp._hydrophila_ATCC_7966	324 (ABK38251.1)
Aeromonas_salmonicida	324 (KFN18363.1)	286 (KFN18364.1)
Aeromonas_salmonicida_subsp._masoucida_NBRC_13784	324 (GAJ51025.1)	281 (GAJ50533.1)
Aeromonas_salmonicida_subsp._pectinolytica	324 (EQC06053.1)	286 (EQC06054.1)
Aeromonas_salmonicida_subsp._salmonicida_01-B526		286 (EHI51646.1)
Aeromonas_sp._MDS8		286 (WP_019839532.1)
Allokutzneria_albata	314 (WP_030430938.1)	276 (WP_030430939.1)
Aquimarina_megaterium	324 (WP_025666507.1)	277 (WP_025666508.1)
Bdellovibrio_bacteriovorus	324 (AHZ84015.1)	277 (AHZ84016.1)
Bdellovibrio_bacteriovorus_HD100	324 (CAE79340.1)	278 (CAE79341.1)
Bdellovibrio_bacteriovorus_str._Tiberius		270 (AFY01139.1)
Burkholderia_mallei	337 (AIS26058.1)	290 (WP_004188574.1)
Burkholderia_oklahomensis	337 (WP_010117725.1)
Burkholderia_oklahomensis	337 (AIO70790.1)
Burkholderia_pseudomallei	337 (KGC63174.1), 337 (KGC18282.1)	295 (KGC93458.1)
Burkholderia_pseudomallei_K96243		295 (CAH37606.1)
Burkholderia_pseudomallei_MSHR6137	337 (EXI98662.1)
Burkholderia_pyrrocinia		278 (WP_026043985.1)
Burkholderia_sp._BGK		295 (AIS49416.1)
Burkholderia_thailandensis	337 (AIP65405.1)
Burkholderia_thailandensis_E254	337 (AIT22739.1)	294 (AIT23383.1)
Burkholderia_ubonensis	318 (WP_029227102.1)	278 (WP_029227101.1)
Cystobacter_fuscus_DSM_2262	321 (EPX63804.1)
Cystobacter_violaceus_Cb_vi76	305 (KFA94192.1)
Erwinia_amylovora_ATCC_BAA-2158	334 (CBX80661.1)
Erwinia_amylovora_Ea644	334 (CCP03235.1)
Erwinia_amylovora_NBRC_12687	334 (GAJ88914.1)	283 (GAJ88915.1)
Erwinia_sp._Ejp617	333 (ADP12604.1)	283 (ADP12603.1)
Fischerella_ambigua_UTEX_1903	326 (AIJ28555.1)	268 (AHB62773.1)
Fischerella_muscicola	317 (WP_016859940.1), 327 (WP_016862223.1), 323 (WP_026087012.1)	268 (WP_016868429.1), 268 (WP_026087013.1)
Fischerella_sp._ATCC_43239	326 (AIJ28524.1)	268 (AIJ28523.1)
Fischerella_sp._PCC_9339		268 (WP_026081695.1)
Fischerella_sp._PCC_9431	317 (WP_026720578.1)	268 (WP_026723853.1)
Hapalosiphon_welwitschii_UH_IC-52-3	327 (AIH14759.1)	268 (AIH14758.1)
Hapalosiphon_welwitschii_UTEX_B_1830	323 (AHI58841.1), 327 (AHI58840.1)
Kutzneria_albida	316 (WP_030110822.1)
Kutzneria_albida_DSM_43870	278 (AHH99657.1)	263 (AHH99658.1)
Legionella_cherrii	323 (WP_028381693.1)	278 (WP_028381694.1)
Legionella_longbeachae_NSW150	323 (CBJ12616.1)	278 (WP_003636353.1)
Legionella_pneumophila		278 (WP_027227987.1), 278 (WP_027223290.1)
Legionella_pneumophila_str._Lens	327 (CAH14465.1)	278 (CAH14466.1)
Legionella_pneumophila_subsp._pneumophila	327 (CCD07498.1)	278 (AGN13103.1)
Legionella_sainthelensi	323 (WP_027270086.1)	278 (WP_027270087.1)
Legionella_shakespearei	322 (WP_018577673.1)	278 (WP_018577674.1)
Listonella_anguillarum_M3		283 (AGU56763.1)
Pectobacterium_atrosepticum	321 (KFX20597.1)	283 (KFX20598.1)
Pectobacterium_atrosepticum_SCRI1043	321 (CAG76279.1)	284 (CAG76278.1)
Pectobacterium_carotovorum	284 (WP_010285362.1)	283 (WP_010300174.1)
Pectobacterium_carotovorum_subsp._brasiliense		283 (KFF68813.1), 283 (KGA23375.1), 283 (KFF72672.1)
Pectobacterium_carotovorum_subsp._carotovorum		284 (ACT14247.1), 283 (KFW97833.1), 284 (KFX15439.1)
Pectobacterium_carotovorum_subsp._odoriferum	321 (KGA39545.1)	283 (KGA39544.1)
Pectobacterium_sp._SCC3193		279 (ACX86918.1)
Pectobacterium_wasabiae	321 (WP_033070995.1)	283 (WP_033070996.1)
Pectobacterium_wasabiae		283 (KGA28788.1), 283 (WP_025919912.1)
Phaseolibacter_flectens	317 (WP_028684909.1)	277 (WP_028684908.1)
Photorhabdus_asymbiotica	315 (CAQ83813.1)	281 (CAQ83812.1)
Photorhabdus_asymbiotica_ATCC43949	326	283
Photorhabdus_asymbiotica_ATCC43951	326	283
Photorhabdus_asymbiotica_Beaudesert	326	283
Photorhabdus_asymbiotica_JUN	326	283
Photorhabdus_asymbiotica_Kingscliff	326	283
Photorhabdus_asymbiotica_Neapel	326	283
Photorhabdus_asymbiotica_PB68.1	326	283
Photorhabdus_luminescens_BA1	315 (EYU14028.1)	281 (EYU14029.1)
Photorhabdus_luminescens_PlPB33.1	326	282
Photorhabdus_luminescens_PlumPB45.5	326	282
Photorhabdus_luminescens_subsp._laumondii_TTO1	315 (CAE15190.1)	281 (CAE15191.1)
Photorhabdus_temperata	305 (WP_031281582.1)	282 (WP_031281580.1)
Photorhabdus_temperata_subsp._khanii_NC19	315 (ETS30312.1)	281 (ETS30311.1)
Photorhabdus_temperata_subsp._temperata_M1021	273 (EQC00220.1)
Photorhabdus_temperata_subsp._temperata_Meg1	315 (KER03474.1)	281 (KER03473.1)
Photorhabdus_temperata_thracensis	326	282
Pseudomonas_aeruginosa_BWH059		282 (EZO68541.1)
Pseudomonas_aeruginosa_M10	328 (KAJ27757.1)
Pseudomonas_aeruginosa_MSH10	328 (ERZ40840.1)
Pseudomonas_aeruginosa_PAO1	327 (AAC21671.1)	282 (AAC21672.1)
Pseudomonas_aeruginosa_VRFPA01	328 (KFF35135.1)	282 (ETV54572.1)
Pseudomonas_aeruginosa_VRFPA04	328 (AID84962.1)
Pseudomonas_aeruginosa_VRFPA09	328 (EVT85917.1)
Pseudomonas_sp._GM102		281 (EJL97949.1)
Pseudomonas_sp._GM50		281 (EJM65003.1)
Serratia_grimesii	321 (KFB88504.1)	287 (KFB88505.1)
Serratia_liquefaciens_ATCC_27592	281 (AGQ29415.1)	287 (AGQ29416.1)
Serratia_liquefaciens_FK01	321 (GAK28803.1)	287 (GAK28804.1)
Serratia_marcescens	321 (KFL05720.1)	287 (WP_019455027.1), 287 (KFF80534.1)
Serratia_marcescens_SM39		287 (BAO32094.1)
Serratia_marcescens_VGH107	296 (EMF07059.1)
Serratia_marcescens_WW4		287 (AGE16503.1)
Serratia_nematodiphila	321 (KFF87335.1)	287 (KFF87336.1)
Serratia_plymuthica	321 (WP_004950042.1)	287 (AHY05630.1)
Serratia_proteamaculans_568	295 (ABV39809.1)	287 (ABV39810.1)
Serratia_sp._AS13		287 (AEG26459.1)
Serratia_sp._FS14		287 (AIA45621.1)
Serratia_sp._S4		287 (WP_017891566.1)
Serratia_sp._SCBI	281 (AIM20265.1)
Stigmatella_aurantiaca_DW4	305 (ADO68065.1)
Streptomyces spp.		263 (WP_030417446.1), 266 (WP_030605960.1)
Streptomyces_achromogenes		266 (WP_030605960.1)
Streptomyces_albulus	305 (AIA01564.1)
Streptomyces_durhamensis	305 (WP_031161351.1)
Streptomyces_himastatinicus_ATCC_53653	315 (EFL29022.1)
Streptomyces_hygroscopicus	305 (AAY28211.1), 305 (WP_030837653.1)
Streptomyces_mobaraensis_DSM_40847	303 (EME97416.1)
Streptomyces_monomycini		258 (WP_033036991.1)
Streptomyces_purpeofuscus	301 (WP_030391846.1)
Streptomyces_pyridomyceticus	275 (WP_030057856.1)
Streptomyces_rapamycinicus_NRRL_5491	305 (AGP52142.1)
Streptomyces_rimosus	268 (WP_030654749.1)	263 (WP_030633945.1), 263 (WP_031018168.1), 265 (WP_030182301.1), 263 (WP_033042824.1)
Streptomyces_rimosus_R6-500		294 (KEF11525.1)
Streptomyces_roseochromogenes_subsp._oscitans_DS_12.976	307 (EST34372.1)
Streptomyces_roseoverticillatus	305 (WP_030369137.1)	280 (WP_030369136.1)
Streptomyces_scopuliridis	321 (WP_030355904.1)	281 (WP_030355905.1)
Streptomyces_sp._CNR698	303 (WP_027732189.1)
Streptomyces_sp._CNS606		278 (WP_027765956.1)
Streptomyces_sp._CNS615	303 (WP_017944562.1)
Streptomyces_sp._CNT302	303 (WP_018888700.1)
Streptomyces_sp._NRRL_F-6131	301 (WP_030305635.1)
Streptomyces_sp._NRRL_WC-3719		269 (WP_031129366.1)
Streptomyces_sp._NRRL_WC-3773		254 (WP_032927833.1)
Streptomyces_sp._TAA486	325 (WP_028434788.1)	283 (WP_028434789.1)
Streptomyces_thermolilacinus		268 (WP_023588107.1)
Streptomyces_viridochromogenes_Tue57	320 (ELS51438.1)
Streptomyces_zinciresistens_K42	305 (EGX60055.1)
Vibrio_anguillarum		278 (WP_029190039.1), 278 (WP_029388271.1)
Vibrio_cholerae		282 (KFE14017.1)
Vibrio_cholerae_623-39		287 (EDL73401.1)
Vibrio_cholerae_MAK_757		287 (EFH78403.1)
Vibrio_metschnikovii_CIP_69.14		282 (EEX36342.1)
Vibrio_nigripulchritudo_ATCC_27043		278 (EGU56616.1)
Vibrio_nigripulchritudo_MADA3020		278 (CCN47812.1)
Vibrio_nigripulchritudo_SFn118		278 (CCN70363.1)
Vibrio_nigripulchritudo_SFn27		278 (CCN89005.1)
Vibrio_nigripulchritudo_SO65		278 (CCN75957.1)
Vibrio_nigripulchritudo_SOn1		278 (CCO48661.1)
Vibrio_ordalii		278 (WP_026029183.1)
Vibrio_proteolyticus_NBRC_13287		278 (GAD66521.1)
Vibrio_tasmaniensis	309 (WP_029225683.1)
Westiella_intricata_UH_HT-29-1	326 (AIH14805.1), 319 (AIH14806.1)	268 (AIH14804.1)
Xenorhabdus bovienii str. puntauvense	335 (CDG97836.1)	297 (CDG97837.1)
Xenorhabdus_beddingii_476	336	282
Xenorhabdus_bovienii_SS-2004	335 (WP_012987888.1)	299 (YP_003467274.1)
Xenorhabdus_bovienii_str._feltiae_Moldova		297 (CDH02549.1)
Xenorhabdus_bovienii_str._Intermedium		297 (CDH34701.1)
Xenorhabdus_bovienii_str._Jollieti		297 (CDH30239.1)
Xenorhabdus_bovienii_str._kraussei_Quebec		297 (CDH21207.1)
Xenorhabdus_bovienii_str._oregonense		297 (CDH06414.1)
Xenorhabdus_budapestensis	336	296
Xenorhabdus_cabanillasii_JM26	335 (CDL80229.1)	295 (CDL80228.1)
Xenorhabdus_doucetiae	332 (CDG18592.1)	290 (CDG18591.1)
Xenorhabdus_doucetiae_FRM_XDv3	333	291
Xenorhabdus_indica_17382	339	295
Xenorhabdus_KJ_21.1_conc	336	292
Xenorhabdus_miraniensis_1	336	301
Xenorhabdus_nematophila_F1	335 (WP_010845414.1)	296 (CCW30243.1)
Xenorhabdus_PB_62.4	335	291
Xenorhabdus_poinarii_G6	335 (CDG20498.1)	290 (CDG20499.1)
Xenorhabdus_szentirmaii_DSM_16338	335 (CDL83934.1)	289 (CDL83933.1)
