# Supplementary material for: From Insect to Man: Photorhabdus Sheds Light on the Emergence of Human Pathogenicity
Source: PLOS journal article supplement (doi:10.1371/journal.pone.0144937), 2015-12-17

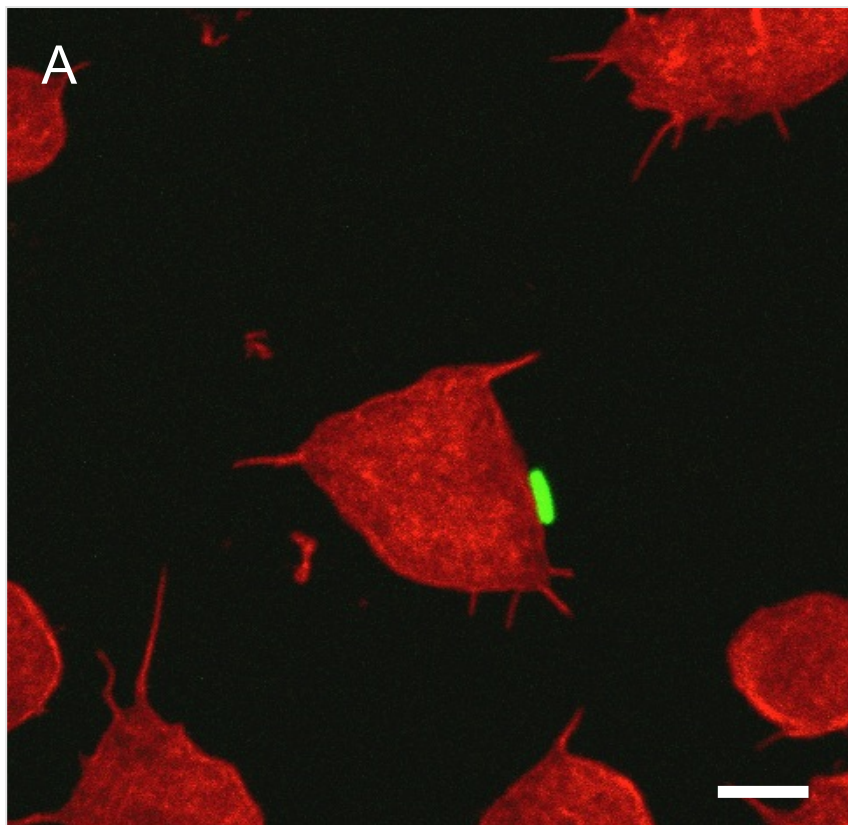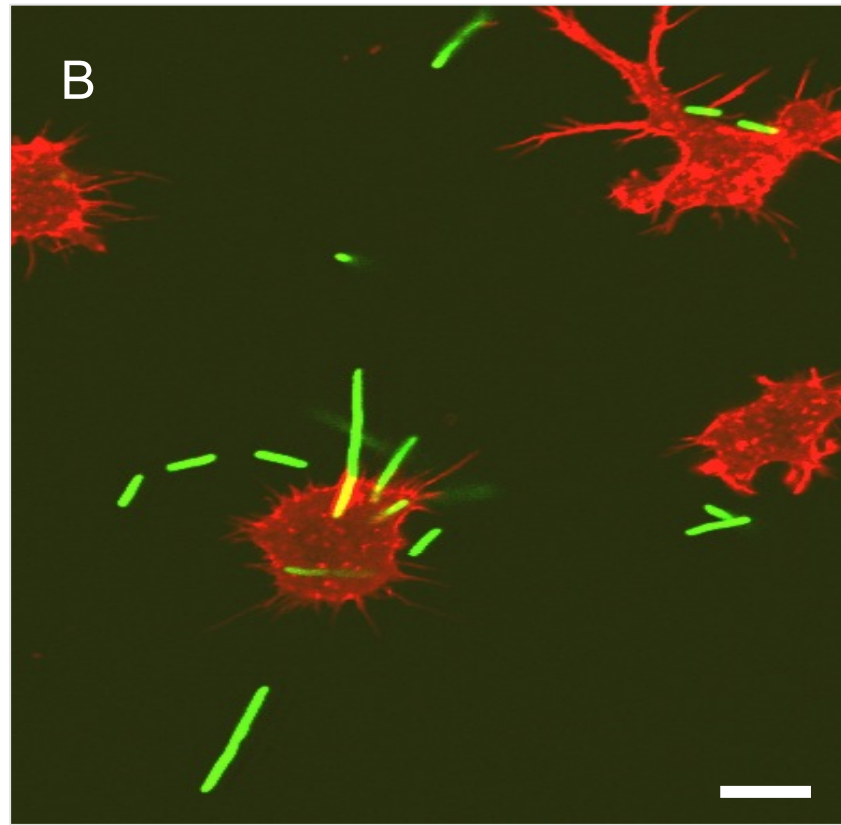

C

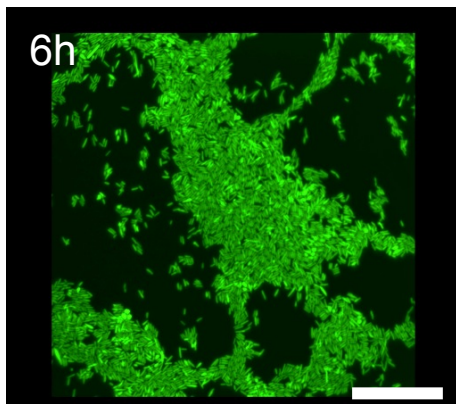

D

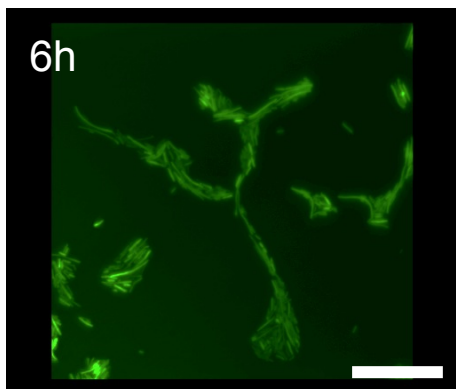

E

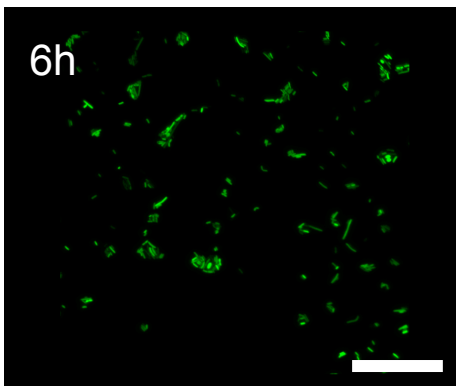

Supplement: S15 (10.1371/journal.pone.0144937.s015) [file journal.pone.0144937.s015.PDF]
